# Supplementary material for: Decoding the transcriptome of calcified atherosclerotic plaque at single-cell resolution
Source: PubMed Central journal article supplement (PMC9556750; doi:10.1038/s42003-022-04056-7), 2022-10-12
Supplement: 42003_2022_4056_MOESM2_ESM.pdf [file 42003_2022_4056_MOESM2_ESM.pdf]

## Description of Additional Supplementary Files

**File name:** Supplementary Data 1

**Description:** Full differential gene expression results for macrophages.

**File name:** Supplementary Data 2

**Description:** Full differential gene expression results for T-cells.

**File name:** Supplementary Data 3

**Description:** Full differential gene expression results for B-cells.

**File name:** Supplementary Data 4

**Description:** Full differential gene expression results for NKT cells.

**File name:** Supplementary Data 5

**Description:** Full differential gene expression results for VSMCs.

**File name:** Supplementary Data 6

**Description:** Full differential gene expression results for ECs.

**File name:** Supplementary Data 7

**Description:** Gene network modules generated in VSMC datasets

**File name:** Supplementary Data 8

**Description:** Gene network modules generated in EC datasets

**File name:** Supplementary Data 9

**Description:** Sub-population differential expression and regression analysis for VSMC heatmap.

**File name:** Supplementary Data 10

**Description:** Sub-population differential expression and regression analysis for EC heatmap.

**File name:** Supplementary Data 11

**Description:** Module level enrichment analysis for EC modules.

**File name:** Supplementary Data 12

**Description:** Individual gene level changes for EC modules significantly enriched with differentially expressed genes.

**File name:** Supplementary Data 13

**Description:** Module level enrichment analysis for VSMC modules.

**File name:** Supplementary Data 14

**Description:** Individual gene level changes for VSMC modules significantly enriched with differentially expressed genes.

**File name:** Supplementary Data 15

**Description:** Dictionary of the relevant network attributes.
