# Supplementary material for: Decoding the transcriptome of calcified atherosclerotic plaque at single-cell resolution
Source: PubMed Central journal article supplement (PMC9556750; doi:10.1038/s42003-022-04056-7), 2022-10-12
Supplement: 42003_2022_4056_MOESM3_ESM.pdf [file 42003_2022_4056_MOESM3_ESM.pdf]

## Full differential gene expression results for macrophages.

| gene_short_name | estimate    | std_err     | test_val | p_value  | normalized_effect | model_component | q_value     |
|-----------------|-------------|-------------|----------|----------|-------------------|-----------------|-------------|
| FABP4           | -7.853728   | 7.1228094   | -1.1026  | 0.27     | -9.726483553      | count           | 1           |
| MT1G            | -6.0358186  | 5.3858463   | -1.1207  | 0.263    | -6.925075976      | count           | 1           |
| CCL7            | -16.7579479 | 579.0145799 | -0.0289  | 0.9769   | -6.868106239      | count           | 1           |
| MT1H            | -17.6708884 | 1377.056097 | -0.0128  | 0.9898   | -6.053447143      | count           | 1           |
| FN1             | -4.182696   | 0.9226583   | -4.5333  | 6.09E-06 | -5.836693239      | count           | 0.14450352  |
| APOC1           | -4.024983   | 0.6292108   | -6.3969  | 1.89E-10 | -5.715760418      | count           | 4.55E-06    |
| SLAMF9          | -4.6222961  | 1.152633    | -4.0102  | 6.25E-05 | -5.065717032      | count           | 1           |
| JAKMIP2         | -17.278782  | 473.843205  | -0.0365  | 0.971    | -4.238259241      | count           | 1           |
| FABP5           | -2.901351   | 0.2718002   | -10.6746 | 4.95E-26 | -4.175069457      | count           | 1.20E-21    |
| SPINK1          | -17.304822  | 1476.497968 | -0.0117  | 0.991    | -4.033058447      | count           | 1           |
| MMP7            | -17.223127  | 2177.085365 | -0.0079  | 0.994    | -3.866270316      | count           | 1           |
| APOE            | -2.665305   | 0.2952539   | -9.0272  | 3.47E-19 | -3.836529057      | count           | 8.41E-15    |
| CHI3L1          | -17.337018  | 1283.111367 | -0.0135  | 0.989    | -3.61589264       | count           | 1           |
| SDS             | -2.5194276  | 0.2993028   | -8.4177  | 6.44E-17 | -3.437768891      | count           | 1.56E-12    |
| GPNMB           | -2.4480897  | 0.2232244   | -10.9669 | 2.35E-27 | -3.43735946       | count           | 5.70E-23    |
| C15orf48        | -2.354126   | 0.2362872   | -9.963   | 6.00E-23 | -3.359733272      | count           | 1.46E-18    |
| MMP12           | -17.037736  | 1556.760097 | -0.0109  | 0.991    | -3.205020923      | count           | 1           |
| CST6            | -2.714291   | 0.8178351   | -3.3189  | 0.000917 | -3.092241901      | count           | 1           |
| SPP1            | -2.119065   | 0.2607386   | -8.1272  | 6.89E-16 | -3.05517052       | count           | 1.67E-11    |
| ITGB8           | -2.879657   | 0.8966875   | -3.2114  | 0.00134  | -2.869865874      | count           | 1           |
| ITLN1           | -2.975454   | 1.8882932   | -1.5757  | 0.115    | -2.612679614      | count           | 1           |
| PPARG           | -1.940231   | 0.3999775   | -4.8509  | 1.31E-06 | -2.550891807      | count           | 0.0311911   |
| OTOA            | -2.3736584  | 0.3836663   | -6.1868  | 7.17E-10 | -2.505438762      | count           | 1.72E-05    |
| RAB42           | -2.1979653  | 0.5379194   | -4.086   | 4.53E-05 | -2.463514849      | count           | 1           |
| NT5E            | -17.775165  | 1208.754147 | -0.0147  | 0.988    | -2.45108539       | count           | 1           |
| ADAMDEC1        | -2.1004575  | 0.3487197   | -6.0233  | 1.97E-09 | -2.418982449      | count           | 4.73E-05    |
| LPL             | -2.3980836  | 0.8340443   | -2.8752  | 0.00407  | -2.410360467      | count           | 1           |
| PCOLCE2         | -2.156078   | 0.835055    | -2.582   | 0.00988  | -2.384582188      | count           | 1           |
| LINC01705       | -17.512754  | 1298.906837 | -0.0135  | 0.989    | -2.353553084      | count           | 1           |
| PHLDA1          | -1.6462835  | 0.1789086   | -9.2018  | 7.31E-20 | -2.337190824      | count           | 1.77E-15    |
| CTSL            | -1.6091682  | 0.1261635   | -12.7546 | 4.02E-36 | -2.312753575      | count           | 9.76E-32    |
| MT1X            | -1.6161869  | 0.3940643   | -4.1013  | 4.24E-05 | -2.295441381      | count           | 0.9993256   |
| CXCL5           | -1.759827   | 0.8557194   | -2.0565  | 0.0398   | -2.236971867      | count           | 1           |
| CSTB            | -1.532215   | 0.1168619   | -13.1113 | 5.22E-38 | -2.207815419      | count           | 1.27E-33    |
| MIR210HG        | -2.425064   | 1.044312    | -2.3222  | 0.0203   | -2.133934736      | count           | 1           |
| SDC2            | -1.5357132  | 0.2350775   | -6.5328  | 7.82E-11 | -2.133776294      | count           | 1.88E-06    |
| TFPI            | -1.671809   | 0.528581    | -3.1628  | 0.00158  | -2.122979266      | count           | 1           |
| NRIP3           | -1.7205729  | 0.4538373   | -3.7912  | 0.000154 | -2.095764976      | count           | 1           |
| AC022092.1      | -16.67632   | 824.0777138 | -0.0202  | 0.984    | -2.076270616      | count           | 1           |
| CD109           | -1.571515   | 0.305002    | -5.1525  | 2.78E-07 | -2.070141728      | count           | 0.006635304 |
| FBP1            | -1.4324131  | 0.1615803   | -8.865   | 1.44E-18 | -2.047087521      | count           | 3.49E-14    |
| LY6K            | -16.539338  | 703.228147  | -0.0235  | 0.981    | -2.045369828      | count           | 1           |
| MATK            | -2.236576   | 0.9355289   | -2.3907  | 0.0169   | -2.03645617       | count           | 1           |
| GSDME           | -1.9767523  | 0.7259346   | -2.723   | 0.00651  | -2.033543787      | count           | 1           |

|            |            |             |          |          |              |       |             |
|------------|------------|-------------|----------|----------|--------------|-------|-------------|
| SCD        | -1.6483733 | 0.3961881   | -4.1606  | 3.28E-05 | -1.998529314 | count | 0.77408     |
| SLC16A10   | -1.449779  | 0.2241593   | -6.4676  | 1.20E-10 | -1.953399075 | count | 2.89E-06    |
| ACP5       | -1.386632  | 0.1680482   | -8.2514  | 2.52E-16 | -1.951021408 | count | 6.10E-12    |
| ADSSL1     | -2.007947  | 0.8483685   | -2.3668  | 0.018    | -1.90214026  | count | 1           |
| TM4SF19    | -2.284186  | 1.466638    | -1.5574  | 0.119    | -1.881787561 | count | 1           |
| HS3ST1     | -1.4221524 | 0.3601901   | -3.9483  | 8.09E-05 | -1.876560557 | count | 1           |
| ENO2       | -2.305484  | 1.5454954   | -1.4917  | 0.136    | -1.860555443 | count | 1           |
| GOLGA7B    | -17.072333 | 927.408354  | -0.0184  | 0.985    | -1.84462627  | count | 1           |
| ANKRD29    | -16.530588 | 812.1649817 | -0.0204  | 0.984    | -1.844626167 | count | 1           |
| ANGPTL4    | -1.538627  | 0.6087138   | -2.5277  | 0.0115   | -1.813084555 | count | 1           |
| ST14       | -1.4059535 | 0.307697    | -4.5693  | 5.14E-06 | -1.804720946 | count | 0.12201846  |
| IGLC2      | -1.8339188 | 0.2713414   | -6.7587  | 1.73E-11 | -1.796278529 | count | 4.17E-07    |
| LINC01857  | -2.5548807 | 1.0636969   | -2.4019  | 0.0164   | -1.786873548 | count | 1           |
| MMP9       | -1.2771939 | 0.4508488   | -2.8329  | 0.00465  | -1.776202945 | count | 1           |
| MMP19      | -1.2683375 | 0.2280245   | -5.5623  | 2.95E-08 | -1.753839381 | count | 0.000706496 |
| SPOCD1     | -16.964828 | 1089.96318  | -0.0156  | 0.988    | -1.73270474  | count | 1           |
| PLIN2      | -1.2021334 | 0.0963508   | -12.4766 | 1.11E-34 | -1.727069231 | count | 2.70E-30    |
| ABCG1      | -1.3563006 | 0.2345934   | -5.7815  | 8.34E-09 | -1.718116569 | count | 0.000200077 |
| SLC39A8    | -1.2654986 | 0.3213341   | -3.9383  | 8.44E-05 | -1.706575851 | count | 1           |
| OLR1       | -1.2096251 | 0.1179055   | -10.2593 | 3.29E-24 | -1.70565781  | count | 7.98E-20    |
| CLLU1OS    | -16.926011 | 969.5722077 | -0.0175  | 0.986    | -1.693380812 | count | 1           |
| EFNA5      | -16.92555  | 1978.134449 | -0.0086  | 0.993    | -1.693380811 | count | 1           |
| TGM2       | -1.7305661 | 0.7047839   | -2.4555  | 0.0141   | -1.68955912  | count | 1           |
| ABCA1      | -1.2046475 | 0.1528141   | -7.8831  | 4.76E-15 | -1.680926397 | count | 1.15E-10    |
| AGRP       | -1.717485  | 1.047495    | -1.6396  | 0.101    | -1.653708308 | count | 1           |
| FHAD1      | -1.7009516 | 0.6069456   | -2.8025  | 0.00511  | -1.633025045 | count | 1           |
| KLHDC8B    | -1.4082636 | 0.3456082   | -4.0747  | 4.75E-05 | -1.627591066 | count | 1           |
| LINC01943  | -1.435282  | 0.5224185   | -2.7474  | 0.00605  | -1.599156144 | count | 1           |
| NCS1       | -1.961491  | 0.7801747   | -2.5142  | 0.012    | -1.589687811 | count | 1           |
| HSD3B7     | -1.2676495 | 0.2986899   | -4.244   | 2.28E-05 | -1.584567328 | count | 0.5388096   |
| ZFP62      | -2.016306  | 0.8722942   | -2.3115  | 0.0209   | -1.581992538 | count | 1           |
| C1orf21    | -2.7006403 | 0.791083    | -3.4139  | 0.000651 | -1.574156486 | count | 1           |
| ALDH1A2    | -16.799531 | 1054.541453 | -0.0159  | 0.987    | -1.568538693 | count | 1           |
| TIMP1      | -1.0881445 | 0.1294858   | -8.4036  | 7.23E-17 | -1.568362846 | count | 1.75E-12    |
| CSF1       | -2.019728  | 1.0158972   | -1.9881  | 0.0469   | -1.565736102 | count | 1           |
| SLC2A5     | -1.228682  | 0.3656546   | -3.3602  | 0.000791 | -1.560425854 | count | 1           |
| KIFC3      | -1.3638477 | 0.3533685   | -3.8596  | 0.000117 | -1.546955999 | count | 1           |
| FABP3      | -1.4670846 | 0.7048435   | -2.0814  | 0.0375   | -1.542797065 | count | 1           |
| CTSD       | -1.0708559 | 0.086337    | -12.4032 | 2.62E-34 | -1.542075336 | count | 6.36E-30    |
| MME        | -1.66332   | 1.078463    | -1.5423  | 0.123    | -1.537846362 | count | 1           |
| SERPINE1   | -1.5977881 | 0.6015071   | -2.6563  | 0.00795  | -1.532807422 | count | 1           |
| AC109826.1 | -1.840701  | 0.4990994   | -3.688   | 0.000231 | -1.52806377  | count | 1           |
| ERO1A      | -1.0873079 | 0.1592828   | -6.8263  | 1.09E-11 | -1.526614929 | count | 2.63E-07    |
| TMEM45A    | -2.4855197 | 1.3745415   | -1.8083  | 0.0707   | -1.523414383 | count | 1           |
| HIF1A-AS2  | -1.324646  | 0.5038858   | -2.6289  | 0.00862  | -1.522287989 | count | 1           |

|            |             |             |          |          |              |       |             |
|------------|-------------|-------------|----------|----------|--------------|-------|-------------|
| SLC6A8     | -1.4933862  | 0.5774093   | -2.5864  | 0.00976  | -1.51897192  | count | 1           |
| RARRES1    | -1.861865   | 0.4333083   | -4.2969  | 1.80E-05 | -1.507589878 | count | 0.42579     |
| RALA       | -1.0615467  | 0.1108231   | -9.5788  | 2.31E-21 | -1.502950545 | count | 5.60E-17    |
| AC004988.1 | -16.916007  | 1059.996739 | -0.016   | 0.987    | -1.478873802 | count | 1           |
| AC004130.1 | -16.7831291 | 860.5236575 | -0.0195  | 0.984    | -1.478873416 | count | 1           |
| SH3D21     | -2.2358079  | 1.2248551   | -1.8254  | 0.0681   | -1.477760256 | count | 1           |
| RAI14      | -1.347254   | 0.60913     | -2.2118  | 0.0271   | -1.474047667 | count | 1           |
| AK4        | -1.6428907  | 0.701752    | -2.3411  | 0.0193   | -1.467843604 | count | 1           |
| NR1H3      | -1.3525284  | 0.4060548   | -3.3309  | 0.000878 | -1.449239245 | count | 1           |
| AP001453.2 | -2.021311   | 1.2369392   | -1.6341  | 0.102    | -1.447604081 | count | 1           |
| SPHK1      | -1.1355532  | 0.2912562   | -3.8988  | 9.93E-05 | -1.445250566 | count | 1           |
| LINC01094  | -1.1003868  | 0.1827093   | -6.0226  | 1.97E-09 | -1.440509866 | count | 4.73E-05    |
| DUSP4      | -1.1962393  | 0.3238198   | -3.6942  | 0.000225 | -1.438846978 | count | 1           |
| AL138724.1 | -17.094318  | 2021.187871 | -0.0085  | 0.993    | -1.431860382 | count | 1           |
| ARL4C      | -1.0043344  | 0.1033559   | -9.7172  | 6.29E-22 | -1.420111264 | count | 1.52E-17    |
| IL4I1      | -1.0508105  | 0.2460233   | -4.2712  | 2.02E-05 | -1.420037366 | count | 0.4777098   |
| CXXC5      | -1.030118   | 0.2077735   | -4.9579  | 7.61E-07 | -1.409203548 | count | 0.018133869 |
| EDNRB      | -1.3711431  | 0.429361    | -3.1935  | 0.00142  | -1.392265576 | count | 1           |
| PLA2G7     | -0.9909204  | 0.1678656   | -5.9031  | 4.06E-09 | -1.384614674 | count | 9.75E-05    |
| GZMA       | -18.0051722 | 1280.00079  | -0.0141  | 0.989    | -1.383264095 | count | 1           |
| ASPHD1     | -16.829472  | 1760.04905  | -0.0096  | 0.992    | -1.383264016 | count | 1           |
| GCHFR      | -0.9824161  | 0.1946862   | -5.0462  | 4.84E-07 | -1.378433619 | count | 0.01154098  |
| CADM1      | -2.0137475  | 0.5996036   | -3.3585  | 0.000796 | -1.376407662 | count | 1           |
| SCIN       | -2.1621509  | 0.8501532   | -2.5432  | 0.011    | -1.376245146 | count | 1           |
| LHFPL2     | -1.0168171  | 0.1805995   | -5.6302  | 2.00E-08 | -1.369119107 | count | 0.00047924  |
| LXN        | -1.105412   | 0.2945794   | -3.7525  | 0.000179 | -1.36033067  | count | 1           |
| GK         | -0.9591309  | 0.095601    | -10.0326 | 3.05E-23 | -1.354211048 | count | 7.40E-19    |
| IL7R       | -1.4445355  | 0.5139661   | -2.8106  | 0.00498  | -1.336230165 | count | 1           |
| DNAH11     | -16.544192  | 1663.931905 | -0.0099  | 0.992    | -1.332973615 | count | 1           |
| B4GALT2    | -17.3689868 | 1036.227709 | -0.0168  | 0.987    | -1.332973348 | count | 1           |
| HAMP       | -1.1266952  | 0.4951172   | -2.2756  | 0.023    | -1.330280544 | count | 1           |
| TACSTD2    | -2.8580353  | 1.6052903   | -1.7804  | 0.0751   | -1.329799358 | count | 1           |
| CXCL10     | -0.9668391  | 0.6342427   | -1.5244  | 0.1275   | -1.32498441  | count | 1           |
| MT1M       | -1.3997877  | 0.6859397   | -2.0407  | 0.0414   | -1.324320227 | count | 1           |
| SMPDL3A    | -1.0007018  | 0.2109923   | -4.7428  | 2.23E-06 | -1.319758783 | count | 0.05303386  |
| CYSTM1     | -0.9281053  | 0.1165121   | -7.9657  | 2.49E-15 | -1.308686022 | count | 6.02E-11    |
| TKTL1      | -1.699127   | 0.9763084   | -1.7404  | 0.0819   | -1.304582265 | count | 1           |
| PROCR      | -1.4996108  | 0.5197937   | -2.885   | 0.00395  | -1.302483119 | count | 1           |
| VWA5A      | -1.020542   | 0.3662675   | -2.7863  | 0.00537  | -1.301085324 | count | 1           |
| SDSL       | -0.9876354  | 0.1848225   | -5.3437  | 9.95E-08 | -1.29091291  | count | 0.002378448 |
| MREG       | -17.483181  | 2539.266946 | -0.0069  | 0.995    | -1.280866051 | count | 1           |
| SIT1       | -16.484338  | 2034.413778 | -0.0081  | 0.994    | -1.28086596  | count | 1           |
| MITF       | -0.9491907  | 0.2289925   | -4.1451  | 3.51E-05 | -1.277352402 | count | 0.8280441   |
| MT1E       | -1.1372166  | 0.3261537   | -3.4868  | 0.000498 | -1.270783822 | count | 1           |
| CDCP1      | -1.0492273  | 0.3332535   | -3.1484  | 0.00166  | -1.269786043 | count | 1           |

|             |             |             |          |          |              |       |             |
|-------------|-------------|-------------|----------|----------|--------------|-------|-------------|
| PLOD2       | -2.001488   | 1.1120188   | -1.7999  | 0.072    | -1.269734898 | count | 1           |
| KCNMA1      | -1.008081   | 0.1878715   | -5.3658  | 8.81E-08 | -1.269497648 | count | 0.002106471 |
| L3MBTL4-AS1 | -1.5917621  | 0.6168447   | -2.5805  | 0.00992  | -1.266966974 | count | 1           |
| CHCHD6      | -1.3889267  | 0.5235452   | -2.6529  | 0.00803  | -1.265405685 | count | 1           |
| GLA         | -0.9214785  | 0.1246749   | -7.3911  | 1.99E-13 | -1.264408333 | count | 4.81E-09    |
| CD81        | -0.8797939  | 0.0683205   | -12.8775 | 9.12E-37 | -1.262964574 | count | 2.22E-32    |
| SMOX        | -1.2463681  | 0.440667    | -2.8284  | 0.00472  | -1.254618363 | count | 1           |
| CCL20       | -0.9079987  | 0.3131925   | -2.8992  | 0.00377  | -1.253348315 | count | 1           |
| SYNJ2       | -1.8128474  | 0.6402446   | -2.8315  | 0.00467  | -1.250971822 | count | 1           |
| TREM2       | -0.8883865  | 0.1649103   | -5.3871  | 7.84E-08 | -1.249688592 | count | 0.001874701 |
| IGKC        | -0.9173176  | 0.1819427   | -5.0418  | 4.95E-07 | -1.249466207 | count | 0.011802285 |
| MAPK13      | -0.9904833  | 0.386939    | -2.5598  | 0.0105   | -1.247588221 | count | 1           |
| NPC1        | -1.0909742  | 0.391379    | -2.7875  | 0.00535  | -1.24238785  | count | 1           |
| TMEM158     | -0.9172697  | 0.2772221   | -3.3088  | 0.000951 | -1.228688605 | count | 1           |
| HACD1       | -17.4486879 | 1151.250769 | -0.0152  | 0.988    | -1.226805978 | count | 1           |
| CRTAC1      | -17.4459171 | 2958.116184 | -0.0059  | 0.995    | -1.226805978 | count | 1           |
| CDK14       | -1.161713   | 0.4892491   | -2.3745  | 0.0177   | -1.225370238 | count | 1           |
| DSE         | -0.8756747  | 0.1121356   | -7.8091  | 8.47E-15 | -1.222130596 | count | 2.05E-10    |
| CELSR1      | -1.715199   | 1.729978    | -0.9915  | 0.322    | -1.209960335 | count | 1           |
| CENPM       | -1.828478   | 2.1197134   | -0.8626  | 0.388    | -1.208091232 | count | 1           |
| CD9         | -0.844591   | 0.0938596   | -8.9985  | 4.47E-19 | -1.20744478  | count | 1.08E-14    |
| CXCL9       | -2.200688   | 1.18052     | -1.8642  | 0.0624   | -1.204664269 | count | 1           |
| NPL         | -0.8507718  | 0.1164566   | -7.3055  | 3.72E-13 | -1.199849608 | count | 8.98E-09    |
| KCNN4       | -1.0171333  | 0.3626628   | -2.8046  | 0.00508  | -1.198899982 | count | 1           |
| UCK2        | -1.3830664  | 0.5324153   | -2.5977  | 0.00944  | -1.189262051 | count | 1           |
| PCBD1       | -0.8578062  | 0.1336486   | -6.4184  | 1.65E-10 | -1.188162963 | count | 3.97E-06    |
| HIC1        | -1.059388   | 0.3576203   | -2.9623  | 0.00308  | -1.186672628 | count | 1           |
| RUNX3       | -0.9912869  | 0.2797335   | -3.5437  | 0.000402 | -1.18627391  | count | 1           |
| SLAMF8      | -0.8883245  | 0.1467885   | -6.0517  | 1.65E-09 | -1.179604006 | count | 3.96E-05    |
| RAB13       | -0.8310595  | 0.1218035   | -6.823   | 1.12E-11 | -1.171459067 | count | 2.70E-07    |
| ACOT4       | -16.625003  | 1023.643639 | -0.0162  | 0.987    | -1.170641281 | count | 1           |
| MYO10       | -16.8595571 | 868.4515805 | -0.0194  | 0.985    | -1.170640983 | count | 1           |
| TCTEX1D1    | -16.7227473 | 767.1447327 | -0.0218  | 0.983    | -1.17064097  | count | 1           |
| LRRC6       | -1.861024   | 1.6694203   | -1.1148  | 0.265    | -1.166399953 | count | 1           |
| LGALS3      | -0.7974459  | 0.0837459   | -9.5222  | 3.91E-21 | -1.148275984 | count | 9.48E-17    |
| VKORC1      | -0.8102714  | 0.0941713   | -8.6042  | 1.35E-17 | -1.144202719 | count | 3.27E-13    |
| P2RY11      | -1.2257123  | 0.5099893   | -2.4034  | 0.0163   | -1.138092045 | count | 1           |
| SATB1       | -0.8961655  | 0.2435278   | -3.6799  | 0.000238 | -1.137225021 | count | 1           |
| INO80B      | -1.599936   | 0.774701    | -2.0652  | 0.039    | -1.136428035 | count | 1           |
| FGGY        | -1.3180357  | 0.5954587   | -2.2135  | 0.027    | -1.134219073 | count | 1           |
| MGP         | -0.8197388  | 0.2209141   | -3.7107  | 0.000211 | -1.131093363 | count | 1           |
| LPIN1       | -1.0279546  | 0.3366062   | -3.0539  | 0.00228  | -1.128896559 | count | 1           |
| TCEAL9      | -0.8591555  | 0.2087258   | -4.1162  | 3.98E-05 | -1.127395175 | count | 0.9385238   |
| RGS1        | -0.8024431  | 0.0972456   | -8.2517  | 2.52E-16 | -1.125573494 | count | 6.10E-12    |
| FAM89A      | -0.8695051  | 0.2645652   | -3.2865  | 0.00103  | -1.120099576 | count | 1           |

|            |             |             |          |          |              |       |             |
|------------|-------------|-------------|----------|----------|--------------|-------|-------------|
| MGLL       | -0.7930192  | 0.202118    | -3.9235  | 8.97E-05 | -1.118183594 | count | 1           |
| SHB        | -2.2847239  | 0.653327    | -3.4971  | 0.000479 | -1.113091291 | count | 1           |
| CACNA1G    | -17.274853  | 2074.937854 | -0.0083  | 0.993    | -1.112200952 | count | 1           |
| FLRT2      | -17.274155  | 1806.521748 | -0.0096  | 0.992    | -1.112200952 | count | 1           |
| SHISAL2A   | -17.273719  | 1603.070718 | -0.0108  | 0.991    | -1.112200952 | count | 1           |
| PTPN13     | -16.27785   | 2589.026385 | -0.0063  | 0.995    | -1.112200862 | count | 1           |
| STX1A      | -16.5683536 | 1979.724292 | -0.0084  | 0.993    | -1.112200588 | count | 1           |
| NMB        | -0.9179373  | 0.3847115   | -2.386   | 0.0171   | -1.106869573 | count | 1           |
| IGHG3      | -1.520553   | 0.8799274   | -1.728   | 0.0841   | -1.099203538 | count | 1           |
| CTSB       | -0.7624065  | 0.057848    | -13.1795 | 2.25E-38 | -1.09743385  | count | 5.47E-34    |
| PRDM1      | -0.7936339  | 0.1417148   | -5.6002  | 2.38E-08 | -1.096795382 | count | 0.000570177 |
| ADAM9      | -0.802952   | 0.1409372   | -5.6972  | 1.36E-08 | -1.096142245 | count | 0.000326142 |
| MRO        | -1.4323275  | 0.6305579   | -2.2715  | 0.0232   | -1.093626346 | count | 1           |
| METTL1     | -0.986038   | 0.4484316   | -2.1989  | 0.028    | -1.09181094  | count | 1           |
| CD3E       | -2.3834704  | 1.7727651   | -1.3445  | 0.179    | -1.090826839 | count | 1           |
| SLC8B1     | -0.8712614  | 0.2481989   | -3.5103  | 0.000456 | -1.090700957 | count | 1           |
| CD82       | -0.8000382  | 0.2384843   | -3.3547  | 0.000807 | -1.078956806 | count | 1           |
| CRADD      | -0.9059879  | 0.3111727   | -2.9115  | 0.00363  | -1.076074076 | count | 1           |
| NUFIP1     | -0.9668001  | 0.285575    | -3.3855  | 0.000722 | -1.072765504 | count | 1           |
| LINC01588  | -1.2819389  | 0.6826629   | -1.8779  | 0.0605   | -1.070494788 | count | 1           |
| MINPP1     | -1.3864067  | 0.5304488   | -2.6136  | 0.00901  | -1.06877437  | count | 1           |
| PIF1       | -1.1716922  | 0.9074694   | -1.2912  | 0.197    | -1.068056061 | count | 1           |
| ARHGAP22   | -0.9018207  | 0.2537268   | -3.5543  | 0.000386 | -1.062864235 | count | 1           |
| TUBA1C     | -0.7432159  | 0.0847839   | -8.766   | 3.39E-18 | -1.060933339 | count | 8.21E-14    |
| LITAF      | -0.7382417  | 0.0605779   | -12.1866 | 3.28E-33 | -1.057036261 | count | 7.97E-29    |
| SNAPC1     | -0.7554713  | 0.1624734   | -4.6498  | 3.50E-06 | -1.056443798 | count | 0.08316     |
| HIST1H1B   | -17.360758  | 1493.521027 | -0.0116  | 0.991    | -1.051292783 | count | 1           |
| IL36RN     | -17.196466  | 3241.051387 | -0.0053  | 0.996    | -1.051292775 | count | 1           |
| TMEM145    | -17.195329  | 2522.089442 | -0.0068  | 0.995    | -1.051292775 | count | 1           |
| GAL        | -17.195259  | 2287.746891 | -0.0075  | 0.994    | -1.051292775 | count | 1           |
| AGAP2-AS1  | -17.193122  | 1491.470793 | -0.0115  | 0.991    | -1.051292775 | count | 1           |
| AC092484.1 | -16.7072473 | 1605.911652 | -0.0104  | 0.992    | -1.051292667 | count | 1           |
| OASL       | -0.7854805  | 0.2787394   | -2.818   | 0.00487  | -1.049830024 | count | 1           |
| HES4       | -0.8245017  | 0.2617658   | -3.1498  | 0.00165  | -1.049686202 | count | 1           |
| HMGB3      | -0.8184147  | 0.2760004   | -2.9653  | 0.00305  | -1.047308874 | count | 1           |
| GPR183     | -0.7279719  | 0.0664538   | -10.9546 | 2.68E-27 | -1.045371818 | count | 6.51E-23    |
| COL6A1     | -1.3438851  | 0.8851295   | -1.5183  | 0.129    | -1.045150125 | count | 1           |
| SEPHS2     | -0.7555485  | 0.1299593   | -5.8137  | 6.90E-09 | -1.039810174 | count | 0.000165572 |
| RASGRP3    | -0.8959261  | 0.3199604   | -2.8001  | 0.00515  | -1.037230561 | count | 1           |
| MIR155HG   | -0.9167366  | 0.339947    | -2.6967  | 0.00705  | -1.035969975 | count | 1           |
| UGCG       | -0.759231   | 0.1337115   | -5.6781  | 1.52E-08 | -1.031095407 | count | 0.00036442  |
| LAT        | -0.9760307  | 0.5481256   | -1.7807  | 0.0751   | -1.024642289 | count | 1           |
| WDR54      | -0.8707796  | 0.3878811   | -2.245   | 0.0249   | -1.020105213 | count | 1           |
| TMEM106C   | -0.897037   | 0.4048071   | -2.216   | 0.0268   | -1.018783734 | count | 1           |
| FAM20C     | -0.7509287  | 0.2793043   | -2.6886  | 0.00722  | -1.017505181 | count | 1           |

|            |            |             |          |          |              |       |             |
|------------|------------|-------------|----------|----------|--------------|-------|-------------|
| FLVCR2     | -0.9317996 | 0.3188277   | -2.9226  | 0.0035   | -1.015011885 | count | 1           |
| DEFB1      | -1.476104  | 0.9734934   | -1.5163  | 0.13     | -1.012426722 | count | 1           |
| MSANTD3    | -0.9331419 | 0.3917041   | -2.3823  | 0.0173   | -1.007915707 | count | 1           |
| CSKMT      | -0.9122844 | 0.4214025   | -2.1649  | 0.0305   | -1.00748972  | count | 1           |
| FBXW8      | -1.5804022 | 0.8256706   | -1.9141  | 0.0557   | -1.007059081 | count | 1           |
| IARS       | -1.0764441 | 0.3931108   | -2.7383  | 0.00622  | -1.006189455 | count | 1           |
| P4HA2      | -0.8422133 | 0.4708833   | -1.7886  | 0.0738   | -1.00366855  | count | 1           |
| CREBL2     | -0.766205  | 0.1693224   | -4.5251  | 6.32E-06 | -1.002534844 | count | 0.14992936  |
| MAOA       | -2.1366741 | 1.1261005   | -1.8974  | 0.0579   | -1.001517164 | count | 1           |
| DNASE2     | -0.7280688 | 0.132335    | -5.5017  | 4.15E-08 | -1.000565604 | count | 0.000993303 |
| CALR       | -0.6939774 | 0.0573437   | -12.1021 | 8.69E-33 | -0.99438649  | count | 2.11E-28    |
| GAL3ST4    | -0.857906  | 0.3044136   | -2.8182  | 0.00487  | -0.994201948 | count | 1           |
| HES1       | -0.7625194 | 0.2231578   | -3.417   | 0.000644 | -0.994086425 | count | 1           |
| LIPA       | -0.7020688 | 0.1150871   | -6.1003  | 1.23E-09 | -0.992166523 | count | 2.96E-05    |
| NAV1       | -0.8982149 | 0.4036689   | -2.2251  | 0.0262   | -0.989792101 | count | 1           |
| IBSP       | -17.108824 | 2749.882549 | -0.0062  | 0.995    | -0.98769989  | count | 1           |
| PNCK       | -16.821029 | 1254.276469 | -0.0134  | 0.989    | -0.987699872 | count | 1           |
| PRR22      | -16.746922 | 2789.731941 | -0.006   | 0.995    | -0.987699867 | count | 1           |
| PAQR5      | -16.745366 | 1214.810503 | -0.0138  | 0.989    | -0.987699867 | count | 1           |
| ST18       | -17.328618 | 1232.750567 | -0.0141  | 0.989    | -0.987699614 | count | 1           |
| SIGLEC10   | -0.8397394 | 0.1676396   | -5.0092  | 5.85E-07 | -0.986416455 | count | 0.01394406  |
| CD63       | -0.6821981 | 0.0422388   | -16.151  | 7.68E-56 | -0.982432332 | count | 1.87E-51    |
| GLUL       | -0.6821164 | 0.0556985   | -12.2466 | 1.64E-33 | -0.980328255 | count | 3.98E-29    |
| CENPN      | -1.0925444 | 0.5635552   | -1.9387  | 0.0527   | -0.978809989 | count | 1           |
| AC078883.3 | -1.571026  | 1.291903    | -1.2161  | 0.224    | -0.976090765 | count | 1           |
| PPP1R14B   | -0.6823748 | 0.0811017   | -8.4138  | 6.65E-17 | -0.97406006  | count | 1.61E-12    |
| VASH1      | -0.931179  | 0.3131311   | -2.9738  | 0.00297  | -0.967718047 | count | 1           |
| VEGFB      | -0.6818426 | 0.0983692   | -6.9315  | 5.31E-12 | -0.963225459 | count | 1.28E-07    |
| HENMT1     | -0.9903238 | 0.4646669   | -2.1313  | 0.0332   | -0.962158079 | count | 1           |
| ABHD12     | -0.7254523 | 0.1626618   | -4.4599  | 8.57E-06 | -0.960567732 | count | 0.20321184  |
| MARCO      | -0.6708014 | 0.1369583   | -4.8979  | 1.03E-06 | -0.959242692 | count | 0.02453151  |
| OLFML2B    | -0.7118996 | 0.1485857   | -4.7912  | 1.76E-06 | -0.956430246 | count | 0.04187568  |
| RRP1       | -0.7811031 | 0.293596    | -2.6605  | 0.00785  | -0.953108111 | count | 1           |
| TDP1       | -0.9522872 | 0.4928323   | -1.9323  | 0.0534   | -0.951031567 | count | 1           |
| CHML       | -0.7237003 | 0.1901472   | -3.806   | 0.000145 | -0.950103537 | count | 1           |
| PEA15      | -0.677791  | 0.1062911   | -6.3767  | 2.15E-10 | -0.948769766 | count | 5.17E-06    |
| AC092069.1 | -0.7669189 | 0.345068    | -2.2225  | 0.0263   | -0.948690491 | count | 1           |
| MT1F       | -0.6995657 | 0.2177797   | -3.2123  | 0.00133  | -0.948468383 | count | 1           |
| JCHAIN     | -2.3349178 | 0.8247546   | -2.831   | 0.00468  | -0.947444302 | count | 1           |
| PLS3       | -1.8966855 | 1.3553792   | -1.3994  | 0.162    | -0.946653379 | count | 1           |
| TPM2       | -0.9622675 | 0.3906324   | -2.4634  | 0.0138   | -0.94597073  | count | 1           |
| GBE1       | -0.719499  | 0.2998691   | -2.3994  | 0.0165   | -0.945221763 | count | 1           |
| TNIP2      | -0.7198587 | 0.1797192   | -4.0055  | 6.37E-05 | -0.944262246 | count | 1           |
| CTNNAL1    | -1.124678  | 0.5884242   | -1.9113  | 0.0561   | -0.941573439 | count | 1           |
| MAPK6      | -0.7100265 | 0.2125619   | -3.3403  | 0.000849 | -0.939920146 | count | 1           |

|           |             |             |          |          |              |       |             |
|-----------|-------------|-------------|----------|----------|--------------|-------|-------------|
| SLC7A1    | -1.7178975  | 0.7083673   | -2.4252  | 0.0154   | -0.933583245 | count | 1           |
| LLGL2     | -1.841737   | 1.0024094   | -1.8373  | 0.0663   | -0.932515107 | count | 1           |
| PRKAR1B   | -1.0025396  | 0.6159648   | -1.6276  | 0.104    | -0.930706545 | count | 1           |
| GPC4      | -1.09504    | 1.4510891   | -0.7546  | 0.451    | -0.921855122 | count | 1           |
| DNAJC5B   | -17.492718  | 1394.467034 | -0.0125  | 0.99     | -0.921173529 | count | 1           |
| EPS8L1    | -17.3661787 | 1694.082308 | -0.0103  | 0.992    | -0.921173525 | count | 1           |
| USP2      | -17.0747218 | 1409.186883 | -0.0121  | 0.99     | -0.921173512 | count | 1           |
| LINC01091 | -17.015672  | 4751.378798 | -0.0036  | 0.997    | -0.921173237 | count | 1           |
| FAM72D    | -17.015054  | 4300.805328 | -0.004   | 0.997    | -0.921173237 | count | 1           |
| TDO2      | -17.015054  | 4300.805328 | -0.004   | 0.997    | -0.921173237 | count | 1           |
| FBXO24    | -17.015054  | 4300.805328 | -0.004   | 0.997    | -0.921173237 | count | 1           |
| 2-Mar     | -17.013721  | 3421.512797 | -0.005   | 0.996    | -0.921173237 | count | 1           |
| GZMM      | -17.012352  | 2415.638058 | -0.007   | 0.994    | -0.921173237 | count | 1           |
| IL36B     | -17.011761  | 2116.932588 | -0.008   | 0.994    | -0.921173237 | count | 1           |
| DCAF4L1   | -16.692191  | 2910.097897 | -0.0057  | 0.995    | -0.921173217 | count | 1           |
| FGF11     | -16.691382  | 1814.348904 | -0.0092  | 0.993    | -0.921173217 | count | 1           |
| CYP27A1   | -0.6513609  | 0.155761    | -4.1818  | 2.99E-05 | -0.914584189 | count | 0.7059091   |
| EEPD1     | -0.7805281  | 0.4503396   | -1.7332  | 0.0832   | -0.913057845 | count | 1           |
| GZMK      | -1.9137845  | 1.1319267   | -1.6907  | 0.091    | -0.911027937 | count | 1           |
| LDHA      | -0.6321425  | 0.0589773   | -10.7184 | 3.15E-26 | -0.908022085 | count | 7.64E-22    |
| ALDOC     | -0.9013767  | 0.6082176   | -1.482   | 0.138    | -0.906585961 | count | 1           |
| IL32      | -1.894525   | 1.0167521   | -1.8633  | 0.0625   | -0.906470521 | count | 1           |
| TDP2      | -0.668494   | 0.2144538   | -3.1172  | 0.00185  | -0.905515775 | count | 1           |
| FAM162A   | -0.6402098  | 0.125005    | -5.1215  | 3.27E-07 | -0.905463878 | count | 0.007803201 |
| CLN8      | -0.6750227  | 0.1676348   | -4.0267  | 5.83E-05 | -0.905290556 | count | 1           |
| NKAPL     | -0.9145043  | 0.5795784   | -1.5779  | 0.115    | -0.905212682 | count | 1           |
| TTL5      | -1.0859505  | 0.5622679   | -1.9314  | 0.0536   | -0.902670497 | count | 1           |
| P4HA1     | -0.6389143  | 0.1272407   | -5.0213  | 5.50E-07 | -0.902658564 | count | 0.0131109   |
| ABCC3     | -0.7023401  | 0.2441787   | -2.8763  | 0.00406  | -0.901452102 | count | 1           |
| ORC6      | -1.3333106  | 0.7949283   | -1.6773  | 0.0936   | -0.900226344 | count | 1           |
| ST20      | -0.715495   | 0.3101569   | -2.3069  | 0.0211   | -0.899512196 | count | 1           |
| SLC38A6   | -0.695143   | 0.2509839   | -2.7697  | 0.00565  | -0.89902377  | count | 1           |
| PPFIBP1   | -0.8792907  | 0.5279552   | -1.6655  | 0.0959   | -0.892937663 | count | 1           |
| NDUFA4L2  | -2.0114793  | 1.8600398   | -1.0814  | 0.28     | -0.889817855 | count | 1           |
| OPTN      | -0.8890425  | 0.3996764   | -2.2244  | 0.0262   | -0.889539684 | count | 1           |
| FMNL2     | -0.6759146  | 0.1919293   | -3.5217  | 0.000437 | -0.885967489 | count | 1           |
| MT2A      | -0.6156809  | 0.1653644   | -3.7232  | 0.000201 | -0.88532863  | count | 1           |
| CYTOR     | -0.6529833  | 0.1594052   | -4.0964  | 4.33E-05 | -0.884282273 | count | 1           |
| OCIAD2    | -1.2990428  | 0.7049343   | -1.8428  | 0.0655   | -0.88399151  | count | 1           |
| CERCAM    | -1.982496   | 1.0441818   | -1.8986  | 0.0577   | -0.883839208 | count | 1           |
| 10-Sep    | -0.7032523  | 0.2682962   | -2.6212  | 0.00882  | -0.879886708 | count | 1           |
| LBX2      | -1.398592   | 1.563832    | -0.8943  | 0.371    | -0.879629998 | count | 1           |
| CD72      | -0.6757502  | 0.1629762   | -4.1463  | 3.49E-05 | -0.878707416 | count | 0.8233608   |
| MSR1      | -0.6146248  | 0.0810235   | -7.5858  | 4.66E-14 | -0.878292802 | count | 1.13E-09    |
| C17orf58  | -0.7639812  | 0.3869494   | -1.9744  | 0.0485   | -0.871095204 | count | 1           |

|            |             |             |          |          |              |       |             |
|------------|-------------|-------------|----------|----------|--------------|-------|-------------|
| SPATS2     | -0.8375774  | 0.4017226   | -2.085   | 0.0372   | -0.87103028  | count | 1           |
| RGCC       | -0.6042106  | 0.1044659   | -5.7838  | 8.23E-09 | -0.869426882 | count | 0.000197446 |
| FNIP2      | -0.6381362  | 0.1507838   | -4.2321  | 2.40E-05 | -0.86589631  | count | 0.567048    |
| PRDX4      | -0.6143705  | 0.1107712   | -5.5463  | 3.23E-08 | -0.864004963 | count | 0.000773488 |
| CTPS1      | -1.1780454  | 0.6245041   | -1.8864  | 0.0594   | -0.863156513 | count | 1           |
| RAB11B-AS1 | -0.9144319  | 0.5412507   | -1.6895  | 0.0913   | -0.860848677 | count | 1           |
| TMEM52B    | -0.8498302  | 0.4859456   | -1.7488  | 0.0804   | -0.860748386 | count | 1           |
| BNIP3      | -0.6271825  | 0.2012563   | -3.1163  | 0.00185  | -0.860502907 | count | 1           |
| ARID5B     | -0.6213069  | 0.1524735   | -4.0749  | 4.75E-05 | -0.858144986 | count | 1           |
| RHOH       | -0.8904691  | 0.3509773   | -2.5371  | 0.0112   | -0.856745304 | count | 1           |
| SH2B2      | -0.8202569  | 0.3740098   | -2.1931  | 0.0284   | -0.85487714  | count | 1           |
| ALCAM      | -0.6238069  | 0.1544337   | -4.0393  | 5.53E-05 | -0.854230481 | count | 1           |
| NEK2       | -16.909627  | 4506.010222 | -0.0038  | 0.997    | -0.851430906 | count | 1           |
| ADGRF5     | -16.909627  | 4506.010222 | -0.0038  | 0.997    | -0.851430906 | count | 1           |
| GSEC       | -16.905309  | 1931.085166 | -0.0088  | 0.993    | -0.851430906 | count | 1           |
| ADAMTS2    | -16.904738  | 1651.751937 | -0.0102  | 0.992    | -0.851430906 | count | 1           |
| ZP1        | -16.904738  | 1651.751937 | -0.0102  | 0.992    | -0.851430906 | count | 1           |
| ICOS       | -17.2911557 | 3767.668758 | -0.0046  | 0.996    | -0.851430858 | count | 1           |
| AC011611.4 | -17.2891264 | 1847.525059 | -0.0094  | 0.993    | -0.851430858 | count | 1           |
| SCG5       | -17.2888624 | 1695.56179  | -0.0102  | 0.992    | -0.851430858 | count | 1           |
| LMNTD2     | -16.8761149 | 1171.4986   | -0.0144  | 0.989    | -0.85143084  | count | 1           |
| AL162231.1 | -16.828495  | 1087.146117 | -0.0155  | 0.988    | -0.851430837 | count | 1           |
| POLR3H     | -0.7350984  | 0.3900315   | -1.8847  | 0.0596   | -0.850187969 | count | 1           |
| PPIF       | -0.5990136  | 0.10597     | -5.6527  | 1.76E-08 | -0.850176193 | count | 0.000421837 |
| PRADC1     | -0.7122934  | 0.2779828   | -2.5624  | 0.0105   | -0.849214685 | count | 1           |
| KCNJ15     | -0.9447545  | 0.610809    | -1.5467  | 0.122    | -0.848655668 | count | 1           |
| DTYMK      | -0.6586963  | 0.2474689   | -2.6617  | 0.00782  | -0.848558085 | count | 1           |
| NECTIN2    | -0.6214845  | 0.1370294   | -4.5354  | 6.03E-06 | -0.84711271  | count | 0.1430919   |
| PLPP5      | -0.6599637  | 0.2394906   | -2.7557  | 0.0059   | -0.846886723 | count | 1           |
| INSIG1     | -0.5899997  | 0.0873875   | -6.7515  | 1.82E-11 | -0.84520078  | count | 4.39E-07    |
| AQP9       | -0.6081214  | 0.1633183   | -3.7235  | 0.000201 | -0.844792151 | count | 1           |
| CNBD2      | -0.7341382  | 0.3313341   | -2.2157  | 0.0268   | -0.844401971 | count | 1           |
| GNG10      | -0.8939687  | 0.4100882   | -2.1799  | 0.0294   | -0.844257802 | count | 1           |
| LMNB2      | -0.8720196  | 0.3842225   | -2.2696  | 0.0233   | -0.841300471 | count | 1           |
| FTL        | -0.5814662  | 0.0431243   | -13.4835 | 5.03E-40 | -0.838823466 | count | 1.22E-35    |
| MARCKSL1   | -0.605079   | 0.1614675   | -3.7474  | 0.000183 | -0.837502525 | count | 1           |
| GZF1       | -0.6055055  | 0.1397564   | -4.3326  | 1.53E-05 | -0.831040084 | count | 0.3620898   |
| CAPG       | -0.5768877  | 0.0666353   | -8.6574  | 8.59E-18 | -0.826337437 | count | 2.08E-13    |
| YDJC       | -0.6373755  | 0.2282227   | -2.7928  | 0.00527  | -0.823131944 | count | 1           |
| LGALS1     | -0.5701068  | 0.052703    | -10.8173 | 1.13E-26 | -0.821237549 | count | 2.74E-22    |
| HS3ST2     | -2.1587871  | 0.9984418   | -2.1622  | 0.0307   | -0.820807348 | count | 1           |
| CYB5A      | -0.6093722  | 0.1843652   | -3.3052  | 0.000963 | -0.819432731 | count | 1           |
| BOLA2B     | -0.870434   | 0.7740215   | -1.1246  | 0.261    | -0.817113279 | count | 1           |
| IL1RN      | -0.5685577  | 0.1296798   | -4.3843  | 1.21E-05 | -0.816518018 | count | 0.2865764   |
| TAF4       | -1.564324   | 0.6759484   | -2.3143  | 0.0207   | -0.816465427 | count | 1           |



|            |            |             |         |          |              |       |             |
|------------|------------|-------------|---------|----------|--------------|-------|-------------|
| ADAM28     | -0.6359048 | 0.161112    | -3.947  | 8.14E-05 | -0.815693806 | count | 1           |
| SLC36A1    | -0.9001864 | 0.5121538   | -1.7576 | 0.0789   | -0.814646138 | count | 1           |
| ANKRD9     | -0.6373996 | 0.2290774   | -2.7825 | 0.00544  | -0.814140297 | count | 1           |
| TLCD2      | -0.9877337 | 0.5923557   | -1.6675 | 0.0955   | -0.810879488 | count | 1           |
| SIPA1L2    | -0.674097  | 0.2301044   | -2.9295 | 0.00343  | -0.809273123 | count | 1           |
| STX6       | -0.5930187 | 0.1429822   | -4.1475 | 3.48E-05 | -0.809186336 | count | 0.8210364   |
| EFEMP1     | -2.0654245 | 1.4277557   | -1.4466 | 0.148    | -0.805642242 | count | 1           |
| BAG3       | -0.7160736 | 0.2509105   | -2.8539 | 0.00435  | -0.804236076 | count | 1           |
| FRRS1      | -1.2278794 | 0.8332108   | -1.4737 | 0.141    | -0.80409333  | count | 1           |
| MRAS       | -0.6364726 | 0.2661477   | -2.3914 | 0.0169   | -0.802978856 | count | 1           |
| PTGR1      | -0.6573467 | 0.2727397   | -2.4102 | 0.016    | -0.802785653 | count | 1           |
| PDLIM4     | -1.2712345 | 1.0538849   | -1.2062 | 0.228    | -0.799048614 | count | 1           |
| UCHL3      | -0.574048  | 0.1427755   | -4.0206 | 5.98E-05 | -0.798433185 | count | 1           |
| ANG        | -0.6010214 | 0.2075361   | -2.896  | 0.00381  | -0.798183396 | count | 1           |
| IL18BP     | -0.625454  | 0.3038813   | -2.0582 | 0.0397   | -0.797265573 | count | 1           |
| METTL7B    | -0.7419624 | 0.4696128   | -1.5799 | 0.114    | -0.797198111 | count | 1           |
| ZNF891     | -1.1639104 | 0.5114828   | -2.2756 | 0.023    | -0.795563048 | count | 1           |
| UBE2C      | -1.0062483 | 1.3778068   | -0.7303 | 0.465    | -0.795100418 | count | 1           |
| CFAP36     | -0.635123  | 0.2539237   | -2.5012 | 0.0124   | -0.791266918 | count | 1           |
| TMEM163    | -0.9966806 | 0.4148404   | -2.4026 | 0.0164   | -0.78902676  | count | 1           |
| PPP1R3E    | -1.1959692 | 0.5636003   | -2.122  | 0.0339   | -0.789024873 | count | 1           |
| SCYL3      | -1.7507142 | 0.8311042   | -2.1065 | 0.0353   | -0.788795988 | count | 1           |
| ZNF569     | -1.24758   | 0.7788465   | -1.6018 | 0.109    | -0.788621768 | count | 1           |
| MTHFS      | -0.6017667 | 0.2317597   | -2.5965 | 0.00947  | -0.788233091 | count | 1           |
| IL18       | -0.5634047 | 0.1010707   | -5.5744 | 2.76E-08 | -0.78799154  | count | 0.00066113  |
| AL133453.1 | -0.5865009 | 0.2181096   | -2.689  | 0.00721  | -0.787582131 | count | 1           |
| PLPP1      | -1.3767632 | 1.0905041   | -1.2625 | 0.207    | -0.785692259 | count | 1           |
| LINC00243  | -1.5790931 | 0.6820733   | -2.3151 | 0.0207   | -0.784203893 | count | 1           |
| FCGR3A     | -0.5448835 | 0.0734827   | -7.4151 | 1.66E-13 | -0.781882964 | count | 4.01E-09    |
| MAFF       | -0.5800269 | 0.1223127   | -4.7422 | 2.24E-06 | -0.781772292 | count | 0.05326944  |
| PPA1       | -0.5586182 | 0.0990161   | -5.6417 | 1.88E-08 | -0.780698043 | count | 0.000450523 |
| C1orf122   | -0.5606558 | 0.1363798   | -4.111  | 4.07E-05 | -0.780343078 | count | 0.9595839   |
| IER3       | -0.5418647 | 0.0640043   | -8.4661 | 4.30E-17 | -0.779611884 | count | 1.04E-12    |
| 2-Mar      | -0.5577679 | 0.1008824   | -5.5289 | 3.56E-08 | -0.778683194 | count | 0.0008523   |
| SLX4       | -1.1733248 | 0.6701478   | -1.7508 | 0.0801   | -0.778146951 | count | 1           |
| ZNF503-AS2 | -16.954676 | 1156.125636 | -0.0147 | 0.988    | -0.778144731 | count | 1           |
| ZKSCAN7    | -16.790939 | 4246.386754 | -0.004  | 0.997    | -0.778144723 | count | 1           |
| AP001330.1 | -16.790939 | 4246.386754 | -0.004  | 0.997    | -0.778144723 | count | 1           |
| REM2       | -16.790939 | 4246.386754 | -0.004  | 0.997    | -0.778144723 | count | 1           |
| ALG1L2     | -16.790144 | 3751.349153 | -0.0045 | 0.996    | -0.778144723 | count | 1           |
| CLEC19A    | -16.790144 | 3751.349153 | -0.0045 | 0.996    | -0.778144723 | count | 1           |
| AC079313.2 | -16.789454 | 3091.540504 | -0.0054 | 0.996    | -0.778144723 | count | 1           |
| SNX22      | -16.78749  | 2116.689374 | -0.0079 | 0.994    | -0.778144723 | count | 1           |
| DAGLA      | -16.787081 | 1979.06912  | -0.0085 | 0.993    | -0.778144723 | count | 1           |
| C4orf47    | -16.786897 | 1831.466658 | -0.0092 | 0.993    | -0.778144723 | count | 1           |

|            |             |             |          |          |              |       |             |
|------------|-------------|-------------|----------|----------|--------------|-------|-------------|
| MAFIP      | -17.2058232 | 2553.016865 | -0.0067  | 0.995    | -0.77814462  | count | 1           |
| CD3D       | -17.1192645 | 2034.660897 | -0.0084  | 0.993    | -0.778144617 | count | 1           |
| GOLGA8R    | -17.119202  | 2216.819178 | -0.0077  | 0.994    | -0.778144617 | count | 1           |
| AP001453.4 | -16.5698146 | 1348.022162 | -0.0123  | 0.99     | -0.778144589 | count | 1           |
| C6orf223   | -16.5694229 | 1146.925907 | -0.0144  | 0.988    | -0.778144589 | count | 1           |
| GPRIN3     | -0.5711379  | 0.175157    | -3.2607  | 0.00113  | -0.777962504 | count | 1           |
| BEX3       | -0.6005175  | 0.2567892   | -2.3386  | 0.0194   | -0.777416325 | count | 1           |
| ABLIM3     | -1.2807803  | 1.1312524   | -1.1322  | 0.258    | -0.776677574 | count | 1           |
| TMEM70     | -0.5498421  | 0.0966033   | -5.6918  | 1.41E-08 | -0.776311851 | count | 0.00033809  |
| HEY1       | -1.1176338  | 1.0011033   | -1.1164  | 0.264    | -0.77191509  | count | 1           |
| IFI6       | -0.5405041  | 0.0971573   | -5.5632  | 2.94E-08 | -0.771149056 | count | 0.00070413  |
| NOP16      | -0.6098367  | 0.2511024   | -2.4286  | 0.0152   | -0.769714836 | count | 1           |
| MIF        | -0.5380335  | 0.0823196   | -6.5359  | 7.66E-11 | -0.768379032 | count | 1.85E-06    |
| ATP6V1F    | -0.5333918  | 0.0522432   | -10.2098 | 5.38E-24 | -0.766044595 | count | 1.30E-19    |
| S100B      | -0.671624   | 0.5828744   | -1.1523  | 0.249    | -0.765262438 | count | 1           |
| TARBP2     | -0.8356767  | 0.4225318   | -1.9778  | 0.0481   | -0.764260068 | count | 1           |
| ENG        | -0.5547204  | 0.1398012   | -3.9679  | 7.46E-05 | -0.764156748 | count | 1           |
| RAB7B      | -0.6116965  | 0.2903008   | -2.1071  | 0.0352   | -0.763165571 | count | 1           |
| AC147651.4 | -0.6261252  | 0.234145    | -2.6741  | 0.00754  | -0.762532438 | count | 1           |
| DHRS3      | -0.5689931  | 0.1968275   | -2.8908  | 0.00388  | -0.762054052 | count | 1           |
| AL035413.1 | -1.1387788  | 0.6390961   | -1.7819  | 0.0749   | -0.761254067 | count | 1           |
| MMP2       | -0.9747515  | 0.7260916   | -1.3425  | 0.18     | -0.760440992 | count | 1           |
| SMIM12     | -0.5554898  | 0.1398392   | -3.9723  | 7.32E-05 | -0.760384546 | count | 1           |
| PRSS21     | -0.6753983  | 0.5960038   | -1.1332  | 0.257    | -0.758885514 | count | 1           |
| HIF1A      | -0.5313767  | 0.071445    | -7.4376  | 1.41E-13 | -0.75833956  | count | 3.41E-09    |
| CCR5       | -0.6597282  | 0.3122934   | -2.1125  | 0.0347   | -0.757245311 | count | 1           |
| ITGA6      | -0.7801364  | 0.4000682   | -1.95    | 0.0513   | -0.756245722 | count | 1           |
| CLEC5A     | -0.5459785  | 0.1874684   | -2.9124  | 0.00362  | -0.755421007 | count | 1           |
| PAICS      | -0.5904274  | 0.2274824   | -2.5955  | 0.0095   | -0.755301791 | count | 1           |
| EXOC6B     | -0.888939   | 0.4733759   | -1.8779  | 0.0605   | -0.754885799 | count | 1           |
| AC016831.1 | -0.6402461  | 0.2170285   | -2.9501  | 0.00321  | -0.75421615  | count | 1           |
| GPR137B    | -0.5625537  | 0.1435228   | -3.9196  | 9.11E-05 | -0.754080388 | count | 1           |
| PAM        | -0.7625925  | 0.4462909   | -1.7087  | 0.0876   | -0.753592227 | count | 1           |
| ME2        | -0.5429005  | 0.13648     | -3.9779  | 7.15E-05 | -0.751752952 | count | 1           |
| TMEM251    | -0.5453904  | 0.1592833   | -3.424   | 0.000627 | -0.750450519 | count | 1           |
| PRDX1      | -0.5222921  | 0.0544067   | -9.5998  | 1.90E-21 | -0.749748576 | count | 4.61E-17    |
| ENOSF1     | -0.5908144  | 0.2322922   | -2.5434  | 0.011    | -0.74953606  | count | 1           |
| MGAT4A     | -0.5369143  | 0.1041207   | -5.1567  | 2.71E-07 | -0.749045674 | count | 0.00646877  |
| RAB33A     | -0.805897   | 0.4734591   | -1.7021  | 0.0889   | -0.748679551 | count | 1           |
| FAM107B    | -0.5267496  | 0.0939844   | -5.6047  | 2.32E-08 | -0.748642981 | count | 0.000555872 |
| ACOT11     | -0.9330762  | 0.7387347   | -1.2631  | 0.207    | -0.747884669 | count | 1           |
| CCDC167    | -0.5595676  | 0.2686964   | -2.0825  | 0.0374   | -0.747328869 | count | 1           |
| TSC22D1    | -0.5555     | 0.226795    | -2.4493  | 0.0144   | -0.747112257 | count | 1           |
| SH3PXD2B   | -1.0685241  | 0.3892566   | -2.745   | 0.00609  | -0.746094068 | count | 1           |
| TYMS       | -1.0028624  | 0.8114133   | -1.2359  | 0.217    | -0.745846426 | count | 1           |

|           |            |           |         |          |              |       |             |
|-----------|------------|-----------|---------|----------|--------------|-------|-------------|
| PTTG1     | -0.598691  | 0.2998352 | -1.9967 | 0.046    | -0.745636188 | count | 1           |
| POLR3E    | -0.928618  | 0.4011841 | -2.3147 | 0.0207   | -0.744951043 | count | 1           |
| ZDHHC12   | -0.5497688 | 0.1592425 | -3.4524 | 0.000565 | -0.744517388 | count | 1           |
| COBLL1    | -1.5752109 | 1.4781325 | -1.0657 | 0.287    | -0.744270221 | count | 1           |
| TPI1      | -0.5166967 | 0.0524912 | -9.8435 | 1.89E-22 | -0.743510603 | count | 4.58E-18    |
| PGK1      | -0.5170106 | 0.055292  | -9.3506 | 1.90E-20 | -0.743163502 | count | 4.60E-16    |
| MGST3     | -0.5180444 | 0.0582334 | -8.896  | 1.10E-18 | -0.742802412 | count | 2.66E-14    |
| PKD1      | -1.0974918 | 0.5138536 | -2.1358 | 0.0328   | -0.740589923 | count | 1           |
| LILRB4    | -0.5200094 | 0.0863071 | -6.0251 | 1.94E-09 | -0.740159075 | count | 4.66E-05    |
| LINC00513 | -1.1389843 | 0.4539716 | -2.5089 | 0.0122   | -0.738660073 | count | 1           |
| PTPN1     | -0.5289645 | 0.1022144 | -5.1751 | 2.46E-07 | -0.738487431 | count | 0.005873004 |
| HMGA1     | -0.5260502 | 0.108598  | -4.844  | 1.35E-06 | -0.737829426 | count | 0.03213945  |
| RALGDS    | -0.5891025 | 0.2290728 | -2.5717 | 0.0102   | -0.735969963 | count | 1           |
| RBM4B     | -0.9575417 | 0.4691662 | -2.0409 | 0.0414   | -0.734590406 | count | 1           |
| RABEPK    | -0.6688658 | 0.3301983 | -2.0256 | 0.0429   | -0.73446658  | count | 1           |
| FRMD4A    | -0.6460712 | 0.2685601 | -2.4057 | 0.0162   | -0.733072438 | count | 1           |
| VOPP1     | -0.5854443 | 0.1413312 | -4.1424 | 3.55E-05 | -0.731558248 | count | 0.837445    |
| HLA-DQB2  | -0.7181035 | 0.2991901 | -2.4002 | 0.0165   | -0.730044236 | count | 1           |
| NACA2     | -1.522714  | 0.9343986 | -1.6296 | 0.103    | -0.729718532 | count | 1           |
| TPRG1     | -1.1183671 | 0.8952443 | -1.2492 | 0.212    | -0.728781274 | count | 1           |
| SOGA1     | -0.7162529 | 0.347977  | -2.0583 | 0.0397   | -0.72833742  | count | 1           |
| LPCAT3    | -0.6481513 | 0.2847188 | -2.2765 | 0.0229   | -0.727562804 | count | 1           |
| CISD2     | -0.5177693 | 0.1024477 | -5.054  | 4.65E-07 | -0.725444178 | count | 0.011088855 |
| ADAL      | -0.9425533 | 0.4393679 | -2.1452 | 0.032    | -0.725279745 | count | 1           |
| CBR3      | -1.3771007 | 0.6591434 | -2.0892 | 0.0368   | -0.721293283 | count | 1           |
| CEP128    | -1.0220196 | 0.4668759 | -2.1891 | 0.0287   | -0.720949331 | count | 1           |
| F3        | -1.376013  | 0.8767621 | -1.5694 | 0.117    | -0.720928469 | count | 1           |
| COL6A2    | -0.9354631 | 0.5871464 | -1.5932 | 0.111    | -0.72084994  | count | 1           |
| VAC14     | -0.5936017 | 0.3096211 | -1.9172 | 0.0553   | -0.719523087 | count | 1           |
| BATF      | -0.5871347 | 0.2435359 | -2.4109 | 0.016    | -0.719301037 | count | 1           |
| ENO1      | -0.5005018 | 0.0578674 | -8.6491 | 9.22E-18 | -0.719223884 | count | 2.23E-13    |
| FAM210A   | -0.554516  | 0.1752133 | -3.1648 | 0.00157  | -0.716819506 | count | 1           |
| FPGS      | -0.6176446 | 0.3570094 | -1.7301 | 0.0837   | -0.715774827 | count | 1           |
| STPG1     | -1.8355219 | 1.1376912 | -1.6134 | 0.107    | -0.714622903 | count | 1           |
| SLC26A6   | -0.7638242 | 0.5500241 | -1.3887 | 0.165    | -0.714227867 | count | 1           |
| TMEM51    | -0.5571281 | 0.2524824 | -2.2066 | 0.0274   | -0.713274941 | count | 1           |
| LY6G5C    | -0.7813129 | 0.9452029 | -0.8266 | 0.409    | -0.712555686 | count | 1           |
| ASB1      | -0.6632707 | 0.4522083 | -1.4667 | 0.143    | -0.711897883 | count | 1           |
| SPAG4     | -0.640476  | 0.4821308 | -1.3284 | 0.184    | -0.711249616 | count | 1           |
| ZNF184    | -1.4573118 | 0.6158253 | -2.3664 | 0.018    | -0.710752095 | count | 1           |
| NEU3      | -0.7507992 | 0.4532136 | -1.6566 | 0.0977   | -0.710699745 | count | 1           |
| POLR2H    | -0.5444545 | 0.1842945 | -2.9543 | 0.00316  | -0.709852538 | count | 1           |
| FERMT2    | -0.8569657 | 0.527755  | -1.6238 | 0.105    | -0.70910402  | count | 1           |
| ACOT13    | -0.5163823 | 0.1693156 | -3.0498 | 0.00231  | -0.70838181  | count | 1           |
| IGLC3     | -0.5474263 | 0.3675457 | -1.4894 | 0.137    | -0.707883984 | count | 1           |

|            |             |             |         |          |              |       |             |
|------------|-------------|-------------|---------|----------|--------------|-------|-------------|
| UBL3       | -0.5397914  | 0.1402167   | -3.8497 | 0.000121 | -0.707659301 | count | 1           |
| HNRNPA1P48 | -0.8540344  | 0.5010629   | -1.7044 | 0.0884   | -0.707060169 | count | 1           |
| CBLB       | -0.6769899  | 0.4540913   | -1.4909 | 0.136    | -0.705498612 | count | 1           |
| ADA        | -0.6546537  | 0.3098421   | -2.1129 | 0.0347   | -0.703326746 | count | 1           |
| DOK5       | -1.7739079  | 0.9764354   | -1.8167 | 0.0694   | -0.702639133 | count | 1           |
| RHEB       | -0.4952776  | 0.0768983   | -6.4407 | 1.43E-10 | -0.702309077 | count | 3.44E-06    |
| EIF4A3     | -0.4943544  | 0.0912621   | -5.4169 | 6.66E-08 | -0.701120467 | count | 0.001592939 |
| PNMA1      | -0.6817547  | 0.4397788   | -1.5502 | 0.121    | -0.7010576   | count | 1           |
| NAP1L5     | -17.5423813 | 2192.864501 | -0.008  | 0.994    | -0.700935462 | count | 1           |
| RASGEF1A   | -17.5021155 | 1895.863086 | -0.0092 | 0.993    | -0.700935461 | count | 1           |
| P2RY10     | -17.4610944 | 1593.518801 | -0.011  | 0.991    | -0.70093546  | count | 1           |
| PPY        | -17.1130677 | 2066.428562 | -0.0083 | 0.993    | -0.700935451 | count | 1           |
| ZCWPW2     | -17.1128026 | 1891.210087 | -0.009  | 0.993    | -0.700935451 | count | 1           |
| PCAT6      | -17.1125277 | 1698.105733 | -0.0101 | 0.992    | -0.700935451 | count | 1           |
| CIB2       | -17.1116666 | 1273.686734 | -0.0134 | 0.989    | -0.700935451 | count | 1           |
| AC007014.1 | -16.5036533 | 2715.300031 | -0.0061 | 0.995    | -0.700935423 | count | 1           |
| TJP1       | -16.5034247 | 2375.585446 | -0.0069 | 0.994    | -0.700935423 | count | 1           |
| ZNF284     | -16.5025798 | 1478.524195 | -0.0112 | 0.991    | -0.700935423 | count | 1           |
| LINC02245  | -16.656299  | 3969.928468 | -0.0042 | 0.997    | -0.700935209 | count | 1           |
| ITGA11     | -16.656299  | 3969.928468 | -0.0042 | 0.997    | -0.700935209 | count | 1           |
| BRICD5     | -16.653784  | 2467.224088 | -0.0068 | 0.995    | -0.700935209 | count | 1           |
| OSCP1      | -16.653036  | 2038.963135 | -0.0082 | 0.993    | -0.700935209 | count | 1           |
| PROC       | -16.652841  | 1874.813839 | -0.0089 | 0.993    | -0.700935209 | count | 1           |
| S100A16    | -16.652394  | 1694.701228 | -0.0098 | 0.992    | -0.700935209 | count | 1           |
| BIRC7      | -16.652394  | 1694.701228 | -0.0098 | 0.992    | -0.700935209 | count | 1           |
| FZD3       | -16.651939  | 1493.20175  | -0.0112 | 0.991    | -0.700935209 | count | 1           |
| MLEC       | -0.4972781  | 0.0908296   | -5.4748 | 4.82E-08 | -0.700539956 | count | 0.001153474 |
| FKTN       | -1.7608398  | 0.9511118   | -1.8513 | 0.0642   | -0.700017489 | count | 1           |
| AC058791.1 | -0.5350142  | 0.1644493   | -3.2534 | 0.00116  | -0.699929504 | count | 1           |
| TMEM217    | -1.5588136  | 1.2047958   | -1.2938 | 0.196    | -0.698996854 | count | 1           |
| AC139530.1 | -0.7860688  | 0.5434843   | -1.4464 | 0.148    | -0.698814027 | count | 1           |
| ST6GALNAC4 | -0.6213544  | 0.2839936   | -2.1879 | 0.0288   | -0.696714298 | count | 1           |
| INTS5      | -0.8538985  | 0.5517602   | -1.5476 | 0.122    | -0.694813005 | count | 1           |
| AKR1B1     | -0.4988616  | 0.0962735   | -5.1817 | 2.38E-07 | -0.694514941 | count | 0.005682964 |
| ETFBKMT    | -1.4009796  | 0.8481895   | -1.6517 | 0.0987   | -0.69364884  | count | 1           |
| ZNF331     | -0.4818434  | 0.0676672   | -7.1208 | 1.40E-12 | -0.691884942 | count | 3.38E-08    |
| PKIB       | -0.5219057  | 0.2138583   | -2.4404 | 0.0147   | -0.691538861 | count | 1           |
| CXorf40B   | -0.5904623  | 0.3050454   | -1.9357 | 0.053    | -0.691459351 | count | 1           |
| MACC1      | -1.2092756  | 0.5418111   | -2.2319 | 0.0257   | -0.691345951 | count | 1           |
| MT-ND6     | -0.5419031  | 0.2121813   | -2.554  | 0.0107   | -0.691216971 | count | 1           |
| KYAT3      | -0.5902271  | 0.3010834   | -1.9603 | 0.0501   | -0.689377362 | count | 1           |
| HAUS2      | -0.5592766  | 0.2301981   | -2.4295 | 0.0152   | -0.687505872 | count | 1           |
| IFI27L1    | -0.6578852  | 0.343633    | -1.9145 | 0.0557   | -0.687171952 | count | 1           |
| DNAJC9     | -0.5801618  | 0.3232938   | -1.7945 | 0.0729   | -0.686724192 | count | 1           |
| TPM4       | -0.4789789  | 0.0580251   | -8.2547 | 2.46E-16 | -0.686136469 | count | 5.95E-12    |

|           |            |           |         |          |              |       |           |
|-----------|------------|-----------|---------|----------|--------------|-------|-----------|
| P4HB      | -0.4816277 | 0.0772123 | -6.2377 | 5.21E-10 | -0.685867336 | count | 1.25E-05  |
| ACAA2     | -0.491198  | 0.1118825 | -4.3903 | 1.18E-05 | -0.685343368 | count | 0.2795184 |
| SBF2-AS1  | -0.6849748 | 0.507157  | -1.3506 | 0.177    | -0.684082826 | count | 1         |
| ATOX1     | -0.4822369 | 0.0807611 | -5.9712 | 2.70E-09 | -0.683983795 | count | 6.48E-05  |
| SLAMF7    | -1.368365  | 0.4359724 | -3.1387 | 0.00172  | -0.683413697 | count | 1         |
| GALE      | -0.5700942 | 0.3325829 | -1.7141 | 0.0866   | -0.682850518 | count | 1         |
| PXMP2     | -1.1870698 | 0.6379093 | -1.8609 | 0.0629   | -0.68243732  | count | 1         |
| LIMS1     | -0.4778964 | 0.0697172 | -6.8548 | 9.00E-12 | -0.682352791 | count | 2.17E-07  |
| EML4      | -0.4849079 | 0.1302341 | -3.7234 | 0.000201 | -0.682317772 | count | 1         |
| S100A13   | -0.5088309 | 0.2311071 | -2.2017 | 0.0278   | -0.681858849 | count | 1         |
| CYR61     | -1.1191381 | 1.4085963 | -0.7945 | 0.427    | -0.680696982 | count | 1         |
| HLA-DOB   | -0.9805096 | 0.6831482 | -1.4353 | 0.151    | -0.679199346 | count | 1         |
| HDAC11    | -0.8912129 | 0.9253723 | -0.9631 | 0.336    | -0.678188048 | count | 1         |
| FAH       | -0.5122812 | 0.2499353 | -2.0497 | 0.0405   | -0.677156819 | count | 1         |
| INAFM2    | -0.5538229 | 0.2005088 | -2.7621 | 0.00579  | -0.676664839 | count | 1         |
| FAM104A   | -0.5313421 | 0.2088617 | -2.544  | 0.011    | -0.676193629 | count | 1         |
| ABCB8     | -0.6704661 | 0.3922701 | -1.7092 | 0.0875   | -0.676025937 | count | 1         |
| CDKN3     | -0.744469  | 0.6413332 | -1.1608 | 0.246    | -0.674833735 | count | 1         |
| SLC41A1   | -1.8997868 | 1.2003429 | -1.5827 | 0.114    | -0.674461196 | count | 1         |
| CRNDE     | -0.909889  | 0.5782433 | -1.5735 | 0.116    | -0.674068672 | count | 1         |
| TNFAIP8L1 | -0.6483641 | 0.3975452 | -1.6309 | 0.103    | -0.673815376 | count | 1         |
| FNDC10    | -0.6990059 | 0.4588933 | -1.5232 | 0.128    | -0.673224813 | count | 1         |
| PPP1R14A  | -1.3354382 | 0.6582044 | -2.0289 | 0.0426   | -0.672828651 | count | 1         |
| SLC2A1    | -1.4562367 | 1.0627362 | -1.3703 | 0.171    | -0.671587799 | count | 1         |
| SLC28A3   | -1.4562367 | 1.949165  | -0.7471 | 0.455    | -0.671587799 | count | 1         |
| SMAD7     | -1.1582586 | 0.5586101 | -2.0735 | 0.0382   | -0.670679006 | count | 1         |
| DZIP1L    | -1.1537647 | 0.7535038 | -1.5312 | 0.126    | -0.668824553 | count | 1         |
| SERPINF2  | -0.8316763 | 0.611821  | -1.3593 | 0.174    | -0.667149911 | count | 1         |
| COG7      | -1.148459  | 0.4641777 | -2.4742 | 0.0134   | -0.666627769 | count | 1         |
| SMIM3     | -0.4860564 | 0.1467113 | -3.313  | 0.000936 | -0.666040506 | count | 1         |
| BYSL      | -0.795241  | 0.6127304 | -1.2979 | 0.194    | -0.665473263 | count | 1         |
| PTRH1     | -0.5413781 | 0.2372213 | -2.2822 | 0.0226   | -0.665232517 | count | 1         |
| ACTN1     | -0.483563  | 0.1460087 | -3.3119 | 0.00094  | -0.665009934 | count | 1         |
| PTCRA     | -1.2154404 | 0.8384891 | -1.4496 | 0.147    | -0.663836796 | count | 1         |
| PIGW      | -1.2154404 | 0.8632775 | -1.4079 | 0.159    | -0.663836796 | count | 1         |
| ITGAV     | -0.5178761 | 0.1959032 | -2.6435 | 0.00826  | -0.663725439 | count | 1         |
| ALG5      | -0.4918621 | 0.1544931 | -3.1837 | 0.00147  | -0.663143992 | count | 1         |
| DSN1      | -0.8061444 | 0.5512573 | -1.4624 | 0.144    | -0.66181311  | count | 1         |
| ENTPD5    | -0.8624151 | 0.6562434 | -1.3142 | 0.189    | -0.660084875 | count | 1         |
| ADORA2B   | -0.6617377 | 0.4757135 | -1.391  | 0.164    | -0.657670677 | count | 1         |
| MIPEP     | -0.9094473 | 0.6237043 | -1.4581 | 0.145    | -0.657266583 | count | 1         |
| HMOX1     | -0.4557998 | 0.1161404 | -3.9246 | 8.93E-05 | -0.654775616 | count | 1         |
| ZSCAN5A   | -0.739533  | 0.5138218 | -1.4393 | 0.15     | -0.653746435 | count | 1         |
| POLR2J3   | -1.1886779 | 1.3457443 | -0.8833 | 0.377    | -0.653681409 | count | 1         |
| TANC2     | -0.601178  | 0.2821661 | -2.1306 | 0.0332   | -0.652878149 | count | 1         |

|            |            |           |         |          |              |       |             |
|------------|------------|-----------|---------|----------|--------------|-------|-------------|
| NOV        | -1.5456067 | 1.2559018 | -1.2307 | 0.219    | -0.652556697 | count | 1           |
| GADD45GIP1 | -0.459734  | 0.0752095 | -6.1127 | 1.14E-09 | -0.651634625 | count | 2.74E-05    |
| S100A2     | -1.00598   | 0.7959112 | -1.2639 | 0.206    | -0.651304274 | count | 1           |
| CXCL1      | -0.4735311 | 0.3848467 | -1.2304 | 0.219    | -0.650584585 | count | 1           |
| SOX15      | -1.760755  | 1.5494086 | -1.1364 | 0.256    | -0.650247622 | count | 1           |
| SRRD       | -0.5792735 | 0.3920648 | -1.4775 | 0.14     | -0.649714265 | count | 1           |
| RMDN3      | -0.5142225 | 0.232408  | -2.2126 | 0.027    | -0.649652815 | count | 1           |
| HSPD1      | -0.4554413 | 0.0632008 | -7.2063 | 7.62E-13 | -0.648052682 | count | 1.84E-08    |
| GAS2L3     | -0.5083608 | 0.1965676 | -2.5862 | 0.00976  | -0.647705487 | count | 1           |
| IFRD2      | -0.5359352 | 0.2859526 | -1.8742 | 0.061    | -0.647407403 | count | 1           |
| AC007038.2 | -1.3677252 | 1.491324  | -0.9171 | 0.359    | -0.646142692 | count | 1           |
| SIGLEC12   | -1.5151266 | 1.1349802 | -1.3349 | 0.182    | -0.645147503 | count | 1           |
| SDF2L1     | -0.4581397 | 0.107711  | -4.2534 | 2.18E-05 | -0.644685723 | count | 0.5153738   |
| APOO       | -0.6876266 | 0.4871205 | -1.4116 | 0.158    | -0.643539817 | count | 1           |
| SDC4       | -0.5176083 | 0.3038499 | -1.7035 | 0.0886   | -0.642643867 | count | 1           |
| CLCF1      | -0.7952267 | 0.6872585 | -1.1571 | 0.247    | -0.642317426 | count | 1           |
| WDR90      | -1.7181811 | 1.5651052 | -1.0978 | 0.272    | -0.642247816 | count | 1           |
| MRGBP      | -0.5434819 | 0.258157  | -2.1052 | 0.0354   | -0.642073142 | count | 1           |
| SLC25A35   | -1.2423713 | 1.465501  | -0.8477 | 0.397    | -0.641506513 | count | 1           |
| MAP3K20    | -0.4800907 | 0.1997959 | -2.4029 | 0.0163   | -0.640716277 | count | 1           |
| SLC37A2    | -0.5379632 | 0.3607653 | -1.4912 | 0.136    | -0.640320974 | count | 1           |
| CSTF1      | -0.5779687 | 0.3291392 | -1.756  | 0.0792   | -0.637873589 | count | 1           |
| IL21R      | -0.8761196 | 0.50331   | -1.7407 | 0.0819   | -0.637644498 | count | 1           |
| PHF19      | -0.5209212 | 0.2066964 | -2.5202 | 0.0118   | -0.636780947 | count | 1           |
| ZDHHC14    | -0.7048087 | 0.3668739 | -1.9211 | 0.0548   | -0.634952217 | count | 1           |
| YWHAH      | -0.4466265 | 0.0769864 | -5.8014 | 7.42E-09 | -0.634904444 | count | 0.000178035 |
| TUBB       | -0.4448483 | 0.0681659 | -6.526  | 8.18E-11 | -0.634460557 | count | 1.97E-06    |
| LRRC59     | -0.4680776 | 0.1433669 | -3.2649 | 0.00111  | -0.634025456 | count | 1           |
| MYO1E      | -0.4817473 | 0.2371178 | -2.0317 | 0.0423   | -0.631590988 | count | 1           |
| RIOX1      | -0.7005193 | 0.4528905 | -1.5468 | 0.122    | -0.631522576 | count | 1           |
| CASC15     | -1.063438  | 2.022951  | -0.5257 | 0.599    | -0.63036523  | count | 1           |
| C1orf198   | -1.2104338 | 0.9167516 | -1.3204 | 0.187    | -0.630269311 | count | 1           |
| CCT3       | -0.4522202 | 0.0938392 | -4.8191 | 1.53E-06 | -0.629925606 | count | 0.03641553  |
| CDC7       | -1.127446  | 1.9923575 | -0.5659 | 0.572    | -0.629736986 | count | 1           |
| SEC22A     | -0.8370199 | 0.4938499 | -1.6949 | 0.0902   | -0.629424014 | count | 1           |
| HSP90AA1   | -0.4376797 | 0.0524754 | -8.3407 | 1.22E-16 | -0.629332928 | count | 2.95E-12    |
| KRT18      | -1.2074072 | 0.7243846 | -1.6668 | 0.0957   | -0.629191233 | count | 1           |
| MYDGF      | -0.4401941 | 0.0697973 | -6.3067 | 3.37E-10 | -0.628070099 | count | 8.11E-06    |
| PRR3       | -0.6464539 | 0.3777454 | -1.7113 | 0.0871   | -0.627273201 | count | 1           |
| DDB1       | -0.5150134 | 0.217043  | -2.3729 | 0.0177   | -0.626521571 | count | 1           |
| IFITM10    | -1.6386114 | 0.9337664 | -1.7548 | 0.0794   | -0.626516997 | count | 1           |
| CCSER1     | -1.9494991 | 0.8193446 | -2.3793 | 0.0174   | -0.626407734 | count | 1           |
| GSTO1      | -0.4360926 | 0.0555406 | -7.8518 | 6.08E-15 | -0.626094311 | count | 1.47E-10    |
| FAM220A    | -0.831592  | 0.6654745 | -1.2496 | 0.212    | -0.626030546 | count | 1           |
| STIP1      | -0.4677977 | 0.1515855 | -3.086  | 0.00205  | -0.625935755 | count | 1           |

|             |             |             |         |          |              |       |   |
|-------------|-------------|-------------|---------|----------|--------------|-------|---|
| IFT81       | -0.6745181  | 0.6635699   | -1.0165 | 0.309    | -0.625515707 | count | 1 |
| ARFGAP3     | -0.4526251  | 0.1233719   | -3.6688 | 0.000249 | -0.624436989 | count | 1 |
| AC016831.5  | -0.4688432  | 0.1885424   | -2.4867 | 0.013    | -0.623964635 | count | 1 |
| SPSB1       | -0.6905229  | 0.6033892   | -1.1444 | 0.253    | -0.623507217 | count | 1 |
| NIPAL3      | -0.7231062  | 0.7833183   | -0.9231 | 0.356    | -0.622693857 | count | 1 |
| ZNF267      | -0.4454695  | 0.1087447   | -4.0965 | 4.33E-05 | -0.622358724 | count | 1 |
| OGFOD1      | -0.765072   | 0.4268762   | -1.7923 | 0.0732   | -0.621448313 | count | 1 |
| FAM114A1    | -0.4826791  | 0.2098064   | -2.3006 | 0.0215   | -0.621211785 | count | 1 |
| FAM92A      | -0.9454286  | 0.8208638   | -1.1517 | 0.25     | -0.620686951 | count | 1 |
| SPIC        | -17.865758  | 2552.47042  | -0.007  | 0.994    | -0.619359615 | count | 1 |
| COLEC10     | -16.500851  | 3673.056765 | -0.0045 | 0.996    | -0.619359576 | count | 1 |
| FOXM1       | -16.500851  | 3673.056765 | -0.0045 | 0.996    | -0.619359576 | count | 1 |
| GNAO1       | -16.500851  | 3673.056765 | -0.0045 | 0.996    | -0.619359576 | count | 1 |
| FBXO17      | -16.500851  | 3673.056765 | -0.0045 | 0.996    | -0.619359576 | count | 1 |
| WDR78       | -16.499953  | 3119.559889 | -0.0053 | 0.996    | -0.619359576 | count | 1 |
| FHL2        | -16.499953  | 3119.559889 | -0.0053 | 0.996    | -0.619359576 | count | 1 |
| FOXP2       | -16.499953  | 3119.559889 | -0.0053 | 0.996    | -0.619359576 | count | 1 |
| TRDC        | -16.499953  | 3119.559889 | -0.0053 | 0.996    | -0.619359576 | count | 1 |
| RSPH9       | -16.498302  | 2116.043982 | -0.0078 | 0.994    | -0.619359576 | count | 1 |
| RTCA-AS1    | -16.497624  | 1725.99618  | -0.0096 | 0.992    | -0.619359576 | count | 1 |
| DAW1        | -16.497624  | 1725.99618  | -0.0096 | 0.992    | -0.619359576 | count | 1 |
| SEMA5A      | -16.497624  | 1725.99618  | -0.0096 | 0.992    | -0.619359576 | count | 1 |
| AC123595.1  | -16.497624  | 1725.99618  | -0.0096 | 0.992    | -0.619359576 | count | 1 |
| MS4A6E      | -16.497624  | 1725.99618  | -0.0096 | 0.992    | -0.619359576 | count | 1 |
| GREM1       | -16.497624  | 1725.99618  | -0.0096 | 0.992    | -0.619359576 | count | 1 |
| ACTC1       | -16.497624  | 1725.99618  | -0.0096 | 0.992    | -0.619359576 | count | 1 |
| ZNF507      | -16.497624  | 1725.99618  | -0.0096 | 0.992    | -0.619359576 | count | 1 |
| TMEM147-AS1 | -16.497144  | 1493.39174  | -0.011  | 0.991    | -0.619359576 | count | 1 |
| SLC7A11     | -17.7492734 | 1369.763136 | -0.013  | 0.99     | -0.619359513 | count | 1 |
| AC107871.1  | -17.5446847 | 2332.581503 | -0.0075 | 0.994    | -0.61935951  | count | 1 |
| DNAH14      | -17.5335097 | 2290.361658 | -0.0077 | 0.994    | -0.619359509 | count | 1 |
| HIST1H2BK   | -17.4297257 | 2698.322878 | -0.0065 | 0.995    | -0.619359507 | count | 1 |
| SPOCK2      | -17.4297257 | 2698.322878 | -0.0065 | 0.995    | -0.619359507 | count | 1 |
| AC083862.2  | -17.4295648 | 2522.568986 | -0.0069 | 0.994    | -0.619359507 | count | 1 |
| AKR1E2      | -17.4293132 | 2128.232118 | -0.0082 | 0.993    | -0.619359507 | count | 1 |
| RNASEH2A    | -17.4293132 | 2128.232118 | -0.0082 | 0.993    | -0.619359507 | count | 1 |
| AL358472.5  | -17.4291255 | 1900.658589 | -0.0092 | 0.993    | -0.619359507 | count | 1 |
| ARNTL2      | -17.3648599 | 1150.929616 | -0.0151 | 0.988    | -0.619359506 | count | 1 |
| AC026785.2  | -17.0680346 | 1274.408965 | -0.0134 | 0.989    | -0.619359498 | count | 1 |
| AL031775.1  | -17.0110585 | 2304.995688 | -0.0074 | 0.994    | -0.619359497 | count | 1 |
| AC008035.1  | -17.0110585 | 2304.995688 | -0.0074 | 0.994    | -0.619359497 | count | 1 |
| AL133415.1  | -17.0104071 | 1698.961362 | -0.01   | 0.992    | -0.619359496 | count | 1 |
| CYP27B1     | -17.0104071 | 1698.961362 | -0.01   | 0.992    | -0.619359496 | count | 1 |
| NRAV        | -17.0104071 | 1698.961362 | -0.01   | 0.992    | -0.619359496 | count | 1 |
| SPC25       | -16.4303458 | 2528.147155 | -0.0065 | 0.995    | -0.619359472 | count | 1 |

|            |             |             |         |          |              |       |            |
|------------|-------------|-------------|---------|----------|--------------|-------|------------|
| E2F8       | -16.4303458 | 2528.147155 | -0.0065 | 0.995    | -0.619359472 | count | 1          |
| THUMPD3    | -0.4746101  | 0.2083676   | -2.2778 | 0.0228   | -0.618635898 | count | 1          |
| HDAC2-AS2  | -1.408322   | 1.0250993   | -1.3738 | 0.17     | -0.617743277 | count | 1          |
| ACER3      | -0.4851305  | 0.2056774   | -2.3587 | 0.0184   | -0.617637957 | count | 1          |
| HSD17B4    | -0.4466584  | 0.1163603   | -3.8386 | 0.000127 | -0.617105853 | count | 1          |
| ZNF200     | -0.6486022  | 0.5314442   | -1.2205 | 0.222    | -0.617014223 | count | 1          |
| CD2        | -1.589567   | 0.7811804   | -2.0348 | 0.042    | -0.616296204 | count | 1          |
| TMEM150A   | -0.4735255  | 0.2419875   | -1.9568 | 0.0505   | -0.615614329 | count | 1          |
| FAM229A    | -1.4002645  | 1.7156686   | -0.8162 | 0.414    | -0.615582427 | count | 1          |
| MRPL17     | -0.4527196  | 0.1656593   | -2.7328 | 0.00632  | -0.615219147 | count | 1          |
| AP002449.1 | -1.8694655  | 1.2530649   | -1.4919 | 0.136    | -0.614648258 | count | 1          |
| WIPI1      | -0.4790414  | 0.1809487   | -2.6474 | 0.00816  | -0.614568123 | count | 1          |
| CD84       | -0.4371897  | 0.0977345   | -4.4732 | 8.06E-06 | -0.613757288 | count | 0.19115096 |
| WSB2       | -0.4662697  | 0.225626    | -2.0666 | 0.0389   | -0.6136904   | count | 1          |
| BHLHE40    | -0.452679   | 0.1265985   | -3.5757 | 0.000356 | -0.613566909 | count | 1          |
| CCDC189    | -1.5758719  | 0.736266    | -2.1404 | 0.0324   | -0.613368491 | count | 1          |
| ZNF140     | -1.0248988  | 0.5926673   | -1.7293 | 0.0839   | -0.613260734 | count | 1          |
| HSPH1      | -0.4475833  | 0.1082475   | -4.1348 | 3.67E-05 | -0.611350149 | count | 0.8656796  |
| CAPN15     | -0.5826848  | 0.4094672   | -1.423  | 0.155    | -0.610314902 | count | 1          |
| ATF5       | -0.4345181  | 0.1352737   | -3.2121 | 0.00133  | -0.608340024 | count | 1          |
| DGCR8      | -0.8852189  | 0.5443492   | -1.6262 | 0.104    | -0.608116505 | count | 1          |
| TK1        | -0.8025881  | 0.6492911   | -1.2361 | 0.217    | -0.607737969 | count | 1          |
| TMUB1      | -0.4537744  | 0.1811331   | -2.5052 | 0.0123   | -0.60721966  | count | 1          |
| NRAS       | -0.4721547  | 0.2170414   | -2.1754 | 0.0297   | -0.605930697 | count | 1          |
| FBXO32     | -1.0684587  | 0.7982479   | -1.3385 | 0.181    | -0.605722556 | count | 1          |
| SRM        | -0.4405916  | 0.1301704   | -3.3847 | 0.000724 | -0.604621114 | count | 1          |
| FLOT1      | -0.4293875  | 0.0901468   | -4.7632 | 2.02E-06 | -0.604146759 | count | 0.04804974 |
| TM4SF1     | -1.356592   | 1.0926016   | -1.2416 | 0.214    | -0.60363584  | count | 1          |
| TMEM38B    | -0.474787   | 0.2268925   | -2.0926 | 0.0365   | -0.603588131 | count | 1          |
| SCARB2     | -0.4306857  | 0.1121098   | -3.8416 | 0.000125 | -0.603574001 | count | 1          |
| MRPL40     | -0.4338329  | 0.1226788   | -3.5363 | 0.000413 | -0.603344209 | count | 1          |
| SND1-IT1   | -0.7745285  | 0.5330517   | -1.453  | 0.146    | -0.603185637 | count | 1          |
| BCAP31     | -0.4222774  | 0.0718063   | -5.8808 | 4.64E-09 | -0.601458021 | count | 0.00011369 |
| DNAJC18    | -2.2558225  | 1.0400205   | -2.169  | 0.0302   | -0.600556195 | count | 1          |
| PRIM2      | -0.6524934  | 0.4185577   | -1.5589 | 0.119    | -0.600074682 | count | 1          |
| SUOX       | -1.769145   | 1.1445987   | -1.5456 | 0.122    | -0.598715632 | count | 1          |
| ID4        | -1.7689513  | 1.3311055   | -1.3289 | 0.184    | -0.598683547 | count | 1          |
| PTPN23     | -0.6598063  | 0.3697037   | -1.7847 | 0.0744   | -0.598680569 | count | 1          |
| FAM24B     | -0.8680281  | 0.9403363   | -0.9231 | 0.356    | -0.598559827 | count | 1          |
| AL035446.1 | -1.2138863  | 1.0268503   | -1.1821 | 0.237    | -0.597729936 | count | 1          |
| EPB41L3    | -0.4285141  | 0.0986088   | -4.3456 | 1.45E-05 | -0.597518914 | count | 0.343215   |
| MAGED2     | -0.4586347  | 0.156617    | -2.9284 | 0.00344  | -0.597427585 | count | 1          |
| ARID5A     | -0.4326938  | 0.115083    | -3.7598 | 0.000174 | -0.596704185 | count | 1          |
| HSPA5      | -0.4158414  | 0.0694683   | -5.9861 | 2.47E-09 | -0.595690974 | count | 5.93E-05   |
| IRAK1      | -0.4339138  | 0.1374808   | -3.1562 | 0.00162  | -0.595349511 | count | 1          |



|               |            |           |          |          |              |       |             |
|---------------|------------|-----------|----------|----------|--------------|-------|-------------|
| ZNF584        | -0.8313193 | 1.4140591 | -0.5879  | 0.557    | -0.594732677 | count | 1           |
| IRAK2         | -0.6228346 | 0.4090737 | -1.5225  | 0.128    | -0.594711401 | count | 1           |
| ZEB1          | -1.2039726 | 0.7261669 | -1.658   | 0.0974   | -0.594420693 | count | 1           |
| PDLIM1        | -0.6726262 | 0.3438942 | -1.9559  | 0.0506   | -0.592875295 | count | 1           |
| MANF          | -0.4297424 | 0.1319089 | -3.2579  | 0.00114  | -0.592820081 | count | 1           |
| VIM           | -0.4105188 | 0.0430754 | -9.5302  | 3.63E-21 | -0.592042236 | count | 8.80E-17    |
| S100A11       | -0.4106421 | 0.0312581 | -13.1371 | 3.80E-38 | -0.591978423 | count | 9.23E-34    |
| TAMM41        | -0.6125561 | 0.4707814 | -1.3011  | 0.193    | -0.591585545 | count | 1           |
| KCTD13        | -0.5530929 | 0.5066106 | -1.0918  | 0.275    | -0.591514221 | count | 1           |
| AHCY          | -0.4629949 | 0.2052394 | -2.2559  | 0.0242   | -0.591236994 | count | 1           |
| DDN-AS1       | -0.9281618 | 0.7071901 | -1.3125  | 0.189    | -0.590746861 | count | 1           |
| P2RX4         | -0.4259836 | 0.1501991 | -2.8361  | 0.0046   | -0.590746544 | count | 1           |
| MRM2          | -0.4766047 | 0.2227285 | -2.1398  | 0.0325   | -0.5906744   | count | 1           |
| CXorf40A      | -0.5005026 | 0.3330817 | -1.5026  | 0.133    | -0.59034252  | count | 1           |
| LGMN          | -0.4124386 | 0.130006  | -3.1725  | 0.00153  | -0.589771632 | count | 1           |
| TIMP4         | -1.183971  | 1.4727691 | -0.8039  | 0.422    | -0.587672328 | count | 1           |
| DLG5          | -1.183971  | 2.4307803 | -0.4871  | 0.626    | -0.587672328 | count | 1           |
| MRPS6         | -0.4179604 | 0.1193465 | -3.5021  | 0.00047  | -0.58747669  | count | 1           |
| MAST4         | -1.4512938 | 0.8150417 | -1.7806  | 0.0751   | -0.585202865 | count | 1           |
| PLEK          | -0.4073799 | 0.0608905 | -6.6904  | 2.75E-11 | -0.585010624 | count | 6.63E-07    |
| GEM           | -0.4607699 | 0.3815068 | -1.2078  | 0.227    | -0.584993582 | count | 1           |
| MAD2L1        | -1.0846604 | 0.8463155 | -1.2816  | 0.2      | -0.583508732 | count | 1           |
| RNF122        | -0.6243647 | 0.5263917 | -1.1861  | 0.236    | -0.58340383  | count | 1           |
| CREB3         | -0.4407571 | 0.1699904 | -2.5928  | 0.00958  | -0.582719593 | count | 1           |
| CTSZ          | -0.404496  | 0.0454422 | -8.9013  | 1.05E-18 | -0.581606407 | count | 2.54E-14    |
| OGN           | -1.6664588 | 0.885477  | -1.882   | 0.06     | -0.58093886  | count | 1           |
| AC092683.1    | -1.6661413 | 0.9264884 | -1.7983  | 0.0722   | -0.580881471 | count | 1           |
| THBD          | -0.4064252 | 0.0732894 | -5.5455  | 3.25E-08 | -0.580766939 | count | 0.000778213 |
| KANK1         | -1.432447  | 0.8665312 | -1.6531  | 0.0984   | -0.580693794 | count | 1           |
| PRDM8         | -0.4667706 | 0.4443127 | -1.0505  | 0.294    | -0.57882698  | count | 1           |
| ADAMTS6       | -1.1528264 | 0.9220474 | -1.2503  | 0.211    | -0.576972069 | count | 1           |
| NUPR1         | -0.4204373 | 0.2405656 | -1.7477  | 0.0806   | -0.576551439 | count | 1           |
| ELL2          | -0.424028  | 0.1130162 | -3.7519  | 0.00018  | -0.576506596 | count | 1           |
| FKBP2         | -0.4034966 | 0.0685026 | -5.8902  | 4.39E-09 | -0.575921808 | count | 0.000105373 |
| ELMO2         | -0.8603155 | 0.615139  | -1.3986  | 0.162    | -0.575777241 | count | 1           |
| SPINT2        | -0.4079158 | 0.0800284 | -5.0971  | 3.71E-07 | -0.575651675 | count | 0.008850576 |
| DNAJC25-GNG10 | -0.993857  | 0.7052916 | -1.4091  | 0.159    | -0.573992486 | count | 1           |
| BX284668.6    | -1.2533247 | 0.762094  | -1.6446  | 0.1      | -0.573769804 | count | 1           |
| MTFR1         | -0.6479706 | 0.427302  | -1.5164  | 0.13     | -0.573455332 | count | 1           |
| SIGLEC7       | -0.4421714 | 0.2210339 | -2.0005  | 0.0456   | -0.572774175 | count | 1           |
| AL512329.2    | -1.2492507 | 1.0910947 | -1.145   | 0.252    | -0.572543798 | count | 1           |
| SGPL1         | -0.4631651 | 0.263772  | -1.7559  | 0.0792   | -0.571924579 | count | 1           |
| FEN1          | -0.7466256 | 0.4124001 | -1.8104  | 0.0703   | -0.571683922 | count | 1           |
| NT5DC2        | -0.6101688 | 0.4050463 | -1.5064  | 0.132    | -0.571343322 | count | 1           |
| PAQR3         | -1.613975  | 0.7221712 | -2.2349  | 0.0255   | -0.571245132 | count | 1           |

|            |            |           |         |          |              |       |             |
|------------|------------|-----------|---------|----------|--------------|-------|-------------|
| HINFP      | -0.6672059 | 0.3989206 | -1.6725 | 0.0945   | -0.571036982 | count | 1           |
| USP5       | -0.6936825 | 0.4429921 | -1.5659 | 0.118    | -0.570874946 | count | 1           |
| HGF        | -0.4731463 | 0.214917  | -2.2015 | 0.0278   | -0.570681832 | count | 1           |
| GPX4       | -0.3967718 | 0.0408478 | -9.7134 | 6.53E-22 | -0.570333954 | count | 1.58E-17    |
| HK1        | -0.4277598 | 0.153466  | -2.7873 | 0.00536  | -0.569356637 | count | 1           |
| HSPA2      | -1.602959  | 0.7337243 | -2.1847 | 0.029    | -0.56915628  | count | 1           |
| ZBED3      | -0.5338107 | 0.3286081 | -1.6245 | 0.104    | -0.568932279 | count | 1           |
| ITGA5      | -0.4340645 | 0.2335774 | -1.8583 | 0.0632   | -0.568812536 | count | 1           |
| MED18      | -0.7224199 | 0.5707149 | -1.2658 | 0.206    | -0.568279286 | count | 1           |
| TXNDC17    | -0.4002197 | 0.0767086 | -5.2174 | 1.97E-07 | -0.568074993 | count | 0.004705542 |
| SEMA6B     | -0.4670327 | 0.297573  | -1.5695 | 0.117    | -0.567908709 | count | 1           |
| STK17A     | -0.4152879 | 0.1395155 | -2.9766 | 0.00294  | -0.567544084 | count | 1           |
| MCOLN2     | -2.771212  | 1.471312  | -1.8835 | 0.0598   | -0.566576661 | count | 1           |
| RAD50      | -0.6732576 | 0.5311093 | -1.2676 | 0.205    | -0.566098571 | count | 1           |
| RABL2A     | -1.1208052 | 0.7713518 | -1.453  | 0.146    | -0.565723686 | count | 1           |
| RBM38      | -0.4584994 | 0.2369616 | -1.9349 | 0.0531   | -0.565451561 | count | 1           |
| GNL3       | -0.4340389 | 0.1652606 | -2.6264 | 0.00868  | -0.564443322 | count | 1           |
| ILKAP      | -0.4786177 | 0.2676051 | -1.7885 | 0.0738   | -0.56404818  | count | 1           |
| PDXK       | -0.3960313 | 0.0800876 | -4.945  | 8.13E-07 | -0.563998643 | count | 0.019372164 |
| NENF       | -0.3969405 | 0.0820691 | -4.8367 | 1.40E-06 | -0.563442715 | count | 0.033327    |
| PLSCR1     | -0.3946426 | 0.0636482 | -6.2004 | 6.59E-10 | -0.563425049 | count | 1.58E-05    |
| OPN3       | -0.4249134 | 0.2013769 | -2.11   | 0.035    | -0.563149441 | count | 1           |
| AC002091.2 | -0.8054304 | 0.8828913 | -0.9123 | 0.362    | -0.562987385 | count | 1           |
| NTAN1      | -0.4002672 | 0.1177693 | -3.3987 | 0.000688 | -0.562666762 | count | 1           |
| MAPKAP1    | -0.4218171 | 0.1678641 | -2.5128 | 0.012    | -0.562244402 | count | 1           |
| FBXO31     | -1.3575707 | 1.1030463 | -1.2307 | 0.219    | -0.562107255 | count | 1           |
| DYRK4      | -0.4384292 | 0.2155664 | -2.0338 | 0.0421   | -0.56206707  | count | 1           |
| ABHD15     | -0.5331975 | 0.3273575 | -1.6288 | 0.103    | -0.56167988  | count | 1           |
| C4orf3     | -0.3912636 | 0.0604898 | -6.4683 | 1.19E-10 | -0.560379237 | count | 2.87E-06    |
| SWAP70     | -0.4125439 | 0.1281433 | -3.2194 | 0.0013   | -0.560010418 | count | 1           |
| AL023806.1 | -1.5529556 | 1.1599114 | -1.3389 | 0.181    | -0.559432793 | count | 1           |
| NXT2       | -0.6115917 | 0.414246  | -1.4764 | 0.14     | -0.559116223 | count | 1           |
| SCYL1      | -0.4629415 | 0.2782865 | -1.6635 | 0.0963   | -0.558767688 | count | 1           |
| FAM50A     | -0.3982724 | 0.105758  | -3.7659 | 0.00017  | -0.55815722  | count | 1           |
| UTP25      | -0.8276814 | 0.6338867 | -1.3057 | 0.192    | -0.557973447 | count | 1           |
| SIGLEC9    | -0.4326163 | 0.1801705 | -2.4012 | 0.0164   | -0.557600572 | count | 1           |
| RANBP2     | -0.4062528 | 0.1453556 | -2.7949 | 0.00523  | -0.557173086 | count | 1           |
| DNMT3A     | -0.4805913 | 0.2908862 | -1.6522 | 0.0986   | -0.55689615  | count | 1           |
| C14orf119  | -0.4023641 | 0.1262554 | -3.1869 | 0.00146  | -0.556151998 | count | 1           |
| ALDH1B1    | -1.3341759 | 0.8280205 | -1.6113 | 0.107    | -0.55607531  | count | 1           |
| RCN1       | -0.5045159 | 0.2914543 | -1.731  | 0.0836   | -0.555983559 | count | 1           |
| BNIP3L     | -0.3879014 | 0.0583871 | -6.6436 | 3.76E-11 | -0.555119203 | count | 9.06E-07    |
| ABCB4      | -2.5630781 | 1.308713  | -1.9585 | 0.0503   | -0.554741711 | count | 1           |
| DCTN2      | -0.4086168 | 0.1344848 | -3.0384 | 0.0024   | -0.554733806 | count | 1           |
| MAN1B1     | -0.4864147 | 0.233353  | -2.0845 | 0.0372   | -0.554293131 | count | 1           |

|           |            |           |          |          |              |       |             |
|-----------|------------|-----------|----------|----------|--------------|-------|-------------|
| LRRC23    | -0.5493983 | 0.3968238 | -1.3845  | 0.166    | -0.554080663 | count | 1           |
| IL7       | -1.0848476 | 0.6134402 | -1.7685  | 0.0771   | -0.552790462 | count | 1           |
| CALM3     | -0.3874029 | 0.0737864 | -5.2503  | 1.65E-07 | -0.552641279 | count | 0.003942015 |
| GNPDA1    | -0.3955456 | 0.1208836 | -3.2721  | 0.00108  | -0.551844487 | count | 1           |
| HDHD3     | -0.5557446 | 0.619667  | -0.8968  | 0.37     | -0.550854566 | count | 1           |
| FAM129B   | -0.4261633 | 0.2869423 | -1.4852  | 0.138    | -0.550751715 | count | 1           |
| LY9       | -0.941119  | 0.6494377 | -1.4491  | 0.147    | -0.550630908 | count | 1           |
| MED19     | -0.4223115 | 0.1901451 | -2.221   | 0.0264   | -0.550203829 | count | 1           |
| FTH1      | -0.3812218 | 0.0294814 | -12.9309 | 4.76E-37 | -0.549953203 | count | 1.16E-32    |
| PDGFA     | -0.5443495 | 0.2809123 | -1.9378  | 0.0528   | -0.549339411 | count | 1           |
| TTC21A    | -0.9374651 | 0.8641242 | -1.0849  | 0.278    | -0.548983495 | count | 1           |
| ABRAXAS2  | -0.4419251 | 0.2035848 | -2.1707  | 0.03     | -0.548821991 | count | 1           |
| PDCD4-AS1 | -0.7315952 | 0.4751806 | -1.5396  | 0.124    | -0.548481378 | count | 1           |
| GPR35     | -0.4550491 | 0.2824709 | -1.611   | 0.107    | -0.548425475 | count | 1           |
| GOLIM4    | -0.4024358 | 0.1392906 | -2.8892  | 0.0039   | -0.547313293 | count | 1           |
| SLC39A11  | -0.4662356 | 0.2235989 | -2.0851  | 0.0372   | -0.547096719 | count | 1           |
| CHCHD1    | -0.3968967 | 0.1555896 | -2.5509  | 0.0108   | -0.547053738 | count | 1           |
| ZNF510    | -0.7520236 | 1.0868586 | -0.6919  | 0.489    | -0.546998887 | count | 1           |
| LINC00900 | -0.7520236 | 0.6062194 | -1.2405  | 0.215    | -0.546998887 | count | 1           |
| GPAA1     | -0.4026202 | 0.1460288 | -2.7571  | 0.00587  | -0.546145542 | count | 1           |
| CENPF     | -0.5455752 | 0.5007969 | -1.0894  | 0.276    | -0.546077887 | count | 1           |
| C1GALT1C1 | -0.4255616 | 0.2185579 | -1.9471  | 0.0516   | -0.545899643 | count | 1           |
| NQO1      | -0.727225  | 0.517839  | -1.4043  | 0.16     | -0.545682254 | count | 1           |
| LINC00526 | -1.1627584 | 0.7403016 | -1.5707  | 0.116    | -0.545634237 | count | 1           |
| LINC01480 | -0.4382706 | 0.3677315 | -1.1918  | 0.233    | -0.54517168  | count | 1           |
| BAMBI     | -0.6450379 | 0.8341274 | -0.7733  | 0.439    | -0.545045464 | count | 1           |
| NAF1      | -0.4170198 | 0.2120314 | -1.9668  | 0.0493   | -0.54484004  | count | 1           |
| POLR1C    | -0.4861034 | 0.5196421 | -0.9355  | 0.35     | -0.543606714 | count | 1           |
| LINC00884 | -0.4683774 | 0.3071504 | -1.5249  | 0.127    | -0.543291166 | count | 1           |
| CTTNBP2NL | -0.4112835 | 0.1449013 | -2.8384  | 0.00457  | -0.542974086 | count | 1           |
| KPNA2     | -0.4014472 | 0.1114537 | -3.6019  | 0.000322 | -0.542887176 | count | 1           |
| MRPL15    | -0.4025361 | 0.1615905 | -2.4911  | 0.0128   | -0.542154028 | count | 1           |
| TIMM8A    | -0.6086279 | 0.4906364 | -1.2405  | 0.215    | -0.542072092 | count | 1           |
| EVA1B     | -0.399374  | 0.1574454 | -2.5366  | 0.0113   | -0.542050185 | count | 1           |
| TCP1      | -0.3958429 | 0.1003116 | -3.9461  | 8.17E-05 | -0.541896404 | count | 1           |
| PLEKHM2   | -0.3933005 | 0.1417592 | -2.7744  | 0.00557  | -0.541837499 | count | 1           |
| PPP1R3B   | -0.4804186 | 0.3654918 | -1.3144  | 0.189    | -0.541790284 | count | 1           |
| MFSD13A   | -0.5010326 | 0.3279029 | -1.528   | 0.127    | -0.541730013 | count | 1           |
| RUBCNL    | -0.5194212 | 0.3397142 | -1.529   | 0.126    | -0.541130834 | count | 1           |
| MKI67     | -0.8312777 | 0.8359568 | -0.9944  | 0.32     | -0.541003279 | count | 1           |
| ARHGAP18  | -0.3793225 | 0.0724755 | -5.2338  | 1.80E-07 | -0.540988814 | count | 0.00430002  |
| BRCA1     | -0.6070162 | 0.5484353 | -1.1068  | 0.268    | -0.540776157 | count | 1           |
| ALG2      | -0.4076236 | 0.1472127 | -2.7689  | 0.00567  | -0.540553889 | count | 1           |
| AMIGO2    | -1.756703  | 0.9311149 | -1.8867  | 0.0593   | -0.540262014 | count | 1           |
| FCHO2     | -0.3904815 | 0.1304195 | -2.994   | 0.00278  | -0.540092973 | count | 1           |

|            |             |             |         |          |              |       |             |
|------------|-------------|-------------|---------|----------|--------------|-------|-------------|
| TMEM86A    | -0.5254527  | 0.3782625   | -1.3891 | 0.165    | -0.539554429 | count | 1           |
| RRAGD      | -0.399658   | 0.1882831   | -2.1226 | 0.0339   | -0.539282997 | count | 1           |
| HIST1H2BN  | -0.9742357  | 0.7421034   | -1.3128 | 0.189    | -0.539055049 | count | 1           |
| ITGB1      | -0.3773929  | 0.0718621   | -5.2516 | 1.64E-07 | -0.537924272 | count | 0.003918288 |
| HAGHL      | -0.4649437  | 0.3600732   | -1.2912 | 0.197    | -0.537820191 | count | 1           |
| TRUB2      | -0.4970463  | 0.284472    | -1.7473 | 0.0807   | -0.537644959 | count | 1           |
| PPP1R17    | -0.8628786  | 1.815733    | -0.4752 | 0.635    | -0.536698526 | count | 1           |
| ADGRE2     | -0.3966262  | 0.1391665   | -2.85   | 0.00441  | -0.536435536 | count | 1           |
| ABCD1      | -0.4481755  | 0.3041959   | -1.4733 | 0.141    | -0.535778183 | count | 1           |
| AL161935.3 | -0.4500474  | 0.2500625   | -1.7997 | 0.072    | -0.535467999 | count | 1           |
| ENC1       | -0.4976278  | 0.3534073   | -1.4081 | 0.159    | -0.535401169 | count | 1           |
| RPP40      | -0.7112339  | 0.4670061   | -1.523  | 0.128    | -0.535388511 | count | 1           |
| SMYD3      | -0.5491542  | 0.5429082   | -1.0115 | 0.312    | -0.535017751 | count | 1           |
| TUBA1B     | -0.3719139  | 0.0489715   | -7.5945 | 4.36E-14 | -0.534751631 | count | 1.05E-09    |
| TMED3      | -0.3953973  | 0.1478247   | -2.6748 | 0.00753  | -0.534351646 | count | 1           |
| RTCB       | -0.3923257  | 0.1330577   | -2.9485 | 0.00322  | -0.534165581 | count | 1           |
| EGLN3      | -0.4218784  | 0.3963168   | -1.0645 | 0.287    | -0.533826649 | count | 1           |
| ADGRB1     | -17.7988987 | 2638.253693 | -0.0067 | 0.995    | -0.532892935 | count | 1           |
| FRMD6      | -17.798853  | 1907.507903 | -0.0093 | 0.993    | -0.532892935 | count | 1           |
| SULF1      | -17.4788308 | 1741.348731 | -0.01   | 0.992    | -0.532892931 | count | 1           |
| COL3A1     | -17.4786412 | 1478.180055 | -0.0118 | 0.991    | -0.532892931 | count | 1           |
| HIST1H2BH  | -17.4726681 | 1583.935758 | -0.011  | 0.991    | -0.532892931 | count | 1           |
| LINC02175  | -17.3493969 | 2175.698639 | -0.008  | 0.994    | -0.532892929 | count | 1           |
| ZFYVE9     | -17.3492286 | 1905.069146 | -0.0091 | 0.993    | -0.532892929 | count | 1           |
| AC064836.3 | -17.3492286 | 1905.069146 | -0.0091 | 0.993    | -0.532892929 | count | 1           |
| AL358852.1 | -17.3492286 | 1905.069146 | -0.0091 | 0.993    | -0.532892929 | count | 1           |
| KLHL11     | -17.3492286 | 1905.069146 | -0.0091 | 0.993    | -0.532892929 | count | 1           |
| AC099568.2 | -17.2227894 | 2398.618802 | -0.0072 | 0.994    | -0.532892926 | count | 1           |
| VCAM1      | -17.2224215 | 1692.659517 | -0.0102 | 0.992    | -0.532892926 | count | 1           |
| AC092587.1 | -16.8969752 | 2951.194046 | -0.0057 | 0.995    | -0.532892918 | count | 1           |
| AL133351.1 | -16.8961981 | 1964.005507 | -0.0086 | 0.993    | -0.532892918 | count | 1           |
| CA12       | -16.8961981 | 1964.005507 | -0.0086 | 0.993    | -0.532892918 | count | 1           |
| AC023043.1 | -16.8959327 | 1699.25233  | -0.0099 | 0.992    | -0.532892918 | count | 1           |
| A4GALT     | -16.8959327 | 1699.25233  | -0.0099 | 0.992    | -0.532892918 | count | 1           |
| UBOX5      | -16.8378582 | 1260.669742 | -0.0134 | 0.989    | -0.532892916 | count | 1           |
| MAFA       | -18.18994   | 1486.581556 | -0.0122 | 0.99     | -0.53289285  | count | 1           |
| HSD17B1    | -17.462882  | 2386.718109 | -0.0073 | 0.994    | -0.532892842 | count | 1           |
| COL7A1     | -17.315103  | 3308.612874 | -0.0052 | 0.996    | -0.532892839 | count | 1           |
| HIST1H2AK  | -17.314607  | 2916.160831 | -0.0059 | 0.995    | -0.532892839 | count | 1           |
| AL080317.1 | -17.314607  | 2916.160831 | -0.0059 | 0.995    | -0.532892839 | count | 1           |
| NOTCH3     | -17.314607  | 2916.160831 | -0.0059 | 0.995    | -0.532892839 | count | 1           |
| CPNE9      | -17.314102  | 2462.404928 | -0.007  | 0.994    | -0.532892839 | count | 1           |
| AC091808.1 | -17.314102  | 2462.404928 | -0.007  | 0.994    | -0.532892839 | count | 1           |
| C8orf88    | -17.314102  | 2462.404928 | -0.007  | 0.994    | -0.532892839 | count | 1           |
| BAALC      | -17.314102  | 2462.404928 | -0.007  | 0.994    | -0.532892839 | count | 1           |

|            |            |             |          |          |              |       |             |
|------------|------------|-------------|----------|----------|--------------|-------|-------------|
| AL359182.2 | -17.314102 | 2462.404928 | -0.007   | 0.994    | -0.532892839 | count | 1           |
| AP001453.1 | -17.314102 | 2462.404928 | -0.007   | 0.994    | -0.532892839 | count | 1           |
| NTSR1      | -17.314102 | 2462.404928 | -0.007   | 0.994    | -0.532892839 | count | 1           |
| AP000695.2 | -17.314102 | 2462.404928 | -0.007   | 0.994    | -0.532892839 | count | 1           |
| SPATA18    | -16.317066 | 3350.573769 | -0.0049  | 0.996    | -0.532892806 | count | 1           |
| PHEX       | -16.317066 | 3350.573769 | -0.0049  | 0.996    | -0.532892806 | count | 1           |
| JAM3       | -16.317066 | 3350.573769 | -0.0049  | 0.996    | -0.532892806 | count | 1           |
| IGHV1-18   | -16.317066 | 3350.573769 | -0.0049  | 0.996    | -0.532892806 | count | 1           |
| AC116914.2 | -16.317066 | 3350.573769 | -0.0049  | 0.996    | -0.532892806 | count | 1           |
| AC010522.1 | -16.317066 | 3350.573769 | -0.0049  | 0.996    | -0.532892806 | count | 1           |
| OSBP2      | -16.317066 | 3350.573769 | -0.0049  | 0.996    | -0.532892806 | count | 1           |
| DPYSL4     | -16.315322 | 2219.318368 | -0.0074  | 0.994    | -0.532892805 | count | 1           |
| CCDC65     | -16.315322 | 2219.318368 | -0.0074  | 0.994    | -0.532892805 | count | 1           |
| AC015712.1 | -16.315322 | 2219.318368 | -0.0074  | 0.994    | -0.532892805 | count | 1           |
| SLC2A11    | -1.4259893 | 0.8881854   | -1.6055  | 0.109    | -0.53288894  | count | 1           |
| UTP18      | -0.3946746 | 0.1610966   | -2.4499  | 0.0144   | -0.532319707 | count | 1           |
| SCX        | -1.1214646 | 2.5336977   | -0.4426  | 0.658    | -0.532181823 | count | 1           |
| ELAC1      | -0.640326  | 0.3494446   | -1.8324  | 0.067    | -0.532013935 | count | 1           |
| CENPL      | -1.4202543 | 1.2024463   | -1.1811  | 0.238    | -0.531624757 | count | 1           |
| ZC4H2      | -2.24237   | 1.3641039   | -1.6438  | 0.1      | -0.531336939 | count | 1           |
| Z93241.1   | -0.5164953 | 0.4512861   | -1.1445  | 0.253    | -0.530929585 | count | 1           |
| SDC3       | -0.4070427 | 0.1957263   | -2.0797  | 0.0377   | -0.530639719 | count | 1           |
| IFT46      | -1.1166274 | 0.7871221   | -1.4186  | 0.156    | -0.530579939 | count | 1           |
| COPS4      | -0.4107239 | 0.1811576   | -2.2672  | 0.0235   | -0.529034634 | count | 1           |
| POLR2J2    | -0.7473596 | 0.8053698   | -0.928   | 0.354    | -0.528900782 | count | 1           |
| TFPT       | -0.3899933 | 0.1869111   | -2.0865  | 0.037    | -0.528524703 | count | 1           |
| ARL8B      | -0.3761302 | 0.096702    | -3.8896  | 0.000103 | -0.527841807 | count | 1           |
| AL136454.1 | -1.0171332 | 0.7045629   | -1.4436  | 0.149    | -0.527553229 | count | 1           |
| CMC4       | -0.7722354 | 0.5931318   | -1.302   | 0.193    | -0.526978163 | count | 1           |
| SNX12      | -0.529017  | 0.4159788   | -1.2717  | 0.204    | -0.526195751 | count | 1           |
| CENPK      | -0.8872382 | 0.6978654   | -1.2714  | 0.204    | -0.525955825 | count | 1           |
| TSPYL4     | -0.5798359 | 0.4689065   | -1.2366  | 0.216    | -0.525888033 | count | 1           |
| BHLHE41    | -0.3939251 | 0.157858    | -2.4954  | 0.0126   | -0.52511049  | count | 1           |
| SIPA1L3    | -0.8393222 | 0.5897819   | -1.4231  | 0.155    | -0.524932014 | count | 1           |
| CARMIL1    | -0.5691459 | 0.392069    | -1.4516  | 0.147    | -0.523691996 | count | 1           |
| RBM41      | -0.5124319 | 0.3574568   | -1.4335  | 0.152    | -0.523175391 | count | 1           |
| PDIA6      | -0.3660451 | 0.065603    | -5.5797  | 2.67E-08 | -0.523100102 | count | 0.000639625 |
| NPC2       | -0.3628623 | 0.0338319   | -10.7254 | 2.93E-26 | -0.522436705 | count | 7.11E-22    |
| VEZT       | -0.4326926 | 0.2891797   | -1.4963  | 0.135    | -0.522283306 | count | 1           |
| USF2       | -0.3683991 | 0.0726315   | -5.0722  | 4.23E-07 | -0.522194887 | count | 0.010088127 |
| ATP6V1D    | -0.3759285 | 0.1077761   | -3.4881  | 0.000495 | -0.521702116 | count | 1           |
| NIT2       | -0.4125616 | 0.2354778   | -1.752   | 0.0799   | -0.521117753 | count | 1           |
| RPS6KA2    | -0.6884925 | 0.5890607   | -1.1688  | 0.243    | -0.520610662 | count | 1           |
| GPI        | -0.3758393 | 0.1427396   | -2.633   | 0.00852  | -0.520324535 | count | 1           |
| ZNF738     | -0.5815362 | 0.6030092   | -0.9644  | 0.335    | -0.520181507 | count | 1           |

|            |            |           |         |          |              |       |          |
|------------|------------|-----------|---------|----------|--------------|-------|----------|
| MRPS14     | -0.3973159 | 0.1976277 | -2.0104 | 0.0445   | -0.520144497 | count | 1        |
| CAVIN3     | -0.4194997 | 0.367096  | -1.1428 | 0.253    | -0.520142225 | count | 1        |
| C19orf24   | -0.3717063 | 0.0969435 | -3.8343 | 0.000129 | -0.520103105 | count | 1        |
| ZFYVE16    | -0.3686596 | 0.1114637 | -3.3074 | 0.000955 | -0.519987328 | count | 1        |
| ZBED4      | -0.5560064 | 0.4191985 | -1.3264 | 0.185    | -0.518820965 | count | 1        |
| NAALADL1   | -0.5205963 | 0.36349   | -1.4322 | 0.152    | -0.518384451 | count | 1        |
| FBLN5      | -1.616697  | 1.0669071 | -1.5153 | 0.13     | -0.518081095 | count | 1        |
| CCRL2      | -0.4025613 | 0.2094275 | -1.9222 | 0.0547   | -0.517839711 | count | 1        |
| TOX        | -0.9915858 | 2.3457591 | -0.4227 | 0.673    | -0.517728106 | count | 1        |
| ZNF530     | -0.9915858 | 1.1473285 | -0.8643 | 0.388    | -0.517728106 | count | 1        |
| MCRIP2     | -0.37495   | 0.1558857 | -2.4053 | 0.0162   | -0.516945553 | count | 1        |
| KBTBD8     | -0.4168565 | 0.1952842 | -2.1346 | 0.0329   | -0.516175206 | count | 1        |
| VAV3-AS1   | -1.1885926 | 2.3845318 | -0.4985 | 0.618    | -0.516030351 | count | 1        |
| SIRT2      | -0.3905096 | 0.1502895 | -2.5984 | 0.00942  | -0.515927667 | count | 1        |
| SNCG       | -1.3458762 | 1.2245581 | -1.0991 | 0.272    | -0.514698283 | count | 1        |
| TARS       | -0.4024041 | 0.1634584 | -2.4618 | 0.0139   | -0.514394274 | count | 1        |
| BRPF1      | -0.53758   | 0.3542475 | -1.5175 | 0.129    | -0.514218764 | count | 1        |
| DDX39A     | -0.3748748 | 0.1325685 | -2.8278 | 0.00473  | -0.512769177 | count | 1        |
| STIMATE    | -0.6578614 | 0.4924122 | -1.336  | 0.182    | -0.512456177 | count | 1        |
| TNFRSF21   | -0.4308701 | 0.254888  | -1.6904 | 0.0911   | -0.512149992 | count | 1        |
| UBN1       | -0.3758247 | 0.1551002 | -2.4231 | 0.0155   | -0.51178541  | count | 1        |
| OTUD6B     | -0.5045825 | 0.2913619 | -1.7318 | 0.0834   | -0.511743785 | count | 1        |
| KLHL5      | -0.3882699 | 0.1730963 | -2.2431 | 0.025    | -0.51027621  | count | 1        |
| PSD4       | -0.4816002 | 0.3776475 | -1.2753 | 0.202    | -0.510270468 | count | 1        |
| PCBD2      | -0.5212641 | 0.3343357 | -1.5591 | 0.119    | -0.509759803 | count | 1        |
| CCDC71L    | -0.3834421 | 0.1976375 | -1.9401 | 0.0525   | -0.508900002 | count | 1        |
| KNOP1      | -0.4186671 | 0.2209491 | -1.8949 | 0.0582   | -0.508818565 | count | 1        |
| CHST2      | -0.5094861 | 0.4143691 | -1.2295 | 0.219    | -0.508047462 | count | 1        |
| CIITA      | -0.4171252 | 0.1792677 | -2.3268 | 0.0201   | -0.506995865 | count | 1        |
| PKD2L1     | -0.6195134 | 0.6752816 | -0.9174 | 0.359    | -0.50696431  | count | 1        |
| GPRC5D-AS1 | -0.6195134 | 0.5731599 | -1.0809 | 0.28     | -0.50696431  | count | 1        |
| ZFAND6     | -0.3615586 | 0.1085474 | -3.3309 | 0.000879 | -0.506704745 | count | 1        |
| PBDC1      | -0.3702629 | 0.1419513 | -2.6084 | 0.00915  | -0.506321969 | count | 1        |
| MTPAP      | -0.4364186 | 0.3823389 | -1.1414 | 0.254    | -0.506011323 | count | 1        |
| RWDD2A     | -1.5464309 | 1.0728809 | -1.4414 | 0.15     | -0.505922498 | count | 1        |
| TCEANC     | -1.9759803 | 1.3867231 | -1.4249 | 0.154    | -0.505918806 | count | 1        |
| IL1R1      | -0.3979108 | 0.3137224 | -1.2684 | 0.205    | -0.505735003 | count | 1        |
| JRK        | -0.8949658 | 0.8532765 | -1.0489 | 0.294    | -0.505121345 | count | 1        |
| ADAT3      | -1.039923  | 0.8037608 | -1.2938 | 0.196    | -0.504436148 | count | 1        |
| TTC19      | -0.3833538 | 0.229353  | -1.6715 | 0.0948   | -0.503906922 | count | 1        |
| PDIA3      | -0.3515017 | 0.0532301 | -6.6034 | 4.91E-11 | -0.503503283 | count | 1.18E-06 |
| AIFM2      | -0.7049633 | 0.5685828 | -1.2399 | 0.215    | -0.503354108 | count | 1        |
| MRNIP      | -0.6622419 | 0.3511626 | -1.8859 | 0.0594   | -0.503350243 | count | 1        |
| CDC42EP4   | -0.4956899 | 0.3472859 | -1.4273 | 0.154    | -0.50327634  | count | 1        |
| FPR3       | -0.3711255 | 0.1182421 | -3.1387 | 0.00172  | -0.502807655 | count | 1        |

|            |            |           |         |          |              |       |             |
|------------|------------|-----------|---------|----------|--------------|-------|-------------|
| MICA       | -0.5441871 | 0.3805128 | -1.4301 | 0.153    | -0.502605914 | count | 1           |
| RENBP      | -0.4007102 | 0.1833575 | -2.1854 | 0.029    | -0.502193744 | count | 1           |
| MCU        | -0.5992773 | 0.7185757 | -0.834  | 0.404    | -0.50150508  | count | 1           |
| SEC61G     | -0.3508489 | 0.0678511 | -5.1709 | 2.52E-07 | -0.501413713 | count | 0.006015492 |
| MEX3D      | -0.7272215 | 0.5900398 | -1.2325 | 0.218    | -0.501122328 | count | 1           |
| SCOC-AS1   | -1.5156768 | 1.274371  | -1.1894 | 0.234    | -0.500373229 | count | 1           |
| ATP1B3     | -0.3513097 | 0.0618912 | -5.6762 | 1.54E-08 | -0.500155655 | count | 0.000369184 |
| DVL3       | -0.4535645 | 0.3421885 | -1.3255 | 0.185    | -0.500064735 | count | 1           |
| ARMCX6     | -0.386349  | 0.1625096 | -2.3774 | 0.0175   | -0.499772575 | count | 1           |
| ARSK       | -1.2822843 | 0.8142992 | -1.5747 | 0.115    | -0.49942249  | count | 1           |
| AKR1A1     | -0.3509019 | 0.0643333 | -5.4544 | 5.40E-08 | -0.498981641 | count | 0.001292058 |
| MARCKS     | -0.3471321 | 0.0542609 | -6.3975 | 1.89E-10 | -0.498176333 | count | 4.55E-06    |
| NMNAT1     | -0.5254881 | 0.4122228 | -1.2748 | 0.203    | -0.498133965 | count | 1           |
| PELO       | -0.3919545 | 0.3105965 | -1.2619 | 0.207    | -0.497788656 | count | 1           |
| SDCCAG8    | -0.360535  | 0.1339409 | -2.6917 | 0.00716  | -0.497596104 | count | 1           |
| SASH1      | -0.4098529 | 0.2231241 | -1.8369 | 0.0663   | -0.497442084 | count | 1           |
| PHLDA2     | -0.3607555 | 0.1683361 | -2.1431 | 0.0322   | -0.497167092 | count | 1           |
| CAPN10     | -0.485034  | 0.4419853 | -1.0974 | 0.273    | -0.496848484 | count | 1           |
| SDE2       | -0.377942  | 0.1456507 | -2.5949 | 0.00952  | -0.496610224 | count | 1           |
| POP4       | -0.3689014 | 0.1657815 | -2.2252 | 0.0262   | -0.496388784 | count | 1           |
| AC021016.3 | -0.6711897 | 0.9128857 | -0.7352 | 0.462    | -0.496310574 | count | 1           |
| TP53BP1    | -0.4277009 | 0.4813226 | -0.8886 | 0.374    | -0.496255309 | count | 1           |
| PTGS1      | -0.3983096 | 0.1811806 | -2.1984 | 0.028    | -0.495902135 | count | 1           |
| C12orf45   | -0.3713755 | 0.225256  | -1.6487 | 0.0993   | -0.495601586 | count | 1           |
| CCDC107    | -0.3541346 | 0.0982929 | -3.6028 | 0.000321 | -0.495503191 | count | 1           |
| NDUFAF6    | -0.5222225 | 0.3555445 | -1.4688 | 0.142    | -0.49526789  | count | 1           |
| PLEK2      | -0.5219671 | 0.3014108 | -1.7317 | 0.0834   | -0.495043608 | count | 1           |
| LRRC42     | -0.4353824 | 0.3094657 | -1.4069 | 0.16     | -0.494833367 | count | 1           |
| CENPW      | -0.3866723 | 0.2083458 | -1.8559 | 0.0636   | -0.494651398 | count | 1           |
| CTSH       | -0.3454491 | 0.048704  | -7.0928 | 1.71E-12 | -0.494483325 | count | 4.13E-08    |
| CCDC88A    | -0.3482813 | 0.0954972 | -3.647  | 0.000271 | -0.494123712 | count | 1           |
| MRPL20     | -0.3484089 | 0.0806247 | -4.3214 | 1.61E-05 | -0.493870386 | count | 0.3809582   |
| C1QB       | -0.3426769 | 0.083663  | -4.0959 | 4.34E-05 | -0.493462352 | count | 1           |
| ARL3       | -0.3629832 | 0.1602857 | -2.2646 | 0.0236   | -0.493098565 | count | 1           |
| AC005838.2 | -0.7762649 | 1.067219  | -0.7274 | 0.467    | -0.492631654 | count | 1           |
| PABPC4     | -0.3523134 | 0.0890466 | -3.9565 | 7.82E-05 | -0.492331089 | count | 1           |
| MRPL39     | -0.4437351 | 0.3399789 | -1.3052 | 0.192    | -0.491913959 | count | 1           |
| TEX2       | -0.4693115 | 0.3947606 | -1.1889 | 0.235    | -0.49175018  | count | 1           |
| FKBP14     | -0.6857541 | 0.4631627 | -1.4806 | 0.139    | -0.491595857 | count | 1           |
| SKIL       | -0.3505934 | 0.0900647 | -3.8927 | 0.000102 | -0.491588579 | count | 1           |
| NETO2      | -0.45177   | 0.2468578 | -1.8301 | 0.0674   | -0.490965539 | count | 1           |
| C11orf45   | -0.6432168 | 0.6525553 | -0.9857 | 0.324    | -0.490705641 | count | 1           |
| AC008736.1 | -0.5969651 | 0.9098846 | -0.6561 | 0.512    | -0.490482448 | count | 1           |
| NUDT9      | -0.3886533 | 0.243034  | -1.5992 | 0.11     | -0.490393983 | count | 1           |
| AC008741.2 | -0.8123556 | 0.9515252 | -0.8537 | 0.393    | -0.490291795 | count | 1           |

|            |            |           |         |          |              |       |             |
|------------|------------|-----------|---------|----------|--------------|-------|-------------|
| DNAJB6     | -0.3451935 | 0.0692536 | -4.9845 | 6.65E-07 | -0.489895886 | count | 0.015848945 |
| SMIM4      | -0.3645492 | 0.1598998 | -2.2799 | 0.0227   | -0.489629665 | count | 1           |
| TIGD5      | -0.5216162 | 0.4771811 | -1.0931 | 0.274    | -0.48917839  | count | 1           |
| PFKP       | -0.404491  | 0.2715953 | -1.4893 | 0.137    | -0.489173357 | count | 1           |
| TXNRD1     | -0.3558898 | 0.1325927 | -2.6841 | 0.00732  | -0.489145239 | count | 1           |
| KCNMB4     | -0.4938101 | 0.3537626 | -1.3959 | 0.163    | -0.489125707 | count | 1           |
| AL355075.4 | -0.5941173 | 0.411296  | -1.4445 | 0.149    | -0.488389501 | count | 1           |
| AC005261.1 | -0.5939994 | 0.4959199 | -1.1978 | 0.231    | -0.488302794 | count | 1           |
| PIK3R5     | -0.3883937 | 0.2473387 | -1.5703 | 0.116    | -0.487083404 | count | 1           |
| IRF8       | -0.3550617 | 0.0946098 | -3.7529 | 0.000179 | -0.486907445 | count | 1           |
| SLC17A5    | -0.3815199 | 0.228009  | -1.6733 | 0.0944   | -0.486768383 | count | 1           |
| NANS       | -0.3439715 | 0.0748049 | -4.5982 | 4.48E-06 | -0.486653613 | count | 0.10638208  |
| ISG15      | -0.3427521 | 0.1189704 | -2.881  | 0.004    | -0.48652502  | count | 1           |
| IFI27      | -0.3673755 | 0.5558429 | -0.6609 | 0.509    | -0.486470799 | count | 1           |
| SERINC5    | -0.3660123 | 0.2350385 | -1.5572 | 0.12     | -0.485826862 | count | 1           |
| XCL1       | -0.987404  | 1.3632525 | -0.7243 | 0.469    | -0.485716665 | count | 1           |
| CENPX      | -0.3490742 | 0.1186399 | -2.9423 | 0.00329  | -0.484918534 | count | 1           |
| EID2       | -0.388093  | 0.2799849 | -1.3861 | 0.166    | -0.484135056 | count | 1           |
| PALB2      | -0.697948  | 0.5759853 | -1.2117 | 0.226    | -0.483974602 | count | 1           |
| MOAP1      | -0.3785374 | 0.2733534 | -1.3848 | 0.166    | -0.483970295 | count | 1           |
| KHDRBS3    | -1.787629  | 1.0499596 | -1.7026 | 0.0888   | -0.483916938 | count | 1           |
| TMEM138    | -0.381507  | 0.2455802 | -1.5535 | 0.12     | -0.483732514 | count | 1           |
| HTR7       | -1.0807795 | 0.7941724 | -1.3609 | 0.174    | -0.483461713 | count | 1           |
| HIST2H2BF  | -0.7245659 | 0.5308491 | -1.3649 | 0.172    | -0.48295464  | count | 1           |
| APOLD1     | -0.5018082 | 0.7328313 | -0.6848 | 0.494    | -0.482392993 | count | 1           |
| ATP6V1H    | -0.3662296 | 0.1984827 | -1.8451 | 0.0651   | -0.481427771 | count | 1           |
| EPAS1      | -0.4689015 | 0.2871927 | -1.6327 | 0.103    | -0.48125073  | count | 1           |
| CRELD1     | -0.4020182 | 0.3413003 | -1.1779 | 0.239    | -0.481090207 | count | 1           |
| APOC2      | -1.7629108 | 1.0321437 | -1.708  | 0.0878   | -0.480749588 | count | 1           |
| TRAF2      | -0.5406415 | 0.7285612 | -0.7421 | 0.458    | -0.479812142 | count | 1           |
| TLCD1      | -1.4076315 | 1.1799757 | -1.1929 | 0.233    | -0.479727988 | count | 1           |
| WDR35      | -0.8957151 | 0.6814113 | -1.3145 | 0.189    | -0.479346004 | count | 1           |
| ZNF674-AS1 | -0.8943988 | 0.7984277 | -1.1202 | 0.263    | -0.47880223  | count | 1           |
| MRT04      | -0.361365  | 0.2350037 | -1.5377 | 0.124    | -0.477906125 | count | 1           |
| ENAH       | -2.5479935 | 1.4681085 | -1.7356 | 0.0828   | -0.477725344 | count | 1           |
| PGM2L1     | -0.5470442 | 0.3246757 | -1.6849 | 0.0921   | -0.47768015  | count | 1           |
| C19orf47   | -0.8903851 | 0.5108531 | -1.7429 | 0.0815   | -0.477141242 | count | 1           |
| LRRC29     | -1.060533  | 0.5982277 | -1.7728 | 0.0764   | -0.477057566 | count | 1           |
| ACRBP      | -0.5289314 | 0.3489445 | -1.5158 | 0.13     | -0.47703248  | count | 1           |
| HSPE1      | -0.334615  | 0.0694597 | -4.8174 | 1.54E-06 | -0.476633105 | count | 0.036652    |
| REXO1      | -0.4113127 | 0.2619256 | -1.5703 | 0.116    | -0.476402833 | count | 1           |
| GNPDA2     | -0.8876785 | 0.6082341 | -1.4594 | 0.145    | -0.476018797 | count | 1           |
| PVR        | -0.7440302 | 0.6088014 | -1.2221 | 0.222    | -0.475666379 | count | 1           |
| LYRM4      | -0.3972765 | 0.2162653 | -1.837  | 0.0663   | -0.475574216 | count | 1           |
| NUDT3      | -0.3627375 | 0.1518708 | -2.3885 | 0.017    | -0.475502739 | count | 1           |



|            |            |           |         |          |              |       |          |
|------------|------------|-----------|---------|----------|--------------|-------|----------|
| PLD3       | -0.333475  | 0.08157   | -4.0882 | 4.49E-05 | -0.475281984 | count | 1        |
| LY6G5B     | -1.054179  | 1.3443664 | -0.7841 | 0.433    | -0.475028673 | count | 1        |
| LCA5       | -1.054179  | 1.1762207 | -0.8962 | 0.37     | -0.475028673 | count | 1        |
| SLC44A1    | -0.3860382 | 0.1915182 | -2.0157 | 0.0439   | -0.474349795 | count | 1        |
| RCC1L      | -0.5334017 | 0.305733  | -1.7447 | 0.0812   | -0.473929701 | count | 1        |
| DIXDC1     | -0.8822563 | 0.9424623 | -0.9361 | 0.349    | -0.473764253 | count | 1        |
| CPNE2      | -0.3706202 | 0.2046326 | -1.8111 | 0.0702   | -0.473568853 | count | 1        |
| NDUFAF3    | -0.3357155 | 0.0815717 | -4.1156 | 3.99E-05 | -0.473553031 | count | 0.940842 |
| UAP1       | -0.4143642 | 0.285725  | -1.4502 | 0.147    | -0.47349762  | count | 1        |
| HSP90AB1   | -0.3290625 | 0.0415496 | -7.9197 | 3.58E-15 | -0.473492172 | count | 8.66E-11 |
| FNDC3B     | -0.3420124 | 0.1508065 | -2.2679 | 0.0234   | -0.472947785 | count | 1        |
| C10orf55   | -1.0464725 | 0.7377831 | -1.4184 | 0.156    | -0.472555556 | count | 1        |
| ZNF549     | -1.0464725 | 1.4620126 | -0.7158 | 0.474    | -0.472555556 | count | 1        |
| ZMYND19    | -0.5998559 | 0.53456   | -1.1221 | 0.262    | -0.472410044 | count | 1        |
| TUBB2A     | -0.350031  | 0.1717497 | -2.038  | 0.0417   | -0.471972712 | count | 1        |
| BLOC1S6    | -0.3425794 | 0.1030938 | -3.323  | 0.000904 | -0.471880642 | count | 1        |
| SCAANT1    | -1.3683755 | 1.1666379 | -1.1729 | 0.241    | -0.471766992 | count | 1        |
| PTPMT1     | -0.3608212 | 0.2274362 | -1.5865 | 0.113    | -0.471551642 | count | 1        |
| SLC25A19   | -0.3481661 | 0.1879003 | -1.8529 | 0.064    | -0.471480661 | count | 1        |
| VDR        | -0.4281313 | 0.3005138 | -1.4247 | 0.154    | -0.470993355 | count | 1        |
| NOL4L      | -0.5468576 | 0.4102039 | -1.3331 | 0.183    | -0.46985093  | count | 1        |
| AP1S1      | -0.3531219 | 0.1682473 | -2.0988 | 0.0359   | -0.469544462 | count | 1        |
| CD68       | -0.3262385 | 0.0425461 | -7.6679 | 2.50E-14 | -0.469527959 | count | 6.04E-10 |
| UBASH3B    | -0.409139  | 0.349883  | -1.1694 | 0.242    | -0.467735542 | count | 1        |
| ATP13A3    | -0.334516  | 0.1312888 | -2.5479 | 0.0109   | -0.467536557 | count | 1        |
| IDH2       | -0.3374664 | 0.1177848 | -2.8651 | 0.0042   | -0.467237867 | count | 1        |
| ZFYVE28    | -0.4745886 | 0.4896532 | -0.9692 | 0.333    | -0.466988629 | count | 1        |
| TMEM176A   | -0.3284814 | 0.0846957 | -3.8784 | 0.000108 | -0.465593619 | count | 1        |
| ISCA2      | -0.3467695 | 0.1773788 | -1.955  | 0.0507   | -0.465187523 | count | 1        |
| AFG1L      | -0.930916  | 0.7963835 | -1.1689 | 0.243    | -0.464823484 | count | 1        |
| ZNF618     | -0.487194  | 0.3483521 | -1.3986 | 0.162    | -0.464328146 | count | 1        |
| BET1L      | -0.3861318 | 0.2280981 | -1.6928 | 0.0906   | -0.46362583  | count | 1        |
| C15orf40   | -0.3505799 | 0.1901473 | -1.8437 | 0.0653   | -0.463582221 | count | 1        |
| GPR160     | -0.4145484 | 0.2956427 | -1.4022 | 0.161    | -0.462832847 | count | 1        |
| RANBP1     | -0.3303079 | 0.0946703 | -3.489  | 0.000493 | -0.462385703 | count | 1        |
| SPIRE1     | -0.3741669 | 0.2628273 | -1.4236 | 0.155    | -0.462342283 | count | 1        |
| TPX2       | -1.0134535 | 0.8320724 | -1.218  | 0.223    | -0.46180551  | count | 1        |
| IGHA1      | -0.6178891 | 0.2462025 | -2.5097 | 0.0121   | -0.461771842 | count | 1        |
| HPS5       | -0.3687229 | 0.1729498 | -2.132  | 0.0331   | -0.461091071 | count | 1        |
| MPP1       | -0.3243011 | 0.0932655 | -3.4772 | 0.000516 | -0.460108672 | count | 1        |
| EREG       | -0.3215341 | 0.1354334 | -2.3741 | 0.0177   | -0.45999688  | count | 1        |
| AC068025.2 | -0.8483704 | 2.0996845 | -0.404  | 0.686    | -0.459497312 | count | 1        |
| CKM        | -0.8483704 | 1.0629205 | -0.7982 | 0.425    | -0.459497312 | count | 1        |
| LRP12      | -0.3974782 | 0.3867413 | -1.0278 | 0.304    | -0.459442971 | count | 1        |
| TRAPP2B    | -0.3468884 | 0.209538  | -1.6555 | 0.098    | -0.459437694 | count | 1        |

|            |            |           |         |          |              |       |             |
|------------|------------|-----------|---------|----------|--------------|-------|-------------|
| SNX24      | -0.3607888 | 0.2243069 | -1.6085 | 0.108    | -0.459385061 | count | 1           |
| AC067852.2 | -0.7498732 | 0.6320785 | -1.1864 | 0.236    | -0.459300905 | count | 1           |
| HSPA4      | -0.3355809 | 0.1307922 | -2.5658 | 0.0104   | -0.459235703 | count | 1           |
| WASHC3     | -0.3377255 | 0.1293261 | -2.6114 | 0.00907  | -0.459172106 | count | 1           |
| RER1       | -0.3231998 | 0.0696359 | -4.6413 | 3.64E-06 | -0.458877783 | count | 0.08647912  |
| HMCN1      | -0.9150718 | 2.311036  | -0.396  | 0.692    | -0.458820018 | count | 1           |
| AC098487.1 | -0.9150718 | 1.067018  | -0.8576 | 0.391    | -0.458820018 | count | 1           |
| PEX11A     | -0.9150718 | 1.0957561 | -0.8351 | 0.404    | -0.458820018 | count | 1           |
| AC078850.1 | -0.654661  | 0.8787866 | -0.745  | 0.456    | -0.458137228 | count | 1           |
| BEND3      | -1.1231883 | 1.173751  | -0.9569 | 0.339    | -0.457782135 | count | 1           |
| TMEM234    | -0.4000652 | 0.3046643 | -1.3131 | 0.189    | -0.457715299 | count | 1           |
| MMP24OS    | -0.3224312 | 0.0879336 | -3.6668 | 0.000251 | -0.457587601 | count | 1           |
| DPP3       | -0.4266069 | 0.2621099 | -1.6276 | 0.104    | -0.457360509 | count | 1           |
| RBAK       | -1.300036  | 0.7605444 | -1.7093 | 0.0875   | -0.457297286 | count | 1           |
| ANKRD22    | -0.5641619 | 0.283213  | -1.992  | 0.0465   | -0.456986567 | count | 1           |
| CIB1       | -0.3203965 | 0.0591092 | -5.4204 | 6.53E-08 | -0.456960518 | count | 0.001562041 |
| OSER1      | -0.3309245 | 0.113969  | -2.9036 | 0.00372  | -0.456732567 | count | 1           |
| ANKS6      | -0.652141  | 0.8275058 | -0.7881 | 0.431    | -0.456615396 | count | 1           |
| GNA12      | -0.3499208 | 0.3272689 | -1.0692 | 0.285    | -0.456294268 | count | 1           |
| E2F6       | -0.4724257 | 0.4383698 | -1.0777 | 0.281    | -0.45597384  | count | 1           |
| POMGNT1    | -0.4626356 | 0.4518177 | -1.0239 | 0.306    | -0.455936082 | count | 1           |
| NUDT14     | -0.338531  | 0.1713595 | -1.9756 | 0.0483   | -0.455759827 | count | 1           |
| TFIP11     | -0.4249058 | 0.3176617 | -1.3376 | 0.181    | -0.45561831  | count | 1           |
| PRKCH      | -0.495576  | 0.3965678 | -1.2497 | 0.212    | -0.455253359 | count | 1           |
| PLIN3      | -0.3221325 | 0.0856736 | -3.76   | 0.000174 | -0.454802595 | count | 1           |
| NELFE      | -0.3341461 | 0.1634603 | -2.0442 | 0.041    | -0.454762148 | count | 1           |
| CEBPE      | -0.4239487 | 0.425825  | -0.9956 | 0.32     | -0.454637763 | count | 1           |
| PLA2G4C    | -0.4709254 | 0.4533751 | -1.0387 | 0.299    | -0.454618184 | count | 1           |
| CA2        | -0.3521328 | 0.2479855 | -1.42   | 0.156    | -0.45436169  | count | 1           |
| MED26      | -0.5605517 | 0.3353924 | -1.6713 | 0.0948   | -0.454356208 | count | 1           |
| GPR82      | -0.6064368 | 0.4475632 | -1.355  | 0.176    | -0.454235582 | count | 1           |
| DCTPP1     | -0.3429907 | 0.1659829 | -2.0664 | 0.0389   | -0.453890205 | count | 1           |
| RNASSET2   | -0.3158552 | 0.0461088 | -6.8502 | 9.29E-12 | -0.453846197 | count | 2.24E-07    |
| MIR181A1HG | -0.3399782 | 0.1598349 | -2.1271 | 0.0335   | -0.453777777 | count | 1           |
| MYL6B      | -0.3540661 | 0.2221244 | -1.594  | 0.111    | -0.453624928 | count | 1           |
| ZNF506     | -0.3821119 | 0.3759532 | -1.0164 | 0.31     | -0.45358474  | count | 1           |
| CCNYL1     | -0.372495  | 0.2465241 | -1.511  | 0.131    | -0.452325068 | count | 1           |
| KDEL2      | -0.3179408 | 0.0729304 | -4.3595 | 1.36E-05 | -0.452216873 | count | 0.32198     |
| FUOM       | -0.3191923 | 0.0995194 | -3.2073 | 0.00136  | -0.452000109 | count | 1           |
| GATC       | -0.4987064 | 0.3831823 | -1.3015 | 0.193    | -0.451861158 | count | 1           |
| CD36       | -0.3142736 | 0.0967791 | -3.2473 | 0.00118  | -0.451774435 | count | 1           |
| PPP1R3D    | -0.4448509 | 0.4617438 | -0.9634 | 0.335    | -0.450906631 | count | 1           |
| RPF1       | -0.3778637 | 0.2711556 | -1.3935 | 0.164    | -0.450861953 | count | 1           |
| RAP2B      | -0.3213345 | 0.0985638 | -3.2602 | 0.00113  | -0.450832772 | count | 1           |
| TMEM135    | -0.5835535 | 0.5411657 | -1.0783 | 0.281    | -0.45031879  | count | 1           |

|            |            |             |         |          |              |       |             |
|------------|------------|-------------|---------|----------|--------------|-------|-------------|
| TMIGD3     | -0.4027924 | 0.3403401   | -1.1835 | 0.237    | -0.450196573 | count | 1           |
| ACP2       | -0.3461049 | 0.1992265   | -1.7372 | 0.0825   | -0.45013453  | count | 1           |
| HS3ST3B1   | -0.9784295 | 0.4716139   | -2.0746 | 0.0381   | -0.450127581 | count | 1           |
| CAMSAP1    | -0.3724924 | 0.2673783   | -1.3931 | 0.164    | -0.44958897  | count | 1           |
| MYLPF      | -0.8878241 | 1.2348085   | -0.719  | 0.472    | -0.448347563 | count | 1           |
| IQCG       | -0.400772  | 0.3678426   | -1.0895 | 0.276    | -0.448021694 | count | 1           |
| FAM129A    | -0.32648   | 0.1091059   | -2.9923 | 0.0028   | -0.447970973 | count | 1           |
| FCGR1A     | -0.3140774 | 0.0756376   | -4.1524 | 3.40E-05 | -0.447868952 | count | 0.802298    |
| COPB2      | -0.3249452 | 0.1173889   | -2.7681 | 0.00568  | -0.447545044 | count | 1           |
| NAA50      | -0.3253798 | 0.139138    | -2.3385 | 0.0194   | -0.447406288 | count | 1           |
| PIM3       | -0.3134667 | 0.0739725   | -4.2376 | 2.34E-05 | -0.446857164 | count | 0.5529186   |
| HSP90B1    | -0.3109503 | 0.0604523   | -5.1437 | 2.91E-07 | -0.446825159 | count | 0.006945006 |
| AC127070.1 | -0.9682995 | 0.954605    | -1.0143 | 0.311    | -0.446696631 | count | 1           |
| ZNF235     | -0.9682995 | 1.2085645   | -0.8012 | 0.423    | -0.446696631 | count | 1           |
| ANKRD54    | -0.5269335 | 0.4722492   | -1.1158 | 0.265    | -0.446458292 | count | 1           |
| KCNK13     | -0.4921882 | 0.4678887   | -1.0519 | 0.293    | -0.446396939 | count | 1           |
| NDUFAF4    | -0.3560477 | 0.2456589   | -1.4494 | 0.147    | -0.44613848  | count | 1           |
| SORD       | -0.4435904 | 0.3397696   | -1.3056 | 0.192    | -0.446027138 | count | 1           |
| AC245595.1 | -0.484477  | 0.4774163   | -1.0148 | 0.31     | -0.445790574 | count | 1           |
| ENPP4      | -0.4290973 | 0.3434251   | -1.2495 | 0.212    | -0.445634865 | count | 1           |
| SYCE1L     | -1.2458785 | 1.1059772   | -1.1265 | 0.26     | -0.445261956 | count | 1           |
| RAB20      | -0.3145638 | 0.0768657   | -4.0924 | 4.41E-05 | -0.445172739 | count | 1           |
| AC010864.1 | -0.7216188 | 0.7691095   | -0.9383 | 0.348    | -0.444916223 | count | 1           |
| SMARCAL1   | -0.4653078 | 0.3465582   | -1.3427 | 0.18     | -0.444815636 | count | 1           |
| AL391069.2 | -1.0764158 | 0.6055058   | -1.7777 | 0.0756   | -0.444567521 | count | 1           |
| FLT1       | -0.3368817 | 0.2201265   | -1.5304 | 0.126    | -0.444531406 | count | 1           |
| TTC3       | -0.326014  | 0.1205575   | -2.7042 | 0.00689  | -0.444269659 | count | 1           |
| ARMC6      | -0.4499771 | 0.4252134   | -1.0582 | 0.29     | -0.44418751  | count | 1           |
| PAQR8      | -0.6309157 | 0.4472211   | -1.4107 | 0.158    | -0.443720577 | count | 1           |
| PGBD5      | -1.5068881 | 1.0095561   | -1.4926 | 0.136    | -0.443656888 | count | 1           |
| NIPAL2     | -0.4955629 | 0.4806682   | -1.031  | 0.303    | -0.44292682  | count | 1           |
| RBFA       | -0.3565565 | 0.2484007   | -1.4354 | 0.151    | -0.44239108  | count | 1           |
| SPAG16     | -0.6284412 | 0.7435475   | -0.8452 | 0.398    | -0.442208299 | count | 1           |
| CD80       | -1.231848  | 0.4862684   | -2.5333 | 0.0114   | -0.442059719 | count | 1           |
| EMSY       | -0.4048521 | 0.287508    | -1.4081 | 0.159    | -0.4420591   | count | 1           |
| NFRKB      | -0.4221967 | 0.4112286   | -1.0267 | 0.305    | -0.441817715 | count | 1           |
| RBX1       | -0.3101687 | 0.0629626   | -4.9262 | 8.94E-07 | -0.441395051 | count | 0.02129955  |
| DNAAF5     | -1.0651953 | 0.6649016   | -1.602  | 0.109    | -0.441329403 | count | 1           |
| EMG1       | -0.3505923 | 0.2000726   | -1.7523 | 0.0798   | -0.441114943 | count | 1           |
| KCTD10     | -0.387921  | 0.4389027   | -0.8838 | 0.377    | -0.441092621 | count | 1           |
| UHRF1      | -18.288248 | 1887.960737 | -0.0097 | 0.992    | -0.44091196  | count | 1           |
| CCDC183    | -18.120875 | 2241.094188 | -0.0081 | 0.994    | -0.440911958 | count | 1           |
| TNFRSF11B  | -17.89633  | 1724.961797 | -0.0104 | 0.992    | -0.440911957 | count | 1           |
| AL645608.8 | -17.627232 | 1501.103572 | -0.0117 | 0.991    | -0.440911954 | count | 1           |
| AC118553.1 | -17.261135 | 3456.82378  | -0.005  | 0.996    | -0.440911949 | count | 1           |

|               |             |             |         |       |              |       |   |
|---------------|-------------|-------------|---------|-------|--------------|-------|---|
| KLRD1         | -17.260956  | 2792.052847 | -0.0062 | 0.995 | -0.440911949 | count | 1 |
| HIST1H1A      | -17.260782  | 2242.034839 | -0.0077 | 0.994 | -0.440911949 | count | 1 |
| ZNF286A       | -17.260782  | 2242.034839 | -0.0077 | 0.994 | -0.440911949 | count | 1 |
| ADNP-AS1      | -17.260782  | 2242.034839 | -0.0077 | 0.994 | -0.440911949 | count | 1 |
| RAB11FIP5     | -17.260647  | 1908.530744 | -0.009  | 0.993 | -0.440911949 | count | 1 |
| AGBL3         | -17.260647  | 1908.530744 | -0.009  | 0.993 | -0.440911949 | count | 1 |
| PNMA6A        | -17.260647  | 1908.530744 | -0.009  | 0.993 | -0.440911949 | count | 1 |
| MMP8          | -17.260647  | 1908.530744 | -0.009  | 0.993 | -0.440911949 | count | 1 |
| ZNF670-ZNF695 | -17.092317  | 4936.997261 | -0.0035 | 0.997 | -0.440911946 | count | 1 |
| GRIA2         | -17.092317  | 4936.997261 | -0.0035 | 0.997 | -0.440911946 | count | 1 |
| UPK2          | -17.092317  | 4936.997261 | -0.0035 | 0.997 | -0.440911946 | count | 1 |
| RHOJ          | -17.092317  | 4936.997261 | -0.0035 | 0.997 | -0.440911946 | count | 1 |
| AL358472.3    | -17.091438  | 3900.277613 | -0.0044 | 0.997 | -0.440911946 | count | 1 |
| PXDN          | -17.091438  | 3900.277613 | -0.0044 | 0.997 | -0.440911946 | count | 1 |
| AOX1          | -17.091438  | 3900.277613 | -0.0044 | 0.997 | -0.440911946 | count | 1 |
| LINC02541     | -17.091438  | 3900.277613 | -0.0044 | 0.997 | -0.440911946 | count | 1 |
| AP000919.2    | -17.091438  | 3900.277613 | -0.0044 | 0.997 | -0.440911946 | count | 1 |
| FNDC5         | -17.090688  | 3018.567076 | -0.0057 | 0.995 | -0.440911946 | count | 1 |
| C1orf74       | -17.090688  | 3018.567076 | -0.0057 | 0.995 | -0.440911946 | count | 1 |
| AL109615.3    | -17.090688  | 3018.567076 | -0.0057 | 0.995 | -0.440911946 | count | 1 |
| AP003419.2    | -17.090688  | 3018.567076 | -0.0057 | 0.995 | -0.440911946 | count | 1 |
| NCAM1         | -17.090688  | 3018.567076 | -0.0057 | 0.995 | -0.440911946 | count | 1 |
| AC010186.1    | -17.090688  | 3018.567076 | -0.0057 | 0.995 | -0.440911946 | count | 1 |
| CEP170B       | -17.090688  | 3018.567076 | -0.0057 | 0.995 | -0.440911946 | count | 1 |
| RBFOX1        | -17.090688  | 3018.567076 | -0.0057 | 0.995 | -0.440911946 | count | 1 |
| LINC02139     | -17.090688  | 3018.567076 | -0.0057 | 0.995 | -0.440911946 | count | 1 |
| EPHA2         | -17.090158  | 2462.524239 | -0.0069 | 0.994 | -0.440911946 | count | 1 |
| WNT5A         | -17.090158  | 2462.524239 | -0.0069 | 0.994 | -0.440911946 | count | 1 |
| PDE5A         | -17.090158  | 2462.524239 | -0.0069 | 0.994 | -0.440911946 | count | 1 |
| TAB2-AS1      | -17.090158  | 2462.524239 | -0.0069 | 0.994 | -0.440911946 | count | 1 |
| IGHG4         | -17.090158  | 2462.524239 | -0.0069 | 0.994 | -0.440911946 | count | 1 |
| AC026471.2    | -17.090158  | 2462.524239 | -0.0069 | 0.994 | -0.440911946 | count | 1 |
| FAM83G        | -17.090158  | 2462.524239 | -0.0069 | 0.994 | -0.440911946 | count | 1 |
| KRT36         | -17.090158  | 2462.524239 | -0.0069 | 0.994 | -0.440911946 | count | 1 |
| GTSE1         | -17.090158  | 2462.524239 | -0.0069 | 0.994 | -0.440911946 | count | 1 |
| TMPRSS13      | -17.7386298 | 2428.48399  | -0.0073 | 0.994 | -0.440911841 | count | 1 |
| AL136961.1    | -17.7386124 | 2125.354018 | -0.0083 | 0.993 | -0.440911841 | count | 1 |
| MYL4          | -17.7386124 | 2125.354018 | -0.0083 | 0.993 | -0.440911841 | count | 1 |
| AL590428.1    | -17.7380567 | 1905.111185 | -0.0093 | 0.993 | -0.440911841 | count | 1 |
| TCTN2         | -17.7380567 | 1905.111185 | -0.0093 | 0.993 | -0.440911841 | count | 1 |
| SOX18         | -17.7380567 | 1905.111185 | -0.0093 | 0.993 | -0.440911841 | count | 1 |
| ATXN7L2       | -17.7380498 | 2238.068342 | -0.0079 | 0.994 | -0.440911841 | count | 1 |
| HCG25         | -17.4435506 | 2042.538974 | -0.0085 | 0.993 | -0.440911838 | count | 1 |
| AL031777.3    | -17.4239365 | 1776.626022 | -0.0098 | 0.992 | -0.440911837 | count | 1 |
| AGMAT         | -16.9702505 | 1468.674279 | -0.0116 | 0.991 | -0.440911829 | count | 1 |

|            |             |             |         |          |              |       |            |
|------------|-------------|-------------|---------|----------|--------------|-------|------------|
| PANO1      | -16.9702505 | 1468.674279 | -0.0116 | 0.991    | -0.440911829 | count | 1          |
| AC018761.3 | -16.7657804 | 2023.615166 | -0.0083 | 0.993    | -0.440911824 | count | 1          |
| FCRLA      | -16.7655341 | 1698.50873  | -0.0099 | 0.992    | -0.440911824 | count | 1          |
| AC008040.1 | -16.7655341 | 1698.50873  | -0.0099 | 0.992    | -0.440911824 | count | 1          |
| KLF1       | -16.7655341 | 1698.50873  | -0.0099 | 0.992    | -0.440911824 | count | 1          |
| AL109811.2 | -16.5853428 | 1797.066808 | -0.0092 | 0.993    | -0.440911819 | count | 1          |
| TINAGL1    | -16.5853285 | 1273.438624 | -0.013  | 0.99     | -0.440911819 | count | 1          |
| CACNA2D3   | -0.3874433  | 0.2459974   | -1.575  | 0.115    | -0.440567616 | count | 1          |
| MICALL1    | -0.5006242  | 0.6136456   | -0.8158 | 0.415    | -0.440421059 | count | 1          |
| DDHD1      | -0.342077   | 0.214055    | -1.5981 | 0.11     | -0.440085097 | count | 1          |
| RPS27L     | -0.3074478  | 0.0651096   | -4.722  | 2.47E-06 | -0.439690566 | count | 0.05872672 |
| ARSG       | -0.4107471  | 0.2712138   | -1.5145 | 0.13     | -0.438548401 | count | 1          |
| IFIT5      | -0.498303   | 0.4066685   | -1.2253 | 0.221    | -0.438540789 | count | 1          |
| PMM2       | -0.353372   | 0.2367686   | -1.4925 | 0.136    | -0.438519565 | count | 1          |
| MYL5       | -0.4898781  | 0.3537614   | -1.3848 | 0.166    | -0.438231789 | count | 1          |
| PPAT       | -0.4898781  | 0.3909387   | -1.2531 | 0.21     | -0.438231789 | count | 1          |
| KHDC4      | -0.4314786  | 0.3058455   | -1.4108 | 0.158    | -0.438061536 | count | 1          |
| GTF3C6     | -0.3096714  | 0.0842582   | -3.6753 | 0.000243 | -0.437364332 | count | 1          |
| FKBP4      | -0.3348933  | 0.1597404   | -2.0965 | 0.0361   | -0.437247447 | count | 1          |
| PHLDB1     | -0.5992612  | 0.5744951   | -1.0431 | 0.297    | -0.437239297 | count | 1          |
| ELK3       | -0.3327325  | 0.2031018   | -1.6383 | 0.101    | -0.437172924 | count | 1          |
| NME1       | -0.3158516  | 0.1289804   | -2.4488 | 0.0144   | -0.436964569 | count | 1          |
| TIGAR      | -0.3287676  | 0.1667959   | -1.9711 | 0.0488   | -0.4369193   | count | 1          |
| AVPI1      | -0.3150025  | 0.150406    | -2.0943 | 0.0363   | -0.436677431 | count | 1          |
| PDZD11     | -0.3411541  | 0.2099008   | -1.6253 | 0.104    | -0.436515872 | count | 1          |
| HM13       | -0.3072091  | 0.0671126   | -4.5775 | 4.94E-06 | -0.436028703 | count | 0.11728548 |
| SLC1A3     | -0.3352624  | 0.1534565   | -2.1847 | 0.029    | -0.435910641 | count | 1          |
| CCNJ       | -0.561446   | 0.5184263   | -1.083  | 0.279    | -0.43507319  | count | 1          |
| DOCK10     | -0.3182658  | 0.1480976   | -2.149  | 0.0317   | -0.435037304 | count | 1          |
| AVEN       | -0.4359183  | 0.391682    | -1.1129 | 0.266    | -0.434983049 | count | 1          |
| AKR7A2     | -0.3152518  | 0.1206967   | -2.6119 | 0.00906  | -0.434934491 | count | 1          |
| B4GALT5    | -0.3492536  | 0.2508867   | -1.3921 | 0.164    | -0.434786878 | count | 1          |
| MRPS7      | -0.3152466  | 0.1259275   | -2.5034 | 0.0124   | -0.434691435 | count | 1          |
| CYTH3      | -0.5767241  | 0.854729    | -0.6747 | 0.5      | -0.434493811 | count | 1          |
| XPO4       | -0.5332319  | 0.4259129   | -1.252  | 0.211    | -0.434320544 | count | 1          |
| ETFB       | -0.305693   | 0.0832232   | -3.6732 | 0.000245 | -0.434048503 | count | 1          |
| PAFAH1B3   | -0.3466488  | 0.2215426   | -1.5647 | 0.118    | -0.434005954 | count | 1          |
| GSPT1      | -0.3083961  | 0.0899652   | -3.4279 | 0.000618 | -0.43389978  | count | 1          |
| RASGRF1    | -1.931878   | 1.6332837   | -1.1828 | 0.237    | -0.433147169 | count | 1          |
| HSD17B8    | -0.4833361  | 0.3818609   | -1.2657 | 0.206    | -0.432816824 | count | 1          |
| LSS        | -1.035677   | 0.6745309   | -1.5354 | 0.125    | -0.432683587 | count | 1          |
| ZBTB5      | -0.6365315  | 0.9236355   | -0.6892 | 0.491    | -0.432479829 | count | 1          |
| MAK16      | -0.3914766  | 0.3770962   | -1.0381 | 0.299    | -0.432196138 | count | 1          |
| DPH5       | -0.6360445  | 0.372557    | -1.7072 | 0.0879   | -0.432194111 | count | 1          |
| SYNC       | -0.4904512  | 0.4070184   | -1.205  | 0.228    | -0.43216844  | count | 1          |

|            |            |           |         |          |              |       |             |
|------------|------------|-----------|---------|----------|--------------|-------|-------------|
| EFL1       | -0.3695727 | 0.346542  | -1.0665 | 0.286    | -0.432072169 | count | 1           |
| SMURF1     | -0.4622233 | 0.4522129 | -1.0221 | 0.307    | -0.432051706 | count | 1           |
| URGCP      | -1.188834  | 0.7530256 | -1.5787 | 0.115    | -0.432023022 | count | 1           |
| BOLA3      | -0.3233149 | 0.1903676 | -1.6984 | 0.0896   | -0.43123008  | count | 1           |
| NSMAF      | -0.344551  | 0.2500862 | -1.3777 | 0.168    | -0.430257731 | count | 1           |
| LRSAM1     | -0.4875898 | 0.3831088 | -1.2727 | 0.203    | -0.429841587 | count | 1           |
| SMUG1      | -0.3537815 | 0.2958208 | -1.1959 | 0.232    | -0.429275539 | count | 1           |
| B3GNTL1    | -0.4428011 | 0.402934  | -1.0989 | 0.272    | -0.429087013 | count | 1           |
| SOCS7      | -1.0223455 | 0.6442698 | -1.5868 | 0.113    | -0.428717828 | count | 1           |
| FAIM       | -0.3523647 | 0.38652   | -0.9116 | 0.362    | -0.428434621 | count | 1           |
| ZDHHC19    | -1.1719536 | 0.7625277 | -1.5369 | 0.124    | -0.427992404 | count | 1           |
| IGLON5     | -0.9133185 | 0.9455847 | -0.9659 | 0.334    | -0.427652813 | count | 1           |
| TAF4B      | -1.170077  | 0.6607761 | -1.7708 | 0.0767   | -0.427541171 | count | 1           |
| RBBP9      | -0.5495663 | 0.5229543 | -1.0509 | 0.293    | -0.426818449 | count | 1           |
| PPARD      | -0.4159141 | 0.3003574 | -1.3847 | 0.166    | -0.42634982  | count | 1           |
| MAN1B1-DT  | -0.5640159 | 0.5395771 | -1.0453 | 0.296    | -0.425967034 | count | 1           |
| LEAP2      | -0.7234447 | 0.586425  | -1.2337 | 0.217    | -0.425750916 | count | 1           |
| TBC1D2     | -0.3504934 | 0.2958438 | -1.1847 | 0.236    | -0.42537594  | count | 1           |
| AARSD1     | -1.010323  | 0.6803496 | -1.485  | 0.138    | -0.425108742 | count | 1           |
| BCKDK      | -0.3081033 | 0.1280074 | -2.4069 | 0.0162   | -0.424953972 | count | 1           |
| BTG1       | -0.2949836 | 0.0531914 | -5.5457 | 3.24E-08 | -0.424902061 | count | 0.00077585  |
| UBE2T      | -0.8262431 | 0.8290268 | -0.9966 | 0.319    | -0.423982595 | count | 1           |
| PLEKHB2    | -0.3034769 | 0.0858722 | -3.5341 | 0.000417 | -0.42376596  | count | 1           |
| NUDT22     | -0.3115014 | 0.1536485 | -2.0274 | 0.0427   | -0.422966789 | count | 1           |
| NDUFB2     | -0.2951532 | 0.0476208 | -6.198  | 6.69E-10 | -0.422628601 | count | 1.61E-05    |
| PKM        | -0.2940801 | 0.0544733 | -5.3986 | 7.36E-08 | -0.421926775 | count | 0.00176007  |
| ELOC       | -0.2960305 | 0.0677429 | -4.3699 | 1.29E-05 | -0.421857268 | count | 0.3054978   |
| NSMCE1     | -0.3144812 | 0.1451258 | -2.167  | 0.0303   | -0.421664419 | count | 1           |
| STK39      | -0.5283764 | 0.4303579 | -1.2278 | 0.22     | -0.421620055 | count | 1           |
| IFNAR2     | -0.310547  | 0.1525867 | -2.0352 | 0.0419   | -0.421470526 | count | 1           |
| SLC30A1    | -0.3288985 | 0.2092109 | -1.5721 | 0.116    | -0.421469232 | count | 1           |
| PLAU       | -0.3072008 | 0.1703437 | -1.8034 | 0.0714   | -0.420092708 | count | 1           |
| RAN        | -0.2934386 | 0.0527355 | -5.5643 | 2.92E-08 | -0.419896471 | count | 0.000699369 |
| IDE        | -0.4481141 | 0.4049306 | -1.1066 | 0.269    | -0.419707578 | count | 1           |
| AC008608.2 | -0.6141334 | 0.7560387 | -0.8123 | 0.417    | -0.419264556 | count | 1           |
| DRAM1      | -0.3053526 | 0.1497147 | -2.0396 | 0.0415   | -0.418873644 | count | 1           |
| ST3GAL6    | -0.3271078 | 0.1933478 | -1.6918 | 0.0908   | -0.418812411 | count | 1           |
| PLTP       | -0.2935455 | 0.0947136 | -3.0993 | 0.00196  | -0.418638637 | count | 1           |
| PDLIM7     | -0.3247582 | 0.2114164 | -1.5361 | 0.125    | -0.417756285 | count | 1           |
| AC116407.1 | -0.7066058 | 0.9574016 | -0.738  | 0.461    | -0.417513623 | count | 1           |
| FAM49B     | -0.2931266 | 0.0537478 | -5.4537 | 5.43E-08 | -0.417102442 | count | 0.001299182 |
| CHI3L2     | -0.5676119 | 0.5957974 | -0.9527 | 0.341    | -0.416773827 | count | 1           |
| LRFN4      | -0.4247576 | 0.4172049 | -1.0181 | 0.309    | -0.416701741 | count | 1           |
| AC093525.7 | -1.7701184 | 1.1387037 | -1.5545 | 0.12     | -0.416675759 | count | 1           |
| KCNQ1OT1   | -0.3356798 | 0.2182993 | -1.5377 | 0.124    | -0.416353197 | count | 1           |

|              |            |           |         |          |              |       |             |
|--------------|------------|-----------|---------|----------|--------------|-------|-------------|
| TSEN54       | -0.4501709 | 0.4374392 | -1.0291 | 0.304    | -0.416312576 | count | 1           |
| USP54        | -0.9812521 | 2.0542391 | -0.4777 | 0.633    | -0.416252541 | count | 1           |
| TRIM27       | -0.3143788 | 0.1839686 | -1.7089 | 0.0876   | -0.416220529 | count | 1           |
| NDN          | -0.3315466 | 0.2616157 | -1.2673 | 0.205    | -0.415979416 | count | 1           |
| CCT6A        | -0.2946154 | 0.075642  | -3.8949 | 0.000101 | -0.415520269 | count | 1           |
| PLB1         | -0.3560685 | 0.2464386 | -1.4449 | 0.149    | -0.415492154 | count | 1           |
| HLA-DMB      | -0.29143   | 0.0573472 | -5.0819 | 4.02E-07 | -0.415157708 | count | 0.009588906 |
| CDV3         | -0.2897107 | 0.0554342 | -5.2262 | 1.88E-07 | -0.41465108  | count | 0.004490944 |
| EHHADH       | -1.1151941 | 1.0310038 | -1.0817 | 0.28     | -0.41405193  | count | 1           |
| BIK          | -1.1151941 | 1.0310038 | -1.0817 | 0.28     | -0.41405193  | count | 1           |
| GM2A         | -0.3050284 | 0.1558029 | -1.9578 | 0.0504   | -0.413826329 | count | 1           |
| MEGF8        | -0.8007412 | 0.5608848 | -1.4276 | 0.154    | -0.413606921 | count | 1           |
| SLC35B1      | -0.3125089 | 0.165162  | -1.8921 | 0.0586   | -0.413356219 | count | 1           |
| SFXN1        | -0.3611059 | 0.3637235 | -0.9928 | 0.321    | -0.413038708 | count | 1           |
| CGAS         | -0.3177572 | 0.1513349 | -2.0997 | 0.0359   | -0.412839153 | count | 1           |
| ZNF501       | -0.6958246 | 1.4253284 | -0.4882 | 0.625    | -0.412197488 | count | 1           |
| AL391834.2   | -0.6958246 | 1.2200215 | -0.5703 | 0.569    | -0.412197488 | count | 1           |
| AC009118.2   | -0.6958246 | 1.4874802 | -0.4678 | 0.64     | -0.412197488 | count | 1           |
| ZNF234       | -0.6589406 | 0.9894285 | -0.666  | 0.505    | -0.412178209 | count | 1           |
| FCHO1        | -0.3805033 | 0.4218072 | -0.9021 | 0.367    | -0.412154548 | count | 1           |
| NRP2         | -0.2933284 | 0.1368291 | -2.1438 | 0.0322   | -0.41197781  | count | 1           |
| PSMD1        | -0.3009999 | 0.126658  | -2.3765 | 0.0176   | -0.410759817 | count | 1           |
| SERPINB9     | -0.2950519 | 0.0977656 | -3.018  | 0.00257  | -0.410539661 | count | 1           |
| PDLIM3       | -0.7929067 | 0.8316436 | -0.9534 | 0.34     | -0.410385538 | count | 1           |
| RAP1GDS1     | -0.3187583 | 0.1991236 | -1.6008 | 0.11     | -0.410145829 | count | 1           |
| SNRNP35      | -0.3093532 | 0.1699253 | -1.8205 | 0.0688   | -0.409836743 | count | 1           |
| TMEM161B-AS1 | -0.4309617 | 0.4206958 | -1.0244 | 0.306    | -0.409372529 | count | 1           |
| SLC25A43     | -0.4549502 | 0.4359429 | -1.0436 | 0.297    | -0.40917367  | count | 1           |
| TADA3        | -0.2996565 | 0.1305194 | -2.2959 | 0.0218   | -0.409107958 | count | 1           |
| TIPARP       | -0.2883003 | 0.0829611 | -3.4751 | 0.000519 | -0.40901533  | count | 1           |
| SEL1L3       | -0.622183  | 0.5734188 | -1.085  | 0.278    | -0.40875367  | count | 1           |
| MERTK        | -0.3045583 | 0.1897773 | -1.6048 | 0.109    | -0.408620756 | count | 1           |
| B3GALNT2     | -0.3543021 | 0.3139675 | -1.1285 | 0.259    | -0.408295511 | count | 1           |
| AC009948.1   | -0.5378486 | 0.3890436 | -1.3825 | 0.167    | -0.408253353 | count | 1           |
| CXCL3        | -0.2837624 | 0.129887  | -2.1847 | 0.029    | -0.408071816 | count | 1           |
| PSMD14       | -0.2997037 | 0.1387737 | -2.1597 | 0.0309   | -0.407837662 | count | 1           |
| PEX11B       | -0.4071331 | 0.3441972 | -1.1828 | 0.237    | -0.407718203 | count | 1           |
| AC112907.3   | -2.847028  | 2.205989  | -1.2906 | 0.197    | -0.407623293 | count | 1           |
| LRRC47       | -0.3936551 | 0.3104563 | -1.268  | 0.205    | -0.407580461 | count | 1           |
| RNF220       | -0.3334197 | 0.2671996 | -1.2478 | 0.212    | -0.407418469 | count | 1           |
| MEA1         | -0.292816  | 0.1211726 | -2.4165 | 0.0157   | -0.406762905 | count | 1           |
| MCUB         | -0.2878208 | 0.0920258 | -3.1276 | 0.00178  | -0.406735294 | count | 1           |
| GNL2         | -0.3062292 | 0.1601137 | -1.9126 | 0.0559   | -0.406704052 | count | 1           |
| GMFB         | -0.3048872 | 0.1775894 | -1.7168 | 0.0861   | -0.406025064 | count | 1           |
| AL645728.1   | -0.6167473 | 0.492663  | -1.2519 | 0.211    | -0.405665936 | count | 1           |

|             |            |           |         |          |              |       |          |
|-------------|------------|-----------|---------|----------|--------------|-------|----------|
| NPM3        | -0.3493519 | 0.3092655 | -1.1296 | 0.259    | -0.405375456 | count | 1        |
| RNF115      | -0.3049047 | 0.1554456 | -1.9615 | 0.0499   | -0.405147952 | count | 1        |
| SELENOI     | -0.5679816 | 0.4818514 | -1.1787 | 0.239    | -0.404679158 | count | 1        |
| VSIG10L     | -0.5325185 | 0.6651922 | -0.8005 | 0.423    | -0.404619468 | count | 1        |
| NAA40       | -0.4560986 | 0.8049838 | -0.5666 | 0.571    | -0.404071454 | count | 1        |
| GNGT2       | -0.4069042 | 0.3062917 | -1.3285 | 0.184    | -0.403878338 | count | 1        |
| REEP6       | -1.6585726 | 1.0499966 | -1.5796 | 0.114    | -0.403865166 | count | 1        |
| PSMC3       | -0.2898021 | 0.1018304 | -2.8459 | 0.00446  | -0.403300861 | count | 1        |
| MLLT1       | -0.4190175 | 0.3204758 | -1.3075 | 0.191    | -0.403094502 | count | 1        |
| MS4A4A      | -0.2822435 | 0.0776709 | -3.6338 | 0.000285 | -0.403026441 | count | 1        |
| NFAT5       | -0.3231355 | 0.194264  | -1.6634 | 0.0964   | -0.402853011 | count | 1        |
| SLC30A4     | -1.0711153 | 0.7040519 | -1.5214 | 0.128    | -0.402805656 | count | 1        |
| HAUS6       | -0.3638779 | 0.2717221 | -1.3392 | 0.181    | -0.402777191 | count | 1        |
| AL136987.1  | -0.5298085 | 0.432358  | -1.2254 | 0.221    | -0.402768555 | count | 1        |
| TSPOAP1-AS1 | -0.5862519 | 0.6221713 | -0.9423 | 0.346    | -0.402602784 | count | 1        |
| AL355488.1  | -0.6751085 | 1.1438944 | -0.5902 | 0.555    | -0.401889995 | count | 1        |
| POP7        | -0.3056251 | 0.1918064 | -1.5934 | 0.111    | -0.401714814 | count | 1        |
| AC008083.2  | -0.8407186 | 0.8868602 | -0.948  | 0.343    | -0.401397144 | count | 1        |
| PSMB1       | -0.280511  | 0.0461303 | -6.0808 | 1.38E-09 | -0.401316096 | count | 3.32E-05 |
| WDR83       | -0.4217771 | 0.3413684 | -1.2355 | 0.217    | -0.401154949 | count | 1        |
| MRPL41      | -0.2833793 | 0.0840757 | -3.3705 | 0.000762 | -0.40095479  | count | 1        |
| TPST1       | -0.4600007 | 0.5328063 | -0.8634 | 0.388    | -0.400856207 | count | 1        |
| TRMT5       | -0.4315707 | 0.4002959 | -1.0781 | 0.281    | -0.400186593 | count | 1        |
| DCAF17      | -0.4573297 | 0.4738106 | -0.9652 | 0.335    | -0.398698447 | count | 1        |
| MON1A       | -0.7112707 | 0.7847277 | -0.9064 | 0.365    | -0.398614133 | count | 1        |
| AKAP6       | -0.7112707 | 1.6467914 | -0.4319 | 0.666    | -0.398614133 | count | 1        |
| PDHA1       | -0.2940352 | 0.1629068 | -1.8049 | 0.0712   | -0.39860574  | count | 1        |
| YARS        | -0.3433256 | 0.2341586 | -1.4662 | 0.143    | -0.398571813 | count | 1        |
| NCEH1       | -0.3055191 | 0.2148387 | -1.4221 | 0.155    | -0.398541456 | count | 1        |
| CTPS2       | -0.7644167 | 0.9243425 | -0.827  | 0.408    | -0.398536274 | count | 1        |
| OTUD3       | -0.6681726 | 0.5603074 | -1.1925 | 0.233    | -0.398411765 | count | 1        |
| ZFAND2A     | -0.319003  | 0.1875607 | -1.7008 | 0.0891   | -0.398353145 | count | 1        |
| ADSL        | -0.3814159 | 0.3228177 | -1.1815 | 0.238    | -0.398251914 | count | 1        |
| ADCY3       | -0.5230522 | 0.5946684 | -0.8796 | 0.379    | -0.398144242 | count | 1        |
| AC007114.1  | -0.5576143 | 0.6016085 | -0.9269 | 0.354    | -0.398132232 | count | 1        |
| GAPDH       | -0.2760971 | 0.0407128 | -6.7816 | 1.48E-11 | -0.398132197 | count | 3.57E-07 |
| LINC01006   | -0.8313193 | 1.4053735 | -0.5915 | 0.554    | -0.397904304 | count | 1        |
| AC073611.1  | -0.3195402 | 0.3143291 | -1.0166 | 0.309    | -0.397875257 | count | 1        |
| AF001548.2  | -1.0521369 | 1.3343025 | -0.7885 | 0.43     | -0.397848177 | count | 1        |
| NAGS        | -1.0521369 | 1.0450717 | -1.0068 | 0.314    | -0.397848177 | count | 1        |
| AC025048.4  | -1.0521369 | 1.0450717 | -1.0068 | 0.314    | -0.397848177 | count | 1        |
| HPRT1       | -0.2883409 | 0.1368894 | -2.1064 | 0.0353   | -0.397672767 | count | 1        |
| HSD17B7     | -0.3645909 | 0.3124895 | -1.1667 | 0.243    | -0.397642707 | count | 1        |
| NUDT19      | -0.3729466 | 0.3500606 | -1.0654 | 0.287    | -0.39739851  | count | 1        |
| GPR107      | -0.3893021 | 0.2807115 | -1.3868 | 0.166    | -0.397234611 | count | 1        |



|            |            |           |         |          |              |       |             |
|------------|------------|-----------|---------|----------|--------------|-------|-------------|
| ACKR3      | -0.3831072 | 0.5349936 | -0.7161 | 0.474    | -0.3971351   | count | 1           |
| TMEM134    | -0.2854813 | 0.1187019 | -2.405  | 0.0162   | -0.39691785  | count | 1           |
| OSTC       | -0.2791598 | 0.0731918 | -3.8141 | 0.00014  | -0.396753816 | count | 1           |
| TMEM156    | -0.5553679 | 0.4775005 | -1.1631 | 0.245    | -0.396709327 | count | 1           |
| MAPRE1     | -0.2851824 | 0.0997275 | -2.8596 | 0.00428  | -0.396685681 | count | 1           |
| SLC43A3    | -0.2945671 | 0.1500861 | -1.9627 | 0.0498   | -0.396534655 | count | 1           |
| LRPAP1     | -0.2778486 | 0.0628696 | -4.4194 | 1.03E-05 | -0.396487881 | count | 0.2440997   |
| TMEM147    | -0.2811804 | 0.0859387 | -3.2719 | 0.00108  | -0.39627854  | count | 1           |
| CHPF       | -1.0400692 | 0.863091  | -1.2051 | 0.228    | -0.394659324 | count | 1           |
| LINC00476  | -0.5521283 | 0.5780322 | -0.9552 | 0.34     | -0.394654653 | count | 1           |
| MR1        | -0.2967568 | 0.1730487 | -1.7149 | 0.0865   | -0.394423118 | count | 1           |
| IFNGR2     | -0.2775722 | 0.0747184 | -3.7149 | 0.000208 | -0.394005157 | count | 1           |
| DTNBP1     | -0.2992668 | 0.1458618 | -2.0517 | 0.0403   | -0.393900265 | count | 1           |
| LAIR1      | -0.2794121 | 0.0731031 | -3.8222 | 0.000136 | -0.393836602 | count | 1           |
| DDX55      | -0.3366789 | 0.2858712 | -1.1777 | 0.239    | -0.393452131 | count | 1           |
| RDX        | -0.2887738 | 0.1359156 | -2.1247 | 0.0337   | -0.393329817 | count | 1           |
| MCFD2      | -0.2852364 | 0.1213992 | -2.3496 | 0.0189   | -0.393249066 | count | 1           |
| NDUFA11    | -0.2763286 | 0.0643159 | -4.2964 | 1.80E-05 | -0.393236117 | count | 0.42579     |
| H2AFV      | -0.275681  | 0.0648838 | -4.2488 | 2.23E-05 | -0.393100227 | count | 0.5270605   |
| BZW1       | -0.2745211 | 0.0600371 | -4.5725 | 5.06E-06 | -0.393019383 | count | 0.1201244   |
| LUCAT1     | -0.3059275 | 0.2367588 | -1.2921 | 0.196    | -0.392799623 | count | 1           |
| CCT2       | -0.2789563 | 0.1019314 | -2.7367 | 0.00625  | -0.392527958 | count | 1           |
| MTOR       | -0.4493773 | 0.4677492 | -0.9607 | 0.337    | -0.392261525 | count | 1           |
| RARA-AS1   | -0.3149096 | 0.2628975 | -1.1978 | 0.231    | -0.392209243 | count | 1           |
| AGAP6      | -0.5930984 | 0.9007882 | -0.6584 | 0.51     | -0.392130036 | count | 1           |
| CCNB1      | -0.5686222 | 0.7420174 | -0.7663 | 0.444    | -0.391946715 | count | 1           |
| NQO2       | -0.2792051 | 0.1082013 | -2.5804 | 0.00993  | -0.391744329 | count | 1           |
| TOMM70     | -0.332936  | 0.2157902 | -1.5429 | 0.123    | -0.391436563 | count | 1           |
| CXCL16     | -0.2743    | 0.0660195 | -4.1548 | 3.37E-05 | -0.391305418 | count | 0.7952526   |
| SNX8       | -0.2892193 | 0.1594409 | -1.814  | 0.0698   | -0.390940543 | count | 1           |
| NPAT       | -0.3622142 | 0.2828449 | -1.2806 | 0.2      | -0.390914995 | count | 1           |
| C2orf74    | -0.2980838 | 0.183785  | -1.6219 | 0.105    | -0.390730055 | count | 1           |
| PBX3       | -0.3219333 | 0.2387399 | -1.3485 | 0.178    | -0.390649248 | count | 1           |
| AC093827.4 | -0.5904306 | 0.4582576 | -1.2884 | 0.198    | -0.390592647 | count | 1           |
| CYFIP1     | -0.2805104 | 0.0979196 | -2.8647 | 0.00421  | -0.390590728 | count | 1           |
| CNOT9      | -0.2986884 | 0.1866308 | -1.6004 | 0.11     | -0.390515693 | count | 1           |
| ACOX2      | -0.5454987 | 0.7774154 | -0.7017 | 0.483    | -0.390439983 | count | 1           |
| SMIM37     | -0.2896645 | 0.1486146 | -1.9491 | 0.0514   | -0.390360308 | count | 1           |
| CCDC126    | -0.3473482 | 0.3072917 | -1.1304 | 0.258    | -0.39017941  | count | 1           |
| MZT2A      | -0.2787696 | 0.1311718 | -2.1252 | 0.0337   | -0.38952622  | count | 1           |
| GAN        | -0.3879625 | 0.458158  | -0.8468 | 0.397    | -0.389435914 | count | 1           |
| GRAMD1B    | -0.3953978 | 0.3583662 | -1.1033 | 0.27     | -0.389365094 | count | 1           |
| CRELD2     | -0.2871896 | 0.1363044 | -2.107  | 0.0352   | -0.389184616 | count | 1           |
| SEC61B     | -0.2712527 | 0.0475711 | -5.7021 | 1.33E-08 | -0.389171734 | count | 0.000318961 |
| FLCN       | -0.3527788 | 0.290149  | -1.2159 | 0.224    | -0.389058526 | count | 1           |

|            |            |           |         |          |              |       |             |
|------------|------------|-----------|---------|----------|--------------|-------|-------------|
| NCBP2      | -0.2900874 | 0.1518501 | -1.9104 | 0.0562   | -0.388802564 | count | 1           |
| MX1        | -0.2763373 | 0.131619  | -2.0995 | 0.0359   | -0.388736007 | count | 1           |
| CKS2       | -0.2788392 | 0.116181  | -2.4    | 0.0165   | -0.388722756 | count | 1           |
| LACC1      | -0.3114897 | 0.2139822 | -1.4557 | 0.146    | -0.388022561 | count | 1           |
| SNAI1      | -0.3935676 | 0.2910817 | -1.3521 | 0.176    | -0.387653202 | count | 1           |
| WDHD1      | -0.8040328 | 0.8351732 | -0.9627 | 0.336    | -0.387641614 | count | 1           |
| CD247      | -1.5298992 | 1.1530973 | -1.3268 | 0.185    | -0.387460282 | count | 1           |
| ANXA2      | -0.2694851 | 0.0468147 | -5.7564 | 9.66E-09 | -0.387104718 | count | 0.000231724 |
| TCAIM      | -0.3204545 | 0.2781554 | -1.1521 | 0.249    | -0.386471376 | count | 1           |
| MGAT4B     | -0.2853148 | 0.1706888 | -1.6715 | 0.0947   | -0.386029171 | count | 1           |
| ANKRD11    | -0.2771268 | 0.1337581 | -2.0719 | 0.0384   | -0.38524122  | count | 1           |
| ABCF1      | -0.2789396 | 0.1132364 | -2.4633 | 0.0138   | -0.38497887  | count | 1           |
| WDR5       | -0.3945587 | 0.4007362 | -0.9846 | 0.325    | -0.384775305 | count | 1           |
| SLU7       | -0.2862794 | 0.1261185 | -2.2699 | 0.0233   | -0.384694106 | count | 1           |
| REPS1      | -0.3792728 | 0.3131745 | -1.2111 | 0.226    | -0.384348581 | count | 1           |
| ZNF268     | -0.7308559 | 0.5499218 | -1.329  | 0.184    | -0.384305606 | count | 1           |
| BLOC1S1    | -0.2684238 | 0.0556177 | -4.8262 | 1.48E-06 | -0.384044358 | count | 0.03522696  |
| TMEM51-AS1 | -1.1838259 | 1.1094918 | -1.067  | 0.286    | -0.384032492 | count | 1           |
| DERL3      | -1.1838259 | 1.1945095 | -0.9911 | 0.322    | -0.384032492 | count | 1           |
| RAB5C      | -0.2681611 | 0.0615401 | -4.3575 | 1.37E-05 | -0.382789068 | count | 0.3243201   |
| HLA-DQA1   | -0.2654073 | 0.0684047 | -3.88   | 0.000107 | -0.382138611 | count | 1           |
| MYL6       | -0.2651645 | 0.0301124 | -8.8058 | 2.40E-18 | -0.38212708  | count | 5.81E-14    |
| CCDC25     | -0.2781026 | 0.2011236 | -1.3827 | 0.167    | -0.38207784  | count | 1           |
| ANXA5      | -0.2656687 | 0.0381168 | -6.9699 | 4.06E-12 | -0.381869485 | count | 9.79E-08    |
| NDUFC2     | -0.2673979 | 0.0620893 | -4.3067 | 1.72E-05 | -0.381447816 | count | 0.4069176   |
| FAM27C     | -0.5742553 | 0.6782186 | -0.8467 | 0.397    | -0.381226072 | count | 1           |
| ZDHHC24    | -0.2874817 | 0.1630383 | -1.7633 | 0.078    | -0.380569248 | count | 1           |
| DNAJC21    | -0.2733591 | 0.1365344 | -2.0021 | 0.0454   | -0.380506526 | count | 1           |
| HOMER3     | -0.2720351 | 0.1006907 | -2.7017 | 0.00695  | -0.380226882 | count | 1           |
| ZNF131     | -0.300689  | 0.186897  | -1.6088 | 0.108    | -0.380202823 | count | 1           |
| DDX10      | -0.3312328 | 0.3084891 | -1.0737 | 0.283    | -0.379808729 | count | 1           |
| WDYHV1     | -0.3580048 | 0.4648168 | -0.7702 | 0.441    | -0.379726249 | count | 1           |
| ZNF697     | -0.7831385 | 0.7375667 | -1.0618 | 0.288    | -0.37965892  | count | 1           |
| AC093895.1 | -0.3513863 | 0.3887389 | -0.9039 | 0.366    | -0.379643295 | count | 1           |
| CUL7       | -0.5979911 | 0.6982114 | -0.8565 | 0.392    | -0.37924616  | count | 1           |
| C8orf76    | -0.2929479 | 0.2239679 | -1.308  | 0.191    | -0.379244594 | count | 1           |
| MPI        | -0.3574426 | 0.3765535 | -0.9492 | 0.343    | -0.379152516 | count | 1           |
| HIST2H2AC  | -0.3306313 | 0.2432779 | -1.3591 | 0.174    | -0.379137732 | count | 1           |
| DST        | -0.3146994 | 0.2002475 | -1.5716 | 0.116    | -0.378847778 | count | 1           |
| AC100810.1 | -0.2708012 | 0.1286473 | -2.105  | 0.0354   | -0.378078701 | count | 1           |
| ACSL3      | -0.2697657 | 0.1161934 | -2.3217 | 0.0203   | -0.377701455 | count | 1           |
| SMIM25     | -0.2655812 | 0.106703  | -2.489  | 0.0129   | -0.37749147  | count | 1           |
| LSR        | -0.4171092 | 0.3726503 | -1.1193 | 0.263    | -0.377285951 | count | 1           |
| ZNF141     | -0.312648  | 0.270942  | -1.1539 | 0.249    | -0.377249614 | count | 1           |
| ZC3HAV1    | -0.2907867 | 0.1433555 | -2.0284 | 0.0426   | -0.37648008  | count | 1           |

|            |            |           |         |          |              |       |            |
|------------|------------|-----------|---------|----------|--------------|-------|------------|
| APBB1P     | -0.2640656 | 0.0691297 | -3.8199 | 0.000137 | -0.375805163 | count | 1          |
| AF117829.1 | -0.3768075 | 0.3527814 | -1.0681 | 0.286    | -0.37541251  | count | 1          |
| AC068580.4 | -0.4768872 | 0.829399  | -0.575  | 0.565    | -0.375374492 | count | 1          |
| XCR1       | -0.6227073 | 0.7142917 | -0.8718 | 0.383    | -0.375272983 | count | 1          |
| BCAT1      | -0.2692847 | 0.1409202 | -1.9109 | 0.0561   | -0.375207282 | count | 1          |
| B3GNT5     | -0.2760939 | 0.1439838 | -1.9175 | 0.0553   | -0.374734526 | count | 1          |
| BTBD8      | -0.8520679 | 0.5499214 | -1.5494 | 0.121    | -0.374635374 | count | 1          |
| MCM7       | -0.3421923 | 0.5101218 | -0.6708 | 0.502    | -0.374029334 | count | 1          |
| OLMALINC   | -0.9641032 | 0.7855529 | -1.2273 | 0.22     | -0.373922731 | count | 1          |
| ZNF438     | -0.31482   | 0.3611373 | -0.8717 | 0.383    | -0.373617443 | count | 1          |
| REV3L      | -0.2747974 | 0.1498331 | -1.834  | 0.0668   | -0.373541025 | count | 1          |
| PDPN       | -0.5610291 | 0.5159263 | -1.0874 | 0.277    | -0.373509561 | count | 1          |
| EXOSC2     | -0.5610291 | 0.5134066 | -1.0928 | 0.275    | -0.373509561 | count | 1          |
| CHEK2      | -0.406596  | 0.5652566 | -0.7193 | 0.472    | -0.373482954 | count | 1          |
| ZNF22      | -0.2775233 | 0.1691304 | -1.6409 | 0.101    | -0.373269639 | count | 1          |
| GLRX2      | -0.2713048 | 0.1418004 | -1.9133 | 0.0558   | -0.373258573 | count | 1          |
| GDF11      | -0.9616379 | 0.5723545 | -1.6801 | 0.0931   | -0.373230359 | count | 1          |
| RASA1      | -0.3054491 | 0.2634374 | -1.1595 | 0.246    | -0.372485749 | count | 1          |
| TAGLN      | -0.2876266 | 0.2405466 | -1.1957 | 0.232    | -0.372436829 | count | 1          |
| ABI3       | -0.2780273 | 0.1334163 | -2.0839 | 0.0373   | -0.37206671  | count | 1          |
| JPT1       | -0.2610032 | 0.072142  | -3.6179 | 0.000303 | -0.372064606 | count | 1          |
| FTO        | -0.5168014 | 0.5698086 | -0.907  | 0.365    | -0.372042821 | count | 1          |
| PSMD8      | -0.2607202 | 0.0574558 | -4.5378 | 5.96E-06 | -0.37195232  | count | 0.14143676 |
| COPRS      | -0.2745273 | 0.1796924 | -1.5278 | 0.127    | -0.371940514 | count | 1          |
| AC073111.5 | -1.4197031 | 1.0763782 | -1.319  | 0.187    | -0.37190441  | count | 1          |
| ENTR1      | -0.3102342 | 0.2428097 | -1.2777 | 0.201    | -0.371900062 | count | 1          |
| MAP3K8     | -0.2607852 | 0.0692647 | -3.7651 | 2.00E-04 | -0.371889032 | count | 1          |
| RGS12      | -0.3438861 | 0.3620685 | -0.9498 | 0.342    | -0.371819365 | count | 1          |
| NASP       | -0.2691925 | 0.0994289 | -2.7074 | 0.00683  | -0.371489292 | count | 1          |
| LSM2       | -0.2676685 | 0.1206254 | -2.219  | 0.0266   | -0.371294827 | count | 1          |
| ARL10      | -1.41473   | 0.768596  | -1.8407 | 0.0658   | -0.371167819 | count | 1          |
| EMC9       | -0.2999207 | 0.3141348 | -0.9548 | 0.34     | -0.371014441 | count | 1          |
| SOD3       | -2.0739768 | 1.5745769 | -1.3172 | 0.188    | -0.370363927 | count | 1          |
| DNAJC15    | -0.2603089 | 0.0778476 | -3.3438 | 0.000839 | -0.370219148 | count | 1          |
| METRNL     | -0.2582888 | 0.0528181 | -4.8902 | 1.07E-06 | -0.37019982  | count | 0.02548205 |
| VAMP8      | -0.2576089 | 0.0388184 | -6.6363 | 3.95E-11 | -0.370090382 | count | 9.52E-07   |
| TNPO1      | -0.2855808 | 0.1897056 | -1.5054 | 0.132    | -0.369523247 | count | 1          |
| SPCS3      | -0.2598864 | 0.0676998 | -3.8388 | 0.000127 | -0.369431641 | count | 1          |
| HMG1       | -0.2582749 | 0.063478  | -4.0687 | 4.88E-05 | -0.369273319 | count | 1          |
| SERPINB9P1 | -0.4955887 | 0.5276377 | -0.9393 | 0.348    | -0.369061533 | count | 1          |
| KIAA0753   | -0.4955887 | 0.6289053 | -0.788  | 0.431    | -0.369061533 | count | 1          |
| UBE2D4     | -0.3122324 | 0.2571302 | -1.2143 | 0.225    | -0.368666152 | count | 1          |
| THBS3      | -0.4456475 | 0.5100928 | -0.8737 | 0.382    | -0.368549124 | count | 1          |
| GPR146     | -0.6470663 | 0.5168926 | -1.2518 | 0.211    | -0.368336365 | count | 1          |
| MPHOSPH6   | -0.2805983 | 0.1638486 | -1.7125 | 0.0869   | -0.36827     | count | 1          |

|              |            |           |         |          |              |       |           |
|--------------|------------|-----------|---------|----------|--------------|-------|-----------|
| AL590096.1   | -0.5779312 | 1.8171946 | -0.318  | 0.75     | -0.36817065  | count | 1         |
| DNAJC8       | -0.2594454 | 0.07832   | -3.3126 | 0.000938 | -0.368092773 | count | 1         |
| DYRK3        | -1.1091468 | 0.8811981 | -1.2587 | 0.208    | -0.367920611 | count | 1         |
| DOCK4        | -0.2768948 | 0.2222109 | -1.2461 | 0.213    | -0.367917304 | count | 1         |
| MAP4K3       | -0.3025809 | 0.2707529 | -1.1176 | 0.264    | -0.367616135 | count | 1         |
| CAMTA1       | -0.2617615 | 0.0893923 | -2.9282 | 0.00344  | -0.367584278 | count | 1         |
| C8orf58      | -0.3996593 | 0.6002802 | -0.6658 | 0.506    | -0.367480498 | count | 1         |
| VAT1         | -0.2717437 | 0.178615  | -1.5214 | 0.128    | -0.367479723 | count | 1         |
| ANKRD36      | -0.3832715 | 0.3610381 | -1.0616 | 0.289    | -0.366444786 | count | 1         |
| ZNF146       | -0.3281633 | 0.3323237 | -0.9875 | 0.324    | -0.366099304 | count | 1         |
| SLC15A3      | -0.2687447 | 0.1380016 | -1.9474 | 0.0516   | -0.365625402 | count | 1         |
| SEC11C       | -0.2610367 | 0.1045494 | -2.4968 | 0.0126   | -0.36535862  | count | 1         |
| VDAC1        | -0.256799  | 0.0687563 | -3.7349 | 0.000192 | -0.365203664 | count | 1         |
| ERP27        | -0.6029909 | 0.9959818 | -0.6054 | 0.545    | -0.365055702 | count | 1         |
| CCT6B        | -0.6029909 | 0.6616995 | -0.9113 | 0.362    | -0.365055702 | count | 1         |
| DEPP1        | -1.9919099 | 1.1928867 | -1.6698 | 0.0951   | -0.364592773 | count | 1         |
| SPATA5L1     | -0.3350684 | 0.367562  | -0.9116 | 0.362    | -0.364581222 | count | 1         |
| HNRNPF       | -0.2564666 | 0.0581237 | -4.4124 | 1.07E-05 | -0.364443196 | count | 0.2535472 |
| FUT7         | -0.396112  | 0.4728381 | -0.8377 | 0.402    | -0.364405632 | count | 1         |
| PKP4         | -0.8216658 | 0.668685  | -1.2288 | 0.219    | -0.364292086 | count | 1         |
| SBNO1        | -0.2735824 | 0.1930073 | -1.4175 | 0.156    | -0.363553823 | count | 1         |
| CEP68        | -0.2926784 | 0.2320727 | -1.2611 | 0.207    | -0.363338524 | count | 1         |
| TIMM8B       | -0.2605582 | 0.1099909 | -2.3689 | 0.0179   | -0.363326584 | count | 1         |
| ACE          | -0.9241125 | 0.8127839 | -1.137  | 0.256    | -0.362538129 | count | 1         |
| JPT2         | -0.3453977 | 0.5399081 | -0.6397 | 0.522    | -0.362075451 | count | 1         |
| UCP2         | -0.2542531 | 0.0731119 | -3.4776 | 0.000515 | -0.361239284 | count | 1         |
| NTMT1        | -0.2667107 | 0.1718359 | -1.5521 | 0.121    | -0.361222794 | count | 1         |
| USP31        | -0.6774785 | 0.4365973 | -1.5517 | 0.121    | -0.361060689 | count | 1         |
| ACAD9        | -0.3396445 | 0.3149917 | -1.0783 | 0.281    | -0.3609495   | count | 1         |
| HMGCL        | -0.2901295 | 0.2176994 | -1.3327 | 0.183    | -0.36077126  | count | 1         |
| PSMB2        | -0.2550544 | 0.0775117 | -3.2905 | 0.00101  | -0.36068912  | count | 1         |
| POLR3A       | -0.4180477 | 0.44648   | -0.9363 | 0.349    | -0.360596628 | count | 1         |
| ANTXR1       | -1.93456   | 1.1720526 | -1.6506 | 0.099    | -0.360295038 | count | 1         |
| AP2M1        | -0.2536007 | 0.063989  | -3.9632 | 7.61E-05 | -0.360249231 | count | 1         |
| MZT2B        | -0.252957  | 0.0641116 | -3.9456 | 8.18E-05 | -0.359957332 | count | 1         |
| ATP9B        | -0.2852246 | 0.2448719 | -1.1648 | 0.244    | -0.359624022 | count | 1         |
| GLRX3        | -0.2623672 | 0.1229816 | -2.1334 | 0.033    | -0.358979314 | count | 1         |
| TDG          | -0.2620688 | 0.143249  | -1.8295 | 0.0675   | -0.358978792 | count | 1         |
| MCCC1        | -0.4540415 | 0.3549379 | -1.2792 | 0.201    | -0.358872028 | count | 1         |
| ABHD14A      | -0.3021139 | 0.2350541 | -1.2853 | 0.199    | -0.358859426 | count | 1         |
| THEM4        | -0.4084275 | 0.3972556 | -1.0281 | 0.304    | -0.358819082 | count | 1         |
| CENPV        | -0.5146784 | 0.7191086 | -0.7157 | 0.474    | -0.358761977 | count | 1         |
| ATP6V0D1     | -0.2517844 | 0.064226  | -3.9203 | 9.09E-05 | -0.357904509 | count | 1         |
| FAM98A       | -0.2783865 | 0.2395417 | -1.1622 | 0.245    | -0.3578682   | count | 1         |
| MAPKAPK5-AS1 | -0.2974919 | 0.2175268 | -1.3676 | 0.172    | -0.357743132 | count | 1         |

|            |            |           |         |          |              |       |             |
|------------|------------|-----------|---------|----------|--------------|-------|-------------|
| CXCL11     | -0.9062384 | 0.9155529 | -0.9898 | 0.322    | -0.357343305 | count | 1           |
| HYOU1      | -0.3089369 | 0.2388422 | -1.2935 | 0.196    | -0.357310703 | count | 1           |
| FAM122B    | -0.3731081 | 0.3836113 | -0.9726 | 0.331    | -0.357214186 | count | 1           |
| AHSA1      | -0.271904  | 0.136472  | -1.9924 | 0.0464   | -0.356970294 | count | 1           |
| ITPR1      | -0.3167694 | 0.3229764 | -0.9808 | 0.327    | -0.35678819  | count | 1           |
| TESK1      | -0.2821066 | 0.2414296 | -1.1685 | 0.243    | -0.35661101  | count | 1           |
| EIF3C      | -0.4300547 | 0.4817401 | -0.8927 | 0.372    | -0.356596774 | count | 1           |
| MPV17      | -0.2622272 | 0.1595449 | -1.6436 | 0.1      | -0.356556585 | count | 1           |
| FAM213B    | -0.6670663 | 0.3781726 | -1.7639 | 0.0779   | -0.356438375 | count | 1           |
| MYH10      | -0.9031264 | 0.6307741 | -1.4318 | 0.152    | -0.35643208  | count | 1           |
| SPCS2      | -0.2489297 | 0.0511818 | -4.8636 | 1.23E-06 | -0.356050557 | count | 0.02928876  |
| PGF        | -0.9015515 | 1.2732045 | -0.7081 | 0.479    | -0.355970175 | count | 1           |
| PKIG       | -0.7214654 | 0.5966942 | -1.2091 | 0.227    | -0.355462814 | count | 1           |
| RMND5B     | -0.331865  | 0.4572134 | -0.7258 | 0.468    | -0.355135308 | count | 1           |
| DDO        | -0.7204472 | 0.7746975 | -0.93   | 0.352    | -0.355055352 | count | 1           |
| AC020928.1 | -0.6195134 | 0.8360911 | -0.741  | 0.459    | -0.354993992 | count | 1           |
| TMEM173    | -0.2619182 | 0.1099367 | -2.3824 | 0.0173   | -0.354965171 | count | 1           |
| FCGR2B     | -0.2500617 | 0.1075868 | -2.3243 | 0.0202   | -0.35472576  | count | 1           |
| PPIB       | -0.2464104 | 0.0472142 | -5.219  | 1.95E-07 | -0.354112835 | count | 0.004657965 |
| SEC22C     | -0.3057877 | 0.2972443 | -1.0287 | 0.304    | -0.353756    | count | 1           |
| CCT5       | -0.2494626 | 0.0725361 | -3.4392 | 0.000593 | -0.353601505 | count | 1           |
| AL645568.1 | -1.0458446 | 1.0662451 | -0.9809 | 0.327    | -0.353517344 | count | 1           |
| QPCTL      | -1.0458446 | 1.0384332 | -1.0071 | 0.314    | -0.353517344 | count | 1           |
| TBC1D8B    | -1.3012396 | 1.1129762 | -1.1692 | 0.242    | -0.353499542 | count | 1           |
| PRDM10     | -1.3012396 | 1.1519097 | -1.1296 | 0.259    | -0.353499542 | count | 1           |
| SIRPA      | -0.2555723 | 0.1230159 | -2.0776 | 0.0379   | -0.353412209 | count | 1           |
| DUSP14     | -0.2848757 | 0.2852962 | -0.9985 | 0.318    | -0.353258966 | count | 1           |
| ARL1       | -0.2616754 | 0.1633605 | -1.6018 | 0.109    | -0.353224977 | count | 1           |
| CCDC152    | -0.3948906 | 0.319742  | -1.235  | 0.217    | -0.353144818 | count | 1           |
| PYM1       | -0.2588301 | 0.1596571 | -1.6212 | 0.105    | -0.352699644 | count | 1           |
| TBCEL      | -1.0417787 | 0.8198526 | -1.2707 | 0.204    | -0.35256824  | count | 1           |
| CASP5      | -0.3637834 | 0.3533965 | -1.0294 | 0.303    | -0.35252693  | count | 1           |
| EIF2S1     | -0.256824  | 0.1232284 | -2.0841 | 0.0373   | -0.352457185 | count | 1           |
| EDEM2      | -0.2662845 | 0.1511773 | -1.7614 | 0.0783   | -0.351660792 | count | 1           |
| AC231981.1 | -0.5027917 | 0.9274848 | -0.5421 | 0.588    | -0.351332585 | count | 1           |
| PC         | -0.655479  | 1.259875  | -0.5203 | 0.603    | -0.351260507 | count | 1           |
| AL049840.1 | -0.3301654 | 0.4954741 | -0.6664 | 0.505    | -0.351223354 | count | 1           |
| DHX35      | -0.4832291 | 0.639636  | -0.7555 | 0.45     | -0.350205485 | count | 1           |
| SLC25A39   | -0.2548571 | 0.1189065 | -2.1433 | 0.0322   | -0.350007864 | count | 1           |
| IFT43      | -0.2850767 | 0.2645495 | -1.0776 | 0.281    | -0.349995468 | count | 1           |
| BTF3L4     | -0.2485782 | 0.0832765 | -2.985  | 0.00286  | -0.349987147 | count | 1           |
| LINC00342  | -0.8797508 | 0.9712129 | -0.9058 | 0.365    | -0.349522857 | count | 1           |
| TMEM64     | -0.573165  | 0.5338868 | -1.0736 | 0.283    | -0.34938901  | count | 1           |
| SOCS3      | -0.2454231 | 0.0613233 | -4.0021 | 6.46E-05 | -0.34923718  | count | 1           |
| METTL2A    | -0.3153701 | 0.3256841 | -0.9683 | 0.333    | -0.34901974  | count | 1           |

|            |            |             |         |          |              |       |            |
|------------|------------|-------------|---------|----------|--------------|-------|------------|
| DPCD       | -0.2986375 | 0.3317742   | -0.9001 | 0.368    | -0.348958783 | count | 1          |
| SSTR2      | -1.7958416 | 0.828459    | -2.1677 | 0.0303   | -0.348927413 | count | 1          |
| HCFC1R1    | -0.2499929 | 0.1272078   | -1.9652 | 0.0495   | -0.34891264  | count | 1          |
| UBE2F      | -0.2568525 | 0.1242421   | -2.0674 | 0.0388   | -0.3483269   | count | 1          |
| RTN4       | -0.2431827 | 0.0501496   | -4.8491 | 1.32E-06 | -0.347711618 | count | 0.03142788 |
| HOMER2     | -0.4386289 | 0.5084795   | -0.8626 | 0.388    | -0.347650045 | count | 1          |
| ALDH7A1    | -0.4013496 | 0.365538    | -1.098  | 0.272    | -0.347116537 | count | 1          |
| HIST1H1C   | -0.2710715 | 0.2128568   | -1.2735 | 0.203    | -0.346936331 | count | 1          |
| MRPS25     | -0.2612823 | 0.1771586   | -1.4748 | 0.14     | -0.346855563 | count | 1          |
| BCL7A      | -0.4780334 | 0.9092174   | -0.5258 | 0.599    | -0.346795675 | count | 1          |
| CHMP6      | -0.29669   | 0.2477194   | -1.1977 | 0.231    | -0.346733885 | count | 1          |
| INO80C     | -0.3023463 | 0.2476446   | -1.2209 | 0.222    | -0.346267028 | count | 1          |
| GALNS      | -0.2919991 | 0.2810343   | -1.039  | 0.299    | -0.346194571 | count | 1          |
| LBX2-AS1   | -0.4617469 | 0.5454666   | -0.8465 | 0.397    | -0.346100197 | count | 1          |
| LINC01311  | -1.255553  | 1.2408185   | -1.0119 | 0.312    | -0.345907278 | count | 1          |
| DHDH       | -0.6005144 | 0.8300484   | -0.7235 | 0.469    | -0.345671393 | count | 1          |
| DECR2      | -0.4358769 | 0.4893726   | -0.8907 | 0.373    | -0.345638799 | count | 1          |
| GPR42      | -0.4252443 | 0.5851467   | -0.7267 | 0.467    | -0.345582581 | count | 1          |
| IPP        | -1.2533247 | 1.0224833   | -1.2258 | 0.22     | -0.345529703 | count | 1          |
| CEP55      | -1.2533247 | 1.1339506   | -1.1053 | 0.269    | -0.345529703 | count | 1          |
| DDAH2      | -0.242871  | 0.0724997   | -3.35   | 0.00082  | -0.345349184 | count | 1          |
| UPP1       | -0.2429252 | 0.0817911   | -2.9701 | 0.00301  | -0.345106617 | count | 1          |
| YBX3       | -0.2410776 | 0.0586463   | -4.1107 | 4.07E-05 | -0.345054269 | count | 0.9595839  |
| TSC1       | -0.3387053 | 0.3005029   | -1.1271 | 0.26     | -0.344883368 | count | 1          |
| MSRB2      | -0.2472226 | 0.0967288   | -2.5558 | 0.0107   | -0.344654042 | count | 1          |
| HAUS8      | -0.2809376 | 0.2335747   | -1.2028 | 0.229    | -0.344380993 | count | 1          |
| CLTA       | -0.2405801 | 0.0504001   | -4.7734 | 1.92E-06 | -0.344379641 | count | 0.04567488 |
| SLC3A2     | -0.241798  | 0.0610661   | -3.9596 | 7.72E-05 | -0.344371659 | count | 1          |
| KANSL3     | -0.3195225 | 0.4573694   | -0.6986 | 0.485    | -0.344369264 | count | 1          |
| MAGI3      | -1.742858  | 0.9896315   | -1.7611 | 0.0783   | -0.344197634 | count | 1          |
| SGSM3      | -1.741014  | 0.9322438   | -1.8676 | 0.0619   | -0.344028982 | count | 1          |
| TUBGCP2    | -0.2458045 | 0.0961906   | -2.5554 | 0.0107   | -0.343744481 | count | 1          |
| PGAP2      | -0.3188495 | 0.4595344   | -0.6939 | 0.488    | -0.343667069 | count | 1          |
| C2         | -0.2939444 | 0.1453013   | -2.023  | 0.0432   | -0.343595974 | count | 1          |
| ADRM1      | -0.2442771 | 0.0939627   | -2.5997 | 0.00939  | -0.343501536 | count | 1          |
| SMIM1      | -0.3620919 | 0.4782076   | -0.7572 | 0.449    | -0.34321717  | count | 1          |
| ANKRD6     | -0.5613728 | 0.7872076   | -0.7131 | 0.476    | -0.343124953 | count | 1          |
| XPO5       | -0.4723561 | 0.4504312   | -1.0487 | 0.294    | -0.343060563 | count | 1          |
| CXCR4      | -0.2405585 | 0.0587806   | -4.0925 | 4.41E-05 | -0.342745757 | count | 1          |
| AC009570.1 | -18.000696 | 2441.15086  | -0.0074 | 0.994    | -0.342664675 | count | 1          |
| ZFP28      | -18.000031 | 1888.739609 | -0.0095 | 0.992    | -0.342664675 | count | 1          |
| ANOS1      | -17.932205 | 1498.325741 | -0.012  | 0.99     | -0.342664675 | count | 1          |
| FAM111B    | -17.859823 | 1752.025593 | -0.0102 | 0.992    | -0.342664674 | count | 1          |
| DOCK6      | -17.69616  | 2316.64302  | -0.0076 | 0.994    | -0.342664673 | count | 1          |
| DEGS2      | -17.413596 | 1257.526218 | -0.0138 | 0.989    | -0.34266467  | count | 1          |

|             |            |             |         |       |              |       |   |
|-------------|------------|-------------|---------|-------|--------------|-------|---|
| LINC02081   | -17.313202 | 1262.415737 | -0.0137 | 0.989 | -0.342664669 | count | 1 |
| AL121936.1  | -17.160748 | 3031.025473 | -0.0057 | 0.995 | -0.342664667 | count | 1 |
| AC004466.1  | -17.160653 | 2343.912326 | -0.0073 | 0.994 | -0.342664667 | count | 1 |
| WDR62       | -17.160653 | 2343.912326 | -0.0073 | 0.994 | -0.342664667 | count | 1 |
| ZNF229      | -17.160653 | 2343.912326 | -0.0073 | 0.994 | -0.342664667 | count | 1 |
| HIST3H2BB   | -17.160572 | 1909.836305 | -0.009  | 0.993 | -0.342664667 | count | 1 |
| TCF7L1      | -17.160572 | 1909.836305 | -0.009  | 0.993 | -0.342664667 | count | 1 |
| TNIP3       | -17.160572 | 1909.836305 | -0.009  | 0.993 | -0.342664667 | count | 1 |
| AC021097.1  | -17.160572 | 1909.836305 | -0.009  | 0.993 | -0.342664667 | count | 1 |
| CA3-AS1     | -17.160572 | 1909.836305 | -0.009  | 0.993 | -0.342664667 | count | 1 |
| AC136475.5  | -17.160572 | 1909.836305 | -0.009  | 0.993 | -0.342664667 | count | 1 |
| KIF11       | -17.160572 | 1909.836305 | -0.009  | 0.993 | -0.342664667 | count | 1 |
| SPESP1      | -17.160572 | 1909.836305 | -0.009  | 0.993 | -0.342664667 | count | 1 |
| PRC1        | -17.160572 | 1909.836305 | -0.009  | 0.993 | -0.342664667 | count | 1 |
| AC145207.2  | -17.160572 | 1909.836305 | -0.009  | 0.993 | -0.342664667 | count | 1 |
| AC002116.2  | -17.160572 | 1909.836305 | -0.009  | 0.993 | -0.342664667 | count | 1 |
| ZNF527      | -17.160572 | 1909.836305 | -0.009  | 0.993 | -0.342664667 | count | 1 |
| CADM4       | -17.160572 | 1909.836305 | -0.009  | 0.993 | -0.342664667 | count | 1 |
| CD27        | -17.01934  | 2209.976639 | -0.0077 | 0.994 | -0.342664665 | count | 1 |
| DPYD-AS2    | -16.802934 | 4271.931304 | -0.0039 | 0.997 | -0.342664662 | count | 1 |
| AC110769.1  | -16.802934 | 4271.931304 | -0.0039 | 0.997 | -0.342664662 | count | 1 |
| LINC02037   | -16.802934 | 4271.931304 | -0.0039 | 0.997 | -0.342664662 | count | 1 |
| ANKRD31     | -16.802934 | 4271.931304 | -0.0039 | 0.997 | -0.342664662 | count | 1 |
| AL031123.2  | -16.802934 | 4271.931304 | -0.0039 | 0.997 | -0.342664662 | count | 1 |
| HIST1H3E    | -16.802934 | 4271.931304 | -0.0039 | 0.997 | -0.342664662 | count | 1 |
| AL157371.2  | -16.802934 | 4271.931304 | -0.0039 | 0.997 | -0.342664662 | count | 1 |
| TRGC2       | -16.802934 | 4271.931304 | -0.0039 | 0.997 | -0.342664662 | count | 1 |
| AC004922.1  | -16.802934 | 4271.931304 | -0.0039 | 0.997 | -0.342664662 | count | 1 |
| AC104958.2  | -16.802934 | 4271.931304 | -0.0039 | 0.997 | -0.342664662 | count | 1 |
| ST8SIA6     | -16.802934 | 4271.931304 | -0.0039 | 0.997 | -0.342664662 | count | 1 |
| TMEM26-AS1  | -16.802934 | 4271.931304 | -0.0039 | 0.997 | -0.342664662 | count | 1 |
| TMEM254-AS1 | -16.802934 | 4271.931304 | -0.0039 | 0.997 | -0.342664662 | count | 1 |
| AC010201.2  | -16.802934 | 4271.931304 | -0.0039 | 0.997 | -0.342664662 | count | 1 |
| USP12-AS2   | -16.802934 | 4271.931304 | -0.0039 | 0.997 | -0.342664662 | count | 1 |
| CTRB2       | -16.802934 | 4271.931304 | -0.0039 | 0.997 | -0.342664662 | count | 1 |
| AC087741.2  | -16.802934 | 4271.931304 | -0.0039 | 0.997 | -0.342664662 | count | 1 |
| AC139530.3  | -16.802934 | 4271.931304 | -0.0039 | 0.997 | -0.342664662 | count | 1 |
| SBSN        | -16.802934 | 4271.931304 | -0.0039 | 0.997 | -0.342664662 | count | 1 |
| ZNF497      | -16.802934 | 4271.931304 | -0.0039 | 0.997 | -0.342664662 | count | 1 |
| DEPDC1      | -16.802147 | 3181.716909 | -0.0053 | 0.996 | -0.342664662 | count | 1 |
| AL139412.1  | -16.802147 | 3181.716909 | -0.0053 | 0.996 | -0.342664662 | count | 1 |
| ELF3        | -16.802147 | 3181.716909 | -0.0053 | 0.996 | -0.342664662 | count | 1 |
| AC009495.3  | -16.802147 | 3181.716909 | -0.0053 | 0.996 | -0.342664662 | count | 1 |
| DUBR        | -16.802147 | 3181.716909 | -0.0053 | 0.996 | -0.342664662 | count | 1 |
| PPBP        | -16.802147 | 3181.716909 | -0.0053 | 0.996 | -0.342664662 | count | 1 |

|            |            |             |         |       |              |       |   |
|------------|------------|-------------|---------|-------|--------------|-------|---|
| C9         | -16.802147 | 3181.716909 | -0.0053 | 0.996 | -0.342664662 | count | 1 |
| HIST1H3G   | -16.802147 | 3181.716909 | -0.0053 | 0.996 | -0.342664662 | count | 1 |
| HIST1H2BL  | -16.802147 | 3181.716909 | -0.0053 | 0.996 | -0.342664662 | count | 1 |
| SH3BGRL2   | -16.802147 | 3181.716909 | -0.0053 | 0.996 | -0.342664662 | count | 1 |
| AC009902.2 | -16.802147 | 3181.716909 | -0.0053 | 0.996 | -0.342664662 | count | 1 |
| RSPO2      | -16.802147 | 3181.716909 | -0.0053 | 0.996 | -0.342664662 | count | 1 |
| CD81-AS1   | -16.802147 | 3181.716909 | -0.0053 | 0.996 | -0.342664662 | count | 1 |
| AP000769.2 | -16.802147 | 3181.716909 | -0.0053 | 0.996 | -0.342664662 | count | 1 |
| AL163636.1 | -16.802147 | 3181.716909 | -0.0053 | 0.996 | -0.342664662 | count | 1 |
| KTN1-AS1   | -16.802147 | 3181.716909 | -0.0053 | 0.996 | -0.342664662 | count | 1 |
| ISL2       | -16.802147 | 3181.716909 | -0.0053 | 0.996 | -0.342664662 | count | 1 |
| AC103810.2 | -16.802147 | 3181.716909 | -0.0053 | 0.996 | -0.342664662 | count | 1 |
| MYBL2      | -16.802147 | 3181.716909 | -0.0053 | 0.996 | -0.342664662 | count | 1 |
| PRR19      | -16.802147 | 3181.716909 | -0.0053 | 0.996 | -0.342664662 | count | 1 |
| SEC14L2    | -16.802147 | 3181.716909 | -0.0053 | 0.996 | -0.342664662 | count | 1 |
| PTPRU      | -16.801591 | 2462.538409 | -0.0068 | 0.995 | -0.342664662 | count | 1 |
| AL591845.1 | -16.801591 | 2462.538409 | -0.0068 | 0.995 | -0.342664662 | count | 1 |
| AL162431.2 | -16.801591 | 2462.538409 | -0.0068 | 0.995 | -0.342664662 | count | 1 |
| LAMC2      | -16.801591 | 2462.538409 | -0.0068 | 0.995 | -0.342664662 | count | 1 |
| LINC01412  | -16.801591 | 2462.538409 | -0.0068 | 0.995 | -0.342664662 | count | 1 |
| AC078802.1 | -16.801591 | 2462.538409 | -0.0068 | 0.995 | -0.342664662 | count | 1 |
| AC007126.1 | -16.801591 | 2462.538409 | -0.0068 | 0.995 | -0.342664662 | count | 1 |
| CXCL6      | -16.801591 | 2462.538409 | -0.0068 | 0.995 | -0.342664662 | count | 1 |
| SEC24B-AS1 | -16.801591 | 2462.538409 | -0.0068 | 0.995 | -0.342664662 | count | 1 |
| CCNA2      | -16.801591 | 2462.538409 | -0.0068 | 0.995 | -0.342664662 | count | 1 |
| AL603910.1 | -16.801591 | 2462.538409 | -0.0068 | 0.995 | -0.342664662 | count | 1 |
| AL080250.1 | -16.801591 | 2462.538409 | -0.0068 | 0.995 | -0.342664662 | count | 1 |
| AC090192.2 | -16.801591 | 2462.538409 | -0.0068 | 0.995 | -0.342664662 | count | 1 |
| LY6E-DT    | -16.801591 | 2462.538409 | -0.0068 | 0.995 | -0.342664662 | count | 1 |
| FRRS1L     | -16.801591 | 2462.538409 | -0.0068 | 0.995 | -0.342664662 | count | 1 |
| AP003486.1 | -16.801591 | 2462.538409 | -0.0068 | 0.995 | -0.342664662 | count | 1 |
| AC008014.1 | -16.801591 | 2462.538409 | -0.0068 | 0.995 | -0.342664662 | count | 1 |
| AHNAK2     | -16.801591 | 2462.538409 | -0.0068 | 0.995 | -0.342664662 | count | 1 |
| TPSB2      | -16.801591 | 2462.538409 | -0.0068 | 0.995 | -0.342664662 | count | 1 |
| RPGRIP1L   | -16.801591 | 2462.538409 | -0.0068 | 0.995 | -0.342664662 | count | 1 |
| PLLP       | -16.801591 | 2462.538409 | -0.0068 | 0.995 | -0.342664662 | count | 1 |
| BCAR1      | -16.801591 | 2462.538409 | -0.0068 | 0.995 | -0.342664662 | count | 1 |
| ARHGAP23   | -16.801591 | 2462.538409 | -0.0068 | 0.995 | -0.342664662 | count | 1 |
| PCGF2      | -16.801591 | 2462.538409 | -0.0068 | 0.995 | -0.342664662 | count | 1 |
| ITGB3      | -16.801591 | 2462.538409 | -0.0068 | 0.995 | -0.342664662 | count | 1 |
| LPO        | -16.801591 | 2462.538409 | -0.0068 | 0.995 | -0.342664662 | count | 1 |
| SMIM24     | -16.801591 | 2462.538409 | -0.0068 | 0.995 | -0.342664662 | count | 1 |
| ANKLE1     | -16.801591 | 2462.538409 | -0.0068 | 0.995 | -0.342664662 | count | 1 |
| AC011476.3 | -16.801591 | 2462.538409 | -0.0068 | 0.995 | -0.342664662 | count | 1 |
| C22orf15   | -16.801591 | 2462.538409 | -0.0068 | 0.995 | -0.342664662 | count | 1 |



|             |             |             |         |          |              |       |            |
|-------------|-------------|-------------|---------|----------|--------------|-------|------------|
| SGSM1       | -16.801591  | 2462.538409 | -0.0068 | 0.995    | -0.342664662 | count | 1          |
| LINC00649   | -16.801591  | 2462.538409 | -0.0068 | 0.995    | -0.342664662 | count | 1          |
| TRBC2       | -17.9534219 | 1936.980662 | -0.0093 | 0.993    | -0.342664553 | count | 1          |
| BCL9        | -17.6706094 | 1899.742585 | -0.0093 | 0.993    | -0.342664551 | count | 1          |
| AC233280.1  | -17.6706094 | 1899.742585 | -0.0093 | 0.993    | -0.342664551 | count | 1          |
| HIST1H2BJ   | -17.6706094 | 1899.742585 | -0.0093 | 0.993    | -0.342664551 | count | 1          |
| CIT         | -17.6706094 | 1899.742585 | -0.0093 | 0.993    | -0.342664551 | count | 1          |
| IL19        | -17.6136785 | 2795.79997  | -0.0063 | 0.995    | -0.34266455  | count | 1          |
| CDS1        | -17.6136785 | 2795.79997  | -0.0063 | 0.995    | -0.34266455  | count | 1          |
| AC245140.1  | -17.6136785 | 2795.79997  | -0.0063 | 0.995    | -0.34266455  | count | 1          |
| AC092123.1  | -17.6136785 | 2795.79997  | -0.0063 | 0.995    | -0.34266455  | count | 1          |
| KCNB1       | -17.6136785 | 2795.79997  | -0.0063 | 0.995    | -0.34266455  | count | 1          |
| GK3P        | -17.4040624 | 1254.260295 | -0.0139 | 0.989    | -0.342664548 | count | 1          |
| TRIM59      | -17.1917669 | 1348.544978 | -0.0127 | 0.99     | -0.342664546 | count | 1          |
| CHKB-DT     | -17.1915305 | 1981.156612 | -0.0087 | 0.993    | -0.342664546 | count | 1          |
| CFI         | -17.0646334 | 1265.127397 | -0.0135 | 0.989    | -0.342664544 | count | 1          |
| LAMP3       | -16.9142748 | 1633.113308 | -0.0104 | 0.992    | -0.342664542 | count | 1          |
| PAWR        | -16.9140974 | 1270.230187 | -0.0133 | 0.989    | -0.342664542 | count | 1          |
| STON1       | -16.6141737 | 2774.217094 | -0.006  | 0.995    | -0.342664536 | count | 1          |
| AC145343.1  | -16.6138894 | 2117.102124 | -0.0078 | 0.994    | -0.342664536 | count | 1          |
| CDCA3       | -16.5090353 | 1273.464108 | -0.013  | 0.99     | -0.342664533 | count | 1          |
| AP002761.3  | -16.5089923 | 1528.32454  | -0.0108 | 0.991    | -0.342664533 | count | 1          |
| CEBPB-AS1   | -16.5089923 | 1528.32454  | -0.0108 | 0.991    | -0.342664533 | count | 1          |
| AC023908.3  | -16.508909  | 1940.033991 | -0.0085 | 0.993    | -0.342664533 | count | 1          |
| SYNM        | -16.508909  | 1940.033991 | -0.0085 | 0.993    | -0.342664533 | count | 1          |
| RNASEH1-AS1 | -0.3764664  | 0.4389402   | -0.8577 | 0.391    | -0.342574378 | count | 1          |
| RTN4IP1     | -0.5322936  | 0.6912459   | -0.77   | 0.441    | -0.342536521 | count | 1          |
| H2AFY       | -0.2387197  | 0.0496857   | -4.8046 | 1.64E-06 | -0.342527359 | count | 0.03902708 |
| DSTN        | -0.2422499  | 0.0906873   | -2.6713 | 0.00761  | -0.342482217 | count | 1          |
| GPN1        | -0.2768255  | 0.2710684   | -1.0212 | 0.307    | -0.34234065  | count | 1          |
| 3-Mar       | -0.4304562  | 0.457716    | -0.9404 | 0.347    | -0.341670575 | count | 1          |
| CARNMT1     | -0.3273888  | 0.5728222   | -0.5715 | 0.568    | -0.341489205 | count | 1          |
| AL592295.4  | -1.713096   | 1.4968727   | -1.1445 | 0.253    | -0.341441089 | count | 1          |
| DNAL1       | -0.454939   | 0.4887583   | -0.9308 | 0.352    | -0.341439497 | count | 1          |
| PLBD2       | -0.2676884  | 0.2532605   | -1.057  | 0.291    | -0.341272545 | count | 1          |
| PHLPP2      | -1.228414   | 0.8339999   | -1.4729 | 0.141    | -0.34126186  | count | 1          |
| IMMT        | -0.2509519  | 0.1207501   | -2.0783 | 0.0378   | -0.341230473 | count | 1          |
| AC016831.7  | -0.2698916  | 0.2076272   | -1.2999 | 0.194    | -0.340965894 | count | 1          |
| MOV10       | -0.4409195  | 0.4125815   | -1.0687 | 0.285    | -0.340820857 | count | 1          |
| CD59        | -0.2495121  | 0.1267394   | -1.9687 | 0.0491   | -0.340730984 | count | 1          |
| ZCCHC14     | -0.350927   | 0.5117272   | -0.6858 | 0.493    | -0.340636552 | count | 1          |
| FCGR2A      | -0.2382556  | 0.0570038   | -4.1796 | 3.02E-05 | -0.340452651 | count | 0.7129314  |
| CFH         | -0.8494768  | 0.4385329   | -1.9371 | 0.0528   | -0.340404008 | count | 1          |
| ISY1        | -0.2876549  | 0.2285455   | -1.2586 | 0.208    | -0.340245559 | count | 1          |
| PPP1R35     | -0.2692409  | 0.2300018   | -1.1706 | 0.242    | -0.339740981 | count | 1          |

|            |            |           |         |          |              |       |             |
|------------|------------|-----------|---------|----------|--------------|-------|-------------|
| CCR7       | -1.6888435 | 1.2393833 | -1.3626 | 0.173    | -0.339140558 | count | 1           |
| MRPL51     | -0.2397242 | 0.0819663 | -2.9247 | 0.00348  | -0.338346353 | count | 1           |
| TRAPPC4    | -0.2496294 | 0.1374852 | -1.8157 | 0.0695   | -0.337662644 | count | 1           |
| SPATC1L    | -0.3006044 | 0.2955975 | -1.0169 | 0.309    | -0.337640336 | count | 1           |
| KRR1       | -0.255972  | 0.1786489 | -1.4328 | 0.152    | -0.337419635 | count | 1           |
| CALU       | -0.2496529 | 0.1682604 | -1.4837 | 0.138    | -0.336996701 | count | 1           |
| SPATA6     | -0.2832179 | 0.2238082 | -1.2654 | 0.206    | -0.336857425 | count | 1           |
| EMC6       | -0.2412191 | 0.104906  | -2.2994 | 0.0216   | -0.336755516 | count | 1           |
| B3GNT2     | -0.2455718 | 0.139114  | -1.7653 | 0.0776   | -0.336614314 | count | 1           |
| CD3G       | -0.9742357 | 1.1455224 | -0.8505 | 0.395    | -0.33636914  | count | 1           |
| MADCAM1    | -0.9742357 | 1.1230558 | -0.8675 | 0.386    | -0.33636914  | count | 1           |
| MTFP1      | -0.9742357 | 1.1455224 | -0.8505 | 0.395    | -0.33636914  | count | 1           |
| RNF19B     | -0.2787125 | 0.2502829 | -1.1136 | 0.266    | -0.336314817 | count | 1           |
| CPVL       | -0.2341695 | 0.0652501 | -3.5888 | 0.000339 | -0.336258047 | count | 1           |
| AP2S1      | -0.2344765 | 0.0480904 | -4.8757 | 1.15E-06 | -0.336220719 | count | 0.0273861   |
| CCT4       | -0.2394092 | 0.091183  | -2.6256 | 0.0087   | -0.33527649  | count | 1           |
| KRTCAP3    | -0.7387022 | 2.3282174 | -0.3173 | 0.751    | -0.334973988 | count | 1           |
| STXBP5-AS1 | -0.7387022 | 1.0881501 | -0.6789 | 0.497    | -0.334973988 | count | 1           |
| DOPEY1     | -0.3208331 | 0.4530291 | -0.7082 | 0.479    | -0.334890985 | count | 1           |
| GNB4       | -0.2445952 | 0.1247304 | -1.961  | 0.05     | -0.334719666 | count | 1           |
| ZBTB46     | -0.9673715 | 0.5728217 | -1.6888 | 0.0914   | -0.334676592 | count | 1           |
| FICD       | -0.3524392 | 0.3950356 | -0.8922 | 0.372    | -0.334504576 | count | 1           |
| SLCO4A1    | -0.459181  | 0.440434  | -1.0426 | 0.297    | -0.334355493 | count | 1           |
| PDCD6      | -0.2362487 | 0.075082  | -3.1465 | 0.00167  | -0.334032647 | count | 1           |
| FRG1       | -0.2388784 | 0.1003669 | -2.3801 | 0.0174   | -0.33395102  | count | 1           |
| AC108863.1 | -1.633834  | 0.783197  | -2.0861 | 0.0371   | -0.333735779 | count | 1           |
| GCLM       | -0.2765288 | 0.2903765 | -0.9523 | 0.341    | -0.333726742 | count | 1           |
| ATP6AP1    | -0.2376314 | 0.0846746 | -2.8064 | 0.00505  | -0.333683213 | count | 1           |
| YIF1A      | -0.2393631 | 0.1129704 | -2.1188 | 0.0342   | -0.333166868 | count | 1           |
| PIK3R6     | -1.6237262 | 0.741685  | -2.1892 | 0.0287   | -0.332713778 | count | 1           |
| ISOC2      | -0.2499943 | 0.1812344 | -1.3794 | 0.168    | -0.332451805 | count | 1           |
| LYRM2      | -0.2422165 | 0.1349253 | -1.7952 | 0.0727   | -0.332446456 | count | 1           |
| DAPK2      | -1.6181471 | 1.1024994 | -1.4677 | 0.142    | -0.332145822 | count | 1           |
| UROD       | -0.2435205 | 0.1569506 | -1.5516 | 0.121    | -0.33164876  | count | 1           |
| ETF1       | -0.2362284 | 0.0788302 | -2.9967 | 0.00276  | -0.331423448 | count | 1           |
| ACADS      | -0.2700623 | 0.22584   | -1.1958 | 0.232    | -0.33126275  | count | 1           |
| NPM1       | -0.2308469 | 0.0406093 | -5.6846 | 1.47E-08 | -0.331125634 | count | 0.000352462 |
| TRIM47     | -0.3484253 | 0.3354767 | -1.0386 | 0.299    | -0.330874044 | count | 1           |
| GEMIN8     | -0.3887018 | 0.5655416 | -0.6873 | 0.492    | -0.330864913 | count | 1           |
| FBXL22     | -1.605533  | 0.8223709 | -1.9523 | 0.051    | -0.330851442 | count | 1           |
| SERF2      | -0.2292694 | 0.0284717 | -8.0525 | 1.25E-15 | -0.330393881 | count | 3.02E-11    |
| CHCHD3     | -0.2479169 | 0.1551604 | -1.5978 | 0.11     | -0.330300177 | count | 1           |
| GPALPP1    | -0.2775644 | 0.2308897 | -1.2022 | 0.229    | -0.330262125 | count | 1           |
| FXD1       | -0.6085358 | 0.7463092 | -0.8154 | 0.415    | -0.329917147 | count | 1           |
| S100A10    | -0.2286811 | 0.0508199 | -4.4998 | 7.12E-06 | -0.329685349 | count | 0.16887928  |

|            |            |           |         |          |              |       |             |
|------------|------------|-----------|---------|----------|--------------|-------|-------------|
| C1orf54    | -0.238433  | 0.1294401 | -1.842  | 0.0656   | -0.329514661 | count | 1           |
| SSB        | -0.231877  | 0.0707513 | -3.2774 | 0.00106  | -0.329443819 | count | 1           |
| HSPA9      | -0.2363887 | 0.0898459 | -2.631  | 0.00857  | -0.329325648 | count | 1           |
| USO1       | -0.2509553 | 0.1735974 | -1.4456 | 0.148    | -0.329309205 | count | 1           |
| PIR        | -0.4861564 | 0.5534734 | -0.8784 | 0.38     | -0.328851893 | count | 1           |
| SETDB2     | -0.2597508 | 0.2354066 | -1.1034 | 0.27     | -0.32870848  | count | 1           |
| TUSC2      | -0.2420836 | 0.1418345 | -1.7068 | 0.088    | -0.328667159 | count | 1           |
| JHY        | -0.7212917 | 0.5551137 | -1.2994 | 0.194    | -0.328615834 | count | 1           |
| ZNF502     | -1.583218  | 1.195781  | -1.324  | 0.186    | -0.328526222 | count | 1           |
| UQCC3      | -0.2490749 | 0.1734837 | -1.4357 | 0.151    | -0.328033286 | count | 1           |
| TMEM50A    | -0.229428  | 0.0508998 | -4.5074 | 6.87E-06 | -0.327924338 | count | 0.16296327  |
| IQCB1      | -0.2890862 | 0.2806876 | -1.0299 | 0.303    | -0.327703921 | count | 1           |
| LMAN2      | -0.2314515 | 0.0719491 | -3.2169 | 0.00131  | -0.327449794 | count | 1           |
| ZNF14      | -1.1497734 | 0.8403381 | -1.3682 | 0.171    | -0.327212055 | count | 1           |
| SLBP       | -0.2365867 | 0.1118316 | -2.1156 | 0.0345   | -0.327178906 | count | 1           |
| LMAN1      | -0.2339552 | 0.1045073 | -2.2387 | 0.0253   | -0.327154673 | count | 1           |
| PEX1       | -0.2785487 | 0.3603518 | -0.773  | 0.44     | -0.326937495 | count | 1           |
| NUP93      | -0.2946183 | 0.3598132 | -0.8188 | 0.413    | -0.326674184 | count | 1           |
| POMP       | -0.2276199 | 0.0436802 | -5.2111 | 2.03E-07 | -0.32638834  | count | 0.004848655 |
| MIEF1      | -0.2972302 | 0.399739  | -0.7436 | 0.457    | -0.326280391 | count | 1           |
| GUSB       | -0.2329138 | 0.1146417 | -2.0317 | 0.0423   | -0.325959735 | count | 1           |
| AC004951.1 | -0.4086157 | 0.4585644 | -0.8911 | 0.373    | -0.325593352 | count | 1           |
| GYS1       | -0.5026457 | 0.5821077 | -0.8635 | 0.388    | -0.325558987 | count | 1           |
| ANKRD10    | -0.2348692 | 0.1190113 | -1.9735 | 0.0486   | -0.325538282 | count | 1           |
| BMP1       | -0.8012332 | 0.6467285 | -1.2389 | 0.216    | -0.325469561 | count | 1           |
| MTHFD2     | -0.2373969 | 0.1114153 | -2.1307 | 0.0332   | -0.325460715 | count | 1           |
| TNS3       | -0.2520388 | 0.235785  | -1.0689 | 0.285    | -0.325219176 | count | 1           |
| PPIH       | -0.2445969 | 0.1626458 | -1.5039 | 0.133    | -0.325178724 | count | 1           |
| LENG9      | -0.3982426 | 0.410168  | -0.9709 | 0.332    | -0.325146648 | count | 1           |
| IL10RB     | -0.39778   | 0.3583758 | -1.11   | 0.267    | -0.324794661 | count | 1           |
| ARV1       | -0.2734469 | 0.2693521 | -1.0152 | 0.31     | -0.32462034  | count | 1           |
| EHMT1      | -0.2488986 | 0.2051948 | -1.213  | 0.225    | -0.324247686 | count | 1           |
| SUMO3      | -0.2289502 | 0.0764727 | -2.9939 | 0.00278  | -0.324235179 | count | 1           |
| NAA20      | -0.2300217 | 0.0896184 | -2.5667 | 0.0103   | -0.324233262 | count | 1           |
| ZWILCH     | -0.459941  | 0.4669025 | -0.9851 | 0.325    | -0.324201186 | count | 1           |
| EXD3       | -0.4297363 | 0.4128709 | -1.0408 | 0.298    | -0.324065021 | count | 1           |
| SKA2       | -0.2613993 | 0.2449427 | -1.0672 | 0.286    | -0.324060125 | count | 1           |
| PSMD11     | -0.2332519 | 0.1167734 | -1.9975 | 0.0459   | -0.323048228 | count | 1           |
| ATP6AP2    | -0.2259009 | 0.0498913 | -4.5279 | 6.24E-06 | -0.322957423 | count | 0.148044    |
| TEX10      | -0.3355557 | 0.4134807 | -0.8115 | 0.417    | -0.322862192 | count | 1           |
| ESCO2      | -0.7923214 | 0.9263855 | -0.8553 | 0.392    | -0.322656039 | count | 1           |
| GOLGA8B    | -0.7923214 | 1.26686   | -0.6254 | 0.532    | -0.322656039 | count | 1           |
| TCF7       | -0.4276083 | 0.8461539 | -0.5054 | 0.613    | -0.322589321 | count | 1           |
| ERCC1      | -0.2309688 | 0.1046148 | -2.2078 | 0.0274   | -0.322558834 | count | 1           |
| DDOST      | -0.2319424 | 0.1057251 | -2.1938 | 0.0283   | -0.322173601 | count | 1           |

|            |            |           |         |          |              |       |           |
|------------|------------|-----------|---------|----------|--------------|-------|-----------|
| GK-AS1     | -0.5531437 | 0.5134485 | -1.0773 | 0.281    | -0.321991032 | count | 1         |
| RNF145     | -0.2360348 | 0.1348156 | -1.7508 | 0.0801   | -0.32186773  | count | 1         |
| LUZP1      | -0.2413898 | 0.1616892 | -1.4929 | 0.136    | -0.321667038 | count | 1         |
| SRCAP      | -0.78874   | 0.5936238 | -1.3287 | 0.184    | -0.321520536 | count | 1         |
| CNDP2      | -0.2308352 | 0.1044036 | -2.211  | 0.0271   | -0.321391444 | count | 1         |
| TBC1D22B   | -0.6380343 | 0.7460643 | -0.8552 | 0.393    | -0.321205147 | count | 1         |
| PMEPA1     | -0.274261  | 0.3143228 | -0.8725 | 0.383    | -0.321057997 | count | 1         |
| L2HGDH     | -1.1166274 | 1.4018576 | -0.7965 | 0.426    | -0.321020988 | count | 1         |
| ZNF324B    | -1.1166274 | 1.1222908 | -0.995  | 0.32     | -0.321020988 | count | 1         |
| AP001636.3 | -0.7006285 | 0.9262466 | -0.7564 | 0.449    | -0.320976316 | count | 1         |
| RAD51AP1   | -0.2890259 | 0.3380664 | -0.8549 | 0.393    | -0.320636102 | count | 1         |
| DEXI       | -0.2777998 | 0.3466394 | -0.8014 | 0.423    | -0.319914176 | count | 1         |
| GPR18      | -0.4374515 | 0.4278658 | -1.0224 | 0.307    | -0.3198853   | count | 1         |
| CALM1      | -0.2222611 | 0.0363272 | -6.1183 | 1.10E-09 | -0.319752005 | count | 2.64E-05  |
| HLA-DPB1   | -0.2216375 | 0.0512129 | -4.3278 | 1.57E-05 | -0.319491635 | count | 0.3715248 |
| CATSPER1   | -0.23752   | 0.1653832 | -1.4362 | 0.151    | -0.319263981 | count | 1         |
| DNAJC5     | -0.2455234 | 0.1904926 | -1.2889 | 0.198    | -0.319189093 | count | 1         |
| FCMR       | -0.5167732 | 1.0502659 | -0.492  | 0.623    | -0.319074919 | count | 1         |
| CCNB2      | -0.5167732 | 0.7823459 | -0.6605 | 0.509    | -0.319074919 | count | 1         |
| ELP5       | -0.2573111 | 0.2348371 | -1.0957 | 0.273    | -0.3190638   | count | 1         |
| TSPAN3     | -0.233183  | 0.1345138 | -1.7335 | 0.0831   | -0.31892736  | count | 1         |
| ATP5MD     | -0.2240274 | 0.0625578 | -3.5811 | 0.000349 | -0.318806822 | count | 1         |
| ASPH       | -0.227531  | 0.1070718 | -2.125  | 0.0337   | -0.31870461  | count | 1         |
| ZNF484     | -0.5152335 | 0.6272097 | -0.8215 | 0.411    | -0.318234524 | count | 1         |
| ORMDL3     | -0.9023188 | 0.717635  | -1.2574 | 0.209    | -0.318203127 | count | 1         |
| DAXX       | -0.2538034 | 0.2802436 | -0.9057 | 0.365    | -0.318027322 | count | 1         |
| CFAP44     | -2.8685432 | 1.4334524 | -2.0011 | 0.0455   | -0.317961253 | count | 1         |
| AL139089.1 | -1.4826891 | 1.1352802 | -1.306  | 0.192    | -0.317472702 | count | 1         |
| NPIPB6     | -1.4826891 | 1.507243  | -0.9837 | 0.325    | -0.317472702 | count | 1         |
| AC027097.2 | -1.4826891 | 0.998978  | -1.4842 | 0.138    | -0.317472702 | count | 1         |
| KATNA1     | -0.2515303 | 0.2353345 | -1.0688 | 0.285    | -0.317277814 | count | 1         |
| ATP2C1     | -0.2664287 | 0.2013939 | -1.3229 | 0.186    | -0.317254659 | count | 1         |
| EMC8       | -0.2456234 | 0.1772286 | -1.3859 | 0.166    | -0.317025061 | count | 1         |
| FLNB       | -0.269894  | 0.3999209 | -0.6749 | 0.5      | -0.316979605 | count | 1         |
| ASPM       | -0.7739051 | 0.7424906 | -1.0423 | 0.297    | -0.316787343 | count | 1         |
| GOLGA8A    | -0.5125736 | 0.6942686 | -0.7383 | 0.46     | -0.31678112  | count | 1         |
| KAT2A      | -0.6275299 | 0.3845909 | -1.6317 | 0.103    | -0.316766375 | count | 1         |
| FYTTD1     | -0.2316255 | 0.1263928 | -1.8326 | 0.067    | -0.31674439  | count | 1         |
| IL10RB-DT  | -0.2355344 | 0.1584596 | -1.4864 | 0.137    | -0.316390397 | count | 1         |
| DUSP8      | -0.3636223 | 0.4162288 | -0.8736 | 0.382    | -0.31635992  | count | 1         |
| SERPINF1   | -0.2371758 | 0.1442882 | -1.6438 | 0.1      | -0.316091371 | count | 1         |
| PINLYP     | -0.4315372 | 0.6526118 | -0.6612 | 0.509    | -0.315922525 | count | 1         |
| REXO4      | -0.2682211 | 0.2880927 | -0.931  | 0.352    | -0.315053201 | count | 1         |
| PTPN2      | -0.2238569 | 0.0894775 | -2.5018 | 0.0124   | -0.314892562 | count | 1         |
| SYNGR2     | -0.2221454 | 0.0749303 | -2.9647 | 0.00306  | -0.31478832  | count | 1         |

|           |            |           |         |          |              |       |             |
|-----------|------------|-----------|---------|----------|--------------|-------|-------------|
| MFSD14B   | -0.2581698 | 0.2450045 | -1.0537 | 0.292    | -0.31452216  | count | 1           |
| CARF      | -0.6824657 | 0.6365057 | -1.0722 | 0.284    | -0.314177035 | count | 1           |
| TMBIM6    | -0.2184649 | 0.037152  | -5.8803 | 4.65E-09 | -0.314049073 | count | 0.000111605 |
| ORAI2     | -0.251235  | 0.1848114 | -1.3594 | 0.174    | -0.313973707 | count | 1           |
| SLC16A3   | -0.2225341 | 0.0825482 | -2.6958 | 0.00707  | -0.313915971 | count | 1           |
| ATP5PF    | -0.2193235 | 0.0518981 | -4.226  | 2.47E-05 | -0.313864854 | count | 0.5835622   |
| MORC2-AS1 | -0.367296  | 0.8864543 | -0.4143 | 0.679    | -0.31372318  | count | 1           |
| RPN2      | -0.2218367 | 0.0741157 | -2.9931 | 0.00279  | -0.313574485 | count | 1           |
| PSMG1     | -0.2472843 | 0.1973342 | -1.2531 | 0.21     | -0.31348479  | count | 1           |
| TXNL4B    | -0.3669031 | 0.3955737 | -0.9275 | 0.354    | -0.313407294 | count | 1           |
| SEMA4C    | -0.8832827 | 0.588166  | -1.5018 | 0.133    | -0.313232406 | count | 1           |
| MCF2L2    | -0.4428421 | 0.6041747 | -0.733  | 0.464    | -0.313222846 | count | 1           |
| DPP7      | -0.2198545 | 0.0630896 | -3.4848 | 0.000501 | -0.313092271 | count | 1           |
| ERRF1     | -0.5049647 | 0.3809142 | -1.3257 | 0.185    | -0.312612377 | count | 1           |
| SLC35E2A  | -0.8809166 | 0.6544173 | -1.3461 | 0.178    | -0.31260976  | count | 1           |
| PDPK1     | -0.2388057 | 0.1840083 | -1.2978 | 0.194    | -0.31250336  | count | 1           |
| SLC49A3   | -0.2562827 | 0.2221101 | -1.1539 | 0.249    | -0.312258969 | count | 1           |
| PUS7      | -0.3812851 | 0.4072117 | -0.9363 | 0.349    | -0.312202269 | count | 1           |
| RAB38     | -0.4410695 | 0.5351287 | -0.8242 | 0.41     | -0.312079813 | count | 1           |
| PAPSS1    | -0.2267565 | 0.129983  | -1.7445 | 0.0812   | -0.312078304 | count | 1           |
| PIK3R1    | -0.2247087 | 0.0967371 | -2.3229 | 0.0203   | -0.31203313  | count | 1           |
| HSD17B14  | -0.2566057 | 0.274634  | -0.9344 | 0.35     | -0.312024884 | count | 1           |
| CHN2      | -0.3134524 | 0.310912  | -1.0082 | 0.313    | -0.311835648 | count | 1           |
| DERL1     | -0.225074  | 0.128237  | -1.7551 | 0.0794   | -0.311689574 | count | 1           |
| ZNF846    | -0.2780794 | 0.3105433 | -0.8955 | 0.371    | -0.311608481 | count | 1           |
| ZPR1      | -0.2360468 | 0.1873474 | -1.2599 | 0.208    | -0.311535688 | count | 1           |
| MMAA      | -0.4577127 | 0.8089046 | -0.5658 | 0.572    | -0.311453941 | count | 1           |
| STK38L    | -0.2283575 | 0.1339801 | -1.7044 | 0.0884   | -0.311381159 | count | 1           |
| PTMS      | -0.2215591 | 0.0914288 | -2.4233 | 0.0155   | -0.310974363 | count | 1           |
| RAB8A     | -0.2207959 | 0.0857482 | -2.5749 | 0.0101   | -0.310926829 | count | 1           |
| PSMC2     | -0.2289967 | 0.129284  | -1.7713 | 0.0766   | -0.310913954 | count | 1           |
| MPG       | -0.2219039 | 0.1081616 | -2.0516 | 0.0403   | -0.310842538 | count | 1           |
| DACT3     | -0.6736103 | 0.6598874 | -1.0208 | 0.307    | -0.310833316 | count | 1           |
| ZNF444    | -0.4232547 | 0.5059399 | -0.8366 | 0.403    | -0.310355551 | count | 1           |
| IMPA1     | -0.2568214 | 0.2133011 | -1.204  | 0.229    | -0.31033356  | count | 1           |
| CDKN1A    | -0.218624  | 0.0748561 | -2.9206 | 0.00353  | -0.310032294 | count | 1           |
| FAM96B    | -0.217798  | 0.0604707 | -3.6017 | 0.000322 | -0.309952185 | count | 1           |
| MRPS17    | -0.3057663 | 0.765441  | -0.3995 | 0.69     | -0.309950911 | count | 1           |
| RHOC      | -0.2196666 | 0.0901143 | -2.4376 | 0.0149   | -0.309745612 | count | 1           |
| AMD1      | -0.2211629 | 0.0772089 | -2.8645 | 0.00421  | -0.309712507 | count | 1           |
| FOCAD     | -0.866934  | 0.6280996 | -1.3802 | 0.168    | -0.308908353 | count | 1           |
| C19orf70  | -0.2174034 | 0.074772  | -2.9075 | 0.00368  | -0.308825317 | count | 1           |
| FRMD6-AS1 | -1.4069228 | 1.2225224 | -1.1508 | 0.25     | -0.308485372 | count | 1           |
| FZD5      | -0.4355031 | 0.4404627 | -0.9887 | 0.323    | -0.308484382 | count | 1           |
| ZNF485    | -0.5265983 | 1.3767879 | -0.3825 | 0.702    | -0.308448673 | count | 1           |

|            |            |           |         |          |              |       |            |
|------------|------------|-----------|---------|----------|--------------|-------|------------|
| AC010542.2 | -0.5620354 | 0.7345217 | -0.7652 | 0.444    | -0.308193408 | count | 1          |
| CTSA       | -0.2166262 | 0.0692806 | -3.1268 | 0.00179  | -0.308162583 | count | 1          |
| SLC4A2     | -0.290278  | 0.3226468 | -0.8997 | 0.368    | -0.308112812 | count | 1          |
| VEGFA      | -0.2193179 | 0.0990476 | -2.2143 | 0.0269   | -0.307803453 | count | 1          |
| SNRPD1     | -0.2180086 | 0.0870154 | -2.5054 | 0.0123   | -0.307597701 | count | 1          |
| CAMK1D     | -0.2388177 | 0.1735503 | -1.3761 | 0.169    | -0.307519506 | count | 1          |
| NDUFAF5    | -0.3527915 | 0.4419455 | -0.7983 | 0.425    | -0.307454126 | count | 1          |
| JOSD2      | -0.2203063 | 0.1090969 | -2.0194 | 0.0436   | -0.307384211 | count | 1          |
| STMN1      | -0.2179348 | 0.1205209 | -1.8083 | 0.0707   | -0.307041049 | count | 1          |
| YBX1       | -0.2129675 | 0.0285875 | -7.4497 | 1.29E-13 | -0.306815116 | count | 3.12E-09   |
| MAP1LC3B2  | -0.4322764 | 0.4938208 | -0.8754 | 0.381    | -0.306395996 | count | 1          |
| GNG5       | -0.2129471 | 0.0395159 | -5.3889 | 7.77E-08 | -0.30602368  | count | 0.00185804 |
| AC074327.1 | -0.4488525 | 0.5872015 | -0.7644 | 0.445    | -0.305986028 | count | 1          |
| ZNF471     | -1.0385505 | 1.0370026 | -1.0015 | 0.317    | -0.305783463 | count | 1          |
| RAC1       | -0.2126408 | 0.0347254 | -6.1235 | 1.06E-09 | -0.30574518  | count | 2.55E-05   |
| TOE1       | -0.3818992 | 0.4711034 | -0.8106 | 0.418    | -0.305734338 | count | 1          |
| PALD1      | -0.3040261 | 0.3254848 | -0.9341 | 0.35     | -0.305582281 | count | 1          |
| ELANE      | -0.4161692 | 0.6952728 | -0.5986 | 0.55     | -0.305576992 | count | 1          |
| DDHD2      | -0.3723299 | 0.4486033 | -0.83   | 0.407    | -0.305332264 | count | 1          |
| ANAPC11    | -0.2143256 | 0.0604183 | -3.5474 | 0.000396 | -0.305191    | count | 1          |
| AL591846.2 | -0.7366855 | 0.7665078 | -0.9611 | 0.337    | -0.304700633 | count | 1          |
| TAGAP      | -0.2181666 | 0.0949809 | -2.297  | 0.0217   | -0.304638764 | count | 1          |
| CACYBP     | -0.216488  | 0.0854038 | -2.5349 | 0.0113   | -0.304629036 | count | 1          |
| MOB4       | -0.2330113 | 0.1564658 | -1.4892 | 0.137    | -0.304578417 | count | 1          |
| DBR1       | -0.3431788 | 0.5937863 | -0.5779 | 0.563    | -0.304522622 | count | 1          |
| PPM1J      | -0.4660971 | 0.8843244 | -0.5271 | 0.598    | -0.304278885 | count | 1          |
| GINS2      | -0.4660971 | 0.6883675 | -0.6771 | 0.498    | -0.304278885 | count | 1          |
| HIST1H1E   | -0.2262842 | 0.2371567 | -0.9542 | 0.34     | -0.304040169 | count | 1          |
| EFHD2      | -0.2117469 | 0.0471556 | -4.4904 | 7.44E-06 | -0.303738193 | count | 0.17645448 |
| ZNF670     | -1.3670652 | 1.2088991 | -1.1308 | 0.258    | -0.303519151 | count | 1          |
| AC091564.6 | -1.3670652 | 1.2088991 | -1.1308 | 0.258    | -0.303519151 | count | 1          |
| TYW1       | -0.3180264 | 0.3110605 | -1.0224 | 0.307    | -0.303235596 | count | 1          |
| MET        | -0.5954091 | 0.7620487 | -0.7813 | 0.435    | -0.303017909 | count | 1          |
| USP14      | -0.2209034 | 0.1299135 | -1.7004 | 0.0892   | -0.302725583 | count | 1          |
| AL121832.2 | -0.8435065 | 0.768013  | -1.0983 | 0.272    | -0.302622644 | count | 1          |
| COL1A2     | -0.6518772 | 0.5151435 | -1.2654 | 0.206    | -0.302547147 | count | 1          |
| HDAC4      | -0.3604061 | 0.3967545 | -0.9084 | 0.364    | -0.302329335 | count | 1          |
| RCAN3      | -0.2825771 | 0.3105587 | -0.9099 | 0.363    | -0.302070893 | count | 1          |
| ARHGAP10   | -0.2222974 | 0.1813485 | -1.2258 | 0.22     | -0.302017432 | count | 1          |
| SLC39A1    | -0.2175931 | 0.1177454 | -1.848  | 0.0647   | -0.301771731 | count | 1          |
| DDX11      | -0.3396323 | 0.3859933 | -0.8799 | 0.379    | -0.301536425 | count | 1          |
| MED12      | -0.3199244 | 0.5292775 | -0.6045 | 0.546    | -0.301324774 | count | 1          |
| PHB        | -0.2147653 | 0.0873777 | -2.4579 | 0.014    | -0.301131309 | count | 1          |
| FAM71A     | -2.328968  | 1.2131164 | -1.9198 | 0.055    | -0.300786627 | count | 1          |
| CBFA2T2    | -0.3152467 | 0.449176  | -0.7018 | 0.483    | -0.300695787 | count | 1          |

|            |            |           |         |          |              |       |   |
|------------|------------|-----------|---------|----------|--------------|-------|---|
| TPD52L2    | -0.2179614 | 0.1453951 | -1.4991 | 0.134    | -0.30064008  | count | 1 |
| ACYP1      | -0.2539834 | 0.3252963 | -0.7808 | 0.435    | -0.300319198 | count | 1 |
| FAM96A     | -0.2124706 | 0.0798299 | -2.6615 | 0.00783  | -0.300037335 | count | 1 |
| B4GALT7    | -0.2351781 | 0.2291364 | -1.0264 | 0.305    | -0.299954042 | count | 1 |
| POP1       | -0.3183672 | 0.3807301 | -0.8362 | 0.403    | -0.299921378 | count | 1 |
| GTF2IRD2B  | -2.300766  | 1.2168823 | -1.8907 | 0.0588   | -0.299623192 | count | 1 |
| FKBP3      | -0.2165021 | 0.1333315 | -1.6238 | 0.105    | -0.299388979 | count | 1 |
| SLC2A8     | -0.2634989 | 0.2335376 | -1.1283 | 0.259    | -0.299337421 | count | 1 |
| RAB9A      | -0.2204012 | 0.1417475 | -1.5549 | 0.12     | -0.299302542 | count | 1 |
| AC073508.3 | -0.8312541 | 1.0515493 | -0.7905 | 0.429    | -0.299293002 | count | 1 |
| PPP4C      | -0.2104738 | 0.0764283 | -2.7539 | 0.00593  | -0.299120373 | count | 1 |
| MCM4       | -0.3939787 | 0.4622786 | -0.8523 | 0.394    | -0.299089875 | count | 1 |
| GGA1       | -0.216179  | 0.1465096 | -1.4755 | 0.14     | -0.299018219 | count | 1 |
| GMPR       | -0.2851126 | 0.403013  | -0.7075 | 0.479    | -0.298754062 | count | 1 |
| ZNF611     | -0.3058038 | 0.7330817 | -0.4171 | 0.677    | -0.298552271 | count | 1 |
| C14orf93   | -0.6412916 | 0.4914333 | -1.3049 | 0.192    | -0.298469908 | count | 1 |
| VMA21      | -0.2131082 | 0.0958172 | -2.2241 | 0.0262   | -0.297852228 | count | 1 |
| KIF13B     | -0.2305265 | 0.2180868 | -1.057  | 0.291    | -0.297723629 | count | 1 |
| RGS13      | -1.32131   | 1.0681256 | -1.237  | 0.216    | -0.297607862 | count | 1 |
| HDGFL3     | -0.295659  | 0.3343177 | -0.8844 | 0.377    | -0.297466451 | count | 1 |
| HSPB1      | -0.2094262 | 0.0824989 | -2.5385 | 0.0112   | -0.297228642 | count | 1 |
| MFSD5      | -0.2584357 | 0.37853   | -0.6827 | 0.495    | -0.297023511 | count | 1 |
| ZNF329     | -0.637143  | 1.0120277 | -0.6296 | 0.529    | -0.296864605 | count | 1 |
| IFT52      | -0.2507937 | 0.2866178 | -0.875  | 0.382    | -0.296613946 | count | 1 |
| ARFGAP1    | -0.2829069 | 0.4186326 | -0.6758 | 0.499    | -0.296512518 | count | 1 |
| TRPV2      | -0.2467976 | 0.2301702 | -1.0722 | 0.284    | -0.296412091 | count | 1 |
| KCTD9      | -0.3181332 | 0.3555074 | -0.8949 | 0.371    | -0.295914891 | count | 1 |
| NDUFB8     | -0.2075449 | 0.057813  | -3.5899 | 0.000337 | -0.295545653 | count | 1 |
| OLFML3     | -0.3323905 | 0.4422027 | -0.7517 | 0.452    | -0.295427656 | count | 1 |
| APOBEC3F   | -0.53526   | 0.676734  | -0.7909 | 0.429    | -0.295421105 | count | 1 |
| RNF7       | -0.2070133 | 0.0625108 | -3.3116 | 0.000941 | -0.295350386 | count | 1 |
| ATP6V1B2   | -0.2095764 | 0.0890316 | -2.354  | 0.0187   | -0.294986305 | count | 1 |
| COA7       | -0.3020018 | 0.4319529 | -0.6992 | 0.485    | -0.294981628 | count | 1 |
| SLC5A3     | -0.2325237 | 0.2493523 | -0.9325 | 0.351    | -0.294977744 | count | 1 |
| GPSM1      | -0.8135455 | 1.0741615 | -0.7574 | 0.449    | -0.294429009 | count | 1 |
| MYO9B      | -0.2110608 | 0.1279847 | -1.6491 | 0.0993   | -0.294261057 | count | 1 |
| MPC1       | -0.2129323 | 0.0971886 | -2.1909 | 0.0286   | -0.294128871 | count | 1 |
| M6PR       | -0.2062128 | 0.0647845 | -3.1831 | 0.00148  | -0.293991473 | count | 1 |
| SUGP2      | -0.2331309 | 0.2442452 | -0.9545 | 0.34     | -0.293966359 | count | 1 |
| DGUOK      | -0.21069   | 0.1036927 | -2.0319 | 0.0423   | -0.293448924 | count | 1 |
| FIZ1       | -0.4701432 | 0.6839644 | -0.6874 | 0.492    | -0.293324211 | count | 1 |
| AC083798.2 | -0.8092649 | 0.6694993 | -1.2088 | 0.227    | -0.293244063 | count | 1 |
| CHORDC1    | -0.2159107 | 0.1400274 | -1.5419 | 0.123    | -0.293083803 | count | 1 |
| MRRF       | -0.258713  | 0.2759517 | -0.9375 | 0.349    | -0.292845101 | count | 1 |
| CREB3L4    | -0.3973051 | 0.5232652 | -0.7593 | 0.448    | -0.292782553 | count | 1 |

|            |            |           |         |          |              |       |           |
|------------|------------|-----------|---------|----------|--------------|-------|-----------|
| AC124283.1 | -0.6262519 | 0.4643419 | -1.3487 | 0.178    | -0.292630454 | count | 1         |
| LAMC1      | -0.3288339 | 0.6749112 | -0.4872 | 0.626    | -0.292422079 | count | 1         |
| RABAC1     | -0.2049789 | 0.0619048 | -3.3112 | 0.000942 | -0.292377789 | count | 1         |
| LINC01011  | -0.8053582 | 0.6952678 | -1.1583 | 0.247    | -0.292159483 | count | 1         |
| HTRA4      | -2.125894  | 1.0193844 | -2.0855 | 0.0371   | -0.291678205 | count | 1         |
| POLR3G     | -0.9702326 | 1.0880352 | -0.8917 | 0.373    | -0.291672105 | count | 1         |
| CLMP       | -0.9702326 | 1.1566616 | -0.8388 | 0.402    | -0.291672105 | count | 1         |
| UBE2L3     | -0.2054738 | 0.0711708 | -2.8871 | 0.00392  | -0.291554271 | count | 1         |
| RPL35      | -0.2025852 | 0.0304438 | -6.6544 | 3.50E-11 | -0.29135654  | count | 8.43E-07  |
| MKL2       | -0.3007552 | 0.3879961 | -0.7752 | 0.438    | -0.290686948 | count | 1         |
| SPAG9      | -0.2048274 | 0.0796915 | -2.5703 | 0.0102   | -0.290592921 | count | 1         |
| GMPPB      | -0.2430084 | 0.3062946 | -0.7934 | 0.428    | -0.290545203 | count | 1         |
| ACTR1B     | -0.2363114 | 0.2753424 | -0.8582 | 0.391    | -0.290432979 | count | 1         |
| MINOS1     | -0.2048232 | 0.0700592 | -2.9236 | 0.00349  | -0.29042138  | count | 1         |
| EIF5       | -0.2044863 | 0.0623446 | -3.2799 | 0.00105  | -0.290353822 | count | 1         |
| GMNN       | -0.2409026 | 0.2404101 | -1.002  | 0.316    | -0.290106816 | count | 1         |
| UTP11      | -0.2152574 | 0.1592885 | -1.3514 | 0.177    | -0.290090969 | count | 1         |
| INTS7      | -0.3811481 | 0.7837781 | -0.4863 | 0.627    | -0.290036111 | count | 1         |
| CENPP      | -0.3811481 | 0.5172115 | -0.7369 | 0.461    | -0.290036111 | count | 1         |
| MRPL55     | -0.2106424 | 0.1282015 | -1.6431 | 0.1      | -0.289849424 | count | 1         |
| SPATA2L    | -0.2324864 | 0.2369742 | -0.9811 | 0.327    | -0.289557985 | count | 1         |
| POLD4      | -0.3030628 | 0.3494834 | -0.8672 | 0.386    | -0.289538873 | count | 1         |
| VBP1       | -0.2133231 | 0.1466256 | -1.4549 | 0.146    | -0.289283517 | count | 1         |
| IP6K2      | -0.234457  | 0.2424792 | -0.9669 | 0.334    | -0.288692947 | count | 1         |
| TUFT1      | -0.6159605 | 0.7642925 | -0.8059 | 0.42     | -0.288603005 | count | 1         |
| NAT10      | -0.2951122 | 0.3704591 | -0.7966 | 0.426    | -0.288501594 | count | 1         |
| C8orf33    | -0.2182703 | 0.2059962 | -1.0596 | 0.289    | -0.287924786 | count | 1         |
| PHPT1      | -0.2023486 | 0.0737677 | -2.743  | 0.00613  | -0.287498711 | count | 1         |
| NCL        | -0.2003487 | 0.0470744 | -4.256  | 2.16E-05 | -0.28746845  | count | 0.5106672 |
| ID3        | -0.206916  | 0.1839001 | -1.1252 | 0.261    | -0.287071762 | count | 1         |
| SGK1       | -0.1997938 | 0.0612971 | -3.2594 | 0.00113  | -0.287025502 | count | 1         |
| LINC01534  | -1.242375  | 1.0535413 | -1.1792 | 0.238    | -0.286861715 | count | 1         |
| TRIP10     | -0.2614234 | 0.3607293 | -0.7247 | 0.469    | -0.286458377 | count | 1         |
| NDUFB7     | -0.2014086 | 0.0720514 | -2.7953 | 0.00522  | -0.28582627  | count | 1         |
| RBM8A      | -0.2002332 | 0.0560929 | -3.5697 | 0.000364 | -0.285824957 | count | 1         |
| ZNHIT2     | -0.3549949 | 0.5342104 | -0.6645 | 0.506    | -0.28552344  | count | 1         |
| C10orf95   | -0.6075687 | 0.9148075 | -0.6641 | 0.507    | -0.285299893 | count | 1         |
| SNHG15     | -0.204358  | 0.1028364 | -1.9872 | 0.047    | -0.285234027 | count | 1         |
| FSD1L      | -0.3637261 | 0.5458566 | -0.6663 | 0.505    | -0.285103219 | count | 1         |
| GGCT       | -0.2147452 | 0.1587242 | -1.3529 | 0.176    | -0.28508102  | count | 1         |
| MBTD1      | -0.3386068 | 0.3968015 | -0.8533 | 0.394    | -0.285052693 | count | 1         |
| CLUAP1     | -0.2756017 | 0.3905953 | -0.7056 | 0.481    | -0.284882539 | count | 1         |
| DERL2      | -0.208019  | 0.1244066 | -1.6721 | 0.0946   | -0.284654288 | count | 1         |
| 6-Sep      | -0.2079352 | 0.1082622 | -1.9207 | 0.0549   | -0.28454009  | count | 1         |
| RNF185     | -0.3094708 | 0.4065907 | -0.7611 | 0.447    | -0.284332746 | count | 1         |



|              |            |           |         |          |              |       |            |
|--------------|------------|-----------|---------|----------|--------------|-------|------------|
| CCSER2       | -0.2236813 | 0.2026605 | -1.1037 | 0.27     | -0.284199969 | count | 1          |
| LMAN2L       | -0.7754903 | 0.6713209 | -1.1552 | 0.248    | -0.283768157 | count | 1          |
| ANKRD36B     | -0.3721305 | 0.4930114 | -0.7548 | 0.45     | -0.283643989 | count | 1          |
| TOR3A        | -0.2169812 | 0.1738077 | -1.2484 | 0.212    | -0.283598223 | count | 1          |
| NIP7         | -0.2298586 | 0.2567829 | -0.8951 | 0.371    | -0.283592402 | count | 1          |
| ERMAP        | -0.3041972 | 0.3925053 | -0.775  | 0.438    | -0.283496673 | count | 1          |
| CD47         | -0.2012296 | 0.0846236 | -2.3779 | 0.0175   | -0.283481533 | count | 1          |
| FHL1         | -0.3081048 | 0.4303068 | -0.716  | 0.474    | -0.283132231 | count | 1          |
| AP006623.1   | -1.9575034 | 1.0809182 | -1.811  | 0.0703   | -0.282701461 | count | 1          |
| RNF6         | -0.2475715 | 0.2281385 | -1.0852 | 0.278    | -0.282699135 | count | 1          |
| C12orf49     | -0.2193446 | 0.2064504 | -1.0625 | 0.288    | -0.282673236 | count | 1          |
| MROH1        | -0.2633928 | 0.3033    | -0.8684 | 0.385    | -0.282106007 | count | 1          |
| ACBD6        | -0.2076305 | 0.1519583 | -1.3664 | 0.172    | -0.281969834 | count | 1          |
| LETM2        | -0.4085125 | 0.5368102 | -0.761  | 0.447    | -0.28080114  | count | 1          |
| ELAC2        | -0.2760486 | 0.3595007 | -0.7679 | 0.443    | -0.280787057 | count | 1          |
| BLMH         | -0.2439884 | 0.2960705 | -0.8241 | 0.41     | -0.280738088 | count | 1          |
| DAD1         | -0.1960925 | 0.0545886 | -3.5922 | 0.000334 | -0.280638962 | count | 1          |
| GRB2         | -0.1957493 | 0.0460265 | -4.253  | 2.19E-05 | -0.28043244  | count | 0.517716   |
| STOM         | -0.2081926 | 0.1250461 | -1.6649 | 0.0961   | -0.280344271 | count | 1          |
| MRPL18       | -0.200784  | 0.0925364 | -2.1698 | 0.0301   | -0.280322154 | count | 1          |
| DFFA         | -0.233737  | 0.2731527 | -0.8557 | 0.392    | -0.280305458 | count | 1          |
| CD226        | -0.3197504 | 0.577085  | -0.5541 | 0.58     | -0.280078192 | count | 1          |
| TMEM165      | -0.1990215 | 0.0868983 | -2.2903 | 0.0221   | -0.279911563 | count | 1          |
| AFTPH        | -0.2137615 | 0.170341  | -1.2549 | 0.21     | -0.279798044 | count | 1          |
| CWC15        | -0.2010027 | 0.123373  | -1.6292 | 0.103    | -0.279321802 | count | 1          |
| GGA2         | -0.2079861 | 0.1608709 | -1.2929 | 0.196    | -0.279292497 | count | 1          |
| FAHD2B       | -1.1887693 | 1.030052  | -1.1541 | 0.249    | -0.279152473 | count | 1          |
| DBN1         | -1.1887693 | 1.1701911 | -1.0159 | 0.31     | -0.279152473 | count | 1          |
| IPO4         | -1.1887693 | 1.030052  | -1.1541 | 0.249    | -0.279152473 | count | 1          |
| SLFN13       | -1.1887693 | 1.1701911 | -1.0159 | 0.31     | -0.279152473 | count | 1          |
| SUGP1        | -0.2768445 | 0.3269885 | -0.8466 | 0.397    | -0.279152077 | count | 1          |
| RAB18        | -0.2051859 | 0.1264757 | -1.6223 | 0.105    | -0.279014868 | count | 1          |
| NARS2        | -0.3656003 | 0.4327462 | -0.8448 | 0.398    | -0.279000174 | count | 1          |
| MAST2        | -0.4696575 | 0.5551198 | -0.846  | 0.398    | -0.278739356 | count | 1          |
| NFKBIE       | -0.2077934 | 0.16413   | -1.266  | 0.206    | -0.278306546 | count | 1          |
| MDN1         | -0.2874193 | 0.4558314 | -0.6305 | 0.528    | -0.27827165  | count | 1          |
| GPR132       | -0.2383651 | 0.2041047 | -1.1679 | 0.243    | -0.278070821 | count | 1          |
| PARD6G-AS1   | -0.7552477 | 0.4638415 | -1.6282 | 0.104    | -0.277980405 | count | 1          |
| BOLA2-SMG1P6 | -0.6572207 | 0.7005612 | -0.9381 | 0.348    | -0.277869427 | count | 1          |
| UQCRFS1      | -0.1966049 | 0.0832221 | -2.3624 | 0.0182   | -0.277755959 | count | 1          |
| TRAM2        | -0.4036829 | 0.6310262 | -0.6397 | 0.522    | -0.277754184 | count | 1          |
| COX14        | -0.1974196 | 0.0821058 | -2.4045 | 0.0163   | -0.277400997 | count | 1          |
| RPL27A       | -0.1933973 | 0.0379991 | -5.0895 | 3.86E-07 | -0.277343864 | count | 0.00920803 |
| TCTN3        | -0.2863155 | 0.2657445 | -1.0774 | 0.281    | -0.277241953 | count | 1          |
| B3GALT6      | -0.2271294 | 0.2429071 | -0.935  | 0.35     | -0.277223377 | count | 1          |

|            |            |           |         |          |              |       |   |
|------------|------------|-----------|---------|----------|--------------|-------|---|
| SMARCC1    | -0.2080672 | 0.1721047 | -1.209  | 0.227    | -0.277046492 | count | 1 |
| UQCC2      | -0.2029873 | 0.1248029 | -1.6265 | 0.104    | -0.276751745 | count | 1 |
| IGF2R      | -0.2018316 | 0.1681225 | -1.2005 | 0.23     | -0.276434077 | count | 1 |
| AP3D1      | -0.2157952 | 0.1775887 | -1.2151 | 0.224    | -0.276315802 | count | 1 |
| PODXL      | -1.1693888 | 1.3125035 | -0.891  | 0.373    | -0.276280686 | count | 1 |
| AL136040.1 | -1.1686596 | 0.7384459 | -1.5826 | 0.114    | -0.27617174  | count | 1 |
| TMED10     | -0.1943491 | 0.0684254 | -2.8403 | 0.00454  | -0.276001123 | count | 1 |
| TMEM17     | -0.4951539 | 1.5116908 | -0.3275 | 0.743    | -0.275928726 | count | 1 |
| SRSF2      | -0.1953902 | 0.0702219 | -2.7825 | 0.00544  | -0.275592344 | count | 1 |
| EZH2       | -0.2952894 | 0.3649868 | -0.809  | 0.419    | -0.275531283 | count | 1 |
| POLR2D     | -0.2375187 | 0.269863  | -0.8801 | 0.379    | -0.275316366 | count | 1 |
| CLPP       | -0.2016773 | 0.133753  | -1.5078 | 0.132    | -0.275216185 | count | 1 |
| KLHL21     | -0.2701513 | 0.318082  | -0.8493 | 0.396    | -0.27497342  | count | 1 |
| COPS8      | -0.2097706 | 0.1944713 | -1.0787 | 0.281    | -0.2749719   | count | 1 |
| SETD5      | -0.2140373 | 0.2429805 | -0.8809 | 0.378    | -0.274884462 | count | 1 |
| LPAR5      | -0.3408739 | 0.3870489 | -0.8807 | 0.379    | -0.27483097  | count | 1 |
| DUSP16     | -0.4367559 | 0.4628561 | -0.9436 | 0.345    | -0.274506973 | count | 1 |
| PLGRKT     | -0.2052482 | 0.1507222 | -1.3618 | 0.173    | -0.274371605 | count | 1 |
| PSMD3      | -0.2020453 | 0.1232547 | -1.6393 | 0.101    | -0.274349122 | count | 1 |
| SH3BP4     | -0.5795896 | 0.5404497 | -1.0724 | 0.284    | -0.274162945 | count | 1 |
| KLHDC1     | -0.5795896 | 0.5896615 | -0.9829 | 0.326    | -0.274162945 | count | 1 |
| ARL2       | -0.1985954 | 0.1155357 | -1.7189 | 0.0858   | -0.273940793 | count | 1 |
| AL020996.1 | -0.8878241 | 1.0519419 | -0.844  | 0.399    | -0.273644832 | count | 1 |
| LINC01526  | -0.8878241 | 1.3772968 | -0.6446 | 0.519    | -0.273644832 | count | 1 |
| VLDLR      | -0.8878241 | 1.0611704 | -0.8366 | 0.403    | -0.273644832 | count | 1 |
| DLGAP5     | -0.8878241 | 1.0611704 | -0.8366 | 0.403    | -0.273644832 | count | 1 |
| ACOT2      | -0.8878241 | 1.0611704 | -0.8366 | 0.403    | -0.273644832 | count | 1 |
| RAC3       | -0.8878241 | 1.0519419 | -0.844  | 0.399    | -0.273644832 | count | 1 |
| ASIP       | -0.8878241 | 1.0611704 | -0.8366 | 0.403    | -0.273644832 | count | 1 |
| AC006116.8 | -0.8878241 | 1.0611704 | -0.8366 | 0.403    | -0.273644832 | count | 1 |
| BACE2      | -0.8873977 | 0.744934  | -1.1912 | 0.234    | -0.273548617 | count | 1 |
| SMARCAD1   | -0.2384713 | 0.2438014 | -0.9781 | 0.328    | -0.273521949 | count | 1 |
| EIF5B      | -0.1935697 | 0.082194  | -2.355  | 0.0186   | -0.273087084 | count | 1 |
| GALC       | -0.2197763 | 0.2348422 | -0.9358 | 0.349    | -0.273076382 | count | 1 |
| EIF5A      | -0.1909945 | 0.0538903 | -3.5441 | 0.000401 | -0.272760963 | count | 1 |
| UQCRHL     | -0.4130553 | 0.5351415 | -0.7719 | 0.44     | -0.272709085 | count | 1 |
| INF2       | -0.2228754 | 0.3353805 | -0.6645 | 0.506    | -0.272623547 | count | 1 |
| KIF5B      | -0.1931041 | 0.0685758 | -2.8159 | 0.0049   | -0.272382971 | count | 1 |
| CDK10      | -0.277902  | 0.2840474 | -0.9784 | 0.328    | -0.272260332 | count | 1 |
| SLC26A11   | -0.316103  | 0.4041113 | -0.7822 | 0.434    | -0.272190707 | count | 1 |
| HEXA       | -0.1933332 | 0.1062641 | -1.8194 | 0.069    | -0.272164898 | count | 1 |
| AURKC      | -1.787629  | 1.3340195 | -1.34   | 0.18     | -0.272120886 | count | 1 |
| COQ2       | -0.2059132 | 0.1797757 | -1.1454 | 0.252    | -0.272034315 | count | 1 |
| RHOQ       | -0.1949536 | 0.0725338 | -2.6878 | 0.00724  | -0.272013247 | count | 1 |
| CD70       | -1.1405897 | 0.8961243 | -1.2728 | 0.203    | -0.271928491 | count | 1 |

|            |            |           |         |         |              |       |   |
|------------|------------|-----------|---------|---------|--------------|-------|---|
| UBE2N      | -0.193242  | 0.0918572 | -2.1037 | 0.0355  | -0.27191956  | count | 1 |
| BCORL1     | -0.3944336 | 0.5825558 | -0.6771 | 0.498   | -0.271899981 | count | 1 |
| MPP6       | -0.6397697 | 0.8880501 | -0.7204 | 0.471   | -0.271787691 | count | 1 |
| PELP1      | -0.3155058 | 0.3761585 | -0.8388 | 0.402   | -0.271701788 | count | 1 |
| COMMD7     | -0.1956001 | 0.1105041 | -1.7701 | 0.0768  | -0.271616444 | count | 1 |
| NACC1      | -0.237636  | 0.3287433 | -0.7229 | 0.47    | -0.271570836 | count | 1 |
| COMMD10    | -0.2006072 | 0.1609613 | -1.2463 | 0.213   | -0.271440819 | count | 1 |
| TIMM50     | -0.2101687 | 0.2174357 | -0.9666 | 0.334   | -0.271423497 | count | 1 |
| PPT1       | -0.1917305 | 0.0608123 | -3.1528 | 0.00164 | -0.271210967 | count | 1 |
| POLR2K     | -0.1942921 | 0.102193  | -1.9012 | 0.0574  | -0.270874382 | count | 1 |
| C5orf34    | -0.4099575 | 0.9967237 | -0.4113 | 0.681   | -0.270840295 | count | 1 |
| VPS35      | -0.1907185 | 0.0638591 | -2.9866 | 0.00285 | -0.270739452 | count | 1 |
| CRYZ       | -0.2633845 | 0.607487  | -0.4336 | 0.665   | -0.270498022 | count | 1 |
| C6orf52    | -0.5702237 | 0.8785008 | -0.6491 | 0.516   | -0.27039215  | count | 1 |
| AC006027.1 | -0.5702237 | 1.95502   | -0.2917 | 0.771   | -0.27039215  | count | 1 |
| CNOT6      | -0.2631776 | 0.350235  | -0.7514 | 0.452   | -0.270291755 | count | 1 |
| ARID4B     | -0.1942745 | 0.0991587 | -1.9592 | 0.0502  | -0.270154569 | count | 1 |
| SLC22A18AS | -0.2372658 | 0.2896507 | -0.8191 | 0.413   | -0.270116945 | count | 1 |
| LINC02542  | -0.634954  | 1.7243502 | -0.3682 | 0.713   | -0.270097371 | count | 1 |
| FAM86B1    | -0.634954  | 1.1671709 | -0.544  | 0.586   | -0.270097371 | count | 1 |
| ADPRHL1    | -0.634954  | 1.1671709 | -0.544  | 0.586   | -0.270097371 | count | 1 |
| C19orf44   | -0.634954  | 1.2393887 | -0.5123 | 0.608   | -0.270097371 | count | 1 |
| HOMER3-AS1 | -0.634954  | 1.0877855 | -0.5837 | 0.559   | -0.270097371 | count | 1 |
| SHANK3     | -0.634954  | 1.1671709 | -0.544  | 0.586   | -0.270097371 | count | 1 |
| SMCR5      | -0.8714095 | 0.79357   | -1.0981 | 0.272   | -0.269919138 | count | 1 |
| SYT1       | -0.8705282 | 0.7329205 | -1.1878 | 0.235   | -0.269717813 | count | 1 |
| TBC1D8-AS1 | -0.5670617 | 0.69006   | -0.8218 | 0.411   | -0.269114251 | count | 1 |
| CLMN       | -0.22077   | 0.2919256 | -0.7563 | 0.45    | -0.269033321 | count | 1 |
| MAPK9      | -0.2392408 | 0.2500878 | -0.9566 | 0.339   | -0.268985696 | count | 1 |
| DLC1       | -0.5662224 | 0.6699043 | -0.8452 | 0.398   | -0.268774657 | count | 1 |
| ACADVL     | -0.1899113 | 0.0873915 | -2.1731 | 0.0299  | -0.268559238 | count | 1 |
| PITPNA     | -0.1941179 | 0.1367498 | -1.4195 | 0.156   | -0.268361692 | count | 1 |
| UBAC1      | -0.1921489 | 0.1109746 | -1.7315 | 0.0835  | -0.268274844 | count | 1 |
| INTS2      | -0.3244599 | 0.4332876 | -0.7488 | 0.454   | -0.268212294 | count | 1 |
| BCLAF3     | -0.2354845 | 0.3981828 | -0.5914 | 0.554   | -0.268127803 | count | 1 |
| AC005726.5 | -0.3243011 | 0.4706397 | -0.6891 | 0.491   | -0.268088051 | count | 1 |
| NUP98      | -0.215934  | 0.2009339 | -1.0747 | 0.283   | -0.267935577 | count | 1 |
| NUDT1      | -0.1908568 | 0.1036354 | -1.8416 | 0.0657  | -0.267428559 | count | 1 |
| AL035587.1 | -0.8603871 | 0.7235617 | -1.1891 | 0.235   | -0.267391754 | count | 1 |
| NIPSNAP1   | -0.2541073 | 0.3905257 | -0.6507 | 0.515   | -0.267138531 | count | 1 |
| NSMCE3     | -0.1968391 | 0.1569911 | -1.2538 | 0.21    | -0.266887997 | count | 1 |
| MIF4GD     | -0.1932599 | 0.121262  | -1.5937 | 0.111   | -0.266826864 | count | 1 |
| SSR3       | -0.1869186 | 0.0565355 | -3.3062 | 0.001   | -0.266659325 | count | 1 |
| ARPC5L     | -0.1916763 | 0.1248494 | -1.5353 | 0.125   | -0.266072455 | count | 1 |
| FAM173A    | -0.1925939 | 0.111782  | -1.7229 | 0.085   | -0.266017793 | count | 1 |

|             |            |           |         |          |              |       |             |
|-------------|------------|-----------|---------|----------|--------------|-------|-------------|
| DHRS11      | -0.284374  | 0.5225966 | -0.5442 | 0.586    | -0.26574135  | count | 1           |
| CHUK        | -0.2582862 | 0.3223133 | -0.8014 | 0.423    | -0.265412221 | count | 1           |
| TTC1        | -0.1907877 | 0.1011095 | -1.8869 | 0.0593   | -0.265293399 | count | 1           |
| MRPL36      | -0.1919512 | 0.1363102 | -1.4082 | 0.159    | -0.265132858 | count | 1           |
| MAP1LC3B    | -0.1853935 | 0.0576119 | -3.218  | 0.00131  | -0.265085198 | count | 1           |
| B4GALT1-AS1 | -0.3693321 | 0.5750937 | -0.6422 | 0.521    | -0.265046552 | count | 1           |
| BRD3OS      | -0.4197973 | 0.6826282 | -0.615  | 0.539    | -0.264828003 | count | 1           |
| CORO1C      | -0.1921124 | 0.1531817 | -1.2541 | 0.21     | -0.264641044 | count | 1           |
| LSM7        | -0.1860534 | 0.0694904 | -2.6774 | 0.00747  | -0.264476363 | count | 1           |
| RNF181      | -0.1855847 | 0.0683664 | -2.7146 | 0.00668  | -0.264402993 | count | 1           |
| ACBD3       | -0.1885418 | 0.1109128 | -1.6999 | 0.0893   | -0.26419153  | count | 1           |
| SFXN4       | -0.2253526 | 0.2766965 | -0.8144 | 0.415    | -0.263953666 | count | 1           |
| ABL2        | -0.2010638 | 0.1990593 | -1.0101 | 0.313    | -0.263639402 | count | 1           |
| PIGZ        | -0.3117014 | 0.9255702 | -0.3368 | 0.736    | -0.263540716 | count | 1           |
| TMEM8A      | -0.2033261 | 0.196589  | -1.0343 | 0.301    | -0.263533607 | count | 1           |
| MICAL2      | -0.2543367 | 0.2722678 | -0.9341 | 0.35     | -0.263512832 | count | 1           |
| GOSR2       | -0.216577  | 0.2232466 | -0.9701 | 0.332    | -0.263459298 | count | 1           |
| PFDN2       | -0.1851572 | 0.0678887 | -2.7274 | 0.00643  | -0.263333514 | count | 1           |
| HIST1H4C    | -0.1889925 | 0.1604974 | -1.1775 | 0.239    | -0.263327103 | count | 1           |
| MRS2        | -0.2684392 | 0.3471932 | -0.7732 | 0.439    | -0.263297571 | count | 1           |
| FCRLB       | -0.2854692 | 0.516629  | -0.5526 | 0.581    | -0.2631642   | count | 1           |
| CST7        | -0.2177116 | 0.2735461 | -0.7959 | 0.426    | -0.263148827 | count | 1           |
| NOMO1       | -0.304858  | 0.6112772 | -0.4987 | 0.618    | -0.262967468 | count | 1           |
| RPF2        | -0.1917671 | 0.1234935 | -1.5529 | 0.121    | -0.262944712 | count | 1           |
| COX8A       | -0.1834254 | 0.0445135 | -4.1207 | 3.90E-05 | -0.262901212 | count | 0.919737    |
| HES6        | -0.298997  | 0.3992483 | -0.7489 | 0.454    | -0.26272498  | count | 1           |
| GTF2H1      | -0.219119  | 0.206435  | -1.0614 | 0.289    | -0.262395122 | count | 1           |
| RDH10       | -0.3100258 | 0.501146  | -0.6186 | 0.536    | -0.262194158 | count | 1           |
| SSR4        | -0.1826836 | 0.0422986 | -4.3189 | 1.63E-05 | -0.262024914 | count | 0.385658    |
| SLAMF1      | -1.0764158 | 0.8531133 | -1.2618 | 0.207    | -0.261857505 | count | 1           |
| ZMIZ2       | -0.2437137 | 0.3459577 | -0.7045 | 0.481    | -0.261538521 | count | 1           |
| GAS8        | -0.3781414 | 0.832711  | -0.4541 | 0.65     | -0.261527843 | count | 1           |
| BAG2        | -0.4373147 | 0.5335871 | -0.8196 | 0.413    | -0.261463326 | count | 1           |
| DHX32       | -0.251859  | 0.4407393 | -0.5714 | 0.568    | -0.261015839 | count | 1           |
| MAGED1      | -0.3309552 | 0.5488423 | -0.603  | 0.547    | -0.260919703 | count | 1           |
| AL021068.1  | -0.8320738 | 0.8023904 | -1.037  | 0.3      | -0.26080461  | count | 1           |
| NXT1        | -0.185013  | 0.0926287 | -1.9974 | 0.0459   | -0.260612082 | count | 1           |
| CDC20       | -0.3302738 | 0.9012916 | -0.3664 | 0.714    | -0.260413539 | count | 1           |
| ILK         | -0.1879642 | 0.1069867 | -1.7569 | 0.0791   | -0.260356959 | count | 1           |
| LAPTM5      | -0.1812031 | 0.0339074 | -5.3441 | 9.93E-08 | -0.260211828 | count | 0.002373767 |
| GPATCH4     | -0.2054603 | 0.2203283 | -0.9325 | 0.351    | -0.260058314 | count | 1           |
| SMIM30      | -0.203682  | 0.159745  | -1.275  | 0.202    | -0.259874149 | count | 1           |
| ZCCHC17     | -0.1909126 | 0.1408273 | -1.3557 | 0.175    | -0.259623787 | count | 1           |
| COX20       | -0.1844954 | 0.1085796 | -1.6992 | 0.0894   | -0.259506031 | count | 1           |
| DACH1       | -1.612705  | 1.0499575 | -1.536  | 0.125    | -0.259383454 | count | 1           |

|            |            |           |         |          |              |       |             |
|------------|------------|-----------|---------|----------|--------------|-------|-------------|
| SLC17A9    | -0.2615904 | 0.5216478 | -0.5015 | 0.616    | -0.25938339  | count | 1           |
| TGIF1      | -0.185098  | 0.0888917 | -2.0823 | 0.0374   | -0.259344579 | count | 1           |
| NKIRAS1    | -0.2274964 | 0.2762892 | -0.8234 | 0.41     | -0.259199921 | count | 1           |
| GGCX       | -0.2003286 | 0.188756  | -1.0613 | 0.289    | -0.258817803 | count | 1           |
| GLOD4      | -0.1910277 | 0.1326766 | -1.4398 | 0.15     | -0.25853777  | count | 1           |
| NPRL2      | -0.2555703 | 0.3670792 | -0.6962 | 0.486    | -0.258336319 | count | 1           |
| RPLP0      | -0.1793645 | 0.0322284 | -5.5654 | 2.90E-08 | -0.258317129 | count | 0.000694608 |
| AC008915.2 | -0.2798842 | 0.5047779 | -0.5545 | 0.579    | -0.258215881 | count | 1           |
| NFS1       | -0.2417025 | 0.4114101 | -0.5875 | 0.557    | -0.257823211 | count | 1           |
| HLA-DRA    | -0.178681  | 0.0472362 | -3.7827 | 0.000159 | -0.257694456 | count | 1           |
| USP9X      | -0.1982857 | 0.1704672 | -1.1632 | 0.245    | -0.257459004 | count | 1           |
| SAT1       | -0.1785758 | 0.0351745 | -5.0769 | 4.13E-07 | -0.257384571 | count | 0.009850463 |
| G3BP2      | -0.1834489 | 0.0909373 | -2.0173 | 0.0438   | -0.257205624 | count | 1           |
| PGM3       | -0.2237401 | 0.3501099 | -0.6391 | 0.523    | -0.256923146 | count | 1           |
| CYP51A1    | -0.3708058 | 0.5244934 | -0.707  | 0.48     | -0.256832714 | count | 1           |
| TMEM201    | -1.0432195 | 1.1229209 | -0.929  | 0.353    | -0.256440756 | count | 1           |
| SPIN4      | -1.0432195 | 1.1229209 | -0.929  | 0.353    | -0.256440756 | count | 1           |
| ABHD8      | -0.2207916 | 0.2917786 | -0.7567 | 0.449    | -0.256250461 | count | 1           |
| NR4A3      | -0.1818403 | 0.1135237 | -1.6018 | 0.109    | -0.256119166 | count | 1           |
| MORF4L2    | -0.1886995 | 0.1287197 | -1.466  | 0.143    | -0.256036906 | count | 1           |
| ZBTB8A     | -1.04024   | 0.8139698 | -1.278  | 0.201    | -0.255947471 | count | 1           |
| PIM1       | -0.1898324 | 0.1562073 | -1.2153 | 0.224    | -0.255740939 | count | 1           |
| ERN1       | -0.1874359 | 0.1380431 | -1.3578 | 0.175    | -0.255689515 | count | 1           |
| TMEM126A   | -0.186698  | 0.1383571 | -1.3494 | 0.177    | -0.25533318  | count | 1           |
| BRWD1-AS2  | -0.6786178 | 0.7751184 | -0.8755 | 0.381    | -0.255323181 | count | 1           |
| SLC22A4    | -0.354371  | 0.5423266 | -0.6534 | 0.514    | -0.255048347 | count | 1           |
| SPARC      | -0.2521755 | 0.458442  | -0.5501 | 0.582    | -0.255004258 | count | 1           |
| ZNF808     | -0.2286216 | 0.506019  | -0.4518 | 0.651    | -0.254989906 | count | 1           |
| CFDP1      | -0.1831357 | 0.122786  | -1.4915 | 0.136    | -0.254940104 | count | 1           |
| CBWD6      | -0.4873153 | 0.7642389 | -0.6376 | 0.524    | -0.254797619 | count | 1           |
| PI4K2A     | -0.2021931 | 0.2379086 | -0.8499 | 0.395    | -0.254356364 | count | 1           |
| PPME1      | -0.2589481 | 0.3850595 | -0.6725 | 0.501    | -0.25428486  | count | 1           |
| BRI3       | -0.1766324 | 0.0372313 | -4.7442 | 2.21E-06 | -0.254101396 | count | 0.05256043  |
| CDC37L1-DT | -0.5302677 | 0.7724588 | -0.6865 | 0.492    | -0.254063787 | count | 1           |
| BBOF1      | -0.5302677 | 0.9339045 | -0.5678 | 0.57     | -0.254063787 | count | 1           |
| CABLES2    | -0.5302677 | 0.8335721 | -0.6361 | 0.525    | -0.254063787 | count | 1           |
| PTTG1IP    | -0.1788035 | 0.0711379 | -2.5135 | 0.012    | -0.254042824 | count | 1           |
| RCC1       | -0.2584926 | 0.4617299 | -0.5598 | 0.576    | -0.253851731 | count | 1           |
| OAZ3       | -0.8027612 | 0.6709982 | -1.1964 | 0.232    | -0.253839432 | count | 1           |
| LINC00484  | -0.8027612 | 0.8198446 | -0.9792 | 0.328    | -0.253839432 | count | 1           |
| ZNF410     | -0.8027612 | 0.9389105 | -0.855  | 0.393    | -0.253839432 | count | 1           |
| B3GAT3     | -0.1857023 | 0.1378126 | -1.3475 | 0.178    | -0.253715693 | count | 1           |
| FBXL8      | -0.381597  | 0.513193  | -0.7436 | 0.457    | -0.253603411 | count | 1           |
| CHMP2B     | -0.180935  | 0.0926562 | -1.9528 | 0.051    | -0.253477184 | count | 1           |
| ARIH2      | -0.1934989 | 0.2034409 | -0.9511 | 0.342    | -0.253290334 | count | 1           |

|            |            |           |         |          |              |       |             |
|------------|------------|-----------|---------|----------|--------------|-------|-------------|
| SNCA       | -0.192143  | 0.1528093 | -1.2574 | 0.209    | -0.253247321 | count | 1           |
| CHMP3      | -0.1848247 | 0.1405681 | -1.3148 | 0.189    | -0.252881756 | count | 1           |
| GRWD1      | -0.2436055 | 0.3451336 | -0.7058 | 0.48     | -0.252687507 | count | 1           |
| LYNX1      | -1.02052   | 0.639651  | -1.5954 | 0.111    | -0.252653646 | count | 1           |
| AC090527.3 | -0.3983872 | 0.6543273 | -0.6089 | 0.543    | -0.252492271 | count | 1           |
| ESF1       | -0.1874007 | 0.1682076 | -1.1141 | 0.265    | -0.252480504 | count | 1           |
| LINS1      | -0.379683  | 0.420589  | -0.9027 | 0.367    | -0.25243184  | count | 1           |
| ATP6V0B    | -0.175553  | 0.0352143 | -4.9853 | 6.62E-07 | -0.252353361 | count | 0.015778108 |
| EID2B      | -0.3114088 | 0.4618763 | -0.6742 | 0.5      | -0.252334003 | count | 1           |
| TMEM260    | -0.2595197 | 0.5180352 | -0.501  | 0.616    | -0.252147255 | count | 1           |
| SMAD6      | -0.6681726 | 1.0126583 | -0.6598 | 0.509    | -0.25214219  | count | 1           |
| XKR6       | -0.6681725 | 0.9500819 | -0.7033 | 0.482    | -0.252142161 | count | 1           |
| AP005329.3 | -0.2656115 | 0.3474269 | -0.7645 | 0.445    | -0.25198987  | count | 1           |
| KLHL42     | -0.3278598 | 0.3845041 | -0.8527 | 0.394    | -0.251918236 | count | 1           |
| CLDN23     | -0.2512119 | 0.3756569 | -0.6687 | 0.504    | -0.251779247 | count | 1           |
| LSM10      | -0.1801396 | 0.091129  | -1.9768 | 0.0482   | -0.251620015 | count | 1           |
| HSDL1      | -0.2463602 | 0.3395105 | -0.7256 | 0.468    | -0.25143276  | count | 1           |
| PRRC2C     | -0.1767948 | 0.0657872 | -2.6874 | 0.00725  | -0.251422587 | count | 1           |
| SECISBP2   | -0.1879148 | 0.1701083 | -1.1047 | 0.269    | -0.251322953 | count | 1           |
| TRIM21     | -0.2506735 | 0.3128987 | -0.8011 | 0.423    | -0.251255465 | count | 1           |
| AC079922.2 | -0.377653  | 0.6079131 | -0.6212 | 0.535    | -0.251188113 | count | 1           |
| CHTOP      | -0.1910297 | 0.1655104 | -1.1542 | 0.249    | -0.251041591 | count | 1           |
| UMPS       | -0.2400638 | 0.3245979 | -0.7396 | 0.46     | -0.250961004 | count | 1           |
| ACVR1      | -0.2437691 | 0.4538476 | -0.5371 | 0.591    | -0.250896187 | count | 1           |
| NDUFC1     | -0.1774245 | 0.0791117 | -2.2427 | 0.025    | -0.250831718 | count | 1           |
| PLVAP      | -1.5028693 | 1.5410051 | -0.9753 | 0.33     | -0.250308571 | count | 1           |
| TESK2      | -0.2326636 | 0.3981105 | -0.5844 | 0.559    | -0.249951147 | count | 1           |
| UPF3B      | -0.2004397 | 0.2222481 | -0.9019 | 0.367    | -0.249688346 | count | 1           |
| BAHD1      | -0.3245969 | 0.498407  | -0.6513 | 0.515    | -0.249557422 | count | 1           |
| TBK1       | -0.1997155 | 0.1690197 | -1.1816 | 0.237    | -0.248795606 | count | 1           |
| OPA3       | -0.217208  | 0.3011081 | -0.7214 | 0.471    | -0.248629521 | count | 1           |
| PDE12      | -0.2313888 | 0.2918662 | -0.7928 | 0.428    | -0.248612601 | count | 1           |
| TAB1       | -0.5171306 | 0.6096479 | -0.8482 | 0.396    | -0.248609405 | count | 1           |
| ZNF428     | -0.1827051 | 0.1365187 | -1.3383 | 0.181    | -0.248445751 | count | 1           |
| CCDC115    | -0.183416  | 0.1361885 | -1.3468 | 0.178    | -0.248351664 | count | 1           |
| PSMD7      | -0.1754467 | 0.0781102 | -2.2461 | 0.0248   | -0.248325534 | count | 1           |
| NHP2       | -0.1763523 | 0.0955552 | -1.8456 | 0.0651   | -0.248235688 | count | 1           |
| SELENOW    | -0.1741821 | 0.0712542 | -2.4445 | 0.0146   | -0.24820379  | count | 1           |
| LRRC3      | -0.7793508 | 0.8405471 | -0.9272 | 0.354    | -0.248169107 | count | 1           |
| ACSM3      | -0.4124039 | 0.485478  | -0.8495 | 0.396    | -0.247959444 | count | 1           |
| TTLL1      | -0.4722815 | 0.7159683 | -0.6596 | 0.51     | -0.247851355 | count | 1           |
| PGAM1      | -0.1731685 | 0.0603486 | -2.8695 | 0.00415  | -0.247839535 | count | 1           |
| RSPRY1     | -0.2133192 | 0.2698609 | -0.7905 | 0.429    | -0.247716366 | count | 1           |
| NIPA2      | -0.1869563 | 0.1407896 | -1.3279 | 0.184    | -0.247662382 | count | 1           |
| GSTM3      | -0.4383976 | 0.8466258 | -0.5178 | 0.605    | -0.247603106 | count | 1           |

|            |            |           |         |          |              |       |            |
|------------|------------|-----------|---------|----------|--------------|-------|------------|
| AL512353.1 | -1.46916   | 1.1353105 | -1.2941 | 0.196    | -0.247342779 | count | 1          |
| SMYD5      | -1.46916   | 1.1353105 | -1.2941 | 0.196    | -0.247342779 | count | 1          |
| CACNA1A    | -0.2639147 | 0.7108074 | -0.3713 | 0.71     | -0.247305232 | count | 1          |
| DUSP23     | -0.1760301 | 0.0986585 | -1.7842 | 0.0745   | -0.247149143 | count | 1          |
| UBE2Z      | -0.1902885 | 0.167269  | -1.1376 | 0.255    | -0.246956826 | count | 1          |
| TRIM3      | -0.5131312 | 0.7258816 | -0.7069 | 0.48     | -0.246940445 | count | 1          |
| SLC35F6    | -0.1861728 | 0.192516  | -0.9671 | 0.334    | -0.246502972 | count | 1          |
| NDUFV2     | -0.1728691 | 0.0594232 | -2.9091 | 0.0037   | -0.246391962 | count | 1          |
| SMPD3      | -0.9831256 | 1.2483993 | -0.7875 | 0.431    | -0.246264716 | count | 1          |
| NOP14      | -0.1918921 | 0.2483456 | -0.7727 | 0.44     | -0.245468252 | count | 1          |
| LAIR2      | -0.6461852 | 0.9064143 | -0.7129 | 0.476    | -0.24537265  | count | 1          |
| NOP56      | -0.183796  | 0.1439763 | -1.2766 | 0.202    | -0.245331927 | count | 1          |
| RAB7A      | -0.1723826 | 0.0588775 | -2.9278 | 0.00344  | -0.245189258 | count | 1          |
| MED8       | -0.1802289 | 0.144081  | -1.2509 | 0.211    | -0.244907741 | count | 1          |
| WDR1       | -0.1767597 | 0.1134005 | -1.5587 | 0.119    | -0.244821495 | count | 1          |
| AC025164.1 | -0.1762141 | 0.2795359 | -0.6304 | 0.529    | -0.244481621 | count | 1          |
| EIF4EBP1   | -0.1724703 | 0.0775774 | -2.2232 | 0.0263   | -0.244369007 | count | 1          |
| EIF5AL1    | -0.5064527 | 0.7824255 | -0.6473 | 0.518    | -0.244144687 | count | 1          |
| C5orf63    | -1.432447  | 1.004187  | -1.4265 | 0.154    | -0.244011602 | count | 1          |
| SNRPE      | -0.1736905 | 0.0916291 | -1.8956 | 0.0581   | -0.244007596 | count | 1          |
| ATP6V0A2   | -0.2816977 | 0.3412315 | -0.8255 | 0.409    | -0.243858897 | count | 1          |
| MILR1      | -0.1819152 | 0.1383631 | -1.3148 | 0.189    | -0.2437252   | count | 1          |
| NUTF2      | -0.1743089 | 0.1046197 | -1.6661 | 0.0958   | -0.24363409  | count | 1          |
| PDAP1      | -0.1735219 | 0.0986002 | -1.7599 | 0.0786   | -0.243271105 | count | 1          |
| WDR43      | -0.1789955 | 0.1484885 | -1.2054 | 0.228    | -0.243176414 | count | 1          |
| NDUFV3     | -0.1743894 | 0.1073771 | -1.6241 | 0.104    | -0.242405564 | count | 1          |
| BTRC       | -0.2620747 | 0.4553817 | -0.5755 | 0.565    | -0.2423803   | count | 1          |
| ACOX3      | -0.2548147 | 0.4291855 | -0.5937 | 0.553    | -0.242088963 | count | 1          |
| SNRNP25    | -0.1813419 | 0.1470326 | -1.2333 | 0.218    | -0.242073099 | count | 1          |
| HELLS      | -0.4598217 | 0.7201245 | -0.6385 | 0.523    | -0.2420499   | count | 1          |
| TMX2       | -0.189562  | 0.1761748 | -1.076  | 0.282    | -0.242009311 | count | 1          |
| PHETA2     | -0.4014461 | 0.6902425 | -0.5816 | 0.561    | -0.241964958 | count | 1          |
| SRR        | -0.3801963 | 0.5648011 | -0.6732 | 0.501    | -0.241909711 | count | 1          |
| CD58       | -0.1741235 | 0.1233135 | -1.412  | 0.158    | -0.241892106 | count | 1          |
| PSMB6      | -0.1692563 | 0.0530598 | -3.1899 | 0.00144  | -0.241703073 | count | 1          |
| ZNF706     | -0.1689871 | 0.0539788 | -3.1306 | 0.00176  | -0.241692848 | count | 1          |
| TBCD       | -0.2612851 | 0.2964227 | -0.8815 | 0.378    | -0.241676245 | count | 1          |
| MALSU1     | -0.1810908 | 0.1675041 | -1.0811 | 0.28     | -0.241635899 | count | 1          |
| PRRG1      | -0.7527666 | 0.8204925 | -0.9175 | 0.359    | -0.241612885 | count | 1          |
| ADAM8      | -0.1787566 | 0.1745534 | -1.0241 | 0.306    | -0.241572751 | count | 1          |
| LAPTM4A    | -0.1686045 | 0.0470014 | -3.5872 | 0.000341 | -0.24145643  | count | 1          |
| TMEM68     | -0.2474638 | 0.4359527 | -0.5676 | 0.57     | -0.240796022 | count | 1          |
| ORMDL2     | -0.1722697 | 0.1056434 | -1.6307 | 0.103    | -0.240789695 | count | 1          |
| SH3BGR13   | -0.1668481 | 0.0354664 | -4.7044 | 2.69E-06 | -0.240519028 | count | 0.06394399 |
| AC092140.1 | -1.392884  | 1.1118937 | -1.2527 | 0.21     | -0.240301008 | count | 1          |

|            |             |             |         |          |              |       |   |
|------------|-------------|-------------|---------|----------|--------------|-------|---|
| RBL1       | -0.6298345  | 0.5790746   | -1.0877 | 0.277    | -0.240273671 | count | 1 |
| GSN        | -0.1685282  | 0.0734752   | -2.2937 | 0.0219   | -0.239711886 | count | 1 |
| IL1A       | -0.4956513  | 1.0425607   | -0.4754 | 0.635    | -0.239599664 | count | 1 |
| SNAPC2     | -0.190002   | 0.1942281   | -0.9782 | 0.328    | -0.239473755 | count | 1 |
| CD22       | -0.3104948  | 0.5943036   | -0.5225 | 0.601    | -0.239318815 | count | 1 |
| SAP130     | -0.2759649  | 0.501487    | -0.5503 | 0.582    | -0.239105814 | count | 1 |
| LRP5L      | -0.3193578  | 0.5566232   | -0.5737 | 0.566    | -0.238811306 | count | 1 |
| MYEF2      | -0.93914    | 0.8669407   | -1.0833 | 0.279    | -0.238506097 | count | 1 |
| MPLKIP     | -0.1723153  | 0.1164102   | -1.4802 | 0.139    | -0.238452013 | count | 1 |
| APAF1      | -0.1809522  | 0.1508595   | -1.1995 | 0.23     | -0.238447757 | count | 1 |
| NDUFS5     | -0.1664843  | 0.0524901   | -3.1717 | 0.00153  | -0.238183967 | count | 1 |
| C5orf22    | -0.2444133  | 0.5684471   | -0.43   | 0.667    | -0.237917906 | count | 1 |
| UQCR11     | -0.1664574  | 0.0532886   | -3.1237 | 0.0018   | -0.237843548 | count | 1 |
| GUK1       | -0.1660384  | 0.0491118   | -3.3808 | 0.000734 | -0.237831556 | count | 1 |
| SPDL1      | -0.2999801  | 0.4872917   | -0.6156 | 0.538    | -0.237775681 | count | 1 |
| MIATNB     | -0.3729953  | 0.5967774   | -0.625  | 0.532    | -0.237694787 | count | 1 |
| TOM1L2     | -0.2691491  | 0.4570426   | -0.5889 | 0.556    | -0.237556199 | count | 1 |
| NUCB2      | -0.1721297  | 0.1222339   | -1.4082 | 0.159    | -0.237539214 | count | 1 |
| SLC38A1    | -0.7355889  | 0.4661188   | -1.5781 | 0.115    | -0.237309646 | count | 1 |
| AL606760.3 | -17.4310003 | 3773.429215 | -0.0046 | 0.996    | -0.237234527 | count | 1 |
| AL139339.1 | -17.4310003 | 3773.429215 | -0.0046 | 0.996    | -0.237234527 | count | 1 |
| AC134312.1 | -17.4310003 | 3773.429215 | -0.0046 | 0.996    | -0.237234527 | count | 1 |
| ZNF610     | -17.4310003 | 3773.429215 | -0.0046 | 0.996    | -0.237234527 | count | 1 |
| AL357079.1 | -17.4308585 | 2783.921146 | -0.0063 | 0.995    | -0.237234527 | count | 1 |
| LINC01160  | -17.4308585 | 2783.921146 | -0.0063 | 0.995    | -0.237234527 | count | 1 |
| AL162258.2 | -17.4308585 | 2783.921146 | -0.0063 | 0.995    | -0.237234527 | count | 1 |
| AL590723.1 | -17.4308585 | 2783.921146 | -0.0063 | 0.995    | -0.237234527 | count | 1 |
| GPC1       | -17.4308585 | 2783.921146 | -0.0063 | 0.995    | -0.237234527 | count | 1 |
| C3orf33    | -17.4308585 | 2783.921146 | -0.0063 | 0.995    | -0.237234527 | count | 1 |
| AC092535.1 | -17.4308585 | 2783.921146 | -0.0063 | 0.995    | -0.237234527 | count | 1 |
| LIFR       | -17.4308585 | 2783.921146 | -0.0063 | 0.995    | -0.237234527 | count | 1 |
| AC008875.1 | -17.4308585 | 2783.921146 | -0.0063 | 0.995    | -0.237234527 | count | 1 |
| MRPS30-DT  | -17.4308585 | 2783.921146 | -0.0063 | 0.995    | -0.237234527 | count | 1 |
| AC109322.1 | -17.4308585 | 2783.921146 | -0.0063 | 0.995    | -0.237234527 | count | 1 |
| ASS1       | -17.4308585 | 2783.921146 | -0.0063 | 0.995    | -0.237234527 | count | 1 |
| ADAM12     | -17.4308585 | 2783.921146 | -0.0063 | 0.995    | -0.237234527 | count | 1 |
| AC022509.4 | -17.4308585 | 2783.921146 | -0.0063 | 0.995    | -0.237234527 | count | 1 |
| IKZF3      | -17.4308585 | 2783.921146 | -0.0063 | 0.995    | -0.237234527 | count | 1 |
| AC130371.2 | -17.4308585 | 2783.921146 | -0.0063 | 0.995    | -0.237234527 | count | 1 |
| CPXM1      | -17.4308585 | 2783.921146 | -0.0063 | 0.995    | -0.237234527 | count | 1 |
| GRIN3B     | -17.4308585 | 2783.921146 | -0.0063 | 0.995    | -0.237234527 | count | 1 |
| NEURL3     | -17.421322  | 2094.167041 | -0.0083 | 0.993    | -0.237234527 | count | 1 |
| EVC2       | -17.421322  | 2094.167041 | -0.0083 | 0.993    | -0.237234527 | count | 1 |
| AL441883.1 | -17.421322  | 2094.167041 | -0.0083 | 0.993    | -0.237234527 | count | 1 |
| LAMB1      | -17.421322  | 2094.167041 | -0.0083 | 0.993    | -0.237234527 | count | 1 |



|             |             |             |         |       |              |       |   |
|-------------|-------------|-------------|---------|-------|--------------|-------|---|
| DNAJC12     | -17.421322  | 2094.167041 | -0.0083 | 0.993 | -0.237234527 | count | 1 |
| FGF5        | -17.421196  | 2698.119368 | -0.0065 | 0.995 | -0.237234527 | count | 1 |
| E2F1        | -17.421196  | 2698.119368 | -0.0065 | 0.995 | -0.237234527 | count | 1 |
| AL031663.3  | -17.3619141 | 1596.679103 | -0.0109 | 0.991 | -0.237234527 | count | 1 |
| ANXA3       | -17.3610703 | 1312.10275  | -0.0132 | 0.989 | -0.237234527 | count | 1 |
| ADTRP       | -17.3610703 | 1312.10275  | -0.0132 | 0.989 | -0.237234527 | count | 1 |
| LPAR3       | -17.0439327 | 1906.12048  | -0.0089 | 0.993 | -0.237234524 | count | 1 |
| DENND2C     | -17.0439327 | 1906.12048  | -0.0089 | 0.993 | -0.237234524 | count | 1 |
| MEX3A       | -17.0439327 | 1906.12048  | -0.0089 | 0.993 | -0.237234524 | count | 1 |
| KIF14       | -17.0439327 | 1906.12048  | -0.0089 | 0.993 | -0.237234524 | count | 1 |
| CCDC150     | -17.0439327 | 1906.12048  | -0.0089 | 0.993 | -0.237234524 | count | 1 |
| AC012510.1  | -17.0439327 | 1906.12048  | -0.0089 | 0.993 | -0.237234524 | count | 1 |
| AC092053.3  | -17.0439327 | 1906.12048  | -0.0089 | 0.993 | -0.237234524 | count | 1 |
| PSMD6-AS1   | -17.0439327 | 1906.12048  | -0.0089 | 0.993 | -0.237234524 | count | 1 |
| HCG20       | -17.0439327 | 1906.12048  | -0.0089 | 0.993 | -0.237234524 | count | 1 |
| THBS2       | -17.0439327 | 1906.12048  | -0.0089 | 0.993 | -0.237234524 | count | 1 |
| SLC38A5     | -17.0439327 | 1906.12048  | -0.0089 | 0.993 | -0.237234524 | count | 1 |
| AC087273.2  | -17.0439327 | 1906.12048  | -0.0089 | 0.993 | -0.237234524 | count | 1 |
| ADRB3       | -17.0439327 | 1906.12048  | -0.0089 | 0.993 | -0.237234524 | count | 1 |
| MELK        | -17.0439327 | 1906.12048  | -0.0089 | 0.993 | -0.237234524 | count | 1 |
| AC090587.1  | -17.0439327 | 1906.12048  | -0.0089 | 0.993 | -0.237234524 | count | 1 |
| CCDC81      | -17.0439327 | 1906.12048  | -0.0089 | 0.993 | -0.237234524 | count | 1 |
| TEAD4       | -17.0439327 | 1906.12048  | -0.0089 | 0.993 | -0.237234524 | count | 1 |
| LINC01481   | -17.0439327 | 1906.12048  | -0.0089 | 0.993 | -0.237234524 | count | 1 |
| SPATA13-AS1 | -17.0439327 | 1906.12048  | -0.0089 | 0.993 | -0.237234524 | count | 1 |
| CPB2-AS1    | -17.0439327 | 1906.12048  | -0.0089 | 0.993 | -0.237234524 | count | 1 |
| RBM26-AS1   | -17.0439327 | 1906.12048  | -0.0089 | 0.993 | -0.237234524 | count | 1 |
| AC091057.2  | -17.0439327 | 1906.12048  | -0.0089 | 0.993 | -0.237234524 | count | 1 |
| AC051619.5  | -17.0439327 | 1906.12048  | -0.0089 | 0.993 | -0.237234524 | count | 1 |
| BCAS1       | -17.0439327 | 1906.12048  | -0.0089 | 0.993 | -0.237234524 | count | 1 |
| ZNF625      | -17.0439327 | 1906.12048  | -0.0089 | 0.993 | -0.237234524 | count | 1 |
| PIK3R2      | -17.0439327 | 1906.12048  | -0.0089 | 0.993 | -0.237234524 | count | 1 |
| AC011479.1  | -17.0439327 | 1906.12048  | -0.0089 | 0.993 | -0.237234524 | count | 1 |
| CRYBB2      | -17.0439327 | 1906.12048  | -0.0089 | 0.993 | -0.237234524 | count | 1 |
| AP001434.1  | -17.0439327 | 1906.12048  | -0.0089 | 0.993 | -0.237234524 | count | 1 |
| SELP        | -17.0439248 | 2527.770254 | -0.0067 | 0.995 | -0.237234524 | count | 1 |
| MOGAT1      | -17.0439248 | 2527.770254 | -0.0067 | 0.995 | -0.237234524 | count | 1 |
| ITK         | -17.0439248 | 2527.770254 | -0.0067 | 0.995 | -0.237234524 | count | 1 |
| CPXM2       | -17.0439248 | 2527.770254 | -0.0067 | 0.995 | -0.237234524 | count | 1 |
| CALB2       | -17.0439248 | 2527.770254 | -0.0067 | 0.995 | -0.237234524 | count | 1 |
| RND2        | -17.0439248 | 2527.770254 | -0.0067 | 0.995 | -0.237234524 | count | 1 |
| ERG         | -17.0439248 | 2527.770254 | -0.0067 | 0.995 | -0.237234524 | count | 1 |
| C12orf60    | -16.8506404 | 1391.939263 | -0.0121 | 0.99  | -0.237234522 | count | 1 |
| CCNT2-AS1   | -16.85023   | 1264.134854 | -0.0133 | 0.989 | -0.237234522 | count | 1 |
| CAV2        | -16.85023   | 1264.134854 | -0.0133 | 0.989 | -0.237234522 | count | 1 |

|            |             |             |         |       |              |       |   |
|------------|-------------|-------------|---------|-------|--------------|-------|---|
| CXCR3      | -16.85023   | 1264.134854 | -0.0133 | 0.989 | -0.237234522 | count | 1 |
| SLC16A13   | -16.85023   | 1264.134854 | -0.0133 | 0.989 | -0.237234522 | count | 1 |
| KAZN       | -16.8134966 | 1289.369266 | -0.013  | 0.99  | -0.237234521 | count | 1 |
| SLC25A34   | -18.566613  | 2265.505006 | -0.0082 | 0.993 | -0.237234423 | count | 1 |
| ACTN2      | -18.40018   | 2346.293979 | -0.0078 | 0.994 | -0.237234422 | count | 1 |
| B3GNT9     | -18.399538  | 2117.899843 | -0.0087 | 0.993 | -0.237234422 | count | 1 |
| SLC47A1    | -18.196182  | 1868.179119 | -0.0097 | 0.992 | -0.237234422 | count | 1 |
| ICA1L      | -17.940905  | 1876.912456 | -0.0096 | 0.992 | -0.237234421 | count | 1 |
| MIAT       | -17.940905  | 1876.912456 | -0.0096 | 0.992 | -0.237234421 | count | 1 |
| ZNF749     | -17.932512  | 1912.902376 | -0.0094 | 0.993 | -0.237234421 | count | 1 |
| DIAPH3     | -17.783356  | 2672.845456 | -0.0067 | 0.995 | -0.23723442  | count | 1 |
| NAT2       | -17.706694  | 1762.003592 | -0.01   | 0.992 | -0.23723442  | count | 1 |
| AC114956.1 | -17.594487  | 2674.601446 | -0.0066 | 0.995 | -0.237234419 | count | 1 |
| AL359643.3 | -17.593663  | 1889.168622 | -0.0093 | 0.993 | -0.237234419 | count | 1 |
| BACH2      | -17.593663  | 1889.168622 | -0.0093 | 0.993 | -0.237234419 | count | 1 |
| AL590708.1 | -17.593663  | 1889.168622 | -0.0093 | 0.993 | -0.237234419 | count | 1 |
| AC044839.1 | -17.593663  | 1889.168622 | -0.0093 | 0.993 | -0.237234419 | count | 1 |
| ZNF582-AS1 | -17.593663  | 1889.168622 | -0.0093 | 0.993 | -0.237234419 | count | 1 |
| AL590787.1 | -17.593544  | 2505.517522 | -0.007  | 0.994 | -0.237234419 | count | 1 |
| AC010999.2 | -17.566309  | 1558.078956 | -0.0113 | 0.991 | -0.237234419 | count | 1 |
| ACSM1      | -17.440746  | 2020.827098 | -0.0086 | 0.993 | -0.237234418 | count | 1 |
| FOXD2-AS1  | -17.371153  | 1538.27023  | -0.0113 | 0.991 | -0.237234418 | count | 1 |
| AL160006.1 | -17.20582   | 1915.40763  | -0.009  | 0.993 | -0.237234416 | count | 1 |
| ZKSCAN2    | -17.202784  | 1657.673019 | -0.0104 | 0.992 | -0.237234416 | count | 1 |
| AL663074.1 | -16.395751  | 3485.021594 | -0.0047 | 0.996 | -0.237234405 | count | 1 |
| NEGR1      | -16.395751  | 3485.021594 | -0.0047 | 0.996 | -0.237234405 | count | 1 |
| PALMD      | -16.395751  | 3485.021594 | -0.0047 | 0.996 | -0.237234405 | count | 1 |
| AC244453.2 | -16.395751  | 3485.021594 | -0.0047 | 0.996 | -0.237234405 | count | 1 |
| ERVMER61-1 | -16.395751  | 3485.021594 | -0.0047 | 0.996 | -0.237234405 | count | 1 |
| HSD11B1    | -16.395751  | 3485.021594 | -0.0047 | 0.996 | -0.237234405 | count | 1 |
| AL353593.2 | -16.395751  | 3485.021594 | -0.0047 | 0.996 | -0.237234405 | count | 1 |
| AC016738.1 | -16.395751  | 3485.021594 | -0.0047 | 0.996 | -0.237234405 | count | 1 |
| GALNT5     | -16.395751  | 3485.021594 | -0.0047 | 0.996 | -0.237234405 | count | 1 |
| FSIP2      | -16.395751  | 3485.021594 | -0.0047 | 0.996 | -0.237234405 | count | 1 |
| AC131235.4 | -16.395751  | 3485.021594 | -0.0047 | 0.996 | -0.237234405 | count | 1 |
| SLC26A1    | -16.395751  | 3485.021594 | -0.0047 | 0.996 | -0.237234405 | count | 1 |
| DTHD1      | -16.395751  | 3485.021594 | -0.0047 | 0.996 | -0.237234405 | count | 1 |
| PRDM5      | -16.395751  | 3485.021594 | -0.0047 | 0.996 | -0.237234405 | count | 1 |
| AC020703.1 | -16.395751  | 3485.021594 | -0.0047 | 0.996 | -0.237234405 | count | 1 |
| LINC01948  | -16.395751  | 3485.021594 | -0.0047 | 0.996 | -0.237234405 | count | 1 |
| KLHL3      | -16.395751  | 3485.021594 | -0.0047 | 0.996 | -0.237234405 | count | 1 |
| CXXC5-AS1  | -16.395751  | 3485.021594 | -0.0047 | 0.996 | -0.237234405 | count | 1 |
| AL157373.2 | -16.395751  | 3485.021594 | -0.0047 | 0.996 | -0.237234405 | count | 1 |
| AC003092.1 | -16.395751  | 3485.021594 | -0.0047 | 0.996 | -0.237234405 | count | 1 |
| STRIP2     | -16.395751  | 3485.021594 | -0.0047 | 0.996 | -0.237234405 | count | 1 |

|            |            |             |         |       |              |       |   |
|------------|------------|-------------|---------|-------|--------------|-------|---|
| PFKFB1     | -16.395751 | 3485.021594 | -0.0047 | 0.996 | -0.237234405 | count | 1 |
| AF131216.4 | -16.395751 | 3485.021594 | -0.0047 | 0.996 | -0.237234405 | count | 1 |
| CHRNA6     | -16.395751 | 3485.021594 | -0.0047 | 0.996 | -0.237234405 | count | 1 |
| PMP2       | -16.395751 | 3485.021594 | -0.0047 | 0.996 | -0.237234405 | count | 1 |
| AP002907.1 | -16.395751 | 3485.021594 | -0.0047 | 0.996 | -0.237234405 | count | 1 |
| PSCA       | -16.395751 | 3485.021594 | -0.0047 | 0.996 | -0.237234405 | count | 1 |
| AC233992.3 | -16.395751 | 3485.021594 | -0.0047 | 0.996 | -0.237234405 | count | 1 |
| FBXO10     | -16.395751 | 3485.021594 | -0.0047 | 0.996 | -0.237234405 | count | 1 |
| WNK2       | -16.395751 | 3485.021594 | -0.0047 | 0.996 | -0.237234405 | count | 1 |
| AL158152.2 | -16.395751 | 3485.021594 | -0.0047 | 0.996 | -0.237234405 | count | 1 |
| PTGES      | -16.395751 | 3485.021594 | -0.0047 | 0.996 | -0.237234405 | count | 1 |
| SARDH      | -16.395751 | 3485.021594 | -0.0047 | 0.996 | -0.237234405 | count | 1 |
| AL138921.1 | -16.395751 | 3485.021594 | -0.0047 | 0.996 | -0.237234405 | count | 1 |
| AL121820.1 | -16.395751 | 3485.021594 | -0.0047 | 0.996 | -0.237234405 | count | 1 |
| IGHV3-33   | -16.395751 | 3485.021594 | -0.0047 | 0.996 | -0.237234405 | count | 1 |
| SLC27A2    | -16.395751 | 3485.021594 | -0.0047 | 0.996 | -0.237234405 | count | 1 |
| AC104590.1 | -16.395751 | 3485.021594 | -0.0047 | 0.996 | -0.237234405 | count | 1 |
| UBAP1L     | -16.395751 | 3485.021594 | -0.0047 | 0.996 | -0.237234405 | count | 1 |
| AC130650.2 | -16.395751 | 3485.021594 | -0.0047 | 0.996 | -0.237234405 | count | 1 |
| PLA2G10    | -16.395751 | 3485.021594 | -0.0047 | 0.996 | -0.237234405 | count | 1 |
| LINC02195  | -16.395751 | 3485.021594 | -0.0047 | 0.996 | -0.237234405 | count | 1 |
| AC009093.5 | -16.395751 | 3485.021594 | -0.0047 | 0.996 | -0.237234405 | count | 1 |
| MT3        | -16.395751 | 3485.021594 | -0.0047 | 0.996 | -0.237234405 | count | 1 |
| AC010542.5 | -16.395751 | 3485.021594 | -0.0047 | 0.996 | -0.237234405 | count | 1 |
| AC009120.5 | -16.395751 | 3485.021594 | -0.0047 | 0.996 | -0.237234405 | count | 1 |
| AC135782.3 | -16.395751 | 3485.021594 | -0.0047 | 0.996 | -0.237234405 | count | 1 |
| AC004771.4 | -16.395751 | 3485.021594 | -0.0047 | 0.996 | -0.237234405 | count | 1 |
| AC005899.6 | -16.395751 | 3485.021594 | -0.0047 | 0.996 | -0.237234405 | count | 1 |
| RAPGEFL1   | -16.395751 | 3485.021594 | -0.0047 | 0.996 | -0.237234405 | count | 1 |
| SDK2       | -16.395751 | 3485.021594 | -0.0047 | 0.996 | -0.237234405 | count | 1 |
| AC087289.4 | -16.395751 | 3485.021594 | -0.0047 | 0.996 | -0.237234405 | count | 1 |
| AC027601.1 | -16.395751 | 3485.021594 | -0.0047 | 0.996 | -0.237234405 | count | 1 |
| AC090772.3 | -16.395751 | 3485.021594 | -0.0047 | 0.996 | -0.237234405 | count | 1 |
| AC017100.1 | -16.395751 | 3485.021594 | -0.0047 | 0.996 | -0.237234405 | count | 1 |
| AC011444.1 | -16.395751 | 3485.021594 | -0.0047 | 0.996 | -0.237234405 | count | 1 |
| AC011511.3 | -16.395751 | 3485.021594 | -0.0047 | 0.996 | -0.237234405 | count | 1 |
| AC008764.3 | -16.395751 | 3485.021594 | -0.0047 | 0.996 | -0.237234405 | count | 1 |
| GNG8       | -16.395751 | 3485.021594 | -0.0047 | 0.996 | -0.237234405 | count | 1 |
| AC016027.1 | -16.395751 | 3485.021594 | -0.0047 | 0.996 | -0.237234405 | count | 1 |
| RFPL3S     | -16.395751 | 3485.021594 | -0.0047 | 0.996 | -0.237234405 | count | 1 |
| FP236383.3 | -16.395751 | 3485.021594 | -0.0047 | 0.996 | -0.237234405 | count | 1 |
| VWA1       | -16.395168 | 2462.462616 | -0.0067 | 0.995 | -0.237234405 | count | 1 |
| AL109917.1 | -16.395168 | 2462.462616 | -0.0067 | 0.995 | -0.237234405 | count | 1 |
| CDCA8      | -16.395168 | 2462.462616 | -0.0067 | 0.995 | -0.237234405 | count | 1 |
| RAD54L     | -16.395168 | 2462.462616 | -0.0067 | 0.995 | -0.237234405 | count | 1 |

|            |            |             |         |       |              |       |   |
|------------|------------|-------------|---------|-------|--------------|-------|---|
| MROH7      | -16.395168 | 2462.462616 | -0.0067 | 0.995 | -0.237234405 | count | 1 |
| AC119674.2 | -16.395168 | 2462.462616 | -0.0067 | 0.995 | -0.237234405 | count | 1 |
| ADGRL4     | -16.395168 | 2462.462616 | -0.0067 | 0.995 | -0.237234405 | count | 1 |
| AC093157.2 | -16.395168 | 2462.462616 | -0.0067 | 0.995 | -0.237234405 | count | 1 |
| HIST2H4A   | -16.395168 | 2462.462616 | -0.0067 | 0.995 | -0.237234405 | count | 1 |
| AL391832.1 | -16.395168 | 2462.462616 | -0.0067 | 0.995 | -0.237234405 | count | 1 |
| SDC1       | -16.395168 | 2462.462616 | -0.0067 | 0.995 | -0.237234405 | count | 1 |
| IGKV3-20   | -16.395168 | 2462.462616 | -0.0067 | 0.995 | -0.237234405 | count | 1 |
| DUSP19     | -16.395168 | 2462.462616 | -0.0067 | 0.995 | -0.237234405 | count | 1 |
| LINC01792  | -16.395168 | 2462.462616 | -0.0067 | 0.995 | -0.237234405 | count | 1 |
| HJURP      | -16.395168 | 2462.462616 | -0.0067 | 0.995 | -0.237234405 | count | 1 |
| SYN2       | -16.395168 | 2462.462616 | -0.0067 | 0.995 | -0.237234405 | count | 1 |
| CCR4       | -16.395168 | 2462.462616 | -0.0067 | 0.995 | -0.237234405 | count | 1 |
| AC112220.4 | -16.395168 | 2462.462616 | -0.0067 | 0.995 | -0.237234405 | count | 1 |
| CCR3       | -16.395168 | 2462.462616 | -0.0067 | 0.995 | -0.237234405 | count | 1 |
| CCDC36     | -16.395168 | 2462.462616 | -0.0067 | 0.995 | -0.237234405 | count | 1 |
| AC006252.1 | -16.395168 | 2462.462616 | -0.0067 | 0.995 | -0.237234405 | count | 1 |
| SPATA12    | -16.395168 | 2462.462616 | -0.0067 | 0.995 | -0.237234405 | count | 1 |
| AC073352.1 | -16.395168 | 2462.462616 | -0.0067 | 0.995 | -0.237234405 | count | 1 |
| SLC12A8    | -16.395168 | 2462.462616 | -0.0067 | 0.995 | -0.237234405 | count | 1 |
| LINC02029  | -16.395168 | 2462.462616 | -0.0067 | 0.995 | -0.237234405 | count | 1 |
| LINC02069  | -16.395168 | 2462.462616 | -0.0067 | 0.995 | -0.237234405 | count | 1 |
| ATP13A4    | -16.395168 | 2462.462616 | -0.0067 | 0.995 | -0.237234405 | count | 1 |
| AC019077.1 | -16.395168 | 2462.462616 | -0.0067 | 0.995 | -0.237234405 | count | 1 |
| BBS12      | -16.395168 | 2462.462616 | -0.0067 | 0.995 | -0.237234405 | count | 1 |
| AC109927.2 | -16.395168 | 2462.462616 | -0.0067 | 0.995 | -0.237234405 | count | 1 |
| ANKDD1B    | -16.395168 | 2462.462616 | -0.0067 | 0.995 | -0.237234405 | count | 1 |
| DMGDH      | -16.395168 | 2462.462616 | -0.0067 | 0.995 | -0.237234405 | count | 1 |
| MZB1       | -16.395168 | 2462.462616 | -0.0067 | 0.995 | -0.237234405 | count | 1 |
| SPINK6     | -16.395168 | 2462.462616 | -0.0067 | 0.995 | -0.237234405 | count | 1 |
| FGF18      | -16.395168 | 2462.462616 | -0.0067 | 0.995 | -0.237234405 | count | 1 |
| GPRIN1     | -16.395168 | 2462.462616 | -0.0067 | 0.995 | -0.237234405 | count | 1 |
| AC145098.1 | -16.395168 | 2462.462616 | -0.0067 | 0.995 | -0.237234405 | count | 1 |
| AC136604.3 | -16.395168 | 2462.462616 | -0.0067 | 0.995 | -0.237234405 | count | 1 |
| HIST1H3I   | -16.395168 | 2462.462616 | -0.0067 | 0.995 | -0.237234405 | count | 1 |
| PPT2-EGFL8 | -16.395168 | 2462.462616 | -0.0067 | 0.995 | -0.237234405 | count | 1 |
| Z97832.2   | -16.395168 | 2462.462616 | -0.0067 | 0.995 | -0.237234405 | count | 1 |
| TDRD6      | -16.395168 | 2462.462616 | -0.0067 | 0.995 | -0.237234405 | count | 1 |
| AL080317.3 | -16.395168 | 2462.462616 | -0.0067 | 0.995 | -0.237234405 | count | 1 |
| KLHL7-DT   | -16.395168 | 2462.462616 | -0.0067 | 0.995 | -0.237234405 | count | 1 |
| HOXA4      | -16.395168 | 2462.462616 | -0.0067 | 0.995 | -0.237234405 | count | 1 |
| TRGV5      | -16.395168 | 2462.462616 | -0.0067 | 0.995 | -0.237234405 | count | 1 |
| TRGV3      | -16.395168 | 2462.462616 | -0.0067 | 0.995 | -0.237234405 | count | 1 |
| SUN3       | -16.395168 | 2462.462616 | -0.0067 | 0.995 | -0.237234405 | count | 1 |
| CDHR3      | -16.395168 | 2462.462616 | -0.0067 | 0.995 | -0.237234405 | count | 1 |

|            |            |             |         |       |              |       |   |
|------------|------------|-------------|---------|-------|--------------|-------|---|
| LEP        | -16.395168 | 2462.462616 | -0.0067 | 0.995 | -0.237234405 | count | 1 |
| DGKI       | -16.395168 | 2462.462616 | -0.0067 | 0.995 | -0.237234405 | count | 1 |
| WDR86      | -16.395168 | 2462.462616 | -0.0067 | 0.995 | -0.237234405 | count | 1 |
| LINC00630  | -16.395168 | 2462.462616 | -0.0067 | 0.995 | -0.237234405 | count | 1 |
| APLN       | -16.395168 | 2462.462616 | -0.0067 | 0.995 | -0.237234405 | count | 1 |
| XPNPEP2    | -16.395168 | 2462.462616 | -0.0067 | 0.995 | -0.237234405 | count | 1 |
| MAMLD1     | -16.395168 | 2462.462616 | -0.0067 | 0.995 | -0.237234405 | count | 1 |
| HCFC1-AS1  | -16.395168 | 2462.462616 | -0.0067 | 0.995 | -0.237234405 | count | 1 |
| AC100810.3 | -16.395168 | 2462.462616 | -0.0067 | 0.995 | -0.237234405 | count | 1 |
| CPA6       | -16.395168 | 2462.462616 | -0.0067 | 0.995 | -0.237234405 | count | 1 |
| ATP6V0D2   | -16.395168 | 2462.462616 | -0.0067 | 0.995 | -0.237234405 | count | 1 |
| AL928970.1 | -16.395168 | 2462.462616 | -0.0067 | 0.995 | -0.237234405 | count | 1 |
| IL33       | -16.395168 | 2462.462616 | -0.0067 | 0.995 | -0.237234405 | count | 1 |
| AL158071.3 | -16.395168 | 2462.462616 | -0.0067 | 0.995 | -0.237234405 | count | 1 |
| ROR2       | -16.395168 | 2462.462616 | -0.0067 | 0.995 | -0.237234405 | count | 1 |
| CCDC180    | -16.395168 | 2462.462616 | -0.0067 | 0.995 | -0.237234405 | count | 1 |
| LHX2       | -16.395168 | 2462.462616 | -0.0067 | 0.995 | -0.237234405 | count | 1 |
| AC107884.1 | -16.395168 | 2462.462616 | -0.0067 | 0.995 | -0.237234405 | count | 1 |
| TMEM9B-AS1 | -16.395168 | 2462.462616 | -0.0067 | 0.995 | -0.237234405 | count | 1 |
| GNG3       | -16.395168 | 2462.462616 | -0.0067 | 0.995 | -0.237234405 | count | 1 |
| MYEOV      | -16.395168 | 2462.462616 | -0.0067 | 0.995 | -0.237234405 | count | 1 |
| UCP3       | -16.395168 | 2462.462616 | -0.0067 | 0.995 | -0.237234405 | count | 1 |
| TECTA      | -16.395168 | 2462.462616 | -0.0067 | 0.995 | -0.237234405 | count | 1 |
| OR8G1      | -16.395168 | 2462.462616 | -0.0067 | 0.995 | -0.237234405 | count | 1 |
| OR8G5      | -16.395168 | 2462.462616 | -0.0067 | 0.995 | -0.237234405 | count | 1 |
| CDNF       | -16.395168 | 2462.462616 | -0.0067 | 0.995 | -0.237234405 | count | 1 |
| TMEM26     | -16.395168 | 2462.462616 | -0.0067 | 0.995 | -0.237234405 | count | 1 |
| AC024597.1 | -16.395168 | 2462.462616 | -0.0067 | 0.995 | -0.237234405 | count | 1 |
| AC073370.1 | -16.395168 | 2462.462616 | -0.0067 | 0.995 | -0.237234405 | count | 1 |
| MORN4      | -16.395168 | 2462.462616 | -0.0067 | 0.995 | -0.237234405 | count | 1 |
| WDR11-AS1  | -16.395168 | 2462.462616 | -0.0067 | 0.995 | -0.237234405 | count | 1 |
| AC005342.2 | -16.395168 | 2462.462616 | -0.0067 | 0.995 | -0.237234405 | count | 1 |
| AC024257.4 | -16.395168 | 2462.462616 | -0.0067 | 0.995 | -0.237234405 | count | 1 |
| TROAP      | -16.395168 | 2462.462616 | -0.0067 | 0.995 | -0.237234405 | count | 1 |
| AC023055.1 | -16.395168 | 2462.462616 | -0.0067 | 0.995 | -0.237234405 | count | 1 |
| IFNG       | -16.395168 | 2462.462616 | -0.0067 | 0.995 | -0.237234405 | count | 1 |
| DAO        | -16.395168 | 2462.462616 | -0.0067 | 0.995 | -0.237234405 | count | 1 |
| CABP1      | -16.395168 | 2462.462616 | -0.0067 | 0.995 | -0.237234405 | count | 1 |
| LINC00544  | -16.395168 | 2462.462616 | -0.0067 | 0.995 | -0.237234405 | count | 1 |
| LRRRC63    | -16.395168 | 2462.462616 | -0.0067 | 0.995 | -0.237234405 | count | 1 |
| PTGDR      | -16.395168 | 2462.462616 | -0.0067 | 0.995 | -0.237234405 | count | 1 |
| AKAP5      | -16.395168 | 2462.462616 | -0.0067 | 0.995 | -0.237234405 | count | 1 |
| ZC2HC1C    | -16.395168 | 2462.462616 | -0.0067 | 0.995 | -0.237234405 | count | 1 |
| AL133279.1 | -16.395168 | 2462.462616 | -0.0067 | 0.995 | -0.237234405 | count | 1 |
| AC124312.1 | -16.395168 | 2462.462616 | -0.0067 | 0.995 | -0.237234405 | count | 1 |

|            |            |             |         |       |              |       |   |
|------------|------------|-------------|---------|-------|--------------|-------|---|
| OIP5       | -16.395168 | 2462.462616 | -0.0067 | 0.995 | -0.237234405 | count | 1 |
| AC090970.2 | -16.395168 | 2462.462616 | -0.0067 | 0.995 | -0.237234405 | count | 1 |
| AC023906.5 | -16.395168 | 2462.462616 | -0.0067 | 0.995 | -0.237234405 | count | 1 |
| RORA-AS1   | -16.395168 | 2462.462616 | -0.0067 | 0.995 | -0.237234405 | count | 1 |
| AC107241.1 | -16.395168 | 2462.462616 | -0.0067 | 0.995 | -0.237234405 | count | 1 |
| IQCH       | -16.395168 | 2462.462616 | -0.0067 | 0.995 | -0.237234405 | count | 1 |
| SENP8      | -16.395168 | 2462.462616 | -0.0067 | 0.995 | -0.237234405 | count | 1 |
| CEMIP      | -16.395168 | 2462.462616 | -0.0067 | 0.995 | -0.237234405 | count | 1 |
| AC068870.2 | -16.395168 | 2462.462616 | -0.0067 | 0.995 | -0.237234405 | count | 1 |
| BICDL2     | -16.395168 | 2462.462616 | -0.0067 | 0.995 | -0.237234405 | count | 1 |
| NPIPB2     | -16.395168 | 2462.462616 | -0.0067 | 0.995 | -0.237234405 | count | 1 |
| PRRT2      | -16.395168 | 2462.462616 | -0.0067 | 0.995 | -0.237234405 | count | 1 |
| AC026461.3 | -16.395168 | 2462.462616 | -0.0067 | 0.995 | -0.237234405 | count | 1 |
| ARHGEF15   | -16.395168 | 2462.462616 | -0.0067 | 0.995 | -0.237234405 | count | 1 |
| AC015922.4 | -16.395168 | 2462.462616 | -0.0067 | 0.995 | -0.237234405 | count | 1 |
| AC011815.1 | -16.395168 | 2462.462616 | -0.0067 | 0.995 | -0.237234405 | count | 1 |
| CCDC68     | -16.395168 | 2462.462616 | -0.0067 | 0.995 | -0.237234405 | count | 1 |
| ATP8B1     | -16.395168 | 2462.462616 | -0.0067 | 0.995 | -0.237234405 | count | 1 |
| LINC01909  | -16.395168 | 2462.462616 | -0.0067 | 0.995 | -0.237234405 | count | 1 |
| AL049634.2 | -16.395168 | 2462.462616 | -0.0067 | 0.995 | -0.237234405 | count | 1 |
| AL121890.4 | -16.395168 | 2462.462616 | -0.0067 | 0.995 | -0.237234405 | count | 1 |
| LINC00237  | -16.395168 | 2462.462616 | -0.0067 | 0.995 | -0.237234405 | count | 1 |
| ZNF337-AS1 | -16.395168 | 2462.462616 | -0.0067 | 0.995 | -0.237234405 | count | 1 |
| ZNF341-AS1 | -16.395168 | 2462.462616 | -0.0067 | 0.995 | -0.237234405 | count | 1 |
| LINC01270  | -16.395168 | 2462.462616 | -0.0067 | 0.995 | -0.237234405 | count | 1 |
| BX640514.2 | -16.395168 | 2462.462616 | -0.0067 | 0.995 | -0.237234405 | count | 1 |
| OGFR-AS1   | -16.395168 | 2462.462616 | -0.0067 | 0.995 | -0.237234405 | count | 1 |
| FNDC11     | -16.395168 | 2462.462616 | -0.0067 | 0.995 | -0.237234405 | count | 1 |
| PLPPR3     | -16.395168 | 2462.462616 | -0.0067 | 0.995 | -0.237234405 | count | 1 |
| PCSK4      | -16.395168 | 2462.462616 | -0.0067 | 0.995 | -0.237234405 | count | 1 |
| AC010336.4 | -16.395168 | 2462.462616 | -0.0067 | 0.995 | -0.237234405 | count | 1 |
| AC136469.1 | -16.395168 | 2462.462616 | -0.0067 | 0.995 | -0.237234405 | count | 1 |
| NANOS3     | -16.395168 | 2462.462616 | -0.0067 | 0.995 | -0.237234405 | count | 1 |
| PPP1R13L   | -16.395168 | 2462.462616 | -0.0067 | 0.995 | -0.237234405 | count | 1 |
| KIR3DL2    | -16.395168 | 2462.462616 | -0.0067 | 0.995 | -0.237234405 | count | 1 |
| RFPL4A     | -16.395168 | 2462.462616 | -0.0067 | 0.995 | -0.237234405 | count | 1 |
| IGLV2-14   | -16.395168 | 2462.462616 | -0.0067 | 0.995 | -0.237234405 | count | 1 |
| IGLC7      | -16.395168 | 2462.462616 | -0.0067 | 0.995 | -0.237234405 | count | 1 |
| Z95115.1   | -16.395168 | 2462.462616 | -0.0067 | 0.995 | -0.237234405 | count | 1 |
| AL022326.1 | -16.395168 | 2462.462616 | -0.0067 | 0.995 | -0.237234405 | count | 1 |
| ENTHD1     | -16.395168 | 2462.462616 | -0.0067 | 0.995 | -0.237234405 | count | 1 |
| AP001062.1 | -16.395168 | 2462.462616 | -0.0067 | 0.995 | -0.237234405 | count | 1 |
| DHRS12     | -0.2121274 | 0.2697772   | -0.7863 | 0.432 | -0.236931168 | count | 1 |
| CYP2S1     | -0.2433426 | 0.4636795   | -0.5248 | 0.6   | -0.236907148 | count | 1 |
| AL355338.1 | -0.3165695 | 0.5078567   | -0.6233 | 0.533 | -0.236848045 | count | 1 |

|            |            |           |         |          |              |       |   |
|------------|------------|-----------|---------|----------|--------------|-------|---|
| EXOSC8     | -0.1740521 | 0.1535697 | -1.1334 | 0.257    | -0.23666531  | count | 1 |
| LACTB      | -0.1666724 | 0.0748841 | -2.2257 | 0.0261   | -0.236638861 | count | 1 |
| COX5A      | -0.1652577 | 0.0491317 | -3.3636 | 0.000781 | -0.236532807 | count | 1 |
| METTLL17   | -0.2259176 | 0.3793833 | -0.5955 | 0.552    | -0.236523889 | count | 1 |
| PITRM1     | -0.2454886 | 0.3363752 | -0.7298 | 0.466    | -0.236284714 | count | 1 |
| CREG1      | -0.1662414 | 0.0719201 | -2.3115 | 0.0209   | -0.236223444 | count | 1 |
| MRPL13     | -0.1700563 | 0.1074904 | -1.5821 | 0.114    | -0.236183228 | count | 1 |
| FAHD1      | -0.1887411 | 0.2321741 | -0.8129 | 0.416    | -0.235955755 | count | 1 |
| ISOC1      | -0.2307551 | 0.3269333 | -0.7058 | 0.48     | -0.235916926 | count | 1 |
| HIVEP3     | -0.2051261 | 0.2634865 | -0.7785 | 0.436    | -0.235889624 | count | 1 |
| DCAF4      | -0.5403833 | 0.8814715 | -0.613  | 0.54     | -0.235829875 | count | 1 |
| COG6       | -0.2477552 | 0.4140832 | -0.5983 | 0.55     | -0.235598686 | count | 1 |
| GTF2B      | -0.1669914 | 0.0816394 | -2.0455 | 0.0409   | -0.23551706  | count | 1 |
| MLF2       | -0.1683841 | 0.0960001 | -1.754  | 0.0796   | -0.235318938 | count | 1 |
| PEX3       | -0.2473338 | 0.3359469 | -0.7362 | 0.462    | -0.235210853 | count | 1 |
| M1AP       | -0.9207933 | 0.9516048 | -0.9676 | 0.333    | -0.235190681 | count | 1 |
| TYSND1     | -0.2471336 | 0.5717018 | -0.4323 | 0.666    | -0.235026587 | count | 1 |
| ALKBH5     | -0.1859638 | 0.2124917 | -0.8752 | 0.382    | -0.235022614 | count | 1 |
| CCDC134    | -0.2762244 | 0.5382308 | -0.5132 | 0.608    | -0.234860697 | count | 1 |
| RCHY1      | -0.1912937 | 0.2178999 | -0.8779 | 0.38     | -0.234857442 | count | 1 |
| TMEM87B    | -0.2019045 | 0.2477677 | -0.8149 | 0.415    | -0.234659903 | count | 1 |
| OSTM1      | -0.1744421 | 0.1457426 | -1.1969 | 0.231    | -0.234620622 | count | 1 |
| PTGER2     | -0.1691342 | 0.1438346 | -1.1759 | 0.24     | -0.234502271 | count | 1 |
| TMBIM1     | -0.1715737 | 0.1131698 | -1.5161 | 0.13     | -0.234380748 | count | 1 |
| FBXW11     | -0.1805938 | 0.1966455 | -0.9184 | 0.359    | -0.234275706 | count | 1 |
| PLK2       | -0.2124962 | 0.2193093 | -0.9689 | 0.333    | -0.233893166 | count | 1 |
| SLF2       | -0.1862224 | 0.2688471 | -0.6927 | 0.489    | -0.233821011 | count | 1 |
| DNAJC3     | -0.1658064 | 0.0835255 | -1.9851 | 0.0472   | -0.233680672 | count | 1 |
| CAV1       | -0.2872128 | 0.7765339 | -0.3699 | 0.712    | -0.233673757 | count | 1 |
| CD14       | -0.162118  | 0.0449689 | -3.6051 | 0.000318 | -0.233546795 | count | 1 |
| RHEBL1     | -0.3860784 | 0.4411916 | -0.8751 | 0.382    | -0.233502126 | count | 1 |
| HMGNA4     | -0.2485996 | 0.4236143 | -0.5869 | 0.557    | -0.233431585 | count | 1 |
| PIM2       | -0.2143795 | 0.3208921 | -0.6681 | 0.504    | -0.233411326 | count | 1 |
| N4BP1      | -0.1759916 | 0.1453653 | -1.2107 | 0.226    | -0.233335579 | count | 1 |
| AC027097.1 | -0.2556774 | 0.3810046 | -0.6711 | 0.502    | -0.233330679 | count | 1 |
| SORBS1     | -1.320787  | 1.621479  | -0.8146 | 0.415    | -0.233204028 | count | 1 |
| ZNF426     | -0.3850934 | 0.4039064 | -0.9534 | 0.34     | -0.232957479 | count | 1 |
| RIT1       | -0.1653701 | 0.0929436 | -1.7793 | 0.0753   | -0.232657703 | count | 1 |
| CTGF       | -0.3211836 | 0.4724504 | -0.6798 | 0.497    | -0.232639066 | count | 1 |
| RAB32      | -0.1631327 | 0.0619921 | -2.6315 | 0.00855  | -0.23240394  | count | 1 |
| WDR73      | -0.2731948 | 0.3295272 | -0.8291 | 0.407    | -0.232395107 | count | 1 |
| GPR65      | -0.1675274 | 0.0987589 | -1.6963 | 0.09     | -0.232383088 | count | 1 |
| RFX3       | -0.3470858 | 0.4772299 | -0.7273 | 0.467    | -0.232318421 | count | 1 |
| ZNF266     | -0.3470408 | 0.5380972 | -0.6449 | 0.519    | -0.232290438 | count | 1 |
| DYNC112    | -0.1665583 | 0.1020072 | -1.6328 | 0.103    | -0.232175959 | count | 1 |

|            |            |           |         |          |              |       |   |
|------------|------------|-----------|---------|----------|--------------|-------|---|
| TREML1     | -0.7150826 | 1.2791884 | -0.559  | 0.576    | -0.232103241 | count | 1 |
| UBAC2-AS1  | -0.7150826 | 1.109106  | -0.6447 | 0.519    | -0.232103241 | count | 1 |
| AL359397.2 | -0.7150826 | 1.0987975 | -0.6508 | 0.515    | -0.232103241 | count | 1 |
| AC016876.1 | -0.7150826 | 1.0987975 | -0.6508 | 0.515    | -0.232103241 | count | 1 |
| ZNF396     | -0.7150826 | 1.1757129 | -0.6082 | 0.543    | -0.232103241 | count | 1 |
| CEBPB      | -0.1613208 | 0.0426624 | -3.7813 | 0.00016  | -0.232030099 | count | 1 |
| PPHLN1     | -0.1733055 | 0.1423665 | -1.2173 | 0.224    | -0.231970885 | count | 1 |
| MXD1       | -0.1648513 | 0.0993814 | -1.6588 | 0.0973   | -0.231855053 | count | 1 |
| WDR44      | -0.2265524 | 0.2872288 | -0.7888 | 0.43     | -0.23172822  | count | 1 |
| BCAS2      | -0.1656226 | 0.1377327 | -1.2025 | 0.229    | -0.231598138 | count | 1 |
| GEMIN2     | -0.2777521 | 0.418969  | -0.6629 | 0.507    | -0.231358607 | count | 1 |
| ABCC5      | -0.209067  | 0.3127159 | -0.6686 | 0.504    | -0.231354776 | count | 1 |
| ATL3       | -0.1772306 | 0.1593617 | -1.1121 | 0.266    | -0.231332772 | count | 1 |
| RPL7L1     | -0.1696075 | 0.1315865 | -1.2889 | 0.198    | -0.231299836 | count | 1 |
| AC243960.1 | -0.19622   | 0.4056363 | -0.4837 | 0.629    | -0.23099373  | count | 1 |
| ZSWIM9     | -0.4058716 | 0.6219839 | -0.6525 | 0.514    | -0.230978891 | count | 1 |
| ZNF821     | -0.2661314 | 0.4353066 | -0.6114 | 0.541    | -0.230931509 | count | 1 |
| GNL1       | -0.1849527 | 0.2955133 | -0.6259 | 0.531    | -0.230925919 | count | 1 |
| UGDH       | -0.3448234 | 0.4488449 | -0.7682 | 0.442    | -0.230911237 | count | 1 |
| THOC6      | -0.1824317 | 0.2125813 | -0.8582 | 0.391    | -0.230880069 | count | 1 |
| THOC1      | -0.1854063 | 0.2496766 | -0.7426 | 0.458    | -0.23078918  | count | 1 |
| KIF2A      | -0.1705803 | 0.1418792 | -1.2023 | 0.229    | -0.230774507 | count | 1 |
| ZFPM1      | -0.1748647 | 0.177544  | -0.9849 | 0.325    | -0.230736206 | count | 1 |
| MKKS       | -0.2035394 | 0.2993637 | -0.6799 | 0.497    | -0.230499931 | count | 1 |
| MRPL27     | -0.1657373 | 0.1125683 | -1.4723 | 0.141    | -0.230473624 | count | 1 |
| STRBP      | -0.3298114 | 0.5917947 | -0.5573 | 0.577    | -0.23030948  | count | 1 |
| ZFP64      | -0.473767  | 0.7343212 | -0.6452 | 0.519    | -0.230302733 | count | 1 |
| MYBBP1A    | -0.2390316 | 0.5934412 | -0.4028 | 0.687    | -0.230258198 | count | 1 |
| PDCD5      | -0.1629259 | 0.0824772 | -1.9754 | 0.0483   | -0.23023663  | count | 1 |
| LY86       | -0.1616555 | 0.0641909 | -2.5184 | 0.0119   | -0.23011263  | count | 1 |
| COMMD5     | -0.1714622 | 0.149673  | -1.1456 | 0.252    | -0.23004781  | count | 1 |
| NT5C2      | -0.1902963 | 0.31808   | -0.5983 | 0.55     | -0.229894955 | count | 1 |
| USB1       | -0.1790768 | 0.2428037 | -0.7375 | 0.461    | -0.22988366  | count | 1 |
| PRELID3A   | -0.4726159 | 0.6467597 | -0.7307 | 0.465    | -0.229810438 | count | 1 |
| SMC2       | -0.1781483 | 0.2231939 | -0.7982 | 0.425    | -0.229763831 | count | 1 |
| DYNLL1     | -0.1601684 | 0.0432229 | -3.7056 | 0.000216 | -0.229730391 | count | 1 |
| LSM12      | -0.1640605 | 0.1055654 | -1.5541 | 0.12     | -0.229693454 | count | 1 |
| TRIM25     | -0.1702629 | 0.1576411 | -1.0801 | 0.28     | -0.229564898 | count | 1 |
| ZC3H3      | -0.2474002 | 0.386316  | -0.6404 | 0.522    | -0.22926825  | count | 1 |
| BANF1      | -0.1619498 | 0.0753464 | -2.1494 | 0.0317   | -0.229135425 | count | 1 |
| KLHL7      | -0.1904982 | 0.2995905 | -0.6359 | 0.525    | -0.229086984 | count | 1 |
| CLN6       | -0.2812705 | 0.6400529 | -0.4394 | 0.66     | -0.229065497 | count | 1 |
| AP003392.4 | -0.8869572 | 1.1896615 | -0.7456 | 0.456    | -0.228951788 | count | 1 |
| ZNF10      | -0.8869572 | 1.1161411 | -0.7947 | 0.427    | -0.228951788 | count | 1 |
| CCL2       | -0.1585173 | 0.127383  | -1.2444 | 0.213    | -0.22846015  | count | 1 |



|            |            |           |         |         |              |       |   |
|------------|------------|-----------|---------|---------|--------------|-------|---|
| PRKCI      | -0.2135364 | 0.2912675 | -0.7331 | 0.464   | -0.228415627 | count | 1 |
| TLR1       | -0.1706068 | 0.1432189 | -1.1912 | 0.234   | -0.228375516 | count | 1 |
| TIMP2      | -0.1596891 | 0.0526222 | -3.0346 | 0.00243 | -0.228368008 | count | 1 |
| KIAA1522   | -0.5202529 | 0.8341689 | -0.6237 | 0.533   | -0.228270389 | count | 1 |
| RRM2       | -0.5202529 | 0.834169  | -0.6237 | 0.533   | -0.228270389 | count | 1 |
| APTR       | -0.2951766 | 0.5503561 | -0.5363 | 0.592   | -0.228132554 | count | 1 |
| IER3IP1    | -0.1693753 | 0.1685075 | -1.0051 | 0.315   | -0.227914529 | count | 1 |
| ANKRD37    | -0.1714455 | 0.2133786 | -0.8035 | 0.422   | -0.227898341 | count | 1 |
| GNAI1      | -0.6985051 | 0.6105416 | -1.1441 | 0.253   | -0.227838816 | count | 1 |
| ARHGAP20   | -0.3398425 | 0.7416659 | -0.4582 | 0.647   | -0.227808068 | count | 1 |
| SEC13      | -0.1665822 | 0.1281488 | -1.2999 | 0.194   | -0.227632781 | count | 1 |
| CIC        | -0.1976494 | 0.2867188 | -0.6893 | 0.491   | -0.227422546 | count | 1 |
| RAB11FIP2  | -0.2075647 | 0.2386341 | -0.8698 | 0.384   | -0.227371317 | count | 1 |
| TCAF1      | -0.2528428 | 0.3750124 | -0.6742 | 0.5     | -0.22736138  | count | 1 |
| MAML2      | -0.1674067 | 0.1789893 | -0.9353 | 0.35    | -0.227254926 | count | 1 |
| ENDOV      | -0.1884528 | 0.2953824 | -0.638  | 0.524   | -0.227181137 | count | 1 |
| G3BP1      | -0.1663705 | 0.1181329 | -1.4083 | 0.159   | -0.227101672 | count | 1 |
| KIAA1324L  | -0.6956549 | 1.1976917 | -0.5808 | 0.561   | -0.227100589 | count | 1 |
| MRPL21     | -0.1638115 | 0.1107366 | -1.4793 | 0.139   | -0.226984966 | count | 1 |
| EIF3D      | -0.1612242 | 0.0799442 | -2.0167 | 0.0438  | -0.226453846 | count | 1 |
| TNFSF14    | -0.1691768 | 0.3995041 | -0.4235 | 0.672   | -0.226379477 | count | 1 |
| DEAF1      | -0.2089253 | 0.3212493 | -0.6504 | 0.516   | -0.226300411 | count | 1 |
| PLXNA3     | -0.3013089 | 0.4432149 | -0.6798 | 0.497   | -0.226063382 | count | 1 |
| GLRX5      | -0.163643  | 0.1188668 | -1.3767 | 0.169   | -0.226014498 | count | 1 |
| AC007950.2 | -0.8713057 | 0.9112177 | -0.9562 | 0.339   | -0.226010656 | count | 1 |
| RABGAP1    | -0.1907445 | 0.2338953 | -0.8155 | 0.415   | -0.225910023 | count | 1 |
| TEX30      | -0.1855506 | 0.2760971 | -0.672  | 0.502   | -0.22567316  | count | 1 |
| AURKA      | -0.2186133 | 0.3380375 | -0.6467 | 0.518   | -0.225622508 | count | 1 |
| FOXQ1      | -0.3217728 | 0.883725  | -0.3641 | 0.716   | -0.22505211  | count | 1 |
| LINC01426  | -0.3706799 | 0.733043  | -0.5057 | 0.613   | -0.224956966 | count | 1 |
| C7orf50    | -0.1617457 | 0.1170081 | -1.3823 | 0.167   | -0.224913504 | count | 1 |
| ZNF8       | -0.86543   | 0.8917178 | -0.9705 | 0.332   | -0.22489742  | count | 1 |
| GTF2H3     | -0.1820524 | 0.2316066 | -0.786  | 0.432   | -0.224431342 | count | 1 |
| ZNF619     | -0.4224651 | 0.6638436 | -0.6364 | 0.525   | -0.22441431  | count | 1 |
| SERBP1     | -0.1570876 | 0.0551415 | -2.8488 | 0.0044  | -0.224307785 | count | 1 |
| URB1       | -0.3693471 | 0.7647109 | -0.483  | 0.629   | -0.224214271 | count | 1 |
| AC004540.1 | -0.6837588 | 0.9189191 | -0.7441 | 0.457   | -0.224003455 | count | 1 |
| NCBP2-AS2  | -0.1677404 | 0.1844355 | -0.9095 | 0.363   | -0.223810274 | count | 1 |
| CD2BP2     | -0.1634136 | 0.1324833 | -1.2335 | 0.218   | -0.223767635 | count | 1 |
| MTCH2      | -0.16148   | 0.1134155 | -1.4238 | 0.155   | -0.223709989 | count | 1 |
| SSU72      | -0.1585574 | 0.0816864 | -1.941  | 0.0524  | -0.22357206  | count | 1 |
| TYW1B      | -0.3326908 | 0.7755591 | -0.429  | 0.668   | -0.223340158 | count | 1 |
| AP002360.1 | -0.3911023 | 0.8152983 | -0.4797 | 0.631   | -0.223336196 | count | 1 |
| AC009119.1 | -0.5767241 | 0.8376987 | -0.6885 | 0.491   | -0.223325971 | count | 1 |
| AC015917.2 | -0.5767241 | 0.8376987 | -0.6885 | 0.491   | -0.223325971 | count | 1 |

|            |            |           |         |          |              |       |             |
|------------|------------|-----------|---------|----------|--------------|-------|-------------|
| AC005264.1 | -0.5767241 | 0.8367429 | -0.6892 | 0.491    | -0.223325971 | count | 1           |
| MEX3C      | -0.2219628 | 0.3316083 | -0.6694 | 0.503    | -0.223220362 | count | 1           |
| SEM1       | -0.1565209 | 0.0566825 | -2.7614 | 0.0058   | -0.223205448 | count | 1           |
| COA5       | -0.1642415 | 0.1706339 | -0.9625 | 0.336    | -0.223090356 | count | 1           |
| PPP1R8     | -0.2124863 | 0.4568517 | -0.4651 | 0.642    | -0.222773312 | count | 1           |
| PPID       | -0.1687712 | 0.1858796 | -0.908  | 0.364    | -0.222739592 | count | 1           |
| CTNNB1     | -0.1574777 | 0.0924492 | -1.7034 | 0.0886   | -0.222735632 | count | 1           |
| LRIG2      | -0.3064291 | 0.4216385 | -0.7268 | 0.467    | -0.222574708 | count | 1           |
| CAMSAP2    | -0.191081  | 0.3055843 | -0.6253 | 0.532    | -0.222257618 | count | 1           |
| AC078846.1 | -0.2428875 | 0.5047706 | -0.4812 | 0.63     | -0.222054918 | count | 1           |
| ZBTB21     | -0.1832521 | 0.2543738 | -0.7204 | 0.471    | -0.221967457 | count | 1           |
| GYG1       | -0.1677099 | 0.1441228 | -1.1637 | 0.245    | -0.221952278 | count | 1           |
| SSNA1      | -0.157274  | 0.0822664 | -1.9118 | 0.056    | -0.221917723 | count | 1           |
| APRT       | -0.155094  | 0.0518958 | -2.9886 | 0.00283  | -0.221790223 | count | 1           |
| AC008686.1 | -1.212082  | 1.1495653 | -1.0544 | 0.292    | -0.22164227  | count | 1           |
| COMMD2     | -0.1627746 | 0.1487615 | -1.0942 | 0.274    | -0.221494008 | count | 1           |
| ARL5A      | -0.1832056 | 0.2307069 | -0.7941 | 0.427    | -0.221425383 | count | 1           |
| TMEM37     | -0.1683541 | 0.1827837 | -0.9211 | 0.357    | -0.221411739 | count | 1           |
| PDXDC1     | -0.1725871 | 0.2360311 | -0.7312 | 0.465    | -0.221397295 | count | 1           |
| ATG4A      | -0.241982  | 0.5057687 | -0.4784 | 0.632    | -0.221254954 | count | 1           |
| PSMB5      | -0.1586385 | 0.0996852 | -1.5914 | 0.112    | -0.221176899 | count | 1           |
| MXRA7      | -0.3285879 | 0.6188471 | -0.531  | 0.595    | -0.220770414 | count | 1           |
| CBY1       | -0.3148591 | 0.4565468 | -0.6897 | 0.49     | -0.2205157   | count | 1           |
| B3GAT2     | -0.4141527 | 0.6064804 | -0.6829 | 0.495    | -0.220440765 | count | 1           |
| CEP170     | -0.1571596 | 0.0944092 | -1.6647 | 0.0961   | -0.220408285 | count | 1           |
| CTU1       | -0.1848998 | 0.291384  | -0.6346 | 0.526    | -0.220249176 | count | 1           |
| PPIL1      | -0.2208987 | 0.3589889 | -0.6153 | 0.538    | -0.22009629  | count | 1           |
| CMAS       | -0.1687731 | 0.1825187 | -0.9247 | 0.355    | -0.21988242  | count | 1           |
| MFSD1      | -0.1551938 | 0.062597  | -2.4793 | 0.0132   | -0.219822858 | count | 1           |
| EMILIN1    | -0.4128466 | 0.6950351 | -0.594  | 0.553    | -0.219814787 | count | 1           |
| ZNHIT6     | -0.1964321 | 0.2994455 | -0.656  | 0.512    | -0.219695416 | count | 1           |
| RAD23A     | -0.1548929 | 0.0814735 | -1.9011 | 0.0574   | -0.219423371 | count | 1           |
| PRRC1      | -0.1735034 | 0.2776306 | -0.6249 | 0.532    | -0.219403217 | count | 1           |
| ZNF330     | -0.1632374 | 0.1499976 | -1.0883 | 0.277    | -0.2193811   | count | 1           |
| MRPS2      | -0.1735943 | 0.2075883 | -0.8362 | 0.403    | -0.219243839 | count | 1           |
| NAGK       | -0.1538438 | 0.0614782 | -2.5024 | 0.0124   | -0.219165405 | count | 1           |
| RPS19      | -0.1521503 | 0.0278484 | -5.4635 | 5.14E-08 | -0.219155531 | count | 0.001229951 |
| B3GNT7     | -0.2826276 | 0.3935364 | -0.7182 | 0.473    | -0.218918555 | count | 1           |
| NME4       | -0.1601253 | 0.1622336 | -0.987  | 0.324    | -0.218791747 | count | 1           |
| PHKA2      | -0.232476  | 0.374441  | -0.6209 | 0.535    | -0.218758636 | count | 1           |
| DGCR6L     | -0.1629153 | 0.1646893 | -0.9892 | 0.323    | -0.218629999 | count | 1           |
| TMED2      | -0.1573135 | 0.0943055 | -1.6681 | 0.0954   | -0.218411289 | count | 1           |
| SIRT3      | -0.274167  | 0.525235  | -0.522  | 0.602    | -0.218278835 | count | 1           |
| CSRP1      | -0.1616675 | 0.1584899 | -1.02   | 0.308    | -0.218231373 | count | 1           |
| KLHL6      | -0.1830265 | 0.2044566 | -0.8952 | 0.371    | -0.218044654 | count | 1           |

|            |            |           |         |          |              |       |           |
|------------|------------|-----------|---------|----------|--------------|-------|-----------|
| DHX38      | -0.1778659 | 0.280718  | -0.6336 | 0.526    | -0.217719564 | count | 1         |
| ENTPD6     | -0.2059666 | 0.3010745 | -0.6841 | 0.494    | -0.217604749 | count | 1         |
| EFNB1      | -0.2990747 | 0.4873995 | -0.6136 | 0.54     | -0.217534895 | count | 1         |
| SGO1       | -0.3790662 | 0.7893328 | -0.4802 | 0.631    | -0.217064475 | count | 1         |
| WDR34      | -0.3790662 | 0.7607917 | -0.4983 | 0.618    | -0.217064475 | count | 1         |
| EIF4E      | -0.1552993 | 0.1301213 | -1.1935 | 0.233    | -0.216858131 | count | 1         |
| DLGAP1-AS2 | -0.8226393 | 0.6454925 | -1.2744 | 0.203    | -0.216638704 | count | 1         |
| CATIP      | -0.2793063 | 0.6197431 | -0.4507 | 0.652    | -0.216472411 | count | 1         |
| GMEB2      | -0.2093482 | 0.5437306 | -0.385  | 0.7      | -0.216276186 | count | 1         |
| ATG7       | -0.168879  | 0.2051336 | -0.8233 | 0.41     | -0.216242957 | count | 1         |
| SBNO2      | -0.1796699 | 0.2163181 | -0.8306 | 0.406    | -0.216212444 | count | 1         |
| GALNT11    | -0.1814265 | 0.2342157 | -0.7746 | 0.439    | -0.216161288 | count | 1         |
| CCDC163    | -0.820161  | 0.8081269 | -1.0149 | 0.31     | -0.216152134 | count | 1         |
| CLDND2     | -0.2585798 | 0.6955781 | -0.3717 | 0.71     | -0.216052516 | count | 1         |
| UBXN7      | -0.1939644 | 0.2658757 | -0.7295 | 0.466    | -0.21597097  | count | 1         |
| AC106782.2 | -0.3536881 | 0.6228208 | -0.5679 | 0.57     | -0.215451827 | count | 1         |
| AC005332.7 | -0.3758174 | 0.5212443 | -0.721  | 0.471    | -0.215364925 | count | 1         |
| KHDRBS1    | -0.1522106 | 0.067099  | -2.2684 | 0.0234   | -0.215294259 | count | 1         |
| CLTB       | -0.1526826 | 0.081451  | -1.8745 | 0.061    | -0.215107162 | count | 1         |
| LCORL      | -0.1639679 | 0.2114107 | -0.7756 | 0.438    | -0.214568974 | count | 1         |
| STX17      | -0.1733541 | 0.2997977 | -0.5782 | 0.563    | -0.214542527 | count | 1         |
| UBE2V2     | -0.1542462 | 0.1102212 | -1.3994 | 0.162    | -0.214527713 | count | 1         |
| JMJD6      | -0.1579873 | 0.1350353 | -1.17   | 0.242    | -0.214513065 | count | 1         |
| KDSR       | -0.1629336 | 0.1500265 | -1.086  | 0.278    | -0.214451257 | count | 1         |
| ATP6V0E1   | -0.1491664 | 0.0377821 | -3.9481 | 8.10E-05 | -0.214125396 | count | 1         |
| YWHAG      | -0.1532151 | 0.1076756 | -1.4229 | 0.155    | -0.214001617 | count | 1         |
| MDC1       | -0.3048108 | 0.4633926 | -0.6578 | 0.511    | -0.21389831  | count | 1         |
| SYNGAP1    | -0.3506186 | 1.3851026 | -0.2531 | 0.8      | -0.21372629  | count | 1         |
| OST4       | -0.1492328 | 0.0476152 | -3.1341 | 0.00174  | -0.213676799 | count | 1         |
| ACTA2      | -0.1965112 | 0.2323351 | -0.8458 | 0.398    | -0.213102965 | count | 1         |
| NARF       | -0.1611836 | 0.1894771 | -0.8507 | 0.395    | -0.213014121 | count | 1         |
| SLC12A2    | -0.2401201 | 0.3823354 | -0.628  | 0.53     | -0.212842249 | count | 1         |
| D2HGDH     | -0.2041642 | 0.4197489 | -0.4864 | 0.627    | -0.2126664   | count | 1         |
| C1QBP      | -0.1504906 | 0.0820727 | -1.8336 | 0.0668   | -0.21246728  | count | 1         |
| FZR1       | -0.2023545 | 0.3152218 | -0.6419 | 0.521    | -0.212373181 | count | 1         |
| PDGFRB     | -2.455543  | 1.4655018 | -1.6756 | 0.094    | -0.212236509 | count | 1         |
| FBXO4      | -0.2037267 | 0.3097003 | -0.6578 | 0.511    | -0.212220428 | count | 1         |
| TULP4      | -0.1705518 | 0.2143507 | -0.7957 | 0.426    | -0.211455232 | count | 1         |
| SRP68      | -0.1973416 | 0.2736468 | -0.7212 | 0.471    | -0.211426664 | count | 1         |
| EBNA1BP2   | -0.1591681 | 0.1745061 | -0.9121 | 0.362    | -0.21134894  | count | 1         |
| OMD        | -1.1182229 | 1.0403023 | -1.0749 | 0.283    | -0.210772649 | count | 1         |
| AC145285.2 | -1.1182229 | 1.0403023 | -1.0749 | 0.283    | -0.210772649 | count | 1         |
| GSDMB      | -1.1182229 | 1.3670667 | -0.818  | 0.413    | -0.210772649 | count | 1         |
| ZNF417     | -1.1182229 | 1.3670667 | -0.818  | 0.413    | -0.210772649 | count | 1         |
| PSAP       | -0.1461831 | 0.0335014 | -4.3635 | 1.33E-05 | -0.210519752 | count | 0.3149174 |

|                |            |           |         |          |              |       |   |
|----------------|------------|-----------|---------|----------|--------------|-------|---|
| BGN            | -0.1951558 | 0.6101733 | -0.3198 | 0.749    | -0.210417142 | count | 1 |
| ANKRD65        | -1.1146395 | 0.9632633 | -1.1571 | 0.247    | -0.210340612 | count | 1 |
| CDH13          | -1.1146395 | 0.9153164 | -1.2178 | 0.223    | -0.210340612 | count | 1 |
| ITPKC          | -0.5371738 | 0.5411927 | -0.9926 | 0.321    | -0.21031913  | count | 1 |
| ATP8B2         | -0.7905058 | 1.075667  | -0.7349 | 0.462    | -0.210259472 | count | 1 |
| F2R            | -0.7905058 | 1.2294638 | -0.643  | 0.52     | -0.210259472 | count | 1 |
| MIR181A2HG     | -0.7905058 | 1.075667  | -0.7349 | 0.462    | -0.210259472 | count | 1 |
| SLFN12L        | -0.7905058 | 1.075667  | -0.7349 | 0.462    | -0.210259472 | count | 1 |
| AC145207.5     | -0.7905058 | 1.075667  | -0.7349 | 0.462    | -0.210259472 | count | 1 |
| CNN1           | -0.7905058 | 1.075667  | -0.7349 | 0.462    | -0.210259472 | count | 1 |
| PBX4           | -0.7905058 | 1.075667  | -0.7349 | 0.462    | -0.210259472 | count | 1 |
| AC243960.3     | -0.7905058 | 1.7811212 | -0.4438 | 0.657    | -0.210259472 | count | 1 |
| PSMC1          | -0.1498516 | 0.0965529 | -1.552  | 0.121    | -0.20996448  | count | 1 |
| RITA1          | -0.2631175 | 0.3630719 | -0.7247 | 0.469    | -0.209875284 | count | 1 |
| MSANTD4        | -0.2630341 | 0.3404544 | -0.7726 | 0.44     | -0.209811719 | count | 1 |
| SLC25A3        | -0.1463823 | 0.0408094 | -3.587  | 0.000341 | -0.209807885 | count | 1 |
| PLEKHM3        | -0.4718217 | 0.4518071 | -1.0443 | 0.296    | -0.209698038 | count | 1 |
| ZNF500         | -0.7872301 | 0.7743809 | -1.0166 | 0.309    | -0.209600514 | count | 1 |
| DYNC1LI2       | -0.1555502 | 0.1511708 | -1.029  | 0.304    | -0.209526979 | count | 1 |
| PLEKHN1        | -0.4254854 | 0.8904156 | -0.4779 | 0.633    | -0.209371737 | count | 1 |
| NECTIN4        | -0.4254854 | 0.926407  | -0.4593 | 0.646    | -0.209371737 | count | 1 |
| ZNF236-DT      | -0.4254854 | 0.8777367 | -0.4848 | 0.628    | -0.209371737 | count | 1 |
| ZNF552         | -0.4254854 | 0.8262043 | -0.515  | 0.607    | -0.209371737 | count | 1 |
| CEP290         | -0.1780701 | 0.3303938 | -0.539  | 0.59     | -0.209274265 | count | 1 |
| GNS            | -0.1506735 | 0.0996137 | -1.5126 | 0.131    | -0.208821156 | count | 1 |
| FAM149B1       | -0.2552426 | 0.5830005 | -0.4378 | 0.662    | -0.208763322 | count | 1 |
| DKC1           | -0.1581951 | 0.186563  | -0.8479 | 0.397    | -0.208734274 | count | 1 |
| LAMTOR5        | -0.1467938 | 0.0681563 | -2.1538 | 0.0314   | -0.208477603 | count | 1 |
| ZNF816-ZNF321P | -0.6253006 | 0.7323882 | -0.8538 | 0.393    | -0.208405979 | count | 1 |
| ZIK1           | -0.4232547 | 0.7219378 | -0.5863 | 0.558    | -0.208390694 | count | 1 |
| AC006547.3     | -0.5305698 | 1.0378485 | -0.5112 | 0.609    | -0.208114898 | count | 1 |
| DNMT1          | -0.1518194 | 0.1157342 | -1.3118 | 0.19     | -0.207897101 | count | 1 |
| ZNF260         | -0.3614827 | 0.590374  | -0.6123 | 0.54     | -0.207832177 | count | 1 |
| NABP2          | -0.1773337 | 0.2791257 | -0.6353 | 0.525    | -0.207788434 | count | 1 |
| MGME1          | -0.1737054 | 0.2336156 | -0.7436 | 0.457    | -0.207596976 | count | 1 |
| LILRB1         | -0.1522114 | 0.1275032 | -1.1938 | 0.233    | -0.207556869 | count | 1 |
| TRMU           | -0.2123717 | 0.4360265 | -0.4871 | 0.626    | -0.207544025 | count | 1 |
| CDKAL1         | -0.2427302 | 0.3381999 | -0.7177 | 0.473    | -0.207459894 | count | 1 |
| EIF4G2         | -0.145662  | 0.0596673 | -2.4412 | 0.0147   | -0.207292437 | count | 1 |
| AC004846.1     | -0.3071455 | 0.6238709 | -0.4923 | 0.623    | -0.207263159 | count | 1 |
| HIVEP2         | -0.307063  | 0.5204255 | -0.59   | 0.555    | -0.207210934 | count | 1 |
| PPP1R15B       | -0.1486774 | 0.1336178 | -1.1127 | 0.266    | -0.207047066 | count | 1 |
| TSC22D2        | -0.1525588 | 0.1673993 | -0.9113 | 0.362    | -0.207002162 | count | 1 |
| ANXA2R         | -0.2073949 | 0.3686325 | -0.5626 | 0.574    | -0.206967736 | count | 1 |
| DYNC2H1        | -0.359806  | 0.6660077 | -0.5402 | 0.589    | -0.206947483 | count | 1 |

|            |            |           |         |          |              |       |            |
|------------|------------|-----------|---------|----------|--------------|-------|------------|
| LAP3       | -0.1451445 | 0.0562799 | -2.579  | 0.00997  | -0.206939717 | count | 1          |
| AC099778.1 | -0.3380704 | 0.4752342 | -0.7114 | 0.477    | -0.206645345 | count | 1          |
| DENND5B    | -0.2464925 | 1.1811284 | -0.2087 | 0.835    | -0.206349873 | count | 1          |
| NAGLU      | -0.1611218 | 0.2068037 | -0.7791 | 0.436    | -0.206167708 | count | 1          |
| CRIP2      | -0.5244815 | 0.5889508 | -0.8905 | 0.373    | -0.206074562 | count | 1          |
| PLEKHM1    | -0.163468  | 0.2295986 | -0.712  | 0.477    | -0.206025393 | count | 1          |
| KLHL15     | -0.2514651 | 0.3490361 | -0.7205 | 0.471    | -0.205800995 | count | 1          |
| GSTZ1      | -0.1606885 | 0.219025  | -0.7337 | 0.463    | -0.205617055 | count | 1          |
| SMS        | -0.1451607 | 0.0807577 | -1.7975 | 0.0724   | -0.205476864 | count | 1          |
| GUCY1B1    | -0.6139554 | 0.6812132 | -0.9013 | 0.368    | -0.205305469 | count | 1          |
| VAMP1      | -0.7657715 | 0.6771702 | -1.1308 | 0.258    | -0.205243855 | count | 1          |
| DNPH1      | -0.1455461 | 0.09089   | -1.6013 | 0.109    | -0.205146859 | count | 1          |
| RNASEH1    | -0.161984  | 0.2420177 | -0.6693 | 0.503    | -0.204946024 | count | 1          |
| FANCM      | -0.3557699 | 0.3787386 | -0.9394 | 0.348    | -0.204814787 | count | 1          |
| MIER2      | -0.1887299 | 0.324255  | -0.582  | 0.561    | -0.204813724 | count | 1          |
| TCAF2      | -0.4590063 | 0.7883327 | -0.5822 | 0.56     | -0.204692191 | count | 1          |
| GIMAP5     | -0.7625188 | 0.6402552 | -1.191  | 0.234    | -0.204577392 | count | 1          |
| RAB34      | -0.1467789 | 0.1157224 | -1.2684 | 0.205    | -0.204498575 | count | 1          |
| TCEA3      | -1.0661981 | 0.9507749 | -1.1214 | 0.262    | -0.204373409 | count | 1          |
| SSR2       | -0.1429357 | 0.0545593 | -2.6198 | 0.00885  | -0.204313975 | count | 1          |
| OXL1       | -0.1590989 | 0.2050374 | -0.776  | 0.438    | -0.204008278 | count | 1          |
| MRPL11     | -0.1462803 | 0.1103816 | -1.3252 | 0.185    | -0.203892993 | count | 1          |
| HLA-DMA    | -0.1417711 | 0.0496556 | -2.8551 | 0.00434  | -0.203874737 | count | 1          |
| CRYL1      | -0.1488995 | 0.1019561 | -1.4604 | 0.144    | -0.203830128 | count | 1          |
| ZDHHC23    | -2.153456  | 1.2629127 | -1.7051 | 0.0883   | -0.203675744 | count | 1          |
| CTSV       | -2.153456  | 1.849958  | -1.1641 | 0.245    | -0.203675744 | count | 1          |
| LRR39      | -0.5167732 | 1.5811474 | -0.3268 | 0.744    | -0.203479971 | count | 1          |
| TOLLIP-AS1 | -0.5167732 | 1.1246937 | -0.4595 | 0.646    | -0.203479971 | count | 1          |
| MRV1-AS1   | -0.5167732 | 1.186984  | -0.4354 | 0.663    | -0.203479971 | count | 1          |
| NLRX1      | -0.5167732 | 1.0911974 | -0.4736 | 0.636    | -0.203479971 | count | 1          |
| AC025580.3 | -0.5167732 | 1.0911974 | -0.4736 | 0.636    | -0.203479971 | count | 1          |
| ZNF223     | -0.5167732 | 1.3043674 | -0.3962 | 0.692    | -0.203479971 | count | 1          |
| BBS4       | -0.2616737 | 0.3728041 | -0.7019 | 0.483    | -0.203433612 | count | 1          |
| TUBA1A     | -0.1414545 | 0.066652  | -2.1223 | 0.0339   | -0.203359301 | count | 1          |
| ARPC2      | -0.1412589 | 0.0298315 | -4.7352 | 2.31E-06 | -0.203284158 | count | 0.05492718 |
| SIVA1      | -0.1429713 | 0.078048  | -1.8318 | 0.0671   | -0.203197319 | count | 1          |
| YWHAQ      | -0.1439899 | 0.0801272 | -1.797  | 0.0725   | -0.203188635 | count | 1          |
| PDCL3      | -0.1456838 | 0.1133132 | -1.2857 | 0.199    | -0.202922213 | count | 1          |
| NUDCD1     | -0.1868415 | 0.3336445 | -0.56   | 0.576    | -0.202800103 | count | 1          |
| AC017002.3 | -0.3773708 | 0.7764503 | -0.486  | 0.627    | -0.202642487 | count | 1          |
| VTI1B      | -0.1440666 | 0.098764  | -1.4587 | 0.145    | -0.202499622 | count | 1          |
| PRPF38B    | -0.1448604 | 0.0921889 | -1.5713 | 0.116    | -0.202382587 | count | 1          |
| SRSF9      | -0.1415813 | 0.0538353 | -2.6299 | 0.00859  | -0.202314681 | count | 1          |
| POLR2J     | -0.1431066 | 0.0863028 | -1.6582 | 0.0974   | -0.202296548 | count | 1          |
| PCNX4      | -0.1651302 | 0.1869914 | -0.8831 | 0.377    | -0.202276945 | count | 1          |

|            |            |           |         |          |              |       |   |
|------------|------------|-----------|---------|----------|--------------|-------|---|
| TMED4      | -0.1447082 | 0.1042747 | -1.3878 | 0.165    | -0.202185247 | count | 1 |
| GBGT1      | -0.1643546 | 0.1977948 | -0.8309 | 0.406    | -0.202088419 | count | 1 |
| DNAJB11    | -0.1494655 | 0.1404794 | -1.064  | 0.287    | -0.202068547 | count | 1 |
| TNFRSF8    | -0.2275262 | 0.4004359 | -0.5682 | 0.57     | -0.202049009 | count | 1 |
| CCR6       | -2.101768  | 1.0367371 | -2.0273 | 0.0427   | -0.201949725 | count | 1 |
| MRPS18C    | -0.1440099 | 0.1045427 | -1.3775 | 0.168    | -0.201900898 | count | 1 |
| QDPR       | -0.1525364 | 0.1892968 | -0.8058 | 0.42     | -0.201859276 | count | 1 |
| CDC123     | -0.1469382 | 0.1177866 | -1.2475 | 0.212    | -0.201823066 | count | 1 |
| SUSD6      | -0.1534293 | 0.1518202 | -1.0106 | 0.312    | -0.201760139 | count | 1 |
| UEVLD      | -0.2020446 | 0.429853  | -0.47   | 0.638    | -0.20175376  | count | 1 |
| CORO7      | -0.1601735 | 0.2464047 | -0.65   | 0.516    | -0.201639632 | count | 1 |
| TUFM       | -0.1428097 | 0.0682834 | -2.0914 | 0.0366   | -0.201635577 | count | 1 |
| TRAF3IP2   | -0.2669768 | 0.5389298 | -0.4954 | 0.62     | -0.201557958 | count | 1 |
| TMC4       | -0.4077676 | 0.599408  | -0.6803 | 0.496    | -0.201545495 | count | 1 |
| NUP50-DT   | -0.1917837 | 0.3977839 | -0.4821 | 0.63     | -0.20149745  | count | 1 |
| OAZ2       | -0.1464228 | 0.1306669 | -1.1206 | 0.263    | -0.201453474 | count | 1 |
| SRP54      | -0.1473309 | 0.1325975 | -1.1111 | 0.267    | -0.201318505 | count | 1 |
| CCDC30     | -0.2666409 | 0.7286363 | -0.3659 | 0.714    | -0.201316544 | count | 1 |
| SDCBP      | -0.1399364 | 0.0413754 | -3.3821 | 0.000731 | -0.201011231 | count | 1 |
| HAVCR2     | -0.14314   | 0.0864516 | -1.6557 | 0.0979   | -0.200931492 | count | 1 |
| TLN2       | -0.4062946 | 0.471386  | -0.8619 | 0.389    | -0.200891334 | count | 1 |
| TNFAIP1    | -0.1838967 | 0.3999476 | -0.4598 | 0.646    | -0.200787089 | count | 1 |
| AL928654.1 | -1.0370172 | 1.3115291 | -0.7907 | 0.429    | -0.200662779 | count | 1 |
| PWP1       | -0.1491713 | 0.1662543 | -0.8972 | 0.37     | -0.200620754 | count | 1 |
| NEK6       | -0.1556434 | 0.1871844 | -0.8315 | 0.406    | -0.200373417 | count | 1 |
| ZW10       | -0.3723841 | 0.4725592 | -0.788  | 0.431    | -0.200202422 | count | 1 |
| COPE       | -0.1400052 | 0.049618  | -2.8217 | 0.00482  | -0.200172623 | count | 1 |
| AC083973.1 | -0.4460252 | 0.7020644 | -0.6353 | 0.525    | -0.199582506 | count | 1 |
| ETV6       | -0.1460376 | 0.1213306 | -1.2036 | 0.229    | -0.199118108 | count | 1 |
| THAP11     | -0.1504482 | 0.2212308 | -0.6801 | 0.497    | -0.198893862 | count | 1 |
| RASGEF1B   | -0.1395759 | 0.0790835 | -1.7649 | 0.0777   | -0.198406949 | count | 1 |
| MICAL1     | -0.1675152 | 0.245254  | -0.683  | 0.495    | -0.19815833  | count | 1 |
| PSMA7      | -0.1378141 | 0.0398477 | -3.4585 | 0.000552 | -0.197991572 | count | 1 |
| EXT2       | -0.2000955 | 0.3588716 | -0.5576 | 0.577    | -0.197889834 | count | 1 |
| SMC3       | -0.146071  | 0.1386863 | -1.0532 | 0.292    | -0.197613418 | count | 1 |
| FZD2       | -0.1701231 | 0.2854962 | -0.5959 | 0.551    | -0.19752701  | count | 1 |
| ZNF622     | -0.1460759 | 0.1465067 | -0.9971 | 0.319    | -0.197501783 | count | 1 |
| CEP250     | -0.3053122 | 0.4346408 | -0.7024 | 0.482    | -0.197368357 | count | 1 |
| TXN        | -0.1374779 | 0.0598318 | -2.2977 | 0.0217   | -0.197190755 | count | 1 |
| REEP5      | -0.1379302 | 0.0547857 | -2.5176 | 0.0119   | -0.197185137 | count | 1 |
| ADH5       | -0.1423336 | 0.1189938 | -1.1961 | 0.232    | -0.197053421 | count | 1 |
| WDR46      | -0.1543158 | 0.1843501 | -0.8371 | 0.403    | -0.196893267 | count | 1 |
| RTL5       | -0.2297452 | 0.5024641 | -0.4572 | 0.648    | -0.196753726 | count | 1 |
| SYS1       | -0.1481172 | 0.1588862 | -0.9322 | 0.351    | -0.196643177 | count | 1 |
| AP005329.1 | -0.7234447 | 0.8292863 | -0.8724 | 0.383    | -0.196445184 | count | 1 |

|            |            |           |         |          |              |       |             |
|------------|------------|-----------|---------|----------|--------------|-------|-------------|
| STARD3NL   | -0.1443067 | 0.1587775 | -0.9089 | 0.364    | -0.19614866  | count | 1           |
| TMSB4X     | -0.1360294 | 0.0269309 | -5.051  | 4.72E-07 | -0.196138507 | count | 0.011255312 |
| CIAPIN1    | -0.1694211 | 0.2257756 | -0.7504 | 0.453    | -0.196051053 | count | 1           |
| MRPL47     | -0.1447539 | 0.1264397 | -1.1448 | 0.252    | -0.195779282 | count | 1           |
| MRPS24     | -0.9978423 | 1.0758831 | -0.9275 | 0.354    | -0.195540784 | count | 1           |
| TMEM167A   | -0.1375439 | 0.0763825 | -1.8007 | 0.0719   | -0.19544489  | count | 1           |
| AURKAIP1   | -0.1372758 | 0.0643086 | -2.1346 | 0.0329   | -0.195374121 | count | 1           |
| XPC        | -0.1566959 | 0.3382242 | -0.4633 | 0.643    | -0.195339727 | count | 1           |
| SPOUT1     | -0.2235067 | 0.3583753 | -0.6237 | 0.533    | -0.195190694 | count | 1           |
| SH3BP5L    | -0.2232611 | 0.5002369 | -0.4463 | 0.655    | -0.194983325 | count | 1           |
| TRIM39     | -0.2498634 | 0.6359111 | -0.3929 | 0.694    | -0.194651159 | count | 1           |
| DHRS9      | -0.1410915 | 0.2195794 | -0.6426 | 0.521    | -0.194583459 | count | 1           |
| STRAP      | -0.1412007 | 0.0965548 | -1.4624 | 0.144    | -0.19455995  | count | 1           |
| ACIN1      | -0.142915  | 0.1255179 | -1.1386 | 0.255    | -0.194552454 | count | 1           |
| TTYH3      | -0.1451096 | 0.1551383 | -0.9354 | 0.35     | -0.194223597 | count | 1           |
| GNL3L      | -0.1888955 | 0.3995768 | -0.4727 | 0.636    | -0.194008967 | count | 1           |
| COX7A2     | -0.1355664 | 0.0492846 | -2.7507 | 0.00599  | -0.194005845 | count | 1           |
| ALDH2      | -0.1371469 | 0.0639548 | -2.1444 | 0.0321   | -0.193992568 | count | 1           |
| TBPL1      | -0.157203  | 0.2271096 | -0.6922 | 0.489    | -0.193719472 | count | 1           |
| C5orf51    | -0.1618105 | 0.2578569 | -0.6275 | 0.53     | -0.193529281 | count | 1           |
| TGFA       | -0.9808895 | 0.9528925 | -1.0294 | 0.303    | -0.19327349  | count | 1           |
| WWC2       | -0.1878576 | 0.3311811 | -0.5672 | 0.571    | -0.192964615 | count | 1           |
| PSMD12     | -0.1383532 | 0.0952304 | -1.4528 | 0.146    | -0.192879468 | count | 1           |
| IRGQ       | -0.1763605 | 0.3343666 | -0.5274 | 0.598    | -0.192691093 | count | 1           |
| RHOA       | -0.1339478 | 0.0348717 | -3.8412 | 0.000126 | -0.192541452 | count | 1           |
| KCTD5      | -0.1608596 | 0.2841802 | -0.566  | 0.571    | -0.192403692 | count | 1           |
| TMED9      | -0.1359351 | 0.0826319 | -1.6451 | 0.1      | -0.192379961 | count | 1           |
| SLC35E1    | -0.1512438 | 0.2274857 | -0.6648 | 0.506    | -0.192358622 | count | 1           |
| SLC12A7    | -0.2061344 | 0.316915  | -0.6504 | 0.515    | -0.192090668 | count | 1           |
| PDE8A      | -0.1576643 | 0.3284127 | -0.4801 | 0.631    | -0.192071822 | count | 1           |
| SNRPG      | -0.1353536 | 0.0704134 | -1.9223 | 0.0547   | -0.191912413 | count | 1           |
| DENND6A-DT | -1.838001  | 1.2705592 | -1.4466 | 0.148    | -0.191718166 | count | 1           |
| PCBP1      | -0.1337813 | 0.0450539 | -2.9694 | 0.00301  | -0.19162513  | count | 1           |
| RPL3       | -0.1330276 | 0.0293523 | -4.5321 | 6.12E-06 | -0.191420855 | count | 0.14520312  |
| MTX2       | -0.153412  | 0.2314114 | -0.6629 | 0.507    | -0.191277894 | count | 1           |
| MAP9       | -0.6988948 | 0.7888952 | -0.8859 | 0.376    | -0.191215471 | count | 1           |
| YEATS2     | -0.1729465 | 0.4472342 | -0.3867 | 0.699    | -0.191032286 | count | 1           |
| SPTY2D1    | -0.1445214 | 0.1717615 | -0.8414 | 0.4      | -0.19088296  | count | 1           |
| ASCC1      | -0.1789861 | 0.3547192 | -0.5046 | 0.614    | -0.190880001 | count | 1           |
| ADGRA2     | -0.9621425 | 1.1344572 | -0.8481 | 0.396    | -0.190729952 | count | 1           |
| BSCL2      | -0.9621425 | 1.1344572 | -0.8481 | 0.396    | -0.190729952 | count | 1           |
| AL844908.1 | -0.9621425 | 1.4152142 | -0.6799 | 0.497    | -0.190729952 | count | 1           |
| SOD1       | -0.1343632 | 0.0705646 | -1.9041 | 0.057    | -0.190593989 | count | 1           |
| PYURF      | -0.1354806 | 0.0889146 | -1.5237 | 0.128    | -0.190519762 | count | 1           |
| MMADHC     | -0.1387014 | 0.1127567 | -1.2301 | 0.219    | -0.190336304 | count | 1           |

|            |            |           |         |         |              |       |   |
|------------|------------|-----------|---------|---------|--------------|-------|---|
| LINC01503  | -0.1511163 | 0.2343893 | -0.6447 | 0.519   | -0.190319816 | count | 1 |
| STAM2      | -0.1598411 | 0.2663096 | -0.6002 | 0.548   | -0.190213298 | count | 1 |
| CD44       | -0.132953  | 0.0623106 | -2.1337 | 0.033   | -0.190212709 | count | 1 |
| ANAPC15    | -0.1390524 | 0.1368717 | -1.0159 | 0.31    | -0.190195362 | count | 1 |
| PIGF       | -0.1460709 | 0.1891592 | -0.7722 | 0.44    | -0.190178575 | count | 1 |
| ZSCAN29    | -0.3821647 | 0.6362103 | -0.6007 | 0.548   | -0.190098373 | count | 1 |
| SUGT1      | -0.1351957 | 0.1032202 | -1.3098 | 0.19    | -0.190046903 | count | 1 |
| TFCP2L1    | -0.6930213 | 0.5345555 | -1.2964 | 0.195   | -0.189950371 | count | 1 |
| C18orf25   | -0.1863458 | 0.2658111 | -0.701  | 0.483   | -0.189836512 | count | 1 |
| ILF3       | -0.1369872 | 0.1193304 | -1.148  | 0.251   | -0.189780696 | count | 1 |
| SLC35A4    | -0.153136  | 0.2326056 | -0.6584 | 0.51    | -0.189724687 | count | 1 |
| TMEM256    | -0.1365451 | 0.1094486 | -1.2476 | 0.212   | -0.189592441 | count | 1 |
| NOL8       | -0.14838   | 0.2098401 | -0.7071 | 0.48    | -0.189570763 | count | 1 |
| PINX1      | -0.1607266 | 0.345219  | -0.4656 | 0.642   | -0.189119094 | count | 1 |
| ACTR3      | -0.1324207 | 0.0609619 | -2.1722 | 0.0299  | -0.189096286 | count | 1 |
| TPGS2      | -0.1439198 | 0.2025689 | -0.7105 | 0.477   | -0.189079742 | count | 1 |
| PAFAH1B2   | -0.1377625 | 0.1315456 | -1.0473 | 0.295   | -0.18894791  | count | 1 |
| GNB1L      | -0.2354845 | 0.4480955 | -0.5255 | 0.599   | -0.18870911  | count | 1 |
| OPLAH      | -0.6861336 | 0.5944093 | -1.1543 | 0.248   | -0.188459942 | count | 1 |
| AL445472.1 | -0.5530705 | 0.8298299 | -0.6665 | 0.505   | -0.188252733 | count | 1 |
| GPKOW      | -0.1670597 | 0.3026239 | -0.552  | 0.581   | -0.188145346 | count | 1 |
| HTATIP2    | -0.1362785 | 0.1200296 | -1.1354 | 0.256   | -0.188095319 | count | 1 |
| AC090630.1 | -0.3243011 | 0.9850727 | -0.3292 | 0.742   | -0.188036812 | count | 1 |
| MAIP1      | -0.173992  | 0.3639374 | -0.4781 | 0.633   | -0.187974531 | count | 1 |
| PARK7      | -0.1312691 | 0.0506195 | -2.5933 | 0.00956 | -0.187780554 | count | 1 |
| AATK       | -0.3048579 | 0.6820854 | -0.4469 | 0.655   | -0.18769532  | count | 1 |
| AC009275.1 | -0.4701432 | 0.7183625 | -0.6545 | 0.513   | -0.187512728 | count | 1 |
| TBX6       | -0.4701432 | 0.9600081 | -0.4897 | 0.624   | -0.187512728 | count | 1 |
| MDH1       | -0.1328358 | 0.0791857 | -1.6775 | 0.0936  | -0.187498338 | count | 1 |
| NOL9       | -0.1757239 | 0.3281058 | -0.5356 | 0.592   | -0.187460701 | count | 1 |
| AL356417.3 | -0.4689184 | 0.7403453 | -0.6334 | 0.527   | -0.187087025 | count | 1 |
| MRPS23     | -0.1389822 | 0.1484028 | -0.9365 | 0.349   | -0.18696562  | count | 1 |
| C19orf12   | -0.1728561 | 0.3853382 | -0.4486 | 0.654   | -0.186767274 | count | 1 |
| AL358472.4 | -0.5475907 | 0.7541999 | -0.7261 | 0.468   | -0.186683466 | count | 1 |
| MRPL14     | -0.131997  | 0.0906372 | -1.4563 | 0.145   | -0.186289819 | count | 1 |
| GNB1       | -0.1327911 | 0.0927843 | -1.4312 | 0.153   | -0.186280004 | count | 1 |
| RBMX2      | -0.1457212 | 0.1848763 | -0.7882 | 0.431   | -0.186195015 | count | 1 |
| BTBD7      | -0.1414769 | 0.1900737 | -0.7443 | 0.457   | -0.185767823 | count | 1 |
| DHX8       | -0.159298  | 0.2941043 | -0.5416 | 0.588   | -0.185716521 | count | 1 |
| COL18A1    | -0.4108171 | 0.5024198 | -0.8177 | 0.414   | -0.18552509  | count | 1 |
| ZNF879     | -0.9243565 | 0.66156   | -1.3972 | 0.162   | -0.185485883 | count | 1 |
| TBC1D32    | -0.9243565 | 0.9030643 | -1.0236 | 0.306   | -0.185485883 | count | 1 |
| TIAM1      | -0.1490713 | 0.22263   | -0.6696 | 0.503   | -0.185329213 | count | 1 |
| GORAB      | -0.2159271 | 0.3842492 | -0.5619 | 0.574   | -0.185309963 | count | 1 |
| WIPF2      | -0.1582572 | 0.2367633 | -0.6684 | 0.504   | -0.18510853  | count | 1 |



|            |            |           |         |         |              |       |   |
|------------|------------|-----------|---------|---------|--------------|-------|---|
| NDUFS6     | -0.1310494 | 0.0743329 | -1.763  | 0.078   | -0.185078833 | count | 1 |
| POC1B      | -0.170225  | 0.4094373 | -0.4158 | 0.678   | -0.185049011 | count | 1 |
| SEH1L      | -0.1550188 | 0.2500089 | -0.6201 | 0.535   | -0.185015664 | count | 1 |
| TUBG1      | -0.1534531 | 0.3627061 | -0.4231 | 0.672   | -0.184964012 | count | 1 |
| CCDC12     | -0.1348334 | 0.1282175 | -1.0516 | 0.293   | -0.184660575 | count | 1 |
| GPR89A     | -0.3179566 | 0.6120765 | -0.5195 | 0.603   | -0.184622072 | count | 1 |
| YEATS4     | -0.1433992 | 0.2040301 | -0.7028 | 0.482   | -0.184529231 | count | 1 |
| HECTD3     | -0.1878965 | 0.616723  | -0.3047 | 0.761   | -0.184169201 | count | 1 |
| ZNF195     | -0.1569482 | 0.2895383 | -0.5421 | 0.588   | -0.18416536  | count | 1 |
| SSBP3      | -0.1476333 | 0.2640356 | -0.5591 | 0.576   | -0.184126762 | count | 1 |
| LRRC14     | -0.2600346 | 0.4721127 | -0.5508 | 0.582   | -0.184063463 | count | 1 |
| PDSS1      | -0.206334  | 0.4464272 | -0.4622 | 0.644   | -0.18379044  | count | 1 |
| ZNF275     | -0.911584  | 0.8834586 | -1.0318 | 0.302   | -0.183677313 | count | 1 |
| SUV39H2    | -0.911584  | 0.9800878 | -0.9301 | 0.352   | -0.183677313 | count | 1 |
| LINC00672  | -0.911584  | 0.8527045 | -1.0691 | 0.285   | -0.183677313 | count | 1 |
| IL6R-AS1   | -0.4585346 | 0.6524557 | -0.7028 | 0.482   | -0.183464881 | count | 1 |
| PIAS4      | -0.1667857 | 0.2976301 | -0.5604 | 0.575   | -0.183373709 | count | 1 |
| XCL2       | -0.5358108 | 1.8109382 | -0.2959 | 0.767   | -0.183290613 | count | 1 |
| PHF23      | -0.1383069 | 0.1666029 | -0.8302 | 0.407   | -0.183205686 | count | 1 |
| PATL1      | -0.1592557 | 0.2686634 | -0.5928 | 0.553   | -0.183113106 | count | 1 |
| FAF2       | -0.1425373 | 0.1935835 | -0.7363 | 0.462   | -0.183076554 | count | 1 |
| CCDC15     | -0.5345483 | 0.7001432 | -0.7635 | 0.445   | -0.182925423 | count | 1 |
| ANXA11     | -0.1289749 | 0.0705214 | -1.8289 | 0.0675  | -0.182831622 | count | 1 |
| TCTN1      | -0.227763  | 0.4676083 | -0.4871 | 0.626   | -0.182756513 | count | 1 |
| ICMT       | -0.1659685 | 0.388794  | -0.4269 | 0.67    | -0.182488478 | count | 1 |
| TAF9       | -0.1303643 | 0.1169309 | -1.1149 | 0.265   | -0.182305355 | count | 1 |
| CANX       | -0.1277787 | 0.0571416 | -2.2362 | 0.0254  | -0.182274555 | count | 1 |
| ST13       | -0.1279264 | 0.0634782 | -2.0153 | 0.044   | -0.182269762 | count | 1 |
| NIFK       | -0.1304289 | 0.1076387 | -1.2117 | 0.226   | -0.182183628 | count | 1 |
| SLC15A4    | -0.1445425 | 0.2299542 | -0.6286 | 0.53    | -0.182097286 | count | 1 |
| AL138885.3 | -1.633834  | 1.579376  | -1.0345 | 0.301   | -0.181900469 | count | 1 |
| BRSK1      | -1.633834  | 1.0274314 | -1.5902 | 0.112   | -0.181900469 | count | 1 |
| ZNF91      | -0.1512681 | 0.2562348 | -0.5903 | 0.555   | -0.181490138 | count | 1 |
| STAG3      | -0.6529123 | 0.6477095 | -1.008  | 0.314   | -0.181166356 | count | 1 |
| PDCD2L     | -0.6529123 | 0.6477095 | -1.008  | 0.314   | -0.181166356 | count | 1 |
| PTGES3     | -0.1271681 | 0.0586346 | -2.1688 | 0.0302  | -0.181116375 | count | 1 |
| HLA-DQB1   | -0.1259502 | 0.0518798 | -2.4277 | 0.0153  | -0.18103573  | count | 1 |
| UBA2       | -0.1350557 | 0.160301  | -0.8425 | 0.4     | -0.181030581 | count | 1 |
| CARD19     | -0.12899   | 0.1150954 | -1.1207 | 0.263   | -0.180509881 | count | 1 |
| OGG1       | -0.2101422 | 0.3733334 | -0.5629 | 0.574   | -0.180503639 | count | 1 |
| BRK1       | -0.1265868 | 0.0512406 | -2.4704 | 0.0136  | -0.180421433 | count | 1 |
| EDF1       | -0.1260899 | 0.0477367 | -2.6414 | 0.00831 | -0.180395855 | count | 1 |
| HYLS1      | -0.3100162 | 0.6705753 | -0.4623 | 0.644   | -0.180333246 | count | 1 |
| BTG3       | -0.1294676 | 0.112815  | -1.1476 | 0.251   | -0.180292005 | count | 1 |
| HERPUD1    | -0.1255399 | 0.0596995 | -2.1029 | 0.0356  | -0.180254959 | count | 1 |

|            |            |           |         |          |              |       |   |
|------------|------------|-----------|---------|----------|--------------|-------|---|
| TM9SF3     | -0.1292098 | 0.0994379 | -1.2994 | 0.194    | -0.18012276  | count | 1 |
| ABI1       | -0.1319511 | 0.1241125 | -1.0632 | 0.288    | -0.180004213 | count | 1 |
| RBSN       | -0.1877135 | 0.3455469 | -0.5432 | 0.587    | -0.179877586 | count | 1 |
| CNPY2      | -0.1303663 | 0.1571385 | -0.8296 | 0.407    | -0.179663811 | count | 1 |
| TPMT       | -0.1355359 | 0.1343103 | -1.0091 | 0.313    | -0.179643822 | count | 1 |
| AL683813.1 | -0.8832827 | 0.7417659 | -1.1908 | 0.234    | -0.179604153 | count | 1 |
| ABHD17A    | -0.1295498 | 0.1119353 | -1.1574 | 0.247    | -0.179580417 | count | 1 |
| ASAH1      | -0.1251411 | 0.046043  | -2.7179 | 0.00662  | -0.179513127 | count | 1 |
| ZNF519     | -0.3584134 | 0.8671808 | -0.4133 | 0.679    | -0.179333267 | count | 1 |
| MAPK12     | -0.5207014 | 0.8284659 | -0.6285 | 0.53     | -0.178899897 | count | 1 |
| ZNF263     | -0.235557  | 0.3808775 | -0.6185 | 0.536    | -0.178839288 | count | 1 |
| C3         | -0.1321182 | 0.2194955 | -0.6019 | 0.547    | -0.178742085 | count | 1 |
| UBXN2B     | -0.1376776 | 0.2193208 | -0.6277 | 0.53     | -0.178605032 | count | 1 |
| DUS3L      | -0.1719256 | 0.349869  | -0.4914 | 0.623    | -0.178322058 | count | 1 |
| MSC        | -1.561725  | 1.0907918 | -1.4317 | 0.152    | -0.177974221 | count | 1 |
| RANBP9     | -0.1420253 | 0.2333685 | -0.6086 | 0.543    | -0.177967482 | count | 1 |
| C16orf87   | -0.1326499 | 0.1479247 | -0.8967 | 0.37     | -0.177954095 | count | 1 |
| NSMF       | -0.2029647 | 0.3573074 | -0.568  | 0.57     | -0.177789668 | count | 1 |
| SDHB       | -0.1272421 | 0.0899525 | -1.4145 | 0.157    | -0.17775234  | count | 1 |
| RASSF4     | -0.1259083 | 0.0822795 | -1.5303 | 0.126    | -0.177693073 | count | 1 |
| PPP2CB     | -0.1324219 | 0.1538321 | -0.8608 | 0.389    | -0.177581249 | count | 1 |
| HEXB       | -0.1253513 | 0.0719646 | -1.7418 | 0.0817   | -0.177575882 | count | 1 |
| DLGAP1-AS1 | -0.1472426 | 0.2624415 | -0.561  | 0.575    | -0.177545749 | count | 1 |
| DOT1L      | -0.1521097 | 0.344218  | -0.4419 | 0.659    | -0.177427236 | count | 1 |
| NDUFV1     | -0.1291764 | 0.1136101 | -1.137  | 0.256    | -0.177134082 | count | 1 |
| P2RY1      | -0.1751085 | 0.4179416 | -0.419  | 0.675    | -0.17703779  | count | 1 |
| CETP       | -0.2863251 | 0.7182286 | -0.3987 | 0.69     | -0.176990141 | count | 1 |
| ZNF7       | -0.1592022 | 0.3743    | -0.4253 | 0.671    | -0.176940469 | count | 1 |
| SIN3A      | -0.1436207 | 0.2391391 | -0.6006 | 0.548    | -0.176795884 | count | 1 |
| MAP7D1     | -0.1280689 | 0.1097534 | -1.1669 | 0.243    | -0.176787566 | count | 1 |
| CDC37      | -0.1246336 | 0.0674959 | -1.8465 | 0.0649   | -0.176638655 | count | 1 |
| TXLNA      | -0.1448873 | 0.2392606 | -0.6056 | 0.545    | -0.176637166 | count | 1 |
| STOML2     | -0.1286121 | 0.1602363 | -0.8026 | 0.422    | -0.176586259 | count | 1 |
| AL161421.1 | -0.149069  | 0.3092122 | -0.4821 | 0.63     | -0.176556186 | count | 1 |
| COPS7A     | -0.1367288 | 0.1766224 | -0.7741 | 0.439    | -0.176476387 | count | 1 |
| CHAF1A     | -0.2095551 | 0.3058673 | -0.6851 | 0.493    | -0.176449345 | count | 1 |
| STX8       | -0.1299368 | 0.1220416 | -1.0647 | 0.287    | -0.176395427 | count | 1 |
| MT-ATP6    | -0.1223769 | 0.0307059 | -3.9854 | 6.93E-05 | -0.176330064 | count | 1 |
| MAP4K5     | -0.1410475 | 0.2177619 | -0.6477 | 0.517    | -0.17623618  | count | 1 |
| SNX7       | -0.231472  | 0.3674731 | -0.6299 | 0.529    | -0.175865228 | count | 1 |
| AKAP2      | -1.52113   | 1.1378164 | -1.3369 | 0.181    | -0.175649266 | count | 1 |
| CD151      | -0.1287868 | 0.0982914 | -1.3103 | 0.19     | -0.175537742 | count | 1 |
| APP        | -0.1289672 | 0.1435022 | -0.8987 | 0.369    | -0.175311686 | count | 1 |
| RASL10A    | -0.2571495 | 0.5250376 | -0.4898 | 0.624    | -0.175267917 | count | 1 |
| TMEM222    | -0.1501185 | 0.3085393 | -0.4865 | 0.627    | -0.175129457 | count | 1 |

|            |            |           |         |          |              |       |   |
|------------|------------|-----------|---------|----------|--------------|-------|---|
| SH3BP5-AS1 | -0.5077973 | 0.8487363 | -0.5983 | 0.55     | -0.175115288 | count | 1 |
| FRS3       | -0.5077973 | 0.8538619 | -0.5947 | 0.552    | -0.175115288 | count | 1 |
| AJM1       | -0.5077973 | 1.0347724 | -0.4907 | 0.624    | -0.175115288 | count | 1 |
| NCOR2      | -0.1307936 | 0.1750181 | -0.7473 | 0.455    | -0.175058825 | count | 1 |
| DCXR       | -0.1249834 | 0.0975841 | -1.2808 | 0.2      | -0.174934105 | count | 1 |
| CCDC90B    | -0.1275411 | 0.1343723 | -0.9492 | 0.343    | -0.174896924 | count | 1 |
| EMILIN2    | -0.1240913 | 0.0750546 | -1.6533 | 0.0984   | -0.174813326 | count | 1 |
| CCL19      | -1.500214  | 0.8732205 | -1.718  | 0.0859   | -0.174418036 | count | 1 |
| ASB7       | -0.2990747 | 0.470579  | -0.6355 | 0.525    | -0.174395885 | count | 1 |
| CHCHD10    | -0.1221724 | 0.0587284 | -2.0803 | 0.0376   | -0.17426026  | count | 1 |
| TAF5L      | -0.172102  | 0.3873692 | -0.4443 | 0.657    | -0.174056496 | count | 1 |
| PCNX1      | -0.1437971 | 0.2793068 | -0.5148 | 0.607    | -0.173823514 | count | 1 |
| AL031848.2 | -1.489796  | 1.481218  | -1.0058 | 0.315    | -0.173796062 | count | 1 |
| TCEAL4     | -0.1234054 | 0.11139   | -1.1079 | 0.268    | -0.173300249 | count | 1 |
| APMAP      | -0.1272869 | 0.1534548 | -0.8295 | 0.407    | -0.173292538 | count | 1 |
| CDH26      | -0.3806309 | 0.6627915 | -0.5743 | 0.566    | -0.173241088 | count | 1 |
| SMTN       | -0.3806309 | 0.8626004 | -0.4413 | 0.659    | -0.173241088 | count | 1 |
| RPSA       | -0.1204973 | 0.0364188 | -3.3087 | 0.000951 | -0.173228844 | count | 1 |
| RELB       | -0.1265615 | 0.1385951 | -0.9132 | 0.361    | -0.172972537 | count | 1 |
| PAPOLA     | -0.1229677 | 0.0799273 | -1.5385 | 0.124    | -0.172943775 | count | 1 |
| RBL2       | -0.1420576 | 0.1923211 | -0.7386 | 0.46     | -0.172493981 | count | 1 |
| GMDS-DT    | -0.2202113 | 0.4209725 | -0.5231 | 0.601    | -0.172428902 | count | 1 |
| ITGB3BP    | -0.1574827 | 0.306672  | -0.5135 | 0.608    | -0.17235901  | count | 1 |
| AL132656.2 | -1.464829  | 1.298091  | -1.1284 | 0.259    | -0.172281956 | count | 1 |
| TOR1A      | -0.128763  | 0.1646254 | -0.7822 | 0.434    | -0.172064756 | count | 1 |
| STAM       | -0.1352258 | 0.2195984 | -0.6158 | 0.538    | -0.171910917 | count | 1 |
| ACBD5      | -0.1375509 | 0.189245  | -0.7268 | 0.467    | -0.171897134 | count | 1 |
| G2E3       | -0.1419904 | 0.2584238 | -0.5494 | 0.583    | -0.171658228 | count | 1 |
| RTL8B      | -0.251118  | 0.7452227 | -0.337  | 0.736    | -0.17136092  | count | 1 |
| PLXDC2     | -0.1214721 | 0.082562  | -1.4713 | 0.141    | -0.17132113  | count | 1 |
| PARM1      | -0.6091694 | 0.7633704 | -0.798  | 0.425    | -0.171294916 | count | 1 |
| AC012360.3 | -0.2251625 | 0.9741886 | -0.2311 | 0.817    | -0.171262498 | count | 1 |
| ACOT7      | -0.2249738 | 0.5036273 | -0.4467 | 0.655    | -0.171124678 | count | 1 |
| USP12      | -0.1266765 | 0.1778503 | -0.7123 | 0.476    | -0.170978827 | count | 1 |
| DMAC1      | -0.125829  | 0.1453923 | -0.8654 | 0.387    | -0.170742362 | count | 1 |
| KHK        | -0.2501576 | 0.4332494 | -0.5774 | 0.564    | -0.17073787  | count | 1 |
| PRMT1      | -0.1218838 | 0.102339  | -1.191  | 0.234    | -0.170426465 | count | 1 |
| AC008429.1 | -0.8212991 | 0.8675742 | -0.9467 | 0.344    | -0.170360982 | count | 1 |
| LINC01268  | -0.8212991 | 0.8786115 | -0.9348 | 0.35     | -0.170360982 | count | 1 |
| PRR14      | -0.1522383 | 0.335318  | -0.454  | 0.65     | -0.170113107 | count | 1 |
| AL137186.2 | -0.1636744 | 0.4167024 | -0.3928 | 0.695    | -0.169910389 | count | 1 |
| LINC01759  | -0.6029909 | 1.1849751 | -0.5089 | 0.611    | -0.169875821 | count | 1 |
| NOS1AP     | -0.6029909 | 1.1849751 | -0.5089 | 0.611    | -0.169875821 | count | 1 |
| DOCK3      | -0.6029909 | 1.1304458 | -0.5334 | 0.594    | -0.169875821 | count | 1 |
| POT1-AS1   | -0.6029909 | 1.550106  | -0.389  | 0.697    | -0.169875821 | count | 1 |

|            |            |           |         |          |              |       |   |
|------------|------------|-----------|---------|----------|--------------|-------|---|
| AL391988.1 | -0.6029909 | 1.2691712 | -0.4751 | 0.635    | -0.169875821 | count | 1 |
| FBXL14     | -0.6029909 | 1.1304458 | -0.5334 | 0.594    | -0.169875821 | count | 1 |
| WNK1       | -0.1232456 | 0.1089277 | -1.1314 | 0.258    | -0.16935212  | count | 1 |
| UBA1       | -0.1310391 | 0.2006236 | -0.6532 | 0.514    | -0.169319871 | count | 1 |
| DNASE1L1   | -0.1449617 | 0.1600311 | -0.9058 | 0.365    | -0.169175467 | count | 1 |
| CA11       | -0.1834503 | 0.3353827 | -0.547  | 0.584    | -0.169084857 | count | 1 |
| OXSM       | -0.1784259 | 0.3689601 | -0.4836 | 0.629    | -0.169079787 | count | 1 |
| SRGAP1     | -0.1272601 | 0.2207562 | -0.5765 | 0.564    | -0.169057267 | count | 1 |
| SPIB       | -0.1581832 | 0.3302073 | -0.479  | 0.632    | -0.169035548 | count | 1 |
| SLC6A6     | -0.1241594 | 0.1709343 | -0.7264 | 0.468    | -0.168836464 | count | 1 |
| MPZL2      | -0.2887062 | 0.6479002 | -0.4456 | 0.656    | -0.168740038 | count | 1 |
| NUCKS1     | -0.1186632 | 0.0690837 | -1.7177 | 0.086    | -0.168698799 | count | 1 |
| TRIM16     | -1.406195  | 0.9297599 | -1.5124 | 0.131    | -0.168591356 | count | 1 |
| SCAMP3     | -0.134041  | 0.2356523 | -0.5688 | 0.57     | -0.168497921 | count | 1 |
| HCCS       | -0.1270233 | 0.1611438 | -0.7883 | 0.431    | -0.168490547 | count | 1 |
| PGPEP1     | -0.140854  | 0.271342  | -0.5191 | 0.604    | -0.168262694 | count | 1 |
| PEX19      | -0.1478856 | 0.3069125 | -0.4818 | 0.63     | -0.168222586 | count | 1 |
| ZDHHC4     | -0.1303907 | 0.1827215 | -0.7136 | 0.476    | -0.168186345 | count | 1 |
| ZNF714     | -0.1882527 | 0.3707741 | -0.5077 | 0.612    | -0.168117469 | count | 1 |
| NUTM2B-AS1 | -0.1255384 | 0.17382   | -0.7222 | 0.47     | -0.168048726 | count | 1 |
| F8A1       | -0.129084  | 0.1839286 | -0.7018 | 0.483    | -0.168038338 | count | 1 |
| SRP9       | -0.1190789 | 0.0805308 | -1.4787 | 0.139    | -0.167973933 | count | 1 |
| SNRPB      | -0.1180539 | 0.054899  | -2.1504 | 0.0316   | -0.167851353 | count | 1 |
| FOXC1      | -0.8048576 | 0.6922496 | -1.1627 | 0.245    | -0.167833447 | count | 1 |
| SNX1       | -0.1229429 | 0.1333532 | -0.9219 | 0.357    | -0.167820872 | count | 1 |
| USP8       | -0.1215114 | 0.1192458 | -1.019  | 0.308    | -0.16760922  | count | 1 |
| C19orf48   | -0.1520989 | 0.4143723 | -0.3671 | 0.714    | -0.167443437 | count | 1 |
| NDUFAB1    | -0.117495  | 0.0690349 | -1.702  | 0.0889   | -0.16701003  | count | 1 |
| CAMKMT     | -0.2556742 | 0.4434319 | -0.5766 | 0.564    | -0.166984193 | count | 1 |
| POGK       | -0.1516038 | 0.2526488 | -0.6001 | 0.549    | -0.166905652 | count | 1 |
| CLIC1      | -0.1158975 | 0.0309112 | -3.7494 | 0.000181 | -0.16687557  | count | 1 |
| PJA1       | -0.2127557 | 0.4702196 | -0.4525 | 0.651    | -0.166802957 | count | 1 |
| FAM53A     | -1.378688  | 1.4503264 | -0.9506 | 0.342    | -0.166793044 | count | 1 |
| COL4A2     | -1.378688  | 1.010867  | -1.3639 | 0.173    | -0.166793044 | count | 1 |
| CGRRF1     | -0.1371972 | 0.2451141 | -0.5597 | 0.576    | -0.166639763 | count | 1 |
| TMEM189    | -0.13405   | 0.2059585 | -0.6509 | 0.515    | -0.166516421 | count | 1 |
| TCEA1      | -0.1175578 | 0.0827858 | -1.42   | 0.156    | -0.166487185 | count | 1 |
| DALRD3     | -0.1325741 | 0.2143393 | -0.6185 | 0.536    | -0.166435463 | count | 1 |
| BEX4       | -0.1183455 | 0.1217485 | -0.972  | 0.331    | -0.166167671 | count | 1 |
| LINC02246  | -0.794049  | 1.0790934 | -0.7358 | 0.462    | -0.166154294 | count | 1 |
| FUT8       | -0.2335237 | 0.4467958 | -0.5227 | 0.601    | -0.16613395  | count | 1 |
| MNT        | -0.1339556 | 0.2348289 | -0.5704 | 0.568    | -0.166128404 | count | 1 |
| AC093627.4 | -0.22515   | 0.4764457 | -0.4726 | 0.637    | -0.166026155 | count | 1 |
| KDELRL1    | -0.1164586 | 0.0633576 | -1.8381 | 0.0662   | -0.165839863 | count | 1 |
| PITHD1     | -0.1209145 | 0.1535999 | -0.7872 | 0.431    | -0.165768008 | count | 1 |

|            |            |           |         |         |              |       |   |
|------------|------------|-----------|---------|---------|--------------|-------|---|
| PIGS       | -0.1364517 | 0.2765432 | -0.4934 | 0.622   | -0.165741515 | count | 1 |
| MYO1D      | -0.4761374 | 0.743485  | -0.6404 | 0.522   | -0.165693558 | count | 1 |
| FANCD2     | -0.4080108 | 0.7969516 | -0.512  | 0.609   | -0.165507458 | count | 1 |
| MTDH       | -0.1156482 | 0.0495467 | -2.3341 | 0.0197  | -0.165453112 | count | 1 |
| CHD3       | -0.1333846 | 0.230697  | -0.5782 | 0.563   | -0.165425173 | count | 1 |
| TPD52      | -0.1883492 | 0.3255977 | -0.5785 | 0.563   | -0.165340012 | count | 1 |
| RILPL1     | -0.474111  | 0.5689957 | -0.8332 | 0.405   | -0.165083903 | count | 1 |
| PARN       | -0.1531362 | 0.259824  | -0.5894 | 0.556   | -0.164761922 | count | 1 |
| BOP1       | -0.1714918 | 0.3063638 | -0.5598 | 0.576   | -0.164666159 | count | 1 |
| TMEM230    | -0.1168726 | 0.0778114 | -1.502  | 0.133   | -0.164620396 | count | 1 |
| AF129075.2 | -1.3426727 | 1.3553721 | -0.9906 | 0.322   | -0.164371854 | count | 1 |
| PDE7A      | -0.1375483 | 0.2856571 | -0.4815 | 0.63    | -0.164348348 | count | 1 |
| GNPTG      | -0.1166691 | 0.0904532 | -1.2898 | 0.197   | -0.164347674 | count | 1 |
| AC010680.3 | -0.3004457 | 1.180064  | -0.2546 | 0.799   | -0.164283987 | count | 1 |
| BIRC5      | -0.3004457 | 0.7828468 | -0.3838 | 0.701   | -0.164283987 | count | 1 |
| DNAJB1     | -0.1155065 | 0.0989703 | -1.1671 | 0.243   | -0.164150721 | count | 1 |
| TXNDC11    | -0.1377161 | 0.252626  | -0.5451 | 0.586   | -0.164119952 | count | 1 |
| CDCA7L     | -0.1708485 | 0.3427607 | -0.4984 | 0.618   | -0.164061567 | count | 1 |
| LRRC57     | -0.1446215 | 0.263075  | -0.5497 | 0.583   | -0.163872873 | count | 1 |
| MARF1      | -0.1286477 | 0.2322502 | -0.5539 | 0.58    | -0.163782258 | count | 1 |
| GPR108     | -0.1183506 | 0.1199489 | -0.9867 | 0.324   | -0.163576415 | count | 1 |
| CREB1      | -0.1250573 | 0.1556475 | -0.8035 | 0.422   | -0.163534369 | count | 1 |
| RTL10      | -0.2144998 | 0.6031871 | -0.3556 | 0.722   | -0.163459003 | count | 1 |
| DDX19A     | -0.1527755 | 0.3713035 | -0.4115 | 0.681   | -0.163341759 | count | 1 |
| TYMP       | -0.1134445 | 0.037939  | -2.9902 | 0.00282 | -0.163123858 | count | 1 |
| ZNF317     | -0.2381024 | 0.3804316 | -0.6259 | 0.531   | -0.162895537 | count | 1 |
| AP002478.1 | -1.320787  | 0.911143  | -1.4496 | 0.147   | -0.162862716 | count | 1 |
| SPATA13    | -0.1328513 | 0.2141142 | -0.6205 | 0.535   | -0.162401081 | count | 1 |
| PSMC5      | -0.1151487 | 0.0736418 | -1.5636 | 0.118   | -0.162325034 | count | 1 |
| MPC2       | -0.115591  | 0.1221008 | -0.9467 | 0.344   | -0.162161813 | count | 1 |
| HRAS       | -0.121839  | 0.1849326 | -0.6588 | 0.51    | -0.162038514 | count | 1 |
| ATF3       | -0.1126889 | 0.0707467 | -1.5929 | 0.111   | -0.161904008 | count | 1 |
| RAD18      | -0.2006478 | 0.3905785 | -0.5137 | 0.607   | -0.16172242  | count | 1 |
| NECAP2     | -0.1171149 | 0.1243557 | -0.9418 | 0.346   | -0.161649242 | count | 1 |
| SLAMF6     | -0.7648622 | 0.9209919 | -0.8305 | 0.406   | -0.161549682 | count | 1 |
| PLEKHA8    | -0.1623645 | 0.4043179 | -0.4016 | 0.688   | -0.161284374 | count | 1 |
| POLH       | -0.3961786 | 0.7484676 | -0.5293 | 0.597   | -0.16122178  | count | 1 |
| PROS1      | -0.2114304 | 0.3410799 | -0.6199 | 0.535   | -0.161206827 | count | 1 |
| PACSN2     | -0.1208302 | 0.1563501 | -0.7728 | 0.44    | -0.161076065 | count | 1 |
| ZNF540     | -0.2746838 | 1.4526059 | -0.1891 | 0.85    | -0.161045558 | count | 1 |
| MIF-AS1    | -0.2746838 | 0.8283578 | -0.3316 | 0.74    | -0.161045558 | count | 1 |
| LRMDA      | -0.1152876 | 0.1090653 | -1.0571 | 0.291   | -0.160926619 | count | 1 |
| SUMO1      | -0.1134791 | 0.0682268 | -1.6633 | 0.0964  | -0.160898903 | count | 1 |
| SRD5A3     | -0.1171829 | 0.129288  | -0.9064 | 0.365   | -0.160811613 | count | 1 |
| PIDD1      | -0.2583932 | 0.7162619 | -0.3608 | 0.718   | -0.160679387 | count | 1 |

|            |            |           |         |         |              |       |   |
|------------|------------|-----------|---------|---------|--------------|-------|---|
| TFB2M      | -0.1616661 | 0.380125  | -0.4253 | 0.671   | -0.160603571 | count | 1 |
| AP3S1      | -0.1150804 | 0.1058918 | -1.0868 | 0.277   | -0.160467698 | count | 1 |
| CLSPN      | -0.1941908 | 0.4803392 | -0.4043 | 0.686   | -0.160401672 | count | 1 |
| TRAF3      | -0.1274262 | 0.2367696 | -0.5382 | 0.59    | -0.160233118 | count | 1 |
| LINC01137  | -0.3486295 | 0.8389572 | -0.4156 | 0.678   | -0.159984333 | count | 1 |
| SNHG10     | -0.3486295 | 0.8494975 | -0.4104 | 0.682   | -0.159984333 | count | 1 |
| AC009126.1 | -0.3927477 | 0.7653549 | -0.5132 | 0.608   | -0.159973378 | count | 1 |
| TNKS1BP1   | -0.3927477 | 0.7063908 | -0.556  | 0.578   | -0.159973378 | count | 1 |
| EFTUD2     | -0.1243209 | 0.1930558 | -0.644  | 0.52    | -0.159950293 | count | 1 |
| RRP15      | -0.1226231 | 0.2432308 | -0.5041 | 0.614   | -0.159542499 | count | 1 |
| THRAP3     | -0.1125261 | 0.0677358 | -1.6612 | 0.0968  | -0.159509747 | count | 1 |
| TIMM9      | -0.1263117 | 0.1889651 | -0.6684 | 0.504   | -0.159473028 | count | 1 |
| PNO1       | -0.1237703 | 0.1940464 | -0.6378 | 0.524   | -0.159395327 | count | 1 |
| MFSD4B     | -0.1603323 | 0.5061066 | -0.3168 | 0.751   | -0.159303048 | count | 1 |
| FBXO45     | -0.1586588 | 0.3307369 | -0.4797 | 0.631   | -0.159218268 | count | 1 |
| PAIP1      | -0.1189426 | 0.1523095 | -0.7809 | 0.435   | -0.159182689 | count | 1 |
| RHBDD3     | -0.158304  | 0.620536  | -0.2551 | 0.799   | -0.15886857  | count | 1 |
| RPS10      | -0.1111503 | 0.0464834 | -2.3912 | 0.0169  | -0.158839612 | count | 1 |
| UNC45A     | -0.1381999 | 0.2657904 | -0.52   | 0.603   | -0.158562513 | count | 1 |
| CSNK1A1    | -0.1114724 | 0.0614822 | -1.8131 | 0.0699  | -0.158528062 | count | 1 |
| DCTN5      | -0.1356441 | 0.3826078 | -0.3545 | 0.723   | -0.157887203 | count | 1 |
| MYO6       | -1.2498252 | 1.0957026 | -1.1407 | 0.254   | -0.157767286 | count | 1 |
| TTLL11     | -1.2498252 | 1.0957026 | -1.1407 | 0.254   | -0.157767286 | count | 1 |
| AL137077.2 | -1.2498252 | 1.3252282 | -0.9431 | 0.346   | -0.157767286 | count | 1 |
| C6orf120   | -0.1280435 | 0.2337857 | -0.5477 | 0.584   | -0.157753745 | count | 1 |
| ATP1A1     | -0.1123739 | 0.0873591 | -1.2863 | 0.198   | -0.157662648 | count | 1 |
| ZNF790     | -0.2685371 | 0.5558993 | -0.4831 | 0.629   | -0.157656243 | count | 1 |
| PPP4R3A    | -0.1152119 | 0.1262461 | -0.9126 | 0.362   | -0.157594128 | count | 1 |
| ARPC5      | -0.1094689 | 0.0350219 | -3.1257 | 0.00179 | -0.157370792 | count | 1 |
| UBE2Q1     | -0.1181465 | 0.1893986 | -0.6238 | 0.533   | -0.15736642  | count | 1 |
| RMDN1      | -0.1172671 | 0.172704  | -0.679  | 0.497   | -0.157320306 | count | 1 |
| MAP4       | -0.1159704 | 0.1271269 | -0.9122 | 0.362   | -0.157312998 | count | 1 |
| PEBP1      | -0.1107847 | 0.0756936 | -1.4636 | 0.143   | -0.157257836 | count | 1 |
| VPS41      | -0.1207217 | 0.1517386 | -0.7956 | 0.426   | -0.156957257 | count | 1 |
| HLA-DRB5   | -0.108927  | 0.0449479 | -2.4234 | 0.0154  | -0.156942377 | count | 1 |
| ENPP2      | -0.1305688 | 0.1613028 | -0.8095 | 0.418   | -0.156857342 | count | 1 |
| FIBP       | -0.1115889 | 0.0944165 | -1.1819 | 0.237   | -0.156666106 | count | 1 |
| FAM207A    | -0.1176241 | 0.1683929 | -0.6985 | 0.485   | -0.156600093 | count | 1 |
| DCST1-AS1  | -0.5460932 | 0.799359  | -0.6832 | 0.495   | -0.156514987 | count | 1 |
| NHLRC1     | -0.5460932 | 0.799359  | -0.6832 | 0.495   | -0.156514987 | count | 1 |
| ANKRD16    | -0.2663769 | 0.5504649 | -0.4839 | 0.628   | -0.156462717 | count | 1 |
| BCOR       | -0.1849942 | 0.3521771 | -0.5253 | 0.599   | -0.156361193 | count | 1 |
| TSR1       | -0.1261119 | 0.3520734 | -0.3582 | 0.72    | -0.156204101 | count | 1 |
| IFNAR1     | -0.1113421 | 0.0881107 | -1.2637 | 0.206   | -0.156154044 | count | 1 |
| SARS       | -0.1147665 | 0.1436885 | -0.7987 | 0.425   | -0.156094721 | count | 1 |

|            |            |           |         |        |              |       |   |
|------------|------------|-----------|---------|--------|--------------|-------|---|
| PITPNB     | -0.1159972 | 0.1450042 | -0.8    | 0.424  | -0.156079841 | count | 1 |
| ZNF250     | -0.2505355 | 0.4394696 | -0.5701 | 0.569  | -0.156052836 | count | 1 |
| ATP5MC3    | -0.1086115 | 0.0453547 | -2.3947 | 0.0167 | -0.155865917 | count | 1 |
| ABHD3      | -0.1361857 | 0.2203766 | -0.618  | 0.537  | -0.155674524 | count | 1 |
| MIR3945HG  | -0.1217046 | 0.2101233 | -0.5792 | 0.563  | -0.155665719 | count | 1 |
| SIK2       | -0.1283538 | 0.307416  | -0.4175 | 0.676  | -0.155642987 | count | 1 |
| EMC3       | -0.1111491 | 0.0984213 | -1.1293 | 0.259  | -0.15561493  | count | 1 |
| FOXK2      | -0.1285696 | 0.2626822 | -0.4894 | 0.625  | -0.15555816  | count | 1 |
| TNPO2      | -0.1768119 | 0.4919287 | -0.3594 | 0.719  | -0.155472285 | count | 1 |
| FSTL1      | -0.3801963 | 1.0133333 | -0.3752 | 0.708  | -0.155384427 | count | 1 |
| AC138356.1 | -0.3801963 | 1.3877242 | -0.274  | 0.784  | -0.155384427 | count | 1 |
| ZBTB3      | -0.3801963 | 1.0748319 | -0.3537 | 0.724  | -0.155384427 | count | 1 |
| AC022098.3 | -0.3801963 | 0.8770262 | -0.4335 | 0.665  | -0.155384427 | count | 1 |
| AC010331.1 | -0.3801963 | 0.8009912 | -0.4747 | 0.635  | -0.155384427 | count | 1 |
| RBM34      | -0.2035028 | 0.5001724 | -0.4069 | 0.684  | -0.155377887 | count | 1 |
| BBS7       | -0.151883  | 0.4008346 | -0.3789 | 0.705  | -0.155309919 | count | 1 |
| LAG3       | -0.1656879 | 0.6295225 | -0.2632 | 0.792  | -0.155222351 | count | 1 |
| ZNF778     | -0.5401754 | 0.6090091 | -0.887  | 0.375  | -0.155094836 | count | 1 |
| RB1        | -0.110817  | 0.0903478 | -1.2266 | 0.22   | -0.154742839 | count | 1 |
| COPB1      | -0.1115682 | 0.1090147 | -1.0234 | 0.306  | -0.154676969 | count | 1 |
| VCP        | -0.1119288 | 0.0975068 | -1.1479 | 0.251  | -0.154674606 | count | 1 |
| LRP1       | -0.1097756 | 0.0905182 | -1.2127 | 0.225  | -0.154614172 | count | 1 |
| IQSEC2     | -0.138845  | 0.321772  | -0.4315 | 0.666  | -0.154582048 | count | 1 |
| EMC2       | -0.116482  | 0.1699321 | -0.6855 | 0.493  | -0.154556409 | count | 1 |
| RALGAPB    | -0.1672786 | 0.3586358 | -0.4664 | 0.641  | -0.154513451 | count | 1 |
| U62317.5   | -0.1274824 | 0.2669425 | -0.4776 | 0.633  | -0.154252725 | count | 1 |
| TTN-AS1    | -0.1646182 | 0.331336  | -0.4968 | 0.619  | -0.154241622 | count | 1 |
| NCKAP5     | -0.2350237 | 0.33865   | -0.694  | 0.488  | -0.154144055 | count | 1 |
| INO80      | -0.1181686 | 0.1867543 | -0.6327 | 0.527  | -0.154120185 | count | 1 |
| UTP4       | -0.1863314 | 0.4098604 | -0.4546 | 0.649  | -0.154101628 | count | 1 |
| PSMD2      | -0.1115144 | 0.112394  | -0.9922 | 0.321  | -0.154061196 | count | 1 |
| CD300A     | -0.109281  | 0.0952011 | -1.1479 | 0.251  | -0.154030862 | count | 1 |
| C11orf49   | -0.1493003 | 0.5186822 | -0.2878 | 0.773  | -0.153991287 | count | 1 |
| TSPAN14    | -0.1142085 | 0.1401032 | -0.8152 | 0.415  | -0.153787115 | count | 1 |
| HIST1H2AC  | -0.1400067 | 0.4261808 | -0.3285 | 0.743  | -0.15347127  | count | 1 |
| SRP72      | -0.1087207 | 0.0829711 | -1.3103 | 0.19   | -0.153430661 | count | 1 |
| CD52       | -0.1068382 | 0.0908416 | -1.1761 | 0.24   | -0.153364511 | count | 1 |
| CBWD1      | -0.1152015 | 0.1976944 | -0.5827 | 0.56   | -0.153313225 | count | 1 |
| MRPS16     | -0.1107791 | 0.1193015 | -0.9286 | 0.353  | -0.153088564 | count | 1 |
| NAMPT      | -0.1065117 | 0.0461626 | -2.3073 | 0.0211 | -0.153080016 | count | 1 |
| ACTR2      | -0.1068355 | 0.0462586 | -2.3095 | 0.021  | -0.15264833  | count | 1 |
| DNAJB9     | -0.1125055 | 0.1180937 | -0.9527 | 0.341  | -0.152453672 | count | 1 |
| UBE2M      | -0.1075067 | 0.0801516 | -1.3413 | 0.18   | -0.152325727 | count | 1 |
| EIF5A2     | -0.1991126 | 0.4716592 | -0.4222 | 0.673  | -0.152142436 | count | 1 |
| AL163051.1 | -0.5273375 | 0.5701648 | -0.9249 | 0.355  | -0.151994059 | count | 1 |

|            |            |           |         |         |              |       |   |
|------------|------------|-----------|---------|---------|--------------|-------|---|
| MYOF       | -0.1140386 | 0.1973448 | -0.5779 | 0.563   | -0.15198225  | count | 1 |
| SURF4      | -0.1117835 | 0.1378639 | -0.8108 | 0.418   | -0.151969835 | count | 1 |
| LRCH1      | -0.1439421 | 0.382493  | -0.3763 | 0.707   | -0.151962485 | count | 1 |
| STRN       | -0.1228279 | 0.2236859 | -0.5491 | 0.583   | -0.151903956 | count | 1 |
| FAM177A1   | -0.1089016 | 0.1064481 | -1.023  | 0.306   | -0.151888934 | count | 1 |
| HLA-DRB1   | -0.1052337 | 0.0482625 | -2.1804 | 0.0293  | -0.151770546 | count | 1 |
| THAP9      | -1.1697709 | 0.7334864 | -1.5948 | 0.111   | -0.151631428 | count | 1 |
| RPA3       | -0.1101177 | 0.1343932 | -0.8194 | 0.413   | -0.151499831 | count | 1 |
| TTC38      | -0.1615649 | 0.4694846 | -0.3441 | 0.731   | -0.151440685 | count | 1 |
| PHKG1      | -0.1395424 | 0.2932382 | -0.4759 | 0.634   | -0.151239531 | count | 1 |
| IPO9       | -0.1612737 | 0.3453465 | -0.467  | 0.641   | -0.151173431 | count | 1 |
| PCLAF      | -0.2041804 | 0.4858474 | -0.4203 | 0.674   | -0.151137002 | count | 1 |
| SRP14      | -0.1050878 | 0.0334888 | -3.138  | 0.00172 | -0.151106611 | count | 1 |
| MINK1      | -0.1588011 | 0.3760103 | -0.4223 | 0.673   | -0.150858266 | count | 1 |
| LEPROT     | -0.1062667 | 0.0723727 | -1.4683 | 0.142   | -0.150822444 | count | 1 |
| PAK1IP1    | -0.1158706 | 0.196804  | -0.5888 | 0.556   | -0.150793758 | count | 1 |
| HAUS1      | -0.1154301 | 0.180605  | -0.6391 | 0.523   | -0.150782118 | count | 1 |
| NUBP1      | -0.11006   | 0.1193897 | -0.9219 | 0.357   | -0.150713647 | count | 1 |
| LAMP1      | -0.1059856 | 0.0682838 | -1.5521 | 0.121   | -0.150650083 | count | 1 |
| LINC00667  | -0.1122691 | 0.2002754 | -0.5606 | 0.575   | -0.150278148 | count | 1 |
| LSM3       | -0.1060288 | 0.0754997 | -1.4044 | 0.16    | -0.150189803 | count | 1 |
| SPTAN1     | -0.1175748 | 0.2080595 | -0.5651 | 0.572   | -0.1500887   | count | 1 |
| PSMA3      | -0.1065266 | 0.0815689 | -1.306  | 0.192   | -0.150079667 | count | 1 |
| ISG20L2    | -0.1111509 | 0.1603779 | -0.6931 | 0.488   | -0.150078779 | count | 1 |
| MSX1       | -0.519201  | 0.8914363 | -0.5824 | 0.56    | -0.150014653 | count | 1 |
| TRAC       | -0.519201  | 0.9626847 | -0.5393 | 0.59    | -0.150014653 | count | 1 |
| R3HCC1     | -0.1183408 | 0.2063923 | -0.5734 | 0.566   | -0.149841251 | count | 1 |
| EFCAB13    | -0.1853342 | 0.5147598 | -0.36   | 0.719   | -0.149754007 | count | 1 |
| H2AFJ      | -0.1050923 | 0.0776558 | -1.3533 | 0.176   | -0.149669383 | count | 1 |
| PARP3      | -0.2538777 | 0.5144047 | -0.4935 | 0.622   | -0.149532559 | count | 1 |
| GMIP       | -0.1205252 | 0.2058924 | -0.5854 | 0.558   | -0.149327775 | count | 1 |
| MIS12      | -0.1516847 | 0.3178693 | -0.4772 | 0.633   | -0.149315566 | count | 1 |
| LZTFL1     | -0.1569825 | 0.3909255 | -0.4016 | 0.688   | -0.149164828 | count | 1 |
| ZNF880     | -0.1195763 | 0.2747583 | -0.4352 | 0.663   | -0.149116101 | count | 1 |
| RASAL2     | -0.125879  | 0.2722142 | -0.4624 | 0.644   | -0.148898539 | count | 1 |
| AC015982.1 | -0.2926817 | 0.6363065 | -0.46   | 0.646   | -0.148809203 | count | 1 |
| KCNAB2     | -0.1100823 | 0.149499  | -0.7363 | 0.462   | -0.14859207  | count | 1 |
| EIF4A1     | -0.1051513 | 0.0766146 | -1.3725 | 0.17    | -0.148418455 | count | 1 |
| KREMEN1    | -0.1561429 | 0.499308  | -0.3127 | 0.755   | -0.148382737 | count | 1 |
| C12orf65   | -0.1269534 | 0.3038124 | -0.4179 | 0.676   | -0.148347192 | count | 1 |
| HNRNPM     | -0.1047903 | 0.0710751 | -1.4744 | 0.141   | -0.148217428 | count | 1 |
| TRIM66     | -0.1833383 | 0.5631112 | -0.3256 | 0.745   | -0.148189392 | count | 1 |
| EPST11     | -0.1046347 | 0.091266  | -1.1465 | 0.252   | -0.148075608 | count | 1 |
| CRYAB      | -0.1935974 | 0.8131395 | -0.2381 | 0.812   | -0.148070392 | count | 1 |
| TWF2       | -0.1040916 | 0.0730841 | -1.4243 | 0.154   | -0.147893389 | count | 1 |



|            |            |           |         |        |              |       |   |
|------------|------------|-----------|---------|--------|--------------|-------|---|
| MCRIP1     | -0.1059793 | 0.1198925 | -0.884  | 0.377  | -0.147743661 | count | 1 |
| ARFIP2     | -0.1338701 | 0.27645   | -0.4842 | 0.628  | -0.147610523 | count | 1 |
| NINJ1      | -0.1029597 | 0.0598219 | -1.7211 | 0.0854 | -0.147598115 | count | 1 |
| DHCR7      | -0.1825463 | 0.4868659 | -0.3749 | 0.708  | -0.147568233 | count | 1 |
| AC239798.2 | -0.6786178 | 1.1283119 | -0.6014 | 0.548  | -0.147331055 | count | 1 |
| AC108047.1 | -0.6786178 | 1.0975105 | -0.6183 | 0.536  | -0.147331055 | count | 1 |
| AC009950.1 | -0.6786178 | 1.0975105 | -0.6183 | 0.536  | -0.147331055 | count | 1 |
| AC011899.3 | -0.6786178 | 1.2958427 | -0.5237 | 0.601  | -0.147331055 | count | 1 |
| AC016394.1 | -0.6786178 | 1.0975105 | -0.6183 | 0.536  | -0.147331055 | count | 1 |
| ENTPD7     | -0.6786178 | 1.0975105 | -0.6183 | 0.536  | -0.147331055 | count | 1 |
| AC025580.2 | -0.6786178 | 1.0975105 | -0.6183 | 0.536  | -0.147331055 | count | 1 |
| AC099524.1 | -0.6786178 | 1.0975105 | -0.6183 | 0.536  | -0.147331055 | count | 1 |
| SNX25      | -0.4161575 | 0.7132723 | -0.5834 | 0.56   | -0.147308819 | count | 1 |
| ELK4       | -0.1241317 | 0.2231813 | -0.5562 | 0.578  | -0.147262813 | count | 1 |
| FH         | -0.1161442 | 0.1830738 | -0.6344 | 0.526  | -0.147254498 | count | 1 |
| KPNA1      | -0.1159429 | 0.192023  | -0.6038 | 0.546  | -0.147177157 | count | 1 |
| ATP5ME     | -0.1036102 | 0.0663987 | -1.5604 | 0.119  | -0.147155914 | count | 1 |
| MFSD12     | -0.1057019 | 0.1119007 | -0.9446 | 0.345  | -0.146978599 | count | 1 |
| GMCL1      | -0.1310888 | 0.2833874 | -0.4626 | 0.644  | -0.146738105 | count | 1 |
| GHRL       | -0.2346353 | 0.5025484 | -0.4669 | 0.641  | -0.146639977 | count | 1 |
| ZBTB17     | -0.1472264 | 0.3191486 | -0.4613 | 0.645  | -0.146501603 | count | 1 |
| AC073957.3 | -0.5042471 | 0.7909641 | -0.6375 | 0.524  | -0.146347959 | count | 1 |
| AP001257.1 | -0.5042471 | 1.1293358 | -0.4465 | 0.655  | -0.146347959 | count | 1 |
| PSMC3IP    | -0.5042471 | 0.7099183 | -0.7103 | 0.478  | -0.146347959 | count | 1 |
| ETS1       | -0.1971808 | 0.8786778 | -0.2244 | 0.822  | -0.146140031 | count | 1 |
| BRI3BP     | -0.1112219 | 0.163813  | -0.679  | 0.497  | -0.145808835 | count | 1 |
| CARS       | -0.1212843 | 0.2936404 | -0.413  | 0.68   | -0.145786802 | count | 1 |
| PRKAG1     | -0.1158734 | 0.1819801 | -0.6367 | 0.524  | -0.145785473 | count | 1 |
| TMEM176B   | -0.1015844 | 0.0684683 | -1.4837 | 0.138  | -0.145551464 | count | 1 |
| RNH1       | -0.1016558 | 0.0467667 | -2.1737 | 0.0298 | -0.145482271 | count | 1 |
| EIF6       | -0.1029377 | 0.0826798 | -1.245  | 0.213  | -0.145361016 | count | 1 |
| CLOCK      | -0.1192684 | 0.2979929 | -0.4002 | 0.689  | -0.145319224 | count | 1 |
| PLS1       | -1.087759  | 0.6464321 | -1.6827 | 0.0926 | -0.144895513 | count | 1 |
| LMBR1L     | -0.1154577 | 0.1802079 | -0.6407 | 0.522  | -0.14486256  | count | 1 |
| FGFR1OP2   | -0.1041711 | 0.1052673 | -0.9896 | 0.322  | -0.144809692 | count | 1 |
| MFSD10     | -0.1035725 | 0.1254034 | -0.8259 | 0.409  | -0.144726739 | count | 1 |
| AL133264.2 | -0.6627556 | 0.8414392 | -0.7876 | 0.431  | -0.144614204 | count | 1 |
| AC090559.1 | -0.6627556 | 0.8414392 | -0.7876 | 0.431  | -0.144614204 | count | 1 |
| C16orf89   | -0.6627556 | 0.8414392 | -0.7876 | 0.431  | -0.144614204 | count | 1 |
| AC008764.6 | -0.6627556 | 1.0045702 | -0.6597 | 0.509  | -0.144614204 | count | 1 |
| ZNF682     | -0.6627556 | 0.8414392 | -0.7876 | 0.431  | -0.144614204 | count | 1 |
| UBA6-AS1   | -0.4957279 | 0.8111603 | -0.6111 | 0.541  | -0.144242336 | count | 1 |
| NEFH       | -0.2821298 | 0.504191  | -0.5596 | 0.576  | -0.143809164 | count | 1 |
| AL024508.2 | -0.6572003 | 0.9105502 | -0.7218 | 0.471  | -0.143655099 | count | 1 |
| ZNF486     | -0.6572003 | 0.7382075 | -0.8903 | 0.373  | -0.143655099 | count | 1 |

|             |            |           |         |       |              |       |   |
|-------------|------------|-----------|---------|-------|--------------|-------|---|
| UBR7        | -0.1379862 | 0.3043139 | -0.4534 | 0.65  | -0.143624348 | count | 1 |
| CREB3L2     | -0.1109436 | 0.2186543 | -0.5074 | 0.612 | -0.143588436 | count | 1 |
| PSMB7       | -0.1026256 | 0.090456  | -1.1345 | 0.257 | -0.143509297 | count | 1 |
| CDC34       | -0.1068528 | 0.1560967 | -0.6845 | 0.494 | -0.143163916 | count | 1 |
| MMP2-AS1    | -0.1504559 | 0.4621575 | -0.3256 | 0.745 | -0.143080651 | count | 1 |
| HSD17B10    | -0.1046015 | 0.1188532 | -0.8801 | 0.379 | -0.143020418 | count | 1 |
| POLDIP2     | -0.1112039 | 0.210037  | -0.5294 | 0.597 | -0.143012351 | count | 1 |
| SAP30L      | -0.116003  | 0.2923052 | -0.3969 | 0.692 | -0.143011833 | count | 1 |
| DDX52       | -0.1111558 | 0.1856901 | -0.5986 | 0.549 | -0.142950768 | count | 1 |
| DDX56       | -0.1130022 | 0.2681318 | -0.4214 | 0.673 | -0.1429378   | count | 1 |
| AP1S3       | -0.1686052 | 1.0626595 | -0.1587 | 0.874 | -0.14286635  | count | 1 |
| SLC29A3     | -0.1301834 | 0.2805707 | -0.464  | 0.643 | -0.142827169 | count | 1 |
| MAP3K6      | -0.4008214 | 0.4570061 | -0.8771 | 0.381 | -0.142494743 | count | 1 |
| ALG6        | -0.1430927 | 0.3579001 | -0.3998 | 0.689 | -0.142455484 | count | 1 |
| HDGFL2      | -0.1084797 | 0.2387568 | -0.4544 | 0.65  | -0.142413855 | count | 1 |
| FBXO5       | -0.1919161 | 0.469655  | -0.4086 | 0.683 | -0.142372721 | count | 1 |
| CINP        | -0.1052831 | 0.1683476 | -0.6254 | 0.532 | -0.1423094   | count | 1 |
| TBCB        | -0.1005132 | 0.0744735 | -1.3496 | 0.177 | -0.142155893 | count | 1 |
| TMEM14B     | -0.0999515 | 0.0696861 | -1.4343 | 0.152 | -0.142031181 | count | 1 |
| NRSN2-AS1   | -0.3992359 | 0.8916878 | -0.4477 | 0.654 | -0.141994407 | count | 1 |
| KTN1        | -0.1000787 | 0.0670743 | -1.4921 | 0.136 | -0.141932274 | count | 1 |
| PGAP1       | -0.3056787 | 0.6617473 | -0.4619 | 0.644 | -0.141812512 | count | 1 |
| PRMT2       | -0.1009475 | 0.1058309 | -0.9539 | 0.34  | -0.141679139 | count | 1 |
| UQCRQ       | -0.0994724 | 0.0625309 | -1.5908 | 0.112 | -0.141674576 | count | 1 |
| SNRPA1      | -0.104203  | 0.1388228 | -0.7506 | 0.453 | -0.141650484 | count | 1 |
| NUDT8       | -0.1671046 | 0.4351742 | -0.384  | 0.701 | -0.141627154 | count | 1 |
| KCNC4       | -0.397491  | 0.8451837 | -0.4703 | 0.638 | -0.141443189 | count | 1 |
| GPR89B      | -0.397491  | 0.853321  | -0.4658 | 0.641 | -0.141443189 | count | 1 |
| TMEM177     | -0.397491  | 1.0867763 | -0.3658 | 0.715 | -0.141443189 | count | 1 |
| TSTD3       | -0.397491  | 0.853321  | -0.4658 | 0.641 | -0.141443189 | count | 1 |
| AC025259.3  | -0.397491  | 0.853321  | -0.4658 | 0.641 | -0.141443189 | count | 1 |
| AC005523.2  | -0.2257381 | 0.3831864 | -0.5891 | 0.556 | -0.141343186 | count | 1 |
| TRAPPC3     | -0.1014002 | 0.1217027 | -0.8332 | 0.405 | -0.141167005 | count | 1 |
| TSEN15      | -0.1176984 | 0.2736974 | -0.43   | 0.667 | -0.141161668 | count | 1 |
| BECN1       | -0.1047096 | 0.1499247 | -0.6984 | 0.485 | -0.141029147 | count | 1 |
| MSRA        | -0.1032072 | 0.1299777 | -0.794  | 0.427 | -0.140841867 | count | 1 |
| AC118553.2  | -1.04024   | 1.0542749 | -0.9867 | 0.324 | -0.140773946 | count | 1 |
| AC109454.2  | -1.04024   | 1.0542749 | -0.9867 | 0.324 | -0.140773946 | count | 1 |
| SEPT7-AS1   | -1.04024   | 1.0542749 | -0.9867 | 0.324 | -0.140773946 | count | 1 |
| ABCB1       | -1.04024   | 1.2426744 | -0.8371 | 0.403 | -0.140773946 | count | 1 |
| PNMA5       | -1.04024   | 1.0542749 | -0.9867 | 0.324 | -0.140773946 | count | 1 |
| THRIL       | -1.04024   | 1.0542749 | -0.9867 | 0.324 | -0.140773946 | count | 1 |
| CCDC168     | -1.04024   | 1.1398628 | -0.9126 | 0.362 | -0.140773946 | count | 1 |
| ZNF594      | -1.04024   | 1.0542749 | -0.9867 | 0.324 | -0.140773946 | count | 1 |
| MIR4435-2HG | -0.1077198 | 0.2053183 | -0.5246 | 0.6   | -0.140748078 | count | 1 |

|            |            |           |         |       |              |       |   |
|------------|------------|-----------|---------|-------|--------------|-------|---|
| LRBA       | -0.196191  | 0.4353497 | -0.4507 | 0.652 | -0.140555258 | count | 1 |
| PDCD10     | -0.100584  | 0.092788  | -1.084  | 0.278 | -0.140359734 | count | 1 |
| HDHD5      | -0.1087263 | 0.1850611 | -0.5875 | 0.557 | -0.140233317 | count | 1 |
| PRR11      | -0.1618151 | 0.3920107 | -0.4128 | 0.68  | -0.139999957 | count | 1 |
| GTPBP4     | -0.1043175 | 0.1564476 | -0.6668 | 0.505 | -0.139831661 | count | 1 |
| TENT4B     | -0.110149  | 0.1831597 | -0.6014 | 0.548 | -0.139520203 | count | 1 |
| SLC52A2    | -0.1043216 | 0.1605827 | -0.6496 | 0.516 | -0.139437288 | count | 1 |
| DUS4L      | -0.1644105 | 0.4448225 | -0.3696 | 0.712 | -0.139400856 | count | 1 |
| DYNC2LI1   | -0.1642567 | 0.4117746 | -0.3989 | 0.69  | -0.139273704 | count | 1 |
| OXCT2      | -0.2995834 | 0.7141781 | -0.4195 | 0.675 | -0.139198457 | count | 1 |
| TXNL4A     | -0.0983147 | 0.0767351 | -1.2812 | 0.2   | -0.139163906 | count | 1 |
| SOD2       | -0.0971678 | 0.0614439 | -1.5814 | 0.114 | -0.139097399 | count | 1 |
| CAPRIN1    | -0.1020207 | 0.1483733 | -0.6876 | 0.492 | -0.139033221 | count | 1 |
| BUD31      | -0.0995554 | 0.104445  | -0.9532 | 0.341 | -0.138970583 | count | 1 |
| TIMM17A    | -0.1010883 | 0.1278492 | -0.7907 | 0.429 | -0.138911751 | count | 1 |
| LDLRAD3    | -0.2511285 | 0.4894709 | -0.5131 | 0.608 | -0.138886932 | count | 1 |
| SPNS1      | -0.1030964 | 0.1473064 | -0.6999 | 0.484 | -0.138861842 | count | 1 |
| ATG3       | -0.0977363 | 0.0617863 | -1.5818 | 0.114 | -0.138839982 | count | 1 |
| GTF2A1     | -0.1085953 | 0.2056096 | -0.5282 | 0.597 | -0.138827583 | count | 1 |
| MIRLET7BHG | -0.2339408 | 0.7542167 | -0.3102 | 0.756 | -0.138393116 | count | 1 |
| PHC1       | -0.1630585 | 0.415961  | -0.392  | 0.695 | -0.138282891 | count | 1 |
| UBE2E3     | -0.0985525 | 0.0995082 | -0.9904 | 0.322 | -0.138235064 | count | 1 |
| GLG1       | -0.1027866 | 0.1486808 | -0.6913 | 0.489 | -0.138100609 | count | 1 |
| SLC22A16   | -0.1564689 | 0.4708994 | -0.3323 | 0.74  | -0.137987668 | count | 1 |
| PIP5K1A    | -0.1263967 | 0.2960767 | -0.4269 | 0.669 | -0.137951412 | count | 1 |
| GOLGA2     | -0.1008941 | 0.1615715 | -0.6245 | 0.532 | -0.13793209  | count | 1 |
| CENPH      | -0.1593459 | 0.4747581 | -0.3356 | 0.737 | -0.137913799 | count | 1 |
| GPS1       | -0.1078785 | 0.1867577 | -0.5776 | 0.564 | -0.137767388 | count | 1 |
| CCZ1B      | -0.2085874 | 0.3449452 | -0.6047 | 0.545 | -0.137536618 | count | 1 |
| MYPOP      | -0.1481555 | 0.3279422 | -0.4518 | 0.651 | -0.137196511 | count | 1 |
| SUMF2      | -0.1012951 | 0.1401712 | -0.7227 | 0.47  | -0.1371784   | count | 1 |
| ERC1       | -0.1068867 | 0.2227892 | -0.4798 | 0.631 | -0.137078537 | count | 1 |
| TRMT10C    | -0.0990787 | 0.1201097 | -0.8249 | 0.41  | -0.13705232  | count | 1 |
| RAMMET     | -0.1006219 | 0.1541877 | -0.6526 | 0.514 | -0.13686266  | count | 1 |
| SYN1       | -0.1983744 | 0.6793785 | -0.292  | 0.77  | -0.136767924 | count | 1 |
| ZDHHC9     | -0.1983744 | 0.6911635 | -0.287  | 0.774 | -0.136767924 | count | 1 |
| ATP5MC1    | -0.097111  | 0.0897069 | -1.0825 | 0.279 | -0.136703769 | count | 1 |
| SFR1       | -0.1154841 | 0.2433478 | -0.4746 | 0.635 | -0.136696527 | count | 1 |
| RBM48      | -0.1417965 | 0.4178684 | -0.3393 | 0.734 | -0.136651264 | count | 1 |
| TRAF4      | -0.1200325 | 0.3169874 | -0.3787 | 0.705 | -0.136274466 | count | 1 |
| TMEM120A   | -0.1024419 | 0.1581322 | -0.6478 | 0.517 | -0.135773201 | count | 1 |
| SLC9B1     | -0.3790662 | 1.0538974 | -0.3597 | 0.719 | -0.13558603  | count | 1 |
| AC109347.1 | -0.3790662 | 1.9962709 | -0.1899 | 0.849 | -0.13558603  | count | 1 |
| USP27X-AS1 | -0.3790662 | 1.1781752 | -0.3217 | 0.748 | -0.13558603  | count | 1 |
| SCARA3     | -0.3790662 | 1.9962709 | -0.1899 | 0.849 | -0.13558603  | count | 1 |

|            |            |           |         |          |              |       |   |
|------------|------------|-----------|---------|----------|--------------|-------|---|
| RND1       | -0.3790662 | 1.429447  | -0.2652 | 0.791    | -0.13558603  | count | 1 |
| AC027319.1 | -0.3790662 | 1.2200511 | -0.3107 | 0.756    | -0.13558603  | count | 1 |
| FAM3B      | -0.3790662 | 1.0538974 | -0.3597 | 0.719    | -0.13558603  | count | 1 |
| GNAS       | -0.0941819 | 0.0315094 | -2.989  | 0.00283  | -0.135503439 | count | 1 |
| ORAOV1     | -0.1320566 | 0.3775012 | -0.3498 | 0.727    | -0.135322852 | count | 1 |
| PTDSS2     | -0.2152998 | 0.4124652 | -0.522  | 0.602    | -0.135101848 | count | 1 |
| RAB3GAP2   | -0.1153824 | 0.25621   | -0.4503 | 0.653    | -0.134934995 | count | 1 |
| REPIN1     | -0.1149338 | 0.2607462 | -0.4408 | 0.659    | -0.134840057 | count | 1 |
| DGKE       | -0.1156231 | 0.3194594 | -0.3619 | 0.717    | -0.13477418  | count | 1 |
| IFNLR1     | -0.3247558 | 1.4367243 | -0.226  | 0.821    | -0.134702159 | count | 1 |
| IGFBP3     | -0.3247558 | 0.9144356 | -0.3551 | 0.723    | -0.134702159 | count | 1 |
| BEX2       | -0.3247558 | 1.0120595 | -0.3209 | 0.748    | -0.134702159 | count | 1 |
| AC011043.1 | -0.3247558 | 0.9034833 | -0.3594 | 0.719    | -0.134702159 | count | 1 |
| PRPF40A    | -0.0951605 | 0.0813029 | -1.1704 | 0.242    | -0.134609966 | count | 1 |
| DEDD       | -0.1115362 | 0.2561214 | -0.4355 | 0.663    | -0.13446867  | count | 1 |
| HTT        | -0.1058823 | 0.2326719 | -0.4551 | 0.649    | -0.134465778 | count | 1 |
| DOLPP1     | -0.3750385 | 0.6188214 | -0.6061 | 0.545    | -0.134296698 | count | 1 |
| ZNF720     | -0.1187277 | 0.2906739 | -0.4085 | 0.683    | -0.134235162 | count | 1 |
| PLXNC1     | -0.1072475 | 0.1707941 | -0.6279 | 0.53     | -0.134226437 | count | 1 |
| CDK5       | -0.1051157 | 0.2452695 | -0.4286 | 0.668    | -0.134108211 | count | 1 |
| C19orf54   | -0.1469207 | 0.4170234 | -0.3523 | 0.725    | -0.134075923 | count | 1 |
| CYCS       | -0.0936141 | 0.0783786 | -1.1944 | 0.232    | -0.133934773 | count | 1 |
| PPP1R18    | -0.0949659 | 0.0846121 | -1.1224 | 0.262    | -0.133733019 | count | 1 |
| MCAM       | -0.9584358 | 1.2057457 | -0.7949 | 0.427    | -0.133285023 | count | 1 |
| PRDX6      | -0.0937103 | 0.0655907 | -1.4287 | 0.153    | -0.133078774 | count | 1 |
| TIMM23     | -0.1114602 | 0.2369372 | -0.4704 | 0.638    | -0.1330527   | count | 1 |
| HSPB11     | -0.0961008 | 0.1232121 | -0.78   | 0.435    | -0.132816431 | count | 1 |
| NXN        | -0.9527278 | 0.8521011 | -1.1181 | 0.264    | -0.132743332 | count | 1 |
| NOL7       | -0.0932279 | 0.0701869 | -1.3283 | 0.184    | -0.132633303 | count | 1 |
| SQSTM1     | -0.0924847 | 0.0570958 | -1.6198 | 0.105    | -0.132590665 | count | 1 |
| MRPS34     | -0.0936679 | 0.0874199 | -1.0715 | 0.284    | -0.132562316 | count | 1 |
| NDFIP1     | -0.0940781 | 0.0776619 | -1.2114 | 0.226    | -0.132550368 | count | 1 |
| UTP14A     | -0.1144685 | 0.2711959 | -0.4221 | 0.673    | -0.132530646 | count | 1 |
| RANBP10    | -0.2108966 | 0.4684165 | -0.4502 | 0.653    | -0.132460315 | count | 1 |
| DARS       | -0.0975971 | 0.1288872 | -0.7572 | 0.449    | -0.131943742 | count | 1 |
| FN3KRP     | -0.1061341 | 0.2475937 | -0.4287 | 0.668    | -0.13159537  | count | 1 |
| RPL15      | -0.0913192 | 0.0245759 | -3.7158 | 0.000207 | -0.131520882 | count | 1 |
| CLIC2      | -0.1162789 | 0.1937848 | -0.6    | 0.549    | -0.131491996 | count | 1 |
| RFTN1      | -0.1242882 | 0.2784867 | -0.4463 | 0.655    | -0.131467321 | count | 1 |
| CFL1       | -0.0912733 | 0.0281805 | -3.2389 | 0.00122  | -0.131353746 | count | 1 |
| URI1       | -0.0969644 | 0.1520725 | -0.6376 | 0.524    | -0.131326306 | count | 1 |
| PNP        | -0.0942599 | 0.1107348 | -0.8512 | 0.395    | -0.131298298 | count | 1 |
| NSMCE2     | -0.0986987 | 0.1557157 | -0.6338 | 0.526    | -0.131094484 | count | 1 |
| COX6C      | -0.0916539 | 0.0519324 | -1.7649 | 0.0777   | -0.131041692 | count | 1 |
| ANXA4      | -0.0936525 | 0.1046831 | -0.8946 | 0.371    | -0.130974704 | count | 1 |

|            |            |           |         |        |              |       |   |
|------------|------------|-----------|---------|--------|--------------|-------|---|
| AGAP5      | -0.5856951 | 0.7252447 | -0.8076 | 0.419  | -0.130953164 | count | 1 |
| GTF3C4     | -0.1357488 | 0.4306811 | -0.3152 | 0.753  | -0.130919329 | count | 1 |
| CBARP      | -0.3143545 | 0.7681402 | -0.4092 | 0.682  | -0.130746814 | count | 1 |
| PPP1R26    | -0.363402  | 0.639538  | -0.5682 | 0.57   | -0.130553576 | count | 1 |
| ZSCAN21    | -0.2076815 | 0.6436459 | -0.3227 | 0.747  | -0.130528259 | count | 1 |
| DENND2D    | -0.1103394 | 0.2553236 | -0.4322 | 0.666  | -0.130274356 | count | 1 |
| MECR       | -0.1270167 | 0.3700645 | -0.3432 | 0.731  | -0.130227898 | count | 1 |
| TRMT44     | -0.312983  | 0.4977623 | -0.6288 | 0.53   | -0.130223497 | count | 1 |
| MAPK1IP1L  | -0.0932843 | 0.1002888 | -0.9302 | 0.352  | -0.129998697 | count | 1 |
| DEGS1      | -0.0931575 | 0.0954823 | -0.9757 | 0.329  | -0.129997473 | count | 1 |
| VPS25      | -0.0956636 | 0.1427438 | -0.6702 | 0.503  | -0.129788895 | count | 1 |
| CREM       | -0.0911269 | 0.0777542 | -1.172  | 0.241  | -0.129720126 | count | 1 |
| BCAM       | -0.5778824 | 0.675503  | -0.8555 | 0.392  | -0.129524729 | count | 1 |
| NT5C       | -0.0930858 | 0.1142851 | -0.8145 | 0.415  | -0.129470181 | count | 1 |
| KIAA1958   | -0.2181029 | 0.6543584 | -0.3333 | 0.739  | -0.129469277 | count | 1 |
| AHDC1      | -0.3108316 | 0.5048486 | -0.6157 | 0.538  | -0.129401751 | count | 1 |
| TSHZ3      | -0.1556932 | 0.3236124 | -0.4811 | 0.63   | -0.129383151 | count | 1 |
| C1D        | -0.093277  | 0.1014126 | -0.9198 | 0.358  | -0.129261666 | count | 1 |
| CHCHD2     | -0.0900014 | 0.0382335 | -2.354  | 0.0187 | -0.129252497 | count | 1 |
| LINC01970  | -0.3103741 | 0.5276563 | -0.5882 | 0.556  | -0.129226878 | count | 1 |
| ARF4       | -0.0913901 | 0.0846706 | -1.0794 | 0.281  | -0.129196863 | count | 1 |
| ANKLE2     | -0.0955522 | 0.1735518 | -0.5506 | 0.582  | -0.129104892 | count | 1 |
| PPP4R2     | -0.0932063 | 0.1231052 | -0.7571 | 0.449  | -0.128973634 | count | 1 |
| GABARAP    | -0.1032469 | 0.1957312 | -0.5275 | 0.598  | -0.128857007 | count | 1 |
| SSBP1      | -0.0904318 | 0.0618808 | -1.4614 | 0.144  | -0.128788202 | count | 1 |
| TIMM13     | -0.0914217 | 0.0891698 | -1.0253 | 0.305  | -0.128655507 | count | 1 |
| RAB10      | -0.090684  | 0.0735374 | -1.2332 | 0.218  | -0.128457556 | count | 1 |
| ZFP14      | -0.1314806 | 0.3032276 | -0.4336 | 0.665  | -0.128333691 | count | 1 |
| BANP       | -0.101606  | 0.2532721 | -0.4012 | 0.688  | -0.128260519 | count | 1 |
| RAB1A      | -0.0913166 | 0.0881013 | -1.0365 | 0.3    | -0.128065192 | count | 1 |
| FP565260.1 | -0.4316682 | 0.6006971 | -0.7186 | 0.472  | -0.128017011 | count | 1 |
| BEND5      | -0.4315999 | 0.8733869 | -0.4942 | 0.621  | -0.127999343 | count | 1 |
| LINC01560  | -0.4315999 | 0.8733869 | -0.4942 | 0.621  | -0.127999343 | count | 1 |
| AC142472.1 | -0.4315999 | 0.8739748 | -0.4938 | 0.621  | -0.127999343 | count | 1 |
| UNKL       | -0.2302628 | 0.4132604 | -0.5572 | 0.577  | -0.127953273 | count | 1 |
| EML3       | -0.1534072 | 0.3937399 | -0.3896 | 0.697  | -0.127528761 | count | 1 |
| POLR3D     | -0.108986  | 0.2621623 | -0.4157 | 0.678  | -0.127511079 | count | 1 |
| ATMIN      | -0.1095378 | 0.2708376 | -0.4044 | 0.686  | -0.127307384 | count | 1 |
| ASF1A      | -0.0999063 | 0.2143606 | -0.4661 | 0.641  | -0.127204807 | count | 1 |
| CLSTN1     | -0.1093693 | 0.2449186 | -0.4466 | 0.655  | -0.127113071 | count | 1 |
| DAPK1      | -0.0984058 | 0.1882496 | -0.5227 | 0.601  | -0.12708753  | count | 1 |
| NELFCD     | -0.0980535 | 0.2275062 | -0.431  | 0.667  | -0.127074522 | count | 1 |
| TTLL4      | -0.1350501 | 0.4579026 | -0.2949 | 0.768  | -0.127019123 | count | 1 |
| TNFRSF12A  | -0.0940196 | 0.1582251 | -0.5942 | 0.552  | -0.126958112 | count | 1 |
| XRR1A      | -0.1332066 | 0.4215922 | -0.316  | 0.752  | -0.126949982 | count | 1 |

|            |            |             |         |          |              |       |   |
|------------|------------|-------------|---------|----------|--------------|-------|---|
| SLC31A1    | -0.0935669 | 0.1548338   | -0.6043 | 0.546    | -0.126879428 | count | 1 |
| ARAP3      | -0.427194  | 0.739719    | -0.5775 | 0.564    | -0.126857714 | count | 1 |
| HAUS7      | -0.2710026 | 0.6339845   | -0.4275 | 0.669    | -0.126824341 | count | 1 |
| P3H2       | -0.1601908 | 0.3230609   | -0.4959 | 0.62     | -0.126704899 | count | 1 |
| SMIM15     | -0.091572  | 0.1415747   | -0.6468 | 0.518    | -0.126633439 | count | 1 |
| CLYBL      | -0.2011079 | 0.7273131   | -0.2765 | 0.782    | -0.126569382 | count | 1 |
| KIAA0895L  | -0.5603454 | 0.6980625   | -0.8027 | 0.422    | -0.126288813 | count | 1 |
| CIPC       | -0.1381784 | 0.3524541   | -0.392  | 0.695    | -0.126246331 | count | 1 |
| TRIM62     | -0.5564266 | 0.8461405   | -0.6576 | 0.511    | -0.125560105 | count | 1 |
| AC004520.1 | -0.5564266 | 1.0110891   | -0.5503 | 0.582    | -0.125560105 | count | 1 |
| HDAC3      | -0.0937243 | 0.1510747   | -0.6204 | 0.535    | -0.125465119 | count | 1 |
| PTN        | -0.2438394 | 1.5006961   | -0.1625 | 0.871    | -0.125433316 | count | 1 |
| RAB40C     | -0.1682492 | 0.5800122   | -0.2901 | 0.772    | -0.125343576 | count | 1 |
| TOMM40     | -0.0912749 | 0.1614591   | -0.5653 | 0.572    | -0.125224161 | count | 1 |
| LYSMD2     | -0.0892629 | 0.1000761   | -0.892  | 0.373    | -0.124850677 | count | 1 |
| WBP1L      | -0.1056895 | 0.2241414   | -0.4715 | 0.637    | -0.124822811 | count | 1 |
| DCP1A      | -0.0959844 | 0.2066118   | -0.4646 | 0.642    | -0.124808443 | count | 1 |
| DHRS1      | -0.0957894 | 0.2331152   | -0.4109 | 0.681    | -0.124749637 | count | 1 |
| HARS2      | -0.2986764 | 0.516833    | -0.5779 | 0.563    | -0.124739904 | count | 1 |
| BUB1       | -0.8713056 | 1.1511046   | -0.7569 | 0.449    | -0.124734813 | count | 1 |
| KCNMB3     | -0.8713056 | 1.1511046   | -0.7569 | 0.449    | -0.124734813 | count | 1 |
| RAD9B      | -0.8713056 | 1.4123739   | -0.6169 | 0.537    | -0.124734813 | count | 1 |
| ARHGAP11B  | -0.8713056 | 1.1511046   | -0.7569 | 0.449    | -0.124734813 | count | 1 |
| ZNF433     | -0.8713056 | 1.1511046   | -0.7569 | 0.449    | -0.124734813 | count | 1 |
| PIN4       | -0.0904808 | 0.1262854   | -0.7165 | 0.474    | -0.124663325 | count | 1 |
| NEDD8      | -0.086987  | 0.0514383   | -1.6911 | 0.0909   | -0.124460828 | count | 1 |
| ZNF614     | -0.1669861 | 0.5493668   | -0.304  | 0.761    | -0.124430447 | count | 1 |
| NCKAP5L    | -0.10047   | 0.2003154   | -0.5016 | 0.616    | -0.124398355 | count | 1 |
| DISP1      | -0.1728561 | 0.6489743   | -0.2664 | 0.79     | -0.124373051 | count | 1 |
| ANKAR      | -0.1407043 | 0.4151404   | -0.3389 | 0.735    | -0.12436384  | count | 1 |
| ARL6IP1    | -0.0886868 | 0.0879846   | -1.008  | 0.314    | -0.124290777 | count | 1 |
| UNK        | -0.1150387 | 0.3681627   | -0.3125 | 0.755    | -0.124211677 | count | 1 |
| UBA5       | -0.1082991 | 0.2701973   | -0.4008 | 0.689    | -0.124059517 | count | 1 |
| AC104695.3 | -0.1873319 | 0.5566124   | -0.3366 | 0.736    | -0.124046414 | count | 1 |
| EXOSC3     | -0.0958324 | 0.1972694   | -0.4858 | 0.627    | -0.123886193 | count | 1 |
| ZFP30      | -0.8623482 | 0.819061    | -1.0528 | 0.293    | -0.123821013 | count | 1 |
| ZNF280B    | -0.8623482 | 0.9049316   | -0.9529 | 0.341    | -0.123821013 | count | 1 |
| MTG1       | -0.2405043 | 0.6310063   | -0.3811 | 0.703    | -0.123815591 | count | 1 |
| AC093249.6 | -0.2405043 | 0.605307    | -0.3973 | 0.691    | -0.123815591 | count | 1 |
| PTMA       | -0.0858358 | 0.0229437   | -3.7411 | 0.000187 | -0.123744637 | count | 1 |
| GPR85      | -0.8591631 | 0.8995776   | -0.9551 | 0.34     | -0.123494482 | count | 1 |
| PCDH17     | -18.525121 | 2745.083433 | -0.0067 | 0.995    | -0.123488054 | count | 1 |
| ZDBF2      | -18.524312 | 2053.985462 | -0.009  | 0.993    | -0.123488054 | count | 1 |
| ASPN       | -18.352372 | 2325.654407 | -0.0079 | 0.994    | -0.123488054 | count | 1 |
| SIGLEC8    | -18.351541 | 2099.172962 | -0.0087 | 0.993    | -0.123488054 | count | 1 |

|            |            |             |         |       |              |       |   |
|------------|------------|-------------|---------|-------|--------------|-------|---|
| KRT17      | -18.161614 | 1965.489598 | -0.0092 | 0.993 | -0.123488053 | count | 1 |
| HLX-AS1    | -18.142466 | 2438.068072 | -0.0074 | 0.994 | -0.123488053 | count | 1 |
| ZNF215     | -18.142466 | 2438.068072 | -0.0074 | 0.994 | -0.123488053 | count | 1 |
| ALDH1L1    | -18.141339 | 2164.167784 | -0.0084 | 0.993 | -0.123488053 | count | 1 |
| AC104984.3 | -18.092035 | 1649.029008 | -0.011  | 0.991 | -0.123488053 | count | 1 |
| FAM110D    | -18.09112  | 3117.481017 | -0.0058 | 0.995 | -0.123488053 | count | 1 |
| GPX8       | -18.09112  | 3117.481017 | -0.0058 | 0.995 | -0.123488053 | count | 1 |
| IGHA2      | -18.087598 | 2697.592818 | -0.0067 | 0.995 | -0.123488053 | count | 1 |
| GALNT4     | -17.973237 | 2194.691266 | -0.0082 | 0.993 | -0.123488053 | count | 1 |
| SLC8A1-AS1 | -17.940974 | 2055.784912 | -0.0087 | 0.993 | -0.123488053 | count | 1 |
| ZNF665     | -17.940974 | 2055.784912 | -0.0087 | 0.993 | -0.123488053 | count | 1 |
| ADGRV1     | -17.906361 | 1557.664006 | -0.0115 | 0.991 | -0.123488053 | count | 1 |
| PIK3CD-AS2 | -17.899091 | 3114.605105 | -0.0057 | 0.995 | -0.123488053 | count | 1 |
| AL139424.3 | -17.899091 | 3114.605105 | -0.0057 | 0.995 | -0.123488053 | count | 1 |
| Z98257.1   | -17.899091 | 3114.605105 | -0.0057 | 0.995 | -0.123488053 | count | 1 |
| AL606760.2 | -17.899091 | 3114.605105 | -0.0057 | 0.995 | -0.123488053 | count | 1 |
| AL356488.2 | -17.899091 | 3114.605105 | -0.0057 | 0.995 | -0.123488053 | count | 1 |
| PGLYRP4    | -17.899091 | 3114.605105 | -0.0057 | 0.995 | -0.123488053 | count | 1 |
| KCNT2      | -17.899091 | 3114.605105 | -0.0057 | 0.995 | -0.123488053 | count | 1 |
| SOX13      | -17.899091 | 3114.605105 | -0.0057 | 0.995 | -0.123488053 | count | 1 |
| DTL        | -17.899091 | 3114.605105 | -0.0057 | 0.995 | -0.123488053 | count | 1 |
| SPATA45    | -17.899091 | 3114.605105 | -0.0057 | 0.995 | -0.123488053 | count | 1 |
| AL513314.2 | -17.899091 | 3114.605105 | -0.0057 | 0.995 | -0.123488053 | count | 1 |
| LGALS8-AS1 | -17.899091 | 3114.605105 | -0.0057 | 0.995 | -0.123488053 | count | 1 |
| AC012074.1 | -17.899091 | 3114.605105 | -0.0057 | 0.995 | -0.123488053 | count | 1 |
| AC006369.1 | -17.899091 | 3114.605105 | -0.0057 | 0.995 | -0.123488053 | count | 1 |
| AC019171.1 | -17.899091 | 3114.605105 | -0.0057 | 0.995 | -0.123488053 | count | 1 |
| ADD2       | -17.899091 | 3114.605105 | -0.0057 | 0.995 | -0.123488053 | count | 1 |
| TMEM182    | -17.899091 | 3114.605105 | -0.0057 | 0.995 | -0.123488053 | count | 1 |
| LINC01963  | -17.899091 | 3114.605105 | -0.0057 | 0.995 | -0.123488053 | count | 1 |
| GRIP2      | -17.899091 | 3114.605105 | -0.0057 | 0.995 | -0.123488053 | count | 1 |
| CXCR6      | -17.899091 | 3114.605105 | -0.0057 | 0.995 | -0.123488053 | count | 1 |
| AC084035.1 | -17.899091 | 3114.605105 | -0.0057 | 0.995 | -0.123488053 | count | 1 |
| AC092953.2 | -17.899091 | 3114.605105 | -0.0057 | 0.995 | -0.123488053 | count | 1 |
| NSG1       | -17.899091 | 3114.605105 | -0.0057 | 0.995 | -0.123488053 | count | 1 |
| AC098829.1 | -17.899091 | 3114.605105 | -0.0057 | 0.995 | -0.123488053 | count | 1 |
| AC124016.2 | -17.899091 | 3114.605105 | -0.0057 | 0.995 | -0.123488053 | count | 1 |
| NPNT       | -17.899091 | 3114.605105 | -0.0057 | 0.995 | -0.123488053 | count | 1 |
| FAT4       | -17.899091 | 3114.605105 | -0.0057 | 0.995 | -0.123488053 | count | 1 |
| SPOCK3     | -17.899091 | 3114.605105 | -0.0057 | 0.995 | -0.123488053 | count | 1 |
| TRIP13     | -17.899091 | 3114.605105 | -0.0057 | 0.995 | -0.123488053 | count | 1 |
| CCNO       | -17.899091 | 3114.605105 | -0.0057 | 0.995 | -0.123488053 | count | 1 |
| KCNIP1     | -17.899091 | 3114.605105 | -0.0057 | 0.995 | -0.123488053 | count | 1 |
| AC136604.2 | -17.899091 | 3114.605105 | -0.0057 | 0.995 | -0.123488053 | count | 1 |
| HIST1H2AH  | -17.899091 | 3114.605105 | -0.0057 | 0.995 | -0.123488053 | count | 1 |

|             |            |             |         |       |              |       |   |
|-------------|------------|-------------|---------|-------|--------------|-------|---|
| C6orf163    | -17.899091 | 3114.605105 | -0.0057 | 0.995 | -0.123488053 | count | 1 |
| AL353135.1  | -17.899091 | 3114.605105 | -0.0057 | 0.995 | -0.123488053 | count | 1 |
| AL023581.2  | -17.899091 | 3114.605105 | -0.0057 | 0.995 | -0.123488053 | count | 1 |
| AL355297.3  | -17.899091 | 3114.605105 | -0.0057 | 0.995 | -0.123488053 | count | 1 |
| AL139393.2  | -17.899091 | 3114.605105 | -0.0057 | 0.995 | -0.123488053 | count | 1 |
| TFR2        | -17.899091 | 3114.605105 | -0.0057 | 0.995 | -0.123488053 | count | 1 |
| ATP6V1FNB   | -17.899091 | 3114.605105 | -0.0057 | 0.995 | -0.123488053 | count | 1 |
| AC073320.1  | -17.899091 | 3114.605105 | -0.0057 | 0.995 | -0.123488053 | count | 1 |
| GHET1       | -17.899091 | 3114.605105 | -0.0057 | 0.995 | -0.123488053 | count | 1 |
| BMX         | -17.899091 | 3114.605105 | -0.0057 | 0.995 | -0.123488053 | count | 1 |
| INE2        | -17.899091 | 3114.605105 | -0.0057 | 0.995 | -0.123488053 | count | 1 |
| AFF2        | -17.899091 | 3114.605105 | -0.0057 | 0.995 | -0.123488053 | count | 1 |
| PRRG3       | -17.899091 | 3114.605105 | -0.0057 | 0.995 | -0.123488053 | count | 1 |
| MSC-AS1     | -17.899091 | 3114.605105 | -0.0057 | 0.995 | -0.123488053 | count | 1 |
| AP001330.5  | -17.899091 | 3114.605105 | -0.0057 | 0.995 | -0.123488053 | count | 1 |
| ARHGEF39    | -17.899091 | 3114.605105 | -0.0057 | 0.995 | -0.123488053 | count | 1 |
| COL27A1     | -17.899091 | 3114.605105 | -0.0057 | 0.995 | -0.123488053 | count | 1 |
| PPP1R26-AS1 | -17.899091 | 3114.605105 | -0.0057 | 0.995 | -0.123488053 | count | 1 |
| SLC1A2      | -17.899091 | 3114.605105 | -0.0057 | 0.995 | -0.123488053 | count | 1 |
| POU2AF1     | -17.899091 | 3114.605105 | -0.0057 | 0.995 | -0.123488053 | count | 1 |
| CYP17A1     | -17.899091 | 3114.605105 | -0.0057 | 0.995 | -0.123488053 | count | 1 |
| AC016957.2  | -17.899091 | 3114.605105 | -0.0057 | 0.995 | -0.123488053 | count | 1 |
| C12orf42    | -17.899091 | 3114.605105 | -0.0057 | 0.995 | -0.123488053 | count | 1 |
| ASCL4       | -17.899091 | 3114.605105 | -0.0057 | 0.995 | -0.123488053 | count | 1 |
| AC026367.1  | -17.899091 | 3114.605105 | -0.0057 | 0.995 | -0.123488053 | count | 1 |
| AC027290.1  | -17.899091 | 3114.605105 | -0.0057 | 0.995 | -0.123488053 | count | 1 |
| DNAH10      | -17.899091 | 3114.605105 | -0.0057 | 0.995 | -0.123488053 | count | 1 |
| MAB21L1     | -17.899091 | 3114.605105 | -0.0057 | 0.995 | -0.123488053 | count | 1 |
| AC001226.1  | -17.899091 | 3114.605105 | -0.0057 | 0.995 | -0.123488053 | count | 1 |
| AC005480.1  | -17.899091 | 3114.605105 | -0.0057 | 0.995 | -0.123488053 | count | 1 |
| LINC01550   | -17.899091 | 3114.605105 | -0.0057 | 0.995 | -0.123488053 | count | 1 |
| JAG2        | -17.899091 | 3114.605105 | -0.0057 | 0.995 | -0.123488053 | count | 1 |
| SCG3        | -17.899091 | 3114.605105 | -0.0057 | 0.995 | -0.123488053 | count | 1 |
| THAP10      | -17.899091 | 3114.605105 | -0.0057 | 0.995 | -0.123488053 | count | 1 |
| ACAN        | -17.899091 | 3114.605105 | -0.0057 | 0.995 | -0.123488053 | count | 1 |
| SRRM2-AS1   | -17.899091 | 3114.605105 | -0.0057 | 0.995 | -0.123488053 | count | 1 |
| AC007216.4  | -17.899091 | 3114.605105 | -0.0057 | 0.995 | -0.123488053 | count | 1 |
| AC130466.1  | -17.899091 | 3114.605105 | -0.0057 | 0.995 | -0.123488053 | count | 1 |
| AC009090.2  | -17.899091 | 3114.605105 | -0.0057 | 0.995 | -0.123488053 | count | 1 |
| AC027682.1  | -17.899091 | 3114.605105 | -0.0057 | 0.995 | -0.123488053 | count | 1 |
| HASPIN      | -17.899091 | 3114.605105 | -0.0057 | 0.995 | -0.123488053 | count | 1 |
| MYH3        | -17.899091 | 3114.605105 | -0.0057 | 0.995 | -0.123488053 | count | 1 |
| MYH7B       | -17.899091 | 3114.605105 | -0.0057 | 0.995 | -0.123488053 | count | 1 |
| BCAS4       | -17.899091 | 3114.605105 | -0.0057 | 0.995 | -0.123488053 | count | 1 |
| PLIN4       | -17.899091 | 3114.605105 | -0.0057 | 0.995 | -0.123488053 | count | 1 |



|             |            |             |         |       |              |       |   |
|-------------|------------|-------------|---------|-------|--------------|-------|---|
| ADGRL1      | -17.899091 | 3114.605105 | -0.0057 | 0.995 | -0.123488053 | count | 1 |
| LIPE        | -17.899091 | 3114.605105 | -0.0057 | 0.995 | -0.123488053 | count | 1 |
| NLGN4Y      | -17.899091 | 3114.605105 | -0.0057 | 0.995 | -0.123488053 | count | 1 |
| AC253536.6  | -17.899091 | 3114.605105 | -0.0057 | 0.995 | -0.123488053 | count | 1 |
| PVALB       | -17.899091 | 3114.605105 | -0.0057 | 0.995 | -0.123488053 | count | 1 |
| SLC16A8     | -17.899091 | 3114.605105 | -0.0057 | 0.995 | -0.123488053 | count | 1 |
| GRAP2       | -17.899091 | 3114.605105 | -0.0057 | 0.995 | -0.123488053 | count | 1 |
| EFCAB6      | -17.899091 | 3114.605105 | -0.0057 | 0.995 | -0.123488053 | count | 1 |
| GCSAM       | -17.889086 | 1996.687505 | -0.009  | 0.993 | -0.123488053 | count | 1 |
| CASZ1       | -17.870915 | 1857.103643 | -0.0096 | 0.992 | -0.123488053 | count | 1 |
| LMOD1       | -17.870915 | 1857.103643 | -0.0096 | 0.992 | -0.123488053 | count | 1 |
| CYB561D2    | -17.794111 | 1827.1213   | -0.0097 | 0.992 | -0.123488053 | count | 1 |
| ZNF365      | -17.794111 | 1827.1213   | -0.0097 | 0.992 | -0.123488053 | count | 1 |
| RAD51       | -17.794111 | 1827.1213   | -0.0097 | 0.992 | -0.123488053 | count | 1 |
| RN7SL832P   | -17.7737   | 2064.251785 | -0.0086 | 0.993 | -0.123488053 | count | 1 |
| AC005540.1  | -17.7737   | 2064.251785 | -0.0086 | 0.993 | -0.123488053 | count | 1 |
| CACNA1C-AS2 | -17.7737   | 2064.251785 | -0.0086 | 0.993 | -0.123488053 | count | 1 |
| AC008758.4  | -17.7737   | 2064.251785 | -0.0086 | 0.993 | -0.123488053 | count | 1 |
| UNC80       | -17.742531 | 2935.421747 | -0.006  | 0.995 | -0.123488053 | count | 1 |
| SPINK2      | -17.742531 | 2935.421747 | -0.006  | 0.995 | -0.123488053 | count | 1 |
| ITPR3       | -17.742531 | 2935.421747 | -0.006  | 0.995 | -0.123488053 | count | 1 |
| THEMIS      | -17.742531 | 2935.421747 | -0.006  | 0.995 | -0.123488053 | count | 1 |
| AL136320.1  | -17.742531 | 2935.421747 | -0.006  | 0.995 | -0.123488053 | count | 1 |
| AC006064.2  | -17.742531 | 2935.421747 | -0.006  | 0.995 | -0.123488053 | count | 1 |
| GZMH        | -17.742531 | 2935.421747 | -0.006  | 0.995 | -0.123488053 | count | 1 |
| IGLV3-1     | -17.742531 | 2935.421747 | -0.006  | 0.995 | -0.123488053 | count | 1 |
| AL513550.1  | -17.740777 | 2716.887115 | -0.0065 | 0.995 | -0.123488053 | count | 1 |
| TRIM6       | -17.740777 | 2716.887115 | -0.0065 | 0.995 | -0.123488053 | count | 1 |
| DNM1P35     | -17.740777 | 2716.887115 | -0.0065 | 0.995 | -0.123488053 | count | 1 |
| ADAM32      | -17.670684 | 1594.044523 | -0.0111 | 0.991 | -0.123488052 | count | 1 |
| AL158151.3  | -17.670684 | 1594.044523 | -0.0111 | 0.991 | -0.123488052 | count | 1 |
| AC093827.5  | -17.553023 | 2175.93826  | -0.0081 | 0.994 | -0.123488052 | count | 1 |
| HIST1H2BF   | -17.552096 | 2045.655339 | -0.0086 | 0.993 | -0.123488052 | count | 1 |
| AC147651.1  | -17.552096 | 2045.655339 | -0.0086 | 0.993 | -0.123488052 | count | 1 |
| ZNF608      | -17.502184 | 2084.392974 | -0.0084 | 0.993 | -0.123488052 | count | 1 |
| RNF217-AS1  | -17.502184 | 2084.392974 | -0.0084 | 0.993 | -0.123488052 | count | 1 |
| RNFT2       | -17.502184 | 2084.392974 | -0.0084 | 0.993 | -0.123488052 | count | 1 |
| AL137786.1  | -17.502184 | 2084.392974 | -0.0084 | 0.993 | -0.123488052 | count | 1 |
| ARNT2       | -17.502184 | 2084.392974 | -0.0084 | 0.993 | -0.123488052 | count | 1 |
| ZNF23       | -17.502184 | 2084.392974 | -0.0084 | 0.993 | -0.123488052 | count | 1 |
| ZNF556      | -17.502184 | 2084.392974 | -0.0084 | 0.993 | -0.123488052 | count | 1 |
| AC007663.3  | -17.502184 | 2084.392974 | -0.0084 | 0.993 | -0.123488052 | count | 1 |
| RAVER2      | -17.500989 | 1868.169847 | -0.0094 | 0.993 | -0.123488052 | count | 1 |
| AC135507.1  | -17.500989 | 1868.169847 | -0.0094 | 0.993 | -0.123488052 | count | 1 |
| LSAMP       | -17.500989 | 1868.169847 | -0.0094 | 0.993 | -0.123488052 | count | 1 |

|             |            |             |         |       |              |       |   |
|-------------|------------|-------------|---------|-------|--------------|-------|---|
| TRPC1       | -17.500989 | 1868.169847 | -0.0094 | 0.993 | -0.123488052 | count | 1 |
| SEMA3A      | -17.500989 | 1868.169847 | -0.0094 | 0.993 | -0.123488052 | count | 1 |
| AL683807.1  | -17.500989 | 1868.169847 | -0.0094 | 0.993 | -0.123488052 | count | 1 |
| AZIN1-AS1   | -17.500989 | 1868.169847 | -0.0094 | 0.993 | -0.123488052 | count | 1 |
| ABO         | -17.500989 | 1868.169847 | -0.0094 | 0.993 | -0.123488052 | count | 1 |
| AC087241.3  | -17.500989 | 1868.169847 | -0.0094 | 0.993 | -0.123488052 | count | 1 |
| TSC22D1-AS1 | -17.500989 | 1868.169847 | -0.0094 | 0.993 | -0.123488052 | count | 1 |
| MSLN        | -17.500989 | 1868.169847 | -0.0094 | 0.993 | -0.123488052 | count | 1 |
| AC009163.7  | -17.500989 | 1868.169847 | -0.0094 | 0.993 | -0.123488052 | count | 1 |
| ARHGAP44    | -17.500989 | 1868.169847 | -0.0094 | 0.993 | -0.123488052 | count | 1 |
| MOCOS       | -17.500989 | 1868.169847 | -0.0094 | 0.993 | -0.123488052 | count | 1 |
| LINC00663   | -17.500989 | 1868.169847 | -0.0094 | 0.993 | -0.123488052 | count | 1 |
| OSBPL10     | -17.4966   | 1674.47573  | -0.0104 | 0.992 | -0.123488052 | count | 1 |
| ADAMTS4     | -17.314235 | 2076.210816 | -0.0083 | 0.993 | -0.123488051 | count | 1 |
| ABCG8       | -17.314235 | 2076.210816 | -0.0083 | 0.993 | -0.123488051 | count | 1 |
| LINC01305   | -17.314235 | 2076.210816 | -0.0083 | 0.993 | -0.123488051 | count | 1 |
| CP          | -17.314235 | 2076.210816 | -0.0083 | 0.993 | -0.123488051 | count | 1 |
| AC096564.1  | -17.314235 | 2076.210816 | -0.0083 | 0.993 | -0.123488051 | count | 1 |
| MIR583HG    | -17.314235 | 2076.210816 | -0.0083 | 0.993 | -0.123488051 | count | 1 |
| LINC02201   | -17.314235 | 2076.210816 | -0.0083 | 0.993 | -0.123488051 | count | 1 |
| ADAMTSL2    | -17.314235 | 2076.210816 | -0.0083 | 0.993 | -0.123488051 | count | 1 |
| AL137145.2  | -17.314235 | 2076.210816 | -0.0083 | 0.993 | -0.123488051 | count | 1 |
| AL133417.1  | -17.314235 | 2076.210816 | -0.0083 | 0.993 | -0.123488051 | count | 1 |
| AC090617.5  | -17.229564 | 1473.714778 | -0.0117 | 0.991 | -0.123488051 | count | 1 |
| PHGDH       | -17.211639 | 1244.530295 | -0.0138 | 0.989 | -0.123488051 | count | 1 |
| AL096855.1  | -17.197067 | 2752.218623 | -0.0062 | 0.995 | -0.123488051 | count | 1 |
| PINK1-AS    | -17.197067 | 2752.218623 | -0.0062 | 0.995 | -0.123488051 | count | 1 |
| LINC01355   | -17.197067 | 2752.218623 | -0.0062 | 0.995 | -0.123488051 | count | 1 |
| LINC02574   | -17.197067 | 2752.218623 | -0.0062 | 0.995 | -0.123488051 | count | 1 |
| LINC02586   | -17.197067 | 2752.218623 | -0.0062 | 0.995 | -0.123488051 | count | 1 |
| S100A3      | -17.197067 | 2752.218623 | -0.0062 | 0.995 | -0.123488051 | count | 1 |
| NR1I3       | -17.197067 | 2752.218623 | -0.0062 | 0.995 | -0.123488051 | count | 1 |
| CCDC181     | -17.197067 | 2752.218623 | -0.0062 | 0.995 | -0.123488051 | count | 1 |
| PLEKHA6     | -17.197067 | 2752.218623 | -0.0062 | 0.995 | -0.123488051 | count | 1 |
| SERTAD4-AS1 | -17.197067 | 2752.218623 | -0.0062 | 0.995 | -0.123488051 | count | 1 |
| FIGLA       | -17.197067 | 2752.218623 | -0.0062 | 0.995 | -0.123488051 | count | 1 |
| SULT1C2     | -17.197067 | 2752.218623 | -0.0062 | 0.995 | -0.123488051 | count | 1 |
| SGPP2       | -17.197067 | 2752.218623 | -0.0062 | 0.995 | -0.123488051 | count | 1 |
| AC099541.1  | -17.197067 | 2752.218623 | -0.0062 | 0.995 | -0.123488051 | count | 1 |
| AC092910.3  | -17.197067 | 2752.218623 | -0.0062 | 0.995 | -0.123488051 | count | 1 |
| IL20RB      | -17.197067 | 2752.218623 | -0.0062 | 0.995 | -0.123488051 | count | 1 |
| CAMK2N2     | -17.197067 | 2752.218623 | -0.0062 | 0.995 | -0.123488051 | count | 1 |
| AC109347.2  | -17.197067 | 2752.218623 | -0.0062 | 0.995 | -0.123488051 | count | 1 |
| MGARP       | -17.197067 | 2752.218623 | -0.0062 | 0.995 | -0.123488051 | count | 1 |
| EDA2R       | -17.197067 | 2752.218623 | -0.0062 | 0.995 | -0.123488051 | count | 1 |

|            |            |             |         |       |              |       |   |
|------------|------------|-------------|---------|-------|--------------|-------|---|
| PDGFRL     | -17.197067 | 2752.218623 | -0.0062 | 0.995 | -0.123488051 | count | 1 |
| AC100814.1 | -17.197067 | 2752.218623 | -0.0062 | 0.995 | -0.123488051 | count | 1 |
| AL358113.1 | -17.197067 | 2752.218623 | -0.0062 | 0.995 | -0.123488051 | count | 1 |
| CXCR5      | -17.197067 | 2752.218623 | -0.0062 | 0.995 | -0.123488051 | count | 1 |
| AL158163.1 | -17.197067 | 2752.218623 | -0.0062 | 0.995 | -0.123488051 | count | 1 |
| CLEC1B     | -17.197067 | 2752.218623 | -0.0062 | 0.995 | -0.123488051 | count | 1 |
| AC025031.4 | -17.197067 | 2752.218623 | -0.0062 | 0.995 | -0.123488051 | count | 1 |
| PTPRB      | -17.197067 | 2752.218623 | -0.0062 | 0.995 | -0.123488051 | count | 1 |
| LINC00426  | -17.197067 | 2752.218623 | -0.0062 | 0.995 | -0.123488051 | count | 1 |
| ITGBL1     | -17.197067 | 2752.218623 | -0.0062 | 0.995 | -0.123488051 | count | 1 |
| PPP1R36    | -17.197067 | 2752.218623 | -0.0062 | 0.995 | -0.123488051 | count | 1 |
| LINC00239  | -17.197067 | 2752.218623 | -0.0062 | 0.995 | -0.123488051 | count | 1 |
| BUB1B      | -17.197067 | 2752.218623 | -0.0062 | 0.995 | -0.123488051 | count | 1 |
| AC018362.2 | -17.197067 | 2752.218623 | -0.0062 | 0.995 | -0.123488051 | count | 1 |
| DUOX1      | -17.197067 | 2752.218623 | -0.0062 | 0.995 | -0.123488051 | count | 1 |
| CSPG4      | -17.197067 | 2752.218623 | -0.0062 | 0.995 | -0.123488051 | count | 1 |
| AC124068.2 | -17.197067 | 2752.218623 | -0.0062 | 0.995 | -0.123488051 | count | 1 |
| NKD1       | -17.197067 | 2752.218623 | -0.0062 | 0.995 | -0.123488051 | count | 1 |
| CDH5       | -17.197067 | 2752.218623 | -0.0062 | 0.995 | -0.123488051 | count | 1 |
| AC092718.8 | -17.197067 | 2752.218623 | -0.0062 | 0.995 | -0.123488051 | count | 1 |
| CORO6      | -17.197067 | 2752.218623 | -0.0062 | 0.995 | -0.123488051 | count | 1 |
| SMIM5      | -17.197067 | 2752.218623 | -0.0062 | 0.995 | -0.123488051 | count | 1 |
| NDC80      | -17.197067 | 2752.218623 | -0.0062 | 0.995 | -0.123488051 | count | 1 |
| ABALON     | -17.197067 | 2752.218623 | -0.0062 | 0.995 | -0.123488051 | count | 1 |
| SLA2       | -17.197067 | 2752.218623 | -0.0062 | 0.995 | -0.123488051 | count | 1 |
| KISS1R     | -17.197067 | 2752.218623 | -0.0062 | 0.995 | -0.123488051 | count | 1 |
| PRR36      | -17.197067 | 2752.218623 | -0.0062 | 0.995 | -0.123488051 | count | 1 |
| F2RL3      | -17.197067 | 2752.218623 | -0.0062 | 0.995 | -0.123488051 | count | 1 |
| ZNF547     | -17.197067 | 2752.218623 | -0.0062 | 0.995 | -0.123488051 | count | 1 |
| AP001065.1 | -17.197067 | 2752.218623 | -0.0062 | 0.995 | -0.123488051 | count | 1 |
| AL627309.1 | -16.700967 | 4059.590711 | -0.0041 | 0.997 | -0.123488048 | count | 1 |
| AL390719.2 | -16.700967 | 4059.590711 | -0.0041 | 0.997 | -0.123488048 | count | 1 |
| TTLL10     | -16.700967 | 4059.590711 | -0.0041 | 0.997 | -0.123488048 | count | 1 |
| AL139246.3 | -16.700967 | 4059.590711 | -0.0041 | 0.997 | -0.123488048 | count | 1 |
| FBXO2      | -16.700967 | 4059.590711 | -0.0041 | 0.997 | -0.123488048 | count | 1 |
| AL121992.1 | -16.700967 | 4059.590711 | -0.0041 | 0.997 | -0.123488048 | count | 1 |
| AL450998.3 | -16.700967 | 4059.590711 | -0.0041 | 0.997 | -0.123488048 | count | 1 |
| MFAP2      | -16.700967 | 4059.590711 | -0.0041 | 0.997 | -0.123488048 | count | 1 |
| GPR3       | -16.700967 | 4059.590711 | -0.0041 | 0.997 | -0.123488048 | count | 1 |
| LINC01778  | -16.700967 | 4059.590711 | -0.0041 | 0.997 | -0.123488048 | count | 1 |
| AC114488.2 | -16.700967 | 4059.590711 | -0.0041 | 0.997 | -0.123488048 | count | 1 |
| TMEM35B    | -16.700967 | 4059.590711 | -0.0041 | 0.997 | -0.123488048 | count | 1 |
| TMCO2      | -16.700967 | 4059.590711 | -0.0041 | 0.997 | -0.123488048 | count | 1 |
| PTPRF      | -16.700967 | 4059.590711 | -0.0041 | 0.997 | -0.123488048 | count | 1 |
| KIF2C      | -16.700967 | 4059.590711 | -0.0041 | 0.997 | -0.123488048 | count | 1 |

|            |            |             |         |       |              |       |   |
|------------|------------|-------------|---------|-------|--------------|-------|---|
| AL358075.2 | -16.700967 | 4059.590711 | -0.0041 | 0.997 | -0.123488048 | count | 1 |
| AC093424.1 | -16.700967 | 4059.590711 | -0.0041 | 0.997 | -0.123488048 | count | 1 |
| AC099794.1 | -16.700967 | 4059.590711 | -0.0041 | 0.997 | -0.123488048 | count | 1 |
| AL031429.1 | -16.700967 | 4059.590711 | -0.0041 | 0.997 | -0.123488048 | count | 1 |
| LINC01725  | -16.700967 | 4059.590711 | -0.0041 | 0.997 | -0.123488048 | count | 1 |
| AL121989.1 | -16.700967 | 4059.590711 | -0.0041 | 0.997 | -0.123488048 | count | 1 |
| HFM1       | -16.700967 | 4059.590711 | -0.0041 | 0.997 | -0.123488048 | count | 1 |
| FAM19A3    | -16.700967 | 4059.590711 | -0.0041 | 0.997 | -0.123488048 | count | 1 |
| SYT6       | -16.700967 | 4059.590711 | -0.0041 | 0.997 | -0.123488048 | count | 1 |
| LINC01762  | -16.700967 | 4059.590711 | -0.0041 | 0.997 | -0.123488048 | count | 1 |
| AC245014.1 | -16.700967 | 4059.590711 | -0.0041 | 0.997 | -0.123488048 | count | 1 |
| NUDT4B     | -16.700967 | 4059.590711 | -0.0041 | 0.997 | -0.123488048 | count | 1 |
| LYSMD1     | -16.700967 | 4059.590711 | -0.0041 | 0.997 | -0.123488048 | count | 1 |
| TDRKH-AS1  | -16.700967 | 4059.590711 | -0.0041 | 0.997 | -0.123488048 | count | 1 |
| AL365181.3 | -16.700967 | 4059.590711 | -0.0041 | 0.997 | -0.123488048 | count | 1 |
| KIRREL1    | -16.700967 | 4059.590711 | -0.0041 | 0.997 | -0.123488048 | count | 1 |
| LINC01704  | -16.700967 | 4059.590711 | -0.0041 | 0.997 | -0.123488048 | count | 1 |
| OR6N1      | -16.700967 | 4059.590711 | -0.0041 | 0.997 | -0.123488048 | count | 1 |
| AL139011.2 | -16.700967 | 4059.590711 | -0.0041 | 0.997 | -0.123488048 | count | 1 |
| AL591806.3 | -16.700967 | 4059.590711 | -0.0041 | 0.997 | -0.123488048 | count | 1 |
| ILDR2      | -16.700967 | 4059.590711 | -0.0041 | 0.997 | -0.123488048 | count | 1 |
| AL022310.1 | -16.700967 | 4059.590711 | -0.0041 | 0.997 | -0.123488048 | count | 1 |
| AXDND1     | -16.700967 | 4059.590711 | -0.0041 | 0.997 | -0.123488048 | count | 1 |
| NMNAT2     | -16.700967 | 4059.590711 | -0.0041 | 0.997 | -0.123488048 | count | 1 |
| AL445228.2 | -16.700967 | 4059.590711 | -0.0041 | 0.997 | -0.123488048 | count | 1 |
| LINC00862  | -16.700967 | 4059.590711 | -0.0041 | 0.997 | -0.123488048 | count | 1 |
| AC104463.2 | -16.700967 | 4059.590711 | -0.0041 | 0.997 | -0.123488048 | count | 1 |
| ADORA1     | -16.700967 | 4059.590711 | -0.0041 | 0.997 | -0.123488048 | count | 1 |
| AL031316.1 | -16.700967 | 4059.590711 | -0.0041 | 0.997 | -0.123488048 | count | 1 |
| AL136379.1 | -16.700967 | 4059.590711 | -0.0041 | 0.997 | -0.123488048 | count | 1 |
| OBSCN-AS1  | -16.700967 | 4059.590711 | -0.0041 | 0.997 | -0.123488048 | count | 1 |
| AL121990.1 | -16.700967 | 4059.590711 | -0.0041 | 0.997 | -0.123488048 | count | 1 |
| LINC01348  | -16.700967 | 4059.590711 | -0.0041 | 0.997 | -0.123488048 | count | 1 |
| AL357556.4 | -16.700967 | 4059.590711 | -0.0041 | 0.997 | -0.123488048 | count | 1 |
| EDARADD    | -16.700967 | 4059.590711 | -0.0041 | 0.997 | -0.123488048 | count | 1 |
| CATSPERE   | -16.700967 | 4059.590711 | -0.0041 | 0.997 | -0.123488048 | count | 1 |
| AL591848.4 | -16.700967 | 4059.590711 | -0.0041 | 0.997 | -0.123488048 | count | 1 |
| ZNF695     | -16.700967 | 4059.590711 | -0.0041 | 0.997 | -0.123488048 | count | 1 |
| OR2L2      | -16.700967 | 4059.590711 | -0.0041 | 0.997 | -0.123488048 | count | 1 |
| LINC00299  | -16.700967 | 4059.590711 | -0.0041 | 0.997 | -0.123488048 | count | 1 |
| LINC01814  | -16.700967 | 4059.590711 | -0.0041 | 0.997 | -0.123488048 | count | 1 |
| AC012065.3 | -16.700967 | 4059.590711 | -0.0041 | 0.997 | -0.123488048 | count | 1 |
| LINC02580  | -16.700967 | 4059.590711 | -0.0041 | 0.997 | -0.123488048 | count | 1 |
| AC009501.1 | -16.700967 | 4059.590711 | -0.0041 | 0.997 | -0.123488048 | count | 1 |
| AC016700.3 | -16.700967 | 4059.590711 | -0.0041 | 0.997 | -0.123488048 | count | 1 |

|            |            |             |         |       |              |       |   |
|------------|------------|-------------|---------|-------|--------------|-------|---|
| LINC01293  | -16.700967 | 4059.590711 | -0.0041 | 0.997 | -0.123488048 | count | 1 |
| AC012511.1 | -16.700967 | 4059.590711 | -0.0041 | 0.997 | -0.123488048 | count | 1 |
| CD8A       | -16.700967 | 4059.590711 | -0.0041 | 0.997 | -0.123488048 | count | 1 |
| AC133644.2 | -16.700967 | 4059.590711 | -0.0041 | 0.997 | -0.123488048 | count | 1 |
| ZAP70      | -16.700967 | 4059.590711 | -0.0041 | 0.997 | -0.123488048 | count | 1 |
| CHST10     | -16.700967 | 4059.590711 | -0.0041 | 0.997 | -0.123488048 | count | 1 |
| NT5DC4     | -16.700967 | 4059.590711 | -0.0041 | 0.997 | -0.123488048 | count | 1 |
| AC016745.1 | -16.700967 | 4059.590711 | -0.0041 | 0.997 | -0.123488048 | count | 1 |
| DPP10      | -16.700967 | 4059.590711 | -0.0041 | 0.997 | -0.123488048 | count | 1 |
| POTEE      | -16.700967 | 4059.590711 | -0.0041 | 0.997 | -0.123488048 | count | 1 |
| CCDC74A    | -16.700967 | 4059.590711 | -0.0041 | 0.997 | -0.123488048 | count | 1 |
| LINC01876  | -16.700967 | 4059.590711 | -0.0041 | 0.997 | -0.123488048 | count | 1 |
| LINC02478  | -16.700967 | 4059.590711 | -0.0041 | 0.997 | -0.123488048 | count | 1 |
| AC008063.2 | -16.700967 | 4059.590711 | -0.0041 | 0.997 | -0.123488048 | count | 1 |
| GRB14      | -16.700967 | 4059.590711 | -0.0041 | 0.997 | -0.123488048 | count | 1 |
| CCDC173    | -16.700967 | 4059.590711 | -0.0041 | 0.997 | -0.123488048 | count | 1 |
| AC016737.2 | -16.700967 | 4059.590711 | -0.0041 | 0.997 | -0.123488048 | count | 1 |
| AC010894.3 | -16.700967 | 4059.590711 | -0.0041 | 0.997 | -0.123488048 | count | 1 |
| CHN1       | -16.700967 | 4059.590711 | -0.0041 | 0.997 | -0.123488048 | count | 1 |
| AC019080.4 | -16.700967 | 4059.590711 | -0.0041 | 0.997 | -0.123488048 | count | 1 |
| NCKAP1     | -16.700967 | 4059.590711 | -0.0041 | 0.997 | -0.123488048 | count | 1 |
| LINC01827  | -16.700967 | 4059.590711 | -0.0041 | 0.997 | -0.123488048 | count | 1 |
| SATB2-AS1  | -16.700967 | 4059.590711 | -0.0041 | 0.997 | -0.123488048 | count | 1 |
| AC005037.1 | -16.700967 | 4059.590711 | -0.0041 | 0.997 | -0.123488048 | count | 1 |
| AC012668.3 | -16.700967 | 4059.590711 | -0.0041 | 0.997 | -0.123488048 | count | 1 |
| AC013448.2 | -16.700967 | 4059.590711 | -0.0041 | 0.997 | -0.123488048 | count | 1 |
| SCYGR4     | -16.700967 | 4059.590711 | -0.0041 | 0.997 | -0.123488048 | count | 1 |
| SLC16A14   | -16.700967 | 4059.590711 | -0.0041 | 0.997 | -0.123488048 | count | 1 |
| SNORC      | -16.700967 | 4059.590711 | -0.0041 | 0.997 | -0.123488048 | count | 1 |
| SAG        | -16.700967 | 4059.590711 | -0.0041 | 0.997 | -0.123488048 | count | 1 |
| AC112715.1 | -16.700967 | 4059.590711 | -0.0041 | 0.997 | -0.123488048 | count | 1 |
| AC068313.1 | -16.700967 | 4059.590711 | -0.0041 | 0.997 | -0.123488048 | count | 1 |
| AC018809.2 | -16.700967 | 4059.590711 | -0.0041 | 0.997 | -0.123488048 | count | 1 |
| COLQ       | -16.700967 | 4059.590711 | -0.0041 | 0.997 | -0.123488048 | count | 1 |
| ZNF385D    | -16.700967 | 4059.590711 | -0.0041 | 0.997 | -0.123488048 | count | 1 |
| LINC01980  | -16.700967 | 4059.590711 | -0.0041 | 0.997 | -0.123488048 | count | 1 |
| CSPG5      | -16.700967 | 4059.590711 | -0.0041 | 0.997 | -0.123488048 | count | 1 |
| PLXNB1     | -16.700967 | 4059.590711 | -0.0041 | 0.997 | -0.123488048 | count | 1 |
| SEMA3F     | -16.700967 | 4059.590711 | -0.0041 | 0.997 | -0.123488048 | count | 1 |
| ITIH3      | -16.700967 | 4059.590711 | -0.0041 | 0.997 | -0.123488048 | count | 1 |
| AC116036.2 | -16.700967 | 4059.590711 | -0.0041 | 0.997 | -0.123488048 | count | 1 |
| FAM3D      | -16.700967 | 4059.590711 | -0.0041 | 0.997 | -0.123488048 | count | 1 |
| LINC00882  | -16.700967 | 4059.590711 | -0.0041 | 0.997 | -0.123488048 | count | 1 |
| BTLA       | -16.700967 | 4059.590711 | -0.0041 | 0.997 | -0.123488048 | count | 1 |
| AC074044.1 | -16.700967 | 4059.590711 | -0.0041 | 0.997 | -0.123488048 | count | 1 |

|              |            |             |         |       |              |       |   |
|--------------|------------|-------------|---------|-------|--------------|-------|---|
| AC128687.2   | -16.700967 | 4059.590711 | -0.0041 | 0.997 | -0.123488048 | count | 1 |
| ARHGAP31-AS1 | -16.700967 | 4059.590711 | -0.0041 | 0.997 | -0.123488048 | count | 1 |
| ALG1L        | -16.700967 | 4059.590711 | -0.0041 | 0.997 | -0.123488048 | count | 1 |
| PODXL2       | -16.700967 | 4059.590711 | -0.0041 | 0.997 | -0.123488048 | count | 1 |
| KBTBD12      | -16.700967 | 4059.590711 | -0.0041 | 0.997 | -0.123488048 | count | 1 |
| EFCC1        | -16.700967 | 4059.590711 | -0.0041 | 0.997 | -0.123488048 | count | 1 |
| LINC02014    | -16.700967 | 4059.590711 | -0.0041 | 0.997 | -0.123488048 | count | 1 |
| LINC02021    | -16.700967 | 4059.590711 | -0.0041 | 0.997 | -0.123488048 | count | 1 |
| BFSP2        | -16.700967 | 4059.590711 | -0.0041 | 0.997 | -0.123488048 | count | 1 |
| EPHB1        | -16.700967 | 4059.590711 | -0.0041 | 0.997 | -0.123488048 | count | 1 |
| FOXL2        | -16.700967 | 4059.590711 | -0.0041 | 0.997 | -0.123488048 | count | 1 |
| CLSTN2       | -16.700967 | 4059.590711 | -0.0041 | 0.997 | -0.123488048 | count | 1 |
| TM4SF18      | -16.700967 | 4059.590711 | -0.0041 | 0.997 | -0.123488048 | count | 1 |
| AC104472.3   | -16.700967 | 4059.590711 | -0.0041 | 0.997 | -0.123488048 | count | 1 |
| LINC00881    | -16.700967 | 4059.590711 | -0.0041 | 0.997 | -0.123488048 | count | 1 |
| AC080013.6   | -16.700967 | 4059.590711 | -0.0041 | 0.997 | -0.123488048 | count | 1 |
| IL12A        | -16.700967 | 4059.590711 | -0.0041 | 0.997 | -0.123488048 | count | 1 |
| PEX5L-AS1    | -16.700967 | 4059.590711 | -0.0041 | 0.997 | -0.123488048 | count | 1 |
| KLHL6-AS1    | -16.700967 | 4059.590711 | -0.0041 | 0.997 | -0.123488048 | count | 1 |
| ABCC5-AS1    | -16.700967 | 4059.590711 | -0.0041 | 0.997 | -0.123488048 | count | 1 |
| CHRD         | -16.700967 | 4059.590711 | -0.0041 | 0.997 | -0.123488048 | count | 1 |
| AC139887.1   | -16.700967 | 4059.590711 | -0.0041 | 0.997 | -0.123488048 | count | 1 |
| ADRA2C       | -16.700967 | 4059.590711 | -0.0041 | 0.997 | -0.123488048 | count | 1 |
| C1QTNF7      | -16.700967 | 4059.590711 | -0.0041 | 0.997 | -0.123488048 | count | 1 |
| AC099550.1   | -16.700967 | 4059.590711 | -0.0041 | 0.997 | -0.123488048 | count | 1 |
| LINC02357    | -16.700967 | 4059.590711 | -0.0041 | 0.997 | -0.123488048 | count | 1 |
| UCHL1        | -16.700967 | 4059.590711 | -0.0041 | 0.997 | -0.123488048 | count | 1 |
| AC110792.3   | -16.700967 | 4059.590711 | -0.0041 | 0.997 | -0.123488048 | count | 1 |
| AC069307.1   | -16.700967 | 4059.590711 | -0.0041 | 0.997 | -0.123488048 | count | 1 |
| AC104806.2   | -16.700967 | 4059.590711 | -0.0041 | 0.997 | -0.123488048 | count | 1 |
| AC053527.1   | -16.700967 | 4059.590711 | -0.0041 | 0.997 | -0.123488048 | count | 1 |
| AC110615.1   | -16.700967 | 4059.590711 | -0.0041 | 0.997 | -0.123488048 | count | 1 |
| PPEF2        | -16.700967 | 4059.590711 | -0.0041 | 0.997 | -0.123488048 | count | 1 |
| AC104785.1   | -16.700967 | 4059.590711 | -0.0041 | 0.997 | -0.123488048 | count | 1 |
| FGF2         | -16.700967 | 4059.590711 | -0.0041 | 0.997 | -0.123488048 | count | 1 |
| GYPE         | -16.700967 | 4059.590711 | -0.0041 | 0.997 | -0.123488048 | count | 1 |
| REELD1       | -16.700967 | 4059.590711 | -0.0041 | 0.997 | -0.123488048 | count | 1 |
| FAM160A1     | -16.700967 | 4059.590711 | -0.0041 | 0.997 | -0.123488048 | count | 1 |
| AC107214.2   | -16.700967 | 4059.590711 | -0.0041 | 0.997 | -0.123488048 | count | 1 |
| AHRR         | -16.700967 | 4059.590711 | -0.0041 | 0.997 | -0.123488048 | count | 1 |
| AC026740.1   | -16.700967 | 4059.590711 | -0.0041 | 0.997 | -0.123488048 | count | 1 |
| AC091891.2   | -16.700967 | 4059.590711 | -0.0041 | 0.997 | -0.123488048 | count | 1 |
| AC034229.1   | -16.700967 | 4059.590711 | -0.0041 | 0.997 | -0.123488048 | count | 1 |
| EGFLAM       | -16.700967 | 4059.590711 | -0.0041 | 0.997 | -0.123488048 | count | 1 |
| LINC01033    | -16.700967 | 4059.590711 | -0.0041 | 0.997 | -0.123488048 | count | 1 |

|             |            |             |         |       |              |       |   |
|-------------|------------|-------------|---------|-------|--------------|-------|---|
| AC010359.1  | -16.700967 | 4059.590711 | -0.0041 | 0.997 | -0.123488048 | count | 1 |
| AC010273.1  | -16.700967 | 4059.590711 | -0.0041 | 0.997 | -0.123488048 | count | 1 |
| SERF1B      | -16.700967 | 4059.590711 | -0.0041 | 0.997 | -0.123488048 | count | 1 |
| AC008972.1  | -16.700967 | 4059.590711 | -0.0041 | 0.997 | -0.123488048 | count | 1 |
| AC113404.1  | -16.700967 | 4059.590711 | -0.0041 | 0.997 | -0.123488048 | count | 1 |
| BHMT2       | -16.700967 | 4059.590711 | -0.0041 | 0.997 | -0.123488048 | count | 1 |
| CMYA5       | -16.700967 | 4059.590711 | -0.0041 | 0.997 | -0.123488048 | count | 1 |
| AC104118.1  | -16.700967 | 4059.590711 | -0.0041 | 0.997 | -0.123488048 | count | 1 |
| SPATA9      | -16.700967 | 4059.590711 | -0.0041 | 0.997 | -0.123488048 | count | 1 |
| AC104123.1  | -16.700967 | 4059.590711 | -0.0041 | 0.997 | -0.123488048 | count | 1 |
| AC012603.1  | -16.700967 | 4059.590711 | -0.0041 | 0.997 | -0.123488048 | count | 1 |
| TMEM232     | -16.700967 | 4059.590711 | -0.0041 | 0.997 | -0.123488048 | count | 1 |
| LOX         | -16.700967 | 4059.590711 | -0.0041 | 0.997 | -0.123488048 | count | 1 |
| KIAA1024L   | -16.700967 | 4059.590711 | -0.0041 | 0.997 | -0.123488048 | count | 1 |
| ACSL6       | -16.700967 | 4059.590711 | -0.0041 | 0.997 | -0.123488048 | count | 1 |
| SMAD5-AS1   | -16.700967 | 4059.590711 | -0.0041 | 0.997 | -0.123488048 | count | 1 |
| AC104116.1  | -16.700967 | 4059.590711 | -0.0041 | 0.997 | -0.123488048 | count | 1 |
| PCDHB4      | -16.700967 | 4059.590711 | -0.0041 | 0.997 | -0.123488048 | count | 1 |
| PLAC8L1     | -16.700967 | 4059.590711 | -0.0041 | 0.997 | -0.123488048 | count | 1 |
| POU4F3      | -16.700967 | 4059.590711 | -0.0041 | 0.997 | -0.123488048 | count | 1 |
| SPINK5      | -16.700967 | 4059.590711 | -0.0041 | 0.997 | -0.123488048 | count | 1 |
| HTR4        | -16.700967 | 4059.590711 | -0.0041 | 0.997 | -0.123488048 | count | 1 |
| CARMN       | -16.700967 | 4059.590711 | -0.0041 | 0.997 | -0.123488048 | count | 1 |
| SLC6A7      | -16.700967 | 4059.590711 | -0.0041 | 0.997 | -0.123488048 | count | 1 |
| C5orf58     | -16.700967 | 4059.590711 | -0.0041 | 0.997 | -0.123488048 | count | 1 |
| NEURL1B     | -16.700967 | 4059.590711 | -0.0041 | 0.997 | -0.123488048 | count | 1 |
| STC2        | -16.700967 | 4059.590711 | -0.0041 | 0.997 | -0.123488048 | count | 1 |
| FAM153A     | -16.700967 | 4059.590711 | -0.0041 | 0.997 | -0.123488048 | count | 1 |
| COL23A1     | -16.700967 | 4059.590711 | -0.0041 | 0.997 | -0.123488048 | count | 1 |
| ZFP2        | -16.700967 | 4059.590711 | -0.0041 | 0.997 | -0.123488048 | count | 1 |
| LINC01962   | -16.700967 | 4059.590711 | -0.0041 | 0.997 | -0.123488048 | count | 1 |
| AL138831.1  | -16.700967 | 4059.590711 | -0.0041 | 0.997 | -0.123488048 | count | 1 |
| AL136309.2  | -16.700967 | 4059.590711 | -0.0041 | 0.997 | -0.123488048 | count | 1 |
| ERVFRD-1    | -16.700967 | 4059.590711 | -0.0041 | 0.997 | -0.123488048 | count | 1 |
| CAP2        | -16.700967 | 4059.590711 | -0.0041 | 0.997 | -0.123488048 | count | 1 |
| AL031775.2  | -16.700967 | 4059.590711 | -0.0041 | 0.997 | -0.123488048 | count | 1 |
| HIST1H3B    | -16.700967 | 4059.590711 | -0.0041 | 0.997 | -0.123488048 | count | 1 |
| GTF2H4      | -16.700967 | 4059.590711 | -0.0041 | 0.997 | -0.123488048 | count | 1 |
| NCR3        | -16.700967 | 4059.590711 | -0.0041 | 0.997 | -0.123488048 | count | 1 |
| C6orf47-AS1 | -16.700967 | 4059.590711 | -0.0041 | 0.997 | -0.123488048 | count | 1 |
| AL662796.1  | -16.700967 | 4059.590711 | -0.0041 | 0.997 | -0.123488048 | count | 1 |
| TCP11       | -16.700967 | 4059.590711 | -0.0041 | 0.997 | -0.123488048 | count | 1 |
| POLH-AS1    | -16.700967 | 4059.590711 | -0.0041 | 0.997 | -0.123488048 | count | 1 |
| LRRC1       | -16.700967 | 4059.590711 | -0.0041 | 0.997 | -0.123488048 | count | 1 |
| AL121972.1  | -16.700967 | 4059.590711 | -0.0041 | 0.997 | -0.123488048 | count | 1 |

|             |            |             |         |       |              |       |   |
|-------------|------------|-------------|---------|-------|--------------|-------|---|
| AL080317.2  | -16.700967 | 4059.590711 | -0.0041 | 0.997 | -0.123488048 | count | 1 |
| PTPRK       | -16.700967 | 4059.590711 | -0.0041 | 0.997 | -0.123488048 | count | 1 |
| AL356124.2  | -16.700967 | 4059.590711 | -0.0041 | 0.997 | -0.123488048 | count | 1 |
| ENPP3       | -16.700967 | 4059.590711 | -0.0041 | 0.997 | -0.123488048 | count | 1 |
| AL596188.1  | -16.700967 | 4059.590711 | -0.0041 | 0.997 | -0.123488048 | count | 1 |
| AL353596.1  | -16.700967 | 4059.590711 | -0.0041 | 0.997 | -0.123488048 | count | 1 |
| AL138737.1  | -16.700967 | 4059.590711 | -0.0041 | 0.997 | -0.123488048 | count | 1 |
| AL031056.2  | -16.700967 | 4059.590711 | -0.0041 | 0.997 | -0.123488048 | count | 1 |
| SOD2        | -16.700967 | 4059.590711 | -0.0041 | 0.997 | -0.123488048 | count | 1 |
| SMOC2       | -16.700967 | 4059.590711 | -0.0041 | 0.997 | -0.123488048 | count | 1 |
| SLC29A4     | -16.700967 | 4059.590711 | -0.0041 | 0.997 | -0.123488048 | count | 1 |
| AC007029.1  | -16.700967 | 4059.590711 | -0.0041 | 0.997 | -0.123488048 | count | 1 |
| AC005014.2  | -16.700967 | 4059.590711 | -0.0041 | 0.997 | -0.123488048 | count | 1 |
| ABCB5       | -16.700967 | 4059.590711 | -0.0041 | 0.997 | -0.123488048 | count | 1 |
| KIAA0895    | -16.700967 | 4059.590711 | -0.0041 | 0.997 | -0.123488048 | count | 1 |
| GLI3        | -16.700967 | 4059.590711 | -0.0041 | 0.997 | -0.123488048 | count | 1 |
| MLXIPL      | -16.700967 | 4059.590711 | -0.0041 | 0.997 | -0.123488048 | count | 1 |
| RUNDC3B     | -16.700967 | 4059.590711 | -0.0041 | 0.997 | -0.123488048 | count | 1 |
| DLX5        | -16.700967 | 4059.590711 | -0.0041 | 0.997 | -0.123488048 | count | 1 |
| TMEM130     | -16.700967 | 4059.590711 | -0.0041 | 0.997 | -0.123488048 | count | 1 |
| AC093668.3  | -16.700967 | 4059.590711 | -0.0041 | 0.997 | -0.123488048 | count | 1 |
| NFE4        | -16.700967 | 4059.590711 | -0.0041 | 0.997 | -0.123488048 | count | 1 |
| AC005046.1  | -16.700967 | 4059.590711 | -0.0041 | 0.997 | -0.123488048 | count | 1 |
| TSPAN12     | -16.700967 | 4059.590711 | -0.0041 | 0.997 | -0.123488048 | count | 1 |
| FSCN3       | -16.700967 | 4059.590711 | -0.0041 | 0.997 | -0.123488048 | count | 1 |
| SMKR1       | -16.700967 | 4059.590711 | -0.0041 | 0.997 | -0.123488048 | count | 1 |
| ZC3HAV1L    | -16.700967 | 4059.590711 | -0.0041 | 0.997 | -0.123488048 | count | 1 |
| DENND2A     | -16.700967 | 4059.590711 | -0.0041 | 0.997 | -0.123488048 | count | 1 |
| CTAGE6      | -16.700967 | 4059.590711 | -0.0041 | 0.997 | -0.123488048 | count | 1 |
| AC073314.1  | -16.700967 | 4059.590711 | -0.0041 | 0.997 | -0.123488048 | count | 1 |
| AC008060.1  | -16.700967 | 4059.590711 | -0.0041 | 0.997 | -0.123488048 | count | 1 |
| AC004554.2  | -16.700967 | 4059.590711 | -0.0041 | 0.997 | -0.123488048 | count | 1 |
| LINC02154   | -16.700967 | 4059.590711 | -0.0041 | 0.997 | -0.123488048 | count | 1 |
| CLTRN       | -16.700967 | 4059.590711 | -0.0041 | 0.997 | -0.123488048 | count | 1 |
| LINC01281   | -16.700967 | 4059.590711 | -0.0041 | 0.997 | -0.123488048 | count | 1 |
| RGN         | -16.700967 | 4059.590711 | -0.0041 | 0.997 | -0.123488048 | count | 1 |
| ZNF157      | -16.700967 | 4059.590711 | -0.0041 | 0.997 | -0.123488048 | count | 1 |
| FAM156B     | -16.700967 | 4059.590711 | -0.0041 | 0.997 | -0.123488048 | count | 1 |
| ZNF711      | -16.700967 | 4059.590711 | -0.0041 | 0.997 | -0.123488048 | count | 1 |
| PABPC5      | -16.700967 | 4059.590711 | -0.0041 | 0.997 | -0.123488048 | count | 1 |
| TSPAN6      | -16.700967 | 4059.590711 | -0.0041 | 0.997 | -0.123488048 | count | 1 |
| BHLHB9      | -16.700967 | 4059.590711 | -0.0041 | 0.997 | -0.123488048 | count | 1 |
| TCEAL5      | -16.700967 | 4059.590711 | -0.0041 | 0.997 | -0.123488048 | count | 1 |
| TMEM31      | -16.700967 | 4059.590711 | -0.0041 | 0.997 | -0.123488048 | count | 1 |
| TMSB15B-AS1 | -16.700967 | 4059.590711 | -0.0041 | 0.997 | -0.123488048 | count | 1 |



|            |            |             |         |       |              |       |   |
|------------|------------|-------------|---------|-------|--------------|-------|---|
| ALG13-AS1  | -16.700967 | 4059.590711 | -0.0041 | 0.997 | -0.123488048 | count | 1 |
| SH2D1A     | -16.700967 | 4059.590711 | -0.0041 | 0.997 | -0.123488048 | count | 1 |
| INTS6L-AS1 | -16.700967 | 4059.590711 | -0.0041 | 0.997 | -0.123488048 | count | 1 |
| FMR1NB     | -16.700967 | 4059.590711 | -0.0041 | 0.997 | -0.123488048 | count | 1 |
| AC004908.3 | -16.700967 | 4059.590711 | -0.0041 | 0.997 | -0.123488048 | count | 1 |
| TDRP       | -16.700967 | 4059.590711 | -0.0041 | 0.997 | -0.123488048 | count | 1 |
| AC104964.4 | -16.700967 | 4059.590711 | -0.0041 | 0.997 | -0.123488048 | count | 1 |
| FAM66D     | -16.700967 | 4059.590711 | -0.0041 | 0.997 | -0.123488048 | count | 1 |
| FAM86B2    | -16.700967 | 4059.590711 | -0.0041 | 0.997 | -0.123488048 | count | 1 |
| TRMT9B     | -16.700967 | 4059.590711 | -0.0041 | 0.997 | -0.123488048 | count | 1 |
| LZTS1      | -16.700967 | 4059.590711 | -0.0041 | 0.997 | -0.123488048 | count | 1 |
| AC100861.2 | -16.700967 | 4059.590711 | -0.0041 | 0.997 | -0.123488048 | count | 1 |
| PBK        | -16.700967 | 4059.590711 | -0.0041 | 0.997 | -0.123488048 | count | 1 |
| MBOAT4     | -16.700967 | 4059.590711 | -0.0041 | 0.997 | -0.123488048 | count | 1 |
| AC026979.3 | -16.700967 | 4059.590711 | -0.0041 | 0.997 | -0.123488048 | count | 1 |
| AC103724.4 | -16.700967 | 4059.590711 | -0.0041 | 0.997 | -0.123488048 | count | 1 |
| AC012103.1 | -16.700967 | 4059.590711 | -0.0041 | 0.997 | -0.123488048 | count | 1 |
| LACTB2-AS1 | -16.700967 | 4059.590711 | -0.0041 | 0.997 | -0.123488048 | count | 1 |
| AC022274.1 | -16.700967 | 4059.590711 | -0.0041 | 0.997 | -0.123488048 | count | 1 |
| AC036214.1 | -16.700967 | 4059.590711 | -0.0041 | 0.997 | -0.123488048 | count | 1 |
| AC009686.2 | -16.700967 | 4059.590711 | -0.0041 | 0.997 | -0.123488048 | count | 1 |
| AC018616.1 | -16.700967 | 4059.590711 | -0.0041 | 0.997 | -0.123488048 | count | 1 |
| AC010834.2 | -16.700967 | 4059.590711 | -0.0041 | 0.997 | -0.123488048 | count | 1 |
| AC023632.2 | -16.700967 | 4059.590711 | -0.0041 | 0.997 | -0.123488048 | count | 1 |
| AC083836.1 | -16.700967 | 4059.590711 | -0.0041 | 0.997 | -0.123488048 | count | 1 |
| AC012213.3 | -16.700967 | 4059.590711 | -0.0041 | 0.997 | -0.123488048 | count | 1 |
| DPYS       | -16.700967 | 4059.590711 | -0.0041 | 0.997 | -0.123488048 | count | 1 |
| ZFPM2      | -16.700967 | 4059.590711 | -0.0041 | 0.997 | -0.123488048 | count | 1 |
| RAD21-AS1  | -16.700967 | 4059.590711 | -0.0041 | 0.997 | -0.123488048 | count | 1 |
| LINC00861  | -16.700967 | 4059.590711 | -0.0041 | 0.997 | -0.123488048 | count | 1 |
| CCDC26     | -16.700967 | 4059.590711 | -0.0041 | 0.997 | -0.123488048 | count | 1 |
| AC087045.2 | -16.700967 | 4059.590711 | -0.0041 | 0.997 | -0.123488048 | count | 1 |
| AC134682.1 | -16.700967 | 4059.590711 | -0.0041 | 0.997 | -0.123488048 | count | 1 |
| LY6H       | -16.700967 | 4059.590711 | -0.0041 | 0.997 | -0.123488048 | count | 1 |
| RHPN1-AS1  | -16.700967 | 4059.590711 | -0.0041 | 0.997 | -0.123488048 | count | 1 |
| AC084125.1 | -16.700967 | 4059.590711 | -0.0041 | 0.997 | -0.123488048 | count | 1 |
| VLDLR-AS1  | -16.700967 | 4059.590711 | -0.0041 | 0.997 | -0.123488048 | count | 1 |
| AL135786.2 | -16.700967 | 4059.590711 | -0.0041 | 0.997 | -0.123488048 | count | 1 |
| AL360014.1 | -16.700967 | 4059.590711 | -0.0041 | 0.997 | -0.123488048 | count | 1 |
| AL137847.2 | -16.700967 | 4059.590711 | -0.0041 | 0.997 | -0.123488048 | count | 1 |
| SHC3       | -16.700967 | 4059.590711 | -0.0041 | 0.997 | -0.123488048 | count | 1 |
| BARX1      | -16.700967 | 4059.590711 | -0.0041 | 0.997 | -0.123488048 | count | 1 |
| AL359182.1 | -16.700967 | 4059.590711 | -0.0041 | 0.997 | -0.123488048 | count | 1 |
| FAM225B    | -16.700967 | 4059.590711 | -0.0041 | 0.997 | -0.123488048 | count | 1 |
| RNF183     | -16.700967 | 4059.590711 | -0.0041 | 0.997 | -0.123488048 | count | 1 |

|            |            |             |         |       |              |       |   |
|------------|------------|-------------|---------|-------|--------------|-------|---|
| WDR31      | -16.700967 | 4059.590711 | -0.0041 | 0.997 | -0.123488048 | count | 1 |
| BSPRY      | -16.700967 | 4059.590711 | -0.0041 | 0.997 | -0.123488048 | count | 1 |
| C9orf43    | -16.700967 | 4059.590711 | -0.0041 | 0.997 | -0.123488048 | count | 1 |
| AL157935.2 | -16.700967 | 4059.590711 | -0.0041 | 0.997 | -0.123488048 | count | 1 |
| QRFP       | -16.700967 | 4059.590711 | -0.0041 | 0.997 | -0.123488048 | count | 1 |
| AIF1L      | -16.700967 | 4059.590711 | -0.0041 | 0.997 | -0.123488048 | count | 1 |
| AK8        | -16.700967 | 4059.590711 | -0.0041 | 0.997 | -0.123488048 | count | 1 |
| GFI1B      | -16.700967 | 4059.590711 | -0.0041 | 0.997 | -0.123488048 | count | 1 |
| DRD4       | -16.700967 | 4059.590711 | -0.0041 | 0.997 | -0.123488048 | count | 1 |
| TRIM34     | -16.700967 | 4059.590711 | -0.0041 | 0.997 | -0.123488048 | count | 1 |
| AC091564.2 | -16.700967 | 4059.590711 | -0.0041 | 0.997 | -0.123488048 | count | 1 |
| OR10A2     | -16.700967 | 4059.590711 | -0.0041 | 0.997 | -0.123488048 | count | 1 |
| AC069360.1 | -16.700967 | 4059.590711 | -0.0041 | 0.997 | -0.123488048 | count | 1 |
| GALNT18    | -16.700967 | 4059.590711 | -0.0041 | 0.997 | -0.123488048 | count | 1 |
| LINC00958  | -16.700967 | 4059.590711 | -0.0041 | 0.997 | -0.123488048 | count | 1 |
| CALCB      | -16.700967 | 4059.590711 | -0.0041 | 0.997 | -0.123488048 | count | 1 |
| KCNC1      | -16.700967 | 4059.590711 | -0.0041 | 0.997 | -0.123488048 | count | 1 |
| AC009549.1 | -16.700967 | 4059.590711 | -0.0041 | 0.997 | -0.123488048 | count | 1 |
| CSTF3-DT   | -16.700967 | 4059.590711 | -0.0041 | 0.997 | -0.123488048 | count | 1 |
| AL356215.1 | -16.700967 | 4059.590711 | -0.0041 | 0.997 | -0.123488048 | count | 1 |
| FJX1       | -16.700967 | 4059.590711 | -0.0041 | 0.997 | -0.123488048 | count | 1 |
| AC087521.1 | -16.700967 | 4059.590711 | -0.0041 | 0.997 | -0.123488048 | count | 1 |
| C11orf94   | -16.700967 | 4059.590711 | -0.0041 | 0.997 | -0.123488048 | count | 1 |
| AGBL2      | -16.700967 | 4059.590711 | -0.0041 | 0.997 | -0.123488048 | count | 1 |
| OR5B21     | -16.700967 | 4059.590711 | -0.0041 | 0.997 | -0.123488048 | count | 1 |
| AP000442.2 | -16.700967 | 4059.590711 | -0.0041 | 0.997 | -0.123488048 | count | 1 |
| MS4A2      | -16.700967 | 4059.590711 | -0.0041 | 0.997 | -0.123488048 | count | 1 |
| AP000777.2 | -16.700967 | 4059.590711 | -0.0041 | 0.997 | -0.123488048 | count | 1 |
| AP003721.4 | -16.700967 | 4059.590711 | -0.0041 | 0.997 | -0.123488048 | count | 1 |
| C11orf95   | -16.700967 | 4059.590711 | -0.0041 | 0.997 | -0.123488048 | count | 1 |
| OVOL1      | -16.700967 | 4059.590711 | -0.0041 | 0.997 | -0.123488048 | count | 1 |
| SNX32      | -16.700967 | 4059.590711 | -0.0041 | 0.997 | -0.123488048 | count | 1 |
| SLC29A2    | -16.700967 | 4059.590711 | -0.0041 | 0.997 | -0.123488048 | count | 1 |
| AP003716.1 | -16.700967 | 4059.590711 | -0.0041 | 0.997 | -0.123488048 | count | 1 |
| ARAP1-AS2  | -16.700967 | 4059.590711 | -0.0041 | 0.997 | -0.123488048 | count | 1 |
| AP001922.5 | -16.700967 | 4059.590711 | -0.0041 | 0.997 | -0.123488048 | count | 1 |
| AP002360.3 | -16.700967 | 4059.590711 | -0.0041 | 0.997 | -0.123488048 | count | 1 |
| AP001189.6 | -16.700967 | 4059.590711 | -0.0041 | 0.997 | -0.123488048 | count | 1 |
| KCTD14     | -16.700967 | 4059.590711 | -0.0041 | 0.997 | -0.123488048 | count | 1 |
| AP003063.1 | -16.700967 | 4059.590711 | -0.0041 | 0.997 | -0.123488048 | count | 1 |
| DSCAML1    | -16.700967 | 4059.590711 | -0.0041 | 0.997 | -0.123488048 | count | 1 |
| USP2-AS1   | -16.700967 | 4059.590711 | -0.0041 | 0.997 | -0.123488048 | count | 1 |
| AP003501.2 | -16.700967 | 4059.590711 | -0.0041 | 0.997 | -0.123488048 | count | 1 |
| AP001318.2 | -16.700967 | 4059.590711 | -0.0041 | 0.997 | -0.123488048 | count | 1 |
| AL590068.1 | -16.700967 | 4059.590711 | -0.0041 | 0.997 | -0.123488048 | count | 1 |

|            |            |             |         |       |              |       |   |
|------------|------------|-------------|---------|-------|--------------|-------|---|
| ZNF239     | -16.700967 | 4059.590711 | -0.0041 | 0.997 | -0.123488048 | count | 1 |
| AL137026.1 | -16.700967 | 4059.590711 | -0.0041 | 0.997 | -0.123488048 | count | 1 |
| OR13A1     | -16.700967 | 4059.590711 | -0.0041 | 0.997 | -0.123488048 | count | 1 |
| PRF1       | -16.700967 | 4059.590711 | -0.0041 | 0.997 | -0.123488048 | count | 1 |
| DNAJC9-AS1 | -16.700967 | 4059.590711 | -0.0041 | 0.997 | -0.123488048 | count | 1 |
| AL139241.1 | -16.700967 | 4059.590711 | -0.0041 | 0.997 | -0.123488048 | count | 1 |
| NKX2-3     | -16.700967 | 4059.590711 | -0.0041 | 0.997 | -0.123488048 | count | 1 |
| INA        | -16.700967 | 4059.590711 | -0.0041 | 0.997 | -0.123488048 | count | 1 |
| TDRD1      | -16.700967 | 4059.590711 | -0.0041 | 0.997 | -0.123488048 | count | 1 |
| AL390763.1 | -16.700967 | 4059.590711 | -0.0041 | 0.997 | -0.123488048 | count | 1 |
| AL162274.2 | -16.700967 | 4059.590711 | -0.0041 | 0.997 | -0.123488048 | count | 1 |
| AL162274.1 | -16.700967 | 4059.590711 | -0.0041 | 0.997 | -0.123488048 | count | 1 |
| LINC00942  | -16.700967 | 4059.590711 | -0.0041 | 0.997 | -0.123488048 | count | 1 |
| AC005842.1 | -16.700967 | 4059.590711 | -0.0041 | 0.997 | -0.123488048 | count | 1 |
| GALNT8     | -16.700967 | 4059.590711 | -0.0041 | 0.997 | -0.123488048 | count | 1 |
| AC006064.1 | -16.700967 | 4059.590711 | -0.0041 | 0.997 | -0.123488048 | count | 1 |
| A2ML1      | -16.700967 | 4059.590711 | -0.0041 | 0.997 | -0.123488048 | count | 1 |
| AC008115.4 | -16.700967 | 4059.590711 | -0.0041 | 0.997 | -0.123488048 | count | 1 |
| AC125611.3 | -16.700967 | 4059.590711 | -0.0041 | 0.997 | -0.123488048 | count | 1 |
| FIGNL2     | -16.700967 | 4059.590711 | -0.0041 | 0.997 | -0.123488048 | count | 1 |
| AC034102.6 | -16.700967 | 4059.590711 | -0.0041 | 0.997 | -0.123488048 | count | 1 |
| LRP1-AS    | -16.700967 | 4059.590711 | -0.0041 | 0.997 | -0.123488048 | count | 1 |
| DTX3       | -16.700967 | 4059.590711 | -0.0041 | 0.997 | -0.123488048 | count | 1 |
| DPY19L2    | -16.700967 | 4059.590711 | -0.0041 | 0.997 | -0.123488048 | count | 1 |
| GLIPR1L1   | -16.700967 | 4059.590711 | -0.0041 | 0.997 | -0.123488048 | count | 1 |
| AC011611.3 | -16.700967 | 4059.590711 | -0.0041 | 0.997 | -0.123488048 | count | 1 |
| AC107032.2 | -16.700967 | 4059.590711 | -0.0041 | 0.997 | -0.123488048 | count | 1 |
| C12orf50   | -16.700967 | 4059.590711 | -0.0041 | 0.997 | -0.123488048 | count | 1 |
| AC024909.1 | -16.700967 | 4059.590711 | -0.0041 | 0.997 | -0.123488048 | count | 1 |
| AC138123.1 | -16.700967 | 4059.590711 | -0.0041 | 0.997 | -0.123488048 | count | 1 |
| AC073655.2 | -16.700967 | 4059.590711 | -0.0041 | 0.997 | -0.123488048 | count | 1 |
| AC089983.1 | -16.700967 | 4059.590711 | -0.0041 | 0.997 | -0.123488048 | count | 1 |
| AC079385.2 | -16.700967 | 4059.590711 | -0.0041 | 0.997 | -0.123488048 | count | 1 |
| TBX3       | -16.700967 | 4059.590711 | -0.0041 | 0.997 | -0.123488048 | count | 1 |
| KSR2       | -16.700967 | 4059.590711 | -0.0041 | 0.997 | -0.123488048 | count | 1 |
| AC131159.2 | -16.700967 | 4059.590711 | -0.0041 | 0.997 | -0.123488048 | count | 1 |
| TMEM233    | -16.700967 | 4059.590711 | -0.0041 | 0.997 | -0.123488048 | count | 1 |
| PITPNM2    | -16.700967 | 4059.590711 | -0.0041 | 0.997 | -0.123488048 | count | 1 |
| AC068790.8 | -16.700967 | 4059.590711 | -0.0041 | 0.997 | -0.123488048 | count | 1 |
| PABPC3     | -16.700967 | 4059.590711 | -0.0041 | 0.997 | -0.123488048 | count | 1 |
| LINC02340  | -16.700967 | 4059.590711 | -0.0041 | 0.997 | -0.123488048 | count | 1 |
| UBE2L5     | -16.700967 | 4059.590711 | -0.0041 | 0.997 | -0.123488048 | count | 1 |
| LINC00545  | -16.700967 | 4059.590711 | -0.0041 | 0.997 | -0.123488048 | count | 1 |
| AL138820.1 | -16.700967 | 4059.590711 | -0.0041 | 0.997 | -0.123488048 | count | 1 |
| AL354696.2 | -16.700967 | 4059.590711 | -0.0041 | 0.997 | -0.123488048 | count | 1 |

|            |            |             |         |       |              |       |   |
|------------|------------|-------------|---------|-------|--------------|-------|---|
| TUSC8      | -16.700967 | 4059.590711 | -0.0041 | 0.997 | -0.123488048 | count | 1 |
| LINC00330  | -16.700967 | 4059.590711 | -0.0041 | 0.997 | -0.123488048 | count | 1 |
| TEX29      | -16.700967 | 4059.590711 | -0.0041 | 0.997 | -0.123488048 | count | 1 |
| ATP11A-AS1 | -16.700967 | 4059.590711 | -0.0041 | 0.997 | -0.123488048 | count | 1 |
| GRTP1      | -16.700967 | 4059.590711 | -0.0041 | 0.997 | -0.123488048 | count | 1 |
| AL136295.6 | -16.700967 | 4059.590711 | -0.0041 | 0.997 | -0.123488048 | count | 1 |
| AL049830.3 | -16.700967 | 4059.590711 | -0.0041 | 0.997 | -0.123488048 | count | 1 |
| AL139353.2 | -16.700967 | 4059.590711 | -0.0041 | 0.997 | -0.123488048 | count | 1 |
| AL133163.2 | -16.700967 | 4059.590711 | -0.0041 | 0.997 | -0.123488048 | count | 1 |
| AL132639.3 | -16.700967 | 4059.590711 | -0.0041 | 0.997 | -0.123488048 | count | 1 |
| AL049875.1 | -16.700967 | 4059.590711 | -0.0041 | 0.997 | -0.123488048 | count | 1 |
| LINC02315  | -16.700967 | 4059.590711 | -0.0041 | 0.997 | -0.123488048 | count | 1 |
| AL139099.1 | -16.700967 | 4059.590711 | -0.0041 | 0.997 | -0.123488048 | count | 1 |
| AL139317.3 | -16.700967 | 4059.590711 | -0.0041 | 0.997 | -0.123488048 | count | 1 |
| LINC00520  | -16.700967 | 4059.590711 | -0.0041 | 0.997 | -0.123488048 | count | 1 |
| SIX1       | -16.700967 | 4059.590711 | -0.0041 | 0.997 | -0.123488048 | count | 1 |
| FAM71D     | -16.700967 | 4059.590711 | -0.0041 | 0.997 | -0.123488048 | count | 1 |
| PLEKHH1    | -16.700967 | 4059.590711 | -0.0041 | 0.997 | -0.123488048 | count | 1 |
| ACTN1-AS1  | -16.700967 | 4059.590711 | -0.0041 | 0.997 | -0.123488048 | count | 1 |
| PLEKHD1    | -16.700967 | 4059.590711 | -0.0041 | 0.997 | -0.123488048 | count | 1 |
| KCNK10     | -16.700967 | 4059.590711 | -0.0041 | 0.997 | -0.123488048 | count | 1 |
| AL162171.1 | -16.700967 | 4059.590711 | -0.0041 | 0.997 | -0.123488048 | count | 1 |
| BCL11B     | -16.700967 | 4059.590711 | -0.0041 | 0.997 | -0.123488048 | count | 1 |
| BEGAIN     | -16.700967 | 4059.590711 | -0.0041 | 0.997 | -0.123488048 | count | 1 |
| AL138976.2 | -16.700967 | 4059.590711 | -0.0041 | 0.997 | -0.123488048 | count | 1 |
| AL583722.4 | -16.700967 | 4059.590711 | -0.0041 | 0.997 | -0.123488048 | count | 1 |
| GOLGA8M    | -16.700967 | 4059.590711 | -0.0041 | 0.997 | -0.123488048 | count | 1 |
| AC055876.5 | -16.700967 | 4059.590711 | -0.0041 | 0.997 | -0.123488048 | count | 1 |
| AC091057.6 | -16.700967 | 4059.590711 | -0.0041 | 0.997 | -0.123488048 | count | 1 |
| AC010809.2 | -16.700967 | 4059.590711 | -0.0041 | 0.997 | -0.123488048 | count | 1 |
| RASGRP1    | -16.700967 | 4059.590711 | -0.0041 | 0.997 | -0.123488048 | count | 1 |
| AC022929.2 | -16.700967 | 4059.590711 | -0.0041 | 0.997 | -0.123488048 | count | 1 |
| AC020661.1 | -16.700967 | 4059.590711 | -0.0041 | 0.997 | -0.123488048 | count | 1 |
| CHAC1      | -16.700967 | 4059.590711 | -0.0041 | 0.997 | -0.123488048 | count | 1 |
| AC022306.2 | -16.700967 | 4059.590711 | -0.0041 | 0.997 | -0.123488048 | count | 1 |
| AC022087.1 | -16.700967 | 4059.590711 | -0.0041 | 0.997 | -0.123488048 | count | 1 |
| AC092755.2 | -16.700967 | 4059.590711 | -0.0041 | 0.997 | -0.123488048 | count | 1 |
| AC100827.4 | -16.700967 | 4059.590711 | -0.0041 | 0.997 | -0.123488048 | count | 1 |
| C15orf59   | -16.700967 | 4059.590711 | -0.0041 | 0.997 | -0.123488048 | count | 1 |
| AC090260.1 | -16.700967 | 4059.590711 | -0.0041 | 0.997 | -0.123488048 | count | 1 |
| AC016705.1 | -16.700967 | 4059.590711 | -0.0041 | 0.997 | -0.123488048 | count | 1 |
| TMC3-AS1   | -16.700967 | 4059.590711 | -0.0041 | 0.997 | -0.123488048 | count | 1 |
| PCSK6-AS1  | -16.700967 | 4059.590711 | -0.0041 | 0.997 | -0.123488048 | count | 1 |
| AC004754.1 | -16.700967 | 4059.590711 | -0.0041 | 0.997 | -0.123488048 | count | 1 |
| CCDC78     | -16.700967 | 4059.590711 | -0.0041 | 0.997 | -0.123488048 | count | 1 |

|            |            |             |         |       |              |       |   |
|------------|------------|-------------|---------|-------|--------------|-------|---|
| TPSAB1     | -16.700967 | 4059.590711 | -0.0041 | 0.997 | -0.123488048 | count | 1 |
| AC120498.9 | -16.700967 | 4059.590711 | -0.0041 | 0.997 | -0.123488048 | count | 1 |
| BAIAP3     | -16.700967 | 4059.590711 | -0.0041 | 0.997 | -0.123488048 | count | 1 |
| SYNGR3     | -16.700967 | 4059.590711 | -0.0041 | 0.997 | -0.123488048 | count | 1 |
| NPW        | -16.700967 | 4059.590711 | -0.0041 | 0.997 | -0.123488048 | count | 1 |
| TEKT5      | -16.700967 | 4059.590711 | -0.0041 | 0.997 | -0.123488048 | count | 1 |
| AC130456.5 | -16.700967 | 4059.590711 | -0.0041 | 0.997 | -0.123488048 | count | 1 |
| AC092375.2 | -16.700967 | 4059.590711 | -0.0041 | 0.997 | -0.123488048 | count | 1 |
| AC092338.2 | -16.700967 | 4059.590711 | -0.0041 | 0.997 | -0.123488048 | count | 1 |
| AC109460.2 | -16.700967 | 4059.590711 | -0.0041 | 0.997 | -0.123488048 | count | 1 |
| AC009133.2 | -16.700967 | 4059.590711 | -0.0041 | 0.997 | -0.123488048 | count | 1 |
| AC106886.3 | -16.700967 | 4059.590711 | -0.0041 | 0.997 | -0.123488048 | count | 1 |
| PYDC1      | -16.700967 | 4059.590711 | -0.0041 | 0.997 | -0.123488048 | count | 1 |
| ITGAD      | -16.700967 | 4059.590711 | -0.0041 | 0.997 | -0.123488048 | count | 1 |
| AC018845.3 | -16.700967 | 4059.590711 | -0.0041 | 0.997 | -0.123488048 | count | 1 |
| ZNF423     | -16.700967 | 4059.590711 | -0.0041 | 0.997 | -0.123488048 | count | 1 |
| AC007610.1 | -16.700967 | 4059.590711 | -0.0041 | 0.997 | -0.123488048 | count | 1 |
| AC007493.2 | -16.700967 | 4059.590711 | -0.0041 | 0.997 | -0.123488048 | count | 1 |
| DOK4       | -16.700967 | 4059.590711 | -0.0041 | 0.997 | -0.123488048 | count | 1 |
| AC092118.2 | -16.700967 | 4059.590711 | -0.0041 | 0.997 | -0.123488048 | count | 1 |
| NDRG4      | -16.700967 | 4059.590711 | -0.0041 | 0.997 | -0.123488048 | count | 1 |
| CDH11      | -16.700967 | 4059.590711 | -0.0041 | 0.997 | -0.123488048 | count | 1 |
| LINC01572  | -16.700967 | 4059.590711 | -0.0041 | 0.997 | -0.123488048 | count | 1 |
| AC092718.3 | -16.700967 | 4059.590711 | -0.0041 | 0.997 | -0.123488048 | count | 1 |
| AC126696.1 | -16.700967 | 4059.590711 | -0.0041 | 0.997 | -0.123488048 | count | 1 |
| LINC02166  | -16.700967 | 4059.590711 | -0.0041 | 0.997 | -0.123488048 | count | 1 |
| AC087392.1 | -16.700967 | 4059.590711 | -0.0041 | 0.997 | -0.123488048 | count | 1 |
| AC027796.3 | -16.700967 | 4059.590711 | -0.0041 | 0.997 | -0.123488048 | count | 1 |
| BCL6B      | -16.700967 | 4059.590711 | -0.0041 | 0.997 | -0.123488048 | count | 1 |
| SLC35G6    | -16.700967 | 4059.590711 | -0.0041 | 0.997 | -0.123488048 | count | 1 |
| GUCY2D     | -16.700967 | 4059.590711 | -0.0041 | 0.997 | -0.123488048 | count | 1 |
| MFSD6L     | -16.700967 | 4059.590711 | -0.0041 | 0.997 | -0.123488048 | count | 1 |
| AC002091.1 | -16.700967 | 4059.590711 | -0.0041 | 0.997 | -0.123488048 | count | 1 |
| HS3ST3A1   | -16.700967 | 4059.590711 | -0.0041 | 0.997 | -0.123488048 | count | 1 |
| DRC3       | -16.700967 | 4059.590711 | -0.0041 | 0.997 | -0.123488048 | count | 1 |
| AC007952.7 | -16.700967 | 4059.590711 | -0.0041 | 0.997 | -0.123488048 | count | 1 |
| VTN        | -16.700967 | 4059.590711 | -0.0041 | 0.997 | -0.123488048 | count | 1 |
| AC104984.1 | -16.700967 | 4059.590711 | -0.0041 | 0.997 | -0.123488048 | count | 1 |
| AC005899.5 | -16.700967 | 4059.590711 | -0.0041 | 0.997 | -0.123488048 | count | 1 |
| AC060766.4 | -16.700967 | 4059.590711 | -0.0041 | 0.997 | -0.123488048 | count | 1 |
| RASL10B    | -16.700967 | 4059.590711 | -0.0041 | 0.997 | -0.123488048 | count | 1 |
| SRCIN1     | -16.700967 | 4059.590711 | -0.0041 | 0.997 | -0.123488048 | count | 1 |
| AC004231.1 | -16.700967 | 4059.590711 | -0.0041 | 0.997 | -0.123488048 | count | 1 |
| ZNF385C    | -16.700967 | 4059.590711 | -0.0041 | 0.997 | -0.123488048 | count | 1 |
| C17orf113  | -16.700967 | 4059.590711 | -0.0041 | 0.997 | -0.123488048 | count | 1 |

|            |            |             |         |       |              |       |   |
|------------|------------|-------------|---------|-------|--------------|-------|---|
| AC099811.3 | -16.700967 | 4059.590711 | -0.0041 | 0.997 | -0.123488048 | count | 1 |
| SOST       | -16.700967 | 4059.590711 | -0.0041 | 0.997 | -0.123488048 | count | 1 |
| ITGA2B     | -16.700967 | 4059.590711 | -0.0041 | 0.997 | -0.123488048 | count | 1 |
| AC005670.1 | -16.700967 | 4059.590711 | -0.0041 | 0.997 | -0.123488048 | count | 1 |
| TMEM92     | -16.700967 | 4059.590711 | -0.0041 | 0.997 | -0.123488048 | count | 1 |
| AC015813.4 | -16.700967 | 4059.590711 | -0.0041 | 0.997 | -0.123488048 | count | 1 |
| AC015813.3 | -16.700967 | 4059.590711 | -0.0041 | 0.997 | -0.123488048 | count | 1 |
| AC005972.1 | -16.700967 | 4059.590711 | -0.0041 | 0.997 | -0.123488048 | count | 1 |
| AC005332.3 | -16.700967 | 4059.590711 | -0.0041 | 0.997 | -0.123488048 | count | 1 |
| KIF19      | -16.700967 | 4059.590711 | -0.0041 | 0.997 | -0.123488048 | count | 1 |
| AC021683.1 | -16.700967 | 4059.590711 | -0.0041 | 0.997 | -0.123488048 | count | 1 |
| C1QTNF1    | -16.700967 | 4059.590711 | -0.0041 | 0.997 | -0.123488048 | count | 1 |
| AC145207.3 | -16.700967 | 4059.590711 | -0.0041 | 0.997 | -0.123488048 | count | 1 |
| PYCR1      | -16.700967 | 4059.590711 | -0.0041 | 0.997 | -0.123488048 | count | 1 |
| AC139099.3 | -16.700967 | 4059.590711 | -0.0041 | 0.997 | -0.123488048 | count | 1 |
| AC139099.1 | -16.700967 | 4059.590711 | -0.0041 | 0.997 | -0.123488048 | count | 1 |
| AP001496.2 | -16.700967 | 4059.590711 | -0.0041 | 0.997 | -0.123488048 | count | 1 |
| AP005059.2 | -16.700967 | 4059.590711 | -0.0041 | 0.997 | -0.123488048 | count | 1 |
| AP005482.1 | -16.700967 | 4059.590711 | -0.0041 | 0.997 | -0.123488048 | count | 1 |
| GATA6-AS1  | -16.700967 | 4059.590711 | -0.0041 | 0.997 | -0.123488048 | count | 1 |
| AC090912.2 | -16.700967 | 4059.590711 | -0.0041 | 0.997 | -0.123488048 | count | 1 |
| LAMA3      | -16.700967 | 4059.590711 | -0.0041 | 0.997 | -0.123488048 | count | 1 |
| AC012417.1 | -16.700967 | 4059.590711 | -0.0041 | 0.997 | -0.123488048 | count | 1 |
| SLC14A1    | -16.700967 | 4059.590711 | -0.0041 | 0.997 | -0.123488048 | count | 1 |
| SIRPG      | -16.700967 | 4059.590711 | -0.0041 | 0.997 | -0.123488048 | count | 1 |
| AL049712.1 | -16.700967 | 4059.590711 | -0.0041 | 0.997 | -0.123488048 | count | 1 |
| PRND       | -16.700967 | 4059.590711 | -0.0041 | 0.997 | -0.123488048 | count | 1 |
| AL133396.2 | -16.700967 | 4059.590711 | -0.0041 | 0.997 | -0.123488048 | count | 1 |
| AL121890.2 | -16.700967 | 4059.590711 | -0.0041 | 0.997 | -0.123488048 | count | 1 |
| CHGB       | -16.700967 | 4059.590711 | -0.0041 | 0.997 | -0.123488048 | count | 1 |
| AL021396.1 | -16.700967 | 4059.590711 | -0.0041 | 0.997 | -0.123488048 | count | 1 |
| PARAL1     | -16.700967 | 4059.590711 | -0.0041 | 0.997 | -0.123488048 | count | 1 |
| SNAP25     | -16.700967 | 4059.590711 | -0.0041 | 0.997 | -0.123488048 | count | 1 |
| LINC01752  | -16.700967 | 4059.590711 | -0.0041 | 0.997 | -0.123488048 | count | 1 |
| AL161938.1 | -16.700967 | 4059.590711 | -0.0041 | 0.997 | -0.123488048 | count | 1 |
| AL121892.1 | -16.700967 | 4059.590711 | -0.0041 | 0.997 | -0.123488048 | count | 1 |
| AL121761.2 | -16.700967 | 4059.590711 | -0.0041 | 0.997 | -0.123488048 | count | 1 |
| AL035252.3 | -16.700967 | 4059.590711 | -0.0041 | 0.997 | -0.123488048 | count | 1 |
| NINL       | -16.700967 | 4059.590711 | -0.0041 | 0.997 | -0.123488048 | count | 1 |
| FOXS1      | -16.700967 | 4059.590711 | -0.0041 | 0.997 | -0.123488048 | count | 1 |
| TTL9       | -16.700967 | 4059.590711 | -0.0041 | 0.997 | -0.123488048 | count | 1 |
| AL133227.1 | -16.700967 | 4059.590711 | -0.0041 | 0.997 | -0.123488048 | count | 1 |
| AL031666.1 | -16.700967 | 4059.590711 | -0.0041 | 0.997 | -0.123488048 | count | 1 |
| AL157838.1 | -16.700967 | 4059.590711 | -0.0041 | 0.997 | -0.123488048 | count | 1 |
| EEF1A2     | -16.700967 | 4059.590711 | -0.0041 | 0.997 | -0.123488048 | count | 1 |

|               |            |             |         |       |              |       |   |
|---------------|------------|-------------|---------|-------|--------------|-------|---|
| LINC00266-1   | -16.700967 | 4059.590711 | -0.0041 | 0.997 | -0.123488048 | count | 1 |
| FGF22         | -16.700967 | 4059.590711 | -0.0041 | 0.997 | -0.123488048 | count | 1 |
| ANKRD24       | -16.700967 | 4059.590711 | -0.0041 | 0.997 | -0.123488048 | count | 1 |
| AC005339.1    | -16.700967 | 4059.590711 | -0.0041 | 0.997 | -0.123488048 | count | 1 |
| TEX45         | -16.700967 | 4059.590711 | -0.0041 | 0.997 | -0.123488048 | count | 1 |
| CAMSAP3       | -16.700967 | 4059.590711 | -0.0041 | 0.997 | -0.123488048 | count | 1 |
| AC011451.1    | -16.700967 | 4059.590711 | -0.0041 | 0.997 | -0.123488048 | count | 1 |
| ZNF559-ZNF177 | -16.700967 | 4059.590711 | -0.0041 | 0.997 | -0.123488048 | count | 1 |
| COL5A3        | -16.700967 | 4059.590711 | -0.0041 | 0.997 | -0.123488048 | count | 1 |
| AC011472.1    | -16.700967 | 4059.590711 | -0.0041 | 0.997 | -0.123488048 | count | 1 |
| ELAVL3        | -16.700967 | 4059.590711 | -0.0041 | 0.997 | -0.123488048 | count | 1 |
| MAST1         | -16.700967 | 4059.590711 | -0.0041 | 0.997 | -0.123488048 | count | 1 |
| AC011446.1    | -16.700967 | 4059.590711 | -0.0041 | 0.997 | -0.123488048 | count | 1 |
| AC010319.4    | -16.700967 | 4059.590711 | -0.0041 | 0.997 | -0.123488048 | count | 1 |
| UNC13A        | -16.700967 | 4059.590711 | -0.0041 | 0.997 | -0.123488048 | count | 1 |
| TSSK6         | -16.700967 | 4059.590711 | -0.0041 | 0.997 | -0.123488048 | count | 1 |
| ZNF730        | -16.700967 | 4059.590711 | -0.0041 | 0.997 | -0.123488048 | count | 1 |
| ZNF724        | -16.700967 | 4059.590711 | -0.0041 | 0.997 | -0.123488048 | count | 1 |
| RGS9BP        | -16.700967 | 4059.590711 | -0.0041 | 0.997 | -0.123488048 | count | 1 |
| AC008747.1    | -16.700967 | 4059.590711 | -0.0041 | 0.997 | -0.123488048 | count | 1 |
| WTIP          | -16.700967 | 4059.590711 | -0.0041 | 0.997 | -0.123488048 | count | 1 |
| FXYD7         | -16.700967 | 4059.590711 | -0.0041 | 0.997 | -0.123488048 | count | 1 |
| AD000090.1    | -16.700967 | 4059.590711 | -0.0041 | 0.997 | -0.123488048 | count | 1 |
| AD000671.3    | -16.700967 | 4059.590711 | -0.0041 | 0.997 | -0.123488048 | count | 1 |
| NPHS1         | -16.700967 | 4059.590711 | -0.0041 | 0.997 | -0.123488048 | count | 1 |
| GGN           | -16.700967 | 4059.590711 | -0.0041 | 0.997 | -0.123488048 | count | 1 |
| LGALS4        | -16.700967 | 4059.590711 | -0.0041 | 0.997 | -0.123488048 | count | 1 |
| ZNF285        | -16.700967 | 4059.590711 | -0.0041 | 0.997 | -0.123488048 | count | 1 |
| GIPR          | -16.700967 | 4059.590711 | -0.0041 | 0.997 | -0.123488048 | count | 1 |
| DACT3-AS1     | -16.700967 | 4059.590711 | -0.0041 | 0.997 | -0.123488048 | count | 1 |
| KCNA7         | -16.700967 | 4059.590711 | -0.0041 | 0.997 | -0.123488048 | count | 1 |
| AC063977.6    | -16.700967 | 4059.590711 | -0.0041 | 0.997 | -0.123488048 | count | 1 |
| AC008750.2    | -16.700967 | 4059.590711 | -0.0041 | 0.997 | -0.123488048 | count | 1 |
| AC092070.3    | -16.700967 | 4059.590711 | -0.0041 | 0.997 | -0.123488048 | count | 1 |
| KIR2DL4       | -16.700967 | 4059.590711 | -0.0041 | 0.997 | -0.123488048 | count | 1 |
| AC020922.4    | -16.700967 | 4059.590711 | -0.0041 | 0.997 | -0.123488048 | count | 1 |
| ZNF667        | -16.700967 | 4059.590711 | -0.0041 | 0.997 | -0.123488048 | count | 1 |
| AC005498.2    | -16.700967 | 4059.590711 | -0.0041 | 0.997 | -0.123488048 | count | 1 |
| ZNF154        | -16.700967 | 4059.590711 | -0.0041 | 0.997 | -0.123488048 | count | 1 |
| AC012313.8    | -16.700967 | 4059.590711 | -0.0041 | 0.997 | -0.123488048 | count | 1 |
| AC012313.7    | -16.700967 | 4059.590711 | -0.0041 | 0.997 | -0.123488048 | count | 1 |
| PCDH11Y       | -16.700967 | 4059.590711 | -0.0041 | 0.997 | -0.123488048 | count | 1 |
| HDHD5-AS1     | -16.700967 | 4059.590711 | -0.0041 | 0.997 | -0.123488048 | count | 1 |
| RTN4R         | -16.700967 | 4059.590711 | -0.0041 | 0.997 | -0.123488048 | count | 1 |
| AC007731.3    | -16.700967 | 4059.590711 | -0.0041 | 0.997 | -0.123488048 | count | 1 |

|            |            |             |         |         |              |       |   |
|------------|------------|-------------|---------|---------|--------------|-------|---|
| LRRRC74B   | -16.700967 | 4059.590711 | -0.0041 | 0.997   | -0.123488048 | count | 1 |
| AP000550.1 | -16.700967 | 4059.590711 | -0.0041 | 0.997   | -0.123488048 | count | 1 |
| RAB36      | -16.700967 | 4059.590711 | -0.0041 | 0.997   | -0.123488048 | count | 1 |
| Z97353.2   | -16.700967 | 4059.590711 | -0.0041 | 0.997   | -0.123488048 | count | 1 |
| C22orf42   | -16.700967 | 4059.590711 | -0.0041 | 0.997   | -0.123488048 | count | 1 |
| PDXP       | -16.700967 | 4059.590711 | -0.0041 | 0.997   | -0.123488048 | count | 1 |
| KDELRL3    | -16.700967 | 4059.590711 | -0.0041 | 0.997   | -0.123488048 | count | 1 |
| DMC1       | -16.700967 | 4059.590711 | -0.0041 | 0.997   | -0.123488048 | count | 1 |
| FAM83F     | -16.700967 | 4059.590711 | -0.0041 | 0.997   | -0.123488048 | count | 1 |
| PNPLA3     | -16.700967 | 4059.590711 | -0.0041 | 0.997   | -0.123488048 | count | 1 |
| AL021392.1 | -16.700967 | 4059.590711 | -0.0041 | 0.997   | -0.123488048 | count | 1 |
| CU638689.4 | -16.700967 | 4059.590711 | -0.0041 | 0.997   | -0.123488048 | count | 1 |
| CU638689.5 | -16.700967 | 4059.590711 | -0.0041 | 0.997   | -0.123488048 | count | 1 |
| FP236241.1 | -16.700967 | 4059.590711 | -0.0041 | 0.997   | -0.123488048 | count | 1 |
| SMIM11B    | -16.700967 | 4059.590711 | -0.0041 | 0.997   | -0.123488048 | count | 1 |
| AF127577.1 | -16.700967 | 4059.590711 | -0.0041 | 0.997   | -0.123488048 | count | 1 |
| AF124730.1 | -16.700967 | 4059.590711 | -0.0041 | 0.997   | -0.123488048 | count | 1 |
| AP000311.1 | -16.700967 | 4059.590711 | -0.0041 | 0.997   | -0.123488048 | count | 1 |
| AP000704.1 | -16.700967 | 4059.590711 | -0.0041 | 0.997   | -0.123488048 | count | 1 |
| LCA5L      | -16.700967 | 4059.590711 | -0.0041 | 0.997   | -0.123488048 | count | 1 |
| ZNF295-AS1 | -16.700967 | 4059.590711 | -0.0041 | 0.997   | -0.123488048 | count | 1 |
| AC145212.1 | -16.700967 | 4059.590711 | -0.0041 | 0.997   | -0.123488048 | count | 1 |
| WDR4       | -0.1655162 | 0.4500587   | -0.3678 | 0.713   | -0.123367269 | count | 1 |
| RGS10      | -0.0861327 | 0.0548783   | -1.5695 | 0.117   | -0.12330862  | count | 1 |
| PEX13      | -0.103728  | 0.2712479   | -0.3824 | 0.702   | -0.123219986 | count | 1 |
| FKBP7      | -0.1600179 | 0.5895013   | -0.2714 | 0.786   | -0.123098213 | count | 1 |
| PUF60      | -0.0886744 | 0.1005412   | -0.882  | 0.378   | -0.123073701 | count | 1 |
| SEC14L1    | -0.088985  | 0.0995422   | -0.8939 | 0.371   | -0.122928472 | count | 1 |
| CD320      | -0.147706  | 0.4535686   | -0.3257 | 0.745   | -0.122897919 | count | 1 |
| CYP2U1     | -0.1596917 | 0.3982073   | -0.401  | 0.688   | -0.122854123 | count | 1 |
| PAFAH1B1   | -0.0873948 | 0.0890038   | -0.9819 | 0.326   | -0.122785582 | count | 1 |
| SERTAD3    | -0.0879854 | 0.1064506   | -0.8265 | 0.409   | -0.122747472 | count | 1 |
| RAP2C      | -0.0975516 | 0.2035035   | -0.4794 | 0.632   | -0.12267123  | count | 1 |
| PIK3C2B    | -0.2933049 | 0.7979251   | -0.3676 | 0.713   | -0.122669436 | count | 1 |
| SLC20A1    | -0.0916254 | 0.1521486   | -0.6022 | 0.547   | -0.122662159 | count | 1 |
| NFE2L2     | -0.0857365 | 0.0570717   | -1.5023 | 0.133   | -0.122608584 | count | 1 |
| GPD1L      | -0.3389565 | 0.4977247   | -0.681  | 0.496   | -0.122602553 | count | 1 |
| SUB1       | -0.0855709 | 0.050616    | -1.6906 | 0.091   | -0.122563147 | count | 1 |
| EPHB2      | -0.1097607 | 0.3595828   | -0.3052 | 0.76    | -0.12249808  | count | 1 |
| C1QC       | -0.0850731 | 0.0774125   | -1.099  | 0.272   | -0.122495109 | count | 1 |
| CDC42BPA   | -0.2604079 | 0.3756152   | -0.6933 | 0.488   | -0.122188442 | count | 1 |
| RAP1B      | -0.085875  | 0.0565792   | -1.5178 | 0.129   | -0.122170042 | count | 1 |
| MGAT1      | -0.0862405 | 0.062577    | -1.3782 | 0.168   | -0.122163746 | count | 1 |
| RPS5       | -0.0848548 | 0.0308845   | -2.7475 | 0.00605 | -0.122115552 | count | 1 |
| MAGIX      | -0.1936039 | 0.4523615   | -0.428  | 0.669   | -0.122036102 | count | 1 |



|            |            |           |         |        |              |       |   |
|------------|------------|-----------|---------|--------|--------------|-------|---|
| PRRC2A     | -0.0993993 | 0.2219079 | -0.4479 | 0.654  | -0.121971491 | count | 1 |
| KCTD7      | -0.1143623 | 0.386752  | -0.2957 | 0.767  | -0.121916705 | count | 1 |
| TMC6       | -0.0927409 | 0.1598649 | -0.5801 | 0.562  | -0.121892553 | count | 1 |
| HIVEP1     | -0.0981702 | 0.1996574 | -0.4917 | 0.623  | -0.121770605 | count | 1 |
| GRN        | -0.0847782 | 0.0407941 | -2.0782 | 0.0378 | -0.121746418 | count | 1 |
| MSH3       | -0.1311705 | 0.272289  | -0.4817 | 0.63   | -0.121738314 | count | 1 |
| UBE2A      | -0.0862576 | 0.0808411 | -1.067  | 0.286  | -0.121699422 | count | 1 |
| AC091271.1 | -0.0989243 | 0.2473893 | -0.3999 | 0.689  | -0.121621783 | count | 1 |
| ICE2       | -0.1001279 | 0.2581765 | -0.3878 | 0.698  | -0.121615648 | count | 1 |
| NDUFA4     | -0.0847723 | 0.0440019 | -1.9266 | 0.0541 | -0.121449689 | count | 1 |
| ATP6V1G1   | -0.0845959 | 0.0427544 | -1.9786 | 0.048  | -0.121433616 | count | 1 |
| GALNT1     | -0.0897549 | 0.1240387 | -0.7236 | 0.469  | -0.121400644 | count | 1 |
| CISD1      | -0.0924578 | 0.2075885 | -0.4454 | 0.656  | -0.121365107 | count | 1 |
| AC108134.2 | -0.3351571 | 0.9189327 | -0.3647 | 0.715  | -0.121356099 | count | 1 |
| C11orf58   | -0.0850549 | 0.0570399 | -1.4911 | 0.136  | -0.121304199 | count | 1 |
| PEX7       | -0.1241632 | 0.3983215 | -0.3117 | 0.755  | -0.121296191 | count | 1 |
| SARAF      | -0.0848312 | 0.043997  | -1.9281 | 0.054  | -0.121279504 | count | 1 |
| KDEL2      | -0.4055057 | 0.4643691 | -0.8732 | 0.383  | -0.12118957  | count | 1 |
| QKI        | -0.0850214 | 0.0622693 | -1.3654 | 0.172  | -0.121122236 | count | 1 |
| GFPT1      | -0.104009  | 0.2696138 | -0.3858 | 0.7    | -0.120929029 | count | 1 |
| TFDP1      | -0.0929242 | 0.1796559 | -0.5172 | 0.605  | -0.120842546 | count | 1 |
| CAMLG      | -0.0879157 | 0.1415735 | -0.621  | 0.535  | -0.1202941   | count | 1 |
| KIAA0556   | -0.1811666 | 0.4649758 | -0.3896 | 0.697  | -0.12011071  | count | 1 |
| EIF3J      | -0.085169  | 0.0985962 | -0.8638 | 0.388  | -0.119796608 | count | 1 |
| TCEAL3     | -0.086913  | 0.1380777 | -0.6294 | 0.529  | -0.119754641 | count | 1 |
| SLC4A7     | -0.0854821 | 0.1186049 | -0.7207 | 0.471  | -0.119575915 | count | 1 |
| GATAD2A    | -0.0956775 | 0.2233624 | -0.4284 | 0.668  | -0.119454427 | count | 1 |
| POLD1      | -0.1373015 | 0.4877629 | -0.2815 | 0.778  | -0.119218187 | count | 1 |
| MTRF1L     | -0.0972397 | 0.2151872 | -0.4519 | 0.651  | -0.119104496 | count | 1 |
| SNX3       | -0.0831218 | 0.051563  | -1.612  | 0.107  | -0.119080877 | count | 1 |
| CCDC32     | -0.0962732 | 0.2003714 | -0.4805 | 0.631  | -0.119022344 | count | 1 |
| IPO13      | -0.1462068 | 0.4929025 | -0.2966 | 0.767  | -0.118885293 | count | 1 |
| MAGOH      | -0.0843574 | 0.0825746 | -1.0216 | 0.307  | -0.118726919 | count | 1 |
| CCNE2      | -0.2521934 | 0.5996658 | -0.4206 | 0.674  | -0.118575844 | count | 1 |
| IFNGR1     | -0.0830182 | 0.0531336 | -1.5624 | 0.118  | -0.1185697   | count | 1 |
| FOXO4      | -0.1877494 | 0.5659285 | -0.3318 | 0.74   | -0.118488898 | count | 1 |
| FAM133B    | -0.0837312 | 0.080303  | -1.0427 | 0.297  | -0.118372642 | count | 1 |
| STARD9     | -0.5161099 | 0.6877238 | -0.7505 | 0.453  | -0.117943318 | count | 1 |
| NOP2       | -0.2506261 | 0.6972381 | -0.3595 | 0.719  | -0.11788477  | count | 1 |
| ARHGEF7    | -0.1076597 | 0.2793471 | -0.3854 | 0.7    | -0.117697079 | count | 1 |
| IL2RA      | -0.1053719 | 0.2572275 | -0.4096 | 0.682  | -0.117642512 | count | 1 |
| NDUFAF7    | -0.1232469 | 0.3355075 | -0.3673 | 0.713  | -0.117602971 | count | 1 |
| SLIRP      | -0.0844184 | 0.1019303 | -0.8282 | 0.408  | -0.117528993 | count | 1 |
| AAED1      | -0.0842647 | 0.1155538 | -0.7292 | 0.466  | -0.117472898 | count | 1 |
| RRAGA      | -0.0862773 | 0.1319111 | -0.6541 | 0.513  | -0.117296795 | count | 1 |

|             |            |           |         |       |              |       |   |
|-------------|------------|-----------|---------|-------|--------------|-------|---|
| HLA-DPA1    | -0.0813201 | 0.0547698 | -1.4848 | 0.138 | -0.117269016 | count | 1 |
| MESD        | -0.0831484 | 0.0861082 | -0.9656 | 0.334 | -0.117240965 | count | 1 |
| NOL11       | -0.1065367 | 0.3015743 | -0.3533 | 0.724 | -0.117125395 | count | 1 |
| SCOC        | -0.0904733 | 0.17304   | -0.5228 | 0.601 | -0.116981957 | count | 1 |
| IGHM        | -0.7972658 | 1.2709058 | -0.6273 | 0.531 | -0.116980432 | count | 1 |
| ARPC1A      | -0.0848885 | 0.1119937 | -0.758  | 0.449 | -0.116560425 | count | 1 |
| MTR         | -0.1012044 | 0.2804551 | -0.3609 | 0.718 | -0.115993981 | count | 1 |
| SNAPC5      | -0.092986  | 0.2013712 | -0.4618 | 0.644 | -0.115930149 | count | 1 |
| FLNA        | -0.0813855 | 0.0927384 | -0.8776 | 0.38  | -0.115773979 | count | 1 |
| MRPL50      | -0.0869631 | 0.1679141 | -0.5179 | 0.605 | -0.115770514 | count | 1 |
| SMAP1       | -0.0827151 | 0.1076416 | -0.7684 | 0.442 | -0.115740876 | count | 1 |
| NCKAP1L     | -0.0832126 | 0.0982123 | -0.8473 | 0.397 | -0.115718616 | count | 1 |
| PCK2        | -0.0924295 | 0.2134879 | -0.4329 | 0.665 | -0.115592208 | count | 1 |
| CDC42EP2    | -0.0891384 | 0.2030633 | -0.439  | 0.661 | -0.115558864 | count | 1 |
| UBP1        | -0.0952661 | 0.2750436 | -0.3464 | 0.729 | -0.11548962  | count | 1 |
| SPR         | -0.0989213 | 0.3164824 | -0.3126 | 0.755 | -0.115440642 | count | 1 |
| PRUNE2      | -0.3169656 | 0.4351131 | -0.7285 | 0.466 | -0.115348177 | count | 1 |
| COPZ1       | -0.0824282 | 0.0945635 | -0.8717 | 0.383 | -0.115315907 | count | 1 |
| SNF8        | -0.0817397 | 0.0882066 | -0.9267 | 0.354 | -0.115303934 | count | 1 |
| HCG18       | -0.0944781 | 0.282763  | -0.3341 | 0.738 | -0.115035952 | count | 1 |
| ZNF799      | -0.2058661 | 0.5255293 | -0.3917 | 0.695 | -0.115027968 | count | 1 |
| PSMD4       | -0.0817381 | 0.082099  | -0.9956 | 0.32  | -0.115027538 | count | 1 |
| SERPINB6    | -0.0809978 | 0.0701475 | -1.1547 | 0.248 | -0.114718457 | count | 1 |
| TINF2       | -0.0866493 | 0.1734597 | -0.4995 | 0.617 | -0.114650125 | count | 1 |
| AC069544.1  | -0.1199463 | 0.6114173 | -0.1962 | 0.844 | -0.114500089 | count | 1 |
| REEP4       | -0.0894758 | 0.1771958 | -0.505  | 0.614 | -0.114229653 | count | 1 |
| HTATSF1     | -0.0880909 | 0.1799152 | -0.4896 | 0.624 | -0.114205288 | count | 1 |
| PSMD10      | -0.092276  | 0.2365309 | -0.3901 | 0.696 | -0.114104302 | count | 1 |
| PROX1       | -0.4958732 | 0.5649119 | -0.8778 | 0.38  | -0.11403707  | count | 1 |
| VPS26A      | -0.081563  | 0.0955245 | -0.8538 | 0.393 | -0.11394934  | count | 1 |
| ZBTB20-AS2  | -0.7675392 | 0.9636642 | -0.7965 | 0.426 | -0.113735958 | count | 1 |
| 7-Sep       | -0.0794682 | 0.0489763 | -1.6226 | 0.105 | -0.113694548 | count | 1 |
| ZFP36L1     | -0.0790488 | 0.0577053 | -1.3699 | 0.171 | -0.113548155 | count | 1 |
| SRA1        | -0.0799676 | 0.0860121 | -0.9297 | 0.353 | -0.113480747 | count | 1 |
| SEPSECS-AS1 | -0.1305649 | 0.6654966 | -0.1962 | 0.844 | -0.113479678 | count | 1 |
| CISD3       | -0.0811516 | 0.1025125 | -0.7916 | 0.429 | -0.113417609 | count | 1 |
| CCT8        | -0.0801936 | 0.0742163 | -1.0805 | 0.28  | -0.113201704 | count | 1 |
| SUCLA2      | -0.0896398 | 0.2075373 | -0.4319 | 0.666 | -0.112917494 | count | 1 |
| SLC39A4     | -0.0836204 | 0.1569302 | -0.5329 | 0.594 | -0.112833362 | count | 1 |
| ABI2        | -0.1013468 | 0.2516774 | -0.4027 | 0.687 | -0.112633111 | count | 1 |
| RALGPS2     | -0.1048525 | 0.2926938 | -0.3582 | 0.72  | -0.112612589 | count | 1 |
| NOP10       | -0.0784745 | 0.0516568 | -1.5192 | 0.129 | -0.112406188 | count | 1 |
| FBXW5       | -0.0813251 | 0.1650729 | -0.4927 | 0.622 | -0.112313167 | count | 1 |
| C1RL-AS1    | -0.2379981 | 0.8989356 | -0.2648 | 0.791 | -0.112295551 | count | 1 |
| SNRNP200    | -0.0845488 | 0.1623208 | -0.5209 | 0.603 | -0.111999126 | count | 1 |

|            |            |           |         |        |              |       |   |
|------------|------------|-----------|---------|--------|--------------|-------|---|
| RFC1       | -0.0818455 | 0.1437396 | -0.5694 | 0.569  | -0.111762355 | count | 1 |
| BMF        | -0.0914829 | 0.3922252 | -0.2332 | 0.816  | -0.111639914 | count | 1 |
| TLK2       | -0.085893  | 0.2048582 | -0.4193 | 0.675  | -0.111638401 | count | 1 |
| NEK1       | -0.0924671 | 0.4482715 | -0.2063 | 0.837  | -0.111605832 | count | 1 |
| UQCR10     | -0.0780526 | 0.0574377 | -1.3589 | 0.174  | -0.111604847 | count | 1 |
| TMEM126B   | -0.0826428 | 0.1443865 | -0.5724 | 0.567  | -0.111589326 | count | 1 |
| FOSL2      | -0.0789157 | 0.0901621 | -0.8753 | 0.382  | -0.111531165 | count | 1 |
| RALY       | -0.0797867 | 0.0890171 | -0.8963 | 0.37   | -0.111519982 | count | 1 |
| ZNF446     | -0.2152377 | 0.6657898 | -0.3233 | 0.747  | -0.11147052  | count | 1 |
| USP37      | -0.0893665 | 0.1945403 | -0.4594 | 0.646  | -0.111437407 | count | 1 |
| ATRAID     | -0.0787129 | 0.0749675 | -1.05   | 0.294  | -0.11123427  | count | 1 |
| AC023509.4 | -0.1278438 | 0.5817367 | -0.2198 | 0.826  | -0.111158402 | count | 1 |
| ZDHHC6     | -0.0844897 | 0.1808171 | -0.4673 | 0.64   | -0.11114722  | count | 1 |
| PPM1G      | -0.0790723 | 0.0903952 | -0.8747 | 0.382  | -0.111055279 | count | 1 |
| DDX41      | -0.0879855 | 0.1953552 | -0.4504 | 0.652  | -0.110990156 | count | 1 |
| GSC        | -0.2632872 | 1.0550026 | -0.2496 | 0.803  | -0.110982118 | count | 1 |
| RAMP2      | -0.2632872 | 0.9263742 | -0.2842 | 0.776  | -0.110982118 | count | 1 |
| TBKBP1     | -0.2632872 | 1.004232  | -0.2622 | 0.793  | -0.110982118 | count | 1 |
| ZNF155     | -0.2632872 | 0.9317084 | -0.2826 | 0.778  | -0.110982118 | count | 1 |
| RPL36AL    | -0.07716   | 0.034288  | -2.2504 | 0.0245 | -0.110863648 | count | 1 |
| DCSTAMP    | -0.1360503 | 0.7156665 | -0.1901 | 0.849  | -0.110805494 | count | 1 |
| OAS3       | -0.0919662 | 0.3084109 | -0.2982 | 0.766  | -0.110742388 | count | 1 |
| UBALD2     | -0.0782196 | 0.0717624 | -1.09   | 0.276  | -0.110719985 | count | 1 |
| CBLL1      | -0.0919198 | 0.2579324 | -0.3564 | 0.722  | -0.110686821 | count | 1 |
| LAMP2      | -0.0784003 | 0.0797694 | -0.9828 | 0.326  | -0.110596271 | count | 1 |
| LAMB3      | -0.2133296 | 0.9454468 | -0.2256 | 0.822  | -0.110531836 | count | 1 |
| PACSN3     | -0.2133296 | 0.7908747 | -0.2697 | 0.787  | -0.110531836 | count | 1 |
| CMC1       | -0.0799633 | 0.1283816 | -0.6229 | 0.533  | -0.109996937 | count | 1 |
| AIDA       | -0.0841998 | 0.1810797 | -0.465  | 0.642  | -0.109946862 | count | 1 |
| FO393401.1 | -0.0981596 | 0.2755802 | -0.3562 | 0.722  | -0.109655208 | count | 1 |
| SKP1       | -0.0764414 | 0.0449005 | -1.7025 | 0.0888 | -0.109560801 | count | 1 |
| ANO7       | -0.4722815 | 1.1726611 | -0.4027 | 0.687  | -0.109412393 | count | 1 |
| ZBED8      | -0.4722815 | 1.2025025 | -0.3927 | 0.695  | -0.109412393 | count | 1 |
| HIST1H2BG  | -0.4722815 | 1.1726611 | -0.4027 | 0.687  | -0.109412393 | count | 1 |
| KIF24      | -0.4722815 | 1.3851632 | -0.341  | 0.733  | -0.109412393 | count | 1 |
| P3H4       | -0.4722815 | 1.3851632 | -0.341  | 0.733  | -0.109412393 | count | 1 |
| ZNF671     | -0.4722815 | 1.1726611 | -0.4027 | 0.687  | -0.109412393 | count | 1 |
| EAF1       | -0.0808756 | 0.1904632 | -0.4246 | 0.671  | -0.109277243 | count | 1 |
| EXOSC7     | -0.0827823 | 0.1852937 | -0.4468 | 0.655  | -0.10923664  | count | 1 |
| HMG20B     | -0.0802498 | 0.1439705 | -0.5574 | 0.577  | -0.109199324 | count | 1 |
| ATAD5      | -0.1052021 | 0.3341397 | -0.3148 | 0.753  | -0.109005267 | count | 1 |
| SCRN3      | -0.1229365 | 0.4288751 | -0.2866 | 0.774  | -0.108931926 | count | 1 |
| LIX1L-AS1  | -0.4689184 | 0.8167814 | -0.5741 | 0.566  | -0.108746885 | count | 1 |
| HECW2      | -0.4689184 | 0.9684151 | -0.4842 | 0.628  | -0.108746885 | count | 1 |
| AP000763.3 | -0.4689184 | 0.8472218 | -0.5535 | 0.58   | -0.108746885 | count | 1 |

|            |            |           |         |        |              |       |   |
|------------|------------|-----------|---------|--------|--------------|-------|---|
| RNFT1-DT   | -0.4689184 | 0.8766384 | -0.5349 | 0.593  | -0.108746885 | count | 1 |
| XRN2       | -0.0764221 | 0.0615849 | -1.2409 | 0.215  | -0.108574818 | count | 1 |
| EHBP1      | -0.1017138 | 0.4260837 | -0.2387 | 0.811  | -0.108562737 | count | 1 |
| ZBTB25     | -0.1002997 | 0.3274617 | -0.3063 | 0.759  | -0.108443284 | count | 1 |
| COX5B      | -0.0755624 | 0.0415772 | -1.8174 | 0.0693 | -0.1084105   | count | 1 |
| VAV3       | -0.0824941 | 0.2086401 | -0.3954 | 0.693  | -0.108321449 | count | 1 |
| DPH3       | -0.078211  | 0.1108648 | -0.7055 | 0.481  | -0.107971886 | count | 1 |
| APIP       | -0.078945  | 0.1306336 | -0.6043 | 0.546  | -0.10780769  | count | 1 |
| PSMA1      | -0.0758729 | 0.0671673 | -1.1296 | 0.259  | -0.107601044 | count | 1 |
| APPL1      | -0.0766727 | 0.0935602 | -0.8195 | 0.413  | -0.107486539 | count | 1 |
| CHID1      | -0.0810919 | 0.1404753 | -0.5773 | 0.564  | -0.107373151 | count | 1 |
| ACSS2      | -0.1019838 | 0.3557747 | -0.2867 | 0.774  | -0.10733871  | count | 1 |
| NUDT5      | -0.079839  | 0.1369799 | -0.5829 | 0.56   | -0.107330314 | count | 1 |
| HS1BP3     | -0.0943444 | 0.2539242 | -0.3715 | 0.71   | -0.107323449 | count | 1 |
| ZFYVE21    | -0.0817938 | 0.2235191 | -0.3659 | 0.714  | -0.107190399 | count | 1 |
| STX7       | -0.0765012 | 0.0896517 | -0.8533 | 0.394  | -0.107186731 | count | 1 |
| GPAT4      | -0.092755  | 0.2652518 | -0.3497 | 0.727  | -0.107175829 | count | 1 |
| STARD5     | -0.1107534 | 0.4626649 | -0.2394 | 0.811  | -0.107135363 | count | 1 |
| TRIM13     | -0.0838811 | 0.2228872 | -0.3763 | 0.707  | -0.107112119 | count | 1 |
| MSH6       | -0.0822839 | 0.1609647 | -0.5112 | 0.609  | -0.107046111 | count | 1 |
| DPY30      | -0.0769514 | 0.1170433 | -0.6575 | 0.511  | -0.106966661 | count | 1 |
| SELENOS    | -0.0756666 | 0.0773719 | -0.978  | 0.328  | -0.106948425 | count | 1 |
| AL139289.2 | -0.2918139 | 0.9118215 | -0.32   | 0.749  | -0.106932637 | count | 1 |
| MAPK10     | -0.2918139 | 1.5153948 | -0.1926 | 0.847  | -0.106932637 | count | 1 |
| AL359644.1 | -0.2918139 | 0.8196777 | -0.356  | 0.722  | -0.106932637 | count | 1 |
| AC136475.1 | -0.2918139 | 1.0756275 | -0.2713 | 0.786  | -0.106932637 | count | 1 |
| RPL36A     | -0.0761394 | 0.0757849 | -1.0047 | 0.315  | -0.106845623 | count | 1 |
| LY96       | -0.0750776 | 0.0692347 | -1.0844 | 0.278  | -0.106772519 | count | 1 |
| BCCIP      | -0.0805471 | 0.1722456 | -0.4676 | 0.64   | -0.106710838 | count | 1 |
| NEK11      | -0.7046919 | 0.7905014 | -0.8914 | 0.373  | -0.106621377 | count | 1 |
| TBC1D16    | -0.7046919 | 0.87603   | -0.8044 | 0.421  | -0.106621377 | count | 1 |
| CCNE1      | -0.7046919 | 0.7905014 | -0.8914 | 0.373  | -0.106621377 | count | 1 |
| C21orf58   | -0.7046919 | 0.8846898 | -0.7965 | 0.426  | -0.106621377 | count | 1 |
| QSER1      | -0.0825863 | 0.2702158 | -0.3056 | 0.76   | -0.106429237 | count | 1 |
| GPM6B      | -0.456261  | 0.5933897 | -0.7689 | 0.442  | -0.10622814  | count | 1 |
| TIMP3      | -0.0861578 | 0.7290518 | -0.1182 | 0.906  | -0.106193946 | count | 1 |
| SCAF1      | -0.1110012 | 0.3889039 | -0.2854 | 0.775  | -0.106077585 | count | 1 |
| PSMG4      | -0.0810454 | 0.1965197 | -0.4124 | 0.68   | -0.105915994 | count | 1 |
| TBC1D19    | -0.4544735 | 0.8229044 | -0.5523 | 0.581  | -0.105870644 | count | 1 |
| POLR2L     | -0.0741454 | 0.0621712 | -1.1926 | 0.233  | -0.105699921 | count | 1 |
| TXNL1      | -0.0752812 | 0.0874186 | -0.8612 | 0.389  | -0.105659987 | count | 1 |
| C1orf35    | -0.0788754 | 0.1627877 | -0.4845 | 0.628  | -0.105585109 | count | 1 |
| PSMA2      | -0.0758649 | 0.1071241 | -0.7082 | 0.479  | -0.105436334 | count | 1 |
| PIGG       | -0.1188696 | 0.3853999 | -0.3084 | 0.758  | -0.105388318 | count | 1 |
| EPG5       | -0.1131547 | 0.369259  | -0.3064 | 0.759  | -0.105263343 | count | 1 |

|            |            |           |         |        |              |       |   |
|------------|------------|-----------|---------|--------|--------------|-------|---|
| HIC2       | -0.0990745 | 0.5353442 | -0.1851 | 0.853  | -0.10505337  | count | 1 |
| AC007325.4 | -0.2018882 | 0.7009565 | -0.288  | 0.773  | -0.104884489 | count | 1 |
| PNPO       | -0.1027908 | 0.2724351 | -0.3773 | 0.706  | -0.104745592 | count | 1 |
| AGFG2      | -0.6885987 | 1.2044369 | -0.5717 | 0.568  | -0.104742747 | count | 1 |
| SKAP1      | -0.6885987 | 1.1036482 | -0.6239 | 0.533  | -0.104742747 | count | 1 |
| ZSCAN22    | -0.6885987 | 1.2682727 | -0.5429 | 0.587  | -0.104742747 | count | 1 |
| NAA10      | -0.0749851 | 0.1070446 | -0.7005 | 0.484  | -0.104669572 | count | 1 |
| USP13      | -0.6874395 | 0.6390759 | -1.0757 | 0.282  | -0.10460652  | count | 1 |
| NSUN4      | -0.0919113 | 0.417952  | -0.2199 | 0.826  | -0.104575099 | count | 1 |
| NBPF12     | -0.2843787 | 0.5627354 | -0.5054 | 0.613  | -0.104420629 | count | 1 |
| GALM       | -0.0831711 | 0.234376  | -0.3549 | 0.723  | -0.10421378  | count | 1 |
| PRKCA      | -0.0975587 | 0.2943058 | -0.3315 | 0.74   | -0.10416862  | count | 1 |
| PPIA       | -0.0724519 | 0.032909  | -2.2016 | 0.0278 | -0.104163384 | count | 1 |
| C19orf53   | -0.072871  | 0.0555019 | -1.3129 | 0.189  | -0.10396233  | count | 1 |
| PTGR2      | -0.130512  | 0.3095477 | -0.4216 | 0.673  | -0.103734799 | count | 1 |
| PIAS2      | -0.1008198 | 0.2361377 | -0.427  | 0.669  | -0.103653325 | count | 1 |
| CD207      | -1.9948141 | 2.088497  | -0.9551 | 0.3396 | -0.103607161 | count | 1 |
| OSBPL8     | -0.0731247 | 0.0875153 | -0.8356 | 0.403  | -0.103583327 | count | 1 |
| TP53BP2    | -0.0792475 | 0.1959556 | -0.4044 | 0.686  | -0.103572701 | count | 1 |
| AC006333.2 | -0.0822831 | 0.305976  | -0.2689 | 0.788  | -0.103544485 | count | 1 |
| TMCC1      | -0.0880322 | 0.3437974 | -0.2561 | 0.798  | -0.103467422 | count | 1 |
| LGALS9     | -0.072779  | 0.073461  | -0.9907 | 0.322  | -0.10344793  | count | 1 |
| FAAP24     | -0.2179424 | 0.7122987 | -0.306  | 0.76   | -0.103341709 | count | 1 |
| DCLK2      | -1.9800126 | 2.2275407 | -0.8889 | 0.3742 | -0.103319416 | count | 1 |
| USPL1      | -0.0943509 | 0.2612239 | -0.3612 | 0.718  | -0.103267961 | count | 1 |
| COL8A2     | -0.1425927 | 0.4353475 | -0.3275 | 0.743  | -0.103166217 | count | 1 |
| ATP6V1E2   | -0.1162289 | 0.3755637 | -0.3095 | 0.757  | -0.103085143 | count | 1 |
| AC026304.1 | -0.1833383 | 1.312477  | -0.1397 | 0.889  | -0.102957975 | count | 1 |
| IL10       | -0.0734713 | 0.2135542 | -0.344  | 0.731  | -0.102566515 | count | 1 |
| MAPK3      | -0.0793977 | 0.1746488 | -0.4546 | 0.649  | -0.102521126 | count | 1 |
| ARHGEF26   | -1.921258  | 1.0348711 | -1.8565 | 0.0635 | -0.102136903 | count | 1 |
| TSPAN13    | -0.1609382 | 0.7247094 | -0.2221 | 0.824  | -0.102128091 | count | 1 |
| YAE1D1     | -0.1320738 | 0.4264353 | -0.3097 | 0.757  | -0.102084432 | count | 1 |
| PSMA5      | -0.0724559 | 0.075768  | -0.9563 | 0.339  | -0.102083729 | count | 1 |
| TMEM9B     | -0.0731841 | 0.098463  | -0.7433 | 0.457  | -0.102012791 | count | 1 |
| ULK4       | -0.1170916 | 0.3578275 | -0.3272 | 0.744  | -0.101967377 | count | 1 |
| GALK1      | -0.0735473 | 0.124262  | -0.5919 | 0.554  | -0.101888419 | count | 1 |
| GDF15      | -0.0929729 | 0.4616051 | -0.2014 | 0.84   | -0.101771963 | count | 1 |
| NDUFB6     | -0.0724462 | 0.0957179 | -0.7569 | 0.449  | -0.101541065 | count | 1 |
| SRSF10     | -0.0722392 | 0.1226584 | -0.5889 | 0.556  | -0.101404691 | count | 1 |
| C4orf48    | -0.0716945 | 0.0771581 | -0.9292 | 0.353  | -0.10134649  | count | 1 |
| EIF3B      | -0.0757761 | 0.2290768 | -0.3308 | 0.741  | -0.101317143 | count | 1 |
| IFT20      | -0.0741822 | 0.1177616 | -0.6299 | 0.529  | -0.101198516 | count | 1 |
| LIN7B      | -0.1085052 | 0.3441432 | -0.3153 | 0.753  | -0.100998476 | count | 1 |
| SPATA20    | -0.097387  | 0.2836041 | -0.3434 | 0.731  | -0.100988079 | count | 1 |

|            |            |           |         |        |              |       |   |
|------------|------------|-----------|---------|--------|--------------|-------|---|
| TIMMDC1    | -0.0745424 | 0.1273942 | -0.5851 | 0.559  | -0.100859145 | count | 1 |
| ZNF551     | -0.1935974 | 0.7468105 | -0.2592 | 0.795  | -0.100772112 | count | 1 |
| HIST1H4H   | -0.2374638 | 0.4999104 | -0.475  | 0.635  | -0.100769119 | count | 1 |
| CHMP2A     | -0.0706394 | 0.0651281 | -1.0846 | 0.2782 | -0.100687324 | count | 1 |
| EIF1B      | -0.0707468 | 0.0693858 | -1.0196 | 0.308  | -0.100514908 | count | 1 |
| ECI2       | -0.0773746 | 0.1799151 | -0.4301 | 0.667  | -0.100267119 | count | 1 |
| VKORC1L1   | -0.085398  | 0.2552832 | -0.3345 | 0.738  | -0.100074986 | count | 1 |
| TMTC3      | -0.1171485 | 0.4428446 | -0.2645 | 0.791  | -0.100034031 | count | 1 |
| GPRC5C     | -0.1920423 | 0.3129849 | -0.6136 | 0.54   | -0.099998877 | count | 1 |
| NF2        | -0.0907674 | 0.4271887 | -0.2125 | 0.832  | -0.099924319 | count | 1 |
| SLC9A1     | -0.112595  | 0.43028   | -0.2617 | 0.794  | -0.099912798 | count | 1 |
| HPS1       | -0.0732177 | 0.1366125 | -0.536  | 0.592  | -0.099907577 | count | 1 |
| MTMR1      | -0.1255007 | 0.4745285 | -0.2645 | 0.791  | -0.099833091 | count | 1 |
| RPL13A     | -0.0693768 | 0.0306549 | -2.2632 | 0.0237 | -0.099782167 | count | 1 |
| SPATA7     | -0.100575  | 0.3250568 | -0.3094 | 0.757  | -0.099589345 | count | 1 |
| AL078604.2 | -1.804128  | 2.070401  | -0.8714 | 0.3836 | -0.099576068 | count | 1 |
| BBS1       | -1.804128  | 1.276397  | -1.4135 | 0.158  | -0.099576068 | count | 1 |
| MCF2L      | -1.804128  | 2.1522761 | -0.8382 | 0.402  | -0.099576068 | count | 1 |
| ISLR       | -1.804128  | 2.1522761 | -0.8382 | 0.402  | -0.099576068 | count | 1 |
| TRPV4      | -0.3253277 | 0.4385241 | -0.7419 | 0.458  | -0.099530063 | count | 1 |
| MEI1       | -0.0931496 | 0.3879029 | -0.2401 | 0.81   | -0.099501983 | count | 1 |
| TANK       | -0.0721054 | 0.1039948 | -0.6934 | 0.488  | -0.099421097 | count | 1 |
| BANK1      | -0.1655015 | 0.6230942 | -0.2656 | 0.791  | -0.099359768 | count | 1 |
| STAU2      | -0.0871954 | 0.3020579 | -0.2887 | 0.773  | -0.099245146 | count | 1 |
| ZNF649     | -0.0991946 | 0.3767816 | -0.2633 | 0.792  | -0.099241412 | count | 1 |
| ZMYND11    | -0.0851762 | 0.2676397 | -0.3182 | 0.75   | -0.099163497 | count | 1 |
| MICALL2    | -0.1757854 | 0.6782698 | -0.2592 | 0.796  | -0.09888239  | count | 1 |
| LDLRAD4    | -0.0726933 | 0.1943883 | -0.374  | 0.708  | -0.098805535 | count | 1 |
| C22orf34   | -0.1753417 | 1.0001479 | -0.1753 | 0.861  | -0.098642515 | count | 1 |
| UBE2J1     | -0.0703248 | 0.1051877 | -0.6686 | 0.504  | -0.098482453 | count | 1 |
| DUSP3      | -0.0720947 | 0.13379   | -0.5389 | 0.59   | -0.098262674 | count | 1 |
| ARL6IP5    | -0.0685651 | 0.0469154 | -1.4615 | 0.144  | -0.09818248  | count | 1 |
| AL031280.1 | -1.7382    | 1.121868  | -1.5494 | 0.121  | -0.098006921 | count | 1 |
| CPQ        | -0.0705696 | 0.1083011 | -0.6516 | 0.515  | -0.097937523 | count | 1 |
| TMEM141    | -0.0703424 | 0.1131067 | -0.6219 | 0.534  | -0.097903566 | count | 1 |
| SRRM1      | -0.0685154 | 0.0563997 | -1.2148 | 0.2246 | -0.097855555 | count | 1 |
| DYNLRB1    | -0.0687715 | 0.0700609 | -0.9816 | 0.326  | -0.097575306 | count | 1 |
| ZCCHC10    | -0.0730323 | 0.1621004 | -0.4505 | 0.652  | -0.097528943 | count | 1 |
| NECTIN1    | -0.1460686 | 0.5860206 | -0.2493 | 0.803  | -0.097511527 | count | 1 |
| RBM28      | -0.0764933 | 0.234363  | -0.3264 | 0.744  | -0.097491204 | count | 1 |
| DRAM2      | -0.0692762 | 0.0800856 | -0.865  | 0.387  | -0.097447003 | count | 1 |
| CFL2       | -0.1295171 | 0.3429727 | -0.3776 | 0.706  | -0.097147286 | count | 1 |
| DARS-AS1   | -0.1527064 | 0.5577615 | -0.2738 | 0.784  | -0.097066775 | count | 1 |
| ELP1       | -0.1527064 | 0.529296  | -0.2885 | 0.773  | -0.097066775 | count | 1 |
| RNASE6     | -0.0683555 | 0.0718169 | -0.9518 | 0.341  | -0.096965167 | count | 1 |

|            |            |           |         |       |              |       |   |
|------------|------------|-----------|---------|-------|--------------|-------|---|
| PPDPF      | -0.0677762 | 0.0734998 | -0.9221 | 0.357 | -0.096634782 | count | 1 |
| BLVRB      | -0.0672344 | 0.0525882 | -1.2785 | 0.201 | -0.096629765 | count | 1 |
| HIST1H2AG  | -0.6210416 | 0.8368133 | -0.7422 | 0.458 | -0.096597153 | count | 1 |
| ATG16L1    | -0.4088184 | 0.524926  | -0.7788 | 0.436 | -0.096588702 | count | 1 |
| RARS       | -0.0771198 | 0.2020411 | -0.3817 | 0.703 | -0.096516885 | count | 1 |
| CEP104     | -0.0937756 | 0.2905324 | -0.3228 | 0.747 | -0.096481658 | count | 1 |
| AC026250.1 | -0.3143545 | 0.9668854 | -0.3251 | 0.745 | -0.096478658 | count | 1 |
| MS4A7      | -0.0671801 | 0.0575148 | -1.168  | 0.243 | -0.096466465 | count | 1 |
| ZNF213-AS1 | -0.1849294 | 0.6301497 | -0.2935 | 0.769 | -0.096454579 | count | 1 |
| AC010654.1 | -0.1179845 | 0.4338157 | -0.272  | 0.786 | -0.096366125 | count | 1 |
| RNF187     | -0.0717927 | 0.1501791 | -0.478  | 0.633 | -0.096351508 | count | 1 |
| C1orf159   | -0.1710122 | 0.4656247 | -0.3673 | 0.713 | -0.096299285 | count | 1 |
| HMMR       | -0.1514051 | 0.7033762 | -0.2153 | 0.83  | -0.096265039 | count | 1 |
| C6orf203   | -0.0900398 | 0.3274864 | -0.2749 | 0.783 | -0.09620813  | count | 1 |
| CORO1B     | -0.0684042 | 0.0934126 | -0.7323 | 0.464 | -0.096193596 | count | 1 |
| LINC00920  | -0.3127241 | 0.5694975 | -0.5491 | 0.583 | -0.096023482 | count | 1 |
| TRDMT1     | -0.0979844 | 0.3817496 | -0.2567 | 0.797 | -0.096015026 | count | 1 |
| ORC3       | -0.0807006 | 0.3153897 | -0.2559 | 0.798 | -0.096006302 | count | 1 |
| ZFYVE19    | -0.084238  | 0.3918071 | -0.215  | 0.83  | -0.095900638 | count | 1 |
| SAP18      | -0.0670125 | 0.0493353 | -1.3583 | 0.174 | -0.095864412 | count | 1 |
| LRR1       | -0.0807825 | 0.2863999 | -0.2821 | 0.778 | -0.095836446 | count | 1 |
| KHDRBS2    | -0.1699822 | 0.573863  | -0.2962 | 0.767 | -0.095741127 | count | 1 |
| FOXRED1    | -0.0895923 | 0.4640591 | -0.1931 | 0.847 | -0.095733982 | count | 1 |
| FAM89B     | -0.0684173 | 0.1096182 | -0.6241 | 0.533 | -0.095306065 | count | 1 |
| ATP5IF1    | -0.0669679 | 0.0631664 | -1.0602 | 0.289 | -0.095047898 | count | 1 |
| LPXN       | -0.0703245 | 0.1454397 | -0.4835 | 0.629 | -0.095013727 | count | 1 |
| CD1B       | -1.619621  | 1.339221  | -1.2094 | 0.227 | -0.094932434 | count | 1 |
| TMEM219    | -0.0663171 | 0.0591816 | -1.1206 | 0.263 | -0.094624925 | count | 1 |
| URB2       | -0.1982408 | 0.620742  | -0.3194 | 0.749 | -0.094453946 | count | 1 |
| WDR5B      | -0.1982408 | 0.6525112 | -0.3038 | 0.761 | -0.094453946 | count | 1 |
| MAGI2      | -0.1982408 | 0.6525112 | -0.3038 | 0.761 | -0.094453946 | count | 1 |
| FAM222A    | -0.6034094 | 0.8691944 | -0.6942 | 0.488 | -0.094401067 | count | 1 |
| AL365361.1 | -0.306546  | 0.6694488 | -0.4579 | 0.647 | -0.094294457 | count | 1 |
| LAMTOR1    | -0.065956  | 0.0549704 | -1.1998 | 0.23  | -0.094293393 | count | 1 |
| FGFRL1     | -0.1410492 | 0.643055  | -0.2193 | 0.826 | -0.094252782 | count | 1 |
| TRAPPC2L   | -0.0674894 | 0.1125003 | -0.5999 | 0.549 | -0.094145525 | count | 1 |
| AL590560.2 | -1.590985  | 1.229861  | -1.2936 | 0.196 | -0.094138296 | count | 1 |
| RAPGEF5    | -1.590985  | 1.229861  | -1.2936 | 0.196 | -0.094138296 | count | 1 |
| AC037487.2 | -0.253151  | 0.901589  | -0.2808 | 0.779 | -0.093749134 | count | 1 |
| TRMT12     | -0.1096088 | 0.4234117 | -0.2589 | 0.796 | -0.093699957 | count | 1 |
| CHMP1A     | -0.0734965 | 0.2025923 | -0.3628 | 0.717 | -0.093683544 | count | 1 |
| AL356056.2 | -0.2194962 | 0.6961817 | -0.3153 | 0.753 | -0.093576429 | count | 1 |
| CLNK       | -0.5962322 | 0.9236078 | -0.6455 | 0.519 | -0.09349872  | count | 1 |
| ZNF367     | -0.5962322 | 0.8566748 | -0.696  | 0.487 | -0.09349872  | count | 1 |
| HNRNPA3    | -0.0653578 | 0.05447   | -1.1999 | 0.23  | -0.093190451 | count | 1 |

|            |            |           |         |        |              |       |   |
|------------|------------|-----------|---------|--------|--------------|-------|---|
| SNRNP40    | -0.0705378 | 0.1592995 | -0.4428 | 0.658  | -0.093168131 | count | 1 |
| SNAP29     | -0.0686337 | 0.1306087 | -0.5255 | 0.599  | -0.093014024 | count | 1 |
| ABHD14B    | -0.0692648 | 0.1524954 | -0.4542 | 0.65   | -0.092928786 | count | 1 |
| FBXO46     | -0.1195817 | 0.5223556 | -0.2289 | 0.819  | -0.092622943 | count | 1 |
| ELK1       | -0.0754501 | 0.2430582 | -0.3104 | 0.756  | -0.092156515 | count | 1 |
| PSMA4      | -0.0649869 | 0.0643044 | -1.0106 | 0.312  | -0.092144739 | count | 1 |
| OSBPL7     | -0.3871673 | 0.567326  | -0.6824 | 0.495  | -0.092084474 | count | 1 |
| CD180      | -0.0768796 | 0.2911618 | -0.264  | 0.792  | -0.091970893 | count | 1 |
| SEC24D     | -0.0707607 | 0.2086794 | -0.3391 | 0.735  | -0.091871545 | count | 1 |
| PCYT1A     | -0.0724556 | 0.1779357 | -0.4072 | 0.684  | -0.091815386 | count | 1 |
| OCIAD1     | -0.0647928 | 0.0726954 | -0.8913 | 0.373  | -0.091734745 | count | 1 |
| C1orf56    | -0.066042  | 0.1439001 | -0.4589 | 0.646  | -0.091363242 | count | 1 |
| ZMAT3      | -0.0865974 | 0.2990797 | -0.2895 | 0.772  | -0.091281258 | count | 1 |
| SMIM29     | -0.0664443 | 0.1343999 | -0.4944 | 0.621  | -0.091181136 | count | 1 |
| NPHP4      | -0.3820781 | 0.6221892 | -0.6141 | 0.539  | -0.091016099 | count | 1 |
| EXOSC6     | -0.0683687 | 0.2125652 | -0.3216 | 0.748  | -0.09097685  | count | 1 |
| TKTL2      | -1.48291   | 1.217315  | -1.2182 | 0.223  | -0.090947264 | count | 1 |
| AL512625.1 | -1.48291   | 1.066513  | -1.3904 | 0.165  | -0.090947264 | count | 1 |
| GINS3      | -1.48291   | 1.066513  | -1.3904 | 0.165  | -0.090947264 | count | 1 |
| GLO1       | -0.0687306 | 0.168392  | -0.4082 | 0.683  | -0.090939659 | count | 1 |
| CD274      | -0.381608  | 0.7090838 | -0.5382 | 0.591  | -0.090917189 | count | 1 |
| DNAJB12    | -0.0654431 | 0.109405  | -0.5982 | 0.55   | -0.090298193 | count | 1 |
| DBI        | -0.0628183 | 0.0462537 | -1.3581 | 0.175  | -0.090240279 | count | 1 |
| ARCN1      | -0.0656788 | 0.1211639 | -0.5421 | 0.588  | -0.089867748 | count | 1 |
| RAB4A      | -0.0660586 | 0.1201039 | -0.55   | 0.582  | -0.089823326 | count | 1 |
| MTMR2      | -0.1027907 | 0.3532646 | -0.291  | 0.771  | -0.08969696  | count | 1 |
| IGHG2      | -1.443018  | 0.6758587 | -2.1351 | 0.0329 | -0.08968815  | count | 1 |
| ZBTB41     | -0.0946305 | 0.2941167 | -0.3217 | 0.748  | -0.089456707 | count | 1 |
| RIDA       | -0.0911981 | 0.2923257 | -0.312  | 0.755  | -0.089435227 | count | 1 |
| HMG5       | -0.104377  | 0.312374  | -0.3341 | 0.738  | -0.08929613  | count | 1 |
| MRPS21     | -0.06304   | 0.0743956 | -0.8474 | 0.397  | -0.089254147 | count | 1 |
| TSEN34     | -0.0631627 | 0.1007997 | -0.6266 | 0.531  | -0.088885372 | count | 1 |
| GRAMD4     | -0.0820007 | 0.2921026 | -0.2807 | 0.779  | -0.088805086 | count | 1 |
| MEIKIN     | -0.3709514 | 0.7170702 | -0.5173 | 0.605  | -0.08866744  | count | 1 |
| ANO5       | -0.3709514 | 0.8120055 | -0.4568 | 0.648  | -0.08866744  | count | 1 |
| ITGA1      | -0.5581938 | 0.8188871 | -0.6816 | 0.496  | -0.088634017 | count | 1 |
| C6orf47    | -0.0723646 | 0.2272886 | -0.3184 | 0.75   | -0.088581428 | count | 1 |
| ATP2A3     | -0.0913449 | 0.4535282 | -0.2014 | 0.84   | -0.088564829 | count | 1 |
| MTERF2     | -0.1849105 | 0.6107387 | -0.3028 | 0.762  | -0.088388753 | count | 1 |
| CD2AP      | -0.0675484 | 0.1766293 | -0.3824 | 0.702  | -0.088380225 | count | 1 |
| AC002310.1 | -0.369381  | 0.6742376 | -0.5478 | 0.584  | -0.088334536 | count | 1 |
| ATP5F1C    | -0.0618903 | 0.0504038 | -1.2279 | 0.2196 | -0.088311645 | count | 1 |
| IDNK       | -0.0733112 | 0.2862163 | -0.2561 | 0.798  | -0.088163595 | count | 1 |
| SYNCRIP    | -0.0627514 | 0.0796212 | -0.7881 | 0.431  | -0.088029731 | count | 1 |
| TM2D1      | -0.0653388 | 0.1554778 | -0.4202 | 0.674  | -0.087836196 | count | 1 |



|            |            |           |         |        |              |       |   |
|------------|------------|-----------|---------|--------|--------------|-------|---|
| PALLD      | -0.0728189 | 0.195391  | -0.3727 | 0.709  | -0.087785826 | count | 1 |
| DRAP1      | -0.0615575 | 0.0660845 | -0.9315 | 0.352  | -0.087701579 | count | 1 |
| CLEC2B     | -0.0613764 | 0.0676145 | -0.9077 | 0.3641 | -0.08763607  | count | 1 |
| PRELID1    | -0.0611667 | 0.0495465 | -1.2345 | 0.217  | -0.087618867 | count | 1 |
| AC009088.1 | -1.378087  | 1.40928   | -0.9779 | 0.328  | -0.087539315 | count | 1 |
| VASH2      | -1.3780868 | 1.5622851 | -0.8821 | 0.3778 | -0.087539293 | count | 1 |
| GNPTAB     | -0.0653274 | 0.1707289 | -0.3826 | 0.702  | -0.087333351 | count | 1 |
| LIG4       | -0.0815273 | 0.2679127 | -0.3043 | 0.761  | -0.087181669 | count | 1 |
| PYROXD1    | -0.0721083 | 0.2611891 | -0.2761 | 0.783  | -0.087137394 | count | 1 |
| SUCLG2     | -0.0678943 | 0.1596993 | -0.4251 | 0.671  | -0.087120404 | count | 1 |
| NUF2       | -1.365715  | 1.0895615 | -1.2535 | 0.21   | -0.08711547  | count | 1 |
| MANEAL     | -0.5460932 | 1.1315662 | -0.4826 | 0.629  | -0.087057184 | count | 1 |
| CD160      | -0.5460932 | 1.1315662 | -0.4826 | 0.629  | -0.087057184 | count | 1 |
| C2orf81    | -0.5460932 | 1.1315662 | -0.4826 | 0.629  | -0.087057184 | count | 1 |
| CDCA7      | -0.5460932 | 1.1933187 | -0.4576 | 0.647  | -0.087057184 | count | 1 |
| PLK4       | -0.5460932 | 1.1315662 | -0.4826 | 0.629  | -0.087057184 | count | 1 |
| AC091982.3 | -0.5460932 | 1.1933187 | -0.4576 | 0.647  | -0.087057184 | count | 1 |
| GET4       | -0.5460932 | 1.1315662 | -0.4826 | 0.629  | -0.087057184 | count | 1 |
| AC068389.4 | -0.5460932 | 1.1315662 | -0.4826 | 0.629  | -0.087057184 | count | 1 |
| PPP1R32    | -0.5460932 | 1.4322371 | -0.3813 | 0.703  | -0.087057184 | count | 1 |
| TESPA1     | -0.5460932 | 1.1315662 | -0.4826 | 0.629  | -0.087057184 | count | 1 |
| PCDH9      | -0.5460932 | 1.1315662 | -0.4826 | 0.629  | -0.087057184 | count | 1 |
| TOMM20L    | -0.5460932 | 1.1315662 | -0.4826 | 0.629  | -0.087057184 | count | 1 |
| CARD14     | -0.5460932 | 1.1933187 | -0.4576 | 0.647  | -0.087057184 | count | 1 |
| FBXO15     | -0.5460932 | 1.1315662 | -0.4826 | 0.629  | -0.087057184 | count | 1 |
| SH2D3A     | -0.5460932 | 1.1315662 | -0.4826 | 0.629  | -0.087057184 | count | 1 |
| EPHX3      | -0.5460932 | 1.1315662 | -0.4826 | 0.629  | -0.087057184 | count | 1 |
| MRPS11     | -0.0652455 | 0.177181  | -0.3682 | 0.713  | -0.087031747 | count | 1 |
| GCSH       | -0.074214  | 0.277706  | -0.2672 | 0.789  | -0.086466859 | count | 1 |
| C1R        | -0.2017519 | 0.6328498 | -0.3188 | 0.75   | -0.086403382 | count | 1 |
| PKP2       | -0.2314736 | 0.3713621 | -0.6233 | 0.533  | -0.086226063 | count | 1 |
| NUP62      | -0.0641704 | 0.2155615 | -0.2977 | 0.766  | -0.085968316 | count | 1 |
| FMN1       | -0.0721875 | 0.2062238 | -0.35   | 0.726  | -0.085924673 | count | 1 |
| CX3CL1     | -1.331068  | 1.710024  | -0.7784 | 0.436  | -0.085903338 | count | 1 |
| NUCB1      | -0.0613091 | 0.0861658 | -0.7115 | 0.477  | -0.085729775 | count | 1 |
| ZC3H13     | -0.0616545 | 0.1109223 | -0.5558 | 0.578  | -0.085603575 | count | 1 |
| LGALSL     | -1.320787  | 1.0194426 | -1.2956 | 0.195  | -0.085536371 | count | 1 |
| ZNF662     | -1.320787  | 1.822703  | -0.7246 | 0.469  | -0.085536371 | count | 1 |
| DLL1       | -1.320787  | 1.716973  | -0.7693 | 0.442  | -0.085536371 | count | 1 |
| AC007541.1 | -1.320787  | 1.0194426 | -1.2956 | 0.195  | -0.085536371 | count | 1 |
| SIGIRR     | -0.0612985 | 0.1023183 | -0.5991 | 0.549  | -0.085341986 | count | 1 |
| FAM136A    | -0.0633473 | 0.163671  | -0.387  | 0.699  | -0.085316121 | count | 1 |
| RAB31      | -0.0599875 | 0.0710028 | -0.8449 | 0.398  | -0.08488848  | count | 1 |
| KRAS       | -0.0604158 | 0.0977117 | -0.6183 | 0.536  | -0.084845144 | count | 1 |
| PTOV1-AS1  | -0.197832  | 0.7810773 | -0.2533 | 0.8    | -0.084809438 | count | 1 |

|             |            |           |         |       |              |       |   |
|-------------|------------|-----------|---------|-------|--------------|-------|---|
| ADARB1      | -0.1035814 | 0.4238302 | -0.2444 | 0.807 | -0.08479282  | count | 1 |
| HYAL3       | -0.2723828 | 0.7771218 | -0.3505 | 0.726 | -0.08461228  | count | 1 |
| 2-Sep       | -0.060372  | 0.0885524 | -0.6818 | 0.495 | -0.084547943 | count | 1 |
| TFB1M       | -0.0860579 | 0.3654558 | -0.2355 | 0.814 | -0.084444332 | count | 1 |
| AC068768.1  | -1.290037  | 1.056757  | -1.2208 | 0.222 | -0.084418626 | count | 1 |
| BRD9        | -0.0684636 | 0.2180997 | -0.3139 | 0.754 | -0.084308489 | count | 1 |
| TMEM223     | -0.0653775 | 0.2283064 | -0.2864 | 0.775 | -0.084228665 | count | 1 |
| NBDY        | -0.0602895 | 0.0957609 | -0.6296 | 0.529 | -0.084087897 | count | 1 |
| DVL2        | -0.0901072 | 0.5343651 | -0.1686 | 0.866 | -0.084070579 | count | 1 |
| CERS4       | -0.0901072 | 0.365826  | -0.2463 | 0.805 | -0.084070579 | count | 1 |
| ZNF653      | -0.3461478 | 0.9146036 | -0.3785 | 0.705 | -0.083368245 | count | 1 |
| FAM50B      | -0.0905648 | 0.4286088 | -0.2113 | 0.833 | -0.083266956 | count | 1 |
| GPATCH11    | -0.0621057 | 0.1603124 | -0.3874 | 0.698 | -0.083206657 | count | 1 |
| MRPL28      | -0.0600531 | 0.1197238 | -0.5016 | 0.616 | -0.08310689  | count | 1 |
| SHTN1       | -0.0592481 | 0.0858847 | -0.6899 | 0.49  | -0.083083847 | count | 1 |
| CDK2        | -0.0990745 | 0.5193012 | -0.1908 | 0.849 | -0.083048992 | count | 1 |
| RNF13       | -0.058233  | 0.0683012 | -0.8526 | 0.394 | -0.082875124 | count | 1 |
| TWF1        | -0.0637232 | 0.1781407 | -0.3577 | 0.721 | -0.082822572 | count | 1 |
| ST3GAL4     | -0.0790666 | 0.3412339 | -0.2317 | 0.817 | -0.082785729 | count | 1 |
| TEPSIN      | -0.0982485 | 0.3632878 | -0.2704 | 0.787 | -0.082366845 | count | 1 |
| IQCIN       | -0.1175369 | 0.914481  | -0.1285 | 0.898 | -0.082282734 | count | 1 |
| DCUN1D5     | -0.0622431 | 0.1999432 | -0.3113 | 0.756 | -0.082185504 | count | 1 |
| TMEM11      | -0.0658455 | 0.2494134 | -0.264  | 0.792 | -0.082073011 | count | 1 |
| MAPKAPK2    | -0.0613993 | 0.1604836 | -0.3826 | 0.702 | -0.081796393 | count | 1 |
| GABPB1      | -0.0701671 | 0.2574876 | -0.2725 | 0.785 | -0.08177463  | count | 1 |
| SNRPN       | -0.0617814 | 0.1690335 | -0.3655 | 0.715 | -0.081481103 | count | 1 |
| ZNF226      | -0.0673661 | 0.2586521 | -0.2605 | 0.795 | -0.081429272 | count | 1 |
| SLC16A1-AS1 | -0.099342  | 0.4233398 | -0.2347 | 0.814 | -0.081376032 | count | 1 |
| MMEL1       | -0.5011557 | 0.6648347 | -0.7538 | 0.451 | -0.0810758   | count | 1 |
| CMPK1       | -0.0589505 | 0.120122  | -0.4908 | 0.624 | -0.081009878 | count | 1 |
| PARP4       | -0.0616409 | 0.1907738 | -0.3231 | 0.747 | -0.08099391  | count | 1 |
| GART        | -0.0646646 | 0.2184128 | -0.2961 | 0.767 | -0.080976861 | count | 1 |
| HNRNPAB     | -0.056701  | 0.0699466 | -0.8106 | 0.418 | -0.080676245 | count | 1 |
| NMRK1       | -0.0624536 | 0.2030389 | -0.3076 | 0.758 | -0.080620552 | count | 1 |
| UBE2E2      | -0.0592482 | 0.1489699 | -0.3977 | 0.691 | -0.080594893 | count | 1 |
| UBA6        | -0.0613999 | 0.2248689 | -0.273  | 0.785 | -0.08057215  | count | 1 |
| AC090198.1  | -1.18366   | 1.182579  | -1.0009 | 0.317 | -0.080308989 | count | 1 |
| RMRP        | -1.18366   | 1.1067293 | -1.0695 | 0.285 | -0.080308989 | count | 1 |
| KDELCL1     | -1.18366   | 1.365757  | -0.8667 | 0.386 | -0.080308989 | count | 1 |
| AC022098.4  | -1.18366   | 1.1067293 | -1.0695 | 0.285 | -0.080308989 | count | 1 |
| DAP3        | -0.0595611 | 0.1398995 | -0.4257 | 0.67  | -0.080224093 | count | 1 |
| EFCAB11     | -0.0800158 | 0.403291  | -0.1984 | 0.843 | -0.080222747 | count | 1 |
| AC244090.1  | -0.0609018 | 0.1744813 | -0.349  | 0.727 | -0.080176823 | count | 1 |
| ALKBH7      | -0.0564498 | 0.0673943 | -0.8376 | 0.402 | -0.080093783 | count | 1 |
| VRK3        | -0.064136  | 0.2408837 | -0.2663 | 0.79  | -0.080073989 | count | 1 |

|           |            |           |         |       |              |       |   |
|-----------|------------|-----------|---------|-------|--------------|-------|---|
| GPATCH2L  | -0.0600167 | 0.1592022 | -0.377  | 0.706 | -0.080031777 | count | 1 |
| LINC01637 | -0.067949  | 0.277053  | -0.2453 | 0.806 | -0.079969605 | count | 1 |
| URB1-AS1  | -0.0692315 | 0.3300137 | -0.2098 | 0.834 | -0.079837309 | count | 1 |
| USP40     | -0.0929935 | 0.5684897 | -0.1636 | 0.87  | -0.079689908 | count | 1 |
| MOK       | -0.0970797 | 0.5840669 | -0.1662 | 0.868 | -0.079550799 | count | 1 |
| C7orf31   | -0.139634  | 0.4736242 | -0.2948 | 0.768 | -0.079175019 | count | 1 |
| EEF2KMT   | -0.084775  | 0.3958246 | -0.2142 | 0.83  | -0.079149074 | count | 1 |
| MVB12A    | -0.0589263 | 0.1530536 | -0.385  | 0.7   | -0.079109189 | count | 1 |
| TSTD1     | -0.0572103 | 0.1494192 | -0.3829 | 0.702 | -0.078983076 | count | 1 |
| PSENE1    | -0.0560039 | 0.0793314 | -0.7059 | 0.48  | -0.078959632 | count | 1 |
| SRP19     | -0.0567036 | 0.1268124 | -0.4471 | 0.655 | -0.078926991 | count | 1 |
| RSRC1     | -0.0576904 | 0.1284896 | -0.449  | 0.653 | -0.078865805 | count | 1 |
| AGPAT2    | -0.0562897 | 0.1095422 | -0.5139 | 0.607 | -0.078808248 | count | 1 |
| ZNF407    | -0.0725898 | 0.3600949 | -0.2016 | 0.84  | -0.078679406 | count | 1 |
| IRAK1BP1  | -0.4830433 | 0.8684696 | -0.5562 | 0.578 | -0.0786084   | count | 1 |
| NLGN2     | -0.4830433 | 1.022004  | -0.4726 | 0.637 | -0.0786084   | count | 1 |
| ZDHHC16   | -0.0674364 | 0.4371769 | -0.1543 | 0.877 | -0.078606964 | count | 1 |
| HERC5     | -0.0582924 | 0.1981301 | -0.2942 | 0.769 | -0.078571928 | count | 1 |
| HDDC2     | -0.0593642 | 0.1744301 | -0.3403 | 0.734 | -0.078436248 | count | 1 |
| GAA       | -0.0559252 | 0.0816092 | -0.6853 | 0.493 | -0.078422053 | count | 1 |
| NEAT1     | -0.0542909 | 0.0679141 | -0.7994 | 0.424 | -0.078223551 | count | 1 |
| SOWAHD    | -0.0674565 | 0.3265111 | -0.2066 | 0.836 | -0.078085037 | count | 1 |
| VPS29     | -0.0547236 | 0.0583813 | -0.9373 | 0.349 | -0.078066912 | count | 1 |
| SLC22A15  | -0.0784981 | 0.4445643 | -0.1766 | 0.86  | -0.077922201 | count | 1 |
| RPS6KA1   | -0.0625033 | 0.192261  | -0.3251 | 0.745 | -0.077919801 | count | 1 |
| CLCN2     | -0.4776356 | 0.9064438 | -0.5269 | 0.598 | -0.077865364 | count | 1 |
| SLC9B2    | -0.4776356 | 0.8144097 | -0.5865 | 0.558 | -0.077865364 | count | 1 |
| NANOS1    | -0.4776356 | 0.7706077 | -0.6198 | 0.535 | -0.077865364 | count | 1 |
| COG8      | -0.4776356 | 0.7396663 | -0.6457 | 0.519 | -0.077865364 | count | 1 |
| LAMTOR2   | -0.0547192 | 0.0628864 | -0.8701 | 0.384 | -0.077802554 | count | 1 |
| SCAMP1    | -0.059267  | 0.1709094 | -0.3468 | 0.729 | -0.077673864 | count | 1 |
| RRM1      | -0.0753364 | 0.3071167 | -0.2453 | 0.806 | -0.077657531 | count | 1 |
| B3GALT4   | -0.0612879 | 0.2338202 | -0.2621 | 0.793 | -0.077505773 | count | 1 |
| P3H3      | -1.115414  | 1.260005  | -0.8852 | 0.376 | -0.077463594 | count | 1 |
| TSPAN31   | -0.0608507 | 0.1856542 | -0.3278 | 0.743 | -0.077148675 | count | 1 |
| PLA2G2D   | -0.3173819 | 0.6336122 | -0.5009 | 0.616 | -0.077111928 | count | 1 |
| ASTN2     | -1.1016767 | 1.373904  | -0.8019 | 0.423 | -0.076870124 | count | 1 |
| RNF212    | -0.1054756 | 0.6498092 | -0.1623 | 0.871 | -0.076821947 | count | 1 |
| COMMD4    | -0.0555652 | 0.1350911 | -0.4113 | 0.681 | -0.076799678 | count | 1 |
| ACTR6     | -0.0591205 | 0.2127625 | -0.2779 | 0.781 | -0.076727371 | count | 1 |
| GLB1L     | -0.066646  | 0.3319539 | -0.2008 | 0.841 | -0.076580278 | count | 1 |
| SF3B6     | -0.05394   | 0.0730916 | -0.738  | 0.461 | -0.076549436 | count | 1 |
| ABCD4     | -0.0612947 | 0.2721051 | -0.2253 | 0.822 | -0.076295663 | count | 1 |
| CAPN10-DT | -0.1087336 | 0.5908926 | -0.184  | 0.854 | -0.076243964 | count | 1 |
| HSD11B1L  | -0.0888635 | 0.4496601 | -0.1976 | 0.843 | -0.076196537 | count | 1 |

|            |            |           |         |        |              |       |   |
|------------|------------|-----------|---------|--------|--------------|-------|---|
| MTFR1L     | -0.0611058 | 0.2782897 | -0.2196 | 0.826  | -0.076182777 | count | 1 |
| SNHG25     | -0.0738771 | 0.4402542 | -0.1678 | 0.867  | -0.076164626 | count | 1 |
| GTF2IRD2   | -0.1339656 | 0.5181295 | -0.2586 | 0.796  | -0.076055105 | count | 1 |
| ANPEP      | -0.0538947 | 0.1178957 | -0.4571 | 0.648  | -0.075990153 | count | 1 |
| RIC8B      | -0.1006713 | 0.8193734 | -0.1229 | 0.902  | -0.075887757 | count | 1 |
| METTL6     | -0.0676234 | 0.3263532 | -0.2072 | 0.836  | -0.075729755 | count | 1 |
| EEF1B2     | -0.0525599 | 0.034231  | -1.5354 | 0.125  | -0.075592959 | count | 1 |
| SLC20A2    | -0.076097  | 0.3328644 | -0.2286 | 0.819  | -0.075558971 | count | 1 |
| YWHAE      | -0.0529567 | 0.0595503 | -0.8893 | 0.374  | -0.07547222  | count | 1 |
| ARHGEF6    | -0.060209  | 0.1721484 | -0.3498 | 0.727  | -0.07506797  | count | 1 |
| AC073332.1 | -0.0655018 | 0.3572786 | -0.1833 | 0.855  | -0.074978429 | count | 1 |
| POLR1E     | -0.0874084 | 0.4223709 | -0.2069 | 0.836  | -0.074964701 | count | 1 |
| AC005229.4 | -0.099347  | 0.55664   | -0.1785 | 0.858  | -0.074906464 | count | 1 |
| EXOSC9     | -0.0593923 | 0.2336841 | -0.2542 | 0.799  | -0.074714124 | count | 1 |
| NUP160     | -0.0705725 | 0.2977661 | -0.237  | 0.813  | -0.074504655 | count | 1 |
| ALOX5      | -0.0530891 | 0.1016781 | -0.5221 | 0.602  | -0.074382983 | count | 1 |
| HGS        | -0.0601913 | 0.2572421 | -0.234  | 0.815  | -0.074153778 | count | 1 |
| ZNF160     | -0.0666761 | 0.2923637 | -0.2281 | 0.82   | -0.07393947  | count | 1 |
| ASMTL-AS1  | -1.035722  | 0.916086  | -1.1306 | 0.258  | -0.073920981 | count | 1 |
| COL14A1    | -1.035198  | 0.8560716 | -1.2092 | 0.227  | -0.073896865 | count | 1 |
| SEC23IP    | -0.0677225 | 0.2558133 | -0.2647 | 0.791  | -0.073872385 | count | 1 |
| AL158850.1 | -1.03373   | 1.200626  | -0.861  | 0.389  | -0.073829297 | count | 1 |
| AL158071.4 | -1.03373   | 1.139308  | -0.9073 | 0.364  | -0.073829297 | count | 1 |
| NHLRC4     | -1.03373   | 1.200626  | -0.861  | 0.389  | -0.073829297 | count | 1 |
| TMEM179B   | -0.0520359 | 0.0769044 | -0.6766 | 0.499  | -0.073750503 | count | 1 |
| CTDNBP1    | -0.05223   | 0.0808003 | -0.6464 | 0.518  | -0.07371289  | count | 1 |
| TNRC6B     | -0.053762  | 0.1160832 | -0.4631 | 0.643  | -0.073623259 | count | 1 |
| NDUFA13    | -0.0527737 | 0.0997498 | -0.5291 | 0.597  | -0.073567675 | count | 1 |
| PRKRA      | -0.0576829 | 0.1917119 | -0.3009 | 0.764  | -0.073491402 | count | 1 |
| STUB1      | -0.0522028 | 0.0918933 | -0.5681 | 0.57   | -0.073431586 | count | 1 |
| H1FO       | -0.0528162 | 0.1538042 | -0.3434 | 0.731  | -0.073395395 | count | 1 |
| SNHG12     | -0.0558748 | 0.1893675 | -0.2951 | 0.768  | -0.073383245 | count | 1 |
| MOCS2      | -0.0583517 | 0.2032717 | -0.2871 | 0.774  | -0.073305461 | count | 1 |
| PON2       | -0.0642692 | 0.2113806 | -0.304  | 0.761  | -0.073277509 | count | 1 |
| AP001462.1 | -0.2331677 | 0.7354827 | -0.317  | 0.751  | -0.073244522 | count | 1 |
| PIGP       | -0.0541405 | 0.1465847 | -0.3693 | 0.712  | -0.073243149 | count | 1 |
| ELAVL1     | -0.0545761 | 0.139597  | -0.391  | 0.696  | -0.073191362 | count | 1 |
| NDUFB11    | -0.0511562 | 0.0491204 | -1.0414 | 0.298  | -0.07317893  | count | 1 |
| FAN1       | -0.2329326 | 0.6040109 | -0.3856 | 0.7    | -0.073175548 | count | 1 |
| SLC25A33   | -0.057771  | 0.1860483 | -0.3105 | 0.756  | -0.073162555 | count | 1 |
| SYVN1      | -0.0806816 | 0.3586048 | -0.225  | 0.822  | -0.073125036 | count | 1 |
| AC005332.5 | -0.11397   | 0.5619345 | -0.2028 | 0.839  | -0.073011387 | count | 1 |
| MORF4L1    | -0.0510145 | 0.0506111 | -1.008  | 0.3136 | -0.072909704 | count | 1 |
| KNL1       | -1.013863  | 0.7079191 | -1.4322 | 0.152  | -0.072906185 | count | 1 |
| NDUFA8     | -0.0529455 | 0.1174457 | -0.4508 | 0.652  | -0.072899925 | count | 1 |

|            |            |           |         |        |              |       |   |
|------------|------------|-----------|---------|--------|--------------|-------|---|
| NUDCD2     | -0.0539112 | 0.1484791 | -0.3631 | 0.717  | -0.072888146 | count | 1 |
| POLD2      | -0.0589516 | 0.2728585 | -0.2161 | 0.829  | -0.072763998 | count | 1 |
| ABCA5      | -0.1133412 | 0.5156607 | -0.2198 | 0.826  | -0.072617675 | count | 1 |
| AAMP       | -0.0536487 | 0.1338669 | -0.4008 | 0.689  | -0.072510884 | count | 1 |
| HSBP1      | -0.0507387 | 0.0591936 | -0.8572 | 0.391  | -0.072446455 | count | 1 |
| ERGIC2     | -0.0538786 | 0.1348956 | -0.3994 | 0.69   | -0.072423505 | count | 1 |
| CYLD       | -0.0535029 | 0.1509777 | -0.3544 | 0.723  | -0.072244587 | count | 1 |
| LINC01303  | -0.0809847 | 0.4502139 | -0.1799 | 0.857  | -0.072177164 | count | 1 |
| CNOT6L     | -0.0547841 | 0.1522818 | -0.3598 | 0.719  | -0.072136684 | count | 1 |
| SLC25A29   | -0.0639419 | 0.38556   | -0.1658 | 0.868  | -0.071963107 | count | 1 |
| PAIP2B     | -0.2933049 | 0.7416491 | -0.3955 | 0.693  | -0.071783494 | count | 1 |
| ALDH18A1   | -0.2933049 | 0.7416491 | -0.3955 | 0.693  | -0.071783494 | count | 1 |
| AC018362.1 | -0.2933049 | 0.7567711 | -0.3876 | 0.698  | -0.071783494 | count | 1 |
| MAD2L1BP   | -0.0551911 | 0.2684155 | -0.2056 | 0.837  | -0.071637826 | count | 1 |
| COL4A3BP   | -0.0515795 | 0.1101619 | -0.4682 | 0.64   | -0.071460425 | count | 1 |
| SCP2       | -0.0505707 | 0.0786089 | -0.6433 | 0.52   | -0.071143537 | count | 1 |
| METTL23    | -0.052463  | 0.1563345 | -0.3356 | 0.737  | -0.071040815 | count | 1 |
| FBNP1      | -0.0513537 | 0.0991536 | -0.5179 | 0.605  | -0.071030753 | count | 1 |
| FUBP1      | -0.0535267 | 0.1455326 | -0.3678 | 0.713  | -0.070969503 | count | 1 |
| MTIF3      | -0.0508518 | 0.1047012 | -0.4857 | 0.627  | -0.070896319 | count | 1 |
| TCEANC2    | -0.1053226 | 0.4420618 | -0.2383 | 0.812  | -0.070865955 | count | 1 |
| ITGAX      | -0.0501078 | 0.0951875 | -0.5264 | 0.599  | -0.070791545 | count | 1 |
| DCTN3      | -0.0504039 | 0.0838404 | -0.6012 | 0.548  | -0.070768617 | count | 1 |
| PIP4K2C    | -0.134062  | 0.5386796 | -0.2489 | 0.803  | -0.070746796 | count | 1 |
| ACTG1      | -0.0490956 | 0.0344615 | -1.4247 | 0.1544 | -0.070718921 | count | 1 |
| MTMR9      | -0.0608724 | 0.2682633 | -0.2269 | 0.821  | -0.070239687 | count | 1 |
| NAPA       | -0.0502823 | 0.1023287 | -0.4914 | 0.623  | -0.070235296 | count | 1 |
| PCNT       | -0.0612662 | 0.281617  | -0.2176 | 0.828  | -0.070151929 | count | 1 |
| MCMBP      | -0.0571274 | 0.2004577 | -0.285  | 0.776  | -0.070124595 | count | 1 |
| ACOT9      | -0.0508894 | 0.1353652 | -0.3759 | 0.707  | -0.070115951 | count | 1 |
| CEP152     | -0.0760513 | 0.4787194 | -0.1589 | 0.874  | -0.070054739 | count | 1 |
| HORMAD1    | -0.9527278 | 1.0736556 | -0.8874 | 0.375  | -0.069965593 | count | 1 |
| AC073046.1 | -0.9527278 | 1.0736556 | -0.8874 | 0.375  | -0.069965593 | count | 1 |
| AC137630.2 | -0.9527278 | 1.0736556 | -0.8874 | 0.375  | -0.069965593 | count | 1 |
| DEPDC1B    | -0.9527278 | 1.0736556 | -0.8874 | 0.375  | -0.069965593 | count | 1 |
| MTBP       | -0.9527278 | 1.0736556 | -0.8874 | 0.375  | -0.069965593 | count | 1 |
| AL354733.3 | -0.9527278 | 1.0736556 | -0.8874 | 0.375  | -0.069965593 | count | 1 |
| EXPH5      | -0.9527278 | 1.515811  | -0.6285 | 0.53   | -0.069965593 | count | 1 |
| PSD        | -0.9527278 | 1.1635679 | -0.8188 | 0.413  | -0.069965593 | count | 1 |
| AC069209.1 | -0.9527278 | 1.0736556 | -0.8874 | 0.375  | -0.069965593 | count | 1 |
| AC015967.1 | -0.9527278 | 1.0736556 | -0.8874 | 0.375  | -0.069965593 | count | 1 |
| LPIN3      | -0.9527278 | 1.643165  | -0.5798 | 0.562  | -0.069965593 | count | 1 |
| AC005944.1 | -0.9527278 | 1.0736556 | -0.8874 | 0.375  | -0.069965593 | count | 1 |
| LINC01694  | -0.9527278 | 1.515811  | -0.6285 | 0.53   | -0.069965593 | count | 1 |
| METAP2     | -0.0504305 | 0.1147499 | -0.4395 | 0.66   | -0.069936136 | count | 1 |

|            |            |           |         |        |              |       |   |
|------------|------------|-----------|---------|--------|--------------|-------|---|
| FAM199X    | -0.0555805 | 0.2295604 | -0.2421 | 0.809  | -0.069931136 | count | 1 |
| SLC2A14    | -0.9508769 | 0.8186868 | -1.1615 | 0.246  | -0.069874168 | count | 1 |
| WASL       | -0.0521038 | 0.1958422 | -0.266  | 0.79   | -0.069852354 | count | 1 |
| PTAFR      | -0.0496599 | 0.1021832 | -0.486  | 0.627  | -0.069776548 | count | 1 |
| MRPL22     | -0.0515297 | 0.1546689 | -0.3332 | 0.739  | -0.069672065 | count | 1 |
| UBE3A      | -0.050885  | 0.1352709 | -0.3762 | 0.707  | -0.069556339 | count | 1 |
| FAM228B    | -0.0584575 | 0.2437412 | -0.2398 | 0.81   | -0.069449488 | count | 1 |
| AC127496.5 | -0.1438359 | 0.8856267 | -0.1624 | 0.871  | -0.069438691 | count | 1 |
| DYNC1LI1   | -0.0499316 | 0.1011277 | -0.4937 | 0.622  | -0.069425091 | count | 1 |
| CMSS1      | -0.0596531 | 0.2733682 | -0.2182 | 0.827  | -0.069334263 | count | 1 |
| CUL3       | -0.0518851 | 0.1665956 | -0.3114 | 0.755  | -0.069296951 | count | 1 |
| SMPD1      | -0.0662997 | 0.3425961 | -0.1935 | 0.847  | -0.068966594 | count | 1 |
| ATP5MF     | -0.048322  | 0.0504331 | -0.9581 | 0.3381 | -0.06894338  | count | 1 |
| AC078883.1 | -0.0820204 | 0.5605313 | -0.1463 | 0.884  | -0.068929417 | count | 1 |
| ID2        | -0.0488373 | 0.0963844 | -0.5067 | 0.612  | -0.068731519 | count | 1 |
| CDC73      | -0.050505  | 0.1349349 | -0.3743 | 0.708  | -0.068731283 | count | 1 |
| SIGLEC11   | -0.2177667 | 0.550637  | -0.3955 | 0.693  | -0.068705546 | count | 1 |
| CD164      | -0.0482772 | 0.0657317 | -0.7345 | 0.463  | -0.068627755 | count | 1 |
| ABHD4      | -0.129747  | 0.5845503 | -0.222  | 0.824  | -0.068537014 | count | 1 |
| FBXO28     | -0.0578154 | 0.2467979 | -0.2343 | 0.815  | -0.068494462 | count | 1 |
| ZNF554     | -0.410404  | 0.7278428 | -0.5639 | 0.573  | -0.068380186 | count | 1 |
| ZNF17      | -0.410404  | 0.6369471 | -0.6443 | 0.519  | -0.068380186 | count | 1 |
| EHD4       | -0.0499285 | 0.1254379 | -0.398  | 0.691  | -0.068322403 | count | 1 |
| NOCT       | -0.0534432 | 0.2386187 | -0.224  | 0.823  | -0.067943174 | count | 1 |
| VDAC2      | -0.0476273 | 0.0588041 | -0.8099 | 0.418  | -0.067876987 | count | 1 |
| ARF1       | -0.0474845 | 0.04618   | -1.0282 | 0.3039 | -0.067859607 | count | 1 |
| NDUFA6     | -0.0478952 | 0.0752584 | -0.6364 | 0.525  | -0.067849388 | count | 1 |
| RPS20      | -0.0472734 | 0.0340892 | -1.3868 | 0.166  | -0.067835526 | count | 1 |
| NABP1      | -0.0481454 | 0.1042795 | -0.4617 | 0.644  | -0.067817917 | count | 1 |
| RIOK3      | -0.048433  | 0.1041471 | -0.465  | 0.642  | -0.067719711 | count | 1 |
| BRIX1      | -0.0536148 | 0.2412477 | -0.2222 | 0.824  | -0.067647889 | count | 1 |
| MRPS12     | -0.0488736 | 0.1291029 | -0.3786 | 0.705  | -0.067602823 | count | 1 |
| IFIH1      | -0.0561007 | 0.1884354 | -0.2977 | 0.766  | -0.067535323 | count | 1 |
| AC005162.3 | -0.9044556 | 0.7673943 | -1.1786 | 0.239  | -0.067533963 | count | 1 |
| PAK3       | -0.9044556 | 0.9356897 | -0.9666 | 0.334  | -0.067533963 | count | 1 |
| TRIM58     | -0.2133296 | 1.872474  | -0.1139 | 0.909  | -0.067390035 | count | 1 |
| AC008443.5 | -0.2133296 | 1.119772  | -0.1905 | 0.849  | -0.067390035 | count | 1 |
| WASF1      | -0.2133296 | 1.119772  | -0.1905 | 0.849  | -0.067390035 | count | 1 |
| AC087672.2 | -0.2133296 | 1.119772  | -0.1905 | 0.849  | -0.067390035 | count | 1 |
| ZNF202     | -0.2133296 | 1.119772  | -0.1905 | 0.849  | -0.067390035 | count | 1 |
| LINC00167  | -0.2133296 | 1.872474  | -0.1139 | 0.909  | -0.067390035 | count | 1 |
| NUAK1      | -0.2133296 | 1.0960392 | -0.1946 | 0.846  | -0.067390035 | count | 1 |
| AL161772.1 | -0.2133296 | 1.0960392 | -0.1946 | 0.846  | -0.067390035 | count | 1 |
| KDM8       | -0.2133296 | 1.2764278 | -0.1671 | 0.867  | -0.067390035 | count | 1 |
| AC004771.1 | -0.2133296 | 1.2764278 | -0.1671 | 0.867  | -0.067390035 | count | 1 |

|            |            |           |         |        |              |       |   |
|------------|------------|-----------|---------|--------|--------------|-------|---|
| AC011498.4 | -0.2133296 | 1.0960392 | -0.1946 | 0.846  | -0.067390035 | count | 1 |
| ARHGEF18   | -0.2133296 | 1.2764278 | -0.1671 | 0.867  | -0.067390035 | count | 1 |
| LINC00665  | -0.2133296 | 1.0960392 | -0.1946 | 0.846  | -0.067390035 | count | 1 |
| AC008440.2 | -0.2133296 | 1.2764278 | -0.1671 | 0.867  | -0.067390035 | count | 1 |
| AC002470.1 | -0.2133296 | 1.119772  | -0.1905 | 0.849  | -0.067390035 | count | 1 |
| RNF227     | -0.2734408 | 0.4926659 | -0.555  | 0.579  | -0.067323988 | count | 1 |
| TRIM33     | -0.050403  | 0.2027009 | -0.2487 | 0.804  | -0.067071263 | count | 1 |
| UFM1       | -0.0479097 | 0.1120572 | -0.4275 | 0.669  | -0.067063756 | count | 1 |
| CCDC124    | -0.0482307 | 0.1099188 | -0.4388 | 0.661  | -0.06699189  | count | 1 |
| BUB3       | -0.0486376 | 0.1304579 | -0.3728 | 0.709  | -0.066777998 | count | 1 |
| SLC35A5    | -0.0736017 | 0.2666267 | -0.276  | 0.783  | -0.066770934 | count | 1 |
| LIMK1      | -0.0615055 | 0.2643112 | -0.2327 | 0.816  | -0.066730804 | count | 1 |
| ARHGEF35   | -0.8875695 | 0.8301569 | -1.0692 | 0.285  | -0.066659842 | count | 1 |
| AEBP1      | -0.1531528 | 0.611845  | -0.2503 | 0.802  | -0.066402962 | count | 1 |
| SLC35B4    | -0.0564702 | 0.3042386 | -0.1856 | 0.853  | -0.066303906 | count | 1 |
| SF3B4      | -0.0490245 | 0.1428014 | -0.3433 | 0.731  | -0.066204191 | count | 1 |
| BBS10      | -0.3946516 | 0.8212829 | -0.4805 | 0.631  | -0.066090828 | count | 1 |
| RSPH3      | -0.0550785 | 0.2815313 | -0.1956 | 0.845  | -0.065977847 | count | 1 |
| MRPL12     | -0.0482082 | 0.1504839 | -0.3204 | 0.749  | -0.065914804 | count | 1 |
| ITFG2-AS1  | -0.1518701 | 0.6441771 | -0.2358 | 0.814  | -0.065868055 | count | 1 |
| AC022211.2 | -0.8711115 | 1.25031   | -0.6967 | 0.486  | -0.065795931 | count | 1 |
| CD79A      | -0.8711115 | 1.210499  | -0.7196 | 0.472  | -0.065795931 | count | 1 |
| AC009061.2 | -0.0702082 | 0.5008951 | -0.1402 | 0.889  | -0.06566933  | count | 1 |
| NDUFS7     | -0.0463182 | 0.0671084 | -0.6902 | 0.49   | -0.065529137 | count | 1 |
| SGTA       | -0.0530736 | 0.2214633 | -0.2396 | 0.811  | -0.06552858  | count | 1 |
| MED4       | -0.0481851 | 0.1427461 | -0.3376 | 0.736  | -0.065422062 | count | 1 |
| ENTPD3-AS1 | -0.0672349 | 0.3712764 | -0.1811 | 0.856  | -0.065372921 | count | 1 |
| DNHD1      | -0.8624539 | 0.8221627 | -1.049  | 0.294  | -0.065336708 | count | 1 |
| SC5D       | -0.058285  | 0.2756359 | -0.2115 | 0.833  | -0.065320521 | count | 1 |
| ZNF469     | -0.2639355 | 0.6994664 | -0.3773 | 0.706  | -0.065169674 | count | 1 |
| CBWD2      | -0.0621382 | 0.2479238 | -0.2506 | 0.802  | -0.065168865 | count | 1 |
| AC004803.1 | -0.1719718 | 0.9216989 | -0.1866 | 0.852  | -0.06509001  | count | 1 |
| CDKL1      | -0.1719718 | 0.925533  | -0.1858 | 0.853  | -0.06509001  | count | 1 |
| ZNF354C    | -0.1499134 | 0.8436426 | -0.1777 | 0.859  | -0.065051383 | count | 1 |
| SRI        | -0.0456176 | 0.0824667 | -0.5532 | 0.58   | -0.064674282 | count | 1 |
| ANP32B     | -0.0453258 | 0.0543916 | -0.8333 | 0.405  | -0.064594723 | count | 1 |
| RB1-DT     | -0.2604903 | 0.9635663 | -0.2703 | 0.787  | -0.064385578 | count | 1 |
| MRPL52     | -0.045736  | 0.0833728 | -0.5486 | 0.583  | -0.064356781 | count | 1 |
| MAX        | -0.0473068 | 0.121797  | -0.3884 | 0.698  | -0.06428284  | count | 1 |
| PJVK       | -0.381608  | 0.839866  | -0.4544 | 0.65   | -0.064175659 | count | 1 |
| SPEG       | -0.381608  | 0.8832674 | -0.432  | 0.666  | -0.064175659 | count | 1 |
| KIF18A     | -0.381608  | 0.839866  | -0.4544 | 0.65   | -0.064175659 | count | 1 |
| AL133467.1 | -0.381608  | 0.839866  | -0.4544 | 0.65   | -0.064175659 | count | 1 |
| NDUFA1     | -0.0449489 | 0.0531884 | -0.8451 | 0.3981 | -0.064128709 | count | 1 |
| ZNF782     | -0.8350737 | 0.6615495 | -1.2623 | 0.207  | -0.063862455 | count | 1 |

|            |            |           |         |       |              |       |   |
|------------|------------|-----------|---------|-------|--------------|-------|---|
| CDC26      | -0.0457292 | 0.105602  | -0.433  | 0.665 | -0.063828064 | count | 1 |
| RRP7A      | -0.0452385 | 0.1058229 | -0.4275 | 0.669 | -0.063816397 | count | 1 |
| ALG3       | -0.0476643 | 0.1595081 | -0.2988 | 0.765 | -0.063776768 | count | 1 |
| IDH1       | -0.0475585 | 0.148692  | -0.3198 | 0.749 | -0.063581118 | count | 1 |
| NR6A1      | -0.073967  | 0.5237176 | -0.1412 | 0.888 | -0.063560338 | count | 1 |
| PDCD11     | -0.0688081 | 0.3796895 | -0.1812 | 0.856 | -0.06344183  | count | 1 |
| NAA15      | -0.0499354 | 0.1777584 | -0.2809 | 0.779 | -0.063417049 | count | 1 |
| SUV39H1    | -0.1671047 | 0.8781318 | -0.1903 | 0.849 | -0.063329575 | count | 1 |
| AC093512.1 | -0.1671047 | 0.8716661 | -0.1917 | 0.848 | -0.063329575 | count | 1 |
| SPAG5      | -0.1671047 | 0.8781318 | -0.1903 | 0.849 | -0.063329575 | count | 1 |
| TPM3       | -0.0440391 | 0.0347292 | -1.2681 | 0.205 | -0.063314607 | count | 1 |
| C9orf3     | -0.1668824 | 0.5801303 | -0.2877 | 0.774 | -0.063249056 | count | 1 |
| AF127577.4 | -0.8235864 | 0.8869078 | -0.9286 | 0.353 | -0.063233922 | count | 1 |
| HADHB      | -0.0445703 | 0.0787606 | -0.5659 | 0.572 | -0.062737196 | count | 1 |
| UQCC1      | -0.3710332 | 0.5412337 | -0.6855 | 0.493 | -0.06261     | count | 1 |
| MOSPD1     | -0.0596816 | 0.3552516 | -0.168  | 0.867 | -0.062607387 | count | 1 |
| YRDC       | -0.0474702 | 0.166637  | -0.2849 | 0.776 | -0.062558701 | count | 1 |
| SLC16A4    | -0.1649425 | 0.8160432 | -0.2021 | 0.84  | -0.062545977 | count | 1 |
| ITGA10     | -0.1649425 | 0.81986   | -0.2012 | 0.841 | -0.062545977 | count | 1 |
| AC010997.5 | -0.1649425 | 0.8744404 | -0.1886 | 0.85  | -0.062545977 | count | 1 |
| PFKM       | -0.1649425 | 0.7452985 | -0.2213 | 0.825 | -0.062545977 | count | 1 |
| MCM8       | -0.1649425 | 0.8326648 | -0.1981 | 0.843 | -0.062545977 | count | 1 |
| EGLN2      | -0.1649425 | 0.7431347 | -0.222  | 0.824 | -0.062545977 | count | 1 |
| TFG        | -0.0459176 | 0.1299726 | -0.3533 | 0.724 | -0.062540954 | count | 1 |
| RNF43      | -0.8093501 | 0.8686358 | -0.9317 | 0.352 | -0.062446661 | count | 1 |
| PSMD6      | -0.0456684 | 0.1186469 | -0.3849 | 0.7   | -0.062418156 | count | 1 |
| MDFIC      | -0.0456532 | 0.1849809 | -0.2468 | 0.805 | -0.062370046 | count | 1 |
| BORA       | -0.8068162 | 0.8991809 | -0.8973 | 0.37  | -0.062305562 | count | 1 |
| TNFRSF10C  | -0.0921014 | 0.6536356 | -0.1409 | 0.888 | -0.062126496 | count | 1 |
| DBF4B      | -0.1637199 | 0.7474789 | -0.219  | 0.827 | -0.062102478 | count | 1 |
| AL031595.2 | -0.1637199 | 0.6571979 | -0.2491 | 0.803 | -0.062102478 | count | 1 |
| LIN54      | -0.0695213 | 0.390591  | -0.178  | 0.859 | -0.062057297 | count | 1 |
| POLE       | -0.3668619 | 0.6445339 | -0.5692 | 0.569 | -0.061989189 | count | 1 |
| VSIG8      | -0.3661425 | 0.9046994 | -0.4047 | 0.686 | -0.061881938 | count | 1 |
| ANKRD39    | -0.0532027 | 0.2731736 | -0.1948 | 0.846 | -0.061864591 | count | 1 |
| PNKP       | -0.0473008 | 0.2132023 | -0.2219 | 0.824 | -0.061751363 | count | 1 |
| LRRRC37A   | -0.1274093 | 1.5132551 | -0.0842 | 0.933 | -0.061749998 | count | 1 |
| AC104532.2 | -0.1274093 | 0.7476824 | -0.1704 | 0.865 | -0.061749998 | count | 1 |
| DDX24      | -0.0433067 | 0.0667831 | -0.6485 | 0.517 | -0.06166471  | count | 1 |
| GRASP      | -0.0448149 | 0.101497  | -0.4415 | 0.659 | -0.061610109 | count | 1 |
| HAT1       | -0.0458065 | 0.1487042 | -0.308  | 0.758 | -0.061515637 | count | 1 |
| GGNBP2     | -0.0440996 | 0.0983508 | -0.4484 | 0.654 | -0.06141019  | count | 1 |
| TAF1A      | -0.0871251 | 0.4621788 | -0.1885 | 0.85  | -0.06133492  | count | 1 |
| HEATR6     | -0.0549476 | 0.2980776 | -0.1843 | 0.854 | -0.061299449 | count | 1 |
| PELI3      | -0.0560616 | 0.4160604 | -0.1347 | 0.893 | -0.061214469 | count | 1 |



|            |            |           |         |        |              |       |   |
|------------|------------|-----------|---------|--------|--------------|-------|---|
| NFYB       | -0.0502516 | 0.2640884 | -0.1903 | 0.849  | -0.061207771 | count | 1 |
| PHF6       | -0.0479587 | 0.1766011 | -0.2716 | 0.786  | -0.061196123 | count | 1 |
| SNX6       | -0.0427319 | 0.0620941 | -0.6882 | 0.4914 | -0.060998951 | count | 1 |
| CSTF2      | -0.0723832 | 0.4433401 | -0.1633 | 0.87   | -0.060917635 | count | 1 |
| TMEM208    | -0.0431922 | 0.0942805 | -0.4581 | 0.647  | -0.060726291 | count | 1 |
| AL353764.1 | -0.1908455 | 1.1661608 | -0.1637 | 0.87   | -0.060670148 | count | 1 |
| COL15A1    | -0.1908455 | 0.9645036 | -0.1979 | 0.843  | -0.060670148 | count | 1 |
| LINC01146  | -0.1908455 | 0.8440173 | -0.2261 | 0.821  | -0.060670148 | count | 1 |
| MAMSTR     | -0.1908455 | 1.1661608 | -0.1637 | 0.87   | -0.060670148 | count | 1 |
| AC084018.2 | -0.1144542 | 0.7136733 | -0.1604 | 0.873  | -0.060668912 | count | 1 |
| DIABLO     | -0.1144542 | 0.7166078 | -0.1597 | 0.873  | -0.060668912 | count | 1 |
| CD99       | -0.042241  | 0.050271  | -0.8403 | 0.401  | -0.060629804 | count | 1 |
| TMEM160    | -0.0429982 | 0.0909766 | -0.4726 | 0.637  | -0.060590424 | count | 1 |
| MDH2       | -0.0426332 | 0.0673202 | -0.6333 | 0.527  | -0.060492527 | count | 1 |
| RXRB       | -0.0618249 | 0.3716221 | -0.1664 | 0.868  | -0.060150466 | count | 1 |
| GANAB      | -0.0459991 | 0.1910603 | -0.2408 | 0.81   | -0.060142577 | count | 1 |
| ALDH4A1    | -0.7675392 | 1.1770254 | -0.6521 | 0.514  | -0.060080603 | count | 1 |
| AL512408.1 | -0.7675392 | 1.1755742 | -0.6529 | 0.514  | -0.060080603 | count | 1 |
| DLEC1      | -0.7675392 | 1.1755742 | -0.6529 | 0.514  | -0.060080603 | count | 1 |
| TERC       | -0.7675392 | 1.1755742 | -0.6529 | 0.514  | -0.060080603 | count | 1 |
| WWC2-AS2   | -0.7675392 | 1.1755742 | -0.6529 | 0.514  | -0.060080603 | count | 1 |
| FANCC      | -0.7675392 | 1.1755742 | -0.6529 | 0.514  | -0.060080603 | count | 1 |
| SYCP3      | -0.7675392 | 1.1755742 | -0.6529 | 0.514  | -0.060080603 | count | 1 |
| AL138963.3 | -0.7675392 | 1.1755742 | -0.6529 | 0.514  | -0.060080603 | count | 1 |
| AC090825.1 | -0.7675392 | 1.1755742 | -0.6529 | 0.514  | -0.060080603 | count | 1 |
| AC005224.4 | -0.7675392 | 1.528769  | -0.5021 | 0.616  | -0.060080603 | count | 1 |
| TEX14      | -0.7675392 | 1.1755742 | -0.6529 | 0.514  | -0.060080603 | count | 1 |
| TMEM87A    | -0.0458179 | 0.1687008 | -0.2716 | 0.786  | -0.060074092 | count | 1 |
| EPRS       | -0.044148  | 0.1199125 | -0.3682 | 0.713  | -0.059994413 | count | 1 |
| PGGHG      | -0.0766517 | 0.3467615 | -0.2211 | 0.825  | -0.059794365 | count | 1 |
| DYNLT1     | -0.0418808 | 0.0676327 | -0.6192 | 0.536  | -0.059612808 | count | 1 |
| OSTF1      | -0.0417892 | 0.0579537 | -0.7211 | 0.471  | -0.059523643 | count | 1 |
| LTBP3      | -0.0491716 | 0.3249347 | -0.1513 | 0.88   | -0.059498917 | count | 1 |
| SRSF8      | -0.0482224 | 0.2842268 | -0.1697 | 0.865  | -0.059445383 | count | 1 |
| R3HCC1L    | -0.0484487 | 0.3083354 | -0.1571 | 0.875  | -0.059263639 | count | 1 |
| PFKFB3     | -0.0435776 | 0.115438  | -0.3775 | 0.706  | -0.05923567  | count | 1 |
| HNRNPR     | -0.0420453 | 0.0890327 | -0.4722 | 0.637  | -0.059233312 | count | 1 |
| SH3YL1     | -0.0516277 | 0.3631266 | -0.1422 | 0.887  | -0.059157293 | count | 1 |
| HINT1      | -0.0412678 | 0.0468005 | -0.8818 | 0.378  | -0.059157108 | count | 1 |
| FBXL15     | -0.0429874 | 0.1514381 | -0.2839 | 0.777  | -0.059139853 | count | 1 |
| PGAM5      | -0.0607223 | 0.378009  | -0.1606 | 0.872  | -0.059085265 | count | 1 |
| OSBPL2     | -0.0500885 | 0.3353978 | -0.1493 | 0.881  | -0.05901847  | count | 1 |
| DNAJA1     | -0.0412559 | 0.0504518 | -0.8177 | 0.414  | -0.059016411 | count | 1 |
| ZNF580     | -0.0440982 | 0.16759   | -0.2631 | 0.792  | -0.058908971 | count | 1 |
| RBM47      | -0.0424263 | 0.1238846 | -0.3425 | 0.732  | -0.058735783 | count | 1 |

|            |            |           |         |        |              |       |   |
|------------|------------|-----------|---------|--------|--------------|-------|---|
| LINC02019  | -0.0774861 | 0.9657969 | -0.0802 | 0.936  | -0.058641392 | count | 1 |
| HIBADH     | -0.0505365 | 0.2473264 | -0.2043 | 0.838  | -0.058568674 | count | 1 |
| ZNF334     | -0.0959888 | 1.100857  | -0.0872 | 0.931  | -0.058471577 | count | 1 |
| SETD3      | -0.0439364 | 0.1401123 | -0.3136 | 0.754  | -0.05823913  | count | 1 |
| CSTF3      | -0.0512936 | 0.3182044 | -0.1612 | 0.872  | -0.05804477  | count | 1 |
| PRDM2      | -0.0437597 | 0.1761707 | -0.2484 | 0.804  | -0.058005204 | count | 1 |
| BATF2      | -0.7317518 | 0.7167178 | -1.021  | 0.307  | -0.057990272 | count | 1 |
| CYB5RL     | -0.1816061 | 0.7594619 | -0.2391 | 0.811  | -0.057882662 | count | 1 |
| AP003354.2 | -0.1816061 | 0.7594619 | -0.2391 | 0.811  | -0.057882662 | count | 1 |
| BAK1       | -0.0463782 | 0.2172871 | -0.2134 | 0.831  | -0.057770548 | count | 1 |
| UQCRC1     | -0.0410674 | 0.090257  | -0.455  | 0.649  | -0.057619637 | count | 1 |
| TMEM191C   | -0.066844  | 0.4859739 | -0.1375 | 0.891  | -0.057498357 | count | 1 |
| B2M        | -0.0398585 | 0.0201103 | -1.982  | 0.0476 | -0.057491961 | count | 1 |
| TMCO6      | -0.0605245 | 0.4174912 | -0.145  | 0.885  | -0.057455542 | count | 1 |
| GTF2A2     | -0.0406756 | 0.0786964 | -0.5169 | 0.605  | -0.057318656 | count | 1 |
| MINCR      | -0.0615522 | 0.5162871 | -0.1192 | 0.905  | -0.056804638 | count | 1 |
| PIGM       | -0.0674389 | 0.3872195 | -0.1742 | 0.862  | -0.056798092 | count | 1 |
| ALG11      | -0.0840312 | 0.622705  | -0.1349 | 0.893  | -0.056769603 | count | 1 |
| ZC3H15     | -0.0399889 | 0.0716658 | -0.558  | 0.577  | -0.056728377 | count | 1 |
| FBXO41     | -0.0929935 | 0.5259191 | -0.1768 | 0.86   | -0.056681934 | count | 1 |
| RAB2A      | -0.0398426 | 0.0673838 | -0.5913 | 0.554  | -0.05666763  | count | 1 |
| UBC        | -0.0393393 | 0.0315589 | -1.2465 | 0.213  | -0.056646576 | count | 1 |
| PRMT3      | -0.067131  | 0.4112648 | -0.1632 | 0.87   | -0.056541347 | count | 1 |
| SEC62      | -0.0394277 | 0.0535031 | -0.7369 | 0.461  | -0.056520775 | count | 1 |
| ZBTB8OS    | -0.0405525 | 0.1161503 | -0.3491 | 0.727  | -0.056424753 | count | 1 |
| ABRACL     | -0.0395745 | 0.0634665 | -0.6235 | 0.533  | -0.05640296  | count | 1 |
| MAD1L1     | -0.0438651 | 0.2435241 | -0.1801 | 0.857  | -0.056396091 | count | 1 |
| IL24       | -0.1765595 | 0.8162251 | -0.2163 | 0.829  | -0.056353702 | count | 1 |
| IDH1-AS1   | -0.1154859 | 0.8696872 | -0.1328 | 0.894  | -0.056129801 | count | 1 |
| CTNBL1     | -0.0412544 | 0.1478748 | -0.279  | 0.78   | -0.056065526 | count | 1 |
| IGSF21     | -0.0428297 | 0.1445405 | -0.2963 | 0.767  | -0.056004567 | count | 1 |
| SNRPD3     | -0.0395224 | 0.0726354 | -0.5441 | 0.586  | -0.055936029 | count | 1 |
| C5         | -0.6969145 | 0.6019978 | -1.1577 | 0.247  | -0.055896409 | count | 1 |
| KATNAL1    | -0.0614985 | 0.6897191 | -0.0892 | 0.929  | -0.055880135 | count | 1 |
| SYT11      | -0.046872  | 0.2274446 | -0.2061 | 0.837  | -0.055725938 | count | 1 |
| TLN1       | -0.0387331 | 0.0520419 | -0.7443 | 0.457  | -0.055444469 | count | 1 |
| PRCP       | -0.0400123 | 0.1115431 | -0.3587 | 0.72   | -0.055443757 | count | 1 |
| THAP4      | -0.0513307 | 0.3217007 | -0.1596 | 0.873  | -0.055398996 | count | 1 |
| FRA10AC1   | -0.0431452 | 0.1856419 | -0.2324 | 0.816  | -0.055303352 | count | 1 |
| MAF1       | -0.0396753 | 0.0985377 | -0.4026 | 0.687  | -0.055287569 | count | 1 |
| DCUN1D4    | -0.0706701 | 0.410362  | -0.1722 | 0.863  | -0.055182103 | count | 1 |
| RALBP1     | -0.039201  | 0.093642  | -0.4186 | 0.676  | -0.055174419 | count | 1 |
| CLK3       | -0.043426  | 0.2072635 | -0.2095 | 0.834  | -0.055165462 | count | 1 |
| AL158835.1 | -0.2204687 | 1.025811  | -0.2149 | 0.83   | -0.0551494   | count | 1 |
| WHRN       | -0.1133529 | 0.544516  | -0.2082 | 0.835  | -0.055120914 | count | 1 |

|            |            |           |         |        |              |       |   |
|------------|------------|-----------|---------|--------|--------------|-------|---|
| OAZ1       | -0.0382314 | 0.0231612 | -1.6507 | 0.0989 | -0.055085761 | count | 1 |
| AC245452.1 | -0.1260721 | 0.5792719 | -0.2176 | 0.828  | -0.055033306 | count | 1 |
| RINT1      | -0.0615344 | 0.4047923 | -0.152  | 0.879  | -0.054987324 | count | 1 |
| KTI12      | -0.0477821 | 0.2974283 | -0.1607 | 0.872  | -0.0549794   | count | 1 |
| RNPS1      | -0.0395595 | 0.1129952 | -0.3501 | 0.726  | -0.054816674 | count | 1 |
| SLC25A1    | -0.0421543 | 0.2042465 | -0.2064 | 0.837  | -0.054786336 | count | 1 |
| SDHC       | -0.0388995 | 0.0828522 | -0.4695 | 0.639  | -0.054575953 | count | 1 |
| RPL27      | -0.0379393 | 0.0333365 | -1.1381 | 0.255  | -0.054491887 | count | 1 |
| SOWAHC     | -0.0571165 | 0.427075  | -0.1337 | 0.894  | -0.054242769 | count | 1 |
| RPL41      | -0.0375718 | 0.020377  | -1.8438 | 0.0653 | -0.054167858 | count | 1 |
| LRRIQ3     | -0.3143545 | 1.2345272 | -0.2546 | 0.799  | -0.054017783 | count | 1 |
| CFB        | -0.3143545 | 1.2345272 | -0.2546 | 0.799  | -0.054017783 | count | 1 |
| PIP5KL1    | -0.3143545 | 1.5161908 | -0.2073 | 0.836  | -0.054017783 | count | 1 |
| PHYHD1     | -0.3143545 | 1.202161  | -0.2615 | 0.794  | -0.054017783 | count | 1 |
| BACE1-AS   | -0.3143545 | 1.2345272 | -0.2546 | 0.799  | -0.054017783 | count | 1 |
| AC090061.1 | -0.3143545 | 1.2345272 | -0.2546 | 0.799  | -0.054017783 | count | 1 |
| LINC02391  | -0.3143545 | 1.202161  | -0.2615 | 0.794  | -0.054017783 | count | 1 |
| PLSCR3     | -0.3143545 | 1.2345272 | -0.2546 | 0.799  | -0.054017783 | count | 1 |
| ZNF382     | -0.3143545 | 1.2345272 | -0.2546 | 0.799  | -0.054017783 | count | 1 |
| AC021092.1 | -0.3143545 | 1.202161  | -0.2615 | 0.794  | -0.054017783 | count | 1 |
| ZNF112     | -0.3143545 | 1.2345272 | -0.2546 | 0.799  | -0.054017783 | count | 1 |
| CDK4       | -0.0400747 | 0.1666175 | -0.2405 | 0.81   | -0.053925732 | count | 1 |
| PPP1R2     | -0.0382343 | 0.0840372 | -0.455  | 0.649  | -0.053861546 | count | 1 |
| IBTK       | -0.0410408 | 0.2027667 | -0.2024 | 0.84   | -0.053782087 | count | 1 |
| RAB5A      | -0.0393693 | 0.120736  | -0.3261 | 0.744  | -0.053767601 | count | 1 |
| EIF2B1     | -0.0422669 | 0.1759039 | -0.2403 | 0.81   | -0.053759856 | count | 1 |
| PPM1A      | -0.0432572 | 0.2183064 | -0.1981 | 0.843  | -0.053714423 | count | 1 |
| NRBP1      | -0.0386325 | 0.1343601 | -0.2875 | 0.774  | -0.053545745 | count | 1 |
| DTX3L      | -0.0416673 | 0.1847282 | -0.2256 | 0.822  | -0.053521573 | count | 1 |
| SAMD13     | -0.3096509 | 0.7652368 | -0.4046 | 0.686  | -0.053289429 | count | 1 |
| TMEM161A   | -0.0474993 | 0.2850244 | -0.1666 | 0.868  | -0.053021855 | count | 1 |
| TBRG1      | -0.0384763 | 0.1293657 | -0.2974 | 0.766  | -0.052964022 | count | 1 |
| MTRF1      | -0.0581027 | 0.4677546 | -0.1242 | 0.901  | -0.052818104 | count | 1 |
| PRPF31     | -0.0385208 | 0.1407104 | -0.2738 | 0.784  | -0.052755361 | count | 1 |
| PLCE1      | -0.0989341 | 0.8767853 | -0.1128 | 0.91   | -0.052625982 | count | 1 |
| ITGA7      | -0.0989341 | 0.8260253 | -0.1198 | 0.905  | -0.052625982 | count | 1 |
| ZNF599     | -0.0989341 | 1.117569  | -0.0885 | 0.929  | -0.052625982 | count | 1 |
| GINM1      | -0.0378765 | 0.10256   | -0.3693 | 0.712  | -0.052559522 | count | 1 |
| SLC39A6    | -0.0427446 | 0.1885582 | -0.2267 | 0.821  | -0.052509429 | count | 1 |
| TDRD3      | -0.0422781 | 0.248842  | -0.1699 | 0.865  | -0.052412162 | count | 1 |
| MRPL19     | -0.0408279 | 0.162707  | -0.2509 | 0.802  | -0.052391893 | count | 1 |
| HUWE1      | -0.0410197 | 0.217349  | -0.1887 | 0.85   | -0.052356696 | count | 1 |
| ZNF32      | -0.0419229 | 0.2119892 | -0.1978 | 0.843  | -0.052315069 | count | 1 |
| XRCC3      | -0.6385284 | 0.8062399 | -0.792  | 0.428  | -0.052253208 | count | 1 |
| LINC01678  | -0.0380821 | 0.139668  | -0.2727 | 0.785  | -0.052216774 | count | 1 |

|            |            |           |         |       |              |       |   |
|------------|------------|-----------|---------|-------|--------------|-------|---|
| TAF11      | -0.038961  | 0.1438048 | -0.2709 | 0.786 | -0.052098715 | count | 1 |
| PSEN2      | -0.0592802 | 0.3758727 | -0.1577 | 0.875 | -0.052046334 | count | 1 |
| ARHGAP32   | -0.0710121 | 0.7545953 | -0.0941 | 0.925 | -0.052035913 | count | 1 |
| RRP1B      | -0.0398757 | 0.1997759 | -0.1996 | 0.842 | -0.052032013 | count | 1 |
| CYFIP2     | -0.084282  | 0.4798698 | -0.1756 | 0.861 | -0.05146405  | count | 1 |
| AP002954.1 | -0.0702032 | 0.4796986 | -0.1463 | 0.884 | -0.051450437 | count | 1 |
| CHRNB1     | -0.0506045 | 0.2946472 | -0.1717 | 0.864 | -0.051383474 | count | 1 |
| SNRPC      | -0.0363497 | 0.0787235 | -0.4617 | 0.644 | -0.051299713 | count | 1 |
| QTRT2      | -0.0398889 | 0.2560204 | -0.1558 | 0.876 | -0.051188812 | count | 1 |
| CDK2AP1    | -0.0955952 | 0.5020192 | -0.1904 | 0.849 | -0.050888071 | count | 1 |
| ATAD3A     | -0.0519027 | 0.2928039 | -0.1773 | 0.859 | -0.05055483  | count | 1 |
| TMEM258    | -0.0353347 | 0.0621976 | -0.5681 | 0.57  | -0.050236136 | count | 1 |
| NLE1       | -0.0874972 | 0.588863  | -0.1486 | 0.882 | -0.050175605 | count | 1 |
| GINS1      | -0.2896891 | 0.9783271 | -0.2961 | 0.767 | -0.050172006 | count | 1 |
| PARL       | -0.0365121 | 0.1089958 | -0.335  | 0.738 | -0.05015852  | count | 1 |
| APBB2      | -0.131084  | 0.5365325 | -0.2443 | 0.807 | -0.050152523 | count | 1 |
| SUZ12      | -0.0365485 | 0.1300099 | -0.2811 | 0.779 | -0.049776944 | count | 1 |
| ZNF805     | -0.0933353 | 0.5240413 | -0.1781 | 0.859 | -0.049710261 | count | 1 |
| TAPBP      | -0.0353768 | 0.091013  | -0.3887 | 0.698 | -0.049698515 | count | 1 |
| C1QA       | -0.0344403 | 0.0743804 | -0.463  | 0.643 | -0.049599805 | count | 1 |
| SNRNP27    | -0.0369123 | 0.201261  | -0.1834 | 0.854 | -0.04958199  | count | 1 |
| KAT6B      | -0.0411298 | 0.2992465 | -0.1374 | 0.891 | -0.049434845 | count | 1 |
| SCMH1      | -0.0651637 | 0.5658219 | -0.1152 | 0.908 | -0.049418408 | count | 1 |
| DBT        | -0.0599038 | 0.4108918 | -0.1458 | 0.884 | -0.049368344 | count | 1 |
| SMARCB1    | -0.035922  | 0.1261842 | -0.2847 | 0.776 | -0.049247256 | count | 1 |
| DEF8       | -0.0364266 | 0.1539139 | -0.2367 | 0.813 | -0.049056058 | count | 1 |
| SELENOK    | -0.03401   | 0.0757709 | -0.4489 | 0.654 | -0.048848784 | count | 1 |
| MMP23B     | -0.2805033 | 0.7799094 | -0.3597 | 0.719 | -0.048723094 | count | 1 |
| MAPK8IP1   | -0.2805033 | 0.7745144 | -0.3622 | 0.717 | -0.048723094 | count | 1 |
| AC008764.8 | -0.2805033 | 0.6156575 | -0.4556 | 0.649 | -0.048723094 | count | 1 |
| LILRA4     | -0.0995176 | 0.5308937 | -0.1875 | 0.851 | -0.048551365 | count | 1 |
| C12orf75   | -0.0542106 | 0.3940845 | -0.1376 | 0.891 | -0.048490584 | count | 1 |
| PPP2R1B    | -0.0454045 | 0.4422375 | -0.1027 | 0.918 | -0.048388447 | count | 1 |
| LRRC27     | -0.0714489 | 0.4594049 | -0.1555 | 0.876 | -0.048384013 | count | 1 |
| NKILA      | -0.277634  | 0.8304401 | -0.3343 | 0.738 | -0.048268669 | count | 1 |
| AL590764.1 | -0.0839337 | 0.4670278 | -0.1797 | 0.857 | -0.048168808 | count | 1 |
| TMEM65     | -0.0386677 | 0.2228547 | -0.1735 | 0.862 | -0.048105934 | count | 1 |
| DNAJC30    | -0.0464294 | 0.3740354 | -0.1241 | 0.901 | -0.048000101 | count | 1 |
| GLMN       | -0.0502907 | 0.3662214 | -0.1373 | 0.891 | -0.047799829 | count | 1 |
| HMGXB3     | -0.0353362 | 0.1726594 | -0.2047 | 0.838 | -0.047779486 | count | 1 |
| LYAR       | -0.0350229 | 0.1359079 | -0.2577 | 0.797 | -0.047747058 | count | 1 |
| PRDM4      | -0.0447935 | 0.3836737 | -0.1167 | 0.907 | -0.047739985 | count | 1 |
| CCDC58     | -0.0404707 | 0.3277247 | -0.1235 | 0.902 | -0.047715696 | count | 1 |
| FBXO34     | -0.0366025 | 0.1646808 | -0.2223 | 0.824 | -0.047693404 | count | 1 |
| OSGEP      | -0.0350467 | 0.1385388 | -0.253  | 0.8   | -0.047596758 | count | 1 |

|            |            |           |         |       |              |       |   |
|------------|------------|-----------|---------|-------|--------------|-------|---|
| SNRPD2     | -0.0332991 | 0.0578311 | -0.5758 | 0.565 | -0.047523301 | count | 1 |
| PKD2L2     | -0.5660077 | 1.1391677 | -0.4969 | 0.619 | -0.047486923 | count | 1 |
| ACHE       | -0.5660077 | 1.1391677 | -0.4969 | 0.619 | -0.047486923 | count | 1 |
| C20orf197  | -0.5660077 | 1.223277  | -0.4627 | 0.644 | -0.047486923 | count | 1 |
| AC011498.1 | -0.5660077 | 1.1391677 | -0.4969 | 0.619 | -0.047486923 | count | 1 |
| NEK8       | -0.0735265 | 0.6955165 | -0.1057 | 0.916 | -0.047480596 | count | 1 |
| AHI1       | -0.0362043 | 0.2158251 | -0.1677 | 0.867 | -0.047451503 | count | 1 |
| AC009133.1 | -0.5652309 | 0.7092245 | -0.797  | 0.426 | -0.047434387 | count | 1 |
| MZT1       | -0.0357013 | 0.1713643 | -0.2083 | 0.835 | -0.047309042 | count | 1 |
| RNF25      | -0.057195  | 0.4154393 | -0.1377 | 0.891 | -0.047155325 | count | 1 |
| LIPE-AS1   | -0.0468556 | 0.355052  | -0.132  | 0.895 | -0.04714554  | count | 1 |
| DYRK1B     | -0.0641486 | 0.4904315 | -0.1308 | 0.896 | -0.047062785 | count | 1 |
| SPCS1      | -0.0329128 | 0.0528624 | -0.6226 | 0.534 | -0.046990289 | count | 1 |
| CHST12     | -0.0378698 | 0.2571932 | -0.1472 | 0.883 | -0.046876158 | count | 1 |
| MTHFD1L    | -0.0377255 | 0.2943224 | -0.1282 | 0.898 | -0.046858208 | count | 1 |
| RAB14      | -0.0332344 | 0.0873103 | -0.3806 | 0.703 | -0.046766087 | count | 1 |
| ZNF395     | -0.0452191 | 0.4338008 | -0.1042 | 0.917 | -0.046754522 | count | 1 |
| ZNHIT1     | -0.0325753 | 0.0718524 | -0.4534 | 0.65  | -0.046332422 | count | 1 |
| NUTM2A-AS1 | -0.0367155 | 0.2116696 | -0.1735 | 0.862 | -0.04629799  | count | 1 |
| TIMM17B    | -0.0331652 | 0.1125536 | -0.2947 | 0.768 | -0.046211041 | count | 1 |
| LARP4      | -0.0350055 | 0.178916  | -0.1957 | 0.845 | -0.046204959 | count | 1 |
| FIS1       | -0.0324783 | 0.0590291 | -0.5502 | 0.582 | -0.046179477 | count | 1 |
| CCDC153    | -0.0803856 | 0.6055012 | -0.1328 | 0.894 | -0.046167561 | count | 1 |
| ITGB1BP1   | -0.0331402 | 0.1169763 | -0.2833 | 0.777 | -0.046078844 | count | 1 |
| CDK1       | -0.0863188 | 0.6447306 | -0.1339 | 0.894 | -0.046045572 | count | 1 |
| DNAJB5     | -0.051437  | 0.5019555 | -0.1025 | 0.918 | -0.046026785 | count | 1 |
| FUCA1      | -0.0337893 | 0.1121996 | -0.3012 | 0.763 | -0.045975255 | count | 1 |
| TRIM24     | -0.0393416 | 0.2519981 | -0.1561 | 0.876 | -0.045946029 | count | 1 |
| STK32C     | -0.036334  | 0.2266105 | -0.1603 | 0.873 | -0.045879162 | count | 1 |
| YIF1B      | -0.0339911 | 0.16675   | -0.2038 | 0.838 | -0.04585774  | count | 1 |
| EIF1AX     | -0.0323868 | 0.0741896 | -0.4365 | 0.662 | -0.045823915 | count | 1 |
| USP46-AS1  | -0.074795  | 0.6179232 | -0.121  | 0.904 | -0.045759806 | count | 1 |
| UTP3       | -0.034779  | 0.1943023 | -0.179  | 0.858 | -0.045707598 | count | 1 |
| AC062017.1 | -0.0449568 | 0.5185101 | -0.0867 | 0.931 | -0.045675821 | count | 1 |
| HS2ST1     | -0.0405089 | 0.31446   | -0.1288 | 0.898 | -0.045673734 | count | 1 |
| CCDC191    | -0.093055  | 0.4256099 | -0.2186 | 0.827 | -0.045467492 | count | 1 |
| BNIP1      | -0.0455874 | 0.3472804 | -0.1313 | 0.896 | -0.045417811 | count | 1 |
| ATP6V0E2   | -0.0451208 | 0.3141119 | -0.1436 | 0.886 | -0.045408422 | count | 1 |
| TMEM237    | -0.0702199 | 0.6909294 | -0.1016 | 0.919 | -0.045374666 | count | 1 |
| EVL        | -0.0334636 | 0.1463697 | -0.2286 | 0.819 | -0.045358779 | count | 1 |
| AL355922.1 | -0.0926224 | 0.5443497 | -0.1702 | 0.865 | -0.045260713 | count | 1 |
| SSH1       | -0.0381032 | 0.273839  | -0.1391 | 0.889 | -0.04506616  | count | 1 |
| OTUD4      | -0.0394876 | 0.2476329 | -0.1595 | 0.873 | -0.044725081 | count | 1 |
| ACAA1      | -0.0320529 | 0.0951584 | -0.3368 | 0.736 | -0.044716398 | count | 1 |
| TMEM53     | -0.0378049 | 0.2745883 | -0.1377 | 0.891 | -0.04458033  | count | 1 |

|                 |            |           |         |       |              |       |   |
|-----------------|------------|-----------|---------|-------|--------------|-------|---|
| AQP1            | -0.5224034 | 0.8761359 | -0.5963 | 0.551 | -0.044488356 | count | 1 |
| STIM2           | -0.0358074 | 0.2026211 | -0.1767 | 0.86  | -0.044479953 | count | 1 |
| KPNA6           | -0.0348898 | 0.2288467 | -0.1525 | 0.879 | -0.044442463 | count | 1 |
| ADAP2           | -0.0310277 | 0.0811368 | -0.3824 | 0.702 | -0.044122104 | count | 1 |
| LEO1            | -0.0356107 | 0.2147409 | -0.1658 | 0.868 | -0.043926965 | count | 1 |
| BBS5            | -0.0545504 | 0.9985305 | -0.0546 | 0.956 | -0.043887343 | count | 1 |
| LRRRC75B        | -0.0896888 | 0.7912999 | -0.1133 | 0.91  | -0.04385736  | count | 1 |
| LARS2           | -0.0896057 | 0.5743641 | -0.156  | 0.876 | -0.043817577 | count | 1 |
| LCP2            | -0.0318472 | 0.099599  | -0.3198 | 0.749 | -0.043769076 | count | 1 |
| RBP1            | -0.064541  | 0.6143353 | -0.1051 | 0.916 | -0.043762827 | count | 1 |
| AP2A2           | -0.0334576 | 0.1380067 | -0.2424 | 0.808 | -0.043699315 | count | 1 |
| KDM1A           | -0.0348081 | 0.2878262 | -0.1209 | 0.904 | -0.04364956  | count | 1 |
| RPS6KL1         | -0.2484519 | 0.9384224 | -0.2648 | 0.791 | -0.043596123 | count | 1 |
| TMEM204         | -0.2484519 | 0.9334979 | -0.2662 | 0.79  | -0.043596123 | count | 1 |
| AL008635.1      | -0.2484519 | 0.9334979 | -0.2662 | 0.79  | -0.043596123 | count | 1 |
| AP001059.2      | -0.2484519 | 0.9169425 | -0.271  | 0.786 | -0.043596123 | count | 1 |
| PRPF6           | -0.0317542 | 0.1399495 | -0.2269 | 0.821 | -0.043493566 | count | 1 |
| AGER            | -0.1130232 | 0.6526207 | -0.1732 | 0.863 | -0.043447229 | count | 1 |
| NMT1            | -0.0323819 | 0.1678021 | -0.193  | 0.847 | -0.04327089  | count | 1 |
| ANKHD1-EIF4EBP3 | -0.5050637 | 0.7352596 | -0.6869 | 0.492 | -0.043267585 | count | 1 |
| DENND1B         | -0.03353   | 0.2087311 | -0.1606 | 0.872 | -0.042712752 | count | 1 |
| ARF6            | -0.0305062 | 0.0879294 | -0.3469 | 0.729 | -0.042674774 | count | 1 |
| PAXIP1          | -0.0529788 | 0.5092974 | -0.104  | 0.917 | -0.04263341  | count | 1 |
| PCNA            | -0.0332559 | 0.2003087 | -0.166  | 0.868 | -0.042599187 | count | 1 |
| C3AR1           | -0.029808  | 0.0630713 | -0.4726 | 0.637 | -0.042366764 | count | 1 |
| MAP3K14         | -0.0444841 | 0.3530601 | -0.126  | 0.9   | -0.042310397 | count | 1 |
| PA2G4           | -0.0297311 | 0.0727003 | -0.409  | 0.683 | -0.042173806 | count | 1 |
| MFSD2A          | -0.0427112 | 0.3737931 | -0.1143 | 0.909 | -0.042116614 | count | 1 |
| LYRM9           | -0.0430602 | 0.444854  | -0.0968 | 0.923 | -0.041984501 | count | 1 |
| ANO6            | -0.0315566 | 0.1998202 | -0.1579 | 0.875 | -0.041973055 | count | 1 |
| FOXO1           | -0.0343576 | 0.2430832 | -0.1413 | 0.888 | -0.041972932 | count | 1 |
| GCNT2           | -0.0388034 | 0.3697436 | -0.1049 | 0.916 | -0.041925487 | count | 1 |
| RAB1B           | -0.0311295 | 0.1557621 | -0.1999 | 0.842 | -0.041867158 | count | 1 |
| UBL5            | -0.0292461 | 0.0486528 | -0.6011 | 0.548 | -0.041854778 | count | 1 |
| LRRRC40         | -0.0398218 | 0.2961788 | -0.1345 | 0.893 | -0.041854017 | count | 1 |
| ASMTL           | -0.033464  | 0.248594  | -0.1346 | 0.893 | -0.041642594 | count | 1 |
| TOP1MT          | -0.0398121 | 0.4422811 | -0.09   | 0.928 | -0.041521804 | count | 1 |
| NDUFA5          | -0.0298903 | 0.1051489 | -0.2843 | 0.776 | -0.041486538 | count | 1 |
| ZNF90           | -0.084632  | 0.4909416 | -0.1724 | 0.863 | -0.041433664 | count | 1 |
| UBAP1           | -0.0316318 | 0.1868627 | -0.1693 | 0.866 | -0.041377364 | count | 1 |
| NUBP2           | -0.0316892 | 0.1777721 | -0.1783 | 0.859 | -0.041097929 | count | 1 |
| BEX1            | -0.066844  | 0.67691   | -0.0987 | 0.921 | -0.040961645 | count | 1 |
| MGRN1           | -0.0314794 | 0.3730794 | -0.0844 | 0.933 | -0.040927837 | count | 1 |
| CSNK2A1         | -0.0306351 | 0.1593824 | -0.1922 | 0.848 | -0.040768418 | count | 1 |
| NFE2L3          | -0.0384725 | 0.190251  | -0.2022 | 0.84  | -0.040739887 | count | 1 |

|            |            |           |         |       |              |       |   |
|------------|------------|-----------|---------|-------|--------------|-------|---|
| JMY        | -0.0331169 | 0.2202263 | -0.1504 | 0.88  | -0.040623674 | count | 1 |
| CASTOR3    | -0.1047798 | 0.5954432 | -0.176  | 0.86  | -0.04036495  | count | 1 |
| SLC37A3    | -0.1047798 | 0.5933502 | -0.1766 | 0.86  | -0.04036495  | count | 1 |
| XYLT1      | -0.0442328 | 0.3957254 | -0.1118 | 0.911 | -0.040282577 | count | 1 |
| IDO1       | -0.039622  | 0.5419704 | -0.0731 | 0.942 | -0.040278091 | count | 1 |
| FDXR       | -0.0418919 | 0.5331285 | -0.0786 | 0.937 | -0.039857267 | count | 1 |
| NNMT       | -0.0904831 | 0.5177454 | -0.1748 | 0.861 | -0.039847575 | count | 1 |
| DESI1      | -0.0294828 | 0.1629814 | -0.1809 | 0.856 | -0.039766225 | count | 1 |
| ZDHHC2     | -0.0306975 | 0.1848101 | -0.1661 | 0.868 | -0.039709446 | count | 1 |
| TRAF1      | -0.0352872 | 0.3294898 | -0.1071 | 0.915 | -0.039618367 | count | 1 |
| ACTR10     | -0.0289687 | 0.1636922 | -0.177  | 0.86  | -0.039614319 | count | 1 |
| COX7B      | -0.0277157 | 0.053578  | -0.5173 | 0.605 | -0.039578603 | count | 1 |
| TGFB2      | -0.0739196 | 0.5808146 | -0.1273 | 0.899 | -0.039540593 | count | 1 |
| EPOP       | -0.0739196 | 0.6108063 | -0.121  | 0.904 | -0.039540593 | count | 1 |
| ROCK2      | -0.0301131 | 0.155728  | -0.1934 | 0.847 | -0.039529252 | count | 1 |
| HIRA       | -0.0476723 | 0.5028482 | -0.0948 | 0.924 | -0.039360808 | count | 1 |
| CHMP5      | -0.027795  | 0.0775417 | -0.3585 | 0.72  | -0.039301795 | count | 1 |
| CD1A       | -0.2220366 | 0.7612231 | -0.2917 | 0.771 | -0.039286766 | count | 1 |
| AC106047.1 | -0.2220366 | 0.7612231 | -0.2917 | 0.771 | -0.039286766 | count | 1 |
| TRIM60     | -0.2220366 | 1.021223  | -0.2174 | 0.828 | -0.039286766 | count | 1 |
| AC006064.4 | -0.2220366 | 0.7685758 | -0.2889 | 0.773 | -0.039286766 | count | 1 |
| CXCL12     | -0.0302808 | 0.1907858 | -0.1587 | 0.874 | -0.039273332 | count | 1 |
| XRCC5      | -0.0275905 | 0.0604083 | -0.4567 | 0.648 | -0.03921347  | count | 1 |
| CD163      | -0.0274114 | 0.0668367 | -0.4101 | 0.682 | -0.039091459 | count | 1 |
| FCER1G     | -0.0270419 | 0.0255655 | -1.0578 | 0.29  | -0.038960502 | count | 1 |
| ARHGAP35   | -0.0350073 | 0.3242759 | -0.108  | 0.914 | -0.038921371 | count | 1 |
| MGMT       | -0.0281738 | 0.1108299 | -0.2542 | 0.799 | -0.038856061 | count | 1 |
| FAM13A-AS1 | -0.0674568 | 0.6035584 | -0.1118 | 0.911 | -0.038848962 | count | 1 |
| SNAP47     | -0.0358777 | 0.4335577 | -0.0828 | 0.934 | -0.038774412 | count | 1 |
| PINK1      | -0.0309524 | 0.1832185 | -0.1689 | 0.866 | -0.03864527  | count | 1 |
| FAM168A    | -0.0390366 | 0.3249656 | -0.1201 | 0.904 | -0.038508937 | count | 1 |
| MEF2C-AS1  | -0.0565368 | 0.5184183 | -0.1091 | 0.913 | -0.038392926 | count | 1 |
| CATSPER2   | -0.0870559 | 0.6514532 | -0.1336 | 0.894 | -0.038370612 | count | 1 |
| SUMO2      | -0.026713  | 0.0365716 | -0.7304 | 0.465 | -0.038353947 | count | 1 |
| COMMD8     | -0.0278638 | 0.1151028 | -0.2421 | 0.809 | -0.038310424 | count | 1 |
| GLIPR2     | -0.0267439 | 0.0798314 | -0.335  | 0.738 | -0.038163837 | count | 1 |
| MED21      | -0.0313602 | 0.2041188 | -0.1536 | 0.878 | -0.037985082 | count | 1 |
| CDC42      | -0.026431  | 0.0371888 | -0.7107 | 0.477 | -0.037941631 | count | 1 |
| CCDC171    | -0.0614339 | 0.6292253 | -0.0976 | 0.922 | -0.037687748 | count | 1 |
| GABARAPL2  | -0.0264505 | 0.0643672 | -0.4109 | 0.681 | -0.037677654 | count | 1 |
| NUFIP2     | -0.0269116 | 0.1002432 | -0.2685 | 0.788 | -0.037658373 | count | 1 |
| TMED5      | -0.0265289 | 0.09262   | -0.2864 | 0.775 | -0.037434424 | count | 1 |
| POLR3GL    | -0.0271488 | 0.1194962 | -0.2272 | 0.82  | -0.037321306 | count | 1 |
| FAM120AOS  | -0.0278488 | 0.1479464 | -0.1882 | 0.851 | -0.037234059 | count | 1 |
| TRERF1     | -0.0365929 | 0.4862273 | -0.0753 | 0.94  | -0.037210546 | count | 1 |

|            |            |           |         |       |              |       |   |
|------------|------------|-----------|---------|-------|--------------|-------|---|
| BRCA2      | -0.0305651 | 0.2488964 | -0.1228 | 0.902 | -0.037189361 | count | 1 |
| TMEM123    | -0.026122  | 0.0633423 | -0.4124 | 0.68  | -0.037149876 | count | 1 |
| MRPS9      | -0.0300687 | 0.2392378 | -0.1257 | 0.9   | -0.037101208 | count | 1 |
| ARF4-AS1   | -0.0840312 | 0.7697284 | -0.1092 | 0.913 | -0.037064985 | count | 1 |
| ZBED3-AS1  | -0.0840312 | 0.7687341 | -0.1093 | 0.913 | -0.037064985 | count | 1 |
| LRRRC49    | -0.4199852 | 0.9264474 | -0.4533 | 0.65  | -0.037038164 | count | 1 |
| ABCE1      | -0.027306  | 0.1465599 | -0.1863 | 0.852 | -0.036962273 | count | 1 |
| PAN3-AS1   | -0.2077307 | 0.6674987 | -0.3112 | 0.756 | -0.036921051 | count | 1 |
| ADAMTS1    | -0.2077307 | 0.8516569 | -0.2439 | 0.807 | -0.036921051 | count | 1 |
| GNA13      | -0.0263841 | 0.1002635 | -0.2631 | 0.792 | -0.036738427 | count | 1 |
| IGFBP7     | -0.0263657 | 0.1385188 | -0.1903 | 0.849 | -0.036726496 | count | 1 |
| NCOR1      | -0.0260096 | 0.0870085 | -0.2989 | 0.765 | -0.036718969 | count | 1 |
| ILVBL      | -0.0288197 | 0.2146052 | -0.1343 | 0.893 | -0.036588692 | count | 1 |
| SELENOT    | -0.0259089 | 0.0678335 | -0.3819 | 0.703 | -0.036574249 | count | 1 |
| ARMCX3     | -0.0264315 | 0.1317883 | -0.2006 | 0.841 | -0.036390987 | count | 1 |
| EIF1AD     | -0.0285746 | 0.2323459 | -0.123  | 0.902 | -0.036365164 | count | 1 |
| MT-ND3     | -0.0251996 | 0.0355565 | -0.7087 | 0.479 | -0.036255464 | count | 1 |
| AC037459.2 | -0.4068395 | 0.7682875 | -0.5295 | 0.596 | -0.036039469 | count | 1 |
| SLC25A25   | -0.032064  | 0.2846904 | -0.1126 | 0.91  | -0.036008597 | count | 1 |
| UBE2D3     | -0.0251579 | 0.0477855 | -0.5265 | 0.599 | -0.035991536 | count | 1 |
| CLUH       | -0.0407956 | 0.543347  | -0.0751 | 0.94  | -0.035908826 | count | 1 |
| PLCD1      | -0.0729676 | 0.5547836 | -0.1315 | 0.895 | -0.035820488 | count | 1 |
| UBE2B      | -0.0251112 | 0.0557423 | -0.4505 | 0.652 | -0.035813256 | count | 1 |
| ZNF710     | -0.0325911 | 0.2927468 | -0.1113 | 0.911 | -0.035658305 | count | 1 |
| STX12      | -0.0255918 | 0.0952686 | -0.2686 | 0.788 | -0.035615096 | count | 1 |
| NDUFA2     | -0.0250078 | 0.0647197 | -0.3864 | 0.699 | -0.035589474 | count | 1 |
| PPP1R16B   | -0.4008463 | 0.8888874 | -0.451  | 0.652 | -0.035580892 | count | 1 |
| AC027307.3 | -0.4008463 | 0.8888874 | -0.451  | 0.652 | -0.035580892 | count | 1 |
| IPO7       | -0.0271684 | 0.1575432 | -0.1725 | 0.863 | -0.035569315 | count | 1 |
| WDR81      | -0.0382714 | 0.3898834 | -0.0982 | 0.922 | -0.03542407  | count | 1 |
| DUSP2      | -0.0247202 | 0.0993283 | -0.2489 | 0.803 | -0.035386427 | count | 1 |
| UBXN4      | -0.0248513 | 0.0667713 | -0.3722 | 0.71  | -0.035359258 | count | 1 |
| DNAJC14    | -0.0338279 | 0.3383142 | -0.1    | 0.92  | -0.035301195 | count | 1 |
| DCAF13     | -0.0262074 | 0.1571082 | -0.1668 | 0.868 | -0.035114854 | count | 1 |
| CDK8       | -0.0377396 | 0.5334135 | -0.0708 | 0.944 | -0.034934177 | count | 1 |
| SGK3       | -0.0254276 | 0.134923  | -0.1885 | 0.851 | -0.034824938 | count | 1 |
| C2orf68    | -0.0280544 | 0.2888518 | -0.0971 | 0.923 | -0.034803528 | count | 1 |
| NEURL2     | -0.3890643 | 0.5592986 | -0.6956 | 0.487 | -0.03467339  | count | 1 |
| RBMXL1     | -0.032182  | 0.2967211 | -0.1085 | 0.914 | -0.034569494 | count | 1 |
| UBE2J2     | -0.0255415 | 0.1457171 | -0.1753 | 0.861 | -0.034487816 | count | 1 |
| TRIM69     | -0.0273237 | 0.2333314 | -0.1171 | 0.907 | -0.034374446 | count | 1 |
| ARHGAP1    | -0.0300604 | 0.288934  | -0.104  | 0.917 | -0.034218445 | count | 1 |
| PATJ       | -0.381608  | 1.1886192 | -0.3211 | 0.748 | -0.034094948 | count | 1 |
| TEX41      | -0.381608  | 1.1886192 | -0.3211 | 0.748 | -0.034094948 | count | 1 |
| DLX2       | -0.381608  | 1.1886192 | -0.3211 | 0.748 | -0.034094948 | count | 1 |



|            |            |           |         |        |              |       |   |
|------------|------------|-----------|---------|--------|--------------|-------|---|
| FAM171B    | -0.381608  | 1.1886192 | -0.3211 | 0.748  | -0.034094948 | count | 1 |
| AC114730.2 | -0.381608  | 1.1886192 | -0.3211 | 0.748  | -0.034094948 | count | 1 |
| FBLN2      | -0.381608  | 1.308419  | -0.2917 | 0.771  | -0.034094948 | count | 1 |
| TNK2-AS1   | -0.381608  | 1.1886192 | -0.3211 | 0.748  | -0.034094948 | count | 1 |
| STBD1      | -0.381608  | 1.1886192 | -0.3211 | 0.748  | -0.034094948 | count | 1 |
| AC126283.1 | -0.381608  | 1.1886192 | -0.3211 | 0.748  | -0.034094948 | count | 1 |
| AC105285.1 | -0.381608  | 1.1886192 | -0.3211 | 0.748  | -0.034094948 | count | 1 |
| PLN        | -0.381608  | 1.308419  | -0.2917 | 0.771  | -0.034094948 | count | 1 |
| AL591468.1 | -0.381608  | 1.1886192 | -0.3211 | 0.748  | -0.034094948 | count | 1 |
| KCND1      | -0.381608  | 1.1886192 | -0.3211 | 0.748  | -0.034094948 | count | 1 |
| NEFM       | -0.381608  | 1.308419  | -0.2917 | 0.771  | -0.034094948 | count | 1 |
| PKIA       | -0.381608  | 1.1886192 | -0.3211 | 0.748  | -0.034094948 | count | 1 |
| ERICD      | -0.381608  | 1.1886192 | -0.3211 | 0.748  | -0.034094948 | count | 1 |
| AL357874.1 | -0.381608  | 1.1886192 | -0.3211 | 0.748  | -0.034094948 | count | 1 |
| AL358781.1 | -0.381608  | 1.1886192 | -0.3211 | 0.748  | -0.034094948 | count | 1 |
| NPFFR1     | -0.381608  | 1.1886192 | -0.3211 | 0.748  | -0.034094948 | count | 1 |
| SYCE1      | -0.381608  | 1.1886192 | -0.3211 | 0.748  | -0.034094948 | count | 1 |
| ADCY6      | -0.381608  | 1.1886192 | -0.3211 | 0.748  | -0.034094948 | count | 1 |
| AC073592.1 | -0.381608  | 1.1886192 | -0.3211 | 0.748  | -0.034094948 | count | 1 |
| AC091057.3 | -0.381608  | 1.1886192 | -0.3211 | 0.748  | -0.034094948 | count | 1 |
| KLHL25     | -0.381608  | 1.1886192 | -0.3211 | 0.748  | -0.034094948 | count | 1 |
| AC018557.1 | -0.381608  | 1.1886192 | -0.3211 | 0.748  | -0.034094948 | count | 1 |
| AC127024.5 | -0.381608  | 1.1886192 | -0.3211 | 0.748  | -0.034094948 | count | 1 |
| SYDE1      | -0.381608  | 1.1886192 | -0.3211 | 0.748  | -0.034094948 | count | 1 |
| CYP4F22    | -0.381608  | 1.1886192 | -0.3211 | 0.748  | -0.034094948 | count | 1 |
| BCKDHA     | -0.381608  | 1.1886192 | -0.3211 | 0.748  | -0.034094948 | count | 1 |
| ARVCF      | -0.381608  | 1.1886192 | -0.3211 | 0.748  | -0.034094948 | count | 1 |
| PLA2G4A    | -0.0362743 | 0.5090031 | -0.0713 | 0.943  | -0.034072256 | count | 1 |
| IFI27L2    | -0.0242076 | 0.1072145 | -0.2258 | 0.821  | -0.034048883 | count | 1 |
| TUBB4B     | -0.0239817 | 0.0771506 | -0.3108 | 0.756  | -0.034012778 | count | 1 |
| PI4K2B     | -0.0385804 | 0.4306665 | -0.0896 | 0.929  | -0.03396929  | count | 1 |
| B4GAT1     | -0.1900327 | 0.5200806 | -0.3654 | 0.715  | -0.033963261 | count | 1 |
| EDEM1      | -0.025364  | 0.1617872 | -0.1568 | 0.875  | -0.033725345 | count | 1 |
| SNHG21     | -0.0398001 | 0.472683  | -0.0842 | 0.933  | -0.033656427 | count | 1 |
| CFAP20     | -0.0273646 | 0.2391493 | -0.1144 | 0.909  | -0.033642934 | count | 1 |
| EXO5       | -0.1027908 | 0.6686335 | -0.1537 | 0.878  | -0.033485471 | count | 1 |
| RNASE3     | -0.1027908 | 0.7692206 | -0.1336 | 0.894  | -0.033485471 | count | 1 |
| HLA-DQA2   | -0.0414656 | 0.071022  | -0.5838 | 0.559  | -0.033428278 | count | 1 |
| TMEM59     | -0.0233789 | 0.0461625 | -0.5064 | 0.6126 | -0.03342431  | count | 1 |
| AC027307.2 | -0.0404357 | 0.9481758 | -0.0426 | 0.966  | -0.033422246 | count | 1 |
| NUDT21     | -0.0252219 | 0.1466464 | -0.172  | 0.863  | -0.033261248 | count | 1 |
| TES        | -0.0257414 | 0.1610998 | -0.1598 | 0.873  | -0.033244169 | count | 1 |
| WDR19      | -0.129056  | 0.7171531 | -0.18   | 0.857  | -0.033164618 | count | 1 |
| PTGES2     | -0.0248052 | 0.1561595 | -0.1588 | 0.874  | -0.033138293 | count | 1 |
| SOX12      | -0.0573648 | 0.5806912 | -0.0988 | 0.921  | -0.033107566 | count | 1 |

|            |            |           |         |       |              |       |   |
|------------|------------|-----------|---------|-------|--------------|-------|---|
| RSU1       | -0.0242469 | 0.1247935 | -0.1943 | 0.846 | -0.033047023 | count | 1 |
| ABAT       | -0.0485221 | 0.4361594 | -0.1112 | 0.911 | -0.032999558 | count | 1 |
| CYB561     | -0.0746182 | 0.4982688 | -0.1498 | 0.881 | -0.032989075 | count | 1 |
| PRR5L      | -0.1282531 | 0.5210643 | -0.2461 | 0.806 | -0.032966004 | count | 1 |
| SLC35D1    | -0.0614305 | 0.491198  | -0.1251 | 0.9   | -0.032951196 | count | 1 |
| AEBP2      | -0.0283037 | 0.2642395 | -0.1071 | 0.915 | -0.03285273  | count | 1 |
| ME3        | -0.0534252 | 0.7556717 | -0.0707 | 0.944 | -0.032827844 | count | 1 |
| AP002433.1 | -0.0534252 | 1.600515  | -0.0334 | 0.973 | -0.032827844 | count | 1 |
| EPN1       | -0.0241584 | 0.1414789 | -0.1708 | 0.864 | -0.032816766 | count | 1 |
| C14orf28   | -0.0481235 | 0.51481   | -0.0935 | 0.926 | -0.032730899 | count | 1 |
| AIG1       | -0.0245022 | 0.1638724 | -0.1495 | 0.881 | -0.032674434 | count | 1 |
| MRPL54     | -0.0230234 | 0.0875137 | -0.2631 | 0.793 | -0.032491133 | count | 1 |
| AC021054.1 | -0.0391055 | 0.6059524 | -0.0645 | 0.949 | -0.032329218 | count | 1 |
| PPARGC1B   | -0.0471376 | 0.3673814 | -0.1283 | 0.898 | -0.032066222 | count | 1 |
| NRL        | -0.0724924 | 0.6170179 | -0.1175 | 0.906 | -0.03206592  | count | 1 |
| WBP2NL     | -0.0724924 | 0.6773708 | -0.107  | 0.915 | -0.03206592  | count | 1 |
| ARSA       | -0.0241245 | 0.1803236 | -0.1338 | 0.894 | -0.032045946 | count | 1 |
| DUSP5      | -0.0233499 | 0.1472752 | -0.1585 | 0.874 | -0.032036944 | count | 1 |
| SCO1       | -0.0275028 | 0.2326868 | -0.1182 | 0.906 | -0.032036647 | count | 1 |
| TIMM29     | -0.0297849 | 0.3333314 | -0.0894 | 0.929 | -0.032001436 | count | 1 |
| AL606760.1 | -0.3534516 | 1.0886027 | -0.3247 | 0.745 | -0.031881683 | count | 1 |
| AKIP1      | -0.0243736 | 0.2009209 | -0.1213 | 0.903 | -0.03186754  | count | 1 |
| SP140      | -0.0315416 | 0.2796445 | -0.1128 | 0.91  | -0.031788504 | count | 1 |
| CEP19      | -0.0447857 | 0.4525461 | -0.099  | 0.921 | -0.031770585 | count | 1 |
| AQP3       | -0.0641486 | 0.7468562 | -0.0859 | 0.932 | -0.031555809 | count | 1 |
| CASTOR1    | -0.0641486 | 0.6508201 | -0.0986 | 0.921 | -0.031555809 | count | 1 |
| CCDC122    | -0.0513307 | 0.5781847 | -0.0888 | 0.929 | -0.031554194 | count | 1 |
| AC048382.5 | -0.0513307 | 0.5767825 | -0.089  | 0.929 | -0.031554194 | count | 1 |
| AC020912.1 | -0.0513307 | 0.6636232 | -0.0773 | 0.938 | -0.031554194 | count | 1 |
| BSG        | -0.0221264 | 0.062183  | -0.3558 | 0.722 | -0.031466634 | count | 1 |
| CD300LB    | -0.0237946 | 0.1750606 | -0.1359 | 0.892 | -0.031220288 | count | 1 |
| BMP2K      | -0.0224728 | 0.1004399 | -0.2237 | 0.823 | -0.031190932 | count | 1 |
| ERGIC3     | -0.0223059 | 0.1096122 | -0.2035 | 0.839 | -0.031122054 | count | 1 |
| ASL        | -0.0256714 | 0.2126533 | -0.1207 | 0.904 | -0.031032443 | count | 1 |
| 8-Sep      | -0.0628938 | 0.4571038 | -0.1376 | 0.891 | -0.030947563 | count | 1 |
| TMX1       | -0.0222269 | 0.1092657 | -0.2034 | 0.839 | -0.030776284 | count | 1 |
| DNAJC7     | -0.0218441 | 0.0910653 | -0.2399 | 0.81  | -0.03070697  | count | 1 |
| TAX1BP1    | -0.0214323 | 0.0617736 | -0.347  | 0.729 | -0.030479638 | count | 1 |
| KCTD17     | -0.0281968 | 0.3264824 | -0.0864 | 0.931 | -0.03029946  | count | 1 |
| CLP1       | -0.0254616 | 0.3477305 | -0.0732 | 0.942 | -0.030226049 | count | 1 |
| RECK       | -0.02959   | 0.359519  | -0.0823 | 0.934 | -0.030111276 | count | 1 |
| HDAC2      | -0.0218182 | 0.1351507 | -0.1614 | 0.872 | -0.029759604 | count | 1 |
| KLF12      | -0.3266344 | 0.598754  | -0.5455 | 0.585 | -0.029730685 | count | 1 |
| AMDHD2     | -0.0229373 | 0.1727838 | -0.1328 | 0.894 | -0.029705589 | count | 1 |
| POLR2I     | -0.0216049 | 0.1449221 | -0.1491 | 0.882 | -0.029692432 | count | 1 |

|            |            |           |         |       |              |       |   |
|------------|------------|-----------|---------|-------|--------------|-------|---|
| SLC25A24   | -0.0212998 | 0.1083702 | -0.1965 | 0.844 | -0.029685167 | count | 1 |
| FAM120C    | -0.043477  | 0.4714073 | -0.0922 | 0.927 | -0.02959613  | count | 1 |
| LAGE3      | -0.0210847 | 0.1193525 | -0.1767 | 0.86  | -0.029393302 | count | 1 |
| ERLIN1     | -0.0243643 | 0.2001349 | -0.1217 | 0.903 | -0.029384544 | count | 1 |
| C22orf39   | -0.0220505 | 0.1804521 | -0.1222 | 0.903 | -0.029336736 | count | 1 |
| SIL1       | -0.0216267 | 0.1421885 | -0.1521 | 0.879 | -0.029287034 | count | 1 |
| EMP2       | -0.0236126 | 0.1482506 | -0.1593 | 0.873 | -0.029249019 | count | 1 |
| GLS        | -0.0208697 | 0.1032725 | -0.2021 | 0.84  | -0.029180517 | count | 1 |
| ZNF436-AS1 | -0.074795  | 0.739756  | -0.1011 | 0.919 | -0.029038224 | count | 1 |
| ATL1       | -0.074795  | 0.820605  | -0.0911 | 0.927 | -0.029038224 | count | 1 |
| SOCS1      | -0.0241025 | 0.2669399 | -0.0903 | 0.928 | -0.028998249 | count | 1 |
| TSPAN10    | -0.1121364 | 0.8572018 | -0.1308 | 0.896 | -0.028958912 | count | 1 |
| RWDD2B     | -0.0537838 | 0.5024399 | -0.107  | 0.915 | -0.02889831  | count | 1 |
| TMEM184B   | -0.029922  | 0.402636  | -0.0743 | 0.941 | -0.028872593 | count | 1 |
| FAM20A     | -0.0252243 | 0.2584414 | -0.0976 | 0.922 | -0.028842826 | count | 1 |
| ATF7       | -0.0230425 | 0.2205963 | -0.1045 | 0.917 | -0.02878019  | count | 1 |
| TNFSF13    | -0.0494352 | 0.5125449 | -0.0965 | 0.923 | -0.028578826 | count | 1 |
| WIZ        | -0.0277386 | 0.4097817 | -0.0677 | 0.946 | -0.028486883 | count | 1 |
| GON4L      | -0.0216525 | 0.1760384 | -0.123  | 0.902 | -0.028291635 | count | 1 |
| ACP6       | -0.0863188 | 1.0228455 | -0.0844 | 0.933 | -0.028246419 | count | 1 |
| TNNI2      | -0.0209966 | 0.1639822 | -0.128  | 0.898 | -0.028245861 | count | 1 |
| CAMKK1     | -0.0318096 | 0.4065224 | -0.0782 | 0.938 | -0.028033664 | count | 1 |
| NME7       | -0.027757  | 0.4432171 | -0.0626 | 0.95  | -0.027985465 | count | 1 |
| RNF10      | -0.0210434 | 0.1884996 | -0.1116 | 0.911 | -0.027787476 | count | 1 |
| C5orf24    | -0.0210254 | 0.1973048 | -0.1066 | 0.915 | -0.027763722 | count | 1 |
| MTHFD2L    | -0.0207862 | 0.2197329 | -0.0946 | 0.925 | -0.027495586 | count | 1 |
| GSKIP      | -0.0266123 | 0.2518034 | -0.1057 | 0.916 | -0.027089442 | count | 1 |
| EEF1E1     | -0.0203745 | 0.1839837 | -0.1107 | 0.912 | -0.027025201 | count | 1 |
| ASB6       | -0.0271279 | 0.4660601 | -0.0582 | 0.954 | -0.026796563 | count | 1 |
| SAE1       | -0.0224551 | 0.2151881 | -0.1044 | 0.917 | -0.02673705  | count | 1 |
| MGAT2      | -0.0203414 | 0.1616382 | -0.1258 | 0.9   | -0.026710247 | count | 1 |
| CYB5R3     | -0.0191094 | 0.1036584 | -0.1843 | 0.854 | -0.026684966 | count | 1 |
| CLIP1      | -0.0196668 | 0.1405472 | -0.1399 | 0.889 | -0.026657725 | count | 1 |
| ARMC5      | -0.0684699 | 0.4333411 | -0.158  | 0.874 | -0.02662588  | count | 1 |
| POLR1A     | -0.029541  | 0.6845204 | -0.0432 | 0.966 | -0.026511096 | count | 1 |
| ANKZF1     | -0.0289927 | 0.3559068 | -0.0815 | 0.935 | -0.026455591 | count | 1 |
| GTPBP2     | -0.0248515 | 0.3385498 | -0.0734 | 0.941 | -0.026349571 | count | 1 |
| FKBP1B     | -0.0258275 | 0.4026025 | -0.0642 | 0.949 | -0.026292698 | count | 1 |
| VSIG4      | -0.0184543 | 0.0712688 | -0.2589 | 0.796 | -0.026253618 | count | 1 |
| RTN2       | -0.0283103 | 0.3144348 | -0.09   | 0.928 | -0.02623687  | count | 1 |
| SBDS       | -0.0185409 | 0.0801712 | -0.2313 | 0.817 | -0.026195207 | count | 1 |
| 11-Sep     | -0.0198047 | 0.1386855 | -0.1428 | 0.886 | -0.026183123 | count | 1 |
| NUDC       | -0.0186281 | 0.0864005 | -0.2156 | 0.829 | -0.026116991 | count | 1 |
| MRPS10     | -0.0197716 | 0.1508159 | -0.1311 | 0.896 | -0.026046055 | count | 1 |
| LAMA4      | -0.2805033 | 0.9408038 | -0.2982 | 0.766 | -0.025930991 | count | 1 |

|            |            |           |         |       |              |       |   |
|------------|------------|-----------|---------|-------|--------------|-------|---|
| OMG        | -0.2805033 | 0.944513  | -0.297  | 0.767 | -0.025930991 | count | 1 |
| NSMCE4A    | -0.020122  | 0.2108439 | -0.0954 | 0.924 | -0.025815537 | count | 1 |
| AL583839.1 | -0.0993269 | 1.1103791 | -0.0895 | 0.929 | -0.025746366 | count | 1 |
| APBB1      | -0.0993269 | 0.8636628 | -0.115  | 0.908 | -0.025746366 | count | 1 |
| AC032044.1 | -0.0993269 | 0.7801571 | -0.1273 | 0.899 | -0.025746366 | count | 1 |
| SFT2D1     | -0.0182797 | 0.0862946 | -0.2118 | 0.832 | -0.025722176 | count | 1 |
| NCLN       | -0.021072  | 0.2393906 | -0.088  | 0.93  | -0.02570721  | count | 1 |
| NOXA1      | -0.0348177 | 0.4224553 | -0.0824 | 0.934 | -0.025673774 | count | 1 |
| SCCPDH     | -0.0191506 | 0.1659952 | -0.1154 | 0.908 | -0.025480622 | count | 1 |
| DEPDC7     | -0.2750998 | 0.9383558 | -0.2932 | 0.769 | -0.025477598 | count | 1 |
| VASN       | -0.2750998 | 1.056868  | -0.2603 | 0.795 | -0.025477598 | count | 1 |
| AC015726.1 | -0.2750998 | 1.010125  | -0.2723 | 0.785 | -0.025477598 | count | 1 |
| LYPD5      | -0.2750998 | 0.9383558 | -0.2932 | 0.769 | -0.025477598 | count | 1 |
| RBFOX2     | -0.2750998 | 0.8732483 | -0.315  | 0.753 | -0.025477598 | count | 1 |
| AL353194.1 | -0.0254939 | 0.3950396 | -0.0645 | 0.949 | -0.025454495 | count | 1 |
| LY75       | -0.0332729 | 0.4867947 | -0.0684 | 0.946 | -0.025367718 | count | 1 |
| MCUR1      | -0.018493  | 0.1427297 | -0.1296 | 0.897 | -0.02532029  | count | 1 |
| C12orf73   | -0.0223755 | 0.3101121 | -0.0722 | 0.942 | -0.0252634   | count | 1 |
| ACVR1B     | -0.0245726 | 0.4673289 | -0.0526 | 0.958 | -0.025243535 | count | 1 |
| CHD9       | -0.0180591 | 0.1065944 | -0.1694 | 0.865 | -0.025162814 | count | 1 |
| IMP4       | -0.0182622 | 0.1687739 | -0.1082 | 0.914 | -0.025125864 | count | 1 |
| RABL6      | -0.0188623 | 0.1706376 | -0.1105 | 0.912 | -0.025059521 | count | 1 |
| CPOX       | -0.0464429 | 0.4428733 | -0.1049 | 0.916 | -0.024994388 | count | 1 |
| TMEM19     | -0.0197518 | 0.233369  | -0.0846 | 0.933 | -0.024958797 | count | 1 |
| TRMT112    | -0.0174531 | 0.0586484 | -0.2976 | 0.766 | -0.024910585 | count | 1 |
| CCDC28B    | -0.0239739 | 0.387207  | -0.0619 | 0.951 | -0.024629973 | count | 1 |
| RPS21      | -0.0170653 | 0.0336813 | -0.5067 | 0.612 | -0.024499618 | count | 1 |
| TAF6       | -0.0234492 | 0.3335291 | -0.0703 | 0.944 | -0.024495087 | count | 1 |
| ETV7       | -0.0453593 | 0.4918975 | -0.0922 | 0.927 | -0.024417039 | count | 1 |
| TAF3       | -0.0196808 | 0.1975906 | -0.0996 | 0.921 | -0.024383422 | count | 1 |
| AGAP3      | -0.0200172 | 0.1975639 | -0.1013 | 0.919 | -0.024369539 | count | 1 |
| RAB30      | -0.1336637 | 0.6726742 | -0.1987 | 0.843 | -0.02431144  | count | 1 |
| APEX1      | -0.0172194 | 0.0754324 | -0.2283 | 0.819 | -0.024261574 | count | 1 |
| ARF3       | -0.0173788 | 0.1181641 | -0.1471 | 0.883 | -0.023902647 | count | 1 |
| CLDN1      | -0.0179453 | 0.2441523 | -0.0735 | 0.941 | -0.02388938  | count | 1 |
| CAB39L     | -0.0267968 | 0.5411919 | -0.0495 | 0.961 | -0.02363203  | count | 1 |
| PPP6C      | -0.0176203 | 0.1561547 | -0.1128 | 0.91  | -0.023554414 | count | 1 |
| GPRC5A     | -0.0316509 | 0.6867439 | -0.0461 | 0.963 | -0.023351299 | count | 1 |
| HIST1H2BD  | -0.1271926 | 0.7326831 | -0.1736 | 0.862 | -0.02318078  | count | 1 |
| EPCAM      | -0.1260721 | 0.983862  | -0.1281 | 0.898 | -0.022984527 | count | 1 |
| CLEC4F     | -0.1260721 | 0.7855534 | -0.1605 | 0.873 | -0.022984527 | count | 1 |
| DDX42      | -0.0171275 | 0.1849735 | -0.0926 | 0.926 | -0.022778788 | count | 1 |
| LINC01315  | -0.0288868 | 0.5722713 | -0.0505 | 0.96  | -0.022708315 | count | 1 |
| GDE1       | -0.0174881 | 0.1477941 | -0.1183 | 0.906 | -0.022652864 | count | 1 |
| PID1       | -0.0162732 | 0.1235756 | -0.1317 | 0.895 | -0.022631445 | count | 1 |

|            |            |           |         |       |              |       |   |
|------------|------------|-----------|---------|-------|--------------|-------|---|
| NDRG2      | -0.0243217 | 0.2588876 | -0.0939 | 0.925 | -0.022551639 | count | 1 |
| PSD3       | -0.0203391 | 0.3299905 | -0.0616 | 0.951 | -0.02240177  | count | 1 |
| REX1BD     | -0.0157211 | 0.0692439 | -0.227  | 0.82  | -0.022395664 | count | 1 |
| DYNC1H1    | -0.0158342 | 0.1268424 | -0.1248 | 0.901 | -0.022132735 | count | 1 |
| PEX26      | -0.0221436 | 0.360051  | -0.0615 | 0.951 | -0.022117347 | count | 1 |
| APBB3      | -0.0173892 | 0.2214364 | -0.0785 | 0.937 | -0.021823545 | count | 1 |
| TM6SF1     | -0.0159575 | 0.1503269 | -0.1062 | 0.915 | -0.021579194 | count | 1 |
| WFS1       | -0.0432701 | 0.6256901 | -0.0692 | 0.945 | -0.021388302 | count | 1 |
| SEC61A2    | -0.0476723 | 0.8900487 | -0.0536 | 0.957 | -0.021214911 | count | 1 |
| PAPLN      | -0.0476723 | 0.7610162 | -0.0626 | 0.95  | -0.021214911 | count | 1 |
| NOL10      | -0.019679  | 0.2735561 | -0.0719 | 0.943 | -0.021162549 | count | 1 |
| PTOV1      | -0.0159826 | 0.2163023 | -0.0739 | 0.941 | -0.02100344  | count | 1 |
| CDK19      | -0.018637  | 0.2901403 | -0.0642 | 0.949 | -0.020951554 | count | 1 |
| AC069185.1 | -0.035986  | 0.7114562 | -0.0506 | 0.96  | -0.020862563 | count | 1 |
| AL021707.6 | -0.0628679 | 0.6113293 | -0.1028 | 0.918 | -0.020704046 | count | 1 |
| SULT1B1    | -0.2181436 | 0.5966145 | -0.3656 | 0.715 | -0.020590943 | count | 1 |
| CPT2       | -0.0188864 | 0.3045988 | -0.062  | 0.951 | -0.020567004 | count | 1 |
| RFC3       | -0.0237273 | 0.625168  | -0.038  | 0.97  | -0.020534926 | count | 1 |
| SHLD1      | -0.0168126 | 0.2756576 | -0.061  | 0.951 | -0.020426859 | count | 1 |
| FTCDNL1    | -0.0295667 | 0.4971945 | -0.0595 | 0.953 | -0.020178775 | count | 1 |
| ENKD1      | -0.0294338 | 0.5672956 | -0.0519 | 0.959 | -0.020088565 | count | 1 |
| NDUFS8     | -0.0141766 | 0.0772392 | -0.1835 | 0.854 | -0.020045621 | count | 1 |
| MIR99AHG   | -0.2107859 | 0.7048752 | -0.299  | 0.765 | -0.019945219 | count | 1 |
| RPS19BP1   | -0.0140755 | 0.0958601 | -0.1468 | 0.883 | -0.019894037 | count | 1 |
| GIGYF2     | -0.0152505 | 0.1753501 | -0.087  | 0.931 | -0.01985487  | count | 1 |
| MED27      | -0.0166489 | 0.2613167 | -0.0637 | 0.949 | -0.019830689 | count | 1 |
| F8         | -0.0340239 | 0.528005  | -0.0644 | 0.949 | -0.01973315  | count | 1 |
| AC098613.1 | -0.0213235 | 0.4292379 | -0.0497 | 0.96  | -0.019476678 | count | 1 |
| AC024257.3 | -0.1041948 | 0.735075  | -0.1417 | 0.887 | -0.019124562 | count | 1 |
| ARHGDI     | -0.0134587 | 0.0689492 | -0.1952 | 0.845 | -0.0190935   | count | 1 |
| ZNF658     | -0.0385804 | 0.7851412 | -0.0491 | 0.961 | -0.019090777 | count | 1 |
| ABHD2      | -0.0141842 | 0.1487442 | -0.0954 | 0.924 | -0.019048628 | count | 1 |
| MRPL35     | -0.0143826 | 0.1813841 | -0.0793 | 0.937 | -0.018973146 | count | 1 |
| TTLL7      | -0.0724924 | 0.9737966 | -0.0744 | 0.941 | -0.018936709 | count | 1 |
| BX323046.1 | -0.0724924 | 1.0410207 | -0.0696 | 0.944 | -0.018936709 | count | 1 |
| AC018638.7 | -0.0724924 | 1.3091132 | -0.0554 | 0.956 | -0.018936709 | count | 1 |
| AL365203.2 | -0.0724924 | 1.125101  | -0.0644 | 0.949 | -0.018936709 | count | 1 |
| ODF3L1     | -0.0724924 | 0.8723876 | -0.0831 | 0.934 | -0.018936709 | count | 1 |
| KCNG2      | -0.0724924 | 0.8723876 | -0.0831 | 0.934 | -0.018936709 | count | 1 |
| ZNF737     | -0.0724924 | 0.8723876 | -0.0831 | 0.934 | -0.018936709 | count | 1 |
| KYNU       | -0.0137993 | 0.1200212 | -0.115  | 0.908 | -0.018850822 | count | 1 |
| REL        | -0.0131557 | 0.0601545 | -0.2187 | 0.827 | -0.018817994 | count | 1 |
| C16orf91   | -0.0146488 | 0.2603399 | -0.0563 | 0.955 | -0.018758169 | count | 1 |
| APEX2      | -0.0160641 | 0.3353043 | -0.0479 | 0.962 | -0.018726672 | count | 1 |
| OXSRI      | -0.0136744 | 0.1482718 | -0.0922 | 0.927 | -0.01865451  | count | 1 |

|            |            |           |         |        |              |       |   |
|------------|------------|-----------|---------|--------|--------------|-------|---|
| LCK        | -0.0565368 | 1.0144026 | -0.0557 | 0.956  | -0.01865097  | count | 1 |
| AC013400.1 | -0.0565368 | 1.0142335 | -0.0557 | 0.956  | -0.01865097  | count | 1 |
| AP003469.4 | -0.0565368 | 1.0139229 | -0.0558 | 0.956  | -0.01865097  | count | 1 |
| ZBTB26     | -0.0565368 | 1.2100903 | -0.0467 | 0.963  | -0.01865097  | count | 1 |
| DTX4       | -0.0565368 | 0.9001992 | -0.0628 | 0.95   | -0.01865097  | count | 1 |
| AC000403.1 | -0.0565368 | 1.0144026 | -0.0557 | 0.956  | -0.01865097  | count | 1 |
| SULT1A3    | -0.0565368 | 0.9007395 | -0.0628 | 0.95   | -0.01865097  | count | 1 |
| PLD6       | -0.0565368 | 0.9012795 | -0.0627 | 0.95   | -0.01865097  | count | 1 |
| RIPOR3     | -0.0565368 | 0.9009299 | -0.0628 | 0.95   | -0.01865097  | count | 1 |
| SH3GLB1    | -0.0129548 | 0.072309  | -0.1792 | 0.858  | -0.018430363 | count | 1 |
| ENY2       | -0.0128983 | 0.0521871 | -0.2472 | 0.8048 | -0.018422559 | count | 1 |
| PIK3IP1    | -0.0164025 | 0.180042  | -0.0911 | 0.927  | -0.018354685 | count | 1 |
| TECPR1     | -0.0168154 | 0.3539796 | -0.0475 | 0.962  | -0.018203446 | count | 1 |
| FUBP3      | -0.0159463 | 0.2658895 | -0.06   | 0.952  | -0.018170925 | count | 1 |
| HELZ2      | -0.0176618 | 0.3039154 | -0.0581 | 0.954  | -0.018156645 | count | 1 |
| SMARCD1    | -0.0144493 | 0.2095989 | -0.0689 | 0.945  | -0.018109624 | count | 1 |
| MXD4       | -0.0129074 | 0.0996114 | -0.1296 | 0.897  | -0.017987379 | count | 1 |
| ZNF764     | -0.021639  | 0.6821725 | -0.0317 | 0.975  | -0.017936034 | count | 1 |
| SIAH1      | -0.0139288 | 0.1872051 | -0.0744 | 0.941  | -0.017928276 | count | 1 |
| VPS28      | -0.0124521 | 0.0506623 | -0.2458 | 0.8059 | -0.017794965 | count | 1 |
| HACL1      | -0.0144907 | 0.2479091 | -0.0585 | 0.953  | -0.017486375 | count | 1 |
| CHAC2      | -0.0525326 | 0.6056301 | -0.0867 | 0.931  | -0.017348779 | count | 1 |
| TBL1XR1    | -0.0126988 | 0.1548614 | -0.082  | 0.935  | -0.017146041 | count | 1 |
| RPL9       | -0.0117897 | 0.0249189 | -0.4731 | 0.636  | -0.016974775 | count | 1 |
| COX6A1     | -0.0118293 | 0.0458183 | -0.2582 | 0.796  | -0.016954297 | count | 1 |
| KLF16      | -0.013063  | 0.1779658 | -0.0734 | 0.941  | -0.016862677 | count | 1 |
| IDI1       | -0.0121836 | 0.1083395 | -0.1125 | 0.91   | -0.016822151 | count | 1 |
| RAD54L2    | -0.0170092 | 0.3906656 | -0.0435 | 0.965  | -0.016820166 | count | 1 |
| SMIM19     | -0.0120157 | 0.1295055 | -0.0928 | 0.926  | -0.016618182 | count | 1 |
| PHF13      | -0.0138227 | 0.253473  | -0.0545 | 0.957  | -0.016598662 | count | 1 |
| SVBP       | -0.0118886 | 0.1253629 | -0.0948 | 0.924  | -0.016580968 | count | 1 |
| MYO7A      | -0.0267699 | 0.3365705 | -0.0795 | 0.937  | -0.016537406 | count | 1 |
| PSMB4      | -0.011658  | 0.0790112 | -0.1475 | 0.883  | -0.016360445 | count | 1 |
| SERPING1   | -0.0117558 | 0.1394859 | -0.0843 | 0.933  | -0.016236263 | count | 1 |
| MACO1      | -0.0126202 | 0.2194539 | -0.0575 | 0.954  | -0.015993343 | count | 1 |
| HSPA8      | -0.0111344 | 0.0470068 | -0.2369 | 0.813  | -0.015985088 | count | 1 |
| PSMG2      | -0.0113304 | 0.0783017 | -0.1447 | 0.885  | -0.015956718 | count | 1 |
| PEX10      | -0.0153507 | 0.2958503 | -0.0519 | 0.959  | -0.015918945 | count | 1 |
| SLMAP      | -0.0131747 | 0.2382609 | -0.0553 | 0.956  | -0.015899509 | count | 1 |
| GTPBP3     | -0.0176184 | 0.3554724 | -0.0496 | 0.96   | -0.015836226 | count | 1 |
| USE1       | -0.0119313 | 0.1717095 | -0.0695 | 0.945  | -0.01579539  | count | 1 |
| TAF15      | -0.0120843 | 0.1370106 | -0.0882 | 0.93   | -0.015709125 | count | 1 |
| ZNF605     | -0.0204961 | 0.4780347 | -0.0429 | 0.966  | -0.015659399 | count | 1 |
| DTD2       | -0.0240002 | 0.6451428 | -0.0372 | 0.97   | -0.01564763  | count | 1 |
| ICAM4      | -0.0211453 | 0.505142  | -0.0419 | 0.967  | -0.015628481 | count | 1 |

|            |            |           |         |       |              |       |   |
|------------|------------|-----------|---------|-------|--------------|-------|---|
| EIF2B2     | -0.0134035 | 0.2588133 | -0.0518 | 0.959 | -0.015627867 | count | 1 |
| MRPS30     | -0.0128116 | 0.2264117 | -0.0566 | 0.955 | -0.015603343 | count | 1 |
| UCKL1      | -0.0126354 | 0.2624087 | -0.0482 | 0.962 | -0.015575565 | count | 1 |
| CCM2       | -0.0114824 | 0.1355631 | -0.0847 | 0.933 | -0.01552907  | count | 1 |
| SOAT1      | -0.0113258 | 0.1518257 | -0.0746 | 0.941 | -0.015479428 | count | 1 |
| OGFOD3     | -0.0118488 | 0.1941622 | -0.061  | 0.951 | -0.015377541 | count | 1 |
| RPS16      | -0.0106162 | 0.0268453 | -0.3955 | 0.693 | -0.015281429 | count | 1 |
| CYP20A1    | -0.0111393 | 0.1628329 | -0.0684 | 0.945 | -0.015151738 | count | 1 |
| ZC3H18     | -0.0118174 | 0.1743732 | -0.0678 | 0.946 | -0.015101233 | count | 1 |
| CDC5L      | -0.0108518 | 0.1076655 | -0.1008 | 0.92  | -0.015044847 | count | 1 |
| FDX2       | -0.0157441 | 0.422913  | -0.0372 | 0.97  | -0.015026081 | count | 1 |
| BPGM       | -0.0138948 | 0.4024136 | -0.0345 | 0.972 | -0.014747313 | count | 1 |
| ATXN7L1    | -0.019264  | 0.3701775 | -0.052  | 0.959 | -0.014721025 | count | 1 |
| CSDE1      | -0.010373  | 0.0787261 | -0.1318 | 0.895 | -0.014646274 | count | 1 |
| GBP7       | -0.0784495 | 0.9799505 | -0.0801 | 0.936 | -0.014513267 | count | 1 |
| UGDH-AS1   | -0.0784495 | 0.9799505 | -0.0801 | 0.936 | -0.014513267 | count | 1 |
| BEND6      | -0.0784495 | 0.9799505 | -0.0801 | 0.936 | -0.014513267 | count | 1 |
| AC069503.2 | -0.0784495 | 0.9799505 | -0.0801 | 0.936 | -0.014513267 | count | 1 |
| CPNE3      | -0.0103901 | 0.1224102 | -0.0849 | 0.932 | -0.014503449 | count | 1 |
| RBM12B     | -0.0146357 | 0.3373067 | -0.0434 | 0.965 | -0.014476808 | count | 1 |
| SDF2       | -0.0105891 | 0.1355523 | -0.0781 | 0.938 | -0.01447592  | count | 1 |
| NDUFB10    | -0.0101145 | 0.0575249 | -0.1758 | 0.86  | -0.014426595 | count | 1 |
| C17orf75   | -0.0132468 | 0.3091791 | -0.0428 | 0.966 | -0.014344721 | count | 1 |
| AL031590.1 | -0.1469191 | 0.9794685 | -0.15   | 0.881 | -0.014199145 | count | 1 |
| NDUFB3     | -0.0100435 | 0.0828919 | -0.1212 | 0.904 | -0.014159336 | count | 1 |
| DNAJC24    | -0.0125493 | 0.3225985 | -0.0389 | 0.969 | -0.014114419 | count | 1 |
| STEAP3     | -0.0172672 | 0.4006271 | -0.0431 | 0.966 | -0.013972253 | count | 1 |
| AC004918.1 | -0.018076  | 0.5090394 | -0.0355 | 0.972 | -0.013815875 | count | 1 |
| TXLNG      | -0.0125268 | 0.2626809 | -0.0477 | 0.962 | -0.013806077 | count | 1 |
| MISP3      | -0.0235154 | 0.5429098 | -0.0433 | 0.965 | -0.013668365 | count | 1 |
| ACSL1      | -0.0098827 | 0.0989038 | -0.0999 | 0.92  | -0.013587181 | count | 1 |
| COX6B1     | -0.0094493 | 0.0375592 | -0.2516 | 0.801 | -0.01356311  | count | 1 |
| SUPT6H     | -0.0100399 | 0.1483739 | -0.0677 | 0.946 | -0.013374733 | count | 1 |
| KIF21B     | -0.0337554 | 0.5688031 | -0.0593 | 0.953 | -0.013243408 | count | 1 |
| RTF2       | -0.0093803 | 0.0937161 | -0.1001 | 0.92  | -0.013224425 | count | 1 |
| MT-ND4     | -0.009154  | 0.030785  | -0.2974 | 0.766 | -0.013191465 | count | 1 |
| HGH1       | -0.0201299 | 0.423416  | -0.0475 | 0.962 | -0.013133977 | count | 1 |
| DNMBP      | -0.013904  | 0.2995757 | -0.0464 | 0.963 | -0.013095557 | count | 1 |
| ATG12      | -0.0094561 | 0.1315941 | -0.0719 | 0.943 | -0.013039218 | count | 1 |
| BMP8B      | -0.1336637 | 0.9509513 | -0.1406 | 0.888 | -0.012974586 | count | 1 |
| PASK       | -0.1336637 | 0.9509513 | -0.1406 | 0.888 | -0.012974586 | count | 1 |
| MEG8       | -0.1336637 | 0.9509513 | -0.1406 | 0.888 | -0.012974586 | count | 1 |
| ZNF726     | -0.1336637 | 0.9509513 | -0.1406 | 0.888 | -0.012974586 | count | 1 |
| AL117339.5 | -0.0281243 | 0.6543517 | -0.043  | 0.966 | -0.012574952 | count | 1 |
| AC002467.1 | -0.0200135 | 0.4079213 | -0.0491 | 0.961 | -0.012380215 | count | 1 |

|            |            |           |         |       |              |       |   |
|------------|------------|-----------|---------|-------|--------------|-------|---|
| ZCRB1      | -0.008834  | 0.1140657 | -0.0774 | 0.938 | -0.012292874 | count | 1 |
| BLVRA      | -0.0086177 | 0.0791809 | -0.1088 | 0.913 | -0.012193015 | count | 1 |
| ATAD3B     | -0.0129954 | 0.3567003 | -0.0364 | 0.971 | -0.012066626 | count | 1 |
| LRCH3      | -0.0110338 | 0.4430569 | -0.0249 | 0.98  | -0.012023695 | count | 1 |
| HLA-A      | -0.0083394 | 0.0296317 | -0.2814 | 0.778 | -0.012011713 | count | 1 |
| PDE6B      | -0.0152062 | 0.4556386 | -0.0334 | 0.973 | -0.01197976  | count | 1 |
| UTP14C     | -0.01611   | 0.4490502 | -0.0359 | 0.971 | -0.011917072 | count | 1 |
| ESD        | -0.0083413 | 0.0835916 | -0.0998 | 0.921 | -0.011792126 | count | 1 |
| NAPG       | -0.0086616 | 0.1769311 | -0.049  | 0.961 | -0.011610587 | count | 1 |
| LINC02345  | -0.0210579 | 0.2940691 | -0.0716 | 0.943 | -0.011395924 | count | 1 |
| RAB4B      | -0.0229377 | 0.6788291 | -0.0338 | 0.973 | -0.011391026 | count | 1 |
| POU5F2     | -0.0148738 | 0.6955894 | -0.0214 | 0.983 | -0.011374322 | count | 1 |
| SAMHD1     | -0.0079009 | 0.0592148 | -0.1334 | 0.894 | -0.011268035 | count | 1 |
| RAB11FIP1  | -0.0077944 | 0.0857425 | -0.0909 | 0.928 | -0.011116485 | count | 1 |
| UBXN10-AS1 | -0.1121364 | 1.283587  | -0.0874 | 0.93  | -0.0109622   | count | 1 |
| AL357055.3 | -0.1121364 | 1.296036  | -0.0865 | 0.931 | -0.0109622   | count | 1 |
| TTC30B     | -0.1121364 | 1.296036  | -0.0865 | 0.931 | -0.0109622   | count | 1 |
| ATG9A      | -0.1121364 | 1.283587  | -0.0874 | 0.93  | -0.0109622   | count | 1 |
| CD96       | -0.1121364 | 1.296036  | -0.0865 | 0.931 | -0.0109622   | count | 1 |
| ACTRT3     | -0.1121364 | 1.296036  | -0.0865 | 0.931 | -0.0109622   | count | 1 |
| AC008957.1 | -0.1121364 | 1.296036  | -0.0865 | 0.931 | -0.0109622   | count | 1 |
| PRR16      | -0.1121364 | 1.296036  | -0.0865 | 0.931 | -0.0109622   | count | 1 |
| CHSY3      | -0.1121364 | 1.296036  | -0.0865 | 0.931 | -0.0109622   | count | 1 |
| TTC26      | -0.1121364 | 1.296036  | -0.0865 | 0.931 | -0.0109622   | count | 1 |
| LINC01546  | -0.1121364 | 1.296036  | -0.0865 | 0.931 | -0.0109622   | count | 1 |
| CTHRC1     | -0.1121364 | 1.296036  | -0.0865 | 0.931 | -0.0109622   | count | 1 |
| SPATC1     | -0.1121364 | 1.283587  | -0.0874 | 0.93  | -0.0109622   | count | 1 |
| AQP11      | -0.1121364 | 1.283587  | -0.0874 | 0.93  | -0.0109622   | count | 1 |
| AP002986.1 | -0.1121364 | 1.283587  | -0.0874 | 0.93  | -0.0109622   | count | 1 |
| AL158211.3 | -0.1121364 | 1.296036  | -0.0865 | 0.931 | -0.0109622   | count | 1 |
| OXGR1      | -0.1121364 | 1.313611  | -0.0854 | 0.932 | -0.0109622   | count | 1 |
| AC123768.4 | -0.1121364 | 1.296036  | -0.0865 | 0.931 | -0.0109622   | count | 1 |
| EFCAB5     | -0.1121364 | 1.313611  | -0.0854 | 0.932 | -0.0109622   | count | 1 |
| CDK5R1     | -0.1121364 | 1.296036  | -0.0865 | 0.931 | -0.0109622   | count | 1 |
| AL121760.1 | -0.1121364 | 1.296036  | -0.0865 | 0.931 | -0.0109622   | count | 1 |
| LMTK3      | -0.1121364 | 1.296036  | -0.0865 | 0.931 | -0.0109622   | count | 1 |
| C19orf84   | -0.1121364 | 1.296036  | -0.0865 | 0.931 | -0.0109622   | count | 1 |
| AC008735.2 | -0.1121364 | 1.283587  | -0.0874 | 0.93  | -0.0109622   | count | 1 |
| SCO2       | -0.1121364 | 1.283587  | -0.0874 | 0.93  | -0.0109622   | count | 1 |
| NRDC       | -0.0077917 | 0.107479  | -0.0725 | 0.942 | -0.010960884 | count | 1 |
| TRIM38     | -0.0079105 | 0.101506  | -0.0779 | 0.938 | -0.010942638 | count | 1 |
| PPP2R2B    | -0.0586752 | 0.678121  | -0.0865 | 0.931 | -0.010920709 | count | 1 |
| PIWIL4     | -0.0586752 | 0.7053292 | -0.0832 | 0.934 | -0.010920709 | count | 1 |
| SERTAD1    | -0.0076772 | 0.0834978 | -0.0919 | 0.927 | -0.010864841 | count | 1 |
| NTPCR      | -0.0079504 | 0.1909507 | -0.0416 | 0.967 | -0.010721395 | count | 1 |



|            |            |           |         |       |              |       |   |
|------------|------------|-----------|---------|-------|--------------|-------|---|
| NEPRO      | -0.0089905 | 0.2612978 | -0.0344 | 0.973 | -0.010683676 | count | 1 |
| AAK1       | -0.007679  | 0.1205068 | -0.0637 | 0.949 | -0.010604801 | count | 1 |
| TRAPPC1    | -0.0071901 | 0.0714085 | -0.1007 | 0.92  | -0.010221814 | count | 1 |
| CENPU      | -0.0092679 | 0.3120676 | -0.0297 | 0.976 | -0.010217099 | count | 1 |
| OXER1      | -0.0181484 | 0.6418595 | -0.0283 | 0.977 | -0.009827601 | count | 1 |
| SARS2      | -0.0181484 | 0.578512  | -0.0314 | 0.975 | -0.009827601 | count | 1 |
| UBE2D2     | -0.0067321 | 0.0603373 | -0.1116 | 0.911 | -0.009584119 | count | 1 |
| CHTF18     | -0.0284633 | 0.6695821 | -0.0425 | 0.966 | -0.009460999 | count | 1 |
| AL355816.2 | -0.0355042 | 0.6879268 | -0.0516 | 0.959 | -0.009373214 | count | 1 |
| SCLY       | -0.0355042 | 0.6879268 | -0.0516 | 0.959 | -0.009373214 | count | 1 |
| ZFR        | -0.0067953 | 0.1127243 | -0.0603 | 0.952 | -0.009332952 | count | 1 |
| RPS2       | -0.0064118 | 0.0255213 | -0.2512 | 0.802 | -0.009241763 | count | 1 |
| HADHA      | -0.0064678 | 0.0532957 | -0.1214 | 0.903 | -0.009216634 | count | 1 |
| PPOX       | -0.0108867 | 0.3709525 | -0.0293 | 0.977 | -0.009038084 | count | 1 |
| GOT1       | -0.0086555 | 0.4737062 | -0.0183 | 0.985 | -0.008906018 | count | 1 |
| CKS1B      | -0.006824  | 0.2476313 | -0.0276 | 0.978 | -0.008459897 | count | 1 |
| SPRYD7     | -0.006793  | 0.255385  | -0.0266 | 0.979 | -0.008406695 | count | 1 |
| VAMP7      | -0.0065347 | 0.2356402 | -0.0277 | 0.978 | -0.00840509  | count | 1 |
| RBBP5      | -0.0073755 | 0.3063728 | -0.0241 | 0.981 | -0.008336869 | count | 1 |
| WTAP       | -0.0058649 | 0.0878465 | -0.0668 | 0.947 | -0.008269602 | count | 1 |
| STRIP1     | -0.0090681 | 0.3444029 | -0.0263 | 0.979 | -0.008159958 | count | 1 |
| DUSP10     | -0.0063025 | 0.1943798 | -0.0324 | 0.974 | -0.008106499 | count | 1 |
| ZCCHC7     | -0.0063542 | 0.1977003 | -0.0321 | 0.974 | -0.00791743  | count | 1 |
| TAF2       | -0.0076595 | 0.294797  | -0.026  | 0.979 | -0.007881972 | count | 1 |
| INAFM1     | -0.0058417 | 0.2248613 | -0.026  | 0.979 | -0.007513932 | count | 1 |
| MYL12B     | -0.0050916 | 0.0366228 | -0.139  | 0.889 | -0.007313741 | count | 1 |
| GDPD1      | -0.0070711 | 0.5017169 | -0.0141 | 0.989 | -0.007144763 | count | 1 |
| FAM49A     | -0.005212  | 0.1191563 | -0.0437 | 0.965 | -0.007131926 | count | 1 |
| RABIF      | -0.0054175 | 0.2169615 | -0.025  | 0.98  | -0.007107467 | count | 1 |
| HNRNPDL    | -0.0048228 | 0.0446583 | -0.108  | 0.914 | -0.006911617 | count | 1 |
| HSPA1L     | -0.0673866 | 0.6909164 | -0.0975 | 0.922 | -0.006684588 | count | 1 |
| CXorf38    | -0.0048802 | 0.137054  | -0.0356 | 0.972 | -0.006670752 | count | 1 |
| RCN2       | -0.0051452 | 0.1831305 | -0.0281 | 0.978 | -0.006597983 | count | 1 |
| PFDN6      | -0.0048416 | 0.1618714 | -0.0299 | 0.976 | -0.006456765 | count | 1 |
| KEAP1      | -0.0055732 | 0.2574273 | -0.0216 | 0.983 | -0.006407152 | count | 1 |
| GALR2      | -0.0069628 | 0.5324364 | -0.0131 | 0.99  | -0.00626722  | count | 1 |
| EIF2S2     | -0.0042408 | 0.076337  | -0.0556 | 0.956 | -0.006033675 | count | 1 |
| PLCB3      | -0.0055212 | 0.3278971 | -0.0168 | 0.987 | -0.005777379 | count | 1 |
| NUP35      | -0.0075239 | 0.4300673 | -0.0175 | 0.986 | -0.005760594 | count | 1 |
| AL118506.1 | -0.006633  | 0.4161379 | -0.0159 | 0.987 | -0.005754224 | count | 1 |
| CDK5RAP1   | -0.0048043 | 0.2799522 | -0.0172 | 0.986 | -0.005604801 | count | 1 |
| ELOB       | -0.0038522 | 0.0458275 | -0.0841 | 0.933 | -0.005524374 | count | 1 |
| ERLEC1     | -0.0038967 | 0.1450108 | -0.0269 | 0.979 | -0.00539135  | count | 1 |
| CDK13      | -0.0039838 | 0.1637869 | -0.0243 | 0.981 | -0.005263186 | count | 1 |
| NPIPB5     | -0.0044793 | 0.3055298 | -0.0147 | 0.988 | -0.005188989 | count | 1 |

|            |            |           |         |       |              |       |   |
|------------|------------|-----------|---------|-------|--------------|-------|---|
| ZNF557     | -0.0047318 | 0.3944118 | -0.012  | 0.99  | -0.004912047 | count | 1 |
| MRPL57     | -0.003367  | 0.0765229 | -0.044  | 0.965 | -0.004764205 | count | 1 |
| GBA        | -0.0037644 | 0.209615  | -0.018  | 0.986 | -0.004760055 | count | 1 |
| DNAAF1     | -0.0468521 | 0.257251  | -0.1821 | 0.855 | -0.004678728 | count | 1 |
| BRD8       | -0.0038952 | 0.2679398 | -0.0145 | 0.988 | -0.004630223 | count | 1 |
| YIPF5      | -0.0033708 | 0.1797796 | -0.0187 | 0.985 | -0.004470861 | count | 1 |
| VPS4A      | -0.0034246 | 0.1699323 | -0.0202 | 0.984 | -0.004456776 | count | 1 |
| ODC1       | -0.003139  | 0.1697673 | -0.0185 | 0.985 | -0.004294551 | count | 1 |
| GPR84      | -0.003276  | 0.1883719 | -0.0174 | 0.986 | -0.004209963 | count | 1 |
| CPM        | -0.0029951 | 0.1050084 | -0.0285 | 0.977 | -0.004106881 | count | 1 |
| ANAPC7     | -0.0037314 | 0.3659705 | -0.0102 | 0.992 | -0.004068682 | count | 1 |
| BLM        | -0.0052815 | 0.6103518 | -0.0087 | 0.993 | -0.004045199 | count | 1 |
| RPS11      | -0.0028005 | 0.0342927 | -0.0817 | 0.935 | -0.004025222 | count | 1 |
| JTB        | -0.002797  | 0.0645858 | -0.0433 | 0.965 | -0.003972294 | count | 1 |
| ATP6V0A1   | -0.0028183 | 0.1649079 | -0.0171 | 0.986 | -0.003849043 | count | 1 |
| SARM1      | -0.0384007 | 0.7922533 | -0.0485 | 0.961 | -0.003845275 | count | 1 |
| MAP1S      | -0.0030891 | 0.2271987 | -0.0136 | 0.989 | -0.003843353 | count | 1 |
| KMO        | -0.0032052 | 0.288143  | -0.0111 | 0.991 | -0.003685428 | count | 1 |
| FCGRT      | -0.0024861 | 0.0401544 | -0.0619 | 0.951 | -0.003576062 | count | 1 |
| EMC4       | -0.002506  | 0.0987141 | -0.0254 | 0.98  | -0.003516532 | count | 1 |
| AC005921.2 | -0.002914  | 0.2832423 | -0.0103 | 0.992 | -0.003510184 | count | 1 |
| NUS1       | -0.0026336 | 0.2025388 | -0.013  | 0.99  | -0.003450672 | count | 1 |
| TCEAL8     | -0.0024771 | 0.1365505 | -0.0181 | 0.986 | -0.003383841 | count | 1 |
| BABAM1     | -0.0023684 | 0.1061025 | -0.0223 | 0.982 | -0.00326364  | count | 1 |
| CCDC43     | -0.0024844 | 0.2043693 | -0.0122 | 0.99  | -0.003259698 | count | 1 |
| RBM17      | -0.0022513 | 0.0908495 | -0.0248 | 0.98  | -0.003155307 | count | 1 |
| SDHA       | -0.0023977 | 0.186094  | -0.0129 | 0.99  | -0.00306848  | count | 1 |
| AP002748.3 | -0.0061033 | 0.5288838 | -0.0115 | 0.991 | -0.003042574 | count | 1 |
| BEST1      | -0.0023321 | 0.267353  | -0.0087 | 0.993 | -0.003039909 | count | 1 |
| INCENP     | -0.0040455 | 0.4572476 | -0.0088 | 0.993 | -0.00299869  | count | 1 |
| EAF2       | -0.0021404 | 0.12118   | -0.0177 | 0.986 | -0.002911903 | count | 1 |
| SLC35D2    | -0.0021368 | 0.1593755 | -0.0134 | 0.989 | -0.002826439 | count | 1 |
| SRGAP2B    | -0.0025941 | 0.1948539 | -0.0133 | 0.989 | -0.002775363 | count | 1 |
| ATXN10     | -0.0018687 | 0.1450038 | -0.0129 | 0.99  | -0.002530145 | count | 1 |
| ZNF562     | -0.0018515 | 0.2531099 | -0.0073 | 0.994 | -0.002174761 | count | 1 |
| NAXE       | -0.0016002 | 0.1408446 | -0.0114 | 0.991 | -0.002172318 | count | 1 |
| PTPRO      | -0.0019829 | 0.4015014 | -0.0049 | 0.996 | -0.002149338 | count | 1 |
| AC097103.2 | -0.0036429 | 1.0868929 | -0.0034 | 0.997 | -0.002126175 | count | 1 |
| ENOPH1     | -0.0017005 | 0.1941401 | -0.0088 | 0.993 | -0.002112301 | count | 1 |
| RPL23      | -0.001434  | 0.0328897 | -0.0436 | 0.965 | -0.002060217 | count | 1 |
| ZNF829     | -0.0026774 | 1.1598884 | -0.0023 | 0.998 | -0.001913506 | count | 1 |
| AC004148.2 | -0.0097583 | 0.6592889 | -0.0148 | 0.988 | -0.001843335 | count | 1 |
| DNAJC1     | -0.0013242 | 0.1009917 | -0.0131 | 0.99  | -0.001843208 | count | 1 |
| PIP4K2A    | -0.0012882 | 0.1196325 | -0.0108 | 0.991 | -0.001769752 | count | 1 |
| MMP25-AS1  | -0.0044057 | 0.631265  | -0.007  | 0.994 | -0.001741375 | count | 1 |

|              |            |           |         |        |              |       |   |
|--------------|------------|-----------|---------|--------|--------------|-------|---|
| GTF2H5       | -0.0012222 | 0.1106227 | -0.011  | 0.991  | -0.001696052 | count | 1 |
| AC016727.1   | -0.0036429 | 0.8179104 | -0.0045 | 0.996  | -0.001638389 | count | 1 |
| ABHD14A-ACY1 | -0.0036429 | 0.8177902 | -0.0045 | 0.996  | -0.001638389 | count | 1 |
| ZNF596       | -0.0036429 | 0.8179104 | -0.0045 | 0.996  | -0.001638389 | count | 1 |
| AP003352.1   | -0.0036429 | 1.0445515 | -0.0035 | 0.997  | -0.001638389 | count | 1 |
| AL354920.1   | -0.0036429 | 1.0444573 | -0.0035 | 0.997  | -0.001638389 | count | 1 |
| CTSW         | -0.0036429 | 0.9747757 | -0.0037 | 0.997  | -0.001638389 | count | 1 |
| AC010336.1   | -0.0036429 | 0.8177902 | -0.0045 | 0.996  | -0.001638389 | count | 1 |
| PARVB        | -0.0011315 | 0.11215   | -0.0101 | 0.992  | -0.001576034 | count | 1 |
| P2RX7        | -0.0012029 | 0.1659438 | -0.0072 | 0.994  | -0.001569258 | count | 1 |
| TUBB6        | -0.0011268 | 0.1265092 | -0.0089 | 0.993  | -0.001555827 | count | 1 |
| SART3        | -0.001351  | 0.2783522 | -0.0049 | 0.996  | -0.001455201 | count | 1 |
| SZRD1        | -0.001045  | 0.1361276 | -0.0077 | 0.994  | -0.001427237 | count | 1 |
| PPP6R1       | -0.0011113 | 0.2041008 | -0.0054 | 0.996  | -0.001380457 | count | 1 |
| NECAB3       | -0.0021586 | 0.418333  | -0.0052 | 0.996  | -0.00126025  | count | 1 |
| SET          | -0.0008694 | 0.0511673 | -0.017  | 0.9864 | -0.001242873 | count | 1 |
| SLC25A22     | -0.0014825 | 0.4824966 | -0.0031 | 0.998  | -0.001232467 | count | 1 |
| PAQR6        | -0.0036429 | 1.37961   | -0.0026 | 0.998  | -0.000970462 | count | 1 |
| AL353708.3   | -0.0036429 | 1.1574636 | -0.0031 | 0.997  | -0.000970462 | count | 1 |
| PPFIA4       | -0.0036429 | 1.1578035 | -0.0031 | 0.997  | -0.000970462 | count | 1 |
| ATP6V1C2     | -0.0036429 | 1.1578035 | -0.0031 | 0.997  | -0.000970462 | count | 1 |
| AC007038.1   | -0.0036429 | 1.1578035 | -0.0031 | 0.997  | -0.000970462 | count | 1 |
| AC009974.1   | -0.0036429 | 1.1578035 | -0.0031 | 0.997  | -0.000970462 | count | 1 |
| ZNF620       | -0.0036429 | 1.37961   | -0.0026 | 0.998  | -0.000970462 | count | 1 |
| LNP1         | -0.0036429 | 1.1578035 | -0.0031 | 0.997  | -0.000970462 | count | 1 |
| KIAA1257     | -0.0036429 | 1.37961   | -0.0026 | 0.998  | -0.000970462 | count | 1 |
| PXYLP1       | -0.0036429 | 1.1574636 | -0.0031 | 0.997  | -0.000970462 | count | 1 |
| AC068620.1   | -0.0036429 | 1.1578035 | -0.0031 | 0.997  | -0.000970462 | count | 1 |
| NEIL3        | -0.0036429 | 1.1578035 | -0.0031 | 0.997  | -0.000970462 | count | 1 |
| AC026691.1   | -0.0036429 | 1.37961   | -0.0026 | 0.998  | -0.000970462 | count | 1 |
| ZNF165       | -0.0036429 | 1.1574636 | -0.0031 | 0.997  | -0.000970462 | count | 1 |
| AC105446.1   | -0.0036429 | 1.1578035 | -0.0031 | 0.997  | -0.000970462 | count | 1 |
| C8orf37      | -0.0036429 | 1.1574636 | -0.0031 | 0.997  | -0.000970462 | count | 1 |
| AL356489.3   | -0.0036429 | 1.1574636 | -0.0031 | 0.997  | -0.000970462 | count | 1 |
| STKLD1       | -0.0036429 | 1.1578035 | -0.0031 | 0.997  | -0.000970462 | count | 1 |
| SCUBE2       | -0.0036429 | 1.1578035 | -0.0031 | 0.997  | -0.000970462 | count | 1 |
| LIPT2        | -0.0036429 | 1.1578035 | -0.0031 | 0.997  | -0.000970462 | count | 1 |
| LINC02550    | -0.0036429 | 1.37961   | -0.0026 | 0.998  | -0.000970462 | count | 1 |
| ABLIM1       | -0.0036429 | 1.740388  | -0.0021 | 0.998  | -0.000970462 | count | 1 |
| AC026333.3   | -0.0036429 | 1.1574636 | -0.0031 | 0.997  | -0.000970462 | count | 1 |
| AL133371.2   | -0.0036429 | 1.1578035 | -0.0031 | 0.997  | -0.000970462 | count | 1 |
| CLBA1        | -0.0036429 | 1.37961   | -0.0026 | 0.998  | -0.000970462 | count | 1 |
| MAP1A        | -0.0036429 | 1.1574636 | -0.0031 | 0.997  | -0.000970462 | count | 1 |
| MESP1        | -0.0036429 | 1.1578035 | -0.0031 | 0.997  | -0.000970462 | count | 1 |
| PKMYT1       | -0.0036429 | 1.1578035 | -0.0031 | 0.997  | -0.000970462 | count | 1 |

|            |             |             |           |        |              |       |   |
|------------|-------------|-------------|-----------|--------|--------------|-------|---|
| ATP2A1-AS1 | -0.0036429  | 1.1574636   | -0.0031   | 0.997  | -0.000970462 | count | 1 |
| MC1R       | -0.0036429  | 1.1578035   | -0.0031   | 0.997  | -0.000970462 | count | 1 |
| CEP112     | -0.0036429  | 1.37961     | -0.0026   | 0.998  | -0.000970462 | count | 1 |
| AC005332.8 | -0.0036429  | 1.37961     | -0.0026   | 0.998  | -0.000970462 | count | 1 |
| AL121899.1 | -0.0036429  | 1.1578035   | -0.0031   | 0.997  | -0.000970462 | count | 1 |
| SPC24      | -0.0036429  | 1.1578035   | -0.0031   | 0.997  | -0.000970462 | count | 1 |
| AC010487.2 | -0.0036429  | 1.1578035   | -0.0031   | 0.997  | -0.000970462 | count | 1 |
| MLC1       | -0.0036429  | 1.1578035   | -0.0031   | 0.997  | -0.000970462 | count | 1 |
| LINC01547  | -0.0036429  | 1.1578035   | -0.0031   | 0.997  | -0.000970462 | count | 1 |
| EFNA3      | -0.00473    | 0.808442    | -0.0059   | 0.995  | -0.000894846 | count | 1 |
| CNIH3      | -0.00473    | 0.8085966   | -0.0058   | 0.995  | -0.000894846 | count | 1 |
| ZNF786     | -0.00473    | 0.7541279   | -0.0063   | 0.995  | -0.000894846 | count | 1 |
| GARNL3     | -0.00473    | 0.754559    | -0.0063   | 0.995  | -0.000894846 | count | 1 |
| ZBTB2      | -0.0009365  | 0.3720413   | -0.0025   | 0.998  | -0.000828782 | count | 1 |
| SOX4       | -0.0005065  | 0.1456336   | -0.0035   | 0.997  | -0.000700052 | count | 1 |
| PPP2CA     | -2.17E-05   | 0.1024337   | -2.00E-04 | 1      | -3.02E-05    | count | 1 |
| CD5        | -18.169022  | 1691.610154 | -0.0107   | 0.991  | -3.72E-08    | count | 1 |
| CCDC85C    | -1.8994837  | 0.7977577   | -2.381    | 0.0173 | -2.99E-08    | count | 1 |
| GTSF1      | -1.2107129  | 0.4152493   | -2.9156   | 0.0036 | -2.37E-08    | count | 1 |
| AC093525.4 | -1.0334775  | 0.8601001   | -1.2016   | 0.23   | -2.15E-08    | count | 1 |
| AL954642.1 | -0.8243504  | 0.5095365   | -1.6178   | 0.106  | -1.84E-08    | count | 1 |
| AL731563.3 | -0.6638257  | 0.6282464   | -1.0566   | 0.291  | -1.57E-08    | count | 1 |
| ANGPT2     | -0.6203618  | 0.5119998   | -1.2116   | 0.226  | -1.49E-08    | count | 1 |
| NOX4       | -18.7498142 | 2522.961576 | -0.0074   | 0.994  | -1.36E-08    | count | 1 |
| GPR75      | -18.7498142 | 2522.961576 | -0.0074   | 0.994  | -1.36E-08    | count | 1 |
| AC015727.1 | -18.7498142 | 2522.961576 | -0.0074   | 0.994  | -1.36E-08    | count | 1 |
| PTPRS      | -18.7498142 | 2522.961576 | -0.0074   | 0.994  | -1.36E-08    | count | 1 |
| ANKRD33B   | -18.7360435 | 2220.130283 | -0.0084   | 0.993  | -1.36E-08    | count | 1 |
| AL022323.3 | -18.6211908 | 1754.161086 | -0.0106   | 0.992  | -1.36E-08    | count | 1 |
| AP001267.2 | -18.5986116 | 2038.513951 | -0.0091   | 0.993  | -1.36E-08    | count | 1 |
| DIO2       | -18.2412221 | 1979.151666 | -0.0092   | 0.993  | -1.36E-08    | count | 1 |
| AKNAD1     | -18.4688718 | 2192.324165 | -0.0084   | 0.993  | -1.36E-08    | count | 1 |
| CAMK4      | -18.4688718 | 2192.324165 | -0.0084   | 0.993  | -1.36E-08    | count | 1 |
| AC211476.2 | -18.4688718 | 2192.324165 | -0.0084   | 0.993  | -1.36E-08    | count | 1 |
| TFPI2      | -18.4688718 | 2192.324165 | -0.0084   | 0.993  | -1.36E-08    | count | 1 |
| CD40LG     | -18.4688718 | 2192.324165 | -0.0084   | 0.993  | -1.36E-08    | count | 1 |
| AC083809.1 | -18.4688718 | 2192.324165 | -0.0084   | 0.993  | -1.36E-08    | count | 1 |
| AC100835.2 | -18.4688718 | 2192.324165 | -0.0084   | 0.993  | -1.36E-08    | count | 1 |
| ZNF114     | -18.4688718 | 2192.324165 | -0.0084   | 0.993  | -1.36E-08    | count | 1 |
| SCHIP1     | -18.1588298 | 2023.268447 | -0.009    | 0.993  | -1.35E-08    | count | 1 |
| SMO        | -0.4957827  | 0.6750333   | -0.7345   | 0.463  | -1.24E-08    | count | 1 |
| FAM129C    | -2.238752   | 1.227489    | -1.8238   | 0.0683 | -1.17E-08    | count | 1 |
| ECM2       | -2.1052206  | 0.9153687   | -2.2999   | 0.0215 | -1.14E-08    | count | 1 |
| PREX2      | -1.9510699  | 0.9680762   | -2.0154   | 0.044  | -1.11E-08    | count | 1 |
| SPRY3      | -1.8732101  | 1.4009598   | -1.3371   | 0.181  | -1.09E-08    | count | 1 |

|            |             |             |         |        |           |       |   |
|------------|-------------|-------------|---------|--------|-----------|-------|---|
| AC012645.4 | -1.7687484  | 0.8946825   | -1.977  | 0.0482 | -1.06E-08 | count | 1 |
| AC007620.3 | -1.7687484  | 1.0399837   | -1.7007 | 0.0891 | -1.06E-08 | count | 1 |
| AL121652.1 | -1.6763339  | 1.1734298   | -1.4286 | 0.153  | -1.04E-08 | count | 1 |
| GJA1       | -1.6763339  | 1.3122069   | -1.2775 | 0.202  | -1.04E-08 | count | 1 |
| AC012467.2 | -1.5456048  | 0.9716621   | -1.5907 | 0.112  | -9.97E-09 | count | 1 |
| AC245297.2 | -1.5456048  | 0.9716621   | -1.5907 | 0.112  | -9.97E-09 | count | 1 |
| ITPRIPL1   | -0.373768   | 0.4406468   | -0.8482 | 0.396  | -9.76E-09 | count | 1 |
| CYS1       | -1.4305494  | 0.8825188   | -1.621  | 0.105  | -9.57E-09 | count | 1 |
| AUNIP      | -1.4120734  | 0.8757092   | -1.6125 | 0.107  | -9.52E-09 | count | 1 |
| TPBG       | -1.1736256  | 0.8191836   | -1.4327 | 0.152  | -8.56E-09 | count | 1 |
| CDCA2      | -1.1109527  | 0.8452878   | -1.3143 | 0.189  | -8.28E-09 | count | 1 |
| CLIC3      | -1.1109527  | 0.7770778   | -1.4297 | 0.153  | -8.28E-09 | count | 1 |
| SPIRE2     | -1.1109527  | 0.947253    | -1.1728 | 0.241  | -8.28E-09 | count | 1 |
| CAPN3      | -0.9918519  | 0.9447676   | -1.0498 | 0.294  | -7.69E-09 | count | 1 |
| STAC       | -0.9490996  | 0.8173814   | -1.1611 | 0.246  | -7.47E-09 | count | 1 |
| JPH4       | -0.9035882  | 0.5670456   | -1.5935 | 0.111  | -7.22E-09 | count | 1 |
| TNFSF4     | -0.6456441  | 0.8399452   | -0.7687 | 0.442  | -5.64E-09 | count | 1 |
| INSL3      | -0.6456441  | 0.8399452   | -0.7687 | 0.442  | -5.64E-09 | count | 1 |
| TUBG2      | -0.6456441  | 0.8399452   | -0.7687 | 0.442  | -5.64E-09 | count | 1 |
| ACTG2      | -0.6456441  | 0.8399452   | -0.7687 | 0.442  | -5.64E-09 | count | 1 |
| AL355304.1 | -0.6456441  | 0.8399452   | -0.7687 | 0.442  | -5.64E-09 | count | 1 |
| LINC01063  | -0.6456441  | 0.8399452   | -0.7687 | 0.442  | -5.64E-09 | count | 1 |
| AC004846.2 | -0.6456441  | 0.8399452   | -0.7687 | 0.442  | -5.64E-09 | count | 1 |
| CFAP97D1   | -0.6456441  | 0.84006     | -0.7686 | 0.442  | -5.64E-09 | count | 1 |
| SGIP1      | -0.6456441  | 0.8399452   | -0.7687 | 0.442  | -5.64E-09 | count | 1 |
| PDE6A      | -0.6456441  | 0.8399452   | -0.7687 | 0.442  | -5.64E-09 | count | 1 |
| ZNF473     | -0.6456441  | 0.8399452   | -0.7687 | 0.442  | -5.64E-09 | count | 1 |
| ABCA10     | -0.6456441  | 1.0332868   | -0.6248 | 0.532  | -5.64E-09 | count | 1 |
| ZFP57      | -0.6124899  | 0.5322154   | -1.1508 | 0.25   | -5.41E-09 | count | 1 |
| AC107959.1 | -0.5647756  | 0.7123264   | -0.7929 | 0.428  | -5.07E-09 | count | 1 |
| AC106795.2 | -18.1492175 | 1932.519667 | -0.0094 | 0.993  | -5.00E-09 | count | 1 |
| NTM        | -18.1492175 | 1932.519667 | -0.0094 | 0.993  | -5.00E-09 | count | 1 |
| TC2N       | -18.1492175 | 1932.519667 | -0.0094 | 0.993  | -5.00E-09 | count | 1 |
| WWC1       | -18.1492175 | 1932.519667 | -0.0094 | 0.993  | -5.00E-09 | count | 1 |
| EFCAB9     | -18.1492175 | 1932.519667 | -0.0094 | 0.993  | -5.00E-09 | count | 1 |
| THY1       | -18.1492175 | 1932.519667 | -0.0094 | 0.993  | -5.00E-09 | count | 1 |
| POSTN      | -18.1492175 | 1932.519667 | -0.0094 | 0.993  | -5.00E-09 | count | 1 |
| AL031666.2 | -18.1492175 | 1932.519667 | -0.0094 | 0.993  | -5.00E-09 | count | 1 |
| TMIGD2     | -18.1492175 | 1932.519667 | -0.0094 | 0.993  | -5.00E-09 | count | 1 |
| WFDC3      | -18.1492175 | 1932.519667 | -0.0094 | 0.993  | -5.00E-09 | count | 1 |
| FAM184A    | -18.1492175 | 1932.519667 | -0.0094 | 0.993  | -5.00E-09 | count | 1 |
| AC011471.2 | -18.1492175 | 1932.519667 | -0.0094 | 0.993  | -5.00E-09 | count | 1 |
| AC073263.2 | -18.1492175 | 1932.519667 | -0.0094 | 0.993  | -5.00E-09 | count | 1 |
| RHCG       | -18.1492175 | 1932.519667 | -0.0094 | 0.993  | -5.00E-09 | count | 1 |
| LINC01356  | -18.1492175 | 1932.519667 | -0.0094 | 0.993  | -5.00E-09 | count | 1 |

|               |             |             |         |       |           |       |   |
|---------------|-------------|-------------|---------|-------|-----------|-------|---|
| AC006213.1    | -18.1492175 | 1932.519667 | -0.0094 | 0.993 | -5.00E-09 | count | 1 |
| RARB          | -18.1492175 | 1932.519667 | -0.0094 | 0.993 | -5.00E-09 | count | 1 |
| LIN37         | -18.1492175 | 1932.519667 | -0.0094 | 0.993 | -5.00E-09 | count | 1 |
| Z68871.1      | -18.7709922 | 1468.020922 | -0.0128 | 0.99  | -5.00E-09 | count | 1 |
| GAD1          | -18.7709922 | 1468.020922 | -0.0128 | 0.99  | -5.00E-09 | count | 1 |
| ZNF773        | -18.7709922 | 1468.020922 | -0.0128 | 0.99  | -5.00E-09 | count | 1 |
| CNKSR3        | -18.66134   | 1934.491173 | -0.0096 | 0.992 | -5.00E-09 | count | 1 |
| CLRN3         | -18.66134   | 1934.491173 | -0.0096 | 0.992 | -5.00E-09 | count | 1 |
| SCML4         | -18.66134   | 1934.491173 | -0.0096 | 0.992 | -5.00E-09 | count | 1 |
| AP001107.2    | -18.77231   | 1899.649652 | -0.0099 | 0.992 | -5.00E-09 | count | 1 |
| TRAT1         | -18.993572  | 2295.917823 | -0.0083 | 0.993 | -5.00E-09 | count | 1 |
| FUT1          | -19.0610187 | 1800.902468 | -0.0106 | 0.992 | -5.00E-09 | count | 1 |
| COL4A1        | -19.2395746 | 2203.399068 | -0.0087 | 0.993 | -5.00E-09 | count | 1 |
| RBM15-AS1     | -18.7740488 | 2553.719074 | -0.0074 | 0.994 | -4.99E-09 | count | 1 |
| PCDHGB2       | -18.7740488 | 2553.719074 | -0.0074 | 0.994 | -4.99E-09 | count | 1 |
| RSPH4A        | -18.7740488 | 2553.719074 | -0.0074 | 0.994 | -4.99E-09 | count | 1 |
| AC012560.1    | -18.7740488 | 2553.719074 | -0.0074 | 0.994 | -4.99E-09 | count | 1 |
| AC087286.2    | -18.7740488 | 2553.719074 | -0.0074 | 0.994 | -4.99E-09 | count | 1 |
| TMEM78        | -18.7740488 | 2553.719074 | -0.0074 | 0.994 | -4.99E-09 | count | 1 |
| GABRD         | -18.9945996 | 2893.869995 | -0.0066 | 0.995 | -4.99E-09 | count | 1 |
| AC106886.5    | -18.4203338 | 1911.9697   | -0.0096 | 0.992 | -4.99E-09 | count | 1 |
| TPTEP2-CSNK1E | -18.4203338 | 1911.9697   | -0.0096 | 0.992 | -4.99E-09 | count | 1 |
| OTUB2         | -18.4203338 | 1911.9697   | -0.0096 | 0.992 | -4.99E-09 | count | 1 |
| MCOLN3        | -19.4681798 | 2551.404622 | -0.0076 | 0.994 | -4.99E-09 | count | 1 |
| DTX1          | -19.2866875 | 2719.318142 | -0.0071 | 0.994 | -4.99E-09 | count | 1 |
| LINC00844     | -19.2866875 | 2719.318142 | -0.0071 | 0.994 | -4.99E-09 | count | 1 |
| ATP9A         | -19.2866875 | 2719.318142 | -0.0071 | 0.994 | -4.99E-09 | count | 1 |
| CRISPLD1      | -19.4686813 | 3069.818202 | -0.0063 | 0.995 | -4.99E-09 | count | 1 |
| BDH1          | -19.4686813 | 3069.818202 | -0.0063 | 0.995 | -4.99E-09 | count | 1 |
| HIST1H4I      | -19.4686813 | 3069.818202 | -0.0063 | 0.995 | -4.99E-09 | count | 1 |
| CCNB3         | -18.421466  | 2249.781849 | -0.0082 | 0.993 | -4.99E-09 | count | 1 |
| PCDHB14       | -19.0638415 | 2951.894243 | -0.0065 | 0.995 | -4.99E-09 | count | 1 |
| OLFML1        | -19.0638415 | 2951.894243 | -0.0065 | 0.995 | -4.99E-09 | count | 1 |
| AL121757.1    | -19.0638415 | 2951.894243 | -0.0065 | 0.995 | -4.99E-09 | count | 1 |
| KLHL13        | -19.0638415 | 2951.894243 | -0.0065 | 0.995 | -4.99E-09 | count | 1 |
| KRTAP5-8      | -19.0638415 | 2951.894243 | -0.0065 | 0.995 | -4.99E-09 | count | 1 |
| AC138028.1    | -19.0638415 | 2951.894243 | -0.0065 | 0.995 | -4.99E-09 | count | 1 |
| AL590648.2    | -19.287568  | 3301.280262 | -0.0058 | 0.995 | -4.99E-09 | count | 1 |
| TRAPPC12-AS1  | -19.287568  | 3301.280262 | -0.0058 | 0.995 | -4.99E-09 | count | 1 |
| CA9           | -19.287568  | 3301.280262 | -0.0058 | 0.995 | -4.99E-09 | count | 1 |
| TOM1L1        | -19.287568  | 3301.280262 | -0.0058 | 0.995 | -4.99E-09 | count | 1 |
| CDC42EP5      | -18.6286142 | 2518.48108  | -0.0074 | 0.994 | -4.99E-09 | count | 1 |
| AL157888.1    | -17.9254142 | 1835.131859 | -0.0098 | 0.992 | -4.97E-09 | count | 1 |
| AC007383.3    | -18.2157226 | 2121.812261 | -0.0086 | 0.993 | -4.97E-09 | count | 1 |
| LINC00683     | -18.7688917 | 2797.860757 | -0.0067 | 0.995 | -4.97E-09 | count | 1 |

|            |             |             |         |        |           |       |   |
|------------|-------------|-------------|---------|--------|-----------|-------|---|
| FANK1      | -18.7688917 | 2797.860757 | -0.0067 | 0.995  | -4.97E-09 | count | 1 |
| AL157402.2 | -18.6194605 | 2596.435361 | -0.0072 | 0.994  | -4.97E-09 | count | 1 |
| AC005670.2 | -0.1593104  | 0.6931143   | -0.2298 | 0.818  | -4.48E-09 | count | 1 |
| MCMD2      | -0.4391085  | 0.6176914   | -0.7109 | 0.477  | -4.12E-09 | count | 1 |
| KRBA1      | -0.4317173  | 0.5029861   | -0.8583 | 0.391  | -4.06E-09 | count | 1 |
| AC005840.2 | -0.4182652  | 0.9946649   | -0.4205 | 0.674  | -3.96E-09 | count | 1 |
| PLEKHG6    | -0.4182652  | 0.9946649   | -0.4205 | 0.674  | -3.96E-09 | count | 1 |
| C11orf80   | -0.382454   | 0.7289795   | -0.5246 | 0.6    | -3.66E-09 | count | 1 |
| NBPF3      | -1.2579227  | 0.649591    | -1.9365 | 0.0529 | -3.28E-09 | count | 1 |
| TMEM98     | -1.2579227  | 0.649591    | -1.9365 | 0.0529 | -3.28E-09 | count | 1 |
| SGCA       | -1.2579227  | 0.649591    | -1.9365 | 0.0529 | -3.28E-09 | count | 1 |
| AL731577.1 | -0.1125293  | 0.3975903   | -0.283  | 0.777  | -3.22E-09 | count | 1 |
| CENPO      | -0.8524576  | 0.6894391   | -1.2365 | 0.216  | -2.55E-09 | count | 1 |
| AC015987.1 | -0.8524576  | 0.6894391   | -1.2365 | 0.216  | -2.55E-09 | count | 1 |
| RNF207     | -0.8524576  | 0.6894391   | -1.2365 | 0.216  | -2.55E-09 | count | 1 |
| SEMA4F     | -0.8524576  | 0.6894391   | -1.2365 | 0.216  | -2.55E-09 | count | 1 |
| GPR174     | -0.8524576  | 0.6894391   | -1.2365 | 0.216  | -2.55E-09 | count | 1 |
| ZNF462     | -0.8524576  | 0.6894391   | -1.2365 | 0.216  | -2.55E-09 | count | 1 |
| ZNF461     | -0.8524576  | 0.8336323   | -1.0226 | 0.307  | -2.55E-09 | count | 1 |
| AC138150.2 | -0.8524576  | 0.8336323   | -1.0226 | 0.307  | -2.55E-09 | count | 1 |
| LINC01134  | -18.6677302 | 2421.510289 | -0.0077 | 0.994  | -1.84E-09 | count | 1 |
| AL050343.1 | -18.6677302 | 2421.510289 | -0.0077 | 0.994  | -1.84E-09 | count | 1 |
| AC099791.2 | -18.6677302 | 2421.510289 | -0.0077 | 0.994  | -1.84E-09 | count | 1 |
| AL391335.1 | -18.6677302 | 2421.510289 | -0.0077 | 0.994  | -1.84E-09 | count | 1 |
| AL596325.1 | -18.6677302 | 2421.510289 | -0.0077 | 0.994  | -1.84E-09 | count | 1 |
| AC138969.1 | -18.6677302 | 2421.510289 | -0.0077 | 0.994  | -1.84E-09 | count | 1 |
| EME1       | -18.6677302 | 2421.510289 | -0.0077 | 0.994  | -1.84E-09 | count | 1 |
| SAMD11     | -18.6677302 | 2421.510289 | -0.0077 | 0.994  | -1.84E-09 | count | 1 |
| PLA2G2C    | -18.6677302 | 2421.510289 | -0.0077 | 0.994  | -1.84E-09 | count | 1 |
| LINC01635  | -18.6677302 | 2421.510289 | -0.0077 | 0.994  | -1.84E-09 | count | 1 |
| EPHA8      | -18.6677302 | 2421.510289 | -0.0077 | 0.994  | -1.84E-09 | count | 1 |
| SMPDL3B    | -18.6677302 | 2421.510289 | -0.0077 | 0.994  | -1.84E-09 | count | 1 |
| TMEM269    | -18.6677302 | 2421.510289 | -0.0077 | 0.994  | -1.84E-09 | count | 1 |
| ZSWIM5     | -18.6677302 | 2421.510289 | -0.0077 | 0.994  | -1.84E-09 | count | 1 |
| AC104170.2 | -18.6677302 | 2421.510289 | -0.0077 | 0.994  | -1.84E-09 | count | 1 |
| AL603832.1 | -18.6677302 | 2421.510289 | -0.0077 | 0.994  | -1.84E-09 | count | 1 |
| AL157904.1 | -18.6677302 | 2421.510289 | -0.0077 | 0.994  | -1.84E-09 | count | 1 |
| SRGAP2-AS1 | -18.6677302 | 2421.510289 | -0.0077 | 0.994  | -1.84E-09 | count | 1 |
| PDZK1      | -18.6677302 | 2421.510289 | -0.0077 | 0.994  | -1.84E-09 | count | 1 |
| BGLAP      | -18.6677302 | 2421.510289 | -0.0077 | 0.994  | -1.84E-09 | count | 1 |
| ETV3L      | -18.6677302 | 2421.510289 | -0.0077 | 0.994  | -1.84E-09 | count | 1 |
| ATP1A2     | -18.6677302 | 2421.510289 | -0.0077 | 0.994  | -1.84E-09 | count | 1 |
| MAEL       | -18.6677302 | 2421.510289 | -0.0077 | 0.994  | -1.84E-09 | count | 1 |
| CNTN2      | -18.6677302 | 2421.510289 | -0.0077 | 0.994  | -1.84E-09 | count | 1 |
| TMEM81     | -18.6677302 | 2421.510289 | -0.0077 | 0.994  | -1.84E-09 | count | 1 |

|            |             |             |         |       |           |       |   |
|------------|-------------|-------------|---------|-------|-----------|-------|---|
| PIGR       | -18.6677302 | 2421.510289 | -0.0077 | 0.994 | -1.84E-09 | count | 1 |
| IRF6       | -18.6677302 | 2421.510289 | -0.0077 | 0.994 | -1.84E-09 | count | 1 |
| AC096637.2 | -18.6677302 | 2421.510289 | -0.0077 | 0.994 | -1.84E-09 | count | 1 |
| AC096642.1 | -18.6677302 | 2421.510289 | -0.0077 | 0.994 | -1.84E-09 | count | 1 |
| LINC01354  | -18.6677302 | 2421.510289 | -0.0077 | 0.994 | -1.84E-09 | count | 1 |
| LINC01132  | -18.6677302 | 2421.510289 | -0.0077 | 0.994 | -1.84E-09 | count | 1 |
| RNF144A    | -18.6677302 | 2421.510289 | -0.0077 | 0.994 | -1.84E-09 | count | 1 |
| EFR3B      | -18.6677302 | 2421.510289 | -0.0077 | 0.994 | -1.84E-09 | count | 1 |
| AC092567.1 | -18.6677302 | 2421.510289 | -0.0077 | 0.994 | -1.84E-09 | count | 1 |
| LINC02576  | -18.6677302 | 2421.510289 | -0.0077 | 0.994 | -1.84E-09 | count | 1 |
| AC073263.1 | -18.6677302 | 2421.510289 | -0.0077 | 0.994 | -1.84E-09 | count | 1 |
| ADRA2B     | -18.6677302 | 2421.510289 | -0.0077 | 0.994 | -1.84E-09 | count | 1 |
| AC108868.1 | -18.6677302 | 2421.510289 | -0.0077 | 0.994 | -1.84E-09 | count | 1 |
| CCDC148    | -18.6677302 | 2421.510289 | -0.0077 | 0.994 | -1.84E-09 | count | 1 |
| AC104076.1 | -18.6677302 | 2421.510289 | -0.0077 | 0.994 | -1.84E-09 | count | 1 |
| PDE1A      | -18.6677302 | 2421.510289 | -0.0077 | 0.994 | -1.84E-09 | count | 1 |
| ASIC4      | -18.6677302 | 2421.510289 | -0.0077 | 0.994 | -1.84E-09 | count | 1 |
| AC013476.1 | -18.6677302 | 2421.510289 | -0.0077 | 0.994 | -1.84E-09 | count | 1 |
| AC104667.1 | -18.6677302 | 2421.510289 | -0.0077 | 0.994 | -1.84E-09 | count | 1 |
| BOK        | -18.6677302 | 2421.510289 | -0.0077 | 0.994 | -1.84E-09 | count | 1 |
| AC098614.4 | -18.6677302 | 2421.510289 | -0.0077 | 0.994 | -1.84E-09 | count | 1 |
| VIPR1-AS1  | -18.6677302 | 2421.510289 | -0.0077 | 0.994 | -1.84E-09 | count | 1 |
| UCN2       | -18.6677302 | 2421.510289 | -0.0077 | 0.994 | -1.84E-09 | count | 1 |
| SUCLG2-AS1 | -18.6677302 | 2421.510289 | -0.0077 | 0.994 | -1.84E-09 | count | 1 |
| FOXP1-AS1  | -18.6677302 | 2421.510289 | -0.0077 | 0.994 | -1.84E-09 | count | 1 |
| CADM2      | -18.6677302 | 2421.510289 | -0.0077 | 0.994 | -1.84E-09 | count | 1 |
| CD200      | -18.6677302 | 2421.510289 | -0.0077 | 0.994 | -1.84E-09 | count | 1 |
| GAP43      | -18.6677302 | 2421.510289 | -0.0077 | 0.994 | -1.84E-09 | count | 1 |
| NPHP3-AS1  | -18.6677302 | 2421.510289 | -0.0077 | 0.994 | -1.84E-09 | count | 1 |
| PLCH1      | -18.6677302 | 2421.510289 | -0.0077 | 0.994 | -1.84E-09 | count | 1 |
| SPTSSB     | -18.6677302 | 2421.510289 | -0.0077 | 0.994 | -1.84E-09 | count | 1 |
| AC090425.2 | -18.6677302 | 2421.510289 | -0.0077 | 0.994 | -1.84E-09 | count | 1 |
| CTBP1-AS   | -18.6677302 | 2421.510289 | -0.0077 | 0.994 | -1.84E-09 | count | 1 |
| AC092546.1 | -18.6677302 | 2421.510289 | -0.0077 | 0.994 | -1.84E-09 | count | 1 |
| AC006160.1 | -18.6677302 | 2421.510289 | -0.0077 | 0.994 | -1.84E-09 | count | 1 |
| PDGFRA     | -18.6677302 | 2421.510289 | -0.0077 | 0.994 | -1.84E-09 | count | 1 |
| TMPRSS11D  | -18.6677302 | 2421.510289 | -0.0077 | 0.994 | -1.84E-09 | count | 1 |
| LINC02435  | -18.6677302 | 2421.510289 | -0.0077 | 0.994 | -1.84E-09 | count | 1 |
| AC131956.2 | -18.6677302 | 2421.510289 | -0.0077 | 0.994 | -1.84E-09 | count | 1 |
| AC098679.1 | -18.6677302 | 2421.510289 | -0.0077 | 0.994 | -1.84E-09 | count | 1 |
| AC021087.1 | -18.6677302 | 2421.510289 | -0.0077 | 0.994 | -1.84E-09 | count | 1 |
| C5orf38    | -18.6677302 | 2421.510289 | -0.0077 | 0.994 | -1.84E-09 | count | 1 |
| AC112187.3 | -18.6677302 | 2421.510289 | -0.0077 | 0.994 | -1.84E-09 | count | 1 |
| AC035140.1 | -18.6677302 | 2421.510289 | -0.0077 | 0.994 | -1.84E-09 | count | 1 |
| FAM169A    | -18.6677302 | 2421.510289 | -0.0077 | 0.994 | -1.84E-09 | count | 1 |



|            |             |             |         |       |           |       |   |
|------------|-------------|-------------|---------|-------|-----------|-------|---|
| AC113383.1 | -18.6677302 | 2421.510289 | -0.0077 | 0.994 | -1.84E-09 | count | 1 |
| AC099509.1 | -18.6677302 | 2421.510289 | -0.0077 | 0.994 | -1.84E-09 | count | 1 |
| PRDM6      | -18.6677302 | 2421.510289 | -0.0077 | 0.994 | -1.84E-09 | count | 1 |
| AC135457.1 | -18.6677302 | 2421.510289 | -0.0077 | 0.994 | -1.84E-09 | count | 1 |
| AC008781.2 | -18.6677302 | 2421.510289 | -0.0077 | 0.994 | -1.84E-09 | count | 1 |
| AFAP1L1    | -18.6677302 | 2421.510289 | -0.0077 | 0.994 | -1.84E-09 | count | 1 |
| AC106801.1 | -18.6677302 | 2421.510289 | -0.0077 | 0.994 | -1.84E-09 | count | 1 |
| IL12B      | -18.6677302 | 2421.510289 | -0.0077 | 0.994 | -1.84E-09 | count | 1 |
| AC008378.1 | -18.6677302 | 2421.510289 | -0.0077 | 0.994 | -1.84E-09 | count | 1 |
| AL138720.1 | -18.6677302 | 2421.510289 | -0.0077 | 0.994 | -1.84E-09 | count | 1 |
| HIST1H2BO  | -18.6677302 | 2421.510289 | -0.0077 | 0.994 | -1.84E-09 | count | 1 |
| AL662890.1 | -18.6677302 | 2421.510289 | -0.0077 | 0.994 | -1.84E-09 | count | 1 |
| TRIM10     | -18.6677302 | 2421.510289 | -0.0077 | 0.994 | -1.84E-09 | count | 1 |
| HCG27      | -18.6677302 | 2421.510289 | -0.0077 | 0.994 | -1.84E-09 | count | 1 |
| ZBTB12     | -18.6677302 | 2421.510289 | -0.0077 | 0.994 | -1.84E-09 | count | 1 |
| AL645940.1 | -18.6677302 | 2421.510289 | -0.0077 | 0.994 | -1.84E-09 | count | 1 |
| AL035588.1 | -18.6677302 | 2421.510289 | -0.0077 | 0.994 | -1.84E-09 | count | 1 |
| AL583856.2 | -18.6677302 | 2421.510289 | -0.0077 | 0.994 | -1.84E-09 | count | 1 |
| OOEP       | -18.6677302 | 2421.510289 | -0.0077 | 0.994 | -1.84E-09 | count | 1 |
| FHL5       | -18.6677302 | 2421.510289 | -0.0077 | 0.994 | -1.84E-09 | count | 1 |
| ALDH8A1    | -18.6677302 | 2421.510289 | -0.0077 | 0.994 | -1.84E-09 | count | 1 |
| PERP       | -18.6677302 | 2421.510289 | -0.0077 | 0.994 | -1.84E-09 | count | 1 |
| GRM1       | -18.6677302 | 2421.510289 | -0.0077 | 0.994 | -1.84E-09 | count | 1 |
| ISPD       | -18.6677302 | 2421.510289 | -0.0077 | 0.994 | -1.84E-09 | count | 1 |
| HOXA9      | -18.6677302 | 2421.510289 | -0.0077 | 0.994 | -1.84E-09 | count | 1 |
| HOXA13     | -18.6677302 | 2421.510289 | -0.0077 | 0.994 | -1.84E-09 | count | 1 |
| AC005091.1 | -18.6677302 | 2421.510289 | -0.0077 | 0.994 | -1.84E-09 | count | 1 |
| WIPF3      | -18.6677302 | 2421.510289 | -0.0077 | 0.994 | -1.84E-09 | count | 1 |
| TRGC1      | -18.6677302 | 2421.510289 | -0.0077 | 0.994 | -1.84E-09 | count | 1 |
| C7orf25    | -18.6677302 | 2421.510289 | -0.0077 | 0.994 | -1.84E-09 | count | 1 |
| EGFR       | -18.6677302 | 2421.510289 | -0.0077 | 0.994 | -1.84E-09 | count | 1 |
| PEG10      | -18.6677302 | 2421.510289 | -0.0077 | 0.994 | -1.84E-09 | count | 1 |
| FBXL13     | -18.6677302 | 2421.510289 | -0.0077 | 0.994 | -1.84E-09 | count | 1 |
| STRA8      | -18.6677302 | 2421.510289 | -0.0077 | 0.994 | -1.84E-09 | count | 1 |
| TRBVB      | -18.6677302 | 2421.510289 | -0.0077 | 0.994 | -1.84E-09 | count | 1 |
| C7orf33    | -18.6677302 | 2421.510289 | -0.0077 | 0.994 | -1.84E-09 | count | 1 |
| AOC1       | -18.6677302 | 2421.510289 | -0.0077 | 0.994 | -1.84E-09 | count | 1 |
| AC099552.1 | -18.6677302 | 2421.510289 | -0.0077 | 0.994 | -1.84E-09 | count | 1 |
| CRLF2      | -18.6677302 | 2421.510289 | -0.0077 | 0.994 | -1.84E-09 | count | 1 |
| RAI2       | -18.6677302 | 2421.510289 | -0.0077 | 0.994 | -1.84E-09 | count | 1 |
| EFHC2      | -18.6677302 | 2421.510289 | -0.0077 | 0.994 | -1.84E-09 | count | 1 |
| JADE3      | -18.6677302 | 2421.510289 | -0.0077 | 0.994 | -1.84E-09 | count | 1 |
| CCDC120    | -18.6677302 | 2421.510289 | -0.0077 | 0.994 | -1.84E-09 | count | 1 |
| DLG3       | -18.6677302 | 2421.510289 | -0.0077 | 0.994 | -1.84E-09 | count | 1 |
| PHKA1      | -18.6677302 | 2421.510289 | -0.0077 | 0.994 | -1.84E-09 | count | 1 |

|             |             |             |         |       |           |       |   |
|-------------|-------------|-------------|---------|-------|-----------|-------|---|
| AMOT        | -18.6677302 | 2421.510289 | -0.0077 | 0.994 | -1.84E-09 | count | 1 |
| AC087269.1  | -18.6677302 | 2421.510289 | -0.0077 | 0.994 | -1.84E-09 | count | 1 |
| SOX7        | -18.6677302 | 2421.510289 | -0.0077 | 0.994 | -1.84E-09 | count | 1 |
| RBPMS       | -18.6677302 | 2421.510289 | -0.0077 | 0.994 | -1.84E-09 | count | 1 |
| AC103724.3  | -18.6677302 | 2421.510289 | -0.0077 | 0.994 | -1.84E-09 | count | 1 |
| AC090739.1  | -18.6677302 | 2421.510289 | -0.0077 | 0.994 | -1.84E-09 | count | 1 |
| CLVS1       | -18.6677302 | 2421.510289 | -0.0077 | 0.994 | -1.84E-09 | count | 1 |
| SLCO5A1     | -18.6677302 | 2421.510289 | -0.0077 | 0.994 | -1.84E-09 | count | 1 |
| AC010834.3  | -18.6677302 | 2421.510289 | -0.0077 | 0.994 | -1.84E-09 | count | 1 |
| AC087752.4  | -18.6677302 | 2421.510289 | -0.0077 | 0.994 | -1.84E-09 | count | 1 |
| AARD        | -18.6677302 | 2421.510289 | -0.0077 | 0.994 | -1.84E-09 | count | 1 |
| ARHGAP39    | -18.6677302 | 2421.510289 | -0.0077 | 0.994 | -1.84E-09 | count | 1 |
| AL161725.1  | -18.6677302 | 2421.510289 | -0.0077 | 0.994 | -1.84E-09 | count | 1 |
| TRBV26OR9-2 | -18.6677302 | 2421.510289 | -0.0077 | 0.994 | -1.84E-09 | count | 1 |
| FRMPD1      | -18.6677302 | 2421.510289 | -0.0077 | 0.994 | -1.84E-09 | count | 1 |
| FOXE1       | -18.6677302 | 2421.510289 | -0.0077 | 0.994 | -1.84E-09 | count | 1 |
| CAVIN4      | -18.6677302 | 2421.510289 | -0.0077 | 0.994 | -1.84E-09 | count | 1 |
| AL356309.2  | -18.6677302 | 2421.510289 | -0.0077 | 0.994 | -1.84E-09 | count | 1 |
| AL592211.1  | -18.6677302 | 2421.510289 | -0.0077 | 0.994 | -1.84E-09 | count | 1 |
| PRDM12      | -18.6677302 | 2421.510289 | -0.0077 | 0.994 | -1.84E-09 | count | 1 |
| AL590226.1  | -18.6677302 | 2421.510289 | -0.0077 | 0.994 | -1.84E-09 | count | 1 |
| AC069287.2  | -18.6677302 | 2421.510289 | -0.0077 | 0.994 | -1.84E-09 | count | 1 |
| AC104389.4  | -18.6677302 | 2421.510289 | -0.0077 | 0.994 | -1.84E-09 | count | 1 |
| UBQLNL      | -18.6677302 | 2421.510289 | -0.0077 | 0.994 | -1.84E-09 | count | 1 |
| OR56B1      | -18.6677302 | 2421.510289 | -0.0077 | 0.994 | -1.84E-09 | count | 1 |
| AC080023.1  | -18.6677302 | 2421.510289 | -0.0077 | 0.994 | -1.84E-09 | count | 1 |
| AC079329.1  | -18.6677302 | 2421.510289 | -0.0077 | 0.994 | -1.84E-09 | count | 1 |
| SAA2        | -18.6677302 | 2421.510289 | -0.0077 | 0.994 | -1.84E-09 | count | 1 |
| SAA1        | -18.6677302 | 2421.510289 | -0.0077 | 0.994 | -1.84E-09 | count | 1 |
| LDHC        | -18.6677302 | 2421.510289 | -0.0077 | 0.994 | -1.84E-09 | count | 1 |
| AP003721.3  | -18.6677302 | 2421.510289 | -0.0077 | 0.994 | -1.84E-09 | count | 1 |
| AP003721.1  | -18.6677302 | 2421.510289 | -0.0077 | 0.994 | -1.84E-09 | count | 1 |
| AC004923.4  | -18.6677302 | 2421.510289 | -0.0077 | 0.994 | -1.84E-09 | count | 1 |
| AP002490.1  | -18.6677302 | 2421.510289 | -0.0077 | 0.994 | -1.84E-09 | count | 1 |
| WNT11       | -18.6677302 | 2421.510289 | -0.0077 | 0.994 | -1.84E-09 | count | 1 |
| THRSP       | -18.6677302 | 2421.510289 | -0.0077 | 0.994 | -1.84E-09 | count | 1 |
| CCDC89      | -18.6677302 | 2421.510289 | -0.0077 | 0.994 | -1.84E-09 | count | 1 |
| AP000880.1  | -18.6677302 | 2421.510289 | -0.0077 | 0.994 | -1.84E-09 | count | 1 |
| AP004147.1  | -18.6677302 | 2421.510289 | -0.0077 | 0.994 | -1.84E-09 | count | 1 |
| AP000646.1  | -18.6677302 | 2421.510289 | -0.0077 | 0.994 | -1.84E-09 | count | 1 |
| CASC10      | -18.6677302 | 2421.510289 | -0.0077 | 0.994 | -1.84E-09 | count | 1 |
| UNC5B-AS1   | -18.6677302 | 2421.510289 | -0.0077 | 0.994 | -1.84E-09 | count | 1 |
| AC067750.1  | -18.6677302 | 2421.510289 | -0.0077 | 0.994 | -1.84E-09 | count | 1 |
| SLIT1       | -18.6677302 | 2421.510289 | -0.0077 | 0.994 | -1.84E-09 | count | 1 |
| AL157786.1  | -18.6677302 | 2421.510289 | -0.0077 | 0.994 | -1.84E-09 | count | 1 |

|            |             |             |         |       |           |       |   |
|------------|-------------|-------------|---------|-------|-----------|-------|---|
| AL513190.1 | -18.6677302 | 2421.510289 | -0.0077 | 0.994 | -1.84E-09 | count | 1 |
| EDRF1-AS1  | -18.6677302 | 2421.510289 | -0.0077 | 0.994 | -1.84E-09 | count | 1 |
| AL451069.2 | -18.6677302 | 2421.510289 | -0.0077 | 0.994 | -1.84E-09 | count | 1 |
| PRMT8      | -18.6677302 | 2421.510289 | -0.0077 | 0.994 | -1.84E-09 | count | 1 |
| AC018630.2 | -18.6677302 | 2421.510289 | -0.0077 | 0.994 | -1.84E-09 | count | 1 |
| RERGL      | -18.6677302 | 2421.510289 | -0.0077 | 0.994 | -1.84E-09 | count | 1 |
| AC053513.1 | -18.6677302 | 2421.510289 | -0.0077 | 0.994 | -1.84E-09 | count | 1 |
| LINC00477  | -18.6677302 | 2421.510289 | -0.0077 | 0.994 | -1.84E-09 | count | 1 |
| PTHLH      | -18.6677302 | 2421.510289 | -0.0077 | 0.994 | -1.84E-09 | count | 1 |
| AC121338.1 | -18.6677302 | 2421.510289 | -0.0077 | 0.994 | -1.84E-09 | count | 1 |
| AC121338.2 | -18.6677302 | 2421.510289 | -0.0077 | 0.994 | -1.84E-09 | count | 1 |
| FAIM2      | -18.6677302 | 2421.510289 | -0.0077 | 0.994 | -1.84E-09 | count | 1 |
| KRT7       | -18.6677302 | 2421.510289 | -0.0077 | 0.994 | -1.84E-09 | count | 1 |
| NEUROD4    | -18.6677302 | 2421.510289 | -0.0077 | 0.994 | -1.84E-09 | count | 1 |
| ERBB3      | -18.6677302 | 2421.510289 | -0.0077 | 0.994 | -1.84E-09 | count | 1 |
| AC083805.3 | -18.6677302 | 2421.510289 | -0.0077 | 0.994 | -1.84E-09 | count | 1 |
| AC020611.2 | -18.6677302 | 2421.510289 | -0.0077 | 0.994 | -1.84E-09 | count | 1 |
| AC089998.1 | -18.6677302 | 2421.510289 | -0.0077 | 0.994 | -1.84E-09 | count | 1 |
| LINC02458  | -18.6677302 | 2421.510289 | -0.0077 | 0.994 | -1.84E-09 | count | 1 |
| AC079907.2 | -18.6677302 | 2421.510289 | -0.0077 | 0.994 | -1.84E-09 | count | 1 |
| CCDC63     | -18.6677302 | 2421.510289 | -0.0077 | 0.994 | -1.84E-09 | count | 1 |
| RASAL1     | -18.6677302 | 2421.510289 | -0.0077 | 0.994 | -1.84E-09 | count | 1 |
| AC127164.1 | -18.6677302 | 2421.510289 | -0.0077 | 0.994 | -1.84E-09 | count | 1 |
| AC026333.4 | -18.6677302 | 2421.510289 | -0.0077 | 0.994 | -1.84E-09 | count | 1 |
| LINC02405  | -18.6677302 | 2421.510289 | -0.0077 | 0.994 | -1.84E-09 | count | 1 |
| GJA3       | -18.6677302 | 2421.510289 | -0.0077 | 0.994 | -1.84E-09 | count | 1 |
| AL160153.1 | -18.6677302 | 2421.510289 | -0.0077 | 0.994 | -1.84E-09 | count | 1 |
| FGF14-AS2  | -18.6677302 | 2421.510289 | -0.0077 | 0.994 | -1.84E-09 | count | 1 |
| NFATC4     | -18.6677302 | 2421.510289 | -0.0077 | 0.994 | -1.84E-09 | count | 1 |
| FOXA1      | -18.6677302 | 2421.510289 | -0.0077 | 0.994 | -1.84E-09 | count | 1 |
| BMP4       | -18.6677302 | 2421.510289 | -0.0077 | 0.994 | -1.84E-09 | count | 1 |
| AL139300.1 | -18.6677302 | 2421.510289 | -0.0077 | 0.994 | -1.84E-09 | count | 1 |
| LINC00638  | -18.6677302 | 2421.510289 | -0.0077 | 0.994 | -1.84E-09 | count | 1 |
| AC021755.3 | -18.6677302 | 2421.510289 | -0.0077 | 0.994 | -1.84E-09 | count | 1 |
| TYRO3      | -18.6677302 | 2421.510289 | -0.0077 | 0.994 | -1.84E-09 | count | 1 |
| SLC28A2    | -18.6677302 | 2421.510289 | -0.0077 | 0.994 | -1.84E-09 | count | 1 |
| AC084757.2 | -18.6677302 | 2421.510289 | -0.0077 | 0.994 | -1.84E-09 | count | 1 |
| LINC01169  | -18.6677302 | 2421.510289 | -0.0077 | 0.994 | -1.84E-09 | count | 1 |
| SH2D7      | -18.6677302 | 2421.510289 | -0.0077 | 0.994 | -1.84E-09 | count | 1 |
| AC013565.3 | -18.6677302 | 2421.510289 | -0.0077 | 0.994 | -1.84E-09 | count | 1 |
| WDR93      | -18.6677302 | 2421.510289 | -0.0077 | 0.994 | -1.84E-09 | count | 1 |
| AC068831.1 | -18.6677302 | 2421.510289 | -0.0077 | 0.994 | -1.84E-09 | count | 1 |
| AL031705.1 | -18.6677302 | 2421.510289 | -0.0077 | 0.994 | -1.84E-09 | count | 1 |
| KREMEN2    | -18.6677302 | 2421.510289 | -0.0077 | 0.994 | -1.84E-09 | count | 1 |
| AC007601.2 | -18.6677302 | 2421.510289 | -0.0077 | 0.994 | -1.84E-09 | count | 1 |

|            |             |             |         |       |           |       |   |
|------------|-------------|-------------|---------|-------|-----------|-------|---|
| MIR193BHG  | -18.6677302 | 2421.510289 | -0.0077 | 0.994 | -1.84E-09 | count | 1 |
| AC092287.1 | -18.6677302 | 2421.510289 | -0.0077 | 0.994 | -1.84E-09 | count | 1 |
| AC012645.1 | -18.6677302 | 2421.510289 | -0.0077 | 0.994 | -1.84E-09 | count | 1 |
| AC116348.1 | -18.6677302 | 2421.510289 | -0.0077 | 0.994 | -1.84E-09 | count | 1 |
| SLC5A2     | -18.6677302 | 2421.510289 | -0.0077 | 0.994 | -1.84E-09 | count | 1 |
| SLC12A3    | -18.6677302 | 2421.510289 | -0.0077 | 0.994 | -1.84E-09 | count | 1 |
| ADGRG5     | -18.6677302 | 2421.510289 | -0.0077 | 0.994 | -1.84E-09 | count | 1 |
| MMP15      | -18.6677302 | 2421.510289 | -0.0077 | 0.994 | -1.84E-09 | count | 1 |
| AC092115.2 | -18.6677302 | 2421.510289 | -0.0077 | 0.994 | -1.84E-09 | count | 1 |
| MTSS1L     | -18.6677302 | 2421.510289 | -0.0077 | 0.994 | -1.84E-09 | count | 1 |
| HYDIN      | -18.6677302 | 2421.510289 | -0.0077 | 0.994 | -1.84E-09 | count | 1 |
| TMEM231    | -18.6677302 | 2421.510289 | -0.0077 | 0.994 | -1.84E-09 | count | 1 |
| CA5A       | -18.6677302 | 2421.510289 | -0.0077 | 0.994 | -1.84E-09 | count | 1 |
| AC134312.5 | -18.6677302 | 2421.510289 | -0.0077 | 0.994 | -1.84E-09 | count | 1 |
| AC138028.3 | -18.6677302 | 2421.510289 | -0.0077 | 0.994 | -1.84E-09 | count | 1 |
| LINC00304  | -18.6677302 | 2421.510289 | -0.0077 | 0.994 | -1.84E-09 | count | 1 |
| SLC22A31   | -18.6677302 | 2421.510289 | -0.0077 | 0.994 | -1.84E-09 | count | 1 |
| TRPV3      | -18.6677302 | 2421.510289 | -0.0077 | 0.994 | -1.84E-09 | count | 1 |
| AC124066.1 | -18.6677302 | 2421.510289 | -0.0077 | 0.994 | -1.84E-09 | count | 1 |
| AC104982.1 | -18.6677302 | 2421.510289 | -0.0077 | 0.994 | -1.84E-09 | count | 1 |
| ARL5C      | -18.6677302 | 2421.510289 | -0.0077 | 0.994 | -1.84E-09 | count | 1 |
| AC040934.1 | -18.6677302 | 2421.510289 | -0.0077 | 0.994 | -1.84E-09 | count | 1 |
| AC103702.2 | -18.6677302 | 2421.510289 | -0.0077 | 0.994 | -1.84E-09 | count | 1 |
| LINC02073  | -18.6677302 | 2421.510289 | -0.0077 | 0.994 | -1.84E-09 | count | 1 |
| HLF        | -18.6677302 | 2421.510289 | -0.0077 | 0.994 | -1.84E-09 | count | 1 |
| C17orf77   | -18.6677302 | 2421.510289 | -0.0077 | 0.994 | -1.84E-09 | count | 1 |
| OTOP2      | -18.6677302 | 2421.510289 | -0.0077 | 0.994 | -1.84E-09 | count | 1 |
| MAFG-DT    | -18.6677302 | 2421.510289 | -0.0077 | 0.994 | -1.84E-09 | count | 1 |
| AP005329.2 | -18.6677302 | 2421.510289 | -0.0077 | 0.994 | -1.84E-09 | count | 1 |
| AP005059.1 | -18.6677302 | 2421.510289 | -0.0077 | 0.994 | -1.84E-09 | count | 1 |
| DSG2       | -18.6677302 | 2421.510289 | -0.0077 | 0.994 | -1.84E-09 | count | 1 |
| MYO5B      | -18.6677302 | 2421.510289 | -0.0077 | 0.994 | -1.84E-09 | count | 1 |
| ONECUT2    | -18.6677302 | 2421.510289 | -0.0077 | 0.994 | -1.84E-09 | count | 1 |
| CDH7       | -18.6677302 | 2421.510289 | -0.0077 | 0.994 | -1.84E-09 | count | 1 |
| AC104423.1 | -18.6677302 | 2421.510289 | -0.0077 | 0.994 | -1.84E-09 | count | 1 |
| AC021594.1 | -18.6677302 | 2421.510289 | -0.0077 | 0.994 | -1.84E-09 | count | 1 |
| LINC01754  | -18.6677302 | 2421.510289 | -0.0077 | 0.994 | -1.84E-09 | count | 1 |
| AL354813.1 | -18.6677302 | 2421.510289 | -0.0077 | 0.994 | -1.84E-09 | count | 1 |
| LAMA5      | -18.6677302 | 2421.510289 | -0.0077 | 0.994 | -1.84E-09 | count | 1 |
| AL121829.2 | -18.6677302 | 2421.510289 | -0.0077 | 0.994 | -1.84E-09 | count | 1 |
| AC020916.2 | -18.6677302 | 2421.510289 | -0.0077 | 0.994 | -1.84E-09 | count | 1 |
| CLEC17A    | -18.6677302 | 2421.510289 | -0.0077 | 0.994 | -1.84E-09 | count | 1 |
| AC020911.1 | -18.6677302 | 2421.510289 | -0.0077 | 0.994 | -1.84E-09 | count | 1 |
| AC020913.1 | -18.6677302 | 2421.510289 | -0.0077 | 0.994 | -1.84E-09 | count | 1 |
| USHBP1     | -18.6677302 | 2421.510289 | -0.0077 | 0.994 | -1.84E-09 | count | 1 |

|             |             |             |         |       |           |       |   |
|-------------|-------------|-------------|---------|-------|-----------|-------|---|
| PLEKHF1     | -18.6677302 | 2421.510289 | -0.0077 | 0.994 | -1.84E-09 | count | 1 |
| AC020907.3  | -18.6677302 | 2421.510289 | -0.0077 | 0.994 | -1.84E-09 | count | 1 |
| CEACAM1     | -18.6677302 | 2421.510289 | -0.0077 | 0.994 | -1.84E-09 | count | 1 |
| GPR4        | -18.6677302 | 2421.510289 | -0.0077 | 0.994 | -1.84E-09 | count | 1 |
| NOVA2       | -18.6677302 | 2421.510289 | -0.0077 | 0.994 | -1.84E-09 | count | 1 |
| MEIS3       | -18.6677302 | 2421.510289 | -0.0077 | 0.994 | -1.84E-09 | count | 1 |
| SLC6A16     | -18.6677302 | 2421.510289 | -0.0077 | 0.994 | -1.84E-09 | count | 1 |
| NAPSA       | -18.6677302 | 2421.510289 | -0.0077 | 0.994 | -1.84E-09 | count | 1 |
| AC010320.1  | -18.6677302 | 2421.510289 | -0.0077 | 0.994 | -1.84E-09 | count | 1 |
| COX6B2      | -18.6677302 | 2421.510289 | -0.0077 | 0.994 | -1.84E-09 | count | 1 |
| ZNF460-AS1  | -18.6677302 | 2421.510289 | -0.0077 | 0.994 | -1.84E-09 | count | 1 |
| AC004076.1  | -18.6677302 | 2421.510289 | -0.0077 | 0.994 | -1.84E-09 | count | 1 |
| LINC01658   | -18.6677302 | 2421.510289 | -0.0077 | 0.994 | -1.84E-09 | count | 1 |
| AP000350.7  | -18.6677302 | 2421.510289 | -0.0077 | 0.994 | -1.84E-09 | count | 1 |
| SUSD2       | -18.6677302 | 2421.510289 | -0.0077 | 0.994 | -1.84E-09 | count | 1 |
| LINC01422   | -18.6677302 | 2421.510289 | -0.0077 | 0.994 | -1.84E-09 | count | 1 |
| PIK3IP1-AS1 | -18.6677302 | 2421.510289 | -0.0077 | 0.994 | -1.84E-09 | count | 1 |
| BAIAP2L2    | -18.6677302 | 2421.510289 | -0.0077 | 0.994 | -1.84E-09 | count | 1 |
| ARHGAP8     | -18.6677302 | 2421.510289 | -0.0077 | 0.994 | -1.84E-09 | count | 1 |
| Z97192.1    | -18.6677302 | 2421.510289 | -0.0077 | 0.994 | -1.84E-09 | count | 1 |
| MIOX        | -18.6677302 | 2421.510289 | -0.0077 | 0.994 | -1.84E-09 | count | 1 |
| AP000223.1  | -18.6677302 | 2421.510289 | -0.0077 | 0.994 | -1.84E-09 | count | 1 |
| AP000317.1  | -18.6677302 | 2421.510289 | -0.0077 | 0.994 | -1.84E-09 | count | 1 |
| TSPEAR-AS1  | -18.6677302 | 2421.510289 | -0.0077 | 0.994 | -1.84E-09 | count | 1 |
| AP001469.2  | -18.6677302 | 2421.510289 | -0.0077 | 0.994 | -1.84E-09 | count | 1 |
| AL109811.3  | -18.6677302 | 2421.510289 | -0.0077 | 0.994 | -1.84E-09 | count | 1 |
| AL590434.1  | -18.6677302 | 2421.510289 | -0.0077 | 0.994 | -1.84E-09 | count | 1 |
| NUP210L     | -18.6677302 | 2421.510289 | -0.0077 | 0.994 | -1.84E-09 | count | 1 |
| LINC01460   | -18.6677302 | 2421.510289 | -0.0077 | 0.994 | -1.84E-09 | count | 1 |
| MEIS1       | -18.6677302 | 2421.510289 | -0.0077 | 0.994 | -1.84E-09 | count | 1 |
| AC012447.1  | -18.6677302 | 2421.510289 | -0.0077 | 0.994 | -1.84E-09 | count | 1 |
| RFTN2       | -18.6677302 | 2421.510289 | -0.0077 | 0.994 | -1.84E-09 | count | 1 |
| KIT         | -18.6677302 | 2421.510289 | -0.0077 | 0.994 | -1.84E-09 | count | 1 |
| CRYGN       | -18.6677302 | 2421.510289 | -0.0077 | 0.994 | -1.84E-09 | count | 1 |
| LINC00102   | -18.6677302 | 2421.510289 | -0.0077 | 0.994 | -1.84E-09 | count | 1 |
| HDC         | -18.6677302 | 2421.510289 | -0.0077 | 0.994 | -1.84E-09 | count | 1 |
| CHRNA3      | -18.6677302 | 2421.510289 | -0.0077 | 0.994 | -1.84E-09 | count | 1 |
| AC100793.2  | -18.6677302 | 2421.510289 | -0.0077 | 0.994 | -1.84E-09 | count | 1 |
| LINC02078   | -18.6677302 | 2421.510289 | -0.0077 | 0.994 | -1.84E-09 | count | 1 |
| SNPH        | -18.6677302 | 2421.510289 | -0.0077 | 0.994 | -1.84E-09 | count | 1 |
| AC004156.1  | -18.6677302 | 2421.510289 | -0.0077 | 0.994 | -1.84E-09 | count | 1 |
| BX322562.1  | -18.6677302 | 2421.510289 | -0.0077 | 0.994 | -1.84E-09 | count | 1 |
| EBF1        | -19.363641  | 2421.469698 | -0.008  | 0.994 | -1.84E-09 | count | 1 |
| C6orf132    | -19.363641  | 2421.469698 | -0.008  | 0.994 | -1.84E-09 | count | 1 |
| WASF3       | -19.363641  | 2421.469698 | -0.008  | 0.994 | -1.84E-09 | count | 1 |

|            |             |             |         |       |           |       |   |
|------------|-------------|-------------|---------|-------|-----------|-------|---|
| TENT5B     | -19.363641  | 2421.469698 | -0.008  | 0.994 | -1.84E-09 | count | 1 |
| AC074099.1 | -19.363641  | 2421.469698 | -0.008  | 0.994 | -1.84E-09 | count | 1 |
| SYNPO2     | -19.363641  | 2421.469698 | -0.008  | 0.994 | -1.84E-09 | count | 1 |
| PNMA2      | -19.363641  | 2421.469698 | -0.008  | 0.994 | -1.84E-09 | count | 1 |
| EHF        | -19.363641  | 2421.469698 | -0.008  | 0.994 | -1.84E-09 | count | 1 |
| CBX2       | -19.363641  | 2421.469698 | -0.008  | 0.994 | -1.84E-09 | count | 1 |
| DRAXIN     | -19.363641  | 2421.469698 | -0.008  | 0.994 | -1.84E-09 | count | 1 |
| AL451074.6 | -19.363641  | 2421.469698 | -0.008  | 0.994 | -1.84E-09 | count | 1 |
| LAD1       | -19.363641  | 2421.469698 | -0.008  | 0.994 | -1.84E-09 | count | 1 |
| RAB17      | -19.363641  | 2421.469698 | -0.008  | 0.994 | -1.84E-09 | count | 1 |
| TBX18      | -19.363641  | 2421.469698 | -0.008  | 0.994 | -1.84E-09 | count | 1 |
| AL732314.4 | -19.363641  | 2421.469698 | -0.008  | 0.994 | -1.84E-09 | count | 1 |
| HSPA12A    | -19.363641  | 2421.469698 | -0.008  | 0.994 | -1.84E-09 | count | 1 |
| COL4A2-AS1 | -19.363641  | 2421.469698 | -0.008  | 0.994 | -1.84E-09 | count | 1 |
| C17orf99   | -19.363641  | 2421.469698 | -0.008  | 0.994 | -1.84E-09 | count | 1 |
| CLUL1      | -19.363641  | 2421.469698 | -0.008  | 0.994 | -1.84E-09 | count | 1 |
| NPR1       | -19.363641  | 2421.469698 | -0.008  | 0.994 | -1.84E-09 | count | 1 |
| NCAPG      | -19.363641  | 2421.469698 | -0.008  | 0.994 | -1.84E-09 | count | 1 |
| AC067735.1 | -19.363641  | 2421.469698 | -0.008  | 0.994 | -1.84E-09 | count | 1 |
| DACT1      | -19.363641  | 2421.469698 | -0.008  | 0.994 | -1.84E-09 | count | 1 |
| BRIP1      | -19.363641  | 2421.469698 | -0.008  | 0.994 | -1.84E-09 | count | 1 |
| AC008752.2 | -19.363641  | 2421.469698 | -0.008  | 0.994 | -1.84E-09 | count | 1 |
| CHMP1B-AS1 | -19.365217  | 3431.971417 | -0.0056 | 0.995 | -1.84E-09 | count | 1 |
| ACOD1      | -19.365217  | 3431.971417 | -0.0056 | 0.995 | -1.84E-09 | count | 1 |
| UNC5C      | -19.365217  | 3431.971417 | -0.0056 | 0.995 | -1.84E-09 | count | 1 |
| AP006284.1 | -19.365217  | 3431.971417 | -0.0056 | 0.995 | -1.84E-09 | count | 1 |
| AL359220.1 | -19.365217  | 3431.971417 | -0.0056 | 0.995 | -1.84E-09 | count | 1 |
| AP001542.3 | -19.365217  | 3431.971417 | -0.0056 | 0.995 | -1.84E-09 | count | 1 |
| TGFBR3L    | -19.365217  | 3431.971417 | -0.0056 | 0.995 | -1.84E-09 | count | 1 |
| SLC8A2     | -19.365217  | 3431.971417 | -0.0056 | 0.995 | -1.84E-09 | count | 1 |
| LINC01122  | -19.365217  | 3431.971417 | -0.0056 | 0.995 | -1.84E-09 | count | 1 |
| CPA3       | -19.365217  | 3431.971417 | -0.0056 | 0.995 | -1.84E-09 | count | 1 |
| AP001610.1 | -19.365217  | 3431.971417 | -0.0056 | 0.995 | -1.84E-09 | count | 1 |
| UPK1B      | -19.365217  | 3431.971417 | -0.0056 | 0.995 | -1.84E-09 | count | 1 |
| AC067930.2 | -19.365217  | 3431.971417 | -0.0056 | 0.995 | -1.84E-09 | count | 1 |
| RCVRN      | -19.365217  | 3431.971417 | -0.0056 | 0.995 | -1.84E-09 | count | 1 |
| DDIT4L     | -18.513372  | 1737.146346 | -0.0107 | 0.991 | -1.83E-09 | count | 1 |
| ACBD7      | -18.513372  | 1737.146346 | -0.0107 | 0.991 | -1.83E-09 | count | 1 |
| C9orf153   | -18.5154838 | 2464.899725 | -0.0075 | 0.994 | -1.83E-09 | count | 1 |
| BEAN1-AS1  | -18.5154838 | 2464.899725 | -0.0075 | 0.994 | -1.83E-09 | count | 1 |
| CES3       | -18.5154838 | 2464.899725 | -0.0075 | 0.994 | -1.83E-09 | count | 1 |
| AC107952.2 | -18.5154838 | 2464.899725 | -0.0075 | 0.994 | -1.83E-09 | count | 1 |
| CRYGS      | -18.5154838 | 2464.899725 | -0.0075 | 0.994 | -1.83E-09 | count | 1 |
| FAM218A    | -18.5154838 | 2464.899725 | -0.0075 | 0.994 | -1.83E-09 | count | 1 |
| RHBDL1     | -18.5154838 | 2464.899725 | -0.0075 | 0.994 | -1.83E-09 | count | 1 |

|              |             |             |         |       |           |       |   |
|--------------|-------------|-------------|---------|-------|-----------|-------|---|
| AC008753.2   | -18.5154838 | 2464.899725 | -0.0075 | 0.994 | -1.83E-09 | count | 1 |
| CYP2D6       | -18.5154838 | 2464.899725 | -0.0075 | 0.994 | -1.83E-09 | count | 1 |
| EMCN         | -18.5154838 | 2464.899725 | -0.0075 | 0.994 | -1.83E-09 | count | 1 |
| EGFL6        | -18.5154838 | 2464.899725 | -0.0075 | 0.994 | -1.83E-09 | count | 1 |
| AC105020.5   | -18.5154838 | 2464.899725 | -0.0075 | 0.994 | -1.83E-09 | count | 1 |
| AL022329.2   | -18.5154838 | 2464.899725 | -0.0075 | 0.994 | -1.83E-09 | count | 1 |
| AC104184.1   | -18.9230629 | 2248.415785 | -0.0084 | 0.993 | -1.83E-09 | count | 1 |
| AC011374.1   | -18.9230629 | 2248.415785 | -0.0084 | 0.993 | -1.83E-09 | count | 1 |
| AL590560.1   | -0.1593104  | 0.6986937   | -0.228  | 0.82  | -1.65E-09 | count | 1 |
| PNMA8A       | -0.1593104  | 0.5931455   | -0.2686 | 0.788 | -1.65E-09 | count | 1 |
| FAM71F2      | -0.1593104  | 0.6803583   | -0.2342 | 0.815 | -1.65E-09 | count | 1 |
| ITPR1-DT     | -0.1593104  | 0.6803583   | -0.2342 | 0.815 | -1.65E-09 | count | 1 |
| POC1B-GALNT4 | -0.1593104  | 0.6803583   | -0.2342 | 0.815 | -1.65E-09 | count | 1 |
| AC013652.2   | -0.1593104  | 0.6803583   | -0.2342 | 0.815 | -1.65E-09 | count | 1 |
| PPT2         | -0.4182652  | 0.8924533   | -0.4687 | 0.639 | -1.46E-09 | count | 1 |
| KRT31        | -0.4182652  | 0.8924533   | -0.4687 | 0.639 | -1.46E-09 | count | 1 |
| ZNF257       | -0.077028   | 0.527679    | -0.146  | 0.884 | -8.20E-10 | count | 1 |
| AC011374.2   | -0.077028   | 0.5243187   | -0.1469 | 0.883 | -8.20E-10 | count | 1 |
| AL136985.3   | -18.8167105 | 2865.561954 | -0.0066 | 0.995 | -6.74E-10 | count | 1 |
| AC093155.3   | -18.8167105 | 2865.561954 | -0.0066 | 0.995 | -6.74E-10 | count | 1 |
| FAM72C       | -18.8167105 | 2865.561954 | -0.0066 | 0.995 | -6.74E-10 | count | 1 |
| AL031733.2   | -18.8167105 | 2865.561954 | -0.0066 | 0.995 | -6.74E-10 | count | 1 |
| Z99127.1     | -18.8167105 | 2865.561954 | -0.0066 | 0.995 | -6.74E-10 | count | 1 |
| LINC01115    | -18.8167105 | 2865.561954 | -0.0066 | 0.995 | -6.74E-10 | count | 1 |
| NRIR         | -18.8167105 | 2865.561954 | -0.0066 | 0.995 | -6.74E-10 | count | 1 |
| SLC5A7       | -18.8167105 | 2865.561954 | -0.0066 | 0.995 | -6.74E-10 | count | 1 |
| RGPD8        | -18.8167105 | 2865.561954 | -0.0066 | 0.995 | -6.74E-10 | count | 1 |
| INHBB        | -18.8167105 | 2865.561954 | -0.0066 | 0.995 | -6.74E-10 | count | 1 |
| PLA2R1       | -18.8167105 | 2865.561954 | -0.0066 | 0.995 | -6.74E-10 | count | 1 |
| MYO1B        | -18.8167105 | 2865.561954 | -0.0066 | 0.995 | -6.74E-10 | count | 1 |
| YEATS2-AS1   | -18.8167105 | 2865.561954 | -0.0066 | 0.995 | -6.74E-10 | count | 1 |
| MEPE         | -18.8167105 | 2865.561954 | -0.0066 | 0.995 | -6.74E-10 | count | 1 |
| SNCA-AS1     | -18.8167105 | 2865.561954 | -0.0066 | 0.995 | -6.74E-10 | count | 1 |
| AC020900.1   | -18.8167105 | 2865.561954 | -0.0066 | 0.995 | -6.74E-10 | count | 1 |
| AL024498.1   | -18.8167105 | 2865.561954 | -0.0066 | 0.995 | -6.74E-10 | count | 1 |
| KCNK5        | -18.8167105 | 2865.561954 | -0.0066 | 0.995 | -6.74E-10 | count | 1 |
| GNMT         | -18.8167105 | 2865.561954 | -0.0066 | 0.995 | -6.74E-10 | count | 1 |
| RIMS1        | -18.8167105 | 2865.561954 | -0.0066 | 0.995 | -6.74E-10 | count | 1 |
| AL390208.1   | -18.8167105 | 2865.561954 | -0.0066 | 0.995 | -6.74E-10 | count | 1 |
| AC006042.2   | -18.8167105 | 2865.561954 | -0.0066 | 0.995 | -6.74E-10 | count | 1 |
| AC005154.4   | -18.8167105 | 2865.561954 | -0.0066 | 0.995 | -6.74E-10 | count | 1 |
| TRGV10       | -18.8167105 | 2865.561954 | -0.0066 | 0.995 | -6.74E-10 | count | 1 |
| TRGV7        | -18.8167105 | 2865.561954 | -0.0066 | 0.995 | -6.74E-10 | count | 1 |
| SEMA3D       | -18.8167105 | 2865.561954 | -0.0066 | 0.995 | -6.74E-10 | count | 1 |
| SPDYE3       | -18.8167105 | 2865.561954 | -0.0066 | 0.995 | -6.74E-10 | count | 1 |

|            |             |             |         |       |           |       |   |
|------------|-------------|-------------|---------|-------|-----------|-------|---|
| AC016831.6 | -18.8167105 | 2865.561954 | -0.0066 | 0.995 | -6.74E-10 | count | 1 |
| NUDT11     | -18.8167105 | 2865.561954 | -0.0066 | 0.995 | -6.74E-10 | count | 1 |
| FAM167A    | -18.8167105 | 2865.561954 | -0.0066 | 0.995 | -6.74E-10 | count | 1 |
| AC079209.2 | -18.8167105 | 2865.561954 | -0.0066 | 0.995 | -6.74E-10 | count | 1 |
| DSCC1      | -18.8167105 | 2865.561954 | -0.0066 | 0.995 | -6.74E-10 | count | 1 |
| AC100803.3 | -18.8167105 | 2865.561954 | -0.0066 | 0.995 | -6.74E-10 | count | 1 |
| KYAT1      | -18.8167105 | 2865.561954 | -0.0066 | 0.995 | -6.74E-10 | count | 1 |
| CNIH2      | -18.8167105 | 2865.561954 | -0.0066 | 0.995 | -6.74E-10 | count | 1 |
| NUTM2D     | -18.8167105 | 2865.561954 | -0.0066 | 0.995 | -6.74E-10 | count | 1 |
| KLRC4      | -18.8167105 | 2865.561954 | -0.0066 | 0.995 | -6.74E-10 | count | 1 |
| EIF2S3B    | -18.8167105 | 2865.561954 | -0.0066 | 0.995 | -6.74E-10 | count | 1 |
| ARHGEF25   | -18.8167105 | 2865.561954 | -0.0066 | 0.995 | -6.74E-10 | count | 1 |
| TRAV8-2    | -18.8167105 | 2865.561954 | -0.0066 | 0.995 | -6.74E-10 | count | 1 |
| SLC10A1    | -18.8167105 | 2865.561954 | -0.0066 | 0.995 | -6.74E-10 | count | 1 |
| DPF3       | -18.8167105 | 2865.561954 | -0.0066 | 0.995 | -6.74E-10 | count | 1 |
| AL138478.1 | -18.8167105 | 2865.561954 | -0.0066 | 0.995 | -6.74E-10 | count | 1 |
| AL137779.2 | -18.8167105 | 2865.561954 | -0.0066 | 0.995 | -6.74E-10 | count | 1 |
| DISP2      | -18.8167105 | 2865.561954 | -0.0066 | 0.995 | -6.74E-10 | count | 1 |
| AC021752.1 | -18.8167105 | 2865.561954 | -0.0066 | 0.995 | -6.74E-10 | count | 1 |
| LINC00926  | -18.8167105 | 2865.561954 | -0.0066 | 0.995 | -6.74E-10 | count | 1 |
| AC027237.2 | -18.8167105 | 2865.561954 | -0.0066 | 0.995 | -6.74E-10 | count | 1 |
| AC104938.1 | -18.8167105 | 2865.561954 | -0.0066 | 0.995 | -6.74E-10 | count | 1 |
| AC008731.1 | -18.8167105 | 2865.561954 | -0.0066 | 0.995 | -6.74E-10 | count | 1 |
| AC044802.2 | -18.8167105 | 2865.561954 | -0.0066 | 0.995 | -6.74E-10 | count | 1 |
| CARMIL2    | -18.8167105 | 2865.561954 | -0.0066 | 0.995 | -6.74E-10 | count | 1 |
| CLEC18A    | -18.8167105 | 2865.561954 | -0.0066 | 0.995 | -6.74E-10 | count | 1 |
| MAFTRR     | -18.8167105 | 2865.561954 | -0.0066 | 0.995 | -6.74E-10 | count | 1 |
| C16orf46   | -18.8167105 | 2865.561954 | -0.0066 | 0.995 | -6.74E-10 | count | 1 |
| AC087393.2 | -18.8167105 | 2865.561954 | -0.0066 | 0.995 | -6.74E-10 | count | 1 |
| FLJ45513   | -18.8167105 | 2865.561954 | -0.0066 | 0.995 | -6.74E-10 | count | 1 |
| SOX9       | -18.8167105 | 2865.561954 | -0.0066 | 0.995 | -6.74E-10 | count | 1 |
| AP001029.2 | -18.8167105 | 2865.561954 | -0.0066 | 0.995 | -6.74E-10 | count | 1 |
| TCF4-AS2   | -18.8167105 | 2865.561954 | -0.0066 | 0.995 | -6.74E-10 | count | 1 |
| XKR7       | -18.8167105 | 2865.561954 | -0.0066 | 0.995 | -6.74E-10 | count | 1 |
| ZNF831     | -18.8167105 | 2865.561954 | -0.0066 | 0.995 | -6.74E-10 | count | 1 |
| AC007292.2 | -18.8167105 | 2865.561954 | -0.0066 | 0.995 | -6.74E-10 | count | 1 |
| AC003956.1 | -18.8167105 | 2865.561954 | -0.0066 | 0.995 | -6.74E-10 | count | 1 |
| AC012313.6 | -18.8167105 | 2865.561954 | -0.0066 | 0.995 | -6.74E-10 | count | 1 |
| Z98885.3   | -18.8167105 | 2865.561954 | -0.0066 | 0.995 | -6.74E-10 | count | 1 |
| BX004987.1 | -18.8167105 | 2865.561954 | -0.0066 | 0.995 | -6.74E-10 | count | 1 |
| AC254633.1 | -18.8167105 | 2865.561954 | -0.0066 | 0.995 | -6.74E-10 | count | 1 |
| AL031283.1 | -18.8167105 | 2865.561954 | -0.0066 | 0.995 | -6.74E-10 | count | 1 |
| AL050343.2 | -18.8167105 | 2865.561954 | -0.0066 | 0.995 | -6.74E-10 | count | 1 |
| DAB1       | -18.8167105 | 2865.561954 | -0.0066 | 0.995 | -6.74E-10 | count | 1 |
| TNNI3K     | -18.8167105 | 2865.561954 | -0.0066 | 0.995 | -6.74E-10 | count | 1 |



|             |             |             |         |       |           |       |   |
|-------------|-------------|-------------|---------|-------|-----------|-------|---|
| TSACC       | -18.8167105 | 2865.561954 | -0.0066 | 0.995 | -6.74E-10 | count | 1 |
| AL513217.1  | -18.8167105 | 2865.561954 | -0.0066 | 0.995 | -6.74E-10 | count | 1 |
| ALK         | -18.8167105 | 2865.561954 | -0.0066 | 0.995 | -6.74E-10 | count | 1 |
| GCC2-AS1    | -18.8167105 | 2865.561954 | -0.0066 | 0.995 | -6.74E-10 | count | 1 |
| AC074286.1  | -18.8167105 | 2865.561954 | -0.0066 | 0.995 | -6.74E-10 | count | 1 |
| KCNH8       | -18.8167105 | 2865.561954 | -0.0066 | 0.995 | -6.74E-10 | count | 1 |
| CCK         | -18.8167105 | 2865.561954 | -0.0066 | 0.995 | -6.74E-10 | count | 1 |
| STX19       | -18.8167105 | 2865.561954 | -0.0066 | 0.995 | -6.74E-10 | count | 1 |
| PLCXD2      | -18.8167105 | 2865.561954 | -0.0066 | 0.995 | -6.74E-10 | count | 1 |
| AC093788.1  | -18.8167105 | 2865.561954 | -0.0066 | 0.995 | -6.74E-10 | count | 1 |
| AC019163.1  | -18.8167105 | 2865.561954 | -0.0066 | 0.995 | -6.74E-10 | count | 1 |
| LINC01262   | -18.8167105 | 2865.561954 | -0.0066 | 0.995 | -6.74E-10 | count | 1 |
| C7          | -18.8167105 | 2865.561954 | -0.0066 | 0.995 | -6.74E-10 | count | 1 |
| CDO1        | -18.8167105 | 2865.561954 | -0.0066 | 0.995 | -6.74E-10 | count | 1 |
| HIST1H2AI   | -18.8167105 | 2865.561954 | -0.0066 | 0.995 | -6.74E-10 | count | 1 |
| UBD         | -18.8167105 | 2865.561954 | -0.0066 | 0.995 | -6.74E-10 | count | 1 |
| AL135905.1  | -18.8167105 | 2865.561954 | -0.0066 | 0.995 | -6.74E-10 | count | 1 |
| AL451064.1  | -18.8167105 | 2865.561954 | -0.0066 | 0.995 | -6.74E-10 | count | 1 |
| AC002464.1  | -18.8167105 | 2865.561954 | -0.0066 | 0.995 | -6.74E-10 | count | 1 |
| AL078590.3  | -18.8167105 | 2865.561954 | -0.0066 | 0.995 | -6.74E-10 | count | 1 |
| AL390955.2  | -18.8167105 | 2865.561954 | -0.0066 | 0.995 | -6.74E-10 | count | 1 |
| FAM180A     | -18.8167105 | 2865.561954 | -0.0066 | 0.995 | -6.74E-10 | count | 1 |
| PIP         | -18.8167105 | 2865.561954 | -0.0066 | 0.995 | -6.74E-10 | count | 1 |
| AC004889.1  | -18.8167105 | 2865.561954 | -0.0066 | 0.995 | -6.74E-10 | count | 1 |
| FAM239B     | -18.8167105 | 2865.561954 | -0.0066 | 0.995 | -6.74E-10 | count | 1 |
| HR          | -18.8167105 | 2865.561954 | -0.0066 | 0.995 | -6.74E-10 | count | 1 |
| RIMS2       | -18.8167105 | 2865.561954 | -0.0066 | 0.995 | -6.74E-10 | count | 1 |
| AC104316.2  | -18.8167105 | 2865.561954 | -0.0066 | 0.995 | -6.74E-10 | count | 1 |
| LINC01219   | -18.8167105 | 2865.561954 | -0.0066 | 0.995 | -6.74E-10 | count | 1 |
| TSKU        | -18.8167105 | 2865.561954 | -0.0066 | 0.995 | -6.74E-10 | count | 1 |
| LAYN        | -18.8167105 | 2865.561954 | -0.0066 | 0.995 | -6.74E-10 | count | 1 |
| SCN4B       | -18.8167105 | 2865.561954 | -0.0066 | 0.995 | -6.74E-10 | count | 1 |
| DKK1        | -18.8167105 | 2865.561954 | -0.0066 | 0.995 | -6.74E-10 | count | 1 |
| AC022509.1  | -18.8167105 | 2865.561954 | -0.0066 | 0.995 | -6.74E-10 | count | 1 |
| BCDIN3D-AS1 | -18.8167105 | 2865.561954 | -0.0066 | 0.995 | -6.74E-10 | count | 1 |
| LINC02389   | -18.8167105 | 2865.561954 | -0.0066 | 0.995 | -6.74E-10 | count | 1 |
| MYL2        | -18.8167105 | 2865.561954 | -0.0066 | 0.995 | -6.74E-10 | count | 1 |
| LINC00642   | -18.8167105 | 2865.561954 | -0.0066 | 0.995 | -6.74E-10 | count | 1 |
| IGHV4-34    | -18.8167105 | 2865.561954 | -0.0066 | 0.995 | -6.74E-10 | count | 1 |
| IGHV1-69-2  | -18.8167105 | 2865.561954 | -0.0066 | 0.995 | -6.74E-10 | count | 1 |
| TGM5        | -18.8167105 | 2865.561954 | -0.0066 | 0.995 | -6.74E-10 | count | 1 |
| AC068722.2  | -18.8167105 | 2865.561954 | -0.0066 | 0.995 | -6.74E-10 | count | 1 |
| UNC13C      | -18.8167105 | 2865.561954 | -0.0066 | 0.995 | -6.74E-10 | count | 1 |
| TMC7        | -18.8167105 | 2865.561954 | -0.0066 | 0.995 | -6.74E-10 | count | 1 |
| PRSS8       | -18.8167105 | 2865.561954 | -0.0066 | 0.995 | -6.74E-10 | count | 1 |

|            |             |             |         |       |           |       |   |
|------------|-------------|-------------|---------|-------|-----------|-------|---|
| AC044802.1 | -18.8167105 | 2865.561954 | -0.0066 | 0.995 | -6.74E-10 | count | 1 |
| TERB1      | -18.8167105 | 2865.561954 | -0.0066 | 0.995 | -6.74E-10 | count | 1 |
| AC091153.3 | -18.8167105 | 2865.561954 | -0.0066 | 0.995 | -6.74E-10 | count | 1 |
| WSCD1      | -18.8167105 | 2865.561954 | -0.0066 | 0.995 | -6.74E-10 | count | 1 |
| AC016876.3 | -18.8167105 | 2865.561954 | -0.0066 | 0.995 | -6.74E-10 | count | 1 |
| AC135178.2 | -18.8167105 | 2865.561954 | -0.0066 | 0.995 | -6.74E-10 | count | 1 |
| AC005224.1 | -18.8167105 | 2865.561954 | -0.0066 | 0.995 | -6.74E-10 | count | 1 |
| ANGPT4     | -18.8167105 | 2865.561954 | -0.0066 | 0.995 | -6.74E-10 | count | 1 |
| HAR1A      | -18.8167105 | 2865.561954 | -0.0066 | 0.995 | -6.74E-10 | count | 1 |
| DIRAS1     | -18.8167105 | 2865.561954 | -0.0066 | 0.995 | -6.74E-10 | count | 1 |
| AC011446.2 | -18.8167105 | 2865.561954 | -0.0066 | 0.995 | -6.74E-10 | count | 1 |
| OR1I1      | -18.8167105 | 2865.561954 | -0.0066 | 0.995 | -6.74E-10 | count | 1 |
| LINC01764  | -18.8167105 | 2865.561954 | -0.0066 | 0.995 | -6.74E-10 | count | 1 |
| MYBPC2     | -18.8167105 | 2865.561954 | -0.0066 | 0.995 | -6.74E-10 | count | 1 |
| FAM71E1    | -18.8167105 | 2865.561954 | -0.0066 | 0.995 | -6.74E-10 | count | 1 |
| VPREB3     | -18.8167105 | 2865.561954 | -0.0066 | 0.995 | -6.74E-10 | count | 1 |
| SHISA8     | -18.8167105 | 2865.561954 | -0.0066 | 0.995 | -6.74E-10 | count | 1 |
| TNFRSF13C  | -18.8167105 | 2865.561954 | -0.0066 | 0.995 | -6.74E-10 | count | 1 |
| AC233755.1 | -18.8167105 | 2865.561954 | -0.0066 | 0.995 | -6.74E-10 | count | 1 |
| HEYL       | -18.8167105 | 2865.561954 | -0.0066 | 0.995 | -6.74E-10 | count | 1 |
| TBR1       | -18.8167105 | 2865.561954 | -0.0066 | 0.995 | -6.74E-10 | count | 1 |
| LINC01013  | -18.8167105 | 2865.561954 | -0.0066 | 0.995 | -6.74E-10 | count | 1 |
| LINC00894  | -18.8167105 | 2865.561954 | -0.0066 | 0.995 | -6.74E-10 | count | 1 |
| AP003110.1 | -18.8167105 | 2865.561954 | -0.0066 | 0.995 | -6.74E-10 | count | 1 |
| AP002884.4 | -18.8167105 | 2865.561954 | -0.0066 | 0.995 | -6.74E-10 | count | 1 |
| SPAG6      | -18.8167105 | 2865.561954 | -0.0066 | 0.995 | -6.74E-10 | count | 1 |
| TMEM72-AS1 | -18.8167105 | 2865.561954 | -0.0066 | 0.995 | -6.74E-10 | count | 1 |
| AC123768.2 | -18.8167105 | 2865.561954 | -0.0066 | 0.995 | -6.74E-10 | count | 1 |
| AC018521.2 | -18.8167105 | 2865.561954 | -0.0066 | 0.995 | -6.74E-10 | count | 1 |
| AC007638.1 | -18.8167105 | 2865.561954 | -0.0066 | 0.995 | -6.74E-10 | count | 1 |
| AL133230.1 | -18.8167105 | 2865.561954 | -0.0066 | 0.995 | -6.74E-10 | count | 1 |
| S1PR5      | -18.8167105 | 2865.561954 | -0.0066 | 0.995 | -6.74E-10 | count | 1 |
| ANGPT1     | -0.1777864  | 0.4627212   | -0.3842 | 0.701 | -6.73E-10 | count | 1 |
| RASL11B    | -0.1593104  | 0.7966078   | -0.2    | 0.842 | -6.07E-10 | count | 1 |
| AC108866.1 | -0.1593104  | 0.7966078   | -0.2    | 0.842 | -6.07E-10 | count | 1 |
| MYOZ3      | -0.1593104  | 0.7966078   | -0.2    | 0.842 | -6.07E-10 | count | 1 |
| EPDR1      | -0.1593104  | 0.7966078   | -0.2    | 0.842 | -6.07E-10 | count | 1 |
| ACTR3C     | -0.1593104  | 0.7966078   | -0.2    | 0.842 | -6.07E-10 | count | 1 |
| AL162586.1 | -0.1593104  | 0.7966078   | -0.2    | 0.842 | -6.07E-10 | count | 1 |
| PIH1D2     | -0.1593104  | 0.7966078   | -0.2    | 0.842 | -6.07E-10 | count | 1 |
| AL133353.1 | -0.1593104  | 0.7966078   | -0.2    | 0.842 | -6.07E-10 | count | 1 |
| SLC4A1     | -0.1593104  | 0.7966078   | -0.2    | 0.842 | -6.07E-10 | count | 1 |
| CCBE1      | -0.1593104  | 0.7966078   | -0.2    | 0.842 | -6.07E-10 | count | 1 |
| PLCG1      | -0.1593104  | 0.7966078   | -0.2    | 0.842 | -6.07E-10 | count | 1 |
| AC022144.1 | -0.1593104  | 0.7966078   | -0.2    | 0.842 | -6.07E-10 | count | 1 |

|               |            |           |         |       |           |       |   |
|---------------|------------|-----------|---------|-------|-----------|-------|---|
| MUC1          | -0.1593104 | 0.7966078 | -0.2    | 0.842 | -6.07E-10 | count | 1 |
| PRELP         | -0.1593104 | 0.7966078 | -0.2    | 0.842 | -6.07E-10 | count | 1 |
| KIF26B        | -0.1593104 | 0.7966078 | -0.2    | 0.842 | -6.07E-10 | count | 1 |
| PDE8B         | -0.1593104 | 0.7966078 | -0.2    | 0.842 | -6.07E-10 | count | 1 |
| LAMA2         | -0.1593104 | 0.7966078 | -0.2    | 0.842 | -6.07E-10 | count | 1 |
| MID1          | -0.1593104 | 0.7966078 | -0.2    | 0.842 | -6.07E-10 | count | 1 |
| AC103957.2    | -0.1593104 | 0.7966078 | -0.2    | 0.842 | -6.07E-10 | count | 1 |
| AC018523.2    | -0.1593104 | 0.7966078 | -0.2    | 0.842 | -6.07E-10 | count | 1 |
| TPH1          | -0.1593104 | 0.7966078 | -0.2    | 0.842 | -6.07E-10 | count | 1 |
| RPS6KB2-AS1   | -0.1593104 | 0.7966078 | -0.2    | 0.842 | -6.07E-10 | count | 1 |
| NAALAD2       | -0.1593104 | 0.7966078 | -0.2    | 0.842 | -6.07E-10 | count | 1 |
| MAT1A         | -0.1593104 | 0.7966078 | -0.2    | 0.842 | -6.07E-10 | count | 1 |
| PPP1R3C       | -0.1593104 | 0.7966078 | -0.2    | 0.842 | -6.07E-10 | count | 1 |
| AL157832.3    | -0.1593104 | 0.7966078 | -0.2    | 0.842 | -6.07E-10 | count | 1 |
| LINC00562     | -0.1593104 | 0.7966078 | -0.2    | 0.842 | -6.07E-10 | count | 1 |
| AC009120.4    | -0.1593104 | 0.7966078 | -0.2    | 0.842 | -6.07E-10 | count | 1 |
| LINC02132     | -0.1593104 | 0.7966078 | -0.2    | 0.842 | -6.07E-10 | count | 1 |
| P2RX5-TAX1BP3 | -0.1593104 | 0.7966078 | -0.2    | 0.842 | -6.07E-10 | count | 1 |
| RHBDL3        | -0.1593104 | 0.7966078 | -0.2    | 0.842 | -6.07E-10 | count | 1 |
| ABCA8         | -0.1593104 | 0.7966078 | -0.2    | 0.842 | -6.07E-10 | count | 1 |
| ITGB4         | -0.1593104 | 0.7966078 | -0.2    | 0.842 | -6.07E-10 | count | 1 |
| RNF157        | -0.1593104 | 0.7966078 | -0.2    | 0.842 | -6.07E-10 | count | 1 |
| PCP2          | -0.1593104 | 0.7966078 | -0.2    | 0.842 | -6.07E-10 | count | 1 |
| ZNRF3-AS1     | -0.1593104 | 0.7966078 | -0.2    | 0.842 | -6.07E-10 | count | 1 |
| AL035681.1    | -0.1593104 | 0.7966078 | -0.2    | 0.842 | -6.07E-10 | count | 1 |
| SFTPD         | -0.1593104 | 0.7966078 | -0.2    | 0.842 | -6.07E-10 | count | 1 |
| AC079949.2    | -0.1593104 | 0.7966078 | -0.2    | 0.842 | -6.07E-10 | count | 1 |
| LRRC46        | -0.1593104 | 0.7966078 | -0.2    | 0.842 | -6.07E-10 | count | 1 |
| OR7A17        | -0.1593104 | 0.7966078 | -0.2    | 0.842 | -6.07E-10 | count | 1 |
| Z83847.1      | -0.1593104 | 0.7966078 | -0.2    | 0.842 | -6.07E-10 | count | 1 |
| ABI3BP        | -0.1593104 | 0.5625623 | -0.2832 | 0.777 | -6.07E-10 | count | 1 |
| ZNF366        | -0.1593104 | 0.5625623 | -0.2832 | 0.777 | -6.07E-10 | count | 1 |
| RECQL4        | -0.1593104 | 0.5625623 | -0.2832 | 0.777 | -6.07E-10 | count | 1 |
| AKR1C1        | 0.0069755  | 0.6857454 | 0.0102  | 0.992 | 7.65E-11  | count | 1 |
| HTR2B         | 0.0069755  | 0.6855492 | 0.0102  | 0.992 | 7.65E-11  | count | 1 |
| BVES          | 0.0069755  | 0.6857454 | 0.0102  | 0.992 | 7.65E-11  | count | 1 |
| IGHEP2        | 0.0069755  | 0.6857454 | 0.0102  | 0.992 | 7.65E-11  | count | 1 |
| AL031599.1    | 0.0636845  | 0.5602511 | 0.1137  | 0.91  | 7.12E-10  | count | 1 |
| AXIN2         | 0.1780252  | 0.9599292 | 0.1855  | 0.853 | 7.62E-10  | count | 1 |
| GNAL          | 0.1780252  | 0.9599292 | 0.1855  | 0.853 | 7.62E-10  | count | 1 |
| HNRNPA1L2     | 0.1780252  | 0.9599292 | 0.1855  | 0.853 | 7.62E-10  | count | 1 |
| AC012640.1    | 0.1780252  | 0.9599292 | 0.1855  | 0.853 | 7.62E-10  | count | 1 |
| AC078795.3    | 0.1780252  | 0.9599292 | 0.1855  | 0.853 | 7.62E-10  | count | 1 |
| FNDC4         | 0.1780252  | 0.9599292 | 0.1855  | 0.853 | 7.62E-10  | count | 1 |
| KRBOX1        | 0.1780252  | 0.9599292 | 0.1855  | 0.853 | 7.62E-10  | count | 1 |

|            |           |           |        |       |          |       |   |
|------------|-----------|-----------|--------|-------|----------|-------|---|
| SPTA1      | 0.1780252 | 0.9599292 | 0.1855 | 0.853 | 7.62E-10 | count | 1 |
| DYNC111    | 0.1780252 | 0.9599292 | 0.1855 | 0.853 | 7.62E-10 | count | 1 |
| HCN2       | 0.1780252 | 0.9599292 | 0.1855 | 0.853 | 7.62E-10 | count | 1 |
| HIST2H2AA4 | 0.1780252 | 0.9599292 | 0.1855 | 0.853 | 7.62E-10 | count | 1 |
| AC007364.1 | 0.1780252 | 0.9599292 | 0.1855 | 0.853 | 7.62E-10 | count | 1 |
| AC004067.1 | 0.1780252 | 0.9937802 | 0.1791 | 0.858 | 7.62E-10 | count | 1 |
| Z94721.1   | 0.1780252 | 0.9599292 | 0.1855 | 0.853 | 7.62E-10 | count | 1 |
| HPN        | 0.1780252 | 0.9937802 | 0.1791 | 0.858 | 7.62E-10 | count | 1 |
| SMAD9      | 0.1780252 | 0.9599292 | 0.1855 | 0.853 | 7.62E-10 | count | 1 |
| ALPK2      | 0.1780252 | 0.9599292 | 0.1855 | 0.853 | 7.62E-10 | count | 1 |
| AC016722.2 | 0.1780252 | 0.9937802 | 0.1791 | 0.858 | 7.62E-10 | count | 1 |
| APOBEC3D   | 0.1780252 | 0.9599292 | 0.1855 | 0.853 | 7.62E-10 | count | 1 |
| FAM95B1    | 0.1780252 | 0.9599292 | 0.1855 | 0.853 | 7.62E-10 | count | 1 |
| AC087203.3 | 0.1780252 | 0.9599292 | 0.1855 | 0.853 | 7.62E-10 | count | 1 |
| SOX8       | 0.1780252 | 0.9599292 | 0.1855 | 0.853 | 7.62E-10 | count | 1 |
| AC026254.2 | 0.1780252 | 0.9937802 | 0.1791 | 0.858 | 7.62E-10 | count | 1 |
| AC010175.1 | 0.1780252 | 0.9599292 | 0.1855 | 0.853 | 7.62E-10 | count | 1 |
| AC097359.2 | 0.1780252 | 0.9599292 | 0.1855 | 0.853 | 7.62E-10 | count | 1 |
| C2orf15    | 0.1780252 | 0.9599292 | 0.1855 | 0.853 | 7.62E-10 | count | 1 |
| FAM66C     | 0.1780252 | 0.9599292 | 0.1855 | 0.853 | 7.62E-10 | count | 1 |
| INPP5J     | 0.1780252 | 0.9599292 | 0.1855 | 0.853 | 7.62E-10 | count | 1 |
| LINC00671  | 0.1780252 | 0.9599292 | 0.1855 | 0.853 | 7.62E-10 | count | 1 |
| DLEU7-AS1  | 0.1780252 | 0.9599292 | 0.1855 | 0.853 | 7.62E-10 | count | 1 |
| AL137789.1 | 0.1780252 | 0.9599292 | 0.1855 | 0.853 | 7.62E-10 | count | 1 |
| AC007220.1 | 0.1780252 | 0.9937802 | 0.1791 | 0.858 | 7.62E-10 | count | 1 |
| POLQ       | 0.1780252 | 0.9937802 | 0.1791 | 0.858 | 7.62E-10 | count | 1 |
| SLC26A4    | 0.1780252 | 0.9599292 | 0.1855 | 0.853 | 7.62E-10 | count | 1 |
| AP003392.1 | 0.1780252 | 0.9599292 | 0.1855 | 0.853 | 7.62E-10 | count | 1 |
| MFAP3L     | 0.1780252 | 0.9937802 | 0.1791 | 0.858 | 7.62E-10 | count | 1 |
| GPR153     | 0.1780252 | 0.9599292 | 0.1855 | 0.853 | 7.62E-10 | count | 1 |
| GRIN3A     | 0.1780252 | 0.9937802 | 0.1791 | 0.858 | 7.62E-10 | count | 1 |
| MCM3AP-AS1 | 0.1780252 | 0.9599292 | 0.1855 | 0.853 | 7.62E-10 | count | 1 |
| RHPN2      | 0.1780252 | 0.9599292 | 0.1855 | 0.853 | 7.62E-10 | count | 1 |
| ZNF74      | 0.1393456 | 0.5271788 | 0.2643 | 0.792 | 1.60E-09 | count | 1 |
| ZNF883     | 0.1780252 | 0.6902367 | 0.2579 | 0.796 | 2.07E-09 | count | 1 |
| ROBO1      | 0.5153608 | 0.3772702 | 1.366  | 0.172 | 2.47E-09 | count | 1 |
| AC007878.1 | 0.5153608 | 0.5350672 | 0.9632 | 0.336 | 2.47E-09 | count | 1 |
| SCGB3A2    | 0.5153608 | 0.5350672 | 0.9632 | 0.336 | 2.47E-09 | count | 1 |
| TBX21      | 0.5153608 | 0.5350672 | 0.9632 | 0.336 | 2.47E-09 | count | 1 |
| AC105105.1 | 0.5153608 | 0.5350672 | 0.9632 | 0.336 | 2.47E-09 | count | 1 |
| AC006504.1 | 0.5153608 | 0.5350672 | 0.9632 | 0.336 | 2.47E-09 | count | 1 |
| AC092747.4 | 0.2157162 | 0.4556486 | 0.4734 | 0.636 | 2.54E-09 | count | 1 |
| SDK1       | 0.5338367 | 0.8560789 | 0.6236 | 0.533 | 2.57E-09 | count | 1 |
| AC139749.1 | 0.5338367 | 0.8560789 | 0.6236 | 0.533 | 2.57E-09 | count | 1 |
| MORC1      | 0.5338367 | 0.8560789 | 0.6236 | 0.533 | 2.57E-09 | count | 1 |

|             |            |             |        |       |          |       |   |
|-------------|------------|-------------|--------|-------|----------|-------|---|
| AL355297.4  | 0.5338367  | 0.8560789   | 0.6236 | 0.533 | 2.57E-09 | count | 1 |
| AL356019.2  | 0.5338367  | 0.8560789   | 0.6236 | 0.533 | 2.57E-09 | count | 1 |
| GPR135      | 0.5338367  | 0.8560789   | 0.6236 | 0.533 | 2.57E-09 | count | 1 |
| GOLGA8H     | 0.5338367  | 0.8560789   | 0.6236 | 0.533 | 2.57E-09 | count | 1 |
| AC239799.2  | 0.5338367  | 0.6894391   | 0.7743 | 0.439 | 2.57E-09 | count | 1 |
| CAPN12      | 0.5338367  | 0.6894391   | 0.7743 | 0.439 | 2.57E-09 | count | 1 |
| TTC34       | 0.5338367  | 0.6894391   | 0.7743 | 0.439 | 2.57E-09 | count | 1 |
| TOGARAM2    | 0.5338367  | 0.6894391   | 0.7743 | 0.439 | 2.57E-09 | count | 1 |
| CYP26B1     | 0.5338367  | 0.6894391   | 0.7743 | 0.439 | 2.57E-09 | count | 1 |
| LINC01238   | 0.5338367  | 0.6894391   | 0.7743 | 0.439 | 2.57E-09 | count | 1 |
| PART1       | 0.5338367  | 0.6894391   | 0.7743 | 0.439 | 2.57E-09 | count | 1 |
| MOCS1       | 0.5338367  | 0.6894391   | 0.7743 | 0.439 | 2.57E-09 | count | 1 |
| LBHD1       | 0.5338367  | 0.6894391   | 0.7743 | 0.439 | 2.57E-09 | count | 1 |
| CDCA5       | 0.5338367  | 0.6894391   | 0.7743 | 0.439 | 2.57E-09 | count | 1 |
| ELOVL3      | 0.5338367  | 0.6894391   | 0.7743 | 0.439 | 2.57E-09 | count | 1 |
| CCDC184     | 0.5338367  | 0.6894391   | 0.7743 | 0.439 | 2.57E-09 | count | 1 |
| SEMA6D      | 0.5338367  | 0.6894391   | 0.7743 | 0.439 | 2.57E-09 | count | 1 |
| AC087286.3  | 0.5338367  | 0.6894391   | 0.7743 | 0.439 | 2.57E-09 | count | 1 |
| AC027130.1  | 0.5338367  | 0.6894391   | 0.7743 | 0.439 | 2.57E-09 | count | 1 |
| SMG8        | 0.5338367  | 0.6894391   | 0.7743 | 0.439 | 2.57E-09 | count | 1 |
| ZNF792      | 0.5338367  | 0.6894391   | 0.7743 | 0.439 | 2.57E-09 | count | 1 |
| FAM198A     | 0.2265442  | 0.5775302   | 0.3923 | 0.695 | 2.68E-09 | count | 1 |
| AC095055.1  | 0.2265442  | 0.5259894   | 0.4307 | 0.667 | 2.68E-09 | count | 1 |
| C2orf80     | 0.2265442  | 0.7860802   | 0.2882 | 0.773 | 2.68E-09 | count | 1 |
| AC055811.3  | 0.2461547  | 0.5132158   | 0.4796 | 0.632 | 2.93E-09 | count | 1 |
| MYLK        | 0.1463533  | 0.4943841   | 0.296  | 0.767 | 4.58E-09 | count | 1 |
| PCDHGA12    | 0.3860913  | 0.7039261   | 0.5485 | 0.583 | 4.82E-09 | count | 1 |
| DUSP15      | 0.3860913  | 0.6319212   | 0.611  | 0.541 | 4.82E-09 | count | 1 |
| MSANTD1     | 18.4303267 | 2731.527168 | 0.0067 | 0.995 | 4.82E-09 | count | 1 |
| STEAP2      | 18.4303269 | 2731.527089 | 0.0067 | 0.995 | 4.82E-09 | count | 1 |
| FHDC1       | 18.4303267 | 2731.526931 | 0.0067 | 0.995 | 4.82E-09 | count | 1 |
| AC092354.1  | 18.4303267 | 2731.526931 | 0.0067 | 0.995 | 4.82E-09 | count | 1 |
| INMT        | 18.4303266 | 2731.527036 | 0.0067 | 0.995 | 4.82E-09 | count | 1 |
| ARSE        | 18.4303266 | 2731.527182 | 0.0067 | 0.995 | 4.82E-09 | count | 1 |
| AC108860.2  | 18.4303266 | 2731.527182 | 0.0067 | 0.995 | 4.82E-09 | count | 1 |
| AC100830.2  | 18.4303268 | 2731.527063 | 0.0067 | 0.995 | 4.82E-09 | count | 1 |
| AC093525.3  | 18.4303266 | 2731.527182 | 0.0067 | 0.995 | 4.82E-09 | count | 1 |
| ADM5        | 18.4303266 | 2731.527182 | 0.0067 | 0.995 | 4.82E-09 | count | 1 |
| AL031283.2  | 18.4303265 | 2731.526957 | 0.0067 | 0.995 | 4.82E-09 | count | 1 |
| AL139220.2  | 18.4303266 | 2731.527049 | 0.0067 | 0.995 | 4.82E-09 | count | 1 |
| MAB21L3     | 18.4303266 | 2731.527089 | 0.0067 | 0.995 | 4.82E-09 | count | 1 |
| AL078644.2  | 18.4303266 | 2731.526878 | 0.0067 | 0.995 | 4.82E-09 | count | 1 |
| NR5A2       | 18.4303266 | 2731.527049 | 0.0067 | 0.995 | 4.82E-09 | count | 1 |
| OR2C3       | 18.4303265 | 2731.526997 | 0.0067 | 0.995 | 4.82E-09 | count | 1 |
| AC009237.15 | 18.4303264 | 2731.527195 | 0.0067 | 0.995 | 4.82E-09 | count | 1 |

|                |            |             |        |       |          |       |   |
|----------------|------------|-------------|--------|-------|----------|-------|---|
| AC012087.1     | 18.4303264 | 2731.527195 | 0.0067 | 0.995 | 4.82E-09 | count | 1 |
| RBMS3          | 18.4303266 | 2731.527049 | 0.0067 | 0.995 | 4.82E-09 | count | 1 |
| CDC25A         | 18.4303266 | 2731.527089 | 0.0067 | 0.995 | 4.82E-09 | count | 1 |
| AC072039.2     | 18.4303266 | 2731.527049 | 0.0067 | 0.995 | 4.82E-09 | count | 1 |
| KLB            | 18.4303264 | 2731.526944 | 0.0067 | 0.995 | 4.82E-09 | count | 1 |
| NIM1K          | 18.4303268 | 2731.526904 | 0.0067 | 0.995 | 4.82E-09 | count | 1 |
| AC008897.2     | 18.4303266 | 2731.527049 | 0.0067 | 0.995 | 4.82E-09 | count | 1 |
| HCG9           | 18.4303266 | 2731.527049 | 0.0067 | 0.995 | 4.82E-09 | count | 1 |
| GABRR2         | 18.4303266 | 2731.527049 | 0.0067 | 0.995 | 4.82E-09 | count | 1 |
| STK31          | 18.4303266 | 2731.526878 | 0.0067 | 0.995 | 4.82E-09 | count | 1 |
| TRPV6          | 18.4303266 | 2731.52701  | 0.0067 | 0.995 | 4.82E-09 | count | 1 |
| WWC3-AS1       | 18.4303266 | 2731.527049 | 0.0067 | 0.995 | 4.82E-09 | count | 1 |
| SHROOM4        | 18.4303264 | 2731.527089 | 0.0067 | 0.995 | 4.82E-09 | count | 1 |
| SBSPON         | 18.4303266 | 2731.526878 | 0.0067 | 0.995 | 4.82E-09 | count | 1 |
| AC100771.2     | 18.4303266 | 2731.527049 | 0.0067 | 0.995 | 4.82E-09 | count | 1 |
| AP001107.7     | 18.4303266 | 2731.52701  | 0.0067 | 0.995 | 4.82E-09 | count | 1 |
| AP001972.1     | 18.4303264 | 2731.527195 | 0.0067 | 0.995 | 4.82E-09 | count | 1 |
| OLAH           | 18.4303265 | 2731.526997 | 0.0067 | 0.995 | 4.82E-09 | count | 1 |
| CYP17A1-AS1    | 18.4303264 | 2731.526944 | 0.0067 | 0.995 | 4.82E-09 | count | 1 |
| PRAP1          | 18.4303264 | 2731.527089 | 0.0067 | 0.995 | 4.82E-09 | count | 1 |
| IQSEC3         | 18.4303266 | 2731.52701  | 0.0067 | 0.995 | 4.82E-09 | count | 1 |
| THSD1          | 18.4303266 | 2731.527049 | 0.0067 | 0.995 | 4.82E-09 | count | 1 |
| AC001226.2     | 18.4303264 | 2731.527089 | 0.0067 | 0.995 | 4.82E-09 | count | 1 |
| WASIR2         | 18.4303264 | 2731.527195 | 0.0067 | 0.995 | 4.82E-09 | count | 1 |
| AC010536.1     | 18.4303266 | 2731.526957 | 0.0067 | 0.995 | 4.82E-09 | count | 1 |
| AC002553.2     | 18.4303268 | 2731.526904 | 0.0067 | 0.995 | 4.82E-09 | count | 1 |
| AP005899.1     | 18.4303267 | 2731.526891 | 0.0067 | 0.995 | 4.82E-09 | count | 1 |
| AP001010.1     | 18.4303264 | 2731.527195 | 0.0067 | 0.995 | 4.82E-09 | count | 1 |
| PCAT18         | 18.4303266 | 2731.527049 | 0.0067 | 0.995 | 4.82E-09 | count | 1 |
| AL391095.1     | 18.4303266 | 2731.527049 | 0.0067 | 0.995 | 4.82E-09 | count | 1 |
| APOBEC3B-AS1   | 18.4303266 | 2731.526957 | 0.0067 | 0.995 | 4.82E-09 | count | 1 |
| Z83851.1       | 18.4303265 | 2731.526997 | 0.0067 | 0.995 | 4.82E-09 | count | 1 |
| AL591163.1     | 18.4303265 | 2731.526983 | 0.0067 | 0.995 | 4.82E-09 | count | 1 |
| AK5            | 18.4303267 | 2731.527023 | 0.0067 | 0.995 | 4.82E-09 | count | 1 |
| AL390066.1     | 18.4303267 | 2731.527023 | 0.0067 | 0.995 | 4.82E-09 | count | 1 |
| C1orf220       | 18.4303264 | 2731.527116 | 0.0067 | 0.995 | 4.82E-09 | count | 1 |
| GREB1          | 18.4303264 | 2731.52697  | 0.0067 | 0.995 | 4.82E-09 | count | 1 |
| AC073869.5     | 18.4303265 | 2731.526983 | 0.0067 | 0.995 | 4.82E-09 | count | 1 |
| AC131097.3     | 18.4303264 | 2731.526957 | 0.0067 | 0.995 | 4.82E-09 | count | 1 |
| UBE2E2-AS1     | 18.4303266 | 2731.527155 | 0.0067 | 0.995 | 4.82E-09 | count | 1 |
| TMEM110-MUSTN1 | 18.4303265 | 2731.526983 | 0.0067 | 0.995 | 4.82E-09 | count | 1 |
| AC131235.3     | 18.4303266 | 2731.52697  | 0.0067 | 0.995 | 4.82E-09 | count | 1 |
| AC109927.1     | 18.4303267 | 2731.527023 | 0.0067 | 0.995 | 4.82E-09 | count | 1 |
| AC034229.4     | 18.4303263 | 2731.52697  | 0.0067 | 0.995 | 4.82E-09 | count | 1 |
| PCDHB15        | 18.4303264 | 2731.526904 | 0.0067 | 0.995 | 4.82E-09 | count | 1 |

|              |            |             |        |       |          |       |   |
|--------------|------------|-------------|--------|-------|----------|-------|---|
| MAS1         | 18.4303263 | 2731.52697  | 0.0067 | 0.995 | 4.82E-09 | count | 1 |
| AC079760.2   | 18.4303265 | 2731.526983 | 0.0067 | 0.995 | 4.82E-09 | count | 1 |
| AL161909.2   | 18.4303265 | 2731.527155 | 0.0067 | 0.995 | 4.82E-09 | count | 1 |
| LINC01474    | 18.4303265 | 2731.527155 | 0.0067 | 0.995 | 4.82E-09 | count | 1 |
| AC138230.1   | 18.4303265 | 2731.526983 | 0.0067 | 0.995 | 4.82E-09 | count | 1 |
| CATSPERZ     | 18.4303266 | 2731.52697  | 0.0067 | 0.995 | 4.82E-09 | count | 1 |
| AC005520.5   | 18.4303265 | 2731.527023 | 0.0067 | 0.995 | 4.82E-09 | count | 1 |
| AC002550.2   | 18.4303264 | 2731.526904 | 0.0067 | 0.995 | 4.82E-09 | count | 1 |
| AC002550.1   | 18.4303264 | 2731.526997 | 0.0067 | 0.995 | 4.82E-09 | count | 1 |
| BOLA2        | 18.4303264 | 2731.52697  | 0.0067 | 0.995 | 4.82E-09 | count | 1 |
| NRN1L        | 18.4303267 | 2731.52701  | 0.0067 | 0.995 | 4.82E-09 | count | 1 |
| FKBP10       | 18.4303266 | 2731.527234 | 0.0067 | 0.995 | 4.82E-09 | count | 1 |
| AC023983.2   | 18.4303264 | 2731.526997 | 0.0067 | 0.995 | 4.82E-09 | count | 1 |
| ATCAY        | 18.4303266 | 2731.527234 | 0.0067 | 0.995 | 4.82E-09 | count | 1 |
| BORCS8-MEF2B | 18.4303264 | 2731.526904 | 0.0067 | 0.995 | 4.82E-09 | count | 1 |
| AC007773.1   | 18.4303265 | 2731.527023 | 0.0067 | 0.995 | 4.82E-09 | count | 1 |
| AC005392.2   | 18.4303263 | 2731.52697  | 0.0067 | 0.995 | 4.82E-09 | count | 1 |
| ZNF320       | 18.4303264 | 2731.526957 | 0.0067 | 0.995 | 4.82E-09 | count | 1 |
| AC008753.3   | 18.4303263 | 2731.52697  | 0.0067 | 0.995 | 4.82E-09 | count | 1 |
| AC007666.1   | 18.4303265 | 2731.527023 | 0.0067 | 0.995 | 4.82E-09 | count | 1 |
| PARS2        | 18.4303263 | 2731.526997 | 0.0067 | 0.995 | 4.82E-09 | count | 1 |
| AC119674.1   | 18.4303265 | 2731.527182 | 0.0067 | 0.995 | 4.82E-09 | count | 1 |
| AC244453.3   | 18.4303264 | 2731.527116 | 0.0067 | 0.995 | 4.82E-09 | count | 1 |
| AL590714.1   | 18.4303266 | 2731.527063 | 0.0067 | 0.995 | 4.82E-09 | count | 1 |
| LINC01934    | 18.4303267 | 2731.527168 | 0.0067 | 0.995 | 4.82E-09 | count | 1 |
| AMOTL2       | 18.4303265 | 2731.527116 | 0.0067 | 0.995 | 4.82E-09 | count | 1 |
| SHOX2        | 18.4303264 | 2731.526944 | 0.0067 | 0.995 | 4.82E-09 | count | 1 |
| LINC01206    | 18.4303266 | 2731.527063 | 0.0067 | 0.995 | 4.82E-09 | count | 1 |
| LINC00887    | 18.4303265 | 2731.526957 | 0.0067 | 0.995 | 4.82E-09 | count | 1 |
| AC046143.1   | 18.4303264 | 2731.526931 | 0.0067 | 0.995 | 4.82E-09 | count | 1 |
| AC139887.4   | 18.4303264 | 2731.527023 | 0.0067 | 0.995 | 4.82E-09 | count | 1 |
| AC096564.2   | 18.4303264 | 2731.526931 | 0.0067 | 0.995 | 4.82E-09 | count | 1 |
| AC008592.5   | 18.4303265 | 2731.52701  | 0.0067 | 0.995 | 4.82E-09 | count | 1 |
| C1QTNF2      | 18.4303265 | 2731.526983 | 0.0067 | 0.995 | 4.82E-09 | count | 1 |
| AL353759.1   | 18.4303264 | 2731.527116 | 0.0067 | 0.995 | 4.82E-09 | count | 1 |
| ZNF391       | 18.4303262 | 2731.52697  | 0.0067 | 0.995 | 4.82E-09 | count | 1 |
| AL078581.1   | 18.4303264 | 2731.526997 | 0.0067 | 0.995 | 4.82E-09 | count | 1 |
| PNLDC1       | 18.4303265 | 2731.526983 | 0.0067 | 0.995 | 4.82E-09 | count | 1 |
| AMPH         | 18.4303265 | 2731.527063 | 0.0067 | 0.995 | 4.82E-09 | count | 1 |
| AC007566.1   | 18.4303264 | 2731.527023 | 0.0067 | 0.995 | 4.82E-09 | count | 1 |
| LRGUK        | 18.4303264 | 2731.527116 | 0.0067 | 0.995 | 4.82E-09 | count | 1 |
| AC026904.2   | 18.4303265 | 2731.527182 | 0.0067 | 0.995 | 4.82E-09 | count | 1 |
| AC100801.1   | 18.4303265 | 2731.526957 | 0.0067 | 0.995 | 4.82E-09 | count | 1 |
| AL353743.2   | 18.4303264 | 2731.527076 | 0.0067 | 0.995 | 4.82E-09 | count | 1 |
| C9orf170     | 18.4303264 | 2731.526931 | 0.0067 | 0.995 | 4.82E-09 | count | 1 |

|            |            |             |        |       |          |       |   |
|------------|------------|-------------|--------|-------|----------|-------|---|
| SYT9       | 18.4303265 | 2731.527208 | 0.0067 | 0.995 | 4.82E-09 | count | 1 |
| STK33      | 18.4303264 | 2731.527023 | 0.0067 | 0.995 | 4.82E-09 | count | 1 |
| AP002770.1 | 18.4303267 | 2731.527142 | 0.0067 | 0.995 | 4.82E-09 | count | 1 |
| AL121749.1 | 18.4303263 | 2731.527049 | 0.0067 | 0.995 | 4.82E-09 | count | 1 |
| GFRA1      | 18.4303264 | 2731.527023 | 0.0067 | 0.995 | 4.82E-09 | count | 1 |
| AC036103.1 | 18.4303266 | 2731.526931 | 0.0067 | 0.995 | 4.82E-09 | count | 1 |
| AP3B2      | 18.4303264 | 2731.527116 | 0.0067 | 0.995 | 4.82E-09 | count | 1 |
| AC099518.4 | 18.4303264 | 2731.527023 | 0.0067 | 0.995 | 4.82E-09 | count | 1 |
| KCNJ12     | 18.4303264 | 2731.526931 | 0.0067 | 0.995 | 4.82E-09 | count | 1 |
| LINC01415  | 18.4303266 | 2731.527063 | 0.0067 | 0.995 | 4.82E-09 | count | 1 |
| AC011450.1 | 18.4303265 | 2731.526983 | 0.0067 | 0.995 | 4.82E-09 | count | 1 |
| AC003002.3 | 18.4303265 | 2731.526878 | 0.0067 | 0.995 | 4.82E-09 | count | 1 |
| SMIM34B    | 18.4303265 | 2731.526878 | 0.0067 | 0.995 | 4.82E-09 | count | 1 |
| SRARP      | 18.4303263 | 2731.526983 | 0.0067 | 0.995 | 4.82E-09 | count | 1 |
| IQCC       | 18.4303265 | 2731.52701  | 0.0067 | 0.995 | 4.82E-09 | count | 1 |
| AL592166.1 | 18.4303264 | 2731.527076 | 0.0067 | 0.995 | 4.82E-09 | count | 1 |
| PODN       | 18.4303264 | 2731.526838 | 0.0067 | 0.995 | 4.82E-09 | count | 1 |
| BCAN       | 18.4303266 | 2731.527089 | 0.0067 | 0.995 | 4.82E-09 | count | 1 |
| MYBPH      | 18.4303263 | 2731.526983 | 0.0067 | 0.995 | 4.82E-09 | count | 1 |
| MAP1LC3C   | 18.4303264 | 2731.526957 | 0.0067 | 0.995 | 4.82E-09 | count | 1 |
| AC092687.3 | 18.4303264 | 2731.527076 | 0.0067 | 0.995 | 4.82E-09 | count | 1 |
| KLHL29     | 18.4303262 | 2731.527023 | 0.0067 | 0.995 | 4.82E-09 | count | 1 |
| AGBL5      | 18.4303264 | 2731.526957 | 0.0067 | 0.995 | 4.82E-09 | count | 1 |
| GCKR       | 18.4303263 | 2731.526983 | 0.0067 | 0.995 | 4.82E-09 | count | 1 |
| AC007250.1 | 18.4303262 | 2731.52697  | 0.0067 | 0.995 | 4.82E-09 | count | 1 |
| AC107081.2 | 18.4303264 | 2731.527076 | 0.0067 | 0.995 | 4.82E-09 | count | 1 |
| AC073869.3 | 18.4303264 | 2731.526957 | 0.0067 | 0.995 | 4.82E-09 | count | 1 |
| AC007750.1 | 18.4303264 | 2731.526957 | 0.0067 | 0.995 | 4.82E-09 | count | 1 |
| NOSTRIN    | 18.4303266 | 2731.527089 | 0.0067 | 0.995 | 4.82E-09 | count | 1 |
| KIAA2012   | 18.4303263 | 2731.526983 | 0.0067 | 0.995 | 4.82E-09 | count | 1 |
| AC090948.3 | 18.4303263 | 2731.526983 | 0.0067 | 0.995 | 4.82E-09 | count | 1 |
| MAGI1      | 18.4303262 | 2731.526931 | 0.0067 | 0.995 | 4.82E-09 | count | 1 |
| TMEM212    | 18.4303263 | 2731.526904 | 0.0067 | 0.995 | 4.82E-09 | count | 1 |
| AC116651.1 | 18.4303266 | 2731.526997 | 0.0067 | 0.995 | 4.82E-09 | count | 1 |
| AC097504.2 | 18.4303266 | 2731.526997 | 0.0067 | 0.995 | 4.82E-09 | count | 1 |
| LRAT       | 18.4303264 | 2731.527076 | 0.0067 | 0.995 | 4.82E-09 | count | 1 |
| LINC02427  | 18.4303264 | 2731.527076 | 0.0067 | 0.995 | 4.82E-09 | count | 1 |
| ROPN1L     | 18.4303265 | 2731.527076 | 0.0067 | 0.995 | 4.82E-09 | count | 1 |
| RNF180     | 18.4303264 | 2731.526957 | 0.0067 | 0.995 | 4.82E-09 | count | 1 |
| SNCAIP     | 18.4303264 | 2731.526957 | 0.0067 | 0.995 | 4.82E-09 | count | 1 |
| DND1       | 18.4303264 | 2731.526997 | 0.0067 | 0.995 | 4.82E-09 | count | 1 |
| SLC36A3    | 18.4303263 | 2731.52701  | 0.0067 | 0.995 | 4.82E-09 | count | 1 |
| SLIT3      | 18.4303264 | 2731.526957 | 0.0067 | 0.995 | 4.82E-09 | count | 1 |
| AL139095.4 | 18.4303265 | 2731.526997 | 0.0067 | 0.995 | 4.82E-09 | count | 1 |
| DDR1-DT    | 18.4303262 | 2731.526997 | 0.0067 | 0.995 | 4.82E-09 | count | 1 |



|            |            |             |        |       |          |       |   |
|------------|------------|-------------|--------|-------|----------|-------|---|
| POU5F1     | 18.4303264 | 2731.526957 | 0.0067 | 0.995 | 4.82E-09 | count | 1 |
| LY6G6C     | 18.4303264 | 2731.526838 | 0.0067 | 0.995 | 4.82E-09 | count | 1 |
| RHAG       | 18.4303263 | 2731.526957 | 0.0067 | 0.995 | 4.82E-09 | count | 1 |
| AL354892.2 | 18.4303263 | 2731.526983 | 0.0067 | 0.995 | 4.82E-09 | count | 1 |
| ZNF853     | 18.4303265 | 2731.527129 | 0.0067 | 0.995 | 4.82E-09 | count | 1 |
| HOXA3      | 18.4303266 | 2731.527089 | 0.0067 | 0.995 | 4.82E-09 | count | 1 |
| SPDYE1     | 18.4303264 | 2731.526957 | 0.0067 | 0.995 | 4.82E-09 | count | 1 |
| ZBPB       | 18.4303264 | 2731.526904 | 0.0067 | 0.995 | 4.82E-09 | count | 1 |
| CFAP69     | 18.4303262 | 2731.526931 | 0.0067 | 0.995 | 4.82E-09 | count | 1 |
| CHRD1      | 18.4303264 | 2731.526838 | 0.0067 | 0.995 | 4.82E-09 | count | 1 |
| FGF20      | 18.4303265 | 2731.526997 | 0.0067 | 0.995 | 4.82E-09 | count | 1 |
| PENK       | 18.4303264 | 2731.526891 | 0.0067 | 0.995 | 4.82E-09 | count | 1 |
| AC067930.5 | 18.4303262 | 2731.527023 | 0.0067 | 0.995 | 4.82E-09 | count | 1 |
| LMO1       | 18.4303263 | 2731.526904 | 0.0067 | 0.995 | 4.82E-09 | count | 1 |
| AC018410.1 | 18.4303263 | 2731.526904 | 0.0067 | 0.995 | 4.82E-09 | count | 1 |
| AP003064.2 | 18.4303264 | 2731.527063 | 0.0067 | 0.995 | 4.82E-09 | count | 1 |
| KDM4D      | 18.4303265 | 2731.526997 | 0.0067 | 0.995 | 4.82E-09 | count | 1 |
| AP000757.1 | 18.4303263 | 2731.526904 | 0.0067 | 0.995 | 4.82E-09 | count | 1 |
| PARD3      | 18.4303264 | 2731.526838 | 0.0067 | 0.995 | 4.82E-09 | count | 1 |
| ASAH2      | 18.4303264 | 2731.526957 | 0.0067 | 0.995 | 4.82E-09 | count | 1 |
| EBF3       | 18.4303264 | 2731.526838 | 0.0067 | 0.995 | 4.82E-09 | count | 1 |
| B4GALNT3   | 18.4303262 | 2731.52697  | 0.0067 | 0.995 | 4.82E-09 | count | 1 |
| GUCY2C     | 18.4303264 | 2731.527063 | 0.0067 | 0.995 | 4.82E-09 | count | 1 |
| ATP7B      | 18.4303262 | 2731.526997 | 0.0067 | 0.995 | 4.82E-09 | count | 1 |
| AC007182.1 | 18.4303263 | 2731.526904 | 0.0067 | 0.995 | 4.82E-09 | count | 1 |
| TMEM63C    | 18.4303262 | 2731.527023 | 0.0067 | 0.995 | 4.82E-09 | count | 1 |
| TEPP       | 18.4303264 | 2731.526865 | 0.0067 | 0.995 | 4.82E-09 | count | 1 |
| NECAB2     | 18.4303264 | 2731.526838 | 0.0067 | 0.995 | 4.82E-09 | count | 1 |
| AC107982.3 | 18.4303262 | 2731.526931 | 0.0067 | 0.995 | 4.82E-09 | count | 1 |
| AC087294.1 | 18.4303264 | 2731.526957 | 0.0067 | 0.995 | 4.82E-09 | count | 1 |
| CCL1       | 18.4303262 | 2731.527023 | 0.0067 | 0.995 | 4.82E-09 | count | 1 |
| AC091132.1 | 18.4303263 | 2731.526983 | 0.0067 | 0.995 | 4.82E-09 | count | 1 |
| LINC01483  | 18.4303264 | 2731.526957 | 0.0067 | 0.995 | 4.82E-09 | count | 1 |
| QRICH2     | 18.4303263 | 2731.526983 | 0.0067 | 0.995 | 4.82E-09 | count | 1 |
| AC022966.1 | 18.4303264 | 2731.526957 | 0.0067 | 0.995 | 4.82E-09 | count | 1 |
| AC090229.1 | 18.4303264 | 2731.526904 | 0.0067 | 0.995 | 4.82E-09 | count | 1 |
| TMEM74B    | 18.4303262 | 2731.526931 | 0.0067 | 0.995 | 4.82E-09 | count | 1 |
| ADAM33     | 18.4303263 | 2731.526983 | 0.0067 | 0.995 | 4.82E-09 | count | 1 |
| ITCH-AS1   | 18.4303264 | 2731.526957 | 0.0067 | 0.995 | 4.82E-09 | count | 1 |
| AC007292.1 | 18.4303264 | 2731.526957 | 0.0067 | 0.995 | 4.82E-09 | count | 1 |
| CYP4F12    | 18.4303264 | 2731.526838 | 0.0067 | 0.995 | 4.82E-09 | count | 1 |
| ZNF221     | 18.4303264 | 2731.526997 | 0.0067 | 0.995 | 4.82E-09 | count | 1 |
| EHD2       | 18.4303264 | 2731.526997 | 0.0067 | 0.995 | 4.82E-09 | count | 1 |
| XKR3       | 18.4303266 | 2731.527089 | 0.0067 | 0.995 | 4.82E-09 | count | 1 |
| AC004832.6 | 18.4303263 | 2731.526983 | 0.0067 | 0.995 | 4.82E-09 | count | 1 |

|            |            |             |        |       |          |       |   |
|------------|------------|-------------|--------|-------|----------|-------|---|
| AC254562.2 | 18.4303264 | 2731.526904 | 0.0067 | 0.995 | 4.82E-09 | count | 1 |
| GRIK1      | 18.4303263 | 2731.526997 | 0.0067 | 0.995 | 4.82E-09 | count | 1 |
| AP000238.1 | 18.4303263 | 2731.526957 | 0.0067 | 0.995 | 4.82E-09 | count | 1 |
| AP000253.1 | 18.4303264 | 2731.526904 | 0.0067 | 0.995 | 4.82E-09 | count | 1 |
| TMPRSS3    | 18.4303265 | 2731.527129 | 0.0067 | 0.995 | 4.82E-09 | count | 1 |
| SCNN1D     | 18.4303263 | 2731.526891 | 0.0067 | 0.995 | 4.82E-09 | count | 1 |
| PRDM16     | 18.4303265 | 2731.527036 | 0.0067 | 0.995 | 4.82E-09 | count | 1 |
| DPYD-AS1   | 18.4303261 | 2731.527076 | 0.0067 | 0.995 | 4.82E-09 | count | 1 |
| FCRL6      | 18.4303266 | 2731.527129 | 0.0067 | 0.995 | 4.82E-09 | count | 1 |
| LINC01645  | 18.4303263 | 2731.526997 | 0.0067 | 0.995 | 4.82E-09 | count | 1 |
| CFHR3      | 18.4303262 | 2731.526825 | 0.0067 | 0.995 | 4.82E-09 | count | 1 |
| MARK1      | 18.4303263 | 2731.526997 | 0.0067 | 0.995 | 4.82E-09 | count | 1 |
| CAPN8      | 18.430326  | 2731.527049 | 0.0067 | 0.995 | 4.82E-09 | count | 1 |
| AC011747.2 | 18.4303263 | 2731.526957 | 0.0067 | 0.995 | 4.82E-09 | count | 1 |
| MIR3681HG  | 18.4303262 | 2731.52701  | 0.0067 | 0.995 | 4.82E-09 | count | 1 |
| AC093690.1 | 18.4303263 | 2731.527129 | 0.0067 | 0.995 | 4.82E-09 | count | 1 |
| PTH2R      | 18.4303265 | 2731.527049 | 0.0067 | 0.995 | 4.82E-09 | count | 1 |
| CPS1       | 18.4303263 | 2731.526957 | 0.0067 | 0.995 | 4.82E-09 | count | 1 |
| AC131097.4 | 18.4303263 | 2731.527129 | 0.0067 | 0.995 | 4.82E-09 | count | 1 |
| AC104187.1 | 18.4303263 | 2731.526957 | 0.0067 | 0.995 | 4.82E-09 | count | 1 |
| AC137630.1 | 18.4303263 | 2731.526957 | 0.0067 | 0.995 | 4.82E-09 | count | 1 |
| HTR1F      | 18.4303263 | 2731.526891 | 0.0067 | 0.995 | 4.82E-09 | count | 1 |
| PTTG2      | 18.4303263 | 2731.526931 | 0.0067 | 0.995 | 4.82E-09 | count | 1 |
| TXK        | 18.4303263 | 2731.527129 | 0.0067 | 0.995 | 4.82E-09 | count | 1 |
| LNX1       | 18.4303262 | 2731.52701  | 0.0067 | 0.995 | 4.82E-09 | count | 1 |
| BTC        | 18.4303266 | 2731.526983 | 0.0067 | 0.995 | 4.82E-09 | count | 1 |
| GALNTL6    | 18.4303264 | 2731.526944 | 0.0067 | 0.995 | 4.82E-09 | count | 1 |
| PLEKHG4B   | 18.4303263 | 2731.526878 | 0.0067 | 0.995 | 4.82E-09 | count | 1 |
| AC034236.3 | 18.4303261 | 2731.527076 | 0.0067 | 0.995 | 4.82E-09 | count | 1 |
| SFTA2      | 18.4303261 | 2731.52697  | 0.0067 | 0.995 | 4.82E-09 | count | 1 |
| PI16       | 18.4303263 | 2731.52697  | 0.0067 | 0.995 | 4.82E-09 | count | 1 |
| BVES-AS1   | 18.4303263 | 2731.526891 | 0.0067 | 0.995 | 4.82E-09 | count | 1 |
| FAM131B    | 18.4303264 | 2731.527023 | 0.0067 | 0.995 | 4.82E-09 | count | 1 |
| NUDT10     | 18.4303264 | 2731.526838 | 0.0067 | 0.995 | 4.82E-09 | count | 1 |
| GLUD2      | 18.430326  | 2731.527049 | 0.0067 | 0.995 | 4.82E-09 | count | 1 |
| TMLHE-AS1  | 18.4303263 | 2731.526997 | 0.0067 | 0.995 | 4.82E-09 | count | 1 |
| AC107959.5 | 18.4303264 | 2731.52701  | 0.0067 | 0.995 | 4.82E-09 | count | 1 |
| DUSP26     | 18.4303265 | 2731.527036 | 0.0067 | 0.995 | 4.82E-09 | count | 1 |
| AC087362.1 | 18.4303264 | 2731.527049 | 0.0067 | 0.995 | 4.82E-09 | count | 1 |
| RAD54B     | 18.4303262 | 2731.526825 | 0.0067 | 0.995 | 4.82E-09 | count | 1 |
| AC090922.1 | 18.4303262 | 2731.526931 | 0.0067 | 0.995 | 4.82E-09 | count | 1 |
| PTPRD-AS1  | 18.4303263 | 2731.527129 | 0.0067 | 0.995 | 4.82E-09 | count | 1 |
| TRPM3      | 18.430326  | 2731.527049 | 0.0067 | 0.995 | 4.82E-09 | count | 1 |
| OR5211     | 18.4303263 | 2731.526865 | 0.0067 | 0.995 | 4.82E-09 | count | 1 |
| AC023946.1 | 18.4303263 | 2731.526957 | 0.0067 | 0.995 | 4.82E-09 | count | 1 |

|            |            |             |        |       |          |       |   |
|------------|------------|-------------|--------|-------|----------|-------|---|
| ABTB2      | 18.4303263 | 2731.527063 | 0.0067 | 0.995 | 4.82E-09 | count | 1 |
| RERG       | 18.4303262 | 2731.526931 | 0.0067 | 0.995 | 4.82E-09 | count | 1 |
| ASIC1      | 18.4303263 | 2731.526865 | 0.0067 | 0.995 | 4.82E-09 | count | 1 |
| MYBPC1     | 18.4303263 | 2731.526983 | 0.0067 | 0.995 | 4.82E-09 | count | 1 |
| AL158063.1 | 18.4303264 | 2731.527116 | 0.0067 | 0.995 | 4.82E-09 | count | 1 |
| AL138694.1 | 18.4303262 | 2731.526865 | 0.0067 | 0.995 | 4.82E-09 | count | 1 |
| AF111167.1 | 18.4303262 | 2731.526851 | 0.0067 | 0.995 | 4.82E-09 | count | 1 |
| C14orf132  | 18.4303263 | 2731.526891 | 0.0067 | 0.995 | 4.82E-09 | count | 1 |
| SNURF      | 18.4303263 | 2731.527129 | 0.0067 | 0.995 | 4.82E-09 | count | 1 |
| DPH6-DT    | 18.4303263 | 2731.526957 | 0.0067 | 0.995 | 4.82E-09 | count | 1 |
| AC013391.1 | 18.430326  | 2731.527049 | 0.0067 | 0.995 | 4.82E-09 | count | 1 |
| CRTC3-AS1  | 18.4303263 | 2731.527129 | 0.0067 | 0.995 | 4.82E-09 | count | 1 |
| AC109597.2 | 18.430326  | 2731.527049 | 0.0067 | 0.995 | 4.82E-09 | count | 1 |
| NPIPA3     | 18.4303265 | 2731.527036 | 0.0067 | 0.995 | 4.82E-09 | count | 1 |
| AC133919.2 | 18.4303263 | 2731.526865 | 0.0067 | 0.995 | 4.82E-09 | count | 1 |
| AC240565.2 | 18.4303264 | 2731.52701  | 0.0067 | 0.995 | 4.82E-09 | count | 1 |
| TEKT3      | 18.4303263 | 2731.526957 | 0.0067 | 0.995 | 4.82E-09 | count | 1 |
| AC005549.1 | 18.4303263 | 2731.526957 | 0.0067 | 0.995 | 4.82E-09 | count | 1 |
| AC060766.6 | 18.4303264 | 2731.52701  | 0.0067 | 0.995 | 4.82E-09 | count | 1 |
| LINC00511  | 18.4303264 | 2731.526944 | 0.0067 | 0.995 | 4.82E-09 | count | 1 |
| AC120049.1 | 18.4303263 | 2731.526957 | 0.0067 | 0.995 | 4.82E-09 | count | 1 |
| AC100778.3 | 18.4303263 | 2731.526957 | 0.0067 | 0.995 | 4.82E-09 | count | 1 |
| AL049794.1 | 18.4303263 | 2731.526891 | 0.0067 | 0.995 | 4.82E-09 | count | 1 |
| CCM2L      | 18.4303262 | 2731.526931 | 0.0067 | 0.995 | 4.82E-09 | count | 1 |
| AL023803.2 | 18.4303262 | 2731.52701  | 0.0067 | 0.995 | 4.82E-09 | count | 1 |
| AL031055.1 | 18.4303261 | 2731.527076 | 0.0067 | 0.995 | 4.82E-09 | count | 1 |
| CSE1L-AS1  | 18.4303263 | 2731.526931 | 0.0067 | 0.995 | 4.82E-09 | count | 1 |
| AC011498.6 | 18.4303263 | 2731.52697  | 0.0067 | 0.995 | 4.82E-09 | count | 1 |
| TM6SF2     | 18.4303263 | 2731.526957 | 0.0067 | 0.995 | 4.82E-09 | count | 1 |
| ZNF418     | 18.4303263 | 2731.526957 | 0.0067 | 0.995 | 4.82E-09 | count | 1 |
| LINC00896  | 18.4303263 | 2731.526983 | 0.0067 | 0.995 | 4.82E-09 | count | 1 |
| SCARF2     | 18.4303261 | 2731.52697  | 0.0067 | 0.995 | 4.82E-09 | count | 1 |
| SLC5A4     | 18.4303262 | 2731.52701  | 0.0067 | 0.995 | 4.82E-09 | count | 1 |
| AL121672.3 | 18.4303263 | 2731.526957 | 0.0067 | 0.995 | 4.82E-09 | count | 1 |
| LINC00158  | 18.4303263 | 2731.526931 | 0.0067 | 0.995 | 4.82E-09 | count | 1 |
| LINC00310  | 18.4303264 | 2731.527142 | 0.0067 | 0.995 | 4.82E-09 | count | 1 |
| AP001412.1 | 18.4303263 | 2731.526878 | 0.0067 | 0.995 | 4.82E-09 | count | 1 |
| LINC01786  | 18.4303263 | 2731.526931 | 0.0067 | 0.995 | 4.82E-09 | count | 1 |
| AL513327.1 | 18.4303264 | 2731.527049 | 0.0067 | 0.995 | 4.82E-09 | count | 1 |
| AL596275.2 | 18.4303263 | 2731.526931 | 0.0067 | 0.995 | 4.82E-09 | count | 1 |
| GNG12-AS1  | 18.4303264 | 2731.526997 | 0.0067 | 0.995 | 4.82E-09 | count | 1 |
| DNASE2B    | 18.4303264 | 2731.526904 | 0.0067 | 0.995 | 4.82E-09 | count | 1 |
| CD5L       | 18.4303263 | 2731.527116 | 0.0067 | 0.995 | 4.82E-09 | count | 1 |
| C1orf143   | 18.4303261 | 2731.526904 | 0.0067 | 0.995 | 4.82E-09 | count | 1 |
| AC009242.1 | 18.4303263 | 2731.527116 | 0.0067 | 0.995 | 4.82E-09 | count | 1 |

|                 |            |             |        |       |          |       |   |
|-----------------|------------|-------------|--------|-------|----------|-------|---|
| FAM228A         | 18.4303261 | 2731.526957 | 0.0067 | 0.995 | 4.82E-09 | count | 1 |
| AC012073.1      | 18.4303264 | 2731.526957 | 0.0067 | 0.995 | 4.82E-09 | count | 1 |
| AC008280.3      | 18.4303264 | 2731.526904 | 0.0067 | 0.995 | 4.82E-09 | count | 1 |
| AC017002.1      | 18.4303263 | 2731.526997 | 0.0067 | 0.995 | 4.82E-09 | count | 1 |
| KIF5C           | 18.4303262 | 2731.52701  | 0.0067 | 0.995 | 4.82E-09 | count | 1 |
| AC022001.3      | 18.4303263 | 2731.526944 | 0.0067 | 0.995 | 4.82E-09 | count | 1 |
| LINC02026       | 18.4303263 | 2731.526997 | 0.0067 | 0.995 | 4.82E-09 | count | 1 |
| AC024560.3      | 18.430326  | 2731.526772 | 0.0067 | 0.995 | 4.82E-09 | count | 1 |
| AC108477.1      | 18.4303263 | 2731.527116 | 0.0067 | 0.995 | 4.82E-09 | count | 1 |
| PCDHB3          | 18.4303261 | 2731.526917 | 0.0067 | 0.995 | 4.82E-09 | count | 1 |
| LINC02569       | 18.4303261 | 2731.526904 | 0.0067 | 0.995 | 4.82E-09 | count | 1 |
| TEAD3           | 18.430326  | 2731.526772 | 0.0067 | 0.995 | 4.82E-09 | count | 1 |
| AL136304.1      | 18.4303263 | 2731.527116 | 0.0067 | 0.995 | 4.82E-09 | count | 1 |
| LINC02518       | 18.4303262 | 2731.526825 | 0.0067 | 0.995 | 4.82E-09 | count | 1 |
| AL627422.2      | 18.4303262 | 2731.527036 | 0.0067 | 0.995 | 4.82E-09 | count | 1 |
| AC019117.2      | 18.4303262 | 2731.527036 | 0.0067 | 0.995 | 4.82E-09 | count | 1 |
| AC004837.2      | 18.4303262 | 2731.527023 | 0.0067 | 0.995 | 4.82E-09 | count | 1 |
| ABCA13          | 18.430326  | 2731.526838 | 0.0067 | 0.995 | 4.82E-09 | count | 1 |
| ZNF727          | 18.4303263 | 2731.526931 | 0.0067 | 0.995 | 4.82E-09 | count | 1 |
| AC004990.1      | 18.4303262 | 2731.527036 | 0.0067 | 0.995 | 4.82E-09 | count | 1 |
| KIAA1549        | 18.4303263 | 2731.526931 | 0.0067 | 0.995 | 4.82E-09 | count | 1 |
| RNF32           | 18.4303263 | 2731.526931 | 0.0067 | 0.995 | 4.82E-09 | count | 1 |
| SRPX            | 18.4303263 | 2731.526944 | 0.0067 | 0.995 | 4.82E-09 | count | 1 |
| TMSB15B         | 18.4303263 | 2731.527142 | 0.0067 | 0.995 | 4.82E-09 | count | 1 |
| PIWIL2          | 18.4303263 | 2731.526931 | 0.0067 | 0.995 | 4.82E-09 | count | 1 |
| GPR20           | 18.4303262 | 2731.52701  | 0.0067 | 0.995 | 4.82E-09 | count | 1 |
| AL359636.1      | 18.4303264 | 2731.527049 | 0.0067 | 0.995 | 4.82E-09 | count | 1 |
| TUBB8           | 18.4303262 | 2731.526825 | 0.0067 | 0.995 | 4.82E-09 | count | 1 |
| AC073651.1      | 18.4303261 | 2731.527089 | 0.0067 | 0.995 | 4.82E-09 | count | 1 |
| SCN8A           | 18.4303263 | 2731.52701  | 0.0067 | 0.995 | 4.82E-09 | count | 1 |
| GLS2            | 18.4303264 | 2731.527049 | 0.0067 | 0.995 | 4.82E-09 | count | 1 |
| AC026367.3      | 18.4303261 | 2731.527089 | 0.0067 | 0.995 | 4.82E-09 | count | 1 |
| LINC00462       | 18.4303263 | 2731.526931 | 0.0067 | 0.995 | 4.82E-09 | count | 1 |
| AL132780.1      | 18.4303261 | 2731.526917 | 0.0067 | 0.995 | 4.82E-09 | count | 1 |
| AL157756.1      | 18.4303263 | 2731.526944 | 0.0067 | 0.995 | 4.82E-09 | count | 1 |
| AC122108.2      | 18.4303262 | 2731.527036 | 0.0067 | 0.995 | 4.82E-09 | count | 1 |
| TPM1-AS         | 18.430326  | 2731.526772 | 0.0067 | 0.995 | 4.82E-09 | count | 1 |
| RPL3L           | 18.4303262 | 2731.527036 | 0.0067 | 0.995 | 4.82E-09 | count | 1 |
| IRX5            | 18.430326  | 2731.526772 | 0.0067 | 0.995 | 4.82E-09 | count | 1 |
| BEAN1           | 18.4303261 | 2731.526904 | 0.0067 | 0.995 | 4.82E-09 | count | 1 |
| AC138627.1      | 18.4303261 | 2731.527089 | 0.0067 | 0.995 | 4.82E-09 | count | 1 |
| AC091153.4      | 18.4303263 | 2731.526944 | 0.0067 | 0.995 | 4.82E-09 | count | 1 |
| LINC02210-CRHR1 | 18.4303263 | 2731.526983 | 0.0067 | 0.995 | 4.82E-09 | count | 1 |
| HOXB3           | 18.4303264 | 2731.526838 | 0.0067 | 0.995 | 4.82E-09 | count | 1 |
| C17orf82        | 18.4303264 | 2731.527049 | 0.0067 | 0.995 | 4.82E-09 | count | 1 |

|            |            |             |        |       |          |       |   |
|------------|------------|-------------|--------|-------|----------|-------|---|
| GRIN2C     | 18.4303262 | 2731.526798 | 0.0067 | 0.995 | 4.82E-09 | count | 1 |
| TRERNA1    | 18.4303264 | 2731.526931 | 0.0067 | 0.995 | 4.82E-09 | count | 1 |
| PALM       | 18.430326  | 2731.526772 | 0.0067 | 0.995 | 4.82E-09 | count | 1 |
| AC008770.2 | 18.4303263 | 2731.526944 | 0.0067 | 0.995 | 4.82E-09 | count | 1 |
| AC010422.3 | 18.4303264 | 2731.526997 | 0.0067 | 0.995 | 4.82E-09 | count | 1 |
| AC016590.3 | 18.4303263 | 2731.527116 | 0.0067 | 0.995 | 4.82E-09 | count | 1 |
| ZNF233     | 18.4303261 | 2731.527089 | 0.0067 | 0.995 | 4.82E-09 | count | 1 |
| ZNF135     | 18.4303264 | 2731.526838 | 0.0067 | 0.995 | 4.82E-09 | count | 1 |
| AL022322.1 | 18.4303264 | 2731.526904 | 0.0067 | 0.995 | 4.82E-09 | count | 1 |
| AL121992.2 | 18.4303261 | 2731.526838 | 0.0067 | 0.995 | 4.82E-09 | count | 1 |
| UBXN10     | 18.4303262 | 2731.526983 | 0.0067 | 0.995 | 4.82E-09 | count | 1 |
| AL136115.1 | 18.4303261 | 2731.526865 | 0.0067 | 0.995 | 4.82E-09 | count | 1 |
| PDZK1IP1   | 18.4303262 | 2731.526983 | 0.0067 | 0.995 | 4.82E-09 | count | 1 |
| AL445231.1 | 18.4303261 | 2731.526865 | 0.0067 | 0.995 | 4.82E-09 | count | 1 |
| MYOC       | 18.4303259 | 2731.526838 | 0.0067 | 0.995 | 4.82E-09 | count | 1 |
| SUSD4      | 18.4303262 | 2731.527049 | 0.0067 | 0.995 | 4.82E-09 | count | 1 |
| PLEKHH2    | 18.4303261 | 2731.52701  | 0.0067 | 0.995 | 4.82E-09 | count | 1 |
| PARD3B     | 18.4303261 | 2731.527049 | 0.0067 | 0.995 | 4.82E-09 | count | 1 |
| ACKR2      | 18.430326  | 2731.526838 | 0.0067 | 0.995 | 4.82E-09 | count | 1 |
| HYAL1      | 18.4303263 | 2731.527076 | 0.0067 | 0.995 | 4.82E-09 | count | 1 |
| TM4SF4     | 18.4303261 | 2731.527116 | 0.0067 | 0.995 | 4.82E-09 | count | 1 |
| AC146944.4 | 18.4303261 | 2731.527049 | 0.0067 | 0.995 | 4.82E-09 | count | 1 |
| AC008438.1 | 18.4303262 | 2731.526865 | 0.0067 | 0.995 | 4.82E-09 | count | 1 |
| TTK        | 18.430326  | 2731.526838 | 0.0067 | 0.995 | 4.82E-09 | count | 1 |
| AC024084.1 | 18.4303261 | 2731.52697  | 0.0067 | 0.995 | 4.82E-09 | count | 1 |
| AC107959.3 | 18.4303262 | 2731.526838 | 0.0067 | 0.995 | 4.82E-09 | count | 1 |
| PGM5-AS1   | 18.4303261 | 2731.527089 | 0.0067 | 0.995 | 4.82E-09 | count | 1 |
| ALDH1L2    | 18.4303261 | 2731.526838 | 0.0067 | 0.995 | 4.82E-09 | count | 1 |
| AL365394.1 | 18.4303261 | 2731.527063 | 0.0067 | 0.995 | 4.82E-09 | count | 1 |
| STXBP6     | 18.430326  | 2731.526838 | 0.0067 | 0.995 | 4.82E-09 | count | 1 |
| AC012236.1 | 18.4303261 | 2731.527116 | 0.0067 | 0.995 | 4.82E-09 | count | 1 |
| PRSS27     | 18.4303261 | 2731.527089 | 0.0067 | 0.995 | 4.82E-09 | count | 1 |
| AC009119.2 | 18.4303261 | 2731.526891 | 0.0067 | 0.995 | 4.82E-09 | count | 1 |
| AC009123.1 | 18.4303262 | 2731.527049 | 0.0067 | 0.995 | 4.82E-09 | count | 1 |
| AL035461.2 | 18.4303261 | 2731.526865 | 0.0067 | 0.995 | 4.82E-09 | count | 1 |
| ZNF99      | 18.4303261 | 2731.526865 | 0.0067 | 0.995 | 4.82E-09 | count | 1 |
| AC011466.1 | 18.4303263 | 2731.527076 | 0.0067 | 0.995 | 4.82E-09 | count | 1 |
| TULP2      | 18.4303262 | 2731.526983 | 0.0067 | 0.995 | 4.82E-09 | count | 1 |
| AC245884.8 | 18.4303261 | 2731.526798 | 0.0067 | 0.995 | 4.82E-09 | count | 1 |
| GRM7-AS1   | 18.430326  | 2731.527049 | 0.0067 | 0.995 | 4.82E-09 | count | 1 |
| RPL34-AS1  | 18.4303261 | 2731.526957 | 0.0067 | 0.995 | 4.82E-09 | count | 1 |
| IDO2       | 18.4303261 | 2731.527102 | 0.0067 | 0.995 | 4.82E-09 | count | 1 |
| CDKN2B-AS1 | 18.430326  | 2731.526983 | 0.0067 | 0.995 | 4.82E-09 | count | 1 |
| AP000936.1 | 18.4303262 | 2731.527102 | 0.0067 | 0.995 | 4.82E-09 | count | 1 |
| LINC02551  | 18.4303261 | 2731.526865 | 0.0067 | 0.995 | 4.82E-09 | count | 1 |

|            |            |             |        |       |          |       |   |
|------------|------------|-------------|--------|-------|----------|-------|---|
| KRT80      | 18.4303262 | 2731.527102 | 0.0067 | 0.995 | 4.82E-09 | count | 1 |
| AC011939.3 | 18.4303261 | 2731.526865 | 0.0067 | 0.995 | 4.82E-09 | count | 1 |
| AC027277.1 | 18.430326  | 2731.526983 | 0.0067 | 0.995 | 4.82E-09 | count | 1 |
| AL117328.2 | 18.4303263 | 2731.526983 | 0.0067 | 0.995 | 4.82E-09 | count | 1 |
| AL445248.1 | 18.4303262 | 2731.526851 | 0.0067 | 0.995 | 4.82E-09 | count | 1 |
| AC096586.1 | 18.4303262 | 2731.526891 | 0.0067 | 0.995 | 4.82E-09 | count | 1 |
| FIRRE      | 18.4303262 | 2731.526851 | 0.0067 | 0.995 | 4.82E-09 | count | 1 |
| CYP7A1     | 18.4303262 | 2731.526851 | 0.0067 | 0.995 | 4.82E-09 | count | 1 |
| CDH3       | 18.4303262 | 2731.526851 | 0.0067 | 0.995 | 4.82E-09 | count | 1 |
| LRRRC7     | 18.430326  | 2731.526931 | 0.0067 | 0.995 | 4.82E-09 | count | 1 |
| KCND3      | 18.430326  | 2731.526983 | 0.0067 | 0.995 | 4.82E-09 | count | 1 |
| KCNS3      | 18.430326  | 2731.526983 | 0.0067 | 0.995 | 4.82E-09 | count | 1 |
| LIMS3      | 18.430326  | 2731.526944 | 0.0067 | 0.995 | 4.82E-09 | count | 1 |
| ZFP37      | 18.430326  | 2731.526931 | 0.0067 | 0.995 | 4.82E-09 | count | 1 |
| AL731533.2 | 18.430326  | 2731.526825 | 0.0067 | 0.995 | 4.82E-09 | count | 1 |
| SFTPD-AS1  | 18.4303259 | 2731.526917 | 0.0067 | 0.995 | 4.82E-09 | count | 1 |
| ABCC2      | 18.430326  | 2731.526944 | 0.0067 | 0.995 | 4.82E-09 | count | 1 |
| LINC01993  | 18.430326  | 2731.526931 | 0.0067 | 0.995 | 4.82E-09 | count | 1 |
| AC010271.1 | 18.4303262 | 2731.526917 | 0.0067 | 0.995 | 4.82E-09 | count | 1 |
| Z82217.1   | 18.4303262 | 2731.527063 | 0.0067 | 0.995 | 4.82E-09 | count | 1 |
| CREB3L1    | 18.4303259 | 2731.526825 | 0.0067 | 0.995 | 4.82E-09 | count | 1 |
| CSMD1      | 19.7400066 | 1476.028717 | 0.0134 | 0.989 | 4.88E-09 | count | 1 |
| TRIM71     | 19.7400062 | 1476.029    | 0.0134 | 0.989 | 4.88E-09 | count | 1 |
| AC022217.3 | 19.7400057 | 1476.028582 | 0.0134 | 0.989 | 4.88E-09 | count | 1 |
| FAM209B    | 19.7400056 | 1476.028582 | 0.0134 | 0.989 | 4.88E-09 | count | 1 |
| AL049795.1 | 19.0442689 | 1479.888577 | 0.0129 | 0.99  | 4.89E-09 | count | 1 |
| LINC01960  | 19.0442686 | 1479.888712 | 0.0129 | 0.99  | 4.89E-09 | count | 1 |
| AC079354.3 | 19.0442686 | 1479.888712 | 0.0129 | 0.99  | 4.89E-09 | count | 1 |
| AC078881.1 | 19.0442686 | 1479.888712 | 0.0129 | 0.99  | 4.89E-09 | count | 1 |
| EGFL8      | 19.0442689 | 1479.888577 | 0.0129 | 0.99  | 4.89E-09 | count | 1 |
| AC131011.1 | 19.0442686 | 1479.888712 | 0.0129 | 0.99  | 4.89E-09 | count | 1 |
| AL354710.2 | 19.0442686 | 1479.888712 | 0.0129 | 0.99  | 4.89E-09 | count | 1 |
| AC027682.2 | 19.0442686 | 1479.888712 | 0.0129 | 0.99  | 4.89E-09 | count | 1 |
| CHMP4C     | 19.0442687 | 1479.888651 | 0.0129 | 0.99  | 4.89E-09 | count | 1 |
| NHLH1      | 19.0442687 | 1479.888725 | 0.0129 | 0.99  | 4.89E-09 | count | 1 |
| AC010746.1 | 19.0442688 | 1479.888759 | 0.0129 | 0.99  | 4.89E-09 | count | 1 |
| DNAH12     | 19.0442686 | 1479.888698 | 0.0129 | 0.99  | 4.89E-09 | count | 1 |
| LINC02102  | 19.0442686 | 1479.888685 | 0.0129 | 0.99  | 4.89E-09 | count | 1 |
| EPB41L4A   | 19.0442686 | 1479.888698 | 0.0129 | 0.99  | 4.89E-09 | count | 1 |
| GRID2IP    | 19.0442688 | 1479.888759 | 0.0129 | 0.99  | 4.89E-09 | count | 1 |
| AC092849.1 | 19.0442686 | 1479.888671 | 0.0129 | 0.99  | 4.89E-09 | count | 1 |
| TRBV9      | 19.0442686 | 1479.888685 | 0.0129 | 0.99  | 4.89E-09 | count | 1 |
| AC084026.2 | 19.0442687 | 1479.888691 | 0.0129 | 0.99  | 4.89E-09 | count | 1 |
| SFTA1P     | 19.0442686 | 1479.888644 | 0.0129 | 0.99  | 4.89E-09 | count | 1 |
| MANSC4     | 19.0442687 | 1479.888725 | 0.0129 | 0.99  | 4.89E-09 | count | 1 |

|            |            |             |        |      |          |       |   |
|------------|------------|-------------|--------|------|----------|-------|---|
| AC007496.2 | 19.0442686 | 1479.888563 | 0.0129 | 0.99 | 4.89E-09 | count | 1 |
| CKLF-CMTM1 | 19.0442686 | 1479.888698 | 0.0129 | 0.99 | 4.89E-09 | count | 1 |
| AC010531.6 | 19.0442686 | 1479.888698 | 0.0129 | 0.99 | 4.89E-09 | count | 1 |
| AC021491.4 | 19.0442686 | 1479.888671 | 0.0129 | 0.99 | 4.89E-09 | count | 1 |
| FAM83D     | 19.0442686 | 1479.888671 | 0.0129 | 0.99 | 4.89E-09 | count | 1 |
| LGI4       | 19.0442686 | 1479.888644 | 0.0129 | 0.99 | 4.89E-09 | count | 1 |
| Z95114.2   | 19.0442686 | 1479.888671 | 0.0129 | 0.99 | 4.89E-09 | count | 1 |
| CACHD1     | 19.0442686 | 1479.888631 | 0.0129 | 0.99 | 4.89E-09 | count | 1 |
| WDR63      | 19.0442687 | 1479.888678 | 0.0129 | 0.99 | 4.89E-09 | count | 1 |
| TMPRSS7    | 19.0442686 | 1479.888631 | 0.0129 | 0.99 | 4.89E-09 | count | 1 |
| MARVELD2   | 19.0442687 | 1479.888685 | 0.0129 | 0.99 | 4.89E-09 | count | 1 |
| LRRRC73    | 19.0442686 | 1479.888671 | 0.0129 | 0.99 | 4.89E-09 | count | 1 |
| RAB40A     | 19.0442686 | 1479.888651 | 0.0129 | 0.99 | 4.89E-09 | count | 1 |
| AC136624.2 | 19.0442686 | 1479.888671 | 0.0129 | 0.99 | 4.89E-09 | count | 1 |
| TMED6      | 19.0442685 | 1479.888624 | 0.0129 | 0.99 | 4.89E-09 | count | 1 |
| AC011921.1 | 19.0442686 | 1479.888631 | 0.0129 | 0.99 | 4.89E-09 | count | 1 |
| PARD6G     | 19.0442687 | 1479.888664 | 0.0129 | 0.99 | 4.89E-09 | count | 1 |
| LYPD8      | 19.0442686 | 1479.888604 | 0.0129 | 0.99 | 4.89E-09 | count | 1 |
| DES        | 19.0442686 | 1479.888617 | 0.0129 | 0.99 | 4.89E-09 | count | 1 |
| NPY1R      | 19.0442686 | 1479.888617 | 0.0129 | 0.99 | 4.89E-09 | count | 1 |
| C9orf163   | 19.0442686 | 1479.888631 | 0.0129 | 0.99 | 4.89E-09 | count | 1 |
| AP001267.3 | 19.0442686 | 1479.888664 | 0.0129 | 0.99 | 4.89E-09 | count | 1 |
| AC079315.1 | 19.0442686 | 1479.888638 | 0.0129 | 0.99 | 4.89E-09 | count | 1 |
| AC023034.1 | 19.0442687 | 1479.888638 | 0.0129 | 0.99 | 4.89E-09 | count | 1 |
| FMOD       | 19.0442684 | 1479.888597 | 0.0129 | 0.99 | 4.89E-09 | count | 1 |
| SPINK9     | 19.0442686 | 1479.888691 | 0.0129 | 0.99 | 4.89E-09 | count | 1 |
| TMEM200A   | 19.0442685 | 1479.888631 | 0.0129 | 0.99 | 4.89E-09 | count | 1 |
| FAM171A1   | 19.0442684 | 1479.888597 | 0.0129 | 0.99 | 4.89E-09 | count | 1 |
| MUCL1      | 19.0442684 | 1479.888644 | 0.0129 | 0.99 | 4.89E-09 | count | 1 |
| AC090181.1 | 19.0442686 | 1479.888691 | 0.0129 | 0.99 | 4.89E-09 | count | 1 |
| AC020978.5 | 19.0442684 | 1479.888631 | 0.0129 | 0.99 | 4.89E-09 | count | 1 |
| PSMA8      | 19.0442686 | 1479.888691 | 0.0129 | 0.99 | 4.89E-09 | count | 1 |
| 3-Sep      | 19.0442684 | 1479.888597 | 0.0129 | 0.99 | 4.89E-09 | count | 1 |
| MAPK11     | 19.0442684 | 1479.888597 | 0.0129 | 0.99 | 4.89E-09 | count | 1 |
| AP000569.1 | 19.0442684 | 1479.888631 | 0.0129 | 0.99 | 4.89E-09 | count | 1 |
| AP000322.2 | 19.0442684 | 1479.888597 | 0.0129 | 0.99 | 4.89E-09 | count | 1 |
| AC018682.1 | 19.0442683 | 1479.888604 | 0.0129 | 0.99 | 4.89E-09 | count | 1 |
| LINC01513  | 19.0442683 | 1479.888691 | 0.0129 | 0.99 | 4.89E-09 | count | 1 |
| PCDHB9     | 19.0442683 | 1479.888604 | 0.0129 | 0.99 | 4.89E-09 | count | 1 |
| ELFN1-AS1  | 19.0442683 | 1479.888671 | 0.0129 | 0.99 | 4.89E-09 | count | 1 |
| OR5AN1     | 19.0442684 | 1479.888638 | 0.0129 | 0.99 | 4.89E-09 | count | 1 |
| MS4A3      | 19.0442683 | 1479.888651 | 0.0129 | 0.99 | 4.89E-09 | count | 1 |
| AL512506.3 | 19.0442684 | 1479.888597 | 0.0129 | 0.99 | 4.89E-09 | count | 1 |
| SLITRK5    | 19.0442683 | 1479.888651 | 0.0129 | 0.99 | 4.89E-09 | count | 1 |
| TBC1D3D    | 19.0442685 | 1479.888604 | 0.0129 | 0.99 | 4.89E-09 | count | 1 |

|            |            |             |        |        |          |       |   |
|------------|------------|-------------|--------|--------|----------|-------|---|
| AC097724.1 | 19.0442682 | 1479.888617 | 0.0129 | 0.99   | 4.89E-09 | count | 1 |
| AC007391.1 | 19.0442682 | 1479.888617 | 0.0129 | 0.99   | 4.89E-09 | count | 1 |
| PCDHB2     | 19.0442684 | 1479.88859  | 0.0129 | 0.99   | 4.89E-09 | count | 1 |
| AL021997.3 | 19.0442682 | 1479.888617 | 0.0129 | 0.99   | 4.89E-09 | count | 1 |
| SFRP1      | 19.0442682 | 1479.888624 | 0.0129 | 0.99   | 4.89E-09 | count | 1 |
| AL391839.2 | 19.0442682 | 1479.888617 | 0.0129 | 0.99   | 4.89E-09 | count | 1 |
| BX248123.1 | 19.0442682 | 1479.888617 | 0.0129 | 0.99   | 4.89E-09 | count | 1 |
| ADRA2A     | 19.0442684 | 1479.888651 | 0.0129 | 0.99   | 4.89E-09 | count | 1 |
| AC121761.1 | 19.0442682 | 1479.888611 | 0.0129 | 0.99   | 4.89E-09 | count | 1 |
| APBA2      | 19.0442682 | 1479.888624 | 0.0129 | 0.99   | 4.89E-09 | count | 1 |
| AC009041.2 | 19.0442682 | 1479.888617 | 0.0129 | 0.99   | 4.89E-09 | count | 1 |
| AP005432.2 | 19.0442684 | 1479.88859  | 0.0129 | 0.99   | 4.89E-09 | count | 1 |
| C20orf144  | 19.0442682 | 1479.888604 | 0.0129 | 0.99   | 4.89E-09 | count | 1 |
| AL354760.1 | 19.0442683 | 1479.888624 | 0.0129 | 0.99   | 4.89E-09 | count | 1 |
| AC112220.3 | 19.0442682 | 1479.888631 | 0.0129 | 0.99   | 4.89E-09 | count | 1 |
| OPRK1      | 19.0442682 | 1479.888631 | 0.0129 | 0.99   | 4.89E-09 | count | 1 |
| SAMD12     | 19.0442682 | 1479.888631 | 0.0129 | 0.99   | 4.89E-09 | count | 1 |
| AL512625.3 | 19.0442683 | 1479.888624 | 0.0129 | 0.99   | 4.89E-09 | count | 1 |
| BICDL1     | 19.0442682 | 1479.888631 | 0.0129 | 0.99   | 4.89E-09 | count | 1 |
| C1orf167   | 19.0442681 | 1479.888644 | 0.0129 | 0.99   | 4.89E-09 | count | 1 |
| DMP1       | 19.0442683 | 1479.888631 | 0.0129 | 0.99   | 4.89E-09 | count | 1 |
| LINC01393  | 19.0442683 | 1479.888698 | 0.0129 | 0.99   | 4.89E-09 | count | 1 |
| TTC16      | 19.0442683 | 1479.888698 | 0.0129 | 0.99   | 4.89E-09 | count | 1 |
| AL136526.1 | 19.0442683 | 1479.888698 | 0.0129 | 0.99   | 4.89E-09 | count | 1 |
| AC087286.1 | 19.0442683 | 1479.888631 | 0.0129 | 0.99   | 4.89E-09 | count | 1 |
| AC134407.1 | 19.0442683 | 1479.888698 | 0.0129 | 0.99   | 4.89E-09 | count | 1 |
| FOXD3-AS1  | 19.0442681 | 1479.88851  | 0.0129 | 0.99   | 4.89E-09 | count | 1 |
| PRL        | 19.0442681 | 1479.88851  | 0.0129 | 0.99   | 4.89E-09 | count | 1 |
| LINC00504  | 0.9393018  | 0.7580156   | 1.2392 | 0.215  | 5.13E-09 | count | 1 |
| AL021707.5 | 0.9393018  | 0.649591    | 1.446  | 0.148  | 5.13E-09 | count | 1 |
| CFAP70     | 0.9393018  | 0.649591    | 1.446  | 0.148  | 5.13E-09 | count | 1 |
| KAT14      | 0.4246942  | 0.5208916   | 0.8153 | 0.415  | 5.37E-09 | count | 1 |
| KIZ-AS1    | 1.0016945  | 0.7688079   | 1.3029 | 0.193  | 5.58E-09 | count | 1 |
| YAP1       | 1.0016945  | 0.7688079   | 1.3029 | 0.193  | 5.58E-09 | count | 1 |
| AC007620.2 | 1.0016945  | 0.7688079   | 1.3029 | 0.193  | 5.58E-09 | count | 1 |
| COL24A1    | 1.0016945  | 0.7688079   | 1.3029 | 0.193  | 5.58E-09 | count | 1 |
| AL590399.1 | 1.0016945  | 0.7688079   | 1.3029 | 0.193  | 5.58E-09 | count | 1 |
| MYB        | 1.0016945  | 0.7688079   | 1.3029 | 0.193  | 5.58E-09 | count | 1 |
| DLX4       | 1.0016945  | 0.7688079   | 1.3029 | 0.193  | 5.58E-09 | count | 1 |
| B9D1       | 1.0016945  | 0.7688079   | 1.3029 | 0.193  | 5.58E-09 | count | 1 |
| ZNF710-AS1 | 0.5259245  | 0.6118511   | 0.8596 | 0.39   | 6.87E-09 | count | 1 |
| PYGM       | 0.5338367  | 0.6556708   | 0.8142 | 0.416  | 6.99E-09 | count | 1 |
| AC005034.3 | 0.5338367  | 0.486565    | 1.0972 | 0.273  | 6.99E-09 | count | 1 |
| BCL2L14    | 1.208508   | 0.5430113   | 2.2256 | 0.0261 | 7.12E-09 | count | 1 |
| NEBL       | 1.208508   | 0.4627212   | 2.6117 | 0.0091 | 7.12E-09 | count | 1 |



|            |            |             |        |        |          |       |   |
|------------|------------|-------------|--------|--------|----------|-------|---|
| FADS2      | 0.6950648  | 0.4840703   | 1.4359 | 0.151  | 9.58E-09 | count | 1 |
| LURAP1     | 0.7031844  | 0.5238275   | 1.3424 | 0.18   | 9.72E-09 | count | 1 |
| SRXN1      | 1.6139731  | 0.5773503   | 2.7955 | 0.0052 | 1.05E-08 | count | 1 |
| LRRRC17    | 0.7569803  | 0.642633    | 1.1779 | 0.239  | 1.06E-08 | count | 1 |
| AC013652.1 | 0.7743155  | 0.6601244   | 1.173  | 0.241  | 1.09E-08 | count | 1 |
| AC068491.3 | 0.7743155  | 0.8266783   | 0.9367 | 0.349  | 1.09E-08 | count | 1 |
| SH2D6      | 0.7743155  | 0.8266783   | 0.9367 | 0.349  | 1.09E-08 | count | 1 |
| HSPB2      | 0.7743155  | 0.8266783   | 0.9367 | 0.349  | 1.09E-08 | count | 1 |
| AL353708.1 | 0.7743155  | 0.8266783   | 0.9367 | 0.349  | 1.09E-08 | count | 1 |
| TRPV1      | 0.7743155  | 0.8266783   | 0.9367 | 0.349  | 1.09E-08 | count | 1 |
| CLDN16     | 0.7743155  | 0.8266783   | 0.9367 | 0.349  | 1.09E-08 | count | 1 |
| AC137723.1 | 0.7743155  | 0.8266783   | 0.9367 | 0.349  | 1.09E-08 | count | 1 |
| AC093227.1 | 0.7743155  | 0.8525727   | 0.9082 | 0.364  | 1.09E-08 | count | 1 |
| GZMB       | 0.7743155  | 0.8525727   | 0.9082 | 0.364  | 1.09E-08 | count | 1 |
| AC011337.1 | 0.7743155  | 0.8525727   | 0.9082 | 0.364  | 1.09E-08 | count | 1 |
| TMCC2      | 0.7743155  | 0.8525727   | 0.9082 | 0.364  | 1.09E-08 | count | 1 |
| KCNH3      | 0.7743155  | 0.8525727   | 0.9082 | 0.364  | 1.09E-08 | count | 1 |
| AC007326.4 | 0.7743155  | 0.8525727   | 0.9082 | 0.364  | 1.09E-08 | count | 1 |
| NPIPB15    | 0.7951589  | 0.5728693   | 1.388  | 0.165  | 1.13E-08 | count | 1 |
| NOMO2      | 0.7951589  | 0.6455904   | 1.2317 | 0.218  | 1.13E-08 | count | 1 |
| SEMA6C     | 0.8902569  | 0.6414993   | 1.3878 | 0.165  | 1.30E-08 | count | 1 |
| VAT1L      | 18.5321042 | 2874.128727 | 0.0064 | 0.995  | 1.31E-08 | count | 1 |
| OSR1       | 18.5321038 | 2874.128809 | 0.0064 | 0.995  | 1.31E-08 | count | 1 |
| SGCD       | 18.532104  | 2874.128665 | 0.0064 | 0.995  | 1.31E-08 | count | 1 |
| AC012150.1 | 18.532104  | 2874.128665 | 0.0064 | 0.995  | 1.31E-08 | count | 1 |
| AC141586.2 | 18.5321038 | 2874.128809 | 0.0064 | 0.995  | 1.31E-08 | count | 1 |
| FCRL1      | 18.5321038 | 2874.128583 | 0.0064 | 0.995  | 1.31E-08 | count | 1 |
| AC018638.6 | 18.5321035 | 2874.128665 | 0.0064 | 0.995  | 1.31E-08 | count | 1 |
| AC008121.2 | 18.5321038 | 2874.128583 | 0.0064 | 0.995  | 1.31E-08 | count | 1 |
| AL121845.1 | 18.5321039 | 2874.128768 | 0.0064 | 0.995  | 1.31E-08 | count | 1 |
| MATN1      | 18.532104  | 2874.128799 | 0.0064 | 0.995  | 1.31E-08 | count | 1 |
| LIPH       | 18.532104  | 2874.128799 | 0.0064 | 0.995  | 1.31E-08 | count | 1 |
| AC004982.1 | 18.532104  | 2874.128799 | 0.0064 | 0.995  | 1.31E-08 | count | 1 |
| ZNF709     | 18.532104  | 2874.128799 | 0.0064 | 0.995  | 1.31E-08 | count | 1 |
| CCDC33     | 18.5321036 | 2874.128635 | 0.0064 | 0.995  | 1.31E-08 | count | 1 |
| HBB        | 18.5321033 | 2874.128573 | 0.0064 | 0.995  | 1.31E-08 | count | 1 |
| TDRD10     | 18.8196994 | 2028.19145  | 0.0093 | 0.993  | 1.31E-08 | count | 1 |
| AC110285.2 | 18.8196994 | 2028.191421 | 0.0093 | 0.993  | 1.31E-08 | count | 1 |
| LLGL1      | 18.8192076 | 1652.963425 | 0.0114 | 0.991  | 1.31E-08 | count | 1 |
| RAPGEF3    | 18.8192072 | 1652.963401 | 0.0114 | 0.991  | 1.31E-08 | count | 1 |
| INSM1      | 18.5313554 | 2139.407022 | 0.0087 | 0.993  | 1.31E-08 | count | 1 |
| PARVA      | 18.5313554 | 2139.407091 | 0.0087 | 0.993  | 1.31E-08 | count | 1 |
| KCNJ11     | 18.5313556 | 2139.407022 | 0.0087 | 0.993  | 1.31E-08 | count | 1 |
| AIRE       | 18.5313557 | 2139.407205 | 0.0087 | 0.993  | 1.31E-08 | count | 1 |
| MAP2       | 18.5313552 | 2139.406908 | 0.0087 | 0.993  | 1.31E-08 | count | 1 |

|            |            |             |        |       |          |       |   |
|------------|------------|-------------|--------|-------|----------|-------|---|
| CXCR1      | 18.5313553 | 2139.406976 | 0.0087 | 0.993 | 1.31E-08 | count | 1 |
| SKIDA1     | 18.5313554 | 2139.407045 | 0.0087 | 0.993 | 1.31E-08 | count | 1 |
| AC139491.7 | 18.5313549 | 2139.406931 | 0.0087 | 0.993 | 1.31E-08 | count | 1 |
| RASGEF1C   | 18.5313554 | 2139.407007 | 0.0087 | 0.993 | 1.31E-08 | count | 1 |
| ZNF79      | 18.5313557 | 2139.407137 | 0.0087 | 0.993 | 1.31E-08 | count | 1 |
| CCDC154    | 18.5313552 | 2139.406954 | 0.0087 | 0.993 | 1.31E-08 | count | 1 |
| AC027702.1 | 18.5313551 | 2139.406992 | 0.0087 | 0.993 | 1.31E-08 | count | 1 |
| AC009159.3 | 18.5313555 | 2139.407091 | 0.0087 | 0.993 | 1.31E-08 | count | 1 |
| PIFO       | 18.5308183 | 1654.35969  | 0.0112 | 0.991 | 1.31E-08 | count | 1 |
| NDFIP2     | 18.5308184 | 1654.359743 | 0.0112 | 0.991 | 1.31E-08 | count | 1 |
| LINC01238  | 18.5308184 | 1654.359661 | 0.0112 | 0.991 | 1.31E-08 | count | 1 |
| SEMA3B     | 18.5308183 | 1654.359666 | 0.0112 | 0.991 | 1.31E-08 | count | 1 |
| PGA4       | 18.5308185 | 1654.35969  | 0.0112 | 0.991 | 1.31E-08 | count | 1 |
| AC022916.1 | 18.5308181 | 1654.35969  | 0.0112 | 0.991 | 1.31E-08 | count | 1 |
| LOXHD1     | 18.5308183 | 1654.359655 | 0.0112 | 0.991 | 1.31E-08 | count | 1 |
| KCTD21-AS1 | 18.5308181 | 1654.359548 | 0.0112 | 0.991 | 1.31E-08 | count | 1 |
| HOXB-AS3   | 18.5308185 | 1654.359619 | 0.0112 | 0.991 | 1.31E-08 | count | 1 |
| AC091173.1 | 18.5308182 | 1654.359637 | 0.0112 | 0.991 | 1.31E-08 | count | 1 |
| DMPK       | 18.5308182 | 1654.359719 | 0.0112 | 0.991 | 1.31E-08 | count | 1 |
| AC008467.1 | 18.5308179 | 1654.359637 | 0.0112 | 0.991 | 1.31E-08 | count | 1 |
| AC084855.2 | 18.1250804 | 2344.888095 | 0.0077 | 0.994 | 1.31E-08 | count | 1 |
| SCGB1B2P   | 18.1250804 | 2344.888229 | 0.0077 | 0.994 | 1.31E-08 | count | 1 |
| AC226118.1 | 18.1250802 | 2344.88812  | 0.0077 | 0.994 | 1.31E-08 | count | 1 |
| GPRASP2    | 18.1250801 | 2344.888078 | 0.0077 | 0.994 | 1.31E-08 | count | 1 |
| LINC02172  | 18.1250801 | 2344.888154 | 0.0077 | 0.994 | 1.31E-08 | count | 1 |
| AL355802.2 | 18.1250803 | 2344.888279 | 0.0077 | 0.994 | 1.31E-08 | count | 1 |
| AC126177.8 | 18.1250801 | 2344.888154 | 0.0077 | 0.994 | 1.31E-08 | count | 1 |
| MTRNR2L1   | 18.1250801 | 2344.88817  | 0.0077 | 0.994 | 1.31E-08 | count | 1 |
| AC007998.4 | 18.1250802 | 2344.888104 | 0.0077 | 0.994 | 1.31E-08 | count | 1 |
| SLC2A10    | 18.1250802 | 2344.888129 | 0.0077 | 0.994 | 1.31E-08 | count | 1 |
| AC104170.1 | 18.1250801 | 2344.888062 | 0.0077 | 0.994 | 1.31E-08 | count | 1 |
| FAXC       | 18.1250802 | 2344.888129 | 0.0077 | 0.994 | 1.31E-08 | count | 1 |
| LINC00629  | 18.1250801 | 2344.888162 | 0.0077 | 0.994 | 1.31E-08 | count | 1 |
| PHYHIP     | 18.1250801 | 2344.888162 | 0.0077 | 0.994 | 1.31E-08 | count | 1 |
| COL5A1     | 18.1250801 | 2344.888162 | 0.0077 | 0.994 | 1.31E-08 | count | 1 |
| ARMC4      | 18.1250802 | 2344.888154 | 0.0077 | 0.994 | 1.31E-08 | count | 1 |
| OLFM4      | 18.1250802 | 2344.888129 | 0.0077 | 0.994 | 1.31E-08 | count | 1 |
| CELF4      | 18.1250802 | 2344.888129 | 0.0077 | 0.994 | 1.31E-08 | count | 1 |
| LINC01273  | 18.1250801 | 2344.888104 | 0.0077 | 0.994 | 1.31E-08 | count | 1 |
| FAM43B     | 18.1250803 | 2344.888129 | 0.0077 | 0.994 | 1.31E-08 | count | 1 |
| AGTR1      | 18.1250801 | 2344.88812  | 0.0077 | 0.994 | 1.31E-08 | count | 1 |
| AC106881.1 | 18.1250803 | 2344.888129 | 0.0077 | 0.994 | 1.31E-08 | count | 1 |
| FRG1-DT    | 18.1250803 | 2344.888129 | 0.0077 | 0.994 | 1.31E-08 | count | 1 |
| BMP6       | 18.1250801 | 2344.88812  | 0.0077 | 0.994 | 1.31E-08 | count | 1 |
| VAX1       | 18.1250799 | 2344.888137 | 0.0077 | 0.994 | 1.31E-08 | count | 1 |

|            |            |             |        |       |          |       |   |
|------------|------------|-------------|--------|-------|----------|-------|---|
| AC009093.1 | 18.1250801 | 2344.88812  | 0.0077 | 0.994 | 1.31E-08 | count | 1 |
| LINC01624  | 18.1250801 | 2344.888087 | 0.0077 | 0.994 | 1.31E-08 | count | 1 |
| LANCL3     | 18.1250801 | 2344.888087 | 0.0077 | 0.994 | 1.31E-08 | count | 1 |
| AL356275.1 | 18.1250799 | 2344.888078 | 0.0077 | 0.994 | 1.31E-08 | count | 1 |
| AL160408.4 | 18.1250799 | 2344.888078 | 0.0077 | 0.994 | 1.31E-08 | count | 1 |
| ALS2CR12   | 18.12508   | 2344.888095 | 0.0077 | 0.994 | 1.31E-08 | count | 1 |
| OR5H14     | 18.1250799 | 2344.888078 | 0.0077 | 0.994 | 1.31E-08 | count | 1 |
| OR2A1-AS1  | 18.1250799 | 2344.888078 | 0.0077 | 0.994 | 1.31E-08 | count | 1 |
| ARMS2      | 18.1250799 | 2344.888078 | 0.0077 | 0.994 | 1.31E-08 | count | 1 |
| LINC00470  | 18.1250799 | 2344.888078 | 0.0077 | 0.994 | 1.31E-08 | count | 1 |
| TLE2       | 18.1250799 | 2344.888078 | 0.0077 | 0.994 | 1.31E-08 | count | 1 |
| OR2B6      | 18.1250799 | 2344.888129 | 0.0077 | 0.994 | 1.31E-08 | count | 1 |
| AL139384.2 | 18.1244968 | 1655.628137 | 0.0109 | 0.991 | 1.31E-08 | count | 1 |
| AC024267.4 | 18.1244967 | 1655.628214 | 0.0109 | 0.991 | 1.31E-08 | count | 1 |
| SPATA25    | 18.1244966 | 1655.628102 | 0.0109 | 0.991 | 1.31E-08 | count | 1 |
| AL162742.1 | 18.1244967 | 1655.628179 | 0.0109 | 0.991 | 1.31E-08 | count | 1 |
| UBE2Q2L    | 18.1244964 | 1655.628137 | 0.0109 | 0.991 | 1.31E-08 | count | 1 |
| AC239803.1 | 18.1244965 | 1655.628137 | 0.0109 | 0.991 | 1.31E-08 | count | 1 |
| AL353593.1 | 18.1244966 | 1655.628102 | 0.0109 | 0.991 | 1.31E-08 | count | 1 |
| CD8B2      | 18.1244967 | 1655.628155 | 0.0109 | 0.991 | 1.31E-08 | count | 1 |
| GALNT15    | 18.1244965 | 1655.628126 | 0.0109 | 0.991 | 1.31E-08 | count | 1 |
| LRRTM2     | 18.1244966 | 1655.628126 | 0.0109 | 0.991 | 1.31E-08 | count | 1 |
| PCDHGB7    | 18.1244965 | 1655.628096 | 0.0109 | 0.991 | 1.31E-08 | count | 1 |
| GPT        | 18.1244964 | 1655.628137 | 0.0109 | 0.991 | 1.31E-08 | count | 1 |
| AL356056.1 | 18.1244965 | 1655.628078 | 0.0109 | 0.991 | 1.31E-08 | count | 1 |
| ENO4       | 18.1244966 | 1655.628161 | 0.0109 | 0.991 | 1.31E-08 | count | 1 |
| AC138207.7 | 18.1244965 | 1655.62812  | 0.0109 | 0.991 | 1.31E-08 | count | 1 |
| PSPN       | 18.1244966 | 1655.628102 | 0.0109 | 0.991 | 1.31E-08 | count | 1 |
| GSTM5      | 18.1244966 | 1655.628096 | 0.0109 | 0.991 | 1.31E-08 | count | 1 |
| AC137630.3 | 18.1244963 | 1655.628055 | 0.0109 | 0.991 | 1.31E-08 | count | 1 |
| LINC02150  | 18.1244965 | 1655.628137 | 0.0109 | 0.991 | 1.31E-08 | count | 1 |
| ITGA2      | 18.1244965 | 1655.628078 | 0.0109 | 0.991 | 1.31E-08 | count | 1 |
| JAZF1-AS1  | 18.1244964 | 1655.628102 | 0.0109 | 0.991 | 1.31E-08 | count | 1 |
| TMEM225B   | 18.1244964 | 1655.628067 | 0.0109 | 0.991 | 1.31E-08 | count | 1 |
| AC007938.3 | 18.1244964 | 1655.628043 | 0.0109 | 0.991 | 1.31E-08 | count | 1 |
| AC124947.1 | 18.1244964 | 1655.628031 | 0.0109 | 0.991 | 1.31E-08 | count | 1 |
| AC012085.2 | 18.1244966 | 1655.628126 | 0.0109 | 0.991 | 1.31E-08 | count | 1 |
| AC055713.1 | 18.1244966 | 1655.628108 | 0.0109 | 0.991 | 1.31E-08 | count | 1 |
| AL031600.3 | 18.1244965 | 1655.628084 | 0.0109 | 0.991 | 1.31E-08 | count | 1 |
| HOXB8      | 18.1244964 | 1655.628108 | 0.0109 | 0.991 | 1.31E-08 | count | 1 |
| AC092835.1 | 18.1244965 | 1655.628043 | 0.0109 | 0.991 | 1.31E-08 | count | 1 |
| AC009226.1 | 18.1244965 | 1655.628132 | 0.0109 | 0.991 | 1.31E-08 | count | 1 |
| ZDHHC11B   | 18.1244964 | 1655.628078 | 0.0109 | 0.991 | 1.31E-08 | count | 1 |
| AC026412.3 | 18.1244965 | 1655.628179 | 0.0109 | 0.991 | 1.31E-08 | count | 1 |
| AC104113.1 | 18.1244963 | 1655.628049 | 0.0109 | 0.991 | 1.31E-08 | count | 1 |

|            |            |             |        |       |          |       |   |
|------------|------------|-------------|--------|-------|----------|-------|---|
| RGMB-AS1   | 18.1244966 | 1655.628143 | 0.0109 | 0.991 | 1.31E-08 | count | 1 |
| FIBCD1     | 18.1244964 | 1655.628161 | 0.0109 | 0.991 | 1.31E-08 | count | 1 |
| AC022400.6 | 18.1244964 | 1655.628143 | 0.0109 | 0.991 | 1.31E-08 | count | 1 |
| AL121929.2 | 18.1244964 | 1655.628078 | 0.0109 | 0.991 | 1.31E-08 | count | 1 |
| NPIPB13    | 18.1244964 | 1655.628155 | 0.0109 | 0.991 | 1.31E-08 | count | 1 |
| HAS3       | 18.1244965 | 1655.628179 | 0.0109 | 0.991 | 1.31E-08 | count | 1 |
| SLC5A10    | 18.1244965 | 1655.628155 | 0.0109 | 0.991 | 1.31E-08 | count | 1 |
| PADI6      | 18.1244965 | 1655.628114 | 0.0109 | 0.991 | 1.31E-08 | count | 1 |
| PM20D1     | 18.1244964 | 1655.62812  | 0.0109 | 0.991 | 1.31E-08 | count | 1 |
| GPR150     | 18.1244964 | 1655.628126 | 0.0109 | 0.991 | 1.31E-08 | count | 1 |
| AC091948.1 | 18.1244964 | 1655.628126 | 0.0109 | 0.991 | 1.31E-08 | count | 1 |
| AL662797.1 | 18.1244963 | 1655.628049 | 0.0109 | 0.991 | 1.31E-08 | count | 1 |
| AL356124.1 | 18.1244963 | 1655.628108 | 0.0109 | 0.991 | 1.31E-08 | count | 1 |
| ZFP92      | 18.1244965 | 1655.628084 | 0.0109 | 0.991 | 1.31E-08 | count | 1 |
| ORM1       | 18.1244964 | 1655.628126 | 0.0109 | 0.991 | 1.31E-08 | count | 1 |
| AL121748.2 | 18.1244963 | 1655.628078 | 0.0109 | 0.991 | 1.31E-08 | count | 1 |
| AL157832.1 | 18.1244964 | 1655.628049 | 0.0109 | 0.991 | 1.31E-08 | count | 1 |
| MYO1A      | 18.1244964 | 1655.628084 | 0.0109 | 0.991 | 1.31E-08 | count | 1 |
| PKN2-AS1   | 18.1244963 | 1655.628149 | 0.0109 | 0.991 | 1.31E-08 | count | 1 |
| CCDC85A    | 18.1244963 | 1655.628078 | 0.0109 | 0.991 | 1.31E-08 | count | 1 |
| AC005740.4 | 18.1244963 | 1655.628037 | 0.0109 | 0.991 | 1.31E-08 | count | 1 |
| TMEM45B    | 18.1244961 | 1655.628043 | 0.0109 | 0.991 | 1.31E-08 | count | 1 |
| AC016394.2 | 18.1244964 | 1655.628137 | 0.0109 | 0.991 | 1.31E-08 | count | 1 |
| AC008763.1 | 18.1244962 | 1655.628067 | 0.0109 | 0.991 | 1.31E-08 | count | 1 |
| PCDHGA6    | 18.1244963 | 1655.628137 | 0.0109 | 0.991 | 1.31E-08 | count | 1 |
| FAM161B    | 0.3860913  | 0.5295237   | 0.7291 | 0.466 | 1.31E-08 | count | 1 |
| TMEM198    | 19.4392274 | 1802.949017 | 0.0108 | 0.991 | 1.32E-08 | count | 1 |
| LINC00211  | 18.8628971 | 2589.943635 | 0.0073 | 0.994 | 1.32E-08 | count | 1 |
| AL360181.2 | 18.8627186 | 1949.026634 | 0.0097 | 0.992 | 1.32E-08 | count | 1 |
| MYO7B      | 18.8626715 | 1949.016967 | 0.0097 | 0.992 | 1.32E-08 | count | 1 |
| DMTN       | 19.1497917 | 1560.031092 | 0.0123 | 0.99  | 1.32E-08 | count | 1 |
| LINC00885  | 19.1497916 | 1560.031092 | 0.0123 | 0.99  | 1.32E-08 | count | 1 |
| HDAC11-AS1 | 19.1497912 | 1560.031155 | 0.0123 | 0.99  | 1.32E-08 | count | 1 |
| GPR137C    | 19.1497914 | 1560.031071 | 0.0123 | 0.99  | 1.32E-08 | count | 1 |
| AC108463.3 | 19.1497911 | 1560.030976 | 0.0123 | 0.99  | 1.32E-08 | count | 1 |
| TENM1      | 19.1497911 | 1560.030976 | 0.0123 | 0.99  | 1.32E-08 | count | 1 |
| AL845472.1 | 19.1497911 | 1560.030976 | 0.0123 | 0.99  | 1.32E-08 | count | 1 |
| AC116366.2 | 18.7413273 | 1271.851491 | 0.0147 | 0.988 | 1.32E-08 | count | 1 |
| AC139795.2 | 18.7413271 | 1271.851375 | 0.0147 | 0.988 | 1.32E-08 | count | 1 |
| SLIT2      | 18.7413271 | 1271.851452 | 0.0147 | 0.988 | 1.32E-08 | count | 1 |
| AC079807.1 | 18.7413269 | 1271.851529 | 0.0147 | 0.988 | 1.32E-08 | count | 1 |
| ASPG       | 18.741327  | 1271.851469 | 0.0147 | 0.988 | 1.32E-08 | count | 1 |
| CSMD2      | 18.7413267 | 1271.851512 | 0.0147 | 0.988 | 1.32E-08 | count | 1 |
| AC092384.1 | 19.0511414 | 2138.991388 | 0.0089 | 0.993 | 1.33E-08 | count | 1 |
| LINC02471  | 19.0511855 | 2139.002037 | 0.0089 | 0.993 | 1.33E-08 | count | 1 |

|             |            |             |        |          |          |       |   |
|-------------|------------|-------------|--------|----------|----------|-------|---|
| ZNF132      | 18.5593643 | 1938.565008 | 0.0096 | 0.992    | 1.33E-08 | count | 1 |
| FZD9        | 18.559371  | 1938.580507 | 0.0096 | 0.992    | 1.33E-08 | count | 1 |
| AC135012.1  | 18.5593575 | 1938.565196 | 0.0096 | 0.992    | 1.33E-08 | count | 1 |
| AL355490.2  | 18.5593627 | 1938.573078 | 0.0096 | 0.992    | 1.33E-08 | count | 1 |
| PLGLB1      | 18.5593673 | 1938.568881 | 0.0096 | 0.992    | 1.33E-08 | count | 1 |
| FOXC2       | 18.5593442 | 1938.574036 | 0.0096 | 0.992    | 1.33E-08 | count | 1 |
| AL512770.1  | 18.5593568 | 1938.577419 | 0.0096 | 0.992    | 1.33E-08 | count | 1 |
| AC004593.3  | 18.5593564 | 1938.577405 | 0.0096 | 0.992    | 1.33E-08 | count | 1 |
| CRX         | 18.5593426 | 1938.569983 | 0.0096 | 0.992    | 1.33E-08 | count | 1 |
| LINC00691   | 18.5593548 | 1938.561272 | 0.0096 | 0.992    | 1.33E-08 | count | 1 |
| F12         | 18.559341  | 1938.570177 | 0.0096 | 0.992    | 1.33E-08 | count | 1 |
| SLC4A3      | 18.5593349 | 1938.570271 | 0.0096 | 0.992    | 1.33E-08 | count | 1 |
| FBXL16      | 18.5593314 | 1938.56647  | 0.0096 | 0.992    | 1.33E-08 | count | 1 |
| OCLN        | 19.0500971 | 1919.879614 | 0.0099 | 0.992    | 1.33E-08 | count | 1 |
| LYPD2       | 0.4003053  | 0.698917    | 0.5728 | 0.567    | 1.36E-08 | count | 1 |
| KALRN       | 0.9393018  | 0.9379904   | 1.0014 | 0.317    | 1.39E-08 | count | 1 |
| PDE3A       | 0.9393018  | 0.9379904   | 1.0014 | 0.317    | 1.39E-08 | count | 1 |
| AL691403.1  | 0.9393018  | 0.9379904   | 1.0014 | 0.317    | 1.39E-08 | count | 1 |
| IKZF2       | 1.035242   | 0.5922974   | 1.7478 | 0.0806   | 1.58E-08 | count | 1 |
| TCIM        | 1.1285195  | 1.1129849   | 1.014  | 0.311    | 1.77E-08 | count | 1 |
| AF230666.1  | 1.1285195  | 0.9176323   | 1.2298 | 0.219    | 1.77E-08 | count | 1 |
| ZNF578      | 1.1285195  | 0.7844669   | 1.4386 | 0.15     | 1.77E-08 | count | 1 |
| MORF4L2-AS1 | 1.2269839  | 0.7087989   | 1.7311 | 0.0836   | 1.97E-08 | count | 1 |
| PRRX1       | 1.2269839  | 0.7087989   | 1.7311 | 0.0836   | 1.97E-08 | count | 1 |
| AC103996.2  | 1.2269839  | 0.6285584   | 1.9521 | 0.051    | 1.97E-08 | count | 1 |
| AC006238.1  | 1.2269839  | 0.6285584   | 1.9521 | 0.051    | 1.97E-08 | count | 1 |
| AC087627.1  | 1.30515    | 0.8825956   | 1.4788 | 0.139    | 2.14E-08 | count | 1 |
| AC107214.1  | 1.30515    | 0.8825956   | 1.4788 | 0.139    | 2.14E-08 | count | 1 |
| EHD3        | 1.3836902  | 0.8834411   | 1.5663 | 0.117    | 2.32E-08 | count | 1 |
| GFPT2       | 1.4670031  | 1.2263035   | 1.1963 | 0.232    | 2.51E-08 | count | 1 |
| FRY-AS1     | 1.5296759  | 0.8691379   | 1.76   | 0.0785   | 2.65E-08 | count | 1 |
| ACKR1       | 1.5296759  | 0.8314648   | 1.8397 | 0.0659   | 2.65E-08 | count | 1 |
| SULT1A2     | 1.632449   | 0.606461    | 2.6918 | 0.0072   | 2.89E-08 | count | 1 |
| PGA5        | 1.632449   | 0.4268866   | 3.8241 | 1.00E-04 | 2.89E-08 | count | 1 |
| ZNF550      | 1.6643649  | 0.9709579   | 1.7141 | 0.0866   | 2.97E-08 | count | 1 |
| TIMD4       | 0.8306861  | 0.5295785   | 1.5686 | 0.117    | 3.25E-08 | count | 1 |
| TBX1        | 1.7865997  | 0.9594085   | 1.8622 | 0.0627   | 3.25E-08 | count | 1 |
| GIPC2       | 0.8359784  | 0.5021302   | 1.6649 | 0.0961   | 3.27E-08 | count | 1 |
| MED12L      | 1.8908357  | 0.9606564   | 1.9683 | 0.0491   | 3.51E-08 | count | 1 |
| OVCH1-AS1   | 18.5170796 | 2852.619212 | 0.0065 | 0.995    | 3.53E-08 | count | 1 |
| AL731571.1  | 18.3833226 | 2668.079438 | 0.0069 | 0.995    | 3.53E-08 | count | 1 |
| SPATA8      | 18.634236  | 2252.338292 | 0.0083 | 0.993    | 3.54E-08 | count | 1 |
| NPIPA5      | 18.6338913 | 1984.814992 | 0.0094 | 0.993    | 3.54E-08 | count | 1 |
| FBN1        | 18.8339124 | 1941.025214 | 0.0097 | 0.992    | 3.54E-08 | count | 1 |
| GPR12       | 18.9206606 | 1967.766782 | 0.0096 | 0.992    | 3.54E-08 | count | 1 |

|            |            |             |        |        |          |       |   |
|------------|------------|-------------|--------|--------|----------|-------|---|
| AC108102.1 | 18.045449  | 2253.359221 | 0.008  | 0.994  | 3.54E-08 | count | 1 |
| AC087289.5 | 18.045449  | 2253.359221 | 0.008  | 0.994  | 3.54E-08 | count | 1 |
| AC008443.3 | 18.0454486 | 2253.359138 | 0.008  | 0.994  | 3.54E-08 | count | 1 |
| LINC02080  | 18.0454486 | 2253.359138 | 0.008  | 0.994  | 3.54E-08 | count | 1 |
| GABRB3     | 18.0454491 | 2253.35915  | 0.008  | 0.994  | 3.54E-08 | count | 1 |
| C4BPB      | 18.8329046 | 1166.252364 | 0.0161 | 0.987  | 3.54E-08 | count | 1 |
| AASS       | 18.3809023 | 1257.41354  | 0.0146 | 0.988  | 3.54E-08 | count | 1 |
| NXPH3      | 18.3809024 | 1257.413543 | 0.0146 | 0.988  | 3.54E-08 | count | 1 |
| RRAS2      | 18.2266691 | 1420.969497 | 0.0128 | 0.99   | 3.54E-08 | count | 1 |
| FGF13      | 18.3805488 | 1135.820261 | 0.0162 | 0.987  | 3.55E-08 | count | 1 |
| ARHGAP42   | 18.0439994 | 1491.361787 | 0.0121 | 0.99   | 3.55E-08 | count | 1 |
| MIR497HG   | 17.820388  | 1590.701359 | 0.0112 | 0.991  | 3.55E-08 | count | 1 |
| RBM44      | 17.8203879 | 1590.701346 | 0.0112 | 0.991  | 3.55E-08 | count | 1 |
| ADAD2      | 17.8203878 | 1590.701334 | 0.0112 | 0.991  | 3.55E-08 | count | 1 |
| CAMK2B     | 17.8203878 | 1590.701296 | 0.0112 | 0.991  | 3.55E-08 | count | 1 |
| BEX5       | 17.8203878 | 1590.701317 | 0.0112 | 0.991  | 3.55E-08 | count | 1 |
| FAM72B     | 18.0433773 | 1187.479445 | 0.0152 | 0.988  | 3.55E-08 | count | 1 |
| ZNF280C    | 18.0433774 | 1187.479411 | 0.0152 | 0.988  | 3.55E-08 | count | 1 |
| TRIM50     | 17.820181  | 1421.940772 | 0.0125 | 0.99   | 3.55E-08 | count | 1 |
| AL590867.1 | 17.8201809 | 1421.940809 | 0.0125 | 0.99   | 3.55E-08 | count | 1 |
| LINC02376  | 18.0429284 | 1001.659618 | 0.018  | 0.986  | 3.55E-08 | count | 1 |
| AC011825.4 | 18.7859724 | 2647.3234   | 0.0071 | 0.994  | 3.55E-08 | count | 1 |
| ANK2       | 18.4303895 | 1764.694729 | 0.0104 | 0.992  | 3.57E-08 | count | 1 |
| ZC3H11A    | 18.4297618 | 1350.589038 | 0.0136 | 0.989  | 3.57E-08 | count | 1 |
| AC025423.1 | 18.4294722 | 1180.810853 | 0.0156 | 0.988  | 3.57E-08 | count | 1 |
| AC127521.1 | 18.2756677 | 1734.994634 | 0.0105 | 0.992  | 3.57E-08 | count | 1 |
| AC013264.1 | 19.1237262 | 1539.851798 | 0.0124 | 0.99   | 3.58E-08 | count | 1 |
| AC079601.1 | 19.1237262 | 1539.851798 | 0.0124 | 0.99   | 3.58E-08 | count | 1 |
| AC013553.4 | 19.1237262 | 1539.851798 | 0.0124 | 0.99   | 3.58E-08 | count | 1 |
| RHEX       | 18.8435991 | 1338.597618 | 0.0141 | 0.989  | 3.58E-08 | count | 1 |
| GPRC5B     | 18.0912116 | 1454.470078 | 0.0124 | 0.99   | 3.58E-08 | count | 1 |
| TRPC6      | 18.6625951 | 1222.772234 | 0.0153 | 0.988  | 3.58E-08 | count | 1 |
| C17orf97   | 18.0909473 | 1182.990657 | 0.0153 | 0.988  | 3.58E-08 | count | 1 |
| MYLK-AS1   | 18.0909514 | 1182.992108 | 0.0153 | 0.988  | 3.58E-08 | count | 1 |
| ZCCHC12    | 18.8140271 | 1609.707141 | 0.0117 | 0.991  | 3.59E-08 | count | 1 |
| CCNA1      | 18.2547523 | 1308.636746 | 0.0139 | 0.989  | 3.59E-08 | count | 1 |
| AC012368.2 | 18.2547519 | 1308.640878 | 0.0139 | 0.989  | 3.59E-08 | count | 1 |
| AC092746.1 | 18.2539205 | 1174.505072 | 0.0155 | 0.988  | 3.60E-08 | count | 1 |
| CA8        | 0.9031511  | 0.550742    | 1.6399 | 0.101  | 3.61E-08 | count | 1 |
| CYP4F3     | 0.9214451  | 0.7388707   | 1.2471 | 0.212  | 3.71E-08 | count | 1 |
| LOXL1      | 1.0901897  | 0.563536    | 1.9346 | 0.0532 | 4.60E-08 | count | 1 |
| ABCA9      | 1.367888   | 0.5587916   | 2.4479 | 0.0144 | 6.22E-08 | count | 1 |
| AMY2B      | 1.3836902  | 0.7057044   | 1.9607 | 0.05   | 6.29E-08 | count | 1 |
| ZNF585B    | 1.4437825  | 0.8071989   | 1.7886 | 0.0738 | 6.67E-08 | count | 1 |
| AL121985.1 | 1.5454376  | 0.8876171   | 1.7411 | 0.0818 | 7.30E-08 | count | 1 |

|            |            |             |          |          |             |       |             |
|------------|------------|-------------|----------|----------|-------------|-------|-------------|
| HOXA5      | 1.7865997  | 0.409011    | 4.3681   | 1.31E-05 | 8.89E-08    | count | 0.3102211   |
| RGPD2      | 1.8506953  | 0.8069838   | 2.2933   | 0.0219   | 9.36E-08    | count | 1           |
| CNTN4      | 17.8342277 | 2027.516223 | 0.0088   | 0.993    | 9.61E-08    | count | 1           |
| FOXL2NB    | 17.8342277 | 2027.51618  | 0.0088   | 0.993    | 9.61E-08    | count | 1           |
| ARHGFE5    | 17.9987579 | 2201.362747 | 0.0082   | 0.993    | 9.63E-08    | count | 1           |
| CACNB4     | 18.5198799 | 810.2949949 | 0.0229   | 0.982    | 9.68E-08    | count | 1           |
| SGCB       | 2.0449251  | 0.8808434   | 2.3216   | 0.0203   | 1.06E-07    | count | 1           |
| GCOM1      | 2.2385848  | 1.1821203   | 1.8937   | 0.0584   | 1.19E-07    | count | 1           |
| AL078639.1 | 2.3255962  | 1.4296555   | 1.6267   | 0.104    | 1.25E-07    | count | 1           |
| AC132192.1 | 2.4451378  | 0.8537101   | 2.8641   | 0.0042   | 1.33E-07    | count | 1           |
| KCNAB1     | 2.5387496  | 1.3754229   | 1.8458   | 0.065    | 1.39E-07    | count | 1           |
| IL12RB2    | 2.6491411  | 0.7773905   | 3.4077   | 7.00E-04 | 1.46E-07    | count | 1           |
| CXCL13     | 3.33674    | 0.6779655   | 4.9217   | 9.15E-07 | 6.01E-07    | count | 0.021798045 |
| PANX1      | 0.000118   | 0.351208    | 3.00E-04 | 1        | 0.000102462 | count | 1           |
| EMC7       | 8.47E-05   | 0.0957679   | 9.00E-04 | 0.999    | 0.000118365 | count | 1           |
| PSMB8-AS1  | 9.78E-05   | 0.1559696   | 6.00E-04 | 0.999    | 0.00013091  | count | 1           |
| ANAPC13    | 0.0001531  | 0.1439231   | 0.0011   | 0.999    | 0.000206499 | count | 1           |
| ZNF100     | 0.0001904  | 0.2323082   | 8.00E-04 | 0.999    | 0.000229953 | count | 1           |
| CYC1       | 0.0001713  | 0.0761019   | 0.0023   | 0.998    | 0.000242458 | count | 1           |
| TNFSF12    | 0.0002249  | 0.0789157   | 0.0028   | 0.998    | 0.000316745 | count | 1           |
| APH1B      | 0.0002807  | 0.1408409   | 0.002    | 0.998    | 0.000380858 | count | 1           |
| CD93       | 0.0002964  | 0.1002478   | 0.003    | 0.998    | 0.000414558 | count | 1           |
| CRACR2A    | 0.0009625  | 0.7053461   | 0.0014   | 0.999    | 0.000433358 | count | 1           |
| NIPA1      | 0.0009625  | 0.7053461   | 0.0014   | 0.999    | 0.000433358 | count | 1           |
| RMND1      | 0.0006346  | 0.3002257   | 0.0021   | 0.998    | 0.000659117 | count | 1           |
| AL160408.2 | 0.0027806  | 0.9677966   | 0.0029   | 0.998    | 0.000742089 | count | 1           |
| HARS       | 0.0006144  | 0.2136912   | 0.0029   | 0.998    | 0.000757872 | count | 1           |
| JMJD8      | 0.0006724  | 0.2117414   | 0.0032   | 0.997    | 0.000824636 | count | 1           |
| TMCC3      | 0.0008418  | 0.2941972   | 0.0029   | 0.998    | 0.000842865 | count | 1           |
| MRPL32     | 0.0006634  | 0.1433376   | 0.0046   | 0.996    | 0.000884005 | count | 1           |
| BAZ1A      | 0.0007011  | 0.0868441   | 0.0081   | 0.994    | 0.000980805 | count | 1           |
| GADD45A    | 0.0008193  | 0.2274288   | 0.0036   | 0.997    | 0.001055132 | count | 1           |
| TTC27      | 0.0014422  | 0.4013179   | 0.0036   | 0.997    | 0.001105813 | count | 1           |
| AXIN1      | 0.0014422  | 0.419368    | 0.0034   | 0.997    | 0.001105813 | count | 1           |
| MCTS1      | 0.0008146  | 0.1129333   | 0.0072   | 0.994    | 0.001115488 | count | 1           |
| RPS29      | 0.0008588  | 0.0315157   | 0.0273   | 0.978    | 0.001234432 | count | 1           |
| MAPKAPK3   | 0.0009686  | 0.1248846   | 0.0078   | 0.994    | 0.001322941 | count | 1           |
| CISH       | 0.0013994  | 0.2817125   | 0.005    | 0.996    | 0.001386625 | count | 1           |
| ABCA7      | 0.0015504  | 0.5109643   | 0.003    | 0.998    | 0.001442179 | count | 1           |
| WDCP       | 0.0168136  | 1.094296    | 0.0154   | 0.988    | 0.001713855 | count | 1           |
| TMEM255A   | 0.0168136  | 0.9553703   | 0.0176   | 0.986    | 0.001713855 | count | 1           |
| KITLG      | 0.0168136  | 1.020771    | 0.0165   | 0.987    | 0.001713855 | count | 1           |
| ADGRD1     | 0.0168136  | 1.021003    | 0.0165   | 0.987    | 0.001713855 | count | 1           |
| CORO2A     | 0.0024969  | 0.6071296   | 0.0041   | 0.997    | 0.001786116 | count | 1           |
| PDE4A      | 0.0014835  | 0.2279283   | 0.0065   | 0.995    | 0.001846122 | count | 1           |

|            |           |           |        |       |             |       |   |
|------------|-----------|-----------|--------|-------|-------------|-------|---|
| MCRS1      | 0.0016393 | 0.2062643 | 0.0079 | 0.994 | 0.002133751 | count | 1 |
| IFT22      | 0.0024163 | 0.4543452 | 0.0053 | 0.996 | 0.002213693 | count | 1 |
| GJC2       | 0.0049771 | 1.0217766 | 0.0049 | 0.996 | 0.002487376 | count | 1 |
| TAPT1-AS1  | 0.0049771 | 0.9074413 | 0.0055 | 0.996 | 0.002487376 | count | 1 |
| NFYC-AS1   | 0.0137794 | 0.5843113 | 0.0236 | 0.981 | 0.002621377 | count | 1 |
| CCT7       | 0.0019558 | 0.1021135 | 0.0192 | 0.985 | 0.00271571  | count | 1 |
| PTPN7      | 0.0022155 | 0.2153928 | 0.0103 | 0.992 | 0.002823083 | count | 1 |
| MIR34AHG   | 0.0084473 | 0.6053633 | 0.014  | 0.989 | 0.002835567 | count | 1 |
| AC006059.1 | 0.0058    | 0.6471915 | 0.009  | 0.993 | 0.00289917  | count | 1 |
| AL031708.1 | 0.0058    | 0.7832307 | 0.0074 | 0.994 | 0.00289917  | count | 1 |
| LINC00910  | 0.0058    | 0.7418924 | 0.0078 | 0.994 | 0.00289917  | count | 1 |
| VPS36      | 0.0021342 | 0.1263009 | 0.0169 | 0.987 | 0.002940651 | count | 1 |
| OAS2       | 0.0023272 | 0.2103175 | 0.0111 | 0.991 | 0.002978806 | count | 1 |
| SNX5       | 0.0021483 | 0.087483  | 0.0246 | 0.98  | 0.003005841 | count | 1 |
| ST8SIA4    | 0.0021629 | 0.1172112 | 0.0185 | 0.985 | 0.003005886 | count | 1 |
| TTC39C     | 0.0024879 | 0.2147661 | 0.0116 | 0.991 | 0.003025921 | count | 1 |
| CYB5D2     | 0.0026962 | 0.3128998 | 0.0086 | 0.993 | 0.003113354 | count | 1 |
| MED30      | 0.0023397 | 0.1610678 | 0.0145 | 0.988 | 0.003151492 | count | 1 |
| ERLIN2     | 0.002877  | 0.2705993 | 0.0106 | 0.992 | 0.003506884 | count | 1 |
| STX4       | 0.0026038 | 0.112609  | 0.0231 | 0.982 | 0.003636035 | count | 1 |
| ZBTB1      | 0.0027584 | 0.1290489 | 0.0214 | 0.983 | 0.003675871 | count | 1 |
| AC083880.1 | 0.0049771 | 0.6824694 | 0.0073 | 0.994 | 0.003694826 | count | 1 |
| LSM1       | 0.0027132 | 0.126927  | 0.0214 | 0.983 | 0.003706719 | count | 1 |
| PPFIA1     | 0.0027591 | 0.1318738 | 0.0209 | 0.983 | 0.003722911 | count | 1 |
| DDRKG1     | 0.002737  | 0.1087845 | 0.0252 | 0.98  | 0.003778218 | count | 1 |
| CMTM3      | 0.0028037 | 0.086193  | 0.0325 | 0.974 | 0.003941918 | count | 1 |
| MS4A1      | 0.01224   | 1.1184248 | 0.0109 | 0.991 | 0.004112816 | count | 1 |
| CIRBP-AS1  | 0.01224   | 1.118357  | 0.0109 | 0.991 | 0.004112816 | count | 1 |
| HIST3H2A   | 0.0045238 | 0.3207518 | 0.0141 | 0.989 | 0.004145579 | count | 1 |
| WDR20      | 0.00362   | 0.2522313 | 0.0144 | 0.989 | 0.004164369 | count | 1 |
| LRRC34     | 0.0247206 | 0.9450064 | 0.0262 | 0.979 | 0.004718227 | count | 1 |
| SLC39A14   | 0.0247206 | 0.902012  | 0.0274 | 0.978 | 0.004718227 | count | 1 |
| PIH1D1     | 0.0034774 | 0.1372965 | 0.0253 | 0.98  | 0.00475082  | count | 1 |
| HAX1       | 0.0034628 | 0.1001777 | 0.0346 | 0.972 | 0.004833651 | count | 1 |
| TSPAN17    | 0.0051935 | 0.2882488 | 0.018  | 0.986 | 0.005031581 | count | 1 |
| GMPPA      | 0.0040765 | 0.2138661 | 0.0191 | 0.985 | 0.005113465 | count | 1 |
| TMED8      | 0.0047145 | 0.3089099 | 0.0153 | 0.988 | 0.005144307 | count | 1 |
| LAT2       | 0.0037585 | 0.09376   | 0.0401 | 0.968 | 0.005175499 | count | 1 |
| TAF10      | 0.0037652 | 0.0584871 | 0.0644 | 0.949 | 0.005365407 | count | 1 |
| GPAT3      | 0.0042095 | 0.1638102 | 0.0257 | 0.98  | 0.005612494 | count | 1 |
| ACYP2      | 0.0046086 | 0.186295  | 0.0247 | 0.98  | 0.005745351 | count | 1 |
| CLPTM1L    | 0.0043256 | 0.1442609 | 0.03   | 0.976 | 0.005756186 | count | 1 |
| LRP10      | 0.0042387 | 0.1396112 | 0.0304 | 0.976 | 0.005765751 | count | 1 |
| PEAK3      | 0.0220747 | 0.465619  | 0.0474 | 0.962 | 0.005923328 | count | 1 |
| AC092279.1 | 0.0149408 | 0.7323174 | 0.0204 | 0.984 | 0.005934111 | count | 1 |



|            |           |           |        |       |             |       |   |
|------------|-----------|-----------|--------|-------|-------------|-------|---|
| SERAC1     | 0.0067046 | 0.3943952 | 0.017  | 0.986 | 0.005939476 | count | 1 |
| HPS3       | 0.0044693 | 0.1619809 | 0.0276 | 0.978 | 0.005953246 | count | 1 |
| APBA3      | 0.0064196 | 0.6296286 | 0.0102 | 0.992 | 0.006061096 | count | 1 |
| FUCA2      | 0.0045844 | 0.0960104 | 0.0477 | 0.962 | 0.006359343 | count | 1 |
| MTCH1      | 0.0045783 | 0.0871845 | 0.0525 | 0.958 | 0.006431364 | count | 1 |
| ATAT1      | 0.0073589 | 0.4593389 | 0.016  | 0.987 | 0.006636078 | count | 1 |
| ARHGEF37   | 0.0107836 | 0.5196903 | 0.0208 | 0.983 | 0.006711336 | count | 1 |
| FBXO7      | 0.0049274 | 0.1481976 | 0.0332 | 0.973 | 0.006756046 | count | 1 |
| IQGAP3     | 0.0654732 | 0.8110503 | 0.0807 | 0.936 | 0.00677821  | count | 1 |
| MAPK1      | 0.0049706 | 0.1132664 | 0.0439 | 0.965 | 0.006836639 | count | 1 |
| NRSN2      | 0.0661193 | 0.8199917 | 0.0806 | 0.936 | 0.006846501 | count | 1 |
| SMG1       | 0.0051525 | 0.1488138 | 0.0346 | 0.972 | 0.006943141 | count | 1 |
| SLC27A4    | 0.0206574 | 0.5489226 | 0.0376 | 0.97  | 0.00695663  | count | 1 |
| HNRNPLL    | 0.0058514 | 0.2348014 | 0.0249 | 0.98  | 0.006979127 | count | 1 |
| UFD1       | 0.0050347 | 0.1206853 | 0.0417 | 0.967 | 0.007044623 | count | 1 |
| APLF       | 0.0122027 | 0.72636   | 0.0168 | 0.987 | 0.00714531  | count | 1 |
| ZKSCAN1    | 0.0056571 | 0.2836824 | 0.0199 | 0.984 | 0.007201029 | count | 1 |
| JADE2      | 0.0102524 | 0.3622848 | 0.0283 | 0.977 | 0.007343779 | count | 1 |
| CDC42SE1   | 0.005357  | 0.0869355 | 0.0616 | 0.951 | 0.00750578  | count | 1 |
| PAPSS2     | 0.0059325 | 0.2031823 | 0.0292 | 0.977 | 0.007602796 | count | 1 |
| POLRMT     | 0.0116033 | 0.3613818 | 0.0321 | 0.974 | 0.007616299 | count | 1 |
| NHSL1      | 0.0098998 | 0.5249886 | 0.0189 | 0.985 | 0.007830024 | count | 1 |
| SMARCA5    | 0.0056935 | 0.0927203 | 0.0614 | 0.951 | 0.007940242 | count | 1 |
| TSPOAP1    | 0.0146748 | 0.6141614 | 0.0239 | 0.981 | 0.008003051 | count | 1 |
| SCRIB      | 0.0087658 | 0.3985926 | 0.022  | 0.982 | 0.008037203 | count | 1 |
| AC036176.1 | 0.0129141 | 0.6874596 | 0.0188 | 0.985 | 0.008040638 | count | 1 |
| BNIP2      | 0.005749  | 0.0832395 | 0.0691 | 0.945 | 0.008075554 | count | 1 |
| MIR22HG    | 0.0057959 | 0.10012   | 0.0579 | 0.954 | 0.008140997 | count | 1 |
| GPR137     | 0.0071106 | 0.3432646 | 0.0207 | 0.983 | 0.008149527 | count | 1 |
| LETM1      | 0.0069256 | 0.2369544 | 0.0292 | 0.977 | 0.008367454 | count | 1 |
| NOP58      | 0.0062277 | 0.141642  | 0.044  | 0.965 | 0.008428335 | count | 1 |
| TM2D2      | 0.0061477 | 0.130083  | 0.0473 | 0.962 | 0.008449877 | count | 1 |
| AACS       | 0.0168869 | 0.4905659 | 0.0344 | 0.973 | 0.008462121 | count | 1 |
| SLC25A53   | 0.0093597 | 0.3788929 | 0.0247 | 0.98  | 0.008582379 | count | 1 |
| TBC1D9     | 0.0067171 | 0.1663905 | 0.0404 | 0.968 | 0.008660839 | count | 1 |
| ZNF775     | 0.0847634 | 0.6028954 | 0.1406 | 0.888 | 0.008829004 | count | 1 |
| TNKS2      | 0.0066949 | 0.1642176 | 0.0408 | 0.967 | 0.00887751  | count | 1 |
| PFDN1      | 0.0063408 | 0.0969256 | 0.0654 | 0.948 | 0.008881964 | count | 1 |
| THOC7      | 0.0066152 | 0.0854186 | 0.0774 | 0.938 | 0.009297285 | count | 1 |
| PGP        | 0.0066497 | 0.0834005 | 0.0797 | 0.936 | 0.009363752 | count | 1 |
| ISCU       | 0.0066371 | 0.0747187 | 0.0888 | 0.929 | 0.009395829 | count | 1 |
| H2AFZ      | 0.006659  | 0.0515361 | 0.1292 | 0.897 | 0.009555321 | count | 1 |
| NRF1       | 0.0146328 | 0.5267317 | 0.0278 | 0.978 | 0.009610294 | count | 1 |
| ALDH6A1    | 0.0087681 | 0.3329102 | 0.0263 | 0.979 | 0.009626505 | count | 1 |
| SEL1L      | 0.0069536 | 0.1380713 | 0.0504 | 0.96  | 0.009636921 | count | 1 |

|            |           |           |        |       |             |       |   |
|------------|-----------|-----------|--------|-------|-------------|-------|---|
| BTBD19     | 0.0089995 | 0.4524977 | 0.0199 | 0.984 | 0.009638291 | count | 1 |
| TIMM10     | 0.0071319 | 0.1266841 | 0.0563 | 0.955 | 0.00971908  | count | 1 |
| ORC2       | 0.0111852 | 0.4835314 | 0.0231 | 0.982 | 0.009727122 | count | 1 |
| SORBS3     | 0.0089688 | 0.2549054 | 0.0352 | 0.972 | 0.009730744 | count | 1 |
| ZNF33B     | 0.0116978 | 0.3148555 | 0.0372 | 0.97  | 0.009965303 | count | 1 |
| PQLC2      | 0.0104551 | 0.4278616 | 0.0244 | 0.981 | 0.010135168 | count | 1 |
| TAX1BP3    | 0.0079851 | 0.2304755 | 0.0346 | 0.972 | 0.010177311 | count | 1 |
| SRRT       | 0.0077834 | 0.1675872 | 0.0464 | 0.963 | 0.010242604 | count | 1 |
| CREBZF     | 0.0082352 | 0.208836  | 0.0394 | 0.969 | 0.01025146  | count | 1 |
| AC107375.1 | 0.0380749 | 0.844895  | 0.0451 | 0.964 | 0.010262454 | count | 1 |
| RRAGC      | 0.0077031 | 0.1657563 | 0.0465 | 0.963 | 0.010299451 | count | 1 |
| PWWP2B     | 0.0086879 | 0.2759389 | 0.0315 | 0.975 | 0.010497685 | count | 1 |
| SMPD4      | 0.0106061 | 0.3838811 | 0.0276 | 0.978 | 0.010837217 | count | 1 |
| CEP89      | 0.0115146 | 0.4150517 | 0.0277 | 0.978 | 0.010878154 | count | 1 |
| SLC37A1    | 0.0120985 | 0.3619101 | 0.0334 | 0.973 | 0.01091681  | count | 1 |
| POLR2A     | 0.0085519 | 0.1990666 | 0.043  | 0.966 | 0.010983706 | count | 1 |
| DHX58      | 0.0097698 | 0.3241696 | 0.0301 | 0.976 | 0.011006931 | count | 1 |
| SMYD4      | 0.0120492 | 0.2952765 | 0.0408 | 0.967 | 0.011052243 | count | 1 |
| PRPF38A    | 0.0084656 | 0.1818902 | 0.0465 | 0.963 | 0.011080226 | count | 1 |
| RFFL       | 0.0117284 | 0.3372463 | 0.0348 | 0.972 | 0.011371138 | count | 1 |
| FKBP15     | 0.0084472 | 0.1302996 | 0.0648 | 0.948 | 0.01156409  | count | 1 |
| AL359915.2 | 0.0430924 | 0.734965  | 0.0586 | 0.953 | 0.011631079 | count | 1 |
| NAIF1      | 0.029688  | 0.491057  | 0.0605 | 0.952 | 0.01183469  | count | 1 |
| MEX3B      | 0.023582  | 0.4529099 | 0.0521 | 0.958 | 0.011834825 | count | 1 |
| E2F3       | 0.0098111 | 0.2174663 | 0.0451 | 0.964 | 0.011855605 | count | 1 |
| RAPGEF2    | 0.0100084 | 0.2530501 | 0.0396 | 0.968 | 0.011872888 | count | 1 |
| TMEM14C    | 0.0084567 | 0.0666871 | 0.1268 | 0.899 | 0.012072218 | count | 1 |
| FBXO33     | 0.0097395 | 0.2283184 | 0.0427 | 0.966 | 0.012104689 | count | 1 |
| ARL6IP6    | 0.0093481 | 0.1720509 | 0.0543 | 0.957 | 0.01215111  | count | 1 |
| RGS5       | 0.0135198 | 0.751709  | 0.018  | 0.986 | 0.012201521 | count | 1 |
| H3F3B      | 0.0085027 | 0.0304477 | 0.2793 | 0.78  | 0.012255952 | count | 1 |
| PDE6D      | 0.0098741 | 0.2247066 | 0.0439 | 0.965 | 0.012272055 | count | 1 |
| TCEAL1     | 0.0102111 | 0.2139787 | 0.0477 | 0.962 | 0.012339235 | count | 1 |
| CHCHD7     | 0.0090079 | 0.1235952 | 0.0729 | 0.942 | 0.012390406 | count | 1 |
| FBXO30     | 0.0113419 | 0.3528534 | 0.0321 | 0.974 | 0.012719067 | count | 1 |
| ETFA       | 0.0091735 | 0.0989765 | 0.0927 | 0.926 | 0.012775474 | count | 1 |
| YWHAZ      | 0.0089216 | 0.0492709 | 0.1811 | 0.856 | 0.01278356  | count | 1 |
| RWDD1      | 0.0090407 | 0.0745099 | 0.1213 | 0.903 | 0.01281787  | count | 1 |
| CYTH4      | 0.0094261 | 0.1443949 | 0.0653 | 0.948 | 0.013028211 | count | 1 |
| RAB22A     | 0.009781  | 0.1662847 | 0.0588 | 0.953 | 0.013089733 | count | 1 |
| ATF6       | 0.0097041 | 0.117943  | 0.0823 | 0.934 | 0.013095969 | count | 1 |
| SORT1      | 0.0103547 | 0.187249  | 0.0553 | 0.956 | 0.013258102 | count | 1 |
| TCTEX1D2   | 0.0174477 | 0.5649289 | 0.0309 | 0.975 | 0.013412661 | count | 1 |
| PTPRJ      | 0.0100435 | 0.1522798 | 0.066  | 0.947 | 0.013576464 | count | 1 |
| TFAP2E     | 0.0716501 | 0.9205733 | 0.0778 | 0.938 | 0.013867062 | count | 1 |

|            |           |           |        |       |             |       |   |
|------------|-----------|-----------|--------|-------|-------------|-------|---|
| IFT172     | 0.0716501 | 1.0246684 | 0.0699 | 0.944 | 0.013867062 | count | 1 |
| AGAP1      | 0.0716501 | 0.9205733 | 0.0778 | 0.938 | 0.013867062 | count | 1 |
| AC107464.3 | 0.0716501 | 0.9205733 | 0.0778 | 0.938 | 0.013867062 | count | 1 |
| AC120053.1 | 0.0716501 | 0.9145319 | 0.0783 | 0.938 | 0.013867062 | count | 1 |
| VSTM4      | 0.0716501 | 0.9205733 | 0.0778 | 0.938 | 0.013867062 | count | 1 |
| CCDC9B     | 0.0716501 | 1.0246684 | 0.0699 | 0.944 | 0.013867062 | count | 1 |
| AC048382.6 | 0.0716501 | 0.9205733 | 0.0778 | 0.938 | 0.013867062 | count | 1 |
| AC011481.2 | 0.0716501 | 1.1771429 | 0.0609 | 0.951 | 0.013867062 | count | 1 |
| RFT1       | 0.0133748 | 0.3042158 | 0.044  | 0.965 | 0.014020416 | count | 1 |
| CCAR2      | 0.0141369 | 0.2884874 | 0.049  | 0.961 | 0.014027086 | count | 1 |
| COA6       | 0.0100931 | 0.1077825 | 0.0936 | 0.925 | 0.01402827  | count | 1 |
| TNFRSF10D  | 0.0178929 | 0.3573642 | 0.0501 | 0.96  | 0.014169557 | count | 1 |
| SORL1      | 0.0104265 | 0.1504596 | 0.0693 | 0.945 | 0.01425905  | count | 1 |
| C1orf53    | 0.0207958 | 0.4956829 | 0.042  | 0.967 | 0.014323291 | count | 1 |
| CMTM6      | 0.0101655 | 0.0618382 | 0.1644 | 0.869 | 0.014436136 | count | 1 |
| TAB3       | 0.013402  | 0.3548434 | 0.0378 | 0.97  | 0.014634467 | count | 1 |
| CDIPT      | 0.0110031 | 0.1659287 | 0.0663 | 0.947 | 0.014651898 | count | 1 |
| TNFRSF10A  | 0.0138933 | 0.343631  | 0.0404 | 0.968 | 0.014676093 | count | 1 |
| ATP6V1C1   | 0.0109011 | 0.14855   | 0.0734 | 0.942 | 0.014745397 | count | 1 |
| PIN1       | 0.0106196 | 0.1011138 | 0.105  | 0.916 | 0.014849189 | count | 1 |
| CC2D1B     | 0.0167461 | 0.4652864 | 0.036  | 0.971 | 0.01485482  | count | 1 |
| AL133342.1 | 0.012633  | 0.2371588 | 0.0533 | 0.958 | 0.015502759 | count | 1 |
| DIP2A      | 0.0124503 | 0.2863145 | 0.0435 | 0.965 | 0.01571218  | count | 1 |
| POU3F1     | 0.1488244 | 0.5685668 | 0.2618 | 0.794 | 0.015816156 | count | 1 |
| IFI30      | 0.0110795 | 0.0915191 | 0.1211 | 0.904 | 0.015860649 | count | 1 |
| SLC11A2    | 0.0125213 | 0.2210412 | 0.0566 | 0.955 | 0.016132474 | count | 1 |
| SLC2A13    | 0.0164717 | 0.3956107 | 0.0416 | 0.967 | 0.016167649 | count | 1 |
| STARD3     | 0.0126166 | 0.1841317 | 0.0685 | 0.945 | 0.016345734 | count | 1 |
| SLC39A3    | 0.0124261 | 0.1623827 | 0.0765 | 0.939 | 0.01660901  | count | 1 |
| MYH11      | 0.0241758 | 0.4716737 | 0.0513 | 0.959 | 0.016661383 | count | 1 |
| TARBP1     | 0.0167971 | 0.4505415 | 0.0373 | 0.97  | 0.016671374 | count | 1 |
| RILP       | 0.0124879 | 0.1485792 | 0.084  | 0.933 | 0.016938301 | count | 1 |
| CENPS      | 0.0423637 | 0.7164213 | 0.0591 | 0.953 | 0.016940767 | count | 1 |
| CBLN3      | 0.0423637 | 0.8029478 | 0.0528 | 0.958 | 0.016940767 | count | 1 |
| SNRK-AS1   | 0.1593638 | 0.9958372 | 0.16   | 0.873 | 0.016991781 | count | 1 |
| SOX5       | 0.1593638 | 1.1113606 | 0.1434 | 0.886 | 0.016991781 | count | 1 |
| ZNF20      | 0.1593638 | 1.0504143 | 0.1517 | 0.879 | 0.016991781 | count | 1 |
| BLCAP      | 0.0143224 | 0.2060568 | 0.0695 | 0.945 | 0.017043823 | count | 1 |
| UBE2R2     | 0.0122346 | 0.071641  | 0.1708 | 0.864 | 0.017325193 | count | 1 |
| UBE2E1     | 0.0128472 | 0.1340951 | 0.0958 | 0.924 | 0.017425776 | count | 1 |
| PRKDC      | 0.0126507 | 0.1053938 | 0.12   | 0.904 | 0.017444817 | count | 1 |
| P3H1       | 0.0157856 | 0.3300832 | 0.0478 | 0.962 | 0.017708347 | count | 1 |
| MCAT       | 0.0147022 | 0.316268  | 0.0465 | 0.963 | 0.017727878 | count | 1 |
| ZNF136     | 0.0224913 | 0.388537  | 0.0579 | 0.954 | 0.017823745 | count | 1 |
| AC007448.3 | 0.0201119 | 0.4805198 | 0.0419 | 0.967 | 0.017848424 | count | 1 |

|            |           |           |        |       |             |       |   |
|------------|-----------|-----------|--------|-------|-------------|-------|---|
| AC010280.2 | 0.1674885 | 0.9433476 | 0.1775 | 0.859 | 0.017903098 | count | 1 |
| TMCO1      | 0.0127639 | 0.0849166 | 0.1503 | 0.881 | 0.018017548 | count | 1 |
| PLRG1      | 0.0140634 | 0.2240605 | 0.0628 | 0.95  | 0.018028574 | count | 1 |
| SLC19A2    | 0.016426  | 0.342103  | 0.048  | 0.962 | 0.018045454 | count | 1 |
| COA4       | 0.0129945 | 0.110336  | 0.1178 | 0.906 | 0.018181    | count | 1 |
| GRAMD2B    | 0.0673354 | 0.5435545 | 0.1239 | 0.901 | 0.018297083 | count | 1 |
| MYZAP      | 0.0673354 | 0.5888245 | 0.1144 | 0.909 | 0.018297083 | count | 1 |
| GRPEL1     | 0.0131589 | 0.0959573 | 0.1371 | 0.891 | 0.018348356 | count | 1 |
| CAHM       | 0.0189984 | 0.4065832 | 0.0467 | 0.963 | 0.018434758 | count | 1 |
| MEGF6      | 0.0682723 | 0.6172925 | 0.1106 | 0.912 | 0.018556467 | count | 1 |
| KLF8       | 0.1733584 | 0.799501  | 0.2168 | 0.828 | 0.018564235 | count | 1 |
| VMP1       | 0.0131147 | 0.0727393 | 0.1803 | 0.857 | 0.018691933 | count | 1 |
| EIF4G1     | 0.0138209 | 0.1326521 | 0.1042 | 0.917 | 0.018846168 | count | 1 |
| DCLRE1B    | 0.0216872 | 0.4050625 | 0.0535 | 0.957 | 0.018887108 | count | 1 |
| SAR1A      | 0.0134905 | 0.0970506 | 0.139  | 0.889 | 0.018923295 | count | 1 |
| ACP1       | 0.013606  | 0.1014869 | 0.1341 | 0.893 | 0.018996036 | count | 1 |
| DCPS       | 0.0145471 | 0.1780954 | 0.0817 | 0.935 | 0.019096884 | count | 1 |
| TNRC6C     | 0.038085  | 0.4750346 | 0.0802 | 0.936 | 0.019175241 | count | 1 |
| AKIRIN1    | 0.0138815 | 0.1081391 | 0.1284 | 0.898 | 0.019176614 | count | 1 |
| LINC00482  | 0.0328567 | 0.8409777 | 0.0391 | 0.969 | 0.019320366 | count | 1 |
| WIPF1      | 0.0138344 | 0.0950693 | 0.1455 | 0.884 | 0.019347894 | count | 1 |
| ZFP1       | 0.0353946 | 0.4572039 | 0.0774 | 0.938 | 0.019388206 | count | 1 |
| TPRKB      | 0.014233  | 0.1325742 | 0.1074 | 0.915 | 0.019514382 | count | 1 |
| JAK1       | 0.0138038 | 0.0622146 | 0.2219 | 0.824 | 0.019635764 | count | 1 |
| WDTC1      | 0.0205877 | 0.3430282 | 0.06   | 0.952 | 0.019732076 | count | 1 |
| FAM72A     | 0.0210862 | 0.3058149 | 0.069  | 0.945 | 0.019943282 | count | 1 |
| RAPGEF1    | 0.0148075 | 0.1554647 | 0.0952 | 0.924 | 0.020130291 | count | 1 |
| PCDHGC3    | 0.0741486 | 1.2090624 | 0.0613 | 0.951 | 0.020186347 | count | 1 |
| AC008393.1 | 0.0741486 | 1.0916312 | 0.0679 | 0.946 | 0.020186347 | count | 1 |
| ANLN       | 0.0741486 | 0.9355963 | 0.0793 | 0.937 | 0.020186347 | count | 1 |
| CYP3A5     | 0.0741486 | 1.0920987 | 0.0679 | 0.946 | 0.020186347 | count | 1 |
| FAM111A-DT | 0.0741486 | 0.9344635 | 0.0793 | 0.937 | 0.020186347 | count | 1 |
| CR381653.1 | 0.0741486 | 0.9350096 | 0.0793 | 0.937 | 0.020186347 | count | 1 |
| SLX4IP     | 0.0256783 | 0.3992853 | 0.0643 | 0.949 | 0.020359365 | count | 1 |
| NREP       | 0.0172472 | 0.2908904 | 0.0593 | 0.953 | 0.02040892  | count | 1 |
| VPS33B     | 0.0373662 | 0.5958285 | 0.0627 | 0.95  | 0.020476751 | count | 1 |
| MED16      | 0.0177849 | 0.2486472 | 0.0715 | 0.943 | 0.020633765 | count | 1 |
| RASSF8     | 0.0206229 | 0.3288346 | 0.0627 | 0.95  | 0.020691939 | count | 1 |
| AC108471.2 | 0.1060709 | 0.8189803 | 0.1295 | 0.897 | 0.020737256 | count | 1 |
| ZNF564     | 0.1060709 | 0.8189803 | 0.1295 | 0.897 | 0.020737256 | count | 1 |
| SYCE3      | 0.1060709 | 0.8111691 | 0.1308 | 0.896 | 0.020737256 | count | 1 |
| PPP4R3B    | 0.0157067 | 0.1631499 | 0.0963 | 0.923 | 0.020774688 | count | 1 |
| IPO8       | 0.0186298 | 0.2693785 | 0.0692 | 0.945 | 0.020800776 | count | 1 |
| FARSA      | 0.0163721 | 0.1754983 | 0.0933 | 0.926 | 0.020990062 | count | 1 |
| CDC4A      | 0.0186037 | 0.3411475 | 0.0545 | 0.957 | 0.021069301 | count | 1 |

|            |           |           |        |       |             |       |   |
|------------|-----------|-----------|--------|-------|-------------|-------|---|
| MFAP1      | 0.016091  | 0.1615104 | 0.0996 | 0.921 | 0.021258487 | count | 1 |
| COX17      | 0.0150021 | 0.0760903 | 0.1972 | 0.844 | 0.021261677 | count | 1 |
| CCDC112    | 0.0155424 | 0.1271067 | 0.1223 | 0.903 | 0.021275512 | count | 1 |
| NADK2      | 0.0216863 | 0.3913692 | 0.0554 | 0.956 | 0.021298149 | count | 1 |
| ERH        | 0.0150287 | 0.0740709 | 0.2029 | 0.839 | 0.021366561 | count | 1 |
| RPS18      | 0.0148376 | 0.0261541 | 0.5673 | 0.571 | 0.021382925 | count | 1 |
| DSC2       | 0.0156303 | 0.1188581 | 0.1315 | 0.895 | 0.02143906  | count | 1 |
| USP34      | 0.0157801 | 0.1501694 | 0.1051 | 0.916 | 0.021558735 | count | 1 |
| PTPN11     | 0.016073  | 0.157586  | 0.102  | 0.919 | 0.021625129 | count | 1 |
| CTNND1     | 0.0164736 | 0.2506159 | 0.0657 | 0.948 | 0.021684191 | count | 1 |
| CHD4       | 0.0157191 | 0.1343882 | 0.117  | 0.907 | 0.021699985 | count | 1 |
| BAD        | 0.0161404 | 0.1434239 | 0.1125 | 0.91  | 0.021707759 | count | 1 |
| THUMPD1    | 0.0160672 | 0.125909  | 0.1276 | 0.898 | 0.021762588 | count | 1 |
| MRPL43     | 0.015589  | 0.0939046 | 0.166  | 0.868 | 0.021849803 | count | 1 |
| CLEC11A    | 0.0158696 | 0.1383647 | 0.1147 | 0.909 | 0.021911021 | count | 1 |
| ZNF830     | 0.0207332 | 0.3147334 | 0.0659 | 0.947 | 0.021915122 | count | 1 |
| ZSCAN18    | 0.0335694 | 0.4187251 | 0.0802 | 0.936 | 0.022125157 | count | 1 |
| ZNF134     | 0.0321813 | 0.4424887 | 0.0727 | 0.942 | 0.022210316 | count | 1 |
| ADORA3     | 0.0273335 | 0.3293124 | 0.083  | 0.934 | 0.02226703  | count | 1 |
| RAD1       | 0.0184505 | 0.2707972 | 0.0681 | 0.946 | 0.022358563 | count | 1 |
| COPS3      | 0.0165052 | 0.1279951 | 0.129  | 0.897 | 0.022528982 | count | 1 |
| SLC41A2    | 0.0239355 | 0.4139449 | 0.0578 | 0.954 | 0.022645747 | count | 1 |
| GPX7       | 0.030423  | 0.5476332 | 0.0556 | 0.956 | 0.022680768 | count | 1 |
| AL353719.1 | 0.030423  | 0.7657124 | 0.0397 | 0.968 | 0.022680768 | count | 1 |
| CYB561A3   | 0.0177721 | 0.1752322 | 0.1014 | 0.919 | 0.022945774 | count | 1 |
| PTPN9      | 0.0214117 | 0.4115456 | 0.052  | 0.959 | 0.02295666  | count | 1 |
| SURF2      | 0.0175414 | 0.2285203 | 0.0768 | 0.939 | 0.02296574  | count | 1 |
| TMEM80     | 0.0182442 | 0.2130176 | 0.0856 | 0.932 | 0.02323518  | count | 1 |
| ETFRF1     | 0.0173531 | 0.1636287 | 0.1061 | 0.916 | 0.023237567 | count | 1 |
| RUVBL1     | 0.0185299 | 0.2284673 | 0.0811 | 0.935 | 0.023453074 | count | 1 |
| SGSH       | 0.0195963 | 0.3935018 | 0.0498 | 0.96  | 0.02345539  | count | 1 |
| BACH1-IT2  | 0.2161909 | 0.792011  | 0.273  | 0.785 | 0.023457972 | count | 1 |
| SMIM7      | 0.016898  | 0.1053542 | 0.1604 | 0.873 | 0.023648483 | count | 1 |
| ANAPC2     | 0.0402195 | 0.5559121 | 0.0723 | 0.942 | 0.023685073 | count | 1 |
| TOP2B      | 0.0185237 | 0.1860794 | 0.0995 | 0.921 | 0.023750496 | count | 1 |
| RPL36      | 0.0166527 | 0.0325595 | 0.5115 | 0.609 | 0.023939426 | count | 1 |
| ELOVL1     | 0.0177696 | 0.1362378 | 0.1304 | 0.896 | 0.024076549 | count | 1 |
| BRD7       | 0.0174792 | 0.1079397 | 0.1619 | 0.871 | 0.024218744 | count | 1 |
| WNT2B      | 0.1236455 | 0.7938892 | 0.1557 | 0.876 | 0.024297244 | count | 1 |
| AC025682.1 | 0.1236455 | 0.7027443 | 0.1759 | 0.86  | 0.024297244 | count | 1 |
| RAB35      | 0.0193479 | 0.1850707 | 0.1045 | 0.917 | 0.024321645 | count | 1 |
| MMACHC     | 0.0716501 | 0.6480358 | 0.1106 | 0.912 | 0.02445283  | count | 1 |
| GRB10      | 0.0716501 | 0.6501708 | 0.1102 | 0.912 | 0.02445283  | count | 1 |
| NFKB1      | 0.0178976 | 0.138538  | 0.1292 | 0.897 | 0.024490134 | count | 1 |
| CNOT11     | 0.0209525 | 0.2363494 | 0.0887 | 0.929 | 0.024646482 | count | 1 |

|            |           |           |        |       |             |       |   |
|------------|-----------|-----------|--------|-------|-------------|-------|---|
| NUP43      | 0.0262753 | 0.356279  | 0.0737 | 0.941 | 0.02486631  | count | 1 |
| CSNK2B     | 0.0174515 | 0.0588678 | 0.2965 | 0.767 | 0.024869235 | count | 1 |
| MMAB       | 0.0210399 | 0.3605596 | 0.0584 | 0.953 | 0.024902698 | count | 1 |
| LRP11      | 0.2298273 | 0.8674098 | 0.265  | 0.791 | 0.025041612 | count | 1 |
| CNPY4      | 0.0324975 | 0.4370386 | 0.0744 | 0.941 | 0.025042095 | count | 1 |
| AC010618.3 | 0.0324975 | 0.5747553 | 0.0565 | 0.955 | 0.025042095 | count | 1 |
| SMC4       | 0.0198196 | 0.191951  | 0.1033 | 0.918 | 0.025119218 | count | 1 |
| LRFN1      | 0.0921138 | 0.6002377 | 0.1535 | 0.878 | 0.025201337 | count | 1 |
| IGFBP5     | 0.0744784 | 0.4660103 | 0.1598 | 0.873 | 0.025436703 | count | 1 |
| CLDN15     | 0.0463537 | 0.5083738 | 0.0912 | 0.927 | 0.025450229 | count | 1 |
| DCHS1      | 0.0463537 | 0.475745  | 0.0974 | 0.922 | 0.025450229 | count | 1 |
| UPF1       | 0.0233142 | 0.252105  | 0.0925 | 0.926 | 0.025627164 | count | 1 |
| GLT8D1     | 0.0217806 | 0.276499  | 0.0788 | 0.937 | 0.025702337 | count | 1 |
| RFK        | 0.0197191 | 0.1836883 | 0.1074 | 0.915 | 0.02570272  | count | 1 |
| C1orf174   | 0.0200265 | 0.1772376 | 0.113  | 0.91  | 0.025809281 | count | 1 |
| GNAI2      | 0.0180724 | 0.0341209 | 0.5297 | 0.596 | 0.025922551 | count | 1 |
| TXNDC12    | 0.0185673 | 0.0950506 | 0.1953 | 0.845 | 0.025992324 | count | 1 |
| C10orf25   | 0.0761402 | 0.889873  | 0.0856 | 0.932 | 0.026015436 | count | 1 |
| MCM3       | 0.0268699 | 0.3344374 | 0.0803 | 0.936 | 0.026095706 | count | 1 |
| WDR92      | 0.0397294 | 0.4549312 | 0.0873 | 0.93  | 0.026215031 | count | 1 |
| SLC23A2    | 0.0262409 | 0.4168861 | 0.0629 | 0.95  | 0.026344144 | count | 1 |
| LSM5       | 0.0188147 | 0.0970018 | 0.194  | 0.846 | 0.026498839 | count | 1 |
| SAP30BP    | 0.0196245 | 0.1509357 | 0.13   | 0.897 | 0.02650733  | count | 1 |
| PRDX5      | 0.018586  | 0.0580708 | 0.3201 | 0.749 | 0.02652217  | count | 1 |
| GPR157     | 0.0322297 | 0.4613333 | 0.0699 | 0.944 | 0.02692536  | count | 1 |
| ZMAT2      | 0.0196842 | 0.1194692 | 0.1648 | 0.869 | 0.027056619 | count | 1 |
| TMED1      | 0.0203182 | 0.2093603 | 0.097  | 0.923 | 0.027126547 | count | 1 |
| PLAGL2     | 0.0251403 | 0.2925664 | 0.0859 | 0.932 | 0.02731354  | count | 1 |
| GPFR1      | 0.2494877 | 0.6337559 | 0.3937 | 0.694 | 0.027346639 | count | 1 |
| SHCBP1     | 0.0367166 | 0.5476003 | 0.0671 | 0.947 | 0.027401148 | count | 1 |
| RASA2      | 0.021606  | 0.1801652 | 0.1199 | 0.905 | 0.02748751  | count | 1 |
| FAM192A    | 0.0206288 | 0.1387435 | 0.1487 | 0.882 | 0.027528769 | count | 1 |
| GSTA4      | 0.2514173 | 0.676166  | 0.3718 | 0.71  | 0.027574255 | count | 1 |
| TRAPPC6A   | 0.0203673 | 0.1329788 | 0.1532 | 0.878 | 0.02762219  | count | 1 |
| TMEM109    | 0.0201561 | 0.1100428 | 0.1832 | 0.855 | 0.027632667 | count | 1 |
| TRAPPC9    | 0.0296891 | 0.3739164 | 0.0794 | 0.937 | 0.0277114   | count | 1 |
| EIF3I      | 0.0197081 | 0.0723649 | 0.2723 | 0.785 | 0.027888245 | count | 1 |
| TBC1D20    | 0.0226382 | 0.2866565 | 0.079  | 0.937 | 0.02790294  | count | 1 |
| SPPL3      | 0.0223688 | 0.2178905 | 0.1027 | 0.918 | 0.027953755 | count | 1 |
| PPIL4      | 0.0203196 | 0.1120442 | 0.1814 | 0.856 | 0.027973686 | count | 1 |
| EIF3A      | 0.0198018 | 0.0763303 | 0.2594 | 0.795 | 0.028029487 | count | 1 |
| VAMP4      | 0.0223772 | 0.2611453 | 0.0857 | 0.932 | 0.02813343  | count | 1 |
| GRINA      | 0.0201456 | 0.0973095 | 0.207  | 0.836 | 0.028152891 | count | 1 |
| SLC7A6OS   | 0.0259628 | 0.2626656 | 0.0988 | 0.921 | 0.028209096 | count | 1 |
| NDUFA10    | 0.0204123 | 0.0988262 | 0.2065 | 0.836 | 0.028324514 | count | 1 |

|            |           |           |        |       |             |       |   |
|------------|-----------|-----------|--------|-------|-------------|-------|---|
| MTMR8      | 0.2586483 | 1.0014526 | 0.2583 | 0.796 | 0.028429435 | count | 1 |
| AC091563.1 | 0.2586483 | 0.942174  | 0.2745 | 0.784 | 0.028429435 | count | 1 |
| SPAG8      | 0.2586483 | 1.0014526 | 0.2583 | 0.796 | 0.028429435 | count | 1 |
| DKK3       | 0.2586483 | 1.104727  | 0.2341 | 0.815 | 0.028429435 | count | 1 |
| PRDM11     | 0.2586483 | 1.0014526 | 0.2583 | 0.796 | 0.028429435 | count | 1 |
| CLEC6A     | 0.2586483 | 1.0014526 | 0.2583 | 0.796 | 0.028429435 | count | 1 |
| AC135050.1 | 0.2586483 | 1.0014526 | 0.2583 | 0.796 | 0.028429435 | count | 1 |
| MARVELD3   | 0.2586483 | 0.942174  | 0.2745 | 0.784 | 0.028429435 | count | 1 |
| ZFP3       | 0.2586483 | 1.0014526 | 0.2583 | 0.796 | 0.028429435 | count | 1 |
| AC008763.2 | 0.2586483 | 1.104727  | 0.2341 | 0.815 | 0.028429435 | count | 1 |
| LRFN3      | 0.2586483 | 0.942174  | 0.2745 | 0.784 | 0.028429435 | count | 1 |
| MED7       | 0.0236614 | 0.2896602 | 0.0817 | 0.935 | 0.028474548 | count | 1 |
| HMGB1      | 0.0200341 | 0.037588  | 0.533  | 0.594 | 0.028810339 | count | 1 |
| LINC01353  | 0.0459979 | 0.4968464 | 0.0926 | 0.926 | 0.028823897 | count | 1 |
| RRAS       | 0.0206339 | 0.1052392 | 0.1961 | 0.845 | 0.028837648 | count | 1 |
| OBSCN      | 0.1050536 | 0.8350864 | 0.1258 | 0.9   | 0.028843396 | count | 1 |
| CD86       | 0.02034   | 0.0665966 | 0.3054 | 0.76  | 0.028936516 | count | 1 |
| CEBPZOS    | 0.0218118 | 0.1914684 | 0.1139 | 0.909 | 0.029010111 | count | 1 |
| HELZ       | 0.0218071 | 0.1563298 | 0.1395 | 0.889 | 0.029102068 | count | 1 |
| HPGD       | 0.0391285 | 0.306734  | 0.1276 | 0.899 | 0.029212703 | count | 1 |
| RCC2       | 0.022094  | 0.1725952 | 0.128  | 0.898 | 0.029277523 | count | 1 |
| YBEY       | 0.0235581 | 0.237249  | 0.0993 | 0.921 | 0.029532392 | count | 1 |
| SNW1       | 0.0211699 | 0.1010272 | 0.2095 | 0.834 | 0.029642567 | count | 1 |
| CEP72      | 0.0502729 | 1.1858875 | 0.0424 | 0.966 | 0.029665466 | count | 1 |
| HIST1H2AE  | 0.0502729 | 0.909805  | 0.0553 | 0.956 | 0.029665466 | count | 1 |
| PLPP4      | 0.0502729 | 0.8139014 | 0.0618 | 0.951 | 0.029665466 | count | 1 |
| ZNF256     | 0.0502729 | 1.5216874 | 0.033  | 0.974 | 0.029665466 | count | 1 |
| SNX4       | 0.0228383 | 0.1931256 | 0.1183 | 0.906 | 0.030345236 | count | 1 |
| SESN2      | 0.0248008 | 0.2106796 | 0.1177 | 0.906 | 0.030392409 | count | 1 |
| CLEC2D     | 0.0330623 | 0.3766575 | 0.0878 | 0.93  | 0.03040608  | count | 1 |
| HMG3-AS1   | 0.0552914 | 0.6357135 | 0.087  | 0.931 | 0.030414592 | count | 1 |
| NAA25      | 0.0294734 | 0.2641531 | 0.1116 | 0.911 | 0.030440233 | count | 1 |
| BDH2       | 0.0262856 | 0.3342185 | 0.0786 | 0.937 | 0.030513481 | count | 1 |
| KLHL24     | 0.0235611 | 0.1406116 | 0.1676 | 0.867 | 0.030640585 | count | 1 |
| ZNF678     | 0.042647  | 0.426996  | 0.0999 | 0.92  | 0.030718552 | count | 1 |
| ZMIZ1      | 0.0239524 | 0.21508   | 0.1114 | 0.911 | 0.03093209  | count | 1 |
| AP003068.2 | 0.2797728 | 0.661931  | 0.4227 | 0.673 | 0.030947669 | count | 1 |
| AL133245.1 | 0.2828022 | 0.6452812 | 0.4383 | 0.661 | 0.031311235 | count | 1 |
| PYCARD-AS1 | 0.0308966 | 0.3848487 | 0.0803 | 0.936 | 0.031340257 | count | 1 |
| RPA2       | 0.0236016 | 0.1575886 | 0.1498 | 0.881 | 0.031392076 | count | 1 |
| RPL10      | 0.0220161 | 0.0216498 | 1.0169 | 0.309 | 0.031751058 | count | 1 |
| MRPL42     | 0.0240696 | 0.1535228 | 0.1568 | 0.875 | 0.03178783  | count | 1 |
| TCIRG1     | 0.0227522 | 0.0933167 | 0.2438 | 0.807 | 0.031919501 | count | 1 |
| EIPR1      | 0.0328567 | 0.3750918 | 0.0876 | 0.93  | 0.031931293 | count | 1 |
| VCPIP1     | 0.0271636 | 0.1874724 | 0.1449 | 0.885 | 0.032065296 | count | 1 |

|            |           |           |        |       |             |       |   |
|------------|-----------|-----------|--------|-------|-------------|-------|---|
| PNKD       | 0.0230862 | 0.1020023 | 0.2263 | 0.821 | 0.032078792 | count | 1 |
| RUNX1      | 0.0230404 | 0.1164261 | 0.1979 | 0.843 | 0.032184168 | count | 1 |
| C17orf80   | 0.0304848 | 0.4413424 | 0.0691 | 0.945 | 0.032251284 | count | 1 |
| PMVK       | 0.0236251 | 0.1271548 | 0.1858 | 0.853 | 0.032273844 | count | 1 |
| SH3BGRL    | 0.0225499 | 0.038678  | 0.583  | 0.56  | 0.032356882 | count | 1 |
| ALDOA      | 0.023748  | 0.1678275 | 0.1415 | 0.887 | 0.032357053 | count | 1 |
| CFAP298    | 0.0248984 | 0.1823794 | 0.1365 | 0.891 | 0.032433557 | count | 1 |
| SLFN5      | 0.0271542 | 0.2668905 | 0.1017 | 0.919 | 0.032515939 | count | 1 |
| GPBP1L1    | 0.02495   | 0.1568173 | 0.1591 | 0.874 | 0.032551798 | count | 1 |
| PPP3CC     | 0.0294687 | 0.3107874 | 0.0948 | 0.924 | 0.032588576 | count | 1 |
| MECP2      | 0.0239065 | 0.1540097 | 0.1552 | 0.877 | 0.032643484 | count | 1 |
| PUM3       | 0.0241351 | 0.1513945 | 0.1594 | 0.873 | 0.032645309 | count | 1 |
| PPP1CA     | 0.0229967 | 0.0605851 | 0.3796 | 0.704 | 0.032698213 | count | 1 |
| SRSF1      | 0.0250641 | 0.1571231 | 0.1595 | 0.873 | 0.032725828 | count | 1 |
| DARS2      | 0.043817  | 0.4983386 | 0.0879 | 0.93  | 0.032738233 | count | 1 |
| GATD1      | 0.0341115 | 0.3295883 | 0.1035 | 0.918 | 0.032744463 | count | 1 |
| MYO1G      | 0.0243173 | 0.1538293 | 0.1581 | 0.874 | 0.032805178 | count | 1 |
| ENSA       | 0.0231504 | 0.0663214 | 0.3491 | 0.727 | 0.032805874 | count | 1 |
| TM7SF3     | 0.0269006 | 0.1855353 | 0.145  | 0.885 | 0.032969184 | count | 1 |
| TMBIM4     | 0.0231305 | 0.0490061 | 0.472  | 0.637 | 0.033095156 | count | 1 |
| WDR18      | 0.0251447 | 0.1964892 | 0.128  | 0.898 | 0.033188801 | count | 1 |
| GMPS       | 0.0253143 | 0.1934968 | 0.1308 | 0.896 | 0.033510486 | count | 1 |
| LYN        | 0.0236672 | 0.067685  | 0.3497 | 0.727 | 0.033636599 | count | 1 |
| SPACA9     | 0.0569745 | 0.617187  | 0.0923 | 0.926 | 0.033665215 | count | 1 |
| MFGE8      | 0.1699024 | 0.614658  | 0.2764 | 0.782 | 0.033835772 | count | 1 |
| AL096865.1 | 0.0741486 | 0.7073423 | 0.1048 | 0.917 | 0.033962266 | count | 1 |
| GTF3A      | 0.0238953 | 0.0703394 | 0.3397 | 0.734 | 0.0339733   | count | 1 |
| CASP9      | 0.0293983 | 0.347313  | 0.0846 | 0.933 | 0.034008657 | count | 1 |
| CAPZB      | 0.0238021 | 0.0459066 | 0.5185 | 0.604 | 0.034060866 | count | 1 |
| LZIC       | 0.0251481 | 0.127113  | 0.1978 | 0.843 | 0.034204046 | count | 1 |
| PRIM1      | 0.0334741 | 0.3956706 | 0.0846 | 0.933 | 0.03428148  | count | 1 |
| RPL37A     | 0.0238895 | 0.0313775 | 0.7614 | 0.447 | 0.034333378 | count | 1 |
| FBXL19     | 0.0476726 | 0.5988032 | 0.0796 | 0.937 | 0.034367845 | count | 1 |
| RORA       | 0.1247    | 0.565333  | 0.2206 | 0.825 | 0.034420917 | count | 1 |
| MUTYH      | 0.0387336 | 0.5273482 | 0.0734 | 0.941 | 0.034458392 | count | 1 |
| TRAM1      | 0.0244283 | 0.0751746 | 0.325  | 0.745 | 0.034582177 | count | 1 |
| RABL2B     | 0.0360891 | 0.4018686 | 0.0898 | 0.928 | 0.034650608 | count | 1 |
| AP000692.2 | 0.0436441 | 0.7851174 | 0.0556 | 0.956 | 0.034699215 | count | 1 |
| AC005332.4 | 0.0860064 | 0.7538602 | 0.1141 | 0.909 | 0.034762635 | count | 1 |
| HNRNPC     | 0.0245914 | 0.0598559 | 0.4108 | 0.681 | 0.034950863 | count | 1 |
| ZEB2       | 0.0244826 | 0.0606322 | 0.4038 | 0.686 | 0.035038049 | count | 1 |
| PTGER4     | 0.0248769 | 0.1014121 | 0.2453 | 0.806 | 0.035058177 | count | 1 |
| TRPM4      | 0.0356447 | 0.3488577 | 0.1022 | 0.919 | 0.035059891 | count | 1 |
| TRIAP1     | 0.0273853 | 0.1953849 | 0.1402 | 0.889 | 0.035402489 | count | 1 |
| AC079209.1 | 0.0511536 | 0.4434841 | 0.1153 | 0.908 | 0.035423233 | count | 1 |



|            |           |           |        |       |             |       |   |
|------------|-----------|-----------|--------|-------|-------------|-------|---|
| RXYLT1     | 0.0301638 | 0.2594544 | 0.1163 | 0.907 | 0.035502323 | count | 1 |
| SMCO4      | 0.0252963 | 0.0828685 | 0.3053 | 0.76  | 0.035714155 | count | 1 |
| CTU2       | 0.0353274 | 0.3612329 | 0.0978 | 0.922 | 0.035850719 | count | 1 |
| DAZAP1     | 0.0259422 | 0.1162928 | 0.2231 | 0.823 | 0.035859302 | count | 1 |
| PTCD3      | 0.0341818 | 0.2922838 | 0.1169 | 0.907 | 0.035901342 | count | 1 |
| STAG2      | 0.0258821 | 0.1053491 | 0.2457 | 0.806 | 0.035976506 | count | 1 |
| DNAAF4     | 0.0358775 | 0.3831054 | 0.0936 | 0.925 | 0.036054601 | count | 1 |
| ARPC3      | 0.0250562 | 0.0242568 | 1.033  | 0.302 | 0.036089402 | count | 1 |
| RTRAF      | 0.0254385 | 0.0598458 | 0.4251 | 0.671 | 0.036096168 | count | 1 |
| RPUSD2     | 0.0501512 | 0.5370413 | 0.0934 | 0.926 | 0.036169914 | count | 1 |
| MS4A6A     | 0.0253048 | 0.0466744 | 0.5422 | 0.588 | 0.036369879 | count | 1 |
| IMP3       | 0.0259341 | 0.0882789 | 0.2938 | 0.769 | 0.036575064 | count | 1 |
| CAPZA1     | 0.0258399 | 0.0634373 | 0.4073 | 0.684 | 0.036643494 | count | 1 |
| KPNA3      | 0.0277289 | 0.1443639 | 0.1921 | 0.848 | 0.036646042 | count | 1 |
| OS9        | 0.0260708 | 0.0737287 | 0.3536 | 0.724 | 0.036695716 | count | 1 |
| MCM9       | 0.0394504 | 0.3784136 | 0.1043 | 0.917 | 0.036865634 | count | 1 |
| PRKAR2A    | 0.0274834 | 0.1519316 | 0.1809 | 0.856 | 0.036872862 | count | 1 |
| EPS15L1    | 0.0361587 | 0.3179894 | 0.1137 | 0.909 | 0.037040635 | count | 1 |
| PFKFB4     | 0.0444362 | 0.3658262 | 0.1215 | 0.903 | 0.037187796 | count | 1 |
| BROX       | 0.0269666 | 0.106843  | 0.2524 | 0.801 | 0.037249419 | count | 1 |
| ERV3-1     | 0.0293701 | 0.2362152 | 0.1243 | 0.901 | 0.037331427 | count | 1 |
| RAMP1      | 0.0922591 | 0.644895  | 0.1431 | 0.886 | 0.037346486 | count | 1 |
| PDCD1LG2   | 0.0539715 | 0.4148853 | 0.1301 | 0.897 | 0.037393158 | count | 1 |
| LINC00623  | 0.030262  | 0.2401527 | 0.126  | 0.9   | 0.037518302 | count | 1 |
| CC2D1A     | 0.0373298 | 0.4500101 | 0.083  | 0.934 | 0.037519685 | count | 1 |
| LRRC28     | 0.0322273 | 0.3267481 | 0.0986 | 0.921 | 0.037688174 | count | 1 |
| HSD17B12   | 0.0279125 | 0.1541498 | 0.1811 | 0.856 | 0.037781359 | count | 1 |
| PLEC       | 0.0280551 | 0.1578502 | 0.1777 | 0.859 | 0.037824542 | count | 1 |
| SLC35B2    | 0.0314287 | 0.2775641 | 0.1132 | 0.91  | 0.037838437 | count | 1 |
| YTHDF2     | 0.0275987 | 0.122927  | 0.2245 | 0.822 | 0.037870221 | count | 1 |
| IFT27      | 0.030793  | 0.2035227 | 0.1513 | 0.88  | 0.037897107 | count | 1 |
| ZNF385A    | 0.0271779 | 0.1142396 | 0.2379 | 0.812 | 0.038006145 | count | 1 |
| SF3B5      | 0.0267945 | 0.0631431 | 0.4243 | 0.671 | 0.038114383 | count | 1 |
| THAP2      | 0.0319543 | 0.2589069 | 0.1234 | 0.902 | 0.038171609 | count | 1 |
| PPRC1      | 0.0388071 | 0.4058406 | 0.0956 | 0.924 | 0.038183454 | count | 1 |
| GNG7       | 0.0304057 | 0.2513766 | 0.121  | 0.904 | 0.03824058  | count | 1 |
| SLC25A38   | 0.0342116 | 0.3695483 | 0.0926 | 0.926 | 0.038244195 | count | 1 |
| ZNF77      | 0.13938   | 0.5631823 | 0.2475 | 0.805 | 0.03862601  | count | 1 |
| AC007365.1 | 0.0516828 | 0.7320253 | 0.0706 | 0.944 | 0.038664917 | count | 1 |
| TDRKH      | 0.0704017 | 0.5781614 | 0.1218 | 0.903 | 0.038849117 | count | 1 |
| XFLT2      | 0.0704017 | 0.6042496 | 0.1165 | 0.907 | 0.038849117 | count | 1 |
| SAMD4B     | 0.0300055 | 0.2235908 | 0.1342 | 0.893 | 0.038897825 | count | 1 |
| RHOT2      | 0.031835  | 0.2203463 | 0.1445 | 0.885 | 0.03894643  | count | 1 |
| EIF4H      | 0.0280825 | 0.0896627 | 0.3132 | 0.754 | 0.0389627   | count | 1 |
| LINC01473  | 0.1943158 | 0.7360607 | 0.264  | 0.792 | 0.038968307 | count | 1 |

|             |           |           |        |       |             |       |   |
|-------------|-----------|-----------|--------|-------|-------------|-------|---|
| RBM3        | 0.0273216 | 0.0505801 | 0.5402 | 0.589 | 0.039012529 | count | 1 |
| ZCCHC2      | 0.0294747 | 0.1572469 | 0.1874 | 0.851 | 0.039087264 | count | 1 |
| BAZ1B       | 0.0307404 | 0.1686674 | 0.1823 | 0.855 | 0.039432596 | count | 1 |
| FAM151B     | 0.049671  | 0.5973899 | 0.0831 | 0.934 | 0.039527137 | count | 1 |
| TBCK        | 0.0716501 | 0.4571321 | 0.1567 | 0.875 | 0.039548304 | count | 1 |
| PMPCA       | 0.0315071 | 0.2185882 | 0.1441 | 0.885 | 0.039627688 | count | 1 |
| GSTM2       | 0.3522197 | 1.070735  | 0.329  | 0.742 | 0.039808988 | count | 1 |
| ACTR3B      | 0.3522197 | 0.8681808 | 0.4057 | 0.685 | 0.039808988 | count | 1 |
| USP20       | 0.3522197 | 0.8681808 | 0.4057 | 0.685 | 0.039808988 | count | 1 |
| PCCA        | 0.0426006 | 0.2982335 | 0.1428 | 0.886 | 0.039824425 | count | 1 |
| FTX         | 0.0314203 | 0.2258973 | 0.1391 | 0.889 | 0.039940682 | count | 1 |
| CASP7       | 0.0379365 | 0.2334931 | 0.1625 | 0.871 | 0.040161881 | count | 1 |
| GOLPH3      | 0.0310096 | 0.1843799 | 0.1682 | 0.866 | 0.040200887 | count | 1 |
| ATXN1       | 0.0301216 | 0.1544297 | 0.1951 | 0.845 | 0.040224935 | count | 1 |
| PHACTR1     | 0.0281924 | 0.0745165 | 0.3783 | 0.705 | 0.040297761 | count | 1 |
| ARPC4       | 0.028309  | 0.06102   | 0.4639 | 0.643 | 0.04029915  | count | 1 |
| TYW5        | 0.0471363 | 0.4537186 | 0.1039 | 0.917 | 0.040353973 | count | 1 |
| TYROBP      | 0.0281037 | 0.0212268 | 1.324  | 0.186 | 0.040517195 | count | 1 |
| ZNF544      | 0.0733808 | 0.5490549 | 0.1336 | 0.894 | 0.040518195 | count | 1 |
| TMEM206     | 0.0324641 | 0.265207  | 0.1224 | 0.903 | 0.040523894 | count | 1 |
| TTL         | 0.0337285 | 0.2861719 | 0.1179 | 0.906 | 0.040811027 | count | 1 |
| A2M-AS1     | 0.0528241 | 0.5091471 | 0.1038 | 0.917 | 0.040836458 | count | 1 |
| TRIO        | 0.0331114 | 0.2486932 | 0.1331 | 0.894 | 0.040909116 | count | 1 |
| IAH1        | 0.0292938 | 0.088935  | 0.3294 | 0.742 | 0.041082008 | count | 1 |
| DUSP11      | 0.0331405 | 0.2222756 | 0.1491 | 0.881 | 0.041302454 | count | 1 |
| PSMC6       | 0.0299605 | 0.1098857 | 0.2727 | 0.785 | 0.041344024 | count | 1 |
| BLOC1S5     | 0.0368718 | 0.3071383 | 0.12   | 0.904 | 0.041428969 | count | 1 |
| RUVBL2      | 0.0338758 | 0.2925237 | 0.1158 | 0.908 | 0.041447477 | count | 1 |
| DPM2        | 0.0306971 | 0.1551797 | 0.1978 | 0.843 | 0.041591049 | count | 1 |
| C11orf54    | 0.0354069 | 0.2437108 | 0.1453 | 0.884 | 0.041687035 | count | 1 |
| AC008074.3  | 0.0498114 | 0.4004772 | 0.1244 | 0.901 | 0.041718081 | count | 1 |
| TOR1B       | 0.0354655 | 0.3076304 | 0.1153 | 0.908 | 0.041756181 | count | 1 |
| ATP5S       | 0.0308291 | 0.1561445 | 0.1974 | 0.843 | 0.041855328 | count | 1 |
| RUSC1-AS1   | 0.1034483 | 0.7161855 | 0.1444 | 0.885 | 0.041989271 | count | 1 |
| JAGN1       | 0.0318489 | 0.1660128 | 0.1918 | 0.848 | 0.042095908 | count | 1 |
| GAS6-AS1    | 0.0502729 | 0.577303  | 0.0871 | 0.931 | 0.042107354 | count | 1 |
| AC009005.1  | 0.0828496 | 0.5357787 | 0.1546 | 0.877 | 0.042126872 | count | 1 |
| AC090114.2  | 0.0492047 | 0.4673225 | 0.1053 | 0.916 | 0.042136752 | count | 1 |
| RPL8        | 0.0292809 | 0.0251006 | 1.1665 | 0.244 | 0.042204927 | count | 1 |
| THTPA       | 0.0399892 | 0.2815676 | 0.142  | 0.887 | 0.042342838 | count | 1 |
| NEK3        | 0.0361206 | 0.2265747 | 0.1594 | 0.873 | 0.042392468 | count | 1 |
| SCAND1      | 0.0297794 | 0.0661644 | 0.4501 | 0.653 | 0.042443133 | count | 1 |
| LRIF1       | 0.032041  | 0.2699204 | 0.1187 | 0.906 | 0.0424935   | count | 1 |
| CHIT1       | 0.0926328 | 0.8028294 | 0.1154 | 0.908 | 0.042609221 | count | 1 |
| ST3GAL6-AS1 | 0.0926328 | 1.1409191 | 0.0812 | 0.935 | 0.042609221 | count | 1 |

|            |           |           |        |       |             |       |   |
|------------|-----------|-----------|--------|-------|-------------|-------|---|
| POLN       | 0.0926328 | 1.1409191 | 0.0812 | 0.935 | 0.042609221 | count | 1 |
| MND1       | 0.0926328 | 0.8028294 | 0.1154 | 0.908 | 0.042609221 | count | 1 |
| CCNF       | 0.0926328 | 0.8028294 | 0.1154 | 0.908 | 0.042609221 | count | 1 |
| ANKEF1     | 0.0926328 | 0.8028294 | 0.1154 | 0.908 | 0.042609221 | count | 1 |
| RHOG       | 0.0299141 | 0.0510107 | 0.5864 | 0.558 | 0.04266382  | count | 1 |
| CALCOCO1   | 0.0339234 | 0.2424953 | 0.1399 | 0.889 | 0.042732073 | count | 1 |
| ZSWIM4     | 0.1236455 | 0.6700241 | 0.1845 | 0.854 | 0.042764709 | count | 1 |
| ZNF503     | 0.0318377 | 0.1635031 | 0.1947 | 0.846 | 0.042819032 | count | 1 |
| THYN1      | 0.0315263 | 0.1339323 | 0.2354 | 0.814 | 0.042861499 | count | 1 |
| AL139260.1 | 0.0617861 | 0.5163915 | 0.1196 | 0.905 | 0.04286618  | count | 1 |
| MAP3K10    | 0.0617861 | 0.5768871 | 0.1071 | 0.915 | 0.04286618  | count | 1 |
| SDHAF2     | 0.0322074 | 0.1748696 | 0.1842 | 0.854 | 0.04286967  | count | 1 |
| DIS3       | 0.0331484 | 0.1596088 | 0.2077 | 0.835 | 0.042900524 | count | 1 |
| H3F3A      | 0.0297761 | 0.0251779 | 1.1826 | 0.237 | 0.042905549 | count | 1 |
| PPP1R7     | 0.0308147 | 0.087559  | 0.3519 | 0.725 | 0.04307085  | count | 1 |
| VHL        | 0.0340361 | 0.1963045 | 0.1734 | 0.862 | 0.043216907 | count | 1 |
| PNMA8B     | 0.3797529 | 0.7542869 | 0.5035 | 0.615 | 0.04326768  | count | 1 |
| TMEM41A    | 0.0385476 | 0.264613  | 0.1457 | 0.884 | 0.043317332 | count | 1 |
| TMEM203    | 0.0349998 | 0.257009  | 0.1362 | 0.892 | 0.04332493  | count | 1 |
| PPCS       | 0.0308619 | 0.0904452 | 0.3412 | 0.733 | 0.043370336 | count | 1 |
| SH2B1      | 0.0445907 | 0.3468664 | 0.1286 | 0.898 | 0.043391118 | count | 1 |
| YIPF2      | 0.03419   | 0.2158618 | 0.1584 | 0.874 | 0.043519061 | count | 1 |
| CHTF8      | 0.0343809 | 0.2388926 | 0.1439 | 0.886 | 0.043600309 | count | 1 |
| COPS9      | 0.030864  | 0.0719829 | 0.4288 | 0.668 | 0.043662617 | count | 1 |
| IRF2BPL    | 0.0349444 | 0.2667617 | 0.131  | 0.896 | 0.043694144 | count | 1 |
| FOXD2      | 0.216874  | 0.8013055 | 0.2707 | 0.787 | 0.043771031 | count | 1 |
| TAF1A-AS1  | 0.216874  | 0.8919104 | 0.2432 | 0.808 | 0.043771031 | count | 1 |
| FZD7       | 0.216874  | 0.8046245 | 0.2695 | 0.788 | 0.043771031 | count | 1 |
| KLHL2      | 0.0389696 | 0.2812073 | 0.1386 | 0.89  | 0.043792933 | count | 1 |
| AL590617.2 | 0.0500974 | 0.4148241 | 0.1208 | 0.904 | 0.043796268 | count | 1 |
| DDX49      | 0.03457   | 0.2040259 | 0.1694 | 0.865 | 0.043840457 | count | 1 |
| ZCCHC9     | 0.0333563 | 0.204054  | 0.1635 | 0.87  | 0.043843417 | count | 1 |
| UBAP2      | 0.0350389 | 0.2208912 | 0.1586 | 0.874 | 0.043880503 | count | 1 |
| SIMC1      | 0.0698662 | 0.4843824 | 0.1442 | 0.885 | 0.043980917 | count | 1 |
| CALCR      | 0.1580818 | 0.7184522 | 0.22   | 0.826 | 0.044029594 | count | 1 |
| SEC61A1    | 0.0331685 | 0.1877225 | 0.1767 | 0.86  | 0.044083185 | count | 1 |
| PRDX3      | 0.0310986 | 0.0643463 | 0.4833 | 0.629 | 0.044106136 | count | 1 |
| DNAJC19    | 0.0323376 | 0.1278281 | 0.253  | 0.8   | 0.044131756 | count | 1 |
| NKRF       | 0.0392989 | 0.3720545 | 0.1056 | 0.916 | 0.04416408  | count | 1 |
| YTHDC1     | 0.0318275 | 0.1149548 | 0.2769 | 0.782 | 0.044171011 | count | 1 |
| ZSWIM7     | 0.0321212 | 0.1095103 | 0.2933 | 0.769 | 0.044440709 | count | 1 |
| GOLGA4     | 0.0321317 | 0.0942359 | 0.341  | 0.733 | 0.044562077 | count | 1 |
| TATDN1     | 0.0336446 | 0.1676985 | 0.2006 | 0.841 | 0.044693368 | count | 1 |
| AP000547.3 | 0.0561738 | 0.4595268 | 0.1222 | 0.903 | 0.044746019 | count | 1 |
| TTLL12     | 0.1295615 | 0.4877671 | 0.2656 | 0.791 | 0.044878184 | count | 1 |

|             |           |           |        |       |             |       |   |
|-------------|-----------|-----------|--------|-------|-------------|-------|---|
| AFF1        | 0.0343241 | 0.1744968 | 0.1967 | 0.844 | 0.044961876 | count | 1 |
| GPCPD1      | 0.031715  | 0.0922384 | 0.3438 | 0.731 | 0.045014063 | count | 1 |
| UBE2H       | 0.0329296 | 0.1513614 | 0.2176 | 0.828 | 0.045022281 | count | 1 |
| PHF10       | 0.0342783 | 0.1928409 | 0.1778 | 0.859 | 0.045056543 | count | 1 |
| SRGAP3      | 0.0403373 | 0.2581227 | 0.1563 | 0.876 | 0.045113026 | count | 1 |
| WRAP53      | 0.0453353 | 0.4581719 | 0.0989 | 0.921 | 0.04513224  | count | 1 |
| ZNF707      | 0.1621478 | 0.731904  | 0.2215 | 0.825 | 0.045211264 | count | 1 |
| N6AMT1      | 0.062765  | 0.485969  | 0.1292 | 0.897 | 0.045363797 | count | 1 |
| SLC19A1     | 0.0473042 | 0.314887  | 0.1502 | 0.881 | 0.045476422 | count | 1 |
| PLPP3       | 0.0377914 | 0.298999  | 0.1264 | 0.899 | 0.045515024 | count | 1 |
| POM121      | 0.0369125 | 0.2389533 | 0.1545 | 0.877 | 0.045528988 | count | 1 |
| WDR13       | 0.0351237 | 0.1943958 | 0.1807 | 0.857 | 0.045540853 | count | 1 |
| PADI2       | 0.0686603 | 0.4801784 | 0.143  | 0.886 | 0.045545956 | count | 1 |
| ZNF566      | 0.0495045 | 0.7732454 | 0.064  | 0.949 | 0.045619349 | count | 1 |
| COMMD1      | 0.032706  | 0.1043255 | 0.3135 | 0.754 | 0.045664642 | count | 1 |
| LMNA        | 0.031964  | 0.0779856 | 0.4099 | 0.682 | 0.045791099 | count | 1 |
| ZNF248      | 0.0830208 | 0.4909069 | 0.1691 | 0.866 | 0.045932961 | count | 1 |
| KXD1        | 0.0330523 | 0.120208  | 0.275  | 0.783 | 0.045937542 | count | 1 |
| HPCAL1      | 0.0330584 | 0.1290878 | 0.2561 | 0.798 | 0.045950903 | count | 1 |
| CLN5        | 0.0345813 | 0.1624582 | 0.2129 | 0.831 | 0.045962626 | count | 1 |
| NET1        | 0.0507478 | 0.2746302 | 0.1848 | 0.853 | 0.046016792 | count | 1 |
| SPEN        | 0.0340286 | 0.1329548 | 0.2559 | 0.798 | 0.046162518 | count | 1 |
| PARP12      | 0.0400036 | 0.2350243 | 0.1702 | 0.865 | 0.0463101   | count | 1 |
| ITGA4       | 0.0331704 | 0.0912272 | 0.3636 | 0.716 | 0.046320834 | count | 1 |
| ZNF600      | 0.2289966 | 0.532762  | 0.4298 | 0.667 | 0.046375816 | count | 1 |
| UBB         | 0.032282  | 0.0367694 | 0.878  | 0.38  | 0.046376446 | count | 1 |
| CDC23       | 0.0472108 | 0.3218019 | 0.1467 | 0.883 | 0.046494137 | count | 1 |
| GHITM       | 0.0328565 | 0.0633546 | 0.5186 | 0.604 | 0.046539542 | count | 1 |
| LY6E        | 0.0326038 | 0.0843823 | 0.3864 | 0.699 | 0.046549737 | count | 1 |
| SAT2        | 0.0328049 | 0.0732993 | 0.4475 | 0.655 | 0.046599125 | count | 1 |
| ECHS1       | 0.0333616 | 0.0970931 | 0.3436 | 0.731 | 0.046964976 | count | 1 |
| TP53TG1     | 0.0365352 | 0.2042268 | 0.1789 | 0.858 | 0.046973308 | count | 1 |
| UBE2I       | 0.033119  | 0.0751073 | 0.441  | 0.659 | 0.047016619 | count | 1 |
| LSP1        | 0.0328657 | 0.0616518 | 0.5331 | 0.594 | 0.047111431 | count | 1 |
| FASTKD2     | 0.0411897 | 0.3440325 | 0.1197 | 0.905 | 0.047128463 | count | 1 |
| AGAP2       | 0.0748607 | 0.5465504 | 0.137  | 0.891 | 0.047169658 | count | 1 |
| NDST2       | 0.0484545 | 0.4026754 | 0.1203 | 0.904 | 0.047171029 | count | 1 |
| DESI2       | 0.0352509 | 0.1549792 | 0.2275 | 0.82  | 0.047706836 | count | 1 |
| TRIM68      | 0.2352118 | 0.9899699 | 0.2376 | 0.812 | 0.047717724 | count | 1 |
| AC091814.1  | 0.2352118 | 0.9899699 | 0.2376 | 0.812 | 0.047717724 | count | 1 |
| PWAR6       | 0.2352118 | 0.977298  | 0.2407 | 0.81  | 0.047717724 | count | 1 |
| FSIP1       | 0.2352118 | 0.977298  | 0.2407 | 0.81  | 0.047717724 | count | 1 |
| NT5M        | 0.2352118 | 0.9875452 | 0.2382 | 0.812 | 0.047717724 | count | 1 |
| ADORA2A-AS1 | 0.2352118 | 0.9875452 | 0.2382 | 0.812 | 0.047717724 | count | 1 |
| APOBEC3H    | 0.2352118 | 0.9899699 | 0.2376 | 0.812 | 0.047717724 | count | 1 |

|            |           |           |        |        |             |       |   |
|------------|-----------|-----------|--------|--------|-------------|-------|---|
| NT5C3B     | 0.0438685 | 0.2777264 | 0.158  | 0.875  | 0.047735461 | count | 1 |
| SPAG1      | 0.0637509 | 0.4861401 | 0.1311 | 0.896  | 0.047786931 | count | 1 |
| UNG        | 0.0637509 | 0.4713992 | 0.1352 | 0.892  | 0.047786931 | count | 1 |
| CRHBP      | 0.0557707 | 0.3308054 | 0.1686 | 0.866  | 0.047802655 | count | 1 |
| MYO15B     | 0.0557707 | 0.3968567 | 0.1405 | 0.888  | 0.047802655 | count | 1 |
| ZNF319     | 0.0637776 | 1.0224862 | 0.0624 | 0.95   | 0.04780715  | count | 1 |
| HCLS1      | 0.0336695 | 0.0556945 | 0.6045 | 0.546  | 0.047872136 | count | 1 |
| EXD2       | 0.086793  | 0.6814946 | 0.1274 | 0.899  | 0.048057535 | count | 1 |
| XRCC6      | 0.03406   | 0.0749747 | 0.4543 | 0.65   | 0.048093502 | count | 1 |
| RABL3      | 0.0461689 | 0.382926  | 0.1206 | 0.904  | 0.04816089  | count | 1 |
| RRN3       | 0.0522816 | 0.3021758 | 0.173  | 0.863  | 0.048194827 | count | 1 |
| APH1A      | 0.0344763 | 0.0863744 | 0.3991 | 0.69   | 0.048201644 | count | 1 |
| SURF6      | 0.0411116 | 0.3281693 | 0.1253 | 0.9    | 0.048265292 | count | 1 |
| RNF217     | 0.0403427 | 0.2556187 | 0.1578 | 0.875  | 0.048345291 | count | 1 |
| MFAP3      | 0.1050536 | 0.9415496 | 0.1116 | 0.911  | 0.04845976  | count | 1 |
| NRARP      | 0.0362728 | 0.2618026 | 0.1386 | 0.89   | 0.048468799 | count | 1 |
| AC009065.4 | 0.0819223 | 0.7541799 | 0.1086 | 0.914  | 0.04864727  | count | 1 |
| TSKS       | 0.0819223 | 0.7092161 | 0.1155 | 0.908  | 0.04864727  | count | 1 |
| CCDC51     | 0.0583147 | 0.4833984 | 0.1206 | 0.904  | 0.048898617 | count | 1 |
| LINC00294  | 0.1060709 | 0.6021006 | 0.1762 | 0.86   | 0.048940357 | count | 1 |
| ZNF593     | 0.0356359 | 0.1442322 | 0.2471 | 0.805  | 0.048995309 | count | 1 |
| LINC00893  | 0.0777384 | 0.934018  | 0.0832 | 0.934  | 0.049009601 | count | 1 |
| AGFG1      | 0.0353273 | 0.1074075 | 0.3289 | 0.742  | 0.049442313 | count | 1 |
| DDIT3      | 0.0363789 | 0.138358  | 0.2629 | 0.793  | 0.049578663 | count | 1 |
| TOP1       | 0.034864  | 0.0669006 | 0.5211 | 0.602  | 0.049581887 | count | 1 |
| NMRAL1     | 0.0393328 | 0.2090352 | 0.1882 | 0.851  | 0.049826165 | count | 1 |
| PIGBOS1    | 0.0379942 | 0.1980308 | 0.1919 | 0.848  | 0.049845063 | count | 1 |
| HRH2       | 0.0367033 | 0.1336066 | 0.2747 | 0.784  | 0.049918275 | count | 1 |
| PNPT1      | 0.0408849 | 0.2141574 | 0.1909 | 0.849  | 0.050041228 | count | 1 |
| ADI1       | 0.0361699 | 0.0927189 | 0.3901 | 0.696  | 0.050429529 | count | 1 |
| GTPBP6     | 0.0387766 | 0.1484056 | 0.2613 | 0.794  | 0.050453573 | count | 1 |
| CCNC       | 0.0383897 | 0.1716157 | 0.2237 | 0.823  | 0.050466945 | count | 1 |
| GCLC       | 0.0481045 | 0.2896054 | 0.1661 | 0.868  | 0.050589184 | count | 1 |
| GLMP       | 0.0374713 | 0.1513307 | 0.2476 | 0.804  | 0.050698249 | count | 1 |
| PTPRM      | 0.1243402 | 0.4931286 | 0.2521 | 0.801  | 0.050723008 | count | 1 |
| KCMF1      | 0.0380085 | 0.1430718 | 0.2657 | 0.791  | 0.050767322 | count | 1 |
| DUSP12     | 0.0423929 | 0.242541  | 0.1748 | 0.861  | 0.050808141 | count | 1 |
| AL138966.2 | 0.1461253 | 0.8552665 | 0.1709 | 0.864  | 0.050827982 | count | 1 |
| BIVM       | 0.1461253 | 0.7409142 | 0.1972 | 0.844  | 0.050827982 | count | 1 |
| AC116913.1 | 0.1461253 | 0.9173933 | 0.1593 | 0.873  | 0.050827982 | count | 1 |
| NR1H2      | 0.0368441 | 0.1157223 | 0.3184 | 0.75   | 0.050878452 | count | 1 |
| VAPA       | 0.0356567 | 0.0508622 | 0.701  | 0.4833 | 0.050948862 | count | 1 |
| PDCL       | 0.0408913 | 0.182385  | 0.2242 | 0.823  | 0.051062913 | count | 1 |
| CLIC4      | 0.0395073 | 0.2198472 | 0.1797 | 0.857  | 0.051095056 | count | 1 |
| UFL1       | 0.0380826 | 0.1349118 | 0.2823 | 0.778  | 0.051244383 | count | 1 |

|            |           |           |        |       |             |       |   |
|------------|-----------|-----------|--------|-------|-------------|-------|---|
| UBFD1      | 0.0565203 | 0.3307792 | 0.1709 | 0.864 | 0.051288229 | count | 1 |
| SACS       | 0.0527167 | 0.3729833 | 0.1413 | 0.888 | 0.051344341 | count | 1 |
| MRPL23     | 0.0367532 | 0.1016539 | 0.3616 | 0.718 | 0.051350632 | count | 1 |
| ACTN4      | 0.0372827 | 0.1229049 | 0.3033 | 0.762 | 0.051751425 | count | 1 |
| TOP2A      | 0.1017308 | 0.8093468 | 0.1257 | 0.9   | 0.05193991  | count | 1 |
| KCNK7      | 0.1272842 | 0.9468374 | 0.1344 | 0.893 | 0.051960508 | count | 1 |
| BTBD11     | 0.1272842 | 0.8407863 | 0.1514 | 0.88  | 0.051960508 | count | 1 |
| AC004943.2 | 0.1272842 | 0.8407863 | 0.1514 | 0.88  | 0.051960508 | count | 1 |
| AC006157.1 | 0.1272842 | 1.5945048 | 0.0798 | 0.936 | 0.051960508 | count | 1 |
| RARS2      | 0.0439387 | 0.2564176 | 0.1714 | 0.864 | 0.052078067 | count | 1 |
| PRR15      | 0.4482087 | 1.211345  | 0.37   | 0.711 | 0.052082244 | count | 1 |
| AMER1      | 0.4482087 | 1.085943  | 0.4127 | 0.68  | 0.052082244 | count | 1 |
| LINC02099  | 0.4482087 | 1.085943  | 0.4127 | 0.68  | 0.052082244 | count | 1 |
| FAM84B     | 0.4482087 | 1.085943  | 0.4127 | 0.68  | 0.052082244 | count | 1 |
| ZFP41      | 0.4482087 | 1.085943  | 0.4127 | 0.68  | 0.052082244 | count | 1 |
| AC023355.1 | 0.4482087 | 1.211345  | 0.37   | 0.711 | 0.052082244 | count | 1 |
| GP1BA      | 0.4482087 | 1.0116915 | 0.443  | 0.658 | 0.052082244 | count | 1 |
| AC010761.2 | 0.4482087 | 1.079644  | 0.4151 | 0.678 | 0.052082244 | count | 1 |
| AC015819.1 | 0.4482087 | 1.085943  | 0.4127 | 0.68  | 0.052082244 | count | 1 |
| ARHGAP33   | 0.4482087 | 1.079644  | 0.4151 | 0.678 | 0.052082244 | count | 1 |
| CCDC13     | 0.0826486 | 0.7546693 | 0.1095 | 0.913 | 0.052153584 | count | 1 |
| MFHAS1     | 0.0468751 | 0.286598  | 0.1636 | 0.87  | 0.052184757 | count | 1 |
| NEMP2      | 0.0721097 | 0.5041355 | 0.143  | 0.886 | 0.052199582 | count | 1 |
| SYTL3      | 0.0422758 | 0.2237907 | 0.1889 | 0.85  | 0.052254978 | count | 1 |
| SLC39A7    | 0.0410364 | 0.1732095 | 0.2369 | 0.813 | 0.05248962  | count | 1 |
| HCST       | 0.0367236 | 0.0464835 | 0.79   | 0.43  | 0.052733484 | count | 1 |
| CDAN1      | 0.2586483 | 0.7449146 | 0.3472 | 0.728 | 0.052817098 | count | 1 |
| PIK3AP1    | 0.0388094 | 0.1372299 | 0.2828 | 0.777 | 0.052880279 | count | 1 |
| SNX33      | 0.0761419 | 0.5103072 | 0.1492 | 0.881 | 0.052958585 | count | 1 |
| PCIF1      | 0.0424095 | 0.2205155 | 0.1923 | 0.848 | 0.053046269 | count | 1 |
| RFESD      | 0.1537275 | 0.7033645 | 0.2186 | 0.827 | 0.053574673 | count | 1 |
| PSMD13     | 0.0386725 | 0.1028271 | 0.3761 | 0.707 | 0.053735198 | count | 1 |
| IFI16      | 0.0377446 | 0.0568634 | 0.6638 | 0.507 | 0.053742799 | count | 1 |
| PFN1       | 0.0374057 | 0.0272845 | 1.371  | 0.171 | 0.0538946   | count | 1 |
| SINHCAF    | 0.0398428 | 0.1506785 | 0.2644 | 0.791 | 0.053959837 | count | 1 |
| CUTA       | 0.038169  | 0.0682182 | 0.5595 | 0.576 | 0.054011942 | count | 1 |
| COG1       | 0.0569075 | 0.3527631 | 0.1613 | 0.872 | 0.054048081 | count | 1 |
| TMEM170A   | 0.0404924 | 0.1471983 | 0.2751 | 0.783 | 0.054063656 | count | 1 |
| ISCA1      | 0.0392574 | 0.1362221 | 0.2882 | 0.773 | 0.054139223 | count | 1 |
| FARS2      | 0.0511536 | 0.3071715 | 0.1665 | 0.868 | 0.054218667 | count | 1 |
| ECH1       | 0.0382492 | 0.0662403 | 0.5774 | 0.564 | 0.054449681 | count | 1 |
| CRTAM      | 0.0497184 | 0.2973941 | 0.1672 | 0.867 | 0.054453161 | count | 1 |
| PDCD6IP    | 0.0394568 | 0.1219299 | 0.3236 | 0.746 | 0.054456056 | count | 1 |
| SCRG1      | 0.0785694 | 0.3993153 | 0.1968 | 0.844 | 0.054670032 | count | 1 |
| RPL10A     | 0.0380212 | 0.0312563 | 1.2164 | 0.224 | 0.054722708 | count | 1 |

|            |           |           |        |        |             |       |   |
|------------|-----------|-----------|--------|--------|-------------|-------|---|
| PHTF1      | 0.0480362 | 0.2837682 | 0.1693 | 0.866  | 0.054757577 | count | 1 |
| USP42      | 0.0577766 | 0.3563648 | 0.1621 | 0.871  | 0.054878998 | count | 1 |
| AC106707.1 | 0.0654851 | 0.3237103 | 0.2023 | 0.84   | 0.054966715 | count | 1 |
| SQOR       | 0.0393498 | 0.0875228 | 0.4496 | 0.653  | 0.05507811  | count | 1 |
| HMG2       | 0.0385588 | 0.0590326 | 0.6532 | 0.5137 | 0.055117468 | count | 1 |
| ZNF813     | 0.1584011 | 0.6296061 | 0.2516 | 0.801  | 0.055268222 | count | 1 |
| CENPT      | 0.0529637 | 0.2863088 | 0.185  | 0.853  | 0.055283914 | count | 1 |
| AP001189.5 | 0.4725612 | 0.7909152 | 0.5975 | 0.55   | 0.055291322 | count | 1 |
| RRBP1      | 0.0392994 | 0.0832781 | 0.4719 | 0.637  | 0.055487845 | count | 1 |
| HSPBP1     | 0.0468306 | 0.2655165 | 0.1764 | 0.86   | 0.055515333 | count | 1 |
| CAMK1      | 0.0403603 | 0.1102167 | 0.3662 | 0.714  | 0.055589849 | count | 1 |
| PTP4A2     | 0.039169  | 0.0677075 | 0.5785 | 0.563  | 0.055680124 | count | 1 |
| SLC8A1     | 0.0397455 | 0.0940756 | 0.4225 | 0.673  | 0.055692397 | count | 1 |
| TMOD3      | 0.0395932 | 0.092536  | 0.4279 | 0.669  | 0.055724876 | count | 1 |
| MUL1       | 0.0614228 | 0.3838675 | 0.16   | 0.873  | 0.05577103  | count | 1 |
| GID8       | 0.0415668 | 0.1441368 | 0.2884 | 0.773  | 0.05615344  | count | 1 |
| IK         | 0.0398317 | 0.0778702 | 0.5115 | 0.609  | 0.056191783 | count | 1 |
| CEP41      | 0.0669842 | 0.488917  | 0.137  | 0.891  | 0.05623687  | count | 1 |
| AMDHD1     | 0.1012677 | 0.6965495 | 0.1454 | 0.884  | 0.056239799 | count | 1 |
| L3MBTL1    | 0.1012677 | 1.2869119 | 0.0787 | 0.937  | 0.056239799 | count | 1 |
| BLOC1S2    | 0.0402117 | 0.1151322 | 0.3493 | 0.727  | 0.056285003 | count | 1 |
| EIF4E2     | 0.0399263 | 0.0800237 | 0.4989 | 0.618  | 0.056350757 | count | 1 |
| SLAIN2     | 0.0408683 | 0.1352466 | 0.3022 | 0.763  | 0.056379574 | count | 1 |
| ZNF350     | 0.0481624 | 0.3950849 | 0.1219 | 0.903  | 0.056380884 | count | 1 |
| ORAI1      | 0.0417796 | 0.1478143 | 0.2826 | 0.777  | 0.056441173 | count | 1 |
| NCK1-DT    | 0.0456089 | 0.2545309 | 0.1792 | 0.858  | 0.056486245 | count | 1 |
| ALKBH2     | 0.0484304 | 0.335784  | 0.1442 | 0.885  | 0.05669558  | count | 1 |
| AAMDC      | 0.0431348 | 0.1706475 | 0.2528 | 0.8    | 0.056859016 | count | 1 |
| SELENBP1   | 0.4853224 | 0.8120123 | 0.5977 | 0.55   | 0.056988182 | count | 1 |
| AC008914.1 | 0.4853224 | 0.8120123 | 0.5977 | 0.55   | 0.056988182 | count | 1 |
| FP565260.6 | 0.4853224 | 0.7463248 | 0.6503 | 0.516  | 0.056988182 | count | 1 |
| ERI3       | 0.0456666 | 0.2122196 | 0.2152 | 0.83   | 0.057038403 | count | 1 |
| DR1        | 0.0418631 | 0.1461687 | 0.2864 | 0.775  | 0.057194231 | count | 1 |
| RHOBTB1    | 0.0698183 | 0.3121243 | 0.2237 | 0.823  | 0.057233008 | count | 1 |
| MAMDC4     | 0.1238797 | 1.0707655 | 0.1157 | 0.908  | 0.057388407 | count | 1 |
| AC079174.2 | 0.1238797 | 1.2483789 | 0.0992 | 0.921  | 0.057388407 | count | 1 |
| PTPN21     | 0.1238797 | 1.6715811 | 0.0741 | 0.941  | 0.057388407 | count | 1 |
| STX1B      | 0.1238797 | 0.8696794 | 0.1424 | 0.887  | 0.057388407 | count | 1 |
| RPP14      | 0.0584668 | 0.4701522 | 0.1244 | 0.901  | 0.057648574 | count | 1 |
| PAF1       | 0.0450111 | 0.1867013 | 0.2411 | 0.81   | 0.057708097 | count | 1 |
| UNC5B      | 0.0970351 | 0.4872094 | 0.1992 | 0.842  | 0.057793326 | count | 1 |
| CAPRIN2    | 0.0724355 | 0.3718746 | 0.1948 | 0.846  | 0.057840925 | count | 1 |
| PRKAG2-AS1 | 0.042794  | 0.1661828 | 0.2575 | 0.797  | 0.057924426 | count | 1 |
| MTREX      | 0.0456623 | 0.2485588 | 0.1837 | 0.854  | 0.057933545 | count | 1 |
| TCTE3      | 0.0772454 | 0.7021497 | 0.11   | 0.912  | 0.058028409 | count | 1 |

|             |           |           |        |       |             |       |   |
|-------------|-----------|-----------|--------|-------|-------------|-------|---|
| CREB5       | 0.0435325 | 0.1358829 | 0.3204 | 0.749 | 0.058100229 | count | 1 |
| AL022069.1  | 0.1418817 | 0.7687729 | 0.1846 | 0.854 | 0.058121155 | count | 1 |
| AC011944.1  | 0.2063004 | 0.8732296 | 0.2362 | 0.813 | 0.058200237 | count | 1 |
| UBAP2L      | 0.0465079 | 0.2017829 | 0.2305 | 0.818 | 0.058447974 | count | 1 |
| FAHD2A      | 0.0555397 | 0.391841  | 0.1417 | 0.887 | 0.058448062 | count | 1 |
| HMBS        | 0.0544011 | 0.2668578 | 0.2039 | 0.838 | 0.058493602 | count | 1 |
| SNX9        | 0.0429252 | 0.122184  | 0.3513 | 0.725 | 0.058578335 | count | 1 |
| GDPD5       | 0.1264034 | 0.5913577 | 0.2138 | 0.831 | 0.05859089  | count | 1 |
| SGK494      | 0.0756871 | 0.4733268 | 0.1599 | 0.873 | 0.058720113 | count | 1 |
| ADCK2       | 0.0462385 | 0.2047856 | 0.2258 | 0.821 | 0.058812153 | count | 1 |
| AL034417.3  | 0.2858546 | 1.2553215 | 0.2277 | 0.82  | 0.058814282 | count | 1 |
| RIMKLA      | 0.2858546 | 1.2388281 | 0.2307 | 0.818 | 0.058814282 | count | 1 |
| AL356356.1  | 0.2858546 | 1.2553215 | 0.2277 | 0.82  | 0.058814282 | count | 1 |
| TRIM46      | 0.2858546 | 1.2388281 | 0.2307 | 0.818 | 0.058814282 | count | 1 |
| AC013271.1  | 0.2858546 | 1.2388281 | 0.2307 | 0.818 | 0.058814282 | count | 1 |
| NPHP1       | 0.2858546 | 1.2388281 | 0.2307 | 0.818 | 0.058814282 | count | 1 |
| COL8A1      | 0.2858546 | 1.2388281 | 0.2307 | 0.818 | 0.058814282 | count | 1 |
| AC016596.1  | 0.2858546 | 1.2553215 | 0.2277 | 0.82  | 0.058814282 | count | 1 |
| AC010245.2  | 0.2858546 | 1.2388281 | 0.2307 | 0.818 | 0.058814282 | count | 1 |
| NRN1        | 0.2858546 | 1.2388281 | 0.2307 | 0.818 | 0.058814282 | count | 1 |
| AL354719.2  | 0.2858546 | 1.2553215 | 0.2277 | 0.82  | 0.058814282 | count | 1 |
| SRSF12      | 0.2858546 | 1.2553215 | 0.2277 | 0.82  | 0.058814282 | count | 1 |
| Z97989.1    | 0.2858546 | 1.2388281 | 0.2307 | 0.818 | 0.058814282 | count | 1 |
| THSD7A      | 0.2858546 | 1.2388281 | 0.2307 | 0.818 | 0.058814282 | count | 1 |
| SLC12A9-AS1 | 0.2858546 | 1.2553215 | 0.2277 | 0.82  | 0.058814282 | count | 1 |
| VGF         | 0.2858546 | 1.2553215 | 0.2277 | 0.82  | 0.058814282 | count | 1 |
| RASA4B      | 0.2858546 | 1.2388281 | 0.2307 | 0.818 | 0.058814282 | count | 1 |
| AC246817.2  | 0.2858546 | 1.2388281 | 0.2307 | 0.818 | 0.058814282 | count | 1 |
| AC138696.2  | 0.2858546 | 1.2388281 | 0.2307 | 0.818 | 0.058814282 | count | 1 |
| ZNF252P-AS1 | 0.2858546 | 1.6004755 | 0.1786 | 0.858 | 0.058814282 | count | 1 |
| GLIDR       | 0.2858546 | 1.2388281 | 0.2307 | 0.818 | 0.058814282 | count | 1 |
| TNC         | 0.2858546 | 1.2388281 | 0.2307 | 0.818 | 0.058814282 | count | 1 |
| RNF208      | 0.2858546 | 1.2388281 | 0.2307 | 0.818 | 0.058814282 | count | 1 |
| AP003774.1  | 0.2858546 | 1.2388281 | 0.2307 | 0.818 | 0.058814282 | count | 1 |
| AP002761.1  | 0.2858546 | 1.2388281 | 0.2307 | 0.818 | 0.058814282 | count | 1 |
| SYTL2       | 0.2858546 | 1.2388281 | 0.2307 | 0.818 | 0.058814282 | count | 1 |
| MMP3        | 0.2858546 | 1.2553215 | 0.2277 | 0.82  | 0.058814282 | count | 1 |
| MCM10       | 0.2858546 | 1.2553215 | 0.2277 | 0.82  | 0.058814282 | count | 1 |
| AL512598.1  | 0.2858546 | 1.2388281 | 0.2307 | 0.818 | 0.058814282 | count | 1 |
| BICC1       | 0.2858546 | 1.2388281 | 0.2307 | 0.818 | 0.058814282 | count | 1 |
| AC092794.1  | 0.2858546 | 1.2388281 | 0.2307 | 0.818 | 0.058814282 | count | 1 |
| AC009318.1  | 0.2858546 | 1.2553215 | 0.2277 | 0.82  | 0.058814282 | count | 1 |
| AC073610.3  | 0.2858546 | 1.2388281 | 0.2307 | 0.818 | 0.058814282 | count | 1 |
| PMEL        | 0.2858546 | 1.2388281 | 0.2307 | 0.818 | 0.058814282 | count | 1 |
| AC089984.1  | 0.2858546 | 1.2553215 | 0.2277 | 0.82  | 0.058814282 | count | 1 |



|            |           |           |        |       |             |       |   |
|------------|-----------|-----------|--------|-------|-------------|-------|---|
| WDR66      | 0.2858546 | 1.2388281 | 0.2307 | 0.818 | 0.058814282 | count | 1 |
| AL136295.2 | 0.2858546 | 1.2388281 | 0.2307 | 0.818 | 0.058814282 | count | 1 |
| POLE2      | 0.2858546 | 1.2388281 | 0.2307 | 0.818 | 0.058814282 | count | 1 |
| AL355916.1 | 0.2858546 | 1.2388281 | 0.2307 | 0.818 | 0.058814282 | count | 1 |
| AC090515.2 | 0.2858546 | 1.2388281 | 0.2307 | 0.818 | 0.058814282 | count | 1 |
| AC068338.3 | 0.2858546 | 1.2388281 | 0.2307 | 0.818 | 0.058814282 | count | 1 |
| ZNF774     | 0.2858546 | 1.2388281 | 0.2307 | 0.818 | 0.058814282 | count | 1 |
| ADGRG3     | 0.2858546 | 1.2388281 | 0.2307 | 0.818 | 0.058814282 | count | 1 |
| ZNF19      | 0.2858546 | 1.2388281 | 0.2307 | 0.818 | 0.058814282 | count | 1 |
| AC092718.1 | 0.2858546 | 1.6004755 | 0.1786 | 0.858 | 0.058814282 | count | 1 |
| TIAF1      | 0.2858546 | 1.2388281 | 0.2307 | 0.818 | 0.058814282 | count | 1 |
| C17orf53   | 0.2858546 | 1.2388281 | 0.2307 | 0.818 | 0.058814282 | count | 1 |
| CA4        | 0.2858546 | 1.6004755 | 0.1786 | 0.858 | 0.058814282 | count | 1 |
| AC132938.3 | 0.2858546 | 1.6004755 | 0.1786 | 0.858 | 0.058814282 | count | 1 |
| AL121894.1 | 0.2858546 | 1.2388281 | 0.2307 | 0.818 | 0.058814282 | count | 1 |
| SLC25A23   | 0.2858546 | 1.2388281 | 0.2307 | 0.818 | 0.058814282 | count | 1 |
| AC011445.2 | 0.2858546 | 1.2553215 | 0.2277 | 0.82  | 0.058814282 | count | 1 |
| CLTCL1     | 0.2858546 | 1.2388281 | 0.2307 | 0.818 | 0.058814282 | count | 1 |
| AF127936.1 | 0.2858546 | 1.2388281 | 0.2307 | 0.818 | 0.058814282 | count | 1 |
| AP001505.1 | 0.2858546 | 1.2388281 | 0.2307 | 0.818 | 0.058814282 | count | 1 |
| AL354822.1 | 0.2858546 | 1.2388281 | 0.2307 | 0.818 | 0.058814282 | count | 1 |
| COA3       | 0.0420848 | 0.1061624 | 0.3964 | 0.692 | 0.0588169   | count | 1 |
| SPAG7      | 0.0425071 | 0.100226  | 0.4241 | 0.672 | 0.058909243 | count | 1 |
| AC099518.5 | 0.0538724 | 0.3530666 | 0.1526 | 0.879 | 0.059022619 | count | 1 |
| CYB5R4     | 0.0424262 | 0.1080707 | 0.3926 | 0.695 | 0.059107921 | count | 1 |
| CTCF       | 0.0446053 | 0.1612508 | 0.2766 | 0.782 | 0.059112134 | count | 1 |
| BMPR2      | 0.056734  | 0.2762936 | 0.2053 | 0.837 | 0.059240145 | count | 1 |
| LTBP4      | 0.0765599 | 0.3490511 | 0.2193 | 0.826 | 0.059405287 | count | 1 |
| DBNL       | 0.0424893 | 0.0897594 | 0.4734 | 0.636 | 0.059542529 | count | 1 |
| CHMP1B     | 0.0415215 | 0.0782116 | 0.5309 | 0.596 | 0.059573735 | count | 1 |
| KMT5C      | 0.0671271 | 0.4953763 | 0.1355 | 0.892 | 0.059937245 | count | 1 |
| YIPF3      | 0.0433268 | 0.111218  | 0.3896 | 0.697 | 0.060096863 | count | 1 |
| AC092164.1 | 0.1008545 | 0.834058  | 0.1209 | 0.904 | 0.060113102 | count | 1 |
| FAM219A    | 0.0624985 | 0.5020116 | 0.1245 | 0.901 | 0.060186177 | count | 1 |
| SLC25A5    | 0.0420279 | 0.0424657 | 0.9897 | 0.322 | 0.060299091 | count | 1 |
| IGF1       | 0.044683  | 0.1589551 | 0.2811 | 0.779 | 0.060502457 | count | 1 |
| TRAK1      | 0.0518889 | 0.2506594 | 0.207  | 0.836 | 0.060550253 | count | 1 |
| APOPT1     | 0.0450368 | 0.157259  | 0.2864 | 0.775 | 0.06063396  | count | 1 |
| ZC3H10     | 0.0723324 | 0.4543641 | 0.1592 | 0.874 | 0.060772524 | count | 1 |
| FASN       | 0.0761415 | 0.495645  | 0.1536 | 0.878 | 0.060833944 | count | 1 |
| PPIE       | 0.0472751 | 0.1651519 | 0.2863 | 0.775 | 0.06098595  | count | 1 |
| TOMM22     | 0.0435581 | 0.0887548 | 0.4908 | 0.624 | 0.061145273 | count | 1 |
| CRK        | 0.046202  | 0.1523395 | 0.3033 | 0.762 | 0.061230802 | count | 1 |
| AMOTL1     | 0.1499405 | 0.6755973 | 0.2219 | 0.824 | 0.061539767 | count | 1 |
| PLXDC1     | 0.0689353 | 0.4089017 | 0.1686 | 0.866 | 0.061565996 | count | 1 |

|            |           |           |        |       |             |       |   |
|------------|-----------|-----------|--------|-------|-------------|-------|---|
| ZNF287     | 0.2179409 | 0.9143607 | 0.2384 | 0.812 | 0.061672455 | count | 1 |
| CCR10      | 0.2179409 | 0.9143607 | 0.2384 | 0.812 | 0.061672455 | count | 1 |
| PRR34      | 0.2179409 | 0.9143607 | 0.2384 | 0.812 | 0.061672455 | count | 1 |
| SBF1       | 0.0679323 | 0.4046486 | 0.1679 | 0.867 | 0.061731514 | count | 1 |
| TSTA3      | 0.046953  | 0.1576523 | 0.2978 | 0.766 | 0.061859991 | count | 1 |
| AC007613.1 | 0.0803045 | 0.4745272 | 0.1692 | 0.866 | 0.062346941 | count | 1 |
| MPZL1      | 0.0507967 | 0.2152944 | 0.2359 | 0.813 | 0.062577726 | count | 1 |
| DNAJC25    | 0.0572637 | 0.3423907 | 0.1672 | 0.867 | 0.062755324 | count | 1 |
| RGL2       | 0.0527936 | 0.1902737 | 0.2775 | 0.781 | 0.062789781 | count | 1 |
| AC104794.2 | 0.0584074 | 0.2801711 | 0.2085 | 0.835 | 0.062822813 | count | 1 |
| ARHGAP25   | 0.0503237 | 0.2286553 | 0.2201 | 0.826 | 0.062967733 | count | 1 |
| TFEC       | 0.0460194 | 0.1188163 | 0.3873 | 0.699 | 0.063066546 | count | 1 |
| SNHG9      | 0.0489076 | 0.2629765 | 0.186  | 0.852 | 0.063095575 | count | 1 |
| SPART      | 0.0472119 | 0.1452596 | 0.325  | 0.745 | 0.063213792 | count | 1 |
| DCAF5      | 0.0506957 | 0.2099008 | 0.2415 | 0.809 | 0.063334215 | count | 1 |
| RUFY1      | 0.0477031 | 0.1376033 | 0.3467 | 0.729 | 0.063359311 | count | 1 |
| DNM2       | 0.0488252 | 0.1372298 | 0.3558 | 0.722 | 0.063390241 | count | 1 |
| MUS81      | 0.0573238 | 0.2608311 | 0.2198 | 0.826 | 0.06353176  | count | 1 |
| ACVR2A     | 0.0844974 | 0.398164  | 0.2122 | 0.832 | 0.0635501   | count | 1 |
| GATD3B     | 0.1144438 | 0.7048654 | 0.1624 | 0.871 | 0.063728952 | count | 1 |
| PHF11      | 0.0468112 | 0.1257771 | 0.3722 | 0.71  | 0.063839939 | count | 1 |
| PPP2R5B    | 0.0570455 | 0.4995736 | 0.1142 | 0.909 | 0.06388004  | count | 1 |
| MUT        | 0.0641257 | 0.3715045 | 0.1726 | 0.863 | 0.06396354  | count | 1 |
| LCP1       | 0.0446304 | 0.0422356 | 1.0567 | 0.291 | 0.06399194  | count | 1 |
| VRK1       | 0.0544891 | 0.2579326 | 0.2113 | 0.833 | 0.064024194 | count | 1 |
| TM9SF2     | 0.0458773 | 0.0967023 | 0.4744 | 0.635 | 0.064149101 | count | 1 |
| CD19       | 0.1382858 | 0.7998261 | 0.1729 | 0.863 | 0.064270178 | count | 1 |
| TOMM7      | 0.0450381 | 0.0452383 | 0.9956 | 0.32  | 0.06432003  | count | 1 |
| C17orf51   | 0.0966457 | 0.5406286 | 0.1788 | 0.858 | 0.064435129 | count | 1 |
| ZNF583     | 0.0786631 | 0.4959414 | 0.1586 | 0.874 | 0.064565948 | count | 1 |
| LINC02470  | 0.0926328 | 0.734747  | 0.1261 | 0.9   | 0.064612588 | count | 1 |
| TOMM20     | 0.0453771 | 0.0547071 | 0.8295 | 0.407 | 0.064619299 | count | 1 |
| TP53I13    | 0.0480939 | 0.1575175 | 0.3053 | 0.76  | 0.064632394 | count | 1 |
| BCL3       | 0.0471392 | 0.1315334 | 0.3584 | 0.72  | 0.064653964 | count | 1 |
| STK11IP    | 0.0725307 | 0.586268  | 0.1237 | 0.902 | 0.064806751 | count | 1 |
| CCR1       | 0.0468702 | 0.119483  | 0.3923 | 0.695 | 0.06517392  | count | 1 |
| CCDC174    | 0.0489831 | 0.1843702 | 0.2657 | 0.791 | 0.065322355 | count | 1 |
| IMMP1L     | 0.0616002 | 0.3458178 | 0.1781 | 0.859 | 0.065351986 | count | 1 |
| GABARAPL1  | 0.0463108 | 0.0843855 | 0.5488 | 0.583 | 0.065409055 | count | 1 |
| AC109587.1 | 0.3157495 | 0.7642442 | 0.4132 | 0.68  | 0.065499718 | count | 1 |
| TEN1       | 0.0521253 | 0.2128261 | 0.2449 | 0.807 | 0.065523477 | count | 1 |
| SCAMP2     | 0.0463271 | 0.0698932 | 0.6628 | 0.508 | 0.065529039 | count | 1 |
| MAP2K6     | 0.0942484 | 0.3581792 | 0.2631 | 0.792 | 0.06575778  | count | 1 |
| ABCD3      | 0.0646409 | 0.2911826 | 0.222  | 0.824 | 0.065790515 | count | 1 |
| NDUFS3     | 0.0474932 | 0.1127921 | 0.4211 | 0.674 | 0.065847867 | count | 1 |

|          |           |           |        |        |             |       |   |
|----------|-----------|-----------|--------|--------|-------------|-------|---|
| ERCC6    | 0.057982  | 0.299041  | 0.1939 | 0.846  | 0.065854206 | count | 1 |
| MT-CO2   | 0.045704  | 0.0268105 | 1.7047 | 0.0884 | 0.065892341 | count | 1 |
| TRNP1    | 0.2321488 | 0.641994  | 0.3616 | 0.718  | 0.065937375 | count | 1 |
| TSSC4    | 0.0490529 | 0.1461629 | 0.3356 | 0.737  | 0.066022534 | count | 1 |
| LRRC45   | 0.0878434 | 0.4628119 | 0.1898 | 0.849  | 0.066101935 | count | 1 |
| CLEC14A  | 0.0850962 | 1.1679758 | 0.0729 | 0.942  | 0.066115978 | count | 1 |
| MRPS15   | 0.0477153 | 0.1080758 | 0.4415 | 0.659  | 0.06622638  | count | 1 |
| TECR     | 0.0476048 | 0.1005655 | 0.4734 | 0.636  | 0.066236693 | count | 1 |
| NBPF1    | 0.0807856 | 0.4439874 | 0.182  | 0.856  | 0.066328347 | count | 1 |
| TASP1    | 0.0807856 | 0.3694289 | 0.2187 | 0.827  | 0.066328347 | count | 1 |
| ZUP1     | 0.0575276 | 0.2401332 | 0.2396 | 0.811  | 0.066423088 | count | 1 |
| C9orf16  | 0.0470908 | 0.0682255 | 0.6902 | 0.49   | 0.066838925 | count | 1 |
| VAMP3    | 0.047683  | 0.0838858 | 0.5684 | 0.57   | 0.066930452 | count | 1 |
| NTHL1    | 0.0622807 | 0.4594818 | 0.1355 | 0.892  | 0.067011051 | count | 1 |
| PLEKHJ1  | 0.0490826 | 0.1348815 | 0.3639 | 0.716  | 0.067081445 | count | 1 |
| ITPA     | 0.0492212 | 0.1401222 | 0.3513 | 0.725  | 0.067255831 | count | 1 |
| NDC1     | 0.0965618 | 0.4653962 | 0.2075 | 0.836  | 0.06739867  | count | 1 |
| CHPT1    | 0.0500084 | 0.1216156 | 0.4112 | 0.681  | 0.067407742 | count | 1 |
| UGP2     | 0.0488928 | 0.1160196 | 0.4214 | 0.673  | 0.067488371 | count | 1 |
| ZMYM2    | 0.0499313 | 0.1354085 | 0.3687 | 0.712  | 0.067531189 | count | 1 |
| DMAP1    | 0.0540084 | 0.1925208 | 0.2805 | 0.779  | 0.067589315 | count | 1 |
| ERO1B    | 0.0548727 | 0.2012144 | 0.2727 | 0.785  | 0.067612558 | count | 1 |
| PCSK7    | 0.055447  | 0.2048485 | 0.2707 | 0.787  | 0.06762729  | count | 1 |
| EZR      | 0.0475198 | 0.0799168 | 0.5946 | 0.552  | 0.067713082 | count | 1 |
| CCNG2    | 0.0615373 | 0.215501  | 0.2856 | 0.775  | 0.067849868 | count | 1 |
| THAP7    | 0.0567531 | 0.2323859 | 0.2442 | 0.807  | 0.067892799 | count | 1 |
| BTBD3    | 0.0826883 | 0.5784471 | 0.1429 | 0.886  | 0.067909123 | count | 1 |
| YIPF6    | 0.0513653 | 0.1970317 | 0.2607 | 0.794  | 0.068300877 | count | 1 |
| FERMT3   | 0.0482832 | 0.0669343 | 0.7214 | 0.471  | 0.068312948 | count | 1 |
| ENDOD1   | 0.0607354 | 0.4995617 | 0.1216 | 0.903  | 0.06836312  | count | 1 |
| NEK10    | 0.5698047 | 0.7619191 | 0.7479 | 0.455  | 0.068482648 | count | 1 |
| ACSL4    | 0.0498162 | 0.1338194 | 0.3723 | 0.71   | 0.068711433 | count | 1 |
| LMF2     | 0.0550802 | 0.1923636 | 0.2863 | 0.775  | 0.069040289 | count | 1 |
| ADPGK    | 0.050102  | 0.117468  | 0.4265 | 0.67   | 0.069062422 | count | 1 |
| DDX43    | 0.5740714 | 0.6197715 | 0.9263 | 0.354  | 0.069075036 | count | 1 |
| ZNF668   | 0.0599213 | 0.2563214 | 0.2338 | 0.815  | 0.069198002 | count | 1 |
| EXOC8    | 0.0613175 | 0.3351106 | 0.183  | 0.855  | 0.069345518 | count | 1 |
| FRMD8    | 0.0616453 | 0.2575569 | 0.2393 | 0.811  | 0.069391939 | count | 1 |
| SFT2D2   | 0.0518177 | 0.1834898 | 0.2824 | 0.778  | 0.069475914 | count | 1 |
| SLC35E4  | 0.0633654 | 0.3368187 | 0.1881 | 0.851  | 0.069476297 | count | 1 |
| TAP1     | 0.0541464 | 0.1241251 | 0.4362 | 0.663  | 0.069660863 | count | 1 |
| GTF2F2   | 0.0514425 | 0.146404  | 0.3514 | 0.725  | 0.069664783 | count | 1 |
| CASP3    | 0.0545815 | 0.204754  | 0.2666 | 0.79   | 0.069773133 | count | 1 |
| TBL2     | 0.0556353 | 0.2352954 | 0.2364 | 0.813  | 0.069946267 | count | 1 |
| KIAA1614 | 0.2456156 | 0.9812744 | 0.2503 | 0.802  | 0.070007011 | count | 1 |

|            |           |           |        |        |             |       |   |
|------------|-----------|-----------|--------|--------|-------------|-------|---|
| TAS2R4     | 0.2456156 | 0.9857669 | 0.2492 | 0.803  | 0.070007011 | count | 1 |
| EIF2AK2    | 0.0501796 | 0.1219396 | 0.4115 | 0.681  | 0.070040036 | count | 1 |
| ELP6       | 0.0602259 | 0.2375813 | 0.2535 | 0.8    | 0.070068951 | count | 1 |
| ABHD16A    | 0.2459551 | 0.7652815 | 0.3214 | 0.748  | 0.070109947 | count | 1 |
| CNN2       | 0.0509937 | 0.1216823 | 0.4191 | 0.675  | 0.070139874 | count | 1 |
| NDUFA3     | 0.0497339 | 0.0793337 | 0.6269 | 0.531  | 0.070238193 | count | 1 |
| HNRNPUL2   | 0.0606693 | 0.2765462 | 0.2194 | 0.826  | 0.070330027 | count | 1 |
| DDX5       | 0.0490371 | 0.034899  | 1.4051 | 0.16   | 0.070339197 | count | 1 |
| STXBP5     | 0.1008217 | 0.4096792 | 0.2461 | 0.806  | 0.070423497 | count | 1 |
| CEP76      | 0.1520492 | 0.5962727 | 0.255  | 0.799  | 0.070884691 | count | 1 |
| GSDMD      | 0.0529124 | 0.1122835 | 0.4712 | 0.638  | 0.07091604  | count | 1 |
| ROMO1      | 0.0507128 | 0.0903475 | 0.5613 | 0.575  | 0.071117145 | count | 1 |
| METTL26    | 0.0504989 | 0.0880704 | 0.5734 | 0.566  | 0.071168699 | count | 1 |
| AL355388.2 | 0.589203  | 0.977433  | 0.6028 | 0.547  | 0.071184989 | count | 1 |
| SLC25A26   | 0.0583673 | 0.2218067 | 0.2631 | 0.792  | 0.071199866 | count | 1 |
| TTC23      | 0.5894214 | 0.7813198 | 0.7544 | 0.451  | 0.071215541 | count | 1 |
| AC005224.3 | 0.2019966 | 0.546039  | 0.3699 | 0.711  | 0.071246995 | count | 1 |
| SS18L2     | 0.0517718 | 0.1439852 | 0.3596 | 0.719  | 0.071388533 | count | 1 |
| DHX33      | 0.0869085 | 0.421417  | 0.2062 | 0.837  | 0.071418286 | count | 1 |
| EHD1       | 0.0538278 | 0.1701172 | 0.3164 | 0.752  | 0.071429848 | count | 1 |
| C6orf62    | 0.0514811 | 0.0985964 | 0.5221 | 0.602  | 0.071488988 | count | 1 |
| SNIP1      | 0.0610351 | 0.2677227 | 0.228  | 0.82   | 0.071508342 | count | 1 |
| CACNA2D4   | 0.0549273 | 0.2171966 | 0.2529 | 0.8    | 0.071620469 | count | 1 |
| L3MBTL2    | 0.0642486 | 0.2933567 | 0.219  | 0.827  | 0.071621351 | count | 1 |
| RGS9       | 0.0725966 | 0.4418647 | 0.1643 | 0.87   | 0.071687805 | count | 1 |
| TLE1       | 0.1130626 | 0.3787313 | 0.2985 | 0.765  | 0.071753103 | count | 1 |
| UBE2K      | 0.0521052 | 0.1188868 | 0.4383 | 0.661  | 0.071814355 | count | 1 |
| DPYSL2     | 0.0518853 | 0.0863959 | 0.6006 | 0.548  | 0.071906195 | count | 1 |
| RPL12      | 0.05005   | 0.0234715 | 2.1324 | 0.0331 | 0.072152653 | count | 1 |
| LMOD3      | 0.0992327 | 0.5548045 | 0.1789 | 0.858  | 0.072158099 | count | 1 |
| MAZ        | 0.0523811 | 0.1166864 | 0.4489 | 0.654  | 0.072194914 | count | 1 |
| AL121658.1 | 0.2046005 | 0.7131707 | 0.2869 | 0.774  | 0.072211679 | count | 1 |
| TRAPPC10   | 0.0528002 | 0.142601  | 0.3703 | 0.711  | 0.072246558 | count | 1 |
| ETV5       | 0.0544226 | 0.1476249 | 0.3687 | 0.712  | 0.072371998 | count | 1 |
| IKBKB      | 0.0629866 | 0.2320446 | 0.2714 | 0.786  | 0.072469437 | count | 1 |
| NPRL3      | 0.0613493 | 0.4026648 | 0.1524 | 0.879  | 0.072571195 | count | 1 |
| VPS33A     | 0.0737065 | 0.3251873 | 0.2267 | 0.821  | 0.072792317 | count | 1 |
| ZSCAN32    | 0.0787569 | 0.4973173 | 0.1584 | 0.874  | 0.07283313  | count | 1 |
| EBAG9      | 0.0554612 | 0.2124024 | 0.2611 | 0.794  | 0.073087518 | count | 1 |
| RBM14      | 0.0675149 | 0.2972041 | 0.2272 | 0.82   | 0.073151267 | count | 1 |
| CTNNA1     | 0.0528591 | 0.1058394 | 0.4994 | 0.618  | 0.073153146 | count | 1 |
| MED10      | 0.0529907 | 0.113112  | 0.4685 | 0.639  | 0.073234624 | count | 1 |
| LIMA1      | 0.059182  | 0.2195585 | 0.2696 | 0.788  | 0.073343613 | count | 1 |
| SPRED2     | 0.0892962 | 0.4287975 | 0.2082 | 0.835  | 0.073405512 | count | 1 |
| ZYX        | 0.0518022 | 0.0793629 | 0.6527 | 0.514  | 0.073423758 | count | 1 |

|            |           |           |        |       |             |       |   |
|------------|-----------|-----------|--------|-------|-------------|-------|---|
| TPR        | 0.0520952 | 0.0849838 | 0.613  | 0.54  | 0.073464478 | count | 1 |
| EPC2       | 0.0646693 | 0.2094839 | 0.3087 | 0.758 | 0.07348439  | count | 1 |
| C12orf10   | 0.0536068 | 0.1377449 | 0.3892 | 0.697 | 0.073762731 | count | 1 |
| PPA2       | 0.0553119 | 0.1476845 | 0.3745 | 0.708 | 0.073774073 | count | 1 |
| CDK2AP2    | 0.0527815 | 0.1016335 | 0.5193 | 0.604 | 0.073791622 | count | 1 |
| PTPN12     | 0.0525119 | 0.1078608 | 0.4868 | 0.626 | 0.073816753 | count | 1 |
| PRMT5-AS1  | 0.3527055 | 0.6864161 | 0.5138 | 0.607 | 0.073901592 | count | 1 |
| MAP2K2     | 0.0522998 | 0.0826801 | 0.6326 | 0.527 | 0.073903473 | count | 1 |
| TEF        | 0.2586483 | 0.5771103 | 0.4482 | 0.654 | 0.073970557 | count | 1 |
| TCF25      | 0.0520139 | 0.0773268 | 0.6726 | 0.501 | 0.073975384 | count | 1 |
| TBL3       | 0.0777434 | 0.3962668 | 0.1962 | 0.844 | 0.074012949 | count | 1 |
| RFPL1S     | 0.3539828 | 0.809975  | 0.437  | 0.662 | 0.074194684 | count | 1 |
| ATP5F1A    | 0.0526603 | 0.0675108 | 0.78   | 0.435 | 0.074279306 | count | 1 |
| C10orf143  | 0.0883203 | 0.6254893 | 0.1412 | 0.888 | 0.074370657 | count | 1 |
| PPAN       | 0.0598275 | 0.2497721 | 0.2395 | 0.811 | 0.074404794 | count | 1 |
| PDIA4      | 0.0540432 | 0.1228948 | 0.4398 | 0.66  | 0.074439067 | count | 1 |
| RNF5       | 0.0543437 | 0.1316938 | 0.4127 | 0.68  | 0.07461589  | count | 1 |
| USP6NL     | 0.0637279 | 0.3152865 | 0.2021 | 0.84  | 0.074675833 | count | 1 |
| GLTP       | 0.0541188 | 0.1252598 | 0.4321 | 0.666 | 0.074718801 | count | 1 |
| TLR10      | 0.1118554 | 0.6001455 | 0.1864 | 0.852 | 0.074778424 | count | 1 |
| UFSP1      | 0.1118554 | 0.6432129 | 0.1739 | 0.862 | 0.074778424 | count | 1 |
| TSR3       | 0.0545584 | 0.1251022 | 0.4361 | 0.663 | 0.074938988 | count | 1 |
| SLC43A2    | 0.0532429 | 0.1122491 | 0.4743 | 0.635 | 0.075046874 | count | 1 |
| TMEM248    | 0.0549942 | 0.1231059 | 0.4467 | 0.655 | 0.075082507 | count | 1 |
| MGST2      | 0.0534803 | 0.0846912 | 0.6315 | 0.528 | 0.075209384 | count | 1 |
| THOP1      | 0.0780292 | 0.4086841 | 0.1909 | 0.849 | 0.075271921 | count | 1 |
| FAM3C      | 0.0587042 | 0.1818827 | 0.3228 | 0.747 | 0.075302257 | count | 1 |
| AK9        | 0.1827887 | 0.4915549 | 0.3719 | 0.71  | 0.075602379 | count | 1 |
| PGAP3      | 0.1191889 | 0.4922964 | 0.2421 | 0.809 | 0.075726998 | count | 1 |
| ATG2B      | 0.0795583 | 0.4031865 | 0.1973 | 0.844 | 0.075756335 | count | 1 |
| MFN1       | 0.0659017 | 0.2723384 | 0.242  | 0.809 | 0.075838359 | count | 1 |
| SLC15A2    | 0.1833832 | 0.5892808 | 0.3112 | 0.756 | 0.075858775 | count | 1 |
| C9orf64    | 0.0786482 | 0.3080564 | 0.2553 | 0.799 | 0.075874232 | count | 1 |
| FIP1L1     | 0.0582048 | 0.1718935 | 0.3386 | 0.735 | 0.075902047 | count | 1 |
| EI24       | 0.0605594 | 0.2320117 | 0.261  | 0.794 | 0.075926434 | count | 1 |
| C3orf14    | 0.0693645 | 0.2657548 | 0.261  | 0.794 | 0.076090504 | count | 1 |
| AL359541.1 | 0.6245294 | 0.9328551 | 0.6695 | 0.503 | 0.076165527 | count | 1 |
| NDUFB2-AS1 | 0.6245294 | 0.9328551 | 0.6695 | 0.503 | 0.076165527 | count | 1 |
| OR52K1     | 0.6245294 | 0.9946242 | 0.6279 | 0.53  | 0.076165527 | count | 1 |
| FAM241B    | 0.6245294 | 0.9328551 | 0.6695 | 0.503 | 0.076165527 | count | 1 |
| NUDT13     | 0.6245294 | 0.9328551 | 0.6695 | 0.503 | 0.076165527 | count | 1 |
| TSPAN9     | 0.6245294 | 0.9963512 | 0.6268 | 0.531 | 0.076165527 | count | 1 |
| ARHGAP11A  | 0.6245294 | 0.9328551 | 0.6695 | 0.503 | 0.076165527 | count | 1 |
| ZNF517     | 0.1841472 | 0.5397034 | 0.3412 | 0.733 | 0.076188372 | count | 1 |
| RBBP7      | 0.0570462 | 0.1518127 | 0.3758 | 0.707 | 0.076231729 | count | 1 |

|            |           |           |        |        |             |       |   |
|------------|-----------|-----------|--------|--------|-------------|-------|---|
| LINC02001  | 0.0613939 | 0.2060373 | 0.298  | 0.766  | 0.076486992 | count | 1 |
| HSPA13     | 0.0607984 | 0.2595226 | 0.2343 | 0.815  | 0.076564844 | count | 1 |
| BRMS1      | 0.0556902 | 0.1545651 | 0.3603 | 0.719  | 0.076591888 | count | 1 |
| COQ5       | 0.0645663 | 0.2991085 | 0.2159 | 0.829  | 0.076621147 | count | 1 |
| AL356599.1 | 0.1851653 | 0.6525907 | 0.2837 | 0.777  | 0.076627763 | count | 1 |
| IL2RG      | 0.0577189 | 0.1607706 | 0.359  | 0.72   | 0.076762084 | count | 1 |
| GAB1       | 0.1208945 | 0.397293  | 0.3043 | 0.761  | 0.076834894 | count | 1 |
| LPCAT2     | 0.0550447 | 0.0907384 | 0.6066 | 0.544  | 0.076853936 | count | 1 |
| ZNF841     | 0.0987788 | 0.7386827 | 0.1337 | 0.894  | 0.076907976 | count | 1 |
| TRNAU1AP   | 0.0566553 | 0.1666029 | 0.3401 | 0.734  | 0.076914276 | count | 1 |
| TRIP4      | 0.0634692 | 0.2644674 | 0.24   | 0.81   | 0.076920457 | count | 1 |
| KLHDC2     | 0.0603022 | 0.2015277 | 0.2992 | 0.765  | 0.076926115 | count | 1 |
| AC011815.2 | 0.6300557 | 0.9206596 | 0.6844 | 0.494  | 0.076951517 | count | 1 |
| MCEMP1     | 0.0552956 | 0.1594405 | 0.3468 | 0.729  | 0.076959993 | count | 1 |
| TBCA       | 0.0539487 | 0.0551927 | 0.9775 | 0.3284 | 0.077027864 | count | 1 |
| AP001056.2 | 0.0962678 | 0.56854   | 0.1693 | 0.866  | 0.077144227 | count | 1 |
| RUFY4      | 0.269181  | 0.7812011 | 0.3446 | 0.73   | 0.077191769 | count | 1 |
| VASP       | 0.0545746 | 0.062275  | 0.8763 | 0.381  | 0.07753295  | count | 1 |
| NFKBIA     | 0.0539953 | 0.0605423 | 0.8919 | 0.373  | 0.077804931 | count | 1 |
| PCCB       | 0.0687915 | 0.3371919 | 0.204  | 0.838  | 0.077839997 | count | 1 |
| DSTYK      | 0.0683239 | 0.3444896 | 0.1983 | 0.843  | 0.077994941 | count | 1 |
| DNAJB14    | 0.0583959 | 0.1589009 | 0.3675 | 0.713  | 0.078107728 | count | 1 |
| DYNLT3     | 0.0567516 | 0.1459104 | 0.3889 | 0.697  | 0.078172817 | count | 1 |
| AL451085.2 | 0.1118127 | 0.9356027 | 0.1195 | 0.905  | 0.07824751  | count | 1 |
| SPRYD4     | 0.0859192 | 0.451762  | 0.1902 | 0.849  | 0.078249953 | count | 1 |
| SP100      | 0.0554715 | 0.0772023 | 0.7185 | 0.473  | 0.078293853 | count | 1 |
| CDC40      | 0.0559603 | 0.0956064 | 0.5853 | 0.558  | 0.078378532 | count | 1 |
| C18orf21   | 0.0666727 | 0.2358474 | 0.2827 | 0.777  | 0.078398988 | count | 1 |
| RAD17      | 0.0769369 | 0.3174954 | 0.2423 | 0.809  | 0.078399799 | count | 1 |
| POLR2E     | 0.0556923 | 0.0768351 | 0.7248 | 0.469  | 0.078766571 | count | 1 |
| GNE        | 0.0960432 | 0.4459759 | 0.2154 | 0.83   | 0.079027966 | count | 1 |
| MPP5       | 0.0800772 | 0.3583333 | 0.2235 | 0.823  | 0.079136919 | count | 1 |
| CSNK2A2    | 0.0587893 | 0.1693343 | 0.3472 | 0.728  | 0.079173553 | count | 1 |
| DLEU2      | 0.0613254 | 0.2063628 | 0.2972 | 0.766  | 0.079299709 | count | 1 |
| ZDHHC3     | 0.0590024 | 0.1474161 | 0.4002 | 0.689  | 0.079372443 | count | 1 |
| RIPK3      | 0.074741  | 0.4589182 | 0.1629 | 0.871  | 0.079385134 | count | 1 |
| RAB23      | 0.2242968 | 0.9246107 | 0.2426 | 0.808  | 0.07954621  | count | 1 |
| ARL6IP4    | 0.0556574 | 0.0509379 | 1.0927 | 0.2747 | 0.079548318 | count | 1 |
| NBAS       | 0.0683441 | 0.2356563 | 0.29   | 0.772  | 0.079555644 | count | 1 |
| RFNG       | 0.0612508 | 0.2145179 | 0.2855 | 0.775  | 0.079622852 | count | 1 |
| CDKN2C     | 0.0825103 | 0.3478984 | 0.2372 | 0.813  | 0.079633992 | count | 1 |
| COPG2      | 0.1097632 | 0.448347  | 0.2448 | 0.807  | 0.079953661 | count | 1 |
| IDUA       | 0.0785453 | 0.298987  | 0.2627 | 0.793  | 0.080051356 | count | 1 |
| MMP14      | 0.0771866 | 0.2413619 | 0.3198 | 0.749  | 0.080081257 | count | 1 |
| ADHFE1     | 0.3797529 | 0.5416499 | 0.7011 | 0.483  | 0.080146202 | count | 1 |

|              |           |           |        |        |             |       |   |
|--------------|-----------|-----------|--------|--------|-------------|-------|---|
| CDKN2AIPNL   | 0.0723008 | 0.2755385 | 0.2624 | 0.793  | 0.080223565 | count | 1 |
| TRG-AS1      | 0.0895952 | 0.3785361 | 0.2367 | 0.813  | 0.080227205 | count | 1 |
| FLYWCH2      | 0.0596573 | 0.1953389 | 0.3054 | 0.76   | 0.080254625 | count | 1 |
| CLCN5        | 0.1263332 | 0.3657619 | 0.3454 | 0.73   | 0.080372133 | count | 1 |
| RPP25L       | 0.0626885 | 0.2213974 | 0.2831 | 0.777  | 0.08042493  | count | 1 |
| EPB41L2      | 0.0611277 | 0.1418465 | 0.4309 | 0.667  | 0.080861265 | count | 1 |
| ZGLP1        | 0.0635872 | 0.2189005 | 0.2905 | 0.771  | 0.080934005 | count | 1 |
| MTFMT        | 0.0720206 | 0.320061  | 0.225  | 0.822  | 0.081132676 | count | 1 |
| PPFIBP2      | 0.0796054 | 0.3261804 | 0.2441 | 0.807  | 0.081140176 | count | 1 |
| SNU13        | 0.0569988 | 0.0560283 | 1.0173 | 0.309  | 0.081148546 | count | 1 |
| ZNF639       | 0.0679931 | 0.2673783 | 0.2543 | 0.799  | 0.081168229 | count | 1 |
| HDAC10       | 0.0804346 | 0.3503941 | 0.2296 | 0.818  | 0.081197881 | count | 1 |
| RPTOR        | 0.1012677 | 0.5870004 | 0.1725 | 0.863  | 0.081210686 | count | 1 |
| PAIP2        | 0.0572346 | 0.0668753 | 0.8558 | 0.392  | 0.081215837 | count | 1 |
| NOP53        | 0.0576042 | 0.0712926 | 0.808  | 0.419  | 0.08144904  | count | 1 |
| RAB11A       | 0.0584634 | 0.1001462 | 0.5838 | 0.559  | 0.081450602 | count | 1 |
| DHODH        | 0.0896635 | 0.3931625 | 0.2281 | 0.82   | 0.081697461 | count | 1 |
| LINC00847    | 0.0635108 | 0.2182571 | 0.291  | 0.771  | 0.081977397 | count | 1 |
| MBOAT2       | 0.2848397 | 0.4894117 | 0.582  | 0.561  | 0.082010247 | count | 1 |
| SERINC2      | 0.1054094 | 0.3305203 | 0.3189 | 0.75   | 0.082153452 | count | 1 |
| MORC4        | 0.198217  | 0.4705715 | 0.4212 | 0.674  | 0.082277906 | count | 1 |
| THAP3        | 0.087558  | 0.3366175 | 0.2601 | 0.795  | 0.082285645 | count | 1 |
| APTX         | 0.0691427 | 0.2586849 | 0.2673 | 0.789  | 0.082313299 | count | 1 |
| AIMP1        | 0.0595867 | 0.1029959 | 0.5785 | 0.563  | 0.082415549 | count | 1 |
| COX7A2L      | 0.0584304 | 0.0714016 | 0.8183 | 0.413  | 0.082486993 | count | 1 |
| MYLIP        | 0.0635131 | 0.1540908 | 0.4122 | 0.68   | 0.082838427 | count | 1 |
| AC009779.2   | 0.0830004 | 0.346916  | 0.2393 | 0.811  | 0.082951178 | count | 1 |
| ARMCX5       | 0.0984054 | 0.4109111 | 0.2395 | 0.811  | 0.082978307 | count | 1 |
| SLC16A5      | 0.0822549 | 0.3459015 | 0.2378 | 0.812  | 0.083050529 | count | 1 |
| RNF103       | 0.0884065 | 0.3476537 | 0.2543 | 0.799  | 0.083091202 | count | 1 |
| MTPN         | 0.0582386 | 0.0535355 | 1.0879 | 0.2768 | 0.083125018 | count | 1 |
| BAG6         | 0.0632632 | 0.178158  | 0.3551 | 0.723  | 0.083226972 | count | 1 |
| GCN1         | 0.138788  | 0.4653248 | 0.2983 | 0.766  | 0.083333339 | count | 1 |
| UCKL1-AS1    | 0.6746252 | 0.6264392 | 1.0769 | 0.282  | 0.083357271 | count | 1 |
| NFYA         | 0.1013653 | 0.3566477 | 0.2842 | 0.776  | 0.083470362 | count | 1 |
| MCTP1        | 0.0655042 | 0.1404406 | 0.4664 | 0.641  | 0.08348049  | count | 1 |
| PPIAL4G      | 0.3940779 | 1.0300171 | 0.3826 | 0.702  | 0.083485917 | count | 1 |
| ANKRD33      | 0.3940779 | 0.9313036 | 0.4231 | 0.672  | 0.083485917 | count | 1 |
| SMU1         | 0.060781  | 0.1276875 | 0.476  | 0.634  | 0.083585235 | count | 1 |
| EPB41L4A-AS1 | 0.0669937 | 0.1843673 | 0.3634 | 0.716  | 0.083621936 | count | 1 |
| ZRANB3       | 0.2352118 | 0.6948293 | 0.3385 | 0.735  | 0.083639079 | count | 1 |
| AC096992.2   | 0.2352118 | 0.6948293 | 0.3385 | 0.735  | 0.083639079 | count | 1 |
| AC020917.3   | 0.2352118 | 0.6956914 | 0.3381 | 0.735  | 0.083639079 | count | 1 |
| ECT2         | 0.0846131 | 0.4263763 | 0.1984 | 0.843  | 0.083659233 | count | 1 |
| FHOD1        | 0.0793302 | 0.2878079 | 0.2756 | 0.783  | 0.083663613 | count | 1 |

|             |           |           |        |        |             |       |   |
|-------------|-----------|-----------|--------|--------|-------------|-------|---|
| PET100      | 0.0598062 | 0.0973659 | 0.6142 | 0.539  | 0.083912079 | count | 1 |
| PLCL1       | 0.1198165 | 0.4720766 | 0.2538 | 0.8    | 0.083962776 | count | 1 |
| CD74        | 0.0582529 | 0.0436891 | 1.3333 | 0.183  | 0.084019559 | count | 1 |
| MBNL3       | 0.1047243 | 0.3491503 | 0.2999 | 0.764  | 0.084025328 | count | 1 |
| SLC35C1     | 0.0775605 | 0.3619598 | 0.2143 | 0.83   | 0.08410545  | count | 1 |
| RBM22       | 0.0612155 | 0.1209213 | 0.5062 | 0.613  | 0.084107358 | count | 1 |
| IRF7        | 0.0599918 | 0.1056859 | 0.5676 | 0.57   | 0.084157424 | count | 1 |
| AC118549.1  | 0.0701237 | 0.2348776 | 0.2986 | 0.765  | 0.08417549  | count | 1 |
| RAB8B       | 0.0597973 | 0.09951   | 0.6009 | 0.548  | 0.084257615 | count | 1 |
| FAM241A     | 0.0659346 | 0.2247765 | 0.2933 | 0.769  | 0.084322481 | count | 1 |
| ZNF35       | 0.0958783 | 0.4184449 | 0.2291 | 0.819  | 0.084324181 | count | 1 |
| PHF5A       | 0.0611313 | 0.1340714 | 0.456  | 0.648  | 0.084345329 | count | 1 |
| SGO2        | 0.0960177 | 0.3578252 | 0.2683 | 0.788  | 0.084448304 | count | 1 |
| FGF7        | 0.682572  | 0.7952283 | 0.8583 | 0.391  | 0.084511741 | count | 1 |
| TMEM159     | 0.0685601 | 0.2212593 | 0.3099 | 0.757  | 0.08453403  | count | 1 |
| ATXN7L3     | 0.0679256 | 0.2639015 | 0.2574 | 0.797  | 0.084649561 | count | 1 |
| AC005726.1  | 0.1805807 | 0.7527307 | 0.2399 | 0.81   | 0.084719352 | count | 1 |
| ZNF570      | 0.1805807 | 0.5848386 | 0.3088 | 0.758  | 0.084719352 | count | 1 |
| RBAK-RBAKDN | 0.0752769 | 0.2796964 | 0.2691 | 0.788  | 0.084821079 | count | 1 |
| TAF1B       | 0.0692293 | 0.2258276 | 0.3066 | 0.759  | 0.084855147 | count | 1 |
| ZNF785      | 0.108874  | 0.9980141 | 0.1091 | 0.913  | 0.084898348 | count | 1 |
| PRICKLE3    | 0.1809854 | 0.7499493 | 0.2413 | 0.809  | 0.084916775 | count | 1 |
| RAB30-AS1   | 0.0645785 | 0.1970188 | 0.3278 | 0.743  | 0.084960614 | count | 1 |
| RPS25       | 0.0590522 | 0.0249632 | 2.3656 | 0.0181 | 0.085042062 | count | 1 |
| VPS37C      | 0.0716894 | 0.307463  | 0.2332 | 0.816  | 0.085109947 | count | 1 |
| AGAP9       | 0.239239  | 0.5586199 | 0.4283 | 0.668  | 0.085154269 | count | 1 |
| TSN         | 0.0674133 | 0.1939095 | 0.3477 | 0.728  | 0.085156325 | count | 1 |
| TIGD6       | 0.1815423 | 0.6545851 | 0.2773 | 0.782  | 0.085188493 | count | 1 |
| RPL4        | 0.0596052 | 0.040404  | 1.4752 | 0.14   | 0.085320492 | count | 1 |
| PACS2       | 0.0719131 | 0.3016495 | 0.2384 | 0.812  | 0.085376648 | count | 1 |
| TPT1        | 0.0592207 | 0.0251986 | 2.3502 | 0.0188 | 0.085394479 | count | 1 |
| METTLL18    | 0.1823572 | 0.6378222 | 0.2859 | 0.775  | 0.085586209 | count | 1 |
| AL645933.2  | 0.1424743 | 0.4864943 | 0.2929 | 0.77   | 0.085607194 | count | 1 |
| WDFY4       | 0.0702192 | 0.2752415 | 0.2551 | 0.799  | 0.085709736 | count | 1 |
| AKT1S1      | 0.0768237 | 0.3013991 | 0.2549 | 0.799  | 0.085720947 | count | 1 |
| MEG3        | 0.6909624 | 0.9187214 | 0.7521 | 0.452  | 0.085734717 | count | 1 |
| CYP1B1-AS1  | 0.2062835 | 0.5725001 | 0.3603 | 0.719  | 0.085785951 | count | 1 |
| CUTC        | 0.0661227 | 0.2379201 | 0.2779 | 0.781  | 0.085823667 | count | 1 |
| TBC1D23     | 0.0689663 | 0.2058332 | 0.3351 | 0.738  | 0.086091759 | count | 1 |
| NUP58       | 0.0665375 | 0.1451411 | 0.4584 | 0.647  | 0.086133852 | count | 1 |
| MOB1A       | 0.0606184 | 0.0587857 | 1.0312 | 0.303  | 0.086190201 | count | 1 |
| RPL7        | 0.0599744 | 0.0317866 | 1.8868 | 0.0593 | 0.08623282  | count | 1 |
| NDUFB4      | 0.0606339 | 0.0605974 | 1.0006 | 0.317  | 0.086374394 | count | 1 |
| UBL4A       | 0.0671776 | 0.3313868 | 0.2027 | 0.839  | 0.086378622 | count | 1 |
| ZNF34       | 0.1024347 | 0.4408896 | 0.2323 | 0.816  | 0.086423759 | count | 1 |



|            |           |           |        |       |             |       |   |
|------------|-----------|-----------|--------|-------|-------------|-------|---|
| TACC1      | 0.0615156 | 0.0798527 | 0.7704 | 0.441 | 0.086570257 | count | 1 |
| ZNRF1      | 0.0775831 | 0.2990737 | 0.2594 | 0.795 | 0.08657324  | count | 1 |
| FMNL3      | 0.0685657 | 0.2357953 | 0.2908 | 0.771 | 0.086616162 | count | 1 |
| SMARCA4    | 0.0665503 | 0.2393171 | 0.2781 | 0.781 | 0.086669715 | count | 1 |
| ARNTL      | 0.0859147 | 0.3429047 | 0.2505 | 0.802 | 0.086777327 | count | 1 |
| TMEM191B   | 0.1239355 | 0.4523828 | 0.274  | 0.784 | 0.086909821 | count | 1 |
| IDH3G      | 0.0622202 | 0.0914711 | 0.6802 | 0.496 | 0.086921464 | count | 1 |
| WEE1       | 0.1446039 | 0.5848581 | 0.2472 | 0.805 | 0.0869222   | count | 1 |
| WDR25      | 0.0823995 | 0.3240016 | 0.2543 | 0.799 | 0.086924376 | count | 1 |
| FCGR1B     | 0.0629166 | 0.1109755 | 0.5669 | 0.571 | 0.087129527 | count | 1 |
| FKRP       | 0.1450165 | 0.434364  | 0.3339 | 0.739 | 0.087177095 | count | 1 |
| RECQL      | 0.0659221 | 0.1321668 | 0.4988 | 0.618 | 0.08741231  | count | 1 |
| MANEA      | 0.0994595 | 0.2990426 | 0.3326 | 0.739 | 0.087514264 | count | 1 |
| PEF1       | 0.0673198 | 0.1731131 | 0.3889 | 0.697 | 0.08760242  | count | 1 |
| SPTLC3     | 0.1306714 | 0.5150224 | 0.2537 | 0.8   | 0.087648524 | count | 1 |
| HSCB       | 0.0688252 | 0.1903779 | 0.3615 | 0.718 | 0.087724163 | count | 1 |
| MCOLN1     | 0.0627882 | 0.1174532 | 0.5346 | 0.593 | 0.087829976 | count | 1 |
| CCDC86     | 0.0816083 | 0.3955829 | 0.2063 | 0.837 | 0.087950144 | count | 1 |
| CBX5       | 0.0682309 | 0.1905411 | 0.3581 | 0.72  | 0.087999584 | count | 1 |
| ALAD       | 0.0871491 | 0.3453134 | 0.2524 | 0.801 | 0.088034914 | count | 1 |
| NUP88      | 0.0871908 | 0.3064614 | 0.2845 | 0.776 | 0.088077403 | count | 1 |
| SLC25A14   | 0.1256347 | 0.5375873 | 0.2337 | 0.815 | 0.088126696 | count | 1 |
| ZNF677     | 0.1256347 | 0.5419107 | 0.2318 | 0.817 | 0.088126696 | count | 1 |
| LINC02384  | 0.7081621 | 0.6754559 | 1.0484 | 0.295 | 0.088254431 | count | 1 |
| JARID2     | 0.0657575 | 0.1602482 | 0.4103 | 0.682 | 0.08837157  | count | 1 |
| HIST1H2BC  | 0.1260585 | 0.5531777 | 0.2279 | 0.82  | 0.088430304 | count | 1 |
| AC003102.1 | 0.1212748 | 0.4409994 | 0.275  | 0.783 | 0.088505045 | count | 1 |
| PDE6G      | 0.1212748 | 0.4154993 | 0.2919 | 0.77  | 0.088505045 | count | 1 |
| AC074117.1 | 0.1175284 | 0.3941619 | 0.2982 | 0.766 | 0.088856047 | count | 1 |
| AC243772.2 | 0.1478756 | 0.6310231 | 0.2343 | 0.815 | 0.088944424 | count | 1 |
| DEK        | 0.0621988 | 0.0514693 | 1.2085 | 0.227 | 0.088992079 | count | 1 |
| TIMM10B    | 0.0721724 | 0.2258862 | 0.3195 | 0.749 | 0.089003481 | count | 1 |
| AC010226.1 | 0.1081048 | 0.5023703 | 0.2152 | 0.83  | 0.089105124 | count | 1 |
| AGPS       | 0.070437  | 0.1712148 | 0.4114 | 0.681 | 0.089107369 | count | 1 |
| AL022328.3 | 0.2499428 | 0.5941901 | 0.4206 | 0.674 | 0.089194725 | count | 1 |
| CLTC       | 0.0636403 | 0.0846473 | 0.7518 | 0.452 | 0.089206313 | count | 1 |
| MPPED2     | 0.7152709 | 0.4889227 | 1.463  | 0.144 | 0.089300835 | count | 1 |
| COPS5      | 0.0646029 | 0.1075297 | 0.6008 | 0.548 | 0.089384034 | count | 1 |
| NCF4       | 0.062962  | 0.070161  | 0.8974 | 0.37  | 0.089407257 | count | 1 |
| PDK3       | 0.0765413 | 0.2926552 | 0.2615 | 0.794 | 0.089457844 | count | 1 |
| MT-ND5     | 0.0623231 | 0.0357047 | 1.7455 | 0.081 | 0.089627063 | count | 1 |
| MINDY2     | 0.0700793 | 0.2121923 | 0.3303 | 0.741 | 0.089736838 | count | 1 |
| KLHDC3     | 0.0716286 | 0.1848596 | 0.3875 | 0.698 | 0.08984774  | count | 1 |
| LINC00467  | 0.0823316 | 0.3035995 | 0.2712 | 0.786 | 0.089871532 | count | 1 |
| CTIF       | 0.1339239 | 0.5739824 | 0.2333 | 0.816 | 0.089881499 | count | 1 |

|             |           |           |        |         |             |       |   |
|-------------|-----------|-----------|--------|---------|-------------|-------|---|
| FAM198B-AS1 | 0.1042156 | 0.3568224 | 0.2921 | 0.77    | 0.089911451 | count | 1 |
| RUNX2       | 0.0942882 | 0.4127438 | 0.2284 | 0.819   | 0.089931361 | count | 1 |
| FOXO6       | 0.4215622 | 0.837236  | 0.5035 | 0.615   | 0.089955942 | count | 1 |
| C1orf115    | 0.4215622 | 0.837236  | 0.5035 | 0.615   | 0.089955942 | count | 1 |
| GXYLT2      | 0.4215622 | 1.1268636 | 0.3741 | 0.708   | 0.089955942 | count | 1 |
| ZSCAN12     | 0.4215622 | 0.837236  | 0.5035 | 0.615   | 0.089955942 | count | 1 |
| EPHB4       | 0.4215622 | 0.837236  | 0.5035 | 0.615   | 0.089955942 | count | 1 |
| KCP         | 0.4215622 | 0.8057521 | 0.5232 | 0.601   | 0.089955942 | count | 1 |
| POMK        | 0.4215622 | 0.8691609 | 0.485  | 0.628   | 0.089955942 | count | 1 |
| PPP1R13B    | 0.4215622 | 0.837236  | 0.5035 | 0.615   | 0.089955942 | count | 1 |
| TRIM16L     | 0.4215622 | 0.837236  | 0.5035 | 0.615   | 0.089955942 | count | 1 |
| LZTS3       | 0.4215622 | 0.8984256 | 0.4692 | 0.639   | 0.089955942 | count | 1 |
| CUL1        | 0.073494  | 0.2284296 | 0.3217 | 0.748   | 0.090101617 | count | 1 |
| PGRMC1      | 0.0666788 | 0.1454457 | 0.4584 | 0.647   | 0.090155216 | count | 1 |
| RASD1       | 0.1192197 | 0.4231382 | 0.2818 | 0.778   | 0.090158617 | count | 1 |
| ATP5PO      | 0.0631701 | 0.0510111 | 1.2384 | 0.2157  | 0.090216734 | count | 1 |
| EIF2B4      | 0.0758017 | 0.2600438 | 0.2915 | 0.771   | 0.090275603 | count | 1 |
| DNM3        | 0.2528183 | 0.8993785 | 0.2811 | 0.779   | 0.090283449 | count | 1 |
| AC016773.1  | 0.2528183 | 0.9961672 | 0.2538 | 0.8     | 0.090283449 | count | 1 |
| HOPX        | 0.2528183 | 0.7974075 | 0.3171 | 0.751   | 0.090283449 | count | 1 |
| ZNF674      | 0.2528183 | 0.7957776 | 0.3177 | 0.751   | 0.090283449 | count | 1 |
| AF196972.1  | 0.2528183 | 0.8696151 | 0.2907 | 0.771   | 0.090283449 | count | 1 |
| PYCR3       | 0.2528183 | 0.9008369 | 0.2806 | 0.779   | 0.090283449 | count | 1 |
| ANKRD42     | 0.0887188 | 0.4021644 | 0.2206 | 0.825   | 0.090509427 | count | 1 |
| KCNK6       | 0.0722823 | 0.1760203 | 0.4106 | 0.681   | 0.09053127  | count | 1 |
| DCAF7       | 0.0686901 | 0.152472  | 0.4505 | 0.652   | 0.090555221 | count | 1 |
| COX7C       | 0.0631802 | 0.0404607 | 1.5615 | 0.119   | 0.090592187 | count | 1 |
| ASB9        | 0.1611598 | 0.4494776 | 0.3585 | 0.72    | 0.090592569 | count | 1 |
| RPL13       | 0.0628356 | 0.0223179 | 2.8155 | 0.00491 | 0.090593702 | count | 1 |
| MRPS26      | 0.0672025 | 0.1512954 | 0.4442 | 0.657   | 0.090743693 | count | 1 |
| SUPT4H1     | 0.0639997 | 0.069868  | 0.916  | 0.36    | 0.09078157  | count | 1 |
| PTBP1       | 0.0676531 | 0.128619  | 0.526  | 0.599   | 0.090958156 | count | 1 |
| ILF3-DT     | 0.0672407 | 0.156134  | 0.4307 | 0.667   | 0.091032086 | count | 1 |
| RPS27       | 0.0632879 | 0.0257145 | 2.4612 | 0.0139  | 0.091128196 | count | 1 |
| ACVR2B      | 0.1517705 | 0.5150673 | 0.2947 | 0.768   | 0.091354972 | count | 1 |
| FASTKD1     | 0.0923789 | 0.6338214 | 0.1457 | 0.884   | 0.091411358 | count | 1 |
| ULBP1       | 0.1764908 | 0.8696482 | 0.2029 | 0.839   | 0.091550775 | count | 1 |
| TMEM246     | 0.1764908 | 1.4740086 | 0.1197 | 0.905   | 0.091550775 | count | 1 |
| AC005363.2  | 0.1764908 | 0.6965141 | 0.2534 | 0.8     | 0.091550775 | count | 1 |
| IPO9-AS1    | 0.1768234 | 0.8916918 | 0.1983 | 0.843   | 0.091729654 | count | 1 |
| FUNDC2      | 0.0655849 | 0.1023483 | 0.6408 | 0.522   | 0.091778021 | count | 1 |
| ATP2B1      | 0.064243  | 0.0660142 | 0.9732 | 0.3306  | 0.091835718 | count | 1 |
| UBE3D       | 0.1770375 | 0.7437847 | 0.238  | 0.812   | 0.091844821 | count | 1 |
| HKR1        | 0.1771868 | 0.5565172 | 0.3184 | 0.75    | 0.091925133 | count | 1 |
| CAND1       | 0.0706935 | 0.217831  | 0.3245 | 0.746   | 0.091926389 | count | 1 |

|          |           |           |        |         |             |       |   |
|----------|-----------|-----------|--------|---------|-------------|-------|---|
| TMEM192  | 0.0762515 | 0.2448809 | 0.3114 | 0.756   | 0.092030034 | count | 1 |
| CRBN     | 0.0689423 | 0.1447064 | 0.4764 | 0.634   | 0.092071508 | count | 1 |
| CENPB    | 0.072159  | 0.2154715 | 0.3349 | 0.738   | 0.092199896 | count | 1 |
| SNRNP48  | 0.0722588 | 0.1825813 | 0.3958 | 0.692   | 0.092221258 | count | 1 |
| IDS      | 0.0657217 | 0.1115356 | 0.5892 | 0.556   | 0.092381961 | count | 1 |
| PLAUR    | 0.0642074 | 0.0600964 | 1.0684 | 0.285   | 0.092452211 | count | 1 |
| RNF130   | 0.0645354 | 0.0485388 | 1.3296 | 0.184   | 0.092471603 | count | 1 |
| MOSPD2   | 0.0733586 | 0.1918901 | 0.3823 | 0.702   | 0.092561421 | count | 1 |
| RPS6     | 0.064313  | 0.0277288 | 2.3194 | 0.0205  | 0.092599549 | count | 1 |
| REXO2    | 0.0687726 | 0.1419144 | 0.4846 | 0.628   | 0.092638834 | count | 1 |
| MAFB     | 0.0646863 | 0.053436  | 1.2105 | 0.226   | 0.092859801 | count | 1 |
| RPS12    | 0.0644544 | 0.0239296 | 2.6935 | 0.00712 | 0.092930314 | count | 1 |
| XPNPEP1  | 0.0758557 | 0.3316161 | 0.2287 | 0.819   | 0.093007929 | count | 1 |
| RAB6A    | 0.070228  | 0.1684111 | 0.417  | 0.677   | 0.093029011 | count | 1 |
| TENT4A   | 0.0888781 | 0.3550379 | 0.2503 | 0.802   | 0.093078164 | count | 1 |
| ARRDC2   | 0.0767639 | 0.1897114 | 0.4046 | 0.686   | 0.09309842  | count | 1 |
| PHC2     | 0.0686239 | 0.1174174 | 0.5844 | 0.559   | 0.093184501 | count | 1 |
| C1orf43  | 0.0659166 | 0.0766499 | 0.86   | 0.39    | 0.093258286 | count | 1 |
| TGOLN2   | 0.0654402 | 0.0648348 | 1.0093 | 0.313   | 0.093272704 | count | 1 |
| PANK4    | 0.1464183 | 0.5065849 | 0.289  | 0.773   | 0.093493678 | count | 1 |
| NOL6     | 0.1464183 | 0.5757946 | 0.2543 | 0.799   | 0.093493678 | count | 1 |
| HAPLN3   | 0.1989499 | 0.3783581 | 0.5258 | 0.599   | 0.093713313 | count | 1 |
| ZNF703   | 0.0839866 | 0.2153678 | 0.39   | 0.697   | 0.093763769 | count | 1 |
| IFT57    | 0.0769407 | 0.2011621 | 0.3825 | 0.702   | 0.093946224 | count | 1 |
| TSPAN4   | 0.0670658 | 0.0981703 | 0.6832 | 0.495   | 0.094022949 | count | 1 |
| UBE2W    | 0.0698674 | 0.1300623 | 0.5372 | 0.591   | 0.094046563 | count | 1 |
| ADPRM    | 0.1400126 | 0.5304199 | 0.264  | 0.792   | 0.094068148 | count | 1 |
| TLNRD1   | 0.0694633 | 0.149865  | 0.4635 | 0.643   | 0.094132281 | count | 1 |
| CYBA     | 0.0653405 | 0.0246733 | 2.6482 | 0.00814 | 0.094144382 | count | 1 |
| EXOC1    | 0.0703618 | 0.162572  | 0.4328 | 0.665   | 0.094181224 | count | 1 |
| HIGD1A   | 0.0697662 | 0.1345183 | 0.5186 | 0.604   | 0.0943357   | count | 1 |
| FNBP4    | 0.0690429 | 0.1213909 | 0.5688 | 0.57    | 0.094538002 | count | 1 |
| ST20-AS1 | 0.1036237 | 0.4240578 | 0.2444 | 0.807   | 0.094577829 | count | 1 |
| LMO4     | 0.067719  | 0.1077407 | 0.6285 | 0.53    | 0.094732035 | count | 1 |
| LAPTM4B  | 0.1075945 | 0.4121605 | 0.2611 | 0.794   | 0.094771306 | count | 1 |
| OTUB1    | 0.0687719 | 0.1388198 | 0.4954 | 0.62    | 0.094897872 | count | 1 |
| LAMP5    | 0.2654623 | 0.6317792 | 0.4202 | 0.674   | 0.095087144 | count | 1 |
| PRPS2    | 0.0748175 | 0.2275858 | 0.3287 | 0.742   | 0.095153406 | count | 1 |
| RABGGTB  | 0.0725069 | 0.1670081 | 0.4342 | 0.664   | 0.095156176 | count | 1 |
| CCDC146  | 0.1259548 | 0.4802674 | 0.2623 | 0.793   | 0.095352243 | count | 1 |
| NSF      | 0.0765037 | 0.2159348 | 0.3543 | 0.723   | 0.095376588 | count | 1 |
| RNF126   | 0.0713451 | 0.1766015 | 0.404  | 0.686   | 0.095499644 | count | 1 |
| NFX1     | 0.0754053 | 0.3554165 | 0.2122 | 0.832   | 0.095538214 | count | 1 |
| FNDC3A   | 0.0691329 | 0.1188056 | 0.5819 | 0.561   | 0.095591978 | count | 1 |
| COX10    | 0.1065604 | 0.4604805 | 0.2314 | 0.817   | 0.095621363 | count | 1 |

|            |           |           |        |        |             |       |   |
|------------|-----------|-----------|--------|--------|-------------|-------|---|
| CAP1       | 0.0668736 | 0.049275  | 1.3572 | 0.175  | 0.095636186 | count | 1 |
| STK19      | 0.078534  | 0.2586835 | 0.3036 | 0.761  | 0.095689509 | count | 1 |
| DDX46      | 0.0676401 | 0.0717966 | 0.9421 | 0.346  | 0.095843451 | count | 1 |
| ZNF598     | 0.0922645 | 0.2977078 | 0.3099 | 0.757  | 0.095858757 | count | 1 |
| GNB2       | 0.0674067 | 0.0620757 | 1.0859 | 0.278  | 0.095872839 | count | 1 |
| ACTB       | 0.0664772 | 0.0279914 | 2.3749 | 0.0176 | 0.095874926 | count | 1 |
| OTUD6B-AS1 | 0.0712144 | 0.1331364 | 0.5349 | 0.593  | 0.095933161 | count | 1 |
| AC022098.1 | 0.0923485 | 0.3380713 | 0.2732 | 0.785  | 0.095946774 | count | 1 |
| DOCK7      | 0.0760642 | 0.2386853 | 0.3187 | 0.75   | 0.096118389 | count | 1 |
| ZC3H8      | 0.0835649 | 0.2571501 | 0.325  | 0.745  | 0.096278746 | count | 1 |
| GPR161     | 0.4482087 | 0.7123416 | 0.6292 | 0.529  | 0.096306355 | count | 1 |
| S100BPB    | 0.0899349 | 0.3158189 | 0.2848 | 0.776  | 0.096334041 | count | 1 |
| USP36      | 0.0733596 | 0.152348  | 0.4815 | 0.63   | 0.096537927 | count | 1 |
| KLHDC4     | 0.0956175 | 0.3140458 | 0.3045 | 0.761  | 0.09667037  | count | 1 |
| AMZ1       | 0.1173063 | 0.7560703 | 0.1552 | 0.877  | 0.096814925 | count | 1 |
| KIF3C      | 0.2055997 | 0.7369228 | 0.279  | 0.78   | 0.096985843 | count | 1 |
| EFCAB7     | 0.3330084 | 0.7264342 | 0.4584 | 0.647  | 0.097052591 | count | 1 |
| AC104653.1 | 0.1611662 | 0.6581805 | 0.2449 | 0.807  | 0.097183858 | count | 1 |
| MEF2D      | 0.0734631 | 0.1908146 | 0.385  | 0.7    | 0.097267779 | count | 1 |
| LSM4       | 0.0690426 | 0.0817793 | 0.8443 | 0.399  | 0.097283334 | count | 1 |
| TRBC1      | 0.2063004 | 0.7251943 | 0.2845 | 0.776  | 0.097331183 | count | 1 |
| SNX2       | 0.0684442 | 0.0585951 | 1.1681 | 0.243  | 0.097351995 | count | 1 |
| MAN2C1     | 0.0887701 | 0.3555654 | 0.2497 | 0.803  | 0.097527765 | count | 1 |
| ORAI3      | 0.0718058 | 0.134485  | 0.5339 | 0.593  | 0.097619904 | count | 1 |
| C1QTNF12   | 0.7713801 | 1.468606  | 0.5252 | 0.599  | 0.097660211 | count | 1 |
| AC114490.2 | 0.7713801 | 1.468606  | 0.5252 | 0.599  | 0.097660211 | count | 1 |
| AL109741.1 | 0.7713801 | 1.468606  | 0.5252 | 0.599  | 0.097660211 | count | 1 |
| TRIM45     | 0.7713801 | 1.468606  | 0.5252 | 0.599  | 0.097660211 | count | 1 |
| ANXA9      | 0.7713801 | 1.468606  | 0.5252 | 0.599  | 0.097660211 | count | 1 |
| AL358472.2 | 0.7713801 | 1.468606  | 0.5252 | 0.599  | 0.097660211 | count | 1 |
| SH2D2A     | 0.7713801 | 1.4140999 | 0.5455 | 0.585  | 0.097660211 | count | 1 |
| AL512306.2 | 0.7713801 | 1.468606  | 0.5252 | 0.599  | 0.097660211 | count | 1 |
| AL512343.2 | 0.7713801 | 1.4140999 | 0.5455 | 0.585  | 0.097660211 | count | 1 |
| BOLA3-AS1  | 0.7713801 | 1.468606  | 0.5252 | 0.599  | 0.097660211 | count | 1 |
| CD8B       | 0.7713801 | 1.468606  | 0.5252 | 0.599  | 0.097660211 | count | 1 |
| NCAPH      | 0.7713801 | 1.468606  | 0.5252 | 0.599  | 0.097660211 | count | 1 |
| AC012360.2 | 0.7713801 | 1.468606  | 0.5252 | 0.599  | 0.097660211 | count | 1 |
| LINC01191  | 0.7713801 | 1.468606  | 0.5252 | 0.599  | 0.097660211 | count | 1 |
| AC068282.1 | 0.7713801 | 1.4140999 | 0.5455 | 0.585  | 0.097660211 | count | 1 |
| AC097468.3 | 0.7713801 | 1.468606  | 0.5252 | 0.599  | 0.097660211 | count | 1 |
| AC012485.3 | 0.7713801 | 1.468606  | 0.5252 | 0.599  | 0.097660211 | count | 1 |
| KIF15      | 0.7713801 | 1.4140999 | 0.5455 | 0.585  | 0.097660211 | count | 1 |
| TRAIIP     | 0.7713801 | 1.468606  | 0.5252 | 0.599  | 0.097660211 | count | 1 |
| PCBP4      | 0.7713801 | 1.4140999 | 0.5455 | 0.585  | 0.097660211 | count | 1 |
| AC108693.2 | 0.7713801 | 1.468606  | 0.5252 | 0.599  | 0.097660211 | count | 1 |

|            |           |           |        |       |             |       |   |
|------------|-----------|-----------|--------|-------|-------------|-------|---|
| ILDR1      | 0.7713801 | 1.468606  | 0.5252 | 0.599 | 0.097660211 | count | 1 |
| EVC        | 0.7713801 | 1.468606  | 0.5252 | 0.599 | 0.097660211 | count | 1 |
| AC024243.1 | 0.7713801 | 1.4140999 | 0.5455 | 0.585 | 0.097660211 | count | 1 |
| TMEM150C   | 0.7713801 | 1.4140999 | 0.5455 | 0.585 | 0.097660211 | count | 1 |
| DKK2       | 0.7713801 | 1.468606  | 0.5252 | 0.599 | 0.097660211 | count | 1 |
| AC096711.2 | 0.7713801 | 1.468606  | 0.5252 | 0.599 | 0.097660211 | count | 1 |
| TPPP       | 0.7713801 | 1.468606  | 0.5252 | 0.599 | 0.097660211 | count | 1 |
| EIF4EBP3   | 0.7713801 | 1.468606  | 0.5252 | 0.599 | 0.097660211 | count | 1 |
| AC008641.1 | 0.7713801 | 1.468606  | 0.5252 | 0.599 | 0.097660211 | count | 1 |
| ZNF311     | 0.7713801 | 1.468606  | 0.5252 | 0.599 | 0.097660211 | count | 1 |
| SLC44A4    | 0.7713801 | 1.468606  | 0.5252 | 0.599 | 0.097660211 | count | 1 |
| AL662884.4 | 0.7713801 | 1.468606  | 0.5252 | 0.599 | 0.097660211 | count | 1 |
| RCAN2      | 0.7713801 | 1.4140999 | 0.5455 | 0.585 | 0.097660211 | count | 1 |
| EYS        | 0.7713801 | 1.4140999 | 0.5455 | 0.585 | 0.097660211 | count | 1 |
| AL138828.1 | 0.7713801 | 1.468606  | 0.5252 | 0.599 | 0.097660211 | count | 1 |
| AL356234.3 | 0.7713801 | 1.468606  | 0.5252 | 0.599 | 0.097660211 | count | 1 |
| AL121956.1 | 0.7713801 | 1.4140999 | 0.5455 | 0.585 | 0.097660211 | count | 1 |
| LINC01615  | 0.7713801 | 1.4140999 | 0.5455 | 0.585 | 0.097660211 | count | 1 |
| MINDY4     | 0.7713801 | 1.468606  | 0.5252 | 0.599 | 0.097660211 | count | 1 |
| AC073335.2 | 0.7713801 | 1.468606  | 0.5252 | 0.599 | 0.097660211 | count | 1 |
| NPTX2      | 0.7713801 | 1.468606  | 0.5252 | 0.599 | 0.097660211 | count | 1 |
| AC008264.2 | 0.7713801 | 1.468606  | 0.5252 | 0.599 | 0.097660211 | count | 1 |
| AC009542.1 | 0.7713801 | 1.468606  | 0.5252 | 0.599 | 0.097660211 | count | 1 |
| ZNF425     | 0.7713801 | 1.4140999 | 0.5455 | 0.585 | 0.097660211 | count | 1 |
| BX890604.1 | 0.7713801 | 1.468606  | 0.5252 | 0.599 | 0.097660211 | count | 1 |
| YY2        | 0.7713801 | 1.468606  | 0.5252 | 0.599 | 0.097660211 | count | 1 |
| AC115618.1 | 0.7713801 | 1.468606  | 0.5252 | 0.599 | 0.097660211 | count | 1 |
| FAM156A    | 0.7713801 | 1.4140999 | 0.5455 | 0.585 | 0.097660211 | count | 1 |
| AL121601.1 | 0.7713801 | 1.468606  | 0.5252 | 0.599 | 0.097660211 | count | 1 |
| FAM85B     | 0.7713801 | 1.468606  | 0.5252 | 0.599 | 0.097660211 | count | 1 |
| LINC01301  | 0.7713801 | 1.468606  | 0.5252 | 0.599 | 0.097660211 | count | 1 |
| CYP7B1     | 0.7713801 | 1.468606  | 0.5252 | 0.599 | 0.097660211 | count | 1 |
| NCALD      | 0.7713801 | 1.468606  | 0.5252 | 0.599 | 0.097660211 | count | 1 |
| PCA3       | 0.7713801 | 1.468606  | 0.5252 | 0.599 | 0.097660211 | count | 1 |
| PTCH1      | 0.7713801 | 1.4140999 | 0.5455 | 0.585 | 0.097660211 | count | 1 |
| AL359091.4 | 0.7713801 | 1.468606  | 0.5252 | 0.599 | 0.097660211 | count | 1 |
| AL356481.1 | 0.7713801 | 1.468606  | 0.5252 | 0.599 | 0.097660211 | count | 1 |
| AL590226.2 | 0.7713801 | 1.468606  | 0.5252 | 0.599 | 0.097660211 | count | 1 |
| PNPLA7     | 0.7713801 | 1.468606  | 0.5252 | 0.599 | 0.097660211 | count | 1 |
| MIR194-2HG | 0.7713801 | 1.468606  | 0.5252 | 0.599 | 0.097660211 | count | 1 |
| P4HA3      | 0.7713801 | 1.468606  | 0.5252 | 0.599 | 0.097660211 | count | 1 |
| AP001528.1 | 0.7713801 | 1.468606  | 0.5252 | 0.599 | 0.097660211 | count | 1 |
| TTC36      | 0.7713801 | 1.468606  | 0.5252 | 0.599 | 0.097660211 | count | 1 |
| AL157395.1 | 0.7713801 | 1.468606  | 0.5252 | 0.599 | 0.097660211 | count | 1 |
| AL137145.1 | 0.7713801 | 1.468606  | 0.5252 | 0.599 | 0.097660211 | count | 1 |

|             |           |           |        |       |             |       |   |
|-------------|-----------|-----------|--------|-------|-------------|-------|---|
| AC067747.1  | 0.7713801 | 1.468606  | 0.5252 | 0.599 | 0.097660211 | count | 1 |
| AL136982.7  | 0.7713801 | 1.4140999 | 0.5455 | 0.585 | 0.097660211 | count | 1 |
| AL592071.1  | 0.7713801 | 1.468606  | 0.5252 | 0.599 | 0.097660211 | count | 1 |
| AKAP3       | 0.7713801 | 1.468606  | 0.5252 | 0.599 | 0.097660211 | count | 1 |
| FAM90A1     | 0.7713801 | 1.468606  | 0.5252 | 0.599 | 0.097660211 | count | 1 |
| TAS2R30     | 0.7713801 | 1.468606  | 0.5252 | 0.599 | 0.097660211 | count | 1 |
| PDE6H       | 0.7713801 | 1.468606  | 0.5252 | 0.599 | 0.097660211 | count | 1 |
| DDN         | 0.7713801 | 1.468606  | 0.5252 | 0.599 | 0.097660211 | count | 1 |
| GLT8D2      | 0.7713801 | 1.4140999 | 0.5455 | 0.585 | 0.097660211 | count | 1 |
| SLAIN1      | 0.7713801 | 1.468606  | 0.5252 | 0.599 | 0.097660211 | count | 1 |
| LINC00379   | 0.7713801 | 1.468606  | 0.5252 | 0.599 | 0.097660211 | count | 1 |
| AL358334.2  | 0.7713801 | 1.468606  | 0.5252 | 0.599 | 0.097660211 | count | 1 |
| ARMH4       | 0.7713801 | 1.4140999 | 0.5455 | 0.585 | 0.097660211 | count | 1 |
| AL391262.1  | 0.7713801 | 1.4140999 | 0.5455 | 0.585 | 0.097660211 | count | 1 |
| KIF26A      | 0.7713801 | 1.468606  | 0.5252 | 0.599 | 0.097660211 | count | 1 |
| DLL4        | 0.7713801 | 1.468606  | 0.5252 | 0.599 | 0.097660211 | count | 1 |
| AC090510.1  | 0.7713801 | 1.468606  | 0.5252 | 0.599 | 0.097660211 | count | 1 |
| SERINC4     | 0.7713801 | 1.468606  | 0.5252 | 0.599 | 0.097660211 | count | 1 |
| AC016355.1  | 0.7713801 | 1.468606  | 0.5252 | 0.599 | 0.097660211 | count | 1 |
| GOLGA6L10   | 0.7713801 | 1.4140999 | 0.5455 | 0.585 | 0.097660211 | count | 1 |
| AC003965.1  | 0.7713801 | 1.468606  | 0.5252 | 0.599 | 0.097660211 | count | 1 |
| AC109460.1  | 0.7713801 | 1.468606  | 0.5252 | 0.599 | 0.097660211 | count | 1 |
| MYLK3       | 0.7713801 | 1.468606  | 0.5252 | 0.599 | 0.097660211 | count | 1 |
| AC023813.3  | 0.7713801 | 1.468606  | 0.5252 | 0.599 | 0.097660211 | count | 1 |
| MT1A        | 0.7713801 | 1.468606  | 0.5252 | 0.599 | 0.097660211 | count | 1 |
| AC004771.3  | 0.7713801 | 1.468606  | 0.5252 | 0.599 | 0.097660211 | count | 1 |
| PITPNM3     | 0.7713801 | 1.468606  | 0.5252 | 0.599 | 0.097660211 | count | 1 |
| ATP1B2      | 0.7713801 | 1.4140999 | 0.5455 | 0.585 | 0.097660211 | count | 1 |
| TMEM220-AS1 | 0.7713801 | 1.468606  | 0.5252 | 0.599 | 0.097660211 | count | 1 |
| AC020558.1  | 0.7713801 | 1.468606  | 0.5252 | 0.599 | 0.097660211 | count | 1 |
| AC122129.1  | 0.7713801 | 1.468606  | 0.5252 | 0.599 | 0.097660211 | count | 1 |
| GRAPL       | 0.7713801 | 1.468606  | 0.5252 | 0.599 | 0.097660211 | count | 1 |
| AC130324.3  | 0.7713801 | 1.468606  | 0.5252 | 0.599 | 0.097660211 | count | 1 |
| AC006441.1  | 0.7713801 | 1.4140999 | 0.5455 | 0.585 | 0.097660211 | count | 1 |
| LINC00854   | 0.7713801 | 1.468606  | 0.5252 | 0.599 | 0.097660211 | count | 1 |
| MEIOC       | 0.7713801 | 1.468606  | 0.5252 | 0.599 | 0.097660211 | count | 1 |
| SMIM6       | 0.7713801 | 1.468606  | 0.5252 | 0.599 | 0.097660211 | count | 1 |
| DSCAS       | 0.7713801 | 1.468606  | 0.5252 | 0.599 | 0.097660211 | count | 1 |
| AL031665.2  | 0.7713801 | 1.468606  | 0.5252 | 0.599 | 0.097660211 | count | 1 |
| SDCBP2      | 0.7713801 | 1.4140999 | 0.5455 | 0.585 | 0.097660211 | count | 1 |
| PDYN-AS1    | 0.7713801 | 1.468606  | 0.5252 | 0.599 | 0.097660211 | count | 1 |
| MACROD2     | 0.7713801 | 1.4140999 | 0.5455 | 0.585 | 0.097660211 | count | 1 |
| AL121772.3  | 0.7713801 | 1.468606  | 0.5252 | 0.599 | 0.097660211 | count | 1 |
| DLGAP4-AS1  | 0.7713801 | 1.468606  | 0.5252 | 0.599 | 0.097660211 | count | 1 |
| TLDC2       | 0.7713801 | 1.468606  | 0.5252 | 0.599 | 0.097660211 | count | 1 |

|            |           |           |        |         |             |       |   |
|------------|-----------|-----------|--------|---------|-------------|-------|---|
| AL008726.1 | 0.7713801 | 1.4140999 | 0.5455 | 0.585   | 0.097660211 | count | 1 |
| AL357033.1 | 0.7713801 | 1.468606  | 0.5252 | 0.599   | 0.097660211 | count | 1 |
| COL9A3     | 0.7713801 | 1.468606  | 0.5252 | 0.599   | 0.097660211 | count | 1 |
| PTK6       | 0.7713801 | 1.468606  | 0.5252 | 0.599   | 0.097660211 | count | 1 |
| SHC2       | 0.7713801 | 1.468606  | 0.5252 | 0.599   | 0.097660211 | count | 1 |
| AMH        | 0.7713801 | 1.468606  | 0.5252 | 0.599   | 0.097660211 | count | 1 |
| ZNF426-DT  | 0.7713801 | 1.468606  | 0.5252 | 0.599   | 0.097660211 | count | 1 |
| ANGPTL8    | 0.7713801 | 1.468606  | 0.5252 | 0.599   | 0.097660211 | count | 1 |
| ZNF491     | 0.7713801 | 1.468606  | 0.5252 | 0.599   | 0.097660211 | count | 1 |
| AC005614.1 | 0.7713801 | 1.4140999 | 0.5455 | 0.585   | 0.097660211 | count | 1 |
| NTN5       | 0.7713801 | 1.468606  | 0.5252 | 0.599   | 0.097660211 | count | 1 |
| LHB        | 0.7713801 | 1.4140999 | 0.5455 | 0.585   | 0.097660211 | count | 1 |
| SIGLECL1   | 0.7713801 | 1.468606  | 0.5252 | 0.599   | 0.097660211 | count | 1 |
| ZNF835     | 0.7713801 | 1.468606  | 0.5252 | 0.599   | 0.097660211 | count | 1 |
| AC012313.1 | 0.7713801 | 1.468606  | 0.5252 | 0.599   | 0.097660211 | count | 1 |
| CECR2      | 0.7713801 | 1.468606  | 0.5252 | 0.599   | 0.097660211 | count | 1 |
| ZNRF3      | 0.7713801 | 1.468606  | 0.5252 | 0.599   | 0.097660211 | count | 1 |
| LINC01521  | 0.7713801 | 1.468606  | 0.5252 | 0.599   | 0.097660211 | count | 1 |
| LSM14A     | 0.0713841 | 0.1199403 | 0.5952 | 0.552   | 0.097684956 | count | 1 |
| FNTA       | 0.0731074 | 0.1310649 | 0.5578 | 0.577   | 0.097688699 | count | 1 |
| DHX9       | 0.0732709 | 0.1287285 | 0.5692 | 0.569   | 0.097725013 | count | 1 |
| AC009948.4 | 0.7731887 | 1.002598  | 0.7712 | 0.441   | 0.097932574 | count | 1 |
| STX18-AS1  | 0.7731887 | 1.214623  | 0.6366 | 0.524   | 0.097932574 | count | 1 |
| LINC02104  | 0.7731887 | 1.083255  | 0.7138 | 0.475   | 0.097932574 | count | 1 |
| CLSTN3     | 0.7731887 | 1.002598  | 0.7712 | 0.441   | 0.097932574 | count | 1 |
| AC018904.1 | 0.7731887 | 1.075238  | 0.7191 | 0.472   | 0.097932574 | count | 1 |
| BX539320.1 | 0.7731887 | 0.9680519 | 0.7987 | 0.425   | 0.097932574 | count | 1 |
| PARP16     | 0.174104  | 0.5473484 | 0.3181 | 0.75    | 0.098120711 | count | 1 |
| LGALS8     | 0.0737741 | 0.1458144 | 0.5059 | 0.613   | 0.098155208 | count | 1 |
| SCML1      | 0.0743919 | 0.1717978 | 0.433  | 0.665   | 0.098443428 | count | 1 |
| TBC1D22A   | 0.0723386 | 0.1563432 | 0.4627 | 0.644   | 0.098527654 | count | 1 |
| WDR89      | 0.1748224 | 0.5488538 | 0.3185 | 0.75    | 0.098539587 | count | 1 |
| FUS        | 0.0691467 | 0.0641969 | 1.0771 | 0.2815  | 0.098637398 | count | 1 |
| IL1B       | 0.0686    | 0.0954437 | 0.7187 | 0.472   | 0.098676661 | count | 1 |
| LINC00891  | 0.1547089 | 0.3470404 | 0.4458 | 0.656   | 0.098936575 | count | 1 |
| ZNF430     | 0.0840889 | 0.2172608 | 0.387  | 0.699   | 0.098983779 | count | 1 |
| ZNF559     | 0.1472083 | 0.4079093 | 0.3609 | 0.718   | 0.099026893 | count | 1 |
| BZW2       | 0.075282  | 0.1878655 | 0.4007 | 0.689   | 0.099137724 | count | 1 |
| CCDC82     | 0.072198  | 0.1320053 | 0.5469 | 0.584   | 0.099214019 | count | 1 |
| CRIP1      | 0.0743737 | 0.1586194 | 0.4689 | 0.639   | 0.099473323 | count | 1 |
| AUP1       | 0.0709039 | 0.0782219 | 0.9064 | 0.365   | 0.099628433 | count | 1 |
| IGLL5      | 0.2111309 | 0.9957263 | 0.212  | 0.832   | 0.099714586 | count | 1 |
| UBA52      | 0.0692611 | 0.0244936 | 2.8277 | 0.00473 | 0.099741375 | count | 1 |
| ANKIB1     | 0.0789633 | 0.2374873 | 0.3325 | 0.74    | 0.099793695 | count | 1 |
| AC009309.1 | 0.4630788 | 0.6665965 | 0.6947 | 0.487   | 0.099883113 | count | 1 |

|           |           |           |        |       |             |       |   |
|-----------|-----------|-----------|--------|-------|-------------|-------|---|
| SMIM26    | 0.0714341 | 0.08603   | 0.8303 | 0.406 | 0.099903188 | count | 1 |
| GNPNAT1   | 0.090411  | 0.3340761 | 0.2706 | 0.787 | 0.099910339 | count | 1 |
| CHD7      | 0.0841092 | 0.2974405 | 0.2828 | 0.777 | 0.100217355 | count | 1 |
| FAM160A2  | 0.0852094 | 0.3229785 | 0.2638 | 0.792 | 0.100309581 | count | 1 |
| RAB21     | 0.0724914 | 0.1028011 | 0.7052 | 0.481 | 0.100465623 | count | 1 |
| BST2      | 0.0702846 | 0.051735  | 1.3585 | 0.174 | 0.100665731 | count | 1 |
| AOAH      | 0.0718579 | 0.0774023 | 0.9284 | 0.353 | 0.100739349 | count | 1 |
| PIK3CB    | 0.077126  | 0.1978578 | 0.3898 | 0.697 | 0.100792199 | count | 1 |
| BASP1     | 0.0704781 | 0.077647  | 0.9077 | 0.364 | 0.100909781 | count | 1 |
| AMFR      | 0.0828278 | 0.2074481 | 0.3993 | 0.69  | 0.100943516 | count | 1 |
| EEFSEC    | 0.0863659 | 0.2762814 | 0.3126 | 0.755 | 0.10100257  | count | 1 |
| NCK2      | 0.0822117 | 0.2325935 | 0.3535 | 0.724 | 0.101037489 | count | 1 |
| TMEM102   | 0.0889647 | 0.3576504 | 0.2487 | 0.804 | 0.101264165 | count | 1 |
| TIAL1     | 0.0735864 | 0.1231513 | 0.5975 | 0.55  | 0.101268158 | count | 1 |
| ZFP90     | 0.0974328 | 0.3262334 | 0.2987 | 0.765 | 0.101276617 | count | 1 |
| SRPRA     | 0.0728814 | 0.098586  | 0.7393 | 0.46  | 0.101277919 | count | 1 |
| BFAR      | 0.0745749 | 0.1289885 | 0.5782 | 0.563 | 0.101471801 | count | 1 |
| FKBP8     | 0.0716345 | 0.0798713 | 0.8969 | 0.37  | 0.101588233 | count | 1 |
| SSSCA1    | 0.0742521 | 0.1397387 | 0.5314 | 0.595 | 0.101614602 | count | 1 |
| MRPS35    | 0.0741053 | 0.1247064 | 0.5942 | 0.552 | 0.101624174 | count | 1 |
| ZNF12     | 0.1027071 | 0.3696994 | 0.2778 | 0.781 | 0.101739976 | count | 1 |
| GPATCH3   | 0.1203262 | 0.4594971 | 0.2619 | 0.793 | 0.101766759 | count | 1 |
| IRS1      | 0.7992824 | 0.9064383 | 0.8818 | 0.378 | 0.101881934 | count | 1 |
| ATP5F1D   | 0.0712018 | 0.0459736 | 1.5488 | 0.122 | 0.101908523 | count | 1 |
| SCFD1     | 0.0789414 | 0.1449556 | 0.5446 | 0.586 | 0.102045808 | count | 1 |
| RAD21     | 0.0740941 | 0.1124887 | 0.6587 | 0.51  | 0.102087856 | count | 1 |
| GPBP1     | 0.0733769 | 0.0941914 | 0.779  | 0.436 | 0.102356521 | count | 1 |
| IMPDH2    | 0.0761679 | 0.1510877 | 0.5041 | 0.614 | 0.102503511 | count | 1 |
| CBR1      | 0.0737409 | 0.1075323 | 0.6858 | 0.493 | 0.102528334 | count | 1 |
| NOC2L     | 0.0798097 | 0.168201  | 0.4745 | 0.635 | 0.102562083 | count | 1 |
| STK40     | 0.0809842 | 0.2035634 | 0.3978 | 0.691 | 0.102629675 | count | 1 |
| SLC25A16  | 0.0909877 | 0.5943099 | 0.1531 | 0.878 | 0.102640288 | count | 1 |
| RBCK1     | 0.0749958 | 0.1147621 | 0.6535 | 0.514 | 0.102846855 | count | 1 |
| MTFR2     | 0.2858546 | 0.881206  | 0.3244 | 0.746 | 0.102890702 | count | 1 |
| TRIM32    | 0.2858546 | 0.8753512 | 0.3266 | 0.744 | 0.102890702 | count | 1 |
| LINC01569 | 0.2858546 | 1.0114082 | 0.2826 | 0.777 | 0.102890702 | count | 1 |
| REXO5     | 0.2858546 | 1.2394998 | 0.2306 | 0.818 | 0.102890702 | count | 1 |
| UTRN      | 0.0765764 | 0.114945  | 0.6662 | 0.505 | 0.103015306 | count | 1 |
| EXOC4     | 0.081026  | 0.2215227 | 0.3658 | 0.715 | 0.103074438 | count | 1 |
| KIAA0825  | 0.2179409 | 0.7061131 | 0.3086 | 0.758 | 0.103082556 | count | 1 |
| PCNP      | 0.0748251 | 0.1120355 | 0.6679 | 0.504 | 0.103096157 | count | 1 |
| RC3H2     | 0.0955635 | 0.2680147 | 0.3566 | 0.721 | 0.103109737 | count | 1 |
| UBR5      | 0.078846  | 0.1933384 | 0.4078 | 0.683 | 0.103199646 | count | 1 |
| NDUFB9    | 0.0726237 | 0.0712057 | 1.0199 | 0.308 | 0.103336368 | count | 1 |
| ZKSCAN4   | 0.35321   | 0.5608994 | 0.6297 | 0.529 | 0.103459016 | count | 1 |



|          |           |           |        |         |             |       |   |
|----------|-----------|-----------|--------|---------|-------------|-------|---|
| CBX6     | 0.0772142 | 0.1415471 | 0.5455 | 0.585   | 0.103502622 | count | 1 |
| COMMD9   | 0.0749948 | 0.1142235 | 0.6566 | 0.512   | 0.10350985  | count | 1 |
| EID1     | 0.0728069 | 0.0538797 | 1.3513 | 0.177   | 0.103802068 | count | 1 |
| BUD23    | 0.0760787 | 0.1363968 | 0.5578 | 0.577   | 0.103834207 | count | 1 |
| ATP2A2   | 0.0771863 | 0.1507757 | 0.5119 | 0.609   | 0.103991513 | count | 1 |
| UXT      | 0.0732488 | 0.0593822 | 1.2335 | 0.218   | 0.104212119 | count | 1 |
| ZNF518A  | 0.0824635 | 0.2109916 | 0.3908 | 0.696   | 0.104232158 | count | 1 |
| ABHD1    | 0.3557799 | 0.7963302 | 0.4468 | 0.655   | 0.104278136 | count | 1 |
| ATP5F1E  | 0.0724285 | 0.0280734 | 2.58   | 0.00994 | 0.104306295 | count | 1 |
| ZNF777   | 0.289564  | 0.7612099 | 0.3804 | 0.704   | 0.104317592 | count | 1 |
| CHST11   | 0.0786089 | 0.1388104 | 0.5663 | 0.571   | 0.10443859  | count | 1 |
| RPS3     | 0.072499  | 0.0256751 | 2.8237 | 0.00479 | 0.104461332 | count | 1 |
| TPP1     | 0.0742619 | 0.0865632 | 0.8579 | 0.391   | 0.104637197 | count | 1 |
| RUSC1    | 0.0859079 | 0.3107036 | 0.2765 | 0.782   | 0.104713777 | count | 1 |
| SERPINH1 | 0.1268053 | 0.4831209 | 0.2625 | 0.793   | 0.104793966 | count | 1 |
| NUDT7    | 0.1166838 | 0.4541261 | 0.2569 | 0.797   | 0.104837037 | count | 1 |
| SMARCA2  | 0.0802667 | 0.1440325 | 0.5573 | 0.577   | 0.104906856 | count | 1 |
| ZNF626   | 0.358129  | 0.4106182 | 0.8722 | 0.383   | 0.105027673 | count | 1 |
| PNPLA8   | 0.0746471 | 0.0881923 | 0.8464 | 0.397   | 0.105076143 | count | 1 |
| PSMB3    | 0.073573  | 0.045787  | 1.6069 | 0.108   | 0.105318674 | count | 1 |
| NDUFA7   | 0.1102567 | 0.3567511 | 0.3091 | 0.757   | 0.105349156 | count | 1 |
| ECI1     | 0.0769821 | 0.1132583 | 0.6797 | 0.497   | 0.105355508 | count | 1 |
| RAP1A    | 0.074261  | 0.0731635 | 1.015  | 0.31    | 0.10539045  | count | 1 |
| UBLCP1   | 0.0901262 | 0.2436516 | 0.3699 | 0.711   | 0.105424848 | count | 1 |
| NSRP1    | 0.0752894 | 0.1245209 | 0.6046 | 0.545   | 0.105442161 | count | 1 |
| AK6      | 0.077637  | 0.1365443 | 0.5686 | 0.57    | 0.105471563 | count | 1 |
| ATP23    | 0.0971251 | 0.2879883 | 0.3373 | 0.736   | 0.105489801 | count | 1 |
| RCL1     | 0.0908944 | 0.4049859 | 0.2244 | 0.822   | 0.105575029 | count | 1 |
| EXOC5    | 0.0849403 | 0.2013264 | 0.4219 | 0.673   | 0.10575751  | count | 1 |
| SFMBT1   | 0.0996077 | 0.4273101 | 0.2331 | 0.816   | 0.106025942 | count | 1 |
| METTL15  | 0.0889626 | 0.2561172 | 0.3474 | 0.728   | 0.106029746 | count | 1 |
| UBE2G2   | 0.078911  | 0.1772446 | 0.4452 | 0.656   | 0.106121012 | count | 1 |
| RABEP1   | 0.0812973 | 0.1836671 | 0.4426 | 0.658   | 0.106493785 | count | 1 |
| TERF2IP  | 0.0752743 | 0.0771664 | 0.9755 | 0.329   | 0.106670933 | count | 1 |
| CCDC6    | 0.0819837 | 0.1786104 | 0.459  | 0.646   | 0.107156639 | count | 1 |
| MED20    | 0.254892  | 0.6368543 | 0.4002 | 0.689   | 0.10718175  | count | 1 |
| SIGLEC5  | 0.254892  | 0.6439012 | 0.3959 | 0.692   | 0.10718175  | count | 1 |
| ZMPSTE24 | 0.0878207 | 0.1953149 | 0.4496 | 0.653   | 0.107290012 | count | 1 |
| TMEM183A | 0.0790286 | 0.1446371 | 0.5464 | 0.585   | 0.107364954 | count | 1 |
| SLK      | 0.0820864 | 0.1482626 | 0.5537 | 0.58    | 0.107371971 | count | 1 |
| MED14OS  | 0.1095842 | 0.2904438 | 0.3773 | 0.706   | 0.107384864 | count | 1 |
| SAYSD1   | 0.0902322 | 0.2361672 | 0.3821 | 0.702   | 0.10755072  | count | 1 |
| MRPS28   | 0.0831527 | 0.1928866 | 0.4311 | 0.666   | 0.107604941 | count | 1 |
| FAM234B  | 0.2274423 | 0.5486907 | 0.4145 | 0.679   | 0.107796916 | count | 1 |
| TTC7B    | 0.1688311 | 0.5288699 | 0.3192 | 0.75    | 0.108243565 | count | 1 |

|            |           |           |        |       |             |       |   |
|------------|-----------|-----------|--------|-------|-------------|-------|---|
| ACTR1A     | 0.0794863 | 0.1408768 | 0.5642 | 0.573 | 0.108277329 | count | 1 |
| TENT5A     | 0.0793564 | 0.1223952 | 0.6484 | 0.517 | 0.108314011 | count | 1 |
| STAU1      | 0.0774062 | 0.0929323 | 0.8329 | 0.405 | 0.108317593 | count | 1 |
| SS18       | 0.0881142 | 0.2152563 | 0.4093 | 0.682 | 0.108322773 | count | 1 |
| LYPLAL1    | 0.0791983 | 0.1440427 | 0.5498 | 0.582 | 0.108438997 | count | 1 |
| RNF34      | 0.0900853 | 0.2799841 | 0.3218 | 0.748 | 0.108535593 | count | 1 |
| ATAD1      | 0.0981951 | 0.225542  | 0.4354 | 0.663 | 0.108577266 | count | 1 |
| PCDHGA10   | 0.8433795 | 0.6946773 | 1.2141 | 0.225 | 0.108638566 | count | 1 |
| TPRG1L     | 0.090658  | 0.2444873 | 0.3708 | 0.711 | 0.108660327 | count | 1 |
| GPS2       | 0.0841894 | 0.1961958 | 0.4291 | 0.668 | 0.10904971  | count | 1 |
| PRPF18     | 0.0877522 | 0.2312304 | 0.3795 | 0.704 | 0.109085775 | count | 1 |
| AC072061.1 | 0.3713953 | 0.5985682 | 0.6205 | 0.535 | 0.109274947 | count | 1 |
| TSHZ1      | 0.1035782 | 0.3863646 | 0.2681 | 0.789 | 0.109470788 | count | 1 |
| PLAC9      | 0.1707807 | 0.4956634 | 0.3445 | 0.73  | 0.109531921 | count | 1 |
| SELENOH    | 0.0770199 | 0.0551042 | 1.3977 | 0.162 | 0.109725459 | count | 1 |
| RPGR       | 0.0923367 | 0.2426525 | 0.3805 | 0.704 | 0.109754629 | count | 1 |
| WDPCP      | 0.1150105 | 0.5609445 | 0.205  | 0.838 | 0.10994911  | count | 1 |
| ELP4       | 0.0961371 | 0.3224761 | 0.2981 | 0.766 | 0.109955179 | count | 1 |
| CHST14     | 0.1087304 | 0.3378503 | 0.3218 | 0.748 | 0.11006923  | count | 1 |
| EML1       | 0.2321488 | 0.5534786 | 0.4194 | 0.675 | 0.110138755 | count | 1 |
| C1orf52    | 0.0804775 | 0.1275342 | 0.631  | 0.528 | 0.110145724 | count | 1 |
| TMEM199    | 0.0874306 | 0.2002507 | 0.4366 | 0.662 | 0.11053283  | count | 1 |
| JMJD1C     | 0.0777783 | 0.0695907 | 1.1177 | 0.264 | 0.110705423 | count | 1 |
| LINC02062  | 0.2632183 | 0.978266  | 0.2691 | 0.788 | 0.110890404 | count | 1 |
| HNRNPK     | 0.0779285 | 0.0492976 | 1.5808 | 0.114 | 0.111087915 | count | 1 |
| ZNF347     | 0.1463344 | 0.5695257 | 0.2569 | 0.797 | 0.111130579 | count | 1 |
| DHRX       | 0.0839613 | 0.1869748 | 0.4491 | 0.653 | 0.11119938  | count | 1 |
| CLK4       | 0.0931542 | 0.2143921 | 0.4345 | 0.664 | 0.11136399  | count | 1 |
| C22orf46   | 0.1198892 | 0.3543324 | 0.3384 | 0.735 | 0.111410792 | count | 1 |
| MRPL24     | 0.083437  | 0.200175  | 0.4168 | 0.677 | 0.111619585 | count | 1 |
| VAV1       | 0.0866987 | 0.1957214 | 0.443  | 0.658 | 0.111670157 | count | 1 |
| KPNA4      | 0.0805129 | 0.1041211 | 0.7733 | 0.439 | 0.111702842 | count | 1 |
| CA5B       | 0.1065938 | 0.2962763 | 0.3598 | 0.719 | 0.111809084 | count | 1 |
| KLHDC7B    | 0.1006218 | 0.3843961 | 0.2618 | 0.794 | 0.11188851  | count | 1 |
| LINC02185  | 0.1155256 | 0.4635808 | 0.2492 | 0.803 | 0.111899224 | count | 1 |
| HDLBP      | 0.0802164 | 0.1045639 | 0.7672 | 0.443 | 0.111925073 | count | 1 |
| CLDND1     | 0.082345  | 0.1328336 | 0.6199 | 0.535 | 0.112030799 | count | 1 |
| TP53I3     | 0.0876328 | 0.1911558 | 0.4584 | 0.647 | 0.112036509 | count | 1 |
| ATR        | 0.1120419 | 0.3126675 | 0.3583 | 0.72  | 0.112304029 | count | 1 |
| ZC3H7B     | 0.1433387 | 0.3632176 | 0.3946 | 0.693 | 0.112353089 | count | 1 |
| ZBTB47     | 0.159468  | 0.582259  | 0.2739 | 0.784 | 0.112493963 | count | 1 |
| DPAGT1     | 0.1018142 | 0.2750036 | 0.3702 | 0.711 | 0.112610202 | count | 1 |
| NDUFB5     | 0.0796667 | 0.0647399 | 1.2306 | 0.219 | 0.112621399 | count | 1 |
| SLC24A1    | 0.1536291 | 0.9470192 | 0.1622 | 0.871 | 0.112702462 | count | 1 |
| SIKE1      | 0.0887049 | 0.2032368 | 0.4365 | 0.663 | 0.112736569 | count | 1 |

|            |           |           |        |       |             |       |   |
|------------|-----------|-----------|--------|-------|-------------|-------|---|
| YY1        | 0.0791859 | 0.0640927 | 1.2355 | 0.217 | 0.112737786 | count | 1 |
| SEC16A     | 0.0900896 | 0.2946915 | 0.3057 | 0.76  | 0.112745497 | count | 1 |
| NOL3       | 0.1151619 | 0.419974  | 0.2742 | 0.784 | 0.11291665  | count | 1 |
| PWWP2A     | 0.0886299 | 0.2290185 | 0.387  | 0.699 | 0.113052972 | count | 1 |
| CAVIN1     | 0.1489389 | 0.6553157 | 0.2273 | 0.82  | 0.113153823 | count | 1 |
| HIPK2      | 0.0861049 | 0.2138042 | 0.4027 | 0.687 | 0.113351915 | count | 1 |
| MDP1       | 0.2386502 | 0.4919751 | 0.4851 | 0.628 | 0.113380843 | count | 1 |
| PLEKHA5    | 0.1050105 | 0.3853809 | 0.2725 | 0.785 | 0.113391192 | count | 1 |
| ZNF804A    | 0.140619  | 0.4506404 | 0.312  | 0.755 | 0.113414264 | count | 1 |
| RTL6       | 0.2688822 | 0.5248422 | 0.5123 | 0.608 | 0.113420421 | count | 1 |
| WIPI2      | 0.082498  | 0.1277217 | 0.6459 | 0.518 | 0.113488183 | count | 1 |
| C2orf49    | 0.0865737 | 0.1984093 | 0.4363 | 0.663 | 0.113505066 | count | 1 |
| PRIMPOL    | 0.117175  | 0.433892  | 0.2701 | 0.787 | 0.113516941 | count | 1 |
| TEX264     | 0.0816684 | 0.0973519 | 0.8389 | 0.402 | 0.113537276 | count | 1 |
| FAM174A    | 0.0914953 | 0.2691177 | 0.34   | 0.734 | 0.113559563 | count | 1 |
| INPP5E     | 0.1263623 | 0.6173848 | 0.2047 | 0.838 | 0.113668255 | count | 1 |
| TRPS1      | 0.0834364 | 0.1419839 | 0.5876 | 0.557 | 0.113695365 | count | 1 |
| FBXO36     | 0.385126  | 0.838375  | 0.4594 | 0.646 | 0.113696655 | count | 1 |
| RAB43      | 0.385126  | 0.8224141 | 0.4683 | 0.64  | 0.113696655 | count | 1 |
| ULBP2      | 0.385126  | 0.9779565 | 0.3938 | 0.694 | 0.113696655 | count | 1 |
| CENPI      | 0.385126  | 1.226056  | 0.3141 | 0.753 | 0.113696655 | count | 1 |
| AC124798.1 | 0.385126  | 0.8224141 | 0.4683 | 0.64  | 0.113696655 | count | 1 |
| TMTC4      | 0.385126  | 0.8255833 | 0.4665 | 0.641 | 0.113696655 | count | 1 |
| AGPAT4     | 0.1023281 | 0.3015929 | 0.3393 | 0.734 | 0.113800438 | count | 1 |
| SGMS1-AS1  | 0.3855594 | 0.6111712 | 0.6309 | 0.528 | 0.113836648 | count | 1 |
| BCL2L1     | 0.0901643 | 0.2280698 | 0.3953 | 0.693 | 0.113845181 | count | 1 |
| CCNDBP1    | 0.0829726 | 0.1137567 | 0.7294 | 0.466 | 0.11386786  | count | 1 |
| MARK2      | 0.0895856 | 0.1744455 | 0.5135 | 0.608 | 0.114139905 | count | 1 |
| FILNC1     | 0.161761  | 0.5266518 | 0.3071 | 0.759 | 0.114154812 | count | 1 |
| ENO1-AS1   | 0.315505  | 0.7747077 | 0.4073 | 0.684 | 0.114359599 | count | 1 |
| SERPINI1   | 0.315505  | 0.7235179 | 0.4361 | 0.663 | 0.114359599 | count | 1 |
| LINC01852  | 0.315505  | 0.6879055 | 0.4586 | 0.647 | 0.114359599 | count | 1 |
| DTWD2      | 0.1558494 | 0.3965922 | 0.393  | 0.694 | 0.114371719 | count | 1 |
| LINC00106  | 0.880927  | 0.7337471 | 1.2006 | 0.23  | 0.114470592 | count | 1 |
| AC023590.1 | 0.880927  | 0.7857269 | 1.1212 | 0.262 | 0.114470592 | count | 1 |
| SEZ6       | 0.880927  | 0.8997634 | 0.9791 | 0.328 | 0.114470592 | count | 1 |
| SHMT2      | 0.0915462 | 0.1967984 | 0.4652 | 0.642 | 0.114575659 | count | 1 |
| SELENOF    | 0.0811462 | 0.0685003 | 1.1846 | 0.236 | 0.114577749 | count | 1 |
| ZNF701     | 0.1076282 | 0.3499892 | 0.3075 | 0.758 | 0.114642127 | count | 1 |
| TPGS1      | 0.0839433 | 0.1356766 | 0.6187 | 0.536 | 0.114871064 | count | 1 |
| AC003681.1 | 0.2725379 | 0.480908  | 0.5667 | 0.571 | 0.115056497 | count | 1 |
| CTNNBIP1   | 0.0854692 | 0.1488703 | 0.5741 | 0.566 | 0.115087269 | count | 1 |
| MED9       | 0.189875  | 0.4728785 | 0.4015 | 0.688 | 0.115115054 | count | 1 |
| C6orf48    | 0.0874118 | 0.13379   | 0.6534 | 0.514 | 0.115297541 | count | 1 |
| CCDC138    | 0.2037139 | 0.6118322 | 0.333  | 0.739 | 0.115477289 | count | 1 |

|            |           |           |        |         |             |       |   |
|------------|-----------|-----------|--------|---------|-------------|-------|---|
| AL159169.2 | 0.2738394 | 1.3252515 | 0.2066 | 0.836   | 0.115639552 | count | 1 |
| AC073896.2 | 0.1912313 | 0.4823707 | 0.3964 | 0.692   | 0.115966653 | count | 1 |
| NUDT18     | 0.1044123 | 0.3983284 | 0.2621 | 0.793   | 0.116136442 | count | 1 |
| NUPL2      | 0.0933567 | 0.1776222 | 0.5256 | 0.599   | 0.116280566 | count | 1 |
| FASTK      | 0.0917609 | 0.2088255 | 0.4394 | 0.66    | 0.116336796 | count | 1 |
| N4BP2      | 0.0953151 | 0.2989926 | 0.3188 | 0.75    | 0.116489707 | count | 1 |
| ERGIC1     | 0.0864672 | 0.131721  | 0.6564 | 0.512   | 0.116882168 | count | 1 |
| YWHAB      | 0.0814065 | 0.0351076 | 2.3188 | 0.0205  | 0.116943159 | count | 1 |
| CTBS       | 0.0839068 | 0.105221  | 0.7974 | 0.425   | 0.117006646 | count | 1 |
| PARP15     | 0.2459551 | 0.5502695 | 0.447  | 0.655   | 0.117033487 | count | 1 |
| PHACTR4    | 0.0908427 | 0.1823406 | 0.4982 | 0.618   | 0.117255141 | count | 1 |
| RPL21      | 0.0814513 | 0.0250633 | 3.2498 | 0.00117 | 0.117306383 | count | 1 |
| PI4KA      | 0.1079914 | 0.2567898 | 0.4205 | 0.674   | 0.117395032 | count | 1 |
| RPP30      | 0.0897901 | 0.1729443 | 0.5192 | 0.604   | 0.11756328  | count | 1 |
| AIF1       | 0.081636  | 0.0293002 | 2.7862 | 0.00537 | 0.117637438 | count | 1 |
| UBQLN1     | 0.0910986 | 0.1892269 | 0.4814 | 0.63    | 0.117699158 | count | 1 |
| EIF4B      | 0.0842694 | 0.0696338 | 1.2102 | 0.226   | 0.117806507 | count | 1 |
| SYF2       | 0.0836968 | 0.0760767 | 1.1002 | 0.271   | 0.118347994 | count | 1 |
| SPARCL1    | 0.1168758 | 0.6035004 | 0.1937 | 0.846   | 0.118408786 | count | 1 |
| POC1B-AS1  | 0.5386618 | 0.6478088 | 0.8315 | 0.406   | 0.118421328 | count | 1 |
| C5AR1      | 0.0823455 | 0.043848  | 1.878  | 0.0605  | 0.118431069 | count | 1 |
| IMPACT     | 0.0923286 | 0.1966241 | 0.4696 | 0.639   | 0.118452807 | count | 1 |
| TADA2A     | 0.1030987 | 0.2898897 | 0.3556 | 0.722   | 0.11846307  | count | 1 |
| ELOA       | 0.0879915 | 0.1403538 | 0.6269 | 0.531   | 0.11861967  | count | 1 |
| ZNF511     | 0.0857861 | 0.1219224 | 0.7036 | 0.482   | 0.118662216 | count | 1 |
| LYSMD3     | 0.101041  | 0.2183605 | 0.4627 | 0.644   | 0.118672064 | count | 1 |
| ZNF274     | 0.1099801 | 0.2980345 | 0.369  | 0.712   | 0.118805892 | count | 1 |
| EGR4       | 0.4014803 | 0.7883167 | 0.5093 | 0.611   | 0.118997172 | count | 1 |
| CCS        | 0.0867728 | 0.1291417 | 0.6719 | 0.502   | 0.119020205 | count | 1 |
| SNRPB2     | 0.0842347 | 0.0775759 | 1.0858 | 0.278   | 0.119059457 | count | 1 |
| NOB1       | 0.0931084 | 0.2676406 | 0.3479 | 0.728   | 0.119195352 | count | 1 |
| SNRPA      | 0.0876418 | 0.1501687 | 0.5836 | 0.56    | 0.119280622 | count | 1 |
| AGPAT5     | 0.0938952 | 0.2884115 | 0.3256 | 0.745   | 0.119357161 | count | 1 |
| TFDP2      | 0.1113004 | 0.2621758 | 0.4245 | 0.671   | 0.119434617 | count | 1 |
| MRPL58     | 0.0912773 | 0.1766822 | 0.5166 | 0.605   | 0.119515868 | count | 1 |
| 9-Mar      | 0.0980351 | 0.2542118 | 0.3856 | 0.7     | 0.119569364 | count | 1 |
| CMC2       | 0.0859499 | 0.108304  | 0.7936 | 0.428   | 0.119595187 | count | 1 |
| FAM104B    | 0.0951102 | 0.2456759 | 0.3871 | 0.699   | 0.119600406 | count | 1 |
| CFAP45     | 0.9142266 | 0.8176887 | 1.1181 | 0.264   | 0.119701215 | count | 1 |
| AC117382.2 | 0.9142266 | 0.9879596 | 0.9254 | 0.355   | 0.119701215 | count | 1 |
| AC112236.2 | 0.9142266 | 0.8753444 | 1.0444 | 0.296   | 0.119701215 | count | 1 |
| MSS51      | 0.9142266 | 1.0758    | 0.8498 | 0.396   | 0.119701215 | count | 1 |
| SND1       | 0.0887945 | 0.1421934 | 0.6245 | 0.532   | 0.119704244 | count | 1 |
| CEP95      | 0.1034136 | 0.2282396 | 0.4531 | 0.651   | 0.119764827 | count | 1 |
| RPP25      | 0.102432  | 0.2491364 | 0.4111 | 0.681   | 0.119910848 | count | 1 |

|            |           |           |        |         |             |       |   |
|------------|-----------|-----------|--------|---------|-------------|-------|---|
| XYLB       | 0.5446572 | 0.7410641 | 0.735  | 0.462   | 0.119917007 | count | 1 |
| ADAMTS10   | 0.5446572 | 0.7547209 | 0.7217 | 0.471   | 0.119917007 | count | 1 |
| MSTO1      | 0.135816  | 0.5446834 | 0.2493 | 0.803   | 0.120058728 | count | 1 |
| COIL       | 0.0996678 | 0.2880486 | 0.346  | 0.729   | 0.120142786 | count | 1 |
| ZRANB1     | 0.0998185 | 0.273399  | 0.3651 | 0.715   | 0.120325418 | count | 1 |
| AL450998.2 | 0.0970138 | 0.2691669 | 0.3604 | 0.719   | 0.120439233 | count | 1 |
| C8orf82    | 0.0935265 | 0.1872817 | 0.4994 | 0.618   | 0.120493417 | count | 1 |
| PAK2       | 0.0844797 | 0.0577564 | 1.4627 | 0.1437  | 0.120571179 | count | 1 |
| ZNF512     | 0.2849553 | 0.5038873 | 0.5655 | 0.572   | 0.120631885 | count | 1 |
| ING5       | 0.0964178 | 0.2191904 | 0.4399 | 0.66    | 0.120698244 | count | 1 |
| THAP5      | 0.0977903 | 0.2211456 | 0.4422 | 0.658   | 0.120742942 | count | 1 |
| PSMF1      | 0.086674  | 0.1048227 | 0.8269 | 0.408   | 0.120964526 | count | 1 |
| PARP1      | 0.0873558 | 0.1098214 | 0.7954 | 0.426   | 0.121221348 | count | 1 |
| ATP5PD     | 0.0847728 | 0.0485099 | 1.7475 | 0.0807  | 0.121266651 | count | 1 |
| SPIN3      | 0.5502916 | 0.8727479 | 0.6305 | 0.528   | 0.121325961 | count | 1 |
| LRP5       | 0.5502916 | 0.8727479 | 0.6305 | 0.528   | 0.121325961 | count | 1 |
| SYCP2      | 0.5502916 | 1.1323299 | 0.486  | 0.627   | 0.121325961 | count | 1 |
| ZNF837     | 0.5502916 | 0.9011822 | 0.6106 | 0.541   | 0.121325961 | count | 1 |
| C3orf70    | 0.9245585 | 1.015012  | 0.9109 | 0.362   | 0.121334944 | count | 1 |
| LINC01554  | 0.9245585 | 0.7819196 | 1.1824 | 0.237   | 0.121334944 | count | 1 |
| IFT122     | 0.1268493 | 0.6718097 | 0.1888 | 0.85    | 0.121424695 | count | 1 |
| ZNF684     | 0.1348479 | 0.4291348 | 0.3142 | 0.753   | 0.121427386 | count | 1 |
| NRBF2      | 0.086009  | 0.0787632 | 1.092  | 0.275   | 0.121524297 | count | 1 |
| KCTD12     | 0.087145  | 0.0914434 | 0.953  | 0.341   | 0.121612038 | count | 1 |
| IFITM3     | 0.0847198 | 0.0610541 | 1.3876 | 0.165   | 0.121637523 | count | 1 |
| TOPBP1     | 0.1060375 | 0.228321  | 0.4644 | 0.642   | 0.121863614 | count | 1 |
| NDUFAF2    | 0.0897118 | 0.1644197 | 0.5456 | 0.585   | 0.121903591 | count | 1 |
| NT5C3A     | 0.0927926 | 0.2178493 | 0.4259 | 0.67    | 0.12201781  | count | 1 |
| DOCK1      | 0.1660042 | 0.42505   | 0.3906 | 0.696   | 0.12202038  | count | 1 |
| IFIT3      | 0.0906685 | 0.2588276 | 0.3503 | 0.726   | 0.122056783 | count | 1 |
| CD83       | 0.0849885 | 0.0482941 | 1.7598 | 0.0786  | 0.122095777 | count | 1 |
| SSBP4      | 0.0878753 | 0.1122523 | 0.7828 | 0.434   | 0.122264555 | count | 1 |
| VPS9D1     | 0.1184886 | 0.3296462 | 0.3594 | 0.719   | 0.122336847 | count | 1 |
| ESRRA      | 0.0956622 | 0.1982983 | 0.4824 | 0.63    | 0.122338488 | count | 1 |
| SMIM10L1   | 0.0894748 | 0.1422413 | 0.629  | 0.529   | 0.122478426 | count | 1 |
| ZNF717     | 0.1479795 | 0.5574102 | 0.2655 | 0.791   | 0.122652214 | count | 1 |
| SP110      | 0.0870126 | 0.0856318 | 1.0161 | 0.31    | 0.12272692  | count | 1 |
| CDK12      | 0.0917294 | 0.1434263 | 0.6396 | 0.523   | 0.122737147 | count | 1 |
| ATP5PB     | 0.0864931 | 0.0591885 | 1.4613 | 0.144   | 0.122790851 | count | 1 |
| IL6R       | 0.0903499 | 0.1390665 | 0.6497 | 0.516   | 0.12284014  | count | 1 |
| CAPNS1     | 0.0868207 | 0.0666974 | 1.3017 | 0.193   | 0.122842333 | count | 1 |
| CDK20      | 0.3375423 | 0.6969216 | 0.4843 | 0.628   | 0.122976749 | count | 1 |
| HPSE       | 0.0912223 | 0.1654728 | 0.5513 | 0.581   | 0.123027377 | count | 1 |
| G0S2       | 0.08566   | 0.1448631 | 0.5913 | 0.554   | 0.123046557 | count | 1 |
| RPL23A     | 0.0855505 | 0.031843  | 2.6866 | 0.00727 | 0.123057032 | count | 1 |

|            |           |           |        |         |             |       |   |
|------------|-----------|-----------|--------|---------|-------------|-------|---|
| SEPHS1     | 0.108949  | 0.2563153 | 0.4251 | 0.671   | 0.123059281 | count | 1 |
| RAB24      | 0.1675639 | 0.4101649 | 0.4085 | 0.683   | 0.123197195 | count | 1 |
| ZNF787     | 0.0926909 | 0.1433145 | 0.6468 | 0.518   | 0.123320453 | count | 1 |
| LAS1L      | 0.1015528 | 0.2852202 | 0.3561 | 0.722   | 0.123321613 | count | 1 |
| TRIM36     | 0.2033611 | 0.5446122 | 0.3734 | 0.709   | 0.12360053  | count | 1 |
| ZNF24      | 0.0905108 | 0.1405102 | 0.6442 | 0.52    | 0.123845016 | count | 1 |
| PNN        | 0.0880219 | 0.075124  | 1.1717 | 0.241   | 0.123961843 | count | 1 |
| FBXO11     | 0.095186  | 0.159121  | 0.5982 | 0.55    | 0.123975404 | count | 1 |
| EIF2AK1    | 0.0938678 | 0.1678512 | 0.5592 | 0.576   | 0.124062972 | count | 1 |
| ZNF672     | 0.1026853 | 0.2454032 | 0.4184 | 0.676   | 0.124109185 | count | 1 |
| SEC11A     | 0.0867333 | 0.0430716 | 2.0137 | 0.0442  | 0.124171992 | count | 1 |
| CBL        | 0.0927082 | 0.143412  | 0.6464 | 0.518   | 0.12421151  | count | 1 |
| PARP11     | 0.108571  | 0.3625835 | 0.2994 | 0.765   | 0.124280721 | count | 1 |
| IQCK       | 0.3409784 | 0.5891933 | 0.5787 | 0.563   | 0.124327442 | count | 1 |
| LINC02352  | 0.1931097 | 0.6459019 | 0.299  | 0.765   | 0.124347642 | count | 1 |
| SCAF4      | 0.1017689 | 0.2304573 | 0.4416 | 0.659   | 0.124417311 | count | 1 |
| C11orf1    | 0.1000324 | 0.2724828 | 0.3671 | 0.714   | 0.124420513 | count | 1 |
| EDA        | 0.1692681 | 0.3648134 | 0.464  | 0.643   | 0.124483665 | count | 1 |
| CCDC127    | 0.1030771 | 0.2396904 | 0.43   | 0.667   | 0.124585312 | count | 1 |
| LAMTOR4    | 0.0870328 | 0.0432616 | 2.0118 | 0.0444  | 0.124710852 | count | 1 |
| MAGOHB     | 0.0975413 | 0.199159  | 0.4898 | 0.624   | 0.124750283 | count | 1 |
| GRK4       | 0.261348  | 0.804682  | 0.3248 | 0.745   | 0.12476436  | count | 1 |
| PFDN5      | 0.0866658 | 0.0274458 | 3.1577 | 0.00161 | 0.124773345 | count | 1 |
| SLC35E2B   | 0.1321969 | 0.6199522 | 0.2132 | 0.831   | 0.124869336 | count | 1 |
| SETD4      | 0.138618  | 0.4083751 | 0.3394 | 0.734   | 0.124879598 | count | 1 |
| TESMIN     | 0.2378602 | 0.6009633 | 0.3958 | 0.692   | 0.124947206 | count | 1 |
| 4-Sep      | 0.1846313 | 0.9206811 | 0.2005 | 0.841   | 0.125004402 | count | 1 |
| CHMP4A     | 0.0890263 | 0.0972038 | 0.9159 | 0.36    | 0.125145125 | count | 1 |
| RASSF7     | 0.1201719 | 0.3085682 | 0.3894 | 0.697   | 0.125171978 | count | 1 |
| ELAVL4     | 0.1944606 | 0.4625466 | 0.4204 | 0.674   | 0.12524752  | count | 1 |
| TXN2       | 0.0894089 | 0.0869105 | 1.0287 | 0.304   | 0.125427287 | count | 1 |
| PHF20L1    | 0.0902647 | 0.1013646 | 0.8905 | 0.373   | 0.125433182 | count | 1 |
| TERF1      | 0.1037828 | 0.1929682 | 0.5378 | 0.591   | 0.125442945 | count | 1 |
| PTRH2      | 0.0953477 | 0.1614237 | 0.5907 | 0.555   | 0.125470371 | count | 1 |
| ZNF276     | 0.1250437 | 0.2894875 | 0.4319 | 0.666   | 0.125498153 | count | 1 |
| NFKBIB     | 0.10366   | 0.2763998 | 0.375  | 0.708   | 0.125597712 | count | 1 |
| AC104596.1 | 0.5680355 | 1.0693511 | 0.5312 | 0.595   | 0.125783925 | count | 1 |
| AL035530.2 | 0.5680355 | 1.0693511 | 0.5312 | 0.595   | 0.125783925 | count | 1 |
| DNMBP-AS1  | 0.5680355 | 1.0693511 | 0.5312 | 0.595   | 0.125783925 | count | 1 |
| ESPL1      | 0.5680355 | 1.0304698 | 0.5512 | 0.582   | 0.125783925 | count | 1 |
| SGCG       | 0.5680355 | 1.0304698 | 0.5512 | 0.582   | 0.125783925 | count | 1 |
| ASB2       | 0.5680355 | 1.0693511 | 0.5312 | 0.595   | 0.125783925 | count | 1 |
| USP3-AS1   | 0.5680355 | 1.0304698 | 0.5512 | 0.582   | 0.125783925 | count | 1 |
| AC005696.4 | 0.5680355 | 1.0693511 | 0.5312 | 0.595   | 0.125783925 | count | 1 |
| PLCD3      | 0.5680355 | 1.0693511 | 0.5312 | 0.595   | 0.125783925 | count | 1 |

|            |           |           |        |          |             |       |   |
|------------|-----------|-----------|--------|----------|-------------|-------|---|
| C20orf204  | 0.5680355 | 1.0304698 | 0.5512 | 0.582    | 0.125783925 | count | 1 |
| GRIN2D     | 0.5680355 | 1.0304698 | 0.5512 | 0.582    | 0.125783925 | count | 1 |
| IQCH-AS1   | 0.2966489 | 0.5561782 | 0.5334 | 0.594    | 0.125907729 | count | 1 |
| AP3S2      | 0.123245  | 0.3576265 | 0.3446 | 0.73     | 0.126148143 | count | 1 |
| SLC7A8     | 0.1006158 | 0.2410556 | 0.4174 | 0.676    | 0.126172365 | count | 1 |
| CNBP       | 0.0883728 | 0.0486028 | 1.8183 | 0.0691   | 0.126204561 | count | 1 |
| DCTN6      | 0.0923434 | 0.1640201 | 0.563  | 0.573    | 0.126300804 | count | 1 |
| U62317.3   | 0.196096  | 1.1633922 | 0.1686 | 0.866    | 0.126337439 | count | 1 |
| KIDINS220  | 0.0947101 | 0.1401225 | 0.6759 | 0.499    | 0.126563452 | count | 1 |
| ZCCHC4     | 0.1431002 | 0.4774654 | 0.2997 | 0.764    | 0.126613397 | count | 1 |
| BARD1      | 0.1023599 | 0.2571098 | 0.3981 | 0.691    | 0.126649031 | count | 1 |
| PHF2       | 0.1138685 | 0.2855779 | 0.3987 | 0.69     | 0.126743805 | count | 1 |
| ICAM1      | 0.0941049 | 0.1446777 | 0.6504 | 0.515    | 0.126785943 | count | 1 |
| ERP44      | 0.0897072 | 0.0708404 | 1.2663 | 0.206    | 0.126807273 | count | 1 |
| WASF2      | 0.088924  | 0.0572492 | 1.5533 | 0.12     | 0.126815268 | count | 1 |
| BPTF       | 0.0911017 | 0.1157588 | 0.787  | 0.431    | 0.126872067 | count | 1 |
| KRT10      | 0.0893612 | 0.0782416 | 1.1421 | 0.254    | 0.126926431 | count | 1 |
| ASB3       | 0.2231785 | 0.5781512 | 0.386  | 0.7      | 0.126988736 | count | 1 |
| NDEL1      | 0.0931487 | 0.1255085 | 0.7422 | 0.458    | 0.127015852 | count | 1 |
| RPL26L1    | 0.0913323 | 0.1281213 | 0.7129 | 0.476    | 0.12707953  | count | 1 |
| MACF1      | 0.0911045 | 0.1165797 | 0.7815 | 0.435    | 0.127164698 | count | 1 |
| ATG14      | 0.1079249 | 0.2589083 | 0.4168 | 0.677    | 0.127224154 | count | 1 |
| BCL11A     | 0.100751  | 0.2828701 | 0.3562 | 0.722    | 0.127441505 | count | 1 |
| RNF114     | 0.0917148 | 0.0985583 | 0.9306 | 0.352    | 0.127546206 | count | 1 |
| CKLF       | 0.0893699 | 0.0642917 | 1.3901 | 0.1646   | 0.127566443 | count | 1 |
| DTNB       | 0.135124  | 0.4447642 | 0.3038 | 0.761    | 0.127675975 | count | 1 |
| ARL8A      | 0.091975  | 0.0980642 | 0.9379 | 0.348    | 0.127697938 | count | 1 |
| GNAI3      | 0.0906335 | 0.0841627 | 1.0769 | 0.282    | 0.1279068   | count | 1 |
| EXOC3      | 0.1002458 | 0.2571477 | 0.3898 | 0.697    | 0.128075318 | count | 1 |
| PTS        | 0.0967828 | 0.1747348 | 0.5539 | 0.58     | 0.128077041 | count | 1 |
| CYB561D2   | 0.0940002 | 0.1270424 | 0.7399 | 0.459    | 0.128146962 | count | 1 |
| SNX17      | 0.091706  | 0.0882611 | 1.039  | 0.299    | 0.128192522 | count | 1 |
| SPECC1L    | 0.1812399 | 0.5356874 | 0.3383 | 0.735    | 0.128311147 | count | 1 |
| MIEN1      | 0.0912181 | 0.0903685 | 1.0094 | 0.313    | 0.128345475 | count | 1 |
| CAMTA2     | 0.1153955 | 0.313646  | 0.3679 | 0.713    | 0.128458028 | count | 1 |
| FXYD5      | 0.0895045 | 0.0375253 | 2.3852 | 0.0171   | 0.128643526 | count | 1 |
| RPLP2      | 0.0893626 | 0.0250003 | 3.5745 | 0.000358 | 0.128721223 | count | 1 |
| CRYBB1     | 0.1169118 | 0.3601136 | 0.3247 | 0.745    | 0.1287273   | count | 1 |
| PEX14      | 0.1819074 | 0.4587316 | 0.3965 | 0.692    | 0.128797754 | count | 1 |
| ITPK1      | 0.1043047 | 0.1789904 | 0.5827 | 0.56     | 0.128825772 | count | 1 |
| ANKS1A     | 0.1052145 | 0.203     | 0.5183 | 0.604    | 0.128924693 | count | 1 |
| FAM53C     | 0.0959149 | 0.1446039 | 0.6633 | 0.507    | 0.128937382 | count | 1 |
| ALG14      | 0.1147946 | 0.4299257 | 0.267  | 0.789    | 0.129093749 | count | 1 |
| AL669831.5 | 0.1521045 | 0.5578507 | 0.2727 | 0.785    | 0.129192869 | count | 1 |
| PFKL       | 0.0945673 | 0.1242781 | 0.7609 | 0.447    | 0.129230673 | count | 1 |

|            |           |           |        |        |             |       |   |
|------------|-----------|-----------|--------|--------|-------------|-------|---|
| TK2        | 0.1023021 | 0.1979414 | 0.5168 | 0.605  | 0.129234717 | count | 1 |
| SLC1A5     | 0.1161224 | 0.2530417 | 0.4589 | 0.646  | 0.129274181 | count | 1 |
| STAM-AS1   | 0.2005492 | 0.7003578 | 0.2864 | 0.775  | 0.129308262 | count | 1 |
| AC006449.2 | 0.2005492 | 0.6587622 | 0.3044 | 0.761  | 0.129308262 | count | 1 |
| PPP1R12A   | 0.0924038 | 0.095454  | 0.968  | 0.333  | 0.129423106 | count | 1 |
| SAMM50     | 0.1015846 | 0.2019174 | 0.5031 | 0.615  | 0.129486907 | count | 1 |
| BRD2       | 0.0924538 | 0.1070718 | 0.8635 | 0.388  | 0.129519549 | count | 1 |
| POLR2C     | 0.101261  | 0.1794874 | 0.5642 | 0.573  | 0.1295254   | count | 1 |
| SOCS2      | 0.3048503 | 0.4411315 | 0.6911 | 0.49   | 0.129622626 | count | 1 |
| AKAP13     | 0.0913754 | 0.0804146 | 1.1363 | 0.256  | 0.129643996 | count | 1 |
| PBX2       | 0.1076112 | 0.2195233 | 0.4902 | 0.624  | 0.129773206 | count | 1 |
| P4HTM      | 0.108774  | 0.2795481 | 0.3891 | 0.697  | 0.129787631 | count | 1 |
| RIPK2      | 0.0933945 | 0.0939312 | 0.9943 | 0.32   | 0.129938672 | count | 1 |
| NARS       | 0.0941982 | 0.1000102 | 0.9419 | 0.346  | 0.130089274 | count | 1 |
| CD1C       | 0.0993123 | 0.2611738 | 0.3803 | 0.704  | 0.130162638 | count | 1 |
| ORC5       | 0.1271958 | 0.5036755 | 0.2525 | 0.801  | 0.130240453 | count | 1 |
| SP4        | 0.1534648 | 0.392041  | 0.3915 | 0.695  | 0.130371775 | count | 1 |
| TSMF       | 0.1011682 | 0.2139351 | 0.4729 | 0.636  | 0.130373218 | count | 1 |
| AL392172.1 | 0.0995028 | 0.2370523 | 0.4198 | 0.675  | 0.130413055 | count | 1 |
| TRIP12     | 0.0952238 | 0.1279658 | 0.7441 | 0.457  | 0.130497681 | count | 1 |
| RYK        | 0.1044181 | 0.238961  | 0.437  | 0.662  | 0.130550688 | count | 1 |
| S1PR1      | 0.2291804 | 0.4792088 | 0.4782 | 0.633  | 0.130554385 | count | 1 |
| TENT5C     | 0.2291804 | 0.4819546 | 0.4755 | 0.634  | 0.130554385 | count | 1 |
| PQLC1      | 0.0940686 | 0.0995454 | 0.945  | 0.345  | 0.130637821 | count | 1 |
| QRSL1      | 0.1208384 | 0.2791947 | 0.4328 | 0.665  | 0.13065129  | count | 1 |
| NAPA-AS1   | 0.2483207 | 0.5244798 | 0.4735 | 0.636  | 0.130716816 | count | 1 |
| LARP4B     | 0.1036646 | 0.2923185 | 0.3546 | 0.723  | 0.13078047  | count | 1 |
| RPS4Y1     | 0.0911659 | 0.0483874 | 1.8841 | 0.0597 | 0.130862751 | count | 1 |
| SAAL1      | 0.1385305 | 0.3647534 | 0.3798 | 0.704  | 0.13094447  | count | 1 |
| PLEKHA7    | 0.9849361 | 0.6592556 | 1.494  | 0.135  | 0.130980424 | count | 1 |
| TP53       | 0.1176513 | 0.2752759 | 0.4274 | 0.669  | 0.130991082 | count | 1 |
| MRPL2      | 0.1055053 | 0.2212295 | 0.4769 | 0.633  | 0.131031658 | count | 1 |
| RRP36      | 0.0981029 | 0.1673617 | 0.5862 | 0.558  | 0.131108018 | count | 1 |
| AP006621.3 | 0.1934154 | 0.7269428 | 0.2661 | 0.79   | 0.131147175 | count | 1 |
| EML2       | 0.120565  | 0.3228538 | 0.3734 | 0.709  | 0.131195555 | count | 1 |
| WRAP73     | 0.1102953 | 0.2092564 | 0.5271 | 0.598  | 0.131236007 | count | 1 |
| ABCF2      | 0.1336073 | 0.3110036 | 0.4296 | 0.668  | 0.13125379  | count | 1 |
| FAM3A      | 0.1061969 | 0.2393113 | 0.4438 | 0.657  | 0.131419871 | count | 1 |
| MTHFD1     | 0.133849  | 0.4256396 | 0.3145 | 0.753  | 0.131494511 | count | 1 |
| PBRM1      | 0.0959539 | 0.1234904 | 0.777  | 0.437  | 0.131499799 | count | 1 |
| MTHFR      | 0.1026289 | 0.2003002 | 0.5124 | 0.608  | 0.131856452 | count | 1 |
| RNF41      | 0.1042989 | 0.1784556 | 0.5845 | 0.559  | 0.131948065 | count | 1 |
| ZNF771     | 0.2505939 | 0.6595197 | 0.38   | 0.704  | 0.131973554 | count | 1 |
| KRBA2      | 0.2505939 | 0.6596397 | 0.3799 | 0.704  | 0.131973554 | count | 1 |
| NUP85      | 0.1267992 | 0.3319488 | 0.382  | 0.703  | 0.132153914 | count | 1 |



|            |           |           |        |         |             |       |   |
|------------|-----------|-----------|--------|---------|-------------|-------|---|
| MTG2       | 0.115901  | 0.323914  | 0.3578 | 0.721   | 0.132169003 | count | 1 |
| MALAT1     | 0.0916432 | 0.0418049 | 2.1922 | 0.02846 | 0.132206698 | count | 1 |
| FAM32A     | 0.0949317 | 0.1230213 | 0.7717 | 0.44    | 0.132262393 | count | 1 |
| MED23      | 0.1468191 | 0.3146548 | 0.4666 | 0.641   | 0.132399497 | count | 1 |
| AC103706.1 | 0.2173371 | 0.4905586 | 0.443  | 0.658   | 0.132435692 | count | 1 |
| LSG1       | 0.1075044 | 0.2581196 | 0.4165 | 0.677   | 0.132543512 | count | 1 |
| AP3B1      | 0.0966698 | 0.124349  | 0.7774 | 0.437   | 0.132869201 | count | 1 |
| CHAMP1     | 0.1068124 | 0.2711583 | 0.3939 | 0.694   | 0.132893886 | count | 1 |
| SREBF1     | 0.104509  | 0.229922  | 0.4545 | 0.649   | 0.132903742 | count | 1 |
| RDH11      | 0.0997663 | 0.1437542 | 0.694  | 0.488   | 0.132957487 | count | 1 |
| AC020909.2 | 0.1450528 | 0.4168832 | 0.3479 | 0.728   | 0.133046026 | count | 1 |
| ILF2       | 0.0946138 | 0.0777773 | 1.2165 | 0.224   | 0.133100727 | count | 1 |
| CCDC97     | 0.1209853 | 0.2888818 | 0.4188 | 0.675   | 0.133254145 | count | 1 |
| AATF       | 0.0998581 | 0.1578412 | 0.6326 | 0.527   | 0.133273065 | count | 1 |
| WDR45B     | 0.0983996 | 0.1306472 | 0.7532 | 0.451   | 0.133501011 | count | 1 |
| MMGT1      | 0.1057199 | 0.2082633 | 0.5076 | 0.612   | 0.133570761 | count | 1 |
| RNASEH2C   | 0.0945103 | 0.0815774 | 1.1585 | 0.247   | 0.13357922  | count | 1 |
| SCRN1      | 0.1236172 | 0.2877323 | 0.4296 | 0.668   | 0.133685893 | count | 1 |
| RBM4       | 0.1189442 | 0.3122597 | 0.3809 | 0.703   | 0.133799928 | count | 1 |
| DPM3       | 0.0970022 | 0.1184959 | 0.8186 | 0.413   | 0.133802995 | count | 1 |
| DYNLL2     | 0.1049806 | 0.2224929 | 0.4718 | 0.637   | 0.133991962 | count | 1 |
| PTP4A1     | 0.0979368 | 0.1257877 | 0.7786 | 0.436   | 0.134022653 | count | 1 |
| ZBTB33     | 0.1285941 | 0.3834231 | 0.3354 | 0.737   | 0.134046217 | count | 1 |
| DDX50      | 0.1034428 | 0.2069739 | 0.4998 | 0.617   | 0.134074407 | count | 1 |
| ERMN       | 1.004202  | 0.8263364 | 1.2152 | 0.224   | 0.134092081 | count | 1 |
| AC021321.1 | 1.004202  | 0.9831385 | 1.0214 | 0.307   | 0.134092081 | count | 1 |
| SOX6       | 1.004202  | 1.119051  | 0.8974 | 0.37    | 0.134092081 | count | 1 |
| GOLGA6L4   | 1.004202  | 1.030436  | 0.9745 | 0.33    | 0.134092081 | count | 1 |
| RTN4RL2    | 0.1979933 | 0.5718298 | 0.3462 | 0.729   | 0.134355256 | count | 1 |
| FAM102B    | 0.1020866 | 0.2039829 | 0.5005 | 0.617   | 0.134452123 | count | 1 |
| COMT       | 0.094414  | 0.0623946 | 1.5132 | 0.13    | 0.13447313  | count | 1 |
| LINC02076  | 0.3157764 | 1.2359528 | 0.2555 | 0.798   | 0.134590365 | count | 1 |
| WNT5B      | 0.602915  | 0.6027943 | 1.0002 | 0.317   | 0.134638385 | count | 1 |
| FER        | 0.1186569 | 0.2474691 | 0.4795 | 0.632   | 0.134736833 | count | 1 |
| ZCCHC8     | 0.1224895 | 0.2156654 | 0.568  | 0.57    | 0.134926428 | count | 1 |
| HAGH       | 0.0979642 | 0.1017869 | 0.9624 | 0.336   | 0.13493449  | count | 1 |
| MRPS36     | 0.0963747 | 0.0986051 | 0.9774 | 0.328   | 0.134943373 | count | 1 |
| PPP1R21    | 0.1169254 | 0.2071294 | 0.5645 | 0.572   | 0.135010027 | count | 1 |
| RIPK1      | 0.1055861 | 0.2132165 | 0.4952 | 0.62    | 0.135079263 | count | 1 |
| LRRC8B     | 0.1771326 | 0.5500553 | 0.322  | 0.747   | 0.135152416 | count | 1 |
| MANBAL     | 0.1307978 | 0.2997199 | 0.4364 | 0.663   | 0.135198957 | count | 1 |
| ATXN7      | 0.2564532 | 0.6631295 | 0.3867 | 0.699   | 0.13521767  | count | 1 |
| PHB2       | 0.0957806 | 0.0778885 | 1.2297 | 0.219   | 0.135259966 | count | 1 |
| CCDC34     | 0.1774988 | 0.4752402 | 0.3735 | 0.709   | 0.135439306 | count | 1 |
| NMT2       | 0.1677903 | 0.6134835 | 0.2735 | 0.784   | 0.135852171 | count | 1 |

|            |           |           |        |          |             |       |   |
|------------|-----------|-----------|--------|----------|-------------|-------|---|
| TMEM267    | 0.1535016 | 0.3967163 | 0.3869 | 0.699    | 0.135992553 | count | 1 |
| TPCN2      | 0.1242412 | 0.3278514 | 0.379  | 0.705    | 0.136070434 | count | 1 |
| CFLAR      | 0.0967364 | 0.0962984 | 1.0045 | 0.315    | 0.136413174 | count | 1 |
| FAAP20     | 0.0972987 | 0.097336  | 0.9996 | 0.318    | 0.136454603 | count | 1 |
| UPF2       | 0.0985671 | 0.1348321 | 0.731  | 0.465    | 0.136510743 | count | 1 |
| TXNDC15    | 0.1015918 | 0.148106  | 0.6859 | 0.493    | 0.136742891 | count | 1 |
| SMDT1      | 0.0962369 | 0.0638472 | 1.5073 | 0.132    | 0.136863969 | count | 1 |
| C3orf38    | 0.1065451 | 0.2015474 | 0.5286 | 0.597    | 0.136906991 | count | 1 |
| PPP6R3     | 0.1065287 | 0.1824603 | 0.5838 | 0.559    | 0.137028504 | count | 1 |
| RTN1       | 0.126733  | 0.205911  | 0.6155 | 0.538    | 0.137090058 | count | 1 |
| YIPF1      | 0.109459  | 0.2464352 | 0.4442 | 0.657    | 0.137100393 | count | 1 |
| SLC27A5    | 0.1578528 | 0.3958364 | 0.3988 | 0.69     | 0.137141147 | count | 1 |
| AC073389.1 | 0.2858546 | 0.9257076 | 0.3088 | 0.758    | 0.137166803 | count | 1 |
| LATS2-AS1  | 0.2858546 | 0.8506572 | 0.336  | 0.737    | 0.137166803 | count | 1 |
| DPH1       | 0.2858546 | 0.7777886 | 0.3675 | 0.713    | 0.137166803 | count | 1 |
| ZNF681     | 0.2858546 | 0.7142045 | 0.4002 | 0.689    | 0.137166803 | count | 1 |
| AL080276.2 | 0.4568268 | 0.6908814 | 0.6612 | 0.509    | 0.137205112 | count | 1 |
| MTF1       | 0.1121992 | 0.3090685 | 0.363  | 0.717    | 0.137239737 | count | 1 |
| CMTM8      | 0.2125296 | 0.5396016 | 0.3939 | 0.694    | 0.137322073 | count | 1 |
| BCAP29     | 0.0987554 | 0.1151713 | 0.8575 | 0.391    | 0.137334342 | count | 1 |
| CD276      | 0.1297174 | 0.3191022 | 0.4065 | 0.684    | 0.137408234 | count | 1 |
| RANBP6     | 0.1233648 | 0.2932584 | 0.4207 | 0.674    | 0.137410391 | count | 1 |
| TNIK       | 0.2025371 | 0.4336166 | 0.4671 | 0.64     | 0.13754398  | count | 1 |
| ZNF281     | 0.1059359 | 0.1585866 | 0.668  | 0.504    | 0.137559913 | count | 1 |
| SFPQ       | 0.0966232 | 0.0591836 | 1.6326 | 0.103    | 0.137727335 | count | 1 |
| ZMYM1      | 0.1418695 | 0.378769  | 0.3746 | 0.708    | 0.137801602 | count | 1 |
| TBC1D25    | 0.1704117 | 0.5288375 | 0.3222 | 0.747    | 0.138025463 | count | 1 |
| NEU1       | 0.0997901 | 0.1166691 | 0.8553 | 0.392    | 0.138115252 | count | 1 |
| MIR503HG   | 0.323733  | 0.5428122 | 0.5964 | 0.551    | 0.138221273 | count | 1 |
| PHRF1      | 0.1152021 | 0.3062925 | 0.3761 | 0.707    | 0.138264802 | count | 1 |
| HEMK1      | 0.1757144 | 0.3675569 | 0.4781 | 0.633    | 0.138386508 | count | 1 |
| CLPTM1     | 0.1064025 | 0.1940617 | 0.5483 | 0.584    | 0.138404273 | count | 1 |
| RUFY3      | 0.1113428 | 0.2256285 | 0.4935 | 0.622    | 0.138793973 | count | 1 |
| METTL5     | 0.1000427 | 0.1135064 | 0.8814 | 0.378    | 0.138880844 | count | 1 |
| CSNK1G2    | 0.1044895 | 0.1366754 | 0.7645 | 0.445    | 0.138915767 | count | 1 |
| B3GNT8     | 0.1540163 | 0.4122421 | 0.3736 | 0.709    | 0.139010433 | count | 1 |
| RPIA       | 0.1079582 | 0.1859784 | 0.5805 | 0.562    | 0.139016346 | count | 1 |
| METTL21A   | 0.1055729 | 0.1709863 | 0.6174 | 0.537    | 0.139057418 | count | 1 |
| RPL18A     | 0.0964945 | 0.0260076 | 3.7102 | 0.000212 | 0.139063861 | count | 1 |
| DNAH17     | 0.2047126 | 0.4796888 | 0.4268 | 0.67     | 0.139072285 | count | 1 |
| WDR83OS    | 0.0973319 | 0.0517468 | 1.8809 | 0.0601   | 0.139170529 | count | 1 |
| CUEDC2     | 0.1001393 | 0.1057079 | 0.9473 | 0.344    | 0.13937599  | count | 1 |
| FBXO38     | 0.1161645 | 0.275575  | 0.4215 | 0.673    | 0.139427167 | count | 1 |
| CD40       | 0.103718  | 0.1510535 | 0.6866 | 0.492    | 0.139715189 | count | 1 |
| UQCRC2     | 0.0995949 | 0.0822848 | 1.2104 | 0.226    | 0.139746444 | count | 1 |

|            |           |           |        |          |             |       |          |
|------------|-----------|-----------|--------|----------|-------------|-------|----------|
| AC127002.1 | 0.3799147 | 0.7356077 | 0.5165 | 0.606    | 0.139764933 | count | 1        |
| AC027682.6 | 0.3799147 | 0.809365  | 0.4694 | 0.639    | 0.139764933 | count | 1        |
| MRPL3      | 0.101637  | 0.1131943 | 0.8979 | 0.369    | 0.139953683 | count | 1        |
| KMT2E      | 0.0990094 | 0.0868096 | 1.1405 | 0.254    | 0.13998309  | count | 1        |
| SLF1       | 0.1459491 | 0.2796546 | 0.5219 | 0.602    | 0.139997724 | count | 1        |
| UFC1       | 0.0985991 | 0.0638589 | 1.544  | 0.123    | 0.140002804 | count | 1        |
| TNFAIP8    | 0.101114  | 0.1084306 | 0.9325 | 0.351    | 0.14013252  | count | 1        |
| TTC5       | 0.1223306 | 0.2784092 | 0.4394 | 0.66     | 0.140160219 | count | 1        |
| CDR2L      | 0.6245294 | 0.6159681 | 1.0139 | 0.311    | 0.140185234 | count | 1        |
| TPST2      | 0.1029543 | 0.1260463 | 0.8168 | 0.414    | 0.140305552 | count | 1        |
| NME6       | 0.1157642 | 0.2188459 | 0.529  | 0.597    | 0.140351712 | count | 1        |
| ANGEL1     | 0.1733437 | 0.4669518 | 0.3712 | 0.711    | 0.14045803  | count | 1        |
| MUC20-OT1  | 0.1056411 | 0.174529  | 0.6053 | 0.545    | 0.140596027 | count | 1        |
| SLC25A42   | 0.6270848 | 0.6975737 | 0.899  | 0.369    | 0.140844003 | count | 1        |
| ZC2HC1A    | 0.129386  | 0.2342222 | 0.5524 | 0.581    | 0.14089296  | count | 1        |
| CRIP3      | 1.0460113 | 0.9772792 | 1.0703 | 0.285    | 0.140898207 | count | 1        |
| AL021707.1 | 1.0460113 | 0.9772792 | 1.0703 | 0.285    | 0.140898207 | count | 1        |
| PIGN       | 0.1340047 | 0.4121763 | 0.3251 | 0.745    | 0.140901984 | count | 1        |
| NBEAL1     | 0.1065903 | 0.1751967 | 0.6084 | 0.543    | 0.140926839 | count | 1        |
| POLR2M     | 0.1470136 | 0.2887735 | 0.5091 | 0.611    | 0.141034988 | count | 1        |
| TREM1      | 0.0991821 | 0.0824195 | 1.2034 | 0.229    | 0.141175662 | count | 1        |
| ATG5       | 0.1050796 | 0.1664254 | 0.6314 | 0.528    | 0.141230845 | count | 1        |
| RPS9       | 0.0980838 | 0.0238177 | 4.1181 | 3.95E-05 | 0.14127388  | count | 0.931489 |
| KDM5B      | 0.1112102 | 0.2401417 | 0.4631 | 0.643    | 0.141284248 | count | 1        |
| C10orf88   | 0.2081026 | 0.6045838 | 0.3442 | 0.731    | 0.141455847 | count | 1        |
| ZNF69      | 0.2081026 | 0.6222527 | 0.3344 | 0.738    | 0.141455847 | count | 1        |
| DAPL1      | 0.1316542 | 0.3609363 | 0.3648 | 0.715    | 0.141514438 | count | 1        |
| HIKESHI    | 0.1029627 | 0.1322075 | 0.7788 | 0.436    | 0.141532234 | count | 1        |
| NOLC1      | 0.1094838 | 0.1582766 | 0.6917 | 0.489    | 0.141541037 | count | 1        |
| CDC42SE2   | 0.1041955 | 0.1225026 | 0.8506 | 0.395    | 0.141583707 | count | 1        |
| PGS1       | 0.1114796 | 0.2108725 | 0.5287 | 0.597    | 0.141627975 | count | 1        |
| ALDH3A2    | 0.1237582 | 0.2118904 | 0.5841 | 0.559    | 0.141809346 | count | 1        |
| C19orf66   | 0.1066138 | 0.1895894 | 0.5623 | 0.574    | 0.141821278 | count | 1        |
| GHDC       | 0.1273488 | 0.2386348 | 0.5337 | 0.594    | 0.141889575 | count | 1        |
| AC239800.2 | 1.052649  | 0.7681175 | 1.3704 | 0.171    | 0.141985279 | count | 1        |
| AL158212.2 | 1.052649  | 0.6214817 | 1.6938 | 0.0904   | 0.141985279 | count | 1        |
| GNA15      | 0.104303  | 0.1340044 | 0.7784 | 0.436    | 0.142000063 | count | 1        |
| SLC7A5     | 0.1180146 | 0.2169188 | 0.544  | 0.586    | 0.142034695 | count | 1        |
| CCDC28A    | 0.1062228 | 0.1745331 | 0.6086 | 0.543    | 0.142051688 | count | 1        |
| MOB3B      | 0.1262925 | 0.280198  | 0.4507 | 0.652    | 0.142140313 | count | 1        |
| RBM26      | 0.1101118 | 0.1591048 | 0.6921 | 0.489    | 0.142489259 | count | 1        |
| PYCR2      | 0.1117738 | 0.2146636 | 0.5207 | 0.603    | 0.142529579 | count | 1        |
| PLOD3      | 0.1148361 | 0.2080216 | 0.552  | 0.581    | 0.142679959 | count | 1        |
| MARK3      | 0.1072134 | 0.1561193 | 0.6867 | 0.492    | 0.142694207 | count | 1        |
| MIR762HG   | 0.1676569 | 0.5258479 | 0.3188 | 0.75     | 0.142695051 | count | 1        |

|            |           |           |        |          |             |       |            |
|------------|-----------|-----------|--------|----------|-------------|-------|------------|
| AC019069.1 | 0.2701007 | 0.7489171 | 0.3607 | 0.718    | 0.142800584 | count | 1          |
| USP35      | 0.2701007 | 0.7397177 | 0.3651 | 0.715    | 0.142800584 | count | 1          |
| GADD45B    | 0.0991695 | 0.0479766 | 2.067  | 0.0388   | 0.14280373  | count | 1          |
| ATP5F1B    | 0.1008149 | 0.0560436 | 1.7989 | 0.0722   | 0.142867771 | count | 1          |
| NOL12      | 0.1394392 | 0.3714386 | 0.3754 | 0.707    | 0.142940592 | count | 1          |
| AL121987.2 | 0.3340584 | 0.7401298 | 0.4514 | 0.652    | 0.142949885 | count | 1          |
| RPL31      | 0.0998261 | 0.0378167 | 2.6397 | 0.00835  | 0.143082669 | count | 1          |
| PRKX       | 0.1324338 | 0.2170909 | 0.61   | 0.542    | 0.143322646 | count | 1          |
| LONP1      | 0.1208198 | 0.2883594 | 0.419  | 0.675    | 0.143419719 | count | 1          |
| NBPF10     | 0.2509853 | 0.7008664 | 0.3581 | 0.72     | 0.143571632 | count | 1          |
| HOMER1     | 0.1826188 | 0.3491741 | 0.523  | 0.601    | 0.143968176 | count | 1          |
| SLC4A1AP   | 0.1077969 | 0.1533315 | 0.703  | 0.482    | 0.144030641 | count | 1          |
| MIDN       | 0.1016852 | 0.0856736 | 1.1869 | 0.235    | 0.144090972 | count | 1          |
| COMMD3     | 0.1044568 | 0.1034994 | 1.0092 | 0.313    | 0.14416816  | count | 1          |
| DNM1L      | 0.1076335 | 0.1753997 | 0.6136 | 0.54     | 0.144319377 | count | 1          |
| FEZ2       | 0.1027537 | 0.0974186 | 1.0548 | 0.292    | 0.144373383 | count | 1          |
| MRPL4      | 0.1045168 | 0.1355214 | 0.7712 | 0.441    | 0.144527102 | count | 1          |
| PXK        | 0.1119184 | 0.1676393 | 0.6676 | 0.504    | 0.144700332 | count | 1          |
| TTC8       | 0.1959791 | 0.4399599 | 0.4454 | 0.656    | 0.144731261 | count | 1          |
| ZDHHC18    | 0.1455054 | 0.3512788 | 0.4142 | 0.679    | 0.144761772 | count | 1          |
| SIGMAR1    | 0.1253763 | 0.2972729 | 0.4218 | 0.673    | 0.144846889 | count | 1          |
| CAMK2G     | 0.1293493 | 0.3007279 | 0.4301 | 0.667    | 0.144888933 | count | 1          |
| UBXN6      | 0.118971  | 0.1650153 | 0.721  | 0.471    | 0.144933394 | count | 1          |
| DNPEP      | 0.1085492 | 0.1558397 | 0.6965 | 0.486    | 0.144971089 | count | 1          |
| REST       | 0.1051805 | 0.1196887 | 0.8788 | 0.38     | 0.144985051 | count | 1          |
| SNX20      | 0.1169034 | 0.1999546 | 0.5846 | 0.559    | 0.145004142 | count | 1          |
| NOD2       | 0.1323164 | 0.3042041 | 0.435  | 0.664    | 0.145005378 | count | 1          |
| POLDIP3    | 0.1255306 | 0.273535  | 0.4589 | 0.646    | 0.145026589 | count | 1          |
| ZNF326     | 0.1086769 | 0.154261  | 0.7045 | 0.481    | 0.145073887 | count | 1          |
| RPLP1      | 0.1006103 | 0.0220759 | 4.5575 | 5.43E-06 | 0.1450824   | count | 0.12888105 |
| NFATC2     | 0.1637104 | 0.3199838 | 0.5116 | 0.609    | 0.145220122 | count | 1          |
| COX18      | 0.1417564 | 0.3804146 | 0.3726 | 0.709    | 0.145347313 | count | 1          |
| WDR47      | 0.1638514 | 0.2752451 | 0.5953 | 0.552    | 0.145347723 | count | 1          |
| HNRNPA0    | 0.1031929 | 0.0736555 | 1.401  | 0.161    | 0.145439979 | count | 1          |
| DHX15      | 0.1143468 | 0.1658533 | 0.6894 | 0.491    | 0.145469309 | count | 1          |
| PILRA      | 0.1020326 | 0.0601233 | 1.6971 | 0.0898   | 0.145540473 | count | 1          |
| TSPYL2     | 0.1142887 | 0.2311969 | 0.4943 | 0.621    | 0.145574287 | count | 1          |
| TRAP1      | 0.1214416 | 0.2292239 | 0.5298 | 0.596    | 0.145802771 | count | 1          |
| ACAT2      | 0.1163593 | 0.1862551 | 0.6247 | 0.532    | 0.146012023 | count | 1          |
| HOOK3      | 0.1047067 | 0.1022025 | 1.0245 | 0.306    | 0.146031653 | count | 1          |
| ZNF442     | 1.078448  | 0.9147384 | 1.179  | 0.239    | 0.146226283 | count | 1          |
| ZNF512B    | 0.2764643 | 0.6357011 | 0.4349 | 0.664    | 0.146349078 | count | 1          |
| PLA2G12A   | 0.2059508 | 0.4321775 | 0.4765 | 0.634    | 0.146390656 | count | 1          |
| CNOT7      | 0.1071053 | 0.1387653 | 0.7718 | 0.44     | 0.146462213 | count | 1          |
| TRPT1      | 0.1176878 | 0.2441561 | 0.482  | 0.63     | 0.146495698 | count | 1          |

|            |           |           |        |          |             |       |            |
|------------|-----------|-----------|--------|----------|-------------|-------|------------|
| TMSB10     | 0.1016242 | 0.0230286 | 4.413  | 1.06E-05 | 0.146520736 | count | 0.2511882  |
| KPNA5      | 0.1429001 | 0.4003985 | 0.3569 | 0.721    | 0.146535553 | count | 1          |
| CLNS1A     | 0.1049422 | 0.086449  | 1.2139 | 0.225    | 0.146574213 | count | 1          |
| CDC42EP1   | 0.159924  | 0.4630697 | 0.3454 | 0.73     | 0.146941329 | count | 1          |
| SRSF7      | 0.1032319 | 0.0687193 | 1.5022 | 0.133    | 0.147050862 | count | 1          |
| KHNYN      | 0.1513404 | 0.2765805 | 0.5472 | 0.584    | 0.147147027 | count | 1          |
| ACO1       | 0.1334772 | 0.4554506 | 0.2931 | 0.769    | 0.147152909 | count | 1          |
| SIPA1      | 0.1098287 | 0.1498969 | 0.7327 | 0.464    | 0.14720798  | count | 1          |
| TBC1D12    | 0.1150505 | 0.195331  | 0.589  | 0.556    | 0.147238339 | count | 1          |
| TTLL3      | 0.172978  | 0.4353771 | 0.3973 | 0.691    | 0.147326539 | count | 1          |
| CCNI       | 0.1029066 | 0.0447659 | 2.2988 | 0.0216   | 0.147484555 | count | 1          |
| DOCK5      | 0.10893   | 0.1830282 | 0.5952 | 0.552    | 0.14750336  | count | 1          |
| ASNA1      | 0.1068203 | 0.1117355 | 0.956  | 0.339    | 0.147568211 | count | 1          |
| FBXO6      | 0.122662  | 0.2004202 | 0.612  | 0.541    | 0.147664687 | count | 1          |
| TAOK1      | 0.1084426 | 0.153575  | 0.7061 | 0.48     | 0.147685573 | count | 1          |
| CCND2      | 0.1112727 | 0.1725152 | 0.645  | 0.519    | 0.147723192 | count | 1          |
| VIL1       | 0.4882519 | 0.9350717 | 0.5222 | 0.602    | 0.147725316 | count | 1          |
| AMT        | 0.4882519 | 0.9383899 | 0.5203 | 0.603    | 0.147725316 | count | 1          |
| MELTF-AS1  | 0.4882519 | 0.9317417 | 0.524  | 0.6      | 0.147725316 | count | 1          |
| HIST1H3A   | 0.4882519 | 0.9383899 | 0.5203 | 0.603    | 0.147725316 | count | 1          |
| ACSS3      | 0.4882519 | 1.1271663 | 0.4332 | 0.665    | 0.147725316 | count | 1          |
| ABHD12B    | 0.4882519 | 0.9350717 | 0.5222 | 0.602    | 0.147725316 | count | 1          |
| CHRFAM7A   | 0.4882519 | 0.9350717 | 0.5222 | 0.602    | 0.147725316 | count | 1          |
| TCAP       | 0.4882519 | 0.9317417 | 0.524  | 0.6      | 0.147725316 | count | 1          |
| SDCBP2-AS1 | 0.4882519 | 0.9383899 | 0.5203 | 0.603    | 0.147725316 | count | 1          |
| WBP4       | 0.1078051 | 0.1275289 | 0.8453 | 0.398    | 0.147739183 | count | 1          |
| BTN2A2     | 0.1185685 | 0.1968474 | 0.6023 | 0.547    | 0.147848031 | count | 1          |
| SGF29      | 0.1241995 | 0.2451556 | 0.5066 | 0.612    | 0.147896379 | count | 1          |
| ELMSAN1    | 0.107942  | 0.1283801 | 0.8408 | 0.401    | 0.148249966 | count | 1          |
| RBM6       | 0.1102614 | 0.1631267 | 0.6759 | 0.499    | 0.148327427 | count | 1          |
| RTCA       | 0.1102892 | 0.1509849 | 0.7305 | 0.465    | 0.148421557 | count | 1          |
| RPS27A     | 0.1030094 | 0.0222155 | 4.6368 | 3.72E-06 | 0.148484346 | count | 0.08837232 |
| HNMT       | 0.1045612 | 0.0753663 | 1.3874 | 0.165    | 0.148538596 | count | 1          |
| BTBD1      | 0.1194059 | 0.2031277 | 0.5878 | 0.557    | 0.148645653 | count | 1          |
| AC091729.3 | 0.2183254 | 0.6062725 | 0.3601 | 0.719    | 0.148658747 | count | 1          |
| SMG6       | 0.1205182 | 0.2853677 | 0.4223 | 0.673    | 0.148679231 | count | 1          |
| TBC1D9B    | 0.1137354 | 0.1881143 | 0.6046 | 0.545    | 0.1486891   | count | 1          |
| MAPKAPK5   | 0.1314817 | 0.2811861 | 0.4676 | 0.64     | 0.148744925 | count | 1          |
| ELMOD3     | 0.188664  | 0.3149479 | 0.599  | 0.549    | 0.148863737 | count | 1          |
| MED24      | 0.1711459 | 0.3931385 | 0.4353 | 0.663    | 0.148941671 | count | 1          |
| CSP1       | 0.1368526 | 0.285627  | 0.4791 | 0.632    | 0.149111374 | count | 1          |
| AC093157.1 | 0.3092951 | 0.6092191 | 0.5077 | 0.612    | 0.149136802 | count | 1          |
| NKAPD1     | 0.1175046 | 0.2154545 | 0.5454 | 0.586    | 0.149317025 | count | 1          |
| OSBP       | 0.1162364 | 0.2436119 | 0.4771 | 0.633    | 0.149411117 | count | 1          |
| NDUFAF8    | 0.1092739 | 0.1297013 | 0.8425 | 0.4      | 0.14987764  | count | 1          |

|             |           |           |        |        |             |       |   |
|-------------|-----------|-----------|--------|--------|-------------|-------|---|
| NDRG1       | 0.1117596 | 0.1902143 | 0.5875 | 0.557  | 0.149928466 | count | 1 |
| ABHD11      | 0.1259115 | 0.2235507 | 0.5632 | 0.573  | 0.14994945  | count | 1 |
| THAP9-AS1   | 0.1184021 | 0.1705512 | 0.6942 | 0.488  | 0.150073972 | count | 1 |
| CTBP2       | 0.1149081 | 0.1460675 | 0.7867 | 0.432  | 0.150112128 | count | 1 |
| PIGT        | 0.1115559 | 0.1436483 | 0.7766 | 0.437  | 0.150187014 | count | 1 |
| ZNF358      | 0.1156135 | 0.2784202 | 0.4152 | 0.678  | 0.150429594 | count | 1 |
| DDI2        | 0.1195355 | 0.294614  | 0.4057 | 0.685  | 0.150467584 | count | 1 |
| C6orf136    | 0.1381962 | 0.3243548 | 0.4261 | 0.67   | 0.150591223 | count | 1 |
| STEAP4      | 0.2627436 | 0.3370964 | 0.7794 | 0.436  | 0.150631979 | count | 1 |
| ANAPC5      | 0.111585  | 0.1144695 | 0.9748 | 0.33   | 0.150659248 | count | 1 |
| CEP131      | 0.2213757 | 0.5672288 | 0.3903 | 0.696  | 0.150812344 | count | 1 |
| LRP8        | 0.4974013 | 0.8015641 | 0.6205 | 0.535  | 0.150812567 | count | 1 |
| CNN3        | 0.4974013 | 0.8043062 | 0.6184 | 0.536  | 0.150812567 | count | 1 |
| VANGL1      | 0.4974013 | 0.8192486 | 0.6071 | 0.544  | 0.150812567 | count | 1 |
| PLPP7       | 0.4974013 | 0.8015641 | 0.6205 | 0.535  | 0.150812567 | count | 1 |
| NTRK3       | 0.4974013 | 0.807039  | 0.6163 | 0.538  | 0.150812567 | count | 1 |
| AL035563.1  | 0.4974013 | 0.8192486 | 0.6071 | 0.544  | 0.150812567 | count | 1 |
| ELMOD2      | 0.1222401 | 0.2221345 | 0.5503 | 0.582  | 0.150815594 | count | 1 |
| BEND7       | 0.6655643 | 0.7463856 | 0.8917 | 0.373  | 0.150838868 | count | 1 |
| ZFHX2       | 0.6655643 | 0.6967689 | 0.9552 | 0.34   | 0.150838868 | count | 1 |
| AC123768.3  | 0.6655643 | 0.7929035 | 0.8394 | 0.401  | 0.150838868 | count | 1 |
| ZNF48       | 0.6655643 | 0.7463856 | 0.8917 | 0.373  | 0.150838868 | count | 1 |
| DDX21       | 0.1054751 | 0.061377  | 1.7185 | 0.0858 | 0.150937439 | count | 1 |
| PMFBP1      | 0.1487465 | 0.4115697 | 0.3614 | 0.718  | 0.151158575 | count | 1 |
| FO704657.1  | 1.108716  | 1.029867  | 1.0766 | 0.282  | 0.151233663 | count | 1 |
| AL354956.1  | 1.108716  | 1.313742  | 0.8439 | 0.399  | 0.151233663 | count | 1 |
| TIE1        | 1.108716  | 1.313742  | 0.8439 | 0.399  | 0.151233663 | count | 1 |
| HIST2H2AA3  | 1.108716  | 1.313742  | 0.8439 | 0.399  | 0.151233663 | count | 1 |
| LINC01133   | 1.108716  | 1.313742  | 0.8439 | 0.399  | 0.151233663 | count | 1 |
| AL451074.2  | 1.108716  | 1.313742  | 0.8439 | 0.399  | 0.151233663 | count | 1 |
| AC009237.14 | 1.108716  | 1.029867  | 1.0766 | 0.282  | 0.151233663 | count | 1 |
| DNER        | 1.108716  | 1.313742  | 0.8439 | 0.399  | 0.151233663 | count | 1 |
| CAMP        | 1.108716  | 1.313742  | 0.8439 | 0.399  | 0.151233663 | count | 1 |
| LDB2        | 1.108716  | 1.029867  | 1.0766 | 0.282  | 0.151233663 | count | 1 |
| FAM47E      | 1.108716  | 1.313742  | 0.8439 | 0.399  | 0.151233663 | count | 1 |
| SORBS2      | 1.108716  | 1.313742  | 0.8439 | 0.399  | 0.151233663 | count | 1 |
| PLCXD3      | 1.108716  | 1.029867  | 1.0766 | 0.282  | 0.151233663 | count | 1 |
| AC025175.1  | 1.108716  | 1.313742  | 0.8439 | 0.399  | 0.151233663 | count | 1 |
| IRGM        | 1.108716  | 1.313742  | 0.8439 | 0.399  | 0.151233663 | count | 1 |
| HIST1H4F    | 1.108716  | 1.313742  | 0.8439 | 0.399  | 0.151233663 | count | 1 |
| HIST1H3H    | 1.108716  | 1.313742  | 0.8439 | 0.399  | 0.151233663 | count | 1 |
| CPNE5       | 1.108716  | 1.313742  | 0.8439 | 0.399  | 0.151233663 | count | 1 |
| FILIP1      | 1.108716  | 1.313742  | 0.8439 | 0.399  | 0.151233663 | count | 1 |
| AR          | 1.108716  | 1.313742  | 0.8439 | 0.399  | 0.151233663 | count | 1 |
| NXF3        | 1.108716  | 1.029867  | 1.0766 | 0.282  | 0.151233663 | count | 1 |

|             |           |           |        |       |             |       |   |
|-------------|-----------|-----------|--------|-------|-------------|-------|---|
| AC090186.1  | 1.108716  | 1.313742  | 0.8439 | 0.399 | 0.151233663 | count | 1 |
| E2F5        | 1.108716  | 1.029867  | 1.0766 | 0.282 | 0.151233663 | count | 1 |
| PRRX2       | 1.108716  | 1.313742  | 0.8439 | 0.399 | 0.151233663 | count | 1 |
| CCDC183-AS1 | 1.108716  | 1.313742  | 0.8439 | 0.399 | 0.151233663 | count | 1 |
| AP000781.1  | 1.108716  | 1.313742  | 0.8439 | 0.399 | 0.151233663 | count | 1 |
| AP001830.1  | 1.108716  | 1.029867  | 1.0766 | 0.282 | 0.151233663 | count | 1 |
| AP000866.2  | 1.108716  | 1.029867  | 1.0766 | 0.282 | 0.151233663 | count | 1 |
| CUBN        | 1.108716  | 1.313742  | 0.8439 | 0.399 | 0.151233663 | count | 1 |
| KCNIP2      | 1.108716  | 1.313742  | 0.8439 | 0.399 | 0.151233663 | count | 1 |
| CLEC4C      | 1.108716  | 1.313742  | 0.8439 | 0.399 | 0.151233663 | count | 1 |
| AC087386.1  | 1.108716  | 1.029867  | 1.0766 | 0.282 | 0.151233663 | count | 1 |
| AC025043.1  | 1.108716  | 1.029867  | 1.0766 | 0.282 | 0.151233663 | count | 1 |
| AC106782.1  | 1.108716  | 1.313742  | 0.8439 | 0.399 | 0.151233663 | count | 1 |
| MYO15A      | 1.108716  | 1.313742  | 0.8439 | 0.399 | 0.151233663 | count | 1 |
| AC005899.7  | 1.108716  | 1.029867  | 1.0766 | 0.282 | 0.151233663 | count | 1 |
| CSF3        | 1.108716  | 1.029867  | 1.0766 | 0.282 | 0.151233663 | count | 1 |
| HID1        | 1.108716  | 1.029867  | 1.0766 | 0.282 | 0.151233663 | count | 1 |
| MTRNR2L3    | 1.108716  | 1.029867  | 1.0766 | 0.282 | 0.151233663 | count | 1 |
| IGFL3       | 1.108716  | 1.029867  | 1.0766 | 0.282 | 0.151233663 | count | 1 |
| AC008440.1  | 1.108716  | 1.029867  | 1.0766 | 0.282 | 0.151233663 | count | 1 |
| AP000357.2  | 1.108716  | 1.029867  | 1.0766 | 0.282 | 0.151233663 | count | 1 |
| Z99774.1    | 1.108716  | 1.313742  | 0.8439 | 0.399 | 0.151233663 | count | 1 |
| CXADR       | 1.108716  | 1.029867  | 1.0766 | 0.282 | 0.151233663 | count | 1 |
| PMM1        | 0.1202011 | 0.2690004 | 0.4468 | 0.655 | 0.151309554 | count | 1 |
| SAMD1       | 0.1159051 | 0.1748546 | 0.6629 | 0.507 | 0.151535547 | count | 1 |
| AK2         | 0.111678  | 0.1651198 | 0.6763 | 0.499 | 0.15164311  | count | 1 |
| AHCTF1      | 0.1155011 | 0.1515551 | 0.7621 | 0.446 | 0.151667022 | count | 1 |
| MTIF2       | 0.1212748 | 0.1889643 | 0.6418 | 0.521 | 0.151736177 | count | 1 |
| IARS2       | 0.1148869 | 0.1653364 | 0.6949 | 0.487 | 0.151746744 | count | 1 |
| PIGQ        | 0.165074  | 0.3903972 | 0.4228 | 0.672 | 0.151763861 | count | 1 |
| KMT5A       | 0.112795  | 0.1673441 | 0.674  | 0.5   | 0.151915945 | count | 1 |
| HUS1        | 0.1152707 | 0.1979485 | 0.5823 | 0.56  | 0.151970077 | count | 1 |
| TNFRSF4     | 0.2649915 | 0.5457251 | 0.4856 | 0.627 | 0.151984973 | count | 1 |
| SSR1        | 0.1081726 | 0.088832  | 1.2177 | 0.223 | 0.152010649 | count | 1 |
| HERC3       | 0.1331529 | 0.2870765 | 0.4638 | 0.643 | 0.15201929  | count | 1 |
| RPS6KB1     | 0.1315425 | 0.2162504 | 0.6083 | 0.543 | 0.152030717 | count | 1 |
| CDK11B      | 0.1183747 | 0.1945224 | 0.6085 | 0.543 | 0.152171129 | count | 1 |
| ARAF        | 0.1229179 | 0.2219012 | 0.5539 | 0.58  | 0.152229052 | count | 1 |
| CEPT1       | 0.1226989 | 0.259912  | 0.4721 | 0.637 | 0.152232578 | count | 1 |
| DHX37       | 0.1928302 | 0.541905  | 0.3558 | 0.722 | 0.15224223  | count | 1 |
| ZNF613      | 0.501931  | 0.7129042 | 0.7041 | 0.481 | 0.152344978 | count | 1 |
| AXL         | 0.1116874 | 0.1990392 | 0.5611 | 0.575 | 0.152492779 | count | 1 |
| VIRMA       | 0.1212842 | 0.1992353 | 0.6087 | 0.543 | 0.152679747 | count | 1 |
| DNAJA2      | 0.1098079 | 0.0976955 | 1.124  | 0.261 | 0.15270809  | count | 1 |
| NBPF11      | 0.2663787 | 0.6536397 | 0.4075 | 0.684 | 0.152820432 | count | 1 |

|            |           |           |        |          |             |       |           |
|------------|-----------|-----------|--------|----------|-------------|-------|-----------|
| MPRIP-AS1  | 0.2663787 | 0.704405  | 0.3782 | 0.705    | 0.152820432 | count | 1         |
| OSR2       | 0.6738629 | 0.9393992 | 0.7173 | 0.473    | 0.15301262  | count | 1         |
| PDZD7      | 0.6738629 | 0.8176064 | 0.8242 | 0.41     | 0.15301262  | count | 1         |
| CAPZA2     | 0.107502  | 0.0580107 | 1.8531 | 0.064    | 0.153017189 | count | 1         |
| CBX7       | 0.1537275 | 0.4721603 | 0.3256 | 0.745    | 0.153066854 | count | 1         |
| NANP       | 0.1594592 | 0.4156728 | 0.3836 | 0.701    | 0.153178693 | count | 1         |
| AC133919.1 | 1.120929  | 0.8015909 | 1.3984 | 0.162    | 0.153263224 | count | 1         |
| SPACA6P-AS | 1.120929  | 1.019292  | 1.0997 | 0.272    | 0.153263224 | count | 1         |
| SAC3D1     | 0.1303143 | 0.2488439 | 0.5237 | 0.601    | 0.153322429 | count | 1         |
| ZMYND15    | 0.1273672 | 0.2061829 | 0.6177 | 0.537    | 0.15336738  | count | 1         |
| ING1       | 0.1133745 | 0.1276041 | 0.8885 | 0.374    | 0.153486705 | count | 1         |
| FXR1       | 0.1109077 | 0.1095834 | 1.0121 | 0.312    | 0.153586239 | count | 1         |
| PLA2G15    | 0.1173648 | 0.1905674 | 0.6159 | 0.538    | 0.153681192 | count | 1         |
| WBP1       | 0.3574899 | 0.8295939 | 0.4309 | 0.667    | 0.153749763 | count | 1         |
| MARS2      | 0.3574899 | 0.7088695 | 0.5043 | 0.614    | 0.153749763 | count | 1         |
| ZNF816     | 0.3574899 | 0.7033447 | 0.5083 | 0.611    | 0.153749763 | count | 1         |
| METTL25    | 0.1600574 | 0.3565128 | 0.449  | 0.654    | 0.153763143 | count | 1         |
| SNN        | 0.1113109 | 0.1175918 | 0.9466 | 0.344    | 0.153781258 | count | 1         |
| SNHG18     | 0.5067329 | 1.1191883 | 0.4528 | 0.651    | 0.153972478 | count | 1         |
| ZKSCAN3    | 0.5067329 | 0.7311985 | 0.693  | 0.488    | 0.153972478 | count | 1         |
| SNAI3-AS1  | 0.5067329 | 0.7311985 | 0.693  | 0.488    | 0.153972478 | count | 1         |
| TMEM143    | 0.5067329 | 0.7125979 | 0.7111 | 0.477    | 0.153972478 | count | 1         |
| DDX19B     | 0.1327603 | 0.2652399 | 0.5005 | 0.617    | 0.154038981 | count | 1         |
| FLII       | 0.1141926 | 0.1257509 | 0.9081 | 0.364    | 0.15418827  | count | 1         |
| PCYT2      | 0.1399942 | 0.4096852 | 0.3417 | 0.733    | 0.154413724 | count | 1         |
| NUBPL      | 0.226547  | 0.5182682 | 0.4371 | 0.662    | 0.154467986 | count | 1         |
| TPCN1      | 0.1280093 | 0.2334422 | 0.5484 | 0.583    | 0.15453881  | count | 1         |
| LCMT1      | 0.1169419 | 0.1874298 | 0.6239 | 0.533    | 0.154656182 | count | 1         |
| PJA2       | 0.1098762 | 0.089893  | 1.2223 | 0.222    | 0.154806808 | count | 1         |
| RALGAPA1   | 0.13349   | 0.3378124 | 0.3952 | 0.693    | 0.154892733 | count | 1         |
| UQCRB      | 0.1079856 | 0.0396044 | 2.7266 | 0.00644  | 0.154910523 | count | 1         |
| H1FX       | 0.1085861 | 0.0794245 | 1.3672 | 0.172    | 0.1549696   | count | 1         |
| C18orf54   | 0.5099814 | 0.8177831 | 0.6236 | 0.533    | 0.155075132 | count | 1         |
| PSMA6      | 0.1164311 | 0.2506677 | 0.4645 | 0.642    | 0.15507634  | count | 1         |
| CWC27      | 0.1194791 | 0.1887725 | 0.6329 | 0.527    | 0.155078338 | count | 1         |
| CELF2      | 0.1111461 | 0.1173576 | 0.9471 | 0.344    | 0.155132002 | count | 1         |
| KANSL1-AS1 | 0.1173765 | 0.1406821 | 0.8343 | 0.404    | 0.155232751 | count | 1         |
| UBXN1      | 0.1090814 | 0.056579  | 1.9279 | 0.054    | 0.155303207 | count | 1         |
| WDR45      | 0.1153432 | 0.15341   | 0.7519 | 0.452    | 0.155526616 | count | 1         |
| CBX3       | 0.1097088 | 0.0664134 | 1.6519 | 0.0987   | 0.15558752  | count | 1         |
| HLA-B      | 0.1079857 | 0.0263132 | 4.1039 | 4.20E-05 | 0.155678837 | count | 0.98994   |
| POLR3K     | 0.1219423 | 0.144291  | 0.8451 | 0.398    | 0.155739168 | count | 1         |
| AC096733.2 | 0.1504313 | 0.4133649 | 0.3639 | 0.716    | 0.155770884 | count | 1         |
| RACK1      | 0.108155  | 0.025444  | 4.2507 | 2.21E-05 | 0.15580275  | count | 0.5223998 |
| OXCT1      | 0.2540796 | 0.511175  | 0.4971 | 0.619    | 0.155861378 | count | 1         |



|            |           |           |        |          |             |       |            |
|------------|-----------|-----------|--------|----------|-------------|-------|------------|
| THAP7-AS1  | 0.2540796 | 0.5418039 | 0.469  | 0.639    | 0.155861378 | count | 1          |
| PPP5D1     | 1.137133  | 1.009722  | 1.1262 | 0.26     | 0.155964033 | count | 1          |
| PARBP      | 0.2190137 | 0.9421382 | 0.2325 | 0.816    | 0.156001783 | count | 1          |
| AC087164.1 | 0.2719969 | 0.5669775 | 0.4797 | 0.631    | 0.156208087 | count | 1          |
| ENTPD4     | 0.1551927 | 0.3470414 | 0.4472 | 0.655    | 0.156215917 | count | 1          |
| BBIP1      | 0.1172395 | 0.2289541 | 0.5121 | 0.609    | 0.156234054 | count | 1          |
| FEM1C      | 0.1336823 | 0.2668978 | 0.5009 | 0.617    | 0.156250058 | count | 1          |
| C1orf216   | 0.1649822 | 0.3403499 | 0.4847 | 0.628    | 0.156403446 | count | 1          |
| SERINC1    | 0.1120608 | 0.0936896 | 1.1961 | 0.232    | 0.156410192 | count | 1          |
| CABP4      | 0.4215622 | 0.6026032 | 0.6996 | 0.484    | 0.156541868 | count | 1          |
| FAM177B    | 0.2411619 | 0.5513387 | 0.4374 | 0.662    | 0.156599711 | count | 1          |
| BAG1       | 0.1109285 | 0.0782259 | 1.4181 | 0.156    | 0.156727881 | count | 1          |
| ATG10      | 0.1398541 | 0.2793157 | 0.5007 | 0.617    | 0.156773792 | count | 1          |
| NIF3L1     | 0.1367598 | 0.2808932 | 0.4869 | 0.626    | 0.156841977 | count | 1          |
| ZNF236     | 0.1400126 | 0.4085203 | 0.3427 | 0.732    | 0.156953242 | count | 1          |
| TOM1       | 0.1156938 | 0.1469457 | 0.7873 | 0.431    | 0.156970354 | count | 1          |
| UTP23      | 0.1150974 | 0.2207558 | 0.5214 | 0.602    | 0.157082437 | count | 1          |
| MSN        | 0.1102084 | 0.0530107 | 2.079  | 0.0377   | 0.157189653 | count | 1          |
| SCAMP1-AS1 | 0.2051549 | 0.4390841 | 0.4672 | 0.64     | 0.157190457 | count | 1          |
| RPS15      | 0.109117  | 0.0234269 | 4.6578 | 3.37E-06 | 0.15723335  | count | 0.08008131 |
| HLA-E      | 0.1094593 | 0.0349714 | 3.13   | 0.00177  | 0.157388653 | count | 1          |
| STAMPB     | 0.1188295 | 0.1962366 | 0.6055 | 0.545    | 0.157435468 | count | 1          |
| GAPVD1     | 0.1219238 | 0.1727755 | 0.7057 | 0.48     | 0.157689095 | count | 1          |
| WBP2       | 0.1135099 | 0.1156042 | 0.9819 | 0.326    | 0.157709238 | count | 1          |
| LYPLA2     | 0.1191984 | 0.1735507 | 0.6868 | 0.492    | 0.157743071 | count | 1          |
| QSOX1      | 0.1174344 | 0.1585668 | 0.7406 | 0.459    | 0.157816962 | count | 1          |
| SMYD2      | 0.138854  | 0.2696207 | 0.515  | 0.607    | 0.157888894 | count | 1          |
| ARRDC4     | 0.1234914 | 0.2453861 | 0.5033 | 0.615    | 0.157909527 | count | 1          |
| NDUFA12    | 0.111144  | 0.0622312 | 1.786  | 0.0742   | 0.158018084 | count | 1          |
| NAIP       | 0.1150354 | 0.0929833 | 1.2372 | 0.216    | 0.158068922 | count | 1          |
| LRRFIP1    | 0.1102485 | 0.0513183 | 2.1483 | 0.0318   | 0.158154623 | count | 1          |
| GLIS3      | 0.146072  | 0.277252  | 0.5269 | 0.598    | 0.158254841 | count | 1          |
| PUS10      | 0.2138453 | 0.4524044 | 0.4727 | 0.636    | 0.158361286 | count | 1          |
| SNAPC4     | 0.1857284 | 0.5375149 | 0.3455 | 0.73     | 0.158448797 | count | 1          |
| JAK3       | 0.1312325 | 0.2112644 | 0.6212 | 0.535    | 0.158456735 | count | 1          |
| DGUOK-AS1  | 0.3275174 | 0.6689755 | 0.4896 | 0.624    | 0.158513458 | count | 1          |
| SPTLC1     | 0.1213467 | 0.1496091 | 0.8111 | 0.417    | 0.158554307 | count | 1          |
| DXO        | 0.1785141 | 0.3907891 | 0.4568 | 0.648    | 0.158639371 | count | 1          |
| FAM174B    | 0.3680842 | 0.613477  | 0.6    | 0.549    | 0.158664082 | count | 1          |
| PTPRE      | 0.1107807 | 0.0562382 | 1.9698 | 0.049    | 0.158751851 | count | 1          |
| ALYREF     | 0.1133669 | 0.1017894 | 1.1137 | 0.266    | 0.158869153 | count | 1          |
| ACVRL1     | 0.1562257 | 0.4493109 | 0.3477 | 0.728    | 0.158871162 | count | 1          |
| CNPPD1     | 0.1214003 | 0.1692949 | 0.7171 | 0.473    | 0.15898444  | count | 1          |
| LINC01374  | 0.4277602 | 0.6003987 | 0.7125 | 0.476    | 0.159061591 | count | 1          |
| WHAMM      | 0.1228758 | 0.1779076 | 0.6907 | 0.49     | 0.159073686 | count | 1          |

|            |           |           |        |        |             |       |   |
|------------|-----------|-----------|--------|--------|-------------|-------|---|
| PTGDS      | 1.1561213 | 0.4756691 | 2.4305 | 0.0151 | 0.15913996  | count | 1 |
| NOP14-AS1  | 0.2233177 | 0.5797081 | 0.3852 | 0.7    | 0.159176546 | count | 1 |
| ATF1       | 0.1216426 | 0.1744824 | 0.6972 | 0.486  | 0.159184476 | count | 1 |
| RUBCN      | 0.1460741 | 0.3507853 | 0.4164 | 0.677  | 0.159273885 | count | 1 |
| PAG1       | 0.118831  | 0.1541497 | 0.7709 | 0.441  | 0.159506009 | count | 1 |
| PCTP       | 0.1361823 | 0.3039219 | 0.4481 | 0.654  | 0.159747189 | count | 1 |
| BAZ2A      | 0.1229572 | 0.1733864 | 0.7092 | 0.478  | 0.159749842 | count | 1 |
| MYO19      | 0.2021827 | 0.4337853 | 0.4661 | 0.641  | 0.159840013 | count | 1 |
| MTERF4     | 0.1300223 | 0.2103247 | 0.6182 | 0.537  | 0.159842275 | count | 1 |
| TLR2       | 0.1138472 | 0.0769482 | 1.4795 | 0.139  | 0.159948816 | count | 1 |
| C12orf43   | 0.1297215 | 0.2573681 | 0.504  | 0.614  | 0.160101525 | count | 1 |
| GAS6       | 0.1156569 | 0.1030297 | 1.1226 | 0.262  | 0.16010908  | count | 1 |
| GFER       | 0.1202198 | 0.1576931 | 0.7624 | 0.446  | 0.16021732  | count | 1 |
| PTPN22     | 0.1371448 | 0.2744967 | 0.4996 | 0.617  | 0.160330816 | count | 1 |
| ADAT1      | 0.1609417 | 0.3083959 | 0.5219 | 0.602  | 0.16036427  | count | 1 |
| MTMR6      | 0.1219297 | 0.1523876 | 0.8001 | 0.424  | 0.160465151 | count | 1 |
| CEACAM4    | 0.1280818 | 0.1916711 | 0.6682 | 0.504  | 0.160552616 | count | 1 |
| PUSL1      | 0.1327129 | 0.2838896 | 0.4675 | 0.64   | 0.160653305 | count | 1 |
| TCOF1      | 0.1395278 | 0.2322332 | 0.6008 | 0.548  | 0.160703973 | count | 1 |
| TLR7       | 0.1302709 | 0.2087333 | 0.6241 | 0.533  | 0.16078368  | count | 1 |
| DPP8       | 0.1313483 | 0.194903  | 0.6739 | 0.5    | 0.160812989 | count | 1 |
| Z98884.1   | 0.4321562 | 1.0378484 | 0.4164 | 0.677  | 0.160852295 | count | 1 |
| AL049597.2 | 0.4321562 | 0.9088362 | 0.4755 | 0.634  | 0.160852295 | count | 1 |
| S100A5     | 0.4321562 | 1.2567506 | 0.3439 | 0.731  | 0.160852295 | count | 1 |
| AC073896.3 | 0.4321562 | 0.9132932 | 0.4732 | 0.636  | 0.160852295 | count | 1 |
| DMWD       | 0.4321562 | 0.9517671 | 0.4541 | 0.65   | 0.160852295 | count | 1 |
| PRKRIP1    | 0.1256815 | 0.204262  | 0.6153 | 0.538  | 0.160905616 | count | 1 |
| RELT       | 0.1196603 | 0.1758789 | 0.6804 | 0.496  | 0.160942059 | count | 1 |
| UNC50      | 0.1195382 | 0.1587874 | 0.7528 | 0.452  | 0.160961124 | count | 1 |
| EPM2A      | 0.2799267 | 0.4519258 | 0.6194 | 0.536  | 0.161000488 | count | 1 |
| SPPL2A     | 0.1153148 | 0.0971233 | 1.1873 | 0.235  | 0.161012124 | count | 1 |
| ATXN7L3B   | 0.1209492 | 0.1691621 | 0.715  | 0.475  | 0.161030778 | count | 1 |
| PLK3       | 0.1165659 | 0.1314948 | 0.8865 | 0.375  | 0.1610764   | count | 1 |
| FKBP1A     | 0.1127847 | 0.052652  | 2.1421 | 0.0323 | 0.161129808 | count | 1 |
| DPH2       | 0.2479665 | 0.4602835 | 0.5387 | 0.59   | 0.161206785 | count | 1 |
| TRMT1L     | 0.1585674 | 0.3316338 | 0.4781 | 0.633  | 0.161288017 | count | 1 |
| CSNK1E     | 0.1406714 | 0.3036477 | 0.4633 | 0.643  | 0.161369352 | count | 1 |
| SNHG19     | 0.2178234 | 0.5229761 | 0.4165 | 0.677  | 0.161405524 | count | 1 |
| DDX23      | 0.1333521 | 0.2306243 | 0.5782 | 0.563  | 0.161432391 | count | 1 |
| AC105277.1 | 0.3035135 | 0.8553695 | 0.3548 | 0.723  | 0.1615216   | count | 1 |
| FAM229B    | 0.3035135 | 0.7817397 | 0.3883 | 0.698  | 0.1615216   | count | 1 |
| AL691447.2 | 0.3035135 | 0.7817397 | 0.3883 | 0.698  | 0.1615216   | count | 1 |
| FOXN3      | 0.1186497 | 0.1163235 | 1.02   | 0.308  | 0.161616101 | count | 1 |
| ZFYVE1     | 0.1937952 | 0.4168845 | 0.4649 | 0.642  | 0.16162665  | count | 1 |
| MBP        | 0.1148792 | 0.0906669 | 1.267  | 0.205  | 0.161651819 | count | 1 |

|            |           |           |        |        |             |       |   |
|------------|-----------|-----------|--------|--------|-------------|-------|---|
| MAP3K2     | 0.1152587 | 0.0974121 | 1.1832 | 0.237  | 0.161668347 | count | 1 |
| SPATA2     | 0.2813777 | 0.440604  | 0.6386 | 0.523  | 0.161878786 | count | 1 |
| PTPRA      | 0.1185853 | 0.1451741 | 0.8168 | 0.414  | 0.161930087 | count | 1 |
| FHL3       | 0.1198278 | 0.1424997 | 0.8409 | 0.4    | 0.162034153 | count | 1 |
| CASS4      | 0.1431368 | 0.2375556 | 0.6025 | 0.547  | 0.16206071  | count | 1 |
| CUX1       | 0.1184644 | 0.1240889 | 0.9547 | 0.34   | 0.162204012 | count | 1 |
| AC137767.1 | 0.2277393 | 0.5017519 | 0.4539 | 0.65   | 0.162442179 | count | 1 |
| SF3B2      | 0.1149952 | 0.0911893 | 1.2611 | 0.207  | 0.162483544 | count | 1 |
| ZNF71      | 0.2644816 | 0.5501657 | 0.4807 | 0.631  | 0.162544741 | count | 1 |
| THRA       | 0.1287595 | 0.2211521 | 0.5822 | 0.56   | 0.162604183 | count | 1 |
| KCNE5      | 0.2825816 | 0.7284233 | 0.3879 | 0.698  | 0.162607836 | count | 1 |
| MYOZ2      | 0.2646759 | 0.7898003 | 0.3351 | 0.738  | 0.162669793 | count | 1 |
| TRMT61B    | 0.1615788 | 0.331734  | 0.4871 | 0.626  | 0.162744126 | count | 1 |
| HHAT       | 0.2122167 | 0.8772616 | 0.2419 | 0.809  | 0.162770944 | count | 1 |
| TBC1D14    | 0.133249  | 0.1989283 | 0.6698 | 0.503  | 0.162803296 | count | 1 |
| BCS1L      | 0.1693105 | 0.4230953 | 0.4002 | 0.689  | 0.162812376 | count | 1 |
| STX2       | 0.1316865 | 0.215027  | 0.6124 | 0.54   | 0.162850948 | count | 1 |
| PLEKHA3    | 0.1191628 | 0.154169  | 0.7729 | 0.44   | 0.163019648 | count | 1 |
| ZNF148     | 0.1223325 | 0.1500537 | 0.8153 | 0.415  | 0.16312152  | count | 1 |
| CIRBP      | 0.1145463 | 0.0597635 | 1.9167 | 0.0554 | 0.163300961 | count | 1 |
| ST3GAL2    | 0.1605636 | 0.3134114 | 0.5123 | 0.608  | 0.163349064 | count | 1 |
| RNPEPL1    | 0.1187282 | 0.1085925 | 1.0933 | 0.274  | 0.163388417 | count | 1 |
| CACUL1     | 0.1189753 | 0.1216274 | 0.9782 | 0.328  | 0.163400138 | count | 1 |
| HYAL2      | 0.1384435 | 0.2526036 | 0.5481 | 0.584  | 0.163492962 | count | 1 |
| NSFL1C     | 0.119201  | 0.1297964 | 0.9184 | 0.359  | 0.163616004 | count | 1 |
| AGO2       | 0.1234521 | 0.1734458 | 0.7118 | 0.477  | 0.163763866 | count | 1 |
| ALS2CL     | 1.184257  | 1.006275  | 1.1769 | 0.239  | 0.163866674 | count | 1 |
| OSBPL11    | 0.1222181 | 0.1809871 | 0.6753 | 0.5    | 0.16392922  | count | 1 |
| CSNK1D     | 0.1195534 | 0.1233103 | 0.9695 | 0.332  | 0.164003461 | count | 1 |
| RHOBTB2    | 0.2139015 | 0.4864366 | 0.4397 | 0.66   | 0.164103901 | count | 1 |
| NDUFS1     | 0.1294899 | 0.1717634 | 0.7539 | 0.451  | 0.164198555 | count | 1 |
| GEMIN6     | 0.1325449 | 0.2465838 | 0.5375 | 0.591  | 0.164223386 | count | 1 |
| FTSJ1      | 0.1432802 | 0.3262933 | 0.4391 | 0.661  | 0.164390043 | count | 1 |
| C2orf69    | 0.1481198 | 0.2742642 | 0.5401 | 0.589  | 0.164395605 | count | 1 |
| PUDP       | 0.1517984 | 0.4769567 | 0.3183 | 0.75   | 0.16453363  | count | 1 |
| CNP        | 0.1285278 | 0.2598059 | 0.4947 | 0.621  | 0.164566514 | count | 1 |
| ANKRD35    | 0.2858546 | 0.6201478 | 0.4609 | 0.645  | 0.164591341 | count | 1 |
| MPZ        | 0.2858546 | 0.6201478 | 0.4609 | 0.645  | 0.164591341 | count | 1 |
| PIAS3      | 0.1929376 | 0.4531412 | 0.4258 | 0.67   | 0.164752492 | count | 1 |
| TRABD      | 0.1202222 | 0.1251219 | 0.9608 | 0.337  | 0.164788847 | count | 1 |
| APOM       | 0.1638579 | 0.4499305 | 0.3642 | 0.716  | 0.165075744 | count | 1 |
| IP6K1      | 0.1364881 | 0.24301   | 0.5617 | 0.574  | 0.165255391 | count | 1 |
| TMEM127    | 0.1223745 | 0.176723  | 0.6925 | 0.489  | 0.165263647 | count | 1 |
| MAP3K7CL   | 0.1353864 | 0.2682332 | 0.5047 | 0.614  | 0.165432065 | count | 1 |
| BORCS6     | 0.1335777 | 0.2289289 | 0.5835 | 0.56   | 0.16551074  | count | 1 |

|            |           |           |        |          |             |       |             |
|------------|-----------|-----------|--------|----------|-------------|-------|-------------|
| RABEP2     | 0.1702281 | 0.3895646 | 0.437  | 0.662    | 0.165836019 | count | 1           |
| CNIH4      | 0.1181888 | 0.1138106 | 1.0385 | 0.299    | 0.165980106 | count | 1           |
| MKRN1      | 0.1238937 | 0.1512175 | 0.8193 | 0.413    | 0.166113065 | count | 1           |
| ZP3        | 0.2700982 | 0.376101  | 0.7182 | 0.473    | 0.166162761 | count | 1           |
| PPP1CC     | 0.1204713 | 0.1054361 | 1.1426 | 0.253    | 0.166333311 | count | 1           |
| MTMR14     | 0.1229401 | 0.1322492 | 0.9296 | 0.353    | 0.166468097 | count | 1           |
| SMNDC1     | 0.1224884 | 0.1303969 | 0.9394 | 0.348    | 0.166543744 | count | 1           |
| GTF2I      | 0.1225522 | 0.1166324 | 1.0508 | 0.293    | 0.166676577 | count | 1           |
| TST        | 0.1313099 | 0.2062864 | 0.6365 | 0.524    | 0.166735019 | count | 1           |
| TULP3      | 0.2439146 | 0.4321814 | 0.5644 | 0.573    | 0.166787112 | count | 1           |
| FDXACB1    | 0.3436074 | 0.4972469 | 0.691  | 0.49     | 0.166844147 | count | 1           |
| SLC16A7    | 0.156274  | 0.2559225 | 0.6106 | 0.542    | 0.167138729 | count | 1           |
| GAS2L1     | 0.1464917 | 0.2450311 | 0.5978 | 0.55     | 0.167396726 | count | 1           |
| RPL28      | 0.1163785 | 0.0231616 | 5.0246 | 5.41E-07 | 0.167782596 | count | 0.012896899 |
| ZNF761     | 0.2010152 | 0.4413128 | 0.4555 | 0.649    | 0.167809255 | count | 1           |
| CNNM4      | 0.2119758 | 0.4646965 | 0.4562 | 0.648    | 0.167815719 | count | 1           |
| KRIT1      | 0.131868  | 0.1908398 | 0.691  | 0.49     | 0.16787071  | count | 1           |
| PPIG       | 0.1189777 | 0.0725479 | 1.64   | 0.101    | 0.168268292 | count | 1           |
| PLXND1     | 0.1269596 | 0.1684549 | 0.7537 | 0.451    | 0.168337892 | count | 1           |
| POLR2F     | 0.1203923 | 0.1146397 | 1.0502 | 0.294    | 0.168353268 | count | 1           |
| ZWINT      | 0.3157566 | 0.5733186 | 0.5508 | 0.582    | 0.168436035 | count | 1           |
| TMEM259    | 0.1243739 | 0.1334608 | 0.9319 | 0.351    | 0.168467343 | count | 1           |
| MICU2      | 0.1300007 | 0.1781076 | 0.7299 | 0.466    | 0.168490986 | count | 1           |
| DCLRE1A    | 0.2737726 | 0.643768  | 0.4253 | 0.671    | 0.168533204 | count | 1           |
| AC040169.1 | 0.2737726 | 0.643768  | 0.4253 | 0.671    | 0.168533204 | count | 1           |
| KIF3B      | 0.1587603 | 0.3317093 | 0.4786 | 0.632    | 0.168587885 | count | 1           |
| ZNF76      | 0.2588609 | 0.459536  | 0.5633 | 0.573    | 0.168603149 | count | 1           |
| PLEKHO2    | 0.1267344 | 0.1508404 | 0.8402 | 0.401    | 0.169009154 | count | 1           |
| ZC3HC1     | 0.1901111 | 0.3864311 | 0.492  | 0.623    | 0.169183205 | count | 1           |
| MRPL33     | 0.1206646 | 0.1000096 | 1.2065 | 0.228    | 0.169184359 | count | 1           |
| ZNF449     | 0.25983   | 0.5157678 | 0.5038 | 0.614    | 0.16926229  | count | 1           |
| DDT        | 0.1187916 | 0.0688437 | 1.7255 | 0.0846   | 0.169269684 | count | 1           |
| TMEM14A    | 0.1680939 | 0.3465426 | 0.4851 | 0.628    | 0.169411871 | count | 1           |
| MEN1       | 0.2282954 | 0.4804397 | 0.4752 | 0.635    | 0.169435378 | count | 1           |
| COQ10A     | 0.220668  | 0.4391243 | 0.5025 | 0.615    | 0.169463432 | count | 1           |
| RNF152     | 0.391421  | 0.7938654 | 0.4931 | 0.622    | 0.169557052 | count | 1           |
| RPL39L     | 0.1400171 | 0.2671891 | 0.524  | 0.6      | 0.169558859 | count | 1           |
| PIGK       | 0.1609362 | 0.2775473 | 0.5799 | 0.562    | 0.16961412  | count | 1           |
| CLN3       | 0.1683249 | 0.5358692 | 0.3141 | 0.753    | 0.169648424 | count | 1           |
| TWSG1      | 0.1485403 | 0.3806548 | 0.3902 | 0.696    | 0.169760682 | count | 1           |
| AC240565.1 | 1.22275   | 0.8453773 | 1.4464 | 0.148    | 0.170371242 | count | 1           |
| AC004817.3 | 0.2040668 | 0.3408063 | 0.5988 | 0.549    | 0.170425654 | count | 1           |
| MAP2K7     | 0.1394958 | 0.302757  | 0.4608 | 0.645    | 0.170487624 | count | 1           |
| RAD51B     | 0.1882972 | 0.425206  | 0.4428 | 0.658    | 0.170644723 | count | 1           |
| SNRPF      | 0.12174   | 0.0853543 | 1.4263 | 0.154    | 0.170704744 | count | 1           |

|            |           |           |        |          |             |       |             |
|------------|-----------|-----------|--------|----------|-------------|-------|-------------|
| DAP        | 0.1260647 | 0.1359586 | 0.9272 | 0.354    | 0.170709461 | count | 1           |
| AGRN       | 0.2494551 | 0.5436286 | 0.4589 | 0.646    | 0.170730522 | count | 1           |
| IGFLR1     | 0.1394059 | 0.2054384 | 0.6786 | 0.497    | 0.170744534 | count | 1           |
| HBEGF      | 0.1195814 | 0.0759127 | 1.5752 | 0.115    | 0.171055998 | count | 1           |
| HUS1B      | 0.4570962 | 0.8540455 | 0.5352 | 0.593    | 0.171067195 | count | 1           |
| CDK16      | 0.1496858 | 0.2544817 | 0.5882 | 0.556    | 0.171082775 | count | 1           |
| ST3GAL1    | 0.1299086 | 0.1623815 | 0.8    | 0.424    | 0.171116699 | count | 1           |
| CMIP       | 0.1267767 | 0.1352333 | 0.9375 | 0.349    | 0.171510701 | count | 1           |
| REPS2      | 0.1832449 | 0.378458  | 0.4842 | 0.628    | 0.171515325 | count | 1           |
| AC034199.1 | 1.2305199 | 1.092564  | 1.1263 | 0.26     | 0.171689141 | count | 1           |
| RREB1      | 0.1316169 | 0.209049  | 0.6296 | 0.529    | 0.171757652 | count | 1           |
| CMTR1      | 0.18352   | 0.3888716 | 0.4719 | 0.637    | 0.171778055 | count | 1           |
| EDC3       | 0.197178  | 0.4312115 | 0.4573 | 0.648    | 0.172157457 | count | 1           |
| SMARCA1    | 0.2515028 | 0.6779245 | 0.371  | 0.711    | 0.172189601 | count | 1           |
| TMEM273    | 0.1589216 | 0.2726698 | 0.5828 | 0.56     | 0.17235136  | count | 1           |
| RFC4       | 0.1841676 | 0.3604053 | 0.511  | 0.609    | 0.172396589 | count | 1           |
| DDB2       | 0.1400269 | 0.2465797 | 0.5679 | 0.57     | 0.172566481 | count | 1           |
| NSD2       | 0.1546805 | 0.3060111 | 0.5055 | 0.613    | 0.172684433 | count | 1           |
| TGS1       | 0.12776   | 0.1480477 | 0.863  | 0.388    | 0.172787734 | count | 1           |
| TBCC       | 0.1362313 | 0.2033055 | 0.6701 | 0.503    | 0.172791899 | count | 1           |
| ELOF1      | 0.1279397 | 0.1942158 | 0.6588 | 0.51     | 0.17279894  | count | 1           |
| WDR27      | 0.561966  | 0.7929839 | 0.7087 | 0.479    | 0.172902884 | count | 1           |
| TTC4       | 0.3553566 | 0.5444094 | 0.6527 | 0.514    | 0.172957391 | count | 1           |
| PROSER3    | 0.2023613 | 0.8690219 | 0.2329 | 0.816    | 0.173008789 | count | 1           |
| LRRC25     | 0.1245736 | 0.0916579 | 1.3591 | 0.174    | 0.17316074  | count | 1           |
| DDR1       | 1.239247  | 0.8992237 | 1.3781 | 0.168    | 0.173171284 | count | 1           |
| MAP2K3     | 0.12456   | 0.1155592 | 1.0779 | 0.281    | 0.173216418 | count | 1           |
| COP1       | 0.1375188 | 0.1744882 | 0.7881 | 0.431    | 0.17323123  | count | 1           |
| FYB1       | 0.1212215 | 0.0510861 | 2.3729 | 0.0177   | 0.173305886 | count | 1           |
| RAD51C     | 0.1286592 | 0.2045219 | 0.6291 | 0.529    | 0.173340802 | count | 1           |
| HINT3      | 0.1600863 | 0.224014  | 0.7146 | 0.475    | 0.173630397 | count | 1           |
| RPL7A      | 0.1204987 | 0.0244374 | 4.9309 | 8.73E-07 | 0.17368438  | count | 0.020800971 |
| STK11      | 0.1368029 | 0.2182659 | 0.6268 | 0.531    | 0.173746386 | count | 1           |
| LNPK       | 0.1434532 | 0.2457237 | 0.5838 | 0.559    | 0.173750436 | count | 1           |
| XPO1       | 0.1279772 | 0.1500787 | 0.8527 | 0.394    | 0.173828434 | count | 1           |
| CCDC50     | 0.127992  | 0.1287411 | 0.9942 | 0.32     | 0.173848584 | count | 1           |
| EEF2       | 0.1220456 | 0.0454394 | 2.6859 | 0.00728  | 0.174132426 | count | 1           |
| NFIC       | 0.1279664 | 0.1266479 | 1.0104 | 0.312    | 0.174151776 | count | 1           |
| ANXA7      | 0.1244618 | 0.0963288 | 1.2921 | 0.196    | 0.174280612 | count | 1           |
| ZNF211     | 0.3579328 | 0.5983242 | 0.5982 | 0.55     | 0.174301183 | count | 1           |
| LINC00278  | 0.3579328 | 0.8006264 | 0.4471 | 0.655    | 0.174301183 | count | 1           |
| ZC3H4      | 0.1713988 | 0.3102204 | 0.5525 | 0.581    | 0.174548721 | count | 1           |
| STK32B     | 0.4020939 | 0.678255  | 0.5928 | 0.553    | 0.174569663 | count | 1           |
| TIAM2      | 0.4020939 | 0.6347733 | 0.6334 | 0.527    | 0.174569663 | count | 1           |
| HLCS       | 0.4020939 | 0.6239782 | 0.6444 | 0.519    | 0.174569663 | count | 1           |

|            |           |           |        |         |             |       |   |
|------------|-----------|-----------|--------|---------|-------------|-------|---|
| SMC6       | 0.1452859 | 0.2546194 | 0.5706 | 0.568   | 0.174653105 | count | 1 |
| NAA38      | 0.1243174 | 0.0832024 | 1.4942 | 0.135   | 0.174693292 | count | 1 |
| DENND1C    | 0.1791753 | 0.3538777 | 0.5063 | 0.613   | 0.174712723 | count | 1 |
| ZC3H12A    | 0.1313512 | 0.1494604 | 0.8788 | 0.38    | 0.174745538 | count | 1 |
| FKBP9      | 0.2554591 | 0.4419632 | 0.578  | 0.563   | 0.175011121 | count | 1 |
| LTB        | 0.1431788 | 0.2748649 | 0.5209 | 0.602   | 0.175020212 | count | 1 |
| MUM1       | 0.1512665 | 0.2728583 | 0.5544 | 0.579   | 0.175045342 | count | 1 |
| RAB40B     | 0.2840866 | 0.4346337 | 0.6536 | 0.513   | 0.175201778 | count | 1 |
| SIGLEC14   | 0.1649527 | 0.2463178 | 0.6697 | 0.503   | 0.175254317 | count | 1 |
| GARS       | 0.1361162 | 0.1886658 | 0.7215 | 0.471   | 0.175266863 | count | 1 |
| ARID1B     | 0.1320531 | 0.152348  | 0.8668 | 0.386   | 0.175308544 | count | 1 |
| UQCRH      | 0.1224353 | 0.0412524 | 2.968  | 0.00303 | 0.175399055 | count | 1 |
| CLEC3B     | 1.252874  | 0.7822929 | 1.6015 | 0.109   | 0.175489321 | count | 1 |
| GLB1       | 0.1308123 | 0.1237665 | 1.0569 | 0.291   | 0.17556314  | count | 1 |
| HPF1       | 0.1332657 | 0.1563454 | 0.8524 | 0.394   | 0.175668935 | count | 1 |
| PEX11G     | 0.1851211 | 0.4339563 | 0.4266 | 0.67    | 0.175878676 | count | 1 |
| NDUFAF1    | 0.1427321 | 0.2641691 | 0.5403 | 0.589   | 0.175922373 | count | 1 |
| PRKD3      | 0.1442669 | 0.2580513 | 0.5591 | 0.576   | 0.175970365 | count | 1 |
| BCL7C      | 0.1255459 | 0.1055115 | 1.1899 | 0.234   | 0.176013536 | count | 1 |
| HSDL2      | 0.1343527 | 0.1858319 | 0.723  | 0.47    | 0.176013853 | count | 1 |
| AL356441.1 | 1.2569057 | 1.1205265 | 1.1217 | 0.262   | 0.176176121 | count | 1 |
| LINC01703  | 1.2569057 | 1.319048  | 0.9529 | 0.341   | 0.176176121 | count | 1 |
| OR2B11     | 1.2569057 | 1.1205265 | 1.1217 | 0.262   | 0.176176121 | count | 1 |
| AC098828.2 | 1.2569057 | 1.319048  | 0.9529 | 0.341   | 0.176176121 | count | 1 |
| LRRC2      | 1.2569057 | 1.319048  | 0.9529 | 0.341   | 0.176176121 | count | 1 |
| ITIH4      | 1.2569057 | 1.319048  | 0.9529 | 0.341   | 0.176176121 | count | 1 |
| ATP1B3-AS1 | 1.2569057 | 1.1205265 | 1.1217 | 0.262   | 0.176176121 | count | 1 |
| HTRA3      | 1.2569057 | 1.319048  | 0.9529 | 0.341   | 0.176176121 | count | 1 |
| AC027607.1 | 1.2569057 | 1.319048  | 0.9529 | 0.341   | 0.176176121 | count | 1 |
| AC020741.1 | 1.2569057 | 1.319048  | 0.9529 | 0.341   | 0.176176121 | count | 1 |
| GPR63      | 1.2569057 | 1.458152  | 0.862  | 0.389   | 0.176176121 | count | 1 |
| FRK        | 1.2569057 | 1.458152  | 0.862  | 0.389   | 0.176176121 | count | 1 |
| AC007285.1 | 1.2569057 | 1.319048  | 0.9529 | 0.341   | 0.176176121 | count | 1 |
| AL022157.1 | 1.2569057 | 1.319048  | 0.9529 | 0.341   | 0.176176121 | count | 1 |
| AL162231.2 | 1.2569057 | 1.319048  | 0.9529 | 0.341   | 0.176176121 | count | 1 |
| SMC5-AS1   | 1.2569057 | 1.319048  | 0.9529 | 0.341   | 0.176176121 | count | 1 |
| B3GNT10    | 1.2569057 | 1.319048  | 0.9529 | 0.341   | 0.176176121 | count | 1 |
| CTTN       | 1.2569057 | 1.319048  | 0.9529 | 0.341   | 0.176176121 | count | 1 |
| SYT15      | 1.2569057 | 1.458152  | 0.862  | 0.389   | 0.176176121 | count | 1 |
| RNASE4     | 1.2569057 | 1.319048  | 0.9529 | 0.341   | 0.176176121 | count | 1 |
| AC005479.2 | 1.2569057 | 1.458152  | 0.862  | 0.389   | 0.176176121 | count | 1 |
| AL049840.2 | 1.2569057 | 1.319048  | 0.9529 | 0.341   | 0.176176121 | count | 1 |
| MYO5C      | 1.2569057 | 1.458152  | 0.862  | 0.389   | 0.176176121 | count | 1 |
| AC010761.1 | 1.2569057 | 1.319048  | 0.9529 | 0.341   | 0.176176121 | count | 1 |
| ITGA3      | 1.2569057 | 1.1205265 | 1.1217 | 0.262   | 0.176176121 | count | 1 |

|            |           |           |        |          |             |       |            |
|------------|-----------|-----------|--------|----------|-------------|-------|------------|
| CFAP61     | 1.2569057 | 1.319048  | 0.9529 | 0.341    | 0.176176121 | count | 1          |
| Z98752.4   | 1.2569057 | 1.319048  | 0.9529 | 0.341    | 0.176176121 | count | 1          |
| STAP2      | 1.2569057 | 1.319048  | 0.9529 | 0.341    | 0.176176121 | count | 1          |
| AC008622.2 | 1.2569057 | 1.1205265 | 1.1217 | 0.262    | 0.176176121 | count | 1          |
| PTOV1-AS2  | 1.2569057 | 1.458152  | 0.862  | 0.389    | 0.176176121 | count | 1          |
| ADPRHL2    | 0.1339328 | 0.1706834 | 0.7847 | 0.433    | 0.176321043 | count | 1          |
| ZFYVE26    | 0.1980182 | 0.3843935 | 0.5151 | 0.606    | 0.176387863 | count | 1          |
| PPP1CB     | 0.1238105 | 0.0595665 | 2.0785 | 0.0378   | 0.176500703 | count | 1          |
| TARDBP     | 0.1414601 | 0.1966745 | 0.7193 | 0.472    | 0.176858189 | count | 1          |
| ADM        | 0.1305371 | 0.1312483 | 0.9946 | 0.32     | 0.176946353 | count | 1          |
| RFWD3      | 0.2118569 | 0.4131286 | 0.5128 | 0.608    | 0.177113566 | count | 1          |
| SUPT16H    | 0.1295967 | 0.1097011 | 1.1814 | 0.238    | 0.1773242   | count | 1          |
| SEC63      | 0.1315226 | 0.1336767 | 0.9839 | 0.325    | 0.177465597 | count | 1          |
| ABCC4      | 0.199222  | 0.6607406 | 0.3015 | 0.763    | 0.177485824 | count | 1          |
| RPL26      | 0.1233514 | 0.0264893 | 4.6567 | 3.39E-06 | 0.177665341 | count | 0.08055318 |
| CUL5       | 0.1333577 | 0.15524   | 0.859  | 0.39     | 0.177694833 | count | 1          |
| PDPR       | 0.1554802 | 0.3103187 | 0.501  | 0.616    | 0.177773307 | count | 1          |
| UBTD2      | 0.1542087 | 0.2855552 | 0.54   | 0.589    | 0.177780111 | count | 1          |
| VPS51      | 0.1388775 | 0.1568021 | 0.8857 | 0.376    | 0.177884163 | count | 1          |
| CNOT1      | 0.1375174 | 0.1703217 | 0.8074 | 0.42     | 0.177948496 | count | 1          |
| CASC4      | 0.1333929 | 0.1759051 | 0.7583 | 0.448    | 0.178088515 | count | 1          |
| UBE2Q2     | 0.1333807 | 0.1744158 | 0.7647 | 0.445    | 0.178483097 | count | 1          |
| CHRAC1     | 0.1318141 | 0.1396294 | 0.944  | 0.345    | 0.178515027 | count | 1          |
| KIAA0586   | 0.1548921 | 0.2406752 | 0.6436 | 0.52     | 0.178575737 | count | 1          |
| ZNF664     | 0.162725  | 0.3173795 | 0.5127 | 0.608    | 0.17874498  | count | 1          |
| RAPH1      | 0.142387  | 0.2017947 | 0.7056 | 0.481    | 0.178865816 | count | 1          |
| PSIP1      | 0.1296635 | 0.1144751 | 1.1327 | 0.257    | 0.178909519 | count | 1          |
| TAF12      | 0.1304187 | 0.1167272 | 1.1173 | 0.264    | 0.178974436 | count | 1          |
| PNPLA4     | 0.1725383 | 0.3079022 | 0.5604 | 0.575    | 0.179016011 | count | 1          |
| AL136115.2 | 0.7713801 | 1.0188793 | 0.7571 | 0.449    | 0.17902115  | count | 1          |
| AL603839.3 | 0.7713801 | 1.3644481 | 0.5653 | 0.572    | 0.17902115  | count | 1          |
| ORC1       | 0.7713801 | 1.0188793 | 0.7571 | 0.449    | 0.17902115  | count | 1          |
| FALEC      | 0.7713801 | 1.1715293 | 0.6584 | 0.51     | 0.17902115  | count | 1          |
| RGS5       | 0.7713801 | 1.037977  | 0.7432 | 0.457    | 0.17902115  | count | 1          |
| AC012358.3 | 0.7713801 | 1.037977  | 0.7432 | 0.457    | 0.17902115  | count | 1          |
| LINC01116  | 0.7713801 | 0.9994168 | 0.7718 | 0.44     | 0.17902115  | count | 1          |
| AC008966.1 | 0.7713801 | 1.0188793 | 0.7571 | 0.449    | 0.17902115  | count | 1          |
| SYCP2L     | 0.7713801 | 1.0188793 | 0.7571 | 0.449    | 0.17902115  | count | 1          |
| PCDH11X    | 0.7713801 | 1.037977  | 0.7432 | 0.457    | 0.17902115  | count | 1          |
| GPRASP1    | 0.7713801 | 1.037977  | 0.7432 | 0.457    | 0.17902115  | count | 1          |
| EPS8L2     | 0.7713801 | 0.9994168 | 0.7718 | 0.44     | 0.17902115  | count | 1          |
| FIBIN      | 0.7713801 | 1.468606  | 0.5252 | 0.599    | 0.17902115  | count | 1          |
| AP001160.2 | 0.7713801 | 1.037977  | 0.7432 | 0.457    | 0.17902115  | count | 1          |
| LRTOMT     | 0.7713801 | 1.037977  | 0.7432 | 0.457    | 0.17902115  | count | 1          |
| ZEB1-AS1   | 0.7713801 | 1.0188793 | 0.7571 | 0.449    | 0.17902115  | count | 1          |

|            |           |           |        |        |             |       |   |
|------------|-----------|-----------|--------|--------|-------------|-------|---|
| NEK5       | 0.7713801 | 1.0188793 | 0.7571 | 0.449  | 0.17902115  | count | 1 |
| EDC4       | 0.7713801 | 1.037977  | 0.7432 | 0.457  | 0.17902115  | count | 1 |
| DHRS13     | 0.7713801 | 1.0188793 | 0.7571 | 0.449  | 0.17902115  | count | 1 |
| MPP3       | 0.7713801 | 1.0188793 | 0.7571 | 0.449  | 0.17902115  | count | 1 |
| AC068234.2 | 0.7713801 | 1.037977  | 0.7432 | 0.457  | 0.17902115  | count | 1 |
| AC011825.2 | 0.7713801 | 1.3644481 | 0.5653 | 0.572  | 0.17902115  | count | 1 |
| AC005523.1 | 0.7713801 | 1.0188793 | 0.7571 | 0.449  | 0.17902115  | count | 1 |
| ZNF788P    | 0.7713801 | 1.1715293 | 0.6584 | 0.51   | 0.17902115  | count | 1 |
| PGLYRP2    | 0.7713801 | 1.0188793 | 0.7571 | 0.449  | 0.17902115  | count | 1 |
| ZNF850     | 0.7713801 | 1.0188793 | 0.7571 | 0.449  | 0.17902115  | count | 1 |
| ZNF793     | 0.7713801 | 1.4141    | 0.5455 | 0.585  | 0.17902115  | count | 1 |
| EDDM13     | 0.7713801 | 1.1715293 | 0.6584 | 0.51   | 0.17902115  | count | 1 |
| C1QTNF6    | 0.7713801 | 1.037977  | 0.7432 | 0.457  | 0.17902115  | count | 1 |
| TOX4       | 0.1276252 | 0.0949627 | 1.344  | 0.179  | 0.179033903 | count | 1 |
| HIBCH      | 0.1536377 | 0.3244807 | 0.4735 | 0.636  | 0.179152365 | count | 1 |
| DCK        | 0.1386176 | 0.1416717 | 0.9784 | 0.328  | 0.179209255 | count | 1 |
| TIPRL      | 0.1302964 | 0.1359693 | 0.9583 | 0.338  | 0.179307109 | count | 1 |
| GSTK1      | 0.1257762 | 0.054675  | 2.3004 | 0.0215 | 0.179364901 | count | 1 |
| TADA1      | 0.7726871 | 0.8592072 | 0.8993 | 0.369  | 0.179375355 | count | 1 |
| OSBPL6     | 0.7726871 | 0.8177903 | 0.9448 | 0.345  | 0.179375355 | count | 1 |
| C7orf61    | 0.7726871 | 0.8592072 | 0.8993 | 0.369  | 0.179375355 | count | 1 |
| ACTL10     | 0.7726871 | 0.8592072 | 0.8993 | 0.369  | 0.179375355 | count | 1 |
| TYW3       | 0.1341951 | 0.1529054 | 0.8776 | 0.38   | 0.179413791 | count | 1 |
| SMURF2     | 0.1475588 | 0.2377436 | 0.6207 | 0.535  | 0.179607022 | count | 1 |
| SMAD1      | 0.3354815 | 0.5849101 | 0.5736 | 0.566  | 0.179636682 | count | 1 |
| POLA2      | 0.3354815 | 0.5106453 | 0.657  | 0.511  | 0.179636682 | count | 1 |
| NAPB       | 0.3354815 | 0.4821486 | 0.6958 | 0.487  | 0.179636682 | count | 1 |
| ZNF616     | 0.2620427 | 0.5426644 | 0.4829 | 0.629  | 0.179713614 | count | 1 |
| CHM        | 0.1339032 | 0.1497083 | 0.8944 | 0.371  | 0.179797427 | count | 1 |
| TMF1       | 0.1292431 | 0.1123355 | 1.1505 | 0.25   | 0.17994234  | count | 1 |
| SKAP2      | 0.1279366 | 0.0758942 | 1.6857 | 0.092  | 0.180078764 | count | 1 |
| RECQL5     | 0.4790831 | 0.6581414 | 0.7279 | 0.467  | 0.180150044 | count | 1 |
| TAF1D      | 0.1280737 | 0.0881483 | 1.4529 | 0.146  | 0.180245859 | count | 1 |
| CMTM4      | 0.4143394 | 1.0044357 | 0.4125 | 0.68   | 0.180344398 | count | 1 |
| GCC2       | 0.1296584 | 0.1090609 | 1.1889 | 0.235  | 0.180355068 | count | 1 |
| XBP1       | 0.1277159 | 0.0742615 | 1.7198 | 0.0856 | 0.180697111 | count | 1 |
| ECSIT      | 0.1617804 | 0.2679638 | 0.6037 | 0.546  | 0.180702512 | count | 1 |
| TOPORS     | 0.1381128 | 0.1398811 | 0.9874 | 0.324  | 0.180959784 | count | 1 |
| ARL13B     | 0.151968  | 0.2274615 | 0.6681 | 0.504  | 0.181242406 | count | 1 |
| CRYBG1     | 0.137445  | 0.1300854 | 1.0566 | 0.291  | 0.181314551 | count | 1 |
| ZNF862     | 0.371577  | 0.6007818 | 0.6185 | 0.536  | 0.181438297 | count | 1 |
| TMEM86B    | 0.371577  | 0.6926517 | 0.5365 | 0.592  | 0.181438297 | count | 1 |
| FBXW2      | 0.1495371 | 0.2340136 | 0.639  | 0.523  | 0.181609459 | count | 1 |
| RING1      | 0.1431781 | 0.1899449 | 0.7538 | 0.451  | 0.181651428 | count | 1 |
| SCFD2      | 0.2941531 | 0.4088984 | 0.7194 | 0.472  | 0.181731223 | count | 1 |



|            |           |           |        |         |             |       |   |
|------------|-----------|-----------|--------|---------|-------------|-------|---|
| KAT6A      | 0.1429485 | 0.1766021 | 0.8094 | 0.418   | 0.181825032 | count | 1 |
| KATNB1     | 0.1912996 | 0.3775958 | 0.5066 | 0.612   | 0.181869238 | count | 1 |
| NAGPA      | 0.138611  | 0.1885147 | 0.7353 | 0.462   | 0.181878088 | count | 1 |
| MTMR10     | 0.150574  | 0.283814  | 0.5305 | 0.596   | 0.181992899 | count | 1 |
| NRIP1      | 0.1332834 | 0.1612185 | 0.8267 | 0.408   | 0.182002895 | count | 1 |
| TMA7       | 0.1269692 | 0.0419836 | 3.0243 | 0.00252 | 0.182127801 | count | 1 |
| FBXW7      | 0.1397833 | 0.1992509 | 0.7015 | 0.483   | 0.182313958 | count | 1 |
| HBP1       | 0.1348508 | 0.1199774 | 1.124  | 0.261   | 0.182343118 | count | 1 |
| UNC93B1    | 0.1303488 | 0.0875202 | 1.4894 | 0.137   | 0.182403186 | count | 1 |
| RPN1       | 0.1302887 | 0.093292  | 1.3966 | 0.163   | 0.182574722 | count | 1 |
| MED29      | 0.1328513 | 0.1289498 | 1.0303 | 0.303   | 0.182666087 | count | 1 |
| PANK2      | 0.1385877 | 0.1827552 | 0.7583 | 0.448   | 0.182710968 | count | 1 |
| INTS6      | 0.1357689 | 0.1562397 | 0.869  | 0.385   | 0.182741401 | count | 1 |
| AC243829.1 | 0.4197244 | 0.5783199 | 0.7258 | 0.468   | 0.182891772 | count | 1 |
| ZNF443     | 0.4864555 | 0.8999408 | 0.5405 | 0.589   | 0.183211653 | count | 1 |
| TANGO2     | 0.1571409 | 0.2752411 | 0.5709 | 0.568   | 0.183276268 | count | 1 |
| GUF1       | 0.1928797 | 0.3846397 | 0.5015 | 0.616   | 0.183402445 | count | 1 |
| RBM10      | 0.1679706 | 0.3202784 | 0.5245 | 0.6     | 0.183459305 | count | 1 |
| GTF2F1     | 0.1332563 | 0.1236539 | 1.0777 | 0.281   | 0.183484045 | count | 1 |
| RBM7       | 0.1470361 | 0.1869324 | 0.7866 | 0.432   | 0.183571026 | count | 1 |
| CLEC10A    | 0.1317264 | 0.1072139 | 1.2286 | 0.219   | 0.183651487 | count | 1 |
| IL12RB1    | 0.2100932 | 0.3513197 | 0.598  | 0.55    | 0.183726903 | count | 1 |
| LINC01003  | 0.1408116 | 0.1940274 | 0.7257 | 0.468   | 0.183807789 | count | 1 |
| UBQLN4     | 0.2150927 | 0.3688082 | 0.5832 | 0.56    | 0.184191985 | count | 1 |
| AC005225.2 | 0.790874  | 0.9377149 | 0.8434 | 0.399   | 0.184318993 | count | 1 |
| C19orf33   | 0.790874  | 0.8046216 | 0.9829 | 0.326   | 0.184318993 | count | 1 |
| CNTROB     | 0.3184024 | 0.5002542 | 0.6365 | 0.525   | 0.184432466 | count | 1 |
| C2orf42    | 0.343899  | 0.5358375 | 0.6418 | 0.521   | 0.184439089 | count | 1 |
| FAM20B     | 0.1847198 | 0.3766169 | 0.4905 | 0.624   | 0.184484538 | count | 1 |
| GDI2       | 0.1305979 | 0.0647936 | 2.0156 | 0.044   | 0.184529566 | count | 1 |
| PGLS       | 0.1289469 | 0.0479013 | 2.6919 | 0.00715 | 0.184544869 | count | 1 |
| HMGXB4     | 0.1361789 | 0.194956  | 0.6985 | 0.485   | 0.184613938 | count | 1 |
| ZNF181     | 0.2263466 | 0.4195505 | 0.5395 | 0.59    | 0.184748606 | count | 1 |
| CCDC47     | 0.1312174 | 0.0797876 | 1.6446 | 0.1     | 0.184821967 | count | 1 |
| PPP6R2     | 0.1509155 | 0.2971922 | 0.5078 | 0.612   | 0.184943361 | count | 1 |
| NEDD4      | 0.2209719 | 0.3435926 | 0.6431 | 0.52    | 0.184954812 | count | 1 |
| AC240274.1 | 0.5967236 | 0.4090127 | 1.4589 | 0.145   | 0.185010004 | count | 1 |
| GALNT6     | 0.1664786 | 0.2648839 | 0.6285 | 0.53    | 0.185019369 | count | 1 |
| PPP1R3G    | 0.2330231 | 0.5712307 | 0.4079 | 0.683   | 0.185025408 | count | 1 |
| SREK1IP1   | 0.1321167 | 0.1004432 | 1.3153 | 0.189   | 0.185038591 | count | 1 |
| CPSF3      | 0.1640556 | 0.2327682 | 0.7048 | 0.481   | 0.185129528 | count | 1 |
| ZNF513     | 0.1874749 | 0.3731787 | 0.5024 | 0.615   | 0.185177958 | count | 1 |
| SH3KBP1    | 0.1324027 | 0.0828654 | 1.5978 | 0.11    | 0.185426755 | count | 1 |
| AC010642.2 | 0.1458698 | 0.2147436 | 0.6793 | 0.497   | 0.185561126 | count | 1 |
| MYCBP2     | 0.1325622 | 0.0971954 | 1.3639 | 0.173   | 0.185584979 | count | 1 |

|            |           |           |        |          |             |       |   |
|------------|-----------|-----------|--------|----------|-------------|-------|---|
| ZNF92      | 0.167906  | 0.2938946 | 0.5713 | 0.568    | 0.185586269 | count | 1 |
| COG2       | 0.1598066 | 0.27189   | 0.5878 | 0.557    | 0.185731817 | count | 1 |
| ASXL1      | 0.14065   | 0.1621254 | 0.8675 | 0.386    | 0.185790625 | count | 1 |
| LBR        | 0.1335917 | 0.1179884 | 1.1322 | 0.258    | 0.18583461  | count | 1 |
| AC004241.1 | 0.3207578 | 0.5922552 | 0.5416 | 0.588    | 0.185876448 | count | 1 |
| BAX        | 0.1308778 | 0.0667737 | 1.96   | 0.0501   | 0.185909247 | count | 1 |
| CYBC1      | 0.1361239 | 0.1086132 | 1.2533 | 0.21     | 0.185934807 | count | 1 |
| TBC1D7     | 0.1433431 | 0.184547  | 0.7767 | 0.437    | 0.186030389 | count | 1 |
| CD53       | 0.1301354 | 0.0477477 | 2.7255 | 0.0065   | 0.186119269 | count | 1 |
| PATZ1      | 0.3469252 | 0.4251156 | 0.8161 | 0.415    | 0.186168898 | count | 1 |
| UCHL5      | 0.1420861 | 0.1622587 | 0.8757 | 0.381    | 0.186322849 | count | 1 |
| ARHGDIB    | 0.1298313 | 0.0357697 | 3.6296 | 0.00029  | 0.18641352  | count | 1 |
| AC107959.4 | 0.4272165 | 0.4925502 | 0.8674 | 0.386    | 0.186443914 | count | 1 |
| MRPL16     | 0.1358311 | 0.115196  | 1.1791 | 0.238    | 0.186454149 | count | 1 |
| RPL38      | 0.1300123 | 0.0354234 | 3.6702 | 0.000247 | 0.186461423 | count | 1 |
| HNRNPA2B1  | 0.1300188 | 0.0388072 | 3.3504 | 0.000819 | 0.186655368 | count | 1 |
| ZNF316     | 0.213476  | 0.3297725 | 0.6473 | 0.517    | 0.186762785 | count | 1 |
| DDX18      | 0.132772  | 0.0819979 | 1.6192 | 0.106    | 0.187064166 | count | 1 |
| PLOD1      | 0.1628684 | 0.2648056 | 0.615  | 0.539    | 0.187101436 | count | 1 |
| FDPS       | 0.1359064 | 0.1171021 | 1.1606 | 0.246    | 0.187204077 | count | 1 |
| MRPL48     | 0.1518535 | 0.2709175 | 0.5605 | 0.575    | 0.187243533 | count | 1 |
| AC084346.2 | 0.6035605 | 0.7763349 | 0.7774 | 0.437    | 0.187408724 | count | 1 |
| AL157938.3 | 0.6035605 | 0.7889991 | 0.765  | 0.444    | 0.187408724 | count | 1 |
| AP003392.6 | 0.6035605 | 0.7584041 | 0.7958 | 0.426    | 0.187408724 | count | 1 |
| SIAE       | 0.6035605 | 0.7738528 | 0.7799 | 0.436    | 0.187408724 | count | 1 |
| EMID1      | 1.322619  | 0.7634871 | 1.7323 | 0.0833   | 0.187420524 | count | 1 |
| GUCD1      | 0.1475331 | 0.1918418 | 0.769  | 0.442    | 0.187450503 | count | 1 |
| PIP5K1C    | 0.1596654 | 0.2691764 | 0.5932 | 0.553    | 0.187554344 | count | 1 |
| DUT        | 0.1331853 | 0.0932163 | 1.4288 | 0.153    | 0.187688267 | count | 1 |
| CCDC9      | 0.1778897 | 0.355808  | 0.5    | 0.617    | 0.187751871 | count | 1 |
| POLG2      | 0.1729947 | 0.468823  | 0.369  | 0.712    | 0.187820493 | count | 1 |
| AL353622.1 | 0.604777  | 0.8045314 | 0.7517 | 0.452    | 0.187836116 | count | 1 |
| MIR3142HG  | 0.604777  | 0.8421133 | 0.7182 | 0.473    | 0.187836116 | count | 1 |
| RPS6KB2    | 0.1402889 | 0.1772342 | 0.7915 | 0.429    | 0.187840415 | count | 1 |
| HIF1AN     | 0.1636516 | 0.3999483 | 0.4092 | 0.682    | 0.188010619 | count | 1 |
| PRR7       | 0.1795987 | 0.3680124 | 0.488  | 0.626    | 0.188054688 | count | 1 |
| ALKBH4     | 0.1732348 | 0.4320854 | 0.4009 | 0.689    | 0.188084682 | count | 1 |
| TPP2       | 0.1449967 | 0.1764453 | 0.8218 | 0.411    | 0.188186315 | count | 1 |
| CHIC1      | 0.3844623 | 0.7706398 | 0.4989 | 0.618    | 0.188209172 | count | 1 |
| AP000845.1 | 0.3844623 | 0.8323994 | 0.4619 | 0.644    | 0.188209172 | count | 1 |
| AC018413.1 | 0.3844623 | 0.7581035 | 0.5071 | 0.612    | 0.188209172 | count | 1 |
| ZNF543     | 0.3844623 | 0.8405036 | 0.4574 | 0.647    | 0.188209172 | count | 1 |
| AL022322.2 | 0.3844623 | 0.8323994 | 0.4619 | 0.644    | 0.188209172 | count | 1 |
| MYL9       | 0.1770248 | 0.3624943 | 0.4884 | 0.625    | 0.188268842 | count | 1 |
| COG3       | 0.1593126 | 0.3497309 | 0.4555 | 0.649    | 0.188363651 | count | 1 |

|            |           |           |        |          |             |       |           |
|------------|-----------|-----------|--------|----------|-------------|-------|-----------|
| COX4I1     | 0.1309207 | 0.0280538 | 4.6668 | 3.22E-06 | 0.188391001 | count | 0.0765233 |
| TVP23B     | 0.1747266 | 0.3172319 | 0.5508 | 0.582    | 0.188467058 | count | 1         |
| AC018797.2 | 0.385126  | 0.5902951 | 0.6524 | 0.514    | 0.188558734 | count | 1         |
| LINC00957  | 0.385126  | 0.6671663 | 0.5773 | 0.564    | 0.188558734 | count | 1         |
| PORCN      | 0.2881092 | 0.4841314 | 0.5951 | 0.552    | 0.188582134 | count | 1         |
| NAA30      | 0.190921  | 0.4196791 | 0.4549 | 0.649    | 0.18864606  | count | 1         |
| TMEM18     | 0.1361106 | 0.1314398 | 1.0355 | 0.301    | 0.188716733 | count | 1         |
| WDR59      | 0.2115492 | 0.3449638 | 0.6133 | 0.54     | 0.188745876 | count | 1         |
| BIRC2      | 0.1401181 | 0.1432989 | 0.9778 | 0.328    | 0.188824602 | count | 1         |
| ZNF789     | 0.2377416 | 0.3563323 | 0.6672 | 0.505    | 0.188896235 | count | 1         |
| CALHM6     | 0.1570586 | 0.1538576 | 1.0208 | 0.307    | 0.188922645 | count | 1         |
| ZNF253     | 0.4326078 | 0.5322095 | 0.8129 | 0.416    | 0.189005744 | count | 1         |
| CXCR2      | 1.3322248 | 0.9509183 | 1.401  | 0.161    | 0.189071541 | count | 1         |
| ELP3       | 0.1742493 | 0.3058775 | 0.5697 | 0.569    | 0.189201072 | count | 1         |
| ZSCAN26    | 0.2083103 | 0.4770866 | 0.4366 | 0.662    | 0.189221883 | count | 1         |
| KLF11      | 0.1523257 | 0.2451583 | 0.6213 | 0.534    | 0.189239545 | count | 1         |
| GDI1       | 0.1472665 | 0.1804609 | 0.8161 | 0.415    | 0.189302472 | count | 1         |
| RPAIN      | 0.1364986 | 0.1090047 | 1.2522 | 0.211    | 0.189394778 | count | 1         |
| NEURL4     | 0.2319688 | 0.9217573 | 0.2517 | 0.801    | 0.189481139 | count | 1         |
| REEP3      | 0.1357632 | 0.1166173 | 1.1642 | 0.244    | 0.189539584 | count | 1         |
| CMTM7      | 0.1368665 | 0.0995875 | 1.3743 | 0.169    | 0.189694833 | count | 1         |
| SUCLG1     | 0.1374314 | 0.0991805 | 1.3857 | 0.166    | 0.190177138 | count | 1         |
| SLC26A2    | 0.1635989 | 0.2711662 | 0.6033 | 0.546    | 0.190183501 | count | 1         |
| GFM2       | 0.2270848 | 0.4201444 | 0.5405 | 0.589    | 0.190223001 | count | 1         |
| LTBP2      | 0.2905308 | 0.347233  | 0.8367 | 0.403    | 0.190244149 | count | 1         |
| LRRC37A3   | 1.3390987 | 1.045264  | 1.2811 | 0.2      | 0.190254038 | count | 1         |
| CNNM3      | 0.3279315 | 0.6844555 | 0.4791 | 0.632    | 0.190280978 | count | 1         |
| GNG12      | 0.3075903 | 0.3839719 | 0.8011 | 0.423    | 0.190478876 | count | 1         |
| SMIM20     | 0.1402712 | 0.1390776 | 1.0086 | 0.313    | 0.190624747 | count | 1         |
| LCLAT1     | 0.2486387 | 0.4324058 | 0.575  | 0.565    | 0.191720336 | count | 1         |
| FIGNL1     | 0.2672769 | 0.6461276 | 0.4137 | 0.679    | 0.19182682  | count | 1         |
| PXN-AS1    | 0.2672769 | 0.5912551 | 0.4521 | 0.651    | 0.19182682  | count | 1         |
| DNAJC27    | 0.2015693 | 0.6714709 | 0.3002 | 0.764    | 0.191842622 | count | 1         |
| PRSS23     | 1.348495  | 0.6065373 | 2.2233 | 0.0263   | 0.191871816 | count | 1         |
| TRABD2A    | 0.4390606 | 0.7794505 | 0.5633 | 0.573    | 0.192078247 | count | 1         |
| TTC12      | 0.4390606 | 0.7794505 | 0.5633 | 0.573    | 0.192078247 | count | 1         |
| LKAAEAR1   | 0.4390606 | 0.6946211 | 0.6321 | 0.527    | 0.192078247 | count | 1         |
| FANCA      | 0.392235  | 0.4346439 | 0.9024 | 0.367    | 0.192307836 | count | 1         |
| ZNF624     | 0.4395947 | 0.5476351 | 0.8027 | 0.422    | 0.19233286  | count | 1         |
| KCNAB3     | 1.351332  | 1.132474  | 1.1933 | 0.233    | 0.192360425 | count | 1         |
| AHR        | 0.1416336 | 0.1286978 | 1.1005 | 0.271    | 0.192481022 | count | 1         |
| ZMIZ1-AS1  | 0.2357336 | 0.5356727 | 0.4401 | 0.66     | 0.192653805 | count | 1         |
| IQGAP1     | 0.1353658 | 0.0602493 | 2.2468 | 0.0247   | 0.19287349  | count | 1         |
| FAM160B2   | 0.2428082 | 0.418429  | 0.5803 | 0.562    | 0.193057731 | count | 1         |
| COPS6      | 0.1378574 | 0.0942757 | 1.4623 | 0.144    | 0.193075684 | count | 1         |

|            |           |           |        |         |             |       |   |
|------------|-----------|-----------|--------|---------|-------------|-------|---|
| CFAP97     | 0.1456782 | 0.1600574 | 0.9102 | 0.363   | 0.193357264 | count | 1 |
| CCZ1       | 0.1536645 | 0.2028219 | 0.7576 | 0.449   | 0.193411207 | count | 1 |
| SRRM2      | 0.1352643 | 0.0542732 | 2.4923 | 0.0128  | 0.193707058 | count | 1 |
| AC003101.2 | 0.360186  | 0.8057035 | 0.447  | 0.655   | 0.193769245 | count | 1 |
| LACTB2     | 0.149288  | 0.22066   | 0.6766 | 0.499   | 0.193782191 | count | 1 |
| KMT2A      | 0.141957  | 0.1405508 | 1.01   | 0.313   | 0.193782307 | count | 1 |
| LIX1L      | 0.1604682 | 0.2380574 | 0.6741 | 0.5     | 0.194049764 | count | 1 |
| EIF2A      | 0.1405334 | 0.0908716 | 1.5465 | 0.122   | 0.194085875 | count | 1 |
| FMR1       | 0.1516013 | 0.2041407 | 0.7426 | 0.458   | 0.194269274 | count | 1 |
| NEURL1     | 0.2177799 | 0.3634201 | 0.5993 | 0.549   | 0.194448663 | count | 1 |
| LINC00921  | 0.2608893 | 0.474441  | 0.5499 | 0.582   | 0.194575949 | count | 1 |
| SYK        | 0.1395098 | 0.1050238 | 1.3284 | 0.184   | 0.194659527 | count | 1 |
| INSIG2     | 0.1575687 | 0.2219189 | 0.71   | 0.478   | 0.194718116 | count | 1 |
| CFLAR-AS1  | 0.283068  | 0.4665572 | 0.6067 | 0.544   | 0.194791578 | count | 1 |
| THAP12     | 0.1461062 | 0.1753482 | 0.8332 | 0.405   | 0.194838059 | count | 1 |
| MAFG       | 0.1396521 | 0.1132605 | 1.233  | 0.218   | 0.19507469  | count | 1 |
| PPP2R3C    | 0.141992  | 0.1330981 | 1.0668 | 0.286   | 0.195116324 | count | 1 |
| PSMC4      | 0.1395394 | 0.0944026 | 1.4781 | 0.14    | 0.195134558 | count | 1 |
| GPATCH1    | 0.2275942 | 0.3667125 | 0.6206 | 0.535   | 0.195205267 | count | 1 |
| AC116366.1 | 0.6261912 | 0.5654067 | 1.1075 | 0.268   | 0.195388354 | count | 1 |
| SECTM1     | 0.1468928 | 0.1208731 | 1.2153 | 0.224   | 0.195596773 | count | 1 |
| DDX58      | 0.1634821 | 0.2239046 | 0.7301 | 0.465   | 0.195651204 | count | 1 |
| DHFR2      | 0.31558   | 0.7159299 | 0.4408 | 0.659   | 0.19569731  | count | 1 |
| BMI1       | 0.1815795 | 0.3357992 | 0.5407 | 0.589   | 0.195965027 | count | 1 |
| RBM12      | 0.1625754 | 0.2791079 | 0.5825 | 0.56    | 0.19612362  | count | 1 |
| APOBR      | 0.1486132 | 0.2282726 | 0.651  | 0.515   | 0.196229724 | count | 1 |
| FAM221A    | 0.2340832 | 0.3918636 | 0.5974 | 0.55    | 0.196263659 | count | 1 |
| LANCL2     | 0.2851424 | 0.5324648 | 0.5355 | 0.592   | 0.196284118 | count | 1 |
| AL590822.2 | 1.37497   | 0.6288247 | 2.1866 | 0.0289  | 0.196437539 | count | 1 |
| MTCP1      | 1.37497   | 1.145237  | 1.2006 | 0.23    | 0.196437539 | count | 1 |
| GXYLT1     | 0.1777461 | 0.2817192 | 0.6309 | 0.528   | 0.1966044   | count | 1 |
| IKBIP      | 0.1412679 | 0.0965714 | 1.4628 | 0.144   | 0.196670994 | count | 1 |
| ATP5MG     | 0.1371669 | 0.0390372 | 3.5137 | 0.00045 | 0.196794911 | count | 1 |
| GTF2E2     | 0.1521729 | 0.1915557 | 0.7944 | 0.427   | 0.196821431 | count | 1 |
| RMC1       | 0.1771912 | 0.2529619 | 0.7005 | 0.484   | 0.197077098 | count | 1 |
| RIOK1      | 0.152842  | 0.2356211 | 0.6487 | 0.517   | 0.197114094 | count | 1 |
| IRF4       | 0.2250153 | 0.3912235 | 0.5752 | 0.565   | 0.197135892 | count | 1 |
| KLHL12     | 0.2132711 | 0.3683438 | 0.579  | 0.563   | 0.197151912 | count | 1 |
| RANGRF     | 0.1479854 | 0.1865821 | 0.7931 | 0.428   | 0.197255401 | count | 1 |
| CCAR1      | 0.1513088 | 0.1553429 | 0.974  | 0.33    | 0.197415089 | count | 1 |
| AL031714.1 | 0.4507117 | 1.0299973 | 0.4376 | 0.662   | 0.197643117 | count | 1 |
| YJEFN3     | 0.4507117 | 0.7316632 | 0.616  | 0.538   | 0.197643117 | count | 1 |
| NKAP       | 0.1452791 | 0.1216225 | 1.1945 | 0.232   | 0.197774299 | count | 1 |
| ANAPC16    | 0.1394108 | 0.0748703 | 1.862  | 0.0627  | 0.197777847 | count | 1 |
| MBNL1-AS1  | 0.2753601 | 0.4816819 | 0.5717 | 0.568   | 0.197874367 | count | 1 |

|            |           |           |        |          |             |       |             |
|------------|-----------|-----------|--------|----------|-------------|-------|-------------|
| PDLIM5     | 0.1473346 | 0.1365427 | 1.079  | 0.281    | 0.197890477 | count | 1           |
| DHX30      | 0.1581787 | 0.2162165 | 0.7316 | 0.464    | 0.197899462 | count | 1           |
| BCL2L2     | 0.18887   | 0.471234  | 0.4008 | 0.689    | 0.197919837 | count | 1           |
| H6PD       | 0.1657133 | 0.2726464 | 0.6078 | 0.543    | 0.198345123 | count | 1           |
| CLHC1      | 0.3023778 | 0.6021317 | 0.5022 | 0.616    | 0.198392243 | count | 1           |
| ARHGEF3    | 0.1865437 | 0.2850602 | 0.6544 | 0.513    | 0.198547705 | count | 1           |
| RPS8       | 0.1377132 | 0.0240875 | 5.7172 | 1.21E-08 | 0.19855089  | count | 0.000290219 |
| DHX40      | 0.1627842 | 0.2077868 | 0.7834 | 0.433    | 0.198735994 | count | 1           |
| VPS16      | 0.1621622 | 0.2175037 | 0.7456 | 0.456    | 0.198831814 | count | 1           |
| TUBGCP3    | 0.1709953 | 0.2541365 | 0.6728 | 0.501    | 0.198871421 | count | 1           |
| TRIQQ      | 0.1577711 | 0.2196178 | 0.7184 | 0.473    | 0.19890398  | count | 1           |
| FBXO9      | 0.1463017 | 0.1417001 | 1.0325 | 0.302    | 0.198953315 | count | 1           |
| ZNF644     | 0.1463096 | 0.1369212 | 1.0686 | 0.285    | 0.198964086 | count | 1           |
| NMD3       | 0.1591087 | 0.1961448 | 0.8112 | 0.417    | 0.199070718 | count | 1           |
| DHRS7      | 0.1400625 | 0.0680268 | 2.0589 | 0.0396   | 0.199282984 | count | 1           |
| USP38      | 0.1757165 | 0.234685  | 0.7487 | 0.454    | 0.19938743  | count | 1           |
| DNTTIP2    | 0.1412544 | 0.0914402 | 1.5448 | 0.123    | 0.199459814 | count | 1           |
| RPE        | 0.16715   | 0.226839  | 0.7369 | 0.461    | 0.199513999 | count | 1           |
| RPL14      | 0.1385705 | 0.0248397 | 5.5786 | 2.69E-08 | 0.199648549 | count | 0.00064439  |
| FAM204A    | 0.1422315 | 0.0865364 | 1.6436 | 0.1      | 0.199728082 | count | 1           |
| AL136162.1 | 0.3045749 | 0.5968112 | 0.5103 | 0.61     | 0.199906472 | count | 1           |
| NATD1      | 0.3710512 | 0.4503596 | 0.8239 | 0.41     | 0.20002099  | count | 1           |
| SETD7      | 0.1610393 | 0.22647   | 0.7111 | 0.477    | 0.200140878 | count | 1           |
| IL13RA1    | 0.1430041 | 0.0851578 | 1.6793 | 0.0932   | 0.200150982 | count | 1           |
| BAP1       | 0.2003305 | 0.3738731 | 0.5358 | 0.592    | 0.200375531 | count | 1           |
| DNAJC2     | 0.1462506 | 0.1333887 | 1.0964 | 0.273    | 0.200381695 | count | 1           |
| TNFRSF1A   | 0.143878  | 0.0821449 | 1.7515 | 0.08     | 0.20046809  | count | 1           |
| RPL22L1    | 0.1415177 | 0.0824535 | 1.7163 | 0.0862   | 0.20049826  | count | 1           |
| HSPA1A     | 0.1393774 | 0.0775314 | 1.7977 | 0.0723   | 0.200540009 | count | 1           |
| C1orf123   | 0.1456193 | 0.1317333 | 1.1054 | 0.269    | 0.200711444 | count | 1           |
| CEP57L1    | 0.2031374 | 0.3243375 | 0.6263 | 0.531    | 0.200957816 | count | 1           |
| C2CD3      | 0.2031374 | 0.4989547 | 0.4071 | 0.684    | 0.200957816 | count | 1           |
| PIGA       | 0.1902624 | 0.3698675 | 0.5144 | 0.607    | 0.201019039 | count | 1           |
| CES2       | 0.1670748 | 0.3410063 | 0.4899 | 0.624    | 0.201076006 | count | 1           |
| ASF1B      | 0.8524591 | 0.6809776 | 1.2518 | 0.211    | 0.201258327 | count | 1           |
| CLASP1     | 0.1841105 | 0.370384  | 0.4971 | 0.619    | 0.201334513 | count | 1           |
| SEMA6A-AS1 | 0.8529447 | 1.069174  | 0.7978 | 0.425    | 0.201393071 | count | 1           |
| MAP3K13    | 0.1469026 | 0.1331596 | 1.1032 | 0.27     | 0.201485574 | count | 1           |
| MFF        | 0.1446466 | 0.1170918 | 1.2353 | 0.217    | 0.201710837 | count | 1           |
| HDGF       | 0.1447186 | 0.1089695 | 1.3281 | 0.184    | 0.201755552 | count | 1           |
| DPH6       | 0.1692963 | 0.2551448 | 0.6635 | 0.507    | 0.202099325 | count | 1           |
| VPS35L     | 0.1827521 | 0.2740883 | 0.6668 | 0.505    | 0.202215305 | count | 1           |
| ZDHHC13    | 0.2152907 | 0.7502037 | 0.287  | 0.774    | 0.20221818  | count | 1           |
| SLC30A7    | 0.1676348 | 0.219826  | 0.7626 | 0.446    | 0.202279599 | count | 1           |
| DBF4       | 0.1561052 | 0.201698  | 0.774  | 0.439    | 0.202310026 | count | 1           |

|            |           |           |        |          |             |       |          |
|------------|-----------|-----------|--------|----------|-------------|-------|----------|
| H2AFX      | 0.1609824 | 0.1829905 | 0.8797 | 0.379    | 0.202378311 | count | 1        |
| AL034549.1 | 0.2070521 | 0.4766972 | 0.4343 | 0.664    | 0.20246531  | count | 1        |
| FGFR1OP    | 0.2156755 | 0.3954397 | 0.5454 | 0.586    | 0.202588041 | count | 1        |
| CPE        | 0.6469752 | 0.5646762 | 1.1457 | 0.252    | 0.202769686 | count | 1        |
| ADD1       | 0.1508989 | 0.1621219 | 0.9308 | 0.352    | 0.20277523  | count | 1        |
| NUP54      | 0.1623464 | 0.2321116 | 0.6994 | 0.484    | 0.202816945 | count | 1        |
| ZCWPW1     | 0.1988404 | 0.4633776 | 0.4291 | 0.668    | 0.203006125 | count | 1        |
| FAM98C     | 0.1659306 | 0.2282828 | 0.7269 | 0.467    | 0.203053556 | count | 1        |
| UCN        | 0.6480194 | 0.9605233 | 0.6747 | 0.5      | 0.20314184  | count | 1        |
| AC009962.1 | 0.6480194 | 1.454252  | 0.4456 | 0.656    | 0.20314184  | count | 1        |
| ZSCAN31    | 0.6480194 | 1.0230415 | 0.6334 | 0.527    | 0.20314184  | count | 1        |
| AL512791.2 | 0.6480194 | 0.9634124 | 0.6726 | 0.501    | 0.20314184  | count | 1        |
| AC010542.4 | 0.6480194 | 0.9605233 | 0.6747 | 0.5      | 0.20314184  | count | 1        |
| AP005131.1 | 0.6480194 | 1.119601  | 0.5788 | 0.563    | 0.20314184  | count | 1        |
| CHAF1B     | 0.6480194 | 0.9634124 | 0.6726 | 0.501    | 0.20314184  | count | 1        |
| SHPK       | 0.6483378 | 0.745956  | 0.8691 | 0.385    | 0.203255345 | count | 1        |
| FADD       | 0.1858582 | 0.3063915 | 0.6066 | 0.544    | 0.203272531 | count | 1        |
| POLI       | 0.1858582 | 0.4388065 | 0.4236 | 0.672    | 0.203272531 | count | 1        |
| USP21      | 0.4625327 | 0.6009292 | 0.7697 | 0.442    | 0.203311596 | count | 1        |
| WDR76      | 0.4625327 | 0.6096328 | 0.7587 | 0.448    | 0.203311596 | count | 1        |
| ARHGAP9    | 0.1573379 | 0.1537641 | 1.0232 | 0.306    | 0.203341523 | count | 1        |
| PEMT       | 0.1768595 | 0.2564823 | 0.6896 | 0.491    | 0.203355747 | count | 1        |
| TMEM30A    | 0.1484294 | 0.1322702 | 1.1222 | 0.262    | 0.203459155 | count | 1        |
| NRDE2      | 0.1769558 | 0.2697839 | 0.6559 | 0.512    | 0.203467718 | count | 1        |
| PDK2       | 0.1743463 | 0.2496727 | 0.6983 | 0.485    | 0.203553529 | count | 1        |
| MHENCN     | 0.1821278 | 0.3883796 | 0.4689 | 0.639    | 0.203722732 | count | 1        |
| MKRN2      | 0.1803607 | 0.3053945 | 0.5906 | 0.555    | 0.203755574 | count | 1        |
| IFT140     | 0.2955499 | 1.1401469 | 0.2592 | 0.795    | 0.203785583 | count | 1        |
| KCNA3      | 0.4139213 | 0.6632132 | 0.6241 | 0.533    | 0.203799651 | count | 1        |
| MYBPC3     | 0.4139213 | 1.0065425 | 0.4112 | 0.681    | 0.203799651 | count | 1        |
| HOTAIRM1   | 0.1504489 | 0.1269617 | 1.185  | 0.236    | 0.203825384 | count | 1        |
| STK16      | 0.1629021 | 0.2060697 | 0.7905 | 0.429    | 0.203849059 | count | 1        |
| AC007388.1 | 0.1596233 | 0.2589542 | 0.6164 | 0.538    | 0.203903524 | count | 1        |
| SYPL1      | 0.1460551 | 0.1089077 | 1.3411 | 0.18     | 0.203998085 | count | 1        |
| RNF38      | 0.1729829 | 0.361139  | 0.479  | 0.632    | 0.20403001  | count | 1        |
| ARHGAP31   | 0.1877522 | 0.3009806 | 0.6238 | 0.533    | 0.204075463 | count | 1        |
| IKZF4      | 0.2641509 | 0.4942432 | 0.5345 | 0.593    | 0.204133561 | count | 1        |
| FAU        | 0.1416396 | 0.0226274 | 6.2597 | 4.54E-10 | 0.204142846 | count | 1.09E-05 |
| DOHH       | 0.1807528 | 0.4200151 | 0.4303 | 0.667    | 0.204203954 | count | 1        |
| ETNK1      | 0.1483036 | 0.1259954 | 1.1771 | 0.239    | 0.20445262  | count | 1        |
| RBM25      | 0.1437639 | 0.0726437 | 1.979  | 0.0479   | 0.204514805 | count | 1        |
| INPP4B     | 0.6519234 | 0.723877  | 0.9006 | 0.368    | 0.204534363 | count | 1        |
| BTBD10     | 0.1661317 | 0.2302676 | 0.7215 | 0.471    | 0.204577199 | count | 1        |
| CDK9       | 0.1563199 | 0.2047006 | 0.7637 | 0.445    | 0.204619248 | count | 1        |
| DENR       | 0.1491232 | 0.1298252 | 1.1486 | 0.251    | 0.204741679 | count | 1        |

|            |           |           |        |        |             |       |   |
|------------|-----------|-----------|--------|--------|-------------|-------|---|
| ESCO1      | 0.1574423 | 0.2003732 | 0.7857 | 0.432  | 0.204775497 | count | 1 |
| PCYOX1L    | 0.4160626 | 0.3892076 | 1.069  | 0.285  | 0.204938806 | count | 1 |
| RNF2       | 0.1605427 | 0.2174861 | 0.7382 | 0.46   | 0.20508474  | count | 1 |
| ZNF205     | 0.2339583 | 0.4872028 | 0.4802 | 0.631  | 0.20519324  | count | 1 |
| RPGRIP1    | 0.3800354 | 0.6393702 | 0.5944 | 0.552  | 0.205206944 | count | 1 |
| SEC23A     | 0.1688669 | 0.2098862 | 0.8046 | 0.421  | 0.205282014 | count | 1 |
| MT-ATP8    | 0.1525489 | 0.1516325 | 1.006  | 0.314  | 0.20532132  | count | 1 |
| TMEM216    | 0.17016   | 0.2605351 | 0.6531 | 0.514  | 0.205353212 | count | 1 |
| STMP1      | 0.1443391 | 0.065529  | 2.2027 | 0.0277 | 0.205374724 | count | 1 |
| CDK6       | 0.1580762 | 0.1782951 | 0.8866 | 0.375  | 0.205426624 | count | 1 |
| NAP1L1     | 0.1442209 | 0.0610586 | 2.362  | 0.0183 | 0.205467076 | count | 1 |
| CD163L1    | 0.1856696 | 0.3630475 | 0.5114 | 0.609  | 0.20548707  | count | 1 |
| PARP9      | 0.1561123 | 0.1492766 | 1.0458 | 0.296  | 0.205509378 | count | 1 |
| CCDC66     | 0.1565415 | 0.1799852 | 0.8697 | 0.385  | 0.205510434 | count | 1 |
| ARHGAP30   | 0.1492189 | 0.1087343 | 1.3723 | 0.17   | 0.205882709 | count | 1 |
| KLHDC10    | 0.1851733 | 0.2786764 | 0.6645 | 0.506  | 0.206072549 | count | 1 |
| TNS2       | 1.431815  | 0.7682421 | 1.8638 | 0.0625 | 0.206273245 | count | 1 |
| SPEF2      | 0.3319184 | 1.0844571 | 0.3061 | 0.76   | 0.206407992 | count | 1 |
| NONO       | 0.1519357 | 0.1213666 | 1.2519 | 0.211  | 0.206461916 | count | 1 |
| RBMX       | 0.1486155 | 0.0989422 | 1.502  | 0.133  | 0.20654639  | count | 1 |
| ATG101     | 0.1512216 | 0.1379824 | 1.0959 | 0.273  | 0.206609337 | count | 1 |
| PCID2      | 0.1616688 | 0.1946199 | 0.8307 | 0.406  | 0.206773162 | count | 1 |
| SDHD       | 0.1470306 | 0.0862106 | 1.7055 | 0.0882 | 0.206843188 | count | 1 |
| PPM1B      | 0.170221  | 0.1842509 | 0.9239 | 0.356  | 0.206941901 | count | 1 |
| BNC2       | 0.355036  | 0.5034792 | 0.7052 | 0.481  | 0.207012634 | count | 1 |
| BX255925.3 | 0.3330084 | 0.5872588 | 0.5671 | 0.571  | 0.207124413 | count | 1 |
| SAV1       | 0.1685598 | 0.2541239 | 0.6633 | 0.507  | 0.207169292 | count | 1 |
| NUP155     | 0.2205318 | 0.4434252 | 0.4973 | 0.619  | 0.207258228 | count | 1 |
| WBP11      | 0.1519547 | 0.1412227 | 1.076  | 0.282  | 0.207312687 | count | 1 |
| BCL2L11    | 0.1640237 | 0.1715311 | 0.9562 | 0.339  | 0.207424634 | count | 1 |
| LIN9       | 0.8752097 | 0.8365327 | 1.0462 | 0.296  | 0.20759053  | count | 1 |
| AC090152.1 | 0.8752097 | 0.8025996 | 1.0905 | 0.276  | 0.20759053  | count | 1 |
| DNALI1     | 0.3157764 | 0.6371674 | 0.4956 | 0.62   | 0.207641495 | count | 1 |
| AL136962.1 | 0.3157764 | 0.6767427 | 0.4666 | 0.641  | 0.207641495 | count | 1 |
| BICD1      | 0.288489  | 0.438158  | 0.6584 | 0.51   | 0.207725364 | count | 1 |
| LHFPL6     | 0.288489  | 0.5422228 | 0.532  | 0.595  | 0.207725364 | count | 1 |
| DIMT1      | 0.1701241 | 0.2395704 | 0.7101 | 0.478  | 0.207770296 | count | 1 |
| NR2C1      | 0.2075851 | 0.3562483 | 0.5827 | 0.56   | 0.20777514  | count | 1 |
| GLRX       | 0.1455065 | 0.0570386 | 2.551  | 0.0108 | 0.207831647 | count | 1 |
| HINT2      | 0.1509314 | 0.1251621 | 1.2059 | 0.228  | 0.207909497 | count | 1 |
| DMAC2      | 0.1904586 | 0.3058145 | 0.6228 | 0.533  | 0.208376131 | count | 1 |
| ZNF302     | 0.1756245 | 0.3032293 | 0.5792 | 0.563  | 0.20848717  | count | 1 |
| CDC16      | 0.1756757 | 0.2519729 | 0.6972 | 0.486  | 0.208548542 | count | 1 |
| CEBPA      | 0.1606111 | 0.1636091 | 0.9817 | 0.326  | 0.208554301 | count | 1 |
| BOD1       | 0.1693521 | 0.2265374 | 0.7476 | 0.455  | 0.20857359  | count | 1 |

|            |           |           |        |          |             |       |             |
|------------|-----------|-----------|--------|----------|-------------|-------|-------------|
| LSM8       | 0.1493278 | 0.0865451 | 1.7254 | 0.0846   | 0.208575958 | count | 1           |
| RAPGEF6    | 0.2291724 | 0.4628937 | 0.4951 | 0.621    | 0.208670554 | count | 1           |
| FNIP1      | 0.150812  | 0.1228253 | 1.2279 | 0.22     | 0.208813911 | count | 1           |
| SAR1B      | 0.151887  | 0.1292361 | 1.1753 | 0.24     | 0.208936063 | count | 1           |
| NOP9       | 0.2066048 | 0.4442431 | 0.4651 | 0.642    | 0.208980218 | count | 1           |
| AAAS       | 0.1783315 | 0.3069824 | 0.5809 | 0.561    | 0.208992877 | count | 1           |
| MPND       | 0.1732729 | 0.2431205 | 0.7127 | 0.476    | 0.209143164 | count | 1           |
| ATP8A1     | 0.2554188 | 0.5397607 | 0.4732 | 0.636    | 0.209289796 | count | 1           |
| NCAPH2     | 0.1812903 | 0.3062158 | 0.592  | 0.554    | 0.209357543 | count | 1           |
| PIBF1      | 0.1730292 | 0.2627528 | 0.6585 | 0.51     | 0.209372478 | count | 1           |
| RPS15A     | 0.1454097 | 0.0258076 | 5.6344 | 1.96E-08 | 0.209508783 | count | 0.000469675 |
| RNASEH2B   | 0.1508401 | 0.0983718 | 1.5334 | 0.125    | 0.209643509 | count | 1           |
| NSA2       | 0.1473949 | 0.0626907 | 2.3511 | 0.0188   | 0.209670347 | count | 1           |
| SLC31A2    | 0.1484631 | 0.0889927 | 1.6683 | 0.0954   | 0.209724069 | count | 1           |
| C16orf74   | 0.1796364 | 0.3788    | 0.4742 | 0.635    | 0.209795848 | count | 1           |
| YME1L1     | 0.1515171 | 0.1140882 | 1.3281 | 0.184    | 0.209820121 | count | 1           |
| TUT1       | 0.2632183 | 0.657731  | 0.4002 | 0.689    | 0.20987482  | count | 1           |
| AC018529.2 | 0.2267436 | 0.3249821 | 0.6977 | 0.485    | 0.209919861 | count | 1           |
| BCL2L13    | 0.1634248 | 0.1990495 | 0.821  | 0.412    | 0.209965749 | count | 1           |
| C6orf89    | 0.1578282 | 0.1502672 | 1.0503 | 0.294    | 0.209997038 | count | 1           |
| TCF19      | 0.5502916 | 0.6241421 | 0.8817 | 0.378    | 0.210050291 | count | 1           |
| BRF2       | 0.5502916 | 0.6163436 | 0.8928 | 0.372    | 0.210050291 | count | 1           |
| ANKRD52    | 0.4766136 | 0.560493  | 0.8503 | 0.395    | 0.210092946 | count | 1           |
| SCAMP4     | 0.1661567 | 0.1907297 | 0.8712 | 0.384    | 0.210139319 | count | 1           |
| MYOM2      | 0.3601964 | 0.7677059 | 0.4692 | 0.639    | 0.210214096 | count | 1           |
| AC138207.5 | 0.3601964 | 0.7132659 | 0.505  | 0.614    | 0.210214096 | count | 1           |
| AKR1C3     | 0.3601965 | 0.6671938 | 0.5399 | 0.589    | 0.210214161 | count | 1           |
| FAM214B    | 0.1629912 | 0.2272539 | 0.7172 | 0.473    | 0.210273993 | count | 1           |
| EWSR1      | 0.1520032 | 0.1187916 | 1.2796 | 0.201    | 0.210409564 | count | 1           |
| TUBGCP4    | 0.2239607 | 0.5222479 | 0.4288 | 0.668    | 0.21055838  | count | 1           |
| CDK3       | 0.4266459 | 0.6985671 | 0.6107 | 0.541    | 0.210580723 | count | 1           |
| DVL1       | 0.2208979 | 0.4499617 | 0.4909 | 0.624    | 0.210667208 | count | 1           |
| UMAD1      | 0.1914452 | 0.4178131 | 0.4582 | 0.647    | 0.210743193 | count | 1           |
| CENPE      | 0.4781087 | 0.410369  | 1.1651 | 0.244    | 0.210814828 | count | 1           |
| CIART      | 1.4580827 | 0.6830038 | 2.1348 | 0.0329   | 0.210829706 | count | 1           |
| LRP2BP     | 1.4580827 | 0.9933214 | 1.4679 | 0.142    | 0.210829706 | count | 1           |
| STAG1      | 0.174329  | 0.2062804 | 0.8451 | 0.398    | 0.210959076 | count | 1           |
| PTP4A3     | 0.5526914 | 0.5913221 | 0.9347 | 0.35     | 0.211070519 | count | 1           |
| ZNF133     | 0.5526914 | 0.5778526 | 0.9565 | 0.339    | 0.211070519 | count | 1           |
| CNOT2      | 0.1535687 | 0.1329223 | 1.1553 | 0.248    | 0.211100076 | count | 1           |
| DGKH       | 0.2456842 | 0.3795052 | 0.6474 | 0.517    | 0.211197113 | count | 1           |
| TRAM2-AS1  | 0.2458107 | 0.4300645 | 0.5716 | 0.568    | 0.21130917  | count | 1           |
| ABHD13     | 0.1613576 | 0.2179246 | 0.7404 | 0.459    | 0.211402103 | count | 1           |
| FAM131A    | 0.171983  | 0.2394801 | 0.7182 | 0.473    | 0.211410033 | count | 1           |
| IGSF6      | 0.1473078 | 0.0554756 | 2.6554 | 0.00797  | 0.211423733 | count | 1           |



|            |           |           |        |          |             |       |            |
|------------|-----------|-----------|--------|----------|-------------|-------|------------|
| IKZF5      | 0.2071992 | 0.4163522 | 0.4977 | 0.619    | 0.211700292 | count | 1          |
| AP1B1      | 0.1568934 | 0.1296121 | 1.2105 | 0.226    | 0.21173342  | count | 1          |
| RASA4      | 0.1687168 | 0.2605756 | 0.6475 | 0.517    | 0.211843924 | count | 1          |
| AC025171.3 | 0.273803  | 0.550161  | 0.4977 | 0.619    | 0.211882133 | count | 1          |
| ZNF420     | 0.273803  | 0.4975383 | 0.5503 | 0.582    | 0.211882133 | count | 1          |
| LYPLA1     | 0.1528478 | 0.1149848 | 1.3293 | 0.184    | 0.212196759 | count | 1          |
| TRIM8      | 0.1538214 | 0.1316187 | 1.1687 | 0.243    | 0.212246297 | count | 1          |
| MBLAC2     | 0.55607   | 0.7257722 | 0.7662 | 0.444    | 0.212508196 | count | 1          |
| RGS3       | 0.3077559 | 0.4914814 | 0.6262 | 0.531    | 0.212611221 | count | 1          |
| IFT88      | 0.1820976 | 0.2459976 | 0.7402 | 0.459    | 0.212701287 | count | 1          |
| PPP2R2D    | 0.1637112 | 0.1984203 | 0.8251 | 0.409    | 0.212786729 | count | 1          |
| AL451050.2 | 1.4693778 | 1.405249  | 1.0456 | 0.296    | 0.212790689 | count | 1          |
| NEB        | 1.4693778 | 1.369788  | 1.0727 | 0.284    | 0.212790689 | count | 1          |
| LINC02447  | 1.4693778 | 1.1071362 | 1.3272 | 0.185    | 0.212790689 | count | 1          |
| HIST1H4B   | 1.4693778 | 1.369788  | 1.0727 | 0.284    | 0.212790689 | count | 1          |
| TREML2     | 1.4693778 | 1.369788  | 1.0727 | 0.284    | 0.212790689 | count | 1          |
| ESR1       | 1.4693778 | 1.369788  | 1.0727 | 0.284    | 0.212790689 | count | 1          |
| TMEM184A   | 1.4693778 | 1.405249  | 1.0456 | 0.296    | 0.212790689 | count | 1          |
| SUGCT      | 1.4693778 | 1.1071362 | 1.3272 | 0.185    | 0.212790689 | count | 1          |
| NOS3       | 1.4693778 | 1.369788  | 1.0727 | 0.284    | 0.212790689 | count | 1          |
| AL136141.1 | 1.4693778 | 1.369788  | 1.0727 | 0.284    | 0.212790689 | count | 1          |
| AC078927.1 | 1.4693778 | 1.1071362 | 1.3272 | 0.185    | 0.212790689 | count | 1          |
| RNF31      | 1.4693778 | 1.1071362 | 1.3272 | 0.185    | 0.212790689 | count | 1          |
| AC092295.2 | 1.4693778 | 1.405249  | 1.0456 | 0.296    | 0.212790689 | count | 1          |
| KCNJ14     | 1.4693778 | 1.369788  | 1.0727 | 0.284    | 0.212790689 | count | 1          |
| PRCC       | 0.1653264 | 0.2212621 | 0.7472 | 0.455    | 0.213088595 | count | 1          |
| AC027031.2 | 0.3236487 | 0.5583094 | 0.5797 | 0.562    | 0.213092531 | count | 1          |
| METAP1     | 0.1774576 | 0.2353307 | 0.7541 | 0.451    | 0.213118336 | count | 1          |
| LHPP       | 0.1775281 | 0.2263499 | 0.7843 | 0.433    | 0.213203787 | count | 1          |
| SVIP       | 0.1636915 | 0.2027995 | 0.8072 | 0.42     | 0.213302727 | count | 1          |
| ARMH3      | 0.1781213 | 0.2773942 | 0.6421 | 0.521    | 0.213337111 | count | 1          |
| LARP1B     | 0.1802761 | 0.251829  | 0.7159 | 0.474    | 0.213401889 | count | 1          |
| FBH1       | 0.1898885 | 0.3052444 | 0.6221 | 0.534    | 0.213606906 | count | 1          |
| TRIM28     | 0.1599582 | 0.1603313 | 0.9977 | 0.319    | 0.213687926 | count | 1          |
| WDR70      | 0.1732012 | 0.202863  | 0.8538 | 0.393    | 0.213773727 | count | 1          |
| CD4        | 0.153261  | 0.0876738 | 1.7481 | 0.0806   | 0.213781765 | count | 1          |
| AGAP4      | 0.3431815 | 0.8237594 | 0.4166 | 0.677    | 0.213821997 | count | 1          |
| LRRC20     | 0.3431815 | 0.7168143 | 0.4788 | 0.632    | 0.213821997 | count | 1          |
| SLC46A2    | 0.2273641 | 0.3876894 | 0.5865 | 0.558    | 0.213836161 | count | 1          |
| DDX27      | 0.1571748 | 0.1365731 | 1.1508 | 0.25     | 0.213840073 | count | 1          |
| PREX1      | 0.1558251 | 0.1352907 | 1.1518 | 0.25     | 0.213881017 | count | 1          |
| SRGN       | 0.1483991 | 0.0307085 | 4.8325 | 1.43E-06 | 0.213942418 | count | 0.03403972 |
| PGRMC2     | 0.1644703 | 0.1743681 | 0.9432 | 0.346    | 0.213962646 | count | 1          |
| ITGA9      | 0.3952181 | 0.3810779 | 1.0371 | 0.3      | 0.21400447  | count | 1          |
| AL008729.2 | 0.6787945 | 0.5884782 | 1.1535 | 0.249    | 0.214165887 | count | 1          |

|            |           |           |        |          |             |       |          |
|------------|-----------|-----------|--------|----------|-------------|-------|----------|
| ZBED5-AS1  | 0.1733314 | 0.2898538 | 0.598  | 0.55     | 0.214348467 | count | 1        |
| TOR1AIP2   | 0.1550495 | 0.1220917 | 1.2699 | 0.204    | 0.214395292 | count | 1        |
| JMJD4      | 0.2120372 | 0.3382103 | 0.6269 | 0.531    | 0.214582726 | count | 1        |
| ARFGEF1    | 0.1608558 | 0.1658248 | 0.97   | 0.332    | 0.214891488 | count | 1        |
| HLTF       | 0.1727512 | 0.2203613 | 0.7839 | 0.433    | 0.215181378 | count | 1        |
| AC009093.2 | 0.298427  | 0.4862455 | 0.6137 | 0.539    | 0.215205329 | count | 1        |
| COQ10B     | 0.1581204 | 0.1358485 | 1.1639 | 0.245    | 0.215529728 | count | 1        |
| SCAF11     | 0.151766  | 0.0700882 | 2.1654 | 0.0305   | 0.215716355 | count | 1        |
| SRF        | 0.1860536 | 0.3416443 | 0.5446 | 0.586    | 0.21576458  | count | 1        |
| ZNF496     | 0.2992123 | 0.4799478 | 0.6234 | 0.533    | 0.215797233 | count | 1        |
| AMN1       | 0.2112691 | 0.3611954 | 0.5849 | 0.559    | 0.215937799 | count | 1        |
| GSTP1      | 0.1500549 | 0.0369062 | 4.0658 | 4.94E-05 | 0.215980947 | count | 1        |
| LSM6       | 0.1532884 | 0.0961673 | 1.594  | 0.111    | 0.216096009 | count | 1        |
| PCM1       | 0.1545485 | 0.1179822 | 1.3099 | 0.19     | 0.216268678 | count | 1        |
| LRPPRC     | 0.1684933 | 0.1781148 | 0.946  | 0.344    | 0.216281129 | count | 1        |
| ZNF597     | 0.3129071 | 0.502084  | 0.6232 | 0.533    | 0.216344773 | count | 1        |
| ZNF490     | 0.3002538 | 0.6951001 | 0.432  | 0.666    | 0.216582447 | count | 1        |
| SAFB2      | 0.1647488 | 0.1401283 | 1.1757 | 0.24     | 0.216636634 | count | 1        |
| CEP164     | 0.1830958 | 0.219674  | 0.8335 | 0.405    | 0.216773791 | count | 1        |
| CTSK       | 0.4000223 | 0.6550894 | 0.6106 | 0.541    | 0.216796961 | count | 1        |
| MPST       | 0.1599742 | 0.1330445 | 1.2024 | 0.229    | 0.21697017  | count | 1        |
| PRPF39     | 0.2523757 | 0.3323484 | 0.7594 | 0.448    | 0.21712887  | count | 1        |
| ELF2       | 0.1569511 | 0.1069269 | 1.4678 | 0.142    | 0.217182934 | count | 1        |
| BIRC6      | 0.1622245 | 0.1590964 | 1.0197 | 0.308    | 0.217413216 | count | 1        |
| ARPC1B     | 0.1516312 | 0.0404194 | 3.7514 | 0.00018  | 0.217456811 | count | 1        |
| EIF1       | 0.1509537 | 0.0220282 | 6.8527 | 9.13E-12 | 0.217506514 | count | 2.20E-07 |
| TNS1       | 0.1722143 | 0.2593496 | 0.664  | 0.507    | 0.217546696 | count | 1        |
| PLEKHB1    | 0.5680355 | 0.7279728 | 0.7803 | 0.435    | 0.217612532 | count | 1        |
| RGS16      | 0.1916324 | 0.3318179 | 0.5775 | 0.564    | 0.217677096 | count | 1        |
| GIT2       | 0.1683817 | 0.1639306 | 1.0272 | 0.304    | 0.217692541 | count | 1        |
| LEPROTL1   | 0.1566212 | 0.0971149 | 1.6127 | 0.107    | 0.217764248 | count | 1        |
| PAXBP1     | 0.162032  | 0.174742  | 0.9273 | 0.354    | 0.217874183 | count | 1        |
| CCNT2      | 0.1909523 | 0.2812535 | 0.6789 | 0.497    | 0.217880295 | count | 1        |
| MTA2       | 0.2003646 | 0.291131  | 0.6882 | 0.491    | 0.217994413 | count | 1        |
| PEX16      | 0.1692966 | 0.1929977 | 0.8772 | 0.38     | 0.218011365 | count | 1        |
| RELA       | 0.1712255 | 0.1862847 | 0.9192 | 0.358    | 0.218020456 | count | 1        |
| SMIM10     | 0.2392557 | 0.4578316 | 0.5226 | 0.601    | 0.218100669 | count | 1        |
| NFATC3     | 0.1897446 | 0.2286244 | 0.8299 | 0.407    | 0.218348583 | count | 1        |
| U2AF1L4    | 0.1972023 | 0.2797921 | 0.7048 | 0.481    | 0.218432507 | count | 1        |
| TEDC1      | 0.2159809 | 0.3242899 | 0.666  | 0.505    | 0.218653098 | count | 1        |
| KIAA1324   | 0.5706602 | 1.123     | 0.5082 | 0.611    | 0.218734815 | count | 1        |
| CCL28      | 0.5706602 | 0.9891124 | 0.5769 | 0.564    | 0.218734815 | count | 1        |
| LINC00265  | 0.5706602 | 0.8566439 | 0.6662 | 0.505    | 0.218734815 | count | 1        |
| LINC00539  | 0.5706602 | 0.7825141 | 0.7293 | 0.466    | 0.218734815 | count | 1        |
| FUT8-AS1   | 0.5706602 | 0.9748212 | 0.5854 | 0.558    | 0.218734815 | count | 1        |

|            |           |           |        |          |             |       |             |
|------------|-----------|-----------|--------|----------|-------------|-------|-------------|
| LINC01679  | 0.5706602 | 0.7825141 | 0.7293 | 0.466    | 0.218734815 | count | 1           |
| MYL12A     | 0.1522359 | 0.0356025 | 4.276  | 1.98E-05 | 0.218777151 | count | 0.46827     |
| DDX6       | 0.1577864 | 0.1148964 | 1.3733 | 0.17     | 0.218828016 | count | 1           |
| NDUFS4     | 0.1585271 | 0.1056365 | 1.5007 | 0.134    | 0.219245109 | count | 1           |
| ZFAND5     | 0.1540267 | 0.057404  | 2.6832 | 0.00734  | 0.219273704 | count | 1           |
| DCUN1D1    | 0.178531  | 0.1758231 | 1.0154 | 0.31     | 0.219525267 | count | 1           |
| SF3A1      | 0.177089  | 0.1865344 | 0.9494 | 0.343    | 0.219846314 | count | 1           |
| DLD        | 0.1692915 | 0.1781218 | 0.9504 | 0.342    | 0.219885277 | count | 1           |
| OAF        | 0.1997264 | 0.3356636 | 0.595  | 0.552    | 0.219992725 | count | 1           |
| ZHX1       | 0.1797857 | 0.192296  | 0.9349 | 0.35     | 0.220152418 | count | 1           |
| TMSB4Y     | 0.2937652 | 0.5896471 | 0.4982 | 0.618    | 0.220155505 | count | 1           |
| UBTD1      | 0.1843197 | 0.2734243 | 0.6741 | 0.5      | 0.2202111   | count | 1           |
| RPL11      | 0.1527697 | 0.0220046 | 6.9426 | 4.91E-12 | 0.220261093 | count | 1.18E-07    |
| STXBP1     | 0.4060442 | 0.6180302 | 0.657  | 0.511    | 0.220303139 | count | 1           |
| AC137932.3 | 0.4060442 | 0.6671781 | 0.6086 | 0.543    | 0.220303139 | count | 1           |
| RAB11FIP3  | 0.2842982 | 1.1374054 | 0.25   | 0.803    | 0.220328794 | count | 1           |
| PGM1       | 0.1785652 | 0.2503596 | 0.7132 | 0.476    | 0.220447325 | count | 1           |
| AARS       | 0.2117476 | 0.2969757 | 0.713  | 0.476    | 0.220449613 | count | 1           |
| RPS4X      | 0.1530021 | 0.0258758 | 5.9129 | 3.83E-09 | 0.220467602 | count | 9.20E-05    |
| CALD1      | 0.2845038 | 0.4459284 | 0.638  | 0.524    | 0.220494493 | count | 1           |
| SLC29A1    | 0.1793519 | 0.2680643 | 0.6691 | 0.504    | 0.220542959 | count | 1           |
| ZNF121     | 0.2101972 | 0.3110312 | 0.6758 | 0.499    | 0.220667091 | count | 1           |
| SLC9A3     | 0.696956  | 0.7815038 | 0.8918 | 0.373    | 0.220721179 | count | 1           |
| SPG21      | 0.1584652 | 0.1217787 | 1.3013 | 0.193    | 0.220805996 | count | 1           |
| AP3M2      | 0.228275  | 0.3716361 | 0.6142 | 0.539    | 0.220857288 | count | 1           |
| SNAPIN     | 0.1602952 | 0.1261912 | 1.2703 | 0.204    | 0.220948402 | count | 1           |
| WDR12      | 0.187792  | 0.2725412 | 0.689  | 0.491    | 0.2209531   | count | 1           |
| DOLK       | 0.3350269 | 0.5153323 | 0.6501 | 0.516    | 0.22099275  | count | 1           |
| TRAPPC11   | 0.1984822 | 0.2566667 | 0.7733 | 0.439    | 0.221091812 | count | 1           |
| FDX1       | 0.1571898 | 0.1034349 | 1.5197 | 0.129    | 0.221107884 | count | 1           |
| ADIPOR1    | 0.1583584 | 0.0977986 | 1.6192 | 0.106    | 0.221154017 | count | 1           |
| SURF1      | 0.1594257 | 0.1000376 | 1.5937 | 0.111    | 0.221240843 | count | 1           |
| AL391121.1 | 0.2144277 | 0.406834  | 0.5271 | 0.598    | 0.221306618 | count | 1           |
| RNF214     | 0.1746478 | 0.1804667 | 0.9678 | 0.333    | 0.221549234 | count | 1           |
| RPL24      | 0.1539291 | 0.0269663 | 5.7082 | 1.28E-08 | 0.221616058 | count | 0.000306995 |
| SPRY2      | 0.1969924 | 0.2510094 | 0.7848 | 0.433    | 0.221705443 | count | 1           |
| KDM5D      | 0.2391689 | 0.3914074 | 0.611  | 0.541    | 0.221725777 | count | 1           |
| ODF2       | 0.2214223 | 0.2770656 | 0.7992 | 0.424    | 0.221914492 | count | 1           |
| KIAA1586   | 0.1764876 | 0.2239011 | 0.7882 | 0.431    | 0.222008383 | count | 1           |
| PIGH       | 0.1829979 | 0.2547226 | 0.7184 | 0.473    | 0.222086631 | count | 1           |
| INTS4      | 0.2360888 | 0.370747  | 0.6368 | 0.524    | 0.222248642 | count | 1           |
| HNRNPD     | 0.1566668 | 0.0612131 | 2.5594 | 0.0105   | 0.222561264 | count | 1           |
| TMEM255B   | 0.1838436 | 0.261731  | 0.7024 | 0.482    | 0.222578822 | count | 1           |
| TCEA2      | 0.1686267 | 0.1792973 | 0.9405 | 0.347    | 0.222773558 | count | 1           |
| TTC17      | 0.1791588 | 0.2197921 | 0.8151 | 0.415    | 0.222833953 | count | 1           |

|            |           |           |        |          |             |       |          |
|------------|-----------|-----------|--------|----------|-------------|-------|----------|
| CCDC18     | 0.1856143 | 0.3051478 | 0.6083 | 0.543    | 0.223008654 | count | 1        |
| C12orf76   | 0.1796841 | 0.1930056 | 0.931  | 0.352    | 0.223093036 | count | 1        |
| ARHGEF9    | 0.1954647 | 0.3291327 | 0.5939 | 0.553    | 0.223094111 | count | 1        |
| MTHFSD     | 0.3380969 | 0.4833838 | 0.6994 | 0.484    | 0.223128678 | count | 1        |
| NAP1L4     | 0.1628789 | 0.1511607 | 1.0775 | 0.281    | 0.223222832 | count | 1        |
| EEF1A1     | 0.1551317 | 0.0229441 | 6.7613 | 1.70E-11 | 0.223707354 | count | 4.10E-07 |
| OTULINL    | 0.1629864 | 0.1033279 | 1.5774 | 0.115    | 0.223734668 | count | 1        |
| SAFB       | 0.1671389 | 0.1406069 | 1.1887 | 0.235    | 0.223827812 | count | 1        |
| PCBP2      | 0.1575637 | 0.0629998 | 2.501  | 0.0124   | 0.223832114 | count | 1        |
| GIT1       | 0.1998832 | 0.2823878 | 0.7078 | 0.479    | 0.223859702 | count | 1        |
| CCDC137    | 0.1821579 | 0.2200001 | 0.828  | 0.408    | 0.224022166 | count | 1        |
| GORASP2    | 0.1711134 | 0.1967864 | 0.8696 | 0.385    | 0.224273273 | count | 1        |
| LENG1      | 0.1756882 | 0.1913139 | 0.9183 | 0.359    | 0.224287028 | count | 1        |
| PIGC       | 0.1713304 | 0.181992  | 0.9414 | 0.347    | 0.224364828 | count | 1        |
| RNF11      | 0.1692278 | 0.1699059 | 0.996  | 0.319    | 0.224497054 | count | 1        |
| RGL4       | 1.537195  | 1.010429  | 1.5213 | 0.128    | 0.22457772  | count | 1        |
| JPX        | 0.1734644 | 0.2089056 | 0.8303 | 0.406    | 0.224724173 | count | 1        |
| MAT2A      | 0.1608762 | 0.0989477 | 1.6259 | 0.104    | 0.224842143 | count | 1        |
| P2RY2      | 0.3602039 | 0.5645064 | 0.6381 | 0.523    | 0.225073623 | count | 1        |
| LSM14B     | 0.1889095 | 0.2888316 | 0.654  | 0.513    | 0.225095027 | count | 1        |
| IGHG1      | 0.2020689 | 0.4447401 | 0.4544 | 0.65     | 0.225143841 | count | 1        |
| CIAO1      | 0.1713521 | 0.1445951 | 1.185  | 0.236    | 0.225205125 | count | 1        |
| PMAIP1     | 0.1633862 | 0.1263713 | 1.2929 | 0.196    | 0.225255792 | count | 1        |
| KLF5       | 0.5080484 | 0.4766417 | 1.0659 | 0.287    | 0.22534461  | count | 1        |
| SRSF11     | 0.158871  | 0.0661452 | 2.4019 | 0.0164   | 0.225383082 | count | 1        |
| MT-CO3     | 0.1565056 | 0.0261869 | 5.9765 | 2.61E-09 | 0.225631618 | count | 6.27E-05 |
| OTUD1      | 0.1584904 | 0.0841708 | 1.883  | 0.0598   | 0.225712841 | count | 1        |
| LINC00685  | 0.2364245 | 0.383426  | 0.6166 | 0.538    | 0.225838869 | count | 1        |
| PEX6       | 0.2519403 | 0.3337226 | 0.7549 | 0.45     | 0.225849069 | count | 1        |
| ZBTB7A     | 0.1621548 | 0.1101635 | 1.4719 | 0.141    | 0.225934178 | count | 1        |
| KRTCAP2    | 0.1608435 | 0.0897368 | 1.7924 | 0.0732   | 0.225950394 | count | 1        |
| CMTR2      | 0.2209534 | 0.3524457 | 0.6269 | 0.531    | 0.226032176 | count | 1        |
| RBMS1      | 0.161357  | 0.0886515 | 1.8201 | 0.0689   | 0.226082945 | count | 1        |
| RHCE       | 1.5464032 | 1.281003  | 1.2072 | 0.227    | 0.226178966 | count | 1        |
| AC007383.2 | 1.5464032 | 1.281003  | 1.2072 | 0.227    | 0.226178966 | count | 1        |
| AC097634.3 | 1.5464032 | 1.281003  | 1.2072 | 0.227    | 0.226178966 | count | 1        |
| PHLDB2     | 1.5464032 | 1.508711  | 1.025  | 0.305    | 0.226178966 | count | 1        |
| STARD4-AS1 | 1.5464032 | 1.361144  | 1.1361 | 0.256    | 0.226178966 | count | 1        |
| PRR7-AS1   | 1.5464032 | 1.281003  | 1.2072 | 0.227    | 0.226178966 | count | 1        |
| AL353803.4 | 1.5464032 | 1.361144  | 1.1361 | 0.256    | 0.226178966 | count | 1        |
| C11orf65   | 1.5464032 | 1.095628  | 1.4114 | 0.158    | 0.226178966 | count | 1        |
| AC022021.1 | 1.5464032 | 1.281003  | 1.2072 | 0.227    | 0.226178966 | count | 1        |
| AL121928.1 | 1.5464032 | 1.361144  | 1.1361 | 0.256    | 0.226178966 | count | 1        |
| HOXC4      | 1.5464032 | 1.508711  | 1.025  | 0.305    | 0.226178966 | count | 1        |
| AL589745.1 | 1.5464032 | 1.361144  | 1.1361 | 0.256    | 0.226178966 | count | 1        |

|            |           |           |        |          |             |       |           |
|------------|-----------|-----------|--------|----------|-------------|-------|-----------|
| LOXL1-AS1  | 1.5464032 | 1.281003  | 1.2072 | 0.227    | 0.226178966 | count | 1         |
| AC027020.2 | 1.5464032 | 1.361144  | 1.1361 | 0.256    | 0.226178966 | count | 1         |
| CASKIN2    | 1.5464032 | 0.9943113 | 1.5553 | 0.12     | 0.226178966 | count | 1         |
| SLC35E3    | 0.1763062 | 0.2111313 | 0.8351 | 0.404    | 0.226370428 | count | 1         |
| TMEM60     | 0.172277  | 0.1803748 | 0.9551 | 0.34     | 0.226582755 | count | 1         |
| MBTPS1     | 0.1741289 | 0.1820584 | 0.9564 | 0.339    | 0.226594501 | count | 1         |
| SASH3      | 0.1775546 | 0.192061  | 0.9245 | 0.355    | 0.226684803 | count | 1         |
| GPR171     | 0.3627118 | 0.6782736 | 0.5348 | 0.593    | 0.226736003 | count | 1         |
| LYRM7      | 0.2177781 | 0.3013639 | 0.7226 | 0.47     | 0.226844931 | count | 1         |
| CCNK       | 0.169788  | 0.1494871 | 1.1358 | 0.256    | 0.226870855 | count | 1         |
| ME1        | 0.190511  | 0.2004279 | 0.9505 | 0.342    | 0.227022845 | count | 1         |
| SPATA24    | 0.4175912 | 0.5771797 | 0.7235 | 0.469    | 0.227044391 | count | 1         |
| CES4A      | 0.4175912 | 0.6018047 | 0.6939 | 0.488    | 0.227044391 | count | 1         |
| AMZ2       | 0.1730489 | 0.1766033 | 0.9799 | 0.327    | 0.22712518  | count | 1         |
| HDAC1      | 0.170787  | 0.159968  | 1.0676 | 0.286    | 0.227191586 | count | 1         |
| LNX2       | 0.3875344 | 0.4985329 | 0.7773 | 0.437    | 0.227257962 | count | 1         |
| EVI5L      | 0.3875344 | 0.5396602 | 0.7181 | 0.473    | 0.227257962 | count | 1         |
| TOX2       | 0.9451946 | 0.844897  | 1.1187 | 0.263    | 0.227304263 | count | 1         |
| GTF2E1     | 0.2768811 | 0.3919949 | 0.7063 | 0.48     | 0.227515901 | count | 1         |
| NCBP1      | 0.2103683 | 0.4615476 | 0.4558 | 0.649    | 0.227544212 | count | 1         |
| HIP1       | 0.1829872 | 0.2224187 | 0.8227 | 0.411    | 0.227632822 | count | 1         |
| TAOK3      | 0.1614417 | 0.0851573 | 1.8958 | 0.0581   | 0.227669833 | count | 1         |
| RFXANK     | 0.1685521 | 0.1627172 | 1.0359 | 0.3      | 0.227758174 | count | 1         |
| DNAJC13    | 0.1807894 | 0.1858329 | 0.9729 | 0.331    | 0.227797279 | count | 1         |
| MOSPD3     | 0.1767298 | 0.2329955 | 0.7585 | 0.448    | 0.22787236  | count | 1         |
| AP001160.3 | 0.4590482 | 0.5757712 | 0.7973 | 0.425    | 0.227973318 | count | 1         |
| CACNB3     | 0.3455088 | 0.6565223 | 0.5263 | 0.599    | 0.228293005 | count | 1         |
| MLXIP      | 0.1763932 | 0.1683626 | 1.0477 | 0.295    | 0.228326116 | count | 1         |
| INTS10     | 0.1765695 | 0.142282  | 1.241  | 0.215    | 0.228338367 | count | 1         |
| CRYBG3     | 0.1775222 | 0.204521  | 0.868  | 0.385    | 0.228428902 | count | 1         |
| IFITM1     | 0.254892  | 0.4132924 | 0.6167 | 0.537    | 0.228572779 | count | 1         |
| RPS23      | 0.1586152 | 0.024344  | 6.5156 | 8.76E-11 | 0.228635411 | count | 2.11E-06  |
| VPS50      | 0.2160009 | 0.2736736 | 0.7893 | 0.43     | 0.2286981   | count | 1         |
| AL137802.2 | 0.9503231 | 1.0349031 | 0.9183 | 0.359    | 0.228762142 | count | 1         |
| AZIN2      | 0.9503231 | 1.1525823 | 0.8245 | 0.41     | 0.228762142 | count | 1         |
| LINC00607  | 0.9503231 | 1.07092   | 0.8874 | 0.375    | 0.228762142 | count | 1         |
| NRG2       | 0.9503231 | 1.0349031 | 0.9183 | 0.359    | 0.228762142 | count | 1         |
| HLA-G      | 0.9503231 | 1.0349031 | 0.9183 | 0.359    | 0.228762142 | count | 1         |
| AC114271.1 | 0.9503231 | 1.07092   | 0.8874 | 0.375    | 0.228762142 | count | 1         |
| FAM227A    | 0.9503231 | 1.388264  | 0.6845 | 0.494    | 0.228762142 | count | 1         |
| AC097376.2 | 0.2196678 | 0.3256346 | 0.6746 | 0.5      | 0.228850175 | count | 1         |
| PTPRC      | 0.1594003 | 0.0365096 | 4.366  | 1.32E-05 | 0.228878359 | count | 0.3125628 |
| ITPR2      | 0.1665952 | 0.1024221 | 1.6266 | 0.104    | 0.22887838  | count | 1         |
| TRIM22     | 0.1683332 | 0.1220007 | 1.3798 | 0.168    | 0.228940417 | count | 1         |
| ANKRD17    | 0.1791928 | 0.1777859 | 1.0079 | 0.314    | 0.229061151 | count | 1         |

|            |           |           |        |          |             |       |             |
|------------|-----------|-----------|--------|----------|-------------|-------|-------------|
| GLI4       | 0.1998543 | 0.2931074 | 0.6818 | 0.495    | 0.229164297 | count | 1           |
| DLEU7      | 0.2337706 | 0.4989148 | 0.4686 | 0.639    | 0.22919712  | count | 1           |
| C11orf24   | 0.1942599 | 0.2919045 | 0.6655 | 0.506    | 0.229401367 | count | 1           |
| RPL5       | 0.1592351 | 0.0273317 | 5.826  | 6.42E-09 | 0.229417353 | count | 0.000154061 |
| AC110079.2 | 0.9527416 | 0.5567392 | 1.7113 | 0.0872   | 0.229450253 | count | 1           |
| TJAP1      | 0.2435706 | 0.4342157 | 0.5609 | 0.575    | 0.229473847 | count | 1           |
| ERCC4      | 0.2109881 | 0.3048302 | 0.6921 | 0.489    | 0.229737247 | count | 1           |
| TIFAB      | 0.4223858 | 0.6943607 | 0.6083 | 0.543    | 0.229850494 | count | 1           |
| AL606469.1 | 0.4223858 | 0.7731558 | 0.5463 | 0.585    | 0.229850494 | count | 1           |
| RIOX2      | 0.2206108 | 0.3239784 | 0.6809 | 0.496    | 0.229851048 | count | 1           |
| PAFAH2     | 0.3479099 | 0.4760824 | 0.7308 | 0.465    | 0.229968282 | count | 1           |
| DNAJC3-DT  | 0.2962645 | 0.4651436 | 0.6369 | 0.524    | 0.22998618  | count | 1           |
| IFI35      | 0.1656183 | 0.1137358 | 1.4562 | 0.145    | 0.230118943 | count | 1           |
| NGLY1      | 0.1701433 | 0.1730002 | 0.9835 | 0.325    | 0.230224101 | count | 1           |
| DDX28      | 0.2410076 | 0.391039  | 0.6163 | 0.538    | 0.230325574 | count | 1           |
| USP32      | 0.1921876 | 0.2114577 | 0.9089 | 0.364    | 0.230354486 | count | 1           |
| KIN        | 0.1701816 | 0.1361271 | 1.2502 | 0.211    | 0.230425885 | count | 1           |
| FBXW9      | 0.3324989 | 0.5704402 | 0.5829 | 0.56     | 0.230592718 | count | 1           |
| TRIR       | 0.1617864 | 0.0502969 | 3.2166 | 0.00131  | 0.230626357 | count | 1           |
| LINC00954  | 0.5189151 | 0.7856725 | 0.6605 | 0.509    | 0.230652564 | count | 1           |
| ST6GALNAC6 | 0.5189151 | 0.8072089 | 0.6429 | 0.52     | 0.230652564 | count | 1           |
| ARHGEF17   | 0.5189151 | 0.7856725 | 0.6605 | 0.509    | 0.230652564 | count | 1           |
| SEMA7A     | 0.5189151 | 0.9665659 | 0.5369 | 0.591    | 0.230652564 | count | 1           |
| ZNF784     | 0.5189151 | 0.7756938 | 0.669  | 0.504    | 0.230652564 | count | 1           |
| AC005261.3 | 0.7243656 | 0.6669055 | 1.0862 | 0.278    | 0.230682355 | count | 1           |
| ARPIN      | 0.1818163 | 0.1828573 | 0.9943 | 0.32     | 0.230704593 | count | 1           |
| ZNF180     | 0.5191432 | 0.4974671 | 1.0436 | 0.297    | 0.230764174 | count | 1           |
| STAT4      | 0.3073413 | 0.52317   | 0.5875 | 0.557    | 0.230781842 | count | 1           |
| AC016065.1 | 0.3073413 | 0.5134464 | 0.5986 | 0.55     | 0.230781842 | count | 1           |
| KLHL23     | 0.4643119 | 1.250548  | 0.3713 | 0.71     | 0.230815422 | count | 1           |
| AC010894.2 | 0.4643119 | 0.8905093 | 0.5214 | 0.602    | 0.230815422 | count | 1           |
| LINC02018  | 0.4643119 | 0.799271  | 0.5809 | 0.561    | 0.230815422 | count | 1           |
| AC019205.1 | 0.4643119 | 1.4766725 | 0.3144 | 0.753    | 0.230815422 | count | 1           |
| C9orf116   | 0.4643119 | 0.9107924 | 0.5098 | 0.61     | 0.230815422 | count | 1           |
| AL022238.2 | 0.4643119 | 0.9918243 | 0.4681 | 0.64     | 0.230815422 | count | 1           |
| MAGT1      | 0.1715651 | 0.1386725 | 1.2372 | 0.216    | 0.230829553 | count | 1           |
| RFX7       | 0.2739359 | 0.352645  | 0.7768 | 0.437    | 0.230848751 | count | 1           |
| GALNT2     | 0.1813136 | 0.2091107 | 0.8671 | 0.386    | 0.230950267 | count | 1           |
| THOC5      | 0.2327913 | 0.2619768 | 0.8886 | 0.374    | 0.230953794 | count | 1           |
| TXNDC9     | 0.1720294 | 0.1582577 | 1.087  | 0.277    | 0.230993144 | count | 1           |
| STAC3      | 0.1751688 | 0.179764  | 0.9744 | 0.33     | 0.231017616 | count | 1           |
| OXNAD1     | 0.3494658 | 0.5511984 | 0.634  | 0.526    | 0.23105444  | count | 1           |
| SF3A3      | 0.1723891 | 0.1391752 | 1.2386 | 0.216    | 0.231087574 | count | 1           |
| ISG20      | 0.1752553 | 0.1869856 | 0.9373 | 0.349    | 0.231132225 | count | 1           |
| AC060780.1 | 0.2577147 | 0.4526883 | 0.5693 | 0.569    | 0.231179001 | count | 1           |

|              |           |           |        |         |             |       |   |
|--------------|-----------|-----------|--------|---------|-------------|-------|---|
| VPS52        | 0.4650529 | 0.4340468 | 1.0714 | 0.284   | 0.231215883 | count | 1 |
| TRIM11       | 0.1978761 | 0.2296307 | 0.8617 | 0.389   | 0.231346031 | count | 1 |
| TMEM120B     | 0.242283  | 0.3486206 | 0.695  | 0.487   | 0.23157482  | count | 1 |
| NOC3L        | 0.1876805 | 0.2183136 | 0.8597 | 0.39    | 0.231794789 | count | 1 |
| TFAM         | 0.1672685 | 0.1371428 | 1.2197 | 0.223   | 0.231888604 | count | 1 |
| DCLRE1C      | 0.2005762 | 0.3320344 | 0.6041 | 0.546   | 0.231904669 | count | 1 |
| RARRES2      | 0.4260902 | 0.8077924 | 0.5275 | 0.598   | 0.232021339 | count | 1 |
| SIRT5        | 0.2692388 | 0.3516913 | 0.7656 | 0.444   | 0.232115998 | count | 1 |
| SLC37A4      | 0.2313978 | 0.3829052 | 0.6043 | 0.546   | 0.23212837  | count | 1 |
| ATP11C       | 0.2247244 | 0.2651079 | 0.8477 | 0.397   | 0.232142039 | count | 1 |
| CCDC102B     | 0.3208809 | 0.5815569 | 0.5518 | 0.581   | 0.232178035 | count | 1 |
| SAMD8        | 0.1854883 | 0.2091189 | 0.887  | 0.375   | 0.232328141 | count | 1 |
| ZADH2        | 0.1901032 | 0.2086051 | 0.9113 | 0.362   | 0.232390926 | count | 1 |
| PCDHGB6      | 1.5831444 | 0.9436053 | 1.6778 | 0.0935  | 0.232567419 | count | 1 |
| AC025171.2   | 0.2995914 | 0.5390664 | 0.5558 | 0.578   | 0.232676158 | count | 1 |
| COQ3         | 0.2995914 | 0.6202061 | 0.4831 | 0.629   | 0.232676158 | count | 1 |
| AP002807.1   | 0.3961879 | 0.4904996 | 0.8077 | 0.419   | 0.232681939 | count | 1 |
| PTGER3       | 0.5233191 | 0.705991  | 0.7413 | 0.459   | 0.232808864 | count | 1 |
| AC080013.1   | 0.6034584 | 0.8468988 | 0.7126 | 0.476   | 0.232837609 | count | 1 |
| STAP1        | 0.6034584 | 0.8468988 | 0.7126 | 0.476   | 0.232837609 | count | 1 |
| HHIP         | 0.6034584 | 1.3907564 | 0.4339 | 0.664   | 0.232837609 | count | 1 |
| Z84485.1     | 0.6034584 | 0.8468988 | 0.7126 | 0.476   | 0.232837609 | count | 1 |
| AC093799.1   | 0.6034584 | 1.0596664 | 0.5695 | 0.569   | 0.232837609 | count | 1 |
| UXT-AS1      | 0.6034584 | 1.3907564 | 0.4339 | 0.664   | 0.232837609 | count | 1 |
| PEBP4        | 0.6034584 | 0.8468988 | 0.7126 | 0.476   | 0.232837609 | count | 1 |
| CSNK2A3      | 0.6034584 | 0.8468988 | 0.7126 | 0.476   | 0.232837609 | count | 1 |
| RTKN2        | 0.6034584 | 0.8468988 | 0.7126 | 0.476   | 0.232837609 | count | 1 |
| SLC25A15     | 0.6034584 | 0.8468988 | 0.7126 | 0.476   | 0.232837609 | count | 1 |
| COG8         | 0.6034584 | 0.8468988 | 0.7126 | 0.476   | 0.232837609 | count | 1 |
| DYNLRB2      | 0.6034584 | 0.8468988 | 0.7126 | 0.476   | 0.232837609 | count | 1 |
| CDC6         | 0.6034584 | 1.0596664 | 0.5695 | 0.569   | 0.232837609 | count | 1 |
| AC007993.3   | 0.6034584 | 1.3907564 | 0.4339 | 0.664   | 0.232837609 | count | 1 |
| AC132872.2   | 0.6034584 | 0.8468988 | 0.7126 | 0.476   | 0.232837609 | count | 1 |
| C21orf62-AS1 | 0.6034584 | 0.8468988 | 0.7126 | 0.476   | 0.232837609 | count | 1 |
| IRF1         | 0.1635139 | 0.0805634 | 2.0296 | 0.0425  | 0.232880963 | count | 1 |
| FAM213A      | 0.1880349 | 0.1936859 | 0.9708 | 0.332   | 0.23311871  | count | 1 |
| EIF3F        | 0.1634123 | 0.05034   | 3.2462 | 0.00119 | 0.233184702 | count | 1 |
| ZFAND4       | 0.5242059 | 0.5314823 | 0.9863 | 0.324   | 0.233243439 | count | 1 |
| TSPAN15      | 0.217032  | 0.2423076 | 0.8957 | 0.371   | 0.233254192 | count | 1 |
| AGGF1        | 0.226099  | 0.3239924 | 0.6979 | 0.485   | 0.233589877 | count | 1 |
| KBTBD2       | 0.180996  | 0.1887306 | 0.959  | 0.338   | 0.233639715 | count | 1 |
| LENG8-AS1    | 0.277188  | 0.6650063 | 0.4168 | 0.677   | 0.233684745 | count | 1 |
| RNMT         | 0.166038  | 0.0980442 | 1.6935 | 0.0905  | 0.23378762  | count | 1 |
| PRR13        | 0.1637304 | 0.0516753 | 3.1684 | 0.0016  | 0.233831382 | count | 1 |
| CCL3         | 0.1622584 | 0.0781855 | 2.0753 | 0.0381  | 0.233860007 | count | 1 |

|            |           |           |        |          |             |       |          |
|------------|-----------|-----------|--------|----------|-------------|-------|----------|
| ITGB7      | 0.2007764 | 0.2951073 | 0.6804 | 0.496    | 0.233924684 | count | 1        |
| SLC22A5    | 0.5257136 | 0.5916099 | 0.8886 | 0.374    | 0.233982524 | count | 1        |
| ABCC10     | 0.3233354 | 0.4154428 | 0.7783 | 0.436    | 0.234039395 | count | 1        |
| ASTE1      | 0.2924587 | 0.4146862 | 0.7053 | 0.481    | 0.234113226 | count | 1        |
| PRKAR1A    | 0.1667129 | 0.0856763 | 1.9458 | 0.0518   | 0.234126556 | count | 1        |
| METTL2B    | 0.1948585 | 0.2427313 | 0.8028 | 0.422    | 0.234226804 | count | 1        |
| RPS7       | 0.1626091 | 0.0242958 | 6.6929 | 2.70E-11 | 0.234355268 | count | 6.51E-07 |
| NUSAP1     | 0.2524839 | 0.5018447 | 0.5031 | 0.615    | 0.234408947 | count | 1        |
| TAF13      | 0.1826719 | 0.1959457 | 0.9323 | 0.351    | 0.234594492 | count | 1        |
| PPP3R1     | 0.1795198 | 0.1567735 | 1.1451 | 0.252    | 0.234604218 | count | 1        |
| GON7       | 0.1816801 | 0.2021819 | 0.8986 | 0.369    | 0.234758809 | count | 1        |
| AP1AR      | 0.1900957 | 0.2269372 | 0.8377 | 0.402    | 0.234802832 | count | 1        |
| MEMO1      | 0.2530199 | 0.3182814 | 0.795  | 0.427    | 0.234920196 | count | 1        |
| SLCO2B1    | 0.1722281 | 0.1163416 | 1.4804 | 0.139    | 0.234993961 | count | 1        |
| EMD        | 0.168797  | 0.1112449 | 1.5173 | 0.129    | 0.235019903 | count | 1        |
| AC002456.1 | 0.9725464 | 0.8259221 | 1.1775 | 0.239    | 0.235099361 | count | 1        |
| LRRRC24    | 0.9725464 | 0.9118858 | 1.0665 | 0.286    | 0.235099361 | count | 1        |
| TET2       | 0.1701366 | 0.1239096 | 1.3731 | 0.17     | 0.235132186 | count | 1        |
| AP002884.1 | 0.4001732 | 0.7146593 | 0.5599 | 0.576    | 0.23518453  | count | 1        |
| MAGEF1     | 0.2060153 | 0.2800763 | 0.7356 | 0.462    | 0.235295439 | count | 1        |
| SDF4       | 0.1688701 | 0.1012428 | 1.668  | 0.0954   | 0.235485238 | count | 1        |
| BIRC3      | 0.1697275 | 0.1101437 | 1.541  | 0.123    | 0.235508893 | count | 1        |
| PRNP       | 0.1693996 | 0.0925733 | 1.8299 | 0.0674   | 0.235539481 | count | 1        |
| WASHC5     | 0.2081206 | 0.2686541 | 0.7747 | 0.439    | 0.235553265 | count | 1        |
| RAB5IF     | 0.1680418 | 0.0833534 | 2.016  | 0.0439   | 0.235573544 | count | 1        |
| SLC40A1    | 0.167858  | 0.1501601 | 1.1179 | 0.264    | 0.235667998 | count | 1        |
| FMO4       | 0.4323875 | 0.5503523 | 0.7857 | 0.432    | 0.235717196 | count | 1        |
| FMC1       | 0.1916483 | 0.2657969 | 0.721  | 0.471    | 0.23579548  | count | 1        |
| EIF3G      | 0.1658801 | 0.0578089 | 2.8695 | 0.00415  | 0.235821756 | count | 1        |
| CDK5RAP3   | 0.1756098 | 0.1591205 | 1.1036 | 0.27     | 0.236010934 | count | 1        |
| TRMT61A    | 0.2106984 | 0.4177282 | 0.5044 | 0.614    | 0.236147584 | count | 1        |
| VPS8       | 0.1945015 | 0.2242272 | 0.8674 | 0.386    | 0.236180368 | count | 1        |
| UPF3A      | 0.17059   | 0.1843733 | 0.9252 | 0.355    | 0.236225257 | count | 1        |
| HNRNPH3    | 0.1713701 | 0.0964478 | 1.7768 | 0.0757   | 0.236288879 | count | 1        |
| TMCO4      | 0.219874  | 0.2895299 | 0.7594 | 0.448    | 0.236361012 | count | 1        |
| NUDT17     | 0.6116357 | 0.8471102 | 0.722  | 0.47     | 0.23637609  | count | 1        |
| ROM1       | 0.6116357 | 0.7279803 | 0.8402 | 0.401    | 0.23637609  | count | 1        |
| LARP1      | 0.1743836 | 0.1459188 | 1.1951 | 0.232    | 0.236647904 | count | 1        |
| AC116667.1 | 0.3574899 | 0.6437048 | 0.5554 | 0.579    | 0.236663403 | count | 1        |
| PMF1       | 0.1739287 | 0.1384384 | 1.2564 | 0.209    | 0.23670415  | count | 1        |
| TDRD7      | 0.2549678 | 0.4186411 | 0.609  | 0.543    | 0.236778591 | count | 1        |
| COG4       | 0.2174292 | 0.2613642 | 0.8319 | 0.406    | 0.236865274 | count | 1        |
| LATS2      | 0.2056707 | 0.2346888 | 0.8764 | 0.381    | 0.236910316 | count | 1        |
| TGFBRAP1   | 0.2219565 | 0.3515208 | 0.6314 | 0.528    | 0.23691527  | count | 1        |
| NMI        | 0.1734637 | 0.1167669 | 1.4856 | 0.138    | 0.236916208 | count | 1        |



|            |           |           |        |          |             |       |          |
|------------|-----------|-----------|--------|----------|-------------|-------|----------|
| LIG1       | 0.2880472 | 0.3964547 | 0.7266 | 0.468    | 0.237034093 | count | 1        |
| CSRNP2     | 0.435189  | 0.4560269 | 0.9543 | 0.34     | 0.237363615 | count | 1        |
| ZDHHC5     | 0.1837456 | 0.2010286 | 0.914  | 0.361    | 0.23744353  | count | 1        |
| MLH1       | 0.2088917 | 0.293237  | 0.7124 | 0.476    | 0.237549977 | count | 1        |
| FAM219B    | 0.2108764 | 0.262859  | 0.8022 | 0.422    | 0.237553822 | count | 1        |
| DUSP18     | 0.2054142 | 0.3022912 | 0.6795 | 0.497    | 0.237568361 | count | 1        |
| TMEM161B   | 0.2421884 | 0.3348941 | 0.7232 | 0.47     | 0.237645299 | count | 1        |
| SHARPIN    | 0.1722196 | 0.1219424 | 1.4123 | 0.158    | 0.237654185 | count | 1        |
| UTY        | 0.1977765 | 0.2770564 | 0.7138 | 0.475    | 0.237769905 | count | 1        |
| CENPC      | 0.1796279 | 0.1467232 | 1.2243 | 0.221    | 0.23780645  | count | 1        |
| ZNF770     | 0.1973073 | 0.2562462 | 0.77   | 0.441    | 0.23782918  | count | 1        |
| ZNF669     | 0.2488481 | 0.3265865 | 0.762  | 0.446    | 0.238009917 | count | 1        |
| LINC00115  | 0.2347794 | 0.4620888 | 0.5081 | 0.611    | 0.238091792 | count | 1        |
| RSL1D1     | 0.1674565 | 0.0594477 | 2.8169 | 0.00489  | 0.238183508 | count | 1        |
| ARMC7      | 0.2268198 | 0.3947478 | 0.5746 | 0.566    | 0.23844772  | count | 1        |
| C1orf50    | 0.2826926 | 0.6946511 | 0.407  | 0.684    | 0.238489666 | count | 1        |
| C17orf67   | 0.1913261 | 0.29032   | 0.659  | 0.51     | 0.238505256 | count | 1        |
| TCTEX1D4   | 0.4786786 | 0.9655368 | 0.4958 | 0.62     | 0.238596017 | count | 1        |
| RPS28      | 0.1656523 | 0.024768  | 6.6882 | 2.79E-11 | 0.238660646 | count | 6.72E-07 |
| SERP1      | 0.1662899 | 0.03945   | 4.2152 | 2.59E-05 | 0.23869782  | count | 0.611758 |
| GNB5       | 0.3070738 | 0.4370864 | 0.7025 | 0.482    | 0.238734005 | count | 1        |
| ATP6V1E1   | 0.1710262 | 0.0969699 | 1.7637 | 0.0779   | 0.238954415 | count | 1        |
| ASCC2      | 0.1837981 | 0.2315843 | 0.7937 | 0.427    | 0.239042097 | count | 1        |
| SMIM8      | 0.1891244 | 0.2867254 | 0.6596 | 0.51     | 0.239063236 | count | 1        |
| MTRNR2L12  | 0.1679134 | 0.0667619 | 2.5151 | 0.012    | 0.23921298  | count | 1        |
| RETREG3    | 0.2169433 | 0.3104714 | 0.6988 | 0.485    | 0.239255214 | count | 1        |
| NORAD      | 0.1713214 | 0.1040398 | 1.6467 | 0.0997   | 0.239483768 | count | 1        |
| ERI2       | 0.361628  | 0.5302331 | 0.682  | 0.495    | 0.239560803 | count | 1        |
| DRG2       | 0.1883688 | 0.2067023 | 0.9113 | 0.362    | 0.239696829 | count | 1        |
| ERI1       | 0.2073269 | 0.2400288 | 0.8638 | 0.388    | 0.239808332 | count | 1        |
| SF3B1      | 0.1696526 | 0.0641107 | 2.6462 | 0.00819  | 0.239937064 | count | 1        |
| ACACA      | 0.2781611 | 0.4419509 | 0.6294 | 0.529    | 0.240067817 | count | 1        |
| LINC01010  | 0.3627219 | 0.5625876 | 0.6447 | 0.519    | 0.240327273 | count | 1        |
| PCGF6      | 0.242033  | 0.4119078 | 0.5876 | 0.557    | 0.240333482 | count | 1        |
| TICAM1     | 0.1945384 | 0.2337251 | 0.8323 | 0.405    | 0.24033757  | count | 1        |
| ENDOG      | 0.1899615 | 0.2451178 | 0.775  | 0.438    | 0.240463399 | count | 1        |
| MTSS1      | 0.1720017 | 0.1023235 | 1.681  | 0.0929   | 0.240549532 | count | 1        |
| SENP5      | 0.187322  | 0.1935225 | 0.968  | 0.333    | 0.240604156 | count | 1        |
| TBCE       | 0.7521517 | 0.5919597 | 1.2706 | 0.204    | 0.240861371 | count | 1        |
| AL731661.1 | 0.3839777 | 0.6890344 | 0.5573 | 0.577    | 0.240880096 | count | 1        |
| MS4A4E     | 0.4829621 | 0.5378116 | 0.898  | 0.369    | 0.240922419 | count | 1        |
| PROSER2    | 0.4093228 | 0.6732547 | 0.608  | 0.543    | 0.240941019 | count | 1        |
| PIK3R4     | 0.4836217 | 0.5573384 | 0.8677 | 0.386    | 0.241280917 | count | 1        |
| KLC1       | 0.193698  | 0.2274907 | 0.8515 | 0.395    | 0.241485951 | count | 1        |
| TRIP6      | 0.1853919 | 0.1976005 | 0.9382 | 0.348    | 0.241536565 | count | 1        |

|            |           |           |        |          |             |       |   |
|------------|-----------|-----------|--------|----------|-------------|-------|---|
| SLC25A45   | 0.2065621 | 0.330181  | 0.6256 | 0.532    | 0.241623211 | count | 1 |
| BCAT2      | 0.2320096 | 0.3058515 | 0.7586 | 0.448    | 0.241960796 | count | 1 |
| PAQR4      | 0.2410422 | 0.3112361 | 0.7745 | 0.439    | 0.242019384 | count | 1 |
| GTPBP8     | 0.1962893 | 0.2454025 | 0.7999 | 0.424    | 0.242043438 | count | 1 |
| TOR2A      | 0.1791989 | 0.1346733 | 1.3306 | 0.183    | 0.242195219 | count | 1 |
| ZNF766     | 0.2303318 | 0.3059292 | 0.7529 | 0.452    | 0.242210027 | count | 1 |
| INTS8      | 0.2568605 | 0.2902909 | 0.8848 | 0.376    | 0.242333081 | count | 1 |
| IPMK       | 0.1811832 | 0.1464351 | 1.2373 | 0.216    | 0.242494431 | count | 1 |
| HEG1       | 0.348907  | 0.419155  | 0.8324 | 0.405    | 0.242582968 | count | 1 |
| SMAP2      | 0.1705945 | 0.0505404 | 3.3754 | 0.000749 | 0.24266958  | count | 1 |
| SPINDOC    | 0.3350587 | 0.4047944 | 0.8277 | 0.408    | 0.242945896 | count | 1 |
| CHMP4B     | 0.1739885 | 0.1073319 | 1.621  | 0.105    | 0.242978727 | count | 1 |
| FUNDC1     | 0.2085081 | 0.2173056 | 0.9595 | 0.337    | 0.243043595 | count | 1 |
| AREL1      | 0.2757544 | 0.5248469 | 0.5254 | 0.599    | 0.243055759 | count | 1 |
| FARSB      | 0.2330924 | 0.3781228 | 0.6164 | 0.538    | 0.243112218 | count | 1 |
| MPRIP      | 0.2051184 | 0.3174221 | 0.6462 | 0.518    | 0.243142167 | count | 1 |
| LDHB       | 0.1726371 | 0.0807457 | 2.138  | 0.0326   | 0.243147995 | count | 1 |
| ANKRD12    | 0.1711515 | 0.0815554 | 2.0986 | 0.036    | 0.243204744 | count | 1 |
| CPT1A      | 0.1880782 | 0.2277823 | 0.8257 | 0.409    | 0.243310658 | count | 1 |
| PRKAB2     | 0.4131182 | 0.4258399 | 0.9701 | 0.332    | 0.24333336  | count | 1 |
| GALNT3     | 0.2579581 | 0.3121129 | 0.8265 | 0.409    | 0.243396541 | count | 1 |
| ZNF765     | 0.2333672 | 0.6277577 | 0.3717 | 0.71     | 0.243404464 | count | 1 |
| ZNF814     | 0.2510103 | 0.3822223 | 0.6567 | 0.511    | 0.243407351 | count | 1 |
| ABR        | 0.1956592 | 0.2099148 | 0.9321 | 0.351    | 0.243527194 | count | 1 |
| AL121983.1 | 0.4459096 | 0.5682673 | 0.7847 | 0.433    | 0.24367668  | count | 1 |
| SERPINB1   | 0.1701758 | 0.0526785 | 3.2305 | 0.00125  | 0.243700915 | count | 1 |
| FAP        | 0.4882519 | 1.356081  | 0.36   | 0.719    | 0.243799488 | count | 1 |
| AC092171.5 | 0.4882519 | 0.7747852 | 0.6302 | 0.529    | 0.243799488 | count | 1 |
| ADCY4      | 0.4882519 | 0.7090909 | 0.6886 | 0.491    | 0.243799488 | count | 1 |
| AC007114.2 | 0.4882519 | 0.7056005 | 0.692  | 0.489    | 0.243799488 | count | 1 |
| RPS6KC1    | 0.2084403 | 0.2847394 | 0.732  | 0.464    | 0.243846703 | count | 1 |
| PIK3CA     | 0.1913776 | 0.2204645 | 0.8681 | 0.385    | 0.243857756 | count | 1 |
| CRABP2     | 0.4462261 | 1.1152982 | 0.4001 | 0.689    | 0.243863354 | count | 1 |
| ADIPOR2    | 0.1864613 | 0.1760465 | 1.0592 | 0.29     | 0.243914084 | count | 1 |
| ALDH3B1    | 0.1855676 | 0.1804054 | 1.0286 | 0.304    | 0.243983427 | count | 1 |
| EPHB3      | 1.649396  | 0.7946876 | 2.0755 | 0.038    | 0.244073228 | count | 1 |
| AC010491.1 | 1.649396  | 1.291076  | 1.2775 | 0.202    | 0.244073228 | count | 1 |
| AC022364.1 | 1.649396  | 0.7946876 | 2.0755 | 0.038    | 0.244073228 | count | 1 |
| PUS3       | 0.2118872 | 0.3697402 | 0.5731 | 0.567    | 0.244164583 | count | 1 |
| SPATA33    | 0.2383807 | 0.4148576 | 0.5746 | 0.566    | 0.244236884 | count | 1 |
| MRFAP1     | 0.1748228 | 0.0772756 | 2.2623 | 0.0238   | 0.244267966 | count | 1 |
| AC093673.1 | 0.1849897 | 0.2079521 | 0.8896 | 0.374    | 0.244342917 | count | 1 |
| LINC02361  | 1.005158  | 0.820863  | 1.2245 | 0.221    | 0.244455086 | count | 1 |
| CXorf21    | 0.1743471 | 0.1310683 | 1.3302 | 0.184    | 0.244598521 | count | 1 |
| PDCD4      | 0.1794328 | 0.114007  | 1.5739 | 0.116    | 0.244792721 | count | 1 |

|            |           |           |        |          |             |       |   |
|------------|-----------|-----------|--------|----------|-------------|-------|---|
| RINL       | 0.2437592 | 0.3832865 | 0.636  | 0.525    | 0.244808702 | count | 1 |
| C1orf112   | 0.2973093 | 0.4559114 | 0.6521 | 0.514    | 0.244947581 | count | 1 |
| TRMO       | 0.2220408 | 0.303085  | 0.7326 | 0.464    | 0.244966639 | count | 1 |
| CTR9       | 0.1861847 | 0.1736545 | 1.0722 | 0.284    | 0.24529671  | count | 1 |
| PDHB       | 0.1787357 | 0.1292907 | 1.3824 | 0.167    | 0.245785581 | count | 1 |
| PLAGL1     | 0.1950608 | 0.1915607 | 1.0183 | 0.309    | 0.245915971 | count | 1 |
| ABCF3      | 0.2081365 | 0.2813049 | 0.7399 | 0.459    | 0.2459779   | count | 1 |
| STX5       | 0.1894476 | 0.1576325 | 1.2018 | 0.23     | 0.245999807 | count | 1 |
| HADH       | 0.1903914 | 0.2621001 | 0.7264 | 0.468    | 0.246083873 | count | 1 |
| ZNF207     | 0.176784  | 0.1077472 | 1.6407 | 0.101    | 0.246210819 | count | 1 |
| SPG7       | 0.1857917 | 0.1684128 | 1.1032 | 0.27     | 0.246292129 | count | 1 |
| OLA1       | 0.1795415 | 0.1176459 | 1.5261 | 0.127    | 0.246521232 | count | 1 |
| ARL16      | 0.2176947 | 0.2308089 | 0.9432 | 0.346    | 0.246544584 | count | 1 |
| AC087500.1 | 0.4937564 | 0.6357882 | 0.7766 | 0.437    | 0.246798145 | count | 1 |
| SEC24C     | 0.2236771 | 0.3161585 | 0.7075 | 0.479    | 0.246800804 | count | 1 |
| INTS12     | 0.2117117 | 0.2760395 | 0.767  | 0.443    | 0.246824167 | count | 1 |
| PANK1      | 0.6362018 | 0.6749432 | 0.9426 | 0.346    | 0.24705879  | count | 1 |
| ZNF470     | 0.6362018 | 0.7966112 | 0.7986 | 0.425    | 0.24705879  | count | 1 |
| ANKS3      | 0.2701007 | 0.4898162 | 0.5514 | 0.581    | 0.247066046 | count | 1 |
| U2AF1      | 1.014261  | 0.4501258 | 2.2533 | 0.0243   | 0.247078026 | count | 1 |
| EFEMP2     | 0.2802742 | 0.5012149 | 0.5592 | 0.576    | 0.247170062 | count | 1 |
| MSL1       | 0.193966  | 0.1810645 | 1.0713 | 0.284    | 0.24717885  | count | 1 |
| ZNRF2      | 0.1857484 | 0.1430703 | 1.2983 | 0.194    | 0.247182887 | count | 1 |
| DENND6B    | 0.1934363 | 0.1931167 | 1.0017 | 0.317    | 0.247391874 | count | 1 |
| SYNGR1     | 0.187914  | 0.1650231 | 1.1387 | 0.255    | 0.247421393 | count | 1 |
| GPN3       | 0.1804508 | 0.1270683 | 1.4201 | 0.156    | 0.247525323 | count | 1 |
| CERS6      | 0.2003592 | 0.1685419 | 1.1888 | 0.235    | 0.247592117 | count | 1 |
| PGM2       | 0.1845375 | 0.1775831 | 1.0392 | 0.299    | 0.247648601 | count | 1 |
| ABCB7      | 0.2020435 | 0.2255745 | 0.8957 | 0.371    | 0.247663566 | count | 1 |
| BTD        | 0.2116862 | 0.2539986 | 0.8334 | 0.405    | 0.247690364 | count | 1 |
| NOD1       | 0.3413359 | 0.7879504 | 0.4332 | 0.665    | 0.247725758 | count | 1 |
| RBBP6      | 0.1788813 | 0.1149265 | 1.5565 | 0.12     | 0.247830683 | count | 1 |
| ZBED6      | 0.7713801 | 0.836741  | 0.9219 | 0.357    | 0.247951716 | count | 1 |
| SLC23A3    | 0.7713801 | 1.0942259 | 0.705  | 0.481    | 0.247951716 | count | 1 |
| FAM83H     | 0.7713801 | 0.836741  | 0.9219 | 0.357    | 0.247951716 | count | 1 |
| KLLN       | 0.7713801 | 0.836741  | 0.9219 | 0.357    | 0.247951716 | count | 1 |
| ITPK1-AS1  | 0.7713801 | 1.0540588 | 0.7318 | 0.464    | 0.247951716 | count | 1 |
| OMA1       | 0.2086744 | 0.331712  | 0.6291 | 0.529    | 0.24816737  | count | 1 |
| RANBP3     | 0.2277159 | 0.2456382 | 0.927  | 0.354    | 0.248261829 | count | 1 |
| COMMD6     | 0.1733434 | 0.0482725 | 3.5909 | 0.000336 | 0.2482947   | count | 1 |
| RFC2       | 0.1961276 | 0.1865158 | 1.0515 | 0.293    | 0.248326282 | count | 1 |
| PTCD2      | 0.7724033 | 0.8550775 | 0.9033 | 0.366    | 0.248330045 | count | 1 |
| AP001157.1 | 0.3741418 | 0.6162987 | 0.6071 | 0.544    | 0.248342429 | count | 1 |
| KLK1       | 0.7728975 | 0.6260772 | 1.2345 | 0.217    | 0.248512813 | count | 1 |
| AC093525.6 | 0.6396553 | 0.7389513 | 0.8656 | 0.387    | 0.24856679  | count | 1 |

|            |           |           |        |          |             |       |          |
|------------|-----------|-----------|--------|----------|-------------|-------|----------|
| ZNF699     | 0.2878776 | 0.5522446 | 0.5213 | 0.602    | 0.248744626 | count | 1        |
| ALKBH3     | 0.2106261 | 0.3060657 | 0.6882 | 0.491    | 0.248954327 | count | 1        |
| NFYC       | 0.1867293 | 0.1835804 | 1.0172 | 0.309    | 0.249002264 | count | 1        |
| NCOA7      | 0.1890359 | 0.1778549 | 1.0629 | 0.288    | 0.249072037 | count | 1        |
| MIOS       | 0.1967802 | 0.2275091 | 0.8649 | 0.387    | 0.249158657 | count | 1        |
| TRIM41     | 0.264038  | 0.4242607 | 0.6223 | 0.534    | 0.249291206 | count | 1        |
| RTL8A      | 0.1935259 | 0.1975878 | 0.9794 | 0.327    | 0.249412194 | count | 1        |
| CABIN1     | 0.2030956 | 0.276303  | 0.735  | 0.462    | 0.24949319  | count | 1        |
| RRP12      | 0.2149024 | 0.2358957 | 0.911  | 0.362    | 0.24965274  | count | 1        |
| CTBP1      | 0.1922655 | 0.1751485 | 1.0977 | 0.272    | 0.249680421 | count | 1        |
| RPS14      | 0.173221  | 0.0226129 | 7.6603 | 2.65E-14 | 0.249705336 | count | 6.40E-10 |
| THADA      | 0.2374508 | 0.3759193 | 0.6317 | 0.528    | 0.249842384 | count | 1        |
| LRRRC8C    | 0.2142803 | 0.2322159 | 0.9228 | 0.356    | 0.2498563   | count | 1        |
| PITPNM1    | 0.2323315 | 0.3248707 | 0.7152 | 0.475    | 0.249993848 | count | 1        |
| AC020910.4 | 0.4998558 | 0.5652931 | 0.8842 | 0.377    | 0.25012662  | count | 1        |
| AC024909.2 | 0.5586201 | 0.6012222 | 0.9291 | 0.353    | 0.25019844  | count | 1        |
| PAAF1      | 0.2181687 | 0.3261293 | 0.669  | 0.504    | 0.250451906 | count | 1        |
| ZNF362     | 0.2421872 | 0.2943207 | 0.8229 | 0.411    | 0.250558141 | count | 1        |
| DERA       | 0.1835645 | 0.1354136 | 1.3556 | 0.175    | 0.250632259 | count | 1        |
| BACE1      | 0.3040104 | 0.4569405 | 0.6653 | 0.506    | 0.250683213 | count | 1        |
| CARM1      | 0.2175679 | 0.2554588 | 0.8517 | 0.394    | 0.250797967 | count | 1        |
| TBC1D4     | 0.2969838 | 0.3063038 | 0.9696 | 0.332    | 0.250991359 | count | 1        |
| HMOX2      | 0.1906135 | 0.1836109 | 1.0381 | 0.299    | 0.25116119  | count | 1        |
| ZBTB43     | 0.189111  | 0.2067592 | 0.9146 | 0.36     | 0.251274791 | count | 1        |
| RCBTB1     | 0.6458578 | 0.5720957 | 1.1289 | 0.259    | 0.25127897  | count | 1        |
| RBM18      | 0.1896184 | 0.2267657 | 0.8362 | 0.403    | 0.251388854 | count | 1        |
| CSK        | 0.180746  | 0.0971257 | 1.861  | 0.0629   | 0.251401878 | count | 1        |
| RPS3A      | 0.1745275 | 0.0244169 | 7.1478 | 1.16E-12 | 0.251570633 | count | 2.80E-08 |
| TTC31      | 0.253141  | 0.3823461 | 0.6621 | 0.508    | 0.251626668 | count | 1        |
| OGFOD2     | 0.400127  | 0.4111063 | 0.9733 | 0.331    | 0.251677466 | count | 1        |
| RPL29      | 0.1746835 | 0.0250141 | 6.9834 | 3.70E-12 | 0.251750746 | count | 8.93E-08 |
| CITED2     | 0.1771284 | 0.1110548 | 1.595  | 0.111    | 0.251842744 | count | 1        |
| UBE2S      | 0.1780306 | 0.084403  | 2.1093 | 0.035    | 0.252260303 | count | 1        |
| NES        | 0.7831002 | 0.8008273 | 0.9779 | 0.328    | 0.252291529 | count | 1        |
| CAD        | 0.7831002 | 0.609526  | 1.2848 | 0.199    | 0.252291529 | count | 1        |
| GCNA       | 0.6484533 | 0.5981101 | 1.0842 | 0.278    | 0.252415351 | count | 1        |
| RHOBTB3    | 0.2043032 | 0.2088088 | 0.9784 | 0.328    | 0.252509483 | count | 1        |
| SUSD1      | 0.226318  | 0.2702555 | 0.8374 | 0.402    | 0.252586952 | count | 1        |
| LLPH       | 0.1839432 | 0.1454953 | 1.2643 | 0.206    | 0.252630785 | count | 1        |
| VIPAS39    | 0.3242169 | 0.372601  | 0.8701 | 0.384    | 0.252654206 | count | 1        |
| SF1        | 0.1786793 | 0.0781266 | 2.287  | 0.0223   | 0.252668941 | count | 1        |
| GTF3C2     | 0.2637766 | 0.3075373 | 0.8577 | 0.391    | 0.2526713   | count | 1        |
| BOLA1      | 0.2638304 | 0.3812662 | 0.692  | 0.489    | 0.252724202 | count | 1        |
| SNRNP70    | 0.1828156 | 0.1018889 | 1.7943 | 0.0729   | 0.252878883 | count | 1        |
| SECISBP2L  | 0.193568  | 0.1826515 | 1.0598 | 0.289    | 0.253065626 | count | 1        |

|            |           |           |        |        |             |       |   |
|------------|-----------|-----------|--------|--------|-------------|-------|---|
| IL6ST      | 0.1917205 | 0.1625111 | 1.1797 | 0.238  | 0.253118155 | count | 1 |
| NDRG3      | 0.2130375 | 0.2949628 | 0.7223 | 0.47   | 0.253415358 | count | 1 |
| GEMIN5     | 0.3488494 | 0.452374  | 0.7712 | 0.441  | 0.253456964 | count | 1 |
| KCTD2      | 0.3637369 | 0.499755  | 0.7278 | 0.467  | 0.253464378 | count | 1 |
| AC109630.1 | 0.3815175 | 0.565399  | 0.6748 | 0.5    | 0.253532177 | count | 1 |
| DOCK11     | 0.196983  | 0.146345  | 1.346  | 0.178  | 0.253633862 | count | 1 |
| LUC7L3     | 0.1815522 | 0.0964034 | 1.8833 | 0.0598 | 0.253645244 | count | 1 |
| 7-Mar      | 0.1883973 | 0.1225759 | 1.537  | 0.124  | 0.253759046 | count | 1 |
| ALDH16A1   | 0.2009848 | 0.2028423 | 0.9908 | 0.322  | 0.253809567 | count | 1 |
| IST1       | 0.1886073 | 0.1490921 | 1.265  | 0.206  | 0.253848244 | count | 1 |
| MRPS31     | 0.2013326 | 0.1863633 | 1.0803 | 0.28   | 0.253884261 | count | 1 |
| MVK        | 0.5067329 | 0.5095357 | 0.9945 | 0.32   | 0.253886643 | count | 1 |
| PIK3CD-AS1 | 1.7065036 | 1.337144  | 1.2762 | 0.202  | 0.253960544 | count | 1 |
| WNT6       | 1.7065036 | 1.064872  | 1.6025 | 0.109  | 0.253960544 | count | 1 |
| AC024060.1 | 1.7065036 | 1.337144  | 1.2762 | 0.202  | 0.253960544 | count | 1 |
| ZNF713     | 1.7065036 | 1.153889  | 1.4789 | 0.139  | 0.253960544 | count | 1 |
| RAB39B     | 1.7065036 | 1.064872  | 1.6025 | 0.109  | 0.253960544 | count | 1 |
| SPATA41    | 1.7065036 | 1.337144  | 1.2762 | 0.202  | 0.253960544 | count | 1 |
| ZSWIM3     | 1.7065036 | 1.064872  | 1.6025 | 0.109  | 0.253960544 | count | 1 |
| SSC5D      | 1.7065036 | 1.337144  | 1.2762 | 0.202  | 0.253960544 | count | 1 |
| VPS54      | 0.2277968 | 0.3506297 | 0.6497 | 0.516  | 0.254263207 | count | 1 |
| ROCK1      | 0.1797879 | 0.0733703 | 2.4504 | 0.0143 | 0.254419522 | count | 1 |
| CCL5       | 0.1968243 | 0.3016872 | 0.6524 | 0.514  | 0.254450582 | count | 1 |
| DHRS4L2    | 0.1838729 | 0.0976301 | 1.8834 | 0.0598 | 0.254861064 | count | 1 |
| EFR3A      | 0.1860949 | 0.1655783 | 1.1239 | 0.261  | 0.254969326 | count | 1 |
| FAM120A    | 0.1891592 | 0.1269515 | 1.49   | 0.136  | 0.254980376 | count | 1 |
| PRKCSH     | 0.19342   | 0.1555294 | 1.2436 | 0.214  | 0.255045416 | count | 1 |
| CRYZL1     | 0.2014013 | 0.2313534 | 0.8705 | 0.384  | 0.255053799 | count | 1 |
| SRC        | 0.2443737 | 0.3391491 | 0.7205 | 0.471  | 0.255119559 | count | 1 |
| ADCK5      | 0.31775   | 0.4369732 | 0.7272 | 0.467  | 0.255212741 | count | 1 |
| ZNF324     | 0.2489074 | 0.5321389 | 0.4677 | 0.64   | 0.255257342 | count | 1 |
| NEMF       | 0.1884294 | 0.1260992 | 1.4943 | 0.135  | 0.255302591 | count | 1 |
| TBC1D15    | 0.1968239 | 0.136169  | 1.4454 | 0.148  | 0.25540618  | count | 1 |
| DCTN1      | 0.2029744 | 0.2287193 | 0.8874 | 0.375  | 0.255592381 | count | 1 |
| WSB1       | 0.1804151 | 0.0702896 | 2.5667 | 0.0103 | 0.255608935 | count | 1 |
| CCDC130    | 0.1991623 | 0.2013281 | 0.9892 | 0.323  | 0.255634508 | count | 1 |
| CEP78      | 0.3845983 | 0.3314519 | 1.1603 | 0.246  | 0.255702918 | count | 1 |
| ATL2       | 0.2543868 | 0.426126  | 0.597  | 0.551  | 0.255731054 | count | 1 |
| NAE1       | 0.2061172 | 0.2234076 | 0.9226 | 0.356  | 0.255735217 | count | 1 |
| NRROS      | 0.2042842 | 0.204775  | 0.9976 | 0.319  | 0.256064353 | count | 1 |
| TTC9C      | 0.2134142 | 0.2256356 | 0.9458 | 0.344  | 0.256077149 | count | 1 |
| AC055822.1 | 0.7934483 | 0.9979214 | 0.7951 | 0.427  | 0.256134536 | count | 1 |
| AC024940.1 | 0.7934483 | 0.7452926 | 1.0646 | 0.287  | 0.256134536 | count | 1 |
| STXBP3     | 0.1885384 | 0.150776  | 1.2505 | 0.211  | 0.256222563 | count | 1 |
| KLHL17     | 0.3286089 | 1.0991073 | 0.299  | 0.765  | 0.256229566 | count | 1 |

|             |           |           |        |          |             |       |          |
|-------------|-----------|-----------|--------|----------|-------------|-------|----------|
| POLA1       | 0.2962468 | 0.428051  | 0.6921 | 0.489    | 0.256232509 | count | 1        |
| SLC30A5     | 0.2222306 | 0.2440931 | 0.9104 | 0.363    | 0.256245709 | count | 1        |
| GABPA       | 0.2234519 | 0.2815777 | 0.7936 | 0.428    | 0.256600913 | count | 1        |
| AKAP8       | 0.2061738 | 0.2229841 | 0.9246 | 0.355    | 0.256727206 | count | 1        |
| MAPK8       | 0.2090992 | 0.2821729 | 0.741  | 0.459    | 0.256938075 | count | 1        |
| CHST13      | 0.2257603 | 0.2555776 | 0.8833 | 0.377    | 0.257011776 | count | 1        |
| EIF3E       | 0.180415  | 0.0495319 | 3.6424 | 0.000276 | 0.257111553 | count | 1        |
| RCOR1       | 0.1876814 | 0.1220432 | 1.5378 | 0.124    | 0.257204075 | count | 1        |
| MIR222HG    | 0.2270185 | 0.4382658 | 0.518  | 0.605    | 0.257260438 | count | 1        |
| RPL6        | 0.1785511 | 0.0245495 | 7.2731 | 4.70E-13 | 0.257313977 | count | 1.13E-08 |
| AL159163.1  | 0.3042496 | 0.5663457 | 0.5372 | 0.591    | 0.257362151 | count | 1        |
| ACADM       | 0.1909436 | 0.1632046 | 1.17   | 0.242    | 0.257394901 | count | 1        |
| HHLA3       | 0.256026  | 0.3664569 | 0.6987 | 0.485    | 0.257417385 | count | 1        |
| PUM1        | 0.1967532 | 0.1663798 | 1.1826 | 0.237    | 0.25745267  | count | 1        |
| TMEM167B    | 0.194302  | 0.1706682 | 1.1385 | 0.255    | 0.257628058 | count | 1        |
| LINC00656   | 1.7283342 | 0.9429855 | 1.8328 | 0.0669   | 0.257729281 | count | 1        |
| VPS37A      | 0.2018276 | 0.18597   | 1.0853 | 0.278    | 0.257894647 | count | 1        |
| COPZ2       | 0.2656227 | 0.3635087 | 0.7307 | 0.465    | 0.257948589 | count | 1        |
| AL356512.1  | 0.3699008 | 0.5424604 | 0.6819 | 0.495    | 0.25799938  | count | 1        |
| INTS13      | 0.2982924 | 0.3958626 | 0.7535 | 0.451    | 0.258064681 | count | 1        |
| ABRAXAS1    | 0.2175708 | 0.2705705 | 0.8041 | 0.421    | 0.258077243 | count | 1        |
| TRIM52      | 0.2247712 | 0.3164477 | 0.7103 | 0.478    | 0.258136982 | count | 1        |
| TOMM5       | 0.1926737 | 0.1844178 | 1.0448 | 0.296    | 0.258168416 | count | 1        |
| KIAA0040    | 0.1976514 | 0.1935462 | 1.0212 | 0.307    | 0.258231089 | count | 1        |
| AC245060.5  | 0.2626623 | 0.5296445 | 0.4959 | 0.62     | 0.258244279 | count | 1        |
| CLCN3       | 0.2023605 | 0.1861595 | 1.087  | 0.277    | 0.258269797 | count | 1        |
| SLC35A2     | 0.2141056 | 0.2685162 | 0.7974 | 0.425    | 0.258294821 | count | 1        |
| IL16        | 0.1947028 | 0.1524935 | 1.2768 | 0.202    | 0.258454537 | count | 1        |
| CTSG        | 0.4103283 | 0.9478798 | 0.4329 | 0.665    | 0.258522707 | count | 1        |
| TEX22       | 0.4103283 | 0.6535561 | 0.6278 | 0.53     | 0.258522707 | count | 1        |
| HDAC8       | 0.2160414 | 0.2732592 | 0.7906 | 0.429    | 0.258540067 | count | 1        |
| LINC01410   | 0.2699101 | 0.4052905 | 0.666  | 0.505    | 0.258706399 | count | 1        |
| RIMS3       | 1.054508  | 0.9979126 | 1.0567 | 0.291    | 0.258731422 | count | 1        |
| PRKAR2A-AS1 | 1.054508  | 1.041727  | 1.0123 | 0.312    | 0.258731422 | count | 1        |
| TF          | 1.054508  | 1.2816545 | 0.8228 | 0.411    | 0.258731422 | count | 1        |
| ADCY2       | 1.054508  | 1.1781147 | 0.8951 | 0.371    | 0.258731422 | count | 1        |
| TSLP        | 1.054508  | 0.9663408 | 1.0912 | 0.275    | 0.258731422 | count | 1        |
| AC091959.3  | 1.054508  | 0.9189394 | 1.1475 | 0.251    | 0.258731422 | count | 1        |
| AL137003.2  | 1.054508  | 0.9663408 | 1.0912 | 0.275    | 0.258731422 | count | 1        |
| AC004839.1  | 1.054508  | 0.9979126 | 1.0567 | 0.291    | 0.258731422 | count | 1        |
| MYBL1       | 1.054508  | 1.001006  | 1.0534 | 0.292    | 0.258731422 | count | 1        |
| RFX3-AS1    | 1.054508  | 1.041727  | 1.0123 | 0.312    | 0.258731422 | count | 1        |
| FZD8        | 1.054508  | 0.8689562 | 1.2135 | 0.225    | 0.258731422 | count | 1        |
| CAPS2       | 1.054508  | 1.041727  | 1.0123 | 0.312    | 0.258731422 | count | 1        |
| DDTL        | 1.054508  | 0.9663408 | 1.0912 | 0.275    | 0.258731422 | count | 1        |

|            |           |           |        |          |             |       |           |
|------------|-----------|-----------|--------|----------|-------------|-------|-----------|
| MRPL49     | 0.2330724 | 0.2614263 | 0.8915 | 0.373    | 0.258819914 | count | 1         |
| CDK18      | 0.4715553 | 0.5265296 | 0.8956 | 0.371    | 0.258858905 | count | 1         |
| LMBR1      | 0.3891381 | 0.3685154 | 1.056  | 0.291    | 0.258904889 | count | 1         |
| TMEM43     | 0.2015324 | 0.2385246 | 0.8449 | 0.398    | 0.258979833 | count | 1         |
| AMMECR1L   | 0.411106  | 0.5370285 | 0.7655 | 0.444    | 0.259045332 | count | 1         |
| RCE1       | 0.2023184 | 0.2528311 | 0.8002 | 0.424    | 0.259130377 | count | 1         |
| KMT2C      | 0.1883969 | 0.1153326 | 1.6335 | 0.102    | 0.259154348 | count | 1         |
| CSF2RA     | 0.1856743 | 0.1089947 | 1.7035 | 0.0886   | 0.259217092 | count | 1         |
| FURIN      | 0.2136152 | 0.2248559 | 0.95   | 0.342    | 0.259629187 | count | 1         |
| TMOD2      | 0.2175668 | 0.2053845 | 1.0593 | 0.29     | 0.259636475 | count | 1         |
| C11orf71   | 0.2210431 | 0.2972452 | 0.7436 | 0.457    | 0.259683675 | count | 1         |
| FBXO21     | 0.2128863 | 0.2305972 | 0.9232 | 0.356    | 0.259938359 | count | 1         |
| AKT1       | 0.1914089 | 0.1348784 | 1.4191 | 0.156    | 0.259986091 | count | 1         |
| TDRD9      | 1.741681  | 0.7671703 | 2.2703 | 0.0233   | 0.26002984  | count | 1         |
| MDK        | 0.3154734 | 0.5050167 | 0.6247 | 0.532    | 0.260514372 | count | 1         |
| WDSUB1     | 0.2347381 | 0.286004  | 0.8208 | 0.412    | 0.260699822 | count | 1         |
| CSAD       | 0.2100932 | 0.3044658 | 0.69   | 0.49     | 0.260712446 | count | 1         |
| ATP7A      | 0.2235651 | 0.2856412 | 0.7827 | 0.434    | 0.260823414 | count | 1         |
| WDR61      | 0.1941106 | 0.1417651 | 1.3692 | 0.171    | 0.260976191 | count | 1         |
| TMEM214    | 0.2315556 | 0.3911433 | 0.592  | 0.554    | 0.261207988 | count | 1         |
| AC100786.1 | 0.4758569 | 0.5874035 | 0.8101 | 0.418    | 0.261416371 | count | 1         |
| TMCO3      | 0.2028216 | 0.2383816 | 0.8508 | 0.395    | 0.261471295 | count | 1         |
| RPL22      | 0.1816216 | 0.0280561 | 6.4735 | 1.15E-10 | 0.261502932 | count | 2.77E-06  |
| TCP11L1    | 0.2446438 | 0.2963352 | 0.8256 | 0.409    | 0.261598176 | count | 1         |
| PUS1       | 0.2693892 | 0.3553834 | 0.758  | 0.449    | 0.261702711 | count | 1         |
| DDX20      | 0.2466142 | 0.289727  | 0.8512 | 0.395    | 0.261755879 | count | 1         |
| SKI        | 0.2260599 | 0.2518934 | 0.8974 | 0.37     | 0.261771175 | count | 1         |
| UBL7-AS1   | 0.2169651 | 0.2769908 | 0.7833 | 0.434    | 0.261781668 | count | 1         |
| PYCARD     | 0.1825363 | 0.0421312 | 4.3326 | 1.53E-05 | 0.261873714 | count | 0.3620898 |
| ZNF480     | 0.2106485 | 0.2776956 | 0.7586 | 0.448    | 0.261883057 | count | 1         |
| ARL2BP     | 0.1919684 | 0.14521   | 1.322  | 0.186    | 0.261949075 | count | 1         |
| PIP4P1     | 0.192752  | 0.1208937 | 1.5944 | 0.111    | 0.261968352 | count | 1         |
| POR        | 0.1922429 | 0.1778673 | 1.0808 | 0.28     | 0.262058302 | count | 1         |
| PSRC1      | 0.3259354 | 0.5962629 | 0.5466 | 0.585    | 0.26206765  | count | 1         |
| SHQ1       | 0.3259354 | 0.5569402 | 0.5852 | 0.558    | 0.26206765  | count | 1         |
| RP9        | 0.2027002 | 0.2053767 | 0.987  | 0.324    | 0.262095538 | count | 1         |
| FBXO25     | 0.2146417 | 0.2583478 | 0.8308 | 0.406    | 0.262103176 | count | 1         |
| SLC25A6    | 0.1824321 | 0.0379316 | 4.8095 | 1.60E-06 | 0.262167091 | count | 0.0380768 |
| LINC01772  | 0.443002  | 0.6296983 | 0.7035 | 0.482    | 0.262259879 | count | 1         |
| GRPEL2     | 0.443002  | 0.6356669 | 0.6969 | 0.486    | 0.262259879 | count | 1         |
| DIRC3      | 1.75609   | 1.12861   | 1.556  | 0.12     | 0.262510164 | count | 1         |
| FAM124B    | 1.75609   | 1.274602  | 1.3778 | 0.168    | 0.262510164 | count | 1         |
| AC116563.1 | 1.75609   | 1.328848  | 1.3215 | 0.186    | 0.262510164 | count | 1         |
| SCNN1A     | 1.75609   | 1.328848  | 1.3215 | 0.186    | 0.262510164 | count | 1         |
| CGNL1      | 1.75609   | 0.9956429 | 1.7638 | 0.0779   | 0.262510164 | count | 1         |

|            |           |           |        |          |             |       |          |
|------------|-----------|-----------|--------|----------|-------------|-------|----------|
| AC012173.1 | 1.75609   | 1.572253  | 1.1169 | 0.264    | 0.262510164 | count | 1        |
| AC099518.1 | 1.75609   | 0.921996  | 1.9047 | 0.0569   | 0.262510164 | count | 1        |
| PRDX2      | 0.1881675 | 0.1288194 | 1.4607 | 0.144    | 0.262542176 | count | 1        |
| PMP22      | 0.1875707 | 0.1061795 | 1.7665 | 0.0774   | 0.262558557 | count | 1        |
| RAB12      | 0.2155052 | 0.2422558 | 0.8896 | 0.374    | 0.262566745 | count | 1        |
| RHO        | 0.2025135 | 0.1708576 | 1.1853 | 0.236    | 0.262595396 | count | 1        |
| CLINT1     | 0.1865697 | 0.0891514 | 2.0927 | 0.0365   | 0.26262386  | count | 1        |
| IL3RA      | 0.25594   | 0.3731235 | 0.6859 | 0.493    | 0.262629805 | count | 1        |
| EXOSC1     | 0.1954978 | 0.1593214 | 1.2271 | 0.22     | 0.262636057 | count | 1        |
| CSNK1G3    | 0.2065348 | 0.2229961 | 0.9262 | 0.354    | 0.262649537 | count | 1        |
| GRIPAP1    | 0.1958746 | 0.1892041 | 1.0353 | 0.301    | 0.262703576 | count | 1        |
| MRPL34     | 0.1871603 | 0.0861251 | 2.1731 | 0.0299   | 0.262916126 | count | 1        |
| NFATC2IP   | 0.2060477 | 0.1985725 | 1.0376 | 0.3      | 0.263009711 | count | 1        |
| ARMC9      | 0.8120867 | 0.6655467 | 1.2202 | 0.223    | 0.263082318 | count | 1        |
| COPS7B     | 0.2321067 | 0.3291255 | 0.7052 | 0.481    | 0.263113207 | count | 1        |
| VCPKMT     | 0.2211307 | 0.4427569 | 0.4994 | 0.618    | 0.26315575  | count | 1        |
| MYO9A      | 0.2332667 | 0.2588023 | 0.9013 | 0.368    | 0.263167842 | count | 1        |
| POLR1D     | 0.1863952 | 0.0695941 | 2.6783 | 0.00745  | 0.263240933 | count | 1        |
| TMEM128    | 0.2384229 | 0.2493421 | 0.9562 | 0.339    | 0.26334693  | count | 1        |
| FAM57A     | 0.3620696 | 0.6813235 | 0.5314 | 0.595    | 0.263567165 | count | 1        |
| APBA1      | 0.6738629 | 0.6249822 | 1.0782 | 0.281    | 0.263584861 | count | 1        |
| OGA        | 0.194071  | 0.1696668 | 1.1438 | 0.253    | 0.263990881 | count | 1        |
| NMNAT3     | 0.3494825 | 0.3790146 | 0.9221 | 0.357    | 0.263995313 | count | 1        |
| MT-CO1     | 0.1830787 | 0.0238961 | 7.6615 | 2.63E-14 | 0.264064015 | count | 6.36E-10 |
| IRF9       | 0.2082156 | 0.2537717 | 0.8205 | 0.412    | 0.264107948 | count | 1        |
| TIFA       | 0.2226914 | 0.2278587 | 0.9773 | 0.329    | 0.264223979 | count | 1        |
| TMEM9      | 0.2008326 | 0.1884514 | 1.0657 | 0.287    | 0.264343612 | count | 1        |
| LTV1       | 0.2043469 | 0.2283173 | 0.895  | 0.371    | 0.264492346 | count | 1        |
| INPP5A     | 0.3127483 | 0.4467046 | 0.7001 | 0.484    | 0.264826511 | count | 1        |
| FCF1       | 0.2364115 | 0.2549332 | 0.9273 | 0.354    | 0.265427264 | count | 1        |
| PLEKHO1    | 0.1865721 | 0.0744877 | 2.5047 | 0.0123   | 0.265457289 | count | 1        |
| AC007384.1 | 0.2639612 | 0.4687308 | 0.5631 | 0.573    | 0.26558703  | count | 1        |
| BORCS8     | 0.1995431 | 0.1520901 | 1.312  | 0.19     | 0.265764537 | count | 1        |
| TCF4       | 0.1988024 | 0.1547474 | 1.2847 | 0.199    | 0.265937145 | count | 1        |
| CNOT8      | 0.2088485 | 0.1763446 | 1.1843 | 0.236    | 0.265952571 | count | 1        |
| RSL24D1    | 0.1887087 | 0.0802815 | 2.3506 | 0.0188   | 0.266258556 | count | 1        |
| LPP-AS2    | 0.4493565 | 0.689203  | 0.652  | 0.514    | 0.266304741 | count | 1        |
| FIG4       | 0.225864  | 0.2438973 | 0.9261 | 0.355    | 0.266316597 | count | 1        |
| SELENOP    | 0.1854146 | 0.0896147 | 2.069  | 0.0386   | 0.266387437 | count | 1        |
| SERPINA1   | 0.1859714 | 0.053697  | 3.4634 | 0.000543 | 0.266464701 | count | 1        |
| BCL2L12    | 0.216477  | 0.2289781 | 0.9454 | 0.345    | 0.266639794 | count | 1        |
| BCL2A1     | 0.1857251 | 0.0658728 | 2.8195 | 0.00485  | 0.266640397 | count | 1        |
| OSCAR      | 0.1957044 | 0.1319391 | 1.4833 | 0.138    | 0.266861042 | count | 1        |
| NAGA       | 0.1961044 | 0.1114272 | 1.7599 | 0.0785   | 0.267058056 | count | 1        |
| ARID4A     | 0.1923836 | 0.1054145 | 1.825  | 0.0681   | 0.267112118 | count | 1        |



|            |           |           |        |          |             |       |          |
|------------|-----------|-----------|--------|----------|-------------|-------|----------|
| MRPS33     | 0.1968011 | 0.1623545 | 1.2122 | 0.226    | 0.267178199 | count | 1        |
| SART1      | 0.2258631 | 0.26973   | 0.8374 | 0.402    | 0.267186715 | count | 1        |
| MEF2A      | 0.1908894 | 0.0940269 | 2.0302 | 0.0424   | 0.267327724 | count | 1        |
| SHKBP1     | 0.191065  | 0.083706  | 2.2826 | 0.0225   | 0.267359244 | count | 1        |
| RPL19      | 0.1854672 | 0.0219877 | 8.435  | 5.57E-17 | 0.267400616 | count | 1.35E-12 |
| AC016745.2 | 0.682621  | 0.815455  | 0.8371 | 0.403    | 0.267453152 | count | 1        |
| STX17-AS1  | 0.682621  | 0.8420904 | 0.8106 | 0.418    | 0.267453152 | count | 1        |
| CRAT       | 0.2381977 | 0.3311048 | 0.7194 | 0.472    | 0.26746458  | count | 1        |
| NDUFA9     | 0.1968518 | 0.1377043 | 1.4295 | 0.153    | 0.267559699 | count | 1        |
| RHBDD1     | 0.3158654 | 0.3930875 | 0.8035 | 0.422    | 0.267567597 | count | 1        |
| TMC8       | 0.2383639 | 0.260934  | 0.9135 | 0.361    | 0.267654162 | count | 1        |
| LONRF1     | 0.2206772 | 0.2374493 | 0.9294 | 0.353    | 0.267655452 | count | 1        |
| VARS2      | 0.5938164 | 0.6072571 | 0.9779 | 0.328    | 0.267718058 | count | 1        |
| UNC13B     | 0.5938164 | 0.5912772 | 1.0043 | 0.315    | 0.267718058 | count | 1        |
| ZNF213     | 0.5939776 | 0.7288098 | 0.815  | 0.415    | 0.267798726 | count | 1        |
| C16orf45   | 0.5939776 | 0.7668984 | 0.7745 | 0.439    | 0.267798726 | count | 1        |
| TBP        | 0.2487776 | 0.3957927 | 0.6286 | 0.53     | 0.26802729  | count | 1        |
| TRMT13     | 0.2636884 | 0.3930154 | 0.6709 | 0.502    | 0.268100164 | count | 1        |
| HEBP1      | 0.1911113 | 0.0935763 | 2.0423 | 0.0412   | 0.268105155 | count | 1        |
| BET1       | 0.2260156 | 0.2331482 | 0.9694 | 0.332    | 0.268215939 | count | 1        |
| SPAST      | 0.2101602 | 0.2020417 | 1.0402 | 0.298    | 0.268297644 | count | 1        |
| NBPF9      | 0.2879709 | 0.5754194 | 0.5005 | 0.617    | 0.268369393 | count | 1        |
| GNAQ       | 0.1983221 | 0.1115788 | 1.7774 | 0.0756   | 0.26849683  | count | 1        |
| PAK1       | 0.1947653 | 0.1029897 | 1.8911 | 0.0587   | 0.268587764 | count | 1        |
| FAM78A     | 0.2295943 | 0.2795388 | 0.8213 | 0.412    | 0.268919444 | count | 1        |
| DGKA       | 0.2157711 | 0.2919234 | 0.7391 | 0.46     | 0.269249894 | count | 1        |
| SAMD9      | 0.1985072 | 0.1546353 | 1.2837 | 0.199    | 0.269258486 | count | 1        |
| WDR82      | 0.2040212 | 0.1789259 | 1.1403 | 0.254    | 0.269272373 | count | 1        |
| RICTOR     | 0.2177938 | 0.2670533 | 0.8155 | 0.415    | 0.269340982 | count | 1        |
| SNX30      | 0.2170533 | 0.2300905 | 0.9433 | 0.346    | 0.269428847 | count | 1        |
| CHURC1     | 0.1930162 | 0.0950305 | 2.0311 | 0.0424   | 0.269509691 | count | 1        |
| FNTB       | 0.3111376 | 0.4527239 | 0.6873 | 0.492    | 0.269587326 | count | 1        |
| DENND5A    | 0.2105493 | 0.1928112 | 1.092  | 0.275    | 0.269748068 | count | 1        |
| MT-CYB     | 0.1871744 | 0.0287892 | 6.5016 | 9.60E-11 | 0.269828974 | count | 2.31E-06 |
| RRAGB      | 0.2457004 | 0.340027  | 0.7226 | 0.47     | 0.269906293 | count | 1        |
| RDH13      | 0.3570867 | 0.4898459 | 0.729  | 0.466    | 0.270024539 | count | 1        |
| NFKB2      | 0.2137512 | 0.1881652 | 1.136  | 0.256    | 0.270061642 | count | 1        |
| GCA        | 0.1906211 | 0.066324  | 2.8741 | 0.00409  | 0.270090779 | count | 1        |
| PPP2R2A    | 0.1963519 | 0.1203771 | 1.6311 | 0.103    | 0.270321209 | count | 1        |
| EIF2AK3    | 0.2588107 | 0.258943  | 0.9995 | 0.318    | 0.270514897 | count | 1        |
| DENND4A    | 0.2126853 | 0.2337379 | 0.9099 | 0.363    | 0.270530809 | count | 1        |
| LARS       | 0.1961417 | 0.126455  | 1.5511 | 0.121    | 0.270535044 | count | 1        |
| TACO1      | 0.2421505 | 0.3287936 | 0.7365 | 0.462    | 0.270549119 | count | 1        |
| ARMC10     | 0.2056325 | 0.1922562 | 1.0696 | 0.285    | 0.271058099 | count | 1        |
| PRRG2      | 0.3198436 | 0.6662    | 0.4801 | 0.631    | 0.271068509 | count | 1        |

|            |           |           |        |          |             |       |             |
|------------|-----------|-----------|--------|----------|-------------|-------|-------------|
| CLASP2     | 0.2247807 | 0.2503363 | 0.8979 | 0.369    | 0.271316433 | count | 1           |
| KBTBD7     | 0.3131197 | 0.6301459 | 0.4969 | 0.619    | 0.271368049 | count | 1           |
| YPEL1      | 0.3589253 | 0.5175829 | 0.6935 | 0.488    | 0.271483952 | count | 1           |
| KDM2B      | 0.2274462 | 0.2650581 | 0.8581 | 0.391    | 0.271566111 | count | 1           |
| MCM5       | 0.2104618 | 0.2035678 | 1.0339 | 0.301    | 0.271662298 | count | 1           |
| MAP3K7     | 0.2298066 | 0.2440365 | 0.9417 | 0.346    | 0.271909859 | count | 1           |
| MOB2       | 0.2109625 | 0.2033954 | 1.0372 | 0.3      | 0.272037653 | count | 1           |
| DNAJA3     | 0.2731731 | 0.3236316 | 0.8441 | 0.399    | 0.272045192 | count | 1           |
| ALG10B     | 0.3289471 | 0.5697953 | 0.5773 | 0.564    | 0.272101476 | count | 1           |
| ETHE1      | 0.1949587 | 0.0914837 | 2.1311 | 0.0332   | 0.272180156 | count | 1           |
| MKLN1      | 0.2201424 | 0.2335839 | 0.9425 | 0.346    | 0.272273001 | count | 1           |
| AFF3       | 0.2968201 | 0.4217273 | 0.7038 | 0.482    | 0.272297833 | count | 1           |
| RHBDD2     | 0.2080524 | 0.1928629 | 1.0788 | 0.281    | 0.272324512 | count | 1           |
| EIF3K      | 0.1897102 | 0.0364012 | 5.2116 | 2.03E-07 | 0.272337319 | count | 0.004848655 |
| TMEM140    | 0.2369611 | 0.2757903 | 0.8592 | 0.39     | 0.272340249 | count | 1           |
| RPA1       | 0.3143235 | 0.336348  | 0.9345 | 0.35     | 0.272449886 | count | 1           |
| ZMYM5      | 0.2159823 | 0.175862  | 1.2281 | 0.22     | 0.272510032 | count | 1           |
| SPA17      | 0.3215712 | 0.4200861 | 0.7655 | 0.444    | 0.272589745 | count | 1           |
| FYCO1      | 0.2531018 | 0.4916018 | 0.5149 | 0.607    | 0.272775501 | count | 1           |
| DGKQ       | 0.6040284 | 0.540951  | 1.1166 | 0.264    | 0.272834259 | count | 1           |
| TRADD      | 0.2031498 | 0.1374562 | 1.4779 | 0.14     | 0.272847351 | count | 1           |
| CNST       | 0.2204485 | 0.260205  | 0.8472 | 0.397    | 0.273174692 | count | 1           |
| MRM3       | 0.2488703 | 0.3421705 | 0.7273 | 0.467    | 0.273450431 | count | 1           |
| HNRNPUL1   | 0.2031437 | 0.1219982 | 1.6651 | 0.096    | 0.273598929 | count | 1           |
| TBC1D2B    | 0.21278   | 0.1643406 | 1.2948 | 0.196    | 0.273827705 | count | 1           |
| BACH1      | 0.1941441 | 0.1000777 | 1.9399 | 0.0525   | 0.273926682 | count | 1           |
| TRAPPC13   | 0.2694916 | 0.3236794 | 0.8326 | 0.405    | 0.274140443 | count | 1           |
| OSBPL1A    | 0.2042211 | 0.172259  | 1.1855 | 0.236    | 0.274292337 | count | 1           |
| ACSL5      | 0.2563784 | 0.3824103 | 0.6704 | 0.503    | 0.274395464 | count | 1           |
| PIGV       | 0.2754961 | 0.3615372 | 0.762  | 0.446    | 0.274417307 | count | 1           |
| EMP3       | 0.190807  | 0.0454646 | 4.1968 | 2.80E-05 | 0.274462176 | count | 0.66122     |
| STT3B      | 0.2033047 | 0.133573  | 1.522  | 0.128    | 0.274521992 | count | 1           |
| NCDN       | 1.108716  | 0.8341143 | 1.3292 | 0.184    | 0.274562565 | count | 1           |
| SPTY2D10S  | 1.108716  | 0.9763295 | 1.1356 | 0.256    | 0.274562565 | count | 1           |
| ACAP1      | 0.2306507 | 0.2136324 | 1.0797 | 0.28     | 0.274622866 | count | 1           |
| DNTTIP1    | 0.2061752 | 0.1402255 | 1.4703 | 0.142    | 0.274780399 | count | 1           |
| SACM1L     | 0.2362566 | 0.2133134 | 1.1076 | 0.268    | 0.274804435 | count | 1           |
| HNRNPA1    | 0.192159  | 0.0456203 | 4.2121 | 2.62E-05 | 0.274846226 | count | 0.6188178   |
| POLR1B     | 0.3048022 | 0.5580038 | 0.5462 | 0.585    | 0.274872578 | count | 1           |
| AFG3L2     | 0.2081308 | 0.2214754 | 0.9397 | 0.347    | 0.274899884 | count | 1           |
| AC116407.2 | 0.2996779 | 0.5132922 | 0.5838 | 0.559    | 0.275004064 | count | 1           |
| CREBRF     | 0.2019203 | 0.1299317 | 1.554  | 0.12     | 0.275005408 | count | 1           |
| EBI3       | 0.2266828 | 0.1873211 | 1.2101 | 0.226    | 0.275018778 | count | 1           |
| MPDU1      | 0.2131929 | 0.1647    | 1.2944 | 0.196    | 0.275211472 | count | 1           |
| RGS19      | 0.1943109 | 0.0707796 | 2.7453 | 0.00609  | 0.275288104 | count | 1           |

|            |           |           |        |          |             |       |             |
|------------|-----------|-----------|--------|----------|-------------|-------|-------------|
| ATP5MC2    | 0.1914455 | 0.0337196 | 5.6776 | 1.53E-08 | 0.275315308 | count | 0.000366802 |
| C8orf59    | 0.194219  | 0.0720409 | 2.696  | 0.00707  | 0.275347475 | count | 1           |
| RNFT1      | 0.2035582 | 0.1745165 | 1.1664 | 0.244    | 0.275431474 | count | 1           |
| UBE2D1     | 0.1941955 | 0.0674226 | 2.8803 | 0.00401  | 0.275452069 | count | 1           |
| PHLDB3     | 0.3424635 | 0.4304444 | 0.7956 | 0.426    | 0.275947439 | count | 1           |
| UHMK1      | 0.2119291 | 0.1657124 | 1.2789 | 0.201    | 0.276095088 | count | 1           |
| TNFSF8     | 0.2223804 | 0.216383  | 1.0277 | 0.304    | 0.276103263 | count | 1           |
| RPUSD3     | 0.213957  | 0.2543125 | 0.8413 | 0.4      | 0.276478826 | count | 1           |
| PARP14     | 0.1977408 | 0.0823997 | 2.3998 | 0.0165   | 0.276548661 | count | 1           |
| PNPLA6     | 0.2241651 | 0.191214  | 1.1723 | 0.241    | 0.276756002 | count | 1           |
| ABCA3      | 0.7036679 | 0.8025588 | 0.8768 | 0.381    | 0.276786926 | count | 1           |
| LARP7      | 0.1978879 | 0.1003776 | 1.9714 | 0.0488   | 0.276818937 | count | 1           |
| TTC32      | 0.2261473 | 0.2254225 | 1.0032 | 0.316    | 0.276914284 | count | 1           |
| PHF1       | 0.2219324 | 0.2801308 | 0.7922 | 0.428    | 0.277007728 | count | 1           |
| PCMT1      | 0.1965391 | 0.0709245 | 2.7711 | 0.00563  | 0.277033414 | count | 1           |
| ZFP69B     | 1.1175489 | 0.768622  | 1.454  | 0.146    | 0.277155566 | count | 1           |
| AC239868.2 | 1.1175489 | 0.7881798 | 1.4179 | 0.156    | 0.277155566 | count | 1           |
| MLYCD      | 0.2848947 | 0.3472763 | 0.8204 | 0.412    | 0.277182701 | count | 1           |
| WDR55      | 0.2225186 | 0.2075933 | 1.0719 | 0.284    | 0.277266998 | count | 1           |
| IMMP2L     | 0.2887512 | 0.3310222 | 0.8723 | 0.383    | 0.277285884 | count | 1           |
| BID        | 0.1954363 | 0.0746701 | 2.6173 | 0.00892  | 0.277338827 | count | 1           |
| TNFSF15    | 0.2297821 | 0.331982  | 0.6922 | 0.489    | 0.277421399 | count | 1           |
| UBE3C      | 0.2212055 | 0.2601937 | 0.8502 | 0.395    | 0.27746068  | count | 1           |
| RNF213     | 0.1967034 | 0.0871434 | 2.2572 | 0.0241   | 0.277693486 | count | 1           |
| PHETA1     | 0.3667951 | 0.4081696 | 0.8986 | 0.369    | 0.277737792 | count | 1           |
| CD300C     | 0.2107518 | 0.1906626 | 1.1054 | 0.269    | 0.277843272 | count | 1           |
| OTULIN     | 0.2140534 | 0.222416  | 0.9624 | 0.336    | 0.277909471 | count | 1           |
| CAGE1      | 1.8472188 | 1.349633  | 1.3687 | 0.171    | 0.278101065 | count | 1           |
| LINC01127  | 1.120929  | 0.6890357 | 1.6268 | 0.104    | 0.278148686 | count | 1           |
| AC025181.2 | 0.3031918 | 0.4605824 | 0.6583 | 0.51     | 0.278333574 | count | 1           |
| MBD4       | 0.1999529 | 0.1090274 | 1.834  | 0.0668   | 0.278406964 | count | 1           |
| ZFP69      | 0.852997  | 0.7285691 | 1.1708 | 0.242    | 0.278445628 | count | 1           |
| C2orf92    | 0.852997  | 0.7582168 | 1.125  | 0.261    | 0.278445628 | count | 1           |
| VTA1       | 0.2140208 | 0.1749761 | 1.2231 | 0.221    | 0.278600338 | count | 1           |
| TRMT10A    | 0.2738517 | 0.3354462 | 0.8164 | 0.414    | 0.27868222  | count | 1           |
| NKX3-1     | 0.6157406 | 0.8194007 | 0.7515 | 0.452    | 0.278719919 | count | 1           |
| BCO2       | 0.2688335 | 0.4508791 | 0.5962 | 0.551    | 0.278753022 | count | 1           |
| PRKACB     | 0.2249816 | 0.1720634 | 1.3075 | 0.191    | 0.278845642 | count | 1           |
| GRHPR      | 0.2027768 | 0.1191598 | 1.7017 | 0.0889   | 0.278889438 | count | 1           |
| ETS2       | 0.1954818 | 0.0595059 | 3.2851 | 0.00103  | 0.2789473   | count | 1           |
| APEH       | 0.2268159 | 0.2189466 | 1.0359 | 0.3      | 0.279501635 | count | 1           |
| AC090204.1 | 0.2234017 | 0.272745  | 0.8191 | 0.413    | 0.279788995 | count | 1           |
| GGT5       | 0.6179656 | 0.9346691 | 0.6612 | 0.509    | 0.279840165 | count | 1           |
| TUT4       | 0.205465  | 0.1905808 | 1.0781 | 0.281    | 0.279849883 | count | 1           |
| RPL18      | 0.1942713 | 0.0244872 | 7.9336 | 3.21E-15 | 0.279966346 | count | 7.76E-11    |

|            |           |           |        |          |             |       |           |
|------------|-----------|-----------|--------|----------|-------------|-------|-----------|
| RPS26      | 0.1945526 | 0.0277487 | 7.0112 | 3.04E-12 | 0.280100619 | count | 7.33E-08  |
| TENT2      | 0.219413  | 0.1803848 | 1.2164 | 0.224    | 0.280200013 | count | 1         |
| CLCC1      | 0.2958128 | 0.2959293 | 0.9996 | 0.318    | 0.280203823 | count | 1         |
| IREB2      | 0.2215417 | 0.1943146 | 1.1401 | 0.254    | 0.280380971 | count | 1         |
| ZNF641     | 0.2349684 | 0.2840894 | 0.8271 | 0.408    | 0.280656661 | count | 1         |
| CDC42BPB   | 0.2387554 | 0.2501434 | 0.9545 | 0.34     | 0.280769595 | count | 1         |
| EME2       | 0.5555304 | 0.557003  | 0.9974 | 0.319    | 0.280780035 | count | 1         |
| KLHL9      | 0.252656  | 0.4216484 | 0.5992 | 0.549    | 0.280946175 | count | 1         |
| DHRS4      | 0.2250673 | 0.1889535 | 1.1911 | 0.234    | 0.280956281 | count | 1         |
| DOK2       | 0.1978977 | 0.0665996 | 2.9715 | 0.00299  | 0.281052425 | count | 1         |
| GEN1       | 0.5088106 | 0.638852  | 0.7964 | 0.426    | 0.281110524 | count | 1         |
| UCK1       | 0.2575155 | 0.3562437 | 0.7229 | 0.47     | 0.281363568 | count | 1         |
| C1orf109   | 0.3317565 | 0.3750035 | 0.8847 | 0.376    | 0.28156949  | count | 1         |
| ANXA1      | 0.1955073 | 0.0446896 | 4.3748 | 1.27E-05 | 0.281680753 | count | 0.3007741 |
| TMEM33     | 0.2061915 | 0.1347585 | 1.5301 | 0.126    | 0.281697722 | count | 1         |
| USP16      | 0.2029938 | 0.1105844 | 1.8356 | 0.0665   | 0.281743161 | count | 1         |
| VPS37B     | 0.2119061 | 0.1864354 | 1.1366 | 0.256    | 0.28186805  | count | 1         |
| RB1CC1     | 0.2087565 | 0.1498214 | 1.3934 | 0.164    | 0.282110361 | count | 1         |
| RAD9A      | 0.2363251 | 0.3124645 | 0.7563 | 0.45     | 0.282296892 | count | 1         |
| PPIL3      | 0.2288122 | 0.2913312 | 0.7854 | 0.432    | 0.282550186 | count | 1         |
| PVT1       | 0.2941015 | 0.4152805 | 0.7082 | 0.479    | 0.282572931 | count | 1         |
| TECPR2     | 0.2602823 | 0.4663408 | 0.5581 | 0.577    | 0.28259314  | count | 1         |
| KIF1B      | 0.2087596 | 0.1507838 | 1.3845 | 0.166    | 0.282773798 | count | 1         |
| C21orf2    | 0.2144722 | 0.1897076 | 1.1305 | 0.258    | 0.282775339 | count | 1         |
| PTPN18     | 0.2051354 | 0.1090812 | 1.8806 | 0.0601   | 0.282787303 | count | 1         |
| BABAM2     | 0.2131962 | 0.2059133 | 1.0354 | 0.301    | 0.282810863 | count | 1         |
| RAD23B     | 0.2068752 | 0.1151714 | 1.7962 | 0.0726   | 0.282901466 | count | 1         |
| DHDDS      | 0.2517672 | 0.2690746 | 0.9357 | 0.35     | 0.282955711 | count | 1         |
| CGGBP1     | 0.2053006 | 0.1164632 | 1.7628 | 0.0781   | 0.2830628   | count | 1         |
| SMARCE1    | 0.2270181 | 0.200909  | 1.13   | 0.259    | 0.283413851 | count | 1         |
| DPH7       | 0.2758426 | 0.3328032 | 0.8288 | 0.407    | 0.283536925 | count | 1         |
| ELF4       | 0.2785889 | 0.3622062 | 0.7691 | 0.442    | 0.283620224 | count | 1         |
| RIOK2      | 0.2244299 | 0.2157566 | 1.0402 | 0.298    | 0.283666704 | count | 1         |
| B3GLCT     | 0.560924  | 0.6415068 | 0.8744 | 0.382    | 0.283775035 | count | 1         |
| MFAP4      | 0.560924  | 0.6016629 | 0.9323 | 0.351    | 0.283775035 | count | 1         |
| TNFAIP3    | 0.208185  | 0.0999158 | 2.0836 | 0.0373   | 0.283791925 | count | 1         |
| PPP1R16A   | 0.3272109 | 0.3182715 | 1.0281 | 0.304    | 0.284048077 | count | 1         |
| NFIL3      | 0.2013184 | 0.0717269 | 2.8067 | 0.00504  | 0.28427049  | count | 1         |
| CKMT2-AS1  | 0.4054687 | 0.8536978 | 0.475  | 0.635    | 0.28430569  | count | 1         |
| IFRD1      | 0.2036342 | 0.111988  | 1.8184 | 0.0691   | 0.284556007 | count | 1         |
| IL18RAP    | 1.886343  | 1.134695  | 1.6624 | 0.0966   | 0.284734242 | count | 1         |
| AL355353.1 | 1.886343  | 1.0411    | 1.8119 | 0.0701   | 0.284734242 | count | 1         |
| AC023509.2 | 1.886343  | 1.0411    | 1.8119 | 0.0701   | 0.284734242 | count | 1         |
| AC005520.2 | 0.4493077 | 0.5869413 | 0.7655 | 0.444    | 0.284850595 | count | 1         |
| HPS4       | 0.2498679 | 0.2937415 | 0.8506 | 0.395    | 0.284890185 | count | 1         |

|            |           |           |        |          |             |       |            |
|------------|-----------|-----------|--------|----------|-------------|-------|------------|
| S100A6     | 0.1977623 | 0.0414469 | 4.7715 | 1.94E-06 | 0.285087204 | count | 0.04614872 |
| CHD1       | 0.2007974 | 0.0759212 | 2.6448 | 0.00823  | 0.28511696  | count | 1          |
| LAMTOR3    | 0.2149422 | 0.1587318 | 1.3541 | 0.176    | 0.285139034 | count | 1          |
| AMMECR1    | 0.3158567 | 0.598416  | 0.5278 | 0.598    | 0.285188333 | count | 1          |
| RAB2B      | 0.2490329 | 0.2978045 | 0.8362 | 0.403    | 0.285194956 | count | 1          |
| DYRK1A     | 0.2214567 | 0.2415875 | 0.9167 | 0.359    | 0.285372469 | count | 1          |
| TRIM35     | 0.4792095 | 0.5105934 | 0.9385 | 0.348    | 0.285400294 | count | 1          |
| ZNF169     | 0.4792095 | 0.4905191 | 0.9769 | 0.329    | 0.285400294 | count | 1          |
| NCOA4      | 0.2033658 | 0.0771415 | 2.6363 | 0.00844  | 0.285431914 | count | 1          |
| PHAX       | 0.2136555 | 0.1629547 | 1.3111 | 0.19     | 0.285767374 | count | 1          |
| RETREG2    | 0.2177438 | 0.1901658 | 1.145  | 0.252    | 0.285932802 | count | 1          |
| DICER1     | 0.2068628 | 0.1208585 | 1.7116 | 0.0871   | 0.285938527 | count | 1          |
| POLR2G     | 0.2064425 | 0.1026148 | 2.0118 | 0.0443   | 0.286257331 | count | 1          |
| POLE4      | 0.2024455 | 0.0791219 | 2.5587 | 0.0106   | 0.286371689 | count | 1          |
| HTRA2      | 0.230599  | 0.2290515 | 1.0068 | 0.314    | 0.286405682 | count | 1          |
| TRAF7      | 0.2212657 | 0.2068204 | 1.0698 | 0.285    | 0.286540927 | count | 1          |
| VMO1       | 0.2016046 | 0.1109051 | 1.8178 | 0.0692   | 0.286698097 | count | 1          |
| SLC50A1    | 0.2169947 | 0.1652347 | 1.3133 | 0.189    | 0.287027581 | count | 1          |
| MVP        | 0.2102935 | 0.1231333 | 1.7079 | 0.0878   | 0.287040475 | count | 1          |
| QARS       | 0.2178396 | 0.1280811 | 1.7008 | 0.0891   | 0.287427432 | count | 1          |
| INTS11     | 0.211921  | 0.1448963 | 1.4626 | 0.144    | 0.287522702 | count | 1          |
| HACD3      | 0.226836  | 0.2062693 | 1.0997 | 0.272    | 0.2875332   | count | 1          |
| PNRC2      | 0.203966  | 0.0816398 | 2.4984 | 0.0125   | 0.287615231 | count | 1          |
| FN3K       | 0.4534438 | 0.5688303 | 0.7972 | 0.425    | 0.287659948 | count | 1          |
| MTRNR2L10  | 1.153801  | 0.7385584 | 1.5622 | 0.118    | 0.287834149 | count | 1          |
| CCDC77     | 0.2689513 | 0.3275736 | 0.821  | 0.412    | 0.288129562 | count | 1          |
| CACTIN     | 0.303931  | 0.4320794 | 0.7034 | 0.482    | 0.288129708 | count | 1          |
| PPIP5K2    | 0.2154908 | 0.1530127 | 1.4083 | 0.159    | 0.288233697 | count | 1          |
| TNFSF13B   | 0.2023649 | 0.0600139 | 3.372  | 0.000758 | 0.288323819 | count | 1          |
| ZNF680     | 0.4544746 | 0.4293243 | 1.0586 | 0.29     | 0.288360556 | count | 1          |
| SLC25A13   | 0.2235641 | 0.1893816 | 1.1805 | 0.238    | 0.288403416 | count | 1          |
| FBN2       | 0.8793611 | 0.5882641 | 1.4948 | 0.135    | 0.288425194 | count | 1          |
| R3HDM2     | 0.2096513 | 0.1169076 | 1.7933 | 0.073    | 0.288477539 | count | 1          |
| AC034111.1 | 0.5698545 | 0.8866596 | 0.6427 | 0.52     | 0.288743639 | count | 1          |
| ZNF525     | 0.5698545 | 0.6898782 | 0.826  | 0.409    | 0.288743639 | count | 1          |
| IMPDH1     | 0.2155022 | 0.1292765 | 1.667  | 0.0956   | 0.28877167  | count | 1          |
| GPR34      | 0.2067566 | 0.1020634 | 2.0258 | 0.0429   | 0.288856006 | count | 1          |
| ATF7IP2    | 0.2394471 | 0.2865184 | 0.8357 | 0.403    | 0.289226487 | count | 1          |
| ATP5MPL    | 0.2034035 | 0.0594516 | 3.4213 | 0.000633 | 0.289310994 | count | 1          |
| MRPS18B    | 0.2141541 | 0.1718231 | 1.2464 | 0.213    | 0.289533724 | count | 1          |
| NUDT6      | 0.3208167 | 0.4517014 | 0.7102 | 0.478    | 0.28982386  | count | 1          |
| KLF3       | 0.2040055 | 0.0784291 | 2.6011 | 0.00935  | 0.289928129 | count | 1          |
| GMPT2      | 0.2159087 | 0.1523797 | 1.4169 | 0.157    | 0.289940351 | count | 1          |
| TBXAS1     | 0.2056371 | 0.0894686 | 2.2984 | 0.0216   | 0.290035465 | count | 1          |
| TNFRSF1B   | 0.2037104 | 0.0672957 | 3.0271 | 0.00249  | 0.290037495 | count | 1          |

|            |           |           |        |        |             |       |   |
|------------|-----------|-----------|--------|--------|-------------|-------|---|
| KANSL1     | 0.2138728 | 0.1390247 | 1.5384 | 0.124  | 0.290091909 | count | 1 |
| TBC1D10A   | 0.2483387 | 0.2894382 | 0.858  | 0.391  | 0.290136852 | count | 1 |
| TUBGCP5    | 0.2773996 | 0.3195502 | 0.8681 | 0.385  | 0.290385086 | count | 1 |
| BAG5       | 0.2184283 | 0.1584586 | 1.3785 | 0.168  | 0.29043204  | count | 1 |
| TLE3       | 0.2140832 | 0.1575708 | 1.3586 | 0.174  | 0.290555731 | count | 1 |
| MYO5A      | 0.2177449 | 0.1606113 | 1.3557 | 0.175  | 0.290567196 | count | 1 |
| PDK1       | 0.2462422 | 0.2876097 | 0.8562 | 0.392  | 0.290667973 | count | 1 |
| TNXB       | 1.921826  | 1.360505  | 1.4126 | 0.158  | 0.290712989 | count | 1 |
| TG         | 1.921826  | 1.638869  | 1.1727 | 0.241  | 0.290712989 | count | 1 |
| LINC02334  | 1.921826  | 1.638869  | 1.1727 | 0.241  | 0.290712989 | count | 1 |
| GSDMA      | 1.921826  | 0.8744343 | 2.1978 | 0.0281 | 0.290712989 | count | 1 |
| AC011484.1 | 1.921826  | 1.038138  | 1.8512 | 0.0643 | 0.290712989 | count | 1 |
| ZNF772     | 1.921826  | 1.281501  | 1.4997 | 0.134  | 0.290712989 | count | 1 |
| AC002451.1 | 0.4140922 | 0.5722958 | 0.7236 | 0.469  | 0.290718402 | count | 1 |
| SRFBP1     | 0.2133699 | 0.1413003 | 1.51   | 0.131  | 0.290808962 | count | 1 |
| CKB        | 0.3507777 | 0.3181133 | 1.1027 | 0.27   | 0.290946195 | count | 1 |
| TNFRSF9    | 1.1643777 | 0.7420391 | 1.5692 | 0.117  | 0.290959866 | count | 1 |
| JKAMP      | 0.2143877 | 0.1318304 | 1.6262 | 0.104  | 0.291144783 | count | 1 |
| GKAP1      | 0.2665763 | 0.2757234 | 0.9668 | 0.334  | 0.291453482 | count | 1 |
| ARMC1      | 0.2360053 | 0.215055  | 1.0974 | 0.273  | 0.291522875 | count | 1 |
| MAP4K1     | 0.3718313 | 0.4618114 | 0.8052 | 0.421  | 0.291608019 | count | 1 |
| HAAO       | 0.2835644 | 0.3139866 | 0.9031 | 0.367  | 0.291665184 | count | 1 |
| NFU1       | 0.2244091 | 0.1881632 | 1.1926 | 0.233  | 0.291704843 | count | 1 |
| DTD1       | 0.2224621 | 0.1857886 | 1.1974 | 0.231  | 0.291740536 | count | 1 |
| MID1IP1    | 0.209962  | 0.1290985 | 1.6264 | 0.104  | 0.29181183  | count | 1 |
| SNX11      | 0.2509903 | 0.3212571 | 0.7813 | 0.435  | 0.292190642 | count | 1 |
| IPCEF1     | 0.3234494 | 0.3792464 | 0.8529 | 0.394  | 0.29228608  | count | 1 |
| ATXN2      | 0.221967  | 0.1568405 | 1.4152 | 0.157  | 0.292324307 | count | 1 |
| RTTN       | 0.4604697 | 0.5698769 | 0.808  | 0.419  | 0.292438909 | count | 1 |
| SEC22B     | 0.2148634 | 0.1559858 | 1.3775 | 0.168  | 0.292459546 | count | 1 |
| CCDC142    | 0.5768137 | 0.5663634 | 1.0185 | 0.309  | 0.292623713 | count | 1 |
| NUP205     | 0.3086193 | 0.4381667 | 0.7043 | 0.481  | 0.292712038 | count | 1 |
| ATG4B      | 0.2384146 | 0.2601428 | 0.9165 | 0.36   | 0.292727522 | count | 1 |
| METTL16    | 0.2591371 | 0.28938   | 0.8955 | 0.371  | 0.29284643  | count | 1 |
| MARVELD1   | 0.2497428 | 0.260531  | 0.9586 | 0.338  | 0.292850141 | count | 1 |
| TAB2       | 0.2391711 | 0.2466421 | 0.9697 | 0.332  | 0.293034162 | count | 1 |
| ZEB2-AS1   | 0.2255791 | 0.1810231 | 1.2461 | 0.213  | 0.293235854 | count | 1 |
| VPS39      | 0.2718965 | 0.3036972 | 0.8953 | 0.371  | 0.293444678 | count | 1 |
| SLC35F3    | 0.8929953 | 1.1426336 | 0.7815 | 0.435  | 0.293609303 | count | 1 |
| C19orf57   | 0.8929953 | 0.8806131 | 1.0141 | 0.311  | 0.293609303 | count | 1 |
| ZNF45      | 0.8929953 | 0.8967149 | 0.9959 | 0.319  | 0.293609303 | count | 1 |
| SETDB1     | 0.2531721 | 0.2522931 | 1.0035 | 0.316  | 0.293635135 | count | 1 |
| PCNX3      | 0.3014706 | 0.3384851 | 0.8906 | 0.373  | 0.293775858 | count | 1 |
| SLC25A46   | 0.2533096 | 0.2270908 | 1.1155 | 0.265  | 0.293796959 | count | 1 |
| GSS        | 0.2208515 | 0.211132  | 1.046  | 0.296  | 0.293828276 | count | 1 |

|            |           |           |        |          |             |       |            |
|------------|-----------|-----------|--------|----------|-------------|-------|------------|
| HIGD2A     | 0.2054562 | 0.0453053 | 4.5349 | 6.04E-06 | 0.293971457 | count | 0.14332316 |
| KPTN       | 0.3457952 | 0.4335859 | 0.7975 | 0.425    | 0.293977248 | count | 1          |
| IBA57      | 0.2785448 | 0.375617  | 0.7416 | 0.458    | 0.294052401 | count | 1          |
| MICU1      | 0.2212962 | 0.1550105 | 1.4276 | 0.154    | 0.294105248 | count | 1          |
| ASH1L      | 0.2155835 | 0.1448354 | 1.4885 | 0.137    | 0.294139027 | count | 1          |
| RNF135     | 0.2144452 | 0.1341829 | 1.5982 | 0.11     | 0.294244478 | count | 1          |
| AREG       | 0.2043763 | 0.115666  | 1.767  | 0.0774   | 0.294309256 | count | 1          |
| MTX3       | 0.3642463 | 0.5436802 | 0.67   | 0.503    | 0.294316745 | count | 1          |
| SPIN2B     | 0.3202356 | 0.4447726 | 0.72   | 0.472    | 0.294513512 | count | 1          |
| CDKN2AIP   | 0.2288167 | 0.1879441 | 1.2175 | 0.224    | 0.294925971 | count | 1          |
| ATP6V1A    | 0.2167148 | 0.1363512 | 1.5894 | 0.112    | 0.294988809 | count | 1          |
| DDIT4      | 0.207388  | 0.0814988 | 2.5447 | 0.011    | 0.295058714 | count | 1          |
| CDKN1C     | 0.2131332 | 0.1887624 | 1.1291 | 0.259    | 0.295171056 | count | 1          |
| KIF20B     | 0.2555286 | 0.2259214 | 1.1311 | 0.258    | 0.2952292   | count | 1          |
| AC012615.1 | 0.269976  | 0.3541202 | 0.7624 | 0.446    | 0.29524227  | count | 1          |
| PRAF2      | 0.2929455 | 0.3353414 | 0.8736 | 0.382    | 0.295514493 | count | 1          |
| DPY19L4    | 0.2929773 | 0.4028776 | 0.7272 | 0.467    | 0.295547405 | count | 1          |
| RNF121     | 0.2929773 | 0.3802405 | 0.7705 | 0.441    | 0.295547405 | count | 1          |
| FOXN3-AS1  | 0.3116024 | 0.3683143 | 0.846  | 0.398    | 0.295629635 | count | 1          |
| RPS6KA4    | 0.243076  | 0.1894726 | 1.2829 | 0.2      | 0.29584669  | count | 1          |
| ACAT1      | 0.2277804 | 0.1790804 | 1.2719 | 0.204    | 0.295853131 | count | 1          |
| ZBTB11-AS1 | 0.2875539 | 0.3247262 | 0.8855 | 0.376    | 0.295868303 | count | 1          |
| STOML1     | 0.4040293 | 0.444599  | 0.9087 | 0.364    | 0.295870697 | count | 1          |
| MAFK       | 0.2361957 | 0.29281   | 0.8067 | 0.42     | 0.295961363 | count | 1          |
| CROT       | 0.3036644 | 0.3519163 | 0.8629 | 0.388    | 0.295975344 | count | 1          |
| AMPD3      | 0.270688  | 0.2672619 | 1.0128 | 0.311    | 0.29603596  | count | 1          |
| EPB41      | 0.2396492 | 0.1826183 | 1.3123 | 0.19     | 0.296070151 | count | 1          |
| AC079305.1 | 0.327651  | 0.3949352 | 0.8296 | 0.407    | 0.296218096 | count | 1          |
| TAPT1      | 0.2447287 | 0.2473825 | 0.9893 | 0.323    | 0.296434049 | count | 1          |
| KIAA0930   | 0.2152842 | 0.1158326 | 1.8586 | 0.0632   | 0.296514651 | count | 1          |
| TSPYL1     | 0.2154862 | 0.1288609 | 1.6722 | 0.0946   | 0.296530259 | count | 1          |
| EIF4A2     | 0.2132366 | 0.0912061 | 2.338  | 0.0195   | 0.296538083 | count | 1          |
| RLF        | 0.227223  | 0.1664562 | 1.3651 | 0.172    | 0.296640655 | count | 1          |
| AGA        | 0.2392537 | 0.1702945 | 1.4049 | 0.16     | 0.296712725 | count | 1          |
| LILRA6     | 0.2416289 | 0.2345253 | 1.0303 | 0.303    | 0.296716331 | count | 1          |
| BTF3       | 0.206324  | 0.0308257 | 6.6932 | 2.70E-11 | 0.29674352  | count | 6.51E-07   |
| AFDN       | 0.2427261 | 0.2613803 | 0.9286 | 0.353    | 0.296780239 | count | 1          |
| MYD88      | 0.2133913 | 0.1073031 | 1.9887 | 0.0468   | 0.296850167 | count | 1          |
| CYREN      | 0.240784  | 0.3056508 | 0.7878 | 0.431    | 0.296894664 | count | 1          |
| ZNF514     | 0.3576553 | 0.4709012 | 0.7595 | 0.448    | 0.296900962 | count | 1          |
| DNAJA4     | 0.3415091 | 0.4868384 | 0.7015 | 0.483    | 0.296950706 | count | 1          |
| DDX1       | 0.2248094 | 0.158011  | 1.4227 | 0.155    | 0.297054443 | count | 1          |
| PHYKPL     | 0.2219647 | 0.1484764 | 1.4949 | 0.135    | 0.297071606 | count | 1          |
| PARVG      | 0.2127194 | 0.0965735 | 2.2027 | 0.0277   | 0.297128509 | count | 1          |
| AC010969.2 | 0.4978255 | 0.7156596 | 0.6956 | 0.487    | 0.297384242 | count | 1          |

|                |           |           |        |         |             |       |   |
|----------------|-----------|-----------|--------|---------|-------------|-------|---|
| AIP            | 0.2149974 | 0.115264  | 1.8653 | 0.0623  | 0.297637494 | count | 1 |
| MLX            | 0.2142701 | 0.110617  | 1.937  | 0.0529  | 0.297711948 | count | 1 |
| CYB561D1       | 0.5365475 | 0.6336728 | 0.8467 | 0.397   | 0.297823373 | count | 1 |
| ZNF222         | 0.5365475 | 0.5985531 | 0.8964 | 0.37    | 0.297823373 | count | 1 |
| 5-Mar          | 0.2285297 | 0.2028937 | 1.1264 | 0.26    | 0.297865363 | count | 1 |
| ARID2          | 0.254873  | 0.2373899 | 1.0736 | 0.283   | 0.297880726 | count | 1 |
| PISD           | 0.2781101 | 0.2211905 | 1.2573 | 0.209   | 0.298148721 | count | 1 |
| DHX36          | 0.212689  | 0.09416   | 2.2588 | 0.024   | 0.298179271 | count | 1 |
| EIF3M          | 0.210481  | 0.0667778 | 3.152  | 0.00164 | 0.298331067 | count | 1 |
| TWNK           | 0.5376023 | 0.6905407 | 0.7785 | 0.436   | 0.298461343 | count | 1 |
| AC007728.2     | 0.5376023 | 0.6905407 | 0.7785 | 0.436   | 0.298461343 | count | 1 |
| LY86-AS1       | 0.5873935 | 0.6963836 | 0.8435 | 0.399   | 0.298536111 | count | 1 |
| FAM124A        | 0.5873935 | 0.6963836 | 0.8435 | 0.399   | 0.298536111 | count | 1 |
| KIF17          | 1.1900084 | 1.1003261 | 1.0815 | 0.28    | 0.298552578 | count | 1 |
| STIL           | 1.1900084 | 1.1036536 | 1.0782 | 0.281   | 0.298552578 | count | 1 |
| AL360270.3     | 1.1900084 | 1.0729548 | 1.1091 | 0.267   | 0.298552578 | count | 1 |
| PRPF40B        | 1.1900084 | 1.072572  | 1.1095 | 0.267   | 0.298552578 | count | 1 |
| PAGR1          | 1.1900084 | 1.0029742 | 1.1865 | 0.236   | 0.298552578 | count | 1 |
| USP6           | 1.1900084 | 1.0029742 | 1.1865 | 0.236   | 0.298552578 | count | 1 |
| MRPL38         | 1.1900084 | 0.9690911 | 1.228  | 0.22    | 0.298552578 | count | 1 |
| RPL17-C18orf32 | 1.1900084 | 1.0029742 | 1.1865 | 0.236   | 0.298552578 | count | 1 |
| BACH1-AS1      | 1.1900084 | 1.0029742 | 1.1865 | 0.236   | 0.298552578 | count | 1 |
| EXOSC4         | 0.2195865 | 0.1561778 | 1.406  | 0.16    | 0.2986631   | count | 1 |
| AC005076.1     | 0.445141  | 0.4828858 | 0.9218 | 0.357   | 0.298712075 | count | 1 |
| C16orf95       | 1.971816  | 1.284072  | 1.5356 | 0.125   | 0.29906966  | count | 1 |
| KLHL22         | 0.3601965 | 0.5549076 | 0.6491 | 0.516   | 0.299103322 | count | 1 |
| RAB11B         | 0.2217655 | 0.1568966 | 1.4135 | 0.158   | 0.29912513  | count | 1 |
| ARRDC1-AS1     | 0.2718084 | 0.3699875 | 0.7346 | 0.463   | 0.299138302 | count | 1 |
| G6PC3          | 0.2441838 | 0.2128922 | 1.147  | 0.252   | 0.299242948 | count | 1 |
| MX2            | 0.2123701 | 0.1036679 | 2.0486 | 0.0406  | 0.299354802 | count | 1 |
| NBN            | 0.2217822 | 0.1359323 | 1.6316 | 0.103   | 0.299578367 | count | 1 |
| USP30          | 0.4091245 | 0.5280956 | 0.7747 | 0.439   | 0.299815063 | count | 1 |
| BRAF           | 0.2392712 | 0.2019038 | 1.1851 | 0.236   | 0.299851114 | count | 1 |
| AL008729.1     | 0.9103129 | 0.7160616 | 1.2713 | 0.204   | 0.300215999 | count | 1 |
| AC007228.2     | 0.9103129 | 1.0578546 | 0.8605 | 0.39    | 0.300215999 | count | 1 |
| FAM189B        | 0.3263725 | 0.416994  | 0.7827 | 0.434   | 0.300351624 | count | 1 |
| DHFR           | 0.3263725 | 0.4179895 | 0.7808 | 0.435   | 0.300351624 | count | 1 |
| PRKCE          | 0.427032  | 0.4331534 | 0.9859 | 0.324   | 0.30036573  | count | 1 |
| CSGALNACT2     | 0.216194  | 0.1032349 | 2.0942 | 0.0363  | 0.300425758 | count | 1 |
| MCM6           | 0.3322022 | 0.4480002 | 0.7415 | 0.458   | 0.300480722 | count | 1 |
| AC004812.2     | 0.3322022 | 0.4113458 | 0.8076 | 0.419   | 0.300480722 | count | 1 |
| AK3            | 0.2470068 | 0.2447727 | 1.0091 | 0.313   | 0.300685684 | count | 1 |
| ZMYND8         | 0.2424631 | 0.2129056 | 1.1388 | 0.255   | 0.300733131 | count | 1 |
| PEPD           | 0.2134245 | 0.0801969 | 2.6613 | 0.00784 | 0.300803672 | count | 1 |
| SOCS5          | 0.3086295 | 0.3668563 | 0.8413 | 0.4     | 0.300956204 | count | 1 |



|              |           |           |        |          |             |       |          |
|--------------|-----------|-----------|--------|----------|-------------|-------|----------|
| PICALM       | 0.2163433 | 0.1039408 | 2.0814 | 0.0375   | 0.301125338 | count | 1        |
| SLC25A17     | 0.3463067 | 0.4393756 | 0.7882 | 0.431    | 0.301288124 | count | 1        |
| KRI1         | 0.3090116 | 0.3726672 | 0.8292 | 0.407    | 0.301339682 | count | 1        |
| FUT11        | 0.2738483 | 0.3796666 | 0.7213 | 0.471    | 0.30142624  | count | 1        |
| ZRANB2       | 0.217812  | 0.1128907 | 1.9294 | 0.0538   | 0.301460538 | count | 1        |
| AP3M1        | 0.2501737 | 0.3247355 | 0.7704 | 0.441    | 0.301550763 | count | 1        |
| RWDD4        | 0.2234104 | 0.1546408 | 1.4447 | 0.149    | 0.30168033  | count | 1        |
| HHEX         | 0.2348378 | 0.1762005 | 1.3328 | 0.183    | 0.301781449 | count | 1        |
| ZNF3         | 0.3732027 | 0.5712434 | 0.6533 | 0.514    | 0.301894468 | count | 1        |
| SEMA4B       | 0.3732027 | 0.5160564 | 0.7232 | 0.47     | 0.301894468 | count | 1        |
| RPL35A       | 0.2096118 | 0.0252984 | 8.2856 | 1.91E-16 | 0.301967832 | count | 4.62E-12 |
| SPOP         | 0.2256593 | 0.1455458 | 1.5504 | 0.121    | 0.302040417 | count | 1        |
| MORN1        | 0.6618333 | 0.9444299 | 0.7008 | 0.484    | 0.302063036 | count | 1        |
| AL133551.1   | 0.6618333 | 1.145342  | 0.5778 | 0.563    | 0.302063036 | count | 1        |
| AC116667.2   | 0.6618333 | 1.0189528 | 0.6495 | 0.516    | 0.302063036 | count | 1        |
| LINC01431    | 0.6618333 | 1.145342  | 0.5778 | 0.563    | 0.302063036 | count | 1        |
| IER5L        | 0.2181666 | 0.140432  | 1.5535 | 0.12     | 0.302119127 | count | 1        |
| ZHX1-C8orf76 | 0.4747123 | 0.6142892 | 0.7728 | 0.44     | 0.302152532 | count | 1        |
| ZNF468       | 0.3974653 | 0.5562475 | 0.7145 | 0.475    | 0.302218221 | count | 1        |
| HDAC5        | 0.2455665 | 0.1968886 | 1.2472 | 0.212    | 0.302236584 | count | 1        |
| FANCB        | 0.373697  | 0.4407096 | 0.8479 | 0.397    | 0.302313096 | count | 1        |
| NIPSNAP2     | 0.2164193 | 0.1052806 | 2.0556 | 0.0399   | 0.302383231 | count | 1        |
| CTSC         | 0.2110961 | 0.0697035 | 3.0285 | 0.00248  | 0.302446187 | count | 1        |
| RBM45        | 0.3287284 | 0.362024  | 0.908  | 0.364    | 0.302594531 | count | 1        |
| POLR2J3      | 0.2180542 | 0.2078912 | 1.0489 | 0.294    | 0.302734201 | count | 1        |
| LTBR         | 0.2221516 | 0.144525  | 1.5371 | 0.124    | 0.302978602 | count | 1        |
| CRLS1        | 0.2348343 | 0.1853771 | 1.2668 | 0.205    | 0.303049902 | count | 1        |
| PHKG2        | 0.2302944 | 0.1976352 | 1.1653 | 0.244    | 0.303150996 | count | 1        |
| HOXB4        | 0.9181805 | 0.6279281 | 1.4622 | 0.144    | 0.303225419 | count | 1        |
| PLAA         | 0.3072222 | 0.3435198 | 0.8943 | 0.371    | 0.30331958  | count | 1        |
| UBR1         | 0.3195572 | 0.3099861 | 1.0309 | 0.303    | 0.30341703  | count | 1        |
| UNC119B      | 0.5072168 | 0.6716764 | 0.7552 | 0.45     | 0.303451565 | count | 1        |
| STMN3        | 0.5072168 | 0.6098504 | 0.8317 | 0.406    | 0.303451565 | count | 1        |
| TGDS         | 0.2791175 | 0.3061801 | 0.9116 | 0.362    | 0.303459712 | count | 1        |
| LRRRC41      | 0.252425  | 0.2253439 | 1.1202 | 0.263    | 0.30348037  | count | 1        |
| IKBKG        | 0.240343  | 0.1895081 | 1.2682 | 0.205    | 0.303523065 | count | 1        |
| TPRA1        | 0.230307  | 0.2428993 | 0.9482 | 0.343    | 0.30357651  | count | 1        |
| CUL4A        | 0.2355317 | 0.2339861 | 1.0066 | 0.314    | 0.303645692 | count | 1        |
| BCL7B        | 0.2218188 | 0.1279791 | 1.7332 | 0.0832   | 0.303682736 | count | 1        |
| CERS2        | 0.230408  | 0.1746263 | 1.3194 | 0.187    | 0.303710431 | count | 1        |
| AC007336.1   | 0.3299167 | 0.3771702 | 0.8747 | 0.382    | 0.303726198 | count | 1        |
| ING3         | 0.2415825 | 0.1927639 | 1.2533 | 0.21     | 0.30373519  | count | 1        |
| QTRT1        | 0.2673722 | 0.2567131 | 1.0415 | 0.298    | 0.303770513 | count | 1        |
| BRWD3        | 0.2813099 | 0.2471484 | 1.1382 | 0.255    | 0.303815916 | count | 1        |
| TCTA         | 0.2550262 | 0.3514831 | 0.7256 | 0.468    | 0.304029875 | count | 1        |

|            |           |           |        |          |             |       |            |
|------------|-----------|-----------|--------|----------|-------------|-------|------------|
| C12orf57   | 0.2178853 | 0.1406166 | 1.5495 | 0.121    | 0.304255332 | count | 1          |
| FAM69A     | 2.00335   | 1.349064  | 1.485  | 0.138    | 0.304297228 | count | 1          |
| AL450384.2 | 2.00335   | 1.382159  | 1.4494 | 0.147    | 0.304297228 | count | 1          |
| DELE1      | 0.2485577 | 0.1921704 | 1.2934 | 0.196    | 0.304662503 | count | 1          |
| NIT1       | 0.2337558 | 0.1783404 | 1.3107 | 0.19     | 0.304722773 | count | 1          |
| A1BG       | 0.2288817 | 0.1551307 | 1.4754 | 0.14     | 0.304729519 | count | 1          |
| PAPOLG     | 0.3124917 | 0.2826835 | 1.1054 | 0.269    | 0.304833425 | count | 1          |
| AC243829.4 | 0.4537019 | 0.4376502 | 1.0367 | 0.3      | 0.304846093 | count | 1          |
| TSPYL5     | 0.7663487 | 0.5266192 | 1.4552 | 0.146    | 0.304887486 | count | 1          |
| CDS2       | 0.2299536 | 0.1934828 | 1.1885 | 0.235    | 0.305162869 | count | 1          |
| DECR1      | 0.2179865 | 0.0873081 | 2.4967 | 0.0126   | 0.305172473 | count | 1          |
| ZNF43      | 0.3056033 | 0.4666803 | 0.6548 | 0.513    | 0.305240161 | count | 1          |
| DIP2C      | 1.2126473 | 0.6715856 | 1.8056 | 0.0711   | 0.305278533 | count | 1          |
| AASDH      | 0.2616181 | 0.3015631 | 0.8675 | 0.386    | 0.305879642 | count | 1          |
| SUMO4      | 0.4346305 | 0.4618423 | 0.9411 | 0.347    | 0.306044571 | count | 1          |
| YTHDF3     | 0.229243  | 0.1525212 | 1.503  | 0.133    | 0.306138983 | count | 1          |
| ITM2B      | 0.2125824 | 0.0374216 | 5.6807 | 1.50E-08 | 0.30627076  | count | 0.00035964 |
| TRMT10B    | 0.2922937 | 0.2738515 | 1.0673 | 0.286    | 0.306343426 | count | 1          |
| SPRYD3     | 0.2922937 | 0.2769084 | 1.0556 | 0.291    | 0.306343426 | count | 1          |
| AC018647.2 | 0.3787011 | 0.5227992 | 0.7244 | 0.469    | 0.306553557 | count | 1          |
| ARID3A     | 0.2352764 | 0.1773547 | 1.3266 | 0.185    | 0.306718364 | count | 1          |
| INTS14     | 0.2952276 | 0.3369432 | 0.8762 | 0.381    | 0.306789484 | count | 1          |
| HEXIM2     | 0.5127064 | 0.5599305 | 0.9157 | 0.36     | 0.307004825 | count | 1          |
| DDX3X      | 0.2155315 | 0.0576805 | 3.7366 | 0.000191 | 0.307090507 | count | 1          |
| ITFG1      | 0.2391993 | 0.2005996 | 1.1924 | 0.233    | 0.307091327 | count | 1          |
| GOLGB1     | 0.2195204 | 0.1058429 | 2.074  | 0.0382   | 0.307116869 | count | 1          |
| SPDYA      | 0.7713801 | 0.7265483 | 1.0617 | 0.288    | 0.307161992 | count | 1          |
| MSX2       | 0.7713801 | 0.7265483 | 1.0617 | 0.288    | 0.307161992 | count | 1          |
| KIFC1      | 0.7713801 | 0.7129038 | 1.082  | 0.279    | 0.307161992 | count | 1          |
| SCML2      | 0.7713801 | 0.8986348 | 0.8584 | 0.391    | 0.307161992 | count | 1          |
| C19orf73   | 0.4820775 | 0.9426843 | 0.5114 | 0.609    | 0.307189134 | count | 1          |
| RNLS       | 0.5130606 | 0.5174062 | 0.9916 | 0.321    | 0.307234251 | count | 1          |
| WDR24      | 0.5130606 | 0.6516971 | 0.7873 | 0.431    | 0.307234251 | count | 1          |
| CDK5RAP2   | 0.2407127 | 0.2141349 | 1.1241 | 0.261    | 0.307251475 | count | 1          |
| LTN1       | 0.2423101 | 0.2167825 | 1.1178 | 0.264    | 0.307319347 | count | 1          |
| FBXL6      | 0.27047   | 0.2670066 | 1.013  | 0.311    | 0.307349529 | count | 1          |
| TRIM65     | 0.3698243 | 0.3312766 | 1.1164 | 0.264    | 0.307457737 | count | 1          |
| AL078459.1 | 0.7722208 | 0.6758913 | 1.1425 | 0.253    | 0.30754231  | count | 1          |
| C9orf106   | 0.7726871 | 0.609279  | 1.2682 | 0.205    | 0.307753301 | count | 1          |
| KDM4A      | 0.3241803 | 0.3304705 | 0.981  | 0.327    | 0.307947657 | count | 1          |
| SRPK2      | 0.2271746 | 0.1254546 | 1.8108 | 0.0703   | 0.30820724  | count | 1          |
| SPSB2      | 0.3158787 | 0.3347862 | 0.9435 | 0.346    | 0.308235593 | count | 1          |
| TLDC1      | 0.4049909 | 0.4772685 | 0.8486 | 0.396    | 0.308250812 | count | 1          |
| C9orf85    | 0.2451741 | 0.2730318 | 0.898  | 0.369    | 0.30829293  | count | 1          |
| GOLT1B     | 0.2400916 | 0.2180189 | 1.1012 | 0.271    | 0.308585421 | count | 1          |

|            |           |           |        |          |             |       |           |
|------------|-----------|-----------|--------|----------|-------------|-------|-----------|
| TET3       | 0.2648756 | 0.239086  | 1.1079 | 0.268    | 0.30859932  | count | 1         |
| PLPBP      | 0.2335557 | 0.1741197 | 1.3414 | 0.18     | 0.308870825 | count | 1         |
| EHBP1L1    | 0.228343  | 0.1444847 | 1.5804 | 0.114    | 0.308903546 | count | 1         |
| RBM39      | 0.2171795 | 0.0509685 | 4.2611 | 2.11E-05 | 0.308958007 | count | 0.4989095 |
| MED17      | 0.3354815 | 0.401668  | 0.8352 | 0.404    | 0.309028942 | count | 1         |
| TMEM79     | 2.0324637 | 1.33726   | 1.5199 | 0.129    | 0.309091337 | count | 1         |
| TMTC1      | 2.0324637 | 0.9738479 | 2.087  | 0.037    | 0.309091337 | count | 1         |
| ARRB2      | 0.2167282 | 0.0568914 | 3.8095 | 0.000143 | 0.309238546 | count | 1         |
| NEDD4L     | 0.2722637 | 0.3172202 | 0.8583 | 0.391    | 0.309422409 | count | 1         |
| APOBEC3G   | 0.2380114 | 0.1527886 | 1.5578 | 0.119    | 0.309509982 | count | 1         |
| TAF7       | 0.2225755 | 0.0989333 | 2.2498 | 0.0246   | 0.309787784 | count | 1         |
| UROS       | 0.232588  | 0.2042236 | 1.1389 | 0.255    | 0.309851624 | count | 1         |
| SLC25A37   | 0.2187952 | 0.1213423 | 1.8031 | 0.0715   | 0.310025013 | count | 1         |
| MED25      | 0.2572908 | 0.2524366 | 1.0192 | 0.308    | 0.310236632 | count | 1         |
| N4BP2L1    | 0.2446526 | 0.1597442 | 1.5315 | 0.126    | 0.310316299 | count | 1         |
| RSAD2      | 0.2653685 | 0.3803542 | 0.6977 | 0.485    | 0.310329461 | count | 1         |
| CALM2      | 0.2159884 | 0.0347945 | 6.2075 | 6.30E-10 | 0.310526814 | count | 1.52E-05  |
| ZNF567     | 0.3644607 | 0.351702  | 1.0363 | 0.3      | 0.310528481 | count | 1         |
| OPRL1      | 0.4406788 | 0.4474295 | 0.9849 | 0.325    | 0.310572029 | count | 1         |
| SYNRG      | 0.2398398 | 0.167538  | 1.4316 | 0.152    | 0.310770079 | count | 1         |
| TGFBR1     | 0.2334064 | 0.1728585 | 1.3503 | 0.177    | 0.310785817 | count | 1         |
| NUDT2      | 0.2564417 | 0.2085313 | 1.2298 | 0.219    | 0.310794174 | count | 1         |
| CNOT4      | 0.2289726 | 0.138077  | 1.6583 | 0.0974   | 0.311030736 | count | 1         |
| CENPBD1    | 0.2824815 | 0.3499459 | 0.8072 | 0.42     | 0.311115434 | count | 1         |
| AIFM3      | 0.3842024 | 0.6309063 | 0.609  | 0.543    | 0.311220444 | count | 1         |
| CLEC1A     | 0.4882519 | 0.5385786 | 0.9066 | 0.365    | 0.31141843  | count | 1         |
| PPP1R15A   | 0.2173263 | 0.05753   | 3.7776 | 0.000162 | 0.311438486 | count | 1         |
| XIAP       | 0.2287002 | 0.156736  | 1.4591 | 0.145    | 0.311534494 | count | 1         |
| RPH3A      | 0.7814065 | 0.6171011 | 1.2663 | 0.206    | 0.31170263  | count | 1         |
| AL136295.5 | 0.4633872 | 0.4147041 | 1.1174 | 0.264    | 0.311800943 | count | 1         |
| PDS5A      | 0.2407155 | 0.1951721 | 1.2333 | 0.218    | 0.311912986 | count | 1         |
| IER3-AS1   | 0.385126  | 0.4525982 | 0.8509 | 0.395    | 0.312004492 | count | 1         |
| MIS18A     | 0.3001769 | 0.3348241 | 0.8965 | 0.37     | 0.312058457 | count | 1         |
| YKT6       | 0.2507648 | 0.2415883 | 1.038  | 0.299    | 0.312271648 | count | 1         |
| PXN        | 0.2512185 | 0.2432532 | 1.0327 | 0.302    | 0.312280506 | count | 1         |
| PRR34-AS1  | 0.2488586 | 0.2313113 | 1.0759 | 0.282    | 0.312481116 | count | 1         |
| LIPT1      | 0.2980822 | 0.3589518 | 0.8304 | 0.406    | 0.312554402 | count | 1         |
| BAHCC1     | 0.6825945 | 0.5651148 | 1.2079 | 0.227    | 0.312668191 | count | 1         |
| LINC02453  | 0.7835436 | 0.6485857 | 1.2081 | 0.227    | 0.31267184  | count | 1         |
| TRIM14     | 0.2415388 | 0.2007397 | 1.2032 | 0.229    | 0.312690144 | count | 1         |
| GOLGA7     | 0.2261588 | 0.1048049 | 2.1579 | 0.031    | 0.312731826 | count | 1         |
| EEA1       | 0.224746  | 0.0954136 | 2.3555 | 0.0186   | 0.31288089  | count | 1         |
| NCOA6      | 0.2766682 | 0.2763762 | 1.0011 | 0.317    | 0.313007402 | count | 1         |
| TOB1       | 0.2259512 | 0.1136677 | 1.9878 | 0.0469   | 0.31301273  | count | 1         |
| ZXDB       | 1.2387731 | 0.7454011 | 1.6619 | 0.0967   | 0.31306114  | count | 1         |

|            |           |           |        |          |              |       |          |
|------------|-----------|-----------|--------|----------|--------------|-------|----------|
| ZBTB38     | 0.2326979 | 0.1534753 | 1.5162 | 0.13     | 0.313224754  | count | 1        |
| FGD5       | 2.059534  | 1.326399  | 1.5527 | 0.121    | 0.313519798  | count | 1        |
| GLIPR1L2   | 2.059534  | 1.473036  | 1.3982 | 0.162    | 0.313519798  | count | 1        |
| TMEM38A    | 2.059534  | 1.326399  | 1.5527 | 0.121    | 0.313519798  | count | 1        |
| CAPS       | 0.3985148 | 0.5334379 | 0.7471 | 0.455    | 0.313618642  | count | 1        |
| EXOC3-AS1  | 0.3402962 | 0.4247    | 0.8013 | 0.423    | 0.31362111   | count | 1        |
| P2RY6      | 0.2552875 | 0.2330209 | 1.0956 | 0.273    | 0.31367711   | count | 1        |
| CALHM2     | 0.2427686 | 0.1838914 | 1.3202 | 0.187    | 0.313990048  | count | 1        |
| ASNSD1     | 0.2428159 | 0.2198679 | 1.1044 | 0.27     | 0.314051679  | count | 1        |
| AF064858.1 | 0.4921884 | 0.5398051 | 0.9118 | 0.362    | 0.3141118116 | count | 1        |
| ARHGAP15   | 0.2452763 | 0.1788476 | 1.3714 | 0.17     | 0.314243437  | count | 1        |
| PDIK1L     | 0.4456637 | 0.5000275 | 0.8913 | 0.373    | 0.314308257  | count | 1        |
| SUFU       | 0.3687592 | 0.3511024 | 1.0503 | 0.294    | 0.314348708  | count | 1        |
| SCAF8      | 0.2708093 | 0.3210244 | 0.8436 | 0.399    | 0.314411012  | count | 1        |
| RNF8       | 0.2472895 | 0.2493434 | 0.9918 | 0.321    | 0.314524561  | count | 1        |
| NAAA       | 0.2259853 | 0.103315  | 2.1873 | 0.0288   | 0.314577647  | count | 1        |
| RPL32      | 0.2182488 | 0.0226869 | 9.62   | 1.57E-21 | 0.314605921  | count | 3.81E-17 |
| IQCE       | 0.2781262 | 0.3105438 | 0.8956 | 0.371    | 0.314685876  | count | 1        |
| AC124242.1 | 1.244387  | 0.7472563 | 1.6653 | 0.096    | 0.314736063  | count | 1        |
| TMEM187    | 0.2768777 | 0.3416976 | 0.8103 | 0.418    | 0.314756396  | count | 1        |
| GOPC       | 0.2352998 | 0.135026  | 1.7426 | 0.0815   | 0.315009045  | count | 1        |
| NHS        | 0.5251707 | 0.5302905 | 0.9903 | 0.322    | 0.315090621  | count | 1        |
| MRPL37     | 0.23347   | 0.1510753 | 1.5454 | 0.122    | 0.315098485  | count | 1        |
| SEC31A     | 0.2283402 | 0.1217112 | 1.8761 | 0.0608   | 0.315229813  | count | 1        |
| KLF6       | 0.2192138 | 0.0604299 | 3.6276 | 0.000292 | 0.315279783  | count | 1        |
| POLR2B     | 0.2383842 | 0.1504333 | 1.5847 | 0.113    | 0.315293904  | count | 1        |
| NR3C1      | 0.2250111 | 0.0884948 | 2.5426 | 0.0111   | 0.315316656  | count | 1        |
| RNF168     | 0.2286159 | 0.1699868 | 1.3449 | 0.179    | 0.315561555  | count | 1        |
| ASRGL1     | 0.2526149 | 0.2110775 | 1.1968 | 0.232    | 0.315691464  | count | 1        |
| AP5Z1      | 0.2681922 | 0.2679332 | 1.001  | 0.317    | 0.315893459  | count | 1        |
| MOSMO      | 0.2648897 | 0.3234953 | 0.8188 | 0.413    | 0.315947762  | count | 1        |
| SLC25A10   | 0.790874  | 0.8946774 | 0.884  | 0.377    | 0.315999798  | count | 1        |
| CRLF3      | 0.2382239 | 0.1783756 | 1.3355 | 0.182    | 0.316019652  | count | 1        |
| CSNK1G1    | 0.2967522 | 0.338812  | 0.8759 | 0.381    | 0.316202821  | count | 1        |
| THOC3      | 0.2781586 | 0.2807377 | 0.9908 | 0.322    | 0.316237644  | count | 1        |
| PHLPP1     | 0.6189683 | 0.5772932 | 1.0722 | 0.284    | 0.316277358  | count | 1        |
| COQ4       | 0.2404352 | 0.218536  | 1.1002 | 0.271    | 0.316365681  | count | 1        |
| ZNF283     | 0.4487246 | 0.5951566 | 0.754  | 0.451    | 0.316604536  | count | 1        |
| MIER1      | 0.2274669 | 0.1120181 | 2.0306 | 0.0424   | 0.316611978  | count | 1        |
| MFN2       | 0.3244478 | 0.3299037 | 0.9835 | 0.325    | 0.316851279  | count | 1        |
| AC138150.1 | 0.3205384 | 0.6070424 | 0.528  | 0.598    | 0.316852292  | count | 1        |
| KIFAP3     | 0.2585121 | 0.2016139 | 1.2822 | 0.2      | 0.317003527  | count | 1        |
| ALPK1      | 0.2591587 | 0.2357876 | 1.0991 | 0.272    | 0.317106501  | count | 1        |
| NACA       | 0.220094  | 0.0256585 | 8.5778 | 1.69E-17 | 0.317127361  | count | 4.09E-13 |
| ITM2A      | 0.6205107 | 0.6899061 | 0.8994 | 0.369    | 0.317147625  | count | 1        |

|            |           |           |        |         |             |       |   |
|------------|-----------|-----------|--------|---------|-------------|-------|---|
| AC111182.1 | 0.6205107 | 0.661338  | 0.9383 | 0.348   | 0.317147625 | count | 1 |
| JAML       | 0.2265601 | 0.0778296 | 2.911  | 0.00364 | 0.317199076 | count | 1 |
| SPIDR      | 0.2460199 | 0.2166105 | 1.1358 | 0.256   | 0.317271571 | count | 1 |
| RMI2       | 0.6917276 | 0.7162816 | 0.9657 | 0.334   | 0.317350808 | count | 1 |
| SRSF4      | 0.2306275 | 0.1144416 | 2.0152 | 0.044   | 0.317432038 | count | 1 |
| NDUFS2     | 0.2301031 | 0.1088312 | 2.1143 | 0.0346  | 0.317467401 | count | 1 |
| TIA1       | 0.2632527 | 0.222051  | 1.1856 | 0.236   | 0.317516681 | count | 1 |
| USP30-AS1  | 0.955506  | 0.5162273 | 1.8509 | 0.0643  | 0.317567757 | count | 1 |
| MEST       | 0.4321562 | 0.5259573 | 0.8217 | 0.411   | 0.317701778 | count | 1 |
| DCTN4      | 0.2466507 | 0.2117794 | 1.1647 | 0.244   | 0.317760996 | count | 1 |
| RFC5       | 0.4503002 | 0.4515342 | 0.9973 | 0.319   | 0.317787172 | count | 1 |
| SYNE2      | 0.3342108 | 0.681531  | 0.4904 | 0.624   | 0.317789617 | count | 1 |
| SMC1A      | 0.2314353 | 0.1213462 | 1.9072 | 0.0566  | 0.317826291 | count | 1 |
| L3HYPDH    | 0.3178574 | 0.3655466 | 0.8695 | 0.385   | 0.317826762 | count | 1 |
| PRKAA1     | 0.2444482 | 0.21703   | 1.1263 | 0.26    | 0.317939967 | count | 1 |
| IMPAD1     | 0.246334  | 0.1906985 | 1.2917 | 0.197   | 0.318004019 | count | 1 |
| TANGO6     | 0.4041603 | 0.3941585 | 1.0254 | 0.305   | 0.318291578 | count | 1 |
| MFSD14A    | 1.2569057 | 0.8647305 | 1.4535 | 0.146   | 0.318474428 | count | 1 |
| VWCE       | 1.2569057 | 0.8647305 | 1.4535 | 0.146   | 0.318474428 | count | 1 |
| AC011511.1 | 1.2569057 | 0.9321136 | 1.3484 | 0.178   | 0.318474428 | count | 1 |
| AL021707.7 | 1.2569057 | 0.8647305 | 1.4535 | 0.146   | 0.318474428 | count | 1 |
| SLC36A4    | 0.2417773 | 0.1551933 | 1.5579 | 0.119   | 0.318576796 | count | 1 |
| LPCAT4     | 0.3222508 | 0.4654666 | 0.6923 | 0.489   | 0.318594557 | count | 1 |
| FGD6       | 0.2714183 | 0.2608258 | 1.0406 | 0.298   | 0.318646998 | count | 1 |
| LINC02158  | 0.38288   | 0.5194319 | 0.7371 | 0.461   | 0.318812612 | count | 1 |
| COPA       | 0.2314312 | 0.1196278 | 1.9346 | 0.0532  | 0.31882341  | count | 1 |
| MTO1       | 0.3586291 | 0.3762406 | 0.9532 | 0.341   | 0.319082734 | count | 1 |
| GEMIN7     | 0.2737984 | 0.287004  | 0.954  | 0.34    | 0.31915552  | count | 1 |
| MCCC2      | 0.3228526 | 0.3411632 | 0.9463 | 0.344   | 0.319206966 | count | 1 |
| NAXD       | 0.3521788 | 0.3677298 | 0.9577 | 0.338   | 0.319232502 | count | 1 |
| CHST15     | 0.2408389 | 0.1831286 | 1.3151 | 0.189   | 0.319323734 | count | 1 |
| TOMM40L    | 0.2934132 | 0.3686567 | 0.7959 | 0.426   | 0.319330157 | count | 1 |
| ZNF660     | 0.9606819 | 0.7463346 | 1.2872 | 0.198   | 0.319564819 | count | 1 |
| DEPDC4     | 2.0968086 | 1.2495184 | 1.6781 | 0.0935  | 0.319568373 | count | 1 |
| KDM6B      | 0.2298069 | 0.1157292 | 1.9857 | 0.0472  | 0.319603446 | count | 1 |
| C7orf26    | 0.2978481 | 0.3205645 | 0.9291 | 0.353   | 0.319781584 | count | 1 |
| L3MBTL4    | 0.500746  | 0.4993817 | 1.0027 | 0.316   | 0.31999584  | count | 1 |
| LUC7L      | 0.2438268 | 0.170945  | 1.4263 | 0.154   | 0.320406261 | count | 1 |
| WDFY2      | 0.2483145 | 0.1950168 | 1.2733 | 0.203   | 0.320580387 | count | 1 |
| DCAF8      | 0.2668109 | 0.2732976 | 0.9763 | 0.329   | 0.32100188  | count | 1 |
| TMED7      | 0.2420008 | 0.1617062 | 1.4965 | 0.135   | 0.321241868 | count | 1 |
| MYH9       | 0.230879  | 0.0999745 | 2.3094 | 0.021   | 0.321538015 | count | 1 |
| DHCR24     | 2.1090641 | 1.429207  | 1.4757 | 0.14    | 0.321544289 | count | 1 |
| RBM5-AS1   | 2.1090641 | 1.429207  | 1.4757 | 0.14    | 0.321544289 | count | 1 |
| RPUSD4     | 0.3253194 | 0.3994619 | 0.8144 | 0.415   | 0.321717844 | count | 1 |

|            |           |           |        |          |             |       |   |
|------------|-----------|-----------|--------|----------|-------------|-------|---|
| SEC23B     | 0.2547336 | 0.2164396 | 1.1769 | 0.239    | 0.321866561 | count | 1 |
| PIGO       | 0.3434721 | 0.3456007 | 0.9938 | 0.32     | 0.321922876 | count | 1 |
| BAIAP2-DT  | 0.3184173 | 0.3120799 | 1.0203 | 0.308    | 0.321924604 | count | 1 |
| TBC1D10B   | 0.2676205 | 0.215287  | 1.2431 | 0.214    | 0.321988574 | count | 1 |
| GABPB2     | 0.2844712 | 0.3585931 | 0.7933 | 0.428    | 0.321993424 | count | 1 |
| PRUNE1     | 0.5038476 | 0.685332  | 0.7352 | 0.462    | 0.322129103 | count | 1 |
| GID4       | 0.3222205 | 0.3192965 | 1.0092 | 0.313    | 0.322313894 | count | 1 |
| FKBPL      | 0.3048347 | 0.3235083 | 0.9423 | 0.346    | 0.322467776 | count | 1 |
| SLC51A     | 0.7020186 | 0.7275822 | 0.9649 | 0.335    | 0.322639501 | count | 1 |
| AC008494.3 | 0.7020186 | 0.8081481 | 0.8687 | 0.385    | 0.322639501 | count | 1 |
| EBPL       | 0.2420957 | 0.1812869 | 1.3354 | 0.182    | 0.322752428 | count | 1 |
| UBR3       | 0.2930758 | 0.2978291 | 0.984  | 0.325    | 0.32301923  | count | 1 |
| CEP192     | 0.3133183 | 0.3061126 | 1.0235 | 0.306    | 0.323070462 | count | 1 |
| CARD11     | 0.47904   | 0.6839192 | 0.7004 | 0.484    | 0.323074561 | count | 1 |
| POC1A      | 0.4574524 | 0.5148233 | 0.8886 | 0.374    | 0.323160905 | count | 1 |
| NOSIP      | 0.2336911 | 0.1243919 | 1.8787 | 0.0604   | 0.323224308 | count | 1 |
| NBR1       | 0.2545126 | 0.1606244 | 1.5845 | 0.113    | 0.323368526 | count | 1 |
| DUS1L      | 0.2419083 | 0.1591205 | 1.5203 | 0.129    | 0.323753409 | count | 1 |
| SREK1      | 0.2413189 | 0.1507483 | 1.6008 | 0.11     | 0.323822687 | count | 1 |
| ZDHHC17    | 0.2758232 | 0.2656961 | 1.0381 | 0.299    | 0.323895945 | count | 1 |
| FEM1B      | 0.2574655 | 0.1995349 | 1.2903 | 0.197    | 0.323898904 | count | 1 |
| SLC25A51   | 0.3141378 | 0.3826962 | 0.8209 | 0.412    | 0.323937319 | count | 1 |
| RNF4       | 0.2614844 | 0.2057008 | 1.2712 | 0.204    | 0.323969522 | count | 1 |
| CYB5R2     | 0.9721001 | 0.803167  | 1.2103 | 0.226    | 0.323977111 | count | 1 |
| LINC01537  | 0.9721001 | 1.0243929 | 0.949  | 0.343    | 0.323977111 | count | 1 |
| GAS6-DT    | 0.9721001 | 0.8323758 | 1.1679 | 0.243    | 0.323977111 | count | 1 |
| SAMD15     | 0.9721001 | 0.803167  | 1.2103 | 0.226    | 0.323977111 | count | 1 |
| OTUD7A     | 0.9721001 | 0.9429096 | 1.031  | 0.303    | 0.323977111 | count | 1 |
| COL1A1     | 0.9721001 | 0.9249416 | 1.051  | 0.293    | 0.323977111 | count | 1 |
| LINC01597  | 0.9721001 | 0.8522975 | 1.1406 | 0.254    | 0.323977111 | count | 1 |
| HMG20A     | 0.3088776 | 0.3061646 | 1.0089 | 0.313    | 0.324150783 | count | 1 |
| MT-ND4L    | 0.22755   | 0.0676733 | 3.3625 | 0.000784 | 0.324362829 | count | 1 |
| AIFM1      | 0.2792496 | 0.2246583 | 1.243  | 0.214    | 0.324366241 | count | 1 |
| TTI1       | 0.3999823 | 0.3988286 | 1.0029 | 0.316    | 0.324636211 | count | 1 |
| NSL1       | 0.2363329 | 0.1099306 | 2.1498 | 0.0317   | 0.324701966 | count | 1 |
| PDZD8      | 0.2765569 | 0.2896744 | 0.9547 | 0.34     | 0.324770447 | count | 1 |
| HLA-DOA    | 0.2429093 | 0.1508369 | 1.6104 | 0.107    | 0.324797015 | count | 1 |
| LMNB1      | 0.2768806 | 0.1939289 | 1.4277 | 0.153    | 0.325156281 | count | 1 |
| POT1       | 0.3586607 | 0.435453  | 0.8236 | 0.41     | 0.32533143  | count | 1 |
| ZNF576     | 0.2752033 | 0.278169  | 0.9893 | 0.323    | 0.325356548 | count | 1 |
| RNPEP      | 0.2379939 | 0.1266127 | 1.8797 | 0.0603   | 0.325385684 | count | 1 |
| KL         | 2.1333285 | 1.388395  | 1.5365 | 0.125    | 0.325436972 | count | 1 |
| ZNF439     | 0.9762866 | 0.5603373 | 1.7423 | 0.0816   | 0.325597178 | count | 1 |
| RPAP2      | 0.2939738 | 0.2707962 | 1.0856 | 0.278    | 0.325949466 | count | 1 |
| ENOX2      | 0.3036817 | 0.2655122 | 1.1438 | 0.253    | 0.32618569  | count | 1 |

|            |           |           |        |          |             |       |             |
|------------|-----------|-----------|--------|----------|-------------|-------|-------------|
| ZER1       | 0.3821633 | 0.3921685 | 0.9745 | 0.33     | 0.326281803 | count | 1           |
| PFDN4      | 0.2457866 | 0.1477153 | 1.6639 | 0.0963   | 0.326296302 | count | 1           |
| AC02       | 0.2468273 | 0.1496587 | 1.6493 | 0.0992   | 0.32632635  | count | 1           |
| ARHGEF2    | 0.2429    | 0.1479516 | 1.6418 | 0.101    | 0.326894778 | count | 1           |
| COX19      | 0.2400288 | 0.1561034 | 1.5376 | 0.124    | 0.327027208 | count | 1           |
| AP4S1      | 0.3307039 | 0.3651423 | 0.9057 | 0.365    | 0.327201835 | count | 1           |
| NOA1       | 0.2700039 | 0.2855828 | 0.9454 | 0.345    | 0.327438651 | count | 1           |
| BORCS7     | 0.2412383 | 0.1118093 | 2.1576 | 0.0311   | 0.327468035 | count | 1           |
| CTTNBP2    | 0.2989802 | 0.2733131 | 1.0939 | 0.274    | 0.327630265 | count | 1           |
| ZNF225     | 0.981557  | 0.8053248 | 1.2188 | 0.223    | 0.32763843  | count | 1           |
| NHLRC3     | 0.2654788 | 0.1846886 | 1.4374 | 0.151    | 0.327689445 | count | 1           |
| ZBTB14     | 0.3208948 | 0.3545682 | 0.905  | 0.366    | 0.327874038 | count | 1           |
| TMEM115    | 0.2748943 | 0.2430031 | 1.1312 | 0.258    | 0.328046727 | count | 1           |
| RALB       | 0.2426443 | 0.1307877 | 1.8553 | 0.0637   | 0.328114143 | count | 1           |
| NSDHL      | 0.3126607 | 0.305688  | 1.0228 | 0.306    | 0.328218561 | count | 1           |
| NARFL      | 0.3401351 | 0.3607111 | 0.943  | 0.346    | 0.328258015 | count | 1           |
| PPP2R5D    | 0.4299581 | 0.4416297 | 0.9736 | 0.33     | 0.328335604 | count | 1           |
| EEF1AKMT2  | 0.2639979 | 0.2439063 | 1.0824 | 0.279    | 0.328336158 | count | 1           |
| TEX261     | 0.310759  | 0.2806    | 1.1075 | 0.268    | 0.328884778 | count | 1           |
| CWC22      | 0.2563451 | 0.1849236 | 1.3862 | 0.166    | 0.328918472 | count | 1           |
| RSBN1L     | 0.235208  | 0.1093145 | 2.1517 | 0.0315   | 0.328957676 | count | 1           |
| PRKCZ      | 2.156153  | 0.9282949 | 2.3227 | 0.0203   | 0.329074545 | count | 1           |
| CLEC12B    | 2.156153  | 1.058677  | 2.0366 | 0.0418   | 0.329074545 | count | 1           |
| GAR1       | 0.2562113 | 0.2061023 | 1.2431 | 0.214    | 0.329112915 | count | 1           |
| RNF26      | 0.3694965 | 0.3723815 | 0.9923 | 0.321    | 0.329140985 | count | 1           |
| RIN2       | 0.243646  | 0.1349522 | 1.8054 | 0.0711   | 0.329246793 | count | 1           |
| HLA-C      | 0.2289656 | 0.0306289 | 7.4755 | 1.06E-13 | 0.329392762 | count | 2.56E-09    |
| HARBI1     | 0.5884739 | 0.6264733 | 0.9393 | 0.348    | 0.329432287 | count | 1           |
| ABCB10     | 0.4176609 | 0.3815601 | 1.0946 | 0.274    | 0.329488757 | count | 1           |
| AC006480.2 | 0.5886211 | 0.5631463 | 1.0452 | 0.296    | 0.329522464 | count | 1           |
| HMGA1P4    | 0.5886211 | 0.6770245 | 0.8694 | 0.385    | 0.329522464 | count | 1           |
| VPS4B      | 0.2371023 | 0.1059592 | 2.2377 | 0.0253   | 0.329666023 | count | 1           |
| KARS       | 0.2492877 | 0.1600473 | 1.5576 | 0.119    | 0.329803103 | count | 1           |
| NDUFV2-AS1 | 0.3295443 | 0.3488771 | 0.9446 | 0.345    | 0.329852445 | count | 1           |
| GOLGA5     | 0.2654264 | 0.2539809 | 1.0451 | 0.296    | 0.330131776 | count | 1           |
| PPIC       | 0.3576158 | 0.4256631 | 0.8401 | 0.401    | 0.33017205  | count | 1           |
| ALG9       | 0.4486165 | 0.4850795 | 0.9248 | 0.355    | 0.330541302 | count | 1           |
| SIRT6      | 0.2700427 | 0.311165  | 0.8678 | 0.386    | 0.330583734 | count | 1           |
| EFCAB14    | 0.2451236 | 0.1420893 | 1.7251 | 0.0846   | 0.330779558 | count | 1           |
| ANKMY1     | 0.4900531 | 0.4997058 | 0.9807 | 0.327    | 0.331031024 | count | 1           |
| MAP4K4     | 0.2453452 | 0.155306  | 1.5798 | 0.114    | 0.331079984 | count | 1           |
| PSMB8      | 0.2324961 | 0.0594787 | 3.9089 | 9.52E-05 | 0.33114487  | count | 1           |
| SPI1       | 0.2310622 | 0.0430943 | 5.3618 | 9.01E-08 | 0.331220633 | count | 0.002154111 |
| APLP2      | 0.2310117 | 0.0507571 | 4.5513 | 5.59E-06 | 0.331266593 | count | 0.13266188  |
| PABPC1L    | 0.468248  | 0.8337971 | 0.5616 | 0.574    | 0.331288434 | count | 1           |

|            |           |           |        |          |             |       |            |
|------------|-----------|-----------|--------|----------|-------------|-------|------------|
| RIMKLB     | 0.371842  | 0.4277493 | 0.8693 | 0.385    | 0.331314427 | count | 1          |
| RBM15      | 0.330964  | 0.4700974 | 0.704  | 0.481    | 0.331314727 | count | 1          |
| MBOAT7     | 0.2419272 | 0.1174157 | 2.0604 | 0.0395   | 0.331385651 | count | 1          |
| ZBTB34     | 0.4079208 | 0.4051023 | 1.007  | 0.314    | 0.331401573 | count | 1          |
| TIPARP-AS1 | 0.3482483 | 0.3739609 | 0.9312 | 0.352    | 0.331590651 | count | 1          |
| 1-Sep      | 0.2652388 | 0.2483099 | 1.0682 | 0.286    | 0.331631246 | count | 1          |
| RTKN       | 0.8254797 | 1.0123034 | 0.8154 | 0.415    | 0.331785105 | count | 1          |
| FAM126A    | 0.2796799 | 0.3156366 | 0.8861 | 0.376    | 0.331794187 | count | 1          |
| EPHX1      | 0.2621233 | 0.1680073 | 1.5602 | 0.119    | 0.332227922 | count | 1          |
| CDC25B     | 0.4917894 | 0.3851248 | 1.277  | 0.202    | 0.332287242 | count | 1          |
| ELF1       | 0.2334007 | 0.0576098 | 4.0514 | 5.25E-05 | 0.332352706 | count | 1          |
| DHPS       | 0.245936  | 0.1432015 | 1.7174 | 0.086    | 0.332355474 | count | 1          |
| ZFAT       | 0.7208856 | 0.6301524 | 1.144  | 0.253    | 0.332369088 | count | 1          |
| AC061992.1 | 0.7208856 | 0.6862815 | 1.0504 | 0.294    | 0.332369088 | count | 1          |
| SCYL2      | 0.284959  | 0.2176885 | 1.309  | 0.191    | 0.332372007 | count | 1          |
| TNIP1      | 0.2634013 | 0.1890232 | 1.3935 | 0.164    | 0.332438964 | count | 1          |
| BRWD1      | 0.2557504 | 0.1888226 | 1.3544 | 0.176    | 0.332454698 | count | 1          |
| LCOR       | 0.2516218 | 0.171339  | 1.4686 | 0.142    | 0.332495482 | count | 1          |
| ZC3H12D    | 0.3492419 | 0.3797756 | 0.9196 | 0.358    | 0.332568712 | count | 1          |
| ZFAS1      | 0.2334891 | 0.0599409 | 3.8953 | 0.000101 | 0.33260891  | count | 1          |
| EIF3L      | 0.2356124 | 0.0621047 | 3.7938 | 0.000152 | 0.332654894 | count | 1          |
| ZNF823     | 0.6480194 | 0.7682315 | 0.8435 | 0.399    | 0.332723828 | count | 1          |
| POLK       | 0.2556058 | 0.1816442 | 1.4072 | 0.16     | 0.3328481   | count | 1          |
| TBC1D5     | 0.2541899 | 0.1737392 | 1.4631 | 0.144    | 0.332881942 | count | 1          |
| FRMD4B     | 0.236792  | 0.0887706 | 2.6675 | 0.00769  | 0.332894999 | count | 1          |
| WVOX       | 0.3076603 | 0.4046591 | 0.7603 | 0.447    | 0.332913243 | count | 1          |
| AC080013.5 | 0.5527507 | 0.5215758 | 1.0598 | 0.289    | 0.333069567 | count | 1          |
| UBL7       | 0.2609711 | 0.2123594 | 1.2289 | 0.219    | 0.333337873 | count | 1          |
| SRSF6      | 0.244868  | 0.1468987 | 1.6669 | 0.0957   | 0.333466922 | count | 1          |
| AL035071.1 | 0.3371645 | 0.3536246 | 0.9535 | 0.34     | 0.333787729 | count | 1          |
| PRELID3B   | 0.2458101 | 0.1533395 | 1.603  | 0.109    | 0.333800915 | count | 1          |
| FBXO8      | 0.297767  | 0.2828442 | 1.0528 | 0.293    | 0.333911744 | count | 1          |
| ETV2       | 0.5540787 | 0.4810258 | 1.1519 | 0.249    | 0.333938248 | count | 1          |
| TAGLN2     | 0.2324637 | 0.0443029 | 5.2471 | 1.68E-07 | 0.334078334 | count | 0.00401352 |
| CTDP1      | 0.3067913 | 0.2997373 | 1.0235 | 0.306    | 0.334207099 | count | 1          |
| ZNF85      | 0.3067994 | 0.2955434 | 1.0381 | 0.299    | 0.334216114 | count | 1          |
| PLPP6      | 0.6507284 | 0.5585757 | 1.165  | 0.244    | 0.334263311 | count | 1          |
| AP000919.4 | 0.6507284 | 0.5928816 | 1.0976 | 0.273    | 0.334263311 | count | 1          |
| GDPD3      | 1.3096647 | 0.7977364 | 1.6417 | 0.101    | 0.334271513 | count | 1          |
| SWI5       | 0.2605739 | 0.212212  | 1.2279 | 0.22     | 0.334390138 | count | 1          |
| UBE2L6     | 0.2384237 | 0.0922178 | 2.5854 | 0.00978  | 0.334524198 | count | 1          |
| SFXN2      | 1.3105833 | 0.7836832 | 1.6723 | 0.0946   | 0.334547096 | count | 1          |
| LRRFIP2    | 0.245623  | 0.1335272 | 1.8395 | 0.066    | 0.334768484 | count | 1          |
| IRF2BP2    | 0.2392536 | 0.0926085 | 2.5835 | 0.00984  | 0.334808659 | count | 1          |
| TBCE       | 0.4541515 | 0.546637  | 0.8308 | 0.406    | 0.334869094 | count | 1          |



|               |           |           |        |          |             |       |          |
|---------------|-----------|-----------|--------|----------|-------------|-------|----------|
| GOLGA8N       | 0.6519234 | 0.6457713 | 1.0095 | 0.313    | 0.33494272  | count | 1        |
| IL18R1        | 0.4382137 | 0.5467074 | 0.8016 | 0.423    | 0.335000359 | count | 1        |
| AHCYL2        | 0.7259875 | 0.6362447 | 1.1411 | 0.254    | 0.335007412 | count | 1        |
| RNF215        | 0.4732686 | 0.4722892 | 1.0021 | 0.316    | 0.335074869 | count | 1        |
| SYNPO         | 1.3127844 | 0.9099471 | 1.4427 | 0.149    | 0.335207488 | count | 1        |
| CEP83-DT      | 1.3127844 | 0.9958201 | 1.3183 | 0.188    | 0.335207488 | count | 1        |
| PODNL1        | 1.3127844 | 0.9958201 | 1.3183 | 0.188    | 0.335207488 | count | 1        |
| TMEM121B      | 1.3127844 | 0.9099471 | 1.4427 | 0.149    | 0.335207488 | count | 1        |
| TMEM243       | 0.2450973 | 0.1177711 | 2.0811 | 0.0375   | 0.335367462 | count | 1        |
| RNF149        | 0.2356945 | 0.0646616 | 3.645  | 0.000273 | 0.335385833 | count | 1        |
| BTK           | 0.2523377 | 0.1474119 | 1.7118 | 0.0871   | 0.335418115 | count | 1        |
| C6orf106      | 0.2562162 | 0.187669  | 1.3653 | 0.172    | 0.33555386  | count | 1        |
| RPL37         | 0.2332172 | 0.0257273 | 9.065  | 2.48E-19 | 0.33591385  | count | 6.01E-15 |
| UBTF          | 0.2555727 | 0.1697315 | 1.5057 | 0.132    | 0.336414828 | count | 1        |
| TXNDC16       | 0.3016554 | 0.254801  | 1.1839 | 0.237    | 0.336532546 | count | 1        |
| SIRT7         | 0.2545364 | 0.168476  | 1.5108 | 0.131    | 0.336581849 | count | 1        |
| PLEKHA1       | 0.2828691 | 0.3128809 | 0.9041 | 0.366    | 0.336680584 | count | 1        |
| BRMS1L        | 0.3535875 | 0.4365035 | 0.81   | 0.418    | 0.336848184 | count | 1        |
| LINC01358     | 1.0053459 | 0.8372559 | 1.2008 | 0.23     | 0.336875286 | count | 1        |
| AL360270.1    | 1.0053459 | 0.8372559 | 1.2008 | 0.23     | 0.336875286 | count | 1        |
| NBPF19        | 0.3209719 | 0.4497163 | 0.7137 | 0.475    | 0.337162365 | count | 1        |
| WDR6          | 0.2890505 | 0.2868473 | 1.0077 | 0.314    | 0.337220733 | count | 1        |
| PIGX          | 0.2727682 | 0.2145905 | 1.2711 | 0.204    | 0.337456055 | count | 1        |
| C9orf78       | 0.2398587 | 0.0901497 | 2.6607 | 0.00785  | 0.337498697 | count | 1        |
| ZNF57         | 0.8386331 | 0.8635476 | 0.9711 | 0.332    | 0.337816028 | count | 1        |
| NUMBL         | 0.8386331 | 0.7172574 | 1.1692 | 0.242    | 0.337816028 | count | 1        |
| DNASE1L3      | 0.2772725 | 0.4321346 | 0.6416 | 0.521    | 0.337995109 | count | 1        |
| AL451165.2    | 0.3192653 | 0.3381951 | 0.944  | 0.345    | 0.338107167 | count | 1        |
| ELMO1         | 0.263165  | 0.1707451 | 1.5413 | 0.123    | 0.338120334 | count | 1        |
| MAPRE2        | 0.2580049 | 0.2029376 | 1.2714 | 0.204    | 0.338170175 | count | 1        |
| PQLC3         | 0.2435547 | 0.1047845 | 2.3243 | 0.0202   | 0.338193022 | count | 1        |
| C1orf127      | 1.008924  | 0.8986123 | 1.1228 | 0.262    | 0.338267744 | count | 1        |
| ZMYND12       | 1.008924  | 0.8986123 | 1.1228 | 0.262    | 0.338267744 | count | 1        |
| AC239868.3    | 1.008924  | 1.2214938 | 0.826  | 0.409    | 0.338267744 | count | 1        |
| EFNA1         | 1.008924  | 0.8986123 | 1.1228 | 0.262    | 0.338267744 | count | 1        |
| AL121983.2    | 1.008924  | 1.2214938 | 0.826  | 0.409    | 0.338267744 | count | 1        |
| KIAA1614-AS1  | 1.008924  | 0.8986123 | 1.1228 | 0.262    | 0.338267744 | count | 1        |
| CD34          | 1.008924  | 0.8986123 | 1.1228 | 0.262    | 0.338267744 | count | 1        |
| AL390728.5    | 1.008924  | 0.8986123 | 1.1228 | 0.262    | 0.338267744 | count | 1        |
| EML6          | 1.008924  | 0.8986123 | 1.1228 | 0.262    | 0.338267744 | count | 1        |
| AC099522.2    | 1.008924  | 0.8986123 | 1.1228 | 0.262    | 0.338267744 | count | 1        |
| CHRNA10       | 1.008924  | 0.8986123 | 1.1228 | 0.262    | 0.338267744 | count | 1        |
| LINC00702     | 1.008924  | 1.2214938 | 0.826  | 0.409    | 0.338267744 | count | 1        |
| LINC01465     | 1.008924  | 0.8986123 | 1.1228 | 0.262    | 0.338267744 | count | 1        |
| SYNJ2BP-COX16 | 1.008924  | 0.8986123 | 1.1228 | 0.262    | 0.338267744 | count | 1        |

|            |           |           |         |          |             |       |          |
|------------|-----------|-----------|---------|----------|-------------|-------|----------|
| PLK1       | 1.008924  | 0.8986123 | 1.1228  | 0.262    | 0.338267744 | count | 1        |
| AC009118.3 | 1.008924  | 0.8986123 | 1.1228  | 0.262    | 0.338267744 | count | 1        |
| AC130343.2 | 1.008924  | 0.8986123 | 1.1228  | 0.262    | 0.338267744 | count | 1        |
| AC099811.4 | 1.008924  | 1.2214938 | 0.826   | 0.409    | 0.338267744 | count | 1        |
| ANGPTL6    | 1.008924  | 0.8986123 | 1.1228  | 0.262    | 0.338267744 | count | 1        |
| CU634019.6 | 1.008924  | 1.2214938 | 0.826   | 0.409    | 0.338267744 | count | 1        |
| PRKAG2     | 0.2481599 | 0.1383746 | 1.7934  | 0.073    | 0.338328967 | count | 1        |
| CNIH1      | 0.2433121 | 0.109043  | 2.2313  | 0.0257   | 0.338507424 | count | 1        |
| ERCC3      | 0.3017901 | 0.3115217 | 0.9688  | 0.333    | 0.338510591 | count | 1        |
| CD38       | 0.366456  | 0.3604383 | 1.0167  | 0.309    | 0.338638848 | count | 1        |
| IGIP       | 0.603529  | 0.6511259 | 0.9269  | 0.354    | 0.338671817 | count | 1        |
| NT5DC3     | 0.603529  | 0.6364031 | 0.9483  | 0.343    | 0.338671817 | count | 1        |
| DPY19L3    | 0.603529  | 0.7362616 | 0.8197  | 0.412    | 0.338671817 | count | 1        |
| C4orf33    | 0.2761422 | 0.2339567 | 1.1803  | 0.238    | 0.338883534 | count | 1        |
| ZNF408     | 0.4293454 | 0.4569994 | 0.9395  | 0.348    | 0.339204806 | count | 1        |
| ATAD2      | 0.3178534 | 0.3076202 | 1.0333  | 0.302    | 0.339225639 | count | 1        |
| CEP63      | 0.2568475 | 0.1562505 | 1.6438  | 0.1      | 0.339444275 | count | 1        |
| RPS24      | 0.2354647 | 0.0221199 | 10.6449 | 6.71E-26 | 0.33947886  | count | 1.63E-21 |
| SLC25A44   | 0.3738616 | 0.3045679 | 1.2275  | 0.22     | 0.339661412 | count | 1        |
| METTL8     | 0.3357032 | 0.3183489 | 1.0545  | 0.292    | 0.33990368  | count | 1        |
| USP28      | 0.3209288 | 0.3027036 | 1.0602  | 0.289    | 0.339911896 | count | 1        |
| SNX18      | 0.2681988 | 0.1827659 | 1.4674  | 0.142    | 0.340001283 | count | 1        |
| C1orf131   | 0.2598532 | 0.1748736 | 1.4859  | 0.137    | 0.340087139 | count | 1        |
| CBR4       | 0.3265745 | 0.3069639 | 1.0639  | 0.287    | 0.340221799 | count | 1        |
| ZNF264     | 0.2977134 | 0.2538513 | 1.1728  | 0.241    | 0.340435769 | count | 1        |
| KRCC1      | 0.2525719 | 0.1484181 | 1.7018  | 0.0889   | 0.340499938 | count | 1        |
| MRE11      | 0.2955642 | 0.2157328 | 1.37    | 0.171    | 0.340878312 | count | 1        |
| IL15RA     | 0.3985401 | 0.3039605 | 1.3112  | 0.19     | 0.34090271  | count | 1        |
| NPEPPS     | 0.2575101 | 0.1611698 | 1.5978  | 0.11     | 0.340956497 | count | 1        |
| ARSB       | 0.3072809 | 0.2870935 | 1.0703  | 0.285    | 0.341006492 | count | 1        |
| KCNJ5      | 0.3632178 | 0.3641565 | 0.9974  | 0.319    | 0.341098941 | count | 1        |
| ZNF84      | 0.3056736 | 0.3166824 | 0.9652  | 0.335    | 0.341104679 | count | 1        |
| FDFT1      | 0.2570256 | 0.1669877 | 1.5392  | 0.124    | 0.341112321 | count | 1        |
| STAT3      | 0.2412729 | 0.0862682 | 2.7968  | 0.0052   | 0.341198334 | count | 1        |
| ZNF675     | 0.2894134 | 0.2602559 | 1.112   | 0.266    | 0.341274595 | count | 1        |
| FLT3       | 0.3903657 | 0.4170587 | 0.936   | 0.349    | 0.341305931 | count | 1        |
| PCED1B     | 0.3991782 | 0.4331158 | 0.9216  | 0.357    | 0.341473303 | count | 1        |
| ZNF516     | 0.3017774 | 0.3317662 | 0.9096  | 0.363    | 0.341950282 | count | 1        |
| PSTK       | 0.3913072 | 0.4499037 | 0.8698  | 0.385    | 0.34216463  | count | 1        |
| ERCC2      | 0.4096721 | 0.3976376 | 1.0303  | 0.303    | 0.342205923 | count | 1        |
| BAIAP2     | 0.2771102 | 0.2776918 | 0.9979  | 0.318    | 0.342213325 | count | 1        |
| CYHR1      | 0.2548227 | 0.1859981 | 1.37    | 0.171    | 0.342326328 | count | 1        |
| CETN3      | 0.3207721 | 0.2906969 | 1.1035  | 0.27     | 0.342415001 | count | 1        |
| CUEDC1     | 0.2791183 | 0.3450836 | 0.8088  | 0.419    | 0.342579903 | count | 1        |
| MZF1       | 0.4476721 | 0.4793808 | 0.9339  | 0.35     | 0.342650246 | count | 1        |

|            |           |           |        |          |             |       |            |
|------------|-----------|-----------|--------|----------|-------------|-------|------------|
| CCNL2      | 0.2638212 | 0.2352481 | 1.1215 | 0.262    | 0.342718276 | count | 1          |
| ZNF844     | 0.4477998 | 0.4117977 | 1.0874 | 0.277    | 0.342753622 | count | 1          |
| TRMT2A     | 0.3147563 | 0.2454981 | 1.2821 | 0.2      | 0.34307584  | count | 1          |
| ARMCX1     | 0.2820793 | 0.2014434 | 1.4003 | 0.162    | 0.343111932 | count | 1          |
| AC025159.1 | 0.2779984 | 0.2523465 | 1.1017 | 0.271    | 0.343322899 | count | 1          |
| FAM41C     | 0.4485458 | 0.4742519 | 0.9458 | 0.344    | 0.343357639 | count | 1          |
| ELP2       | 0.2797511 | 0.2571308 | 1.088  | 0.277    | 0.343365958 | count | 1          |
| HDHD2      | 0.3656797 | 0.2931008 | 1.2476 | 0.212    | 0.343494203 | count | 1          |
| DCP2       | 0.2493677 | 0.1072015 | 2.3262 | 0.0201   | 0.343790385 | count | 1          |
| CHFR       | 0.2946001 | 0.2995624 | 0.9834 | 0.325    | 0.343800406 | count | 1          |
| UFSP2      | 0.2981757 | 0.2205227 | 1.3521 | 0.176    | 0.343942039 | count | 1          |
| GFOD2      | 0.3397648 | 0.3588768 | 0.9467 | 0.344    | 0.344134622 | count | 1          |
| KDM2A      | 0.2527403 | 0.1351018 | 1.8707 | 0.0615   | 0.344138042 | count | 1          |
| ARHGAP21   | 0.2536755 | 0.1607741 | 1.5778 | 0.115    | 0.344320273 | count | 1          |
| CROCC      | 0.8529447 | 0.5209548 | 1.6373 | 0.102    | 0.344396739 | count | 1          |
| AC018816.1 | 0.8530348 | 0.8176262 | 1.0433 | 0.297    | 0.344438228 | count | 1          |
| USP22      | 0.259561  | 0.2230431 | 1.1637 | 0.245    | 0.344497525 | count | 1          |
| AL355472.1 | 0.4123095 | 0.3225511 | 1.2783 | 0.201    | 0.344515295 | count | 1          |
| DNAJC17    | 0.2725468 | 0.236695  | 1.1515 | 0.25     | 0.344595919 | count | 1          |
| MITD1      | 0.260945  | 0.1713269 | 1.5231 | 0.128    | 0.34467506  | count | 1          |
| PYGO2      | 0.5368001 | 0.4843488 | 1.1083 | 0.268    | 0.344889158 | count | 1          |
| PNRC1      | 0.2397485 | 0.0374505 | 6.4017 | 1.83E-10 | 0.344962155 | count | 4.41E-06   |
| EP400      | 0.2866442 | 0.2309239 | 1.2413 | 0.215    | 0.345192797 | count | 1          |
| ARPP19     | 0.2533426 | 0.1372321 | 1.8461 | 0.065    | 0.345241227 | count | 1          |
| EIF4G3     | 0.2565897 | 0.1337101 | 1.919  | 0.0551   | 0.345411006 | count | 1          |
| TSPAN33    | 0.2649744 | 0.1291702 | 2.0514 | 0.0403   | 0.345433603 | count | 1          |
| MEAF6      | 0.2472067 | 0.0992308 | 2.4912 | 0.0128   | 0.345440905 | count | 1          |
| MUC12      | 0.537619  | 0.564923  | 0.9517 | 0.341    | 0.345456937 | count | 1          |
| PKD2       | 0.3573802 | 0.3595129 | 0.9941 | 0.32     | 0.345460074 | count | 1          |
| ZC3H14     | 0.2828435 | 0.1902732 | 1.4865 | 0.137    | 0.345670458 | count | 1          |
| HERC2      | 0.2816189 | 0.2152195 | 1.3085 | 0.191    | 0.345686323 | count | 1          |
| SEC31B     | 2.2637447 | 1.393512  | 1.6245 | 0.104    | 0.345884129 | count | 1          |
| TOR1AIP1   | 0.2665411 | 0.1526096 | 1.7466 | 0.0808   | 0.345963156 | count | 1          |
| SRSF3      | 0.2433014 | 0.0539228 | 4.512  | 6.72E-06 | 0.346077828 | count | 0.15941184 |
| RRP8       | 0.2900837 | 0.2323097 | 1.2487 | 0.212    | 0.34643588  | count | 1          |
| MFNG       | 0.2623025 | 0.1519189 | 1.7266 | 0.0844   | 0.34647967  | count | 1          |
| RASSF3     | 0.2586053 | 0.1287364 | 2.0088 | 0.0447   | 0.346535264 | count | 1          |
| MPHOSPH8   | 0.2447888 | 0.0840781 | 2.9114 | 0.00363  | 0.346737069 | count | 1          |
| PTPN6      | 0.2454264 | 0.0774029 | 3.1708 | 0.00154  | 0.347023426 | count | 1          |
| PPP2R3A    | 0.5401934 | 0.6596342 | 0.8189 | 0.413    | 0.347242615 | count | 1          |
| DUSP28     | 0.2801191 | 0.295524  | 0.9479 | 0.343    | 0.347322195 | count | 1          |
| IRAK4      | 0.2670177 | 0.1643401 | 1.6248 | 0.104    | 0.347519743 | count | 1          |
| NBPF14     | 0.2803225 | 0.1962872 | 1.4281 | 0.153    | 0.347577257 | count | 1          |
| AP002495.2 | 0.674101  | 0.6747668 | 0.999  | 0.318    | 0.347585876 | count | 1          |
| ACLY       | 0.2814796 | 0.2256803 | 1.2472 | 0.212    | 0.347672436 | count | 1          |

|            |           |           |        |          |             |       |            |
|------------|-----------|-----------|--------|----------|-------------|-------|------------|
| ST6GAL1    | 0.2784184 | 0.1991325 | 1.3982 | 0.162    | 0.347695098 | count | 1          |
| PRRC2B     | 0.2705937 | 0.1939435 | 1.3952 | 0.163    | 0.347746837 | count | 1          |
| AL138995.1 | 0.3550915 | 0.4439684 | 0.7998 | 0.424    | 0.347756049 | count | 1          |
| BCL10      | 0.2522911 | 0.1164106 | 2.1673 | 0.0303   | 0.347774995 | count | 1          |
| PRPS1      | 0.2675665 | 0.2122241 | 1.2608 | 0.208    | 0.347932819 | count | 1          |
| DZANK1     | 0.427274  | 0.863253  | 0.495  | 0.621    | 0.347939425 | count | 1          |
| POLR3B     | 0.5413507 | 0.5602288 | 0.9663 | 0.334    | 0.34804569  | count | 1          |
| AGO3       | 0.2787127 | 0.2269835 | 1.2279 | 0.22     | 0.348066601 | count | 1          |
| LONRF3     | 0.2760993 | 0.3550338 | 0.7777 | 0.437    | 0.348108925 | count | 1          |
| MMP25      | 2.278581  | 0.919512  | 2.478  | 0.0133   | 0.348156029 | count | 1          |
| GPATCH8    | 0.2646409 | 0.182479  | 1.4503 | 0.147    | 0.348190454 | count | 1          |
| OPHN1      | 0.4545385 | 0.4890119 | 0.9295 | 0.353    | 0.348213089 | count | 1          |
| NCAPD3     | 0.2942574 | 0.2298339 | 1.2803 | 0.201    | 0.348228868 | count | 1          |
| KLHL20     | 0.3475108 | 0.3320701 | 1.0465 | 0.295    | 0.348380199 | count | 1          |
| CAPN1      | 0.259945  | 0.1617346 | 1.6072 | 0.108    | 0.348495026 | count | 1          |
| ZNF219     | 0.3406643 | 0.3959532 | 0.8604 | 0.39     | 0.348646162 | count | 1          |
| CASD1      | 0.3022231 | 0.2351947 | 1.285  | 0.199    | 0.348691855 | count | 1          |
| TRA2B      | 0.2478208 | 0.1037132 | 2.3895 | 0.0169   | 0.348757295 | count | 1          |
| ATPAF1     | 0.2904392 | 0.2173004 | 1.3366 | 0.181    | 0.348866936 | count | 1          |
| GALNT7     | 0.286199  | 0.2042465 | 1.4012 | 0.161    | 0.349015913 | count | 1          |
| HESX1      | 0.514851  | 0.6310611 | 0.8158 | 0.415    | 0.349018831 | count | 1          |
| AP001059.3 | 0.514851  | 0.7019195 | 0.7335 | 0.463    | 0.349018831 | count | 1          |
| RPAP1      | 0.676741  | 0.5366857 | 1.261  | 0.207    | 0.349095305 | count | 1          |
| CA13       | 0.8634587 | 0.7740665 | 1.1155 | 0.265    | 0.349243382 | count | 1          |
| ZNF66      | 0.8634587 | 0.7767831 | 1.1116 | 0.266    | 0.349243382 | count | 1          |
| ZFP82      | 0.8634587 | 0.7814765 | 1.1049 | 0.269    | 0.349243382 | count | 1          |
| LRRRC75A   | 0.263582  | 0.1822156 | 1.4465 | 0.148    | 0.349255801 | count | 1          |
| ZBTB44     | 0.2915885 | 0.2203071 | 1.3236 | 0.186    | 0.349277011 | count | 1          |
| MASTL      | 0.3614755 | 0.2971026 | 1.2167 | 0.224    | 0.349551935 | count | 1          |
| HP1BP3     | 0.246894  | 0.0774069 | 3.1896 | 0.00144  | 0.349565436 | count | 1          |
| ZNF224     | 0.2926983 | 0.3174632 | 0.922  | 0.357    | 0.349603655 | count | 1          |
| MED15      | 0.2786146 | 0.2638813 | 1.0558 | 0.291    | 0.349681827 | count | 1          |
| EEF1D      | 0.2434355 | 0.0330636 | 7.3626 | 2.45E-13 | 0.349954208 | count | 5.92E-09   |
| USP19      | 0.3491768 | 0.3895212 | 0.8964 | 0.37     | 0.350100696 | count | 1          |
| KAT8       | 0.2636637 | 0.1537384 | 1.715  | 0.0865   | 0.350174537 | count | 1          |
| TMA16      | 0.2611448 | 0.1630736 | 1.6014 | 0.109    | 0.35041794  | count | 1          |
| OGFR       | 0.2559168 | 0.1258462 | 2.0336 | 0.0421   | 0.350543384 | count | 1          |
| ZNF277     | 0.2676066 | 0.1884767 | 1.4198 | 0.156    | 0.35057813  | count | 1          |
| CEP295     | 0.3065049 | 0.3062821 | 1.0007 | 0.317    | 0.350672189 | count | 1          |
| OSER1-DT   | 0.8668858 | 0.6095091 | 1.4223 | 0.155    | 0.350825365 | count | 1          |
| PKNOX1     | 0.2835167 | 0.2358323 | 1.2022 | 0.229    | 0.350908739 | count | 1          |
| GLIPR1     | 0.245608  | 0.0498243 | 4.9295 | 8.80E-07 | 0.350940894 | count | 0.02096688 |
| AZIN1      | 0.2586653 | 0.1399053 | 1.8489 | 0.0646   | 0.35112315  | count | 1          |
| SNX16      | 0.3055782 | 0.2443399 | 1.2506 | 0.211    | 0.35113742  | count | 1          |
| ATP1B1     | 0.249038  | 0.0955052 | 2.6076 | 0.00917  | 0.351188341 | count | 1          |

|            |           |           |        |          |             |       |          |
|------------|-----------|-----------|--------|----------|-------------|-------|----------|
| ITFG2      | 0.3860988 | 0.2705712 | 1.427  | 0.154    | 0.351224808 | count | 1        |
| ZMAT5      | 0.2647036 | 0.1806791 | 1.465  | 0.143    | 0.351364851 | count | 1        |
| MPHOSPH10  | 0.2712075 | 0.1656254 | 1.6375 | 0.102    | 0.351409935 | count | 1        |
| SH3GL1     | 0.2729455 | 0.2230925 | 1.2235 | 0.221    | 0.351554648 | count | 1        |
| FAAH       | 0.4105366 | 0.4418839 | 0.9291 | 0.353    | 0.35164125  | count | 1        |
| RBM19      | 0.3167169 | 0.2405195 | 1.3168 | 0.188    | 0.351697028 | count | 1        |
| TNKS       | 0.3168097 | 0.3231555 | 0.9804 | 0.327    | 0.35180222  | count | 1        |
| PYROXD2    | 1.04388   | 0.6343577 | 1.6456 | 0.1      | 0.351914125 | count | 1        |
| PHLDA3     | 0.5817354 | 0.4715194 | 1.2337 | 0.217    | 0.35208997  | count | 1        |
| MINDY1     | 0.4762702 | 0.4391484 | 1.0845 | 0.278    | 0.352214522 | count | 1        |
| SBF2       | 0.2734923 | 0.1776469 | 1.5395 | 0.124    | 0.352264889 | count | 1        |
| PTBP3      | 0.253967  | 0.1049245 | 2.4205 | 0.0156   | 0.352434544 | count | 1        |
| CAT        | 0.2498834 | 0.0750907 | 3.3278 | 0.000888 | 0.352808285 | count | 1        |
| CTF1       | 0.4221352 | 0.7862477 | 0.5369 | 0.591    | 0.353128967 | count | 1        |
| LIMCH1     | 1.047202  | 0.5547435 | 1.8877 | 0.0592   | 0.353214675 | count | 1        |
| ACCS       | 0.5207953 | 0.4767039 | 1.0925 | 0.275    | 0.353345339 | count | 1        |
| LPIN2      | 0.2593071 | 0.1485675 | 1.7454 | 0.081    | 0.353403196 | count | 1        |
| CARD6      | 0.2878351 | 0.258674  | 1.1127 | 0.266    | 0.353410995 | count | 1        |
| SLC38A9    | 0.3564027 | 0.354666  | 1.0049 | 0.315    | 0.3534367   | count | 1        |
| AC009053.2 | 0.4976393 | 0.606954  | 0.8199 | 0.412    | 0.353513618 | count | 1        |
| SULF2      | 0.2644085 | 0.1808242 | 1.4622 | 0.144    | 0.353705639 | count | 1        |
| PPP2R5C    | 0.2565001 | 0.1099608 | 2.3327 | 0.0197   | 0.353832731 | count | 1        |
| PANK3      | 0.2876268 | 0.2561033 | 1.1231 | 0.262    | 0.353904474 | count | 1        |
| MED28      | 0.2555344 | 0.1163404 | 2.1964 | 0.0282   | 0.354209761 | count | 1        |
| AL138762.1 | 0.47881   | 0.9453646 | 0.5065 | 0.613    | 0.354211368 | count | 1        |
| POLG       | 0.339655  | 0.292174  | 1.1625 | 0.245    | 0.354214346 | count | 1        |
| MAP7       | 0.3893631 | 0.4084721 | 0.9532 | 0.341    | 0.354313433 | count | 1        |
| CASP6      | 0.3208789 | 0.30957   | 1.0365 | 0.3      | 0.35432874  | count | 1        |
| HSF2       | 0.3533865 | 0.3061694 | 1.1542 | 0.249    | 0.354449912 | count | 1        |
| PER2       | 0.284355  | 0.2249197 | 1.2643 | 0.206    | 0.354573019 | count | 1        |
| POP5       | 0.2631803 | 0.150969  | 1.7433 | 0.0814   | 0.354603585 | count | 1        |
| EXOC2      | 0.3463426 | 0.3153342 | 1.0983 | 0.272    | 0.354622961 | count | 1        |
| RC3H1      | 0.273203  | 0.2026054 | 1.3484 | 0.178    | 0.354678583 | count | 1        |
| STK4       | 0.2513393 | 0.077953  | 3.2242 | 0.00128  | 0.354729423 | count | 1        |
| MT-ND2     | 0.2462983 | 0.0381837 | 6.4503 | 1.34E-10 | 0.354756236 | count | 3.23E-06 |
| COASY      | 0.2871804 | 0.206212  | 1.3926 | 0.164    | 0.354797528 | count | 1        |
| CAPN7      | 0.279141  | 0.2230748 | 1.2513 | 0.211    | 0.355424801 | count | 1        |
| RNF170     | 0.3108384 | 0.2733665 | 1.1371 | 0.256    | 0.35572124  | count | 1        |
| NUP188     | 0.3382938 | 0.348375  | 0.9711 | 0.332    | 0.355833981 | count | 1        |
| HLX        | 0.2737759 | 0.1684521 | 1.6252 | 0.104    | 0.35607023  | count | 1        |
| KLF13      | 0.2545614 | 0.112176  | 2.2693 | 0.0233   | 0.356114095 | count | 1        |
| SMARCD2    | 0.2883939 | 0.1958841 | 1.4723 | 0.141    | 0.35631458  | count | 1        |
| F11R       | 0.2950626 | 0.3290828 | 0.8966 | 0.37     | 0.356419964 | count | 1        |
| HNRNPU     | 0.2485706 | 0.0592272 | 4.1969 | 2.80E-05 | 0.356479807 | count | 0.66122  |
| AC009403.1 | 0.3289606 | 0.336951  | 0.9763 | 0.329    | 0.356502827 | count | 1        |

|            |           |           |        |          |             |       |            |
|------------|-----------|-----------|--------|----------|-------------|-------|------------|
| MFSD6      | 0.3790529 | 0.3966527 | 0.9556 | 0.339    | 0.356522076 | count | 1          |
| EPB41L5    | 0.6898156 | 0.7142085 | 0.9658 | 0.334    | 0.356583179 | count | 1          |
| JMJD1C-AS1 | 0.6898156 | 0.8001977 | 0.8621 | 0.389    | 0.356583179 | count | 1          |
| SMAGP      | 0.5019783 | 0.5240888 | 0.9578 | 0.338    | 0.356806575 | count | 1          |
| IMPA2      | 0.2615242 | 0.1389849 | 1.8817 | 0.06     | 0.356809614 | count | 1          |
| ZG16B      | 0.416352  | 0.3937403 | 1.0574 | 0.29     | 0.356855329 | count | 1          |
| E2F4       | 0.2682154 | 0.1509193 | 1.7772 | 0.0757   | 0.357037898 | count | 1          |
| PIK3R3     | 0.8806706 | 0.5605825 | 1.571  | 0.116    | 0.357199168 | count | 1          |
| RCBTB2     | 0.2644939 | 0.1411793 | 1.8735 | 0.0611   | 0.357304952 | count | 1          |
| POMC       | 0.2880814 | 0.1954805 | 1.4737 | 0.141    | 0.357309671 | count | 1          |
| HDX        | 0.3743665 | 0.3596815 | 1.0408 | 0.298    | 0.357351957 | count | 1          |
| SON        | 0.250068  | 0.0535376 | 4.6709 | 3.16E-06 | 0.357582923 | count | 0.07510056 |
| RNF123     | 0.5266782 | 0.4329492 | 1.2165 | 0.224    | 0.357632613 | count | 1          |
| SFRP2      | 2.3415585 | 1.128019  | 2.0758 | 0.038    | 0.357668879 | count | 1          |
| LASP1      | 0.262593  | 0.1658081 | 1.5837 | 0.113    | 0.357708363 | count | 1          |
| KMT5B      | 0.2817006 | 0.2071036 | 1.3602 | 0.174    | 0.357772043 | count | 1          |
| WDR60      | 0.2813478 | 0.2615533 | 1.0757 | 0.282    | 0.357795109 | count | 1          |
| ABHD6      | 0.3114272 | 0.2963389 | 1.0509 | 0.293    | 0.357980038 | count | 1          |
| ZNF341     | 2.343685  | 1.44718   | 1.6195 | 0.105    | 0.357986409 | count | 1          |
| AC026369.3 | 0.4277126 | 0.406449  | 1.0523 | 0.293    | 0.35802544  | count | 1          |
| ZSCAN2     | 0.483695  | 0.5162378 | 0.937  | 0.349    | 0.358055012 | count | 1          |
| ZNF568     | 0.483695  | 0.5377494 | 0.8995 | 0.368    | 0.358055012 | count | 1          |
| ZNF574     | 0.483695  | 0.5126819 | 0.9435 | 0.346    | 0.358055012 | count | 1          |
| CDPF1      | 0.4522411 | 0.5048517 | 0.8958 | 0.37     | 0.358309445 | count | 1          |
| ACOX1      | 0.2874417 | 0.2145128 | 1.34   | 0.18     | 0.358465032 | count | 1          |
| AC007262.2 | 0.7713801 | 0.6906269 | 1.1169 | 0.264    | 0.358613578 | count | 1          |
| LZTR1      | 0.484463  | 0.4797329 | 1.0099 | 0.313    | 0.358659631 | count | 1          |
| TFRC       | 0.2547368 | 0.1211613 | 2.1025 | 0.0356   | 0.358753752 | count | 1          |
| TGFBR3     | 2.34888   | 1.199749  | 1.9578 | 0.0504   | 0.358760576 | count | 1          |
| PCF11      | 0.2609887 | 0.1318439 | 1.9795 | 0.0479   | 0.358768593 | count | 1          |
| CLECL1     | 0.304035  | 0.3043262 | 0.999  | 0.318    | 0.358790743 | count | 1          |
| ZBTB22     | 0.3085416 | 0.2572233 | 1.1995 | 0.23     | 0.358978792 | count | 1          |
| CRAMP1     | 0.7720936 | 0.8561641 | 0.9018 | 0.367    | 0.358986481 | count | 1          |
| BRD3       | 0.290569  | 0.1677458 | 1.7322 | 0.0834   | 0.359034091 | count | 1          |
| WDR53      | 0.5049163 | 0.4891075 | 1.0323 | 0.302    | 0.359037985 | count | 1          |
| MAK        | 0.7725279 | 0.5517204 | 1.4002 | 0.162    | 0.359213487 | count | 1          |
| TRAPP6B    | 0.29189   | 0.206185  | 1.4157 | 0.157    | 0.35921463  | count | 1          |
| GSE1       | 0.5051548 | 0.3196903 | 1.5801 | 0.114    | 0.359219192 | count | 1          |
| AC147067.1 | 0.358002  | 0.3280655 | 1.0913 | 0.275    | 0.359221362 | count | 1          |
| FBXO44     | 0.7728203 | 0.5215657 | 1.4817 | 0.139    | 0.35936635  | count | 1          |
| ARHGAP26   | 0.2602013 | 0.130077  | 2.0004 | 0.0456   | 0.359414594 | count | 1          |
| ZBED1      | 0.2835144 | 0.2196859 | 1.2905 | 0.197    | 0.359609619 | count | 1          |
| PPM1M      | 0.2752531 | 0.1652851 | 1.6653 | 0.096    | 0.359822352 | count | 1          |
| BPNT1      | 0.4108005 | 0.4189783 | 0.9805 | 0.327    | 0.359976166 | count | 1          |
| NUDT4      | 0.2745504 | 0.1829838 | 1.5004 | 0.134    | 0.360013966 | count | 1          |

|             |           |           |        |          |             |       |             |
|-------------|-----------|-----------|--------|----------|-------------|-------|-------------|
| PTK2B       | 0.282044  | 0.2434102 | 1.1587 | 0.247    | 0.360064333 | count | 1           |
| CEBPD       | 0.2499446 | 0.0423809 | 5.8976 | 4.20E-09 | 0.360172422 | count | 0.000100821 |
| LIMK2       | 0.3322962 | 0.3119894 | 1.0651 | 0.287    | 0.360202352 | count | 1           |
| ARRDC5      | 0.8871806 | 0.6635098 | 1.3371 | 0.181    | 0.360215085 | count | 1           |
| AC084033.3  | 0.3243848 | 0.3111714 | 1.0425 | 0.297    | 0.360392621 | count | 1           |
| NGDN        | 0.2863329 | 0.2532706 | 1.1305 | 0.258    | 0.360599524 | count | 1           |
| U73166.1    | 0.696956  | 0.6002407 | 1.1611 | 0.246    | 0.360681698 | count | 1           |
| PRDM15      | 0.696956  | 0.6056021 | 1.1508 | 0.25     | 0.360681698 | count | 1           |
| VARS        | 0.3067075 | 0.2487113 | 1.2332 | 0.218    | 0.360758022 | count | 1           |
| COPS2       | 0.2630537 | 0.1158196 | 2.2712 | 0.0232   | 0.360821503 | count | 1           |
| NUDT16L1    | 0.2830497 | 0.1940696 | 1.4585 | 0.145    | 0.360909088 | count | 1           |
| CAAP1       | 0.2824903 | 0.2155423 | 1.3106 | 0.19     | 0.361081237 | count | 1           |
| TMEM263     | 0.3040296 | 0.3037194 | 1.001  | 0.317    | 0.361129251 | count | 1           |
| ST3GAL3     | 0.6401288 | 0.5638048 | 1.1354 | 0.256    | 0.361267968 | count | 1           |
| TMEM202-AS1 | 0.6401288 | 0.5891734 | 1.0865 | 0.277    | 0.361267968 | count | 1           |
| DGCR6       | 0.6401288 | 0.5891734 | 1.0865 | 0.277    | 0.361267968 | count | 1           |
| ZNF526      | 0.3291121 | 0.5940959 | 0.554  | 0.58     | 0.361395771 | count | 1           |
| TRPC4AP     | 0.2888173 | 0.2066118 | 1.3979 | 0.162    | 0.361439022 | count | 1           |
| WAPL        | 0.2663467 | 0.1410492 | 1.8883 | 0.0591   | 0.36159759  | count | 1           |
| AC006504.5  | 0.4882519 | 0.5785125 | 0.844  | 0.399    | 0.36164394  | count | 1           |
| TSPO        | 0.2514772 | 0.0368407 | 6.8261 | 1.10E-11 | 0.361795623 | count | 2.65E-07    |
| MGA         | 0.3098638 | 0.2671726 | 1.1598 | 0.246    | 0.361914776 | count | 1           |
| AL135925.1  | 0.3020093 | 0.2523318 | 1.1969 | 0.231    | 0.361942541 | count | 1           |
| SP2         | 0.3320512 | 0.3796611 | 0.8746 | 0.382    | 0.362361708 | count | 1           |
| TRAPPC12    | 0.2985427 | 0.1765304 | 1.6912 | 0.0909   | 0.362522161 | count | 1           |
| KIF16B      | 0.3507464 | 0.3263714 | 1.0747 | 0.283    | 0.362761246 | count | 1           |
| TXNRD3      | 1.07179   | 1.0145409 | 1.0564 | 0.291    | 0.362861216 | count | 1           |
| NSD3        | 0.2591763 | 0.0996772 | 2.6002 | 0.00937  | 0.363197358 | count | 1           |
| USP7        | 0.2713375 | 0.1469316 | 1.8467 | 0.0649   | 0.363363491 | count | 1           |
| DPYSL3      | 0.5106891 | 0.4942625 | 1.0332 | 0.302    | 0.363426407 | count | 1           |
| TRIP11      | 0.2700748 | 0.1617605 | 1.6696 | 0.0951   | 0.363515468 | count | 1           |
| FRYL        | 0.2797405 | 0.2118521 | 1.3205 | 0.187    | 0.363564279 | count | 1           |
| EIF1AY      | 0.2610574 | 0.1239356 | 2.1064 | 0.0353   | 0.363749804 | count | 1           |
| ZFAND3      | 0.2730948 | 0.1570274 | 1.7392 | 0.0821   | 0.363764916 | count | 1           |
| ST5         | 0.7816186 | 0.7870789 | 0.9931 | 0.321    | 0.363969873 | count | 1           |
| ECHDC1      | 0.2629959 | 0.1080171 | 2.4348 | 0.015    | 0.364039625 | count | 1           |
| SLC25A28    | 0.2862134 | 0.1629892 | 1.756  | 0.0792   | 0.364042955 | count | 1           |
| TMEM175     | 0.3106253 | 0.2763096 | 1.1242 | 0.261    | 0.364150784 | count | 1           |
| HBS1L       | 0.2914548 | 0.2754648 | 1.058  | 0.29     | 0.364158193 | count | 1           |
| NOC4L       | 0.3246753 | 0.2899009 | 1.12   | 0.263    | 0.364708863 | count | 1           |
| FECH        | 0.3718711 | 0.3389623 | 1.0971 | 0.273    | 0.364739542 | count | 1           |
| AIRN        | 2.389403  | 1.446081  | 1.6523 | 0.0986   | 0.364748537 | count | 1           |
| STX18       | 0.2996396 | 0.2149037 | 1.3943 | 0.163    | 0.364759423 | count | 1           |
| MYSM1       | 0.2924489 | 0.2798724 | 1.0449 | 0.296    | 0.364780295 | count | 1           |
| METTL14     | 0.3111916 | 0.2832466 | 1.0987 | 0.272    | 0.364825666 | count | 1           |

|            |           |           |        |          |             |       |   |
|------------|-----------|-----------|--------|----------|-------------|-------|---|
| AMPD2      | 0.2797464 | 0.201458  | 1.3886 | 0.165    | 0.364840586 | count | 1 |
| TOR4A      | 0.3249469 | 0.2591564 | 1.2539 | 0.21     | 0.365020165 | count | 1 |
| BRAP       | 0.3391012 | 0.3391251 | 0.9999 | 0.317    | 0.365168567 | count | 1 |
| SAMSN1     | 0.2569637 | 0.0687273 | 3.7389 | 0.000189 | 0.365188898 | count | 1 |
| TXLNB      | 0.4083058 | 0.315041  | 1.296  | 0.195    | 0.36521907  | count | 1 |
| AC233723.1 | 0.7840997 | 0.7328914 | 1.0699 | 0.285    | 0.36526957  | count | 1 |
| TMEM106B   | 0.2914245 | 0.2108777 | 1.382  | 0.167    | 0.365342353 | count | 1 |
| HMG3       | 0.2586905 | 0.0783829 | 3.3003 | 0.00098  | 0.365569936 | count | 1 |
| MFSD3      | 0.3884037 | 0.382672  | 1.015  | 0.31     | 0.365647949 | count | 1 |
| KCNMB1     | 0.3329171 | 0.2773623 | 1.2003 | 0.23     | 0.365667916 | count | 1 |
| TMEM185B   | 0.3946135 | 0.3263782 | 1.2091 | 0.227    | 0.36569017  | count | 1 |
| WDR11      | 0.2758468 | 0.2417478 | 1.1411 | 0.254    | 0.366040305 | count | 1 |
| AC099063.4 | 1.4154761 | 0.8315954 | 1.7021 | 0.0889   | 0.366092192 | count | 1 |
| LINC01736  | 1.4154761 | 0.8315954 | 1.7021 | 0.0889   | 0.366092192 | count | 1 |
| CXCL14     | 1.4154761 | 1.307151  | 1.0829 | 0.279    | 0.366092192 | count | 1 |
| ZNF300     | 1.4154761 | 1.021294  | 1.386  | 0.166    | 0.366092192 | count | 1 |
| SPDYE16    | 1.4154761 | 1.0545611 | 1.3422 | 0.18     | 0.366092192 | count | 1 |
| TMEM266    | 1.4154761 | 1.38413   | 1.0226 | 0.307    | 0.366092192 | count | 1 |
| AIMP2      | 0.2797826 | 0.1725237 | 1.6217 | 0.105    | 0.366365257 | count | 1 |
| RWDD3      | 0.6034584 | 0.5979392 | 1.0092 | 0.313    | 0.366426622 | count | 1 |
| PDCD1      | 0.6034584 | 0.5979392 | 1.0092 | 0.313    | 0.366426622 | count | 1 |
| KIFC2      | 0.6035734 | 0.4840204 | 1.247  | 0.213    | 0.36650269  | count | 1 |
| TGFB111    | 0.6038933 | 0.4563939 | 1.3232 | 0.186    | 0.366714329 | count | 1 |
| TSR2       | 0.2766005 | 0.1617714 | 1.7098 | 0.0874   | 0.367046807 | count | 1 |
| VPS26B     | 0.2994878 | 0.2449215 | 1.2228 | 0.222    | 0.367099827 | count | 1 |
| RAVER1     | 0.4627628 | 1.011448  | 0.4575 | 0.647    | 0.367117727 | count | 1 |
| AP005019.1 | 1.083071  | 0.6707652 | 1.6147 | 0.107    | 0.367298035 | count | 1 |
| IER5       | 0.2605396 | 0.0871665 | 2.989  | 0.00283  | 0.367324742 | count | 1 |
| CCDC59     | 0.2679557 | 0.1097867 | 2.4407 | 0.0147   | 0.36733744  | count | 1 |
| VDAC3      | 0.2629143 | 0.1020577 | 2.5761 | 0.01     | 0.367412169 | count | 1 |
| PRPSAP1    | 0.282692  | 0.2225889 | 1.27   | 0.204    | 0.36743099  | count | 1 |
| AC062029.1 | 0.7883215 | 0.5855004 | 1.3464 | 0.178    | 0.367482622 | count | 1 |
| CNOT10     | 0.3157838 | 0.3143292 | 1.0046 | 0.315    | 0.367551185 | count | 1 |
| INPP5B     | 0.4504353 | 0.3404092 | 1.3232 | 0.186    | 0.367812699 | count | 1 |
| ADA2       | 0.2646419 | 0.1035834 | 2.5549 | 0.0107   | 0.367815341 | count | 1 |
| ANKRD40    | 0.2920085 | 0.2107386 | 1.3856 | 0.166    | 0.36782303  | count | 1 |
| RELL1      | 0.3060248 | 0.2576634 | 1.1877 | 0.235    | 0.367861767 | count | 1 |
| SDHAF1     | 0.3137443 | 0.3203546 | 0.9794 | 0.327    | 0.367868266 | count | 1 |
| AURKB      | 0.7891219 | 0.7227912 | 1.0918 | 0.275    | 0.367902394 | count | 1 |
| C3orf62    | 0.3556614 | 0.2827605 | 1.2578 | 0.209    | 0.367988184 | count | 1 |
| RPS17      | 0.2820519 | 0.1402519 | 2.011  | 0.0444   | 0.368177717 | count | 1 |
| STK25      | 0.2762025 | 0.1850832 | 1.4923 | 0.136    | 0.368310941 | count | 1 |
| HIRIP3     | 0.3231378 | 0.3349699 | 0.9647 | 0.335    | 0.368377816 | count | 1 |
| RFX2       | 0.3091027 | 0.271734  | 1.1375 | 0.255    | 0.368387925 | count | 1 |
| NEDD1      | 0.3131163 | 0.3480279 | 0.8997 | 0.368    | 0.36842011  | count | 1 |



|            |           |           |         |          |             |       |          |
|------------|-----------|-----------|---------|----------|-------------|-------|----------|
| NPTN       | 0.2654411 | 0.112447  | 2.3606  | 0.0183   | 0.368538812 | count | 1        |
| ANKMY2     | 0.3711739 | 0.3704126 | 1.0021  | 0.316    | 0.368560814 | count | 1        |
| AC100858.3 | 1.423983  | 0.9639486 | 1.4772  | 0.14     | 0.368654477 | count | 1        |
| CPNE7      | 1.423983  | 0.9639486 | 1.4772  | 0.14     | 0.368654477 | count | 1        |
| SOCS4      | 0.2871229 | 0.2052525 | 1.3989  | 0.162    | 0.368771117 | count | 1        |
| ORMDL1     | 0.2632472 | 0.0914761 | 2.8778  | 0.00404  | 0.368837275 | count | 1        |
| SLC18B1    | 0.3283799 | 0.3139788 | 1.0459  | 0.296    | 0.36895575  | count | 1        |
| LDB1       | 0.3105645 | 0.283065  | 1.0971  | 0.273    | 0.369012551 | count | 1        |
| THEMIS2    | 0.26273   | 0.0876621 | 2.9971  | 0.00275  | 0.369035077 | count | 1        |
| WAC        | 0.2687158 | 0.1178103 | 2.2809  | 0.0226   | 0.369142311 | count | 1        |
| THOC2      | 0.270575  | 0.1340603 | 2.0183  | 0.0437   | 0.369210239 | count | 1        |
| DNAJB4     | 0.315016  | 0.2260559 | 1.3935  | 0.164    | 0.369384287 | count | 1        |
| SAMD9L     | 0.2756258 | 0.1511849 | 1.8231  | 0.0684   | 0.369471804 | count | 1        |
| ALG1       | 0.3766743 | 0.3471128 | 1.0852  | 0.278    | 0.36960884  | count | 1        |
| ERAL1      | 0.3387082 | 0.2565419 | 1.3203  | 0.187    | 0.369795333 | count | 1        |
| MIA3       | 0.2695277 | 0.1206592 | 2.2338  | 0.0256   | 0.36981253  | count | 1        |
| TLR4       | 0.2736298 | 0.116415  | 2.3505  | 0.0188   | 0.369967771 | count | 1        |
| ANKRD28    | 0.2636237 | 0.1111915 | 2.3709  | 0.0178   | 0.370093173 | count | 1        |
| MT-ND1     | 0.2570013 | 0.0362828 | 7.0833  | 1.83E-12 | 0.370126236 | count | 4.42E-08 |
| SDR39U1    | 0.3218367 | 0.2541793 | 1.2662  | 0.206    | 0.370167513 | count | 1        |
| FAM53B     | 0.3821723 | 0.2838106 | 1.3466  | 0.178    | 0.370270452 | count | 1        |
| ACD        | 0.3648393 | 0.249983  | 1.4595  | 0.145    | 0.370307864 | count | 1        |
| RFX5       | 0.3463474 | 0.2947273 | 1.1751  | 0.24     | 0.370411323 | count | 1        |
| CYB5R1     | 0.2779435 | 0.1405637 | 1.9773  | 0.0481   | 0.370646518 | count | 1        |
| ZC3H6      | 0.2851921 | 0.1884604 | 1.5133  | 0.13     | 0.370706759 | count | 1        |
| YAF2       | 0.2840079 | 0.1933769 | 1.4687  | 0.142    | 0.370750724 | count | 1        |
| SYAP1      | 0.2615814 | 0.0945347 | 2.767   | 0.0057   | 0.370837912 | count | 1        |
| NDST1      | 0.355187  | 0.3538056 | 1.0039  | 0.316    | 0.370860382 | count | 1        |
| PSME3      | 0.3069105 | 0.2219536 | 1.3828  | 0.167    | 0.370935164 | count | 1        |
| HOMEZ      | 0.432128  | 0.4305726 | 1.0036  | 0.316    | 0.371027495 | count | 1        |
| PTPRN2     | 0.3338093 | 0.2981942 | 1.1194  | 0.263    | 0.3710902   | count | 1        |
| CASP4      | 0.262884  | 0.0761588 | 3.4518  | 0.000566 | 0.371193431 | count | 1        |
| MAP3K4     | 0.2939013 | 0.241614  | 1.2164  | 0.224    | 0.371339921 | count | 1        |
| FXN        | 0.3135851 | 0.2293498 | 1.3673  | 0.172    | 0.37146874  | count | 1        |
| PAOX       | 0.3559021 | 0.4025963 | 0.884   | 0.377    | 0.371627575 | count | 1        |
| MRPS5      | 0.2684488 | 0.1332705 | 2.0143  | 0.0441   | 0.371867985 | count | 1        |
| KBTBD11    | 0.3207282 | 0.2795746 | 1.1472  | 0.251    | 0.371943951 | count | 1        |
| CD6        | 1.095187  | 0.6945091 | 1.5769  | 0.115    | 0.372070459 | count | 1        |
| MRPL1      | 0.2936884 | 0.2130227 | 1.3787  | 0.168    | 0.372130029 | count | 1        |
| RPL39      | 0.258262  | 0.024985  | 10.3367 | 1.52E-24 | 0.372156825 | count | 3.69E-20 |
| HCFC1      | 0.3430847 | 0.330161  | 1.0391  | 0.299    | 0.372177801 | count | 1        |
| UBR5-AS1   | 0.3330588 | 0.4622656 | 0.7205  | 0.471    | 0.372318453 | count | 1        |
| VPS26C     | 0.2872329 | 0.1821042 | 1.5773  | 0.115    | 0.372698432 | count | 1        |
| CCHCR1     | 0.5023254 | 0.406941  | 1.2344  | 0.217    | 0.372748894 | count | 1        |
| ZNF839     | 0.5768602 | 0.5179593 | 1.1137  | 0.266    | 0.372785428 | count | 1        |

|            |           |           |        |          |             |       |          |
|------------|-----------|-----------|--------|----------|-------------|-------|----------|
| KSR1       | 0.5474561 | 0.4128052 | 1.3262 | 0.185    | 0.37281788  | count | 1        |
| CEP162     | 0.3513507 | 0.2833175 | 1.2401 | 0.215    | 0.372983447 | count | 1        |
| DCAF12     | 0.3085941 | 0.2247992 | 1.3728 | 0.17     | 0.372998881 | count | 1        |
| TIGD7      | 0.4251925 | 0.6765284 | 0.6285 | 0.53     | 0.373165619 | count | 1        |
| IQCD       | 0.3515357 | 0.4581748 | 0.7673 | 0.443    | 0.373184939 | count | 1        |
| GMFG       | 0.2602429 | 0.0401026 | 6.4894 | 1.04E-10 | 0.373244977 | count | 2.50E-06 |
| RBM42      | 0.2742047 | 0.1195388 | 2.2939 | 0.0219   | 0.373288803 | count | 1        |
| STT3A      | 0.3131733 | 0.2665    | 1.1751 | 0.24     | 0.373314141 | count | 1        |
| TOB2       | 0.27412   | 0.142608  | 1.9222 | 0.0547   | 0.373378313 | count | 1        |
| DROSHA     | 0.503287  | 0.5051312 | 0.9963 | 0.319    | 0.373508805 | count | 1        |
| RPUSD1     | 0.3342157 | 0.2741589 | 1.2191 | 0.223    | 0.373639107 | count | 1        |
| GMEB1      | 0.2945503 | 0.1974609 | 1.4917 | 0.136    | 0.373749737 | count | 1        |
| EMC10      | 0.2723934 | 0.1303121 | 2.0903 | 0.0367   | 0.373759512 | count | 1        |
| ITGB2      | 0.260484  | 0.0385296 | 6.7606 | 1.71E-11 | 0.373813137 | count | 4.12E-07 |
| SLC11A1    | 0.2620993 | 0.0956191 | 2.7411 | 0.00617  | 0.373882988 | count | 1        |
| RABGAP1L   | 0.2833437 | 0.2080806 | 1.3617 | 0.173    | 0.373981416 | count | 1        |
| UBE4A      | 0.2885353 | 0.201755  | 1.4301 | 0.153    | 0.374050972 | count | 1        |
| CST3       | 0.2594175 | 0.0415559 | 6.2426 | 5.05E-10 | 0.374068127 | count | 1.21E-05 |
| CEACAM21   | 0.4863616 | 0.432983  | 1.1233 | 0.261    | 0.374095095 | count | 1        |
| BOD1L1     | 0.2643197 | 0.0821167 | 3.2188 | 0.0013   | 0.374096464 | count | 1        |
| STAT2      | 0.2761684 | 0.1382908 | 1.997  | 0.0459   | 0.37417051  | count | 1        |
| GGPS1      | 0.2966372 | 0.2385129 | 1.2437 | 0.214    | 0.374280264 | count | 1        |
| STYXL1     | 0.3040273 | 0.22386   | 1.3581 | 0.175    | 0.374341434 | count | 1        |
| ZSCAN20    | 0.9182308 | 0.8689214 | 1.0567 | 0.291    | 0.374649488 | count | 1        |
| KDM4A-AS1  | 0.9182308 | 1.05643   | 0.8692 | 0.385    | 0.374649488 | count | 1        |
| LTA        | 0.9182308 | 1.0351217 | 0.8871 | 0.375    | 0.374649488 | count | 1        |
| GTF2IRD1   | 0.9182308 | 1.05643   | 0.8692 | 0.385    | 0.374649488 | count | 1        |
| GNRH1      | 0.9182308 | 0.8689214 | 1.0567 | 0.291    | 0.374649488 | count | 1        |
| PRNCR1     | 0.9182308 | 1.0351217 | 0.8871 | 0.375    | 0.374649488 | count | 1        |
| CDT1       | 0.9182308 | 0.9948409 | 0.923  | 0.356    | 0.374649488 | count | 1        |
| C19orf81   | 0.9182308 | 0.9948409 | 0.923  | 0.356    | 0.374649488 | count | 1        |
| IL17RC     | 0.3690377 | 0.336217  | 1.0976 | 0.272    | 0.374699047 | count | 1        |
| LRCH4      | 0.2890704 | 0.2115301 | 1.3666 | 0.172    | 0.37475046  | count | 1        |
| JAG1       | 0.4113893 | 0.3536268 | 1.1633 | 0.245    | 0.375198064 | count | 1        |
| TMEM229B   | 0.9196146 | 0.6806243 | 1.3511 | 0.177    | 0.37529464  | count | 1        |
| PPP1R11    | 0.2710722 | 0.1158444 | 2.34   | 0.0194   | 0.375462125 | count | 1        |
| FAM98B     | 0.3596499 | 0.3459829 | 1.0395 | 0.299    | 0.375649514 | count | 1        |
| IL1RL2     | 0.8040595 | 0.5543067 | 1.4506 | 0.147    | 0.375748982 | count | 1        |
| GALK2      | 0.3228271 | 0.2456324 | 1.3143 | 0.189    | 0.375893609 | count | 1        |
| TIGD2      | 0.66389   | 0.6505901 | 1.0204 | 0.308    | 0.376035988 | count | 1        |
| BX537318.1 | 0.66389   | 0.5710723 | 1.1625 | 0.245    | 0.376035988 | count | 1        |
| CCDC85B    | 0.265268  | 0.0801429 | 3.3099 | 0.000947 | 0.376052281 | count | 1        |
| FARP1      | 0.3255628 | 0.2352261 | 1.384  | 0.166    | 0.376118258 | count | 1        |
| THG1L      | 0.3106402 | 0.2305423 | 1.3474 | 0.178    | 0.376475    | count | 1        |
| GPR180     | 0.3938069 | 0.3814925 | 1.0323 | 0.302    | 0.37659488  | count | 1        |

|            |           |           |        |         |             |       |   |
|------------|-----------|-----------|--------|---------|-------------|-------|---|
| MAML3      | 0.2928543 | 0.2166923 | 1.3515 | 0.177   | 0.376616332 | count | 1 |
| SLC25A4    | 0.3835882 | 0.6266085 | 0.6122 | 0.54    | 0.376623839 | count | 1 |
| PDHX       | 0.3426933 | 0.288711  | 1.187  | 0.235   | 0.37665268  | count | 1 |
| CYB5D1     | 0.5073384 | 0.5140907 | 0.9869 | 0.324   | 0.376712036 | count | 1 |
| TSC22D4    | 0.2761203 | 0.1488045 | 1.8556 | 0.0636  | 0.376712862 | count | 1 |
| ZNFX1      | 0.2942902 | 0.1893306 | 1.5544 | 0.12    | 0.376758801 | count | 1 |
| CBX4       | 0.2951277 | 0.1578668 | 1.8695 | 0.0617  | 0.376929142 | count | 1 |
| SLC35F5    | 0.3102688 | 0.2633563 | 1.1781 | 0.239   | 0.376959767 | count | 1 |
| TRIM44     | 0.2715925 | 0.1226962 | 2.2135 | 0.027   | 0.376966518 | count | 1 |
| CPLANE1    | 0.3305385 | 0.419559  | 0.7878 | 0.431   | 0.376979532 | count | 1 |
| CHMP7      | 0.3305527 | 0.3285077 | 1.0062 | 0.314   | 0.376996041 | count | 1 |
| RDH14      | 0.3203455 | 0.2271317 | 1.4104 | 0.159   | 0.377068212 | count | 1 |
| EXOG       | 0.375288  | 0.3565573 | 1.0525 | 0.293   | 0.377118932 | count | 1 |
| AKAP12     | 2.4754134 | 1.53595   | 1.6117 | 0.107   | 0.377140717 | count | 1 |
| AC021739.2 | 2.4754134 | 1.53595   | 1.6117 | 0.107   | 0.377140717 | count | 1 |
| NID1       | 0.6656665 | 0.6054523 | 1.0995 | 0.272   | 0.377143114 | count | 1 |
| USP49      | 0.4495247 | 0.4604788 | 0.9762 | 0.329   | 0.37722263  | count | 1 |
| C17orf100  | 1.108716  | 0.7072473 | 1.5676 | 0.117   | 0.377408124 | count | 1 |
| AL121761.1 | 1.108716  | 0.7353296 | 1.5078 | 0.132   | 0.377408124 | count | 1 |
| KIAA1671   | 1.108716  | 0.8340581 | 1.3293 | 0.184   | 0.377408124 | count | 1 |
| ALS2       | 0.5542553 | 0.4348667 | 1.2745 | 0.203   | 0.377801305 | count | 1 |
| DMD        | 0.9252908 | 0.6073921 | 1.5234 | 0.128   | 0.377942686 | count | 1 |
| MBTPS2     | 0.4758569 | 0.5787854 | 0.8222 | 0.411   | 0.37810425  | count | 1 |
| SENP2      | 0.3463021 | 0.2601819 | 1.331  | 0.183   | 0.378282022 | count | 1 |
| AL033527.5 | 0.7278808 | 0.6549281 | 1.1114 | 0.267   | 0.378504653 | count | 1 |
| SDAD1      | 0.2871783 | 0.1698876 | 1.6904 | 0.0911  | 0.37857514  | count | 1 |
| EIF2D      | 0.315758  | 0.2871659 | 1.0996 | 0.272   | 0.378669273 | count | 1 |
| LMLN       | 0.8096116 | 0.647549  | 1.2503 | 0.211   | 0.378671341 | count | 1 |
| SHLD3      | 0.6681611 | 0.6342226 | 1.0535 | 0.292   | 0.378698472 | count | 1 |
| AC004982.2 | 0.9270196 | 0.7265572 | 1.2759 | 0.202   | 0.378749576 | count | 1 |
| OSBPL5     | 0.9270196 | 0.8236669 | 1.1255 | 0.26    | 0.378749576 | count | 1 |
| AP000487.1 | 0.9270196 | 0.6906885 | 1.3422 | 0.18    | 0.378749576 | count | 1 |
| PTGIS      | 0.9270196 | 0.8040362 | 1.153  | 0.249   | 0.378749576 | count | 1 |
| PAXX       | 0.2746062 | 0.1136672 | 2.4159 | 0.0158  | 0.378770615 | count | 1 |
| UBQLN2     | 0.3292172 | 0.2535641 | 1.2984 | 0.194   | 0.37881601  | count | 1 |
| UAP1L1     | 0.3490854 | 0.2971854 | 1.1746 | 0.24    | 0.378845164 | count | 1 |
| GPN2       | 0.3514954 | 0.3164146 | 1.1109 | 0.267   | 0.378848957 | count | 1 |
| TTC13      | 0.4515052 | 0.4739349 | 0.9527 | 0.341   | 0.378969445 | count | 1 |
| EIF2S3     | 0.2727228 | 0.0836871 | 3.2588 | 0.00113 | 0.378991705 | count | 1 |
| SYP        | 0.6689242 | 0.5919851 | 1.13   | 0.259   | 0.379174428 | count | 1 |
| KCTD18     | 0.4233279 | 0.3971617 | 1.0659 | 0.287   | 0.379248442 | count | 1 |
| CEP350     | 0.2767923 | 0.1314999 | 2.1049 | 0.0354  | 0.379335436 | count | 1 |
| IRF5       | 0.3450902 | 0.230603  | 1.4965 | 0.135   | 0.379347715 | count | 1 |
| TSC2       | 0.3698622 | 0.3069568 | 1.2049 | 0.228   | 0.379427778 | count | 1 |
| ZNF577     | 0.3546935 | 0.3432958 | 1.0332 | 0.302   | 0.379566288 | count | 1 |

|            |           |           |        |          |             |       |          |
|------------|-----------|-----------|--------|----------|-------------|-------|----------|
| PDCD7      | 0.2872229 | 0.1441516 | 1.9925 | 0.0464   | 0.379626054 | count | 1        |
| ZNF106     | 0.2699665 | 0.0801283 | 3.3692 | 0.000766 | 0.379667103 | count | 1        |
| POU2F1     | 0.3150493 | 0.2850339 | 1.1053 | 0.269    | 0.379906548 | count | 1        |
| ARMT1      | 0.289247  | 0.1600551 | 1.8072 | 0.0709   | 0.379990705 | count | 1        |
| FBXO27     | 1.115635  | 0.7908176 | 1.4107 | 0.158    | 0.380141173 | count | 1        |
| VIPR1      | 1.462908  | 0.5459126 | 2.6797 | 0.00742  | 0.380380825 | count | 1        |
| AKT2       | 0.2960825 | 0.2424787 | 1.2211 | 0.222    | 0.380384875 | count | 1        |
| SLC25A36   | 0.278214  | 0.1283298 | 2.168  | 0.0303   | 0.380426488 | count | 1        |
| PDE7B      | 2.500038  | 1.028617  | 2.4305 | 0.0151   | 0.380606922 | count | 1        |
| PGGT1B     | 0.2896372 | 0.1657144 | 1.7478 | 0.0806   | 0.380781429 | count | 1        |
| NAPEPLD    | 0.4790564 | 0.4364894 | 1.0975 | 0.273    | 0.380792885 | count | 1        |
| RPL30      | 0.2642172 | 0.0229975 | 11.489 | 8.55E-30 | 0.380878536 | count | 2.08E-25 |
| EED        | 0.3216129 | 0.2590356 | 1.2416 | 0.215    | 0.381132761 | count | 1        |
| MED22      | 0.4107039 | 0.3282312 | 1.2513 | 0.211    | 0.381203848 | count | 1        |
| NR2C2      | 0.3648695 | 0.3205227 | 1.1384 | 0.255    | 0.381254086 | count | 1        |
| ABHD10     | 0.3792885 | 0.3140456 | 1.2077 | 0.227    | 0.381267064 | count | 1        |
| RTN3       | 0.2704162 | 0.0713147 | 3.7919 | 0.000153 | 0.381323276 | count | 1        |
| ZNF25      | 0.3985781 | 0.4176942 | 0.9542 | 0.34     | 0.381326289 | count | 1        |
| MRPL53     | 0.443775  | 0.4482704 | 0.99   | 0.322    | 0.38151573  | count | 1        |
| RNASEK     | 0.2785452 | 0.1361081 | 2.0465 | 0.0408   | 0.381663911 | count | 1        |
| NFE2L1     | 0.301154  | 0.2787519 | 1.0804 | 0.28     | 0.381688013 | count | 1        |
| SHOC2      | 0.2748339 | 0.1233967 | 2.2272 | 0.026    | 0.381845101 | count | 1        |
| TNFAIP8L2  | 0.2820983 | 0.1519521 | 1.8565 | 0.0635   | 0.381865755 | count | 1        |
| SPRTN      | 0.3183893 | 0.2271235 | 1.4018 | 0.161    | 0.381872625 | count | 1        |
| DYSF       | 0.4548329 | 0.338452  | 1.3439 | 0.179    | 0.381905879 | count | 1        |
| C2orf76    | 0.309015  | 0.2283918 | 1.353  | 0.176    | 0.382113461 | count | 1        |
| UBXN2A     | 0.3130609 | 0.2406485 | 1.3009 | 0.193    | 0.382224708 | count | 1        |
| MAP1LC3A   | 0.3308373 | 0.2805389 | 1.1793 | 0.238    | 0.382324687 | count | 1        |
| BRD4       | 0.2745092 | 0.0957259 | 2.8677 | 0.00417  | 0.382351454 | count | 1        |
| ELOA-AS1   | 0.6274949 | 0.6538075 | 0.9598 | 0.337    | 0.382368593 | count | 1        |
| SLC5A6     | 0.6274949 | 0.6275693 | 0.9999 | 0.317    | 0.382368593 | count | 1        |
| ANO8       | 0.8177014 | 0.6321214 | 1.2936 | 0.196    | 0.382935041 | count | 1        |
| STK3       | 0.3233692 | 0.2307408 | 1.4014 | 0.161    | 0.383247895 | count | 1        |
| SPSB3      | 0.2862314 | 0.146383  | 1.9554 | 0.0507   | 0.383250127 | count | 1        |
| TRIB3      | 0.3486478 | 0.3761261 | 0.9269 | 0.354    | 0.383349122 | count | 1        |
| TMEM236    | 0.6757741 | 0.4081451 | 1.6557 | 0.0979   | 0.383450099 | count | 1        |
| FBL        | 0.2846063 | 0.1644294 | 1.7309 | 0.0836   | 0.383480496 | count | 1        |
| GAK        | 0.3043795 | 0.2151206 | 1.4149 | 0.157    | 0.38357665  | count | 1        |
| AF213884.3 | 0.6295076 | 0.6817279 | 0.9234 | 0.356    | 0.383707143 | count | 1        |
| PI4KB      | 0.3270673 | 0.2502232 | 1.3071 | 0.191    | 0.383759314 | count | 1        |
| JUN        | 0.2667864 | 0.0859553 | 3.1038 | 0.00193  | 0.383817302 | count | 1        |
| PPP5C      | 0.4690165 | 0.4510689 | 1.0398 | 0.299    | 0.383818278 | count | 1        |
| DCP1B      | 0.7374505 | 0.5808306 | 1.2696 | 0.204    | 0.384043213 | count | 1        |
| REV1       | 0.2991226 | 0.2084847 | 1.4347 | 0.151    | 0.384751713 | count | 1        |
| KHSRP      | 0.3181952 | 0.2057858 | 1.5462 | 0.122    | 0.384772763 | count | 1        |

|           |           |           |        |          |             |       |   |
|-----------|-----------|-----------|--------|----------|-------------|-------|---|
| SUPT3H    | 0.3917076 | 0.3970421 | 0.9866 | 0.324    | 0.38487087  | count | 1 |
| ZFH3      | 0.2823851 | 0.1225153 | 2.3049 | 0.0213   | 0.384894019 | count | 1 |
| TRAK2     | 0.335846  | 0.3475231 | 0.9664 | 0.334    | 0.384900147 | count | 1 |
| DLAT      | 0.3716678 | 0.3496616 | 1.0629 | 0.288    | 0.385033595 | count | 1 |
| LILRB2    | 0.2738186 | 0.0863271 | 3.1719 | 0.00153  | 0.385095159 | count | 1 |
| L1TD1     | 1.1284209 | 0.7847236 | 1.438  | 0.151    | 0.385197617 | count | 1 |
| FOX1      | 1.1284209 | 0.8274372 | 1.3638 | 0.173    | 0.385197617 | count | 1 |
| ZNF251    | 0.4843064 | 0.5548058 | 0.8729 | 0.383    | 0.385208085 | count | 1 |
| LINC02207 | 0.5644556 | 0.3077486 | 1.8341 | 0.0668   | 0.385290511 | count | 1 |
| MAL       | 2.534346  | 2.0175867 | 1.2561 | 0.2092   | 0.385373714 | count | 1 |
| PPP2R5A   | 0.3067364 | 0.1938539 | 1.5823 | 0.114    | 0.385377378 | count | 1 |
| CCP110    | 0.3297743 | 0.265648  | 1.2414 | 0.215    | 0.385581628 | count | 1 |
| CAMK2D    | 0.3031077 | 0.2008054 | 1.5095 | 0.131    | 0.385750157 | count | 1 |
| ICE1      | 0.2875179 | 0.1693713 | 1.6976 | 0.0897   | 0.385843794 | count | 1 |
| RHOT1     | 0.2977307 | 0.1914743 | 1.5549 | 0.12     | 0.386073796 | count | 1 |
| EFNB2     | 0.5958498 | 0.7726819 | 0.7711 | 0.441    | 0.386092361 | count | 1 |
| LPAR6     | 0.276488  | 0.108896  | 2.539  | 0.0112   | 0.386232238 | count | 1 |
| KCTD11    | 0.5960685 | 0.5916206 | 1.0075 | 0.314    | 0.386245932 | count | 1 |
| ASCC3     | 0.2941586 | 0.1718312 | 1.7119 | 0.087    | 0.386491303 | count | 1 |
| MKNK1     | 0.2793777 | 0.1374689 | 2.0323 | 0.0422   | 0.38673434  | count | 1 |
| FUT10     | 0.9451946 | 0.735308  | 1.2854 | 0.199    | 0.387247685 | count | 1 |
| SNUPN     | 0.2980964 | 0.2020078 | 1.4757 | 0.14     | 0.387270494 | count | 1 |
| EXOC7     | 0.3037553 | 0.2147223 | 1.4146 | 0.157    | 0.387574808 | count | 1 |
| RPH3AL    | 0.4614504 | 0.5160029 | 0.8943 | 0.371    | 0.387750421 | count | 1 |
| PTER      | 0.3816421 | 0.3037985 | 1.2562 | 0.209    | 0.3878971   | count | 1 |
| IL1RAP    | 0.323347  | 0.1945145 | 1.6623 | 0.0966   | 0.387909955 | count | 1 |
| CCSAP     | 0.2947235 | 0.1914443 | 1.5395 | 0.124    | 0.388063389 | count | 1 |
| SLC35B3   | 0.357396  | 0.3291978 | 1.0857 | 0.278    | 0.388086581 | count | 1 |
| MDM2      | 0.294593  | 0.1645031 | 1.7908 | 0.0734   | 0.388157087 | count | 1 |
| NUDT12    | 0.6362018 | 0.4832065 | 1.3166 | 0.188    | 0.38816314  | count | 1 |
| YPEL5     | 0.2733962 | 0.0749991 | 3.6453 | 0.000273 | 0.388330767 | count | 1 |
| ADCY7     | 0.3135821 | 0.1708831 | 1.8351 | 0.0666   | 0.388591251 | count | 1 |
| OSGEPL1   | 0.5436655 | 0.4477961 | 1.2141 | 0.225    | 0.388594086 | count | 1 |
| ATP13A2   | 0.3629818 | 0.2810765 | 1.2914 | 0.197    | 0.388666806 | count | 1 |
| CCNY      | 0.2830164 | 0.1085087 | 2.6082 | 0.00916  | 0.388786373 | count | 1 |
| PRRG4     | 0.3350603 | 0.2840652 | 1.1795 | 0.238    | 0.388871347 | count | 1 |
| VPS45     | 0.3496514 | 0.2642181 | 1.3233 | 0.186    | 0.389096612 | count | 1 |
| RAB29     | 0.3038649 | 0.1670778 | 1.8187 | 0.0691   | 0.389135253 | count | 1 |
| ACAD8     | 0.4752127 | 0.390869  | 1.2158 | 0.224    | 0.389167647 | count | 1 |
| B9D2      | 0.36086   | 0.2749886 | 1.3123 | 0.19     | 0.389198457 | count | 1 |
| CASK      | 0.387025  | 0.3170367 | 1.2208 | 0.222    | 0.38929547  | count | 1 |
| METR1     | 0.310821  | 0.2317966 | 1.3409 | 0.18     | 0.389296863 | count | 1 |
| TRAPPC2   | 0.3587948 | 0.3276653 | 1.095  | 0.274    | 0.389642909 | count | 1 |
| ZNF2      | 0.9503231 | 0.7566291 | 1.256  | 0.209    | 0.389650204 | count | 1 |
| SCD5      | 0.9503231 | 0.8761219 | 1.0847 | 0.278    | 0.389650204 | count | 1 |

|            |           |           |        |          |             |       |           |
|------------|-----------|-----------|--------|----------|-------------|-------|-----------|
| AC012306.2 | 0.33328   | 0.2675562 | 1.2456 | 0.213    | 0.389753055 | count | 1         |
| ZNF398     | 0.5451966 | 0.6983322 | 0.7807 | 0.435    | 0.389766647 | count | 1         |
| CCPG1      | 0.2781605 | 0.0982972 | 2.8298 | 0.0047   | 0.389780185 | count | 1         |
| CEP85      | 0.4529898 | 0.488777  | 0.9268 | 0.354    | 0.389828724 | count | 1         |
| TRMT6      | 0.2829052 | 0.1514084 | 1.8685 | 0.0618   | 0.389928241 | count | 1         |
| STK26      | 0.3567704 | 0.3075046 | 1.1602 | 0.246    | 0.389992871 | count | 1         |
| SLC22A18   | 0.3030179 | 0.2042613 | 1.4835 | 0.138    | 0.39023099  | count | 1         |
| AC104986.2 | 0.4764606 | 1.0664414 | 0.4468 | 0.655    | 0.390245707 | count | 1         |
| C12orf66   | 0.4764606 | 0.4951158 | 0.9623 | 0.336    | 0.390245707 | count | 1         |
| ZNF587B    | 0.5061233 | 0.6967169 | 0.7264 | 0.468    | 0.390248281 | count | 1         |
| C3orf58    | 0.2859631 | 0.1336583 | 2.1395 | 0.0325   | 0.390497311 | count | 1         |
| EPM2AIP1   | 0.3193197 | 0.2040725 | 1.5647 | 0.118    | 0.390866184 | count | 1         |
| CHCHD5     | 0.2833354 | 0.1137367 | 2.4912 | 0.0128   | 0.390918221 | count | 1         |
| CYTIP      | 0.2743734 | 0.0652564 | 4.2045 | 2.71E-05 | 0.390942285 | count | 0.6399936 |
| CD300E     | 0.2878029 | 0.1488851 | 1.9331 | 0.0533   | 0.390985311 | count | 1         |
| KIAA2013   | 0.3041873 | 0.1525218 | 1.9944 | 0.0462   | 0.391326913 | count | 1         |
| AC007686.3 | 0.5472907 | 0.5261833 | 1.0401 | 0.298    | 0.39137094  | count | 1         |
| PARD6A     | 0.3323263 | 0.2992695 | 1.1105 | 0.267    | 0.391412421 | count | 1         |
| CD46       | 0.2765947 | 0.0815605 | 3.3913 | 0.000707 | 0.391424199 | count | 1         |
| CPSF6      | 0.3055583 | 0.1898209 | 1.6097 | 0.108    | 0.391782765 | count | 1         |
| VPS72      | 0.3207994 | 0.246137  | 1.3033 | 0.193    | 0.39180379  | count | 1         |
| DDX39B     | 0.3024816 | 0.1647417 | 1.8361 | 0.0665   | 0.391914219 | count | 1         |
| SRPRB      | 0.3104749 | 0.1840463 | 1.6869 | 0.0917   | 0.391931877 | count | 1         |
| SQLE       | 0.3025484 | 0.2812824 | 1.0756 | 0.282    | 0.392001523 | count | 1         |
| ANKRD36C   | 0.3940352 | 0.3193734 | 1.2338 | 0.217    | 0.392030787 | count | 1         |
| ADAM10     | 0.2837569 | 0.1090228 | 2.6027 | 0.0093   | 0.392063895 | count | 1         |
| SLC45A4    | 0.42221   | 0.3355788 | 1.2582 | 0.208    | 0.392321563 | count | 1         |
| ATF4       | 0.2819284 | 0.0951145 | 2.9641 | 0.00306  | 0.392713911 | count | 1         |
| TSNAX      | 0.2921424 | 0.1297385 | 2.2518 | 0.0244   | 0.392910406 | count | 1         |
| RABGGTA    | 0.3198426 | 0.1986227 | 1.6103 | 0.107    | 0.393240264 | count | 1         |
| RPL34      | 0.2730195 | 0.0238611 | 11.442 | 1.43E-29 | 0.393489575 | count | 3.47E-25  |
| HOXB-AS1   | 0.6063892 | 0.4642043 | 1.3063 | 0.192    | 0.393500164 | count | 1         |
| ZNF589     | 0.5285831 | 0.5456342 | 0.9687 | 0.333    | 0.393550541 | count | 1         |
| THNSL2     | 1.1495826 | 0.7441422 | 1.5448 | 0.123    | 0.393581881 | count | 1         |
| RUFY2      | 0.3194515 | 0.3051509 | 1.0469 | 0.295    | 0.393583211 | count | 1         |
| ZNF700     | 0.5286609 | 0.460391  | 1.1483 | 0.251    | 0.393612327 | count | 1         |
| SPATA5     | 0.4573718 | 0.4848187 | 0.9434 | 0.346    | 0.393786459 | count | 1         |
| CHD6       | 0.3154608 | 0.1666053 | 1.8935 | 0.0584   | 0.393830111 | count | 1         |
| USP18      | 0.480745  | 0.489619  | 0.9819 | 0.326    | 0.393948829 | count | 1         |
| PIKFYVE    | 0.333525  | 0.215947  | 1.5445 | 0.123    | 0.394186537 | count | 1         |
| MFSD9      | 0.5294653 | 0.5819238 | 0.9099 | 0.363    | 0.394251251 | count | 1         |
| LFNG       | 0.2859006 | 0.1372668 | 2.0828 | 0.0374   | 0.39427301  | count | 1         |
| LOXL3      | 0.3962397 | 0.3879942 | 1.0213 | 0.307    | 0.394297904 | count | 1         |
| AZU1       | 0.4579513 | 0.451027  | 1.0154 | 0.31     | 0.394310073 | count | 1         |
| PHF7       | 0.5111872 | 0.5037493 | 1.0148 | 0.31     | 0.394397204 | count | 1         |

|            |           |           |        |          |             |       |   |
|------------|-----------|-----------|--------|----------|-------------|-------|---|
| ESYT1      | 0.3252639 | 0.2830578 | 1.1491 | 0.251    | 0.39445697  | count | 1 |
| FAM216A    | 0.4062611 | 0.3972084 | 1.0228 | 0.307    | 0.394464663 | count | 1 |
| ARGLU1     | 0.277329  | 0.0726595 | 3.8168 | 0.000139 | 0.394533506 | count | 1 |
| TMEM181    | 0.3772522 | 0.3268697 | 1.1541 | 0.249    | 0.394564685 | count | 1 |
| MKS1       | 1.152821  | 0.7179008 | 1.6058 | 0.108    | 0.394866693 | count | 1 |
| CDC27      | 0.2955251 | 0.1479424 | 1.9976 | 0.0459   | 0.395023393 | count | 1 |
| NAA35      | 0.3431449 | 0.3520906 | 0.9746 | 0.33     | 0.395152922 | count | 1 |
| UNC119     | 0.3046887 | 0.145708  | 2.0911 | 0.0366   | 0.395174799 | count | 1 |
| ICAM5      | 0.5524204 | 0.5244114 | 1.0534 | 0.292    | 0.395303588 | count | 1 |
| SH2B3      | 0.2934565 | 0.1479675 | 1.9832 | 0.0475   | 0.395622209 | count | 1 |
| CDIP1      | 0.3574224 | 0.3041136 | 1.1753 | 0.24     | 0.39562892  | count | 1 |
| FADS3      | 0.323203  | 0.2264329 | 1.4274 | 0.154    | 0.395684778 | count | 1 |
| AL024507.2 | 0.5789258 | 0.8039123 | 0.7201 | 0.472    | 0.395941071 | count | 1 |
| IDH3B      | 0.2947614 | 0.1300147 | 2.2671 | 0.0235   | 0.396125637 | count | 1 |
| ADIRF      | 0.367197  | 0.5421833 | 0.6773 | 0.498    | 0.396208242 | count | 1 |
| SYT17      | 0.3652193 | 0.413381  | 0.8835 | 0.377    | 0.396794019 | count | 1 |
| AKAP9      | 0.283756  | 0.0836542 | 3.392  | 0.000705 | 0.396994028 | count | 1 |
| ZNF518B    | 0.3708499 | 0.3008403 | 1.2327 | 0.218    | 0.397314093 | count | 1 |
| BCL2       | 0.3047076 | 0.1629812 | 1.8696 | 0.0617   | 0.397328957 | count | 1 |
| NEU4       | 0.4041203 | 0.4644827 | 0.87   | 0.384    | 0.397496972 | count | 1 |
| STX10      | 0.2832212 | 0.0948353 | 2.9865 | 0.00285  | 0.397713287 | count | 1 |
| WARS2      | 0.4044714 | 0.3236073 | 1.2499 | 0.211    | 0.397854417 | count | 1 |
| MED31      | 0.3019413 | 0.2165627 | 1.3942 | 0.163    | 0.397910678 | count | 1 |
| LETMD1     | 0.3134541 | 0.1816846 | 1.7253 | 0.0846   | 0.397991753 | count | 1 |
| HDAC6      | 0.3806786 | 0.4687654 | 0.8121 | 0.417    | 0.398251431 | count | 1 |
| RMND5A     | 0.319593  | 0.2610163 | 1.2244 | 0.221    | 0.398346679 | count | 1 |
| ATG4D      | 0.4218617 | 0.4875544 | 0.8653 | 0.387    | 0.39840951  | count | 1 |
| USP48      | 0.2977023 | 0.1589632 | 1.8728 | 0.0612   | 0.398517741 | count | 1 |
| SNX19      | 0.3719701 | 0.3164088 | 1.1756 | 0.24     | 0.398545865 | count | 1 |
| ATPAF2     | 0.3209941 | 0.2092058 | 1.5343 | 0.125    | 0.398650507 | count | 1 |
| TRIM5      | 0.3420848 | 0.3156098 | 1.0839 | 0.279    | 0.398730403 | count | 1 |
| AC002553.1 | 0.7007662 | 0.5675575 | 1.2347 | 0.217    | 0.399100681 | count | 1 |
| PTEN       | 0.2877542 | 0.0786598 | 3.6582 | 0.000259 | 0.399117791 | count | 1 |
| AEN        | 0.3887909 | 0.4139955 | 0.9391 | 0.348    | 0.399446511 | count | 1 |
| STK10      | 0.3024394 | 0.1366812 | 2.2127 | 0.027    | 0.399627191 | count | 1 |
| AC106791.1 | 1.1648231 | 0.7983742 | 1.459  | 0.145    | 0.399631357 | count | 1 |
| AL136038.3 | 1.1648231 | 0.7983742 | 1.459  | 0.145    | 0.399631357 | count | 1 |
| MXI1       | 0.2940044 | 0.1324893 | 2.2191 | 0.0266   | 0.399687224 | count | 1 |
| AP003108.2 | 0.6153914 | 0.6392913 | 0.9626 | 0.336    | 0.399839883 | count | 1 |
| SSRP1      | 0.3141694 | 0.2070274 | 1.5175 | 0.129    | 0.399974286 | count | 1 |
| THAP8      | 0.4753496 | 0.491026  | 0.9681 | 0.333    | 0.400048052 | count | 1 |
| TOLLIP     | 0.2913047 | 0.1426273 | 2.0424 | 0.0412   | 0.400217007 | count | 1 |
| FOXP4      | 0.423799  | 0.438984  | 0.9654 | 0.334    | 0.400311556 | count | 1 |
| N4BP2L2    | 0.2836926 | 0.0792837 | 3.5782 | 0.000353 | 0.400360584 | count | 1 |
| FAM173B    | 0.4239803 | 0.5158314 | 0.8219 | 0.411    | 0.400489584 | count | 1 |

|            |           |           |        |          |             |       |   |
|------------|-----------|-----------|--------|----------|-------------|-------|---|
| RTF1       | 0.2857572 | 0.109906  | 2.6    | 0.00938  | 0.400588219 | count | 1 |
| KIAA1147   | 0.3198338 | 0.3234712 | 0.9888 | 0.323    | 0.400718597 | count | 1 |
| HEATR3     | 0.3226394 | 0.2526148 | 1.2772 | 0.202    | 0.400719479 | count | 1 |
| OXR1       | 0.2991333 | 0.139099  | 2.1505 | 0.0316   | 0.400812899 | count | 1 |
| AL117379.1 | 0.6553562 | 0.6978189 | 0.9391 | 0.348    | 0.40094662  | count | 1 |
| YPEL2      | 0.3051791 | 0.1584047 | 1.9266 | 0.0541   | 0.401082077 | count | 1 |
| MRPL9      | 0.3093545 | 0.1844406 | 1.6773 | 0.0936   | 0.401279308 | count | 1 |
| HDDC3      | 0.314432  | 0.1781976 | 1.7645 | 0.0778   | 0.401336671 | count | 1 |
| BMT2       | 0.4390607 | 0.3796787 | 1.1564 | 0.248    | 0.401540776 | count | 1 |
| GSK3A      | 0.3153894 | 0.1796573 | 1.7555 | 0.0793   | 0.401543602 | count | 1 |
| KATNAL2    | 0.8529731 | 0.6532852 | 1.3057 | 0.192    | 0.401600276 | count | 1 |
| ICOSLG     | 0.3649246 | 0.2914363 | 1.2522 | 0.211    | 0.401676138 | count | 1 |
| SHC1       | 0.348805  | 0.3391736 | 1.0284 | 0.304    | 0.401798138 | count | 1 |
| NPEPL1     | 0.3473709 | 0.2492342 | 1.3938 | 0.164    | 0.40179906  | count | 1 |
| ADPRH      | 0.3488172 | 0.2614862 | 1.334  | 0.182    | 0.401812465 | count | 1 |
| TNFRSF14   | 0.2931509 | 0.105367  | 2.7822 | 0.00544  | 0.401847465 | count | 1 |
| BCAR3      | 0.4036477 | 0.3663743 | 1.1017 | 0.271    | 0.401921317 | count | 1 |
| HNRNPH2    | 0.2939622 | 0.1271638 | 2.3117 | 0.0209   | 0.401958436 | count | 1 |
| MBD1       | 0.346378  | 0.2687931 | 1.2886 | 0.198    | 0.402254004 | count | 1 |
| GTDC1      | 0.3702054 | 0.2922862 | 1.2666 | 0.205    | 0.402347564 | count | 1 |
| IRF2       | 0.2879883 | 0.1061215 | 2.7138 | 0.0067   | 0.402541895 | count | 1 |
| SPTSSA     | 0.2926416 | 0.1176642 | 2.4871 | 0.0129   | 0.402677676 | count | 1 |
| CLPX       | 0.3226914 | 0.1850004 | 1.7443 | 0.0812   | 0.402966654 | count | 1 |
| ITGB5      | 0.3284464 | 0.2175231 | 1.5099 | 0.131    | 0.403088513 | count | 1 |
| SH2D4A     | 0.7076719 | 0.4760112 | 1.4867 | 0.137    | 0.403438897 | count | 1 |
| SLC38A10   | 0.3143645 | 0.1767535 | 1.7785 | 0.0754   | 0.40364626  | count | 1 |
| ESS2       | 0.4211529 | 0.4887859 | 0.8616 | 0.389    | 0.403758062 | count | 1 |
| SIGLEC15   | 0.7713801 | 0.6880124 | 1.1212 | 0.262    | 0.403764885 | count | 1 |
| KIAA1551   | 0.2939357 | 0.1186166 | 2.478  | 0.0133   | 0.404313951 | count | 1 |
| SOS1       | 0.331695  | 0.2148606 | 1.5438 | 0.123    | 0.404348957 | count | 1 |
| MIER3      | 0.450349  | 0.5040599 | 0.8934 | 0.372    | 0.40457086  | count | 1 |
| AES        | 0.2890869 | 0.086859  | 3.3282 | 0.000887 | 0.404656746 | count | 1 |
| NUB1       | 0.2964908 | 0.1008786 | 2.9391 | 0.00332  | 0.404734129 | count | 1 |
| ACAD10     | 0.5076035 | 0.4175391 | 1.2157 | 0.224    | 0.404851843 | count | 1 |
| ZNF800     | 0.3115487 | 0.1582294 | 1.969  | 0.0491   | 0.404899108 | count | 1 |
| PLXNB2     | 0.3124255 | 0.1647915 | 1.8959 | 0.0581   | 0.404913206 | count | 1 |
| GGACT      | 0.4427325 | 0.3869026 | 1.1443 | 0.253    | 0.405044861 | count | 1 |
| YOD1       | 0.4811558 | 0.3408496 | 1.4116 | 0.158    | 0.405193914 | count | 1 |
| RFLNB      | 0.2927617 | 0.1551781 | 1.8866 | 0.0593   | 0.405492629 | count | 1 |
| KCNRG      | 1.5464032 | 1.0153588 | 1.523  | 0.128    | 0.405507789 | count | 1 |
| AC009404.1 | 0.8605168 | 0.5962275 | 1.4433 | 0.149    | 0.405607624 | count | 1 |
| AL117335.1 | 0.4292063 | 0.3831728 | 1.1201 | 0.263    | 0.40562332  | count | 1 |
| SUPT5H     | 0.3022862 | 0.1613972 | 1.8729 | 0.0612   | 0.405780337 | count | 1 |
| FOSL1      | 0.3294349 | 0.224619  | 1.4666 | 0.143    | 0.406048352 | count | 1 |
| TMEM185A   | 0.3645984 | 0.3672069 | 0.9929 | 0.321    | 0.406112992 | count | 1 |



|            |           |           |        |          |             |       |   |
|------------|-----------|-----------|--------|----------|-------------|-------|---|
| POFUT2     | 0.4439026 | 0.3196172 | 1.3889 | 0.165    | 0.406161931 | count | 1 |
| ANKRD44    | 0.3049242 | 0.1476552 | 2.0651 | 0.039    | 0.406229282 | count | 1 |
| NME3       | 0.2886822 | 0.0928993 | 3.1075 | 0.00191  | 0.406274893 | count | 1 |
| GPR162     | 0.3713117 | 0.3270607 | 1.1353 | 0.256    | 0.406282522 | count | 1 |
| FCER1A     | 0.2874366 | 0.2238013 | 1.2843 | 0.199    | 0.406344561 | count | 1 |
| PLPPR2     | 0.3822252 | 0.3309855 | 1.1548 | 0.248    | 0.406672651 | count | 1 |
| CRIM1      | 0.5097858 | 0.4810396 | 1.0598 | 0.289    | 0.406696157 | count | 1 |
| UGGT2      | 0.3594609 | 0.2923764 | 1.2294 | 0.219    | 0.406724491 | count | 1 |
| METAP1D    | 0.9868529 | 0.7699899 | 1.2816 | 0.2      | 0.406818414 | count | 1 |
| B4GALT1    | 0.2875651 | 0.0842764 | 3.4122 | 0.000655 | 0.406923029 | count | 1 |
| ACAP2      | 0.2885411 | 0.0851901 | 3.387  | 0.000718 | 0.406997863 | count | 1 |
| COA1       | 0.3152948 | 0.176775  | 1.7836 | 0.0746   | 0.407044874 | count | 1 |
| TRAF6      | 0.4620181 | 0.4014357 | 1.1509 | 0.25     | 0.407060371 | count | 1 |
| USP53      | 0.3170593 | 0.1800096 | 1.7613 | 0.0783   | 0.407140096 | count | 1 |
| SLC7A6     | 0.5942468 | 0.377247  | 1.5752 | 0.115    | 0.407250778 | count | 1 |
| MCTP2      | 0.5460521 | 0.3347981 | 1.631  | 0.103    | 0.407447507 | count | 1 |
| MAP2K4     | 0.3472794 | 0.2396508 | 1.4491 | 0.147    | 0.40790244  | count | 1 |
| KPNB1      | 0.2931341 | 0.1117614 | 2.6229 | 0.00877  | 0.40794132  | count | 1 |
| HGSNAT     | 0.3144707 | 0.1810242 | 1.7372 | 0.0825   | 0.408729708 | count | 1 |
| MORC3      | 0.3023742 | 0.1291864 | 2.3406 | 0.0193   | 0.408756156 | count | 1 |
| RSRC2      | 0.2898072 | 0.0878569 | 3.2986 | 0.000985 | 0.408922459 | count | 1 |
| MICB       | 0.4742657 | 0.3519462 | 1.3476 | 0.178    | 0.409071852 | count | 1 |
| AL139246.5 | 0.317518  | 0.2235664 | 1.4202 | 0.156    | 0.40908262  | count | 1 |
| ASPHD2     | 0.4553286 | 0.498925  | 0.9126 | 0.362    | 0.409249314 | count | 1 |
| TTI2       | 0.3847195 | 0.3382599 | 1.1373 | 0.256    | 0.409399689 | count | 1 |
| PAXIP1-AS2 | 0.4475174 | 0.3294041 | 1.3586 | 0.174    | 0.409614154 | count | 1 |
| WWP2       | 0.3947697 | 0.2708516 | 1.4575 | 0.145    | 0.409696065 | count | 1 |
| TMEM129    | 0.3556925 | 0.3409203 | 1.0433 | 0.297    | 0.409889001 | count | 1 |
| AC079015.1 | 0.7818753 | 0.669054  | 1.1686 | 0.243    | 0.40989109  | count | 1 |
| LINC02328  | 0.7818753 | 0.6449851 | 1.2122 | 0.226    | 0.40989109  | count | 1 |
| ZNF548     | 0.7818753 | 0.6454322 | 1.2114 | 0.226    | 0.40989109  | count | 1 |
| ENGASE     | 0.416492  | 0.3241989 | 1.2847 | 0.199    | 0.410103    | count | 1 |
| CXCL2      | 0.2851979 | 0.0962787 | 2.9622 | 0.00308  | 0.410150063 | count | 1 |
| SLA        | 0.2917288 | 0.0832433 | 3.5045 | 0.000466 | 0.410247855 | count | 1 |
| KATNBL1    | 0.3003719 | 0.1254499 | 2.3944 | 0.0167   | 0.410262129 | count | 1 |
| TMEM268    | 0.3990358 | 0.3153003 | 1.2656 | 0.206    | 0.410301536 | count | 1 |
| ATF2       | 0.3285539 | 0.1982094 | 1.6576 | 0.0975   | 0.410377491 | count | 1 |
| MXRA8      | 1.5630278 | 1.188027  | 1.3156 | 0.188    | 0.410501041 | count | 1 |
| TRIM61     | 1.5630278 | 0.7261906 | 2.1524 | 0.0315   | 0.410501041 | count | 1 |
| GGH        | 0.3829499 | 0.3768167 | 1.0163 | 0.31     | 0.410627624 | count | 1 |
| MMS22L     | 0.4875467 | 0.6621578 | 0.7363 | 0.462    | 0.410863801 | count | 1 |
| HTRA1      | 0.2978572 | 0.1631478 | 1.8257 | 0.068    | 0.410891411 | count | 1 |
| LUC7L2     | 0.3355188 | 0.1863402 | 1.8006 | 0.0719   | 0.410975496 | count | 1 |
| ZNF16      | 0.8706889 | 0.6222925 | 1.3992 | 0.162    | 0.411019497 | count | 1 |
| ALAS1      | 0.3414519 | 0.2279247 | 1.4981 | 0.134    | 0.411125227 | count | 1 |

|             |           |           |        |         |             |       |   |
|-------------|-----------|-----------|--------|---------|-------------|-------|---|
| CEP83       | 0.3733949 | 0.3130971 | 1.1926 | 0.233   | 0.411225939 | count | 1 |
| ERBIN       | 0.3074073 | 0.1419144 | 2.1661 | 0.0304  | 0.411397888 | count | 1 |
| FCGR3B      | 0.7848177 | 0.7604354 | 1.0321 | 0.302   | 0.411610747 | count | 1 |
| AZI2        | 0.2998079 | 0.1289271 | 2.3254 | 0.0201  | 0.411782298 | count | 1 |
| LINC02193   | 2.735886  | 1.19696   | 2.2857 | 0.0224  | 0.411865263 | count | 1 |
| DBP         | 0.3257824 | 0.2057358 | 1.5835 | 0.113   | 0.412078216 | count | 1 |
| BAZ2B       | 0.2962465 | 0.1145751 | 2.5856 | 0.00978 | 0.412106186 | count | 1 |
| TBC1D13     | 0.4776676 | 0.3973238 | 1.2022 | 0.229   | 0.412155017 | count | 1 |
| LIN52       | 1.197267  | 0.705666  | 1.6966 | 0.0899  | 0.412537447 | count | 1 |
| NT5DC1      | 0.3347399 | 0.1984166 | 1.6871 | 0.0917  | 0.412675498 | count | 1 |
| LPCAT1      | 0.3114779 | 0.2089412 | 1.4907 | 0.136   | 0.41268319  | count | 1 |
| FOXP1       | 0.3020258 | 0.1270364 | 2.3775 | 0.0175  | 0.412734671 | count | 1 |
| FAM208A     | 0.3170481 | 0.1779735 | 1.7814 | 0.075   | 0.412845059 | count | 1 |
| OGDH        | 0.3301152 | 0.1992547 | 1.6567 | 0.0977  | 0.413061423 | count | 1 |
| DNAJC28     | 0.7230893 | 0.8632381 | 0.8376 | 0.402   | 0.413145019 | count | 1 |
| PLD2        | 0.3799856 | 0.3488443 | 1.0893 | 0.276   | 0.413249625 | count | 1 |
| KNTC1       | 0.6740269 | 0.5008143 | 1.3459 | 0.178   | 0.413453747 | count | 1 |
| DONSON      | 0.6740269 | 0.4994653 | 1.3495 | 0.177   | 0.413453747 | count | 1 |
| AP001437.1  | 0.5762177 | 0.6255552 | 0.9211 | 0.357   | 0.413597976 | count | 1 |
| PHACTR2     | 0.3027313 | 0.1304398 | 2.3209 | 0.0204  | 0.413703081 | count | 1 |
| BRAT1       | 0.3214448 | 0.2324802 | 1.3827 | 0.167   | 0.41374397  | count | 1 |
| CEP57       | 0.3060454 | 0.1347915 | 2.2705 | 0.0233  | 0.413745701 | count | 1 |
| RNF138      | 0.3301408 | 0.1721313 | 1.918  | 0.0552  | 0.413788125 | count | 1 |
| HECTD4      | 0.3713332 | 0.3503362 | 1.0599 | 0.289   | 0.413788723 | count | 1 |
| STARD7      | 0.3167024 | 0.1724959 | 1.836  | 0.0665  | 0.413792256 | count | 1 |
| LINC02482   | 0.3986262 | 0.4359253 | 0.9144 | 0.361   | 0.413819924 | count | 1 |
| PIPOX       | 0.6035419 | 0.6161165 | 0.9796 | 0.327   | 0.414128421 | count | 1 |
| UTP6        | 0.3083418 | 0.1407491 | 2.1907 | 0.0286  | 0.414135308 | count | 1 |
| SNAI3       | 0.4204956 | 0.3704276 | 1.1352 | 0.256   | 0.414186979 | count | 1 |
| BBX         | 0.3027329 | 0.112648  | 2.6874 | 0.00725 | 0.414199573 | count | 1 |
| IQCJ-SCHIP1 | 0.8771959 | 0.8338283 | 1.052  | 0.293   | 0.414486293 | count | 1 |
| AL117336.3  | 0.8771959 | 0.7482159 | 1.1724 | 0.241   | 0.414486293 | count | 1 |
| SLX1A       | 0.8771959 | 0.7482159 | 1.1724 | 0.241   | 0.414486293 | count | 1 |
| AC026471.4  | 0.8771959 | 0.8610528 | 1.0187 | 0.308   | 0.414486293 | count | 1 |
| GOSR1       | 0.3092884 | 0.1424932 | 2.1705 | 0.0301  | 0.414503703 | count | 1 |
| MTM1        | 0.3924976 | 0.2724093 | 1.4408 | 0.15    | 0.414523517 | count | 1 |
| GLYR1       | 0.3175485 | 0.2051984 | 1.5475 | 0.122   | 0.414564138 | count | 1 |
| ZNF687      | 0.4322522 | 0.4112012 | 1.0512 | 0.293   | 0.41481387  | count | 1 |
| DUSP22      | 0.3110655 | 0.1538745 | 2.0216 | 0.0433  | 0.415108205 | count | 1 |
| ECM1        | 0.5197891 | 0.321726  | 1.6156 | 0.106   | 0.415159138 | count | 1 |
| CCNQ        | 0.3165035 | 0.1765982 | 1.7922 | 0.0732  | 0.415161428 | count | 1 |
| TMPPE       | 1.004805  | 0.6887817 | 1.4588 | 0.145   | 0.415289212 | count | 1 |
| AC007611.1  | 1.004805  | 0.6542149 | 1.5359 | 0.125   | 0.415289212 | count | 1 |
| ZNF852      | 0.6769846 | 0.5297304 | 1.278  | 0.201   | 0.415439158 | count | 1 |
| AL132639.2  | 0.6769846 | 0.5646385 | 1.199  | 0.231   | 0.415439158 | count | 1 |

|            |           |           |        |          |             |       |   |
|------------|-----------|-----------|--------|----------|-------------|-------|---|
| SCRN2      | 0.4271019 | 0.3201662 | 1.334  | 0.182    | 0.415463908 | count | 1 |
| GATM       | 0.3061106 | 0.1498861 | 2.0423 | 0.0412   | 0.415731163 | count | 1 |
| ZNF692     | 1.0059036 | 0.7286817 | 1.3804 | 0.168    | 0.415808283 | count | 1 |
| ZBTB4      | 0.3297204 | 0.2045456 | 1.612  | 0.107    | 0.415882763 | count | 1 |
| IPO11      | 0.5570259 | 0.6218027 | 0.8958 | 0.37     | 0.416200341 | count | 1 |
| FAM76A     | 0.3207747 | 0.2193487 | 1.4624 | 0.144    | 0.41622659  | count | 1 |
| GATD3A     | 0.6389375 | 0.7141309 | 0.8947 | 0.371    | 0.416474614 | count | 1 |
| PSMG3      | 0.3121013 | 0.1888338 | 1.6528 | 0.0985   | 0.416709083 | count | 1 |
| MRPS22     | 0.315716  | 0.1579555 | 1.9988 | 0.0457   | 0.417031446 | count | 1 |
| ABL1       | 0.4094828 | 0.3641141 | 1.1246 | 0.261    | 0.417126247 | count | 1 |
| YIPF4      | 0.3062385 | 0.1301464 | 2.353  | 0.0187   | 0.417337442 | count | 1 |
| MACROD1    | 0.4188103 | 0.3931382 | 1.0653 | 0.287    | 0.417548436 | count | 1 |
| NVL        | 0.4483483 | 0.3306119 | 1.3561 | 0.175    | 0.417649982 | count | 1 |
| AC048341.1 | 0.7303392 | 0.7717066 | 0.9464 | 0.344    | 0.417719015 | count | 1 |
| ZBTB18     | 0.3841517 | 0.3651326 | 1.0521 | 0.293    | 0.417897117 | count | 1 |
| DCAF16     | 0.3841517 | 0.3152026 | 1.2187 | 0.223    | 0.417897117 | count | 1 |
| SLC35C2    | 0.3382479 | 0.2055985 | 1.6452 | 0.1      | 0.41791361  | count | 1 |
| FAM120B    | 0.3926256 | 0.3824512 | 1.0266 | 0.305    | 0.418048632 | count | 1 |
| TMEM119    | 1.2121041 | 0.7125142 | 1.7012 | 0.089    | 0.418450978 | count | 1 |
| KLF10      | 0.3008716 | 0.1118759 | 2.6893 | 0.00721  | 0.418513341 | count | 1 |
| BCKDHB     | 0.5827137 | 0.5205743 | 1.1194 | 0.263    | 0.41860599  | count | 1 |
| HLA-F      | 0.2958679 | 0.075751  | 3.9058 | 9.65E-05 | 0.418703575 | count | 1 |
| DNAH1      | 1.2136261 | 0.7905475 | 1.5352 | 0.125    | 0.419057957 | count | 1 |
| AC011416.3 | 1.2136261 | 0.7978174 | 1.5212 | 0.128    | 0.419057957 | count | 1 |
| STXBP4     | 1.2136261 | 0.832662  | 1.4575 | 0.145    | 0.419057957 | count | 1 |
| ZNF304     | 1.2136261 | 0.9329251 | 1.3009 | 0.193    | 0.419057957 | count | 1 |
| RSF1       | 0.3006935 | 0.1142932 | 2.6309 | 0.00857  | 0.419096499 | count | 1 |
| LRRRC61    | 0.682621  | 0.5788251 | 1.1793 | 0.238    | 0.419225763 | count | 1 |
| ATP10A     | 0.682621  | 0.5916456 | 1.1538 | 0.249    | 0.419225763 | count | 1 |
| SDR42E2    | 0.682621  | 0.5949877 | 1.1473 | 0.251    | 0.419225763 | count | 1 |
| KRBOX4     | 0.5420088 | 0.3686748 | 1.4702 | 0.142    | 0.419732631 | count | 1 |
| TELO2      | 0.3884506 | 0.3374794 | 1.151  | 0.25     | 0.419754674 | count | 1 |
| IRF3       | 0.3218378 | 0.1730557 | 1.8597 | 0.063    | 0.419858776 | count | 1 |
| RBM15B     | 0.3747516 | 0.2253876 | 1.6627 | 0.0965   | 0.420011943 | count | 1 |
| ZNHIT3     | 0.3049801 | 0.1243192 | 2.4532 | 0.0142   | 0.420028331 | count | 1 |
| RNF144B    | 0.3249504 | 0.1115472 | 2.9131 | 0.00361  | 0.420055969 | count | 1 |
| ECHDC2     | 0.4212518 | 0.4099647 | 1.0275 | 0.304    | 0.420067657 | count | 1 |
| HMBOX1     | 0.3710496 | 0.2919215 | 1.2711 | 0.204    | 0.420124395 | count | 1 |
| DCUN1D3    | 0.3488186 | 0.2288762 | 1.524  | 0.128    | 0.420136084 | count | 1 |
| WDR33      | 0.3081453 | 0.1219187 | 2.5275 | 0.0116   | 0.420173007 | count | 1 |
| ADNP2      | 0.3554301 | 0.3117236 | 1.1402 | 0.254    | 0.420535031 | count | 1 |
| USF1       | 0.3566634 | 0.2778614 | 1.2836 | 0.199    | 0.42059501  | count | 1 |
| TMEM238    | 0.3680309 | 0.3856655 | 0.9543 | 0.34     | 0.420650562 | count | 1 |
| DOCK2      | 0.3027838 | 0.1165492 | 2.5979 | 0.00944  | 0.420750869 | count | 1 |
| NUAK2      | 0.4269377 | 0.368944  | 1.1572 | 0.247    | 0.42076304  | count | 1 |

|            |           |           |        |          |             |       |             |
|------------|-----------|-----------|--------|----------|-------------|-------|-------------|
| TAF8       | 0.3568137 | 0.2509911 | 1.4216 | 0.155    | 0.420775421 | count | 1           |
| CACNB1     | 1.5975089 | 0.9181603 | 1.7399 | 0.082    | 0.42084161  | count | 1           |
| MYOM1      | 1.5975089 | 0.9489505 | 1.6834 | 0.0924   | 0.42084161  | count | 1           |
| LZTS2      | 0.3444949 | 0.3388704 | 1.0166 | 0.309    | 0.421167842 | count | 1           |
| ZNF654     | 0.3539364 | 0.3016756 | 1.1732 | 0.241    | 0.421441293 | count | 1           |
| ZBTB10     | 0.3671171 | 0.204018  | 1.7994 | 0.0721   | 0.421484824 | count | 1           |
| TGFBR2     | 0.306621  | 0.1098767 | 2.7906 | 0.0053   | 0.421591921 | count | 1           |
| LINC00309  | 2.815831  | 0.9341503 | 3.0143 | 0.0026   | 0.421638379 | count | 1           |
| HCK        | 0.2994135 | 0.0846371 | 3.5376 | 0.000411 | 0.421659228 | count | 1           |
| RIPOR1     | 0.3426401 | 0.2304801 | 1.4866 | 0.137    | 0.421662698 | count | 1           |
| ZNF354A    | 0.3804893 | 0.265355  | 1.4339 | 0.152    | 0.421780869 | count | 1           |
| PDSS2      | 0.3827827 | 0.3133725 | 1.2215 | 0.222    | 0.421820053 | count | 1           |
| SMAD4      | 0.3532219 | 0.2445401 | 1.4444 | 0.149    | 0.421867055 | count | 1           |
| SPPL2B     | 0.4065272 | 0.3106176 | 1.3088 | 0.191    | 0.422274696 | count | 1           |
| AC114760.2 | 0.410371  | 0.3521979 | 1.1652 | 0.244    | 0.422327904 | count | 1           |
| MAT2B      | 0.3378838 | 0.1831678 | 1.8447 | 0.0652   | 0.422902336 | count | 1           |
| SYNJ1      | 0.3840742 | 0.2706358 | 1.4192 | 0.156    | 0.423278318 | count | 1           |
| C15orf39   | 0.3412708 | 0.236862  | 1.4408 | 0.15     | 0.423361397 | count | 1           |
| SERINC3    | 0.3072488 | 0.1332978 | 2.305  | 0.0213   | 0.4233899   | count | 1           |
| KCTD21     | 0.7393218 | 0.5494157 | 1.3457 | 0.179    | 0.423394661 | count | 1           |
| NEK7       | 0.3479794 | 0.2047856 | 1.6992 | 0.0894   | 0.423475114 | count | 1           |
| CLECT7A    | 0.2965536 | 0.0547053 | 5.4209 | 6.51E-08 | 0.423618692 | count | 0.001557322 |
| FKBP5      | 0.3110796 | 0.0791263 | 3.9314 | 8.68E-05 | 0.42385154  | count | 1           |
| RNF141     | 0.3089542 | 0.1351753 | 2.2856 | 0.0224   | 0.423874321 | count | 1           |
| DICER1-AS1 | 0.6168055 | 0.6200905 | 0.9947 | 0.32     | 0.423963176 | count | 1           |
| AHCYL1     | 0.3167692 | 0.1382842 | 2.2907 | 0.0221   | 0.424006582 | count | 1           |
| CDC14B     | 2.8357771 | 1.343483  | 2.1108 | 0.0349   | 0.424010405 | count | 1           |
| AF111167.2 | 0.8954696 | 0.5172438 | 1.7312 | 0.0835   | 0.42424194  | count | 1           |
| ATM        | 0.3215652 | 0.1562552 | 2.0579 | 0.0397   | 0.424257419 | count | 1           |
| ARFGF2     | 0.3827419 | 0.2606628 | 1.4683 | 0.142    | 0.42433805  | count | 1           |
| SPIN1      | 0.3334613 | 0.2183875 | 1.5269 | 0.127    | 0.424802039 | count | 1           |
| SLTM       | 0.3021549 | 0.0859269 | 3.5164 | 0.000445 | 0.424848328 | count | 1           |
| AC004865.2 | 0.4054068 | 0.3218895 | 1.2595 | 0.208    | 0.424903676 | count | 1           |
| TRIM72     | 2.8433975 | 1.700759  | 1.6718 | 0.0947   | 0.424909694 | count | 1           |
| APOL2      | 0.3629118 | 0.2608635 | 1.3912 | 0.164    | 0.425062344 | count | 1           |
| CYTH2      | 0.3168839 | 0.1464267 | 2.1641 | 0.0306   | 0.425125732 | count | 1           |
| ZNF621     | 0.6512179 | 0.4765068 | 1.3666 | 0.172    | 0.425179877 | count | 1           |
| LDLRAP1    | 0.4638539 | 0.4186031 | 1.1081 | 0.268    | 0.425239482 | count | 1           |
| ZNF655     | 0.3150261 | 0.1490523 | 2.1135 | 0.0347   | 0.425343599 | count | 1           |
| SMG9       | 0.421695  | 0.2970231 | 1.4197 | 0.156    | 0.425374765 | count | 1           |
| Z93930.2   | 0.3963463 | 0.3703401 | 1.0702 | 0.285    | 0.425388736 | count | 1           |
| FITM2      | 0.5915252 | 0.5190017 | 1.1397 | 0.255    | 0.42540858  | count | 1           |
| TOGARAM1   | 0.3777862 | 0.3391606 | 1.1139 | 0.265    | 0.425746989 | count | 1           |
| ATXN7      | 0.5494381 | 0.9557184 | 0.5749 | 0.565    | 0.42586033  | count | 1           |
| LOH12CR2   | 0.8985259 | 0.6444169 | 1.3943 | 0.163    | 0.425876375 | count | 1           |

|            |           |           |        |          |             |       |   |
|------------|-----------|-----------|--------|----------|-------------|-------|---|
| PROCA1     | 0.5044515 | 0.4832796 | 1.0438 | 0.297    | 0.42589044  | count | 1 |
| CPNE1      | 0.3156873 | 0.1045579 | 3.0193 | 0.00256  | 0.426241348 | count | 1 |
| PPP1R10    | 0.3010307 | 0.0834338 | 3.608  | 0.000315 | 0.426443823 | count | 1 |
| CCDC71     | 0.5698545 | 0.5169591 | 1.1023 | 0.27     | 0.426454582 | count | 1 |
| MRPL44     | 0.3458779 | 0.2098415 | 1.6483 | 0.0994   | 0.426596918 | count | 1 |
| ANKRD13A   | 0.3242577 | 0.1912486 | 1.6955 | 0.0901   | 0.426661914 | count | 1 |
| TMUB2      | 0.324035  | 0.1776988 | 1.8235 | 0.0683   | 0.426962246 | count | 1 |
| MED13L     | 0.3214332 | 0.1354554 | 2.373  | 0.0177   | 0.426969036 | count | 1 |
| ING4       | 0.3596343 | 0.2375945 | 1.5136 | 0.13     | 0.426990445 | count | 1 |
| C9orf139   | 0.5708744 | 0.4106811 | 1.3901 | 0.165    | 0.427270815 | count | 1 |
| DPM1       | 0.3287034 | 0.1817212 | 1.8088 | 0.0706   | 0.427395367 | count | 1 |
| STK35      | 0.4286738 | 0.3848026 | 1.114  | 0.265    | 0.427730836 | count | 1 |
| IL4R       | 0.3358017 | 0.2100022 | 1.599  | 0.11     | 0.427815759 | count | 1 |
| GALNT12    | 0.5349593 | 1.0117967 | 0.5287 | 0.597    | 0.428021333 | count | 1 |
| KIF3A      | 0.4083878 | 0.3354193 | 1.2175 | 0.224    | 0.428121888 | count | 1 |
| KDM5A      | 0.3104422 | 0.1348292 | 2.3025 | 0.0214   | 0.428246657 | count | 1 |
| NRP1       | 0.306244  | 0.1105009 | 2.7714 | 0.00562  | 0.428335508 | count | 1 |
| CYTH1      | 0.3098498 | 0.1589999 | 1.9487 | 0.0514   | 0.428506961 | count | 1 |
| IL10RA     | 0.3049549 | 0.0947849 | 3.2173 | 0.00131  | 0.428602176 | count | 1 |
| RRS1       | 0.4023887 | 0.318236  | 1.2644 | 0.206    | 0.42873976  | count | 1 |
| PPP2R1A    | 0.3145658 | 0.1284848 | 2.4483 | 0.0144   | 0.428740634 | count | 1 |
| BTBD6      | 0.3436911 | 0.219008  | 1.5693 | 0.117    | 0.428771119 | count | 1 |
| CARHSP1    | 0.3141469 | 0.1404392 | 2.2369 | 0.0254   | 0.429270098 | count | 1 |
| SUPT7L     | 0.3512115 | 0.3016601 | 1.1643 | 0.244    | 0.429499976 | count | 1 |
| ADAR       | 0.3129964 | 0.1166128 | 2.6841 | 0.00732  | 0.429533529 | count | 1 |
| SERGEF     | 0.3667402 | 0.2380178 | 1.5408 | 0.123    | 0.429630703 | count | 1 |
| BLOC1S4    | 0.3226542 | 0.1634219 | 1.9744 | 0.0485   | 0.429784285 | count | 1 |
| TMEM184C   | 0.4173974 | 0.3263861 | 1.2788 | 0.201    | 0.42979112  | count | 1 |
| CCDC159    | 0.3429608 | 0.2537674 | 1.3515 | 0.177    | 0.430055432 | count | 1 |
| SMIM13     | 0.3494576 | 0.2261687 | 1.5451 | 0.122    | 0.430170697 | count | 1 |
| YJU2       | 0.355187  | 0.3055446 | 1.1625 | 0.245    | 0.430214981 | count | 1 |
| TTC9       | 1.6290862 | 0.9405895 | 1.732  | 0.0834   | 0.430288411 | count | 1 |
| ZMAT1      | 0.4779409 | 0.2992858 | 1.5969 | 0.11     | 0.430539469 | count | 1 |
| AC096667.1 | 0.3159579 | 0.1415727 | 2.2318 | 0.0257   | 0.430647175 | count | 1 |
| TRIM23     | 0.4875865 | 0.330599  | 1.4749 | 0.14     | 0.430712658 | count | 1 |
| ICK        | 0.4044993 | 0.2618423 | 1.5448 | 0.123    | 0.431052518 | count | 1 |
| TMEM42     | 0.4014939 | 0.2879376 | 1.3944 | 0.163    | 0.431066542 | count | 1 |
| RNF169     | 0.3236514 | 0.2093731 | 1.5458 | 0.122    | 0.431121681 | count | 1 |
| ARMC8      | 0.3375728 | 0.1955571 | 1.7262 | 0.0844   | 0.431191112 | count | 1 |
| ZNF768     | 0.4486642 | 0.4321945 | 1.0381 | 0.299    | 0.431193148 | count | 1 |
| CAB39      | 0.3164215 | 0.1323893 | 2.3901 | 0.0169   | 0.431397743 | count | 1 |
| NEK4       | 0.3669309 | 0.287563  | 1.276  | 0.202    | 0.431415251 | count | 1 |
| MFSD11     | 0.3498842 | 0.2348607 | 1.4898 | 0.136    | 0.431606865 | count | 1 |
| ARL17A     | 0.4705098 | 0.4287368 | 1.0974 | 0.273    | 0.43161653  | count | 1 |
| XPA        | 0.3161863 | 0.1622109 | 1.9492 | 0.0514   | 0.431637775 | count | 1 |

|             |           |           |        |          |             |       |            |
|-------------|-----------|-----------|--------|----------|-------------|-------|------------|
| SLC25A12    | 0.5242603 | 0.4139089 | 1.2666 | 0.205    | 0.431716183 | count | 1          |
| C7orf43     | 0.3965826 | 0.3208716 | 1.236  | 0.217    | 0.431776686 | count | 1          |
| PIK3C3      | 0.3920345 | 0.2460996 | 1.593  | 0.111    | 0.432270692 | count | 1          |
| RAB3IL1     | 0.4335006 | 0.2119664 | 2.0451 | 0.0409   | 0.432718416 | count | 1          |
| ING2        | 0.308307  | 0.1250178 | 2.4661 | 0.0137   | 0.432863105 | count | 1          |
| ZNF563      | 0.8211393 | 0.7840943 | 1.0472 | 0.295    | 0.432912572 | count | 1          |
| OGFRL1      | 0.3070554 | 0.0863466 | 3.5561 | 0.000384 | 0.432921351 | count | 1          |
| HSPA14      | 0.4443836 | 0.3734834 | 1.1898 | 0.234    | 0.432922723 | count | 1          |
| PCMTD1      | 0.3128536 | 0.1162825 | 2.6905 | 0.00718  | 0.433054418 | count | 1          |
| DDX3Y       | 0.3105075 | 0.1117967 | 2.7774 | 0.00552  | 0.433148745 | count | 1          |
| ITCH        | 0.350426  | 0.2078292 | 1.6861 | 0.0919   | 0.433167638 | count | 1          |
| UBIAD1      | 0.4066013 | 0.3612047 | 1.1257 | 0.26     | 0.433356392 | count | 1          |
| PRPF8       | 0.3223128 | 0.1482923 | 2.1735 | 0.0298   | 0.433378726 | count | 1          |
| TTYH2       | 0.5261885 | 0.2852385 | 1.8447 | 0.0652   | 0.433396082 | count | 1          |
| ZNF652      | 0.3293591 | 0.1569195 | 2.0989 | 0.0359   | 0.433427954 | count | 1          |
| MLF1        | 0.3552725 | 0.256466  | 1.3853 | 0.166    | 0.433525871 | count | 1          |
| C12orf4     | 0.3775845 | 0.2656353 | 1.4214 | 0.155    | 0.433754143 | count | 1          |
| COLGALT1    | 0.3160854 | 0.1298503 | 2.4342 | 0.015    | 0.433880656 | count | 1          |
| WASHC4      | 0.3176244 | 0.1145558 | 2.7727 | 0.0056   | 0.434255209 | count | 1          |
| C1orf162    | 0.3029971 | 0.049916  | 6.0701 | 1.48E-09 | 0.434333906 | count | 3.56E-05   |
| LMF1        | 0.4142456 | 0.3488919 | 1.1873 | 0.235    | 0.434449043 | count | 1          |
| TAF1C       | 0.5799147 | 0.4853658 | 1.1948 | 0.232    | 0.434512197 | count | 1          |
| ACADSB      | 0.6644849 | 0.4860965 | 1.367  | 0.172    | 0.434606554 | count | 1          |
| U2SURP      | 0.3088013 | 0.0882444 | 3.4994 | 0.000475 | 0.434670963 | count | 1          |
| AP2B1       | 0.3300751 | 0.1980257 | 1.6668 | 0.0957   | 0.434682872 | count | 1          |
| LDHD        | 0.9150507 | 0.509546  | 1.7958 | 0.0726   | 0.434726812 | count | 1          |
| SLC25A11    | 0.3150706 | 0.1108083 | 2.8434 | 0.0045   | 0.434871186 | count | 1          |
| ARHGAP29    | 1.2539922 | 0.7461076 | 1.6807 | 0.0929   | 0.435178357 | count | 1          |
| HECTD1      | 0.3191273 | 0.148347  | 2.1512 | 0.0316   | 0.43556028  | count | 1          |
| VEZF1       | 0.331745  | 0.1510824 | 2.1958 | 0.0282   | 0.435645411 | count | 1          |
| CUL2        | 0.3362913 | 0.1777929 | 1.8915 | 0.0587   | 0.435717047 | count | 1          |
| KIAA2026    | 0.3243219 | 0.1782152 | 1.8198 | 0.0689   | 0.435731134 | count | 1          |
| SIRT1       | 0.3420405 | 0.1968619 | 1.7375 | 0.0824   | 0.435851235 | count | 1          |
| SZT2        | 0.419259  | 0.343033  | 1.2222 | 0.222    | 0.435915606 | count | 1          |
| POLM        | 0.4274262 | 0.4329046 | 0.9873 | 0.324    | 0.436019065 | count | 1          |
| CNPY3       | 0.3061165 | 0.0573895 | 5.334  | 1.05E-07 | 0.436042783 | count | 0.00250971 |
| PDRG1       | 0.4004268 | 0.2701731 | 1.4821 | 0.138    | 0.436072561 | count | 1          |
| DISC1       | 0.4475978 | 0.3546972 | 1.2619 | 0.207    | 0.43617434  | count | 1          |
| ARG2        | 0.5160831 | 0.4224764 | 1.2216 | 0.222    | 0.436253772 | count | 1          |
| GPT2        | 1.049421  | 0.7656643 | 1.3706 | 0.171    | 0.436428456 | count | 1          |
| LINC02381   | 0.6672064 | 0.5382957 | 1.2395 | 0.215    | 0.436543061 | count | 1          |
| MIA2        | 0.3265663 | 0.1677082 | 1.9472 | 0.0516   | 0.436581288 | count | 1          |
| RPS6KA3     | 0.3228309 | 0.1433975 | 2.2513 | 0.0245   | 0.436717641 | count | 1          |
| ZSCAN16-AS1 | 0.3320954 | 0.1865452 | 1.7802 | 0.0752   | 0.436746254 | count | 1          |
| HK2         | 0.3819752 | 0.323396  | 1.1811 | 0.238    | 0.436931659 | count | 1          |

|            |           |           |        |          |             |       |             |
|------------|-----------|-----------|--------|----------|-------------|-------|-------------|
| TAOK2      | 0.5174454 | 0.3959157 | 1.307  | 0.191    | 0.437468772 | count | 1           |
| JDP2       | 0.3118406 | 0.0885922 | 3.52   | 0.000439 | 0.437699713 | count | 1           |
| ELL        | 0.3385078 | 0.1638224 | 2.0663 | 0.0389   | 0.437750904 | count | 1           |
| PLD1       | 0.4249234 | 0.2950942 | 1.44   | 0.15     | 0.437791997 | count | 1           |
| FAM161A    | 0.5841067 | 0.6602378 | 0.8847 | 0.376    | 0.4378739   | count | 1           |
| DDA1       | 0.3252764 | 0.1745516 | 1.8635 | 0.0625   | 0.437922062 | count | 1           |
| CEP85L     | 0.3454971 | 0.2206843 | 1.5656 | 0.118    | 0.437930955 | count | 1           |
| FLVCR1-DT  | 0.4077196 | 0.450846  | 0.9043 | 0.366    | 0.43793774  | count | 1           |
| RBBP4      | 0.3190366 | 0.1332015 | 2.3951 | 0.0167   | 0.438128221 | count | 1           |
| C20orf27   | 0.3170026 | 0.0924533 | 3.4288 | 0.000616 | 0.438170481 | count | 1           |
| PPM1L      | 0.4861072 | 0.3112974 | 1.5616 | 0.119    | 0.438246177 | count | 1           |
| TIGD3      | 0.6361067 | 0.6640073 | 0.958  | 0.338    | 0.438317175 | count | 1           |
| COL4A2-AS2 | 0.6361067 | 0.6383046 | 0.9966 | 0.319    | 0.438317175 | count | 1           |
| TMEM218    | 0.3380033 | 0.1809295 | 1.8681 | 0.0619   | 0.438377105 | count | 1           |
| UGGT1      | 0.3609301 | 0.2195438 | 1.644  | 0.1      | 0.438394282 | count | 1           |
| NCAPG2     | 0.6083191 | 0.4442138 | 1.3694 | 0.171    | 0.438403375 | count | 1           |
| COQ9       | 0.372771  | 0.2540548 | 1.4673 | 0.142    | 0.438410141 | count | 1           |
| ZKSCAN5    | 0.9222498 | 0.6215741 | 1.4837 | 0.138    | 0.438589455 | count | 1           |
| TFAP4      | 0.9222498 | 0.5851685 | 1.576  | 0.115    | 0.438589455 | count | 1           |
| NR4A2      | 0.305886  | 0.0574241 | 5.3268 | 1.09E-07 | 0.438606229 | count | 0.002605209 |
| FOXO3      | 0.3189462 | 0.1178216 | 2.707  | 0.00684  | 0.438608723 | count | 1           |
| WDR74      | 0.3578102 | 0.2296138 | 1.5583 | 0.119    | 0.438684132 | count | 1           |
| PSMD9      | 0.3731088 | 0.2029369 | 1.8385 | 0.0661   | 0.438814837 | count | 1           |
| MORN2      | 0.3579444 | 0.2976683 | 1.2025 | 0.229    | 0.438851074 | count | 1           |
| HMGCS1     | 0.3773838 | 0.3360723 | 1.1229 | 0.262    | 0.438984875 | count | 1           |
| AC008906.1 | 1.658246  | 1.305714  | 1.27   | 0.204    | 0.438988329 | count | 1           |
| AC012150.2 | 1.658246  | 1.379544  | 1.202  | 0.229    | 0.438988329 | count | 1           |
| BTN3A1     | 0.4347836 | 0.3174905 | 1.3694 | 0.171    | 0.439037129 | count | 1           |
| MBNL1      | 0.3108142 | 0.0836842 | 3.7141 | 0.000208 | 0.439267988 | count | 1           |
| CEACAM3    | 0.7126829 | 0.4481576 | 1.5903 | 0.112    | 0.43948796  | count | 1           |
| SCAP       | 0.4509853 | 0.3056207 | 1.4756 | 0.14     | 0.439602778 | count | 1           |
| AC104506.1 | 0.5662181 | 0.4382004 | 1.2921 | 0.196    | 0.439729363 | count | 1           |
| EIF4EBP2   | 0.3307873 | 0.1675028 | 1.9748 | 0.0484   | 0.439732207 | count | 1           |
| ASPSCR1    | 0.3507595 | 0.2133398 | 1.6441 | 0.1      | 0.439957179 | count | 1           |
| JOSD1      | 0.3209541 | 0.1505289 | 2.1322 | 0.0331   | 0.440033766 | count | 1           |
| ZHX2       | 0.8333407 | 0.6737656 | 1.2368 | 0.216    | 0.440098113 | count | 1           |
| CRTC3      | 0.3425474 | 0.2967295 | 1.1544 | 0.248    | 0.440208995 | count | 1           |
| SNHG8      | 0.3127429 | 0.0843518 | 3.7076 | 0.000214 | 0.440296991 | count | 1           |
| TNFRSF10B  | 0.3371056 | 0.1484693 | 2.2705 | 0.0233   | 0.44032149  | count | 1           |
| PKN1       | 0.320513  | 0.1172712 | 2.7331 | 0.00632  | 0.440341489 | count | 1           |
| ZNF432     | 0.9257819 | 0.5551172 | 1.6677 | 0.0955   | 0.440486079 | count | 1           |
| TMEM205    | 0.3145898 | 0.0985423 | 3.1924 | 0.00143  | 0.440546159 | count | 1           |
| CYP4V2     | 0.4412364 | 0.3348346 | 1.3178 | 0.188    | 0.440718283 | count | 1           |
| CARD8      | 0.326434  | 0.1375774 | 2.3727 | 0.0177   | 0.440835176 | count | 1           |
| RBPJ       | 0.3104508 | 0.0700289 | 4.4332 | 9.69E-06 | 0.440863426 | count | 0.22967238  |

|            |           |           |        |          |             |       |           |
|------------|-----------|-----------|--------|----------|-------------|-------|-----------|
| DRAIC      | 0.6732904 | 1.2052639 | 0.5586 | 0.576    | 0.440875551 | count | 1         |
| TARSL2     | 0.3629426 | 0.324965  | 1.1169 | 0.264    | 0.440876792 | count | 1         |
| ABCG2      | 0.4365815 | 0.5148055 | 0.8481 | 0.396    | 0.440915582 | count | 1         |
| ITPRIPL2   | 0.3230862 | 0.1340031 | 2.411  | 0.016    | 0.440989486 | count | 1         |
| TSG101     | 0.317444  | 0.1090758 | 2.9103 | 0.00364  | 0.441085303 | count | 1         |
| ABHD17B    | 0.4806453 | 0.3566328 | 1.3477 | 0.178    | 0.441339272 | count | 1         |
| FOXK1      | 0.3956128 | 0.2619469 | 1.5103 | 0.131    | 0.441503147 | count | 1         |
| TTC33      | 0.4809857 | 0.3653404 | 1.3165 | 0.188    | 0.441666058 | count | 1         |
| RPL17      | 0.3193291 | 0.1130417 | 2.8249 | 0.00477  | 0.44172955  | count | 1         |
| SHISA5     | 0.3196242 | 0.1252809 | 2.5513 | 0.0108   | 0.441739744 | count | 1         |
| PHF20      | 0.3164353 | 0.0916151 | 3.454  | 0.000562 | 0.441845858 | count | 1         |
| ANP32E     | 0.3176755 | 0.1027017 | 3.0932 | 0.002    | 0.441961174 | count | 1         |
| ODF3B      | 0.3150366 | 0.0886634 | 3.5532 | 0.000388 | 0.442084074 | count | 1         |
| PPP2R5E    | 0.327176  | 0.1502588 | 2.1774 | 0.0295   | 0.442162162 | count | 1         |
| OSGIN1     | 0.4332522 | 0.2798297 | 1.5483 | 0.122    | 0.442162272 | count | 1         |
| SETD2      | 0.339187  | 0.1694821 | 2.0013 | 0.0455   | 0.442317647 | count | 1         |
| BRCC3      | 0.3571982 | 0.2091891 | 1.7075 | 0.0878   | 0.442533022 | count | 1         |
| STAMBPL1   | 0.5007768 | 0.4612827 | 1.0856 | 0.278    | 0.442951005 | count | 1         |
| ARMCX2     | 0.5703929 | 0.5344173 | 1.0673 | 0.286    | 0.443186043 | count | 1         |
| ACTL6A     | 0.3511405 | 0.2064993 | 1.7004 | 0.0892   | 0.443227047 | count | 1         |
| NDUFB1     | 0.3120392 | 0.0700153 | 4.4567 | 8.70E-06 | 0.443319065 | count | 0.2062857 |
| CDKL3      | 0.5909268 | 0.4770488 | 1.2387 | 0.216    | 0.443348314 | count | 1         |
| PSME1      | 0.3096498 | 0.0437995 | 7.0697 | 2.02E-12 | 0.44351076  | count | 4.87E-08  |
| GBP2       | 0.3218632 | 0.0905394 | 3.555  | 0.000385 | 0.443608743 | count | 1         |
| RRNAD1     | 0.3915441 | 0.3054845 | 1.2817 | 0.2      | 0.443857799 | count | 1         |
| VPS11      | 0.4395082 | 0.3008126 | 1.4611 | 0.144    | 0.443974295 | count | 1         |
| NINJ2      | 0.367328  | 0.2017545 | 1.8207 | 0.0688   | 0.443993141 | count | 1         |
| ZNF282     | 0.7719278 | 0.5339581 | 1.4457 | 0.148    | 0.444073233 | count | 1         |
| ZNF573     | 0.7719278 | 0.5751573 | 1.3421 | 0.18     | 0.444073233 | count | 1         |
| CD1E       | 0.3776934 | 0.4054799 | 0.9315 | 0.352    | 0.44430841  | count | 1         |
| FBXW4      | 0.4685826 | 0.4559957 | 1.0276 | 0.304    | 0.444428415 | count | 1         |
| FUT4       | 0.3920828 | 0.3395064 | 1.1549 | 0.248    | 0.444482233 | count | 1         |
| DCAF11     | 0.3822161 | 0.2440053 | 1.5664 | 0.117    | 0.444718156 | count | 1         |
| IQGAP2     | 0.3134094 | 0.0758563 | 4.1316 | 3.72E-05 | 0.445079779 | count | 0.8774364 |
| RAP2A      | 0.3295129 | 0.1523216 | 2.1633 | 0.0306   | 0.445338394 | count | 1         |
| NUMB       | 0.324754  | 0.1203271 | 2.6989 | 0.007    | 0.445362636 | count | 1         |
| ZNF217     | 0.3320571 | 0.1551604 | 2.1401 | 0.0324   | 0.44541528  | count | 1         |
| INPP4A     | 0.3657555 | 0.2189103 | 1.6708 | 0.0949   | 0.445444683 | count | 1         |
| TNPO3      | 0.3738653 | 0.2702168 | 1.3836 | 0.167    | 0.445591919 | count | 1         |
| KCNQ3      | 0.6459964 | 0.5871705 | 1.1002 | 0.271    | 0.445691003 | count | 1         |
| PMS1       | 0.4040846 | 0.2500131 | 1.6163 | 0.106    | 0.445896871 | count | 1         |
| AL691432.2 | 0.4635695 | 0.3978258 | 1.1653 | 0.244    | 0.446100579 | count | 1         |
| NR2C2AP    | 0.3935339 | 0.285389  | 1.3789 | 0.168    | 0.446164446 | count | 1         |
| OXA1L      | 0.327862  | 0.1145209 | 2.8629 | 0.00423  | 0.446338772 | count | 1         |
| GDPGP1     | 0.6186027 | 0.4641445 | 1.3328 | 0.183    | 0.446379468 | count | 1         |



|            |           |           |        |          |             |       |   |
|------------|-----------|-----------|--------|----------|-------------|-------|---|
| ASAP1      | 0.3210252 | 0.1079938 | 2.9726 | 0.00298  | 0.446437228 | count | 1 |
| GPX3       | 0.3838378 | 0.2578783 | 1.4884 | 0.137    | 0.446642732 | count | 1 |
| PPP1R12B   | 0.4951904 | 0.3727725 | 1.3284 | 0.184    | 0.446829071 | count | 1 |
| FAM215B    | 0.3855503 | 0.3090343 | 1.2476 | 0.212    | 0.44687865  | count | 1 |
| ATF6B      | 0.339569  | 0.2259461 | 1.5029 | 0.133    | 0.44697353  | count | 1 |
| ID2-AS1    | 1.284112  | 0.9484273 | 1.3539 | 0.176    | 0.447229986 | count | 1 |
| LRIG1      | 1.284112  | 1.2155904 | 1.0564 | 0.291    | 0.447229986 | count | 1 |
| AC104825.1 | 1.284112  | 1.2188783 | 1.0535 | 0.292    | 0.447229986 | count | 1 |
| AMACR      | 1.284112  | 0.9484273 | 1.3539 | 0.176    | 0.447229986 | count | 1 |
| AC011405.1 | 1.284112  | 0.9484273 | 1.3539 | 0.176    | 0.447229986 | count | 1 |
| PXT1       | 1.284112  | 0.9484273 | 1.3539 | 0.176    | 0.447229986 | count | 1 |
| RAMP3      | 1.284112  | 0.9484273 | 1.3539 | 0.176    | 0.447229986 | count | 1 |
| RPA4       | 1.284112  | 0.9484273 | 1.3539 | 0.176    | 0.447229986 | count | 1 |
| TACR2      | 1.284112  | 0.9484273 | 1.3539 | 0.176    | 0.447229986 | count | 1 |
| AL731569.1 | 1.284112  | 1.1513374 | 1.1153 | 0.265    | 0.447229986 | count | 1 |
| MSRB3      | 1.284112  | 1.1513374 | 1.1153 | 0.265    | 0.447229986 | count | 1 |
| KIF23      | 1.284112  | 0.9484273 | 1.3539 | 0.176    | 0.447229986 | count | 1 |
| LARP6      | 1.284112  | 0.9484273 | 1.3539 | 0.176    | 0.447229986 | count | 1 |
| AC092119.2 | 1.284112  | 0.9484273 | 1.3539 | 0.176    | 0.447229986 | count | 1 |
| RTN4RL1    | 1.284112  | 0.9484273 | 1.3539 | 0.176    | 0.447229986 | count | 1 |
| ZNF416     | 1.284112  | 0.9484273 | 1.3539 | 0.176    | 0.447229986 | count | 1 |
| AL441992.1 | 0.422564  | 0.3473337 | 1.2166 | 0.224    | 0.44724034  | count | 1 |
| CCNT1      | 0.3690552 | 0.3006214 | 1.2276 | 0.22     | 0.447282416 | count | 1 |
| UBE2G1     | 0.3459208 | 0.1764191 | 1.9608 | 0.05     | 0.447430951 | count | 1 |
| LDAH       | 0.6826029 | 0.5334784 | 1.2795 | 0.201    | 0.447516052 | count | 1 |
| SKP2       | 0.5757488 | 0.4817024 | 1.1952 | 0.232    | 0.447624162 | count | 1 |
| SMAD2      | 0.3435228 | 0.1658527 | 2.0713 | 0.0384   | 0.447635835 | count | 1 |
| OARD1      | 0.3482805 | 0.1817468 | 1.9163 | 0.0554   | 0.447652952 | count | 1 |
| TRMT2B     | 0.7778097 | 0.4892869 | 1.5897 | 0.112    | 0.447815894 | count | 1 |
| SFXN5      | 0.4231133 | 0.3112575 | 1.3594 | 0.174    | 0.447839085 | count | 1 |
| NFXL1      | 1.2857405 | 0.5270663 | 2.4394 | 0.0148   | 0.447881911 | count | 1 |
| TNRC6A     | 0.3432169 | 0.2175622 | 1.5776 | 0.115    | 0.448000401 | count | 1 |
| UTF1       | 0.3991743 | 0.29291   | 1.3628 | 0.173    | 0.448041159 | count | 1 |
| RGMA       | 0.7783745 | 0.5118264 | 1.5208 | 0.128    | 0.448175465 | count | 1 |
| AC015819.2 | 1.074157  | 0.5753207 | 1.8671 | 0.062    | 0.448197188 | count | 1 |
| CLK2       | 0.4800107 | 0.3493108 | 1.3742 | 0.17     | 0.448461094 | count | 1 |
| EVI5       | 0.3290682 | 0.1372357 | 2.3978 | 0.0166   | 0.448484551 | count | 1 |
| MPO        | 1.0749195 | 0.7817256 | 1.3751 | 0.169    | 0.448560434 | count | 1 |
| CRTAP      | 0.3209997 | 0.0840216 | 3.8204 | 0.000137 | 0.448625391 | count | 1 |
| TMEM39A    | 0.4274086 | 0.2483242 | 1.7212 | 0.0853   | 0.448682184 | count | 1 |
| ZNF587     | 0.4663461 | 0.3648893 | 1.278  | 0.201    | 0.448880858 | count | 1 |
| RMDN2      | 0.4977094 | 0.3902209 | 1.2755 | 0.202    | 0.449211349 | count | 1 |
| CCDC91     | 0.3338191 | 0.1328835 | 2.5121 | 0.0121   | 0.449313004 | count | 1 |
| HEATR1     | 0.4358353 | 0.2980247 | 1.4624 | 0.144    | 0.449405084 | count | 1 |
| PANX2      | 0.780313  | 0.7073724 | 1.1031 | 0.27     | 0.449409853 | count | 1 |

|              |           |           |        |         |             |       |   |
|--------------|-----------|-----------|--------|---------|-------------|-------|---|
| YES1         | 1.6942875 | 0.9317109 | 1.8185 | 0.0691  | 0.449705593 | count | 1 |
| LINC00324    | 0.347802  | 0.213062  | 1.6324 | 0.103   | 0.449887981 | count | 1 |
| RASSF1       | 0.3404517 | 0.1517392 | 2.2437 | 0.0249  | 0.449962626 | count | 1 |
| MRPL10       | 0.3677203 | 0.2265291 | 1.6233 | 0.105   | 0.449995586 | count | 1 |
| AP5M1        | 0.4102672 | 0.2878705 | 1.4252 | 0.154   | 0.450045369 | count | 1 |
| TMEM41B      | 0.3486488 | 0.214833  | 1.6229 | 0.105   | 0.45007357  | count | 1 |
| DHX29        | 0.3256986 | 0.1259504 | 2.5859 | 0.00977 | 0.450097004 | count | 1 |
| BRF1         | 0.4453907 | 0.3579729 | 1.2442 | 0.214   | 0.45012545  | count | 1 |
| MTRNR2L8     | 0.3509013 | 0.1452717 | 2.4155 | 0.0158  | 0.451056526 | count | 1 |
| JRKL         | 0.4111859 | 0.3292504 | 1.2489 | 0.212   | 0.451079546 | count | 1 |
| AL357054.4   | 1.2937393 | 0.7978871 | 1.6215 | 0.105   | 0.451085186 | count | 1 |
| MPZL3        | 1.2937393 | 0.7758252 | 1.6676 | 0.0955  | 0.451085186 | count | 1 |
| CEMIP2       | 0.3494541 | 0.1805989 | 1.935  | 0.0531  | 0.451123512 | count | 1 |
| ZBTB39       | 1.0807261 | 0.7156995 | 1.51   | 0.131   | 0.451327789 | count | 1 |
| ZNF581       | 0.3519261 | 0.1762138 | 1.9972 | 0.0459  | 0.451352982 | count | 1 |
| APOL3        | 0.4201208 | 0.3333733 | 1.2602 | 0.208   | 0.451638411 | count | 1 |
| ZNF689       | 0.852997  | 0.5001643 | 1.7054 | 0.0882  | 0.451703678 | count | 1 |
| PMS2         | 0.4762115 | 0.3873982 | 1.2293 | 0.219   | 0.451971229 | count | 1 |
| AL928921.2   | 1.702071  | 1.0380211 | 1.6397 | 0.101   | 0.452014113 | count | 1 |
| DCDC2B       | 1.702071  | 1.0380211 | 1.6397 | 0.101   | 0.452014113 | count | 1 |
| CCDC17       | 1.702071  | 1.0380211 | 1.6397 | 0.101   | 0.452014113 | count | 1 |
| S100A1       | 1.702071  | 1.0380211 | 1.6397 | 0.101   | 0.452014113 | count | 1 |
| KLHDC9       | 1.702071  | 1.0380211 | 1.6397 | 0.101   | 0.452014113 | count | 1 |
| LINC01740    | 1.702071  | 1.0380211 | 1.6397 | 0.101   | 0.452014113 | count | 1 |
| AL117350.1   | 1.702071  | 1.0380211 | 1.6397 | 0.101   | 0.452014113 | count | 1 |
| LINC01914    | 1.702071  | 1.0380211 | 1.6397 | 0.101   | 0.452014113 | count | 1 |
| ST3GAL5-AS1  | 1.702071  | 1.0380211 | 1.6397 | 0.101   | 0.452014113 | count | 1 |
| LINC00471    | 1.702071  | 1.0380211 | 1.6397 | 0.101   | 0.452014113 | count | 1 |
| SNED1        | 1.702071  | 1.0380211 | 1.6397 | 0.101   | 0.452014113 | count | 1 |
| LINC00852    | 1.702071  | 1.0380211 | 1.6397 | 0.101   | 0.452014113 | count | 1 |
| AC112220.2   | 1.702071  | 1.0380211 | 1.6397 | 0.101   | 0.452014113 | count | 1 |
| SLC35G2      | 1.702071  | 1.0380211 | 1.6397 | 0.101   | 0.452014113 | count | 1 |
| FGFBP2       | 1.702071  | 1.0380211 | 1.6397 | 0.101   | 0.452014113 | count | 1 |
| LINC01093    | 1.702071  | 1.0380211 | 1.6397 | 0.101   | 0.452014113 | count | 1 |
| AC008799.2   | 1.702071  | 1.0380211 | 1.6397 | 0.101   | 0.452014113 | count | 1 |
| AL137003.1   | 1.702071  | 1.0380211 | 1.6397 | 0.101   | 0.452014113 | count | 1 |
| HIST1H4J     | 1.702071  | 1.0380211 | 1.6397 | 0.101   | 0.452014113 | count | 1 |
| SYNGAP1-AS1  | 1.702071  | 1.0380211 | 1.6397 | 0.101   | 0.452014113 | count | 1 |
| CAPN11       | 1.702071  | 1.0380211 | 1.6397 | 0.101   | 0.452014113 | count | 1 |
| ADGB         | 1.702071  | 1.0380211 | 1.6397 | 0.101   | 0.452014113 | count | 1 |
| HOXA1        | 1.702071  | 1.0380211 | 1.6397 | 0.101   | 0.452014113 | count | 1 |
| AC018645.2   | 1.702071  | 1.0380211 | 1.6397 | 0.101   | 0.452014113 | count | 1 |
| ATP6V0E2-AS1 | 1.702071  | 1.0380211 | 1.6397 | 0.101   | 0.452014113 | count | 1 |
| ATG9B        | 1.702071  | 1.0380211 | 1.6397 | 0.101   | 0.452014113 | count | 1 |
| EXTL3-AS1    | 1.702071  | 1.0380211 | 1.6397 | 0.101   | 0.452014113 | count | 1 |

|            |           |           |        |          |             |       |           |
|------------|-----------|-----------|--------|----------|-------------|-------|-----------|
| RUNX1T1    | 1.702071  | 1.0380211 | 1.6397 | 0.101    | 0.452014113 | count | 1         |
| PKN3       | 1.702071  | 1.0380211 | 1.6397 | 0.101    | 0.452014113 | count | 1         |
| AC068580.3 | 1.702071  | 1.0380211 | 1.6397 | 0.101    | 0.452014113 | count | 1         |
| AC006299.1 | 1.702071  | 1.0380211 | 1.6397 | 0.101    | 0.452014113 | count | 1         |
| AP003419.3 | 1.702071  | 1.0380211 | 1.6397 | 0.101    | 0.452014113 | count | 1         |
| IDI2-AS1   | 1.702071  | 1.0380211 | 1.6397 | 0.101    | 0.452014113 | count | 1         |
| MEIG1      | 1.702071  | 1.0380211 | 1.6397 | 0.101    | 0.452014113 | count | 1         |
| THNSL1     | 1.702071  | 1.0380211 | 1.6397 | 0.101    | 0.452014113 | count | 1         |
| AC021028.1 | 1.702071  | 1.0380211 | 1.6397 | 0.101    | 0.452014113 | count | 1         |
| KAZALD1    | 1.702071  | 1.0380211 | 1.6397 | 0.101    | 0.452014113 | count | 1         |
| AC022075.1 | 1.702071  | 1.0380211 | 1.6397 | 0.101    | 0.452014113 | count | 1         |
| HIGD1C     | 1.702071  | 1.0380211 | 1.6397 | 0.101    | 0.452014113 | count | 1         |
| CCDC62     | 1.702071  | 1.0380211 | 1.6397 | 0.101    | 0.452014113 | count | 1         |
| SEC23A-AS1 | 1.702071  | 1.0380211 | 1.6397 | 0.101    | 0.452014113 | count | 1         |
| AL121820.2 | 1.702071  | 1.0380211 | 1.6397 | 0.101    | 0.452014113 | count | 1         |
| CNGB1      | 1.702071  | 1.0380211 | 1.6397 | 0.101    | 0.452014113 | count | 1         |
| AC027682.4 | 1.702071  | 1.0380211 | 1.6397 | 0.101    | 0.452014113 | count | 1         |
| P2RX5      | 1.702071  | 1.0380211 | 1.6397 | 0.101    | 0.452014113 | count | 1         |
| PIMREG     | 1.702071  | 1.0380211 | 1.6397 | 0.101    | 0.452014113 | count | 1         |
| AC005288.1 | 1.702071  | 1.0380211 | 1.6397 | 0.101    | 0.452014113 | count | 1         |
| KRT15      | 1.702071  | 1.0380211 | 1.6397 | 0.101    | 0.452014113 | count | 1         |
| AP005671.1 | 1.702071  | 1.0380211 | 1.6397 | 0.101    | 0.452014113 | count | 1         |
| GATA6      | 1.702071  | 1.0380211 | 1.6397 | 0.101    | 0.452014113 | count | 1         |
| DBNDD2     | 1.702071  | 1.0380211 | 1.6397 | 0.101    | 0.452014113 | count | 1         |
| AC092068.1 | 1.702071  | 1.0380211 | 1.6397 | 0.101    | 0.452014113 | count | 1         |
| TINCR      | 1.702071  | 1.0380211 | 1.6397 | 0.101    | 0.452014113 | count | 1         |
| TDRD12     | 1.702071  | 1.0380211 | 1.6397 | 0.101    | 0.452014113 | count | 1         |
| SIX5       | 1.702071  | 1.0380211 | 1.6397 | 0.101    | 0.452014113 | count | 1         |
| MMP11      | 1.702071  | 1.0380211 | 1.6397 | 0.101    | 0.452014113 | count | 1         |
| AP001043.1 | 1.702071  | 1.0380211 | 1.6397 | 0.101    | 0.452014113 | count | 1         |
| CRNKL1     | 0.3551006 | 0.2046949 | 1.7348 | 0.0829   | 0.452090305 | count | 1         |
| KMT2B      | 0.3510791 | 0.1944929 | 1.8051 | 0.0712   | 0.452282483 | count | 1         |
| SLC45A3    | 0.8539844 | 0.727081  | 1.1745 | 0.24     | 0.452287625 | count | 1         |
| NADSYN1    | 0.3582999 | 0.2601031 | 1.3775 | 0.168    | 0.452373771 | count | 1         |
| PECAM1     | 0.3271362 | 0.1279983 | 2.5558 | 0.0107   | 0.452502119 | count | 1         |
| MTERF1     | 0.5344457 | 0.5418198 | 0.9864 | 0.324    | 0.452652915 | count | 1         |
| TNFRSF18   | 0.78578   | 0.6587347 | 1.1929 | 0.233    | 0.452893149 | count | 1         |
| ZFY-AS1    | 0.78578   | 0.8712276 | 0.9019 | 0.367    | 0.452893149 | count | 1         |
| FAM200B    | 0.3254119 | 0.106555  | 3.0539 | 0.00228  | 0.453051672 | count | 1         |
| ECPAS      | 0.3643454 | 0.2427702 | 1.5008 | 0.134    | 0.453236269 | count | 1         |
| TRIM7      | 0.6035605 | 0.3853511 | 1.5663 | 0.117    | 0.45350585  | count | 1         |
| TGFBI      | 0.3208168 | 0.0745511 | 4.3033 | 1.75E-05 | 0.453602361 | count | 0.4139975 |
| FXR2       | 0.4713114 | 0.4168014 | 1.1308 | 0.258    | 0.453855292 | count | 1         |
| TMEM116    | 0.502832  | 0.4582958 | 1.0972 | 0.273    | 0.454058543 | count | 1         |
| APOL4      | 1.0864724 | 0.6599989 | 1.6462 | 0.0999   | 0.454068062 | count | 1         |

|            |           |           |        |          |             |       |          |
|------------|-----------|-----------|--------|----------|-------------|-------|----------|
| KCTD20     | 0.3295862 | 0.1482079 | 2.2238 | 0.0263   | 0.454216449 | count | 1        |
| GDAP1      | 0.5503103 | 0.4481838 | 1.2279 | 0.22     | 0.454455671 | count | 1        |
| STARD10    | 0.3779645 | 0.2427296 | 1.5571 | 0.12     | 0.454572627 | count | 1        |
| C8orf44    | 0.6582346 | 0.5144515 | 1.2795 | 0.201    | 0.454833275 | count | 1        |
| AC132192.2 | 0.4791201 | 0.4839405 | 0.99   | 0.322    | 0.454849034 | count | 1        |
| PITPNC1    | 0.371657  | 0.2197389 | 1.6914 | 0.0909   | 0.454886277 | count | 1        |
| ITGAE      | 0.3316823 | 0.1404525 | 2.3615 | 0.0183   | 0.455003676 | count | 1        |
| ARRDC3-AS1 | 0.7359726 | 0.6268399 | 1.1741 | 0.24     | 0.455259481 | count | 1        |
| ADAT2      | 0.693514  | 0.5802895 | 1.1951 | 0.232    | 0.455310004 | count | 1        |
| COPG1      | 0.3834258 | 0.2339545 | 1.6389 | 0.101    | 0.455755417 | count | 1        |
| PIGL       | 0.4877636 | 0.3882509 | 1.2563 | 0.209    | 0.456026431 | count | 1        |
| ADRB1      | 0.7910887 | 0.4407551 | 1.7948 | 0.0728   | 0.456278665 | count | 1        |
| MED13      | 0.3370612 | 0.1684893 | 2.0005 | 0.0456   | 0.456389758 | count | 1        |
| VAV2       | 0.5158168 | 0.4267908 | 1.2086 | 0.227    | 0.456934999 | count | 1        |
| SELENOM    | 0.3417144 | 0.1856895 | 1.8402 | 0.0659   | 0.456970928 | count | 1        |
| ANGEL2     | 0.3898372 | 0.2340528 | 1.6656 | 0.0959   | 0.457222152 | count | 1        |
| BMP2       | 0.9577114 | 0.639241  | 1.4982 | 0.134    | 0.457674183 | count | 1        |
| UHRF1BP1L  | 0.3456089 | 0.167271  | 2.0662 | 0.0389   | 0.45769671  | count | 1        |
| FRZB       | 0.5402134 | 0.7539365 | 0.7165 | 0.474    | 0.457813493 | count | 1        |
| BCL9L      | 0.517111  | 0.3801199 | 1.3604 | 0.174    | 0.458139787 | count | 1        |
| PPIL2      | 0.3726688 | 0.2303659 | 1.6177 | 0.106    | 0.458183396 | count | 1        |
| HEBP2      | 0.322453  | 0.0731319 | 4.4092 | 1.08E-05 | 0.458213813 | count | 0.255906 |
| GPR141     | 0.5172189 | 0.3704575 | 1.3962 | 0.163    | 0.458240236 | count | 1        |
| CD28       | 0.4532708 | 0.2957457 | 1.5326 | 0.125    | 0.458372275 | count | 1        |
| SNX14      | 0.3746311 | 0.1984525 | 1.8878 | 0.0592   | 0.458581938 | count | 1        |
| DNAL4      | 0.5076646 | 0.3798589 | 1.3365 | 0.182    | 0.458634605 | count | 1        |
| CXorf56    | 0.429766  | 0.3662829 | 1.1733 | 0.241    | 0.458780815 | count | 1        |
| DIDO1      | 0.3886351 | 0.2537439 | 1.5316 | 0.126    | 0.45901953  | count | 1        |
| EIF4ENIF1  | 0.5181651 | 0.3219174 | 1.6096 | 0.108    | 0.459121204 | count | 1        |
| MSL3       | 0.3354529 | 0.1206251 | 2.781  | 0.00546  | 0.459179911 | count | 1        |
| RAB3IP     | 0.6106474 | 0.4794784 | 1.2736 | 0.203    | 0.459213075 | count | 1        |
| SGPP1      | 0.4708002 | 0.2466766 | 1.9086 | 0.0564   | 0.45968738  | count | 1        |
| CCNH       | 0.3272732 | 0.0831471 | 3.9361 | 8.51E-05 | 0.459749497 | count | 1        |
| TM2D3      | 0.3408097 | 0.1416847 | 2.4054 | 0.0162   | 0.460025557 | count | 1        |
| PLP2       | 0.322716  | 0.083352  | 3.8717 | 0.000111 | 0.460073541 | count | 1        |
| PFKFB2     | 0.477893  | 0.5991754 | 0.7976 | 0.425    | 0.460453962 | count | 1        |
| SLC48A1    | 0.368989  | 0.2783712 | 1.3255 | 0.185    | 0.460757977 | count | 1        |
| HIST1H2BE  | 1.7320997 | 1.010385  | 1.7143 | 0.0866   | 0.460899428 | count | 1        |
| AC099489.1 | 3.1811996 | 2.2894634 | 1.3895 | 0.1648   | 0.460911674 | count | 1        |
| USP27X     | 0.9637973 | 0.6772854 | 1.423  | 0.155    | 0.460958752 | count | 1        |
| ZNF623     | 0.9637973 | 0.6804307 | 1.4165 | 0.157    | 0.460958752 | count | 1        |
| SUN1       | 0.4351565 | 0.2721077 | 1.5992 | 0.11     | 0.460975445 | count | 1        |
| PRPF19     | 0.3742236 | 0.1950793 | 1.9183 | 0.0552   | 0.461109259 | count | 1        |
| PIGB       | 0.8689982 | 0.5584645 | 1.556  | 0.12     | 0.461177337 | count | 1        |
| MFSD14C    | 0.3736063 | 0.308013  | 1.213  | 0.225    | 0.461297892 | count | 1        |

|            |           |           |        |          |             |       |           |
|------------|-----------|-----------|--------|----------|-------------|-------|-----------|
| DGAT2      | 0.4321413 | 0.3367429 | 1.2833 | 0.2      | 0.461391391 | count | 1         |
| NELFB      | 0.3807113 | 0.1983966 | 1.9189 | 0.0551   | 0.461640112 | count | 1         |
| HERC1      | 0.3635561 | 0.2095074 | 1.7353 | 0.0828   | 0.461735661 | count | 1         |
| MAN1A2     | 0.3543188 | 0.159027  | 2.228  | 0.026    | 0.461834397 | count | 1         |
| ZNF529     | 0.6385563 | 0.502118  | 1.2717 | 0.204    | 0.46189538  | count | 1         |
| USP4       | 0.3483651 | 0.1909963 | 1.8239 | 0.0683   | 0.46193574  | count | 1         |
| ZFYVE27    | 0.4237185 | 0.4274579 | 0.9913 | 0.322    | 0.462137263 | count | 1         |
| MCM3AP     | 0.3927273 | 0.2810008 | 1.3976 | 0.162    | 0.462336983 | count | 1         |
| ATP5MGL    | 0.871462  | 0.6917267 | 1.2598 | 0.208    | 0.462638089 | count | 1         |
| SENP6      | 0.3341336 | 0.1380319 | 2.4207 | 0.0156   | 0.462749779 | count | 1         |
| TXNRD2     | 0.4100586 | 0.2513876 | 1.6312 | 0.103    | 0.462989478 | count | 1         |
| TBC1D30    | 0.4080528 | 0.3586368 | 1.1378 | 0.255    | 0.463007807 | count | 1         |
| INHBA      | 0.3683713 | 0.349379  | 1.0544 | 0.292    | 0.463086363 | count | 1         |
| RGP1       | 0.5124008 | 0.3563693 | 1.4378 | 0.151    | 0.463122403 | count | 1         |
| TMEM220    | 0.3679136 | 0.2131676 | 1.7259 | 0.0845   | 0.463238473 | count | 1         |
| RNF20      | 0.3737013 | 0.2329869 | 1.604  | 0.109    | 0.463269384 | count | 1         |
| ZNF37A     | 0.4411037 | 0.2478591 | 1.7797 | 0.0753   | 0.463512942 | count | 1         |
| MAPRE3     | 0.5037473 | 0.5365932 | 0.9388 | 0.348    | 0.463552886 | count | 1         |
| AC013394.1 | 0.3593789 | 0.2476869 | 1.4509 | 0.147    | 0.463580559 | count | 1         |
| ANP32A     | 0.3284703 | 0.0786576 | 4.176  | 3.07E-05 | 0.46364076  | count | 0.7247042 |
| BCR        | 0.705215  | 0.6706567 | 1.0515 | 0.293    | 0.463684104 | count | 1         |
| PCGF3      | 0.4049098 | 0.2458301 | 1.6471 | 0.0997   | 0.463753486 | count | 1         |
| ZFPL1      | 0.3856204 | 0.2324025 | 1.6593 | 0.0972   | 0.463938222 | count | 1         |
| STN1       | 0.3856204 | 0.2207173 | 1.7471 | 0.0807   | 0.463938222 | count | 1         |
| CEP135     | 0.3659608 | 0.2484522 | 1.473  | 0.141    | 0.46418092  | count | 1         |
| NPLOC4     | 0.3840222 | 0.2918642 | 1.3158 | 0.188    | 0.464508746 | count | 1         |
| AC103691.1 | 0.5618584 | 0.4624295 | 1.215  | 0.224    | 0.464566044 | count | 1         |
| RNF175     | 1.108716  | 0.6233494 | 1.7786 | 0.0754   | 0.464689949 | count | 1         |
| ZNF763     | 1.108716  | 0.7529074 | 1.4726 | 0.141    | 0.464689949 | count | 1         |
| CNFN       | 0.8043754 | 0.5486275 | 1.4662 | 0.143    | 0.464764512 | count | 1         |
| ATP13A1    | 0.464465  | 0.3212492 | 1.4458 | 0.148    | 0.46478617  | count | 1         |
| ZYG11B     | 0.4008281 | 0.2118589 | 1.892  | 0.0586   | 0.46495864  | count | 1         |
| PRPF4      | 0.3621203 | 0.1927704 | 1.8785 | 0.0604   | 0.465105002 | count | 1         |
| AL139384.1 | 0.3952389 | 0.2925966 | 1.3508 | 0.177    | 0.46535093  | count | 1         |
| IWS1       | 0.3458657 | 0.1610273 | 2.1479 | 0.0318   | 0.465440961 | count | 1         |
| MADD       | 0.3942932 | 0.3525044 | 1.1185 | 0.263    | 0.465829543 | count | 1         |
| PRPF4B     | 0.3309903 | 0.0879613 | 3.7629 | 0.000172 | 0.465926118 | count | 1         |
| POGZ       | 0.3732085 | 0.1883106 | 1.9819 | 0.0476   | 0.466097733 | count | 1         |
| AC005837.1 | 1.3317222 | 0.8895824 | 1.497  | 0.135    | 0.466306564 | count | 1         |
| INSR       | 0.39097   | 0.1895092 | 2.0631 | 0.0392   | 0.466348867 | count | 1         |
| CCDC106    | 0.4305246 | 0.2659715 | 1.6187 | 0.106    | 0.466526578 | count | 1         |
| MINDY3     | 0.4839783 | 0.3877426 | 1.2482 | 0.212    | 0.466560054 | count | 1         |
| SMIM14     | 0.3401925 | 0.124711  | 2.7278 | 0.00642  | 0.46673093  | count | 1         |
| DPP4       | 0.6741706 | 0.5450017 | 1.237  | 0.216    | 0.466766073 | count | 1         |
| FAM193A    | 0.4114357 | 0.2952093 | 1.3937 | 0.164    | 0.466935425 | count | 1         |

|              |           |           |        |          |             |       |   |
|--------------|-----------|-----------|--------|----------|-------------|-------|---|
| MAD2L2       | 0.3482361 | 0.1582847 | 2.2001 | 0.0279   | 0.467053432 | count | 1 |
| ZNF451       | 0.3662658 | 0.17219   | 2.1271 | 0.0335   | 0.467077427 | count | 1 |
| AL450326.1   | 0.4916937 | 0.4217199 | 1.1659 | 0.244    | 0.46730234  | count | 1 |
| RFX1         | 0.3983045 | 0.2584024 | 1.5414 | 0.123    | 0.467349814 | count | 1 |
| HSPA1B       | 0.3268762 | 0.0842697 | 3.8789 | 0.000108 | 0.467393268 | count | 1 |
| MBLAC1       | 0.9758215 | 0.7714671 | 1.2649 | 0.206    | 0.467455748 | count | 1 |
| CACFD1       | 0.9758215 | 0.7969647 | 1.2244 | 0.221    | 0.467455748 | count | 1 |
| LINC00865    | 0.9758215 | 0.9091252 | 1.0734 | 0.283    | 0.467455748 | count | 1 |
| ABCB9        | 0.9758215 | 1.0023479 | 0.9735 | 0.33     | 0.467455748 | count | 1 |
| DOK3         | 0.3535654 | 0.1753056 | 2.0169 | 0.0438   | 0.467731817 | count | 1 |
| FPGT         | 0.4287535 | 0.2812588 | 1.5244 | 0.128    | 0.46777974  | count | 1 |
| DOK1         | 0.3643068 | 0.1773045 | 2.0547 | 0.04     | 0.467943457 | count | 1 |
| MIR646HG     | 1.75609   | 0.8503709 | 2.0651 | 0.039    | 0.467971775 | count | 1 |
| KLHL36       | 0.3699786 | 0.2593552 | 1.4265 | 0.154    | 0.467994754 | count | 1 |
| RBBP8        | 0.3830841 | 0.2451751 | 1.5625 | 0.118    | 0.46800243  | count | 1 |
| 6-Mar        | 0.352133  | 0.1550136 | 2.2716 | 0.0232   | 0.468320898 | count | 1 |
| TBC1D1       | 0.3398056 | 0.1278361 | 2.6581 | 0.00791  | 0.468358293 | count | 1 |
| CNOT3        | 0.4322936 | 0.2846542 | 1.5187 | 0.129    | 0.468497551 | count | 1 |
| FAM91A1      | 0.3526722 | 0.1828152 | 1.9291 | 0.0538   | 0.46904333  | count | 1 |
| CHKB         | 0.7127746 | 0.5747549 | 1.2401 | 0.215    | 0.469102871 | count | 1 |
| FUK          | 0.8826469 | 0.5771502 | 1.5293 | 0.126    | 0.46927596  | count | 1 |
| PAX8         | 0.4014382 | 0.2920599 | 1.3745 | 0.169    | 0.469351959 | count | 1 |
| CCDC186      | 0.3462352 | 0.1458167 | 2.3745 | 0.0177   | 0.469501846 | count | 1 |
| MED14        | 0.3951452 | 0.3111529 | 1.2699 | 0.204    | 0.469943628 | count | 1 |
| FAM198B      | 0.3602284 | 0.1745022 | 2.0643 | 0.0391   | 0.470013335 | count | 1 |
| PIGU         | 0.4945579 | 0.4324471 | 1.1436 | 0.253    | 0.470142017 | count | 1 |
| KNSTRN       | 0.4752457 | 0.355436  | 1.3371 | 0.181    | 0.470251141 | count | 1 |
| ZMYM3        | 0.4697997 | 0.3816656 | 1.2309 | 0.218    | 0.470323231 | count | 1 |
| YTHDF1       | 0.3581959 | 0.2343695 | 1.5283 | 0.127    | 0.470333669 | count | 1 |
| FAM234A      | 0.3898902 | 0.259495  | 1.5025 | 0.133    | 0.470462465 | count | 1 |
| CHPF2        | 0.3933089 | 0.2522304 | 1.5593 | 0.119    | 0.470615994 | count | 1 |
| ASNS         | 1.1211981 | 0.8009676 | 1.3998 | 0.162    | 0.470659923 | count | 1 |
| ZNF696       | 1.1211981 | 0.9611637 | 1.1665 | 0.244    | 0.470659923 | count | 1 |
| DDX47        | 1.1211981 | 0.9007285 | 1.2448 | 0.213    | 0.470659923 | count | 1 |
| AL139353.1   | 1.1211981 | 0.8523089 | 1.3155 | 0.188    | 0.470659923 | count | 1 |
| DPEP3        | 1.1211981 | 0.9611637 | 1.1665 | 0.244    | 0.470659923 | count | 1 |
| AC015813.1   | 1.1211981 | 0.9007285 | 1.2448 | 0.213    | 0.470659923 | count | 1 |
| CLDN5        | 1.1211981 | 1.042734  | 1.0752 | 0.282    | 0.470659923 | count | 1 |
| TRAF3IP2-AS1 | 0.4602992 | 0.4543576 | 1.0131 | 0.311    | 0.470737528 | count | 1 |
| NUDT15       | 0.3853915 | 0.246136  | 1.5658 | 0.118    | 0.47086561  | count | 1 |
| RTL8C        | 0.3449048 | 0.1418576 | 2.4313 | 0.0151   | 0.470920589 | count | 1 |
| ZFP91        | 0.3837588 | 0.1995679 | 1.9229 | 0.0546   | 0.470989876 | count | 1 |
| KBTBD4       | 0.6798976 | 0.485636  | 1.4    | 0.162    | 0.471062029 | count | 1 |
| ARHGEF11     | 0.4316925 | 0.300197  | 1.438  | 0.151    | 0.471074641 | count | 1 |
| ZNF394       | 0.3499272 | 0.1565914 | 2.2347 | 0.0255   | 0.471131715 | count | 1 |

|            |           |           |        |          |             |       |          |
|------------|-----------|-----------|--------|----------|-------------|-------|----------|
| PURA       | 0.3435367 | 0.1422796 | 2.4145 | 0.0158   | 0.471138426 | count | 1        |
| TMEM97     | 0.4608968 | 0.363957  | 1.2663 | 0.206    | 0.471369904 | count | 1        |
| MXD3       | 0.625726  | 0.3882198 | 1.6118 | 0.107    | 0.471377926 | count | 1        |
| TIMM44     | 0.4065007 | 0.2591517 | 1.5686 | 0.117    | 0.471677441 | count | 1        |
| FAM102A    | 0.8154156 | 0.7369254 | 1.1065 | 0.269    | 0.471829012 | count | 1        |
| DSEL       | 1.1238996 | 0.7487911 | 1.501  | 0.133    | 0.471952871 | count | 1        |
| KCTD15     | 1.1238996 | 0.7007901 | 1.6038 | 0.109    | 0.471952871 | count | 1        |
| PARP6      | 0.4531043 | 0.3818578 | 1.1866 | 0.236    | 0.472275052 | count | 1        |
| ARHGEF12   | 0.6055593 | 0.3485538 | 1.7373 | 0.0825   | 0.472396824 | count | 1        |
| NLK        | 0.5567919 | 0.4311042 | 1.2915 | 0.197    | 0.472671851 | count | 1        |
| TLR6       | 0.414635  | 0.270013  | 1.5356 | 0.125    | 0.472937274 | count | 1        |
| CYBB       | 0.329969  | 0.0456405 | 7.2297 | 6.44E-13 | 0.473025728 | count | 1.55E-08 |
| APPBP2     | 0.4130738 | 0.243412  | 1.697  | 0.0898   | 0.473314012 | count | 1        |
| TMEM91     | 0.3571259 | 0.1877878 | 1.9018 | 0.0573   | 0.473358031 | count | 1        |
| ATAD2B     | 0.3712443 | 0.2190285 | 1.695  | 0.0902   | 0.47349937  | count | 1        |
| C9orf72    | 0.3428747 | 0.0949613 | 3.6107 | 0.000312 | 0.473629996 | count | 1        |
| PTRHD1     | 0.3412922 | 0.1006786 | 3.3899 | 0.00071  | 0.473703267 | count | 1        |
| ZCCHC24    | 0.4153824 | 0.5713036 | 0.7271 | 0.467    | 0.473809263 | count | 1        |
| RASSF5     | 0.3483491 | 0.1382284 | 2.5201 | 0.0118   | 0.474377355 | count | 1        |
| SCAPER     | 0.3891825 | 0.2853661 | 1.3638 | 0.173    | 0.474438387 | count | 1        |
| AC005280.2 | 0.3699253 | 0.1963216 | 1.8843 | 0.0596   | 0.474691922 | count | 1        |
| SH3BP1     | 0.3569654 | 0.1767657 | 2.0194 | 0.0436   | 0.474795906 | count | 1        |
| ZNF565     | 0.6300008 | 0.4980627 | 1.2649 | 0.206    | 0.474831977 | count | 1        |
| CLPB       | 0.3935549 | 0.2155457 | 1.8259 | 0.068    | 0.47495997  | count | 1        |
| DNAJC10    | 0.3639156 | 0.1828626 | 1.9901 | 0.0467   | 0.475270458 | count | 1        |
| IZUMO4     | 0.8929953 | 0.6611426 | 1.3507 | 0.177    | 0.475426851 | count | 1        |
| ZNF441     | 0.8929953 | 0.6554522 | 1.3624 | 0.173    | 0.475426851 | count | 1        |
| SETD9      | 0.3939557 | 0.2342355 | 1.6819 | 0.0927   | 0.475451918 | count | 1        |
| SPRED1     | 0.3524072 | 0.1401766 | 2.514  | 0.012    | 0.475598155 | count | 1        |
| CPEB4      | 0.3461315 | 0.1095217 | 3.1604 | 0.00159  | 0.475695418 | count | 1        |
| ADAMTSL4   | 0.3867139 | 0.2379691 | 1.6251 | 0.104    | 0.47571444  | count | 1        |
| JUP        | 0.7663487 | 0.4044452 | 1.8948 | 0.0582   | 0.475921408 | count | 1        |
| AC008040.5 | 1.7839572 | 0.7558647 | 2.3602 | 0.0183   | 0.476155257 | count | 1        |
| SEC24A     | 0.4456637 | 0.3702137 | 1.2038 | 0.229    | 0.476265594 | count | 1        |
| KLHL26     | 1.1329583 | 0.7053438 | 1.6062 | 0.108    | 0.47629042  | count | 1        |
| ZBTB16     | 0.9922293 | 0.2485041 | 3.9928 | 6.72E-05 | 0.476336939 | count | 1        |
| ATIC       | 0.3921682 | 0.2386881 | 1.643  | 0.101    | 0.476965951 | count | 1        |
| ATXN2L     | 0.37301   | 0.2231317 | 1.6717 | 0.0947   | 0.476977604 | count | 1        |
| MRPL46     | 0.3812495 | 0.2106507 | 1.8099 | 0.0704   | 0.477106787 | count | 1        |
| ARAP1      | 0.3613865 | 0.1795461 | 2.0128 | 0.0442   | 0.477548476 | count | 1        |
| TRAPP5     | 0.6118758 | 0.4468988 | 1.3692 | 0.171    | 0.477660826 | count | 1        |
| GPAM       | 0.8246293 | 0.6460713 | 1.2764 | 0.202    | 0.477733802 | count | 1        |
| MBOAT1     | 0.6889688 | 0.4271554 | 1.6129 | 0.107    | 0.477874612 | count | 1        |
| FAM8A1     | 0.528229  | 0.3801744 | 1.3894 | 0.165    | 0.478141992 | count | 1        |
| CD3EAP     | 0.4410373 | 0.3671866 | 1.2011 | 0.23     | 0.478244676 | count | 1        |

|            |           |           |        |          |             |       |             |
|------------|-----------|-----------|--------|----------|-------------|-------|-------------|
| BCLAF1     | 0.3409259 | 0.095361  | 3.5751 | 0.000357 | 0.478289518 | count | 1           |
| RNF111     | 0.3668756 | 0.2113995 | 1.7355 | 0.0828   | 0.478356744 | count | 1           |
| ADCK1      | 0.6897918 | 0.5710315 | 1.208  | 0.227    | 0.478493177 | count | 1           |
| FCER2      | 3.381364  | 1.473398  | 2.2949 | 0.0218   | 0.478782397 | count | 1           |
| AP5B1      | 0.3891933 | 0.2541168 | 1.5316 | 0.126    | 0.478810803 | count | 1           |
| P2RX1      | 0.4896412 | 0.3017984 | 1.6224 | 0.105    | 0.478831672 | count | 1           |
| ODR4       | 0.3878012 | 0.2218647 | 1.7479 | 0.0806   | 0.479085307 | count | 1           |
| PPM1D      | 0.4027592 | 0.2295111 | 1.7549 | 0.0794   | 0.479168114 | count | 1           |
| EBLN3P     | 0.3643404 | 0.1930504 | 1.8873 | 0.0592   | 0.479176607 | count | 1           |
| CPSF2      | 0.3761369 | 0.2186141 | 1.7206 | 0.0855   | 0.479189302 | count | 1           |
| AC239800.3 | 0.5512456 | 0.4232859 | 1.3023 | 0.193    | 0.47924068  | count | 1           |
| FPR1       | 0.3363643 | 0.064762  | 5.1939 | 2.23E-07 | 0.479316557 | count | 0.005325686 |
| ZNF83      | 0.4165127 | 0.3270405 | 1.2736 | 0.203    | 0.479481479 | count | 1           |
| TPRG1-AS1  | 0.5954182 | 0.4348563 | 1.3692 | 0.171    | 0.47960088  | count | 1           |
| ERMP1      | 0.5119007 | 0.6177594 | 0.8286 | 0.407    | 0.479630224 | count | 1           |
| RAP2C-AS1  | 0.7718708 | 0.640259  | 1.2056 | 0.228    | 0.479688242 | count | 1           |
| ALOX15B    | 0.7718708 | 0.5164394 | 1.4946 | 0.135    | 0.479688242 | count | 1           |
| CXCL8      | 0.3332173 | 0.0756194 | 4.4065 | 1.10E-05 | 0.479889616 | count | 0.260623    |
| PRR5       | 0.4368224 | 0.3515801 | 1.2425 | 0.214    | 0.479976085 | count | 1           |
| KCTD3      | 0.5123378 | 0.4510064 | 1.136  | 0.256    | 0.480058353 | count | 1           |
| TTF1       | 0.3698572 | 0.2107866 | 1.7547 | 0.0794   | 0.48010577  | count | 1           |
| NBPF20     | 1.366269  | 1.170204  | 1.1675 | 0.243    | 0.480159885 | count | 1           |
| FLYWCH1    | 0.5306929 | 0.3443795 | 1.541  | 0.123    | 0.480482956 | count | 1           |
| MANBA      | 0.3582386 | 0.1403593 | 2.5523 | 0.0108   | 0.480772828 | count | 1           |
| SLC9A7     | 0.4982121 | 0.3449869 | 1.4441 | 0.149    | 0.48086091  | count | 1           |
| GGA3       | 0.4498914 | 0.3447614 | 1.3049 | 0.192    | 0.480920182 | count | 1           |
| FILIP1L    | 0.3435034 | 0.1156022 | 2.9714 | 0.00299  | 0.481075945 | count | 1           |
| NLRC4      | 0.4805395 | 0.2925436 | 1.6426 | 0.101    | 0.481481048 | count | 1           |
| DLG4       | 0.5138351 | 0.4057936 | 1.2662 | 0.206    | 0.481525134 | count | 1           |
| PYGL       | 0.3507509 | 0.1203923 | 2.9134 | 0.00361  | 0.481585364 | count | 1           |
| ST6GALNAC3 | 0.9036593 | 0.5563254 | 1.6243 | 0.104    | 0.481774531 | count | 1           |
| HMCES      | 0.3907791 | 0.2952221 | 1.3237 | 0.186    | 0.481817663 | count | 1           |
| SERTAD2    | 0.3610548 | 0.1517436 | 2.3794 | 0.0174   | 0.481818952 | count | 1           |
| ASH1L-AS1  | 0.5322796 | 0.3987408 | 1.3349 | 0.182    | 0.481990889 | count | 1           |
| CASC3      | 0.3972376 | 0.243615  | 1.6306 | 0.103    | 0.482016111 | count | 1           |
| ZNF292     | 0.3789676 | 0.2357968 | 1.6072 | 0.108    | 0.48219838  | count | 1           |
| UBA3       | 0.374491  | 0.1587547 | 2.3589 | 0.0184   | 0.48224363  | count | 1           |
| NUP107     | 0.4079303 | 0.306835  | 1.3295 | 0.184    | 0.482254875 | count | 1           |
| KANTR      | 0.6647679 | 0.6040204 | 1.1006 | 0.271    | 0.482354275 | count | 1           |
| CPTP       | 0.4292391 | 0.4105579 | 1.0455 | 0.296    | 0.48263331  | count | 1           |
| ZBTB11     | 0.369325  | 0.1759382 | 2.0992 | 0.0359   | 0.482801392 | count | 1           |
| TNK2       | 0.4422286 | 0.273158  | 1.6189 | 0.106    | 0.482894346 | count | 1           |
| PUS7L      | 0.3763685 | 0.2390819 | 1.5742 | 0.116    | 0.483051406 | count | 1           |
| DEDD2      | 0.360802  | 0.1467515 | 2.4586 | 0.014    | 0.48313615  | count | 1           |
| SRP14-AS1  | 0.5686558 | 0.3789541 | 1.5006 | 0.134    | 0.483327013 | count | 1           |



|            |           |           |        |          |             |       |             |
|------------|-----------|-----------|--------|----------|-------------|-------|-------------|
| FLAD1      | 0.4026197 | 0.3069435 | 1.3117 | 0.19     | 0.483375247 | count | 1           |
| PCGF5      | 0.3558172 | 0.1255912 | 2.8331 | 0.00465  | 0.483474699 | count | 1           |
| ZNF780B    | 0.6191645 | 0.5990546 | 1.0336 | 0.301    | 0.483741338 | count | 1           |
| CDR2       | 0.5563465 | 0.6238762 | 0.8918 | 0.373    | 0.483918625 | count | 1           |
| PCDH12     | 0.7334539 | 0.442228  | 1.6585 | 0.0973   | 0.483959352 | count | 1           |
| SETD6      | 0.5693641 | 0.5248683 | 1.0848 | 0.278    | 0.483963714 | count | 1           |
| RPS13      | 0.3358524 | 0.0257417 | 13.047 | 1.15E-37 | 0.484106305 | count | 2.79E-33    |
| TGFB1      | 0.3401187 | 0.0639223 | 5.3208 | 1.13E-07 | 0.484140442 | count | 0.002700587 |
| C15orf61   | 0.365411  | 0.1545786 | 2.3639 | 0.0182   | 0.484426703 | count | 1           |
| CHP1       | 0.3481155 | 0.0979711 | 3.5532 | 0.000388 | 0.484452546 | count | 1           |
| IL17RE     | 0.7343328 | 0.5444714 | 1.3487 | 0.178    | 0.484591813 | count | 1           |
| GSR        | 0.3767535 | 0.1822663 | 2.067  | 0.0388   | 0.484652625 | count | 1           |
| AC026803.2 | 0.8355129 | 0.6720962 | 1.2431 | 0.214    | 0.4847192   | count | 1           |
| GDAP2      | 0.3920563 | 0.2045906 | 1.9163 | 0.0554   | 0.485400174 | count | 1           |
| MMS19      | 0.5711949 | 0.4551288 | 1.255  | 0.21     | 0.485609774 | count | 1           |
| AC108673.3 | 0.9103129 | 0.53276   | 1.7087 | 0.0876   | 0.485739659 | count | 1           |
| CKAP2      | 0.3715368 | 0.173261  | 2.1444 | 0.0321   | 0.486115828 | count | 1           |
| ASB13      | 0.6442343 | 0.437174  | 1.4736 | 0.141    | 0.486349243 | count | 1           |
| ARRB1      | 0.3656266 | 0.1707894 | 2.1408 | 0.0324   | 0.486403784 | count | 1           |
| PPM1N      | 0.4853198 | 0.2957075 | 1.6412 | 0.101    | 0.486451922 | count | 1           |
| PCOLCE     | 0.603529  | 0.6339348 | 0.952  | 0.341    | 0.486557373 | count | 1           |
| HSPA6      | 0.3575444 | 0.2039396 | 1.7532 | 0.0797   | 0.486691654 | count | 1           |
| SYMPK      | 0.4021905 | 0.2967591 | 1.3553 | 0.175    | 0.486862353 | count | 1           |
| ZNF747     | 0.6229248 | 0.5540277 | 1.1244 | 0.261    | 0.486880924 | count | 1           |
| ADK        | 0.3588884 | 0.1570713 | 2.2849 | 0.0224   | 0.486914711 | count | 1           |
| FGD3       | 0.4589177 | 0.2481788 | 1.8491 | 0.0646   | 0.486942952 | count | 1           |
| AC092490.1 | 0.7825938 | 0.6552482 | 1.1943 | 0.232    | 0.487011834 | count | 1           |
| ABCC6      | 0.8390924 | 0.8575423 | 0.9785 | 0.328    | 0.487019009 | count | 1           |
| TLK1       | 0.3587852 | 0.1639552 | 2.1883 | 0.0287   | 0.487232045 | count | 1           |
| ZNF667-AS1 | 0.6043429 | 0.6524433 | 0.9263 | 0.354    | 0.487255911 | count | 1           |
| SNHG7      | 0.3503621 | 0.10431   | 3.3589 | 0.000795 | 0.48726435  | count | 1           |
| SF3B3      | 0.4069747 | 0.2593476 | 1.5692 | 0.117    | 0.487266953 | count | 1           |
| ZNF524     | 0.3536462 | 0.1246574 | 2.8369 | 0.00459  | 0.487430401 | count | 1           |
| S1PR2      | 0.4864886 | 0.3920274 | 1.241  | 0.215    | 0.487667735 | count | 1           |
| FANCL      | 0.4868616 | 0.389719  | 1.2493 | 0.212    | 0.488055776 | count | 1           |
| AC110769.2 | 0.5886732 | 0.4373344 | 1.346  | 0.178    | 0.488110341 | count | 1           |
| CSF2RB     | 0.4241024 | 0.1869186 | 2.2689 | 0.0234   | 0.488414113 | count | 1           |
| SOCS6      | 0.4092565 | 0.2701555 | 1.5149 | 0.13     | 0.488568381 | count | 1           |
| PITPNA-AS1 | 0.4346025 | 0.3043268 | 1.4281 | 0.153    | 0.488814154 | count | 1           |
| STK36      | 0.9155404 | 0.6239541 | 1.4673 | 0.142    | 0.488857365 | count | 1           |
| CNEP1R1    | 0.390523  | 0.1910575 | 2.044  | 0.0411   | 0.488870741 | count | 1           |
| CTSO       | 0.4324421 | 0.2401801 | 1.8005 | 0.0719   | 0.488883906 | count | 1           |
| CSF1R      | 0.3452147 | 0.0693473 | 4.9781 | 6.87E-07 | 0.488894233 | count | 0.016371897 |
| HELQ       | 0.413482  | 0.2492017 | 1.6592 | 0.0972   | 0.48894642  | count | 1           |
| SMAD5      | 0.3899873 | 0.2084776 | 1.8706 | 0.0615   | 0.489019338 | count | 1           |

|            |           |           |        |          |             |       |           |
|------------|-----------|-----------|--------|----------|-------------|-------|-----------|
| TIRAP      | 0.5750949 | 0.6742037 | 0.853  | 0.394    | 0.489117663 | count | 1         |
| CELF1      | 0.3636919 | 0.166771  | 2.1808 | 0.0293   | 0.489387436 | count | 1         |
| SLC25A20   | 0.47409   | 0.5133814 | 0.9235 | 0.356    | 0.49023258  | count | 1         |
| IPPK       | 0.787613  | 0.5564973 | 1.4153 | 0.157    | 0.490443883 | count | 1         |
| SLC4A8     | 0.5518791 | 0.4979327 | 1.1083 | 0.268    | 0.490588259 | count | 1         |
| ZNF185     | 0.5011975 | 0.3227873 | 1.5527 | 0.121    | 0.490595892 | count | 1         |
| C2CD2L     | 0.4660805 | 0.2712631 | 1.7182 | 0.0859   | 0.49061758  | count | 1         |
| CD7        | 0.4701731 | 0.402208  | 1.169  | 0.243    | 0.490663469 | count | 1         |
| AC087645.2 | 0.84512   | 0.5104106 | 1.6558 | 0.0979   | 0.490894367 | count | 1         |
| IFI44L     | 0.3590554 | 0.1603723 | 2.2389 | 0.0253   | 0.490950223 | count | 1         |
| FAM126B    | 0.484426  | 0.2489437 | 1.9459 | 0.0518   | 0.491052213 | count | 1         |
| SCNM1      | 0.3555354 | 0.1213303 | 2.9303 | 0.00342  | 0.491111652 | count | 1         |
| GPR155     | 0.389847  | 0.1636305 | 2.3825 | 0.0173   | 0.491218168 | count | 1         |
| PDE3B      | 0.4346321 | 0.2269642 | 1.915  | 0.0556   | 0.491420124 | count | 1         |
| WDR26      | 0.3713835 | 0.1790918 | 2.0737 | 0.0382   | 0.491497122 | count | 1         |
| HIPK3      | 0.3611637 | 0.1198892 | 3.0125 | 0.00262  | 0.491504304 | count | 1         |
| ZNF273     | 0.6507284 | 0.4873097 | 1.3353 | 0.182    | 0.491612327 | count | 1         |
| GSTM4      | 0.5778738 | 0.3129484 | 1.8465 | 0.0649   | 0.49161834  | count | 1         |
| FAM76B     | 0.3885274 | 0.2090585 | 1.8585 | 0.0632   | 0.49175527  | count | 1         |
| ANAPC4     | 0.4120263 | 0.2573013 | 1.6013 | 0.109    | 0.491936403 | count | 1         |
| SHLD2      | 0.3972699 | 0.2617763 | 1.5176 | 0.129    | 0.491950722 | count | 1         |
| ARID3B     | 0.4907853 | 0.3442663 | 1.4256 | 0.154    | 0.492138673 | count | 1         |
| COMTD1     | 0.3862273 | 0.1879418 | 2.055  | 0.04     | 0.492197768 | count | 1         |
| INPP1      | 0.4045133 | 0.2750774 | 1.4705 | 0.142    | 0.492231114 | count | 1         |
| TMEM131    | 0.3757258 | 0.2006807 | 1.8723 | 0.0613   | 0.492429521 | count | 1         |
| AMBRA1     | 0.6778979 | 0.5755167 | 1.1779 | 0.239    | 0.492634103 | count | 1         |
| ZNF232     | 0.5939216 | 0.5311191 | 1.1182 | 0.264    | 0.492729424 | count | 1         |
| KIAA1143   | 0.3718653 | 0.2651572 | 1.4024 | 0.161    | 0.492751938 | count | 1         |
| AP001269.4 | 0.5101532 | 0.4602501 | 1.1084 | 0.268    | 0.492877799 | count | 1         |
| SLFN11     | 0.3761407 | 0.1836594 | 2.048  | 0.0407   | 0.492978246 | count | 1         |
| YTHDF3-AS1 | 0.4435258 | 0.3149233 | 1.4084 | 0.159    | 0.493551936 | count | 1         |
| ARL14EP    | 0.372261  | 0.1689921 | 2.2028 | 0.0277   | 0.493580484 | count | 1         |
| SETX       | 0.3650168 | 0.1376153 | 2.6524 | 0.00804  | 0.493619211 | count | 1         |
| C9orf40    | 0.446251  | 0.4949912 | 0.9015 | 0.367    | 0.493703741 | count | 1         |
| ARF5       | 0.3482461 | 0.0692553 | 5.0284 | 5.30E-07 | 0.493717948 | count | 0.0126352 |
| LINC00909  | 0.4148456 | 0.2903434 | 1.4288 | 0.153    | 0.493821331 | count | 1         |
| TP53RK     | 0.3901518 | 0.2136151 | 1.8264 | 0.0679   | 0.493837155 | count | 1         |
| ANKHD1     | 0.4205084 | 0.2274424 | 1.8489 | 0.0646   | 0.493938997 | count | 1         |
| EGLN1      | 0.3981146 | 0.2147276 | 1.854  | 0.0639   | 0.493982382 | count | 1         |
| ECD        | 0.3952769 | 0.2203317 | 1.794  | 0.0729   | 0.494045874 | count | 1         |
| SPHK2      | 0.6538835 | 0.3669443 | 1.782  | 0.0749   | 0.494171211 | count | 1         |
| MYC        | 0.4985784 | 0.3046308 | 1.6367 | 0.102    | 0.494259764 | count | 1         |
| EIF3H      | 0.3458673 | 0.0461007 | 7.5024 | 8.71E-14 | 0.494432074 | count | 2.10E-09  |
| MED1       | 0.4026128 | 0.321972  | 1.2505 | 0.211    | 0.494495985 | count | 1         |
| WAS        | 0.3518941 | 0.0789628 | 4.4565 | 8.71E-06 | 0.494538004 | count | 0.2065141 |

|            |           |           |        |          |             |       |          |
|------------|-----------|-----------|--------|----------|-------------|-------|----------|
| POGLUT1    | 0.41296   | 0.2442286 | 1.6909 | 0.091    | 0.494564656 | count | 1        |
| LINC01252  | 1.0263421 | 0.7267568 | 1.4122 | 0.158    | 0.494854942 | count | 1        |
| CBWD3      | 0.5053946 | 0.4277344 | 1.1816 | 0.237    | 0.494872549 | count | 1        |
| BDP1       | 0.3561861 | 0.1315425 | 2.7078 | 0.00682  | 0.494932658 | count | 1        |
| MAPKBP1    | 0.7487256 | 0.5520095 | 1.3564 | 0.175    | 0.494961347 | count | 1        |
| ZZEF1      | 0.3734897 | 0.2474725 | 1.5092 | 0.131    | 0.495222642 | count | 1        |
| NIN        | 0.3701611 | 0.1419014 | 2.6086 | 0.00915  | 0.495757006 | count | 1        |
| ZNF555     | 0.7128824 | 0.5714194 | 1.2476 | 0.212    | 0.495880166 | count | 1        |
| NAT1       | 0.6144251 | 0.5063534 | 1.2134 | 0.225    | 0.495915815 | count | 1        |
| ATRX       | 0.3540877 | 0.0900581 | 3.9318 | 8.67E-05 | 0.496049246 | count | 1        |
| GTF3C3     | 0.4485664 | 0.2743808 | 1.6348 | 0.102    | 0.496334316 | count | 1        |
| C5orf15    | 0.3743482 | 0.1556449 | 2.4051 | 0.0162   | 0.496370069 | count | 1        |
| RRM2B      | 0.3875972 | 0.2058297 | 1.8831 | 0.0598   | 0.497044187 | count | 1        |
| GYPC       | 0.3496993 | 0.0793953 | 4.4045 | 1.11E-05 | 0.497179259 | count | 0.262959 |
| RBM33      | 0.3780601 | 0.1545235 | 2.4466 | 0.0145   | 0.497380327 | count | 1        |
| KLHL28     | 0.4206547 | 0.2419289 | 1.7388 | 0.0822   | 0.497595767 | count | 1        |
| AL359711.2 | 0.9302852 | 0.5454641 | 1.7055 | 0.0882   | 0.497662438 | count | 1        |
| POLD3      | 0.3818952 | 0.2021124 | 1.8895 | 0.0589   | 0.498130724 | count | 1        |
| PREB       | 0.3978405 | 0.214223  | 1.8571 | 0.0634   | 0.49815759  | count | 1        |
| ANXA6      | 0.3798059 | 0.1647539 | 2.3053 | 0.0212   | 0.4982118   | count | 1        |
| ATRN       | 0.4226133 | 0.2315799 | 1.8249 | 0.0681   | 0.498237561 | count | 1        |
| TFE3       | 0.4343705 | 0.2286305 | 1.8999 | 0.0576   | 0.498284313 | count | 1        |
| DHTKD1     | 0.6589919 | 0.391187  | 1.6846 | 0.0922   | 0.498316813 | count | 1        |
| FBXL3      | 0.4167289 | 0.1938942 | 2.1493 | 0.0317   | 0.499161497 | count | 1        |
| CAST       | 0.3483655 | 0.0441348 | 7.8932 | 4.40E-15 | 0.499162876 | count | 1.06E-10 |
| FKBP11     | 0.5164034 | 0.3587521 | 1.4394 | 0.15     | 0.499174644 | count | 1        |
| TRAF3IP1   | 0.4874985 | 0.3172446 | 1.5367 | 0.125    | 0.499562778 | count | 1        |
| AL445686.2 | 1.0360274 | 0.7432668 | 1.3939 | 0.163    | 0.50012482  | count | 1        |
| LINC01816  | 1.0360274 | 0.8663135 | 1.1959 | 0.232    | 0.50012482  | count | 1        |
| AC064801.1 | 1.0360274 | 0.9984929 | 1.0376 | 0.3      | 0.50012482  | count | 1        |
| SH3BGR     | 1.0360274 | 0.7241734 | 1.4306 | 0.153    | 0.50012482  | count | 1        |
| PHF21A     | 0.3981013 | 0.2057527 | 1.9349 | 0.0531   | 0.500158422 | count | 1        |
| PIAS1      | 0.3728795 | 0.1695246 | 2.1996 | 0.0279   | 0.500335746 | count | 1        |
| DYM        | 0.3907608 | 0.2039517 | 1.9159 | 0.0555   | 0.500550413 | count | 1        |
| AFMID      | 0.4218784 | 0.231609  | 1.8215 | 0.0687   | 0.500737589 | count | 1        |
| GVQW3      | 1.4181491 | 0.845284  | 1.6777 | 0.0935   | 0.500962129 | count | 1        |
| LRRC32     | 1.4181491 | 0.8668396 | 1.636  | 0.102    | 0.500962129 | count | 1        |
| AC135279.3 | 1.4181491 | 0.8668396 | 1.636  | 0.102    | 0.500962129 | count | 1        |
| ANKFY1     | 0.4475174 | 0.2636601 | 1.6973 | 0.0898   | 0.500964218 | count | 1        |
| ACTR8      | 0.4250207 | 0.3140527 | 1.3533 | 0.176    | 0.501132909 | count | 1        |
| TBC1D24    | 0.6035605 | 0.3904512 | 1.5458 | 0.122    | 0.501221568 | count | 1        |
| DAAM2      | 3.6827805 | 2.2409033 | 1.6434 | 0.1004   | 0.501237385 | count | 1        |
| STX3       | 0.3867107 | 0.2055587 | 1.8813 | 0.0601   | 0.501245555 | count | 1        |
| TRPM2      | 0.4149572 | 0.2425525 | 1.7108 | 0.0872   | 0.501248002 | count | 1        |
| CKAP5      | 0.4224611 | 0.2366677 | 1.785  | 0.0744   | 0.501442643 | count | 1        |

|          |           |           |        |          |             |       |             |
|----------|-----------|-----------|--------|----------|-------------|-------|-------------|
| TMEM250  | 0.425444  | 0.2708494 | 1.5708 | 0.116    | 0.50164205  | count | 1           |
| DCBLD2   | 0.6631626 | 0.4393553 | 1.5094 | 0.131    | 0.501703745 | count | 1           |
| ARL5B    | 0.3754247 | 0.1573011 | 2.3867 | 0.0171   | 0.502380697 | count | 1           |
| NSUN6    | 0.4291585 | 0.2319989 | 1.8498 | 0.0645   | 0.502449994 | count | 1           |
| HYPK     | 0.6418342 | 0.4930083 | 1.3019 | 0.193    | 0.502695503 | count | 1           |
| RBM43    | 0.495624  | 0.3106336 | 1.5955 | 0.111    | 0.502826531 | count | 1           |
| PTPA     | 0.4045034 | 0.232581  | 1.7392 | 0.0821   | 0.50298819  | count | 1           |
| ERVK3-1  | 0.4818412 | 0.3611109 | 1.3343 | 0.182    | 0.503252836 | count | 1           |
| NDOR1    | 0.8643347 | 0.5104324 | 1.6933 | 0.0905   | 0.503269768 | count | 1           |
| SMG7     | 0.4214515 | 0.1999617 | 2.1077 | 0.0352   | 0.503402091 | count | 1           |
| CEBPG    | 0.373186  | 0.1536235 | 2.4292 | 0.0152   | 0.503439711 | count | 1           |
| TCN2     | 0.3945205 | 0.19167   | 2.0583 | 0.0397   | 0.503544675 | count | 1           |
| DENND4C  | 0.3961953 | 0.2030051 | 1.9517 | 0.0511   | 0.503708583 | count | 1           |
| TAF9B    | 0.5552514 | 0.4652917 | 1.1933 | 0.233    | 0.503858095 | count | 1           |
| VAMP2    | 0.3598114 | 0.0955469 | 3.7658 | 0.00017  | 0.503866939 | count | 1           |
| ZNF460   | 0.8072474 | 0.4921789 | 1.6402 | 0.101    | 0.50389368  | count | 1           |
| CENPQ    | 0.4676153 | 0.3182085 | 1.4695 | 0.142    | 0.504271458 | count | 1           |
| MBD2     | 0.3563081 | 0.0772015 | 4.6153 | 4.13E-06 | 0.504363151 | count | 0.0980875   |
| ABHD18   | 0.4532007 | 0.4389896 | 1.0324 | 0.302    | 0.504604566 | count | 1           |
| MROH6    | 0.4713788 | 0.3997127 | 1.1793 | 0.238    | 0.504607873 | count | 1           |
| DAPK3    | 0.4831036 | 0.3868384 | 1.2489 | 0.212    | 0.504615816 | count | 1           |
| ZSCAN30  | 0.693208  | 0.8427524 | 0.8226 | 0.411    | 0.504646461 | count | 1           |
| CTDSPL2  | 0.3964253 | 0.1884503 | 2.1036 | 0.0355   | 0.504684713 | count | 1           |
| SLC1A4   | 0.4190078 | 0.3299143 | 1.2701 | 0.204    | 0.504839198 | count | 1           |
| DAZAP2   | 0.3553519 | 0.0674389 | 5.2692 | 1.49E-07 | 0.505021194 | count | 0.003560504 |
| USP51    | 0.5222737 | 0.3267425 | 1.5984 | 0.11     | 0.505093023 | count | 1           |
| ATXN3    | 0.3802437 | 0.1648611 | 2.3064 | 0.0212   | 0.50514357  | count | 1           |
| TRAFD1   | 0.5033992 | 0.2592878 | 1.9415 | 0.0523   | 0.505276657 | count | 1           |
| ST7L     | 0.4467043 | 0.3545684 | 1.2599 | 0.208    | 0.505409255 | count | 1           |
| C11orf74 | 0.4164399 | 0.3137194 | 1.3274 | 0.184    | 0.505719035 | count | 1           |
| PTK2     | 0.430363  | 0.2898367 | 1.4848 | 0.138    | 0.505754024 | count | 1           |
| NSUN2    | 0.4494074 | 0.2684524 | 1.6741 | 0.0942   | 0.505890426 | count | 1           |
| DNAJB2   | 0.4210671 | 0.2215951 | 1.9002 | 0.0575   | 0.505930396 | count | 1           |
| EIF2B5   | 0.4140333 | 0.2368639 | 1.748  | 0.0806   | 0.506440989 | count | 1           |
| SCIMP    | 0.373029  | 0.1122243 | 3.324  | 0.000901 | 0.50668718  | count | 1           |
| PYGB     | 0.4604982 | 0.3671515 | 1.2542 | 0.21     | 0.506725116 | count | 1           |
| SATB2    | 1.4332175 | 0.7080976 | 2.024  | 0.0431   | 0.507000635 | count | 1           |
| SPATS2L  | 0.3738864 | 0.1422545 | 2.6283 | 0.00863  | 0.507220984 | count | 1           |
| PDS5B    | 0.3916807 | 0.1827183 | 2.1436 | 0.0322   | 0.507255645 | count | 1           |
| RASL11A  | 0.4488035 | 0.3748426 | 1.1973 | 0.231    | 0.507843234 | count | 1           |
| SERPINB8 | 0.3734117 | 0.1387874 | 2.6905 | 0.00718  | 0.508119207 | count | 1           |
| PDE4DIP  | 0.3888263 | 0.184872  | 2.1032 | 0.0355   | 0.508119765 | count | 1           |
| RARA     | 0.3691202 | 0.133672  | 2.7614 | 0.0058   | 0.508211147 | count | 1           |
| STX16    | 0.3922298 | 0.2401125 | 1.6335 | 0.102    | 0.508473858 | count | 1           |
| ATXN1L   | 0.4750174 | 0.3403368 | 1.3957 | 0.163    | 0.50862403  | count | 1           |

|            |           |           |        |          |             |       |          |
|------------|-----------|-----------|--------|----------|-------------|-------|----------|
| EYA3       | 0.4030709 | 0.2297027 | 1.7548 | 0.0794   | 0.508885202 | count | 1        |
| BMS1       | 0.3905141 | 0.2010868 | 1.942  | 0.0522   | 0.50904089  | count | 1        |
| MAP3K12    | 0.3955947 | 0.2547896 | 1.5526 | 0.121    | 0.509162469 | count | 1        |
| ZFAND2B    | 0.3840154 | 0.1699372 | 2.2597 | 0.0239   | 0.509897798 | count | 1        |
| SLC25A32   | 0.423349  | 0.2626601 | 1.6118 | 0.107    | 0.510164043 | count | 1        |
| LPP        | 0.3769221 | 0.142461  | 2.6458 | 0.0082   | 0.510174933 | count | 1        |
| ZNF18      | 0.8753228 | 0.5033916 | 1.7389 | 0.0822   | 0.510361079 | count | 1        |
| RIC8A      | 0.3855167 | 0.1950358 | 1.9766 | 0.0482   | 0.510676473 | count | 1        |
| BAG4       | 0.3820394 | 0.1805823 | 2.1156 | 0.0345   | 0.510800992 | count | 1        |
| HSF1       | 0.391912  | 0.1736367 | 2.2571 | 0.0241   | 0.510881061 | count | 1        |
| RASSF1-AS1 | 0.5088455 | 0.4597156 | 1.1069 | 0.268    | 0.51095497  | count | 1        |
| FANCE      | 1.443179  | 0.7157604 | 2.0163 | 0.0439   | 0.510991376 | count | 1        |
| TMEM63A    | 0.4849596 | 0.3639572 | 1.3325 | 0.183    | 0.511151885 | count | 1        |
| NKG7       | 0.4349255 | 0.3241207 | 1.3419 | 0.18     | 0.511227045 | count | 1        |
| DDX31      | 0.8180648 | 0.5984478 | 1.367  | 0.172    | 0.511319603 | count | 1        |
| PEX2       | 0.3888625 | 0.150448  | 2.5847 | 0.0098   | 0.511348768 | count | 1        |
| GPSM2      | 0.5742845 | 0.4276958 | 1.3427 | 0.179    | 0.511580402 | count | 1        |
| MBIP       | 0.4322963 | 0.3076759 | 1.405  | 0.16     | 0.511643455 | count | 1        |
| FEZ1       | 1.4450717 | 0.5598171 | 2.5813 | 0.0099   | 0.511749234 | count | 1        |
| RYBP       | 0.3822058 | 0.1711143 | 2.2336 | 0.0256   | 0.511764207 | count | 1        |
| C5AR2      | 0.3944756 | 0.1930732 | 2.0431 | 0.0411   | 0.511909278 | count | 1        |
| OAT        | 0.3882315 | 0.1885026 | 2.0596 | 0.0395   | 0.511960575 | count | 1        |
| CHIC2      | 0.3732731 | 0.1303189 | 2.8643 | 0.00421  | 0.512228453 | count | 1        |
| EPOR       | 0.3989289 | 0.2507677 | 1.5908 | 0.112    | 0.512340906 | count | 1        |
| FAAP100    | 0.5756498 | 0.386235  | 1.4904 | 0.136    | 0.512861591 | count | 1        |
| LSMEM1     | 1.4485997 | 0.657377  | 2.2036 | 0.0276   | 0.513162077 | count | 1        |
| WDR3       | 0.4534268 | 0.2905279 | 1.5607 | 0.119    | 0.513205345 | count | 1        |
| KIAA1191   | 0.4295869 | 0.2429414 | 1.7683 | 0.0771   | 0.51330467  | count | 1        |
| CWC25      | 0.3757102 | 0.1435051 | 2.6181 | 0.0089   | 0.513334873 | count | 1        |
| GPHN       | 0.6348254 | 0.5263172 | 1.2062 | 0.228    | 0.513476412 | count | 1        |
| GTF2H2C    | 0.6549299 | 0.3734791 | 1.7536 | 0.0796   | 0.513673123 | count | 1        |
| CARD9      | 0.4132508 | 0.1832594 | 2.255  | 0.0242   | 0.514026359 | count | 1        |
| AP1M1      | 0.4458635 | 0.2154637 | 2.0693 | 0.0386   | 0.514055676 | count | 1        |
| CPD        | 0.3849989 | 0.1791681 | 2.1488 | 0.0317   | 0.514275493 | count | 1        |
| ERICH1     | 0.366302  | 0.098163  | 3.7316 | 0.000195 | 0.514376637 | count | 1        |
| TCF3       | 0.4673854 | 0.3037268 | 1.5388 | 0.124    | 0.514517169 | count | 1        |
| MPPE1      | 0.4153912 | 0.1871166 | 2.22   | 0.0265   | 0.514734173 | count | 1        |
| SH2D3C     | 0.5395951 | 0.3758919 | 1.4355 | 0.151    | 0.514928465 | count | 1        |
| GLUD1      | 0.371001  | 0.1226392 | 3.0251 | 0.00251  | 0.514962782 | count | 1        |
| LMTK2      | 0.679679  | 0.4759962 | 1.4279 | 0.153    | 0.51513635  | count | 1        |
| DAB2       | 0.3609699 | 0.084695  | 4.262  | 2.10E-05 | 0.515209924 | count | 0.496566 |
| PSTPIP2    | 0.4016037 | 0.1577999 | 2.545  | 0.011    | 0.51521484  | count | 1        |
| GATAD1     | 0.3858953 | 0.1419732 | 2.7181 | 0.00661  | 0.515220598 | count | 1        |
| ITSN2      | 0.3702673 | 0.1101099 | 3.3627 | 0.000784 | 0.515330615 | count | 1        |
| C1GALT1    | 0.3907702 | 0.1683566 | 2.3211 | 0.0204   | 0.515337677 | count | 1        |

|            |           |           |        |          |             |       |          |
|------------|-----------|-----------|--------|----------|-------------|-------|----------|
| GCDH       | 0.4744804 | 0.3364517 | 1.4102 | 0.159    | 0.51560198  | count | 1        |
| MED6       | 0.4049138 | 0.2005921 | 2.0186 | 0.0436   | 0.515625081 | count | 1        |
| CCDC84     | 0.4814778 | 0.3280153 | 1.4679 | 0.142    | 0.515758263 | count | 1        |
| TROVE2     | 0.3733554 | 0.1243027 | 3.0036 | 0.0027   | 0.515911497 | count | 1        |
| PABPC1     | 0.3592362 | 0.0347358 | 10.342 | 1.44E-24 | 0.515938293 | count | 3.49E-20 |
| PRTFDC1    | 1.216067  | 0.6202923 | 1.9605 | 0.0501   | 0.516211064 | count | 1        |
| PIP4P2     | 0.3761551 | 0.1431155 | 2.6283 | 0.00863  | 0.516419414 | count | 1        |
| ZNF431     | 0.4821852 | 0.2986093 | 1.6148 | 0.106    | 0.516539702 | count | 1        |
| AUH        | 0.4859793 | 0.3400121 | 1.4293 | 0.153    | 0.516594252 | count | 1        |
| AP2A1      | 0.3980519 | 0.187391  | 2.1242 | 0.0338   | 0.516598511 | count | 1        |
| NKIRAS2    | 0.381863  | 0.1437759 | 2.656  | 0.00796  | 0.516724807 | count | 1        |
| ATAD3C     | 1.9243683 | 1.1474879 | 1.677  | 0.0937   | 0.516772594 | count | 1        |
| AL031432.3 | 1.9243683 | 1.1474879 | 1.677  | 0.0937   | 0.516772594 | count | 1        |
| LINC00853  | 1.9243683 | 1.654342  | 1.1632 | 0.245    | 0.516772594 | count | 1        |
| AMIGO1     | 1.9243683 | 1.1474879 | 1.677  | 0.0937   | 0.516772594 | count | 1        |
| PLSCR2     | 1.9243683 | 1.1474879 | 1.677  | 0.0937   | 0.516772594 | count | 1        |
| TMEM44     | 1.9243683 | 1.576046  | 1.221  | 0.222    | 0.516772594 | count | 1        |
| MPIG6B     | 1.9243683 | 1.1474879 | 1.677  | 0.0937   | 0.516772594 | count | 1        |
| AL133338.1 | 1.9243683 | 1.1474879 | 1.677  | 0.0937   | 0.516772594 | count | 1        |
| BX322234.1 | 1.9243683 | 1.1474879 | 1.677  | 0.0937   | 0.516772594 | count | 1        |
| HOXA-AS2   | 1.9243683 | 1.1474879 | 1.677  | 0.0937   | 0.516772594 | count | 1        |
| AC067930.1 | 1.9243683 | 1.1474879 | 1.677  | 0.0937   | 0.516772594 | count | 1        |
| FAM225A    | 1.9243683 | 1.1474879 | 1.677  | 0.0937   | 0.516772594 | count | 1        |
| LGR4       | 1.9243683 | 1.1474879 | 1.677  | 0.0937   | 0.516772594 | count | 1        |
| BDNF-AS    | 1.9243683 | 1.1474879 | 1.677  | 0.0937   | 0.516772594 | count | 1        |
| NRXN2      | 1.9243683 | 1.1474879 | 1.677  | 0.0937   | 0.516772594 | count | 1        |
| AP000866.1 | 1.9243683 | 1.1474879 | 1.677  | 0.0937   | 0.516772594 | count | 1        |
| AC068987.5 | 1.9243683 | 1.1474879 | 1.677  | 0.0937   | 0.516772594 | count | 1        |
| AC126614.1 | 1.9243683 | 1.1474879 | 1.677  | 0.0937   | 0.516772594 | count | 1        |
| MEIS2      | 1.9243683 | 1.654342  | 1.1632 | 0.245    | 0.516772594 | count | 1        |
| AC079322.1 | 1.9243683 | 1.1474879 | 1.677  | 0.0937   | 0.516772594 | count | 1        |
| NPIPA1     | 1.9243683 | 1.1474879 | 1.677  | 0.0937   | 0.516772594 | count | 1        |
| AC135782.1 | 1.9243683 | 1.1474879 | 1.677  | 0.0937   | 0.516772594 | count | 1        |
| AC008946.1 | 1.9243683 | 1.1474879 | 1.677  | 0.0937   | 0.516772594 | count | 1        |
| SPTBN4     | 1.9243683 | 1.1474879 | 1.677  | 0.0937   | 0.516772594 | count | 1        |
| AC010247.2 | 1.9243683 | 1.654342  | 1.1632 | 0.245    | 0.516772594 | count | 1        |
| AC011468.5 | 1.9243683 | 1.1474879 | 1.677  | 0.0937   | 0.516772594 | count | 1        |
| OLIG2      | 1.9243683 | 1.1474879 | 1.677  | 0.0937   | 0.516772594 | count | 1        |
| AC004854.2 | 0.5148753 | 0.337321  | 1.5264 | 0.127    | 0.517245598 | count | 1        |
| ZNF780A    | 0.4200446 | 0.251307  | 1.6714 | 0.0948   | 0.517377462 | count | 1        |
| ARIH2OS    | 0.682621  | 0.540044  | 1.264  | 0.206    | 0.517532331 | count | 1        |
| LSM11      | 0.8273478 | 0.5909658 | 1.4    | 0.162    | 0.517700899 | count | 1        |
| NLN        | 0.4308993 | 0.2161163 | 1.9938 | 0.0463   | 0.517963257 | count | 1        |
| POMT2      | 0.7805606 | 0.6473182 | 1.2058 | 0.228    | 0.517974824 | count | 1        |
| PXMP4      | 0.6401288 | 0.4082512 | 1.568  | 0.117    | 0.518049735 | count | 1        |

|            |           |           |        |         |             |       |   |
|------------|-----------|-----------|--------|---------|-------------|-------|---|
| AL391069.3 | 0.5352059 | 0.3465868 | 1.5442 | 0.123   | 0.518145578 | count | 1 |
| PARP2      | 0.5352059 | 0.3369071 | 1.5886 | 0.112   | 0.518145578 | count | 1 |
| EXOC6      | 0.4091749 | 0.1979339 | 2.0672 | 0.0388  | 0.51823027  | count | 1 |
| CLCN7      | 0.4246434 | 0.2279446 | 1.8629 | 0.0626  | 0.518408234 | count | 1 |
| IFI44      | 0.3771152 | 0.1289248 | 2.9251 | 0.00348 | 0.518478012 | count | 1 |
| WWTR1      | 0.8287373 | 0.6405519 | 1.2938 | 0.196   | 0.518656742 | count | 1 |
| HACE1      | 0.8287373 | 0.5652389 | 1.4662 | 0.143   | 0.518656742 | count | 1 |
| B4GALT4    | 0.4427742 | 0.3035089 | 1.4589 | 0.145   | 0.5187323   | count | 1 |
| AKNA       | 0.3957782 | 0.2368965 | 1.6707 | 0.0949  | 0.518959416 | count | 1 |
| CUL9       | 0.7435944 | 0.5213811 | 1.4262 | 0.154   | 0.519098222 | count | 1 |
| GLE1       | 0.5112356 | 0.3667669 | 1.3939 | 0.163   | 0.519265627 | count | 1 |
| IL27       | 0.8891662 | 0.5405992 | 1.6448 | 0.1     | 0.519309238 | count | 1 |
| AC093484.2 | 0.8891662 | 0.6049134 | 1.4699 | 0.142   | 0.519309238 | count | 1 |
| SIK1       | 0.8891754 | 0.5031566 | 1.7672 | 0.0773  | 0.519315198 | count | 1 |
| LPGAT1     | 0.3749218 | 0.1333889 | 2.8107 | 0.00498 | 0.519318358 | count | 1 |
| HACD2      | 0.4588146 | 0.2220387 | 2.0664 | 0.0389  | 0.519456679 | count | 1 |
| CC2D2A     | 1.2236579 | 1.0256861 | 1.193  | 0.233   | 0.519866384 | count | 1 |
| SUPT20H    | 0.447356  | 0.2149407 | 2.0813 | 0.0375  | 0.520156235 | count | 1 |
| ARIH1      | 0.3859515 | 0.1521432 | 2.5368 | 0.0112  | 0.520169332 | count | 1 |
| PPP3CB     | 0.4262125 | 0.1898634 | 2.2448 | 0.0249  | 0.520356052 | count | 1 |
| NHLRC2     | 0.4976921 | 0.3397467 | 1.4649 | 0.143   | 0.520379485 | count | 1 |
| THAP6      | 0.4726366 | 0.2892579 | 1.634  | 0.102   | 0.520461488 | count | 1 |
| GSK3B      | 0.3972578 | 0.1813475 | 2.1906 | 0.0286  | 0.520917747 | count | 1 |
| SUCNR1     | 0.5310958 | 0.2648331 | 2.0054 | 0.045   | 0.521106509 | count | 1 |
| MIR4458HG  | 0.5734991 | 0.3904172 | 1.4689 | 0.142   | 0.521274598 | count | 1 |
| DIRC2      | 0.4088175 | 0.1599542 | 2.5558 | 0.0107  | 0.521343531 | count | 1 |
| DDX51      | 0.5544917 | 0.3813101 | 1.4542 | 0.146   | 0.521458784 | count | 1 |
| RNF44      | 0.4707033 | 0.2426311 | 1.94   | 0.0525  | 0.521511998 | count | 1 |
| ZNF836     | 0.6111662 | 0.4048186 | 1.5097 | 0.131   | 0.521651859 | count | 1 |
| KIAA0232   | 0.3903887 | 0.159928  | 2.441  | 0.0147  | 0.521790038 | count | 1 |
| SKIV2L     | 0.5742193 | 0.3721828 | 1.5428 | 0.123   | 0.521962805 | count | 1 |
| AKAP8L     | 0.396029  | 0.1929935 | 2.052  | 0.0403  | 0.521973387 | count | 1 |
| CTSF       | 0.4237404 | 0.2325604 | 1.8221 | 0.0686  | 0.522002176 | count | 1 |
| PHIP       | 0.3810664 | 0.1296638 | 2.9389 | 0.00332 | 0.522058742 | count | 1 |
| AC026202.2 | 1.4711102 | 0.8947039 | 1.6442 | 0.1     | 0.522172375 | count | 1 |
| H1FX-AS1   | 1.4711102 | 0.8947039 | 1.6442 | 0.1     | 0.522172375 | count | 1 |
| FAM149A    | 1.4711102 | 1.0902625 | 1.3493 | 0.177   | 0.522172375 | count | 1 |
| UNC5CL     | 1.4711102 | 1.0278079 | 1.4313 | 0.152   | 0.522172375 | count | 1 |
| AL136131.3 | 1.4711102 | 0.8947039 | 1.6442 | 0.1     | 0.522172375 | count | 1 |
| TMEM67     | 1.4711102 | 0.8947039 | 1.6442 | 0.1     | 0.522172375 | count | 1 |
| INCA1      | 1.4711102 | 0.8947039 | 1.6442 | 0.1     | 0.522172375 | count | 1 |
| PRSS57     | 1.4711102 | 0.8947039 | 1.6442 | 0.1     | 0.522172375 | count | 1 |
| TPK1       | 0.4491451 | 0.221894  | 2.0241 | 0.0431  | 0.522282613 | count | 1 |
| SYNE1      | 0.4300697 | 0.1921119 | 2.2386 | 0.0253  | 0.522560796 | count | 1 |
| TMEM101    | 0.4178011 | 0.213808  | 1.9541 | 0.0508  | 0.522605921 | count | 1 |

|            |           |           |        |          |             |       |             |
|------------|-----------|-----------|--------|----------|-------------|-------|-------------|
| API5       | 0.4110438 | 0.1885564 | 2.18   | 0.0294   | 0.522825306 | count | 1           |
| ARFRP1     | 0.4020899 | 0.2214696 | 1.8156 | 0.0696   | 0.522873303 | count | 1           |
| LILRB3     | 0.3738939 | 0.1081125 | 3.4584 | 0.000553 | 0.522951472 | count | 1           |
| SMN1       | 0.6281667 | 0.4910986 | 1.2791 | 0.201    | 0.522951555 | count | 1           |
| EBP        | 0.3999421 | 0.1763268 | 2.2682 | 0.0234   | 0.523218862 | count | 1           |
| PSME2      | 0.3655996 | 0.0572564 | 6.3853 | 2.04E-10 | 0.523289707 | count | 4.91E-06    |
| ZNF791     | 0.406554  | 0.1811269 | 2.2446 | 0.0249   | 0.52342832  | count | 1           |
| CPSF4      | 0.4725211 | 0.2721407 | 1.7363 | 0.0826   | 0.523581667 | count | 1           |
| FAM168B    | 0.4187666 | 0.2423612 | 1.7279 | 0.0841   | 0.523830908 | count | 1           |
| ATP8B4     | 0.450474  | 0.2147523 | 2.0976 | 0.036    | 0.523862264 | count | 1           |
| SLC46A3    | 0.4091807 | 0.2022049 | 2.0236 | 0.0431   | 0.524426547 | count | 1           |
| PAN2       | 0.557642  | 0.4328641 | 1.2883 | 0.198    | 0.524561344 | count | 1           |
| NSD1       | 0.3829304 | 0.1301451 | 2.9423 | 0.00329  | 0.524861153 | count | 1           |
| ALKBH1     | 0.5496655 | 0.3851869 | 1.427  | 0.154    | 0.52497625  | count | 1           |
| AC017083.1 | 0.6918166 | 0.6043939 | 1.1446 | 0.252    | 0.525027577 | count | 1           |
| SH3GLB2    | 0.4093003 | 0.2516446 | 1.6265 | 0.104    | 0.525204462 | count | 1           |
| SAP30      | 0.3765272 | 0.0754152 | 4.9927 | 6.37E-07 | 0.52535313  | count | 0.015182895 |
| GAB2       | 0.447083  | 0.21165   | 2.1124 | 0.0348   | 0.525819501 | count | 1           |
| DOCK8      | 0.3718373 | 0.0837864 | 4.4379 | 9.48E-06 | 0.526021398 | count | 0.22474236  |
| AP001056.1 | 0.9777295 | 0.5536051 | 1.7661 | 0.0775   | 0.526099322 | count | 1           |
| SNX29      | 0.3816557 | 0.1190259 | 3.2065 | 0.00136  | 0.526116533 | count | 1           |
| SRGAP2C    | 0.4344275 | 0.218832  | 1.9852 | 0.0472   | 0.526590573 | count | 1           |
| CIZ1       | 0.4447043 | 0.3319915 | 1.3395 | 0.181    | 0.526628519 | count | 1           |
| LINC01954  | 0.7212415 | 0.4952191 | 1.4564 | 0.145    | 0.526709931 | count | 1           |
| FAM86C1    | 0.8407802 | 0.6072885 | 1.3845 | 0.166    | 0.526948387 | count | 1           |
| ZBTB49     | 0.5601913 | 0.5030944 | 1.1135 | 0.266    | 0.52707285  | count | 1           |
| FTSJ3      | 0.4609611 | 0.2878984 | 1.6011 | 0.109    | 0.527087795 | count | 1           |
| LMO2       | 0.3746532 | 0.0788921 | 4.7489 | 2.16E-06 | 0.527240359 | count | 0.0513756   |
| AC098850.3 | 0.5138938 | 0.502735  | 1.0222 | 0.307    | 0.527617124 | count | 1           |
| EIF2B3     | 0.4148376 | 0.2348113 | 1.7667 | 0.0774   | 0.527711779 | count | 1           |
| ANKRD13D   | 0.385574  | 0.142646  | 2.703  | 0.00692  | 0.527901539 | count | 1           |
| BICD2      | 0.3989215 | 0.152673  | 2.6129 | 0.00903  | 0.527921904 | count | 1           |
| PHF14      | 0.3900016 | 0.165431  | 2.3575 | 0.0185   | 0.528700993 | count | 1           |
| TTY14      | 0.6190777 | 0.7617127 | 0.8127 | 0.416    | 0.528808499 | count | 1           |
| SRSF5      | 0.3718909 | 0.0604002 | 6.1571 | 8.63E-10 | 0.528858953 | count | 2.07E-05    |
| RRP9       | 0.4864237 | 0.3317408 | 1.4663 | 0.143    | 0.528971422 | count | 1           |
| LMO7       | 0.9044362 | 0.7620394 | 1.1869 | 0.235    | 0.529197191 | count | 1           |
| TAF6L      | 0.5106299 | 0.3482098 | 1.4664 | 0.143    | 0.529387769 | count | 1           |
| MIS18BP1   | 0.3773242 | 0.0785729 | 4.8022 | 1.66E-06 | 0.529730312 | count | 0.0394997   |
| LTBP1      | 0.983973  | 0.7500073 | 1.312  | 0.19     | 0.52985268  | count | 1           |
| LRRRC8A    | 0.5110809 | 0.3483944 | 1.467  | 0.143    | 0.529871966 | count | 1           |
| CPAMD8     | 0.757843  | 0.567882  | 1.3345 | 0.182    | 0.529903993 | count | 1           |
| PKN2       | 0.3829029 | 0.1208486 | 3.1685 | 0.00155  | 0.529962047 | count | 1           |
| BTAF1      | 0.4069463 | 0.2170505 | 1.8749 | 0.0609   | 0.530211294 | count | 1           |
| ZSWIM8     | 0.4323272 | 0.2663936 | 1.6229 | 0.105    | 0.530411426 | count | 1           |



|             |           |           |        |          |             |       |            |
|-------------|-----------|-----------|--------|----------|-------------|-------|------------|
| GRK5        | 0.6985362 | 0.4131271 | 1.6909 | 0.091    | 0.530510585 | count | 1          |
| ARHGEF1     | 0.3971309 | 0.1235902 | 3.2133 | 0.00133  | 0.530604941 | count | 1          |
| ANKRD26     | 0.4759575 | 0.2686729 | 1.7715 | 0.0766   | 0.530638619 | count | 1          |
| PTAR1       | 0.4273396 | 0.2424038 | 1.7629 | 0.078    | 0.530804687 | count | 1          |
| EID3        | 0.5640283 | 0.4463674 | 1.2636 | 0.206    | 0.530854388 | count | 1          |
| FASTKD5     | 0.5224809 | 0.3482987 | 1.5001 | 0.134    | 0.531123899 | count | 1          |
| GPSM3       | 0.3718625 | 0.0485777 | 7.655  | 2.76E-14 | 0.531279434 | count | 6.67E-10   |
| FAR2        | 0.4667226 | 0.2795802 | 1.6694 | 0.0952   | 0.531284351 | count | 1          |
| SMC5        | 0.3934015 | 0.1471749 | 2.673  | 0.00757  | 0.531291261 | count | 1          |
| CLCN6       | 0.5284745 | 0.3491883 | 1.5134 | 0.13     | 0.531448086 | count | 1          |
| STAT1       | 0.3799836 | 0.086257  | 4.4052 | 1.10E-05 | 0.531537688 | count | 0.260623   |
| SOS2        | 0.4099515 | 0.1530494 | 2.6786 | 0.00744  | 0.531694725 | count | 1          |
| THUMPD3-AS1 | 0.388205  | 0.1499038 | 2.5897 | 0.00966  | 0.532127112 | count | 1          |
| UBAC2       | 0.3807917 | 0.0912683 | 4.1722 | 3.12E-05 | 0.532138567 | count | 0.7364448  |
| PEL1        | 0.395386  | 0.1297039 | 3.0484 | 0.00233  | 0.532331648 | count | 1          |
| ZFY         | 0.43489   | 0.2365673 | 1.8383 | 0.0661   | 0.532385646 | count | 1          |
| IFITM2      | 0.3716466 | 0.0565094 | 6.5767 | 5.86E-11 | 0.532387768 | count | 1.41E-06   |
| GOT2        | 0.5493308 | 0.3119111 | 1.7612 | 0.0783   | 0.532424111 | count | 1          |
| ALG10       | 0.9882533 | 0.6076132 | 1.6265 | 0.104    | 0.532426952 | count | 1          |
| INTS6-AS1   | 0.5294261 | 0.3425209 | 1.5457 | 0.122    | 0.532442679 | count | 1          |
| POLE3       | 0.388809  | 0.1323074 | 2.9387 | 0.00333  | 0.532598861 | count | 1          |
| GOLGA3      | 0.4133588 | 0.1873643 | 2.2062 | 0.0275   | 0.532872873 | count | 1          |
| ANKRD50     | 0.5243363 | 0.3172277 | 1.6529 | 0.0985   | 0.533081764 | count | 1          |
| SFXN3       | 0.4115413 | 0.2020047 | 2.0373 | 0.0417   | 0.533256572 | count | 1          |
| APPL2       | 0.4602377 | 0.2016902 | 2.2819 | 0.0226   | 0.533282702 | count | 1          |
| FBXO48      | 0.5304696 | 0.484354  | 1.0952 | 0.274    | 0.533533422 | count | 1          |
| NELFA       | 0.4646735 | 0.3828252 | 1.2138 | 0.225    | 0.533887812 | count | 1          |
| TMX3        | 0.4133317 | 0.2420344 | 1.7077 | 0.0878   | 0.533972802 | count | 1          |
| PML         | 0.4235433 | 0.1907173 | 2.2208 | 0.0265   | 0.534265095 | count | 1          |
| IL15        | 0.4431315 | 0.1790195 | 2.4753 | 0.0134   | 0.534447638 | count | 1          |
| GFM1        | 0.4484951 | 0.2242432 | 2      | 0.0456   | 0.534681562 | count | 1          |
| KIF1BP      | 0.4377742 | 0.2385228 | 1.8354 | 0.0666   | 0.534713907 | count | 1          |
| STX11       | 0.3790109 | 0.0747064 | 5.0733 | 4.20E-07 | 0.535618996 | count | 0.010017   |
| SCPEP1      | 0.382466  | 0.0805646 | 4.7473 | 2.18E-06 | 0.535644638 | count | 0.05184912 |
| DNAAF2      | 0.4215651 | 0.2482734 | 1.698  | 0.0896   | 0.535644726 | count | 1          |
| MAP7D3      | 0.4312922 | 0.216113  | 1.9957 | 0.0461   | 0.53578931  | count | 1          |
| MAP3K11     | 0.4046872 | 0.1439646 | 2.811  | 0.00498  | 0.535955427 | count | 1          |
| EPHB6       | 0.4510558 | 0.26559   | 1.6983 | 0.0896   | 0.536076007 | count | 1          |
| TPRN        | 0.5608321 | 0.3686326 | 1.5214 | 0.128    | 0.536131413 | count | 1          |
| LEMD3       | 0.4928205 | 0.3883435 | 1.269  | 0.205    | 0.536137967 | count | 1          |
| CCNG1       | 0.4379645 | 0.2237672 | 1.9572 | 0.0504   | 0.536212845 | count | 1          |
| KLC2        | 0.7334721 | 0.597318  | 1.2279 | 0.22     | 0.536362531 | count | 1          |
| DCAKD       | 0.6274949 | 0.4429592 | 1.4166 | 0.157    | 0.536430534 | count | 1          |
| METTL4      | 0.4965317 | 0.3489574 | 1.4229 | 0.155    | 0.536435191 | count | 1          |
| LRRC4       | 1.1025546 | 0.6500649 | 1.6961 | 0.09     | 0.536448133 | count | 1          |

|            |           |           |        |          |             |       |   |
|------------|-----------|-----------|--------|----------|-------------|-------|---|
| THUMPD2    | 0.4227938 | 0.2829241 | 1.4944 | 0.135    | 0.53647458  | count | 1 |
| BTN2A1     | 0.4577207 | 0.2309025 | 1.9823 | 0.0476   | 0.536624404 | count | 1 |
| AFF4       | 0.3875499 | 0.1193328 | 3.2476 | 0.00118  | 0.536804834 | count | 1 |
| PTGIR      | 0.5467325 | 0.3350524 | 1.6318 | 0.103    | 0.537104594 | count | 1 |
| UVSSA      | 0.4130236 | 0.2038502 | 2.0261 | 0.0429   | 0.537240284 | count | 1 |
| WDR41      | 0.4224248 | 0.2052217 | 2.0584 | 0.0397   | 0.537486761 | count | 1 |
| USP1       | 0.4046256 | 0.1525447 | 2.6525 | 0.00804  | 0.537492287 | count | 1 |
| TATDN3     | 0.4184767 | 0.1846969 | 2.2657 | 0.0236   | 0.537742797 | count | 1 |
| EHMT2      | 0.494416  | 0.2546913 | 1.9412 | 0.0523   | 0.537926083 | count | 1 |
| FGD5-AS1   | 0.3962742 | 0.1177215 | 3.3662 | 0.000774 | 0.537949682 | count | 1 |
| USP10      | 0.4060789 | 0.1644442 | 2.4694 | 0.0136   | 0.538477549 | count | 1 |
| CNNM2      | 1.1062894 | 0.5471617 | 2.0219 | 0.0433   | 0.538492954 | count | 1 |
| SFSWAP     | 0.404827  | 0.1602097 | 2.5269 | 0.0116   | 0.538682398 | count | 1 |
| XAF1       | 0.3862834 | 0.1244568 | 3.1038 | 0.00193  | 0.538752143 | count | 1 |
| CH25H      | 0.3828476 | 0.1293752 | 2.9592 | 0.00311  | 0.538884153 | count | 1 |
| MON2       | 0.4295814 | 0.2451711 | 1.7522 | 0.0799   | 0.539387609 | count | 1 |
| NNT        | 0.4486538 | 0.3207022 | 1.399  | 0.162    | 0.539710894 | count | 1 |
| TRAPPC8    | 0.4658276 | 0.2281225 | 2.042  | 0.0413   | 0.539908996 | count | 1 |
| FAM214A    | 0.4930722 | 0.3802405 | 1.2967 | 0.195    | 0.54009593  | count | 1 |
| TMEM242    | 0.4026723 | 0.1676959 | 2.4012 | 0.0164   | 0.540363929 | count | 1 |
| MBNL2      | 0.4431892 | 0.1827333 | 2.4253 | 0.0154   | 0.541441843 | count | 1 |
| ZBTB48     | 0.4671866 | 0.242088  | 1.9298 | 0.0537   | 0.541520373 | count | 1 |
| MLST8      | 0.4619273 | 0.2906561 | 1.5893 | 0.112    | 0.541663413 | count | 1 |
| LRRC37B    | 0.5088418 | 0.3508134 | 1.4505 | 0.147    | 0.541705447 | count | 1 |
| GIN1       | 0.7405844 | 0.4425841 | 1.6733 | 0.0944   | 0.541982859 | count | 1 |
| AL359258.2 | 0.8630574 | 0.6791471 | 1.2708 | 0.204    | 0.542319511 | count | 1 |
| PRSS36     | 0.5591606 | 0.3653173 | 1.5306 | 0.126    | 0.542374125 | count | 1 |
| FBXO22     | 0.4609311 | 0.2255986 | 2.0431 | 0.0411   | 0.542456279 | count | 1 |
| HEXIM1     | 0.4293055 | 0.2186834 | 1.9631 | 0.0497   | 0.542462248 | count | 1 |
| ASB8       | 0.4152397 | 0.1791909 | 2.3173 | 0.0206   | 0.542531876 | count | 1 |
| ITSN1      | 0.4066193 | 0.1722642 | 2.3604 | 0.0183   | 0.542547705 | count | 1 |
| HAUS5      | 0.7413272 | 0.7213629 | 1.0277 | 0.304    | 0.542570135 | count | 1 |
| TSNARE1    | 0.8634587 | 0.5873376 | 1.4701 | 0.142    | 0.542596788 | count | 1 |
| ZNF440     | 0.8634587 | 0.5683117 | 1.5193 | 0.129    | 0.542596788 | count | 1 |
| CHD2       | 0.3998285 | 0.1390868 | 2.8747 | 0.00408  | 0.542632022 | count | 1 |
| MRM1       | 1.0053459 | 0.7007634 | 1.4346 | 0.152    | 0.542718169 | count | 1 |
| MRPS18A    | 0.4291404 | 0.2063051 | 2.0801 | 0.0376   | 0.543061822 | count | 1 |
| ZNF575     | 0.9260384 | 0.6022729 | 1.5376 | 0.124    | 0.543215472 | count | 1 |
| XPO6       | 0.4502775 | 0.2218758 | 2.0294 | 0.0425   | 0.543226954 | count | 1 |
| NFKBIZ     | 0.3886987 | 0.1109033 | 3.5048 | 0.000465 | 0.543315918 | count | 1 |
| IKZF1      | 0.4040312 | 0.1486705 | 2.7176 | 0.00662  | 0.543377774 | count | 1 |
| WDR75      | 0.492954  | 0.4097467 | 1.2031 | 0.229    | 0.543486289 | count | 1 |
| FAM208B    | 0.4357864 | 0.191616  | 2.2743 | 0.023    | 0.543492915 | count | 1 |
| AL078590.2 | 1.2735793 | 0.8301379 | 1.5342 | 0.125    | 0.543927223 | count | 1 |
| LINC00968  | 1.2735793 | 0.7629577 | 1.6693 | 0.0952   | 0.543927223 | count | 1 |

|            |           |           |        |          |             |       |          |
|------------|-----------|-----------|--------|----------|-------------|-------|----------|
| ZSWIM1     | 1.2735793 | 0.7629577 | 1.6693 | 0.0952   | 0.543927223 | count | 1        |
| AAGAB      | 0.4998742 | 0.3107353 | 1.6087 | 0.108    | 0.544045156 | count | 1        |
| DDX60L     | 0.4032829 | 0.1554439 | 2.5944 | 0.00953  | 0.544109342 | count | 1        |
| SGTB       | 0.4085579 | 0.1469731 | 2.7798 | 0.00548  | 0.544285752 | count | 1        |
| MTUS1      | 0.6362018 | 0.3662476 | 1.7371 | 0.0825   | 0.544323414 | count | 1        |
| RIN1       | 0.4908474 | 0.2964803 | 1.6556 | 0.0979   | 0.544465066 | count | 1        |
| CHSY1      | 0.4037261 | 0.1303808 | 3.0965 | 0.00198  | 0.544711316 | count | 1        |
| HECA       | 0.4050687 | 0.1576531 | 2.5694 | 0.0102   | 0.544782911 | count | 1        |
| TRIB2      | 1.1178689 | 0.7797609 | 1.4336 | 0.152    | 0.544836193 | count | 1        |
| PNOC       | 1.1178689 | 0.7295322 | 1.5323 | 0.126    | 0.544836193 | count | 1        |
| EFHB       | 1.008924  | 0.6346924 | 1.5896 | 0.112    | 0.544874756 | count | 1        |
| AC008443.6 | 1.008924  | 0.6820795 | 1.4792 | 0.139    | 0.544874756 | count | 1        |
| KIF21A     | 1.008924  | 0.7576082 | 1.3317 | 0.183    | 0.544874756 | count | 1        |
| AC004233.3 | 1.008924  | 0.6346924 | 1.5896 | 0.112    | 0.544874756 | count | 1        |
| TM9SF1     | 0.7775549 | 0.5083483 | 1.5296 | 0.126    | 0.544886659 | count | 1        |
| ZNRD1      | 0.3989021 | 0.1288311 | 3.0963 | 0.00198  | 0.544920841 | count | 1        |
| DNLZ       | 0.9287073 | 0.6041033 | 1.5373 | 0.124    | 0.544949706 | count | 1        |
| MAP2K1     | 0.4223422 | 0.1369084 | 3.0849 | 0.00206  | 0.545170657 | count | 1        |
| SUDS3      | 0.3997607 | 0.1447575 | 2.7616 | 0.00579  | 0.545244744 | count | 1        |
| PPWD1      | 0.4299101 | 0.2581863 | 1.6651 | 0.096    | 0.545623215 | count | 1        |
| STK24      | 0.4095871 | 0.1482889 | 2.7621 | 0.00579  | 0.545667853 | count | 1        |
| ULK3       | 0.4606784 | 0.2853088 | 1.6147 | 0.107    | 0.545938949 | count | 1        |
| MCL1       | 0.3807214 | 0.0450233 | 8.4561 | 4.68E-17 | 0.546122954 | count | 1.13E-12 |
| DEF6       | 0.4148648 | 0.1699207 | 2.4415 | 0.0147   | 0.546258086 | count | 1        |
| FLI1       | 0.4170411 | 0.1858125 | 2.2444 | 0.0249   | 0.546685205 | count | 1        |
| THAP1      | 0.4464121 | 0.2447267 | 1.8241 | 0.0683   | 0.546732049 | count | 1        |
| SLC27A3    | 0.422321  | 0.1532655 | 2.7555 | 0.0059   | 0.546833738 | count | 1        |
| RAB3A      | 0.4646394 | 0.3103191 | 1.4973 | 0.134    | 0.546914027 | count | 1        |
| IGBP1      | 0.3940917 | 0.0959687 | 4.1065 | 4.15E-05 | 0.547341426 | count | 0.978238 |
| ZNF865     | 0.6396731 | 0.4952189 | 1.2917 | 0.197    | 0.547472528 | count | 1        |
| CAPN2      | 0.3947727 | 0.1145929 | 3.445  | 0.000581 | 0.547521772 | count | 1        |
| SLC38A2    | 0.3889045 | 0.1009337 | 3.8531 | 0.00012  | 0.547542288 | count | 1        |
| IGHMBP2    | 0.6744771 | 0.5432867 | 1.2415 | 0.215    | 0.547747714 | count | 1        |
| RAF1       | 0.4264891 | 0.1806835 | 2.3604 | 0.0183   | 0.548160824 | count | 1        |
| PHKB       | 0.4111671 | 0.1562883 | 2.6308 | 0.00857  | 0.548663671 | count | 1        |
| STARD4     | 0.5113149 | 0.3231234 | 1.5824 | 0.114    | 0.54876351  | count | 1        |
| SIRPD      | 0.7500837 | 0.4932872 | 1.5206 | 0.128    | 0.549497436 | count | 1        |
| A2M        | 0.3940371 | 0.1228671 | 3.207  | 0.00136  | 0.549813669 | count | 1        |
| EYA2       | 0.8740955 | 0.5143221 | 1.6995 | 0.0893   | 0.549950974 | count | 1        |
| PQBP1      | 0.39983   | 0.1147216 | 3.4852 | 5.00E-04 | 0.549966115 | count | 1        |
| GBP1       | 0.4079489 | 0.1427505 | 2.8578 | 0.0043   | 0.55065675  | count | 1        |
| CAVIN2     | 0.7853429 | 0.3203107 | 2.4518 | 0.0143   | 0.550816548 | count | 1        |
| PRMT6      | 1.0188416 | 0.5555016 | 1.8341 | 0.0668   | 0.550855309 | count | 1        |
| NUP50      | 0.4131351 | 0.1675976 | 2.465  | 0.0138   | 0.551021714 | count | 1        |
| PSPH       | 0.6995052 | 0.4650687 | 1.5041 | 0.133    | 0.551185473 | count | 1        |

|            |           |           |        |          |             |       |   |
|------------|-----------|-----------|--------|----------|-------------|-------|---|
| GCC1       | 0.6600513 | 0.3780904 | 1.7457 | 0.081    | 0.551213875 | count | 1 |
| HNRNPL     | 0.4055164 | 0.1441958 | 2.8123 | 0.00496  | 0.551252657 | count | 1 |
| TARS2      | 0.644069  | 0.4294235 | 1.4998 | 0.134    | 0.551462336 | count | 1 |
| GPR27      | 1.2896541 | 0.614361  | 2.0992 | 0.0359   | 0.551680528 | count | 1 |
| AC005082.1 | 0.5365883 | 0.4333634 | 1.2382 | 0.216    | 0.551798781 | count | 1 |
| PRLR       | 0.786709  | 0.5159267 | 1.5248 | 0.127    | 0.551857303 | count | 1 |
| TTBK2      | 0.462851  | 0.2952813 | 1.5675 | 0.117    | 0.552141493 | count | 1 |
| AC108673.2 | 1.5464032 | 0.8414758 | 1.8377 | 0.0662   | 0.55222842  | count | 1 |
| AL162414.1 | 1.5464032 | 0.651042  | 2.3753 | 0.0176   | 0.55222842  | count | 1 |
| AC016588.2 | 1.5464032 | 0.8414758 | 1.8377 | 0.0662   | 0.55222842  | count | 1 |
| GBP5       | 0.4470106 | 0.1971904 | 2.2669 | 0.0235   | 0.552304512 | count | 1 |
| DZIP3      | 0.8775458 | 0.6012258 | 1.4596 | 0.145    | 0.552338417 | count | 1 |
| NUP133     | 0.577269  | 0.3384948 | 1.7054 | 0.0882   | 0.552576951 | count | 1 |
| MSL2       | 0.4928085 | 0.3254272 | 1.5143 | 0.13     | 0.553069083 | count | 1 |
| AC027644.3 | 0.4257016 | 0.1886539 | 2.2565 | 0.0241   | 0.553395313 | count | 1 |
| COQ8B      | 0.5438655 | 0.3453489 | 1.5748 | 0.115    | 0.553711932 | count | 1 |
| ETFDH      | 0.4774903 | 0.2556308 | 1.8679 | 0.0619   | 0.553742613 | count | 1 |
| FBXL5      | 0.404057  | 0.1165772 | 3.466  | 0.000537 | 0.553845069 | count | 1 |
| LINC02035  | 0.5562371 | 0.4536443 | 1.2262 | 0.22     | 0.553861548 | count | 1 |
| TBC1D10C   | 0.4738795 | 0.2520005 | 1.8805 | 0.0602   | 0.553883775 | count | 1 |
| EAPP       | 0.4034796 | 0.1286217 | 3.1369 | 0.00173  | 0.553890271 | count | 1 |
| RAE1       | 0.4376255 | 0.1737582 | 2.5186 | 0.0118   | 0.553945291 | count | 1 |
| ZNF189     | 0.6323715 | 0.3815738 | 1.6573 | 0.0976   | 0.554017596 | count | 1 |
| AC004687.1 | 0.407697  | 0.1495843 | 2.7255 | 0.00647  | 0.55406654  | count | 1 |
| SLC5A9     | 2.0580676 | 1.0459481 | 1.9677 | 0.0492   | 0.554272538 | count | 1 |
| TRH        | 2.0580676 | 1.1225812 | 1.8333 | 0.0669   | 0.554272538 | count | 1 |
| AL139041.1 | 2.0580676 | 1.0459481 | 1.9677 | 0.0492   | 0.554272538 | count | 1 |
| ABCA2      | 2.0580676 | 1.017587  | 2.0225 | 0.0432   | 0.554272538 | count | 1 |
| AL133215.2 | 2.0580676 | 1.0459481 | 1.9677 | 0.0492   | 0.554272538 | count | 1 |
| AC005476.2 | 2.0580676 | 1.0459481 | 1.9677 | 0.0492   | 0.554272538 | count | 1 |
| CCDC102A   | 2.0580676 | 1.017587  | 2.0225 | 0.0432   | 0.554272538 | count | 1 |
| LINC01664  | 2.0580676 | 1.0459481 | 1.9677 | 0.0492   | 0.554272538 | count | 1 |
| C16orf72   | 0.408669  | 0.1409978 | 2.8984 | 0.00378  | 0.554704254 | count | 1 |
| ITGB2-AS1  | 0.4310532 | 0.1972158 | 2.1857 | 0.0289   | 0.554725664 | count | 1 |
| PIK3CD     | 0.4892503 | 0.247483  | 1.9769 | 0.0482   | 0.554820996 | count | 1 |
| ZNF606     | 0.8312527 | 0.9320784 | 0.8918 | 0.373    | 0.554823526 | count | 1 |
| KIF13A     | 0.4199404 | 0.1727992 | 2.4302 | 0.0152   | 0.554906839 | count | 1 |
| APOBEC3C   | 0.4158395 | 0.1378815 | 3.0159 | 0.00259  | 0.554948042 | count | 1 |
| MTA1       | 0.4974865 | 0.2982822 | 1.6678 | 0.0955   | 0.555313638 | count | 1 |
| NCK1       | 0.418097  | 0.1648183 | 2.5367 | 0.0113   | 0.555858553 | count | 1 |
| OCEL1      | 0.4301164 | 0.1563056 | 2.7518 | 0.00597  | 0.55590417  | count | 1 |
| FLT3LG     | 0.7295944 | 0.3980658 | 1.8328 | 0.0669   | 0.55591597  | count | 1 |
| PNISR      | 0.3946713 | 0.1036864 | 3.8064 | 0.000144 | 0.556598847 | count | 1 |
| BICRA      | 0.9466917 | 0.5223693 | 1.8123 | 0.0701   | 0.556648708 | count | 1 |
| CHD1L      | 0.480417  | 0.2433557 | 1.9741 | 0.0485   | 0.557215891 | count | 1 |

|            |           |           |        |          |             |       |             |
|------------|-----------|-----------|--------|----------|-------------|-------|-------------|
| ATP11B     | 0.4616856 | 0.2842111 | 1.6244 | 0.104    | 0.557250447 | count | 1           |
| MVD        | 0.482447  | 0.2591237 | 1.8618 | 0.0627   | 0.557258745 | count | 1           |
| MOB3A      | 0.4194045 | 0.1880591 | 2.2302 | 0.0258   | 0.557290285 | count | 1           |
| MBD5       | 0.4452223 | 0.2287995 | 1.9459 | 0.0518   | 0.557420213 | count | 1           |
| DAAM1      | 0.4403668 | 0.1967887 | 2.2378 | 0.0253   | 0.557462346 | count | 1           |
| CCL3L1     | 0.3873807 | 0.1013461 | 3.8224 | 0.000135 | 0.557589823 | count | 1           |
| NR1D2      | 0.4461835 | 0.1646454 | 2.71   | 0.00678  | 0.557660722 | count | 1           |
| TMEM245    | 0.4893486 | 0.2571187 | 1.9032 | 0.0571   | 0.557701152 | count | 1           |
| TIMM23B    | 0.7318292 | 0.4947129 | 1.4793 | 0.139    | 0.557747871 | count | 1           |
| SS18L1     | 0.6234964 | 0.3398403 | 1.8347 | 0.0667   | 0.5578973   | count | 1           |
| FARP2      | 0.5377207 | 0.3696065 | 1.4548 | 0.146    | 0.558510574 | count | 1           |
| MANEA-DT   | 0.795517  | 0.527191  | 1.509  | 0.131    | 0.558571696 | count | 1           |
| NBEA       | 0.795517  | 1.0377297 | 0.7666 | 0.443    | 0.558571696 | count | 1           |
| PLXNA1     | 0.5610018 | 0.3641829 | 1.5404 | 0.124    | 0.558803192 | count | 1           |
| ARFIP1     | 0.4217968 | 0.1514089 | 2.7858 | 0.00538  | 0.55881435  | count | 1           |
| C20orf194  | 0.4463442 | 0.2410365 | 1.8518 | 0.0642   | 0.558845607 | count | 1           |
| EXOSC5     | 0.4206891 | 0.1682666 | 2.5001 | 0.0125   | 0.559011566 | count | 1           |
| CEBPZ      | 0.4032518 | 0.1314527 | 3.0677 | 0.00218  | 0.559254398 | count | 1           |
| DDX54      | 0.4355576 | 0.2079239 | 2.0948 | 0.0363   | 0.559309317 | count | 1           |
| PMPCB      | 0.4145633 | 0.1378405 | 3.0076 | 0.00266  | 0.559432943 | count | 1           |
| CASP1      | 0.3947206 | 0.0688922 | 5.7295 | 1.13E-08 | 0.559680202 | count | 0.000271053 |
| RGS2       | 0.38982   | 0.0565663 | 6.8914 | 7.00E-12 | 0.559847228 | count | 1.69E-07    |
| ZNF688     | 0.4356453 | 0.1946682 | 2.2379 | 0.0253   | 0.560070289 | count | 1           |
| KMT2D      | 0.5502994 | 0.3121304 | 1.763  | 0.078    | 0.560517337 | count | 1           |
| CEP70      | 0.9531598 | 0.8242428 | 1.1564 | 0.248    | 0.560861489 | count | 1           |
| CALML4     | 0.9531598 | 0.6745584 | 1.413  | 0.158    | 0.560861489 | count | 1           |
| ZNF629     | 0.6715984 | 0.4302206 | 1.5611 | 0.119    | 0.561476826 | count | 1           |
| GNLY       | 0.5456987 | 0.6145309 | 0.888  | 0.375    | 0.561521342 | count | 1           |
| PSPC1      | 0.4323376 | 0.1787607 | 2.4185 | 0.0157   | 0.561587273 | count | 1           |
| SFI1       | 0.6552266 | 0.5591251 | 1.1719 | 0.241    | 0.561598703 | count | 1           |
| RETREG1    | 1.3108243 | 0.6378167 | 2.0552 | 0.04     | 0.561893268 | count | 1           |
| DYRK2      | 0.4865405 | 0.314289  | 1.5481 | 0.122    | 0.562100105 | count | 1           |
| ZNF384     | 0.6412533 | 0.3683993 | 1.7406 | 0.0819   | 0.562250436 | count | 1           |
| TRNT1      | 0.4633975 | 0.2336581 | 1.9832 | 0.0475   | 0.562359799 | count | 1           |
| TRIM73     | 0.8005398 | 0.4633183 | 1.7278 | 0.0841   | 0.562403994 | count | 1           |
| CBX1       | 0.4175136 | 0.1665064 | 2.5075 | 0.0122   | 0.562561384 | count | 1           |
| CAMK2N1    | 2.0888534 | 1.1207677 | 1.8638 | 0.0625   | 0.562716452 | count | 1           |
| INKA2      | 2.0888534 | 1.1207677 | 1.8638 | 0.0625   | 0.562716452 | count | 1           |
| HCN3       | 2.0888534 | 1.1207677 | 1.8638 | 0.0625   | 0.562716452 | count | 1           |
| LINC00886  | 2.0888534 | 1.1207677 | 1.8638 | 0.0625   | 0.562716452 | count | 1           |
| FLNC       | 2.0888534 | 1.1207677 | 1.8638 | 0.0625   | 0.562716452 | count | 1           |
| NALT1      | 2.0888534 | 1.1207677 | 1.8638 | 0.0625   | 0.562716452 | count | 1           |
| IGSF22     | 2.0888534 | 1.1207677 | 1.8638 | 0.0625   | 0.562716452 | count | 1           |
| AL392046.1 | 2.0888534 | 1.319267  | 1.5833 | 0.113    | 0.562716452 | count | 1           |
| TEX9       | 2.0888534 | 1.1207677 | 1.8638 | 0.0625   | 0.562716452 | count | 1           |

|            |           |           |        |         |             |       |   |
|------------|-----------|-----------|--------|---------|-------------|-------|---|
| ERBB2      | 2.0888534 | 1.1207677 | 1.8638 | 0.0625  | 0.562716452 | count | 1 |
| AL118508.1 | 2.0888534 | 1.1207677 | 1.8638 | 0.0625  | 0.562716452 | count | 1 |
| CLEC4M     | 2.0888534 | 1.319267  | 1.5833 | 0.113   | 0.562716452 | count | 1 |
| SLC10A7    | 0.9560654 | 0.5561936 | 1.7189 | 0.0858  | 0.562754825 | count | 1 |
| RNF146     | 0.4285475 | 0.191345  | 2.2397 | 0.0252  | 0.562786215 | count | 1 |
| LINC02397  | 1.3127844 | 0.8695903 | 1.5097 | 0.131   | 0.562838878 | count | 1 |
| HIST1H2AL  | 0.7381878 | 0.5856315 | 1.2605 | 0.208   | 0.562962847 | count | 1 |
| ZBED5      | 0.4529522 | 0.2089893 | 2.1673 | 0.0303  | 0.563123022 | count | 1 |
| CPSF1      | 0.5420894 | 0.3485598 | 1.5552 | 0.12    | 0.563214018 | count | 1 |
| MAN2B1     | 0.4586445 | 0.2325235 | 1.9725 | 0.0487  | 0.563256255 | count | 1 |
| GINS4      | 0.6927232 | 0.3425121 | 2.0225 | 0.0432  | 0.563576159 | count | 1 |
| VAPB       | 0.4769376 | 0.3224929 | 1.4789 | 0.139   | 0.563690953 | count | 1 |
| AC242426.2 | 0.6073547 | 0.6399468 | 0.9491 | 0.343   | 0.564000141 | count | 1 |
| PDP1       | 0.4554353 | 0.2145624 | 2.1226 | 0.0339  | 0.564036256 | count | 1 |
| XAB2       | 0.5537676 | 0.3039751 | 1.8218 | 0.0686  | 0.564187552 | count | 1 |
| AKAP1      | 0.5430191 | 0.3600267 | 1.5083 | 0.132   | 0.564215215 | count | 1 |
| NCOA2      | 0.4438125 | 0.2464102 | 1.8011 | 0.0718  | 0.564290001 | count | 1 |
| FAM110A    | 0.4227057 | 0.1667855 | 2.5344 | 0.0113  | 0.564475702 | count | 1 |
| RNF219     | 0.4776547 | 0.2361758 | 2.0225 | 0.0432  | 0.564556563 | count | 1 |
| LINC02363  | 1.5774313 | 1.2144657 | 1.2989 | 0.194   | 0.564565094 | count | 1 |
| AC008771.1 | 1.5774313 | 0.9213426 | 1.7121 | 0.087   | 0.564565094 | count | 1 |
| UNC79      | 1.5774313 | 0.9213426 | 1.7121 | 0.087   | 0.564565094 | count | 1 |
| AC091132.5 | 1.5774313 | 1.1678557 | 1.3507 | 0.177   | 0.564565094 | count | 1 |
| PPP1R27    | 1.5774313 | 1.0039341 | 1.5712 | 0.116   | 0.564565094 | count | 1 |
| CEACAM19   | 1.5774313 | 0.9470184 | 1.6657 | 0.0959  | 0.564565094 | count | 1 |
| CRCP       | 0.4258596 | 0.177693  | 2.3966 | 0.0166  | 0.564936707 | count | 1 |
| MICU3      | 0.8041217 | 0.5375111 | 1.496  | 0.135   | 0.56513819  | count | 1 |
| SPG11      | 0.4444789 | 0.1820675 | 2.4413 | 0.0147  | 0.56514848  | count | 1 |
| IFIT1      | 0.4154597 | 0.2764193 | 1.503  | 0.133   | 0.56535498  | count | 1 |
| PBLD       | 0.9600792 | 0.5864644 | 1.6371 | 0.102   | 0.565371181 | count | 1 |
| DLST       | 0.4937801 | 0.2795619 | 1.7663 | 0.0775  | 0.565568928 | count | 1 |
| LMBRD1     | 0.4213193 | 0.1497794 | 2.8129 | 0.00495 | 0.565574128 | count | 1 |
| XRCC4      | 0.4347229 | 0.1911203 | 2.2746 | 0.023   | 0.566283619 | count | 1 |
| ZNF81      | 0.7713801 | 0.5613596 | 1.3741 | 0.17    | 0.566376576 | count | 1 |
| PHC3       | 0.4508033 | 0.3113349 | 1.448  | 0.148   | 0.566425493 | count | 1 |
| AP1G1      | 0.4278997 | 0.2406024 | 1.7785 | 0.0755  | 0.566615807 | count | 1 |
| VGLL4      | 0.454959  | 0.1946133 | 2.3378 | 0.0195  | 0.566727758 | count | 1 |
| RNF14      | 0.4995465 | 0.262591  | 1.9024 | 0.0572  | 0.566803301 | count | 1 |
| SNTB1      | 0.4577295 | 0.428809  | 1.0674 | 0.286   | 0.566923317 | count | 1 |
| MSH2       | 0.6103691 | 0.3478643 | 1.7546 | 0.0794  | 0.566941074 | count | 1 |
| SHROOM1    | 0.6103691 | 0.3386941 | 1.8021 | 0.0716  | 0.566941074 | count | 1 |
| ZNF28      | 0.9627013 | 0.5209963 | 1.8478 | 0.0648  | 0.567080882 | count | 1 |
| NFKBIL1    | 0.4508231 | 0.2778921 | 1.6223 | 0.105   | 0.567375996 | count | 1 |
| DCAF1      | 0.5838533 | 0.3463089 | 1.6859 | 0.0919  | 0.567415359 | count | 1 |
| SPRY1      | 0.6470235 | 0.3764341 | 1.7188 | 0.0858  | 0.567603577 | count | 1 |

|            |           |           |        |          |             |       |            |
|------------|-----------|-----------|--------|----------|-------------|-------|------------|
| FAM43A     | 0.6111097 | 0.3787926 | 1.6133 | 0.107    | 0.567663787 | count | 1          |
| DDX17      | 0.3995109 | 0.0840935 | 4.7508 | 2.14E-06 | 0.567734711 | count | 0.05090204 |
| BCDIN3D    | 0.7191226 | 0.4534637 | 1.5858 | 0.113    | 0.567762159 | count | 1          |
| EIF2AK4    | 0.4166042 | 0.1133769 | 3.6745 | 0.000243 | 0.568043619 | count | 1          |
| TOMM34     | 0.4876833 | 0.3003886 | 1.6235 | 0.105    | 0.568152381 | count | 1          |
| RNF139     | 0.4254874 | 0.1982478 | 2.1462 | 0.032    | 0.568219947 | count | 1          |
| SENCR      | 0.5215727 | 0.2756347 | 1.8923 | 0.0586   | 0.568399268 | count | 1          |
| TMPO       | 0.4137846 | 0.1226388 | 3.374  | 0.000752 | 0.568462314 | count | 1          |
| ADNP       | 0.4270277 | 0.1581349 | 2.7004 | 0.00697  | 0.568471999 | count | 1          |
| CASP8AP2   | 0.4809183 | 0.217775  | 2.2083 | 0.0273   | 0.568496526 | count | 1          |
| SLC27A1    | 0.488099  | 0.2984458 | 1.6355 | 0.102    | 0.568647833 | count | 1          |
| BPHL       | 0.5254873 | 0.3110894 | 1.6892 | 0.0913   | 0.5687264   | count | 1          |
| ADAM17     | 0.4108288 | 0.1134797 | 3.6203 | 3.00E-04 | 0.568860352 | count | 1          |
| NAB1       | 0.4506152 | 0.2393477 | 1.8827 | 0.0599   | 0.568900486 | count | 1          |
| HCAR2      | 0.4131977 | 0.1477482 | 2.7966 | 0.0052   | 0.568981983 | count | 1          |
| ENTPD1     | 0.4300707 | 0.1376355 | 3.1247 | 0.0018   | 0.569154264 | count | 1          |
| SPINT1     | 0.4769761 | 0.2442673 | 1.9527 | 0.051    | 0.569336211 | count | 1          |
| WDFY1      | 0.4605996 | 0.2812975 | 1.6374 | 0.102    | 0.569371197 | count | 1          |
| SETMAR     | 1.1628456 | 0.6766504 | 1.7185 | 0.0858   | 0.569515469 | count | 1          |
| ZNF483     | 1.1628456 | 0.8874462 | 1.3103 | 0.19     | 0.569515469 | count | 1          |
| KIAA0391   | 1.1628456 | 0.8045857 | 1.4453 | 0.149    | 0.569515469 | count | 1          |
| SP2-AS1    | 1.1628456 | 0.6766504 | 1.7185 | 0.0858   | 0.569515469 | count | 1          |
| 1-Mar      | 0.4064634 | 0.0892954 | 4.5519 | 5.58E-06 | 0.569522695 | count | 0.13243014 |
| TLR5       | 0.4354489 | 0.1546943 | 2.8149 | 0.00492  | 0.569682951 | count | 1          |
| RBM23      | 0.4505576 | 0.2078755 | 2.1674 | 0.0303   | 0.56969294  | count | 1          |
| AC105020.6 | 0.8101706 | 0.4954381 | 1.6353 | 0.102    | 0.569758171 | count | 1          |
| HYI        | 0.4574987 | 0.2035537 | 2.2476 | 0.0247   | 0.569940492 | count | 1          |
| LINC02285  | 0.9673181 | 0.5141522 | 1.8814 | 0.06     | 0.570092249 | count | 1          |
| TMTC2      | 0.721949  | 0.4285637 | 1.6846 | 0.0922   | 0.570153673 | count | 1          |
| LTA4H      | 0.4038919 | 0.0801724 | 5.0378 | 5.05E-07 | 0.570205681 | count | 0.01204021 |
| RHBDF2     | 0.4301514 | 0.184441  | 2.3322 | 0.0198   | 0.570332621 | count | 1          |
| THEM6      | 0.776365  | 0.4511449 | 1.7209 | 0.0854   | 0.570333746 | count | 1          |
| OAS1       | 0.4042147 | 0.089293  | 4.5268 | 6.27E-06 | 0.570753139 | count | 0.14874948 |
| SERPINB2   | 0.4073723 | 0.2764603 | 1.4735 | 0.141    | 0.57088273  | count | 1          |
| NIPBL      | 0.4100254 | 0.0997855 | 4.1091 | 4.10E-05 | 0.570993129 | count | 0.966575   |
| FCHSD2     | 0.4218734 | 0.1411557 | 2.9887 | 0.00283  | 0.57102925  | count | 1          |
| AC244021.1 | 2.120691  | 1.009649  | 2.1004 | 0.0358   | 0.571367296 | count | 1          |
| SHE        | 2.120691  | 0.9205696 | 2.3037 | 0.0213   | 0.571367296 | count | 1          |
| CLCN4      | 2.120691  | 1.365817  | 1.5527 | 0.121    | 0.571367296 | count | 1          |
| PRR14L     | 0.4470266 | 0.1803824 | 2.4782 | 0.0133   | 0.571438015 | count | 1          |
| WDR48      | 0.4787826 | 0.245146  | 1.9531 | 0.0509   | 0.571536379 | count | 1          |
| CDKN1B     | 0.4103708 | 0.0963261 | 4.2602 | 2.12E-05 | 0.571536724 | count | 0.5012316  |
| AC008972.2 | 0.7781164 | 0.8221186 | 0.9465 | 0.344    | 0.571724599 | count | 1          |
| SLC38A7    | 0.5609069 | 0.3445262 | 1.6281 | 0.104    | 0.57174657  | count | 1          |
| BSDC1      | 0.4559244 | 0.2941427 | 1.55   | 0.121    | 0.57199826  | count | 1          |

|              |            |             |        |          |             |       |          |
|--------------|------------|-------------|--------|----------|-------------|-------|----------|
| ALKBH6       | 0.5323933  | 0.3210712   | 1.6582 | 0.0974   | 0.572133428 | count | 1        |
| DPY19L1      | 0.5675771  | 0.3560442   | 1.5941 | 0.111    | 0.572396767 | count | 1        |
| ERP29        | 0.4016042  | 0.0489382   | 8.2064 | 3.64E-16 | 0.573077422 | count | 8.80E-12 |
| TXNIP        | 0.3993225  | 0.0624333   | 6.396  | 1.90E-10 | 0.573114818 | count | 4.57E-06 |
| AC004069.1   | 0.7255943  | 0.419637    | 1.7291 | 0.0839   | 0.573239279 | count | 1        |
| AKAP7        | 0.4939209  | 0.2315183   | 2.1334 | 0.033    | 0.573250868 | count | 1        |
| DNAJC16      | 0.5980984  | 0.3340754   | 1.7903 | 0.0735   | 0.573459336 | count | 1        |
| VPS13D       | 0.4775269  | 0.3073771   | 1.5536 | 0.12     | 0.573471223 | count | 1        |
| NIFK-AS1     | 0.6172257  | 0.3998491   | 1.5436 | 0.123    | 0.57363418  | count | 1        |
| POMGNT2      | 0.8152915  | 0.5503788   | 1.4813 | 0.139    | 0.573671847 | count | 1        |
| BLZF1        | 0.4906099  | 0.2462956   | 1.992  | 0.0465   | 0.573886931 | count | 1        |
| CCDC7        | 0.7517323  | 0.5835178   | 1.2883 | 0.198    | 0.574084557 | count | 1        |
| MFAP5        | 0.6080711  | 0.4443616   | 1.3684 | 0.171    | 0.574377948 | count | 1        |
| AC008105.3   | 0.4878387  | 0.2679117   | 1.8209 | 0.0687   | 0.574826845 | count | 1        |
| MYO1C        | 0.4760347  | 0.3104199   | 1.5335 | 0.125    | 0.574902668 | count | 1        |
| PTPN4        | 0.5996627  | 0.5569843   | 1.0766 | 0.282    | 0.575029445 | count | 1        |
| LIMD1        | 0.5435157  | 0.3172446   | 1.7132 | 0.0868   | 0.57508143  | count | 1        |
| FBXL4        | 0.55848    | 0.3112617   | 1.7942 | 0.0729   | 0.575175626 | count | 1        |
| LCMT2        | 18.0441746 | 1167.694012 | 0.0155 | 0.988    | 0.575502158 | count | 1        |
| HOXB5        | 18.072149  | 758.9498303 | 0.0238 | 0.981    | 0.575502159 | count | 1        |
| GABRB2       | 18.2145087 | 931.3120318 | 0.0196 | 0.984    | 0.57550216  | count | 1        |
| CACNA1D      | 18.2429163 | 1059.82375  | 0.0172 | 0.9863   | 0.57550216  | count | 1        |
| AC025569.1   | 18.2865714 | 1421.948345 | 0.0129 | 0.99     | 0.57550216  | count | 1        |
| CCL14        | 18.3662078 | 874.6311153 | 0.021  | 0.9832   | 0.575502161 | count | 1        |
| CLDN4        | 18.3665489 | 1033.614715 | 0.0178 | 0.9858   | 0.575502161 | count | 1        |
| STX16-NPEPL1 | 18.4129917 | 1180.629386 | 0.0156 | 0.988    | 0.575502161 | count | 1        |
| AL391244.3   | 18.6617547 | 1369.961069 | 0.0136 | 0.989    | 0.575502163 | count | 1        |
| UTS2         | 18.6617547 | 1369.96108  | 0.0136 | 0.989    | 0.575502163 | count | 1        |
| AL358473.1   | 18.6617547 | 1369.961062 | 0.0136 | 0.989    | 0.575502163 | count | 1        |
| AC013468.1   | 18.6617547 | 1369.961067 | 0.0136 | 0.989    | 0.575502163 | count | 1        |
| ADGRA3       | 18.6617547 | 1369.961071 | 0.0136 | 0.989    | 0.575502163 | count | 1        |
| PCDH1        | 18.6617548 | 1369.961085 | 0.0136 | 0.989    | 0.575502163 | count | 1        |
| SLC26A8      | 18.6617547 | 1369.961069 | 0.0136 | 0.989    | 0.575502163 | count | 1        |
| U47924.2     | 18.6617547 | 1369.961067 | 0.0136 | 0.989    | 0.575502163 | count | 1        |
| AC023509.3   | 18.6617547 | 1369.961089 | 0.0136 | 0.989    | 0.575502163 | count | 1        |
| AL137779.1   | 18.6617547 | 1369.961078 | 0.0136 | 0.989    | 0.575502163 | count | 1        |
| FAM81A       | 18.6617547 | 1369.961085 | 0.0136 | 0.989    | 0.575502163 | count | 1        |
| LINC02206    | 18.6617547 | 1369.961074 | 0.0136 | 0.989    | 0.575502163 | count | 1        |
| AC005696.1   | 18.6617547 | 1369.961078 | 0.0136 | 0.989    | 0.575502163 | count | 1        |
| AC092117.1   | 18.6617584 | 1369.96379  | 0.0136 | 0.989    | 0.575502163 | count | 1        |
| AC138207.2   | 18.6617584 | 1369.963779 | 0.0136 | 0.989    | 0.575502163 | count | 1        |
| LINC02085    | 18.6617585 | 1369.963799 | 0.0136 | 0.989    | 0.575502163 | count | 1        |
| SLC35G1      | 18.6617585 | 1369.963795 | 0.0136 | 0.989    | 0.575502163 | count | 1        |
| AL357078.1   | 18.6617591 | 1369.964174 | 0.0136 | 0.989    | 0.575502163 | count | 1        |
| AC015971.1   | 18.6617591 | 1369.964177 | 0.0136 | 0.989    | 0.575502163 | count | 1        |



|                |            |             |        |        |             |       |   |
|----------------|------------|-------------|--------|--------|-------------|-------|---|
| AC009948.3     | 18.6617591 | 1369.964157 | 0.0136 | 0.989  | 0.575502163 | count | 1 |
| ZMYND10        | 18.6617591 | 1369.964168 | 0.0136 | 0.989  | 0.575502163 | count | 1 |
| TM4SF19-AS1    | 18.6617591 | 1369.96417  | 0.0136 | 0.989  | 0.575502163 | count | 1 |
| SLCO4C1        | 18.6617591 | 1369.964174 | 0.0136 | 0.989  | 0.575502163 | count | 1 |
| STC1           | 18.6617591 | 1369.964161 | 0.0136 | 0.989  | 0.575502163 | count | 1 |
| SCARA5         | 18.6617591 | 1369.964166 | 0.0136 | 0.989  | 0.575502163 | count | 1 |
| OLFML2A        | 18.6617591 | 1369.964166 | 0.0136 | 0.989  | 0.575502163 | count | 1 |
| OR52K2         | 18.6617591 | 1369.964161 | 0.0136 | 0.989  | 0.575502163 | count | 1 |
| GSTO2          | 18.6617591 | 1369.964163 | 0.0136 | 0.989  | 0.575502163 | count | 1 |
| AICDA          | 18.6617591 | 1369.964168 | 0.0136 | 0.989  | 0.575502163 | count | 1 |
| TGFB3          | 18.661759  | 1369.964168 | 0.0136 | 0.989  | 0.575502163 | count | 1 |
| AC007614.1     | 18.6617591 | 1369.964161 | 0.0136 | 0.989  | 0.575502163 | count | 1 |
| PLEKHG4        | 18.6617591 | 1369.964181 | 0.0136 | 0.989  | 0.575502163 | count | 1 |
| AC009802.1     | 18.661759  | 1369.964154 | 0.0136 | 0.989  | 0.575502163 | count | 1 |
| RTEL1-TNFRSF6B | 18.6617591 | 1369.96417  | 0.0136 | 0.989  | 0.575502163 | count | 1 |
| AC119396.1     | 18.6617591 | 1369.964179 | 0.0136 | 0.989  | 0.575502163 | count | 1 |
| AC007786.1     | 18.6617591 | 1369.964174 | 0.0136 | 0.989  | 0.575502163 | count | 1 |
| AC006213.2     | 18.6617591 | 1369.964159 | 0.0136 | 0.989  | 0.575502163 | count | 1 |
| ADORA2A        | 18.6617591 | 1369.964168 | 0.0136 | 0.989  | 0.575502163 | count | 1 |
| HOXA10         | 18.6617592 | 1369.964181 | 0.0136 | 0.989  | 0.575502163 | count | 1 |
| PLA2G2A        | 18.6643422 | 1530.662854 | 0.0122 | 0.9903 | 0.575502163 | count | 1 |
| IL31RA         | 18.7976097 | 1375.468012 | 0.0137 | 0.989  | 0.575502164 | count | 1 |
| AC003991.1     | 18.7976097 | 1375.468022 | 0.0137 | 0.989  | 0.575502164 | count | 1 |
| MATN2          | 18.7976097 | 1375.46801  | 0.0137 | 0.989  | 0.575502164 | count | 1 |
| DAB2IP         | 18.7976097 | 1375.468022 | 0.0137 | 0.989  | 0.575502164 | count | 1 |
| AC104031.1     | 18.7976097 | 1375.468017 | 0.0137 | 0.989  | 0.575502164 | count | 1 |
| LTB4R2         | 18.7976096 | 1375.467994 | 0.0137 | 0.989  | 0.575502164 | count | 1 |
| AP000915.1     | 18.7976114 | 1375.469634 | 0.0137 | 0.989  | 0.575502164 | count | 1 |
| ITPKB-AS1      | 18.7976116 | 1375.469634 | 0.0137 | 0.989  | 0.575502164 | count | 1 |
| AC078845.1     | 18.7976115 | 1375.469634 | 0.0137 | 0.989  | 0.575502164 | count | 1 |
| ABCF2          | 18.7976156 | 1375.469242 | 0.0137 | 0.989  | 0.575502164 | count | 1 |
| AC005253.1     | 18.7976198 | 1375.470764 | 0.0137 | 0.989  | 0.575502164 | count | 1 |
| AP001528.2     | 18.79769   | 1781.21132  | 0.0106 | 0.992  | 0.575502164 | count | 1 |
| NPAS3          | 18.79769   | 1781.21132  | 0.0106 | 0.992  | 0.575502164 | count | 1 |
| PAK6           | 18.7976901 | 1781.211332 | 0.0106 | 0.992  | 0.575502164 | count | 1 |
| FPGT-TNNI3K    | 18.9083814 | 1654.998096 | 0.0114 | 0.991  | 0.575502164 | count | 1 |
| ZC3H11B        | 18.9083814 | 1654.998074 | 0.0114 | 0.991  | 0.575502164 | count | 1 |
| ZNF625-ZNF20   | 18.9083913 | 1654.998857 | 0.0114 | 0.991  | 0.575502164 | count | 1 |
| NEO1           | 18.9083926 | 1655.000483 | 0.0114 | 0.991  | 0.575502164 | count | 1 |
| AC009480.1     | 18.9085841 | 2108.340833 | 0.009  | 0.993  | 0.575502164 | count | 1 |
| AC105345.1     | 18.9085841 | 2108.340833 | 0.009  | 0.993  | 0.575502164 | count | 1 |
| CUZD1          | 18.9085843 | 2108.340854 | 0.009  | 0.993  | 0.575502164 | count | 1 |
| EMG1           | 18.9085998 | 2108.343581 | 0.009  | 0.993  | 0.575502164 | count | 1 |
| ANKRD34B       | 18.9340587 | 1535.959232 | 0.0123 | 0.99   | 0.575502164 | count | 1 |
| SAP30L-AS1     | 18.9340586 | 1535.959224 | 0.0123 | 0.99   | 0.575502164 | count | 1 |

|            |            |             |        |        |             |       |   |
|------------|------------|-------------|--------|--------|-------------|-------|---|
| PDP2       | 18.9340587 | 1535.959219 | 0.0123 | 0.99   | 0.575502164 | count | 1 |
| SAPCD2     | 18.9340661 | 1535.957492 | 0.0123 | 0.99   | 0.575502164 | count | 1 |
| AC092368.3 | 18.9560243 | 982.850499  | 0.0193 | 0.9846 | 0.575502164 | count | 1 |
| AC022098.2 | 18.956836  | 1161.899285 | 0.0163 | 0.987  | 0.575502164 | count | 1 |
| DOC2A      | 19.0442047 | 1541.87875  | 0.0124 | 0.99   | 0.575502165 | count | 1 |
| PKDCC      | 19.1030569 | 1519.093327 | 0.0126 | 0.99   | 0.575502165 | count | 1 |
| AL049780.2 | 19.2493127 | 1431.949063 | 0.0134 | 0.9893 | 0.575502165 | count | 1 |
| AC091488.1 | 19.7601536 | 1634.485681 | 0.0121 | 0.99   | 0.575502167 | count | 1 |
| TNKS2-AS1  | 19.7601572 | 1634.485603 | 0.0121 | 0.99   | 0.575502167 | count | 1 |
| GCAT       | 19.7601573 | 1634.485596 | 0.0121 | 0.99   | 0.575502167 | count | 1 |
| PPIL6      | 19.7601601 | 1634.484834 | 0.0121 | 0.99   | 0.575502167 | count | 1 |
| LRRC36     | 19.7601604 | 1634.484813 | 0.0121 | 0.99   | 0.575502167 | count | 1 |
| SPIN2A     | 19.7601602 | 1634.484791 | 0.0121 | 0.99   | 0.575502167 | count | 1 |
| AC136944.2 | 19.7601602 | 1634.484827 | 0.0121 | 0.99   | 0.575502167 | count | 1 |
| AP000640.1 | 19.760168  | 1634.491681 | 0.0121 | 0.99   | 0.575502167 | count | 1 |
| AL450468.2 | 19.7601745 | 1634.48724  | 0.0121 | 0.99   | 0.575502167 | count | 1 |
| AC098934.4 | 20.4390722 | 2044.230305 | 0.01   | 0.992  | 0.575502168 | count | 1 |
| LINC00628  | 20.4390722 | 2044.230294 | 0.01   | 0.992  | 0.575502168 | count | 1 |
| ADGRF3     | 20.4390722 | 2044.230213 | 0.01   | 0.992  | 0.575502168 | count | 1 |
| TMEM169    | 20.4390722 | 2044.230282 | 0.01   | 0.992  | 0.575502168 | count | 1 |
| DOK7       | 20.4390722 | 2044.230202 | 0.01   | 0.992  | 0.575502168 | count | 1 |
| ENPP6      | 20.4390722 | 2044.230305 | 0.01   | 0.992  | 0.575502168 | count | 1 |
| BTNL9      | 20.4390722 | 2044.230328 | 0.01   | 0.992  | 0.575502168 | count | 1 |
| FZD6       | 20.4390722 | 2044.230294 | 0.01   | 0.992  | 0.575502168 | count | 1 |
| AC090579.1 | 20.4390722 | 2044.230213 | 0.01   | 0.992  | 0.575502168 | count | 1 |
| LINC01230  | 20.4390722 | 2044.230294 | 0.01   | 0.992  | 0.575502168 | count | 1 |
| FOCAD-AS1  | 20.4390722 | 2044.230294 | 0.01   | 0.992  | 0.575502168 | count | 1 |
| AL162426.1 | 20.4390722 | 2044.230236 | 0.01   | 0.992  | 0.575502168 | count | 1 |
| AC025263.1 | 20.4390722 | 2044.230294 | 0.01   | 0.992  | 0.575502168 | count | 1 |
| AL158196.1 | 20.4390722 | 2044.230282 | 0.01   | 0.992  | 0.575502168 | count | 1 |
| LINC00449  | 20.4390722 | 2044.230305 | 0.01   | 0.992  | 0.575502168 | count | 1 |
| AL110504.1 | 20.4390722 | 2044.230271 | 0.01   | 0.992  | 0.575502168 | count | 1 |
| LIPC       | 20.4390722 | 2044.230236 | 0.01   | 0.992  | 0.575502168 | count | 1 |
| MEGF11     | 20.4390722 | 2044.230294 | 0.01   | 0.992  | 0.575502168 | count | 1 |
| SHBG       | 20.4390722 | 2044.230213 | 0.01   | 0.992  | 0.575502168 | count | 1 |
| C17orf64   | 20.4390721 | 2044.23019  | 0.01   | 0.992  | 0.575502168 | count | 1 |
| TBX2       | 20.4390722 | 2044.230202 | 0.01   | 0.992  | 0.575502168 | count | 1 |
| AL357033.3 | 20.4390722 | 2044.230282 | 0.01   | 0.992  | 0.575502168 | count | 1 |
| TMPRSS9    | 20.4390722 | 2044.230202 | 0.01   | 0.992  | 0.575502168 | count | 1 |
| SULT2B1    | 20.4390722 | 2044.230282 | 0.01   | 0.992  | 0.575502168 | count | 1 |
| TMEM52     | 20.4390724 | 2044.230316 | 0.01   | 0.992  | 0.575502168 | count | 1 |
| TMEM54     | 20.4390723 | 2044.230374 | 0.01   | 0.992  | 0.575502168 | count | 1 |
| CLDN19     | 20.4390724 | 2044.23042  | 0.01   | 0.992  | 0.575502168 | count | 1 |
| DUSP27     | 20.4390723 | 2044.230271 | 0.01   | 0.992  | 0.575502168 | count | 1 |
| SELE       | 20.4390724 | 2044.230339 | 0.01   | 0.992  | 0.575502168 | count | 1 |

|            |            |             |      |       |             |       |   |
|------------|------------|-------------|------|-------|-------------|-------|---|
| AL449106.1 | 20.4390723 | 2044.230316 | 0.01 | 0.992 | 0.575502168 | count | 1 |
| COLGALT2   | 20.4390724 | 2044.230248 | 0.01 | 0.992 | 0.575502168 | count | 1 |
| AL596220.1 | 20.4390723 | 2044.230259 | 0.01 | 0.992 | 0.575502168 | count | 1 |
| AL121655.1 | 20.4390723 | 2044.230339 | 0.01 | 0.992 | 0.575502168 | count | 1 |
| RMDN2-AS1  | 20.4390724 | 2044.230236 | 0.01 | 0.992 | 0.575502168 | count | 1 |
| AC007389.3 | 20.4390724 | 2044.230236 | 0.01 | 0.992 | 0.575502168 | count | 1 |
| AC008277.1 | 20.4390724 | 2044.230351 | 0.01 | 0.992 | 0.575502168 | count | 1 |
| LINC01806  | 20.4390726 | 2044.230282 | 0.01 | 0.992 | 0.575502168 | count | 1 |
| AC064836.2 | 20.4390724 | 2044.230294 | 0.01 | 0.992 | 0.575502168 | count | 1 |
| AC073052.2 | 20.4390724 | 2044.230248 | 0.01 | 0.992 | 0.575502168 | count | 1 |
| COL4A4     | 20.4390724 | 2044.230282 | 0.01 | 0.992 | 0.575502168 | count | 1 |
| ERICH6     | 20.4390724 | 2044.230339 | 0.01 | 0.992 | 0.575502168 | count | 1 |
| AC096577.1 | 20.4390724 | 2044.230248 | 0.01 | 0.992 | 0.575502168 | count | 1 |
| AC021151.1 | 20.4390724 | 2044.230236 | 0.01 | 0.992 | 0.575502168 | count | 1 |
| LINC02218  | 20.4390726 | 2044.230248 | 0.01 | 0.992 | 0.575502168 | count | 1 |
| ELOVL7     | 20.4390724 | 2044.230248 | 0.01 | 0.992 | 0.575502168 | count | 1 |
| LINC02242  | 20.4390723 | 2044.230236 | 0.01 | 0.992 | 0.575502168 | count | 1 |
| SERF1A     | 20.4390723 | 2044.230351 | 0.01 | 0.992 | 0.575502168 | count | 1 |
| AC008522.1 | 20.4390723 | 2044.230374 | 0.01 | 0.992 | 0.575502168 | count | 1 |
| SEMA6A     | 20.4390724 | 2044.230294 | 0.01 | 0.992 | 0.575502168 | count | 1 |
| AC113361.1 | 20.4390723 | 2044.230236 | 0.01 | 0.992 | 0.575502168 | count | 1 |
| PCDHGA11   | 20.4390724 | 2044.230305 | 0.01 | 0.992 | 0.575502168 | count | 1 |
| RANBP17    | 20.4390724 | 2044.230225 | 0.01 | 0.992 | 0.575502168 | count | 1 |
| MYLK4      | 20.4390724 | 2044.230362 | 0.01 | 0.992 | 0.575502168 | count | 1 |
| PNPLA1     | 20.4390726 | 2044.230248 | 0.01 | 0.992 | 0.575502168 | count | 1 |
| AL365275.1 | 20.4390724 | 2044.230294 | 0.01 | 0.992 | 0.575502168 | count | 1 |
| PNMA3      | 20.4390723 | 2044.230316 | 0.01 | 0.992 | 0.575502168 | count | 1 |
| AVPR2      | 20.4390723 | 2044.230328 | 0.01 | 0.992 | 0.575502168 | count | 1 |
| AC011773.3 | 20.4390724 | 2044.230271 | 0.01 | 0.992 | 0.575502168 | count | 1 |
| SYBU       | 20.4390724 | 2044.230316 | 0.01 | 0.992 | 0.575502168 | count | 1 |
| AC090921.1 | 20.4390724 | 2044.230294 | 0.01 | 0.992 | 0.575502168 | count | 1 |
| C9orf24    | 20.4390724 | 2044.230236 | 0.01 | 0.992 | 0.575502168 | count | 1 |
| AL133410.1 | 20.4390726 | 2044.230248 | 0.01 | 0.992 | 0.575502168 | count | 1 |
| PCAT7      | 20.4390724 | 2044.230339 | 0.01 | 0.992 | 0.575502168 | count | 1 |
| AL049629.2 | 20.4390724 | 2044.230225 | 0.01 | 0.992 | 0.575502168 | count | 1 |
| ANGPTL5    | 20.4390723 | 2044.230282 | 0.01 | 0.992 | 0.575502168 | count | 1 |
| CARD17     | 20.4390723 | 2044.230339 | 0.01 | 0.992 | 0.575502168 | count | 1 |
| SMIM35     | 20.4390724 | 2044.230305 | 0.01 | 0.992 | 0.575502168 | count | 1 |
| AP003392.5 | 20.4390724 | 2044.230351 | 0.01 | 0.992 | 0.575502168 | count | 1 |
| C10orf67   | 20.4390724 | 2044.230339 | 0.01 | 0.992 | 0.575502168 | count | 1 |
| AC010998.2 | 20.4390723 | 2044.230351 | 0.01 | 0.992 | 0.575502168 | count | 1 |
| NRIP2      | 20.4390724 | 2044.230294 | 0.01 | 0.992 | 0.575502168 | count | 1 |
| MIR200CHG  | 20.4390723 | 2044.230305 | 0.01 | 0.992 | 0.575502168 | count | 1 |
| KLRK1      | 20.4390724 | 2044.230282 | 0.01 | 0.992 | 0.575502168 | count | 1 |
| H3F3C      | 20.4390724 | 2044.23042  | 0.01 | 0.992 | 0.575502168 | count | 1 |

|             |            |             |      |       |             |       |   |
|-------------|------------|-------------|------|-------|-------------|-------|---|
| C12orf54    | 20.4390724 | 2044.230282 | 0.01 | 0.992 | 0.575502168 | count | 1 |
| E2F7        | 20.4390723 | 2044.230374 | 0.01 | 0.992 | 0.575502168 | count | 1 |
| USP44       | 20.4390723 | 2044.230271 | 0.01 | 0.992 | 0.575502168 | count | 1 |
| AC069234.4  | 20.4390723 | 2044.230374 | 0.01 | 0.992 | 0.575502168 | count | 1 |
| HNF1A       | 20.4390724 | 2044.230271 | 0.01 | 0.992 | 0.575502168 | count | 1 |
| HPD         | 20.4390724 | 2044.230339 | 0.01 | 0.992 | 0.575502168 | count | 1 |
| CLIP1-AS1   | 20.4390724 | 2044.230339 | 0.01 | 0.992 | 0.575502168 | count | 1 |
| SERP2       | 20.4390723 | 2044.230225 | 0.01 | 0.992 | 0.575502168 | count | 1 |
| G2E3-AS1    | 20.4390724 | 2044.230305 | 0.01 | 0.992 | 0.575502168 | count | 1 |
| SERPINA5    | 20.4390723 | 2044.230339 | 0.01 | 0.992 | 0.575502168 | count | 1 |
| AL133367.1  | 20.4390723 | 2044.230328 | 0.01 | 0.992 | 0.575502168 | count | 1 |
| GOLGA8S     | 20.4390723 | 2044.230374 | 0.01 | 0.992 | 0.575502168 | count | 1 |
| USP50       | 20.4390723 | 2044.230339 | 0.01 | 0.992 | 0.575502168 | count | 1 |
| AC073167.1  | 20.4390724 | 2044.230282 | 0.01 | 0.992 | 0.575502168 | count | 1 |
| LINC00924   | 20.4390724 | 2044.230259 | 0.01 | 0.992 | 0.575502168 | count | 1 |
| AC004233.4  | 20.4390727 | 2044.230294 | 0.01 | 0.992 | 0.575502168 | count | 1 |
| AC109597.1  | 20.4390726 | 2044.230271 | 0.01 | 0.992 | 0.575502168 | count | 1 |
| AC138904.3  | 20.4390727 | 2044.230294 | 0.01 | 0.992 | 0.575502168 | count | 1 |
| AC092723.1  | 20.4390724 | 2044.230339 | 0.01 | 0.992 | 0.575502168 | count | 1 |
| ZNF286B     | 20.4390723 | 2044.230305 | 0.01 | 0.992 | 0.575502168 | count | 1 |
| KRT27       | 20.4390724 | 2044.230362 | 0.01 | 0.992 | 0.575502168 | count | 1 |
| HAP1        | 20.4390726 | 2044.230248 | 0.01 | 0.992 | 0.575502168 | count | 1 |
| RUNDC3A     | 20.4390724 | 2044.230316 | 0.01 | 0.992 | 0.575502168 | count | 1 |
| AC005920.1  | 20.4390723 | 2044.230259 | 0.01 | 0.992 | 0.575502168 | count | 1 |
| AC011195.2  | 20.4390724 | 2044.230248 | 0.01 | 0.992 | 0.575502168 | count | 1 |
| AC005332.6  | 20.4390724 | 2044.230305 | 0.01 | 0.992 | 0.575502168 | count | 1 |
| GPR142      | 20.4390726 | 2044.230271 | 0.01 | 0.992 | 0.575502168 | count | 1 |
| AP005530.1  | 20.4390723 | 2044.230271 | 0.01 | 0.992 | 0.575502168 | count | 1 |
| CABYR       | 20.4390723 | 2044.230374 | 0.01 | 0.992 | 0.575502168 | count | 1 |
| LINC01915   | 20.4390724 | 2044.230248 | 0.01 | 0.992 | 0.575502168 | count | 1 |
| AC104365.3  | 20.4390723 | 2044.230374 | 0.01 | 0.992 | 0.575502168 | count | 1 |
| DOK6        | 20.4390724 | 2044.230282 | 0.01 | 0.992 | 0.575502168 | count | 1 |
| AC090360.1  | 20.4390723 | 2044.230328 | 0.01 | 0.992 | 0.575502168 | count | 1 |
| TCF15       | 20.4390724 | 2044.230248 | 0.01 | 0.992 | 0.575502168 | count | 1 |
| LINC01729   | 20.4390724 | 2044.230236 | 0.01 | 0.992 | 0.575502168 | count | 1 |
| AL050403.2  | 20.4390726 | 2044.230305 | 0.01 | 0.992 | 0.575502168 | count | 1 |
| SLC24A3     | 20.4390724 | 2044.230282 | 0.01 | 0.992 | 0.575502168 | count | 1 |
| SGK2        | 20.4390724 | 2044.230339 | 0.01 | 0.992 | 0.575502168 | count | 1 |
| AL139352.1  | 20.4390724 | 2044.230339 | 0.01 | 0.992 | 0.575502168 | count | 1 |
| SLC12A5-AS1 | 20.4390726 | 2044.230271 | 0.01 | 0.992 | 0.575502168 | count | 1 |
| BMP7        | 20.4390727 | 2044.230294 | 0.01 | 0.992 | 0.575502168 | count | 1 |
| JSRP1       | 20.4390723 | 2044.230259 | 0.01 | 0.992 | 0.575502168 | count | 1 |
| AC024575.1  | 20.4390724 | 2044.230248 | 0.01 | 0.992 | 0.575502168 | count | 1 |
| AC011448.1  | 20.4390723 | 2044.230259 | 0.01 | 0.992 | 0.575502168 | count | 1 |
| AC092329.3  | 20.4390723 | 2044.230248 | 0.01 | 0.992 | 0.575502168 | count | 1 |

|                 |            |             |      |       |             |       |   |
|-----------------|------------|-------------|------|-------|-------------|-------|---|
| AD000671.2      | 20.4390723 | 2044.230236 | 0.01 | 0.992 | 0.575502168 | count | 1 |
| NKPD1           | 20.4390724 | 2044.230225 | 0.01 | 0.992 | 0.575502168 | count | 1 |
| AC020922.2      | 20.4390726 | 2044.230248 | 0.01 | 0.992 | 0.575502168 | count | 1 |
| RFPL4AL1        | 20.4390724 | 2044.230385 | 0.01 | 0.992 | 0.575502168 | count | 1 |
| CDC45           | 20.4390724 | 2044.230282 | 0.01 | 0.992 | 0.575502168 | count | 1 |
| HSF2BP          | 20.4390724 | 2044.230316 | 0.01 | 0.992 | 0.575502168 | count | 1 |
| DIRAS3          | 20.4390725 | 2044.230328 | 0.01 | 0.992 | 0.575502168 | count | 1 |
| LHX4            | 20.4390725 | 2044.230305 | 0.01 | 0.992 | 0.575502168 | count | 1 |
| AC015969.1      | 20.4390725 | 2044.230305 | 0.01 | 0.992 | 0.575502168 | count | 1 |
| AC010894.4      | 20.4390725 | 2044.230271 | 0.01 | 0.992 | 0.575502168 | count | 1 |
| AC007163.1      | 20.4390725 | 2044.230305 | 0.01 | 0.992 | 0.575502168 | count | 1 |
| AC098820.3      | 20.4390725 | 2044.230282 | 0.01 | 0.992 | 0.575502168 | count | 1 |
| CHDH            | 20.4390725 | 2044.230328 | 0.01 | 0.992 | 0.575502168 | count | 1 |
| LINC02024       | 20.4390725 | 2044.230294 | 0.01 | 0.992 | 0.575502168 | count | 1 |
| GATA2-AS1       | 20.4390725 | 2044.230305 | 0.01 | 0.992 | 0.575502168 | count | 1 |
| AC019131.2      | 20.4390725 | 2044.230351 | 0.01 | 0.992 | 0.575502168 | count | 1 |
| PCDHAC2         | 20.4390725 | 2044.230316 | 0.01 | 0.992 | 0.575502168 | count | 1 |
| AC139795.3      | 20.4390725 | 2044.230305 | 0.01 | 0.992 | 0.575502168 | count | 1 |
| AL023583.1      | 20.4390725 | 2044.230305 | 0.01 | 0.992 | 0.575502168 | count | 1 |
| SCUBE3          | 20.4390725 | 2044.230305 | 0.01 | 0.992 | 0.575502168 | count | 1 |
| AL365226.1      | 20.4390725 | 2044.230316 | 0.01 | 0.992 | 0.575502168 | count | 1 |
| TRGV6           | 20.4390725 | 2044.230305 | 0.01 | 0.992 | 0.575502168 | count | 1 |
| AC027644.4      | 20.4390725 | 2044.230305 | 0.01 | 0.992 | 0.575502168 | count | 1 |
| AC093673.2      | 20.4390725 | 2044.230305 | 0.01 | 0.992 | 0.575502168 | count | 1 |
| XIAP-AS1        | 20.4390725 | 2044.230282 | 0.01 | 0.992 | 0.575502168 | count | 1 |
| MCPH1-AS1       | 20.4390725 | 2044.230282 | 0.01 | 0.992 | 0.575502168 | count | 1 |
| AL391834.1      | 20.4390725 | 2044.230316 | 0.01 | 0.992 | 0.575502168 | count | 1 |
| HRCT1           | 20.4390725 | 2044.230305 | 0.01 | 0.992 | 0.575502168 | count | 1 |
| AL390067.1      | 20.4390725 | 2044.230305 | 0.01 | 0.992 | 0.575502168 | count | 1 |
| TNNT3           | 20.4390725 | 2044.230339 | 0.01 | 0.992 | 0.575502168 | count | 1 |
| OR2AT4          | 20.4390725 | 2044.230282 | 0.01 | 0.992 | 0.575502168 | count | 1 |
| MALRD1          | 20.4390725 | 2044.230294 | 0.01 | 0.992 | 0.575502168 | count | 1 |
| RBP4            | 20.4390725 | 2044.230351 | 0.01 | 0.992 | 0.575502168 | count | 1 |
| CFAP43          | 20.4390725 | 2044.230305 | 0.01 | 0.992 | 0.575502168 | count | 1 |
| AC068896.1      | 20.4390725 | 2044.230316 | 0.01 | 0.992 | 0.575502168 | count | 1 |
| AC079907.1      | 20.4390725 | 2044.230282 | 0.01 | 0.992 | 0.575502168 | count | 1 |
| AL627171.2      | 20.4390725 | 2044.230282 | 0.01 | 0.992 | 0.575502168 | count | 1 |
| AL136038.5      | 20.4390725 | 2044.230305 | 0.01 | 0.992 | 0.575502168 | count | 1 |
| SMOC1           | 20.4390725 | 2044.230282 | 0.01 | 0.992 | 0.575502168 | count | 1 |
| AL583722.2      | 20.4390725 | 2044.230305 | 0.01 | 0.992 | 0.575502168 | count | 1 |
| AC100830.3      | 20.4390725 | 2044.230305 | 0.01 | 0.992 | 0.575502168 | count | 1 |
| AC120114.1      | 20.4390725 | 2044.230316 | 0.01 | 0.992 | 0.575502168 | count | 1 |
| AC092118.1      | 20.4390725 | 2044.230305 | 0.01 | 0.992 | 0.575502168 | count | 1 |
| RNASEK-C17orf49 | 20.4390725 | 2044.230316 | 0.01 | 0.992 | 0.575502168 | count | 1 |
| AC080112.1      | 20.4390725 | 2044.230271 | 0.01 | 0.992 | 0.575502168 | count | 1 |

|            |            |             |        |          |             |       |           |
|------------|------------|-------------|--------|----------|-------------|-------|-----------|
| HIGD1B     | 20.4390725 | 2044.230305 | 0.01   | 0.992    | 0.575502168 | count | 1         |
| EFCAB3     | 20.4390725 | 2044.230282 | 0.01   | 0.992    | 0.575502168 | count | 1         |
| AL121890.5 | 20.4390725 | 2044.230351 | 0.01   | 0.992    | 0.575502168 | count | 1         |
| AL035661.1 | 20.4390725 | 2044.230316 | 0.01   | 0.992    | 0.575502168 | count | 1         |
| AC027307.1 | 20.4390725 | 2044.230282 | 0.01   | 0.992    | 0.575502168 | count | 1         |
| AC005786.2 | 20.4390725 | 2044.230305 | 0.01   | 0.992    | 0.575502168 | count | 1         |
| AP000552.1 | 20.4390725 | 2044.230282 | 0.01   | 0.992    | 0.575502168 | count | 1         |
| TSHZ2      | 18.6617548 | 1369.961096 | 0.0136 | 0.989    | 0.57550221  | count | 1         |
| CFAP99     | 18.6617585 | 1369.963786 | 0.0136 | 0.989    | 0.57550221  | count | 1         |
| DNA2       | 18.6617591 | 1369.964161 | 0.0136 | 0.989    | 0.57550221  | count | 1         |
| AC022509.3 | 20.4390724 | 2044.230316 | 0.01   | 0.992    | 0.575502215 | count | 1         |
| PRTN3      | 20.4390725 | 2044.230339 | 0.01   | 0.992    | 0.575502215 | count | 1         |
| AC016737.1 | 20.4390727 | 2044.230385 | 0.01   | 0.992    | 0.575502215 | count | 1         |
| AC117395.1 | 20.4390727 | 2044.230385 | 0.01   | 0.992    | 0.575502215 | count | 1         |
| AF186192.1 | 20.4390727 | 2044.230385 | 0.01   | 0.992    | 0.575502215 | count | 1         |
| CFAP161    | 20.4390727 | 2044.230385 | 0.01   | 0.992    | 0.575502215 | count | 1         |
| CCDC113    | 20.4390727 | 2044.230385 | 0.01   | 0.992    | 0.575502215 | count | 1         |
| KRTAP19-8  | 20.4390727 | 2044.230385 | 0.01   | 0.992    | 0.575502215 | count | 1         |
| RBM27      | 0.5919344  | 0.3013938   | 1.964  | 0.0496   | 0.575624529 | count | 1         |
| USP39      | 0.4597961  | 0.1980169   | 2.322  | 0.0203   | 0.575942484 | count | 1         |
| ADO        | 0.454835   | 0.2115696   | 2.1498 | 0.0317   | 0.576032076 | count | 1         |
| GTPBP10    | 0.5490795  | 0.3884368   | 1.4136 | 0.158    | 0.576084666 | count | 1         |
| SHISA4     | 0.5776737  | 0.2936097   | 1.9675 | 0.0492   | 0.576112835 | count | 1         |
| MRPL45     | 0.4679944  | 0.2113069   | 2.2148 | 0.0269   | 0.576210515 | count | 1         |
| ZBTB40     | 0.6202691  | 0.3294847   | 1.8825 | 0.0599   | 0.576606582 | count | 1         |
| SPATA1     | 0.7844344  | 0.5732725   | 1.3683 | 0.171    | 0.576744356 | count | 1         |
| MYCL       | 0.6319412  | 0.3376922   | 1.8714 | 0.0614   | 0.577311697 | count | 1         |
| VPS13C     | 0.4103239  | 0.1049093   | 3.9112 | 9.43E-05 | 0.577416578 | count | 1         |
| ANAPC10    | 0.4440837  | 0.1946212   | 2.2818 | 0.0226   | 0.577554248 | count | 1         |
| SIN3B      | 0.4486028  | 0.1734799   | 2.5859 | 0.00977  | 0.5775838   | count | 1         |
| AP001816.1 | 0.5230272  | 0.3065012   | 1.7064 | 0.0881   | 0.577638715 | count | 1         |
| RMI1       | 0.6114272  | 0.3378647   | 1.8097 | 0.0705   | 0.577703004 | count | 1         |
| FBXL12     | 0.4663538  | 0.2120524   | 2.1992 | 0.028    | 0.577779303 | count | 1         |
| ID1        | 0.5727477  | 0.4408943   | 1.2991 | 0.194    | 0.577823346 | count | 1         |
| TBCCD1     | 0.6731008  | 0.5585789   | 1.205  | 0.228    | 0.577864439 | count | 1         |
| HPS6       | 0.5794941  | 0.4082946   | 1.4193 | 0.156    | 0.578004582 | count | 1         |
| PGM5       | 1.611489   | 0.6327587   | 2.5468 | 0.0109   | 0.578063871 | count | 1         |
| STARD13    | 0.6737926  | 0.3024481   | 2.2278 | 0.026    | 0.578494671 | count | 1         |
| DNAJC11    | 0.5242387  | 0.2921029   | 1.7947 | 0.0728   | 0.579016278 | count | 1         |
| CS         | 0.4896794  | 0.2488266   | 1.968  | 0.0492   | 0.579077356 | count | 1         |
| NUDT16     | 0.4257685  | 0.0967225   | 4.402  | 1.12E-05 | 0.579126959 | count | 0.2653168 |
| PDCD2      | 0.4201975  | 0.1227898   | 3.4221 | 0.000632 | 0.57929615  | count | 1         |
| EBLN2      | 0.9816805  | 0.5479651   | 1.7915 | 0.0733   | 0.579468353 | count | 1         |
| NBPF15     | 1.6152527  | 0.8840099   | 1.8272 | 0.0678   | 0.579552574 | count | 1         |
| TTC30A     | 1.6152527  | 0.9407268   | 1.717  | 0.0861   | 0.579552574 | count | 1         |

|            |           |           |        |          |             |       |            |
|------------|-----------|-----------|--------|----------|-------------|-------|------------|
| GPC2       | 1.6152527 | 0.9407268 | 1.717  | 0.0861   | 0.579552574 | count | 1          |
| ARHGEF10   | 1.6152527 | 1.0524766 | 1.5347 | 0.125    | 0.579552574 | count | 1          |
| LINC00654  | 1.6152527 | 0.9407268 | 1.717  | 0.0861   | 0.579552574 | count | 1          |
| AL031846.2 | 1.6152527 | 1.0022209 | 1.6117 | 0.107    | 0.579552574 | count | 1          |
| ZNF638     | 0.4337898 | 0.147117  | 2.9486 | 0.00322  | 0.579691169 | count | 1          |
| WASHC2C    | 0.5217768 | 0.1761559 | 2.962  | 0.00309  | 0.579781229 | count | 1          |
| INTS9      | 0.6346463 | 0.4304677 | 1.4743 | 0.141    | 0.579914426 | count | 1          |
| AGL        | 0.4860515 | 0.2703202 | 1.7981 | 0.0723   | 0.580391727 | count | 1          |
| ZNF571     | 0.9182308 | 0.717165  | 1.2804 | 0.201    | 0.580557891 | count | 1          |
| CBFB       | 0.4565758 | 0.2632809 | 1.7342 | 0.083    | 0.580736428 | count | 1          |
| FOLR2      | 0.4063434 | 0.0880366 | 4.6156 | 4.12E-06 | 0.581027489 | count | 0.09785412 |
| SSPN       | 0.5697392 | 0.4009015 | 1.4211 | 0.155    | 0.581105187 | count | 1          |
| STRADB     | 0.5640631 | 0.3231619 | 1.7455 | 0.081    | 0.581145141 | count | 1          |
| FAM193B    | 0.6481932 | 0.4033393 | 1.6071 | 0.108    | 0.581242227 | count | 1          |
| NPIPB4     | 0.8680187 | 0.7722683 | 1.124  | 0.261    | 0.581689287 | count | 1          |
| BTN3A2     | 0.4678152 | 0.1522371 | 3.0729 | 0.00214  | 0.581896695 | count | 1          |
| C11orf68   | 0.5179812 | 0.3692051 | 1.403  | 0.161    | 0.582110412 | count | 1          |
| DPEP2      | 0.4380976 | 0.1653802 | 2.649  | 0.00812  | 0.58234431  | count | 1          |
| CTBP1-DT   | 0.6629361 | 0.4535968 | 1.4615 | 0.144    | 0.582384116 | count | 1          |
| SMCR8      | 0.4894342 | 0.2515041 | 1.946  | 0.0518   | 0.582661334 | count | 1          |
| DCBLD1     | 0.7919272 | 0.4136517 | 1.9145 | 0.0557   | 0.582702163 | count | 1          |
| EFNA4      | 0.5552183 | 0.5779876 | 0.9606 | 0.337    | 0.582756912 | count | 1          |
| ZNF75A     | 0.5084411 | 0.2869885 | 1.7716 | 0.0766   | 0.582789188 | count | 1          |
| TATDN2     | 0.6500936 | 0.3332089 | 1.951  | 0.0512   | 0.583041229 | count | 1          |
| UXS1       | 0.4725629 | 0.2303661 | 2.0514 | 0.0403   | 0.583184162 | count | 1          |
| FOXJ2      | 0.5115335 | 0.2846192 | 1.7973 | 0.0724   | 0.58364614  | count | 1          |
| NCAPD2     | 0.6083191 | 0.3587486 | 1.6957 | 0.0901   | 0.583722611 | count | 1          |
| SMN2       | 0.9229123 | 0.7444833 | 1.2397 | 0.215    | 0.583812581 | count | 1          |
| ZNF740     | 0.7160154 | 0.5781054 | 1.2386 | 0.216    | 0.583832023 | count | 1          |
| H2AFY2     | 0.6390256 | 0.3369439 | 1.8965 | 0.058    | 0.584129576 | count | 1          |
| APOBEC3B   | 0.794077  | 0.4078736 | 1.9469 | 0.0517   | 0.584412475 | count | 1          |
| IL27RA     | 0.4595307 | 0.1952611 | 2.3534 | 0.0187   | 0.584545302 | count | 1          |
| FOXJ3      | 0.4580383 | 0.1991134 | 2.3004 | 0.0215   | 0.584950421 | count | 1          |
| CRKL       | 0.5154403 | 0.4030162 | 1.279  | 0.201    | 0.585317757 | count | 1          |
| FAM172A    | 0.4664445 | 0.2530358 | 1.8434 | 0.0654   | 0.585394656 | count | 1          |
| ZNF124     | 0.4887418 | 0.2340669 | 2.088  | 0.0369   | 0.585465712 | count | 1          |
| WASHC2A    | 0.4657712 | 0.2269822 | 2.052  | 0.0403   | 0.585511777 | count | 1          |
| SNX10      | 0.4157299 | 0.0896737 | 4.636  | 3.74E-06 | 0.585666046 | count | 0.0888437  |
| ZNF107     | 0.6410943 | 0.4292478 | 1.4935 | 0.135    | 0.586121419 | count | 1          |
| ZBTB7B     | 0.4761296 | 0.2408284 | 1.977  | 0.0481   | 0.586398347 | count | 1          |
| SCAI       | 0.9270196 | 0.5455666 | 1.6992 | 0.0894   | 0.586669246 | count | 1          |
| POPDC2     | 1.194129  | 0.7129172 | 1.675  | 0.0941   | 0.586711536 | count | 1          |
| AC012640.2 | 0.6115434 | 0.4413529 | 1.3856 | 0.166    | 0.586962546 | count | 1          |
| R3HDM1     | 0.4701887 | 0.1984823 | 2.3689 | 0.0179   | 0.587077034 | count | 1          |
| MKNK2      | 0.4292159 | 0.1210327 | 3.5463 | 0.000398 | 0.58743296  | count | 1          |

|            |           |           |        |          |             |       |          |
|------------|-----------|-----------|--------|----------|-------------|-------|----------|
| RNGTT      | 0.528717  | 0.2524453 | 2.0944 | 0.0363   | 0.587717536 | count | 1        |
| ERG28      | 0.5126939 | 0.2895378 | 1.7707 | 0.0767   | 0.587787678 | count | 1        |
| INO80E     | 0.4969136 | 0.2874832 | 1.7285 | 0.084    | 0.587818518 | count | 1        |
| IGFBP4     | 0.5713554 | 0.2796355 | 2.0432 | 0.0411   | 0.588946726 | count | 1        |
| LST1       | 0.4108275 | 0.0496618 | 8.2725 | 2.13E-16 | 0.589050928 | count | 5.15E-12 |
| CCDC125    | 0.476389  | 0.2373427 | 2.0072 | 0.0448   | 0.589216431 | count | 1        |
| SLC22A23   | 1.367596  | 0.7176104 | 1.9058 | 0.0568   | 0.589275507 | count | 1        |
| LAMB2      | 0.6443879 | 0.351724  | 1.8321 | 0.0671   | 0.589293546 | count | 1        |
| SENP3      | 0.8358911 | 0.4886195 | 1.7107 | 0.0873   | 0.589437749 | count | 1        |
| AASDHPPT   | 0.4413646 | 0.162815  | 2.7108 | 0.00676  | 0.58959657  | count | 1        |
| HELB       | 0.5568791 | 0.3106583 | 1.7926 | 0.0732   | 0.589718741 | count | 1        |
| ST3GAL5    | 0.4600802 | 0.2166646 | 2.1235 | 0.0338   | 0.589795022 | count | 1        |
| PSMD5      | 0.5981052 | 0.2979319 | 2.0075 | 0.0448   | 0.589850358 | count | 1        |
| INPP5D     | 0.46698   | 0.2076995 | 2.2483 | 0.0246   | 0.589858256 | count | 1        |
| ABHD17C    | 1.0834679 | 0.5448903 | 1.9884 | 0.0469   | 0.589943385 | count | 1        |
| SH3BP2     | 0.4267794 | 0.1364406 | 3.128  | 0.00178  | 0.590162977 | count | 1        |
| SRPK1      | 0.4565605 | 0.1850176 | 2.4677 | 0.0137   | 0.590485817 | count | 1        |
| AC119428.2 | 1.370149  | 0.6718179 | 2.0395 | 0.0415   | 0.590506422 | count | 1        |
| UTP20      | 0.5987609 | 0.3588298 | 1.6686 | 0.0953   | 0.590525334 | count | 1        |
| AL031963.3 | 0.7238377 | 0.5033399 | 1.4381 | 0.151    | 0.590646664 | count | 1        |
| ATG4C      | 0.4650079 | 0.2137392 | 2.1756 | 0.0297   | 0.590787097 | count | 1        |
| RNF113A    | 0.4633762 | 0.1917592 | 2.4164 | 0.0157   | 0.591087663 | count | 1        |
| BBS2       | 0.6592081 | 0.392245  | 1.6806 | 0.093    | 0.591674539 | count | 1        |
| MED11      | 0.4341984 | 0.1528994 | 2.8398 | 0.00455  | 0.591851376 | count | 1        |
| C2CD5      | 0.5637517 | 0.3514436 | 1.6041 | 0.109    | 0.592037785 | count | 1        |
| AC073283.1 | 2.198335  | 1.1461401 | 1.918  | 0.0552   | 0.592097941 | count | 1        |
| TXNDC5     | 2.198335  | 1.1618592 | 1.8921 | 0.0586   | 0.592097941 | count | 1        |
| AC005616.1 | 2.198335  | 1.1461401 | 1.918  | 0.0552   | 0.592097941 | count | 1        |
| CCDC57     | 0.4796931 | 0.246385  | 1.9469 | 0.0517   | 0.592132532 | count | 1        |
| IL23A      | 1.2043538 | 0.7119782 | 1.6916 | 0.0909   | 0.592336061 | count | 1        |
| CSE1L      | 0.5594714 | 0.3085618 | 1.8132 | 0.0699   | 0.592560099 | count | 1        |
| PDE4D      | 0.5026671 | 0.252856  | 1.988  | 0.0469   | 0.592689848 | count | 1        |
| GPD2       | 0.521773  | 0.2799654 | 1.8637 | 0.0625   | 0.592700526 | count | 1        |
| KIAA1328   | 0.6177347 | 0.2952853 | 2.092  | 0.0365   | 0.593186775 | count | 1        |
| RALGAPA2   | 0.5556317 | 0.3342813 | 1.6622 | 0.0966   | 0.59325981  | count | 1        |
| VPS18      | 0.5225657 | 0.2941253 | 1.7767 | 0.0757   | 0.593624907 | count | 1        |
| ALPK3      | 0.7503727 | 0.4622775 | 1.6232 | 0.105    | 0.594247293 | count | 1        |
| CEBPA-DT   | 0.9381435 | 0.6199208 | 1.5133 | 0.13     | 0.594411561 | count | 1        |
| MSMO1      | 0.6190492 | 0.3235435 | 1.9133 | 0.0558   | 0.594508762 | count | 1        |
| EDN1       | 0.93839   | 0.7291132 | 1.287  | 0.198    | 0.594583197 | count | 1        |
| CATSPERG   | 0.93839   | 0.561326  | 1.6717 | 0.0947   | 0.594583197 | count | 1        |
| XRN1       | 0.4473023 | 0.1349481 | 3.3146 | 0.000931 | 0.594686173 | count | 1        |
| TRIM26     | 0.5080997 | 0.237371  | 2.1405 | 0.0324   | 0.594821607 | count | 1        |
| CLIP2      | 0.9387452 | 0.4364767 | 2.1507 | 0.0316   | 0.594830558 | count | 1        |
| VSIG10     | 0.7286864 | 0.4489474 | 1.6231 | 0.105    | 0.594873678 | count | 1        |



|            |           |           |        |          |             |       |         |
|------------|-----------|-----------|--------|----------|-------------|-------|---------|
| ASAP2      | 0.9388092 | 0.5805872 | 1.617  | 0.106    | 0.594875143 | count | 1       |
| NAA16      | 0.523701  | 0.2740797 | 1.9108 | 0.0562   | 0.594948879 | count | 1       |
| RALGPS1    | 1.0920486 | 0.6142259 | 1.7779 | 0.0755   | 0.595146234 | count | 1       |
| SLC12A9    | 0.456736  | 0.1462818 | 3.1223 | 0.00182  | 0.595273425 | count | 1       |
| NR2F2      | 0.7518425 | 0.858978  | 0.8753 | 0.382    | 0.595495263 | count | 1       |
| IFFO2      | 0.6396682 | 0.6041354 | 1.0588 | 0.29     | 0.59557537  | count | 1       |
| DPF2       | 0.5624062 | 0.3189656 | 1.7632 | 0.078    | 0.595777618 | count | 1       |
| PLEKHA4    | 1.0067039 | 0.6472954 | 1.5552 | 0.12     | 0.595831651 | count | 1       |
| TNFRSF11A  | 0.6297574 | 0.3725372 | 1.6905 | 0.0911   | 0.595883895 | count | 1       |
| RP2        | 0.4690431 | 0.1579194 | 2.9701 | 0.00301  | 0.595983979 | count | 1       |
| AC044849.1 | 0.730138  | 0.3601452 | 2.0273 | 0.0427   | 0.59613961  | count | 1       |
| ZNF227     | 0.6515411 | 0.4079766 | 1.597  | 0.11     | 0.596186656 | count | 1       |
| OSM        | 0.4223243 | 0.1137891 | 3.7115 | 0.000211 | 0.596263314 | count | 1       |
| ZNF628     | 0.7303392 | 0.4941789 | 1.4779 | 0.14     | 0.596315098 | count | 1       |
| GAS7       | 0.4437874 | 0.1380653 | 3.2143 | 0.00132  | 0.596488313 | count | 1       |
| METTL3     | 0.5905962 | 0.4520739 | 1.3064 | 0.192    | 0.596575731 | count | 1       |
| TRAF5      | 0.5844654 | 0.4485514 | 1.303  | 0.193    | 0.596725872 | count | 1       |
| C6orf226   | 0.4644607 | 0.2166451 | 2.1439 | 0.0321   | 0.596893104 | count | 1       |
| SCARB1     | 0.6410932 | 0.3214969 | 1.9941 | 0.0463   | 0.596970249 | count | 1       |
| CNTLN      | 0.4486918 | 0.1773944 | 2.5293 | 0.0115   | 0.597227649 | count | 1       |
| TMEM144    | 0.5102986 | 0.2420208 | 2.1085 | 0.0351   | 0.59745527  | count | 1       |
| CHKA       | 0.4709147 | 0.171403  | 2.7474 | 0.00605  | 0.597548298 | count | 1       |
| FAM122C    | 0.8106819 | 0.5828805 | 1.3908 | 0.164    | 0.597636285 | count | 1       |
| CR1        | 0.4745545 | 0.1817057 | 2.6117 | 0.00907  | 0.597687421 | count | 1       |
| KCNC3      | 0.7319457 | 0.4269739 | 1.7143 | 0.0866   | 0.597716364 | count | 1       |
| SNAP23     | 0.4354373 | 0.1058155 | 4.1151 | 4.00E-05 | 0.597867546 | count | 0.94316 |
| USP33      | 0.4543447 | 0.1509858 | 3.0092 | 0.00265  | 0.597894453 | count | 1       |
| TACC3      | 0.5053701 | 0.1840094 | 2.7464 | 0.00607  | 0.598041537 | count | 1       |
| RHNO1      | 0.4948888 | 0.2665826 | 1.8564 | 0.0635   | 0.598119029 | count | 1       |
| GULP1      | 2.221378  | 1.1738719 | 1.8924 | 0.0586   | 0.598146208 | count | 1       |
| AC105760.2 | 2.221378  | 1.1738719 | 1.8924 | 0.0586   | 0.598146208 | count | 1       |
| TRIM2      | 2.221378  | 1.0901705 | 2.0376 | 0.0417   | 0.598146208 | count | 1       |
| MTRNR2L6   | 2.221378  | 1.1105563 | 2.0002 | 0.0456   | 0.598146208 | count | 1       |
| AC100849.1 | 2.221378  | 1.188244  | 1.8695 | 0.0617   | 0.598146208 | count | 1       |
| AL139383.1 | 2.221378  | 1.1105563 | 2.0002 | 0.0456   | 0.598146208 | count | 1       |
| DMKN       | 2.221378  | 1.330075  | 1.6701 | 0.095    | 0.598146208 | count | 1       |
| ZNF415     | 2.221378  | 1.1105563 | 2.0002 | 0.0456   | 0.598146208 | count | 1       |
| AC132872.3 | 2.2215355 | 1.522     | 1.4596 | 0.145    | 0.598187356 | count | 1       |
| ZNF704     | 1.3865624 | 0.6235244 | 2.2238 | 0.0263   | 0.598416811 | count | 1       |
| EPB41L1    | 1.3865624 | 0.535603  | 2.5888 | 0.00969  | 0.598416811 | count | 1       |
| XPR1       | 0.4916084 | 0.3636413 | 1.3519 | 0.177    | 0.598770044 | count | 1       |
| PRKACA     | 0.4473377 | 0.1358051 | 3.294  | 0.001    | 0.598828593 | count | 1       |
| ARFGAP2    | 0.4555507 | 0.1951036 | 2.3349 | 0.0196   | 0.599497065 | count | 1       |
| PSME4      | 0.4837631 | 0.2055515 | 2.3535 | 0.0187   | 0.599707811 | count | 1       |
| PPDCD      | 0.5183385 | 0.2499783 | 2.0735 | 0.0382   | 0.599753967 | count | 1       |

|            |           |           |        |          |             |       |             |
|------------|-----------|-----------|--------|----------|-------------|-------|-------------|
| RAB5B      | 0.4978311 | 0.2919319 | 1.7053 | 0.0883   | 0.600071211 | count | 1           |
| AC135050.3 | 0.8501721 | 0.5527144 | 1.5382 | 0.124    | 0.600387995 | count | 1           |
| LGALS3BP   | 0.4463815 | 0.1609689 | 2.7731 | 0.00559  | 0.600765102 | count | 1           |
| CRY1       | 0.601448  | 0.5214927 | 1.1533 | 0.249    | 0.60084484  | count | 1           |
| GTF3C1     | 0.4899745 | 0.2364301 | 2.0724 | 0.0383   | 0.601054738 | count | 1           |
| MYO1F      | 0.431742  | 0.1032094 | 4.1832 | 2.98E-05 | 0.601154881 | count | 0.703578    |
| ARL17B     | 1.3922829 | 0.7876077 | 1.7677 | 0.0772   | 0.601172902 | count | 1           |
| KCTD6      | 0.5346136 | 0.3216876 | 1.6619 | 0.0967   | 0.601328899 | count | 1           |
| AC020915.3 | 0.7162991 | 0.5789212 | 1.2373 | 0.216    | 0.601335867 | count | 1           |
| UBXN11     | 0.4678787 | 0.1679791 | 2.7853 | 0.00539  | 0.60134047  | count | 1           |
| CCDC61     | 0.6101454 | 0.3628033 | 1.6818 | 0.0927   | 0.60225117  | count | 1           |
| FMO2       | 1.6729951 | 0.7546593 | 2.2169 | 0.0267   | 0.602307326 | count | 1           |
| AC019254.1 | 1.6729951 | 0.8188923 | 2.043  | 0.0412   | 0.602307326 | count | 1           |
| KLF7       | 0.4797536 | 0.1776694 | 2.7003 | 0.00698  | 0.602351852 | count | 1           |
| USP24      | 0.4799291 | 0.2588826 | 1.8538 | 0.0639   | 0.60257552  | count | 1           |
| ALOX5AP    | 0.421618  | 0.0758185 | 5.5609 | 2.97E-08 | 0.602596825 | count | 0.000711256 |
| ALG13      | 0.4323632 | 0.1274194 | 3.3932 | 0.000702 | 0.602655546 | count | 1           |
| LIAS       | 0.5487565 | 0.3428702 | 1.6005 | 0.11     | 0.603030822 | count | 1           |
| TRIM37     | 0.5968975 | 0.3381185 | 1.7653 | 0.0776   | 0.603203506 | count | 1           |
| TMEM63B    | 0.7183942 | 0.3878823 | 1.8521 | 0.0641   | 0.603208832 | count | 1           |
| GNA11      | 0.6192202 | 0.4324723 | 1.4318 | 0.152    | 0.603391489 | count | 1           |
| STARD8     | 0.6040169 | 0.4344572 | 1.3903 | 0.165    | 0.603520504 | count | 1           |
| NHSL2      | 0.6280816 | 0.3365256 | 1.8664 | 0.0621   | 0.603597163 | count | 1           |
| SYNJ2BP    | 0.4832653 | 0.2199808 | 2.1969 | 0.0281   | 0.603662655 | count | 1           |
| OCRL       | 0.8183378 | 0.5517827 | 1.4831 | 0.138    | 0.603741106 | count | 1           |
| DFFB       | 1.1065884 | 0.8116057 | 1.3635 | 0.173    | 0.603968103 | count | 1           |
| ZNF419     | 0.7391464 | 0.585847  | 1.2617 | 0.207    | 0.60400009  | count | 1           |
| DMXL1      | 0.4589958 | 0.1799399 | 2.5508 | 0.0108   | 0.604075474 | count | 1           |
| COX11      | 0.5265804 | 0.2091584 | 2.5176 | 0.0119   | 0.604119192 | count | 1           |
| A1BG-AS1   | 0.6203107 | 0.3586297 | 1.7297 | 0.0838   | 0.604502751 | count | 1           |
| MSI2       | 0.5982104 | 0.3627951 | 1.6489 | 0.0993   | 0.604584893 | count | 1           |
| PDGFB      | 0.518266  | 0.1919969 | 2.6993 | 0.007    | 0.60463883  | count | 1           |
| UHRF2      | 0.6124935 | 0.3025576 | 2.0244 | 0.043    | 0.604671226 | count | 1           |
| TMEM69     | 0.506124  | 0.1926728 | 2.6269 | 0.00867  | 0.604864929 | count | 1           |
| TMEM44-AS1 | 0.6732748 | 0.5260558 | 1.2799 | 0.201    | 0.605014753 | count | 1           |
| PSEN1      | 0.4625926 | 0.1955469 | 2.3656 | 0.0181   | 0.605071731 | count | 1           |
| TTC37      | 0.4730502 | 0.1651444 | 2.8645 | 0.00421  | 0.605144109 | count | 1           |
| AGPAT3     | 0.4627411 | 0.1637064 | 2.8267 | 0.00474  | 0.605268012 | count | 1           |
| CD48       | 0.4256105 | 0.0627893 | 6.7784 | 1.52E-11 | 0.605854151 | count | 3.66E-07    |
| USP3       | 0.4333132 | 0.0986915 | 4.3906 | 1.18E-05 | 0.606670402 | count | 0.2795184   |
| ZNF41      | 2.254578  | 0.743894  | 3.0308 | 0.00246  | 0.606772621 | count | 1           |
| HSPA14     | 0.4925009 | 0.2031275 | 2.4246 | 0.0154   | 0.60691314  | count | 1           |
| SLC10A3    | 0.4915263 | 0.2587528 | 1.8996 | 0.0576   | 0.606990167 | count | 1           |
| GRK6       | 0.4553466 | 0.1599271 | 2.8472 | 0.00445  | 0.607159037 | count | 1           |
| ITPKB      | 0.8230129 | 0.4599016 | 1.7895 | 0.0737   | 0.607471423 | count | 1           |

|            |           |           |        |          |             |       |             |
|------------|-----------|-----------|--------|----------|-------------|-------|-------------|
| WRB        | 0.5002522 | 0.2325098 | 2.1515 | 0.0315   | 0.607949893 | count | 1           |
| HERC4      | 0.4747051 | 0.1943626 | 2.4424 | 0.0147   | 0.608044106 | count | 1           |
| FAM118B    | 0.6421347 | 0.3383199 | 1.898  | 0.0578   | 0.608179176 | count | 1           |
| AP001107.9 | 1.2334513 | 0.7584171 | 1.6263 | 0.104    | 0.608349631 | count | 1           |
| AC011603.2 | 1.2334513 | 0.7351431 | 1.6778 | 0.0935   | 0.608349631 | count | 1           |
| AL135999.1 | 1.6884231 | 0.7675189 | 2.1998 | 0.0279   | 0.608357529 | count | 1           |
| INIP       | 0.4601108 | 0.1786756 | 2.5751 | 0.0101   | 0.609282145 | count | 1           |
| ZBTB6      | 0.6651937 | 0.4707682 | 1.413  | 0.158    | 0.609356801 | count | 1           |
| MARS       | 0.5477207 | 0.2408171 | 2.2744 | 0.023    | 0.609469926 | count | 1           |
| CBWD5      | 0.497901  | 0.2324929 | 2.1416 | 0.0323   | 0.609532719 | count | 1           |
| RASA3      | 0.4981301 | 0.2496263 | 1.9955 | 0.0461   | 0.609818254 | count | 1           |
| FAM180B    | 1.692227  | 1.550471  | 1.0914 | 0.2752   | 0.609847127 | count | 1           |
| VAMP5      | 0.4334564 | 0.0833074 | 5.2031 | 2.12E-07 | 0.610214303 | count | 0.005063196 |
| ATP10D     | 0.4868523 | 0.2102478 | 2.3156 | 0.0207   | 0.610362544 | count | 1           |
| RGPD5      | 0.6037098 | 0.4102605 | 1.4715 | 0.141    | 0.610372936 | count | 1           |
| FES        | 0.4649856 | 0.1470714 | 3.1616 | 0.00159  | 0.610666491 | count | 1           |
| CMKLR1     | 0.5427187 | 0.295575  | 1.8361 | 0.0665   | 0.61070255  | count | 1           |
| AC020765.2 | 0.7095213 | 0.5174821 | 1.3711 | 0.17     | 0.611106968 | count | 1           |
| PRPSAP2    | 0.4969247 | 0.2109902 | 2.3552 | 0.0186   | 0.611113878 | count | 1           |
| CLK1       | 0.4382755 | 0.1119079 | 3.9164 | 9.23E-05 | 0.61147178  | count | 1           |
| CERS5      | 0.5165412 | 0.2585323 | 1.998  | 0.0458   | 0.611554174 | count | 1           |
| FMNL1      | 0.4416714 | 0.110396  | 4.0008 | 6.50E-05 | 0.611579083 | count | 1           |
| MCC        | 1.1191256 | 0.9356071 | 1.1961 | 0.232    | 0.611580183 | count | 1           |
| GAPLINC    | 0.6361721 | 0.3803487 | 1.6726 | 0.0945   | 0.611744501 | count | 1           |
| HSD17B11   | 0.4321241 | 0.0667103 | 6.4776 | 1.12E-10 | 0.612275426 | count | 2.70E-06    |
| AKAP10     | 0.5781268 | 0.3257599 | 1.7747 | 0.0761   | 0.613025875 | count | 1           |
| ALKBH8     | 0.867083  | 0.5189974 | 1.6707 | 0.0949   | 0.613374995 | count | 1           |
| LARGE1     | 2.281462  | 0.9170953 | 2.4877 | 0.0129   | 0.613681107 | count | 1           |
| KIAA0100   | 0.4692144 | 0.1880824 | 2.4947 | 0.0127   | 0.613825209 | count | 1           |
| YARS2      | 0.5705356 | 0.2881834 | 1.9798 | 0.0478   | 0.614527526 | count | 1           |
| ARL6       | 1.7045946 | 0.8952256 | 1.9041 | 0.057    | 0.614684643 | count | 1           |
| AL109615.2 | 1.7045946 | 0.926769  | 1.8393 | 0.066    | 0.614684643 | count | 1           |
| LINC01684  | 1.7045946 | 1.1117616 | 1.5332 | 0.125    | 0.614684643 | count | 1           |
| RASGRP2    | 0.4699349 | 0.1753108 | 2.6806 | 0.0074   | 0.614777761 | count | 1           |
| MTA3       | 0.640066  | 0.4875242 | 1.3129 | 0.189    | 0.615667881 | count | 1           |
| MS4A14     | 0.6157096 | 0.3125223 | 1.9701 | 0.0489   | 0.615707024 | count | 1           |
| UBALD1     | 0.5676719 | 0.3143727 | 1.8057 | 0.0711   | 0.615910184 | count | 1           |
| BTBD9      | 0.7758983 | 0.4804488 | 1.6149 | 0.106    | 0.615947878 | count | 1           |
| ZNF174     | 0.7758983 | 0.4182852 | 1.855  | 0.0637   | 0.615947878 | count | 1           |
| ZNF646     | 0.5857705 | 0.4399083 | 1.3316 | 0.183    | 0.616016349 | count | 1           |
| GOLPH3L    | 0.8026454 | 0.4710497 | 1.704  | 0.0885   | 0.616041457 | count | 1           |
| ZFC3H1     | 0.447283  | 0.1362466 | 3.2829 | 0.00104  | 0.616154617 | count | 1           |
| CCDC92     | 0.4932132 | 0.2685524 | 1.8366 | 0.0664   | 0.616286682 | count | 1           |
| PICK1      | 0.6503349 | 0.2519606 | 2.5811 | 0.00991  | 0.616333133 | count | 1           |
| CDYL       | 0.4805214 | 0.2133486 | 2.2523 | 0.0244   | 0.61634011  | count | 1           |

|            |           |           |        |          |             |       |           |
|------------|-----------|-----------|--------|----------|-------------|-------|-----------|
| BBC3       | 0.530226  | 0.2344755 | 2.2613 | 0.0238   | 0.616432424 | count | 1         |
| ATE1       | 0.5140915 | 0.2357548 | 2.1806 | 0.0293   | 0.616467643 | count | 1         |
| UACA       | 0.5142956 | 0.2210431 | 2.3267 | 0.0201   | 0.616717429 | count | 1         |
| LINC01506  | 1.0388519 | 0.4922516 | 2.1104 | 0.0349   | 0.616899369 | count | 1         |
| GAREM1     | 2.295881  | 1.0430137 | 2.2012 | 0.0278   | 0.617357368 | count | 1         |
| AC040970.1 | 0.6418771 | 0.3106092 | 2.0665 | 0.0389   | 0.617493303 | count | 1         |
| RPP21      | 0.7344894 | 0.4205095 | 1.7467 | 0.0808   | 0.617611093 | count | 1         |
| GOLGA1     | 0.5121543 | 0.2716288 | 1.8855 | 0.0595   | 0.617683422 | count | 1         |
| U2AF1L5    | 0.6624227 | 0.3885235 | 1.705  | 0.0883   | 0.617872372 | count | 1         |
| TAZ        | 0.5012691 | 0.2340126 | 2.1421 | 0.0323   | 0.617907357 | count | 1         |
| C18orf65   | 0.5875673 | 0.5091494 | 1.154  | 0.249    | 0.617975005 | count | 1         |
| EXOSC10    | 0.5202167 | 0.2449182 | 2.124  | 0.0338   | 0.618085384 | count | 1         |
| CPEB3      | 0.9722574 | 0.5454672 | 1.7824 | 0.0748   | 0.618201934 | count | 1         |
| UPK3A      | 0.5522594 | 0.5585711 | 0.9887 | 0.323    | 0.618276571 | count | 1         |
| SLC25A40   | 0.5467311 | 0.2642337 | 2.0691 | 0.0386   | 0.618648612 | count | 1         |
| UBE3B      | 0.5833493 | 0.3075634 | 1.8967 | 0.058    | 0.618760741 | count | 1         |
| CTDSP1     | 0.4533091 | 0.1126926 | 4.0225 | 5.93E-05 | 0.619055217 | count | 1         |
| NNT-AS1    | 0.5417646 | 0.2767483 | 1.9576 | 0.0504   | 0.619066094 | count | 1         |
| WAC-AS1    | 0.4635106 | 0.1428954 | 3.2437 | 0.0012   | 0.619112001 | count | 1         |
| ASCL2      | 0.4726361 | 0.178219  | 2.652  | 0.00805  | 0.61935982  | count | 1         |
| GIPC1      | 0.5084396 | 0.263997  | 1.9259 | 0.0542   | 0.619658605 | count | 1         |
| TMEM39B    | 0.5232881 | 0.2212495 | 2.3651 | 0.0181   | 0.619719583 | count | 1         |
| PLEKHG2    | 0.5600692 | 0.2865819 | 1.9543 | 0.0508   | 0.619815665 | count | 1         |
| DIS3L      | 0.6445605 | 0.3632986 | 1.7742 | 0.0762   | 0.620198341 | count | 1         |
| P2RY12     | 1.044166  | 0.3657982 | 2.8545 | 0.00435  | 0.620386165 | count | 1         |
| SLC39A13   | 0.6281425 | 0.4133138 | 1.5198 | 0.129    | 0.620813047 | count | 1         |
| ZNF561     | 0.5644603 | 0.3758308 | 1.5019 | 0.133    | 0.620828949 | count | 1         |
| ORC4       | 0.5106589 | 0.2205954 | 2.3149 | 0.0207   | 0.620839598 | count | 1         |
| PREP       | 0.6072365 | 0.3111965 | 1.9513 | 0.0511   | 0.620920349 | count | 1         |
| BCAS3      | 0.8769251 | 0.4578907 | 1.9151 | 0.0556   | 0.620943025 | count | 1         |
| SP3        | 0.4543682 | 0.1409163 | 3.2244 | 0.00128  | 0.620987968 | count | 1         |
| SEMA4A     | 0.510861  | 0.193582  | 2.639  | 0.00837  | 0.621089987 | count | 1         |
| FGD2       | 0.4714746 | 0.1497423 | 3.1486 | 0.00166  | 0.621111957 | count | 1         |
| NEK9       | 0.5905277 | 0.3229562 | 1.8285 | 0.0676   | 0.621202668 | count | 1         |
| ZDHHC21    | 0.568978  | 0.3069751 | 1.8535 | 0.0639   | 0.621755791 | count | 1         |
| PRMT7      | 0.7211688 | 0.3563663 | 2.0237 | 0.0431   | 0.621764696 | count | 1         |
| AP003774.3 | 1.2578277 | 0.4892508 | 2.5709 | 0.0102   | 0.621770437 | count | 1         |
| CX3CR1     | 0.4541019 | 0.1362606 | 3.3326 | 0.000873 | 0.621834038 | count | 1         |
| PFN2       | 2.3150489 | 1.146531  | 2.0192 | 0.0436   | 0.622212598 | count | 1         |
| DEPDC5     | 0.6466986 | 0.3902111 | 1.6573 | 0.0976   | 0.622354168 | count | 1         |
| TVP23A     | 0.6220849 | 0.316261  | 1.967  | 0.0493   | 0.622356884 | count | 1         |
| MOGS       | 0.5192504 | 0.2732059 | 1.9006 | 0.0575   | 0.622782218 | count | 1         |
| ZDHHC7     | 0.4923003 | 0.1548548 | 3.1791 | 0.0015   | 0.62325329  | count | 1         |
| C11orf98   | 0.7852612 | 0.5346291 | 1.4688 | 0.142    | 0.623921915 | count | 1         |
| YPEL3      | 0.4405396 | 0.0827568 | 5.3233 | 1.11E-07 | 0.624593189 | count | 0.0026529 |

|              |           |           |         |          |             |       |           |
|--------------|-----------|-----------|---------|----------|-------------|-------|-----------|
| PACERR       | 1.4421768 | 1.051599  | 1.3714  | 0.17     | 0.625183153 | count | 1         |
| OSBPL9       | 0.4841078 | 0.1737351 | 2.7865  | 0.00537  | 0.625235216 | count | 1         |
| SGSM2        | 0.6052463 | 0.4030794 | 1.5016  | 0.133    | 0.625269873 | count | 1         |
| LINC02432    | 0.9273824 | 0.4130969 | 2.245   | 0.0249   | 0.625280381 | count | 1         |
| HMGCR        | 0.4978071 | 0.23464   | 2.1216  | 0.034    | 0.625369919 | count | 1         |
| AL359198.1   | 1.265273  | 0.6295408 | 2.0098  | 0.0446   | 0.62586999  | count | 1         |
| PDE4B        | 0.4518783 | 0.0928137 | 4.8687  | 1.20E-06 | 0.625954914 | count | 0.0285756 |
| ZNF630       | 1.7336057 | 0.8365598 | 2.0723  | 0.0383   | 0.625995309 | count | 1         |
| AC124319.2   | 1.7336057 | 0.8842021 | 1.9606  | 0.05     | 0.625995309 | count | 1         |
| ARHGAP24     | 0.4672934 | 0.1937206 | 2.4122  | 0.0159   | 0.626060411 | count | 1         |
| ATP8B3       | 0.8151296 | 0.4812755 | 1.6937  | 0.0905   | 0.626363279 | count | 1         |
| CERK         | 0.5141131 | 0.2557442 | 2.0103  | 0.0445   | 0.626703832 | count | 1         |
| PGBD4        | 2.3332661 | 1.1644131 | 2.0038  | 0.0452   | 0.626793063 | count | 1         |
| ZNF781       | 2.3332661 | 1.0055139 | 2.3205  | 0.0204   | 0.626793063 | count | 1         |
| DENND4B      | 0.5258615 | 0.2257638 | 2.3293  | 0.0199   | 0.626978633 | count | 1         |
| B3GALNT1     | 0.7108298 | 0.5990499 | 1.1866  | 0.236    | 0.627021701 | count | 1         |
| TLE4         | 0.4562082 | 0.1280608 | 3.5624  | 0.000374 | 0.627056894 | count | 1         |
| METTL22      | 0.5393846 | 0.2753594 | 1.9588  | 0.0502   | 0.627341484 | count | 1         |
| COL6A3       | 0.9858814 | 0.7308566 | 1.3489  | 0.177    | 0.627721153 | count | 1         |
| MANSC1       | 1.2689208 | 0.7647187 | 1.6593  | 0.0972   | 0.627878553 | count | 1         |
| SP140L       | 0.4685896 | 0.162891  | 2.8767  | 0.00405  | 0.628107342 | count | 1         |
| TNFRSF14-AS1 | 0.7464903 | 0.5394955 | 1.3837  | 0.167    | 0.628364882 | count | 1         |
| AKAP11       | 0.4922687 | 0.2061532 | 2.3879  | 0.017    | 0.628449965 | count | 1         |
| CDK11A       | 0.4842127 | 0.2109491 | 2.2954  | 0.0218   | 0.628564008 | count | 1         |
| TALDO1       | 0.4381025 | 0.0457692 | 9.572   | 2.46E-21 | 0.628620624 | count | 5.96E-17  |
| NCBP3        | 0.4651641 | 0.1624064 | 2.8642  | 0.00422  | 0.628690392 | count | 1         |
| ERCC8        | 0.6530137 | 0.394267  | 1.6563  | 0.0978   | 0.628724049 | count | 1         |
| AP4M1        | 0.6085898 | 0.3484724 | 1.7465  | 0.0809   | 0.628858936 | count | 1         |
| BRPF3        | 0.7471978 | 0.5232815 | 1.4279  | 0.153    | 0.628999242 | count | 1         |
| CD99L2       | 0.5716726 | 0.3479913 | 1.6428  | 0.101    | 0.629009981 | count | 1         |
| RPAP3        | 0.4855173 | 0.1656816 | 2.9304  | 0.00342  | 0.62903152  | count | 1         |
| RSBN1        | 0.4829364 | 0.1738501 | 2.7779  | 0.00551  | 0.629242069 | count | 1         |
| BIN3         | 0.5126307 | 0.2479846 | 2.0672  | 0.0388   | 0.629355676 | count | 1         |
| SIPA1L1      | 0.4931051 | 0.1701549 | 2.898   | 0.00379  | 0.629532182 | count | 1         |
| ERCC5        | 0.7135297 | 0.3992463 | 1.7872  | 0.074    | 0.62954441  | count | 1         |
| VMAC         | 0.7135297 | 0.4229488 | 1.687   | 0.0917   | 0.62954441  | count | 1         |
| CCL4         | 0.4371255 | 0.1025749 | 4.2615  | 2.11E-05 | 0.630148502 | count | 0.4989095 |
| HCFC2        | 0.7143448 | 0.3272216 | 2.1831  | 0.0291   | 0.630306149 | count | 1         |
| AC009506.1   | 0.6229248 | 0.365589  | 1.7039  | 0.0885   | 0.630618203 | count | 1         |
| COTL1        | 0.438875  | 0.043398  | 10.1128 | 1.40E-23 | 0.63101856  | count | 3.40E-19  |
| PTPDC1       | 0.8210082 | 0.5446708 | 1.5073  | 0.132    | 0.631227927 | count | 1         |
| SLC12A4      | 0.8533229 | 0.4287365 | 1.9903  | 0.0467   | 0.631697302 | count | 1         |
| ASGR2        | 0.4853037 | 0.1855975 | 2.6148  | 0.00898  | 0.631785128 | count | 1         |
| ARL4A        | 0.4432215 | 0.0677918 | 6.538   | 7.56E-11 | 0.631843465 | count | 1.82E-06  |
| NUP153       | 0.5013789 | 0.274223  | 1.8284  | 0.0676   | 0.631987509 | count | 1         |

|            |           |           |        |          |             |       |             |
|------------|-----------|-----------|--------|----------|-------------|-------|-------------|
| GCFC2      | 0.567421  | 0.2956314 | 1.9194 | 0.0551   | 0.632051179 | count | 1           |
| TUBE1      | 0.6565217 | 0.3772068 | 1.7405 | 0.0819   | 0.63226404  | count | 1           |
| AC093323.1 | 0.6666858 | 0.443298  | 1.5039 | 0.133    | 0.63261044  | count | 1           |
| ZNF318     | 0.5358382 | 0.3375104 | 1.5876 | 0.113    | 0.63270774  | count | 1           |
| TNFSF9     | 0.4624675 | 0.1697716 | 2.7241 | 0.00649  | 0.632902908 | count | 1           |
| HERC6      | 0.6251302 | 0.5505645 | 1.1354 | 0.256    | 0.632943964 | count | 1           |
| AP000787.1 | 2.3587404 | 1.118571  | 2.1087 | 0.0351   | 0.633141974 | count | 1           |
| KDM5C      | 0.5930935 | 0.2893019 | 2.0501 | 0.0405   | 0.634681199 | count | 1           |
| TCERG1     | 0.4673408 | 0.1522419 | 3.0697 | 0.00217  | 0.634683243 | count | 1           |
| TM9SF4     | 0.510643  | 0.1951179 | 2.6171 | 0.00892  | 0.634849403 | count | 1           |
| PRPF3      | 0.5033195 | 0.294603  | 1.7085 | 0.0877   | 0.635470897 | count | 1           |
| CYSLTR2    | 0.7199264 | 0.3322163 | 2.167  | 0.0303   | 0.635523885 | count | 1           |
| AL391832.3 | 0.9413995 | 0.5269176 | 1.7866 | 0.0741   | 0.635606586 | count | 1           |
| URM1       | 0.4867059 | 0.1426963 | 3.4108 | 0.000658 | 0.635884454 | count | 1           |
| FMO5       | 0.7554351 | 0.3915552 | 1.9293 | 0.0538   | 0.636388241 | count | 1           |
| DCTD       | 0.5038293 | 0.1918843 | 2.6257 | 0.0087   | 0.637103862 | count | 1           |
| TMEM62     | 0.8009389 | 0.4046518 | 1.9793 | 0.0479   | 0.637290197 | count | 1           |
| NSUN3      | 0.5957201 | 0.356899  | 1.6692 | 0.0952   | 0.637589928 | count | 1           |
| ADSS       | 0.4659652 | 0.1348993 | 3.4542 | 0.000561 | 0.637717183 | count | 1           |
| KDM7A      | 0.4839735 | 0.1448203 | 3.3419 | 0.000845 | 0.63774347  | count | 1           |
| KDM4C      | 0.5193812 | 0.2853859 | 1.8199 | 0.0689   | 0.63779409  | count | 1           |
| PCGF1      | 0.5420106 | 0.295171  | 1.8363 | 0.0664   | 0.637857905 | count | 1           |
| GAPT       | 0.4688628 | 0.1207936 | 3.8815 | 0.000107 | 0.637937762 | count | 1           |
| SLC30A9    | 0.4977632 | 0.189811  | 2.6224 | 0.00878  | 0.637973019 | count | 1           |
| PDE1B      | 0.5961388 | 0.5777985 | 1.0317 | 0.302    | 0.638053651 | count | 1           |
| MMP17      | 1.764941  | 0.5810897 | 3.0373 | 0.00241  | 0.63815051  | count | 1           |
| AL606491.1 | 1.163007  | 0.944256  | 1.2317 | 0.218    | 0.638254479 | count | 1           |
| AC092171.4 | 1.163007  | 0.8050232 | 1.4447 | 0.149    | 0.638254479 | count | 1           |
| LRRCC1     | 0.6453511 | 0.3425759 | 1.8838 | 0.0597   | 0.638589367 | count | 1           |
| AC093297.2 | 1.4704768 | 0.9303936 | 1.5805 | 0.114    | 0.63877286  | count | 1           |
| EP300      | 0.4738588 | 0.1508603 | 3.141  | 0.0017   | 0.638808657 | count | 1           |
| PCED1A     | 0.740072  | 0.4121161 | 1.7958 | 0.0727   | 0.639087281 | count | 1           |
| ZFX        | 0.4791431 | 0.1811918 | 2.6444 | 0.00824  | 0.639166649 | count | 1           |
| UVRAG      | 0.4667031 | 0.1115568 | 4.1835 | 2.97E-05 | 0.639188383 | count | 0.7012467   |
| SLC2A3     | 0.4470856 | 0.0787675 | 5.676  | 1.54E-08 | 0.639227342 | count | 0.000369184 |
| PLEKHA2    | 0.4861664 | 0.1924339 | 2.5264 | 0.0116   | 0.639257121 | count | 1           |
| LRMP       | 0.5230587 | 0.1641241 | 3.187  | 0.00146  | 0.639382571 | count | 1           |
| UBE4B      | 0.5739627 | 0.2449977 | 2.3427 | 0.0192   | 0.639556376 | count | 1           |
| ZNF746     | 0.6464273 | 0.331743  | 1.9486 | 0.0515   | 0.639701943 | count | 1           |
| AC087741.1 | 0.6186916 | 0.5045854 | 1.2261 | 0.22     | 0.639708574 | count | 1           |
| ZNF138     | 0.6387826 | 0.3402537 | 1.8774 | 0.0606   | 0.639790984 | count | 1           |
| MAP3K3     | 0.4793771 | 0.1560376 | 3.0722 | 0.00215  | 0.639820565 | count | 1           |
| PHF3       | 0.4612    | 0.105696  | 4.3635 | 1.33E-05 | 0.640056694 | count | 0.3149174   |
| EVI2A      | 0.4583968 | 0.0906587 | 5.0563 | 4.59E-07 | 0.640069152 | count | 0.010946232 |
| PPP1R37    | 0.619043  | 0.3893609 | 1.5899 | 0.112    | 0.64008614  | count | 1           |

|            |           |           |        |          |             |       |             |
|------------|-----------|-----------|--------|----------|-------------|-------|-------------|
| RDH5       | 0.7250444 | 0.5538871 | 1.309  | 0.191    | 0.640310618 | count | 1           |
| SETD1B     | 0.6973691 | 0.3512428 | 1.9854 | 0.0472   | 0.64046419  | count | 1           |
| MYO18A     | 0.6973691 | 0.3782952 | 1.8435 | 0.0654   | 0.64046419  | count | 1           |
| AP1G2      | 0.6085267 | 0.3156529 | 1.9278 | 0.054    | 0.640842936 | count | 1           |
| AC245140.2 | 0.8055633 | 0.475365  | 1.6946 | 0.0903   | 0.641237137 | count | 1           |
| CUL4B      | 0.5826245 | 0.2292136 | 2.5418 | 0.0111   | 0.641440917 | count | 1           |
| LRP3       | 0.5992855 | 0.3479944 | 1.7221 | 0.0852   | 0.6415392   | count | 1           |
| KIF27      | 1.0059036 | 0.5197998 | 1.9352 | 0.0531   | 0.641727621 | count | 1           |
| TADA2B     | 0.6867673 | 0.3453648 | 1.9885 | 0.0469   | 0.641780784 | count | 1           |
| MLLT3      | 1.0768722 | 0.6017653 | 1.7895 | 0.0737   | 0.641870685 | count | 1           |
| AKIRIN2    | 0.456261  | 0.0738337 | 6.1796 | 7.50E-10 | 0.641894149 | count | 1.80E-05    |
| DUS2       | 0.641042  | 0.4639257 | 1.3818 | 0.167    | 0.642151913 | count | 1           |
| IRAK3      | 0.4757424 | 0.0930233 | 5.1142 | 3.39E-07 | 0.642611535 | count | 0.008089218 |
| TCF12      | 0.4920402 | 0.1924605 | 2.5566 | 0.0106   | 0.642930563 | count | 1           |
| CAMTA1-DT  | 1.296606  | 1.1304284 | 1.147  | 0.251    | 0.643122041 | count | 1           |
| CPLANE2    | 1.296606  | 0.7192112 | 1.8028 | 0.0715   | 0.643122041 | count | 1           |
| CASTOR2    | 1.296606  | 0.6692785 | 1.9373 | 0.0528   | 0.643122041 | count | 1           |
| CLCN1      | 1.296606  | 0.6692785 | 1.9373 | 0.0528   | 0.643122041 | count | 1           |
| AC080038.1 | 1.296606  | 0.837537  | 1.5481 | 0.122    | 0.643122041 | count | 1           |
| TMCC1-AS1  | 1.4799132 | 0.7024672 | 2.1067 | 0.0352   | 0.643298458 | count | 1           |
| SPNS2      | 2.4000815 | 1.195162  | 2.0082 | 0.0447   | 0.643303518 | count | 1           |
| MICAL3     | 0.9522109 | 0.7556711 | 1.2601 | 0.208    | 0.643578933 | count | 1           |
| MIGA1      | 0.5384428 | 0.304062  | 1.7708 | 0.0767   | 0.644327723 | count | 1           |
| MKL1       | 0.5781252 | 0.2983722 | 1.9376 | 0.0528   | 0.644333669 | count | 1           |
| TIMM22     | 0.5661057 | 0.312333  | 1.8125 | 0.07     | 0.644473706 | count | 1           |
| RIF1       | 0.482623  | 0.1784921 | 2.7039 | 0.0069   | 0.644526803 | count | 1           |
| SIAH2      | 0.4760263 | 0.1362196 | 3.4945 | 0.000483 | 0.644629818 | count | 1           |
| ZNF691     | 1.2998517 | 0.6955317 | 1.8689 | 0.0618   | 0.644908622 | count | 1           |
| TCHH       | 0.8698914 | 0.428951  | 2.028  | 0.0427   | 0.64496852  | count | 1           |
| CCDC40     | 1.4837489 | 1.119428  | 1.3255 | 0.185    | 0.645137131 | count | 1           |
| BRD1       | 0.4943465 | 0.189001  | 2.6156 | 0.00896  | 0.645420254 | count | 1           |
| ARRDC3     | 0.4643362 | 0.1243697 | 3.7335 | 0.000193 | 0.645549716 | count | 1           |
| RSRP1      | 0.4548817 | 0.0820742 | 5.5423 | 3.30E-08 | 0.645673683 | count | 0.000790152 |
| MNS1       | 1.3013094 | 0.6485878 | 2.0064 | 0.0449   | 0.645711071 | count | 1           |
| HEXA-AS1   | 1.3013094 | 0.6560559 | 1.9835 | 0.0474   | 0.645711071 | count | 1           |
| SMAD3      | 0.5943707 | 0.3375258 | 1.761  | 0.0784   | 0.645852183 | count | 1           |
| ALMS1      | 1.0119967 | 0.6763765 | 1.4962 | 0.135    | 0.645993697 | count | 1           |
| ZNF345     | 1.3022926 | 0.695405  | 1.8727 | 0.0612   | 0.646252313 | count | 1           |
| AL365205.1 | 1.786376  | 1.1766098 | 1.5182 | 0.129    | 0.6464262   | count | 1           |
| ZMYM4      | 0.4871594 | 0.1861425 | 2.6171 | 0.00892  | 0.646641631 | count | 1           |
| MTX1       | 0.4703095 | 0.1366447 | 3.4418 | 0.000587 | 0.646801646 | count | 1           |
| ZNF335     | 0.7675857 | 0.3934329 | 1.951  | 0.0512   | 0.647297899 | count | 1           |
| MEF2C      | 0.4551537 | 0.0758804 | 5.9983 | 2.29E-09 | 0.647355138 | count | 5.50E-05    |
| AL662844.4 | 1.1782002 | 0.5490503 | 2.1459 | 0.032    | 0.647498824 | count | 1           |
| PUM2       | 0.5335799 | 0.1913934 | 2.7879 | 0.00535  | 0.647568804 | count | 1           |

|            |           |           |         |          |             |       |          |
|------------|-----------|-----------|---------|----------|-------------|-------|----------|
| JUNB       | 0.4497032 | 0.036234  | 12.4111 | 2.39E-34 | 0.647734221 | count | 5.81E-30 |
| ENTPD1-AS1 | 0.9579695 | 0.558889  | 1.7141  | 0.0866   | 0.647827934 | count | 1        |
| AL390036.1 | 0.5588435 | 0.2796984 | 1.998   | 0.0458   | 0.647830864 | count | 1        |
| ZNF397     | 0.5723534 | 0.2813797 | 2.0341  | 0.042    | 0.648465408 | count | 1        |
| CEP120     | 0.6269118 | 0.2692466 | 2.3284  | 0.02     | 0.648543722 | count | 1        |
| CD37       | 0.4532192 | 0.047432  | 9.5551  | 2.88E-21 | 0.648656692 | count | 6.98E-17 |
| SLC35A1    | 0.6938576 | 0.2944237 | 2.3567  | 0.0185   | 0.648753909 | count | 1        |
| MLH3       | 0.615914  | 0.3337819 | 1.8453  | 0.0651   | 0.648911739 | count | 1        |
| STXBP2     | 0.4567813 | 0.0757453 | 6.0305  | 1.88E-09 | 0.649105154 | count | 4.52E-05 |
| AC092803.2 | 0.4908781 | 0.1644073 | 2.9857  | 0.00286  | 0.649583958 | count | 1        |
| DCAF15     | 0.5464184 | 0.2766624 | 1.975   | 0.0484   | 0.649915636 | count | 1        |
| ZNF230     | 0.6117253 | 0.4670853 | 1.3097  | 0.19     | 0.649961298 | count | 1        |
| TTC21B     | 0.6740459 | 0.335552  | 2.0088  | 0.0447   | 0.64996433  | count | 1        |
| ZNF528     | 0.6565044 | 0.424906  | 1.5451  | 0.122    | 0.650124494 | count | 1        |
| FAM217B    | 0.5526384 | 0.3127043 | 1.7673  | 0.0773   | 0.650658841 | count | 1        |
| SULT1C4    | 2.430584  | 1.0305385 | 2.3586  | 0.0184   | 0.650686355 | count | 1        |
| DHX34      | 0.6848539 | 0.3687043 | 1.8575  | 0.0634   | 0.650724738 | count | 1        |
| ACOT8      | 0.510342  | 0.2242156 | 2.2761  | 0.0229   | 0.650986418 | count | 1        |
| MMD        | 0.5048589 | 0.279053  | 1.8092  | 0.0705   | 0.651671473 | count | 1        |
| GAB3       | 0.5812427 | 0.2567613 | 2.2637  | 0.0237   | 0.651693202 | count | 1        |
| BCL6       | 0.4854109 | 0.1325722 | 3.6615  | 0.000256 | 0.651735372 | count | 1        |
| AP4B1      | 0.8181026 | 0.4120345 | 1.9855  | 0.0472   | 0.651947724 | count | 1        |
| ANAPC1     | 0.6670252 | 0.3580928 | 1.8627  | 0.0626   | 0.652208724 | count | 1        |
| TCF7L2     | 0.5884708 | 0.2306197 | 2.5517  | 0.0108   | 0.652230942 | count | 1        |
| C16orf70   | 0.538906  | 0.3535356 | 1.5243  | 0.128    | 0.652412381 | count | 1        |
| SLC46A1    | 0.6512774 | 0.3694881 | 1.7626  | 0.0781   | 0.652852679 | count | 1        |
| LAX1       | 1.5003966 | 1.2518776 | 1.1985  | 0.231    | 0.653110981 | count | 1        |
| CCL24      | 1.5003966 | 1.1278147 | 1.3304  | 0.184    | 0.653110981 | count | 1        |
| AL357033.4 | 1.5003966 | 0.7232451 | 2.0745  | 0.0381   | 0.653110981 | count | 1        |
| FGL2       | 0.4552762 | 0.0559691 | 8.1344  | 6.50E-16 | 0.653161069 | count | 1.57E-11 |
| TMEM50B    | 0.4919409 | 0.1476217 | 3.3324  | 0.000874 | 0.65343914  | count | 1        |
| CCDC69     | 0.496145  | 0.1583279 | 3.1337  | 0.00175  | 0.653475342 | count | 1        |
| NCOA3      | 0.5038837 | 0.1463366 | 3.4433  | 0.000584 | 0.653765451 | count | 1        |
| DIP2B      | 0.5900168 | 0.2330769 | 2.5314  | 0.0114   | 0.653997219 | count | 1        |
| AL445524.1 | 0.5418471 | 0.2092025 | 2.5901  | 0.00965  | 0.654237034 | count | 1        |
| ARHGAP19   | 0.7753446 | 0.4061621 | 1.909   | 0.0564   | 0.654270625 | count | 1        |
| RNF216     | 0.4969014 | 0.1563185 | 3.1788  | 0.0015   | 0.654481732 | count | 1        |
| CANT1      | 0.5582153 | 0.2786178 | 2.0035  | 0.0452   | 0.654933167 | count | 1        |
| MDM4       | 0.4794039 | 0.1444324 | 3.3192  | 0.000916 | 0.655245426 | count | 1        |
| TKFC       | 0.6395771 | 0.3645735 | 1.7543  | 0.0795   | 0.655361682 | count | 1        |
| NXF1       | 0.5373512 | 0.2612212 | 2.0571  | 0.0398   | 0.655580977 | count | 1        |
| ZXDA       | 1.8112827 | 1.0435147 | 1.7358  | 0.0827   | 0.655999658 | count | 1        |
| CHEK1      | 1.8112827 | 0.9084316 | 1.9939  | 0.0463   | 0.655999658 | count | 1        |
| AL691403.2 | 1.8112827 | 0.8792659 | 2.06    | 0.0395   | 0.655999658 | count | 1        |
| SERPINB10  | 1.8112827 | 0.9880133 | 1.8333  | 0.0669   | 0.655999658 | count | 1        |



|            |           |           |        |          |             |       |             |
|------------|-----------|-----------|--------|----------|-------------|-------|-------------|
| MYNN       | 0.6036806 | 0.3266097 | 1.8483 | 0.0647   | 0.656306506 | count | 1           |
| DCAF6      | 0.5499835 | 0.2591697 | 2.1221 | 0.0339   | 0.656375029 | count | 1           |
| TRRAP      | 0.595892  | 0.2718566 | 2.1919 | 0.0285   | 0.656512773 | count | 1           |
| DPYD       | 0.4845546 | 0.1252286 | 3.8694 | 0.000112 | 0.656933499 | count | 1           |
| EEF1AKMT3  | 1.0282293 | 0.6612378 | 1.555  | 0.12     | 0.657366677 | count | 1           |
| CARD16     | 0.4624259 | 0.0608916 | 7.5943 | 4.37E-14 | 0.657453821 | count | 1.06E-09    |
| TRIOBP     | 0.5014289 | 0.1754907 | 2.8573 | 0.00431  | 0.657502158 | count | 1           |
| ADH1B      | 1.5098389 | 0.7848612 | 1.9237 | 0.0545   | 0.657628713 | count | 1           |
| AC068888.1 | 1.5098389 | 0.8703662 | 1.7347 | 0.0829   | 0.657628713 | count | 1           |
| AC108134.3 | 0.8003964 | 0.3643295 | 2.1969 | 0.0281   | 0.657632371 | count | 1           |
| CIR1       | 0.4696084 | 0.0905833 | 5.1843 | 2.35E-07 | 0.65775655  | count | 0.0056118   |
| FAM19A2    | 0.8533201 | 0.4510863 | 1.8917 | 0.0586   | 0.658012655 | count | 1           |
| TUT7       | 0.4738353 | 0.1167337 | 4.0591 | 5.08E-05 | 0.658169738 | count | 1           |
| GASAL1     | 1.0293873 | 0.5388148 | 1.9105 | 0.0562   | 0.658178386 | count | 1           |
| FAM135A    | 0.6644404 | 0.3577737 | 1.8572 | 0.0634   | 0.658338615 | count | 1           |
| TOP3A      | 0.5870049 | 0.2602383 | 2.2556 | 0.0242   | 0.658344404 | count | 1           |
| PM20D2     | 1.1021476 | 0.5844008 | 1.8859 | 0.0594   | 0.658497909 | count | 1           |
| COX7A1     | 1.1021476 | 0.9087477 | 1.2128 | 0.225    | 0.658497909 | count | 1           |
| UIMC1      | 0.525766  | 0.2591284 | 2.029  | 0.0426   | 0.658800425 | count | 1           |
| SPTBN1     | 0.692967  | 0.4384309 | 1.5806 | 0.114    | 0.658822952 | count | 1           |
| CSTF2T     | 0.6251723 | 0.2799343 | 2.2333 | 0.0256   | 0.659030441 | count | 1           |
| IPO5       | 0.5521684 | 0.2665554 | 2.0715 | 0.0384   | 0.659039527 | count | 1           |
| IVNS1ABP   | 0.4709488 | 0.0959989 | 4.9058 | 9.92E-07 | 0.659283629 | count | 0.023628448 |
| PPP1R12C   | 0.5524078 | 0.2611474 | 2.1153 | 0.0345   | 0.659331492 | count | 1           |
| GSTCD      | 0.8879874 | 0.4621592 | 1.9214 | 0.0548   | 0.659484468 | count | 1           |
| GMDS       | 0.6206104 | 0.3097523 | 2.0036 | 0.0452   | 0.659744428 | count | 1           |
| ATG13      | 0.6373278 | 0.3480765 | 1.831  | 0.0672   | 0.65974697  | count | 1           |
| MBD3       | 0.5719254 | 0.2377119 | 2.406  | 0.0162   | 0.660518774 | count | 1           |
| AC022706.1 | 1.5171663 | 0.6579902 | 2.3058 | 0.0212   | 0.661132013 | count | 1           |
| FAF1       | 0.5381774 | 0.2238388 | 2.4043 | 0.0163   | 0.661304193 | count | 1           |
| SNTB2      | 0.575429  | 0.3386495 | 1.6992 | 0.0894   | 0.661685387 | count | 1           |
| ANK3       | 1.3313855 | 0.8239337 | 1.6159 | 0.106    | 0.662263049 | count | 1           |
| PIP4K2B    | 0.7339088 | 0.340131  | 2.1577 | 0.031    | 0.662725739 | count | 1           |
| DDX59      | 0.5148067 | 0.2195868 | 2.3444 | 0.0191   | 0.663210364 | count | 1           |
| AL356488.3 | 0.9791576 | 0.4242525 | 2.308  | 0.0211   | 0.66347635  | count | 1           |
| AL591895.1 | 0.9791714 | 0.856298  | 1.1435 | 0.253    | 0.663486552 | count | 1           |
| SEMA3C     | 0.5188033 | 0.3624234 | 1.4315 | 0.152    | 0.663651068 | count | 1           |
| LINC01184  | 0.5616172 | 0.3860254 | 1.4549 | 0.146    | 0.663860197 | count | 1           |
| THBS1      | 0.4748736 | 0.1158327 | 4.0997 | 4.27E-05 | 0.664315102 | count | 1           |
| ACY1       | 1.833216  | 1.089773  | 1.6822 | 0.0927   | 0.664390804 | count | 1           |
| TMEM106A   | 0.5189463 | 0.2020151 | 2.5688 | 0.0103   | 0.664671565 | count | 1           |
| MN1        | 2.491399  | 1.29162   | 1.9289 | 0.0539   | 0.665110572 | count | 1           |
| AC139887.2 | 0.7365683 | 0.5823499 | 1.2648 | 0.206    | 0.665264202 | count | 1           |
| DLGAP4     | 0.5123537 | 0.1862365 | 2.7511 | 0.00598  | 0.665535093 | count | 1           |
| KAT5       | 0.5841085 | 0.2585405 | 2.2593 | 0.024    | 0.665540124 | count | 1           |

|              |           |           |        |          |             |       |          |
|--------------|-----------|-----------|--------|----------|-------------|-------|----------|
| COQ8A        | 0.6119891 | 0.2663975 | 2.2973 | 0.0217   | 0.665642    | count | 1        |
| LMBRD2       | 0.689801  | 0.386574  | 1.7844 | 0.0745   | 0.665900063 | count | 1        |
| LRRRC8C-DT   | 0.8344891 | 0.5091418 | 1.639  | 0.101    | 0.665961931 | count | 1        |
| SH3BP5       | 0.4824964 | 0.1194745 | 4.0385 | 5.54E-05 | 0.666084329 | count | 1        |
| KLC4         | 1.2090445 | 0.6866911 | 1.7607 | 0.0784   | 0.666274364 | count | 1        |
| RNASEH2B-AS1 | 1.2090445 | 0.6338101 | 1.9076 | 0.0566   | 0.666274364 | count | 1        |
| ZFP36L2      | 0.4651124 | 0.0565907 | 8.2189 | 3.29E-16 | 0.666287779 | count | 7.96E-12 |
| AP5S1        | 0.8635793 | 0.512222  | 1.6859 | 0.0919   | 0.666532294 | count | 1        |
| LINC01504    | 0.6500936 | 0.3338989 | 1.947  | 0.0517   | 0.666580165 | count | 1        |
| HIST1H4A     | 1.1146845 | 0.8327714 | 1.3385 | 0.181    | 0.66675154  | count | 1        |
| 8-Mar        | 0.5854167 | 0.2985279 | 1.961  | 0.05     | 0.667071841 | count | 1        |
| SCLT1        | 0.5214568 | 0.1860556 | 2.8027 | 0.00511  | 0.667091821 | count | 1        |
| ADGRE1       | 0.7537961 | 0.4160878 | 1.8116 | 0.0702   | 0.667242094 | count | 1        |
| SLC39A10     | 0.4908935 | 0.1563554 | 3.1396 | 0.00171  | 0.667303433 | count | 1        |
| WDR77        | 0.5364767 | 0.222207  | 2.4143 | 0.0158   | 0.667519559 | count | 1        |
| POMZP3       | 0.8117141 | 0.4596745 | 1.7658 | 0.0775   | 0.667575259 | count | 1        |
| SAP25        | 0.7018405 | 0.3750075 | 1.8715 | 0.0614   | 0.667686408 | count | 1        |
| BISPR        | 0.5560425 | 0.2508748 | 2.2164 | 0.0268   | 0.667866324 | count | 1        |
| KDM3A        | 0.5669263 | 0.2541545 | 2.2306 | 0.0258   | 0.667880097 | count | 1        |
| ACSF2        | 0.8372677 | 0.3354564 | 2.4959 | 0.0126   | 0.668340156 | count | 1        |
| MYCBP        | 0.5738597 | 0.238038  | 2.4108 | 0.016    | 0.668458983 | count | 1        |
| ATN1         | 0.6189023 | 0.3975092 | 1.557  | 0.12     | 0.668464467 | count | 1        |
| UBR2         | 0.5093571 | 0.1710985 | 2.977  | 0.00294  | 0.668538291 | count | 1        |
| PDLIM2       | 0.4878993 | 0.1368164 | 3.5661 | 0.000369 | 0.668543338 | count | 1        |
| CDC14A       | 0.5679953 | 0.3648393 | 1.5568 | 0.12     | 0.6691691   | count | 1        |
| AP001160.1   | 0.7408048 | 0.4389    | 1.6879 | 0.0916   | 0.669309092 | count | 1        |
| TP53I11      | 0.5933984 | 0.3422637 | 1.7337 | 0.0831   | 0.669430251 | count | 1        |
| AC012368.1   | 0.6037077 | 0.2737328 | 2.2055 | 0.0275   | 0.669646637 | count | 1        |
| MGAM         | 0.9006827 | 0.6139605 | 1.467  | 0.143    | 0.669680557 | count | 1        |
| USP47        | 0.5095817 | 0.1698536 | 3.0001 | 0.00273  | 0.669867633 | count | 1        |
| ZNF579       | 0.6201911 | 0.4048928 | 1.5317 | 0.126    | 0.669904226 | count | 1        |
| MIR29B2CHG   | 0.5647203 | 0.2823038 | 2.0004 | 0.0456   | 0.669930316 | count | 1        |
| XKR8         | 0.5970566 | 0.3085211 | 1.9352 | 0.0531   | 0.66995272  | count | 1        |
| ARRDC1       | 0.4948078 | 0.1551154 | 3.1899 | 0.00144  | 0.670476401 | count | 1        |
| PSMB9        | 0.4715249 | 0.0664152 | 7.0996 | 1.63E-12 | 0.670688145 | count | 3.93E-08 |
| RAP1GAP2     | 0.8407504 | 0.5097157 | 1.6494 | 0.0992   | 0.671321753 | count | 1        |
| AC040977.1   | 0.9900689 | 0.5605769 | 1.7662 | 0.0775   | 0.671543277 | count | 1        |
| ASXL2        | 0.5530142 | 0.228919  | 2.4158 | 0.0158   | 0.671629518 | count | 1        |
| MAVS         | 0.528747  | 0.252221  | 2.0964 | 0.0362   | 0.672033405 | count | 1        |
| CREBBP       | 0.5129546 | 0.1654585 | 3.1002 | 0.00196  | 0.672239829 | count | 1        |
| ZNF383       | 0.8425131 | 0.4601999 | 1.8308 | 0.0673   | 0.672831174 | count | 1        |
| TMEM107      | 0.5010247 | 0.1364738 | 3.6712 | 0.000247 | 0.672869731 | count | 1        |
| ECHDC3       | 0.6496159 | 0.3061101 | 2.1222 | 0.0339   | 0.672975048 | count | 1        |
| IRF2BP1      | 0.871625  | 0.488895  | 1.7828 | 0.0747   | 0.673218615 | count | 1        |
| GRAMD1A      | 0.5275858 | 0.1791575 | 2.9448 | 0.00326  | 0.673293574 | count | 1        |

|            |           |           |        |          |             |       |          |
|------------|-----------|-----------|--------|----------|-------------|-------|----------|
| CDK17      | 0.6634977 | 0.3072908 | 2.1592 | 0.0309   | 0.673471344 | count | 1        |
| PRKCB      | 0.4932491 | 0.131846  | 3.7411 | 0.000187 | 0.673588702 | count | 1        |
| FGD4       | 0.5120412 | 0.1325184 | 3.8639 | 0.000114 | 0.673640771 | count | 1        |
| THRB       | 1.125169  | 0.6144677 | 1.8311 | 0.0672   | 0.673656843 | count | 1        |
| KIF1C      | 0.6282525 | 0.291366  | 2.1562 | 0.0312   | 0.673662609 | count | 1        |
| C1RL       | 0.6037586 | 0.3679593 | 1.6408 | 0.101    | 0.67378176  | count | 1        |
| ARAP2      | 0.5609844 | 0.2619245 | 2.1418 | 0.0323   | 0.673928417 | count | 1        |
| AL391422.3 | 1.0526448 | 0.5547477 | 1.8975 | 0.0579   | 0.674491878 | count | 1        |
| NCR3LG1    | 1.0526448 | 0.6121247 | 1.7197 | 0.0856   | 0.674491878 | count | 1        |
| FFAR4      | 0.8734787 | 0.4523774 | 1.9309 | 0.0536   | 0.674759689 | count | 1        |
| SMG5       | 0.6513343 | 0.3486733 | 1.868  | 0.0619   | 0.674825846 | count | 1        |
| METTL9     | 0.4783245 | 0.0772446 | 6.1923 | 6.93E-10 | 0.675138701 | count | 1.67E-05 |
| NEDD9      | 0.4972481 | 0.1261412 | 3.942  | 8.31E-05 | 0.67536511  | count | 1        |
| SELENOO    | 0.5532674 | 0.2438173 | 2.2692 | 0.0233   | 0.675377843 | count | 1        |
| INTS1      | 0.5955646 | 0.3052677 | 1.951  | 0.0512   | 0.675518155 | count | 1        |
| ARHGAP12   | 0.5483911 | 0.2238368 | 2.45   | 0.0144   | 0.675597822 | count | 1        |
| DTWD1      | 0.5309349 | 0.1902048 | 2.7914 | 0.00529  | 0.675798057 | count | 1        |
| MAP10      | 1.054508  | 0.4895367 | 2.1541 | 0.0313   | 0.675799621 | count | 1        |
| CTDSP2     | 0.5042323 | 0.1504409 | 3.3517 | 0.000815 | 0.675969122 | count | 1        |
| FRMD3      | 0.9961409 | 0.425936  | 2.3387 | 0.0194   | 0.676034726 | count | 1        |
| ABCC1      | 0.6130915 | 0.3040439 | 2.0165 | 0.0439   | 0.676071187 | count | 1        |
| HEATR5A    | 0.722482  | 0.3810529 | 1.896  | 0.0581   | 0.676947862 | count | 1        |
| ZNF44      | 0.6669801 | 0.3765459 | 1.7713 | 0.0766   | 0.677155719 | count | 1        |
| HAUS4      | 0.6103617 | 0.3134927 | 1.947  | 0.0517   | 0.677257459 | count | 1        |
| WDR7       | 0.7497755 | 0.3432842 | 2.1841 | 0.029    | 0.677878679 | count | 1        |
| TIGD1      | 1.0579513 | 0.5822441 | 1.817  | 0.0693   | 0.67821658  | count | 1        |
| PCSK5      | 0.6838895 | 0.4489774 | 1.5232 | 0.128    | 0.678491058 | count | 1        |
| SLC9A6     | 0.9123403 | 0.4054719 | 2.2501 | 0.0245   | 0.679051697 | count | 1        |
| RIN3       | 0.4970527 | 0.1247367 | 3.9848 | 6.95E-05 | 0.679168407 | count | 1        |
| FAM210B    | 0.5197652 | 0.1975679 | 2.6308 | 0.00857  | 0.679570921 | count | 1        |
| TERF2      | 0.5420856 | 0.2237841 | 2.4224 | 0.0155   | 0.67958335  | count | 1        |
| TAF1       | 0.5767187 | 0.2364478 | 2.4391 | 0.0148   | 0.679690507 | count | 1        |
| KBTBD3     | 0.624824  | 0.315243  | 1.982  | 0.0476   | 0.680073582 | count | 1        |
| NAA60      | 0.5329518 | 0.2600891 | 2.0491 | 0.0406   | 0.680237984 | count | 1        |
| PCNX2      | 0.6856629 | 0.5199454 | 1.3187 | 0.187    | 0.680330091 | count | 1        |
| DMXL2      | 0.4905068 | 0.1285147 | 3.8167 | 0.000139 | 0.68036876  | count | 1        |
| NME8       | 0.9143439 | 0.5204451 | 1.7568 | 0.0791   | 0.680663104 | count | 1        |
| ERAP2      | 0.60323   | 0.2103293 | 2.868  | 0.00417  | 0.680844961 | count | 1        |
| SENP1      | 0.7150253 | 0.3752153 | 1.9056 | 0.0568   | 0.680867936 | count | 1        |
| PPP3CA     | 0.4950853 | 0.12421   | 3.9859 | 6.92E-05 | 0.681327108 | count | 1        |
| SELENON    | 0.567038  | 0.2587276 | 2.1916 | 0.0285   | 0.681356179 | count | 1        |
| GEMIN4     | 0.7156586 | 0.3951683 | 1.811  | 0.0703   | 0.681501417 | count | 1        |
| MAN1C1     | 0.8276229 | 0.4224064 | 1.9593 | 0.0502   | 0.681567067 | count | 1        |
| TGIF2      | 0.7399926 | 0.2998819 | 2.4676 | 0.0137   | 0.681810126 | count | 1        |
| FGFR1      | 0.604162  | 0.3154446 | 1.9153 | 0.0556   | 0.681927373 | count | 1        |

|            |           |           |        |          |             |       |            |
|------------|-----------|-----------|--------|----------|-------------|-------|------------|
| CLEC9A     | 0.5573809 | 0.3910353 | 1.4254 | 0.154    | 0.682155895 | count | 1          |
| LGI2       | 1.0047675 | 0.4026123 | 2.4956 | 0.0126   | 0.682418495 | count | 1          |
| TONSL      | 1.8814576 | 0.7038898 | 2.6729 | 0.00757  | 0.682707218 | count | 1          |
| NF1        | 0.5281915 | 0.2419702 | 2.1829 | 0.0291   | 0.682904785 | count | 1          |
| CCDC170    | 0.5403442 | 0.1866074 | 2.8956 | 0.00382  | 0.682945685 | count | 1          |
| ARID1A     | 0.511307  | 0.1481347 | 3.4516 | 0.000567 | 0.683172923 | count | 1          |
| TNRC18     | 0.5669614 | 0.210822  | 2.6893 | 0.00721  | 0.683258044 | count | 1          |
| ARHGEF10L  | 0.6234467 | 0.2326901 | 2.6793 | 0.00743  | 0.683291542 | count | 1          |
| ENO3       | 1.0060677 | 0.6048861 | 1.6632 | 0.0964   | 0.683380915 | count | 1          |
| NOM1       | 0.546015  | 0.2383918 | 2.2904 | 0.0221   | 0.683383655 | count | 1          |
| CRTC1      | 0.7420541 | 0.3649211 | 2.0335 | 0.0421   | 0.683813516 | count | 1          |
| CCDC117    | 0.5941858 | 0.2918372 | 2.036  | 0.0419   | 0.683834613 | count | 1          |
| PPP2R3B    | 0.7421138 | 0.4778099 | 1.5532 | 0.121    | 0.68387152  | count | 1          |
| MPV17L2    | 0.5782125 | 0.272264  | 2.1237 | 0.0338   | 0.683937392 | count | 1          |
| TMEM117    | 1.1413424 | 0.5678795 | 2.0098 | 0.0446   | 0.684312719 | count | 1          |
| PES1       | 0.5541648 | 0.2098207 | 2.6411 | 0.00832  | 0.684326769 | count | 1          |
| LINC01004  | 1.5658337 | 0.9094394 | 1.7218 | 0.0852   | 0.684337385 | count | 1          |
| LCAT       | 1.5658337 | 0.7887229 | 1.9853 | 0.0472   | 0.684337385 | count | 1          |
| FAM111A    | 0.5144233 | 0.156224  | 3.2929 | 0.00101  | 0.684384133 | count | 1          |
| RASAL3     | 0.5921318 | 0.2525492 | 2.3446 | 0.0191   | 0.68447161  | count | 1          |
| FAM45A     | 0.492918  | 0.1262894 | 3.9031 | 9.75E-05 | 0.68470453  | count | 1          |
| PSMG3-AS1  | 1.0673959 | 0.5245499 | 2.0349 | 0.042    | 0.684848067 | count | 1          |
| ZNF609     | 0.5512466 | 0.2987134 | 1.8454 | 0.0651   | 0.684876231 | count | 1          |
| GPANK1     | 0.5373511 | 0.1916742 | 2.8035 | 0.0051   | 0.685017022 | count | 1          |
| FOXN2      | 0.4991664 | 0.123189  | 4.052  | 5.24E-05 | 0.685143569 | count | 1          |
| EPC1       | 0.4952701 | 0.1355813 | 3.6529 | 0.000265 | 0.685234007 | count | 1          |
| COX15      | 0.5813699 | 0.2716125 | 2.1404 | 0.0324   | 0.685302335 | count | 1          |
| MTMR3      | 0.5984501 | 0.2788498 | 2.1461 | 0.032    | 0.685666139 | count | 1          |
| VCAN       | 0.4769104 | 0.0815393 | 5.8488 | 5.61E-09 | 0.68623819  | count | 0.00013464 |
| MAP3K5     | 0.5710497 | 0.2681691 | 2.1294 | 0.0333   | 0.686279728 | count | 1          |
| AC025171.4 | 2.5840835 | 1.1334279 | 2.2799 | 0.0227   | 0.686317766 | count | 1          |
| CCNL1      | 0.4823302 | 0.0771439 | 6.2523 | 4.75E-10 | 0.686337595 | count | 1.14E-05   |
| CCNB1IP1   | 0.6183172 | 0.2658189 | 2.3261 | 0.0201   | 0.68636109  | count | 1          |
| AL118516.1 | 0.5031863 | 0.1526259 | 3.2969 | 0.000992 | 0.686508805 | count | 1          |
| FBLN1      | 1.892861  | 0.6683165 | 2.8323 | 0.00466  | 0.687007646 | count | 1          |
| NAA80      | 0.6842389 | 0.6186179 | 1.1061 | 0.269    | 0.687371054 | count | 1          |
| LINC01220  | 0.7930239 | 0.5559205 | 1.4265 | 0.154    | 0.687767216 | count | 1          |
| ZNF721     | 0.5679625 | 0.247363  | 2.2961 | 0.0218   | 0.688317643 | count | 1          |
| KDM4B      | 0.5458701 | 0.2843868 | 1.9195 | 0.055    | 0.68896029  | count | 1          |
| SRD5A1     | 0.7231591 | 0.3622676 | 1.9962 | 0.046    | 0.689006449 | count | 1          |
| AC006449.6 | 0.5804806 | 0.356465  | 1.6284 | 0.104    | 0.68905874  | count | 1          |
| NLRC5      | 0.8614586 | 0.3249956 | 2.6507 | 0.00808  | 0.689067199 | count | 1          |
| PRX        | 1.898538  | 0.9471539 | 2.0045 | 0.0451   | 0.68914445  | count | 1          |
| PHTF2      | 0.5768759 | 0.2199102 | 2.6232 | 0.00876  | 0.689190851 | count | 1          |
| CORO1A     | 0.4813953 | 0.0515026 | 9.347  | 1.96E-20 | 0.689301754 | count | 4.75E-16   |

|            |           |           |        |          |             |       |             |
|------------|-----------|-----------|--------|----------|-------------|-------|-------------|
| ASGR1      | 0.4907158 | 0.0931637 | 5.2672 | 1.51E-07 | 0.689389977 | count | 0.003608145 |
| AGO4       | 0.5409737 | 0.1926785 | 2.8077 | 0.00503  | 0.689701085 | count | 1           |
| ACTR5      | 0.8371127 | 0.4476836 | 1.8699 | 0.0616   | 0.689921645 | count | 1           |
| SHPRH      | 0.5335938 | 0.194071  | 2.7495 | 0.00601  | 0.689977636 | count | 1           |
| TMEM150B   | 0.7782939 | 0.5614086 | 1.3863 | 0.166    | 0.690240191 | count | 1           |
| RNF167     | 0.5141053 | 0.150045  | 3.4263 | 0.000622 | 0.690270254 | count | 1           |
| PACRGL     | 0.8628723 | 0.4701763 | 1.8352 | 0.0666   | 0.690279643 | count | 1           |
| KLRG1      | 1.1506806 | 0.6828581 | 1.6851 | 0.0921   | 0.69046722  | count | 1           |
| RND3       | 0.5401735 | 0.385445  | 1.4014 | 0.161    | 0.690487129 | count | 1           |
| CHRNE      | 0.5416637 | 0.214147  | 2.5294 | 0.0115   | 0.690593328 | count | 1           |
| RBMS2      | 0.634415  | 0.312658  | 2.0291 | 0.0426   | 0.690865585 | count | 1           |
| ERMARD     | 0.7254295 | 0.3947424 | 1.8377 | 0.0662   | 0.691279081 | count | 1           |
| ERCC6L2    | 0.588601  | 0.2696339 | 2.183  | 0.0291   | 0.691462597 | count | 1           |
| TMEM186    | 0.6971479 | 0.4459594 | 1.5633 | 0.118    | 0.692245939 | count | 1           |
| SP1        | 0.5571003 | 0.2248993 | 2.4771 | 0.0133   | 0.692275556 | count | 1           |
| COQ6       | 0.6814759 | 0.3216987 | 2.1184 | 0.0342   | 0.692502221 | count | 1           |
| XPOT       | 0.6214443 | 0.2871176 | 2.1644 | 0.0305   | 0.694126939 | count | 1           |
| HNRNPH1    | 0.48869   | 0.0772576 | 6.3255 | 2.99E-10 | 0.694232573 | count | 7.19E-06    |
| SIRPB1     | 0.5094013 | 0.1363163 | 3.7369 | 0.000191 | 0.694466016 | count | 1           |
| HVCN1      | 0.523576  | 0.1417264 | 3.6943 | 0.000225 | 0.694602116 | count | 1           |
| ZNF70      | 1.3905271 | 0.7354572 | 1.8907 | 0.0588   | 0.694765228 | count | 1           |
| EZH1       | 0.5703419 | 0.2499157 | 2.2821 | 0.0226   | 0.694890242 | count | 1           |
| SUCO       | 0.5267003 | 0.1890141 | 2.7866 | 0.00537  | 0.695129423 | count | 1           |
| VTI1A      | 0.543784  | 0.2234556 | 2.4335 | 0.015    | 0.695166953 | count | 1           |
| HAS1       | 0.6340065 | 0.3623174 | 1.7499 | 0.0803   | 0.695247072 | count | 1           |
| AQR        | 0.5679663 | 0.2159278 | 2.6304 | 0.00858  | 0.69536103  | count | 1           |
| AL022328.4 | 0.8210316 | 0.4029234 | 2.0377 | 0.0417   | 0.695420452 | count | 1           |
| SRGAP2     | 0.5167997 | 0.142519  | 3.6262 | 0.000294 | 0.695440545 | count | 1           |
| VPS13B     | 0.6014011 | 0.2998901 | 2.0054 | 0.045    | 0.695468468 | count | 1           |
| RAB3GAP1   | 0.5530278 | 0.2033442 | 2.7197 | 0.00658  | 0.695882369 | count | 1           |
| GORASP1    | 0.6588996 | 0.408494  | 1.613  | 0.107    | 0.695948426 | count | 1           |
| NIPSNAP3A  | 0.5280875 | 0.1682305 | 3.1391 | 0.00172  | 0.695992758 | count | 1           |
| NR3C2      | 1.5904326 | 0.8768598 | 1.8138 | 0.0698   | 0.696019905 | count | 1           |
| GRK3       | 0.5222386 | 0.1393076 | 3.7488 | 0.000182 | 0.696052302 | count | 1           |
| AL118558.3 | 0.6779946 | 0.3012104 | 2.2509 | 0.0245   | 0.696385566 | count | 1           |
| SUMF1      | 0.5715465 | 0.2950807 | 1.9369 | 0.0529   | 0.696386924 | count | 1           |
| AC234772.3 | 0.9758215 | 0.6653079 | 1.4667 | 0.143    | 0.697322475 | count | 1           |
| AC010173.1 | 0.9355214 | 0.4510381 | 2.0742 | 0.0382   | 0.697708438 | count | 1           |
| KCNJ2      | 0.7214288 | 0.3312159 | 2.1781 | 0.0295   | 0.697950294 | count | 1           |
| EPHA1-AS1  | 1.08608   | 0.4168293 | 2.6056 | 0.00923  | 0.697974418 | count | 1           |
| ARC        | 2.638107  | 1.095782  | 2.4075 | 0.0161   | 0.698238069 | count | 1           |
| FBRSL1     | 0.5865752 | 0.3493936 | 1.6788 | 0.0933   | 0.698784036 | count | 1           |
| SLC9A9     | 0.5419925 | 0.1609874 | 3.3667 | 0.000773 | 0.699470565 | count | 1           |
| HCG11      | 0.7454659 | 0.3724373 | 2.0016 | 0.0454   | 0.699632639 | count | 1           |
| C12orf29   | 0.6052722 | 0.3218843 | 1.8804 | 0.0602   | 0.700062653 | count | 1           |

|            |           |           |        |          |             |       |             |
|------------|-----------|-----------|--------|----------|-------------|-------|-------------|
| TTPAL      | 0.7236704 | 0.489407  | 1.4787 | 0.139    | 0.700224715 | count | 1           |
| TMEM241    | 1.400569  | 0.7665934 | 1.827  | 0.0678   | 0.700275352 | count | 1           |
| HEATR5B    | 0.6574427 | 0.2918198 | 2.2529 | 0.0244   | 0.700363987 | count | 1           |
| CD33       | 0.5028268 | 0.099033  | 5.0774 | 4.11E-07 | 0.700910651 | count | 0.009803172 |
| MIEF2      | 0.9397292 | 0.5089668 | 1.8463 | 0.065    | 0.701097981 | count | 1           |
| NME2       | 0.7353816 | 0.4273057 | 1.721  | 0.0854   | 0.701245374 | count | 1           |
| MORC2      | 0.850622  | 0.4691454 | 1.8131 | 0.0699   | 0.701825022 | count | 1           |
| AC026471.1 | 0.6644007 | 0.510067  | 1.3026 | 0.193    | 0.701977934 | count | 1           |
| HIST1H1D   | 0.5824335 | 0.273437  | 2.13   | 0.0333   | 0.702301269 | count | 1           |
| NUP37      | 0.5986961 | 0.2700497 | 2.217  | 0.0267   | 0.703611621 | count | 1           |
| FAM114A2   | 0.5991859 | 0.2465213 | 2.4306 | 0.0151   | 0.704201221 | count | 1           |
| HHIPL1     | 2.6659486 | 0.9442763 | 2.8233 | 0.00479  | 0.704252843 | count | 1           |
| TNFAIP6    | 0.5634542 | 0.2984576 | 1.8879 | 0.0592   | 0.70430565  | count | 1           |
| UBR4       | 0.5274502 | 0.1594268 | 3.3084 | 0.000952 | 0.704569243 | count | 1           |
| RAB28      | 0.5843385 | 0.2659522 | 2.1972 | 0.0281   | 0.704646892 | count | 1           |
| RAC2       | 0.4967386 | 0.0718085 | 6.9175 | 5.84E-12 | 0.705085217 | count | 1.41E-07    |
| ARHGEF19   | 0.9100716 | 0.5096772 | 1.7856 | 0.0743   | 0.705223491 | count | 1           |
| CD300LF    | 0.5849425 | 0.1999331 | 2.9257 | 0.00347  | 0.705390635 | count | 1           |
| AL160272.1 | 0.8322058 | 0.5916514 | 1.4066 | 0.16     | 0.705507081 | count | 1           |
| ZNF212     | 1.0968996 | 0.5561913 | 1.9722 | 0.0487   | 0.70557948  | count | 1           |
| PIEZO1     | 0.6158155 | 0.2946068 | 2.0903 | 0.0367   | 0.706112846 | count | 1           |
| CCDC80     | 1.2751054 | 0.5837271 | 2.1844 | 0.029    | 0.706495117 | count | 1           |
| OPA1       | 0.5694891 | 0.2467666 | 2.3078 | 0.0211   | 0.706529233 | count | 1           |
| C4orf46    | 0.730925  | 0.3825289 | 1.9108 | 0.0562   | 0.707587994 | count | 1           |
| SLC16A1    | 0.6817548 | 0.2895135 | 2.3548 | 0.0186   | 0.707626837 | count | 1           |
| AVL9       | 0.6451176 | 0.287479  | 2.2441 | 0.0249   | 0.70783513  | count | 1           |
| PTCD1      | 1.0393072 | 0.4869859 | 2.1342 | 0.0329   | 0.708006427 | count | 1           |
| KLRB1      | 1.277851  | 1.132028  | 1.1288 | 0.259    | 0.708166301 | count | 1           |
| POM121C    | 0.589105  | 0.2143929 | 2.7478 | 0.00604  | 0.708450301 | count | 1           |
| ZGRF1      | 1.4166503 | 0.7530396 | 1.8812 | 0.0601   | 0.7090924   | count | 1           |
| DENND6A    | 0.5880298 | 0.3151243 | 1.866  | 0.0622   | 0.709192548 | count | 1           |
| TRUB1      | 0.8364313 | 0.4393761 | 1.9037 | 0.0571   | 0.709323392 | count | 1           |
| EEF2K      | 0.6281295 | 0.3028276 | 2.0742 | 0.0382   | 0.709783126 | count | 1           |
| AL162377.1 | 0.8600844 | 0.4722561 | 1.8212 | 0.0687   | 0.710169329 | count | 1           |
| ATG2A      | 0.5473651 | 0.1960764 | 2.7916 | 0.00529  | 0.710189403 | count | 1           |
| ADPGK-AS1  | 0.9517376 | 0.6240387 | 1.5251 | 0.127    | 0.710775851 | count | 1           |
| GRSF1      | 0.5245095 | 0.1209707 | 4.3358 | 1.51E-05 | 0.711016699 | count | 0.3573868   |
| PDE2A      | 0.8182443 | 0.393592  | 2.0789 | 0.0377   | 0.711025195 | count | 1           |
| MTF2       | 0.5409685 | 0.1930455 | 2.8023 | 0.00511  | 0.711037924 | count | 1           |
| DENND3     | 0.548046  | 0.1852849 | 2.9579 | 0.00313  | 0.711083749 | count | 1           |
| NUDCD3     | 0.6073209 | 0.2824901 | 2.1499 | 0.0317   | 0.711265972 | count | 1           |
| ZNF337     | 0.9954104 | 0.6388115 | 1.5582 | 0.119    | 0.712509939 | count | 1           |
| KIF22      | 0.5296587 | 0.1676009 | 3.1602 | 0.0016   | 0.712580147 | count | 1           |
| UPRT       | 0.7589197 | 0.3262802 | 2.326  | 0.0201   | 0.712929221 | count | 1           |
| AC144652.1 | 0.5682744 | 0.2407842 | 2.3601 | 0.0183   | 0.712961906 | count | 1           |

|            |           |           |        |          |             |       |             |
|------------|-----------|-----------|--------|----------|-------------|-------|-------------|
| UHRF1BP1   | 0.6588173 | 0.3269904 | 2.0148 | 0.044    | 0.713110834 | count | 1           |
| PTGS2      | 0.5113094 | 0.1581239 | 3.2336 | 0.00124  | 0.713143503 | count | 1           |
| MFSD8      | 0.7092519 | 0.3512987 | 2.0189 | 0.0436   | 0.713620823 | count | 1           |
| HIST2H2BE  | 0.955431  | 0.3990156 | 2.3945 | 0.0167   | 0.713753813 | count | 1           |
| NR1D1      | 0.86429   | 0.4780651 | 1.8079 | 0.0707   | 0.713879722 | count | 1           |
| SPOPL      | 0.5411801 | 0.1936859 | 2.7941 | 0.00524  | 0.713937884 | count | 1           |
| ZDHHC20    | 0.5381319 | 0.1796905 | 2.9948 | 0.00277  | 0.71410134  | count | 1           |
| ADCY9      | 0.8908582 | 0.5945969 | 1.4983 | 0.134    | 0.714305932 | count | 1           |
| AC098818.2 | 0.6600863 | 0.50545   | 1.3059 | 0.192    | 0.714532075 | count | 1           |
| GADD45G    | 0.5315591 | 0.2358331 | 2.254  | 0.0243   | 0.714536608 | count | 1           |
| PET117     | 0.6950095 | 0.3221131 | 2.1577 | 0.0311   | 0.714590079 | count | 1           |
| SLC2A4RG   | 0.5468527 | 0.1782161 | 3.0685 | 0.00218  | 0.714786797 | count | 1           |
| PLBD1-AS1  | 1.1876494 | 0.6866195 | 1.7297 | 0.0838   | 0.714841252 | count | 1           |
| SAXO2      | 1.1876494 | 0.6114972 | 1.9422 | 0.0522   | 0.714841252 | count | 1           |
| ZNF888     | 1.1876494 | 0.6458305 | 1.8389 | 0.066    | 0.714841252 | count | 1           |
| USP46      | 0.6706352 | 0.3284535 | 2.0418 | 0.0413   | 0.714936883 | count | 1           |
| ZNF558     | 1.9682431 | 0.870036  | 2.2623 | 0.0238   | 0.715133138 | count | 1           |
| PAN3       | 0.5594404 | 0.1814055 | 3.0839 | 0.00207  | 0.715466733 | count | 1           |
| GOLM1      | 0.6562975 | 0.2979922 | 2.2024 | 0.0277   | 0.715512326 | count | 1           |
| BATF3      | 0.5815845 | 0.1871759 | 3.1072 | 0.00191  | 0.715671616 | count | 1           |
| RNF19A     | 0.525918  | 0.1349261 | 3.8978 | 9.97E-05 | 0.715679249 | count | 1           |
| CCND3      | 0.5267369 | 0.1155134 | 4.56   | 5.37E-06 | 0.715923891 | count | 0.12746769  |
| EDRF1      | 0.6243919 | 0.364458  | 1.7132 | 0.0868   | 0.71621807  | count | 1           |
| UBXN8      | 0.6971172 | 0.3175377 | 2.1954 | 0.0282   | 0.716846572 | count | 1           |
| GIMAP1     | 0.5399765 | 0.1366137 | 3.9526 | 7.95E-05 | 0.717010838 | count | 1           |
| CYSLTR1    | 0.541435  | 0.1408197 | 3.8449 | 0.000124 | 0.717171972 | count | 1           |
| GBA2       | 0.653383  | 0.3562137 | 1.8342 | 0.0667   | 0.717204582 | count | 1           |
| MAEA       | 0.5769547 | 0.2080385 | 2.7733 | 0.00559  | 0.717384989 | count | 1           |
| MAN2B2     | 0.6454449 | 0.2352224 | 2.744  | 0.00611  | 0.717436382 | count | 1           |
| RTP4       | 0.8072106 | 0.4354718 | 1.8536 | 0.0639   | 0.717441809 | count | 1           |
| APC        | 0.5484018 | 0.1738202 | 3.155  | 0.00162  | 0.717446442 | count | 1           |
| DNAJC4     | 0.5184212 | 0.1066925 | 4.859  | 1.25E-06 | 0.717744024 | count | 0.02976375  |
| RARG       | 0.7639815 | 0.3869733 | 1.9742 | 0.0485   | 0.717935129 | count | 1           |
| FANCI      | 1.1926301 | 0.631952  | 1.8872 | 0.0592   | 0.718125726 | count | 1           |
| NFKBID     | 0.510694  | 0.0952155 | 5.3636 | 8.92E-08 | 0.718423246 | count | 0.002132683 |
| AHNAK      | 0.5041592 | 0.0705599 | 7.1451 | 1.18E-12 | 0.718947499 | count | 2.85E-08    |
| HIPK1      | 0.5423687 | 0.160551  | 3.3782 | 0.000741 | 0.719332261 | count | 1           |
| TRPM7      | 0.5708333 | 0.200815  | 2.8426 | 0.00451  | 0.719822006 | count | 1           |
| CMPK2      | 0.6304489 | 0.3293964 | 1.914  | 0.0557   | 0.719868034 | count | 1           |
| FEM1A      | 0.6931656 | 0.3072483 | 2.256  | 0.0242   | 0.719947703 | count | 1           |
| GLCE       | 0.6197063 | 0.2564102 | 2.4169 | 0.0157   | 0.720283015 | count | 1           |
| SLCO3A1    | 0.5377455 | 0.1476731 | 3.6415 | 0.000277 | 0.720945103 | count | 1           |
| E4F1       | 0.7011466 | 0.3937998 | 1.7805 | 0.0751   | 0.72116124  | count | 1           |
| STAT6      | 0.5436636 | 0.156354  | 3.4771 | 0.000516 | 0.721954044 | count | 1           |
| PCF11-AS1  | 1.1984517 | 0.5854594 | 2.047  | 0.0408   | 0.721964785 | count | 1           |

|            |           |           |        |          |             |       |            |
|------------|-----------|-----------|--------|----------|-------------|-------|------------|
| SPACA6     | 0.6951342 | 0.3411339 | 2.0377 | 0.0417   | 0.722074206 | count | 1          |
| STRN3      | 0.5497775 | 0.1827684 | 3.0081 | 0.00266  | 0.722186079 | count | 1          |
| AC097634.1 | 1.1211981 | 0.6751406 | 1.6607 | 0.0969   | 0.722667295 | count | 1          |
| MAN2A1     | 0.5642704 | 0.2145661 | 2.6298 | 0.0086   | 0.723550335 | count | 1          |
| WDR91      | 0.6228201 | 0.2817541 | 2.2105 | 0.0272   | 0.723995935 | count | 1          |
| YPEL4      | 0.9326696 | 0.5385274 | 1.7319 | 0.0834   | 0.724072732 | count | 1          |
| LONP2      | 0.5407333 | 0.1788009 | 3.0242 | 0.00252  | 0.724289692 | count | 1          |
| GIMAP6     | 0.7121388 | 0.2362916 | 3.0138 | 0.00261  | 0.725015156 | count | 1          |
| RELL2      | 1.0624843 | 0.4477795 | 2.3728 | 0.0177   | 0.72519806  | count | 1          |
| ZNF582     | 1.1253241 | 0.5900906 | 1.907  | 0.0566   | 0.725569832 | count | 1          |
| CCDC93     | 0.5607696 | 0.2043418 | 2.7443 | 0.00611  | 0.72557442  | count | 1          |
| SH3RF1     | 0.6194316 | 0.2964619 | 2.0894 | 0.0368   | 0.725805278 | count | 1          |
| CDC37L1    | 0.5952525 | 0.2514855 | 2.3669 | 0.018    | 0.725856622 | count | 1          |
| TSGA10     | 0.6611274 | 0.4796557 | 1.3783 | 0.168    | 0.725987514 | count | 1          |
| LGALS12    | 1.4475793 | 0.6835032 | 2.1179 | 0.0343   | 0.726024187 | count | 1          |
| ARSD       | 0.6001985 | 0.2975115 | 2.0174 | 0.0438   | 0.726223964 | count | 1          |
| ZNF445     | 0.7602959 | 0.3527667 | 2.1552 | 0.0312   | 0.726226048 | count | 1          |
| TM7SF2     | 0.9051438 | 0.3775833 | 2.3972 | 0.0166   | 0.726587142 | count | 1          |
| NOTCH1     | 0.658734  | 0.2857064 | 2.3056 | 0.0212   | 0.728074383 | count | 1          |
| STAT5A     | 0.5747019 | 0.1770397 | 3.2462 | 0.00119  | 0.728161867 | count | 1          |
| CCDC14     | 0.6215129 | 0.2637279 | 2.3566 | 0.0185   | 0.72830481  | count | 1          |
| AC008124.1 | 0.6551306 | 0.4561227 | 1.4363 | 0.151    | 0.728543184 | count | 1          |
| DLG1       | 0.6057068 | 0.2971142 | 2.0386 | 0.0416   | 0.728851921 | count | 1          |
| ENPP1      | 0.8582171 | 0.6608837 | 1.2986 | 0.194    | 0.72901676  | count | 1          |
| GSPT2      | 0.8196087 | 0.4200416 | 1.9513 | 0.0511   | 0.729121351 | count | 1          |
| TIPIN      | 0.6448601 | 0.3100381 | 2.0799 | 0.0376   | 0.729249813 | count | 1          |
| SLC12A6    | 0.5832856 | 0.251357  | 2.3205 | 0.0204   | 0.729518727 | count | 1          |
| ZNF93      | 0.7427371 | 0.3871836 | 1.9183 | 0.0552   | 0.729907453 | count | 1          |
| ZMYM6      | 0.6603687 | 0.319185  | 2.0689 | 0.0387   | 0.729939439 | count | 1          |
| TMLHE      | 0.6306042 | 0.2315396 | 2.7235 | 0.0065   | 0.730149031 | count | 1          |
| KBTBD6     | 2.792011  | 1.407034  | 1.9843 | 0.0473   | 0.730384327 | count | 1          |
| ATP6V0C    | 1.3150665 | 0.6115327 | 2.1504 | 0.0316   | 0.730806423 | count | 1          |
| LYL1       | 0.527688  | 0.1150243 | 4.5876 | 4.71E-06 | 0.73106289  | count | 0.11183424 |
| AP004609.3 | 0.8054519 | 0.5103598 | 1.5782 | 0.115    | 0.73119575  | count | 1          |
| COL9A2     | 0.9771458 | 0.4506401 | 2.1684 | 0.0302   | 0.731274037 | count | 1          |
| RPP38      | 0.5783519 | 0.2170346 | 2.6648 | 0.00775  | 0.73174788  | count | 1          |
| BIN1       | 0.5455374 | 0.1528597 | 3.5689 | 0.000365 | 0.731825009 | count | 1          |
| GIMAP4     | 0.5200391 | 0.0722714 | 7.1956 | 8.22E-13 | 0.73192762  | count | 1.98E-08   |
| EXTL3      | 0.7043429 | 0.3433805 | 2.0512 | 0.0404   | 0.732024996 | count | 1          |
| ZNF75D     | 1.07179   | 0.4809009 | 2.2287 | 0.0259   | 0.732104442 | count | 1          |
| POLB       | 0.5938034 | 0.1879895 | 3.1587 | 0.0016   | 0.732615872 | count | 1          |
| SLC16A6    | 0.5699144 | 0.2502821 | 2.2771 | 0.0229   | 0.732652612 | count | 1          |
| AC106739.1 | 1.2148554 | 0.6462805 | 1.8798 | 0.0603   | 0.732782217 | count | 1          |
| CXXC1      | 0.6024883 | 0.2409689 | 2.5003 | 0.0125   | 0.732976688 | count | 1          |
| SLC7A7     | 0.5245468 | 0.0760993 | 6.8929 | 6.93E-12 | 0.733252181 | count | 1.67E-07   |



|            |           |           |         |          |             |       |             |
|------------|-----------|-----------|---------|----------|-------------|-------|-------------|
| AC005070.3 | 1.6701696 | 0.7347701 | 2.2731  | 0.0231   | 0.733630613 | count | 1           |
| ARL15      | 0.6993986 | 0.3672227 | 1.9046  | 0.057    | 0.733704832 | count | 1           |
| MLLT10     | 0.5647277 | 0.1818709 | 3.1051  | 0.00192  | 0.733719838 | count | 1           |
| AC004921.1 | 0.7208366 | 0.3785458 | 1.9042  | 0.057    | 0.734249518 | count | 1           |
| DIS3L2     | 0.6427117 | 0.3489091 | 1.8421  | 0.0656   | 0.734267222 | count | 1           |
| JUND       | 0.5100163 | 0.0323646 | 15.7585 | 2.28E-53 | 0.73448932  | count | 5.54E-49    |
| FAM185A    | 1.2182144 | 0.6471248 | 1.8825  | 0.0599   | 0.734997221 | count | 1           |
| CSRNP1     | 0.5271743 | 0.10171   | 5.1831  | 2.36E-07 | 0.735136141 | count | 0.005635444 |
| YY1AP1     | 0.6188587 | 0.2011379 | 3.0768  | 0.00212  | 0.735699442 | count | 1           |
| PDIA5      | 0.7154945 | 0.4774168 | 1.4987  | 0.134    | 0.736533787 | count | 1           |
| EEF1AKMT4  | 0.7024664 | 0.3426251 | 2.0502  | 0.0404   | 0.737048446 | count | 1           |
| WDR36      | 0.6107092 | 0.2579567 | 2.3675  | 0.018    | 0.737137059 | count | 1           |
| XPNPEP3    | 0.6452653 | 0.3376868 | 1.9108  | 0.0561   | 0.737266824 | count | 1           |
| GTF3C5     | 0.6908684 | 0.3123843 | 2.2116  | 0.0271   | 0.737309856 | count | 1           |
| SLC9A8     | 0.7324442 | 0.3330266 | 2.1994  | 0.0279   | 0.737998935 | count | 1           |
| DAG1       | 1.3269379 | 0.4977284 | 2.666   | 0.00773  | 0.738022952 | count | 1           |
| UBN2       | 0.6098334 | 0.266793  | 2.2858  | 0.0224   | 0.738128114 | count | 1           |
| SSBP2      | 0.5842264 | 0.205749  | 2.8395  | 0.00456  | 0.738151838 | count | 1           |
| KIZ        | 0.7721919 | 0.3133428 | 2.4644  | 0.0138   | 0.738168419 | count | 1           |
| REC8       | 1.028512  | 0.4324274 | 2.3785  | 0.0175   | 0.738205983 | count | 1           |
| PHF12      | 0.6298878 | 0.2703166 | 2.3302  | 0.0199   | 0.738365018 | count | 1           |
| ZNF718     | 1.4701825 | 0.6654115 | 2.2094  | 0.0272   | 0.73837301  | count | 1           |
| MPV17L     | 1.4701825 | 0.7060506 | 2.0823  | 0.0374   | 0.73837301  | count | 1           |
| TRA2A      | 0.5359889 | 0.1268379 | 4.2258  | 2.47E-05 | 0.738629025 | count | 0.5835622   |
| LTC4S      | 0.5293839 | 0.1245572 | 4.2501  | 2.22E-05 | 0.73881492  | count | 0.5247414   |
| FAM200A    | 0.8300626 | 0.440252  | 1.8854  | 0.0595   | 0.738976695 | count | 1           |
| FFAR2      | 0.5955647 | 0.3008812 | 1.9794  | 0.0479   | 0.739467528 | count | 1           |
| HABP4      | 1.0303931 | 0.5060429 | 2.0362  | 0.0418   | 0.739667304 | count | 1           |
| MTMR4      | 0.7184734 | 0.3525971 | 2.0377  | 0.0417   | 0.73972711  | count | 1           |
| ZC3H7A     | 0.5496374 | 0.1743744 | 3.1521  | 0.00164  | 0.739994361 | count | 1           |
| AC108488.1 | 0.8149534 | 0.5603796 | 1.4543  | 0.146    | 0.740314989 | count | 1           |
| FRAT1      | 0.5639601 | 0.173156  | 3.2569  | 0.00114  | 0.740444782 | count | 1           |
| FAS        | 0.7121635 | 0.2500786 | 2.8478  | 0.00444  | 0.740480175 | count | 1           |
| NRG1       | 0.5803658 | 0.2311087 | 2.5112  | 0.0121   | 0.740671635 | count | 1           |
| NOMO3      | 1.3317222 | 0.5389163 | 2.4711  | 0.0135   | 0.740930359 | count | 1           |
| POLL       | 0.7000486 | 0.2961794 | 2.3636  | 0.0182   | 0.74110027  | count | 1           |
| CCR2       | 0.7062885 | 0.296333  | 2.3834  | 0.0172   | 0.741215014 | count | 1           |
| NEIL1      | 0.9537661 | 0.5800434 | 1.6443  | 0.1      | 0.741691168 | count | 1           |
| NKTR       | 0.5381446 | 0.1348341 | 3.9912  | 6.77E-05 | 0.741752119 | count | 1           |
| CWF19L2    | 0.562902  | 0.1631605 | 3.45    | 0.00057  | 0.741838398 | count | 1           |
| NSUN5      | 0.6261048 | 0.2778839 | 2.2531  | 0.0243   | 0.74196979  | count | 1           |
| JAZF1      | 0.5791806 | 0.1546154 | 3.7459  | 0.000184 | 0.742016094 | count | 1           |
| RHOF       | 0.6283286 | 0.2716064 | 2.3134  | 0.0208   | 0.742031172 | count | 1           |
| NAPRT      | 0.5407604 | 0.1219432 | 4.4345  | 9.63E-06 | 0.742572313 | count | 0.22827915  |
| PAK4       | 1.0859047 | 0.6433308 | 1.6879  | 0.0915   | 0.742583535 | count | 1           |

|            |           |           |         |          |             |       |            |
|------------|-----------|-----------|---------|----------|-------------|-------|------------|
| CD79B      | 1.0869043 | 0.4715262 | 2.3051  | 0.0212   | 0.743325819 | count | 1          |
| C19orf25   | 0.5508923 | 0.1894777 | 2.9074  | 0.00368  | 0.743511228 | count | 1          |
| TMEM254    | 0.672262  | 0.350645  | 1.9172  | 0.0553   | 0.743513651 | count | 1          |
| PAXIP1-AS1 | 0.7155206 | 0.3864852 | 1.8514  | 0.0642   | 0.744110883 | count | 1          |
| RASSF2     | 0.5486437 | 0.1477356 | 3.7137  | 0.000209 | 0.744224429 | count | 1          |
| KDM1B      | 0.6070981 | 0.2319994 | 2.6168  | 0.00893  | 0.744227609 | count | 1          |
| MTAP       | 0.5911157 | 0.2850058 | 2.074   | 0.0382   | 0.744602195 | count | 1          |
| CHCHD4     | 0.6692327 | 0.2976203 | 2.2486  | 0.0246   | 0.744724767 | count | 1          |
| CDC42EP3   | 0.537813  | 0.121421  | 4.4293  | 9.87E-06 | 0.744831408 | count | 0.23392887 |
| S1PR3      | 0.6517492 | 0.382628  | 1.7033  | 0.0886   | 0.744884879 | count | 1          |
| ASB16-AS1  | 0.7480361 | 0.5183019 | 1.4432  | 0.149    | 0.745156751 | count | 1          |
| HIST1H4E   | 0.8999892 | 0.4779876 | 1.8829  | 0.0598   | 0.745414688 | count | 1          |
| INO80D     | 0.662502  | 0.2365149 | 2.8011  | 0.00513  | 0.745700033 | count | 1          |
| ZBTB20     | 0.5844159 | 0.1848505 | 3.1616  | 0.00159  | 0.745915751 | count | 1          |
| FBRS       | 0.575296  | 0.1868529 | 3.0789  | 0.0021   | 0.746144515 | count | 1          |
| FANCF      | 0.8569338 | 0.5450911 | 1.5721  | 0.116    | 0.746782101 | count | 1          |
| INTU       | 1.0915997 | 0.5410254 | 2.0176  | 0.0437   | 0.746812697 | count | 1          |
| ULK2       | 0.7496567 | 0.3515321 | 2.1325  | 0.0331   | 0.74684459  | count | 1          |
| RUNDC1     | 0.7594081 | 0.3300869 | 2.3006  | 0.0215   | 0.747070294 | count | 1          |
| CTSS       | 0.5191505 | 0.0367871 | 14.1123 | 1.54E-43 | 0.747634562 | count | 3.74E-39   |
| ASH2L      | 0.6194507 | 0.3062651 | 2.0226  | 0.0432   | 0.747914989 | count | 1          |
| FBF1       | 2.0582029 | 0.9356486 | 2.1998  | 0.0279   | 0.747950447 | count | 1          |
| LRRRC58    | 0.5700617 | 0.1978176 | 2.8818  | 0.00399  | 0.747951892 | count | 1          |
| PABPN1     | 0.5457724 | 0.1249594 | 4.3676  | 1.31E-05 | 0.747989695 | count | 0.3102211  |
| AC010240.3 | 1.702071  | 1.0380211 | 1.6397  | 0.101    | 0.748551582 | count | 1          |
| CAPN5      | 1.702071  | 0.7881152 | 2.1597  | 0.0309   | 0.748551582 | count | 1          |
| AL359232.1 | 1.702071  | 0.7334359 | 2.3207  | 0.0204   | 0.748551582 | count | 1          |
| PIK3C2A    | 0.6067143 | 0.1807665 | 3.3563  | 0.000802 | 0.748844724 | count | 1          |
| CHD8       | 0.5804765 | 0.1977551 | 2.9353  | 0.00336  | 0.748981434 | count | 1          |
| CPEB2      | 0.6864738 | 0.386476  | 1.7762  | 0.0758   | 0.749552043 | count | 1          |
| HOXB2      | 0.6864738 | 0.3525539 | 1.9471  | 0.0516   | 0.749552043 | count | 1          |
| ZBTB24     | 0.5819127 | 0.234875  | 2.4775  | 0.0133   | 0.750018681 | count | 1          |
| AC011978.2 | 1.7052872 | 0.7403583 | 2.3033  | 0.0213   | 0.750051657 | count | 1          |
| WWC3       | 0.6738944 | 0.2755951 | 2.4452  | 0.0145   | 0.750076487 | count | 1          |
| RASSF8-AS1 | 1.4923464 | 0.6896534 | 2.1639  | 0.0306   | 0.750458484 | count | 1          |
| PLEKHF2    | 0.5809774 | 0.1993844 | 2.9139  | 0.0036   | 0.750459881 | count | 1          |
| LEKR1      | 0.8108002 | 0.7815349 | 1.0374  | 0.3      | 0.75079139  | count | 1          |
| PLA1A      | 0.9652346 | 0.5164931 | 1.8688  | 0.0618   | 0.751276748 | count | 1          |
| DGKZ       | 0.5557824 | 0.157816  | 3.5217  | 0.000437 | 0.751313735 | count | 1          |
| TLR8       | 0.5964854 | 0.1937572 | 3.0785  | 0.0021   | 0.751475833 | count | 1          |
| SNX21      | 0.8840819 | 0.3852801 | 2.2946  | 0.0218   | 0.752432053 | count | 1          |
| SLC41A3    | 0.646702  | 0.4062565 | 1.5919  | 0.112    | 0.752491227 | count | 1          |
| SSH2       | 0.5554519 | 0.1252793 | 4.4337  | 9.67E-06 | 0.752757715 | count | 0.22920801 |
| ZNF493     | 0.7562368 | 0.4369903 | 1.7306  | 0.0837   | 0.753699339 | count | 1          |
| FAR1       | 0.5577493 | 0.169991  | 3.2811  | 0.00105  | 0.75370921  | count | 1          |

|            |           |           |        |          |             |       |             |
|------------|-----------|-----------|--------|----------|-------------|-------|-------------|
| LNPEP      | 0.5623772 | 0.1573531 | 3.574  | 0.000358 | 0.753899229 | count | 1           |
| MCM2       | 1.3535414 | 0.7184791 | 1.8839 | 0.0597   | 0.754182088 | count | 1           |
| ZNF595     | 1.3535414 | 0.7649977 | 1.7693 | 0.077    | 0.754182088 | count | 1           |
| MALINC1    | 1.3535414 | 0.8118608 | 1.6672 | 0.0956   | 0.754182088 | count | 1           |
| SCAMP5     | 1.3535414 | 0.8915718 | 1.5182 | 0.129    | 0.754182088 | count | 1           |
| DDX60      | 0.6384618 | 0.2508116 | 2.5456 | 0.011    | 0.754288717 | count | 1           |
| PPP1R9B    | 0.5960033 | 0.2403189 | 2.4801 | 0.0132   | 0.754433498 | count | 1           |
| SMCHD1     | 0.5394164 | 0.0914712 | 5.8971 | 4.21E-09 | 0.754566638 | count | 0.000101057 |
| GIMAP2     | 0.620051  | 0.1706155 | 3.6342 | 0.000285 | 0.754784493 | count | 1           |
| PLD4       | 0.5675585 | 0.1850949 | 3.0663 | 0.00219  | 0.75489592  | count | 1           |
| TMOD1      | 0.8872205 | 0.4187832 | 2.1186 | 0.0342   | 0.755275716 | count | 1           |
| ISYNA1     | 1.0071864 | 0.4973162 | 2.0252 | 0.043    | 0.755541263 | count | 1           |
| OGT        | 0.5810395 | 0.1866364 | 3.1132 | 0.00187  | 0.755903864 | count | 1           |
| IKBKE      | 0.7082166 | 0.2942751 | 2.4066 | 0.0162   | 0.756513419 | count | 1           |
| SLC2A9     | 0.6796978 | 0.3296436 | 2.0619 | 0.0393   | 0.756740679 | count | 1           |
| OFD1       | 0.5802287 | 0.1699287 | 3.4145 | 0.000649 | 0.756936156 | count | 1           |
| IER2       | 0.5283648 | 0.0604868 | 8.7352 | 4.42E-18 | 0.757308417 | count | 1.07E-13    |
| DHRS7B     | 0.5754134 | 0.2307788 | 2.4934 | 0.0127   | 0.758504749 | count | 1           |
| SLC35A3    | 0.6573038 | 0.3844562 | 1.7097 | 0.0874   | 0.758530675 | count | 1           |
| FAM117A    | 1.0548473 | 0.5739346 | 1.8379 | 0.0662   | 0.758672668 | count | 1           |
| MLLT6      | 0.5843678 | 0.2420962 | 2.4138 | 0.0159   | 0.75881553  | count | 1           |
| RAB39A     | 0.7522945 | 0.3241683 | 2.3207 | 0.0204   | 0.758891694 | count | 1           |
| RGS18      | 0.5757799 | 0.1368809 | 4.2064 | 2.69E-05 | 0.758993027 | count | 0.6352973   |
| ZFAND1     | 0.5750774 | 0.165732  | 3.4699 | 0.00053  | 0.759137737 | count | 1           |
| SNX13      | 0.5792099 | 0.1644982 | 3.5211 | 0.000438 | 0.759479062 | count | 1           |
| TESC       | 0.5712806 | 0.144996  | 3.94   | 8.38E-05 | 0.759894276 | count | 1           |
| TMEM8B     | 1.056597  | 0.4856196 | 2.1758 | 0.0297   | 0.760033076 | count | 1           |
| IFFO1      | 0.6096935 | 0.1986585 | 3.0691 | 0.00217  | 0.760294288 | count | 1           |
| VILL       | 1.174892  | 0.5764675 | 2.0381 | 0.0416   | 0.760451831 | count | 1           |
| WDFY3      | 0.5877159 | 0.2273576 | 2.585  | 0.0098   | 0.760897645 | count | 1           |
| TUBD1      | 0.7460991 | 0.4431119 | 1.6838 | 0.0924   | 0.761097727 | count | 1           |
| LYSMD4     | 0.893704  | 0.4691302 | 1.905  | 0.0569   | 0.761151553 | count | 1           |
| SPNS3      | 0.7184855 | 0.3762791 | 1.9094 | 0.0563   | 0.761366049 | count | 1           |
| ODF2L      | 0.6470481 | 0.2980956 | 2.1706 | 0.0301   | 0.761882024 | count | 1           |
| CC2D2B     | 2.0996406 | 0.9322178 | 2.2523 | 0.0244   | 0.762769768 | count | 1           |
| IGSF8      | 0.653017  | 0.3290956 | 1.9843 | 0.0473   | 0.763152475 | count | 1           |
| FBXL18     | 2.100796  | 1.020723  | 2.0581 | 0.0397   | 0.763180003 | count | 1           |
| ALG8       | 0.6531624 | 0.3172057 | 2.0591 | 0.0396   | 0.763326741 | count | 1           |
| AC064807.1 | 1.0171789 | 0.479237  | 2.1225 | 0.0339   | 0.76361977  | count | 1           |
| ARHGAP27   | 0.6079755 | 0.2790624 | 2.1786 | 0.0295   | 0.76362147  | count | 1           |
| ZNF142     | 0.8756144 | 0.4766914 | 1.8369 | 0.0664   | 0.764076565 | count | 1           |
| B4GALT3    | 0.6009805 | 0.2321719 | 2.5885 | 0.0097   | 0.764205241 | count | 1           |
| CLASRP     | 0.6682607 | 0.2167145 | 3.0836 | 0.00207  | 0.764295199 | count | 1           |
| MLKL       | 0.6403513 | 0.2130051 | 3.0063 | 0.00267  | 0.764370625 | count | 1           |
| AC092171.3 | 1.1808337 | 0.5823427 | 2.0277 | 0.0427   | 0.76463393  | count | 1           |

|            |           |           |        |          |             |       |           |
|------------|-----------|-----------|--------|----------|-------------|-------|-----------|
| PHF8       | 0.7102455 | 0.3002703 | 2.3654 | 0.0181   | 0.764915232 | count | 1         |
| CITED4     | 0.6266544 | 0.223204  | 2.8075 | 0.00503  | 0.764936474 | count | 1         |
| CCDC149    | 0.6495947 | 0.2610446 | 2.4884 | 0.0129   | 0.764954481 | count | 1         |
| CNTRL      | 0.5726313 | 0.1338289 | 4.2788 | 1.95E-05 | 0.76508712  | count | 0.4611945 |
| RANGAP1    | 0.7353547 | 0.3235904 | 2.2725 | 0.0231   | 0.765575507 | count | 1         |
| SPON2      | 1.264612  | 0.5920308 | 2.1361 | 0.0328   | 0.765583308 | count | 1         |
| CCDC136    | 1.264612  | 0.7147442 | 1.7693 | 0.077    | 0.765583308 | count | 1         |
| MALT1      | 0.5646693 | 0.139741  | 4.0408 | 5.49E-05 | 0.765604855 | count | 1         |
| LINC01136  | 0.899677  | 0.5143323 | 1.7492 | 0.0804   | 0.766566495 | count | 1         |
| GPATCH2    | 0.5870292 | 0.1761129 | 3.3333 | 0.000871 | 0.766597872 | count | 1         |
| SLC25A30   | 0.983973  | 0.5643668 | 1.7435 | 0.0814   | 0.766949237 | count | 1         |
| SIK3       | 0.5985679 | 0.2035887 | 2.9401 | 0.00331  | 0.76721009  | count | 1         |
| PURB       | 0.5641136 | 0.1304874 | 4.3231 | 1.60E-05 | 0.768249268 | count | 0.378608  |
| LANCL1     | 0.8612625 | 0.5289709 | 1.6282 | 0.104    | 0.768426728 | count | 1         |
| RCAN1      | 0.5883485 | 0.1737953 | 3.3853 | 0.000722 | 0.769014577 | count | 1         |
| PIP5K1B    | 1.0243813 | 0.5167798 | 1.9822 | 0.0476   | 0.769444337 | count | 1         |
| SLFN12     | 0.660912  | 0.248597  | 2.6586 | 0.0079   | 0.769460946 | count | 1         |
| IFIT2      | 0.5684142 | 0.2380202 | 2.3881 | 0.017    | 0.769917855 | count | 1         |
| HERPUD2    | 0.5789254 | 0.1725854 | 3.3544 | 0.000807 | 0.770161555 | count | 1         |
| HILPDA     | 0.7150543 | 0.4024957 | 1.7766 | 0.0758   | 0.770280254 | count | 1         |
| FSTL3      | 0.8634571 | 0.3705821 | 2.33   | 0.0199   | 0.770500158 | count | 1         |
| AC245297.3 | 0.6018591 | 0.2574745 | 2.3375 | 0.0195   | 0.770515091 | count | 1         |
| KIAA1841   | 0.7333622 | 0.3795097 | 1.9324 | 0.0534   | 0.770754404 | count | 1         |
| KLHL18     | 0.6157753 | 0.2127281 | 2.8947 | 0.00383  | 0.770862785 | count | 1         |
| CARD8-AS1  | 0.6504253 | 0.2237527 | 2.9069 | 0.00368  | 0.7714872   | count | 1         |
| NCSTN      | 0.6035938 | 0.1978064 | 3.0514 | 0.0023   | 0.771772069 | count | 1         |
| TIMM21     | 0.7415726 | 0.3061463 | 2.4223 | 0.0155   | 0.772309356 | count | 1         |
| CRTC2      | 0.6934568 | 0.2751174 | 2.5206 | 0.0118   | 0.772548102 | count | 1         |
| MAP4K2     | 0.9065336 | 0.3205496 | 2.8281 | 0.00472  | 0.77278448  | count | 1         |
| CMBL       | 1.3842299 | 0.5810202 | 2.3824 | 0.0173   | 0.772795344 | count | 1         |
| TSEN2      | 1.3843884 | 0.6541268 | 2.1164 | 0.0344   | 0.772891374 | count | 1         |
| AL390957.1 | 1.3846785 | 0.7945203 | 1.7428 | 0.0815   | 0.773067169 | count | 1         |
| STS        | 1.3846785 | 0.7993034 | 1.7324 | 0.0833   | 0.773067169 | count | 1         |
| FFAR3      | 0.5765784 | 0.2579754 | 2.235  | 0.0255   | 0.773469718 | count | 1         |
| FP700111.1 | 1.0745123 | 0.596072  | 1.8027 | 0.0716   | 0.773965573 | count | 1         |
| NECAP1     | 0.5949264 | 0.2030472 | 2.93   | 0.00342  | 0.774194856 | count | 1         |
| TTC7A      | 0.6065022 | 0.2136073 | 2.8393 | 0.00456  | 0.774524286 | count | 1         |
| NR2F6      | 0.7244841 | 0.4198257 | 1.7257 | 0.0845   | 0.774536942 | count | 1         |
| ZNF776     | 1.7582702 | 0.8465213 | 2.0771 | 0.0379   | 0.774635589 | count | 1         |
| NISCH      | 0.583872  | 0.1781861 | 3.2768 | 0.00106  | 0.774940051 | count | 1         |
| DCUN1D2    | 0.9937742 | 0.554485  | 1.7922 | 0.0732   | 0.775151313 | count | 1         |
| CEP44      | 0.7093657 | 0.2661369 | 2.6654 | 0.00774  | 0.775411324 | count | 1         |
| ERF        | 0.6021911 | 0.1805999 | 3.3344 | 0.000868 | 0.775628636 | count | 1         |
| F13A1      | 0.5439255 | 0.0858858 | 6.3331 | 2.85E-10 | 0.776040906 | count | 6.86E-06  |
| PRELID2    | 0.7450446 | 0.4817896 | 1.5464 | 0.122    | 0.776070405 | count | 1         |

|            |           |           |        |          |             |       |            |
|------------|-----------|-----------|--------|----------|-------------|-------|------------|
| MNAT1      | 0.6086641 | 0.2246875 | 2.7089 | 0.0068   | 0.776280609 | count | 1          |
| AC009113.1 | 1.0776733 | 0.7225228 | 1.4915 | 0.136    | 0.77642446  | count | 1          |
| ANKRD46    | 0.7988785 | 0.4074788 | 1.9605 | 0.05     | 0.77672795  | count | 1          |
| NAT14      | 0.9109997 | 0.5126349 | 1.7771 | 0.0757   | 0.776835715 | count | 1          |
| EEF1G      | 1.5413892 | 0.6904155 | 2.2326 | 0.0257   | 0.777105692 | count | 1          |
| STAT5B     | 0.6674321 | 0.3039615 | 2.1958 | 0.0282   | 0.777250789 | count | 1          |
| NOTCH2     | 0.5901929 | 0.1613243 | 3.6584 | 0.000259 | 0.777632614 | count | 1          |
| AC012651.1 | 3.050161  | 1.363085  | 2.2377 | 0.0253   | 0.778250909 | count | 1          |
| SDHAF3     | 0.5875165 | 0.1897198 | 3.0968 | 0.00198  | 0.778346604 | count | 1          |
| PPP1R3F    | 1.2842954 | 0.5926122 | 2.1672 | 0.0303   | 0.778549635 | count | 1          |
| DDIAS      | 1.2842954 | 0.6893337 | 1.8631 | 0.0626   | 0.778549635 | count | 1          |
| CCL4L2     | 0.5406231 | 0.1240281 | 4.3589 | 1.36E-05 | 0.779153994 | count | 0.32198    |
| CASP2      | 0.717838  | 0.3264457 | 2.199  | 0.028    | 0.779319485 | count | 1          |
| JAM2       | 1.2019794 | 0.6453633 | 1.8625 | 0.0627   | 0.779516108 | count | 1          |
| ZNF429     | 0.7349947 | 0.5513637 | 1.333  | 0.183    | 0.779529856 | count | 1          |
| GIGYF1     | 0.6179082 | 0.228328  | 2.7062 | 0.00685  | 0.780168687 | count | 1          |
| COG5       | 0.7357346 | 0.2721621 | 2.7033 | 0.00691  | 0.780344263 | count | 1          |
| AL592494.3 | 1.54749   | 0.8631647 | 1.7928 | 0.0731   | 0.780410241 | count | 1          |
| NAT8L      | 1.54749   | 1.0627122 | 1.4562 | 0.145    | 0.780410241 | count | 1          |
| AC006033.2 | 1.54749   | 0.8248743 | 1.876  | 0.0608   | 0.780410241 | count | 1          |
| TAPBPL     | 0.6522617 | 0.2047542 | 3.1856 | 0.00146  | 0.781397168 | count | 1          |
| SNRK       | 0.6230513 | 0.1816008 | 3.4309 | 0.000612 | 0.781517784 | count | 1          |
| HOOK2      | 0.6450504 | 0.250642  | 2.5736 | 0.0101   | 0.781677983 | count | 1          |
| MAP2K5     | 0.7199673 | 0.5182405 | 1.3893 | 0.165    | 0.781711915 | count | 1          |
| LYRM1      | 0.6316342 | 0.2343809 | 2.6949 | 0.00709  | 0.781861531 | count | 1          |
| S100Z      | 0.6871628 | 0.2501372 | 2.7471 | 0.00606  | 0.782615436 | count | 1          |
| NSUN7      | 1.1402658 | 0.4841304 | 2.3553 | 0.0186   | 0.782969657 | count | 1          |
| COX16      | 0.6462805 | 0.3455396 | 1.8704 | 0.0616   | 0.783200187 | count | 1          |
| XPO7       | 0.7027759 | 0.2551262 | 2.7546 | 0.00592  | 0.78326048  | count | 1          |
| CCDC121    | 1.0868545 | 0.5225215 | 2.08   | 0.0376   | 0.783567135 | count | 1          |
| MAU2       | 0.7124019 | 0.3055261 | 2.3317 | 0.0198   | 0.784229586 | count | 1          |
| ITPRIP     | 0.5957785 | 0.1861923 | 3.1998 | 0.00139  | 0.784492814 | count | 1          |
| AL117332.1 | 1.1425216 | 0.5831261 | 1.9593 | 0.0502   | 0.784646081 | count | 1          |
| FAM110B    | 0.9197049 | 0.3527236 | 2.6074 | 0.00918  | 0.784734677 | count | 1          |
| CRACR2B    | 1.005545  | 0.420391  | 2.3919 | 0.0168   | 0.785005569 | count | 1          |
| SARNP      | 0.6638552 | 0.3274524 | 2.0273 | 0.0427   | 0.78502847  | count | 1          |
| IL1R2      | 0.5971656 | 0.2046285 | 2.9183 | 0.00355  | 0.785150415 | count | 1          |
| NCF2       | 0.5524216 | 0.0590833 | 9.3499 | 1.91E-20 | 0.785402644 | count | 4.63E-16   |
| BIN2       | 0.5679949 | 0.1050053 | 5.4092 | 6.94E-08 | 0.786011439 | count | 0.00165977 |
| EAF1-AS1   | 1.044862  | 0.5539567 | 1.8862 | 0.0594   | 0.786013928 | count | 1          |
| STK17B     | 0.552449  | 0.0633068 | 8.7265 | 4.76E-18 | 0.786469725 | count | 1.15E-13   |
| MOB1B      | 0.6219452 | 0.1988655 | 3.1275 | 0.00178  | 0.786585666 | count | 1          |
| NPHP3      | 0.9750481 | 0.3988011 | 2.4449 | 0.0146   | 0.786817203 | count | 1          |
| INPPL1     | 0.6732087 | 0.2070678 | 3.2512 | 0.00116  | 0.787362553 | count | 1          |
| ACACB      | 1.5605415 | 0.6413932 | 2.433  | 0.015    | 0.78747222  | count | 1          |

|            |           |           |        |          |             |       |           |
|------------|-----------|-----------|--------|----------|-------------|-------|-----------|
| DTX2       | 0.6913286 | 0.2507831 | 2.7567 | 0.00588  | 0.787497451 | count | 1         |
| AC015912.3 | 0.6311555 | 0.384579  | 1.6412 | 0.101    | 0.787534572 | count | 1         |
| RAB27A     | 0.5861524 | 0.1901791 | 3.0821 | 0.00208  | 0.787864789 | count | 1         |
| CMTM2      | 1.41146   | 0.5649639 | 2.4983 | 0.0125   | 0.789281092 | count | 1         |
| SPECC1     | 0.5823601 | 0.1506435 | 3.8658 | 0.000114 | 0.789499816 | count | 1         |
| MTERF3     | 0.7269727 | 0.3045158 | 2.3873 | 0.017    | 0.789584696 | count | 1         |
| NAALADL2   | 1.7915484 | 0.8875443 | 2.0185 | 0.0436   | 0.789948467 | count | 1         |
| AFAP1      | 1.7915484 | 0.8148933 | 2.1985 | 0.028    | 0.789948467 | count | 1         |
| POLR3C     | 0.6937583 | 0.2511074 | 2.7628 | 0.00577  | 0.790345263 | count | 1         |
| USP15      | 0.5579913 | 0.0732172 | 7.621  | 3.57E-14 | 0.791675813 | count | 8.63E-10  |
| HDAC7      | 0.7927031 | 0.2957959 | 2.6799 | 0.00741  | 0.791733273 | count | 1         |
| ACPP       | 0.852861  | 0.272086  | 3.1345 | 0.00174  | 0.791910508 | count | 1         |
| RETN       | 0.5946818 | 0.1375955 | 4.322  | 1.61E-05 | 0.792682801 | count | 0.3809582 |
| ZNF143     | 0.6322103 | 0.1958111 | 3.2287 | 0.00126  | 0.793201688 | count | 1         |
| POMT1      | 1.0539836 | 0.461142  | 2.2856 | 0.0224   | 0.793396444 | count | 1         |
| AC068473.5 | 2.1872353 | 1.0138218 | 2.1574 | 0.0311   | 0.793432357 | count | 1         |
| HS6ST1     | 0.7611369 | 0.3274201 | 2.3246 | 0.0202   | 0.793511051 | count | 1         |
| PRRT3      | 1.2236579 | 0.6661091 | 1.837  | 0.0663   | 0.794769924 | count | 1         |
| POFUT1     | 1.223747  | 0.5020623 | 2.4374 | 0.0149   | 0.794832647 | count | 1         |
| SASS6      | 0.6825142 | 0.3316753 | 2.0578 | 0.0397   | 0.795278078 | count | 1         |
| QRICH1     | 0.6799267 | 0.2638154 | 2.5773 | 0.01     | 0.795421908 | count | 1         |
| LEPR       | 1.1570387 | 0.5956139 | 1.9426 | 0.0522   | 0.795434738 | count | 1         |
| RHPN1      | 1.1570387 | 0.5997601 | 1.9292 | 0.0538   | 0.795434738 | count | 1         |
| C2CD2      | 0.9094711 | 0.4592426 | 1.9804 | 0.0478   | 0.795463258 | count | 1         |
| CCDC22     | 0.6374728 | 0.1947816 | 3.2728 | 0.00108  | 0.795556187 | count | 1         |
| ADD3       | 0.6246286 | 0.2018323 | 3.0948 | 0.00199  | 0.795855328 | count | 1         |
| GBF1       | 0.6729252 | 0.2989646 | 2.2509 | 0.0245   | 0.796015589 | count | 1         |
| ZNF736     | 0.7636238 | 0.4465574 | 1.71   | 0.0874   | 0.796207555 | count | 1         |
| MRFAP1L1   | 0.6988932 | 0.3816618 | 1.8312 | 0.0672   | 0.79636479  | count | 1         |
| CASP8      | 0.5971341 | 0.1680956 | 3.5523 | 0.000389 | 0.796858906 | count | 1         |
| CYP2R1     | 0.807733  | 0.4111966 | 1.9643 | 0.0496   | 0.796913686 | count | 1         |
| AL121603.2 | 0.7644086 | 0.372445  | 2.0524 | 0.0402   | 0.797058556 | count | 1         |
| ANKH       | 0.6035551 | 0.3218922 | 1.875  | 0.0609   | 0.798231797 | count | 1         |
| SGMS2      | 0.6249472 | 0.212897  | 2.9354 | 0.00336  | 0.798429719 | count | 1         |
| CBFA2T3    | 0.8454148 | 0.5143712 | 1.6436 | 0.1      | 0.798683546 | count | 1         |
| IVD        | 0.630552  | 0.2139813 | 2.9468 | 0.00324  | 0.798870703 | count | 1         |
| IL11RA     | 1.4285226 | 0.6533992 | 2.1863 | 0.0289   | 0.799594646 | count | 1         |
| GRAP       | 1.1627811 | 0.564237  | 2.0608 | 0.0394   | 0.799702292 | count | 1         |
| KDM3B      | 0.6294795 | 0.2406219 | 2.6161 | 0.00895  | 0.799859542 | count | 1         |
| TUSC1      | 0.7475433 | 0.3046499 | 2.4538 | 0.0142   | 0.800110302 | count | 1         |
| CYP1B1     | 0.5789458 | 0.1766086 | 3.2781 | 0.00106  | 0.80035838  | count | 1         |
| SF3A2      | 0.7836008 | 0.3234272 | 2.4228 | 0.0155   | 0.801021653 | count | 1         |
| SIGLEC1    | 0.6056956 | 0.1837383 | 3.2965 | 0.000993 | 0.801092342 | count | 1         |
| C9orf66    | 0.7068841 | 0.303974  | 2.3255 | 0.0201   | 0.801557561 | count | 1         |
| BORCS5     | 0.631959  | 0.2071914 | 3.0501 | 0.00231  | 0.801882867 | count | 1         |

|            |           |           |         |          |             |       |            |
|------------|-----------|-----------|---------|----------|-------------|-------|------------|
| Z82244.2   | 0.8496198 | 0.4471609 | 1.9     | 0.0575   | 0.802862719 | count | 1          |
| MYADM      | 0.5644314 | 0.0748684 | 7.539   | 6.63E-14 | 0.803517251 | count | 1.60E-09   |
| ZNF322     | 0.6414622 | 0.2423498 | 2.6468  | 0.00818  | 0.803580399 | count | 1          |
| OSBPL3     | 0.7346707 | 0.4141916 | 1.7737  | 0.0762   | 0.804029772 | count | 1          |
| WARS       | 0.6043102 | 0.125799  | 4.8038  | 1.65E-06 | 0.804265277 | count | 0.0392634  |
| ZNF529-AS1 | 1.1135436 | 0.5619489 | 1.9816  | 0.0476   | 0.804335754 | count | 1          |
| EVA1C      | 0.9665992 | 0.5747415 | 1.6818  | 0.0927   | 0.80441049  | count | 1          |
| AC009414.2 | 1.823263  | 1.2788352 | 1.4257  | 0.154    | 0.80444234  | count | 1          |
| MST1       | 1.823263  | 1.2788352 | 1.4257  | 0.154    | 0.80444234  | count | 1          |
| LDOC1      | 1.823263  | 1.2788352 | 1.4257  | 0.154    | 0.80444234  | count | 1          |
| HYKK       | 1.823263  | 0.8288207 | 2.1998  | 0.0279   | 0.80444234  | count | 1          |
| AC011447.3 | 1.823263  | 0.8288207 | 2.1998  | 0.0279   | 0.80444234  | count | 1          |
| ADM2       | 1.823263  | 1.22194   | 1.4921  | 0.136    | 0.80444234  | count | 1          |
| ATP2B4     | 0.6475145 | 0.2116435 | 3.0595  | 0.00224  | 0.805178844 | count | 1          |
| ZBTB45     | 1.0298657 | 0.4911396 | 2.0969  | 0.0361   | 0.805377567 | count | 1          |
| MAPK14     | 0.624477  | 0.1700512 | 3.6723  | 0.000246 | 0.805643654 | count | 1          |
| AP1S2      | 0.5629992 | 0.0570082 | 9.8758  | 1.39E-22 | 0.80573661  | count | 3.37E-18   |
| CLDN7      | 0.7735868 | 0.3270741 | 2.3652  | 0.0181   | 0.807013395 | count | 1          |
| PARP8      | 0.6355601 | 0.1970996 | 3.2246  | 0.00128  | 0.807705274 | count | 1          |
| EVI2B      | 0.5667155 | 0.0526714 | 10.7595 | 2.06E-26 | 0.80771311  | count | 5.00E-22   |
| SSFA2      | 0.5979752 | 0.1339764 | 4.4633  | 8.44E-06 | 0.808198639 | count | 0.20013772 |
| SUPV3L1    | 0.790428  | 0.3002786 | 2.6323  | 0.00853  | 0.808297773 | count | 1          |
| MRC2       | 1.175007  | 0.5912891 | 1.9872  | 0.047    | 0.808787536 | count | 1          |
| SDHAF4     | 0.7293729 | 0.3729299 | 1.9558  | 0.0506   | 0.808808137 | count | 1          |
| MAN1A1     | 0.6001241 | 0.1334651 | 4.4965  | 7.23E-06 | 0.808881283 | count | 0.17148114 |
| FUZ        | 0.709608  | 0.2924377 | 2.4265  | 0.0153   | 0.808929624 | count | 1          |
| C1orf32    | 0.6560351 | 0.1993491 | 3.2909  | 0.00101  | 0.809132225 | count | 1          |
| WRN        | 0.8308513 | 0.35276   | 2.3553  | 0.0186   | 0.809349986 | count | 1          |
| AC092053.2 | 1.035164  | 0.6015597 | 1.7208  | 0.0854   | 0.809817223 | count | 1          |
| ZHX3       | 1.445641  | 0.7869428 | 1.837   | 0.0663   | 0.809927596 | count | 1          |
| AP002387.2 | 0.7626345 | 0.3387682 | 2.2512  | 0.0245   | 0.809972745 | count | 1          |
| CYBRD1     | 0.6517426 | 0.2317261 | 2.8126  | 0.00495  | 0.810531726 | count | 1          |
| MB21D2     | 0.7771673 | 0.2729491 | 2.8473  | 0.00445  | 0.810898002 | count | 1          |
| AC083843.3 | 1.4477054 | 0.533191  | 2.7152  | 0.00667  | 0.811172624 | count | 1          |
| TMEM99     | 1.4477054 | 0.6164079 | 2.3486  | 0.0189   | 0.811172624 | count | 1          |
| PRMT9      | 0.6044499 | 0.1926171 | 3.1381  | 0.00172  | 0.811190819 | count | 1          |
| SLC39A9    | 0.8584827 | 0.3866761 | 2.2202  | 0.0265   | 0.811673855 | count | 1          |
| SLC2A6     | 0.7275682 | 0.3158251 | 2.3037  | 0.0213   | 0.811781132 | count | 1          |
| LEMD2      | 0.684311  | 0.280523  | 2.4394  | 0.0148   | 0.812661147 | count | 1          |
| ZBTB37     | 0.7531468 | 0.3991434 | 1.8869  | 0.0593   | 0.812822827 | count | 1          |
| PLCL2      | 0.6523022 | 0.224284  | 2.9084  | 0.00367  | 0.812835633 | count | 1          |
| DRG1       | 0.648932  | 0.2115175 | 3.068   | 0.00218  | 0.813099397 | count | 1          |
| RILPL2     | 0.5693921 | 0.0567101 | 10.0404 | 2.83E-23 | 0.813130393 | count | 6.86E-19   |
| U2AF2      | 0.6479724 | 0.238334  | 2.7188  | 0.0066   | 0.813316307 | count | 1          |
| GATB       | 0.813762  | 0.3860205 | 2.1081  | 0.0351   | 0.813729376 | count | 1          |

|            |           |           |         |          |             |       |            |
|------------|-----------|-----------|---------|----------|-------------|-------|------------|
| ZKSCAN8    | 0.9295573 | 0.5443652 | 1.7076  | 0.0878   | 0.814106263 | count | 1          |
| PRH1       | 0.7665565 | 0.3768713 | 2.034   | 0.0421   | 0.814295611 | count | 1          |
| RNF166     | 0.6004598 | 0.1303151 | 4.6078  | 4.28E-06 | 0.81450024  | count | 0.10163716 |
| KLRF1      | 0.8147675 | 0.3716036 | 2.1926  | 0.0284   | 0.814780148 | count | 1          |
| IGFBP2     | 0.7349569 | 0.5408986 | 1.3588  | 0.174    | 0.815201308 | count | 1          |
| RNASE2     | 0.6126857 | 0.1514814 | 4.0446  | 5.40E-05 | 0.816454934 | count | 1          |
| TRMT11     | 0.8069484 | 0.3459036 | 2.3329  | 0.0197   | 0.816530949 | count | 1          |
| PEAK1      | 0.7061994 | 0.3402117 | 2.0758  | 0.038    | 0.816544915 | count | 1          |
| IGF2BP2    | 0.6718024 | 0.516245  | 1.3013  | 0.193    | 0.816992311 | count | 1          |
| ZSCAN16    | 0.8383468 | 0.3808882 | 2.201   | 0.0278   | 0.817004788 | count | 1          |
| PRMT5      | 0.7832002 | 0.3490477 | 2.2438  | 0.0249   | 0.817444691 | count | 1          |
| CFD        | 0.569217  | 0.0544269 | 10.4584 | 4.48E-25 | 0.817526857 | count | 1.09E-20   |
| LIN7A      | 0.9134327 | 0.3336176 | 2.738   | 0.00623  | 0.817775301 | count | 1          |
| PXDC1      | 0.6311288 | 0.1732372 | 3.6431  | 0.000275 | 0.817857619 | count | 1          |
| GRHL1      | 1.6172993 | 0.8336982 | 1.9399  | 0.0525   | 0.818042233 | count | 1          |
| ZNF175     | 1.8532947 | 0.7480513 | 2.4775  | 0.0133   | 0.818073263 | count | 1          |
| QPRT       | 0.7999716 | 0.3194886 | 2.5039  | 0.0123   | 0.818472664 | count | 1          |
| CYTL1      | 0.6996147 | 0.2929386 | 2.3883  | 0.017    | 0.819052872 | count | 1          |
| FBXO3      | 0.7587804 | 0.3087279 | 2.4578  | 0.014    | 0.819120745 | count | 1          |
| NUP214     | 0.5791332 | 0.082031  | 7.0599  | 2.16E-12 | 0.81979852  | count | 5.21E-08   |
| AL442128.2 | 0.8012269 | 0.3677809 | 2.1785  | 0.0295   | 0.819811308 | count | 1          |
| FAM206A    | 0.7784874 | 0.3326489 | 2.3403  | 0.0193   | 0.820079579 | count | 1          |
| DET1       | 0.9844716 | 0.6603081 | 1.4909  | 0.136    | 0.820266145 | count | 1          |
| HIST4H4    | 1.6226872 | 0.6348192 | 2.5561  | 0.0106   | 0.82093143  | count | 1          |
| AC022182.2 | 1.1919308 | 0.5844595 | 2.0394  | 0.0415   | 0.821362885 | count | 1          |
| SESTD1     | 0.6427127 | 0.1718363 | 3.7403  | 0.000188 | 0.821465332 | count | 1          |
| LUM        | 0.9180473 | 0.7685478 | 1.1945  | 0.232    | 0.822145574 | count | 1          |
| ZNF182     | 0.9382814 | 0.4348693 | 2.1576  | 0.0311   | 0.82220798  | count | 1          |
| PPTC7      | 0.6436147 | 0.2498839 | 2.5757  | 0.0101   | 0.822635178 | count | 1          |
| TBC1D8     | 0.8131222 | 0.337538  | 2.409   | 0.0161   | 0.823051373 | count | 1          |
| KLF9       | 0.635888  | 0.1343874 | 4.7318  | 2.35E-06 | 0.823245083 | count | 0.05587595 |
| RAD51D     | 0.7965524 | 0.4140209 | 1.9239  | 0.0545   | 0.823609071 | count | 1          |
| SENP7      | 0.6652081 | 0.2133332 | 3.1182  | 0.00184  | 0.824211979 | count | 1          |
| ARHGAP5    | 0.6431722 | 0.1750665 | 3.6739  | 0.000244 | 0.825223497 | count | 1          |
| MTURN      | 0.666282  | 0.2283938 | 2.9173  | 0.00356  | 0.825567311 | count | 1          |
| PGBD1      | 1.1410505 | 0.5789372 | 1.9709  | 0.0488   | 0.8257449   | count | 1          |
| AC145124.1 | 1.1410505 | 0.582848  | 1.9577  | 0.0504   | 0.8257449   | count | 1          |
| AC108718.1 | 1.356171  | 0.5795324 | 2.3401  | 0.0194   | 0.825810518 | count | 1          |
| BBS9       | 1.1980447 | 0.5178489 | 2.3135  | 0.0208   | 0.825905121 | count | 1          |
| PGD        | 0.6102642 | 0.1295411 | 4.711   | 2.60E-06 | 0.827332591 | count | 0.0618098  |
| PECR       | 0.8005502 | 0.3794989 | 2.1095  | 0.035    | 0.827912377 | count | 1          |
| TRIM56     | 0.6572129 | 0.3974579 | 1.6535  | 0.0983   | 0.827928886 | count | 1          |
| USP25      | 0.6485672 | 0.1966363 | 3.2983  | 0.000987 | 0.827952711 | count | 1          |
| SUSD3      | 0.8006872 | 0.2490438 | 3.215   | 0.00132  | 0.828059872 | count | 1          |
| EFCAB2     | 0.751653  | 0.3024433 | 2.4853  | 0.013    | 0.828909761 | count | 1          |



|            |           |           |         |          |             |       |             |
|------------|-----------|-----------|---------|----------|-------------|-------|-------------|
| S100A4     | 0.575116  | 0.0383341 | 15.0027 | 9.59E-49 | 0.828997979 | count | 2.33E-44    |
| PHYH       | 0.614089  | 0.1741518 | 3.5262  | 0.000429 | 0.829191266 | count | 1           |
| OTUD5      | 0.6628461 | 0.2573664 | 2.5755  | 0.0101   | 0.829331115 | count | 1           |
| YTHDC2     | 0.6205578 | 0.1896141 | 3.2727  | 0.00108  | 0.829731352 | count | 1           |
| AC068338.2 | 1.2735793 | 0.6255164 | 2.036   | 0.0419   | 0.829868597 | count | 1           |
| G6PD       | 0.6197139 | 0.1481886 | 4.1819  | 2.99E-05 | 0.830266188 | count | 0.7059091   |
| AC099850.1 | 1.6420872 | 0.8613206 | 1.9065  | 0.0567   | 0.831314887 | count | 1           |
| LRG1       | 0.6228455 | 0.2188392 | 2.8461  | 0.00446  | 0.831944299 | count | 1           |
| ADAM19     | 0.8216487 | 0.3767027 | 2.1812  | 0.0293   | 0.832059391 | count | 1           |
| GLYCTK     | 0.7897103 | 0.3252071 | 2.4283  | 0.0152   | 0.832362538 | count | 1           |
| FOPNL      | 0.6703821 | 0.2653888 | 2.526   | 0.0116   | 0.832461323 | count | 1           |
| VRK2       | 0.6410296 | 0.1701267 | 3.768   | 0.000168 | 0.832542477 | count | 1           |
| AC074032.1 | 0.8221474 | 0.3786038 | 2.1715  | 0.03     | 0.832586349 | count | 1           |
| ANKRD27    | 1.0285096 | 0.4292602 | 2.396   | 0.0166   | 0.832988542 | count | 1           |
| DUSP1      | 0.5787847 | 0.0414216 | 13.973  | 9.50E-43 | 0.833270702 | count | 2.31E-38    |
| TEFM       | 0.699392  | 0.2666664 | 2.6227  | 0.00878  | 0.833814497 | count | 1           |
| CASP10     | 0.7120129 | 0.2248087 | 3.1672  | 0.00156  | 0.833942758 | count | 1           |
| FLVCR1     | 0.7921529 | 0.3765341 | 2.1038  | 0.0355   | 0.835036588 | count | 1           |
| GFRA2      | 0.8686696 | 0.2255791 | 3.8508  | 0.000121 | 0.835313577 | count | 1           |
| MGAT5      | 0.6778015 | 0.2156944 | 3.1424  | 0.0017   | 0.836499486 | count | 1           |
| TFCP2      | 0.8175699 | 0.3436735 | 2.3789  | 0.0174   | 0.837245906 | count | 1           |
| GRK2       | 0.6102367 | 0.1242314 | 4.9121  | 9.60E-07 | 0.837286049 | count | 0.02286912  |
| CTH        | 1.2136261 | 0.472226  | 2.57    | 0.0102   | 0.837478752 | count | 1           |
| GALNT10    | 0.8269439 | 0.3683462 | 2.245   | 0.0249   | 0.837655214 | count | 1           |
| BLNK       | 0.661686  | 0.1985425 | 3.3327  | 0.000873 | 0.837672318 | count | 1           |
| AGTPBP1    | 0.6233013 | 0.1479597 | 4.2126  | 2.62E-05 | 0.837861277 | count | 0.6188178   |
| EMB        | 0.6083188 | 0.108436  | 5.6099  | 2.25E-08 | 0.838097765 | count | 0.000539123 |
| NXPE3      | 0.8590748 | 0.3072876 | 2.7957  | 0.00522  | 0.838185849 | count | 1           |
| RETSAT     | 1.1101534 | 0.4317859 | 2.5711  | 0.0102   | 0.838881208 | count | 1           |
| NDE1       | 0.6687123 | 0.2063091 | 3.2413  | 0.00121  | 0.839796582 | count | 1           |
| AL033528.2 | 1.9025903 | 0.7932282 | 2.3985  | 0.0165   | 0.840236219 | count | 1           |
| PLCB2      | 0.6862184 | 0.1790584 | 3.8324  | 0.00013  | 0.841239915 | count | 1           |
| CTNS       | 0.745403  | 0.2992654 | 2.4908  | 0.0128   | 0.842001156 | count | 1           |
| ANTXR2     | 0.6491059 | 0.1890031 | 3.4344  | 0.000604 | 0.842321559 | count | 1           |
| GLTPD2     | 1.291343  | 0.626451  | 2.0614  | 0.0394   | 0.84234377  | count | 1           |
| RIC3       | 1.3824127 | 0.8009553 | 1.726   | 0.0845   | 0.843018731 | count | 1           |
| ADGRE3     | 1.3826652 | 0.5641347 | 2.4509  | 0.0143   | 0.843184134 | count | 1           |
| VCL        | 0.6751031 | 0.2352342 | 2.8699  | 0.00414  | 0.843368978 | count | 1           |
| ZSWIM6     | 0.6236289 | 0.1462471 | 4.2642  | 2.08E-05 | 0.843466034 | count | 0.4918576   |
| RPRD1A     | 0.7865904 | 0.4194008 | 1.8755  | 0.0608   | 0.843474622 | count | 1           |
| WDR37      | 0.7600674 | 0.3063285 | 2.4812  | 0.0132   | 0.843968127 | count | 1           |
| IFT80      | 2.3387476 | 0.8593187 | 2.7216  | 0.00654  | 0.844176327 | count | 1           |
| S100P      | 1.0770979 | 0.334014  | 3.2247  | 0.00128  | 0.844971308 | count | 1           |
| COCH       | 3.5107143 | 1.515855  | 2.316   | 0.0206   | 0.845690671 | count | 1           |
| ZSCAN25    | 1.043765  | 0.5424651 | 1.9241  | 0.0545   | 0.846174251 | count | 1           |

|            |           |           |        |          |             |       |             |
|------------|-----------|-----------|--------|----------|-------------|-------|-------------|
| ALDH9A1    | 0.6386149 | 0.1666822 | 3.8313 | 0.000131 | 0.846217237 | count | 1           |
| GNPAT      | 0.7349111 | 0.2552892 | 2.8787 | 0.00403  | 0.846797118 | count | 1           |
| TBC1D31    | 2.3470186 | 1.0545273 | 2.2257 | 0.0261   | 0.846858153 | count | 1           |
| SMARCC2    | 0.6300167 | 0.1518281 | 4.1495 | 3.44E-05 | 0.846966059 | count | 0.811668    |
| AL021368.2 | 1.2979629 | 0.5603506 | 2.3163 | 0.0206   | 0.84699036  | count | 1           |
| TUBA4A     | 0.6075405 | 0.1298547 | 4.6786 | 3.05E-06 | 0.847080663 | count | 0.07248935  |
| CDKN2B     | 0.8818973 | 0.4749324 | 1.8569 | 0.0634   | 0.84866577  | count | 1           |
| FPR2       | 0.6991695 | 0.1744903 | 4.0069 | 6.33E-05 | 0.848707321 | count | 1           |
| GBP3       | 0.7094794 | 0.2644293 | 2.6831 | 0.00734  | 0.848884294 | count | 1           |
| KIF9       | 0.8379429 | 0.3456881 | 2.424  | 0.0154   | 0.849282268 | count | 1           |
| RAB11FIP4  | 1.0474737 | 0.4427665 | 2.3657 | 0.0181   | 0.849380288 | count | 1           |
| LINC00662  | 0.7058704 | 0.3111362 | 2.2687 | 0.0234   | 0.849713508 | count | 1           |
| LILRA2     | 0.6101592 | 0.104641  | 5.831  | 6.24E-09 | 0.849928036 | count | 0.000149754 |
| AC083843.2 | 1.9243683 | 0.8107598 | 2.3735 | 0.0177   | 0.849939601 | count | 1           |
| FXD2       | 1.9243683 | 0.8488598 | 2.267  | 0.0235   | 0.849939601 | count | 1           |
| PPFIA3     | 1.9243683 | 0.8488598 | 2.267  | 0.0235   | 0.849939601 | count | 1           |
| CALCOCO2   | 0.6059852 | 0.0993431 | 6.0999 | 1.23E-09 | 0.850173489 | count | 2.96E-05    |
| HSBP1L1    | 0.6478628 | 0.2301015 | 2.8156 | 0.00491  | 0.850586944 | count | 1           |
| EOGT       | 1.3941511 | 0.682142  | 2.0438 | 0.0411   | 0.850705972 | count | 1           |
| AL390728.6 | 0.8714796 | 0.3960128 | 2.2006 | 0.0279   | 0.850869899 | count | 1           |
| RCOR3      | 0.6852151 | 0.2171825 | 3.155  | 0.00162  | 0.851221827 | count | 1           |
| RNF40      | 0.7583881 | 0.3269116 | 2.3199 | 0.0204   | 0.852295202 | count | 1           |
| SWSAP1     | 0.7402419 | 0.3353715 | 2.2072 | 0.0274   | 0.853109867 | count | 1           |
| KIAA0355   | 0.8087585 | 0.3738352 | 2.1634 | 0.0306   | 0.853222395 | count | 1           |
| TTC14      | 0.6321327 | 0.1694469 | 3.7306 | 0.000195 | 0.853417509 | count | 1           |
| METTL13    | 0.779741  | 0.4275764 | 1.8236 | 0.0683   | 0.85507765  | count | 1           |
| SETD1A     | 0.779741  | 0.335459  | 2.3244 | 0.0202   | 0.85507765  | count | 1           |
| SESN3      | 0.6884737 | 0.1547553 | 4.4488 | 9.02E-06 | 0.855344234 | count | 0.21384616  |
| DGAT1      | 0.653352  | 0.1924093 | 3.3956 | 0.000696 | 0.855766409 | count | 1           |
| EEF1AKMT1  | 0.8041693 | 0.3333516 | 2.4124 | 0.0159   | 0.855788076 | count | 1           |
| SEMA4D     | 0.6720569 | 0.2130114 | 3.155  | 0.00162  | 0.856037939 | count | 1           |
| NEIL2      | 0.9988462 | 0.4164468 | 2.3985 | 0.0165   | 0.856662778 | count | 1           |
| STRN4      | 0.7762065 | 0.2861054 | 2.713  | 0.00671  | 0.856895111 | count | 1           |
| AL021453.1 | 0.9991144 | 0.4528922 | 2.2061 | 0.0275   | 0.856906808 | count | 1           |
| AC069224.1 | 1.6912183 | 0.6255744 | 2.7035 | 0.00691  | 0.857464692 | count | 1           |
| AL390729.1 | 1.525741  | 0.7300826 | 2.0898 | 0.0367   | 0.858050701 | count | 1           |
| SVIL       | 0.7354315 | 0.2274036 | 3.234  | 0.00124  | 0.858609403 | count | 1           |
| AC106739.2 | 0.8793418 | 0.3611494 | 2.4348 | 0.015    | 0.85891196  | count | 1           |
| MPHOSPH9   | 0.8472224 | 0.3268625 | 2.592  | 0.0096   | 0.859095284 | count | 1           |
| SLPI       | 1.9465945 | 0.6257213 | 3.111  | 0.00189  | 0.859784899 | count | 1           |
| TLR3       | 1.1359836 | 0.4910731 | 2.3133 | 0.0208   | 0.859802717 | count | 1           |
| AKAP17A    | 0.6376138 | 0.1463207 | 4.3576 | 1.37E-05 | 0.859838735 | count | 0.3243201   |
| TFEB       | 0.7032106 | 0.1997032 | 3.5213 | 0.000437 | 0.860388781 | count | 1           |
| LRRRC8D    | 0.7697784 | 0.3152827 | 2.4415 | 0.0147   | 0.860404189 | count | 1           |
| KAT7       | 0.7086699 | 0.2043637 | 3.4677 | 0.000534 | 0.860485551 | count | 1           |

|            |           |           |        |          |             |       |           |
|------------|-----------|-----------|--------|----------|-------------|-------|-----------|
| AC097534.2 | 0.8489756 | 0.3167523 | 2.6803 | 0.00741  | 0.860949644 | count | 1         |
| PCYOX1     | 0.7293814 | 0.263591  | 2.7671 | 0.0057   | 0.86136717  | count | 1         |
| RPRD1B     | 0.7712669 | 0.2663392 | 2.8958 | 0.00382  | 0.86212017  | count | 1         |
| HIST2H3D   | 2.395218  | 0.9655569 | 2.4807 | 0.0132   | 0.862297952 | count | 1         |
| LINC01888  | 2.395218  | 0.8986123 | 2.6655 | 0.00774  | 0.862297952 | count | 1         |
| MALL       | 2.395218  | 0.8986123 | 2.6655 | 0.00774  | 0.862297952 | count | 1         |
| AC053503.5 | 2.395218  | 0.8986123 | 2.6655 | 0.00774  | 0.862297952 | count | 1         |
| ACAD11     | 2.395218  | 0.8986123 | 2.6655 | 0.00774  | 0.862297952 | count | 1         |
| LINC00472  | 2.395218  | 0.8986123 | 2.6655 | 0.00774  | 0.862297952 | count | 1         |
| LINC00271  | 2.395218  | 0.8986123 | 2.6655 | 0.00774  | 0.862297952 | count | 1         |
| AL355312.2 | 2.395218  | 0.9655569 | 2.4807 | 0.0132   | 0.862297952 | count | 1         |
| GPC3       | 2.395218  | 0.9655569 | 2.4807 | 0.0132   | 0.862297952 | count | 1         |
| AP001372.3 | 2.395218  | 0.8986123 | 2.6655 | 0.00774  | 0.862297952 | count | 1         |
| AL391684.1 | 2.395218  | 0.9655569 | 2.4807 | 0.0132   | 0.862297952 | count | 1         |
| C10orf91   | 2.395218  | 0.9655569 | 2.4807 | 0.0132   | 0.862297952 | count | 1         |
| PEX12      | 2.395218  | 0.9655569 | 2.4807 | 0.0132   | 0.862297952 | count | 1         |
| AC004528.2 | 2.395218  | 0.9655569 | 2.4807 | 0.0132   | 0.862297952 | count | 1         |
| GCH1       | 0.7141147 | 0.1793007 | 3.9828 | 7.01E-05 | 0.862391995 | count | 1         |
| PFAS       | 1.098852  | 0.5297981 | 2.0741 | 0.0382   | 0.863214113 | count | 1         |
| AC015712.2 | 1.414389  | 0.6917644 | 2.0446 | 0.041    | 0.863943222 | count | 1         |
| SIK1B      | 1.414389  | 0.5595335 | 2.5278 | 0.0115   | 0.863943222 | count | 1         |
| PPM1F      | 0.6831793 | 0.3037553 | 2.2491 | 0.0246   | 0.863976859 | count | 1         |
| CCDC24     | 1.7038352 | 0.8657374 | 1.9681 | 0.0492   | 0.864143907 | count | 1         |
| GHRLOS     | 1.7038352 | 1.2578695 | 1.3545 | 0.176    | 0.864143907 | count | 1         |
| ARMCX4     | 1.7055723 | 0.5792966 | 2.9442 | 0.00327  | 0.86506229  | count | 1         |
| LENG8      | 0.7012172 | 0.2404818 | 2.9159 | 0.00358  | 0.865959039 | count | 1         |
| C11orf96   | 0.8994743 | 0.4453055 | 2.0199 | 0.0435   | 0.866417566 | count | 1         |
| CALCRL     | 0.9649567 | 0.3518811 | 2.7423 | 0.00615  | 0.866608732 | count | 1         |
| ARHGAP6    | 0.6846573 | 0.2062786 | 3.3191 | 0.000916 | 0.867225063 | count | 1         |
| FAM222B    | 1.3271965 | 0.5576893 | 2.3798 | 0.0174   | 0.867491563 | count | 1         |
| DOPEY2     | 0.7407287 | 0.2790011 | 2.6549 | 0.00798  | 0.868453135 | count | 1         |
| XRCC1      | 0.7470793 | 0.2419773 | 3.0874 | 0.00204  | 0.868913994 | count | 1         |
| FASTKD3    | 0.9314877 | 0.3808158 | 2.446  | 0.0145   | 0.868984319 | count | 1         |
| FGFBP3     | 0.9676435 | 0.472563  | 2.0476 | 0.0407   | 0.86915717  | count | 1         |
| HFE        | 0.9321351 | 0.3579576 | 2.604  | 0.00927  | 0.869619799 | count | 1         |
| VIM-AS1    | 0.6872548 | 0.2462655 | 2.7907 | 0.0053   | 0.870567741 | count | 1         |
| NCOA5      | 1.1493872 | 0.5067941 | 2.268  | 0.0234   | 0.870658073 | count | 1         |
| AARS2      | 1.547166  | 0.7106814 | 2.177  | 0.0296   | 0.870849121 | count | 1         |
| CCDC88B    | 0.7299119 | 0.2421336 | 3.0145 | 0.0026   | 0.871069022 | count | 1         |
| ZXDC       | 0.7888972 | 0.2836812 | 2.7809 | 0.00546  | 0.871369069 | count | 1         |
| ETAA1      | 0.9045741 | 0.5966395 | 1.5161 | 0.13     | 0.871569909 | count | 1         |
| NAB2       | 0.7215589 | 0.2719729 | 2.6531 | 0.00803  | 0.871579197 | count | 1         |
| TCP11L2    | 0.7411959 | 0.4073504 | 1.8196 | 0.0689   | 0.872396345 | count | 1         |
| SGMS1      | 0.6497051 | 0.156522  | 4.1509 | 3.42E-05 | 0.872474255 | count | 0.8069832 |
| AL627171.1 | 0.8598752 | 0.3487725 | 2.4654 | 0.0138   | 0.872480572 | count | 1         |

|           |           |           |        |          |             |       |            |
|-----------|-----------|-----------|--------|----------|-------------|-------|------------|
| PLBD1     | 0.6173109 | 0.0744762 | 8.2887 | 1.86E-16 | 0.873363925 | count | 4.50E-12   |
| SIDT2     | 0.7482779 | 0.2118378 | 3.5323 | 0.00042  | 0.874000768 | count | 1          |
| EXTL2     | 0.9540292 | 0.4508507 | 2.1161 | 0.0344   | 0.874291783 | count | 1          |
| LIN7C     | 0.6970062 | 0.2436815 | 2.8603 | 0.00427  | 0.874406957 | count | 1          |
| GTF2H2    | 0.8210484 | 0.3831822 | 2.1427 | 0.0322   | 0.874426978 | count | 1          |
| ARHGAP4   | 0.6541939 | 0.1506333 | 4.343  | 1.46E-05 | 0.874677144 | count | 0.3455674  |
| CCND1     | 0.6894684 | 0.233274  | 2.9556 | 0.00315  | 0.874744143 | count | 1          |
| PARG      | 0.8289005 | 0.3560009 | 2.3284 | 0.02     | 0.87529568  | count | 1          |
| CD24      | 1.4320491 | 1.0138574 | 1.4125 | 0.158    | 0.875475564 | count | 1          |
| MIIP      | 0.6575647 | 0.1559463 | 4.2166 | 2.57E-05 | 0.876360931 | count | 0.6070854  |
| RNF125    | 0.7052005 | 0.229896  | 3.0675 | 0.00218  | 0.876510312 | count | 1          |
| MTMR12    | 0.8101048 | 0.2900284 | 2.7932 | 0.00526  | 0.8765608   | count | 1          |
| AGO1      | 0.7163343 | 0.2879419 | 2.4878 | 0.0129   | 0.876773359 | count | 1          |
| SLC30A6   | 1.0802138 | 0.4266697 | 2.5317 | 0.0114   | 0.877687917 | count | 1          |
| CLEC16A   | 1.049805  | 0.4472251 | 2.3474 | 0.019    | 0.878284426 | count | 1          |
| BTBD2     | 0.7465316 | 0.260733  | 2.8632 | 0.00423  | 0.878834117 | count | 1          |
| MSRB1     | 0.6566388 | 0.1409544 | 4.6585 | 3.36E-06 | 0.878880501 | count | 0.07984704 |
| PELI2     | 0.8015681 | 0.282891  | 2.8335 | 0.00464  | 0.879829801 | count | 1          |
| PACS1     | 0.7327363 | 0.2180447 | 3.3605 | 0.00079  | 0.880114322 | count | 1          |
| ACAP3     | 0.7744148 | 0.3460073 | 2.2381 | 0.0253   | 0.880494193 | count | 1          |
| KLHL35    | 1.9938216 | 0.9266302 | 2.1517 | 0.0315   | 0.880502826 | count | 1          |
| DDIT4-AS1 | 1.9938216 | 1.0182547 | 1.9581 | 0.0503   | 0.880502826 | count | 1          |
| KCNJ2-AS1 | 1.9938216 | 0.8392115 | 2.3758 | 0.0176   | 0.880502826 | count | 1          |
| GGT1      | 1.9938216 | 0.8392115 | 2.3758 | 0.0176   | 0.880502826 | count | 1          |
| RCN3      | 0.9432649 | 0.3735982 | 2.5248 | 0.0116   | 0.880546036 | count | 1          |
| CYYR1     | 1.735108  | 0.821909  | 2.1111 | 0.0349   | 0.880631396 | count | 1          |
| LPAR1     | 1.1201803 | 0.5927385 | 1.8898 | 0.0589   | 0.881100524 | count | 1          |
| TBC1D17   | 1.0529996 | 0.3979152 | 2.6463 | 0.00819  | 0.881122789 | count | 1          |
| TMEM164   | 0.7879922 | 0.3040169 | 2.5919 | 0.0096   | 0.881407261 | count | 1          |
| FAXDC2    | 1.0263421 | 0.4171191 | 2.4605 | 0.0139   | 0.88168644  | count | 1          |
| PHOSPHO2  | 1.3476398 | 0.7144048 | 1.8864 | 0.0594   | 0.881808042 | count | 1          |
| SPICE1    | 0.9620257 | 0.4088129 | 2.3532 | 0.0187   | 0.882015234 | count | 1          |
| TPM1      | 0.6718218 | 0.1612373 | 4.1667 | 3.20E-05 | 0.882410851 | count | 0.755296   |
| RAD52     | 1.2156191 | 0.5822647 | 2.0877 | 0.0369   | 0.883758736 | count | 1          |
| GSTT2B    | 0.7661794 | 0.3231724 | 2.3708 | 0.0178   | 0.88384036  | count | 1          |
| C21orf91  | 0.7276148 | 0.214873  | 3.3863 | 0.00072  | 0.883981807 | count | 1          |
| PER3      | 0.7072143 | 0.2364572 | 2.9909 | 0.00281  | 0.884206353 | count | 1          |
| ETV3      | 0.6591309 | 0.1833318 | 3.5953 | 0.00033  | 0.884414191 | count | 1          |
| USF3      | 0.6895736 | 0.2888062 | 2.3877 | 0.017    | 0.88453928  | count | 1          |
| DAGLB     | 0.7740746 | 0.2357661 | 3.2832 | 0.00104  | 0.884631563 | count | 1          |
| FRS2      | 0.8241311 | 0.3479749 | 2.3684 | 0.0179   | 0.885226292 | count | 1          |
| FAM157C   | 1.4478401 | 0.4126426 | 3.5087 | 0.000458 | 0.885771836 | count | 1          |
| PPIP5K1   | 1.030909  | 0.7547686 | 1.3659 | 0.172    | 0.88584365  | count | 1          |
| IQSEC1    | 0.6798073 | 0.1599675 | 4.2497 | 2.22E-05 | 0.886117429 | count | 0.5247414  |
| POLR3F    | 0.7754909 | 0.3178665 | 2.4397 | 0.0148   | 0.886296473 | count | 1          |

|            |           |           |        |          |             |       |             |
|------------|-----------|-----------|--------|----------|-------------|-------|-------------|
| ACSM5      | 1.2195757 | 0.4754727 | 2.565  | 0.0104   | 0.886834461 | count | 1           |
| TRIB1      | 0.6529091 | 0.1192419 | 5.4755 | 4.81E-08 | 0.887075293 | count | 0.001151129 |
| LIPN       | 0.9068667 | 0.2771519 | 3.2721 | 0.00108  | 0.887082159 | count | 1           |
| SH3RF3     | 1.1704493 | 0.5840253 | 2.0041 | 0.0452   | 0.887712348 | count | 1           |
| TNNT1      | 0.7290118 | 0.2615966 | 2.7868 | 0.00536  | 0.888077349 | count | 1           |
| AC026401.3 | 1.0925695 | 0.4131649 | 2.6444 | 0.00824  | 0.888372062 | count | 1           |
| POU2F2     | 0.6350603 | 0.0898783 | 7.0658 | 2.07E-12 | 0.888667355 | count | 4.99E-08    |
| USP11      | 0.8102612 | 0.3088913 | 2.6231 | 0.00877  | 0.889692635 | count | 1           |
| AL139274.2 | 1.284112  | 0.7694217 | 1.6689 | 0.0953   | 0.889769459 | count | 1           |
| HSF4       | 2.486537  | 1.220077  | 2.038  | 0.0417   | 0.890650311 | count | 1           |
| UBE2O      | 0.8605713 | 0.3835232 | 2.2439 | 0.0249   | 0.892597078 | count | 1           |
| MON1B      | 0.7194212 | 0.27196   | 2.6453 | 0.00821  | 0.892680507 | count | 1           |
| GATA2      | 2.495488  | 1.0863664 | 2.2971 | 0.0217   | 0.89336464  | count | 1           |
| F2RL1      | 2.495488  | 1.0324181 | 2.4171 | 0.0157   | 0.89336464  | count | 1           |
| AC116366.3 | 2.495488  | 1.0324181 | 2.4171 | 0.0157   | 0.89336464  | count | 1           |
| CASC8      | 2.495488  | 1.0324181 | 2.4171 | 0.0157   | 0.89336464  | count | 1           |
| CEP295NL   | 2.495488  | 1.0324181 | 2.4171 | 0.0157   | 0.89336464  | count | 1           |
| ALG12      | 0.8251658 | 0.3317245 | 2.4875 | 0.0129   | 0.893435444 | count | 1           |
| MPP7       | 1.4614765 | 0.4273894 | 3.4195 | 0.000638 | 0.894650535 | count | 1           |
| ERAP1      | 0.7873035 | 0.2594813 | 3.0341 | 0.00244  | 0.895579706 | count | 1           |
| MIB2       | 0.8928207 | 0.3609655 | 2.4734 | 0.0134   | 0.896470996 | count | 1           |
| FAM13B     | 0.6924202 | 0.2041346 | 3.392  | 0.000705 | 0.896492921 | count | 1           |
| FAM184B    | 0.9595912 | 0.4789147 | 2.0037 | 0.0452   | 0.896578888 | count | 1           |
| AL050341.2 | 0.9443789 | 0.4923917 | 1.9179 | 0.0552   | 0.897216793 | count | 1           |
| DIAPH2     | 0.6581124 | 0.1615631 | 4.0734 | 4.78E-05 | 0.897980876 | count | 1           |
| CBX8       | 1.1836335 | 0.6048583 | 1.9569 | 0.0505   | 0.898384578 | count | 1           |
| SRBD1      | 0.7243214 | 0.2229563 | 3.2487 | 0.00117  | 0.89887366  | count | 1           |
| MSANTD2    | 0.8240312 | 0.4933214 | 1.6704 | 0.095    | 0.898891941 | count | 1           |
| VASH1-AS1  | 1.4707226 | 0.666173  | 2.2077 | 0.0274   | 0.900663599 | count | 1           |
| ZNF280D    | 0.7165769 | 0.2473211 | 2.8974 | 0.0038   | 0.900960485 | count | 1           |
| AC009831.1 | 1.376384  | 0.7791669 | 1.7665 | 0.0774   | 0.901904446 | count | 1           |
| EDEM3      | 0.6789524 | 0.1785509 | 3.8026 | 0.000147 | 0.901943934 | count | 1           |
| TMEM209    | 0.8880337 | 0.358415  | 2.4777 | 0.0133   | 0.90228766  | count | 1           |
| ZNF615     | 1.188803  | 0.7306557 | 1.627  | 0.104    | 0.902568292 | count | 1           |
| ALOX12-AS1 | 0.8698331 | 0.3400719 | 2.5578 | 0.0106   | 0.902589473 | count | 1           |
| PRKAR2B    | 0.7703503 | 0.2814326 | 2.7372 | 0.00624  | 0.904082812 | count | 1           |
| FAM227B    | 1.7799913 | 0.7849761 | 2.2676 | 0.0234   | 0.904115331 | count | 1           |
| TCHP       | 0.7299797 | 0.2437701 | 2.9945 | 0.00278  | 0.904122407 | count | 1           |
| TRMT1      | 0.6577805 | 0.1163543 | 5.6533 | 1.76E-08 | 0.90429944  | count | 0.000421837 |
| ABTB1      | 0.6626378 | 0.1320883 | 5.0166 | 5.64E-07 | 0.904449926 | count | 0.013444068 |
| R3HDM4     | 0.697081  | 0.1872491 | 3.7227 | 0.000202 | 0.904492568 | count | 1           |
| MAF        | 0.6482914 | 0.101762  | 6.3707 | 2.24E-10 | 0.904510115 | count | 5.39E-06    |
| MDM1       | 1.3810448 | 0.4053633 | 3.4069 | 0.000668 | 0.905159173 | count | 1           |
| AL161785.1 | 1.3829686 | 0.4459814 | 3.101  | 0.00195  | 0.906502184 | count | 1           |
| ABT1       | 0.6965866 | 0.2005386 | 3.4736 | 0.000522 | 0.906542568 | count | 1           |

|            |           |           |        |          |             |       |             |
|------------|-----------|-----------|--------|----------|-------------|-------|-------------|
| MAP3K21    | 1.0819442 | 0.52816   | 2.0485 | 0.0406   | 0.906841526 | count | 1           |
| DCAF10     | 0.7389755 | 0.2473421 | 2.9877 | 0.00284  | 0.907250869 | count | 1           |
| TANC1      | 2.0580676 | 0.7732558 | 2.6616 | 0.00783  | 0.908223724 | count | 1           |
| RAB3D      | 0.7874691 | 0.2775875 | 2.8368 | 0.00459  | 0.909081387 | count | 1           |
| LINC01089  | 0.9572235 | 0.4018115 | 2.3823 | 0.0173   | 0.910025835 | count | 1           |
| RNASE1     | 0.6319663 | 0.0866031 | 7.2973 | 3.95E-13 | 0.910871193 | count | 9.54E-09    |
| AC007881.3 | 1.6149319 | 0.6270114 | 2.5756 | 0.0101   | 0.9110856   | count | 1           |
| RNF139-AS1 | 1.1198484 | 0.5695453 | 1.9662 | 0.0494   | 0.911959132 | count | 1           |
| VWA8       | 0.8702122 | 0.6722595 | 1.2945 | 0.196    | 0.912031305 | count | 1           |
| ZC3H12C    | 0.9450145 | 0.4887233 | 1.9336 | 0.0533   | 0.912451014 | count | 1           |
| CIDEB      | 0.7836622 | 0.2730464 | 2.8701 | 0.00414  | 0.912612308 | count | 1           |
| ROGDI      | 0.6932708 | 0.1480041 | 4.6841 | 2.97E-06 | 0.913030524 | count | 0.07059393  |
| FBXL19-AS1 | 1.7974257 | 0.9389931 | 1.9142 | 0.0557   | 0.91317724  | count | 1           |
| MAML1      | 0.8430478 | 0.3174975 | 2.6553 | 0.00798  | 0.91348017  | count | 1           |
| CTC1       | 1.6200274 | 0.6374851 | 2.5413 | 0.0111   | 0.914094737 | count | 1           |
| EPS8       | 0.6777512 | 0.1363118 | 4.9721 | 7.08E-07 | 0.914423008 | count | 0.01687164  |
| NUMA1      | 0.686708  | 0.1734824 | 3.9584 | 7.76E-05 | 0.914537205 | count | 1           |
| TMEM131L   | 0.8906909 | 0.3078922 | 2.8929 | 0.00385  | 0.915373166 | count | 1           |
| GBP4       | 0.7100762 | 0.1842662 | 3.8535 | 0.000119 | 0.91560415  | count | 1           |
| MEPCE      | 0.749447  | 0.2194434 | 3.4152 | 0.000648 | 0.915848324 | count | 1           |
| GFOD1      | 0.7869096 | 0.2646207 | 2.9737 | 0.00297  | 0.916493347 | count | 1           |
| MGST1      | 0.6563257 | 0.1206976 | 5.4378 | 5.93E-08 | 0.917341206 | count | 0.001418753 |
| INPP5F     | 0.7910312 | 0.3125369 | 2.531  | 0.0114   | 0.917436442 | count | 1           |
| PILRB      | 0.8406581 | 0.3124081 | 2.6909 | 0.00717  | 0.917652134 | count | 1           |
| ARNT       | 0.7327292 | 0.2435867 | 3.0081 | 0.00266  | 0.918361851 | count | 1           |
| FAM160B1   | 0.8682178 | 0.4264509 | 2.0359 | 0.0419   | 0.918421842 | count | 1           |
| RPS6KA5    | 0.7515396 | 0.3163302 | 2.3758 | 0.0176   | 0.918457634 | count | 1           |
| ZNF333     | 0.8031341 | 0.4689803 | 1.7125 | 0.0869   | 0.918804919 | count | 1           |
| NECTIN3    | 2.5830007 | 1.426052  | 1.8113 | 0.0702   | 0.919285835 | count | 1           |
| CNGA1      | 2.5830007 | 1.0795869 | 2.3926 | 0.0168   | 0.919285835 | count | 1           |
| TAS2R14    | 2.5830007 | 1.0795869 | 2.3926 | 0.0168   | 0.919285835 | count | 1           |
| SNX27      | 0.6833053 | 0.1337282 | 5.1097 | 3.48E-07 | 0.919648984 | count | 0.008302932 |
| LATS1      | 0.8263546 | 0.2629258 | 3.1429 | 0.00169  | 0.920024719 | count | 1           |
| SLC33A1    | 0.8218398 | 0.3449569 | 2.3824 | 0.0173   | 0.920468011 | count | 1           |
| METTL7A    | 0.6929097 | 0.115484  | 6      | 2.26E-09 | 0.920674237 | count | 5.43E-05    |
| TMEM168    | 0.8784141 | 0.2912424 | 3.0161 | 0.00259  | 0.920959967 | count | 1           |
| AL359513.1 | 2.0888534 | 0.7917158 | 2.6384 | 0.00838  | 0.921308642 | count | 1           |
| UBE2V1     | 0.7474887 | 0.2445606 | 3.0565 | 0.00226  | 0.92217489  | count | 1           |
| C16orf86   | 0.9414227 | 0.3178326 | 2.962  | 0.00309  | 0.92247634  | count | 1           |
| P2RY13     | 0.6572367 | 0.0921056 | 7.1357 | 1.26E-12 | 0.922582057 | count | 3.04E-08    |
| TBRG4      | 0.7636253 | 0.2282139 | 3.3461 | 0.000832 | 0.923527668 | count | 1           |
| FAM13A     | 0.7089358 | 0.1935359 | 3.6631 | 0.000254 | 0.923700289 | count | 1           |
| SMPD2      | 0.9564575 | 0.3907285 | 2.4479 | 0.0144   | 0.924025018 | count | 1           |
| MIB1       | 0.8993633 | 0.3173279 | 2.8342 | 0.00463  | 0.924649813 | count | 1           |
| LRWD1      | 0.97213   | 0.4433041 | 2.1929 | 0.0284   | 0.924894625 | count | 1           |

|            |           |           |         |          |             |       |             |
|------------|-----------|-----------|---------|----------|-------------|-------|-------------|
| TSTD2      | 0.8669917 | 0.3823029 | 2.2678  | 0.0234   | 0.925208117 | count | 1           |
| AKTIP      | 1.0492924 | 0.5020987 | 2.0898  | 0.0367   | 0.925450549 | count | 1           |
| EPS15      | 0.6778603 | 0.1237098 | 5.4794  | 4.70E-08 | 0.925624286 | count | 0.001124851 |
| CD302      | 0.6596154 | 0.0717497 | 9.1933  | 7.90E-20 | 0.926954027 | count | 1.91E-15    |
| NGRN       | 1.0285989 | 0.465052  | 2.2118  | 0.0271   | 0.927004707 | count | 1           |
| DGLUCY     | 0.8142964 | 0.2268405 | 3.5897  | 0.000338 | 0.927190229 | count | 1           |
| UBA7       | 1.0523411 | 0.3188932 | 3.3     | 0.000981 | 0.928287967 | count | 1           |
| SLC44A2    | 1.0524448 | 0.3781748 | 2.783   | 0.00543  | 0.92838447  | count | 1           |
| KLHL8      | 0.7586963 | 0.2116604 | 3.5845  | 0.000344 | 0.92969622  | count | 1           |
| PLEKHH3    | 1.4174745 | 0.540178  | 2.6241  | 0.00874  | 0.930554652 | count | 1           |
| DGKG       | 1.0133085 | 0.4482299 | 2.2607  | 0.0239   | 0.93157216  | count | 1           |
| SH3PXD2A   | 0.9791844 | 0.3317832 | 2.9513  | 0.00319  | 0.931932298 | count | 1           |
| PER1       | 0.6862211 | 0.1089283 | 6.2998  | 3.52E-10 | 0.932371209 | count | 8.47E-06    |
| SCARF1     | 0.8815244 | 0.26726   | 3.2984  | 0.000986 | 0.933027254 | count | 1           |
| CLEC4D     | 0.7813471 | 0.2048758 | 3.8138  | 0.00014  | 0.933923509 | count | 1           |
| PPM1K      | 0.7796915 | 0.2438559 | 3.1973  | 0.0014   | 0.934903908 | count | 1           |
| DHRS4-AS1  | 0.766728  | 0.2426677 | 3.1596  | 0.0016   | 0.934997498 | count | 1           |
| IGSF10     | 1.4241887 | 0.529656  | 2.6889  | 0.00722  | 0.935226261 | count | 1           |
| DHX57      | 1.1146049 | 0.3258855 | 3.4202  | 0.000636 | 0.93586045  | count | 1           |
| PPARA      | 0.8307218 | 0.350609  | 2.3694  | 0.0179   | 0.936174645 | count | 1           |
| MAPK7      | 0.8313673 | 0.2558763 | 3.2491  | 0.00117  | 0.936923874 | count | 1           |
| ZSCAN9     | 1.2842545 | 0.5004461 | 2.5662  | 0.0103   | 0.937048406 | count | 1           |
| SYTL1      | 1.3484133 | 0.4031059 | 3.3451  | 0.000835 | 0.937319769 | count | 1           |
| MATR3      | 0.8857431 | 0.3036933 | 2.9166  | 0.00357  | 0.937658602 | count | 1           |
| SEC16B     | 2.6506688 | 1.276468  | 2.0766  | 0.0379   | 0.938551708 | count | 1           |
| AL512306.3 | 2.6506688 | 1.991831  | 1.3308  | 0.183    | 0.938551708 | count | 1           |
| AC084036.1 | 2.6506688 | 1.0708119 | 2.4754  | 0.0134   | 0.938551708 | count | 1           |
| ZRSR2      | 0.7562501 | 0.2053139 | 3.6834  | 0.000235 | 0.939242336 | count | 1           |
| MATN1-AS1  | 2.131814  | 0.8437107 | 2.5267  | 0.0116   | 0.939343718 | count | 1           |
| DMTF1      | 0.8205954 | 0.2583052 | 3.1768  | 0.00151  | 0.939350846 | count | 1           |
| LINC00996  | 1.8482106 | 0.764774  | 2.4167  | 0.0157   | 0.939369307 | count | 1           |
| PLCG2      | 0.6695395 | 0.1210028 | 5.5333  | 3.48E-08 | 0.940036253 | count | 0.000833216 |
| SPTLC2     | 0.7056916 | 0.1132079 | 6.2336  | 5.35E-10 | 0.94006954  | count | 1.29E-05    |
| RAB33B     | 0.849162  | 0.2594267 | 3.2732  | 0.00108  | 0.940175232 | count | 1           |
| TNFRSF25   | 1.6649858 | 0.6388197 | 2.6063  | 0.00921  | 0.940536178 | count | 1           |
| HEXDC      | 0.7162942 | 0.2045011 | 3.5026  | 0.000469 | 0.940763016 | count | 1           |
| CPNE8      | 0.7006053 | 0.1518093 | 4.615   | 4.13E-06 | 0.941011322 | count | 0.0980875   |
| KLF4       | 0.6578609 | 0.0581316 | 11.3168 | 5.60E-29 | 0.941179043 | count | 1.36E-24    |
| ZNF354B    | 0.9734707 | 0.3678373 | 2.6465  | 0.00819  | 0.941236754 | count | 1           |
| ANKRD23    | 2.6609832 | 1.2401129 | 2.1458  | 0.032    | 0.941428235 | count | 1           |
| SEZ6L      | 2.6609832 | 1.0771069 | 2.4705  | 0.0136   | 0.941428235 | count | 1           |
| CLEC4A     | 0.676044  | 0.0947601 | 7.1343  | 1.28E-12 | 0.942214692 | count | 3.09E-08    |
| SEC24B     | 0.8118695 | 0.270048  | 3.0064  | 0.00267  | 0.942255427 | count | 1           |
| TBL1X      | 0.746097  | 0.2063634 | 3.6155  | 0.000306 | 0.943391476 | count | 1           |
| STYX       | 0.7565627 | 0.2516146 | 3.0068  | 0.00267  | 0.943421143 | count | 1           |

|            |           |           |         |          |             |       |           |
|------------|-----------|-----------|---------|----------|-------------|-------|-----------|
| INPP5K     | 0.7845348 | 0.2750093 | 2.8528  | 0.00437  | 0.943771571 | count | 1         |
| AKT3       | 0.8373261 | 0.2858561 | 2.9292  | 0.00343  | 0.94384083  | count | 1         |
| LINC00346  | 0.8209251 | 0.3775931 | 2.1741  | 0.0298   | 0.944341293 | count | 1         |
| MCPH1      | 0.8647357 | 0.2530103 | 3.4178  | 0.000642 | 0.944832257 | count | 1         |
| NADK       | 0.7564631 | 0.1887663 | 4.0074  | 6.32E-05 | 0.945116353 | count | 1         |
| MRI1       | 0.8180495 | 0.401097  | 2.0395  | 0.0415   | 0.945360616 | count | 1         |
| TTF2       | 0.7814885 | 0.2546121 | 3.0693  | 0.00217  | 0.945601996 | count | 1         |
| MTRR       | 1.1590531 | 0.3904568 | 2.9685  | 0.00302  | 0.945845296 | count | 1         |
| ZNF586     | 1.5407545 | 0.49638   | 3.104   | 0.00193  | 0.946001962 | count | 1         |
| FAM122A    | 0.7496184 | 0.2534709 | 2.9574  | 0.00313  | 0.946386002 | count | 1         |
| VSIR       | 0.6673467 | 0.0622976 | 10.7122 | 3.35E-26 | 0.94674374  | count | 8.13E-22  |
| ROBO4      | 2.152247  | 0.692947  | 3.1059  | 0.00192  | 0.947827794 | count | 1         |
| AGPAT1     | 0.7347372 | 0.2595088 | 2.8313  | 0.00467  | 0.94784712  | count | 1         |
| STAB1      | 0.6827758 | 0.1083064 | 6.3041  | 3.43E-10 | 0.947994167 | count | 8.25E-06  |
| AC103591.3 | 0.7041485 | 0.2967657 | 2.3727  | 0.0177   | 0.948353767 | count | 1         |
| ANKRA2     | 0.904547  | 0.3348253 | 2.7015  | 0.00695  | 0.949418967 | count | 1         |
| ARL11      | 0.7275529 | 0.1981022 | 3.6726  | 0.000245 | 0.950021162 | count | 1         |
| RLIM       | 0.7537012 | 0.1992335 | 3.783   | 0.000159 | 0.950051648 | count | 1         |
| VPS13A     | 0.8101929 | 0.3334649 | 2.4296  | 0.0152   | 0.952047553 | count | 1         |
| LINC01176  | 1.450646  | 0.6232521 | 2.3275  | 0.02     | 0.953605031 | count | 1         |
| BX284668.5 | 0.7451471 | 0.1964833 | 3.7924  | 0.000153 | 0.954459148 | count | 1         |
| KIAA1109   | 0.7326246 | 0.158143  | 4.6327  | 3.80E-06 | 0.954955876 | count | 0.0902576 |
| ACSF3      | 0.7719775 | 0.2307825 | 3.345   | 0.000835 | 0.95508138  | count | 1         |
| ZNF101     | 0.9109344 | 0.5424205 | 1.6794  | 0.0932   | 0.956377002 | count | 1         |
| CENPJ      | 0.9397001 | 0.3770125 | 2.4925  | 0.0128   | 0.957029583 | count | 1         |
| RGL1       | 0.7159806 | 0.1568544 | 4.5646  | 5.25E-06 | 0.957084969 | count | 0.1246245 |
| PIK3CG     | 0.8896299 | 0.2596961 | 3.4257  | 0.000623 | 0.958177913 | count | 1         |
| S1PR4      | 0.75309   | 0.2014257 | 3.7388  | 0.000189 | 0.958188943 | count | 1         |
| CDADC1     | 0.8770361 | 0.2623826 | 3.3426  | 0.000842 | 0.958722804 | count | 1         |
| CWF19L1    | 0.8502736 | 0.3065777 | 2.7734  | 0.00559  | 0.958873057 | count | 1         |
| SMIM27     | 0.7977989 | 0.222902  | 3.5791  | 0.000351 | 0.96008355  | count | 1         |
| AC114490.3 | 2.7315296 | 1.0318309 | 2.6473  | 0.00817  | 0.960674909 | count | 1         |
| AP003774.4 | 2.7315296 | 1.0318309 | 2.6473  | 0.00817  | 0.960674909 | count | 1         |
| AC020656.2 | 1.564376  | 0.6481014 | 2.4138  | 0.0159   | 0.961203284 | count | 1         |
| HECTD2     | 0.8734278 | 0.2747793 | 3.1787  | 0.0015   | 0.96142513  | count | 1         |
| BTN3A3     | 1.0449742 | 0.3218873 | 3.2464  | 0.00118  | 0.962183523 | count | 1         |
| CLU        | 0.7977271 | 0.4397537 | 1.814   | 0.0698   | 0.962878182 | count | 1         |
| TMPO-AS1   | 1.1787881 | 0.6119663 | 1.9262  | 0.0542   | 0.962892739 | count | 1         |
| RPRD2      | 0.8258537 | 0.3324927 | 2.4838  | 0.0131   | 0.963057894 | count | 1         |
| EPN2       | 1.0902477 | 0.4418608 | 2.4674  | 0.0137   | 0.963565395 | count | 1         |
| GALT       | 0.766942  | 0.2076753 | 3.693   | 0.000226 | 0.963709576 | count | 1         |
| ZNF343     | 1.8963808 | 0.7412267 | 2.5584  | 0.0106   | 0.963915062 | count | 1         |
| ADRB2      | 0.7326466 | 0.1765735 | 4.1492  | 3.45E-05 | 0.964008903 | count | 0.813993  |
| RBM5       | 0.7357479 | 0.1697032 | 4.3355  | 1.51E-05 | 0.964225364 | count | 0.3573868 |
| SIRPB2     | 0.7929397 | 0.3312872 | 2.3935  | 0.0168   | 0.965079209 | count | 1         |



|            |            |             |        |          |             |       |             |
|------------|------------|-------------|--------|----------|-------------|-------|-------------|
| DIAPH1     | 0.7151563  | 0.1359929   | 5.2588 | 1.58E-07 | 0.965701043 | count | 0.003775252 |
| PRKAB1     | 1.0926743  | 0.4366523   | 2.5024 | 0.0124   | 0.965823382 | count | 1           |
| ZBP1       | 1.2674475  | 1.0359523   | 1.2235 | 0.221    | 0.966127991 | count | 1           |
| DPP9       | 0.7902751  | 0.2530338   | 3.1232 | 0.00181  | 0.966777294 | count | 1           |
| AC090517.4 | 1.2236579  | 0.6328326   | 1.9336 | 0.0533   | 0.967796897 | count | 1           |
| MAPK8IP3   | 1.1223093  | 0.4515017   | 2.4857 | 0.013    | 0.969052171 | count | 1           |
| FZD1       | 0.7461737  | 0.2301382   | 3.2423 | 0.0012   | 0.970018329 | count | 1           |
| TSPAN2     | 1.3931463  | 0.5520871   | 2.5234 | 0.0117   | 0.970274561 | count | 1           |
| ANKRD49    | 0.8113783  | 0.2678033   | 3.0298 | 0.00247  | 0.970654516 | count | 1           |
| ACBD4      | 1.1244226  | 0.4051563   | 2.7753 | 0.00556  | 0.970975331 | count | 1           |
| BLOC1S3    | 0.9342633  | 0.3914169   | 2.3869 | 0.0171   | 0.972158279 | count | 1           |
| AC010883.1 | 1.395767   | 0.6417283   | 2.175  | 0.0297   | 0.972201285 | count | 1           |
| AC124016.1 | 1.395767   | 0.5545322   | 2.517  | 0.0119   | 0.972201285 | count | 1           |
| EFHC1      | 1.1558507  | 0.4438251   | 2.6043 | 0.00926  | 0.972490038 | count | 1           |
| NTNG2      | 0.878156   | 0.3118583   | 2.8159 | 0.0049   | 0.973312264 | count | 1           |
| PRKCD      | 0.7591399  | 0.1508331   | 5.033  | 5.18E-07 | 0.973891647 | count | 0.012349638 |
| PRAG1      | 1.1576412  | 0.4328909   | 2.6742 | 0.00754  | 0.974079455 | count | 1           |
| AC023157.3 | 0.7963802  | 0.2440848   | 3.2627 | 0.00112  | 0.974395965 | count | 1           |
| NUP210     | 0.9045381  | 0.3208389   | 2.8193 | 0.00485  | 0.974795947 | count | 1           |
| CFAP58-DT  | 1.586088   | 0.8089229   | 1.9607 | 0.05     | 0.975130008 | count | 1           |
| CYB5B      | 0.7421178  | 0.1794403   | 4.1357 | 3.66E-05 | 0.976611793 | count | 0.8633574   |
| RIC1       | 0.8655757  | 0.2507139   | 3.4524 | 0.000565 | 0.976643541 | count | 1           |
| KMT2E-AS1  | 0.8277344  | 0.2485542   | 3.3302 | 0.000881 | 0.976912189 | count | 1           |
| BUD13      | 0.866415   | 0.2930113   | 2.9569 | 0.00314  | 0.977618352 | count | 1           |
| PRKN       | 2.796085   | 1.1210477   | 2.4942 | 0.0127   | 0.977631994 | count | 1           |
| RGL3       | 2.796085   | 1.120051    | 2.4964 | 0.0126   | 0.977631994 | count | 1           |
| ZNF30      | 2.796085   | 1.1990069   | 2.332  | 0.0198   | 0.977631994 | count | 1           |
| 9-Sep      | 0.7238496  | 0.1311673   | 5.5185 | 3.78E-08 | 0.978305327 | count | 0.000904894 |
| WRNIP1     | 0.8262907  | 0.287164    | 2.8774 | 0.00404  | 0.978771983 | count | 1           |
| POC5       | 0.9404359  | 0.4020312   | 2.3392 | 0.0194   | 0.978826939 | count | 1           |
| TMEM104    | 1.2371225  | 0.4353318   | 2.8418 | 0.00452  | 0.979057876 | count | 1           |
| TRIT1      | 1.0436216  | 0.3736988   | 2.7927 | 0.00527  | 0.979153703 | count | 1           |
| USP45      | 1.0267393  | 0.4576141   | 2.2437 | 0.0249   | 0.979385192 | count | 1           |
| SWT1       | 0.9720573  | 0.6001552   | 1.6197 | 0.105    | 0.979567088 | count | 1           |
| PLIN5      | 1.3396769  | 0.5926468   | 2.2605 | 0.0239   | 0.979941246 | count | 1           |
| CNRIP1     | 0.7974975  | 0.2148947   | 3.7111 | 0.000211 | 0.980563264 | count | 1           |
| TRAF3IP3   | 0.7264982  | 0.1370722   | 5.3001 | 1.26E-07 | 0.981140902 | count | 0.003011148 |
| AC144831.1 | 1.065223   | 0.4280483   | 2.4886 | 0.0129   | 0.981757805 | count | 1           |
| PAXBP1-AS1 | 1.1383517  | 0.4059758   | 2.804  | 0.00509  | 0.983649378 | count | 1           |
| AAR2       | 0.9759689  | 0.3290878   | 2.9657 | 0.00305  | 0.983671412 | count | 1           |
| LIG3       | 0.9361605  | 0.3536264   | 2.6473 | 0.00817  | 0.983862938 | count | 1           |
| AC005332.1 | 0.9058415  | 0.3253173   | 2.7845 | 0.0054   | 0.983931158 | count | 1           |
| GGT7       | 1.2037457  | 0.492181    | 2.4457 | 0.0145   | 0.984437418 | count | 1           |
| RERE       | 0.7385522  | 0.1437119   | 5.1391 | 2.98E-07 | 0.985396583 | count | 0.00711177  |
| MEDAG      | 18.6516772 | 1259.393233 | 0.0148 | 0.988    | 0.985786068 | count | 1           |

|            |            |             |        |        |             |       |   |
|------------|------------|-------------|--------|--------|-------------|-------|---|
| AC093388.1 | 19.2691062 | 1564.758214 | 0.0123 | 0.9902 | 0.985786073 | count | 1 |
| TNN        | 19.3561681 | 1938.641643 | 0.01   | 0.992  | 0.985786073 | count | 1 |
| HIP1R      | 19.559496  | 1320.282742 | 0.0148 | 0.9882 | 0.985786074 | count | 1 |
| ADGRG1     | 20.1345959 | 1238.268074 | 0.0163 | 0.987  | 0.985786076 | count | 1 |
| CELSR3     | 20.1358452 | 1756.601605 | 0.0115 | 0.991  | 0.985786076 | count | 1 |
| OR7G2      | 20.1358452 | 1756.601605 | 0.0115 | 0.991  | 0.985786076 | count | 1 |
| AC007249.2 | 20.1358453 | 1756.601655 | 0.0115 | 0.991  | 0.985786076 | count | 1 |
| NCBP2-AS1  | 20.1358453 | 1756.601677 | 0.0115 | 0.991  | 0.985786076 | count | 1 |
| ECT2L      | 20.1358453 | 1756.601677 | 0.0115 | 0.991  | 0.985786076 | count | 1 |
| HEPH       | 20.1358453 | 1756.601655 | 0.0115 | 0.991  | 0.985786076 | count | 1 |
| GRIK5      | 20.1358453 | 1756.601677 | 0.0115 | 0.991  | 0.985786076 | count | 1 |
| SH3TC2     | 18.601927  | 920.1423476 | 0.0202 | 0.984  | 0.985786138 | count | 1 |
| AC009318.3 | 19.2683063 | 1357.302788 | 0.0142 | 0.9887 | 0.985786144 | count | 1 |
| ADAMTS5    | 19.2683104 | 1357.302344 | 0.0142 | 0.9887 | 0.985786144 | count | 1 |
| AC010680.4 | 19.3305558 | 1258.052218 | 0.0154 | 0.988  | 0.985786145 | count | 1 |
| UST        | 19.355698  | 1368.299796 | 0.0141 | 0.989  | 0.985786145 | count | 1 |
| PRICKLE1   | 19.355698  | 1368.299796 | 0.0141 | 0.989  | 0.985786145 | count | 1 |
| PTPRG      | 19.4277769 | 2106.811277 | 0.0092 | 0.993  | 0.985786145 | count | 1 |
| LINC01126  | 19.4448558 | 1526.726132 | 0.0127 | 0.9898 | 0.985786145 | count | 1 |
| SCGB3A1    | 19.4452758 | 1721.520012 | 0.0113 | 0.991  | 0.985786145 | count | 1 |
| LINC02217  | 20.1345958 | 1238.268145 | 0.0163 | 0.987  | 0.985786148 | count | 1 |
| CDC20B     | 20.1345958 | 1238.268156 | 0.0163 | 0.987  | 0.985786148 | count | 1 |
| AC007216.2 | 20.1345957 | 1238.26813  | 0.0163 | 0.987  | 0.985786148 | count | 1 |
| AC110285.6 | 20.1345958 | 1238.268094 | 0.0163 | 0.987  | 0.985786148 | count | 1 |
| IL11       | 20.1345957 | 1238.268074 | 0.0163 | 0.987  | 0.985786148 | count | 1 |
| FAM87B     | 20.1345961 | 1238.268115 | 0.0163 | 0.987  | 0.985786148 | count | 1 |
| TAS1R3     | 20.134596  | 1238.268115 | 0.0163 | 0.987  | 0.985786148 | count | 1 |
| ROR1       | 20.134596  | 1238.26813  | 0.0163 | 0.987  | 0.985786148 | count | 1 |
| KCNN1      | 20.134596  | 1238.268125 | 0.0163 | 0.987  | 0.985786148 | count | 1 |
| PLA2G6     | 20.1345956 | 1238.268104 | 0.0163 | 0.987  | 0.985786148 | count | 1 |
| CNTNAP2    | 20.1345959 | 1238.268084 | 0.0163 | 0.987  | 0.985786148 | count | 1 |
| AL590399.3 | 20.1345962 | 1238.268161 | 0.0163 | 0.987  | 0.985786148 | count | 1 |
| LINC02257  | 20.135845  | 1756.601663 | 0.0115 | 0.991  | 0.985786148 | count | 1 |
| HOOK1      | 20.1358452 | 1756.601576 | 0.0115 | 0.991  | 0.985786148 | count | 1 |
| AL449266.1 | 20.1358452 | 1756.601648 | 0.0115 | 0.991  | 0.985786148 | count | 1 |
| DNM3OS     | 20.1358452 | 1756.601612 | 0.0115 | 0.991  | 0.985786148 | count | 1 |
| AC018693.1 | 20.1358453 | 1756.60167  | 0.0115 | 0.991  | 0.985786148 | count | 1 |
| AC007389.5 | 20.1358453 | 1756.601714 | 0.0115 | 0.991  | 0.985786148 | count | 1 |
| AC007879.3 | 20.1358452 | 1756.601612 | 0.0115 | 0.991  | 0.985786148 | count | 1 |
| APOA1      | 20.1358452 | 1756.601626 | 0.0115 | 0.991  | 0.985786148 | count | 1 |
| CYP46A1    | 20.1358453 | 1756.601655 | 0.0115 | 0.991  | 0.985786148 | count | 1 |
| MKRN3      | 20.1358452 | 1756.60175  | 0.0115 | 0.991  | 0.985786148 | count | 1 |
| HSPB6      | 20.1358452 | 1756.601648 | 0.0115 | 0.991  | 0.985786148 | count | 1 |
| FP565260.3 | 20.1358455 | 1756.601743 | 0.0115 | 0.991  | 0.985786148 | count | 1 |
| AC097382.2 | 20.1358451 | 1756.601619 | 0.0115 | 0.991  | 0.985786148 | count | 1 |

|            |            |             |         |          |             |       |             |
|------------|------------|-------------|---------|----------|-------------|-------|-------------|
| DUOXA1     | 20.1358451 | 1756.601648 | 0.0115  | 0.991    | 0.985786148 | count | 1           |
| AC015674.1 | 20.1358451 | 1756.601619 | 0.0115  | 0.991    | 0.985786148 | count | 1           |
| AC013403.2 | 20.1358454 | 1756.601721 | 0.0115  | 0.991    | 0.985786148 | count | 1           |
| AC023128.1 | 20.1358454 | 1756.601655 | 0.0115  | 0.991    | 0.985786148 | count | 1           |
| RGS7BP     | 20.1358454 | 1756.601721 | 0.0115  | 0.991    | 0.985786148 | count | 1           |
| AL031123.1 | 20.1358454 | 1756.601655 | 0.0115  | 0.991    | 0.985786148 | count | 1           |
| AC110285.5 | 20.1358454 | 1756.601721 | 0.0115  | 0.991    | 0.985786148 | count | 1           |
| AC004221.1 | 20.1358454 | 1756.601655 | 0.0115  | 0.991    | 0.985786148 | count | 1           |
| WNT7B      | 20.1358454 | 1756.601721 | 0.0115  | 0.991    | 0.985786148 | count | 1           |
| MVB12B     | 0.9671209  | 0.2876906   | 3.3617  | 0.000787 | 0.986099888 | count | 1           |
| PRKD2      | 0.9150475  | 0.3789269   | 2.4148  | 0.0158   | 0.986512784 | count | 1           |
| HMGB2      | 0.6986995  | 0.0853264   | 8.1886  | 4.20E-16 | 0.986778266 | count | 1.02E-11    |
| CKAP4      | 0.7384122  | 0.1507486   | 4.8983  | 1.03E-06 | 0.986827745 | count | 0.02453151  |
| CPED1      | 0.8128832  | 0.2415033   | 3.3659  | 0.000775 | 0.987176383 | count | 1           |
| RXRA       | 0.7217197  | 0.1267368   | 5.6946  | 1.38E-08 | 0.987236024 | count | 0.000330924 |
| YLPM1      | 0.8334656  | 0.271326    | 3.0718  | 0.00215  | 0.987473407 | count | 1           |
| GANC       | 0.9487399  | 0.297508    | 3.189   | 0.00145  | 0.987798966 | count | 1           |
| PBXIP1     | 0.8281837  | 0.2199615   | 3.7651  | 0.00017  | 0.987943126 | count | 1           |
| ATOH8      | 1.5003966  | 0.5222435   | 2.873   | 0.0041   | 0.988023038 | count | 1           |
| ZBTB42     | 1.5003966  | 0.5400968   | 2.778   | 0.00551  | 0.988023038 | count | 1           |
| RABGEF1    | 0.8231632  | 0.2200604   | 3.7406  | 0.000188 | 0.988228548 | count | 1           |
| MEFV       | 1.1182756  | 0.2718512   | 4.1136  | 4.02E-05 | 0.989641601 | count | 0.9478356   |
| FOSB       | 0.6916567  | 0.0643136   | 10.7544 | 2.17E-26 | 0.990928374 | count | 5.27E-22    |
| TNFAIP2    | 0.706715   | 0.0967853   | 7.3019  | 3.82E-13 | 0.991023488 | count | 9.22E-09    |
| ANKDD1A    | 0.9832846  | 0.4382046   | 2.2439  | 0.0249   | 0.991347795 | count | 1           |
| NFATC1     | 0.7964842  | 0.3363051   | 2.3683  | 0.0179   | 0.992150139 | count | 1           |
| TMX4       | 0.7155344  | 0.13385     | 5.3458  | 9.83E-08 | 0.992332536 | count | 0.00234996  |
| PLA2G16    | 0.7612496  | 0.1409185   | 5.4021  | 7.22E-08 | 0.992737139 | count | 0.001726663 |
| NCKIPSD    | 1.0408045  | 0.4952213   | 2.1017  | 0.0357   | 0.99342125  | count | 1           |
| ACSS1      | 1.301886   | 0.3674092   | 3.5434  | 0.000402 | 0.99388802  | count | 1           |
| LBH        | 1.0415537  | 0.4011327   | 2.5965  | 0.00947  | 0.994168892 | count | 1           |
| APOOL      | 0.8173289  | 0.2298028   | 3.5567  | 0.000383 | 0.995382076 | count | 1           |
| PPP4R1     | 0.7949627  | 0.2166376   | 3.6696  | 0.000248 | 0.995935736 | count | 1           |
| AC106028.4 | 0.754962   | 0.2195719   | 3.4383  | 0.000595 | 0.995954594 | count | 1           |
| ZNF414     | 0.9104647  | 0.4065992   | 2.2392  | 0.0252   | 0.99648678  | count | 1           |
| PREPL      | 0.9393778  | 0.3148421   | 2.9836  | 0.00288  | 0.996567334 | count | 1           |
| SELPLG     | 0.7778525  | 0.1453544   | 5.3514  | 9.54E-08 | 0.996969678 | count | 0.002280728 |
| KANK2      | 1.258574   | 0.394523    | 3.1901  | 0.00144  | 0.996984433 | count | 1           |
| SYNE3      | 0.9788659  | 0.2659826   | 3.6802  | 0.000238 | 0.998553359 | count | 1           |
| HSPA4L     | 2.2794458  | 0.9740702   | 2.3401  | 0.0194   | 0.999212697 | count | 1           |
| TREML4     | 2.2794458  | 0.8339961   | 2.7332  | 0.00632  | 0.999212697 | count | 1           |
| TAF5       | 1.0323034  | 0.3685612   | 2.8009  | 0.00514  | 1.000773691 | count | 1           |
| SEPSECS    | 1.1308939  | 0.3811723   | 2.9669  | 0.00304  | 1.001377239 | count | 1           |
| CD69       | 0.7140088  | 0.1619584   | 4.4086  | 1.09E-05 | 1.001505653 | count | 0.2582646   |
| PSKH1      | 1.2648599  | 0.4841584   | 2.6125  | 0.00904  | 1.002233668 | count | 1           |

|            |           |           |         |          |             |       |             |
|------------|-----------|-----------|---------|----------|-------------|-------|-------------|
| CAPNS2     | 1.4367189 | 0.8057791 | 1.783   | 0.0747   | 1.002250038 | count | 1           |
| SH3TC1     | 0.7829999 | 0.1880509 | 4.1638  | 3.24E-05 | 1.003661835 | count | 0.7647048   |
| PSMA3-AS1  | 0.7487097 | 0.158748  | 4.7163  | 2.54E-06 | 1.005262334 | count | 0.0603885   |
| KAT2B      | 0.8691592 | 0.4198987 | 2.0699  | 0.0386   | 1.006042207 | count | 1           |
| ATG16L2    | 0.7637158 | 0.1556044 | 4.9081  | 9.80E-07 | 1.006125651 | count | 0.02334458  |
| FOS        | 0.6988844 | 0.0512621 | 13.6335 | 7.51E-41 | 1.007517252 | count | 1.83E-36    |
| FBXO42     | 0.9084315 | 0.3568504 | 2.5457  | 0.011    | 1.007929704 | count | 1           |
| AC145285.6 | 1.2310191 | 0.5854546 | 2.1027  | 0.0356   | 1.007958363 | count | 1           |
| PARD6B     | 1.637896  | 0.8372648 | 1.9562  | 0.0505   | 1.008172463 | count | 1           |
| LINC02256  | 1.0008223 | 0.417625  | 2.3965  | 0.0166   | 1.009750959 | count | 1           |
| TPD52L1    | 1.78553   | 0.873738  | 2.0436  | 0.0411   | 1.010343805 | count | 1           |
| SESN1      | 0.7946333 | 0.1640769 | 4.8431  | 1.36E-06 | 1.010397799 | count | 0.03237616  |
| CDKN2A     | 1.3224414 | 0.5842751 | 2.2634  | 0.0237   | 1.010428689 | count | 1           |
| RCCD1      | 1.3225016 | 0.5894815 | 2.2435  | 0.025    | 1.010477077 | count | 1           |
| SREBF2     | 1.0760239 | 0.3048159 | 3.5301  | 0.000423 | 1.010997263 | count | 1           |
| APOBEC3A   | 0.7151821 | 0.1719362 | 4.1596  | 3.30E-05 | 1.01114513  | count | 0.778767    |
| MCEE       | 0.8535367 | 0.253929  | 3.3613  | 0.000788 | 1.011819424 | count | 1           |
| MOCS3      | 1.2011256 | 0.5129032 | 2.3418  | 0.0193   | 1.012654422 | count | 1           |
| CLIP4      | 0.8574361 | 0.2385799 | 3.5939  | 0.000332 | 1.012823188 | count | 1           |
| ELOVL5     | 0.7758028 | 0.1558231 | 4.9787  | 6.84E-07 | 1.012888755 | count | 0.016301088 |
| AL355001.2 | 1.0791611 | 0.3577086 | 3.0169  | 0.00258  | 1.014079873 | count | 1           |
| GSAP       | 0.8013412 | 0.2093053 | 3.8286  | 0.000132 | 1.014399366 | count | 1           |
| JADE1      | 0.8767997 | 0.2744494 | 3.1948  | 0.00142  | 1.015117435 | count | 1           |
| MNDA       | 0.708079  | 0.0474252 | 14.9304 | 2.60E-48 | 1.017588073 | count | 6.32E-44    |
| AL451085.1 | 1.7990467 | 0.7993425 | 2.2507  | 0.0245   | 1.018061613 | count | 1           |
| FANCG      | 1.284112  | 0.5292654 | 2.4262  | 0.0153   | 1.018299604 | count | 1           |
| PCMTD2     | 0.8427283 | 0.3145332 | 2.6793  | 0.00743  | 1.018391297 | count | 1           |
| PSMB10     | 0.7363242 | 0.1032088 | 7.1343  | 1.28E-12 | 1.018524797 | count | 3.09E-08    |
| TTC28      | 2.9630146 | 1.1092562 | 2.6712  | 0.00761  | 1.018586315 | count | 1           |
| MELTF      | 1.1263232 | 0.5562999 | 2.0247  | 0.043    | 1.019759756 | count | 1           |
| TIMELESS   | 1.656285  | 0.6073616 | 2.727   | 0.00644  | 1.01983178  | count | 1           |
| LINGO3     | 2.0086149 | 0.7586202 | 2.6477  | 0.00816  | 1.019871947 | count | 1           |
| CD101      | 1.1518683 | 0.4233468 | 2.7209  | 0.00656  | 1.020877119 | count | 1           |
| NPDC1      | 1.0530081 | 0.3670866 | 2.8686  | 0.00416  | 1.021725922 | count | 1           |
| ZFP36      | 0.7098621 | 0.0414323 | 17.1331 | 3.06E-62 | 1.021992445 | count | 7.44E-58    |
| RACGAP1    | 1.1070533 | 0.4770029 | 2.3209  | 0.0204   | 1.022183164 | count | 1           |
| CD244      | 1.0874968 | 0.3426966 | 3.1734  | 0.00153  | 1.022269888 | count | 1           |
| CETN2      | 0.797484  | 0.2114852 | 3.7709  | 0.000167 | 1.022494656 | count | 1           |
| GLCC11     | 1.0545427 | 0.3577151 | 2.948   | 0.00323  | 1.023278758 | count | 1           |
| CD200R1    | 1.1845204 | 0.3066569 | 3.8627  | 0.000115 | 1.025626547 | count | 1           |
| MAP1B      | 1.3418685 | 0.7669034 | 1.7497  | 0.0803   | 1.026039714 | count | 1           |
| FADS1      | 0.7887091 | 0.2118457 | 3.723   | 0.000201 | 1.02703443  | count | 1           |
| RAI1       | 1.2182145 | 0.5299607 | 2.2987  | 0.0216   | 1.027797457 | count | 1           |
| TTY15      | 0.880509  | 0.2750488 | 3.2013  | 0.00139  | 1.028459827 | count | 1           |
| STON2      | 1.1602304 | 0.3997924 | 2.9021  | 0.00374  | 1.028648306 | count | 1           |

|            |           |           |        |          |             |       |             |
|------------|-----------|-----------|--------|----------|-------------|-------|-------------|
| C15orf41   | 1.559922  | 0.7584452 | 2.0567 | 0.0398   | 1.028923118 | count | 1           |
| AC007032.1 | 0.7994759 | 0.1892156 | 4.2252 | 2.47E-05 | 1.028923803 | count | 0.5835622   |
| EGR2       | 0.7424082 | 0.1460161 | 5.0844 | 3.97E-07 | 1.029192709 | count | 0.009470038 |
| KDM6A      | 1.0460354 | 0.33325   | 3.1389 | 0.00172  | 1.02971424  | count | 1           |
| ZNF436     | 2.3585458 | 0.8512441 | 2.7707 | 0.00564  | 1.029867675 | count | 1           |
| HOXB7      | 1.3468564 | 0.477331  | 2.8216 | 0.00482  | 1.030044151 | count | 1           |
| XXYL1      | 0.9985787 | 0.3134892 | 3.1854 | 0.00146  | 1.030858592 | count | 1           |
| CPPED1     | 0.7418551 | 0.0986253 | 7.522  | 7.53E-14 | 1.031217896 | count | 1.82E-09    |
| RNASEL     | 0.9041131 | 0.3130581 | 2.888  | 0.00391  | 1.032490713 | count | 1           |
| ZDHHC8     | 1.0806374 | 0.3761799 | 2.8727 | 0.00411  | 1.033164717 | count | 1           |
| U62317.2   | 1.141195  | 0.4016443 | 2.8413 | 0.00453  | 1.033863761 | count | 1           |
| GRIP1      | 1.6806965 | 0.7760653 | 2.1657 | 0.0304   | 1.035250365 | count | 1           |
| HAL        | 1.5694206 | 0.5076449 | 3.0916 | 0.00201  | 1.035418404 | count | 1           |
| ST7-AS1    | 1.263767  | 0.4697678 | 2.6902 | 0.00719  | 1.036161304 | count | 1           |
| DAPP1      | 0.7692524 | 0.139909  | 5.4982 | 4.23E-08 | 1.036354335 | count | 0.001012408 |
| SCN1B      | 0.8028261 | 0.2331769 | 3.443  | 0.000585 | 1.038087312 | count | 1           |
| PTGFRN     | 1.4859826 | 0.4424658 | 3.3584 | 0.000796 | 1.038226374 | count | 1           |
| OSGIN2     | 0.8457667 | 0.290099  | 2.9154 | 0.00358  | 1.038599941 | count | 1           |
| RSAD1      | 0.9354118 | 0.3003701 | 3.1142 | 0.00187  | 1.038788217 | count | 1           |
| AC093627.5 | 1.6867588 | 0.7648212 | 2.2054 | 0.0275   | 1.039068489 | count | 1           |
| TICAM2     | 1.5765157 | 0.6118173 | 2.5768 | 0.01     | 1.040263979 | count | 1           |
| FHIT       | 0.9034234 | 0.3084264 | 2.9291 | 0.00343  | 1.041914053 | count | 1           |
| FRAT2      | 0.7663265 | 0.122314  | 6.2652 | 4.38E-10 | 1.042708393 | count | 1.05E-05    |
| RNF24      | 0.7931689 | 0.1800632 | 4.4049 | 1.10E-05 | 1.04293244  | count | 0.260623    |
| TNF        | 0.7728524 | 0.1825443 | 4.2338 | 2.38E-05 | 1.043842038 | count | 0.5623464   |
| P2RY8      | 1.3155048 | 0.4665905 | 2.8194 | 0.00485  | 1.044456152 | count | 1           |
| ZNF33A     | 0.7862736 | 0.1835857 | 4.2829 | 1.92E-05 | 1.044753767 | count | 0.4541184   |
| PTBP2      | 1.0356285 | 0.3367509 | 3.0754 | 0.00213  | 1.046273723 | count | 1           |
| MAGEH1     | 0.9367361 | 0.3093672 | 3.0279 | 0.00249  | 1.046914684 | count | 1           |
| ZNF117     | 0.9168848 | 0.238846  | 3.8388 | 0.000127 | 1.047473423 | count | 1           |
| ANO10      | 0.9858875 | 0.3047687 | 3.2349 | 0.00123  | 1.047673686 | count | 1           |
| EGFL7      | 0.7794519 | 0.1757871 | 4.4341 | 9.65E-06 | 1.047877401 | count | 0.2287436   |
| EIF4E3     | 0.949532  | 0.2661163 | 3.5681 | 0.000366 | 1.047948231 | count | 1           |
| ADAM15     | 0.8196767 | 0.1737953 | 4.7163 | 2.54E-06 | 1.048601181 | count | 0.0603885   |
| C20orf96   | 1.037983  | 0.4060252 | 2.5564 | 0.0106   | 1.048743962 | count | 1           |
| FGR        | 0.7443506 | 0.0858327 | 8.6721 | 7.58E-18 | 1.048994134 | count | 1.84E-13    |
| CTLA4      | 1.5904326 | 0.537381  | 2.9596 | 0.00311  | 1.049753228 | count | 1           |
| ARHGAP45   | 0.7788613 | 0.1308019 | 5.9545 | 2.98E-09 | 1.050299632 | count | 7.15E-05    |
| CIP2A      | 1.2804049 | 0.4700573 | 2.7239 | 0.0065   | 1.050471117 | count | 1           |
| MPEG1      | 0.7499001 | 0.0804239 | 9.3243 | 2.41E-20 | 1.050516992 | count | 5.84E-16    |
| ADGRE5     | 0.7627247 | 0.1018727 | 7.487  | 9.77E-14 | 1.050536145 | count | 2.36E-09    |
| STRADA     | 0.997363  | 0.3290168 | 3.0313 | 0.00246  | 1.050570359 | count | 1           |
| ICA1       | 0.8461301 | 0.2518348 | 3.3599 | 0.000792 | 1.050818577 | count | 1           |
| EARS2      | 1.858809  | 0.8767815 | 2.12   | 0.0341   | 1.051889554 | count | 1           |
| VSTM1      | 1.504776  | 0.2864497 | 5.2532 | 1.62E-07 | 1.051895505 | count | 0.003870666 |

|              |           |           |         |          |             |       |             |
|--------------|-----------|-----------|---------|----------|-------------|-------|-------------|
| SIDT1        | 1.7079803 | 0.440988  | 3.8731  | 0.00011  | 1.052399104 | count | 1           |
| ABHD5        | 0.7553763 | 0.0984768 | 7.6706  | 2.45E-14 | 1.052582859 | count | 5.92E-10    |
| KRT8         | 1.435472  | 0.6471919 | 2.218   | 0.0266   | 1.053645035 | count | 1           |
| TTC39B       | 1.1195538 | 0.4187999 | 2.6732  | 0.00756  | 1.053755646 | count | 1           |
| ROBO3        | 1.1018419 | 0.3665619 | 3.0059  | 0.00267  | 1.054313245 | count | 1           |
| SLC6A12      | 1.1881049 | 0.7027863 | 1.6906  | 0.091    | 1.054537853 | count | 1           |
| HOXB6        | 2.0837792 | 0.5460214 | 3.8163  | 0.000139 | 1.056295313 | count | 1           |
| MIGA2        | 1.5109276 | 0.6982682 | 2.1638  | 0.0306   | 1.056362854 | count | 1           |
| BST1         | 0.7629018 | 0.1090107 | 6.9984  | 3.33E-12 | 1.057741009 | count | 8.03E-08    |
| KANSL2       | 0.8711367 | 0.2831322 | 3.0768  | 0.00212  | 1.059415696 | count | 1           |
| ZNF546       | 1.7193198 | 0.8236226 | 2.0875  | 0.0369   | 1.059499269 | count | 1           |
| MBD6         | 0.851721  | 0.2162751 | 3.9381  | 8.44E-05 | 1.060069947 | count | 1           |
| MRC1         | 0.7455928 | 0.0804036 | 9.2731  | 3.84E-20 | 1.060458272 | count | 9.30E-16    |
| CCDC144A     | 0.8444594 | 0.3420215 | 2.469   | 0.0136   | 1.060933927 | count | 1           |
| HAUS3        | 0.9920959 | 0.311791  | 3.1819  | 0.00148  | 1.063688386 | count | 1           |
| LILRA5       | 0.7778162 | 0.1183469 | 6.5723  | 6.03E-11 | 1.063929546 | count | 1.45E-06    |
| ZCCHC3       | 0.964337  | 0.3383159 | 2.8504  | 0.0044   | 1.064785155 | count | 1           |
| LINC01023    | 1.5227987 | 0.7171112 | 2.1235  | 0.0338   | 1.064973302 | count | 1           |
| CD55         | 0.7472263 | 0.0668869 | 11.1715 | 2.68E-28 | 1.066269293 | count | 6.51E-24    |
| FBXL20       | 0.9376968 | 0.2631159 | 3.5638  | 0.000372 | 1.066281455 | count | 1           |
| ZNF346       | 1.6164434 | 0.622386  | 2.5972  | 0.00946  | 1.067432478 | count | 1           |
| AC048341.2   | 1.6164434 | 0.6966101 | 2.3204  | 0.0204   | 1.067432478 | count | 1           |
| PPM1H        | 2.107536  | 0.6692785 | 3.149   | 0.00166  | 1.067619903 | count | 1           |
| BTG2         | 0.7451396 | 0.0718378 | 10.3725 | 1.06E-24 | 1.06884884  | count | 2.57E-20    |
| AL158152.1   | 1.5289411 | 0.610053  | 2.5062  | 0.0123   | 1.069423148 | count | 1           |
| AC087190.1   | 0.9147519 | 0.2888062 | 3.1674  | 0.00156  | 1.069454535 | count | 1           |
| SUN2         | 0.8039473 | 0.1678202 | 4.7905  | 1.76E-06 | 1.071057307 | count | 0.04187568  |
| TRIM4        | 0.8475038 | 0.2127304 | 3.9839  | 6.98E-05 | 1.072060293 | count | 1           |
| ARMH1        | 0.9335754 | 0.3253005 | 2.8699  | 0.00414  | 1.072426524 | count | 1           |
| HIPK1-AS1    | 1.6250474 | 0.6284831 | 2.5857  | 0.00978  | 1.073263789 | count | 1           |
| UTP15        | 1.0886916 | 0.4048693 | 2.689   | 0.00722  | 1.073430412 | count | 1           |
| DENND1A      | 0.9146972 | 0.2083923 | 4.3893  | 1.19E-05 | 1.073769753 | count | 0.2818634   |
| HACD4        | 0.7711585 | 0.102473  | 7.5255  | 7.33E-14 | 1.074307874 | count | 1.77E-09    |
| AC073352.2   | 0.9412236 | 0.4619111 | 2.0377  | 0.0417   | 1.076028274 | count | 1           |
| GABPB1-AS1   | 0.7924491 | 0.1748259 | 4.5328  | 6.10E-06 | 1.07676743  | count | 0.1447347   |
| INHBA-AS1    | 3.2535754 | 0.9659721 | 3.3682  | 0.000768 | 1.080183808 | count | 1           |
| SLC25A25-AS1 | 1.910005  | 0.6950483 | 2.748   | 0.00604  | 1.080464489 | count | 1           |
| AC087482.1   | 1.910005  | 1.0192552 | 1.8739  | 0.0611   | 1.080464489 | count | 1           |
| SFT2D3       | 0.9360809 | 0.3148929 | 2.9727  | 0.00298  | 1.080560214 | count | 1           |
| TMEM71       | 0.8932078 | 0.2050724 | 4.3556  | 1.38E-05 | 1.080694609 | count | 0.3266598   |
| GJB2         | 0.9453784 | 0.5132411 | 1.842   | 0.0656   | 1.080902964 | count | 1           |
| USP9Y        | 1.2785216 | 0.4146537 | 3.0833  | 0.00207  | 1.081137732 | count | 1           |
| GTPBP1       | 0.8942656 | 0.2757287 | 3.2433  | 0.0012   | 1.082000408 | count | 1           |
| HCAR3        | 0.7872845 | 0.154314  | 5.1018  | 3.62E-07 | 1.082095273 | count | 0.008636596 |
| PNPLA2       | 0.8041102 | 0.1569588 | 5.1231  | 3.24E-07 | 1.0827664   | count | 0.007731936 |

|            |           |           |         |          |             |       |             |
|------------|-----------|-----------|---------|----------|-------------|-------|-------------|
| SSX2IP     | 1.2486633 | 0.5181356 | 2.4099  | 0.016    | 1.083825672 | count | 1           |
| AC026979.2 | 1.1144985 | 0.3252263 | 3.4268  | 0.000621 | 1.083920097 | count | 1           |
| IGF1R      | 1.0381272 | 0.4112973 | 2.524   | 0.0117   | 1.084389871 | count | 1           |
| RASGRP4    | 0.9697569 | 0.2787107 | 3.4794  | 0.000511 | 1.084897771 | count | 1           |
| APOL6      | 0.8076094 | 0.1477519 | 5.466   | 5.07E-08 | 1.085555708 | count | 0.001213251 |
| NEXN       | 1.0122937 | 0.3600397 | 2.8116  | 0.00497  | 1.086052224 | count | 1           |
| ZNF467     | 0.8077732 | 0.1460059 | 5.5325  | 3.49E-08 | 1.086277306 | count | 0.000835576 |
| ARHGEF40   | 0.8667657 | 0.1870163 | 4.6347  | 3.76E-06 | 1.087458275 | count | 0.08931128  |
| PTCH2      | 1.224094  | 0.4598191 | 2.6621  | 0.00782  | 1.087922212 | count | 1           |
| SPN        | 0.8430218 | 0.2207258 | 3.8193  | 0.000137 | 1.088297016 | count | 1           |
| GLDN       | 1.9243683 | 1.18623   | 1.6223  | 0.105    | 1.088410976 | count | 1           |
| L3MBTL3    | 0.9306587 | 0.2583396 | 3.6025  | 0.000321 | 1.088500067 | count | 1           |
| RHOB       | 0.764639  | 0.0651362 | 11.7391 | 5.34E-31 | 1.089578581 | count | 1.30E-26    |
| QSOX2      | 1.6494253 | 0.7309259 | 2.2566  | 0.0241   | 1.089738905 | count | 1           |
| MRPL30     | 0.9329708 | 0.2400271 | 3.8869  | 0.000104 | 1.091268445 | count | 1           |
| CARS2      | 0.825904  | 0.1741839 | 4.7416  | 2.24E-06 | 1.092147308 | count | 0.05326944  |
| FYN        | 0.8394301 | 0.1809238 | 4.6397  | 3.67E-06 | 1.09284626  | count | 0.08718819  |
| AC025423.4 | 2.5392994 | 0.8853024 | 2.8683  | 0.00416  | 1.095956779 | count | 1           |
| CHERP      | 0.9450285 | 0.2955689 | 3.1973  | 0.0014   | 1.096181252 | count | 1           |
| RYR1       | 1.1128836 | 0.4192406 | 2.6545  | 0.00799  | 1.098209184 | count | 1           |
| AC011899.2 | 0.9875228 | 0.3351527 | 2.9465  | 0.00324  | 1.098397506 | count | 1           |
| ZNF708     | 0.9391959 | 0.3159291 | 2.9728  | 0.00298  | 1.098722039 | count | 1           |
| TAP2       | 0.9011415 | 0.2740673 | 3.288   | 0.00102  | 1.099578236 | count | 1           |
| DGKD       | 0.9062308 | 0.2047748 | 4.4255  | 1.00E-05 | 1.099907187 | count | 0.237       |
| LINC00987  | 1.9456781 | 0.7753305 | 2.5095  | 0.0122   | 1.100141643 | count | 1           |
| ANKRD13C   | 1.0878293 | 0.352311  | 3.0877  | 0.00204  | 1.101026589 | count | 1           |
| TP53INP1   | 1.0030542 | 0.3745333 | 2.6781  | 0.00745  | 1.101131172 | count | 1           |
| HSPBAP1    | 0.8898122 | 0.2229024 | 3.9919  | 6.75E-05 | 1.101309671 | count | 1           |
| MSH5       | 2.181289  | 1.312691  | 1.6617  | 0.0967   | 1.102178091 | count | 1           |
| TNFAIP8L3  | 1.1176311 | 0.2745838 | 4.0703  | 4.84E-05 | 1.103070192 | count | 1           |
| AC067930.4 | 1.3040154 | 0.4563563 | 2.8574  | 0.00431  | 1.103629371 | count | 1           |
| AP003481.1 | 1.3041994 | 0.5371453 | 2.428   | 0.0153   | 1.103791531 | count | 1           |
| ZNF627     | 1.343035  | 0.5282887 | 2.5422  | 0.0111   | 1.104195542 | count | 1           |
| C5orf30    | 1.5017782 | 0.5694854 | 2.6371  | 0.00842  | 1.104234951 | count | 1           |
| RNPC3      | 0.8393347 | 0.2236788 | 3.7524  | 0.000179 | 1.105183502 | count | 1           |
| LDLR       | 0.9943523 | 0.2026612 | 4.9065  | 9.88E-07 | 1.10620926  | count | 0.02353416  |
| TKT        | 0.7719776 | 0.047954  | 16.0983 | 1.66E-55 | 1.106264244 | count | 4.04E-51    |
| JAK2       | 0.8835455 | 0.1632821 | 5.4112  | 6.87E-08 | 1.106810811 | count | 0.001643098 |
| AL357060.1 | 1.7965408 | 0.5111128 | 3.515   | 0.000448 | 1.107400005 | count | 1           |
| LYZ        | 0.7684416 | 0.0491822 | 15.6244 | 1.56E-52 | 1.107999944 | count | 3.79E-48    |
| VENTX      | 0.9491632 | 0.2694591 | 3.5225  | 0.000435 | 1.110656358 | count | 1           |
| AC016575.1 | 1.6814393 | 0.6611863 | 2.5431  | 0.011    | 1.111264662 | count | 1           |
| PLAG1      | 2.5840834 | 0.8687699 | 2.9744  | 0.00296  | 1.111452942 | count | 1           |
| LRRRC37A2  | 1.3521962 | 0.493464  | 2.7402  | 0.00618  | 1.112032596 | count | 1           |
| FAM118A    | 0.8072251 | 0.1557961 | 5.1813  | 2.38E-07 | 1.112392357 | count | 0.005682964 |

|            |           |           |         |          |             |       |             |
|------------|-----------|-----------|---------|----------|-------------|-------|-------------|
| TRANK1     | 1.3141708 | 0.3944864 | 3.3313  | 0.000877 | 1.112577824 | count | 1           |
| CEP97      | 1.315039  | 0.4271102 | 3.0789  | 0.0021   | 1.113342552 | count | 1           |
| FLOT2      | 0.9800289 | 0.2465982 | 3.9742  | 7.27E-05 | 1.115719086 | count | 1           |
| KIAA1468   | 1.0309503 | 0.348372  | 2.9593  | 0.00311  | 1.115769831 | count | 1           |
| SNTA1      | 1.284112  | 0.6907258 | 1.8591  | 0.0631   | 1.115906312 | count | 1           |
| ECE1       | 1.2044917 | 0.3063434 | 3.9318  | 8.66E-05 | 1.116192815 | count | 1           |
| AC093635.1 | 1.4567539 | 0.6154515 | 2.367   | 0.018    | 1.117815204 | count | 1           |
| ATP11A     | 0.890788  | 0.1914547 | 4.6527  | 3.45E-06 | 1.118087428 | count | 0.08197545  |
| SNAPC3     | 0.9326927 | 0.3565312 | 2.616   | 0.00895  | 1.119170909 | count | 1           |
| NCOA1      | 0.8505966 | 0.1463663 | 5.8114  | 7.00E-09 | 1.120170753 | count | 0.000167965 |
| NLRP3      | 0.8171364 | 0.1005054 | 8.1303  | 6.72E-16 | 1.120298818 | count | 1.63E-11    |
| AC012645.3 | 1.2091007 | 0.4331219 | 2.7916  | 0.00529  | 1.120631188 | count | 1           |
| TBX19      | 1.9838468 | 0.6546713 | 3.0303  | 0.00247  | 1.120972554 | count | 1           |
| IDH3A      | 0.8824126 | 0.2370236 | 3.7229  | 0.000201 | 1.122095889 | count | 1           |
| MRPS27     | 0.9920118 | 0.3223849 | 3.0771  | 0.00211  | 1.123568904 | count | 1           |
| LINC00937  | 0.8757066 | 0.2076609 | 4.217   | 2.57E-05 | 1.125655225 | count | 0.6070854   |
| IGFBP6     | 1.3682875 | 0.4081303 | 3.3526  | 0.000813 | 1.125783442 | count | 1           |
| GOLGA8Q    | 2.2358403 | 0.9870627 | 2.2651  | 0.0236   | 1.127134628 | count | 1           |
| CHST7      | 0.9801593 | 0.2819017 | 3.477   | 0.000516 | 1.127322478 | count | 1           |
| NBPF26     | 2.6419074 | 0.8453515 | 3.1252  | 0.0018   | 1.130935852 | count | 1           |
| KIF9-AS1   | 2.247452  | 0.8495899 | 2.6453  | 0.00821  | 1.132378462 | count | 1           |
| AP003680.1 | 2.247452  | 0.7610957 | 2.9529  | 0.00318  | 1.132378462 | count | 1           |
| C2orf40    | 1.4756367 | 0.7699335 | 1.9166  | 0.0554   | 1.132793623 | count | 1           |
| MOB3C      | 0.980359  | 0.3138047 | 3.1241  | 0.0018   | 1.132959721 | count | 1           |
| RGS14      | 0.9191305 | 0.2394426 | 3.8386  | 0.000127 | 1.133103382 | count | 1           |
| PLXNA2     | 1.2463104 | 0.4215384 | 2.9566  | 0.00314  | 1.13334212  | count | 1           |
| QPCT       | 0.8431877 | 0.151408  | 5.569   | 2.84E-08 | 1.13378193  | count | 0.000680265 |
| LIMD2      | 0.8054131 | 0.0769787 | 10.4628 | 4.29E-25 | 1.136841841 | count | 1.04E-20    |
| NR4A1      | 0.7955869 | 0.0726746 | 10.9473 | 2.90E-27 | 1.136960366 | count | 7.04E-23    |
| GK5        | 0.9680543 | 0.3146873 | 3.0762  | 0.00212  | 1.137885409 | count | 1           |
| AC084064.1 | 3.6042785 | 1.0572812 | 3.409   | 0.000663 | 1.139420531 | count | 1           |
| DGCR2      | 1.0705729 | 0.2949024 | 3.6303  | 0.000289 | 1.140705106 | count | 1           |
| AP000766.1 | 2.2673549 | 0.7544898 | 3.0051  | 0.00268  | 1.141310221 | count | 1           |
| LTB4R      | 0.9159365 | 0.2184396 | 4.1931  | 2.85E-05 | 1.141394433 | count | 0.6729705   |
| LGALS2     | 0.8205544 | 0.1514456 | 5.4181  | 6.61E-08 | 1.143156345 | count | 0.001581046 |
| ZNF296     | 1.0648986 | 0.3120048 | 3.4131  | 0.000653 | 1.144278329 | count | 1           |
| STK38      | 0.8794172 | 0.2059512 | 4.27    | 2.03E-05 | 1.144406853 | count | 0.4800544   |
| PRAM1      | 0.8792073 | 0.1841586 | 4.7742  | 1.91E-06 | 1.145257819 | count | 0.0454389   |
| AP4E1      | 1.0574134 | 0.3656936 | 2.8915  | 0.00387  | 1.145270221 | count | 1           |
| FOXRED2    | 1.7330627 | 0.5681577 | 3.0503  | 0.00231  | 1.14569483  | count | 1           |
| SLC9A3R1   | 0.9502398 | 0.2202732 | 4.3139  | 1.67E-05 | 1.147727037 | count | 0.3951053   |
| CD1D       | 0.8766122 | 0.1470001 | 5.9633  | 2.83E-09 | 1.149171417 | count | 6.80E-05    |
| PRR12      | 1.6402057 | 0.530601  | 3.0912  | 0.00202  | 1.14931996  | count | 1           |
| PLSCR4     | 2.0383947 | 0.8582764 | 2.375   | 0.0176   | 1.150325326 | count | 1           |
| SFRP4      | 2.0383947 | 1.0538632 | 1.9342  | 0.0532   | 1.150325326 | count | 1           |



|             |           |           |        |          |             |       |             |
|-------------|-----------|-----------|--------|----------|-------------|-------|-------------|
| NAT9        | 0.9614056 | 0.2366097 | 4.0633 | 4.99E-05 | 1.150587972 | count | 1           |
| DUSP7       | 1.2649423 | 0.4263531 | 2.9669 | 0.00304  | 1.150922221 | count | 1           |
| ICAM2       | 0.8855351 | 0.149792  | 5.9118 | 3.86E-09 | 1.151305833 | count | 9.27E-05    |
| LINC00528   | 1.398772  | 0.5733818 | 2.4395 | 0.0148   | 1.151778881 | count | 1           |
| METTL27     | 1.092201  | 0.3758181 | 2.9062 | 0.00369  | 1.153896087 | count | 1           |
| ARHGAP5-AS1 | 1.5024176 | 0.5405278 | 2.7795 | 0.00549  | 1.153977118 | count | 1           |
| AL354707.1  | 1.5690148 | 0.8485747 | 1.849  | 0.0646   | 1.155089903 | count | 1           |
| NEMP1       | 1.4511918 | 0.4516171 | 3.2133 | 0.00133  | 1.156737784 | count | 1           |
| KANSL1L     | 1.1057307 | 0.3102289 | 3.5642 | 0.000372 | 1.157387509 | count | 1           |
| EMC1        | 1.0066825 | 0.322425  | 3.1222 | 0.00182  | 1.158573311 | count | 1           |
| RUSC2       | 1.3315095 | 0.5266951 | 2.528  | 0.0115   | 1.158681412 | count | 1           |
| LINC00960   | 2.3076225 | 1.1077126 | 2.0832 | 0.0373   | 1.15915949  | count | 1           |
| ADGRB3      | 2.3076225 | 0.9714691 | 2.3754 | 0.0176   | 1.15915949  | count | 1           |
| WASHC1      | 0.8934984 | 0.1884961 | 4.7401 | 2.26E-06 | 1.159385217 | count | 0.05374054  |
| PROSER1     | 1.1582382 | 0.3837943 | 3.0179 | 0.00257  | 1.160149465 | count | 1           |
| ZNF487      | 0.9617156 | 0.3812639 | 2.5224 | 0.0117   | 1.161856573 | count | 1           |
| PLAC8       | 0.8818447 | 0.154863  | 5.6944 | 1.39E-08 | 1.162646566 | count | 0.000333308 |
| CCDC151     | 1.0102737 | 0.3281611 | 3.0786 | 0.0021   | 1.162804081 | count | 1           |
| INKA1       | 1.4586078 | 0.5717695 | 2.551  | 0.0108   | 1.162830105 | count | 1           |
| ARL4D       | 1.1251543 | 0.3438342 | 3.2724 | 0.00108  | 1.166303052 | count | 1           |
| AC133550.2  | 1.765742  | 0.9035165 | 1.9543 | 0.0508   | 1.167299167 | count | 1           |
| AC110995.1  | 1.6667446 | 0.5864602 | 2.842  | 0.00452  | 1.168157527 | count | 1           |
| BICRAL      | 1.2842724 | 0.3902996 | 3.2905 | 0.00101  | 1.169139719 | count | 1           |
| MAST3       | 1.1291748 | 0.3259457 | 3.4643 | 0.000541 | 1.170599453 | count | 1           |
| AC084871.2  | 1.901457  | 0.6576384 | 2.8913 | 0.00387  | 1.171094458 | count | 1           |
| AUTS2       | 1.5910983 | 0.5517372 | 2.8838 | 0.00396  | 1.171682331 | count | 1           |
| AC009961.1  | 1.3461757 | 0.6574973 | 2.0474 | 0.0407   | 1.17188587  | count | 1           |
| C17orf49    | 1.1330173 | 0.3235618 | 3.5017 | 0.000471 | 1.174705136 | count | 1           |
| FBNP1L      | 1.4762833 | 0.518625  | 2.8465 | 0.00446  | 1.177329058 | count | 1           |
| PCSK6       | 1.321072  | 0.7345749 | 1.7984 | 0.0722   | 1.177553268 | count | 1           |
| GCNT1       | 1.0287765 | 0.2865913 | 3.5897 | 0.000338 | 1.178734946 | count | 1           |
| AC132872.1  | 1.323245  | 0.4889047 | 2.7065 | 0.00685  | 1.17955467  | count | 1           |
| TWIST2      | 2.800683  | 0.9690703 | 2.8901 | 0.00389  | 1.181366273 | count | 1           |
| AC069277.1  | 2.800683  | 0.9690703 | 2.8901 | 0.00389  | 1.181366273 | count | 1           |
| FBXL2       | 2.800683  | 0.8894891 | 3.1486 | 0.00166  | 1.181366273 | count | 1           |
| AC073349.1  | 2.800683  | 0.9690703 | 2.8901 | 0.00389  | 1.181366273 | count | 1           |
| AC084082.1  | 2.800683  | 0.9690703 | 2.8901 | 0.00389  | 1.181366273 | count | 1           |
| MESP2       | 2.800683  | 0.9690703 | 2.8901 | 0.00389  | 1.181366273 | count | 1           |
| ZNF607      | 2.800683  | 0.9690703 | 2.8901 | 0.00389  | 1.181366273 | count | 1           |
| DEPTOR      | 1.1082312 | 0.2925574 | 3.7881 | 0.000155 | 1.182035073 | count | 1           |
| ZNF592      | 1.0382265 | 0.3243075 | 3.2014 | 0.00139  | 1.18366547  | count | 1           |
| IFT74       | 0.9173395 | 0.2296742 | 3.9941 | 6.69E-05 | 1.184132538 | count | 1           |
| KIAA1211L   | 1.0152531 | 0.3423094 | 2.9659 | 0.00305  | 1.184787527 | count | 1           |
| LYST        | 0.8512671 | 0.108455  | 7.849  | 6.21E-15 | 1.187032821 | count | 1.50E-10    |
| PEX5        | 1.3316421 | 0.3833725 | 3.4735 | 0.000523 | 1.187286311 | count | 1           |

|            |           |           |        |          |             |       |             |
|------------|-----------|-----------|--------|----------|-------------|-------|-------------|
| LYPD3      | 1.2562794 | 0.4063483 | 3.0916 | 0.00201  | 1.187672296 | count | 1           |
| KCNQ1      | 0.9281657 | 0.1486931 | 6.2422 | 5.07E-10 | 1.189408484 | count | 1.22E-05    |
| CDH23      | 1.2389071 | 0.3770983 | 3.2854 | 0.00103  | 1.190690178 | count | 1           |
| AC002070.1 | 2.3977766 | 0.8338548 | 2.8755 | 0.00407  | 1.198023307 | count | 1           |
| AIM2       | 1.5031838 | 0.3260537 | 4.6102 | 4.23E-06 | 1.199333737 | count | 0.10045404  |
| AGTRAP     | 0.8521582 | 0.086563  | 9.8444 | 1.88E-22 | 1.199461435 | count | 4.56E-18    |
| DLGAP3     | 1.1451764 | 0.3659873 | 3.129  | 0.00177  | 1.199926364 | count | 1           |
| RAB44      | 2.863548  | 1.0145737 | 2.8224 | 0.0048   | 1.200091352 | count | 1           |
| POU6F1     | 2.863548  | 1.0821904 | 2.6461 | 0.0082   | 1.200091352 | count | 1           |
| TLE6       | 2.863548  | 1.0821904 | 2.6461 | 0.0082   | 1.200091352 | count | 1           |
| AATBC      | 1.7135258 | 0.4922625 | 3.4809 | 0.000508 | 1.20113236  | count | 1           |
| WDR17      | 1.379294  | 0.6853553 | 2.0125 | 0.0443   | 1.201642143 | count | 1           |
| OLIG1      | 1.5080932 | 0.4638957 | 3.2509 | 0.00117  | 1.203341365 | count | 1           |
| AC037459.3 | 2.4141698 | 0.806943  | 2.9917 | 0.0028   | 1.204923819 | count | 1           |
| SLC43A1    | 1.2740524 | 0.5234474 | 2.434  | 0.015    | 1.205013527 | count | 1           |
| SULT1A1    | 0.8762829 | 0.1108716 | 7.9036 | 4.06E-15 | 1.205394038 | count | 9.82E-11    |
| PATL2      | 1.636812  | 0.5033077 | 3.2521 | 0.00116  | 1.205838397 | count | 1           |
| ARMC2      | 1.3530657 | 0.4234692 | 3.1952 | 0.00142  | 1.206987776 | count | 1           |
| DTNA       | 1.2200702 | 0.3131646 | 3.8959 | 1.00E-04 | 1.207766779 | count | 1           |
| DUSP6      | 0.8566308 | 0.0985679 | 8.6908 | 6.46E-18 | 1.208274127 | count | 1.56E-13    |
| VPS53      | 0.935638  | 0.2331776 | 4.0126 | 6.19E-05 | 1.210786977 | count | 1           |
| AC040162.1 | 1.328617  | 0.3828775 | 3.4701 | 0.000529 | 1.210839308 | count | 1           |
| STIM1      | 1.1177059 | 0.3456109 | 3.234  | 0.00124  | 1.212426755 | count | 1           |
| MAP3K1     | 0.9221087 | 0.1546769 | 5.9615 | 2.86E-09 | 1.213447868 | count | 6.87E-05    |
| MLLT11     | 1.1953375 | 0.3335724 | 3.5834 | 0.000346 | 1.21356897  | count | 1           |
| LILRB5     | 0.9640919 | 0.1631036 | 5.9109 | 3.88E-09 | 1.213708677 | count | 9.31E-05    |
| INTS3      | 1.1111069 | 0.310236  | 3.5815 | 0.000348 | 1.214329254 | count | 1           |
| CAMKK2     | 0.913742  | 0.1995705 | 4.5785 | 4.92E-06 | 1.215087844 | count | 0.11681556  |
| OBSL1      | 2.921448  | 1.1811404 | 2.4734 | 0.0135   | 1.216717882 | count | 1           |
| SPINT1-AS1 | 1.524824  | 0.706553  | 2.1581 | 0.031    | 1.216978698 | count | 1           |
| INTS6L     | 1.2152958 | 0.3558932 | 3.4148 | 0.000649 | 1.219123433 | count | 1           |
| GAMT       | 1.0698078 | 0.2977608 | 3.5928 | 0.000334 | 1.220514839 | count | 1           |
| PTDSS1     | 0.9713121 | 0.2300978 | 4.2213 | 2.52E-05 | 1.220758325 | count | 0.5952996   |
| MARK4      | 1.2344644 | 0.3735589 | 3.3046 | 0.000965 | 1.222440222 | count | 1           |
| ALDH1A1    | 0.9765145 | 0.1471813 | 6.6348 | 3.99E-11 | 1.2228668   | count | 9.61E-07    |
| APOL1      | 1.1201646 | 0.2767898 | 4.047  | 5.35E-05 | 1.224479742 | count | 1           |
| ZNF26      | 1.2940609 | 0.3814736 | 3.3923 | 0.000704 | 1.224511841 | count | 1           |
| DNASE1     | 2.4617209 | 0.745336  | 3.3028 | 0.000971 | 1.224645489 | count | 1           |
| AL359265.3 | 2.9693264 | 1.0541607 | 2.8168 | 0.00489  | 1.230021501 | count | 1           |
| C15orf65   | 2.9693264 | 1.115671  | 2.6615 | 0.00783  | 1.230021501 | count | 1           |
| PSTPIP1    | 0.9110878 | 0.1275638 | 7.1422 | 1.21E-12 | 1.230593539 | count | 2.92E-08    |
| TNFSF10    | 0.8687016 | 0.105734  | 8.2159 | 3.37E-16 | 1.230953049 | count | 8.15E-12    |
| KCNE1      | 0.9980117 | 0.3033229 | 3.2903 | 0.00102  | 1.232044033 | count | 1           |
| CLDN12     | 2.198335  | 0.8432658 | 2.6069 | 0.00919  | 1.233350597 | count | 1           |
| IL17RA     | 0.9135285 | 0.1658026 | 5.5097 | 3.97E-08 | 1.233913541 | count | 0.000950259 |

|             |           |           |         |          |             |       |             |
|-------------|-----------|-----------|---------|----------|-------------|-------|-------------|
| SLC9A3R2    | 1.4169572 | 0.4170462 | 3.3976  | 0.000691 | 1.235368225 | count | 1           |
| AC015802.6  | 1.7633467 | 0.5631748 | 3.1311  | 0.00176  | 1.235903676 | count | 1           |
| WWP1        | 0.9144012 | 0.1603457 | 5.7027  | 1.32E-08 | 1.23609411  | count | 0.000316576 |
| VNN1        | 1.029383  | 0.3062422 | 3.3613  | 0.000788 | 1.2375504   | count | 1           |
| IRS2        | 0.9386498 | 0.1186221 | 7.9129  | 3.77E-15 | 1.241910752 | count | 9.11E-11    |
| ZNF197      | 1.5571271 | 0.4156337 | 3.7464  | 0.000184 | 1.243218106 | count | 1           |
| AL121944.1  | 1.0662674 | 0.3487057 | 3.0578  | 0.00225  | 1.245593454 | count | 1           |
| ITM2C       | 1.012051  | 0.2386489 | 4.2408  | 2.31E-05 | 1.246732826 | count | 0.5458761   |
| CCL8        | 0.8746723 | 0.1981212 | 4.4148  | 1.05E-05 | 1.246828893 | count | 0.248829    |
| CCDC144NL   | 1.280227  | 0.3649107 | 3.5083  | 0.000459 | 1.250912692 | count | 1           |
| PTX3        | 0.9041965 | 0.230777  | 3.9181  | 9.17E-05 | 1.255133993 | count | 1           |
| WDR49       | 3.0726595 | 1.1886592 | 2.585   | 0.0098   | 1.257378231 | count | 1           |
| GATAD2B     | 1.0559511 | 0.2209173 | 4.7798  | 1.86E-06 | 1.257422421 | count | 0.04425126  |
| TSC22D3     | 0.8879633 | 0.0643959 | 13.7891 | 1.02E-41 | 1.258376213 | count | 2.48E-37    |
| UNC13D      | 1.031647  | 0.2845039 | 3.6261  | 0.000294 | 1.258512831 | count | 1           |
| NFIX        | 1.1782118 | 0.4061562 | 2.9009  | 0.00375  | 1.258718282 | count | 1           |
| AC008267.5  | 1.2882032 | 0.4326943 | 2.9772  | 0.00294  | 1.258912768 | count | 1           |
| CRISPLD2    | 1.4112017 | 0.3594796 | 3.9257  | 8.89E-05 | 1.260258612 | count | 1           |
| NAV2        | 1.7122073 | 0.4150552 | 4.1253  | 3.83E-05 | 1.261557094 | count | 0.9033055   |
| ITGAM       | 0.9223956 | 0.1477153 | 6.2444  | 5.00E-10 | 1.266655742 | count | 1.20E-05    |
| RBKS        | 1.0298905 | 0.265315  | 3.8818  | 0.000106 | 1.269050848 | count | 1           |
| CABLES1     | 1.9232134 | 0.5522814 | 3.4823  | 0.000506 | 1.269077287 | count | 1           |
| TEP1        | 1.3644635 | 0.3066197 | 4.45    | 8.97E-06 | 1.269518847 | count | 0.21266973  |
| DNAJC27-AS1 | 1.9243683 | 0.6452832 | 2.9822  | 0.00289  | 1.269808335 | count | 1           |
| DHX16       | 0.9758457 | 0.2720757 | 3.5867  | 0.000341 | 1.270089951 | count | 1           |
| KCNE3       | 0.991257  | 0.1798584 | 5.5113  | 3.93E-08 | 1.271286684 | count | 0.000940724 |
| TNFSF18     | 1.6531397 | 0.6794652 | 2.433   | 0.015    | 1.271664992 | count | 1           |
| MRVI1       | 1.4271647 | 0.4070441 | 3.5062  | 0.000463 | 1.274831766 | count | 1           |
| RGMB        | 2.2848678 | 0.7230662 | 3.16    | 0.0016   | 1.276243287 | count | 1           |
| RCS1        | 0.9463752 | 0.1009948 | 9.3705  | 1.58E-20 | 1.277008154 | count | 3.83E-16    |
| NLRP1       | 0.9615572 | 0.1984468 | 4.8454  | 1.34E-06 | 1.279228648 | count | 0.03190272  |
| NLRP12      | 1.2083142 | 0.3319355 | 3.6402  | 0.000278 | 1.280071087 | count | 1           |
| AC064805.1  | 1.5101658 | 0.5622466 | 2.6859  | 0.00728  | 1.283635024 | count | 1           |
| CDK7        | 1.2956907 | 0.3501981 | 3.6999  | 0.00022  | 1.284715294 | count | 1           |
| HSPG2       | 1.671013  | 0.7709987 | 2.1673  | 0.0303   | 1.285424328 | count | 1           |
| C17orf107   | 1.0036184 | 0.2201518 | 4.5588  | 5.40E-06 | 1.285620909 | count | 0.1281744   |
| APCDD1      | 3.1879088 | 1.1075954 | 2.8782  | 0.00403  | 1.28575114  | count | 1           |
| EXOC3L1     | 2.6167045 | 0.7819235 | 3.3465  | 0.000831 | 1.28583213  | count | 1           |
| ATP6AP1L    | 3.1918479 | 1.221527  | 2.613   | 0.00903  | 1.286681899 | count | 1           |
| AK1         | 2.100954  | 0.6857788 | 3.0636  | 0.00221  | 1.287090201 | count | 1           |
| AL360012.1  | 1.8379658 | 0.4948502 | 3.7142  | 0.000208 | 1.287256601 | count | 1           |
| CTDSPL      | 1.3836066 | 0.3575784 | 3.8694  | 0.000112 | 1.287740682 | count | 1           |
| AC093677.2  | 1.9564527 | 1.1279263 | 1.7346  | 0.0829   | 1.290021603 | count | 1           |
| NRGN        | 0.9468935 | 0.1565918 | 6.0469  | 1.70E-09 | 1.291354714 | count | 4.08E-05    |
| AC079630.1  | 1.6193755 | 0.3924319 | 4.1265  | 3.81E-05 | 1.293414882 | count | 0.8986266   |

|            |            |             |         |          |             |       |             |
|------------|------------|-------------|---------|----------|-------------|-------|-------------|
| CDKL5      | 1.366421   | 0.4344297   | 3.1453  | 0.00168  | 1.294782638 | count | 1           |
| ULK1       | 1.201399   | 0.3022594   | 3.9747  | 7.25E-05 | 1.295023782 | count | 1           |
| AC008759.3 | 3.2343073  | 1.2295619   | 2.6305  | 0.00858  | 1.296553539 | count | 1           |
| AC009812.1 | 2.3272928  | 0.8321498   | 2.7967  | 0.0052   | 1.296724739 | count | 1           |
| AC087239.1 | 1.1863275  | 0.2889992   | 4.105   | 4.18E-05 | 1.298531949 | count | 0.9852678   |
| AC093495.1 | 2.1225421  | 1.0081009   | 2.1055  | 0.0354   | 1.299197333 | count | 1           |
| NBL1       | 1.2940556  | 0.4047788   | 3.1969  | 0.00141  | 1.300240544 | count | 1           |
| AC021188.1 | 19.641114  | 1738.531958 | 0.0113  | 0.991    | 1.304854494 | count | 1           |
| STK24-AS1  | 18.7620173 | 1072.223078 | 0.0175  | 0.986    | 1.304854571 | count | 1           |
| ETV1       | 18.8111616 | 917.287194  | 0.0205  | 0.984    | 1.304854572 | count | 1           |
| ZNF845     | 18.8111616 | 917.2871985 | 0.0205  | 0.984    | 1.304854572 | count | 1           |
| BMPR1A     | 18.9693158 | 931.3556514 | 0.0204  | 0.984    | 1.304854574 | count | 1           |
| OVGP1      | 18.9955792 | 1008.526166 | 0.0188  | 0.985    | 1.304854574 | count | 1           |
| PEAR1      | 19.5439008 | 1306.594202 | 0.015   | 0.988    | 1.304854579 | count | 1           |
| LYG2       | 19.5439008 | 1306.59422  | 0.015   | 0.988    | 1.304854579 | count | 1           |
| AL138895.1 | 19.5439008 | 1306.59422  | 0.015   | 0.988    | 1.304854579 | count | 1           |
| NANOG      | 19.5439008 | 1306.59422  | 0.015   | 0.988    | 1.304854579 | count | 1           |
| ANKS1B     | 19.5439008 | 1306.59422  | 0.015   | 0.988    | 1.304854579 | count | 1           |
| MMRN1      | 19.5439009 | 1306.594232 | 0.015   | 0.988    | 1.304854579 | count | 1           |
| NIPAL4     | 19.5439009 | 1306.594244 | 0.015   | 0.988    | 1.304854579 | count | 1           |
| FKBP1C     | 19.5439009 | 1306.594236 | 0.015   | 0.988    | 1.304854579 | count | 1           |
| AC025034.1 | 19.5439009 | 1306.594244 | 0.015   | 0.988    | 1.304854579 | count | 1           |
| FAM209A    | 19.5439009 | 1306.594244 | 0.015   | 0.988    | 1.304854579 | count | 1           |
| PKD1L3     | 19.6400881 | 1490.389196 | 0.0132  | 0.9895   | 1.30485458  | count | 1           |
| AL590648.3 | 19.6411142 | 1738.532008 | 0.0113  | 0.991    | 1.30485458  | count | 1           |
| AL450306.1 | 19.6411141 | 1738.531947 | 0.0113  | 0.991    | 1.30485458  | count | 1           |
| TVP23C     | 19.641114  | 1738.53193  | 0.0113  | 0.991    | 1.30485458  | count | 1           |
| TMEM221    | 19.6411142 | 1738.531947 | 0.0113  | 0.991    | 1.30485458  | count | 1           |
| AC022762.2 | 19.6877804 | 1474.522805 | 0.0134  | 0.989    | 1.30485458  | count | 1           |
| ALDH5A1    | 20.5425082 | 1601.337881 | 0.0128  | 0.99     | 1.304854583 | count | 1           |
| KIAA0319L  | 1.0544221  | 0.2458844   | 4.2883  | 1.87E-05 | 1.305700687 | count | 0.4423111   |
| NYNRIN     | 1.4625919  | 0.4812151   | 3.0394  | 0.0024   | 1.307082671 | count | 1           |
| KIAA0513   | 1.0585     | 0.2576102   | 4.1089  | 4.11E-05 | 1.307866712 | count | 0.9688914   |
| VNN3       | 2.1432755  | 0.5830793   | 3.6758  | 0.000242 | 1.310738491 | count | 1           |
| SAMD4A     | 1.2540602  | 0.2990684   | 4.1932  | 2.85E-05 | 1.317003705 | count | 0.6729705   |
| PARP10     | 1.1475019  | 0.2707398   | 4.2384  | 2.33E-05 | 1.317791365 | count | 0.550579    |
| CDYL2      | 2.3726003  | 0.7905038   | 3.0014  | 0.00271  | 1.318189565 | count | 1           |
| LILRA1     | 0.9759701  | 0.1594252   | 6.1218  | 1.07E-09 | 1.318842372 | count | 2.57E-05    |
| ZNF585A    | 2.0028646  | 0.6019582   | 3.3272  | 0.00089  | 1.318924967 | count | 1           |
| RAB37      | 2.1613105  | 0.6191315   | 3.4909  | 0.00049  | 1.320707355 | count | 1           |
| TEC        | 1.2461308  | 0.3257813   | 3.8251  | 0.000134 | 1.32102999  | count | 1           |
| EMP1       | 0.9420169  | 0.1563847   | 6.0237  | 1.96E-09 | 1.322480225 | count | 4.71E-05    |
| AL450311.2 | 2.0116787  | 0.9060727   | 2.2202  | 0.0265   | 1.324367874 | count | 1           |
| CSTA       | 0.9315963  | 0.0667151   | 13.9638 | 1.07E-42 | 1.324961565 | count | 2.60E-38    |
| CD209      | 1.156022   | 0.2232774   | 5.1775  | 2.43E-07 | 1.327753115 | count | 0.005801625 |

|            |           |           |         |          |             |       |             |
|------------|-----------|-----------|---------|----------|-------------|-------|-------------|
| GIMAP8     | 1.0862967 | 0.1965501 | 5.5268  | 3.61E-08 | 1.32971234  | count | 0.000864234 |
| LINC00877  | 1.2156561 | 0.2597988 | 4.6792  | 3.04E-06 | 1.331294616 | count | 0.07225472  |
| NRM        | 1.0569392 | 0.2776751 | 3.8064  | 0.000144 | 1.334501678 | count | 1           |
| C16orf54   | 1.0137177 | 0.1982888 | 5.1123  | 3.43E-07 | 1.335169518 | count | 0.00818398  |
| PGBD2      | 1.364726  | 0.3925995 | 3.4761  | 0.000518 | 1.335421729 | count | 1           |
| RARRES3    | 0.9774075 | 0.1141311 | 8.5639  | 1.90E-17 | 1.336967963 | count | 4.60E-13    |
| NRBP2      | 1.6751864 | 0.5332479 | 3.1415  | 0.0017   | 1.337969642 | count | 1           |
| MROH8      | 2.0350165 | 0.7266144 | 2.8007  | 0.00514  | 1.338706778 | count | 1           |
| KLF2       | 0.9365665 | 0.0864133 | 10.8382 | 9.08E-27 | 1.341696085 | count | 2.20E-22    |
| ITGAL      | 1.0917527 | 0.2043603 | 5.3423  | 1.00E-07 | 1.343184851 | count | 0.0023903   |
| LIF        | 1.442538  | 0.4342607 | 3.3218  | 0.000907 | 1.343619854 | count | 1           |
| COLEC12    | 1.0398194 | 0.1838152 | 5.6569  | 1.72E-08 | 1.344107638 | count | 0.000412284 |
| CCL23      | 1.475108  | 0.4247479 | 3.4729  | 0.000524 | 1.347420884 | count | 1           |
| ZNF783     | 1.6908038 | 0.5791421 | 2.9195  | 0.00354  | 1.350354994 | count | 1           |
| GIMAP7     | 0.9830907 | 0.1242329 | 7.9133  | 3.76E-15 | 1.351927228 | count | 9.09E-11    |
| LRRK1      | 1.0996713 | 0.2341481 | 4.6965  | 2.79E-06 | 1.353057342 | count | 0.0663183   |
| C9orf47    | 2.222336  | 0.5860262 | 3.7922  | 0.000153 | 1.353945426 | count | 1           |
| ADAP1      | 1.1044441 | 0.1928757 | 5.7262  | 1.15E-08 | 1.355669871 | count | 0.000275839 |
| TMEM170B   | 1.0464304 | 0.1697177 | 6.1657  | 8.18E-10 | 1.358699728 | count | 1.97E-05    |
| AL161457.2 | 1.9441971 | 0.7290474 | 2.6668  | 0.00771  | 1.358711782 | count | 1           |
| CDKN2D     | 0.9825776 | 0.1175474 | 8.359   | 1.05E-16 | 1.362015175 | count | 2.54E-12    |
| ZNF532     | 1.2857392 | 0.4014602 | 3.2027  | 0.00138  | 1.36383571  | count | 1           |
| CLEC12A    | 0.9949858 | 0.0944573 | 10.5337 | 2.09E-25 | 1.363935262 | count | 5.07E-21    |
| ESYT2      | 1.0339199 | 0.2249297 | 4.5966  | 4.51E-06 | 1.366138855 | count | 0.10708995  |
| CSF3R      | 0.9764305 | 0.1082084 | 9.0236  | 3.58E-19 | 1.372999395 | count | 8.67E-15    |
| ATF7IP     | 1.0407443 | 0.1645562 | 6.3246  | 3.01E-10 | 1.375226226 | count | 7.24E-06    |
| FAM117B    | 1.4064798 | 0.3501737 | 4.0165  | 6.08E-05 | 1.376957565 | count | 1           |
| CLEC4E     | 0.9864555 | 0.0893599 | 11.0391 | 1.10E-27 | 1.377808988 | count | 2.67E-23    |
| NPPA-AS1   | 2.2742489 | 0.7308302 | 3.1119  | 0.00188  | 1.381605487 | count | 1           |
| TWISTNB    | 0.9821644 | 0.1530445 | 6.4175  | 1.66E-10 | 1.382718462 | count | 4.00E-06    |
| AC006942.1 | 2.1104642 | 0.6063233 | 3.4808  | 0.000509 | 1.384319283 | count | 1           |
| TSPAN32    | 1.3051852 | 0.2773511 | 4.7059  | 2.67E-06 | 1.384811985 | count | 0.06347124  |
| GPBAR1     | 1.1150671 | 0.1855703 | 6.0089  | 2.15E-09 | 1.384816064 | count | 5.16E-05    |
| GNG2       | 1.062797  | 0.1538053 | 6.91    | 6.15E-12 | 1.388400814 | count | 1.48E-07    |
| ATRIP      | 1.4922783 | 0.6032057 | 2.4739  | 0.0134   | 1.390500923 | count | 1           |
| HDAC9      | 1.0685894 | 0.1889265 | 5.6561  | 1.73E-08 | 1.397327186 | count | 0.000414664 |
| PLCXD1     | 1.1863188 | 0.3511508 | 3.3784  | 0.000741 | 1.399696558 | count | 1           |
| LRRC69     | 2.1452636 | 0.8113399 | 2.6441  | 0.00824  | 1.404962587 | count | 1           |
| CDA        | 1.0383842 | 0.200049  | 5.1906  | 2.27E-07 | 1.405367099 | count | 0.005420987 |
| TYK2       | 1.2359291 | 0.2969976 | 4.1614  | 3.27E-05 | 1.406302208 | count | 0.7717527   |
| TMEM88     | 1.9168273 | 0.5501735 | 3.484   | 0.000503 | 1.408217326 | count | 1           |
| LINC01001  | 1.7106976 | 0.4343377 | 3.9386  | 8.42E-05 | 1.411959935 | count | 1           |
| FCHSD1     | 1.3623975 | 0.4188853 | 3.2524  | 0.00116  | 1.418412038 | count | 1           |
| INVS       | 1.671536  | 0.4977698 | 3.3581  | 0.000797 | 1.421211263 | count | 1           |
| FSCN1      | 1.160555  | 0.2366133 | 4.9049  | 9.96E-07 | 1.421813632 | count | 0.023722728 |

|            |           |           |        |          |             |       |             |
|------------|-----------|-----------|--------|----------|-------------|-------|-------------|
| MAN2A2     | 1.4346516 | 0.2646114 | 5.4217 | 6.48E-08 | 1.424973882 | count | 0.00155021  |
| EXT1       | 1.369675  | 0.3976752 | 3.4442 | 0.000582 | 1.426083138 | count | 1           |
| EIF3J-DT   | 1.1801657 | 0.3081245 | 3.8302 | 0.000131 | 1.426149182 | count | 1           |
| TCF20      | 1.3212458 | 0.4355579 | 3.0335 | 0.00244  | 1.426613362 | count | 1           |
| RFXAP      | 1.418758  | 0.4063091 | 3.4918 | 0.000488 | 1.427721142 | count | 1           |
| HIST2H2AB  | 2.050494  | 1.041888  | 1.9681 | 0.0492   | 1.428062753 | count | 1           |
| AC034236.2 | 2.050494  | 0.9105335 | 2.252  | 0.0244   | 1.428062753 | count | 1           |
| AC087623.3 | 1.562909  | 0.681727  | 2.2926 | 0.022    | 1.428175249 | count | 1           |
| GLT1D1     | 1.3765007 | 0.3422693 | 4.0217 | 5.95E-05 | 1.433273639 | count | 1           |
| SHF        | 2.05887   | 0.8396041 | 2.4522 | 0.0143   | 1.433429917 | count | 1           |
| TSPAN7     | 3.088365  | 0.8196954 | 3.7677 | 0.000169 | 1.442490991 | count | 1           |
| PLAT       | 2.6609832 | 0.8505095 | 3.1287 | 0.00178  | 1.444557211 | count | 1           |
| AC093462.1 | 2.6609832 | 0.9579936 | 2.7777 | 0.00552  | 1.444557211 | count | 1           |
| F5         | 1.2154821 | 0.3097504 | 3.9241 | 8.95E-05 | 1.445323104 | count | 1           |
| MZF1-AS1   | 1.4190395 | 0.4295681 | 3.3034 | 0.000969 | 1.445628238 | count | 1           |
| CCL17      | 2.216321  | 0.722285  | 3.0685 | 0.00218  | 1.446309317 | count | 1           |
| RHBDF1     | 1.702071  | 1.0380211 | 1.6397 | 0.101    | 1.446818185 | count | 1           |
| SMARCD3    | 1.193974  | 0.2188808 | 5.4549 | 5.39E-08 | 1.455490429 | count | 0.001289719 |
| PDGFC      | 1.1799143 | 0.1964481 | 6.0062 | 2.18E-09 | 1.469320002 | count | 5.24E-05    |
| NOTCH2NL   | 1.3864716 | 0.3563078 | 3.8912 | 0.000102 | 1.472169736 | count | 1           |
| CPSF7      | 1.1954789 | 0.2678329 | 4.4635 | 8.43E-06 | 1.472342685 | count | 0.19990902  |
| SLITRK4    | 1.4827087 | 0.3898835 | 3.803  | 0.000146 | 1.473038533 | count | 1           |
| CENPA      | 3.213349  | 1.130143  | 2.8433 | 0.0045   | 1.476736963 | count | 1           |
| ST7        | 1.4198944 | 0.3927411 | 3.6153 | 0.000306 | 1.478883678 | count | 1           |
| LPAR2      | 1.31861   | 0.3576196 | 3.6872 | 0.000232 | 1.484554566 | count | 1           |
| PDE9A      | 2.7644835 | 0.7802309 | 3.5432 | 0.000403 | 1.485482065 | count | 1           |
| NFAM1      | 1.1402963 | 0.181151  | 6.2947 | 3.64E-10 | 1.489024262 | count | 8.76E-06    |
| SFMBT2     | 1.2893796 | 0.3574931 | 3.6067 | 0.000316 | 1.490420151 | count | 1           |
| ARHGAP17   | 1.1608761 | 0.2072115 | 5.6024 | 2.35E-08 | 1.494880677 | count | 0.000563013 |
| WLS        | 1.1406074 | 0.1779512 | 6.4097 | 1.74E-10 | 1.498742748 | count | 4.19E-06    |
| CRY2       | 1.334615  | 0.3824617 | 3.4895 | 0.000492 | 1.50273833  | count | 1           |
| CCDC96     | 2.1693521 | 0.5886981 | 3.685  | 0.000234 | 1.502817998 | count | 1           |
| TFAP2C     | 2.8350539 | 0.622127  | 4.557  | 5.44E-06 | 1.512035791 | count | 0.12911296  |
| VNN2       | 1.303659  | 0.229714  | 5.6751 | 1.55E-08 | 1.514087317 | count | 0.000371551 |
| FCAR       | 1.1637459 | 0.2144747 | 5.426  | 6.33E-08 | 1.516903354 | count | 0.001514389 |
| AC245128.3 | 1.1212654 | 0.1673644 | 6.6995 | 2.58E-11 | 1.52038726  | count | 6.22E-07    |
| LRRK2      | 1.1824077 | 0.1630074 | 7.2537 | 5.41E-13 | 1.520897343 | count | 1.31E-08    |
| AC020916.1 | 1.0765453 | 0.1286864 | 8.3657 | 9.90E-17 | 1.523013981 | count | 2.40E-12    |
| COQ7       | 1.2368814 | 0.2207186 | 5.6039 | 2.33E-08 | 1.523776209 | count | 0.000558245 |
| IGF2BP3    | 3.420262  | 1.4192335 | 2.4099 | 0.016    | 1.527212094 | count | 1           |
| AC011444.2 | 1.999021  | 0.6780431 | 2.9482 | 0.00323  | 1.528381438 | count | 1           |
| HP         | 1.9249737 | 0.4975057 | 3.8692 | 0.000112 | 1.531076289 | count | 1           |
| ICAM3      | 1.123451  | 0.1181127 | 9.5117 | 4.31E-21 | 1.531077589 | count | 1.04E-16    |
| TCFL5      | 1.6162375 | 0.6675161 | 2.4213 | 0.0155   | 1.533282942 | count | 1           |
| SETBP1     | 1.8636135 | 0.6464379 | 2.8829 | 0.00397  | 1.534204506 | count | 1           |

|            |            |             |         |          |             |       |             |
|------------|------------|-------------|---------|----------|-------------|-------|-------------|
| FXVD6      | 1.2916393  | 0.2288428   | 5.6442  | 1.85E-08 | 1.536762654 | count | 0.000443353 |
| JARID2-AS1 | 1.8169294  | 0.5532367   | 3.2842  | 0.00104  | 1.541727059 | count | 1           |
| TP53INP2   | 1.7705958  | 0.4242825   | 4.1732  | 3.11E-05 | 1.543660378 | count | 0.7341155   |
| NACC2      | 1.3514587  | 0.3046032   | 4.4368  | 9.53E-06 | 1.547359472 | count | 0.22591818  |
| AGK        | 1.4399888  | 0.3654825   | 3.94    | 8.38E-05 | 1.555887295 | count | 1           |
| FCN1       | 1.0876625  | 0.0659892   | 16.4824 | 5.74E-58 | 1.56433071  | count | 1.40E-53    |
| PTPN20     | 19.9089016 | 1450.810584 | 0.0137  | 0.9891   | 1.565979327 | count | 1           |
| AC114811.2 | 19.832348  | 1191.443737 | 0.0166  | 0.987    | 1.565979422 | count | 1           |
| DLX6-AS1   | 19.832348  | 1191.443755 | 0.0166  | 0.987    | 1.565979422 | count | 1           |
| CCDC194    | 19.832348  | 1191.443737 | 0.0166  | 0.987    | 1.565979422 | count | 1           |
| AC008649.1 | 19.8323481 | 1191.443763 | 0.0166  | 0.987    | 1.565979422 | count | 1           |
| AC079834.2 | 19.8336562 | 1510.289992 | 0.0131  | 0.99     | 1.565979422 | count | 1           |
| GADL1      | 19.8336562 | 1510.289992 | 0.0131  | 0.99     | 1.565979422 | count | 1           |
| SERPINI2   | 19.8336562 | 1510.289992 | 0.0131  | 0.99     | 1.565979422 | count | 1           |
| AC004771.5 | 19.8336562 | 1510.289992 | 0.0131  | 0.99     | 1.565979422 | count | 1           |
| TSPAN5     | 1.9060016  | 0.6797819   | 2.8038  | 0.00509  | 1.567314141 | count | 1           |
| AL135791.1 | 1.723724   | 0.6329402   | 2.7234  | 0.00651  | 1.57328023  | count | 1           |
| HRH1       | 1.3091056  | 0.2143742   | 6.1066  | 1.18E-09 | 1.573597354 | count | 2.84E-05    |
| TMEM94     | 1.4516761  | 0.3520457   | 4.1235  | 3.85E-05 | 1.580946929 | count | 0.907984    |
| AC009630.2 | 2.4631526  | 0.9628673   | 2.5581  | 0.0106   | 1.581030671 | count | 1           |
| CCDC157    | 2.695846   | 0.7524217   | 3.5829  | 0.000346 | 1.583857038 | count | 1           |
| ENHO       | 1.6234918  | 0.5252066   | 3.0911  | 0.00202  | 1.589673453 | count | 1           |
| PLCB1      | 1.5468435  | 0.3596261   | 4.3013  | 1.76E-05 | 1.59410915  | count | 0.4163456   |
| AC020911.2 | 1.6821196  | 0.4775023   | 3.5227  | 0.000435 | 1.5947897   | count | 1           |
| AC245014.3 | 1.1932945  | 0.1874893   | 6.3646  | 2.33E-10 | 1.595237162 | count | 5.61E-06    |
| AL592183.1 | 1.6372323  | 0.3849656   | 4.2529  | 2.19E-05 | 1.602928757 | count | 0.517716    |
| NFIB       | 2.209022   | 0.889859    | 2.4824  | 0.0131   | 1.603374045 | count | 1           |
| RNF150     | 1.6976141  | 0.4157066   | 4.0837  | 4.57E-05 | 1.609154319 | count | 1           |
| HSH2D      | 1.4385097  | 0.2852425   | 5.0431  | 4.92E-07 | 1.610450444 | count | 0.011731248 |
| AL356020.1 | 2.761422   | 1.460094    | 1.8913  | 0.0587   | 1.611598386 | count | 1           |
| CRIP1      | 1.1731544  | 0.1191951   | 9.8423  | 1.92E-22 | 1.611813185 | count | 4.66E-18    |
| C16orf58   | 1.414212   | 0.4363093   | 3.2413  | 0.00121  | 1.619471979 | count | 1           |
| MTMR11     | 1.3187749  | 0.2159401   | 6.1071  | 1.18E-09 | 1.621313918 | count | 2.84E-05    |
| IL6        | 1.9186142  | 0.7749137   | 2.4759  | 0.0134   | 1.623689516 | count | 1           |
| ZNF254     | 1.5060698  | 0.3876676   | 3.885   | 0.000105 | 1.627214644 | count | 1           |
| AC073195.1 | 2.247452   | 0.5644209   | 3.9819  | 7.04E-05 | 1.627604855 | count | 1           |
| SSH3       | 1.7193706  | 0.5608355   | 3.0657  | 0.0022   | 1.629256292 | count | 1           |
| PAQR7      | 1.7253691  | 0.3716543   | 4.6424  | 3.63E-06 | 1.634784375 | count | 0.08624517  |
| AC020656.1 | 1.1430648  | 0.0771137   | 14.8231 | 1.13E-47 | 1.635228868 | count | 2.75E-43    |
| NCF1       | 1.1578583  | 0.0861522   | 13.4397 | 8.74E-40 | 1.637949849 | count | 2.12E-35    |
| SLC35F2    | 2.1753673  | 0.8254976   | 2.6352  | 0.00846  | 1.649987052 | count | 1           |
| CES1       | 1.322602   | 0.2396677   | 5.5185  | 3.78E-08 | 1.651512038 | count | 0.000904894 |
| AL391832.2 | 1.4752262  | 0.3381157   | 4.3631  | 1.34E-05 | 1.661531459 | count | 0.3172584   |
| CCDC88C    | 1.366585   | 0.2837685   | 4.8158  | 1.56E-06 | 1.662717977 | count | 0.03712644  |
| ANK1       | 3.311509   | 1.0217057   | 3.2412  | 0.00121  | 1.663518305 | count | 1           |

|              |            |             |         |          |             |       |             |
|--------------|------------|-------------|---------|----------|-------------|-------|-------------|
| PDGFD        | 3.311509   | 1.0217057   | 3.2412  | 0.00121  | 1.663518305 | count | 1           |
| C19orf38     | 1.2184285  | 0.1046324   | 11.6448 | 1.53E-30 | 1.668009093 | count | 3.72E-26    |
| LMCD1        | 2.458549   | 0.8230181   | 2.9872  | 0.00284  | 1.67106708  | count | 1           |
| EGR1         | 1.214468   | 0.1616252   | 7.5141  | 7.98E-14 | 1.673692293 | count | 1.93E-09    |
| C3orf18      | 3.380762   | 1.1211255   | 3.0155  | 0.00259  | 1.681717093 | count | 1           |
| NIPSNAP3B    | 1.894962   | 0.6853052   | 2.7651  | 0.00573  | 1.686489439 | count | 1           |
| ATP2B1-AS1   | 1.1783762  | 0.1068832   | 11.0249 | 1.28E-27 | 1.686833422 | count | 3.11E-23    |
| AL034397.3   | 1.3702423  | 0.2661531   | 5.1483  | 2.84E-07 | 1.704053539 | count | 0.006778228 |
| AC106712.1   | 3.501326   | 1.155831    | 3.0293  | 0.00248  | 1.711268124 | count | 1           |
| C1S          | 3.501326   | 1.1986065   | 2.9212  | 0.00352  | 1.711268124 | count | 1           |
| RRAD         | 1.5544225  | 0.4336703   | 3.5843  | 0.000345 | 1.716986782 | count | 1           |
| AC007952.4   | 1.3087595  | 0.179762    | 7.2805  | 4.46E-13 | 1.717683199 | count | 1.08E-08    |
| PLEKHG3      | 2.189104   | 0.6555858   | 3.3392  | 0.000853 | 1.721441957 | count | 1           |
| GUCY1A1      | 1.7989257  | 0.4669663   | 3.8524  | 0.00012  | 1.730196396 | count | 1           |
| NBEAL2       | 1.617155   | 0.2804887   | 5.7655  | 9.16E-09 | 1.731486125 | count | 0.000219739 |
| HK3          | 1.4609185  | 0.2587574   | 5.6459  | 1.83E-08 | 1.732268182 | count | 0.000438578 |
| FBLIM1       | 1.83677    | 0.6576164   | 2.7931  | 0.00526  | 1.736262945 | count | 1           |
| CSGALNACT1   | 1.4872394  | 0.2806305   | 5.2996  | 1.26E-07 | 1.742716464 | count | 0.003011148 |
| TMEM154      | 1.430765   | 0.1869007   | 7.6552  | 2.76E-14 | 1.750175065 | count | 6.67E-10    |
| CLEC4G       | 1.683517   | 0.290942    | 5.7864  | 8.11E-09 | 1.751173913 | count | 0.000194575 |
| TOP3B        | 1.7495546  | 0.6496767   | 2.693   | 0.00713  | 1.756999264 | count | 1           |
| GABBR1       | 1.5323588  | 0.4929372   | 3.1086  | 0.0019   | 1.763036566 | count | 1           |
| GAS1         | 1.8681482  | 0.7406039   | 2.5225  | 0.0117   | 1.76441616  | count | 1           |
| DNM1         | 3.8004711  | 1.00355     | 3.787   | 0.000156 | 1.773797461 | count | 1           |
| BPI          | 2.6819986  | 0.6942061   | 3.8634  | 0.000115 | 1.786770493 | count | 1           |
| PCBP3        | 19.2736161 | 1022.653449 | 0.0188  | 0.985    | 1.787006243 | count | 1           |
| LRRRC4C      | 19.3037483 | 1436.559676 | 0.0134  | 0.989    | 1.787006243 | count | 1           |
| AL355574.1   | 20.0579197 | 1689.495603 | 0.0119  | 0.991    | 1.787006251 | count | 1           |
| ADAMTSL3     | 20.0579197 | 1689.495603 | 0.0119  | 0.991    | 1.787006251 | count | 1           |
| LRP6         | 19.2414793 | 1319.095282 | 0.0146  | 0.988    | 1.787006345 | count | 1           |
| SLC25A30-AS1 | 20.0579201 | 1689.49566  | 0.0119  | 0.991    | 1.787006353 | count | 1           |
| AL158071.5   | 3.9227822  | 1.0292147   | 3.8114  | 0.000142 | 1.795352271 | count | 1           |
| VWF          | 1.876525   | 0.7364708   | 2.548   | 0.0109   | 1.80116975  | count | 1           |
| FRY          | 1.9893276  | 0.4950336   | 4.0186  | 6.03E-05 | 1.802770187 | count | 1           |
| ADGRG6       | 1.9742846  | 0.3829769   | 5.1551  | 2.74E-07 | 1.825315061 | count | 0.006540106 |
| LIMS2        | 2.072464   | 0.9325173   | 2.2224  | 0.0263   | 1.832016605 | count | 1           |
| SLC24A4      | 1.8825097  | 0.3045078   | 6.1821  | 7.38E-10 | 1.834115504 | count | 1.77E-05    |
| MEGF9        | 1.4048906  | 0.167717    | 8.3766  | 9.05E-17 | 1.842178909 | count | 2.19E-12    |
| AL596094.1   | 2.633267   | 1.1022024   | 2.3891  | 0.017    | 1.850180827 | count | 1           |
| AVIL         | 2.633267   | 0.8031521   | 3.2787  | 0.00106  | 1.850180827 | count | 1           |
| CELSR2       | 3.49383    | 0.8504229   | 4.1083  | 4.12E-05 | 1.855137782 | count | 0.9712076   |
| AC012360.1   | 3.49383    | 0.974526    | 3.5852  | 0.000343 | 1.855137782 | count | 1           |
| ACY3         | 3.522773   | 1.075975    | 3.274   | 0.00107  | 1.862445791 | count | 1           |
| SLC2A12      | 3.5227728  | 2.7723594   | 1.2707  | 0.204    | 1.86244596  | count | 1           |
| SHMT1        | 1.516151   | 0.2443411   | 6.2051  | 6.40E-10 | 1.872295819 | count | 1.54E-05    |



|            |            |             |         |          |             |       |             |
|------------|------------|-------------|---------|----------|-------------|-------|-------------|
| NOTCH4     | 1.667667   | 0.3700666   | 4.5064  | 6.90E-06 | 1.875293453 | count | 0.163668    |
| FBXL17     | 1.8400754  | 0.383266    | 4.801   | 1.67E-06 | 1.887750897 | count | 0.03973598  |
| AC004825.2 | 2.728563   | 0.872659    | 3.1267  | 0.00179  | 1.899107384 | count | 1           |
| OR11G2     | 2.289857   | 0.6557038   | 3.4922  | 0.000488 | 1.90320557  | count | 1           |
| ELN        | 2.954834   | 0.8157232   | 3.6223  | 0.000298 | 1.910519022 | count | 1           |
| SLC12A5    | 1.6024063  | 0.276674    | 5.7917  | 7.86E-09 | 1.930581609 | count | 0.000188585 |
| ITGA8      | 3.00759    | 1.309182    | 2.2973  | 0.0217   | 1.932238499 | count | 1           |
| ZDHHC1     | 1.6872498  | 0.2821841   | 5.9793  | 2.57E-09 | 1.956362157 | count | 6.17E-05    |
| EGR3       | 1.5416374  | 0.2444522   | 6.3065  | 3.37E-10 | 1.95810153  | count | 8.11E-06    |
| CHADL      | 2.102565   | 0.4952096   | 4.2458  | 2.26E-05 | 1.96796042  | count | 0.5341284   |
| DLG2       | 2.707702   | 0.7800743   | 3.4711  | 0.000527 | 1.969645889 | count | 1           |
| PAM16      | 19.3759879 | 1254.038813 | 0.0155  | 0.9877   | 1.978626359 | count | 1           |
| HRNR       | 20.2403474 | 1850.848111 | 0.0109  | 0.991    | 1.978626369 | count | 1           |
| ANKUB1     | 20.2403474 | 1850.848111 | 0.0109  | 0.991    | 1.978626369 | count | 1           |
| CFP        | 1.42835    | 0.1007001   | 14.1842 | 5.98E-44 | 1.991888326 | count | 1.45E-39    |
| PDK4       | 1.482914   | 0.1579319   | 9.3896  | 1.33E-20 | 2.01456059  | count | 3.22E-16    |
| S100A9     | 1.3993004  | 0.088826    | 15.7533 | 2.46E-53 | 2.015941292 | count | 5.98E-49    |
| AP003086.1 | 1.7434558  | 0.3540996   | 4.9236  | 9.06E-07 | 2.019654929 | count | 0.021584544 |
| 1-Mar      | 2.1681572  | 0.3498942   | 6.1966  | 6.75E-10 | 2.02257125  | count | 1.62E-05    |
| F10        | 3.647981   | 1.087845    | 3.3534  | 0.00081  | 2.024265392 | count | 1           |
| CSRP2      | 2.269222   | 0.8233409   | 2.7561  | 0.00589  | 2.027287202 | count | 1           |
| GNG11      | 1.981472   | 0.5417902   | 3.6573  | 0.00026  | 2.065739397 | count | 1           |
| TUBGCP6    | 2.2736714  | 0.497148    | 4.5734  | 5.04E-06 | 2.070687296 | count | 0.11965464  |
| AL391807.1 | 2.640445   | 0.6452279   | 4.0923  | 4.41E-05 | 2.07250778  | count | 1           |
| RBP7       | 1.5153009  | 0.1155212   | 13.1171 | 4.86E-38 | 2.100571473 | count | 1.18E-33    |
| PLEKHG1    | 3.195165   | 1.225583    | 2.6071  | 0.00919  | 2.103668818 | count | 1           |
| PADI4      | 2.601758   | 0.3851246   | 6.7556  | 1.77E-11 | 2.110052209 | count | 4.27E-07    |
| NFIA       | 1.6825377  | 0.2656477   | 6.3337  | 2.84E-10 | 2.113060106 | count | 6.83E-06    |
| HPGDS      | 1.6538334  | 0.1958672   | 8.4436  | 5.19E-17 | 2.116872517 | count | 1.26E-12    |
| CCL18      | 1.5173915  | 0.3273324   | 4.6356  | 3.75E-06 | 2.130014946 | count | 0.0890775   |
| TPPP3      | 1.996815   | 0.3424672   | 5.8307  | 6.25E-09 | 2.136530697 | count | 0.000149988 |
| C11orf21   | 2.0530702  | 0.4249524   | 4.8313  | 1.44E-06 | 2.154546319 | count | 0.03427632  |
| ECSCR      | 2.677261   | 1.186324    | 2.2568  | 0.0241   | 2.155920769 | count | 1           |
| NFE2       | 2.5317425  | 0.4966563   | 5.0976  | 3.70E-07 | 2.171459315 | count | 0.00882709  |
| RIPOR2     | 1.7539825  | 0.1698711   | 10.3254 | 1.70E-24 | 2.18391855  | count | 4.12E-20    |
| FOLR3      | 2.2475161  | 0.2300708   | 9.7688  | 3.86E-22 | 2.241096104 | count | 9.36E-18    |
| AC027575.2 | 19.6012669 | 1479.659141 | 0.0132  | 0.9894   | 2.29911814  | count | 1           |
| PRG4       | 20.5255869 | 2134.567182 | 0.0096  | 0.992    | 2.299118265 | count | 1           |
| PROK2      | 1.871709   | 0.361707    | 5.1747  | 2.47E-07 | 2.334865348 | count | 0.005896384 |
| CCL13      | 2.805191   | 0.5417123   | 5.1784  | 2.42E-07 | 2.344661281 | count | 0.005777992 |
| S100A8     | 1.6351444  | 0.117021    | 13.9731 | 9.49E-43 | 2.355834048 | count | 2.31E-38    |
| ABCA6      | 3.6903438  | 0.6868052   | 5.3732  | 8.46E-08 | 2.360306683 | count | 0.002022871 |
| PSMD6-AS2  | 4.144489   | 1.8736603   | 2.212   | 0.0271   | 2.362392407 | count | 1           |
| SELL       | 1.7689094  | 0.1431586   | 12.3563 | 4.55E-34 | 2.383422588 | count | 1.11E-29    |
| MAMDC2     | 2.4546039  | 0.3481193   | 7.051   | 2.30E-12 | 2.415037528 | count | 5.55E-08    |

|            |            |             |         |          |             |       |             |
|------------|------------|-------------|---------|----------|-------------|-------|-------------|
| OLFM1      | 2.390315   | 0.4673466   | 5.1146  | 3.39E-07 | 2.415846907 | count | 0.008089218 |
| ESAM       | 19.7823562 | 1613.827298 | 0.0123  | 0.9902   | 2.436099118 | count | 1           |
| TMEM47     | 3.118916   | 1.485135    | 2.1001  | 0.0358   | 2.455088148 | count | 1           |
| AL138899.1 | 2.831778   | 0.7115857   | 3.9795  | 7.11E-05 | 2.460951083 | count | 1           |
| FCGBP      | 1.8179726  | 0.3354744   | 5.4191  | 6.57E-08 | 2.513494204 | count | 0.001571544 |
| CEP126     | 18.9063107 | 1075.301432 | 0.0176  | 0.986    | 2.561194292 | count | 1           |
| EFHD1      | 4.2007252  | 3.7157673   | 1.1305  | 0.2584   | 2.662203626 | count | 1           |
| RPS6KA6    | 4.2134584  | 2.2983444   | 1.8333  | 0.0669   | 2.664758991 | count | 1           |
| DCN        | 2.8343462  | 0.5476636   | 5.1753  | 2.46E-07 | 2.821461805 | count | 0.005873004 |
| C2CD4B     | 4.341128   | 0.9894658   | 4.3873  | 1.20E-05 | 2.851544607 | count | 0.28422     |
| WISP2      | 4.4193557  | 1.9752643   | 2.2373  | 0.0254   | 2.866257468 | count | 1           |
| APOD       | 19.3426438 | 940.276298  | 0.0206  | 0.9836   | 2.882163519 | count | 1           |
| P2RY14     | 2.6053393  | 0.261826    | 9.9507  | 6.76E-23 | 2.895391933 | count | 1.64E-18    |
| DPT        | 3.513249   | 0.8275233   | 4.2455  | 2.26E-05 | 2.913515209 | count | 0.5341284   |
| CCDC141    | 4.9545502  | 2.1733552   | 2.2797  | 0.0227   | 2.943925601 | count | 1           |
| PLEKHG5    | 19.4730636 | 955.7473798 | 0.0204  | 0.9837   | 2.975033131 | count | 1           |
| S100A12    | 2.1201061  | 0.161932    | 13.0926 | 6.58E-38 | 3.002639027 | count | 1.60E-33    |
| SCN9A      | 3.4574168  | 0.4835528   | 7.15    | 1.14E-12 | 3.067226029 | count | 2.75E-08    |
| TTN        | 3.7357891  | 0.8368362   | 4.4642  | 8.40E-06 | 3.648857664 | count | 0.199206    |
| LYVE1      | 3.3549124  | 0.3295958   | 10.1789 | 7.29E-24 | 3.842679041 | count | 1.77E-19    |
