# Supplementary material for: Decoding the transcriptome of calcified atherosclerotic plaque at single-cell resolution
Source: PubMed Central journal article supplement (PMC9556750; doi:10.1038/s42003-022-04056-7), 2022-10-12
Supplement: 42003_2022_4056_MOESM5_ESM.pdf [file 42003_2022_4056_MOESM5_ESM.pdf]

## Full differential gene expression results for B-cells.

| gene_short_name | estimate    | std_err     | test_val | p_value | normalized_effect | model_component | q_value |
|-----------------|-------------|-------------|----------|---------|-------------------|-----------------|---------|
| FTCDNL1         | -17.8333156 | 1605.870665 | -0.0111  | 0.9911  | -5.988683106      | count           | 1       |
| DHX58           | -18.2761568 | 1690.986029 | -0.0108  | 0.991   | -5.26678585       | count           | 1       |
| P2RX7           | -18.0277693 | 2443.263452 | -0.0074  | 0.994   | -5.266785673      | count           | 1       |
| NAT1            | -17.9025282 | 2325.090025 | -0.0077  | 0.994   | -5.266785566      | count           | 1       |
| EGFL7           | -17.9025282 | 2325.090025 | -0.0077  | 0.994   | -5.266785566      | count           | 1       |
| AL022328.3      | -17.9025282 | 2325.090025 | -0.0077  | 0.994   | -5.266785566      | count           | 1       |
| SAMD11          | -17.386259  | 1284.202387 | -0.0135  | 0.989   | -5.266784953      | count           | 1       |
| TGFB2           | -17.386259  | 1284.202387 | -0.0135  | 0.989   | -5.266784953      | count           | 1       |
| FBXO36          | -17.386259  | 1284.202387 | -0.0135  | 0.989   | -5.266784953      | count           | 1       |
| AC233280.1      | -17.386259  | 1284.202387 | -0.0135  | 0.989   | -5.266784953      | count           | 1       |
| SGMS2           | -17.386259  | 1284.202387 | -0.0135  | 0.989   | -5.266784953      | count           | 1       |
| P2RY6           | -17.386259  | 1284.202387 | -0.0135  | 0.989   | -5.266784953      | count           | 1       |
| HIST2H2BF       | -17.2924151 | 1668.857595 | -0.0104  | 0.992   | -5.266784803      | count           | 1       |
| PRELP           | -18.262667  | 2757.882578 | -0.0066  | 0.995   | -4.700439797      | count           | 1       |
| PRICKLE3        | -18.262667  | 2757.882578 | -0.0066  | 0.995   | -4.700439797      | count           | 1       |
| LINC02156       | -18.262667  | 2757.882578 | -0.0066  | 0.995   | -4.700439797      | count           | 1       |
| LRRC45          | -18.262667  | 2757.882578 | -0.0066  | 0.995   | -4.700439797      | count           | 1       |
| VPS11           | -18.058693  | 1926.344679 | -0.0094  | 0.993   | -4.700439701      | count           | 1       |
| NPL             | -18.001623  | 1746.859997 | -0.0103  | 0.992   | -4.700439671      | count           | 1       |
| DISC1           | -18.001623  | 1746.859997 | -0.0103  | 0.992   | -4.700439671      | count           | 1       |
| SH3BP5-AS1      | -18.001623  | 1746.859997 | -0.0103  | 0.992   | -4.700439671      | count           | 1       |
| APBB2           | -18.001623  | 1746.859997 | -0.0103  | 0.992   | -4.700439671      | count           | 1       |
| CPVL            | -18.001623  | 1746.859997 | -0.0103  | 0.992   | -4.700439671      | count           | 1       |
| OR2A1-AS1       | -18.001623  | 1746.859997 | -0.0103  | 0.992   | -4.700439671      | count           | 1       |
| LRRC69          | -18.001623  | 1746.859997 | -0.0103  | 0.992   | -4.700439671      | count           | 1       |
| ZFP41           | -18.001623  | 1746.859997 | -0.0103  | 0.992   | -4.700439671      | count           | 1       |
| CLIC3           | -18.001623  | 1746.859997 | -0.0103  | 0.992   | -4.700439671      | count           | 1       |
| KIF11           | -18.001623  | 1746.859997 | -0.0103  | 0.992   | -4.700439671      | count           | 1       |
| AL138762.1      | -18.001623  | 1746.859997 | -0.0103  | 0.992   | -4.700439671      | count           | 1       |
| NEURL1          | -18.001623  | 1746.859997 | -0.0103  | 0.992   | -4.700439671      | count           | 1       |
| VWF             | -18.001623  | 1746.859997 | -0.0103  | 0.992   | -4.700439671      | count           | 1       |
| NRG4            | -18.001623  | 1746.859997 | -0.0103  | 0.992   | -4.700439671      | count           | 1       |
| CLEC10A         | -18.001623  | 1746.859997 | -0.0103  | 0.992   | -4.700439671      | count           | 1       |
| AC005224.3      | -18.001623  | 1746.859997 | -0.0103  | 0.992   | -4.700439671      | count           | 1       |
| HOXB6           | -18.001623  | 1746.859997 | -0.0103  | 0.992   | -4.700439671      | count           | 1       |
| SERPINB2        | -18.001623  | 1746.859997 | -0.0103  | 0.992   | -4.700439671      | count           | 1       |
| AC011445.2      | -18.001623  | 1746.859997 | -0.0103  | 0.992   | -4.700439671      | count           | 1       |
| CASTOR1         | -18.001623  | 1746.859997 | -0.0103  | 0.992   | -4.700439671      | count           | 1       |
| S100B           | -18.001623  | 1746.859997 | -0.0103  | 0.992   | -4.700439671      | count           | 1       |
| LANCL1          | -17.894585  | 1682.864199 | -0.0106  | 0.992   | -4.700439609      | count           | 1       |
| COL5A2          | -17.63961   | 2049.801115 | -0.0086  | 0.993   | -4.700439431      | count           | 1       |
| PI4K2B          | -17.63961   | 2049.801115 | -0.0086  | 0.993   | -4.700439431      | count           | 1       |
| RNF32           | -17.63961   | 2049.801115 | -0.0086  | 0.993   | -4.700439431      | count           | 1       |
| GDPD3           | -17.63961   | 2049.801115 | -0.0086  | 0.993   | -4.700439431      | count           | 1       |

|            |             |             |         |          |              |       |            |
|------------|-------------|-------------|---------|----------|--------------|-------|------------|
| AC087741.1 | -17.63961   | 2049.801115 | -0.0086 | 0.993    | -4.700439431 | count | 1          |
| CMPK2      | -18.5590123 | 2043.080761 | -0.0091 | 0.9928   | -4.70043935  | count | 1          |
| TBC1D31    | -18.2833331 | 2860.729905 | -0.0064 | 0.9949   | -4.70043925  | count | 1          |
| TMOD1      | -18.2814003 | 2148.755715 | -0.0085 | 0.9932   | -4.70043925  | count | 1          |
| FN1        | -18.1640251 | 1358.447403 | -0.0134 | 0.9893   | -4.700439198 | count | 1          |
| DHFR2      | -18.1418687 | 1461.240711 | -0.0124 | 0.9901   | -4.700439188 | count | 1          |
| APOE       | -18.1104181 | 1396.465871 | -0.013  | 0.9897   | -4.700439172 | count | 1          |
| LYZ        | -18.10338   | 1184.363123 | -0.0153 | 0.9878   | -4.700439169 | count | 1          |
| HTRA1      | -18.0431481 | 1494.405832 | -0.0121 | 0.9904   | -4.700439138 | count | 1          |
| CCL18      | -17.5878119 | 1969.741963 | -0.0089 | 0.9929   | -4.700438835 | count | 1          |
| CD33       | -17.4473243 | 2154.888831 | -0.0081 | 0.9935   | -4.70043871  | count | 1          |
| RNF139-AS1 | -17.3948502 | 1521.79768  | -0.0114 | 0.9909   | -4.700438658 | count | 1          |
| PRRT3      | -18.2738842 | 2144.591331 | -0.0085 | 0.9932   | -3.754887349 | count | 1          |
| GPR146     | -18.2186743 | 2750.472106 | -0.0066 | 0.9947   | -3.754887337 | count | 1          |
| AC090825.1 | -17.336925  | 1917.29881  | -0.009  | 0.993    | -3.754886357 | count | 1          |
| MTTP       | -17.318963  | 1241.710551 | -0.0139 | 0.989    | -3.754886347 | count | 1          |
| RUNDC1     | -2.8734139  | 1.0951173   | -2.6238 | 0.009    | -3.426000137 | count | 1          |
| HMBOX1     | -2.6871283  | 1.2202826   | -2.2021 | 0.0282   | -3.262398923 | count | 1          |
| KIAA0355   | -2.6212999  | 1.2652826   | -2.0717 | 0.0389   | -3.201776322 | count | 1          |
| ANXA1      | -2.1139002  | 0.4985101   | -4.2404 | 2.72E-05 | -2.68897783  | count | 0.660688   |
| IFITM3     | -2.0860466  | 0.781582    | -2.669  | 0.0079   | -2.658674146 | count | 1          |
| U62317.5   | -1.8671619  | 0.6296049   | -2.9656 | 0.0032   | -2.572361288 | count | 1          |
| IFI6       | -1.9876938  | 0.6708817   | -2.9628 | 0.0032   | -2.550049686 | count | 1          |
| MGP        | -1.8353281  | 0.3318812   | -5.5301 | 5.47E-08 | -2.503384726 | count | 0.00132921 |
| GATAD2A    | -1.9375648  | 0.7290879   | -2.6575 | 0.0082   | -2.493744039 | count | 1          |
| TYROBP     | -2.0052707  | 0.9120928   | -2.1985 | 0.0284   | -2.323925129 | count | 1          |
| TMEM260    | -1.7729541  | 1.0649275   | -1.6649 | 0.0966   | -2.304637757 | count | 1          |
| GAA        | -1.6906673  | 0.8690875   | -1.9453 | 0.0524   | -2.207824791 | count | 1          |
| SOD3       | -1.6613286  | 1.290804    | -1.287  | 0.1987   | -2.172960076 | count | 1          |
| PPP1R14A   | -1.747019   | 1.2616922   | -1.3847 | 0.1669   | -2.078941002 | count | 1          |
| FGGY       | -1.5612406  | 1.1450496   | -1.3635 | 0.1734   | -2.052710859 | count | 1          |
| C16orf86   | -1.4700702  | 0.8700208   | -1.6897 | 0.0918   | -1.941499071 | count | 1          |
| MXD4       | -1.4633942  | 0.4263345   | -3.4325 | 7.00E-04 | -1.933295577 | count | 1          |
| ABCA1      | -1.4577589  | 0.7807716   | -1.8671 | 0.0625   | -1.926364684 | count | 1          |
| PSMD10     | -1.3802838  | 0.6282796   | -2.1969 | 0.0285   | -1.880745391 | count | 1          |
| CHST2      | -1.400069   | 0.6071773   | -2.3059 | 0.0216   | -1.855089893 | count | 1          |
| CERK       | -1.3836018  | 0.6799389   | -2.0349 | 0.0425   | -1.834639549 | count | 1          |
| SLK        | -1.3113442  | 0.5820755   | -2.2529 | 0.0248   | -1.81474403  | count | 1          |
| LGALS3BP   | -1.4700702  | 1.024786    | -1.4345 | 0.1521   | -1.793517807 | count | 1          |
| MAK16      | -1.3468887  | 0.6920505   | -1.9462 | 0.0523   | -1.788882127 | count | 1          |
| DDX58      | -1.3365088  | 0.7100214   | -1.8824 | 0.0604   | -1.775904696 | count | 1          |
| RAB12      | -1.33312    | 1.0705198   | -1.2453 | 0.2137   | -1.771664062 | count | 1          |
| TMEM223    | -1.2871767  | 0.4889512   | -2.6325 | 0.0088   | -1.758846103 | count | 1          |
| PRMT3      | -1.2734357  | 1.3735814   | -0.9271 | 0.3544   | -1.740770073 | count | 1          |
| TUBB6      | -1.2968792  | 0.8513496   | -1.5233 | 0.1284   | -1.726197644 | count | 1          |

|             |            |           |         |          |              |       |           |
|-------------|------------|-----------|---------|----------|--------------|-------|-----------|
| RALGAPA2    | -1.2968792 | 0.9612849 | -1.3491 | 0.178    | -1.726197644 | count | 1         |
| TRIP4       | -1.2968792 | 1.0903614 | -1.1894 | 0.2349   | -1.726197644 | count | 1         |
| MT1F        | -1.3758621 | 0.7501703 | -1.8341 | 0.0673   | -1.691532028 | count | 1         |
| CLCC1       | -1.2683004 | 0.8473197 | -1.4968 | 0.1351   | -1.690196925 | count | 1         |
| CEMIP2      | -1.2140287 | 0.3217554 | -3.7731 | 2.00E-04 | -1.683696503 | count | 1         |
| TMEM14A     | -1.3681753 | 0.4822989 | -2.8368 | 0.0048   | -1.683107679 | count | 1         |
| GUCY2C      | -1.2264171 | 0.7483275 | -1.6389 | 0.1019   | -1.678758126 | count | 1         |
| PRMT9       | -1.2574231 | 0.99796   | -1.26   | 0.2083   | -1.676461442 | count | 1         |
| ATP1B3      | -1.1788568 | 0.347549  | -3.3919 | 8.00E-04 | -1.648615419 | count | 1         |
| SLC31A2     | -1.2272942 | 1.1923837 | -1.0293 | 0.3039   | -1.63832138  | count | 1         |
| DMD         | -1.2272942 | 1.3747601 | -0.8927 | 0.3725   | -1.63832138  | count | 1         |
| GALNT12     | -1.2272942 | 1.3747601 | -0.8927 | 0.3725   | -1.63832138  | count | 1         |
| IPP         | -1.3267663 | 0.7682194 | -1.7271 | 0.0849   | -1.637465131 | count | 1         |
| CSAD        | -1.2964341 | 0.5519505 | -2.3488 | 0.0193   | -1.603757201 | count | 1         |
| SERGEF      | -1.1932867 | 0.7880955 | -1.5141 | 0.131    | -1.595108164 | count | 1         |
| HMGCL       | -1.1732981 | 0.7647859 | -1.5342 | 0.126    | -1.569629706 | count | 1         |
| IRF9        | -1.170955  | 0.3514647 | -3.3316 | 9.00E-04 | -1.566639304 | count | 1         |
| ZSCAN16-AS1 | -1.2597277 | 0.5162497 | -2.4402 | 0.0151   | -1.562661435 | count | 1         |
| ENTPD3-AS1  | -1.1446724 | 0.6103432 | -1.8755 | 0.0614   | -1.533042298 | count | 1         |
| LYPD6B      | -1.1442318 | 1.1486435 | -0.9962 | 0.3197   | -1.532478244 | count | 1         |
| CLDND2      | -1.1442318 | 1.3484994 | -0.8485 | 0.3966   | -1.532478244 | count | 1         |
| GMPR2       | -1.2308211 | 0.4374803 | -2.8134 | 0.0051   | -1.530067982 | count | 1         |
| GLIPR2      | -1.141315  | 0.5610347 | -2.0343 | 0.0425   | -1.528743513 | count | 1         |
| SCLT1       | -1.1357351 | 0.5120376 | -2.2181 | 0.0271   | -1.521595574 | count | 1         |
| PI4KB       | -1.1312421 | 0.802989  | -1.4088 | 0.1596   | -1.515836817 | count | 1         |
| SPP1        | -1.0553338 | 0.6224512 | -1.6954 | 0.0907   | -1.50231505  | count | 1         |
| TIMP1       | -1.058647  | 0.3198014 | -3.3103 | 0.001    | -1.499530434 | count | 1         |
| TBC1D10B    | -1.1005777 | 0.7723885 | -1.4249 | 0.1549   | -1.476459429 | count | 1         |
| TULP4       | -1.0438751 | 0.4149138 | -2.5159 | 0.0122   | -1.469997708 | count | 1         |
| PDIA4       | -1.1737375 | 0.4494655 | -2.6114 | 0.0093   | -1.465122264 | count | 1         |
| IMPA2       | -1.0882405 | 0.8152435 | -1.3349 | 0.1826   | -1.46058064  | count | 1         |
| ZNF765      | -1.0882405 | 0.8152435 | -1.3349 | 0.1826   | -1.46058064  | count | 1         |
| C1orf162    | -1.0789337 | 0.4977246 | -2.1677 | 0.0307   | -1.448588665 | count | 1         |
| SLC35A5     | -1.1584589 | 0.665482  | -1.7408 | 0.0824   | -1.447611039 | count | 1         |
| PIN4        | -1.0767396 | 0.468657  | -2.2975 | 0.0221   | -1.445759851 | count | 1         |
| SLC16A7     | -1.0443267 | 0.512145  | -2.0391 | 0.042    | -1.436423388 | count | 1         |
| ANKMY2      | -1.068467  | 0.85637   | -1.2477 | 0.2128   | -1.435088381 | count | 1         |
| RASGRP1     | -1.068467  | 0.8902779 | -1.2001 | 0.2307   | -1.435088381 | count | 1         |
| COQ7        | -1.0648218 | 0.5953871 | -1.7885 | 0.0744   | -1.430383292 | count | 1         |
| USP7        | -1.0395625 | 0.3397615 | -3.0597 | 0.0024   | -1.430039527 | count | 1         |
| SDHAF3      | -1.0636014 | 0.4643372 | -2.2906 | 0.0225   | -1.428807648 | count | 1         |
| CCL4        | -1.0539055 | 0.382155  | -2.7578 | 0.0061   | -1.416282496 | count | 1         |
| PEAK1       | -1.0482853 | 0.5800942 | -1.8071 | 0.0714   | -1.409016711 | count | 1         |
| HERC4       | -1.0386928 | 0.4185286 | -2.4818 | 0.0134   | -1.396606085 | count | 1         |
| ZNF331      | -0.9767252 | 0.2201851 | -4.4359 | 1.16E-05 | -1.38457405  | count | 0.2817988 |

|            |            |           |         |          |              |       |          |
|------------|------------|-----------|---------|----------|--------------|-------|----------|
| UROS       | -1.0235216 | 0.3459482 | -2.9586 | 0.0033   | -1.376953709 | count | 1        |
| AC114760.2 | -1.0969208 | 0.5361747 | -2.0458 | 0.0414   | -1.376547045 | count | 1        |
| ZFX        | -0.980962  | 0.3881509 | -2.5273 | 0.0118   | -1.376143362 | count | 1        |
| YAF2       | -0.990942  | 0.4276429 | -2.3172 | 0.0209   | -1.364771703 | count | 1        |
| SAMD9L     | -0.9752646 | 0.4077598 | -2.3918 | 0.0172   | -1.358933681 | count | 1        |
| FEZ2       | -0.9629413 | 0.4350968 | -2.2132 | 0.0274   | -1.351217178 | count | 1        |
| DSP        | -1.0027785 | 1.5144913 | -0.6621 | 0.5082   | -1.350036394 | count | 1        |
| APLP2      | -0.9614299 | 0.5378782 | -1.7874 | 0.0745   | -1.32505257  | count | 1        |
| HERC5      | -0.9411734 | 0.4588068 | -2.0514 | 0.0408   | -1.321084301 | count | 1        |
| TRAK2      | -1.0443156 | 0.7025883 | -1.4864 | 0.138    | -1.315139522 | count | 1        |
| DNAJC30    | -0.9735666 | 0.7842338 | -1.2414 | 0.2151   | -1.312038642 | count | 1        |
| UNC50      | -0.9622151 | 0.3655408 | -2.6323 | 0.0088   | -1.297244849 | count | 1        |
| IGFBP7     | -0.9551333 | 0.3142575 | -3.0393 | 0.0025   | -1.288007638 | count | 1        |
| PEG10      | -1.0177801 | 0.6190761 | -1.644  | 0.101    | -1.283940335 | count | 1        |
| TOR1A      | -0.9161925 | 0.5415043 | -1.6919 | 0.0914   | -1.277955881 | count | 1        |
| KAT5       | -0.9227658 | 0.5137385 | -1.7962 | 0.0731   | -1.272903238 | count | 1        |
| NIPSNAP3A  | -0.9418564 | 0.5335842 | -1.7652 | 0.0782   | -1.270673621 | count | 1        |
| PHF12      | -0.940365  | 0.4989298 | -1.8848 | 0.0601   | -1.26872517  | count | 1        |
| MCRIP2     | -1.0016762 | 0.419862  | -2.3857 | 0.0175   | -1.264934553 | count | 1        |
| FZD3       | -0.9362825 | 0.8917013 | -1.05   | 0.2943   | -1.263390224 | count | 1        |
| TAPBPL     | -0.9123246 | 0.459596  | -1.9851 | 0.0478   | -1.258798926 | count | 1        |
| CRKL       | -0.9305717 | 0.6975879 | -1.334  | 0.1829   | -1.25592413  | count | 1        |
| PRDX4      | -0.9266153 | 0.3860873 | -2.4    | 0.0168   | -1.250749433 | count | 1        |
| GPR18      | -0.9219378 | 0.3562457 | -2.5879 | 0.01     | -1.244629229 | count | 1        |
| GAPT       | -0.9138846 | 0.2635755 | -3.4673 | 6.00E-04 | -1.234086164 | count | 1        |
| TCHP       | -0.9123173 | 0.5241904 | -1.7404 | 0.0825   | -1.232033414 | count | 1        |
| ISG15      | -0.8640059 | 0.3561801 | -2.4258 | 0.0157   | -1.228254498 | count | 1        |
| EXOC6      | -0.8748012 | 0.3798089 | -2.3033 | 0.0217   | -1.221081904 | count | 1        |
| LY6E       | -0.8673927 | 0.2422283 | -3.5809 | 4.00E-04 | -1.210890991 | count | 1        |
| SLC10A3    | -0.9518688 | 0.5629188 | -1.691  | 0.0915   | -1.205817026 | count | 1        |
| SAP25      | -0.9509791 | 0.8925559 | -1.0655 | 0.2872   | -1.204756485 | count | 1        |
| AGPS       | -0.8895664 | 0.8808154 | -1.0099 | 0.3131   | -1.202203993 | count | 1        |
| ZFYVE21    | -0.8895664 | 0.9753899 | -0.912  | 0.3623   | -1.202203993 | count | 1        |
| SPIN2B     | -0.8883147 | 0.6539069 | -1.3585 | 0.175    | -1.200561135 | count | 1        |
| ZNF286A    | -0.8659553 | 0.8514606 | -1.017  | 0.3097   | -1.196054784 | count | 1        |
| PRAF2      | -0.9418564 | 0.6717868 | -1.402  | 0.1616   | -1.193873024 | count | 1        |
| DHX16      | -0.859958  | 0.5079692 | -1.6929 | 0.0912   | -1.187927091 | count | 1        |
| STARD10    | -0.8486817 | 0.4048849 | -2.0961 | 0.0366   | -1.185137842 | count | 1        |
| LGALS9     | -0.8514753 | 0.3757552 | -2.266  | 0.0239   | -1.176426317 | count | 1        |
| C16orf58   | -0.8633367 | 0.7643696 | -1.1295 | 0.259    | -1.16774067  | count | 1        |
| UACA       | -0.8337136 | 1.1474627 | -0.7266 | 0.4679   | -1.152327111 | count | 1        |
| ZBED5-AS1  | -0.8486817 | 0.498661  | -1.7019 | 0.0895   | -1.148452108 | count | 1        |
| TXNIP      | -0.795638  | 0.1079407 | -7.3711 | 8.34E-13 | -1.140849098 | count | 2.03E-08 |
| SSX2IP     | -0.8243082 | 1.2502851 | -0.6593 | 0.51     | -1.139556016 | count | 1        |
| GRK3       | -0.8223891 | 0.3682385 | -2.2333 | 0.026    | -1.136949348 | count | 1        |

|            |            |           |         |          |              |       |   |
|------------|------------|-----------|---------|----------|--------------|-------|---|
| CD72       | -0.8935173 | 0.3844197 | -2.3243 | 0.0206   | -1.135932553 | count | 1 |
| DLGAP4     | -0.8110208 | 0.3753352 | -2.1608 | 0.0312   | -1.133239547 | count | 1 |
| DIDO1      | -0.8276379 | 0.4953473 | -1.6708 | 0.0955   | -1.120713755 | count | 1 |
| C1RL-AS1   | -0.8058895 | 0.7547263 | -1.0678 | 0.2862   | -1.114526898 | count | 1 |
| STARD7     | -0.8704689 | 0.4186064 | -2.0794 | 0.0381   | -1.108148394 | count | 1 |
| CCNT1      | -0.7899156 | 0.5003912 | -1.5786 | 0.1151   | -1.104119691 | count | 1 |
| BANP       | -0.815045  | 0.5739346 | -1.4201 | 0.156    | -1.104091958 | count | 1 |
| HCK        | -0.8105259 | 0.5173355 | -1.5667 | 0.118    | -1.098122924 | count | 1 |
| C6orf226   | -0.7845024 | 0.5791598 | -1.3546 | 0.176    | -1.085432395 | count | 1 |
| TIMM21     | -0.7935007 | 0.7851851 | -1.0106 | 0.313    | -1.075615964 | count | 1 |
| AZI2       | -0.7751068 | 0.5043602 | -1.5368 | 0.1251   | -1.072640262 | count | 1 |
| PRKD2      | -0.8394244 | 0.4927842 | -1.7034 | 0.0892   | -1.070568119 | count | 1 |
| IGHG3      | -0.7603083 | 0.2638667 | -2.8814 | 0.0042   | -1.069786079 | count | 1 |
| ZNF667-AS1 | -0.7884936 | 0.7116052 | -1.108  | 0.2684   | -1.068990913 | count | 1 |
| SH3GL1     | -0.8313624 | 0.5512827 | -1.5081 | 0.132    | -1.060779787 | count | 1 |
| PEF1       | -0.829792  | 0.4670289 | -1.7767 | 0.0763   | -1.058871726 | count | 1 |
| PCSK7      | -0.7558298 | 0.3263233 | -2.3162 | 0.021    | -1.057036875 | count | 1 |
| LIPT1      | -0.7527002 | 1.0484552 | -0.7179 | 0.4732   | -1.052710729 | count | 1 |
| CKS2       | -0.7493348 | 0.2224667 | -3.3683 | 8.00E-04 | -1.048058035 | count | 1 |
| NAGPA      | -0.7698156 | 0.6348839 | -1.2125 | 0.226    | -1.044254638 | count | 1 |
| TTC37      | -0.7689959 | 0.3372855 | -2.28   | 0.0231   | -1.043168251 | count | 1 |
| ZCCHC9     | -0.7667144 | 0.4958756 | -1.5462 | 0.123    | -1.040144098 | count | 1 |
| DHRS4L2    | -0.7425241 | 0.3957323 | -1.8763 | 0.0613   | -1.038640298 | count | 1 |
| VPS37B     | -0.8076465 | 0.3239389 | -2.4932 | 0.013    | -1.0319172   | count | 1 |
| HES1       | -0.8056597 | 0.6106701 | -1.3193 | 0.188    | -1.029494643 | count | 1 |
| BCL2L13    | -0.7967059 | 0.6410566 | -1.2428 | 0.215    | -1.018568318 | count | 1 |
| IRF2BPL    | -0.7498729 | 0.447007  | -1.6775 | 0.0941   | -1.017804211 | count | 1 |
| C16orf91   | -0.7208914 | 0.3486529 | -2.0676 | 0.0393   | -1.014815597 | count | 1 |
| USP44      | -0.7452599 | 1.121158  | -0.6647 | 0.5066   | -1.011680193 | count | 1 |
| TOMM34     | -0.7294301 | 0.6995111 | -1.0428 | 0.298    | -1.010361481 | count | 1 |
| KCTD20     | -0.7210542 | 0.5122761 | -1.4075 | 0.16     | -1.008935708 | count | 1 |
| NCKAP1L    | -0.7417861 | 0.3622281 | -2.0478 | 0.0412   | -1.00706713  | count | 1 |
| ABHD18     | -0.7414453 | 0.7369423 | -1.0061 | 0.3149   | -1.006614494 | count | 1 |
| FXYD1      | -0.7414453 | 0.7369423 | -1.0061 | 0.3149   | -1.006614494 | count | 1 |
| GCDH       | -0.7262159 | 0.6293675 | -1.1539 | 0.2492   | -1.005973507 | count | 1 |
| RPS6KA4    | -0.7224804 | 0.7762377 | -0.9307 | 0.3525   | -1.000872967 | count | 1 |
| MRPL36     | -0.7366663 | 0.3656573 | -2.0146 | 0.0445   | -1.000266055 | count | 1 |
| TRIP10     | -0.7199095 | 0.8210446 | -0.8768 | 0.3811   | -0.997362043 | count | 1 |
| MIEN1      | -0.7192529 | 0.3692944 | -1.9476 | 0.0521   | -0.99646529  | count | 1 |
| TRMU       | -0.7184013 | 0.7249891 | -0.9909 | 0.3223   | -0.995302173 | count | 1 |
| FMR1       | -0.7729349 | 0.3578489 | -2.1599 | 0.0313   | -0.98949181  | count | 1 |
| NDUFA8     | -0.7028202 | 0.3389598 | -2.0735 | 0.0387   | -0.983688963 | count | 1 |
| PPIF       | -0.6983978 | 0.5154339 | -1.355  | 0.176    | -0.983416078 | count | 1 |
| FBXO6      | -0.7623362 | 0.6649934 | -1.1464 | 0.2523   | -0.976495713 | count | 1 |
| TXN2       | -0.7124905 | 0.3216584 | -2.2151 | 0.0273   | -0.968116416 | count | 1 |

|          |            |           |         |          |              |       |             |
|----------|------------|-----------|---------|----------|--------------|-------|-------------|
| SLC25A29 | -0.7101599 | 0.6619581 | -1.0728 | 0.2839   | -0.965014109 | count | 1           |
| HERPUD1  | -0.6704852 | 0.1189209 | -5.6381 | 3.06E-08 | -0.963966485 | count | 0.000743611 |
| ANKRD49  | -0.7092855 | 0.4032414 | -1.759  | 0.0793   | -0.963850046 | count | 1           |
| LAMP2    | -0.7061914 | 0.422252  | -1.6724 | 0.0951   | -0.959730356 | count | 1           |
| DDX60    | -0.7483984 | 0.6861333 | -1.0907 | 0.276    | -0.959375711 | count | 1           |
| ROM1     | -0.6911991 | 1.2312941 | -0.5614 | 0.5748   | -0.958123444 | count | 1           |
| ECHDC2   | -0.689519  | 0.4295098 | -1.6054 | 0.1091   | -0.955825529 | count | 1           |
| RAB31    | -0.7009049 | 0.2785297 | -2.5164 | 0.0122   | -0.952689439 | count | 1           |
| C12orf65 | -0.671016  | 0.2806167 | -2.3912 | 0.0172   | -0.951593811 | count | 1           |
| CKLF     | -0.6848914 | 0.2539101 | -2.6974 | 0.0072   | -0.949495273 | count | 1           |
| CST3     | -0.7375709 | 0.558969  | -1.3195 | 0.188    | -0.946053189 | count | 1           |
| HMOX1    | -0.6741455 | 0.4983789 | -1.3527 | 0.1768   | -0.934790114 | count | 1           |
| PHKG2    | -0.6741455 | 0.5748853 | -1.1727 | 0.2416   | -0.934790114 | count | 1           |
| SFSWAP   | -0.6863885 | 0.3583489 | -1.9154 | 0.0561   | -0.93334179  | count | 1           |
| BMPR2    | -0.7269214 | 0.6062616 | -1.199  | 0.2312   | -0.932930297 | count | 1           |
| NFX1     | -0.7232764 | 0.4064008 | -1.7797 | 0.0758   | -0.928434338 | count | 1           |
| DPEP2    | -0.7219987 | 0.651501  | -1.1082 | 0.2684   | -0.926857821 | count | 1           |
| COX11    | -0.654546  | 0.4640395 | -1.4105 | 0.1591   | -0.916766042 | count | 1           |
| TXNL1    | -0.6721107 | 0.2363901 | -2.8432 | 0.0047   | -0.91429272  | count | 1           |
| CSTF1    | -0.7105977 | 0.7092914 | -1.0018 | 0.317    | -0.912778397 | count | 1           |
| G6PD     | -0.6564632 | 0.6703541 | -0.9793 | 0.328    | -0.910576436 | count | 1           |
| DICER1   | -0.6685948 | 0.4423605 | -1.5114 | 0.131    | -0.909598977 | count | 1           |
| SLC35E1  | -0.7057559 | 0.4896866 | -1.4412 | 0.1502   | -0.906792568 | count | 1           |
| SRM      | -0.6518074 | 0.2295114 | -2.84   | 0.0047   | -0.904197539 | count | 1           |
| NCBP2    | -0.6488262 | 0.347767  | -1.8657 | 0.0627   | -0.900112273 | count | 1           |
| LEPROTL1 | -0.6607055 | 0.2999404 | -2.2028 | 0.0281   | -0.899062537 | count | 1           |
| CTSC     | -0.6471514 | 0.3068741 | -2.1088 | 0.0355   | -0.897816974 | count | 1           |
| RAB5IF   | -0.6330696 | 0.2959063 | -2.1394 | 0.0329   | -0.895569627 | count | 1           |
| NMRAL1   | -0.6448693 | 0.4900682 | -1.3159 | 0.189    | -0.894689089 | count | 1           |
| IER5L    | -0.6571273 | 0.6739819 | -0.975  | 0.33     | -0.894281826 | count | 1           |
| TMEM189  | -0.6567074 | 0.8074575 | -0.8133 | 0.4165   | -0.893720733 | count | 1           |
| SLC2A3   | -0.62283   | 0.1554781 | -4.0059 | 7.24E-05 | -0.891952322 | count | 1           |
| RAP2B    | -0.652698  | 0.3905216 | -1.6713 | 0.0954   | -0.888362361 | count | 1           |
| MESD     | -0.6519122 | 0.3008984 | -2.1666 | 0.0308   | -0.887312006 | count | 1           |
| FAM98C   | -0.6512453 | 0.430782  | -1.5118 | 0.1313   | -0.886420534 | count | 1           |
| CISD3    | -0.6711796 | 0.5530121 | -1.2137 | 0.2255   | -0.863934796 | count | 1           |
| MYSM1    | -0.6340782 | 0.3386029 | -1.8726 | 0.0618   | -0.863458674 | count | 1           |
| FAM30A   | -0.6042366 | 0.197291  | -3.0627 | 0.0023   | -0.861619266 | count | 1           |
| EIF3D    | -0.6317003 | 0.1702006 | -3.7115 | 2.00E-04 | -0.860276013 | count | 1           |
| KMT2B    | -0.6189202 | 0.314684  | -1.9668 | 0.0498   | -0.859099622 | count | 1           |
| C14orf28 | -0.6099282 | 0.6492855 | -0.9394 | 0.348    | -0.854809235 | count | 1           |
| C4orf48  | -0.6025018 | 0.2723824 | -2.212  | 0.0275   | -0.849318785 | count | 1           |
| CXXC5    | -0.6051177 | 0.2388127 | -2.5339 | 0.0116   | -0.848123609 | count | 1           |
| MRPL28   | -0.598641  | 0.4000048 | -1.4966 | 0.1352   | -0.843912401 | count | 1           |
| THOC6    | -0.6185776 | 0.4551469 | -1.3591 | 0.1748   | -0.842703039 | count | 1           |

|              |            |           |         |          |              |       |   |
|--------------|------------|-----------|---------|----------|--------------|-------|---|
| BIN2         | -0.6514012 | 0.3570916 | -1.8242 | 0.0688   | -0.83933241  | count | 1 |
| SNRNP200     | -0.651034  | 0.3008404 | -2.1641 | 0.031    | -0.838875058 | count | 1 |
| BCL6         | -0.6148585 | 0.529805  | -1.1605 | 0.246    | -0.837719905 | count | 1 |
| TRAF3IP2-AS1 | -0.61421   | 0.7526219 | -0.8161 | 0.4149   | -0.836850868 | count | 1 |
| EAF1         | -0.6015553 | 0.8133034 | -0.7396 | 0.4599   | -0.835260041 | count | 1 |
| CCR6         | -0.6112645 | 0.2895117 | -2.1114 | 0.0353   | -0.832903226 | count | 1 |
| ZNF83        | -0.5986711 | 0.500524  | -1.1961 | 0.232    | -0.831298643 | count | 1 |
| MIR22HG      | -0.6089266 | 0.5755873 | -1.0579 | 0.2907   | -0.82976936  | count | 1 |
| HSD17B10     | -0.5885376 | 0.3112891 | -1.8906 | 0.0593   | -0.829761662 | count | 1 |
| MARF1        | -0.6086578 | 0.3701559 | -1.6443 | 0.1008   | -0.829409014 | count | 1 |
| GLRX         | -0.6431245 | 0.3071763 | -2.0937 | 0.0369   | -0.829018566 | count | 1 |
| MAPKAP1      | -0.6049705 | 0.3768965 | -1.6051 | 0.109    | -0.824465267 | count | 1 |
| RFK          | -0.6039898 | 0.3706037 | -1.6297 | 0.104    | -0.823150192 | count | 1 |
| ZNF721       | -0.5915427 | 0.3350354 | -1.7656 | 0.0781   | -0.821505745 | count | 1 |
| ACAA2        | -0.5773689 | 0.4669443 | -1.2365 | 0.2169   | -0.817195473 | count | 1 |
| CSRP1        | -0.6291916 | 0.4853518 | -1.2964 | 0.1955   | -0.811632088 | count | 1 |
| BHLHE40      | -0.6291916 | 0.5724593 | -1.0991 | 0.272    | -0.811632088 | count | 1 |
| GLOD4        | -0.5827276 | 0.2942971 | -1.9801 | 0.0483   | -0.809391433 | count | 1 |
| USP20        | -0.5936311 | 1.2446974 | -0.4769 | 0.6337   | -0.809254521 | count | 1 |
| IGFBP6       | -0.5936311 | 1.2446974 | -0.4769 | 0.6337   | -0.809254521 | count | 1 |
| EIF3A        | -0.5920129 | 0.1747905 | -3.387  | 8.00E-04 | -0.807082945 | count | 1 |
| CDK4         | -0.5790761 | 0.3585541 | -1.615  | 0.107    | -0.804371923 | count | 1 |
| IGLL5        | -0.5732339 | 0.5275599 | -1.0866 | 0.278    | -0.803784234 | count | 1 |
| FIGNL1       | -0.5700496 | 0.5582175 | -1.0212 | 0.3077   | -0.799353398 | count | 1 |
| ZFAND2B      | -0.5656662 | 0.3621712 | -1.5619 | 0.119    | -0.797714035 | count | 1 |
| VPS72        | -0.5815589 | 0.4435943 | -1.311  | 0.191    | -0.793048556 | count | 1 |
| MAPK6        | -0.5700849 | 0.4545249 | -1.2542 | 0.2104   | -0.792008844 | count | 1 |
| SNX29        | -0.5639337 | 0.3421213 | -1.6483 | 0.1      | -0.790842053 | count | 1 |
| PSMC6        | -0.5607367 | 0.2676797 | -2.0948 | 0.0368   | -0.790804237 | count | 1 |
| AC118549.1   | -0.60991   | 0.5327725 | -1.1448 | 0.2529   | -0.787521402 | count | 1 |
| SLC30A4      | -0.5728111 | 1.0434252 | -0.549  | 0.5833   | -0.781297522 | count | 1 |
| ATG2B        | -0.5728111 | 1.1598762 | -0.4939 | 0.6217   | -0.781297522 | count | 1 |
| C1orf123     | -0.5507947 | 0.37877   | -1.4542 | 0.1466   | -0.779769434 | count | 1 |
| ASAP1        | -0.5709266 | 0.4183308 | -1.3648 | 0.173    | -0.778765196 | count | 1 |
| MX2          | -0.560303  | 0.3830487 | -1.4627 | 0.144    | -0.778553103 | count | 1 |
| ANKS1A       | -0.5502246 | 0.9321096 | -0.5903 | 0.555    | -0.776066213 | count | 1 |
| POLR3GL      | -0.5499522 | 0.2326986 | -2.3634 | 0.0185   | -0.771378018 | count | 1 |
| TNK2         | -0.5625605 | 0.6953045 | -0.8091 | 0.419    | -0.767519487 | count | 1 |
| DBF4         | -0.5931834 | 0.3207874 | -1.8491 | 0.0651   | -0.766559505 | count | 1 |
| TMEM9        | -0.561454  | 0.5182861 | -1.0833 | 0.2793   | -0.766031689 | count | 1 |
| FAM122B      | -0.5506789 | 0.7579359 | -0.7266 | 0.4679   | -0.765308949 | count | 1 |
| MYL6B        | -0.5603736 | 0.4599194 | -1.2184 | 0.2237   | -0.764578887 | count | 1 |
| LYRM7        | -0.5603736 | 0.4908296 | -1.1417 | 0.2542   | -0.764578887 | count | 1 |
| N4BP2        | -0.5599007 | 0.6672892 | -0.8391 | 0.4019   | -0.763942952 | count | 1 |
| UBQLN2       | -0.5587726 | 0.4259713 | -1.3118 | 0.1903   | -0.762425854 | count | 1 |

|            |            |           |         |          |              |       |   |
|------------|------------|-----------|---------|----------|--------------|-------|---|
| PRPS2      | -0.557263  | 0.4553233 | -1.2239 | 0.2216   | -0.760395542 | count | 1 |
| GPN3       | -0.5866532 | 0.3800734 | -1.5435 | 0.1234   | -0.758364321 | count | 1 |
| CHAMP1     | -0.58631   | 0.7414571 | -0.7908 | 0.4295   | -0.757933441 | count | 1 |
| TRAPPC4    | -0.5525614 | 0.2552508 | -2.1648 | 0.0309   | -0.754070983 | count | 1 |
| OSGEPL1    | -0.5790761 | 0.7221602 | -0.8019 | 0.4231   | -0.748847294 | count | 1 |
| TMED3      | -0.548461  | 0.3656544 | -1.4999 | 0.1343   | -0.748553649 | count | 1 |
| FH         | -0.5483135 | 0.4073984 | -1.3459 | 0.179    | -0.748355155 | count | 1 |
| CCND3      | -0.5345595 | 0.2162078 | -2.4724 | 0.0138   | -0.743114299 | count | 1 |
| TMEM33     | -0.5335668 | 0.4989382 | -1.0694 | 0.2855   | -0.741746971 | count | 1 |
| PAWR       | -0.5428755 | 0.3217927 | -1.687  | 0.0923   | -0.741035782 | count | 1 |
| CDK12      | -0.5424875 | 0.2496634 | -2.1729 | 0.0303   | -0.740513453 | count | 1 |
| LONP2      | -0.5321352 | 0.3682494 | -1.445  | 0.149    | -0.739775013 | count | 1 |
| H2AFJ      | -0.5718368 | 0.3853349 | -1.484  | 0.1385   | -0.739746557 | count | 1 |
| PPIB       | -0.5158329 | 0.1276792 | -4.0401 | 6.30E-05 | -0.739297746 | count | 1 |
| ANKRD10    | -0.5395125 | 0.3427729 | -1.574  | 0.1162   | -0.73650807  | count | 1 |
| SNHG9      | -0.5390304 | 0.4467214 | -1.2066 | 0.2282   | -0.735858926 | count | 1 |
| HVCN1      | -0.5288596 | 0.1934043 | -2.7345 | 0.0065   | -0.735262594 | count | 1 |
| EFR3A      | -0.5198765 | 0.3117926 | -1.6674 | 0.0961   | -0.733495722 | count | 1 |
| WDR45      | -0.5145348 | 0.4015024 | -1.2815 | 0.201    | -0.730586239 | count | 1 |
| USP15      | -0.5103621 | 0.1969307 | -2.5916 | 0.0099   | -0.727232151 | count | 1 |
| LINC01857  | -0.5097465 | 0.2486407 | -2.0501 | 0.0409   | -0.723813131 | count | 1 |
| SMS        | -0.5127654 | 0.3044807 | -1.6841 | 0.0929   | -0.723515991 | count | 1 |
| AHI1       | -0.511666  | 0.4025631 | -1.271  | 0.2044   | -0.721972934 | count | 1 |
| CASP4      | -0.5099546 | 0.2023433 | -2.5202 | 0.0121   | -0.719570824 | count | 1 |
| DERA       | -0.5264673 | 0.4399424 | -1.1967 | 0.2321   | -0.718936133 | count | 1 |
| DECR1      | -0.5119864 | 0.236532  | -2.1646 | 0.031    | -0.718481175 | count | 1 |
| AC004687.1 | -0.5162719 | 0.2750144 | -1.8773 | 0.0611   | -0.717916306 | count | 1 |
| WAPL       | -0.5538494 | 0.285892  | -1.9373 | 0.0533   | -0.717100531 | count | 1 |
| SIPA1      | -0.5531916 | 0.2738151 | -2.0203 | 0.044    | -0.716271466 | count | 1 |
| PCED1B     | -0.5240647 | 0.4316146 | -1.2142 | 0.2253   | -0.715698308 | count | 1 |
| GIGYF1     | -0.5225216 | 0.3863114 | -1.3526 | 0.1769   | -0.713618528 | count | 1 |
| TAF12      | -0.5043365 | 0.3314402 | -1.5217 | 0.129    | -0.707815195 | count | 1 |
| GYPC       | -0.4963204 | 0.1886559 | -2.6308 | 0.0088   | -0.707280981 | count | 1 |
| FGD6       | -0.508157  | 0.6846008 | -0.7423 | 0.4583   | -0.706728972 | count | 1 |
| SYMPK      | -0.508157  | 0.6912789 | -0.7351 | 0.4627   | -0.706728972 | count | 1 |
| PIK3C3     | -0.5074375 | 0.5881718 | -0.8627 | 0.3887   | -0.705736879 | count | 1 |
| BAG1       | -0.5165467 | 0.26846   | -1.9241 | 0.055    | -0.705563779 | count | 1 |
| KIZ        | -0.5071479 | 0.483323  | -1.0493 | 0.295    | -0.705337554 | count | 1 |
| NKRF       | -0.5423757 | 0.5565614 | -0.9745 | 0.3303   | -0.702630501 | count | 1 |
| LY96       | -0.5403801 | 0.2873055 | -1.8809 | 0.0606   | -0.7001118   | count | 1 |
| SUGT1      | -0.4942741 | 0.2675709 | -1.8473 | 0.0654   | -0.700097285 | count | 1 |
| NPRL2      | -0.5111672 | 0.5836032 | -0.8759 | 0.3816   | -0.698309228 | count | 1 |
| RNF130     | -0.536885  | 0.4169221 | -1.2877 | 0.1985   | -0.695699166 | count | 1 |
| NELFE      | -0.5085892 | 0.4310279 | -1.1799 | 0.2387   | -0.694831833 | count | 1 |
| ETHE1      | -0.4988538 | 0.2906456 | -1.7164 | 0.0868   | -0.693898921 | count | 1 |



|            |            |           |         |        |              |       |   |
|------------|------------|-----------|---------|--------|--------------|-------|---|
| F8A1       | -0.5049917 | 0.3956377 | -1.2764 | 0.2025 | -0.689978375 | count | 1 |
| GSTO1      | -0.4894942 | 0.2096985 | -2.3343 | 0.02   | -0.687114027 | count | 1 |
| AC104024.1 | -0.4935146 | 0.4106348 | -1.2018 | 0.23   | -0.686533468 | count | 1 |
| DDAH2      | -0.4929733 | 0.1777145 | -2.774  | 0.0058 | -0.685786655 | count | 1 |
| ABCE1      | -0.4999632 | 0.3129128 | -1.5978 | 0.1108 | -0.683192599 | count | 1 |
| CNR2       | -0.4994867 | 0.5363015 | -0.9314 | 0.352  | -0.682549476 | count | 1 |
| LPP        | -0.525344  | 0.5734913 | -0.916  | 0.36   | -0.681115965 | count | 1 |
| CHD8       | -0.524528  | 0.4086549 | -1.2835 | 0.2    | -0.680084146 | count | 1 |
| IGLC3      | -0.4717888 | 0.2793661 | -1.6888 | 0.092  | -0.679286403 | count | 1 |
| CRK        | -0.523488  | 0.4485807 | -1.167  | 0.2438 | -0.678768945 | count | 1 |
| TAF9       | -0.4803736 | 0.3028786 | -1.586  | 0.1134 | -0.678035209 | count | 1 |
| IFT80      | -0.4951225 | 0.7237611 | -0.6841 | 0.4943 | -0.676658363 | count | 1 |
| KBTBD2     | -0.4939091 | 0.3565233 | -1.3853 | 0.1666 | -0.675020159 | count | 1 |
| NQO2       | -0.484556  | 0.5095664 | -0.9509 | 0.3422 | -0.674171528 | count | 1 |
| OSTF1      | -0.4787944 | 0.1857016 | -2.5783 | 0.0102 | -0.672184842 | count | 1 |
| ZNF277     | -0.5161125 | 0.3523044 | -1.465  | 0.1436 | -0.669437373 | count | 1 |
| SLC25A38   | -0.4867313 | 0.2998986 | -1.623  | 0.105  | -0.665327099 | count | 1 |
| TBC1D10C   | -0.4852724 | 0.2062183 | -2.3532 | 0.019  | -0.663356473 | count | 1 |
| MHENCN     | -0.4750097 | 0.5180564 | -0.9169 | 0.3597 | -0.660993822 | count | 1 |
| ULK3       | -0.4833257 | 0.6923199 | -0.6981 | 0.485  | -0.66072669  | count | 1 |
| TMEM167A   | -0.4740858 | 0.3467634 | -1.3672 | 0.172  | -0.659718212 | count | 1 |
| DHX29      | -0.4739632 | 0.3878727 | -1.222  | 0.222  | -0.659548935 | count | 1 |
| NHP2       | -0.4735402 | 0.2277496 | -2.0792 | 0.0382 | -0.65896489  | count | 1 |
| HHEX       | -0.4691061 | 0.3369046 | -1.3924 | 0.1645 | -0.658662888 | count | 1 |
| INTS11     | -0.4815335 | 0.3664194 | -1.3142 | 0.1895 | -0.658305361 | count | 1 |
| NUDT22     | -0.5067878 | 0.3749282 | -1.3517 | 0.177  | -0.657628656 | count | 1 |
| NDUFV1     | -0.5061891 | 0.366049  | -1.3828 | 0.1674 | -0.656870045 | count | 1 |
| ATP10D     | -0.4703371 | 0.4993168 | -0.942  | 0.3467 | -0.65454198  | count | 1 |
| CDK13      | -0.4635684 | 0.2383858 | -1.9446 | 0.0525 | -0.654425326 | count | 1 |
| CNPY2      | -0.4699755 | 0.2777403 | -1.6921 | 0.0913 | -0.65404264  | count | 1 |
| PUDP       | -0.4779654 | 0.9057349 | -0.5277 | 0.598  | -0.653483973 | count | 1 |
| PABPC1L    | -0.4779654 | 1.2721145 | -0.3757 | 0.7073 | -0.653483973 | count | 1 |
| KIF5B      | -0.4688565 | 0.2221783 | -2.1103 | 0.0354 | -0.65249735  | count | 1 |
| ERCC1      | -0.4688345 | 0.2454962 | -1.9097 | 0.0568 | -0.652466968 | count | 1 |
| FAM120A    | -0.5027102 | 0.4055701 | -1.2395 | 0.2158 | -0.65246098  | count | 1 |
| POLL       | -0.5019188 | 0.5499901 | -0.9126 | 0.362  | -0.65145774  | count | 1 |
| TUBA1C     | -0.4666774 | 0.2453732 | -1.9019 | 0.0578 | -0.649487913 | count | 1 |
| RIPK1      | -0.4742527 | 0.4424852 | -1.0718 | 0.2844 | -0.648466151 | count | 1 |
| RNF169     | -0.4590583 | 0.4131621 | -1.1111 | 0.2671 | -0.648087423 | count | 1 |
| ASPH       | -0.4588164 | 0.6593196 | -0.6959 | 0.487  | -0.647747469 | count | 1 |
| FAM120AOS  | -0.4540695 | 0.3241715 | -1.4007 | 0.162  | -0.643368227 | count | 1 |
| PPP1CA     | -0.4580448 | 0.1912557 | -2.3949 | 0.017  | -0.643219937 | count | 1 |
| CREBZF     | -0.4577538 | 0.2823013 | -1.6215 | 0.106  | -0.642813598 | count | 1 |
| GUSB       | -0.4698435 | 0.5232442 | -0.8979 | 0.3697 | -0.642505605 | count | 1 |
| IKKBK      | -0.4698435 | 0.5724438 | -0.8208 | 0.412  | -0.642505605 | count | 1 |

|          |            |           |         |          |              |       |          |
|----------|------------|-----------|---------|----------|--------------|-------|----------|
| ZDHC4    | -0.4696697 | 0.5469887 | -0.8586 | 0.391    | -0.642270624 | count | 1        |
| PSMB4    | -0.4939636 | 0.2133327 | -2.3155 | 0.021    | -0.6413683   | count | 1        |
| P4HTM    | -0.4687766 | 0.4021099 | -1.1658 | 0.2443   | -0.641063102 | count | 1        |
| UBQLN1   | -0.4605556 | 0.3478638 | -1.324  | 0.186    | -0.641032079 | count | 1        |
| NDUFA1   | -0.4485423 | 0.1646192 | -2.7247 | 0.0067   | -0.640132773 | count | 1        |
| UQCR11   | -0.4492484 | 0.1628034 | -2.7595 | 0.006    | -0.634299568 | count | 1        |
| DALRD3   | -0.4871006 | 0.36505   | -1.3343 | 0.1828   | -0.632657027 | count | 1        |
| S100A11  | -0.439496  | 0.1815796 | -2.4204 | 0.0159   | -0.630035884 | count | 1        |
| CYB5R2   | -0.4846641 | 0.6811635 | -0.7115 | 0.4771   | -0.629562789 | count | 1        |
| SELENOW  | -0.4472568 | 0.2025399 | -2.2082 | 0.0277   | -0.628153768 | count | 1        |
| CLIP1    | -0.4456736 | 0.4033972 | -1.1048 | 0.2698   | -0.625942328 | count | 1        |
| OSTC     | -0.4809694 | 0.2435877 | -1.9745 | 0.0489   | -0.624869139 | count | 1        |
| TRAF3IP3 | -0.4391665 | 0.2287713 | -1.9197 | 0.0555   | -0.62391146  | count | 1        |
| ARL2     | -0.455832  | 0.2392964 | -1.9049 | 0.0574   | -0.62355437  | count | 1        |
| ZNF337   | -0.4779654 | 1.1247592 | -0.4249 | 0.6711   | -0.621051557 | count | 1        |
| ADM      | -0.4779654 | 1.2721145 | -0.3757 | 0.7073   | -0.621051557 | count | 1        |
| ZBTB38   | -0.4434927 | 0.3015474 | -1.4707 | 0.142    | -0.617453224 | count | 1        |
| GRAP     | -0.4738354 | 0.406658  | -1.1652 | 0.245    | -0.615801009 | count | 1        |
| HM13     | -0.4735188 | 0.418608  | -1.1312 | 0.2586   | -0.61539841  | count | 1        |
| VDAC3    | -0.4497726 | 0.3014699 | -1.4919 | 0.1364   | -0.615354115 | count | 1        |
| PWWP2B   | -0.4397446 | 0.5223658 | -0.8418 | 0.4003   | -0.612271765 | count | 1        |
| RAB5A    | -0.4461284 | 0.3157964 | -1.4127 | 0.1584   | -0.61042104  | count | 1        |
| BTN3A2   | -0.446095  | 0.3151676 | -1.4154 | 0.1576   | -0.610375825 | count | 1        |
| GPR137   | -0.4460752 | 0.5275042 | -0.8456 | 0.3982   | -0.610349019 | count | 1        |
| AGA      | -0.4460752 | 0.5790807 | -0.7703 | 0.442    | -0.610349019 | count | 1        |
| SPICE1   | -0.4460752 | 0.6083477 | -0.7333 | 0.464    | -0.610349019 | count | 1        |
| EIF1AY   | -0.4268973 | 0.1515108 | -2.8176 | 0.005    | -0.609899368 | count | 1        |
| PICALM   | -0.4369652 | 0.5177857 | -0.8439 | 0.3992   | -0.608428988 | count | 1        |
| ORAI3    | -0.4368031 | 0.4560637 | -0.9578 | 0.339    | -0.608204857 | count | 1        |
| SF3B5    | -0.4293968 | 0.1982984 | -2.1654 | 0.0309   | -0.606388512 | count | 1        |
| BRI3     | -0.4354536 | 0.1984811 | -2.1939 | 0.0288   | -0.606338893 | count | 1        |
| ABRACL   | -0.434656  | 0.3243004 | -1.3403 | 0.181    | -0.605236001 | count | 1        |
| FABP5    | -0.4250907 | 0.2268432 | -1.8739 | 0.0616   | -0.605120942 | count | 1        |
| PLEKHA2  | -0.4635119 | 0.3766445 | -1.2306 | 0.2191   | -0.602666393 | count | 1        |
| VPS35    | -0.4263959 | 0.1950537 | -2.186  | 0.0293   | -0.602168191 | count | 1        |
| STOML2   | -0.4400211 | 0.2645124 | -1.6635 | 0.0969   | -0.602151492 | count | 1        |
| TMSB4X   | -0.4154141 | 0.0520792 | -7.9766 | 1.29E-14 | -0.598766433 | count | 3.14E-10 |
| STMN1    | -0.4366037 | 0.2810579 | -1.5534 | 0.121    | -0.597522969 | count | 1        |
| NBEAL1   | -0.4360444 | 0.2939195 | -1.4836 | 0.1386   | -0.596765371 | count | 1        |
| EVI5     | -0.4283836 | 0.467862  | -0.9156 | 0.36     | -0.596561616 | count | 1        |
| ZFP36L2  | -0.4238341 | 0.1260691 | -3.3619 | 8.00E-04 | -0.595426402 | count | 1        |
| TMEM8A   | -0.4578013 | 0.7141427 | -0.6411 | 0.5218   | -0.595394594 | count | 1        |
| UMAD1    | -0.42744   | 0.5906231 | -0.7237 | 0.4696   | -0.595256493 | count | 1        |
| CHKA     | -0.4574028 | 0.5966769 | -0.7666 | 0.4437   | -0.594886987 | count | 1        |
| ADCY3    | -0.4338478 | 0.83875   | -0.5173 | 0.6052   | -0.593789745 | count | 1        |

|          |            |           |         |         |              |       |   |
|----------|------------|-----------|---------|---------|--------------|-------|---|
| SETD7    | -0.4338478 | 0.8839814 | -0.4908 | 0.6238  | -0.593789745 | count | 1 |
| PARM1    | -0.4338478 | 0.9617049 | -0.4511 | 0.6521  | -0.593789745 | count | 1 |
| TRAPPC8  | -0.4559    | 0.5406494 | -0.8432 | 0.3995  | -0.59297253  | count | 1 |
| NCR3     | -0.4211717 | 0.227546  | -1.8509 | 0.0648  | -0.591704996 | count | 1 |
| SIDT1    | -0.4320739 | 0.3486998 | -1.2391 | 0.216   | -0.591386471 | count | 1 |
| VAMP2    | -0.4243903 | 0.1494813 | -2.8391 | 0.0047  | -0.591038048 | count | 1 |
| CALR     | -0.4243063 | 0.1491767 | -2.8443 | 0.0047  | -0.590921849 | count | 1 |
| DDIT4    | -0.4304703 | 0.1597519 | -2.6946 | 0.0073  | -0.58921372  | count | 1 |
| CCNG1    | -0.4288592 | 0.4101572 | -1.0456 | 0.2963  | -0.587030613 | count | 1 |
| IFI30    | -0.4208404 | 0.2938105 | -1.4324 | 0.153   | -0.586127111 | count | 1 |
| UNC93B1  | -0.4270048 | 0.3665178 | -1.165  | 0.245   | -0.584517589 | count | 1 |
| DDHD1    | -0.4142855 | 0.3842129 | -1.0783 | 0.281   | -0.582078434 | count | 1 |
| TBK1     | -0.4473306 | 0.4060558 | -1.1016 | 0.2712  | -0.582049987 | count | 1 |
| NOP16    | -0.4136795 | 0.4144863 | -0.9981 | 0.3188  | -0.58123119  | count | 1 |
| TUBA4A   | -0.4135206 | 0.1573056 | -2.6288 | 0.0089  | -0.58100903  | count | 1 |
| AP2S1    | -0.4088209 | 0.2573036 | -1.5889 | 0.1128  | -0.580922836 | count | 1 |
| DNAJB9   | -0.4463967 | 0.2976578 | -1.4997 | 0.1344  | -0.580859045 | count | 1 |
| ZNF581   | -0.4127059 | 0.2454861 | -1.6812 | 0.0934  | -0.579869974 | count | 1 |
| TERF1    | -0.4445535 | 0.3680334 | -1.2079 | 0.228   | -0.578508198 | count | 1 |
| HSPE1    | -0.406024  | 0.1294443 | -3.1367 | 0.0018  | -0.578046035 | count | 1 |
| PYCARD   | -0.4138306 | 0.2194479 | -1.8858 | 0.06    | -0.576427863 | count | 1 |
| VPS36    | -0.4137923 | 0.259634  | -1.5938 | 0.112   | -0.57637486  | count | 1 |
| TFDP2    | -0.412857  | 0.4413896 | -0.9354 | 0.3501  | -0.575080524 | count | 1 |
| DDX6     | -0.4077193 | 0.1744427 | -2.3373 | 0.0199  | -0.572897508 | count | 1 |
| CAPN2    | -0.4182297 | 0.3313446 | -1.2622 | 0.2075  | -0.572622419 | count | 1 |
| NDUFB8   | -0.3979992 | 0.1768663 | -2.2503 | 0.0249  | -0.569525813 | count | 1 |
| ZNF274   | -0.4374855 | 0.4420943 | -0.9896 | 0.3229  | -0.569489379 | count | 1 |
| ABHD15   | -0.4339262 | 0.4971815 | -0.8728 | 0.3833  | -0.564945186 | count | 1 |
| ITM2C    | -0.41158   | 0.3229198 | -1.2746 | 0.2031  | -0.563604606 | count | 1 |
| TUSC2    | -0.4008246 | 0.3115399 | -1.2866 | 0.199   | -0.563255487 | count | 1 |
| ECHDC1   | -0.3984933 | 0.2708737 | -1.4711 | 0.142   | -0.562913746 | count | 1 |
| METRNL   | -0.4108675 | 0.2504926 | -1.6402 | 0.102   | -0.562638178 | count | 1 |
| RALGAPA1 | -0.4104753 | 0.3971127 | -1.0336 | 0.302   | -0.562106183 | count | 1 |
| FAM120C  | -0.410462  | 0.9618606 | -0.4267 | 0.6698  | -0.562088143 | count | 1 |
| IDH3B    | -0.4316325 | 0.3654231 | -1.1812 | 0.238   | -0.562015918 | count | 1 |
| ASL      | -0.4316176 | 0.8028032 | -0.5376 | 0.5911  | -0.561996888 | count | 1 |
| NEMF     | -0.4021758 | 0.274813  | -1.4635 | 0.144   | -0.560295981 | count | 1 |
| RUBCNL   | -0.4088778 | 0.3467406 | -1.1792 | 0.239   | -0.55993917  | count | 1 |
| PSMB9    | -0.3890768 | 0.122043  | -3.188  | 0.00153 | -0.559122583 | count | 1 |
| ALDH9A1  | -0.4078167 | 0.287495  | -1.4185 | 0.1567  | -0.558499683 | count | 1 |
| NSD1     | -0.4078098 | 0.2609715 | -1.5627 | 0.119   | -0.558490323 | count | 1 |
| ANKS3    | -0.4001388 | 0.7018042 | -0.5702 | 0.5689  | -0.557475789 | count | 1 |
| MCRS1    | -0.4065446 | 0.4398422 | -0.9243 | 0.3558  | -0.556773846 | count | 1 |
| EIF2AK2  | -0.3996318 | 0.2645819 | -1.5104 | 0.132   | -0.556773824 | count | 1 |
| ORMDL2   | -0.4269175 | 0.3176712 | -1.3439 | 0.1797  | -0.555992254 | count | 1 |

|            |            |           |         |          |              |       |          |
|------------|------------|-----------|---------|----------|--------------|-------|----------|
| NDUFAB1    | -0.4046586 | 0.2084627 | -1.9412 | 0.0529   | -0.554214928 | count | 1        |
| DPM3       | -0.4045003 | 0.4129263 | -0.9796 | 0.328    | -0.554000135 | count | 1        |
| AKAP17A    | -0.3969782 | 0.3151212 | -1.2598 | 0.208    | -0.553099581 | count | 1        |
| SHKBP1     | -0.4035039 | 0.2732377 | -1.4768 | 0.1405   | -0.552648106 | count | 1        |
| L3MBTL2    | -0.4032526 | 0.5621298 | -0.7174 | 0.4735   | -0.552307104 | count | 1        |
| HNRNPH3    | -0.3904208 | 0.2119667 | -1.8419 | 0.0662   | -0.551552535 | count | 1        |
| THAP11     | -0.4021016 | 0.3577617 | -1.1239 | 0.2616   | -0.550745187 | count | 1        |
| AC025164.1 | -0.3947217 | 0.2733577 | -1.444  | 0.149    | -0.5499749   | count | 1        |
| JADE1      | -0.4008246 | 0.4404437 | -0.91   | 0.3633   | -0.549012177 | count | 1        |
| TUBE1      | -0.4008246 | 0.5373481 | -0.7459 | 0.456    | -0.549012177 | count | 1        |
| TM9SF2     | -0.4209736 | 0.2812867 | -1.4966 | 0.1352   | -0.548394467 | count | 1        |
| NDUFS2     | -0.3928561 | 0.3867633 | -1.0158 | 0.31     | -0.547391324 | count | 1        |
| NRM        | -0.3922711 | 0.6119168 | -0.6411 | 0.5218   | -0.546581153 | count | 1        |
| HUS1       | -0.419389  | 0.4283923 | -0.979  | 0.3281   | -0.546368179 | count | 1        |
| FCRL2      | -0.3920469 | 0.2942113 | -1.3325 | 0.183    | -0.546270653 | count | 1        |
| RBM33      | -0.398175  | 0.3020353 | -1.3183 | 0.188    | -0.545416045 | count | 1        |
| PSMC3      | -0.418489  | 0.3126443 | -1.3385 | 0.1814   | -0.545217167 | count | 1        |
| NFYC       | -0.3972448 | 0.3904428 | -1.0174 | 0.3095   | -0.544153424 | count | 1        |
| TMEM259    | -0.3968459 | 0.2405034 | -1.6501 | 0.0996   | -0.543611953 | count | 1        |
| RRAGA      | -0.3892526 | 0.3074535 | -1.2661 | 0.206    | -0.542400533 | count | 1        |
| ZBTB6      | -0.3959448 | 0.5901261 | -0.6709 | 0.503    | -0.542388748 | count | 1        |
| IGLC2      | -0.3756561 | 0.1973376 | -1.9036 | 0.0576   | -0.541625182 | count | 1        |
| SNHG15     | -0.3803511 | 0.2736432 | -1.39   | 0.1652   | -0.540572601 | count | 1        |
| NEDD8      | -0.381145  | 0.160813  | -2.3701 | 0.0182   | -0.540358911 | count | 1        |
| METTL23    | -0.3876077 | 0.3242705 | -1.1953 | 0.233    | -0.540122216 | count | 1        |
| PLEKHO1    | -0.3840775 | 0.2025944 | -1.8958 | 0.0586   | -0.539827663 | count | 1        |
| AGFG1      | -0.4142629 | 0.3352079 | -1.2358 | 0.2172   | -0.539811004 | count | 1        |
| ARHGAP9    | -0.3935111 | 0.2946301 | -1.3356 | 0.182    | -0.539084811 | count | 1        |
| AIM2       | -0.3813548 | 0.2026306 | -1.882  | 0.0605   | -0.538790701 | count | 1        |
| FCGRT      | -0.3921606 | 0.3611062 | -1.086  | 0.2781   | -0.537251221 | count | 1        |
| PTPN2      | -0.3788353 | 0.2448407 | -1.5473 | 0.123    | -0.537094083 | count | 1        |
| ATP6V0B    | -0.3821138 | 0.146979  | -2.5998 | 0.0096   | -0.537079915 | count | 1        |
| ARRB2      | -0.3900313 | 0.542801  | -0.7186 | 0.4728   | -0.534359981 | count | 1        |
| UBA6       | -0.3829537 | 0.4137116 | -0.9257 | 0.355    | -0.533675122 | count | 1        |
| IL16       | -0.4084318 | 0.2130132 | -1.9174 | 0.0558   | -0.532347882 | count | 1        |
| MAP1LC3B   | -0.3750931 | 0.1614065 | -2.3239 | 0.0206   | -0.531804088 | count | 1        |
| R3HDM1     | -0.407859  | 0.3474835 | -1.1738 | 0.241    | -0.531614533 | count | 1        |
| MRPS2      | -0.3810684 | 0.5101691 | -0.7469 | 0.4555   | -0.531063174 | count | 1        |
| RPL27A     | -0.3696939 | 0.052047  | -7.1031 | 4.88E-12 | -0.530928381 | count | 1.19E-07 |
| DENR       | -0.3737271 | 0.3126047 | -1.1955 | 0.2325   | -0.529873014 | count | 1        |
| FAM76A     | -0.3746097 | 0.4153676 | -0.9019 | 0.3676   | -0.529294287 | count | 1        |
| MDFIC      | -0.3796167 | 0.3126068 | -1.2144 | 0.225    | -0.529051829 | count | 1        |
| ATG4A      | -0.3860749 | 0.6163307 | -0.6264 | 0.5314   | -0.528986987 | count | 1        |
| SCAMP1     | -0.3795673 | 0.5391693 | -0.704  | 0.4818   | -0.528983383 | count | 1        |
| KIF3B      | -0.4056683 | 0.6467605 | -0.6272 | 0.531    | -0.528809405 | count | 1        |

|           |            |           |         |        |              |       |   |
|-----------|------------|-----------|---------|--------|--------------|-------|---|
| AGL       | -0.4050647 | 0.4456877 | -0.9089 | 0.3639 | -0.528036402 | count | 1 |
| PSMG3     | -0.3851474 | 0.4436505 | -0.8681 | 0.3858 | -0.527727233 | count | 1 |
| LAMTOR4   | -0.3680534 | 0.1525615 | -2.4125 | 0.0162 | -0.526380206 | count | 1 |
| NDUFAF2   | -0.4035187 | 0.3902496 | -1.034  | 0.302  | -0.526056306 | count | 1 |
| AKR1A1    | -0.3761641 | 0.2406742 | -1.563  | 0.119  | -0.524267806 | count | 1 |
| BABAM1    | -0.4005914 | 0.2644984 | -1.5145 | 0.1306 | -0.522306218 | count | 1 |
| TMPO      | -0.3709549 | 0.2211063 | -1.6777 | 0.0941 | -0.521462862 | count | 1 |
| ZDHHC21   | -0.3800775 | 0.3820423 | -0.9949 | 0.3203 | -0.520840098 | count | 1 |
| RNF7      | -0.3643175 | 0.1910107 | -1.9073 | 0.0571 | -0.520634751 | count | 1 |
| FYN       | -0.398873  | 0.5739693 | -0.6949 | 0.487  | -0.520104311 | count | 1 |
| PIGK      | -0.3789089 | 0.6198574 | -0.6113 | 0.5413 | -0.519252372 | count | 1 |
| GNPNAT1   | -0.3789089 | 0.7251621 | -0.5225 | 0.602  | -0.519252372 | count | 1 |
| SIRT1     | -0.3980342 | 0.4291166 | -0.9276 | 0.3541 | -0.519029363 | count | 1 |
| HMGA1     | -0.3691269 | 0.2232734 | -1.6533 | 0.099  | -0.518904107 | count | 1 |
| PPP1R2    | -0.3671994 | 0.1586399 | -2.3147 | 0.0211 | -0.518859762 | count | 1 |
| MRPL42    | -0.3784419 | 0.2948424 | -1.2835 | 0.2    | -0.518617854 | count | 1 |
| DMAP1     | -0.37705   | 0.3560111 | -1.0591 | 0.29   | -0.516726572 | count | 1 |
| CLPTM1L   | -0.3766869 | 0.4862739 | -0.7746 | 0.439  | -0.516233176 | count | 1 |
| SLC25A4   | -0.3745455 | 0.3790971 | -0.988  | 0.324  | -0.51332317  | count | 1 |
| DHPS      | -0.3742149 | 0.2202132 | -1.6993 | 0.09   | -0.512873879 | count | 1 |
| TFRC      | -0.3931652 | 0.3234251 | -1.2156 | 0.225  | -0.512787809 | count | 1 |
| MFAP1     | -0.3675418 | 0.2932576 | -1.2533 | 0.211  | -0.512317971 | count | 1 |
| BIN1      | -0.3737763 | 0.2043281 | -1.8293 | 0.068  | -0.512277805 | count | 1 |
| LARP1B    | -0.3734736 | 0.6122037 | -0.61   | 0.5421 | -0.511866415 | count | 1 |
| PQLC1     | -0.372785  | 0.3713728 | -1.0038 | 0.316  | -0.510930537 | count | 1 |
| TRMT1     | -0.372785  | 0.3766999 | -0.9896 | 0.323  | -0.510930537 | count | 1 |
| ALDOA     | -0.3727258 | 0.5044442 | -0.7389 | 0.4604 | -0.510850077 | count | 1 |
| TNFSF12   | -0.3632926 | 0.2262245 | -1.6059 | 0.109  | -0.510736686 | count | 1 |
| GOLGA4    | -0.3903272 | 0.2375272 | -1.6433 | 0.101  | -0.509148401 | count | 1 |
| PLSCR1    | -0.3710545 | 0.3351859 | -1.107  | 0.269  | -0.508578467 | count | 1 |
| ORMDL3    | -0.3885303 | 0.4650923 | -0.8354 | 0.404  | -0.506843557 | count | 1 |
| MAF1      | -0.3598325 | 0.2145963 | -1.6768 | 0.0943 | -0.50589231  | count | 1 |
| S100A6    | -0.3522236 | 0.111269  | -3.1655 | 0.0016 | -0.504105995 | count | 1 |
| NIPSNAP3B | -0.3860749 | 0.7338041 | -0.5261 | 0.5991 | -0.503693416 | count | 1 |
| KLHL22    | -0.3860749 | 0.8493135 | -0.4546 | 0.6496 | -0.503693416 | count | 1 |
| GPATCH11  | -0.3605622 | 0.3426314 | -1.0523 | 0.293  | -0.502642167 | count | 1 |
| EI24      | -0.3847987 | 0.5969158 | -0.6446 | 0.5195 | -0.50205582  | count | 1 |
| PRELID1   | -0.3518298 | 0.1449    | -2.4281 | 0.0156 | -0.500131567 | count | 1 |
| C20orf27  | -0.3832671 | 0.3708302 | -1.0335 | 0.3019 | -0.500090229 | count | 1 |
| SRSF8     | -0.358547  | 0.3095132 | -1.1584 | 0.247  | -0.499848067 | count | 1 |
| CDKN1B    | -0.3533186 | 0.1652901 | -2.1376 | 0.0331 | -0.499309659 | count | 1 |
| PTGER4    | -0.3550708 | 0.5745959 | -0.6179 | 0.5369 | -0.499224893 | count | 1 |
| NR1D2     | -0.3629951 | 0.375342  | -0.9671 | 0.334  | -0.497621507 | count | 1 |
| ECE1      | -0.3629474 | 0.5392991 | -0.673  | 0.501  | -0.497556644 | count | 1 |
| DTNBP1    | -0.3620966 | 0.3309651 | -1.0941 | 0.2745 | -0.496399695 | count | 1 |

|            |            |           |         |        |              |       |   |
|------------|------------|-----------|---------|--------|--------------|-------|---|
| PPP1R14B   | -0.3802043 | 0.1933819 | -1.9661 | 0.0499 | -0.49615868  | count | 1 |
| METTL9     | -0.3800558 | 0.235241  | -1.6156 | 0.1069 | -0.495968028 | count | 1 |
| PET100     | -0.3608259 | 0.2343739 | -1.5395 | 0.1244 | -0.494671656 | count | 1 |
| PSAP       | -0.3603557 | 0.2670776 | -1.3493 | 0.178  | -0.494032198 | count | 1 |
| ATP5F1A    | -0.3491837 | 0.1698635 | -2.0557 | 0.0404 | -0.493484855 | count | 1 |
| ABT1       | -0.3778702 | 0.2651515 | -1.4251 | 0.1548 | -0.493161733 | count | 1 |
| TMEM131L   | -0.3533308 | 0.3287923 | -1.0746 | 0.283  | -0.492614839 | count | 1 |
| RIOK1      | -0.3455172 | 0.3305805 | -1.0452 | 0.2965 | -0.492078798 | count | 1 |
| S1PR4      | -0.3437029 | 0.3055429 | -1.1249 | 0.261  | -0.490758485 | count | 1 |
| IDNK       | -0.3578538 | 0.5363741 | -0.6672 | 0.505  | -0.490629433 | count | 1 |
| ARL6IP1    | -0.3576128 | 0.2413704 | -1.4816 | 0.139  | -0.490301632 | count | 1 |
| RAC1       | -0.3428673 | 0.1494918 | -2.2936 | 0.0223 | -0.490025216 | count | 1 |
| IRF7       | -0.3442215 | 0.2965583 | -1.1607 | 0.2464 | -0.489340636 | count | 1 |
| FIBP       | -0.3451151 | 0.3141847 | -1.0984 | 0.2726 | -0.487752957 | count | 1 |
| ANP32B     | -0.3401688 | 0.1320706 | -2.5757 | 0.0103 | -0.486873874 | count | 1 |
| CLK3       | -0.3729139 | 0.3146059 | -1.1853 | 0.2365 | -0.486795669 | count | 1 |
| KLF9       | -0.3533348 | 0.3030085 | -1.1661 | 0.244  | -0.484482175 | count | 1 |
| LCOR       | -0.3705343 | 0.4089208 | -0.9061 | 0.365  | -0.483738134 | count | 1 |
| LAMTOR2    | -0.3527626 | 0.2980272 | -1.1837 | 0.237  | -0.483703703 | count | 1 |
| SYPL1      | -0.3374008 | 0.1315387 | -2.565  | 0.0106 | -0.482916832 | count | 1 |
| PHB2       | -0.3383058 | 0.1651108 | -2.049  | 0.0411 | -0.481828324 | count | 1 |
| CHMP4B     | -0.3451865 | 0.337832  | -1.0218 | 0.3074 | -0.481318683 | count | 1 |
| COMMD7     | -0.3451865 | 0.3701074 | -0.9327 | 0.351  | -0.481318683 | count | 1 |
| SHISAL2A   | -0.3422565 | 0.2755703 | -1.242  | 0.215  | -0.481277997 | count | 1 |
| GABPB1-AS1 | -0.3681487 | 0.2455467 | -1.4993 | 0.135  | -0.480672183 | count | 1 |
| BRD7       | -0.3432388 | 0.244548  | -1.4036 | 0.161  | -0.478616757 | count | 1 |
| EPST1      | -0.3381227 | 0.3302949 | -1.0237 | 0.3065 | -0.477900849 | count | 1 |
| ACBD3      | -0.3425237 | 0.2648285 | -1.2934 | 0.197  | -0.477624698 | count | 1 |
| KIAA1551   | -0.3645112 | 0.1346874 | -2.7063 | 0.0071 | -0.475995945 | count | 1 |
| SERPINB1   | -0.3405878 | 0.1861644 | -1.8295 | 0.068  | -0.474938901 | count | 1 |
| LDHA       | -0.334313  | 0.1630644 | -2.0502 | 0.0409 | -0.474134476 | count | 1 |
| CEP350     | -0.3456219 | 0.2879207 | -1.2004 | 0.2306 | -0.473986988 | count | 1 |
| FGFR10P2   | -0.3363104 | 0.198994  | -1.6901 | 0.0917 | -0.472948264 | count | 1 |
| LRRRC41    | -0.361996  | 0.6118061 | -0.5917 | 0.5544 | -0.472761543 | count | 1 |
| OGT        | -0.3356481 | 0.3006944 | -1.1162 | 0.265  | -0.472020387 | count | 1 |
| DCTN3      | -0.3332207 | 0.2266196 | -1.4704 | 0.142  | -0.470993217 | count | 1 |
| MCAT       | -0.3377254 | 0.7777077 | -0.4343 | 0.6643 | -0.470967389 | count | 1 |
| MEPCE      | -0.3345937 | 0.3923149 | -0.8529 | 0.394  | -0.470543149 | count | 1 |
| FAM110A    | -0.3365171 | 0.6910949 | -0.4869 | 0.6266 | -0.469290788 | count | 1 |
| NDUFB9     | -0.3592386 | 0.1906564 | -1.8842 | 0.0602 | -0.469214786 | count | 1 |
| NAGK       | -0.3313351 | 0.2424217 | -1.3668 | 0.1724 | -0.468335947 | count | 1 |
| RNPEPL1    | -0.3357278 | 0.2851687 | -1.1773 | 0.24   | -0.46819554  | count | 1 |
| NUDT21     | -0.3394582 | 0.396358  | -0.8564 | 0.392  | -0.465596945 | count | 1 |
| CSDE1      | -0.3558376 | 0.1825812 | -1.9489 | 0.0519 | -0.464838904 | count | 1 |
| MRPS18C    | -0.3287966 | 0.3135091 | -1.0488 | 0.295  | -0.464758422 | count | 1 |

|          |            |           |         |          |              |       |   |
|----------|------------|-----------|---------|----------|--------------|-------|---|
| AIDA     | -0.3378389 | 0.2771245 | -1.2191 | 0.2235   | -0.463392324 | count | 1 |
| MRPL11   | -0.3545599 | 0.2747076 | -1.2907 | 0.197    | -0.463194588 | count | 1 |
| DBNL     | -0.3264407 | 0.23763   | -1.3737 | 0.1702   | -0.462997096 | count | 1 |
| H1FX     | -0.3254285 | 0.4879792 | -0.6669 | 0.5052   | -0.462681124 | count | 1 |
| BLK      | -0.3264072 | 0.1739838 | -1.8761 | 0.0613   | -0.459072342 | count | 1 |
| BST2     | -0.3242992 | 0.1869234 | -1.7349 | 0.0834   | -0.458419753 | count | 1 |
| HSPA8    | -0.3187809 | 0.0901817 | -3.5349 | 5.00E-04 | -0.458159547 | count | 1 |
| POLR2F   | -0.3283252 | 0.3184044 | -1.0312 | 0.303    | -0.457922157 | count | 1 |
| LY9      | -0.3231406 | 0.2505173 | -1.2899 | 0.198    | -0.45678672  | count | 1 |
| EXOC1    | -0.3495294 | 0.4519074 | -0.7735 | 0.4397   | -0.456718739 | count | 1 |
| RASGRP3  | -0.349014  | 0.389774  | -0.8954 | 0.371    | -0.456055079 | count | 1 |
| DCAF5    | -0.3484521 | 0.4557507 | -0.7646 | 0.4449   | -0.45533151  | count | 1 |
| GDI2     | -0.3483896 | 0.2160427 | -1.6126 | 0.108    | -0.455251024 | count | 1 |
| ISG20    | -0.3172507 | 0.122404  | -2.5918 | 0.0099   | -0.455235108 | count | 1 |
| GPSM3    | -0.3183603 | 0.1141931 | -2.7879 | 0.0055   | -0.454112113 | count | 1 |
| UBL7     | -0.320122  | 0.4112271 | -0.7785 | 0.4367   | -0.454056605 | count | 1 |
| UQCRH    | -0.3148263 | 0.0976367 | -3.2245 | 0.00136  | -0.452650256 | count | 1 |
| SFT2D2   | -0.3238107 | 0.4010201 | -0.8075 | 0.42     | -0.451655656 | count | 1 |
| CSNK1A1  | -0.3176123 | 0.1583702 | -2.0055 | 0.0455   | -0.451591009 | count | 1 |
| CAMLG    | -0.3187891 | 0.2383015 | -1.3378 | 0.182    | -0.450652994 | count | 1 |
| SCAND1   | -0.3445683 | 0.1952305 | -1.7649 | 0.0783   | -0.450329207 | count | 1 |
| RBBP7    | -0.3436809 | 0.2460116 | -1.397  | 0.1631   | -0.449185988 | count | 1 |
| NIT2     | -0.3434374 | 0.3937189 | -0.8723 | 0.3835   | -0.448872276 | count | 1 |
| RCC2     | -0.3270983 | 0.4340746 | -0.7536 | 0.4515   | -0.448764917 | count | 1 |
| TSPAN31  | -0.3269279 | 0.3655235 | -0.8944 | 0.3716   | -0.448532791 | count | 1 |
| PGLS     | -0.3156546 | 0.1693427 | -1.864  | 0.063    | -0.447734993 | count | 1 |
| SHISA5   | -0.3420077 | 0.360896  | -0.9477 | 0.344    | -0.44703018  | count | 1 |
| ZNF32    | -0.3253225 | 0.4012451 | -0.8108 | 0.4179   | -0.44634575  | count | 1 |
| LSM6     | -0.3250796 | 0.2266097 | -1.4345 | 0.1521   | -0.44601483  | count | 1 |
| COA1     | -0.3240298 | 0.3223797 | -1.0051 | 0.315    | -0.444584574 | count | 1 |
| GRN      | -0.322569  | 0.2428753 | -1.3281 | 0.185    | -0.442594249 | count | 1 |
| CYTOR    | -0.3384013 | 0.2811925 | -1.2035 | 0.2294   | -0.442382416 | count | 1 |
| IL18BP   | -0.3207769 | 0.5406437 | -0.5933 | 0.553    | -0.440152334 | count | 1 |
| ARHGAP15 | -0.3151773 | 0.2268761 | -1.3892 | 0.165    | -0.439669177 | count | 1 |
| TACC3    | -0.3195027 | 0.6651108 | -0.4804 | 0.631    | -0.438415982 | count | 1 |
| MAP3K13  | -0.3097353 | 0.2993032 | -1.0349 | 0.3013   | -0.437889351 | count | 1 |
| GSPT1    | -0.3344608 | 0.1948812 | -1.7162 | 0.0868   | -0.43730229  | count | 1 |
| UBE2G2   | -0.3338072 | 0.3394074 | -0.9835 | 0.3259   | -0.436459482 | count | 1 |
| APPL1    | -0.3173401 | 0.1689351 | -1.8785 | 0.061    | -0.435468762 | count | 1 |
| EMD      | -0.3172483 | 0.2372723 | -1.3371 | 0.182    | -0.43534365  | count | 1 |
| REEP5    | -0.3045589 | 0.1885074 | -1.6156 | 0.1069   | -0.434943448 | count | 1 |
| ZC3H18   | -0.3161935 | 0.4263193 | -0.7417 | 0.459    | -0.433906035 | count | 1 |
| GLB1     | -0.3160301 | 0.5441593 | -0.5808 | 0.5617   | -0.433683327 | count | 1 |
| ZNF428   | -0.3156437 | 0.29056   | -1.0863 | 0.2779   | -0.43315667  | count | 1 |
| SC5D     | -0.3311519 | 0.4942374 | -0.67   | 0.503    | -0.433034985 | count | 1 |

|            |            |           |         |        |              |       |   |
|------------|------------|-----------|---------|--------|--------------|-------|---|
| DRAM2      | -0.3103519 | 0.1938524 | -1.601  | 0.11   | -0.432968186 | count | 1 |
| ATF6B      | -0.3152859 | 0.4001128 | -0.788  | 0.4311 | -0.432668985 | count | 1 |
| ICAM3      | -0.3049819 | 0.1604545 | -1.9007 | 0.058  | -0.432630638 | count | 1 |
| BIRC6      | -0.305927  | 0.3198817 | -0.9564 | 0.339  | -0.432519894 | count | 1 |
| GTF2I      | -0.3145034 | 0.2786543 | -1.1287 | 0.26   | -0.431602402 | count | 1 |
| IGHA1      | -0.3000451 | 0.1316383 | -2.2793 | 0.0231 | -0.43096359  | count | 1 |
| TAF8       | -0.3294823 | 0.5137491 | -0.6413 | 0.5216 | -0.4308813   | count | 1 |
| DNAJC10    | -0.3127217 | 0.2229525 | -1.4026 | 0.161  | -0.429173712 | count | 1 |
| MTERF4     | -0.3126981 | 0.2383516 | -1.3119 | 0.19   | -0.429141543 | count | 1 |
| SERINC1    | -0.3124321 | 0.3105591 | -1.006  | 0.315  | -0.428778932 | count | 1 |
| URI1       | -0.3123383 | 0.2478446 | -1.2602 | 0.208  | -0.428651062 | count | 1 |
| PRRC2B     | -0.3069233 | 0.4373679 | -0.7018 | 0.483  | -0.428206278 | count | 1 |
| PDE4B      | -0.3028131 | 0.1844006 | -1.6421 | 0.101  | -0.428129194 | count | 1 |
| DGKZ       | -0.3270983 | 0.580984  | -0.563  | 0.5737 | -0.427805502 | count | 1 |
| SND1       | -0.3014755 | 0.2976735 | -1.0128 | 0.3117 | -0.427667683 | count | 1 |
| TAZ        | -0.3058359 | 0.3935513 | -0.7771 | 0.4375 | -0.426695902 | count | 1 |
| RAB35      | -0.3103431 | 0.6475915 | -0.4792 | 0.632  | -0.425931049 | count | 1 |
| WASF2      | -0.300192  | 0.1732949 | -1.7323 | 0.0839 | -0.425850946 | count | 1 |
| YY1        | -0.2993607 | 0.1456672 | -2.0551 | 0.0405 | -0.425689646 | count | 1 |
| TMEM120B   | -0.3252197 | 0.3591276 | -0.9056 | 0.3656 | -0.425381287 | count | 1 |
| MPHOSPH8   | -0.2975232 | 0.1577127 | -1.8865 | 0.0599 | -0.42443369  | count | 1 |
| CDC40      | -0.324266  | 0.1659999 | -1.9534 | 0.0514 | -0.424150433 | count | 1 |
| MRPS34     | -0.2997373 | 0.2150059 | -1.3941 | 0.164  | -0.423791952 | count | 1 |
| ATP5MC2    | -0.2940643 | 0.0899737 | -3.2683 | 0.0012 | -0.422526836 | count | 1 |
| TFEB       | -0.296914  | 0.2872296 | -1.0337 | 0.3018 | -0.422216955 | count | 1 |
| MINDY2     | -0.3070106 | 0.5039853 | -0.6092 | 0.543  | -0.42138734  | count | 1 |
| STK11      | -0.3019424 | 0.4930473 | -0.6124 | 0.541  | -0.421287471 | count | 1 |
| GRB2       | -0.2935892 | 0.1256744 | -2.3361 | 0.0199 | -0.421042251 | count | 1 |
| AL392172.1 | -0.3066304 | 0.4299187 | -0.7132 | 0.4761 | -0.420868909 | count | 1 |
| C19orf38   | -0.305883  | 0.6839195 | -0.4473 | 0.6549 | -0.419849746 | count | 1 |
| FAM136A    | -0.3058135 | 0.3956732 | -0.7729 | 0.44   | -0.419754975 | count | 1 |
| CSNK2A2    | -0.3055104 | 0.3173756 | -0.9626 | 0.3363 | -0.419341651 | count | 1 |
| NDUFAF8    | -0.2977172 | 0.2356521 | -1.2634 | 0.207  | -0.418853823 | count | 1 |
| SCAF4      | -0.2974853 | 0.4600364 | -0.6467 | 0.5182 | -0.418528623 | count | 1 |
| STAT3      | -0.3046064 | 0.2226258 | -1.3682 | 0.172  | -0.418108878 | count | 1 |
| UTRN       | -0.2970758 | 0.2754057 | -1.0787 | 0.281  | -0.417954364 | count | 1 |
| SHPRH      | -0.3044552 | 0.3499385 | -0.87   | 0.385  | -0.417902682 | count | 1 |
| TSPAN3     | -0.2981108 | 0.1882035 | -1.584  | 0.114  | -0.41596436  | count | 1 |
| ARMC10     | -0.3179125 | 0.4845755 | -0.6561 | 0.512  | -0.415947816 | count | 1 |
| NUDT1      | -0.3028872 | 0.2764778 | -1.0955 | 0.274  | -0.415764278 | count | 1 |
| RASGRP2    | -0.2977819 | 0.2569288 | -1.159  | 0.247  | -0.4155074   | count | 1 |
| MSN        | -0.3162574 | 0.1705751 | -1.8541 | 0.0644 | -0.413810233 | count | 1 |
| DUSP23     | -0.2955737 | 0.4082947 | -0.7239 | 0.4695 | -0.412439293 | count | 1 |
| SOD1       | -0.2875786 | 0.1159084 | -2.4811 | 0.0135 | -0.411905569 | count | 1 |
| TYMP       | -0.2907294 | 0.2014902 | -1.4429 | 0.15   | -0.411088244 | count | 1 |



|            |            |           |         |          |              |       |            |
|------------|------------|-----------|---------|----------|--------------|-------|------------|
| CCDC138    | -0.294281  | 0.6573608 | -0.4477 | 0.6546   | -0.410643095 | count | 1          |
| PLCL2      | -0.3132338 | 0.4162178 | -0.7526 | 0.452    | -0.409904376 | count | 1          |
| NAA16      | -0.2935436 | 0.5530918 | -0.5307 | 0.5959   | -0.40961845  | count | 1          |
| PNKD       | -0.2934571 | 0.306666  | -0.9569 | 0.339    | -0.409498253 | count | 1          |
| HP1BP3     | -0.2878449 | 0.1689581 | -1.7036 | 0.0891   | -0.408372233 | count | 1          |
| TENT2      | -0.3117728 | 0.4461749 | -0.6988 | 0.4851   | -0.408016687 | count | 1          |
| MIDN       | -0.2971294 | 0.1914881 | -1.5517 | 0.121    | -0.407910544 | count | 1          |
| CD48       | -0.2831524 | 0.0856283 | -3.3068 | 0.00102  | -0.406855912 | count | 1          |
| FBP1       | -0.2888167 | 0.8064295 | -0.3581 | 0.7204   | -0.406371076 | count | 1          |
| RARS       | -0.2956769 | 0.5769944 | -0.5124 | 0.609    | -0.405928972 | count | 1          |
| FTL        | -0.281604  | 0.0495139 | -5.6874 | 2.34E-08 | -0.40585417  | count | 0.00056869 |
| PMPEA1     | -0.2947769 | 0.399813  | -0.7373 | 0.461    | -0.404701078 | count | 1          |
| EIF4A1     | -0.2876136 | 0.1985995 | -1.4482 | 0.148    | -0.40468355  | count | 1          |
| SAT1       | -0.2814461 | 0.0984224 | -2.8596 | 0.0044   | -0.403998572 | count | 1          |
| ACSL4      | -0.3081277 | 0.4588172 | -0.6716 | 0.5022   | -0.403305934 | count | 1          |
| CCDC25     | -0.3076658 | 0.3085648 | -0.9971 | 0.3193   | -0.402708884 | count | 1          |
| OSER1      | -0.2856746 | 0.1807716 | -1.5803 | 0.115    | -0.401963712 | count | 1          |
| PDCD2      | -0.2876167 | 0.2552155 | -1.127  | 0.26     | -0.401381916 | count | 1          |
| CAPN12     | -0.291742  | 0.4984059 | -0.5854 | 0.559    | -0.400560103 | count | 1          |
| NDUFA4     | -0.2813325 | 0.113471  | -2.4793 | 0.0135   | -0.400098765 | count | 1          |
| RAB5C      | -0.2911576 | 0.2611868 | -1.1147 | 0.2656   | -0.39976265  | count | 1          |
| XRN1       | -0.2814898 | 0.2864545 | -0.9827 | 0.3263   | -0.399374506 | count | 1          |
| PSMA3-AS1  | -0.3046263 | 0.2938573 | -1.0366 | 0.3005   | -0.398779428 | count | 1          |
| RPS27L     | -0.2789848 | 0.1716532 | -1.6253 | 0.1048   | -0.398465744 | count | 1          |
| PLEKHA3    | -0.2852972 | 0.2840603 | -1.0044 | 0.316    | -0.398158114 | count | 1          |
| PSMB8      | -0.2780994 | 0.1641512 | -1.6942 | 0.0909   | -0.397202687 | count | 1          |
| DDX39B     | -0.2819048 | 0.3080597 | -0.9151 | 0.361    | -0.396675446 | count | 1          |
| BTBD9      | -0.2888167 | 0.8879508 | -0.3253 | 0.7451   | -0.396568115 | count | 1          |
| VPS35L     | -0.2888167 | 0.9332235 | -0.3095 | 0.7571   | -0.396568115 | count | 1          |
| AC010226.1 | -0.28037   | 0.4888254 | -0.5736 | 0.5666   | -0.396475787 | count | 1          |
| PNPLA8     | -0.280256  | 0.2056101 | -1.363  | 0.174    | -0.396314968 | count | 1          |
| STX16      | -0.2885654 | 0.584845  | -0.4934 | 0.622    | -0.396225155 | count | 1          |
| PPP1R15B   | -0.288423  | 0.3764617 | -0.7661 | 0.444    | -0.396030813 | count | 1          |
| CPNE1      | -0.2832399 | 0.2853746 | -0.9925 | 0.321    | -0.39529854  | count | 1          |
| CARS2      | -0.3016233 | 0.4082053 | -0.7389 | 0.4604   | -0.394896097 | count | 1          |
| CALM1      | -0.2740412 | 0.0742169 | -3.6924 | 0.00025  | -0.394388447 | count | 1          |
| NDUFB10    | -0.2758191 | 0.1920678 | -1.4361 | 0.1517   | -0.394307595 | count | 1          |
| LBR        | -0.282415  | 0.2849975 | -0.9909 | 0.322    | -0.394151904 | count | 1          |
| WAC        | -0.2787185 | 0.2128389 | -1.3095 | 0.191    | -0.394145993 | count | 1          |
| TTC3       | -0.2861332 | 0.2659394 | -1.0759 | 0.283    | -0.392905614 | count | 1          |
| CASP8AP2   | -0.2858207 | 0.4346362 | -0.6576 | 0.511    | -0.392479077 | count | 1          |
| SLC2A11    | -0.2852258 | 0.4683561 | -0.609  | 0.5428   | -0.39166707  | count | 1          |
| SMCHD1     | -0.275124  | 0.1376399 | -1.9989 | 0.0462   | -0.391284366 | count | 1          |
| SPRYD7     | -0.2977372 | 0.4639961 | -0.6417 | 0.5214   | -0.389869228 | count | 1          |
| NHLRC2     | -0.2829371 | 0.6021445 | -0.4699 | 0.6387   | -0.388542907 | count | 1          |

|            |            |           |         |          |              |       |          |
|------------|------------|-----------|---------|----------|--------------|-------|----------|
| POLR2H     | -0.282896  | 0.3829465 | -0.7387 | 0.4605   | -0.3884868   | count | 1        |
| ODC1       | -0.2735247 | 0.1571402 | -1.7406 | 0.0824   | -0.388095996 | count | 1        |
| ADRM1      | -0.2729674 | 0.1889237 | -1.4449 | 0.1492   | -0.387306811 | count | 1        |
| BCL11A     | -0.2738406 | 0.1846223 | -1.4832 | 0.139    | -0.387264242 | count | 1        |
| SAFB       | -0.2819953 | 0.2597534 | -1.0856 | 0.2782   | -0.387257217 | count | 1        |
| ATP5PO     | -0.2699657 | 0.1394209 | -1.9363 | 0.0535   | -0.387186942 | count | 1        |
| KBTBD3     | -0.2814294 | 0.5140985 | -0.5474 | 0.584    | -0.386484656 | count | 1        |
| IMP4       | -0.2945421 | 0.288671  | -1.0203 | 0.3081   | -0.385734895 | count | 1        |
| LTB        | -0.267245  | 0.0938646 | -2.8471 | 0.00462  | -0.384948645 | count | 1        |
| CXCR4      | -0.2685359 | 0.0875127 | -3.0685 | 0.0023   | -0.384442302 | count | 1        |
| ZBTB21     | -0.2794368 | 0.4070857 | -0.6864 | 0.493    | -0.38376422  | count | 1        |
| SOD2       | -0.2706521 | 0.3149889 | -0.8592 | 0.3907   | -0.382765553 | count | 1        |
| SMARCD1    | -0.2781665 | 0.2909894 | -0.9559 | 0.3396   | -0.382029785 | count | 1        |
| MT-ATP6    | -0.2646141 | 0.0438657 | -6.0324 | 3.41E-09 | -0.381119908 | count | 8.29E-05 |
| JTB        | -0.2678962 | 0.1659805 | -1.614  | 0.107    | -0.380125226 | count | 1        |
| PPP4R3A    | -0.2716913 | 0.2562331 | -1.0603 | 0.29     | -0.379242941 | count | 1        |
| CDV3       | -0.2656913 | 0.1414869 | -1.8779 | 0.0611   | -0.379082221 | count | 1        |
| ATP6V0D1   | -0.2756328 | 0.2334319 | -1.1808 | 0.2383   | -0.378570034 | count | 1        |
| BORCS8     | -0.2748521 | 0.443571  | -0.6196 | 0.5358   | -0.377503911 | count | 1        |
| AC010642.2 | -0.2748521 | 0.4798953 | -0.5727 | 0.567    | -0.377503911 | count | 1        |
| ILF3       | -0.270172  | 0.2321529 | -1.1638 | 0.245    | -0.377130282 | count | 1        |
| DUSP4      | -0.2729839 | 0.5639001 | -0.4841 | 0.629    | -0.374952543 | count | 1        |
| PDIA3      | -0.2635208 | 0.1407436 | -1.8723 | 0.0618   | -0.374808936 | count | 1        |
| RBM17      | -0.2683983 | 0.2269756 | -1.1825 | 0.238    | -0.374663738 | count | 1        |
| CD79B      | -0.2613614 | 0.1542792 | -1.6941 | 0.091    | -0.374180051 | count | 1        |
| MRPL57     | -0.2679979 | 0.2626064 | -1.0205 | 0.308    | -0.374106916 | count | 1        |
| HLA-DRB5   | -0.2590212 | 0.0657006 | -3.9425 | 9.37E-05 | -0.37270657  | count | 1        |
| GTF2E2     | -0.2627749 | 0.290439  | -0.9048 | 0.3661   | -0.371650361 | count | 1        |
| AES        | -0.2592619 | 0.1458807 | -1.7772 | 0.0762   | -0.371379624 | count | 1        |
| RPL13A     | -0.2576239 | 0.0366917 | -7.0213 | 8.29E-12 | -0.371297431 | count | 2.02E-07 |
| HMG1       | -0.2624349 | 0.1020958 | -2.5705 | 0.0105   | -0.371170565 | count | 1        |
| PSMD8      | -0.261505  | 0.1561785 | -1.6744 | 0.0948   | -0.371073502 | count | 1        |
| BRK1       | -0.2613049 | 0.1626592 | -1.6065 | 0.109    | -0.369575922 | count | 1        |
| MRPS5      | -0.2646684 | 0.326039  | -0.8118 | 0.417    | -0.369476423 | count | 1        |
| NOC3L      | -0.2689422 | 0.3979998 | -0.6757 | 0.5      | -0.369432118 | count | 1        |
| USE1       | -0.2644539 | 0.4635681 | -0.5705 | 0.569    | -0.369178091 | count | 1        |
| XPA        | -0.2643692 | 0.3145694 | -0.8404 | 0.401    | -0.369060287 | count | 1        |
| MKNK1      | -0.2637625 | 0.6605418 | -0.3993 | 0.6899   | -0.368216462 | count | 1        |
| GMFG       | -0.2806301 | 0.1676193 | -1.6742 | 0.0948   | -0.367719607 | count | 1        |
| ALOX5AP    | -0.2599834 | 0.1729803 | -1.503  | 0.134    | -0.367710994 | count | 1        |
| CD52       | -0.2543381 | 0.0675444 | -3.7655 | 0.000189 | -0.366228577 | count | 1        |
| UBE2L6     | -0.2622583 | 0.2671634 | -0.9816 | 0.327    | -0.366124284 | count | 1        |
| ZNHIT3     | -0.2622539 | 0.2354852 | -1.1137 | 0.266    | -0.366118164 | count | 1        |
| RRBP1      | -0.2664154 | 0.5590161 | -0.4766 | 0.6339   | -0.365980324 | count | 1        |
| FUT8       | -0.2621166 | 0.3249397 | -0.8067 | 0.42     | -0.36592719  | count | 1        |

|              |            |           |         |         |              |       |   |
|--------------|------------|-----------|---------|---------|--------------|-------|---|
| PSMA7        | -0.2555087 | 0.1201669 | -2.1263 | 0.034   | -0.365808073 | count | 1 |
| TIGD3        | -0.2661078 | 0.5746135 | -0.4631 | 0.6435  | -0.365560092 | count | 1 |
| MZF1-AS1     | -0.2661078 | 0.7758315 | -0.343  | 0.7318  | -0.365560092 | count | 1 |
| C12orf10     | -0.2617449 | 0.3552462 | -0.7368 | 0.462   | -0.365410178 | count | 1 |
| TTC9         | -0.2657922 | 0.4539231 | -0.5855 | 0.5585  | -0.365128925 | count | 1 |
| HSP90AA1     | -0.2547046 | 0.0965061 | -2.6393 | 0.0086  | -0.364657824 | count | 1 |
| RAB14        | -0.2549891 | 0.2121684 | -1.2018 | 0.2301  | -0.364559104 | count | 1 |
| TP53TG1      | -0.2653028 | 0.3668395 | -0.7232 | 0.47    | -0.364460304 | count | 1 |
| GSDMD        | -0.256911  | 0.2605403 | -0.9861 | 0.325   | -0.363374982 | count | 1 |
| CYB561A3     | -0.2600171 | 0.2483914 | -1.0468 | 0.296   | -0.36300684  | count | 1 |
| PLEKHJ1      | -0.2636829 | 0.266004  | -0.9913 | 0.3221  | -0.36224708  | count | 1 |
| STAMPB       | -0.2552101 | 0.4023762 | -0.6343 | 0.5262  | -0.362157275 | count | 1 |
| HSPD1        | -0.2572518 | 0.1474008 | -1.7453 | 0.0816  | -0.362080614 | count | 1 |
| TSPAN13      | -0.25502   | 0.324914  | -0.7849 | 0.4329  | -0.361887999 | count | 1 |
| MAP2K2       | -0.2570024 | 0.1739115 | -1.4778 | 0.14    | -0.361730535 | count | 1 |
| PEX16        | -0.2588096 | 0.3604053 | -0.7181 | 0.4731  | -0.361327153 | count | 1 |
| SYNCRIP      | -0.2561083 | 0.2125445 | -1.205  | 0.229   | -0.360475487 | count | 1 |
| PHPT1        | -0.254638  | 0.2885335 | -0.8825 | 0.378   | -0.358411571 | count | 1 |
| CCDC186      | -0.254638  | 0.2889372 | -0.8813 | 0.379   | -0.358411571 | count | 1 |
| TOMM40       | -0.2566484 | 0.3884921 | -0.6606 | 0.509   | -0.358320671 | count | 1 |
| TSPYL2       | -0.2605718 | 0.2965577 | -0.8787 | 0.38    | -0.357996012 | count | 1 |
| SF3B3        | -0.2729839 | 0.616752  | -0.4426 | 0.6583  | -0.35780878  | count | 1 |
| LINC00996    | -0.2729839 | 0.7963383 | -0.3428 | 0.732   | -0.35780878  | count | 1 |
| HSPH1        | -0.2556358 | 0.2719849 | -0.9399 | 0.348   | -0.356911957 | count | 1 |
| TMEM160      | -0.2518249 | 0.1915773 | -1.3145 | 0.189   | -0.356196532 | count | 1 |
| VPS29        | -0.2716135 | 0.2329587 | -1.1659 | 0.244   | -0.356031796 | count | 1 |
| NORAD        | -0.2708864 | 0.2771204 | -0.9775 | 0.329   | -0.35508889  | count | 1 |
| SIT1         | -0.2707271 | 0.2190878 | -1.2357 | 0.2172  | -0.354882299 | count | 1 |
| NFKB2        | -0.2706443 | 0.2673381 | -1.0124 | 0.312   | -0.354774919 | count | 1 |
| PSMD13       | -0.2580452 | 0.2436502 | -1.0591 | 0.29    | -0.354543175 | count | 1 |
| RECQL        | -0.2575167 | 0.2634191 | -0.9776 | 0.3288  | -0.353820879 | count | 1 |
| RSRP1        | -0.2486933 | 0.1253749 | -1.9836 | 0.0479  | -0.353751542 | count | 1 |
| TXNDC17      | -0.2480392 | 0.2800712 | -0.8856 | 0.3763  | -0.35282252  | count | 1 |
| FYTTD1       | -0.268755  | 0.1893212 | -1.4196 | 0.156   | -0.352324532 | count | 1 |
| ACTG1        | -0.2442191 | 0.0772676 | -3.1607 | 0.00168 | -0.351708857 | count | 1 |
| LYL1         | -0.2486394 | 0.2284381 | -1.0884 | 0.277   | -0.351700215 | count | 1 |
| HECTD1       | -0.2660849 | 0.295266  | -0.9012 | 0.368   | -0.348860774 | count | 1 |
| PML          | -0.2537412 | 0.5455293 | -0.4651 | 0.6421  | -0.348660443 | count | 1 |
| EPB41L4A-AS1 | -0.2463452 | 0.2495412 | -0.9872 | 0.324   | -0.348461799 | count | 1 |
| MYCBP2       | -0.2493462 | 0.1473928 | -1.6917 | 0.0914  | -0.348160982 | count | 1 |
| PCMTD2       | -0.2488651 | 0.7313772 | -0.3403 | 0.7338  | -0.347491538 | count | 1 |
| ATM          | -0.2527636 | 0.2210736 | -1.1433 | 0.254   | -0.347324094 | count | 1 |
| DHX36        | -0.2454448 | 0.195309  | -1.2567 | 0.21    | -0.347190787 | count | 1 |
| C4orf3       | -0.2431605 | 0.1452756 | -1.6738 | 0.0949  | -0.346972905 | count | 1 |
| NIPA2        | -0.2484043 | 0.2352353 | -1.056  | 0.292   | -0.346850333 | count | 1 |

|          |            |           |         |          |              |       |             |
|----------|------------|-----------|---------|----------|--------------|-------|-------------|
| BCL3     | -0.2522914 | 0.3400316 | -0.742  | 0.459    | -0.346678591 | count | 1           |
| PTPN11   | -0.2640106 | 0.3198608 | -0.8254 | 0.4096   | -0.346169359 | count | 1           |
| IGHM     | -0.2402874 | 0.155911  | -1.5412 | 0.124    | -0.345757758 | count | 1           |
| RBX1     | -0.2422989 | 0.1645885 | -1.4721 | 0.142    | -0.345744864 | count | 1           |
| SMIM15   | -0.2636434 | 0.3440522 | -0.7663 | 0.4439   | -0.345692867 | count | 1           |
| H2AFZ    | -0.2412466 | 0.1147063 | -2.1032 | 0.036    | -0.345405405 | count | 1           |
| CCNH     | -0.2456742 | 0.1944599 | -1.2634 | 0.207    | -0.343051204 | count | 1           |
| MAPRE1   | -0.2410762 | 0.275491  | -0.8751 | 0.382    | -0.342932434 | count | 1           |
| SRP9     | -0.2409377 | 0.1931571 | -1.2474 | 0.2129   | -0.342735703 | count | 1           |
| CAPNS1   | -0.2448673 | 0.2961983 | -0.8267 | 0.409    | -0.341928285 | count | 1           |
| EBAG9    | -0.2470831 | 0.3372431 | -0.7327 | 0.464    | -0.339557868 | count | 1           |
| BHLHE41  | -0.2585317 | 0.3058785 | -0.8452 | 0.398    | -0.33905814  | count | 1           |
| PTPRJ    | -0.2582645 | 0.9039047 | -0.2857 | 0.7752   | -0.338711248 | count | 1           |
| MFF      | -0.2392323 | 0.2588454 | -0.9242 | 0.3559   | -0.338420597 | count | 1           |
| DUSP2    | -0.235584  | 0.1523002 | -1.5468 | 0.123    | -0.337304184 | count | 1           |
| ID3      | -0.2435772 | 0.2955853 | -0.8241 | 0.41     | -0.334763709 | count | 1           |
| GINM1    | -0.2395646 | 0.2674234 | -0.8958 | 0.371    | -0.334548119 | count | 1           |
| FCRL3    | -0.2548332 | 0.349788  | -0.7285 | 0.4667   | -0.334255858 | count | 1           |
| TPR      | -0.2354025 | 0.1552174 | -1.5166 | 0.13     | -0.334095689 | count | 1           |
| CCDC50   | -0.235305  | 0.1451674 | -1.6209 | 0.106    | -0.333957538 | count | 1           |
| IFITM2   | -0.2365558 | 0.1559393 | -1.517  | 0.13     | -0.333023176 | count | 1           |
| CD2AP    | -0.2419209 | 0.3902746 | -0.6199 | 0.536    | -0.332498534 | count | 1           |
| SNRPF    | -0.2379774 | 0.1716166 | -1.3867 | 0.166    | -0.332338864 | count | 1           |
| TMEM256  | -0.2416056 | 0.2383606 | -1.0136 | 0.3113   | -0.332067307 | count | 1           |
| PHACTR1  | -0.2307358 | 0.2241346 | -1.0295 | 0.3038   | -0.330700765 | count | 1           |
| TTC9C    | -0.2365397 | 0.382891  | -0.6178 | 0.537    | -0.33033761  | count | 1           |
| OAS1     | -0.236443  | 0.4261947 | -0.5548 | 0.579    | -0.330203002 | count | 1           |
| ATG4C    | -0.2363738 | 0.4418031 | -0.535  | 0.5929   | -0.330106675 | count | 1           |
| MED30    | -0.2340044 | 0.2349891 | -0.9958 | 0.32     | -0.329440027 | count | 1           |
| GTPBP4   | -0.2511248 | 0.2954673 | -0.8499 | 0.3958   | -0.329439195 | count | 1           |
| ATF2     | -0.2358091 | 0.4598805 | -0.5128 | 0.6084   | -0.329320595 | count | 1           |
| KLHDC4   | -0.2505651 | 0.5984707 | -0.4187 | 0.6757   | -0.328712095 | count | 1           |
| KCNAB2   | -0.2505651 | 0.7098346 | -0.353  | 0.724    | -0.328712095 | count | 1           |
| UBE2D2   | -0.2300651 | 0.1332102 | -1.7271 | 0.0848   | -0.328663961 | count | 1           |
| IFNAR1   | -0.2502694 | 0.2850697 | -0.8779 | 0.3805   | -0.328327941 | count | 1           |
| TMEM205  | -0.2332036 | 0.3414501 | -0.683  | 0.495    | -0.328315352 | count | 1           |
| SERBP1   | -0.2325192 | 0.1364673 | -1.7038 | 0.0891   | -0.327354139 | count | 1           |
| C19orf24 | -0.2378915 | 0.2573137 | -0.9245 | 0.356    | -0.326987182 | count | 1           |
| TMEM156  | -0.2338427 | 0.2640654 | -0.8855 | 0.376    | -0.3265832   | count | 1           |
| STK26    | -0.2369234 | 0.3779243 | -0.6269 | 0.531    | -0.325662884 | count | 1           |
| PPP1CC   | -0.2367595 | 0.2124877 | -1.1142 | 0.266    | -0.325438672 | count | 1           |
| COMMD4   | -0.236443  | 0.5066629 | -0.4667 | 0.641    | -0.325005705 | count | 1           |
| RPL26    | -0.2249926 | 0.0409796 | -5.4904 | 6.76E-08 | -0.324351407 | count | 0.001642612 |
| CD200    | -0.2349297 | 0.6416029 | -0.3662 | 0.7144   | -0.32293545  | count | 1           |
| ABCB4    | -0.2342235 | 0.7174967 | -0.3264 | 0.7442   | -0.321969293 | count | 1           |

|           |            |           |         |          |              |       |   |
|-----------|------------|-----------|---------|----------|--------------|-------|---|
| CEP164    | -0.2441295 | 0.4767678 | -0.5121 | 0.6089   | -0.320349193 | count | 1 |
| NUFIP2    | -0.2330007 | 0.2219536 | -1.0498 | 0.2944   | -0.3202963   | count | 1 |
| CHCHD5    | -0.2329017 | 0.3764272 | -0.6187 | 0.5364   | -0.320160847 | count | 1 |
| TRNAU1AP  | -0.2325284 | 0.406868  | -0.5715 | 0.568    | -0.319650091 | count | 1 |
| MYL12A    | -0.221787  | 0.0690895 | -3.2101 | 0.00142  | -0.318957207 | count | 1 |
| STAT1     | -0.2319325 | 0.3368445 | -0.6885 | 0.491    | -0.318834752 | count | 1 |
| HTATSF1   | -0.2279131 | 0.3552076 | -0.6416 | 0.5214   | -0.318327721 | count | 1 |
| LUC7L3    | -0.2310129 | 0.2051193 | -1.1262 | 0.261    | -0.317576468 | count | 1 |
| PRRC2C    | -0.2309793 | 0.1261386 | -1.8312 | 0.0677   | -0.317530493 | count | 1 |
| MIER1     | -0.2218843 | 0.2030704 | -1.0926 | 0.2751   | -0.317269379 | count | 1 |
| TMSB10    | -0.2198875 | 0.0738314 | -2.9782 | 0.00306  | -0.316930577 | count | 1 |
| NKAP      | -0.2305017 | 0.2384845 | -0.9665 | 0.334    | -0.316876975 | count | 1 |
| LINC00324 | -0.2266278 | 0.3495225 | -0.6484 | 0.517    | -0.316538072 | count | 1 |
| FAM162A   | -0.2265519 | 0.2532755 | -0.8945 | 0.372    | -0.316432387 | count | 1 |
| CCT4      | -0.2300479 | 0.2045666 | -1.1246 | 0.261    | -0.31625601  | count | 1 |
| SNRPD1    | -0.2252567 | 0.1922252 | -1.1718 | 0.242    | -0.31462888  | count | 1 |
| ANXA2     | -0.2393618 | 0.2070484 | -1.1561 | 0.248    | -0.314150745 | count | 1 |
| TMEM219   | -0.2206943 | 0.2212309 | -0.9976 | 0.319    | -0.313252962 | count | 1 |
| NDUFA2    | -0.2240138 | 0.2103442 | -1.065  | 0.287    | -0.312898133 | count | 1 |
| MDH1      | -0.2204237 | 0.1972092 | -1.1177 | 0.264    | -0.312869456 | count | 1 |
| C6orf48   | -0.2269764 | 0.1980594 | -1.146  | 0.2524   | -0.312052747 | count | 1 |
| FAM89B    | -0.2215775 | 0.2045848 | -1.0831 | 0.279    | -0.311984918 | count | 1 |
| RAB8A     | -0.2229006 | 0.2315658 | -0.9626 | 0.336    | -0.31134794  | count | 1 |
| NELFB     | -0.2371838 | 0.486053  | -0.488  | 0.626    | -0.311318319 | count | 1 |
| IGBP1     | -0.2225723 | 0.2068884 | -1.0758 | 0.283    | -0.310890754 | count | 1 |
| CFL1      | -0.2160411 | 0.0724608 | -2.9815 | 0.00303  | -0.310460802 | count | 1 |
| PSMB1     | -0.2166799 | 0.145968  | -1.4844 | 0.1384   | -0.310256605 | count | 1 |
| ALG2      | -0.2220091 | 0.3838473 | -0.5784 | 0.563    | -0.31010644  | count | 1 |
| DYNLL1    | -0.2164126 | 0.1287063 | -1.6814 | 0.0934   | -0.309680454 | count | 1 |
| PYURF     | -0.2216818 | 0.2054619 | -1.0789 | 0.281    | -0.309650634 | count | 1 |
| ABCF1     | -0.2194393 | 0.2060491 | -1.065  | 0.287    | -0.308981062 | count | 1 |
| UBE2Q2    | -0.2193256 | 0.4041553 | -0.5427 | 0.5876   | -0.308821326 | count | 1 |
| SNX1      | -0.2244306 | 0.3216802 | -0.6977 | 0.4857   | -0.308568462 | count | 1 |
| NDUFA11   | -0.2173622 | 0.1736766 | -1.2515 | 0.211    | -0.308530461 | count | 1 |
| CPT1A     | -0.2342235 | 0.8368477 | -0.2799 | 0.7797   | -0.307467699 | count | 1 |
| OAZ1      | -0.2135012 | 0.0635998 | -3.3569 | 0.000856 | -0.307458086 | count | 1 |
| IGHE      | -0.2200995 | 0.4901392 | -0.4491 | 0.654    | -0.307447027 | count | 1 |
| TGIF1     | -0.215259  | 0.1881731 | -1.1439 | 0.253    | -0.305549527 | count | 1 |
| ARL16     | -0.2218619 | 0.3734315 | -0.5941 | 0.553    | -0.305052444 | count | 1 |
| ZNF506    | -0.2181942 | 0.3668663 | -0.5948 | 0.552    | -0.304793453 | count | 1 |
| NSMCE3    | -0.2140556 | 0.2116254 | -1.0115 | 0.312    | -0.304544443 | count | 1 |
| TLK1      | -0.2212056 | 0.1927022 | -1.1479 | 0.252    | -0.304154041 | count | 1 |
| CNIH1     | -0.2142068 | 0.3031671 | -0.7066 | 0.48     | -0.304058175 | count | 1 |
| MITD1     | -0.2176289 | 0.3347927 | -0.65   | 0.516    | -0.304006112 | count | 1 |
| NUP35     | -0.2175175 | 0.5331413 | -0.408  | 0.6835   | -0.303850955 | count | 1 |

|            |            |           |         |        |              |       |   |
|------------|------------|-----------|---------|--------|--------------|-------|---|
| MGST3      | -0.2139239 | 0.1999231 | -1.07   | 0.285  | -0.303657198 | count | 1 |
| MARCKSL1   | -0.2151938 | 0.175996  | -1.2227 | 0.222  | -0.303016337 | count | 1 |
| DNTTIP2    | -0.2200326 | 0.19196   | -1.1462 | 0.252  | -0.30254827  | count | 1 |
| HK1        | -0.2165705 | 0.4556815 | -0.4753 | 0.6348 | -0.302531955 | count | 1 |
| AC007388.1 | -0.219753  | 1.2913333 | -0.1702 | 0.8649 | -0.302165501 | count | 1 |
| TMEM220    | -0.219753  | 1.3485594 | -0.163  | 0.8706 | -0.302165501 | count | 1 |
| HMGB1      | -0.2102196 | 0.0772418 | -2.7216 | 0.0068 | -0.302048808 | count | 1 |
| NOP53      | -0.210174  | 0.0894996 | -2.3483 | 0.0193 | -0.301660334 | count | 1 |
| MRPL21     | -0.2106347 | 0.2751647 | -0.7655 | 0.4444 | -0.300201834 | count | 1 |
| C17orf100  | -0.2183155 | 0.727494  | -0.3001 | 0.7642 | -0.30019751  | count | 1 |
| EIF6       | -0.2119106 | 0.2080061 | -1.0188 | 0.309  | -0.299838773 | count | 1 |
| SLIRP      | -0.2178484 | 0.3421943 | -0.6366 | 0.525  | -0.299558006 | count | 1 |
| RRP36      | -0.2279377 | 0.3693953 | -0.6171 | 0.5375 | -0.299288266 | count | 1 |
| CSTB       | -0.2089722 | 0.3178906 | -0.6574 | 0.511  | -0.298821095 | count | 1 |
| SDHAF2     | -0.2273811 | 0.290838  | -0.7818 | 0.4347 | -0.298563781 | count | 1 |
| PGAM1      | -0.2119344 | 0.1889459 | -1.1217 | 0.263  | -0.298436655 | count | 1 |
| KIAA2026   | -0.2163362 | 0.3041532 | -0.7113 | 0.477  | -0.297487573 | count | 1 |
| IFNGR1     | -0.2081974 | 0.1930669 | -1.0784 | 0.281  | -0.296731853 | count | 1 |
| DDX17      | -0.2121427 | 0.1414184 | -1.5001 | 0.134  | -0.296364346 | count | 1 |
| NUDT5      | -0.2255625 | 0.3509145 | -0.6428 | 0.5207 | -0.296196406 | count | 1 |
| SCPEP1     | -0.2153268 | 0.234478  | -0.9183 | 0.359  | -0.296105474 | count | 1 |
| TOMM20     | -0.2080856 | 0.1124033 | -1.8512 | 0.0648 | -0.296061097 | count | 1 |
| NOP10      | -0.2057568 | 0.1664189 | -1.2364 | 0.217  | -0.294443119 | count | 1 |
| IRF2       | -0.2078758 | 0.2126386 | -0.9776 | 0.329  | -0.294139504 | count | 1 |
| CLTB       | -0.2088673 | 0.2590603 | -0.8062 | 0.4205 | -0.294126866 | count | 1 |
| RGS10      | -0.2077281 | 0.2523653 | -0.8231 | 0.411  | -0.293930866 | count | 1 |
| IFI35      | -0.2136544 | 0.3638705 | -0.5872 | 0.5574 | -0.293815446 | count | 1 |
| BNIP2      | -0.2074906 | 0.2170991 | -0.9557 | 0.34   | -0.293595377 | count | 1 |
| SUCLA2     | -0.2235583 | 0.4527534 | -0.4938 | 0.6217 | -0.293587017 | count | 1 |
| RAD9A      | -0.2132611 | 0.4761673 | -0.4479 | 0.6545 | -0.293276873 | count | 1 |
| PLD4       | -0.208078  | 0.3764603 | -0.5527 | 0.5807 | -0.29301772  | count | 1 |
| PSME2      | -0.2050311 | 0.1762926 | -1.163  | 0.245  | -0.292616625 | count | 1 |
| VAMP8      | -0.2069517 | 0.1615197 | -1.2813 | 0.201  | -0.29143498  | count | 1 |
| ZNF226     | -0.2117523 | 0.5256006 | -0.4029 | 0.687  | -0.291210686 | count | 1 |
| BLOC1S5    | -0.2117523 | 0.5426741 | -0.3902 | 0.697  | -0.291210686 | count | 1 |
| DNAJA2     | -0.2052844 | 0.1892845 | -1.0845 | 0.279  | -0.290478865 | count | 1 |
| UTP6       | -0.2076893 | 0.341831  | -0.6076 | 0.544  | -0.290160274 | count | 1 |
| SP140      | -0.2207893 | 0.1788757 | -1.2343 | 0.218  | -0.289981171 | count | 1 |
| SKAP2      | -0.210362  | 0.1848921 | -1.1378 | 0.2558 | -0.289306657 | count | 1 |
| CD63       | -0.2031966 | 0.2031472 | -1.0002 | 0.318  | -0.289113368 | count | 1 |
| MMADHC     | -0.2035866 | 0.29905   | -0.6808 | 0.4964 | -0.289004163 | count | 1 |
| ARHGAP25   | -0.2041333 | 0.2423942 | -0.8422 | 0.4    | -0.288852755 | count | 1 |
| TLR10      | -0.2029715 | 0.2886052 | -0.7033 | 0.4822 | -0.288132193 | count | 1 |
| IDH3A      | -0.2192134 | 0.4031083 | -0.5438 | 0.5868 | -0.287928638 | count | 1 |
| ATP1A1     | -0.2085794 | 0.286678  | -0.7276 | 0.4673 | -0.286865204 | count | 1 |

|           |            |           |         |          |              |       |   |
|-----------|------------|-----------|---------|----------|--------------|-------|---|
| BTG1      | -0.1989207 | 0.055126  | -3.6085 | 0.000343 | -0.286754416 | count | 1 |
| SRRM2     | -0.1998945 | 0.1081524 | -1.8483 | 0.0652   | -0.285292436 | count | 1 |
| PSMA1     | -0.2023919 | 0.2073228 | -0.9762 | 0.329    | -0.285026891 | count | 1 |
| GLCCI1    | -0.2039358 | 0.4424878 | -0.4609 | 0.6451   | -0.284930616 | count | 1 |
| GBA       | -0.2165705 | 0.8352308 | -0.2593 | 0.7955   | -0.284485786 | count | 1 |
| SEC31A    | -0.2035302 | 0.2977904 | -0.6835 | 0.495    | -0.284365469 | count | 1 |
| NOSIP     | -0.2003507 | 0.2609299 | -0.7678 | 0.443    | -0.283509004 | count | 1 |
| MEAF6     | -0.198988  | 0.1971661 | -1.0092 | 0.313    | -0.283132207 | count | 1 |
| ORMDL1    | -0.1994061 | 0.2017383 | -0.9884 | 0.323    | -0.283077705 | count | 1 |
| ATP6V1G1  | -0.1969512 | 0.0985167 | -1.9992 | 0.0462   | -0.282990901 | count | 1 |
| SECISBP2L | -0.2056367 | 0.2841601 | -0.7237 | 0.4697   | -0.282834467 | count | 1 |
| ZNF326    | -0.2021309 | 0.315412  | -0.6408 | 0.522    | -0.282415691 | count | 1 |
| ITSN2     | -0.2021147 | 0.188363  | -1.073  | 0.284    | -0.282393117 | count | 1 |
| NSL1      | -0.2143947 | 0.2586298 | -0.829  | 0.4076   | -0.281650859 | count | 1 |
| EIF4A2    | -0.1981222 | 0.1353831 | -1.4634 | 0.144    | -0.28125752  | count | 1 |
| ARRDC2    | -0.2040542 | 0.3601466 | -0.5666 | 0.5713   | -0.280666642 | count | 1 |
| MRPS16    | -0.2036037 | 0.3340892 | -0.6094 | 0.5426   | -0.280049486 | count | 1 |
| ANKRD11   | -0.1965617 | 0.2096944 | -0.9374 | 0.349    | -0.279683864 | count | 1 |
| 1-Mar     | -0.2127117 | 0.1875489 | -1.1342 | 0.2573   | -0.279457668 | count | 1 |
| NDUFS6    | -0.2000066 | 0.2084226 | -0.9596 | 0.338    | -0.279455551 | count | 1 |
| BAX       | -0.1981862 | 0.1998525 | -0.9917 | 0.322    | -0.279115869 | count | 1 |
| RTF2      | -0.2026528 | 0.2164916 | -0.9361 | 0.35     | -0.278746779 | count | 1 |
| RBCK1     | -0.2019467 | 0.2756384 | -0.7327 | 0.4642   | -0.277779406 | count | 1 |
| ATP5F1D   | -0.1937879 | 0.125104  | -1.549  | 0.122    | -0.277326666 | count | 1 |
| FBXO21    | -0.198469  | 0.300778  | -0.6599 | 0.51     | -0.277312844 | count | 1 |
| HSH2D     | -0.1948355 | 0.2515446 | -0.7746 | 0.439    | -0.277230464 | count | 1 |
| ATG101    | -0.1957028 | 0.1833767 | -1.0672 | 0.286    | -0.276942343 | count | 1 |
| PUF60     | -0.1981447 | 0.2063933 | -0.96   | 0.3376   | -0.276860906 | count | 1 |
| DCK       | -0.2009786 | 0.2508812 | -0.8011 | 0.4235   | -0.27645304  | count | 1 |
| GTF2F1    | -0.2004594 | 0.2847609 | -0.704  | 0.482    | -0.275741678 | count | 1 |
| JUNB      | -0.1916407 | 0.0960311 | -1.9956 | 0.0466   | -0.275666465 | count | 1 |
| OPA1      | -0.2002436 | 0.4260661 | -0.47   | 0.639    | -0.275446001 | count | 1 |
| SNRPE     | -0.1937607 | 0.2157609 | -0.898  | 0.37     | -0.275073966 | count | 1 |
| ZNF829    | -0.1998523 | 0.9559114 | -0.2091 | 0.8345   | -0.274909861 | count | 1 |
| AATF      | -0.1997288 | 0.3091154 | -0.6461 | 0.519    | -0.274740644 | count | 1 |
| GTF3A     | -0.1947963 | 0.1390577 | -1.4008 | 0.162    | -0.274351043 | count | 1 |
| RETREG2   | -0.2085296 | 0.4438426 | -0.4698 | 0.6387   | -0.27400649  | count | 1 |
| NDUFS4    | -0.1983451 | 0.3324043 | -0.5967 | 0.551    | -0.272844683 | count | 1 |
| HTATIP2   | -0.1983451 | 0.3950545 | -0.5021 | 0.616    | -0.272844683 | count | 1 |
| ATP5MF    | -0.198103  | 0.2012245 | -0.9845 | 0.325    | -0.272512943 | count | 1 |
| PRDX2     | -0.1913822 | 0.2615734 | -0.7317 | 0.4648   | -0.271701662 | count | 1 |
| RPS11     | -0.1883674 | 0.051921  | -3.628  | 0.000319 | -0.271196175 | count | 1 |
| GNAI2     | -0.2061611 | 0.1521721 | -1.3548 | 0.1762   | -0.27091843  | count | 1 |
| BPTF      | -0.1913914 | 0.1680557 | -1.1389 | 0.255    | -0.270850622 | count | 1 |
| ECHS1     | -0.193533  | 0.2786227 | -0.6946 | 0.488    | -0.270433692 | count | 1 |

|           |            |           |         |        |              |       |   |
|-----------|------------|-----------|---------|--------|--------------|-------|---|
| PPP2R5E   | -0.1932364 | 0.3831521 | -0.5043 | 0.614  | -0.270020299 | count | 1 |
| EDF1      | -0.1890442 | 0.1245864 | -1.5174 | 0.13   | -0.269819967 | count | 1 |
| PDCD4-AS1 | -0.2049029 | 0.606171  | -0.338  | 0.7355 | -0.269277744 | count | 1 |
| DCTN4     | -0.2049029 | 0.6836478 | -0.2997 | 0.7645 | -0.269277744 | count | 1 |
| 7-Sep     | -0.1872927 | 0.0974838 | -1.9213 | 0.0553 | -0.269237985 | count | 1 |
| PEBP1     | -0.1873252 | 0.1259755 | -1.487  | 0.1377 | -0.268803074 | count | 1 |
| TAF10     | -0.1892092 | 0.1808247 | -1.0464 | 0.296  | -0.26862062  | count | 1 |
| ESF1      | -0.2043249 | 0.2810314 | -0.7271 | 0.468  | -0.26852398  | count | 1 |
| PSMA4     | -0.1950008 | 0.1785084 | -1.0924 | 0.2753 | -0.268261823 | count | 1 |
| EIF3G     | -0.1881055 | 0.1399899 | -1.3437 | 0.18   | -0.268123471 | count | 1 |
| TRADD     | -0.1918047 | 0.3196959 | -0.6    | 0.549  | -0.268024784 | count | 1 |
| NUMB      | -0.1947903 | 0.4317054 | -0.4512 | 0.652  | -0.267973343 | count | 1 |
| OST4      | -0.1865456 | 0.1130727 | -1.6498 | 0.0997 | -0.267275259 | count | 1 |
| ITGB2-AS1 | -0.1908647 | 0.5683906 | -0.3358 | 0.7372 | -0.26671456  | count | 1 |
| VPS50     | -0.2023916 | 0.4959293 | -0.4081 | 0.6834 | -0.26600252  | count | 1 |
| SP100     | -0.1903499 | 0.1212985 | -1.5693 | 0.1173 | -0.265996989 | count | 1 |
| QTRT1     | -0.1932863 | 0.4422878 | -0.437  | 0.6623 | -0.265912109 | count | 1 |
| NUFIP1    | -0.1899138 | 0.4618013 | -0.4112 | 0.681  | -0.265389107 | count | 1 |
| EIF4G2    | -0.1874248 | 0.1664227 | -1.1262 | 0.261  | -0.265245677 | count | 1 |
| PRPF6     | -0.2017043 | 0.2527644 | -0.798  | 0.4253 | -0.265106033 | count | 1 |
| FKBP1A    | -0.2017043 | 0.266248  | -0.7576 | 0.4491 | -0.265106033 | count | 1 |
| HSPB11    | -0.2009716 | 0.2644367 | -0.76   | 0.4477 | -0.26415027  | count | 1 |
| CMAS      | -0.1875295 | 0.4963845 | -0.3778 | 0.7058 | -0.26413569  | count | 1 |
| DNAJC19   | -0.1919833 | 0.2491887 | -0.7704 | 0.441  | -0.264126239 | count | 1 |
| ARF6      | -0.1871588 | 0.1467427 | -1.2754 | 0.203  | -0.263614533 | count | 1 |
| ADAR      | -0.2005393 | 0.2925921 | -0.6854 | 0.493  | -0.263586335 | count | 1 |
| ASNA1     | -0.2003615 | 0.3526039 | -0.5682 | 0.5702 | -0.263354389 | count | 1 |
| USP24     | -0.1878817 | 0.3554132 | -0.5286 | 0.597  | -0.262556458 | count | 1 |
| KHDRBS1   | -0.1862762 | 0.1440079 | -1.2935 | 0.197  | -0.262373693 | count | 1 |
| NSA2      | -0.1831447 | 0.1280587 | -1.4302 | 0.153  | -0.262266452 | count | 1 |
| RIPOR2    | -0.183682  | 0.1639837 | -1.1201 | 0.263  | -0.262172897 | count | 1 |
| ESD       | -0.1874818 | 0.2196254 | -0.8536 | 0.394  | -0.261998997 | count | 1 |
| BAZ1A     | -0.1851213 | 0.2142892 | -0.8639 | 0.388  | -0.261990575 | count | 1 |
| EMC6      | -0.1841342 | 0.2227701 | -0.8266 | 0.409  | -0.261424528 | count | 1 |
| ITM2B     | -0.1845242 | 0.1146721 | -1.6091 | 0.1083 | -0.261146785 | count | 1 |
| UBAC2     | -0.1845525 | 0.3930501 | -0.4695 | 0.6389 | -0.259950291 | count | 1 |
| BORCS6    | -0.184547  | 0.3880519 | -0.4756 | 0.6346 | -0.259942558 | count | 1 |
| TIMM17B   | -0.1835002 | 0.218787  | -0.8387 | 0.402  | -0.259699702 | count | 1 |
| ATG12     | -0.1857926 | 0.2332969 | -0.7964 | 0.426  | -0.259644183 | count | 1 |
| STUB1     | -0.1857484 | 0.2022466 | -0.9184 | 0.359  | -0.259582564 | count | 1 |
| MZT1      | -0.182768  | 0.2565534 | -0.7124 | 0.4766 | -0.259487235 | count | 1 |
| ANAPC5    | -0.1879823 | 0.3021891 | -0.6221 | 0.534  | -0.258641928 | count | 1 |
| TAF7      | -0.1826301 | 0.1534941 | -1.1898 | 0.235  | -0.258470086 | count | 1 |
| TUBGCP2   | -0.1876895 | 0.3036609 | -0.6181 | 0.537  | -0.25824054  | count | 1 |
| HLA-DQB1  | -0.1789312 | 0.0743371 | -2.407  | 0.0165 | -0.257576722 | count | 1 |



|          |            |           |         |          |              |       |           |
|----------|------------|-----------|---------|----------|--------------|-------|-----------|
| PHF11    | -0.180976  | 0.3463384 | -0.5225 | 0.6016   | -0.25753043  | count | 1         |
| ENO1     | -0.1796088 | 0.1510561 | -1.189  | 0.235    | -0.256860687 | count | 1         |
| ARF3     | -0.1862052 | 0.5532004 | -0.3366 | 0.7366   | -0.256205699 | count | 1         |
| CCDC102A | -0.1808241 | 0.5654713 | -0.3198 | 0.7493   | -0.255917807 | count | 1         |
| PTMA     | -0.17731   | 0.0394811 | -4.491  | 9.05E-06 | -0.2556699   | count | 0.2198607 |
| GNL3     | -0.1784313 | 0.2644885 | -0.6746 | 0.5003   | -0.254684454 | count | 1         |
| DAD1     | -0.1788474 | 0.1360233 | -1.3148 | 0.189    | -0.254504517 | count | 1         |
| TCF25    | -0.1820331 | 0.1622339 | -1.122  | 0.262    | -0.25440288  | count | 1         |
| POP7     | -0.1836822 | 0.3880055 | -0.4734 | 0.6362   | -0.252746604 | count | 1         |
| MRPS15   | -0.1774977 | 0.3423557 | -0.5185 | 0.6044   | -0.251216659 | count | 1         |
| GPS2     | -0.1909154 | 0.277924  | -0.6869 | 0.492    | -0.251026882 | count | 1         |
| XRCC5    | -0.1754615 | 0.1357094 | -1.2929 | 0.197    | -0.250116761 | count | 1         |
| VRK1     | -0.1814723 | 0.399741  | -0.454  | 0.65     | -0.249716479 | count | 1         |
| STX8     | -0.1812425 | 0.386924  | -0.4684 | 0.64     | -0.24940137  | count | 1         |
| HBP1     | -0.1782052 | 0.2016449 | -0.8838 | 0.377    | -0.249065647 | count | 1         |
| AMZ2     | -0.1893728 | 0.359735  | -0.5264 | 0.5989   | -0.249012846 | count | 1         |
| SMAD3    | -0.1806104 | 0.5514816 | -0.3275 | 0.743    | -0.248534601 | count | 1         |
| SWAP70   | -0.180501  | 0.1468606 | -1.2291 | 0.22     | -0.248384583 | count | 1         |
| SETX     | -0.1888508 | 0.263145  | -0.7177 | 0.4733   | -0.248331259 | count | 1         |
| DIAPH1   | -0.1802945 | 0.3993574 | -0.4515 | 0.6519   | -0.248101413 | count | 1         |
| HDAC2    | -0.1800522 | 0.3144007 | -0.5727 | 0.5671   | -0.247769148 | count | 1         |
| NUCKS1   | -0.1772673 | 0.1449723 | -1.2228 | 0.222    | -0.247757847 | count | 1         |
| PIP4P1   | -0.188255  | 0.2420824 | -0.7776 | 0.437    | -0.247553277 | count | 1         |
| ACAP3    | -0.1881126 | 1.2354579 | -0.1523 | 0.879    | -0.247367328 | count | 1         |
| UGCG     | -0.1746206 | 0.2386958 | -0.7316 | 0.465    | -0.247150284 | count | 1         |
| SDHB     | -0.1795273 | 0.3012276 | -0.596  | 0.5515   | -0.247049343 | count | 1         |
| SMAP1    | -0.1767225 | 0.2735945 | -0.6459 | 0.519    | -0.246998167 | count | 1         |
| RNGTT    | -0.1785009 | 0.3207078 | -0.5566 | 0.578    | -0.245641777 | count | 1         |
| C16orf72 | -0.1750592 | 0.421671  | -0.4152 | 0.678    | -0.244678756 | count | 1         |
| DOK7     | -0.1859608 | 0.6951898 | -0.2675 | 0.7892   | -0.244557218 | count | 1         |
| RPS4Y1   | -0.1694504 | 0.0744232 | -2.2768 | 0.0233   | -0.243793943 | count | 1         |
| MAP3K8   | -0.1730448 | 0.1737173 | -0.9961 | 0.32     | -0.243768981 | count | 1         |
| CYBA     | -0.1691913 | 0.0578991 | -2.9222 | 0.00365  | -0.24360239  | count | 1         |
| APRT     | -0.1696082 | 0.1375883 | -1.2327 | 0.2183   | -0.243227747 | count | 1         |
| PPP1R10  | -0.1724604 | 0.165888  | -1.0396 | 0.299    | -0.242947134 | count | 1         |
| CCT7     | -0.1764934 | 0.1883788 | -0.9369 | 0.3493   | -0.242888594 | count | 1         |
| ARPP19   | -0.1720008 | 0.234178  | -0.7345 | 0.463    | -0.242300787 | count | 1         |
| YBX1     | -0.1678889 | 0.0785217 | -2.1381 | 0.0331   | -0.241202449 | count | 1         |
| ABHD17A  | -0.1723564 | 0.255897  | -0.6735 | 0.501    | -0.24090957  | count | 1         |
| CAPN1    | -0.1697903 | 0.3851799 | -0.4408 | 0.6596   | -0.240322889 | count | 1         |
| GOT1     | -0.1826203 | 0.4586383 | -0.3982 | 0.6907   | -0.240193791 | count | 1         |
| NR2C2AP  | -0.1822862 | 0.5049597 | -0.361  | 0.718    | -0.23975732  | count | 1         |
| DPH7     | -0.1822862 | 0.5523238 | -0.33   | 0.7415   | -0.23975732  | count | 1         |
| UBAC1    | -0.1714337 | 0.5012971 | -0.342  | 0.7325   | -0.239622755 | count | 1         |
| MAGED2   | -0.1735744 | 0.2754509 | -0.6301 | 0.529    | -0.238884928 | count | 1         |

|           |            |           |         |         |              |       |   |
|-----------|------------|-----------|---------|---------|--------------|-------|---|
| NOB1      | -0.1705735 | 0.3203889 | -0.5324 | 0.595   | -0.238423074 | count | 1 |
| TMEM159   | -0.1809134 | 0.5210823 | -0.3472 | 0.729   | -0.237963759 | count | 1 |
| CWC15     | -0.1724277 | 0.2819242 | -0.6116 | 0.541   | -0.237311996 | count | 1 |
| RNF213    | -0.1673066 | 0.2300286 | -0.7273 | 0.467   | -0.236812082 | count | 1 |
| XRCC6     | -0.1662953 | 0.1576965 | -1.0545 | 0.292   | -0.236659468 | count | 1 |
| RNF114    | -0.1712918 | 0.2502774 | -0.6844 | 0.4941  | -0.235753805 | count | 1 |
| PNN       | -0.166514  | 0.1397105 | -1.1918 | 0.234   | -0.235691681 | count | 1 |
| EP300     | -0.170741  | 0.4193737 | -0.4071 | 0.684   | -0.23499821  | count | 1 |
| RNF126    | -0.1659665 | 0.2524374 | -0.6575 | 0.511   | -0.234917738 | count | 1 |
| TNF       | -0.16658   | 0.1740738 | -0.9569 | 0.339   | -0.234676911 | count | 1 |
| PDCD4     | -0.1674563 | 0.1710729 | -0.9789 | 0.328   | -0.234075419 | count | 1 |
| CGGBP1    | -0.1661306 | 0.2358113 | -0.7045 | 0.481   | -0.234044831 | count | 1 |
| DDX27     | -0.164576  | 0.2398607 | -0.6861 | 0.493   | -0.232952103 | count | 1 |
| RPS20     | -0.1616395 | 0.0524442 | -3.0821 | 0.00218 | -0.23275809  | count | 1 |
| SMDT1     | -0.1628716 | 0.1304349 | -1.2487 | 0.212   | -0.232737223 | count | 1 |
| CLTA      | -0.163647  | 0.1795711 | -0.9113 | 0.363   | -0.23236941  | count | 1 |
| METTL5    | -0.1639319 | 0.2362518 | -0.6939 | 0.488   | -0.232041577 | count | 1 |
| HIKESHI   | -0.1642594 | 0.3041737 | -0.54   | 0.589   | -0.231412927 | count | 1 |
| SRP14     | -0.1611787 | 0.0812469 | -1.9838 | 0.0479  | -0.231297577 | count | 1 |
| LINC01184 | -0.1652085 | 0.4085314 | -0.4044 | 0.6861  | -0.230940109 | count | 1 |
| RRNAD1    | -0.1677434 | 0.5633102 | -0.2978 | 0.766   | -0.230885758 | count | 1 |
| GKAP1     | -0.1672269 | 0.4136817 | -0.4042 | 0.686   | -0.230177112 | count | 1 |
| HMG2      | -0.1607752 | 0.1261177 | -1.2748 | 0.203   | -0.230108222 | count | 1 |
| SDHC      | -0.1632016 | 0.2630768 | -0.6204 | 0.535   | -0.229925052 | count | 1 |
| RFC1      | -0.1746703 | 0.2473274 | -0.7062 | 0.4804  | -0.229804711 | count | 1 |
| POLR2G    | -0.1745642 | 0.2811049 | -0.621  | 0.5349  | -0.229666016 | count | 1 |
| ENTPD1    | -0.1745185 | 0.2716408 | -0.6425 | 0.5209  | -0.229606275 | count | 1 |
| TRIM52    | -0.1668005 | 0.5495683 | -0.3035 | 0.762   | -0.229592074 | count | 1 |
| GPX4      | -0.1597701 | 0.1172927 | -1.3621 | 0.174   | -0.228810107 | count | 1 |
| EIF5      | -0.1623761 | 0.1347906 | -1.2047 | 0.229   | -0.228763901 | count | 1 |
| CWC22     | -0.1661242 | 0.3341244 | -0.4972 | 0.619   | -0.228664143 | count | 1 |
| XBP1      | -0.1658711 | 0.3263731 | -0.5082 | 0.612   | -0.228316866 | count | 1 |
| CAMK1D    | -0.1619708 | 0.2533616 | -0.6393 | 0.523   | -0.228193797 | count | 1 |
| IDI1      | -0.163236  | 0.1806142 | -0.9038 | 0.367   | -0.228188638 | count | 1 |
| TUT4      | -0.1616282 | 0.1417601 | -1.1402 | 0.255   | -0.227711885 | count | 1 |
| ETFB      | -0.1627497 | 0.1994439 | -0.816  | 0.415   | -0.227510267 | count | 1 |
| SERINC3   | -0.1648387 | 0.2917063 | -0.5651 | 0.5723  | -0.226900276 | count | 1 |
| DNAJB14   | -0.1596236 | 0.2528392 | -0.6313 | 0.528   | -0.225950933 | count | 1 |
| TAF1D     | -0.1584888 | 0.1244772 | -1.2732 | 0.204   | -0.225941582 | count | 1 |
| ENY2      | -0.1584012 | 0.1822908 | -0.8689 | 0.3853  | -0.225816797 | count | 1 |
| SELENOF   | -0.1589905 | 0.171977  | -0.9245 | 0.356   | -0.224001496 | count | 1 |
| ANKRD12   | -0.1576026 | 0.1312778 | -1.2005 | 0.231   | -0.223795586 | count | 1 |
| CMC2      | -0.1625238 | 0.2343447 | -0.6935 | 0.4883  | -0.223723709 | count | 1 |
| TIMM10    | -0.1597813 | 0.2552972 | -0.6259 | 0.532   | -0.223369261 | count | 1 |
| RPL23     | -0.1551701 | 0.0653128 | -2.3758 | 0.0179  | -0.223300165 | count | 1 |

|          |            |           |         |          |              |       |   |
|----------|------------|-----------|---------|----------|--------------|-------|---|
| MTPN     | -0.156549  | 0.1244537 | -1.2579 | 0.209    | -0.223178339 | count | 1 |
| ALCAM    | -0.1619512 | 0.4646811 | -0.3485 | 0.728    | -0.222937926 | count | 1 |
| SINHCAF  | -0.157999  | 0.1714244 | -0.9217 | 0.357    | -0.222606725 | count | 1 |
| TRAF1    | -0.1690255 | 0.4920959 | -0.3435 | 0.7314   | -0.222424132 | count | 1 |
| FCMR     | -0.1569277 | 0.1657976 | -0.9465 | 0.344    | -0.222139516 | count | 1 |
| CAST     | -0.1561302 | 0.1332605 | -1.1716 | 0.242    | -0.221706915 | count | 1 |
| COTL1    | -0.1545531 | 0.128059  | -1.2069 | 0.228    | -0.221457941 | count | 1 |
| PSMB5    | -0.1582864 | 0.3771572 | -0.4197 | 0.675    | -0.221283702 | count | 1 |
| ELOA     | -0.1561983 | 0.2537539 | -0.6156 | 0.539    | -0.221108274 | count | 1 |
| TNFRSF14 | -0.1553728 | 0.2134958 | -0.7278 | 0.467    | -0.219941147 | count | 1 |
| CCNI     | -0.1536944 | 0.085609  | -1.7953 | 0.0733   | -0.219820848 | count | 1 |
| NCOR1    | -0.1555717 | 0.1712366 | -0.9085 | 0.364    | -0.219192051 | count | 1 |
| BZW2     | -0.1591254 | 0.4758891 | -0.3344 | 0.738    | -0.219059793 | count | 1 |
| TATDN3   | -0.1590076 | 0.5072865 | -0.3134 | 0.7541   | -0.218898114 | count | 1 |
| MAPKAPK2 | -0.1563589 | 0.3853977 | -0.4057 | 0.685    | -0.218594491 | count | 1 |
| C12orf57 | -0.1537552 | 0.1519202 | -1.0121 | 0.312    | -0.218337772 | count | 1 |
| C9orf16  | -0.1533747 | 0.1740181 | -0.8814 | 0.379    | -0.217797989 | count | 1 |
| LRIG2    | -0.1579127 | 0.7856736 | -0.201  | 0.8408   | -0.217395345 | count | 1 |
| AKIRIN2  | -0.1645558 | 0.2505343 | -0.6568 | 0.5116   | -0.216577691 | count | 1 |
| LAMTOR1  | -0.1528862 | 0.1898217 | -0.8054 | 0.421    | -0.216425392 | count | 1 |
| TRAPPC2B | -0.1533256 | 0.2771334 | -0.5533 | 0.58     | -0.216032132 | count | 1 |
| H2AFV    | -0.1516921 | 0.1972881 | -0.7689 | 0.4424   | -0.215895004 | count | 1 |
| HDDC3    | -0.1541617 | 0.3901609 | -0.3951 | 0.6929   | -0.215528827 | count | 1 |
| HLA-DMA  | -0.1497345 | 0.109691  | -1.3651 | 0.173    | -0.215286275 | count | 1 |
| LCP1     | -0.1635294 | 0.1335093 | -1.2249 | 0.2213   | -0.215234861 | count | 1 |
| TIMM13   | -0.1558875 | 0.3493252 | -0.4463 | 0.656    | -0.214615548 | count | 1 |
| MS4A7    | -0.1503186 | 0.3482414 | -0.4317 | 0.6662   | -0.213462461 | count | 1 |
| DDX24    | -0.1484409 | 0.1185612 | -1.252  | 0.211    | -0.212311041 | count | 1 |
| BOD1L1   | -0.1499198 | 0.1396411 | -1.0736 | 0.284    | -0.212231068 | count | 1 |
| EVI2B    | -0.1477373 | 0.1418056 | -1.0418 | 0.298    | -0.211456909 | count | 1 |
| LITAF    | -0.149875  | 0.2111961 | -0.7096 | 0.478    | -0.211177382 | count | 1 |
| VEGFB    | -0.1603772 | 0.1981617 | -0.8093 | 0.4188   | -0.211110178 | count | 1 |
| C11orf58 | -0.1471619 | 0.1209202 | -1.217  | 0.224    | -0.210966812 | count | 1 |
| SPCS1    | -0.1481973 | 0.1381024 | -1.0731 | 0.284    | -0.210452977 | count | 1 |
| RPS16    | -0.1459203 | 0.0414994 | -3.5162 | 0.000483 | -0.210257894 | count | 1 |
| CCT3     | -0.1487946 | 0.2097116 | -0.7095 | 0.478    | -0.209657265 | count | 1 |
| FAM118A  | -0.1497975 | 0.3112498 | -0.4813 | 0.631    | -0.209439089 | count | 1 |
| SLC38A1  | -0.1467967 | 0.2313674 | -0.6345 | 0.526    | -0.207814957 | count | 1 |
| YTHDF2   | -0.1456599 | 0.2416956 | -0.6027 | 0.547    | -0.207316691 | count | 1 |
| PDAP1    | -0.156856  | 0.2356931 | -0.6655 | 0.5061   | -0.206501473 | count | 1 |
| SSR4     | -0.1439312 | 0.1127771 | -1.2762 | 0.203    | -0.206244067 | count | 1 |
| TNFSF9   | -0.1438115 | 0.2049392 | -0.7017 | 0.483    | -0.205516516 | count | 1 |
| MED11    | -0.1560594 | 0.3823252 | -0.4082 | 0.6833   | -0.205458674 | count | 1 |
| ARGLU1   | -0.1438133 | 0.12259   | -1.1731 | 0.241    | -0.205303635 | count | 1 |
| RTRAF    | -0.1438054 | 0.1782101 | -0.8069 | 0.4201   | -0.205292364 | count | 1 |

|           |            |           |         |         |              |       |   |
|-----------|------------|-----------|---------|---------|--------------|-------|---|
| CCNL2     | -0.1448568 | 0.3000048 | -0.4828 | 0.6294  | -0.205071794 | count | 1 |
| IST1      | -0.1451528 | 0.2964864 | -0.4896 | 0.625   | -0.204533023 | count | 1 |
| MRPS36    | -0.1462542 | 0.2277491 | -0.6422 | 0.521   | -0.204494292 | count | 1 |
| NT5C3A    | -0.1435118 | 0.2865779 | -0.5008 | 0.6168  | -0.204261758 | count | 1 |
| TNFRSF10B | -0.1447258 | 0.5221706 | -0.2772 | 0.7818  | -0.203932182 | count | 1 |
| RANBP1    | -0.1442732 | 0.211421  | -0.6824 | 0.495   | -0.203295313 | count | 1 |
| COX5B     | -0.1417353 | 0.1268314 | -1.1175 | 0.264   | -0.202870204 | count | 1 |
| UBA52     | -0.140711  | 0.0494109 | -2.8478 | 0.00461 | -0.202675929 | count | 1 |
| LRIF1     | -0.1536881 | 0.2949712 | -0.521  | 0.603   | -0.202354117 | count | 1 |
| HIBCH     | -0.1534984 | 0.510525  | -0.3007 | 0.764   | -0.202105733 | count | 1 |
| SH3BGR13  | -0.1403556 | 0.0827135 | -1.6969 | 0.0904  | -0.201997165 | count | 1 |
| COPS5     | -0.1464903 | 0.3310716 | -0.4425 | 0.6584  | -0.20171395  | count | 1 |
| ZNF791    | -0.1463577 | 0.2059871 | -0.7105 | 0.478   | -0.201531866 | count | 1 |
| SOS1      | -0.1528614 | 0.3966979 | -0.3853 | 0.7002  | -0.20127165  | count | 1 |
| LSM10     | -0.14269   | 0.2469225 | -0.5779 | 0.564   | -0.201067492 | count | 1 |
| LAPTM5    | -0.1394923 | 0.0855512 | -1.6305 | 0.1037  | -0.200241728 | count | 1 |
| YBX3      | -0.1401765 | 0.3164661 | -0.4429 | 0.658   | -0.200115    | count | 1 |
| IFI16     | -0.1407405 | 0.1588496 | -0.886  | 0.376   | -0.199873331 | count | 1 |
| ZNF692    | -0.1448047 | 0.8264778 | -0.1752 | 0.861   | -0.199399244 | count | 1 |
| METTL26   | -0.1514073 | 0.2773895 | -0.5458 | 0.5855  | -0.19936751  | count | 1 |
| UTP3      | -0.1446455 | 0.3550485 | -0.4074 | 0.684   | -0.199180619 | count | 1 |
| WSB1      | -0.139799  | 0.1667482 | -0.8384 | 0.402   | -0.198981396 | count | 1 |
| UQCC2     | -0.1443361 | 0.3816088 | -0.3782 | 0.7054  | -0.198755724 | count | 1 |
| REV1      | -0.141005  | 0.4208942 | -0.335  | 0.7378  | -0.198696343 | count | 1 |
| RNF181    | -0.1508858 | 0.2641532 | -0.5712 | 0.5681  | -0.198684556 | count | 1 |
| STAP1     | -0.1420824 | 0.2869152 | -0.4952 | 0.621   | -0.198671795 | count | 1 |
| HNRNPA3   | -0.1416654 | 0.1141485 | -1.2411 | 0.2152  | -0.19808976  | count | 1 |
| ARPC5L    | -0.1386481 | 0.1562357 | -0.8874 | 0.375   | -0.196291644 | count | 1 |
| RPS10     | -0.1363532 | 0.0721459 | -1.89   | 0.0594  | -0.196133456 | count | 1 |
| CAT       | -0.1423213 | 0.2847199 | -0.4999 | 0.617   | -0.195988696 | count | 1 |
| NDUFB2    | -0.1378015 | 0.1566361 | -0.8798 | 0.379   | -0.195703206 | count | 1 |
| HIST1H1E  | -0.1379378 | 0.3203825 | -0.4305 | 0.667   | -0.195287103 | count | 1 |
| HSP90AB1  | -0.1355036 | 0.0627183 | -2.1605 | 0.0313  | -0.195246249 | count | 1 |
| CTDSPL2   | -0.1394482 | 0.3706181 | -0.3763 | 0.707   | -0.194994957 | count | 1 |
| REL       | -0.1347914 | 0.0893837 | -1.508  | 0.1323  | -0.193781083 | count | 1 |
| TPI1      | -0.1355528 | 0.1301263 | -1.0417 | 0.2981  | -0.193720502 | count | 1 |
| LBH       | -0.1374629 | 0.181344  | -0.758  | 0.449   | -0.193711599 | count | 1 |
| PTPN7     | -0.1466902 | 0.2738029 | -0.5358 | 0.5924  | -0.193189026 | count | 1 |
| ARPC2     | -0.134132  | 0.08043   | -1.6677 | 0.0961  | -0.192748838 | count | 1 |
| SS18      | -0.139359  | 0.3411026 | -0.4086 | 0.6831  | -0.191920018 | count | 1 |
| NIF3L1    | -0.139241  | 0.4230538 | -0.3291 | 0.742   | -0.191757936 | count | 1 |
| MT-ND1    | -0.133232  | 0.0578675 | -2.3024 | 0.0218  | -0.191677935 | count | 1 |
| POLE3     | -0.13885   | 0.2642998 | -0.5254 | 0.5996  | -0.191220865 | count | 1 |
| LZIC      | -0.1361143 | 0.5363307 | -0.2538 | 0.7998  | -0.190341101 | count | 1 |
| MBNL1     | -0.1380169 | 0.1892664 | -0.7292 | 0.466   | -0.190076505 | count | 1 |

|            |            |           |         |         |              |       |   |
|------------|------------|-----------|---------|---------|--------------|-------|---|
| TRIM38     | -0.137521  | 0.1904307 | -0.7222 | 0.471   | -0.18939531  | count | 1 |
| ZFC3H1     | -0.1374787 | 0.2870268 | -0.479  | 0.632   | -0.189337203 | count | 1 |
| UBTF       | -0.1336425 | 0.2663301 | -0.5018 | 0.616   | -0.189212233 | count | 1 |
| NDUFB4     | -0.1371876 | 0.1603271 | -0.8557 | 0.3926  | -0.188937326 | count | 1 |
| CCT5       | -0.1348475 | 0.193094  | -0.6984 | 0.485   | -0.188572641 | count | 1 |
| RTN4       | -0.1322724 | 0.2280183 | -0.5801 | 0.562   | -0.187857555 | count | 1 |
| CYTH4      | -0.1426205 | 0.4914636 | -0.2902 | 0.7718  | -0.187856728 | count | 1 |
| RPA2       | -0.1361802 | 0.2183489 | -0.6237 | 0.5332  | -0.187553448 | count | 1 |
| LY86-AS1   | -0.1358914 | 1.253897  | -0.1084 | 0.9137  | -0.18715671  | count | 1 |
| SH3GLB1    | -0.133423  | 0.2169184 | -0.6151 | 0.539   | -0.18658396  | count | 1 |
| EXOSC6     | -0.1322921 | 0.2880195 | -0.4593 | 0.646   | -0.186434168 | count | 1 |
| RPS9       | -0.1293085 | 0.0433591 | -2.9823 | 0.00302 | -0.186349711 | count | 1 |
| DARS       | -0.1348146 | 0.2254427 | -0.598  | 0.55    | -0.185677419 | count | 1 |
| NOL7       | -0.1297995 | 0.1528021 | -0.8495 | 0.396   | -0.185309153 | count | 1 |
| IMP3       | -0.1406331 | 0.204983  | -0.6861 | 0.493   | -0.185252153 | count | 1 |
| RPS19      | -0.1280309 | 0.0499269 | -2.5644 | 0.0107  | -0.18458002  | count | 1 |
| PLK3       | -0.1315459 | 0.4259957 | -0.3088 | 0.7576  | -0.183963308 | count | 1 |
| LARP4      | -0.1315013 | 0.3795579 | -0.3465 | 0.729   | -0.18390104  | count | 1 |
| SH3BGRL    | -0.1286804 | 0.1207649 | -1.0655 | 0.287   | -0.183712344 | count | 1 |
| PLRG1      | -0.1333638 | 0.3362348 | -0.3966 | 0.692   | -0.183684233 | count | 1 |
| GADD45B    | -0.1281177 | 0.2246528 | -0.5703 | 0.569   | -0.183592429 | count | 1 |
| MZT2B      | -0.1278645 | 0.1291608 | -0.99   | 0.3227  | -0.183554354 | count | 1 |
| CTDNEP1    | -0.1392351 | 0.2417994 | -0.5758 | 0.565   | -0.183419778 | count | 1 |
| OTUD6B-AS1 | -0.1330835 | 0.290435  | -0.4582 | 0.647   | -0.18329913  | count | 1 |
| ALKBH7     | -0.1274871 | 0.1649054 | -0.7731 | 0.44    | -0.181773028 | count | 1 |
| DNAJC2     | -0.1296179 | 0.3399842 | -0.3812 | 0.703   | -0.181271459 | count | 1 |
| SKP1       | -0.1260859 | 0.092384  | -1.3648 | 0.173   | -0.180762808 | count | 1 |
| CWC25      | -0.1371541 | 0.256648  | -0.5344 | 0.593   | -0.180691828 | count | 1 |
| IER2       | -0.1255777 | 0.1522309 | -0.8249 | 0.41    | -0.18031709  | count | 1 |
| NOL9       | -0.1306813 | 0.541786  | -0.2412 | 0.81    | -0.179998574 | count | 1 |
| ANXA11     | -0.1285444 | 0.1906864 | -0.6741 | 0.501   | -0.179772592 | count | 1 |
| RPL27      | -0.1248885 | 0.0561303 | -2.225  | 0.0266  | -0.179644885 | count | 1 |
| RPL15      | -0.1245164 | 0.0438012 | -2.8428 | 0.00468 | -0.179452648 | count | 1 |
| OXLD1      | -0.1361675 | 0.4497805 | -0.3027 | 0.7622  | -0.17939836  | count | 1 |
| LGALS8     | -0.1361675 | 0.5132496 | -0.2653 | 0.791   | -0.17939836  | count | 1 |
| HEXB       | -0.1301778 | 0.3541301 | -0.3676 | 0.7133  | -0.17930674  | count | 1 |
| NUTM2B-AS1 | -0.129377  | 0.2983204 | -0.4337 | 0.6647  | -0.178206372 | count | 1 |
| PSPC1      | -0.1349371 | 0.325425  | -0.4146 | 0.6786  | -0.177785127 | count | 1 |
| NUMA1      | -0.1348807 | 0.3867524 | -0.3488 | 0.7274  | -0.177711175 | count | 1 |
| PDCD6IP    | -0.1289892 | 0.2657673 | -0.4853 | 0.628   | -0.17767349  | count | 1 |
| PXK        | -0.125015  | 0.3158172 | -0.3958 | 0.6924  | -0.17700903  | count | 1 |
| PTEN       | -0.1258968 | 0.2816213 | -0.447  | 0.655   | -0.176075715 | count | 1 |
| VTI1B      | -0.127769  | 0.249158  | -0.5128 | 0.608   | -0.175996739 | count | 1 |
| ERP44      | -0.1238465 | 0.2627427 | -0.4714 | 0.6376  | -0.175900293 | count | 1 |
| PNISR      | -0.1236243 | 0.1275161 | -0.9695 | 0.333   | -0.175584948 | count | 1 |

|          |            |           |         |          |              |       |           |
|----------|------------|-----------|---------|----------|--------------|-------|-----------|
| C8orf76  | -0.1330398 | 0.3986099 | -0.3338 | 0.7387   | -0.1752972   | count | 1         |
| NDUFC1   | -0.1251628 | 0.2631913 | -0.4756 | 0.635    | -0.175050777 | count | 1         |
| SRP72    | -0.1239972 | 0.2186886 | -0.567  | 0.571    | -0.174758271 | count | 1         |
| RPL13    | -0.1209032 | 0.0284916 | -4.2435 | 2.68E-05 | -0.174387041 | count | 0.6509988 |
| ATP5MG   | -0.1212912 | 0.0907393 | -1.3367 | 0.182    | -0.17372377  | count | 1         |
| NCOA3    | -0.1314837 | 0.2156645 | -0.6097 | 0.5424   | -0.173256424 | count | 1         |
| H2AFY    | -0.1257166 | 0.247802  | -0.5073 | 0.612    | -0.173176232 | count | 1         |
| KHDRBS2  | -0.1254453 | 0.6585791 | -0.1905 | 0.849    | -0.172803381 | count | 1         |
| PRDX3    | -0.1251543 | 0.3360941 | -0.3724 | 0.7098   | -0.172403453 | count | 1         |
| FAM204A  | -0.1307864 | 0.2143554 | -0.6101 | 0.542    | -0.17234186  | count | 1         |
| IDH3G    | -0.1298265 | 0.271696  | -0.4778 | 0.633    | -0.171082797 | count | 1         |
| LMBRD1   | -0.119725  | 0.2332979 | -0.5132 | 0.6081   | -0.170712064 | count | 1         |
| C3orf58  | -0.1238749 | 0.4286022 | -0.289  | 0.773    | -0.170645087 | count | 1         |
| SH3GLB2  | -0.1238547 | 0.4162833 | -0.2975 | 0.7662   | -0.170617324 | count | 1         |
| SAMD4B   | -0.1238272 | 0.497115  | -0.2491 | 0.803    | -0.170579528 | count | 1         |
| SSR2     | -0.1190961 | 0.1109216 | -1.0737 | 0.284    | -0.170357603 | count | 1         |
| PMF1     | -0.1229926 | 0.2651495 | -0.4639 | 0.643    | -0.169432432 | count | 1         |
| UQCR10   | -0.1200201 | 0.1732384 | -0.6928 | 0.489    | -0.169159422 | count | 1         |
| RRP1B    | -0.1280659 | 0.3583204 | -0.3574 | 0.721    | -0.168773254 | count | 1         |
| TRAPPC3  | -0.1206411 | 0.3385549 | -0.3563 | 0.722    | -0.168736354 | count | 1         |
| MRPL4    | -0.1278663 | 0.2749795 | -0.465  | 0.6422   | -0.168511401 | count | 1         |
| CIB1     | -0.1173971 | 0.1379127 | -0.8512 | 0.3951   | -0.168485351 | count | 1         |
| HSPA1B   | -0.1272727 | 0.2997355 | -0.4246 | 0.671    | -0.167732641 | count | 1         |
| RCN2     | -0.1187296 | 0.212166  | -0.5596 | 0.576    | -0.167342597 | count | 1         |
| CTSH     | -0.1171163 | 0.134261  | -0.8723 | 0.384    | -0.167210948 | count | 1         |
| C19orf25 | -0.1213195 | 0.3651113 | -0.3323 | 0.7398   | -0.167132766 | count | 1         |
| TSTD1    | -0.1179086 | 0.168027  | -0.7017 | 0.483    | -0.166956084 | count | 1         |
| TMA7     | -0.1161474 | 0.0972346 | -1.1945 | 0.233    | -0.166444494 | count | 1         |
| NAA10    | -0.1177873 | 0.2511708 | -0.469  | 0.639    | -0.166015955 | count | 1         |
| MRPL22   | -0.1199454 | 0.33476   | -0.3583 | 0.72     | -0.165243963 | count | 1         |
| POMC     | -0.1245459 | 0.4578257 | -0.272  | 0.7857   | -0.164154834 | count | 1         |
| NEAT1    | -0.1145252 | 0.1714002 | -0.6682 | 0.504    | -0.163301886 | count | 1         |
| SERF2    | -0.1135788 | 0.0708093 | -1.604  | 0.1094   | -0.163268209 | count | 1         |
| MIF4GD   | -0.1184298 | 0.3435388 | -0.3447 | 0.7305   | -0.163160542 | count | 1         |
| AQR      | -0.1237105 | 0.4643679 | -0.2664 | 0.79     | -0.163058568 | count | 1         |
| PNOC     | -0.1235211 | 0.2596859 | -0.4757 | 0.6346   | -0.162810016 | count | 1         |
| MBD6     | -0.1162955 | 0.6423158 | -0.1811 | 0.8564   | -0.162667142 | count | 1         |
| PSMB3    | -0.1144215 | 0.1596379 | -0.7168 | 0.474    | -0.1625236   | count | 1         |
| TNFAIP8  | -0.1136888 | 0.1499526 | -0.7582 | 0.449    | -0.162488014 | count | 1         |
| HLA-DPB1 | -0.1122061 | 0.0508286 | -2.2075 | 0.0278   | -0.161734208 | count | 1         |
| PARP14   | -0.1217203 | 0.192418  | -0.6326 | 0.527    | -0.160446628 | count | 1         |
| ELAVL1   | -0.1163919 | 0.2982957 | -0.3902 | 0.697    | -0.160358947 | count | 1         |
| TMEM14C  | -0.1144462 | 0.2590675 | -0.4418 | 0.659    | -0.160084138 | count | 1         |
| NDUFV2   | -0.1119378 | 0.1706701 | -0.6559 | 0.5122   | -0.159820933 | count | 1         |
| CXorf38  | -0.1209091 | 0.3626015 | -0.3334 | 0.739    | -0.159381897 | count | 1         |

|         |            |           |         |        |              |       |   |
|---------|------------|-----------|---------|--------|--------------|-------|---|
| PLEKHF1 | -0.1155334 | 0.4879075 | -0.2368 | 0.8129 | -0.159178662 | count | 1 |
| MTDH    | -0.1109881 | 0.1389199 | -0.7989 | 0.4248 | -0.159053225 | count | 1 |
| CDC26   | -0.1125669 | 0.2376289 | -0.4737 | 0.636  | -0.158665829 | count | 1 |
| COA3    | -0.120329  | 0.4652468 | -0.2586 | 0.796  | -0.158620455 | count | 1 |
| IGHG1   | -0.1115963 | 0.2690674 | -0.4148 | 0.679  | -0.158513531 | count | 1 |
| CISD2   | -0.120084  | 0.3332865 | -0.3603 | 0.7188 | -0.158298858 | count | 1 |
| PIGT    | -0.1114253 | 0.2924693 | -0.381  | 0.7034 | -0.15827081  | count | 1 |
| TWF2    | -0.1118965 | 0.2934934 | -0.3813 | 0.703  | -0.157721876 | count | 1 |
| SAT2    | -0.1104338 | 0.2616326 | -0.4221 | 0.6732 | -0.157471006 | count | 1 |
| TEX264  | -0.1194439 | 0.2405831 | -0.4965 | 0.6198 | -0.157458606 | count | 1 |
| STX5    | -0.1103631 | 0.2947332 | -0.3745 | 0.7082 | -0.157370246 | count | 1 |
| ARMCX3  | -0.1115101 | 0.2569377 | -0.434  | 0.665  | -0.157177802 | count | 1 |
| SEL1L3  | -0.1114531 | 0.2498968 | -0.446  | 0.656  | -0.157097543 | count | 1 |
| ARPC1B  | -0.1094421 | 0.1591712 | -0.6876 | 0.4921 | -0.156908143 | count | 1 |
| GNPTG   | -0.1120761 | 0.3800536 | -0.2949 | 0.7682 | -0.156773528 | count | 1 |
| VPS13C  | -0.1103183 | 0.1706024 | -0.6466 | 0.518  | -0.156699498 | count | 1 |
| UQCRB   | -0.1089959 | 0.0843355 | -1.2924 | 0.1969 | -0.15638317  | count | 1 |
| COPS6   | -0.1108535 | 0.2158555 | -0.5136 | 0.608  | -0.156253262 | count | 1 |
| PDCD10  | -0.1184039 | 0.2411807 | -0.4909 | 0.6237 | -0.156093327 | count | 1 |
| HCCS    | -0.1131624 | 0.3140592 | -0.3603 | 0.7188 | -0.155918755 | count | 1 |
| SRSF7   | -0.1105448 | 0.1177602 | -0.9387 | 0.3484 | -0.155818588 | count | 1 |
| RNMT    | -0.1084889 | 0.1476105 | -0.735  | 0.4627 | -0.155472766 | count | 1 |
| KDM1A   | -0.1123009 | 0.4658631 | -0.2411 | 0.8096 | -0.154734198 | count | 1 |
| NOL11   | -0.1123009 | 0.4797935 | -0.2341 | 0.815  | -0.154734198 | count | 1 |
| CSNK1G2 | -0.1095943 | 0.273141  | -0.4012 | 0.688  | -0.154480183 | count | 1 |
| CDC123  | -0.1164017 | 0.2204484 | -0.528  | 0.5977 | -0.153464606 | count | 1 |
| TUBA1B  | -0.107549  | 0.1125442 | -0.9556 | 0.34   | -0.153359577 | count | 1 |
| BLOC1S2 | -0.1075306 | 0.2563314 | -0.4195 | 0.6751 | -0.153333352 | count | 1 |
| IKZF1   | -0.1078747 | 0.255911  | -0.4215 | 0.6736 | -0.15323089  | count | 1 |
| ERGIC2  | -0.1104589 | 0.2511259 | -0.4399 | 0.66   | -0.152201329 | count | 1 |
| U2AF1L4 | -0.110356  | 0.3150097 | -0.3503 | 0.726  | -0.152059829 | count | 1 |
| SEMA7A  | -0.1072864 | 0.3746368 | -0.2864 | 0.7747 | -0.151927456 | count | 1 |
| AGTRAP  | -0.115151  | 0.5412012 | -0.2128 | 0.8316 | -0.151822345 | count | 1 |
| HLA-C   | -0.1050764 | 0.048949  | -2.1466 | 0.0324 | -0.151360338 | count | 1 |
| HPS3    | -0.1096086 | 0.5317837 | -0.2061 | 0.8368 | -0.151032051 | count | 1 |
| NUBP1   | -0.1092622 | 0.3223916 | -0.3389 | 0.7348 | -0.150555693 | count | 1 |
| PGK1    | -0.1052942 | 0.1314369 | -0.8011 | 0.424  | -0.15049496  | count | 1 |
| MINOS1  | -0.1074635 | 0.2226087 | -0.4827 | 0.63   | -0.150329956 | count | 1 |
| RPSA    | -0.103811  | 0.0463445 | -2.24   | 0.0256 | -0.149649658 | count | 1 |
| EIF3L   | -0.1051141 | 0.1503113 | -0.6993 | 0.485  | -0.14964139  | count | 1 |
| NR4A2   | -0.1048019 | 0.1484604 | -0.7059 | 0.481  | -0.149637043 | count | 1 |
| SEC62   | -0.1043078 | 0.1337786 | -0.7797 | 0.436  | -0.149211751 | count | 1 |
| RAB22A  | -0.1052641 | 0.3190495 | -0.3299 | 0.7416 | -0.149065957 | count | 1 |
| RPL35   | -0.1032578 | 0.0513347 | -2.0115 | 0.0449 | -0.14871595  | count | 1 |
| FKBP8   | -0.1040016 | 0.2063095 | -0.5041 | 0.6144 | -0.148058512 | count | 1 |

|            |            |           |         |        |              |       |   |
|------------|------------|-----------|---------|--------|--------------|-------|---|
| TPM3       | -0.1034192 | 0.0936328 | -1.1045 | 0.27   | -0.147473563 | count | 1 |
| RAB2A      | -0.1053093 | 0.2013374 | -0.523  | 0.601  | -0.147320383 | count | 1 |
| COQ10B     | -0.1112923 | 0.2003582 | -0.5555 | 0.5789 | -0.146754641 | count | 1 |
| CBX3       | -0.1048132 | 0.1826131 | -0.574  | 0.566  | -0.146627272 | count | 1 |
| SLC25A36   | -0.1033216 | 0.2701233 | -0.3825 | 0.702  | -0.145646948 | count | 1 |
| SLC39A10   | -0.1038104 | 0.3547425 | -0.2926 | 0.77   | -0.145226213 | count | 1 |
| NPM1       | -0.1008692 | 0.0650591 | -1.5504 | 0.122  | -0.145038208 | count | 1 |
| DEK        | -0.1051453 | 0.1498678 | -0.7016 | 0.483  | -0.144893786 | count | 1 |
| AC245297.3 | -0.1049957 | 0.2867945 | -0.3661 | 0.7145 | -0.144688027 | count | 1 |
| ARAP2      | -0.1049957 | 0.3052344 | -0.344  | 0.731  | -0.144688027 | count | 1 |
| THG1L      | -0.1033476 | 0.4831944 | -0.2139 | 0.8307 | -0.144579601 | count | 1 |
| LINC01781  | -0.1030922 | 0.2117413 | -0.4869 | 0.627  | -0.144222759 | count | 1 |
| TMEM147    | -0.1030458 | 0.270962  | -0.3803 | 0.704  | -0.14415793  | count | 1 |
| FAM96A     | -0.1009359 | 0.2372679 | -0.4254 | 0.6707 | -0.143696496 | count | 1 |
| MRPL51     | -0.1011631 | 0.2333073 | -0.4336 | 0.665  | -0.143262875 | count | 1 |
| CAPRIN2    | -0.1081355 | 0.5383627 | -0.2009 | 0.8409 | -0.142607691 | count | 1 |
| GRK6       | -0.1034067 | 0.2738921 | -0.3775 | 0.7059 | -0.142502451 | count | 1 |
| SLC25A5    | -0.0999126 | 0.1118453 | -0.8933 | 0.372  | -0.14247558  | count | 1 |
| CD81       | -0.0991408 | 0.0922809 | -1.0743 | 0.2833 | -0.142423863 | count | 1 |
| GTF2A2     | -0.1027789 | 0.209541  | -0.4905 | 0.624  | -0.141638912 | count | 1 |
| RPL24      | -0.0977775 | 0.0429189 | -2.2782 | 0.0232 | -0.140927173 | count | 1 |
| PTPRA      | -0.1022308 | 0.2984221 | -0.3426 | 0.7321 | -0.140884984 | count | 1 |
| MNDA       | -0.099131  | 0.2932852 | -0.338  | 0.736  | -0.140818593 | count | 1 |
| ARHGAP24   | -0.0989956 | 0.154935  | -0.6389 | 0.523  | -0.140626372 | count | 1 |
| HDAC3      | -0.106278  | 0.2780883 | -0.3822 | 0.703  | -0.140167129 | count | 1 |
| RPL23A     | -0.0971635 | 0.0403134 | -2.4102 | 0.0163 | -0.140021367 | count | 1 |
| NGLY1      | -0.0983508 | 0.2294925 | -0.4286 | 0.668  | -0.139710975 | count | 1 |
| CDK17      | -0.0985965 | 0.4808478 | -0.205  | 0.8376 | -0.139630843 | count | 1 |
| NIPSNAP2   | -0.0996855 | 0.3535773 | -0.2819 | 0.778  | -0.139462742 | count | 1 |
| MRPS7      | -0.0988069 | 0.2594559 | -0.3808 | 0.704  | -0.139288667 | count | 1 |
| BCAS4      | -0.0968105 | 0.2036991 | -0.4753 | 0.6348 | -0.138490468 | count | 1 |
| LINC01504  | -0.1049531 | 0.8713027 | -0.1205 | 0.9042 | -0.138426146 | count | 1 |
| COX6A1     | -0.0967701 | 0.1117869 | -0.8657 | 0.387  | -0.138316081 | count | 1 |
| M6PR       | -0.0972339 | 0.2219695 | -0.4381 | 0.662  | -0.138125339 | count | 1 |
| FBL        | -0.0955905 | 0.1942902 | -0.492  | 0.623  | -0.135792202 | count | 1 |
| INSIG2     | -0.0984719 | 0.4449421 | -0.2213 | 0.8249 | -0.135714083 | count | 1 |
| UGP2       | -0.0966346 | 0.2650108 | -0.3646 | 0.716  | -0.135199513 | count | 1 |
| PPP1R12A   | -0.0958955 | 0.1796998 | -0.5336 | 0.594  | -0.1351881   | count | 1 |
| SSU72      | -0.0953209 | 0.1678097 | -0.568  | 0.57   | -0.134995285 | count | 1 |
| CUL3       | -0.0979314 | 0.2155802 | -0.4543 | 0.65   | -0.134970488 | count | 1 |
| RPL9       | -0.0933934 | 0.0415472 | -2.2479 | 0.0251 | -0.134628851 | count | 1 |
| RPL3       | -0.0933203 | 0.0393813 | -2.3697 | 0.0182 | -0.134515317 | count | 1 |
| ERICH1     | -0.0942454 | 0.2436613 | -0.3868 | 0.6991 | -0.134176434 | count | 1 |
| WASHC4     | -0.0951715 | 0.288219  | -0.3302 | 0.741  | -0.133154907 | count | 1 |
| PTPN22     | -0.0964911 | 0.3691843 | -0.2614 | 0.794  | -0.132988916 | count | 1 |



|          |            |           |         |        |              |       |   |
|----------|------------|-----------|---------|--------|--------------|-------|---|
| OGFOD3   | -0.0943244 | 0.4257372 | -0.2216 | 0.8248 | -0.132975185 | count | 1 |
| SLA      | -0.1006487 | 0.4516557 | -0.2228 | 0.824  | -0.132768802 | count | 1 |
| SNX22    | -0.095998  | 0.3746206 | -0.2563 | 0.798  | -0.132310482 | count | 1 |
| SDAD1    | -0.1000551 | 0.3198258 | -0.3128 | 0.7545 | -0.131988485 | count | 1 |
| ARPC3    | -0.0916444 | 0.0643507 | -1.4241 | 0.155  | -0.131973395 | count | 1 |
| PPM1K    | -0.0941262 | 0.1848558 | -0.5092 | 0.611  | -0.131694108 | count | 1 |
| SIVA1    | -0.0996063 | 0.1851493 | -0.538  | 0.5909 | -0.131398493 | count | 1 |
| TGFB1    | -0.0920425 | 0.1764195 | -0.5217 | 0.602  | -0.130754932 | count | 1 |
| ASAH1    | -0.0923964 | 0.2395643 | -0.3857 | 0.7    | -0.130259481 | count | 1 |
| GGNBP2   | -0.0911694 | 0.1657482 | -0.55   | 0.583  | -0.130179861 | count | 1 |
| HSP90B1  | -0.0906762 | 0.1295947 | -0.6997 | 0.4845 | -0.130178865 | count | 1 |
| TMEM242  | -0.0984288 | 0.3586871 | -0.2744 | 0.7839 | -0.129850463 | count | 1 |
| TXLNB    | -0.0937722 | 0.4081924 | -0.2297 | 0.818  | -0.129247947 | count | 1 |
| SPCS2    | -0.0900094 | 0.1175623 | -0.7656 | 0.4443 | -0.128996687 | count | 1 |
| GNA13    | -0.0920534 | 0.3409528 | -0.27   | 0.787  | -0.128797271 | count | 1 |
| MZT2A    | -0.0975414 | 0.1646438 | -0.5924 | 0.5539 | -0.128683732 | count | 1 |
| CHST11   | -0.093322  | 0.3040785 | -0.3069 | 0.7591 | -0.128628474 | count | 1 |
| PHC3     | -0.0931915 | 0.3672449 | -0.2538 | 0.8    | -0.128448905 | count | 1 |
| RPL4     | -0.0892432 | 0.0713749 | -1.2503 | 0.2118 | -0.128252435 | count | 1 |
| EIF4A3   | -0.0901894 | 0.2117829 | -0.4259 | 0.67   | -0.128123903 | count | 1 |
| CCDC9    | -0.0970022 | 0.5207803 | -0.1863 | 0.8523 | -0.12797477  | count | 1 |
| MT-ND3   | -0.0888146 | 0.04796   | -1.8518 | 0.0647 | -0.127855179 | count | 1 |
| ZNHIT1   | -0.090166  | 0.2531854 | -0.3561 | 0.722  | -0.127117704 | count | 1 |
| HMGB2    | -0.0901523 | 0.191832  | -0.47   | 0.639  | -0.127098405 | count | 1 |
| CANX     | -0.0907562 | 0.2928041 | -0.31   | 0.757  | -0.126984295 | count | 1 |
| TRIM44   | -0.0919752 | 0.2785872 | -0.3301 | 0.741  | -0.126775222 | count | 1 |
| PPCS     | -0.0905563 | 0.2940777 | -0.3079 | 0.758  | -0.126704908 | count | 1 |
| LAMTOR5  | -0.0886556 | 0.1593803 | -0.5563 | 0.578  | -0.126591753 | count | 1 |
| ATP6V1F  | -0.0890346 | 0.1782035 | -0.4996 | 0.618  | -0.126484288 | count | 1 |
| HSPA4    | -0.0900571 | 0.2140083 | -0.4208 | 0.674  | -0.126007203 | count | 1 |
| FBXW5    | -0.0953943 | 0.37768   | -0.2526 | 0.8007 | -0.125860474 | count | 1 |
| SRGAP2   | -0.0953943 | 0.4332247 | -0.2202 | 0.8258 | -0.125860474 | count | 1 |
| PIN1     | -0.0911938 | 0.3066919 | -0.2973 | 0.7663 | -0.125699941 | count | 1 |
| SNHG7    | -0.0952385 | 0.1587386 | -0.6    | 0.549  | -0.125655593 | count | 1 |
| MEF2C    | -0.0879407 | 0.1146355 | -0.7671 | 0.443  | -0.125410652 | count | 1 |
| CAP1     | -0.0884562 | 0.1615407 | -0.5476 | 0.584  | -0.125279749 | count | 1 |
| RPL18A   | -0.0868517 | 0.042223  | -2.057  | 0.0403 | -0.12526175  | count | 1 |
| EBPL     | -0.0894998 | 0.3105328 | -0.2882 | 0.773  | -0.125228284 | count | 1 |
| RNASEH2B | -0.0875223 | 0.1819912 | -0.4809 | 0.631  | -0.124609271 | count | 1 |
| SNHG8    | -0.0944058 | 0.1184874 | -0.7968 | 0.426  | -0.124560533 | count | 1 |
| CEBPB    | -0.0943739 | 0.2799332 | -0.3371 | 0.7362 | -0.124518579 | count | 1 |
| G3BP1    | -0.0941949 | 0.2532644 | -0.3719 | 0.7101 | -0.124283172 | count | 1 |
| RPS6     | -0.0859942 | 0.0377669 | -2.277  | 0.0233 | -0.123987445 | count | 1 |
| NDUFS8   | -0.0876829 | 0.2540989 | -0.3451 | 0.73   | -0.123619811 | count | 1 |
| ETS1     | -0.088332  | 0.21964   | -0.4022 | 0.688  | -0.123596055 | count | 1 |

|            |            |           |         |        |              |       |   |
|------------|------------|-----------|---------|--------|--------------|-------|---|
| RRAS2      | -0.0881439 | 0.2844516 | -0.3099 | 0.757  | -0.123333144 | count | 1 |
| MFNG       | -0.0894324 | 0.3746252 | -0.2387 | 0.8114 | -0.12327597  | count | 1 |
| PRDX5      | -0.089211  | 0.1776289 | -0.5022 | 0.6158 | -0.122971277 | count | 1 |
| KMT2A      | -0.0861864 | 0.2019879 | -0.4267 | 0.67   | -0.122708163 | count | 1 |
| TMC6       | -0.0863659 | 0.2790425 | -0.3095 | 0.7571 | -0.122695106 | count | 1 |
| NDUFC2     | -0.0857757 | 0.2040554 | -0.4204 | 0.6744 | -0.122123694 | count | 1 |
| RRAGC      | -0.0881291 | 0.3407881 | -0.2586 | 0.796  | -0.121482316 | count | 1 |
| HELZ       | -0.0865853 | 0.3970141 | -0.2181 | 0.8275 | -0.12115461  | count | 1 |
| PRKCB      | -0.0859038 | 0.2216419 | -0.3876 | 0.699  | -0.121113527 | count | 1 |
| RPL36      | -0.0838696 | 0.0499122 | -1.6803 | 0.0936 | -0.120702717 | count | 1 |
| DCAF7      | -0.0913569 | 0.4017632 | -0.2274 | 0.8202 | -0.120550449 | count | 1 |
| ABHD14B    | -0.0873809 | 0.2404976 | -0.3633 | 0.7165 | -0.120452575 | count | 1 |
| ITGB1      | -0.0846678 | 0.2011641 | -0.4209 | 0.674  | -0.120283973 | count | 1 |
| USP3       | -0.0869083 | 0.2104323 | -0.413  | 0.68   | -0.119802124 | count | 1 |
| ITGA4      | -0.084396  | 0.2444122 | -0.3453 | 0.73   | -0.119532909 | count | 1 |
| FAM168B    | -0.0860775 | 0.5217328 | -0.165  | 0.869  | -0.118658646 | count | 1 |
| CHD2       | -0.0860367 | 0.2508511 | -0.343  | 0.7318 | -0.11860249  | count | 1 |
| PKM        | -0.0898282 | 0.1887233 | -0.476  | 0.634  | -0.118539488 | count | 1 |
| NRROS      | -0.0896162 | 0.5039953 | -0.1778 | 0.859  | -0.118260591 | count | 1 |
| CLNS1A     | -0.0827971 | 0.231122  | -0.3582 | 0.7203 | -0.117884753 | count | 1 |
| RNASEH2C   | -0.0831466 | 0.250046  | -0.3325 | 0.7396 | -0.117764426 | count | 1 |
| ZNF280D    | -0.0841163 | 0.5303416 | -0.1586 | 0.8741 | -0.117703389 | count | 1 |
| HLA-DPA1   | -0.0815487 | 0.0508717 | -1.603  | 0.11   | -0.117567113 | count | 1 |
| MRPL34     | -0.0852416 | 0.2409821 | -0.3537 | 0.724  | -0.117508113 | count | 1 |
| MT-ND4     | -0.081499  | 0.0450354 | -1.8097 | 0.071  | -0.117467909 | count | 1 |
| CHCHD1     | -0.0831998 | 0.3669095 | -0.2268 | 0.821  | -0.116422232 | count | 1 |
| RAB1A      | -0.0881077 | 0.3518803 | -0.2504 | 0.8024 | -0.116275958 | count | 1 |
| FAU        | -0.0804681 | 0.0369175 | -2.1797 | 0.0298 | -0.116039093 | count | 1 |
| PARP1      | -0.0812037 | 0.1494992 | -0.5432 | 0.587  | -0.115954722 | count | 1 |
| MYL6       | -0.0805489 | 0.0754641 | -1.0674 | 0.286  | -0.115916398 | count | 1 |
| SUB1       | -0.0805419 | 0.1056878 | -0.7621 | 0.4464 | -0.115749269 | count | 1 |
| AC026250.1 | -0.0874398 | 0.786352  | -0.1112 | 0.912  | -0.115397179 | count | 1 |
| COL4A3BP   | -0.0809026 | 0.3357532 | -0.241  | 0.8097 | -0.114937577 | count | 1 |
| NCL        | -0.0799109 | 0.0828333 | -0.9647 | 0.335  | -0.114918946 | count | 1 |
| KIAA1109   | -0.0830276 | 0.4301803 | -0.193  | 0.847  | -0.114460591 | count | 1 |
| FIS1       | -0.0805066 | 0.2122254 | -0.3793 | 0.7046 | -0.114375262 | count | 1 |
| RPS15      | -0.0787117 | 0.0366733 | -2.1463 | 0.0324 | -0.113492331 | count | 1 |
| SUMO3      | -0.0804582 | 0.259067  | -0.3106 | 0.756  | -0.113441581 | count | 1 |
| SLC25A28   | -0.0820544 | 0.3368858 | -0.2436 | 0.8077 | -0.113120924 | count | 1 |
| EIF3F      | -0.0786835 | 0.0979561 | -0.8033 | 0.4223 | -0.113078831 | count | 1 |
| EIF2S2     | -0.0804605 | 0.1710117 | -0.4705 | 0.638  | -0.112592841 | count | 1 |
| MBD4       | -0.0815312 | 0.175835  | -0.4637 | 0.643  | -0.112400688 | count | 1 |
| FAM27C     | -0.0797368 | 1.2348312 | -0.0646 | 0.9485 | -0.111581105 | count | 1 |
| RAB21      | -0.0809224 | 0.2361999 | -0.3426 | 0.7321 | -0.111562598 | count | 1 |
| RBM39      | -0.0768481 | 0.09551   | -0.8046 | 0.4215 | -0.109180104 | count | 1 |

|          |            |           |         |        |              |       |   |
|----------|------------|-----------|---------|--------|--------------|-------|---|
| PLEK     | -0.0761435 | 0.192863  | -0.3948 | 0.6932 | -0.108842306 | count | 1 |
| H3F3A    | -0.0751573 | 0.0636952 | -1.18   | 0.239  | -0.108279224 | count | 1 |
| YPEL3    | -0.0767836 | 0.1574095 | -0.4878 | 0.626  | -0.108264234 | count | 1 |
| LSP1     | -0.07572   | 0.1355605 | -0.5586 | 0.577  | -0.108237109 | count | 1 |
| RPS25    | -0.0750379 | 0.0338651 | -2.2158 | 0.0272 | -0.108183595 | count | 1 |
| FCGR2B   | -0.0766415 | 0.2092455 | -0.3663 | 0.714  | -0.108064014 | count | 1 |
| CXXC1    | -0.0782994 | 0.4413054 | -0.1774 | 0.8593 | -0.107951492 | count | 1 |
| DCP2     | -0.0816561 | 0.2606651 | -0.3133 | 0.754  | -0.107785616 | count | 1 |
| ATXN10   | -0.0769163 | 0.2614981 | -0.2941 | 0.769  | -0.107637856 | count | 1 |
| ARL6IP4  | -0.0759002 | 0.1269059 | -0.5981 | 0.55   | -0.107506734 | count | 1 |
| FAM177B  | -0.0814169 | 0.4727949 | -0.1722 | 0.863  | -0.107470753 | count | 1 |
| FCRL1    | -0.081383  | 0.2740346 | -0.297  | 0.7666 | -0.107426129 | count | 1 |
| DNAJC8   | -0.0778429 | 0.1819674 | -0.4278 | 0.669  | -0.107322989 | count | 1 |
| CAPZB    | -0.076502  | 0.1321305 | -0.579  | 0.563  | -0.107058613 | count | 1 |
| GID8     | -0.0754059 | 0.365392  | -0.2064 | 0.8366 | -0.106806983 | count | 1 |
| TRIP11   | -0.0774397 | 0.3566863 | -0.2171 | 0.828  | -0.10676786  | count | 1 |
| THAP1    | -0.0804435 | 0.5281169 | -0.1523 | 0.879  | -0.106189394 | count | 1 |
| RPL21    | -0.0734558 | 0.0388379 | -1.8913 | 0.0592 | -0.105911414 | count | 1 |
| AURKAIP1 | -0.0738812 | 0.1997989 | -0.3698 | 0.7117 | -0.105501742 | count | 1 |
| EEF1D    | -0.0727168 | 0.0643435 | -1.1301 | 0.259  | -0.104771484 | count | 1 |
| IRF8     | -0.0759253 | 0.1458456 | -0.5206 | 0.6029 | -0.104682748 | count | 1 |
| NCF2     | -0.0741342 | 0.6216694 | -0.1193 | 0.9051 | -0.104531125 | count | 1 |
| PRPF40A  | -0.0730958 | 0.1953043 | -0.3743 | 0.708  | -0.104077569 | count | 1 |
| ADH5     | -0.0742519 | 0.2642492 | -0.281  | 0.779  | -0.103912591 | count | 1 |
| PTP4A3   | -0.0749899 | 0.5447798 | -0.1377 | 0.8906 | -0.103394779 | count | 1 |
| TRAPPC10 | -0.0728982 | 0.2531214 | -0.288  | 0.773  | -0.103256902 | count | 1 |
| ANP32A   | -0.0726076 | 0.2193973 | -0.3309 | 0.741  | -0.102380001 | count | 1 |
| BORCS5   | -0.0727484 | 0.4463622 | -0.163  | 0.8706 | -0.101810345 | count | 1 |
| EXOC5    | -0.0737545 | 0.3968718 | -0.1858 | 0.8527 | -0.101693665 | count | 1 |
| FNBP1    | -0.076916  | 0.1712276 | -0.4492 | 0.654  | -0.101545149 | count | 1 |
| ACTR3    | -0.0708562 | 0.118122  | -0.5999 | 0.549  | -0.101286422 | count | 1 |
| RTCB     | -0.0734534 | 0.2839283 | -0.2587 | 0.796  | -0.101279047 | count | 1 |
| C19orf66 | -0.0733542 | 0.2611593 | -0.2809 | 0.7789 | -0.101142446 | count | 1 |
| BCL2     | -0.0764    | 0.1814802 | -0.421  | 0.674  | -0.100865695 | count | 1 |
| PTGES3   | -0.07036   | 0.1231955 | -0.5711 | 0.568  | -0.100731237 | count | 1 |
| ATP5F1E  | -0.0700468 | 0.0715108 | -0.9795 | 0.3279 | -0.10066807  | count | 1 |
| TOB2     | -0.072718  | 0.299825  | -0.2425 | 0.8085 | -0.100266372 | count | 1 |
| PRPF38A  | -0.0757914 | 0.3392769 | -0.2234 | 0.8233 | -0.100064277 | count | 1 |
| RPS24    | -0.0693824 | 0.0397832 | -1.744  | 0.0818 | -0.100036363 | count | 1 |
| CD27     | -0.0709309 | 0.1870469 | -0.3792 | 0.705  | -0.100017302 | count | 1 |
| YTHDC1   | -0.0752917 | 0.2106832 | -0.3574 | 0.721  | -0.099406235 | count | 1 |
| U2SURP   | -0.0715856 | 0.2064908 | -0.3467 | 0.729  | -0.098706961 | count | 1 |
| TMEM258  | -0.0691802 | 0.1967546 | -0.3516 | 0.725  | -0.098290722 | count | 1 |
| HLA-A    | -0.0681915 | 0.0483619 | -1.41   | 0.159  | -0.09828077  | count | 1 |
| RPS2     | -0.0681206 | 0.0348562 | -1.9543 | 0.0513 | -0.098240628 | count | 1 |

|         |            |           |         |        |              |       |   |
|---------|------------|-----------|---------|--------|--------------|-------|---|
| AIMP1   | -0.0743387 | 0.2942012 | -0.2527 | 0.801  | -0.098151191 | count | 1 |
| NDUFS7  | -0.0742514 | 0.1996011 | -0.372  | 0.7101 | -0.098036218 | count | 1 |
| PPIA    | -0.0681707 | 0.0761717 | -0.895  | 0.3713 | -0.097704289 | count | 1 |
| NAP1L1  | -0.067994  | 0.1295636 | -0.5248 | 0.6    | -0.097344649 | count | 1 |
| RPL28   | -0.0674425 | 0.0316878 | -2.1283 | 0.0339 | -0.097266737 | count | 1 |
| PRCP    | -0.0694177 | 0.4538802 | -0.1529 | 0.8785 | -0.097152964 | count | 1 |
| EIF1AX  | -0.0731052 | 0.1908953 | -0.383  | 0.7019 | -0.096526621 | count | 1 |
| GSTP1   | -0.0670326 | 0.1465847 | -0.4573 | 0.6477 | -0.096152235 | count | 1 |
| S100A4  | -0.0668575 | 0.1496936 | -0.4466 | 0.6554 | -0.096051533 | count | 1 |
| ECI1    | -0.0672993 | 0.3164024 | -0.2127 | 0.8317 | -0.095330212 | count | 1 |
| SSSCA1  | -0.0669957 | 0.3113375 | -0.2152 | 0.8297 | -0.095188266 | count | 1 |
| ASH1L   | -0.0674236 | 0.2377819 | -0.2836 | 0.777  | -0.095074797 | count | 1 |
| RACK1   | -0.0658123 | 0.0448583 | -1.4671 | 0.143  | -0.094884476 | count | 1 |
| SKI     | -0.0716219 | 0.6039835 | -0.1186 | 0.9057 | -0.094572867 | count | 1 |
| ATP5PF  | -0.0660459 | 0.1564667 | -0.4221 | 0.673  | -0.094411938 | count | 1 |
| HNRNPF  | -0.0656689 | 0.1229283 | -0.5342 | 0.5935 | -0.094196425 | count | 1 |
| RPL38   | -0.0656333 | 0.0542363 | -1.2101 | 0.2269 | -0.094068239 | count | 1 |
| TPT1    | -0.0647438 | 0.0354214 | -1.8278 | 0.0682 | -0.093365277 | count | 1 |
| PMPCB   | -0.0703291 | 0.248062  | -0.2835 | 0.7769 | -0.092869868 | count | 1 |
| MTRF1L  | -0.0672841 | 0.4924291 | -0.1366 | 0.8914 | -0.09278284  | count | 1 |
| TMEM43  | -0.0672841 | 0.5160411 | -0.1304 | 0.8963 | -0.09278284  | count | 1 |
| SLC9B2  | -0.0672841 | 0.5771359 | -0.1166 | 0.9072 | -0.09278284  | count | 1 |
| PRRC1   | -0.0672841 | 0.5967896 | -0.1127 | 0.91   | -0.09278284  | count | 1 |
| MLF2    | -0.0699738 | 0.2656646 | -0.2634 | 0.7924 | -0.092401807 | count | 1 |
| RGS19   | -0.0649587 | 0.1590514 | -0.4084 | 0.683  | -0.092295214 | count | 1 |
| TMEM80  | -0.0665531 | 0.5132061 | -0.1297 | 0.8969 | -0.091775998 | count | 1 |
| LONRF1  | -0.0694382 | 0.3194664 | -0.2174 | 0.828  | -0.091696201 | count | 1 |
| TXNL4A  | -0.0652541 | 0.1945858 | -0.3353 | 0.7375 | -0.091330385 | count | 1 |
| ANP32E  | -0.0651236 | 0.1572176 | -0.4142 | 0.679  | -0.091147878 | count | 1 |
| RBM8A   | -0.0637264 | 0.1121879 | -0.568  | 0.57   | -0.090741379 | count | 1 |
| RAB4A   | -0.0652573 | 0.3929074 | -0.1661 | 0.868  | -0.089991164 | count | 1 |
| SPCS3   | -0.0650662 | 0.2305508 | -0.2822 | 0.7779 | -0.089727936 | count | 1 |
| PSMA5   | -0.0649857 | 0.2877939 | -0.2258 | 0.8215 | -0.089617052 | count | 1 |
| TMBIM4  | -0.0624443 | 0.1505336 | -0.4148 | 0.6785 | -0.089601888 | count | 1 |
| CHMP5   | -0.063972  | 0.2486463 | -0.2573 | 0.797  | -0.089537315 | count | 1 |
| SNRPD3  | -0.0649034 | 0.152692  | -0.4251 | 0.671  | -0.089503688 | count | 1 |
| HNRNPC  | -0.0635232 | 0.1407693 | -0.4513 | 0.652  | -0.088909636 | count | 1 |
| TMEM50A | -0.0629776 | 0.166823  | -0.3775 | 0.706  | -0.088809008 | count | 1 |
| SYNRG   | -0.0643022 | 0.2370285 | -0.2713 | 0.7863 | -0.088675557 | count | 1 |
| P3H1    | -0.0669645 | 1.2545481 | -0.0534 | 0.9575 | -0.08843698  | count | 1 |
| MRPL41  | -0.0624763 | 0.2126937 | -0.2937 | 0.769  | -0.087445445 | count | 1 |
| RBM25   | -0.0614048 | 0.1332742 | -0.4607 | 0.645  | -0.087436659 | count | 1 |
| RBBP6   | -0.0633027 | 0.2741362 | -0.2309 | 0.817  | -0.087298742 | count | 1 |
| LSM8    | -0.0660788 | 0.1581348 | -0.4179 | 0.6762 | -0.087269891 | count | 1 |
| GNB2    | -0.0620786 | 0.1910112 | -0.325  | 0.745  | -0.086889213 | count | 1 |

|           |            |           |         |        |              |       |   |
|-----------|------------|-----------|---------|--------|--------------|-------|---|
| GLRX5     | -0.0629839 | 0.3295313 | -0.1911 | 0.8485 | -0.086859583 | count | 1 |
| ARPC5     | -0.0611235 | 0.1306826 | -0.4677 | 0.64   | -0.086848069 | count | 1 |
| NT5C      | -0.0617676 | 0.2042191 | -0.3025 | 0.762  | -0.086454238 | count | 1 |
| POLR2K    | -0.0616747 | 0.2212457 | -0.2788 | 0.781  | -0.086324304 | count | 1 |
| SAP18     | -0.0607821 | 0.1161498 | -0.5233 | 0.601  | -0.086102596 | count | 1 |
| CLEC2D    | -0.0614074 | 0.309971  | -0.1981 | 0.843  | -0.085950446 | count | 1 |
| SELENOT   | -0.0613521 | 0.1464433 | -0.4189 | 0.675  | -0.085873101 | count | 1 |
| LSM2      | -0.0599275 | 0.2194041 | -0.2731 | 0.785  | -0.083880544 | count | 1 |
| NCK2      | -0.0634935 | 0.3439592 | -0.1846 | 0.8536 | -0.083862822 | count | 1 |
| ERP29     | -0.0586327 | 0.1002847 | -0.5847 | 0.559  | -0.083732208 | count | 1 |
| LSM1      | -0.0628065 | 0.3272601 | -0.1919 | 0.8479 | -0.082957349 | count | 1 |
| SZRD1     | -0.0588056 | 0.308977  | -0.1903 | 0.849  | -0.082311319 | count | 1 |
| EIF3E     | -0.0572448 | 0.1112433 | -0.5146 | 0.607  | -0.082083056 | count | 1 |
| AP1S2     | -0.0569103 | 0.2680146 | -0.2123 | 0.8319 | -0.081273049 | count | 1 |
| ARL4C     | -0.0613778 | 0.40981   | -0.1498 | 0.881  | -0.081074168 | count | 1 |
| SSPN      | -0.0611529 | 0.2861626 | -0.2137 | 0.831  | -0.080777709 | count | 1 |
| NDUFA3    | -0.0565723 | 0.191854  | -0.2949 | 0.7682 | -0.08038365  | count | 1 |
| GCC2      | -0.0579052 | 0.179601  | -0.3224 | 0.747  | -0.079862804 | count | 1 |
| LINC02132 | -0.0577974 | 0.7198907 | -0.0803 | 0.936  | -0.079714277 | count | 1 |
| ANAPC11   | -0.06025   | 0.2397466 | -0.2513 | 0.8017 | -0.079587476 | count | 1 |
| PTPN18    | -0.0566759 | 0.3991317 | -0.142  | 0.887  | -0.079332344 | count | 1 |
| ZFAS1     | -0.0551916 | 0.0947265 | -0.5826 | 0.56   | -0.079139377 | count | 1 |
| WASHC3    | -0.0573527 | 0.2910577 | -0.197  | 0.8439 | -0.079101564 | count | 1 |
| COX7A2    | -0.0553861 | 0.1211204 | -0.4573 | 0.648  | -0.078996938 | count | 1 |
| ZNF787    | -0.0562736 | 0.3030959 | -0.1857 | 0.853  | -0.078769599 | count | 1 |
| MED13L    | -0.0570393 | 0.3191406 | -0.1787 | 0.8582 | -0.078669751 | count | 1 |
| SRA1      | -0.0552217 | 0.3618137 | -0.1526 | 0.8788 | -0.078465219 | count | 1 |
| HNRNPA0   | -0.0535385 | 0.1315892 | -0.4069 | 0.684  | -0.076362353 | count | 1 |
| EVL       | -0.0536312 | 0.1964432 | -0.273  | 0.785  | -0.075976706 | count | 1 |
| DDOST     | -0.0549052 | 0.3153546 | -0.1741 | 0.862  | -0.07572919  | count | 1 |
| 6-Sep     | -0.0530756 | 0.1493052 | -0.3555 | 0.722  | -0.075702274 | count | 1 |
| SYK       | -0.0540616 | 0.3032297 | -0.1783 | 0.859  | -0.075675312 | count | 1 |
| LETMD1    | -0.0540181 | 0.3981538 | -0.1357 | 0.8921 | -0.07561446  | count | 1 |
| KTN1      | -0.0531058 | 0.1565834 | -0.3392 | 0.735  | -0.07545967  | count | 1 |
| LEMD2     | -0.053854  | 0.5653606 | -0.0953 | 0.9242 | -0.0753849   | count | 1 |
| NOP56     | -0.0528196 | 0.2739794 | -0.1928 | 0.8472 | -0.074827389 | count | 1 |
| RPL12     | -0.0518    | 0.0411439 | -1.259  | 0.209  | -0.074708102 | count | 1 |
| TRIM22    | -0.0521139 | 0.2014036 | -0.2588 | 0.7959 | -0.074561773 | count | 1 |
| PPDPF     | -0.0521018 | 0.1438462 | -0.3622 | 0.717  | -0.074482776 | count | 1 |
| UBE2A     | -0.0520643 | 0.2104299 | -0.2474 | 0.8047 | -0.073980233 | count | 1 |
| BCAS2     | -0.0516813 | 0.2070165 | -0.2496 | 0.803  | -0.073942937 | count | 1 |
| RB1       | -0.0523277 | 0.2753428 | -0.19   | 0.849  | -0.073797914 | count | 1 |
| RBM38     | -0.0556568 | 0.1776573 | -0.3133 | 0.7542 | -0.073531416 | count | 1 |
| CDK5R1    | -0.0524912 | 1.007981  | -0.0521 | 0.9585 | -0.073478435 | count | 1 |
| PFDN5     | -0.0509412 | 0.0549189 | -0.9276 | 0.354  | -0.073390512 | count | 1 |

|          |            |           |         |        |              |       |   |
|----------|------------|-----------|---------|--------|--------------|-------|---|
| CORO1A   | -0.0505338 | 0.0868546 | -0.5818 | 0.561  | -0.072682437 | count | 1 |
| RASSF1   | -0.0508211 | 0.2429899 | -0.2091 | 0.8344 | -0.072214259 | count | 1 |
| RPS18    | -0.0498797 | 0.0370977 | -1.3445 | 0.179  | -0.071937273 | count | 1 |
| VPS28    | -0.050056  | 0.1551973 | -0.3225 | 0.747  | -0.071396362 | count | 1 |
| FAM96B   | -0.0503795 | 0.1833735 | -0.2747 | 0.784  | -0.071371848 | count | 1 |
| PAFAH1B2 | -0.0501911 | 0.3033162 | -0.1655 | 0.8686 | -0.07131933  | count | 1 |
| EEF2     | -0.0497213 | 0.0930078 | -0.5346 | 0.593  | -0.071296445 | count | 1 |
| SEC11A   | -0.0499758 | 0.1983581 | -0.2519 | 0.8012 | -0.071166674 | count | 1 |
| TBCA     | -0.0515614 | 0.1493271 | -0.3453 | 0.73   | -0.07112134  | count | 1 |
| LAT2     | -0.0496272 | 0.2336299 | -0.2124 | 0.8319 | -0.070874203 | count | 1 |
| DMTF1    | -0.0534584 | 0.4003449 | -0.1335 | 0.8938 | -0.070632187 | count | 1 |
| GSTK1    | -0.0500142 | 0.1709502 | -0.2926 | 0.77   | -0.070536635 | count | 1 |
| PARVG    | -0.0503616 | 0.3311482 | -0.1521 | 0.879  | -0.070499145 | count | 1 |
| POP5     | -0.0509514 | 0.2968434 | -0.1716 | 0.864  | -0.070280684 | count | 1 |
| RPS15A   | -0.0487086 | 0.0336037 | -1.4495 | 0.148  | -0.070245244 | count | 1 |
| ATP6V1E1 | -0.0531383 | 0.2952175 | -0.18   | 0.8572 | -0.070210005 | count | 1 |
| GPR183   | -0.0487018 | 0.1263012 | -0.3856 | 0.7    | -0.070032388 | count | 1 |
| GOSR2    | -0.0503184 | 0.4480465 | -0.1123 | 0.9106 | -0.069408311 | count | 1 |
| SELENOH  | -0.0480577 | 0.1417469 | -0.339  | 0.7347 | -0.068937435 | count | 1 |
| SNX3     | -0.0479598 | 0.1188997 | -0.4034 | 0.687  | -0.068770885 | count | 1 |
| HLA-DRA  | -0.0475249 | 0.0411313 | -1.1554 | 0.249  | -0.068545771 | count | 1 |
| MRPL40   | -0.0483357 | 0.3009703 | -0.1606 | 0.8725 | -0.068477431 | count | 1 |
| POLR3K   | -0.0492473 | 0.2848358 | -0.1729 | 0.8628 | -0.067932124 | count | 1 |
| ZBTB8OS  | -0.049153  | 0.3215867 | -0.1528 | 0.879  | -0.067802157 | count | 1 |
| GNG5     | -0.0478486 | 0.1526874 | -0.3134 | 0.754  | -0.067787591 | count | 1 |
| UBE2V2   | -0.0479778 | 0.2883305 | -0.1664 | 0.8679 | -0.067665863 | count | 1 |
| ZNF330   | -0.0479778 | 0.3197763 | -0.15   | 0.8808 | -0.067665863 | count | 1 |
| UFC1     | -0.0472821 | 0.1685904 | -0.2805 | 0.779  | -0.067525725 | count | 1 |
| RPL36AL  | -0.0467626 | 0.0600874 | -0.7782 | 0.4368 | -0.067184227 | count | 1 |
| UBA3     | -0.048398  | 0.3691041 | -0.1311 | 0.8957 | -0.066761581 | count | 1 |
| TADA3    | -0.0471079 | 0.3744061 | -0.1258 | 0.8999 | -0.066738587 | count | 1 |
| CYB5R4   | -0.04726   | 0.2854876 | -0.1655 | 0.869  | -0.066159762 | count | 1 |
| MAML2    | -0.0464416 | 0.422471  | -0.1099 | 0.9125 | -0.065500167 | count | 1 |
| UBE2D3   | -0.0456366 | 0.1317161 | -0.3465 | 0.729  | -0.065176141 | count | 1 |
| SLC25A6  | -0.0451399 | 0.0727953 | -0.6201 | 0.536  | -0.06492485  | count | 1 |
| RPL36A   | -0.045497  | 0.1199947 | -0.3792 | 0.705  | -0.064895057 | count | 1 |
| EIF4B    | -0.0454599 | 0.1461779 | -0.311  | 0.756  | -0.064598333 | count | 1 |
| UBLCP1   | -0.0463392 | 0.5197248 | -0.0892 | 0.929  | -0.063923904 | count | 1 |
| POLK     | -0.0483178 | 0.2919303 | -0.1655 | 0.8686 | -0.063851109 | count | 1 |
| RPL7     | -0.0438947 | 0.0572818 | -0.7663 | 0.444  | -0.063221413 | count | 1 |
| SLC25A26 | -0.0450488 | 0.3831564 | -0.1176 | 0.9065 | -0.063065921 | count | 1 |
| HELQ     | -0.0441091 | 0.4026389 | -0.1096 | 0.9128 | -0.062679357 | count | 1 |
| PSMG2    | -0.0438181 | 0.2225356 | -0.1969 | 0.844  | -0.062265952 | count | 1 |
| HSPB1    | -0.0470428 | 0.2458008 | -0.1914 | 0.8483 | -0.062168861 | count | 1 |
| SHOC2    | -0.0435808 | 0.1850441 | -0.2355 | 0.814  | -0.061928834 | count | 1 |

|          |            |           |         |        |              |       |   |
|----------|------------|-----------|---------|--------|--------------|-------|---|
| PPIG     | -0.0435784 | 0.1483546 | -0.2937 | 0.769  | -0.061925424 | count | 1 |
| EIF3H    | -0.0431366 | 0.1115037 | -0.3869 | 0.699  | -0.061828697 | count | 1 |
| CARD16   | -0.043179  | 0.344735  | -0.1253 | 0.9004 | -0.061174162 | count | 1 |
| RPL37A   | -0.0420274 | 0.0516874 | -0.8131 | 0.417  | -0.060524137 | count | 1 |
| GNL2     | -0.0456353 | 0.348947  | -0.1308 | 0.896  | -0.060311623 | count | 1 |
| CSK      | -0.0425966 | 0.2166411 | -0.1966 | 0.844  | -0.060079319 | count | 1 |
| ITGB2    | -0.0423996 | 0.2940122 | -0.1442 | 0.885  | -0.059801569 | count | 1 |
| SMARCA5  | -0.0421902 | 0.1812245 | -0.2328 | 0.816  | -0.059773694 | count | 1 |
| RALGPS2  | -0.041343  | 0.1044514 | -0.3958 | 0.692  | -0.059153439 | count | 1 |
| COX4I1   | -0.0404379 | 0.0650508 | -0.6216 | 0.535  | -0.058246119 | count | 1 |
| CYBB     | -0.0409929 | 0.1654952 | -0.2477 | 0.804  | -0.057818241 | count | 1 |
| SNN      | -0.043608  | 0.2844926 | -0.1533 | 0.8782 | -0.057636228 | count | 1 |
| DGUOK    | -0.0403875 | 0.1843605 | -0.2191 | 0.8267 | -0.057392208 | count | 1 |
| HLA-DQA1 | -0.0397334 | 0.0705777 | -0.563  | 0.574  | -0.057252453 | count | 1 |
| PSIP1    | -0.0411429 | 0.171165  | -0.2404 | 0.81   | -0.056760842 | count | 1 |
| PTTG1    | -0.0409317 | 0.4767477 | -0.0859 | 0.932  | -0.056469676 | count | 1 |
| HLA-DRB1 | -0.0391113 | 0.052116  | -0.7505 | 0.453  | -0.056404638 | count | 1 |
| DDX5     | -0.0393466 | 0.0682694 | -0.5763 | 0.5647 | -0.05633605  | count | 1 |
| CMSS1    | -0.0397364 | 0.4027471 | -0.0987 | 0.9214 | -0.05604664  | count | 1 |
| MRPL20   | -0.0396026 | 0.1902298 | -0.2082 | 0.835  | -0.055857986 | count | 1 |
| CPQ      | -0.0397652 | 0.5893626 | -0.0675 | 0.9462 | -0.054861472 | count | 1 |
| POU2F2   | -0.0381026 | 0.1685574 | -0.2261 | 0.821  | -0.053743005 | count | 1 |
| NOP58    | -0.0388809 | 0.2166949 | -0.1794 | 0.8577 | -0.053642281 | count | 1 |
| ATP5IF1  | -0.0375358 | 0.1475131 | -0.2545 | 0.799  | -0.053181252 | count | 1 |
| ZBTB24   | -0.038423  | 0.2436693 | -0.1577 | 0.875  | -0.053010955 | count | 1 |
| CORO1B   | -0.0381333 | 0.2712065 | -0.1406 | 0.888  | -0.052611529 | count | 1 |
| SNU13    | -0.0365655 | 0.1111584 | -0.3289 | 0.742  | -0.052354535 | count | 1 |
| PPP2CA   | -0.0375346 | 0.2086021 | -0.1799 | 0.857  | -0.051786054 | count | 1 |
| DAZAP1   | -0.0372967 | 0.2440535 | -0.1528 | 0.8786 | -0.051458037 | count | 1 |
| KDM5A    | -0.0363029 | 0.2724352 | -0.1333 | 0.894  | -0.051205375 | count | 1 |
| CD164    | -0.036918  | 0.2089276 | -0.1767 | 0.8598 | -0.05093588  | count | 1 |
| G3BP2    | -0.036284  | 0.1561881 | -0.2323 | 0.816  | -0.050800884 | count | 1 |
| CSNK2B   | -0.036816  | 0.1903851 | -0.1934 | 0.8468 | -0.05079524  | count | 1 |
| PSMD2    | -0.0359337 | 0.2826738 | -0.1271 | 0.899  | -0.050310638 | count | 1 |
| SSBP4    | -0.0353853 | 0.2597936 | -0.1362 | 0.892  | -0.050135158 | count | 1 |
| RSL24D1  | -0.0347676 | 0.1478464 | -0.2352 | 0.8142 | -0.049809477 | count | 1 |
| PPM1G    | -0.0355322 | 0.2124522 | -0.1672 | 0.867  | -0.049748732 | count | 1 |
| NUPL2    | -0.0358348 | 0.4421786 | -0.081  | 0.935  | -0.04944231  | count | 1 |
| EIF5A    | -0.0342647 | 0.1460766 | -0.2346 | 0.815  | -0.049197322 | count | 1 |
| RPL41    | -0.0335488 | 0.0281415 | -1.1921 | 0.234  | -0.048389344 | count | 1 |
| ACADM    | -0.0347603 | 0.3170817 | -0.1096 | 0.9128 | -0.047960679 | count | 1 |
| VIM      | -0.0328347 | 0.1186761 | -0.2767 | 0.7822 | -0.047226943 | count | 1 |
| TELO2    | -0.0341963 | 0.6275731 | -0.0545 | 0.9566 | -0.047182956 | count | 1 |
| TCTA     | -0.0341044 | 0.8211267 | -0.0415 | 0.9669 | -0.04705623  | count | 1 |
| NOC2L    | -0.0334763 | 0.4724875 | -0.0709 | 0.9435 | -0.046871384 | count | 1 |

|           |            |           |         |        |              |       |   |
|-----------|------------|-----------|---------|--------|--------------|-------|---|
| APBB1IP   | -0.0326362 | 0.1489817 | -0.2191 | 0.827  | -0.046379439 | count | 1 |
| FOS       | -0.0322413 | 0.2971206 | -0.1085 | 0.914  | -0.04630335  | count | 1 |
| PPP1R8    | -0.0342257 | 0.7615988 | -0.0449 | 0.9642 | -0.045249795 | count | 1 |
| YJU2      | -0.0335294 | 0.4358712 | -0.0769 | 0.9387 | -0.044330234 | count | 1 |
| NUDCD2    | -0.0333069 | 0.297022  | -0.1121 | 0.9108 | -0.044036383 | count | 1 |
| HCG18     | -0.0314    | 0.2835407 | -0.1107 | 0.912  | -0.043965343 | count | 1 |
| SRRM1     | -0.0305674 | 0.1080346 | -0.2829 | 0.777  | -0.043737276 | count | 1 |
| RHOH      | -0.0304574 | 0.1345617 | -0.2263 | 0.821  | -0.043692023 | count | 1 |
| BDP1      | -0.0306217 | 0.2024346 | -0.1513 | 0.88   | -0.043680441 | count | 1 |
| SUPT16H   | -0.0316424 | 0.253249  | -0.1249 | 0.901  | -0.043661085 | count | 1 |
| CREB1     | -0.0309995 | 0.2942414 | -0.1054 | 0.916  | -0.043404777 | count | 1 |
| HTRA2     | -0.0322427 | 0.3195736 | -0.1009 | 0.9197 | -0.042630857 | count | 1 |
| ZCCHC10   | -0.0317207 | 0.2409042 | -0.1317 | 0.895  | -0.041941396 | count | 1 |
| MTRNR2L12 | -0.0285993 | 0.0958025 | -0.2985 | 0.765  | -0.040973214 | count | 1 |
| DNP1      | -0.0308968 | 0.2487125 | -0.1242 | 0.9012 | -0.040853136 | count | 1 |
| SARS      | -0.0295238 | 0.2933245 | -0.1007 | 0.9199 | -0.040739262 | count | 1 |
| PSME4     | -0.0294406 | 0.5087092 | -0.0579 | 0.9539 | -0.040624514 | count | 1 |
| TFG       | -0.0287439 | 0.2965944 | -0.0969 | 0.923  | -0.039663626 | count | 1 |
| DCTN6     | -0.0283011 | 0.3355672 | -0.0843 | 0.933  | -0.039627782 | count | 1 |
| CLK1      | -0.0277687 | 0.1967403 | -0.1411 | 0.888  | -0.039547739 | count | 1 |
| PHB       | -0.0278552 | 0.2283083 | -0.122  | 0.903  | -0.039003625 | count | 1 |
| EZR       | -0.0268351 | 0.0883648 | -0.3037 | 0.7615 | -0.038574531 | count | 1 |
| PRKD3     | -0.0279492 | 0.2830277 | -0.0988 | 0.921  | -0.038567547 | count | 1 |
| PAX5      | -0.0268395 | 0.4233755 | -0.0634 | 0.9495 | -0.038029457 | count | 1 |
| CD79A     | -0.0263894 | 0.0635398 | -0.4153 | 0.678  | -0.037996743 | count | 1 |
| GUK1      | -0.0263907 | 0.1509847 | -0.1748 | 0.8613 | -0.037871157 | count | 1 |
| CYCS      | -0.0265018 | 0.1357499 | -0.1952 | 0.845  | -0.037851554 | count | 1 |
| SPAG7     | -0.027416  | 0.2729085 | -0.1005 | 0.92   | -0.037832121 | count | 1 |
| TRIR      | -0.0262732 | 0.1075716 | -0.2442 | 0.8072 | -0.037702551 | count | 1 |
| PLPP5     | -0.0269897 | 0.3047518 | -0.0886 | 0.929  | -0.037244129 | count | 1 |
| PAK2      | -0.0260315 | 0.1492005 | -0.1745 | 0.862  | -0.037179911 | count | 1 |
| DIS3      | -0.0257095 | 0.325695  | -0.0789 | 0.937  | -0.036674213 | count | 1 |
| TCF4      | -0.0260635 | 0.1636567 | -0.1593 | 0.874  | -0.0359666   | count | 1 |
| SEM1      | -0.0251196 | 0.1884126 | -0.1333 | 0.894  | -0.035832823 | count | 1 |
| CD53      | -0.0245596 | 0.1032689 | -0.2378 | 0.8121 | -0.035271758 | count | 1 |
| TCEA1     | -0.0246772 | 0.1281979 | -0.1925 | 0.847  | -0.035245798 | count | 1 |
| RERE      | -0.0265268 | 0.2949256 | -0.0899 | 0.928  | -0.03507996  | count | 1 |
| QARS      | -0.0246782 | 0.3969114 | -0.0622 | 0.95   | -0.034967596 | count | 1 |
| MT-CO2    | -0.0242234 | 0.0376691 | -0.6431 | 0.521  | -0.034927746 | count | 1 |
| HAUS3     | -0.0252314 | 0.7327442 | -0.0344 | 0.9725 | -0.034818831 | count | 1 |
| CEP57     | -0.0246675 | 0.2724057 | -0.0906 | 0.928  | -0.034541394 | count | 1 |
| HNRNPU    | -0.0238101 | 0.1206536 | -0.1973 | 0.8436 | -0.033910641 | count | 1 |
| MAZ       | -0.0237166 | 0.275929  | -0.086  | 0.9315 | -0.033705528 | count | 1 |
| COBLL1    | -0.0242877 | 0.2310228 | -0.1051 | 0.916  | -0.033517084 | count | 1 |
| PRKCD     | -0.0230454 | 0.4269363 | -0.054  | 0.957  | -0.031803381 | count | 1 |



|          |            |           |         |        |              |       |   |
|----------|------------|-----------|---------|--------|--------------|-------|---|
| ATG3     | -0.0224024 | 0.2745183 | -0.0816 | 0.935  | -0.031743424 | count | 1 |
| STK4     | -0.0219794 | 0.0939094 | -0.234  | 0.8151 | -0.031236974 | count | 1 |
| MTSS1    | -0.0218893 | 0.231533  | -0.0945 | 0.925  | -0.031016491 | count | 1 |
| OTULIN   | -0.0219031 | 0.3488587 | -0.0628 | 0.95   | -0.03067144  | count | 1 |
| RTF1     | -0.0214974 | 0.2352567 | -0.0914 | 0.927  | -0.030461264 | count | 1 |
| CHMP4A   | -0.0227602 | 0.2268661 | -0.1003 | 0.9201 | -0.03010259  | count | 1 |
| PDCD6    | -0.0216565 | 0.1818847 | -0.1191 | 0.9053 | -0.029887363 | count | 1 |
| GPR174   | -0.0210922 | 0.4655799 | -0.0453 | 0.9639 | -0.029887191 | count | 1 |
| ESRRA    | -0.0211245 | 0.5683528 | -0.0372 | 0.9704 | -0.029581413 | count | 1 |
| NDUFA9   | -0.022039  | 0.3107817 | -0.0709 | 0.9435 | -0.029149419 | count | 1 |
| POMP     | -0.0208861 | 0.1555403 | -0.1343 | 0.8932 | -0.02882454  | count | 1 |
| SRI      | -0.0201013 | 0.1899982 | -0.1058 | 0.916  | -0.028483304 | count | 1 |
| MOGS     | -0.0214809 | 0.5323633 | -0.0404 | 0.9678 | -0.028411778 | count | 1 |
| SLC35E2B | -0.0205667 | 0.6565447 | -0.0313 | 0.975  | -0.028383896 | count | 1 |
| MNAT1    | -0.0201981 | 0.2815316 | -0.0717 | 0.9428 | -0.02787537  | count | 1 |
| NDUFA12  | -0.0198355 | 0.2070603 | -0.0958 | 0.924  | -0.027776792 | count | 1 |
| LDHB     | -0.0194035 | 0.1438827 | -0.1349 | 0.893  | -0.027714084 | count | 1 |
| LSM7     | -0.018359  | 0.1252754 | -0.1465 | 0.884  | -0.026248502 | count | 1 |
| PSMC5    | -0.0194826 | 0.2225291 | -0.0876 | 0.9303 | -0.025770401 | count | 1 |
| ACSF3    | -0.0186514 | 0.4425621 | -0.0421 | 0.9664 | -0.025741449 | count | 1 |
| RPL14    | -0.0175638 | 0.0374976 | -0.4684 | 0.64   | -0.025325707 | count | 1 |
| RPLP2    | -0.0172963 | 0.0358958 | -0.4818 | 0.63   | -0.024933469 | count | 1 |
| FDPS     | -0.0175948 | 0.3119633 | -0.0564 | 0.955  | -0.02493206  | count | 1 |
| TSEN34   | -0.018634  | 0.3593694 | -0.0519 | 0.9587 | -0.024648606 | count | 1 |
| RPS21    | -0.0170709 | 0.0449815 | -0.3795 | 0.704  | -0.024590341 | count | 1 |
| RPF2     | -0.0184817 | 0.3300124 | -0.056  | 0.9554 | -0.024447268 | count | 1 |
| RPL19    | -0.016883  | 0.0289519 | -0.5831 | 0.56   | -0.024350212 | count | 1 |
| SLC25A45 | -0.0173485 | 0.3691384 | -0.047  | 0.9625 | -0.023943801 | count | 1 |
| ENTR1    | -0.0173203 | 0.3583451 | -0.0483 | 0.961  | -0.023904892 | count | 1 |
| ATP5S    | -0.017298  | 0.3487944 | -0.0496 | 0.96   | -0.023874124 | count | 1 |
| SPAG9    | -0.0170011 | 0.2522888 | -0.0674 | 0.946  | -0.023808394 | count | 1 |
| C7orf50  | -0.0171754 | 0.1688404 | -0.1017 | 0.919  | -0.023704965 | count | 1 |
| RPLP0    | -0.0158919 | 0.0527582 | -0.3012 | 0.763  | -0.022915239 | count | 1 |
| ARPC4    | -0.0156603 | 0.163254  | -0.0959 | 0.924  | -0.022257133 | count | 1 |
| SAV1     | -0.0157932 | 0.3195081 | -0.0494 | 0.9606 | -0.021797806 | count | 1 |
| HLA-DMB  | -0.015066  | 0.1320674 | -0.1141 | 0.909  | -0.021572893 | count | 1 |
| RHOB     | -0.0153165 | 0.3627803 | -0.0422 | 0.966  | -0.02144969  | count | 1 |
| DDX3X    | -0.0149438 | 0.1403717 | -0.1065 | 0.915  | -0.021284093 | count | 1 |
| KPNA1    | -0.0151277 | 0.4301452 | -0.0352 | 0.972  | -0.020879517 | count | 1 |
| HLA-F    | -0.0145879 | 0.1410723 | -0.1034 | 0.918  | -0.020429507 | count | 1 |
| JAK1     | -0.014311  | 0.1147169 | -0.1248 | 0.901  | -0.020339606 | count | 1 |
| EIF3K    | -0.0138358 | 0.0950534 | -0.1456 | 0.8843 | -0.019848587 | count | 1 |
| C1orf52  | -0.0147902 | 0.2564554 | -0.0577 | 0.954  | -0.019566567 | count | 1 |
| SMARCA2  | -0.0141741 | 0.2903443 | -0.0488 | 0.961  | -0.018751878 | count | 1 |
| FBXO9    | -0.0141462 | 0.3142266 | -0.045  | 0.9641 | -0.018714984 | count | 1 |

|            |            |           |         |        |              |       |   |
|------------|------------|-----------|---------|--------|--------------|-------|---|
| TMEM154    | -0.0131644 | 0.2013874 | -0.0654 | 0.948  | -0.018710118 | count | 1 |
| ZFAND6     | -0.0127849 | 0.1970423 | -0.0649 | 0.9483 | -0.018294283 | count | 1 |
| RPS12      | -0.0126227 | 0.0379825 | -0.3323 | 0.74   | -0.018207339 | count | 1 |
| ZNF22      | -0.0126358 | 0.2956311 | -0.0427 | 0.966  | -0.0176961   | count | 1 |
| DUSP22     | -0.0119179 | 0.2698156 | -0.0442 | 0.9648 | -0.016888486 | count | 1 |
| PSMD4      | -0.0118353 | 0.1996435 | -0.0593 | 0.953  | -0.016697301 | count | 1 |
| DTD1       | -0.0118793 | 0.3628315 | -0.0327 | 0.9739 | -0.01639692  | count | 1 |
| SLC7A6OS   | -0.0114485 | 0.4718779 | -0.0243 | 0.9807 | -0.016033536 | count | 1 |
| AC016831.5 | -0.0114913 | 0.3537833 | -0.0325 | 0.9741 | -0.01586147  | count | 1 |
| POU2AF1    | -0.0114381 | 0.278037  | -0.0411 | 0.967  | -0.015788052 | count | 1 |
| RNF219     | -0.0113302 | 0.4852319 | -0.0234 | 0.9814 | -0.015639146 | count | 1 |
| FAM3C      | -0.0112859 | 0.2581118 | -0.0437 | 0.9651 | -0.01557801  | count | 1 |
| ZNF706     | -0.0107071 | 0.1301151 | -0.0823 | 0.934  | -0.015331612 | count | 1 |
| MED29      | -0.0107242 | 0.4482711 | -0.0239 | 0.9809 | -0.01524216  | count | 1 |
| FTH1       | -0.0104767 | 0.0595331 | -0.176  | 0.86   | -0.015108023 | count | 1 |
| UBL5       | -0.0103909 | 0.1344332 | -0.0773 | 0.938  | -0.014841879 | count | 1 |
| IK         | -0.0099415 | 0.1662962 | -0.0598 | 0.952  | -0.014159791 | count | 1 |
| CAPG       | -0.0096189 | 0.1656267 | -0.0581 | 0.9537 | -0.013781371 | count | 1 |
| UBXN1      | -0.0095055 | 0.1179515 | -0.0806 | 0.936  | -0.013577261 | count | 1 |
| ATP23      | -0.0096176 | 0.5985035 | -0.0161 | 0.987  | -0.013275618 | count | 1 |
| PLGRKT     | -0.0099568 | 0.3626064 | -0.0275 | 0.9781 | -0.013174327 | count | 1 |
| SSR1       | -0.0099313 | 0.290281  | -0.0342 | 0.973  | -0.013140597 | count | 1 |
| MT-CO3     | -0.0090715 | 0.0405369 | -0.2238 | 0.823  | -0.013078658 | count | 1 |
| PCBP2      | -0.0090294 | 0.1408413 | -0.0641 | 0.9489 | -0.01295355  | count | 1 |
| WDR82      | -0.0089168 | 0.3385726 | -0.0263 | 0.979  | -0.012308417 | count | 1 |
| HNRNPR     | -0.0091091 | 0.1688814 | -0.0539 | 0.957  | -0.012053024 | count | 1 |
| RAB8B      | -0.0084622 | 0.1873278 | -0.0452 | 0.964  | -0.01185165  | count | 1 |
| C15orf40   | -0.0082158 | 0.3392717 | -0.0242 | 0.981  | -0.011340916 | count | 1 |
| TIFA       | -0.0085572 | 0.2970374 | -0.0288 | 0.977  | -0.01132296  | count | 1 |
| TMEM216    | -0.0079412 | 0.402735  | -0.0197 | 0.9843 | -0.011253538 | count | 1 |
| EIF5B      | -0.0078872 | 0.1766744 | -0.0446 | 0.964  | -0.011251851 | count | 1 |
| RPS17      | -0.008465  | 0.2657202 | -0.0319 | 0.9746 | -0.011200994 | count | 1 |
| RCSD1      | -0.0077884 | 0.1828453 | -0.0426 | 0.966  | -0.011037016 | count | 1 |
| ELF1       | -0.007286  | 0.1020892 | -0.0714 | 0.943  | -0.010417453 | count | 1 |
| STK24      | -0.0073388 | 0.2673272 | -0.0275 | 0.978  | -0.010278415 | count | 1 |
| SETD5      | -0.0072297 | 0.3637163 | -0.0199 | 0.984  | -0.010125627 | count | 1 |
| RPS5       | -0.0066338 | 0.0404387 | -0.164  | 0.87   | -0.009565088 | count | 1 |
| ZFP14      | -0.0065486 | 0.4365667 | -0.015  | 0.988  | -0.009039803 | count | 1 |
| NBDY       | -0.0058604 | 0.2615676 | -0.0224 | 0.9821 | -0.007755207 | count | 1 |
| MARS       | -0.0056965 | 0.4797957 | -0.0119 | 0.9905 | -0.007538354 | count | 1 |
| TMEM123    | -0.0052861 | 0.2286016 | -0.0231 | 0.982  | -0.007513299 | count | 1 |
| TRIM8      | -0.0050058 | 0.3727241 | -0.0134 | 0.9893 | -0.006910274 | count | 1 |
| COX6C      | -0.0047184 | 0.1203718 | -0.0392 | 0.969  | -0.006746383 | count | 1 |
| C1QBP      | -0.0046955 | 0.1787315 | -0.0263 | 0.9791 | -0.0062139   | count | 1 |
| PSENN      | -0.0041118 | 0.2471164 | -0.0166 | 0.987  | -0.005759026 | count | 1 |

|            |            |           |           |          |              |       |   |
|------------|------------|-----------|-----------|----------|--------------|-------|---|
| MRFAP1     | -0.0038563 | 0.2140489 | -0.018    | 0.986    | -0.005401186 | count | 1 |
| BTF3L4     | -0.0037364 | 0.2488096 | -0.015    | 0.988    | -0.005233259 | count | 1 |
| LY86       | -0.0034905 | 0.138021  | -0.0253   | 0.98     | -0.004961208 | count | 1 |
| SUMO2      | -0.0030815 | 0.082851  | -0.0372   | 0.97     | -0.004430311 | count | 1 |
| CHD1       | -0.0030213 | 0.1748923 | -0.0173   | 0.9862   | -0.003998524 | count | 1 |
| HSPA5      | -0.0027379 | 0.1780314 | -0.0154   | 0.988    | -0.003899762 | count | 1 |
| LIMD2      | -0.0026716 | 0.1110619 | -0.0241   | 0.981    | -0.003819889 | count | 1 |
| SIGIRR     | -0.0025789 | 0.231942  | -0.0111   | 0.9911   | -0.003560197 | count | 1 |
| DDX46      | -0.0023842 | 0.1721458 | -0.0139   | 0.989    | -0.003411733 | count | 1 |
| IFI27L2    | -0.0019788 | 0.2600593 | -0.0076   | 0.9939   | -0.002804289 | count | 1 |
| YWHAZ      | -0.0018976 | 0.0827796 | -0.0229   | 0.982    | -0.002728556 | count | 1 |
| ISCU       | -0.0018465 | 0.1307976 | -0.0141   | 0.989    | -0.002630097 | count | 1 |
| ATP5MD     | -0.0017786 | 0.1911515 | -0.0093   | 0.993    | -0.002520576 | count | 1 |
| PRDX1      | -0.001746  | 0.1256871 | -0.0139   | 0.989    | -0.002490904 | count | 1 |
| LGALS1     | -0.0015968 | 0.180103  | -0.0089   | 0.993    | -0.002283134 | count | 1 |
| SH3BP5     | -0.0016858 | 0.1916632 | -0.0088   | 0.993    | -0.002231159 | count | 1 |
| C19orf53   | -0.0013429 | 0.1304185 | -0.0103   | 0.9918   | -0.001918203 | count | 1 |
| ARL1       | -0.0014107 | 0.3202179 | -0.0044   | 0.9965   | -0.00186708  | count | 1 |
| ACTR2      | -0.0007995 | 0.1394707 | -0.0057   | 0.995    | -0.00110375  | count | 1 |
| SMAP2      | -0.0007407 | 0.0987381 | -0.0075   | 0.994    | -0.001061255 | count | 1 |
| CHMP2A     | -0.0004671 | 0.2407966 | -0.0019   | 0.9985   | -0.000654252 | count | 1 |
| KDELR1     | -0.0002536 | 0.2343866 | -0.0011   | 0.9991   | -0.000335655 | count | 1 |
| SS18L2     | -0.0001772 | 0.1890763 | -9.00E-04 | 0.999    | -0.00025002  | count | 1 |
| IGLC7      | -3.9015907 | 2.7017927 | -1.4441   | 0.149    | -2.19E-05    | count | 1 |
| RGS1       | -1.1864544 | 0.5677661 | -2.0897   | 0.0372   | -9.77E-06    | count | 1 |
| CCL4L2     | -1.1408519 | 0.4132528 | -2.7607   | 0.006    | -9.29E-06    | count | 1 |
| UBA2       | -0.9651771 | 0.24759   | -3.8983   | 1.00E-04 | -8.26E-06    | count | 1 |
| TIPARP     | -0.8795963 | 0.3927611 | -2.2395   | 0.0256   | -7.81E-06    | count | 1 |
| TTC14      | -0.8755713 | 0.3436539 | -2.5478   | 0.0112   | -7.74E-06    | count | 1 |
| KCMF1      | -0.8677961 | 0.3212851 | -2.701    | 0.0072   | -7.68E-06    | count | 1 |
| OSGEP      | -0.808155  | 0.2986184 | -2.7063   | 0.0071   | -7.30E-06    | count | 1 |
| MX1        | -0.7881084 | 0.3648332 | -2.1602   | 0.0313   | -7.23E-06    | count | 1 |
| ST6GAL1    | -0.7881084 | 0.2811738 | -2.8029   | 0.0053   | -7.13E-06    | count | 1 |
| SLAMF1     | -0.784021  | 0.375533  | -2.0878   | 0.0374   | -7.11E-06    | count | 1 |
| EMC3       | -0.7732002 | 0.3485848 | -2.2181   | 0.0271   | -7.07E-06    | count | 1 |
| DUSP5      | -0.7608574 | 0.4270477 | -1.7817   | 0.0755   | -7.06E-06    | count | 1 |
| HAUS1      | -0.7760155 | 0.3562444 | -2.1783   | 0.0299   | -7.02E-06    | count | 1 |
| FBXL5      | -0.7653053 | 0.4202944 | -1.8209   | 0.0693   | -6.99E-06    | count | 1 |
| TMOD3      | -0.7031996 | 0.3084241 | -2.28     | 0.0231   | -6.57E-06    | count | 1 |
| TAP1       | -0.6953742 | 0.2633329 | -2.6407   | 0.0086   | -6.47E-06    | count | 1 |
| RIF1       | -0.6738102 | 0.4006582 | -1.6818   | 0.0933   | -6.37E-06    | count | 1 |
| KANSL1-AS1 | -0.6659696 | 0.3336409 | -1.9961   | 0.0465   | -6.35E-06    | count | 1 |
| COMMD3     | -0.6732801 | 0.2770579 | -2.4301   | 0.0155   | -6.34E-06    | count | 1 |
| MICU2      | -0.6697055 | 0.2619615 | -2.5565   | 0.0109   | -6.32E-06    | count | 1 |
| THAP12     | -0.6644369 | 0.3314477 | -2.0047   | 0.0456   | -6.30E-06    | count | 1 |

|           |            |           |         |        |           |       |   |
|-----------|------------|-----------|---------|--------|-----------|-------|---|
| ZNF107    | -0.6480859 | 0.3387953 | -1.9129 | 0.0564 | -6.16E-06 | count | 1 |
| MED28     | -0.6353055 | 0.2434079 | -2.61   | 0.0094 | -6.04E-06 | count | 1 |
| PSMA2     | -0.6130995 | 0.2814944 | -2.178  | 0.0299 | -5.88E-06 | count | 1 |
| C9orf72   | -0.6068453 | 0.33939   | -1.788  | 0.0745 | -5.88E-06 | count | 1 |
| CHML      | -0.5969044 | 0.4299922 | -1.3882 | 0.166  | -5.81E-06 | count | 1 |
| APOBEC3G  | -0.5948966 | 0.2466946 | -2.4115 | 0.0163 | -5.79E-06 | count | 1 |
| ZNF830    | -0.5894947 | 0.3374046 | -1.7471 | 0.0813 | -5.76E-06 | count | 1 |
| SMIM29    | -0.5924262 | 0.3613896 | -1.6393 | 0.102  | -5.76E-06 | count | 1 |
| KIAA0040  | -0.5906367 | 0.308319  | -1.9157 | 0.056  | -5.72E-06 | count | 1 |
| MXI1      | -0.583348  | 0.3498985 | -1.6672 | 0.0962 | -5.65E-06 | count | 1 |
| ZBTB32    | -0.5773298 | 0.34115   | -1.6923 | 0.0913 | -5.62E-06 | count | 1 |
| N4BP2L1   | -0.5645652 | 0.372138  | -1.5171 | 0.13   | -5.57E-06 | count | 1 |
| NSMCE2    | -0.5714685 | 0.3351146 | -1.7053 | 0.0888 | -5.57E-06 | count | 1 |
| ZMAT2     | -0.5684005 | 0.2764366 | -2.0562 | 0.0404 | -5.53E-06 | count | 1 |
| ECI2      | -0.5547951 | 0.3358357 | -1.652  | 0.0992 | -5.42E-06 | count | 1 |
| DNAJC9    | -0.5502385 | 0.3147352 | -1.7483 | 0.0811 | -5.40E-06 | count | 1 |
| RNASE1    | -3.3374109 | 1.1146064 | -2.9943 | 0.0029 | -5.38E-06 | count | 1 |
| FKBP3     | -0.5337826 | 0.3150067 | -1.6945 | 0.0909 | -5.27E-06 | count | 1 |
| FUS       | -0.1713159 | 0.113442  | -1.5102 | 0.132  | -5.23E-06 | count | 1 |
| STX12     | -0.5206292 | 0.2672669 | -1.948  | 0.052  | -5.13E-06 | count | 1 |
| RASA2     | -0.5110876 | 0.3781092 | -1.3517 | 0.177  | -5.12E-06 | count | 1 |
| MCRIP1    | -0.5049702 | 0.3102747 | -1.6275 | 0.104  | -5.05E-06 | count | 1 |
| UBE2K     | -0.4978091 | 0.2921446 | -1.704  | 0.0891 | -5.01E-06 | count | 1 |
| RB1CC1    | -0.4976192 | 0.3797846 | -1.3103 | 0.191  | -4.96E-06 | count | 1 |
| PHRF1     | -2.7145349 | 1.0702034 | -2.5365 | 0.0115 | -4.95E-06 | count | 1 |
| IRF4      | -0.490631  | 0.3745901 | -1.3098 | 0.191  | -4.93E-06 | count | 1 |
| PPP2R2D   | -0.4874365 | 0.3083876 | -1.5806 | 0.115  | -4.90E-06 | count | 1 |
| BLOC1S1   | -0.4908919 | 0.174222  | -2.8176 | 0.005  | -4.90E-06 | count | 1 |
| CYFIP2    | -0.4901733 | 0.3343079 | -1.4662 | 0.143  | -4.89E-06 | count | 1 |
| LINC01480 | -0.4875483 | 0.3547762 | -1.3742 | 0.17   | -4.88E-06 | count | 1 |
| FUBP1     | -0.4856473 | 0.2729478 | -1.7793 | 0.0759 | -4.86E-06 | count | 1 |
| DNAJC7    | -0.4836719 | 0.1983262 | -2.4388 | 0.0151 | -4.85E-06 | count | 1 |
| NUCB1     | -0.4768131 | 0.3107811 | -1.5342 | 0.126  | -4.80E-06 | count | 1 |
| ZNF184    | -2.3035191 | 0.845404  | -2.7248 | 0.0067 | -4.80E-06 | count | 1 |
| CUEDC2    | -0.4698848 | 0.3538371 | -1.328  | 0.185  | -4.74E-06 | count | 1 |
| RXRB      | -2.1081173 | 0.7396135 | -2.8503 | 0.0046 | -4.73E-06 | count | 1 |
| MLX       | -0.46392   | 0.3453465 | -1.3433 | 0.18   | -4.70E-06 | count | 1 |
| ZBTB16    | -2.3048331 | 1.6301213 | -1.4139 | 0.158  | -4.68E-06 | count | 1 |
| QRSL1     | -0.4617529 | 0.2993957 | -1.5423 | 0.124  | -4.67E-06 | count | 1 |
| COX19     | -0.4517631 | 0.3159226 | -1.43   | 0.153  | -4.58E-06 | count | 1 |
| CEP295    | -0.4517743 | 0.4420082 | -1.0221 | 0.307  | -4.58E-06 | count | 1 |
| WDR47     | -2.0695307 | 0.8901244 | -2.325  | 0.0205 | -4.57E-06 | count | 1 |
| SNRNP27   | -0.4422868 | 0.3594301 | -1.2305 | 0.219  | -4.51E-06 | count | 1 |
| TPM1      | -1.8346876 | 0.6583971 | -2.7866 | 0.0056 | -4.51E-06 | count | 1 |
| RGS2      | -0.4400202 | 0.2627715 | -1.6745 | 0.0947 | -4.48E-06 | count | 1 |

|          |            |           |         |          |           |       |   |
|----------|------------|-----------|---------|----------|-----------|-------|---|
| CKAP2    | -0.4364574 | 0.2862591 | -1.5247 | 0.128    | -4.43E-06 | count | 1 |
| GOLGA7   | -0.4293924 | 0.3227857 | -1.3303 | 0.184    | -4.41E-06 | count | 1 |
| RICTOR   | -0.4260655 | 0.3253668 | -1.3095 | 0.191    | -4.39E-06 | count | 1 |
| IFI44L   | -1.7642464 | 0.5276206 | -3.3438 | 9.00E-04 | -4.37E-06 | count | 1 |
| HOPX     | -0.4257115 | 0.2765814 | -1.5392 | 0.124    | -4.35E-06 | count | 1 |
| CALD1    | -1.7783973 | 0.7192998 | -2.4724 | 0.0138   | -4.28E-06 | count | 1 |
| FKBP15   | -1.8059448 | 0.9147417 | -1.9743 | 0.049    | -4.26E-06 | count | 1 |
| NCBP3    | -0.408601  | 0.3640159 | -1.1225 | 0.262    | -4.24E-06 | count | 1 |
| METTL7A  | -1.6211943 | 0.5453078 | -2.973  | 0.0031   | -4.20E-06 | count | 1 |
| TRIM56   | -1.7125559 | 0.6812979 | -2.5137 | 0.0123   | -4.19E-06 | count | 1 |
| ADD1     | -0.4054651 | 0.2680947 | -1.5124 | 0.131    | -4.18E-06 | count | 1 |
| UBN1     | -0.4029578 | 0.3447415 | -1.1689 | 0.243    | -4.18E-06 | count | 1 |
| FAM13B   | -0.4021899 | 0.4096128 | -0.9819 | 0.327    | -4.17E-06 | count | 1 |
| IL7R     | -1.6659173 | 0.9850659 | -1.6912 | 0.0915   | -4.16E-06 | count | 1 |
| OXSR1    | -1.6106261 | 0.5856718 | -2.75   | 0.0062   | -4.13E-06 | count | 1 |
| ZNF207   | -0.3991432 | 0.2266854 | -1.7608 | 0.079    | -4.12E-06 | count | 1 |
| TNFSF10  | -1.6127004 | 0.6944121 | -2.3224 | 0.0207   | -4.12E-06 | count | 1 |
| IDH1     | -1.5816097 | 0.6651165 | -2.3779 | 0.0178   | -4.11E-06 | count | 1 |
| XAF1     | -1.5619012 | 0.4168409 | -3.747  | 2.00E-04 | -4.11E-06 | count | 1 |
| MILR1    | -1.5744022 | 0.8842835 | -1.7804 | 0.0757   | -4.07E-06 | count | 1 |
| KNOP1    | -1.5997746 | 0.6580244 | -2.4312 | 0.0154   | -4.07E-06 | count | 1 |
| CEBPD    | -1.4430231 | 0.9817131 | -1.4699 | 0.142    | -4.07E-06 | count | 1 |
| PEPD     | -0.392613  | 0.3301568 | -1.1892 | 0.235    | -4.06E-06 | count | 1 |
| FCER1G   | -1.513172  | 0.7950491 | -1.9032 | 0.0577   | -4.05E-06 | count | 1 |
| RBM4     | -0.3903545 | 0.3639792 | -1.0725 | 0.284    | -4.05E-06 | count | 1 |
| ACTA2    | -1.5128824 | 0.6153182 | -2.4587 | 0.0143   | -4.04E-06 | count | 1 |
| SERTAD1  | -0.387717  | 0.2788674 | -1.3903 | 0.165    | -4.03E-06 | count | 1 |
| CCDC57   | -1.5347307 | 0.5192196 | -2.9558 | 0.0033   | -4.03E-06 | count | 1 |
| SFXN1    | -0.3829266 | 0.3846565 | -0.9955 | 0.32     | -3.99E-06 | count | 1 |
| METTL15  | -1.5223395 | 0.649221  | -2.3449 | 0.0195   | -3.98E-06 | count | 1 |
| MT2A     | -1.4246655 | 0.4397271 | -3.2399 | 0.0013   | -3.94E-06 | count | 1 |
| NIN      | -0.3773798 | 0.2752752 | -1.3709 | 0.171    | -3.93E-06 | count | 1 |
| NME3     | -0.3761563 | 0.2337596 | -1.6092 | 0.108    | -3.92E-06 | count | 1 |
| TCP1     | -0.3757928 | 0.2085655 | -1.8018 | 0.0723   | -3.91E-06 | count | 1 |
| PPP2R2A  | -0.3744161 | 0.2951084 | -1.2687 | 0.205    | -3.89E-06 | count | 1 |
| RPS19BP1 | -0.374227  | 0.1801396 | -2.0774 | 0.0383   | -3.89E-06 | count | 1 |
| CCDC88A  | -0.373131  | 0.4725231 | -0.7897 | 0.43     | -3.89E-06 | count | 1 |
| TUBD1    | -1.4482429 | 0.7209325 | -2.0088 | 0.0452   | -3.87E-06 | count | 1 |
| USP45    | -1.4482429 | 0.7067156 | -2.0493 | 0.041    | -3.87E-06 | count | 1 |
| MTRNR2L8 | -0.3678359 | 0.3135101 | -1.1733 | 0.241    | -3.85E-06 | count | 1 |
| TNFRSF17 | -1.4482429 | 0.8074039 | -1.7937 | 0.0735   | -3.85E-06 | count | 1 |
| DMXL1    | -0.3624787 | 0.290658  | -1.2471 | 0.213    | -3.82E-06 | count | 1 |
| MCTS1    | -0.3657162 | 0.2921536 | -1.2518 | 0.211    | -3.82E-06 | count | 1 |
| ABCG1    | -1.4130019 | 0.6517899 | -2.1679 | 0.0307   | -3.81E-06 | count | 1 |
| GLTP     | -1.378467  | 0.4522168 | -3.0482 | 0.0024   | -3.81E-06 | count | 1 |

|          |            |           |         |        |           |       |   |
|----------|------------|-----------|---------|--------|-----------|-------|---|
| TRAPPC1  | -0.3629722 | 0.1817288 | -1.9973 | 0.0464 | -3.79E-06 | count | 1 |
| IQSEC1   | -1.3530439 | 0.480833  | -2.814  | 0.0051 | -3.79E-06 | count | 1 |
| CHRAC1   | -0.3597708 | 0.2894472 | -1.243  | 0.215  | -3.78E-06 | count | 1 |
| TXLNG    | -1.3413179 | 0.5627102 | -2.3837 | 0.0176 | -3.76E-06 | count | 1 |
| DCAF6    | -1.3800309 | 0.6201567 | -2.2253 | 0.0266 | -3.76E-06 | count | 1 |
| MIA3     | -0.3581392 | 0.2712081 | -1.3205 | 0.187  | -3.76E-06 | count | 1 |
| TPM2     | -1.377236  | 0.728865  | -1.8896 | 0.0595 | -3.75E-06 | count | 1 |
| SART3    | -1.35054   | 0.5152491 | -2.6211 | 0.0091 | -3.75E-06 | count | 1 |
| CTCF     | -0.3571988 | 0.2594184 | -1.3769 | 0.169  | -3.74E-06 | count | 1 |
| SSH2     | -0.3532292 | 0.2759277 | -1.2802 | 0.201  | -3.72E-06 | count | 1 |
| ARHGAP30 | -0.3540423 | 0.2729369 | -1.2972 | 0.195  | -3.72E-06 | count | 1 |
| ANAPC15  | -0.3536681 | 0.3493205 | -1.0124 | 0.312  | -3.72E-06 | count | 1 |
| JPT1     | -0.3536886 | 0.2206765 | -1.6027 | 0.11   | -3.72E-06 | count | 1 |
| GLRX3    | -0.3530211 | 0.3029032 | -1.1655 | 0.244  | -3.71E-06 | count | 1 |
| GSS      | -1.3174401 | 0.4827301 | -2.7291 | 0.0066 | -3.70E-06 | count | 1 |
| TMEM134  | -0.3521039 | 0.2078074 | -1.6944 | 0.0909 | -3.69E-06 | count | 1 |
| TMEM165  | -0.3509025 | 0.2105182 | -1.6669 | 0.0962 | -3.68E-06 | count | 1 |
| STAG3    | -0.3492039 | 0.3211905 | -1.0872 | 0.278  | -3.68E-06 | count | 1 |
| AHCY     | -1.2884946 | 0.4829832 | -2.6678 | 0.0079 | -3.67E-06 | count | 1 |
| PRKRA    | -0.3481657 | 0.3539439 | -0.9837 | 0.326  | -3.67E-06 | count | 1 |
| PDHB     | -0.3482323 | 0.2856266 | -1.2192 | 0.223  | -3.67E-06 | count | 1 |
| UBE4A    | -1.3255323 | 0.7002125 | -1.893  | 0.059  | -3.66E-06 | count | 1 |
| MED17    | -1.3031398 | 0.5818255 | -2.2397 | 0.0256 | -3.66E-06 | count | 1 |
| TMEM41A  | -1.3031398 | 0.6221987 | -2.0944 | 0.0368 | -3.65E-06 | count | 1 |
| MTHFD1   | -1.3043814 | 0.6174204 | -2.1126 | 0.0352 | -3.65E-06 | count | 1 |
| GTPBP3   | -1.3043814 | 0.6140708 | -2.1242 | 0.0342 | -3.65E-06 | count | 1 |
| FAM200B  | -1.2580634 | 0.5027896 | -2.5022 | 0.0127 | -3.64E-06 | count | 1 |
| POLR3E   | -1.3074321 | 0.7258053 | -1.8014 | 0.0723 | -3.63E-06 | count | 1 |
| ATF1     | -0.3425596 | 0.3113659 | -1.1002 | 0.272  | -3.62E-06 | count | 1 |
| CLUAP1   | -1.2880203 | 0.7480071 | -1.7219 | 0.0858 | -3.59E-06 | count | 1 |
| KIAA2013 | -1.2632913 | 0.5383653 | -2.3465 | 0.0194 | -3.58E-06 | count | 1 |
| PRKX     | -1.2689042 | 0.7535936 | -1.6838 | 0.0929 | -3.58E-06 | count | 1 |
| CPLANE1  | -1.2697711 | 0.7980008 | -1.5912 | 0.112  | -3.57E-06 | count | 1 |
| PRKAR2A  | -0.3380743 | 0.3888843 | -0.8693 | 0.385  | -3.57E-06 | count | 1 |
| ITFG1    | -1.200475  | 0.5152597 | -2.3298 | 0.0203 | -3.52E-06 | count | 1 |
| MICAL1   | -1.2259454 | 0.5359648 | -2.2874 | 0.0226 | -3.51E-06 | count | 1 |
| KYAT3    | -1.1866522 | 0.4674493 | -2.5386 | 0.0115 | -3.51E-06 | count | 1 |
| CHMP1B   | -0.3301446 | 0.2684831 | -1.2297 | 0.219  | -3.51E-06 | count | 1 |
| PSMC2    | -0.3287702 | 0.3024312 | -1.0871 | 0.278  | -3.50E-06 | count | 1 |
| OXA1L    | -0.3298704 | 0.2551094 | -1.2931 | 0.197  | -3.50E-06 | count | 1 |
| PFDN6    | -0.328956  | 0.3548715 | -0.927  | 0.354  | -3.49E-06 | count | 1 |
| DBP      | -1.1911503 | 0.5022497 | -2.3716 | 0.0181 | -3.49E-06 | count | 1 |
| TFEC     | -1.1731235 | 0.3800444 | -3.0868 | 0.0022 | -3.48E-06 | count | 1 |
| APP      | -0.3273797 | 0.3468096 | -0.944  | 0.346  | -3.47E-06 | count | 1 |
| INTS6    | -0.3262702 | 0.2288404 | -1.4258 | 0.155  | -3.47E-06 | count | 1 |

|            |            |           |         |          |           |       |   |
|------------|------------|-----------|---------|----------|-----------|-------|---|
| CLNK       | -1.1731235 | 0.6016306 | -1.9499 | 0.0518   | -3.46E-06 | count | 1 |
| PXDC1      | -0.3253624 | 0.3494002 | -0.9312 | 0.352    | -3.46E-06 | count | 1 |
| EAPP       | -0.3248877 | 0.2156787 | -1.5064 | 0.133    | -3.45E-06 | count | 1 |
| TRAC       | -0.3255585 | 0.2058224 | -1.5817 | 0.114    | -3.44E-06 | count | 1 |
| RHBDF2     | -0.320701  | 0.3441446 | -0.9319 | 0.352    | -3.42E-06 | count | 1 |
| PTPA       | -1.1886856 | 0.6980566 | -1.7028 | 0.0893   | -3.42E-06 | count | 1 |
| DUS3L      | -1.1886856 | 0.7009565 | -1.6958 | 0.0906   | -3.41E-06 | count | 1 |
| ITGB1BP1   | -0.3210365 | 0.2984504 | -1.0757 | 0.283    | -3.41E-06 | count | 1 |
| LNPEP      | -0.317522  | 0.3410189 | -0.9311 | 0.352    | -3.40E-06 | count | 1 |
| AAAS       | -1.1670905 | 0.7408262 | -1.5754 | 0.116    | -3.39E-06 | count | 1 |
| RORA       | -0.3179686 | 0.3320995 | -0.9574 | 0.339    | -3.39E-06 | count | 1 |
| SEMA4B     | -1.1586298 | 0.6428817 | -1.8022 | 0.0722   | -3.39E-06 | count | 1 |
| ZFAND3     | -1.1529804 | 0.5532451 | -2.084  | 0.0377   | -3.38E-06 | count | 1 |
| NASP       | -0.3179177 | 0.1793029 | -1.7731 | 0.0769   | -3.38E-06 | count | 1 |
| NDUFA10    | -0.3167715 | 0.277893  | -1.1399 | 0.255    | -3.37E-06 | count | 1 |
| SLBP       | -0.3171499 | 0.2291466 | -1.384  | 0.167    | -3.37E-06 | count | 1 |
| FAM173A    | -0.315811  | 0.2718173 | -1.1619 | 0.246    | -3.36E-06 | count | 1 |
| ATP5MC1    | -0.3149987 | 0.1946193 | -1.6185 | 0.106    | -3.35E-06 | count | 1 |
| TTC19      | -1.1075643 | 0.4961779 | -2.2322 | 0.0261   | -3.34E-06 | count | 1 |
| CHERP      | -1.1246367 | 0.5088023 | -2.2104 | 0.0276   | -3.34E-06 | count | 1 |
| AFF4       | -0.3128604 | 0.2497261 | -1.2528 | 0.211    | -3.34E-06 | count | 1 |
| SMARCC1    | -0.3138421 | 0.2753665 | -1.1397 | 0.255    | -3.34E-06 | count | 1 |
| ZNF106     | -0.3119918 | 0.310466  | -1.0049 | 0.315    | -3.33E-06 | count | 1 |
| ATF7IP2    | -0.3119918 | 0.2802685 | -1.1132 | 0.266    | -3.32E-06 | count | 1 |
| TBC1D5     | -1.1025485 | 0.328912  | -3.3521 | 9.00E-04 | -3.31E-06 | count | 1 |
| PPP3R1     | -1.1115493 | 0.5350923 | -2.0773 | 0.0383   | -3.31E-06 | count | 1 |
| PTPRN2     | -1.1246367 | 0.7533244 | -1.4929 | 0.136    | -3.31E-06 | count | 1 |
| XPO7       | -1.128275  | 0.885791  | -1.2737 | 0.203    | -3.28E-06 | count | 1 |
| PPP2R5A    | -1.089662  | 0.4891418 | -2.2277 | 0.0264   | -3.27E-06 | count | 1 |
| ZNF708     | -0.3051052 | 0.3322357 | -0.9183 | 0.359    | -3.26E-06 | count | 1 |
| FAM217B    | -1.0477036 | 0.5187302 | -2.0197 | 0.044    | -3.26E-06 | count | 1 |
| LNPK       | -1.1015208 | 0.7573302 | -1.4545 | 0.147    | -3.26E-06 | count | 1 |
| MATR3      | -1.0611527 | 0.4569483 | -2.3223 | 0.0207   | -3.25E-06 | count | 1 |
| CKAP5      | -1.0872651 | 0.6162306 | -1.7644 | 0.0784   | -3.24E-06 | count | 1 |
| MKMK2      | -0.3034013 | 0.2041944 | -1.4858 | 0.138    | -3.24E-06 | count | 1 |
| FUBP3      | -1.0677768 | 0.7426386 | -1.4378 | 0.151    | -3.23E-06 | count | 1 |
| SMARCAD1   | -1.0374345 | 0.4301028 | -2.4121 | 0.0163   | -3.22E-06 | count | 1 |
| TET2       | -1.045703  | 0.5542712 | -1.8866 | 0.0599   | -3.21E-06 | count | 1 |
| SEC16A     | -1.0675941 | 0.832339  | -1.2826 | 0.2      | -3.20E-06 | count | 1 |
| NUP107     | -1.0407703 | 0.4149977 | -2.5079 | 0.0125   | -3.20E-06 | count | 1 |
| ARMH3      | -1.0442982 | 0.6050495 | -1.726  | 0.085    | -3.19E-06 | count | 1 |
| CTBS       | -1.0377065 | 0.4166608 | -2.4905 | 0.0131   | -3.18E-06 | count | 1 |
| AL390728.6 | -1.0527789 | 0.698223  | -1.5078 | 0.132    | -3.18E-06 | count | 1 |
| OTUD5      | -0.2960167 | 0.3215256 | -0.9207 | 0.358    | -3.18E-06 | count | 1 |
| TMEM251    | -1.0301623 | 0.5084211 | -2.0262 | 0.0433   | -3.17E-06 | count | 1 |

|            |            |           |         |        |           |       |   |
|------------|------------|-----------|---------|--------|-----------|-------|---|
| CAMTA1     | -0.2935115 | 0.2574447 | -1.1401 | 0.255  | -3.16E-06 | count | 1 |
| MCM3AP     | -1.0320028 | 0.7011681 | -1.4718 | 0.142  | -3.15E-06 | count | 1 |
| PPP2CB     | -1.0064793 | 0.4503966 | -2.2347 | 0.0259 | -3.14E-06 | count | 1 |
| PARL       | -0.2908628 | 0.3431498 | -0.8476 | 0.397  | -3.14E-06 | count | 1 |
| INKA1      | -1.008533  | 0.4688975 | -2.1509 | 0.032  | -3.14E-06 | count | 1 |
| ZNF580     | -0.2918954 | 0.3176581 | -0.9189 | 0.359  | -3.14E-06 | count | 1 |
| C12orf42   | -1.0113504 | 0.742642  | -1.3618 | 0.174  | -3.12E-06 | count | 1 |
| CISD1      | -1.0157759 | 0.5839032 | -1.7396 | 0.0826 | -3.12E-06 | count | 1 |
| MSL1       | -0.992895  | 0.361934  | -2.7433 | 0.0063 | -3.12E-06 | count | 1 |
| DDX42      | -0.2897902 | 0.3255008 | -0.8903 | 0.374  | -3.11E-06 | count | 1 |
| CFDP1      | -0.2877795 | 0.2909642 | -0.9891 | 0.323  | -3.11E-06 | count | 1 |
| IQCB1      | -0.2883183 | 0.3350007 | -0.8606 | 0.39   | -3.11E-06 | count | 1 |
| TES        | -0.2877504 | 0.3145786 | -0.9147 | 0.361  | -3.10E-06 | count | 1 |
| CBL        | -0.9977737 | 0.4316879 | -2.3113 | 0.0213 | -3.09E-06 | count | 1 |
| SMC2       | -1.0113504 | 0.6123284 | -1.6516 | 0.0993 | -3.09E-06 | count | 1 |
| MUM1       | -0.2872969 | 0.4131566 | -0.6954 | 0.487  | -3.09E-06 | count | 1 |
| AUTS2      | -0.9903855 | 0.477064  | -2.076  | 0.0385 | -3.08E-06 | count | 1 |
| ACADSB     | -1.0075088 | 0.6684015 | -1.5073 | 0.132  | -3.08E-06 | count | 1 |
| SPARCL1    | -1.0011702 | 0.6397811 | -1.5649 | 0.118  | -3.08E-06 | count | 1 |
| SPINK2     | -0.9900421 | 0.6951916 | -1.4241 | 0.155  | -3.07E-06 | count | 1 |
| TMEM70     | -0.283642  | 0.3039557 | -0.9332 | 0.351  | -3.06E-06 | count | 1 |
| PIGF       | -0.9850885 | 0.5390072 | -1.8276 | 0.0683 | -3.05E-06 | count | 1 |
| ZC3H6      | -0.2809745 | 0.2934678 | -0.9574 | 0.339  | -3.04E-06 | count | 1 |
| ZBTB11     | -0.2809521 | 0.3038539 | -0.9246 | 0.356  | -3.03E-06 | count | 1 |
| GRK2       | -0.2807608 | 0.2620813 | -1.0713 | 0.285  | -3.03E-06 | count | 1 |
| SREK1IP1   | -0.2798736 | 0.276426  | -1.0125 | 0.312  | -3.02E-06 | count | 1 |
| RBM12      | -0.948702  | 0.5205072 | -1.8226 | 0.069  | -3.01E-06 | count | 1 |
| P4HA1      | -0.2780718 | 0.3582709 | -0.7761 | 0.438  | -3.01E-06 | count | 1 |
| CCSAP      | -0.9680274 | 0.6731139 | -1.4381 | 0.151  | -3.01E-06 | count | 1 |
| KIAA1147   | -0.9680274 | 0.5800376 | -1.6689 | 0.0958 | -3.01E-06 | count | 1 |
| TMCO1      | -0.2778167 | 0.2411492 | -1.1521 | 0.25   | -3.01E-06 | count | 1 |
| PRAG1      | -0.9592735 | 0.5991516 | -1.6011 | 0.11   | -2.98E-06 | count | 1 |
| SPATS2L    | -0.9529613 | 0.7858477 | -1.2127 | 0.226  | -2.97E-06 | count | 1 |
| EMILIN2    | -0.9275679 | 0.7225152 | -1.2838 | 0.2    | -2.97E-06 | count | 1 |
| BICD2      | -0.9452491 | 0.6250214 | -1.5123 | 0.131  | -2.97E-06 | count | 1 |
| SEH1L      | -0.938592  | 0.5995914 | -1.5654 | 0.118  | -2.95E-06 | count | 1 |
| PTDSS1     | -0.9275679 | 0.5421456 | -1.7109 | 0.0878 | -2.94E-06 | count | 1 |
| TOP2B      | -0.2720509 | 0.3201434 | -0.8498 | 0.396  | -2.94E-06 | count | 1 |
| SCYL1      | -0.9188152 | 0.4984478 | -1.8434 | 0.0659 | -2.93E-06 | count | 1 |
| AC007384.1 | -0.9182468 | 0.4960181 | -1.8512 | 0.0648 | -2.93E-06 | count | 1 |
| SUSD3      | -0.9166974 | 0.3722465 | -2.4626 | 0.0142 | -2.92E-06 | count | 1 |
| ARCN1      | -0.2700904 | 0.3160454 | -0.8546 | 0.393  | -2.92E-06 | count | 1 |
| TOR1AIP2   | -0.9144686 | 0.4574076 | -1.9992 | 0.0462 | -2.92E-06 | count | 1 |
| CBR1       | -0.930423  | 0.6275512 | -1.4826 | 0.139  | -2.92E-06 | count | 1 |
| SLC35E3    | -0.9161434 | 0.7695777 | -1.1904 | 0.235  | -2.91E-06 | count | 1 |



|          |            |           |         |        |           |       |   |
|----------|------------|-----------|---------|--------|-----------|-------|---|
| CEPT1    | -0.8909393 | 0.571024  | -1.5602 | 0.119  | -2.89E-06 | count | 1 |
| CLPX     | -0.9081385 | 0.5086451 | -1.7854 | 0.0749 | -2.89E-06 | count | 1 |
| UBXN7    | -0.8997873 | 0.5127281 | -1.7549 | 0.08   | -2.89E-06 | count | 1 |
| RIOK3    | -0.2657481 | 0.3097061 | -0.8581 | 0.391  | -2.89E-06 | count | 1 |
| SDE2     | -0.2659842 | 0.2722149 | -0.9771 | 0.329  | -2.88E-06 | count | 1 |
| UBE3C    | -0.9078194 | 0.6243851 | -1.4539 | 0.147  | -2.88E-06 | count | 1 |
| CREBBP   | -0.8997873 | 0.5207645 | -1.7278 | 0.0847 | -2.88E-06 | count | 1 |
| ITPK1    | -0.9058025 | 0.7190132 | -1.2598 | 0.208  | -2.87E-06 | count | 1 |
| FANCF    | -0.9058025 | 0.7325873 | -1.2364 | 0.217  | -2.87E-06 | count | 1 |
| HCST     | -0.2637081 | 0.1850303 | -1.4252 | 0.155  | -2.87E-06 | count | 1 |
| ERCC6    | -0.8908796 | 0.5507935 | -1.6174 | 0.106  | -2.84E-06 | count | 1 |
| SLC7A6   | -0.8874543 | 0.6085713 | -1.4583 | 0.145  | -2.84E-06 | count | 1 |
| TLE1     | -0.2616572 | 0.2969508 | -0.8811 | 0.379  | -2.84E-06 | count | 1 |
| TAF15    | -0.2607492 | 0.2937734 | -0.8876 | 0.375  | -2.84E-06 | count | 1 |
| ARHGAP12 | -0.8874543 | 0.5767476 | -1.5387 | 0.125  | -2.83E-06 | count | 1 |
| WDR74    | -0.2604145 | 0.2951442 | -0.8823 | 0.378  | -2.83E-06 | count | 1 |
| PPM1D    | -0.8698814 | 0.4250688 | -2.0464 | 0.0413 | -2.82E-06 | count | 1 |
| LIG1     | -0.882717  | 0.5852443 | -1.5083 | 0.132  | -2.82E-06 | count | 1 |
| DSN1     | -0.882717  | 0.715951  | -1.2329 | 0.218  | -2.82E-06 | count | 1 |
| PARP9    | -0.8561949 | 0.4581312 | -1.8689 | 0.0623 | -2.81E-06 | count | 1 |
| ATP13A1  | -0.8885897 | 0.983295  | -0.9037 | 0.367  | -2.81E-06 | count | 1 |
| TBL1X    | -0.8719251 | 0.5377811 | -1.6213 | 0.106  | -2.81E-06 | count | 1 |
| ZC3H4    | -0.8628209 | 0.6595605 | -1.3082 | 0.191  | -2.81E-06 | count | 1 |
| CPSF7    | -0.8757375 | 0.7525218 | -1.1637 | 0.245  | -2.80E-06 | count | 1 |
| TAF13    | -0.8628209 | 0.564441  | -1.5286 | 0.127  | -2.79E-06 | count | 1 |
| WAC-AS1  | -0.8574939 | 0.4190214 | -2.0464 | 0.0413 | -2.79E-06 | count | 1 |
| NIPAL3   | -0.8628209 | 0.5362129 | -1.6091 | 0.108  | -2.79E-06 | count | 1 |
| SMC5     | -0.2559441 | 0.3012412 | -0.8496 | 0.396  | -2.78E-06 | count | 1 |
| TRAPPC11 | -0.8574939 | 0.6858604 | -1.2502 | 0.212  | -2.78E-06 | count | 1 |
| WDR34    | -0.85926   | 0.5083551 | -1.6903 | 0.0917 | -2.78E-06 | count | 1 |
| ORAI2    | -0.2555378 | 0.248466  | -1.0285 | 0.304  | -2.78E-06 | count | 1 |
| SRRD     | -0.8324289 | 0.4824601 | -1.7254 | 0.0852 | -2.78E-06 | count | 1 |
| COPRS    | -0.8589437 | 0.6768628 | -1.269  | 0.205  | -2.77E-06 | count | 1 |
| PTPN12   | -0.8407255 | 0.4147628 | -2.027  | 0.0433 | -2.77E-06 | count | 1 |
| TEX9     | -0.2538416 | 0.2453893 | -1.0344 | 0.301  | -2.77E-06 | count | 1 |
| EBLN3P   | -0.2534171 | 0.2297582 | -1.103  | 0.271  | -2.76E-06 | count | 1 |
| SIDT2    | -0.8527536 | 0.5083445 | -1.6775 | 0.0941 | -2.76E-06 | count | 1 |
| ARIH2    | -0.8445436 | 0.3828854 | -2.2057 | 0.0279 | -2.76E-06 | count | 1 |
| SURF6    | -0.8574939 | 0.7200636 | -1.1909 | 0.234  | -2.76E-06 | count | 1 |
| ZFYVE16  | -0.8517848 | 0.5498087 | -1.5492 | 0.122  | -2.76E-06 | count | 1 |
| PCNA     | -0.8393269 | 0.3796833 | -2.2106 | 0.0276 | -2.75E-06 | count | 1 |
| SLC25A46 | -0.8371088 | 0.5144291 | -1.6273 | 0.104  | -2.74E-06 | count | 1 |
| FAM208A  | -0.251256  | 0.3321958 | -0.7563 | 0.45   | -2.74E-06 | count | 1 |
| GOLGA8B  | -0.856742  | 0.5947826 | -1.4404 | 0.15   | -2.74E-06 | count | 1 |
| TMEM99   | -0.8442428 | 0.8359717 | -1.0099 | 0.313  | -2.74E-06 | count | 1 |

|           |            |           |         |        |           |       |   |
|-----------|------------|-----------|---------|--------|-----------|-------|---|
| WDR12     | -0.8348893 | 0.5778354 | -1.4449 | 0.149  | -2.74E-06 | count | 1 |
| RAB2B     | -0.8333987 | 0.6438576 | -1.2944 | 0.196  | -2.73E-06 | count | 1 |
| NMRK1     | -0.8333987 | 0.6729719 | -1.2384 | 0.216  | -2.73E-06 | count | 1 |
| C6orf106  | -0.2493541 | 0.3508127 | -0.7108 | 0.478  | -2.72E-06 | count | 1 |
| PABPN1    | -0.2493409 | 0.2745299 | -0.9082 | 0.364  | -2.72E-06 | count | 1 |
| RNF139    | -0.8254931 | 0.4226292 | -1.9532 | 0.0514 | -2.72E-06 | count | 1 |
| ERVK3-1   | -0.8254931 | 0.5556293 | -1.4857 | 0.138  | -2.71E-06 | count | 1 |
| FBXO11    | -0.247519  | 0.3155853 | -0.7843 | 0.433  | -2.70E-06 | count | 1 |
| PSMD14    | -0.2475228 | 0.305085  | -0.8113 | 0.418  | -2.70E-06 | count | 1 |
| THOP1     | -0.8312425 | 0.5770046 | -1.4406 | 0.15   | -2.70E-06 | count | 1 |
| KIF2A     | -0.2473298 | 0.2763343 | -0.895  | 0.371  | -2.70E-06 | count | 1 |
| FIG4      | -0.8312425 | 0.6913411 | -1.2024 | 0.23   | -2.70E-06 | count | 1 |
| MOSPD3    | -0.8312425 | 0.6323676 | -1.3145 | 0.189  | -2.70E-06 | count | 1 |
| ZNF720    | -0.8312425 | 0.6323676 | -1.3145 | 0.189  | -2.70E-06 | count | 1 |
| OXR1      | -0.2461969 | 0.2906918 | -0.8469 | 0.397  | -2.69E-06 | count | 1 |
| GM2A      | -0.8083875 | 0.4314921 | -1.8735 | 0.0617 | -2.68E-06 | count | 1 |
| WDR77     | -0.8181048 | 0.5982533 | -1.3675 | 0.172  | -2.67E-06 | count | 1 |
| RBMS1     | -0.8111503 | 0.5076593 | -1.5978 | 0.111  | -2.67E-06 | count | 1 |
| RP9       | -0.2436657 | 0.3339658 | -0.7296 | 0.466  | -2.67E-06 | count | 1 |
| CCDC93    | -0.8026047 | 0.3989234 | -2.0119 | 0.0448 | -2.67E-06 | count | 1 |
| FCRL5     | -0.2435378 | 0.3387289 | -0.719  | 0.473  | -2.67E-06 | count | 1 |
| ARPC1A    | -0.8009318 | 0.3639005 | -2.201  | 0.0283 | -2.66E-06 | count | 1 |
| RPRD2     | -0.8000292 | 0.4975233 | -1.608  | 0.109  | -2.66E-06 | count | 1 |
| FAM207A   | -0.8078797 | 0.4670273 | -1.7298 | 0.0844 | -2.66E-06 | count | 1 |
| ARL5B     | -0.8071426 | 0.5484063 | -1.4718 | 0.142  | -2.66E-06 | count | 1 |
| SETD4     | -0.8059785 | 0.5889849 | -1.3684 | 0.172  | -2.65E-06 | count | 1 |
| BRCC3     | -0.8071432 | 0.4970684 | -1.6238 | 0.105  | -2.65E-06 | count | 1 |
| MRPL49    | -0.8059785 | 0.5308208 | -1.5184 | 0.13   | -2.65E-06 | count | 1 |
| HIST2H2AC | -0.7995485 | 0.4280161 | -1.868  | 0.0624 | -2.64E-06 | count | 1 |
| SIMC1     | -0.784647  | 0.6126826 | -1.2807 | 0.201  | -2.64E-06 | count | 1 |
| TAGLN     | -0.7939433 | 0.3907472 | -2.0319 | 0.0428 | -2.64E-06 | count | 1 |
| LRCH4     | -0.7916127 | 0.5782054 | -1.3691 | 0.172  | -2.64E-06 | count | 1 |
| SLC25A42  | -0.7939433 | 0.5965646 | -1.3309 | 0.184  | -2.62E-06 | count | 1 |
| ATG2A     | -0.7939433 | 0.6075108 | -1.3069 | 0.192  | -2.62E-06 | count | 1 |
| PARP8     | -0.7762581 | 0.5056103 | -1.5353 | 0.125  | -2.62E-06 | count | 1 |
| LINC00662 | -0.7851624 | 0.4209531 | -1.8652 | 0.0628 | -2.62E-06 | count | 1 |
| MPLKIP    | -0.2383094 | 0.2724135 | -0.8748 | 0.382  | -2.62E-06 | count | 1 |
| TRAF7     | -0.7911569 | 0.6240555 | -1.2678 | 0.206  | -2.61E-06 | count | 1 |
| SAFB2     | -0.2382046 | 0.2890566 | -0.8241 | 0.41   | -2.61E-06 | count | 1 |
| PHYKPL    | -0.2381286 | 0.2919633 | -0.8156 | 0.415  | -2.61E-06 | count | 1 |
| STOM      | -0.7955081 | 0.889892  | -0.8939 | 0.372  | -2.61E-06 | count | 1 |
| SYNC      | -0.7712313 | 0.4540804 | -1.6984 | 0.0901 | -2.58E-06 | count | 1 |
| SPINT2    | -0.2350177 | 0.2341133 | -1.0039 | 0.316  | -2.57E-06 | count | 1 |
| AAMDC     | -0.7641865 | 0.7418371 | -1.0301 | 0.304  | -2.57E-06 | count | 1 |
| FAM210A   | -0.7634658 | 0.4037396 | -1.891  | 0.0593 | -2.57E-06 | count | 1 |

|            |            |           |         |        |           |       |   |
|------------|------------|-----------|---------|--------|-----------|-------|---|
| LCK        | -0.7641865 | 0.4460331 | -1.7133 | 0.0874 | -2.57E-06 | count | 1 |
| SH2B2      | -0.7641865 | 0.4397708 | -1.7377 | 0.083  | -2.56E-06 | count | 1 |
| DCAF11     | -0.7684567 | 0.6074988 | -1.265  | 0.207  | -2.55E-06 | count | 1 |
| WDFY2      | -0.745934  | 0.4924957 | -1.5146 | 0.131  | -2.55E-06 | count | 1 |
| ATG5       | -0.2319797 | 0.2471208 | -0.9387 | 0.348  | -2.55E-06 | count | 1 |
| JMJD6      | -0.2314971 | 0.3094199 | -0.7482 | 0.455  | -2.55E-06 | count | 1 |
| SPATA2L    | -0.2310344 | 0.3287056 | -0.7029 | 0.483  | -2.54E-06 | count | 1 |
| EXOSC4     | -0.7564495 | 0.5336153 | -1.4176 | 0.157  | -2.54E-06 | count | 1 |
| ZMAT1      | -0.7503314 | 0.5723854 | -1.3109 | 0.191  | -2.54E-06 | count | 1 |
| PTCD3      | -0.745934  | 0.4421694 | -1.687  | 0.0923 | -2.54E-06 | count | 1 |
| RNASE6     | -0.2307347 | 0.3485166 | -0.662  | 0.508  | -2.53E-06 | count | 1 |
| EP400      | -0.7564495 | 0.5975433 | -1.2659 | 0.206  | -2.53E-06 | count | 1 |
| ZNF146     | -0.7486631 | 0.4269091 | -1.7537 | 0.0802 | -2.53E-06 | count | 1 |
| GGPS1      | -0.7474338 | 0.4114737 | -1.8165 | 0.07   | -2.53E-06 | count | 1 |
| C12orf43   | -0.7527252 | 0.4920863 | -1.5297 | 0.127  | -2.53E-06 | count | 1 |
| RDX        | -0.7500994 | 0.4759882 | -1.5759 | 0.116  | -2.53E-06 | count | 1 |
| EPN1       | -0.7487622 | 0.3712259 | -2.017  | 0.0443 | -2.52E-06 | count | 1 |
| CCDC88C    | -0.7430967 | 0.3582029 | -2.0745 | 0.0386 | -2.52E-06 | count | 1 |
| ING2       | -0.2286452 | 0.2585297 | -0.8844 | 0.377  | -2.52E-06 | count | 1 |
| NEK8       | -0.7527252 | 0.524335  | -1.4356 | 0.152  | -2.51E-06 | count | 1 |
| DEGS1      | -0.2281363 | 0.225942  | -1.0097 | 0.313  | -2.51E-06 | count | 1 |
| DDX39A     | -0.2279519 | 0.2729897 | -0.835  | 0.404  | -2.51E-06 | count | 1 |
| CBLL1      | -0.2281363 | 0.3510205 | -0.6499 | 0.516  | -2.51E-06 | count | 1 |
| CRYL1      | -0.7361389 | 0.5440645 | -1.353  | 0.177  | -2.50E-06 | count | 1 |
| KPNA4      | -0.227202  | 0.2505276 | -0.9069 | 0.365  | -2.50E-06 | count | 1 |
| SPG21      | -0.7357452 | 0.3988842 | -1.8445 | 0.0658 | -2.50E-06 | count | 1 |
| FNIP1      | -0.2263736 | 0.2985742 | -0.7582 | 0.449  | -2.49E-06 | count | 1 |
| ZNF12      | -0.7475819 | 0.6536736 | -1.1437 | 0.253  | -2.49E-06 | count | 1 |
| FAM114A2   | -0.7361389 | 0.5550634 | -1.3262 | 0.185  | -2.48E-06 | count | 1 |
| ENDOD1     | -0.7211112 | 0.4798801 | -1.5027 | 0.134  | -2.48E-06 | count | 1 |
| CDKN2AIPNL | -0.7361389 | 0.5362188 | -1.3728 | 0.17   | -2.48E-06 | count | 1 |
| FNBP4      | -0.2250838 | 0.1968746 | -1.1433 | 0.254  | -2.48E-06 | count | 1 |
| AC012368.1 | -0.7361389 | 0.5558765 | -1.3243 | 0.186  | -2.48E-06 | count | 1 |
| NSUN2      | -0.7352401 | 0.5241682 | -1.4027 | 0.161  | -2.47E-06 | count | 1 |
| CBWD5      | -0.2246687 | 0.3074161 | -0.7308 | 0.465  | -2.47E-06 | count | 1 |
| LINC01003  | -0.7352401 | 0.5570992 | -1.3198 | 0.188  | -2.47E-06 | count | 1 |
| CDC27      | -0.7272117 | 0.4052428 | -1.7945 | 0.0734 | -2.47E-06 | count | 1 |
| TTPAL      | -0.725436  | 0.5739631 | -1.2639 | 0.207  | -2.47E-06 | count | 1 |
| ITCH       | -0.7299419 | 0.4671289 | -1.5626 | 0.119  | -2.46E-06 | count | 1 |
| HSF2       | -0.7336337 | 0.6700384 | -1.0949 | 0.274  | -2.46E-06 | count | 1 |
| PARP10     | -0.7361223 | 0.7051169 | -1.044  | 0.297  | -2.46E-06 | count | 1 |
| LINC01678  | -0.7336337 | 0.7695522 | -0.9533 | 0.341  | -2.46E-06 | count | 1 |
| GFPT1      | -0.7299419 | 0.5431476 | -1.3439 | 0.18   | -2.46E-06 | count | 1 |
| ZNF880     | -0.7191006 | 0.5473643 | -1.3138 | 0.19   | -2.46E-06 | count | 1 |
| HEATR5B    | -0.7299419 | 0.6658278 | -1.0963 | 0.274  | -2.46E-06 | count | 1 |

|            |            |           |         |        |           |       |   |
|------------|------------|-----------|---------|--------|-----------|-------|---|
| PI4K2A     | -0.7299419 | 0.6082579 | -1.2001 | 0.231  | -2.46E-06 | count | 1 |
| DES1       | -0.7184007 | 0.4918008 | -1.4608 | 0.145  | -2.45E-06 | count | 1 |
| SGF29      | -0.7243608 | 0.4420673 | -1.6386 | 0.102  | -2.45E-06 | count | 1 |
| SUPT6H     | -0.7173735 | 0.4437848 | -1.6165 | 0.107  | -2.45E-06 | count | 1 |
| AKNA       | -0.2215828 | 0.3254307 | -0.6809 | 0.496  | -2.44E-06 | count | 1 |
| AP2B1      | -0.7132883 | 0.4223956 | -1.6887 | 0.092  | -2.44E-06 | count | 1 |
| GOLIM4     | -0.725436  | 0.7847191 | -0.9245 | 0.356  | -2.44E-06 | count | 1 |
| CHRN1      | -0.7227894 | 0.7028389 | -1.0284 | 0.304  | -2.44E-06 | count | 1 |
| HACL1      | -0.7092272 | 0.4352815 | -1.6294 | 0.104  | -2.43E-06 | count | 1 |
| DDX23      | -0.7083646 | 0.4701988 | -1.5065 | 0.133  | -2.42E-06 | count | 1 |
| SLC26A2    | -0.7131975 | 0.5867354 | -1.2155 | 0.225  | -2.42E-06 | count | 1 |
| TMC8       | -0.7052155 | 0.4764589 | -1.4801 | 0.14   | -2.42E-06 | count | 1 |
| CTNBL1     | -0.2185012 | 0.2911899 | -0.7504 | 0.453  | -2.42E-06 | count | 1 |
| ZNF395     | -0.7045515 | 0.6590925 | -1.069  | 0.286  | -2.41E-06 | count | 1 |
| ARHGEF7    | -0.7132883 | 0.606585  | -1.1759 | 0.24   | -2.41E-06 | count | 1 |
| VAMP7      | -0.7045515 | 0.6026764 | -1.169  | 0.243  | -2.40E-06 | count | 1 |
| SYNJ2      | -0.7045515 | 0.6424994 | -1.0966 | 0.273  | -2.40E-06 | count | 1 |
| CS         | -0.7045515 | 0.6424994 | -1.0966 | 0.273  | -2.40E-06 | count | 1 |
| KIAA1328   | -0.7027876 | 0.7743843 | -0.9075 | 0.365  | -2.40E-06 | count | 1 |
| EXOC4      | -0.6991114 | 0.4827181 | -1.4483 | 0.148  | -2.40E-06 | count | 1 |
| FAM49A     | -0.2165957 | 0.3141637 | -0.6894 | 0.491  | -2.39E-06 | count | 1 |
| SH2D3C     | -0.7027876 | 0.727955  | -0.9654 | 0.335  | -2.39E-06 | count | 1 |
| AC242426.2 | -0.7027876 | 0.728419  | -0.9648 | 0.335  | -2.38E-06 | count | 1 |
| CCDC124    | -0.2147351 | 0.3481706 | -0.6168 | 0.538  | -2.38E-06 | count | 1 |
| ODF3B      | -0.6935592 | 0.5156561 | -1.345  | 0.179  | -2.38E-06 | count | 1 |
| CCL3       | -0.6911951 | 0.4684627 | -1.4755 | 0.141  | -2.37E-06 | count | 1 |
| SLC25A11   | -0.6835028 | 0.3891833 | -1.7562 | 0.0797 | -2.37E-06 | count | 1 |
| AP1G1      | -0.685751  | 0.4016963 | -1.7071 | 0.0885 | -2.36E-06 | count | 1 |
| HCFC1R1    | -0.6804583 | 0.3442308 | -1.9768 | 0.0487 | -2.35E-06 | count | 1 |
| CHD9       | -0.2125847 | 0.2113188 | -1.006  | 0.315  | -2.35E-06 | count | 1 |
| RASSF2     | -0.2121641 | 0.3025181 | -0.7013 | 0.483  | -2.35E-06 | count | 1 |
| SF3A1      | -0.2120293 | 0.3261802 | -0.65   | 0.516  | -2.34E-06 | count | 1 |
| HIVEP3     | -0.6873639 | 0.9653889 | -0.712  | 0.477  | -2.34E-06 | count | 1 |
| OGFR       | -0.2108952 | 0.2511487 | -0.8397 | 0.402  | -2.34E-06 | count | 1 |
| ZDBF2      | -0.6873639 | 0.8388471 | -0.8194 | 0.413  | -2.34E-06 | count | 1 |
| LPGAT1     | -0.2103729 | 0.2347837 | -0.896  | 0.371  | -2.33E-06 | count | 1 |
| OAS2       | -0.6780969 | 0.5855492 | -1.1581 | 0.247  | -2.33E-06 | count | 1 |
| TM9SF4     | -0.6728657 | 0.4722554 | -1.4248 | 0.155  | -2.33E-06 | count | 1 |
| TRAPPC6A   | -0.2106186 | 0.2461424 | -0.8557 | 0.393  | -2.33E-06 | count | 1 |
| ACSL3      | -0.6671931 | 0.4144196 | -1.6099 | 0.108  | -2.33E-06 | count | 1 |
| FGD2       | -0.2105407 | 0.3567816 | -0.5901 | 0.555  | -2.33E-06 | count | 1 |
| C12orf45   | -0.2104696 | 0.3612902 | -0.5826 | 0.56   | -2.33E-06 | count | 1 |
| IL32       | -0.6780969 | 0.6645963 | -1.0203 | 0.308  | -2.33E-06 | count | 1 |
| LINC02397  | -0.2094986 | 0.2409123 | -0.8696 | 0.385  | -2.32E-06 | count | 1 |
| GALK2      | -0.6732801 | 0.5581616 | -1.2062 | 0.228  | -2.32E-06 | count | 1 |

|            |            |           |         |        |           |       |   |
|------------|------------|-----------|---------|--------|-----------|-------|---|
| GRAMD1C    | -0.6598158 | 0.7216645 | -0.9143 | 0.361  | -2.32E-06 | count | 1 |
| THUMPD2    | -0.6515166 | 0.5348505 | -1.2181 | 0.224  | -2.32E-06 | count | 1 |
| TMX3       | -0.2079214 | 0.3881233 | -0.5357 | 0.592  | -2.31E-06 | count | 1 |
| ORC4       | -0.667444  | 0.508421  | -1.3128 | 0.19   | -2.31E-06 | count | 1 |
| POU2F1     | -0.667444  | 0.602413  | -1.108  | 0.268  | -2.30E-06 | count | 1 |
| GALM       | -0.6703285 | 0.8272847 | -0.8103 | 0.418  | -2.30E-06 | count | 1 |
| TLE4       | -0.2062715 | 0.28423   | -0.7257 | 0.468  | -2.29E-06 | count | 1 |
| CRYBG1     | -0.2061294 | 0.258841  | -0.7964 | 0.426  | -2.29E-06 | count | 1 |
| DHX40      | -0.6554289 | 0.4348762 | -1.5072 | 0.132  | -2.29E-06 | count | 1 |
| ZCRB1      | -0.2065684 | 0.2998726 | -0.6889 | 0.491  | -2.29E-06 | count | 1 |
| ZNF264     | -0.6594996 | 0.5197122 | -1.269  | 0.205  | -2.28E-06 | count | 1 |
| DYM        | -0.6603036 | 0.5488548 | -1.2031 | 0.23   | -2.28E-06 | count | 1 |
| B3GNT2     | -0.2054555 | 0.2693653 | -0.7627 | 0.446  | -2.28E-06 | count | 1 |
| RANBP3     | -0.6603036 | 0.6262691 | -1.0543 | 0.292  | -2.28E-06 | count | 1 |
| MCCC1      | -0.6611548 | 0.7681539 | -0.8607 | 0.39   | -2.28E-06 | count | 1 |
| GRHPR      | -0.6541352 | 0.3529628 | -1.8533 | 0.0645 | -2.28E-06 | count | 1 |
| MAGEF1     | -0.6504684 | 0.4115363 | -1.5806 | 0.115  | -2.27E-06 | count | 1 |
| FAM208B    | -0.651143  | 0.3666788 | -1.7758 | 0.0765 | -2.27E-06 | count | 1 |
| CAND1      | -0.20461   | 0.2458328 | -0.8323 | 0.406  | -2.27E-06 | count | 1 |
| TSC22D2    | -0.2039186 | 0.3484928 | -0.5851 | 0.559  | -2.27E-06 | count | 1 |
| ETFDH      | -0.6504684 | 0.6127774 | -1.0615 | 0.289  | -2.27E-06 | count | 1 |
| ERAP2      | -0.6447909 | 0.4107665 | -1.5697 | 0.117  | -2.26E-06 | count | 1 |
| MSANTD4    | -0.6504684 | 0.6109994 | -1.0646 | 0.288  | -2.25E-06 | count | 1 |
| BTBD1      | -0.6504684 | 0.6109994 | -1.0646 | 0.288  | -2.25E-06 | count | 1 |
| SHLD2      | -0.6447763 | 0.4581973 | -1.4072 | 0.16   | -2.25E-06 | count | 1 |
| SLC23A2    | -0.6504684 | 0.7065164 | -0.9207 | 0.358  | -2.25E-06 | count | 1 |
| PHF2       | -0.6504684 | 0.6302252 | -1.0321 | 0.303  | -2.25E-06 | count | 1 |
| TENT4B     | -0.6447763 | 0.4947122 | -1.3033 | 0.193  | -2.24E-06 | count | 1 |
| NUDT3      | -0.6417025 | 0.5206089 | -1.2326 | 0.218  | -2.24E-06 | count | 1 |
| PIK3C2B    | -0.6409765 | 0.5513796 | -1.1625 | 0.246  | -2.24E-06 | count | 1 |
| MRPL48     | -0.6428223 | 0.4319378 | -1.4882 | 0.137  | -2.24E-06 | count | 1 |
| CSGALNACT2 | -0.6361747 | 0.4512289 | -1.4099 | 0.159  | -2.24E-06 | count | 1 |
| HNRNPL     | -0.2010538 | 0.2455325 | -0.8188 | 0.413  | -2.24E-06 | count | 1 |
| PSMD3      | -0.641327  | 0.3762119 | -1.7047 | 0.089  | -2.24E-06 | count | 1 |
| TMCO4      | -0.6417025 | 0.6357484 | -1.0094 | 0.313  | -2.23E-06 | count | 1 |
| RPIA       | -0.6313547 | 0.3563129 | -1.7719 | 0.0771 | -2.22E-06 | count | 1 |
| TRIM28     | -0.1995511 | 0.3360561 | -0.5938 | 0.553  | -2.22E-06 | count | 1 |
| APOL3      | -0.6319198 | 0.4757663 | -1.3282 | 0.185  | -2.22E-06 | count | 1 |
| TIMM8B     | -0.6362661 | 0.6198305 | -1.0265 | 0.305  | -2.22E-06 | count | 1 |
| CD2BP2     | -0.6299211 | 0.2967528 | -2.1227 | 0.0343 | -2.22E-06 | count | 1 |
| ADK        | -0.1986165 | 0.2694517 | -0.7371 | 0.461  | -2.22E-06 | count | 1 |
| SERTAD2    | -0.198149  | 0.380969  | -0.5201 | 0.603  | -2.21E-06 | count | 1 |
| ARV1       | -0.6319198 | 0.5393671 | -1.1716 | 0.242  | -2.21E-06 | count | 1 |
| TSC22D4    | -0.198671  | 0.2947383 | -0.6741 | 0.501  | -2.21E-06 | count | 1 |
| ARHGEF3    | -0.636774  | 0.9462748 | -0.6729 | 0.501  | -2.21E-06 | count | 1 |

|            |            |           |         |        |           |       |   |
|------------|------------|-----------|---------|--------|-----------|-------|---|
| GPN1       | -0.6256091 | 0.5524526 | -1.1324 | 0.258  | -2.20E-06 | count | 1 |
| TBRG4      | -0.6305757 | 0.5931149 | -1.0632 | 0.288  | -2.20E-06 | count | 1 |
| IQCG       | -0.6279629 | 0.7886012 | -0.7963 | 0.426  | -2.20E-06 | count | 1 |
| PPP1R21    | -0.6208804 | 0.5466195 | -1.1359 | 0.257  | -2.19E-06 | count | 1 |
| IMPACT     | -0.6256091 | 0.6373716 | -0.9815 | 0.327  | -2.19E-06 | count | 1 |
| ABCF2      | -0.6279629 | 0.7367505 | -0.8523 | 0.394  | -2.19E-06 | count | 1 |
| CCDC14     | -0.6256091 | 0.5106428 | -1.2251 | 0.221  | -2.19E-06 | count | 1 |
| ARID3B     | -0.6279629 | 0.7163187 | -0.8767 | 0.381  | -2.18E-06 | count | 1 |
| PPP1R7     | -0.1964335 | 0.2715711 | -0.7233 | 0.47   | -2.18E-06 | count | 1 |
| MAPK1      | -0.1961923 | 0.3520018 | -0.5574 | 0.578  | -2.18E-06 | count | 1 |
| STIM1      | -0.6252019 | 0.5450707 | -1.147  | 0.252  | -2.18E-06 | count | 1 |
| STAT2      | -0.6152827 | 0.4645473 | -1.3245 | 0.186  | -2.17E-06 | count | 1 |
| TMEM183A   | -0.6182583 | 0.3122026 | -1.9803 | 0.0483 | -2.17E-06 | count | 1 |
| MRPL46     | -0.614332  | 0.4790463 | -1.2824 | 0.2    | -2.17E-06 | count | 1 |
| ALKBH5     | -0.6164988 | 0.4289779 | -1.4371 | 0.151  | -2.17E-06 | count | 1 |
| ZPR1       | -0.614332  | 0.3415925 | -1.7984 | 0.0728 | -2.17E-06 | count | 1 |
| GPAA1      | -0.6130638 | 0.3831789 | -1.5999 | 0.11   | -2.16E-06 | count | 1 |
| MYD88      | -0.617319  | 0.6337154 | -0.9741 | 0.331  | -2.16E-06 | count | 1 |
| RBM19      | -0.608461  | 0.4665348 | -1.3042 | 0.193  | -2.16E-06 | count | 1 |
| ALG8       | -0.6112539 | 0.5624213 | -1.0868 | 0.278  | -2.16E-06 | count | 1 |
| KCNQ1OT1   | -0.6112539 | 0.4773566 | -1.2805 | 0.201  | -2.16E-06 | count | 1 |
| ZDHHC17    | -0.6112539 | 0.559589  | -1.0923 | 0.275  | -2.15E-06 | count | 1 |
| MAP3K11    | -0.6075624 | 0.382437  | -1.5887 | 0.113  | -2.15E-06 | count | 1 |
| NDUFS1     | -0.608461  | 0.520853  | -1.1682 | 0.243  | -2.15E-06 | count | 1 |
| TBPL1      | -0.1923647 | 0.3144876 | -0.6117 | 0.541  | -2.15E-06 | count | 1 |
| RPUSD1     | -0.6112539 | 0.5919278 | -1.0326 | 0.302  | -2.15E-06 | count | 1 |
| HDGF       | -0.1927937 | 0.346843  | -0.5559 | 0.579  | -2.15E-06 | count | 1 |
| ATL3       | -0.6071594 | 0.4162191 | -1.4587 | 0.145  | -2.14E-06 | count | 1 |
| NEDD1      | -0.6048203 | 0.4033004 | -1.4997 | 0.134  | -2.14E-06 | count | 1 |
| NADK       | -0.6112539 | 0.6361191 | -0.9609 | 0.337  | -2.14E-06 | count | 1 |
| TMEM222    | -0.6035858 | 0.540448  | -1.1168 | 0.265  | -2.13E-06 | count | 1 |
| TRMT61B    | -0.6035858 | 0.4857683 | -1.2425 | 0.215  | -2.13E-06 | count | 1 |
| NIPSNAP1   | -0.6035858 | 0.5700034 | -1.0589 | 0.29   | -2.13E-06 | count | 1 |
| DGAT1      | -0.6035858 | 0.6094632 | -0.9904 | 0.323  | -2.13E-06 | count | 1 |
| RAD51C     | -0.5994733 | 0.4864996 | -1.2322 | 0.219  | -2.13E-06 | count | 1 |
| SCRN2      | -0.5976493 | 0.5708277 | -1.047  | 0.296  | -2.12E-06 | count | 1 |
| GPX7       | -0.5959578 | 0.4524293 | -1.3172 | 0.188  | -2.12E-06 | count | 1 |
| PTK2B      | -0.5953486 | 0.4261725 | -1.397  | 0.163  | -2.11E-06 | count | 1 |
| BRD8       | -0.5884515 | 0.539587  | -1.0906 | 0.276  | -2.11E-06 | count | 1 |
| TBC1D23    | -0.5884515 | 0.4125551 | -1.4264 | 0.154  | -2.11E-06 | count | 1 |
| ICK        | -0.5919704 | 0.504561  | -1.1732 | 0.241  | -2.10E-06 | count | 1 |
| ZNF566     | -0.5953486 | 0.8418956 | -0.7072 | 0.48   | -2.10E-06 | count | 1 |
| ZNF576     | -0.5953486 | 0.7883651 | -0.7552 | 0.451  | -2.09E-06 | count | 1 |
| TMEM63A    | -0.5953486 | 0.7681798 | -0.775  | 0.439  | -2.09E-06 | count | 1 |
| AC092140.1 | -0.592918  | 0.8193302 | -0.7237 | 0.47   | -2.09E-06 | count | 1 |

|          |            |           |         |       |           |       |   |
|----------|------------|-----------|---------|-------|-----------|-------|---|
| DNAL4    | -0.592918  | 0.7229342 | -0.8202 | 0.413 | -2.09E-06 | count | 1 |
| MDH2     | -0.1866189 | 0.1752289 | -1.065  | 0.287 | -2.09E-06 | count | 1 |
| MRPL44   | -0.5807817 | 0.3756876 | -1.5459 | 0.123 | -2.08E-06 | count | 1 |
| ARHGAP18 | -0.5828016 | 0.4085305 | -1.4266 | 0.154 | -2.08E-06 | count | 1 |
| KMO      | -0.5858517 | 0.5771395 | -1.0151 | 0.311 | -2.08E-06 | count | 1 |
| RBSN     | -0.5867393 | 0.7127857 | -0.8232 | 0.411 | -2.07E-06 | count | 1 |
| TAB2     | -0.5828016 | 0.4375438 | -1.332  | 0.184 | -2.07E-06 | count | 1 |
| KIAA0930 | -0.5807408 | 0.6125799 | -0.948  | 0.344 | -2.07E-06 | count | 1 |
| WNT10A   | -0.5807408 | 0.5972188 | -0.9724 | 0.331 | -2.07E-06 | count | 1 |
| PGM2L1   | -0.5807408 | 0.5582588 | -1.0403 | 0.299 | -2.07E-06 | count | 1 |
| TP53RK   | -0.5807408 | 0.5992526 | -0.9691 | 0.333 | -2.07E-06 | count | 1 |
| INPP5K   | -0.5773298 | 0.5296392 | -1.09   | 0.276 | -2.06E-06 | count | 1 |
| MRPL45   | -0.5807408 | 0.5573617 | -1.0419 | 0.298 | -2.06E-06 | count | 1 |
| TMED9    | -0.1841907 | 0.2426285 | -0.7591 | 0.448 | -2.06E-06 | count | 1 |
| ZMIZ2    | -0.5773298 | 0.5599324 | -1.0311 | 0.303 | -2.05E-06 | count | 1 |
| THOC2    | -0.1836024 | 0.2602774 | -0.7054 | 0.481 | -2.05E-06 | count | 1 |
| RAB3GAP2 | -0.5666143 | 0.5208403 | -1.0879 | 0.277 | -2.05E-06 | count | 1 |
| CINP     | -0.5741588 | 0.5331435 | -1.0769 | 0.282 | -2.05E-06 | count | 1 |
| RBM41    | -0.5767582 | 0.6132635 | -0.9405 | 0.347 | -2.05E-06 | count | 1 |
| CUL1     | -0.5696862 | 0.4140041 | -1.376  | 0.17  | -2.05E-06 | count | 1 |
| ZC3H7A   | -0.1831147 | 0.3156789 | -0.5801 | 0.562 | -2.05E-06 | count | 1 |
| SNX4     | -0.5718333 | 0.489612  | -1.1679 | 0.243 | -2.05E-06 | count | 1 |
| HAUS8    | -0.5689871 | 0.3960522 | -1.4366 | 0.152 | -2.04E-06 | count | 1 |
| NEK7     | -0.5546479 | 0.5190631 | -1.0686 | 0.286 | -2.02E-06 | count | 1 |
| VPS26C   | -0.5565199 | 0.4313927 | -1.2901 | 0.198 | -2.01E-06 | count | 1 |
| IARS2    | -0.5546479 | 0.4306715 | -1.2879 | 0.198 | -2.00E-06 | count | 1 |
| STIP1    | -0.1783617 | 0.3308165 | -0.5392 | 0.59  | -2.00E-06 | count | 1 |
| GNL3L    | -0.5563084 | 0.5212491 | -1.0673 | 0.286 | -2.00E-06 | count | 1 |
| POLR3D   | -0.5546479 | 0.435418  | -1.2738 | 0.203 | -2.00E-06 | count | 1 |
| PSTPIP1  | -0.5563084 | 0.5429006 | -1.0247 | 0.306 | -2.00E-06 | count | 1 |
| SPOUT1   | -0.554955  | 0.6729146 | -0.8247 | 0.41  | -1.99E-06 | count | 1 |
| C11orf96 | -0.554955  | 0.583903  | -0.9504 | 0.342 | -1.99E-06 | count | 1 |
| ZBTB14   | -0.5557626 | 0.8141712 | -0.6826 | 0.495 | -1.99E-06 | count | 1 |
| PATL2    | -0.5543862 | 0.6359665 | -0.8717 | 0.384 | -1.99E-06 | count | 1 |
| TBP      | -0.5539639 | 0.6400595 | -0.8655 | 0.387 | -1.99E-06 | count | 1 |
| NKIRAS2  | -0.553638  | 0.5275578 | -1.0494 | 0.295 | -1.99E-06 | count | 1 |
| SLC35A1  | -0.5557626 | 0.7595177 | -0.7317 | 0.465 | -1.99E-06 | count | 1 |
| TOGARAM1 | -0.5533788 | 0.4890477 | -1.1315 | 0.258 | -1.99E-06 | count | 1 |
| DUSP18   | -0.5557626 | 0.7656594 | -0.7259 | 0.468 | -1.99E-06 | count | 1 |
| RNF145   | -0.1769675 | 0.3412575 | -0.5186 | 0.604 | -1.98E-06 | count | 1 |
| CBX4     | -0.5463594 | 0.3509385 | -1.5569 | 0.12  | -1.98E-06 | count | 1 |
| SEC22C   | -0.5511077 | 0.4819461 | -1.1435 | 0.253 | -1.98E-06 | count | 1 |
| NBR1     | -0.5511077 | 0.8543151 | -0.6451 | 0.519 | -1.97E-06 | count | 1 |
| JOSD1    | -0.5439425 | 0.3620482 | -1.5024 | 0.134 | -1.97E-06 | count | 1 |
| DHX15    | -0.5435526 | 0.3373132 | -1.6114 | 0.108 | -1.97E-06 | count | 1 |

|          |            |           |         |       |           |       |   |
|----------|------------|-----------|---------|-------|-----------|-------|---|
| ARRDC1   | -0.542227  | 0.4187836 | -1.2948 | 0.196 | -1.97E-06 | count | 1 |
| CHI3L2   | -0.5426298 | 0.3965069 | -1.3685 | 0.172 | -1.96E-06 | count | 1 |
| ALDH2    | -0.5428554 | 0.4015101 | -1.352  | 0.177 | -1.96E-06 | count | 1 |
| SGCB     | -0.5362965 | 0.5591766 | -0.9591 | 0.338 | -1.95E-06 | count | 1 |
| LTBP3    | -0.5398888 | 0.4607919 | -1.1717 | 0.242 | -1.94E-06 | count | 1 |
| AK9      | -0.5377251 | 0.4865585 | -1.1052 | 0.27  | -1.94E-06 | count | 1 |
| TMA16    | -0.5361065 | 0.364778  | -1.4697 | 0.142 | -1.94E-06 | count | 1 |
| PPP3CC   | -0.1726606 | 0.3065516 | -0.5632 | 0.574 | -1.94E-06 | count | 1 |
| UHRF2    | -0.1713775 | 0.4540498 | -0.3774 | 0.706 | -1.94E-06 | count | 1 |
| ZNF407   | -0.5343603 | 0.5814198 | -0.9191 | 0.359 | -1.94E-06 | count | 1 |
| DKC1     | -0.5334555 | 0.3893438 | -1.3701 | 0.171 | -1.93E-06 | count | 1 |
| TMEM141  | -0.1719949 | 0.3577055 | -0.4808 | 0.631 | -1.93E-06 | count | 1 |
| CCDC28B  | -0.5324151 | 0.4983239 | -1.0684 | 0.286 | -1.93E-06 | count | 1 |
| JDP2     | -0.5325199 | 0.5109699 | -1.0422 | 0.298 | -1.93E-06 | count | 1 |
| MRM2     | -0.5299582 | 0.3725008 | -1.4227 | 0.156 | -1.93E-06 | count | 1 |
| SDHAF1   | -0.5310976 | 0.3844102 | -1.3816 | 0.168 | -1.93E-06 | count | 1 |
| SNAPC5   | -0.5325199 | 0.5437104 | -0.9794 | 0.328 | -1.92E-06 | count | 1 |
| RHBDD1   | -0.5296652 | 0.5316298 | -0.9963 | 0.32  | -1.92E-06 | count | 1 |
| IKZF3    | -0.1701477 | 0.2402962 | -0.7081 | 0.479 | -1.91E-06 | count | 1 |
| ELL      | -0.5267571 | 0.6245804 | -0.8434 | 0.399 | -1.91E-06 | count | 1 |
| PHACTR2  | -0.5267571 | 0.5729163 | -0.9194 | 0.358 | -1.91E-06 | count | 1 |
| TMEM126B | -0.5240235 | 0.3754127 | -1.3959 | 0.163 | -1.91E-06 | count | 1 |
| HMGNS    | -0.5224126 | 0.8709181 | -0.5998 | 0.549 | -1.90E-06 | count | 1 |
| SMIM30   | -0.524763  | 0.3949544 | -1.3287 | 0.185 | -1.90E-06 | count | 1 |
| C9orf40  | -0.5224126 | 0.4344548 | -1.2025 | 0.23  | -1.90E-06 | count | 1 |
| SNAI3    | -0.5224126 | 0.7538327 | -0.693  | 0.489 | -1.90E-06 | count | 1 |
| ZNF780A  | -0.5224126 | 0.6820765 | -0.7659 | 0.444 | -1.90E-06 | count | 1 |
| NFAT5    | -0.5210872 | 0.430936  | -1.2092 | 0.227 | -1.90E-06 | count | 1 |
| TRAFD1   | -0.5224126 | 0.7197143 | -0.7259 | 0.468 | -1.90E-06 | count | 1 |
| ARHGAP1  | -0.5224126 | 0.6345433 | -0.8233 | 0.411 | -1.89E-06 | count | 1 |
| CIC      | -0.5224126 | 0.609388  | -0.8573 | 0.392 | -1.89E-06 | count | 1 |
| MYLIP    | -0.5182158 | 0.4952807 | -1.0463 | 0.296 | -1.89E-06 | count | 1 |
| ZNF486   | -0.5224126 | 0.6267556 | -0.8335 | 0.405 | -1.89E-06 | count | 1 |
| TGFBRAP1 | -0.5198184 | 0.7425292 | -0.7001 | 0.484 | -1.88E-06 | count | 1 |
| ATG14    | -0.5198184 | 0.6134239 | -0.8474 | 0.397 | -1.88E-06 | count | 1 |
| RFTN1    | -0.5115039 | 0.4426796 | -1.1555 | 0.249 | -1.87E-06 | count | 1 |
| ANKAR    | -0.5104321 | 0.577031  | -0.8846 | 0.377 | -1.87E-06 | count | 1 |
| DOCK10   | -0.1660994 | 0.2872153 | -0.5783 | 0.563 | -1.87E-06 | count | 1 |
| GAMT     | -0.5133703 | 0.7814678 | -0.6569 | 0.512 | -1.87E-06 | count | 1 |
| TUBGCP4  | -0.5133703 | 0.6592281 | -0.7787 | 0.437 | -1.87E-06 | count | 1 |
| UTP14A   | -0.5133703 | 0.6827886 | -0.7519 | 0.453 | -1.86E-06 | count | 1 |
| BAZ2A    | -0.1655204 | 0.3531055 | -0.4688 | 0.639 | -1.86E-06 | count | 1 |
| ZNF250   | -0.5104321 | 0.6109994 | -0.8354 | 0.404 | -1.86E-06 | count | 1 |
| PDCL     | -0.5078733 | 0.3851227 | -1.3187 | 0.188 | -1.86E-06 | count | 1 |
| ZCCHC2   | -0.5042595 | 0.449253  | -1.1224 | 0.262 | -1.86E-06 | count | 1 |



|            |            |           |         |        |           |       |   |
|------------|------------|-----------|---------|--------|-----------|-------|---|
| ATP8A1     | -0.5044937 | 0.5192003 | -0.9717 | 0.332  | -1.85E-06 | count | 1 |
| GTF2H5     | -0.1644974 | 0.279131  | -0.5893 | 0.556  | -1.85E-06 | count | 1 |
| EPS8       | -2.7463786 | 1.3817638 | -1.9876 | 0.0475 | -1.85E-06 | count | 1 |
| LAIR1      | -0.5022652 | 0.6235452 | -0.8055 | 0.421  | -1.85E-06 | count | 1 |
| RINL       | -0.5020659 | 0.3819296 | -1.3146 | 0.189  | -1.85E-06 | count | 1 |
| XPO4       | -0.5054578 | 0.4907087 | -1.0301 | 0.304  | -1.85E-06 | count | 1 |
| STK25      | -0.4978091 | 0.4721454 | -1.0544 | 0.292  | -1.84E-06 | count | 1 |
| AL118516.1 | -0.5049702 | 0.623092  | -0.8104 | 0.418  | -1.84E-06 | count | 1 |
| RBM15      | -0.4999655 | 0.5459004 | -0.9159 | 0.36   | -1.84E-06 | count | 1 |
| SP1        | -0.5035725 | 0.6090523 | -0.8268 | 0.409  | -1.83E-06 | count | 1 |
| ZC3HAV1    | -0.1622752 | 0.3177739 | -0.5107 | 0.61   | -1.83E-06 | count | 1 |
| PMM2       | -0.4999655 | 0.5629336 | -0.8881 | 0.375  | -1.83E-06 | count | 1 |
| PTBP3      | -0.1614038 | 0.261022  | -0.6184 | 0.537  | -1.83E-06 | count | 1 |
| DNAJB12    | -0.4948995 | 0.3690246 | -1.3411 | 0.181  | -1.82E-06 | count | 1 |
| CNOT6L     | -0.1616864 | 0.2316701 | -0.6979 | 0.486  | -1.82E-06 | count | 1 |
| XRRA1      | -0.4978091 | 0.6115374 | -0.814  | 0.416  | -1.82E-06 | count | 1 |
| CRTC3      | -0.4936186 | 0.558283  | -0.8842 | 0.377  | -1.82E-06 | count | 1 |
| AVL9       | -0.4978091 | 0.6427547 | -0.7745 | 0.439  | -1.82E-06 | count | 1 |
| PI4KA      | -0.4978091 | 0.6427547 | -0.7745 | 0.439  | -1.82E-06 | count | 1 |
| UQCC3      | -0.4978091 | 0.5438958 | -0.9153 | 0.361  | -1.82E-06 | count | 1 |
| ATG16L2    | -0.4912371 | 0.3934007 | -1.2487 | 0.212  | -1.82E-06 | count | 1 |
| SUPT5H     | -0.4908336 | 0.4038793 | -1.2153 | 0.225  | -1.81E-06 | count | 1 |
| FBXO28     | -0.4936186 | 0.4992684 | -0.9887 | 0.323  | -1.81E-06 | count | 1 |
| VGLL4      | -0.4916527 | 0.3593538 | -1.3682 | 0.172  | -1.81E-06 | count | 1 |
| KIF3A      | -0.4873258 | 0.4402342 | -1.107  | 0.269  | -1.80E-06 | count | 1 |
| ITGAE      | -0.1595026 | 0.3521499 | -0.4529 | 0.651  | -1.80E-06 | count | 1 |
| SEC63      | -0.1595028 | 0.3326586 | -0.4795 | 0.632  | -1.80E-06 | count | 1 |
| KMT2C      | -0.1595027 | 0.2772349 | -0.5753 | 0.565  | -1.80E-06 | count | 1 |
| IGHG2      | -0.1595023 | 0.2932622 | -0.5439 | 0.587  | -1.80E-06 | count | 1 |
| AL354733.3 | -2.5669356 | 1.4331875 | -1.7911 | 0.074  | -1.80E-06 | count | 1 |
| TWF1       | -0.4874365 | 0.4620022 | -1.0551 | 0.292  | -1.80E-06 | count | 1 |
| SWSAP1     | -0.4874365 | 0.569694  | -0.8556 | 0.393  | -1.79E-06 | count | 1 |
| RING1      | -0.4876234 | 0.5618352 | -0.8679 | 0.386  | -1.79E-06 | count | 1 |
| PTPRK      | -0.4868932 | 0.5761995 | -0.845  | 0.399  | -1.79E-06 | count | 1 |
| ACTR6      | -0.1580919 | 0.3390294 | -0.4663 | 0.641  | -1.79E-06 | count | 1 |
| IL6ST      | -0.4868932 | 0.6445695 | -0.7554 | 0.45   | -1.79E-06 | count | 1 |
| NP1PB5     | -0.4868932 | 0.5520731 | -0.8819 | 0.378  | -1.79E-06 | count | 1 |
| MAT2A      | -0.4837786 | 0.3337616 | -1.4495 | 0.148  | -1.78E-06 | count | 1 |
| DERL1      | -0.1576124 | 0.2865906 | -0.55   | 0.583  | -1.78E-06 | count | 1 |
| SPART      | -0.482411  | 0.4006544 | -1.2041 | 0.229  | -1.78E-06 | count | 1 |
| MAD2L2     | -0.4811501 | 0.4819995 | -0.9982 | 0.319  | -1.77E-06 | count | 1 |
| LINC02001  | -0.4811501 | 0.5092493 | -0.9448 | 0.345  | -1.77E-06 | count | 1 |
| ABLIM1     | -0.48021   | 0.3785353 | -1.2686 | 0.205  | -1.77E-06 | count | 1 |
| CLPTM1     | -0.4811501 | 0.4988685 | -0.9645 | 0.335  | -1.77E-06 | count | 1 |
| ACTR10     | -0.1566391 | 0.3243351 | -0.483  | 0.629  | -1.77E-06 | count | 1 |

|          |            |           |         |        |           |       |   |
|----------|------------|-----------|---------|--------|-----------|-------|---|
| MED16    | -0.4783827 | 0.5526696 | -0.8656 | 0.387  | -1.77E-06 | count | 1 |
| PACSIN2  | -0.4789018 | 0.6040484 | -0.7928 | 0.428  | -1.77E-06 | count | 1 |
| FKBPL    | -0.4789018 | 0.5620863 | -0.852  | 0.395  | -1.77E-06 | count | 1 |
| MRPL39   | -0.1562276 | 0.3370493 | -0.4635 | 0.643  | -1.76E-06 | count | 1 |
| SPDL1    | -2.4927089 | 1.1123691 | -2.2409 | 0.0255 | -1.76E-06 | count | 1 |
| ATXN1L   | -0.4783827 | 0.5199195 | -0.9201 | 0.358  | -1.76E-06 | count | 1 |
| CSKMT    | -0.4734809 | 0.521184  | -0.9085 | 0.364  | -1.76E-06 | count | 1 |
| SQOR     | -0.4733921 | 0.4149887 | -1.1407 | 0.255  | -1.76E-06 | count | 1 |
| DHRS1    | -0.4735715 | 0.4105303 | -1.1536 | 0.249  | -1.75E-06 | count | 1 |
| WDR11    | -0.4733921 | 0.4397549 | -1.0765 | 0.282  | -1.75E-06 | count | 1 |
| KIF16B   | -0.4732195 | 0.8037837 | -0.5887 | 0.556  | -1.75E-06 | count | 1 |
| RMDN1    | -0.4735715 | 0.4144603 | -1.1426 | 0.254  | -1.75E-06 | count | 1 |
| CCS      | -0.1542484 | 0.2449055 | -0.6298 | 0.529  | -1.75E-06 | count | 1 |
| IPO9     | -0.4732195 | 0.7375614 | -0.6416 | 0.521  | -1.74E-06 | count | 1 |
| FAM227B  | -0.4732195 | 0.7375614 | -0.6416 | 0.521  | -1.74E-06 | count | 1 |
| PDCD5    | -0.1543796 | 0.2354543 | -0.6557 | 0.512  | -1.74E-06 | count | 1 |
| MPZL1    | -0.4734809 | 0.5932869 | -0.7981 | 0.425  | -1.74E-06 | count | 1 |
| ARHGAP27 | -0.4732195 | 0.7596978 | -0.6229 | 0.534  | -1.74E-06 | count | 1 |
| AP4B1    | -2.433855  | 1.2193227 | -1.9961 | 0.0465 | -1.74E-06 | count | 1 |
| CHCHD7   | -0.1537069 | 0.26089   | -0.5892 | 0.556  | -1.74E-06 | count | 1 |
| ZMAT5    | -0.4698848 | 0.4422429 | -1.0625 | 0.289  | -1.74E-06 | count | 1 |
| TENT5C   | -0.1534196 | 0.294184  | -0.5215 | 0.602  | -1.74E-06 | count | 1 |
| CASP7    | -0.4672654 | 0.6108352 | -0.765  | 0.445  | -1.73E-06 | count | 1 |
| PUS10    | -0.4672654 | 0.6528222 | -0.7158 | 0.475  | -1.73E-06 | count | 1 |
| ZNF814   | -0.4672654 | 0.7253234 | -0.6442 | 0.52   | -1.72E-06 | count | 1 |
| RPL39L   | -0.4639136 | 0.4986298 | -0.9304 | 0.353  | -1.72E-06 | count | 1 |
| IGF2R    | -0.4639136 | 0.59239   | -0.7831 | 0.434  | -1.72E-06 | count | 1 |
| TMEM199  | -0.4639136 | 0.5432708 | -0.8539 | 0.394  | -1.72E-06 | count | 1 |
| KPNB1    | -0.1518374 | 0.2666323 | -0.5695 | 0.569  | -1.72E-06 | count | 1 |
| MAST4    | -0.4602254 | 0.465601  | -0.9885 | 0.323  | -1.72E-06 | count | 1 |
| CHD7     | -0.151399  | 0.2443917 | -0.6195 | 0.536  | -1.71E-06 | count | 1 |
| ZNF101   | -0.4617277 | 0.4299534 | -1.0739 | 0.283  | -1.71E-06 | count | 1 |
| PSMB7    | -0.1507031 | 0.2564107 | -0.5877 | 0.557  | -1.71E-06 | count | 1 |
| RSAD1    | -2.3266145 | 1.1549992 | -2.0144 | 0.0446 | -1.71E-06 | count | 1 |
| CFH      | -2.3035191 | 1.2538248 | -1.8372 | 0.0668 | -1.70E-06 | count | 1 |
| FOXO1    | -0.1504134 | 0.3503716 | -0.4293 | 0.668  | -1.70E-06 | count | 1 |
| NSF      | -0.456565  | 0.3299498 | -1.3837 | 0.167  | -1.70E-06 | count | 1 |
| CPEB2    | -2.3035191 | 1.1544874 | -1.9953 | 0.0466 | -1.70E-06 | count | 1 |
| IFI44    | -2.3035191 | 1.1544874 | -1.9953 | 0.0466 | -1.70E-06 | count | 1 |
| LSM14A   | -0.1497191 | 0.2043999 | -0.7325 | 0.464  | -1.70E-06 | count | 1 |
| NCOA4    | -0.4519508 | 0.3384204 | -1.3355 | 0.182  | -1.69E-06 | count | 1 |
| LRBA     | -0.4518041 | 0.4282112 | -1.0551 | 0.292  | -1.69E-06 | count | 1 |
| PHF21A   | -0.4518041 | 0.4979789 | -0.9073 | 0.365  | -1.69E-06 | count | 1 |
| NUP214   | -0.452425  | 0.5132563 | -0.8815 | 0.379  | -1.69E-06 | count | 1 |
| PHF20L1  | -0.1486369 | 0.3286987 | -0.4522 | 0.651  | -1.68E-06 | count | 1 |

|           |            |           |         |        |           |       |   |
|-----------|------------|-----------|---------|--------|-----------|-------|---|
| STYX      | -0.4518041 | 0.4965158 | -0.9099 | 0.363  | -1.68E-06 | count | 1 |
| TNFRSF10A | -0.4518506 | 0.4472455 | -1.0103 | 0.313  | -1.68E-06 | count | 1 |
| VAMP4     | -0.4521224 | 0.6102431 | -0.7409 | 0.459  | -1.68E-06 | count | 1 |
| PRPF19    | -0.4525707 | 0.5561902 | -0.8137 | 0.416  | -1.68E-06 | count | 1 |
| TUT7      | -0.1481935 | 0.2867412 | -0.5168 | 0.606  | -1.68E-06 | count | 1 |
| RGS16     | -0.1476245 | 0.3794458 | -0.3891 | 0.697  | -1.68E-06 | count | 1 |
| DCTD      | -0.4433129 | 0.4123302 | -1.0751 | 0.283  | -1.67E-06 | count | 1 |
| TMUB1     | -0.147276  | 0.280493  | -0.5251 | 0.6    | -1.67E-06 | count | 1 |
| TMED1     | -0.4449252 | 0.4118839 | -1.0802 | 0.281  | -1.67E-06 | count | 1 |
| UBR2      | -0.1465046 | 0.330934  | -0.4427 | 0.658  | -1.66E-06 | count | 1 |
| AEBP1     | -2.1844188 | 1.2309293 | -1.7746 | 0.0766 | -1.66E-06 | count | 1 |
| SPARC     | -2.1808899 | 1.1235091 | -1.9411 | 0.0529 | -1.66E-06 | count | 1 |
| GCC1      | -2.1808899 | 1.1235091 | -1.9411 | 0.0529 | -1.66E-06 | count | 1 |
| DNAJB2    | -0.4438104 | 0.476275  | -0.9318 | 0.352  | -1.66E-06 | count | 1 |
| PITPNB    | -0.1458805 | 0.2956384 | -0.4934 | 0.622  | -1.65E-06 | count | 1 |
| ICE2      | -0.4405604 | 0.408174  | -1.0793 | 0.281  | -1.65E-06 | count | 1 |
| CD2       | -2.1537203 | 1.1844753 | -1.8183 | 0.0697 | -1.65E-06 | count | 1 |
| VRK3      | -0.441651  | 0.4611891 | -0.9576 | 0.339  | -1.65E-06 | count | 1 |
| ATAD5     | -0.4400794 | 0.6200311 | -0.7098 | 0.478  | -1.65E-06 | count | 1 |
| ATAD1     | -0.4396554 | 0.3646083 | -1.2058 | 0.229  | -1.65E-06 | count | 1 |
| UBAP2     | -0.4400794 | 0.6108946 | -0.7204 | 0.472  | -1.65E-06 | count | 1 |
| DNASE1L1  | -2.1537203 | 1.0577689 | -2.0361 | 0.0423 | -1.65E-06 | count | 1 |
| VAV1      | -0.4380479 | 0.4083457 | -1.0727 | 0.284  | -1.65E-06 | count | 1 |
| COQ10A    | -0.4380479 | 0.4609047 | -0.9504 | 0.342  | -1.64E-06 | count | 1 |
| NAPRT     | -0.4377724 | 0.6454823 | -0.6782 | 0.498  | -1.64E-06 | count | 1 |
| ADNP      | -0.1441825 | 0.3502461 | -0.4117 | 0.681  | -1.64E-06 | count | 1 |
| ELP3      | -0.4365942 | 0.649276  | -0.6724 | 0.502  | -1.64E-06 | count | 1 |
| DEF8      | -0.4377724 | 0.5713781 | -0.7662 | 0.444  | -1.64E-06 | count | 1 |
| PYHIN1    | -0.4361775 | 0.3750639 | -1.1629 | 0.245  | -1.64E-06 | count | 1 |
| PAFAH1B3  | -0.4372291 | 0.3421713 | -1.2778 | 0.202  | -1.64E-06 | count | 1 |
| TMEM214   | -0.4365942 | 0.6073089 | -0.7189 | 0.473  | -1.63E-06 | count | 1 |
| ZNF141    | -0.4359643 | 0.4755276 | -0.9168 | 0.36   | -1.63E-06 | count | 1 |
| FARS2     | -0.4359643 | 0.4577783 | -0.9523 | 0.341  | -1.63E-06 | count | 1 |
| TRIM26    | -0.4344462 | 0.4049287 | -1.0729 | 0.284  | -1.63E-06 | count | 1 |
| SEC23A    | -0.4331562 | 0.4902729 | -0.8835 | 0.377  | -1.63E-06 | count | 1 |
| CYP20A1   | -0.143462  | 0.3258645 | -0.4403 | 0.66   | -1.63E-06 | count | 1 |
| CHMP7     | -0.4357478 | 0.3820962 | -1.1404 | 0.255  | -1.63E-06 | count | 1 |
| FAM91A1   | -0.4339671 | 0.5573425 | -0.7786 | 0.437  | -1.63E-06 | count | 1 |
| ACBD6     | -0.1429867 | 0.2763287 | -0.5175 | 0.605  | -1.62E-06 | count | 1 |
| C21orf2   | -0.4302699 | 0.4901249 | -0.8779 | 0.38   | -1.62E-06 | count | 1 |
| PARP6     | -2.0422416 | 1.1813896 | -1.7287 | 0.0846 | -1.62E-06 | count | 1 |
| RNF103    | -0.4302699 | 0.5825658 | -0.7386 | 0.461  | -1.61E-06 | count | 1 |
| ZNF608    | -2.0105986 | 1.3574783 | -1.4811 | 0.139  | -1.61E-06 | count | 1 |
| SLC44A1   | -0.4302699 | 0.8584103 | -0.5012 | 0.616  | -1.61E-06 | count | 1 |
| PLTP      | -0.4302699 | 0.7776123 | -0.5533 | 0.58   | -1.61E-06 | count | 1 |

|            |            |           |         |        |           |       |   |
|------------|------------|-----------|---------|--------|-----------|-------|---|
| RNF44      | -0.426837  | 0.4439374 | -0.9615 | 0.337  | -1.61E-06 | count | 1 |
| DHX32      | -0.4302699 | 0.8054939 | -0.5342 | 0.593  | -1.61E-06 | count | 1 |
| CUX1       | -0.4261887 | 0.5857542 | -0.7276 | 0.467  | -1.61E-06 | count | 1 |
| ENOX2      | -2.0105986 | 1.0513695 | -1.9124 | 0.0565 | -1.61E-06 | count | 1 |
| PFKP       | -0.4261887 | 0.4983542 | -0.8552 | 0.393  | -1.60E-06 | count | 1 |
| GRPEL1     | -0.1412178 | 0.2440668 | -0.5786 | 0.563  | -1.60E-06 | count | 1 |
| REPS1      | -1.9776586 | 1.3604372 | -1.4537 | 0.147  | -1.60E-06 | count | 1 |
| NDUFA5     | -0.1407968 | 0.2078211 | -0.6775 | 0.498  | -1.60E-06 | count | 1 |
| C6orf62    | -0.1406094 | 0.2629307 | -0.5348 | 0.593  | -1.60E-06 | count | 1 |
| ZNF655     | -0.1406588 | 0.3363796 | -0.4182 | 0.676  | -1.60E-06 | count | 1 |
| RPP14      | -1.9776586 | 1.22546   | -1.6138 | 0.107  | -1.60E-06 | count | 1 |
| ELOVL1     | -0.4238807 | 0.3918385 | -1.0818 | 0.28   | -1.60E-06 | count | 1 |
| AC239800.3 | -0.4246814 | 0.6082693 | -0.6982 | 0.485  | -1.60E-06 | count | 1 |
| PRIM1      | -0.4246814 | 0.5911858 | -0.7184 | 0.473  | -1.59E-06 | count | 1 |
| SGSM3      | -1.9776586 | 1.1520562 | -1.7166 | 0.0867 | -1.59E-06 | count | 1 |
| CTBP1-DT   | -1.9776586 | 1.1520562 | -1.7166 | 0.0867 | -1.59E-06 | count | 1 |
| CEP162     | -0.4221239 | 0.5628491 | -0.75   | 0.454  | -1.59E-06 | count | 1 |
| MTM1       | -1.9776586 | 1.0736456 | -1.842  | 0.0661 | -1.59E-06 | count | 1 |
| ANKRD26    | -0.4177407 | 0.5387802 | -0.7753 | 0.439  | -1.59E-06 | count | 1 |
| KIDINS220  | -0.4188528 | 0.3884973 | -1.0781 | 0.282  | -1.58E-06 | count | 1 |
| CCDC112    | -0.4206576 | 0.644266  | -0.6529 | 0.514  | -1.58E-06 | count | 1 |
| SMC4       | -0.4183051 | 0.3916021 | -1.0682 | 0.286  | -1.58E-06 | count | 1 |
| EIF2AK3    | -0.4199831 | 0.643653  | -0.6525 | 0.514  | -1.58E-06 | count | 1 |
| AP1AR      | -0.4152503 | 0.491125  | -0.8455 | 0.398  | -1.57E-06 | count | 1 |
| KIAA0586   | -0.4162789 | 0.4656395 | -0.894  | 0.372  | -1.57E-06 | count | 1 |
| MUC20-OT1  | -0.4162789 | 0.4063329 | -1.0245 | 0.306  | -1.57E-06 | count | 1 |
| GBP4       | -0.4104786 | 0.4858416 | -0.8449 | 0.399  | -1.57E-06 | count | 1 |
| CAV1       | -1.8832202 | 1.4685861 | -1.2823 | 0.2    | -1.57E-06 | count | 1 |
| DHRS4-AS1  | -0.4152503 | 0.5792517 | -0.7169 | 0.474  | -1.57E-06 | count | 1 |
| NSD2       | -0.4152503 | 0.6957584 | -0.5968 | 0.551  | -1.57E-06 | count | 1 |
| DTWD1      | -0.4152503 | 0.6494213 | -0.6394 | 0.523  | -1.57E-06 | count | 1 |
| SPAG16     | -0.4152503 | 0.6862267 | -0.6051 | 0.545  | -1.56E-06 | count | 1 |
| TLR6       | -0.4152503 | 0.6687412 | -0.6209 | 0.535  | -1.56E-06 | count | 1 |
| VPS45      | -1.8832202 | 1.3159123 | -1.4311 | 0.153  | -1.56E-06 | count | 1 |
| LAP3       | -0.1370438 | 0.2966272 | -0.462  | 0.644  | -1.56E-06 | count | 1 |
| NNMT       | -1.8832202 | 1.190458  | -1.5819 | 0.114  | -1.56E-06 | count | 1 |
| NAGA       | -1.8832202 | 1.2325037 | -1.528  | 0.127  | -1.56E-06 | count | 1 |
| COG4       | -1.8832202 | 1.2325037 | -1.528  | 0.127  | -1.56E-06 | count | 1 |
| TRIM41     | -1.8832202 | 1.1669824 | -1.6138 | 0.107  | -1.56E-06 | count | 1 |
| ZNF37A     | -0.409372  | 0.5522204 | -0.7413 | 0.459  | -1.55E-06 | count | 1 |
| CCDC91     | -0.136092  | 0.2339384 | -0.5817 | 0.561  | -1.55E-06 | count | 1 |
| LSG1       | -0.1361897 | 0.4261739 | -0.3196 | 0.749  | -1.55E-06 | count | 1 |
| TBRG1      | -0.4075972 | 0.3363157 | -1.2119 | 0.226  | -1.55E-06 | count | 1 |
| SERPINB9P1 | -1.8455256 | 1.27686   | -1.4454 | 0.149  | -1.55E-06 | count | 1 |
| RBM45      | -1.8455256 | 1.27686   | -1.4454 | 0.149  | -1.55E-06 | count | 1 |

|            |            |           |         |        |           |       |   |
|------------|------------|-----------|---------|--------|-----------|-------|---|
| LMAN2L     | -1.8455256 | 1.220219  | -1.5125 | 0.131  | -1.55E-06 | count | 1 |
| AC008105.3 | -0.4093826 | 0.5373927 | -0.7618 | 0.447  | -1.55E-06 | count | 1 |
| ZNF654     | -1.8455256 | 1.1891401 | -1.552  | 0.121  | -1.55E-06 | count | 1 |
| TPGS1      | -0.404287  | 0.3546091 | -1.1401 | 0.255  | -1.54E-06 | count | 1 |
| MS4A6A     | -1.7425177 | 1.1228663 | -1.5518 | 0.121  | -1.54E-06 | count | 1 |
| UBE2D4     | -1.7425177 | 0.8742126 | -1.9932 | 0.0468 | -1.54E-06 | count | 1 |
| CCDC126    | -1.7425177 | 0.8742126 | -1.9932 | 0.0468 | -1.54E-06 | count | 1 |
| AGPAT5     | -0.4030898 | 0.4661341 | -0.8648 | 0.388  | -1.54E-06 | count | 1 |
| ALG11      | -1.8059448 | 1.1921029 | -1.5149 | 0.131  | -1.53E-06 | count | 1 |
| AC026401.3 | -1.8059448 | 1.1921029 | -1.5149 | 0.131  | -1.53E-06 | count | 1 |
| BGN        | -1.8059448 | 1.1921029 | -1.5149 | 0.131  | -1.53E-06 | count | 1 |
| ACLY       | -0.404287  | 0.6164442 | -0.6558 | 0.512  | -1.53E-06 | count | 1 |
| MTURN      | -0.404287  | 0.5939937 | -0.6806 | 0.496  | -1.53E-06 | count | 1 |
| PMM1       | -0.404287  | 0.6276773 | -0.6441 | 0.52   | -1.53E-06 | count | 1 |
| AC100810.1 | -0.404287  | 0.5704056 | -0.7088 | 0.479  | -1.53E-06 | count | 1 |
| YTHDF1     | -0.404287  | 0.5704056 | -0.7088 | 0.479  | -1.53E-06 | count | 1 |
| LIPA       | -0.4012298 | 0.3963569 | -1.0123 | 0.312  | -1.53E-06 | count | 1 |
| ITPR3      | -0.404287  | 0.7381705 | -0.5477 | 0.584  | -1.53E-06 | count | 1 |
| BRAP       | -0.404287  | 0.604438  | -0.6689 | 0.504  | -1.53E-06 | count | 1 |
| PUS3       | -0.404287  | 0.6375701 | -0.6341 | 0.526  | -1.53E-06 | count | 1 |
| BATF       | -0.4024401 | 0.4158057 | -0.9679 | 0.334  | -1.53E-06 | count | 1 |
| EPHA1-AS1  | -1.7642464 | 1.5978188 | -1.1042 | 0.27   | -1.53E-06 | count | 1 |
| ARHGAP4    | -0.4012618 | 0.3599971 | -1.1146 | 0.266  | -1.53E-06 | count | 1 |
| RETREG1    | -0.4012618 | 0.5472392 | -0.7332 | 0.464  | -1.52E-06 | count | 1 |
| MBD5       | -0.4012896 | 0.4393095 | -0.9135 | 0.361  | -1.52E-06 | count | 1 |
| RGS5       | -1.7642464 | 1.3700258 | -1.2877 | 0.199  | -1.52E-06 | count | 1 |
| TMEM273    | -0.4012896 | 0.4507659 | -0.8902 | 0.374  | -1.52E-06 | count | 1 |
| PUS1       | -1.7642464 | 1.2851535 | -1.3728 | 0.171  | -1.52E-06 | count | 1 |
| PWWP2A     | -0.3978671 | 0.4016535 | -0.9906 | 0.322  | -1.52E-06 | count | 1 |
| LTC4S      | -1.7642464 | 1.2784807 | -1.38   | 0.168  | -1.52E-06 | count | 1 |
| SPTY2D1    | -0.3998447 | 0.439291  | -0.9102 | 0.363  | -1.52E-06 | count | 1 |
| NUDT7      | -1.7642464 | 1.1942646 | -1.4773 | 0.14   | -1.52E-06 | count | 1 |
| ABAT       | -1.7642464 | 1.1942646 | -1.4773 | 0.14   | -1.52E-06 | count | 1 |
| NAPA-AS1   | -1.7642464 | 1.1942646 | -1.4773 | 0.14   | -1.52E-06 | count | 1 |
| IGKV3-15   | -1.7642464 | 1.1942646 | -1.4773 | 0.14   | -1.52E-06 | count | 1 |
| CREB3L4    | -1.7642464 | 1.1942646 | -1.4773 | 0.14   | -1.52E-06 | count | 1 |
| CDKN1C     | -1.7642464 | 1.1942646 | -1.4773 | 0.14   | -1.52E-06 | count | 1 |
| IGHV1-3    | -1.7642464 | 1.1942646 | -1.4773 | 0.14   | -1.52E-06 | count | 1 |
| COG7       | -1.7642464 | 1.1942646 | -1.4773 | 0.14   | -1.52E-06 | count | 1 |
| MOSPD1     | -1.7642464 | 1.0958634 | -1.6099 | 0.108  | -1.51E-06 | count | 1 |
| ADAM10     | -0.132759  | 0.3536067 | -0.3754 | 0.708  | -1.51E-06 | count | 1 |
| IP6K2      | -0.1324783 | 0.2996892 | -0.4421 | 0.659  | -1.51E-06 | count | 1 |
| CR1        | -0.3986482 | 0.5795755 | -0.6878 | 0.492  | -1.51E-06 | count | 1 |
| FILIP1L    | -0.3959304 | 0.6361497 | -0.6224 | 0.534  | -1.51E-06 | count | 1 |
| AKT1S1     | -1.6378974 | 1.1501963 | -1.424  | 0.155  | -1.51E-06 | count | 1 |

|            |            |           |         |        |           |       |   |
|------------|------------|-----------|---------|--------|-----------|-------|---|
| PDE8A      | -1.741409  | 1.2187262 | -1.4289 | 0.154  | -1.50E-06 | count | 1 |
| RBM15B     | -0.3959304 | 0.3940675 | -1.0047 | 0.316  | -1.50E-06 | count | 1 |
| MSH3       | -0.3959304 | 0.4560152 | -0.8682 | 0.386  | -1.50E-06 | count | 1 |
| TESK2      | -0.3959304 | 0.5270253 | -0.7513 | 0.453  | -1.50E-06 | count | 1 |
| NCOA6      | -1.6622761 | 0.9556917 | -1.7393 | 0.0827 | -1.50E-06 | count | 1 |
| BRCA2      | -0.3947754 | 0.3852792 | -1.0246 | 0.306  | -1.50E-06 | count | 1 |
| CKS1B      | -0.3924549 | 0.3789651 | -1.0356 | 0.301  | -1.50E-06 | count | 1 |
| CFD        | -1.6378974 | 1.029497  | -1.591  | 0.112  | -1.50E-06 | count | 1 |
| P2RY14     | -0.3840298 | 0.7479126 | -0.5135 | 0.608  | -1.50E-06 | count | 1 |
| ATP6V1A    | -0.3932077 | 0.5153946 | -0.7629 | 0.446  | -1.50E-06 | count | 1 |
| WDR48      | -0.3932077 | 0.4434803 | -0.8866 | 0.376  | -1.50E-06 | count | 1 |
| AC027097.1 | -0.3924549 | 0.4474246 | -0.8771 | 0.381  | -1.49E-06 | count | 1 |
| SESTD1     | -1.6515729 | 0.9225319 | -1.7903 | 0.0741 | -1.49E-06 | count | 1 |
| MPHOSPH6   | -0.3913815 | 0.4554415 | -0.8593 | 0.391  | -1.49E-06 | count | 1 |
| ARFGAP3    | -0.3893485 | 0.4135511 | -0.9415 | 0.347  | -1.49E-06 | count | 1 |
| NVL        | -0.3893485 | 0.5483977 | -0.71   | 0.478  | -1.49E-06 | count | 1 |
| EPB41      | -0.1301898 | 0.2062768 | -0.6311 | 0.528  | -1.48E-06 | count | 1 |
| ADAT1      | -1.6378974 | 0.8214978 | -1.9938 | 0.0468 | -1.48E-06 | count | 1 |
| NR2C2      | -0.3893485 | 0.5707381 | -0.6822 | 0.495  | -1.48E-06 | count | 1 |
| CASP10     | -0.3891008 | 0.6616792 | -0.5881 | 0.557  | -1.48E-06 | count | 1 |
| PTBP2      | -0.3891008 | 0.6855033 | -0.5676 | 0.571  | -1.48E-06 | count | 1 |
| PCDH9      | -0.3874544 | 0.5344704 | -0.7249 | 0.469  | -1.48E-06 | count | 1 |
| SGK494     | -0.3891008 | 0.7296852 | -0.5332 | 0.594  | -1.48E-06 | count | 1 |
| UGT8       | -0.3891008 | 0.7003193 | -0.5556 | 0.579  | -1.48E-06 | count | 1 |
| VPS4B      | -0.1293561 | 0.2369455 | -0.5459 | 0.585  | -1.48E-06 | count | 1 |
| IFRD2      | -0.3857992 | 0.4266331 | -0.9043 | 0.366  | -1.48E-06 | count | 1 |
| UBE2J1     | -0.129139  | 0.2213481 | -0.5834 | 0.56   | -1.47E-06 | count | 1 |
| LSM5       | -0.1288156 | 0.2066288 | -0.6234 | 0.533  | -1.47E-06 | count | 1 |
| NOL8       | -0.3857992 | 0.4276241 | -0.9022 | 0.367  | -1.47E-06 | count | 1 |
| CLASP1     | -1.6127004 | 1.0389603 | -1.5522 | 0.121  | -1.47E-06 | count | 1 |
| LMBRD2     | -1.6515729 | 1.3104019 | -1.2604 | 0.208  | -1.47E-06 | count | 1 |
| RARA-AS1   | -1.6515729 | 1.3104019 | -1.2604 | 0.208  | -1.47E-06 | count | 1 |
| RAD51D     | -1.6515729 | 1.2894047 | -1.2809 | 0.201  | -1.47E-06 | count | 1 |
| FAM160B2   | -0.384969  | 0.7681523 | -0.5012 | 0.617  | -1.46E-06 | count | 1 |
| IL23A      | -0.3821833 | 0.4937103 | -0.7741 | 0.439  | -1.46E-06 | count | 1 |
| CCDC107    | -0.1278689 | 0.2204426 | -0.5801 | 0.562  | -1.46E-06 | count | 1 |
| AC124312.1 | -1.6024741 | 1.2216077 | -1.3118 | 0.19   | -1.46E-06 | count | 1 |
| RAD18      | -0.3796422 | 0.5722569 | -0.6634 | 0.507  | -1.46E-06 | count | 1 |
| MGAT4B     | -0.3796422 | 0.4983059 | -0.7619 | 0.447  | -1.45E-06 | count | 1 |
| PIGH       | -0.3759608 | 0.5779383 | -0.6505 | 0.516  | -1.45E-06 | count | 1 |
| MRM1       | -1.6024741 | 1.3354454 | -1.2    | 0.231  | -1.45E-06 | count | 1 |
| CDC23      | -1.6024741 | 0.9101411 | -1.7607 | 0.079  | -1.45E-06 | count | 1 |
| BACE2      | -0.3784124 | 0.4493245 | -0.8422 | 0.4    | -1.45E-06 | count | 1 |
| MEF2C-AS1  | -0.3759608 | 0.8673231 | -0.4335 | 0.665  | -1.45E-06 | count | 1 |
| BBS2       | -1.6024741 | 1.1252136 | -1.4242 | 0.155  | -1.45E-06 | count | 1 |

|           |            |           |         |        |           |       |   |
|-----------|------------|-----------|---------|--------|-----------|-------|---|
| POC1B     | -0.3759608 | 0.6648045 | -0.5655 | 0.572  | -1.44E-06 | count | 1 |
| SLC25A19  | -0.3759608 | 0.4744728 | -0.7924 | 0.429  | -1.44E-06 | count | 1 |
| FAM221A   | -0.3759608 | 0.66895   | -0.562  | 0.574  | -1.44E-06 | count | 1 |
| GCFC2     | -0.3759608 | 0.6349642 | -0.5921 | 0.554  | -1.44E-06 | count | 1 |
| UTP11     | -0.3759608 | 0.5128979 | -0.733  | 0.464  | -1.44E-06 | count | 1 |
| NEIL2     | -0.3759608 | 0.677987  | -0.5545 | 0.579  | -1.44E-06 | count | 1 |
| NFE2L1    | -0.3759608 | 0.677987  | -0.5545 | 0.579  | -1.44E-06 | count | 1 |
| SLC25A24  | -0.3728276 | 0.5019599 | -0.7427 | 0.458  | -1.44E-06 | count | 1 |
| NR2C1     | -0.3728276 | 0.4637137 | -0.804  | 0.422  | -1.43E-06 | count | 1 |
| IFNAR2    | -0.3745564 | 0.7126658 | -0.5256 | 0.599  | -1.43E-06 | count | 1 |
| PYM1      | -0.3738188 | 0.3730654 | -1.002  | 0.317  | -1.43E-06 | count | 1 |
| LIN52     | -1.5223395 | 0.9056556 | -1.6809 | 0.0935 | -1.43E-06 | count | 1 |
| BTK       | -0.1249184 | 0.263107  | -0.4748 | 0.635  | -1.43E-06 | count | 1 |
| PIK3CD    | -0.3701286 | 0.7697801 | -0.4808 | 0.631  | -1.43E-06 | count | 1 |
| LINC00494 | -1.5223395 | 0.8398175 | -1.8127 | 0.0706 | -1.43E-06 | count | 1 |
| MED14     | -1.5223395 | 0.8398175 | -1.8127 | 0.0706 | -1.43E-06 | count | 1 |
| ZCCHC8    | -0.3677795 | 0.4736293 | -0.7765 | 0.438  | -1.43E-06 | count | 1 |
| DPH5      | -1.4935963 | 0.6712152 | -2.2252 | 0.0266 | -1.43E-06 | count | 1 |
| PCNT      | -1.5223395 | 1.083799  | -1.4046 | 0.161  | -1.43E-06 | count | 1 |
| ARHGEF12  | -1.5223395 | 1.083799  | -1.4046 | 0.161  | -1.43E-06 | count | 1 |
| MYO15B    | -1.5500099 | 1.2542239 | -1.2358 | 0.217  | -1.43E-06 | count | 1 |
| ZBED5     | -0.3718844 | 0.3659096 | -1.0163 | 0.31   | -1.43E-06 | count | 1 |
| TCAIM     | -1.5223395 | 1.0294181 | -1.4788 | 0.14   | -1.43E-06 | count | 1 |
| RABL2B    | -1.5500099 | 1.1264855 | -1.376  | 0.17   | -1.43E-06 | count | 1 |
| EGR3      | -0.1244903 | 0.2949096 | -0.4221 | 0.673  | -1.42E-06 | count | 1 |
| NDUFAF7   | -0.3701286 | 0.5667961 | -0.653  | 0.514  | -1.42E-06 | count | 1 |
| NARFL     | -0.3698265 | 0.5372762 | -0.6883 | 0.492  | -1.42E-06 | count | 1 |
| EIF2AK4   | -0.3698265 | 0.4275497 | -0.865  | 0.388  | -1.42E-06 | count | 1 |
| YIPF2     | -0.3701286 | 0.6023585 | -0.6145 | 0.539  | -1.42E-06 | count | 1 |
| MTMR14    | -0.124157  | 0.3150085 | -0.3941 | 0.694  | -1.42E-06 | count | 1 |
| PIAS4     | -0.3701286 | 0.5718312 | -0.6473 | 0.518  | -1.42E-06 | count | 1 |
| CNNM4     | -1.4935963 | 0.9310672 | -1.6042 | 0.109  | -1.42E-06 | count | 1 |
| KMT2E-AS1 | -0.3701286 | 0.6678263 | -0.5542 | 0.58   | -1.42E-06 | count | 1 |
| TMPO-AS1  | -1.4935963 | 1.1034589 | -1.3536 | 0.177  | -1.42E-06 | count | 1 |
| ATF3      | -0.3701286 | 0.5829694 | -0.6349 | 0.526  | -1.42E-06 | count | 1 |
| RUNX1     | -0.3696083 | 0.6171191 | -0.5989 | 0.55   | -1.42E-06 | count | 1 |
| HNRNPUL2  | -1.4534249 | 0.750317  | -1.9371 | 0.0534 | -1.42E-06 | count | 1 |
| TRMT5     | -0.3701286 | 0.9143565 | -0.4048 | 0.686  | -1.42E-06 | count | 1 |
| NCAPD3    | -0.3660829 | 0.5635113 | -0.6496 | 0.516  | -1.41E-06 | count | 1 |
| BLCAP     | -0.3660829 | 0.5275797 | -0.6939 | 0.488  | -1.41E-06 | count | 1 |
| ZNF736    | -1.4534249 | 0.7007606 | -2.0741 | 0.0386 | -1.41E-06 | count | 1 |
| YPEL2     | -1.4534249 | 0.7007606 | -2.0741 | 0.0386 | -1.41E-06 | count | 1 |
| SAMD10    | -1.4636784 | 1.0563776 | -1.3856 | 0.167  | -1.41E-06 | count | 1 |
| COQ8A     | -1.4534249 | 0.8251224 | -1.7615 | 0.0788 | -1.41E-06 | count | 1 |
| TSTD2     | -0.3657162 | 0.6005199 | -0.609  | 0.543  | -1.41E-06 | count | 1 |

|            |            |           |         |        |           |       |   |
|------------|------------|-----------|---------|--------|-----------|-------|---|
| GART       | -0.3659138 | 0.4092318 | -0.8941 | 0.372  | -1.41E-06 | count | 1 |
| NFATC3     | -0.3630459 | 0.6255252 | -0.5804 | 0.562  | -1.41E-06 | count | 1 |
| HSPBAP1    | -0.3657162 | 0.6005199 | -0.609  | 0.543  | -1.41E-06 | count | 1 |
| C2orf69    | -0.3660829 | 0.5778783 | -0.6335 | 0.527  | -1.41E-06 | count | 1 |
| DXO        | -0.3657162 | 0.6265007 | -0.5837 | 0.56   | -1.41E-06 | count | 1 |
| RASA4      | -1.4636784 | 0.9353719 | -1.5648 | 0.118  | -1.41E-06 | count | 1 |
| EXD2       | -1.4636784 | 1.1412553 | -1.2825 | 0.2    | -1.40E-06 | count | 1 |
| KATNB1     | -1.4935963 | 1.4902924 | -1.0022 | 0.317  | -1.40E-06 | count | 1 |
| GGT5       | -1.4935963 | 1.4902924 | -1.0022 | 0.317  | -1.40E-06 | count | 1 |
| LINC02447  | -1.4935963 | 1.4902924 | -1.0022 | 0.317  | -1.40E-06 | count | 1 |
| DDX60L     | -1.4534249 | 0.7803313 | -1.8626 | 0.0632 | -1.40E-06 | count | 1 |
| TOR1AIP1   | -0.3644747 | 0.3042103 | -1.1981 | 0.232  | -1.40E-06 | count | 1 |
| GZMA       | -1.4636784 | 0.8913939 | -1.642  | 0.101  | -1.40E-06 | count | 1 |
| TET3       | -1.4636784 | 0.8913939 | -1.642  | 0.101  | -1.40E-06 | count | 1 |
| RBKS       | -1.4636784 | 0.8913939 | -1.642  | 0.101  | -1.40E-06 | count | 1 |
| OTULINL    | -1.4935963 | 1.2612977 | -1.1842 | 0.237  | -1.40E-06 | count | 1 |
| TBC1D14    | -1.4935963 | 1.2612977 | -1.1842 | 0.237  | -1.40E-06 | count | 1 |
| ABCC4      | -1.4935963 | 1.2612977 | -1.1842 | 0.237  | -1.40E-06 | count | 1 |
| AQP1       | -1.4935963 | 1.2612977 | -1.1842 | 0.237  | -1.40E-06 | count | 1 |
| A2M        | -1.4935963 | 1.2612977 | -1.1842 | 0.237  | -1.40E-06 | count | 1 |
| EFCAB11    | -1.4935963 | 1.2612977 | -1.1842 | 0.237  | -1.40E-06 | count | 1 |
| EARS2      | -1.4935963 | 1.2036897 | -1.2408 | 0.215  | -1.40E-06 | count | 1 |
| AL731577.1 | -1.4636784 | 1.068545  | -1.3698 | 0.171  | -1.40E-06 | count | 1 |
| SOS2       | -0.3630459 | 0.5103569 | -0.7114 | 0.477  | -1.40E-06 | count | 1 |
| GBF1       | -0.3630459 | 0.5190407 | -0.6995 | 0.485  | -1.40E-06 | count | 1 |
| FMC1       | -0.3608002 | 0.394866  | -0.9137 | 0.361  | -1.40E-06 | count | 1 |
| USP39      | -0.3622611 | 0.5313656 | -0.6818 | 0.496  | -1.40E-06 | count | 1 |
| ZNF253     | -0.3622611 | 0.5768742 | -0.628  | 0.53   | -1.39E-06 | count | 1 |
| C19orf12   | -0.3622611 | 0.4122759 | -0.8787 | 0.38   | -1.39E-06 | count | 1 |
| NUDT14     | -0.3622611 | 0.5594878 | -0.6475 | 0.518  | -1.39E-06 | count | 1 |
| NEDD9      | -0.3605325 | 0.5261294 | -0.6853 | 0.494  | -1.39E-06 | count | 1 |
| NEK3       | -0.3594823 | 0.5678022 | -0.6331 | 0.527  | -1.39E-06 | count | 1 |
| TNS3       | -1.4255081 | 0.850185  | -1.6767 | 0.0943 | -1.39E-06 | count | 1 |
| FAM192A    | -0.3588943 | 0.3746739 | -0.9579 | 0.339  | -1.38E-06 | count | 1 |
| FCF1       | -0.3594823 | 0.5228878 | -0.6875 | 0.492  | -1.38E-06 | count | 1 |
| PRR14L     | -0.3571988 | 0.5521375 | -0.6469 | 0.518  | -1.38E-06 | count | 1 |
| HACD4      | -0.358418  | 0.4955804 | -0.7232 | 0.47   | -1.38E-06 | count | 1 |
| POGZ       | -0.357844  | 0.3492314 | -1.0247 | 0.306  | -1.38E-06 | count | 1 |
| FAF1       | -0.3571988 | 0.5303777 | -0.6735 | 0.501  | -1.38E-06 | count | 1 |
| HPS4       | -0.3566143 | 0.4650026 | -0.7669 | 0.444  | -1.38E-06 | count | 1 |
| TCEAL3     | -0.1198454 | 0.3755526 | -0.3191 | 0.75   | -1.37E-06 | count | 1 |
| PITPNA     | -0.355289  | 0.4475872 | -0.7938 | 0.428  | -1.37E-06 | count | 1 |
| INPP5B     | -0.3550575 | 0.4735667 | -0.7498 | 0.454  | -1.37E-06 | count | 1 |
| VEZF1      | -0.3505033 | 0.4352042 | -0.8054 | 0.421  | -1.37E-06 | count | 1 |
| GRK5       | -0.3536681 | 0.4394953 | -0.8047 | 0.421  | -1.37E-06 | count | 1 |



|            |            |           |         |        |           |       |   |
|------------|------------|-----------|---------|--------|-----------|-------|---|
| C2orf68    | -1.4189334 | 1.3451278 | -1.0549 | 0.292  | -1.36E-06 | count | 1 |
| SEC14L1    | -0.3525063 | 0.4408345 | -0.7996 | 0.424  | -1.36E-06 | count | 1 |
| MAGOHB     | -0.3500045 | 0.4259423 | -0.8217 | 0.412  | -1.36E-06 | count | 1 |
| MOSPD2     | -0.3500045 | 0.4287109 | -0.8164 | 0.415  | -1.36E-06 | count | 1 |
| CPEB4      | -0.3510653 | 0.4868093 | -0.7212 | 0.471  | -1.35E-06 | count | 1 |
| IWS1       | -0.1179532 | 0.2836035 | -0.4159 | 0.678  | -1.35E-06 | count | 1 |
| MFSD4B     | -1.3387906 | 0.7739302 | -1.7299 | 0.0844 | -1.35E-06 | count | 1 |
| SPINT1-AS1 | -1.3387906 | 0.7465962 | -1.7932 | 0.0736 | -1.35E-06 | count | 1 |
| FBXL20     | -1.3387906 | 0.7465962 | -1.7932 | 0.0736 | -1.35E-06 | count | 1 |
| ST3GAL1    | -0.3461763 | 0.4239776 | -0.8165 | 0.415  | -1.35E-06 | count | 1 |
| SMIM27     | -0.3481938 | 0.3585136 | -0.9712 | 0.332  | -1.35E-06 | count | 1 |
| AL445472.1 | -0.3474845 | 0.4553972 | -0.763  | 0.446  | -1.35E-06 | count | 1 |
| BARD1      | -0.3451372 | 0.3603666 | -0.9577 | 0.339  | -1.34E-06 | count | 1 |
| GCNT2      | -1.3604102 | 1.0321813 | -1.318  | 0.188  | -1.34E-06 | count | 1 |
| CDC42BPB   | -1.3604102 | 1.0126417 | -1.3434 | 0.18   | -1.34E-06 | count | 1 |
| STK39      | -1.3387906 | 0.7954981 | -1.683  | 0.0931 | -1.34E-06 | count | 1 |
| CFL2       | -0.3420025 | 0.5033078 | -0.6795 | 0.497  | -1.33E-06 | count | 1 |
| ABL2       | -1.3555697 | 0.9075123 | -1.4937 | 0.136  | -1.33E-06 | count | 1 |
| PMVK       | -0.1157551 | 0.3391304 | -0.3413 | 0.733  | -1.33E-06 | count | 1 |
| BNIP3      | -0.3427562 | 0.7838558 | -0.4373 | 0.662  | -1.33E-06 | count | 1 |
| ENC1       | -1.3255323 | 1.132548  | -1.1704 | 0.242  | -1.33E-06 | count | 1 |
| DEXI       | -1.3255323 | 0.904168  | -1.466  | 0.143  | -1.33E-06 | count | 1 |
| SEC61A2    | -1.3255323 | 0.8697904 | -1.524  | 0.128  | -1.33E-06 | count | 1 |
| MARK4      | -1.3255323 | 0.8697904 | -1.524  | 0.128  | -1.33E-06 | count | 1 |
| ST20       | -1.3255323 | 0.8697904 | -1.524  | 0.128  | -1.33E-06 | count | 1 |
| ZNF432     | -1.3255323 | 0.8697904 | -1.524  | 0.128  | -1.33E-06 | count | 1 |
| SREBF2     | -1.3255323 | 0.8697904 | -1.524  | 0.128  | -1.33E-06 | count | 1 |
| PPA2       | -0.3399416 | 0.3948124 | -0.861  | 0.39   | -1.32E-06 | count | 1 |
| CGRRF1     | -0.3399416 | 0.4416796 | -0.7697 | 0.442  | -1.32E-06 | count | 1 |
| AMDHD2     | -0.3371959 | 0.484956  | -0.6953 | 0.487  | -1.32E-06 | count | 1 |
| TMEM62     | -0.3403524 | 0.6417085 | -0.5304 | 0.596  | -1.32E-06 | count | 1 |
| NTHL1      | -0.3403524 | 0.617413  | -0.5513 | 0.582  | -1.32E-06 | count | 1 |
| CELF1      | -0.3395796 | 0.368996  | -0.9203 | 0.358  | -1.32E-06 | count | 1 |
| PDXK       | -0.3384796 | 0.4896039 | -0.6913 | 0.49   | -1.32E-06 | count | 1 |
| RDH14      | -0.1145932 | 0.294464  | -0.3892 | 0.697  | -1.32E-06 | count | 1 |
| UBE2G1     | -0.1145932 | 0.279075  | -0.4106 | 0.682  | -1.31E-06 | count | 1 |
| FADS3      | -0.114425  | 0.2760444 | -0.4145 | 0.679  | -1.31E-06 | count | 1 |
| TIMM50     | -0.3384796 | 0.550956  | -0.6143 | 0.539  | -1.31E-06 | count | 1 |
| ZBTB25     | -0.337445  | 0.4953172 | -0.6813 | 0.496  | -1.31E-06 | count | 1 |
| NR4A3      | -0.3384796 | 0.5372558 | -0.63   | 0.529  | -1.31E-06 | count | 1 |
| AFF1       | -0.337445  | 0.4483201 | -0.7527 | 0.452  | -1.31E-06 | count | 1 |
| UPF3B      | -0.1141704 | 0.3307027 | -0.3452 | 0.73   | -1.31E-06 | count | 1 |
| DSE        | -0.3380743 | 0.5670989 | -0.5961 | 0.551  | -1.31E-06 | count | 1 |
| MTHFD2L    | -1.2888551 | 1.0325339 | -1.2482 | 0.213  | -1.31E-06 | count | 1 |
| NARF       | -0.3367887 | 0.4409861 | -0.7637 | 0.445  | -1.31E-06 | count | 1 |

|            |            |           |         |        |           |       |   |
|------------|------------|-----------|---------|--------|-----------|-------|---|
| CAMK2N1    | -1.2888551 | 1.2770723 | -1.0092 | 0.313  | -1.31E-06 | count | 1 |
| STAG2      | -0.1140753 | 0.2513524 | -0.4538 | 0.65   | -1.31E-06 | count | 1 |
| NUBP2      | -0.3369791 | 0.4228299 | -0.797  | 0.426  | -1.31E-06 | count | 1 |
| BTN2A1     | -0.3367887 | 0.4638001 | -0.7262 | 0.468  | -1.31E-06 | count | 1 |
| TTC39C     | -0.3363354 | 0.43044   | -0.7814 | 0.435  | -1.31E-06 | count | 1 |
| STMP1      | -0.1135413 | 0.2584874 | -0.4393 | 0.661  | -1.30E-06 | count | 1 |
| TMEM268    | -1.2864161 | 0.9306188 | -1.3823 | 0.168  | -1.30E-06 | count | 1 |
| SLC43A2    | -1.2888551 | 1.0626402 | -1.2129 | 0.226  | -1.30E-06 | count | 1 |
| NHSL2      | -1.2888551 | 1.0626402 | -1.2129 | 0.226  | -1.30E-06 | count | 1 |
| CYP51A1    | -1.2888551 | 0.8153274 | -1.5808 | 0.115  | -1.30E-06 | count | 1 |
| PGM1       | -1.2627989 | 0.6997002 | -1.8048 | 0.0718 | -1.30E-06 | count | 1 |
| GTF3C3     | -1.2864161 | 0.9384614 | -1.3708 | 0.171  | -1.29E-06 | count | 1 |
| TAB1       | -1.2864161 | 1.3766876 | -0.9344 | 0.351  | -1.29E-06 | count | 1 |
| ICA1L      | -1.2864161 | 1.2667164 | -1.0156 | 0.31   | -1.29E-06 | count | 1 |
| AC091132.5 | -1.2864161 | 1.2667164 | -1.0156 | 0.31   | -1.29E-06 | count | 1 |
| DNASE1     | -1.2864161 | 1.2667164 | -1.0156 | 0.31   | -1.29E-06 | count | 1 |
| HINT2      | -0.1125272 | 0.2967021 | -0.3793 | 0.705  | -1.29E-06 | count | 1 |
| TNIP1      | -0.3302767 | 0.4075531 | -0.8104 | 0.418  | -1.29E-06 | count | 1 |
| CEP290     | -0.1118953 | 0.4317727 | -0.2592 | 0.796  | -1.29E-06 | count | 1 |
| SDHAF4     | -1.2366398 | 0.8691514 | -1.4228 | 0.155  | -1.28E-06 | count | 1 |
| GLA        | -1.2366398 | 0.7361571 | -1.6799 | 0.0937 | -1.28E-06 | count | 1 |
| NCKAP5L    | -1.2492586 | 0.9306651 | -1.3423 | 0.18   | -1.28E-06 | count | 1 |
| MTX2       | -0.3260194 | 0.4703867 | -0.6931 | 0.489  | -1.27E-06 | count | 1 |
| USP33      | -0.110634  | 0.3310083 | -0.3342 | 0.738  | -1.27E-06 | count | 1 |
| HRAS       | -0.3232589 | 0.3869095 | -0.8355 | 0.404  | -1.27E-06 | count | 1 |
| TLNRD1     | -0.3206406 | 0.5027061 | -0.6378 | 0.524  | -1.27E-06 | count | 1 |
| STARD3NL   | -0.3232295 | 0.4847222 | -0.6668 | 0.505  | -1.27E-06 | count | 1 |
| FBXO3      | -0.3248158 | 0.5223292 | -0.6219 | 0.534  | -1.26E-06 | count | 1 |
| DOPEY2     | -1.2100985 | 0.9937581 | -1.2177 | 0.224  | -1.26E-06 | count | 1 |
| C1orf174   | -0.3220937 | 0.4036087 | -0.798  | 0.425  | -1.26E-06 | count | 1 |
| ARFGAP2    | -0.3189249 | 0.367705  | -0.8673 | 0.386  | -1.25E-06 | count | 1 |
| SRPK2      | -0.1089447 | 0.2288551 | -0.476  | 0.634  | -1.25E-06 | count | 1 |
| TSTA3      | -0.320701  | 0.4932712 | -0.6502 | 0.516  | -1.25E-06 | count | 1 |
| FAM126A    | -0.3208092 | 0.5878209 | -0.5458 | 0.586  | -1.25E-06 | count | 1 |
| LINC00342  | -1.2100985 | 1.4071935 | -0.8599 | 0.39   | -1.25E-06 | count | 1 |
| FAM131A    | -1.2100985 | 1.362438  | -0.8882 | 0.375  | -1.25E-06 | count | 1 |
| YTHDF3     | -0.3195679 | 0.5262146 | -0.6073 | 0.544  | -1.25E-06 | count | 1 |
| FAM219B    | -0.3197706 | 0.4434309 | -0.7211 | 0.471  | -1.25E-06 | count | 1 |
| ASNS       | -1.2100985 | 1.1751336 | -1.0298 | 0.304  | -1.25E-06 | count | 1 |
| ENG        | -1.2100985 | 1.1751336 | -1.0298 | 0.304  | -1.25E-06 | count | 1 |
| LDOC1      | -1.2100985 | 1.1751336 | -1.0298 | 0.304  | -1.25E-06 | count | 1 |
| CDK10      | -1.1827492 | 0.7352634 | -1.6086 | 0.108  | -1.25E-06 | count | 1 |
| ZNF136     | -0.3176349 | 0.4384184 | -0.7245 | 0.469  | -1.24E-06 | count | 1 |
| IP6K1      | -0.3176349 | 0.4850554 | -0.6548 | 0.513  | -1.24E-06 | count | 1 |
| MPRIP      | -0.3176349 | 0.4799883 | -0.6618 | 0.508  | -1.24E-06 | count | 1 |

|            |            |           |         |       |           |       |   |
|------------|------------|-----------|---------|-------|-----------|-------|---|
| ZNF318     | -0.3170988 | 0.8632031 | -0.3674 | 0.714 | -1.24E-06 | count | 1 |
| PBX2       | -0.3163044 | 0.4737663 | -0.6676 | 0.505 | -1.24E-06 | count | 1 |
| TRMT13     | -0.3163044 | 0.5283732 | -0.5986 | 0.55  | -1.24E-06 | count | 1 |
| GOLGA8A    | -0.3165951 | 0.5233728 | -0.6049 | 0.546 | -1.24E-06 | count | 1 |
| PPM1B      | -0.3146733 | 0.414647  | -0.7589 | 0.448 | -1.24E-06 | count | 1 |
| KCNQ1      | -0.3147362 | 0.4717739 | -0.6671 | 0.505 | -1.24E-06 | count | 1 |
| SMIM19     | -0.1069843 | 0.3216238 | -0.3326 | 0.74  | -1.23E-06 | count | 1 |
| CCDC69     | -0.3147362 | 0.3469811 | -0.9071 | 0.365 | -1.23E-06 | count | 1 |
| PBRM1      | -0.1070164 | 0.3307266 | -0.3236 | 0.746 | -1.23E-06 | count | 1 |
| ZNF121     | -0.3147362 | 0.5481613 | -0.5742 | 0.566 | -1.23E-06 | count | 1 |
| PAXIP1-AS2 | -0.3147362 | 0.4998615 | -0.6296 | 0.529 | -1.23E-06 | count | 1 |
| MAP2K4     | -0.3145916 | 0.5445801 | -0.5777 | 0.564 | -1.23E-06 | count | 1 |
| COPG1      | -1.1686678 | 0.9688939 | -1.2062 | 0.228 | -1.23E-06 | count | 1 |
| C16orf87   | -0.3134049 | 0.3930674 | -0.7973 | 0.426 | -1.23E-06 | count | 1 |
| SIKE1      | -0.3138421 | 0.3541993 | -0.8861 | 0.376 | -1.23E-06 | count | 1 |
| ALOX5      | -0.313125  | 0.3584187 | -0.8736 | 0.383 | -1.23E-06 | count | 1 |
| ATL2       | -0.3128604 | 0.5074251 | -0.6166 | 0.538 | -1.23E-06 | count | 1 |
| YWHAG      | -0.1064894 | 0.3465622 | -0.3073 | 0.759 | -1.23E-06 | count | 1 |
| TM7SF3     | -0.3128604 | 0.6123011 | -0.511  | 0.61  | -1.23E-06 | count | 1 |
| GATAD2B    | -0.3125192 | 0.4747037 | -0.6583 | 0.511 | -1.22E-06 | count | 1 |
| FLOT2      | -0.3105767 | 0.3817714 | -0.8135 | 0.416 | -1.22E-06 | count | 1 |
| ZRANB1     | -0.3105767 | 0.5676155 | -0.5472 | 0.585 | -1.22E-06 | count | 1 |
| FUOM       | -0.1056105 | 0.3750145 | -0.2816 | 0.778 | -1.22E-06 | count | 1 |
| PLEKHB2    | -0.3098208 | 0.5034377 | -0.6154 | 0.539 | -1.22E-06 | count | 1 |
| ALDH16A1   | -0.309238  | 0.4315079 | -0.7166 | 0.474 | -1.22E-06 | count | 1 |
| TMEM38B    | -0.3087518 | 0.3987594 | -0.7743 | 0.439 | -1.21E-06 | count | 1 |
| ABL1       | -1.1246367 | 0.8813571 | -1.276  | 0.203 | -1.21E-06 | count | 1 |
| NPRL3      | -0.307736  | 0.5588933 | -0.5506 | 0.582 | -1.21E-06 | count | 1 |
| CTSO       | -1.1246367 | 0.8820583 | -1.275  | 0.203 | -1.21E-06 | count | 1 |
| SEC24D     | -0.307736  | 0.7032958 | -0.4376 | 0.662 | -1.21E-06 | count | 1 |
| OTUD4      | -0.307736  | 0.6681212 | -0.4606 | 0.645 | -1.21E-06 | count | 1 |
| METTL16    | -0.3073542 | 0.3774017 | -0.8144 | 0.416 | -1.21E-06 | count | 1 |
| APOPT1     | -0.3057919 | 0.4242969 | -0.7207 | 0.471 | -1.21E-06 | count | 1 |
| DPP9       | -1.1246367 | 0.8719666 | -1.2898 | 0.198 | -1.20E-06 | count | 1 |
| SLC30A7    | -1.1246367 | 1.1590983 | -0.9703 | 0.332 | -1.20E-06 | count | 1 |
| LINC00476  | -1.1246367 | 0.9082708 | -1.2382 | 0.216 | -1.20E-06 | count | 1 |
| AP002360.1 | -1.1347909 | 1.2853641 | -0.8829 | 0.378 | -1.20E-06 | count | 1 |
| PKN1       | -0.1042111 | 0.3131254 | -0.3328 | 0.739 | -1.20E-06 | count | 1 |
| AC087482.1 | -1.1246367 | 1.1028982 | -1.0197 | 0.308 | -1.20E-06 | count | 1 |
| HS2ST1     | -1.1246367 | 1.1028982 | -1.0197 | 0.308 | -1.20E-06 | count | 1 |
| KPNA5      | -0.3040338 | 0.3936394 | -0.7724 | 0.44  | -1.20E-06 | count | 1 |
| UTS2B      | -1.1246367 | 1.2878042 | -0.8733 | 0.383 | -1.20E-06 | count | 1 |
| METTL3     | -1.1246367 | 1.2878042 | -0.8733 | 0.383 | -1.20E-06 | count | 1 |
| AC008741.2 | -1.1246367 | 1.3845431 | -0.8123 | 0.417 | -1.20E-06 | count | 1 |
| AC016588.2 | -1.1246367 | 1.3845431 | -0.8123 | 0.417 | -1.20E-06 | count | 1 |

|               |            |           |         |        |           |       |   |
|---------------|------------|-----------|---------|--------|-----------|-------|---|
| EXT2          | -1.1246367 | 1.3845431 | -0.8123 | 0.417  | -1.20E-06 | count | 1 |
| AZIN1-AS1     | -1.1246367 | 1.3845431 | -0.8123 | 0.417  | -1.20E-06 | count | 1 |
| EZH2          | -1.1246367 | 1.3845431 | -0.8123 | 0.417  | -1.20E-06 | count | 1 |
| CRY2          | -1.1246367 | 1.3845431 | -0.8123 | 0.417  | -1.20E-06 | count | 1 |
| TLCD1         | -1.1246367 | 1.3845431 | -0.8123 | 0.417  | -1.20E-06 | count | 1 |
| DARS-AS1      | -1.1246367 | 1.3845431 | -0.8123 | 0.417  | -1.20E-06 | count | 1 |
| CRY1          | -1.1246367 | 1.3845431 | -0.8123 | 0.417  | -1.20E-06 | count | 1 |
| WDR17         | -1.1246367 | 1.3845431 | -0.8123 | 0.417  | -1.20E-06 | count | 1 |
| GZMH          | -1.1246367 | 1.3845431 | -0.8123 | 0.417  | -1.20E-06 | count | 1 |
| AGAP9         | -1.1246367 | 1.3845431 | -0.8123 | 0.417  | -1.20E-06 | count | 1 |
| RCBTB1        | -1.1246367 | 1.3845431 | -0.8123 | 0.417  | -1.20E-06 | count | 1 |
| CDC42EP2      | -1.1246367 | 1.3845431 | -0.8123 | 0.417  | -1.20E-06 | count | 1 |
| NCK1          | -0.1037997 | 0.3754686 | -0.2765 | 0.782  | -1.20E-06 | count | 1 |
| AC025171.3    | -1.1246367 | 1.0723534 | -1.0488 | 0.295  | -1.20E-06 | count | 1 |
| C9orf64       | -1.1246367 | 1.0723534 | -1.0488 | 0.295  | -1.20E-06 | count | 1 |
| RTL10         | -1.1246367 | 1.0723534 | -1.0488 | 0.295  | -1.20E-06 | count | 1 |
| AC124016.1    | -1.1246367 | 1.1867864 | -0.9476 | 0.344  | -1.20E-06 | count | 1 |
| FDXACB1       | -1.1246367 | 1.1867864 | -0.9476 | 0.344  | -1.20E-06 | count | 1 |
| KCNMB4        | -1.1246367 | 1.1867864 | -0.9476 | 0.344  | -1.20E-06 | count | 1 |
| ILVBL         | -1.1246367 | 1.1867864 | -0.9476 | 0.344  | -1.20E-06 | count | 1 |
| ZNF17         | -1.1246367 | 1.1867864 | -0.9476 | 0.344  | -1.20E-06 | count | 1 |
| MLLT11        | -1.1246367 | 1.1867864 | -0.9476 | 0.344  | -1.20E-06 | count | 1 |
| LINC01006     | -1.1246367 | 1.1867864 | -0.9476 | 0.344  | -1.20E-06 | count | 1 |
| TPTEP2-CSNK1E | -1.1246367 | 1.1867864 | -0.9476 | 0.344  | -1.20E-06 | count | 1 |
| UHRF1BP1      | -1.1246367 | 1.1867864 | -0.9476 | 0.344  | -1.20E-06 | count | 1 |
| AC022167.3    | -1.1246367 | 1.1867864 | -0.9476 | 0.344  | -1.20E-06 | count | 1 |
| LINC01004     | -1.1246367 | 1.1867864 | -0.9476 | 0.344  | -1.20E-06 | count | 1 |
| CHAC2         | -1.1246367 | 1.1867864 | -0.9476 | 0.344  | -1.20E-06 | count | 1 |
| SNX13         | -0.3041065 | 0.5799799 | -0.5243 | 0.6    | -1.20E-06 | count | 1 |
| RIMKLB        | -0.3041065 | 0.6834897 | -0.4449 | 0.657  | -1.20E-06 | count | 1 |
| ZFYVE27       | -0.3041065 | 0.6596189 | -0.461  | 0.645  | -1.20E-06 | count | 1 |
| ZNF460        | -0.3043126 | 0.7523186 | -0.4045 | 0.686  | -1.19E-06 | count | 1 |
| BCL9L         | -1.093638  | 0.8353893 | -1.3091 | 0.191  | -1.19E-06 | count | 1 |
| DDX59         | -0.3027118 | 0.3592503 | -0.8426 | 0.4    | -1.19E-06 | count | 1 |
| MAPK9         | -1.093638  | 0.7912573 | -1.3822 | 0.168  | -1.19E-06 | count | 1 |
| IFIT3         | -1.093638  | 0.7628087 | -1.4337 | 0.152  | -1.19E-06 | count | 1 |
| ILK           | -0.3013867 | 0.3376206 | -0.8927 | 0.373  | -1.19E-06 | count | 1 |
| UBP1          | -1.093638  | 0.8689137 | -1.2586 | 0.209  | -1.19E-06 | count | 1 |
| SCO1          | -0.3020409 | 0.4962391 | -0.6087 | 0.543  | -1.19E-06 | count | 1 |
| PDLIM2        | -0.1027875 | 0.3093036 | -0.3323 | 0.74   | -1.18E-06 | count | 1 |
| GNG11         | -1.093638  | 0.826511  | -1.3232 | 0.186  | -1.18E-06 | count | 1 |
| ASMTL         | -0.2997625 | 0.4530022 | -0.6617 | 0.508  | -1.18E-06 | count | 1 |
| USP28         | -1.0775915 | 0.6178179 | -1.7442 | 0.0818 | -1.18E-06 | count | 1 |
| TCEAL4        | -0.1024601 | 0.2951157 | -0.3472 | 0.729  | -1.18E-06 | count | 1 |
| HERC2         | -0.2993071 | 0.4017179 | -0.7451 | 0.457  | -1.18E-06 | count | 1 |

|            |            |           |         |       |           |       |   |
|------------|------------|-----------|---------|-------|-----------|-------|---|
| EFL1       | -0.2993071 | 0.7235268 | -0.4137 | 0.679 | -1.18E-06 | count | 1 |
| MASTL      | -0.2993071 | 0.6738938 | -0.4441 | 0.657 | -1.18E-06 | count | 1 |
| MFHAS1     | -0.2993071 | 0.6768406 | -0.4422 | 0.659 | -1.18E-06 | count | 1 |
| BCS1L      | -0.2993071 | 0.7330373 | -0.4083 | 0.683 | -1.18E-06 | count | 1 |
| AMIGO2     | -0.2993071 | 0.7330373 | -0.4083 | 0.683 | -1.18E-06 | count | 1 |
| TTL        | -0.2993071 | 0.7330373 | -0.4083 | 0.683 | -1.18E-06 | count | 1 |
| HIPK3      | -0.2982541 | 0.3858192 | -0.773  | 0.44  | -1.18E-06 | count | 1 |
| AC090204.1 | -1.0775915 | 1.0515254 | -1.0248 | 0.306 | -1.17E-06 | count | 1 |
| ZNF281     | -0.2962767 | 0.4987303 | -0.5941 | 0.553 | -1.17E-06 | count | 1 |
| GNPDA2     | -0.2971329 | 0.456343  | -0.6511 | 0.515 | -1.17E-06 | count | 1 |
| REXO4      | -0.2971329 | 0.456343  | -0.6511 | 0.515 | -1.17E-06 | count | 1 |
| GPR82      | -0.2979349 | 0.956435  | -0.3115 | 0.756 | -1.17E-06 | count | 1 |
| CASC3      | -0.2962767 | 0.4755093 | -0.6231 | 0.534 | -1.17E-06 | count | 1 |
| ARMC5      | -1.0775915 | 0.9170865 | -1.175  | 0.241 | -1.17E-06 | count | 1 |
| FPGT       | -1.0775915 | 0.9170865 | -1.175  | 0.241 | -1.17E-06 | count | 1 |
| ACBD4      | -1.0775915 | 0.9170865 | -1.175  | 0.241 | -1.17E-06 | count | 1 |
| PIP5K1C    | -1.0775915 | 0.9170865 | -1.175  | 0.241 | -1.17E-06 | count | 1 |
| PCGF6      | -1.0775915 | 0.9170865 | -1.175  | 0.241 | -1.17E-06 | count | 1 |
| NUSAP1     | -1.0775915 | 0.9170865 | -1.175  | 0.241 | -1.17E-06 | count | 1 |
| EID3       | -1.0775915 | 0.9170865 | -1.175  | 0.241 | -1.17E-06 | count | 1 |
| Z84485.1   | -1.0775915 | 0.9177752 | -1.1741 | 0.241 | -1.17E-06 | count | 1 |
| KCNG1      | -1.0775915 | 1.1089531 | -0.9717 | 0.332 | -1.17E-06 | count | 1 |
| ALDH5A1    | -1.0775915 | 1.1089531 | -0.9717 | 0.332 | -1.17E-06 | count | 1 |
| C17orf80   | -1.0775915 | 1.1089531 | -0.9717 | 0.332 | -1.17E-06 | count | 1 |
| S100Z      | -1.0775915 | 0.8418543 | -1.28   | 0.201 | -1.17E-06 | count | 1 |
| ATG7       | -1.0775915 | 0.8418543 | -1.28   | 0.201 | -1.17E-06 | count | 1 |
| OXSM       | -1.0775915 | 0.8426045 | -1.2789 | 0.202 | -1.17E-06 | count | 1 |
| KMT5B      | -0.2958535 | 0.3778776 | -0.7829 | 0.434 | -1.17E-06 | count | 1 |
| PTGES2     | -0.2956599 | 0.3272704 | -0.9034 | 0.367 | -1.17E-06 | count | 1 |
| FEM1B      | -1.0775915 | 1.0475915 | -1.0286 | 0.304 | -1.17E-06 | count | 1 |
| GNB4       | -1.0611527 | 0.7687678 | -1.3803 | 0.168 | -1.17E-06 | count | 1 |
| ASB3       | -1.0611527 | 0.90726   | -1.1696 | 0.243 | -1.17E-06 | count | 1 |
| ZBTB20-AS2 | -1.0611527 | 1.108007  | -0.9577 | 0.339 | -1.17E-06 | count | 1 |
| CLEC16A    | -1.0611527 | 0.873754  | -1.2145 | 0.225 | -1.17E-06 | count | 1 |
| FANCA      | -1.0611527 | 0.873754  | -1.2145 | 0.225 | -1.17E-06 | count | 1 |
| GGA2       | -0.100846  | 0.2762273 | -0.3651 | 0.715 | -1.16E-06 | count | 1 |
| CARNMT1    | -1.0611527 | 0.8389108 | -1.2649 | 0.207 | -1.16E-06 | count | 1 |
| ALKBH3     | -1.0527789 | 0.6463888 | -1.6287 | 0.104 | -1.16E-06 | count | 1 |
| SPATC1L    | -0.2940638 | 0.5381214 | -0.5465 | 0.585 | -1.16E-06 | count | 1 |
| EDEM2      | -0.2940638 | 0.4707729 | -0.6246 | 0.533 | -1.16E-06 | count | 1 |
| SSR3       | -0.1001502 | 0.2688191 | -0.3726 | 0.71  | -1.16E-06 | count | 1 |
| ING1       | -0.100396  | 0.22037   | -0.4556 | 0.649 | -1.16E-06 | count | 1 |
| IMMT       | -0.2915208 | 0.363434  | -0.8021 | 0.423 | -1.15E-06 | count | 1 |
| DCUN1D1    | -0.2911527 | 0.3790756 | -0.7681 | 0.443 | -1.15E-06 | count | 1 |
| ZNF493     | -0.2904353 | 0.4995147 | -0.5814 | 0.561 | -1.15E-06 | count | 1 |

|            |            |           |         |       |           |       |   |
|------------|------------|-----------|---------|-------|-----------|-------|---|
| ZADH2      | -0.2904353 | 0.4862073 | -0.5973 | 0.551 | -1.15E-06 | count | 1 |
| PCF11-AS1  | -1.0494289 | 1.2988684 | -0.808  | 0.42  | -1.15E-06 | count | 1 |
| CACNA1A    | -1.0494289 | 1.2801341 | -0.8198 | 0.413 | -1.15E-06 | count | 1 |
| AC067852.2 | -1.0494289 | 1.2801341 | -0.8198 | 0.413 | -1.15E-06 | count | 1 |
| ZNF90      | -1.0494289 | 1.241818  | -0.8451 | 0.399 | -1.15E-06 | count | 1 |
| IGFLR1     | -0.2897419 | 0.3762122 | -0.7702 | 0.442 | -1.15E-06 | count | 1 |
| IRGQ       | -1.0389827 | 1.1877257 | -0.8748 | 0.382 | -1.14E-06 | count | 1 |
| RNF141     | -0.2883612 | 0.3619948 | -0.7966 | 0.426 | -1.14E-06 | count | 1 |
| STAU2      | -0.2882864 | 0.5454834 | -0.5285 | 0.597 | -1.14E-06 | count | 1 |
| TSPAN33    | -0.0986134 | 0.2417795 | -0.4079 | 0.684 | -1.14E-06 | count | 1 |
| NDE1       | -0.2866045 | 0.3169305 | -0.9043 | 0.366 | -1.14E-06 | count | 1 |
| RLIM       | -0.2860791 | 0.491941  | -0.5815 | 0.561 | -1.13E-06 | count | 1 |
| PITPNA-AS1 | -0.2851266 | 0.4635597 | -0.6151 | 0.539 | -1.13E-06 | count | 1 |
| EPRS       | -0.097655  | 0.254178  | -0.3842 | 0.701 | -1.13E-06 | count | 1 |
| ARL14EP    | -0.0971659 | 0.2420954 | -0.4014 | 0.688 | -1.12E-06 | count | 1 |
| ATXN2      | -0.2828697 | 0.4529641 | -0.6245 | 0.533 | -1.12E-06 | count | 1 |
| OPA3       | -0.2828697 | 0.4984011 | -0.5676 | 0.571 | -1.12E-06 | count | 1 |
| THOC7      | -0.0967238 | 0.2535497 | -0.3815 | 0.703 | -1.12E-06 | count | 1 |
| ERO1B      | -0.2807522 | 0.4190624 | -0.67   | 0.503 | -1.12E-06 | count | 1 |
| DZIP3      | -0.2807522 | 0.5328013 | -0.5269 | 0.599 | -1.11E-06 | count | 1 |
| RANGAP1    | -0.9887348 | 0.7860896 | -1.2578 | 0.209 | -1.11E-06 | count | 1 |
| DNAAF5     | -0.9887348 | 0.9614722 | -1.0284 | 0.304 | -1.11E-06 | count | 1 |
| PPP1R12B   | -0.9887348 | 1.1215566 | -0.8816 | 0.378 | -1.11E-06 | count | 1 |
| PRKAR1A    | -0.0954551 | 0.2602241 | -0.3668 | 0.714 | -1.10E-06 | count | 1 |
| TBCB       | -0.0952594 | 0.1935535 | -0.4922 | 0.623 | -1.10E-06 | count | 1 |
| DCPS       | -0.2776174 | 0.4371348 | -0.6351 | 0.526 | -1.10E-06 | count | 1 |
| MPP5       | -0.2759973 | 0.686924  | -0.4018 | 0.688 | -1.10E-06 | count | 1 |
| 2-Sep      | -0.0946339 | 0.2483866 | -0.381  | 0.703 | -1.09E-06 | count | 1 |
| CHAF1A     | -0.2759973 | 0.700744  | -0.3939 | 0.694 | -1.09E-06 | count | 1 |
| THEMIS2    | -0.0946295 | 0.2491941 | -0.3797 | 0.704 | -1.09E-06 | count | 1 |
| RNF10      | -0.2751912 | 0.4016729 | -0.6851 | 0.494 | -1.09E-06 | count | 1 |
| NPIP4      | -0.9653779 | 0.8717983 | -1.1073 | 0.269 | -1.09E-06 | count | 1 |
| RAPGEF6    | -0.9653779 | 0.8360557 | -1.1547 | 0.249 | -1.09E-06 | count | 1 |
| NAF1       | -0.2750095 | 0.4831049 | -0.5693 | 0.569 | -1.09E-06 | count | 1 |
| CSNK1E     | -0.2740897 | 0.5380734 | -0.5094 | 0.611 | -1.09E-06 | count | 1 |
| KDM5B      | -0.2740897 | 0.5971233 | -0.459  | 0.646 | -1.09E-06 | count | 1 |
| CNKS2      | -0.2740897 | 0.6636805 | -0.413  | 0.68  | -1.09E-06 | count | 1 |
| MCTP2      | -0.2740897 | 0.6245582 | -0.4389 | 0.661 | -1.09E-06 | count | 1 |
| EIF4EBP1   | -0.2740897 | 0.4034124 | -0.6794 | 0.497 | -1.09E-06 | count | 1 |
| PAXIP1-AS1 | -0.2709387 | 0.5133139 | -0.5278 | 0.598 | -1.08E-06 | count | 1 |
| CCDC92     | -0.2709387 | 0.541429  | -0.5004 | 0.617 | -1.08E-06 | count | 1 |
| AC104532.2 | -0.9533746 | 1.3713316 | -0.6952 | 0.487 | -1.08E-06 | count | 1 |
| VPS37C     | -0.9533746 | 1.3004227 | -0.7331 | 0.464 | -1.08E-06 | count | 1 |
| CDK16      | -0.9533746 | 1.2509191 | -0.7621 | 0.446 | -1.08E-06 | count | 1 |
| ERGIC1     | -0.2700904 | 0.4046918 | -0.6674 | 0.505 | -1.08E-06 | count | 1 |

|            |            |           |         |       |           |       |   |
|------------|------------|-----------|---------|-------|-----------|-------|---|
| C9orf85    | -0.2709387 | 0.6812409 | -0.3977 | 0.691 | -1.08E-06 | count | 1 |
| CNST       | -0.2697098 | 0.3735353 | -0.722  | 0.471 | -1.08E-06 | count | 1 |
| CDK5RAP3   | -0.2689179 | 0.3912975 | -0.6872 | 0.492 | -1.07E-06 | count | 1 |
| SNX14      | -0.2689179 | 0.3970137 | -0.6774 | 0.499 | -1.07E-06 | count | 1 |
| ARNTL      | -0.9238992 | 0.7686117 | -1.202  | 0.23  | -1.07E-06 | count | 1 |
| DCAF1      | -0.9275679 | 0.7982603 | -1.162  | 0.246 | -1.07E-06 | count | 1 |
| AC005726.5 | -0.9345794 | 0.9759357 | -0.9576 | 0.339 | -1.07E-06 | count | 1 |
| AEN        | -0.2669947 | 0.4485871 | -0.5952 | 0.552 | -1.07E-06 | count | 1 |
| ZNF678     | -0.9345794 | 1.1421917 | -0.8182 | 0.414 | -1.07E-06 | count | 1 |
| SUGP1      | -0.9345794 | 1.1421917 | -0.8182 | 0.414 | -1.07E-06 | count | 1 |
| EXOC3      | -0.9275679 | 0.8649358 | -1.0724 | 0.284 | -1.06E-06 | count | 1 |
| NPLOC4     | -0.9275679 | 0.821922  | -1.1285 | 0.26  | -1.06E-06 | count | 1 |
| GSKIP      | -0.2655182 | 0.5530846 | -0.4801 | 0.631 | -1.06E-06 | count | 1 |
| PHF13      | -0.26525   | 0.3820124 | -0.6943 | 0.488 | -1.06E-06 | count | 1 |
| TIA1       | -0.2655182 | 0.4630349 | -0.5734 | 0.567 | -1.06E-06 | count | 1 |
| ATP9B      | -0.26525   | 0.4072131 | -0.6514 | 0.515 | -1.06E-06 | count | 1 |
| CTDSP2     | -0.2655182 | 0.478837  | -0.5545 | 0.58  | -1.06E-06 | count | 1 |
| TBC1D9B    | -0.2655182 | 0.479045  | -0.5543 | 0.58  | -1.06E-06 | count | 1 |
| PHACTR4    | -0.2657948 | 0.4520509 | -0.588  | 0.557 | -1.06E-06 | count | 1 |
| GDE1       | -0.2655182 | 0.621081  | -0.4275 | 0.669 | -1.06E-06 | count | 1 |
| RRAS       | -0.2650757 | 0.5048804 | -0.525  | 0.6   | -1.06E-06 | count | 1 |
| ING4       | -0.2650757 | 0.5215868 | -0.5082 | 0.612 | -1.06E-06 | count | 1 |
| TXNRD1     | -0.2620881 | 0.4303623 | -0.609  | 0.543 | -1.05E-06 | count | 1 |
| GATAD1     | -0.0901019 | 0.4129429 | -0.2182 | 0.827 | -1.05E-06 | count | 1 |
| MCPH1      | -0.0900094 | 0.4020538 | -0.2239 | 0.823 | -1.05E-06 | count | 1 |
| VEZT       | -0.0901019 | 0.3383788 | -0.2663 | 0.79  | -1.04E-06 | count | 1 |
| ROCK2      | -0.0900094 | 0.3710447 | -0.2426 | 0.808 | -1.04E-06 | count | 1 |
| PDS5B      | -0.2607767 | 0.4395731 | -0.5932 | 0.553 | -1.04E-06 | count | 1 |
| AKT1       | -0.2602408 | 0.462806  | -0.5623 | 0.574 | -1.04E-06 | count | 1 |
| FLNA       | -0.0896483 | 0.3120265 | -0.2873 | 0.774 | -1.04E-06 | count | 1 |
| MPND       | -0.8874543 | 0.8617271 | -1.0299 | 0.304 | -1.04E-06 | count | 1 |
| AC109446.3 | -0.2580079 | 0.6118817 | -0.4217 | 0.673 | -1.03E-06 | count | 1 |
| INTS6-AS1  | -0.8874543 | 0.9139672 | -0.971  | 0.332 | -1.03E-06 | count | 1 |
| SKA2       | -0.8874543 | 0.7593736 | -1.1687 | 0.243 | -1.03E-06 | count | 1 |
| MAPK8IP3   | -0.8874543 | 0.7593736 | -1.1687 | 0.243 | -1.03E-06 | count | 1 |
| TSEN54     | -0.2580079 | 0.5351759 | -0.4821 | 0.63  | -1.03E-06 | count | 1 |
| TSC22D1    | -0.2586011 | 0.5382666 | -0.4804 | 0.631 | -1.03E-06 | count | 1 |
| ZNF490     | -0.8874543 | 0.8717187 | -1.0181 | 0.309 | -1.03E-06 | count | 1 |
| WDPCP      | -0.8874543 | 0.8717187 | -1.0181 | 0.309 | -1.03E-06 | count | 1 |
| ZNF154     | -0.8874543 | 0.8717187 | -1.0181 | 0.309 | -1.03E-06 | count | 1 |
| NDUFA7     | -0.8874543 | 0.8273155 | -1.0727 | 0.284 | -1.03E-06 | count | 1 |
| ARL17A     | -0.8874543 | 0.8273155 | -1.0727 | 0.284 | -1.03E-06 | count | 1 |
| CEP70      | -0.8874543 | 1.0613124 | -0.8362 | 0.404 | -1.03E-06 | count | 1 |
| KIAA1671   | -0.8912662 | 1.6185399 | -0.5507 | 0.582 | -1.03E-06 | count | 1 |
| SUSD6      | -0.2571502 | 0.4267343 | -0.6026 | 0.547 | -1.03E-06 | count | 1 |

|            |            |           |         |       |           |       |   |
|------------|------------|-----------|---------|-------|-----------|-------|---|
| CES2       | -0.8757375 | 0.9260392 | -0.9457 | 0.345 | -1.02E-06 | count | 1 |
| ZNF25      | -0.8757375 | 1.0018397 | -0.8741 | 0.383 | -1.02E-06 | count | 1 |
| RPUSD2     | -0.8757375 | 0.9657454 | -0.9068 | 0.365 | -1.02E-06 | count | 1 |
| CCDC146    | -0.8757375 | 0.9085184 | -0.9639 | 0.336 | -1.02E-06 | count | 1 |
| POLR3C     | -0.8757375 | 0.8685546 | -1.0083 | 0.314 | -1.02E-06 | count | 1 |
| RNF215     | -0.8757375 | 1.1195472 | -0.7822 | 0.434 | -1.02E-06 | count | 1 |
| LASP1      | -0.2540818 | 0.4816953 | -0.5275 | 0.598 | -1.02E-06 | count | 1 |
| SPECC1L    | -0.8757375 | 1.0873672 | -0.8054 | 0.421 | -1.02E-06 | count | 1 |
| HDHD2      | -0.2546988 | 0.7900828 | -0.3224 | 0.747 | -1.02E-06 | count | 1 |
| RNF38      | -0.2540818 | 0.6883772 | -0.3691 | 0.712 | -1.02E-06 | count | 1 |
| SAC3D1     | -0.2540818 | 0.7309213 | -0.3476 | 0.728 | -1.02E-06 | count | 1 |
| ADIPOR2    | -0.2540818 | 0.5275465 | -0.4816 | 0.63  | -1.02E-06 | count | 1 |
| TLR7       | -0.2540818 | 0.7414493 | -0.3427 | 0.732 | -1.02E-06 | count | 1 |
| GABPB2     | -0.2540818 | 0.7811081 | -0.3253 | 0.745 | -1.02E-06 | count | 1 |
| UFD1       | -0.0871303 | 0.3156584 | -0.276  | 0.783 | -1.01E-06 | count | 1 |
| SESN3      | -0.0868568 | 0.2339216 | -0.3713 | 0.711 | -1.01E-06 | count | 1 |
| EXOC7      | -0.251387  | 0.4112543 | -0.6113 | 0.541 | -1.01E-06 | count | 1 |
| PGGHG      | -0.251256  | 0.4819073 | -0.5214 | 0.602 | -1.01E-06 | count | 1 |
| UBE2W      | -0.2493217 | 0.3955216 | -0.6304 | 0.529 | -1.00E-06 | count | 1 |
| BCLAF3     | -0.2494231 | 0.6180315 | -0.4036 | 0.687 | -1.00E-06 | count | 1 |
| SHLD1      | -0.2493217 | 0.5339316 | -0.467  | 0.641 | -1.00E-06 | count | 1 |
| KRI1       | -0.2493217 | 0.5973947 | -0.4173 | 0.677 | -1.00E-06 | count | 1 |
| MBD3       | -0.2495385 | 0.6130012 | -0.4071 | 0.684 | -1.00E-06 | count | 1 |
| AC009403.1 | -0.2493217 | 0.6259563 | -0.3983 | 0.691 | -9.99E-07 | count | 1 |
| WDHD1      | -0.8430639 | 1.3394883 | -0.6294 | 0.529 | -9.93E-07 | count | 1 |
| RPAP1      | -0.8430639 | 1.2711388 | -0.6632 | 0.508 | -9.93E-07 | count | 1 |
| ATMIN      | -0.2468007 | 0.5203963 | -0.4743 | 0.636 | -9.91E-07 | count | 1 |
| RUBCN      | -0.2452317 | 0.4727448 | -0.5187 | 0.604 | -9.87E-07 | count | 1 |
| AGO3       | -0.2441874 | 0.3978163 | -0.6138 | 0.54  | -9.82E-07 | count | 1 |
| PLEC       | -0.2441874 | 0.4387595 | -0.5565 | 0.578 | -9.82E-07 | count | 1 |
| SPATA13    | -0.8225679 | 0.8148868 | -1.0094 | 0.313 | -9.81E-07 | count | 1 |
| AKIRIN1    | -0.0843944 | 0.1900229 | -0.4441 | 0.657 | -9.80E-07 | count | 1 |
| EIF3J-DT   | -0.8225679 | 0.7110341 | -1.1569 | 0.248 | -9.79E-07 | count | 1 |
| VNN2       | -0.8225679 | 0.8386733 | -0.9808 | 0.327 | -9.78E-07 | count | 1 |
| ITPKB      | -0.8111503 | 0.6837486 | -1.1863 | 0.236 | -9.74E-07 | count | 1 |
| C1orf220   | -0.8111503 | 0.8667017 | -0.9359 | 0.35  | -9.71E-07 | count | 1 |
| BAMBI      | -0.8111503 | 1.1604401 | -0.699  | 0.485 | -9.71E-07 | count | 1 |
| CEACAM21   | -0.8111503 | 1.0633089 | -0.7629 | 0.446 | -9.70E-07 | count | 1 |
| FBXL4      | -0.8111503 | 0.9831004 | -0.8251 | 0.41  | -9.69E-07 | count | 1 |
| AC002467.1 | -0.8111503 | 0.9831004 | -0.8251 | 0.41  | -9.69E-07 | count | 1 |
| TTC8       | -0.8111503 | 0.9831004 | -0.8251 | 0.41  | -9.69E-07 | count | 1 |
| DLEU2      | -0.8111503 | 0.9831004 | -0.8251 | 0.41  | -9.69E-07 | count | 1 |
| CRTC1      | -0.8111503 | 0.9831004 | -0.8251 | 0.41  | -9.69E-07 | count | 1 |
| NEMP1      | -0.8111503 | 0.9831004 | -0.8251 | 0.41  | -9.69E-07 | count | 1 |
| ZNF671     | -0.8111503 | 0.9831004 | -0.8251 | 0.41  | -9.69E-07 | count | 1 |



|            |            |           |         |       |           |       |   |
|------------|------------|-----------|---------|-------|-----------|-------|---|
| PACRGL     | -0.8111503 | 0.9831004 | -0.8251 | 0.41  | -9.69E-07 | count | 1 |
| LMNB2      | -0.8111503 | 0.9831004 | -0.8251 | 0.41  | -9.69E-07 | count | 1 |
| HS1BP3     | -0.8111503 | 0.9698239 | -0.8364 | 0.403 | -9.69E-07 | count | 1 |
| TFAP4      | -0.8111503 | 0.9698239 | -0.8364 | 0.403 | -9.69E-07 | count | 1 |
| ACACB      | -0.8111503 | 1.1807761 | -0.687  | 0.492 | -9.68E-07 | count | 1 |
| POT1       | -0.8111503 | 1.1807761 | -0.687  | 0.492 | -9.68E-07 | count | 1 |
| KCNA3      | -0.8111503 | 1.1807761 | -0.687  | 0.492 | -9.68E-07 | count | 1 |
| PIGR       | -0.8111503 | 1.1807761 | -0.687  | 0.492 | -9.68E-07 | count | 1 |
| POLR3F     | -0.8111503 | 0.8811463 | -0.9206 | 0.358 | -9.68E-07 | count | 1 |
| AMN        | -0.8111503 | 0.8811463 | -0.9206 | 0.358 | -9.68E-07 | count | 1 |
| ORC5       | -0.8111503 | 0.8811463 | -0.9206 | 0.358 | -9.68E-07 | count | 1 |
| ANKRD27    | -0.8111503 | 0.8811463 | -0.9206 | 0.358 | -9.68E-07 | count | 1 |
| FMNL2      | -0.8111503 | 1.0973444 | -0.7392 | 0.46  | -9.67E-07 | count | 1 |
| MREG       | -0.8111503 | 1.0973444 | -0.7392 | 0.46  | -9.67E-07 | count | 1 |
| DDX50      | -0.0832411 | 0.3072417 | -0.2709 | 0.787 | -9.67E-07 | count | 1 |
| CYHR1      | -0.2382046 | 0.4276657 | -0.557  | 0.578 | -9.62E-07 | count | 1 |
| CRTC2      | -0.2383894 | 0.6280014 | -0.3796 | 0.704 | -9.61E-07 | count | 1 |
| TEN1       | -0.2383894 | 0.4408299 | -0.5408 | 0.589 | -9.61E-07 | count | 1 |
| MTMR4      | -0.2382608 | 0.4748799 | -0.5017 | 0.616 | -9.61E-07 | count | 1 |
| CHST12     | -0.2383894 | 0.4503616 | -0.5293 | 0.597 | -9.61E-07 | count | 1 |
| TTF2       | -0.2380611 | 0.5798186 | -0.4106 | 0.682 | -9.60E-07 | count | 1 |
| AL592183.1 | -0.2383894 | 0.5838173 | -0.4083 | 0.683 | -9.60E-07 | count | 1 |
| KHSRP      | -0.2383894 | 0.5838173 | -0.4083 | 0.683 | -9.60E-07 | count | 1 |
| CMTR2      | -0.2380611 | 0.5065507 | -0.47   | 0.639 | -9.60E-07 | count | 1 |
| LMNB1      | -0.2383894 | 0.6599782 | -0.3612 | 0.718 | -9.60E-07 | count | 1 |
| KIF22      | -0.2383894 | 0.6122264 | -0.3894 | 0.697 | -9.60E-07 | count | 1 |
| FARP2      | -0.2380611 | 0.591541  | -0.4024 | 0.688 | -9.59E-07 | count | 1 |
| ZNF770     | -0.0824842 | 0.3847181 | -0.2144 | 0.83  | -9.58E-07 | count | 1 |
| LMF2       | -0.2378529 | 0.4795248 | -0.496  | 0.62  | -9.58E-07 | count | 1 |
| MRPL30     | -0.7762581 | 0.7718808 | -1.0057 | 0.315 | -9.43E-07 | count | 1 |
| TKFC       | -0.7762581 | 0.7718808 | -1.0057 | 0.315 | -9.43E-07 | count | 1 |
| MAN2B2     | -0.7762581 | 0.7718808 | -1.0057 | 0.315 | -9.43E-07 | count | 1 |
| IL13RA1    | -0.2334143 | 0.3806036 | -0.6133 | 0.54  | -9.43E-07 | count | 1 |
| ASB1       | -0.7778938 | 0.7835249 | -0.9928 | 0.321 | -9.42E-07 | count | 1 |
| FAHD1      | -0.7762581 | 0.7051489 | -1.1008 | 0.272 | -9.41E-07 | count | 1 |
| FAM213B    | -0.7762581 | 0.8721992 | -0.89   | 0.374 | -9.40E-07 | count | 1 |
| SLFN5      | -0.7762581 | 0.8721992 | -0.89   | 0.374 | -9.40E-07 | count | 1 |
| VAMP3      | -0.2317901 | 0.4334845 | -0.5347 | 0.593 | -9.37E-07 | count | 1 |
| SPRTN      | -0.2317901 | 0.4649855 | -0.4985 | 0.618 | -9.36E-07 | count | 1 |
| ARHGAP5    | -0.2301015 | 0.3502015 | -0.6571 | 0.511 | -9.31E-07 | count | 1 |
| FBXW4      | -0.2301015 | 0.4618175 | -0.4983 | 0.619 | -9.30E-07 | count | 1 |
| GPR160     | -0.2301015 | 0.505804  | -0.4549 | 0.649 | -9.30E-07 | count | 1 |
| MAP2K3     | -0.2301015 | 0.3618085 | -0.636  | 0.525 | -9.29E-07 | count | 1 |
| MRPS10     | -0.2289205 | 0.4077177 | -0.5615 | 0.575 | -9.29E-07 | count | 1 |
| NKX3-1     | -0.758855  | 0.9389362 | -0.8082 | 0.419 | -9.24E-07 | count | 1 |

|            |            |           |         |       |           |       |   |
|------------|------------|-----------|---------|-------|-----------|-------|---|
| INPP5F     | -0.2279519 | 0.4244248 | -0.5371 | 0.591 | -9.23E-07 | count | 1 |
| MRPS30     | -0.2279519 | 0.3782727 | -0.6026 | 0.547 | -9.22E-07 | count | 1 |
| ING5       | -0.2273777 | 0.3849694 | -0.5906 | 0.555 | -9.21E-07 | count | 1 |
| MICU1      | -0.2279519 | 0.4150763 | -0.5492 | 0.583 | -9.21E-07 | count | 1 |
| MTHFR      | -0.2273777 | 0.5856889 | -0.3882 | 0.698 | -9.20E-07 | count | 1 |
| IL10RA     | -0.0789963 | 0.2282626 | -0.3461 | 0.729 | -9.20E-07 | count | 1 |
| IARS       | -0.2273777 | 0.6345856 | -0.3583 | 0.72  | -9.19E-07 | count | 1 |
| DUSP12     | -0.2260199 | 0.4572031 | -0.4944 | 0.621 | -9.16E-07 | count | 1 |
| AKAP8      | -0.2254771 | 0.3562713 | -0.6329 | 0.527 | -9.13E-07 | count | 1 |
| EFCAB13    | -0.2242112 | 0.8302651 | -0.27   | 0.787 | -9.12E-07 | count | 1 |
| EXOSC1     | -0.2242112 | 0.3711991 | -0.604  | 0.546 | -9.12E-07 | count | 1 |
| KDM3A      | -0.224482  | 0.5393235 | -0.4162 | 0.677 | -9.09E-07 | count | 1 |
| MRPS28     | -0.2242112 | 0.5655996 | -0.3964 | 0.692 | -9.08E-07 | count | 1 |
| CXorf40A   | -0.2242112 | 0.6955865 | -0.3223 | 0.747 | -9.08E-07 | count | 1 |
| CCL28      | -0.2242112 | 0.6955865 | -0.3223 | 0.747 | -9.08E-07 | count | 1 |
| MAP7D3     | -0.2242112 | 0.5102506 | -0.4394 | 0.661 | -9.08E-07 | count | 1 |
| AC119396.1 | -0.2242112 | 0.6671688 | -0.3361 | 0.737 | -9.08E-07 | count | 1 |
| DNAJC13    | -0.2242112 | 0.568227  | -0.3946 | 0.693 | -9.08E-07 | count | 1 |
| TGDS       | -0.2242112 | 0.6693976 | -0.3349 | 0.738 | -9.08E-07 | count | 1 |
| QSER1      | -0.2242112 | 0.6063117 | -0.3698 | 0.712 | -9.08E-07 | count | 1 |
| ZFP90      | -0.2242112 | 0.5358493 | -0.4184 | 0.676 | -9.07E-07 | count | 1 |
| XRCC1      | -0.2242112 | 0.6112442 | -0.3668 | 0.714 | -9.07E-07 | count | 1 |
| TRAPPC9    | -0.2242112 | 0.7918466 | -0.2831 | 0.777 | -9.07E-07 | count | 1 |
| SRRT       | -0.0777137 | 0.331806  | -0.2342 | 0.815 | -9.06E-07 | count | 1 |
| IPO7       | -0.221884  | 0.4006338 | -0.5538 | 0.58  | -9.04E-07 | count | 1 |
| AC012306.2 | -0.7299419 | 0.8477159 | -0.8611 | 0.39  | -9.01E-07 | count | 1 |
| DGCR8      | -0.7299419 | 0.8929099 | -0.8175 | 0.414 | -8.99E-07 | count | 1 |
| INTS6L     | -0.7299419 | 0.9338817 | -0.7816 | 0.435 | -8.99E-07 | count | 1 |
| GPAT4      | -0.7299419 | 0.9338817 | -0.7816 | 0.435 | -8.99E-07 | count | 1 |
| FGR        | -0.7299419 | 0.9061949 | -0.8055 | 0.421 | -8.99E-07 | count | 1 |
| NF2        | -0.7299419 | 0.9061949 | -0.8055 | 0.421 | -8.99E-07 | count | 1 |
| CD9        | -0.2199383 | 0.6500626 | -0.3383 | 0.735 | -8.98E-07 | count | 1 |
| RREB1      | -0.7299419 | 0.851924  | -0.8568 | 0.392 | -8.98E-07 | count | 1 |
| FBXO25     | -0.725436  | 0.6675667 | -1.0867 | 0.278 | -8.97E-07 | count | 1 |
| VCPIP1     | -0.2204222 | 0.5435917 | -0.4055 | 0.685 | -8.93E-07 | count | 1 |
| ABHD3      | -0.2204222 | 0.5598708 | -0.3937 | 0.694 | -8.93E-07 | count | 1 |
| HLA-DQA2   | -0.0276816 | 0.0821501 | -0.337  | 0.736 | -8.93E-07 | count | 1 |
| PDS5A      | -0.076389  | 0.3491785 | -0.2188 | 0.827 | -8.90E-07 | count | 1 |
| CLN8       | -0.7126147 | 0.7977456 | -0.8933 | 0.372 | -8.89E-07 | count | 1 |
| 1-Sep      | -0.0761904 | 0.1940913 | -0.3925 | 0.695 | -8.88E-07 | count | 1 |
| RABGAP1L   | -0.0759496 | 0.2991625 | -0.2539 | 0.8   | -8.85E-07 | count | 1 |
| REXO2      | -0.0758851 | 0.3762324 | -0.2017 | 0.84  | -8.84E-07 | count | 1 |
| NMI        | -0.2176928 | 0.4100723 | -0.5309 | 0.596 | -8.84E-07 | count | 1 |
| HENMT1     | -0.7126147 | 1.0004111 | -0.7123 | 0.477 | -8.82E-07 | count | 1 |
| PEX26      | -0.7126147 | 0.885233  | -0.805  | 0.421 | -8.81E-07 | count | 1 |

|            |            |           |         |        |           |       |   |
|------------|------------|-----------|---------|--------|-----------|-------|---|
| GALNT6     | -0.7126147 | 0.885233  | -0.805  | 0.421  | -8.81E-07 | count | 1 |
| CRYAB      | -0.7126147 | 1.1741924 | -0.6069 | 0.544  | -8.81E-07 | count | 1 |
| ZNF517     | -0.7126147 | 1.3137274 | -0.5424 | 0.588  | -8.81E-07 | count | 1 |
| ABCA2      | -0.7126147 | 1.3137274 | -0.5424 | 0.588  | -8.81E-07 | count | 1 |
| ARIH1      | -0.2163334 | 0.3665252 | -0.5902 | 0.555  | -8.79E-07 | count | 1 |
| UTP4       | -0.7027876 | 0.5957024 | -1.1798 | 0.239  | -8.78E-07 | count | 1 |
| GMPPB      | -0.7027876 | 0.6521423 | -1.0777 | 0.282  | -8.77E-07 | count | 1 |
| NUP133     | -0.7027876 | 0.6521423 | -1.0777 | 0.282  | -8.77E-07 | count | 1 |
| DCAF10     | -0.7027876 | 0.6521423 | -1.0777 | 0.282  | -8.77E-07 | count | 1 |
| MTO1       | -0.7027876 | 0.5656722 | -1.2424 | 0.215  | -8.77E-07 | count | 1 |
| TMEM238    | -0.0750043 | 0.3212802 | -0.2335 | 0.816  | -8.74E-07 | count | 1 |
| NAB2       | -0.2140242 | 0.5195102 | -0.412  | 0.681  | -8.72E-07 | count | 1 |
| DFFA       | -0.2140242 | 0.573115  | -0.3734 | 0.709  | -8.71E-07 | count | 1 |
| GEN1       | -0.2140242 | 0.5089256 | -0.4205 | 0.674  | -8.70E-07 | count | 1 |
| CENPX      | -0.6756049 | 0.3034319 | -2.2265 | 0.0265 | -8.65E-07 | count | 1 |
| RAB33A     | -0.6873639 | 0.7981906 | -0.8612 | 0.39   | -8.63E-07 | count | 1 |
| AC005523.2 | -0.6873639 | 0.8425356 | -0.8158 | 0.415  | -8.63E-07 | count | 1 |
| XPOT       | -0.6873639 | 0.804414  | -0.8545 | 0.393  | -8.61E-07 | count | 1 |
| NOA1       | -0.2102884 | 0.4693393 | -0.4481 | 0.654  | -8.58E-07 | count | 1 |
| PGP        | -0.2104696 | 0.3434819 | -0.6128 | 0.54   | -8.58E-07 | count | 1 |
| RNF2       | -0.2102884 | 0.5336801 | -0.394  | 0.694  | -8.58E-07 | count | 1 |
| PRPF4      | -0.2100363 | 0.4554869 | -0.4611 | 0.645  | -8.56E-07 | count | 1 |
| ZNF528     | -0.6780969 | 0.8646015 | -0.7843 | 0.433  | -8.52E-07 | count | 1 |
| DGCR6L     | -0.2088326 | 0.4794771 | -0.4355 | 0.663  | -8.52E-07 | count | 1 |
| PORCN      | -0.6780969 | 0.9715642 | -0.6979 | 0.486  | -8.52E-07 | count | 1 |
| ABHD17B    | -0.6780969 | 0.8025636 | -0.8449 | 0.399  | -8.52E-07 | count | 1 |
| SIK2       | -0.6780969 | 0.8025636 | -0.8449 | 0.399  | -8.52E-07 | count | 1 |
| YPEL1      | -0.6780969 | 0.9181442 | -0.7386 | 0.461  | -8.51E-07 | count | 1 |
| RECK       | -0.6780969 | 0.9181442 | -0.7386 | 0.461  | -8.51E-07 | count | 1 |
| PMS2       | -0.6780969 | 0.7369941 | -0.9201 | 0.358  | -8.51E-07 | count | 1 |
| BISPR      | -0.6780969 | 0.9194933 | -0.7375 | 0.461  | -8.51E-07 | count | 1 |
| C19orf73   | -0.6780969 | 0.9194933 | -0.7375 | 0.461  | -8.51E-07 | count | 1 |
| CXorf40B   | -0.6780969 | 0.7386741 | -0.918  | 0.359  | -8.51E-07 | count | 1 |
| MZB1       | -0.0727942 | 0.3288005 | -0.2214 | 0.825  | -8.50E-07 | count | 1 |
| LINC01089  | -0.6780969 | 0.8614178 | -0.7872 | 0.432  | -8.50E-07 | count | 1 |
| SLC25A23   | -0.6780969 | 0.8614178 | -0.7872 | 0.432  | -8.50E-07 | count | 1 |
| HDHD5      | -0.2087559 | 0.5279619 | -0.3954 | 0.693  | -8.50E-07 | count | 1 |
| CSGALNACT1 | -0.2087559 | 0.6493038 | -0.3215 | 0.748  | -8.50E-07 | count | 1 |
| RBM6       | -0.0724255 | 0.2442098 | -0.2966 | 0.767  | -8.48E-07 | count | 1 |
| SLC38A11   | -0.670331  | 1.3542971 | -0.495  | 0.621  | -8.42E-07 | count | 1 |
| TRIM5      | -0.6630165 | 0.8074342 | -0.8211 | 0.412  | -8.41E-07 | count | 1 |
| ZSWIM6     | -0.6630165 | 1.0215063 | -0.6491 | 0.517  | -8.40E-07 | count | 1 |
| FAM214A    | -0.0720008 | 0.3434589 | -0.2096 | 0.834  | -8.40E-07 | count | 1 |
| ZNF567     | -0.2050909 | 0.4915753 | -0.4172 | 0.677  | -8.39E-07 | count | 1 |
| GRIPAP1    | -0.2050909 | 0.3588674 | -0.5715 | 0.568  | -8.38E-07 | count | 1 |

|            |            |           |         |       |           |       |   |
|------------|------------|-----------|---------|-------|-----------|-------|---|
| ZBTB41     | -0.2050909 | 0.7876427 | -0.2604 | 0.795 | -8.36E-07 | count | 1 |
| CENPK      | -0.2050909 | 0.8257843 | -0.2484 | 0.804 | -8.36E-07 | count | 1 |
| S100A13    | -0.2050909 | 0.7948534 | -0.258  | 0.797 | -8.36E-07 | count | 1 |
| RLF        | -0.0712611 | 0.3224434 | -0.221  | 0.825 | -8.32E-07 | count | 1 |
| PURA       | -0.0711883 | 0.2961707 | -0.2404 | 0.81  | -8.31E-07 | count | 1 |
| ZCWPW1     | -0.2031023 | 0.5927783 | -0.3426 | 0.732 | -8.31E-07 | count | 1 |
| AASDH      | -0.2031023 | 0.5527644 | -0.3674 | 0.713 | -8.30E-07 | count | 1 |
| CLCN6      | -0.646876  | 0.7137081 | -0.9064 | 0.365 | -8.25E-07 | count | 1 |
| CNNM3      | -0.646876  | 0.8256511 | -0.7835 | 0.434 | -8.24E-07 | count | 1 |
| SMN1       | -0.646876  | 0.8010524 | -0.8075 | 0.42  | -8.23E-07 | count | 1 |
| NABP2      | -0.646876  | 0.7627865 | -0.848  | 0.397 | -8.22E-07 | count | 1 |
| ID1        | -0.2009269 | 0.8050901 | -0.2496 | 0.803 | -8.20E-07 | count | 1 |
| STX18      | -0.2009269 | 0.5065589 | -0.3967 | 0.692 | -8.20E-07 | count | 1 |
| PLBD2      | -0.636774  | 1.103213  | -0.5772 | 0.564 | -8.11E-07 | count | 1 |
| TIMP2      | -0.636774  | 1.031812  | -0.6171 | 0.537 | -8.11E-07 | count | 1 |
| ZNF485     | -0.636774  | 1.2025741 | -0.5295 | 0.597 | -8.10E-07 | count | 1 |
| ZNF549     | -0.636774  | 1.2025741 | -0.5295 | 0.597 | -8.10E-07 | count | 1 |
| AC009779.2 | -0.636774  | 1.2025741 | -0.5295 | 0.597 | -8.10E-07 | count | 1 |
| TAF1B      | -0.1968639 | 0.6296661 | -0.3126 | 0.755 | -8.06E-07 | count | 1 |
| C11orf1    | -0.1968639 | 0.4473857 | -0.44   | 0.66  | -8.05E-07 | count | 1 |
| DGKA       | -0.1955081 | 0.4011884 | -0.4873 | 0.626 | -8.03E-07 | count | 1 |
| FRA10AC1   | -0.1955081 | 0.4621537 | -0.423  | 0.672 | -8.00E-07 | count | 1 |
| UPF1       | -0.1944229 | 0.5167524 | -0.3762 | 0.707 | -7.96E-07 | count | 1 |
| TFB1M      | -0.1944229 | 0.4469727 | -0.435  | 0.664 | -7.96E-07 | count | 1 |
| DDX19B     | -0.1944229 | 0.5395718 | -0.3603 | 0.719 | -7.96E-07 | count | 1 |
| VPS41      | -0.1927937 | 0.5150298 | -0.3743 | 0.708 | -7.90E-07 | count | 1 |
| OAZ2       | -0.1927937 | 0.4846133 | -0.3978 | 0.691 | -7.90E-07 | count | 1 |
| SHARPIN    | -0.0674714 | 0.3851486 | -0.1752 | 0.861 | -7.88E-07 | count | 1 |
| ABHD10     | -0.1916289 | 0.45058   | -0.4253 | 0.671 | -7.86E-07 | count | 1 |
| WDR60      | -0.1916289 | 0.5369021 | -0.3569 | 0.721 | -7.85E-07 | count | 1 |
| TARDBP     | -0.191432  | 0.3592566 | -0.5329 | 0.594 | -7.85E-07 | count | 1 |
| CBX6       | -0.191432  | 0.3808918 | -0.5026 | 0.616 | -7.85E-07 | count | 1 |
| ZNF740     | -0.6094495 | 1.0150952 | -0.6004 | 0.549 | -7.84E-07 | count | 1 |
| ABR        | -0.6094495 | 0.7864722 | -0.7749 | 0.439 | -7.84E-07 | count | 1 |
| AC006449.6 | -0.6094495 | 0.9137844 | -0.667  | 0.505 | -7.84E-07 | count | 1 |
| RGL2       | -0.1911405 | 0.618234  | -0.3092 | 0.757 | -7.83E-07 | count | 1 |
| DAG1       | -0.6035858 | 0.9488608 | -0.6361 | 0.525 | -7.81E-07 | count | 1 |
| IRS2       | -0.6035858 | 0.7435758 | -0.8117 | 0.417 | -7.81E-07 | count | 1 |
| CC2D1A     | -0.6035858 | 0.7435758 | -0.8117 | 0.417 | -7.81E-07 | count | 1 |
| B3GAT2     | -0.6035858 | 0.812152  | -0.7432 | 0.458 | -7.80E-07 | count | 1 |
| ZNF687     | -0.6035858 | 0.694064  | -0.8696 | 0.385 | -7.80E-07 | count | 1 |
| ZBP1       | -0.6035858 | 0.694064  | -0.8696 | 0.385 | -7.80E-07 | count | 1 |
| MIB2       | -0.6035858 | 0.7724707 | -0.7814 | 0.435 | -7.79E-07 | count | 1 |
| TEP1       | -0.6035858 | 0.8436215 | -0.7155 | 0.475 | -7.79E-07 | count | 1 |
| TNNI2      | -0.6035858 | 0.9092213 | -0.6638 | 0.507 | -7.79E-07 | count | 1 |

|            |            |           |         |       |           |       |   |
|------------|------------|-----------|---------|-------|-----------|-------|---|
| TEX10      | -0.1892055 | 0.5121382 | -0.3694 | 0.712 | -7.78E-07 | count | 1 |
| SLC25A32   | -0.1877929 | 0.415597  | -0.4519 | 0.652 | -7.71E-07 | count | 1 |
| SLC35B3    | -0.592918  | 0.637976  | -0.9294 | 0.353 | -7.69E-07 | count | 1 |
| EIF3B      | -0.1863124 | 0.4318835 | -0.4314 | 0.666 | -7.65E-07 | count | 1 |
| NCOR2      | -0.1861122 | 0.4603128 | -0.4043 | 0.686 | -7.64E-07 | count | 1 |
| DIAPH2     | -0.1859543 | 0.4108226 | -0.4526 | 0.651 | -7.64E-07 | count | 1 |
| CCDC6      | -0.0650483 | 0.2799478 | -0.2324 | 0.816 | -7.62E-07 | count | 1 |
| SP3        | -0.0650743 | 0.2898887 | -0.2245 | 0.822 | -7.61E-07 | count | 1 |
| COCH       | -0.0648953 | 0.3339202 | -0.1943 | 0.846 | -7.59E-07 | count | 1 |
| NUB1       | -0.0647772 | 0.2333577 | -0.2776 | 0.781 | -7.59E-07 | count | 1 |
| EIF4E      | -0.0633918 | 0.2395954 | -0.2646 | 0.791 | -7.42E-07 | count | 1 |
| YME1L1     | -0.0631726 | 0.2360171 | -0.2677 | 0.789 | -7.41E-07 | count | 1 |
| TNFRSF1B   | -0.1789435 | 0.4040426 | -0.4429 | 0.658 | -7.38E-07 | count | 1 |
| CCNQ       | -0.0628754 | 0.2881457 | -0.2182 | 0.827 | -7.36E-07 | count | 1 |
| CABIN1     | -0.1779028 | 0.6747641 | -0.2637 | 0.792 | -7.36E-07 | count | 1 |
| TTN        | -0.1784668 | 0.4115238 | -0.4337 | 0.665 | -7.35E-07 | count | 1 |
| TPST2      | -0.1779028 | 0.4600908 | -0.3867 | 0.699 | -7.34E-07 | count | 1 |
| BRD3       | -0.1779028 | 0.5277536 | -0.3371 | 0.736 | -7.34E-07 | count | 1 |
| MSL2       | -0.1779028 | 0.3962974 | -0.4489 | 0.654 | -7.34E-07 | count | 1 |
| MAEA       | -0.1779028 | 0.5314413 | -0.3348 | 0.738 | -7.33E-07 | count | 1 |
| AP1S1      | -0.1779028 | 0.5519815 | -0.3223 | 0.747 | -7.33E-07 | count | 1 |
| POR        | -0.1779028 | 0.6130506 | -0.2902 | 0.772 | -7.33E-07 | count | 1 |
| KAT2A      | -0.1779028 | 0.5753986 | -0.3092 | 0.757 | -7.33E-07 | count | 1 |
| NCLN       | -0.5557626 | 0.6605299 | -0.8414 | 0.401 | -7.32E-07 | count | 1 |
| APPBP2     | -0.5557626 | 0.6271331 | -0.8862 | 0.376 | -7.31E-07 | count | 1 |
| PRKAB1     | -0.5557626 | 0.6774186 | -0.8204 | 0.412 | -7.31E-07 | count | 1 |
| SNAP47     | -0.5557626 | 0.5838877 | -0.9518 | 0.342 | -7.31E-07 | count | 1 |
| SFXN4      | -0.5557626 | 0.5838877 | -0.9518 | 0.342 | -7.31E-07 | count | 1 |
| OXCT1      | -0.1769675 | 0.4543833 | -0.3895 | 0.697 | -7.30E-07 | count | 1 |
| FRMD8      | -0.1769675 | 0.5483214 | -0.3227 | 0.747 | -7.29E-07 | count | 1 |
| ETAA1      | -0.1763949 | 0.6473972 | -0.2725 | 0.785 | -7.28E-07 | count | 1 |
| FASTKD5    | -0.1763949 | 0.624066  | -0.2827 | 0.778 | -7.28E-07 | count | 1 |
| TK2        | -0.5511077 | 0.7793951 | -0.7071 | 0.48  | -7.26E-07 | count | 1 |
| HIST3H2A   | -0.5511077 | 0.8243953 | -0.6685 | 0.504 | -7.26E-07 | count | 1 |
| POGLUT1    | -0.5511077 | 0.7392735 | -0.7455 | 0.456 | -7.26E-07 | count | 1 |
| FHL1       | -0.5511077 | 0.8061008 | -0.6837 | 0.495 | -7.26E-07 | count | 1 |
| AL645728.1 | -0.5511077 | 0.8477793 | -0.6501 | 0.516 | -7.25E-07 | count | 1 |
| MARK3      | -0.1753551 | 0.4570544 | -0.3837 | 0.701 | -7.25E-07 | count | 1 |
| HMGCR      | -0.5511077 | 0.8158077 | -0.6755 | 0.5   | -7.25E-07 | count | 1 |
| PMS1       | -0.1753551 | 0.4345858 | -0.4035 | 0.687 | -7.25E-07 | count | 1 |
| TMEM245    | -0.5511077 | 1.0600497 | -0.5199 | 0.603 | -7.24E-07 | count | 1 |
| STARD4     | -0.5511077 | 1.0600497 | -0.5199 | 0.603 | -7.24E-07 | count | 1 |
| IGLV6-57   | -0.5511077 | 0.9397541 | -0.5864 | 0.558 | -7.24E-07 | count | 1 |
| TSC1       | -0.5511077 | 1.1711178 | -0.4706 | 0.638 | -7.24E-07 | count | 1 |
| ST3GAL4    | -0.5511077 | 1.3017441 | -0.4234 | 0.672 | -7.24E-07 | count | 1 |

|            |            |           |         |       |           |       |   |
|------------|------------|-----------|---------|-------|-----------|-------|---|
| ABHD16A    | -0.5511077 | 0.9606201 | -0.5737 | 0.566 | -7.24E-07 | count | 1 |
| MYO1D      | -0.5511077 | 0.9606201 | -0.5737 | 0.566 | -7.24E-07 | count | 1 |
| GNS        | -0.5511077 | 0.9173598 | -0.6008 | 0.548 | -7.24E-07 | count | 1 |
| CDR2       | -0.5511077 | 0.9173598 | -0.6008 | 0.548 | -7.24E-07 | count | 1 |
| CNPY4      | -0.5511077 | 1.1884365 | -0.4637 | 0.643 | -7.24E-07 | count | 1 |
| UBA6-AS1   | -0.5511077 | 1.1537501 | -0.4777 | 0.633 | -7.24E-07 | count | 1 |
| RBFA       | -0.1753551 | 0.4870656 | -0.36   | 0.719 | -7.23E-07 | count | 1 |
| APH1B      | -0.1751148 | 0.4208573 | -0.4161 | 0.678 | -7.22E-07 | count | 1 |
| RBBP9      | -0.544262  | 0.7309597 | -0.7446 | 0.457 | -7.18E-07 | count | 1 |
| CHPF2      | -0.1740147 | 0.6303926 | -0.276  | 0.783 | -7.18E-07 | count | 1 |
| FN3KRP     | -0.1740147 | 0.7504711 | -0.2319 | 0.817 | -7.18E-07 | count | 1 |
| WDR41      | -0.1740147 | 0.6752232 | -0.2577 | 0.797 | -7.18E-07 | count | 1 |
| CREB3L2    | -0.1740147 | 0.748363  | -0.2325 | 0.816 | -7.18E-07 | count | 1 |
| CD59       | -0.1740147 | 0.4833781 | -0.36   | 0.719 | -7.18E-07 | count | 1 |
| MIR29B2CHG | -0.0603725 | 0.3208352 | -0.1882 | 0.851 | -7.08E-07 | count | 1 |
| DIP2C      | -0.5332447 | 1.4070888 | -0.379  | 0.705 | -7.05E-07 | count | 1 |
| DENND6B    | -0.169954  | 0.4233303 | -0.4015 | 0.688 | -7.03E-07 | count | 1 |
| GOSR1      | -0.0595898 | 0.2862956 | -0.2081 | 0.835 | -6.99E-07 | count | 1 |
| URM1       | -0.1682503 | 0.4587272 | -0.3668 | 0.714 | -6.96E-07 | count | 1 |
| MLLT10     | -0.1682503 | 0.4452819 | -0.3779 | 0.706 | -6.96E-07 | count | 1 |
| RUFY1      | -0.1675131 | 0.3946343 | -0.4245 | 0.671 | -6.94E-07 | count | 1 |
| CBR4       | -0.1673614 | 0.7732658 | -0.2164 | 0.829 | -6.93E-07 | count | 1 |
| MRRF       | -0.1660994 | 0.4522223 | -0.3673 | 0.714 | -6.88E-07 | count | 1 |
| SYNE1      | -0.1660994 | 0.4994375 | -0.3326 | 0.74  | -6.87E-07 | count | 1 |
| EHMT2      | -0.1655204 | 0.415768  | -0.3981 | 0.691 | -6.86E-07 | count | 1 |
| HOOK2      | -0.1650848 | 0.3312974 | -0.4983 | 0.619 | -6.83E-07 | count | 1 |
| SEPHS1     | -0.1637716 | 0.5367572 | -0.3051 | 0.76  | -6.79E-07 | count | 1 |
| JAM3       | -0.1637716 | 0.5035735 | -0.3252 | 0.745 | -6.79E-07 | count | 1 |
| FAM228B    | -0.1637716 | 0.5393782 | -0.3036 | 0.762 | -6.78E-07 | count | 1 |
| CDYL       | -0.1635214 | 0.3820393 | -0.428  | 0.669 | -6.78E-07 | count | 1 |
| UTY        | -0.1632988 | 0.3462373 | -0.4716 | 0.637 | -6.77E-07 | count | 1 |
| ARID1B     | -0.0576822 | 0.2400051 | -0.2403 | 0.81  | -6.77E-07 | count | 1 |
| ASPHD2     | -0.5035725 | 0.7080169 | -0.7112 | 0.477 | -6.75E-07 | count | 1 |
| MTFR1L     | -0.5035725 | 0.8004614 | -0.6291 | 0.53  | -6.75E-07 | count | 1 |
| C9orf3     | -0.5035725 | 0.8419797 | -0.5981 | 0.55  | -6.75E-07 | count | 1 |
| AC147651.4 | -0.5035725 | 0.7902703 | -0.6372 | 0.524 | -6.75E-07 | count | 1 |
| DRAM1      | -0.5035725 | 0.8808522 | -0.5717 | 0.568 | -6.74E-07 | count | 1 |
| CCDC71L    | -0.161835  | 0.378829  | -0.4272 | 0.669 | -6.72E-07 | count | 1 |
| SEC22B     | -0.0572089 | 0.3214643 | -0.178  | 0.859 | -6.71E-07 | count | 1 |
| MLEC       | -0.1615556 | 0.3521826 | -0.4587 | 0.647 | -6.70E-07 | count | 1 |
| NUDCD3     | -0.1595023 | 0.4352952 | -0.3664 | 0.714 | -6.62E-07 | count | 1 |
| MRPL19     | -0.1595023 | 0.4202774 | -0.3795 | 0.704 | -6.62E-07 | count | 1 |
| SLC6A6     | -0.1595025 | 0.5969075 | -0.2672 | 0.789 | -6.62E-07 | count | 1 |
| SMAD4      | -0.1595027 | 0.4325433 | -0.3688 | 0.712 | -6.62E-07 | count | 1 |
| TCEAL1     | -0.1595028 | 0.589759  | -0.2705 | 0.787 | -6.62E-07 | count | 1 |

|            |            |           |         |       |           |       |   |
|------------|------------|-----------|---------|-------|-----------|-------|---|
| GTF2H1     | -0.1595023 | 0.4554651 | -0.3502 | 0.726 | -6.62E-07 | count | 1 |
| ZNF668     | -0.4868932 | 0.8301697 | -0.5865 | 0.558 | -6.57E-07 | count | 1 |
| BRAT1      | -0.1563773 | 0.4244328 | -0.3684 | 0.713 | -6.50E-07 | count | 1 |
| MRPL58     | -0.1540686 | 0.5765703 | -0.2672 | 0.789 | -6.41E-07 | count | 1 |
| KIF13B     | -0.1540686 | 0.6018598 | -0.256  | 0.798 | -6.41E-07 | count | 1 |
| TFE3       | -0.1530412 | 0.7331945 | -0.2087 | 0.835 | -6.38E-07 | count | 1 |
| IL2RA      | -0.1530412 | 0.5500946 | -0.2782 | 0.781 | -6.37E-07 | count | 1 |
| TOPBP1     | -0.1526065 | 0.4105847 | -0.3717 | 0.71  | -6.36E-07 | count | 1 |
| NAA38      | -0.0540141 | 0.2876018 | -0.1878 | 0.851 | -6.35E-07 | count | 1 |
| SUN1       | -0.1523664 | 0.5139619 | -0.2965 | 0.767 | -6.34E-07 | count | 1 |
| PPP6R3     | -0.0539567 | 0.3361832 | -0.1605 | 0.873 | -6.34E-07 | count | 1 |
| GPI        | -0.152109  | 0.3958345 | -0.3843 | 0.701 | -6.33E-07 | count | 1 |
| LINC00513  | -0.1496472 | 0.5497696 | -0.2722 | 0.786 | -6.23E-07 | count | 1 |
| EBF1       | -0.1485752 | 0.4136171 | -0.3592 | 0.72  | -6.19E-07 | count | 1 |
| SORL1      | -0.4529874 | 0.6435583 | -0.7039 | 0.482 | -6.19E-07 | count | 1 |
| LUM        | -0.4537384 | 1.2213379 | -0.3715 | 0.71  | -6.19E-07 | count | 1 |
| SLC16A4    | -0.4537384 | 0.9563367 | -0.4745 | 0.635 | -6.18E-07 | count | 1 |
| ZNF711     | -0.4521224 | 0.6490036 | -0.6966 | 0.486 | -6.18E-07 | count | 1 |
| PRKAG2     | -0.1477479 | 0.3534675 | -0.418  | 0.676 | -6.18E-07 | count | 1 |
| IFI27L1    | -0.4521224 | 0.7968457 | -0.5674 | 0.571 | -6.18E-07 | count | 1 |
| CENPN      | -0.4521224 | 0.8301146 | -0.5447 | 0.586 | -6.18E-07 | count | 1 |
| COA7       | -0.4521224 | 0.8031215 | -0.563  | 0.574 | -6.17E-07 | count | 1 |
| SFI1       | -0.4521224 | 0.8031215 | -0.563  | 0.574 | -6.17E-07 | count | 1 |
| MSANTD2    | -0.4521224 | 0.8031215 | -0.563  | 0.574 | -6.17E-07 | count | 1 |
| ZNF418     | -0.4521224 | 1.081438  | -0.4181 | 0.676 | -6.17E-07 | count | 1 |
| LIMS2      | -0.4521224 | 1.081438  | -0.4181 | 0.676 | -6.17E-07 | count | 1 |
| BRD3OS     | -0.4521224 | 1.081438  | -0.4181 | 0.676 | -6.17E-07 | count | 1 |
| LIMK2      | -0.4521224 | 0.7521886 | -0.6011 | 0.548 | -6.17E-07 | count | 1 |
| COX18      | -0.4521224 | 0.7521886 | -0.6011 | 0.548 | -6.17E-07 | count | 1 |
| EPM2A      | -0.4521224 | 1.0998509 | -0.4111 | 0.681 | -6.17E-07 | count | 1 |
| SEC23B     | -0.4521224 | 1.0998509 | -0.4111 | 0.681 | -6.17E-07 | count | 1 |
| ZNF627     | -0.4521224 | 0.9233865 | -0.4896 | 0.625 | -6.17E-07 | count | 1 |
| TNS1       | -0.4521224 | 1.3067792 | -0.346  | 0.73  | -6.17E-07 | count | 1 |
| SLC43A3    | -0.4521224 | 1.3067792 | -0.346  | 0.73  | -6.17E-07 | count | 1 |
| NETO2      | -0.4521224 | 1.3067792 | -0.346  | 0.73  | -6.17E-07 | count | 1 |
| AL359711.2 | -0.4521224 | 1.3067792 | -0.346  | 0.73  | -6.17E-07 | count | 1 |
| AC104506.1 | -0.4521224 | 1.3067792 | -0.346  | 0.73  | -6.17E-07 | count | 1 |
| SSFA2      | -0.4521224 | 0.9448844 | -0.4785 | 0.633 | -6.17E-07 | count | 1 |
| PLCD1      | -0.4521224 | 0.9448844 | -0.4785 | 0.633 | -6.17E-07 | count | 1 |
| NR2F6      | -0.4521224 | 0.9448844 | -0.4785 | 0.633 | -6.17E-07 | count | 1 |
| CAPN10     | -0.4521224 | 0.9448844 | -0.4785 | 0.633 | -6.17E-07 | count | 1 |
| ERCC5      | -0.4521224 | 0.9448844 | -0.4785 | 0.633 | -6.17E-07 | count | 1 |
| ZWILCH     | -0.4521224 | 0.9448844 | -0.4785 | 0.633 | -6.17E-07 | count | 1 |
| EIF5AL1    | -0.4521224 | 0.9448844 | -0.4785 | 0.633 | -6.17E-07 | count | 1 |
| ZNF845     | -0.4521224 | 0.9448844 | -0.4785 | 0.633 | -6.17E-07 | count | 1 |

|              |            |           |         |        |           |       |   |
|--------------|------------|-----------|---------|--------|-----------|-------|---|
| GASAL1       | -0.4521224 | 1.1793246 | -0.3834 | 0.702  | -6.17E-07 | count | 1 |
| KNTC1        | -0.4521224 | 1.1793246 | -0.3834 | 0.702  | -6.17E-07 | count | 1 |
| INPP4A       | -0.4521224 | 1.1793246 | -0.3834 | 0.702  | -6.17E-07 | count | 1 |
| NQO1         | -0.4521224 | 1.1793246 | -0.3834 | 0.702  | -6.17E-07 | count | 1 |
| AC004982.2   | -0.4521224 | 1.1793246 | -0.3834 | 0.702  | -6.17E-07 | count | 1 |
| RNF146       | -0.1476245 | 0.4394821 | -0.3359 | 0.737  | -6.15E-07 | count | 1 |
| LMBR1L       | -0.1470323 | 0.5192517 | -0.2832 | 0.777  | -6.13E-07 | count | 1 |
| STAM         | -0.1470323 | 0.5798941 | -0.2536 | 0.8    | -6.13E-07 | count | 1 |
| SLC12A9      | -0.1470323 | 0.5798941 | -0.2536 | 0.8    | -6.13E-07 | count | 1 |
| MTX3         | -2.0386037 | 0.8391392 | -2.4294 | 0.0155 | -6.12E-07 | count | 1 |
| AKIP1        | -2.0386037 | 0.8624609 | -2.3637 | 0.0185 | -6.10E-07 | count | 1 |
| HOOK1        | -0.1456529 | 0.7291591 | -0.1998 | 0.842  | -6.09E-07 | count | 1 |
| CCDC159      | -0.1453024 | 0.5573361 | -0.2607 | 0.794  | -6.07E-07 | count | 1 |
| COPS7A       | -0.1453024 | 0.5002328 | -0.2905 | 0.772  | -6.06E-07 | count | 1 |
| UFL1         | -0.0512887 | 0.3306708 | -0.1551 | 0.877  | -6.03E-07 | count | 1 |
| NAIP         | -1.9432935 | 1.0012155 | -1.9409 | 0.0529 | -6.02E-07 | count | 1 |
| AL121944.1   | -0.0504258 | 0.2946862 | -0.1711 | 0.864  | -5.94E-07 | count | 1 |
| FAM50B       | -0.4302699 | 0.7323789 | -0.5875 | 0.557  | -5.93E-07 | count | 1 |
| TNFRSF14-AS1 | -0.4302699 | 0.6959087 | -0.6183 | 0.537  | -5.93E-07 | count | 1 |
| NAA30        | -0.4302699 | 0.5970247 | -0.7207 | 0.471  | -5.93E-07 | count | 1 |
| SNX18        | -0.4302699 | 0.7541374 | -0.5705 | 0.569  | -5.92E-07 | count | 1 |
| HIBADH       | -0.4302699 | 0.7724833 | -0.557  | 0.578  | -5.92E-07 | count | 1 |
| MBD2         | -0.0499833 | 0.1719151 | -0.2907 | 0.771  | -5.88E-07 | count | 1 |
| WAS          | -0.0497577 | 0.2367675 | -0.2102 | 0.834  | -5.85E-07 | count | 1 |
| FARSB        | -0.1395946 | 0.6200765 | -0.2251 | 0.822  | -5.84E-07 | count | 1 |
| SAMM50       | -0.0495028 | 0.300849  | -0.1645 | 0.869  | -5.83E-07 | count | 1 |
| RAI1         | -0.4199831 | 0.8677493 | -0.484  | 0.629  | -5.81E-07 | count | 1 |
| USP38        | -0.4199831 | 0.7706873 | -0.5449 | 0.586  | -5.81E-07 | count | 1 |
| JMJD4        | -0.4199831 | 0.8338933 | -0.5036 | 0.615  | -5.80E-07 | count | 1 |
| MANBA        | -0.1376831 | 0.3996317 | -0.3445 | 0.731  | -5.77E-07 | count | 1 |
| TRPV3        | -0.4152503 | 1.1282304 | -0.3681 | 0.713  | -5.75E-07 | count | 1 |
| APOL2        | -0.4152503 | 1.1282304 | -0.3681 | 0.713  | -5.75E-07 | count | 1 |
| SLC2A14      | -0.4152503 | 1.0577155 | -0.3926 | 0.695  | -5.75E-07 | count | 1 |
| C4orf46      | -0.4152503 | 0.8686886 | -0.478  | 0.633  | -5.75E-07 | count | 1 |
| WWOX         | -0.4152503 | 0.8686886 | -0.478  | 0.633  | -5.75E-07 | count | 1 |
| MAP2K6       | -0.4152503 | 0.864834  | -0.4802 | 0.631  | -5.75E-07 | count | 1 |
| ZNF266       | -0.4152503 | 0.864834  | -0.4802 | 0.631  | -5.75E-07 | count | 1 |
| LRRCC1       | -0.4152503 | 0.988931  | -0.4199 | 0.675  | -5.75E-07 | count | 1 |
| SLC33A1      | -0.4152503 | 0.988931  | -0.4199 | 0.675  | -5.75E-07 | count | 1 |
| PPP5D1       | -0.4152503 | 0.988931  | -0.4199 | 0.675  | -5.75E-07 | count | 1 |
| TRIB2        | -0.4152503 | 0.988931  | -0.4199 | 0.675  | -5.75E-07 | count | 1 |
| ZNF677       | -0.4152503 | 0.988931  | -0.4199 | 0.675  | -5.75E-07 | count | 1 |
| TRAM2        | -0.4152503 | 0.988931  | -0.4199 | 0.675  | -5.75E-07 | count | 1 |
| OGFOD2       | -0.4152503 | 0.9855468 | -0.4213 | 0.674  | -5.75E-07 | count | 1 |
| KDELC2       | -0.4152503 | 0.9855468 | -0.4213 | 0.674  | -5.75E-07 | count | 1 |



|              |            |           |         |       |           |       |   |
|--------------|------------|-----------|---------|-------|-----------|-------|---|
| SLC39A8      | -0.4152503 | 0.7792048 | -0.5329 | 0.594 | -5.75E-07 | count | 1 |
| TXNDC16      | -0.4152503 | 0.9113313 | -0.4557 | 0.649 | -5.74E-07 | count | 1 |
| PRICKLE1     | -0.4152503 | 0.9113313 | -0.4557 | 0.649 | -5.74E-07 | count | 1 |
| TRIM39       | -0.4152503 | 0.9113313 | -0.4557 | 0.649 | -5.74E-07 | count | 1 |
| ALG3         | -0.1361897 | 0.6248135 | -0.218  | 0.828 | -5.70E-07 | count | 1 |
| ZNF276       | -0.1361897 | 0.4638393 | -0.2936 | 0.769 | -5.70E-07 | count | 1 |
| NPEPPS       | -0.1361897 | 0.415455  | -0.3278 | 0.743 | -5.70E-07 | count | 1 |
| AL450998.2   | -0.1361897 | 0.5089946 | -0.2676 | 0.789 | -5.70E-07 | count | 1 |
| ANAPC10      | -0.1344757 | 0.4219067 | -0.3187 | 0.75  | -5.63E-07 | count | 1 |
| TM4SF1       | -1.7201499 | 1.1249374 | -1.5291 | 0.127 | -5.63E-07 | count | 1 |
| RSU1         | -0.133733  | 0.3889578 | -0.3438 | 0.731 | -5.62E-07 | count | 1 |
| ZNF211       | -0.3959304 | 0.8452986 | -0.4684 | 0.64  | -5.54E-07 | count | 1 |
| JADE3        | -0.3959304 | 0.7945972 | -0.4983 | 0.619 | -5.53E-07 | count | 1 |
| TPCN1        | -0.3959304 | 0.9169817 | -0.4318 | 0.666 | -5.53E-07 | count | 1 |
| AL357060.1   | -0.3959304 | 0.7945972 | -0.4983 | 0.619 | -5.53E-07 | count | 1 |
| ZNF358       | -0.3959304 | 0.8693857 | -0.4554 | 0.649 | -5.53E-07 | count | 1 |
| AC110769.2   | -0.3959304 | 0.8190284 | -0.4834 | 0.629 | -5.52E-07 | count | 1 |
| ZNF641       | -0.3959304 | 0.8190284 | -0.4834 | 0.629 | -5.52E-07 | count | 1 |
| CASP6        | -0.3959304 | 0.8190284 | -0.4834 | 0.629 | -5.52E-07 | count | 1 |
| CACFD1       | -0.3959304 | 1.0042324 | -0.3943 | 0.694 | -5.52E-07 | count | 1 |
| AL391121.1   | -0.3959304 | 0.8201747 | -0.4827 | 0.63  | -5.52E-07 | count | 1 |
| ZNF846       | -0.3959304 | 0.8928231 | -0.4435 | 0.658 | -5.52E-07 | count | 1 |
| SEC24C       | -0.3959304 | 0.8928231 | -0.4435 | 0.658 | -5.52E-07 | count | 1 |
| SERPING1     | -0.3959304 | 0.8928231 | -0.4435 | 0.658 | -5.52E-07 | count | 1 |
| AC040162.1   | -0.3959304 | 0.765365  | -0.5173 | 0.605 | -5.52E-07 | count | 1 |
| ZNF439       | -0.1312473 | 0.3897673 | -0.3367 | 0.736 | -5.52E-07 | count | 1 |
| ZNF224       | -0.0465064 | 0.3893942 | -0.1194 | 0.905 | -5.48E-07 | count | 1 |
| ZNF639       | -0.0464672 | 0.3332633 | -0.1394 | 0.889 | -5.48E-07 | count | 1 |
| NME1         | -0.1303348 | 0.3502243 | -0.3721 | 0.71  | -5.47E-07 | count | 1 |
| MYO1C        | -0.1298507 | 0.46278   | -0.2806 | 0.779 | -5.45E-07 | count | 1 |
| NUDCD1       | -0.1298507 | 0.522143  | -0.2487 | 0.804 | -5.45E-07 | count | 1 |
| ZNF891       | -0.1298507 | 0.5157657 | -0.2518 | 0.801 | -5.45E-07 | count | 1 |
| ZMYND8       | -0.1296267 | 0.3818056 | -0.3395 | 0.734 | -5.44E-07 | count | 1 |
| DLG1         | -0.1282732 | 0.4410571 | -0.2908 | 0.771 | -5.41E-07 | count | 1 |
| PYCARD-AS1   | -0.3840298 | 0.8192753 | -0.4687 | 0.639 | -5.40E-07 | count | 1 |
| ZNF764       | -0.3840298 | 0.7313083 | -0.5251 | 0.6   | -5.40E-07 | count | 1 |
| CYREN        | -0.3840298 | 0.6924944 | -0.5546 | 0.579 | -5.39E-07 | count | 1 |
| TMEM116      | -0.3840298 | 0.7877682 | -0.4875 | 0.626 | -5.39E-07 | count | 1 |
| CEP152       | -0.3840298 | 0.7109305 | -0.5402 | 0.589 | -5.38E-07 | count | 1 |
| RBM43        | -0.3840298 | 0.7109305 | -0.5402 | 0.589 | -5.38E-07 | count | 1 |
| HIC2         | -0.3840298 | 0.8502702 | -0.4517 | 0.652 | -5.38E-07 | count | 1 |
| MAPKAPK5-AS1 | -0.1273542 | 0.6526582 | -0.1951 | 0.845 | -5.38E-07 | count | 1 |
| MBD1         | -0.3840298 | 0.7141793 | -0.5377 | 0.591 | -5.38E-07 | count | 1 |
| SEC23IP      | -0.3840298 | 0.7658715 | -0.5014 | 0.616 | -5.38E-07 | count | 1 |
| SLC46A3      | -0.3840298 | 0.7658715 | -0.5014 | 0.616 | -5.38E-07 | count | 1 |

|            |            |           |         |        |           |       |   |
|------------|------------|-----------|---------|--------|-----------|-------|---|
| CBFB       | -0.1278493 | 0.4449811 | -0.2873 | 0.774  | -5.37E-07 | count | 1 |
| PARP15     | -0.0454675 | 0.3212119 | -0.1415 | 0.887  | -5.37E-07 | count | 1 |
| ANKRD36C   | -0.1273542 | 0.5505054 | -0.2313 | 0.817  | -5.35E-07 | count | 1 |
| SPINDOC    | -0.1273542 | 0.6045097 | -0.2107 | 0.833  | -5.35E-07 | count | 1 |
| UAP1       | -0.1266686 | 0.4990298 | -0.2538 | 0.8    | -5.33E-07 | count | 1 |
| ZZEF1      | -0.3759608 | 0.5888061 | -0.6385 | 0.523  | -5.29E-07 | count | 1 |
| TCTN3      | -0.0446379 | 0.388371  | -0.1149 | 0.909  | -5.27E-07 | count | 1 |
| DAXX       | -0.0445319 | 0.2675816 | -0.1664 | 0.868  | -5.25E-07 | count | 1 |
| ZNF236     | -1.4324679 | 0.9858864 | -1.453  | 0.147  | -5.21E-07 | count | 1 |
| BORCS7     | -0.0440331 | 0.3566958 | -0.1234 | 0.902  | -5.20E-07 | count | 1 |
| PIGBOS1    | -1.4324679 | 0.6042476 | -2.3707 | 0.0182 | -5.19E-07 | count | 1 |
| ARHGEF35   | -0.3682543 | 1.1829932 | -0.3113 | 0.756  | -5.19E-07 | count | 1 |
| ZNF573     | -0.3682543 | 1.4358662 | -0.2565 | 0.798  | -5.19E-07 | count | 1 |
| CERS6      | -0.3682543 | 1.4358662 | -0.2565 | 0.798  | -5.19E-07 | count | 1 |
| ZNF618     | -0.3682543 | 1.4358662 | -0.2565 | 0.798  | -5.19E-07 | count | 1 |
| BCORL1     | -0.3682543 | 1.4358662 | -0.2565 | 0.798  | -5.19E-07 | count | 1 |
| STX18-AS1  | -0.3682543 | 1.4358662 | -0.2565 | 0.798  | -5.19E-07 | count | 1 |
| PSMC3IP    | -0.3682543 | 1.4358662 | -0.2565 | 0.798  | -5.19E-07 | count | 1 |
| SAAL1      | -1.4324679 | 0.5870218 | -2.4402 | 0.0151 | -5.19E-07 | count | 1 |
| TPP1       | -0.1221433 | 0.3783086 | -0.3229 | 0.747  | -5.16E-07 | count | 1 |
| PHLDB3     | -0.1223286 | 0.5829401 | -0.2098 | 0.834  | -5.15E-07 | count | 1 |
| BNIP1      | -0.1223286 | 0.416151  | -0.294  | 0.769  | -5.15E-07 | count | 1 |
| PPP1R37    | -0.1223286 | 0.7148629 | -0.1711 | 0.864  | -5.15E-07 | count | 1 |
| TCTN1      | -0.1223286 | 0.5608651 | -0.2181 | 0.827  | -5.15E-07 | count | 1 |
| HMGXB3     | -0.121912  | 0.3989822 | -0.3056 | 0.76   | -5.14E-07 | count | 1 |
| LPXN       | -0.0435342 | 0.2884576 | -0.1509 | 0.88   | -5.14E-07 | count | 1 |
| FRAT1      | -1.4324679 | 0.7554348 | -1.8962 | 0.0586 | -5.11E-07 | count | 1 |
| TOP1       | -0.0431989 | 0.2028092 | -0.213  | 0.831  | -5.10E-07 | count | 1 |
| CDKN2A     | -1.363475  | 0.492908  | -2.7662 | 0.0059 | -5.04E-07 | count | 1 |
| MED21      | -0.1192923 | 0.3843639 | -0.3104 | 0.756  | -5.03E-07 | count | 1 |
| MIGA2      | -0.353877  | 0.9872521 | -0.3584 | 0.72   | -5.01E-07 | count | 1 |
| SLC36A4    | -0.1182361 | 0.4955395 | -0.2386 | 0.812  | -5.00E-07 | count | 1 |
| PNO1       | -0.1176195 | 0.3781241 | -0.3111 | 0.756  | -4.97E-07 | count | 1 |
| BACH2      | -0.1175888 | 0.4649825 | -0.2529 | 0.8    | -4.96E-07 | count | 1 |
| NFYA       | -0.3479872 | 0.8195542 | -0.4246 | 0.671  | -4.94E-07 | count | 1 |
| TTI1       | -0.3479872 | 0.9570905 | -0.3636 | 0.716  | -4.94E-07 | count | 1 |
| SIK3       | -0.1168556 | 0.4020358 | -0.2907 | 0.771  | -4.93E-07 | count | 1 |
| ZNF217     | -0.041731  | 0.3271493 | -0.1276 | 0.899  | -4.93E-07 | count | 1 |
| SPNS3      | -1.3146848 | 0.7784277 | -1.6889 | 0.0919 | -4.92E-07 | count | 1 |
| IFI27      | -1.3146848 | 1.1171523 | -1.1768 | 0.24   | -4.92E-07 | count | 1 |
| AL157938.3 | -1.3146848 | 0.8738105 | -1.5045 | 0.133  | -4.91E-07 | count | 1 |
| GOLGA2     | -0.116276  | 0.4092731 | -0.2841 | 0.776  | -4.91E-07 | count | 1 |
| IZUMO4     | -0.3447772 | 0.8617297 | -0.4001 | 0.689  | -4.90E-07 | count | 1 |
| TRBC1      | -1.3146848 | 0.8239524 | -1.5956 | 0.111  | -4.89E-07 | count | 1 |
| CD96       | -0.114989  | 0.5090255 | -0.2259 | 0.821  | -4.87E-07 | count | 1 |

|             |            |           |         |        |           |       |   |
|-------------|------------|-----------|---------|--------|-----------|-------|---|
| AL161781.2  | -1.2501463 | 0.5361226 | -2.3318 | 0.0202 | -4.86E-07 | count | 1 |
| TRIOBP      | -0.1146084 | 0.6675965 | -0.1717 | 0.864  | -4.84E-07 | count | 1 |
| MINDY3      | -0.1146084 | 0.6279722 | -0.1825 | 0.855  | -4.84E-07 | count | 1 |
| CNDP2       | -0.0408137 | 0.2828648 | -0.1443 | 0.885  | -4.82E-07 | count | 1 |
| FKBP4       | -0.1137403 | 0.4178757 | -0.2722 | 0.786  | -4.82E-07 | count | 1 |
| NENF        | -0.0406261 | 0.2663443 | -0.1525 | 0.879  | -4.80E-07 | count | 1 |
| LRRC8D      | -1.2501463 | 0.8203424 | -1.5239 | 0.128  | -4.76E-07 | count | 1 |
| ERCC4       | -1.2501463 | 0.6638765 | -1.8831 | 0.0603 | -4.76E-07 | count | 1 |
| NUDT16      | -1.2501463 | 0.6638765 | -1.8831 | 0.0603 | -4.76E-07 | count | 1 |
| SETDB2      | -0.1125272 | 0.4295591 | -0.262  | 0.793  | -4.75E-07 | count | 1 |
| AL158850.1  | -1.2093243 | 0.6396672 | -1.8906 | 0.0593 | -4.69E-07 | count | 1 |
| ME2         | -0.1105969 | 0.3970379 | -0.2786 | 0.781  | -4.68E-07 | count | 1 |
| UBR5        | -0.1090428 | 0.3973165 | -0.2744 | 0.784  | -4.61E-07 | count | 1 |
| KARS        | -0.1086035 | 0.36807   | -0.2951 | 0.768  | -4.60E-07 | count | 1 |
| ANKRD37     | -0.0387761 | 0.2895169 | -0.1339 | 0.894  | -4.58E-07 | count | 1 |
| GANAB       | -0.107744  | 0.5138534 | -0.2097 | 0.834  | -4.56E-07 | count | 1 |
| TUBGCP3     | -1.1447858 | 0.6308576 | -1.8147 | 0.0703 | -4.53E-07 | count | 1 |
| NFYB        | -0.1069843 | 0.4371987 | -0.2447 | 0.807  | -4.53E-07 | count | 1 |
| EXTL2       | -1.1447858 | 0.8021917 | -1.4271 | 0.154  | -4.53E-07 | count | 1 |
| OGFOD1      | -1.1447858 | 0.7007893 | -1.6336 | 0.103  | -4.52E-07 | count | 1 |
| TPMT        | -1.1447858 | 0.7447075 | -1.5372 | 0.125  | -4.50E-07 | count | 1 |
| PPP2R3B     | -0.1057019 | 0.6561103 | -0.1611 | 0.872  | -4.48E-07 | count | 1 |
| USP25       | -0.1057019 | 0.4808646 | -0.2198 | 0.826  | -4.48E-07 | count | 1 |
| TRIO        | -0.1057019 | 0.6915866 | -0.1528 | 0.879  | -4.48E-07 | count | 1 |
| FZR1        | -0.1057019 | 0.6219523 | -0.17   | 0.865  | -4.48E-07 | count | 1 |
| ZNF844      | -0.1057019 | 0.859815  | -0.1229 | 0.902  | -4.48E-07 | count | 1 |
| PSMD9       | -0.1057019 | 0.622467  | -0.1698 | 0.865  | -4.48E-07 | count | 1 |
| FAM53B      | -0.1057019 | 0.7286282 | -0.1451 | 0.885  | -4.48E-07 | count | 1 |
| SLC16A1-AS1 | -0.1057019 | 0.6832287 | -0.1547 | 0.877  | -4.48E-07 | count | 1 |
| LIN54       | -0.1057019 | 0.6832287 | -0.1547 | 0.877  | -4.48E-07 | count | 1 |
| GDAP2       | -0.1057019 | 0.6597549 | -0.1602 | 0.873  | -4.48E-07 | count | 1 |
| PNMA1       | -0.1057019 | 0.6131677 | -0.1724 | 0.863  | -4.48E-07 | count | 1 |
| TAMM41      | -0.1057019 | 0.5868984 | -0.1801 | 0.857  | -4.48E-07 | count | 1 |
| CD320       | -0.1057019 | 0.5868984 | -0.1801 | 0.857  | -4.48E-07 | count | 1 |
| CSNK2A1     | -0.0378511 | 0.3555576 | -0.1065 | 0.915  | -4.48E-07 | count | 1 |
| GPS1        | -1.1070455 | 0.5499394 | -2.013  | 0.0447 | -4.47E-07 | count | 1 |
| ZNF302      | -1.0959956 | 0.5559306 | -1.9715 | 0.0493 | -4.46E-07 | count | 1 |
| LRPPRC      | -0.0376167 | 0.3382486 | -0.1112 | 0.911  | -4.45E-07 | count | 1 |
| EWSR1       | -0.0374887 | 0.244571  | -0.1533 | 0.878  | -4.43E-07 | count | 1 |
| ING3        | -0.1042111 | 0.4498117 | -0.2317 | 0.817  | -4.42E-07 | count | 1 |
| PIH1D1      | -0.1036234 | 0.3215716 | -0.3222 | 0.747  | -4.39E-07 | count | 1 |
| KBTBD8      | -0.3030839 | 0.2934539 | -1.0328 | 0.302  | -4.39E-07 | count | 1 |
| GTF2F2      | -0.037026  | 0.2798006 | -0.1323 | 0.895  | -4.38E-07 | count | 1 |
| CCSER1      | -0.103075  | 0.5526267 | -0.1865 | 0.852  | -4.37E-07 | count | 1 |
| P2RY8       | -0.103075  | 0.6819623 | -0.1511 | 0.88   | -4.37E-07 | count | 1 |

|            |            |           |         |        |           |       |   |
|------------|------------|-----------|---------|--------|-----------|-------|---|
| SMAD2      | -0.1027875 | 0.4541729 | -0.2263 | 0.821  | -4.36E-07 | count | 1 |
| VRK2       | -0.101881  | 0.4429401 | -0.23   | 0.818  | -4.32E-07 | count | 1 |
| ESYT1      | -0.1014579 | 0.5256985 | -0.193  | 0.847  | -4.31E-07 | count | 1 |
| WDR37      | -1.0270028 | 0.6362722 | -1.6141 | 0.107  | -4.26E-07 | count | 1 |
| ARFIP2     | -1.0270028 | 0.5618636 | -1.8279 | 0.0682 | -4.25E-07 | count | 1 |
| PLEKHO2    | -0.2926647 | 0.6799004 | -0.4305 | 0.667  | -4.25E-07 | count | 1 |
| XIAP       | -0.291296  | 0.3263859 | -0.8925 | 0.373  | -4.24E-07 | count | 1 |
| TDRKH      | -1.0270028 | 1.2505254 | -0.8213 | 0.412  | -4.22E-07 | count | 1 |
| POLD4      | -1.0270028 | 0.6253377 | -1.6423 | 0.101  | -4.22E-07 | count | 1 |
| UCK1       | -1.0270028 | 0.6253377 | -1.6423 | 0.101  | -4.22E-07 | count | 1 |
| CRBN       | -0.0355779 | 0.340073  | -0.1046 | 0.917  | -4.21E-07 | count | 1 |
| CCL2       | -1.0270028 | 0.7868213 | -1.3053 | 0.192  | -4.21E-07 | count | 1 |
| CARMIL2    | -1.0270028 | 0.846046  | -1.2139 | 0.225  | -4.21E-07 | count | 1 |
| NAT9       | -0.0990029 | 0.5177557 | -0.1912 | 0.848  | -4.20E-07 | count | 1 |
| CETN3      | -1.0270028 | 0.6731456 | -1.5257 | 0.128  | -4.20E-07 | count | 1 |
| ACYP1      | -0.2873356 | 0.3798579 | -0.7564 | 0.45   | -4.18E-07 | count | 1 |
| CTSD       | -0.0976692 | 0.3859678 | -0.2531 | 0.8    | -4.15E-07 | count | 1 |
| NCBP2-AS2  | -0.0971659 | 0.3820997 | -0.2543 | 0.799  | -4.14E-07 | count | 1 |
| CCDC191    | -0.0969234 | 0.4102824 | -0.2362 | 0.813  | -4.12E-07 | count | 1 |
| ALDH3A2    | -0.2828697 | 0.8132781 | -0.3478 | 0.728  | -4.12E-07 | count | 1 |
| INTS10     | -0.0969234 | 0.3890252 | -0.2491 | 0.803  | -4.12E-07 | count | 1 |
| KLF4       | -0.2828697 | 0.6726569 | -0.4205 | 0.674  | -4.12E-07 | count | 1 |
| SLC9A9     | -0.2828697 | 0.7472958 | -0.3785 | 0.705  | -4.12E-07 | count | 1 |
| NAXD       | -0.2828697 | 0.7472958 | -0.3785 | 0.705  | -4.12E-07 | count | 1 |
| S1PR2      | -0.2828697 | 0.7951265 | -0.3558 | 0.722  | -4.12E-07 | count | 1 |
| RHOF       | -0.0346006 | 0.2102315 | -0.1646 | 0.869  | -4.10E-07 | count | 1 |
| HNRNPAB    | -0.0342154 | 0.1611059 | -0.2124 | 0.832  | -4.05E-07 | count | 1 |
| DPYSL2     | -0.9528948 | 0.5044701 | -1.8889 | 0.0596 | -4.04E-07 | count | 1 |
| ZDHHC3     | -0.0946667 | 0.561827  | -0.1685 | 0.866  | -4.03E-07 | count | 1 |
| LIMK1      | -0.9399914 | 0.6598432 | -1.4246 | 0.155  | -4.02E-07 | count | 1 |
| MTR        | -0.093582  | 0.5080972 | -0.1842 | 0.854  | -3.99E-07 | count | 1 |
| PMPCA      | -0.0937475 | 0.4617325 | -0.203  | 0.839  | -3.99E-07 | count | 1 |
| MAP3K4     | -0.0933437 | 0.4394061 | -0.2124 | 0.832  | -3.98E-07 | count | 1 |
| UNC45A     | -0.0933437 | 0.5629329 | -0.1658 | 0.868  | -3.98E-07 | count | 1 |
| SMAD5      | -0.0933437 | 0.6330045 | -0.1475 | 0.883  | -3.97E-07 | count | 1 |
| LRRC28     | -0.0933437 | 0.5832104 | -0.1601 | 0.873  | -3.97E-07 | count | 1 |
| NFKBIL1    | -0.0933437 | 0.6545927 | -0.1426 | 0.887  | -3.97E-07 | count | 1 |
| KDM5D      | -0.0929713 | 0.5245904 | -0.1772 | 0.859  | -3.96E-07 | count | 1 |
| DLGAP1-AS1 | -0.0929713 | 0.4551888 | -0.2042 | 0.838  | -3.96E-07 | count | 1 |
| TTC33      | -0.0929713 | 0.7460646 | -0.1246 | 0.901  | -3.96E-07 | count | 1 |
| COPS4      | -0.0929713 | 0.3706505 | -0.2508 | 0.802  | -3.96E-07 | count | 1 |
| TRIAP1     | -0.0929713 | 0.5799701 | -0.1603 | 0.873  | -3.96E-07 | count | 1 |
| PSD4       | -0.0929713 | 0.6107972 | -0.1522 | 0.879  | -3.96E-07 | count | 1 |
| TCF3       | -0.0929713 | 0.3606601 | -0.2578 | 0.797  | -3.96E-07 | count | 1 |
| VMAC       | -0.9216422 | 0.6571882 | -1.4024 | 0.161  | -3.94E-07 | count | 1 |

|            |            |           |         |        |           |       |   |
|------------|------------|-----------|---------|--------|-----------|-------|---|
| DUS4L      | -0.9216422 | 0.685962  | -1.3436 | 0.18   | -3.93E-07 | count | 1 |
| YARS       | -0.9216422 | 0.6171086 | -1.4935 | 0.136  | -3.93E-07 | count | 1 |
| AIF1       | -0.9216422 | 0.7572157 | -1.2171 | 0.224  | -3.91E-07 | count | 1 |
| ZNF507     | -0.2669947 | 1.0456135 | -0.2553 | 0.799  | -3.91E-07 | count | 1 |
| GINS3      | -0.2669947 | 0.8585602 | -0.311  | 0.756  | -3.91E-07 | count | 1 |
| AC003102.1 | -0.2669947 | 0.9503154 | -0.281  | 0.779  | -3.91E-07 | count | 1 |
| RER1       | -0.0325246 | 0.2618848 | -0.1242 | 0.901  | -3.85E-07 | count | 1 |
| TMEM106A   | -0.8934714 | 0.7098155 | -1.2587 | 0.209  | -3.85E-07 | count | 1 |
| E4F1       | -0.8934714 | 0.7779133 | -1.1485 | 0.251  | -3.84E-07 | count | 1 |
| MALT1      | -0.0323899 | 0.2218088 | -0.146  | 0.884  | -3.84E-07 | count | 1 |
| GSPT2      | -0.8934714 | 0.7226545 | -1.2364 | 0.217  | -3.83E-07 | count | 1 |
| AP2A2      | -0.8934714 | 0.7226545 | -1.2364 | 0.217  | -3.83E-07 | count | 1 |
| AUH        | -0.8934714 | 0.6933756 | -1.2886 | 0.198  | -3.83E-07 | count | 1 |
| SYNE3      | -0.8934714 | 0.6933756 | -1.2886 | 0.198  | -3.83E-07 | count | 1 |
| USP42      | -0.8934714 | 0.7629422 | -1.1711 | 0.242  | -3.82E-07 | count | 1 |
| GALK1      | -0.8728521 | 0.501708  | -1.7398 | 0.0826 | -3.79E-07 | count | 1 |
| CASP3      | -0.0883569 | 0.3979213 | -0.222  | 0.824  | -3.77E-07 | count | 1 |
| FMNL3      | -0.0878118 | 0.4995411 | -0.1758 | 0.861  | -3.75E-07 | count | 1 |
| ARHGEF2    | -0.0315614 | 0.3200489 | -0.0986 | 0.921  | -3.74E-07 | count | 1 |
| FAM45A     | -0.2540818 | 0.6165987 | -0.4121 | 0.68   | -3.74E-07 | count | 1 |
| ABI3       | -0.8446812 | 0.4287235 | -1.9702 | 0.0494 | -3.73E-07 | count | 1 |
| PIAS2      | -0.8446812 | 0.5756486 | -1.4674 | 0.143  | -3.71E-07 | count | 1 |
| SRD5A3     | -0.8446812 | 0.515583  | -1.6383 | 0.102  | -3.71E-07 | count | 1 |
| HIP1R      | -0.0866506 | 0.5256595 | -0.1648 | 0.869  | -3.70E-07 | count | 1 |
| HMG20A     | -0.0866506 | 0.5247387 | -0.1651 | 0.869  | -3.70E-07 | count | 1 |
| ACSL1      | -0.8446812 | 0.650433  | -1.2986 | 0.195  | -3.70E-07 | count | 1 |
| RAB5B      | -0.8446812 | 0.5979277 | -1.4127 | 0.158  | -3.69E-07 | count | 1 |
| APOL6      | -0.8446812 | 0.5403443 | -1.5632 | 0.119  | -3.69E-07 | count | 1 |
| CCNC       | -0.0865202 | 0.3284007 | -0.2635 | 0.792  | -3.69E-07 | count | 1 |
| SNTB2      | -0.8446812 | 0.6194059 | -1.3637 | 0.173  | -3.69E-07 | count | 1 |
| STK19      | -0.0851798 | 0.4916435 | -0.1733 | 0.863  | -3.64E-07 | count | 1 |
| DUS2       | -0.0850154 | 0.5134609 | -0.1656 | 0.869  | -3.63E-07 | count | 1 |
| RBMX2      | -0.0850154 | 0.3885744 | -0.2188 | 0.827  | -3.63E-07 | count | 1 |
| CPSF3      | -0.0850154 | 0.4971722 | -0.171  | 0.864  | -3.63E-07 | count | 1 |
| BTN3A1     | -0.0839331 | 0.4057982 | -0.2068 | 0.836  | -3.59E-07 | count | 1 |
| DENND5B    | -0.0839493 | 0.4488194 | -0.187  | 0.852  | -3.59E-07 | count | 1 |
| RNF216     | -0.0301471 | 0.3089951 | -0.0976 | 0.922  | -3.58E-07 | count | 1 |
| NTPCR      | -0.8038592 | 0.6310295 | -1.2739 | 0.203  | -3.58E-07 | count | 1 |
| ZBTB11-AS1 | -0.8038592 | 0.636573  | -1.2628 | 0.207  | -3.56E-07 | count | 1 |
| GIT1       | -0.8038592 | 0.636573  | -1.2628 | 0.207  | -3.56E-07 | count | 1 |
| AL133467.1 | -0.8038592 | 0.665029  | -1.2088 | 0.227  | -3.55E-07 | count | 1 |
| UBN2       | -0.7858407 | 0.6004413 | -1.3088 | 0.191  | -3.53E-07 | count | 1 |
| CWF19L1    | -0.2380611 | 0.6765229 | -0.3519 | 0.725  | -3.53E-07 | count | 1 |
| MUL1       | -0.2380611 | 0.6765229 | -0.3519 | 0.725  | -3.53E-07 | count | 1 |
| FLI1       | -0.0824842 | 0.3809878 | -0.2165 | 0.829  | -3.53E-07 | count | 1 |

|            |            |           |         |        |           |       |   |
|------------|------------|-----------|---------|--------|-----------|-------|---|
| IQGAP2     | -0.2380611 | 0.620072  | -0.3839 | 0.701  | -3.53E-07 | count | 1 |
| NMT2       | -0.2380611 | 0.7652884 | -0.3111 | 0.756  | -3.53E-07 | count | 1 |
| MICB       | -0.2380611 | 0.7386303 | -0.3223 | 0.747  | -3.53E-07 | count | 1 |
| IQCN       | -0.2380611 | 0.7186057 | -0.3313 | 0.741  | -3.52E-07 | count | 1 |
| CENPV      | -0.7858407 | 0.615856  | -1.276  | 0.203  | -3.52E-07 | count | 1 |
| SSRP1      | -0.7646385 | 0.5148662 | -1.4851 | 0.138  | -3.52E-07 | count | 1 |
| CCDC117    | -0.0823519 | 0.6528327 | -0.1261 | 0.9    | -3.52E-07 | count | 1 |
| MUS81      | -0.2369232 | 0.833357  | -0.2843 | 0.776  | -3.51E-07 | count | 1 |
| ZNF646     | -0.2369232 | 1.2434149 | -0.1905 | 0.849  | -3.51E-07 | count | 1 |
| C2CD2L     | -0.2369232 | 1.2434149 | -0.1905 | 0.849  | -3.51E-07 | count | 1 |
| EPB41L5    | -0.2369232 | 1.2434149 | -0.1905 | 0.849  | -3.51E-07 | count | 1 |
| LINC00449  | -0.2369232 | 1.2905256 | -0.1836 | 0.854  | -3.51E-07 | count | 1 |
| NOTCH4     | -0.2369232 | 1.2905256 | -0.1836 | 0.854  | -3.51E-07 | count | 1 |
| IGSF10     | -0.2369232 | 1.0378041 | -0.2283 | 0.82   | -3.51E-07 | count | 1 |
| ORC2       | -0.7756883 | 0.4599635 | -1.6864 | 0.0924 | -3.50E-07 | count | 1 |
| MCUR1      | -0.0289396 | 0.3346112 | -0.0865 | 0.931  | -3.43E-07 | count | 1 |
| SLC25A51   | -0.7393207 | 0.9340422 | -0.7915 | 0.429  | -3.38E-07 | count | 1 |
| RFX7       | -0.7393207 | 0.650539  | -1.1365 | 0.256  | -3.36E-07 | count | 1 |
| GTSF1      | -0.7393207 | 0.5665209 | -1.305  | 0.193  | -3.36E-07 | count | 1 |
| ADGRG5     | -0.7393207 | 0.632772  | -1.1684 | 0.243  | -3.36E-07 | count | 1 |
| HMGNA4     | -0.7393207 | 0.632772  | -1.1684 | 0.243  | -3.36E-07 | count | 1 |
| AC009061.2 | -0.7393207 | 0.787894  | -0.9384 | 0.349  | -3.35E-07 | count | 1 |
| AC133644.2 | -0.7393207 | 0.7042106 | -1.0499 | 0.294  | -3.35E-07 | count | 1 |
| POMZP3     | -0.7393207 | 0.7546361 | -0.9797 | 0.328  | -3.35E-07 | count | 1 |
| LY75       | -0.7393207 | 0.7546361 | -0.9797 | 0.328  | -3.35E-07 | count | 1 |
| KLHDC3     | -0.7393207 | 0.6344725 | -1.1653 | 0.245  | -3.35E-07 | count | 1 |
| AC005332.5 | -0.7393207 | 0.8227557 | -0.8986 | 0.369  | -3.34E-07 | count | 1 |
| PXN-AS1    | -0.7393207 | 0.856199  | -0.8635 | 0.388  | -3.34E-07 | count | 1 |
| CALU       | -0.0778023 | 0.491457  | -0.1583 | 0.874  | -3.33E-07 | count | 1 |
| HELB       | -0.0778023 | 0.491457  | -0.1583 | 0.874  | -3.33E-07 | count | 1 |
| GMNN       | -0.0775912 | 0.5272169 | -0.1472 | 0.883  | -3.32E-07 | count | 1 |
| TFDP1      | -0.0775912 | 0.4595842 | -0.1688 | 0.866  | -3.32E-07 | count | 1 |
| CLTC       | -0.0774799 | 0.4084281 | -0.1897 | 0.85   | -3.32E-07 | count | 1 |
| DIS3L2     | -0.0771202 | 0.622466  | -0.1239 | 0.901  | -3.31E-07 | count | 1 |
| EPB41L2    | -0.0755605 | 0.4531566 | -0.1667 | 0.868  | -3.24E-07 | count | 1 |
| MINK1      | -0.7126147 | 1.2574139 | -0.5667 | 0.571  | -3.24E-07 | count | 1 |
| CDK8       | -0.7126147 | 1.2574139 | -0.5667 | 0.571  | -3.24E-07 | count | 1 |
| AC090152.1 | -0.7015804 | 0.5829697 | -1.2035 | 0.229  | -3.23E-07 | count | 1 |
| C5orf63    | -0.6905305 | 0.6486639 | -1.0645 | 0.288  | -3.22E-07 | count | 1 |
| IFT88      | -0.0750043 | 0.4877114 | -0.1538 | 0.878  | -3.22E-07 | count | 1 |
| TCF7       | -0.6821623 | 0.4958475 | -1.3758 | 0.17   | -3.21E-07 | count | 1 |
| TTC39B     | -0.2140242 | 0.8404009 | -0.2547 | 0.799  | -3.20E-07 | count | 1 |
| PCBP4      | -0.2140242 | 0.775258  | -0.2761 | 0.783  | -3.20E-07 | count | 1 |
| SMYD4      | -0.2140242 | 0.889317  | -0.2407 | 0.81   | -3.20E-07 | count | 1 |
| AC027097.2 | -0.2140242 | 0.889317  | -0.2407 | 0.81   | -3.20E-07 | count | 1 |

|            |            |           |         |        |           |       |   |
|------------|------------|-----------|---------|--------|-----------|-------|---|
| C8orf82    | -0.6905305 | 0.4914717 | -1.405  | 0.161  | -3.20E-07 | count | 1 |
| MAGEH1     | -0.2140242 | 0.7338881 | -0.2916 | 0.771  | -3.20E-07 | count | 1 |
| SPNS1      | -0.2140242 | 0.6988036 | -0.3063 | 0.76   | -3.20E-07 | count | 1 |
| PRKCI      | -0.2140242 | 0.6988036 | -0.3063 | 0.76   | -3.20E-07 | count | 1 |
| TDRD7      | -0.2140242 | 0.7876997 | -0.2717 | 0.786  | -3.20E-07 | count | 1 |
| ZNF805     | -0.2140242 | 0.938197  | -0.2281 | 0.82   | -3.20E-07 | count | 1 |
| AC064807.1 | -0.2140242 | 0.7924145 | -0.2701 | 0.787  | -3.20E-07 | count | 1 |
| QDPR       | -0.2140242 | 0.7924145 | -0.2701 | 0.787  | -3.20E-07 | count | 1 |
| ZNF609     | -0.2140242 | 0.7924145 | -0.2701 | 0.787  | -3.20E-07 | count | 1 |
| ARSA       | -0.6905305 | 0.5907636 | -1.1689 | 0.243  | -3.20E-07 | count | 1 |
| C1orf35    | -0.0269257 | 0.313165  | -0.086  | 0.932  | -3.20E-07 | count | 1 |
| TMEM131    | -0.026795  | 0.2719427 | -0.0985 | 0.922  | -3.18E-07 | count | 1 |
| SMARCA4    | -0.0742245 | 0.4457936 | -0.1665 | 0.868  | -3.18E-07 | count | 1 |
| TNKS2      | -0.0267238 | 0.3469417 | -0.077  | 0.939  | -3.17E-07 | count | 1 |
| PLEKHF2    | -0.0266919 | 0.2826117 | -0.0944 | 0.925  | -3.17E-07 | count | 1 |
| SPRY1      | -0.2090461 | 0.8421531 | -0.2482 | 0.804  | -3.13E-07 | count | 1 |
| CAMK4      | -0.6703278 | 0.713915  | -0.9389 | 0.348  | -3.12E-07 | count | 1 |
| MTA1       | -0.6703278 | 0.6054542 | -1.1071 | 0.269  | -3.12E-07 | count | 1 |
| PQLC2      | -0.6703278 | 0.574797  | -1.1662 | 0.244  | -3.11E-07 | count | 1 |
| SCX        | -0.6703278 | 0.7127706 | -0.9405 | 0.347  | -3.11E-07 | count | 1 |
| SYBU       | -0.6703278 | 0.6333445 | -1.0584 | 0.29   | -3.11E-07 | count | 1 |
| RBM11      | -0.6703278 | 0.6333445 | -1.0584 | 0.29   | -3.11E-07 | count | 1 |
| C12orf66   | -0.6703278 | 0.6333445 | -1.0584 | 0.29   | -3.11E-07 | count | 1 |
| CEP104     | -0.0723856 | 0.6675074 | -0.1084 | 0.914  | -3.11E-07 | count | 1 |
| RNF121     | -0.0723856 | 0.6087046 | -0.1189 | 0.905  | -3.11E-07 | count | 1 |
| CWC27      | -0.0718476 | 0.4410035 | -0.1629 | 0.871  | -3.09E-07 | count | 1 |
| TIMM8A     | -0.2050909 | 0.6618384 | -0.3099 | 0.757  | -3.08E-07 | count | 1 |
| HCFC2      | -0.2050909 | 0.7051977 | -0.2908 | 0.771  | -3.08E-07 | count | 1 |
| SAE1       | -0.2050909 | 0.7068017 | -0.2902 | 0.772  | -3.08E-07 | count | 1 |
| DMAC2      | -0.2050909 | 0.7132424 | -0.2875 | 0.774  | -3.08E-07 | count | 1 |
| AKAP5      | -0.2050909 | 0.7211974 | -0.2844 | 0.776  | -3.08E-07 | count | 1 |
| BPHL       | -0.2050909 | 0.7211974 | -0.2844 | 0.776  | -3.08E-07 | count | 1 |
| MGRN1      | -0.6523093 | 0.5031989 | -1.2963 | 0.196  | -3.07E-07 | count | 1 |
| TADA2A     | -0.6523093 | 0.5301403 | -1.2304 | 0.219  | -3.06E-07 | count | 1 |
| ARID1A     | -0.0256981 | 0.3499774 | -0.0734 | 0.941  | -3.05E-07 | count | 1 |
| NAE1       | -0.07087   | 0.3720406 | -0.1905 | 0.849  | -3.04E-07 | count | 1 |
| ERG28      | -0.0706994 | 0.3322841 | -0.2128 | 0.832  | -3.04E-07 | count | 1 |
| FCHO1      | -0.2009269 | 0.6501991 | -0.309  | 0.757  | -3.02E-07 | count | 1 |
| MAD1L1     | -0.6361364 | 0.3723691 | -1.7083 | 0.0883 | -3.02E-07 | count | 1 |
| DHR SX     | -0.0701826 | 0.588232  | -0.1193 | 0.905  | -3.01E-07 | count | 1 |
| XPO6       | -0.0689089 | 0.5274655 | -0.1306 | 0.896  | -2.96E-07 | count | 1 |
| ASPS CR1   | -0.6215376 | 0.4827839 | -1.2874 | 0.199  | -2.96E-07 | count | 1 |
| GYG1       | -0.6215376 | 0.5970607 | -1.041  | 0.298  | -2.95E-07 | count | 1 |
| FOXK2      | -0.6215376 | 0.6557858 | -0.9478 | 0.344  | -2.94E-07 | count | 1 |
| PHYH       | -0.5962198 | 0.462707  | -1.2885 | 0.198  | -2.86E-07 | count | 1 |

|             |            |           |         |       |           |       |   |
|-------------|------------|-----------|---------|-------|-----------|-------|---|
| BLVRB       | -0.5916847 | 0.3942652 | -1.5007 | 0.134 | -2.84E-07 | count | 1 |
| ANTXR2      | -0.0652001 | 0.4073184 | -0.1601 | 0.873 | -2.81E-07 | count | 1 |
| NT5E        | -0.0653652 | 0.4507927 | -0.145  | 0.885 | -2.81E-07 | count | 1 |
| RHOC        | -0.0653652 | 0.4435447 | -0.1474 | 0.883 | -2.81E-07 | count | 1 |
| NCOA1       | -0.0652001 | 0.3812706 | -0.171  | 0.864 | -2.81E-07 | count | 1 |
| MYO9A       | -0.58517   | 0.5233695 | -1.1181 | 0.264 | -2.81E-07 | count | 1 |
| MGME1       | -0.0652001 | 0.4094081 | -0.1593 | 0.874 | -2.81E-07 | count | 1 |
| GALNT3      | -0.58517   | 0.6972482 | -0.8393 | 0.402 | -2.80E-07 | count | 1 |
| LINC02482   | -0.064144  | 0.8102609 | -0.0792 | 0.937 | -2.76E-07 | count | 1 |
| RCAN3       | -0.064144  | 0.4615897 | -0.139  | 0.89  | -2.76E-07 | count | 1 |
| DRG1        | -0.064144  | 0.5479046 | -0.1171 | 0.907 | -2.76E-07 | count | 1 |
| CARD8       | -0.064144  | 0.3887946 | -0.165  | 0.869 | -2.76E-07 | count | 1 |
| TMEM42      | -0.064144  | 0.6072317 | -0.1056 | 0.916 | -2.76E-07 | count | 1 |
| PRCD        | -0.064144  | 0.5025001 | -0.1276 | 0.898 | -2.76E-07 | count | 1 |
| KCNH8       | -0.064144  | 0.7653478 | -0.0838 | 0.933 | -2.76E-07 | count | 1 |
| HADHB       | -0.0228862 | 0.2839933 | -0.0806 | 0.936 | -2.72E-07 | count | 1 |
| SLC39A3     | -0.0228614 | 0.2897351 | -0.0789 | 0.937 | -2.72E-07 | count | 1 |
| EXOSC5      | -0.5569991 | 0.5190189 | -1.0732 | 0.284 | -2.72E-07 | count | 1 |
| KIF21B      | -0.5569991 | 0.5185658 | -1.0741 | 0.283 | -2.71E-07 | count | 1 |
| DLAT        | -0.5569991 | 0.8781699 | -0.6343 | 0.526 | -2.70E-07 | count | 1 |
| AC008074.3  | -0.1779028 | 0.8057415 | -0.2208 | 0.825 | -2.70E-07 | count | 1 |
| RUVBL2      | -0.1779028 | 0.6956526 | -0.2557 | 0.798 | -2.70E-07 | count | 1 |
| ADPRM       | -0.1779028 | 0.8063372 | -0.2206 | 0.825 | -2.70E-07 | count | 1 |
| USP5        | -0.1779028 | 0.8063372 | -0.2206 | 0.825 | -2.70E-07 | count | 1 |
| SESN2       | -0.1779028 | 0.9510424 | -0.1871 | 0.852 | -2.70E-07 | count | 1 |
| ADAL        | -0.1779028 | 0.8597644 | -0.2069 | 0.836 | -2.70E-07 | count | 1 |
| PIP4P2      | -0.5569991 | 0.5144697 | -1.0827 | 0.28  | -2.70E-07 | count | 1 |
| NIPA1       | -0.1779028 | 0.7575671 | -0.2348 | 0.814 | -2.70E-07 | count | 1 |
| RXYLT1      | -0.1779028 | 0.7575671 | -0.2348 | 0.814 | -2.70E-07 | count | 1 |
| ABHD12      | -0.1779028 | 0.7575671 | -0.2348 | 0.814 | -2.70E-07 | count | 1 |
| ZNF780B     | -0.1779028 | 0.6392347 | -0.2783 | 0.781 | -2.70E-07 | count | 1 |
| NAA40       | -0.1779028 | 0.8147903 | -0.2183 | 0.827 | -2.70E-07 | count | 1 |
| PPOX        | -0.1779028 | 0.8147903 | -0.2183 | 0.827 | -2.70E-07 | count | 1 |
| TAX1BP3     | -0.1779028 | 0.7061136 | -0.2519 | 0.801 | -2.70E-07 | count | 1 |
| GMDS-DT     | -0.1779028 | 0.7061136 | -0.2519 | 0.801 | -2.70E-07 | count | 1 |
| ZNF316      | -0.1779028 | 0.7061136 | -0.2519 | 0.801 | -2.70E-07 | count | 1 |
| LRWD1       | -0.1779028 | 0.7061136 | -0.2519 | 0.801 | -2.70E-07 | count | 1 |
| PACS2       | -0.5511077 | 1.5898897 | -0.3466 | 0.729 | -2.66E-07 | count | 1 |
| ZNF676      | -0.5511077 | 1.5898897 | -0.3466 | 0.729 | -2.66E-07 | count | 1 |
| AQP11       | -0.5511077 | 1.5898897 | -0.3466 | 0.729 | -2.66E-07 | count | 1 |
| DARS2       | -0.5511077 | 1.1828456 | -0.4659 | 0.642 | -2.66E-07 | count | 1 |
| SLC11A2     | -0.5511077 | 1.1828456 | -0.4659 | 0.642 | -2.66E-07 | count | 1 |
| ADORA2A-AS1 | -0.5511077 | 1.1828456 | -0.4659 | 0.642 | -2.66E-07 | count | 1 |
| ALKBH6      | -0.5511077 | 1.1828456 | -0.4659 | 0.642 | -2.66E-07 | count | 1 |
| AC008083.2  | -0.5511077 | 1.1828456 | -0.4659 | 0.642 | -2.66E-07 | count | 1 |



|            |            |           |         |       |           |       |   |
|------------|------------|-----------|---------|-------|-----------|-------|---|
| AC007114.1 | -0.5511077 | 1.1828456 | -0.4659 | 0.642 | -2.66E-07 | count | 1 |
| UVSSA      | -0.5511077 | 1.1828456 | -0.4659 | 0.642 | -2.66E-07 | count | 1 |
| LRRC27     | -0.5511077 | 1.1828456 | -0.4659 | 0.642 | -2.66E-07 | count | 1 |
| C3orf62    | -0.5511077 | 1.3017441 | -0.4234 | 0.672 | -2.66E-07 | count | 1 |
| CTGF       | -0.5511077 | 1.3017441 | -0.4234 | 0.672 | -2.66E-07 | count | 1 |
| AL162377.1 | -0.5511077 | 1.3017441 | -0.4234 | 0.672 | -2.66E-07 | count | 1 |
| DPYD       | -0.5511077 | 1.3017441 | -0.4234 | 0.672 | -2.66E-07 | count | 1 |
| ADAM15     | -0.5511077 | 1.3017441 | -0.4234 | 0.672 | -2.66E-07 | count | 1 |
| TRPS1      | -0.5511077 | 1.3017441 | -0.4234 | 0.672 | -2.66E-07 | count | 1 |
| SGSM2      | -0.5511077 | 1.3017441 | -0.4234 | 0.672 | -2.66E-07 | count | 1 |
| FLVCR1     | -0.5511077 | 1.3017441 | -0.4234 | 0.672 | -2.66E-07 | count | 1 |
| AC108718.1 | -0.5511077 | 1.3017441 | -0.4234 | 0.672 | -2.66E-07 | count | 1 |
| CELSR1     | -0.5511077 | 1.3017441 | -0.4234 | 0.672 | -2.66E-07 | count | 1 |
| CDCA7      | -0.5511077 | 1.3017441 | -0.4234 | 0.672 | -2.66E-07 | count | 1 |
| AC004951.1 | -0.5511077 | 1.3017441 | -0.4234 | 0.672 | -2.66E-07 | count | 1 |
| ACACA      | -0.5511077 | 1.3017441 | -0.4234 | 0.672 | -2.66E-07 | count | 1 |
| ZNF483     | -0.5511077 | 1.3017441 | -0.4234 | 0.672 | -2.66E-07 | count | 1 |
| PLA1A      | -0.5511077 | 1.3017441 | -0.4234 | 0.672 | -2.66E-07 | count | 1 |
| CAHM       | -0.5511077 | 1.3017441 | -0.4234 | 0.672 | -2.66E-07 | count | 1 |
| ZBTB5      | -0.5511077 | 1.3017441 | -0.4234 | 0.672 | -2.66E-07 | count | 1 |
| ZNF621     | -0.5511077 | 1.3017441 | -0.4234 | 0.672 | -2.66E-07 | count | 1 |
| WDR27      | -0.5511077 | 1.3017441 | -0.4234 | 0.672 | -2.66E-07 | count | 1 |
| NBEA       | -0.5511077 | 1.3017441 | -0.4234 | 0.672 | -2.66E-07 | count | 1 |
| SNX16      | -0.5511077 | 1.3017441 | -0.4234 | 0.672 | -2.66E-07 | count | 1 |
| RBAK       | -0.5511077 | 1.3017441 | -0.4234 | 0.672 | -2.66E-07 | count | 1 |
| TYW1B      | -0.5511077 | 1.3017441 | -0.4234 | 0.672 | -2.66E-07 | count | 1 |
| CNNM2      | -0.5511077 | 1.3017441 | -0.4234 | 0.672 | -2.66E-07 | count | 1 |
| GDPGP1     | -0.5511077 | 1.3017441 | -0.4234 | 0.672 | -2.66E-07 | count | 1 |
| CRYBG3     | -0.5511077 | 1.3017441 | -0.4234 | 0.672 | -2.66E-07 | count | 1 |
| BICRA      | -0.5511077 | 1.3017441 | -0.4234 | 0.672 | -2.66E-07 | count | 1 |
| PDE6B      | -0.5511077 | 1.3017441 | -0.4234 | 0.672 | -2.66E-07 | count | 1 |
| ZNF726     | -0.5511077 | 1.3017441 | -0.4234 | 0.672 | -2.66E-07 | count | 1 |
| PWAR6      | -0.5511077 | 1.3017441 | -0.4234 | 0.672 | -2.66E-07 | count | 1 |
| CDC42EP1   | -0.5511077 | 1.3017441 | -0.4234 | 0.672 | -2.66E-07 | count | 1 |
| STK3       | -0.5511077 | 1.3017441 | -0.4234 | 0.672 | -2.66E-07 | count | 1 |
| TARBP2     | -0.1740147 | 0.9243293 | -0.1883 | 0.851 | -2.64E-07 | count | 1 |
| NUAK2      | -0.1740147 | 0.7911827 | -0.2199 | 0.826 | -2.64E-07 | count | 1 |
| HMBS       | -0.1740147 | 0.9672818 | -0.1799 | 0.857 | -2.64E-07 | count | 1 |
| RGS5       | -0.1740147 | 1.0912469 | -0.1595 | 0.873 | -2.64E-07 | count | 1 |
| CCHCR1     | -0.1740147 | 1.0599795 | -0.1642 | 0.87  | -2.64E-07 | count | 1 |
| PLCB2      | -0.1740147 | 1.0599795 | -0.1642 | 0.87  | -2.64E-07 | count | 1 |
| ATG13      | -0.1740147 | 0.8492382 | -0.2049 | 0.838 | -2.64E-07 | count | 1 |
| CHD3       | -0.1740147 | 0.9881251 | -0.1761 | 0.86  | -2.64E-07 | count | 1 |
| BPGM       | -0.1740147 | 0.8086669 | -0.2152 | 0.83  | -2.64E-07 | count | 1 |
| RAP1GDS1   | -0.0610311 | 0.3786264 | -0.1612 | 0.872 | -2.63E-07 | count | 1 |

|            |            |           |         |       |           |       |   |
|------------|------------|-----------|---------|-------|-----------|-------|---|
| CITED2     | -0.0218584 | 0.3359106 | -0.0651 | 0.948 | -2.60E-07 | count | 1 |
| NUTM2A-AS1 | -0.059847  | 0.4523066 | -0.1323 | 0.895 | -2.58E-07 | count | 1 |
| FUT11      | -0.1696997 | 1.053115  | -0.1611 | 0.872 | -2.58E-07 | count | 1 |
| DYRK2      | -0.0588378 | 0.5360584 | -0.1098 | 0.913 | -2.54E-07 | count | 1 |
| ARHGEF9    | -0.0588378 | 0.520317  | -0.1131 | 0.91  | -2.54E-07 | count | 1 |
| TAF1C      | -0.5161771 | 0.7256353 | -0.7113 | 0.477 | -2.54E-07 | count | 1 |
| B3GLCT     | -0.5161771 | 0.693831  | -0.744  | 0.457 | -2.54E-07 | count | 1 |
| ELK1       | -0.5161771 | 0.6005086 | -0.8596 | 0.39  | -2.54E-07 | count | 1 |
| ZBTB7B     | -0.5161771 | 0.660497  | -0.7815 | 0.435 | -2.53E-07 | count | 1 |
| DDX28      | -0.5161771 | 0.7154732 | -0.7214 | 0.471 | -2.53E-07 | count | 1 |
| URB1       | -0.5161771 | 0.7154732 | -0.7214 | 0.471 | -2.53E-07 | count | 1 |
| BEND4      | -0.5161771 | 0.7154732 | -0.7214 | 0.471 | -2.53E-07 | count | 1 |
| ZNF597     | -0.5161771 | 0.9271621 | -0.5567 | 0.578 | -2.53E-07 | count | 1 |
| RC3H1      | -0.058238  | 0.3992573 | -0.1459 | 0.884 | -2.52E-07 | count | 1 |
| EFNA4      | -0.5057058 | 0.4178449 | -1.2103 | 0.227 | -2.50E-07 | count | 1 |
| UBL7-AS1   | -0.5009097 | 0.4841322 | -1.0347 | 0.301 | -2.49E-07 | count | 1 |
| B3GALT4    | -0.4963745 | 0.4005835 | -1.2391 | 0.216 | -2.47E-07 | count | 1 |
| CDK19      | -0.0572089 | 0.6668487 | -0.0858 | 0.932 | -2.47E-07 | count | 1 |
| PHF10      | -0.0572089 | 0.4537296 | -0.1261 | 0.9   | -2.47E-07 | count | 1 |
| DPH6       | -0.0572089 | 0.651686  | -0.0878 | 0.93  | -2.47E-07 | count | 1 |
| PEX13      | -0.0572089 | 0.574901  | -0.0995 | 0.921 | -2.47E-07 | count | 1 |
| ZC3H7B     | -0.159505  | 0.9159853 | -0.1741 | 0.862 | -2.43E-07 | count | 1 |
| LINC01023  | -0.159505  | 1.3988336 | -0.114  | 0.909 | -2.43E-07 | count | 1 |
| MED12      | -0.159505  | 1.3988336 | -0.114  | 0.909 | -2.43E-07 | count | 1 |
| CCDC42     | -0.159505  | 1.3988336 | -0.114  | 0.909 | -2.43E-07 | count | 1 |
| TRAPPC13   | -0.4880063 | 0.6289428 | -0.7759 | 0.438 | -2.43E-07 | count | 1 |
| CEP192     | -0.4880063 | 0.6192353 | -0.7881 | 0.431 | -2.42E-07 | count | 1 |
| EYA3       | -0.4880063 | 0.6608073 | -0.7385 | 0.461 | -2.42E-07 | count | 1 |
| CRYZ       | -0.4880063 | 0.5922727 | -0.824  | 0.41  | -2.42E-07 | count | 1 |
| NFS1       | -0.4880063 | 0.5922727 | -0.824  | 0.41  | -2.42E-07 | count | 1 |
| MAP4       | -0.0203322 | 0.2712616 | -0.075  | 0.94  | -2.42E-07 | count | 1 |
| CCDC22     | -0.0559514 | 0.4632096 | -0.1208 | 0.904 | -2.42E-07 | count | 1 |
| FTSJ3      | -0.0559514 | 0.4610229 | -0.1214 | 0.903 | -2.42E-07 | count | 1 |
| GPBP1L1    | -0.0554243 | 0.4134212 | -0.1341 | 0.893 | -2.40E-07 | count | 1 |
| POLDIP2    | -0.4769564 | 0.4216148 | -1.1313 | 0.259 | -2.38E-07 | count | 1 |
| RASL11A    | -0.467387  | 0.8439297 | -0.5538 | 0.58  | -2.35E-07 | count | 1 |
| AC106707.1 | -0.0541366 | 0.9349131 | -0.0579 | 0.954 | -2.35E-07 | count | 1 |
| C6orf136   | -0.467387  | 0.6371205 | -0.7336 | 0.464 | -2.34E-07 | count | 1 |
| XPNPEP1    | -0.467387  | 0.6174042 | -0.757  | 0.449 | -2.34E-07 | count | 1 |
| USB1       | -0.0541366 | 0.7780324 | -0.0696 | 0.945 | -2.34E-07 | count | 1 |
| PILRB      | -0.0541366 | 0.4858215 | -0.1114 | 0.911 | -2.34E-07 | count | 1 |
| GON7       | -0.0541366 | 0.4839697 | -0.1119 | 0.911 | -2.34E-07 | count | 1 |
| ZNF681     | -0.467387  | 0.6174042 | -0.757  | 0.449 | -2.34E-07 | count | 1 |
| DPM1       | -0.0541366 | 0.4282594 | -0.1264 | 0.899 | -2.34E-07 | count | 1 |
| MRS2       | -0.0541366 | 0.6377787 | -0.0849 | 0.932 | -2.34E-07 | count | 1 |

|             |            |           |         |        |           |       |   |
|-------------|------------|-----------|---------|--------|-----------|-------|---|
| TSGA10      | -0.0541366 | 0.7108584 | -0.0762 | 0.939  | -2.34E-07 | count | 1 |
| RBL1        | -0.0541366 | 0.7090399 | -0.0764 | 0.939  | -2.34E-07 | count | 1 |
| QSOX2       | -0.0541366 | 0.7750696 | -0.0698 | 0.944  | -2.34E-07 | count | 1 |
| SAP130      | -2.4132971 | 1.1334145 | -2.1292 | 0.0338 | -2.34E-07 | count | 1 |
| CYFIP1      | -0.0541366 | 0.6750995 | -0.0802 | 0.936  | -2.34E-07 | count | 1 |
| FAM98B      | -0.467387  | 0.5970372 | -0.7828 | 0.434  | -2.34E-07 | count | 1 |
| NME7        | -0.467387  | 0.6292259 | -0.7428 | 0.458  | -2.34E-07 | count | 1 |
| EFCAB7      | -2.4132971 | 1.0866201 | -2.2209 | 0.0269 | -2.34E-07 | count | 1 |
| TENT5A      | -2.4132971 | 1.0866201 | -2.2209 | 0.0269 | -2.34E-07 | count | 1 |
| PTER        | -0.467387  | 0.744186  | -0.6281 | 0.53   | -2.33E-07 | count | 1 |
| ARRDC3      | -0.151534  | 0.4292058 | -0.3531 | 0.724  | -2.33E-07 | count | 1 |
| CDK9        | -0.019513  | 0.3011926 | -0.0648 | 0.948  | -2.32E-07 | count | 1 |
| RFX3        | -2.2797657 | 1.5224012 | -1.4975 | 0.135  | -2.32E-07 | count | 1 |
| MAN1B1      | -0.0535316 | 0.5850898 | -0.0915 | 0.927  | -2.32E-07 | count | 1 |
| SGPP1       | -0.0535316 | 0.6497281 | -0.0824 | 0.934  | -2.31E-07 | count | 1 |
| C14orf93    | -2.2797657 | 1.1631089 | -1.9601 | 0.0506 | -2.29E-07 | count | 1 |
| MRGBP       | -0.0528901 | 0.3443548 | -0.1536 | 0.878  | -2.29E-07 | count | 1 |
| C11orf49    | -2.2797657 | 0.9954853 | -2.2901 | 0.0225 | -2.28E-07 | count | 1 |
| AP2M1       | -0.019086  | 0.2767883 | -0.069  | 0.945  | -2.27E-07 | count | 1 |
| TADA2B      | -0.4516386 | 0.574495  | -0.7861 | 0.432  | -2.27E-07 | count | 1 |
| ZNF43       | -0.0524026 | 0.4598311 | -0.114  | 0.909  | -2.27E-07 | count | 1 |
| JOSD2       | -0.0524026 | 0.4666074 | -0.1123 | 0.911  | -2.27E-07 | count | 1 |
| IGSF6       | -2.125615  | 1.5654714 | -1.3578 | 0.175  | -2.25E-07 | count | 1 |
| ELMOD2      | -0.4392161 | 0.5291524 | -0.83   | 0.407  | -2.23E-07 | count | 1 |
| MED22       | -2.125615  | 1.2604915 | -1.6863 | 0.0924 | -2.23E-07 | count | 1 |
| COQ9        | -0.4392161 | 0.5730576 | -0.7664 | 0.444  | -2.23E-07 | count | 1 |
| SAMHD1      | -2.125615  | 1.2021627 | -1.7682 | 0.0777 | -2.23E-07 | count | 1 |
| STK33       | -2.125615  | 1.1408556 | -1.8632 | 0.0631 | -2.22E-07 | count | 1 |
| GNLY        | -2.125615  | 1.1408556 | -1.8632 | 0.0631 | -2.22E-07 | count | 1 |
| OGG1        | -0.4392161 | 0.5451641 | -0.8057 | 0.421  | -2.22E-07 | count | 1 |
| DENND3      | -0.0512887 | 0.4014477 | -0.1278 | 0.898  | -2.22E-07 | count | 1 |
| EMG1        | -0.0512891 | 0.3822073 | -0.1342 | 0.893  | -2.22E-07 | count | 1 |
| TSEN15      | -0.0512887 | 0.541289  | -0.0948 | 0.925  | -2.22E-07 | count | 1 |
| GCLC        | -0.0512887 | 0.5951359 | -0.0862 | 0.931  | -2.22E-07 | count | 1 |
| AL645568.1  | -2.125615  | 1.0760613 | -1.9754 | 0.0488 | -2.22E-07 | count | 1 |
| USP9X       | -0.0512891 | 0.3922916 | -0.1307 | 0.896  | -2.22E-07 | count | 1 |
| RANBP6      | -0.0512887 | 0.5776673 | -0.0888 | 0.929  | -2.22E-07 | count | 1 |
| ESCO1       | -0.0183934 | 0.295042  | -0.0623 | 0.95   | -2.19E-07 | count | 1 |
| CRLS1       | -0.4291658 | 0.4937096 | -0.8693 | 0.385  | -2.19E-07 | count | 1 |
| RNASEH1-AS1 | -0.1421294 | 0.7326642 | -0.194  | 0.846  | -2.18E-07 | count | 1 |
| INO80E      | -0.1421294 | 0.6690189 | -0.2124 | 0.832  | -2.18E-07 | count | 1 |
| DHDDS       | -0.4291658 | 0.5208035 | -0.824  | 0.41   | -2.17E-07 | count | 1 |
| AL662796.1  | -0.0499413 | 0.4966947 | -0.1005 | 0.92   | -2.16E-07 | count | 1 |
| NTNG1       | -0.420867  | 0.5291825 | -0.7953 | 0.427  | -2.15E-07 | count | 1 |
| ACER3       | -1.9432935 | 1.3248151 | -1.4668 | 0.143  | -2.15E-07 | count | 1 |

|            |            |           |         |        |           |       |   |
|------------|------------|-----------|---------|--------|-----------|-------|---|
| NPM3       | -1.9432935 | 1.2561201 | -1.5471 | 0.123  | -2.14E-07 | count | 1 |
| STK32C     | -1.9432935 | 1.2561201 | -1.5471 | 0.123  | -2.14E-07 | count | 1 |
| WDR81      | -1.9432935 | 1.1834444 | -1.6421 | 0.101  | -2.14E-07 | count | 1 |
| KRBA2      | -1.9432935 | 1.1834444 | -1.6421 | 0.101  | -2.14E-07 | count | 1 |
| TSTD3      | -1.9432935 | 1.1834444 | -1.6421 | 0.101  | -2.14E-07 | count | 1 |
| IL18       | -1.9432935 | 1.1834444 | -1.6421 | 0.101  | -2.14E-07 | count | 1 |
| ACO1       | -1.9432935 | 1.1834444 | -1.6421 | 0.101  | -2.14E-07 | count | 1 |
| C11orf68   | -1.9432935 | 1.1060033 | -1.757  | 0.0796 | -2.14E-07 | count | 1 |
| FBXO48     | -1.9432935 | 1.1060033 | -1.757  | 0.0796 | -2.14E-07 | count | 1 |
| BEX3       | -1.9432935 | 1.1060033 | -1.757  | 0.0796 | -2.14E-07 | count | 1 |
| ANO10      | -1.9432935 | 1.1060033 | -1.757  | 0.0796 | -2.14E-07 | count | 1 |
| DHX57      | -1.9432935 | 1.022715  | -1.9001 | 0.0581 | -2.14E-07 | count | 1 |
| PES1       | -1.9432935 | 1.022715  | -1.9001 | 0.0581 | -2.14E-07 | count | 1 |
| TMED2      | -0.017672  | 0.247601  | -0.0714 | 0.943  | -2.11E-07 | count | 1 |
| SLC39A13   | -0.1361897 | 0.8040682 | -0.1694 | 0.866  | -2.10E-07 | count | 1 |
| MIB1       | -0.1361897 | 0.8040682 | -0.1694 | 0.866  | -2.10E-07 | count | 1 |
| ATP2B4     | -0.1361897 | 0.8040682 | -0.1694 | 0.866  | -2.10E-07 | count | 1 |
| SLC18B1    | -0.1361897 | 0.8040682 | -0.1694 | 0.866  | -2.10E-07 | count | 1 |
| AGGF1      | -0.1361897 | 0.803301  | -0.1695 | 0.865  | -2.10E-07 | count | 1 |
| C8orf58    | -0.1361897 | 0.803301  | -0.1695 | 0.865  | -2.10E-07 | count | 1 |
| DIP2A      | -0.1361897 | 0.9754305 | -0.1396 | 0.889  | -2.10E-07 | count | 1 |
| TTC13      | -0.1361897 | 0.8993187 | -0.1514 | 0.88   | -2.10E-07 | count | 1 |
| C11orf71   | -0.1361897 | 0.8890722 | -0.1532 | 0.878  | -2.10E-07 | count | 1 |
| TTLL3      | -0.1361897 | 0.8890722 | -0.1532 | 0.878  | -2.10E-07 | count | 1 |
| LMTK2      | -0.1361897 | 0.8890722 | -0.1532 | 0.878  | -2.10E-07 | count | 1 |
| AC092069.1 | -0.1361897 | 0.8890722 | -0.1532 | 0.878  | -2.10E-07 | count | 1 |
| PTMS       | -0.1361897 | 0.8890722 | -0.1532 | 0.878  | -2.10E-07 | count | 1 |
| ZNF852     | -0.1361897 | 0.8890722 | -0.1532 | 0.878  | -2.10E-07 | count | 1 |
| DEPDC5     | -0.1361897 | 0.8890722 | -0.1532 | 0.878  | -2.10E-07 | count | 1 |
| PPARA      | -0.1361897 | 0.8883784 | -0.1533 | 0.878  | -2.10E-07 | count | 1 |
| SLC17A5    | -0.1361897 | 0.8883784 | -0.1533 | 0.878  | -2.10E-07 | count | 1 |
| KLHL42     | -0.1361897 | 0.7208977 | -0.1889 | 0.85   | -2.10E-07 | count | 1 |
| MAIP1      | -0.1361897 | 0.7208977 | -0.1889 | 0.85   | -2.10E-07 | count | 1 |
| PIGQ       | -0.1361897 | 0.7217526 | -0.1887 | 0.85   | -2.10E-07 | count | 1 |
| RMDN3      | -0.1361897 | 0.8153836 | -0.167  | 0.867  | -2.10E-07 | count | 1 |
| RTL8C      | -0.1361897 | 0.8153836 | -0.167  | 0.867  | -2.10E-07 | count | 1 |
| FHIT       | -0.1361897 | 0.8153836 | -0.167  | 0.867  | -2.10E-07 | count | 1 |
| SIPA1L3    | -0.1361897 | 0.8153836 | -0.167  | 0.867  | -2.10E-07 | count | 1 |
| TSHZ1      | -0.1361897 | 1.0384107 | -0.1312 | 0.896  | -2.10E-07 | count | 1 |
| ERV3-1     | -0.4079635 | 0.5320607 | -0.7668 | 0.444  | -2.09E-07 | count | 1 |
| CDADC1     | -1.7201499 | 0.8439637 | -2.0382 | 0.0421 | -2.07E-07 | count | 1 |
| MAP3K20    | -1.7201499 | 0.8090493 | -2.1261 | 0.034  | -2.06E-07 | count | 1 |
| ANGPTL6    | -1.7201499 | 0.7725586 | -2.2266 | 0.0265 | -2.06E-07 | count | 1 |
| ZNF524     | -0.3983941 | 0.4572859 | -0.8712 | 0.384  | -2.04E-07 | count | 1 |
| TMEM106B   | -0.0468883 | 0.4952119 | -0.0947 | 0.925  | -2.03E-07 | count | 1 |

|            |            |           |         |        |           |       |   |
|------------|------------|-----------|---------|--------|-----------|-------|---|
| MCM8       | -1.7201499 | 1.3360052 | -1.2875 | 0.199  | -2.03E-07 | count | 1 |
| FNDC11     | -1.7201499 | 1.3360052 | -1.2875 | 0.199  | -2.03E-07 | count | 1 |
| AC009118.3 | -1.7201499 | 1.1503035 | -1.4954 | 0.136  | -2.03E-07 | count | 1 |
| LINC02413  | -1.7201499 | 1.1503035 | -1.4954 | 0.136  | -2.03E-07 | count | 1 |
| BTN3A3     | -1.7201499 | 1.1503035 | -1.4954 | 0.136  | -2.03E-07 | count | 1 |
| TAOK2      | -1.7201499 | 1.1503035 | -1.4954 | 0.136  | -2.03E-07 | count | 1 |
| ADAP2      | -1.7201499 | 1.1503035 | -1.4954 | 0.136  | -2.03E-07 | count | 1 |
| SNX30      | -1.7201499 | 1.1503035 | -1.4954 | 0.136  | -2.03E-07 | count | 1 |
| MFSD2A     | -1.7201499 | 1.1503035 | -1.4954 | 0.136  | -2.03E-07 | count | 1 |
| ZNF169     | -1.7201499 | 1.1503035 | -1.4954 | 0.136  | -2.03E-07 | count | 1 |
| DNAJA4     | -1.7201499 | 1.1503035 | -1.4954 | 0.136  | -2.03E-07 | count | 1 |
| ZNF174     | -1.7201499 | 1.1503035 | -1.4954 | 0.136  | -2.03E-07 | count | 1 |
| TNFAIP1    | -1.7201499 | 1.1503035 | -1.4954 | 0.136  | -2.03E-07 | count | 1 |
| SMAD7      | -1.7201499 | 1.1503035 | -1.4954 | 0.136  | -2.03E-07 | count | 1 |
| PCNX4      | -0.0169743 | 0.436455  | -0.0389 | 0.969  | -2.03E-07 | count | 1 |
| ETFBKMT    | -1.7201499 | 1.0451518 | -1.6458 | 0.101  | -2.02E-07 | count | 1 |
| DCUN1D3    | -1.7201499 | 1.0451518 | -1.6458 | 0.101  | -2.02E-07 | count | 1 |
| BMPR1A     | -1.7201499 | 1.0451518 | -1.6458 | 0.101  | -2.02E-07 | count | 1 |
| FUT7       | -1.7201499 | 1.0451518 | -1.6458 | 0.101  | -2.02E-07 | count | 1 |
| GPR180     | -1.5866185 | 0.9813484 | -1.6168 | 0.107  | -1.99E-07 | count | 1 |
| MAP3K10    | -1.5866185 | 0.9095922 | -1.7443 | 0.0818 | -1.98E-07 | count | 1 |
| ZNF75D     | -1.5866185 | 0.8715014 | -1.8206 | 0.0693 | -1.98E-07 | count | 1 |
| SPATA6     | -1.5866185 | 1.0765322 | -1.4738 | 0.141  | -1.98E-07 | count | 1 |
| MUTYH      | -1.5866185 | 0.8316678 | -1.9078 | 0.0571 | -1.98E-07 | count | 1 |
| TCF20      | -1.5866185 | 1.0115508 | -1.5685 | 0.117  | -1.97E-07 | count | 1 |
| FLCN       | -1.5866185 | 1.0115508 | -1.5685 | 0.117  | -1.97E-07 | count | 1 |
| NUP43      | -1.5866185 | 0.7898278 | -2.0088 | 0.0452 | -1.97E-07 | count | 1 |
| TLK2       | -0.0164918 | 0.3234866 | -0.051  | 0.959  | -1.97E-07 | count | 1 |
| AC012645.3 | -1.5866185 | 0.9420978 | -1.6841 | 0.0929 | -1.97E-07 | count | 1 |
| GBP1       | -0.043656  | 0.492884  | -0.0886 | 0.929  | -1.89E-07 | count | 1 |
| GABARAP    | -1.4324679 | 0.9079231 | -1.5777 | 0.115  | -1.88E-07 | count | 1 |
| KCTD7      | -1.4324679 | 0.8615348 | -1.6627 | 0.0971 | -1.87E-07 | count | 1 |
| PIK3CD-AS2 | -1.4324679 | 0.8615348 | -1.6627 | 0.0971 | -1.87E-07 | count | 1 |
| PLPP1      | -1.4324679 | 0.8615348 | -1.6627 | 0.0971 | -1.87E-07 | count | 1 |
| POU3F1     | -1.4324679 | 1.0421545 | -1.3745 | 0.17   | -1.87E-07 | count | 1 |
| RAB39A     | -1.4324679 | 1.0421545 | -1.3745 | 0.17   | -1.87E-07 | count | 1 |
| AL139246.3 | -1.4324679 | 0.8125024 | -1.763  | 0.0786 | -1.87E-07 | count | 1 |
| SNAPC4     | -1.4324679 | 0.8125024 | -1.763  | 0.0786 | -1.87E-07 | count | 1 |
| CNEP1R1    | -1.4324679 | 0.7603145 | -1.884  | 0.0602 | -1.87E-07 | count | 1 |
| FAM229B    | -0.1198491 | 0.7888448 | -0.1519 | 0.879  | -1.86E-07 | count | 1 |
| AC025423.1 | -1.4324679 | 1.4673626 | -0.9762 | 0.329  | -1.86E-07 | count | 1 |
| HECW2      | -1.4324679 | 1.4673626 | -0.9762 | 0.329  | -1.86E-07 | count | 1 |
| PDE2A      | -1.4324679 | 1.4673626 | -0.9762 | 0.329  | -1.86E-07 | count | 1 |
| C17orf58   | -1.4324679 | 1.4673626 | -0.9762 | 0.329  | -1.86E-07 | count | 1 |
| TTC30A     | -1.4324679 | 1.4673626 | -0.9762 | 0.329  | -1.86E-07 | count | 1 |

|            |            |           |         |       |           |       |   |
|------------|------------|-----------|---------|-------|-----------|-------|---|
| MPZL3      | -1.4324679 | 1.4673626 | -0.9762 | 0.329 | -1.86E-07 | count | 1 |
| DCAF13     | -0.0155725 | 0.2836467 | -0.0549 | 0.956 | -1.86E-07 | count | 1 |
| AL118506.1 | -1.4324679 | 1.2233137 | -1.171  | 0.242 | -1.85E-07 | count | 1 |
| IGLV3-1    | -1.4324679 | 1.2233137 | -1.171  | 0.242 | -1.85E-07 | count | 1 |
| NBPF15     | -1.4324679 | 1.2233137 | -1.171  | 0.242 | -1.85E-07 | count | 1 |
| ST5        | -1.4324679 | 1.2233137 | -1.171  | 0.242 | -1.85E-07 | count | 1 |
| AACS       | -1.4324679 | 1.2233137 | -1.171  | 0.242 | -1.85E-07 | count | 1 |
| RFX2       | -1.4324679 | 1.2233137 | -1.171  | 0.242 | -1.85E-07 | count | 1 |
| AC098483.1 | -1.4324679 | 1.2233137 | -1.171  | 0.242 | -1.85E-07 | count | 1 |
| IL12A      | -1.4324679 | 1.2233137 | -1.171  | 0.242 | -1.85E-07 | count | 1 |
| AC091959.3 | -1.4324679 | 1.2233137 | -1.171  | 0.242 | -1.85E-07 | count | 1 |
| HACE1      | -1.4324679 | 1.2233137 | -1.171  | 0.242 | -1.85E-07 | count | 1 |
| ATG9B      | -1.4324679 | 1.2233137 | -1.171  | 0.242 | -1.85E-07 | count | 1 |
| ZNF79      | -1.4324679 | 1.2233137 | -1.171  | 0.242 | -1.85E-07 | count | 1 |
| SUFU       | -1.4324679 | 1.2233137 | -1.171  | 0.242 | -1.85E-07 | count | 1 |
| AC048341.1 | -1.4324679 | 1.2233137 | -1.171  | 0.242 | -1.85E-07 | count | 1 |
| AC004812.2 | -1.4324679 | 1.2233137 | -1.171  | 0.242 | -1.85E-07 | count | 1 |
| TEPSIN     | -1.4324679 | 1.2233137 | -1.171  | 0.242 | -1.85E-07 | count | 1 |
| AL590705.1 | -1.4324679 | 1.2233137 | -1.171  | 0.242 | -1.85E-07 | count | 1 |
| PIF1       | -1.4324679 | 1.2233137 | -1.171  | 0.242 | -1.85E-07 | count | 1 |
| HIST1H2AE  | -1.4324679 | 1.2233137 | -1.171  | 0.242 | -1.85E-07 | count | 1 |
| ARHGAP20   | -1.4324679 | 1.2233137 | -1.171  | 0.242 | -1.85E-07 | count | 1 |
| AC116913.1 | -1.4324679 | 1.2233137 | -1.171  | 0.242 | -1.85E-07 | count | 1 |
| ZNF710     | -1.4324679 | 1.2233137 | -1.171  | 0.242 | -1.85E-07 | count | 1 |
| GEMIN4     | -1.4324679 | 1.2233137 | -1.171  | 0.242 | -1.85E-07 | count | 1 |
| CCDC127    | -1.4324679 | 1.2233137 | -1.171  | 0.242 | -1.85E-07 | count | 1 |
| AC008393.1 | -1.4324679 | 1.2233137 | -1.171  | 0.242 | -1.85E-07 | count | 1 |
| FANCE      | -1.4324679 | 1.2233137 | -1.171  | 0.242 | -1.85E-07 | count | 1 |
| PET117     | -1.4324679 | 1.2233137 | -1.171  | 0.242 | -1.85E-07 | count | 1 |
| PRUNE1     | -1.4324679 | 1.2233137 | -1.171  | 0.242 | -1.85E-07 | count | 1 |
| HYAL3      | -1.4324679 | 1.2233137 | -1.171  | 0.242 | -1.85E-07 | count | 1 |
| AL365205.1 | -1.4324679 | 1.2233137 | -1.171  | 0.242 | -1.85E-07 | count | 1 |
| ZNF543     | -1.4324679 | 1.2233137 | -1.171  | 0.242 | -1.85E-07 | count | 1 |
| TMEM68     | -1.4324679 | 1.0808183 | -1.3254 | 0.186 | -1.85E-07 | count | 1 |
| MRVI1-AS1  | -1.4324679 | 1.0808183 | -1.3254 | 0.186 | -1.85E-07 | count | 1 |
| CLUH       | -1.4324679 | 1.0808183 | -1.3254 | 0.186 | -1.85E-07 | count | 1 |
| ZNF440     | -1.4324679 | 1.0808183 | -1.3254 | 0.186 | -1.85E-07 | count | 1 |
| MTHFD1L    | -1.4324679 | 1.0808183 | -1.3254 | 0.186 | -1.85E-07 | count | 1 |
| ZNF16      | -1.4324679 | 1.0808183 | -1.3254 | 0.186 | -1.85E-07 | count | 1 |
| FOXN3-AS1  | -1.4324679 | 1.0808183 | -1.3254 | 0.186 | -1.85E-07 | count | 1 |
| SORBS3     | -1.4324679 | 1.0808183 | -1.3254 | 0.186 | -1.85E-07 | count | 1 |
| ZNF200     | -1.4324679 | 1.0808183 | -1.3254 | 0.186 | -1.85E-07 | count | 1 |
| SLC1A4     | -1.4324679 | 1.0808183 | -1.3254 | 0.186 | -1.85E-07 | count | 1 |
| ZNF500     | -1.4324679 | 1.0808183 | -1.3254 | 0.186 | -1.85E-07 | count | 1 |
| RRP8       | -0.041786  | 0.5342214 | -0.0782 | 0.938 | -1.81E-07 | count | 1 |

|            |            |           |         |        |           |       |   |
|------------|------------|-----------|---------|--------|-----------|-------|---|
| REXO1      | -0.0417436 | 0.383345  | -0.1089 | 0.913  | -1.81E-07 | count | 1 |
| TMEM203    | -0.0417436 | 0.3328117 | -0.1254 | 0.9    | -1.81E-07 | count | 1 |
| RAP2A      | -1.3146848 | 0.6920831 | -1.8996 | 0.0581 | -1.80E-07 | count | 1 |
| RABL6      | -0.0408388 | 0.4854238 | -0.0841 | 0.933  | -1.78E-07 | count | 1 |
| API5       | -0.0408388 | 0.4322029 | -0.0945 | 0.925  | -1.78E-07 | count | 1 |
| FKBP5      | -0.0407857 | 0.4376738 | -0.0932 | 0.926  | -1.77E-07 | count | 1 |
| SLFN12     | -0.3338556 | 0.6135535 | -0.5441 | 0.587  | -1.76E-07 | count | 1 |
| SPSB2      | -0.3338556 | 0.7227325 | -0.4619 | 0.644  | -1.76E-07 | count | 1 |
| LRR1       | -0.3338556 | 0.6067274 | -0.5503 | 0.582  | -1.76E-07 | count | 1 |
| CKAP4      | -0.3338556 | 0.4996384 | -0.6682 | 0.504  | -1.76E-07 | count | 1 |
| MACC1      | -0.3338556 | 0.7515416 | -0.4442 | 0.657  | -1.76E-07 | count | 1 |
| BEX5       | -0.3338556 | 0.4607329 | -0.7246 | 0.469  | -1.76E-07 | count | 1 |
| SLC25A13   | -0.3338556 | 0.5391487 | -0.6192 | 0.536  | -1.76E-07 | count | 1 |
| P2RY13     | -0.3338556 | 0.6373693 | -0.5238 | 0.601  | -1.76E-07 | count | 1 |
| QPCT       | -0.3338556 | 0.6806197 | -0.4905 | 0.624  | -1.76E-07 | count | 1 |
| ZFP91      | -0.3338556 | 0.4255833 | -0.7845 | 0.433  | -1.76E-07 | count | 1 |
| CASP1      | -0.0147287 | 0.3403011 | -0.0433 | 0.965  | -1.76E-07 | count | 1 |
| DGAT2      | -0.3338556 | 0.7777306 | -0.4293 | 0.668  | -1.76E-07 | count | 1 |
| ZNF737     | -0.3338556 | 0.6522464 | -0.5119 | 0.609  | -1.76E-07 | count | 1 |
| RAB11FIP4  | -0.3338556 | 0.6522464 | -0.5119 | 0.609  | -1.76E-07 | count | 1 |
| RNASEH1    | -0.3338556 | 0.4494602 | -0.7428 | 0.458  | -1.76E-07 | count | 1 |
| FBXO44     | -0.3338556 | 0.5682576 | -0.5875 | 0.557  | -1.76E-07 | count | 1 |
| GNPDA1     | -0.3338556 | 0.5682576 | -0.5875 | 0.557  | -1.76E-07 | count | 1 |
| FANCL      | -0.3338556 | 0.5430146 | -0.6148 | 0.539  | -1.76E-07 | count | 1 |
| AMPD2      | -0.3338556 | 0.7387596 | -0.4519 | 0.652  | -1.76E-07 | count | 1 |
| SLC35D1    | -0.3338556 | 0.7387596 | -0.4519 | 0.652  | -1.76E-07 | count | 1 |
| SMG9       | -0.3338556 | 0.5622657 | -0.5938 | 0.553  | -1.76E-07 | count | 1 |
| EXOC2      | -0.3338556 | 0.5622657 | -0.5938 | 0.553  | -1.76E-07 | count | 1 |
| AC093462.1 | -0.3338556 | 0.8290883 | -0.4027 | 0.687  | -1.76E-07 | count | 1 |
| TMCC1      | -0.3338556 | 0.6947897 | -0.4805 | 0.631  | -1.76E-07 | count | 1 |
| TBC1D7     | -0.3338556 | 0.6947897 | -0.4805 | 0.631  | -1.76E-07 | count | 1 |
| STAT5B     | -0.3338556 | 0.6199874 | -0.5385 | 0.591  | -1.75E-07 | count | 1 |
| DHFR       | -0.3338556 | 0.6199874 | -0.5385 | 0.591  | -1.75E-07 | count | 1 |
| C5orf30    | -0.3338556 | 0.6199874 | -0.5385 | 0.591  | -1.75E-07 | count | 1 |
| ANKDD1A    | -0.3338556 | 0.8774451 | -0.3805 | 0.704  | -1.75E-07 | count | 1 |
| GEMIN8     | -0.3338556 | 0.5348234 | -0.6242 | 0.533  | -1.75E-07 | count | 1 |
| C11orf54   | -0.3338556 | 0.697615  | -0.4786 | 0.632  | -1.75E-07 | count | 1 |
| IQCH-AS1   | -0.3338556 | 0.697615  | -0.4786 | 0.632  | -1.75E-07 | count | 1 |
| BCAS3      | -0.3338556 | 0.697615  | -0.4786 | 0.632  | -1.75E-07 | count | 1 |
| DNAJC5     | -0.3338556 | 0.697615  | -0.4786 | 0.632  | -1.75E-07 | count | 1 |
| TLR1       | -0.3338556 | 0.5150877 | -0.6482 | 0.517  | -1.75E-07 | count | 1 |
| STT3B      | -0.0403426 | 0.3758211 | -0.1073 | 0.915  | -1.75E-07 | count | 1 |
| ZNF559     | -0.3338556 | 0.6035742 | -0.5531 | 0.58   | -1.75E-07 | count | 1 |
| SIK1       | -0.3338556 | 0.6327316 | -0.5276 | 0.598  | -1.75E-07 | count | 1 |
| GATM       | -0.3338556 | 0.7544463 | -0.4425 | 0.658  | -1.75E-07 | count | 1 |

|            |            |           |         |       |           |       |   |
|------------|------------|-----------|---------|-------|-----------|-------|---|
| WHRN       | -0.3338556 | 0.8072866 | -0.4136 | 0.679 | -1.75E-07 | count | 1 |
| HERC6      | -0.3338556 | 0.6329697 | -0.5274 | 0.598 | -1.75E-07 | count | 1 |
| PPP1R12C   | -0.3338556 | 0.7458594 | -0.4476 | 0.655 | -1.75E-07 | count | 1 |
| PCCA       | -0.3338556 | 0.7142059 | -0.4675 | 0.64  | -1.75E-07 | count | 1 |
| FERMT3     | -0.0146934 | 0.3126396 | -0.047  | 0.963 | -1.75E-07 | count | 1 |
| KEAP1      | -0.3338556 | 0.7178198 | -0.4651 | 0.642 | -1.75E-07 | count | 1 |
| PARP3      | -0.3338556 | 0.7698134 | -0.4337 | 0.665 | -1.75E-07 | count | 1 |
| TNFAIP8L1  | -0.3338556 | 0.7698134 | -0.4337 | 0.665 | -1.75E-07 | count | 1 |
| SPTY2D1OS  | -1.2501463 | 1.4155666 | -0.8831 | 0.378 | -1.75E-07 | count | 1 |
| TRAM2-AS1  | -1.2501463 | 1.0110649 | -1.2365 | 0.217 | -1.74E-07 | count | 1 |
| SPINT1     | -1.2501463 | 1.0110649 | -1.2365 | 0.217 | -1.74E-07 | count | 1 |
| UBE2E3     | -0.0145785 | 0.315157  | -0.0463 | 0.963 | -1.74E-07 | count | 1 |
| FBXL19-AS1 | -1.2501463 | 1.1761328 | -1.0629 | 0.288 | -1.74E-07 | count | 1 |
| ERICH6-AS1 | -1.2501463 | 0.9585556 | -1.3042 | 0.193 | -1.74E-07 | count | 1 |
| ENTPD1-AS1 | -1.2501463 | 0.9585556 | -1.3042 | 0.193 | -1.74E-07 | count | 1 |
| RENBP      | -1.2501463 | 0.902998  | -1.3844 | 0.167 | -1.74E-07 | count | 1 |
| FBXO30     | -1.2501463 | 0.902998  | -1.3844 | 0.167 | -1.74E-07 | count | 1 |
| PLBD1      | -1.2501463 | 1.1313111 | -1.105  | 0.27  | -1.73E-07 | count | 1 |
| SWT1       | -1.2501463 | 1.0846388 | -1.1526 | 0.25  | -1.73E-07 | count | 1 |
| MCU        | -1.2501463 | 1.0846388 | -1.1526 | 0.25  | -1.73E-07 | count | 1 |
| PTAFR      | -1.2501463 | 0.8437902 | -1.4816 | 0.139 | -1.73E-07 | count | 1 |
| CAMTA2     | -1.2501463 | 0.8437902 | -1.4816 | 0.139 | -1.73E-07 | count | 1 |
| ADCY7      | -1.2501463 | 0.8437902 | -1.4816 | 0.139 | -1.73E-07 | count | 1 |
| MRPL52     | -0.0145187 | 0.2165252 | -0.0671 | 0.947 | -1.73E-07 | count | 1 |
| INTS4      | -1.2501463 | 1.0358658 | -1.2069 | 0.228 | -1.73E-07 | count | 1 |
| MT1X       | -1.2501463 | 0.7801016 | -1.6025 | 0.11  | -1.73E-07 | count | 1 |
| CEP250     | -1.2501463 | 0.9846799 | -1.2696 | 0.205 | -1.73E-07 | count | 1 |
| SPTLC1     | -0.0395459 | 0.3594376 | -0.11   | 0.912 | -1.72E-07 | count | 1 |
| TMEM179B   | -0.0143992 | 0.2708148 | -0.0532 | 0.958 | -1.72E-07 | count | 1 |
| LMO2       | -0.0394696 | 0.5217992 | -0.0756 | 0.94  | -1.72E-07 | count | 1 |
| SPHK2      | -1.1811534 | 0.7493537 | -1.5762 | 0.116 | -1.69E-07 | count | 1 |
| MIATNB     | -1.1811534 | 0.821591  | -1.4376 | 0.151 | -1.68E-07 | count | 1 |
| EMC4       | -0.0140756 | 0.2236907 | -0.0629 | 0.95  | -1.68E-07 | count | 1 |
| REEP3      | -0.0374899 | 0.41139   | -0.0911 | 0.927 | -1.63E-07 | count | 1 |
| PSMD1      | -0.0374899 | 0.3785065 | -0.099  | 0.921 | -1.63E-07 | count | 1 |
| HERC1      | -0.0371554 | 0.6165544 | -0.0603 | 0.952 | -1.62E-07 | count | 1 |
| ADIRF      | -0.0371554 | 0.6158607 | -0.0603 | 0.952 | -1.62E-07 | count | 1 |
| TP53       | -0.0356065 | 0.5860165 | -0.0608 | 0.952 | -1.55E-07 | count | 1 |
| ARHGAP6    | -1.0270028 | 0.9222801 | -1.1135 | 0.266 | -1.55E-07 | count | 1 |
| PIGU       | -1.0270028 | 1.2185226 | -0.8428 | 0.4   | -1.54E-07 | count | 1 |
| ARL17B     | -1.0270028 | 0.8529229 | -1.2041 | 0.229 | -1.54E-07 | count | 1 |
| TJAP1      | -1.0270028 | 0.8160367 | -1.2585 | 0.209 | -1.54E-07 | count | 1 |
| PCBD2      | -1.0270028 | 1.0340487 | -0.9932 | 0.321 | -1.54E-07 | count | 1 |
| ZFP64      | -1.0270028 | 1.0340487 | -0.9932 | 0.321 | -1.54E-07 | count | 1 |
| METTL2A    | -1.0270028 | 0.7774023 | -1.3211 | 0.187 | -1.54E-07 | count | 1 |



|            |            |           |         |       |           |       |   |
|------------|------------|-----------|---------|-------|-----------|-------|---|
| PHLDA2     | -1.0270028 | 1.2066818 | -0.8511 | 0.395 | -1.54E-07 | count | 1 |
| KLRB1      | -1.0270028 | 1.2066818 | -0.8511 | 0.395 | -1.54E-07 | count | 1 |
| ZNF761     | -1.0270028 | 1.2066818 | -0.8511 | 0.395 | -1.54E-07 | count | 1 |
| FKTN       | -1.0270028 | 1.2066818 | -0.8511 | 0.395 | -1.54E-07 | count | 1 |
| GAS7       | -1.0270028 | 1.2066818 | -0.8511 | 0.395 | -1.54E-07 | count | 1 |
| CXCL3      | -1.0270028 | 1.1478535 | -0.8947 | 0.371 | -1.54E-07 | count | 1 |
| THAP7-AS1  | -1.0270028 | 0.8900729 | -1.1538 | 0.249 | -1.54E-07 | count | 1 |
| UBFD1      | -1.0270028 | 0.8900729 | -1.1538 | 0.249 | -1.54E-07 | count | 1 |
| NADK2      | -1.0270028 | 0.8900729 | -1.1538 | 0.249 | -1.54E-07 | count | 1 |
| STMN3      | -1.0270028 | 0.8900729 | -1.1538 | 0.249 | -1.54E-07 | count | 1 |
| HSDL1      | -1.0270028 | 0.8900729 | -1.1538 | 0.249 | -1.54E-07 | count | 1 |
| ZNF562     | -1.0270028 | 0.8900729 | -1.1538 | 0.249 | -1.54E-07 | count | 1 |
| TMEM135    | -1.0270028 | 0.8900729 | -1.1538 | 0.249 | -1.54E-07 | count | 1 |
| COL9A2     | -1.0270028 | 0.8900729 | -1.1538 | 0.249 | -1.54E-07 | count | 1 |
| NUP98      | -0.0352745 | 0.4054573 | -0.087  | 0.931 | -1.54E-07 | count | 1 |
| NSMF       | -1.0270028 | 1.0858425 | -0.9458 | 0.345 | -1.53E-07 | count | 1 |
| MUT        | -1.0270028 | 1.0858425 | -0.9458 | 0.345 | -1.53E-07 | count | 1 |
| CITED4     | -1.0270028 | 1.0858425 | -0.9458 | 0.345 | -1.53E-07 | count | 1 |
| ARSG       | -1.0270028 | 1.0858425 | -0.9458 | 0.345 | -1.53E-07 | count | 1 |
| ACAD8      | -1.0270028 | 1.0858425 | -0.9458 | 0.345 | -1.53E-07 | count | 1 |
| IFT122     | -1.0270028 | 1.0858425 | -0.9458 | 0.345 | -1.53E-07 | count | 1 |
| STX3       | -1.0270028 | 1.0858425 | -0.9458 | 0.345 | -1.53E-07 | count | 1 |
| SVIL       | -1.0270028 | 0.8085272 | -1.2702 | 0.205 | -1.53E-07 | count | 1 |
| GDPD5      | -1.0270028 | 0.8085272 | -1.2702 | 0.205 | -1.53E-07 | count | 1 |
| ZNF367     | -1.0270028 | 0.8085272 | -1.2702 | 0.205 | -1.53E-07 | count | 1 |
| ZNF182     | -1.0270028 | 0.8085272 | -1.2702 | 0.205 | -1.53E-07 | count | 1 |
| RMI2       | -1.0270028 | 0.8085272 | -1.2702 | 0.205 | -1.53E-07 | count | 1 |
| FBF1       | -1.0270028 | 0.8085272 | -1.2702 | 0.205 | -1.53E-07 | count | 1 |
| MORC2      | -1.0270028 | 0.8085272 | -1.2702 | 0.205 | -1.53E-07 | count | 1 |
| CDK6       | -1.0270028 | 1.0200689 | -1.0068 | 0.315 | -1.53E-07 | count | 1 |
| ZBTB42     | -1.0270028 | 1.0200689 | -1.0068 | 0.315 | -1.53E-07 | count | 1 |
| NLGN4Y     | -1.0270028 | 1.0200689 | -1.0068 | 0.315 | -1.53E-07 | count | 1 |
| NCAPG2     | -1.0270028 | 1.0200689 | -1.0068 | 0.315 | -1.53E-07 | count | 1 |
| AL365361.1 | -1.0270028 | 1.3680722 | -0.7507 | 0.453 | -1.53E-07 | count | 1 |
| LY6G5C     | -1.0270028 | 1.3680722 | -0.7507 | 0.453 | -1.53E-07 | count | 1 |
| ZBTB20-AS5 | -1.0270028 | 1.3680722 | -0.7507 | 0.453 | -1.53E-07 | count | 1 |
| ZNF595     | -1.0270028 | 1.3680722 | -0.7507 | 0.453 | -1.53E-07 | count | 1 |
| XRCC3      | -1.0270028 | 1.3680722 | -0.7507 | 0.453 | -1.53E-07 | count | 1 |
| LDAH       | -1.0270028 | 1.3680722 | -0.7507 | 0.453 | -1.53E-07 | count | 1 |
| EPHA4      | -1.0270028 | 1.3680722 | -0.7507 | 0.453 | -1.53E-07 | count | 1 |
| SLC39A14   | -1.0270028 | 1.3680722 | -0.7507 | 0.453 | -1.53E-07 | count | 1 |
| TNFRSF10D  | -1.0270028 | 1.3680722 | -0.7507 | 0.453 | -1.53E-07 | count | 1 |
| KYAT1      | -1.0270028 | 1.3680722 | -0.7507 | 0.453 | -1.53E-07 | count | 1 |
| SPACA9     | -1.0270028 | 1.3680722 | -0.7507 | 0.453 | -1.53E-07 | count | 1 |
| LRP5       | -1.0270028 | 1.3680722 | -0.7507 | 0.453 | -1.53E-07 | count | 1 |

|            |            |           |         |       |           |       |   |
|------------|------------|-----------|---------|-------|-----------|-------|---|
| LINC02416  | -1.0270028 | 1.3680722 | -0.7507 | 0.453 | -1.53E-07 | count | 1 |
| KLF5       | -1.0270028 | 1.3680722 | -0.7507 | 0.453 | -1.53E-07 | count | 1 |
| AC027307.2 | -1.0270028 | 1.3680722 | -0.7507 | 0.453 | -1.53E-07 | count | 1 |
| PPP1R13L   | -1.0270028 | 1.3680722 | -0.7507 | 0.453 | -1.53E-07 | count | 1 |
| MAMSTR     | -1.0270028 | 1.3680722 | -0.7507 | 0.453 | -1.53E-07 | count | 1 |
| ZNF579     | -1.0270028 | 1.3680722 | -0.7507 | 0.453 | -1.53E-07 | count | 1 |
| ADAMTS1    | -1.0270028 | 1.3680722 | -0.7507 | 0.453 | -1.53E-07 | count | 1 |
| IL3RA      | -1.0270028 | 1.3680722 | -0.7507 | 0.453 | -1.53E-07 | count | 1 |
| PAN2       | -1.0270028 | 1.3680722 | -0.7507 | 0.453 | -1.53E-07 | count | 1 |
| AC007541.1 | -1.0270028 | 1.3680722 | -0.7507 | 0.453 | -1.53E-07 | count | 1 |
| AC004825.2 | -1.0270028 | 1.3680722 | -0.7507 | 0.453 | -1.53E-07 | count | 1 |
| IGHV1-69D  | -1.0270028 | 1.3680722 | -0.7507 | 0.453 | -1.53E-07 | count | 1 |
| LINC02352  | -1.0270028 | 1.3680722 | -0.7507 | 0.453 | -1.53E-07 | count | 1 |
| CD7        | -1.0270028 | 1.3680722 | -0.7507 | 0.453 | -1.53E-07 | count | 1 |
| NFYC-AS1   | -1.0270028 | 1.3680722 | -0.7507 | 0.453 | -1.53E-07 | count | 1 |
| TRIM61     | -1.0270028 | 1.3680722 | -0.7507 | 0.453 | -1.53E-07 | count | 1 |
| AC025171.2 | -1.0270028 | 1.3680722 | -0.7507 | 0.453 | -1.53E-07 | count | 1 |
| ZNF300     | -1.0270028 | 1.3680722 | -0.7507 | 0.453 | -1.53E-07 | count | 1 |
| PDE7B      | -1.0270028 | 1.3680722 | -0.7507 | 0.453 | -1.53E-07 | count | 1 |
| SLC25A40   | -1.0270028 | 1.3680722 | -0.7507 | 0.453 | -1.53E-07 | count | 1 |
| LAMB1      | -1.0270028 | 1.3680722 | -0.7507 | 0.453 | -1.53E-07 | count | 1 |
| PHKA2      | -1.0270028 | 1.3680722 | -0.7507 | 0.453 | -1.53E-07 | count | 1 |
| RND1       | -1.0270028 | 1.3680722 | -0.7507 | 0.453 | -1.53E-07 | count | 1 |
| AC005476.2 | -1.0270028 | 1.3680722 | -0.7507 | 0.453 | -1.53E-07 | count | 1 |
| CCDC151    | -1.0270028 | 1.3680722 | -0.7507 | 0.453 | -1.53E-07 | count | 1 |
| ZNF155     | -1.0270028 | 1.3680722 | -0.7507 | 0.453 | -1.53E-07 | count | 1 |
| ZNF114     | -1.0270028 | 1.3680722 | -0.7507 | 0.453 | -1.53E-07 | count | 1 |
| AC006157.1 | -1.0270028 | 1.3680722 | -0.7507 | 0.453 | -1.53E-07 | count | 1 |
| HSPA6      | -1.0270028 | 1.3680722 | -0.7507 | 0.453 | -1.53E-07 | count | 1 |
| CAVIN2     | -1.0270028 | 1.3680722 | -0.7507 | 0.453 | -1.53E-07 | count | 1 |
| HDAC4      | -1.0270028 | 1.3680722 | -0.7507 | 0.453 | -1.53E-07 | count | 1 |
| HYAL2      | -1.0270028 | 1.3680722 | -0.7507 | 0.453 | -1.53E-07 | count | 1 |
| NUP62CL    | -1.0270028 | 1.3680722 | -0.7507 | 0.453 | -1.53E-07 | count | 1 |
| MROH1      | -1.0270028 | 1.3680722 | -0.7507 | 0.453 | -1.53E-07 | count | 1 |
| MTMR2      | -1.0270028 | 1.3680722 | -0.7507 | 0.453 | -1.53E-07 | count | 1 |
| SRGAP1     | -1.0270028 | 1.3680722 | -0.7507 | 0.453 | -1.53E-07 | count | 1 |
| SYCP3      | -1.0270028 | 1.3680722 | -0.7507 | 0.453 | -1.53E-07 | count | 1 |
| SLC8B1     | -1.0270028 | 1.3680722 | -0.7507 | 0.453 | -1.53E-07 | count | 1 |
| LINC01754  | -1.0270028 | 1.3680722 | -0.7507 | 0.453 | -1.53E-07 | count | 1 |
| MIER2      | -1.0270028 | 1.3680722 | -0.7507 | 0.453 | -1.53E-07 | count | 1 |
| NIPAL4     | -1.0270028 | 1.3680722 | -0.7507 | 0.453 | -1.53E-07 | count | 1 |
| INVS       | -1.0270028 | 1.3680722 | -0.7507 | 0.453 | -1.53E-07 | count | 1 |
| ERLIN1     | -1.0270028 | 1.3680722 | -0.7507 | 0.453 | -1.53E-07 | count | 1 |
| C16orf46   | -1.0270028 | 1.3680722 | -0.7507 | 0.453 | -1.53E-07 | count | 1 |
| VPS26B     | -0.0946667 | 1.2277209 | -0.0771 | 0.939 | -1.48E-07 | count | 1 |

|            |            |           |         |       |           |       |   |
|------------|------------|-----------|---------|-------|-----------|-------|---|
| PECAM1     | -0.0946667 | 0.7085025 | -0.1336 | 0.894 | -1.48E-07 | count | 1 |
| SOX4       | -0.0946667 | 1.2588833 | -0.0752 | 0.94  | -1.48E-07 | count | 1 |
| DENND1A    | -0.0946667 | 1.2588833 | -0.0752 | 0.94  | -1.48E-07 | count | 1 |
| SNHG25     | -0.0946667 | 1.2588833 | -0.0752 | 0.94  | -1.48E-07 | count | 1 |
| SGMS1-AS1  | -0.0946667 | 0.9763929 | -0.097  | 0.923 | -1.48E-07 | count | 1 |
| ATAD3A     | -0.0946667 | 0.9763929 | -0.097  | 0.923 | -1.48E-07 | count | 1 |
| ZNF587B    | -0.0946667 | 0.9763929 | -0.097  | 0.923 | -1.48E-07 | count | 1 |
| NOL4L      | -0.0946667 | 1.298398  | -0.0729 | 0.942 | -1.48E-07 | count | 1 |
| ALKBH1     | -0.0946667 | 0.8866506 | -0.1068 | 0.915 | -1.48E-07 | count | 1 |
| TSPAN14    | -0.0946667 | 0.8088359 | -0.117  | 0.907 | -1.48E-07 | count | 1 |
| NDRG1      | -0.0946667 | 0.9878401 | -0.0958 | 0.924 | -1.48E-07 | count | 1 |
| OSM        | -0.0946667 | 0.9878401 | -0.0958 | 0.924 | -1.48E-07 | count | 1 |
| FCHO2      | -0.0946667 | 0.9878401 | -0.0958 | 0.924 | -1.48E-07 | count | 1 |
| DHRS11     | -0.0946667 | 0.9878401 | -0.0958 | 0.924 | -1.48E-07 | count | 1 |
| BRCA1      | -0.0946667 | 0.9615811 | -0.0984 | 0.922 | -1.48E-07 | count | 1 |
| WDR54      | -0.0334537 | 0.4365449 | -0.0766 | 0.939 | -1.46E-07 | count | 1 |
| HPF1       | -0.2693171 | 0.4104414 | -0.6562 | 0.512 | -1.46E-07 | count | 1 |
| SERPIN1    | -0.0331322 | 0.5947978 | -0.0557 | 0.956 | -1.45E-07 | count | 1 |
| FBXO34     | -0.0331322 | 0.3836158 | -0.0864 | 0.931 | -1.44E-07 | count | 1 |
| EPM2AIP1   | -0.0331322 | 0.370758  | -0.0894 | 0.929 | -1.44E-07 | count | 1 |
| HGSNAT     | -0.0324032 | 0.6263633 | -0.0517 | 0.959 | -1.41E-07 | count | 1 |
| SGTB       | -0.0324032 | 0.6246793 | -0.0519 | 0.959 | -1.41E-07 | count | 1 |
| EPOR       | -0.2597476 | 0.5522394 | -0.4704 | 0.638 | -1.41E-07 | count | 1 |
| FAM104B    | -0.2538129 | 0.5083798 | -0.4993 | 0.618 | -1.38E-07 | count | 1 |
| UBIAD1     | -0.2538129 | 0.4649054 | -0.5459 | 0.585 | -1.37E-07 | count | 1 |
| ZUP1       | -0.0313118 | 0.3447399 | -0.0908 | 0.928 | -1.37E-07 | count | 1 |
| KIF5C      | -0.8446812 | 0.980327  | -0.8616 | 0.389 | -1.36E-07 | count | 1 |
| KLHL20     | -0.8446812 | 0.8359778 | -1.0104 | 0.313 | -1.35E-07 | count | 1 |
| PTCH2      | -0.8446812 | 0.9392775 | -0.8993 | 0.369 | -1.35E-07 | count | 1 |
| GATC       | -0.8446812 | 0.8512606 | -0.9923 | 0.322 | -1.35E-07 | count | 1 |
| CPTP       | -0.8446812 | 0.6800459 | -1.2421 | 0.215 | -1.35E-07 | count | 1 |
| HNRNPA1P48 | -0.8446812 | 0.6800459 | -1.2421 | 0.215 | -1.35E-07 | count | 1 |
| TIRAP      | -0.8446812 | 1.0447064 | -0.8085 | 0.419 | -1.35E-07 | count | 1 |
| ARL3       | -0.030852  | 0.4300561 | -0.0717 | 0.943 | -1.35E-07 | count | 1 |
| BTAF1      | -0.030852  | 0.4129875 | -0.0747 | 0.94  | -1.35E-07 | count | 1 |
| QTRT2      | -0.030852  | 0.4716341 | -0.0654 | 0.948 | -1.35E-07 | count | 1 |
| POLD3      | -0.2468442 | 0.5134424 | -0.4808 | 0.631 | -1.34E-07 | count | 1 |
| TIMMDC1    | -0.0306251 | 0.3838689 | -0.0798 | 0.936 | -1.34E-07 | count | 1 |
| FAR1       | -0.2385454 | 0.4732467 | -0.5041 | 0.614 | -1.30E-07 | count | 1 |
| WWP1       | -0.2284951 | 0.5391615 | -0.4238 | 0.672 | -1.25E-07 | count | 1 |
| LMCD1      | -0.7393207 | 0.7164676 | -1.0319 | 0.303 | -1.23E-07 | count | 1 |
| WSB2       | -0.7393207 | 0.6408769 | -1.1536 | 0.249 | -1.23E-07 | count | 1 |
| ABHD6      | -0.7393207 | 0.6408769 | -1.1536 | 0.249 | -1.23E-07 | count | 1 |
| NAGLU      | -0.7393207 | 0.7198433 | -1.0271 | 0.305 | -1.23E-07 | count | 1 |
| STARD3     | -0.7393207 | 0.7198433 | -1.0271 | 0.305 | -1.23E-07 | count | 1 |

|            |            |           |         |       |           |       |   |
|------------|------------|-----------|---------|-------|-----------|-------|---|
| SCAI       | -0.7393207 | 0.7198433 | -1.0271 | 0.305 | -1.23E-07 | count | 1 |
| BTD        | -0.7393207 | 0.7198433 | -1.0271 | 0.305 | -1.23E-07 | count | 1 |
| PANK4      | -0.7393207 | 1.1592428 | -0.6378 | 0.524 | -1.23E-07 | count | 1 |
| USP6       | -0.7393207 | 1.1592428 | -0.6378 | 0.524 | -1.23E-07 | count | 1 |
| AL592295.4 | -0.7393207 | 1.331784  | -0.5551 | 0.579 | -1.23E-07 | count | 1 |
| ALKAL2     | -0.7393207 | 1.331784  | -0.5551 | 0.579 | -1.23E-07 | count | 1 |
| PIGM       | -0.7393207 | 1.331784  | -0.5551 | 0.579 | -1.23E-07 | count | 1 |
| TMEM176A   | -0.7393207 | 1.331784  | -0.5551 | 0.579 | -1.23E-07 | count | 1 |
| MIEF2      | -0.7393207 | 1.331784  | -0.5551 | 0.579 | -1.23E-07 | count | 1 |
| HOXB4      | -0.7393207 | 1.331784  | -0.5551 | 0.579 | -1.23E-07 | count | 1 |
| AC084018.2 | -0.7393207 | 1.331784  | -0.5551 | 0.579 | -1.23E-07 | count | 1 |
| SPRY2      | -0.7393207 | 0.9661436 | -0.7652 | 0.445 | -1.23E-07 | count | 1 |
| KATNAL1    | -0.7393207 | 0.9661436 | -0.7652 | 0.445 | -1.23E-07 | count | 1 |
| C17orf53   | -0.7393207 | 0.9661436 | -0.7652 | 0.445 | -1.23E-07 | count | 1 |
| U2AF1L5    | -0.7393207 | 0.9661436 | -0.7652 | 0.445 | -1.23E-07 | count | 1 |
| MOXD1      | -0.7393207 | 0.9661436 | -0.7652 | 0.445 | -1.23E-07 | count | 1 |
| AL159169.2 | -0.7393207 | 0.9661436 | -0.7652 | 0.445 | -1.23E-07 | count | 1 |
| SLC22A18   | -0.7393207 | 0.9661436 | -0.7652 | 0.445 | -1.23E-07 | count | 1 |
| GPR89A     | -0.7393207 | 0.9661436 | -0.7652 | 0.445 | -1.23E-07 | count | 1 |
| TMEM56     | -0.7393207 | 0.9661436 | -0.7652 | 0.445 | -1.23E-07 | count | 1 |
| NAP1L2     | -0.7393207 | 0.9661436 | -0.7652 | 0.445 | -1.23E-07 | count | 1 |
| HIRA       | -0.7393207 | 0.9661436 | -0.7652 | 0.445 | -1.23E-07 | count | 1 |
| TCEAL9     | -0.7393207 | 0.9661436 | -0.7652 | 0.445 | -1.23E-07 | count | 1 |
| TPRN       | -0.7393207 | 0.9661436 | -0.7652 | 0.445 | -1.23E-07 | count | 1 |
| FUT4       | -0.7393207 | 0.9661436 | -0.7652 | 0.445 | -1.23E-07 | count | 1 |
| ATAD3B     | -0.7393207 | 0.9661436 | -0.7652 | 0.445 | -1.23E-07 | count | 1 |
| MBTPS2     | -0.7393207 | 1.1675779 | -0.6332 | 0.527 | -1.23E-07 | count | 1 |
| MT1M       | -0.7393207 | 1.1675779 | -0.6332 | 0.527 | -1.23E-07 | count | 1 |
| MED24      | -0.7393207 | 1.1675779 | -0.6332 | 0.527 | -1.23E-07 | count | 1 |
| AL356512.1 | -0.7393207 | 1.1675779 | -0.6332 | 0.527 | -1.23E-07 | count | 1 |
| LYG2       | -0.7393207 | 1.1675779 | -0.6332 | 0.527 | -1.23E-07 | count | 1 |
| NEMP2      | -0.7393207 | 1.1675779 | -0.6332 | 0.527 | -1.23E-07 | count | 1 |
| WWTR1      | -0.7393207 | 1.1675779 | -0.6332 | 0.527 | -1.23E-07 | count | 1 |
| HNRNPA1L2  | -0.7393207 | 1.1675779 | -0.6332 | 0.527 | -1.23E-07 | count | 1 |
| TNC        | -0.7393207 | 1.1675779 | -0.6332 | 0.527 | -1.23E-07 | count | 1 |
| MYO19      | -0.7393207 | 1.1675779 | -0.6332 | 0.527 | -1.23E-07 | count | 1 |
| AC011481.2 | -0.7393207 | 1.1675779 | -0.6332 | 0.527 | -1.23E-07 | count | 1 |
| AC010618.3 | -0.7393207 | 1.1675779 | -0.6332 | 0.527 | -1.23E-07 | count | 1 |
| HIST1H2AL  | -0.7393207 | 0.8533629 | -0.8664 | 0.387 | -1.23E-07 | count | 1 |
| TK1        | -0.7393207 | 0.8533629 | -0.8664 | 0.387 | -1.23E-07 | count | 1 |
| CHCHD6     | -0.7393207 | 0.8533629 | -0.8664 | 0.387 | -1.23E-07 | count | 1 |
| OSER1-DT   | -0.7393207 | 0.8533629 | -0.8664 | 0.387 | -1.23E-07 | count | 1 |
| BEND3      | -0.7393207 | 0.8533629 | -0.8664 | 0.387 | -1.23E-07 | count | 1 |
| ALG1       | -0.7393207 | 0.8533629 | -0.8664 | 0.387 | -1.23E-07 | count | 1 |
| ZSWIM9     | -0.7393207 | 0.8533629 | -0.8664 | 0.387 | -1.23E-07 | count | 1 |

|            |            |           |         |       |           |       |   |
|------------|------------|-----------|---------|-------|-----------|-------|---|
| HAUS4      | -0.7393207 | 0.8533629 | -0.8664 | 0.387 | -1.23E-07 | count | 1 |
| GZMK       | -0.7393207 | 0.8533629 | -0.8664 | 0.387 | -1.23E-07 | count | 1 |
| GTPBP2     | -0.7393207 | 0.8533629 | -0.8664 | 0.387 | -1.23E-07 | count | 1 |
| FAM160B1   | -0.7393207 | 1.0761194 | -0.687  | 0.492 | -1.22E-07 | count | 1 |
| PKD2       | -0.7393207 | 1.0761194 | -0.687  | 0.492 | -1.22E-07 | count | 1 |
| SPIRE1     | -0.7393207 | 1.0761194 | -0.687  | 0.492 | -1.22E-07 | count | 1 |
| HEATR5A    | -0.7393207 | 1.0761194 | -0.687  | 0.492 | -1.22E-07 | count | 1 |
| BATF3      | -0.7393207 | 1.0761194 | -0.687  | 0.492 | -1.22E-07 | count | 1 |
| WDR25      | -0.7393207 | 1.0761194 | -0.687  | 0.492 | -1.22E-07 | count | 1 |
| USP30      | -0.7393207 | 1.0761194 | -0.687  | 0.492 | -1.22E-07 | count | 1 |
| AC008764.8 | -0.7393207 | 1.0761194 | -0.687  | 0.492 | -1.22E-07 | count | 1 |
| SPATA5     | -0.0771202 | 0.7041357 | -0.1095 | 0.913 | -1.22E-07 | count | 1 |
| RNF40      | -0.0771202 | 0.7674617 | -0.1005 | 0.92  | -1.22E-07 | count | 1 |
| GCH1       | -0.0274817 | 0.60068   | -0.0458 | 0.964 | -1.20E-07 | count | 1 |
| IFIT2      | -0.2160725 | 0.6246203 | -0.3459 | 0.73  | -1.19E-07 | count | 1 |
| RALB       | -0.2160725 | 0.370883  | -0.5826 | 0.56  | -1.19E-07 | count | 1 |
| IL1RAP     | -0.2160725 | 0.5886803 | -0.367  | 0.714 | -1.19E-07 | count | 1 |
| FAM69A     | -0.2160725 | 0.5503984 | -0.3926 | 0.695 | -1.19E-07 | count | 1 |
| SH3BP2     | -0.0751448 | 0.7654036 | -0.0982 | 0.922 | -1.18E-07 | count | 1 |
| TRMT12     | -0.0269257 | 0.715959  | -0.0376 | 0.97  | -1.18E-07 | count | 1 |
| CIB2       | -0.0269257 | 0.5506207 | -0.0489 | 0.961 | -1.18E-07 | count | 1 |
| FAS        | -0.0269257 | 0.6887089 | -0.0391 | 0.969 | -1.18E-07 | count | 1 |
| PKNOX1     | -0.0269257 | 0.615403  | -0.0438 | 0.965 | -1.18E-07 | count | 1 |
| GALNT11    | -0.0269257 | 0.6880159 | -0.0391 | 0.969 | -1.18E-07 | count | 1 |
| MEX3C      | -0.0266481 | 0.4453961 | -0.0598 | 0.952 | -1.16E-07 | count | 1 |
| EXOC8      | -0.0264817 | 0.4780988 | -0.0554 | 0.956 | -1.16E-07 | count | 1 |
| RNF11      | -0.0264817 | 0.5040669 | -0.0525 | 0.958 | -1.16E-07 | count | 1 |
| CHCHD4     | -0.2003242 | 0.5593252 | -0.3582 | 0.72  | -1.11E-07 | count | 1 |
| AC044849.1 | -0.2003242 | 0.6179972 | -0.3242 | 0.746 | -1.11E-07 | count | 1 |
| MRI1       | -0.2003242 | 0.5649022 | -0.3546 | 0.723 | -1.11E-07 | count | 1 |
| MTAP       | -0.2003242 | 0.4064906 | -0.4928 | 0.622 | -1.11E-07 | count | 1 |
| ZSCAN26    | -0.2003242 | 0.6453359 | -0.3104 | 0.756 | -1.11E-07 | count | 1 |
| ASH2L      | -0.2003242 | 0.5393018 | -0.3715 | 0.71  | -1.11E-07 | count | 1 |
| FYB1       | -0.2003242 | 0.7057434 | -0.2838 | 0.777 | -1.11E-07 | count | 1 |
| ITGAL      | -0.2003242 | 0.5704247 | -0.3512 | 0.726 | -1.11E-07 | count | 1 |
| UBALD1     | -0.2003242 | 0.6051381 | -0.331  | 0.741 | -1.11E-07 | count | 1 |
| AC073352.2 | -0.6215376 | 1.0740244 | -0.5787 | 0.563 | -1.08E-07 | count | 1 |
| Z93241.1   | -0.6215376 | 0.9112246 | -0.6821 | 0.496 | -1.08E-07 | count | 1 |
| SNHG19     | -0.6215376 | 0.8500574 | -0.7312 | 0.465 | -1.08E-07 | count | 1 |
| USP22      | -0.0090172 | 0.3091937 | -0.0292 | 0.977 | -1.08E-07 | count | 1 |
| ZNF251     | -0.6215376 | 0.7841332 | -0.7926 | 0.428 | -1.08E-07 | count | 1 |
| IL1B       | -0.6215376 | 1.1966859 | -0.5194 | 0.604 | -1.08E-07 | count | 1 |
| IRAK1BP1   | -0.6215376 | 0.9030174 | -0.6883 | 0.492 | -1.08E-07 | count | 1 |
| NDUFAF1    | -0.6215376 | 0.9030174 | -0.6883 | 0.492 | -1.08E-07 | count | 1 |
| EOGT       | -0.6215376 | 0.9030174 | -0.6883 | 0.492 | -1.08E-07 | count | 1 |

|            |             |             |         |       |           |       |   |
|------------|-------------|-------------|---------|-------|-----------|-------|---|
| IDUA       | -0.6215376  | 0.9030174   | -0.6883 | 0.492 | -1.08E-07 | count | 1 |
| GMEB2      | -0.6215376  | 0.9030174   | -0.6883 | 0.492 | -1.08E-07 | count | 1 |
| TNR        | -0.6215376  | 0.9030174   | -0.6883 | 0.492 | -1.08E-07 | count | 1 |
| FEM1A      | -0.6215376  | 0.7121321   | -0.8728 | 0.383 | -1.08E-07 | count | 1 |
| GPR137B    | -0.6215376  | 0.7121321   | -0.8728 | 0.383 | -1.08E-07 | count | 1 |
| NKG7       | -0.6215376  | 0.7121321   | -0.8728 | 0.383 | -1.08E-07 | count | 1 |
| C11orf80   | -0.6215376  | 0.7121321   | -0.8728 | 0.383 | -1.08E-07 | count | 1 |
| XAB2       | -0.6215376  | 0.8412536   | -0.7388 | 0.46  | -1.08E-07 | count | 1 |
| MRPS11     | -0.1907547  | 0.4286407   | -0.445  | 0.657 | -1.06E-07 | count | 1 |
| WASHC2C    | -0.0239794  | 0.5590993   | -0.0429 | 0.966 | -1.05E-07 | count | 1 |
| ICE1       | -0.0238254  | 0.3350238   | -0.0711 | 0.943 | -1.04E-07 | count | 1 |
| C1QA       | -19.0712598 | 1219.810268 | -0.0156 | 0.988 | -1.04E-07 | count | 1 |
| MGAT2      | -0.0232985  | 0.4617087   | -0.0505 | 0.96  | -1.02E-07 | count | 1 |
| ANKRD52    | -0.064144   | 1.3144978   | -0.0488 | 0.961 | -1.02E-07 | count | 1 |
| NDC1       | -0.064144   | 0.9805658   | -0.0654 | 0.948 | -1.02E-07 | count | 1 |
| MTFR1      | -0.064144   | 0.9805658   | -0.0654 | 0.948 | -1.02E-07 | count | 1 |
| AC087239.1 | -0.064144   | 0.9822502   | -0.0653 | 0.948 | -1.02E-07 | count | 1 |
| SRGAP2B    | -0.064144   | 0.9822502   | -0.0653 | 0.948 | -1.02E-07 | count | 1 |
| GAB1       | -0.064144   | 0.9822502   | -0.0653 | 0.948 | -1.02E-07 | count | 1 |
| AC016957.2 | -0.064144   | 0.9822502   | -0.0653 | 0.948 | -1.02E-07 | count | 1 |
| CCDC171    | -0.064144   | 0.9822502   | -0.0653 | 0.948 | -1.02E-07 | count | 1 |
| HMCES      | -0.064144   | 0.6969487   | -0.092  | 0.927 | -1.02E-07 | count | 1 |
| TPCN2      | -0.064144   | 1.3282795   | -0.0483 | 0.962 | -1.02E-07 | count | 1 |
| MADD       | -0.064144   | 1.1081575   | -0.0579 | 0.954 | -1.02E-07 | count | 1 |
| SEMA4F     | -0.064144   | 1.3282795   | -0.0483 | 0.962 | -1.02E-07 | count | 1 |
| LACC1      | -0.064144   | 0.9906429   | -0.0647 | 0.948 | -1.02E-07 | count | 1 |
| SOCS5      | -0.064144   | 0.9906429   | -0.0647 | 0.948 | -1.02E-07 | count | 1 |
| TTC21A     | -0.064144   | 0.6939727   | -0.0924 | 0.926 | -1.02E-07 | count | 1 |
| TOR1B      | -0.064144   | 0.6939727   | -0.0924 | 0.926 | -1.02E-07 | count | 1 |
| NCEH1      | -0.064144   | 0.6473883   | -0.0991 | 0.921 | -1.02E-07 | count | 1 |
| KDM1B      | -0.064144   | 0.8435423   | -0.076  | 0.939 | -1.02E-07 | count | 1 |
| YOD1       | -0.064144   | 0.8435423   | -0.076  | 0.939 | -1.02E-07 | count | 1 |
| SZT2       | -0.064144   | 1.1096482   | -0.0578 | 0.954 | -1.02E-07 | count | 1 |
| C1RL       | -0.064144   | 0.8454996   | -0.0759 | 0.94  | -1.02E-07 | count | 1 |
| SLC5A6     | -0.064144   | 0.8454996   | -0.0759 | 0.94  | -1.02E-07 | count | 1 |
| POLI       | -0.064144   | 0.8454996   | -0.0759 | 0.94  | -1.02E-07 | count | 1 |
| NGRN       | -0.064144   | 0.8454996   | -0.0759 | 0.94  | -1.02E-07 | count | 1 |
| CCL3L1     | -18.6966334 | 1592.818742 | -0.0117 | 0.991 | -1.02E-07 | count | 1 |
| SLC9A3R1   | -0.1797049  | 0.5840606   | -0.3077 | 0.758 | -1.00E-07 | count | 1 |
| C17orf67   | -0.1797049  | 0.6000269   | -0.2995 | 0.765 | -1.00E-07 | count | 1 |
| TMEM185A   | -0.1797049  | 0.6575338   | -0.2733 | 0.785 | -1.00E-07 | count | 1 |
| SGO2       | -0.1797049  | 0.6575338   | -0.2733 | 0.785 | -1.00E-07 | count | 1 |
| VPS13B     | -0.1797049  | 0.6575338   | -0.2733 | 0.785 | -1.00E-07 | count | 1 |
| SPIN1      | -0.1797049  | 0.4256598   | -0.4222 | 0.673 | -1.00E-07 | count | 1 |
| KLC1       | -0.1797049  | 0.5904483   | -0.3044 | 0.761 | -1.00E-07 | count | 1 |

|              |             |             |         |       |           |       |   |
|--------------|-------------|-------------|---------|-------|-----------|-------|---|
| PLD3         | -0.1797049  | 0.7183816   | -0.2502 | 0.803 | -1.00E-07 | count | 1 |
| TMEM161B-AS1 | -0.1797049  | 0.6913484   | -0.2599 | 0.795 | -1.00E-07 | count | 1 |
| FBXO45       | -0.1797049  | 0.5967677   | -0.3011 | 0.763 | -1.00E-07 | count | 1 |
| FAM111B      | -18.4390161 | 1819.192517 | -0.0101 | 0.992 | -1.00E-07 | count | 1 |
| CCL19        | -18.6221084 | 1257.221219 | -0.0148 | 0.988 | -9.98E-08 | count | 1 |
| SELENOP      | -18.5226797 | 1422.15283  | -0.013  | 0.99  | -9.94E-08 | count | 1 |
| NAA80        | -0.5569991  | 0.7672344   | -0.726  | 0.468 | -9.93E-08 | count | 1 |
| IGKV3-20     | -0.5569991  | 0.7226079   | -0.7708 | 0.441 | -9.92E-08 | count | 1 |
| MACROD2      | -0.5569991  | 0.8394617   | -0.6635 | 0.507 | -9.92E-08 | count | 1 |
| AC012236.1   | -0.5569991  | 0.7988801   | -0.6972 | 0.486 | -9.91E-08 | count | 1 |
| MANEA        | -0.5569991  | 0.7988801   | -0.6972 | 0.486 | -9.91E-08 | count | 1 |
| PRR12        | -0.5569991  | 0.7988801   | -0.6972 | 0.486 | -9.91E-08 | count | 1 |
| MFSD5        | -0.5569991  | 0.6750375   | -0.8251 | 0.41  | -9.91E-08 | count | 1 |
| MZF1         | -0.5569991  | 0.8684796   | -0.6413 | 0.522 | -9.90E-08 | count | 1 |
| NRP2         | -18.4419584 | 1388.351397 | -0.0133 | 0.989 | -9.90E-08 | count | 1 |
| SLC37A4      | -0.5569991  | 0.7561236   | -0.7367 | 0.462 | -9.90E-08 | count | 1 |
| UTP20        | -0.5569991  | 0.7561236   | -0.7367 | 0.462 | -9.90E-08 | count | 1 |
| LINC01268    | -0.5569991  | 0.8293192   | -0.6716 | 0.502 | -9.89E-08 | count | 1 |
| IL12RB1      | -0.5569991  | 0.8293192   | -0.6716 | 0.502 | -9.89E-08 | count | 1 |
| SOX12        | -0.5569991  | 0.7107999   | -0.7836 | 0.434 | -9.89E-08 | count | 1 |
| ZNF707       | -0.5569991  | 0.8965587   | -0.6213 | 0.535 | -9.89E-08 | count | 1 |
| XRCC4        | -0.0224113  | 0.6918363   | -0.0324 | 0.974 | -9.82E-08 | count | 1 |
| NUBPL        | -18.3713352 | 1363.782107 | -0.0135 | 0.989 | -9.82E-08 | count | 1 |
| ARL11        | -0.0224113  | 0.6701192   | -0.0334 | 0.973 | -9.82E-08 | count | 1 |
| WDSUB1       | -0.0224113  | 0.6256165   | -0.0358 | 0.971 | -9.81E-08 | count | 1 |
| HDAC8        | -0.0224113  | 0.549034    | -0.0408 | 0.967 | -9.81E-08 | count | 1 |
| CLN5         | -0.0224113  | 0.6009883   | -0.0373 | 0.97  | -9.81E-08 | count | 1 |
| SMUG1        | -18.3715707 | 1278.805236 | -0.0144 | 0.989 | -9.81E-08 | count | 1 |
| AP002495.2   | -0.0224113  | 0.6908793   | -0.0324 | 0.974 | -9.81E-08 | count | 1 |
| EMC8         | -0.0224113  | 0.6009883   | -0.0373 | 0.97  | -9.81E-08 | count | 1 |
| FAM193A      | -0.0224113  | 0.6009883   | -0.0373 | 0.97  | -9.81E-08 | count | 1 |
| AP002748.3   | -0.0224113  | 0.5752736   | -0.039  | 0.969 | -9.80E-08 | count | 1 |
| TPK1         | -0.0224113  | 0.7147145   | -0.0314 | 0.975 | -9.80E-08 | count | 1 |
| ACTR5        | -18.1866915 | 1600.595175 | -0.0114 | 0.991 | -9.79E-08 | count | 1 |
| ZBED3        | -18.1262419 | 1713.81758  | -0.0106 | 0.992 | -9.75E-08 | count | 1 |
| TCEANC2      | -18.159571  | 1489.373367 | -0.0122 | 0.99  | -9.73E-08 | count | 1 |
| CD14         | -18.12663   | 1535.830793 | -0.0118 | 0.991 | -9.73E-08 | count | 1 |
| MTMR1        | -18.0421044 | 1552.524373 | -0.0116 | 0.991 | -9.71E-08 | count | 1 |
| C1QC         | -18.1498074 | 1333.102399 | -0.0136 | 0.989 | -9.71E-08 | count | 1 |
| COL14A1      | -17.9763889 | 1798.766599 | -0.01   | 0.992 | -9.70E-08 | count | 1 |
| C1QB         | -18.0483218 | 1382.151558 | -0.0131 | 0.99  | -9.68E-08 | count | 1 |
| COL1A2       | -18.0021894 | 1489.393334 | -0.0121 | 0.99  | -9.67E-08 | count | 1 |
| AL353194.1   | -18.0010116 | 1453.454658 | -0.0124 | 0.99  | -9.65E-08 | count | 1 |
| OSBPL10-AS1  | -18.0021915 | 1370.971473 | -0.0131 | 0.99  | -9.65E-08 | count | 1 |
| VCAN         | -17.8286159 | 1909.014936 | -0.0093 | 0.993 | -9.64E-08 | count | 1 |

|            |             |             |         |       |           |       |   |
|------------|-------------|-------------|---------|-------|-----------|-------|---|
| CHRNA5     | -17.8275494 | 1750.433499 | -0.0102 | 0.992 | -9.63E-08 | count | 1 |
| YLPM1      | -17.978034  | 1243.83132  | -0.0145 | 0.988 | -9.61E-08 | count | 1 |
| ICOSLG     | -17.8284799 | 1421.057507 | -0.0125 | 0.99  | -9.59E-08 | count | 1 |
| AC093157.1 | -17.8376596 | 1427.857093 | -0.0125 | 0.99  | -9.59E-08 | count | 1 |
| MID1IP1    | -17.8009697 | 1560.43826  | -0.0114 | 0.991 | -9.59E-08 | count | 1 |
| HEG1       | -17.8011041 | 1424.284309 | -0.0125 | 0.99  | -9.58E-08 | count | 1 |
| LINC00467  | -17.8504306 | 1223.471396 | -0.0146 | 0.988 | -9.57E-08 | count | 1 |
| ZNF714     | -17.8261648 | 1358.037784 | -0.0131 | 0.99  | -9.57E-08 | count | 1 |
| KLHL2      | -17.6293339 | 1509.505642 | -0.0117 | 0.991 | -9.54E-08 | count | 1 |
| MT1E       | -17.6288553 | 1459.880869 | -0.0121 | 0.99  | -9.53E-08 | count | 1 |
| SLC7A1     | -17.6383263 | 1357.468276 | -0.013  | 0.99  | -9.53E-08 | count | 1 |
| MYPOP      | -17.4168595 | 1451.564688 | -0.012  | 0.99  | -9.50E-08 | count | 1 |
| MAFB       | -17.3647686 | 1330.513786 | -0.0131 | 0.99  | -9.48E-08 | count | 1 |
| GLMN       | -0.1668015  | 0.5535959   | -0.3013 | 0.763 | -9.34E-08 | count | 1 |
| TPGS2      | -0.0204385  | 0.4885276   | -0.0418 | 0.967 | -8.96E-08 | count | 1 |
| MFAP4      | -0.159505   | 1.2801846   | -0.1246 | 0.901 | -8.96E-08 | count | 1 |
| PKD2L2     | -0.159505   | 1.320919    | -0.1208 | 0.904 | -8.96E-08 | count | 1 |
| PSME3      | -0.0204385  | 0.4295761   | -0.0476 | 0.962 | -8.95E-08 | count | 1 |
| EMC9       | -0.151534   | 0.5328663   | -0.2844 | 0.776 | -8.54E-08 | count | 1 |
| SCRIB      | -0.151534   | 0.8492798   | -0.1784 | 0.858 | -8.54E-08 | count | 1 |
| ELMOD3     | -0.151534   | 0.8856152   | -0.1711 | 0.864 | -8.54E-08 | count | 1 |
| ZNF408     | -0.151534   | 0.7415456   | -0.2043 | 0.838 | -8.54E-08 | count | 1 |
| VPS39      | -0.151534   | 0.7415456   | -0.2043 | 0.838 | -8.54E-08 | count | 1 |
| ZNF227     | -0.151534   | 0.7103376   | -0.2133 | 0.831 | -8.54E-08 | count | 1 |
| ANKFY1     | -0.151534   | 0.8647935   | -0.1752 | 0.861 | -8.54E-08 | count | 1 |
| ERAL1      | -0.151534   | 0.7040708   | -0.2152 | 0.83  | -8.53E-08 | count | 1 |
| NARS2      | -0.151534   | 0.6644859   | -0.228  | 0.82  | -8.53E-08 | count | 1 |
| DDX52      | -0.0068636  | 0.4213964   | -0.0163 | 0.987 | -8.24E-08 | count | 1 |
| UBR3       | -0.0186246  | 0.7478099   | -0.0249 | 0.98  | -8.18E-08 | count | 1 |
| FAM129A    | -0.0186246  | 0.5858636   | -0.0318 | 0.975 | -8.16E-08 | count | 1 |
| ENTPD4     | -0.0186246  | 0.6062048   | -0.0307 | 0.976 | -8.16E-08 | count | 1 |
| PTK2       | -0.0186246  | 0.6062048   | -0.0307 | 0.976 | -8.16E-08 | count | 1 |
| ESS2       | -0.0186246  | 0.5856699   | -0.0318 | 0.975 | -8.16E-08 | count | 1 |
| TRAF6      | -0.0186246  | 0.6054593   | -0.0308 | 0.975 | -8.16E-08 | count | 1 |
| PHC2       | -0.0186246  | 0.5643884   | -0.033  | 0.974 | -8.16E-08 | count | 1 |
| RAB33B     | -0.0186246  | 0.5643884   | -0.033  | 0.974 | -8.16E-08 | count | 1 |
| CCDC152    | -0.0186246  | 0.6633295   | -0.0281 | 0.978 | -8.16E-08 | count | 1 |
| STK10      | -0.0183934  | 0.3598784   | -0.0511 | 0.959 | -8.06E-08 | count | 1 |
| CCDC141    | -0.0182234  | 0.5582758   | -0.0326 | 0.974 | -8.00E-08 | count | 1 |
| MOB3B      | -0.0182234  | 0.5035251   | -0.0362 | 0.971 | -7.99E-08 | count | 1 |
| ZNHIT6     | -0.0179901  | 0.4365033   | -0.0412 | 0.967 | -7.89E-08 | count | 1 |
| CNTRL      | -0.0064882  | 0.2211964   | -0.0293 | 0.977 | -7.76E-08 | count | 1 |
| SNX12      | -0.0478494  | 0.7302372   | -0.0655 | 0.948 | -7.63E-08 | count | 1 |
| TMEM218    | -0.1331849  | 0.4882688   | -0.2728 | 0.785 | -7.57E-08 | count | 1 |
| ANKRD36B   | -0.1331849  | 0.573066    | -0.2324 | 0.816 | -7.56E-08 | count | 1 |



|            |            |           |         |       |           |       |   |
|------------|------------|-----------|---------|-------|-----------|-------|---|
| LRCH1      | -0.1331849 | 0.5096208 | -0.2613 | 0.794 | -7.56E-08 | count | 1 |
| SLC38A10   | -0.0171087 | 0.8022158 | -0.0213 | 0.983 | -7.53E-08 | count | 1 |
| PAG1       | -0.016951  | 0.5118852 | -0.0331 | 0.974 | -7.44E-08 | count | 1 |
| AC103591.3 | -0.0461735 | 0.4925445 | -0.0937 | 0.925 | -7.36E-08 | count | 1 |
| RBM28      | -0.0160845 | 0.5586017 | -0.0288 | 0.977 | -7.07E-08 | count | 1 |
| RNF167     | -0.005513  | 0.3190835 | -0.0173 | 0.986 | -6.60E-08 | count | 1 |
| GBP5       | -0.3338556 | 0.8429624 | -0.3961 | 0.692 | -6.46E-08 | count | 1 |
| CABYR      | -0.3338556 | 1.0361339 | -0.3222 | 0.747 | -6.46E-08 | count | 1 |
| CATSPER2   | -0.3338556 | 0.9162571 | -0.3644 | 0.716 | -6.46E-08 | count | 1 |
| MICA       | -0.3338556 | 0.9162571 | -0.3644 | 0.716 | -6.46E-08 | count | 1 |
| PKIA       | -0.3338556 | 0.6357233 | -0.5252 | 0.6   | -6.46E-08 | count | 1 |
| TMEM44-AS1 | -0.3338556 | 1.1414039 | -0.2925 | 0.77  | -6.46E-08 | count | 1 |
| ZGRF1      | -0.3338556 | 0.7251902 | -0.4604 | 0.645 | -6.45E-08 | count | 1 |
| HIST1H2BN  | -0.3338556 | 0.9841079 | -0.3392 | 0.735 | -6.45E-08 | count | 1 |
| RAP2C-AS1  | -0.3338556 | 0.9841079 | -0.3392 | 0.735 | -6.45E-08 | count | 1 |
| TMEM44     | -0.3338556 | 0.9360161 | -0.3567 | 0.722 | -6.45E-08 | count | 1 |
| SPATA5L1   | -0.3338556 | 0.8632759 | -0.3867 | 0.699 | -6.45E-08 | count | 1 |
| ADAT2      | -0.3338556 | 0.8632759 | -0.3867 | 0.699 | -6.45E-08 | count | 1 |
| IDE        | -0.3338556 | 0.8632759 | -0.3867 | 0.699 | -6.45E-08 | count | 1 |
| IKBKG      | -0.3338556 | 0.8092233 | -0.4126 | 0.68  | -6.45E-08 | count | 1 |
| ARHGEF19   | -0.3338556 | 0.8092233 | -0.4126 | 0.68  | -6.45E-08 | count | 1 |
| NACA2      | -0.3338556 | 0.8092233 | -0.4126 | 0.68  | -6.45E-08 | count | 1 |
| EFCAB2     | -0.3338556 | 0.8092233 | -0.4126 | 0.68  | -6.45E-08 | count | 1 |
| FXR2       | -0.3338556 | 0.8092233 | -0.4126 | 0.68  | -6.45E-08 | count | 1 |
| ZNF808     | -0.3338556 | 0.8092233 | -0.4126 | 0.68  | -6.45E-08 | count | 1 |
| ARSB       | -0.3338556 | 0.8092233 | -0.4126 | 0.68  | -6.45E-08 | count | 1 |
| JAML       | -0.3338556 | 1.3271252 | -0.2516 | 0.801 | -6.45E-08 | count | 1 |
| SH3RF1     | -0.3338556 | 1.3271252 | -0.2516 | 0.801 | -6.45E-08 | count | 1 |
| ABCD3      | -0.3338556 | 0.6538865 | -0.5106 | 0.61  | -6.45E-08 | count | 1 |
| TOM1L2     | -0.3338556 | 1.1160177 | -0.2991 | 0.765 | -6.45E-08 | count | 1 |
| FNDC10     | -0.3338556 | 1.1160177 | -0.2991 | 0.765 | -6.45E-08 | count | 1 |
| CYB561D2   | -0.3338556 | 1.1160177 | -0.2991 | 0.765 | -6.45E-08 | count | 1 |
| NT5C2      | -0.3338556 | 1.1160177 | -0.2991 | 0.765 | -6.45E-08 | count | 1 |
| STPG1      | -0.3338556 | 1.1160177 | -0.2991 | 0.765 | -6.45E-08 | count | 1 |
| IGKV1-5    | -0.3338556 | 1.1160177 | -0.2991 | 0.765 | -6.45E-08 | count | 1 |
| TRAIP      | -0.3338556 | 1.1160177 | -0.2991 | 0.765 | -6.45E-08 | count | 1 |
| GAS6-AS1   | -0.3338556 | 1.1160177 | -0.2991 | 0.765 | -6.45E-08 | count | 1 |
| AC010883.1 | -0.3338556 | 1.1160177 | -0.2991 | 0.765 | -6.45E-08 | count | 1 |
| DDX43      | -0.3338556 | 1.1160177 | -0.2991 | 0.765 | -6.45E-08 | count | 1 |
| ZFP30      | -0.3338556 | 1.1160177 | -0.2991 | 0.765 | -6.45E-08 | count | 1 |
| LENG9      | -0.3338556 | 1.1160177 | -0.2991 | 0.765 | -6.45E-08 | count | 1 |
| KCNC1      | -0.3338556 | 1.1160177 | -0.2991 | 0.765 | -6.45E-08 | count | 1 |
| MKL2       | -0.3338556 | 1.1160177 | -0.2991 | 0.765 | -6.45E-08 | count | 1 |
| HS6ST1     | -0.3338556 | 1.1160177 | -0.2991 | 0.765 | -6.45E-08 | count | 1 |
| CD200R1    | -0.3338556 | 0.9871547 | -0.3382 | 0.735 | -6.45E-08 | count | 1 |

|             |            |           |         |       |           |       |   |
|-------------|------------|-----------|---------|-------|-----------|-------|---|
| UBE3D       | -0.3338556 | 0.9871547 | -0.3382 | 0.735 | -6.45E-08 | count | 1 |
| AC016876.1  | -0.3338556 | 0.9871547 | -0.3382 | 0.735 | -6.45E-08 | count | 1 |
| CRACR2A     | -0.3338556 | 0.9871547 | -0.3382 | 0.735 | -6.45E-08 | count | 1 |
| DNAJC28     | -0.3338556 | 0.9871547 | -0.3382 | 0.735 | -6.45E-08 | count | 1 |
| LINC01679   | -0.3338556 | 0.9871547 | -0.3382 | 0.735 | -6.45E-08 | count | 1 |
| CHRNA1      | -0.3338556 | 0.9871547 | -0.3382 | 0.735 | -6.45E-08 | count | 1 |
| AC016065.1  | -0.3338556 | 0.9871547 | -0.3382 | 0.735 | -6.45E-08 | count | 1 |
| ITGAV       | -0.3338556 | 0.9871547 | -0.3382 | 0.735 | -6.45E-08 | count | 1 |
| NBEAL2      | -0.3338556 | 0.9871547 | -0.3382 | 0.735 | -6.45E-08 | count | 1 |
| ALG9        | -0.3338556 | 0.9871547 | -0.3382 | 0.735 | -6.45E-08 | count | 1 |
| NUDT13      | -0.3338556 | 0.9871547 | -0.3382 | 0.735 | -6.45E-08 | count | 1 |
| FBXO31      | -0.3338556 | 0.9871547 | -0.3382 | 0.735 | -6.45E-08 | count | 1 |
| TBX21       | -0.3338556 | 0.9871547 | -0.3382 | 0.735 | -6.45E-08 | count | 1 |
| AC027307.3  | -0.3338556 | 0.9871547 | -0.3382 | 0.735 | -6.45E-08 | count | 1 |
| C2orf88     | -0.3338556 | 0.9871547 | -0.3382 | 0.735 | -6.45E-08 | count | 1 |
| FUT8-AS1    | -0.3338556 | 0.9871547 | -0.3382 | 0.735 | -6.45E-08 | count | 1 |
| C2orf15     | -0.3338556 | 0.9871547 | -0.3382 | 0.735 | -6.45E-08 | count | 1 |
| ZNF382      | -0.3338556 | 0.8853156 | -0.3771 | 0.706 | -6.45E-08 | count | 1 |
| PRADC1      | -0.3338556 | 0.8853156 | -0.3771 | 0.706 | -6.45E-08 | count | 1 |
| FAM57A      | -0.3338556 | 0.8853156 | -0.3771 | 0.706 | -6.45E-08 | count | 1 |
| PLAGL2      | -0.3338556 | 0.7622867 | -0.438  | 0.662 | -6.45E-08 | count | 1 |
| SYCE1L      | -0.3338556 | 0.7622867 | -0.438  | 0.662 | -6.45E-08 | count | 1 |
| ARMCX2      | -0.3338556 | 0.7622867 | -0.438  | 0.662 | -6.45E-08 | count | 1 |
| NSUN3       | -0.3338556 | 0.7622867 | -0.438  | 0.662 | -6.45E-08 | count | 1 |
| RGL4        | -0.3338556 | 0.7622867 | -0.438  | 0.662 | -6.45E-08 | count | 1 |
| ANO9        | -0.3338556 | 0.75      | -0.4451 | 0.656 | -6.45E-08 | count | 1 |
| RILP        | -0.3338556 | 0.9553665 | -0.3495 | 0.727 | -6.45E-08 | count | 1 |
| IGLV2-14    | -0.3338556 | 0.9553665 | -0.3495 | 0.727 | -6.45E-08 | count | 1 |
| PPCDC       | -0.3338556 | 1.1263964 | -0.2964 | 0.767 | -6.45E-08 | count | 1 |
| AC073332.1  | -0.3338556 | 1.1263964 | -0.2964 | 0.767 | -6.45E-08 | count | 1 |
| NOXA1       | -0.3338556 | 1.3271252 | -0.2516 | 0.801 | -6.45E-08 | count | 1 |
| IGLV1-44    | -0.3338556 | 1.3271252 | -0.2516 | 0.801 | -6.45E-08 | count | 1 |
| AC018797.2  | -0.3338556 | 1.3271252 | -0.2516 | 0.801 | -6.45E-08 | count | 1 |
| IGLV2-8     | -0.3338556 | 1.3271252 | -0.2516 | 0.801 | -6.45E-08 | count | 1 |
| TMSB15B-AS1 | -0.3338556 | 1.3271252 | -0.2516 | 0.801 | -6.45E-08 | count | 1 |
| GSTM2       | -0.3338556 | 1.3271252 | -0.2516 | 0.801 | -6.45E-08 | count | 1 |
| AC007381.1  | -0.3338556 | 1.3271252 | -0.2516 | 0.801 | -6.45E-08 | count | 1 |
| DCBLD2      | -0.3338556 | 1.3271252 | -0.2516 | 0.801 | -6.45E-08 | count | 1 |
| HIST1H2BF   | -0.3338556 | 1.3271252 | -0.2516 | 0.801 | -6.45E-08 | count | 1 |
| NEO1        | -0.3338556 | 1.3271252 | -0.2516 | 0.801 | -6.45E-08 | count | 1 |
| EVA1C       | -0.3338556 | 1.3271252 | -0.2516 | 0.801 | -6.45E-08 | count | 1 |
| AC012510.1  | -0.3338556 | 1.3271252 | -0.2516 | 0.801 | -6.45E-08 | count | 1 |
| HIST1H4A    | -0.3338556 | 1.3271252 | -0.2516 | 0.801 | -6.45E-08 | count | 1 |
| PRDM11      | -0.3338556 | 1.3271252 | -0.2516 | 0.801 | -6.45E-08 | count | 1 |
| AL359198.1  | -0.3338556 | 1.3271252 | -0.2516 | 0.801 | -6.45E-08 | count | 1 |

|            |            |           |         |       |           |       |   |
|------------|------------|-----------|---------|-------|-----------|-------|---|
| APOLD1     | -0.3338556 | 1.3271252 | -0.2516 | 0.801 | -6.45E-08 | count | 1 |
| AC127002.1 | -0.3338556 | 1.3271252 | -0.2516 | 0.801 | -6.45E-08 | count | 1 |
| TSPOAP1    | -0.3338556 | 1.3271252 | -0.2516 | 0.801 | -6.45E-08 | count | 1 |
| ZSWIM4     | -0.3338556 | 1.3271252 | -0.2516 | 0.801 | -6.45E-08 | count | 1 |
| LBHD1      | -0.3338556 | 1.3271252 | -0.2516 | 0.801 | -6.45E-08 | count | 1 |
| FGFBP3     | -0.3338556 | 1.3271252 | -0.2516 | 0.801 | -6.45E-08 | count | 1 |
| AL356019.2 | -0.3338556 | 1.3271252 | -0.2516 | 0.801 | -6.45E-08 | count | 1 |
| RPP25      | -0.3338556 | 1.3271252 | -0.2516 | 0.801 | -6.45E-08 | count | 1 |
| SFXN3      | -0.3338556 | 0.9001724 | -0.3709 | 0.711 | -6.45E-08 | count | 1 |
| KCTD2      | -0.3338556 | 0.9001724 | -0.3709 | 0.711 | -6.45E-08 | count | 1 |
| AC137767.1 | -0.3338556 | 0.9001724 | -0.3709 | 0.711 | -6.45E-08 | count | 1 |
| CSNK1G1    | -0.3338556 | 0.9001724 | -0.3709 | 0.711 | -6.45E-08 | count | 1 |
| FAM102B    | -0.3338556 | 0.9001724 | -0.3709 | 0.711 | -6.45E-08 | count | 1 |
| ADAMDEC1   | -0.3338556 | 0.9001724 | -0.3709 | 0.711 | -6.45E-08 | count | 1 |
| FICD       | -0.3338556 | 0.9001724 | -0.3709 | 0.711 | -6.45E-08 | count | 1 |
| CDPF1      | -0.3338556 | 0.9001724 | -0.3709 | 0.711 | -6.45E-08 | count | 1 |
| AARS       | -0.3338556 | 1.1970518 | -0.2789 | 0.78  | -6.45E-08 | count | 1 |
| PPME1      | -0.3338556 | 0.9360161 | -0.3567 | 0.722 | -6.45E-08 | count | 1 |
| C5orf22    | -0.3338556 | 0.9360161 | -0.3567 | 0.722 | -6.45E-08 | count | 1 |
| SNHG21     | -0.3338556 | 0.9360161 | -0.3567 | 0.722 | -6.45E-08 | count | 1 |
| MAST3      | -0.3338556 | 0.9360161 | -0.3567 | 0.722 | -6.45E-08 | count | 1 |
| ZNF419     | -0.3338556 | 0.9360161 | -0.3567 | 0.722 | -6.45E-08 | count | 1 |
| SMIM1      | -0.3338556 | 0.9360161 | -0.3567 | 0.722 | -6.45E-08 | count | 1 |
| SLAMF7     | -0.3338556 | 0.9360161 | -0.3567 | 0.722 | -6.45E-08 | count | 1 |
| AC021054.1 | -0.3338556 | 0.9360161 | -0.3567 | 0.722 | -6.45E-08 | count | 1 |
| BLMH       | -0.3338556 | 0.9360161 | -0.3567 | 0.722 | -6.45E-08 | count | 1 |
| RPTOR      | -0.3338556 | 0.9360161 | -0.3567 | 0.722 | -6.45E-08 | count | 1 |
| LINC01534  | -0.3338556 | 0.9360161 | -0.3567 | 0.722 | -6.45E-08 | count | 1 |
| SLC22A15   | -0.3338556 | 0.9360161 | -0.3567 | 0.722 | -6.45E-08 | count | 1 |
| TNFAIP8L2  | -0.3338556 | 0.9360161 | -0.3567 | 0.722 | -6.45E-08 | count | 1 |
| PRSS16     | -0.3338556 | 0.9360161 | -0.3567 | 0.722 | -6.45E-08 | count | 1 |
| FECH       | -0.3338556 | 0.9360161 | -0.3567 | 0.722 | -6.45E-08 | count | 1 |
| LINC01353  | -0.3338556 | 0.9360161 | -0.3567 | 0.722 | -6.45E-08 | count | 1 |
| EXOC3-AS1  | -0.3338556 | 0.9360161 | -0.3567 | 0.722 | -6.45E-08 | count | 1 |
| C11orf98   | -0.3338556 | 0.9360161 | -0.3567 | 0.722 | -6.45E-08 | count | 1 |
| CRADD      | -0.3338556 | 0.9360161 | -0.3567 | 0.722 | -6.45E-08 | count | 1 |
| ALDOC      | -0.3338556 | 0.9360161 | -0.3567 | 0.722 | -6.45E-08 | count | 1 |
| HCN2       | -0.3338556 | 0.9360161 | -0.3567 | 0.722 | -6.45E-08 | count | 1 |
| SELENON    | -0.3338556 | 1.1797847 | -0.283  | 0.777 | -6.45E-08 | count | 1 |
| CD3E       | -0.3338556 | 1.1797847 | -0.283  | 0.777 | -6.45E-08 | count | 1 |
| ADGRL4     | -0.3338556 | 1.1797847 | -0.283  | 0.777 | -6.45E-08 | count | 1 |
| ZNF519     | -0.3338556 | 1.1797847 | -0.283  | 0.777 | -6.45E-08 | count | 1 |
| A4GALT     | -0.3338556 | 1.1797847 | -0.283  | 0.777 | -6.45E-08 | count | 1 |
| SHMT1      | -0.3338556 | 1.1797847 | -0.283  | 0.777 | -6.45E-08 | count | 1 |
| APOL1      | -0.3338556 | 1.1797847 | -0.283  | 0.777 | -6.45E-08 | count | 1 |

|             |            |           |         |       |           |       |   |
|-------------|------------|-----------|---------|-------|-----------|-------|---|
| LINC01136   | -0.3338556 | 1.1797847 | -0.283  | 0.777 | -6.45E-08 | count | 1 |
| TFPI        | -0.3338556 | 1.1797847 | -0.283  | 0.777 | -6.45E-08 | count | 1 |
| GPRASP1     | -0.3338556 | 1.1797847 | -0.283  | 0.777 | -6.45E-08 | count | 1 |
| LINC01001   | -0.3338556 | 1.1797847 | -0.283  | 0.777 | -6.45E-08 | count | 1 |
| ZBED2       | -0.3338556 | 1.1797847 | -0.283  | 0.777 | -6.45E-08 | count | 1 |
| PELI3       | -0.3338556 | 1.1797847 | -0.283  | 0.777 | -6.45E-08 | count | 1 |
| AL355001.2  | -0.3338556 | 1.1797847 | -0.283  | 0.777 | -6.45E-08 | count | 1 |
| AC015802.6  | -0.3338556 | 1.1797847 | -0.283  | 0.777 | -6.45E-08 | count | 1 |
| DPY19L3     | -0.3338556 | 1.1797847 | -0.283  | 0.777 | -6.45E-08 | count | 1 |
| PLXND1      | -0.3338556 | 1.1797847 | -0.283  | 0.777 | -6.45E-08 | count | 1 |
| PIGA        | -0.3338556 | 1.1797847 | -0.283  | 0.777 | -6.45E-08 | count | 1 |
| ZNF582-AS1  | -0.3338556 | 1.1797847 | -0.283  | 0.777 | -6.45E-08 | count | 1 |
| CEP41       | -0.3338556 | 1.1797847 | -0.283  | 0.777 | -6.45E-08 | count | 1 |
| ARHGAP5-AS1 | -0.3338556 | 1.1797847 | -0.283  | 0.777 | -6.45E-08 | count | 1 |
| AL117332.1  | -0.3338556 | 1.1797847 | -0.283  | 0.777 | -6.45E-08 | count | 1 |
| ZNF304      | -0.3338556 | 1.1797847 | -0.283  | 0.777 | -6.45E-08 | count | 1 |
| MIRLET7BHG  | -0.3338556 | 1.1797847 | -0.283  | 0.777 | -6.45E-08 | count | 1 |
| ARHGAP31    | -0.110712  | 0.5854659 | -0.1891 | 0.85  | -6.34E-08 | count | 1 |
| DYRK4       | -0.110712  | 0.4705278 | -0.2353 | 0.814 | -6.34E-08 | count | 1 |
| CXorf56     | -0.110712  | 0.5272635 | -0.21   | 0.834 | -6.34E-08 | count | 1 |
| AC116366.1  | -0.110712  | 0.8608606 | -0.1286 | 0.898 | -6.34E-08 | count | 1 |
| GALT        | -0.110712  | 0.5717151 | -0.1936 | 0.847 | -6.34E-08 | count | 1 |
| MFN2        | -0.110712  | 0.9185035 | -0.1205 | 0.904 | -6.34E-08 | count | 1 |
| MCM6        | -0.110712  | 0.7073695 | -0.1565 | 0.876 | -6.33E-08 | count | 1 |
| DDX41       | -0.110712  | 0.5071782 | -0.2183 | 0.827 | -6.33E-08 | count | 1 |
| FRYL        | -0.005151  | 0.3470234 | -0.0148 | 0.988 | -6.17E-08 | count | 1 |
| KHDC4       | -0.013687  | 0.5222717 | -0.0262 | 0.979 | -6.02E-08 | count | 1 |
| GMEB1       | -0.013687  | 0.521932  | -0.0262 | 0.979 | -6.01E-08 | count | 1 |
| ITGB3BP     | -0.013687  | 0.489895  | -0.0279 | 0.978 | -6.01E-08 | count | 1 |
| ZNF821      | -0.013687  | 0.4176775 | -0.0328 | 0.974 | -6.01E-08 | count | 1 |
| TBL2        | -1.0270028 | 1.1478535 | -0.8947 | 0.371 | -5.63E-08 | count | 1 |
| MAP2        | -1.0270028 | 1.1478535 | -0.8947 | 0.371 | -5.63E-08 | count | 1 |
| F11R        | -1.0270028 | 1.1478535 | -0.8947 | 0.371 | -5.63E-08 | count | 1 |
| NIFK-AS1    | -1.0270028 | 1.1478535 | -0.8947 | 0.371 | -5.63E-08 | count | 1 |
| TRIT1       | -1.0270028 | 1.1478535 | -0.8947 | 0.371 | -5.63E-08 | count | 1 |
| C1orf50     | -1.0270028 | 1.1478535 | -0.8947 | 0.371 | -5.63E-08 | count | 1 |
| MDC1        | -1.0270028 | 1.1478535 | -0.8947 | 0.371 | -5.63E-08 | count | 1 |
| AC026471.1  | -1.0270028 | 1.1478535 | -0.8947 | 0.371 | -5.63E-08 | count | 1 |
| KNSTRN      | -1.0270028 | 1.1478535 | -0.8947 | 0.371 | -5.63E-08 | count | 1 |
| AC015726.1  | -1.0270028 | 1.1478535 | -0.8947 | 0.371 | -5.63E-08 | count | 1 |
| ZNF175      | -1.0270028 | 1.1478535 | -0.8947 | 0.371 | -5.63E-08 | count | 1 |
| AC025181.2  | -1.0270028 | 1.1478535 | -0.8947 | 0.371 | -5.63E-08 | count | 1 |
| UBTD2       | -1.0270028 | 1.1478535 | -0.8947 | 0.371 | -5.63E-08 | count | 1 |
| RRAGD       | -1.0270028 | 1.1478535 | -0.8947 | 0.371 | -5.63E-08 | count | 1 |
| TFCP2       | -1.0270028 | 1.1478535 | -0.8947 | 0.371 | -5.63E-08 | count | 1 |

|            |             |             |         |       |           |       |   |
|------------|-------------|-------------|---------|-------|-----------|-------|---|
| LAT        | -1.0270028  | 1.1478535   | -0.8947 | 0.371 | -5.63E-08 | count | 1 |
| UQCC1      | -1.0270028  | 1.1478535   | -0.8947 | 0.371 | -5.63E-08 | count | 1 |
| AL355472.1 | -1.0270028  | 1.1478535   | -0.8947 | 0.371 | -5.63E-08 | count | 1 |
| CKMT2-AS1  | -1.0270028  | 1.1478535   | -0.8947 | 0.371 | -5.63E-08 | count | 1 |
| FLT3LG     | -1.0270028  | 1.1478535   | -0.8947 | 0.371 | -5.63E-08 | count | 1 |
| GPR89B     | -1.0270028  | 1.1478535   | -0.8947 | 0.371 | -5.63E-08 | count | 1 |
| ERCC8      | -1.0270028  | 1.1478535   | -0.8947 | 0.371 | -5.63E-08 | count | 1 |
| KLRG1      | -1.0270028  | 1.1478535   | -0.8947 | 0.371 | -5.63E-08 | count | 1 |
| UTP14C     | -1.0270028  | 1.1478535   | -0.8947 | 0.371 | -5.63E-08 | count | 1 |
| ZNF48      | -1.0270028  | 1.1478535   | -0.8947 | 0.371 | -5.63E-08 | count | 1 |
| TLDC1      | -1.0270028  | 1.1478535   | -0.8947 | 0.371 | -5.63E-08 | count | 1 |
| TTLL4      | -1.0270028  | 1.1478535   | -0.8947 | 0.371 | -5.63E-08 | count | 1 |
| HDX        | -1.0270028  | 1.1478535   | -0.8947 | 0.371 | -5.63E-08 | count | 1 |
| LINC01410  | -1.0270028  | 1.1478535   | -0.8947 | 0.371 | -5.63E-08 | count | 1 |
| SH3PXD2A   | -1.0270028  | 1.1478535   | -0.8947 | 0.371 | -5.63E-08 | count | 1 |
| ST3GAL2    | -1.0270028  | 1.1478535   | -0.8947 | 0.371 | -5.63E-08 | count | 1 |
| AC008691.1 | -1.0270028  | 1.1478535   | -0.8947 | 0.371 | -5.63E-08 | count | 1 |
| MMS19      | -1.0270028  | 1.1478535   | -0.8947 | 0.371 | -5.63E-08 | count | 1 |
| TIMELESS   | -1.0270028  | 1.1478535   | -0.8947 | 0.371 | -5.63E-08 | count | 1 |
| LMOD3      | -1.0270028  | 1.1478535   | -0.8947 | 0.371 | -5.63E-08 | count | 1 |
| AC093827.4 | -1.0270028  | 1.1478535   | -0.8947 | 0.371 | -5.63E-08 | count | 1 |
| ZNF879     | -1.0270028  | 1.1478535   | -0.8947 | 0.371 | -5.63E-08 | count | 1 |
| SPAG8      | -1.0270028  | 1.1478535   | -0.8947 | 0.371 | -5.63E-08 | count | 1 |
| AAK1       | -1.0270028  | 1.1478535   | -0.8947 | 0.371 | -5.63E-08 | count | 1 |
| SLC2A8     | -1.0270028  | 1.1478535   | -0.8947 | 0.371 | -5.63E-08 | count | 1 |
| SFRP2      | -1.0270028  | 1.1478535   | -0.8947 | 0.371 | -5.63E-08 | count | 1 |
| INPP5E     | -1.0270028  | 1.1478535   | -0.8947 | 0.371 | -5.63E-08 | count | 1 |
| C16orf45   | -1.0270028  | 1.1478535   | -0.8947 | 0.371 | -5.63E-08 | count | 1 |
| PHLPP2     | -1.0270028  | 1.1478535   | -0.8947 | 0.371 | -5.63E-08 | count | 1 |
| SFRP4      | -1.0270028  | 1.1478535   | -0.8947 | 0.371 | -5.63E-08 | count | 1 |
| LPAR6      | -1.0270028  | 1.1478535   | -0.8947 | 0.371 | -5.63E-08 | count | 1 |
| FGL2       | -0.0926935  | 0.6221793   | -0.149  | 0.882 | -5.34E-08 | count | 1 |
| ATG10      | -0.0825411  | 0.5504268   | -0.15   | 0.881 | -4.78E-08 | count | 1 |
| HABP4      | -0.0825411  | 0.5971384   | -0.1382 | 0.89  | -4.77E-08 | count | 1 |
| TTC21B     | -0.0825411  | 0.6440429   | -0.1282 | 0.898 | -4.77E-08 | count | 1 |
| MYBL2      | -0.0291577  | 0.963202    | -0.0303 | 0.976 | -4.68E-08 | count | 1 |
| SMPD1      | -0.0291577  | 1.0105173   | -0.0289 | 0.977 | -4.68E-08 | count | 1 |
| ARIH2OS    | -0.0291577  | 0.9578517   | -0.0304 | 0.976 | -4.68E-08 | count | 1 |
| PGPEP1     | -0.0094839  | 0.73473     | -0.0129 | 0.99  | -4.17E-08 | count | 1 |
| SPATA2     | -0.0714913  | 0.5934671   | -0.1205 | 0.904 | -4.15E-08 | count | 1 |
| ZNF91      | -0.0033457  | 0.377559    | -0.0089 | 0.993 | -4.01E-08 | count | 1 |
| TOPORS     | -0.0031373  | 0.2874076   | -0.0109 | 0.991 | -3.76E-08 | count | 1 |
| IFNG       | -19.2229848 | 2148.526333 | -0.0089 | 0.993 | -3.59E-08 | count | 1 |
| THBD       | -19.2229848 | 2148.526333 | -0.0089 | 0.993 | -3.59E-08 | count | 1 |
| ANGEL1     | -19.0895157 | 2832.846038 | -0.0067 | 0.995 | -3.59E-08 | count | 1 |

|            |             |             |         |       |           |       |   |
|------------|-------------|-------------|---------|-------|-----------|-------|---|
| ARHGAP19   | -18.93635   | 3416.314542 | -0.0055 | 0.996 | -3.57E-08 | count | 1 |
| HSD17B14   | -19.0907492 | 2388.743609 | -0.008  | 0.994 | -3.57E-08 | count | 1 |
| BOLA1      | -19.0910481 | 2220.651881 | -0.0086 | 0.993 | -3.57E-08 | count | 1 |
| AC026904.2 | -19.0916968 | 2038.990789 | -0.0094 | 0.993 | -3.56E-08 | count | 1 |
| MTFP1      | -19.0916968 | 2038.990789 | -0.0094 | 0.993 | -3.56E-08 | count | 1 |
| PARD6B     | -18.9377349 | 2839.127272 | -0.0067 | 0.995 | -3.55E-08 | count | 1 |
| CFI        | -18.7557596 | 3677.229281 | -0.0051 | 0.996 | -3.55E-08 | count | 1 |
| FCN1       | -18.7557596 | 3677.229281 | -0.0051 | 0.996 | -3.55E-08 | count | 1 |
| PLCXD1     | -18.9382195 | 2500.060617 | -0.0076 | 0.994 | -3.55E-08 | count | 1 |
| MPPED2     | -18.9382195 | 2500.060617 | -0.0076 | 0.994 | -3.55E-08 | count | 1 |
| CXCL12     | -18.9385007 | 2311.856919 | -0.0082 | 0.993 | -3.54E-08 | count | 1 |
| FABP4      | -18.9391053 | 2107.127707 | -0.009  | 0.993 | -3.54E-08 | count | 1 |
| TSPAN4     | -18.9391053 | 2107.127707 | -0.009  | 0.993 | -3.54E-08 | count | 1 |
| IFIT1      | -18.9391053 | 2107.127707 | -0.009  | 0.993 | -3.54E-08 | count | 1 |
| ZNF738     | -18.9391053 | 2107.127707 | -0.009  | 0.993 | -3.54E-08 | count | 1 |
| FXD7       | -18.9391053 | 2107.127707 | -0.009  | 0.993 | -3.54E-08 | count | 1 |
| LRRIQ3     | -18.9391053 | 2107.127707 | -0.009  | 0.993 | -3.54E-08 | count | 1 |
| IGLV3-21   | -18.9391053 | 2107.127707 | -0.009  | 0.993 | -3.54E-08 | count | 1 |
| LCAT       | -18.7575069 | 2646.479884 | -0.0071 | 0.994 | -3.53E-08 | count | 1 |
| NHLRC4     | -18.7575069 | 2646.479884 | -0.0071 | 0.994 | -3.53E-08 | count | 1 |
| PEX11B     | -18.9401854 | 1620.792354 | -0.0117 | 0.991 | -3.52E-08 | count | 1 |
| OGN        | -18.7580719 | 2432.467184 | -0.0077 | 0.994 | -3.52E-08 | count | 1 |
| OSBPL7     | -18.7580719 | 2432.467184 | -0.0077 | 0.994 | -3.52E-08 | count | 1 |
| AC116366.3 | -18.7580719 | 2432.467184 | -0.0077 | 0.994 | -3.52E-08 | count | 1 |
| GPR155     | -18.7583071 | 2197.069503 | -0.0085 | 0.993 | -3.52E-08 | count | 1 |
| AL445524.1 | -18.7583071 | 2197.069503 | -0.0085 | 0.993 | -3.52E-08 | count | 1 |
| APOC1      | -18.7583071 | 2197.069503 | -0.0085 | 0.993 | -3.52E-08 | count | 1 |
| BAIAP3     | -18.7583071 | 2197.069503 | -0.0085 | 0.993 | -3.52E-08 | count | 1 |
| HIST1H2BK  | -18.7583071 | 2197.069503 | -0.0085 | 0.993 | -3.52E-08 | count | 1 |
| AC116407.2 | -18.7583071 | 2197.069503 | -0.0085 | 0.993 | -3.52E-08 | count | 1 |
| PRDM15     | -18.801352  | 2099.954919 | -0.009  | 0.993 | -3.52E-08 | count | 1 |
| CXCL2      | -18.758801  | 1933.335453 | -0.0097 | 0.992 | -3.51E-08 | count | 1 |
| FYCO1      | -18.758801  | 1933.335453 | -0.0097 | 0.992 | -3.51E-08 | count | 1 |
| MADCAM1    | -18.758801  | 1933.335453 | -0.0097 | 0.992 | -3.51E-08 | count | 1 |
| TONSL      | -18.758801  | 1933.335453 | -0.0097 | 0.992 | -3.51E-08 | count | 1 |
| ZNF577     | -18.758801  | 1933.335453 | -0.0097 | 0.992 | -3.51E-08 | count | 1 |
| CIDEB      | -18.758801  | 1933.335453 | -0.0097 | 0.992 | -3.51E-08 | count | 1 |
| TNFSF13B   | -18.5856177 | 2732.867622 | -0.0068 | 0.995 | -3.51E-08 | count | 1 |
| SPIN3      | -18.5856177 | 2732.867622 | -0.0068 | 0.995 | -3.51E-08 | count | 1 |
| EXOC6B     | -18.5856177 | 2732.867622 | -0.0068 | 0.995 | -3.51E-08 | count | 1 |
| NBPF9      | -18.5856177 | 2732.867622 | -0.0068 | 0.995 | -3.51E-08 | count | 1 |
| COX7A1     | -18.5857117 | 2467.12271  | -0.0075 | 0.994 | -3.50E-08 | count | 1 |
| SLCO4A1    | -18.5857117 | 2467.12271  | -0.0075 | 0.994 | -3.50E-08 | count | 1 |
| STAT4      | -18.617168  | 2160.441749 | -0.0086 | 0.993 | -3.50E-08 | count | 1 |
| AC016737.1 | -18.5364072 | 2600.328179 | -0.0071 | 0.994 | -3.50E-08 | count | 1 |

|            |             |             |         |       |           |       |   |
|------------|-------------|-------------|---------|-------|-----------|-------|---|
| AP5S1      | -18.5364072 | 2600.328179 | -0.0071 | 0.994 | -3.50E-08 | count | 1 |
| HSBP1L1    | -18.5364072 | 2600.328179 | -0.0071 | 0.994 | -3.50E-08 | count | 1 |
| LINC00562  | -18.5364072 | 2600.328179 | -0.0071 | 0.994 | -3.50E-08 | count | 1 |
| ID2        | -18.5366043 | 2323.167165 | -0.008  | 0.994 | -3.50E-08 | count | 1 |
| SLC38A5    | -18.5366043 | 2323.167165 | -0.008  | 0.994 | -3.50E-08 | count | 1 |
| PCSK4      | -18.5366043 | 2323.167165 | -0.008  | 0.994 | -3.50E-08 | count | 1 |
| LTB4R      | -18.5366043 | 2323.167165 | -0.008  | 0.994 | -3.50E-08 | count | 1 |
| ANKRD9     | -18.5366043 | 2323.167165 | -0.008  | 0.994 | -3.50E-08 | count | 1 |
| ZXDA       | -18.5366043 | 2323.167165 | -0.008  | 0.994 | -3.50E-08 | count | 1 |
| DHRS7B     | -18.5366043 | 2323.167165 | -0.008  | 0.994 | -3.50E-08 | count | 1 |
| MRPS24     | -18.5366043 | 2323.167165 | -0.008  | 0.994 | -3.50E-08 | count | 1 |
| CPE        | -18.5366043 | 2323.167165 | -0.008  | 0.994 | -3.50E-08 | count | 1 |
| ZNF256     | -18.5858588 | 2169.058134 | -0.0086 | 0.993 | -3.50E-08 | count | 1 |
| C1orf115   | -18.5858588 | 2169.058134 | -0.0086 | 0.993 | -3.50E-08 | count | 1 |
| KANK1      | -18.382617  | 2944.494793 | -0.0062 | 0.995 | -3.49E-08 | count | 1 |
| MFGE8      | -18.3470853 | 3066.05779  | -0.006  | 0.995 | -3.49E-08 | count | 1 |
| FOXO4      | -18.5370057 | 2008.180727 | -0.0092 | 0.993 | -3.49E-08 | count | 1 |
| IGHGP      | -18.5370057 | 2008.180727 | -0.0092 | 0.993 | -3.49E-08 | count | 1 |
| DSEL       | -18.5370057 | 2008.180727 | -0.0092 | 0.993 | -3.49E-08 | count | 1 |
| VPS54      | -18.5370057 | 2008.180727 | -0.0092 | 0.993 | -3.49E-08 | count | 1 |
| PTGDS      | -18.5370057 | 2008.180727 | -0.0092 | 0.993 | -3.49E-08 | count | 1 |
| ESR2       | -18.5370057 | 2008.180727 | -0.0092 | 0.993 | -3.49E-08 | count | 1 |
| ZNF347     | -18.5370057 | 2008.180727 | -0.0092 | 0.993 | -3.49E-08 | count | 1 |
| RAB13      | -18.5370057 | 2008.180727 | -0.0092 | 0.993 | -3.49E-08 | count | 1 |
| ATL1       | -18.5370057 | 2008.180727 | -0.0092 | 0.993 | -3.49E-08 | count | 1 |
| LRRRC61    | -18.5370057 | 2008.180727 | -0.0092 | 0.993 | -3.49E-08 | count | 1 |
| GLMP       | -18.5370057 | 2008.180727 | -0.0092 | 0.993 | -3.49E-08 | count | 1 |
| DDR1       | -18.5859119 | 1822.69384  | -0.0102 | 0.992 | -3.49E-08 | count | 1 |
| HLA-G      | -18.5859119 | 1822.69384  | -0.0102 | 0.992 | -3.49E-08 | count | 1 |
| STRN4      | -18.3655919 | 2490.580441 | -0.0074 | 0.994 | -3.49E-08 | count | 1 |
| B4GALT5    | -18.3655919 | 2490.580441 | -0.0074 | 0.994 | -3.49E-08 | count | 1 |
| GPNMB      | -18.3097036 | 2977.498836 | -0.0061 | 0.995 | -3.49E-08 | count | 1 |
| DNAJC5B    | -18.537345  | 1633.160152 | -0.0114 | 0.991 | -3.49E-08 | count | 1 |
| CATSPERG   | -18.537345  | 1633.160152 | -0.0114 | 0.991 | -3.49E-08 | count | 1 |
| SGCA       | -18.3455426 | 2395.966132 | -0.0077 | 0.994 | -3.48E-08 | count | 1 |
| PLEKHA8    | -18.3486604 | 2263.4208   | -0.0081 | 0.994 | -3.48E-08 | count | 1 |
| OASL       | -18.2500664 | 2855.688498 | -0.0064 | 0.995 | -3.48E-08 | count | 1 |
| PREX2      | -18.2500664 | 2855.688498 | -0.0064 | 0.995 | -3.48E-08 | count | 1 |
| SERPINA1   | -18.2500664 | 2855.688498 | -0.0064 | 0.995 | -3.48E-08 | count | 1 |
| LILRB2     | -18.2500664 | 2855.688498 | -0.0064 | 0.995 | -3.48E-08 | count | 1 |
| AIFM2      | -18.2500664 | 2855.688498 | -0.0064 | 0.995 | -3.48E-08 | count | 1 |
| DKK3       | -18.2500664 | 2855.688498 | -0.0064 | 0.995 | -3.48E-08 | count | 1 |
| IL1R1      | -18.2500664 | 2855.688498 | -0.0064 | 0.995 | -3.48E-08 | count | 1 |
| AL360091.3 | -18.2500664 | 2855.688498 | -0.0064 | 0.995 | -3.48E-08 | count | 1 |
| LINC00240  | -18.2500664 | 2855.688498 | -0.0064 | 0.995 | -3.48E-08 | count | 1 |

|             |             |             |         |       |           |       |   |
|-------------|-------------|-------------|---------|-------|-----------|-------|---|
| IGHV4-39    | -18.2500664 | 2855.688498 | -0.0064 | 0.995 | -3.48E-08 | count | 1 |
| TMEM225B    | -18.2500664 | 2855.688498 | -0.0064 | 0.995 | -3.48E-08 | count | 1 |
| AC097468.3  | -18.2500664 | 2855.688498 | -0.0064 | 0.995 | -3.48E-08 | count | 1 |
| FCAR        | -18.2500664 | 2855.688498 | -0.0064 | 0.995 | -3.48E-08 | count | 1 |
| TNNT3       | -18.2500664 | 2855.688498 | -0.0064 | 0.995 | -3.48E-08 | count | 1 |
| SLC12A9-AS1 | -18.3097913 | 2276.054326 | -0.008  | 0.994 | -3.48E-08 | count | 1 |
| EFEMP1      | -18.3097913 | 2276.054326 | -0.008  | 0.994 | -3.48E-08 | count | 1 |
| TMEM97      | -18.3097913 | 2276.054326 | -0.008  | 0.994 | -3.48E-08 | count | 1 |
| TMEM181     | -18.3097913 | 2276.054326 | -0.008  | 0.994 | -3.48E-08 | count | 1 |
| MAP1LC3B2   | -18.3097913 | 2276.054326 | -0.008  | 0.994 | -3.48E-08 | count | 1 |
| RCAN2       | -18.3097913 | 2276.054326 | -0.008  | 0.994 | -3.48E-08 | count | 1 |
| DDN-AS1     | -18.3097913 | 2276.054326 | -0.008  | 0.994 | -3.48E-08 | count | 1 |
| ATRIP       | -18.3097913 | 2276.054326 | -0.008  | 0.994 | -3.48E-08 | count | 1 |
| PPARD       | -18.3097913 | 2276.054326 | -0.008  | 0.994 | -3.48E-08 | count | 1 |
| AC009961.1  | -18.3097913 | 2276.054326 | -0.008  | 0.994 | -3.48E-08 | count | 1 |
| FKBP14      | -18.3097913 | 2276.054326 | -0.008  | 0.994 | -3.48E-08 | count | 1 |
| PCYOX1      | -18.3442484 | 1978.08088  | -0.0093 | 0.993 | -3.48E-08 | count | 1 |
| CCDC80      | -18.3442484 | 1978.08088  | -0.0093 | 0.993 | -3.48E-08 | count | 1 |
| NSDHL       | -18.3097177 | 1826.814301 | -0.01   | 0.992 | -3.48E-08 | count | 1 |
| NRL         | -18.3097177 | 1826.814301 | -0.01   | 0.992 | -3.48E-08 | count | 1 |
| FARP1       | -18.3097177 | 1826.814301 | -0.01   | 0.992 | -3.48E-08 | count | 1 |
| SPIN2A      | -18.3097177 | 1826.814301 | -0.01   | 0.992 | -3.48E-08 | count | 1 |
| FCRLB       | -18.2504884 | 2123.722878 | -0.0086 | 0.993 | -3.48E-08 | count | 1 |
| AP006621.3  | -18.2504884 | 2123.722878 | -0.0086 | 0.993 | -3.48E-08 | count | 1 |
| PEX12       | -18.2504884 | 2123.722878 | -0.0086 | 0.993 | -3.48E-08 | count | 1 |
| FDX2        | -18.2504884 | 2123.722878 | -0.0086 | 0.993 | -3.48E-08 | count | 1 |
| AC231981.1  | -18.2504884 | 2123.722878 | -0.0086 | 0.993 | -3.48E-08 | count | 1 |
| EEF1AKMT4   | -18.2504884 | 2123.722878 | -0.0086 | 0.993 | -3.48E-08 | count | 1 |
| GRPEL2      | -18.2504884 | 2123.722878 | -0.0086 | 0.993 | -3.48E-08 | count | 1 |
| TCF7L2      | -18.2504884 | 2123.722878 | -0.0086 | 0.993 | -3.48E-08 | count | 1 |
| SCML2       | -18.2504884 | 2123.722878 | -0.0086 | 0.993 | -3.48E-08 | count | 1 |
| C6orf163    | -18.2504884 | 2123.722878 | -0.0086 | 0.993 | -3.48E-08 | count | 1 |
| AC005332.1  | -18.2504884 | 2123.722878 | -0.0086 | 0.993 | -3.48E-08 | count | 1 |
| KHK         | -18.2504884 | 2123.722878 | -0.0086 | 0.993 | -3.48E-08 | count | 1 |
| ATP6AP1L    | -18.2504884 | 2123.722878 | -0.0086 | 0.993 | -3.48E-08 | count | 1 |
| GPRC5D-AS1  | -18.2504884 | 2123.722878 | -0.0086 | 0.993 | -3.48E-08 | count | 1 |
| LINC00663   | -18.2504884 | 2123.722878 | -0.0086 | 0.993 | -3.48E-08 | count | 1 |
| GZMM        | -18.2504884 | 2123.722878 | -0.0086 | 0.993 | -3.48E-08 | count | 1 |
| ZNF799      | -18.2504884 | 2123.722878 | -0.0086 | 0.993 | -3.48E-08 | count | 1 |
| AC109826.1  | -18.2504884 | 2123.722878 | -0.0086 | 0.993 | -3.48E-08 | count | 1 |
| PPP2R3A     | -18.2504884 | 2123.722878 | -0.0086 | 0.993 | -3.48E-08 | count | 1 |
| CHST7       | -18.2504884 | 2123.722878 | -0.0086 | 0.993 | -3.48E-08 | count | 1 |
| ZNF496      | -18.2504884 | 2123.722878 | -0.0086 | 0.993 | -3.48E-08 | count | 1 |
| SLC8A1      | -18.2504884 | 2123.722878 | -0.0086 | 0.993 | -3.48E-08 | count | 1 |
| CCNT2-AS1   | -18.2504884 | 2123.722878 | -0.0086 | 0.993 | -3.48E-08 | count | 1 |



|            |             |             |         |       |           |       |   |
|------------|-------------|-------------|---------|-------|-----------|-------|---|
| MFAP5      | -18.2504884 | 2123.722878 | -0.0086 | 0.993 | -3.48E-08 | count | 1 |
| ITPK1-AS1  | -18.2504884 | 2123.722878 | -0.0086 | 0.993 | -3.48E-08 | count | 1 |
| SDR42E1    | -18.2504884 | 2123.722878 | -0.0086 | 0.993 | -3.48E-08 | count | 1 |
| FAM198B    | -18.2504884 | 2123.722878 | -0.0086 | 0.993 | -3.48E-08 | count | 1 |
| ZBTB37     | -18.2504884 | 2123.722878 | -0.0086 | 0.993 | -3.48E-08 | count | 1 |
| AC013264.1 | -18.2504884 | 2123.722878 | -0.0086 | 0.993 | -3.48E-08 | count | 1 |
| QRICH2     | -18.2504884 | 2123.722878 | -0.0086 | 0.993 | -3.48E-08 | count | 1 |
| LINC01473  | -18.2504884 | 2123.722878 | -0.0086 | 0.993 | -3.48E-08 | count | 1 |
| MAML3      | -18.2504884 | 2123.722878 | -0.0086 | 0.993 | -3.48E-08 | count | 1 |
| OLFML2A    | -18.2504884 | 2123.722878 | -0.0086 | 0.993 | -3.48E-08 | count | 1 |
| DLEC1      | -18.2504884 | 2123.722878 | -0.0086 | 0.993 | -3.48E-08 | count | 1 |
| KSR1       | -18.2504884 | 2123.722878 | -0.0086 | 0.993 | -3.48E-08 | count | 1 |
| PAGR1      | -18.2504884 | 2123.722878 | -0.0086 | 0.993 | -3.48E-08 | count | 1 |
| AC008752.2 | -18.2504884 | 2123.722878 | -0.0086 | 0.993 | -3.48E-08 | count | 1 |
| AC104596.1 | -18.2504884 | 2123.722878 | -0.0086 | 0.993 | -3.48E-08 | count | 1 |
| AC004241.1 | -18.2504884 | 2123.722878 | -0.0086 | 0.993 | -3.48E-08 | count | 1 |
| IL10       | -18.2504884 | 2123.722878 | -0.0086 | 0.993 | -3.48E-08 | count | 1 |
| AC018682.1 | -18.2504884 | 2123.722878 | -0.0086 | 0.993 | -3.48E-08 | count | 1 |
| SRGAP3     | -18.2504884 | 2123.722878 | -0.0086 | 0.993 | -3.48E-08 | count | 1 |
| AL355075.4 | -18.2504884 | 2123.722878 | -0.0086 | 0.993 | -3.48E-08 | count | 1 |
| ZNF619     | -18.2504884 | 2123.722878 | -0.0086 | 0.993 | -3.48E-08 | count | 1 |
| AC055822.1 | -18.2504884 | 2123.722878 | -0.0086 | 0.993 | -3.48E-08 | count | 1 |
| CLCN5      | -18.2504884 | 2123.722878 | -0.0086 | 0.993 | -3.48E-08 | count | 1 |
| LAPTM4B    | -18.2504884 | 2123.722878 | -0.0086 | 0.993 | -3.48E-08 | count | 1 |
| SRCAP      | -18.2506906 | 1639.097896 | -0.0111 | 0.991 | -3.47E-08 | count | 1 |
| TMEM176B   | -18.2506906 | 1639.097896 | -0.0111 | 0.991 | -3.47E-08 | count | 1 |
| ZNF324B    | -18.2506906 | 1639.097896 | -0.0111 | 0.991 | -3.47E-08 | count | 1 |
| ATXN7      | -18.2506906 | 1639.097896 | -0.0111 | 0.991 | -3.47E-08 | count | 1 |
| AC040970.1 | -18.2506906 | 1639.097896 | -0.0111 | 0.991 | -3.47E-08 | count | 1 |
| ADSL       | -18.2506906 | 1639.097896 | -0.0111 | 0.991 | -3.47E-08 | count | 1 |
| ZNF345     | -18.2506906 | 1639.097896 | -0.0111 | 0.991 | -3.47E-08 | count | 1 |
| AMMECR1    | -18.2506906 | 1639.097896 | -0.0111 | 0.991 | -3.47E-08 | count | 1 |
| LIPE-AS1   | -18.2506906 | 1639.097896 | -0.0111 | 0.991 | -3.47E-08 | count | 1 |
| FES        | -18.2506906 | 1639.097896 | -0.0111 | 0.991 | -3.47E-08 | count | 1 |
| FAM184B    | -18.2506906 | 1639.097896 | -0.0111 | 0.991 | -3.47E-08 | count | 1 |
| AC008014.1 | -18.2506906 | 1639.097896 | -0.0111 | 0.991 | -3.47E-08 | count | 1 |
| GTF2H2     | -18.2506906 | 1639.097896 | -0.0111 | 0.991 | -3.47E-08 | count | 1 |
| MAP3K21    | -18.2506906 | 1639.097896 | -0.0111 | 0.991 | -3.47E-08 | count | 1 |
| ZFYVE28    | -18.2506906 | 1639.097896 | -0.0111 | 0.991 | -3.47E-08 | count | 1 |
| RBM47      | -18.1343947 | 1860.400131 | -0.0097 | 0.992 | -3.47E-08 | count | 1 |
| DNASE1L3   | -18.0468284 | 2557.459386 | -0.0071 | 0.994 | -3.47E-08 | count | 1 |
| AP001059.2 | -18.0468284 | 2557.459386 | -0.0071 | 0.994 | -3.47E-08 | count | 1 |
| PLN        | -18.0468284 | 2557.459386 | -0.0071 | 0.994 | -3.47E-08 | count | 1 |
| GIMAP4     | -18.0091417 | 2647.00011  | -0.0068 | 0.995 | -3.47E-08 | count | 1 |
| AC019131.2 | -17.976247  | 2571.453362 | -0.007  | 0.994 | -3.47E-08 | count | 1 |

|            |             |             |         |       |           |       |   |
|------------|-------------|-------------|---------|-------|-----------|-------|---|
| POLE       | -17.976247  | 2571.453362 | -0.007  | 0.994 | -3.47E-08 | count | 1 |
| LMOD1      | -17.976247  | 2571.453362 | -0.007  | 0.994 | -3.47E-08 | count | 1 |
| ZNF785     | -18.0054582 | 2088.308662 | -0.0086 | 0.993 | -3.47E-08 | count | 1 |
| ZNF607     | -18.0054582 | 2088.308662 | -0.0086 | 0.993 | -3.47E-08 | count | 1 |
| IGLC5      | -17.9796232 | 2450.394825 | -0.0073 | 0.994 | -3.47E-08 | count | 1 |
| C3AR1      | -17.9796232 | 2450.394825 | -0.0073 | 0.994 | -3.47E-08 | count | 1 |
| AC010969.2 | -17.9796232 | 2450.394825 | -0.0073 | 0.994 | -3.47E-08 | count | 1 |
| AL390728.5 | -17.9255695 | 2470.641666 | -0.0073 | 0.994 | -3.47E-08 | count | 1 |
| HEXIM2     | -17.9255695 | 2470.641666 | -0.0073 | 0.994 | -3.47E-08 | count | 1 |
| AC019197.1 | -17.9255695 | 2470.641666 | -0.0073 | 0.994 | -3.47E-08 | count | 1 |
| ITGB5      | -17.9255695 | 2470.641666 | -0.0073 | 0.994 | -3.47E-08 | count | 1 |
| SLC35F6    | -17.9255695 | 2470.641666 | -0.0073 | 0.994 | -3.47E-08 | count | 1 |
| HSF5       | -17.9255695 | 2470.641666 | -0.0073 | 0.994 | -3.47E-08 | count | 1 |
| LMBR1      | -17.9255695 | 2470.641666 | -0.0073 | 0.994 | -3.47E-08 | count | 1 |
| GSTO2      | -17.9255695 | 2470.641666 | -0.0073 | 0.994 | -3.47E-08 | count | 1 |
| C12orf60   | -17.9255695 | 2470.641666 | -0.0073 | 0.994 | -3.47E-08 | count | 1 |
| APBB1      | -17.9255695 | 2470.641666 | -0.0073 | 0.994 | -3.47E-08 | count | 1 |
| RAB25      | -17.9255695 | 2470.641666 | -0.0073 | 0.994 | -3.47E-08 | count | 1 |
| CTBP2      | -17.9255695 | 2470.641666 | -0.0073 | 0.994 | -3.47E-08 | count | 1 |
| STK11IP    | -17.9255695 | 2470.641666 | -0.0073 | 0.994 | -3.47E-08 | count | 1 |
| PTGIR      | -17.9255695 | 2470.641666 | -0.0073 | 0.994 | -3.47E-08 | count | 1 |
| HES6       | -17.9255695 | 2470.641666 | -0.0073 | 0.994 | -3.47E-08 | count | 1 |
| CCR1       | -17.9255695 | 2470.641666 | -0.0073 | 0.994 | -3.47E-08 | count | 1 |
| ACOX3      | -17.9255695 | 2470.641666 | -0.0073 | 0.994 | -3.47E-08 | count | 1 |
| AC015967.1 | -17.9255695 | 2470.641666 | -0.0073 | 0.994 | -3.47E-08 | count | 1 |
| LYPLAL1-DT | -17.9255695 | 2470.641666 | -0.0073 | 0.994 | -3.47E-08 | count | 1 |
| ZNF202     | -17.9747142 | 1973.65758  | -0.0091 | 0.993 | -3.47E-08 | count | 1 |
| ZNF445     | -17.9787287 | 1811.424068 | -0.0099 | 0.992 | -3.47E-08 | count | 1 |
| ZNF257     | -17.9787287 | 1811.424068 | -0.0099 | 0.992 | -3.47E-08 | count | 1 |
| AC099778.1 | -17.9253874 | 1829.125288 | -0.0098 | 0.992 | -3.46E-08 | count | 1 |
| SPATA7     | -17.9253874 | 1829.125288 | -0.0098 | 0.992 | -3.46E-08 | count | 1 |
| IGSF22     | -17.9253874 | 1829.125288 | -0.0098 | 0.992 | -3.46E-08 | count | 1 |
| AC107884.1 | -17.9253874 | 1829.125288 | -0.0098 | 0.992 | -3.46E-08 | count | 1 |
| AC025569.1 | -17.9253874 | 1829.125288 | -0.0098 | 0.992 | -3.46E-08 | count | 1 |
| ZNF433     | -17.9253874 | 1829.125288 | -0.0098 | 0.992 | -3.46E-08 | count | 1 |
| FOCAD      | -17.9253874 | 1829.125288 | -0.0098 | 0.992 | -3.46E-08 | count | 1 |
| SPON1      | -17.9253874 | 1829.125288 | -0.0098 | 0.992 | -3.46E-08 | count | 1 |
| SIRPA      | -17.9253874 | 1829.125288 | -0.0098 | 0.992 | -3.46E-08 | count | 1 |
| TNFRSF18   | -17.9253874 | 1829.125288 | -0.0098 | 0.992 | -3.46E-08 | count | 1 |
| POFUT2     | -17.9253874 | 1829.125288 | -0.0098 | 0.992 | -3.46E-08 | count | 1 |
| GIMAP1     | -17.9253874 | 1829.125288 | -0.0098 | 0.992 | -3.46E-08 | count | 1 |
| MAP1B      | -17.9253874 | 1829.125288 | -0.0098 | 0.992 | -3.46E-08 | count | 1 |
| TMEM234    | -17.9253874 | 1829.125288 | -0.0098 | 0.992 | -3.46E-08 | count | 1 |
| ZNF585B    | -17.9253874 | 1829.125288 | -0.0098 | 0.992 | -3.46E-08 | count | 1 |
| HMMR       | -17.9253874 | 1829.125288 | -0.0098 | 0.992 | -3.46E-08 | count | 1 |

|            |             |             |         |       |           |       |   |
|------------|-------------|-------------|---------|-------|-----------|-------|---|
| ZSCAN12    | -17.5528127 | 2019.790605 | -0.0087 | 0.993 | -3.46E-08 | count | 1 |
| CACNA2D4   | -17.4928174 | 2133.463129 | -0.0082 | 0.993 | -3.46E-08 | count | 1 |
| PTGIS      | -17.5163872 | 1950.92206  | -0.009  | 0.993 | -3.46E-08 | count | 1 |
| ENAH       | -17.5163872 | 1950.92206  | -0.009  | 0.993 | -3.46E-08 | count | 1 |
| ZPBP2      | -17.5163872 | 1950.92206  | -0.009  | 0.993 | -3.46E-08 | count | 1 |
| TTLL1      | -17.4488954 | 2058.214364 | -0.0085 | 0.993 | -3.46E-08 | count | 1 |
| NBL1       | -17.4488954 | 2058.214364 | -0.0085 | 0.993 | -3.46E-08 | count | 1 |
| ZBTB3      | -17.4488954 | 2058.214364 | -0.0085 | 0.993 | -3.46E-08 | count | 1 |
| AL163051.1 | -17.4488954 | 2058.214364 | -0.0085 | 0.993 | -3.46E-08 | count | 1 |
| PTPRO      | -17.4488954 | 2058.214364 | -0.0085 | 0.993 | -3.46E-08 | count | 1 |
| DLGAP3     | -17.4488954 | 2058.214364 | -0.0085 | 0.993 | -3.46E-08 | count | 1 |
| HSD11B1L   | -17.4488954 | 2058.214364 | -0.0085 | 0.993 | -3.46E-08 | count | 1 |
| ACOT7      | -17.4488954 | 2058.214364 | -0.0085 | 0.993 | -3.46E-08 | count | 1 |
| C6orf99    | -17.4488954 | 2058.214364 | -0.0085 | 0.993 | -3.46E-08 | count | 1 |
| FOXJ2      | -17.4488954 | 2058.214364 | -0.0085 | 0.993 | -3.46E-08 | count | 1 |
| AGAP5      | -17.3816025 | 1955.140307 | -0.0089 | 0.993 | -3.46E-08 | count | 1 |
| AC006946.2 | -17.3816025 | 1955.140307 | -0.0089 | 0.993 | -3.46E-08 | count | 1 |
| PTCH1      | -17.3816025 | 1955.140307 | -0.0089 | 0.993 | -3.46E-08 | count | 1 |
| ERRF1      | -17.3816025 | 1955.140307 | -0.0089 | 0.993 | -3.46E-08 | count | 1 |
| RARRES1    | -17.3816025 | 1955.140307 | -0.0089 | 0.993 | -3.46E-08 | count | 1 |
| TBX6       | -17.3816025 | 1955.140307 | -0.0089 | 0.993 | -3.46E-08 | count | 1 |
| CDC42EP4   | -17.3851414 | 1794.728549 | -0.0097 | 0.992 | -3.46E-08 | count | 1 |
| RTTN       | -17.3851414 | 1794.728549 | -0.0097 | 0.992 | -3.46E-08 | count | 1 |
| PLCG1      | -17.4608552 | 1869.343674 | -0.0093 | 0.993 | -3.46E-08 | count | 1 |
| RNLS       | -17.466271  | 1764.90359  | -0.0099 | 0.992 | -3.46E-08 | count | 1 |
| PCNX1      | -0.0075254  | 0.5034153   | -0.0149 | 0.988 | -3.31E-08 | count | 1 |
| SYS1       | -0.0024575  | 0.2541851   | -0.0097 | 0.992 | -2.95E-08 | count | 1 |
| PIGS       | -0.0066279  | 0.7109258   | -0.0093 | 0.993 | -2.92E-08 | count | 1 |
| PHF8       | -0.0066279  | 0.610162    | -0.0109 | 0.991 | -2.92E-08 | count | 1 |
| CEP95      | -0.0063745  | 0.379181    | -0.0168 | 0.987 | -2.81E-08 | count | 1 |
| GLE1       | -0.0171087  | 0.8548275   | -0.02   | 0.984 | -2.76E-08 | count | 1 |
| SLCO5A1    | -0.0171087  | 0.9116525   | -0.0188 | 0.985 | -2.76E-08 | count | 1 |
| GATD1      | -0.0461735  | 0.8035451   | -0.0575 | 0.954 | -2.72E-08 | count | 1 |
| LLGL2      | -0.0461735  | 0.6279398   | -0.0735 | 0.941 | -2.71E-08 | count | 1 |
| IKZF5      | -0.0461735  | 0.5432509   | -0.085  | 0.932 | -2.71E-08 | count | 1 |
| PISD       | -0.0461735  | 0.5693712   | -0.0811 | 0.935 | -2.71E-08 | count | 1 |
| ZNF584     | -0.0461735  | 0.6306365   | -0.0732 | 0.942 | -2.71E-08 | count | 1 |
| ZNF414     | -0.0461735  | 0.567879    | -0.0813 | 0.935 | -2.71E-08 | count | 1 |
| TM2D2      | -0.0461735  | 0.6000787   | -0.0769 | 0.939 | -2.71E-08 | count | 1 |
| C10orf143  | -0.0461735  | 0.6000787   | -0.0769 | 0.939 | -2.71E-08 | count | 1 |
| GALNT7     | -0.0461735  | 0.5115586   | -0.0903 | 0.928 | -2.71E-08 | count | 1 |
| REX1BD     | -0.0020779  | 0.1766966   | -0.0118 | 0.991 | -2.49E-08 | count | 1 |
| ZFP28      | -0.3338556  | 1.3271252   | -0.2516 | 0.801 | -2.37E-08 | count | 1 |
| MFSD13A    | -0.3338556  | 1.3271252   | -0.2516 | 0.801 | -2.37E-08 | count | 1 |
| MINDY4     | -0.3338556  | 1.3271252   | -0.2516 | 0.801 | -2.37E-08 | count | 1 |

|            |            |           |         |       |           |       |   |
|------------|------------|-----------|---------|-------|-----------|-------|---|
| POP1       | -0.3338556 | 1.3271252 | -0.2516 | 0.801 | -2.37E-08 | count | 1 |
| ZNF653     | -0.3338556 | 1.3271252 | -0.2516 | 0.801 | -2.37E-08 | count | 1 |
| PRRG2      | -0.3338556 | 1.3271252 | -0.2516 | 0.801 | -2.37E-08 | count | 1 |
| COL3A1     | -0.3338556 | 1.3271252 | -0.2516 | 0.801 | -2.37E-08 | count | 1 |
| ZNF862     | -0.3338556 | 1.3271252 | -0.2516 | 0.801 | -2.37E-08 | count | 1 |
| TMEM8B     | -0.3338556 | 1.3271252 | -0.2516 | 0.801 | -2.37E-08 | count | 1 |
| TOLLIP-AS1 | -0.3338556 | 1.3271252 | -0.2516 | 0.801 | -2.37E-08 | count | 1 |
| MS4A14     | -0.3338556 | 1.3271252 | -0.2516 | 0.801 | -2.37E-08 | count | 1 |
| SERPINA9   | -0.3338556 | 1.3271252 | -0.2516 | 0.801 | -2.37E-08 | count | 1 |
| PLEKHG4    | -0.3338556 | 1.3271252 | -0.2516 | 0.801 | -2.37E-08 | count | 1 |
| ZNF181     | -0.3338556 | 1.3271252 | -0.2516 | 0.801 | -2.37E-08 | count | 1 |
| IL10RB     | -0.3338556 | 1.3271252 | -0.2516 | 0.801 | -2.37E-08 | count | 1 |
| LDLRAP1    | -0.3338556 | 1.3271252 | -0.2516 | 0.801 | -2.37E-08 | count | 1 |
| PLPP3      | -0.3338556 | 1.3271252 | -0.2516 | 0.801 | -2.37E-08 | count | 1 |
| LGALS1     | -0.3338556 | 1.3271252 | -0.2516 | 0.801 | -2.37E-08 | count | 1 |
| LINC01800  | -0.3338556 | 1.3271252 | -0.2516 | 0.801 | -2.37E-08 | count | 1 |
| ARL6       | -0.3338556 | 1.3271252 | -0.2516 | 0.801 | -2.37E-08 | count | 1 |
| GFM2       | -0.3338556 | 1.3271252 | -0.2516 | 0.801 | -2.37E-08 | count | 1 |
| NUDT12     | -0.3338556 | 1.3271252 | -0.2516 | 0.801 | -2.37E-08 | count | 1 |
| PILRA      | -0.3338556 | 1.3271252 | -0.2516 | 0.801 | -2.37E-08 | count | 1 |
| AC004918.1 | -0.3338556 | 1.3271252 | -0.2516 | 0.801 | -2.37E-08 | count | 1 |
| XKR9       | -0.3338556 | 1.3271252 | -0.2516 | 0.801 | -2.37E-08 | count | 1 |
| EFEMP2     | -0.3338556 | 1.3271252 | -0.2516 | 0.801 | -2.37E-08 | count | 1 |
| NLRX1      | -0.3338556 | 1.3271252 | -0.2516 | 0.801 | -2.37E-08 | count | 1 |
| ARHGEF40   | -0.3338556 | 1.3271252 | -0.2516 | 0.801 | -2.37E-08 | count | 1 |
| CCDC144A   | -0.3338556 | 1.3271252 | -0.2516 | 0.801 | -2.37E-08 | count | 1 |
| ZNF286B    | -0.3338556 | 1.3271252 | -0.2516 | 0.801 | -2.37E-08 | count | 1 |
| FAAP24     | -0.3338556 | 1.3271252 | -0.2516 | 0.801 | -2.37E-08 | count | 1 |
| ZNF28      | -0.3338556 | 1.3271252 | -0.2516 | 0.801 | -2.37E-08 | count | 1 |
| LILRB4     | -0.3338556 | 1.3271252 | -0.2516 | 0.801 | -2.37E-08 | count | 1 |
| LSS        | -0.3338556 | 1.3271252 | -0.2516 | 0.801 | -2.37E-08 | count | 1 |
| AL592494.3 | -0.3338556 | 1.3271252 | -0.2516 | 0.801 | -2.37E-08 | count | 1 |
| CLEC20A    | -0.3338556 | 1.3271252 | -0.2516 | 0.801 | -2.37E-08 | count | 1 |
| CD8B       | -0.3338556 | 1.3271252 | -0.2516 | 0.801 | -2.37E-08 | count | 1 |
| IGKV2D-29  | -0.3338556 | 1.3271252 | -0.2516 | 0.801 | -2.37E-08 | count | 1 |
| IL18R1     | -0.3338556 | 1.3271252 | -0.2516 | 0.801 | -2.37E-08 | count | 1 |
| VIPR1      | -0.3338556 | 1.3271252 | -0.2516 | 0.801 | -2.37E-08 | count | 1 |
| AC097534.2 | -0.3338556 | 1.3271252 | -0.2516 | 0.801 | -2.37E-08 | count | 1 |
| ICA1       | -0.3338556 | 1.3271252 | -0.2516 | 0.801 | -2.37E-08 | count | 1 |
| NFE2L3     | -0.3338556 | 1.3271252 | -0.2516 | 0.801 | -2.37E-08 | count | 1 |
| THEM6      | -0.3338556 | 1.3271252 | -0.2516 | 0.801 | -2.37E-08 | count | 1 |
| CNTLN      | -0.3338556 | 1.3271252 | -0.2516 | 0.801 | -2.37E-08 | count | 1 |
| ST6GALNAC6 | -0.3338556 | 1.3271252 | -0.2516 | 0.801 | -2.37E-08 | count | 1 |
| RXRA       | -0.3338556 | 1.3271252 | -0.2516 | 0.801 | -2.37E-08 | count | 1 |
| HARB11     | -0.3338556 | 1.3271252 | -0.2516 | 0.801 | -2.37E-08 | count | 1 |

|                 |            |           |         |       |           |       |   |
|-----------------|------------|-----------|---------|-------|-----------|-------|---|
| TNKS2-AS1       | -0.3338556 | 1.3271252 | -0.2516 | 0.801 | -2.37E-08 | count | 1 |
| KCNA5           | -0.3338556 | 1.3271252 | -0.2516 | 0.801 | -2.37E-08 | count | 1 |
| LINC02422       | -0.3338556 | 1.3271252 | -0.2516 | 0.801 | -2.37E-08 | count | 1 |
| STAC3           | -0.3338556 | 1.3271252 | -0.2516 | 0.801 | -2.37E-08 | count | 1 |
| IGHV4-34        | -0.3338556 | 1.3271252 | -0.2516 | 0.801 | -2.37E-08 | count | 1 |
| CHRFAM7A        | -0.3338556 | 1.3271252 | -0.2516 | 0.801 | -2.37E-08 | count | 1 |
| AC068338.2      | -0.3338556 | 1.3271252 | -0.2516 | 0.801 | -2.37E-08 | count | 1 |
| BRICD5          | -0.3338556 | 1.3271252 | -0.2516 | 0.801 | -2.37E-08 | count | 1 |
| NOMO3           | -0.3338556 | 1.3271252 | -0.2516 | 0.801 | -2.37E-08 | count | 1 |
| AC105105.1      | -0.3338556 | 1.3271252 | -0.2516 | 0.801 | -2.37E-08 | count | 1 |
| NECTIN2         | -0.3338556 | 1.3271252 | -0.2516 | 0.801 | -2.37E-08 | count | 1 |
| DCLRE1B         | -0.3338556 | 1.3271252 | -0.2516 | 0.801 | -2.37E-08 | count | 1 |
| RGS13           | -0.3338556 | 1.3271252 | -0.2516 | 0.801 | -2.37E-08 | count | 1 |
| EMILIN1         | -0.3338556 | 1.3271252 | -0.2516 | 0.801 | -2.37E-08 | count | 1 |
| CMTM8           | -0.3338556 | 1.3271252 | -0.2516 | 0.801 | -2.37E-08 | count | 1 |
| DGKQ            | -0.3338556 | 1.3271252 | -0.2516 | 0.801 | -2.37E-08 | count | 1 |
| EREG            | -0.3338556 | 1.3271252 | -0.2516 | 0.801 | -2.37E-08 | count | 1 |
| PPARGC1B        | -0.3338556 | 1.3271252 | -0.2516 | 0.801 | -2.37E-08 | count | 1 |
| HSPA1L          | -0.3338556 | 1.3271252 | -0.2516 | 0.801 | -2.37E-08 | count | 1 |
| VPS52           | -0.3338556 | 1.3271252 | -0.2516 | 0.801 | -2.37E-08 | count | 1 |
| STEAP1          | -0.3338556 | 1.3271252 | -0.2516 | 0.801 | -2.37E-08 | count | 1 |
| VSIG1           | -0.3338556 | 1.3271252 | -0.2516 | 0.801 | -2.37E-08 | count | 1 |
| AL512625.2      | -0.3338556 | 1.3271252 | -0.2516 | 0.801 | -2.37E-08 | count | 1 |
| AP000442.2      | -0.3338556 | 1.3271252 | -0.2516 | 0.801 | -2.37E-08 | count | 1 |
| AP5B1           | -0.3338556 | 1.3271252 | -0.2516 | 0.801 | -2.37E-08 | count | 1 |
| FAM86C1         | -0.3338556 | 1.3271252 | -0.2516 | 0.801 | -2.37E-08 | count | 1 |
| MPP7            | -0.3338556 | 1.3271252 | -0.2516 | 0.801 | -2.37E-08 | count | 1 |
| AVP1            | -0.3338556 | 1.3271252 | -0.2516 | 0.801 | -2.37E-08 | count | 1 |
| TAS2R14         | -0.3338556 | 1.3271252 | -0.2516 | 0.801 | -2.37E-08 | count | 1 |
| TCTN2           | -0.3338556 | 1.3271252 | -0.2516 | 0.801 | -2.37E-08 | count | 1 |
| SLC25A30        | -0.3338556 | 1.3271252 | -0.2516 | 0.801 | -2.37E-08 | count | 1 |
| CDKL1           | -0.3338556 | 1.3271252 | -0.2516 | 0.801 | -2.37E-08 | count | 1 |
| GALC            | -0.3338556 | 1.3271252 | -0.2516 | 0.801 | -2.37E-08 | count | 1 |
| IGHV2-5         | -0.3338556 | 1.3271252 | -0.2516 | 0.801 | -2.37E-08 | count | 1 |
| POLG            | -0.3338556 | 1.3271252 | -0.2516 | 0.801 | -2.37E-08 | count | 1 |
| ATP6V0C         | -0.3338556 | 1.3271252 | -0.2516 | 0.801 | -2.37E-08 | count | 1 |
| AC106739.1      | -0.3338556 | 1.3271252 | -0.2516 | 0.801 | -2.37E-08 | count | 1 |
| AC009093.2      | -0.3338556 | 1.3271252 | -0.2516 | 0.801 | -2.37E-08 | count | 1 |
| PSKH1           | -0.3338556 | 1.3271252 | -0.2516 | 0.801 | -2.37E-08 | count | 1 |
| AC009113.1      | -0.3338556 | 1.3271252 | -0.2516 | 0.801 | -2.37E-08 | count | 1 |
| KCTD11          | -0.3338556 | 1.3271252 | -0.2516 | 0.801 | -2.37E-08 | count | 1 |
| LINC02210-CRHR1 | -0.3338556 | 1.3271252 | -0.2516 | 0.801 | -2.37E-08 | count | 1 |
| SMG8            | -0.3338556 | 1.3271252 | -0.2516 | 0.801 | -2.37E-08 | count | 1 |
| AC127496.5      | -0.3338556 | 1.3271252 | -0.2516 | 0.801 | -2.37E-08 | count | 1 |
| KAT14           | -0.3338556 | 1.3271252 | -0.2516 | 0.801 | -2.37E-08 | count | 1 |

|             |            |           |         |       |           |       |   |
|-------------|------------|-----------|---------|-------|-----------|-------|---|
| ZNF599      | -0.3338556 | 1.3271252 | -0.2516 | 0.801 | -2.37E-08 | count | 1 |
| SERHL2      | -0.3338556 | 1.3271252 | -0.2516 | 0.801 | -2.37E-08 | count | 1 |
| KLHDC9      | -0.3338556 | 1.3271252 | -0.2516 | 0.801 | -2.37E-08 | count | 1 |
| RNASEL      | -0.3338556 | 1.3271252 | -0.2516 | 0.801 | -2.37E-08 | count | 1 |
| ZNF512      | -0.3338556 | 1.3271252 | -0.2516 | 0.801 | -2.37E-08 | count | 1 |
| CYBRD1      | -0.3338556 | 1.3271252 | -0.2516 | 0.801 | -2.37E-08 | count | 1 |
| NAP1L5      | -0.3338556 | 1.3271252 | -0.2516 | 0.801 | -2.37E-08 | count | 1 |
| C6orf47-AS1 | -0.3338556 | 1.3271252 | -0.2516 | 0.801 | -2.37E-08 | count | 1 |
| HLA-DQB2    | -0.3338556 | 1.3271252 | -0.2516 | 0.801 | -2.37E-08 | count | 1 |
| AC087672.2  | -0.3338556 | 1.3271252 | -0.2516 | 0.801 | -2.37E-08 | count | 1 |
| ALDH1B1     | -0.3338556 | 1.3271252 | -0.2516 | 0.801 | -2.37E-08 | count | 1 |
| OLFM1       | -0.3338556 | 1.3271252 | -0.2516 | 0.801 | -2.37E-08 | count | 1 |
| DHCR7       | -0.3338556 | 1.3271252 | -0.2516 | 0.801 | -2.37E-08 | count | 1 |
| AL132656.2  | -0.3338556 | 1.3271252 | -0.2516 | 0.801 | -2.37E-08 | count | 1 |
| RAD52       | -0.3338556 | 1.3271252 | -0.2516 | 0.801 | -2.37E-08 | count | 1 |
| H3F3C       | -0.3338556 | 1.3271252 | -0.2516 | 0.801 | -2.37E-08 | count | 1 |
| ENTPD5      | -0.3338556 | 1.3271252 | -0.2516 | 0.801 | -2.37E-08 | count | 1 |
| ZKSCAN2     | -0.3338556 | 1.3271252 | -0.2516 | 0.801 | -2.37E-08 | count | 1 |
| C17orf97    | -0.3338556 | 1.3271252 | -0.2516 | 0.801 | -2.37E-08 | count | 1 |
| AC002091.2  | -0.3338556 | 1.3271252 | -0.2516 | 0.801 | -2.37E-08 | count | 1 |
| PLVAP       | -0.3338556 | 1.3271252 | -0.2516 | 0.801 | -2.37E-08 | count | 1 |
| ZNF429      | -0.3338556 | 1.3271252 | -0.2516 | 0.801 | -2.37E-08 | count | 1 |
| ATP5MGL     | -0.3338556 | 1.3271252 | -0.2516 | 0.801 | -2.37E-08 | count | 1 |
| RTL6        | -0.3338556 | 1.3271252 | -0.2516 | 0.801 | -2.37E-08 | count | 1 |
| AP001059.3  | -0.3338556 | 1.3271252 | -0.2516 | 0.801 | -2.37E-08 | count | 1 |
| PEX14       | -0.3338556 | 1.3271252 | -0.2516 | 0.801 | -2.37E-08 | count | 1 |
| CPT2        | -0.3338556 | 1.3271252 | -0.2516 | 0.801 | -2.37E-08 | count | 1 |
| ZEB2-AS1    | -0.3338556 | 1.3271252 | -0.2516 | 0.801 | -2.37E-08 | count | 1 |
| CYP27A1     | -0.3338556 | 1.3271252 | -0.2516 | 0.801 | -2.37E-08 | count | 1 |
| AC062017.1  | -0.3338556 | 1.3271252 | -0.2516 | 0.801 | -2.37E-08 | count | 1 |
| SETMAR      | -0.3338556 | 1.3271252 | -0.2516 | 0.801 | -2.37E-08 | count | 1 |
| AMACR       | -0.3338556 | 1.3271252 | -0.2516 | 0.801 | -2.37E-08 | count | 1 |
| AGER        | -0.3338556 | 1.3271252 | -0.2516 | 0.801 | -2.37E-08 | count | 1 |
| AC004466.1  | -0.3338556 | 1.3271252 | -0.2516 | 0.801 | -2.37E-08 | count | 1 |
| PARP2       | -0.3338556 | 1.3271252 | -0.2516 | 0.801 | -2.37E-08 | count | 1 |
| HYPK        | -0.3338556 | 1.3271252 | -0.2516 | 0.801 | -2.37E-08 | count | 1 |
| AC093512.1  | -0.3338556 | 1.3271252 | -0.2516 | 0.801 | -2.37E-08 | count | 1 |
| AC007728.2  | -0.3338556 | 1.3271252 | -0.2516 | 0.801 | -2.37E-08 | count | 1 |
| LZTS3       | -0.3338556 | 1.3271252 | -0.2516 | 0.801 | -2.37E-08 | count | 1 |
| MOCS3       | -0.3338556 | 1.3271252 | -0.2516 | 0.801 | -2.37E-08 | count | 1 |
| LARGE1      | -0.3338556 | 1.3271252 | -0.2516 | 0.801 | -2.37E-08 | count | 1 |
| FP565260.1  | -0.3338556 | 1.3271252 | -0.2516 | 0.801 | -2.37E-08 | count | 1 |
| MCM3AP-AS1  | -0.3338556 | 1.3271252 | -0.2516 | 0.801 | -2.37E-08 | count | 1 |
| TTC22       | -0.3338556 | 1.3271252 | -0.2516 | 0.801 | -2.37E-08 | count | 1 |
| ARF4-AS1    | -0.3338556 | 1.3271252 | -0.2516 | 0.801 | -2.37E-08 | count | 1 |

|            |            |           |         |       |           |       |   |
|------------|------------|-----------|---------|-------|-----------|-------|---|
| AL355338.1 | -0.3338556 | 1.3271252 | -0.2516 | 0.801 | -2.37E-08 | count | 1 |
| NDRG2      | -0.3338556 | 1.3271252 | -0.2516 | 0.801 | -2.37E-08 | count | 1 |
| USP40      | -0.3338556 | 1.3271252 | -0.2516 | 0.801 | -2.37E-08 | count | 1 |
| EFCAB12    | -0.3338556 | 1.3271252 | -0.2516 | 0.801 | -2.37E-08 | count | 1 |
| RGS12      | -0.3338556 | 1.3271252 | -0.2516 | 0.801 | -2.37E-08 | count | 1 |
| NEXMIF     | -0.3338556 | 1.3271252 | -0.2516 | 0.801 | -2.37E-08 | count | 1 |
| ARMCX5     | -0.3338556 | 1.3271252 | -0.2516 | 0.801 | -2.37E-08 | count | 1 |
| ENPP2      | -0.3338556 | 1.3271252 | -0.2516 | 0.801 | -2.37E-08 | count | 1 |
| REM2       | -0.3338556 | 1.3271252 | -0.2516 | 0.801 | -2.37E-08 | count | 1 |
| AC068446.2 | -0.3338556 | 1.3271252 | -0.2516 | 0.801 | -2.37E-08 | count | 1 |
| ZNF283     | -0.3338556 | 1.3271252 | -0.2516 | 0.801 | -2.37E-08 | count | 1 |
| CHKB       | -0.3338556 | 1.3271252 | -0.2516 | 0.801 | -2.37E-08 | count | 1 |
| MARK1      | -0.3338556 | 1.3271252 | -0.2516 | 0.801 | -2.37E-08 | count | 1 |
| AC012360.3 | -0.3338556 | 1.3271252 | -0.2516 | 0.801 | -2.37E-08 | count | 1 |
| NEB        | -0.3338556 | 1.3271252 | -0.2516 | 0.801 | -2.37E-08 | count | 1 |
| FBLN2      | -0.3338556 | 1.3271252 | -0.2516 | 0.801 | -2.37E-08 | count | 1 |
| POLR3G     | -0.3338556 | 1.3271252 | -0.2516 | 0.801 | -2.37E-08 | count | 1 |
| RAD54B     | -0.3338556 | 1.3271252 | -0.2516 | 0.801 | -2.37E-08 | count | 1 |
| CCL21      | -0.3338556 | 1.3271252 | -0.2516 | 0.801 | -2.37E-08 | count | 1 |
| AP000880.1 | -0.3338556 | 1.3271252 | -0.2516 | 0.801 | -2.37E-08 | count | 1 |
| CCT6B      | -0.3338556 | 1.3271252 | -0.2516 | 0.801 | -2.37E-08 | count | 1 |
| AL021707.6 | -0.3338556 | 1.3271252 | -0.2516 | 0.801 | -2.37E-08 | count | 1 |
| SUSD1      | -0.3338556 | 1.3271252 | -0.2516 | 0.801 | -2.37E-08 | count | 1 |
| ZBTB26     | -0.3338556 | 1.3271252 | -0.2516 | 0.801 | -2.37E-08 | count | 1 |
| MIR210HG   | -0.3338556 | 1.3271252 | -0.2516 | 0.801 | -2.37E-08 | count | 1 |
| HSD17B1    | -0.3338556 | 1.3271252 | -0.2516 | 0.801 | -2.37E-08 | count | 1 |
| PHLDB2     | -0.3338556 | 1.3271252 | -0.2516 | 0.801 | -2.37E-08 | count | 1 |
| CDCA7L     | -0.0053713 | 0.4031569 | -0.0133 | 0.989 | -2.37E-08 | count | 1 |
| BMT2       | -0.110712  | 0.8051355 | -0.1375 | 0.891 | -2.33E-08 | count | 1 |
| CPSF4      | -0.110712  | 0.6872389 | -0.1611 | 0.872 | -2.33E-08 | count | 1 |
| RIOX1      | -0.110712  | 0.7517547 | -0.1473 | 0.883 | -2.33E-08 | count | 1 |
| USP51      | -0.110712  | 0.7517547 | -0.1473 | 0.883 | -2.33E-08 | count | 1 |
| GDAP1      | -0.110712  | 0.7517547 | -0.1473 | 0.883 | -2.33E-08 | count | 1 |
| ZNF611     | -0.110712  | 0.7581984 | -0.146  | 0.884 | -2.33E-08 | count | 1 |
| HSPA12A    | -0.110712  | 0.7581984 | -0.146  | 0.884 | -2.33E-08 | count | 1 |
| INPPL1     | -0.110712  | 0.8111553 | -0.1365 | 0.891 | -2.33E-08 | count | 1 |
| SGCE       | -0.110712  | 0.8111553 | -0.1365 | 0.891 | -2.33E-08 | count | 1 |
| PPP5C      | -0.110712  | 0.6942817 | -0.1595 | 0.873 | -2.33E-08 | count | 1 |
| HEMK1      | -0.110712  | 0.6942817 | -0.1595 | 0.873 | -2.33E-08 | count | 1 |
| ECSIT      | -0.0042114 | 0.4445962 | -0.0095 | 0.992 | -1.86E-08 | count | 1 |
| BTLA       | -0.0042114 | 0.4318882 | -0.0098 | 0.992 | -1.86E-08 | count | 1 |
| SLTM       | -0.0012926 | 0.1773915 | -0.0073 | 0.994 | -1.55E-08 | count | 1 |
| AP4S1      | -0.0094839 | 0.8182871 | -0.0116 | 0.991 | -1.53E-08 | count | 1 |
| UPRT       | -0.0094839 | 0.8402896 | -0.0113 | 0.991 | -1.53E-08 | count | 1 |
| ZDHHC7     | -0.0094839 | 0.8826508 | -0.0107 | 0.991 | -1.53E-08 | count | 1 |

|            |             |             |         |       |           |       |   |
|------------|-------------|-------------|---------|-------|-----------|-------|---|
| REC8       | -0.0094839  | 0.8818122   | -0.0108 | 0.991 | -1.53E-08 | count | 1 |
| KLHL32     | -18.8458926 | 3846.740106 | -0.0049 | 0.996 | -1.27E-08 | count | 1 |
| LANCL2     | -18.8458926 | 3846.740106 | -0.0049 | 0.996 | -1.27E-08 | count | 1 |
| AC022540.1 | -18.8458926 | 3846.740106 | -0.0049 | 0.996 | -1.27E-08 | count | 1 |
| ACSM3      | -18.8458926 | 3846.740106 | -0.0049 | 0.996 | -1.27E-08 | count | 1 |
| CDH11      | -18.8458926 | 3846.740106 | -0.0049 | 0.996 | -1.27E-08 | count | 1 |
| LILRB3     | -18.8458926 | 3846.740106 | -0.0049 | 0.996 | -1.27E-08 | count | 1 |
| AC233755.2 | -18.8458926 | 3846.740106 | -0.0049 | 0.996 | -1.27E-08 | count | 1 |
| TRBV7-2    | -18.8458926 | 3846.740106 | -0.0049 | 0.996 | -1.27E-08 | count | 1 |
| AC024060.1 | -18.8458926 | 3846.740106 | -0.0049 | 0.996 | -1.27E-08 | count | 1 |
| AC092849.1 | -18.8458926 | 3846.740106 | -0.0049 | 0.996 | -1.27E-08 | count | 1 |
| HMGA1P4    | -18.8458926 | 3846.740106 | -0.0049 | 0.996 | -1.27E-08 | count | 1 |
| AL137779.1 | -18.8458926 | 3846.740106 | -0.0049 | 0.996 | -1.27E-08 | count | 1 |
| FAM110D    | -18.8458926 | 3846.740106 | -0.0049 | 0.996 | -1.27E-08 | count | 1 |
| FAM8A1     | -18.8458926 | 3846.740106 | -0.0049 | 0.996 | -1.27E-08 | count | 1 |
| STEAP1B    | -18.8458926 | 3846.740106 | -0.0049 | 0.996 | -1.27E-08 | count | 1 |
| AC145207.2 | -18.8458926 | 3846.740106 | -0.0049 | 0.996 | -1.27E-08 | count | 1 |
| IGLV3-19   | -18.8458926 | 3846.740106 | -0.0049 | 0.996 | -1.27E-08 | count | 1 |
| ZNF70      | -18.8458926 | 3846.740106 | -0.0049 | 0.996 | -1.27E-08 | count | 1 |
| ZKSCAN3    | -18.8458926 | 3846.740106 | -0.0049 | 0.996 | -1.27E-08 | count | 1 |
| AC083862.2 | -18.8458926 | 3846.740106 | -0.0049 | 0.996 | -1.27E-08 | count | 1 |
| ADAMTS17   | -18.8458926 | 3846.740106 | -0.0049 | 0.996 | -1.27E-08 | count | 1 |
| ERI2       | -18.8458926 | 3846.740106 | -0.0049 | 0.996 | -1.27E-08 | count | 1 |
| GINS1      | -18.8458926 | 3846.740106 | -0.0049 | 0.996 | -1.27E-08 | count | 1 |
| ZNF30      | -18.8458926 | 3846.740106 | -0.0049 | 0.996 | -1.27E-08 | count | 1 |
| AC007228.2 | -18.8458926 | 3846.740106 | -0.0049 | 0.996 | -1.27E-08 | count | 1 |
| ANTXR1     | -18.8458926 | 3846.740106 | -0.0049 | 0.996 | -1.27E-08 | count | 1 |
| AC004834.1 | -18.8458926 | 3846.740106 | -0.0049 | 0.996 | -1.27E-08 | count | 1 |
| TCEAL2     | -18.8458926 | 3846.740106 | -0.0049 | 0.996 | -1.27E-08 | count | 1 |
| ADCK5      | -18.8458926 | 3846.740106 | -0.0049 | 0.996 | -1.27E-08 | count | 1 |
| ZNF404     | -18.8458926 | 3846.740106 | -0.0049 | 0.996 | -1.27E-08 | count | 1 |
| AL589666.1 | -18.8458926 | 3846.740106 | -0.0049 | 0.996 | -1.27E-08 | count | 1 |
| SLC43A1    | -18.8458926 | 3846.740106 | -0.0049 | 0.996 | -1.27E-08 | count | 1 |
| RASSF4     | -18.8458926 | 3846.740106 | -0.0049 | 0.996 | -1.27E-08 | count | 1 |
| CASTOR2    | -18.8458926 | 3846.740106 | -0.0049 | 0.996 | -1.27E-08 | count | 1 |
| ITGBL1     | -18.8458926 | 3846.740106 | -0.0049 | 0.996 | -1.27E-08 | count | 1 |
| AC017083.1 | -18.8458926 | 3846.740106 | -0.0049 | 0.996 | -1.27E-08 | count | 1 |
| IDH1-AS1   | -18.8458926 | 3846.740106 | -0.0049 | 0.996 | -1.27E-08 | count | 1 |
| CACNA2D3   | -18.8458926 | 3846.740106 | -0.0049 | 0.996 | -1.27E-08 | count | 1 |
| FZD6       | -18.8458926 | 3846.740106 | -0.0049 | 0.996 | -1.27E-08 | count | 1 |
| AP003392.3 | -18.8458926 | 3846.740106 | -0.0049 | 0.996 | -1.27E-08 | count | 1 |
| AL136295.5 | -18.8458926 | 3846.740106 | -0.0049 | 0.996 | -1.27E-08 | count | 1 |
| IGLV3-25   | -18.8458926 | 3846.740106 | -0.0049 | 0.996 | -1.27E-08 | count | 1 |
| C21orf58   | -18.8458926 | 3846.740106 | -0.0049 | 0.996 | -1.27E-08 | count | 1 |
| KCND3      | -18.8458926 | 3846.740106 | -0.0049 | 0.996 | -1.27E-08 | count | 1 |



|            |             |             |         |       |           |       |   |
|------------|-------------|-------------|---------|-------|-----------|-------|---|
| XCL1       | -18.8458926 | 3846.740106 | -0.0049 | 0.996 | -1.27E-08 | count | 1 |
| IGKV2D-28  | -18.8458926 | 3846.740106 | -0.0049 | 0.996 | -1.27E-08 | count | 1 |
| FHL3       | -18.8458926 | 3846.740106 | -0.0049 | 0.996 | -1.27E-08 | count | 1 |
| CHPF       | -18.8458926 | 3846.740106 | -0.0049 | 0.996 | -1.27E-08 | count | 1 |
| ABTB2      | -18.8458926 | 3846.740106 | -0.0049 | 0.996 | -1.27E-08 | count | 1 |
| TANC2      | -18.8458926 | 3846.740106 | -0.0049 | 0.996 | -1.27E-08 | count | 1 |
| LINC01415  | -18.8458926 | 3846.740106 | -0.0049 | 0.996 | -1.27E-08 | count | 1 |
| SLC35G2    | -18.8458926 | 3846.740106 | -0.0049 | 0.996 | -1.27E-08 | count | 1 |
| AC090061.1 | -18.8458926 | 3846.740106 | -0.0049 | 0.996 | -1.27E-08 | count | 1 |
| MAPKBP1    | -18.8458926 | 3846.740106 | -0.0049 | 0.996 | -1.27E-08 | count | 1 |
| MT1G       | -18.8458926 | 3846.740106 | -0.0049 | 0.996 | -1.27E-08 | count | 1 |
| AL353807.2 | -18.8458926 | 3846.740106 | -0.0049 | 0.996 | -1.27E-08 | count | 1 |
| PRRT2      | -18.8458926 | 3846.740106 | -0.0049 | 0.996 | -1.27E-08 | count | 1 |
| GPR52      | -18.8458926 | 3846.740106 | -0.0049 | 0.996 | -1.27E-08 | count | 1 |
| STON1      | -18.8458926 | 3846.740106 | -0.0049 | 0.996 | -1.27E-08 | count | 1 |
| ROBO1      | -18.8458926 | 3846.740106 | -0.0049 | 0.996 | -1.27E-08 | count | 1 |
| HIST1H3A   | -18.8458926 | 3846.740106 | -0.0049 | 0.996 | -1.27E-08 | count | 1 |
| SMIM10L2B  | -18.8458926 | 3846.740106 | -0.0049 | 0.996 | -1.27E-08 | count | 1 |
| NOL6       | -18.8458926 | 3846.740106 | -0.0049 | 0.996 | -1.27E-08 | count | 1 |
| DOLPP1     | -18.8458926 | 3846.740106 | -0.0049 | 0.996 | -1.27E-08 | count | 1 |
| AC011603.2 | -18.8458926 | 3846.740106 | -0.0049 | 0.996 | -1.27E-08 | count | 1 |
| AC011611.4 | -18.8458926 | 3846.740106 | -0.0049 | 0.996 | -1.27E-08 | count | 1 |
| FNTB       | -18.8458926 | 3846.740106 | -0.0049 | 0.996 | -1.27E-08 | count | 1 |
| C2CD4B     | -18.8458926 | 3846.740106 | -0.0049 | 0.996 | -1.27E-08 | count | 1 |
| TP53INP2   | -18.8458926 | 3846.740106 | -0.0049 | 0.996 | -1.27E-08 | count | 1 |
| LINC01094  | -18.8458926 | 3846.740106 | -0.0049 | 0.996 | -1.27E-08 | count | 1 |
| STK24-AS1  | -18.8458926 | 3846.740106 | -0.0049 | 0.996 | -1.27E-08 | count | 1 |
| TCAP       | -18.8458926 | 3846.740106 | -0.0049 | 0.996 | -1.27E-08 | count | 1 |
| NNAT       | -18.8458926 | 3846.740106 | -0.0049 | 0.996 | -1.27E-08 | count | 1 |
| INKA2      | -18.8458926 | 3846.740106 | -0.0049 | 0.996 | -1.27E-08 | count | 1 |
| KIFC3      | -18.8458926 | 3846.740106 | -0.0049 | 0.996 | -1.27E-08 | count | 1 |
| RBP7       | -18.8458926 | 3846.740106 | -0.0049 | 0.996 | -1.27E-08 | count | 1 |
| NFIA       | -18.8458926 | 3846.740106 | -0.0049 | 0.996 | -1.27E-08 | count | 1 |
| SHROOM3    | -18.8458926 | 3846.740106 | -0.0049 | 0.996 | -1.27E-08 | count | 1 |
| PRDM6      | -18.8458926 | 3846.740106 | -0.0049 | 0.996 | -1.27E-08 | count | 1 |
| ULBP3      | -18.8458926 | 3846.740106 | -0.0049 | 0.996 | -1.27E-08 | count | 1 |
| GPC4       | -18.8458926 | 3846.740106 | -0.0049 | 0.996 | -1.27E-08 | count | 1 |
| TNFRSF11B  | -18.8458926 | 3846.740106 | -0.0049 | 0.996 | -1.27E-08 | count | 1 |
| CRAT       | -18.8458926 | 3846.740106 | -0.0049 | 0.996 | -1.27E-08 | count | 1 |
| DNAJC9-AS1 | -18.8458926 | 3846.740106 | -0.0049 | 0.996 | -1.27E-08 | count | 1 |
| TNFRSF1A   | -18.8458926 | 3846.740106 | -0.0049 | 0.996 | -1.27E-08 | count | 1 |
| AC009053.2 | -18.8458926 | 3846.740106 | -0.0049 | 0.996 | -1.27E-08 | count | 1 |
| AC004771.1 | -18.8458926 | 3846.740106 | -0.0049 | 0.996 | -1.27E-08 | count | 1 |
| DBNDD2     | -18.8458926 | 3846.740106 | -0.0049 | 0.996 | -1.27E-08 | count | 1 |
| ZBED6      | -18.8458926 | 3846.740106 | -0.0049 | 0.996 | -1.27E-08 | count | 1 |

|             |             |             |         |       |           |       |   |
|-------------|-------------|-------------|---------|-------|-----------|-------|---|
| TMEM177     | -18.8458926 | 3846.740106 | -0.0049 | 0.996 | -1.27E-08 | count | 1 |
| AC108471.2  | -18.8458926 | 3846.740106 | -0.0049 | 0.996 | -1.27E-08 | count | 1 |
| LRIG3       | -18.8458926 | 3846.740106 | -0.0049 | 0.996 | -1.27E-08 | count | 1 |
| AL121809.1  | -18.8458926 | 3846.740106 | -0.0049 | 0.996 | -1.27E-08 | count | 1 |
| AL118558.3  | -18.8458926 | 3846.740106 | -0.0049 | 0.996 | -1.27E-08 | count | 1 |
| GOLGA8H     | -18.8458926 | 3846.740106 | -0.0049 | 0.996 | -1.27E-08 | count | 1 |
| AC015819.2  | -18.8458926 | 3846.740106 | -0.0049 | 0.996 | -1.27E-08 | count | 1 |
| AL451085.1  | -18.8458926 | 3846.740106 | -0.0049 | 0.996 | -1.27E-08 | count | 1 |
| TDRD15      | -18.8458926 | 3846.740106 | -0.0049 | 0.996 | -1.27E-08 | count | 1 |
| AC009501.1  | -18.8458926 | 3846.740106 | -0.0049 | 0.996 | -1.27E-08 | count | 1 |
| SEPSECS-AS1 | -18.8458926 | 3846.740106 | -0.0049 | 0.996 | -1.27E-08 | count | 1 |
| HPGD        | -18.8458926 | 3846.740106 | -0.0049 | 0.996 | -1.27E-08 | count | 1 |
| PPIC        | -18.8458926 | 3846.740106 | -0.0049 | 0.996 | -1.27E-08 | count | 1 |
| BSPRY       | -18.8458926 | 3846.740106 | -0.0049 | 0.996 | -1.27E-08 | count | 1 |
| DLG2        | -18.8458926 | 3846.740106 | -0.0049 | 0.996 | -1.27E-08 | count | 1 |
| TGFB3       | -18.8458926 | 3846.740106 | -0.0049 | 0.996 | -1.27E-08 | count | 1 |
| KLK2        | -18.8458926 | 3846.740106 | -0.0049 | 0.996 | -1.27E-08 | count | 1 |
| MUC1        | -18.8458926 | 3846.740106 | -0.0049 | 0.996 | -1.27E-08 | count | 1 |
| ITPR1-DT    | -18.8458926 | 3846.740106 | -0.0049 | 0.996 | -1.27E-08 | count | 1 |
| AC008522.1  | -18.8458926 | 3846.740106 | -0.0049 | 0.996 | -1.27E-08 | count | 1 |
| TFR2        | -18.8458926 | 3846.740106 | -0.0049 | 0.996 | -1.27E-08 | count | 1 |
| LINC02547   | -18.8458926 | 3846.740106 | -0.0049 | 0.996 | -1.27E-08 | count | 1 |
| UBAP1L      | -18.8458926 | 3846.740106 | -0.0049 | 0.996 | -1.27E-08 | count | 1 |
| EDC4        | -18.8458926 | 3846.740106 | -0.0049 | 0.996 | -1.27E-08 | count | 1 |
| MYRIP       | -18.8458926 | 3846.740106 | -0.0049 | 0.996 | -1.27E-08 | count | 1 |
| USP46-AS1   | -18.8458926 | 3846.740106 | -0.0049 | 0.996 | -1.27E-08 | count | 1 |
| SND1-JT1    | -18.8458926 | 3846.740106 | -0.0049 | 0.996 | -1.27E-08 | count | 1 |
| CDK1        | -18.8458926 | 3846.740106 | -0.0049 | 0.996 | -1.27E-08 | count | 1 |
| TPSAB1      | -18.8458926 | 3846.740106 | -0.0049 | 0.996 | -1.27E-08 | count | 1 |
| AC025283.2  | -18.8458926 | 3846.740106 | -0.0049 | 0.996 | -1.27E-08 | count | 1 |
| C9orf43     | -18.8458926 | 3846.740106 | -0.0049 | 0.996 | -1.27E-08 | count | 1 |
| MICAL2      | -18.8458926 | 3846.740106 | -0.0049 | 0.996 | -1.27E-08 | count | 1 |
| TMEM94      | -18.8458926 | 3846.740106 | -0.0049 | 0.996 | -1.27E-08 | count | 1 |
| CP          | -18.8458926 | 3846.740106 | -0.0049 | 0.996 | -1.27E-08 | count | 1 |
| HIST1H4H    | -18.8458926 | 3846.740106 | -0.0049 | 0.996 | -1.27E-08 | count | 1 |
| DOCK5       | -18.8458926 | 3846.740106 | -0.0049 | 0.996 | -1.27E-08 | count | 1 |
| AL358472.5  | -18.8458926 | 3846.740106 | -0.0049 | 0.996 | -1.27E-08 | count | 1 |
| TMSB15B     | -18.8458926 | 3846.740106 | -0.0049 | 0.996 | -1.27E-08 | count | 1 |
| SUOX        | -18.8458926 | 3846.740106 | -0.0049 | 0.996 | -1.27E-08 | count | 1 |
| FSIP1       | -18.8458926 | 3846.740106 | -0.0049 | 0.996 | -1.27E-08 | count | 1 |
| ZNF888      | -18.8458926 | 3846.740106 | -0.0049 | 0.996 | -1.27E-08 | count | 1 |
| AC103736.1  | -18.8458926 | 3846.740106 | -0.0049 | 0.996 | -1.27E-08 | count | 1 |
| AP002360.3  | -18.8458926 | 3846.740106 | -0.0049 | 0.996 | -1.27E-08 | count | 1 |
| STAM-AS1    | -18.8458926 | 3846.740106 | -0.0049 | 0.996 | -1.27E-08 | count | 1 |
| GNA15       | -18.8458926 | 3846.740106 | -0.0049 | 0.996 | -1.27E-08 | count | 1 |

|            |             |             |         |       |           |       |   |
|------------|-------------|-------------|---------|-------|-----------|-------|---|
| AC090948.1 | -18.8458926 | 3846.740106 | -0.0049 | 0.996 | -1.27E-08 | count | 1 |
| LAMB2      | -18.8458926 | 3846.740106 | -0.0049 | 0.996 | -1.27E-08 | count | 1 |
| TREM1      | -18.8458926 | 3846.740106 | -0.0049 | 0.996 | -1.27E-08 | count | 1 |
| RPS6KA6    | -18.8458926 | 3846.740106 | -0.0049 | 0.996 | -1.27E-08 | count | 1 |
| AC022021.1 | -18.8458926 | 3846.740106 | -0.0049 | 0.996 | -1.27E-08 | count | 1 |
| WDR62      | -18.8458926 | 3846.740106 | -0.0049 | 0.996 | -1.27E-08 | count | 1 |
| AL121574.1 | -18.8458926 | 3846.740106 | -0.0049 | 0.996 | -1.27E-08 | count | 1 |
| SRRM3      | -18.8458926 | 3846.740106 | -0.0049 | 0.996 | -1.27E-08 | count | 1 |
| AC246817.2 | -18.8458926 | 3846.740106 | -0.0049 | 0.996 | -1.27E-08 | count | 1 |
| GATA3      | -18.8458926 | 3846.740106 | -0.0049 | 0.996 | -1.27E-08 | count | 1 |
| TIE1       | -18.8458926 | 3846.740106 | -0.0049 | 0.996 | -1.27E-08 | count | 1 |
| LIX1L-AS1  | -18.8458926 | 3846.740106 | -0.0049 | 0.996 | -1.27E-08 | count | 1 |
| PCAT6      | -18.8458926 | 3846.740106 | -0.0049 | 0.996 | -1.27E-08 | count | 1 |
| ATOH8      | -18.8458926 | 3846.740106 | -0.0049 | 0.996 | -1.27E-08 | count | 1 |
| ITGA9      | -18.8458926 | 3846.740106 | -0.0049 | 0.996 | -1.27E-08 | count | 1 |
| LINC02014  | -18.8458926 | 3846.740106 | -0.0049 | 0.996 | -1.27E-08 | count | 1 |
| LMLN       | -18.8458926 | 3846.740106 | -0.0049 | 0.996 | -1.27E-08 | count | 1 |
| ANKRD50    | -18.8458926 | 3846.740106 | -0.0049 | 0.996 | -1.27E-08 | count | 1 |
| SMAD1      | -18.8458926 | 3846.740106 | -0.0049 | 0.996 | -1.27E-08 | count | 1 |
| ANKRD31    | -18.8458926 | 3846.740106 | -0.0049 | 0.996 | -1.27E-08 | count | 1 |
| ARMC2      | -18.8458926 | 3846.740106 | -0.0049 | 0.996 | -1.27E-08 | count | 1 |
| LINC01615  | -18.8458926 | 3846.740106 | -0.0049 | 0.996 | -1.27E-08 | count | 1 |
| MTBP       | -18.8458926 | 3846.740106 | -0.0049 | 0.996 | -1.27E-08 | count | 1 |
| B3GNT10    | -18.8458926 | 3846.740106 | -0.0049 | 0.996 | -1.27E-08 | count | 1 |
| CHRNA10    | -18.8458926 | 3846.740106 | -0.0049 | 0.996 | -1.27E-08 | count | 1 |
| AP003086.1 | -18.8458926 | 3846.740106 | -0.0049 | 0.996 | -1.27E-08 | count | 1 |
| AL512770.1 | -18.8458926 | 3846.740106 | -0.0049 | 0.996 | -1.27E-08 | count | 1 |
| AC074032.1 | -18.8458926 | 3846.740106 | -0.0049 | 0.996 | -1.27E-08 | count | 1 |
| IGF1       | -18.8458926 | 3846.740106 | -0.0049 | 0.996 | -1.27E-08 | count | 1 |
| BCL2L10    | -18.8458926 | 3846.740106 | -0.0049 | 0.996 | -1.27E-08 | count | 1 |
| AC100830.1 | -18.8458926 | 3846.740106 | -0.0049 | 0.996 | -1.27E-08 | count | 1 |
| STOML1     | -18.8458926 | 3846.740106 | -0.0049 | 0.996 | -1.27E-08 | count | 1 |
| SPNS2      | -18.8458926 | 3846.740106 | -0.0049 | 0.996 | -1.27E-08 | count | 1 |
| DOCK6      | -18.8458926 | 3846.740106 | -0.0049 | 0.996 | -1.27E-08 | count | 1 |
| UPK1A      | -18.8458926 | 3846.740106 | -0.0049 | 0.996 | -1.27E-08 | count | 1 |
| LINC01424  | -18.8458926 | 3846.740106 | -0.0049 | 0.996 | -1.27E-08 | count | 1 |
| IGHEP1     | -18.8458926 | 3846.740106 | -0.0049 | 0.996 | -1.27E-08 | count | 1 |
| AC087164.1 | -18.8458926 | 3846.740106 | -0.0049 | 0.996 | -1.27E-08 | count | 1 |
| ABHD8      | -18.8458926 | 3846.740106 | -0.0049 | 0.996 | -1.27E-08 | count | 1 |
| AC006547.3 | -18.8458926 | 3846.740106 | -0.0049 | 0.996 | -1.27E-08 | count | 1 |
| S100A16    | -18.8458926 | 3846.740106 | -0.0049 | 0.996 | -1.27E-08 | count | 1 |
| CCL20      | -18.8458926 | 3846.740106 | -0.0049 | 0.996 | -1.27E-08 | count | 1 |
| EFNB2      | -18.8458926 | 3846.740106 | -0.0049 | 0.996 | -1.27E-08 | count | 1 |
| IQCK       | -18.8458926 | 3846.740106 | -0.0049 | 0.996 | -1.27E-08 | count | 1 |
| CNIH3      | -18.8459109 | 2711.724213 | -0.0069 | 0.994 | -1.27E-08 | count | 1 |

|            |             |             |         |       |           |       |   |
|------------|-------------|-------------|---------|-------|-----------|-------|---|
| ULK1       | -18.8459109 | 2711.724213 | -0.0069 | 0.994 | -1.27E-08 | count | 1 |
| RNF125     | -18.8459109 | 2711.724213 | -0.0069 | 0.994 | -1.27E-08 | count | 1 |
| NAGS       | -18.8459109 | 2711.724213 | -0.0069 | 0.994 | -1.27E-08 | count | 1 |
| BX255925.3 | -18.8459109 | 2711.724213 | -0.0069 | 0.994 | -1.27E-08 | count | 1 |
| ACSM1      | -18.8459109 | 2711.724213 | -0.0069 | 0.994 | -1.27E-08 | count | 1 |
| SLC14A1    | -18.8459109 | 2711.724213 | -0.0069 | 0.994 | -1.27E-08 | count | 1 |
| NDST1      | -18.8459109 | 2711.724213 | -0.0069 | 0.994 | -1.27E-08 | count | 1 |
| AL158835.1 | -18.8459109 | 2711.724213 | -0.0069 | 0.994 | -1.27E-08 | count | 1 |
| VEGFA      | -18.8459109 | 2711.724213 | -0.0069 | 0.994 | -1.27E-08 | count | 1 |
| FBLIM1     | -18.8459109 | 2711.724213 | -0.0069 | 0.994 | -1.27E-08 | count | 1 |
| LINGO3     | -18.8459109 | 2711.724213 | -0.0069 | 0.994 | -1.27E-08 | count | 1 |
| AC007686.3 | -18.8459109 | 2711.724213 | -0.0069 | 0.994 | -1.27E-08 | count | 1 |
| BRIP1      | -18.8459109 | 2711.724213 | -0.0069 | 0.994 | -1.27E-08 | count | 1 |
| AL356599.1 | -18.8459109 | 2711.724213 | -0.0069 | 0.994 | -1.27E-08 | count | 1 |
| RBPMS      | -18.8459109 | 2711.724213 | -0.0069 | 0.994 | -1.27E-08 | count | 1 |
| AC127070.1 | -18.8459109 | 2711.724213 | -0.0069 | 0.994 | -1.27E-08 | count | 1 |
| IPO13      | -18.8459109 | 2711.724213 | -0.0069 | 0.994 | -1.27E-08 | count | 1 |
| CTBP1-AS   | -18.8459109 | 2711.724213 | -0.0069 | 0.994 | -1.27E-08 | count | 1 |
| TNFAIP2    | -18.8459109 | 2711.724213 | -0.0069 | 0.994 | -1.27E-08 | count | 1 |
| MED18      | -18.8459109 | 2711.724213 | -0.0069 | 0.994 | -1.27E-08 | count | 1 |
| F13A1      | -18.8459109 | 2711.724213 | -0.0069 | 0.994 | -1.27E-08 | count | 1 |
| MIR193BHG  | -18.8459109 | 2711.724213 | -0.0069 | 0.994 | -1.27E-08 | count | 1 |
| PCTP       | -18.8459109 | 2711.724213 | -0.0069 | 0.994 | -1.27E-08 | count | 1 |
| GPRC5C     | -18.8459109 | 2711.724213 | -0.0069 | 0.994 | -1.27E-08 | count | 1 |
| ZNF749     | -18.8459109 | 2711.724213 | -0.0069 | 0.994 | -1.27E-08 | count | 1 |
| CLIP4      | -18.8459109 | 2711.724213 | -0.0069 | 0.994 | -1.27E-08 | count | 1 |
| ZNF589     | -18.8459109 | 2711.724213 | -0.0069 | 0.994 | -1.27E-08 | count | 1 |
| C11orf65   | -18.8459109 | 2711.724213 | -0.0069 | 0.994 | -1.27E-08 | count | 1 |
| BCL2L14    | -18.8459109 | 2711.724213 | -0.0069 | 0.994 | -1.27E-08 | count | 1 |
| LINC00944  | -18.8459109 | 2711.724213 | -0.0069 | 0.994 | -1.27E-08 | count | 1 |
| CEP128     | -18.8459109 | 2711.724213 | -0.0069 | 0.994 | -1.27E-08 | count | 1 |
| H1FO       | -18.8459109 | 2711.724213 | -0.0069 | 0.994 | -1.27E-08 | count | 1 |
| TNFRSF25   | -18.8459109 | 2711.724213 | -0.0069 | 0.994 | -1.27E-08 | count | 1 |
| MRC1       | -18.8459109 | 2711.724213 | -0.0069 | 0.994 | -1.27E-08 | count | 1 |
| NR2F2      | -18.8459109 | 2711.724213 | -0.0069 | 0.994 | -1.27E-08 | count | 1 |
| VSIG10L    | -18.8459109 | 2711.724213 | -0.0069 | 0.994 | -1.27E-08 | count | 1 |
| HIST1H1B   | -18.8459109 | 2711.724213 | -0.0069 | 0.994 | -1.27E-08 | count | 1 |
| KISS1R     | -18.8459109 | 2711.724213 | -0.0069 | 0.994 | -1.27E-08 | count | 1 |
| NUMBL      | -18.8459109 | 2711.724213 | -0.0069 | 0.994 | -1.27E-08 | count | 1 |
| NR1H3      | -18.8459109 | 2711.724213 | -0.0069 | 0.994 | -1.27E-08 | count | 1 |
| RSAD2      | -18.8459109 | 2711.724213 | -0.0069 | 0.994 | -1.27E-08 | count | 1 |
| DFFB       | -18.8459109 | 2711.724213 | -0.0069 | 0.994 | -1.27E-08 | count | 1 |
| NLE1       | -18.8459109 | 2711.724213 | -0.0069 | 0.994 | -1.27E-08 | count | 1 |
| CHIT1      | -18.8459109 | 2711.724213 | -0.0069 | 0.994 | -1.27E-08 | count | 1 |
| RPH3AL     | -18.8459109 | 2711.724213 | -0.0069 | 0.994 | -1.27E-08 | count | 1 |

|               |             |             |         |       |           |       |   |
|---------------|-------------|-------------|---------|-------|-----------|-------|---|
| COL6A3        | -18.8459109 | 2711.724213 | -0.0069 | 0.994 | -1.27E-08 | count | 1 |
| RTP4          | -18.8459109 | 2711.724213 | -0.0069 | 0.994 | -1.27E-08 | count | 1 |
| AL157392.5    | -18.8459109 | 2711.724213 | -0.0069 | 0.994 | -1.27E-08 | count | 1 |
| AL450311.2    | -18.8459109 | 2711.724213 | -0.0069 | 0.994 | -1.27E-08 | count | 1 |
| IGHV3-74      | -18.8459109 | 2711.724213 | -0.0069 | 0.994 | -1.27E-08 | count | 1 |
| HIC1          | -18.8459109 | 2711.724213 | -0.0069 | 0.994 | -1.27E-08 | count | 1 |
| ZNF317        | -18.8459109 | 2711.724213 | -0.0069 | 0.994 | -1.27E-08 | count | 1 |
| NAV2          | -18.8459109 | 2711.724213 | -0.0069 | 0.994 | -1.27E-08 | count | 1 |
| PEX5          | -18.8459109 | 2711.724213 | -0.0069 | 0.994 | -1.27E-08 | count | 1 |
| BCL11B        | -18.8459109 | 2711.724213 | -0.0069 | 0.994 | -1.27E-08 | count | 1 |
| AL049597.2    | -18.8459109 | 2711.724213 | -0.0069 | 0.994 | -1.27E-08 | count | 1 |
| CDKN2C        | -18.8459109 | 2711.724213 | -0.0069 | 0.994 | -1.27E-08 | count | 1 |
| ARHGAP29      | -18.8459109 | 2711.724213 | -0.0069 | 0.994 | -1.27E-08 | count | 1 |
| SH3BP5L       | -18.8459109 | 2711.724213 | -0.0069 | 0.994 | -1.27E-08 | count | 1 |
| AL139274.2    | -18.8459109 | 2711.724213 | -0.0069 | 0.994 | -1.27E-08 | count | 1 |
| PANO1         | -18.8459109 | 2711.724213 | -0.0069 | 0.994 | -1.27E-08 | count | 1 |
| RARG          | -18.8459109 | 2711.724213 | -0.0069 | 0.994 | -1.27E-08 | count | 1 |
| LINC02324     | -18.8459109 | 2711.724213 | -0.0069 | 0.994 | -1.27E-08 | count | 1 |
| SPN           | -18.8459109 | 2711.724213 | -0.0069 | 0.994 | -1.27E-08 | count | 1 |
| DPH1          | -18.8459109 | 2711.724213 | -0.0069 | 0.994 | -1.27E-08 | count | 1 |
| KREMEN2       | -18.8459109 | 2711.724213 | -0.0069 | 0.994 | -1.27E-08 | count | 1 |
| ADNP-AS1      | -18.8459109 | 2711.724213 | -0.0069 | 0.994 | -1.27E-08 | count | 1 |
| CCDC120       | -18.8459109 | 2711.724213 | -0.0069 | 0.994 | -1.27E-08 | count | 1 |
| CTSK          | -18.8459109 | 2711.724213 | -0.0069 | 0.994 | -1.27E-08 | count | 1 |
| AP004609.3    | -18.8459109 | 2711.724213 | -0.0069 | 0.994 | -1.27E-08 | count | 1 |
| NPIPB2        | -18.8459109 | 2711.724213 | -0.0069 | 0.994 | -1.27E-08 | count | 1 |
| P2RX5-TAX1BP3 | -18.8459109 | 2711.724213 | -0.0069 | 0.994 | -1.27E-08 | count | 1 |
| C1QTNF2       | -18.8459109 | 2711.724213 | -0.0069 | 0.994 | -1.27E-08 | count | 1 |
| BBS5          | -18.8459109 | 2711.724213 | -0.0069 | 0.994 | -1.27E-08 | count | 1 |
| C18orf54      | -18.8459109 | 2711.724213 | -0.0069 | 0.994 | -1.27E-08 | count | 1 |
| CTSF          | -18.8459109 | 2711.724213 | -0.0069 | 0.994 | -1.27E-08 | count | 1 |
| PRKG1         | -18.8459109 | 2711.724213 | -0.0069 | 0.994 | -1.27E-08 | count | 1 |
| AL596325.1    | -18.8459109 | 2711.724213 | -0.0069 | 0.994 | -1.27E-08 | count | 1 |
| PLAC9         | -18.8459109 | 2711.724213 | -0.0069 | 0.994 | -1.27E-08 | count | 1 |
| ZNF781        | -18.8459109 | 2711.724213 | -0.0069 | 0.994 | -1.27E-08 | count | 1 |
| GPD1L         | -18.8459109 | 2711.724213 | -0.0069 | 0.994 | -1.27E-08 | count | 1 |
| AC005670.2    | -18.8459109 | 2711.724213 | -0.0069 | 0.994 | -1.27E-08 | count | 1 |
| SRD5A1        | -18.8459109 | 2711.724213 | -0.0069 | 0.994 | -1.27E-08 | count | 1 |
| AP002026.1    | -18.8459109 | 2711.724213 | -0.0069 | 0.994 | -1.27E-08 | count | 1 |
| USP18         | -18.8459109 | 2711.724213 | -0.0069 | 0.994 | -1.27E-08 | count | 1 |
| APLNR         | -18.8459109 | 2711.724213 | -0.0069 | 0.994 | -1.27E-08 | count | 1 |
| MYH15         | -18.8459109 | 2711.724213 | -0.0069 | 0.994 | -1.27E-08 | count | 1 |
| ZNF554        | -18.8459109 | 2711.724213 | -0.0069 | 0.994 | -1.27E-08 | count | 1 |
| AL359644.1    | -18.8459109 | 2711.724213 | -0.0069 | 0.994 | -1.27E-08 | count | 1 |
| FAM19A2       | -18.8459109 | 2711.724213 | -0.0069 | 0.994 | -1.27E-08 | count | 1 |

|            |             |             |         |       |           |       |   |
|------------|-------------|-------------|---------|-------|-----------|-------|---|
| ERN1       | -18.8459109 | 2711.724213 | -0.0069 | 0.994 | -1.27E-08 | count | 1 |
| FAM167B    | -18.1529225 | 2720.296955 | -0.0067 | 0.995 | -1.27E-08 | count | 1 |
| PIK3R3     | -18.1529225 | 2720.296955 | -0.0067 | 0.995 | -1.27E-08 | count | 1 |
| AL589765.4 | -18.1529225 | 2720.296955 | -0.0067 | 0.995 | -1.27E-08 | count | 1 |
| EFNA1      | -18.1529225 | 2720.296955 | -0.0067 | 0.995 | -1.27E-08 | count | 1 |
| PFKFB2     | -18.1529225 | 2720.296955 | -0.0067 | 0.995 | -1.27E-08 | count | 1 |
| KRTCAP3    | -18.1529225 | 2720.296955 | -0.0067 | 0.995 | -1.27E-08 | count | 1 |
| AC083949.1 | -18.1529225 | 2720.296955 | -0.0067 | 0.995 | -1.27E-08 | count | 1 |
| RND3       | -18.1529225 | 2720.296955 | -0.0067 | 0.995 | -1.27E-08 | count | 1 |
| AC009495.3 | -18.1529225 | 2720.296955 | -0.0067 | 0.995 | -1.27E-08 | count | 1 |
| AC009950.1 | -18.1529225 | 2720.296955 | -0.0067 | 0.995 | -1.27E-08 | count | 1 |
| PDCD1      | -18.1529225 | 2720.296955 | -0.0067 | 0.995 | -1.27E-08 | count | 1 |
| ALG1L      | -18.1529225 | 2720.296955 | -0.0067 | 0.995 | -1.27E-08 | count | 1 |
| ATP1B3-AS1 | -18.1529225 | 2720.296955 | -0.0067 | 0.995 | -1.27E-08 | count | 1 |
| SPON2      | -18.1529225 | 2720.296955 | -0.0067 | 0.995 | -1.27E-08 | count | 1 |
| SORBS2     | -18.1529225 | 2720.296955 | -0.0067 | 0.995 | -1.27E-08 | count | 1 |
| DROSHA     | -18.1529225 | 2720.296955 | -0.0067 | 0.995 | -1.27E-08 | count | 1 |
| LSM11      | -18.1529225 | 2720.296955 | -0.0067 | 0.995 | -1.27E-08 | count | 1 |
| FAM193B    | -18.1529225 | 2720.296955 | -0.0067 | 0.995 | -1.27E-08 | count | 1 |
| RPS6KA2    | -18.1529225 | 2720.296955 | -0.0067 | 0.995 | -1.27E-08 | count | 1 |
| SPDYE3     | -18.1529225 | 2720.296955 | -0.0067 | 0.995 | -1.27E-08 | count | 1 |
| AC034111.1 | -18.1529225 | 2720.296955 | -0.0067 | 0.995 | -1.27E-08 | count | 1 |
| UBXN8      | -18.1529225 | 2720.296955 | -0.0067 | 0.995 | -1.27E-08 | count | 1 |
| CTHRC1     | -18.1529225 | 2720.296955 | -0.0067 | 0.995 | -1.27E-08 | count | 1 |
| AC083843.2 | -18.1529225 | 2720.296955 | -0.0067 | 0.995 | -1.27E-08 | count | 1 |
| STX17-AS1  | -18.1529225 | 2720.296955 | -0.0067 | 0.995 | -1.27E-08 | count | 1 |
| CSNK2A3    | -18.1529225 | 2720.296955 | -0.0067 | 0.995 | -1.27E-08 | count | 1 |
| SNX15      | -18.1529225 | 2720.296955 | -0.0067 | 0.995 | -1.27E-08 | count | 1 |
| SERPINH1   | -18.1529225 | 2720.296955 | -0.0067 | 0.995 | -1.27E-08 | count | 1 |
| TEX12      | -18.1529225 | 2720.296955 | -0.0067 | 0.995 | -1.27E-08 | count | 1 |
| PBLD       | -18.1529225 | 2720.296955 | -0.0067 | 0.995 | -1.27E-08 | count | 1 |
| VAMP1      | -18.1529225 | 2720.296955 | -0.0067 | 0.995 | -1.27E-08 | count | 1 |
| AC053513.1 | -18.1529225 | 2720.296955 | -0.0067 | 0.995 | -1.27E-08 | count | 1 |
| RACGAP1    | -18.1529225 | 2720.296955 | -0.0067 | 0.995 | -1.27E-08 | count | 1 |
| LINC02381  | -18.1529225 | 2720.296955 | -0.0067 | 0.995 | -1.27E-08 | count | 1 |
| HSPB8      | -18.1529225 | 2720.296955 | -0.0067 | 0.995 | -1.27E-08 | count | 1 |
| AL136962.1 | -18.1529225 | 2720.296955 | -0.0067 | 0.995 | -1.27E-08 | count | 1 |
| AL139384.1 | -18.1529225 | 2720.296955 | -0.0067 | 0.995 | -1.27E-08 | count | 1 |
| AL139099.1 | -18.1529225 | 2720.296955 | -0.0067 | 0.995 | -1.27E-08 | count | 1 |
| LINC01569  | -18.1529225 | 2720.296955 | -0.0067 | 0.995 | -1.27E-08 | count | 1 |
| TP53TG3D   | -18.1529225 | 2720.296955 | -0.0067 | 0.995 | -1.27E-08 | count | 1 |
| VMO1       | -18.1529225 | 2720.296955 | -0.0067 | 0.995 | -1.27E-08 | count | 1 |
| AC005304.3 | -18.1529225 | 2720.296955 | -0.0067 | 0.995 | -1.27E-08 | count | 1 |
| OMG        | -18.1529225 | 2720.296955 | -0.0067 | 0.995 | -1.27E-08 | count | 1 |
| RUNDC3A    | -18.1529225 | 2720.296955 | -0.0067 | 0.995 | -1.27E-08 | count | 1 |

|             |             |             |         |       |           |       |   |
|-------------|-------------|-------------|---------|-------|-----------|-------|---|
| SRC         | -18.1529225 | 2720.296955 | -0.0067 | 0.995 | -1.27E-08 | count | 1 |
| SLPI        | -18.1529225 | 2720.296955 | -0.0067 | 0.995 | -1.27E-08 | count | 1 |
| ZSWIM3      | -18.1529225 | 2720.296955 | -0.0067 | 0.995 | -1.27E-08 | count | 1 |
| AL121829.2  | -18.1529225 | 2720.296955 | -0.0067 | 0.995 | -1.27E-08 | count | 1 |
| ZNF442      | -18.1529225 | 2720.296955 | -0.0067 | 0.995 | -1.27E-08 | count | 1 |
| TMEM91      | -18.1529225 | 2720.296955 | -0.0067 | 0.995 | -1.27E-08 | count | 1 |
| CLEC11A     | -18.1529225 | 2720.296955 | -0.0067 | 0.995 | -1.27E-08 | count | 1 |
| BRSK1       | -18.1529225 | 2720.296955 | -0.0067 | 0.995 | -1.27E-08 | count | 1 |
| FOXD2       | -18.1529225 | 2720.296955 | -0.0067 | 0.995 | -1.27E-08 | count | 1 |
| AL353719.1  | -18.1529225 | 2720.296955 | -0.0067 | 0.995 | -1.27E-08 | count | 1 |
| OSGEPL1-AS1 | -18.1529225 | 2720.296955 | -0.0067 | 0.995 | -1.27E-08 | count | 1 |
| ADAM23      | -18.1529225 | 2720.296955 | -0.0067 | 0.995 | -1.27E-08 | count | 1 |
| SH3BP4      | -18.1529225 | 2720.296955 | -0.0067 | 0.995 | -1.27E-08 | count | 1 |
| CD5         | -18.1529225 | 2720.296955 | -0.0067 | 0.995 | -1.27E-08 | count | 1 |
| KIF26A      | -18.1529225 | 2720.296955 | -0.0067 | 0.995 | -1.27E-08 | count | 1 |
| IGHV3-73    | -18.1529225 | 2720.296955 | -0.0067 | 0.995 | -1.27E-08 | count | 1 |
| AL031705.1  | -18.1529225 | 2720.296955 | -0.0067 | 0.995 | -1.27E-08 | count | 1 |
| SGIP1       | -18.1529225 | 2720.296955 | -0.0067 | 0.995 | -1.27E-08 | count | 1 |
| F3          | -18.1529225 | 2720.296955 | -0.0067 | 0.995 | -1.27E-08 | count | 1 |
| DPT         | -18.1529225 | 2720.296955 | -0.0067 | 0.995 | -1.27E-08 | count | 1 |
| TMCC2       | -18.1529225 | 2720.296955 | -0.0067 | 0.995 | -1.27E-08 | count | 1 |
| TAF1A-AS1   | -18.1529225 | 2720.296955 | -0.0067 | 0.995 | -1.27E-08 | count | 1 |
| CAPN14      | -18.1529225 | 2720.296955 | -0.0067 | 0.995 | -1.27E-08 | count | 1 |
| AC008676.1  | -18.1529225 | 2720.296955 | -0.0067 | 0.995 | -1.27E-08 | count | 1 |
| SMARCA1     | -18.1529225 | 2720.296955 | -0.0067 | 0.995 | -1.27E-08 | count | 1 |
| C11orf74    | -18.1529225 | 2720.296955 | -0.0067 | 0.995 | -1.27E-08 | count | 1 |
| SPX         | -18.1529225 | 2720.296955 | -0.0067 | 0.995 | -1.27E-08 | count | 1 |
| MMP19       | -18.1529225 | 2720.296955 | -0.0067 | 0.995 | -1.27E-08 | count | 1 |
| AGAP2-AS1   | -18.1529225 | 2720.296955 | -0.0067 | 0.995 | -1.27E-08 | count | 1 |
| FGF7        | -18.1529225 | 2720.296955 | -0.0067 | 0.995 | -1.27E-08 | count | 1 |
| AC015813.1  | -18.1529225 | 2720.296955 | -0.0067 | 0.995 | -1.27E-08 | count | 1 |
| NAV1        | -18.1529225 | 2720.296955 | -0.0067 | 0.995 | -1.27E-08 | count | 1 |
| CXCL11      | -18.1529225 | 2720.296955 | -0.0067 | 0.995 | -1.27E-08 | count | 1 |
| PALLD       | -18.1529225 | 2720.296955 | -0.0067 | 0.995 | -1.27E-08 | count | 1 |
| DST         | -18.1529225 | 2720.296955 | -0.0067 | 0.995 | -1.27E-08 | count | 1 |
| SNTB1       | -18.1529225 | 2720.296955 | -0.0067 | 0.995 | -1.27E-08 | count | 1 |
| NRP1        | -18.1529225 | 2720.296955 | -0.0067 | 0.995 | -1.27E-08 | count | 1 |
| ZNF503      | -18.1529225 | 2720.296955 | -0.0067 | 0.995 | -1.27E-08 | count | 1 |
| KCNMA1      | -18.1529225 | 2720.296955 | -0.0067 | 0.995 | -1.27E-08 | count | 1 |
| ZNRF1       | -18.1529225 | 2720.296955 | -0.0067 | 0.995 | -1.27E-08 | count | 1 |
| CCL13       | -18.1529225 | 2720.296955 | -0.0067 | 0.995 | -1.27E-08 | count | 1 |
| PRELID3A    | -18.1529225 | 2720.296955 | -0.0067 | 0.995 | -1.27E-08 | count | 1 |
| SDCBP2      | -18.1529225 | 2720.296955 | -0.0067 | 0.995 | -1.27E-08 | count | 1 |
| NBPF1       | -18.1529225 | 2720.296955 | -0.0067 | 0.995 | -1.27E-08 | count | 1 |
| AL358472.4  | -18.1529225 | 2720.296955 | -0.0067 | 0.995 | -1.27E-08 | count | 1 |

|            |             |             |         |       |           |       |   |
|------------|-------------|-------------|---------|-------|-----------|-------|---|
| AL121987.2 | -18.1529225 | 2720.296955 | -0.0067 | 0.995 | -1.27E-08 | count | 1 |
| BX323046.1 | -18.1529225 | 2720.296955 | -0.0067 | 0.995 | -1.27E-08 | count | 1 |
| AC007681.1 | -18.1529225 | 2720.296955 | -0.0067 | 0.995 | -1.27E-08 | count | 1 |
| C2orf40    | -18.1529225 | 2720.296955 | -0.0067 | 0.995 | -1.27E-08 | count | 1 |
| LINC01934  | -18.1529225 | 2720.296955 | -0.0067 | 0.995 | -1.27E-08 | count | 1 |
| LRRN1      | -18.1529225 | 2720.296955 | -0.0067 | 0.995 | -1.27E-08 | count | 1 |
| THRB       | -18.1529225 | 2720.296955 | -0.0067 | 0.995 | -1.27E-08 | count | 1 |
| EOMES      | -18.1529225 | 2720.296955 | -0.0067 | 0.995 | -1.27E-08 | count | 1 |
| AC006058.1 | -18.1529225 | 2720.296955 | -0.0067 | 0.995 | -1.27E-08 | count | 1 |
| ATXN7      | -18.1529225 | 2720.296955 | -0.0067 | 0.995 | -1.27E-08 | count | 1 |
| UGDH-AS1   | -18.1529225 | 2720.296955 | -0.0067 | 0.995 | -1.27E-08 | count | 1 |
| HPSE       | -18.1529225 | 2720.296955 | -0.0067 | 0.995 | -1.27E-08 | count | 1 |
| GPRIN3     | -18.1529225 | 2720.296955 | -0.0067 | 0.995 | -1.27E-08 | count | 1 |
| SKP2       | -18.1529225 | 2720.296955 | -0.0067 | 0.995 | -1.27E-08 | count | 1 |
| SNHG4      | -18.1529225 | 2720.296955 | -0.0067 | 0.995 | -1.27E-08 | count | 1 |
| AC008429.1 | -18.1529225 | 2720.296955 | -0.0067 | 0.995 | -1.27E-08 | count | 1 |
| ATAT1      | -18.1529225 | 2720.296955 | -0.0067 | 0.995 | -1.27E-08 | count | 1 |
| TNFRSF21   | -18.1529225 | 2720.296955 | -0.0067 | 0.995 | -1.27E-08 | count | 1 |
| ZNF853     | -18.1529225 | 2720.296955 | -0.0067 | 0.995 | -1.27E-08 | count | 1 |
| CTTNBP2    | -18.1529225 | 2720.296955 | -0.0067 | 0.995 | -1.27E-08 | count | 1 |
| PODXL      | -18.1529225 | 2720.296955 | -0.0067 | 0.995 | -1.27E-08 | count | 1 |
| NDUFB2-AS1 | -18.1529225 | 2720.296955 | -0.0067 | 0.995 | -1.27E-08 | count | 1 |
| ARMCX1     | -18.1529225 | 2720.296955 | -0.0067 | 0.995 | -1.27E-08 | count | 1 |
| YTHDF3-AS1 | -18.1529225 | 2720.296955 | -0.0067 | 0.995 | -1.27E-08 | count | 1 |
| PHLDB1     | -18.1529225 | 2720.296955 | -0.0067 | 0.995 | -1.27E-08 | count | 1 |
| PLXDC2     | -18.1529225 | 2720.296955 | -0.0067 | 0.995 | -1.27E-08 | count | 1 |
| PLAU       | -18.1529225 | 2720.296955 | -0.0067 | 0.995 | -1.27E-08 | count | 1 |
| CD163      | -18.1529225 | 2720.296955 | -0.0067 | 0.995 | -1.27E-08 | count | 1 |
| AC027288.3 | -18.1529225 | 2720.296955 | -0.0067 | 0.995 | -1.27E-08 | count | 1 |
| SOCS2      | -18.1529225 | 2720.296955 | -0.0067 | 0.995 | -1.27E-08 | count | 1 |
| RCBTB2     | -18.1529225 | 2720.296955 | -0.0067 | 0.995 | -1.27E-08 | count | 1 |
| PLEKHH1    | -18.1529225 | 2720.296955 | -0.0067 | 0.995 | -1.27E-08 | count | 1 |
| MAP3K9     | -18.1529225 | 2720.296955 | -0.0067 | 0.995 | -1.27E-08 | count | 1 |
| LINC02285  | -18.1529225 | 2720.296955 | -0.0067 | 0.995 | -1.27E-08 | count | 1 |
| AC091057.6 | -18.1529225 | 2720.296955 | -0.0067 | 0.995 | -1.27E-08 | count | 1 |
| FBN1       | -18.1529225 | 2720.296955 | -0.0067 | 0.995 | -1.27E-08 | count | 1 |
| AC023906.5 | -18.1529225 | 2720.296955 | -0.0067 | 0.995 | -1.27E-08 | count | 1 |
| LCTL       | -18.1529225 | 2720.296955 | -0.0067 | 0.995 | -1.27E-08 | count | 1 |
| TMC3-AS1   | -18.1529225 | 2720.296955 | -0.0067 | 0.995 | -1.27E-08 | count | 1 |
| AL031600.3 | -18.1529225 | 2720.296955 | -0.0067 | 0.995 | -1.27E-08 | count | 1 |
| TEDC2      | -18.1529225 | 2720.296955 | -0.0067 | 0.995 | -1.27E-08 | count | 1 |
| AC012645.1 | -18.1529225 | 2720.296955 | -0.0067 | 0.995 | -1.27E-08 | count | 1 |
| CES4A      | -18.1529225 | 2720.296955 | -0.0067 | 0.995 | -1.27E-08 | count | 1 |
| AC087500.2 | -18.1529225 | 2720.296955 | -0.0067 | 0.995 | -1.27E-08 | count | 1 |
| CLDN7      | -18.1529225 | 2720.296955 | -0.0067 | 0.995 | -1.27E-08 | count | 1 |



|                |             |             |         |       |           |       |   |
|----------------|-------------|-------------|---------|-------|-----------|-------|---|
| KRT17          | -18.1529225 | 2720.296955 | -0.0067 | 0.995 | -1.27E-08 | count | 1 |
| COPZ2          | -18.1529225 | 2720.296955 | -0.0067 | 0.995 | -1.27E-08 | count | 1 |
| AC011825.2     | -18.1529225 | 2720.296955 | -0.0067 | 0.995 | -1.27E-08 | count | 1 |
| POFUT1         | -18.1529225 | 2720.296955 | -0.0067 | 0.995 | -1.27E-08 | count | 1 |
| TRERNA1        | -18.1529225 | 2720.296955 | -0.0067 | 0.995 | -1.27E-08 | count | 1 |
| CRB3           | -18.1529225 | 2720.296955 | -0.0067 | 0.995 | -1.27E-08 | count | 1 |
| TTY14          | -18.1529225 | 2720.296955 | -0.0067 | 0.995 | -1.27E-08 | count | 1 |
| IGLV2-11       | -18.1529225 | 2720.296955 | -0.0067 | 0.995 | -1.27E-08 | count | 1 |
| IGLJ2          | -18.1529225 | 2720.296955 | -0.0067 | 0.995 | -1.27E-08 | count | 1 |
| BX537318.1     | -18.1529225 | 2720.296955 | -0.0067 | 0.995 | -1.27E-08 | count | 1 |
| RGS7           | -18.1529225 | 2720.296955 | -0.0067 | 0.995 | -1.27E-08 | count | 1 |
| ZAP70          | -18.1529225 | 2720.296955 | -0.0067 | 0.995 | -1.27E-08 | count | 1 |
| SLC6A20        | -18.1529225 | 2720.296955 | -0.0067 | 0.995 | -1.27E-08 | count | 1 |
| PSMD6-AS2      | -18.1529225 | 2720.296955 | -0.0067 | 0.995 | -1.27E-08 | count | 1 |
| NEK11          | -18.1529225 | 2720.296955 | -0.0067 | 0.995 | -1.27E-08 | count | 1 |
| TIGD2          | -18.1529225 | 2720.296955 | -0.0067 | 0.995 | -1.27E-08 | count | 1 |
| CARD6          | -18.1529225 | 2720.296955 | -0.0067 | 0.995 | -1.27E-08 | count | 1 |
| WWC1           | -18.1529225 | 2720.296955 | -0.0067 | 0.995 | -1.27E-08 | count | 1 |
| ATP6V1G2       | -18.1529225 | 2720.296955 | -0.0067 | 0.995 | -1.27E-08 | count | 1 |
| SH3BGRL2       | -18.1529225 | 2720.296955 | -0.0067 | 0.995 | -1.27E-08 | count | 1 |
| AC015987.1     | -18.1529225 | 2720.296955 | -0.0067 | 0.995 | -1.27E-08 | count | 1 |
| TMEM164        | -18.1529225 | 2720.296955 | -0.0067 | 0.995 | -1.27E-08 | count | 1 |
| CRISPLD1       | -18.1529225 | 2720.296955 | -0.0067 | 0.995 | -1.27E-08 | count | 1 |
| AL353608.2     | -18.1529225 | 2720.296955 | -0.0067 | 0.995 | -1.27E-08 | count | 1 |
| NALT1          | -18.1529225 | 2720.296955 | -0.0067 | 0.995 | -1.27E-08 | count | 1 |
| AL133523.1     | -18.1529225 | 2720.296955 | -0.0067 | 0.995 | -1.27E-08 | count | 1 |
| BEGAIN         | -18.1529225 | 2720.296955 | -0.0067 | 0.995 | -1.27E-08 | count | 1 |
| IGHV1-18       | -18.1529225 | 2720.296955 | -0.0067 | 0.995 | -1.27E-08 | count | 1 |
| STX1B          | -18.1529225 | 2720.296955 | -0.0067 | 0.995 | -1.27E-08 | count | 1 |
| AC107926.1     | -18.1529225 | 2720.296955 | -0.0067 | 0.995 | -1.27E-08 | count | 1 |
| LINC02081      | -18.1529225 | 2720.296955 | -0.0067 | 0.995 | -1.27E-08 | count | 1 |
| AL117335.1     | -18.1529225 | 2720.296955 | -0.0067 | 0.995 | -1.27E-08 | count | 1 |
| COL16A1        | -18.1529225 | 2720.296955 | -0.0067 | 0.995 | -1.27E-08 | count | 1 |
| ZNF449         | -18.1529225 | 2720.296955 | -0.0067 | 0.995 | -1.27E-08 | count | 1 |
| KPTN           | -18.1529225 | 2720.296955 | -0.0067 | 0.995 | -1.27E-08 | count | 1 |
| RPS4Y2         | -18.1529225 | 2720.296955 | -0.0067 | 0.995 | -1.27E-08 | count | 1 |
| CRYBB2         | -18.1529225 | 2720.296955 | -0.0067 | 0.995 | -1.27E-08 | count | 1 |
| AC079922.2     | -18.1529225 | 2720.296955 | -0.0067 | 0.995 | -1.27E-08 | count | 1 |
| MAST4-AS1      | -18.1529225 | 2720.296955 | -0.0067 | 0.995 | -1.27E-08 | count | 1 |
| TM6SF1         | -18.1529225 | 2720.296955 | -0.0067 | 0.995 | -1.27E-08 | count | 1 |
| BOLA2-SMG1P6   | -18.1529225 | 2720.296955 | -0.0067 | 0.995 | -1.27E-08 | count | 1 |
| AC133919.1     | -18.1529225 | 2720.296955 | -0.0067 | 0.995 | -1.27E-08 | count | 1 |
| ZNF816-ZNF321P | -18.1529225 | 2720.296955 | -0.0067 | 0.995 | -1.27E-08 | count | 1 |
| AL021707.7     | -18.1529225 | 2720.296955 | -0.0067 | 0.995 | -1.27E-08 | count | 1 |
| TMEM201        | -18.1529225 | 2720.296955 | -0.0067 | 0.995 | -1.27E-08 | count | 1 |

|             |             |             |         |       |           |       |   |
|-------------|-------------|-------------|---------|-------|-----------|-------|---|
| TINAGL1     | -18.1529225 | 2720.296955 | -0.0067 | 0.995 | -1.27E-08 | count | 1 |
| BEST4       | -18.1529225 | 2720.296955 | -0.0067 | 0.995 | -1.27E-08 | count | 1 |
| CYP2J2      | -18.1529225 | 2720.296955 | -0.0067 | 0.995 | -1.27E-08 | count | 1 |
| GBP7        | -18.1529225 | 2720.296955 | -0.0067 | 0.995 | -1.27E-08 | count | 1 |
| AL355816.2  | -18.1529225 | 2720.296955 | -0.0067 | 0.995 | -1.27E-08 | count | 1 |
| S100A3      | -18.1529225 | 2720.296955 | -0.0067 | 0.995 | -1.27E-08 | count | 1 |
| DCST1-AS1   | -18.1529225 | 2720.296955 | -0.0067 | 0.995 | -1.27E-08 | count | 1 |
| VASH2       | -18.1529225 | 2720.296955 | -0.0067 | 0.995 | -1.27E-08 | count | 1 |
| HLX-AS1     | -18.1529225 | 2720.296955 | -0.0067 | 0.995 | -1.27E-08 | count | 1 |
| TLR5        | -18.1529225 | 2720.296955 | -0.0067 | 0.995 | -1.27E-08 | count | 1 |
| AC093635.1  | -18.1529225 | 2720.296955 | -0.0067 | 0.995 | -1.27E-08 | count | 1 |
| ST3GAL5-AS1 | -18.1529225 | 2720.296955 | -0.0067 | 0.995 | -1.27E-08 | count | 1 |
| KLHL23      | -18.1529225 | 2720.296955 | -0.0067 | 0.995 | -1.27E-08 | count | 1 |
| TMEM237     | -18.1529225 | 2720.296955 | -0.0067 | 0.995 | -1.27E-08 | count | 1 |
| CD28        | -18.1529225 | 2720.296955 | -0.0067 | 0.995 | -1.27E-08 | count | 1 |
| GPR35       | -18.1529225 | 2720.296955 | -0.0067 | 0.995 | -1.27E-08 | count | 1 |
| CPNE9       | -18.1529225 | 2720.296955 | -0.0067 | 0.995 | -1.27E-08 | count | 1 |
| FAM198A     | -18.1529225 | 2720.296955 | -0.0067 | 0.995 | -1.27E-08 | count | 1 |
| CSTA        | -18.1529225 | 2720.296955 | -0.0067 | 0.995 | -1.27E-08 | count | 1 |
| WDR5B       | -18.1529225 | 2720.296955 | -0.0067 | 0.995 | -1.27E-08 | count | 1 |
| MSANTD1     | -18.1529225 | 2720.296955 | -0.0067 | 0.995 | -1.27E-08 | count | 1 |
| AC105345.1  | -18.1529225 | 2720.296955 | -0.0067 | 0.995 | -1.27E-08 | count | 1 |
| AC111006.1  | -18.1529225 | 2720.296955 | -0.0067 | 0.995 | -1.27E-08 | count | 1 |
| WDFY3       | -18.1529225 | 2720.296955 | -0.0067 | 0.995 | -1.27E-08 | count | 1 |
| POU5F2      | -18.1529225 | 2720.296955 | -0.0067 | 0.995 | -1.27E-08 | count | 1 |
| AC008549.2  | -18.1529225 | 2720.296955 | -0.0067 | 0.995 | -1.27E-08 | count | 1 |
| HRH2        | -18.1529225 | 2720.296955 | -0.0067 | 0.995 | -1.27E-08 | count | 1 |
| AL358933.1  | -18.1529225 | 2720.296955 | -0.0067 | 0.995 | -1.27E-08 | count | 1 |
| LY6G5B      | -18.1529225 | 2720.296955 | -0.0067 | 0.995 | -1.27E-08 | count | 1 |
| XPO5        | -18.1529225 | 2720.296955 | -0.0067 | 0.995 | -1.27E-08 | count | 1 |
| HMG3-AS1    | -18.1529225 | 2720.296955 | -0.0067 | 0.995 | -1.27E-08 | count | 1 |
| THEMIS      | -18.1529225 | 2720.296955 | -0.0067 | 0.995 | -1.27E-08 | count | 1 |
| AL159163.1  | -18.1529225 | 2720.296955 | -0.0067 | 0.995 | -1.27E-08 | count | 1 |
| DLL1        | -18.1529225 | 2720.296955 | -0.0067 | 0.995 | -1.27E-08 | count | 1 |
| AC073957.3  | -18.1529225 | 2720.296955 | -0.0067 | 0.995 | -1.27E-08 | count | 1 |
| HOXA1       | -18.1529225 | 2720.296955 | -0.0067 | 0.995 | -1.27E-08 | count | 1 |
| AC007036.1  | -18.1529225 | 2720.296955 | -0.0067 | 0.995 | -1.27E-08 | count | 1 |
| CD36        | -18.1529225 | 2720.296955 | -0.0067 | 0.995 | -1.27E-08 | count | 1 |
| HGF         | -18.1529225 | 2720.296955 | -0.0067 | 0.995 | -1.27E-08 | count | 1 |
| PDK4        | -18.1529225 | 2720.296955 | -0.0067 | 0.995 | -1.27E-08 | count | 1 |
| TLR8        | -18.1529225 | 2720.296955 | -0.0067 | 0.995 | -1.27E-08 | count | 1 |
| KCND1       | -18.1529225 | 2720.296955 | -0.0067 | 0.995 | -1.27E-08 | count | 1 |
| SH2D1A      | -18.1529225 | 2720.296955 | -0.0067 | 0.995 | -1.27E-08 | count | 1 |
| OCRL        | -18.1529225 | 2720.296955 | -0.0067 | 0.995 | -1.27E-08 | count | 1 |
| ELF4        | -18.1529225 | 2720.296955 | -0.0067 | 0.995 | -1.27E-08 | count | 1 |

|             |             |             |         |       |           |       |   |
|-------------|-------------|-------------|---------|-------|-----------|-------|---|
| F8          | -18.1529225 | 2720.296955 | -0.0067 | 0.995 | -1.27E-08 | count | 1 |
| CHRNA6      | -18.1529225 | 2720.296955 | -0.0067 | 0.995 | -1.27E-08 | count | 1 |
| POMK        | -18.1529225 | 2720.296955 | -0.0067 | 0.995 | -1.27E-08 | count | 1 |
| C8orf37     | -18.1529225 | 2720.296955 | -0.0067 | 0.995 | -1.27E-08 | count | 1 |
| EXT1        | -18.1529225 | 2720.296955 | -0.0067 | 0.995 | -1.27E-08 | count | 1 |
| C9orf66     | -18.1529225 | 2720.296955 | -0.0067 | 0.995 | -1.27E-08 | count | 1 |
| NTRK2       | -18.1529225 | 2720.296955 | -0.0067 | 0.995 | -1.27E-08 | count | 1 |
| GOLM1       | -18.1529225 | 2720.296955 | -0.0067 | 0.995 | -1.27E-08 | count | 1 |
| PTPDC1      | -18.1529225 | 2720.296955 | -0.0067 | 0.995 | -1.27E-08 | count | 1 |
| AL359091.4  | -18.1529225 | 2720.296955 | -0.0067 | 0.995 | -1.27E-08 | count | 1 |
| AL158151.1  | -18.1529225 | 2720.296955 | -0.0067 | 0.995 | -1.27E-08 | count | 1 |
| AL358781.1  | -18.1529225 | 2720.296955 | -0.0067 | 0.995 | -1.27E-08 | count | 1 |
| AP003721.4  | -18.1529225 | 2720.296955 | -0.0067 | 0.995 | -1.27E-08 | count | 1 |
| AP000759.1  | -18.1529225 | 2720.296955 | -0.0067 | 0.995 | -1.27E-08 | count | 1 |
| KCNE3       | -18.1529225 | 2720.296955 | -0.0067 | 0.995 | -1.27E-08 | count | 1 |
| KLHL35      | -18.1529225 | 2720.296955 | -0.0067 | 0.995 | -1.27E-08 | count | 1 |
| NAALAD2     | -18.1529225 | 2720.296955 | -0.0067 | 0.995 | -1.27E-08 | count | 1 |
| TMPRSS13    | -18.1529225 | 2720.296955 | -0.0067 | 0.995 | -1.27E-08 | count | 1 |
| CD3D        | -18.1529225 | 2720.296955 | -0.0067 | 0.995 | -1.27E-08 | count | 1 |
| OAF         | -18.1529225 | 2720.296955 | -0.0067 | 0.995 | -1.27E-08 | count | 1 |
| DCLRE1A     | -18.1529225 | 2720.296955 | -0.0067 | 0.995 | -1.27E-08 | count | 1 |
| TRUB1       | -18.1529225 | 2720.296955 | -0.0067 | 0.995 | -1.27E-08 | count | 1 |
| ENO4        | -18.1529225 | 2720.296955 | -0.0067 | 0.995 | -1.27E-08 | count | 1 |
| CACNA1C-AS2 | -18.1529225 | 2720.296955 | -0.0067 | 0.995 | -1.27E-08 | count | 1 |
| AC107032.2  | -18.1529225 | 2720.296955 | -0.0067 | 0.995 | -1.27E-08 | count | 1 |
| ACSS3       | -18.1529225 | 2720.296955 | -0.0067 | 0.995 | -1.27E-08 | count | 1 |
| AC007569.1  | -18.1529225 | 2720.296955 | -0.0067 | 0.995 | -1.27E-08 | count | 1 |
| RNFT2       | -18.1529225 | 2720.296955 | -0.0067 | 0.995 | -1.27E-08 | count | 1 |
| NRAV        | -18.1529225 | 2720.296955 | -0.0067 | 0.995 | -1.27E-08 | count | 1 |
| THRIL       | -18.1529225 | 2720.296955 | -0.0067 | 0.995 | -1.27E-08 | count | 1 |
| PRKCH       | -18.1529225 | 2720.296955 | -0.0067 | 0.995 | -1.27E-08 | count | 1 |
| AC005520.2  | -18.1529225 | 2720.296955 | -0.0067 | 0.995 | -1.27E-08 | count | 1 |
| ZNF410      | -18.1529225 | 2720.296955 | -0.0067 | 0.995 | -1.27E-08 | count | 1 |
| DICER1-AS1  | -18.1529225 | 2720.296955 | -0.0067 | 0.995 | -1.27E-08 | count | 1 |
| TECPR2      | -18.1529225 | 2720.296955 | -0.0067 | 0.995 | -1.27E-08 | count | 1 |
| ARHGAP11B   | -18.1529225 | 2720.296955 | -0.0067 | 0.995 | -1.27E-08 | count | 1 |
| HEXA-AS1    | -18.1529225 | 2720.296955 | -0.0067 | 0.995 | -1.27E-08 | count | 1 |
| ZNF319      | -18.1529225 | 2720.296955 | -0.0067 | 0.995 | -1.27E-08 | count | 1 |
| RRAD        | -18.1529225 | 2720.296955 | -0.0067 | 0.995 | -1.27E-08 | count | 1 |
| TAT-AS1     | -18.1529225 | 2720.296955 | -0.0067 | 0.995 | -1.27E-08 | count | 1 |
| CENPBD1     | -18.1529225 | 2720.296955 | -0.0067 | 0.995 | -1.27E-08 | count | 1 |
| AC015727.1  | -18.1529225 | 2720.296955 | -0.0067 | 0.995 | -1.27E-08 | count | 1 |
| ASGR2       | -18.1529225 | 2720.296955 | -0.0067 | 0.995 | -1.27E-08 | count | 1 |
| MYH10       | -18.1529225 | 2720.296955 | -0.0067 | 0.995 | -1.27E-08 | count | 1 |
| TVP23C      | -18.1529225 | 2720.296955 | -0.0067 | 0.995 | -1.27E-08 | count | 1 |

|            |             |             |         |       |           |       |   |
|------------|-------------|-------------|---------|-------|-----------|-------|---|
| AC005726.1 | -18.1529225 | 2720.296955 | -0.0067 | 0.995 | -1.27E-08 | count | 1 |
| AC005899.7 | -18.1529225 | 2720.296955 | -0.0067 | 0.995 | -1.27E-08 | count | 1 |
| AC138150.2 | -18.1529225 | 2720.296955 | -0.0067 | 0.995 | -1.27E-08 | count | 1 |
| AC011825.4 | -18.1529225 | 2720.296955 | -0.0067 | 0.995 | -1.27E-08 | count | 1 |
| AC018529.2 | -18.1529225 | 2720.296955 | -0.0067 | 0.995 | -1.27E-08 | count | 1 |
| PLCB1      | -18.1529225 | 2720.296955 | -0.0067 | 0.995 | -1.27E-08 | count | 1 |
| MCEMP1     | -18.1529225 | 2720.296955 | -0.0067 | 0.995 | -1.27E-08 | count | 1 |
| TRAPPC5    | -18.1529225 | 2720.296955 | -0.0067 | 0.995 | -1.27E-08 | count | 1 |
| NANOS3     | -18.1529225 | 2720.296955 | -0.0067 | 0.995 | -1.27E-08 | count | 1 |
| AC010331.1 | -18.1529225 | 2720.296955 | -0.0067 | 0.995 | -1.27E-08 | count | 1 |
| Z99774.1   | -18.1529225 | 2720.296955 | -0.0067 | 0.995 | -1.27E-08 | count | 1 |
| PLA2G6     | -18.1529225 | 2720.296955 | -0.0067 | 0.995 | -1.27E-08 | count | 1 |
| APOBEC3A   | -18.1529225 | 2720.296955 | -0.0067 | 0.995 | -1.27E-08 | count | 1 |
| TTC34      | -18.1529225 | 2720.296955 | -0.0067 | 0.995 | -1.27E-08 | count | 1 |
| CRYBG2     | -18.1529225 | 2720.296955 | -0.0067 | 0.995 | -1.27E-08 | count | 1 |
| S100A5     | -18.1529225 | 2720.296955 | -0.0067 | 0.995 | -1.27E-08 | count | 1 |
| AL358472.2 | -18.1529225 | 2720.296955 | -0.0067 | 0.995 | -1.27E-08 | count | 1 |
| AL591846.2 | -18.1529225 | 2720.296955 | -0.0067 | 0.995 | -1.27E-08 | count | 1 |
| AC092164.1 | -18.1529225 | 2720.296955 | -0.0067 | 0.995 | -1.27E-08 | count | 1 |
| HNRNPLL    | -18.1529225 | 2720.296955 | -0.0067 | 0.995 | -1.27E-08 | count | 1 |
| AC012447.1 | -18.1529225 | 2720.296955 | -0.0067 | 0.995 | -1.27E-08 | count | 1 |
| KCNE4      | -18.1529225 | 2720.296955 | -0.0067 | 0.995 | -1.27E-08 | count | 1 |
| GATA2      | -18.1529225 | 2720.296955 | -0.0067 | 0.995 | -1.27E-08 | count | 1 |
| TMCO6      | -18.1529225 | 2720.296955 | -0.0067 | 0.995 | -1.27E-08 | count | 1 |
| TRERF1     | -18.1529225 | 2720.296955 | -0.0067 | 0.995 | -1.27E-08 | count | 1 |
| AL590764.1 | -18.1529225 | 2720.296955 | -0.0067 | 0.995 | -1.27E-08 | count | 1 |
| AC104986.2 | -18.1529225 | 2720.296955 | -0.0067 | 0.995 | -1.27E-08 | count | 1 |
| TRIM6      | -18.1529225 | 2720.296955 | -0.0067 | 0.995 | -1.27E-08 | count | 1 |
| DENND5A    | -18.1529225 | 2720.296955 | -0.0067 | 0.995 | -1.27E-08 | count | 1 |
| C11orf95   | -18.1529225 | 2720.296955 | -0.0067 | 0.995 | -1.27E-08 | count | 1 |
| CDNF       | -18.1529225 | 2720.296955 | -0.0067 | 0.995 | -1.27E-08 | count | 1 |
| LINC00843  | -18.1529225 | 2720.296955 | -0.0067 | 0.995 | -1.27E-08 | count | 1 |
| CRTAC1     | -18.1529225 | 2720.296955 | -0.0067 | 0.995 | -1.27E-08 | count | 1 |
| WDR11-AS1  | -18.1529225 | 2720.296955 | -0.0067 | 0.995 | -1.27E-08 | count | 1 |
| AL162274.2 | -18.1529225 | 2720.296955 | -0.0067 | 0.995 | -1.27E-08 | count | 1 |
| TSPAN9     | -18.1529225 | 2720.296955 | -0.0067 | 0.995 | -1.27E-08 | count | 1 |
| LAG3       | -18.1529225 | 2720.296955 | -0.0067 | 0.995 | -1.27E-08 | count | 1 |
| VSIG10     | -18.1529225 | 2720.296955 | -0.0067 | 0.995 | -1.27E-08 | count | 1 |
| AL139353.1 | -18.1529225 | 2720.296955 | -0.0067 | 0.995 | -1.27E-08 | count | 1 |
| PTGDR      | -18.1529225 | 2720.296955 | -0.0067 | 0.995 | -1.27E-08 | count | 1 |
| POMT2      | -18.1529225 | 2720.296955 | -0.0067 | 0.995 | -1.27E-08 | count | 1 |
| CCNB2      | -18.1529225 | 2720.296955 | -0.0067 | 0.995 | -1.27E-08 | count | 1 |
| SLC24A1    | -18.1529225 | 2720.296955 | -0.0067 | 0.995 | -1.27E-08 | count | 1 |
| ZNF213-AS1 | -18.1529225 | 2720.296955 | -0.0067 | 0.995 | -1.27E-08 | count | 1 |
| AC106779.1 | -18.1529225 | 2720.296955 | -0.0067 | 0.995 | -1.27E-08 | count | 1 |

|            |             |             |         |       |           |       |   |
|------------|-------------|-------------|---------|-------|-----------|-------|---|
| GAPLINC    | -18.1529225 | 2720.296955 | -0.0067 | 0.995 | -1.27E-08 | count | 1 |
| TWSG1      | -18.1529225 | 2720.296955 | -0.0067 | 0.995 | -1.27E-08 | count | 1 |
| AC011815.2 | -18.1529225 | 2720.296955 | -0.0067 | 0.995 | -1.27E-08 | count | 1 |
| LKAAEAR1   | -18.1529225 | 2720.296955 | -0.0067 | 0.995 | -1.27E-08 | count | 1 |
| AC012615.5 | -18.1529225 | 2720.296955 | -0.0067 | 0.995 | -1.27E-08 | count | 1 |
| DLL3       | -18.1529225 | 2720.296955 | -0.0067 | 0.995 | -1.27E-08 | count | 1 |
| AC008079.2 | -18.1529225 | 2720.296955 | -0.0067 | 0.995 | -1.27E-08 | count | 1 |
| SCO2       | -18.1529225 | 2720.296955 | -0.0067 | 0.995 | -1.27E-08 | count | 1 |
| LINC00115  | -18.1529225 | 2720.296955 | -0.0067 | 0.995 | -1.27E-08 | count | 1 |
| AC013403.2 | -18.1529225 | 2720.296955 | -0.0067 | 0.995 | -1.27E-08 | count | 1 |
| AC012358.3 | -18.1529225 | 2720.296955 | -0.0067 | 0.995 | -1.27E-08 | count | 1 |
| AC016745.2 | -18.1529225 | 2720.296955 | -0.0067 | 0.995 | -1.27E-08 | count | 1 |
| HCG22      | -18.1529225 | 2720.296955 | -0.0067 | 0.995 | -1.27E-08 | count | 1 |
| AC011978.2 | -18.1529225 | 2720.296955 | -0.0067 | 0.995 | -1.27E-08 | count | 1 |
| AC010834.2 | -18.1529225 | 2720.296955 | -0.0067 | 0.995 | -1.27E-08 | count | 1 |
| GNAQ       | -18.1529225 | 2720.296955 | -0.0067 | 0.995 | -1.27E-08 | count | 1 |
| FZD4       | -18.1529225 | 2720.296955 | -0.0067 | 0.995 | -1.27E-08 | count | 1 |
| KLRF1      | -18.1529225 | 2720.296955 | -0.0067 | 0.995 | -1.27E-08 | count | 1 |
| AC008035.1 | -18.1529225 | 2720.296955 | -0.0067 | 0.995 | -1.27E-08 | count | 1 |
| MYL2       | -18.1529225 | 2720.296955 | -0.0067 | 0.995 | -1.27E-08 | count | 1 |
| GCN1       | -18.1529225 | 2720.296955 | -0.0067 | 0.995 | -1.27E-08 | count | 1 |
| BUB1B      | -18.1529225 | 2720.296955 | -0.0067 | 0.995 | -1.27E-08 | count | 1 |
| ZGLP1      | -18.1529225 | 2720.296955 | -0.0067 | 0.995 | -1.27E-08 | count | 1 |
| NAT14      | -18.1529225 | 2720.296955 | -0.0067 | 0.995 | -1.27E-08 | count | 1 |
| U62317.2   | -18.1529225 | 2720.296955 | -0.0067 | 0.995 | -1.27E-08 | count | 1 |
| BCL2L15    | -18.1529225 | 2720.296955 | -0.0067 | 0.995 | -1.27E-08 | count | 1 |
| AC008438.1 | -18.1529225 | 2720.296955 | -0.0067 | 0.995 | -1.27E-08 | count | 1 |
| TRDC       | -18.1529225 | 2720.296955 | -0.0067 | 0.995 | -1.27E-08 | count | 1 |
| AL136038.3 | -18.1529225 | 2720.296955 | -0.0067 | 0.995 | -1.27E-08 | count | 1 |
| AC020915.1 | -18.1529225 | 2720.296955 | -0.0067 | 0.995 | -1.27E-08 | count | 1 |
| AL031432.3 | -18.1529225 | 2720.296955 | -0.0067 | 0.995 | -1.27E-08 | count | 1 |
| FAM85B     | -18.1529225 | 2720.296955 | -0.0067 | 0.995 | -1.27E-08 | count | 1 |
| AL591368.1 | -18.1529225 | 2720.296955 | -0.0067 | 0.995 | -1.27E-08 | count | 1 |
| FRMD3      | -18.1529225 | 2720.296955 | -0.0067 | 0.995 | -1.27E-08 | count | 1 |
| NPDC1      | -18.1529225 | 2720.296955 | -0.0067 | 0.995 | -1.27E-08 | count | 1 |
| C2CD4D     | -18.1529225 | 2720.296955 | -0.0067 | 0.995 | -1.27E-08 | count | 1 |
| FCER1A     | -18.1529225 | 2720.296955 | -0.0067 | 0.995 | -1.27E-08 | count | 1 |
| LINC01871  | -18.1529225 | 2720.296955 | -0.0067 | 0.995 | -1.27E-08 | count | 1 |
| TP53I3     | -18.1529225 | 2720.296955 | -0.0067 | 0.995 | -1.27E-08 | count | 1 |
| AC107081.2 | -18.1529225 | 2720.296955 | -0.0067 | 0.995 | -1.27E-08 | count | 1 |
| AC078883.1 | -18.1529225 | 2720.296955 | -0.0067 | 0.995 | -1.27E-08 | count | 1 |
| CALCRL     | -18.1529225 | 2720.296955 | -0.0067 | 0.995 | -1.27E-08 | count | 1 |
| NREP       | -18.1529225 | 2720.296955 | -0.0067 | 0.995 | -1.27E-08 | count | 1 |
| SLC45A4    | -18.1529225 | 2720.296955 | -0.0067 | 0.995 | -1.27E-08 | count | 1 |
| ARHGEF39   | -18.1529225 | 2720.296955 | -0.0067 | 0.995 | -1.27E-08 | count | 1 |

|               |             |             |         |       |           |       |   |
|---------------|-------------|-------------|---------|-------|-----------|-------|---|
| VWCE          | -18.1529225 | 2720.296955 | -0.0067 | 0.995 | -1.27E-08 | count | 1 |
| AP001453.1    | -18.1529225 | 2720.296955 | -0.0067 | 0.995 | -1.27E-08 | count | 1 |
| CPXM2         | -18.1529225 | 2720.296955 | -0.0067 | 0.995 | -1.27E-08 | count | 1 |
| LIN7A         | -18.1529225 | 2720.296955 | -0.0067 | 0.995 | -1.27E-08 | count | 1 |
| AC027290.1    | -18.1529225 | 2720.296955 | -0.0067 | 0.995 | -1.27E-08 | count | 1 |
| SCARB1        | -18.1529225 | 2720.296955 | -0.0067 | 0.995 | -1.27E-08 | count | 1 |
| AF111167.2    | -18.1529225 | 2720.296955 | -0.0067 | 0.995 | -1.27E-08 | count | 1 |
| KIAA0513      | -18.1529225 | 2720.296955 | -0.0067 | 0.995 | -1.27E-08 | count | 1 |
| CCDC144NL-AS1 | -18.1529225 | 2720.296955 | -0.0067 | 0.995 | -1.27E-08 | count | 1 |
| AC130324.1    | -18.1529225 | 2720.296955 | -0.0067 | 0.995 | -1.27E-08 | count | 1 |
| CELF4         | -18.1529225 | 2720.296955 | -0.0067 | 0.995 | -1.27E-08 | count | 1 |
| CD93          | -18.1529225 | 2720.296955 | -0.0067 | 0.995 | -1.27E-08 | count | 1 |
| AL357033.1    | -18.1529225 | 2720.296955 | -0.0067 | 0.995 | -1.27E-08 | count | 1 |
| ICAM4         | -18.1529225 | 2720.296955 | -0.0067 | 0.995 | -1.27E-08 | count | 1 |
| F2RL3         | -18.1529225 | 2720.296955 | -0.0067 | 0.995 | -1.27E-08 | count | 1 |
| PNMA8B        | -18.1529225 | 2720.296955 | -0.0067 | 0.995 | -1.27E-08 | count | 1 |
| ZNF837        | -18.1529225 | 2720.296955 | -0.0067 | 0.995 | -1.27E-08 | count | 1 |
| VWA1          | -18.1529225 | 2720.296955 | -0.0067 | 0.995 | -1.27E-08 | count | 1 |
| HIST2H2AB     | -18.1529225 | 2720.296955 | -0.0067 | 0.995 | -1.27E-08 | count | 1 |
| LINC01126     | -18.1529225 | 2720.296955 | -0.0067 | 0.995 | -1.27E-08 | count | 1 |
| TUBB2B        | -18.1529225 | 2720.296955 | -0.0067 | 0.995 | -1.27E-08 | count | 1 |
| GNMT          | -18.1529225 | 2720.296955 | -0.0067 | 0.995 | -1.27E-08 | count | 1 |
| AL080317.1    | -18.1529225 | 2720.296955 | -0.0067 | 0.995 | -1.27E-08 | count | 1 |
| PRSS1         | -18.1529225 | 2720.296955 | -0.0067 | 0.995 | -1.27E-08 | count | 1 |
| AC109322.1    | -18.1529225 | 2720.296955 | -0.0067 | 0.995 | -1.27E-08 | count | 1 |
| SMC2-AS1      | -18.1529225 | 2720.296955 | -0.0067 | 0.995 | -1.27E-08 | count | 1 |
| AMER2         | -18.1529225 | 2720.296955 | -0.0067 | 0.995 | -1.27E-08 | count | 1 |
| POSTN         | -18.1529225 | 2720.296955 | -0.0067 | 0.995 | -1.27E-08 | count | 1 |
| CTSG          | -18.1529225 | 2720.296955 | -0.0067 | 0.995 | -1.27E-08 | count | 1 |
| PPP1R36       | -18.1529225 | 2720.296955 | -0.0067 | 0.995 | -1.27E-08 | count | 1 |
| IGHV2-70D     | -18.1529225 | 2720.296955 | -0.0067 | 0.995 | -1.27E-08 | count | 1 |
| B4GALT6       | -18.1529225 | 2720.296955 | -0.0067 | 0.995 | -1.27E-08 | count | 1 |
| BTBD8         | -18.1529225 | 2720.296955 | -0.0067 | 0.995 | -1.27E-08 | count | 1 |
| PALMD         | -18.1529225 | 2720.296955 | -0.0067 | 0.995 | -1.27E-08 | count | 1 |
| SELE          | -18.1529225 | 2720.296955 | -0.0067 | 0.995 | -1.27E-08 | count | 1 |
| FAM72A        | -18.1529225 | 2720.296955 | -0.0067 | 0.995 | -1.27E-08 | count | 1 |
| LINC01918     | -18.1529225 | 2720.296955 | -0.0067 | 0.995 | -1.27E-08 | count | 1 |
| AC092053.3    | -18.1529225 | 2720.296955 | -0.0067 | 0.995 | -1.27E-08 | count | 1 |
| LRRRC34       | -18.1529225 | 2720.296955 | -0.0067 | 0.995 | -1.27E-08 | count | 1 |
| AC104825.1    | -18.1529225 | 2720.296955 | -0.0067 | 0.995 | -1.27E-08 | count | 1 |
| STPG2         | -18.1529225 | 2720.296955 | -0.0067 | 0.995 | -1.27E-08 | count | 1 |
| AC095050.1    | -18.1529225 | 2720.296955 | -0.0067 | 0.995 | -1.27E-08 | count | 1 |
| KCNQ5         | -18.1529225 | 2720.296955 | -0.0067 | 0.995 | -1.27E-08 | count | 1 |
| AL356417.1    | -18.1529225 | 2720.296955 | -0.0067 | 0.995 | -1.27E-08 | count | 1 |
| EEF1G         | -18.1529225 | 2720.296955 | -0.0067 | 0.995 | -1.27E-08 | count | 1 |

|            |             |             |         |       |           |       |   |
|------------|-------------|-------------|---------|-------|-----------|-------|---|
| AP001825.1 | -18.1529225 | 2720.296955 | -0.0067 | 0.995 | -1.27E-08 | count | 1 |
| AP002433.1 | -18.1529225 | 2720.296955 | -0.0067 | 0.995 | -1.27E-08 | count | 1 |
| COL4A2     | -18.1529225 | 2720.296955 | -0.0067 | 0.995 | -1.27E-08 | count | 1 |
| RNASE4     | -18.1529225 | 2720.296955 | -0.0067 | 0.995 | -1.27E-08 | count | 1 |
| NDN        | -18.1529225 | 2720.296955 | -0.0067 | 0.995 | -1.27E-08 | count | 1 |
| CCNF       | -18.1529225 | 2720.296955 | -0.0067 | 0.995 | -1.27E-08 | count | 1 |
| TPPP3      | -18.1529225 | 2720.296955 | -0.0067 | 0.995 | -1.27E-08 | count | 1 |
| MC1R       | -18.1529225 | 2720.296955 | -0.0067 | 0.995 | -1.27E-08 | count | 1 |
| SENP3      | -18.1529225 | 2720.296955 | -0.0067 | 0.995 | -1.27E-08 | count | 1 |
| EFCAB5     | -18.1529225 | 2720.296955 | -0.0067 | 0.995 | -1.27E-08 | count | 1 |
| MMP28      | -18.1529225 | 2720.296955 | -0.0067 | 0.995 | -1.27E-08 | count | 1 |
| PROSER3    | -18.1529225 | 2720.296955 | -0.0067 | 0.995 | -1.27E-08 | count | 1 |
| RYR1       | -18.1529225 | 2720.296955 | -0.0067 | 0.995 | -1.27E-08 | count | 1 |
| ZNF470     | -18.1529225 | 2720.296955 | -0.0067 | 0.995 | -1.27E-08 | count | 1 |
| AC245060.6 | -18.1529225 | 2720.296955 | -0.0067 | 0.995 | -1.27E-08 | count | 1 |
| AL050343.1 | -18.1529225 | 2720.296955 | -0.0067 | 0.995 | -1.27E-08 | count | 1 |
| XCL2       | -18.1529225 | 2720.296955 | -0.0067 | 0.995 | -1.27E-08 | count | 1 |
| NR5A2      | -18.1529225 | 2720.296955 | -0.0067 | 0.995 | -1.27E-08 | count | 1 |
| VIL1       | -18.1529225 | 2720.296955 | -0.0067 | 0.995 | -1.27E-08 | count | 1 |
| SLC6A1     | -18.1529225 | 2720.296955 | -0.0067 | 0.995 | -1.27E-08 | count | 1 |
| FNDC3B     | -18.1529225 | 2720.296955 | -0.0067 | 0.995 | -1.27E-08 | count | 1 |
| MED20      | -18.1529225 | 2720.296955 | -0.0067 | 0.995 | -1.27E-08 | count | 1 |
| AC005091.1 | -18.1529225 | 2720.296955 | -0.0067 | 0.995 | -1.27E-08 | count | 1 |
| ANKRD7     | -18.1529225 | 2720.296955 | -0.0067 | 0.995 | -1.27E-08 | count | 1 |
| SPIN4      | -18.1529225 | 2720.296955 | -0.0067 | 0.995 | -1.27E-08 | count | 1 |
| ZCCHC18    | -18.1529225 | 2720.296955 | -0.0067 | 0.995 | -1.27E-08 | count | 1 |
| PCAT1      | -18.1529225 | 2720.296955 | -0.0067 | 0.995 | -1.27E-08 | count | 1 |
| MKI67      | -18.1529225 | 2720.296955 | -0.0067 | 0.995 | -1.27E-08 | count | 1 |
| AL360181.3 | -18.1529225 | 2720.296955 | -0.0067 | 0.995 | -1.27E-08 | count | 1 |
| AL138966.2 | -18.1529225 | 2720.296955 | -0.0067 | 0.995 | -1.27E-08 | count | 1 |
| THBS1      | -18.1529225 | 2720.296955 | -0.0067 | 0.995 | -1.27E-08 | count | 1 |
| SENP8      | -18.1529225 | 2720.296955 | -0.0067 | 0.995 | -1.27E-08 | count | 1 |
| LINC01572  | -18.1529225 | 2720.296955 | -0.0067 | 0.995 | -1.27E-08 | count | 1 |
| TAS1R3     | -18.1529225 | 2720.296955 | -0.0067 | 0.995 | -1.27E-08 | count | 1 |
| TNFRSF9    | -18.1529225 | 2720.296955 | -0.0067 | 0.995 | -1.27E-08 | count | 1 |
| HIST3H2BB  | -18.1529225 | 2720.296955 | -0.0067 | 0.995 | -1.27E-08 | count | 1 |
| GRHL1      | -18.1529225 | 2720.296955 | -0.0067 | 0.995 | -1.27E-08 | count | 1 |
| SNED1      | -18.1529225 | 2720.296955 | -0.0067 | 0.995 | -1.27E-08 | count | 1 |
| TAPT1-AS1  | -18.1529225 | 2720.296955 | -0.0067 | 0.995 | -1.27E-08 | count | 1 |
| ADCY2      | -18.1529225 | 2720.296955 | -0.0067 | 0.995 | -1.27E-08 | count | 1 |
| GCNT4      | -18.1529225 | 2720.296955 | -0.0067 | 0.995 | -1.27E-08 | count | 1 |
| PDE8B      | -18.1529225 | 2720.296955 | -0.0067 | 0.995 | -1.27E-08 | count | 1 |
| PCDHGB3    | -18.1529225 | 2720.296955 | -0.0067 | 0.995 | -1.27E-08 | count | 1 |
| AL365275.1 | -18.1529225 | 2720.296955 | -0.0067 | 0.995 | -1.27E-08 | count | 1 |
| ULBP2      | -18.1529225 | 2720.296955 | -0.0067 | 0.995 | -1.27E-08 | count | 1 |

|            |             |             |         |       |           |       |   |
|------------|-------------|-------------|---------|-------|-----------|-------|---|
| CLEC5A     | -18.1529225 | 2720.296955 | -0.0067 | 0.995 | -1.27E-08 | count | 1 |
| AC083973.1 | -18.1529225 | 2720.296955 | -0.0067 | 0.995 | -1.27E-08 | count | 1 |
| MROH6      | -18.1529225 | 2720.296955 | -0.0067 | 0.995 | -1.27E-08 | count | 1 |
| GAS1RR     | -18.1529225 | 2720.296955 | -0.0067 | 0.995 | -1.27E-08 | count | 1 |
| GADD45G    | -18.1529225 | 2720.296955 | -0.0067 | 0.995 | -1.27E-08 | count | 1 |
| ANKS6      | -18.1529225 | 2720.296955 | -0.0067 | 0.995 | -1.27E-08 | count | 1 |
| RIN1       | -18.1529225 | 2720.296955 | -0.0067 | 0.995 | -1.27E-08 | count | 1 |
| KCTD21-AS1 | -18.1529225 | 2720.296955 | -0.0067 | 0.995 | -1.27E-08 | count | 1 |
| MINPP1     | -18.1529225 | 2720.296955 | -0.0067 | 0.995 | -1.27E-08 | count | 1 |
| UBTD1      | -18.1529225 | 2720.296955 | -0.0067 | 0.995 | -1.27E-08 | count | 1 |
| LINC01481  | -18.1529225 | 2720.296955 | -0.0067 | 0.995 | -1.27E-08 | count | 1 |
| AC073912.2 | -18.1529225 | 2720.296955 | -0.0067 | 0.995 | -1.27E-08 | count | 1 |
| DOCK9      | -18.1529225 | 2720.296955 | -0.0067 | 0.995 | -1.27E-08 | count | 1 |
| FITM1      | -18.1529225 | 2720.296955 | -0.0067 | 0.995 | -1.27E-08 | count | 1 |
| AL136295.2 | -18.1529225 | 2720.296955 | -0.0067 | 0.995 | -1.27E-08 | count | 1 |
| SHCBP1     | -18.1529225 | 2720.296955 | -0.0067 | 0.995 | -1.27E-08 | count | 1 |
| CETP       | -18.1529225 | 2720.296955 | -0.0067 | 0.995 | -1.27E-08 | count | 1 |
| ENO3       | -18.1529225 | 2720.296955 | -0.0067 | 0.995 | -1.27E-08 | count | 1 |
| JUP        | -18.1529225 | 2720.296955 | -0.0067 | 0.995 | -1.27E-08 | count | 1 |
| KLHL11     | -18.1529225 | 2720.296955 | -0.0067 | 0.995 | -1.27E-08 | count | 1 |
| ACE        | -18.1529225 | 2720.296955 | -0.0067 | 0.995 | -1.27E-08 | count | 1 |
| CYGB       | -18.1529225 | 2720.296955 | -0.0067 | 0.995 | -1.27E-08 | count | 1 |
| AC145207.5 | -18.1529225 | 2720.296955 | -0.0067 | 0.995 | -1.27E-08 | count | 1 |
| SKA1       | -18.1529225 | 2720.296955 | -0.0067 | 0.995 | -1.27E-08 | count | 1 |
| UBOX5      | -18.1529225 | 2720.296955 | -0.0067 | 0.995 | -1.27E-08 | count | 1 |
| MKKS       | -18.1529225 | 2720.296955 | -0.0067 | 0.995 | -1.27E-08 | count | 1 |
| LINC00237  | -18.1529225 | 2720.296955 | -0.0067 | 0.995 | -1.27E-08 | count | 1 |
| AC092279.1 | -18.1529225 | 2720.296955 | -0.0067 | 0.995 | -1.27E-08 | count | 1 |
| SGSM1      | -18.1529225 | 2720.296955 | -0.0067 | 0.995 | -1.27E-08 | count | 1 |
| MGAT3      | -18.1529225 | 2720.296955 | -0.0067 | 0.995 | -1.27E-08 | count | 1 |
| FAM83F     | -18.1529225 | 2720.296955 | -0.0067 | 0.995 | -1.27E-08 | count | 1 |
| HSF2BP     | -18.1529225 | 2720.296955 | -0.0067 | 0.995 | -1.27E-08 | count | 1 |
| ITIH4      | -18.1529225 | 2720.296955 | -0.0067 | 0.995 | -1.27E-08 | count | 1 |
| ADAM29     | -18.1529225 | 2720.296955 | -0.0067 | 0.995 | -1.27E-08 | count | 1 |
| AC018638.7 | -18.1529225 | 2720.296955 | -0.0067 | 0.995 | -1.27E-08 | count | 1 |
| CCDC136    | -18.1529225 | 2720.296955 | -0.0067 | 0.995 | -1.27E-08 | count | 1 |
| KLF14      | -18.1529225 | 2720.296955 | -0.0067 | 0.995 | -1.27E-08 | count | 1 |
| AP001636.3 | -18.1529225 | 2720.296955 | -0.0067 | 0.995 | -1.27E-08 | count | 1 |
| CD3G       | -18.1529225 | 2720.296955 | -0.0067 | 0.995 | -1.27E-08 | count | 1 |
| ESPL1      | -18.1529225 | 2720.296955 | -0.0067 | 0.995 | -1.27E-08 | count | 1 |
| AC107958.2 | -18.1529225 | 2720.296955 | -0.0067 | 0.995 | -1.27E-08 | count | 1 |
| AC022167.2 | -18.1529225 | 2720.296955 | -0.0067 | 0.995 | -1.27E-08 | count | 1 |
| ZNF234     | -18.1529225 | 2720.296955 | -0.0067 | 0.995 | -1.27E-08 | count | 1 |
| SERINC2    | -18.1529225 | 2720.296955 | -0.0067 | 0.995 | -1.27E-08 | count | 1 |
| SCN11A     | -18.1529225 | 2720.296955 | -0.0067 | 0.995 | -1.27E-08 | count | 1 |



|             |             |             |         |       |           |       |   |
|-------------|-------------|-------------|---------|-------|-----------|-------|---|
| MYLK        | -18.1529225 | 2720.296955 | -0.0067 | 0.995 | -1.27E-08 | count | 1 |
| AC008914.1  | -18.1529225 | 2720.296955 | -0.0067 | 0.995 | -1.27E-08 | count | 1 |
| MTMR8       | -18.1529225 | 2720.296955 | -0.0067 | 0.995 | -1.27E-08 | count | 1 |
| TSPAN6      | -18.1529225 | 2720.296955 | -0.0067 | 0.995 | -1.27E-08 | count | 1 |
| VSTM4       | -18.1529225 | 2720.296955 | -0.0067 | 0.995 | -1.27E-08 | count | 1 |
| SEC31B      | -18.1529225 | 2720.296955 | -0.0067 | 0.995 | -1.27E-08 | count | 1 |
| AC006064.4  | -18.1529225 | 2720.296955 | -0.0067 | 0.995 | -1.27E-08 | count | 1 |
| TOP2A       | -18.1529225 | 2720.296955 | -0.0067 | 0.995 | -1.27E-08 | count | 1 |
| AC037487.2  | -18.1529225 | 2720.296955 | -0.0067 | 0.995 | -1.27E-08 | count | 1 |
| RAB27B      | -18.1529225 | 2720.296955 | -0.0067 | 0.995 | -1.27E-08 | count | 1 |
| SLC27A1     | -18.1529225 | 2720.296955 | -0.0067 | 0.995 | -1.27E-08 | count | 1 |
| AHDC1       | -18.1529225 | 2720.296955 | -0.0067 | 0.995 | -1.27E-08 | count | 1 |
| TMEM54      | -18.1529225 | 2720.296955 | -0.0067 | 0.995 | -1.27E-08 | count | 1 |
| FASLG       | -18.1529225 | 2720.296955 | -0.0067 | 0.995 | -1.27E-08 | count | 1 |
| AC108488.1  | -18.1529225 | 2720.296955 | -0.0067 | 0.995 | -1.27E-08 | count | 1 |
| CYP1B1-AS1  | -18.1529225 | 2720.296955 | -0.0067 | 0.995 | -1.27E-08 | count | 1 |
| NECTIN3     | -18.1529225 | 2720.296955 | -0.0067 | 0.995 | -1.27E-08 | count | 1 |
| KLB         | -18.1529225 | 2720.296955 | -0.0067 | 0.995 | -1.27E-08 | count | 1 |
| HPGDS       | -18.1529225 | 2720.296955 | -0.0067 | 0.995 | -1.27E-08 | count | 1 |
| PRR7-AS1    | -18.1529225 | 2720.296955 | -0.0067 | 0.995 | -1.27E-08 | count | 1 |
| PERP        | -18.1529225 | 2720.296955 | -0.0067 | 0.995 | -1.27E-08 | count | 1 |
| SLC22A3     | -18.1529225 | 2720.296955 | -0.0067 | 0.995 | -1.27E-08 | count | 1 |
| AC067838.1  | -18.1529225 | 2720.296955 | -0.0067 | 0.995 | -1.27E-08 | count | 1 |
| GLIS3       | -18.1529225 | 2720.296955 | -0.0067 | 0.995 | -1.27E-08 | count | 1 |
| CHEK1       | -18.1529225 | 2720.296955 | -0.0067 | 0.995 | -1.27E-08 | count | 1 |
| FZD8        | -18.1529225 | 2720.296955 | -0.0067 | 0.995 | -1.27E-08 | count | 1 |
| AC091057.2  | -18.1529225 | 2720.296955 | -0.0067 | 0.995 | -1.27E-08 | count | 1 |
| AC020659.1  | -18.1529225 | 2720.296955 | -0.0067 | 0.995 | -1.27E-08 | count | 1 |
| MAP3K14-AS1 | -18.1529225 | 2720.296955 | -0.0067 | 0.995 | -1.27E-08 | count | 1 |
| AL139260.1  | -18.1529225 | 2720.296955 | -0.0067 | 0.995 | -1.27E-08 | count | 1 |
| AL513493.1  | -18.1529225 | 2720.296955 | -0.0067 | 0.995 | -1.27E-08 | count | 1 |
| NES         | -18.1529225 | 2720.296955 | -0.0067 | 0.995 | -1.27E-08 | count | 1 |
| BUB1        | -18.1529225 | 2720.296955 | -0.0067 | 0.995 | -1.27E-08 | count | 1 |
| TANC1       | -18.1529225 | 2720.296955 | -0.0067 | 0.995 | -1.27E-08 | count | 1 |
| CHST13      | -18.1529225 | 2720.296955 | -0.0067 | 0.995 | -1.27E-08 | count | 1 |
| LAMP3       | -18.1529225 | 2720.296955 | -0.0067 | 0.995 | -1.27E-08 | count | 1 |
| KIAA1211    | -18.1529225 | 2720.296955 | -0.0067 | 0.995 | -1.27E-08 | count | 1 |
| PCDHGC3     | -18.1529225 | 2720.296955 | -0.0067 | 0.995 | -1.27E-08 | count | 1 |
| FGFR4       | -18.1529225 | 2720.296955 | -0.0067 | 0.995 | -1.27E-08 | count | 1 |
| AC145098.1  | -18.1529225 | 2720.296955 | -0.0067 | 0.995 | -1.27E-08 | count | 1 |
| LINC01446   | -18.1529225 | 2720.296955 | -0.0067 | 0.995 | -1.27E-08 | count | 1 |
| MIR3150BHG  | -18.1529225 | 2720.296955 | -0.0067 | 0.995 | -1.27E-08 | count | 1 |
| DCAF12      | -18.1529225 | 2720.296955 | -0.0067 | 0.995 | -1.27E-08 | count | 1 |
| NDOR1       | -18.1529225 | 2720.296955 | -0.0067 | 0.995 | -1.27E-08 | count | 1 |
| TRIM34      | -18.1529225 | 2720.296955 | -0.0067 | 0.995 | -1.27E-08 | count | 1 |

|            |             |             |         |       |           |       |   |
|------------|-------------|-------------|---------|-------|-----------|-------|---|
| PDE3B      | -18.1529225 | 2720.296955 | -0.0067 | 0.995 | -1.27E-08 | count | 1 |
| AP003108.2 | -18.1529225 | 2720.296955 | -0.0067 | 0.995 | -1.27E-08 | count | 1 |
| TESMIN     | -18.1529225 | 2720.296955 | -0.0067 | 0.995 | -1.27E-08 | count | 1 |
| SIAE       | -18.1529225 | 2720.296955 | -0.0067 | 0.995 | -1.27E-08 | count | 1 |
| TMTC2      | -18.1529225 | 2720.296955 | -0.0067 | 0.995 | -1.27E-08 | count | 1 |
| AL122035.1 | -18.1529225 | 2720.296955 | -0.0067 | 0.995 | -1.27E-08 | count | 1 |
| AL359232.1 | -18.1529225 | 2720.296955 | -0.0067 | 0.995 | -1.27E-08 | count | 1 |
| CCDC9B     | -18.1529225 | 2720.296955 | -0.0067 | 0.995 | -1.27E-08 | count | 1 |
| WNT9B      | -18.1529225 | 2720.296955 | -0.0067 | 0.995 | -1.27E-08 | count | 1 |
| CIRBP-AS1  | -18.1529225 | 2720.296955 | -0.0067 | 0.995 | -1.27E-08 | count | 1 |
| PLXNB2     | -18.1529225 | 2720.296955 | -0.0067 | 0.995 | -1.27E-08 | count | 1 |
| AL449106.1 | -18.1529225 | 2720.296955 | -0.0067 | 0.995 | -1.27E-08 | count | 1 |
| PLEKHA6    | -18.1529225 | 2720.296955 | -0.0067 | 0.995 | -1.27E-08 | count | 1 |
| HESX1      | -18.1529225 | 2720.296955 | -0.0067 | 0.995 | -1.27E-08 | count | 1 |
| AC107464.3 | -18.1529225 | 2720.296955 | -0.0067 | 0.995 | -1.27E-08 | count | 1 |
| CSRFP2     | -18.1529225 | 2720.296955 | -0.0067 | 0.995 | -1.27E-08 | count | 1 |
| AL121658.1 | -18.1529225 | 2720.296955 | -0.0067 | 0.995 | -1.27E-08 | count | 1 |
| HNMT       | -18.1529225 | 2720.296955 | -0.0067 | 0.995 | -1.27E-08 | count | 1 |
| PLCL1      | -18.1529225 | 2720.296955 | -0.0067 | 0.995 | -1.27E-08 | count | 1 |
| AC096711.1 | -18.1529225 | 2720.296955 | -0.0067 | 0.995 | -1.27E-08 | count | 1 |
| IGFBP2     | -18.1529225 | 2720.296955 | -0.0067 | 0.995 | -1.27E-08 | count | 1 |
| IGFBP5     | -18.1529225 | 2720.296955 | -0.0067 | 0.995 | -1.27E-08 | count | 1 |
| TRIM68     | -18.1529225 | 2720.296955 | -0.0067 | 0.995 | -1.27E-08 | count | 1 |
| DND1       | -18.1529225 | 2720.296955 | -0.0067 | 0.995 | -1.27E-08 | count | 1 |
| DDX39B-AS1 | -18.1529225 | 2720.296955 | -0.0067 | 0.995 | -1.27E-08 | count | 1 |
| MSR1       | -18.1529225 | 2720.296955 | -0.0067 | 0.995 | -1.27E-08 | count | 1 |
| JMJD1C-AS1 | -18.1529225 | 2720.296955 | -0.0067 | 0.995 | -1.27E-08 | count | 1 |
| AC008083.3 | -18.1529225 | 2720.296955 | -0.0067 | 0.995 | -1.27E-08 | count | 1 |
| FAM209B    | -18.1529225 | 2720.296955 | -0.0067 | 0.995 | -1.27E-08 | count | 1 |
| CU638689.4 | -18.1529225 | 2720.296955 | -0.0067 | 0.995 | -1.27E-08 | count | 1 |
| PRRX1      | -18.2893503 | 3007.240567 | -0.0061 | 0.995 | -1.27E-08 | count | 1 |
| LINC01816  | -18.2893503 | 3007.240567 | -0.0061 | 0.995 | -1.27E-08 | count | 1 |
| TBX19      | -18.2893503 | 3007.240567 | -0.0061 | 0.995 | -1.27E-08 | count | 1 |
| USP19      | -18.2893503 | 3007.240567 | -0.0061 | 0.995 | -1.27E-08 | count | 1 |
| KIAA1522   | -18.2893503 | 3007.240567 | -0.0061 | 0.995 | -1.27E-08 | count | 1 |
| SLC37A2    | -18.2893503 | 3007.240567 | -0.0061 | 0.995 | -1.27E-08 | count | 1 |
| MMP17      | -18.2893503 | 3007.240567 | -0.0061 | 0.995 | -1.27E-08 | count | 1 |
| OPRL1      | -18.2893503 | 3007.240567 | -0.0061 | 0.995 | -1.27E-08 | count | 1 |
| AC120498.9 | -18.2893503 | 3007.240567 | -0.0061 | 0.995 | -1.27E-08 | count | 1 |
| LRRRC29    | -18.2893503 | 3007.240567 | -0.0061 | 0.995 | -1.27E-08 | count | 1 |
| CAPS2      | -18.2893503 | 3007.240567 | -0.0061 | 0.995 | -1.27E-08 | count | 1 |
| ZCCHC24    | -18.2893503 | 3007.240567 | -0.0061 | 0.995 | -1.27E-08 | count | 1 |
| AGAP6      | -18.2893503 | 3007.240567 | -0.0061 | 0.995 | -1.27E-08 | count | 1 |
| FOSL2      | -18.2893503 | 3007.240567 | -0.0061 | 0.995 | -1.27E-08 | count | 1 |
| IGKV3-11   | -18.2893503 | 3007.240567 | -0.0061 | 0.995 | -1.27E-08 | count | 1 |

|            |             |             |         |       |           |       |   |
|------------|-------------|-------------|---------|-------|-----------|-------|---|
| UGGT2      | -18.2893503 | 3007.240567 | -0.0061 | 0.995 | -1.27E-08 | count | 1 |
| AC005498.3 | -18.2893503 | 3007.240567 | -0.0061 | 0.995 | -1.27E-08 | count | 1 |
| CASZ1      | -18.2893503 | 3007.240567 | -0.0061 | 0.995 | -1.27E-08 | count | 1 |
| GHRL       | -18.2893503 | 3007.240567 | -0.0061 | 0.995 | -1.27E-08 | count | 1 |
| ANAPC2     | -18.2893503 | 3007.240567 | -0.0061 | 0.995 | -1.27E-08 | count | 1 |
| P3H4       | -18.2893503 | 3007.240567 | -0.0061 | 0.995 | -1.27E-08 | count | 1 |
| CLDN15     | -18.2893503 | 3007.240567 | -0.0061 | 0.995 | -1.27E-08 | count | 1 |
| STAB1      | -18.2893503 | 3007.240567 | -0.0061 | 0.995 | -1.27E-08 | count | 1 |
| UCN        | -18.2893503 | 3007.240567 | -0.0061 | 0.995 | -1.27E-08 | count | 1 |
| ZFYVE26    | -18.2893503 | 3007.240567 | -0.0061 | 0.995 | -1.27E-08 | count | 1 |
| GCNT1      | -18.2893503 | 3007.240567 | -0.0061 | 0.995 | -1.27E-08 | count | 1 |
| ZNF674-AS1 | -18.2893503 | 3007.240567 | -0.0061 | 0.995 | -1.27E-08 | count | 1 |
| IL9R       | -18.2893503 | 3007.240567 | -0.0061 | 0.995 | -1.27E-08 | count | 1 |
| DLC1       | -18.2893503 | 3007.240567 | -0.0061 | 0.995 | -1.27E-08 | count | 1 |
| URB2       | -18.2893503 | 3007.240567 | -0.0061 | 0.995 | -1.27E-08 | count | 1 |
| SLC6A16    | -18.2893503 | 3007.240567 | -0.0061 | 0.995 | -1.27E-08 | count | 1 |
| ETS2       | -18.2893503 | 3007.240567 | -0.0061 | 0.995 | -1.27E-08 | count | 1 |
| IGLC6      | -17.5024295 | 2411.088862 | -0.0073 | 0.994 | -1.27E-08 | count | 1 |
| VAV3-AS1   | -17.5761534 | 1744.847773 | -0.0101 | 0.992 | -1.27E-08 | count | 1 |
| ITPKB-AS1  | -17.2221755 | 1643.412824 | -0.0105 | 0.992 | -1.27E-08 | count | 1 |
| KDF1       | -17.2046244 | 2077.52212  | -0.0083 | 0.993 | -1.27E-08 | count | 1 |
| RFTN2      | -17.2046244 | 2077.52212  | -0.0083 | 0.993 | -1.27E-08 | count | 1 |
| CTLA4      | -17.2046244 | 2077.52212  | -0.0083 | 0.993 | -1.27E-08 | count | 1 |
| AC018816.1 | -17.2046244 | 2077.52212  | -0.0083 | 0.993 | -1.27E-08 | count | 1 |
| CMYA5      | -17.2046244 | 2077.52212  | -0.0083 | 0.993 | -1.27E-08 | count | 1 |
| CMC1       | -0.0010327  | 0.3570181   | -0.0029 | 0.998 | -1.24E-08 | count | 1 |
| POM121C    | -0.0027967  | 0.4451644   | -0.0063 | 0.995 | -1.23E-08 | count | 1 |
| NLRP1      | -0.0027967  | 0.4623071   | -0.006  | 0.995 | -1.23E-08 | count | 1 |
| GUF1       | -0.0461735  | 1.0433095   | -0.0443 | 0.965 | -9.97E-09 | count | 1 |
| RAB40C     | -0.0461735  | 1.0433095   | -0.0443 | 0.965 | -9.97E-09 | count | 1 |
| E2F7       | -0.0461735  | 1.246341    | -0.037  | 0.97  | -9.97E-09 | count | 1 |
| Z93930.2   | -0.0461735  | 0.9789929   | -0.0472 | 0.962 | -9.97E-09 | count | 1 |
| TADA1      | -0.0461735  | 0.8067067   | -0.0572 | 0.954 | -9.97E-09 | count | 1 |
| CNR1       | -0.0461735  | 0.8067067   | -0.0572 | 0.954 | -9.97E-09 | count | 1 |
| ATP6V1E2   | -0.0461735  | 0.8067067   | -0.0572 | 0.954 | -9.97E-09 | count | 1 |
| POLR1B     | -0.0461735  | 0.8109031   | -0.0569 | 0.955 | -9.97E-09 | count | 1 |
| THAP9      | -0.0461735  | 0.8109031   | -0.0569 | 0.955 | -9.97E-09 | count | 1 |
| LRRC14     | -0.0461735  | 0.8109031   | -0.0569 | 0.955 | -9.97E-09 | count | 1 |
| CYP2U1     | -0.0461735  | 0.8109031   | -0.0569 | 0.955 | -9.97E-09 | count | 1 |
| WDYHV1     | -0.0461735  | 0.8109031   | -0.0569 | 0.955 | -9.97E-09 | count | 1 |
| GGH        | -0.0461735  | 0.8109031   | -0.0569 | 0.955 | -9.97E-09 | count | 1 |
| TACO1      | -0.0461735  | 0.8109031   | -0.0569 | 0.955 | -9.97E-09 | count | 1 |
| DHX33      | -0.0461735  | 0.8109031   | -0.0569 | 0.955 | -9.97E-09 | count | 1 |
| VKORC1L1   | -0.0461735  | 0.8951019   | -0.0516 | 0.959 | -9.97E-09 | count | 1 |
| PITPNM2    | -0.0461735  | 0.8951019   | -0.0516 | 0.959 | -9.97E-09 | count | 1 |

|            |             |             |         |       |           |       |   |
|------------|-------------|-------------|---------|-------|-----------|-------|---|
| PSMA6      | -0.0461735  | 0.8951019   | -0.0516 | 0.959 | -9.97E-09 | count | 1 |
| AC005037.1 | -0.0461735  | 0.8951019   | -0.0516 | 0.959 | -9.97E-09 | count | 1 |
| SLC9A3     | -0.0461735  | 0.8951019   | -0.0516 | 0.959 | -9.97E-09 | count | 1 |
| TCTE3      | -0.0461735  | 0.8951019   | -0.0516 | 0.959 | -9.97E-09 | count | 1 |
| PSTK       | -0.0461735  | 0.8951019   | -0.0516 | 0.959 | -9.97E-09 | count | 1 |
| FUCA1      | -0.0461735  | 0.8951019   | -0.0516 | 0.959 | -9.97E-09 | count | 1 |
| PHLDA1     | -0.0461735  | 0.8951019   | -0.0516 | 0.959 | -9.97E-09 | count | 1 |
| PCDHGA10   | -0.0461735  | 0.9755199   | -0.0473 | 0.962 | -9.96E-09 | count | 1 |
| ZYG11A     | -0.0461735  | 0.9755199   | -0.0473 | 0.962 | -9.96E-09 | count | 1 |
| THNSL1     | -0.0461735  | 0.9755199   | -0.0473 | 0.962 | -9.96E-09 | count | 1 |
| AC123023.1 | -0.0461735  | 0.9755199   | -0.0473 | 0.962 | -9.96E-09 | count | 1 |
| CYR61      | -0.0461735  | 0.9755199   | -0.0473 | 0.962 | -9.96E-09 | count | 1 |
| TMEM25     | -0.0461735  | 0.9755199   | -0.0473 | 0.962 | -9.96E-09 | count | 1 |
| ITFG2-AS1  | -0.0461735  | 0.9755199   | -0.0473 | 0.962 | -9.96E-09 | count | 1 |
| CST7       | -0.0461735  | 0.9755199   | -0.0473 | 0.962 | -9.96E-09 | count | 1 |
| PHF7       | -0.0461735  | 0.9755199   | -0.0473 | 0.962 | -9.96E-09 | count | 1 |
| RAB24      | -0.0461735  | 0.9755199   | -0.0473 | 0.962 | -9.96E-09 | count | 1 |
| COQ5       | -0.0461735  | 0.7121321   | -0.0648 | 0.948 | -9.96E-09 | count | 1 |
| COPS7B     | -0.0021398  | 0.5457963   | -0.0039 | 0.997 | -9.46E-09 | count | 1 |
| TRAF3IP2   | -0.0021398  | 0.5403419   | -0.004  | 0.997 | -9.44E-09 | count | 1 |
| GANC       | -0.0021398  | 0.5403014   | -0.004  | 0.997 | -9.44E-09 | count | 1 |
| NINJ1      | -0.0021398  | 0.5070917   | -0.0042 | 0.997 | -9.44E-09 | count | 1 |
| DUSP3      | -0.0021398  | 0.5459284   | -0.0039 | 0.997 | -9.44E-09 | count | 1 |
| TMEM175    | -0.0154018  | 0.5861194   | -0.0263 | 0.979 | -9.16E-09 | count | 1 |
| TVP23B     | -0.0154018  | 0.5502113   | -0.028  | 0.978 | -9.14E-09 | count | 1 |
| DENND1C    | -0.0154018  | 0.471226    | -0.0327 | 0.974 | -9.14E-09 | count | 1 |
| CFLAR      | -0.0006915  | 0.1998272   | -0.0035 | 0.997 | -8.29E-09 | count | 1 |
| LINC00847  | -0.0042114  | 0.7293595   | -0.0058 | 0.995 | -6.83E-09 | count | 1 |
| GATB       | -0.0042114  | 0.7293595   | -0.0058 | 0.995 | -6.83E-09 | count | 1 |
| EDC3       | -0.0042114  | 0.7941668   | -0.0053 | 0.996 | -6.83E-09 | count | 1 |
| PBX3       | -0.0042114  | 0.8544443   | -0.0049 | 0.996 | -6.83E-09 | count | 1 |
| RABL2A     | -0.0042114  | 0.881155    | -0.0048 | 0.996 | -6.83E-09 | count | 1 |
| ITM2A      | -0.0036139  | 0.3240578   | -0.0112 | 0.991 | -5.86E-09 | count | 1 |
| TMED7      | -0.0012108  | 0.3810125   | -0.0032 | 0.997 | -5.34E-09 | count | 1 |
| PDGFRA     | -17.9563581 | 2230.487198 | -0.0081 | 0.994 | -4.66E-09 | count | 1 |
| ZBED3-AS1  | -17.9563581 | 2230.487198 | -0.0081 | 0.994 | -4.66E-09 | count | 1 |
| POLR2J2    | -17.9563581 | 2230.487198 | -0.0081 | 0.994 | -4.66E-09 | count | 1 |
| CATSPERE   | -17.9493107 | 3014.756518 | -0.006  | 0.995 | -4.66E-09 | count | 1 |
| AC007249.2 | -17.9493107 | 3014.756518 | -0.006  | 0.995 | -4.66E-09 | count | 1 |
| FST        | -17.9493107 | 3014.756518 | -0.006  | 0.995 | -4.66E-09 | count | 1 |
| GTF2H4     | -17.9493107 | 3014.756518 | -0.006  | 0.995 | -4.66E-09 | count | 1 |
| ETV7       | -17.9493107 | 3014.756518 | -0.006  | 0.995 | -4.66E-09 | count | 1 |
| IGHV3-53   | -17.9493107 | 3014.756518 | -0.006  | 0.995 | -4.66E-09 | count | 1 |
| MKS1       | -17.9493107 | 3014.756518 | -0.006  | 0.995 | -4.66E-09 | count | 1 |
| ICOS       | -17.9493107 | 3014.756518 | -0.006  | 0.995 | -4.66E-09 | count | 1 |

|             |             |             |         |       |           |       |   |
|-------------|-------------|-------------|---------|-------|-----------|-------|---|
| THBS2       | -17.9493107 | 3014.756518 | -0.006  | 0.995 | -4.66E-09 | count | 1 |
| ITGA10      | -17.9493107 | 3014.756518 | -0.006  | 0.995 | -4.66E-09 | count | 1 |
| DGKI        | -17.9493107 | 3014.756518 | -0.006  | 0.995 | -4.66E-09 | count | 1 |
| ZNF20       | -17.9493107 | 3014.756518 | -0.006  | 0.995 | -4.66E-09 | count | 1 |
| CHST10      | -17.9493107 | 3014.756518 | -0.006  | 0.995 | -4.66E-09 | count | 1 |
| AC073611.1  | -17.9493107 | 3014.756518 | -0.006  | 0.995 | -4.66E-09 | count | 1 |
| ZNF492      | -17.9493107 | 3014.756518 | -0.006  | 0.995 | -4.66E-09 | count | 1 |
| AC092329.3  | -17.9493107 | 3014.756518 | -0.006  | 0.995 | -4.66E-09 | count | 1 |
| AP001432.1  | -17.9493107 | 3014.756518 | -0.006  | 0.995 | -4.66E-09 | count | 1 |
| FGF18       | -17.9493107 | 3014.756518 | -0.006  | 0.995 | -4.66E-09 | count | 1 |
| BICC1       | -17.9493107 | 3014.756518 | -0.006  | 0.995 | -4.66E-09 | count | 1 |
| LINC02298   | -17.9493107 | 3014.756518 | -0.006  | 0.995 | -4.66E-09 | count | 1 |
| MANSC1      | -17.5606354 | 1731.361908 | -0.0101 | 0.992 | -4.66E-09 | count | 1 |
| Z97192.1    | -17.5606354 | 1731.361908 | -0.0101 | 0.992 | -4.66E-09 | count | 1 |
| ZC3H12B     | -17.5606354 | 1731.361908 | -0.0101 | 0.992 | -4.66E-09 | count | 1 |
| EMG1        | -17.5606354 | 1731.361908 | -0.0101 | 0.992 | -4.66E-09 | count | 1 |
| MORF4L2-AS1 | -17.5606354 | 1731.361908 | -0.0101 | 0.992 | -4.66E-09 | count | 1 |
| PLS3        | -17.5606354 | 1731.361908 | -0.0101 | 0.992 | -4.66E-09 | count | 1 |
| DAB2IP      | -17.5606354 | 1731.361908 | -0.0101 | 0.992 | -4.66E-09 | count | 1 |
| CACNB2      | -17.5606354 | 1731.361908 | -0.0101 | 0.992 | -4.66E-09 | count | 1 |
| C1R         | -17.5606354 | 1731.361908 | -0.0101 | 0.992 | -4.66E-09 | count | 1 |
| TREML2      | -17.5606354 | 1731.361908 | -0.0101 | 0.992 | -4.66E-09 | count | 1 |
| SLC4A8      | -17.5606354 | 1731.361908 | -0.0101 | 0.992 | -4.66E-09 | count | 1 |
| AC079305.1  | -17.5606354 | 1731.361908 | -0.0101 | 0.992 | -4.66E-09 | count | 1 |
| BCL2L2      | -17.5606354 | 1731.361908 | -0.0101 | 0.992 | -4.66E-09 | count | 1 |
| RAVER2      | -17.5603336 | 2481.9152   | -0.0071 | 0.994 | -4.66E-09 | count | 1 |
| AC007365.1  | -17.5603336 | 2481.9152   | -0.0071 | 0.994 | -4.66E-09 | count | 1 |
| P4HA2       | -17.5603336 | 2481.9152   | -0.0071 | 0.994 | -4.66E-09 | count | 1 |
| AC005696.1  | -17.5603336 | 2481.9152   | -0.0071 | 0.994 | -4.66E-09 | count | 1 |
| TEX14       | -17.5603336 | 2481.9152   | -0.0071 | 0.994 | -4.66E-09 | count | 1 |
| ZNF497      | -17.5603336 | 2481.9152   | -0.0071 | 0.994 | -4.66E-09 | count | 1 |
| AC064836.3  | -17.5603336 | 2481.9152   | -0.0071 | 0.994 | -4.66E-09 | count | 1 |
| ADGRF3      | -17.5603336 | 2481.9152   | -0.0071 | 0.994 | -4.66E-09 | count | 1 |
| EEPD1       | -17.5603336 | 2481.9152   | -0.0071 | 0.994 | -4.66E-09 | count | 1 |
| AC145124.1  | -17.5603336 | 2481.9152   | -0.0071 | 0.994 | -4.66E-09 | count | 1 |
| AC021678.2  | -17.5603336 | 2481.9152   | -0.0071 | 0.994 | -4.66E-09 | count | 1 |
| AC100812.1  | -17.5603336 | 2481.9152   | -0.0071 | 0.994 | -4.66E-09 | count | 1 |
| FAM149B1    | -17.5603336 | 2481.9152   | -0.0071 | 0.994 | -4.66E-09 | count | 1 |
| RGS11       | -17.5603336 | 2481.9152   | -0.0071 | 0.994 | -4.66E-09 | count | 1 |
| UPK3A       | -17.5603336 | 2481.9152   | -0.0071 | 0.994 | -4.66E-09 | count | 1 |
| NACC2       | -17.5603336 | 2481.9152   | -0.0071 | 0.994 | -4.66E-09 | count | 1 |
| CPEB1-AS1   | -17.5603336 | 2481.9152   | -0.0071 | 0.994 | -4.66E-09 | count | 1 |
| ELMO3       | -17.5603336 | 2481.9152   | -0.0071 | 0.994 | -4.66E-09 | count | 1 |
| PTPRM       | -17.5603336 | 2481.9152   | -0.0071 | 0.994 | -4.66E-09 | count | 1 |
| KANK2       | -17.5603336 | 2481.9152   | -0.0071 | 0.994 | -4.66E-09 | count | 1 |

|            |             |             |         |       |           |       |   |
|------------|-------------|-------------|---------|-------|-----------|-------|---|
| AC096642.1 | -17.5603336 | 2481.9152   | -0.0071 | 0.994 | -4.66E-09 | count | 1 |
| AL450344.2 | -17.5603336 | 2481.9152   | -0.0071 | 0.994 | -4.66E-09 | count | 1 |
| FAM84B     | -17.5603336 | 2481.9152   | -0.0071 | 0.994 | -4.66E-09 | count | 1 |
| FERMT2     | -17.5603336 | 2481.9152   | -0.0071 | 0.994 | -4.66E-09 | count | 1 |
| UCKL1-AS1  | -17.5603336 | 2481.9152   | -0.0071 | 0.994 | -4.66E-09 | count | 1 |
| AXL        | -17.5603336 | 2481.9152   | -0.0071 | 0.994 | -4.66E-09 | count | 1 |
| COIL       | -0.0003437  | 0.3292537   | -0.001  | 0.999 | -4.12E-09 | count | 1 |
| HK2        | -17.8696159 | 2896.988219 | -0.0062 | 0.995 | -1.71E-09 | count | 1 |
| KCNJ3      | -17.8696159 | 2896.988219 | -0.0062 | 0.995 | -1.71E-09 | count | 1 |
| AC013468.1 | -17.8696159 | 2896.988219 | -0.0062 | 0.995 | -1.71E-09 | count | 1 |
| LINC00702  | -17.8696159 | 2896.988219 | -0.0062 | 0.995 | -1.71E-09 | count | 1 |
| AL450326.1 | -17.8696159 | 2896.988219 | -0.0062 | 0.995 | -1.71E-09 | count | 1 |
| TMEM229B   | -17.8696159 | 2896.988219 | -0.0062 | 0.995 | -1.71E-09 | count | 1 |
| AC005253.1 | -17.8696159 | 2896.988219 | -0.0062 | 0.995 | -1.71E-09 | count | 1 |
| IRS1       | -17.8696159 | 2896.988219 | -0.0062 | 0.995 | -1.71E-09 | count | 1 |
| ABI3BP     | -17.8696159 | 2896.988219 | -0.0062 | 0.995 | -1.71E-09 | count | 1 |
| MYO10      | -17.8696159 | 2896.988219 | -0.0062 | 0.995 | -1.71E-09 | count | 1 |
| DAB2       | -17.8696159 | 2896.988219 | -0.0062 | 0.995 | -1.71E-09 | count | 1 |
| BHMT2      | -17.8696159 | 2896.988219 | -0.0062 | 0.995 | -1.71E-09 | count | 1 |
| DBN1       | -17.8696159 | 2896.988219 | -0.0062 | 0.995 | -1.71E-09 | count | 1 |
| ZFP2       | -17.8696159 | 2896.988219 | -0.0062 | 0.995 | -1.71E-09 | count | 1 |
| TREML4     | -17.8696159 | 2896.988219 | -0.0062 | 0.995 | -1.71E-09 | count | 1 |
| AC091729.3 | -17.8696159 | 2896.988219 | -0.0062 | 0.995 | -1.71E-09 | count | 1 |
| CDHR3      | -17.8696159 | 2896.988219 | -0.0062 | 0.995 | -1.71E-09 | count | 1 |
| HTRA4      | -17.8696159 | 2896.988219 | -0.0062 | 0.995 | -1.71E-09 | count | 1 |
| AC027702.1 | -17.8696159 | 2896.988219 | -0.0062 | 0.995 | -1.71E-09 | count | 1 |
| RORB       | -17.8696159 | 2896.988219 | -0.0062 | 0.995 | -1.71E-09 | count | 1 |
| ASPN       | -17.8696159 | 2896.988219 | -0.0062 | 0.995 | -1.71E-09 | count | 1 |
| MEIG1      | -17.8696159 | 2896.988219 | -0.0062 | 0.995 | -1.71E-09 | count | 1 |
| ZNF365     | -17.8696159 | 2896.988219 | -0.0062 | 0.995 | -1.71E-09 | count | 1 |
| RASSF8     | -17.8696159 | 2896.988219 | -0.0062 | 0.995 | -1.71E-09 | count | 1 |
| AC009318.3 | -17.8696159 | 2896.988219 | -0.0062 | 0.995 | -1.71E-09 | count | 1 |
| AC007014.1 | -17.8696159 | 2896.988219 | -0.0062 | 0.995 | -1.71E-09 | count | 1 |
| B3GNT9     | -17.8696159 | 2896.988219 | -0.0062 | 0.995 | -1.71E-09 | count | 1 |
| AC137932.3 | -17.8696159 | 2896.988219 | -0.0062 | 0.995 | -1.71E-09 | count | 1 |
| AC026954.3 | -17.8696159 | 2896.988219 | -0.0062 | 0.995 | -1.71E-09 | count | 1 |
| TBC1D3L    | -17.8696159 | 2896.988219 | -0.0062 | 0.995 | -1.71E-09 | count | 1 |
| PCGF2      | -17.8696159 | 2896.988219 | -0.0062 | 0.995 | -1.71E-09 | count | 1 |
| AC090844.2 | -17.8696159 | 2896.988219 | -0.0062 | 0.995 | -1.71E-09 | count | 1 |
| CSF3       | -17.8696159 | 2896.988219 | -0.0062 | 0.995 | -1.71E-09 | count | 1 |
| AC090912.1 | -17.8696159 | 2896.988219 | -0.0062 | 0.995 | -1.71E-09 | count | 1 |
| CCBE1      | -17.8696159 | 2896.988219 | -0.0062 | 0.995 | -1.71E-09 | count | 1 |
| SDCBP2-AS1 | -17.8696159 | 2896.988219 | -0.0062 | 0.995 | -1.71E-09 | count | 1 |
| SPAG4      | -17.8696159 | 2896.988219 | -0.0062 | 0.995 | -1.71E-09 | count | 1 |
| NTN5       | -17.8696159 | 2896.988219 | -0.0062 | 0.995 | -1.71E-09 | count | 1 |

|            |             |             |         |       |           |       |   |
|------------|-------------|-------------|---------|-------|-----------|-------|---|
| CHAF1B     | -17.8696159 | 2896.988219 | -0.0062 | 0.995 | -1.71E-09 | count | 1 |
| FRZB       | -17.8696159 | 2896.988219 | -0.0062 | 0.995 | -1.71E-09 | count | 1 |
| RAB43      | -17.8696159 | 2896.988219 | -0.0062 | 0.995 | -1.71E-09 | count | 1 |
| CD163L1    | -17.8696159 | 2896.988219 | -0.0062 | 0.995 | -1.71E-09 | count | 1 |
| HDGFL3     | -17.8696159 | 2896.988219 | -0.0062 | 0.995 | -1.71E-09 | count | 1 |
| CHTF18     | -17.8696159 | 2896.988219 | -0.0062 | 0.995 | -1.71E-09 | count | 1 |
| SLC25A34   | -17.8696159 | 2896.988219 | -0.0062 | 0.995 | -1.71E-09 | count | 1 |
| ITLN1      | -17.8696159 | 2896.988219 | -0.0062 | 0.995 | -1.71E-09 | count | 1 |
| STPG4      | -17.8696159 | 2896.988219 | -0.0062 | 0.995 | -1.71E-09 | count | 1 |
| ARHGAP10   | -17.8696159 | 2896.988219 | -0.0062 | 0.995 | -1.71E-09 | count | 1 |
| AL009179.1 | -17.8696159 | 2896.988219 | -0.0062 | 0.995 | -1.71E-09 | count | 1 |
| DTX4       | -17.8696159 | 2896.988219 | -0.0062 | 0.995 | -1.71E-09 | count | 1 |
| OR4D9      | -17.8696159 | 2896.988219 | -0.0062 | 0.995 | -1.71E-09 | count | 1 |
| RERGL      | -17.8696159 | 2896.988219 | -0.0062 | 0.995 | -1.71E-09 | count | 1 |
| TBC1D24    | -17.8696159 | 2896.988219 | -0.0062 | 0.995 | -1.71E-09 | count | 1 |
| ELMO2      | -17.8696159 | 2896.988219 | -0.0062 | 0.995 | -1.71E-09 | count | 1 |
| GNG8       | -17.8696159 | 2896.988219 | -0.0062 | 0.995 | -1.71E-09 | count | 1 |
| GULP1      | -17.8696159 | 2896.988219 | -0.0062 | 0.995 | -1.71E-09 | count | 1 |
| TRMT9B     | -17.8696159 | 2896.988219 | -0.0062 | 0.995 | -1.71E-09 | count | 1 |
| TRIM66     | -17.8696159 | 2896.988219 | -0.0062 | 0.995 | -1.71E-09 | count | 1 |
| AP003392.1 | -17.8696159 | 2896.988219 | -0.0062 | 0.995 | -1.71E-09 | count | 1 |
| ESAM       | -17.8696159 | 2896.988219 | -0.0062 | 0.995 | -1.71E-09 | count | 1 |
| DOCK1      | -17.8696159 | 2896.988219 | -0.0062 | 0.995 | -1.71E-09 | count | 1 |
| AL138820.1 | -17.8696159 | 2896.988219 | -0.0062 | 0.995 | -1.71E-09 | count | 1 |
| AC135782.1 | -17.8696159 | 2896.988219 | -0.0062 | 0.995 | -1.71E-09 | count | 1 |
| PGAP1      | -17.8696159 | 2896.988219 | -0.0062 | 0.995 | -1.71E-09 | count | 1 |
| AL121972.1 | -17.8696159 | 2896.988219 | -0.0062 | 0.995 | -1.71E-09 | count | 1 |
| LINC00957  | -17.8696159 | 2896.988219 | -0.0062 | 0.995 | -1.71E-09 | count | 1 |
| LINC01285  | -17.8696159 | 2896.988219 | -0.0062 | 0.995 | -1.71E-09 | count | 1 |
| GALR2      | -17.8696159 | 2896.988219 | -0.0062 | 0.995 | -1.71E-09 | count | 1 |
| ARL9       | -17.8696159 | 2896.988219 | -0.0062 | 0.995 | -1.71E-09 | count | 1 |
| GSG1       | -17.8696159 | 2896.988219 | -0.0062 | 0.995 | -1.71E-09 | count | 1 |
| MYT1       | -17.8696159 | 2896.988219 | -0.0062 | 0.995 | -1.71E-09 | count | 1 |
| Z95115.1   | -17.8696159 | 2896.988219 | -0.0062 | 0.995 | -1.71E-09 | count | 1 |
| AP4B1-AS1  | -17.8696159 | 2896.988219 | -0.0062 | 0.995 | -1.71E-09 | count | 1 |
| CRIM1      | -17.8696159 | 2896.988219 | -0.0062 | 0.995 | -1.71E-09 | count | 1 |
| ADH1B      | -17.8696159 | 2896.988219 | -0.0062 | 0.995 | -1.71E-09 | count | 1 |
| LHFPL2     | -17.8696159 | 2896.988219 | -0.0062 | 0.995 | -1.71E-09 | count | 1 |
| EIF4EBP3   | -17.8696159 | 2896.988219 | -0.0062 | 0.995 | -1.71E-09 | count | 1 |
| CASC15     | -17.8696159 | 2896.988219 | -0.0062 | 0.995 | -1.71E-09 | count | 1 |
| AC084824.5 | -17.8696159 | 2896.988219 | -0.0062 | 0.995 | -1.71E-09 | count | 1 |
| DIAPH3     | -17.8696159 | 2896.988219 | -0.0062 | 0.995 | -1.71E-09 | count | 1 |
| PGBD1      | -17.8696159 | 2896.988219 | -0.0062 | 0.995 | -1.71E-09 | count | 1 |
| MYO6       | -17.8696159 | 2896.988219 | -0.0062 | 0.995 | -1.71E-09 | count | 1 |
| HEY2       | -17.8696159 | 2896.988219 | -0.0062 | 0.995 | -1.71E-09 | count | 1 |

|            |             |             |         |       |           |       |   |
|------------|-------------|-------------|---------|-------|-----------|-------|---|
| AC004846.2 | -17.8696159 | 2896.988219 | -0.0062 | 0.995 | -1.71E-09 | count | 1 |
| AC005523.1 | -17.8696159 | 2896.988219 | -0.0062 | 0.995 | -1.71E-09 | count | 1 |
| LINC00954  | -17.8696159 | 2896.988219 | -0.0062 | 0.995 | -1.71E-09 | count | 1 |
| NCKAP5     | -17.8696159 | 2896.988219 | -0.0062 | 0.995 | -1.71E-09 | count | 1 |
| PTH2R      | -17.8696159 | 2896.988219 | -0.0062 | 0.995 | -1.71E-09 | count | 1 |
| MST1       | -17.8696159 | 2896.988219 | -0.0062 | 0.995 | -1.71E-09 | count | 1 |
| AC008040.1 | -17.8696159 | 2896.988219 | -0.0062 | 0.995 | -1.71E-09 | count | 1 |
| AC008957.1 | -17.8696159 | 2896.988219 | -0.0062 | 0.995 | -1.71E-09 | count | 1 |
| SPATA24    | -17.8696159 | 2896.988219 | -0.0062 | 0.995 | -1.71E-09 | count | 1 |
| FOXC1      | -17.8696159 | 2896.988219 | -0.0062 | 0.995 | -1.71E-09 | count | 1 |
| HCG21      | -17.8696159 | 2896.988219 | -0.0062 | 0.995 | -1.71E-09 | count | 1 |
| IGFBP3     | -17.8696159 | 2896.988219 | -0.0062 | 0.995 | -1.71E-09 | count | 1 |
| PPP1R9A    | -17.8696159 | 2896.988219 | -0.0062 | 0.995 | -1.71E-09 | count | 1 |
| AC244090.1 | -17.8696159 | 2896.988219 | -0.0062 | 0.995 | -1.71E-09 | count | 1 |
| SULF1      | -17.8696159 | 2896.988219 | -0.0062 | 0.995 | -1.71E-09 | count | 1 |
| ANGPT1     | -17.8696159 | 2896.988219 | -0.0062 | 0.995 | -1.71E-09 | count | 1 |
| ENHO       | -17.8696159 | 2896.988219 | -0.0062 | 0.995 | -1.71E-09 | count | 1 |
| IL11RA     | -17.8696159 | 2896.988219 | -0.0062 | 0.995 | -1.71E-09 | count | 1 |
| PIP5KL1    | -17.8696159 | 2896.988219 | -0.0062 | 0.995 | -1.71E-09 | count | 1 |
| OR13A1     | -17.8696159 | 2896.988219 | -0.0062 | 0.995 | -1.71E-09 | count | 1 |
| KRT8       | -17.8696159 | 2896.988219 | -0.0062 | 0.995 | -1.71E-09 | count | 1 |
| USP12-AS2  | -17.8696159 | 2896.988219 | -0.0062 | 0.995 | -1.71E-09 | count | 1 |
| SMAD9      | -17.8696159 | 2896.988219 | -0.0062 | 0.995 | -1.71E-09 | count | 1 |
| AC025580.3 | -17.8696159 | 2896.988219 | -0.0062 | 0.995 | -1.71E-09 | count | 1 |
| CPEB1      | -17.8696159 | 2896.988219 | -0.0062 | 0.995 | -1.71E-09 | count | 1 |
| NOMO1      | -17.8696159 | 2896.988219 | -0.0062 | 0.995 | -1.71E-09 | count | 1 |
| AC004943.2 | -17.8696159 | 2896.988219 | -0.0062 | 0.995 | -1.71E-09 | count | 1 |
| JAG1       | -17.8696159 | 2896.988219 | -0.0062 | 0.995 | -1.71E-09 | count | 1 |
| SLA2       | -17.8696159 | 2896.988219 | -0.0062 | 0.995 | -1.71E-09 | count | 1 |
| TGM2       | -17.8696159 | 2896.988219 | -0.0062 | 0.995 | -1.71E-09 | count | 1 |
| FITM2      | -17.8696159 | 2896.988219 | -0.0062 | 0.995 | -1.71E-09 | count | 1 |
| LILRA4     | -17.8696159 | 2896.988219 | -0.0062 | 0.995 | -1.71E-09 | count | 1 |
| GTSE1      | -17.8696159 | 2896.988219 | -0.0062 | 0.995 | -1.71E-09 | count | 1 |
| COL6A2     | -17.8696159 | 2896.988219 | -0.0062 | 0.995 | -1.71E-09 | count | 1 |
| AL391834.2 | -17.8696159 | 2896.988219 | -0.0062 | 0.995 | -1.71E-09 | count | 1 |
| LAYN       | -17.8696159 | 2896.988219 | -0.0062 | 0.995 | -1.71E-09 | count | 1 |
| NET1       | -17.8696159 | 2896.988219 | -0.0062 | 0.995 | -1.71E-09 | count | 1 |
| ANO8       | -17.8696159 | 2896.988219 | -0.0062 | 0.995 | -1.71E-09 | count | 1 |
| AC010247.2 | -17.8696159 | 2896.988219 | -0.0062 | 0.995 | -1.71E-09 | count | 1 |
| LINC00528  | -17.8696159 | 2896.988219 | -0.0062 | 0.995 | -1.71E-09 | count | 1 |
| SEC24B-AS1 | -17.8696159 | 2896.988219 | -0.0062 | 0.995 | -1.71E-09 | count | 1 |
| HIP1       | -17.8696159 | 2896.988219 | -0.0062 | 0.995 | -1.71E-09 | count | 1 |
| AC025419.1 | -17.8696159 | 2896.988219 | -0.0062 | 0.995 | -1.71E-09 | count | 1 |
| AL135999.1 | -17.8696159 | 2896.988219 | -0.0062 | 0.995 | -1.71E-09 | count | 1 |
| AL132639.2 | -17.8696159 | 2896.988219 | -0.0062 | 0.995 | -1.71E-09 | count | 1 |



|            |             |             |         |       |           |       |   |
|------------|-------------|-------------|---------|-------|-----------|-------|---|
| AC010401.1 | -17.8696159 | 2896.988219 | -0.0062 | 0.995 | -1.71E-09 | count | 1 |
| C1QTNF1    | -17.8696159 | 2896.988219 | -0.0062 | 0.995 | -1.71E-09 | count | 1 |
| OXT        | -17.8696159 | 2896.988219 | -0.0062 | 0.995 | -1.71E-09 | count | 1 |
| PRR19      | -17.8696159 | 2896.988219 | -0.0062 | 0.995 | -1.71E-09 | count | 1 |
| MXRA8      | -17.8696159 | 2896.988219 | -0.0062 | 0.995 | -1.71E-09 | count | 1 |
| RAB23      | -17.8696159 | 2896.988219 | -0.0062 | 0.995 | -1.71E-09 | count | 1 |
| AC093627.4 | -17.8696159 | 2896.988219 | -0.0062 | 0.995 | -1.71E-09 | count | 1 |
| SATL1      | -17.8696159 | 2896.988219 | -0.0062 | 0.995 | -1.71E-09 | count | 1 |
| FAM69B     | -17.8696159 | 2896.988219 | -0.0062 | 0.995 | -1.71E-09 | count | 1 |
| RAMP2-AS1  | -17.8696159 | 2896.988219 | -0.0062 | 0.995 | -1.71E-09 | count | 1 |
| SKAP1-AS1  | -17.8696159 | 2896.988219 | -0.0062 | 0.995 | -1.71E-09 | count | 1 |
| PNPLA6     | -17.8696159 | 2896.988219 | -0.0062 | 0.995 | -1.71E-09 | count | 1 |
| URB1-AS1   | -17.8696159 | 2896.988219 | -0.0062 | 0.995 | -1.71E-09 | count | 1 |
| AL354822.1 | -17.8696159 | 2896.988219 | -0.0062 | 0.995 | -1.71E-09 | count | 1 |
| SAMD13     | -17.8696159 | 2896.988219 | -0.0062 | 0.995 | -1.71E-09 | count | 1 |
| TGFBI      | -17.8696159 | 2896.988219 | -0.0062 | 0.995 | -1.71E-09 | count | 1 |
| AL109914.1 | -17.8696159 | 2896.988219 | -0.0062 | 0.995 | -1.71E-09 | count | 1 |
| MSRB3      | -17.8696159 | 2896.988219 | -0.0062 | 0.995 | -1.71E-09 | count | 1 |
| PKD1L3     | -17.8696159 | 2896.988219 | -0.0062 | 0.995 | -1.71E-09 | count | 1 |
| ZNF850     | -17.8696159 | 2896.988219 | -0.0062 | 0.995 | -1.71E-09 | count | 1 |
| LINC01311  | -17.8696159 | 2896.988219 | -0.0062 | 0.995 | -1.71E-09 | count | 1 |
| CFHR1      | -17.8696159 | 2896.988219 | -0.0062 | 0.995 | -1.71E-09 | count | 1 |
| CSF1R      | -17.8696159 | 2896.988219 | -0.0062 | 0.995 | -1.71E-09 | count | 1 |
| AC005076.1 | -17.8696159 | 2896.988219 | -0.0062 | 0.995 | -1.71E-09 | count | 1 |
| AC067817.2 | -17.8696159 | 2896.988219 | -0.0062 | 0.995 | -1.71E-09 | count | 1 |
| MATN2      | -17.8696159 | 2896.988219 | -0.0062 | 0.995 | -1.71E-09 | count | 1 |
| MS4A2      | -17.8696159 | 2896.988219 | -0.0062 | 0.995 | -1.71E-09 | count | 1 |
| EGLN3      | -17.8696159 | 2896.988219 | -0.0062 | 0.995 | -1.71E-09 | count | 1 |
| PFAS       | -17.8696159 | 2896.988219 | -0.0062 | 0.995 | -1.71E-09 | count | 1 |
| EFHD1      | -17.8696159 | 2896.988219 | -0.0062 | 0.995 | -1.71E-09 | count | 1 |
| MAFA       | -17.8696159 | 2896.988219 | -0.0062 | 0.995 | -1.71E-09 | count | 1 |
| ZNF883     | -17.8696159 | 2896.988219 | -0.0062 | 0.995 | -1.71E-09 | count | 1 |
| AP001107.1 | -17.8696159 | 2896.988219 | -0.0062 | 0.995 | -1.71E-09 | count | 1 |
| GPR68      | -17.8696159 | 2896.988219 | -0.0062 | 0.995 | -1.71E-09 | count | 1 |
| PLCD4      | -17.8696159 | 2896.988219 | -0.0062 | 0.995 | -1.71E-09 | count | 1 |
| RASSF1-AS1 | -17.8696159 | 2896.988219 | -0.0062 | 0.995 | -1.71E-09 | count | 1 |
| WFS1       | -17.8696159 | 2896.988219 | -0.0062 | 0.995 | -1.71E-09 | count | 1 |
| GSDME      | -17.8696159 | 2896.988219 | -0.0062 | 0.995 | -1.71E-09 | count | 1 |
| AL157935.2 | -17.8696159 | 2896.988219 | -0.0062 | 0.995 | -1.71E-09 | count | 1 |
| SLCO2B1    | -17.8696159 | 2896.988219 | -0.0062 | 0.995 | -1.71E-09 | count | 1 |
| RNF31      | -17.8696159 | 2896.988219 | -0.0062 | 0.995 | -1.71E-09 | count | 1 |
| ATXN7L2    | -17.8696159 | 2896.988219 | -0.0062 | 0.995 | -1.71E-09 | count | 1 |
| AC092953.2 | -17.8696159 | 2896.988219 | -0.0062 | 0.995 | -1.71E-09 | count | 1 |
| FNIP2      | -17.8696159 | 2896.988219 | -0.0062 | 0.995 | -1.71E-09 | count | 1 |
| HMGB3      | -17.8696159 | 2896.988219 | -0.0062 | 0.995 | -1.71E-09 | count | 1 |

|              |             |             |           |       |           |       |   |
|--------------|-------------|-------------|-----------|-------|-----------|-------|---|
| AP003696.1   | -17.8696159 | 2896.988219 | -0.0062   | 0.995 | -1.71E-09 | count | 1 |
| ZNF239       | -17.8696159 | 2896.988219 | -0.0062   | 0.995 | -1.71E-09 | count | 1 |
| ABHD17C      | -17.8696159 | 2896.988219 | -0.0062   | 0.995 | -1.71E-09 | count | 1 |
| NEURL4       | -17.8696159 | 2896.988219 | -0.0062   | 0.995 | -1.71E-09 | count | 1 |
| MYO5B        | -17.8696159 | 2896.988219 | -0.0062   | 0.995 | -1.71E-09 | count | 1 |
| ZNF625-ZNF20 | -17.8696159 | 2896.988219 | -0.0062   | 0.995 | -1.71E-09 | count | 1 |
| F12          | -17.8696159 | 2896.988219 | -0.0062   | 0.995 | -1.71E-09 | count | 1 |
| AC107375.1   | -17.8696159 | 2896.988219 | -0.0062   | 0.995 | -1.71E-09 | count | 1 |
| PAX8         | -17.8696159 | 2896.988219 | -0.0062   | 0.995 | -1.71E-09 | count | 1 |
| EPHA3        | -17.8696159 | 2896.988219 | -0.0062   | 0.995 | -1.71E-09 | count | 1 |
| AC107067.1   | -17.8696159 | 2896.988219 | -0.0062   | 0.995 | -1.71E-09 | count | 1 |
| LINC01596    | -17.8696159 | 2896.988219 | -0.0062   | 0.995 | -1.71E-09 | count | 1 |
| IRGM         | -17.8696159 | 2896.988219 | -0.0062   | 0.995 | -1.71E-09 | count | 1 |
| KCNMB1       | -17.8696159 | 2896.988219 | -0.0062   | 0.995 | -1.71E-09 | count | 1 |
| AL513550.1   | -17.8696159 | 2896.988219 | -0.0062   | 0.995 | -1.71E-09 | count | 1 |
| ZKSCAN5      | -17.8696159 | 2896.988219 | -0.0062   | 0.995 | -1.71E-09 | count | 1 |
| BNC2         | -17.8696159 | 2896.988219 | -0.0062   | 0.995 | -1.71E-09 | count | 1 |
| CH25H        | -17.8696159 | 2896.988219 | -0.0062   | 0.995 | -1.71E-09 | count | 1 |
| ZNF385A      | -17.8696159 | 2896.988219 | -0.0062   | 0.995 | -1.71E-09 | count | 1 |
| TBX3         | -17.8696159 | 2896.988219 | -0.0062   | 0.995 | -1.71E-09 | count | 1 |
| MEG8         | -17.8696159 | 2896.988219 | -0.0062   | 0.995 | -1.71E-09 | count | 1 |
| AC233723.1   | -17.8696159 | 2896.988219 | -0.0062   | 0.995 | -1.71E-09 | count | 1 |
| AC009283.1   | -17.8696159 | 2896.988219 | -0.0062   | 0.995 | -1.71E-09 | count | 1 |
| MMP23B       | -17.8696159 | 2896.988219 | -0.0062   | 0.995 | -1.71E-09 | count | 1 |
| GLDC         | -17.8696159 | 2896.988219 | -0.0062   | 0.995 | -1.71E-09 | count | 1 |
| KIAA0895L    | -17.8696159 | 2896.988219 | -0.0062   | 0.995 | -1.71E-09 | count | 1 |
| AC002094.2   | -17.8696159 | 2896.988219 | -0.0062   | 0.995 | -1.71E-09 | count | 1 |
| U2AF1        | -17.8696159 | 2896.988219 | -0.0062   | 0.995 | -1.71E-09 | count | 1 |
| ABHD14A      | -0.0003437  | 0.3892789   | -9.00E-04 | 0.999 | -1.52E-09 | count | 1 |
| PGBD2        | -0.0003437  | 0.5501138   | -6.00E-04 | 1     | -1.52E-09 | count | 1 |
| GLT8D1       | -0.0003437  | 0.6094083   | -6.00E-04 | 1     | -1.52E-09 | count | 1 |
| PUM2         | -0.0003437  | 0.4665219   | -7.00E-04 | 0.999 | -1.52E-09 | count | 1 |
| HIVEP2       | -0.0003437  | 0.5179354   | -7.00E-04 | 0.999 | -1.52E-09 | count | 1 |
| CLU          | -0.0003437  | 0.8869831   | -4.00E-04 | 1     | -1.52E-09 | count | 1 |
| EEFSEC       | -0.0003437  | 0.4836263   | -7.00E-04 | 0.999 | -1.52E-09 | count | 1 |
| CLOCK        | -0.0003437  | 0.5370061   | -6.00E-04 | 0.999 | -1.52E-09 | count | 1 |
| ERCC6L2      | -0.0003437  | 0.7619334   | -5.00E-04 | 1     | -5.58E-10 | count | 1 |
| ALOX12-AS1   | -0.0003437  | 0.7619334   | -5.00E-04 | 1     | -5.58E-10 | count | 1 |
| RBM14        | -0.0003437  | 0.7153981   | -5.00E-04 | 1     | -5.58E-10 | count | 1 |
| PASK         | -0.0003437  | 0.7153981   | -5.00E-04 | 1     | -5.58E-10 | count | 1 |
| CEP68        | -0.0003437  | 0.7619037   | -5.00E-04 | 1     | -5.58E-10 | count | 1 |
| TAF6L        | -0.0003437  | 0.6656189   | -5.00E-04 | 1     | -5.58E-10 | count | 1 |
| HAUS5        | -0.0003437  | 0.6656174   | -5.00E-04 | 1     | -5.58E-10 | count | 1 |
| CORO1C       | -0.0003437  | 0.7619179   | -5.00E-04 | 1     | -5.58E-10 | count | 1 |
| DPH2         | -0.0003437  | 0.7619179   | -5.00E-04 | 1     | -5.58E-10 | count | 1 |

|            |            |           |           |       |           |       |   |
|------------|------------|-----------|-----------|-------|-----------|-------|---|
| PPP1R13B   | -0.0003437 | 0.7153816 | -5.00E-04 | 1     | -5.58E-10 | count | 1 |
| BCKDK      | -0.0003437 | 0.7153816 | -5.00E-04 | 1     | -5.58E-10 | count | 1 |
| SLC25A14   | -0.0003437 | 0.7153816 | -5.00E-04 | 1     | -5.58E-10 | count | 1 |
| ERAP1      | -0.0003437 | 0.8057575 | -4.00E-04 | 1     | -5.58E-10 | count | 1 |
| HLX        | 0.0026167  | 0.7731427 | 0.0034    | 0.997 | 1.56E-09  | count | 1 |
| COG1       | 0.0026167  | 0.6677671 | 0.0039    | 0.997 | 1.56E-09  | count | 1 |
| MRPL35     | 0.0026167  | 0.7045827 | 0.0037    | 0.997 | 1.56E-09  | count | 1 |
| ZRSR2      | 0.0026167  | 0.3991441 | 0.0066    | 0.995 | 1.56E-09  | count | 1 |
| MTOR       | 0.002617   | 0.6286943 | 0.0042    | 0.997 | 1.57E-09  | count | 1 |
| RPS6KC1    | 0.002617   | 0.739568  | 0.0035    | 0.997 | 1.57E-09  | count | 1 |
| TYW5       | 0.002617   | 0.6286943 | 0.0042    | 0.997 | 1.57E-09  | count | 1 |
| NUDT8      | 0.002617   | 0.739747  | 0.0035    | 0.997 | 1.57E-09  | count | 1 |
| THOC5      | 0.002617   | 0.739568  | 0.0035    | 0.997 | 1.57E-09  | count | 1 |
| TIMM22     | 0.0007267  | 0.4013256 | 0.0018    | 0.999 | 3.21E-09  | count | 1 |
| SUCO       | 0.0007267  | 0.4341512 | 0.0017    | 0.999 | 3.21E-09  | count | 1 |
| TRANK1     | 0.0007267  | 0.4637218 | 0.0016    | 0.999 | 3.21E-09  | count | 1 |
| SWI5       | 0.0012286  | 0.5364339 | 0.0023    | 0.998 | 5.43E-09  | count | 1 |
| KIF21A     | 0.0012286  | 0.5083898 | 0.0024    | 0.998 | 5.43E-09  | count | 1 |
| ZNF831     | 0.1718503  | 0.5252627 | 0.3272    | 0.744 | 5.46E-09  | count | 1 |
| MOAP1      | 0.0016893  | 0.4963152 | 0.0034    | 0.997 | 7.47E-09  | count | 1 |
| EMC2       | 0.0017101  | 0.4199224 | 0.0041    | 0.997 | 7.55E-09  | count | 1 |
| TRAPPC2    | 0.0144511  | 0.460358  | 0.0314    | 0.975 | 8.68E-09  | count | 1 |
| CYBC1      | 0.0010952  | 0.2271092 | 0.0048    | 0.996 | 1.32E-08  | count | 1 |
| EHBP1      | 0.0228194  | 0.5304672 | 0.043     | 0.966 | 1.38E-08  | count | 1 |
| GPALPP1    | 0.0228194  | 0.5304672 | 0.043     | 0.966 | 1.38E-08  | count | 1 |
| SLC38A6    | 0.0228194  | 0.597602  | 0.0382    | 0.97  | 1.38E-08  | count | 1 |
| SP2        | 0.0228194  | 0.531012  | 0.043     | 0.966 | 1.38E-08  | count | 1 |
| AL078459.1 | 0.0228194  | 0.6182068 | 0.0369    | 0.971 | 1.38E-08  | count | 1 |
| WRN        | 0.0228194  | 0.6376934 | 0.0358    | 0.971 | 1.38E-08  | count | 1 |
| CNTNAP2    | 0.0228194  | 0.7297181 | 0.0313    | 0.975 | 1.38E-08  | count | 1 |
| ADAM17     | 0.0012281  | 0.3967662 | 0.0031    | 0.998 | 1.47E-08  | count | 1 |
| BLOC1S3    | 0.0716095  | 0.8533629 | 0.0839    | 0.933 | 1.62E-08  | count | 1 |
| STK35      | 0.0716095  | 0.8533629 | 0.0839    | 0.933 | 1.62E-08  | count | 1 |
| CDKL3      | 0.0716095  | 0.8533629 | 0.0839    | 0.933 | 1.62E-08  | count | 1 |
| TTBK2      | 0.0716095  | 0.8533629 | 0.0839    | 0.933 | 1.62E-08  | count | 1 |
| MCEE       | 0.0716095  | 0.8533629 | 0.0839    | 0.933 | 1.62E-08  | count | 1 |
| EPG5       | 0.0716095  | 0.8533629 | 0.0839    | 0.933 | 1.62E-08  | count | 1 |
| TRIM16     | 0.0716095  | 1.1500315 | 0.0623    | 0.95  | 1.62E-08  | count | 1 |
| C8orf88    | 0.0716095  | 1.1500315 | 0.0623    | 0.95  | 1.62E-08  | count | 1 |
| RFESD      | 0.0716095  | 1.1500315 | 0.0623    | 0.95  | 1.62E-08  | count | 1 |
| ZNF461     | 0.0716095  | 1.1500315 | 0.0623    | 0.95  | 1.62E-08  | count | 1 |
| POLH       | 0.0716095  | 1.1500315 | 0.0623    | 0.95  | 1.62E-08  | count | 1 |
| LINC01361  | 0.0716095  | 1.1500315 | 0.0623    | 0.95  | 1.62E-08  | count | 1 |
| AL034397.3 | 0.0716095  | 1.1500315 | 0.0623    | 0.95  | 1.62E-08  | count | 1 |
| PYGM       | 0.0716095  | 1.1500315 | 0.0623    | 0.95  | 1.62E-08  | count | 1 |

|              |            |             |        |       |          |       |   |
|--------------|------------|-------------|--------|-------|----------|-------|---|
| SMURF1       | 0.0716095  | 1.1500315   | 0.0623 | 0.95  | 1.62E-08 | count | 1 |
| MSC          | 0.0716095  | 1.1500315   | 0.0623 | 0.95  | 1.62E-08 | count | 1 |
| SLC35G1      | 0.0716095  | 1.1500315   | 0.0623 | 0.95  | 1.62E-08 | count | 1 |
| INSR         | 0.0716095  | 1.1500315   | 0.0623 | 0.95  | 1.62E-08 | count | 1 |
| CAMSAP2      | 0.0716095  | 1.1500315   | 0.0623 | 0.95  | 1.62E-08 | count | 1 |
| MYLK-AS1     | 0.0716095  | 1.1500315   | 0.0623 | 0.95  | 1.62E-08 | count | 1 |
| CPEB3        | 0.0716095  | 1.1500315   | 0.0623 | 0.95  | 1.62E-08 | count | 1 |
| ZNF527       | 0.0716095  | 1.1500315   | 0.0623 | 0.95  | 1.62E-08 | count | 1 |
| IFNLR1       | 0.0716095  | 1.1500315   | 0.0623 | 0.95  | 1.62E-08 | count | 1 |
| SOX18        | 0.0716095  | 1.1500315   | 0.0623 | 0.95  | 1.62E-08 | count | 1 |
| SLC38A7      | 0.0716095  | 1.0073553   | 0.0711 | 0.943 | 1.62E-08 | count | 1 |
| APBA3        | 0.0716095  | 1.0073553   | 0.0711 | 0.943 | 1.62E-08 | count | 1 |
| FBXW8        | 0.0716095  | 1.0073553   | 0.0711 | 0.943 | 1.62E-08 | count | 1 |
| FAN1         | 0.0716095  | 1.0073553   | 0.0711 | 0.943 | 1.62E-08 | count | 1 |
| ZNF865       | 0.0716095  | 1.0073553   | 0.0711 | 0.943 | 1.62E-08 | count | 1 |
| TOP3B        | 0.0716095  | 1.0073553   | 0.0711 | 0.943 | 1.62E-08 | count | 1 |
| ANKRD6       | 0.0716095  | 1.0073553   | 0.0711 | 0.943 | 1.62E-08 | count | 1 |
| VWA8         | 0.0716095  | 1.0073553   | 0.0711 | 0.943 | 1.62E-08 | count | 1 |
| CXorf57      | 0.0716095  | 1.0073553   | 0.0711 | 0.943 | 1.62E-08 | count | 1 |
| SGPL1        | 0.0716095  | 1.0073553   | 0.0711 | 0.943 | 1.62E-08 | count | 1 |
| SLC29A2      | 0.0716095  | 1.0178585   | 0.0704 | 0.944 | 1.62E-08 | count | 1 |
| AC002310.1   | 0.0716095  | 1.0178585   | 0.0704 | 0.944 | 1.62E-08 | count | 1 |
| PTCD2        | 0.0716095  | 1.0178585   | 0.0704 | 0.944 | 1.62E-08 | count | 1 |
| MDP1         | 0.0716095  | 1.0178585   | 0.0704 | 0.944 | 1.62E-08 | count | 1 |
| SLC11A1      | 0.0716095  | 1.3768245   | 0.052  | 0.959 | 1.62E-08 | count | 1 |
| SERPINF1     | 0.0716095  | 1.3768245   | 0.052  | 0.959 | 1.62E-08 | count | 1 |
| WNT2B        | 0.0716095  | 1.3768245   | 0.052  | 0.959 | 1.62E-08 | count | 1 |
| ZNF354C      | 0.0716095  | 1.3768245   | 0.052  | 0.959 | 1.62E-08 | count | 1 |
| ZNF778       | 0.0716095  | 1.3768245   | 0.052  | 0.959 | 1.62E-08 | count | 1 |
| AC079807.1   | 0.0716095  | 1.3768245   | 0.052  | 0.959 | 1.62E-08 | count | 1 |
| ZNF718       | 0.0716095  | 1.3768245   | 0.052  | 0.959 | 1.62E-08 | count | 1 |
| CAVIN3       | 0.0716095  | 1.3768245   | 0.052  | 0.959 | 1.62E-08 | count | 1 |
| SLC23A3      | 0.0716095  | 1.3768245   | 0.052  | 0.959 | 1.62E-08 | count | 1 |
| TNFSF8       | 0.0716095  | 0.6565486   | 0.1091 | 0.913 | 1.62E-08 | count | 1 |
| ZMYND19      | 0.0716095  | 0.6565486   | 0.1091 | 0.913 | 1.62E-08 | count | 1 |
| ABHD11       | 0.0716095  | 0.6565486   | 0.1091 | 0.913 | 1.62E-08 | count | 1 |
| TMEM206      | 0.0716095  | 0.6565486   | 0.1091 | 0.913 | 1.62E-08 | count | 1 |
| AC022182.2   | 0.0716095  | 0.6565486   | 0.1091 | 0.913 | 1.62E-08 | count | 1 |
| AC136475.3   | 0.0716095  | 1.2600944   | 0.0568 | 0.955 | 1.62E-08 | count | 1 |
| SLC25A25-AS1 | 0.0716095  | 1.2600944   | 0.0568 | 0.955 | 1.62E-08 | count | 1 |
| TACC1        | 0.001512   | 0.3237658   | 0.0047 | 0.996 | 1.81E-08 | count | 1 |
| ZNF44        | 0.0338692  | 0.4661691   | 0.0727 | 0.942 | 2.05E-08 | count | 1 |
| AC107068.1   | 21.0922268 | 1328.869578 | 0.0159 | 0.987 | 2.07E-08 | count | 1 |
| AGAP3        | 21.0922268 | 1328.869578 | 0.0159 | 0.987 | 2.07E-08 | count | 1 |
| JPH1         | 21.0922268 | 1328.869578 | 0.0159 | 0.987 | 2.07E-08 | count | 1 |

|            |            |             |        |       |          |       |   |
|------------|------------|-------------|--------|-------|----------|-------|---|
| LINC02361  | 21.0922268 | 1328.869578 | 0.0159 | 0.987 | 2.07E-08 | count | 1 |
| SH3BGR     | 21.0922268 | 1328.869578 | 0.0159 | 0.987 | 2.07E-08 | count | 1 |
| AL121935.1 | 21.0922267 | 1328.869826 | 0.0159 | 0.987 | 2.07E-08 | count | 1 |
| AL121928.1 | 21.0922267 | 1328.869826 | 0.0159 | 0.987 | 2.07E-08 | count | 1 |
| AC105020.6 | 21.0922267 | 1328.869826 | 0.0159 | 0.987 | 2.07E-08 | count | 1 |
| UGDH       | 21.0922263 | 1328.869644 | 0.0159 | 0.987 | 2.07E-08 | count | 1 |
| FOXD1      | 21.0922263 | 1328.869644 | 0.0159 | 0.987 | 2.07E-08 | count | 1 |
| ADAM9      | 21.0922263 | 1328.869644 | 0.0159 | 0.987 | 2.07E-08 | count | 1 |
| LY6E-DT    | 21.0922263 | 1328.869644 | 0.0159 | 0.987 | 2.07E-08 | count | 1 |
| AP003486.1 | 21.0922263 | 1328.869644 | 0.0159 | 0.987 | 2.07E-08 | count | 1 |
| ABCC9      | 21.0922263 | 1328.869644 | 0.0159 | 0.987 | 2.07E-08 | count | 1 |
| LINC01134  | 21.0922258 | 1328.869562 | 0.0159 | 0.987 | 2.07E-08 | count | 1 |
| AC239868.2 | 21.0922258 | 1328.869562 | 0.0159 | 0.987 | 2.07E-08 | count | 1 |
| SEMA4A     | 21.0922258 | 1328.869562 | 0.0159 | 0.987 | 2.07E-08 | count | 1 |
| FAM218A    | 21.0922258 | 1328.869562 | 0.0159 | 0.987 | 2.07E-08 | count | 1 |
| RHOD       | 21.0922258 | 1328.869562 | 0.0159 | 0.987 | 2.07E-08 | count | 1 |
| AC079907.2 | 21.0922258 | 1328.869562 | 0.0159 | 0.987 | 2.07E-08 | count | 1 |
| LINC02175  | 21.0922258 | 1328.869562 | 0.0159 | 0.987 | 2.07E-08 | count | 1 |
| LINC00672  | 21.0922258 | 1328.869562 | 0.0159 | 0.987 | 2.07E-08 | count | 1 |
| HOXB-AS1   | 21.0922258 | 1328.869562 | 0.0159 | 0.987 | 2.07E-08 | count | 1 |
| LRRC37A3   | 21.0922258 | 1328.869562 | 0.0159 | 0.987 | 2.07E-08 | count | 1 |
| CEACAM3    | 21.0922258 | 1328.869562 | 0.0159 | 0.987 | 2.07E-08 | count | 1 |
| ZBTB8A     | 21.0922258 | 1328.869429 | 0.0159 | 0.987 | 2.07E-08 | count | 1 |
| FMO5       | 21.0922258 | 1328.869429 | 0.0159 | 0.987 | 2.07E-08 | count | 1 |
| ERMP1      | 21.0922258 | 1328.869429 | 0.0159 | 0.987 | 2.07E-08 | count | 1 |
| FOSL1      | 21.0922258 | 1328.869429 | 0.0159 | 0.987 | 2.07E-08 | count | 1 |
| CTNNA3     | 21.0922258 | 1328.869429 | 0.0159 | 0.987 | 2.07E-08 | count | 1 |
| PRC1       | 21.0922258 | 1328.869429 | 0.0159 | 0.987 | 2.07E-08 | count | 1 |
| ZNF763     | 21.0922258 | 1328.869429 | 0.0159 | 0.987 | 2.07E-08 | count | 1 |
| ELF3-AS1   | 21.0922259 | 1328.869446 | 0.0159 | 0.987 | 2.07E-08 | count | 1 |
| MAP10      | 21.0922259 | 1328.869446 | 0.0159 | 0.987 | 2.07E-08 | count | 1 |
| AC008608.2 | 21.0922259 | 1328.869446 | 0.0159 | 0.987 | 2.07E-08 | count | 1 |
| PCDHGA7    | 21.0922259 | 1328.869446 | 0.0159 | 0.987 | 2.07E-08 | count | 1 |
| AC006027.1 | 21.0922259 | 1328.869446 | 0.0159 | 0.987 | 2.07E-08 | count | 1 |
| AC016405.3 | 21.0922259 | 1328.869446 | 0.0159 | 0.987 | 2.07E-08 | count | 1 |
| AL359636.1 | 21.0922259 | 1328.869446 | 0.0159 | 0.987 | 2.07E-08 | count | 1 |
| GPRC5D     | 21.0922259 | 1328.869446 | 0.0159 | 0.987 | 2.07E-08 | count | 1 |
| PCLAF      | 21.0922259 | 1328.869446 | 0.0159 | 0.987 | 2.07E-08 | count | 1 |
| FBXL8      | 21.0922259 | 1328.869446 | 0.0159 | 0.987 | 2.07E-08 | count | 1 |
| ITGA3      | 21.0922259 | 1328.869446 | 0.0159 | 0.987 | 2.07E-08 | count | 1 |
| CHAD       | 21.0922259 | 1328.869446 | 0.0159 | 0.987 | 2.07E-08 | count | 1 |
| C19orf57   | 21.0922259 | 1328.869446 | 0.0159 | 0.987 | 2.07E-08 | count | 1 |
| TST        | 21.0922259 | 1328.869446 | 0.0159 | 0.987 | 2.07E-08 | count | 1 |
| DYNC1H1    | 0.0020596  | 0.3289079   | 0.0063 | 0.995 | 2.47E-08 | count | 1 |
| ANG        | 0.0408379  | 0.5269731   | 0.0775 | 0.938 | 2.48E-08 | count | 1 |

|           |           |           |        |          |          |       |   |
|-----------|-----------|-----------|--------|----------|----------|-------|---|
| WDR44     | 0.0408379 | 0.5070456 | 0.0805 | 0.936    | 2.48E-08 | count | 1 |
| TBCE      | 1.5581446 | 0.4451946 | 3.4999 | 5.00E-04 | 3.03E-08 | count | 1 |
| LINC00294 | 1.5581446 | 0.4451946 | 3.4999 | 5.00E-04 | 3.03E-08 | count | 1 |
| SULT1A3   | 1.5581446 | 0.4451946 | 3.4999 | 5.00E-04 | 3.03E-08 | count | 1 |
| ZNF773    | 1.5581446 | 0.4451946 | 3.4999 | 5.00E-04 | 3.03E-08 | count | 1 |
| LRP8      | 1.5581446 | 0.4451946 | 3.4999 | 5.00E-04 | 3.03E-08 | count | 1 |
| FUK       | 1.5581446 | 0.4451946 | 3.4999 | 5.00E-04 | 3.03E-08 | count | 1 |
| DIRAS1    | 1.5581446 | 0.4451946 | 3.4999 | 5.00E-04 | 3.03E-08 | count | 1 |
| MAFG      | 0.0025679 | 0.2609767 | 0.0098 | 0.992    | 3.09E-08 | count | 1 |
| CAAP1     | 0.0072078 | 0.357168  | 0.0202 | 0.984    | 3.19E-08 | count | 1 |
| SYVN1     | 0.0073695 | 0.458943  | 0.0161 | 0.987    | 3.26E-08 | count | 1 |
| SH2D3A    | 0.0206752 | 0.6798493 | 0.0304 | 0.976    | 3.38E-08 | count | 1 |
| GSE1      | 0.0206752 | 0.8633114 | 0.0239 | 0.981    | 3.39E-08 | count | 1 |
| INTS3     | 0.0217405 | 0.6046843 | 0.036  | 0.971    | 3.56E-08 | count | 1 |
| KDM5C     | 0.0217405 | 0.6460421 | 0.0337 | 0.973    | 3.56E-08 | count | 1 |
| CUL2      | 0.0080965 | 0.4636325 | 0.0175 | 0.986    | 3.59E-08 | count | 1 |
| UPF3A     | 0.0031041 | 0.230868  | 0.0134 | 0.989    | 3.73E-08 | count | 1 |
| NUP58     | 0.0087658 | 0.4096761 | 0.0214 | 0.983    | 3.88E-08 | count | 1 |
| SMG6      | 0.0087658 | 0.3938295 | 0.0223 | 0.982    | 3.88E-08 | count | 1 |
| ACBD5     | 0.0090582 | 0.4964005 | 0.0182 | 0.985    | 4.01E-08 | count | 1 |
| ARHGAP42  | 0.17697   | 1.0375531 | 0.1706 | 0.865    | 4.17E-08 | count | 1 |
| INTS8     | 0.17697   | 0.7705802 | 0.2297 | 0.818    | 4.17E-08 | count | 1 |
| WDR5      | 0.17697   | 0.8389421 | 0.2109 | 0.833    | 4.17E-08 | count | 1 |
| CROCC     | 0.17697   | 0.8389421 | 0.2109 | 0.833    | 4.17E-08 | count | 1 |
| MLLT1     | 0.17697   | 0.8389421 | 0.2109 | 0.833    | 4.17E-08 | count | 1 |
| FNBP1L    | 0.17697   | 0.8389421 | 0.2109 | 0.833    | 4.17E-08 | count | 1 |
| LXN       | 0.17697   | 0.6800459 | 0.2602 | 0.795    | 4.17E-08 | count | 1 |
| MOB3C     | 0.17697   | 0.9021385 | 0.1962 | 0.845    | 4.17E-08 | count | 1 |
| EIF5A2    | 0.17697   | 0.9021385 | 0.1962 | 0.845    | 4.17E-08 | count | 1 |
| ZRANB3    | 0.17697   | 0.7566323 | 0.2339 | 0.815    | 4.17E-08 | count | 1 |
| SLC25A22  | 0.17697   | 0.7566323 | 0.2339 | 0.815    | 4.17E-08 | count | 1 |
| TMEM67    | 0.17697   | 0.7566323 | 0.2339 | 0.815    | 4.17E-08 | count | 1 |
| RNF185    | 0.17697   | 0.8261492 | 0.2142 | 0.83     | 4.17E-08 | count | 1 |
| INTS5     | 0.17697   | 0.8261492 | 0.2142 | 0.83     | 4.17E-08 | count | 1 |
| WDR59     | 0.17697   | 0.8261492 | 0.2142 | 0.83     | 4.17E-08 | count | 1 |
| HRK       | 0.17697   | 1.1198098 | 0.158  | 0.875    | 4.17E-08 | count | 1 |
| NINJ2     | 0.17697   | 1.1198098 | 0.158  | 0.875    | 4.17E-08 | count | 1 |
| MPST      | 0.17697   | 0.9500435 | 0.1863 | 0.852    | 4.17E-08 | count | 1 |
| EPB41L4A  | 0.17697   | 0.9500435 | 0.1863 | 0.852    | 4.17E-08 | count | 1 |
| MAGED1    | 0.0716095 | 0.7127468 | 0.1005 | 0.92     | 4.40E-08 | count | 1 |
| ZNF35     | 0.0716095 | 0.7127468 | 0.1005 | 0.92     | 4.40E-08 | count | 1 |
| METTL25   | 0.0716095 | 0.7127468 | 0.1005 | 0.92     | 4.40E-08 | count | 1 |
| ATP1B1    | 0.0716095 | 0.6070939 | 0.118  | 0.906    | 4.40E-08 | count | 1 |
| COG3      | 0.0716095 | 0.8103049 | 0.0884 | 0.93     | 4.40E-08 | count | 1 |
| PIP5K1B   | 0.0716095 | 0.5500225 | 0.1302 | 0.896    | 4.40E-08 | count | 1 |

|            |            |             |        |       |          |       |   |
|------------|------------|-------------|--------|-------|----------|-------|---|
| ERMAP      | 0.0716095  | 0.9363836   | 0.0765 | 0.939 | 4.40E-08 | count | 1 |
| ARHGAP35   | 0.0716095  | 0.632772    | 0.1132 | 0.91  | 4.40E-08 | count | 1 |
| PRKCZ      | 0.0716095  | 0.7613423   | 0.0941 | 0.925 | 4.40E-08 | count | 1 |
| SOX5       | 0.0716095  | 0.7613423   | 0.0941 | 0.925 | 4.40E-08 | count | 1 |
| CDKAL1     | 0.0716095  | 0.7613423   | 0.0941 | 0.925 | 4.40E-08 | count | 1 |
| CUL9       | 0.0716095  | 0.7648267   | 0.0936 | 0.925 | 4.40E-08 | count | 1 |
| SARNP      | 0.0716095  | 0.5782405   | 0.1238 | 0.901 | 4.40E-08 | count | 1 |
| SLC7A5     | 0.0716095  | 0.8070169   | 0.0887 | 0.929 | 4.40E-08 | count | 1 |
| USP37      | 0.0716095  | 0.7924576   | 0.0904 | 0.928 | 4.40E-08 | count | 1 |
| TRMT2A     | 0.0716095  | 0.6051442   | 0.1183 | 0.906 | 4.40E-08 | count | 1 |
| WDR70      | 0.0716095  | 0.5504883   | 0.1301 | 0.897 | 4.40E-08 | count | 1 |
| TBCK       | 0.0716095  | 0.7090065   | 0.101  | 0.92  | 4.40E-08 | count | 1 |
| TRIM24     | 0.0716095  | 0.7090065   | 0.101  | 0.92  | 4.40E-08 | count | 1 |
| ABCA5      | 0.0716095  | 0.7090065   | 0.101  | 0.92  | 4.40E-08 | count | 1 |
| CASTOR3    | 0.0716095  | 0.9711491   | 0.0737 | 0.941 | 4.40E-08 | count | 1 |
| RUFY3      | 0.0716095  | 0.5478698   | 0.1307 | 0.896 | 4.40E-08 | count | 1 |
| ARHGAP26   | 0.0716095  | 0.7042106   | 0.1017 | 0.919 | 4.40E-08 | count | 1 |
| KHNYN      | 0.0716095  | 0.6290258   | 0.1138 | 0.909 | 4.41E-08 | count | 1 |
| RNF144B    | 0.0716095  | 0.4585248   | 0.1562 | 0.876 | 4.41E-08 | count | 1 |
| CXCL8      | 0.0716095  | 1.2600944   | 0.0568 | 0.955 | 4.41E-08 | count | 1 |
| IFT74      | 0.0099569  | 0.4805824   | 0.0207 | 0.983 | 4.43E-08 | count | 1 |
| SLC15A4    | 0.0104891  | 0.3996159   | 0.0262 | 0.979 | 4.65E-08 | count | 1 |
| TAOK3      | 0.0041563  | 0.2583667   | 0.0161 | 0.987 | 4.99E-08 | count | 1 |
| NMD3       | 0.011924   | 0.5298566   | 0.0225 | 0.982 | 5.29E-08 | count | 1 |
| MAP3K7CL   | 0.011924   | 0.4824076   | 0.0247 | 0.98  | 5.29E-08 | count | 1 |
| SPSB3      | 0.0044536  | 0.2986519   | 0.0149 | 0.988 | 5.35E-08 | count | 1 |
| HHIP       | 21.0647983 | 1310.769664 | 0.0161 | 0.987 | 5.58E-08 | count | 1 |
| AL356417.3 | 21.0647983 | 1310.769664 | 0.0161 | 0.987 | 5.58E-08 | count | 1 |
| BCO2       | 21.0647983 | 1310.769664 | 0.0161 | 0.987 | 5.58E-08 | count | 1 |
| IGHV3-23   | 21.0647983 | 1310.769664 | 0.0161 | 0.987 | 5.58E-08 | count | 1 |
| CGNL1      | 21.0647983 | 1310.769664 | 0.0161 | 0.987 | 5.58E-08 | count | 1 |
| MYZAP      | 21.0647983 | 1310.769664 | 0.0161 | 0.987 | 5.58E-08 | count | 1 |
| LINC00921  | 21.0647983 | 1310.769664 | 0.0161 | 0.987 | 5.58E-08 | count | 1 |
| DBF4B      | 21.0647983 | 1310.769664 | 0.0161 | 0.987 | 5.58E-08 | count | 1 |
| C2CD2      | 21.0647983 | 1310.769664 | 0.0161 | 0.987 | 5.58E-08 | count | 1 |
| MBOAT2     | 20.7516591 | 1120.801881 | 0.0185 | 0.985 | 5.61E-08 | count | 1 |
| IL1RN      | 20.7516591 | 1120.801881 | 0.0185 | 0.985 | 5.61E-08 | count | 1 |
| CHL1       | 20.7516591 | 1120.801881 | 0.0185 | 0.985 | 5.61E-08 | count | 1 |
| LINC01506  | 20.7516591 | 1120.801881 | 0.0185 | 0.985 | 5.61E-08 | count | 1 |
| AL158801.2 | 20.7516591 | 1120.801881 | 0.0185 | 0.985 | 5.61E-08 | count | 1 |
| FBXL22     | 20.7516591 | 1120.801881 | 0.0185 | 0.985 | 5.61E-08 | count | 1 |
| CHRNE      | 20.7516591 | 1120.801881 | 0.0185 | 0.985 | 5.61E-08 | count | 1 |
| AL133342.1 | 0.0126629  | 0.4811379   | 0.0263 | 0.979 | 5.62E-08 | count | 1 |
| CERS2      | 0.0126629  | 0.4940239   | 0.0256 | 0.98  | 5.62E-08 | count | 1 |
| NFATC2IP   | 0.0126629  | 0.4808007   | 0.0263 | 0.979 | 5.62E-08 | count | 1 |

|            |           |           |        |          |          |       |          |
|------------|-----------|-----------|--------|----------|----------|-------|----------|
| TARS       | 0.0126629 | 0.5648335 | 0.0224 | 0.982    | 5.63E-08 | count | 1        |
| DPP8       | 0.0133228 | 0.4611447 | 0.0289 | 0.977    | 5.91E-08 | count | 1        |
| LYSMD3     | 0.0969273 | 0.4198238 | 0.2309 | 0.818    | 6.02E-08 | count | 1        |
| IRAK3      | 1.2704625 | 0.3835976 | 3.312  | 0.001    | 6.10E-08 | count | 1        |
| DOK1       | 0.0139156 | 0.4548168 | 0.0306 | 0.976    | 6.17E-08 | count | 1        |
| USPL1      | 0.0139156 | 0.4438299 | 0.0314 | 0.975    | 6.18E-08 | count | 1        |
| ARL13B     | 0.0139156 | 0.5053772 | 0.0275 | 0.978    | 6.18E-08 | count | 1        |
| COL9A3     | 0.0151387 | 0.5114829 | 0.0296 | 0.976    | 6.77E-08 | count | 1        |
| C8orf44    | 2.656757  | 0.4173418 | 6.3659 | 4.85E-10 | 6.79E-08 | count | 1.18E-05 |
| SART1      | 0.042959  | 0.6125053 | 0.0701 | 0.944    | 7.10E-08 | count | 1        |
| MRNIP      | 0.0162019 | 0.3611573 | 0.0449 | 0.964    | 7.20E-08 | count | 1        |
| UHMK1      | 0.0060358 | 0.2783921 | 0.0217 | 0.983    | 7.26E-08 | count | 1        |
| BRI3BP     | 0.0165072 | 0.4207349 | 0.0392 | 0.969    | 7.33E-08 | count | 1        |
| WRAP73     | 0.0165072 | 0.3661072 | 0.0451 | 0.964    | 7.33E-08 | count | 1        |
| AP003774.4 | 0.1181295 | 0.6015676 | 0.1964 | 0.844    | 7.39E-08 | count | 1        |
| HIRIP3     | 0.1181295 | 0.5590555 | 0.2113 | 0.833    | 7.39E-08 | count | 1        |
| NXPE3      | 0.1181295 | 0.5759478 | 0.2051 | 0.838    | 7.40E-08 | count | 1        |
| ZMYM4      | 0.1256768 | 0.4331706 | 0.2901 | 0.772    | 7.89E-08 | count | 1        |
| ELOF1      | 0.0067111 | 0.2966349 | 0.0226 | 0.982    | 8.07E-08 | count | 1        |
| BCCIP      | 0.0067111 | 0.3132721 | 0.0214 | 0.983    | 8.07E-08 | count | 1        |
| HBEGF      | 0.1287169 | 1.3804934 | 0.0932 | 0.926    | 8.08E-08 | count | 1        |
| SLC25A16   | 0.1287169 | 1.3804934 | 0.0932 | 0.926    | 8.08E-08 | count | 1        |
| PRKCA      | 0.1287169 | 1.3804934 | 0.0932 | 0.926    | 8.08E-08 | count | 1        |
| ZNF616     | 0.1287169 | 1.3804934 | 0.0932 | 0.926    | 8.08E-08 | count | 1        |
| TMPPE      | 0.1287169 | 1.3804934 | 0.0932 | 0.926    | 8.08E-08 | count | 1        |
| ACY1       | 0.1287169 | 1.3804934 | 0.0932 | 0.926    | 8.08E-08 | count | 1        |
| INAFM2     | 0.1287169 | 1.3804934 | 0.0932 | 0.926    | 8.08E-08 | count | 1        |
| CYB5D1     | 0.1287169 | 1.3086167 | 0.0984 | 0.922    | 8.08E-08 | count | 1        |
| AL353622.1 | 0.1287169 | 1.3086167 | 0.0984 | 0.922    | 8.08E-08 | count | 1        |
| PCBP3      | 0.1287169 | 1.3086167 | 0.0984 | 0.922    | 8.08E-08 | count | 1        |
| CLEC4A     | 0.1287169 | 1.3086167 | 0.0984 | 0.922    | 8.08E-08 | count | 1        |
| C2CD3      | 0.1287169 | 1.3086167 | 0.0984 | 0.922    | 8.08E-08 | count | 1        |
| CCDC180    | 0.1287169 | 1.3086167 | 0.0984 | 0.922    | 8.08E-08 | count | 1        |
| LINC00685  | 0.1287169 | 1.3824563 | 0.0931 | 0.926    | 8.08E-08 | count | 1        |
| TTYH3      | 0.1287169 | 1.3824563 | 0.0931 | 0.926    | 8.08E-08 | count | 1        |
| ZNF561     | 0.1287169 | 1.3824563 | 0.0931 | 0.926    | 8.08E-08 | count | 1        |
| E2F3       | 0.1361481 | 0.7986545 | 0.1705 | 0.865    | 8.57E-08 | count | 1        |
| BOP1       | 0.1361481 | 0.6767578 | 0.2012 | 0.841    | 8.57E-08 | count | 1        |
| IGKV4-1    | 0.1361481 | 0.7680046 | 0.1773 | 0.859    | 8.58E-08 | count | 1        |
| GGT7       | 0.1361481 | 0.7070411 | 0.1926 | 0.847    | 8.58E-08 | count | 1        |
| SCAP       | 0.1361481 | 0.7640151 | 0.1782 | 0.859    | 8.58E-08 | count | 1        |
| CHEK2      | 0.1361481 | 0.6722269 | 0.2025 | 0.84     | 8.58E-08 | count | 1        |
| SIRT3      | 0.1361481 | 0.7027055 | 0.1937 | 0.846    | 8.58E-08 | count | 1        |
| ACOX1      | 0.1361481 | 0.7027055 | 0.1937 | 0.846    | 8.58E-08 | count | 1        |
| GMIP       | 0.1361481 | 0.4197912 | 0.3243 | 0.746    | 8.60E-08 | count | 1        |



|            |           |           |        |       |          |       |   |
|------------|-----------|-----------|--------|-------|----------|-------|---|
| AIMP2      | 0.1361481 | 0.7559728 | 0.1801 | 0.857 | 8.61E-08 | count | 1 |
| SOCS7      | 0.3592916 | 1.1478534 | 0.313  | 0.754 | 9.08E-08 | count | 1 |
| ZFAND4     | 0.3592916 | 1.1478534 | 0.313  | 0.754 | 9.08E-08 | count | 1 |
| CABP4      | 0.3592916 | 1.1478534 | 0.313  | 0.754 | 9.08E-08 | count | 1 |
| PXMP4      | 0.3592916 | 1.1478534 | 0.313  | 0.754 | 9.08E-08 | count | 1 |
| AL645933.2 | 0.3592916 | 1.1478534 | 0.313  | 0.754 | 9.08E-08 | count | 1 |
| KRBA1      | 0.3592916 | 1.1478534 | 0.313  | 0.754 | 9.08E-08 | count | 1 |
| HAUS7      | 0.3592916 | 1.1478534 | 0.313  | 0.754 | 9.08E-08 | count | 1 |
| PPP1R3B    | 0.3592916 | 1.1478534 | 0.313  | 0.754 | 9.08E-08 | count | 1 |
| RAD51AP1   | 0.3592916 | 1.1478534 | 0.313  | 0.754 | 9.08E-08 | count | 1 |
| ABCB9      | 0.3592916 | 1.1478534 | 0.313  | 0.754 | 9.08E-08 | count | 1 |
| WDR7       | 0.3592916 | 1.1478534 | 0.313  | 0.754 | 9.08E-08 | count | 1 |
| NOTCH2NL   | 0.3592916 | 1.1478534 | 0.313  | 0.754 | 9.08E-08 | count | 1 |
| MMS22L     | 0.3592916 | 1.1478534 | 0.313  | 0.754 | 9.08E-08 | count | 1 |
| CD99L2     | 0.3592916 | 1.1478534 | 0.313  | 0.754 | 9.08E-08 | count | 1 |
| AC091814.1 | 0.3592916 | 1.1478534 | 0.313  | 0.754 | 9.08E-08 | count | 1 |
| AC079630.1 | 0.3592916 | 1.1478534 | 0.313  | 0.754 | 9.08E-08 | count | 1 |
| PALB2      | 0.3592916 | 1.1478534 | 0.313  | 0.754 | 9.08E-08 | count | 1 |
| MTCL1      | 0.3592916 | 1.1478534 | 0.313  | 0.754 | 9.08E-08 | count | 1 |
| RWDD3      | 0.3592916 | 1.1478534 | 0.313  | 0.754 | 9.08E-08 | count | 1 |
| MFSD6      | 0.3592916 | 1.1478534 | 0.313  | 0.754 | 9.08E-08 | count | 1 |
| OXNAD1     | 0.3592916 | 1.1478534 | 0.313  | 0.754 | 9.08E-08 | count | 1 |
| FLNB       | 0.3592916 | 1.1478534 | 0.313  | 0.754 | 9.08E-08 | count | 1 |
| GRAMD2B    | 0.3592916 | 1.1478534 | 0.313  | 0.754 | 9.08E-08 | count | 1 |
| CKB        | 0.3592916 | 1.1478534 | 0.313  | 0.754 | 9.08E-08 | count | 1 |
| ZSCAN32    | 0.3592916 | 1.1478534 | 0.313  | 0.754 | 9.08E-08 | count | 1 |
| CTU2       | 0.3592916 | 1.1478534 | 0.313  | 0.754 | 9.08E-08 | count | 1 |
| SLC16A6    | 0.3592916 | 1.1478534 | 0.313  | 0.754 | 9.08E-08 | count | 1 |
| SIGLEC6    | 0.3592916 | 1.1478534 | 0.313  | 0.754 | 9.08E-08 | count | 1 |
| WDR4       | 0.3592916 | 1.1478534 | 0.313  | 0.754 | 9.08E-08 | count | 1 |
| LARS2      | 0.3592916 | 1.1478534 | 0.313  | 0.754 | 9.08E-08 | count | 1 |
| CCNE2      | 0.3592916 | 1.1478534 | 0.313  | 0.754 | 9.08E-08 | count | 1 |
| KNL1       | 0.3592916 | 1.1478534 | 0.313  | 0.754 | 9.08E-08 | count | 1 |
| MMP25-AS1  | 0.3592916 | 1.1478534 | 0.313  | 0.754 | 9.08E-08 | count | 1 |
| CNTROB     | 0.3592916 | 1.1478534 | 0.313  | 0.754 | 9.08E-08 | count | 1 |
| EPHX1      | 0.3592916 | 1.1478534 | 0.313  | 0.754 | 9.08E-08 | count | 1 |
| NFXL1      | 0.3592916 | 1.1478534 | 0.313  | 0.754 | 9.08E-08 | count | 1 |
| NLN        | 0.3592916 | 1.1478534 | 0.313  | 0.754 | 9.08E-08 | count | 1 |
| AC106791.1 | 0.3592916 | 1.1478534 | 0.313  | 0.754 | 9.08E-08 | count | 1 |
| ZEB1-AS1   | 0.3592916 | 1.1478534 | 0.313  | 0.754 | 9.08E-08 | count | 1 |
| SLC48A1    | 0.3592916 | 1.1478534 | 0.313  | 0.754 | 9.08E-08 | count | 1 |
| ABHD4      | 0.3592916 | 1.1478534 | 0.313  | 0.754 | 9.08E-08 | count | 1 |
| IL4I1      | 0.3592916 | 1.1478534 | 0.313  | 0.754 | 9.08E-08 | count | 1 |
| EXO5       | 0.3592916 | 1.1478534 | 0.313  | 0.754 | 9.08E-08 | count | 1 |
| FLVCR1-DT  | 0.3592916 | 1.1478534 | 0.313  | 0.754 | 9.08E-08 | count | 1 |

|              |           |           |        |       |          |       |   |
|--------------|-----------|-----------|--------|-------|----------|-------|---|
| DLG3         | 0.3592916 | 1.1478534 | 0.313  | 0.754 | 9.08E-08 | count | 1 |
| SENCR        | 0.3592916 | 1.1478534 | 0.313  | 0.754 | 9.08E-08 | count | 1 |
| CCNJ         | 0.3592916 | 1.1478534 | 0.313  | 0.754 | 9.08E-08 | count | 1 |
| ZNF555       | 0.3592916 | 1.1478534 | 0.313  | 0.754 | 9.08E-08 | count | 1 |
| ZMYM3        | 0.3592916 | 1.1478534 | 0.313  | 0.754 | 9.08E-08 | count | 1 |
| SULT1A1      | 0.3592916 | 1.1478534 | 0.313  | 0.754 | 9.08E-08 | count | 1 |
| C20orf194    | 0.3592916 | 1.1478534 | 0.313  | 0.754 | 9.08E-08 | count | 1 |
| AC011416.3   | 0.3592916 | 1.4461038 | 0.2485 | 0.804 | 9.08E-08 | count | 1 |
| CEP85        | 0.3592916 | 1.4461038 | 0.2485 | 0.804 | 9.08E-08 | count | 1 |
| AL683813.1   | 0.3592916 | 1.4461038 | 0.2485 | 0.804 | 9.08E-08 | count | 1 |
| KCNIP2       | 0.3592916 | 1.4461038 | 0.2485 | 0.804 | 9.08E-08 | count | 1 |
| UNC119B      | 0.3592916 | 1.4461038 | 0.2485 | 0.804 | 9.08E-08 | count | 1 |
| DTD2         | 0.3592916 | 1.4461038 | 0.2485 | 0.804 | 9.08E-08 | count | 1 |
| LIN7B        | 0.3592916 | 1.4461038 | 0.2485 | 0.804 | 9.08E-08 | count | 1 |
| ARNT         | 0.3592916 | 1.4461038 | 0.2485 | 0.804 | 9.08E-08 | count | 1 |
| MSH5         | 0.3592916 | 1.4461038 | 0.2485 | 0.804 | 9.08E-08 | count | 1 |
| MAOA         | 0.3592916 | 1.4461038 | 0.2485 | 0.804 | 9.08E-08 | count | 1 |
| POC1B-GALNT4 | 0.3592916 | 1.4461038 | 0.2485 | 0.804 | 9.08E-08 | count | 1 |
| SGSH         | 0.3592916 | 1.4461038 | 0.2485 | 0.804 | 9.08E-08 | count | 1 |
| LINC00158    | 0.3592916 | 1.4461038 | 0.2485 | 0.804 | 9.08E-08 | count | 1 |
| IGKV1-39     | 0.3592916 | 1.4461038 | 0.2485 | 0.804 | 9.08E-08 | count | 1 |
| DNAH1        | 0.3592916 | 1.4461038 | 0.2485 | 0.804 | 9.08E-08 | count | 1 |
| AL365203.2   | 0.3592916 | 1.4461038 | 0.2485 | 0.804 | 9.08E-08 | count | 1 |
| ZBTB39       | 0.3592916 | 1.4461038 | 0.2485 | 0.804 | 9.08E-08 | count | 1 |
| VASH1-AS1    | 0.3592916 | 1.4461038 | 0.2485 | 0.804 | 9.08E-08 | count | 1 |
| BMF          | 0.3592916 | 1.4461038 | 0.2485 | 0.804 | 9.08E-08 | count | 1 |
| FAM171A2     | 0.3592916 | 1.4461038 | 0.2485 | 0.804 | 9.08E-08 | count | 1 |
| LAMA5        | 0.3592916 | 1.4461038 | 0.2485 | 0.804 | 9.08E-08 | count | 1 |
| POLR1A       | 0.3592916 | 1.4461038 | 0.2485 | 0.804 | 9.08E-08 | count | 1 |
| COL8A1       | 0.3592916 | 1.4461038 | 0.2485 | 0.804 | 9.08E-08 | count | 1 |
| CXCL13       | 0.3592916 | 1.4461038 | 0.2485 | 0.804 | 9.08E-08 | count | 1 |
| PDE5A        | 0.3592916 | 1.4461038 | 0.2485 | 0.804 | 9.08E-08 | count | 1 |
| ADAP1        | 0.3592916 | 1.4461038 | 0.2485 | 0.804 | 9.08E-08 | count | 1 |
| ELFN1-AS1    | 0.3592916 | 1.4461038 | 0.2485 | 0.804 | 9.08E-08 | count | 1 |
| FANCG        | 0.3592916 | 1.4461038 | 0.2485 | 0.804 | 9.08E-08 | count | 1 |
| CTSL         | 0.3592916 | 1.4461038 | 0.2485 | 0.804 | 9.08E-08 | count | 1 |
| KIAA1958     | 0.3592916 | 1.4461038 | 0.2485 | 0.804 | 9.08E-08 | count | 1 |
| NTNG2        | 0.3592916 | 1.4461038 | 0.2485 | 0.804 | 9.08E-08 | count | 1 |
| PAN3-AS1     | 0.3592916 | 1.4461038 | 0.2485 | 0.804 | 9.08E-08 | count | 1 |
| AL161421.1   | 0.3592916 | 1.4461038 | 0.2485 | 0.804 | 9.08E-08 | count | 1 |
| GZMB         | 0.3592916 | 1.4461038 | 0.2485 | 0.804 | 9.08E-08 | count | 1 |
| CIPC         | 0.3592916 | 1.4461038 | 0.2485 | 0.804 | 9.08E-08 | count | 1 |
| CCDC78       | 0.3592916 | 1.4461038 | 0.2485 | 0.804 | 9.08E-08 | count | 1 |
| RAB3D        | 0.3592916 | 1.4461038 | 0.2485 | 0.804 | 9.08E-08 | count | 1 |
| NACC1        | 0.3592916 | 1.4461038 | 0.2485 | 0.804 | 9.08E-08 | count | 1 |

|            |           |           |        |       |          |       |   |
|------------|-----------|-----------|--------|-------|----------|-------|---|
| LINC02576  | 0.3592916 | 1.4461038 | 0.2485 | 0.804 | 9.08E-08 | count | 1 |
| DAPL1      | 0.3592916 | 1.4461038 | 0.2485 | 0.804 | 9.08E-08 | count | 1 |
| POMGNT2    | 0.3592916 | 1.4461038 | 0.2485 | 0.804 | 9.08E-08 | count | 1 |
| RNF123     | 0.3592916 | 1.4461038 | 0.2485 | 0.804 | 9.08E-08 | count | 1 |
| GYPE       | 0.3592916 | 1.4461038 | 0.2485 | 0.804 | 9.08E-08 | count | 1 |
| SEPT7-AS1  | 0.3592916 | 1.4461038 | 0.2485 | 0.804 | 9.08E-08 | count | 1 |
| RLN2       | 0.3592916 | 1.4461038 | 0.2485 | 0.804 | 9.08E-08 | count | 1 |
| NAIF1      | 0.3592916 | 1.4461038 | 0.2485 | 0.804 | 9.08E-08 | count | 1 |
| PNPLA7     | 0.3592916 | 1.4461038 | 0.2485 | 0.804 | 9.08E-08 | count | 1 |
| CLSTN3     | 0.3592916 | 1.4461038 | 0.2485 | 0.804 | 9.08E-08 | count | 1 |
| ALG10B     | 0.3592916 | 1.4461038 | 0.2485 | 0.804 | 9.08E-08 | count | 1 |
| CAB39L     | 0.3592916 | 1.4461038 | 0.2485 | 0.804 | 9.08E-08 | count | 1 |
| PAQR4      | 0.3592916 | 1.4461038 | 0.2485 | 0.804 | 9.08E-08 | count | 1 |
| LINC00910  | 0.3592916 | 1.4461038 | 0.2485 | 0.804 | 9.08E-08 | count | 1 |
| MAL        | 0.3592916 | 1.4461038 | 0.2485 | 0.804 | 9.08E-08 | count | 1 |
| STK36      | 0.3592916 | 1.4461038 | 0.2485 | 0.804 | 9.08E-08 | count | 1 |
| AGPAT4     | 0.3592916 | 1.4461038 | 0.2485 | 0.804 | 9.08E-08 | count | 1 |
| AC022182.1 | 0.3592916 | 1.4461038 | 0.2485 | 0.804 | 9.08E-08 | count | 1 |
| SMC5-AS1   | 0.3592916 | 1.4461038 | 0.2485 | 0.804 | 9.08E-08 | count | 1 |
| SFXN2      | 0.3592916 | 1.4461038 | 0.2485 | 0.804 | 9.08E-08 | count | 1 |
| GRAPL      | 0.3592916 | 1.4461038 | 0.2485 | 0.804 | 9.08E-08 | count | 1 |
| FCRL4      | 0.3592916 | 1.4461038 | 0.2485 | 0.804 | 9.08E-08 | count | 1 |
| AC091982.3 | 0.3592916 | 1.4461038 | 0.2485 | 0.804 | 9.08E-08 | count | 1 |
| TWNK       | 0.3592916 | 1.4461038 | 0.2485 | 0.804 | 9.08E-08 | count | 1 |
| RIC8B      | 0.3592916 | 1.4461038 | 0.2485 | 0.804 | 9.08E-08 | count | 1 |
| MRPL53     | 0.3592916 | 0.9647503 | 0.3724 | 0.71  | 9.08E-08 | count | 1 |
| DBR1       | 0.3592916 | 0.9647503 | 0.3724 | 0.71  | 9.08E-08 | count | 1 |
| AP003068.2 | 0.3592916 | 0.9647503 | 0.3724 | 0.71  | 9.08E-08 | count | 1 |
| LINC02158  | 0.3592916 | 0.9647503 | 0.3724 | 0.71  | 9.08E-08 | count | 1 |
| LINC01358  | 0.3592916 | 1.0602619 | 0.3389 | 0.735 | 9.08E-08 | count | 1 |
| MAP3K6     | 0.3592916 | 1.0602619 | 0.3389 | 0.735 | 9.08E-08 | count | 1 |
| MBNL1-AS1  | 0.3592916 | 1.0602619 | 0.3389 | 0.735 | 9.08E-08 | count | 1 |
| RCC1       | 0.3592916 | 1.0602619 | 0.3389 | 0.735 | 9.08E-08 | count | 1 |
| ZNF551     | 0.3592916 | 1.0602619 | 0.3389 | 0.735 | 9.08E-08 | count | 1 |
| NUP205     | 0.3592916 | 1.0602619 | 0.3389 | 0.735 | 9.08E-08 | count | 1 |
| AL627422.2 | 0.3592916 | 1.0602619 | 0.3389 | 0.735 | 9.08E-08 | count | 1 |
| ARMC7      | 0.3592916 | 1.0602619 | 0.3389 | 0.735 | 9.08E-08 | count | 1 |
| LINC00539  | 0.3592916 | 1.0602619 | 0.3389 | 0.735 | 9.08E-08 | count | 1 |
| TBC1D19    | 0.3592916 | 1.0602619 | 0.3389 | 0.735 | 9.08E-08 | count | 1 |
| PINK1      | 0.3592916 | 0.8085272 | 0.4444 | 0.657 | 9.08E-08 | count | 1 |
| ZNF208     | 0.3592916 | 0.8085272 | 0.4444 | 0.657 | 9.08E-08 | count | 1 |
| TBC1D8     | 0.3592916 | 0.8085272 | 0.4444 | 0.657 | 9.08E-08 | count | 1 |
| TBC1D17    | 0.3592916 | 0.8085272 | 0.4444 | 0.657 | 9.08E-08 | count | 1 |
| TMEM182    | 0.3592916 | 0.8085272 | 0.4444 | 0.657 | 9.08E-08 | count | 1 |
| PIGN       | 0.3592916 | 0.8085272 | 0.4444 | 0.657 | 9.08E-08 | count | 1 |

|            |           |           |        |       |          |       |   |
|------------|-----------|-----------|--------|-------|----------|-------|---|
| SLC9A8     | 0.3592916 | 0.745356  | 0.482  | 0.63  | 9.08E-08 | count | 1 |
| SLC16A13   | 0.3592916 | 1.1478534 | 0.313  | 0.754 | 9.08E-08 | count | 1 |
| EID2B      | 0.3592916 | 1.1478534 | 0.313  | 0.754 | 9.08E-08 | count | 1 |
| DOLK       | 0.3592916 | 1.1478534 | 0.313  | 0.754 | 9.08E-08 | count | 1 |
| ZNF548     | 0.3592916 | 1.1478534 | 0.313  | 0.754 | 9.08E-08 | count | 1 |
| SETD1A     | 0.3592916 | 1.1478534 | 0.313  | 0.754 | 9.08E-08 | count | 1 |
| MTRR       | 0.3592916 | 0.9203958 | 0.3904 | 0.696 | 9.08E-08 | count | 1 |
| ATP8B2     | 0.3592916 | 0.9203958 | 0.3904 | 0.696 | 9.08E-08 | count | 1 |
| PCNX2      | 0.3592916 | 0.9203958 | 0.3904 | 0.696 | 9.08E-08 | count | 1 |
| MORC2-AS1  | 0.3592916 | 0.9203958 | 0.3904 | 0.696 | 9.08E-08 | count | 1 |
| FASTKD3    | 0.3592916 | 0.9203958 | 0.3904 | 0.696 | 9.08E-08 | count | 1 |
| NDC80      | 0.3592916 | 0.9203958 | 0.3904 | 0.696 | 9.08E-08 | count | 1 |
| PEX10      | 0.3592916 | 0.9203958 | 0.3904 | 0.696 | 9.08E-08 | count | 1 |
| TAF1A      | 0.3592916 | 0.9203958 | 0.3904 | 0.696 | 9.08E-08 | count | 1 |
| DHX35      | 0.3592916 | 0.9203958 | 0.3904 | 0.696 | 9.08E-08 | count | 1 |
| ZNF550     | 0.3592916 | 0.9203958 | 0.3904 | 0.696 | 9.08E-08 | count | 1 |
| NUDT18     | 0.3592916 | 0.9203958 | 0.3904 | 0.696 | 9.08E-08 | count | 1 |
| ARRDC3-AS1 | 0.3592916 | 0.9203958 | 0.3904 | 0.696 | 9.08E-08 | count | 1 |
| VPS9D1     | 0.3592916 | 0.9203958 | 0.3904 | 0.696 | 9.08E-08 | count | 1 |
| MYBBP1A    | 0.3592916 | 0.9203958 | 0.3904 | 0.696 | 9.08E-08 | count | 1 |
| CAMSAP1    | 0.3592916 | 0.9203958 | 0.3904 | 0.696 | 9.08E-08 | count | 1 |
| NRF1       | 0.3592916 | 0.6575959 | 0.5464 | 0.585 | 9.08E-08 | count | 1 |
| NOCT       | 0.3592916 | 0.8529229 | 0.4212 | 0.674 | 9.09E-08 | count | 1 |
| KANSL3     | 0.3592916 | 1.0200689 | 0.3522 | 0.725 | 9.09E-08 | count | 1 |
| APBB3      | 0.3592916 | 1.0200689 | 0.3522 | 0.725 | 9.09E-08 | count | 1 |
| YAE1D1     | 0.3592916 | 1.0200689 | 0.3522 | 0.725 | 9.09E-08 | count | 1 |
| ZNF180     | 0.3592916 | 1.0200689 | 0.3522 | 0.725 | 9.09E-08 | count | 1 |
| ZNF280B    | 0.3592916 | 1.0200689 | 0.3522 | 0.725 | 9.09E-08 | count | 1 |
| ZFYVE1     | 0.3592916 | 1.0200689 | 0.3522 | 0.725 | 9.09E-08 | count | 1 |
| GIN1       | 0.3592916 | 1.0200689 | 0.3522 | 0.725 | 9.09E-08 | count | 1 |
| SLC16A1    | 0.3592916 | 0.7199954 | 0.499  | 0.618 | 9.09E-08 | count | 1 |
| GNB1L      | 0.3592916 | 0.7774023 | 0.4622 | 0.644 | 9.10E-08 | count | 1 |
| PIK3R6     | 0.3592916 | 0.7774023 | 0.4622 | 0.644 | 9.10E-08 | count | 1 |
| NUS1       | 0.3592916 | 0.8308522 | 0.4324 | 0.666 | 9.10E-08 | count | 1 |
| ANKRD46    | 0.3592916 | 0.8308522 | 0.4324 | 0.666 | 9.11E-08 | count | 1 |
| XPR1       | 0.3592916 | 0.8308522 | 0.4324 | 0.666 | 9.11E-08 | count | 1 |
| CREB5      | 0.3592916 | 1.3469184 | 0.2668 | 0.79  | 9.11E-08 | count | 1 |
| CCDC68     | 0.3592916 | 1.3469184 | 0.2668 | 0.79  | 9.11E-08 | count | 1 |
| BAZ1B      | 0.0077406 | 0.3202434 | 0.0242 | 0.981 | 9.33E-08 | count | 1 |
| NRBP1      | 0.0078738 | 0.2911474 | 0.027  | 0.978 | 9.48E-08 | count | 1 |
| SNX25      | 0.0215264 | 0.5822676 | 0.037  | 0.971 | 9.58E-08 | count | 1 |
| PAPSS1     | 0.1516522 | 0.4856869 | 0.3122 | 0.755 | 9.62E-08 | count | 1 |
| C4orf33    | 0.0217405 | 0.7122557 | 0.0305 | 0.976 | 9.68E-08 | count | 1 |
| KCTD6      | 0.0217405 | 0.6898915 | 0.0315 | 0.975 | 9.68E-08 | count | 1 |
| RIC1       | 0.0217405 | 0.7378163 | 0.0295 | 0.977 | 9.69E-08 | count | 1 |

|            |           |           |        |       |          |       |   |
|------------|-----------|-----------|--------|-------|----------|-------|---|
| APPL2      | 0.0220986 | 0.7339581 | 0.0301 | 0.976 | 9.84E-08 | count | 1 |
| MAP3K7     | 0.0220986 | 0.6421646 | 0.0344 | 0.973 | 9.84E-08 | count | 1 |
| MEMO1      | 0.0220986 | 0.7285898 | 0.0303 | 0.976 | 9.84E-08 | count | 1 |
| ELP5       | 0.0220986 | 0.4243954 | 0.0521 | 0.958 | 9.84E-08 | count | 1 |
| ACTN4      | 0.0220986 | 0.3758592 | 0.0588 | 0.953 | 9.84E-08 | count | 1 |
| TAF6       | 0.0220986 | 0.7195972 | 0.0307 | 0.976 | 9.84E-08 | count | 1 |
| ARAP1      | 0.0220986 | 0.680173  | 0.0325 | 0.974 | 9.85E-08 | count | 1 |
| RPS6KA1    | 0.0220986 | 0.5775287 | 0.0383 | 0.969 | 9.88E-08 | count | 1 |
| RPS6KB1    | 0.0222498 | 0.487412  | 0.0456 | 0.964 | 9.91E-08 | count | 1 |
| CCDC58     | 0.0222498 | 0.4970712 | 0.0448 | 0.964 | 9.91E-08 | count | 1 |
| AMPD3      | 0.0223861 | 0.5973552 | 0.0375 | 0.97  | 9.97E-08 | count | 1 |
| FBXL12     | 0.0223861 | 0.4617268 | 0.0485 | 0.961 | 9.97E-08 | count | 1 |
| FBXO38     | 0.0223861 | 0.660415  | 0.0339 | 0.973 | 9.97E-08 | count | 1 |
| TRAF3IP1   | 0.0223861 | 0.660415  | 0.0339 | 0.973 | 9.97E-08 | count | 1 |
| MIER3      | 0.0223861 | 0.6293224 | 0.0356 | 0.972 | 9.97E-08 | count | 1 |
| CREB3      | 0.0223861 | 0.4695744 | 0.0477 | 0.962 | 9.97E-08 | count | 1 |
| ZDHHC14    | 0.0223861 | 0.5244531 | 0.0427 | 0.966 | 9.97E-08 | count | 1 |
| KIF27      | 0.0223861 | 0.6597425 | 0.0339 | 0.973 | 9.97E-08 | count | 1 |
| NUP85      | 0.0223861 | 0.6610867 | 0.0339 | 0.973 | 9.97E-08 | count | 1 |
| GOLGA5     | 0.0223861 | 0.7104256 | 0.0315 | 0.975 | 9.97E-08 | count | 1 |
| CEP83      | 0.0223861 | 0.6590694 | 0.034  | 0.973 | 9.98E-08 | count | 1 |
| CRLF3      | 0.0224698 | 0.3394195 | 0.0662 | 0.947 | 1.00E-07 | count | 1 |
| SPPL2B     | 0.0226222 | 0.4552643 | 0.0497 | 0.96  | 1.01E-07 | count | 1 |
| RNF187     | 0.0226222 | 0.4286125 | 0.0528 | 0.958 | 1.01E-07 | count | 1 |
| POC5       | 0.0226222 | 0.5879299 | 0.0385 | 0.969 | 1.01E-07 | count | 1 |
| ADA2       | 0.0226222 | 0.6632415 | 0.0341 | 0.973 | 1.01E-07 | count | 1 |
| AKAP1      | 0.0226222 | 0.6627076 | 0.0341 | 0.973 | 1.01E-07 | count | 1 |
| SLC25A43   | 0.0226222 | 0.5877073 | 0.0385 | 0.969 | 1.01E-07 | count | 1 |
| UXS1       | 0.0226222 | 0.6136766 | 0.0369 | 0.971 | 1.01E-07 | count | 1 |
| CDC14A     | 0.0226222 | 0.6637749 | 0.0341 | 0.973 | 1.01E-07 | count | 1 |
| 2-Mar      | 0.1586209 | 0.4487619 | 0.3535 | 0.724 | 1.01E-07 | count | 1 |
| PREPL      | 0.1586209 | 0.5182038 | 0.3061 | 0.76  | 1.01E-07 | count | 1 |
| YWHAE      | 0.0085132 | 0.1998655 | 0.0426 | 0.966 | 1.02E-07 | count | 1 |
| CCNG2      | 0.0092724 | 0.3347418 | 0.0277 | 0.978 | 1.12E-07 | count | 1 |
| RANBP9     | 0.17697   | 0.5355061 | 0.3305 | 0.741 | 1.13E-07 | count | 1 |
| AC093010.2 | 0.17697   | 0.5039186 | 0.3512 | 0.726 | 1.13E-07 | count | 1 |
| ZNF680     | 0.17697   | 0.5846211 | 0.3027 | 0.762 | 1.13E-07 | count | 1 |
| STARD5     | 0.17697   | 0.5846211 | 0.3027 | 0.762 | 1.13E-07 | count | 1 |
| CLYBL      | 0.17697   | 0.6299181 | 0.2809 | 0.779 | 1.13E-07 | count | 1 |
| DAPK3      | 0.17697   | 0.5002858 | 0.3537 | 0.724 | 1.14E-07 | count | 1 |
| DHX30      | 0.17697   | 0.4240753 | 0.4173 | 0.677 | 1.14E-07 | count | 1 |
| REV3L      | 0.0100223 | 0.3404155 | 0.0294 | 0.977 | 1.21E-07 | count | 1 |
| CDK14      | 0.0102278 | 0.2760214 | 0.0371 | 0.97  | 1.23E-07 | count | 1 |
| KATNBL1    | 0.0103131 | 0.2857703 | 0.0361 | 0.971 | 1.24E-07 | count | 1 |
| NECAP2     | 0.0103131 | 0.2851477 | 0.0362 | 0.971 | 1.24E-07 | count | 1 |

|            |            |             |        |       |          |       |   |
|------------|------------|-------------|--------|-------|----------|-------|---|
| CASK       | 0.0278674  | 0.3722247   | 0.0749 | 0.94  | 1.24E-07 | count | 1 |
| ILF3-DT    | 0.0107038  | 0.3344518   | 0.032  | 0.974 | 1.29E-07 | count | 1 |
| SLF1       | 0.0291995  | 0.4222845   | 0.0691 | 0.945 | 1.30E-07 | count | 1 |
| PURB       | 0.0295347  | 0.4220354   | 0.07   | 0.944 | 1.32E-07 | count | 1 |
| SCYL3      | 0.0791277  | 0.8272283   | 0.0957 | 0.924 | 1.32E-07 | count | 1 |
| SORD       | 0.0791277  | 0.8269867   | 0.0957 | 0.924 | 1.32E-07 | count | 1 |
| CERNA1     | 0.0791277  | 0.8269867   | 0.0957 | 0.924 | 1.32E-07 | count | 1 |
| TRMT2B     | 0.0791277  | 0.8269867   | 0.0957 | 0.924 | 1.32E-07 | count | 1 |
| KLHL9      | 0.0791277  | 0.8272283   | 0.0957 | 0.924 | 1.32E-07 | count | 1 |
| IFNG-AS1   | 0.0791277  | 0.8269867   | 0.0957 | 0.924 | 1.32E-07 | count | 1 |
| IFFO1      | 0.0791277  | 0.8269867   | 0.0957 | 0.924 | 1.32E-07 | count | 1 |
| C7orf26    | 0.0791277  | 0.6845332   | 0.1156 | 0.908 | 1.32E-07 | count | 1 |
| PDK3       | 0.0791277  | 0.6842413   | 0.1156 | 0.908 | 1.32E-07 | count | 1 |
| TATDN2     | 0.0791277  | 1.0060582   | 0.0787 | 0.937 | 1.32E-07 | count | 1 |
| ACSF2      | 0.0791277  | 0.8874133   | 0.0892 | 0.929 | 1.33E-07 | count | 1 |
| LPCAT3     | 0.0791277  | 0.8874133   | 0.0892 | 0.929 | 1.33E-07 | count | 1 |
| YIPF1      | 0.0791277  | 0.8874133   | 0.0892 | 0.929 | 1.33E-07 | count | 1 |
| KDM4A      | 0.0791277  | 0.7561623   | 0.1046 | 0.917 | 1.33E-07 | count | 1 |
| ZNF260     | 0.0791277  | 0.7561623   | 0.1046 | 0.917 | 1.33E-07 | count | 1 |
| NMB        | 0.0791277  | 0.953183    | 0.083  | 0.934 | 1.33E-07 | count | 1 |
| ZBTB49     | 0.0791277  | 0.8825939   | 0.0897 | 0.929 | 1.33E-07 | count | 1 |
| AL133453.1 | 0.0297232  | 0.4197305   | 0.0708 | 0.944 | 1.33E-07 | count | 1 |
| ADTRP      | 0.2051409  | 0.7687315   | 0.2669 | 0.79  | 1.33E-07 | count | 1 |
| SLC35F5    | 0.2051409  | 0.5957623   | 0.3443 | 0.731 | 1.33E-07 | count | 1 |
| SNIP1      | 0.0303968  | 0.4943846   | 0.0615 | 0.951 | 1.36E-07 | count | 1 |
| WDR13      | 0.0303968  | 0.481039    | 0.0632 | 0.95  | 1.36E-07 | count | 1 |
| LIPE       | 0.5134423  | 0.773434    | 0.6638 | 0.507 | 1.38E-07 | count | 1 |
| MLYCD      | 0.5134423  | 0.773434    | 0.6638 | 0.507 | 1.38E-07 | count | 1 |
| LINC00665  | 0.5134423  | 0.6409118   | 0.8011 | 0.423 | 1.38E-07 | count | 1 |
| TRIM21     | 0.5134423  | 0.6934985   | 0.7404 | 0.459 | 1.38E-07 | count | 1 |
| PELO       | 0.5134423  | 0.6934985   | 0.7404 | 0.459 | 1.38E-07 | count | 1 |
| AC004865.2 | 0.5134423  | 0.7423694   | 0.6916 | 0.49  | 1.38E-07 | count | 1 |
| POMGNT1    | 0.5134423  | 0.7423694   | 0.6916 | 0.49  | 1.38E-07 | count | 1 |
| TICAM1     | 0.0312954  | 0.4801758   | 0.0652 | 0.948 | 1.40E-07 | count | 1 |
| SPATC1     | 18.2510171 | 3328.981499 | 0.0055 | 0.996 | 1.44E-07 | count | 1 |
| MMAA       | 18.2510171 | 3328.98145  | 0.0055 | 0.996 | 1.44E-07 | count | 1 |
| CENPI      | 18.2510171 | 3328.981547 | 0.0055 | 0.996 | 1.44E-07 | count | 1 |
| USP31      | 18.2510171 | 3328.98145  | 0.0055 | 0.996 | 1.44E-07 | count | 1 |
| C19orf47   | 18.2510171 | 3328.98145  | 0.0055 | 0.996 | 1.44E-07 | count | 1 |
| PLD2       | 18.251017  | 3328.981466 | 0.0055 | 0.996 | 1.44E-07 | count | 1 |
| MFSD4A     | 18.2510169 | 3328.98145  | 0.0055 | 0.996 | 1.44E-07 | count | 1 |
| TTC26      | 18.2510169 | 3328.981515 | 0.0055 | 0.996 | 1.44E-07 | count | 1 |
| SPATA1     | 18.2510168 | 3328.98137  | 0.0055 | 0.996 | 1.44E-07 | count | 1 |
| KIAA0895   | 18.251017  | 3328.98145  | 0.0055 | 0.996 | 1.44E-07 | count | 1 |
| MAGI2      | 18.2510169 | 3328.981354 | 0.0055 | 0.996 | 1.44E-07 | count | 1 |

|              |            |             |        |       |          |       |   |
|--------------|------------|-------------|--------|-------|----------|-------|---|
| MORN3        | 18.2510169 | 3328.981434 | 0.0055 | 0.996 | 1.44E-07 | count | 1 |
| DHRS13       | 18.2510167 | 3328.981466 | 0.0055 | 0.996 | 1.44E-07 | count | 1 |
| WNT16        | 18.2510169 | 3328.981418 | 0.0055 | 0.996 | 1.44E-07 | count | 1 |
| TRIQQ        | 18.2510168 | 3328.981306 | 0.0055 | 0.996 | 1.44E-07 | count | 1 |
| DSCC1        | 18.2510168 | 3328.981306 | 0.0055 | 0.996 | 1.44E-07 | count | 1 |
| ARHGAP44     | 18.2510169 | 3328.981418 | 0.0055 | 0.996 | 1.44E-07 | count | 1 |
| ZNF391       | 18.2510168 | 3328.981258 | 0.0055 | 0.996 | 1.44E-07 | count | 1 |
| AC034236.2   | 18.2510167 | 3328.981434 | 0.0055 | 0.996 | 1.44E-07 | count | 1 |
| KLHL26       | 18.2510169 | 3328.981466 | 0.0055 | 0.996 | 1.44E-07 | count | 1 |
| NPIPB15      | 18.2510168 | 3328.981226 | 0.0055 | 0.996 | 1.44E-07 | count | 1 |
| ZNF547       | 18.2510169 | 3328.981322 | 0.0055 | 0.996 | 1.44E-07 | count | 1 |
| SNHG10       | 18.2510167 | 3328.98145  | 0.0055 | 0.996 | 1.44E-07 | count | 1 |
| TMEM38A      | 18.2510168 | 3328.981483 | 0.0055 | 0.996 | 1.44E-07 | count | 1 |
| NCKIPSD      | 18.2510166 | 3328.981499 | 0.0055 | 0.996 | 1.44E-07 | count | 1 |
| AL109811.3   | 18.2510167 | 3328.981226 | 0.0055 | 0.996 | 1.44E-07 | count | 1 |
| GSTM1        | 18.2510167 | 3328.981226 | 0.0055 | 0.996 | 1.44E-07 | count | 1 |
| CEP131       | 18.2510165 | 3328.981434 | 0.0055 | 0.996 | 1.44E-07 | count | 1 |
| KCTD17       | 18.2510169 | 3328.981643 | 0.0055 | 0.996 | 1.44E-07 | count | 1 |
| PDIA5        | 18.2510165 | 3328.981434 | 0.0055 | 0.996 | 1.44E-07 | count | 1 |
| DUSP19       | 18.2510167 | 3328.981306 | 0.0055 | 0.996 | 1.44E-07 | count | 1 |
| PAM          | 18.2510167 | 3328.981402 | 0.0055 | 0.996 | 1.44E-07 | count | 1 |
| LRRRC24      | 18.2510166 | 3328.981418 | 0.0055 | 0.996 | 1.44E-07 | count | 1 |
| AC142472.1   | 18.2510166 | 3328.981258 | 0.0055 | 0.996 | 1.44E-07 | count | 1 |
| FAM214B      | 18.2510166 | 3328.981402 | 0.0055 | 0.996 | 1.44E-07 | count | 1 |
| ITPRIPL2     | 18.2510165 | 3328.981466 | 0.0055 | 0.996 | 1.44E-07 | count | 1 |
| CAMK2N2      | 18.2510166 | 3328.981226 | 0.0055 | 0.996 | 1.44E-07 | count | 1 |
| SPRED1       | 18.2510167 | 3328.981354 | 0.0055 | 0.996 | 1.44E-07 | count | 1 |
| MCOLN1       | 18.2510167 | 3328.981258 | 0.0055 | 0.996 | 1.44E-07 | count | 1 |
| RIN2         | 18.2510165 | 3328.981402 | 0.0055 | 0.996 | 1.44E-07 | count | 1 |
| FAM13A-AS1   | 18.2510164 | 3328.981418 | 0.0055 | 0.996 | 1.44E-07 | count | 1 |
| ZNF582       | 18.2510164 | 3328.981547 | 0.0055 | 0.996 | 1.44E-07 | count | 1 |
| AL358072.1   | 18.2510167 | 3328.981274 | 0.0055 | 0.996 | 1.44E-07 | count | 1 |
| ANKRD65      | 18.2510165 | 3328.981322 | 0.0055 | 0.996 | 1.44E-07 | count | 1 |
| LYSMD4       | 18.2510166 | 3328.981483 | 0.0055 | 0.996 | 1.44E-07 | count | 1 |
| AL669831.5   | 18.2510166 | 3328.981338 | 0.0055 | 0.996 | 1.44E-07 | count | 1 |
| ABCB10       | 18.2510165 | 3328.981338 | 0.0055 | 0.996 | 1.44E-07 | count | 1 |
| KCNRG        | 18.2510166 | 3328.981354 | 0.0055 | 0.996 | 1.44E-07 | count | 1 |
| C21orf62-AS1 | 18.2510167 | 3328.981402 | 0.0055 | 0.996 | 1.44E-07 | count | 1 |
| ELP1         | 18.2510164 | 3328.981226 | 0.0055 | 0.996 | 1.44E-07 | count | 1 |
| TLR4         | 18.2510166 | 3328.981483 | 0.0055 | 0.996 | 1.44E-07 | count | 1 |
| HLCS         | 18.2510166 | 3328.981322 | 0.0055 | 0.996 | 1.44E-07 | count | 1 |
| BOLA2B       | 18.2510163 | 3328.981162 | 0.0055 | 0.996 | 1.44E-07 | count | 1 |
| ZMAT3        | 18.2510166 | 3328.981386 | 0.0055 | 0.996 | 1.44E-07 | count | 1 |
| GOLGA8N      | 18.2510166 | 3328.981531 | 0.0055 | 0.996 | 1.44E-07 | count | 1 |
| P2RY11       | 18.2510165 | 3328.981226 | 0.0055 | 0.996 | 1.44E-07 | count | 1 |

|             |            |             |        |       |          |       |   |
|-------------|------------|-------------|--------|-------|----------|-------|---|
| GPR135      | 18.2510163 | 3328.981402 | 0.0055 | 0.996 | 1.44E-07 | count | 1 |
| IGKV2-24    | 18.2510164 | 3328.981563 | 0.0055 | 0.996 | 1.44E-07 | count | 1 |
| LINC01521   | 18.2510165 | 3328.98145  | 0.0055 | 0.996 | 1.44E-07 | count | 1 |
| SEC61A1     | 18.2510163 | 3328.98129  | 0.0055 | 0.996 | 1.44E-07 | count | 1 |
| ZNF282      | 18.2510163 | 3328.981338 | 0.0055 | 0.996 | 1.44E-07 | count | 1 |
| TRIP6       | 18.2510164 | 3328.981531 | 0.0055 | 0.996 | 1.44E-07 | count | 1 |
| VAR52       | 18.2510164 | 3328.981386 | 0.0055 | 0.996 | 1.44E-07 | count | 1 |
| AC011773.4  | 18.2510164 | 3328.981402 | 0.0055 | 0.996 | 1.44E-07 | count | 1 |
| ZNF438      | 18.2510164 | 3328.981386 | 0.0055 | 0.996 | 1.44E-07 | count | 1 |
| CCDC51      | 18.2510165 | 3328.981322 | 0.0055 | 0.996 | 1.44E-07 | count | 1 |
| PANK1       | 18.2510162 | 3328.98137  | 0.0055 | 0.996 | 1.44E-07 | count | 1 |
| LINC02202   | 18.2510166 | 3328.981499 | 0.0055 | 0.996 | 1.44E-07 | count | 1 |
| BIK         | 18.2510163 | 3328.981418 | 0.0055 | 0.996 | 1.44E-07 | count | 1 |
| ELOA-AS1    | 18.2510163 | 3328.981338 | 0.0055 | 0.996 | 1.44E-07 | count | 1 |
| OBSCN       | 18.2510164 | 3328.981306 | 0.0055 | 0.996 | 1.44E-07 | count | 1 |
| HGH1        | 18.2510163 | 3328.981338 | 0.0055 | 0.996 | 1.44E-07 | count | 1 |
| CCDC157     | 18.2510163 | 3328.981338 | 0.0055 | 0.996 | 1.44E-07 | count | 1 |
| AL080276.2  | 18.2510162 | 3328.98145  | 0.0055 | 0.996 | 1.44E-07 | count | 1 |
| AC021016.3  | 18.2510163 | 3328.981402 | 0.0055 | 0.996 | 1.44E-07 | count | 1 |
| RAP1GAP2    | 18.2510163 | 3328.981402 | 0.0055 | 0.996 | 1.44E-07 | count | 1 |
| LLGL1       | 18.2510163 | 3328.981402 | 0.0055 | 0.996 | 1.44E-07 | count | 1 |
| HMSD        | 18.2510163 | 3328.981402 | 0.0055 | 0.996 | 1.44E-07 | count | 1 |
| ANKMY1      | 18.251016  | 3328.981306 | 0.0055 | 0.996 | 1.44E-07 | count | 1 |
| AC068338.3  | 18.2510163 | 3328.981226 | 0.0055 | 0.996 | 1.44E-07 | count | 1 |
| HIST1H2BH   | 18.2510163 | 3328.981434 | 0.0055 | 0.996 | 1.44E-07 | count | 1 |
| ADHFE1      | 18.2510161 | 3328.981194 | 0.0055 | 0.996 | 1.44E-07 | count | 1 |
| MACROD1     | 18.2510162 | 3328.981466 | 0.0055 | 0.996 | 1.44E-07 | count | 1 |
| IL2RB       | 18.2510162 | 3328.981242 | 0.0055 | 0.996 | 1.44E-07 | count | 1 |
| AC023906.3  | 18.2510162 | 3328.981402 | 0.0055 | 0.996 | 1.44E-07 | count | 1 |
| CD247       | 18.2510159 | 3328.981306 | 0.0055 | 0.996 | 1.44E-07 | count | 1 |
| C1orf198    | 18.2510161 | 3328.981515 | 0.0055 | 0.996 | 1.44E-07 | count | 1 |
| GLYCTK      | 18.2510161 | 3328.981515 | 0.0055 | 0.996 | 1.44E-07 | count | 1 |
| TCEANC      | 18.2510161 | 3328.981434 | 0.0055 | 0.996 | 1.44E-07 | count | 1 |
| TDG         | 0.011924   | 0.3059061   | 0.039  | 0.969 | 1.44E-07 | count | 1 |
| TTC23       | 17.5574105 | 3335.552586 | 0.0053 | 0.996 | 1.44E-07 | count | 1 |
| AC024592.3  | 17.5574105 | 3335.552586 | 0.0053 | 0.996 | 1.44E-07 | count | 1 |
| STRIP2      | 17.5574103 | 3335.552586 | 0.0053 | 0.996 | 1.44E-07 | count | 1 |
| CDC42BPG    | 17.5574103 | 3335.552586 | 0.0053 | 0.996 | 1.44E-07 | count | 1 |
| LIPT2       | 17.5574103 | 3335.552586 | 0.0053 | 0.996 | 1.44E-07 | count | 1 |
| AC025034.1  | 17.5574103 | 3335.552586 | 0.0053 | 0.996 | 1.44E-07 | count | 1 |
| PTK6        | 17.5574103 | 3335.552586 | 0.0053 | 0.996 | 1.44E-07 | count | 1 |
| ZNF436      | 17.5574104 | 3335.552626 | 0.0053 | 0.996 | 1.44E-07 | count | 1 |
| FAM229A     | 17.5574104 | 3335.552538 | 0.0053 | 0.996 | 1.44E-07 | count | 1 |
| EPB41L4A-DT | 17.5574104 | 3335.552538 | 0.0053 | 0.996 | 1.44E-07 | count | 1 |
| AC006333.2  | 17.5574104 | 3335.552538 | 0.0053 | 0.996 | 1.44E-07 | count | 1 |



|            |            |             |        |       |          |       |   |
|------------|------------|-------------|--------|-------|----------|-------|---|
| RMRP       | 17.5574104 | 3335.552626 | 0.0053 | 0.996 | 1.44E-07 | count | 1 |
| TMEM9B-AS1 | 17.5574104 | 3335.552538 | 0.0053 | 0.996 | 1.44E-07 | count | 1 |
| AC069544.1 | 17.5574104 | 3335.552538 | 0.0053 | 0.996 | 1.44E-07 | count | 1 |
| C14orf132  | 17.5574104 | 3335.552626 | 0.0053 | 0.996 | 1.44E-07 | count | 1 |
| AC021739.2 | 17.5574104 | 3335.552538 | 0.0053 | 0.996 | 1.44E-07 | count | 1 |
| CCL14      | 17.5574104 | 3335.552538 | 0.0053 | 0.996 | 1.44E-07 | count | 1 |
| AL035413.1 | 17.5574104 | 3335.552513 | 0.0053 | 0.996 | 1.44E-07 | count | 1 |
| AL353708.3 | 17.5574104 | 3335.552513 | 0.0053 | 0.996 | 1.44E-07 | count | 1 |
| AC137630.3 | 17.5574104 | 3335.552513 | 0.0053 | 0.996 | 1.44E-07 | count | 1 |
| GPER1      | 17.5574104 | 3335.552513 | 0.0053 | 0.996 | 1.44E-07 | count | 1 |
| TRGV5      | 17.5574104 | 3335.552513 | 0.0053 | 0.996 | 1.44E-07 | count | 1 |
| MAGEE1     | 17.5574104 | 3335.552513 | 0.0053 | 0.996 | 1.44E-07 | count | 1 |
| NLRP6      | 17.5574103 | 3335.55257  | 0.0053 | 0.996 | 1.44E-07 | count | 1 |
| OVOL1      | 17.5574103 | 3335.55257  | 0.0053 | 0.996 | 1.44E-07 | count | 1 |
| AL117336.3 | 17.5574104 | 3335.552513 | 0.0053 | 0.996 | 1.44E-07 | count | 1 |
| CCDC189    | 17.5574104 | 3335.552513 | 0.0053 | 0.996 | 1.44E-07 | count | 1 |
| AC092723.5 | 17.5574104 | 3335.552513 | 0.0053 | 0.996 | 1.44E-07 | count | 1 |
| 4-Sep      | 17.5574104 | 3335.552513 | 0.0053 | 0.996 | 1.44E-07 | count | 1 |
| AC123912.1 | 17.5574104 | 3335.552513 | 0.0053 | 0.996 | 1.44E-07 | count | 1 |
| AC020910.4 | 17.5574104 | 3335.552513 | 0.0053 | 0.996 | 1.44E-07 | count | 1 |
| SIK1B      | 17.5574104 | 3335.552513 | 0.0053 | 0.996 | 1.44E-07 | count | 1 |
| DHCR24     | 17.5574103 | 3335.552522 | 0.0053 | 0.996 | 1.44E-07 | count | 1 |
| GPAT2      | 17.5574104 | 3335.552586 | 0.0053 | 0.996 | 1.44E-07 | count | 1 |
| RARB       | 17.5574103 | 3335.552473 | 0.0053 | 0.996 | 1.44E-07 | count | 1 |
| EIF4E3     | 17.5574103 | 3335.552522 | 0.0053 | 0.996 | 1.44E-07 | count | 1 |
| AC097382.2 | 17.5574103 | 3335.552538 | 0.0053 | 0.996 | 1.44E-07 | count | 1 |
| GALNTL6    | 17.5574103 | 3335.552473 | 0.0053 | 0.996 | 1.44E-07 | count | 1 |
| CLDN12     | 17.5574103 | 3335.552473 | 0.0053 | 0.996 | 1.44E-07 | count | 1 |
| TRIM3      | 17.5574104 | 3335.552586 | 0.0053 | 0.996 | 1.44E-07 | count | 1 |
| CSRNP2     | 17.5574103 | 3335.552538 | 0.0053 | 0.996 | 1.44E-07 | count | 1 |
| IGHV4-28   | 17.5574104 | 3335.552586 | 0.0053 | 0.996 | 1.44E-07 | count | 1 |
| AC027601.1 | 17.5574104 | 3335.552586 | 0.0053 | 0.996 | 1.44E-07 | count | 1 |
| AC012123.1 | 17.5574103 | 3335.552538 | 0.0053 | 0.996 | 1.44E-07 | count | 1 |
| HM13-AS1   | 17.5574103 | 3335.552522 | 0.0053 | 0.996 | 1.44E-07 | count | 1 |
| AC007876.1 | 17.5574103 | 3335.552538 | 0.0053 | 0.996 | 1.44E-07 | count | 1 |
| LINC02562  | 17.5574103 | 3335.552505 | 0.0053 | 0.996 | 1.44E-07 | count | 1 |
| AMER1      | 17.5574103 | 3335.55257  | 0.0053 | 0.996 | 1.44E-07 | count | 1 |
| ANK1       | 17.5574103 | 3335.55257  | 0.0053 | 0.996 | 1.44E-07 | count | 1 |
| AC079209.1 | 17.5574103 | 3335.552505 | 0.0053 | 0.996 | 1.44E-07 | count | 1 |
| LRRC8A     | 17.5574103 | 3335.552505 | 0.0053 | 0.996 | 1.44E-07 | count | 1 |
| DDX47      | 17.5574104 | 3335.552626 | 0.0053 | 0.996 | 1.44E-07 | count | 1 |
| ASPHD1     | 17.5574103 | 3335.552505 | 0.0053 | 0.996 | 1.44E-07 | count | 1 |
| ZNF469     | 17.5574104 | 3335.552626 | 0.0053 | 0.996 | 1.44E-07 | count | 1 |
| RFLNB      | 17.5574104 | 3335.552626 | 0.0053 | 0.996 | 1.44E-07 | count | 1 |
| AC084809.1 | 17.5574103 | 3335.552505 | 0.0053 | 0.996 | 1.44E-07 | count | 1 |

|            |            |             |        |       |          |       |   |
|------------|------------|-------------|--------|-------|----------|-------|---|
| CD1A       | 17.5574104 | 3335.55253  | 0.0053 | 0.996 | 1.44E-07 | count | 1 |
| IGKV1-9    | 17.5574103 | 3335.552546 | 0.0053 | 0.996 | 1.44E-07 | count | 1 |
| CFAP69     | 17.5574103 | 3335.552546 | 0.0053 | 0.996 | 1.44E-07 | count | 1 |
| AC008264.2 | 17.5574104 | 3335.55253  | 0.0053 | 0.996 | 1.44E-07 | count | 1 |
| WDCP       | 17.5574104 | 3335.552497 | 0.0053 | 0.996 | 1.44E-07 | count | 1 |
| MYLK4      | 17.5574104 | 3335.552497 | 0.0053 | 0.996 | 1.44E-07 | count | 1 |
| AC104958.2 | 17.5574104 | 3335.552497 | 0.0053 | 0.996 | 1.44E-07 | count | 1 |
| AC090192.2 | 17.5574104 | 3335.552497 | 0.0053 | 0.996 | 1.44E-07 | count | 1 |
| KBTBD7     | 17.5574104 | 3335.552497 | 0.0053 | 0.996 | 1.44E-07 | count | 1 |
| COLEC12    | 17.5574104 | 3335.552497 | 0.0053 | 0.996 | 1.44E-07 | count | 1 |
| OSBPL1A    | 17.5574104 | 3335.552497 | 0.0053 | 0.996 | 1.44E-07 | count | 1 |
| LINC02055  | 17.5574104 | 3335.552578 | 0.0053 | 0.996 | 1.44E-07 | count | 1 |
| C1S        | 17.5574104 | 3335.552578 | 0.0053 | 0.996 | 1.44E-07 | count | 1 |
| LINC00937  | 17.5574104 | 3335.552578 | 0.0053 | 0.996 | 1.44E-07 | count | 1 |
| RAMP2      | 17.5574103 | 3335.552562 | 0.0053 | 0.996 | 1.44E-07 | count | 1 |
| ZSCAN5A    | 17.5574103 | 3335.552562 | 0.0053 | 0.996 | 1.44E-07 | count | 1 |
| AC104123.1 | 17.5574103 | 3335.552497 | 0.0053 | 0.996 | 1.44E-07 | count | 1 |
| LINC01551  | 17.5574103 | 3335.552497 | 0.0053 | 0.996 | 1.44E-07 | count | 1 |
| AC004771.3 | 17.5574103 | 3335.552497 | 0.0053 | 0.996 | 1.44E-07 | count | 1 |
| AL031772.1 | 17.5574103 | 3335.552634 | 0.0053 | 0.996 | 1.44E-07 | count | 1 |
| AC131011.1 | 17.5574103 | 3335.552634 | 0.0053 | 0.996 | 1.44E-07 | count | 1 |
| AC124242.1 | 17.5574103 | 3335.552634 | 0.0053 | 0.996 | 1.44E-07 | count | 1 |
| AP000424.1 | 17.5574103 | 3335.552562 | 0.0053 | 0.996 | 1.44E-07 | count | 1 |
| TMEM255B   | 17.5574103 | 3335.552562 | 0.0053 | 0.996 | 1.44E-07 | count | 1 |
| GPAT3      | 17.5574104 | 3335.552513 | 0.0053 | 0.996 | 1.44E-07 | count | 1 |
| C6orf52    | 17.5574104 | 3335.552513 | 0.0053 | 0.996 | 1.44E-07 | count | 1 |
| DEPTOR     | 17.5574104 | 3335.552513 | 0.0053 | 0.996 | 1.44E-07 | count | 1 |
| CUL7       | 17.5574103 | 3335.552618 | 0.0053 | 0.996 | 1.44E-07 | count | 1 |
| LRP11      | 17.5574103 | 3335.552618 | 0.0053 | 0.996 | 1.44E-07 | count | 1 |
| PROC       | 17.5574104 | 3335.55261  | 0.0053 | 0.996 | 1.44E-07 | count | 1 |
| CCRL2      | 17.5574104 | 3335.55261  | 0.0053 | 0.996 | 1.44E-07 | count | 1 |
| MON1A      | 17.5574103 | 3335.552602 | 0.0053 | 0.996 | 1.44E-07 | count | 1 |
| LPP-AS1    | 17.5574103 | 3335.552618 | 0.0053 | 0.996 | 1.44E-07 | count | 1 |
| CENPE      | 17.5574103 | 3335.552602 | 0.0053 | 0.996 | 1.44E-07 | count | 1 |
| DMGDH      | 17.5574103 | 3335.552602 | 0.0053 | 0.996 | 1.44E-07 | count | 1 |
| LCP2       | 17.5574103 | 3335.552602 | 0.0053 | 0.996 | 1.44E-07 | count | 1 |
| ZNF713     | 17.5574104 | 3335.55261  | 0.0053 | 0.996 | 1.44E-07 | count | 1 |
| AP003352.1 | 17.5574103 | 3335.552618 | 0.0053 | 0.996 | 1.44E-07 | count | 1 |
| AC023908.3 | 17.5574103 | 3335.552602 | 0.0053 | 0.996 | 1.44E-07 | count | 1 |
| AC010542.2 | 17.5574103 | 3335.552618 | 0.0053 | 0.996 | 1.44E-07 | count | 1 |
| ZNF19      | 17.5574103 | 3335.552602 | 0.0053 | 0.996 | 1.44E-07 | count | 1 |
| SLFN12L    | 17.5574104 | 3335.55261  | 0.0053 | 0.996 | 1.44E-07 | count | 1 |
| YES1       | 17.5574103 | 3335.552618 | 0.0053 | 0.996 | 1.44E-07 | count | 1 |
| AC009005.1 | 17.5574103 | 3335.552602 | 0.0053 | 0.996 | 1.44E-07 | count | 1 |
| DYRK3      | 17.5574104 | 3335.552618 | 0.0053 | 0.996 | 1.44E-07 | count | 1 |

|            |            |             |        |       |          |       |   |
|------------|------------|-------------|--------|-------|----------|-------|---|
| AC021321.1 | 17.5574104 | 3335.552618 | 0.0053 | 0.996 | 1.44E-07 | count | 1 |
| RSPO2      | 17.5574104 | 3335.552618 | 0.0053 | 0.996 | 1.44E-07 | count | 1 |
| TBCD       | 17.5574104 | 3335.552618 | 0.0053 | 0.996 | 1.44E-07 | count | 1 |
| BCAM       | 17.5574102 | 3335.552497 | 0.0053 | 0.996 | 1.44E-07 | count | 1 |
| MICALL1    | 17.5574104 | 3335.552618 | 0.0053 | 0.996 | 1.44E-07 | count | 1 |
| LINC01063  | 17.5574103 | 3335.552505 | 0.0053 | 0.996 | 1.44E-07 | count | 1 |
| HCG25      | 17.5574103 | 3335.552602 | 0.0053 | 0.996 | 1.44E-07 | count | 1 |
| ADGRF5     | 17.5574103 | 3335.552505 | 0.0053 | 0.996 | 1.44E-07 | count | 1 |
| RWDD2A     | 17.5574103 | 3335.552481 | 0.0053 | 0.996 | 1.44E-07 | count | 1 |
| SPDYE16    | 17.5574103 | 3335.552481 | 0.0053 | 0.996 | 1.44E-07 | count | 1 |
| ZNF623     | 17.5574103 | 3335.552602 | 0.0053 | 0.996 | 1.44E-07 | count | 1 |
| AL161725.1 | 17.5574103 | 3335.552505 | 0.0053 | 0.996 | 1.44E-07 | count | 1 |
| ARHGEF17   | 17.5574103 | 3335.552481 | 0.0053 | 0.996 | 1.44E-07 | count | 1 |
| FAM241B    | 17.5574103 | 3335.552578 | 0.0053 | 0.996 | 1.44E-07 | count | 1 |
| TMEM254    | 17.5574103 | 3335.552505 | 0.0053 | 0.996 | 1.44E-07 | count | 1 |
| ITGA5      | 17.5574103 | 3335.552578 | 0.0053 | 0.996 | 1.44E-07 | count | 1 |
| NEK5       | 17.5574103 | 3335.552602 | 0.0053 | 0.996 | 1.44E-07 | count | 1 |
| NOL3       | 17.5574103 | 3335.552578 | 0.0053 | 0.996 | 1.44E-07 | count | 1 |
| MYO18A     | 17.5574103 | 3335.552602 | 0.0053 | 0.996 | 1.44E-07 | count | 1 |
| RND2       | 17.5574103 | 3335.552602 | 0.0053 | 0.996 | 1.44E-07 | count | 1 |
| PLEKHA4    | 17.5574103 | 3335.552578 | 0.0053 | 0.996 | 1.44E-07 | count | 1 |
| LEPR       | 17.5574103 | 3335.552586 | 0.0053 | 0.996 | 1.44E-07 | count | 1 |
| LYPD1      | 17.5574103 | 3335.552554 | 0.0053 | 0.996 | 1.44E-07 | count | 1 |
| AP003392.5 | 17.5574103 | 3335.552554 | 0.0053 | 0.996 | 1.44E-07 | count | 1 |
| SLC25A15   | 17.5574103 | 3335.552554 | 0.0053 | 0.996 | 1.44E-07 | count | 1 |
| AL928654.1 | 17.5574103 | 3335.552586 | 0.0053 | 0.996 | 1.44E-07 | count | 1 |
| GPR153     | 17.5574103 | 3335.552562 | 0.0053 | 0.996 | 1.44E-07 | count | 1 |
| PARS2      | 17.5574103 | 3335.552562 | 0.0053 | 0.996 | 1.44E-07 | count | 1 |
| VANGL1     | 17.5574103 | 3335.552562 | 0.0053 | 0.996 | 1.44E-07 | count | 1 |
| C2orf42    | 17.5574103 | 3335.552562 | 0.0053 | 0.996 | 1.44E-07 | count | 1 |
| AC104076.1 | 17.5574103 | 3335.552562 | 0.0053 | 0.996 | 1.44E-07 | count | 1 |
| ODAPH      | 17.5574103 | 3335.552562 | 0.0053 | 0.996 | 1.44E-07 | count | 1 |
| HIST1H2AH  | 17.5574103 | 3335.552562 | 0.0053 | 0.996 | 1.44E-07 | count | 1 |
| WEE2-AS1   | 17.5574103 | 3335.552562 | 0.0053 | 0.996 | 1.44E-07 | count | 1 |
| TSPYL5     | 17.5574103 | 3335.55265  | 0.0053 | 0.996 | 1.44E-07 | count | 1 |
| TMEM132A   | 17.5574103 | 3335.552562 | 0.0053 | 0.996 | 1.44E-07 | count | 1 |
| AP001160.3 | 17.5574103 | 3335.552562 | 0.0053 | 0.996 | 1.44E-07 | count | 1 |
| TET1       | 17.5574103 | 3335.552562 | 0.0053 | 0.996 | 1.44E-07 | count | 1 |
| MEG3       | 17.5574103 | 3335.552562 | 0.0053 | 0.996 | 1.44E-07 | count | 1 |
| NPW        | 17.5574103 | 3335.55265  | 0.0053 | 0.996 | 1.44E-07 | count | 1 |
| OVCA2      | 17.5574103 | 3335.552562 | 0.0053 | 0.996 | 1.44E-07 | count | 1 |
| PSTPIP2    | 17.5574103 | 3335.552562 | 0.0053 | 0.996 | 1.44E-07 | count | 1 |
| KCNJ14     | 17.5574103 | 3335.552562 | 0.0053 | 0.996 | 1.44E-07 | count | 1 |
| AL022322.2 | 17.5574103 | 3335.552562 | 0.0053 | 0.996 | 1.44E-07 | count | 1 |
| AL356488.3 | 17.5574103 | 3335.552465 | 0.0053 | 0.996 | 1.44E-07 | count | 1 |

|              |            |             |        |       |          |       |   |
|--------------|------------|-------------|--------|-------|----------|-------|---|
| LINC01118    | 17.5574103 | 3335.552465 | 0.0053 | 0.996 | 1.44E-07 | count | 1 |
| IL17RC       | 17.5574103 | 3335.552578 | 0.0053 | 0.996 | 1.44E-07 | count | 1 |
| ABLIM2       | 17.5574103 | 3335.552465 | 0.0053 | 0.996 | 1.44E-07 | count | 1 |
| CAGE1        | 17.5574103 | 3335.552465 | 0.0053 | 0.996 | 1.44E-07 | count | 1 |
| INE2         | 17.5574103 | 3335.552578 | 0.0053 | 0.996 | 1.44E-07 | count | 1 |
| PLAT         | 17.5574103 | 3335.552465 | 0.0053 | 0.996 | 1.44E-07 | count | 1 |
| AP000866.2   | 17.5574103 | 3335.552578 | 0.0053 | 0.996 | 1.44E-07 | count | 1 |
| AL442128.2   | 17.5574103 | 3335.552465 | 0.0053 | 0.996 | 1.44E-07 | count | 1 |
| THAP10       | 17.5574103 | 3335.552465 | 0.0053 | 0.996 | 1.44E-07 | count | 1 |
| CRNDE        | 17.5574103 | 3335.552578 | 0.0053 | 0.996 | 1.44E-07 | count | 1 |
| CPNE2        | 17.5574103 | 3335.552578 | 0.0053 | 0.996 | 1.44E-07 | count | 1 |
| ZNF624       | 17.5574103 | 3335.552465 | 0.0053 | 0.996 | 1.44E-07 | count | 1 |
| AC003681.1   | 17.5574103 | 3335.552578 | 0.0053 | 0.996 | 1.44E-07 | count | 1 |
| KCTD3        | 17.5574104 | 3335.55261  | 0.0053 | 0.996 | 1.44E-07 | count | 1 |
| LINC00471    | 17.5574103 | 3335.552546 | 0.0053 | 0.996 | 1.44E-07 | count | 1 |
| C3orf18      | 17.5574103 | 3335.552546 | 0.0053 | 0.996 | 1.44E-07 | count | 1 |
| LINC00635    | 17.5574103 | 3335.552546 | 0.0053 | 0.996 | 1.44E-07 | count | 1 |
| SMIM3        | 17.5574103 | 3335.552546 | 0.0053 | 0.996 | 1.44E-07 | count | 1 |
| DOCK4        | 17.5574103 | 3335.552546 | 0.0053 | 0.996 | 1.44E-07 | count | 1 |
| FAM219A      | 17.5574103 | 3335.552546 | 0.0053 | 0.996 | 1.44E-07 | count | 1 |
| CARD9        | 17.5574103 | 3335.552546 | 0.0053 | 0.996 | 1.44E-07 | count | 1 |
| AC010864.1   | 17.5574103 | 3335.552546 | 0.0053 | 0.996 | 1.44E-07 | count | 1 |
| AL137077.2   | 17.5574103 | 3335.552546 | 0.0053 | 0.996 | 1.44E-07 | count | 1 |
| ZFP69        | 17.5574103 | 3335.552554 | 0.0053 | 0.996 | 1.44E-07 | count | 1 |
| HIST2H2BE    | 17.5574103 | 3335.552578 | 0.0053 | 0.996 | 1.44E-07 | count | 1 |
| AC007881.3   | 17.5574103 | 3335.552554 | 0.0053 | 0.996 | 1.44E-07 | count | 1 |
| VGLL3        | 17.5574103 | 3335.552554 | 0.0053 | 0.996 | 1.44E-07 | count | 1 |
| 8-Sep        | 17.5574103 | 3335.552554 | 0.0053 | 0.996 | 1.44E-07 | count | 1 |
| AL157373.2   | 17.5574103 | 3335.552578 | 0.0053 | 0.996 | 1.44E-07 | count | 1 |
| AL137003.2   | 17.5574103 | 3335.552578 | 0.0053 | 0.996 | 1.44E-07 | count | 1 |
| TRG-AS1      | 17.5574103 | 3335.552578 | 0.0053 | 0.996 | 1.44E-07 | count | 1 |
| SCARA3       | 17.5574103 | 3335.552554 | 0.0053 | 0.996 | 1.44E-07 | count | 1 |
| AC073508.3   | 17.5574103 | 3335.552578 | 0.0053 | 0.996 | 1.44E-07 | count | 1 |
| AC011498.1   | 17.5574103 | 3335.552554 | 0.0053 | 0.996 | 1.44E-07 | count | 1 |
| KLK15        | 17.5574103 | 3335.552578 | 0.0053 | 0.996 | 1.44E-07 | count | 1 |
| ZNF613       | 17.5574103 | 3335.552578 | 0.0053 | 0.996 | 1.44E-07 | count | 1 |
| BACH1-AS1    | 17.5574103 | 3335.552578 | 0.0053 | 0.996 | 1.44E-07 | count | 1 |
| ABHD14A-ACY1 | 17.5574103 | 3335.552602 | 0.0053 | 0.996 | 1.44E-07 | count | 1 |
| AC068888.1   | 17.5574103 | 3335.552602 | 0.0053 | 0.996 | 1.44E-07 | count | 1 |
| SPACA6       | 17.5574103 | 3335.552602 | 0.0053 | 0.996 | 1.44E-07 | count | 1 |
| LINC01376    | 17.5574102 | 3335.552578 | 0.0053 | 0.996 | 1.44E-07 | count | 1 |
| CAPN10-DT    | 17.5574103 | 3335.552578 | 0.0053 | 0.996 | 1.44E-07 | count | 1 |
| POPDC2       | 17.5574102 | 3335.552578 | 0.0053 | 0.996 | 1.44E-07 | count | 1 |
| KCNMB3       | 17.5574102 | 3335.552578 | 0.0053 | 0.996 | 1.44E-07 | count | 1 |
| AC106882.1   | 17.5574102 | 3335.55253  | 0.0053 | 0.996 | 1.44E-07 | count | 1 |

|               |            |             |        |       |          |       |   |
|---------------|------------|-------------|--------|-------|----------|-------|---|
| AL137784.2    | 17.5574103 | 3335.552489 | 0.0053 | 0.996 | 1.44E-07 | count | 1 |
| STEAP4        | 17.5574103 | 3335.552449 | 0.0053 | 0.996 | 1.44E-07 | count | 1 |
| UFSP1         | 17.5574103 | 3335.552489 | 0.0053 | 0.996 | 1.44E-07 | count | 1 |
| ZNF425        | 17.5574102 | 3335.552578 | 0.0053 | 0.996 | 1.44E-07 | count | 1 |
| KDM4D         | 17.5574102 | 3335.55253  | 0.0053 | 0.996 | 1.44E-07 | count | 1 |
| USP2          | 17.5574103 | 3335.552578 | 0.0053 | 0.996 | 1.44E-07 | count | 1 |
| EIF2S3B       | 17.5574102 | 3335.552578 | 0.0053 | 0.996 | 1.44E-07 | count | 1 |
| HCAR3         | 17.5574103 | 3335.552489 | 0.0053 | 0.996 | 1.44E-07 | count | 1 |
| CCDC154       | 17.5574103 | 3335.552449 | 0.0053 | 0.996 | 1.44E-07 | count | 1 |
| MMP9          | 17.5574102 | 3335.552578 | 0.0053 | 0.996 | 1.44E-07 | count | 1 |
| EYA2          | 17.5574103 | 3335.552489 | 0.0053 | 0.996 | 1.44E-07 | count | 1 |
| SSC5D         | 17.5574102 | 3335.55253  | 0.0053 | 0.996 | 1.44E-07 | count | 1 |
| KIRREL1       | 17.5574102 | 3335.55261  | 0.0053 | 0.996 | 1.44E-07 | count | 1 |
| DNM3OS        | 17.5574103 | 3335.552634 | 0.0053 | 0.996 | 1.44E-07 | count | 1 |
| C1orf74       | 17.5574102 | 3335.55261  | 0.0053 | 0.996 | 1.44E-07 | count | 1 |
| MMRN1         | 17.5574102 | 3335.55261  | 0.0053 | 0.996 | 1.44E-07 | count | 1 |
| SMPDL3A       | 17.5574102 | 3335.552449 | 0.0053 | 0.996 | 1.44E-07 | count | 1 |
| XK            | 17.5574102 | 3335.55261  | 0.0053 | 0.996 | 1.44E-07 | count | 1 |
| KANTR         | 17.5574103 | 3335.552634 | 0.0053 | 0.996 | 1.44E-07 | count | 1 |
| ZNF696        | 17.5574102 | 3335.552497 | 0.0053 | 0.996 | 1.44E-07 | count | 1 |
| TAL2          | 17.5574102 | 3335.552449 | 0.0053 | 0.996 | 1.44E-07 | count | 1 |
| MEN1          | 17.5574102 | 3335.552449 | 0.0053 | 0.996 | 1.44E-07 | count | 1 |
| AP000487.1    | 17.5574102 | 3335.55261  | 0.0053 | 0.996 | 1.44E-07 | count | 1 |
| PABPC3        | 17.5574102 | 3335.552449 | 0.0053 | 0.996 | 1.44E-07 | count | 1 |
| SYNJ2BP-COX16 | 17.5574102 | 3335.552497 | 0.0053 | 0.996 | 1.44E-07 | count | 1 |
| FBLN5         | 17.5574102 | 3335.552449 | 0.0053 | 0.996 | 1.44E-07 | count | 1 |
| AC107241.1    | 17.5574102 | 3335.552449 | 0.0053 | 0.996 | 1.44E-07 | count | 1 |
| AC068831.1    | 17.5574103 | 3335.552634 | 0.0053 | 0.996 | 1.44E-07 | count | 1 |
| AC027682.3    | 17.5574102 | 3335.552449 | 0.0053 | 0.996 | 1.44E-07 | count | 1 |
| AL022332.1    | 17.5574103 | 3335.552634 | 0.0053 | 0.996 | 1.44E-07 | count | 1 |
| TTC24         | 17.5574103 | 3335.552473 | 0.0053 | 0.996 | 1.44E-07 | count | 1 |
| SNTG2         | 17.5574102 | 3335.552602 | 0.0053 | 0.996 | 1.44E-07 | count | 1 |
| PLEKHM3       | 17.5574103 | 3335.55261  | 0.0053 | 0.996 | 1.44E-07 | count | 1 |
| IKZF2         | 17.5574102 | 3335.552602 | 0.0053 | 0.996 | 1.44E-07 | count | 1 |
| ESPNL         | 17.5574103 | 3335.55261  | 0.0053 | 0.996 | 1.44E-07 | count | 1 |
| PODXL2        | 17.5574102 | 3335.552602 | 0.0053 | 0.996 | 1.44E-07 | count | 1 |
| RNF212        | 17.5574102 | 3335.55253  | 0.0053 | 0.996 | 1.44E-07 | count | 1 |
| MGST2         | 17.5574103 | 3335.552473 | 0.0053 | 0.996 | 1.44E-07 | count | 1 |
| FHDC1         | 17.5574102 | 3335.55253  | 0.0053 | 0.996 | 1.44E-07 | count | 1 |
| KHDC1         | 17.5574102 | 3335.55253  | 0.0053 | 0.996 | 1.44E-07 | count | 1 |
| AC073073.2    | 17.5574103 | 3335.55261  | 0.0053 | 0.996 | 1.44E-07 | count | 1 |
| CACNA1F       | 17.5574102 | 3335.552602 | 0.0053 | 0.996 | 1.44E-07 | count | 1 |
| LRRRC4C       | 17.5574102 | 3335.55253  | 0.0053 | 0.996 | 1.44E-07 | count | 1 |
| CLLU1OS       | 17.5574103 | 3335.552473 | 0.0053 | 0.996 | 1.44E-07 | count | 1 |
| LINC01550     | 17.5574103 | 3335.552473 | 0.0053 | 0.996 | 1.44E-07 | count | 1 |

|             |            |             |        |       |          |       |   |
|-------------|------------|-------------|--------|-------|----------|-------|---|
| AC018512.1  | 17.5574103 | 3335.55261  | 0.0053 | 0.996 | 1.44E-07 | count | 1 |
| WNT3        | 17.5574103 | 3335.55261  | 0.0053 | 0.996 | 1.44E-07 | count | 1 |
| AC120024.1  | 17.5574103 | 3335.55261  | 0.0053 | 0.996 | 1.44E-07 | count | 1 |
| ZNF565      | 17.5574103 | 3335.552473 | 0.0053 | 0.996 | 1.44E-07 | count | 1 |
| AC010487.2  | 17.5574102 | 3335.55253  | 0.0053 | 0.996 | 1.44E-07 | count | 1 |
| ZNF776      | 17.5574103 | 3335.55261  | 0.0053 | 0.996 | 1.44E-07 | count | 1 |
| AL136115.2  | 17.5574102 | 3335.552497 | 0.0053 | 0.996 | 1.44E-07 | count | 1 |
| AC245297.2  | 17.5574103 | 3335.55261  | 0.0053 | 0.996 | 1.44E-07 | count | 1 |
| AC007405.3  | 17.5574102 | 3335.552546 | 0.0053 | 0.996 | 1.44E-07 | count | 1 |
| AC026202.2  | 17.5574102 | 3335.552546 | 0.0053 | 0.996 | 1.44E-07 | count | 1 |
| AL035701.1  | 17.5574103 | 3335.55261  | 0.0053 | 0.996 | 1.44E-07 | count | 1 |
| LRRC1       | 17.5574102 | 3335.552546 | 0.0053 | 0.996 | 1.44E-07 | count | 1 |
| AC105446.1  | 17.5574102 | 3335.552497 | 0.0053 | 0.996 | 1.44E-07 | count | 1 |
| CTPS2       | 17.5574103 | 3335.55261  | 0.0053 | 0.996 | 1.44E-07 | count | 1 |
| TBC1D8B     | 17.5574102 | 3335.552497 | 0.0053 | 0.996 | 1.44E-07 | count | 1 |
| FANCC       | 17.5574102 | 3335.552546 | 0.0053 | 0.996 | 1.44E-07 | count | 1 |
| AP005019.1  | 17.5574103 | 3335.55261  | 0.0053 | 0.996 | 1.44E-07 | count | 1 |
| AC008537.4  | 17.5574103 | 3335.55261  | 0.0053 | 0.996 | 1.44E-07 | count | 1 |
| ADGRB2      | 17.5574102 | 3335.552538 | 0.0053 | 0.996 | 1.44E-07 | count | 1 |
| AC123595.1  | 17.5574102 | 3335.552505 | 0.0053 | 0.996 | 1.44E-07 | count | 1 |
| KLHL3       | 17.5574102 | 3335.552538 | 0.0053 | 0.996 | 1.44E-07 | count | 1 |
| TIGD6       | 17.5574102 | 3335.552505 | 0.0053 | 0.996 | 1.44E-07 | count | 1 |
| AASS        | 17.5574102 | 3335.552505 | 0.0053 | 0.996 | 1.44E-07 | count | 1 |
| L1CAM       | 17.5574102 | 3335.552538 | 0.0053 | 0.996 | 1.44E-07 | count | 1 |
| SLC35G5     | 17.5574103 | 3335.552489 | 0.0053 | 0.996 | 1.44E-07 | count | 1 |
| FAM181B     | 17.5574102 | 3335.552578 | 0.0053 | 0.996 | 1.44E-07 | count | 1 |
| PRKD1       | 17.5574103 | 3335.552489 | 0.0053 | 0.996 | 1.44E-07 | count | 1 |
| IGHV3-15    | 17.5574102 | 3335.552505 | 0.0053 | 0.996 | 1.44E-07 | count | 1 |
| XYLT1       | 17.5574102 | 3335.552505 | 0.0053 | 0.996 | 1.44E-07 | count | 1 |
| AC111182.1  | 17.5574102 | 3335.552505 | 0.0053 | 0.996 | 1.44E-07 | count | 1 |
| AL034417.4  | 17.5574102 | 3335.552538 | 0.0053 | 0.996 | 1.44E-07 | count | 1 |
| ZSCAN20     | 17.5574102 | 3335.55257  | 0.0053 | 0.996 | 1.44E-07 | count | 1 |
| ZMYND12     | 17.5574102 | 3335.55257  | 0.0053 | 0.996 | 1.44E-07 | count | 1 |
| USP21       | 17.5574103 | 3335.552586 | 0.0053 | 0.996 | 1.44E-07 | count | 1 |
| AC006058.3  | 17.5574103 | 3335.552586 | 0.0053 | 0.996 | 1.44E-07 | count | 1 |
| PLSCR4      | 17.5574103 | 3335.552586 | 0.0053 | 0.996 | 1.44E-07 | count | 1 |
| SPINK9      | 17.5574102 | 3335.55257  | 0.0053 | 0.996 | 1.44E-07 | count | 1 |
| AL139393.2  | 17.5574103 | 3335.552586 | 0.0053 | 0.996 | 1.44E-07 | count | 1 |
| LINC02099   | 17.5574103 | 3335.55257  | 0.0053 | 0.996 | 1.44E-07 | count | 1 |
| MYBL1       | 17.5574102 | 3335.55257  | 0.0053 | 0.996 | 1.44E-07 | count | 1 |
| SVEP1       | 17.5574103 | 3335.552497 | 0.0053 | 0.996 | 1.44E-07 | count | 1 |
| AC090587.1  | 17.5574102 | 3335.552538 | 0.0053 | 0.996 | 1.44E-07 | count | 1 |
| RPS6KB2-AS1 | 17.5574102 | 3335.55257  | 0.0053 | 0.996 | 1.44E-07 | count | 1 |
| VWA5A       | 17.5574103 | 3335.552586 | 0.0053 | 0.996 | 1.44E-07 | count | 1 |
| AL391988.1  | 17.5574102 | 3335.552538 | 0.0053 | 0.996 | 1.44E-07 | count | 1 |

|              |            |             |        |       |          |       |   |
|--------------|------------|-------------|--------|-------|----------|-------|---|
| C12orf40     | 17.5574102 | 3335.552538 | 0.0053 | 0.996 | 1.44E-07 | count | 1 |
| USP3-AS1     | 17.5574102 | 3335.55257  | 0.0053 | 0.996 | 1.44E-07 | count | 1 |
| AC092295.2   | 17.5574103 | 3335.552586 | 0.0053 | 0.996 | 1.44E-07 | count | 1 |
| AC114490.2   | 17.5574101 | 3335.552522 | 0.0053 | 0.996 | 1.44E-07 | count | 1 |
| NBPF26       | 17.5574102 | 3335.552546 | 0.0053 | 0.996 | 1.44E-07 | count | 1 |
| GPR55        | 17.5574102 | 3335.552546 | 0.0053 | 0.996 | 1.44E-07 | count | 1 |
| XYLB         | 17.5574102 | 3335.552546 | 0.0053 | 0.996 | 1.44E-07 | count | 1 |
| PTPN23       | 17.5574101 | 3335.552522 | 0.0053 | 0.996 | 1.44E-07 | count | 1 |
| POLA1        | 17.5574102 | 3335.552546 | 0.0053 | 0.996 | 1.44E-07 | count | 1 |
| OVCH1-AS1    | 17.5574102 | 3335.552546 | 0.0053 | 0.996 | 1.44E-07 | count | 1 |
| PLOD1        | 17.5574103 | 3335.552522 | 0.0053 | 0.996 | 1.44E-07 | count | 1 |
| PHLDA3       | 17.5574103 | 3335.552554 | 0.0053 | 0.996 | 1.44E-07 | count | 1 |
| C5orf38      | 17.5574103 | 3335.552522 | 0.0053 | 0.996 | 1.44E-07 | count | 1 |
| CXCL14       | 17.5574103 | 3335.552554 | 0.0053 | 0.996 | 1.44E-07 | count | 1 |
| AL096865.1   | 17.5574103 | 3335.552554 | 0.0053 | 0.996 | 1.44E-07 | count | 1 |
| SLC39A9      | 17.5574103 | 3335.552522 | 0.0053 | 0.996 | 1.44E-07 | count | 1 |
| AC137723.1   | 17.5574103 | 3335.552522 | 0.0053 | 0.996 | 1.44E-07 | count | 1 |
| ELAC1        | 17.5574103 | 3335.552554 | 0.0053 | 0.996 | 1.44E-07 | count | 1 |
| ZSWIM1       | 17.5574103 | 3335.552554 | 0.0053 | 0.996 | 1.44E-07 | count | 1 |
| CLHC1        | 17.5574102 | 3335.552578 | 0.0053 | 0.996 | 1.44E-07 | count | 1 |
| FHL2         | 17.5574102 | 3335.552578 | 0.0053 | 0.996 | 1.44E-07 | count | 1 |
| CYTL1        | 17.5574102 | 3335.552578 | 0.0053 | 0.996 | 1.44E-07 | count | 1 |
| AC010768.1   | 17.5574103 | 3335.552465 | 0.0053 | 0.996 | 1.44E-07 | count | 1 |
| CCDC15       | 17.5574103 | 3335.552465 | 0.0053 | 0.996 | 1.44E-07 | count | 1 |
| NTRK3        | 17.5574103 | 3335.552465 | 0.0053 | 0.996 | 1.44E-07 | count | 1 |
| DHX34        | 17.5574103 | 3335.552465 | 0.0053 | 0.996 | 1.44E-07 | count | 1 |
| REEP6        | 17.5574102 | 3335.552489 | 0.0053 | 0.996 | 1.44E-07 | count | 1 |
| CYB561D1     | 17.5574103 | 3335.552554 | 0.0053 | 0.996 | 1.44E-07 | count | 1 |
| AC062029.1   | 17.5574103 | 3335.552554 | 0.0053 | 0.996 | 1.44E-07 | count | 1 |
| SOWAHC       | 17.5574103 | 3335.552481 | 0.0053 | 0.996 | 1.44E-07 | count | 1 |
| AC114811.2   | 17.5574103 | 3335.552481 | 0.0053 | 0.996 | 1.44E-07 | count | 1 |
| AC091965.4   | 17.5574103 | 3335.552554 | 0.0053 | 0.996 | 1.44E-07 | count | 1 |
| JAZF1-AS1    | 17.5574103 | 3335.552554 | 0.0053 | 0.996 | 1.44E-07 | count | 1 |
| PSPH         | 17.5574103 | 3335.552481 | 0.0053 | 0.996 | 1.44E-07 | count | 1 |
| MAGIX        | 17.5574103 | 3335.552481 | 0.0053 | 0.996 | 1.44E-07 | count | 1 |
| AMOT         | 17.5574103 | 3335.552481 | 0.0053 | 0.996 | 1.44E-07 | count | 1 |
| TMEM71       | 17.5574103 | 3335.552481 | 0.0053 | 0.996 | 1.44E-07 | count | 1 |
| AL158163.1   | 17.5574103 | 3335.552554 | 0.0053 | 0.996 | 1.44E-07 | count | 1 |
| U47924.2     | 17.5574103 | 3335.552554 | 0.0053 | 0.996 | 1.44E-07 | count | 1 |
| AC020656.1   | 17.5574103 | 3335.552481 | 0.0053 | 0.996 | 1.44E-07 | count | 1 |
| LINC02453    | 17.5574103 | 3335.552481 | 0.0053 | 0.996 | 1.44E-07 | count | 1 |
| RNASEH2B-AS1 | 17.5574103 | 3335.552554 | 0.0053 | 0.996 | 1.44E-07 | count | 1 |
| AC008915.2   | 17.5574103 | 3335.552554 | 0.0053 | 0.996 | 1.44E-07 | count | 1 |
| AC027682.6   | 17.5574103 | 3335.552481 | 0.0053 | 0.996 | 1.44E-07 | count | 1 |
| EXO1         | 17.5574103 | 3335.552666 | 0.0053 | 0.996 | 1.44E-07 | count | 1 |

|            |            |             |        |       |          |       |   |
|------------|------------|-------------|--------|-------|----------|-------|---|
| IFT172     | 17.5574103 | 3335.552666 | 0.0053 | 0.996 | 1.44E-07 | count | 1 |
| GALNT14    | 17.5574103 | 3335.552666 | 0.0053 | 0.996 | 1.44E-07 | count | 1 |
| SIX3       | 17.5574103 | 3335.552666 | 0.0053 | 0.996 | 1.44E-07 | count | 1 |
| EFHB       | 17.5574103 | 3335.552666 | 0.0053 | 0.996 | 1.44E-07 | count | 1 |
| AP000442.1 | 17.5574103 | 3335.552666 | 0.0053 | 0.996 | 1.44E-07 | count | 1 |
| Z69706.1   | 17.5574103 | 3335.552666 | 0.0053 | 0.996 | 1.44E-07 | count | 1 |
| IRF6       | 17.5574102 | 3335.55257  | 0.0053 | 0.996 | 1.44E-07 | count | 1 |
| MCM2       | 17.5574102 | 3335.55257  | 0.0053 | 0.996 | 1.44E-07 | count | 1 |
| AC112907.3 | 17.5574102 | 3335.552586 | 0.0053 | 0.996 | 1.44E-07 | count | 1 |
| KIF4A      | 17.5574102 | 3335.552586 | 0.0053 | 0.996 | 1.44E-07 | count | 1 |
| FAM133A    | 17.5574102 | 3335.55257  | 0.0053 | 0.996 | 1.44E-07 | count | 1 |
| SYDE2      | 17.5574101 | 3335.552473 | 0.0053 | 0.996 | 1.44E-07 | count | 1 |
| KIF9-AS1   | 17.5574102 | 3335.552489 | 0.0053 | 0.996 | 1.44E-07 | count | 1 |
| ZCCHC12    | 17.5574101 | 3335.552473 | 0.0053 | 0.996 | 1.44E-07 | count | 1 |
| NECTIN1    | 17.5574102 | 3335.552489 | 0.0053 | 0.996 | 1.44E-07 | count | 1 |
| WASIR2     | 17.5574102 | 3335.552489 | 0.0053 | 0.996 | 1.44E-07 | count | 1 |
| OLFML3     | 17.5574102 | 3335.552497 | 0.0053 | 0.996 | 1.44E-07 | count | 1 |
| FAM72B     | 17.5574102 | 3335.552497 | 0.0053 | 0.996 | 1.44E-07 | count | 1 |
| DNAH14     | 17.5574102 | 3335.552497 | 0.0053 | 0.996 | 1.44E-07 | count | 1 |
| AC096992.2 | 17.5574101 | 3335.552497 | 0.0053 | 0.996 | 1.44E-07 | count | 1 |
| AC008892.1 | 17.5574102 | 3335.55265  | 0.0053 | 0.996 | 1.44E-07 | count | 1 |
| TMEM184A   | 17.5574101 | 3335.552497 | 0.0053 | 0.996 | 1.44E-07 | count | 1 |
| SLC9A6     | 17.5574102 | 3335.552497 | 0.0053 | 0.996 | 1.44E-07 | count | 1 |
| SLC12A3    | 17.5574102 | 3335.55265  | 0.0053 | 0.996 | 1.44E-07 | count | 1 |
| SLC12A4    | 17.5574102 | 3335.552497 | 0.0053 | 0.996 | 1.44E-07 | count | 1 |
| SNAP25     | 17.5574101 | 3335.552497 | 0.0053 | 0.996 | 1.44E-07 | count | 1 |
| AC008686.1 | 17.5574101 | 3335.552497 | 0.0053 | 0.996 | 1.44E-07 | count | 1 |
| AC006213.2 | 17.5574102 | 3335.55265  | 0.0053 | 0.996 | 1.44E-07 | count | 1 |
| GATD3B     | 17.5574101 | 3335.552497 | 0.0053 | 0.996 | 1.44E-07 | count | 1 |
| TMEM240    | 17.5574102 | 3335.552481 | 0.0053 | 0.996 | 1.44E-07 | count | 1 |
| AL359541.1 | 17.5574102 | 3335.552562 | 0.0053 | 0.996 | 1.44E-07 | count | 1 |
| IGKV5-2    | 17.5574102 | 3335.552562 | 0.0053 | 0.996 | 1.44E-07 | count | 1 |
| AC109587.1 | 17.5574102 | 3335.552505 | 0.0053 | 0.996 | 1.44E-07 | count | 1 |
| OMD        | 17.5574102 | 3335.552481 | 0.0053 | 0.996 | 1.44E-07 | count | 1 |
| CARNS1     | 17.5574102 | 3335.552481 | 0.0053 | 0.996 | 1.44E-07 | count | 1 |
| AC073896.3 | 17.5574102 | 3335.552505 | 0.0053 | 0.996 | 1.44E-07 | count | 1 |
| THSD1      | 17.5574102 | 3335.552562 | 0.0053 | 0.996 | 1.44E-07 | count | 1 |
| AC005695.2 | 17.5574102 | 3335.552481 | 0.0053 | 0.996 | 1.44E-07 | count | 1 |
| SP2-AS1    | 17.5574102 | 3335.552481 | 0.0053 | 0.996 | 1.44E-07 | count | 1 |
| C1orf159   | 17.5574102 | 3335.55257  | 0.0053 | 0.996 | 1.44E-07 | count | 1 |
| AL009181.1 | 17.5574102 | 3335.55257  | 0.0053 | 0.996 | 1.44E-07 | count | 1 |
| BCL9       | 17.5574102 | 3335.55257  | 0.0053 | 0.996 | 1.44E-07 | count | 1 |
| TEX35      | 17.5574102 | 3335.552578 | 0.0053 | 0.996 | 1.44E-07 | count | 1 |
| C1orf53    | 17.5574102 | 3335.55257  | 0.0053 | 0.996 | 1.44E-07 | count | 1 |
| TRABD2A    | 17.5574102 | 3335.55257  | 0.0053 | 0.996 | 1.44E-07 | count | 1 |



|             |            |             |        |       |          |       |   |
|-------------|------------|-------------|--------|-------|----------|-------|---|
| SATB2       | 17.5574102 | 3335.552578 | 0.0053 | 0.996 | 1.44E-07 | count | 1 |
| PRKAR2A-AS1 | 17.5574102 | 3335.55257  | 0.0053 | 0.996 | 1.44E-07 | count | 1 |
| AF213884.3  | 17.5574102 | 3335.55257  | 0.0053 | 0.996 | 1.44E-07 | count | 1 |
| AC106897.1  | 17.5574102 | 3335.55257  | 0.0053 | 0.996 | 1.44E-07 | count | 1 |
| AL391422.3  | 17.5574102 | 3335.55257  | 0.0053 | 0.996 | 1.44E-07 | count | 1 |
| PNMA5       | 17.5574102 | 3335.552578 | 0.0053 | 0.996 | 1.44E-07 | count | 1 |
| JRK         | 17.5574102 | 3335.552578 | 0.0053 | 0.996 | 1.44E-07 | count | 1 |
| CDC37L1-DT  | 17.5574102 | 3335.55257  | 0.0053 | 0.996 | 1.44E-07 | count | 1 |
| SPA17       | 17.5574102 | 3335.55257  | 0.0053 | 0.996 | 1.44E-07 | count | 1 |
| BBS10       | 17.5574102 | 3335.55257  | 0.0053 | 0.996 | 1.44E-07 | count | 1 |
| AL139089.1  | 17.5574102 | 3335.55257  | 0.0053 | 0.996 | 1.44E-07 | count | 1 |
| AC084782.1  | 17.5574102 | 3335.55257  | 0.0053 | 0.996 | 1.44E-07 | count | 1 |
| AC009560.1  | 17.5574102 | 3335.552578 | 0.0053 | 0.996 | 1.44E-07 | count | 1 |
| VPS33B      | 17.5574102 | 3335.55257  | 0.0053 | 0.996 | 1.44E-07 | count | 1 |
| ZNF23       | 17.5574102 | 3335.55257  | 0.0053 | 0.996 | 1.44E-07 | count | 1 |
| AC015912.3  | 17.5574102 | 3335.55257  | 0.0053 | 0.996 | 1.44E-07 | count | 1 |
| TNNC2       | 17.5574102 | 3335.55257  | 0.0053 | 0.996 | 1.44E-07 | count | 1 |
| ZNF45       | 17.5574102 | 3335.55257  | 0.0053 | 0.996 | 1.44E-07 | count | 1 |
| NPAS1       | 17.5574102 | 3335.552578 | 0.0053 | 0.996 | 1.44E-07 | count | 1 |
| AP001065.1  | 17.5574102 | 3335.552578 | 0.0053 | 0.996 | 1.44E-07 | count | 1 |
| DENND6A-AS1 | 17.5574101 | 3335.552497 | 0.0053 | 0.996 | 1.44E-07 | count | 1 |
| OLAH        | 17.5574101 | 3335.552497 | 0.0053 | 0.996 | 1.44E-07 | count | 1 |
| C19orf44    | 17.5574101 | 3335.552497 | 0.0053 | 0.996 | 1.44E-07 | count | 1 |
| ZNF99       | 17.5574101 | 3335.552497 | 0.0053 | 0.996 | 1.44E-07 | count | 1 |
| TIMP3       | 17.5574101 | 3335.552497 | 0.0053 | 0.996 | 1.44E-07 | count | 1 |
| PLA2G2A     | 17.5574102 | 3335.552602 | 0.0053 | 0.996 | 1.44E-07 | count | 1 |
| AL449266.1  | 17.5574102 | 3335.552602 | 0.0053 | 0.996 | 1.44E-07 | count | 1 |
| ASPM        | 17.5574102 | 3335.552546 | 0.0053 | 0.996 | 1.44E-07 | count | 1 |
| LINC00862   | 17.5574102 | 3335.552618 | 0.0053 | 0.996 | 1.44E-07 | count | 1 |
| CLSTN2      | 17.5574102 | 3335.552602 | 0.0053 | 0.996 | 1.44E-07 | count | 1 |
| LINC01991   | 17.5574102 | 3335.552602 | 0.0053 | 0.996 | 1.44E-07 | count | 1 |
| SERF1B      | 17.5574102 | 3335.552602 | 0.0053 | 0.996 | 1.44E-07 | count | 1 |
| LINC01301   | 17.5574102 | 3335.552602 | 0.0053 | 0.996 | 1.44E-07 | count | 1 |
| MAPK8IP1    | 17.5574102 | 3335.552602 | 0.0053 | 0.996 | 1.44E-07 | count | 1 |
| SAMD15      | 17.5574102 | 3335.552602 | 0.0053 | 0.996 | 1.44E-07 | count | 1 |
| FRMD5       | 17.5574102 | 3335.552618 | 0.0053 | 0.996 | 1.44E-07 | count | 1 |
| ZNF625      | 17.5574102 | 3335.552546 | 0.0053 | 0.996 | 1.44E-07 | count | 1 |
| LINC01801   | 17.5574102 | 3335.552546 | 0.0053 | 0.996 | 1.44E-07 | count | 1 |
| TMEM145     | 17.5574102 | 3335.552618 | 0.0053 | 0.996 | 1.44E-07 | count | 1 |
| ZNF417      | 17.5574102 | 3335.552546 | 0.0053 | 0.996 | 1.44E-07 | count | 1 |
| AC005540.1  | 17.5574102 | 3335.552522 | 0.0053 | 0.996 | 1.44E-07 | count | 1 |
| AC074044.1  | 17.5574102 | 3335.552522 | 0.0053 | 0.996 | 1.44E-07 | count | 1 |
| MRPL38      | 17.5574102 | 3335.552522 | 0.0053 | 0.996 | 1.44E-07 | count | 1 |
| BOLA3-AS1   | 17.5574101 | 3335.552513 | 0.0053 | 0.996 | 1.44E-07 | count | 1 |
| GET4        | 17.5574101 | 3335.552513 | 0.0053 | 0.996 | 1.44E-07 | count | 1 |

|             |            |             |        |       |          |       |   |
|-------------|------------|-------------|--------|-------|----------|-------|---|
| NR6A1       | 17.5574101 | 3335.552513 | 0.0053 | 0.996 | 1.44E-07 | count | 1 |
| NCS1        | 17.5574101 | 3335.552513 | 0.0053 | 0.996 | 1.44E-07 | count | 1 |
| ITIH5       | 17.5574101 | 3335.552513 | 0.0053 | 0.996 | 1.44E-07 | count | 1 |
| ENTPD7      | 17.5574101 | 3335.552513 | 0.0053 | 0.996 | 1.44E-07 | count | 1 |
| AC008736.1  | 17.5574101 | 3335.552513 | 0.0053 | 0.996 | 1.44E-07 | count | 1 |
| FRRS1       | 17.5574101 | 3335.552522 | 0.0053 | 0.996 | 1.44E-07 | count | 1 |
| FRMD6-AS1   | 17.5574101 | 3335.552522 | 0.0053 | 0.996 | 1.44E-07 | count | 1 |
| AC007998.4  | 17.5574101 | 3335.552522 | 0.0053 | 0.996 | 1.44E-07 | count | 1 |
| NID1        | 17.5574102 | 3335.55265  | 0.0053 | 0.996 | 1.44E-07 | count | 1 |
| IGKV3D-11   | 17.5574102 | 3335.552538 | 0.0053 | 0.996 | 1.44E-07 | count | 1 |
| LINC01238   | 17.5574102 | 3335.55265  | 0.0053 | 0.996 | 1.44E-07 | count | 1 |
| NMNAT3      | 17.5574102 | 3335.55265  | 0.0053 | 0.996 | 1.44E-07 | count | 1 |
| AC002480.4  | 17.5574102 | 3335.55265  | 0.0053 | 0.996 | 1.44E-07 | count | 1 |
| PON2        | 17.5574101 | 3335.552473 | 0.0053 | 0.996 | 1.44E-07 | count | 1 |
| AC007032.1  | 17.5574101 | 3335.552473 | 0.0053 | 0.996 | 1.44E-07 | count | 1 |
| CYP17A1-AS1 | 17.5574101 | 3335.552473 | 0.0053 | 0.996 | 1.44E-07 | count | 1 |
| AL513190.1  | 17.5574102 | 3335.55265  | 0.0053 | 0.996 | 1.44E-07 | count | 1 |
| PRPF40B     | 17.5574102 | 3335.552538 | 0.0053 | 0.996 | 1.44E-07 | count | 1 |
| CDAN1       | 17.5574101 | 3335.552473 | 0.0053 | 0.996 | 1.44E-07 | count | 1 |
| MEX3B       | 17.5574102 | 3335.55265  | 0.0053 | 0.996 | 1.44E-07 | count | 1 |
| ATRN        | 17.5574102 | 3335.55265  | 0.0053 | 0.996 | 1.44E-07 | count | 1 |
| ENTPD6      | 17.5574101 | 3335.552473 | 0.0053 | 0.996 | 1.44E-07 | count | 1 |
| ZNF564      | 17.5574101 | 3335.552473 | 0.0053 | 0.996 | 1.44E-07 | count | 1 |
| IGLV5-45    | 17.5574102 | 3335.552538 | 0.0053 | 0.996 | 1.44E-07 | count | 1 |
| PLK4        | 17.5574101 | 3335.552513 | 0.0053 | 0.996 | 1.44E-07 | count | 1 |
| IGF2BP3     | 17.5574101 | 3335.552513 | 0.0053 | 0.996 | 1.44E-07 | count | 1 |
| KCTD21      | 17.5574101 | 3335.552513 | 0.0053 | 0.996 | 1.44E-07 | count | 1 |
| LTBP1       | 17.5574102 | 3335.55253  | 0.0053 | 0.996 | 1.44E-07 | count | 1 |
| INPP1       | 17.5574101 | 3335.552554 | 0.0053 | 0.996 | 1.44E-07 | count | 1 |
| GRK4        | 17.5574101 | 3335.552554 | 0.0053 | 0.996 | 1.44E-07 | count | 1 |
| LNX1        | 17.5574102 | 3335.55253  | 0.0053 | 0.996 | 1.44E-07 | count | 1 |
| AL357054.2  | 17.5574102 | 3335.55253  | 0.0053 | 0.996 | 1.44E-07 | count | 1 |
| HCG15       | 17.5574101 | 3335.552554 | 0.0053 | 0.996 | 1.44E-07 | count | 1 |
| AL355297.4  | 17.5574101 | 3335.552489 | 0.0053 | 0.996 | 1.44E-07 | count | 1 |
| CYTH3       | 17.5574102 | 3335.55253  | 0.0053 | 0.996 | 1.44E-07 | count | 1 |
| STEAP2      | 17.5574102 | 3335.55253  | 0.0053 | 0.996 | 1.44E-07 | count | 1 |
| XRCC2       | 17.5574101 | 3335.552554 | 0.0053 | 0.996 | 1.44E-07 | count | 1 |
| PTCHD1      | 17.5574102 | 3335.55253  | 0.0053 | 0.996 | 1.44E-07 | count | 1 |
| AC087354.1  | 17.5574101 | 3335.552554 | 0.0053 | 0.996 | 1.44E-07 | count | 1 |
| FJX1        | 17.5574101 | 3335.552554 | 0.0053 | 0.996 | 1.44E-07 | count | 1 |
| AC073389.1  | 17.5574102 | 3335.55253  | 0.0053 | 0.996 | 1.44E-07 | count | 1 |
| AL355073.2  | 17.5574101 | 3335.552489 | 0.0053 | 0.996 | 1.44E-07 | count | 1 |
| AL139022.2  | 17.5574102 | 3335.55253  | 0.0053 | 0.996 | 1.44E-07 | count | 1 |
| PTGR2       | 17.5574101 | 3335.552554 | 0.0053 | 0.996 | 1.44E-07 | count | 1 |
| IL21R       | 17.5574101 | 3335.552554 | 0.0053 | 0.996 | 1.44E-07 | count | 1 |

|            |            |             |        |       |          |       |   |
|------------|------------|-------------|--------|-------|----------|-------|---|
| AC009133.1 | 17.5574102 | 3335.55253  | 0.0053 | 0.996 | 1.44E-07 | count | 1 |
| RAPGEFL1   | 17.5574101 | 3335.552489 | 0.0053 | 0.996 | 1.44E-07 | count | 1 |
| ZHX3       | 17.5574101 | 3335.552554 | 0.0053 | 0.996 | 1.44E-07 | count | 1 |
| ARHGAP33   | 17.5574101 | 3335.552554 | 0.0053 | 0.996 | 1.44E-07 | count | 1 |
| LYPD3      | 17.5574101 | 3335.552554 | 0.0053 | 0.996 | 1.44E-07 | count | 1 |
| CDKL5      | 17.5574101 | 3335.552489 | 0.0053 | 0.996 | 1.44E-07 | count | 1 |
| ATAD3C     | 17.55741   | 3335.552481 | 0.0053 | 0.996 | 1.44E-07 | count | 1 |
| ENO1-AS1   | 17.55741   | 3335.552481 | 0.0053 | 0.996 | 1.44E-07 | count | 1 |
| MIR4422HG  | 17.55741   | 3335.552481 | 0.0053 | 0.996 | 1.44E-07 | count | 1 |
| AC092053.2 | 17.55741   | 3335.552481 | 0.0053 | 0.996 | 1.44E-07 | count | 1 |
| LINC00882  | 17.55741   | 3335.552481 | 0.0053 | 0.996 | 1.44E-07 | count | 1 |
| AC016575.1 | 17.55741   | 3335.552481 | 0.0053 | 0.996 | 1.44E-07 | count | 1 |
| FAM169A    | 17.55741   | 3335.552481 | 0.0053 | 0.996 | 1.44E-07 | count | 1 |
| TNXB       | 17.55741   | 3335.552481 | 0.0053 | 0.996 | 1.44E-07 | count | 1 |
| PPT2       | 17.55741   | 3335.552481 | 0.0053 | 0.996 | 1.44E-07 | count | 1 |
| AC002480.2 | 17.55741   | 3335.552481 | 0.0053 | 0.996 | 1.44E-07 | count | 1 |
| LINC01393  | 17.55741   | 3335.552481 | 0.0053 | 0.996 | 1.44E-07 | count | 1 |
| KCP        | 17.55741   | 3335.552481 | 0.0053 | 0.996 | 1.44E-07 | count | 1 |
| KCNH2      | 17.55741   | 3335.552481 | 0.0053 | 0.996 | 1.44E-07 | count | 1 |
| ABCF2      | 17.55741   | 3335.552481 | 0.0053 | 0.996 | 1.44E-07 | count | 1 |
| VSIG4      | 17.55741   | 3335.552481 | 0.0053 | 0.996 | 1.44E-07 | count | 1 |
| ANKRD20A2  | 17.55741   | 3335.552481 | 0.0053 | 0.996 | 1.44E-07 | count | 1 |
| CCDC183    | 17.55741   | 3335.552481 | 0.0053 | 0.996 | 1.44E-07 | count | 1 |
| PIDD1      | 17.55741   | 3335.552481 | 0.0053 | 0.996 | 1.44E-07 | count | 1 |
| DNHD1      | 17.55741   | 3335.552481 | 0.0053 | 0.996 | 1.44E-07 | count | 1 |
| DIXDC1     | 17.55741   | 3335.552481 | 0.0053 | 0.996 | 1.44E-07 | count | 1 |
| AP001267.3 | 17.55741   | 3335.552481 | 0.0053 | 0.996 | 1.44E-07 | count | 1 |
| AC034102.6 | 17.55741   | 3335.552481 | 0.0053 | 0.996 | 1.44E-07 | count | 1 |
| AL355076.2 | 17.55741   | 3335.552481 | 0.0053 | 0.996 | 1.44E-07 | count | 1 |
| AC010809.3 | 17.55741   | 3335.552481 | 0.0053 | 0.996 | 1.44E-07 | count | 1 |
| AC078909.1 | 17.55741   | 3335.552481 | 0.0053 | 0.996 | 1.44E-07 | count | 1 |
| C15orf65   | 17.55741   | 3335.552481 | 0.0053 | 0.996 | 1.44E-07 | count | 1 |
| ZFHX3      | 17.55741   | 3335.552481 | 0.0053 | 0.996 | 1.44E-07 | count | 1 |
| CDYL2      | 17.55741   | 3335.552481 | 0.0053 | 0.996 | 1.44E-07 | count | 1 |
| FAM157C    | 17.55741   | 3335.552481 | 0.0053 | 0.996 | 1.44E-07 | count | 1 |
| C20orf96   | 17.55741   | 3335.552481 | 0.0053 | 0.996 | 1.44E-07 | count | 1 |
| ZNF343     | 17.55741   | 3335.552481 | 0.0053 | 0.996 | 1.44E-07 | count | 1 |
| NPEPL1     | 17.55741   | 3335.552481 | 0.0053 | 0.996 | 1.44E-07 | count | 1 |
| CABLES2    | 17.55741   | 3335.552481 | 0.0053 | 0.996 | 1.44E-07 | count | 1 |
| ADM5       | 17.55741   | 3335.552481 | 0.0053 | 0.996 | 1.44E-07 | count | 1 |
| IGLV9-49   | 17.55741   | 3335.552481 | 0.0053 | 0.996 | 1.44E-07 | count | 1 |
| IGLV7-43   | 17.55741   | 3335.552481 | 0.0053 | 0.996 | 1.44E-07 | count | 1 |
| AP000692.2 | 17.55741   | 3335.552481 | 0.0053 | 0.996 | 1.44E-07 | count | 1 |
| AC007038.2 | 17.5574101 | 3335.552562 | 0.0053 | 0.996 | 1.44E-07 | count | 1 |
| SLC27A4    | 17.5574101 | 3335.552562 | 0.0053 | 0.996 | 1.44E-07 | count | 1 |

|               |            |             |        |       |          |       |   |
|---------------|------------|-------------|--------|-------|----------|-------|---|
| ACTL10        | 17.5574101 | 3335.552562 | 0.0053 | 0.996 | 1.44E-07 | count | 1 |
| AC020922.4    | 17.5574101 | 3335.552562 | 0.0053 | 0.996 | 1.44E-07 | count | 1 |
| AC105935.1    | 17.5574101 | 3335.55261  | 0.0053 | 0.996 | 1.44E-07 | count | 1 |
| DUSP7         | 17.5574101 | 3335.55261  | 0.0053 | 0.996 | 1.44E-07 | count | 1 |
| ACTR3B        | 17.5574101 | 3335.55261  | 0.0053 | 0.996 | 1.44E-07 | count | 1 |
| AL354710.2    | 17.5574101 | 3335.55261  | 0.0053 | 0.996 | 1.44E-07 | count | 1 |
| ZNF385C       | 17.5574101 | 3335.55261  | 0.0053 | 0.996 | 1.44E-07 | count | 1 |
| MUC16         | 17.5574101 | 3335.55261  | 0.0053 | 0.996 | 1.44E-07 | count | 1 |
| GNAZ          | 17.5574101 | 3335.55261  | 0.0053 | 0.996 | 1.44E-07 | count | 1 |
| RFC5          | 0.2257602  | 0.7355271   | 0.3069 | 0.759 | 1.47E-07 | count | 1 |
| C5orf51       | 0.2257602  | 0.6407444   | 0.3523 | 0.725 | 1.47E-07 | count | 1 |
| TXNL4B        | 0.2257602  | 0.6407444   | 0.3523 | 0.725 | 1.47E-07 | count | 1 |
| ASB2          | 0.2257602  | 0.8540135   | 0.2644 | 0.792 | 1.47E-07 | count | 1 |
| INTS1         | 0.2257602  | 0.6291985   | 0.3588 | 0.72  | 1.47E-07 | count | 1 |
| SUPT3H        | 0.2257602  | 0.6291985   | 0.3588 | 0.72  | 1.47E-07 | count | 1 |
| AL512631.1    | 0.2257602  | 0.7643491   | 0.2954 | 0.768 | 1.47E-07 | count | 1 |
| MED12L        | 0.2257602  | 0.7643491   | 0.2954 | 0.768 | 1.47E-07 | count | 1 |
| SCCPDH        | 0.2257602  | 0.4595842   | 0.4912 | 0.624 | 1.47E-07 | count | 1 |
| AGPAT1        | 0.2257602  | 0.801325    | 0.2817 | 0.778 | 1.47E-07 | count | 1 |
| PUSL1         | 0.2257602  | 0.6736341   | 0.3351 | 0.738 | 1.47E-07 | count | 1 |
| TBCE          | 0.2257602  | 0.6736341   | 0.3351 | 0.738 | 1.47E-07 | count | 1 |
| TOX           | 0.2257602  | 0.5167912   | 0.4368 | 0.662 | 1.49E-07 | count | 1 |
| PPM1F         | 0.0894925  | 1.0597092   | 0.0845 | 0.933 | 1.50E-07 | count | 1 |
| YEATS2        | 0.0894925  | 1.0597092   | 0.0845 | 0.933 | 1.50E-07 | count | 1 |
| TAF9B         | 0.0894925  | 1.0597092   | 0.0845 | 0.933 | 1.50E-07 | count | 1 |
| RBM26-AS1     | 0.0894925  | 1.0597092   | 0.0845 | 0.933 | 1.50E-07 | count | 1 |
| CAMP          | 0.0894925  | 1.0597092   | 0.0845 | 0.933 | 1.50E-07 | count | 1 |
| VILL          | 0.0894925  | 1.0597092   | 0.0845 | 0.933 | 1.50E-07 | count | 1 |
| GPR107        | 0.0894925  | 1.0597092   | 0.0845 | 0.933 | 1.50E-07 | count | 1 |
| SLC10A7       | 0.0894925  | 1.0597092   | 0.0845 | 0.933 | 1.50E-07 | count | 1 |
| TANGO2        | 0.0894925  | 1.0597092   | 0.0845 | 0.933 | 1.50E-07 | count | 1 |
| DNMBP         | 0.0894925  | 1.0597092   | 0.0845 | 0.933 | 1.50E-07 | count | 1 |
| SOGA1         | 0.0894925  | 1.0597092   | 0.0845 | 0.933 | 1.50E-07 | count | 1 |
| DNAJC25-GNG10 | 0.0894925  | 1.0597092   | 0.0845 | 0.933 | 1.50E-07 | count | 1 |
| GBGT1         | 0.0894925  | 0.7492516   | 0.1194 | 0.905 | 1.50E-07 | count | 1 |
| ZFAT          | 0.0894925  | 0.857456    | 0.1044 | 0.917 | 1.50E-07 | count | 1 |
| CD300A        | 0.0894925  | 0.9480685   | 0.0944 | 0.925 | 1.50E-07 | count | 1 |
| ZIK1          | 0.0894925  | 1.0692288   | 0.0837 | 0.933 | 1.50E-07 | count | 1 |
| RCN1          | 0.0894925  | 1.0692288   | 0.0837 | 0.933 | 1.50E-07 | count | 1 |
| AL359513.1    | 0.0894925  | 1.0692288   | 0.0837 | 0.933 | 1.50E-07 | count | 1 |
| TRPM2         | 0.0894925  | 1.0692288   | 0.0837 | 0.933 | 1.50E-07 | count | 1 |
| SCMH1         | 0.0894925  | 0.8514582   | 0.1051 | 0.916 | 1.50E-07 | count | 1 |
| USP9Y         | 0.0894925  | 0.7458628   | 0.12   | 0.905 | 1.50E-07 | count | 1 |
| IPPK          | 0.0894925  | 1.3331902   | 0.0671 | 0.947 | 1.50E-07 | count | 1 |
| BCR           | 0.0894925  | 1.3331902   | 0.0671 | 0.947 | 1.50E-07 | count | 1 |

|            |            |             |        |       |          |       |   |
|------------|------------|-------------|--------|-------|----------|-------|---|
| HIST1H4E   | 0.0894925  | 1.3331902   | 0.0671 | 0.947 | 1.50E-07 | count | 1 |
| AC040977.1 | 0.0894925  | 1.3331902   | 0.0671 | 0.947 | 1.50E-07 | count | 1 |
| AC083798.2 | 0.0894925  | 1.3331902   | 0.0671 | 0.947 | 1.50E-07 | count | 1 |
| CRHBP      | 0.0894925  | 1.3331902   | 0.0671 | 0.947 | 1.50E-07 | count | 1 |
| FAM213A    | 0.0894925  | 1.3331902   | 0.0671 | 0.947 | 1.50E-07 | count | 1 |
| KIAA0825   | 0.0894925  | 1.3331902   | 0.0671 | 0.947 | 1.50E-07 | count | 1 |
| ZNF41      | 0.0894925  | 1.3331902   | 0.0671 | 0.947 | 1.50E-07 | count | 1 |
| FAM161B    | 0.0894925  | 1.3331902   | 0.0671 | 0.947 | 1.50E-07 | count | 1 |
| AL161457.2 | 0.0894925  | 1.3331902   | 0.0671 | 0.947 | 1.50E-07 | count | 1 |
| CCDC34     | 0.0894925  | 1.3331902   | 0.0671 | 0.947 | 1.50E-07 | count | 1 |
| BBS12      | 0.0894925  | 1.3331902   | 0.0671 | 0.947 | 1.50E-07 | count | 1 |
| MTHFSD     | 0.0894925  | 1.3331902   | 0.0671 | 0.947 | 1.50E-07 | count | 1 |
| ALPL       | 0.0894925  | 1.3331902   | 0.0671 | 0.947 | 1.50E-07 | count | 1 |
| AC104653.1 | 0.0894925  | 1.3331902   | 0.0671 | 0.947 | 1.50E-07 | count | 1 |
| AC108673.3 | 0.0894925  | 0.8604054   | 0.104  | 0.917 | 1.50E-07 | count | 1 |
| SLC2A13    | 0.0894925  | 0.8834371   | 0.1013 | 0.919 | 1.50E-07 | count | 1 |
| EME2       | 0.0894925  | 1.3634252   | 0.0656 | 0.948 | 1.51E-07 | count | 1 |
| LINC02328  | 0.0894925  | 1.3634252   | 0.0656 | 0.948 | 1.51E-07 | count | 1 |
| CR2        | 0.0894925  | 1.1072669   | 0.0808 | 0.936 | 1.51E-07 | count | 1 |
| D2HGDH     | 0.0894925  | 0.8484777   | 0.1055 | 0.916 | 1.51E-07 | count | 1 |
| UQCRHL     | 0.0894925  | 0.8484777   | 0.1055 | 0.916 | 1.51E-07 | count | 1 |
| MVD        | 0.0894925  | 0.6718958   | 0.1332 | 0.894 | 1.51E-07 | count | 1 |
| C15orf39   | 0.0894925  | 1.1232718   | 0.0797 | 0.937 | 1.51E-07 | count | 1 |
| IFIT5      | 0.0894925  | 0.8633447   | 0.1037 | 0.917 | 1.51E-07 | count | 1 |
| B3GALNT2   | 0.0894925  | 0.9399561   | 0.0952 | 0.924 | 1.51E-07 | count | 1 |
| ZNF546     | 20.2034602 | 2863.06839  | 0.0071 | 0.994 | 1.51E-07 | count | 1 |
| HS3ST1     | 19.4057862 | 3088.634149 | 0.0063 | 0.995 | 1.52E-07 | count | 1 |
| AC018413.1 | 19.4057842 | 3088.630898 | 0.0063 | 0.995 | 1.52E-07 | count | 1 |
| C11orf21   | 19.405784  | 3088.634433 | 0.0063 | 0.995 | 1.52E-07 | count | 1 |
| DBNDD1     | 19.405784  | 3088.632258 | 0.0063 | 0.995 | 1.52E-07 | count | 1 |
| STKLD1     | 19.4057834 | 3088.634162 | 0.0063 | 0.995 | 1.52E-07 | count | 1 |
| TPST1      | 19.405783  | 3088.632802 | 0.0063 | 0.995 | 1.52E-07 | count | 1 |
| ARHGEF5    | 19.4057825 | 3088.633346 | 0.0063 | 0.995 | 1.52E-07 | count | 1 |
| UAP1L1     | 19.4057823 | 3088.632814 | 0.0063 | 0.995 | 1.52E-07 | count | 1 |
| S1PR1      | 19.9457748 | 2953.219157 | 0.0068 | 0.995 | 1.52E-07 | count | 1 |
| AGPAT2     | 0.0126629  | 0.3464637   | 0.0365 | 0.971 | 1.53E-07 | count | 1 |
| SLFN11     | 0.0344685  | 0.559046    | 0.0617 | 0.951 | 1.54E-07 | count | 1 |
| UBXN6      | 0.0351547  | 0.5559279   | 0.0632 | 0.95  | 1.57E-07 | count | 1 |
| MSRB2      | 0.0351547  | 0.5361321   | 0.0656 | 0.948 | 1.57E-07 | count | 1 |
| GABPA      | 0.0351547  | 0.4949221   | 0.071  | 0.943 | 1.57E-07 | count | 1 |
| ZNF322     | 0.2415086  | 0.4660107   | 0.5182 | 0.605 | 1.59E-07 | count | 1 |
| PDCD11     | 0.5824352  | 0.9311912   | 0.6255 | 0.532 | 1.60E-07 | count | 1 |
| ZSCAN29    | 0.5824352  | 1.0057492   | 0.5791 | 0.563 | 1.60E-07 | count | 1 |
| TBC1D25    | 0.5824352  | 1.0057492   | 0.5791 | 0.563 | 1.60E-07 | count | 1 |
| INAFM1     | 0.5824352  | 1.0057492   | 0.5791 | 0.563 | 1.60E-07 | count | 1 |

|            |           |           |        |       |          |       |   |
|------------|-----------|-----------|--------|-------|----------|-------|---|
| CLK2       | 0.5824352 | 1.0057492 | 0.5791 | 0.563 | 1.60E-07 | count | 1 |
| BX284668.5 | 0.5824352 | 1.0057492 | 0.5791 | 0.563 | 1.60E-07 | count | 1 |
| UBR5-AS1   | 0.5824352 | 1.0057492 | 0.5791 | 0.563 | 1.60E-07 | count | 1 |
| FANCM      | 0.5824352 | 0.7801016 | 0.7466 | 0.456 | 1.61E-07 | count | 1 |
| ALG6       | 0.5824352 | 0.7801016 | 0.7466 | 0.456 | 1.61E-07 | count | 1 |
| ITPRIPL1   | 0.5824352 | 1.0751493 | 0.5417 | 0.588 | 1.61E-07 | count | 1 |
| FBXO10     | 0.5824352 | 1.0751493 | 0.5417 | 0.588 | 1.61E-07 | count | 1 |
| FAM135A    | 0.5824352 | 1.0751493 | 0.5417 | 0.588 | 1.61E-07 | count | 1 |
| ZNF71      | 0.5824352 | 1.0751493 | 0.5417 | 0.588 | 1.61E-07 | count | 1 |
| DECR2      | 0.5824352 | 1.0751493 | 0.5417 | 0.588 | 1.61E-07 | count | 1 |
| PGAP3      | 0.5824352 | 1.0751493 | 0.5417 | 0.588 | 1.61E-07 | count | 1 |
| HHAT       | 0.5824352 | 1.1403334 | 0.5108 | 0.61  | 1.61E-07 | count | 1 |
| TOM1       | 0.5824352 | 0.8677401 | 0.6712 | 0.502 | 1.61E-07 | count | 1 |
| LINC00309  | 0.5824352 | 0.8677401 | 0.6712 | 0.502 | 1.61E-07 | count | 1 |
| ZNF513     | 0.5824352 | 0.8677401 | 0.6712 | 0.502 | 1.61E-07 | count | 1 |
| RMDN2      | 0.5824352 | 0.8677401 | 0.6712 | 0.502 | 1.61E-07 | count | 1 |
| ZNF700     | 0.5824352 | 0.8677401 | 0.6712 | 0.502 | 1.61E-07 | count | 1 |
| FAM173B    | 0.5824352 | 0.8677401 | 0.6712 | 0.502 | 1.61E-07 | count | 1 |
| PRIMPOL    | 0.5824352 | 0.8677401 | 0.6712 | 0.502 | 1.61E-07 | count | 1 |
| SDF2L1     | 0.0133228 | 0.3293566 | 0.0405 | 0.968 | 1.61E-07 | count | 1 |
| AC015982.1 | 0.5824352 | 0.9473053 | 0.6148 | 0.539 | 1.61E-07 | count | 1 |
| TOX2       | 0.5824352 | 0.9473053 | 0.6148 | 0.539 | 1.61E-07 | count | 1 |
| AL359764.1 | 0.5824352 | 0.9473053 | 0.6148 | 0.539 | 1.61E-07 | count | 1 |
| FAM234A    | 0.5824352 | 0.9473053 | 0.6148 | 0.539 | 1.61E-07 | count | 1 |
| MYO1B      | 0.5824352 | 1.0206869 | 0.5706 | 0.569 | 1.61E-07 | count | 1 |
| NCBP1      | 0.5824352 | 1.0891355 | 0.5348 | 0.593 | 1.61E-07 | count | 1 |
| CPOX       | 0.5824352 | 1.0891355 | 0.5348 | 0.593 | 1.61E-07 | count | 1 |
| ZBED1      | 0.0359482 | 0.5435388 | 0.0661 | 0.947 | 1.61E-07 | count | 1 |
| RNPC3      | 0.0363933 | 0.4165711 | 0.0874 | 0.93  | 1.63E-07 | count | 1 |
| DLST       | 0.0368761 | 0.584656  | 0.0631 | 0.95  | 1.65E-07 | count | 1 |
| RPRD1A     | 0.0368761 | 0.5633106 | 0.0655 | 0.948 | 1.65E-07 | count | 1 |
| AGAP2      | 0.0368761 | 0.7280068 | 0.0507 | 0.96  | 1.65E-07 | count | 1 |
| ORAOV1     | 0.0988773 | 0.816085  | 0.1212 | 0.904 | 1.67E-07 | count | 1 |
| NAA60      | 0.0988773 | 0.8148707 | 0.1213 | 0.903 | 1.67E-07 | count | 1 |
| RABGGTA    | 0.2539311 | 0.5892278 | 0.431  | 0.667 | 1.68E-07 | count | 1 |
| MAML1      | 0.2539311 | 0.6187465 | 0.4104 | 0.682 | 1.68E-07 | count | 1 |
| SLC35A3    | 0.2539311 | 0.6187465 | 0.4104 | 0.682 | 1.68E-07 | count | 1 |
| NIPAL2     | 0.2539311 | 0.6187465 | 0.4104 | 0.682 | 1.68E-07 | count | 1 |
| DHRS12     | 0.2539311 | 0.5066074 | 0.5012 | 0.616 | 1.68E-07 | count | 1 |
| MCM9       | 0.2539311 | 0.6739162 | 0.3768 | 0.707 | 1.68E-07 | count | 1 |
| WDFY4      | 0.038474  | 0.3728817 | 0.1032 | 0.918 | 1.72E-07 | count | 1 |
| COMT       | 0.0388928 | 0.3460383 | 0.1124 | 0.911 | 1.74E-07 | count | 1 |
| MTA2       | 0.0392991 | 0.8313602 | 0.0473 | 0.962 | 1.77E-07 | count | 1 |
| ZNF526     | 0.1046468 | 0.833133  | 0.1256 | 0.9   | 1.77E-07 | count | 1 |
| RCCD1      | 0.1046468 | 0.9106998 | 0.1149 | 0.909 | 1.77E-07 | count | 1 |

|            |           |           |        |       |          |       |   |
|------------|-----------|-----------|--------|-------|----------|-------|---|
| USP30-AS1  | 0.1046468 | 0.8246434 | 0.1269 | 0.899 | 1.77E-07 | count | 1 |
| ZNF383     | 0.2722802 | 0.5460306 | 0.4987 | 0.618 | 1.81E-07 | count | 1 |
| AC023157.3 | 0.2722802 | 0.6530545 | 0.4169 | 0.677 | 1.81E-07 | count | 1 |
| TMEM41B    | 0.2722802 | 0.4291325 | 0.6345 | 0.526 | 1.81E-07 | count | 1 |
| PGRMC1     | 0.2722802 | 0.5390642 | 0.5051 | 0.614 | 1.81E-07 | count | 1 |
| RPS6KA3    | 0.0408642 | 0.3889857 | 0.1051 | 0.916 | 1.84E-07 | count | 1 |
| AKAP10     | 0.0409222 | 0.8108703 | 0.0505 | 0.96  | 1.85E-07 | count | 1 |
| RBBP8      | 0.0416994 | 0.4558416 | 0.0915 | 0.927 | 1.87E-07 | count | 1 |
| CNOT1      | 0.0156479 | 0.2973301 | 0.0526 | 0.958 | 1.89E-07 | count | 1 |
| TMEM208    | 0.0421663 | 0.3401753 | 0.124  | 0.901 | 1.89E-07 | count | 1 |
| NAPG       | 0.0157006 | 0.2999185 | 0.0523 | 0.958 | 1.90E-07 | count | 1 |
| AP3M1      | 0.2851836 | 0.5322984 | 0.5358 | 0.592 | 1.91E-07 | count | 1 |
| GXYLT1     | 0.2851836 | 0.5431627 | 0.525  | 0.6   | 1.91E-07 | count | 1 |
| DDB2       | 0.0426599 | 0.4746902 | 0.0899 | 0.928 | 1.91E-07 | count | 1 |
| AIFM1      | 0.0426599 | 0.4745943 | 0.0899 | 0.928 | 1.91E-07 | count | 1 |
| CEP44      | 0.0426599 | 0.4880324 | 0.0874 | 0.93  | 1.91E-07 | count | 1 |
| RASGRF1    | 0.0426599 | 0.5011103 | 0.0851 | 0.932 | 1.92E-07 | count | 1 |
| NT5C3B     | 0.2851836 | 0.5743729 | 0.4965 | 0.62  | 1.92E-07 | count | 1 |
| ZNF669     | 0.0426599 | 0.4782876 | 0.0892 | 0.929 | 1.92E-07 | count | 1 |
| DGKG       | 0.0426599 | 0.5504052 | 0.0775 | 0.938 | 1.92E-07 | count | 1 |
| SERTAD3    | 0.016129  | 0.1838025 | 0.0878 | 0.93  | 1.95E-07 | count | 1 |
| SMIM8      | 0.0437373 | 0.5810916 | 0.0753 | 0.94  | 1.96E-07 | count | 1 |
| UBXN11     | 0.2947531 | 0.5870484 | 0.5021 | 0.616 | 1.99E-07 | count | 1 |
| VCL        | 0.2947531 | 0.6303559 | 0.4676 | 0.64  | 1.99E-07 | count | 1 |
| STK38L     | 0.0449542 | 0.4870064 | 0.0923 | 0.926 | 2.02E-07 | count | 1 |
| HECTD4     | 0.0449542 | 0.4853414 | 0.0926 | 0.926 | 2.02E-07 | count | 1 |
| ZNF100     | 0.0449542 | 0.5025948 | 0.0894 | 0.929 | 2.02E-07 | count | 1 |
| TMUB2      | 0.0449542 | 0.4034011 | 0.1114 | 0.911 | 2.02E-07 | count | 1 |
| UBL3       | 0.0451493 | 0.428451  | 0.1054 | 0.916 | 2.03E-07 | count | 1 |
| C6orf47    | 0.0456237 | 0.3980784 | 0.1146 | 0.909 | 2.05E-07 | count | 1 |
| SUPV3L1    | 0.0463396 | 0.5722834 | 0.081  | 0.935 | 2.08E-07 | count | 1 |
| ODR4       | 0.0463396 | 0.6548631 | 0.0708 | 0.944 | 2.09E-07 | count | 1 |
| MRPL32     | 0.0172386 | 0.3773017 | 0.0457 | 0.964 | 2.09E-07 | count | 1 |
| SEL1L      | 0.0173807 | 0.3856073 | 0.0451 | 0.964 | 2.10E-07 | count | 1 |
| GRSF1      | 0.0471066 | 0.3879131 | 0.1214 | 0.903 | 2.12E-07 | count | 1 |
| CLINT1     | 0.0180633 | 0.2375359 | 0.076  | 0.939 | 2.18E-07 | count | 1 |
| PAK1IP1    | 0.3200709 | 0.3788794 | 0.8448 | 0.399 | 2.19E-07 | count | 1 |
| CCP110     | 0.0487319 | 0.4567797 | 0.1067 | 0.915 | 2.19E-07 | count | 1 |
| ZNFX1      | 0.0487319 | 0.4675357 | 0.1042 | 0.917 | 2.19E-07 | count | 1 |
| CAPS       | 0.1287169 | 1.0677123 | 0.1206 | 0.904 | 2.20E-07 | count | 1 |
| PPP1R3D    | 0.1287169 | 1.0677123 | 0.1206 | 0.904 | 2.20E-07 | count | 1 |
| GPATCH1    | 0.1287169 | 0.9975201 | 0.129  | 0.897 | 2.20E-07 | count | 1 |
| ZNF782     | 0.1287169 | 1.3269509 | 0.097  | 0.923 | 2.20E-07 | count | 1 |
| PTPN4      | 0.0499812 | 0.5070222 | 0.0986 | 0.922 | 2.25E-07 | count | 1 |
| NUDT2      | 0.0500806 | 0.3917706 | 0.1278 | 0.898 | 2.25E-07 | count | 1 |

|             |           |           |        |       |          |       |   |
|-------------|-----------|-----------|--------|-------|----------|-------|---|
| METTL2B     | 0.0500806 | 0.5044091 | 0.0993 | 0.921 | 2.26E-07 | count | 1 |
| POLR3B      | 0.7647567 | 1.0808183 | 0.7076 | 0.48  | 2.26E-07 | count | 1 |
| CCNB1       | 0.7647567 | 1.0808183 | 0.7076 | 0.48  | 2.26E-07 | count | 1 |
| ZNF66       | 0.7647567 | 1.0808183 | 0.7076 | 0.48  | 2.26E-07 | count | 1 |
| CENPS       | 0.7647567 | 1.0808183 | 0.7076 | 0.48  | 2.26E-07 | count | 1 |
| ANKRD34A    | 0.7647567 | 1.0808183 | 0.7076 | 0.48  | 2.26E-07 | count | 1 |
| TSPAN17     | 0.7647567 | 1.0808183 | 0.7076 | 0.48  | 2.26E-07 | count | 1 |
| TEX261      | 0.7647567 | 1.0808183 | 0.7076 | 0.48  | 2.26E-07 | count | 1 |
| AP3S2       | 0.7647567 | 1.0808183 | 0.7076 | 0.48  | 2.26E-07 | count | 1 |
| IGFBP4      | 0.7647567 | 1.0808183 | 0.7076 | 0.48  | 2.26E-07 | count | 1 |
| LNX2        | 0.7647567 | 1.0808183 | 0.7076 | 0.48  | 2.26E-07 | count | 1 |
| TMEM150A    | 0.7647567 | 1.0808183 | 0.7076 | 0.48  | 2.26E-07 | count | 1 |
| WRAP53      | 0.7647567 | 1.0808183 | 0.7076 | 0.48  | 2.26E-07 | count | 1 |
| ZNF18       | 0.7647567 | 1.0808183 | 0.7076 | 0.48  | 2.26E-07 | count | 1 |
| ZDHH8       | 0.7647567 | 1.0808183 | 0.7076 | 0.48  | 2.26E-07 | count | 1 |
| PHYHD1      | 0.7647567 | 1.0808183 | 0.7076 | 0.48  | 2.26E-07 | count | 1 |
| AP001160.1  | 0.7647567 | 1.0808183 | 0.7076 | 0.48  | 2.26E-07 | count | 1 |
| LINC01465   | 0.7647567 | 1.0808183 | 0.7076 | 0.48  | 2.26E-07 | count | 1 |
| GAB3        | 0.7647567 | 1.0808183 | 0.7076 | 0.48  | 2.26E-07 | count | 1 |
| SLC26A4-AS1 | 0.7647567 | 1.2753927 | 0.5996 | 0.549 | 2.26E-07 | count | 1 |
| PTDSS2      | 0.7647567 | 1.2753927 | 0.5996 | 0.549 | 2.26E-07 | count | 1 |
| ZNF333      | 0.7647567 | 1.2753927 | 0.5996 | 0.549 | 2.26E-07 | count | 1 |
| AL691432.2  | 0.7647567 | 1.2753927 | 0.5996 | 0.549 | 2.26E-07 | count | 1 |
| ATP13A2     | 0.7647567 | 1.2753927 | 0.5996 | 0.549 | 2.26E-07 | count | 1 |
| AC119428.2  | 0.7647567 | 1.2753927 | 0.5996 | 0.549 | 2.26E-07 | count | 1 |
| BTN1A1      | 0.7647567 | 1.2753927 | 0.5996 | 0.549 | 2.26E-07 | count | 1 |
| GSTM3       | 0.7647567 | 1.2753927 | 0.5996 | 0.549 | 2.26E-07 | count | 1 |
| AC245014.1  | 0.7647567 | 1.2753927 | 0.5996 | 0.549 | 2.26E-07 | count | 1 |
| UBE2QL1     | 0.7647567 | 1.2753927 | 0.5996 | 0.549 | 2.26E-07 | count | 1 |
| SLC4A2      | 0.7647567 | 1.2753927 | 0.5996 | 0.549 | 2.26E-07 | count | 1 |
| COLCA1      | 0.7647567 | 1.2753927 | 0.5996 | 0.549 | 2.26E-07 | count | 1 |
| MATK        | 0.7647567 | 1.2753927 | 0.5996 | 0.549 | 2.26E-07 | count | 1 |
| ZNF682      | 0.7647567 | 1.2753927 | 0.5996 | 0.549 | 2.26E-07 | count | 1 |
| L1TD1       | 0.7647567 | 1.2753927 | 0.5996 | 0.549 | 2.26E-07 | count | 1 |
| UCK2        | 0.7647567 | 1.2753927 | 0.5996 | 0.549 | 2.26E-07 | count | 1 |
| SNCG        | 0.7647567 | 1.2753927 | 0.5996 | 0.549 | 2.26E-07 | count | 1 |
| LIMA1       | 0.7647567 | 1.2753927 | 0.5996 | 0.549 | 2.26E-07 | count | 1 |
| RGS9        | 0.7647567 | 1.2753927 | 0.5996 | 0.549 | 2.26E-07 | count | 1 |
| ITPKC       | 0.7647567 | 1.2753927 | 0.5996 | 0.549 | 2.26E-07 | count | 1 |
| AC124016.2  | 0.7647567 | 1.2753927 | 0.5996 | 0.549 | 2.26E-07 | count | 1 |
| AMZ1        | 0.7647567 | 1.2753927 | 0.5996 | 0.549 | 2.26E-07 | count | 1 |
| MRPS17      | 0.7647567 | 1.2753927 | 0.5996 | 0.549 | 2.26E-07 | count | 1 |
| AL133551.1  | 0.7647567 | 1.2753927 | 0.5996 | 0.549 | 2.26E-07 | count | 1 |
| ABCD2       | 0.7647567 | 1.2753927 | 0.5996 | 0.549 | 2.26E-07 | count | 1 |
| MYO5C       | 0.7647567 | 1.2753927 | 0.5996 | 0.549 | 2.26E-07 | count | 1 |



|            |           |           |        |       |          |       |   |
|------------|-----------|-----------|--------|-------|----------|-------|---|
| MYLPF      | 0.7647567 | 1.2753927 | 0.5996 | 0.549 | 2.26E-07 | count | 1 |
| PYGB       | 0.7647567 | 1.2753927 | 0.5996 | 0.549 | 2.26E-07 | count | 1 |
| ZNF558     | 0.7647567 | 1.2753927 | 0.5996 | 0.549 | 2.26E-07 | count | 1 |
| IL10RB-DT  | 0.7647567 | 1.2753927 | 0.5996 | 0.549 | 2.26E-07 | count | 1 |
| LINC00649  | 0.7647567 | 1.2753927 | 0.5996 | 0.549 | 2.26E-07 | count | 1 |
| EFNA3      | 0.7647567 | 1.2753927 | 0.5996 | 0.549 | 2.26E-07 | count | 1 |
| ZSCAN21    | 0.7647567 | 1.2753927 | 0.5996 | 0.549 | 2.26E-07 | count | 1 |
| SDR16C5    | 0.7647567 | 1.2753927 | 0.5996 | 0.549 | 2.26E-07 | count | 1 |
| C12orf74   | 0.7647567 | 1.2753927 | 0.5996 | 0.549 | 2.26E-07 | count | 1 |
| GGACT      | 0.7647567 | 1.2753927 | 0.5996 | 0.549 | 2.26E-07 | count | 1 |
| FBXL19     | 0.7647567 | 1.2753927 | 0.5996 | 0.549 | 2.26E-07 | count | 1 |
| AP001347.1 | 0.7647567 | 1.2753927 | 0.5996 | 0.549 | 2.26E-07 | count | 1 |
| ASH1L-AS1  | 0.7647567 | 1.2753927 | 0.5996 | 0.549 | 2.26E-07 | count | 1 |
| PIK3R4     | 0.7647567 | 1.2753927 | 0.5996 | 0.549 | 2.26E-07 | count | 1 |
| ERCC2      | 0.7647567 | 1.2753927 | 0.5996 | 0.549 | 2.26E-07 | count | 1 |
| JAM2       | 0.7647567 | 1.2753927 | 0.5996 | 0.549 | 2.26E-07 | count | 1 |
| HOMER1     | 0.7647567 | 1.2753927 | 0.5996 | 0.549 | 2.26E-07 | count | 1 |
| IFT81      | 0.7647567 | 1.2753927 | 0.5996 | 0.549 | 2.26E-07 | count | 1 |
| OAS3       | 0.7647567 | 1.2753927 | 0.5996 | 0.549 | 2.26E-07 | count | 1 |
| ADAT3      | 0.7647567 | 1.2753927 | 0.5996 | 0.549 | 2.26E-07 | count | 1 |
| CBR3       | 0.7647567 | 1.2753927 | 0.5996 | 0.549 | 2.26E-07 | count | 1 |
| PDIK1L     | 0.7647567 | 1.594849  | 0.4795 | 0.632 | 2.26E-07 | count | 1 |
| FAM66C     | 0.7647567 | 1.594849  | 0.4795 | 0.632 | 2.26E-07 | count | 1 |
| TIGD1      | 0.7647567 | 1.594849  | 0.4795 | 0.632 | 2.26E-07 | count | 1 |
| AC083843.3 | 0.7647567 | 1.594849  | 0.4795 | 0.632 | 2.26E-07 | count | 1 |
| INTS7      | 0.7647567 | 1.594849  | 0.4795 | 0.632 | 2.26E-07 | count | 1 |
| C15orf48   | 0.7647567 | 1.594849  | 0.4795 | 0.632 | 2.26E-07 | count | 1 |
| LRG1       | 0.7647567 | 1.594849  | 0.4795 | 0.632 | 2.26E-07 | count | 1 |
| C19orf18   | 0.7647567 | 1.594849  | 0.4795 | 0.632 | 2.26E-07 | count | 1 |
| AP000911.1 | 0.7647567 | 1.594849  | 0.4795 | 0.632 | 2.26E-07 | count | 1 |
| CRAMP1     | 0.7647567 | 1.594849  | 0.4795 | 0.632 | 2.26E-07 | count | 1 |
| APOBR      | 0.7647567 | 1.594849  | 0.4795 | 0.632 | 2.26E-07 | count | 1 |
| LRRC37A    | 0.7647567 | 1.594849  | 0.4795 | 0.632 | 2.26E-07 | count | 1 |
| MORN1      | 0.7647567 | 1.594849  | 0.4795 | 0.632 | 2.26E-07 | count | 1 |
| CDA        | 0.7647567 | 1.594849  | 0.4795 | 0.632 | 2.26E-07 | count | 1 |
| ASF1B      | 0.7647567 | 1.594849  | 0.4795 | 0.632 | 2.26E-07 | count | 1 |
| RAB34      | 0.7647567 | 0.9079231 | 0.8423 | 0.4   | 2.26E-07 | count | 1 |
| ZNF670     | 0.7647567 | 0.9689886 | 0.7892 | 0.43  | 2.26E-07 | count | 1 |
| PFKFB3     | 0.7647567 | 0.9689886 | 0.7892 | 0.43  | 2.26E-07 | count | 1 |
| TMLHE      | 0.7647567 | 0.9689886 | 0.7892 | 0.43  | 2.26E-07 | count | 1 |
| AC104699.1 | 0.7647567 | 0.7603144 | 1.0058 | 0.315 | 2.26E-07 | count | 1 |
| LINC02541  | 0.7647567 | 1.0264276 | 0.7451 | 0.457 | 2.26E-07 | count | 1 |
| GALNS      | 0.7647567 | 1.0264276 | 0.7451 | 0.457 | 2.26E-07 | count | 1 |
| DTWD2      | 0.7647567 | 1.0264276 | 0.7451 | 0.457 | 2.26E-07 | count | 1 |
| SLC38A9    | 0.7647567 | 1.0264276 | 0.7451 | 0.457 | 2.26E-07 | count | 1 |

|            |           |           |        |       |          |       |   |
|------------|-----------|-----------|--------|-------|----------|-------|---|
| ZP3        | 0.7647567 | 0.8322816 | 0.9189 | 0.359 | 2.26E-07 | count | 1 |
| GOT2       | 0.7647567 | 0.8322816 | 0.9189 | 0.359 | 2.26E-07 | count | 1 |
| EXOSC2     | 0.7647567 | 0.8322816 | 0.9189 | 0.359 | 2.26E-07 | count | 1 |
| LINC01684  | 0.7647567 | 1.1326    | 0.6752 | 0.5   | 2.26E-07 | count | 1 |
| PRKAB2     | 0.7647567 | 0.8985028 | 0.8511 | 0.395 | 2.27E-07 | count | 1 |
| TRDMT1     | 0.7647567 | 0.8985028 | 0.8511 | 0.395 | 2.27E-07 | count | 1 |
| FAAH2      | 0.7647567 | 0.8985028 | 0.8511 | 0.395 | 2.27E-07 | count | 1 |
| ZNF514     | 0.7647567 | 0.9601676 | 0.7965 | 0.426 | 2.27E-07 | count | 1 |
| FKRP       | 0.7647567 | 1.0181044 | 0.7512 | 0.453 | 2.27E-07 | count | 1 |
| RNF115     | 0.0188072 | 0.3181646 | 0.0591 | 0.953 | 2.27E-07 | count | 1 |
| ABCC5      | 0.7647567 | 1.1748959 | 0.6509 | 0.515 | 2.28E-07 | count | 1 |
| DAPP1      | 0.0189629 | 0.2170995 | 0.0873 | 0.93  | 2.29E-07 | count | 1 |
| BCAP31     | 0.0191712 | 0.2006261 | 0.0956 | 0.924 | 2.32E-07 | count | 1 |
| ACD        | 0.0527261 | 0.3759574 | 0.1402 | 0.889 | 2.38E-07 | count | 1 |
| SETD2      | 0.0197918 | 0.3104528 | 0.0638 | 0.949 | 2.39E-07 | count | 1 |
| ZBTB20     | 0.0197884 | 0.2145978 | 0.0922 | 0.927 | 2.39E-07 | count | 1 |
| RNF220     | 0.0534119 | 0.4113653 | 0.1298 | 0.897 | 2.41E-07 | count | 1 |
| POLD2      | 0.0537102 | 0.4062837 | 0.1322 | 0.895 | 2.42E-07 | count | 1 |
| RPS6KB2    | 0.0547269 | 0.4036206 | 0.1356 | 0.892 | 2.47E-07 | count | 1 |
| DNAJC11    | 0.3592916 | 1.0703483 | 0.3357 | 0.737 | 2.47E-07 | count | 1 |
| LETM2      | 0.3592916 | 0.6123724 | 0.5867 | 0.558 | 2.47E-07 | count | 1 |
| PHTF1      | 0.3592916 | 0.6710218 | 0.5354 | 0.593 | 2.47E-07 | count | 1 |
| NEK9       | 0.3592916 | 0.6628728 | 0.542  | 0.588 | 2.47E-07 | count | 1 |
| TAF5L      | 0.3592916 | 0.6936975 | 0.5179 | 0.605 | 2.47E-07 | count | 1 |
| WDR18      | 0.3592916 | 0.660978  | 0.5436 | 0.587 | 2.47E-07 | count | 1 |
| S100A12    | 0.3592916 | 1.1478534 | 0.313  | 0.754 | 2.47E-07 | count | 1 |
| ZNF134     | 0.3592916 | 0.6983934 | 0.5145 | 0.607 | 2.47E-07 | count | 1 |
| AL031663.3 | 0.3592916 | 0.6983934 | 0.5145 | 0.607 | 2.47E-07 | count | 1 |
| PIK3CG     | 0.05466   | 0.5909705 | 0.0925 | 0.926 | 2.47E-07 | count | 1 |
| AC145285.6 | 0.3592916 | 0.9019082 | 0.3984 | 0.691 | 2.47E-07 | count | 1 |
| C6orf203   | 0.3592916 | 0.6065985 | 0.5923 | 0.554 | 2.47E-07 | count | 1 |
| AC093673.1 | 0.3592916 | 0.6083943 | 0.5906 | 0.555 | 2.47E-07 | count | 1 |
| IFT52      | 0.3592916 | 0.6083943 | 0.5906 | 0.555 | 2.47E-07 | count | 1 |
| UBE2O      | 0.3592916 | 0.6013498 | 0.5975 | 0.55  | 2.47E-07 | count | 1 |
| LRRC40     | 0.3592916 | 0.5806728 | 0.6188 | 0.536 | 2.47E-07 | count | 1 |
| GOLPH3L    | 0.3592916 | 0.7321929 | 0.4907 | 0.624 | 2.47E-07 | count | 1 |
| TMEM161B   | 0.3592916 | 0.5216626 | 0.6887 | 0.491 | 2.47E-07 | count | 1 |
| TRIM59     | 0.3592916 | 0.7644995 | 0.47   | 0.639 | 2.47E-07 | count | 1 |
| POLG2      | 0.3592916 | 0.6469131 | 0.5554 | 0.579 | 2.47E-07 | count | 1 |
| MLKL       | 0.3592916 | 0.6469131 | 0.5554 | 0.579 | 2.47E-07 | count | 1 |
| THAP4      | 0.3592916 | 0.6469131 | 0.5554 | 0.579 | 2.47E-07 | count | 1 |
| RFT1       | 0.3592916 | 0.6469131 | 0.5554 | 0.579 | 2.47E-07 | count | 1 |
| AGO1       | 0.3592916 | 0.683264  | 0.5258 | 0.599 | 2.48E-07 | count | 1 |
| PRKAG2-AS1 | 0.3592916 | 0.683264  | 0.5258 | 0.599 | 2.48E-07 | count | 1 |
| AP4M1      | 0.3592916 | 0.6337599 | 0.5669 | 0.571 | 2.48E-07 | count | 1 |

|          |           |           |        |       |          |       |   |
|----------|-----------|-----------|--------|-------|----------|-------|---|
| TMEM64   | 0.3592916 | 0.6741361 | 0.533  | 0.594 | 2.48E-07 | count | 1 |
| SCNM1    | 0.3592916 | 0.4833044 | 0.7434 | 0.458 | 2.48E-07 | count | 1 |
| NUP188   | 0.3592916 | 0.7185759 | 0.5    | 0.617 | 2.48E-07 | count | 1 |
| CDIPT    | 0.3592916 | 0.4484761 | 0.8011 | 0.423 | 2.49E-07 | count | 1 |
| PELP1    | 0.3592916 | 0.7092059 | 0.5066 | 0.613 | 2.49E-07 | count | 1 |
| ZNF75A   | 0.0557302 | 0.4117422 | 0.1354 | 0.892 | 2.52E-07 | count | 1 |
| SLC30A9  | 0.0559028 | 0.4444986 | 0.1258 | 0.9   | 2.52E-07 | count | 1 |
| GCLM     | 0.0559028 | 0.4091764 | 0.1366 | 0.891 | 2.52E-07 | count | 1 |
| PER1     | 0.0561688 | 0.446799  | 0.1257 | 0.9   | 2.53E-07 | count | 1 |
| PGAP2    | 0.0566317 | 0.5743204 | 0.0986 | 0.921 | 2.56E-07 | count | 1 |
| SLAMF6   | 0.1493594 | 0.6429665 | 0.2323 | 0.816 | 2.57E-07 | count | 1 |
| SLC25A12 | 0.1493594 | 0.68445   | 0.2182 | 0.827 | 2.57E-07 | count | 1 |
| SLC39A7  | 0.1493594 | 0.6360309 | 0.2348 | 0.814 | 2.57E-07 | count | 1 |
| MTA3     | 0.1493594 | 0.6779389 | 0.2203 | 0.826 | 2.57E-07 | count | 1 |
| PLPBP    | 0.0577937 | 0.3909464 | 0.1478 | 0.883 | 2.61E-07 | count | 1 |
| IDH2     | 0.0582813 | 0.3357311 | 0.1736 | 0.862 | 2.63E-07 | count | 1 |
| COMMD10  | 0.0589323 | 0.4063745 | 0.145  | 0.885 | 2.66E-07 | count | 1 |
| LTV1     | 0.0589323 | 0.3971608 | 0.1484 | 0.882 | 2.66E-07 | count | 1 |
| ZDHC6    | 0.0589323 | 0.4054268 | 0.1454 | 0.884 | 2.67E-07 | count | 1 |
| PIK3R1   | 0.0223861 | 0.4114888 | 0.0544 | 0.957 | 2.71E-07 | count | 1 |
| ACTR1A   | 0.0601522 | 0.386881  | 0.1555 | 0.877 | 2.72E-07 | count | 1 |
| WDR45B   | 0.0603361 | 0.3346648 | 0.1803 | 0.857 | 2.73E-07 | count | 1 |
| HMGXB4   | 0.0614624 | 0.4456384 | 0.1379 | 0.89  | 2.78E-07 | count | 1 |
| SENP5    | 0.0614644 | 0.4432389 | 0.1387 | 0.89  | 2.78E-07 | count | 1 |
| DYNLL2   | 0.061461  | 0.4237869 | 0.145  | 0.885 | 2.79E-07 | count | 1 |
| ENOSF1   | 0.1660166 | 0.7504038 | 0.2212 | 0.825 | 2.88E-07 | count | 1 |
| CSE1L    | 0.1660166 | 0.6282209 | 0.2643 | 0.792 | 2.88E-07 | count | 1 |
| BDH1     | 0.1660166 | 0.7594527 | 0.2186 | 0.827 | 2.88E-07 | count | 1 |
| GCSH     | 0.1660166 | 0.7970487 | 0.2083 | 0.835 | 2.88E-07 | count | 1 |
| DNMT3A   | 0.1660166 | 0.7970487 | 0.2083 | 0.835 | 2.88E-07 | count | 1 |
| ACSL5    | 0.1660166 | 0.6857956 | 0.2421 | 0.809 | 2.88E-07 | count | 1 |
| RNF4     | 0.0636035 | 0.3503769 | 0.1815 | 0.856 | 2.88E-07 | count | 1 |
| DHODH    | 0.9189074 | 0.9424271 | 0.975  | 0.33  | 2.88E-07 | count | 1 |
| DHTKD1   | 0.1660166 | 0.7388977 | 0.2247 | 0.822 | 2.88E-07 | count | 1 |
| LONP1    | 0.9189074 | 0.9914138 | 0.9269 | 0.354 | 2.88E-07 | count | 1 |
| BICRAL   | 0.9189074 | 0.8066703 | 1.1391 | 0.255 | 2.88E-07 | count | 1 |
| HCG11    | 0.9189074 | 0.8066703 | 1.1391 | 0.255 | 2.88E-07 | count | 1 |
| PITPNM1  | 0.9189074 | 1.0827586 | 0.8487 | 0.397 | 2.89E-07 | count | 1 |
| GLCE     | 0.9189074 | 1.0827586 | 0.8487 | 0.397 | 2.89E-07 | count | 1 |
| GBE1     | 0.9189074 | 0.8633942 | 1.0643 | 0.288 | 2.89E-07 | count | 1 |
| DNM3     | 0.9189074 | 0.8633942 | 1.0643 | 0.288 | 2.89E-07 | count | 1 |
| CMTR1    | 0.9189074 | 0.8633942 | 1.0643 | 0.288 | 2.89E-07 | count | 1 |
| SIRT5    | 0.9189074 | 0.8633942 | 1.0643 | 0.288 | 2.89E-07 | count | 1 |
| KANSL1L  | 0.9189074 | 0.9166144 | 1.0025 | 0.317 | 2.89E-07 | count | 1 |
| ZMIZ1    | 0.9189074 | 0.9669098 | 0.9504 | 0.342 | 2.89E-07 | count | 1 |

|            |           |           |        |       |          |       |   |
|------------|-----------|-----------|--------|-------|----------|-------|---|
| TBC1D10A   | 0.4133588 | 0.5093995 | 0.8115 | 0.418 | 2.91E-07 | count | 1 |
| UNK        | 0.4199162 | 0.4625466 | 0.9078 | 0.364 | 2.97E-07 | count | 1 |
| GSAP       | 0.0660125 | 0.3761146 | 0.1755 | 0.861 | 2.99E-07 | count | 1 |
| ZNF117     | 0.1754379 | 0.6908741 | 0.2539 | 0.8   | 3.06E-07 | count | 1 |
| CCDC66     | 0.0256321 | 0.2858433 | 0.0897 | 0.929 | 3.11E-07 | count | 1 |
| BMI1       | 0.4393343 | 0.5684668 | 0.7728 | 0.44  | 3.12E-07 | count | 1 |
| AC027644.3 | 0.4393343 | 0.6015077 | 0.7304 | 0.466 | 3.13E-07 | count | 1 |
| IRF2BP1    | 0.4393343 | 0.5590094 | 0.7859 | 0.432 | 3.13E-07 | count | 1 |
| TYK2       | 0.4393343 | 0.5925778 | 0.7414 | 0.459 | 3.14E-07 | count | 1 |
| KMT5A      | 0.0263506 | 0.3431336 | 0.0768 | 0.939 | 3.19E-07 | count | 1 |
| GUCD1      | 0.0266437 | 0.3958497 | 0.0673 | 0.946 | 3.24E-07 | count | 1 |
| TRIM37     | 0.4546018 | 0.5491548 | 0.8278 | 0.408 | 3.26E-07 | count | 1 |
| C11orf24   | 0.4546018 | 0.6317535 | 0.7196 | 0.472 | 3.26E-07 | count | 1 |
| ZNF10      | 0.4546018 | 0.6735524 | 0.6749 | 0.5   | 3.26E-07 | count | 1 |
| DUSP14     | 0.4546018 | 0.5967674 | 0.7618 | 0.447 | 3.27E-07 | count | 1 |
| PPRC1      | 0.1875943 | 0.6958059 | 0.2696 | 0.788 | 3.28E-07 | count | 1 |
| PDZD8      | 0.1875943 | 0.8974772 | 0.209  | 0.835 | 3.28E-07 | count | 1 |
| TRIM14     | 0.1875943 | 0.7490959 | 0.2504 | 0.802 | 3.28E-07 | count | 1 |
| TOR4A      | 0.1875943 | 0.8400101 | 0.2233 | 0.823 | 3.28E-07 | count | 1 |
| PCM1       | 0.0272682 | 0.1886946 | 0.1445 | 0.885 | 3.31E-07 | count | 1 |
| PUM1       | 0.1893926 | 0.3672531 | 0.5157 | 0.606 | 3.32E-07 | count | 1 |
| B4GALT3    | 0.0735376 | 0.4219312 | 0.1743 | 0.862 | 3.35E-07 | count | 1 |
| SNUPN      | 0.0743539 | 0.5613092 | 0.1325 | 0.895 | 3.38E-07 | count | 1 |
| WASHC2A    | 0.0743539 | 0.5239547 | 0.1419 | 0.887 | 3.38E-07 | count | 1 |
| RCOR3      | 0.0743539 | 0.4826718 | 0.154  | 0.878 | 3.38E-07 | count | 1 |
| TMEM106C   | 0.0750907 | 0.5688811 | 0.132  | 0.895 | 3.41E-07 | count | 1 |
| C12orf4    | 0.0750907 | 0.5880231 | 0.1277 | 0.898 | 3.41E-07 | count | 1 |
| AC084033.3 | 0.0750907 | 0.5284543 | 0.1421 | 0.887 | 3.41E-07 | count | 1 |
| DTYMK      | 0.0750907 | 0.5268768 | 0.1425 | 0.887 | 3.41E-07 | count | 1 |
| RAB3A      | 0.4770746 | 0.6458633 | 0.7387 | 0.461 | 3.44E-07 | count | 1 |
| HHLA3      | 0.4770746 | 0.6458633 | 0.7387 | 0.461 | 3.44E-07 | count | 1 |
| THTPA      | 0.4770746 | 0.7797415 | 0.6118 | 0.541 | 3.44E-07 | count | 1 |
| PLEKHG7    | 0.4770746 | 0.5919862 | 0.8059 | 0.421 | 3.44E-07 | count | 1 |
| ZNF605     | 0.4770746 | 0.7070478 | 0.6747 | 0.5   | 3.44E-07 | count | 1 |
| ZFP1       | 0.4770746 | 0.6259683 | 0.7621 | 0.446 | 3.44E-07 | count | 1 |
| PAXIP1     | 0.1959796 | 0.7728433 | 0.2536 | 0.8   | 3.45E-07 | count | 1 |
| ZNF570     | 0.4770746 | 0.7633438 | 0.625  | 0.532 | 3.45E-07 | count | 1 |
| ACY3       | 0.4770746 | 0.7633438 | 0.625  | 0.532 | 3.45E-07 | count | 1 |
| JRKL       | 0.4770746 | 0.6581982 | 0.7248 | 0.469 | 3.45E-07 | count | 1 |
| ACCS       | 1.0524388 | 1.0451518 | 1.007  | 0.314 | 3.45E-07 | count | 1 |
| NLK        | 1.0524388 | 1.0451518 | 1.007  | 0.314 | 3.45E-07 | count | 1 |
| MAK        | 1.0524388 | 1.0451518 | 1.007  | 0.314 | 3.45E-07 | count | 1 |
| DVL2       | 1.0524388 | 1.0451518 | 1.007  | 0.314 | 3.45E-07 | count | 1 |
| MARS2      | 1.0524388 | 1.0451518 | 1.007  | 0.314 | 3.45E-07 | count | 1 |
| ZCCHC4     | 1.0524388 | 1.0451518 | 1.007  | 0.314 | 3.45E-07 | count | 1 |

|            |           |           |        |       |          |       |   |
|------------|-----------|-----------|--------|-------|----------|-------|---|
| FAM220A    | 1.0524388 | 1.0451518 | 1.007  | 0.314 | 3.45E-07 | count | 1 |
| EEF2K      | 1.0524388 | 1.0451518 | 1.007  | 0.314 | 3.45E-07 | count | 1 |
| TTC30B     | 1.0524388 | 1.1894099 | 0.8848 | 0.377 | 3.45E-07 | count | 1 |
| AL683807.1 | 1.0524388 | 1.1894099 | 0.8848 | 0.377 | 3.45E-07 | count | 1 |
| RITA1      | 1.0524388 | 1.1894099 | 0.8848 | 0.377 | 3.45E-07 | count | 1 |
| PARPBP     | 1.0524388 | 1.1894099 | 0.8848 | 0.377 | 3.45E-07 | count | 1 |
| NRARP      | 1.0524388 | 1.1894099 | 0.8848 | 0.377 | 3.45E-07 | count | 1 |
| UEVLD      | 1.0524388 | 1.1894099 | 0.8848 | 0.377 | 3.45E-07 | count | 1 |
| AGPAT3     | 1.0524388 | 1.1894099 | 0.8848 | 0.377 | 3.45E-07 | count | 1 |
| TIMM23B    | 1.0524388 | 1.1894099 | 0.8848 | 0.377 | 3.45E-07 | count | 1 |
| L3HYPDH    | 1.0524388 | 1.1894099 | 0.8848 | 0.377 | 3.45E-07 | count | 1 |
| PRELID2    | 1.0524388 | 1.1894099 | 0.8848 | 0.377 | 3.45E-07 | count | 1 |
| CCDC7      | 1.0524388 | 1.1894099 | 0.8848 | 0.377 | 3.45E-07 | count | 1 |
| ATP11A     | 1.0524388 | 1.1894099 | 0.8848 | 0.377 | 3.45E-07 | count | 1 |
| C1orf216   | 1.0524388 | 1.1894099 | 0.8848 | 0.377 | 3.45E-07 | count | 1 |
| PDK1       | 1.0524388 | 1.1894099 | 0.8848 | 0.377 | 3.45E-07 | count | 1 |
| HIST1H4I   | 1.0524388 | 1.1894099 | 0.8848 | 0.377 | 3.45E-07 | count | 1 |
| CSTF2      | 1.0524388 | 1.1894099 | 0.8848 | 0.377 | 3.45E-07 | count | 1 |
| NECAB3     | 1.0524388 | 1.1894099 | 0.8848 | 0.377 | 3.45E-07 | count | 1 |
| ZNF578     | 1.0524388 | 1.1894099 | 0.8848 | 0.377 | 3.45E-07 | count | 1 |
| SLC35E4    | 1.0524388 | 1.1894099 | 0.8848 | 0.377 | 3.45E-07 | count | 1 |
| BYSL       | 1.0524388 | 1.1894099 | 0.8848 | 0.377 | 3.45E-07 | count | 1 |
| FGF9       | 1.0524388 | 1.1894099 | 0.8848 | 0.377 | 3.45E-07 | count | 1 |
| KDM8       | 1.0524388 | 1.1894099 | 0.8848 | 0.377 | 3.45E-07 | count | 1 |
| PLEKHG2    | 1.0524388 | 1.1894099 | 0.8848 | 0.377 | 3.45E-07 | count | 1 |
| IGIP       | 1.0524388 | 1.1894099 | 0.8848 | 0.377 | 3.45E-07 | count | 1 |
| HOXC4      | 1.0524388 | 1.1894099 | 0.8848 | 0.377 | 3.45E-07 | count | 1 |
| NR1D1      | 1.0524388 | 1.1894099 | 0.8848 | 0.377 | 3.45E-07 | count | 1 |
| SLC17A9    | 1.0524388 | 1.1894099 | 0.8848 | 0.377 | 3.45E-07 | count | 1 |
| GPR34      | 1.0524388 | 1.3179717 | 0.7985 | 0.425 | 3.46E-07 | count | 1 |
| AC009126.1 | 1.0524388 | 1.3179717 | 0.7985 | 0.425 | 3.46E-07 | count | 1 |
| KCNK12     | 1.0524388 | 1.3179717 | 0.7985 | 0.425 | 3.46E-07 | count | 1 |
| AL035563.1 | 1.0524388 | 1.3179717 | 0.7985 | 0.425 | 3.46E-07 | count | 1 |
| GRAMD1B    | 1.0524388 | 1.3179717 | 0.7985 | 0.425 | 3.46E-07 | count | 1 |
| SELPLG     | 1.0524388 | 1.3179717 | 0.7985 | 0.425 | 3.46E-07 | count | 1 |
| TBC1D4     | 1.0524388 | 1.3179717 | 0.7985 | 0.425 | 3.46E-07 | count | 1 |
| SLC39A11   | 1.0524388 | 1.3179717 | 0.7985 | 0.425 | 3.46E-07 | count | 1 |
| PRDM10     | 1.0524388 | 1.3179717 | 0.7985 | 0.425 | 3.46E-07 | count | 1 |
| CBY1       | 1.0524388 | 1.3179717 | 0.7985 | 0.425 | 3.46E-07 | count | 1 |
| TSPAN2     | 1.0524388 | 1.3179717 | 0.7985 | 0.425 | 3.46E-07 | count | 1 |
| COL1A1     | 1.0524388 | 1.435062  | 0.7334 | 0.464 | 3.46E-07 | count | 1 |
| EGR4       | 1.0524388 | 1.435062  | 0.7334 | 0.464 | 3.46E-07 | count | 1 |
| SS18L1     | 1.0524388 | 1.435062  | 0.7334 | 0.464 | 3.46E-07 | count | 1 |
| CDC14B     | 1.0524388 | 1.435062  | 0.7334 | 0.464 | 3.46E-07 | count | 1 |
| RILPL1     | 1.0524388 | 1.435062  | 0.7334 | 0.464 | 3.46E-07 | count | 1 |

|          |           |           |        |       |          |       |   |
|----------|-----------|-----------|--------|-------|----------|-------|---|
| CYP4V2   | 1.0524388 | 1.435062  | 0.7334 | 0.464 | 3.46E-07 | count | 1 |
| SNAI1    | 1.0524388 | 1.435062  | 0.7334 | 0.464 | 3.46E-07 | count | 1 |
| WASF1    | 1.0524388 | 1.435062  | 0.7334 | 0.464 | 3.46E-07 | count | 1 |
| HOXB7    | 1.0524388 | 1.435062  | 0.7334 | 0.464 | 3.46E-07 | count | 1 |
| COQ2     | 0.0763684 | 0.6789938 | 0.1125 | 0.91  | 3.47E-07 | count | 1 |
| ZNF684   | 0.0763684 | 0.6140384 | 0.1244 | 0.901 | 3.47E-07 | count | 1 |
| FIZ1     | 0.0763684 | 0.6460922 | 0.1182 | 0.906 | 3.47E-07 | count | 1 |
| FAM41C   | 0.0763684 | 0.7360818 | 0.1037 | 0.917 | 3.47E-07 | count | 1 |
| UBA7     | 0.0763684 | 0.7075762 | 0.1079 | 0.914 | 3.47E-07 | count | 1 |
| WDTC1    | 0.0763684 | 0.5774475 | 0.1323 | 0.895 | 3.47E-07 | count | 1 |
| PAK1     | 0.0763684 | 0.6766292 | 0.1129 | 0.91  | 3.47E-07 | count | 1 |
| THAP2    | 0.0763684 | 0.5774475 | 0.1323 | 0.895 | 3.47E-07 | count | 1 |
| THAP3    | 0.0763684 | 0.6504504 | 0.1174 | 0.907 | 3.47E-07 | count | 1 |
| DBT      | 0.0763684 | 0.7360818 | 0.1037 | 0.917 | 3.47E-07 | count | 1 |
| ISYNA1   | 0.0763684 | 0.7126258 | 0.1072 | 0.915 | 3.47E-07 | count | 1 |
| TCEAL8   | 0.0763684 | 0.5002575 | 0.1527 | 0.879 | 3.47E-07 | count | 1 |
| ATP2C1   | 1.0524388 | 0.7872238 | 1.3369 | 0.182 | 3.48E-07 | count | 1 |
| ATXN1    | 0.4770746 | 0.5190255 | 0.9192 | 0.359 | 3.48E-07 | count | 1 |
| TMEM128  | 1.0524388 | 0.8836844 | 1.191  | 0.234 | 3.48E-07 | count | 1 |
| P2RX4    | 1.0524388 | 0.8836844 | 1.191  | 0.234 | 3.49E-07 | count | 1 |
| FBXL6    | 1.0524388 | 0.9281629 | 1.1339 | 0.257 | 3.49E-07 | count | 1 |
| BCDIN3D  | 1.0524388 | 0.9281629 | 1.1339 | 0.257 | 3.49E-07 | count | 1 |
| GLUD1    | 0.0770318 | 0.3759349 | 0.2049 | 0.838 | 3.50E-07 | count | 1 |
| PQLC3    | 0.0770318 | 0.4137451 | 0.1862 | 0.852 | 3.51E-07 | count | 1 |
| CAPZA2   | 0.0290065 | 0.2254909 | 0.1286 | 0.898 | 3.52E-07 | count | 1 |
| HACD3    | 0.0774381 | 0.4892052 | 0.1583 | 0.874 | 3.52E-07 | count | 1 |
| RASSF7   | 0.0774381 | 0.506928  | 0.1528 | 0.879 | 3.52E-07 | count | 1 |
| SMIM37   | 0.0774381 | 0.3610583 | 0.2145 | 0.83  | 3.52E-07 | count | 1 |
| CDK5RAP1 | 0.0779101 | 0.4185143 | 0.1862 | 0.852 | 3.54E-07 | count | 1 |
| EIF2D    | 0.0779101 | 0.4565028 | 0.1707 | 0.865 | 3.54E-07 | count | 1 |
| PDRG1    | 0.0779101 | 0.4445333 | 0.1753 | 0.861 | 3.55E-07 | count | 1 |
| PPAN     | 0.487125  | 0.4530365 | 1.0752 | 0.283 | 3.56E-07 | count | 1 |
| CEP120   | 0.0791277 | 0.5823965 | 0.1359 | 0.892 | 3.60E-07 | count | 1 |
| OSBPL2   | 0.0791277 | 0.6024549 | 0.1313 | 0.896 | 3.60E-07 | count | 1 |
| PDP1     | 0.0791277 | 0.4272202 | 0.1852 | 0.853 | 3.61E-07 | count | 1 |
| KIAA0232 | 0.0791277 | 0.4419764 | 0.179  | 0.858 | 3.61E-07 | count | 1 |
| XRN2     | 0.0297628 | 0.1965449 | 0.1514 | 0.88  | 3.61E-07 | count | 1 |
| LAGE3    | 0.0299282 | 0.3138142 | 0.0954 | 0.924 | 3.64E-07 | count | 1 |
| PPTC7    | 0.0300375 | 0.3442899 | 0.0872 | 0.931 | 3.65E-07 | count | 1 |
| MED27    | 0.0804021 | 0.4857562 | 0.1655 | 0.869 | 3.66E-07 | count | 1 |
| RDH11    | 0.0804021 | 0.4489633 | 0.1791 | 0.858 | 3.66E-07 | count | 1 |
| PPIL3    | 0.2084424 | 0.9152806 | 0.2277 | 0.82  | 3.67E-07 | count | 1 |
| PTRH1    | 0.2084424 | 0.9152806 | 0.2277 | 0.82  | 3.67E-07 | count | 1 |
| FSCN1    | 0.2084424 | 1.0060798 | 0.2072 | 0.836 | 3.67E-07 | count | 1 |
| MXRA7    | 0.2084424 | 1.0060798 | 0.2072 | 0.836 | 3.67E-07 | count | 1 |

|            |            |             |        |       |          |       |   |
|------------|------------|-------------|--------|-------|----------|-------|---|
| AC008267.5 | 0.2084424  | 0.7937583   | 0.2626 | 0.793 | 3.67E-07 | count | 1 |
| TBCCD1     | 0.2084424  | 0.9192074   | 0.2268 | 0.821 | 3.67E-07 | count | 1 |
| RDH5       | 0.2084424  | 0.7892076   | 0.2641 | 0.792 | 3.67E-07 | count | 1 |
| NKIRAS1    | 0.2084424  | 0.7892076   | 0.2641 | 0.792 | 3.67E-07 | count | 1 |
| CCDC102B   | 0.2084424  | 0.8969449   | 0.2324 | 0.816 | 3.67E-07 | count | 1 |
| AL021368.2 | 0.2084424  | 1.0893367   | 0.1913 | 0.848 | 3.67E-07 | count | 1 |
| ARL15      | 0.2084424  | 0.8929203   | 0.2334 | 0.816 | 3.67E-07 | count | 1 |
| ZER1       | 0.2084424  | 0.8929203   | 0.2334 | 0.816 | 3.67E-07 | count | 1 |
| DNAJC25    | 0.2084424  | 0.8929203   | 0.2334 | 0.816 | 3.67E-07 | count | 1 |
| MECR       | 0.2084424  | 0.8929203   | 0.2334 | 0.816 | 3.67E-07 | count | 1 |
| E2F6       | 0.2084424  | 0.8929203   | 0.2334 | 0.816 | 3.67E-07 | count | 1 |
| C7orf31    | 0.2084424  | 0.9857812   | 0.2114 | 0.833 | 3.67E-07 | count | 1 |
| MBLAC1     | 0.2084424  | 0.9857812   | 0.2114 | 0.833 | 3.67E-07 | count | 1 |
| DNLZ       | 0.2084424  | 0.9857812   | 0.2114 | 0.833 | 3.67E-07 | count | 1 |
| TBC1D2B    | 0.2084424  | 0.9857812   | 0.2114 | 0.833 | 3.67E-07 | count | 1 |
| IFT46      | 0.2084424  | 1.0706178   | 0.1947 | 0.846 | 3.67E-07 | count | 1 |
| MTG1       | 0.2084424  | 1.2921286   | 0.1613 | 0.872 | 3.68E-07 | count | 1 |
| FASTKD1    | 0.2084424  | 1.2921286   | 0.1613 | 0.872 | 3.68E-07 | count | 1 |
| PLEKHG1    | 0.0809286  | 0.5297238   | 0.1528 | 0.879 | 3.69E-07 | count | 1 |
| CAB39      | 0.0809286  | 0.5284922   | 0.1531 | 0.878 | 3.69E-07 | count | 1 |
| ZNF649     | 0.0821964  | 0.6874959   | 0.1196 | 0.905 | 3.75E-07 | count | 1 |
| STYXL1     | 0.0821964  | 0.7273699   | 0.113  | 0.91  | 3.75E-07 | count | 1 |
| ERI3       | 0.0821964  | 0.4765683   | 0.1725 | 0.863 | 3.75E-07 | count | 1 |
| MRPL10     | 0.0821964  | 0.5324558   | 0.1544 | 0.877 | 3.75E-07 | count | 1 |
| LPCAT4     | 0.0821964  | 0.6998854   | 0.1174 | 0.907 | 3.75E-07 | count | 1 |
| TNFRSF12A  | 0.0821964  | 0.6998854   | 0.1174 | 0.907 | 3.75E-07 | count | 1 |
| PPFIA1     | 0.0821964  | 0.4934097   | 0.1666 | 0.868 | 3.75E-07 | count | 1 |
| DNAL1      | 0.5134423  | 0.8992868   | 0.5709 | 0.568 | 3.76E-07 | count | 1 |
| METRNL     | 0.5134423  | 0.5472739   | 0.9382 | 0.349 | 3.77E-07 | count | 1 |
| DDX49      | 0.5134423  | 0.5630735   | 0.9119 | 0.362 | 3.78E-07 | count | 1 |
| CEP85L     | 0.0838633  | 0.4556757   | 0.184  | 0.854 | 3.82E-07 | count | 1 |
| KCTD13     | 0.0838633  | 0.6078839   | 0.138  | 0.89  | 3.82E-07 | count | 1 |
| FAM78A     | 0.0838633  | 0.6846898   | 0.1225 | 0.903 | 3.82E-07 | count | 1 |
| HSPBP1     | 0.0838633  | 0.5761567   | 0.1456 | 0.884 | 3.83E-07 | count | 1 |
| KIF1B      | 0.2164728  | 0.7193337   | 0.3009 | 0.764 | 3.83E-07 | count | 1 |
| SMPD2      | 0.0849102  | 0.5397621   | 0.1573 | 0.875 | 3.87E-07 | count | 1 |
| HDAC5      | 0.0849102  | 0.5770276   | 0.1472 | 0.883 | 3.88E-07 | count | 1 |
| LPIN3      | 17.9453936 | 4049.643109 | 0.0044 | 0.996 | 3.88E-07 | count | 1 |
| MNS1       | 17.9453936 | 4049.643253 | 0.0044 | 0.996 | 3.88E-07 | count | 1 |
| MSTO1      | 17.9453936 | 4049.643209 | 0.0044 | 0.996 | 3.88E-07 | count | 1 |
| CD8A       | 17.9453936 | 4049.643209 | 0.0044 | 0.996 | 3.88E-07 | count | 1 |
| ARHGEF26   | 17.9453936 | 4049.643209 | 0.0044 | 0.996 | 3.88E-07 | count | 1 |
| TRIM32     | 17.9453936 | 4049.643209 | 0.0044 | 0.996 | 3.88E-07 | count | 1 |
| GARNL3     | 17.9453936 | 4049.643209 | 0.0044 | 0.996 | 3.88E-07 | count | 1 |
| TSPAN18    | 17.9453936 | 4049.643209 | 0.0044 | 0.996 | 3.88E-07 | count | 1 |

|             |            |             |        |       |          |       |   |
|-------------|------------|-------------|--------|-------|----------|-------|---|
| AL359397.2  | 17.9453936 | 4049.643209 | 0.0044 | 0.996 | 3.88E-07 | count | 1 |
| GNAO1       | 17.9453936 | 4049.643209 | 0.0044 | 0.996 | 3.88E-07 | count | 1 |
| TLR2        | 17.6573425 | 3506.45471  | 0.005  | 0.996 | 3.89E-07 | count | 1 |
| DIABLO      | 17.6573426 | 3506.454697 | 0.005  | 0.996 | 3.89E-07 | count | 1 |
| REEP4       | 17.6573425 | 3506.454797 | 0.005  | 0.996 | 3.89E-07 | count | 1 |
| FCGR3A      | 17.6573426 | 3506.454753 | 0.005  | 0.996 | 3.89E-07 | count | 1 |
| 1-Mar       | 17.6573426 | 3506.454753 | 0.005  | 0.996 | 3.89E-07 | count | 1 |
| OR2T10      | 17.6573427 | 3506.454753 | 0.005  | 0.996 | 3.89E-07 | count | 1 |
| IL18RAP     | 17.6573426 | 3506.454753 | 0.005  | 0.996 | 3.89E-07 | count | 1 |
| S100P       | 17.6573426 | 3506.454753 | 0.005  | 0.996 | 3.89E-07 | count | 1 |
| HAVCR2      | 17.6573427 | 3506.454753 | 0.005  | 0.996 | 3.89E-07 | count | 1 |
| CYP3A5      | 17.6573427 | 3506.454753 | 0.005  | 0.996 | 3.89E-07 | count | 1 |
| MGAM        | 17.6573426 | 3506.454753 | 0.005  | 0.996 | 3.89E-07 | count | 1 |
| AC107959.4  | 17.6573426 | 3506.454753 | 0.005  | 0.996 | 3.89E-07 | count | 1 |
| OLMALINC    | 17.6573426 | 3506.454753 | 0.005  | 0.996 | 3.89E-07 | count | 1 |
| PI3         | 17.6573426 | 3506.454753 | 0.005  | 0.996 | 3.89E-07 | count | 1 |
| AC022144.1  | 17.6573427 | 3506.454753 | 0.005  | 0.996 | 3.89E-07 | count | 1 |
| EGLN2       | 17.6573426 | 3506.454753 | 0.005  | 0.996 | 3.89E-07 | count | 1 |
| FPR1        | 17.6573426 | 3506.454753 | 0.005  | 0.996 | 3.89E-07 | count | 1 |
| PGAM2       | 17.6573426 | 3506.454722 | 0.005  | 0.996 | 3.89E-07 | count | 1 |
| C5orf34     | 17.6573426 | 3506.454735 | 0.005  | 0.996 | 3.89E-07 | count | 1 |
| AQP9        | 17.6573426 | 3506.454846 | 0.005  | 0.996 | 3.89E-07 | count | 1 |
| HIST1H4B    | 17.6573426 | 3506.454822 | 0.005  | 0.996 | 3.89E-07 | count | 1 |
| AFF2        | 17.6573426 | 3506.454822 | 0.005  | 0.996 | 3.89E-07 | count | 1 |
| GLT1D1      | 17.6573426 | 3506.454822 | 0.005  | 0.996 | 3.89E-07 | count | 1 |
| NOP9        | 17.6573426 | 3506.454822 | 0.005  | 0.996 | 3.89E-07 | count | 1 |
| ANPEP       | 17.6573426 | 3506.454822 | 0.005  | 0.996 | 3.89E-07 | count | 1 |
| PRAM1       | 17.6573426 | 3506.454822 | 0.005  | 0.996 | 3.89E-07 | count | 1 |
| CYP4F3      | 17.6573426 | 3506.454822 | 0.005  | 0.996 | 3.89E-07 | count | 1 |
| FPR2        | 17.6573426 | 3506.454822 | 0.005  | 0.996 | 3.89E-07 | count | 1 |
| AC074386.1  | 17.6573425 | 3506.454753 | 0.005  | 0.996 | 3.89E-07 | count | 1 |
| RAD21-AS1   | 17.6573425 | 3506.454753 | 0.005  | 0.996 | 3.89E-07 | count | 1 |
| ENKUR       | 17.6573425 | 3506.454753 | 0.005  | 0.996 | 3.89E-07 | count | 1 |
| TSC22D1-AS1 | 17.6573425 | 3506.454753 | 0.005  | 0.996 | 3.89E-07 | count | 1 |
| IGLV10-54   | 17.6573426 | 3506.454735 | 0.005  | 0.996 | 3.89E-07 | count | 1 |
| VEGFC       | 17.6573425 | 3506.45484  | 0.005  | 0.996 | 3.89E-07 | count | 1 |
| HOMER2      | 17.6573426 | 3506.454809 | 0.005  | 0.996 | 3.89E-07 | count | 1 |
| AL451007.3  | 17.6573425 | 3506.454759 | 0.005  | 0.996 | 3.89E-07 | count | 1 |
| ARAP3       | 17.6573425 | 3506.454759 | 0.005  | 0.996 | 3.89E-07 | count | 1 |
| AL022157.1  | 17.6573425 | 3506.454759 | 0.005  | 0.996 | 3.89E-07 | count | 1 |
| USP35       | 17.6573425 | 3506.454759 | 0.005  | 0.996 | 3.89E-07 | count | 1 |
| EMP1        | 17.6573425 | 3506.454759 | 0.005  | 0.996 | 3.89E-07 | count | 1 |
| TGM1        | 17.6573425 | 3506.454759 | 0.005  | 0.996 | 3.89E-07 | count | 1 |
| AC091045.1  | 17.9450896 | 3196.822682 | 0.0056 | 0.996 | 3.89E-07 | count | 1 |
| PTPN9       | 17.9450895 | 3196.822727 | 0.0056 | 0.996 | 3.89E-07 | count | 1 |



|            |            |             |        |       |          |       |   |
|------------|------------|-------------|--------|-------|----------|-------|---|
| CTSW       | 17.9450896 | 3196.822739 | 0.0056 | 0.996 | 3.89E-07 | count | 1 |
| AP001107.9 | 17.9450894 | 3196.822659 | 0.0056 | 0.996 | 3.89E-07 | count | 1 |
| ZNF606     | 17.9450894 | 3196.822659 | 0.0056 | 0.996 | 3.89E-07 | count | 1 |
| HIST1H2BI  | 17.9450895 | 3196.822795 | 0.0056 | 0.996 | 3.89E-07 | count | 1 |
| AC103702.2 | 18.168463  | 3729.592872 | 0.0049 | 0.996 | 3.89E-07 | count | 1 |
| AL035530.2 | 17.9450061 | 2856.689818 | 0.0063 | 0.995 | 3.89E-07 | count | 1 |
| NEXN       | 17.9450059 | 2856.689787 | 0.0063 | 0.995 | 3.89E-07 | count | 1 |
| LIN9       | 17.9450058 | 2856.689808 | 0.0063 | 0.995 | 3.89E-07 | count | 1 |
| DNAAF4     | 17.9450059 | 2856.689919 | 0.0063 | 0.995 | 3.89E-07 | count | 1 |
| FAH        | 17.9450059 | 2856.689868 | 0.0063 | 0.995 | 3.89E-07 | count | 1 |
| ZKSCAN4    | 17.945006  | 2856.689909 | 0.0063 | 0.995 | 3.89E-07 | count | 1 |
| AC008040.5 | 17.9450058 | 2856.689737 | 0.0063 | 0.995 | 3.89E-07 | count | 1 |
| MIPEP      | 17.9450058 | 2856.689838 | 0.0063 | 0.995 | 3.89E-07 | count | 1 |
| AC010654.1 | 17.9450059 | 2856.689787 | 0.0063 | 0.995 | 3.89E-07 | count | 1 |
| ZNF540     | 17.9450058 | 2856.689696 | 0.0063 | 0.995 | 3.89E-07 | count | 1 |
| OR2G6      | 17.9450059 | 2856.689767 | 0.0063 | 0.995 | 3.89E-07 | count | 1 |
| B3GALNT1   | 17.9450059 | 2856.689818 | 0.0063 | 0.995 | 3.89E-07 | count | 1 |
| MPZ        | 17.945006  | 2856.689848 | 0.0063 | 0.995 | 3.89E-07 | count | 1 |
| ERICH3     | 17.9450059 | 2856.689676 | 0.0063 | 0.995 | 3.89E-07 | count | 1 |
| TUT1       | 17.9450059 | 2856.689787 | 0.0063 | 0.995 | 3.89E-07 | count | 1 |
| IGLV7-46   | 17.9450058 | 2856.689848 | 0.0063 | 0.995 | 3.89E-07 | count | 1 |
| ZNF594     | 18.1683598 | 3258.02154  | 0.0056 | 0.996 | 3.89E-07 | count | 1 |
| CD302      | 18.1683595 | 3258.02154  | 0.0056 | 0.996 | 3.89E-07 | count | 1 |
| ENKD1      | 18.1683594 | 3258.02154  | 0.0056 | 0.996 | 3.89E-07 | count | 1 |
| KIF1C      | 18.1683593 | 3258.02139  | 0.0056 | 0.996 | 3.89E-07 | count | 1 |
| TTC12      | 18.1683596 | 3258.021528 | 0.0056 | 0.996 | 3.89E-07 | count | 1 |
| AC023509.4 | 18.1683596 | 3258.021367 | 0.0056 | 0.996 | 3.89E-07 | count | 1 |
| XXYLT1     | 18.1683593 | 3258.02154  | 0.0056 | 0.996 | 3.89E-07 | count | 1 |
| POC1A      | 18.1683592 | 3258.021424 | 0.0056 | 0.996 | 3.89E-07 | count | 1 |
| IGKV2-29   | 18.1683594 | 3258.021563 | 0.0056 | 0.996 | 3.89E-07 | count | 1 |
| MAP7       | 18.1683593 | 3258.021517 | 0.0056 | 0.996 | 3.89E-07 | count | 1 |
| TXNRD2     | 18.1682096 | 2994.411188 | 0.0061 | 0.995 | 3.89E-07 | count | 1 |
| ZNF717     | 18.1682097 | 2994.411315 | 0.0061 | 0.995 | 3.89E-07 | count | 1 |
| H6PD       | 18.1682096 | 2994.411326 | 0.0061 | 0.995 | 3.89E-07 | count | 1 |
| FAM160A2   | 18.1682093 | 2994.411283 | 0.0061 | 0.995 | 3.89E-07 | count | 1 |
| RNF24      | 18.1682095 | 2994.411156 | 0.0061 | 0.995 | 3.89E-07 | count | 1 |
| SARM1      | 18.1681395 | 2705.433671 | 0.0067 | 0.995 | 3.89E-07 | count | 1 |
| AC020911.2 | 18.1681396 | 2705.43346  | 0.0067 | 0.995 | 3.89E-07 | count | 1 |
| PXMP2      | 18.1681395 | 2705.433623 | 0.0067 | 0.995 | 3.89E-07 | count | 1 |
| TSNARE1    | 18.1681396 | 2705.433691 | 0.0067 | 0.995 | 3.89E-07 | count | 1 |
| CPED1      | 18.1681394 | 2705.433643 | 0.0067 | 0.995 | 3.89E-07 | count | 1 |
| SIGLEC14   | 18.1681395 | 2705.433604 | 0.0067 | 0.995 | 3.89E-07 | count | 1 |
| AL591895.1 | 18.1681394 | 2705.433671 | 0.0067 | 0.995 | 3.89E-07 | count | 1 |
| P2RY12     | 18.1681394 | 2705.433566 | 0.0067 | 0.995 | 3.89E-07 | count | 1 |
| SMYD5      | 18.1681394 | 2705.433614 | 0.0067 | 0.995 | 3.89E-07 | count | 1 |

|            |            |             |        |       |          |       |   |
|------------|------------|-------------|--------|-------|----------|-------|---|
| NBPF19     | 18.1681393 | 2705.43347  | 0.0067 | 0.995 | 3.89E-07 | count | 1 |
| HIST1H2BC  | 18.1681392 | 2705.43348  | 0.0067 | 0.995 | 3.89E-07 | count | 1 |
| AL391069.3 | 17.9448083 | 2470.086067 | 0.0073 | 0.994 | 3.89E-07 | count | 1 |
| BFSP2      | 17.9448083 | 2470.086102 | 0.0073 | 0.994 | 3.89E-07 | count | 1 |
| CLCN2      | 17.9448082 | 2470.086032 | 0.0073 | 0.994 | 3.89E-07 | count | 1 |
| LINC01011  | 17.9448082 | 2470.086067 | 0.0073 | 0.994 | 3.89E-07 | count | 1 |
| FO704657.1 | 17.944808  | 2470.086084 | 0.0073 | 0.994 | 3.89E-07 | count | 1 |
| CELSR3     | 17.9448082 | 2470.085997 | 0.0073 | 0.994 | 3.89E-07 | count | 1 |
| GPHN       | 17.9448082 | 2470.086111 | 0.0073 | 0.994 | 3.89E-07 | count | 1 |
| DYNC2H1    | 17.9448081 | 2470.086058 | 0.0073 | 0.994 | 3.89E-07 | count | 1 |
| ZNF436-AS1 | 17.9448081 | 2470.086006 | 0.0073 | 0.994 | 3.89E-07 | count | 1 |
| ANGPT2     | 17.944808  | 2470.085979 | 0.0073 | 0.994 | 3.89E-07 | count | 1 |
| DCP1B      | 17.944808  | 2470.086049 | 0.0073 | 0.994 | 3.89E-07 | count | 1 |
| PIK3R5     | 17.9448081 | 2470.086058 | 0.0073 | 0.994 | 3.89E-07 | count | 1 |
| QPCTL      | 17.9448081 | 2470.086111 | 0.0073 | 0.994 | 3.89E-07 | count | 1 |
| TCFL5      | 17.9448079 | 2470.086032 | 0.0073 | 0.994 | 3.89E-07 | count | 1 |
| AC009812.1 | 17.944808  | 2470.086049 | 0.0073 | 0.994 | 3.89E-07 | count | 1 |
| ZNF529-AS1 | 17.9448081 | 2470.086111 | 0.0073 | 0.994 | 3.89E-07 | count | 1 |
| SYNJ1      | 17.9448081 | 2470.086084 | 0.0073 | 0.994 | 3.89E-07 | count | 1 |
| CTH        | 17.9448081 | 2470.086067 | 0.0073 | 0.994 | 3.89E-07 | count | 1 |
| PDSS1      | 17.9448079 | 2470.085988 | 0.0073 | 0.994 | 3.89E-07 | count | 1 |
| MAGI3      | 17.944808  | 2470.085944 | 0.0073 | 0.994 | 3.89E-07 | count | 1 |
| CTNND1     | 17.9448081 | 2470.086084 | 0.0073 | 0.994 | 3.89E-07 | count | 1 |
| CCDC184    | 17.944808  | 2470.086023 | 0.0073 | 0.994 | 3.89E-07 | count | 1 |
| AL031728.1 | 17.9448081 | 2470.086102 | 0.0073 | 0.994 | 3.89E-07 | count | 1 |
| AC006369.1 | 17.9448081 | 2470.086084 | 0.0073 | 0.994 | 3.89E-07 | count | 1 |
| DDTL       | 17.9448079 | 2470.086014 | 0.0073 | 0.994 | 3.89E-07 | count | 1 |
| RAPGEF5    | 17.9448079 | 2470.086093 | 0.0073 | 0.994 | 3.89E-07 | count | 1 |
| TIGD7      | 17.944808  | 2470.086102 | 0.0073 | 0.994 | 3.89E-07 | count | 1 |
| AHCYL2     | 17.9448079 | 2470.086076 | 0.0073 | 0.994 | 3.89E-07 | count | 1 |
| AF001548.2 | 17.9448078 | 2470.086119 | 0.0073 | 0.994 | 3.89E-07 | count | 1 |
| AL360270.1 | 17.9448078 | 2470.086041 | 0.0073 | 0.994 | 3.89E-07 | count | 1 |
| AC100793.2 | 18.1679732 | 2381.581106 | 0.0076 | 0.994 | 3.89E-07 | count | 1 |
| TM7SF2     | 18.1679733 | 2381.581089 | 0.0076 | 0.994 | 3.89E-07 | count | 1 |
| NBPF10     | 18.1679732 | 2381.580996 | 0.0076 | 0.994 | 3.89E-07 | count | 1 |
| ST7        | 18.1679731 | 2381.58103  | 0.0076 | 0.994 | 3.89E-07 | count | 1 |
| CAD        | 18.1679732 | 2381.580954 | 0.0076 | 0.994 | 3.89E-07 | count | 1 |
| TCAF2      | 18.1679732 | 2381.581097 | 0.0076 | 0.994 | 3.89E-07 | count | 1 |
| ZNF747     | 18.1679728 | 2381.581038 | 0.0076 | 0.994 | 3.89E-07 | count | 1 |
| DNAJC14    | 18.167973  | 2381.580895 | 0.0076 | 0.994 | 3.89E-07 | count | 1 |
| FAM234B    | 18.1679729 | 2381.580954 | 0.0076 | 0.994 | 3.89E-07 | count | 1 |
| RELL1      | 18.167973  | 2381.581097 | 0.0076 | 0.994 | 3.89E-07 | count | 1 |
| MEGF9      | 18.1679729 | 2381.581021 | 0.0076 | 0.994 | 3.89E-07 | count | 1 |
| AL357054.4 | 18.1679729 | 2381.581089 | 0.0076 | 0.994 | 3.89E-07 | count | 1 |
| MCTP1      | 17.6570072 | 2608.530197 | 0.0068 | 0.995 | 3.89E-07 | count | 1 |

|            |            |             |        |       |          |       |   |
|------------|------------|-------------|--------|-------|----------|-------|---|
| LINC00893  | 17.6570072 | 2608.530248 | 0.0068 | 0.995 | 3.89E-07 | count | 1 |
| PARP16     | 17.6570072 | 2608.530183 | 0.0068 | 0.995 | 3.89E-07 | count | 1 |
| NRN1       | 17.6570071 | 2608.530151 | 0.0068 | 0.995 | 3.89E-07 | count | 1 |
| PSMG3-AS1  | 17.6570071 | 2608.530142 | 0.0068 | 0.995 | 3.89E-07 | count | 1 |
| ZNF771     | 17.6570072 | 2608.530146 | 0.0068 | 0.995 | 3.89E-07 | count | 1 |
| AC099850.1 | 17.6570071 | 2608.530234 | 0.0068 | 0.995 | 3.89E-07 | count | 1 |
| AL049840.2 | 17.6570072 | 2608.530179 | 0.0068 | 0.995 | 3.89E-07 | count | 1 |
| LINC01431  | 17.6570071 | 2608.53016  | 0.0068 | 0.995 | 3.89E-07 | count | 1 |
| STIMATE    | 17.657007  | 2608.530179 | 0.0068 | 0.995 | 3.89E-07 | count | 1 |
| DNMBP-AS1  | 17.6570071 | 2608.530202 | 0.0068 | 0.995 | 3.89E-07 | count | 1 |
| CBX8       | 17.6570072 | 2608.53022  | 0.0068 | 0.995 | 3.89E-07 | count | 1 |
| AC007773.1 | 17.657007  | 2608.530206 | 0.0068 | 0.995 | 3.89E-07 | count | 1 |
| TMEM121    | 17.6570071 | 2608.530188 | 0.0068 | 0.995 | 3.89E-07 | count | 1 |
| AP002449.1 | 17.6570072 | 2608.530225 | 0.0068 | 0.995 | 3.89E-07 | count | 1 |
| AP001505.1 | 17.6570071 | 2608.530119 | 0.0068 | 0.995 | 3.89E-07 | count | 1 |
| HOXB2      | 17.6570071 | 2608.530202 | 0.0068 | 0.995 | 3.89E-07 | count | 1 |
| TC2N       | 17.657007  | 2608.530109 | 0.0068 | 0.995 | 3.89E-07 | count | 1 |
| AC087386.1 | 17.6570071 | 2608.530211 | 0.0068 | 0.995 | 3.89E-07 | count | 1 |
| GIMAP7     | 17.6570072 | 2608.530202 | 0.0068 | 0.995 | 3.89E-07 | count | 1 |
| ECT2       | 17.6570071 | 2608.530174 | 0.0068 | 0.995 | 3.89E-07 | count | 1 |
| SCAF1      | 17.6570071 | 2608.530137 | 0.0068 | 0.995 | 3.89E-07 | count | 1 |
| DGCR2      | 17.6570071 | 2608.530188 | 0.0068 | 0.995 | 3.89E-07 | count | 1 |
| PRRT3-AS1  | 17.657007  | 2608.530174 | 0.0068 | 0.995 | 3.89E-07 | count | 1 |
| GORASP1    | 17.6570071 | 2608.530197 | 0.0068 | 0.995 | 3.89E-07 | count | 1 |
| AP000766.1 | 17.6570071 | 2608.530188 | 0.0068 | 0.995 | 3.89E-07 | count | 1 |
| PIGW       | 17.6570072 | 2608.530202 | 0.0068 | 0.995 | 3.89E-07 | count | 1 |
| ABALON     | 17.6570071 | 2608.530146 | 0.0068 | 0.995 | 3.89E-07 | count | 1 |
| AC025171.4 | 17.6570072 | 2608.530119 | 0.0068 | 0.995 | 3.89E-07 | count | 1 |
| AFG1L      | 17.6570071 | 2608.530174 | 0.0068 | 0.995 | 3.89E-07 | count | 1 |
| GTF2IRD2B  | 17.6570071 | 2608.530179 | 0.0068 | 0.995 | 3.89E-07 | count | 1 |
| SBF2       | 17.657007  | 2608.530114 | 0.0068 | 0.995 | 3.89E-07 | count | 1 |
| PPP2R5D    | 17.657007  | 2608.530151 | 0.0068 | 0.995 | 3.89E-07 | count | 1 |
| PANX1      | 17.6570071 | 2608.530179 | 0.0068 | 0.995 | 3.89E-07 | count | 1 |
| UBQLN4     | 17.6570071 | 2608.530206 | 0.0068 | 0.995 | 3.89E-07 | count | 1 |
| TBC1D13    | 17.657007  | 2608.530211 | 0.0068 | 0.995 | 3.89E-07 | count | 1 |
| LINC00221  | 17.6570072 | 2608.530132 | 0.0068 | 0.995 | 3.89E-07 | count | 1 |
| ZNF77      | 17.6570071 | 2608.530225 | 0.0068 | 0.995 | 3.89E-07 | count | 1 |
| IGKV1-27   | 17.6570072 | 2608.53016  | 0.0068 | 0.995 | 3.89E-07 | count | 1 |
| F2RL1      | 17.6570071 | 2608.530197 | 0.0068 | 0.995 | 3.89E-07 | count | 1 |
| FAM185A    | 17.6570071 | 2608.530179 | 0.0068 | 0.995 | 3.89E-07 | count | 1 |
| AL353597.1 | 17.6570071 | 2608.530128 | 0.0068 | 0.995 | 3.89E-07 | count | 1 |
| DPY19L4    | 17.6570069 | 2608.530193 | 0.0068 | 0.995 | 3.89E-07 | count | 1 |
| AC139887.2 | 17.6570071 | 2608.530225 | 0.0068 | 0.995 | 3.89E-07 | count | 1 |
| PDLIM3     | 17.6570072 | 2608.530193 | 0.0068 | 0.995 | 3.89E-07 | count | 1 |
| IGHV5-51   | 17.657007  | 2608.530193 | 0.0068 | 0.995 | 3.89E-07 | count | 1 |

|             |            |             |        |       |          |       |   |
|-------------|------------|-------------|--------|-------|----------|-------|---|
| FBLN1       | 17.6570072 | 2608.530202 | 0.0068 | 0.995 | 3.89E-07 | count | 1 |
| LINC00265   | 17.657007  | 2608.530229 | 0.0068 | 0.995 | 3.89E-07 | count | 1 |
| C15orf41    | 17.6570071 | 2608.530183 | 0.0068 | 0.995 | 3.89E-07 | count | 1 |
| TMEM147-AS1 | 17.657007  | 2608.530229 | 0.0068 | 0.995 | 3.89E-07 | count | 1 |
| AREL1       | 17.657007  | 2608.530225 | 0.0068 | 0.995 | 3.89E-07 | count | 1 |
| LRIG1       | 17.657007  | 2608.530243 | 0.0068 | 0.995 | 3.89E-07 | count | 1 |
| PTPN20      | 17.6570071 | 2608.530132 | 0.0068 | 0.995 | 3.89E-07 | count | 1 |
| AC009041.2  | 17.657007  | 2608.530169 | 0.0068 | 0.995 | 3.89E-07 | count | 1 |
| RHOBTB3     | 17.657007  | 2608.530188 | 0.0068 | 0.995 | 3.89E-07 | count | 1 |
| MBOAT1      | 17.6570071 | 2608.530188 | 0.0068 | 0.995 | 3.89E-07 | count | 1 |
| TNKS1BP1    | 17.6570071 | 2608.530169 | 0.0068 | 0.995 | 3.89E-07 | count | 1 |
| TBCEL       | 17.657007  | 2608.530132 | 0.0068 | 0.995 | 3.89E-07 | count | 1 |
| CBWD6       | 17.6570071 | 2608.530197 | 0.0068 | 0.995 | 3.89E-07 | count | 1 |
| AC007114.2  | 17.657007  | 2608.530174 | 0.0068 | 0.995 | 3.89E-07 | count | 1 |
| PLCH2       | 17.657007  | 2608.5301   | 0.0068 | 0.995 | 3.89E-07 | count | 1 |
| LINC01943   | 17.657007  | 2608.530202 | 0.0068 | 0.995 | 3.89E-07 | count | 1 |
| TMEM241     | 17.6570069 | 2608.530132 | 0.0068 | 0.995 | 3.89E-07 | count | 1 |
| AC010894.2  | 17.657007  | 2608.53016  | 0.0068 | 0.995 | 3.89E-07 | count | 1 |
| CA13        | 17.657007  | 2608.530179 | 0.0068 | 0.995 | 3.89E-07 | count | 1 |
| AC073072.1  | 17.6570071 | 2608.530202 | 0.0068 | 0.995 | 3.89E-07 | count | 1 |
| SCOC-AS1    | 17.6570071 | 2608.530179 | 0.0068 | 0.995 | 3.89E-07 | count | 1 |
| PAQR7       | 17.6570069 | 2608.53016  | 0.0068 | 0.995 | 3.89E-07 | count | 1 |
| PRMT6       | 17.657007  | 2608.530188 | 0.0068 | 0.995 | 3.89E-07 | count | 1 |
| SLC29A1     | 17.657007  | 2608.530174 | 0.0068 | 0.995 | 3.89E-07 | count | 1 |
| CPNE8       | 17.657007  | 2608.530142 | 0.0068 | 0.995 | 3.89E-07 | count | 1 |
| AC018647.2  | 17.6570071 | 2608.53022  | 0.0068 | 0.995 | 3.89E-07 | count | 1 |
| TMEM184B    | 17.657007  | 2608.530151 | 0.0068 | 0.995 | 3.89E-07 | count | 1 |
| AC078883.3  | 17.6570069 | 2608.530169 | 0.0068 | 0.995 | 3.89E-07 | count | 1 |
| SLC19A2     | 17.657007  | 2608.530114 | 0.0068 | 0.995 | 3.89E-07 | count | 1 |
| ACAD11      | 17.657007  | 2608.530174 | 0.0068 | 0.995 | 3.89E-07 | count | 1 |
| CNIH2       | 17.6570069 | 2608.530105 | 0.0068 | 0.995 | 3.89E-07 | count | 1 |
| POLRMT      | 17.657007  | 2608.530137 | 0.0068 | 0.995 | 3.89E-07 | count | 1 |
| RN7SL832P   | 17.657007  | 2608.530156 | 0.0068 | 0.995 | 3.89E-07 | count | 1 |
| U91328.1    | 17.657007  | 2608.530119 | 0.0068 | 0.995 | 3.89E-07 | count | 1 |
| MTCP1       | 17.6570069 | 2608.530137 | 0.0068 | 0.995 | 3.89E-07 | count | 1 |
| ZNF823      | 17.657007  | 2608.530188 | 0.0068 | 0.995 | 3.89E-07 | count | 1 |
| ARHGAP22    | 17.6570071 | 2608.530174 | 0.0068 | 0.995 | 3.89E-07 | count | 1 |
| IL1A        | 17.657007  | 2608.530105 | 0.0068 | 0.995 | 3.89E-07 | count | 1 |
| ZDHH9       | 17.657007  | 2608.530132 | 0.0068 | 0.995 | 3.89E-07 | count | 1 |
| LINC01963   | 17.6570068 | 2608.530132 | 0.0068 | 0.995 | 3.89E-07 | count | 1 |
| IPCEF1      | 17.9445976 | 2010.655842 | 0.0089 | 0.993 | 3.90E-07 | count | 1 |
| SYT17       | 17.9445975 | 2010.655842 | 0.0089 | 0.993 | 3.90E-07 | count | 1 |
| PLOD3       | 17.9445974 | 2010.655878 | 0.0089 | 0.993 | 3.90E-07 | count | 1 |
| CHST14      | 18.3505596 | 3081.827964 | 0.006  | 0.995 | 3.90E-07 | count | 1 |
| KBTBD6      | 18.3505595 | 3081.827931 | 0.006  | 0.995 | 3.90E-07 | count | 1 |

|            |            |             |        |       |          |       |   |
|------------|------------|-------------|--------|-------|----------|-------|---|
| AL139020.1 | 18.3505597 | 3081.828062 | 0.006  | 0.995 | 3.90E-07 | count | 1 |
| TBC1D22B   | 18.3505596 | 3081.828117 | 0.006  | 0.995 | 3.90E-07 | count | 1 |
| AC124283.1 | 18.3505596 | 3081.828259 | 0.006  | 0.995 | 3.90E-07 | count | 1 |
| PHOSPHO2   | 18.3505056 | 2850.439567 | 0.0064 | 0.995 | 3.90E-07 | count | 1 |
| ZNF793     | 18.3505056 | 2850.439789 | 0.0064 | 0.995 | 3.90E-07 | count | 1 |
| MTERF2     | 18.3506452 | 3499.021024 | 0.0052 | 0.996 | 3.90E-07 | count | 1 |
| AL451165.2 | 18.3504344 | 2850.338755 | 0.0064 | 0.995 | 3.90E-07 | count | 1 |
| SMIM25     | 18.3507222 | 3499.155101 | 0.0052 | 0.996 | 3.90E-07 | count | 1 |
| FAM118B    | 18.3503763 | 2598.458833 | 0.0071 | 0.994 | 3.90E-07 | count | 1 |
| PLPP6      | 18.3503764 | 2598.458833 | 0.0071 | 0.994 | 3.90E-07 | count | 1 |
| ROGDI      | 18.3503761 | 2598.458897 | 0.0071 | 0.994 | 3.90E-07 | count | 1 |
| KLHL15     | 18.3503759 | 2598.458833 | 0.0071 | 0.994 | 3.90E-07 | count | 1 |
| COQ3       | 18.3503759 | 2598.458861 | 0.0071 | 0.994 | 3.90E-07 | count | 1 |
| ZNF329     | 18.3503756 | 2598.458815 | 0.0071 | 0.994 | 3.90E-07 | count | 1 |
| BAHD1      | 18.3503755 | 2598.458759 | 0.0071 | 0.994 | 3.90E-07 | count | 1 |
| MOK        | 18.3503758 | 2598.458787 | 0.0071 | 0.994 | 3.90E-07 | count | 1 |
| SRR        | 18.3507523 | 3690.114012 | 0.005  | 0.996 | 3.90E-07 | count | 1 |
| PPM1N      | 18.3502357 | 2319.325003 | 0.0079 | 0.994 | 3.90E-07 | count | 1 |
| RTN4IP1    | 18.3502356 | 2319.324913 | 0.0079 | 0.994 | 3.90E-07 | count | 1 |
| DCN        | 18.3502357 | 2319.324904 | 0.0079 | 0.994 | 3.90E-07 | count | 1 |
| C10orf88   | 17.6567578 | 2014.964507 | 0.0088 | 0.993 | 3.90E-07 | count | 1 |
| MLLT3      | 17.2513052 | 2862.186587 | 0.006  | 0.995 | 3.90E-07 | count | 1 |
| LINC01374  | 17.2513052 | 2862.186587 | 0.006  | 0.995 | 3.90E-07 | count | 1 |
| DDX11-AS1  | 17.2513052 | 2862.186587 | 0.006  | 0.995 | 3.90E-07 | count | 1 |
| BTNL9      | 17.2513052 | 2862.186623 | 0.006  | 0.995 | 3.90E-07 | count | 1 |
| USP54      | 17.2513052 | 2862.186623 | 0.006  | 0.995 | 3.90E-07 | count | 1 |
| JSRP1      | 17.2513052 | 2862.186623 | 0.006  | 0.995 | 3.90E-07 | count | 1 |
| ZNF225     | 17.2513052 | 2862.186623 | 0.006  | 0.995 | 3.90E-07 | count | 1 |
| RSPH14     | 17.2513052 | 2862.186623 | 0.006  | 0.995 | 3.90E-07 | count | 1 |
| AL359915.2 | 17.2513051 | 2862.186587 | 0.006  | 0.995 | 3.90E-07 | count | 1 |
| AC009948.3 | 17.2513051 | 2862.186587 | 0.006  | 0.995 | 3.90E-07 | count | 1 |
| GAS1       | 17.2513051 | 2862.186587 | 0.006  | 0.995 | 3.90E-07 | count | 1 |
| KIAA0556   | 17.2513051 | 2862.186587 | 0.006  | 0.995 | 3.90E-07 | count | 1 |
| AC106739.2 | 17.6567578 | 2014.964504 | 0.0088 | 0.993 | 3.90E-07 | count | 1 |
| SLC3A1     | 17.2513051 | 2862.186567 | 0.006  | 0.995 | 3.90E-07 | count | 1 |
| FZD7       | 17.2513051 | 2862.186567 | 0.006  | 0.995 | 3.90E-07 | count | 1 |
| PTPRG      | 17.2513051 | 2862.186567 | 0.006  | 0.995 | 3.90E-07 | count | 1 |
| SUGCT      | 17.2513051 | 2862.186567 | 0.006  | 0.995 | 3.90E-07 | count | 1 |
| AC115618.1 | 17.2513051 | 2862.186633 | 0.006  | 0.995 | 3.90E-07 | count | 1 |
| ULK2       | 17.2513051 | 2862.186567 | 0.006  | 0.995 | 3.90E-07 | count | 1 |
| C19orf33   | 17.2513051 | 2862.186567 | 0.006  | 0.995 | 3.90E-07 | count | 1 |
| FRMD4A     | 17.2513051 | 2862.186602 | 0.006  | 0.995 | 3.90E-07 | count | 1 |
| Z83851.1   | 17.2513051 | 2862.186602 | 0.006  | 0.995 | 3.90E-07 | count | 1 |
| ST6GALNAC3 | 17.6567578 | 2014.964507 | 0.0088 | 0.993 | 3.90E-07 | count | 1 |
| AC073046.1 | 17.2513051 | 2862.186521 | 0.006  | 0.995 | 3.90E-07 | count | 1 |

|            |            |             |        |       |          |       |   |
|------------|------------|-------------|--------|-------|----------|-------|---|
| AL121601.1 | 17.2513051 | 2862.186521 | 0.006  | 0.995 | 3.90E-07 | count | 1 |
| NATD1      | 17.2513051 | 2862.186521 | 0.006  | 0.995 | 3.90E-07 | count | 1 |
| ZNF512B    | 17.2513051 | 2862.186521 | 0.006  | 0.995 | 3.90E-07 | count | 1 |
| RNASEH2A   | 17.2513051 | 2862.186521 | 0.006  | 0.995 | 3.90E-07 | count | 1 |
| AC245595.1 | 17.2513051 | 2862.186618 | 0.006  | 0.995 | 3.90E-07 | count | 1 |
| AC017071.1 | 17.2513051 | 2862.186618 | 0.006  | 0.995 | 3.90E-07 | count | 1 |
| PEBP4      | 17.2513051 | 2862.186618 | 0.006  | 0.995 | 3.90E-07 | count | 1 |
| AC091057.3 | 17.2513051 | 2862.186618 | 0.006  | 0.995 | 3.90E-07 | count | 1 |
| RTCA-AS1   | 17.2513051 | 2862.186597 | 0.006  | 0.995 | 3.90E-07 | count | 1 |
| TDRKH-AS1  | 17.2513051 | 2862.186537 | 0.006  | 0.995 | 3.90E-07 | count | 1 |
| EVC2       | 17.2513051 | 2862.186537 | 0.006  | 0.995 | 3.90E-07 | count | 1 |
| AC113361.1 | 17.2513051 | 2862.186537 | 0.006  | 0.995 | 3.90E-07 | count | 1 |
| HIST1H2BJ  | 17.2513051 | 2862.186557 | 0.006  | 0.995 | 3.90E-07 | count | 1 |
| HIST1H2AI  | 17.2513051 | 2862.186597 | 0.006  | 0.995 | 3.90E-07 | count | 1 |
| AC246817.1 | 17.251305  | 2862.186582 | 0.006  | 0.995 | 3.90E-07 | count | 1 |
| EXTL3-AS1  | 17.2513051 | 2862.186557 | 0.006  | 0.995 | 3.90E-07 | count | 1 |
| LHX2       | 17.251305  | 2862.186582 | 0.006  | 0.995 | 3.90E-07 | count | 1 |
| TDRD1      | 17.2513051 | 2862.186597 | 0.006  | 0.995 | 3.90E-07 | count | 1 |
| TMEM88     | 17.2513051 | 2862.186557 | 0.006  | 0.995 | 3.90E-07 | count | 1 |
| BMP2       | 17.2513051 | 2862.186557 | 0.006  | 0.995 | 3.90E-07 | count | 1 |
| AC012615.1 | 17.2513051 | 2862.186537 | 0.006  | 0.995 | 3.90E-07 | count | 1 |
| LPP-AS2    | 17.2513051 | 2862.186633 | 0.006  | 0.995 | 3.90E-07 | count | 1 |
| ALDH7A1    | 17.2513051 | 2862.186633 | 0.006  | 0.995 | 3.90E-07 | count | 1 |
| AC034243.1 | 17.2513051 | 2862.186521 | 0.006  | 0.995 | 3.90E-07 | count | 1 |
| CHMP4C     | 17.2513051 | 2862.186633 | 0.006  | 0.995 | 3.90E-07 | count | 1 |
| RNF157     | 17.2513051 | 2862.186521 | 0.006  | 0.995 | 3.90E-07 | count | 1 |
| SLC26A11   | 17.2513051 | 2862.186633 | 0.006  | 0.995 | 3.90E-07 | count | 1 |
| FBXW9      | 17.2513051 | 2862.186633 | 0.006  | 0.995 | 3.90E-07 | count | 1 |
| SH2B1      | 17.6567577 | 2014.964514 | 0.0088 | 0.993 | 3.90E-07 | count | 1 |
| DUBR       | 17.2513051 | 2862.186552 | 0.006  | 0.995 | 3.90E-07 | count | 1 |
| RAB3C      | 17.251305  | 2862.186547 | 0.006  | 0.995 | 3.90E-07 | count | 1 |
| TMEM47     | 17.2513051 | 2862.186552 | 0.006  | 0.995 | 3.90E-07 | count | 1 |
| COL15A1    | 17.2513051 | 2862.186552 | 0.006  | 0.995 | 3.90E-07 | count | 1 |
| LINC00167  | 17.2513051 | 2862.186552 | 0.006  | 0.995 | 3.90E-07 | count | 1 |
| GLS2       | 17.2513051 | 2862.186592 | 0.006  | 0.995 | 3.90E-07 | count | 1 |
| NDUFA4L2   | 17.2513051 | 2862.186552 | 0.006  | 0.995 | 3.90E-07 | count | 1 |
| KTN1-AS1   | 17.2513051 | 2862.186552 | 0.006  | 0.995 | 3.90E-07 | count | 1 |
| AL031055.1 | 17.2513051 | 2862.186552 | 0.006  | 0.995 | 3.90E-07 | count | 1 |
| NUDT4B     | 17.2513051 | 2862.186592 | 0.006  | 0.995 | 3.90E-07 | count | 1 |
| FKBP1B     | 17.251305  | 2862.186633 | 0.006  | 0.995 | 3.90E-07 | count | 1 |
| ALS2CR12   | 17.251305  | 2862.186577 | 0.006  | 0.995 | 3.90E-07 | count | 1 |
| ZNF197     | 17.251305  | 2862.186577 | 0.006  | 0.995 | 3.90E-07 | count | 1 |
| LNP1       | 17.251305  | 2862.186633 | 0.006  | 0.995 | 3.90E-07 | count | 1 |
| TRAT1      | 17.251305  | 2862.186633 | 0.006  | 0.995 | 3.90E-07 | count | 1 |
| CCDC96     | 17.251305  | 2862.186633 | 0.006  | 0.995 | 3.90E-07 | count | 1 |

|            |            |             |        |       |          |       |   |
|------------|------------|-------------|--------|-------|----------|-------|---|
| HIST1H2BE  | 17.2513051 | 2862.186592 | 0.006  | 0.995 | 3.90E-07 | count | 1 |
| AC004130.1 | 17.251305  | 2862.186633 | 0.006  | 0.995 | 3.90E-07 | count | 1 |
| ADAM22     | 17.251305  | 2862.186633 | 0.006  | 0.995 | 3.90E-07 | count | 1 |
| TRBV28     | 17.2513051 | 2862.186592 | 0.006  | 0.995 | 3.90E-07 | count | 1 |
| CXorf36    | 17.2513051 | 2862.186592 | 0.006  | 0.995 | 3.90E-07 | count | 1 |
| ZNF81      | 17.251305  | 2862.186633 | 0.006  | 0.995 | 3.90E-07 | count | 1 |
| FAM167A    | 17.251305  | 2862.186577 | 0.006  | 0.995 | 3.90E-07 | count | 1 |
| CDKN2B     | 17.2513051 | 2862.186633 | 0.006  | 0.995 | 3.90E-07 | count | 1 |
| GNG10      | 17.2513051 | 2862.186633 | 0.006  | 0.995 | 3.90E-07 | count | 1 |
| PPP2R5B    | 17.251305  | 2862.186633 | 0.006  | 0.995 | 3.90E-07 | count | 1 |
| CADM1      | 17.2513051 | 2862.186633 | 0.006  | 0.995 | 3.90E-07 | count | 1 |
| AGAP4      | 17.2513051 | 2862.186633 | 0.006  | 0.995 | 3.90E-07 | count | 1 |
| AL450306.1 | 17.251305  | 2862.186633 | 0.006  | 0.995 | 3.90E-07 | count | 1 |
| CLEC7A     | 17.2513051 | 2862.186633 | 0.006  | 0.995 | 3.90E-07 | count | 1 |
| DUSP16     | 17.2513051 | 2862.186592 | 0.006  | 0.995 | 3.90E-07 | count | 1 |
| AC125603.4 | 17.251305  | 2862.186633 | 0.006  | 0.995 | 3.90E-07 | count | 1 |
| AL354696.2 | 17.251305  | 2862.186633 | 0.006  | 0.995 | 3.90E-07 | count | 1 |
| DGKH       | 17.2513051 | 2862.186592 | 0.006  | 0.995 | 3.90E-07 | count | 1 |
| AC243965.1 | 17.2513051 | 2862.186592 | 0.006  | 0.995 | 3.90E-07 | count | 1 |
| AC005280.2 | 17.2513051 | 2862.186633 | 0.006  | 0.995 | 3.90E-07 | count | 1 |
| FLRT2      | 17.2513051 | 2862.186592 | 0.006  | 0.995 | 3.90E-07 | count | 1 |
| MAP1A      | 17.251305  | 2862.186633 | 0.006  | 0.995 | 3.90E-07 | count | 1 |
| TMEM104    | 17.251305  | 2862.186633 | 0.006  | 0.995 | 3.90E-07 | count | 1 |
| AC100788.1 | 17.2513051 | 2862.186592 | 0.006  | 0.995 | 3.90E-07 | count | 1 |
| TBC1D16    | 17.2513051 | 2862.186633 | 0.006  | 0.995 | 3.90E-07 | count | 1 |
| AC015819.1 | 17.251305  | 2862.186633 | 0.006  | 0.995 | 3.90E-07 | count | 1 |
| ONECUT3    | 17.2513051 | 2862.186592 | 0.006  | 0.995 | 3.90E-07 | count | 1 |
| ZNF57      | 17.2513051 | 2862.186592 | 0.006  | 0.995 | 3.90E-07 | count | 1 |
| YJEFN3     | 17.2513051 | 2862.186633 | 0.006  | 0.995 | 3.90E-07 | count | 1 |
| ZNF223     | 17.2513051 | 2862.186592 | 0.006  | 0.995 | 3.90E-07 | count | 1 |
| ZNF233     | 17.251305  | 2862.186633 | 0.006  | 0.995 | 3.90E-07 | count | 1 |
| AL031846.2 | 17.251305  | 2862.186633 | 0.006  | 0.995 | 3.90E-07 | count | 1 |
| LRRC7      | 17.2513051 | 2862.186618 | 0.006  | 0.995 | 3.90E-07 | count | 1 |
| NCAPH      | 17.2513051 | 2862.186572 | 0.006  | 0.995 | 3.90E-07 | count | 1 |
| ADAMTS9    | 17.2513051 | 2862.186618 | 0.006  | 0.995 | 3.90E-07 | count | 1 |
| AC078795.2 | 17.2513051 | 2862.186547 | 0.006  | 0.995 | 3.90E-07 | count | 1 |
| AC008771.1 | 17.2513051 | 2862.186618 | 0.006  | 0.995 | 3.90E-07 | count | 1 |
| AC007285.1 | 17.2513051 | 2862.186547 | 0.006  | 0.995 | 3.90E-07 | count | 1 |
| SLC7A8     | 17.2513051 | 2862.186572 | 0.006  | 0.995 | 3.90E-07 | count | 1 |
| ATP8B4     | 17.2513051 | 2862.186572 | 0.006  | 0.995 | 3.90E-07 | count | 1 |
| TSPAN10    | 17.2513051 | 2862.186547 | 0.006  | 0.995 | 3.90E-07 | count | 1 |
| ZFY-AS1    | 17.2513051 | 2862.186618 | 0.006  | 0.995 | 3.90E-07 | count | 1 |
| PIP4K2C    | 17.6567578 | 2014.964529 | 0.0088 | 0.993 | 3.90E-07 | count | 1 |
| GPR75      | 17.2513051 | 2862.186623 | 0.006  | 0.995 | 3.90E-07 | count | 1 |
| CLIP2      | 17.2513051 | 2862.186623 | 0.006  | 0.995 | 3.90E-07 | count | 1 |

|            |            |             |       |       |          |       |   |
|------------|------------|-------------|-------|-------|----------|-------|---|
| CCR2       | 17.251305  | 2862.186531 | 0.006 | 0.995 | 3.90E-07 | count | 1 |
| CCR5       | 17.251305  | 2862.186531 | 0.006 | 0.995 | 3.90E-07 | count | 1 |
| AC008467.1 | 17.2513051 | 2862.186607 | 0.006 | 0.995 | 3.90E-07 | count | 1 |
| HOXA10     | 17.251305  | 2862.186531 | 0.006 | 0.995 | 3.90E-07 | count | 1 |
| AC073335.2 | 17.251305  | 2862.186531 | 0.006 | 0.995 | 3.90E-07 | count | 1 |
| PDE1B      | 17.251305  | 2862.186531 | 0.006 | 0.995 | 3.90E-07 | count | 1 |
| AC106028.4 | 17.2513051 | 2862.186607 | 0.006 | 0.995 | 3.90E-07 | count | 1 |
| CLN3       | 17.251305  | 2862.186531 | 0.006 | 0.995 | 3.90E-07 | count | 1 |
| MYOM1      | 17.251305  | 2862.186531 | 0.006 | 0.995 | 3.90E-07 | count | 1 |
| RSPO3      | 17.251305  | 2862.186567 | 0.006 | 0.995 | 3.90E-07 | count | 1 |
| FAM71D     | 17.251305  | 2862.186567 | 0.006 | 0.995 | 3.90E-07 | count | 1 |
| AL354872.2 | 17.251305  | 2862.186562 | 0.006 | 0.995 | 3.90E-07 | count | 1 |
| FREM3      | 17.251305  | 2862.186562 | 0.006 | 0.995 | 3.90E-07 | count | 1 |
| NUGGC      | 17.251305  | 2862.186562 | 0.006 | 0.995 | 3.90E-07 | count | 1 |
| IDI2-AS1   | 17.251305  | 2862.186562 | 0.006 | 0.995 | 3.90E-07 | count | 1 |
| DDIT4-AS1  | 17.251305  | 2862.186562 | 0.006 | 0.995 | 3.90E-07 | count | 1 |
| PEX11A     | 17.251305  | 2862.186582 | 0.006 | 0.995 | 3.90E-07 | count | 1 |
| MT1A       | 17.251305  | 2862.186562 | 0.006 | 0.995 | 3.90E-07 | count | 1 |
| AC024940.1 | 17.2513051 | 2862.186552 | 0.006 | 0.995 | 3.90E-07 | count | 1 |
| CLN6       | 17.2513051 | 2862.186552 | 0.006 | 0.995 | 3.90E-07 | count | 1 |
| AC117382.2 | 17.251305  | 2862.186582 | 0.006 | 0.995 | 3.90E-07 | count | 1 |
| RBP5       | 17.2513051 | 2862.186552 | 0.006 | 0.995 | 3.90E-07 | count | 1 |
| ZNF341     | 17.2513051 | 2862.186547 | 0.006 | 0.995 | 3.90E-07 | count | 1 |
| GDF5       | 17.251305  | 2862.186582 | 0.006 | 0.995 | 3.90E-07 | count | 1 |
| RAB11B-AS1 | 17.2513051 | 2862.186547 | 0.006 | 0.995 | 3.90E-07 | count | 1 |
| SNX7       | 17.251305  | 2862.186592 | 0.006 | 0.995 | 3.90E-07 | count | 1 |
| CFAP45     | 17.251305  | 2862.186592 | 0.006 | 0.995 | 3.90E-07 | count | 1 |
| PBX1       | 17.251305  | 2862.186592 | 0.006 | 0.995 | 3.90E-07 | count | 1 |
| TNFSF4     | 17.251305  | 2862.186537 | 0.006 | 0.995 | 3.90E-07 | count | 1 |
| WBP1       | 17.251305  | 2862.186537 | 0.006 | 0.995 | 3.90E-07 | count | 1 |
| NEK10      | 17.251305  | 2862.186592 | 0.006 | 0.995 | 3.90E-07 | count | 1 |
| LSAMP      | 17.251305  | 2862.186633 | 0.006 | 0.995 | 3.90E-07 | count | 1 |
| ILDR1      | 17.251305  | 2862.186633 | 0.006 | 0.995 | 3.90E-07 | count | 1 |
| MAPK10     | 17.251305  | 2862.186577 | 0.006 | 0.995 | 3.90E-07 | count | 1 |
| AC010491.1 | 17.251305  | 2862.186537 | 0.006 | 0.995 | 3.90E-07 | count | 1 |
| AL603910.1 | 17.251305  | 2862.186537 | 0.006 | 0.995 | 3.90E-07 | count | 1 |
| TRGC2      | 17.251305  | 2862.186592 | 0.006 | 0.995 | 3.90E-07 | count | 1 |
| CLIC2      | 17.251305  | 2862.186542 | 0.006 | 0.995 | 3.90E-07 | count | 1 |
| KIF24      | 17.251305  | 2862.186592 | 0.006 | 0.995 | 3.90E-07 | count | 1 |
| GPD1       | 17.251305  | 2862.186537 | 0.006 | 0.995 | 3.90E-07 | count | 1 |
| AC018362.2 | 17.251305  | 2862.186537 | 0.006 | 0.995 | 3.90E-07 | count | 1 |
| AC084782.3 | 17.251305  | 2862.186577 | 0.006 | 0.995 | 3.90E-07 | count | 1 |
| OSGIN1     | 17.251305  | 2862.186577 | 0.006 | 0.995 | 3.90E-07 | count | 1 |
| AL023803.2 | 17.251305  | 2862.186537 | 0.006 | 0.995 | 3.90E-07 | count | 1 |
| ZNF473     | 17.251305  | 2862.186592 | 0.006 | 0.995 | 3.90E-07 | count | 1 |



|            |            |             |        |       |          |       |   |
|------------|------------|-------------|--------|-------|----------|-------|---|
| CADM2      | 17.251305  | 2862.186567 | 0.006  | 0.995 | 3.90E-07 | count | 1 |
| SH3D19     | 17.2513049 | 2862.186552 | 0.006  | 0.995 | 3.90E-07 | count | 1 |
| GPX8       | 17.2513049 | 2862.186552 | 0.006  | 0.995 | 3.90E-07 | count | 1 |
| SERF1A     | 17.251305  | 2862.186552 | 0.006  | 0.995 | 3.90E-07 | count | 1 |
| PCDHB1     | 17.251305  | 2862.186552 | 0.006  | 0.995 | 3.90E-07 | count | 1 |
| GCK        | 17.251305  | 2862.186567 | 0.006  | 0.995 | 3.90E-07 | count | 1 |
| TSPAN7     | 17.2513049 | 2862.186552 | 0.006  | 0.995 | 3.90E-07 | count | 1 |
| TUSC3      | 17.2513049 | 2862.186552 | 0.006  | 0.995 | 3.90E-07 | count | 1 |
| LINC01030  | 17.251305  | 2862.186567 | 0.006  | 0.995 | 3.90E-07 | count | 1 |
| AC069234.5 | 17.251305  | 2862.186567 | 0.006  | 0.995 | 3.90E-07 | count | 1 |
| L2HGDH     | 17.251305  | 2862.186567 | 0.006  | 0.995 | 3.90E-07 | count | 1 |
| PGBD4      | 17.2513049 | 2862.186552 | 0.006  | 0.995 | 3.90E-07 | count | 1 |
| AC018362.1 | 17.251305  | 2862.186552 | 0.006  | 0.995 | 3.90E-07 | count | 1 |
| AC106886.5 | 17.2513049 | 2862.186552 | 0.006  | 0.995 | 3.90E-07 | count | 1 |
| AC027682.2 | 17.251305  | 2862.186602 | 0.006  | 0.995 | 3.90E-07 | count | 1 |
| AC007292.2 | 17.2513049 | 2862.186552 | 0.006  | 0.995 | 3.90E-07 | count | 1 |
| AL365330.1 | 17.251305  | 2862.186552 | 0.006  | 0.995 | 3.90E-07 | count | 1 |
| AC009948.1 | 17.251305  | 2862.186572 | 0.006  | 0.995 | 3.90E-07 | count | 1 |
| CXXC5-AS1  | 17.251305  | 2862.186552 | 0.006  | 0.995 | 3.90E-07 | count | 1 |
| AC008443.6 | 17.251305  | 2862.186572 | 0.006  | 0.995 | 3.90E-07 | count | 1 |
| AC068389.4 | 17.251305  | 2862.186552 | 0.006  | 0.995 | 3.90E-07 | count | 1 |
| AC008764.2 | 17.251305  | 2862.186552 | 0.006  | 0.995 | 3.90E-07 | count | 1 |
| SLC44A5    | 17.251305  | 2862.186537 | 0.006  | 0.995 | 3.90E-07 | count | 1 |
| PCYOX1L    | 17.251305  | 2862.186577 | 0.006  | 0.995 | 3.90E-07 | count | 1 |
| GPR63      | 17.251305  | 2862.186577 | 0.006  | 0.995 | 3.90E-07 | count | 1 |
| ZC3H10     | 17.251305  | 2862.186577 | 0.006  | 0.995 | 3.90E-07 | count | 1 |
| RPS6KL1    | 17.251305  | 2862.186537 | 0.006  | 0.995 | 3.90E-07 | count | 1 |
| ATP2A1     | 17.251305  | 2862.186537 | 0.006  | 0.995 | 3.90E-07 | count | 1 |
| AC109460.1 | 17.251305  | 2862.186537 | 0.006  | 0.995 | 3.90E-07 | count | 1 |
| TLL9       | 17.251305  | 2862.186577 | 0.006  | 0.995 | 3.90E-07 | count | 1 |
| AC005498.2 | 17.251305  | 2862.186537 | 0.006  | 0.995 | 3.90E-07 | count | 1 |
| AL008719.1 | 17.251305  | 2862.186537 | 0.006  | 0.995 | 3.90E-07 | count | 1 |
| AC007262.2 | 17.251305  | 2862.186552 | 0.006  | 0.995 | 3.90E-07 | count | 1 |
| AC008440.1 | 17.251305  | 2862.186607 | 0.006  | 0.995 | 3.90E-07 | count | 1 |
| AC008946.1 | 17.2513051 | 2862.186567 | 0.006  | 0.995 | 3.90E-07 | count | 1 |
| ITGA6      | 17.251305  | 2862.186582 | 0.006  | 0.995 | 3.90E-07 | count | 1 |
| F2R        | 17.251305  | 2862.186582 | 0.006  | 0.995 | 3.90E-07 | count | 1 |
| SCUBE3     | 17.251305  | 2862.186582 | 0.006  | 0.995 | 3.90E-07 | count | 1 |
| GPRASP2    | 17.2513049 | 2862.186531 | 0.006  | 0.995 | 3.90E-07 | count | 1 |
| CNTNAP3    | 17.251305  | 2862.186597 | 0.006  | 0.995 | 3.90E-07 | count | 1 |
| KLLN       | 17.251305  | 2862.186597 | 0.006  | 0.995 | 3.90E-07 | count | 1 |
| AP003900.1 | 17.251305  | 2862.186597 | 0.006  | 0.995 | 3.90E-07 | count | 1 |
| KLRD1      | 17.251305  | 2862.186623 | 0.006  | 0.995 | 3.90E-07 | count | 1 |
| TMEM86B    | 17.6567577 | 2014.964557 | 0.0088 | 0.993 | 3.90E-07 | count | 1 |
| IGKV2D-26  | 17.6567577 | 2014.964514 | 0.0088 | 0.993 | 3.90E-07 | count | 1 |

|            |            |             |        |       |          |       |   |
|------------|------------|-------------|--------|-------|----------|-------|---|
| AC007952.7 | 17.6567578 | 2014.964564 | 0.0088 | 0.993 | 3.90E-07 | count | 1 |
| CLEC3B     | 17.251305  | 2862.186547 | 0.006  | 0.995 | 3.90E-07 | count | 1 |
| AC093274.1 | 17.251305  | 2862.186547 | 0.006  | 0.995 | 3.90E-07 | count | 1 |
| DSG2       | 17.251305  | 2862.186547 | 0.006  | 0.995 | 3.90E-07 | count | 1 |
| AC010335.1 | 17.251305  | 2862.186547 | 0.006  | 0.995 | 3.90E-07 | count | 1 |
| AC007785.3 | 17.251305  | 2862.186547 | 0.006  | 0.995 | 3.90E-07 | count | 1 |
| AC025259.3 | 17.251305  | 2862.186582 | 0.006  | 0.995 | 3.90E-07 | count | 1 |
| IKZF4      | 17.251305  | 2862.186582 | 0.006  | 0.995 | 3.90E-07 | count | 1 |
| BORA       | 17.251305  | 2862.186582 | 0.006  | 0.995 | 3.90E-07 | count | 1 |
| KLHL25     | 17.251305  | 2862.186582 | 0.006  | 0.995 | 3.90E-07 | count | 1 |
| CSF1       | 17.251305  | 2862.186587 | 0.006  | 0.995 | 3.90E-07 | count | 1 |
| PIFO       | 17.251305  | 2862.186572 | 0.006  | 0.995 | 3.90E-07 | count | 1 |
| BRPF1      | 17.251305  | 2862.186592 | 0.006  | 0.995 | 3.90E-07 | count | 1 |
| SLC22A5    | 17.251305  | 2862.186587 | 0.006  | 0.995 | 3.90E-07 | count | 1 |
| KIAA0319   | 17.251305  | 2862.186572 | 0.006  | 0.995 | 3.90E-07 | count | 1 |
| PI16       | 17.251305  | 2862.186572 | 0.006  | 0.995 | 3.90E-07 | count | 1 |
| FRK        | 17.251305  | 2862.186572 | 0.006  | 0.995 | 3.90E-07 | count | 1 |
| NRCAM      | 17.251305  | 2862.186587 | 0.006  | 0.995 | 3.90E-07 | count | 1 |
| RBM14-RBM4 | 17.251305  | 2862.186572 | 0.006  | 0.995 | 3.90E-07 | count | 1 |
| PDGFD      | 17.251305  | 2862.186572 | 0.006  | 0.995 | 3.90E-07 | count | 1 |
| CCDC65     | 17.251305  | 2862.186587 | 0.006  | 0.995 | 3.90E-07 | count | 1 |
| RHPN2      | 17.251305  | 2862.186572 | 0.006  | 0.995 | 3.90E-07 | count | 1 |
| AC016027.1 | 17.251305  | 2862.186572 | 0.006  | 0.995 | 3.90E-07 | count | 1 |
| TRIM46     | 17.251305  | 2862.186613 | 0.006  | 0.995 | 3.90E-07 | count | 1 |
| RAB11FIP5  | 17.2513049 | 2862.186572 | 0.006  | 0.995 | 3.90E-07 | count | 1 |
| HDAC11     | 17.251305  | 2862.186613 | 0.006  | 0.995 | 3.90E-07 | count | 1 |
| DCDC2      | 17.2513049 | 2862.186572 | 0.006  | 0.995 | 3.90E-07 | count | 1 |
| AC044839.1 | 17.2513049 | 2862.186572 | 0.006  | 0.995 | 3.90E-07 | count | 1 |
| FEZ1       | 17.251305  | 2862.186613 | 0.006  | 0.995 | 3.90E-07 | count | 1 |
| AC011731.1 | 17.251305  | 2862.186613 | 0.006  | 0.995 | 3.90E-07 | count | 1 |
| ZNF530     | 17.251305  | 2862.186613 | 0.006  | 0.995 | 3.90E-07 | count | 1 |
| LRR8C-DT   | 17.6567578 | 2014.964571 | 0.0088 | 0.993 | 3.90E-07 | count | 1 |
| AC011944.1 | 17.6567577 | 2014.964507 | 0.0088 | 0.993 | 3.90E-07 | count | 1 |
| AMBRA1     | 17.2513049 | 2862.186552 | 0.006  | 0.995 | 3.90E-07 | count | 1 |
| ARNTL2     | 17.2513049 | 2862.186552 | 0.006  | 0.995 | 3.90E-07 | count | 1 |
| IGHV1-24   | 17.2513049 | 2862.186552 | 0.006  | 0.995 | 3.90E-07 | count | 1 |
| AC002553.1 | 17.2513049 | 2862.186552 | 0.006  | 0.995 | 3.90E-07 | count | 1 |
| MESTIT1    | 17.2513049 | 2862.186547 | 0.006  | 0.995 | 3.90E-07 | count | 1 |
| CDK3       | 17.2513049 | 2862.186547 | 0.006  | 0.995 | 3.90E-07 | count | 1 |
| AC022098.2 | 17.2513049 | 2862.186547 | 0.006  | 0.995 | 3.90E-07 | count | 1 |
| MFSD3      | 17.6567578 | 2014.964582 | 0.0088 | 0.993 | 3.90E-07 | count | 1 |
| COL18A1    | 17.6567576 | 2014.964457 | 0.0088 | 0.993 | 3.90E-07 | count | 1 |
| FAM83G     | 17.251305  | 2862.186562 | 0.006  | 0.995 | 3.90E-07 | count | 1 |
| AC022098.4 | 17.251305  | 2862.186562 | 0.006  | 0.995 | 3.90E-07 | count | 1 |
| AC008966.1 | 17.6567576 | 2014.964522 | 0.0088 | 0.993 | 3.90E-07 | count | 1 |

|            |            |             |        |       |          |       |   |
|------------|------------|-------------|--------|-------|----------|-------|---|
| CCDC24     | 17.251305  | 2862.186537 | 0.006  | 0.995 | 3.90E-07 | count | 1 |
| PLOD2      | 17.251305  | 2862.186537 | 0.006  | 0.995 | 3.90E-07 | count | 1 |
| AARS2      | 17.251305  | 2862.186537 | 0.006  | 0.995 | 3.90E-07 | count | 1 |
| AC068189.1 | 17.251305  | 2862.186537 | 0.006  | 0.995 | 3.90E-07 | count | 1 |
| UCP3       | 17.251305  | 2862.186537 | 0.006  | 0.995 | 3.90E-07 | count | 1 |
| GPAM       | 17.251305  | 2862.186537 | 0.006  | 0.995 | 3.90E-07 | count | 1 |
| GALNT4     | 17.251305  | 2862.186537 | 0.006  | 0.995 | 3.90E-07 | count | 1 |
| AC123768.3 | 17.251305  | 2862.186537 | 0.006  | 0.995 | 3.90E-07 | count | 1 |
| PRSS27     | 17.251305  | 2862.186537 | 0.006  | 0.995 | 3.90E-07 | count | 1 |
| AC008105.1 | 17.251305  | 2862.186537 | 0.006  | 0.995 | 3.90E-07 | count | 1 |
| ABCA10     | 17.251305  | 2862.186537 | 0.006  | 0.995 | 3.90E-07 | count | 1 |
| CEBPA      | 17.251305  | 2862.186537 | 0.006  | 0.995 | 3.90E-07 | count | 1 |
| LINC01535  | 17.251305  | 2862.186537 | 0.006  | 0.995 | 3.90E-07 | count | 1 |
| ZSCAN22    | 17.251305  | 2862.186537 | 0.006  | 0.995 | 3.90E-07 | count | 1 |
| C1QTNF6    | 17.251305  | 2862.186537 | 0.006  | 0.995 | 3.90E-07 | count | 1 |
| AC104971.3 | 17.6567576 | 2014.964479 | 0.0088 | 0.993 | 3.90E-07 | count | 1 |
| LEKR1      | 17.6567577 | 2014.964464 | 0.0088 | 0.993 | 3.90E-07 | count | 1 |
| GYS1       | 17.6567576 | 2014.964543 | 0.0088 | 0.993 | 3.90E-07 | count | 1 |
| HAAO       | 17.6567577 | 2014.964472 | 0.0088 | 0.993 | 3.90E-07 | count | 1 |
| ZC4H2      | 17.6567576 | 2014.964482 | 0.0088 | 0.993 | 3.90E-07 | count | 1 |
| CSTF3      | 0.0856288  | 0.521683    | 0.1641 | 0.87  | 3.91E-07 | count | 1 |
| CMC4       | 18.5042674 | 2272.600708 | 0.0081 | 0.994 | 3.91E-07 | count | 1 |
| AAR2       | 18.5042667 | 2272.600547 | 0.0081 | 0.994 | 3.91E-07 | count | 1 |
| ZSCAN9     | 18.5043852 | 2518.159543 | 0.0073 | 0.994 | 3.91E-07 | count | 1 |
| TSEN2      | 18.5043848 | 2518.159499 | 0.0073 | 0.994 | 3.91E-07 | count | 1 |
| AL158152.1 | 18.5044928 | 2741.85014  | 0.0067 | 0.995 | 3.91E-07 | count | 1 |
| FBXO32     | 18.504493  | 2741.850053 | 0.0067 | 0.995 | 3.91E-07 | count | 1 |
| CYB5R1     | 0.0856288  | 0.4804612   | 0.1782 | 0.859 | 3.91E-07 | count | 1 |
| RPP40      | 18.6376356 | 2235.838429 | 0.0083 | 0.993 | 3.92E-07 | count | 1 |
| UBE2V1     | 0.5311419  | 0.5129732   | 1.0354 | 0.301 | 3.93E-07 | count | 1 |
| AKR1B1     | 0.0324825  | 0.2899179   | 0.112  | 0.911 | 3.97E-07 | count | 1 |
| RTL8A      | 18.9928354 | 2384.467803 | 0.008  | 0.994 | 4.03E-07 | count | 1 |
| LZTR1      | 18.9928333 | 2384.465019 | 0.008  | 0.994 | 4.03E-07 | count | 1 |
| CASP9      | 18.9928314 | 2384.465649 | 0.008  | 0.994 | 4.03E-07 | count | 1 |
| GALNT2     | 18.9926474 | 2017.550619 | 0.0094 | 0.992 | 4.04E-07 | count | 1 |
| AC083809.1 | 18.8828639 | 2446.525302 | 0.0077 | 0.994 | 4.04E-07 | count | 1 |
| HECTD2     | 18.8828629 | 2446.525844 | 0.0077 | 0.994 | 4.04E-07 | count | 1 |
| AF131216.5 | 18.7557374 | 3406.284706 | 0.0055 | 0.996 | 4.04E-07 | count | 1 |
| RAB11FIP3  | 18.7555427 | 2544.513498 | 0.0074 | 0.994 | 4.05E-07 | count | 1 |
| CFLAR-AS1  | 18.7555423 | 2544.514198 | 0.0074 | 0.994 | 4.05E-07 | count | 1 |
| SLC30A1    | 18.7555422 | 2544.514214 | 0.0074 | 0.994 | 4.05E-07 | count | 1 |
| WIZ        | 18.7555392 | 2544.514256 | 0.0074 | 0.994 | 4.05E-07 | count | 1 |
| SLC27A3    | 18.7555384 | 2544.514029 | 0.0074 | 0.994 | 4.05E-07 | count | 1 |
| NDUFAF5    | 18.7553679 | 1977.602438 | 0.0095 | 0.992 | 4.06E-07 | count | 1 |
| SLC29A3    | 18.7553669 | 1977.602078 | 0.0095 | 0.992 | 4.06E-07 | count | 1 |

|            |            |             |        |       |          |       |   |
|------------|------------|-------------|--------|-------|----------|-------|---|
| HARS2      | 18.7553647 | 1977.601554 | 0.0095 | 0.992 | 4.06E-07 | count | 1 |
| RABGEF1    | 0.2293444  | 0.6411981   | 0.3577 | 0.721 | 4.07E-07 | count | 1 |
| AK8        | 19.2681138 | 2705.276662 | 0.0071 | 0.994 | 4.07E-07 | count | 1 |
| NDST2      | 18.6026059 | 2728.22755  | 0.0068 | 0.995 | 4.08E-07 | count | 1 |
| STAP2      | 18.6026056 | 2728.227338 | 0.0068 | 0.995 | 4.08E-07 | count | 1 |
| GDPD1      | 18.6026055 | 2728.226257 | 0.0068 | 0.995 | 4.08E-07 | count | 1 |
| SLC35E2A   | 18.602603  | 2728.225215 | 0.0068 | 0.995 | 4.08E-07 | count | 1 |
| DONSON     | 18.6026025 | 2728.226296 | 0.0068 | 0.995 | 4.08E-07 | count | 1 |
| ZNF552     | 19.2771738 | 2334.961325 | 0.0083 | 0.993 | 4.09E-07 | count | 1 |
| FLYWCH1    | 18.6024029 | 1939.339945 | 0.0096 | 0.992 | 4.09E-07 | count | 1 |
| AC132192.1 | 18.6024026 | 1939.339182 | 0.0096 | 0.992 | 4.09E-07 | count | 1 |
| CACTIN     | 18.6024003 | 1939.340117 | 0.0096 | 0.992 | 4.09E-07 | count | 1 |
| CSTF2T     | 0.0894925  | 0.6355536   | 0.1408 | 0.888 | 4.09E-07 | count | 1 |
| DIS3L      | 0.0894925  | 0.7747428   | 0.1155 | 0.908 | 4.09E-07 | count | 1 |
| ECD        | 0.0894925  | 0.4566362   | 0.196  | 0.845 | 4.09E-07 | count | 1 |
| CBFA2T2    | 0.0894925  | 0.6360835   | 0.1407 | 0.888 | 4.09E-07 | count | 1 |
| KLHL18     | 0.0894925  | 0.4854351   | 0.1844 | 0.854 | 4.09E-07 | count | 1 |
| SCML1      | 0.0894925  | 0.529246    | 0.1691 | 0.866 | 4.09E-07 | count | 1 |
| HIF1AN     | 0.0894925  | 0.8413097   | 0.1064 | 0.915 | 4.09E-07 | count | 1 |
| SRP68      | 0.0894925  | 0.6670206   | 0.1342 | 0.893 | 4.09E-07 | count | 1 |
| PAFAH2     | 19.0675487 | 2608.071902 | 0.0073 | 0.994 | 4.09E-07 | count | 1 |
| IGHV3-7    | 19.0675483 | 2608.072073 | 0.0073 | 0.994 | 4.09E-07 | count | 1 |
| TMEM186    | 0.0894925  | 0.7700757   | 0.1162 | 0.908 | 4.10E-07 | count | 1 |
| TIMM44     | 0.0894925  | 0.5397261   | 0.1658 | 0.868 | 4.10E-07 | count | 1 |
| ZNF841     | 19.4776666 | 2241.05446  | 0.0087 | 0.993 | 4.10E-07 | count | 1 |
| AGBL5      | 19.0648811 | 1865.093199 | 0.0102 | 0.992 | 4.10E-07 | count | 1 |
| POLDIP3    | 0.5534476  | 0.5655028   | 0.9787 | 0.328 | 4.10E-07 | count | 1 |
| FBRSL1     | 19.4373789 | 2330.814666 | 0.0083 | 0.993 | 4.11E-07 | count | 1 |
| GOLPH3     | 0.0908055  | 0.3421781   | 0.2654 | 0.791 | 4.16E-07 | count | 1 |
| DDX56      | 0.5599623  | 0.5545718   | 1.0097 | 0.313 | 4.17E-07 | count | 1 |
| STRBP      | 0.0348049  | 0.2204338   | 0.1579 | 0.875 | 4.23E-07 | count | 1 |
| METAP2     | 0.0349152  | 0.2416881   | 0.1445 | 0.885 | 4.25E-07 | count | 1 |
| POLB       | 0.0938725  | 0.6688935   | 0.1403 | 0.888 | 4.33E-07 | count | 1 |
| YIF1A      | 0.0356703  | 0.3384857   | 0.1054 | 0.916 | 4.34E-07 | count | 1 |
| CENPJ      | 0.5824352  | 0.7515899   | 0.7749 | 0.439 | 4.37E-07 | count | 1 |
| TEFM       | 0.5824352  | 0.7752361   | 0.7513 | 0.453 | 4.37E-07 | count | 1 |
| TMEM163    | 0.5824352  | 0.6600061   | 0.8825 | 0.378 | 4.38E-07 | count | 1 |
| ATP6V0A1   | 0.0954652  | 0.4390452   | 0.2174 | 0.828 | 4.38E-07 | count | 1 |
| EPS8L2     | 0.5824352  | 0.6090718   | 0.9563 | 0.339 | 4.39E-07 | count | 1 |
| CENPT      | 0.5824352  | 0.7375086   | 0.7897 | 0.43  | 4.39E-07 | count | 1 |
| CEP63      | 0.5824352  | 0.5125014   | 1.1365 | 0.256 | 4.40E-07 | count | 1 |
| TBC1D12    | 0.5824352  | 0.6923      | 0.8413 | 0.401 | 4.40E-07 | count | 1 |
| GEMIN2     | 0.5824352  | 0.5517739   | 1.0556 | 0.292 | 4.41E-07 | count | 1 |
| MYO1E      | 0.0962889  | 0.6844844   | 0.1407 | 0.888 | 4.42E-07 | count | 1 |
| SCYL2      | 0.0962889  | 0.5958393   | 0.1616 | 0.872 | 4.42E-07 | count | 1 |

|            |           |           |        |       |          |       |   |
|------------|-----------|-----------|--------|-------|----------|-------|---|
| PARP4      | 0.0973654 | 0.3609402 | 0.2698 | 0.787 | 4.47E-07 | count | 1 |
| SMCR8      | 1.2755823 | 1.022715  | 1.2473 | 0.213 | 4.53E-07 | count | 1 |
| AL035071.1 | 1.2755823 | 1.022715  | 1.2473 | 0.213 | 4.53E-07 | count | 1 |
| ZNF93      | 1.2755823 | 1.1373273 | 1.1216 | 0.263 | 4.53E-07 | count | 1 |
| ZNF280C    | 1.2755823 | 1.1373273 | 1.1216 | 0.263 | 4.53E-07 | count | 1 |
| FKBP7      | 1.2755823 | 1.1373273 | 1.1216 | 0.263 | 4.53E-07 | count | 1 |
| TMEM184C   | 1.2755823 | 1.1373273 | 1.1216 | 0.263 | 4.53E-07 | count | 1 |
| INTS2      | 1.2755823 | 1.1373273 | 1.1216 | 0.263 | 4.53E-07 | count | 1 |
| SLC27A5    | 1.2755823 | 1.1373273 | 1.1216 | 0.263 | 4.53E-07 | count | 1 |
| RGMB       | 1.2755823 | 1.1373273 | 1.1216 | 0.263 | 4.53E-07 | count | 1 |
| TULP3      | 1.2755823 | 1.1373273 | 1.1216 | 0.263 | 4.53E-07 | count | 1 |
| FAM43A     | 1.2755823 | 1.2414028 | 1.0275 | 0.305 | 4.53E-07 | count | 1 |
| ARHGAP11A  | 1.2755823 | 1.2414028 | 1.0275 | 0.305 | 4.53E-07 | count | 1 |
| GSTA4      | 1.2755823 | 1.2414028 | 1.0275 | 0.305 | 4.53E-07 | count | 1 |
| CENPF      | 1.2755823 | 1.2414028 | 1.0275 | 0.305 | 4.53E-07 | count | 1 |
| ZFP3       | 1.2755823 | 1.2414028 | 1.0275 | 0.305 | 4.53E-07 | count | 1 |
| AC015917.2 | 1.2755823 | 1.2414028 | 1.0275 | 0.305 | 4.53E-07 | count | 1 |
| CAMKMT     | 1.2755823 | 1.2414028 | 1.0275 | 0.305 | 4.53E-07 | count | 1 |
| ZNF816     | 1.2755823 | 1.2414028 | 1.0275 | 0.305 | 4.53E-07 | count | 1 |
| FDXR       | 1.2755823 | 1.2414028 | 1.0275 | 0.305 | 4.53E-07 | count | 1 |
| CENPP      | 1.2755823 | 1.2414028 | 1.0275 | 0.305 | 4.53E-07 | count | 1 |
| CEP57L1    | 1.2755823 | 1.2414028 | 1.0275 | 0.305 | 4.53E-07 | count | 1 |
| HSPA2      | 1.2755823 | 1.3374037 | 0.9538 | 0.341 | 4.54E-07 | count | 1 |
| TMEM63B    | 1.2755823 | 1.3374037 | 0.9538 | 0.341 | 4.54E-07 | count | 1 |
| ZDHHC19    | 1.2755823 | 1.4269604 | 0.8939 | 0.372 | 4.54E-07 | count | 1 |
| AC005261.3 | 1.2755823 | 1.4269604 | 0.8939 | 0.372 | 4.54E-07 | count | 1 |
| DDX31      | 1.2755823 | 1.4269604 | 0.8939 | 0.372 | 4.54E-07 | count | 1 |
| SLC16A11   | 1.2755823 | 1.4269604 | 0.8939 | 0.372 | 4.54E-07 | count | 1 |
| EDRF1      | 0.0989907 | 0.513674  | 0.1927 | 0.847 | 4.54E-07 | count | 1 |
| GDF7       | 0.2543021 | 0.9490314 | 0.268  | 0.789 | 4.56E-07 | count | 1 |
| CNOT6      | 0.2543021 | 0.7320403 | 0.3474 | 0.728 | 4.56E-07 | count | 1 |
| DSTYK      | 0.2543021 | 0.7846517 | 0.3241 | 0.746 | 4.56E-07 | count | 1 |
| SMIM13     | 0.2543021 | 0.6575459 | 0.3867 | 0.699 | 4.56E-07 | count | 1 |
| NFATC2     | 0.2543021 | 0.6575459 | 0.3867 | 0.699 | 4.56E-07 | count | 1 |
| PIGV       | 0.2543021 | 0.8335817 | 0.3051 | 0.76  | 4.56E-07 | count | 1 |
| ABCF3      | 0.2543021 | 0.8804937 | 0.2888 | 0.773 | 4.56E-07 | count | 1 |
| DNAJC27    | 0.2543021 | 0.8801442 | 0.2889 | 0.773 | 4.56E-07 | count | 1 |
| CHUK       | 0.2543021 | 0.715655  | 0.3553 | 0.723 | 4.56E-07 | count | 1 |
| SBF2-AS1   | 0.2543021 | 0.715655  | 0.3553 | 0.723 | 4.56E-07 | count | 1 |
| GSTZ1      | 0.2543021 | 0.715655  | 0.3553 | 0.723 | 4.56E-07 | count | 1 |
| DCUN1D4    | 0.2543021 | 0.7693877 | 0.3305 | 0.741 | 4.57E-07 | count | 1 |
| CLCN7      | 0.2543021 | 0.7693877 | 0.3305 | 0.741 | 4.57E-07 | count | 1 |
| FEN1       | 0.2543021 | 0.7693877 | 0.3305 | 0.741 | 4.57E-07 | count | 1 |
| RBM12B     | 0.2552531 | 0.9500667 | 0.2687 | 0.788 | 4.58E-07 | count | 1 |
| ZNF275     | 0.2552531 | 0.9212806 | 0.2771 | 0.782 | 4.58E-07 | count | 1 |

|            |           |           |        |       |          |       |   |
|------------|-----------|-----------|--------|-------|----------|-------|---|
| ZNF346     | 0.2552531 | 0.8729063 | 0.2924 | 0.77  | 4.58E-07 | count | 1 |
| SIGMAR1    | 0.2552531 | 1.1006276 | 0.2319 | 0.817 | 4.58E-07 | count | 1 |
| EBLN2      | 0.2552531 | 1.1006276 | 0.2319 | 0.817 | 4.58E-07 | count | 1 |
| NBPF12     | 0.2552531 | 1.0809666 | 0.2361 | 0.813 | 4.58E-07 | count | 1 |
| FBXL18     | 0.2552531 | 1.0400463 | 0.2454 | 0.806 | 4.58E-07 | count | 1 |
| PNPO       | 0.2552531 | 1.0400463 | 0.2454 | 0.806 | 4.58E-07 | count | 1 |
| NAPEPLD    | 0.2552531 | 1.0400463 | 0.2454 | 0.806 | 4.58E-07 | count | 1 |
| ATN1       | 0.2552531 | 1.0400463 | 0.2454 | 0.806 | 4.58E-07 | count | 1 |
| ZNF583     | 0.2552531 | 1.0400463 | 0.2454 | 0.806 | 4.58E-07 | count | 1 |
| RAB4B      | 0.2552531 | 1.0400463 | 0.2454 | 0.806 | 4.58E-07 | count | 1 |
| POLD1      | 0.2552531 | 1.0400463 | 0.2454 | 0.806 | 4.58E-07 | count | 1 |
| NXF1       | 0.2552531 | 0.8249166 | 0.3094 | 0.757 | 4.59E-07 | count | 1 |
| AC005070.3 | 0.2566426 | 0.8467493 | 0.3031 | 0.762 | 4.60E-07 | count | 1 |
| PHLPP1     | 0.2566426 | 1.0507166 | 0.2443 | 0.807 | 4.62E-07 | count | 1 |
| DNAJC18    | 0.2566426 | 1.0092362 | 0.2543 | 0.799 | 4.62E-07 | count | 1 |
| MPP1       | 0.6121445 | 1.4355437 | 0.4264 | 0.67  | 4.63E-07 | count | 1 |
| MCF2L-AS1  | 0.6121445 | 1.4355437 | 0.4264 | 0.67  | 4.63E-07 | count | 1 |
| AL627171.2 | 0.6121445 | 1.4355437 | 0.4264 | 0.67  | 4.63E-07 | count | 1 |
| GNGT2      | 0.6121445 | 1.4355437 | 0.4264 | 0.67  | 4.63E-07 | count | 1 |
| AC006942.1 | 0.6121445 | 1.4355437 | 0.4264 | 0.67  | 4.63E-07 | count | 1 |
| CCDC30     | 0.6121445 | 1.4355437 | 0.4264 | 0.67  | 4.63E-07 | count | 1 |
| LINC01825  | 0.6121445 | 1.4355437 | 0.4264 | 0.67  | 4.63E-07 | count | 1 |
| AC026979.2 | 0.6121445 | 1.4355437 | 0.4264 | 0.67  | 4.63E-07 | count | 1 |
| BAALC      | 0.6121445 | 1.4355437 | 0.4264 | 0.67  | 4.63E-07 | count | 1 |
| TMEM185B   | 0.6121445 | 1.4355437 | 0.4264 | 0.67  | 4.63E-07 | count | 1 |
| AC136475.1 | 0.6121445 | 1.4355437 | 0.4264 | 0.67  | 4.63E-07 | count | 1 |
| ECHDC3     | 0.6121445 | 1.4355437 | 0.4264 | 0.67  | 4.63E-07 | count | 1 |
| AL356488.2 | 0.6121445 | 1.4355437 | 0.4264 | 0.67  | 4.63E-07 | count | 1 |
| FAM153A    | 0.6121445 | 1.4355437 | 0.4264 | 0.67  | 4.63E-07 | count | 1 |
| AC002456.1 | 0.6121445 | 1.4355437 | 0.4264 | 0.67  | 4.63E-07 | count | 1 |
| SLC41A2    | 0.6121445 | 1.4355437 | 0.4264 | 0.67  | 4.63E-07 | count | 1 |
| GAS6       | 0.6121445 | 1.4355437 | 0.4264 | 0.67  | 4.63E-07 | count | 1 |
| MYLK3      | 0.6121445 | 1.4355437 | 0.4264 | 0.67  | 4.63E-07 | count | 1 |
| SH2D2A     | 0.6121445 | 1.4355437 | 0.4264 | 0.67  | 4.63E-07 | count | 1 |
| NFIB       | 0.6121445 | 1.4355437 | 0.4264 | 0.67  | 4.63E-07 | count | 1 |
| FAM168A    | 0.6121445 | 1.4355437 | 0.4264 | 0.67  | 4.63E-07 | count | 1 |
| LOXL3      | 0.6121445 | 1.4355437 | 0.4264 | 0.67  | 4.63E-07 | count | 1 |
| PCOLCE     | 0.6121445 | 1.4355437 | 0.4264 | 0.67  | 4.63E-07 | count | 1 |
| BDNF-AS    | 0.6121445 | 1.4355437 | 0.4264 | 0.67  | 4.63E-07 | count | 1 |
| ACP6       | 0.6121445 | 1.4355437 | 0.4264 | 0.67  | 4.63E-07 | count | 1 |
| CEP72      | 0.6121445 | 1.4355437 | 0.4264 | 0.67  | 4.63E-07 | count | 1 |
| AC245452.1 | 0.6121445 | 1.4355437 | 0.4264 | 0.67  | 4.63E-07 | count | 1 |
| AURKA      | 0.6121445 | 1.4355437 | 0.4264 | 0.67  | 4.63E-07 | count | 1 |
| NMNAT1     | 0.6121445 | 1.4355437 | 0.4264 | 0.67  | 4.63E-07 | count | 1 |
| AC109347.2 | 0.6121445 | 1.4355437 | 0.4264 | 0.67  | 4.63E-07 | count | 1 |

|            |           |           |        |       |          |       |   |
|------------|-----------|-----------|--------|-------|----------|-------|---|
| DDIAS      | 0.6121445 | 1.4355437 | 0.4264 | 0.67  | 4.63E-07 | count | 1 |
| MIR762HG   | 0.6121445 | 1.4355437 | 0.4264 | 0.67  | 4.63E-07 | count | 1 |
| RECQL4     | 0.6121445 | 1.4355437 | 0.4264 | 0.67  | 4.63E-07 | count | 1 |
| SUV39H2    | 0.6121445 | 1.4355437 | 0.4264 | 0.67  | 4.63E-07 | count | 1 |
| WBP2NL     | 0.6121445 | 1.4355437 | 0.4264 | 0.67  | 4.63E-07 | count | 1 |
| AL022328.4 | 0.6121445 | 1.4355437 | 0.4264 | 0.67  | 4.63E-07 | count | 1 |
| AGRN       | 0.6121445 | 1.4355437 | 0.4264 | 0.67  | 4.63E-07 | count | 1 |
| ENGASE     | 0.6121445 | 1.4355437 | 0.4264 | 0.67  | 4.63E-07 | count | 1 |
| AC074387.1 | 0.6121445 | 1.4355437 | 0.4264 | 0.67  | 4.63E-07 | count | 1 |
| REPS2      | 0.6121445 | 1.4355437 | 0.4264 | 0.67  | 4.63E-07 | count | 1 |
| SLC25A44   | 0.6121445 | 1.4355437 | 0.4264 | 0.67  | 4.63E-07 | count | 1 |
| DOCK9-DT   | 0.6121445 | 1.4355437 | 0.4264 | 0.67  | 4.63E-07 | count | 1 |
| LMNTD2     | 0.6121445 | 1.0123256 | 0.6047 | 0.546 | 4.63E-07 | count | 1 |
| MPV17L     | 0.6121445 | 1.0123256 | 0.6047 | 0.546 | 4.63E-07 | count | 1 |
| UST        | 0.6121445 | 1.1688396 | 0.5237 | 0.601 | 4.63E-07 | count | 1 |
| AP002884.1 | 0.6121445 | 1.1688396 | 0.5237 | 0.601 | 4.63E-07 | count | 1 |
| SCFD2      | 0.6121445 | 1.8510314 | 0.3307 | 0.741 | 4.64E-07 | count | 1 |
| RHBDD3     | 0.6121445 | 1.8510314 | 0.3307 | 0.741 | 4.64E-07 | count | 1 |
| AC009686.2 | 0.6121445 | 1.8510314 | 0.3307 | 0.741 | 4.64E-07 | count | 1 |
| CDCA8      | 0.6121445 | 1.8510314 | 0.3307 | 0.741 | 4.64E-07 | count | 1 |
| BTBD19     | 0.6121445 | 1.8510314 | 0.3307 | 0.741 | 4.64E-07 | count | 1 |
| DMKN       | 0.6121445 | 1.8510314 | 0.3307 | 0.741 | 4.64E-07 | count | 1 |
| AC011447.3 | 0.6121445 | 1.8510314 | 0.3307 | 0.741 | 4.64E-07 | count | 1 |
| ZNF786     | 0.6121445 | 1.8510314 | 0.3307 | 0.741 | 4.64E-07 | count | 1 |
| AC139887.4 | 0.6121445 | 1.8510314 | 0.3307 | 0.741 | 4.64E-07 | count | 1 |
| TMED5      | 0.0386802 | 0.2715426 | 0.1424 | 0.887 | 4.72E-07 | count | 1 |
| RAF1       | 0.1035265 | 0.43216   | 0.2396 | 0.811 | 4.76E-07 | count | 1 |
| DDA1       | 0.1035265 | 0.43216   | 0.2396 | 0.811 | 4.76E-07 | count | 1 |
| B4GALT7    | 0.1035265 | 0.4502211 | 0.2299 | 0.818 | 4.76E-07 | count | 1 |
| KAT7       | 0.1038418 | 0.3842607 | 0.2702 | 0.787 | 4.78E-07 | count | 1 |
| GTPBP10    | 0.6216559 | 0.6546882 | 0.9495 | 0.343 | 4.79E-07 | count | 1 |
| AHR        | 0.6216559 | 0.7338146 | 0.8472 | 0.397 | 4.81E-07 | count | 1 |
| OSBPL8     | 0.0393193 | 0.304558  | 0.1291 | 0.897 | 4.81E-07 | count | 1 |
| C12orf75   | 0.0395162 | 0.2610409 | 0.1514 | 0.88  | 4.82E-07 | count | 1 |
| GEMIN6     | 0.1054469 | 0.5883311 | 0.1792 | 0.858 | 4.87E-07 | count | 1 |
| TMEM120A   | 0.6469737 | 0.8899542 | 0.727  | 0.468 | 4.97E-07 | count | 1 |
| TMEM53     | 0.6469737 | 0.9225599 | 0.7013 | 0.483 | 4.97E-07 | count | 1 |
| EDEM3      | 0.6469737 | 0.7908167 | 0.8181 | 0.414 | 4.98E-07 | count | 1 |
| CAMKK2     | 0.6469737 | 1.0707976 | 0.6042 | 0.546 | 4.99E-07 | count | 1 |
| RETREG3    | 0.6469737 | 0.8273386 | 0.782  | 0.435 | 4.99E-07 | count | 1 |
| N6AMT1     | 0.6469737 | 0.7560597 | 0.8557 | 0.393 | 5.00E-07 | count | 1 |
| PIP5K1A    | 0.6469737 | 0.7941816 | 0.8146 | 0.416 | 5.00E-07 | count | 1 |
| FRAT2      | 0.1088702 | 0.4520201 | 0.2409 | 0.81  | 5.02E-07 | count | 1 |
| TIGIT      | 0.6469737 | 1.0219645 | 0.6331 | 0.527 | 5.04E-07 | count | 1 |
| SNRNP48    | 0.6469737 | 0.5005862 | 1.2924 | 0.197 | 5.04E-07 | count | 1 |

|            |           |           |        |       |          |       |   |
|------------|-----------|-----------|--------|-------|----------|-------|---|
| WDR26      | 0.1093908 | 0.4530797 | 0.2414 | 0.809 | 5.04E-07 | count | 1 |
| RAB37      | 0.109862  | 0.4831153 | 0.2274 | 0.82  | 5.06E-07 | count | 1 |
| IPO8       | 0.109862  | 0.4831153 | 0.2274 | 0.82  | 5.06E-07 | count | 1 |
| USP34      | 0.0415923 | 0.1945666 | 0.2138 | 0.831 | 5.08E-07 | count | 1 |
| ACIN1      | 0.0418558 | 0.2670436 | 0.1567 | 0.876 | 5.11E-07 | count | 1 |
| LIN7C      | 0.1114339 | 0.4525002 | 0.2463 | 0.806 | 5.14E-07 | count | 1 |
| VSIR       | 0.1114459 | 0.3800136 | 0.2933 | 0.769 | 5.14E-07 | count | 1 |
| TIGAR      | 0.1114339 | 0.4142273 | 0.269  | 0.788 | 5.14E-07 | count | 1 |
| MYL9       | 0.1113651 | 0.6352105 | 0.1753 | 0.861 | 5.19E-07 | count | 1 |
| CD80       | 0.6646733 | 0.6094825 | 1.0906 | 0.276 | 5.22E-07 | count | 1 |
| TMEM192    | 0.6646733 | 0.49588   | 1.3404 | 0.181 | 5.23E-07 | count | 1 |
| CARS       | 0.1132973 | 0.5143154 | 0.2203 | 0.826 | 5.23E-07 | count | 1 |
| MCM3       | 0.1132973 | 0.5740664 | 0.1974 | 0.844 | 5.23E-07 | count | 1 |
| ARRDC1-AS1 | 0.2879977 | 0.8188995 | 0.3517 | 0.725 | 5.23E-07 | count | 1 |
| FKBP11     | 0.0426599 | 0.4358083 | 0.0979 | 0.922 | 5.24E-07 | count | 1 |
| ZDHHC13    | 0.2879977 | 0.8785305 | 0.3278 | 0.743 | 5.25E-07 | count | 1 |
| HDDC2      | 0.0431827 | 0.3750215 | 0.1151 | 0.908 | 5.28E-07 | count | 1 |
| ZNF14      | 0.6777453 | 0.620615  | 1.0921 | 0.275 | 5.29E-07 | count | 1 |
| TESC       | 0.6777453 | 0.6458576 | 1.0494 | 0.295 | 5.29E-07 | count | 1 |
| CBWD3      | 0.11478   | 0.4961711 | 0.2313 | 0.817 | 5.31E-07 | count | 1 |
| AC147067.1 | 0.2916482 | 0.790758  | 0.3688 | 0.712 | 5.31E-07 | count | 1 |
| MAPK11     | 0.6777453 | 0.693592  | 0.9772 | 0.329 | 5.31E-07 | count | 1 |
| HIST1H2AG  | 0.6777453 | 0.693592  | 0.9772 | 0.329 | 5.31E-07 | count | 1 |
| POF1B      | 0.6777453 | 0.693592  | 0.9772 | 0.329 | 5.31E-07 | count | 1 |
| GPM6B      | 0.2916482 | 0.7827258 | 0.3726 | 0.71  | 5.31E-07 | count | 1 |
| DNAJB4     | 0.2916482 | 0.7827258 | 0.3726 | 0.71  | 5.31E-07 | count | 1 |
| ARL5A      | 0.11478   | 0.5614855 | 0.2044 | 0.838 | 5.31E-07 | count | 1 |
| HDAC6      | 0.2916482 | 0.8542326 | 0.3414 | 0.733 | 5.31E-07 | count | 1 |
| BTRC       | 0.2916482 | 0.9505457 | 0.3068 | 0.759 | 5.32E-07 | count | 1 |
| RFWD3      | 0.2916482 | 0.9817435 | 0.2971 | 0.767 | 5.32E-07 | count | 1 |
| TSNAX      | 0.114955  | 0.3775007 | 0.3045 | 0.761 | 5.32E-07 | count | 1 |
| TMCO3      | 0.6777453 | 0.7169491 | 0.9453 | 0.345 | 5.35E-07 | count | 1 |
| BCL2L12    | 0.1154904 | 0.3572922 | 0.3232 | 0.747 | 5.35E-07 | count | 1 |
| MFSD14C    | 0.1160032 | 0.5288246 | 0.2194 | 0.826 | 5.36E-07 | count | 1 |
| LSR        | 0.116868  | 0.3473125 | 0.3365 | 0.737 | 5.40E-07 | count | 1 |
| UFM1       | 0.0445245 | 0.2370409 | 0.1878 | 0.851 | 5.44E-07 | count | 1 |
| CD1D       | 0.6957638 | 0.6395676 | 1.0879 | 0.277 | 5.45E-07 | count | 1 |
| MRPS31     | 0.044844  | 0.3949603 | 0.1135 | 0.91  | 5.48E-07 | count | 1 |
| TRIP12     | 0.044875  | 0.3296976 | 0.1361 | 0.892 | 5.48E-07 | count | 1 |
| DTNB       | 1.4579039 | 1.0071068 | 1.4476 | 0.148 | 5.50E-07 | count | 1 |
| BRF2       | 1.4579039 | 1.1021977 | 1.3227 | 0.187 | 5.51E-07 | count | 1 |
| LCLAT1     | 1.4579039 | 1.1021977 | 1.3227 | 0.187 | 5.51E-07 | count | 1 |
| DCAKD      | 1.4579039 | 1.1021977 | 1.3227 | 0.187 | 5.51E-07 | count | 1 |
| EMC1       | 1.4579039 | 1.1021977 | 1.3227 | 0.187 | 5.51E-07 | count | 1 |
| TRIM47     | 1.4579039 | 1.1021977 | 1.3227 | 0.187 | 5.51E-07 | count | 1 |



|            |           |           |        |       |          |       |   |
|------------|-----------|-----------|--------|-------|----------|-------|---|
| ZNF790     | 1.4579039 | 1.1021977 | 1.3227 | 0.187 | 5.51E-07 | count | 1 |
| SLFN13     | 1.4579039 | 1.1021977 | 1.3227 | 0.187 | 5.51E-07 | count | 1 |
| RFC4       | 1.4579039 | 1.1021977 | 1.3227 | 0.187 | 5.51E-07 | count | 1 |
| ZNF626     | 0.6957638 | 0.5372458 | 1.2951 | 0.196 | 5.51E-07 | count | 1 |
| KLHDC7B    | 1.4579039 | 1.1897123 | 1.2254 | 0.221 | 5.51E-07 | count | 1 |
| TUBG1      | 1.4579039 | 1.1897123 | 1.2254 | 0.221 | 5.51E-07 | count | 1 |
| AGO4       | 1.4579039 | 1.1897123 | 1.2254 | 0.221 | 5.51E-07 | count | 1 |
| NOD1       | 1.4579039 | 1.1897123 | 1.2254 | 0.221 | 5.51E-07 | count | 1 |
| ZNF510     | 1.4579039 | 1.1897123 | 1.2254 | 0.221 | 5.51E-07 | count | 1 |
| TMEM231    | 1.4579039 | 1.1897123 | 1.2254 | 0.221 | 5.51E-07 | count | 1 |
| NPHP1      | 1.4579039 | 1.2712163 | 1.1469 | 0.252 | 5.52E-07 | count | 1 |
| MAPK14     | 0.1193323 | 0.6045714 | 0.1974 | 0.844 | 5.52E-07 | count | 1 |
| FAM189B    | 1.4579039 | 1.3478006 | 1.0817 | 0.28  | 5.53E-07 | count | 1 |
| PER3       | 1.4579039 | 1.3478006 | 1.0817 | 0.28  | 5.53E-07 | count | 1 |
| RRP12      | 1.4579039 | 1.3478006 | 1.0817 | 0.28  | 5.53E-07 | count | 1 |
| ARMC6      | 1.4579039 | 1.3478006 | 1.0817 | 0.28  | 5.53E-07 | count | 1 |
| PPP1R16B   | 0.1193323 | 0.3669954 | 0.3252 | 0.745 | 5.53E-07 | count | 1 |
| ANXA2R     | 0.6957638 | 0.5904492 | 1.1784 | 0.239 | 5.54E-07 | count | 1 |
| CCDC110    | 1.4579039 | 1.5550862 | 0.9375 | 0.349 | 5.54E-07 | count | 1 |
| TCEA2      | 0.1198369 | 0.3566089 | 0.336  | 0.737 | 5.55E-07 | count | 1 |
| CCNY       | 0.12029   | 0.3727865 | 0.3227 | 0.747 | 5.56E-07 | count | 1 |
| MRPS14     | 0.12029   | 0.6035527 | 0.1993 | 0.842 | 5.57E-07 | count | 1 |
| COG2       | 0.1210706 | 0.4831811 | 0.2506 | 0.802 | 5.61E-07 | count | 1 |
| AC016831.1 | 0.1218564 | 0.4728693 | 0.2577 | 0.797 | 5.64E-07 | count | 1 |
| JADE2      | 0.1222851 | 0.4361968 | 0.2803 | 0.779 | 5.66E-07 | count | 1 |
| SMG5       | 0.3091216 | 0.7175509 | 0.4308 | 0.667 | 5.66E-07 | count | 1 |
| RIDA       | 0.3091216 | 0.7584849 | 0.4076 | 0.684 | 5.66E-07 | count | 1 |
| POLR2M     | 0.3091216 | 0.7138331 | 0.433  | 0.665 | 5.66E-07 | count | 1 |
| ZNF532     | 0.3091216 | 0.6577033 | 0.47   | 0.639 | 5.67E-07 | count | 1 |
| NSUN4      | 0.3091216 | 0.7549686 | 0.4094 | 0.682 | 5.67E-07 | count | 1 |
| CAPN15     | 0.3091216 | 0.7549686 | 0.4094 | 0.682 | 5.67E-07 | count | 1 |
| FMNL1      | 0.0467163 | 0.2828203 | 0.1652 | 0.869 | 5.71E-07 | count | 1 |
| AP5M1      | 0.7159665 | 0.4888878 | 1.4645 | 0.144 | 5.75E-07 | count | 1 |
| EML6       | 0.3149313 | 0.929477  | 0.3388 | 0.735 | 5.78E-07 | count | 1 |
| IGSF8      | 0.1257505 | 0.3391478 | 0.3708 | 0.711 | 5.83E-07 | count | 1 |
| CNFN       | 0.1258878 | 0.6412649 | 0.1963 | 0.844 | 5.83E-07 | count | 1 |
| CPPED1     | 0.1258878 | 0.5725341 | 0.2199 | 0.826 | 5.83E-07 | count | 1 |
| UBR7       | 0.1258878 | 0.5442591 | 0.2313 | 0.817 | 5.84E-07 | count | 1 |
| CDK7       | 0.1258878 | 0.569407  | 0.2211 | 0.825 | 5.84E-07 | count | 1 |
| TIGD5      | 0.1258878 | 0.569407  | 0.2211 | 0.825 | 5.84E-07 | count | 1 |
| B4GALT4    | 0.1258878 | 0.5171239 | 0.2434 | 0.808 | 5.84E-07 | count | 1 |
| MAPK13     | 0.1258878 | 0.5923196 | 0.2125 | 0.832 | 5.84E-07 | count | 1 |
| DOK2       | 0.1258878 | 0.6762507 | 0.1862 | 0.852 | 5.85E-07 | count | 1 |
| RAD51B     | 0.1258878 | 0.5892975 | 0.2136 | 0.831 | 5.85E-07 | count | 1 |
| BUD13      | 0.1262327 | 0.5674364 | 0.2225 | 0.824 | 5.85E-07 | count | 1 |

|           |           |           |        |       |          |       |   |
|-----------|-----------|-----------|--------|-------|----------|-------|---|
| SURF4     | 0.1262327 | 0.5427854 | 0.2326 | 0.816 | 5.85E-07 | count | 1 |
| EPN2      | 0.1262327 | 0.5626839 | 0.2243 | 0.823 | 5.85E-07 | count | 1 |
| HEXIM1    | 0.1262327 | 0.3822208 | 0.3303 | 0.741 | 5.85E-07 | count | 1 |
| RABEPK    | 0.1262327 | 0.6204965 | 0.2034 | 0.839 | 5.86E-07 | count | 1 |
| ATF6      | 0.1262327 | 0.4816241 | 0.2621 | 0.793 | 5.86E-07 | count | 1 |
| LCMT1     | 0.1260715 | 0.4330645 | 0.2911 | 0.771 | 5.86E-07 | count | 1 |
| HOMER3    | 0.1262327 | 0.6256813 | 0.2018 | 0.84  | 5.86E-07 | count | 1 |
| C16orf74  | 0.1265027 | 0.5869414 | 0.2155 | 0.829 | 5.86E-07 | count | 1 |
| ACOT8     | 0.1267198 | 0.5525262 | 0.2293 | 0.819 | 5.88E-07 | count | 1 |
| ZFAND2A   | 0.1300662 | 0.4227897 | 0.3076 | 0.759 | 6.04E-07 | count | 1 |
| KDM7A     | 0.1300662 | 0.4350678 | 0.299  | 0.765 | 6.05E-07 | count | 1 |
| GLRX2     | 0.1302617 | 0.4698555 | 0.2772 | 0.782 | 6.07E-07 | count | 1 |
| BCL2L1    | 0.3302351 | 1.0247182 | 0.3223 | 0.747 | 6.10E-07 | count | 1 |
| SCN3A     | 0.3302351 | 1.0610175 | 0.3112 | 0.756 | 6.10E-07 | count | 1 |
| RSPH3     | 0.3302351 | 1.0610175 | 0.3112 | 0.756 | 6.10E-07 | count | 1 |
| LRRC37A2  | 0.3302351 | 0.9506952 | 0.3474 | 0.728 | 6.10E-07 | count | 1 |
| CFAP44    | 0.3302351 | 1.3902397 | 0.2375 | 0.812 | 6.10E-07 | count | 1 |
| PTCD1     | 0.3302351 | 1.3902397 | 0.2375 | 0.812 | 6.10E-07 | count | 1 |
| FAM222A   | 0.3302351 | 1.3059993 | 0.2529 | 0.8   | 6.10E-07 | count | 1 |
| RANGRF    | 0.3311207 | 0.3315595 | 0.9987 | 0.318 | 6.13E-07 | count | 1 |
| TMEM161A  | 0.7647567 | 0.7698726 | 0.9934 | 0.321 | 6.17E-07 | count | 1 |
| COX10     | 0.7647567 | 0.6807815 | 1.1234 | 0.262 | 6.17E-07 | count | 1 |
| DHX38     | 0.1321386 | 0.4575381 | 0.2888 | 0.773 | 6.18E-07 | count | 1 |
| FEM1C     | 0.7647567 | 0.6339573 | 1.2063 | 0.228 | 6.19E-07 | count | 1 |
| AVEN      | 0.7647567 | 0.7308904 | 1.0463 | 0.296 | 6.19E-07 | count | 1 |
| LINC02384 | 0.7647567 | 0.7412317 | 1.0317 | 0.303 | 6.19E-07 | count | 1 |
| CTNNBIP1  | 0.7647567 | 0.8924478 | 0.8569 | 0.392 | 6.20E-07 | count | 1 |
| ENDOG     | 0.7647567 | 0.5833869 | 1.3109 | 0.191 | 6.20E-07 | count | 1 |
| MAP7D1    | 0.1330535 | 0.4888184 | 0.2722 | 0.786 | 6.21E-07 | count | 1 |
| CERS5     | 0.1335572 | 0.5110648 | 0.2613 | 0.794 | 6.21E-07 | count | 1 |
| ZNF143    | 0.7647567 | 0.4923031 | 1.5534 | 0.121 | 6.21E-07 | count | 1 |
| MCM7      | 0.1335572 | 0.5619206 | 0.2377 | 0.812 | 6.21E-07 | count | 1 |
| TGFBR1    | 0.7647567 | 0.8288669 | 0.9227 | 0.357 | 6.21E-07 | count | 1 |
| KLF12     | 0.1341935 | 0.6570497 | 0.2042 | 0.838 | 6.24E-07 | count | 1 |
| MFN1      | 0.1341935 | 0.4357063 | 0.308  | 0.758 | 6.26E-07 | count | 1 |
| S100PBP   | 0.1341935 | 0.5644379 | 0.2377 | 0.812 | 6.26E-07 | count | 1 |
| SRBD1     | 0.1350226 | 0.5698529 | 0.2369 | 0.813 | 6.28E-07 | count | 1 |
| GMPPA     | 0.1350226 | 0.6323207 | 0.2135 | 0.831 | 6.29E-07 | count | 1 |
| KPNA3     | 0.1350226 | 0.3748244 | 0.3602 | 0.719 | 6.29E-07 | count | 1 |
| ALAS1     | 0.1350226 | 0.5981254 | 0.2257 | 0.822 | 6.29E-07 | count | 1 |
| HYLS1     | 0.3376584 | 0.6975715 | 0.484  | 0.629 | 6.29E-07 | count | 1 |
| ALPK1     | 0.1350226 | 0.6012456 | 0.2246 | 0.822 | 6.29E-07 | count | 1 |
| MAGT1     | 0.1353578 | 0.3471123 | 0.39   | 0.697 | 6.30E-07 | count | 1 |
| USP53     | 0.1355391 | 0.5259373 | 0.2577 | 0.797 | 6.31E-07 | count | 1 |
| FBH1      | 0.1350226 | 0.790993  | 0.1707 | 0.865 | 6.32E-07 | count | 1 |

|          |           |           |        |        |          |       |   |
|----------|-----------|-----------|--------|--------|----------|-------|---|
| IBA57    | 0.3420533 | 0.7743569 | 0.4417 | 0.659  | 6.34E-07 | count | 1 |
| ZNF135   | 0.3420533 | 0.9441389 | 0.3623 | 0.717  | 6.35E-07 | count | 1 |
| ARMH1    | 0.3420533 | 0.8698424 | 0.3932 | 0.694  | 6.36E-07 | count | 1 |
| MINCR    | 0.3420533 | 1.1267099 | 0.3036 | 0.762  | 6.36E-07 | count | 1 |
| LATS1    | 0.3420533 | 1.1267099 | 0.3036 | 0.762  | 6.36E-07 | count | 1 |
| PIGP     | 0.3398735 | 0.3200931 | 1.0618 | 0.289  | 6.37E-07 | count | 1 |
| ZFYVE19  | 1.6120546 | 1.0767563 | 1.4971 | 0.135  | 6.41E-07 | count | 1 |
| EHD3     | 1.6120546 | 1.0767563 | 1.4971 | 0.135  | 6.41E-07 | count | 1 |
| ATPAF2   | 1.6120546 | 1.0767563 | 1.4971 | 0.135  | 6.41E-07 | count | 1 |
| HDAC10   | 1.6120546 | 1.0767563 | 1.4971 | 0.135  | 6.41E-07 | count | 1 |
| SLC35B4  | 1.6120546 | 1.1523096 | 1.399  | 0.163  | 6.42E-07 | count | 1 |
| NOTCH1   | 1.6120546 | 1.1523096 | 1.399  | 0.163  | 6.42E-07 | count | 1 |
| STT3A    | 1.6120546 | 1.1523096 | 1.399  | 0.163  | 6.42E-07 | count | 1 |
| FHOD1    | 1.6120546 | 1.1523096 | 1.399  | 0.163  | 6.42E-07 | count | 1 |
| ST3GAL3  | 1.6120546 | 1.2232051 | 1.3179 | 0.188  | 6.43E-07 | count | 1 |
| WDR35    | 1.6120546 | 1.2232051 | 1.3179 | 0.188  | 6.43E-07 | count | 1 |
| RPGRIP1L | 1.6120546 | 1.4147334 | 1.1395 | 0.255  | 6.45E-07 | count | 1 |
| RBM27    | 0.347029  | 0.7577929 | 0.4579 | 0.647  | 6.45E-07 | count | 1 |
| PDCD2L   | 0.347029  | 0.9274412 | 0.3742 | 0.708  | 6.45E-07 | count | 1 |
| TMEM117  | 0.347029  | 0.7664049 | 0.4528 | 0.651  | 6.46E-07 | count | 1 |
| PPP2R5C  | 0.0529177 | 0.220481  | 0.24   | 0.81   | 6.50E-07 | count | 1 |
| LRP10    | 0.0535774 | 0.2789816 | 0.192  | 0.848  | 6.57E-07 | count | 1 |
| MAN2A1   | 0.1412135 | 0.4708208 | 0.2999 | 0.764  | 6.59E-07 | count | 1 |
| SAP30    | 0.1412135 | 0.4932218 | 0.2863 | 0.775  | 6.59E-07 | count | 1 |
| VAMP5    | 0.1416304 | 0.5280535 | 0.2682 | 0.789  | 6.61E-07 | count | 1 |
| RNF20    | 0.1416304 | 0.5413762 | 0.2616 | 0.794  | 6.63E-07 | count | 1 |
| SLC39A6  | 0.1423917 | 0.4872879 | 0.2922 | 0.77   | 6.64E-07 | count | 1 |
| NUDT9    | 0.1423917 | 0.5434914 | 0.262  | 0.793  | 6.66E-07 | count | 1 |
| SH3BP1   | 0.1423917 | 0.5326842 | 0.2673 | 0.789  | 6.66E-07 | count | 1 |
| SPOP     | 0.0547422 | 0.2662063 | 0.2056 | 0.837  | 6.71E-07 | count | 1 |
| C2orf49  | 0.8011244 | 0.4791739 | 1.6719 | 0.0953 | 6.72E-07 | count | 1 |
| MOSMO    | 0.1434703 | 0.6140423 | 0.2336 | 0.815  | 6.72E-07 | count | 1 |
| AAMP     | 0.1442689 | 0.306062  | 0.4714 | 0.638  | 6.74E-07 | count | 1 |
| CHTOP    | 0.3592916 | 0.3414429 | 1.0523 | 0.293  | 6.75E-07 | count | 1 |
| LMO7     | 0.1459234 | 0.6152515 | 0.2372 | 0.813  | 6.82E-07 | count | 1 |
| ZNF76    | 0.1459234 | 0.6485559 | 0.225  | 0.822  | 6.82E-07 | count | 1 |
| KIFAP3   | 0.1459234 | 0.4855322 | 0.3005 | 0.764  | 6.84E-07 | count | 1 |
| PSMB2    | 0.0558377 | 0.2413908 | 0.2313 | 0.817  | 6.85E-07 | count | 1 |
| STAMBPL1 | 0.1466477 | 0.3688998 | 0.3975 | 0.691  | 6.87E-07 | count | 1 |
| RRP1     | 0.1474848 | 0.5048285 | 0.2921 | 0.77   | 6.90E-07 | count | 1 |
| PRDM1    | 0.1474848 | 0.4992568 | 0.2954 | 0.768  | 6.90E-07 | count | 1 |
| MAP4K2   | 0.1480705 | 0.4357738 | 0.3398 | 0.734  | 6.93E-07 | count | 1 |
| SGTA     | 0.8292952 | 0.6141508 | 1.3503 | 0.178  | 6.96E-07 | count | 1 |
| FAM172A  | 0.1488822 | 0.3743922 | 0.3977 | 0.691  | 6.96E-07 | count | 1 |
| NSMCE4A  | 0.0567287 | 0.2876035 | 0.1972 | 0.844  | 6.97E-07 | count | 1 |

|             |           |           |        |        |          |       |   |
|-------------|-----------|-----------|--------|--------|----------|-------|---|
| KCTD5       | 0.1493594 | 0.7290245 | 0.2049 | 0.838  | 6.99E-07 | count | 1 |
| CC2D1B      | 0.1493594 | 0.7664685 | 0.1949 | 0.846  | 6.99E-07 | count | 1 |
| SASS6       | 0.1493594 | 0.6293247 | 0.2373 | 0.813  | 6.99E-07 | count | 1 |
| DHX37       | 0.1493594 | 0.7658606 | 0.195  | 0.845  | 6.99E-07 | count | 1 |
| ST7L        | 0.1493594 | 0.723559  | 0.2064 | 0.837  | 6.99E-07 | count | 1 |
| WDR76       | 0.1493594 | 0.723559  | 0.2064 | 0.837  | 6.99E-07 | count | 1 |
| AL451085.2  | 0.1493594 | 0.7606599 | 0.1964 | 0.844  | 6.99E-07 | count | 1 |
| SLC37A1     | 0.1493594 | 0.4172373 | 0.358  | 0.721  | 7.00E-07 | count | 1 |
| EXOSC7      | 0.1493594 | 0.446706  | 0.3344 | 0.738  | 7.00E-07 | count | 1 |
| MRPL2       | 0.1493594 | 0.504391  | 0.2961 | 0.767  | 7.00E-07 | count | 1 |
| MIS18A      | 0.1493594 | 0.8572808 | 0.1742 | 0.862  | 7.01E-07 | count | 1 |
| SYT1        | 0.1508331 | 0.4822773 | 0.3128 | 0.755  | 7.07E-07 | count | 1 |
| CAMK2G      | 0.8447994 | 0.5733546 | 1.4734 | 0.141  | 7.08E-07 | count | 1 |
| WDR55       | 0.1513345 | 0.4149177 | 0.3647 | 0.715  | 7.09E-07 | count | 1 |
| ZYG11B      | 0.8447994 | 0.6376191 | 1.3249 | 0.186  | 7.13E-07 | count | 1 |
| SULF2       | 0.8447994 | 0.6376191 | 1.3249 | 0.186  | 7.13E-07 | count | 1 |
| ATXN7L3     | 0.1521983 | 0.4461437 | 0.3411 | 0.733  | 7.13E-07 | count | 1 |
| SOWAHD      | 0.1521983 | 0.4888231 | 0.3114 | 0.756  | 7.14E-07 | count | 1 |
| FOXO3       | 0.1521983 | 0.5357903 | 0.2841 | 0.776  | 7.16E-07 | count | 1 |
| RMND1       | 1.745586  | 1.0573703 | 1.6509 | 0.0995 | 7.24E-07 | count | 1 |
| AC020928.1  | 1.745586  | 1.0573703 | 1.6509 | 0.0995 | 7.24E-07 | count | 1 |
| CAMK2D      | 0.1544043 | 0.667679  | 0.2313 | 0.817  | 7.24E-07 | count | 1 |
| C17orf51    | 1.745586  | 1.1866551 | 1.471  | 0.142  | 7.26E-07 | count | 1 |
| PIP4K2B     | 1.745586  | 1.1866551 | 1.471  | 0.142  | 7.26E-07 | count | 1 |
| AC098818.2  | 1.745586  | 1.3031763 | 1.3395 | 0.181  | 7.28E-07 | count | 1 |
| CCL22       | 1.745586  | 1.4101017 | 1.2379 | 0.216  | 7.30E-07 | count | 1 |
| AL031714.1  | 1.745586  | 1.4101017 | 1.2379 | 0.216  | 7.31E-07 | count | 1 |
| DPF3        | 0.8701172 | 0.7820976 | 1.1125 | 0.267  | 7.32E-07 | count | 1 |
| SELENOO     | 0.8701172 | 0.7820976 | 1.1125 | 0.267  | 7.32E-07 | count | 1 |
| TSPOAP1-AS1 | 0.8701172 | 0.8373028 | 1.0392 | 0.299  | 7.34E-07 | count | 1 |
| ZNF544      | 0.8701172 | 0.7413971 | 1.1736 | 0.241  | 7.35E-07 | count | 1 |
| EIF4ENIF1   | 0.8701172 | 0.8890869 | 0.9787 | 0.328  | 7.35E-07 | count | 1 |
| RNF122      | 0.8701172 | 0.7413971 | 1.1736 | 0.241  | 7.36E-07 | count | 1 |
| ATP5F1B     | 0.0600729 | 0.1432344 | 0.4194 | 0.675  | 7.38E-07 | count | 1 |
| NFU1        | 0.3882791 | 0.3247977 | 1.1954 | 0.233  | 7.38E-07 | count | 1 |
| TUBGCP5     | 0.1571807 | 0.5108942 | 0.3077 | 0.758  | 7.38E-07 | count | 1 |
| PARN        | 0.1571807 | 0.5135164 | 0.3061 | 0.76   | 7.38E-07 | count | 1 |
| COMMD2      | 0.1571807 | 0.3387327 | 0.464  | 0.643  | 7.39E-07 | count | 1 |
| GFOD1       | 0.8701172 | 0.7994179 | 1.0884 | 0.277  | 7.39E-07 | count | 1 |
| SRP54       | 0.0601522 | 0.2897465 | 0.2076 | 0.836  | 7.39E-07 | count | 1 |
| DDX20       | 0.1571807 | 0.7659578 | 0.2052 | 0.838  | 7.45E-07 | count | 1 |
| GPR132      | 0.1587774 | 0.3866784 | 0.4106 | 0.682  | 7.47E-07 | count | 1 |
| ABCB8       | 0.159135  | 0.7486234 | 0.2126 | 0.832  | 7.47E-07 | count | 1 |
| SRGAP2C     | 0.159135  | 0.6682008 | 0.2382 | 0.812  | 7.49E-07 | count | 1 |
| GIPC1       | 0.395142  | 0.757117  | 0.5219 | 0.602  | 7.51E-07 | count | 1 |

|           |           |           |        |       |          |       |   |
|-----------|-----------|-----------|--------|-------|----------|-------|---|
| FAAP100   | 0.395142  | 0.757117  | 0.5219 | 0.602 | 7.51E-07 | count | 1 |
| ERI1      | 0.395142  | 0.8834423 | 0.4473 | 0.655 | 7.51E-07 | count | 1 |
| TMEM209   | 0.1605654 | 0.5883692 | 0.2729 | 0.785 | 7.55E-07 | count | 1 |
| HPS6      | 0.1605654 | 0.5523903 | 0.2907 | 0.771 | 7.55E-07 | count | 1 |
| MBNL3     | 0.1605654 | 0.5523903 | 0.2907 | 0.771 | 7.55E-07 | count | 1 |
| CRIP1     | 0.06146   | 0.4087799 | 0.1503 | 0.881 | 7.55E-07 | count | 1 |
| UBE2F     | 0.1605654 | 0.5106895 | 0.3144 | 0.753 | 7.56E-07 | count | 1 |
| RIOX2     | 0.1605654 | 0.5288491 | 0.3036 | 0.762 | 7.56E-07 | count | 1 |
| SERPINB8  | 0.3970319 | 0.4558814 | 0.8709 | 0.384 | 7.59E-07 | count | 1 |
| YKT6      | 0.4018913 | 0.7090001 | 0.5668 | 0.571 | 7.63E-07 | count | 1 |
| SARS2     | 0.4018913 | 0.7528569 | 0.5338 | 0.594 | 7.64E-07 | count | 1 |
| NUDT19    | 0.4018913 | 0.7944284 | 0.5059 | 0.613 | 7.64E-07 | count | 1 |
| SLC35A2   | 0.4018913 | 0.7944284 | 0.5059 | 0.613 | 7.64E-07 | count | 1 |
| STN1      | 0.4018913 | 0.6861952 | 0.5857 | 0.558 | 7.64E-07 | count | 1 |
| SETD1B    | 0.4018913 | 0.6861952 | 0.5857 | 0.558 | 7.64E-07 | count | 1 |
| CENPW     | 0.4018913 | 0.6861952 | 0.5857 | 0.558 | 7.64E-07 | count | 1 |
| UBE2T     | 0.4018913 | 0.6860417 | 0.5858 | 0.558 | 7.64E-07 | count | 1 |
| RELL2     | 0.4018913 | 0.6860417 | 0.5858 | 0.558 | 7.64E-07 | count | 1 |
| TMEM102   | 0.8899199 | 0.5770916 | 1.5421 | 0.124 | 7.65E-07 | count | 1 |
| CROT      | 0.4018913 | 0.7315646 | 0.5494 | 0.583 | 7.65E-07 | count | 1 |
| NNT       | 0.4018913 | 0.8716435 | 0.4611 | 0.645 | 7.65E-07 | count | 1 |
| PCBD1     | 0.8899199 | 0.5429494 | 1.639  | 0.102 | 7.67E-07 | count | 1 |
| MRPL55    | 0.0625014 | 0.3521027 | 0.1775 | 0.859 | 7.69E-07 | count | 1 |
| CLASRP    | 0.1634588 | 0.4680291 | 0.3492 | 0.727 | 7.71E-07 | count | 1 |
| BCAR3     | 0.8899199 | 0.5847299 | 1.5219 | 0.129 | 7.72E-07 | count | 1 |
| NRAS      | 0.1653004 | 0.4605081 | 0.359  | 0.72  | 7.79E-07 | count | 1 |
| RHNO1     | 0.1653004 | 0.5015531 | 0.3296 | 0.742 | 7.79E-07 | count | 1 |
| LINC01588 | 0.1654954 | 0.4088515 | 0.4048 | 0.686 | 7.80E-07 | count | 1 |
| KIF1BP    | 0.1653004 | 0.4788405 | 0.3452 | 0.73  | 7.80E-07 | count | 1 |
| SMYD2     | 0.1653004 | 0.4670703 | 0.3539 | 0.724 | 7.82E-07 | count | 1 |
| ACADVL    | 0.1660166 | 0.4197551 | 0.3955 | 0.693 | 7.82E-07 | count | 1 |
| CACUL1    | 0.0636035 | 0.3978904 | 0.1599 | 0.873 | 7.83E-07 | count | 1 |
| TRIM4     | 0.1660166 | 0.4329186 | 0.3835 | 0.702 | 7.84E-07 | count | 1 |
| NHLRC3    | 0.1665918 | 0.4014321 | 0.415  | 0.678 | 7.86E-07 | count | 1 |
| PCNX3     | 0.4122878 | 0.926616  | 0.4449 | 0.657 | 7.86E-07 | count | 1 |
| IFFO2     | 0.4122878 | 0.8117368 | 0.5079 | 0.612 | 7.87E-07 | count | 1 |
| AHSA1     | 0.0640509 | 0.2958772 | 0.2165 | 0.829 | 7.88E-07 | count | 1 |
| PWP1      | 0.0642154 | 0.2364521 | 0.2716 | 0.786 | 7.90E-07 | count | 1 |
| FTX       | 0.1685446 | 0.4062236 | 0.4149 | 0.678 | 7.94E-07 | count | 1 |
| ZNF33B    | 0.1683291 | 0.6317905 | 0.2664 | 0.79  | 7.96E-07 | count | 1 |
| UBAP2L    | 0.169065  | 0.4559866 | 0.3708 | 0.711 | 7.97E-07 | count | 1 |
| GAK       | 0.169065  | 0.5323667 | 0.3176 | 0.751 | 7.98E-07 | count | 1 |
| ETV3      | 0.169065  | 0.4872499 | 0.347  | 0.729 | 7.99E-07 | count | 1 |
| SCRN3     | 0.4183666 | 0.9466707 | 0.4419 | 0.659 | 7.99E-07 | count | 1 |
| NAALADL1  | 0.4183666 | 0.9466707 | 0.4419 | 0.659 | 7.99E-07 | count | 1 |

|            |           |           |        |        |          |       |   |
|------------|-----------|-----------|--------|--------|----------|-------|---|
| MAP2K5     | 0.4183666 | 0.9411817 | 0.4445 | 0.657  | 8.00E-07 | count | 1 |
| AL109955.1 | 0.4183666 | 0.9411817 | 0.4445 | 0.657  | 8.00E-07 | count | 1 |
| MAP3K14    | 0.4183666 | 0.9411817 | 0.4445 | 0.657  | 8.00E-07 | count | 1 |
| KIF13A     | 0.4183666 | 0.7522869 | 0.5561 | 0.578  | 8.00E-07 | count | 1 |
| KCNK6      | 0.4183666 | 1.0063741 | 0.4157 | 0.678  | 8.00E-07 | count | 1 |
| SSBP3      | 0.4183666 | 1.0724351 | 0.3901 | 0.697  | 8.00E-07 | count | 1 |
| MYNN       | 0.169065  | 0.4872499 | 0.347  | 0.729  | 8.00E-07 | count | 1 |
| ADD2       | 0.4183666 | 1.0675929 | 0.3919 | 0.695  | 8.00E-07 | count | 1 |
| CARM1      | 0.4183666 | 1.0675929 | 0.3919 | 0.695  | 8.00E-07 | count | 1 |
| UPP1       | 0.4183666 | 0.832407  | 0.5026 | 0.615  | 8.00E-07 | count | 1 |
| AC090114.2 | 0.4183666 | 0.832407  | 0.5026 | 0.615  | 8.00E-07 | count | 1 |
| PIEZO1     | 0.4183666 | 0.832407  | 0.5026 | 0.615  | 8.00E-07 | count | 1 |
| OTUD3      | 0.4183666 | 0.9111693 | 0.4592 | 0.646  | 8.00E-07 | count | 1 |
| SFMBT1     | 0.169065  | 0.5109377 | 0.3309 | 0.741  | 8.01E-07 | count | 1 |
| DOCK7      | 0.4183666 | 0.9054651 | 0.462  | 0.644  | 8.01E-07 | count | 1 |
| AC108863.1 | 0.4183666 | 0.9054651 | 0.462  | 0.644  | 8.01E-07 | count | 1 |
| AL441992.1 | 0.4183666 | 0.9054651 | 0.462  | 0.644  | 8.01E-07 | count | 1 |
| ERMARD     | 0.4183666 | 0.9054651 | 0.462  | 0.644  | 8.01E-07 | count | 1 |
| ZMYND11    | 0.169065  | 0.4824577 | 0.3504 | 0.726  | 8.01E-07 | count | 1 |
| SLC31A1    | 0.4183666 | 1.0362426 | 0.4037 | 0.687  | 8.02E-07 | count | 1 |
| PNPLA4     | 1.863369  | 1.1014343 | 1.6918 | 0.0914 | 8.03E-07 | count | 1 |
| NDRG3      | 1.863369  | 1.1014343 | 1.6918 | 0.0914 | 8.03E-07 | count | 1 |
| CCZ1       | 0.169736  | 0.3737858 | 0.4541 | 0.65   | 8.03E-07 | count | 1 |
| RBM48      | 0.9189074 | 0.467701  | 1.9647 | 0.0501 | 8.04E-07 | count | 1 |
| RPGR       | 0.1693601 | 0.4815779 | 0.3517 | 0.725  | 8.04E-07 | count | 1 |
| ZSCAN30    | 1.863369  | 1.1578027 | 1.6094 | 0.108  | 8.04E-07 | count | 1 |
| COPG2      | 1.863369  | 1.2115513 | 1.538  | 0.125  | 8.05E-07 | count | 1 |
| INO80B     | 1.863369  | 1.2115513 | 1.538  | 0.125  | 8.05E-07 | count | 1 |
| DNAJC24    | 0.1707858 | 0.5184182 | 0.3294 | 0.742  | 8.06E-07 | count | 1 |
| ULK4       | 1.863369  | 1.2115513 | 1.538  | 0.125  | 8.06E-07 | count | 1 |
| DCLRE1C    | 0.1707858 | 0.602717  | 0.2834 | 0.777  | 8.06E-07 | count | 1 |
| 11-Sep     | 0.1726614 | 0.4629181 | 0.373  | 0.709  | 8.19E-07 | count | 1 |
| RPP30      | 0.173664  | 0.4139192 | 0.4196 | 0.675  | 8.22E-07 | count | 1 |
| BANF1      | 0.0667695 | 0.1933859 | 0.3453 | 0.73   | 8.22E-07 | count | 1 |
| KAT8       | 0.1742881 | 0.3699695 | 0.4711 | 0.638  | 8.25E-07 | count | 1 |
| RGP1       | 0.1746121 | 0.5571841 | 0.3134 | 0.754  | 8.26E-07 | count | 1 |
| ZNF124     | 0.4308807 | 0.8183077 | 0.5266 | 0.599  | 8.28E-07 | count | 1 |
| RPUSD3     | 0.432506  | 0.5877849 | 0.7358 | 0.462  | 8.33E-07 | count | 1 |
| HSPA14     | 0.432506  | 0.6288007 | 0.6878 | 0.492  | 8.34E-07 | count | 1 |
| SACM1L     | 0.1763319 | 0.4762489 | 0.3703 | 0.711  | 8.34E-07 | count | 1 |
| EML2       | 0.9470783 | 0.5691632 | 1.664  | 0.0968 | 8.34E-07 | count | 1 |
| ZFPL1      | 0.176069  | 0.6114928 | 0.2879 | 0.774  | 8.35E-07 | count | 1 |
| HSF1       | 0.176567  | 0.394053  | 0.4481 | 0.654  | 8.36E-07 | count | 1 |
| RABEP1     | 0.068262  | 0.3230532 | 0.2113 | 0.833  | 8.42E-07 | count | 1 |
| KLC2       | 0.9654274 | 0.7390332 | 1.3063 | 0.192  | 8.42E-07 | count | 1 |

|            |           |           |        |        |          |       |   |
|------------|-----------|-----------|--------|--------|----------|-------|---|
| TSPAN5     | 0.9654274 | 0.7910356 | 1.2205 | 0.223  | 8.45E-07 | count | 1 |
| BBIP1      | 0.179313  | 0.3804145 | 0.4714 | 0.638  | 8.50E-07 | count | 1 |
| FCRLA      | 0.0692138 | 0.1835187 | 0.3771 | 0.706  | 8.53E-07 | count | 1 |
| PPID       | 0.1798802 | 0.4668173 | 0.3853 | 0.7    | 8.55E-07 | count | 1 |
| SLC35B1    | 0.1808097 | 0.5715901 | 0.3163 | 0.752  | 8.57E-07 | count | 1 |
| ANAPC13    | 0.1814671 | 0.3440797 | 0.5274 | 0.598  | 8.62E-07 | count | 1 |
| C17orf75   | 0.1826112 | 0.6540727 | 0.2792 | 0.78   | 8.69E-07 | count | 1 |
| IER3       | 0.1826112 | 0.7416814 | 0.2462 | 0.806  | 8.69E-07 | count | 1 |
| AL139246.5 | 0.1826112 | 0.4505099 | 0.4053 | 0.685  | 8.71E-07 | count | 1 |
| SLC7A7     | 1.9687295 | 1.0294974 | 1.9123 | 0.0565 | 8.74E-07 | count | 1 |
| RAD54L2    | 1.9687295 | 1.0832051 | 1.8175 | 0.0698 | 8.75E-07 | count | 1 |
| AGK        | 1.9687295 | 1.0832051 | 1.8175 | 0.0698 | 8.75E-07 | count | 1 |
| BAG3       | 1.9687295 | 1.0832051 | 1.8175 | 0.0698 | 8.75E-07 | count | 1 |
| SMN2       | 1.9687295 | 1.1343728 | 1.7355 | 0.0833 | 8.77E-07 | count | 1 |
| CTC1       | 1.9687295 | 1.1343728 | 1.7355 | 0.0833 | 8.77E-07 | count | 1 |
| AC025159.1 | 0.9879003 | 0.7171955 | 1.3774 | 0.169  | 8.77E-07 | count | 1 |
| PPP4R2     | 0.0711495 | 0.221137  | 0.3217 | 0.748  | 8.78E-07 | count | 1 |
| MAD2L1     | 1.9687295 | 1.1833301 | 1.6637 | 0.0969 | 8.79E-07 | count | 1 |
| CCDC61     | 1.9687295 | 1.1833301 | 1.6637 | 0.0969 | 8.79E-07 | count | 1 |
| TRAK1      | 0.9879003 | 0.6751932 | 1.4631 | 0.144  | 8.81E-07 | count | 1 |
| AP002387.2 | 0.9654274 | 0.6079278 | 1.5881 | 0.113  | 8.82E-07 | count | 1 |
| LACTB2-AS1 | 1.9687295 | 1.3193466 | 1.4922 | 0.136  | 8.82E-07 | count | 1 |
| CENPQ      | 0.9879003 | 0.6911314 | 1.4294 | 0.154  | 8.82E-07 | count | 1 |
| ZSCAN25    | 0.4554843 | 0.990959  | 0.4596 | 0.646  | 8.83E-07 | count | 1 |
| ZNF839     | 0.4554843 | 0.990959  | 0.4596 | 0.646  | 8.83E-07 | count | 1 |
| C16orf70   | 0.4554843 | 0.990959  | 0.4596 | 0.646  | 8.83E-07 | count | 1 |
| NRSN2-AS1  | 0.4554843 | 0.990959  | 0.4596 | 0.646  | 8.83E-07 | count | 1 |
| NEK4       | 0.4554843 | 0.9583672 | 0.4753 | 0.635  | 8.83E-07 | count | 1 |
| GPATCH3    | 0.4554843 | 0.9583672 | 0.4753 | 0.635  | 8.83E-07 | count | 1 |
| KMT2D      | 0.4554843 | 0.9583672 | 0.4753 | 0.635  | 8.83E-07 | count | 1 |
| ZNF398     | 0.4554843 | 0.9583672 | 0.4753 | 0.635  | 8.83E-07 | count | 1 |
| AC132872.1 | 0.4554843 | 1.1577716 | 0.3934 | 0.694  | 8.83E-07 | count | 1 |
| ZFP69B     | 0.4554843 | 1.1577716 | 0.3934 | 0.694  | 8.83E-07 | count | 1 |
| AL035587.1 | 0.4554843 | 1.2438769 | 0.3662 | 0.714  | 8.83E-07 | count | 1 |
| SYP        | 0.4554843 | 1.2438769 | 0.3662 | 0.714  | 8.83E-07 | count | 1 |
| PEX7       | 0.4554843 | 1.1300014 | 0.4031 | 0.687  | 8.83E-07 | count | 1 |
| ERLIN2     | 0.4554843 | 1.1300014 | 0.4031 | 0.687  | 8.83E-07 | count | 1 |
| ST14       | 0.4554843 | 1.1300014 | 0.4031 | 0.687  | 8.83E-07 | count | 1 |
| AP001462.1 | 0.4554843 | 1.1300014 | 0.4031 | 0.687  | 8.83E-07 | count | 1 |
| AL354707.1 | 0.4554843 | 1.1300014 | 0.4031 | 0.687  | 8.83E-07 | count | 1 |
| PLK2       | 0.4554843 | 1.1300014 | 0.4031 | 0.687  | 8.83E-07 | count | 1 |
| PPIP5K1    | 0.4554843 | 1.1300014 | 0.4031 | 0.687  | 8.83E-07 | count | 1 |
| SLX4       | 0.4554843 | 1.1300014 | 0.4031 | 0.687  | 8.83E-07 | count | 1 |
| ZBED4      | 0.4554843 | 1.1300014 | 0.4031 | 0.687  | 8.83E-07 | count | 1 |
| LEAP2      | 0.4554843 | 1.1300014 | 0.4031 | 0.687  | 8.83E-07 | count | 1 |

|            |           |           |        |       |          |       |   |
|------------|-----------|-----------|--------|-------|----------|-------|---|
| MAN2A2     | 0.4554843 | 0.8889658 | 0.5124 | 0.609 | 8.84E-07 | count | 1 |
| MAN1B1-DT  | 0.4554843 | 0.8889658 | 0.5124 | 0.609 | 8.84E-07 | count | 1 |
| DOT1L      | 0.4554843 | 0.8275073 | 0.5504 | 0.582 | 8.84E-07 | count | 1 |
| ZNF571     | 0.4554843 | 0.8275073 | 0.5504 | 0.582 | 8.84E-07 | count | 1 |
| NCK1-DT    | 0.4554843 | 0.9380133 | 0.4856 | 0.628 | 8.84E-07 | count | 1 |
| ZBTB33     | 0.4554843 | 0.6736854 | 0.6761 | 0.499 | 8.84E-07 | count | 1 |
| METTL3     | 0.4554843 | 0.879987  | 0.5176 | 0.605 | 8.84E-07 | count | 1 |
| PRR5       | 0.4554843 | 0.805576  | 0.5654 | 0.572 | 8.84E-07 | count | 1 |
| KRT18      | 0.4554843 | 0.859396  | 0.53   | 0.596 | 8.85E-07 | count | 1 |
| MRE11      | 0.1862297 | 0.5435934 | 0.3426 | 0.732 | 8.85E-07 | count | 1 |
| IMMP2L     | 0.1862297 | 0.5142251 | 0.3622 | 0.717 | 8.86E-07 | count | 1 |
| WDR20      | 0.1866194 | 0.440963  | 0.4232 | 0.672 | 8.88E-07 | count | 1 |
| MTMR10     | 0.4571741 | 1.0350718 | 0.4417 | 0.659 | 8.89E-07 | count | 1 |
| CREBL2     | 0.4571741 | 0.7888956 | 0.5795 | 0.563 | 8.89E-07 | count | 1 |
| VKORC1     | 0.1862297 | 0.4138474 | 0.45   | 0.653 | 8.90E-07 | count | 1 |
| NECAP1     | 0.0718002 | 0.392014  | 0.1832 | 0.855 | 8.90E-07 | count | 1 |
| DOPEY1     | 0.9879003 | 0.6960672 | 1.4193 | 0.157 | 8.94E-07 | count | 1 |
| ADNP2      | 0.4565519 | 0.6466595 | 0.706  | 0.481 | 8.94E-07 | count | 1 |
| NEK1       | 0.1892432 | 0.4412812 | 0.4288 | 0.668 | 9.01E-07 | count | 1 |
| LYAR       | 1.0011455 | 0.608871  | 1.6443 | 0.101 | 9.09E-07 | count | 1 |
| PER2       | 0.1912809 | 0.7095765 | 0.2696 | 0.788 | 9.10E-07 | count | 1 |
| B3GNT7     | 0.1912809 | 0.6232293 | 0.3069 | 0.759 | 9.10E-07 | count | 1 |
| ZBTB43     | 0.1912809 | 0.6232293 | 0.3069 | 0.759 | 9.10E-07 | count | 1 |
| CREG1      | 0.1912809 | 0.6232293 | 0.3069 | 0.759 | 9.10E-07 | count | 1 |
| LIG3       | 0.1912809 | 0.6500687 | 0.2942 | 0.769 | 9.11E-07 | count | 1 |
| AC087500.1 | 0.1912809 | 0.5890978 | 0.3247 | 0.746 | 9.11E-07 | count | 1 |
| PCGF1      | 0.1912809 | 0.70067   | 0.273  | 0.785 | 9.11E-07 | count | 1 |
| OTUD6B     | 0.1912809 | 0.6174227 | 0.3098 | 0.757 | 9.11E-07 | count | 1 |
| CCDC88B    | 0.1917014 | 0.4599983 | 0.4167 | 0.677 | 9.13E-07 | count | 1 |
| CHID1      | 0.1912809 | 0.4692774 | 0.4076 | 0.684 | 9.13E-07 | count | 1 |
| VAV2       | 0.1912809 | 0.4816665 | 0.3971 | 0.691 | 9.14E-07 | count | 1 |
| B3GAT3     | 0.0740912 | 0.3324928 | 0.2228 | 0.824 | 9.16E-07 | count | 1 |
| PPP2R1A    | 0.0740912 | 0.3324928 | 0.2228 | 0.824 | 9.16E-07 | count | 1 |
| TMEM109    | 0.0748047 | 0.2216346 | 0.3375 | 0.736 | 9.24E-07 | count | 1 |
| ARMC1      | 0.1948363 | 0.3734456 | 0.5217 | 0.602 | 9.30E-07 | count | 1 |
| EIF2S3     | 0.0753246 | 0.1813317 | 0.4154 | 0.678 | 9.31E-07 | count | 1 |
| MAPK3      | 0.1964318 | 0.6425418 | 0.3057 | 0.76  | 9.36E-07 | count | 1 |
| TPD52L2    | 0.1964318 | 0.6172244 | 0.3183 | 0.75  | 9.37E-07 | count | 1 |
| PDGFA      | 0.1964318 | 0.722812  | 0.2718 | 0.786 | 9.38E-07 | count | 1 |
| TRMT61A    | 0.1966469 | 0.7038664 | 0.2794 | 0.78  | 9.38E-07 | count | 1 |
| SOAT1      | 0.1964318 | 0.6443635 | 0.3048 | 0.761 | 9.38E-07 | count | 1 |
| SIN3A      | 0.0759255 | 0.2842812 | 0.2671 | 0.79  | 9.38E-07 | count | 1 |
| APAF1      | 0.1966469 | 0.5902273 | 0.3332 | 0.739 | 9.39E-07 | count | 1 |
| PLAGL1     | 0.1964318 | 0.7161611 | 0.2743 | 0.784 | 9.39E-07 | count | 1 |
| PEX6       | 0.4808271 | 0.6871072 | 0.6998 | 0.484 | 9.42E-07 | count | 1 |



|            |           |           |        |        |          |       |   |
|------------|-----------|-----------|--------|--------|----------|-------|---|
| TAF5       | 0.1966469 | 0.6646505 | 0.2959 | 0.767  | 9.43E-07 | count | 1 |
| NAT10      | 0.4808271 | 0.7685308 | 0.6256 | 0.532  | 9.44E-07 | count | 1 |
| CNN3       | 0.4808271 | 0.7315536 | 0.6573 | 0.511  | 9.44E-07 | count | 1 |
| RPRD1B     | 0.4808271 | 0.688157  | 0.6987 | 0.485  | 9.45E-07 | count | 1 |
| MRPS12     | 0.0763684 | 0.3192542 | 0.2392 | 0.811  | 9.46E-07 | count | 1 |
| TMEM191C   | 2.0640397 | 1.114908  | 1.8513 | 0.0648 | 9.46E-07 | count | 1 |
| EMC7       | 0.0766785 | 0.2644487 | 0.29   | 0.772  | 9.48E-07 | count | 1 |
| TSHZ2      | 1.0524388 | 1.1550357 | 0.9112 | 0.363  | 9.49E-07 | count | 1 |
| SIDT1-AS1  | 1.0524388 | 0.9706054 | 1.0843 | 0.279  | 9.50E-07 | count | 1 |
| ICMT       | 1.0524388 | 1.0503578 | 1.002  | 0.317  | 9.52E-07 | count | 1 |
| DUSP6      | 0.2000064 | 0.6045101 | 0.3309 | 0.741  | 9.55E-07 | count | 1 |
| GTF3C4     | 1.0524388 | 0.7977579 | 1.3192 | 0.188  | 9.55E-07 | count | 1 |
| RRM1       | 1.0524388 | 0.6798389 | 1.5481 | 0.122  | 9.56E-07 | count | 1 |
| RAB1B      | 0.2006398 | 0.4161462 | 0.4821 | 0.63   | 9.58E-07 | count | 1 |
| USP11      | 0.2003985 | 0.3984839 | 0.5029 | 0.615  | 9.60E-07 | count | 1 |
| ZBTB17     | 0.2011856 | 0.4427388 | 0.4544 | 0.65   | 9.61E-07 | count | 1 |
| AL360012.1 | 1.0524388 | 0.7547398 | 1.3944 | 0.164  | 9.62E-07 | count | 1 |
| ROMO1      | 0.0777124 | 0.245069  | 0.3171 | 0.751  | 9.62E-07 | count | 1 |
| AMN1       | 0.2011856 | 0.4454224 | 0.4517 | 0.652  | 9.63E-07 | count | 1 |
| CBFA2T3    | 0.0783465 | 0.381819  | 0.2052 | 0.838  | 9.70E-07 | count | 1 |
| SPG11      | 0.2031539 | 0.4835156 | 0.4202 | 0.675  | 9.72E-07 | count | 1 |
| HSPA14     | 1.0524388 | 0.5814063 | 1.8102 | 0.0709 | 9.78E-07 | count | 1 |
| MED4       | 0.0791277 | 0.2520344 | 0.314  | 0.754  | 9.80E-07 | count | 1 |
| C1GALT1    | 0.0791277 | 0.2747668 | 0.288  | 0.773  | 9.80E-07 | count | 1 |
| RRS1       | 0.4991823 | 0.8373267 | 0.5962 | 0.551  | 9.84E-07 | count | 1 |
| SDK2       | 0.4991823 | 0.8373267 | 0.5962 | 0.551  | 9.84E-07 | count | 1 |
| DEDD       | 0.4991823 | 0.8063821 | 0.619  | 0.536  | 9.85E-07 | count | 1 |
| CHIC2      | 0.2056358 | 0.351803  | 0.5845 | 0.559  | 9.85E-07 | count | 1 |
| AKTIP      | 0.4991823 | 0.9252231 | 0.5395 | 0.59   | 9.85E-07 | count | 1 |
| CD68       | 0.2056358 | 0.4023609 | 0.5111 | 0.61   | 9.86E-07 | count | 1 |
| LIMD1      | 0.4991823 | 1.0304482 | 0.4844 | 0.628  | 9.86E-07 | count | 1 |
| AC103691.1 | 0.4991823 | 1.0304482 | 0.4844 | 0.628  | 9.86E-07 | count | 1 |
| ALKBH8     | 0.4991823 | 1.1258815 | 0.4434 | 0.658  | 9.87E-07 | count | 1 |
| MRPS27     | 0.2060016 | 0.4873    | 0.4227 | 0.673  | 9.87E-07 | count | 1 |
| GEM        | 1.0524388 | 1.0855976 | 0.9695 | 0.333  | 9.87E-07 | count | 1 |
| HOOK3      | 0.0798066 | 0.3211683 | 0.2485 | 0.804  | 9.89E-07 | count | 1 |
| C6orf120   | 0.2060016 | 0.5504533 | 0.3742 | 0.708  | 9.90E-07 | count | 1 |
| VTA1       | 0.2070728 | 0.4049793 | 0.5113 | 0.609  | 9.91E-07 | count | 1 |
| CCL8       | 1.0955721 | 1.6035614 | 0.6832 | 0.495  | 9.91E-07 | count | 1 |
| AL022238.2 | 1.0955721 | 1.6035614 | 0.6832 | 0.495  | 9.91E-07 | count | 1 |
| INCENP     | 1.0955721 | 1.6035614 | 0.6832 | 0.495  | 9.91E-07 | count | 1 |
| KLC4       | 1.0955721 | 1.6035614 | 0.6832 | 0.495  | 9.91E-07 | count | 1 |
| AC069185.1 | 1.0955721 | 1.6035614 | 0.6832 | 0.495  | 9.91E-07 | count | 1 |
| LINC01685  | 1.0955721 | 1.6035614 | 0.6832 | 0.495  | 9.91E-07 | count | 1 |
| PIK3R2     | 1.0955721 | 1.6035614 | 0.6832 | 0.495  | 9.91E-07 | count | 1 |

|            |           |           |        |       |          |       |   |
|------------|-----------|-----------|--------|-------|----------|-------|---|
| TUBGCP6    | 1.0955721 | 1.6035614 | 0.6832 | 0.495 | 9.91E-07 | count | 1 |
| RARRES2    | 1.0955721 | 1.6035614 | 0.6832 | 0.495 | 9.91E-07 | count | 1 |
| HAPLN3     | 1.0955721 | 1.6035614 | 0.6832 | 0.495 | 9.91E-07 | count | 1 |
| ZNF724     | 1.0955721 | 1.6035614 | 0.6832 | 0.495 | 9.91E-07 | count | 1 |
| TMEM170B   | 1.0955721 | 1.6035614 | 0.6832 | 0.495 | 9.91E-07 | count | 1 |
| MEST       | 1.0955721 | 1.6035614 | 0.6832 | 0.495 | 9.91E-07 | count | 1 |
| ZNF703     | 1.0955721 | 1.6035614 | 0.6832 | 0.495 | 9.91E-07 | count | 1 |
| MSMP       | 1.0955721 | 1.6035614 | 0.6832 | 0.495 | 9.91E-07 | count | 1 |
| CAVIN1     | 1.0955721 | 1.6035614 | 0.6832 | 0.495 | 9.91E-07 | count | 1 |
| AL157838.1 | 1.0955721 | 1.6035614 | 0.6832 | 0.495 | 9.91E-07 | count | 1 |
| AC008443.5 | 1.0955721 | 1.6035614 | 0.6832 | 0.495 | 9.91E-07 | count | 1 |
| GNE        | 1.0955721 | 1.6035614 | 0.6832 | 0.495 | 9.91E-07 | count | 1 |
| LINC00526  | 1.0955721 | 1.6035614 | 0.6832 | 0.495 | 9.91E-07 | count | 1 |
| B3GNT5     | 1.0955721 | 1.6035614 | 0.6832 | 0.495 | 9.92E-07 | count | 1 |
| CD40LG     | 1.0955721 | 1.6035614 | 0.6832 | 0.495 | 9.92E-07 | count | 1 |
| C8orf89    | 1.0955721 | 1.6035614 | 0.6832 | 0.495 | 9.92E-07 | count | 1 |
| TM9SF1     | 1.0955721 | 1.1860088 | 0.9237 | 0.356 | 9.92E-07 | count | 1 |
| PLA2G12A   | 1.0955721 | 1.1860088 | 0.9237 | 0.356 | 9.92E-07 | count | 1 |
| WDR92      | 1.0955721 | 1.1860088 | 0.9237 | 0.356 | 9.92E-07 | count | 1 |
| MED14OS    | 1.0955721 | 1.1860088 | 0.9237 | 0.356 | 9.92E-07 | count | 1 |
| LINC02021  | 1.0955721 | 1.1860088 | 0.9237 | 0.356 | 9.92E-07 | count | 1 |
| AC093249.6 | 1.0955721 | 1.1860088 | 0.9237 | 0.356 | 9.92E-07 | count | 1 |
| IFRD1      | 0.0799319 | 0.2790039 | 0.2865 | 0.775 | 9.92E-07 | count | 1 |
| CFAP36     | 0.2070728 | 0.3915778 | 0.5288 | 0.597 | 9.92E-07 | count | 1 |
| TSPYL4     | 1.0955721 | 1.5482052 | 0.7076 | 0.48  | 9.92E-07 | count | 1 |
| NKILA      | 1.0955721 | 1.5482052 | 0.7076 | 0.48  | 9.92E-07 | count | 1 |
| SAMD4A     | 1.0955721 | 1.5482052 | 0.7076 | 0.48  | 9.92E-07 | count | 1 |
| ALKBH4     | 1.0955721 | 1.5482052 | 0.7076 | 0.48  | 9.92E-07 | count | 1 |
| SCLY       | 1.0955721 | 1.5482052 | 0.7076 | 0.48  | 9.92E-07 | count | 1 |
| ZBTB45     | 1.0955721 | 1.5482052 | 0.7076 | 0.48  | 9.92E-07 | count | 1 |
| MVK        | 1.0955721 | 1.5482052 | 0.7076 | 0.48  | 9.92E-07 | count | 1 |
| MANEAL     | 1.0955721 | 1.5482052 | 0.7076 | 0.48  | 9.92E-07 | count | 1 |
| FMO4       | 1.0955721 | 1.5482052 | 0.7076 | 0.48  | 9.92E-07 | count | 1 |
| LIX1-AS1   | 1.0955721 | 1.5482052 | 0.7076 | 0.48  | 9.92E-07 | count | 1 |
| TPH1       | 1.0955721 | 1.5482052 | 0.7076 | 0.48  | 9.92E-07 | count | 1 |
| NADSYN1    | 0.2060016 | 0.5046817 | 0.4082 | 0.683 | 9.92E-07 | count | 1 |
| SURF2      | 0.2068381 | 0.4065777 | 0.5087 | 0.611 | 9.93E-07 | count | 1 |
| TRAPPC6B   | 0.2084424 | 0.5812483 | 0.3586 | 0.72  | 9.98E-07 | count | 1 |
| APEX2      | 0.2084424 | 0.668818  | 0.3117 | 0.755 | 9.99E-07 | count | 1 |
| TMEM168    | 0.2084424 | 0.5923168 | 0.3519 | 0.725 | 9.99E-07 | count | 1 |
| LACTB2     | 0.2084424 | 0.5326365 | 0.3913 | 0.696 | 9.99E-07 | count | 1 |
| TOR2A      | 0.2084424 | 0.6273716 | 0.3322 | 0.74  | 1.00E-06 | count | 1 |
| IMPAD1     | 0.2084424 | 0.6273716 | 0.3322 | 0.74  | 1.00E-06 | count | 1 |
| ZNF292     | 0.0807511 | 0.2791282 | 0.2893 | 0.772 | 1.00E-06 | count | 1 |
| PTS        | 0.2084424 | 0.4880052 | 0.4271 | 0.669 | 1.00E-06 | count | 1 |

|          |            |             |        |        |          |       |   |
|----------|------------|-------------|--------|--------|----------|-------|---|
| MTFMT    | 0.2084424  | 0.6612182   | 0.3152 | 0.753  | 1.00E-06 | count | 1 |
| INPP5A   | 0.2084424  | 0.6612182   | 0.3152 | 0.753  | 1.00E-06 | count | 1 |
| GDF11    | 0.2084424  | 0.7536929   | 0.2766 | 0.782  | 1.00E-06 | count | 1 |
| DIMT1    | 0.0812162  | 0.3569143   | 0.2276 | 0.82   | 1.01E-06 | count | 1 |
| GPN2     | 2.1510511  | 1.0984308   | 1.9583 | 0.0508 | 1.01E-06 | count | 1 |
| FNDC3A   | 0.2113762  | 0.3935464   | 0.5371 | 0.591  | 1.01E-06 | count | 1 |
| CDC34    | 0.2119123  | 0.4340515   | 0.4882 | 0.626  | 1.02E-06 | count | 1 |
| PTOV1    | 0.2119123  | 0.3492225   | 0.6068 | 0.544  | 1.02E-06 | count | 1 |
| PRKAG1   | 0.2127659  | 0.539483    | 0.3944 | 0.693  | 1.02E-06 | count | 1 |
| DDI2     | 0.2127659  | 0.6772533   | 0.3142 | 0.754  | 1.02E-06 | count | 1 |
| UBE2J2   | 0.2127135  | 0.3782167   | 0.5624 | 0.574  | 1.02E-06 | count | 1 |
| OSBPL11  | 0.2127659  | 0.4761832   | 0.4468 | 0.655  | 1.02E-06 | count | 1 |
| EFCAB14  | 0.0821964  | 0.3620269   | 0.227  | 0.82   | 1.02E-06 | count | 1 |
| LRRC59   | 0.2139857  | 0.3741115   | 0.572  | 0.568  | 1.03E-06 | count | 1 |
| EZH1     | 0.2145554  | 0.5168239   | 0.4151 | 0.678  | 1.03E-06 | count | 1 |
| TAOK1    | 0.2146882  | 0.4675967   | 0.4591 | 0.646  | 1.04E-06 | count | 1 |
| KTI12    | 0.216236   | 0.4865826   | 0.4444 | 0.657  | 1.04E-06 | count | 1 |
| LINS1    | 1.1130634  | 0.6250877   | 1.7807 | 0.0757 | 1.04E-06 | count | 1 |
| NME2     | 0.5239353  | 0.9542262   | 0.5491 | 0.583  | 1.04E-06 | count | 1 |
| ZNF263   | 0.5239353  | 0.817991    | 0.6405 | 0.522  | 1.04E-06 | count | 1 |
| RUFY2    | 0.216236   | 0.5469807   | 0.3953 | 0.693  | 1.04E-06 | count | 1 |
| SLC35C1  | 0.5239353  | 0.790433    | 0.6628 | 0.508  | 1.04E-06 | count | 1 |
| MOB1B    | 0.5239353  | 0.9699158   | 0.5402 | 0.589  | 1.05E-06 | count | 1 |
| PSEN1    | 0.2183573  | 0.4842292   | 0.4509 | 0.652  | 1.05E-06 | count | 1 |
| TRIM33   | 0.0846074  | 0.3410797   | 0.2481 | 0.804  | 1.05E-06 | count | 1 |
| NAA35    | 1.1130634  | 0.6092433   | 1.827  | 0.0684 | 1.05E-06 | count | 1 |
| RABL3    | 0.2191914  | 0.6069155   | 0.3612 | 0.718  | 1.05E-06 | count | 1 |
| GALNT10  | 0.2191914  | 0.6459374   | 0.3393 | 0.735  | 1.05E-06 | count | 1 |
| HAUS6    | 1.1130634  | 0.6092433   | 1.827  | 0.0684 | 1.05E-06 | count | 1 |
| KLHDC2   | 0.2186988  | 0.3610319   | 0.6058 | 0.545  | 1.05E-06 | count | 1 |
| TMEM191B | 0.2191914  | 0.6751045   | 0.3247 | 0.746  | 1.06E-06 | count | 1 |
| KDM6A    | 0.2191914  | 0.5946057   | 0.3686 | 0.713  | 1.06E-06 | count | 1 |
| RFFL     | 0.5293711  | 0.7642399   | 0.6927 | 0.489  | 1.06E-06 | count | 1 |
| TFPI2    | 17.3508432 | 2554.353296 | 0.0068 | 0.995  | 1.06E-06 | count | 1 |
| RNPEP    | 0.5293711  | 0.7025756   | 0.7535 | 0.452  | 1.06E-06 | count | 1 |
| WWP2     | 0.5293711  | 0.7397135   | 0.7156 | 0.475  | 1.06E-06 | count | 1 |
| WRB      | 1.1324815  | 0.6678384   | 1.6957 | 0.0906 | 1.06E-06 | count | 1 |
| C17orf49 | 1.1324815  | 0.6678384   | 1.6957 | 0.0906 | 1.06E-06 | count | 1 |
| PRR3     | 0.5293711  | 0.7747555   | 0.6833 | 0.495  | 1.06E-06 | count | 1 |
| FBXL13   | 17.5046305 | 1905.605687 | 0.0092 | 0.993  | 1.06E-06 | count | 1 |
| KCTD12   | 17.5046303 | 1905.605687 | 0.0092 | 0.993  | 1.06E-06 | count | 1 |
| GABBR1   | 1.1324815  | 0.8029271   | 1.4104 | 0.159  | 1.06E-06 | count | 1 |
| EHBP1L1  | 0.2205837  | 0.4480194   | 0.4924 | 0.623  | 1.06E-06 | count | 1 |
| DZANK1   | 17.637823  | 1611.291806 | 0.0109 | 0.991  | 1.07E-06 | count | 1 |
| HOMEZ    | 17.6378228 | 1611.291781 | 0.0109 | 0.991  | 1.07E-06 | count | 1 |

|            |            |             |        |       |          |       |   |
|------------|------------|-------------|--------|-------|----------|-------|---|
| CCDC71     | 17.6379048 | 1724.805405 | 0.0102 | 0.992 | 1.07E-06 | count | 1 |
| ANKRD44    | 0.0859945  | 0.1934135   | 0.4446 | 0.657 | 1.07E-06 | count | 1 |
| AL135791.1 | 1.1324815  | 0.8424954   | 1.3442 | 0.18  | 1.07E-06 | count | 1 |
| SBF1       | 17.7551237 | 1205.654101 | 0.0147 | 0.988 | 1.07E-06 | count | 1 |
| GTPBP1     | 0.2218928  | 0.5246899   | 0.4229 | 0.673 | 1.07E-06 | count | 1 |
| DENND4C    | 17.755215  | 1337.909579 | 0.0133 | 0.989 | 1.07E-06 | count | 1 |
| ASXL2      | 1.1324815  | 0.7373384   | 1.5359 | 0.125 | 1.07E-06 | count | 1 |
| CALHM2     | 17.755298  | 1458.234083 | 0.0122 | 0.99  | 1.07E-06 | count | 1 |
| CARD11     | 0.2218928  | 0.5448704   | 0.4072 | 0.684 | 1.07E-06 | count | 1 |
| BBS9       | 17.7555225 | 1863.440182 | 0.0095 | 0.992 | 1.07E-06 | count | 1 |
| RBBP4      | 0.086319   | 0.249806    | 0.3455 | 0.73  | 1.07E-06 | count | 1 |
| SKIV2L     | 17.8605315 | 1630.206896 | 0.011  | 0.991 | 1.08E-06 | count | 1 |
| TRIM65     | 17.955516  | 1505.013755 | 0.0119 | 0.99  | 1.08E-06 | count | 1 |
| TNFSF11    | 17.9555599 | 1593.801915 | 0.0113 | 0.991 | 1.08E-06 | count | 1 |
| FCGR3B     | 17.7556831 | 2740.450917 | 0.0065 | 0.995 | 1.09E-06 | count | 1 |
| ATP7A      | 0.5398267  | 0.8072558   | 0.6687 | 0.504 | 1.09E-06 | count | 1 |
| WDR19      | 0.5398267  | 0.8072558   | 0.6687 | 0.504 | 1.09E-06 | count | 1 |
| LRRRC47    | 0.2242883  | 0.564799    | 0.3971 | 0.691 | 1.09E-06 | count | 1 |
| CLSTN1     | 0.2242883  | 0.5565857   | 0.403  | 0.687 | 1.09E-06 | count | 1 |
| NAAA       | 0.5369728  | 0.3772567   | 1.4234 | 0.155 | 1.09E-06 | count | 1 |
| SLAIN1     | 0.5398267  | 0.8415948   | 0.6414 | 0.522 | 1.09E-06 | count | 1 |
| PDK2       | 17.883211  | 2417.043677 | 0.0074 | 0.994 | 1.09E-06 | count | 1 |
| MKL1       | 17.9929828 | 1638.890383 | 0.011  | 0.991 | 1.10E-06 | count | 1 |
| SFR1       | 18.1220018 | 1535.02368  | 0.0118 | 0.991 | 1.10E-06 | count | 1 |
| CENPL      | 18.1777488 | 1682.503654 | 0.0108 | 0.991 | 1.10E-06 | count | 1 |
| CDCA4      | 0.2276406  | 0.5354442   | 0.4251 | 0.671 | 1.10E-06 | count | 1 |
| LRRRC23    | 1.1702218  | 1.0157118   | 1.1521 | 0.25  | 1.10E-06 | count | 1 |
| EIF2B5     | 0.2270347  | 0.4346785   | 0.5223 | 0.602 | 1.10E-06 | count | 1 |
| NFIC       | 0.2276406  | 0.5000438   | 0.4552 | 0.649 | 1.10E-06 | count | 1 |
| ZNF699     | 1.1702218  | 0.8578476   | 1.3641 | 0.173 | 1.10E-06 | count | 1 |
| ZBTB48     | 1.1702218  | 0.8578476   | 1.3641 | 0.173 | 1.10E-06 | count | 1 |
| IFT22      | 1.1702218  | 0.8578476   | 1.3641 | 0.173 | 1.10E-06 | count | 1 |
| EXD3       | 1.1702218  | 0.8977443   | 1.3035 | 0.193 | 1.10E-06 | count | 1 |
| ENPP5      | 1.1702218  | 0.8977443   | 1.3035 | 0.193 | 1.10E-06 | count | 1 |
| MTRF1      | 1.1702218  | 0.8977443   | 1.3035 | 0.193 | 1.10E-06 | count | 1 |
| C12orf49   | 0.228227   | 0.413432    | 0.552  | 0.581 | 1.10E-06 | count | 1 |
| BBS7       | 1.1702218  | 0.9359418   | 1.2503 | 0.212 | 1.11E-06 | count | 1 |
| GBP3       | 0.2293444  | 0.8315      | 0.2758 | 0.783 | 1.11E-06 | count | 1 |
| A1BG-AS1   | 0.2293444  | 0.7288488   | 0.3147 | 0.753 | 1.11E-06 | count | 1 |
| PGD        | 0.2293444  | 0.70319     | 0.3261 | 0.744 | 1.11E-06 | count | 1 |
| PAQR3      | 18.1958377 | 1647.557151 | 0.011  | 0.991 | 1.11E-06 | count | 1 |
| PJA1       | 0.2293444  | 0.7713015   | 0.2973 | 0.766 | 1.11E-06 | count | 1 |
| MXD1       | 0.5508807  | 0.7260119   | 0.7588 | 0.448 | 1.11E-06 | count | 1 |
| TNRC6A     | 0.0891548  | 0.3061711   | 0.2912 | 0.771 | 1.11E-06 | count | 1 |
| INPP5D     | 0.0894925  | 0.2547709   | 0.3513 | 0.726 | 1.11E-06 | count | 1 |

|            |            |             |        |       |          |       |   |
|------------|------------|-------------|--------|-------|----------|-------|---|
| RAD17      | 0.2299249  | 0.4161214   | 0.5525 | 0.581 | 1.12E-06 | count | 1 |
| BEND5      | 0.2309048  | 0.4313764   | 0.5353 | 0.593 | 1.12E-06 | count | 1 |
| C5orf24    | 0.2315961  | 0.4816182   | 0.4809 | 0.631 | 1.12E-06 | count | 1 |
| SPPL3      | 0.2309048  | 0.4106622   | 0.5623 | 0.574 | 1.12E-06 | count | 1 |
| VBP1       | 0.0903242  | 0.2692891   | 0.3354 | 0.737 | 1.12E-06 | count | 1 |
| CA2        | 18.2645126 | 1738.836592 | 0.0105 | 0.992 | 1.12E-06 | count | 1 |
| ACTN1      | 18.0422718 | 2781.024864 | 0.0065 | 0.995 | 1.12E-06 | count | 1 |
| SNX5       | 0.0910513  | 0.2431246   | 0.3745 | 0.708 | 1.13E-06 | count | 1 |
| METTL14    | 0.2344856  | 0.4255725   | 0.551  | 0.582 | 1.13E-06 | count | 1 |
| QKI        | 0.091585   | 0.3092995   | 0.2961 | 0.767 | 1.14E-06 | count | 1 |
| IMPA1      | 0.2344856  | 0.4294977   | 0.546  | 0.585 | 1.14E-06 | count | 1 |
| MAP3K3     | 0.2355068  | 0.6381024   | 0.3691 | 0.712 | 1.14E-06 | count | 1 |
| TOE1       | 0.2355068  | 0.7017891   | 0.3356 | 0.737 | 1.14E-06 | count | 1 |
| FBRS       | 0.0919448  | 0.3558549   | 0.2584 | 0.796 | 1.14E-06 | count | 1 |
| ATP11B     | 0.2355068  | 0.670113    | 0.3514 | 0.725 | 1.14E-06 | count | 1 |
| ZC3H12D    | 0.2355068  | 0.754939    | 0.312  | 0.755 | 1.14E-06 | count | 1 |
| NOTCH2     | 0.2373478  | 0.6042163   | 0.3928 | 0.695 | 1.15E-06 | count | 1 |
| BET1L      | 0.2391262  | 0.4857155   | 0.4923 | 0.623 | 1.16E-06 | count | 1 |
| SLC2A1     | 0.238961   | 0.5125735   | 0.4662 | 0.641 | 1.16E-06 | count | 1 |
| SMARCD2    | 0.2404156  | 0.6092882   | 0.3946 | 0.693 | 1.17E-06 | count | 1 |
| AF117829.1 | 1.2065895  | 0.7882776   | 1.5307 | 0.127 | 1.17E-06 | count | 1 |
| RAB30-AS1  | 0.0939663  | 0.358532    | 0.2621 | 0.793 | 1.17E-06 | count | 1 |
| YARS2      | 0.2415745  | 0.5250046   | 0.4601 | 0.646 | 1.17E-06 | count | 1 |
| ARMT1      | 0.2404156  | 0.5846662   | 0.4112 | 0.681 | 1.17E-06 | count | 1 |
| AHCYL1     | 0.2415745  | 0.4978911   | 0.4852 | 0.628 | 1.18E-06 | count | 1 |
| RFXANK     | 0.0946511  | 0.3953585   | 0.2394 | 0.811 | 1.18E-06 | count | 1 |
| SMURF2     | 0.2415745  | 0.53999     | 0.4474 | 0.655 | 1.19E-06 | count | 1 |
| TMED8      | 0.2441871  | 0.4733683   | 0.5159 | 0.606 | 1.19E-06 | count | 1 |
| MMGT1      | 0.2439673  | 0.4739771   | 0.5147 | 0.607 | 1.19E-06 | count | 1 |
| LINC00909  | 0.2441871  | 0.4918304   | 0.4965 | 0.62  | 1.19E-06 | count | 1 |
| ZSCAN16    | 0.2446815  | 0.4866287   | 0.5028 | 0.615 | 1.19E-06 | count | 1 |
| ANK3       | 0.2433707  | 0.549798    | 0.4427 | 0.658 | 1.19E-06 | count | 1 |
| SUPT20H    | 0.2450878  | 0.4633134   | 0.529  | 0.597 | 1.19E-06 | count | 1 |
| C12orf29   | 0.2453446  | 0.4636116   | 0.5292 | 0.597 | 1.19E-06 | count | 1 |
| C22orf39   | 0.2450878  | 0.4381255   | 0.5594 | 0.576 | 1.19E-06 | count | 1 |
| PGGT1B     | 0.2450878  | 0.4274814   | 0.5733 | 0.567 | 1.20E-06 | count | 1 |
| JMY        | 0.2462354  | 0.4258694   | 0.5782 | 0.563 | 1.20E-06 | count | 1 |
| ZNF335     | 0.5889782  | 0.8962515   | 0.6572 | 0.511 | 1.20E-06 | count | 1 |
| NISCH      | 0.5889782  | 0.790937    | 0.7447 | 0.457 | 1.20E-06 | count | 1 |
| FAHD2A     | 0.5889782  | 0.790937    | 0.7447 | 0.457 | 1.20E-06 | count | 1 |
| NEDD4L     | 0.5889782  | 0.790937    | 0.7447 | 0.457 | 1.20E-06 | count | 1 |
| AC005261.1 | 0.5889782  | 0.790937    | 0.7447 | 0.457 | 1.20E-06 | count | 1 |
| AC132192.2 | 0.5889782  | 0.8509864   | 0.6921 | 0.489 | 1.21E-06 | count | 1 |
| SPATA20    | 0.5889782  | 0.8509864   | 0.6921 | 0.489 | 1.21E-06 | count | 1 |
| ACKR1      | 0.5889782  | 1.1385297   | 0.5173 | 0.605 | 1.21E-06 | count | 1 |

|            |           |           |        |       |          |       |   |
|------------|-----------|-----------|--------|-------|----------|-------|---|
| AP001816.1 | 0.5889782 | 1.1032502 | 0.5339 | 0.594 | 1.21E-06 | count | 1 |
| LENG8-AS1  | 0.5931657 | 0.8298681 | 0.7148 | 0.475 | 1.21E-06 | count | 1 |
| ZNF451     | 0.247993  | 0.3649664 | 0.6795 | 0.497 | 1.21E-06 | count | 1 |
| MTERF1     | 0.5931657 | 0.7905442 | 0.7503 | 0.453 | 1.22E-06 | count | 1 |
| ATR        | 0.5931657 | 0.6505418 | 0.9118 | 0.362 | 1.22E-06 | count | 1 |
| MAN1A1     | 0.5931657 | 0.9260573 | 0.6405 | 0.522 | 1.22E-06 | count | 1 |
| DVL3       | 0.5931657 | 0.7642121 | 0.7762 | 0.438 | 1.22E-06 | count | 1 |
| IL17RA     | 0.5931657 | 0.8766831 | 0.6766 | 0.499 | 1.22E-06 | count | 1 |
| CNOT3      | 0.5931657 | 0.787319  | 0.7534 | 0.452 | 1.22E-06 | count | 1 |
| TOX4       | 0.0977676 | 0.2054268 | 0.4759 | 0.634 | 1.22E-06 | count | 1 |
| IL15RA     | 0.5931657 | 0.7991397 | 0.7423 | 0.458 | 1.22E-06 | count | 1 |
| NFATC1     | 0.0976367 | 0.4160639 | 0.2347 | 0.815 | 1.23E-06 | count | 1 |
| RAB28      | 0.2540832 | 0.5198364 | 0.4888 | 0.625 | 1.24E-06 | count | 1 |
| SSBP2      | 0.2543021 | 0.41073   | 0.6191 | 0.536 | 1.24E-06 | count | 1 |
| TXNDC11    | 0.2543021 | 0.5260851 | 0.4834 | 0.629 | 1.24E-06 | count | 1 |
| DTX2       | 0.254644  | 0.6330864 | 0.4022 | 0.688 | 1.24E-06 | count | 1 |
| ZNF397     | 0.254644  | 0.7191622 | 0.3541 | 0.723 | 1.24E-06 | count | 1 |
| CLASP2     | 0.2540832 | 0.5037078 | 0.5044 | 0.614 | 1.24E-06 | count | 1 |
| AFG3L2     | 0.2540268 | 0.4051142 | 0.627  | 0.531 | 1.24E-06 | count | 1 |
| WASL       | 0.2543021 | 0.56663   | 0.4488 | 0.654 | 1.24E-06 | count | 1 |
| WDR3       | 0.2543021 | 0.5448561 | 0.4667 | 0.641 | 1.24E-06 | count | 1 |
| TRPT1      | 0.2545106 | 0.4787388 | 0.5316 | 0.595 | 1.24E-06 | count | 1 |
| TMEM267    | 0.254644  | 0.6943317 | 0.3667 | 0.714 | 1.24E-06 | count | 1 |
| SENP2      | 0.2541469 | 0.4260612 | 0.5965 | 0.551 | 1.24E-06 | count | 1 |
| ARID3A     | 0.2543021 | 0.5801828 | 0.4383 | 0.661 | 1.24E-06 | count | 1 |
| PATJ       | 0.2543021 | 0.5034435 | 0.5051 | 0.614 | 1.24E-06 | count | 1 |
| MAFF       | 0.2552531 | 0.5640786 | 0.4525 | 0.651 | 1.24E-06 | count | 1 |
| FCHSD1     | 1.2755823 | 0.9602927 | 1.3283 | 0.185 | 1.25E-06 | count | 1 |
| ATP6V1H    | 0.254644  | 0.4757519 | 0.5352 | 0.593 | 1.25E-06 | count | 1 |
| NEIL1      | 0.2552531 | 0.6164337 | 0.4141 | 0.679 | 1.25E-06 | count | 1 |
| IFIH1      | 0.2545611 | 0.3704674 | 0.6871 | 0.492 | 1.25E-06 | count | 1 |
| LRRRC58    | 0.254644  | 0.4691806 | 0.5427 | 0.588 | 1.25E-06 | count | 1 |
| LARS       | 0.099906  | 0.2581232 | 0.387  | 0.699 | 1.25E-06 | count | 1 |
| ARG2       | 1.2755823 | 0.836983  | 1.524  | 0.128 | 1.25E-06 | count | 1 |
| HIST4H4    | 1.2755823 | 0.836983  | 1.524  | 0.128 | 1.25E-06 | count | 1 |
| CDC37L1    | 0.2552531 | 0.5836666 | 0.4373 | 0.662 | 1.26E-06 | count | 1 |
| AC073896.2 | 0.6121445 | 1.0827033 | 0.5654 | 0.572 | 1.26E-06 | count | 1 |
| ZNF337-AS1 | 0.6121445 | 1.0827033 | 0.5654 | 0.572 | 1.26E-06 | count | 1 |
| SCAMP1-AS1 | 0.6121445 | 1.1365026 | 0.5386 | 0.59  | 1.26E-06 | count | 1 |
| ZNF74      | 0.6121445 | 1.4355437 | 0.4264 | 0.67  | 1.26E-06 | count | 1 |
| P2RX1      | 0.6121445 | 1.3832363 | 0.4425 | 0.658 | 1.26E-06 | count | 1 |
| MTRNR2L1   | 0.6121445 | 1.3832363 | 0.4425 | 0.658 | 1.26E-06 | count | 1 |
| PBX4       | 1.2755823 | 0.8935202 | 1.4276 | 0.154 | 1.26E-06 | count | 1 |
| ALS2       | 0.6121445 | 1.8510314 | 0.3307 | 0.741 | 1.26E-06 | count | 1 |
| FRMD4B     | 0.6121445 | 1.8510314 | 0.3307 | 0.741 | 1.26E-06 | count | 1 |

|           |           |           |        |       |          |       |   |
|-----------|-----------|-----------|--------|-------|----------|-------|---|
| GUCY1A1   | 0.6121445 | 1.8510314 | 0.3307 | 0.741 | 1.26E-06 | count | 1 |
| RHEBL1    | 0.6121445 | 1.0817497 | 0.5659 | 0.572 | 1.26E-06 | count | 1 |
| NCAPD2    | 0.6121445 | 1.1273744 | 0.543  | 0.587 | 1.26E-06 | count | 1 |
| CCDC85C   | 0.6121445 | 1.1273744 | 0.543  | 0.587 | 1.26E-06 | count | 1 |
| USP13     | 0.6121445 | 0.7373416 | 0.8302 | 0.407 | 1.26E-06 | count | 1 |
| GLUL      | 0.2552531 | 1.2548249 | 0.2034 | 0.839 | 1.26E-06 | count | 1 |
| SERINC5   | 0.6121445 | 0.8751043 | 0.6995 | 0.485 | 1.27E-06 | count | 1 |
| CCDC174   | 0.1016306 | 0.2895778 | 0.351  | 0.726 | 1.27E-06 | count | 1 |
| SRFBP1    | 0.102345  | 0.3025624 | 0.3383 | 0.735 | 1.28E-06 | count | 1 |
| PNKP      | 0.2617712 | 0.3956806 | 0.6616 | 0.509 | 1.28E-06 | count | 1 |
| SEMA4D    | 0.2626711 | 0.4563742 | 0.5756 | 0.565 | 1.29E-06 | count | 1 |
| AEBP2     | 0.2638734 | 0.3919668 | 0.6732 | 0.501 | 1.30E-06 | count | 1 |
| NUP153    | 0.2639427 | 0.4315247 | 0.6117 | 0.541 | 1.30E-06 | count | 1 |
| DAAM1     | 0.104413  | 0.3123846 | 0.3342 | 0.738 | 1.31E-06 | count | 1 |
| RIN3      | 0.2674037 | 0.5275186 | 0.5069 | 0.612 | 1.31E-06 | count | 1 |
| TRIM25    | 1.2755823 | 1.6561922 | 0.7702 | 0.442 | 1.31E-06 | count | 1 |
| SP4       | 0.2681261 | 0.5604607 | 0.4784 | 0.633 | 1.32E-06 | count | 1 |
| WDR75     | 0.26827   | 0.3721615 | 0.7208 | 0.471 | 1.32E-06 | count | 1 |
| MSH2      | 0.2678605 | 0.5600311 | 0.4783 | 0.633 | 1.32E-06 | count | 1 |
| NTAN1     | 0.26827   | 0.3536702 | 0.7585 | 0.449 | 1.32E-06 | count | 1 |
| APTX      | 0.2676209 | 0.5306909 | 0.5043 | 0.614 | 1.32E-06 | count | 1 |
| H2AFX     | 0.2697057 | 0.488355  | 0.5523 | 0.581 | 1.32E-06 | count | 1 |
| RNF5      | 0.1060968 | 0.2714476 | 0.3909 | 0.696 | 1.33E-06 | count | 1 |
| RASA3     | 0.2676209 | 0.5172353 | 0.5174 | 0.605 | 1.33E-06 | count | 1 |
| AP1M1     | 0.2711091 | 0.5367914 | 0.5051 | 0.614 | 1.33E-06 | count | 1 |
| ZBTB4     | 0.2716552 | 0.5674937 | 0.4787 | 0.632 | 1.33E-06 | count | 1 |
| C2CD5     | 0.2716552 | 0.6589526 | 0.4123 | 0.68  | 1.34E-06 | count | 1 |
| NBPF14    | 0.2716552 | 0.5738863 | 0.4734 | 0.636 | 1.34E-06 | count | 1 |
| PLEKHB1   | 0.6415501 | 0.6453866 | 0.9941 | 0.321 | 1.34E-06 | count | 1 |
| CTU1      | 0.6415501 | 0.6453866 | 0.9941 | 0.321 | 1.34E-06 | count | 1 |
| MAP3K12   | 0.2719568 | 0.4344086 | 0.626  | 0.532 | 1.34E-06 | count | 1 |
| INF2      | 0.2716552 | 0.6462354 | 0.4204 | 0.674 | 1.35E-06 | count | 1 |
| CARD8-AS1 | 0.2745624 | 0.4222036 | 0.6503 | 0.516 | 1.35E-06 | count | 1 |
| AKAP11    | 0.1078463 | 0.2712988 | 0.3975 | 0.691 | 1.35E-06 | count | 1 |
| OCEL1     | 0.2750403 | 0.4656037 | 0.5907 | 0.555 | 1.35E-06 | count | 1 |
| PLIN2     | 0.2734851 | 0.3605976 | 0.7584 | 0.449 | 1.36E-06 | count | 1 |
| ANKHD1    | 0.2761797 | 0.7415635 | 0.3724 | 0.71  | 1.36E-06 | count | 1 |
| N4BP1     | 0.2761452 | 0.3866606 | 0.7142 | 0.475 | 1.36E-06 | count | 1 |
| OSBPL9    | 0.2761452 | 0.4068546 | 0.6787 | 0.498 | 1.36E-06 | count | 1 |
| TCTEX1D2  | 0.2780001 | 0.5170388 | 0.5377 | 0.591 | 1.37E-06 | count | 1 |
| SPTBN1    | 0.2780001 | 0.439455  | 0.6326 | 0.527 | 1.37E-06 | count | 1 |
| NF1       | 0.2773395 | 0.6611596 | 0.4195 | 0.675 | 1.37E-06 | count | 1 |
| DTX3L     | 0.2761452 | 0.3987185 | 0.6926 | 0.489 | 1.37E-06 | count | 1 |
| NDUFB6    | 0.1092728 | 0.2813943 | 0.3883 | 0.698 | 1.37E-06 | count | 1 |
| PDPR      | 0.278725  | 0.6606932 | 0.4219 | 0.673 | 1.37E-06 | count | 1 |

|            |           |           |        |       |          |       |   |
|------------|-----------|-----------|--------|-------|----------|-------|---|
| GOLGA1     | 0.278725  | 0.6606932 | 0.4219 | 0.673 | 1.37E-06 | count | 1 |
| SAMD12     | 0.278725  | 0.7668349 | 0.3635 | 0.716 | 1.37E-06 | count | 1 |
| CDC25B     | 0.278725  | 0.6943589 | 0.4014 | 0.688 | 1.37E-06 | count | 1 |
| SCARB2     | 0.278725  | 0.6943589 | 0.4014 | 0.688 | 1.37E-06 | count | 1 |
| MAPK8      | 0.278725  | 0.6943589 | 0.4014 | 0.688 | 1.37E-06 | count | 1 |
| EIF4EBP2   | 0.278725  | 0.52642   | 0.5295 | 0.597 | 1.37E-06 | count | 1 |
| AC138150.1 | 0.278725  | 0.7252079 | 0.3843 | 0.701 | 1.37E-06 | count | 1 |
| CNP        | 0.278725  | 0.7252079 | 0.3843 | 0.701 | 1.37E-06 | count | 1 |
| WARS2      | 0.278725  | 0.6495011 | 0.4291 | 0.668 | 1.37E-06 | count | 1 |
| FAM120B    | 0.278725  | 0.6495011 | 0.4291 | 0.668 | 1.37E-06 | count | 1 |
| PIGL       | 0.278725  | 0.6480934 | 0.4301 | 0.667 | 1.37E-06 | count | 1 |
| ALKBH2     | 0.278725  | 0.6837181 | 0.4077 | 0.684 | 1.37E-06 | count | 1 |
| CDK5RAP2   | 0.278725  | 0.4213396 | 0.6615 | 0.509 | 1.37E-06 | count | 1 |
| CXCL16     | 0.278725  | 0.7163025 | 0.3891 | 0.697 | 1.38E-06 | count | 1 |
| CHIC1      | 0.278725  | 0.7150263 | 0.3898 | 0.697 | 1.38E-06 | count | 1 |
| SLC2A4RG   | 0.109862  | 0.3672973 | 0.2991 | 0.765 | 1.38E-06 | count | 1 |
| ZNF235     | 1.3837941 | 1.0915681 | 1.2677 | 0.206 | 1.38E-06 | count | 1 |
| PFKM       | 1.3837941 | 1.0915681 | 1.2677 | 0.206 | 1.38E-06 | count | 1 |
| USP27X     | 1.3837941 | 1.0915681 | 1.2677 | 0.206 | 1.38E-06 | count | 1 |
| ABCA7      | 1.3837941 | 1.0915681 | 1.2677 | 0.206 | 1.38E-06 | count | 1 |
| APTR       | 1.3837941 | 1.0915681 | 1.2677 | 0.206 | 1.38E-06 | count | 1 |
| TMEM143    | 1.3837941 | 1.4001102 | 0.9883 | 0.324 | 1.38E-06 | count | 1 |
| TCP11L1    | 1.3837941 | 1.4001102 | 0.9883 | 0.324 | 1.38E-06 | count | 1 |
| SHLD3      | 1.3837941 | 1.4001102 | 0.9883 | 0.324 | 1.38E-06 | count | 1 |
| GEMIN5     | 1.3837941 | 1.4001102 | 0.9883 | 0.324 | 1.38E-06 | count | 1 |
| PIM2       | 0.1105735 | 0.2286878 | 0.4835 | 0.629 | 1.38E-06 | count | 1 |
| KCTD18     | 0.661451  | 0.8260209 | 0.8008 | 0.424 | 1.39E-06 | count | 1 |
| ZNF354A    | 1.3708925 | 0.9724444 | 1.4097 | 0.159 | 1.39E-06 | count | 1 |
| 9-Mar      | 0.1108352 | 0.1832529 | 0.6048 | 0.546 | 1.39E-06 | count | 1 |
| STRN3      | 0.2810722 | 0.3985383 | 0.7053 | 0.481 | 1.39E-06 | count | 1 |
| ZNF431     | 0.2812883 | 0.4307107 | 0.6531 | 0.514 | 1.39E-06 | count | 1 |
| ISOC2      | 0.2838907 | 0.5535153 | 0.5129 | 0.608 | 1.40E-06 | count | 1 |
| PPP3CB     | 0.2826679 | 0.4626912 | 0.6109 | 0.542 | 1.40E-06 | count | 1 |
| RBBP5      | 1.3708925 | 0.9453163 | 1.4502 | 0.148 | 1.40E-06 | count | 1 |
| NPHP3      | 0.661451  | 0.8148537 | 0.8117 | 0.417 | 1.40E-06 | count | 1 |
| ODF2       | 0.2838907 | 0.4963412 | 0.572  | 0.568 | 1.40E-06 | count | 1 |
| ACAT2      | 0.2845175 | 0.3665906 | 0.7761 | 0.438 | 1.41E-06 | count | 1 |
| ZMYM2      | 0.111854  | 0.2732429 | 0.4094 | 0.682 | 1.41E-06 | count | 1 |
| CEBPZOS    | 0.2845175 | 0.4418921 | 0.6439 | 0.52  | 1.41E-06 | count | 1 |
| BLOC1S6    | 0.111854  | 0.2861461 | 0.3909 | 0.696 | 1.41E-06 | count | 1 |
| PYROXD1    | 0.2871116 | 0.4786661 | 0.5998 | 0.549 | 1.42E-06 | count | 1 |
| BTBD6      | 0.2871116 | 0.4364269 | 0.6579 | 0.511 | 1.42E-06 | count | 1 |
| CA11       | 0.6714097 | 0.8328372 | 0.8062 | 0.421 | 1.42E-06 | count | 1 |
| SACS       | 0.2871116 | 0.5951315 | 0.4824 | 0.63  | 1.43E-06 | count | 1 |
| BOLA3      | 0.2890278 | 0.4211041 | 0.6864 | 0.493 | 1.43E-06 | count | 1 |



|          |           |           |        |        |          |       |   |
|----------|-----------|-----------|--------|--------|----------|-------|---|
| RABEP2   | 0.2881213 | 0.3740511 | 0.7703 | 0.442  | 1.43E-06 | count | 1 |
| SLC52A2  | 0.2890278 | 0.3937069 | 0.7341 | 0.463  | 1.43E-06 | count | 1 |
| SP140L   | 0.1141285 | 0.2529499 | 0.4512 | 0.652  | 1.43E-06 | count | 1 |
| CHMP3    | 0.2873376 | 0.41148   | 0.6983 | 0.485  | 1.44E-06 | count | 1 |
| ZMYM5    | 0.11478   | 0.2961398 | 0.3876 | 0.699  | 1.44E-06 | count | 1 |
| MGAT1    | 0.2881539 | 0.5151439 | 0.5594 | 0.576  | 1.44E-06 | count | 1 |
| ZNF160   | 0.2916482 | 0.6187372 | 0.4714 | 0.638  | 1.45E-06 | count | 1 |
| DNM2     | 0.2927372 | 0.4763848 | 0.6145 | 0.539  | 1.45E-06 | count | 1 |
| PNP      | 0.2925127 | 0.4079635 | 0.717  | 0.474  | 1.45E-06 | count | 1 |
| CHD1L    | 0.2916482 | 0.6975493 | 0.4181 | 0.676  | 1.45E-06 | count | 1 |
| ZNF628   | 0.6864523 | 0.9633314 | 0.7126 | 0.476  | 1.45E-06 | count | 1 |
| CLCN3    | 0.2925127 | 0.5379592 | 0.5437 | 0.587  | 1.45E-06 | count | 1 |
| MYEF2    | 0.2939141 | 0.6939993 | 0.4235 | 0.672  | 1.45E-06 | count | 1 |
| STX2     | 0.6864523 | 0.8845084 | 0.7761 | 0.438  | 1.46E-06 | count | 1 |
| ZNF525   | 0.6864523 | 0.8845084 | 0.7761 | 0.438  | 1.46E-06 | count | 1 |
| SNX27    | 0.2939141 | 0.5797988 | 0.5069 | 0.612  | 1.46E-06 | count | 1 |
| CYP2R1   | 0.6864523 | 0.8108878 | 0.8465 | 0.398  | 1.46E-06 | count | 1 |
| UNG      | 0.6864523 | 0.8973078 | 0.765  | 0.445  | 1.46E-06 | count | 1 |
| SLC25A25 | 0.2939141 | 0.6286256 | 0.4676 | 0.64   | 1.46E-06 | count | 1 |
| ZC3H3    | 0.6864523 | 0.9761064 | 0.7033 | 0.482  | 1.46E-06 | count | 1 |
| ZDHHC5   | 0.2939141 | 0.458057  | 0.6417 | 0.521  | 1.46E-06 | count | 1 |
| YIF1B    | 0.2939141 | 0.673924  | 0.4361 | 0.663  | 1.46E-06 | count | 1 |
| HINFP    | 0.2939141 | 0.673924  | 0.4361 | 0.663  | 1.46E-06 | count | 1 |
| GDI1     | 0.2927372 | 0.4370981 | 0.6697 | 0.503  | 1.46E-06 | count | 1 |
| CEP126   | 0.2931192 | 0.5393717 | 0.5434 | 0.587  | 1.46E-06 | count | 1 |
| SOCS4    | 0.294412  | 0.3817332 | 0.7713 | 0.441  | 1.46E-06 | count | 1 |
| CSNK1D   | 0.1162252 | 0.2587573 | 0.4492 | 0.654  | 1.46E-06 | count | 1 |
| MDS2     | 0.2939141 | 0.6954677 | 0.4226 | 0.673  | 1.46E-06 | count | 1 |
| C19orf48 | 0.2939141 | 0.3671448 | 0.8005 | 0.424  | 1.46E-06 | count | 1 |
| FOXRED1  | 0.6864523 | 1.0823214 | 0.6342 | 0.526  | 1.46E-06 | count | 1 |
| ACAA1    | 0.2959591 | 0.4321738 | 0.6848 | 0.494  | 1.47E-06 | count | 1 |
| CXCL10   | 1.3243725 | 1.0620328 | 1.247  | 0.213  | 1.47E-06 | count | 1 |
| PRKCSH   | 0.2951754 | 0.3604053 | 0.819  | 0.413  | 1.47E-06 | count | 1 |
| ABHD13   | 0.2959591 | 0.4216685 | 0.7019 | 0.483  | 1.47E-06 | count | 1 |
| ARFGEF1  | 0.1176429 | 0.347084  | 0.3389 | 0.735  | 1.48E-06 | count | 1 |
| SOCS3    | 0.2982628 | 0.501653  | 0.5946 | 0.552  | 1.48E-06 | count | 1 |
| PUM3     | 0.1180791 | 0.2210805 | 0.5341 | 0.594  | 1.48E-06 | count | 1 |
| INTS12   | 1.4007455 | 0.7532604 | 1.8596 | 0.0636 | 1.49E-06 | count | 1 |
| ABCD4    | 0.2986898 | 0.5451125 | 0.5479 | 0.584  | 1.49E-06 | count | 1 |
| MYL5     | 0.7003537 | 0.8793689 | 0.7964 | 0.426  | 1.49E-06 | count | 1 |
| STX6     | 0.2995431 | 0.4395658 | 0.6815 | 0.496  | 1.50E-06 | count | 1 |
| CNOT11   | 0.2982628 | 0.4534132 | 0.6578 | 0.511  | 1.50E-06 | count | 1 |
| CCDC84   | 0.3003302 | 0.5191231 | 0.5785 | 0.563  | 1.50E-06 | count | 1 |
| MYO5A    | 0.3016859 | 0.6215494 | 0.4854 | 0.628  | 1.50E-06 | count | 1 |
| SH2B3    | 0.2973865 | 0.5522051 | 0.5385 | 0.59   | 1.50E-06 | count | 1 |

|            |           |           |        |        |          |       |   |
|------------|-----------|-----------|--------|--------|----------|-------|---|
| TRAPPC12   | 0.3016859 | 0.5361623 | 0.5627 | 0.574  | 1.51E-06 | count | 1 |
| TRIM69     | 0.3019385 | 0.3741457 | 0.807  | 0.42   | 1.51E-06 | count | 1 |
| HACD2      | 0.3042786 | 0.7299073 | 0.4169 | 0.677  | 1.51E-06 | count | 1 |
| CARHSP1    | 0.12029   | 0.3987301 | 0.3017 | 0.763  | 1.51E-06 | count | 1 |
| AC091271.1 | 0.3045744 | 0.7671838 | 0.397  | 0.692  | 1.51E-06 | count | 1 |
| GCSAM      | 0.3042786 | 0.584334  | 0.5207 | 0.603  | 1.51E-06 | count | 1 |
| ANKRD36    | 0.3042786 | 0.5411413 | 0.5623 | 0.574  | 1.51E-06 | count | 1 |
| SNRPB2     | 0.1205175 | 0.1812867 | 0.6648 | 0.507  | 1.52E-06 | count | 1 |
| SCML4      | 0.3042786 | 0.5780198 | 0.5264 | 0.599  | 1.52E-06 | count | 1 |
| PDE4DIP    | 0.3042786 | 0.5313791 | 0.5726 | 0.567  | 1.52E-06 | count | 1 |
| ZNF789     | 0.3042786 | 0.5716359 | 0.5323 | 0.595  | 1.52E-06 | count | 1 |
| STXBP5     | 0.7118861 | 1.1686987 | 0.6091 | 0.543  | 1.52E-06 | count | 1 |
| AC016727.1 | 0.7118861 | 1.1686987 | 0.6091 | 0.543  | 1.52E-06 | count | 1 |
| ZNF784     | 0.7118861 | 1.1686987 | 0.6091 | 0.543  | 1.52E-06 | count | 1 |
| DPP3       | 0.7118861 | 0.9386978 | 0.7584 | 0.449  | 1.52E-06 | count | 1 |
| DENND6A    | 0.7118861 | 0.9004806 | 0.7906 | 0.43   | 1.52E-06 | count | 1 |
| WBP1L      | 0.7118861 | 0.9004806 | 0.7906 | 0.43   | 1.52E-06 | count | 1 |
| AQP3       | 0.7118861 | 1.0578308 | 0.673  | 0.501  | 1.52E-06 | count | 1 |
| AC144652.1 | 0.7118861 | 1.0578308 | 0.673  | 0.501  | 1.52E-06 | count | 1 |
| ARHGAP21   | 0.7118861 | 1.0240692 | 0.6952 | 0.487  | 1.52E-06 | count | 1 |
| MAP3K5     | 0.7118861 | 1.0240692 | 0.6952 | 0.487  | 1.52E-06 | count | 1 |
| MORC4      | 0.7118861 | 1.0240692 | 0.6952 | 0.487  | 1.52E-06 | count | 1 |
| RALGPS1    | 0.7118861 | 1.0240692 | 0.6952 | 0.487  | 1.52E-06 | count | 1 |
| NBPF11     | 0.7118861 | 1.0240692 | 0.6952 | 0.487  | 1.52E-06 | count | 1 |
| PITPNC1    | 0.7118861 | 1.0240692 | 0.6952 | 0.487  | 1.52E-06 | count | 1 |
| KCTD10     | 0.7118861 | 1.0240692 | 0.6952 | 0.487  | 1.52E-06 | count | 1 |
| AC036176.1 | 0.7118861 | 1.0240692 | 0.6952 | 0.487  | 1.52E-06 | count | 1 |
| MON1B      | 0.7118861 | 1.0240692 | 0.6952 | 0.487  | 1.52E-06 | count | 1 |
| KLHDC10    | 0.7118861 | 1.0240692 | 0.6952 | 0.487  | 1.52E-06 | count | 1 |
| VPS18      | 0.7118861 | 1.0240692 | 0.6952 | 0.487  | 1.52E-06 | count | 1 |
| NOL10      | 0.3042786 | 0.5867481 | 0.5186 | 0.604  | 1.52E-06 | count | 1 |
| UBE2E1     | 0.1212378 | 0.3193079 | 0.3797 | 0.704  | 1.53E-06 | count | 1 |
| LRRC57     | 0.7118861 | 0.8107666 | 0.878  | 0.38   | 1.53E-06 | count | 1 |
| RABIF      | 0.3065365 | 0.364781  | 0.8403 | 0.401  | 1.53E-06 | count | 1 |
| WDR1       | 0.1218564 | 0.3071417 | 0.3967 | 0.692  | 1.53E-06 | count | 1 |
| CCAR2      | 1.4579039 | 0.8652484 | 1.685  | 0.0927 | 1.54E-06 | count | 1 |
| SGK3       | 0.7118861 | 0.7603011 | 0.9363 | 0.35   | 1.54E-06 | count | 1 |
| NUTF2      | 0.1220776 | 0.321886  | 0.3793 | 0.705  | 1.54E-06 | count | 1 |
| FAM20B     | 0.3091216 | 0.8311543 | 0.3719 | 0.71   | 1.54E-06 | count | 1 |
| KDSR       | 0.3091216 | 0.5246578 | 0.5892 | 0.556  | 1.54E-06 | count | 1 |
| TRMT10A    | 0.3091216 | 0.9009203 | 0.3431 | 0.732  | 1.54E-06 | count | 1 |
| EID2       | 0.3091216 | 0.5199592 | 0.5945 | 0.552  | 1.55E-06 | count | 1 |
| EBI3       | 1.4579039 | 1.0244599 | 1.4231 | 0.155  | 1.55E-06 | count | 1 |
| YEATS4     | 0.1231646 | 0.3647473 | 0.3377 | 0.736  | 1.55E-06 | count | 1 |
| DERL3      | 0.1234039 | 0.3345371 | 0.3689 | 0.712  | 1.55E-06 | count | 1 |

|            |           |           |        |       |          |       |   |
|------------|-----------|-----------|--------|-------|----------|-------|---|
| ECPAS      | 0.311023  | 0.5970713 | 0.5209 | 0.603 | 1.56E-06 | count | 1 |
| RINT1      | 0.311804  | 0.542702  | 0.5745 | 0.566 | 1.56E-06 | count | 1 |
| SCAMP4     | 0.311804  | 0.542702  | 0.5745 | 0.566 | 1.56E-06 | count | 1 |
| SLC4A1AP   | 0.3104236 | 0.396584  | 0.7827 | 0.434 | 1.56E-06 | count | 1 |
| JAK3       | 0.314853  | 0.5209814 | 0.6043 | 0.546 | 1.57E-06 | count | 1 |
| ARFGEF2    | 0.3148669 | 0.5934018 | 0.5306 | 0.596 | 1.57E-06 | count | 1 |
| KAT2B      | 0.3148669 | 0.5824019 | 0.5406 | 0.589 | 1.57E-06 | count | 1 |
| PTGS2      | 1.4579039 | 1.3290683 | 1.0969 | 0.273 | 1.58E-06 | count | 1 |
| MCCC2      | 0.314853  | 0.524446  | 0.6004 | 0.549 | 1.58E-06 | count | 1 |
| MKLN1      | 0.3148469 | 0.4893366 | 0.6434 | 0.52  | 1.58E-06 | count | 1 |
| TAF4B      | 0.3148669 | 0.6577271 | 0.4787 | 0.632 | 1.58E-06 | count | 1 |
| WASHC1     | 0.7326579 | 0.8154432 | 0.8985 | 0.369 | 1.58E-06 | count | 1 |
| MARK2      | 0.314853  | 0.5197519 | 0.6058 | 0.545 | 1.58E-06 | count | 1 |
| ATG16L1    | 0.7326579 | 0.8688835 | 0.8432 | 0.4   | 1.58E-06 | count | 1 |
| NUP155     | 0.7326579 | 0.8688835 | 0.8432 | 0.4   | 1.58E-06 | count | 1 |
| AGMAT      | 0.7326579 | 0.8688835 | 0.8432 | 0.4   | 1.58E-06 | count | 1 |
| DYNC1LI2   | 0.3164825 | 0.383097  | 0.8261 | 0.409 | 1.58E-06 | count | 1 |
| WDR83      | 0.7326579 | 0.7060735 | 1.0377 | 0.3   | 1.58E-06 | count | 1 |
| CDK5       | 0.7326579 | 0.7671705 | 0.955  | 0.34  | 1.58E-06 | count | 1 |
| FBXO5      | 0.7326579 | 0.7606053 | 0.9633 | 0.336 | 1.59E-06 | count | 1 |
| ZNF563     | 0.7326579 | 0.7606053 | 0.9633 | 0.336 | 1.59E-06 | count | 1 |
| MIEF1      | 0.7326579 | 0.8114807 | 0.9029 | 0.367 | 1.59E-06 | count | 1 |
| STRIP1     | 0.7326579 | 0.8114807 | 0.9029 | 0.367 | 1.59E-06 | count | 1 |
| SEC24A     | 0.7326579 | 0.9102156 | 0.8049 | 0.421 | 1.59E-06 | count | 1 |
| AKAP2      | 0.7326579 | 0.8593495 | 0.8526 | 0.394 | 1.59E-06 | count | 1 |
| TDRD3      | 0.3175171 | 0.48164   | 0.6592 | 0.51  | 1.59E-06 | count | 1 |
| HMOX2      | 0.1262327 | 0.3083054 | 0.4094 | 0.682 | 1.59E-06 | count | 1 |
| LGMN       | 0.3175171 | 0.4680486 | 0.6784 | 0.498 | 1.59E-06 | count | 1 |
| ANAPC7     | 0.7326579 | 0.904689  | 0.8098 | 0.418 | 1.59E-06 | count | 1 |
| ZBTB44     | 0.3186806 | 0.4215134 | 0.756  | 0.45  | 1.59E-06 | count | 1 |
| ELP2       | 0.3182161 | 0.4040134 | 0.7876 | 0.431 | 1.60E-06 | count | 1 |
| VPS13A     | 0.1266168 | 0.4134149 | 0.3063 | 0.76  | 1.60E-06 | count | 1 |
| UCKL1      | 0.3182161 | 0.4324401 | 0.7359 | 0.462 | 1.60E-06 | count | 1 |
| SHF        | 0.3194069 | 0.7322376 | 0.4362 | 0.663 | 1.60E-06 | count | 1 |
| BAG6       | 0.3194069 | 0.465536  | 0.6861 | 0.493 | 1.60E-06 | count | 1 |
| AC008124.1 | 0.3194069 | 0.64415   | 0.4959 | 0.62  | 1.60E-06 | count | 1 |
| ZNF768     | 0.3194069 | 0.7227099 | 0.442  | 0.659 | 1.60E-06 | count | 1 |
| SNX19      | 0.3194069 | 0.6593734 | 0.4844 | 0.628 | 1.60E-06 | count | 1 |
| LDB1       | 0.3194069 | 0.5086056 | 0.628  | 0.53  | 1.60E-06 | count | 1 |
| RIPOR1     | 0.3194069 | 0.4959887 | 0.644  | 0.52  | 1.60E-06 | count | 1 |
| OSBPL10    | 0.127338  | 0.2676539 | 0.4758 | 0.634 | 1.61E-06 | count | 1 |
| AL445686.2 | 0.3194069 | 0.774025  | 0.4127 | 0.68  | 1.61E-06 | count | 1 |
| TIPRL      | 0.1277079 | 0.2815009 | 0.4537 | 0.65  | 1.61E-06 | count | 1 |
| ANKRD13D   | 0.3211099 | 0.4054122 | 0.7921 | 0.429 | 1.62E-06 | count | 1 |
| RNF41      | 0.3219566 | 0.3868383 | 0.8323 | 0.406 | 1.62E-06 | count | 1 |

|            |           |           |        |       |          |       |   |
|------------|-----------|-----------|--------|-------|----------|-------|---|
| FBXO22     | 0.3231128 | 0.4644398 | 0.6957 | 0.487 | 1.62E-06 | count | 1 |
| FAM76B     | 0.1281812 | 0.32424   | 0.3953 | 0.693 | 1.62E-06 | count | 1 |
| RFC2       | 0.3220024 | 0.4857902 | 0.6628 | 0.508 | 1.62E-06 | count | 1 |
| AKAP7      | 0.3220024 | 0.5140864 | 0.6264 | 0.531 | 1.63E-06 | count | 1 |
| CNOT9      | 0.3236225 | 0.3974203 | 0.8143 | 0.416 | 1.63E-06 | count | 1 |
| RCOR1      | 0.3231128 | 0.4598796 | 0.7026 | 0.483 | 1.64E-06 | count | 1 |
| CASD1      | 0.3256175 | 0.5546775 | 0.587  | 0.557 | 1.64E-06 | count | 1 |
| RCC1L      | 0.3261877 | 0.5699667 | 0.5723 | 0.567 | 1.64E-06 | count | 1 |
| PAOX       | 0.3261877 | 0.5933073 | 0.5498 | 0.583 | 1.64E-06 | count | 1 |
| C22orf46   | 0.3261877 | 0.6112069 | 0.5337 | 0.594 | 1.64E-06 | count | 1 |
| HIST1H2AC  | 0.3261877 | 0.6060086 | 0.5383 | 0.591 | 1.64E-06 | count | 1 |
| CEP97      | 0.3269895 | 0.6493493 | 0.5036 | 0.615 | 1.65E-06 | count | 1 |
| NFIL3      | 0.3285934 | 0.4323275 | 0.7601 | 0.448 | 1.65E-06 | count | 1 |
| ANKRD40    | 0.3287803 | 0.4157997 | 0.7907 | 0.43  | 1.65E-06 | count | 1 |
| FBXO8      | 1.5379466 | 0.9420053 | 1.6326 | 0.103 | 1.66E-06 | count | 1 |
| ELP6       | 0.3287803 | 0.429115  | 0.7662 | 0.444 | 1.66E-06 | count | 1 |
| P2RX5      | 0.3306052 | 0.3937695 | 0.8396 | 0.402 | 1.66E-06 | count | 1 |
| POM121     | 0.330996  | 0.5543543 | 0.5971 | 0.551 | 1.67E-06 | count | 1 |
| EGLN1      | 0.330996  | 0.5914721 | 0.5596 | 0.576 | 1.67E-06 | count | 1 |
| WHAMM      | 0.1317936 | 0.2947826 | 0.4471 | 0.655 | 1.67E-06 | count | 1 |
| RAE1       | 0.330996  | 0.5314963 | 0.6228 | 0.534 | 1.67E-06 | count | 1 |
| CCND1      | 0.3308633 | 0.5692929 | 0.5812 | 0.561 | 1.68E-06 | count | 1 |
| XPNPEP3    | 0.7671149 | 0.8765119 | 0.8752 | 0.382 | 1.68E-06 | count | 1 |
| SLC2A5     | 0.7671149 | 0.8815181 | 0.8702 | 0.385 | 1.68E-06 | count | 1 |
| STRADA     | 0.3339061 | 0.4646676 | 0.7186 | 0.473 | 1.68E-06 | count | 1 |
| AC104794.2 | 0.7671149 | 0.9090023 | 0.8439 | 0.399 | 1.68E-06 | count | 1 |
| TBC1D1     | 0.1330687 | 0.3028012 | 0.4395 | 0.661 | 1.68E-06 | count | 1 |
| MPDU1      | 0.3339061 | 0.4894052 | 0.6823 | 0.495 | 1.68E-06 | count | 1 |
| SH3YL1     | 0.3329114 | 0.3675385 | 0.9058 | 0.366 | 1.69E-06 | count | 1 |
| IVD        | 0.3356041 | 0.4554521 | 0.7369 | 0.462 | 1.70E-06 | count | 1 |
| TMOD2      | 0.3345837 | 0.5628698 | 0.5944 | 0.553 | 1.70E-06 | count | 1 |
| AL662844.4 | 0.3363598 | 0.5379902 | 0.6252 | 0.532 | 1.70E-06 | count | 1 |
| AC005921.2 | 0.3363598 | 0.4634247 | 0.7258 | 0.468 | 1.70E-06 | count | 1 |
| HAGHL      | 0.3373635 | 0.498553  | 0.6767 | 0.499 | 1.71E-06 | count | 1 |
| PCGF5      | 0.1350226 | 0.2888574 | 0.4674 | 0.64  | 1.71E-06 | count | 1 |
| CSPP1      | 0.3373635 | 0.4726333 | 0.7138 | 0.476 | 1.71E-06 | count | 1 |
| SMNDC1     | 0.135162  | 0.2464203 | 0.5485 | 0.584 | 1.71E-06 | count | 1 |
| USP1       | 0.1352707 | 0.237765  | 0.5689 | 0.57  | 1.71E-06 | count | 1 |
| ARID5A     | 0.1350226 | 0.337941  | 0.3995 | 0.69  | 1.71E-06 | count | 1 |
| TIMM17A    | 0.1355391 | 0.3247157 | 0.4174 | 0.677 | 1.72E-06 | count | 1 |
| PHF1       | 0.1369143 | 0.2732365 | 0.5011 | 0.617 | 1.73E-06 | count | 1 |
| TBC1D15    | 0.3428961 | 0.4205243 | 0.8154 | 0.415 | 1.74E-06 | count | 1 |
| BICD1      | 0.3427515 | 0.4059153 | 0.8444 | 0.399 | 1.74E-06 | count | 1 |
| RAB7A      | 0.1375943 | 0.2043965 | 0.6732 | 0.501 | 1.74E-06 | count | 1 |
| ARFRP1     | 0.3427515 | 0.4025346 | 0.8515 | 0.395 | 1.75E-06 | count | 1 |

|            |           |           |        |        |          |       |   |
|------------|-----------|-----------|--------|--------|----------|-------|---|
| RTN3       | 0.3441678 | 0.4480802 | 0.7681 | 0.443  | 1.75E-06 | count | 1 |
| IREB2      | 0.3400736 | 0.4622715 | 0.7357 | 0.462  | 1.75E-06 | count | 1 |
| DOCK11     | 0.138307  | 0.359217  | 0.385  | 0.7    | 1.76E-06 | count | 1 |
| RSPRY1     | 1.5632644 | 0.661869  | 2.3619 | 0.0186 | 1.76E-06 | count | 1 |
| APOO       | 0.7955109 | 0.7578548 | 1.0497 | 0.294  | 1.76E-06 | count | 1 |
| RAP1B      | 0.1391132 | 0.1408048 | 0.988  | 0.324  | 1.77E-06 | count | 1 |
| MPC1       | 0.1387274 | 0.3773221 | 0.3677 | 0.713  | 1.77E-06 | count | 1 |
| HINT3      | 0.7955109 | 0.8806831 | 0.9033 | 0.367  | 1.77E-06 | count | 1 |
| SLU7       | 0.1395821 | 0.2716727 | 0.5138 | 0.608  | 1.77E-06 | count | 1 |
| PIGG       | 0.3497741 | 0.6797151 | 0.5146 | 0.607  | 1.77E-06 | count | 1 |
| AP5Z1      | 0.3497741 | 0.6611928 | 0.529  | 0.597  | 1.77E-06 | count | 1 |
| UGGT1      | 0.3497741 | 0.6611928 | 0.529  | 0.597  | 1.77E-06 | count | 1 |
| AC096733.2 | 0.7955109 | 0.880588  | 0.9034 | 0.367  | 1.77E-06 | count | 1 |
| ASB7       | 0.7955109 | 0.880588  | 0.9034 | 0.367  | 1.77E-06 | count | 1 |
| CDS2       | 0.3490068 | 0.4034293 | 0.8651 | 0.387  | 1.78E-06 | count | 1 |
| KAT6A      | 0.3516192 | 0.3836509 | 0.9165 | 0.36   | 1.78E-06 | count | 1 |
| METTL18    | 0.3515144 | 0.6547163 | 0.5369 | 0.592  | 1.78E-06 | count | 1 |
| TNFAIP6    | 1.6120546 | 2.1278322 | 0.7576 | 0.449  | 1.78E-06 | count | 1 |
| CHSY1      | 0.3515144 | 0.6422505 | 0.5473 | 0.584  | 1.79E-06 | count | 1 |
| CD180      | 0.3521659 | 0.462494  | 0.7614 | 0.447  | 1.79E-06 | count | 1 |
| RPE        | 0.347029  | 0.6596335 | 0.5261 | 0.599  | 1.79E-06 | count | 1 |
| GRAMD1A    | 0.3527165 | 0.6145955 | 0.5739 | 0.566  | 1.79E-06 | count | 1 |
| CETN2      | 0.3527165 | 0.6188327 | 0.57   | 0.569  | 1.79E-06 | count | 1 |
| VAR5       | 0.3527165 | 0.5762843 | 0.6121 | 0.541  | 1.80E-06 | count | 1 |
| MSANTD3    | 1.6120546 | 0.834096  | 1.9327 | 0.0539 | 1.80E-06 | count | 1 |
| AKT3       | 0.3531882 | 0.424251  | 0.8325 | 0.406  | 1.80E-06 | count | 1 |
| MRPL50     | 0.141776  | 0.3387321 | 0.4185 | 0.676  | 1.80E-06 | count | 1 |
| JPT2       | 0.3535967 | 0.5959831 | 0.5933 | 0.553  | 1.80E-06 | count | 1 |
| DCAF16     | 0.354269  | 0.5475383 | 0.647  | 0.518  | 1.80E-06 | count | 1 |
| ORC6       | 0.8120012 | 0.8758116 | 0.9271 | 0.354  | 1.80E-06 | count | 1 |
| PLCE1      | 0.8120012 | 1.0060471 | 0.8071 | 0.42   | 1.80E-06 | count | 1 |
| LENG8      | 0.3527165 | 0.6451886 | 0.5467 | 0.585  | 1.80E-06 | count | 1 |
| COLGALT1   | 0.8120012 | 0.9754368 | 0.8324 | 0.406  | 1.80E-06 | count | 1 |
| FAM122A    | 0.354269  | 0.5434211 | 0.6519 | 0.515  | 1.80E-06 | count | 1 |
| HSCB       | 0.3527165 | 0.4208027 | 0.8382 | 0.402  | 1.80E-06 | count | 1 |
| HSD17B7    | 0.3535967 | 0.6196983 | 0.5706 | 0.569  | 1.81E-06 | count | 1 |
| FAM122C    | 0.8120012 | 0.867031  | 0.9365 | 0.35   | 1.81E-06 | count | 1 |
| CCDC86     | 0.8120012 | 1.1144112 | 0.7286 | 0.467  | 1.81E-06 | count | 1 |
| MPHOSPH10  | 0.1426599 | 0.3078056 | 0.4635 | 0.643  | 1.81E-06 | count | 1 |
| SLC35D2    | 0.3558798 | 0.4151063 | 0.8573 | 0.392  | 1.81E-06 | count | 1 |
| PPP6C      | 0.1430061 | 0.3179925 | 0.4497 | 0.653  | 1.81E-06 | count | 1 |
| NAA50      | 0.1430932 | 0.2379147 | 0.6014 | 0.548  | 1.82E-06 | count | 1 |
| NAP1L4     | 0.1432332 | 0.28455   | 0.5034 | 0.615  | 1.82E-06 | count | 1 |
| GAPVD1     | 0.3561331 | 0.3823001 | 0.9316 | 0.352  | 1.82E-06 | count | 1 |
| GNB1       | 0.1429533 | 0.2811402 | 0.5085 | 0.611  | 1.82E-06 | count | 1 |

|             |           |           |        |        |          |       |   |
|-------------|-----------|-----------|--------|--------|----------|-------|---|
| ZNF420      | 1.6120546 | 0.9519625 | 1.6934 | 0.0911 | 1.82E-06 | count | 1 |
| TMEM129     | 0.816245  | 0.6942109 | 1.1758 | 0.24   | 1.84E-06 | count | 1 |
| CLCF1       | 0.3671885 | 0.4739194 | 0.7748 | 0.439  | 1.88E-06 | count | 1 |
| RBMX        | 0.1477909 | 0.1677271 | 0.8811 | 0.379  | 1.88E-06 | count | 1 |
| RAB18       | 0.3661392 | 0.351283  | 1.0423 | 0.298  | 1.88E-06 | count | 1 |
| CD58        | 0.3690811 | 0.3902431 | 0.9458 | 0.345  | 1.88E-06 | count | 1 |
| MANBAL      | 0.8385374 | 0.8365882 | 1.0023 | 0.317  | 1.89E-06 | count | 1 |
| MIR4435-2HG | 0.8385374 | 1.0058855 | 0.8336 | 0.405  | 1.89E-06 | count | 1 |
| PLEKHM1     | 0.8385374 | 0.8041957 | 1.0427 | 0.298  | 1.89E-06 | count | 1 |
| SNRPN       | 0.148955  | 0.2278554 | 0.6537 | 0.514  | 1.89E-06 | count | 1 |
| NUDT6       | 0.8385374 | 0.9932103 | 0.8443 | 0.399  | 1.90E-06 | count | 1 |
| TCOF1       | 0.3702242 | 0.488653  | 0.7576 | 0.449  | 1.90E-06 | count | 1 |
| NDUFS5      | 0.1500226 | 0.175953  | 0.8526 | 0.394  | 1.91E-06 | count | 1 |
| GINS4       | 0.3741416 | 0.7252035 | 0.5159 | 0.606  | 1.91E-06 | count | 1 |
| PLEKHA1     | 0.3748686 | 0.5640488 | 0.6646 | 0.507  | 1.92E-06 | count | 1 |
| RMND5A      | 0.3752139 | 0.4760977 | 0.7881 | 0.431  | 1.92E-06 | count | 1 |
| AUP1        | 0.1510186 | 0.2529919 | 0.5969 | 0.551  | 1.93E-06 | count | 1 |
| ANKRA2      | 0.37707   | 0.534625  | 0.7053 | 0.481  | 1.93E-06 | count | 1 |
| SPOPL       | 0.37707   | 0.493526  | 0.764  | 0.445  | 1.93E-06 | count | 1 |
| HOTAIRM1    | 0.3752139 | 0.4677704 | 0.8021 | 0.423  | 1.93E-06 | count | 1 |
| LTBP4       | 0.37707   | 0.5366388 | 0.7027 | 0.483  | 1.94E-06 | count | 1 |
| NLRC5       | 0.3774369 | 0.5473276 | 0.6896 | 0.491  | 1.94E-06 | count | 1 |
| ATG4D       | 0.8567517 | 0.8019927 | 1.0683 | 0.286  | 1.94E-06 | count | 1 |
| MTG2        | 0.8567517 | 0.8019927 | 1.0683 | 0.286  | 1.94E-06 | count | 1 |
| ZNF354B     | 1.6810474 | 0.8675613 | 1.9377 | 0.0533 | 1.94E-06 | count | 1 |
| DMWD        | 0.3774369 | 0.6415728 | 0.5883 | 0.557  | 1.94E-06 | count | 1 |
| APOM        | 0.8567517 | 0.8426929 | 1.0167 | 0.31   | 1.94E-06 | count | 1 |
| BTBD10      | 0.3794157 | 0.5187777 | 0.7314 | 0.465  | 1.95E-06 | count | 1 |
| CTDP1       | 0.8567517 | 0.9139499 | 0.9374 | 0.349  | 1.95E-06 | count | 1 |
| NR3C2       | 0.8567517 | 0.9139499 | 0.9374 | 0.349  | 1.95E-06 | count | 1 |
| ZNF140      | 0.8567517 | 0.9139499 | 0.9374 | 0.349  | 1.95E-06 | count | 1 |
| ITGAM       | 0.8567517 | 0.787017  | 1.0886 | 0.277  | 1.95E-06 | count | 1 |
| ATP6AP2     | 0.1529533 | 0.1909842 | 0.8009 | 0.424  | 1.95E-06 | count | 1 |
| PLXNC1      | 0.3794157 | 0.5872832 | 0.6461 | 0.519  | 1.95E-06 | count | 1 |
| PPP6R2      | 0.3794157 | 0.3863656 | 0.982  | 0.327  | 1.96E-06 | count | 1 |
| CCZ1B       | 0.8567517 | 0.9372549 | 0.9141 | 0.361  | 1.96E-06 | count | 1 |
| SEPSECS     | 0.3810172 | 0.6729525 | 0.5662 | 0.572  | 1.96E-06 | count | 1 |
| GABPB1      | 0.1544759 | 0.2925364 | 0.5281 | 0.598  | 1.97E-06 | count | 1 |
| LRRFIP2     | 0.1544883 | 0.4188391 | 0.3688 | 0.712  | 1.97E-06 | count | 1 |
| RAD23B      | 0.1544611 | 0.3229603 | 0.4783 | 0.633  | 1.97E-06 | count | 1 |
| GTF2IRD2    | 0.3824744 | 0.6298701 | 0.6072 | 0.544  | 1.97E-06 | count | 1 |
| MFSD14B     | 0.3824744 | 0.5393171 | 0.7092 | 0.479  | 1.97E-06 | count | 1 |
| PARVB       | 0.3843809 | 0.4143221 | 0.9277 | 0.354  | 1.98E-06 | count | 1 |
| MAD2L1BP    | 0.3843809 | 0.4305931 | 0.8927 | 0.373  | 1.98E-06 | count | 1 |
| PRRC2A      | 0.3839572 | 0.4855383 | 0.7908 | 0.429  | 1.99E-06 | count | 1 |

|            |           |           |        |        |          |       |   |
|------------|-----------|-----------|--------|--------|----------|-------|---|
| ANKRD42    | 0.3866288 | 0.6867999 | 0.5629 | 0.574  | 1.99E-06 | count | 1 |
| MPEG1      | 0.3866288 | 0.5893638 | 0.656  | 0.512  | 1.99E-06 | count | 1 |
| BRMS1L     | 0.3866288 | 0.610924  | 0.6329 | 0.527  | 1.99E-06 | count | 1 |
| TMEM87B    | 0.3839572 | 0.4615066 | 0.832  | 0.406  | 1.99E-06 | count | 1 |
| ST8SIA4    | 0.1563894 | 0.2345933 | 0.6666 | 0.505  | 1.99E-06 | count | 1 |
| PTAR1      | 0.3863524 | 0.5568682 | 0.6938 | 0.488  | 2.00E-06 | count | 1 |
| SNX11      | 0.3865122 | 0.4645398 | 0.832  | 0.406  | 2.00E-06 | count | 1 |
| BCOR       | 0.8822358 | 0.9178247 | 0.9612 | 0.337  | 2.01E-06 | count | 1 |
| ABCB1      | 1.7753967 | 1.075989  | 1.65   | 0.0996 | 2.01E-06 | count | 1 |
| ZNF667     | 1.7753967 | 1.075989  | 1.65   | 0.0996 | 2.01E-06 | count | 1 |
| BST1       | 1.7753967 | 2.4245418 | 0.7323 | 0.464  | 2.01E-06 | count | 1 |
| RAB32      | 1.7753967 | 2.4245418 | 0.7323 | 0.464  | 2.01E-06 | count | 1 |
| XXYLT1-AS2 | 1.7753967 | 2.4245418 | 0.7323 | 0.464  | 2.01E-06 | count | 1 |
| ACOT9      | 0.389319  | 0.5718089 | 0.6809 | 0.496  | 2.01E-06 | count | 1 |
| CD38       | 0.8822358 | 1.170754  | 0.7536 | 0.452  | 2.02E-06 | count | 1 |
| SUPT7L     | 0.392596  | 0.7257438 | 0.541  | 0.589  | 2.02E-06 | count | 1 |
| TECPR1     | 0.392596  | 0.7652339 | 0.513  | 0.608  | 2.02E-06 | count | 1 |
| SNAPC3     | 0.392596  | 0.5931645 | 0.6619 | 0.508  | 2.02E-06 | count | 1 |
| DCTN1      | 0.392596  | 0.6995954 | 0.5612 | 0.575  | 2.02E-06 | count | 1 |
| DOHH       | 0.392596  | 0.7267673 | 0.5402 | 0.589  | 2.03E-06 | count | 1 |
| CNOT8      | 0.1588609 | 0.3554389 | 0.4469 | 0.655  | 2.03E-06 | count | 1 |
| COQ6       | 0.392596  | 0.8027838 | 0.489  | 0.625  | 2.03E-06 | count | 1 |
| CSF3R      | 0.392596  | 1.1652251 | 0.3369 | 0.736  | 2.03E-06 | count | 1 |
| SDF2       | 0.1597403 | 0.2786903 | 0.5732 | 0.567  | 2.04E-06 | count | 1 |
| IGHMBP2    | 0.8940539 | 1.2459816 | 0.7175 | 0.473  | 2.05E-06 | count | 1 |
| C17orf107  | 0.8940539 | 1.2459816 | 0.7175 | 0.473  | 2.05E-06 | count | 1 |
| SERAC1     | 0.8940539 | 1.2004016 | 0.7448 | 0.457  | 2.05E-06 | count | 1 |
| ACVR1      | 0.8940539 | 1.1811811 | 0.7569 | 0.45   | 2.05E-06 | count | 1 |
| TTC4       | 0.8940539 | 1.1811811 | 0.7569 | 0.45   | 2.05E-06 | count | 1 |
| IL5RA      | 0.8940539 | 1.1811811 | 0.7569 | 0.45   | 2.05E-06 | count | 1 |
| KIFC2      | 0.8940539 | 1.1811811 | 0.7569 | 0.45   | 2.05E-06 | count | 1 |
| MAPRE3     | 0.8940539 | 1.1234486 | 0.7958 | 0.427  | 2.05E-06 | count | 1 |
| MAN2C1     | 0.8940539 | 1.1234486 | 0.7958 | 0.427  | 2.05E-06 | count | 1 |
| ASRGL1     | 0.8940539 | 1.4746698 | 0.6063 | 0.545  | 2.05E-06 | count | 1 |
| RSRC1      | 0.1608325 | 0.291698  | 0.5514 | 0.582  | 2.06E-06 | count | 1 |
| AP1S3      | 0.3962548 | 0.503176  | 0.7875 | 0.431  | 2.06E-06 | count | 1 |
| CCDC32     | 0.1610312 | 0.3018963 | 0.5334 | 0.594  | 2.06E-06 | count | 1 |
| DGKD       | 0.1613396 | 0.3851508 | 0.4189 | 0.675  | 2.06E-06 | count | 1 |
| PPAT       | 0.3987692 | 0.6190879 | 0.6441 | 0.52   | 2.07E-06 | count | 1 |
| TTC32      | 0.398266  | 0.4695958 | 0.8481 | 0.397  | 2.07E-06 | count | 1 |
| PDPK1      | 0.3962548 | 0.4510386 | 0.8785 | 0.38   | 2.07E-06 | count | 1 |
| GADD45A    | 0.3987692 | 0.6363041 | 0.6267 | 0.531  | 2.07E-06 | count | 1 |
| TSSC4      | 0.1624442 | 0.3124331 | 0.5199 | 0.603  | 2.08E-06 | count | 1 |
| DENND4B    | 0.9027151 | 0.8416987 | 1.0725 | 0.284  | 2.08E-06 | count | 1 |
| ALG10      | 0.4018913 | 0.9077915 | 0.4427 | 0.658  | 2.08E-06 | count | 1 |

|            |           |           |        |       |          |       |   |
|------------|-----------|-----------|--------|-------|----------|-------|---|
| MAFK       | 0.3987692 | 0.5434014 | 0.7338 | 0.463 | 2.08E-06 | count | 1 |
| ZHX2       | 0.9027151 | 0.7721245 | 1.1691 | 0.243 | 2.08E-06 | count | 1 |
| UROD       | 0.4018913 | 0.5198271 | 0.7731 | 0.44  | 2.08E-06 | count | 1 |
| BEX4       | 0.162947  | 0.3186374 | 0.5114 | 0.609 | 2.08E-06 | count | 1 |
| MRPS26     | 0.1623831 | 0.2860689 | 0.5676 | 0.571 | 2.08E-06 | count | 1 |
| C18orf25   | 0.4019989 | 0.5138388 | 0.7823 | 0.434 | 2.09E-06 | count | 1 |
| BCKDHB     | 0.4018913 | 0.4390068 | 0.9155 | 0.36  | 2.09E-06 | count | 1 |
| PITHD1     | 0.1636269 | 0.2549608 | 0.6418 | 0.521 | 2.09E-06 | count | 1 |
| HKR1       | 0.9093577 | 1.1918574 | 0.763  | 0.446 | 2.09E-06 | count | 1 |
| ZSCAN2     | 0.9093577 | 1.1918574 | 0.763  | 0.446 | 2.09E-06 | count | 1 |
| DET1       | 0.9093577 | 1.1918574 | 0.763  | 0.446 | 2.09E-06 | count | 1 |
| GAB2       | 0.9093577 | 0.9011623 | 1.0091 | 0.313 | 2.09E-06 | count | 1 |
| EML3       | 0.9093577 | 0.9933745 | 0.9154 | 0.36  | 2.10E-06 | count | 1 |
| AL117339.5 | 0.9093577 | 0.9933745 | 0.9154 | 0.36  | 2.10E-06 | count | 1 |
| PHC1       | 0.9093577 | 0.8625302 | 1.0543 | 0.292 | 2.10E-06 | count | 1 |
| PLAG1      | 0.9093577 | 0.8625302 | 1.0543 | 0.292 | 2.10E-06 | count | 1 |
| GBP2       | 0.3976222 | 0.5848434 | 0.6799 | 0.497 | 2.10E-06 | count | 1 |
| KLF8       | 0.9093577 | 1.0777256 | 0.8438 | 0.399 | 2.10E-06 | count | 1 |
| TBL3       | 0.9093577 | 1.0777256 | 0.8438 | 0.399 | 2.10E-06 | count | 1 |
| AC022706.1 | 0.9093577 | 1.0777256 | 0.8438 | 0.399 | 2.10E-06 | count | 1 |
| RUSC1      | 0.9093577 | 0.9584664 | 0.9488 | 0.343 | 2.10E-06 | count | 1 |
| FAM200A    | 0.9093577 | 0.9584664 | 0.9488 | 0.343 | 2.10E-06 | count | 1 |
| ZNF746     | 0.9093577 | 0.9584664 | 0.9488 | 0.343 | 2.10E-06 | count | 1 |
| SLC25A53   | 0.9093577 | 0.9584664 | 0.9488 | 0.343 | 2.10E-06 | count | 1 |
| LINC02256  | 0.9093577 | 0.9584664 | 0.9488 | 0.343 | 2.10E-06 | count | 1 |
| AMMECR1L   | 0.9093577 | 0.9584664 | 0.9488 | 0.343 | 2.10E-06 | count | 1 |
| LZTS2      | 0.9093577 | 0.9584664 | 0.9488 | 0.343 | 2.10E-06 | count | 1 |
| PROSER1    | 0.9093577 | 1.0456373 | 0.8697 | 0.385 | 2.10E-06 | count | 1 |
| RIPK3      | 0.9093577 | 1.0456373 | 0.8697 | 0.385 | 2.10E-06 | count | 1 |
| TESPA1     | 0.9093577 | 1.0456373 | 0.8697 | 0.385 | 2.10E-06 | count | 1 |
| GPSM2      | 0.9093577 | 1.0456373 | 0.8697 | 0.385 | 2.10E-06 | count | 1 |
| USP16      | 0.1641551 | 0.1959352 | 0.8378 | 0.403 | 2.10E-06 | count | 1 |
| ENPP4      | 0.4032958 | 0.3917687 | 1.0294 | 0.304 | 2.10E-06 | count | 1 |
| NCOA5      | 0.9093577 | 1.1260803 | 0.8075 | 0.42  | 2.10E-06 | count | 1 |
| ZNF689     | 0.9093577 | 1.1260803 | 0.8075 | 0.42  | 2.10E-06 | count | 1 |
| COG5       | 0.4018913 | 0.5714796 | 0.7032 | 0.482 | 2.10E-06 | count | 1 |
| CLMN       | 0.4057275 | 0.6104061 | 0.6647 | 0.507 | 2.10E-06 | count | 1 |
| ANKLE2     | 0.1642295 | 0.2331246 | 0.7045 | 0.482 | 2.10E-06 | count | 1 |
| DISP1      | 0.9093577 | 1.2011479 | 0.7571 | 0.449 | 2.10E-06 | count | 1 |
| GSK3A      | 0.4062591 | 0.4055692 | 1.0017 | 0.317 | 2.11E-06 | count | 1 |
| BRD1       | 0.4044089 | 0.3498113 | 1.1561 | 0.248 | 2.11E-06 | count | 1 |
| ZNF384     | 0.9093577 | 0.6398727 | 1.4212 | 0.156 | 2.12E-06 | count | 1 |
| STX4       | 0.1655578 | 0.2668362 | 0.6204 | 0.535 | 2.12E-06 | count | 1 |
| C6orf89    | 0.4062591 | 0.5342991 | 0.7604 | 0.447 | 2.13E-06 | count | 1 |
| TRIM73     | 0.4087965 | 0.6117591 | 0.6682 | 0.504 | 2.13E-06 | count | 1 |



|         |           |           |        |       |          |       |   |
|---------|-----------|-----------|--------|-------|----------|-------|---|
| BAD     | 0.1653004 | 0.341855  | 0.4835 | 0.629 | 2.13E-06 | count | 1 |
| SUDS3   | 0.1665234 | 0.2530845 | 0.658  | 0.511 | 2.13E-06 | count | 1 |
| RELA    | 0.4093036 | 0.4452822 | 0.9192 | 0.358 | 2.14E-06 | count | 1 |
| TNRC6C  | 0.9234281 | 0.6108467 | 1.5117 | 0.131 | 2.15E-06 | count | 1 |
| LRCH3   | 0.4104546 | 0.4036385 | 1.0169 | 0.31  | 2.16E-06 | count | 1 |
| U2AF2   | 0.4156442 | 0.3416941 | 1.2164 | 0.224 | 2.17E-06 | count | 1 |
| SYNJ2BP | 0.4170715 | 0.4690856 | 0.8891 | 0.374 | 2.17E-06 | count | 1 |
| OGFRL1  | 0.4170715 | 0.5231279 | 0.7973 | 0.426 | 2.17E-06 | count | 1 |
| TESK1   | 0.4096822 | 0.5404785 | 0.758  | 0.449 | 2.17E-06 | count | 1 |
| ZBTB18  | 0.4183666 | 0.6023664 | 0.6945 | 0.488 | 2.18E-06 | count | 1 |
| SLC41A3 | 0.4183666 | 0.6002122 | 0.697  | 0.486 | 2.18E-06 | count | 1 |
| HDAC7   | 0.4183666 | 0.7420802 | 0.5638 | 0.573 | 2.18E-06 | count | 1 |
| MYDGF   | 0.169736  | 0.261972  | 0.6479 | 0.517 | 2.18E-06 | count | 1 |
| ZNF701  | 0.4183666 | 0.7836874 | 0.5338 | 0.594 | 2.18E-06 | count | 1 |
| TIMM23  | 0.4183666 | 0.6240236 | 0.6704 | 0.503 | 2.18E-06 | count | 1 |
| FANCD2  | 0.4183666 | 0.6489583 | 0.6447 | 0.519 | 2.18E-06 | count | 1 |
| QRICH1  | 0.4183666 | 0.5841019 | 0.7163 | 0.474 | 2.18E-06 | count | 1 |
| PUS7L   | 0.4147911 | 0.377098  | 1.1    | 0.272 | 2.18E-06 | count | 1 |
| HEATR6  | 0.4183666 | 0.6371749 | 0.6566 | 0.512 | 2.19E-06 | count | 1 |
| ESYT2   | 0.4183666 | 0.6106689 | 0.6851 | 0.494 | 2.19E-06 | count | 1 |
| RBM26   | 0.1708478 | 0.314564  | 0.5431 | 0.587 | 2.19E-06 | count | 1 |
| ZNF394  | 0.1703987 | 0.23068   | 0.7387 | 0.46  | 2.19E-06 | count | 1 |
| PPP6R1  | 0.4183666 | 0.4317406 | 0.969  | 0.333 | 2.19E-06 | count | 1 |
| ERC1    | 0.4183666 | 0.4878937 | 0.8575 | 0.392 | 2.20E-06 | count | 1 |
| STAM2   | 0.4183666 | 0.536368  | 0.78   | 0.436 | 2.20E-06 | count | 1 |
| TOMM5   | 0.1713728 | 0.2873068 | 0.5965 | 0.551 | 2.21E-06 | count | 1 |
| ASB8    | 0.1725685 | 0.3595966 | 0.4799 | 0.632 | 2.21E-06 | count | 1 |
| UBE2E2  | 0.1726614 | 0.3701165 | 0.4665 | 0.641 | 2.22E-06 | count | 1 |
| MAN2B1  | 0.4257331 | 0.544529  | 0.7818 | 0.435 | 2.22E-06 | count | 1 |
| GOLGA3  | 0.4264408 | 0.419224  | 1.0172 | 0.31  | 2.22E-06 | count | 1 |
| COQ4    | 0.4233142 | 0.4420129 | 0.9577 | 0.339 | 2.23E-06 | count | 1 |
| DDB1    | 0.4246829 | 0.4426066 | 0.9595 | 0.338 | 2.23E-06 | count | 1 |
| VTI1A   | 0.1739498 | 0.3837548 | 0.4533 | 0.651 | 2.23E-06 | count | 1 |
| GMCL1   | 0.4231539 | 0.3992666 | 1.0598 | 0.29  | 2.23E-06 | count | 1 |
| DNAJA3  | 0.4270986 | 0.5469744 | 0.7808 | 0.435 | 2.23E-06 | count | 1 |
| NUP37   | 0.4270986 | 0.5160144 | 0.8277 | 0.408 | 2.24E-06 | count | 1 |
| CUL4B   | 0.4270986 | 0.6070399 | 0.7036 | 0.482 | 2.25E-06 | count | 1 |
| ZFAND5  | 0.1742639 | 0.2327688 | 0.7487 | 0.454 | 2.25E-06 | count | 1 |
| KAT6B   | 0.4277117 | 0.385317  | 1.11   | 0.268 | 2.25E-06 | count | 1 |
| FLII    | 0.4270986 | 0.5512041 | 0.7748 | 0.439 | 2.25E-06 | count | 1 |
| DCAF15  | 0.4291632 | 0.4745412 | 0.9044 | 0.366 | 2.25E-06 | count | 1 |
| EAF2    | 0.175657  | 0.2396751 | 0.7329 | 0.464 | 2.26E-06 | count | 1 |
| DRG2    | 0.4298292 | 0.4622367 | 0.9299 | 0.353 | 2.26E-06 | count | 1 |
| ADCK2   | 0.4291632 | 0.4611146 | 0.9307 | 0.353 | 2.26E-06 | count | 1 |
| CD84    | 0.4291632 | 0.4859134 | 0.8832 | 0.378 | 2.26E-06 | count | 1 |

|            |           |           |        |       |          |       |   |
|------------|-----------|-----------|--------|-------|----------|-------|---|
| PEX2       | 0.4298292 | 0.4341166 | 0.9901 | 0.323 | 2.27E-06 | count | 1 |
| PITRM1     | 0.432506  | 0.697474  | 0.6201 | 0.536 | 2.27E-06 | count | 1 |
| SGK1       | 0.176567  | 0.4692462 | 0.3763 | 0.707 | 2.27E-06 | count | 1 |
| FCGR2A     | 0.432506  | 0.7036966 | 0.6146 | 0.539 | 2.27E-06 | count | 1 |
| TP53BP1    | 0.432506  | 0.4932563 | 0.8768 | 0.381 | 2.27E-06 | count | 1 |
| EEF1E1     | 0.1767105 | 0.3130534 | 0.5645 | 0.573 | 2.28E-06 | count | 1 |
| ENOPH1     | 0.1766297 | 0.3475559 | 0.5082 | 0.612 | 2.28E-06 | count | 1 |
| ITPRIP     | 0.9676465 | 0.9706289 | 0.9969 | 0.319 | 2.28E-06 | count | 1 |
| MED26      | 0.9676465 | 0.7914404 | 1.2226 | 0.222 | 2.28E-06 | count | 1 |
| APOBEC3F   | 0.9690359 | 0.8723991 | 1.1108 | 0.267 | 2.28E-06 | count | 1 |
| PCID2      | 0.432506  | 0.3880462 | 1.1146 | 0.266 | 2.28E-06 | count | 1 |
| CD6        | 0.9676465 | 0.7498714 | 1.2904 | 0.198 | 2.29E-06 | count | 1 |
| RPUSD4     | 0.432506  | 0.4661827 | 0.9278 | 0.354 | 2.29E-06 | count | 1 |
| ALG12      | 0.9666808 | 0.767985  | 1.2587 | 0.209 | 2.29E-06 | count | 1 |
| C1orf131   | 0.4331881 | 0.4904098 | 0.8833 | 0.378 | 2.29E-06 | count | 1 |
| RGPD5      | 0.9676465 | 1.0107324 | 0.9574 | 0.339 | 2.29E-06 | count | 1 |
| LRRC56     | 0.9666808 | 0.8685538 | 1.113  | 0.266 | 2.29E-06 | count | 1 |
| FURIN      | 0.9676465 | 1.0923484 | 0.8858 | 0.376 | 2.29E-06 | count | 1 |
| PPP2R1B    | 0.9666808 | 0.8250522 | 1.1717 | 0.242 | 2.29E-06 | count | 1 |
| ZW10       | 1.9369038 | 1.3842026 | 1.3993 | 0.162 | 2.29E-06 | count | 1 |
| ARL10      | 1.9369038 | 1.8820467 | 1.0291 | 0.304 | 2.30E-06 | count | 1 |
| AC074117.1 | 1.9369038 | 1.8820467 | 1.0291 | 0.304 | 2.30E-06 | count | 1 |
| ZNF416     | 0.9676465 | 1.1682765 | 0.8283 | 0.408 | 2.30E-06 | count | 1 |
| GPANK1     | 0.432506  | 0.365296  | 1.184  | 0.237 | 2.30E-06 | count | 1 |
| ABI2       | 0.9676465 | 1.261815  | 0.7669 | 0.444 | 2.30E-06 | count | 1 |
| SBNO2      | 0.965971  | 0.8301036 | 1.1637 | 0.245 | 2.30E-06 | count | 1 |
| MFSD11     | 0.9682726 | 0.6772353 | 1.4297 | 0.153 | 2.31E-06 | count | 1 |
| ABCC1      | 0.9666808 | 1.0654867 | 0.9073 | 0.365 | 2.31E-06 | count | 1 |
| SREK1      | 0.1794849 | 0.3103087 | 0.5784 | 0.563 | 2.31E-06 | count | 1 |
| MR1        | 0.4388462 | 0.6275194 | 0.6993 | 0.485 | 2.31E-06 | count | 1 |
| MTHFD2     | 0.4390997 | 0.4657421 | 0.9428 | 0.346 | 2.32E-06 | count | 1 |
| LEO1       | 0.4390997 | 0.4833704 | 0.9084 | 0.364 | 2.33E-06 | count | 1 |
| YDJC       | 0.1808092 | 0.2782068 | 0.6499 | 0.516 | 2.33E-06 | count | 1 |
| SLC35B2    | 0.4424445 | 0.5108032 | 0.8662 | 0.387 | 2.33E-06 | count | 1 |
| SNX6       | 0.1811346 | 0.1973291 | 0.9179 | 0.359 | 2.34E-06 | count | 1 |
| AGO2       | 0.4447633 | 0.4516879 | 0.9847 | 0.325 | 2.35E-06 | count | 1 |
| TRIM11     | 0.4447946 | 0.508762  | 0.8743 | 0.382 | 2.35E-06 | count | 1 |
| OGA        | 0.1819444 | 0.2365013 | 0.7693 | 0.442 | 2.35E-06 | count | 1 |
| GFM1       | 0.4447946 | 0.4717359 | 0.9429 | 0.346 | 2.35E-06 | count | 1 |
| VPS33A     | 0.4447633 | 0.5150335 | 0.8636 | 0.388 | 2.35E-06 | count | 1 |
| SAMD1      | 0.4426194 | 0.5169603 | 0.8562 | 0.392 | 2.36E-06 | count | 1 |
| UBR4       | 0.4447287 | 0.5209802 | 0.8536 | 0.394 | 2.36E-06 | count | 1 |
| R3HCC1L    | 0.4447946 | 0.4852749 | 0.9166 | 0.36  | 2.36E-06 | count | 1 |
| SRPRB      | 0.4447633 | 0.5120323 | 0.8686 | 0.386 | 2.36E-06 | count | 1 |
| ZFY        | 0.4463408 | 0.4520402 | 0.9874 | 0.324 | 2.38E-06 | count | 1 |

|            |           |           |        |        |          |       |   |
|------------|-----------|-----------|--------|--------|----------|-------|---|
| MDN1       | 0.9971409 | 0.8045026 | 1.2395 | 0.216  | 2.38E-06 | count | 1 |
| YRDC       | 0.1845426 | 0.3578051 | 0.5158 | 0.606  | 2.38E-06 | count | 1 |
| ZBTB1      | 0.1843171 | 0.2340447 | 0.7875 | 0.431  | 2.38E-06 | count | 1 |
| CCNB1IP1   | 0.1844657 | 0.2764333 | 0.6673 | 0.505  | 2.38E-06 | count | 1 |
| NDUF4F4    | 0.1841527 | 0.2573124 | 0.7157 | 0.475  | 2.39E-06 | count | 1 |
| URGCP      | 1.0018015 | 0.9196061 | 1.0894 | 0.277  | 2.39E-06 | count | 1 |
| PRKACA     | 1.0018015 | 0.8308905 | 1.2057 | 0.229  | 2.40E-06 | count | 1 |
| AL031708.1 | 1.9687295 | 1.3193466 | 1.4922 | 0.136  | 2.40E-06 | count | 1 |
| TYW1       | 0.4554843 | 0.6337267 | 0.7187 | 0.473  | 2.41E-06 | count | 1 |
| HYOU1      | 1.0018015 | 0.7820866 | 1.2809 | 0.201  | 2.41E-06 | count | 1 |
| DGLUCY     | 0.4554843 | 0.6131747 | 0.7428 | 0.458  | 2.41E-06 | count | 1 |
| RBM34      | 0.4554843 | 0.6302607 | 0.7227 | 0.47   | 2.41E-06 | count | 1 |
| KLHL36     | 0.4551343 | 0.4472951 | 1.0175 | 0.309  | 2.41E-06 | count | 1 |
| PVT1       | 0.455023  | 0.4901958 | 0.9282 | 0.354  | 2.41E-06 | count | 1 |
| CNOT10     | 0.4548077 | 0.5321426 | 0.8547 | 0.393  | 2.41E-06 | count | 1 |
| ZSWIM7     | 0.186457  | 0.3454555 | 0.5397 | 0.59   | 2.41E-06 | count | 1 |
| FUZ        | 1.9174362 | 0.8018937 | 2.3911 | 0.0172 | 2.41E-06 | count | 1 |
| EIF4G1     | 0.4493379 | 0.3985051 | 1.1276 | 0.26   | 2.41E-06 | count | 1 |
| ZNF7       | 0.4549357 | 0.5105134 | 0.8911 | 0.373  | 2.41E-06 | count | 1 |
| PREB       | 0.4554843 | 0.6347019 | 0.7176 | 0.473  | 2.41E-06 | count | 1 |
| SCRN1      | 0.4548077 | 0.4053158 | 1.1221 | 0.262  | 2.42E-06 | count | 1 |
| SIL1       | 0.4548077 | 0.5773812 | 0.7877 | 0.431  | 2.42E-06 | count | 1 |
| BTBD7      | 0.4549357 | 0.5035879 | 0.9034 | 0.367  | 2.42E-06 | count | 1 |
| GFOD2      | 0.9971409 | 0.7696525 | 1.2956 | 0.196  | 2.43E-06 | count | 1 |
| MYH11      | 0.4565519 | 0.849299  | 0.5376 | 0.591  | 2.45E-06 | count | 1 |
| ZNF138     | 0.4640997 | 0.4296582 | 1.0802 | 0.281  | 2.47E-06 | count | 1 |
| PIAS1      | 0.1906512 | 0.3347008 | 0.5696 | 0.569  | 2.47E-06 | count | 1 |
| POLM       | 0.4629748 | 0.4194695 | 1.1037 | 0.27   | 2.48E-06 | count | 1 |
| STX17      | 0.4677989 | 0.5096633 | 0.9179 | 0.359  | 2.49E-06 | count | 1 |
| LARP4B     | 0.4677989 | 0.5589084 | 0.837  | 0.403  | 2.49E-06 | count | 1 |
| G0S2       | 1.863369  | 1.3548891 | 1.3753 | 0.17   | 2.51E-06 | count | 1 |
| STK16      | 0.4692801 | 0.3956557 | 1.1861 | 0.236  | 2.51E-06 | count | 1 |
| FAIM       | 0.4711667 | 0.5764296 | 0.8174 | 0.414  | 2.51E-06 | count | 1 |
| RTCA       | 0.4701239 | 0.4104677 | 1.1453 | 0.253  | 2.51E-06 | count | 1 |
| RMND5B     | 0.4711667 | 0.596044  | 0.7905 | 0.43   | 2.51E-06 | count | 1 |
| OSTN-AS1   | 0.4733281 | 0.6145781 | 0.7702 | 0.442  | 2.51E-06 | count | 1 |
| PGS1       | 0.4711667 | 0.6114933 | 0.7705 | 0.441  | 2.52E-06 | count | 1 |
| KLF11      | 0.4711667 | 0.5642959 | 0.835  | 0.404  | 2.52E-06 | count | 1 |
| TRIM27     | 0.4692801 | 0.3979436 | 1.1793 | 0.239  | 2.52E-06 | count | 1 |
| SMG7       | 0.4692532 | 0.5452302 | 0.8607 | 0.39   | 2.52E-06 | count | 1 |
| LIG4       | 0.4733281 | 0.5926523 | 0.7987 | 0.425  | 2.52E-06 | count | 1 |
| RABGAP1    | 0.464936  | 0.4656724 | 0.9984 | 0.319  | 2.52E-06 | count | 1 |
| KLHL14     | 0.4758731 | 0.6410413 | 0.7423 | 0.458  | 2.53E-06 | count | 1 |
| SMPD4      | 0.4733281 | 0.6763466 | 0.6998 | 0.484  | 2.53E-06 | count | 1 |
| C8orf33    | 0.472205  | 0.4248375 | 1.1115 | 0.267  | 2.54E-06 | count | 1 |

|           |           |           |        |       |          |       |   |
|-----------|-----------|-----------|--------|-------|----------|-------|---|
| PDE6D     | 0.4749761 | 0.5073659 | 0.9362 | 0.35  | 2.54E-06 | count | 1 |
| MFS12     | 0.4749761 | 0.4880199 | 0.9733 | 0.331 | 2.54E-06 | count | 1 |
| MSRA      | 0.472205  | 0.4469063 | 1.0566 | 0.291 | 2.54E-06 | count | 1 |
| TRIM13    | 0.47045   | 0.3145428 | 1.4957 | 0.135 | 2.55E-06 | count | 1 |
| TRPC4AP   | 0.4808271 | 0.8714248 | 0.5518 | 0.581 | 2.56E-06 | count | 1 |
| PSMF1     | 0.1966842 | 0.2573181 | 0.7644 | 0.445 | 2.56E-06 | count | 1 |
| MAX       | 0.1975022 | 0.2578883 | 0.7658 | 0.444 | 2.56E-06 | count | 1 |
| HERC3     | 0.478849  | 0.5194637 | 0.9218 | 0.357 | 2.56E-06 | count | 1 |
| IPMK      | 0.478849  | 0.5303202 | 0.9029 | 0.367 | 2.56E-06 | count | 1 |
| HSD17B4   | 0.4808271 | 0.5078455 | 0.9468 | 0.344 | 2.57E-06 | count | 1 |
| MTMR9     | 0.478849  | 0.5781829 | 0.8282 | 0.408 | 2.58E-06 | count | 1 |
| ZNF268    | 2.0640397 | 1.2031712 | 1.7155 | 0.087 | 2.58E-06 | count | 1 |
| C7orf43   | 0.4846451 | 0.656646  | 0.7381 | 0.461 | 2.59E-06 | count | 1 |
| PHF19     | 2.0640397 | 1.2449584 | 1.6579 | 0.098 | 2.59E-06 | count | 1 |
| ZNF26     | 0.4808271 | 1.1789249 | 0.4079 | 0.684 | 2.59E-06 | count | 1 |
| RBM7      | 0.4816406 | 0.407572  | 1.1817 | 0.238 | 2.60E-06 | count | 1 |
| GNB5      | 0.1997951 | 0.3020453 | 0.6615 | 0.509 | 2.60E-06 | count | 1 |
| ANGEL2    | 0.4794842 | 0.5095278 | 0.941  | 0.347 | 2.60E-06 | count | 1 |
| DMAC1     | 0.1997012 | 0.3646721 | 0.5476 | 0.584 | 2.61E-06 | count | 1 |
| DUSP28    | 0.4808271 | 0.6942897 | 0.6925 | 0.489 | 2.61E-06 | count | 1 |
| LINC01215 | 0.4832276 | 0.4861324 | 0.994  | 0.321 | 2.61E-06 | count | 1 |
| OAT       | 0.4832276 | 0.4359547 | 1.1084 | 0.268 | 2.61E-06 | count | 1 |
| MYO9B     | 0.2007226 | 0.3402585 | 0.5899 | 0.556 | 2.62E-06 | count | 1 |
| FAM206A   | 1.0700776 | 1.197083  | 0.8939 | 0.372 | 2.62E-06 | count | 1 |
| BDH2      | 1.0700776 | 0.8356275 | 1.2806 | 0.201 | 2.62E-06 | count | 1 |
| SLC5A3    | 0.4692801 | 0.54104   | 0.8674 | 0.386 | 2.62E-06 | count | 1 |
| WDFY1     | 0.4883557 | 0.5106072 | 0.9564 | 0.339 | 2.62E-06 | count | 1 |
| MGLL      | 1.0700776 | 1.0172307 | 1.052  | 0.293 | 2.62E-06 | count | 1 |
| FTO       | 1.0700776 | 0.9137098 | 1.1711 | 0.242 | 2.62E-06 | count | 1 |
| DIRC2     | 1.0700776 | 0.9137098 | 1.1711 | 0.242 | 2.62E-06 | count | 1 |
| EEF2KMT   | 1.0700776 | 0.9137098 | 1.1711 | 0.242 | 2.62E-06 | count | 1 |
| CDK2      | 1.0700776 | 0.9856256 | 1.0857 | 0.278 | 2.63E-06 | count | 1 |
| PGM3      | 1.0700776 | 0.9856256 | 1.0857 | 0.278 | 2.63E-06 | count | 1 |
| CTTNBP2NL | 1.0700776 | 0.9856256 | 1.0857 | 0.278 | 2.63E-06 | count | 1 |
| SFMBT2    | 1.0700776 | 0.9856256 | 1.0857 | 0.278 | 2.63E-06 | count | 1 |
| EIPR1     | 1.0635154 | 0.7388273 | 1.4395 | 0.151 | 2.63E-06 | count | 1 |
| VPS16     | 1.0635154 | 0.7388273 | 1.4395 | 0.151 | 2.63E-06 | count | 1 |
| WDR43     | 0.2021932 | 0.2693202 | 0.7508 | 0.453 | 2.63E-06 | count | 1 |
| WWC3      | 0.4862451 | 0.4969527 | 0.9785 | 0.328 | 2.63E-06 | count | 1 |
| NELFCD    | 0.2015303 | 0.315019  | 0.6397 | 0.523 | 2.63E-06 | count | 1 |
| PPM1M     | 1.0635154 | 0.7719496 | 1.3777 | 0.169 | 2.63E-06 | count | 1 |
| RSF1      | 0.2024983 | 0.2006543 | 1.0092 | 0.313 | 2.63E-06 | count | 1 |
| RNF113A   | 0.2018225 | 0.3015332 | 0.6693 | 0.504 | 2.64E-06 | count | 1 |
| COX7A2L   | 0.20298   | 0.2049294 | 0.9905 | 0.322 | 2.64E-06 | count | 1 |
| MMAB      | 0.4846451 | 0.7338183 | 0.6604 | 0.509 | 2.64E-06 | count | 1 |

|            |           |           |        |        |          |       |   |
|------------|-----------|-----------|--------|--------|----------|-------|---|
| MOCS2      | 0.4883557 | 0.5115559 | 0.9546 | 0.34   | 2.64E-06 | count | 1 |
| RFX1       | 0.4860554 | 0.4419347 | 1.0998 | 0.272  | 2.64E-06 | count | 1 |
| MAPRE2     | 0.4917037 | 0.3697377 | 1.3299 | 0.184  | 2.65E-06 | count | 1 |
| MICU3      | 0.4942738 | 0.6910035 | 0.7153 | 0.475  | 2.65E-06 | count | 1 |
| TSC2       | 0.4942738 | 0.6499575 | 0.7605 | 0.447  | 2.65E-06 | count | 1 |
| PRKCE      | 1.0774911 | 0.7725354 | 1.3947 | 0.164  | 2.66E-06 | count | 1 |
| TRIM23     | 0.4942738 | 0.675293  | 0.7319 | 0.465  | 2.66E-06 | count | 1 |
| PTPRE      | 0.4932715 | 0.5657619 | 0.8719 | 0.384  | 2.66E-06 | count | 1 |
| TNRC18     | 0.4942738 | 0.6359916 | 0.7772 | 0.437  | 2.66E-06 | count | 1 |
| TAP2       | 0.4890374 | 0.4178161 | 1.1705 | 0.242  | 2.66E-06 | count | 1 |
| CDK11B     | 0.4890374 | 0.3965901 | 1.2331 | 0.218  | 2.66E-06 | count | 1 |
| ACAD10     | 1.0774911 | 0.9470218 | 1.1378 | 0.256  | 2.67E-06 | count | 1 |
| PA2G4      | 0.2047032 | 0.1994286 | 1.0264 | 0.305  | 2.67E-06 | count | 1 |
| AL136454.1 | 0.4991823 | 0.6693059 | 0.7458 | 0.456  | 2.68E-06 | count | 1 |
| CYB561D2   | 0.2050515 | 0.3469435 | 0.591  | 0.555  | 2.68E-06 | count | 1 |
| MYO1G      | 0.4942738 | 0.4018977 | 1.2298 | 0.219  | 2.70E-06 | count | 1 |
| QSOX1      | 1.0955721 | 0.9719739 | 1.1272 | 0.26   | 2.70E-06 | count | 1 |
| AC005332.7 | 1.0955721 | 1.1117245 | 0.9855 | 0.325  | 2.70E-06 | count | 1 |
| SPRYD4     | 1.0955721 | 1.1117245 | 0.9855 | 0.325  | 2.70E-06 | count | 1 |
| ZNF446     | 1.0955721 | 0.9078661 | 1.2068 | 0.228  | 2.70E-06 | count | 1 |
| VIPAS39    | 1.0955721 | 0.9690592 | 1.1306 | 0.259  | 2.70E-06 | count | 1 |
| TRIB1      | 1.0955721 | 1.3484537 | 0.8125 | 0.417  | 2.70E-06 | count | 1 |
| RNF19B     | 1.0955721 | 0.9941583 | 1.102  | 0.271  | 2.70E-06 | count | 1 |
| WIPI1      | 1.0955721 | 0.9941583 | 1.102  | 0.271  | 2.70E-06 | count | 1 |
| C10orf95   | 1.0955721 | 0.9941583 | 1.102  | 0.271  | 2.70E-06 | count | 1 |
| IGF1R      | 1.0955721 | 0.9941583 | 1.102  | 0.271  | 2.70E-06 | count | 1 |
| CCNT2      | 0.4974453 | 0.4693161 | 1.0599 | 0.29   | 2.71E-06 | count | 1 |
| KIAA1586   | 0.5019532 | 0.4829597 | 1.0393 | 0.299  | 2.71E-06 | count | 1 |
| LPAR5      | 0.5019532 | 0.5180999 | 0.9688 | 0.333  | 2.72E-06 | count | 1 |
| ILKAP      | 0.5013578 | 0.4184417 | 1.1982 | 0.231  | 2.73E-06 | count | 1 |
| HCFC1      | 1.0955721 | 0.7626807 | 1.4365 | 0.152  | 2.73E-06 | count | 1 |
| GPD2       | 1.0955721 | 1.0713423 | 1.0226 | 0.307  | 2.74E-06 | count | 1 |
| OSTM1      | 0.5042488 | 0.4133202 | 1.22   | 0.223  | 2.74E-06 | count | 1 |
| KYNU       | 0.2100976 | 0.3019812 | 0.6957 | 0.487  | 2.74E-06 | count | 1 |
| ZKSCAN1    | 0.5076518 | 0.6534716 | 0.7769 | 0.438  | 2.74E-06 | count | 1 |
| SRPK1      | 0.2100976 | 0.2842909 | 0.739  | 0.46   | 2.74E-06 | count | 1 |
| RRP9       | 0.5076518 | 0.5703281 | 0.8901 | 0.374  | 2.74E-06 | count | 1 |
| PM20D2     | 0.5076518 | 0.7286359 | 0.6967 | 0.486  | 2.75E-06 | count | 1 |
| CRACR2B    | 0.5076518 | 0.6534716 | 0.7769 | 0.438  | 2.75E-06 | count | 1 |
| SLC12A2    | 0.5076518 | 0.5941922 | 0.8544 | 0.393  | 2.75E-06 | count | 1 |
| COPZ1      | 0.2099649 | 0.2918357 | 0.7195 | 0.472  | 2.75E-06 | count | 1 |
| SNTA1      | 0.5052069 | 0.5258756 | 0.9607 | 0.337  | 2.75E-06 | count | 1 |
| RBM4B      | 2.1510511 | 1.1400327 | 1.8868 | 0.0598 | 2.76E-06 | count | 1 |
| TRPV2      | 2.1510511 | 1.1400327 | 1.8868 | 0.0598 | 2.76E-06 | count | 1 |
| PICK1      | 0.5076518 | 0.7317714 | 0.6937 | 0.488  | 2.76E-06 | count | 1 |

|            |           |           |        |        |          |       |   |
|------------|-----------|-----------|--------|--------|----------|-------|---|
| TPRG1L     | 0.505239  | 0.4400938 | 1.148  | 0.252  | 2.76E-06 | count | 1 |
| RNF26      | 1.0955721 | 0.8100125 | 1.3525 | 0.177  | 2.77E-06 | count | 1 |
| CFAP20     | 0.5107949 | 0.4103006 | 1.2449 | 0.214  | 2.78E-06 | count | 1 |
| IPO11      | 2.1510511 | 1.2931248 | 1.6635 | 0.0969 | 2.78E-06 | count | 1 |
| USF1       | 0.5098088 | 0.4949285 | 1.0301 | 0.304  | 2.78E-06 | count | 1 |
| VCPKMT     | 0.2141012 | 0.239261  | 0.8948 | 0.371  | 2.80E-06 | count | 1 |
| POLR2I     | 0.2145554 | 0.3337401 | 0.6429 | 0.521  | 2.80E-06 | count | 1 |
| USP4       | 0.5166354 | 0.4979727 | 1.0375 | 0.3    | 2.81E-06 | count | 1 |
| SCOC       | 0.5153251 | 0.3751991 | 1.3735 | 0.17   | 2.81E-06 | count | 1 |
| ZNF688     | 0.5158111 | 0.4200981 | 1.2278 | 0.22   | 2.82E-06 | count | 1 |
| PIGX       | 0.5183392 | 0.6868465 | 0.7547 | 0.451  | 2.83E-06 | count | 1 |
| DELE1      | 0.5183392 | 0.6428795 | 0.8063 | 0.421  | 2.83E-06 | count | 1 |
| ATE1       | 0.5075092 | 0.4778784 | 1.062  | 0.289  | 2.83E-06 | count | 1 |
| AL049840.1 | 0.5193804 | 0.5209199 | 0.997  | 0.319  | 2.84E-06 | count | 1 |
| CALCOCO1   | 0.5239353 | 0.5870327 | 0.8925 | 0.373  | 2.84E-06 | count | 1 |
| SMKR1      | 2.1084915 | 0.7724622 | 2.7296 | 0.0066 | 2.85E-06 | count | 1 |
| HEATR1     | 0.5203615 | 0.4369238 | 1.191  | 0.234  | 2.85E-06 | count | 1 |
| ELAC2      | 0.5220939 | 0.5410748 | 0.9649 | 0.335  | 2.85E-06 | count | 1 |
| MLH3       | 0.5220939 | 0.5549929 | 0.9407 | 0.347  | 2.85E-06 | count | 1 |
| EIF2B4     | 0.5220939 | 0.5818311 | 0.8973 | 0.37   | 2.86E-06 | count | 1 |
| USP10      | 0.2163522 | 0.4002697 | 0.5405 | 0.589  | 2.86E-06 | count | 1 |
| AL135925.1 | 0.5220939 | 0.5641117 | 0.9255 | 0.355  | 2.86E-06 | count | 1 |
| SDHA       | 0.5245072 | 0.4148964 | 1.2642 | 0.207  | 2.86E-06 | count | 1 |
| ZNF131     | 0.218572  | 0.3073777 | 0.7111 | 0.477  | 2.86E-06 | count | 1 |
| TMEM140    | 0.5293711 | 0.9346502 | 0.5664 | 0.571  | 2.88E-06 | count | 1 |
| RNF111     | 0.5246555 | 0.4009909 | 1.3084 | 0.191  | 2.88E-06 | count | 1 |
| ZNF600     | 0.5293711 | 0.8316751 | 0.6365 | 0.525  | 2.88E-06 | count | 1 |
| CHFR       | 0.5270651 | 0.6200101 | 0.8501 | 0.396  | 2.89E-06 | count | 1 |
| MAPK7      | 0.5293711 | 0.862991  | 0.6134 | 0.54   | 2.89E-06 | count | 1 |
| ISG20L2    | 0.2196676 | 0.3378974 | 0.6501 | 0.516  | 2.89E-06 | count | 1 |
| DEGS2      | 0.5293711 | 0.9232412 | 0.5734 | 0.567  | 2.89E-06 | count | 1 |
| DOCK2      | 0.2205837 | 0.3126277 | 0.7056 | 0.481  | 2.89E-06 | count | 1 |
| SPATS2     | 0.5246555 | 0.5263854 | 0.9967 | 0.319  | 2.89E-06 | count | 1 |
| CLK4       | 0.2205837 | 0.3080298 | 0.7161 | 0.474  | 2.90E-06 | count | 1 |
| MAU2       | 0.5303747 | 0.6010642 | 0.8824 | 0.378  | 2.90E-06 | count | 1 |
| GMPS       | 0.5293711 | 0.4402635 | 1.2024 | 0.23   | 2.90E-06 | count | 1 |
| RNF8       | 0.5279076 | 0.486557  | 1.085  | 0.279  | 2.91E-06 | count | 1 |
| PGRMC2     | 0.5344566 | 0.4405078 | 1.2133 | 0.226  | 2.93E-06 | count | 1 |
| PEMT       | 2.2310938 | 1.1229757 | 1.9868 | 0.0476 | 2.93E-06 | count | 1 |
| PSMG1      | 0.5355737 | 0.5100439 | 1.0501 | 0.294  | 2.93E-06 | count | 1 |
| MSI2       | 0.5344566 | 0.443411  | 1.2053 | 0.229  | 2.94E-06 | count | 1 |
| IAH1       | 0.2233176 | 0.2823979 | 0.7908 | 0.429  | 2.94E-06 | count | 1 |
| CUL4A      | 0.5398267 | 0.5599111 | 0.9641 | 0.336  | 2.95E-06 | count | 1 |
| BIN3       | 0.5409208 | 0.6709055 | 0.8063 | 0.421  | 2.95E-06 | count | 1 |
| WDR61      | 0.5344566 | 0.4245961 | 1.2587 | 0.209  | 2.95E-06 | count | 1 |

|            |           |           |        |       |          |       |   |
|------------|-----------|-----------|--------|-------|----------|-------|---|
| MPV17L2    | 0.5409208 | 0.6144322 | 0.8804 | 0.379 | 2.96E-06 | count | 1 |
| ZCCHC3     | 0.5368234 | 0.4294527 | 1.25   | 0.212 | 2.96E-06 | count | 1 |
| LILRB1     | 0.5409208 | 0.6427062 | 0.8416 | 0.4   | 2.96E-06 | count | 1 |
| FGFR1OP    | 0.5409208 | 0.7814178 | 0.6922 | 0.489 | 2.96E-06 | count | 1 |
| COX15      | 0.5409208 | 0.7825868 | 0.6912 | 0.49  | 2.97E-06 | count | 1 |
| POLR3A     | 0.5409208 | 0.7054032 | 0.7668 | 0.444 | 2.97E-06 | count | 1 |
| RHOQ       | 0.2275521 | 0.2532961 | 0.8984 | 0.369 | 2.99E-06 | count | 1 |
| THADA      | 0.540443  | 0.6029764 | 0.8963 | 0.371 | 2.99E-06 | count | 1 |
| CHORDC1    | 0.2278589 | 0.2512476 | 0.9069 | 0.365 | 2.99E-06 | count | 1 |
| IMMP1L     | 0.5455764 | 0.4825284 | 1.1307 | 0.259 | 3.00E-06 | count | 1 |
| TRA2A      | 0.2276406 | 0.2567789 | 0.8865 | 0.376 | 3.00E-06 | count | 1 |
| KLHL6      | 0.5413019 | 0.4632253 | 1.1686 | 0.243 | 3.01E-06 | count | 1 |
| AL138724.1 | 1.1751767 | 0.7914577 | 1.4848 | 0.138 | 3.01E-06 | count | 1 |
| MGAT5      | 0.229112  | 0.3153213 | 0.7266 | 0.468 | 3.01E-06 | count | 1 |
| USP36      | 0.5488489 | 0.6298535 | 0.8714 | 0.384 | 3.02E-06 | count | 1 |
| AP1G2      | 0.5455764 | 0.4929368 | 1.1068 | 0.269 | 3.02E-06 | count | 1 |
| UBXN2A     | 0.545493  | 0.4648679 | 1.1734 | 0.241 | 3.02E-06 | count | 1 |
| SLF2       | 0.5488489 | 0.6421439 | 0.8547 | 0.393 | 3.02E-06 | count | 1 |
| RPF1       | 0.5441686 | 0.3463132 | 1.5713 | 0.117 | 3.02E-06 | count | 1 |
| OSGIN2     | 0.5508807 | 0.8680385 | 0.6346 | 0.526 | 3.03E-06 | count | 1 |
| ZNF766     | 0.2297855 | 0.3704835 | 0.6202 | 0.535 | 3.03E-06 | count | 1 |
| ARL14      | 1.1751767 | 0.948937  | 1.2384 | 0.216 | 3.06E-06 | count | 1 |
| LYRM9      | 0.5547516 | 0.5337933 | 1.0393 | 0.299 | 3.06E-06 | count | 1 |
| INO80      | 0.2322544 | 0.3166692 | 0.7334 | 0.464 | 3.06E-06 | count | 1 |
| KPNA2      | 0.2315272 | 0.2500507 | 0.9259 | 0.355 | 3.06E-06 | count | 1 |
| SNX9       | 0.2327563 | 0.2686288 | 0.8665 | 0.387 | 3.07E-06 | count | 1 |
| TMEM138    | 0.5578623 | 0.5527479 | 1.0093 | 0.313 | 3.08E-06 | count | 1 |
| HIGD1A     | 0.551943  | 0.4224731 | 1.3065 | 0.192 | 3.08E-06 | count | 1 |
| KIAA1143   | 0.5540545 | 0.4053401 | 1.3669 | 0.172 | 3.08E-06 | count | 1 |
| COMMD1     | 0.2341084 | 0.2814152 | 0.8319 | 0.406 | 3.09E-06 | count | 1 |
| ZNF664     | 0.5565102 | 0.699222  | 0.7959 | 0.427 | 3.09E-06 | count | 1 |
| INTS9      | 2.3489257 | 2.8807484 | 0.8154 | 0.415 | 3.09E-06 | count | 1 |
| GTF2H2C    | 0.5565102 | 0.7883719 | 0.7059 | 0.481 | 3.09E-06 | count | 1 |
| ZNF587     | 1.2036138 | 0.9572579 | 1.2574 | 0.209 | 3.10E-06 | count | 1 |
| DPF2       | 0.5596555 | 0.4955522 | 1.1294 | 0.259 | 3.10E-06 | count | 1 |
| DHX8       | 0.5620106 | 0.6058576 | 0.9276 | 0.354 | 3.10E-06 | count | 1 |
| LSM12      | 0.2355937 | 0.2368413 | 0.9947 | 0.32  | 3.11E-06 | count | 1 |
| ZNF324     | 0.5620106 | 0.6330943 | 0.8877 | 0.375 | 3.11E-06 | count | 1 |
| IRF5       | 1.2057067 | 0.8812293 | 1.3682 | 0.172 | 3.11E-06 | count | 1 |
| TOP3A      | 1.2057067 | 0.9423199 | 1.2795 | 0.201 | 3.11E-06 | count | 1 |
| AL162231.1 | 1.2057067 | 0.9423199 | 1.2795 | 0.201 | 3.11E-06 | count | 1 |
| AARSD1     | 1.2057067 | 0.9423199 | 1.2795 | 0.201 | 3.11E-06 | count | 1 |
| THRA       | 1.2036138 | 0.8744207 | 1.3765 | 0.169 | 3.11E-06 | count | 1 |
| PIM1       | 0.5634877 | 0.5086109 | 1.1079 | 0.269 | 3.12E-06 | count | 1 |
| PUS7       | 1.2057067 | 0.9996843 | 1.2061 | 0.228 | 3.12E-06 | count | 1 |

|            |           |           |        |        |          |       |   |
|------------|-----------|-----------|--------|--------|----------|-------|---|
| ZMYM6      | 1.2057067 | 0.9996843 | 1.2061 | 0.228  | 3.12E-06 | count | 1 |
| NLRC3      | 1.2057067 | 0.9996843 | 1.2061 | 0.228  | 3.12E-06 | count | 1 |
| PARG       | 0.5616651 | 0.5297826 | 1.0602 | 0.29   | 3.12E-06 | count | 1 |
| BICDL1     | 1.2057067 | 1.0539309 | 1.144  | 0.253  | 3.12E-06 | count | 1 |
| ATXN7L1    | 1.2057067 | 1.0539309 | 1.144  | 0.253  | 3.12E-06 | count | 1 |
| LRRC8C     | 1.2057067 | 1.0539309 | 1.144  | 0.253  | 3.12E-06 | count | 1 |
| ZNF598     | 0.5665257 | 0.5613128 | 1.0093 | 0.313  | 3.12E-06 | count | 1 |
| FAM241A    | 1.2057067 | 1.1548047 | 1.0441 | 0.297  | 3.13E-06 | count | 1 |
| RAB11FIP2  | 0.5637929 | 0.5465111 | 1.0316 | 0.303  | 3.14E-06 | count | 1 |
| C3orf38    | 0.5633752 | 0.3141577 | 1.7933 | 0.0736 | 3.14E-06 | count | 1 |
| PRDM4      | 0.5649741 | 0.4830762 | 1.1695 | 0.243  | 3.14E-06 | count | 1 |
| KDM6B      | 0.2401063 | 0.1925874 | 1.2467 | 0.213  | 3.17E-06 | count | 1 |
| ARF5       | 0.2387336 | 0.2659855 | 0.8975 | 0.37   | 3.17E-06 | count | 1 |
| NBAS       | 0.5730546 | 0.4645332 | 1.2336 | 0.218  | 3.17E-06 | count | 1 |
| TAF1       | 0.5678787 | 0.4769344 | 1.1907 | 0.234  | 3.17E-06 | count | 1 |
| HSPA13     | 0.5704486 | 0.4387753 | 1.3001 | 0.194  | 3.18E-06 | count | 1 |
| IRAK1      | 0.5682781 | 0.4114479 | 1.3812 | 0.168  | 3.19E-06 | count | 1 |
| BOD1       | 0.2415402 | 0.3764011 | 0.6417 | 0.521  | 3.19E-06 | count | 1 |
| ARMC8      | 0.5705586 | 0.3603527 | 1.5833 | 0.114  | 3.20E-06 | count | 1 |
| SLC44A2    | 0.5607294 | 0.4691904 | 1.1951 | 0.233  | 3.20E-06 | count | 1 |
| STAG1      | 0.5747903 | 0.4349072 | 1.3216 | 0.187  | 3.20E-06 | count | 1 |
| COL4A4     | 0.5649741 | 0.6051076 | 0.9337 | 0.351  | 3.21E-06 | count | 1 |
| RBL2       | 0.5704948 | 0.4602469 | 1.2395 | 0.216  | 3.21E-06 | count | 1 |
| PPP4R3B    | 0.2433098 | 0.2862777 | 0.8499 | 0.396  | 3.21E-06 | count | 1 |
| KIN        | 0.2432803 | 0.3562983 | 0.6828 | 0.495  | 3.22E-06 | count | 1 |
| ATAD2B     | 0.2429357 | 0.3378512 | 0.7191 | 0.472  | 3.22E-06 | count | 1 |
| MIIP       | 0.5721642 | 0.3812127 | 1.5009 | 0.134  | 3.23E-06 | count | 1 |
| ISCA1      | 0.2451702 | 0.2626162 | 0.9336 | 0.351  | 3.24E-06 | count | 1 |
| ZEB1       | 0.5747903 | 0.4344565 | 1.323  | 0.187  | 3.24E-06 | count | 1 |
| NAPB       | 2.4343875 | 1.2873546 | 1.891  | 0.0593 | 3.25E-06 | count | 1 |
| KDM2B      | 0.5659661 | 0.4171079 | 1.3569 | 0.176  | 3.25E-06 | count | 1 |
| ZXDB       | 2.4343875 | 2.1734036 | 1.1201 | 0.263  | 3.25E-06 | count | 1 |
| LARGE2     | 2.3741946 | 1.1280391 | 2.1047 | 0.0359 | 3.26E-06 | count | 1 |
| NKAPD1     | 0.5861095 | 0.7360072 | 0.7963 | 0.426  | 3.26E-06 | count | 1 |
| LYRM2      | 0.2468007 | 0.3248363 | 0.7598 | 0.448  | 3.26E-06 | count | 1 |
| AOAH       | 1.2534467 | 1.5664287 | 0.8002 | 0.424  | 3.27E-06 | count | 1 |
| LRRC8B     | 1.2534467 | 0.9208848 | 1.3611 | 0.174  | 3.27E-06 | count | 1 |
| SLX4IP     | 0.5861095 | 0.6599495 | 0.8881 | 0.375  | 3.27E-06 | count | 1 |
| CPSF1      | 1.2534467 | 1.0277493 | 1.2196 | 0.223  | 3.27E-06 | count | 1 |
| AC016773.1 | 1.2534467 | 1.0277493 | 1.2196 | 0.223  | 3.27E-06 | count | 1 |
| CDC16      | 0.5849895 | 0.5447231 | 1.0739 | 0.283  | 3.28E-06 | count | 1 |
| CRELD1     | 1.2534467 | 0.9166428 | 1.3674 | 0.172  | 3.28E-06 | count | 1 |
| RPS6KA5    | 0.247993  | 0.3989031 | 0.6217 | 0.534  | 3.28E-06 | count | 1 |
| USP46      | 0.5861095 | 0.7239887 | 0.8096 | 0.419  | 3.28E-06 | count | 1 |
| PPP1R3E    | 1.2534467 | 1.0239501 | 1.2241 | 0.222  | 3.28E-06 | count | 1 |



|            |           |           |        |        |          |       |   |
|------------|-----------|-----------|--------|--------|----------|-------|---|
| GTF2E1     | 1.2534467 | 1.0239501 | 1.2241 | 0.222  | 3.28E-06 | count | 1 |
| AC006480.2 | 1.2534467 | 1.1210325 | 1.1181 | 0.264  | 3.29E-06 | count | 1 |
| AIG1       | 0.5843928 | 0.4496384 | 1.2997 | 0.194  | 3.29E-06 | count | 1 |
| MBTPS1     | 0.5867385 | 0.3991517 | 1.47   | 0.142  | 3.29E-06 | count | 1 |
| HAUS2      | 0.5889782 | 0.5526434 | 1.0657 | 0.287  | 3.29E-06 | count | 1 |
| GOLT1B     | 0.5861095 | 0.4279192 | 1.3697 | 0.171  | 3.29E-06 | count | 1 |
| SNAPIN     | 0.5849895 | 0.3732704 | 1.5672 | 0.118  | 3.29E-06 | count | 1 |
| LUC7L2     | 0.2487082 | 0.3603029 | 0.6903 | 0.49   | 3.30E-06 | count | 1 |
| FAM89A     | 0.5889782 | 0.7508359 | 0.7844 | 0.433  | 3.30E-06 | count | 1 |
| METAP1     | 0.5912793 | 0.5765347 | 1.0256 | 0.306  | 3.30E-06 | count | 1 |
| POLR1C     | 0.5889782 | 0.5135439 | 1.1469 | 0.252  | 3.30E-06 | count | 1 |
| SPIDR      | 0.247993  | 0.373764  | 0.6635 | 0.507  | 3.31E-06 | count | 1 |
| TTC7A      | 0.5889782 | 0.4921323 | 1.1968 | 0.232  | 3.31E-06 | count | 1 |
| ETFRF1     | 0.2495437 | 0.3296734 | 0.7569 | 0.449  | 3.31E-06 | count | 1 |
| ATP6AP1    | 0.5861095 | 0.4296675 | 1.3641 | 0.173  | 3.31E-06 | count | 1 |
| PDHX       | 0.5889782 | 0.6391703 | 0.9215 | 0.357  | 3.31E-06 | count | 1 |
| ELMO1      | 0.2492952 | 0.3346451 | 0.745  | 0.457  | 3.31E-06 | count | 1 |
| TRAF2      | 0.5912793 | 0.6286491 | 0.9406 | 0.347  | 3.31E-06 | count | 1 |
| ANKRD16    | 0.5960735 | 0.7978282 | 0.7471 | 0.455  | 3.32E-06 | count | 1 |
| TSR1       | 0.5912793 | 0.5630439 | 1.0501 | 0.294  | 3.32E-06 | count | 1 |
| ELOVL5     | 0.2508626 | 0.304425  | 0.8241 | 0.41   | 3.33E-06 | count | 1 |
| SPSB1      | 0.5931657 | 1.1274835 | 0.5261 | 0.599  | 3.33E-06 | count | 1 |
| HECA       | 0.2500191 | 0.316917  | 0.7889 | 0.431  | 3.33E-06 | count | 1 |
| RAB11B     | 0.5846517 | 0.3694461 | 1.5825 | 0.114  | 3.33E-06 | count | 1 |
| TAF2       | 0.5982097 | 0.7550386 | 0.7923 | 0.429  | 3.33E-06 | count | 1 |
| ICAM2      | 0.5942449 | 0.4154652 | 1.4303 | 0.153  | 3.33E-06 | count | 1 |
| HNRNPUL1   | 0.2509773 | 0.2757664 | 0.9101 | 0.363  | 3.33E-06 | count | 1 |
| HGS        | 0.5960735 | 0.7048131 | 0.8457 | 0.398  | 3.33E-06 | count | 1 |
| STRN       | 0.5942449 | 0.4421866 | 1.3439 | 0.18   | 3.33E-06 | count | 1 |
| AP001157.1 | 0.5960735 | 0.8605411 | 0.6927 | 0.489  | 3.33E-06 | count | 1 |
| PCYT1A     | 1.26258   | 0.8868272 | 1.4237 | 0.155  | 3.34E-06 | count | 1 |
| UBR1       | 0.5931657 | 0.5833564 | 1.0168 | 0.31   | 3.34E-06 | count | 1 |
| FAM104A    | 0.5901887 | 0.4218909 | 1.3989 | 0.163  | 3.35E-06 | count | 1 |
| MIS12      | 0.5861095 | 0.5151991 | 1.1376 | 0.256  | 3.35E-06 | count | 1 |
| RHOBTB2    | 1.2721384 | 0.7972691 | 1.5956 | 0.111  | 3.36E-06 | count | 1 |
| THOC3      | 0.6030492 | 0.58635   | 1.0285 | 0.304  | 3.37E-06 | count | 1 |
| ZNF296     | 0.2546943 | 0.3170533 | 0.8033 | 0.422  | 3.38E-06 | count | 1 |
| LETM1      | 0.5982097 | 0.474695  | 1.2602 | 0.208  | 3.39E-06 | count | 1 |
| IMPDH2     | 0.2545106 | 0.2798564 | 0.9094 | 0.364  | 3.39E-06 | count | 1 |
| AP2A1      | 0.5982097 | 0.7760868 | 0.7708 | 0.441  | 3.40E-06 | count | 1 |
| GRWD1      | 0.5889782 | 0.4732194 | 1.2446 | 0.214  | 3.40E-06 | count | 1 |
| AC097376.2 | 0.6011375 | 0.7298305 | 0.8237 | 0.411  | 3.40E-06 | count | 1 |
| IGHG4      | 2.2310938 | 1.2575853 | 1.7741 | 0.0767 | 3.42E-06 | count | 1 |
| EDEM1      | 0.2583476 | 0.2949921 | 0.8758 | 0.382  | 3.43E-06 | count | 1 |
| PLIN3      | 0.602006  | 0.3761089 | 1.6006 | 0.11   | 3.44E-06 | count | 1 |

|          |           |           |        |        |          |       |   |
|----------|-----------|-----------|--------|--------|----------|-------|---|
| CRTAP    | 0.6052706 | 0.4204533 | 1.4396 | 0.151  | 3.44E-06 | count | 1 |
| CEP170   | 0.258209  | 0.3053069 | 0.8457 | 0.398  | 3.44E-06 | count | 1 |
| LYST     | 0.2588042 | 0.3196696 | 0.8096 | 0.419  | 3.45E-06 | count | 1 |
| AXIN1    | 1.2994338 | 0.8351884 | 1.5559 | 0.12   | 3.45E-06 | count | 1 |
| PRKAA1   | 0.2603683 | 0.3643926 | 0.7145 | 0.475  | 3.46E-06 | count | 1 |
| THEM4    | 0.6107199 | 0.504268  | 1.2111 | 0.227  | 3.46E-06 | count | 1 |
| ZNF350   | 0.6107199 | 0.4912769 | 1.2431 | 0.214  | 3.46E-06 | count | 1 |
| SPEN     | 0.2597347 | 0.2967673 | 0.8752 | 0.382  | 3.47E-06 | count | 1 |
| BIRC2    | 0.2590895 | 0.3323279 | 0.7796 | 0.436  | 3.47E-06 | count | 1 |
| CTSA     | 0.2612855 | 0.2676486 | 0.9762 | 0.329  | 3.48E-06 | count | 1 |
| FBXW2    | 0.6107199 | 0.5308944 | 1.1504 | 0.251  | 3.48E-06 | count | 1 |
| RELT     | 0.6109037 | 0.4772344 | 1.2801 | 0.201  | 3.49E-06 | count | 1 |
| EIF2B1   | 0.6187221 | 0.5573221 | 1.1102 | 0.268  | 3.49E-06 | count | 1 |
| MAP2K1   | 0.6109788 | 0.5094416 | 1.1993 | 0.231  | 3.50E-06 | count | 1 |
| COMTD1   | 0.6199211 | 0.579661  | 1.0695 | 0.285  | 3.50E-06 | count | 1 |
| NAMPT    | 0.2580581 | 0.2786894 | 0.926  | 0.355  | 3.50E-06 | count | 1 |
| AK6      | 0.2626757 | 0.2735511 | 0.9602 | 0.337  | 3.50E-06 | count | 1 |
| SLC20A1  | 0.6192715 | 0.4985462 | 1.2422 | 0.215  | 3.51E-06 | count | 1 |
| THAP8    | 1.3189557 | 1.1926318 | 1.1059 | 0.269  | 3.51E-06 | count | 1 |
| PHKB     | 0.2632674 | 0.2968897 | 0.8868 | 0.376  | 3.52E-06 | count | 1 |
| ANKRD33B | 0.6192715 | 0.5102997 | 1.2135 | 0.226  | 3.52E-06 | count | 1 |
| PCK2     | 0.6207013 | 0.5885034 | 1.0547 | 0.292  | 3.52E-06 | count | 1 |
| ANKRD17  | 0.6207013 | 0.5885034 | 1.0547 | 0.292  | 3.52E-06 | count | 1 |
| LYPLA2   | 0.6207013 | 0.40277   | 1.5411 | 0.124  | 3.52E-06 | count | 1 |
| ELP4     | 0.6108181 | 0.5170685 | 1.1813 | 0.238  | 3.53E-06 | count | 1 |
| CAPN7    | 0.6195821 | 0.3897739 | 1.5896 | 0.113  | 3.53E-06 | count | 1 |
| CANT1    | 1.3189557 | 0.7651039 | 1.7239 | 0.0854 | 3.53E-06 | count | 1 |
| ELK4     | 0.2647878 | 0.346509  | 0.7642 | 0.445  | 3.54E-06 | count | 1 |
| ZNF248   | 0.6207013 | 0.6490277 | 0.9564 | 0.339  | 3.55E-06 | count | 1 |
| DYRK1A   | 0.265723  | 0.3550574 | 0.7484 | 0.455  | 3.55E-06 | count | 1 |
| SLC35F2  | 0.6207013 | 0.6632965 | 0.9358 | 0.35   | 3.55E-06 | count | 1 |
| FAHD2B   | 1.323122  | 0.8863829 | 1.4927 | 0.136  | 3.55E-06 | count | 1 |
| MRPL27   | 0.265723  | 0.2931688 | 0.9064 | 0.365  | 3.55E-06 | count | 1 |
| PCED1A   | 1.323122  | 0.9863987 | 1.3414 | 0.18   | 3.57E-06 | count | 1 |
| PIGO     | 1.323122  | 0.9096553 | 1.4545 | 0.147  | 3.57E-06 | count | 1 |
| ARMCX6   | 0.2671584 | 0.2985548 | 0.8948 | 0.371  | 3.57E-06 | count | 1 |
| RAD50    | 1.323122  | 0.9597534 | 1.3786 | 0.169  | 3.57E-06 | count | 1 |
| SYT11    | 1.323122  | 1.0771677 | 1.2283 | 0.22   | 3.58E-06 | count | 1 |
| VIM-AS1  | 1.3214178 | 0.6996585 | 1.8887 | 0.0596 | 3.58E-06 | count | 1 |
| CD82     | 0.2691084 | 0.1814734 | 1.4829 | 0.139  | 3.60E-06 | count | 1 |
| RAPGEF1  | 0.2690266 | 0.314155  | 0.8563 | 0.392  | 3.61E-06 | count | 1 |
| ATP6V1C1 | 0.6322048 | 0.5805459 | 1.089  | 0.277  | 3.61E-06 | count | 1 |
| MAP2K7   | 0.6287025 | 0.5704239 | 1.1022 | 0.271  | 3.62E-06 | count | 1 |
| PREP     | 0.6322048 | 0.6773058 | 0.9334 | 0.351  | 3.62E-06 | count | 1 |
| PAAF1    | 0.6375941 | 0.6758618 | 0.9434 | 0.346  | 3.63E-06 | count | 1 |

|            |           |           |        |        |          |       |   |
|------------|-----------|-----------|--------|--------|----------|-------|---|
| AMFR       | 0.2712833 | 0.351726  | 0.7713 | 0.441  | 3.63E-06 | count | 1 |
| GRINA      | 0.6316139 | 0.3754146 | 1.6824 | 0.0932 | 3.63E-06 | count | 1 |
| SLC25A39   | 0.2703085 | 0.3572861 | 0.7566 | 0.45   | 3.63E-06 | count | 1 |
| ZNF189     | 0.6345793 | 0.7494094 | 0.8468 | 0.398  | 3.63E-06 | count | 1 |
| HSD17B12   | 0.6316139 | 0.3716093 | 1.6997 | 0.0899 | 3.64E-06 | count | 1 |
| CBWD2      | 0.6415501 | 0.8500867 | 0.7547 | 0.451  | 3.64E-06 | count | 1 |
| EHD4       | 0.6256121 | 0.4950652 | 1.2637 | 0.207  | 3.64E-06 | count | 1 |
| TRMO       | 0.6359914 | 0.490411  | 1.2969 | 0.195  | 3.64E-06 | count | 1 |
| NELFA      | 0.6375941 | 0.485093  | 1.3144 | 0.189  | 3.64E-06 | count | 1 |
| AP3M2      | 0.6375941 | 0.6787738 | 0.9393 | 0.348  | 3.64E-06 | count | 1 |
| DDX19A     | 1.3441381 | 0.9377525 | 1.4334 | 0.152  | 3.65E-06 | count | 1 |
| PCYT2      | 0.6415501 | 0.7711905 | 0.8319 | 0.406  | 3.65E-06 | count | 1 |
| LMF1       | 0.6415501 | 0.8002729 | 0.8017 | 0.423  | 3.66E-06 | count | 1 |
| CENPB      | 0.6415501 | 0.7126904 | 0.9002 | 0.369  | 3.66E-06 | count | 1 |
| CASC4      | 0.2737536 | 0.3869992 | 0.7074 | 0.48   | 3.66E-06 | count | 1 |
| PPP1R3F    | 0.6415501 | 0.7732918 | 0.8296 | 0.407  | 3.67E-06 | count | 1 |
| ZFP62      | 1.3417097 | 0.7487829 | 1.7919 | 0.0738 | 3.67E-06 | count | 1 |
| PIGB       | 1.3417097 | 0.7487829 | 1.7919 | 0.0738 | 3.67E-06 | count | 1 |
| BBS4       | 0.6415501 | 0.774165  | 0.8287 | 0.408  | 3.67E-06 | count | 1 |
| TTC5       | 0.6394287 | 0.4858069 | 1.3162 | 0.189  | 3.67E-06 | count | 1 |
| SPAG1      | 0.6344199 | 0.453911  | 1.3977 | 0.163  | 3.68E-06 | count | 1 |
| ZNF529     | 1.3552062 | 0.8508644 | 1.5927 | 0.112  | 3.68E-06 | count | 1 |
| COP1       | 0.6440314 | 0.5464186 | 1.1786 | 0.239  | 3.68E-06 | count | 1 |
| VPS53      | 0.6440314 | 0.5464186 | 1.1786 | 0.239  | 3.68E-06 | count | 1 |
| SLC9A7     | 0.6490642 | 0.592269  | 1.0959 | 0.274  | 3.69E-06 | count | 1 |
| UNC13D     | 1.3417097 | 0.7535443 | 1.7805 | 0.0757 | 3.71E-06 | count | 1 |
| MDM2       | 0.2767403 | 0.3361617 | 0.8232 | 0.411  | 3.71E-06 | count | 1 |
| IER3IP1    | 0.6491924 | 0.3745644 | 1.7332 | 0.0838 | 3.74E-06 | count | 1 |
| DENND1B    | 0.6511335 | 0.4870143 | 1.337  | 0.182  | 3.75E-06 | count | 1 |
| AP4E1      | 1.3837941 | 1.6120864 | 0.8584 | 0.391  | 3.76E-06 | count | 1 |
| SLC9A1     | 1.3837941 | 1.3527879 | 1.0229 | 0.307  | 3.76E-06 | count | 1 |
| FZD5       | 1.3837941 | 1.3527879 | 1.0229 | 0.307  | 3.76E-06 | count | 1 |
| CBLN3      | 1.3837941 | 1.3527879 | 1.0229 | 0.307  | 3.76E-06 | count | 1 |
| PTGS1      | 1.3837941 | 1.3527879 | 1.0229 | 0.307  | 3.76E-06 | count | 1 |
| ZNF614     | 1.3837941 | 1.3527879 | 1.0229 | 0.307  | 3.76E-06 | count | 1 |
| LRSAM1     | 1.3837941 | 1.3527879 | 1.0229 | 0.307  | 3.76E-06 | count | 1 |
| RAB40B     | 1.3837941 | 1.3527879 | 1.0229 | 0.307  | 3.76E-06 | count | 1 |
| CAMKK1     | 1.3837941 | 1.3527879 | 1.0229 | 0.307  | 3.76E-06 | count | 1 |
| PAK4       | 1.3837941 | 1.3527879 | 1.0229 | 0.307  | 3.76E-06 | count | 1 |
| HUS1B      | 1.3837941 | 1.3527879 | 1.0229 | 0.307  | 3.76E-06 | count | 1 |
| CTNS       | 1.3837941 | 1.3527879 | 1.0229 | 0.307  | 3.76E-06 | count | 1 |
| NOP2       | 1.3837941 | 1.7626865 | 0.785  | 0.433  | 3.76E-06 | count | 1 |
| AL133338.1 | 1.3837941 | 1.7626865 | 0.785  | 0.433  | 3.76E-06 | count | 1 |
| SFT2D3     | 1.3837941 | 1.7626865 | 0.785  | 0.433  | 3.76E-06 | count | 1 |
| AC023590.1 | 1.3837941 | 1.7626865 | 0.785  | 0.433  | 3.76E-06 | count | 1 |

|          |           |           |        |        |          |       |   |
|----------|-----------|-----------|--------|--------|----------|-------|---|
| FGFRL1   | 1.3837941 | 1.7626865 | 0.785  | 0.433  | 3.76E-06 | count | 1 |
| GSK3B    | 0.6511335 | 0.5472195 | 1.1899 | 0.235  | 3.77E-06 | count | 1 |
| AFDN     | 0.6508621 | 0.4050156 | 1.607  | 0.109  | 3.77E-06 | count | 1 |
| ZNF672   | 0.6347342 | 0.3956343 | 1.6043 | 0.109  | 3.78E-06 | count | 1 |
| ARFGAP1  | 1.3837941 | 1.0488673 | 1.3193 | 0.188  | 3.78E-06 | count | 1 |
| SQLE     | 0.2826679 | 0.3227985 | 0.8757 | 0.382  | 3.79E-06 | count | 1 |
| ARSD     | 1.3837941 | 0.9841146 | 1.4061 | 0.16   | 3.79E-06 | count | 1 |
| SCAMP3   | 0.6569252 | 0.4407791 | 1.4904 | 0.137  | 3.79E-06 | count | 1 |
| SLC30A5  | 0.6545644 | 0.5441856 | 1.2028 | 0.23   | 3.79E-06 | count | 1 |
| LTA      | 0.2823037 | 0.3626488 | 0.7784 | 0.437  | 3.79E-06 | count | 1 |
| ACAD9    | 1.3837941 | 0.8650417 | 1.5997 | 0.11   | 3.79E-06 | count | 1 |
| ATRNL1   | 1.3837941 | 1.015821  | 1.3622 | 0.174  | 3.80E-06 | count | 1 |
| PRMT7    | 1.3837941 | 1.0332252 | 1.3393 | 0.181  | 3.80E-06 | count | 1 |
| TFPT     | 0.6636447 | 0.6187352 | 1.0726 | 0.284  | 3.81E-06 | count | 1 |
| ATG4B    | 0.6636447 | 0.6855277 | 0.9681 | 0.334  | 3.81E-06 | count | 1 |
| TDP1     | 0.6636447 | 0.5830251 | 1.1383 | 0.256  | 3.82E-06 | count | 1 |
| PEX1     | 0.6508621 | 0.4411333 | 1.4754 | 0.141  | 3.83E-06 | count | 1 |
| THUMPD3  | 0.6636447 | 0.6845482 | 0.9695 | 0.333  | 3.83E-06 | count | 1 |
| PDE4D    | 0.6610258 | 0.4565008 | 1.448  | 0.148  | 3.84E-06 | count | 1 |
| CCDC97   | 0.6636447 | 0.6088177 | 1.0901 | 0.276  | 3.85E-06 | count | 1 |
| MED19    | 0.2851832 | 0.3186504 | 0.895  | 0.371  | 3.85E-06 | count | 1 |
| ZNF652   | 0.2851833 | 0.2834582 | 1.0061 | 0.315  | 3.85E-06 | count | 1 |
| BROX     | 0.6599047 | 0.3845452 | 1.7161 | 0.0868 | 3.86E-06 | count | 1 |
| DDHD2    | 0.6698362 | 0.7210634 | 0.929  | 0.353  | 3.86E-06 | count | 1 |
| ATP6V0E2 | 0.6698362 | 0.6448675 | 1.0387 | 0.3    | 3.86E-06 | count | 1 |
| BMP2K    | 0.2862366 | 0.3196469 | 0.8955 | 0.371  | 3.87E-06 | count | 1 |
| SPRYD3   | 1.3837941 | 0.727743  | 1.9015 | 0.0579 | 3.87E-06 | count | 1 |
| HDHD3    | 0.6698362 | 0.6611447 | 1.0131 | 0.312  | 3.87E-06 | count | 1 |
| NARS     | 0.2871116 | 0.3633564 | 0.7902 | 0.43   | 3.88E-06 | count | 1 |
| ZNF230   | 1.3837941 | 0.7749554 | 1.7856 | 0.0748 | 3.88E-06 | count | 1 |
| RP2      | 0.6596814 | 0.4641012 | 1.4214 | 0.156  | 3.88E-06 | count | 1 |
| SMIM7    | 0.2891252 | 0.2522095 | 1.1464 | 0.252  | 3.89E-06 | count | 1 |
| TBL1XR1  | 0.2899095 | 0.2690555 | 1.0775 | 0.282  | 3.92E-06 | count | 1 |
| ARHGEF6  | 0.6663371 | 0.5588282 | 1.1924 | 0.234  | 3.93E-06 | count | 1 |
| SETBP1   | 0.6676251 | 0.3870945 | 1.7247 | 0.0853 | 3.94E-06 | count | 1 |
| FAF2     | 0.6698362 | 0.4714367 | 1.4208 | 0.156  | 3.94E-06 | count | 1 |
| HPS1     | 0.2928997 | 0.3668334 | 0.7985 | 0.425  | 3.95E-06 | count | 1 |
| APEH     | 0.6808017 | 0.5443308 | 1.2507 | 0.212  | 3.96E-06 | count | 1 |
| PTTG1IP  | 0.6864523 | 0.5345931 | 1.2841 | 0.2    | 3.98E-06 | count | 1 |
| COASY    | 1.4267144 | 0.7878608 | 1.8109 | 0.0708 | 3.98E-06 | count | 1 |
| GGCT     | 0.6864523 | 0.6254543 | 1.0975 | 0.273  | 3.98E-06 | count | 1 |
| ZNF444   | 1.4267144 | 0.884206  | 1.6136 | 0.107  | 4.00E-06 | count | 1 |
| ZNF33A   | 0.2961834 | 0.3663952 | 0.8084 | 0.419  | 4.00E-06 | count | 1 |
| DCAF17   | 1.4267144 | 0.9286377 | 1.5364 | 0.125  | 4.01E-06 | count | 1 |
| DAPK2    | 1.4267144 | 0.9286377 | 1.5364 | 0.125  | 4.01E-06 | count | 1 |

|            |            |           |        |        |          |       |   |
|------------|------------|-----------|--------|--------|----------|-------|---|
| KRBOX4     | 1.4267144  | 0.9710385 | 1.4693 | 0.142  | 4.01E-06 | count | 1 |
| GIT2       | 0.2961291  | 0.34313   | 0.863  | 0.389  | 4.01E-06 | count | 1 |
| WDR89      | 0.6875362  | 0.6474288 | 1.0619 | 0.289  | 4.02E-06 | count | 1 |
| ZNF254     | 0.6864523  | 0.6730175 | 1.02   | 0.308  | 4.02E-06 | count | 1 |
| MED25      | 0.6875362  | 0.6557479 | 1.0485 | 0.295  | 4.02E-06 | count | 1 |
| ERBIN      | 0.2968554  | 0.3111399 | 0.9541 | 0.341  | 4.03E-06 | count | 1 |
| EPHX2      | 0.6972901  | 0.7505005 | 0.9291 | 0.353  | 4.04E-06 | count | 1 |
| CD151      | 0.6972901  | 0.7305317 | 0.9545 | 0.34   | 4.05E-06 | count | 1 |
| SF3A2      | 0.6972901  | 0.6284225 | 1.1096 | 0.268  | 4.05E-06 | count | 1 |
| CYB5D2     | 0.6972901  | 0.7614479 | 0.9157 | 0.36   | 4.05E-06 | count | 1 |
| HDGFL2     | 0.6822702  | 0.5106631 | 1.336  | 0.182  | 4.06E-06 | count | 1 |
| NME6       | 0.6875362  | 0.6068227 | 1.133  | 0.258  | 4.06E-06 | count | 1 |
| NUP54      | 0.6834588  | 0.4526542 | 1.5099 | 0.132  | 4.08E-06 | count | 1 |
| PTP4A1     | 0.3011369  | 0.312885  | 0.9625 | 0.336  | 4.08E-06 | count | 1 |
| RANBP10    | 1.4612122  | 1.3492087 | 1.083  | 0.279  | 4.08E-06 | count | 1 |
| LUZP1      | 0.6914993  | 0.5100002 | 1.3559 | 0.176  | 4.08E-06 | count | 1 |
| RGS14      | 0.3006556  | 0.309388  | 0.9718 | 0.332  | 4.08E-06 | count | 1 |
| AC133550.2 | 1.4612122  | 0.7977398 | 1.8317 | 0.0677 | 4.08E-06 | count | 1 |
| ZNF85      | 0.6972901  | 0.6865143 | 1.0157 | 0.31   | 4.09E-06 | count | 1 |
| KPNA6      | 0.6905221  | 0.4806682 | 1.4366 | 0.152  | 4.10E-06 | count | 1 |
| ELF2       | 0.3018619  | 0.3056585 | 0.9876 | 0.324  | 4.10E-06 | count | 1 |
| VCP        | 0.3034956  | 0.2286923 | 1.3271 | 0.185  | 4.11E-06 | count | 1 |
| ABCB7      | 0.6929664  | 0.579464  | 1.1959 | 0.232  | 4.12E-06 | count | 1 |
| LRRK2      | 0.698804   | 0.4498812 | 1.5533 | 0.121  | 4.13E-06 | count | 1 |
| TIAL1      | 0.3047283  | 0.2246826 | 1.3563 | 0.176  | 4.13E-06 | count | 1 |
| CYSTM1     | 0.3054163  | 0.407697  | 0.7491 | 0.454  | 4.14E-06 | count | 1 |
| ICAM1      | 0.6745654  | 0.4678707 | 1.4418 | 0.15   | 4.15E-06 | count | 1 |
| GTF2A1     | 0.6914993  | 0.4765353 | 1.4511 | 0.147  | 4.16E-06 | count | 1 |
| MORC3      | 0.3054163  | 0.2751233 | 1.1101 | 0.268  | 4.16E-06 | count | 1 |
| MTF1       | 1.4597748  | 0.7974521 | 1.8305 | 0.0678 | 4.17E-06 | count | 1 |
| NRBF2      | 0.305765   | 0.2159623 | 1.4158 | 0.158  | 4.17E-06 | count | 1 |
| PAICS      | 0.7054782  | 0.4189414 | 1.684  | 0.0929 | 4.18E-06 | count | 1 |
| SENP1      | 0.7118861  | 0.6016047 | 1.1833 | 0.237  | 4.18E-06 | count | 1 |
| TP53BP2    | 0.7118861  | 0.4406565 | 1.6155 | 0.107  | 4.20E-06 | count | 1 |
| DAP        | 0.7005528  | 0.4387124 | 1.5968 | 0.111  | 4.21E-06 | count | 1 |
| ZSCAN18    | 0.7094955  | 0.4892793 | 1.4501 | 0.148  | 4.21E-06 | count | 1 |
| RARA       | 0.3120517  | 0.302972  | 1.03   | 0.304  | 4.23E-06 | count | 1 |
| RPAP2      | 0.311242   | 0.3748253 | 0.8304 | 0.407  | 4.23E-06 | count | 1 |
| AAGAB      | 0.7118861  | 0.5409802 | 1.3159 | 0.189  | 4.24E-06 | count | 1 |
| ADGRE5     | 0.3128111  | 0.2291448 | 1.3651 | 0.173  | 4.26E-06 | count | 1 |
| ZNRF2      | 0.3138142  | 0.3068361 | 1.0227 | 0.307  | 4.26E-06 | count | 1 |
| PRPF18     | 0.71143183 | 0.4445398 | 1.6069 | 0.109  | 4.26E-06 | count | 1 |
| AP3D1      | 0.7248173  | 0.6171965 | 1.1744 | 0.241  | 4.27E-06 | count | 1 |
| NSMAF      | 0.7118861  | 0.4749334 | 1.4989 | 0.135  | 4.27E-06 | count | 1 |
| CRYZL1     | 0.7212744  | 0.5985533 | 1.205  | 0.229  | 4.28E-06 | count | 1 |

|           |           |           |        |        |          |       |   |
|-----------|-----------|-----------|--------|--------|----------|-------|---|
| ASB16-AS1 | 0.7248173 | 0.6060333 | 1.196  | 0.232  | 4.28E-06 | count | 1 |
| PCMT1     | 0.3153249 | 0.2111113 | 1.4936 | 0.136  | 4.28E-06 | count | 1 |
| GK5       | 1.4951383 | 0.970835  | 1.5401 | 0.124  | 4.29E-06 | count | 1 |
| NUCB2     | 0.7118861 | 0.58387   | 1.2193 | 0.223  | 4.29E-06 | count | 1 |
| ZNF836    | 0.7294304 | 0.7113977 | 1.0253 | 0.306  | 4.30E-06 | count | 1 |
| CHD6      | 0.3158453 | 0.3490386 | 0.9049 | 0.366  | 4.30E-06 | count | 1 |
| ARID2     | 0.7278253 | 0.5101515 | 1.4267 | 0.154  | 4.33E-06 | count | 1 |
| PRPSAP1   | 0.7204992 | 0.4827284 | 1.4926 | 0.136  | 4.33E-06 | count | 1 |
| FLOT1     | 0.7247644 | 0.4003024 | 1.8105 | 0.0709 | 4.34E-06 | count | 1 |
| EFTUD2    | 0.7326579 | 0.5873766 | 1.2473 | 0.213  | 4.35E-06 | count | 1 |
| SNHG12    | 0.3191718 | 0.2815345 | 1.1337 | 0.258  | 4.36E-06 | count | 1 |
| TMEM115   | 0.7278253 | 0.5513644 | 1.32   | 0.188  | 4.36E-06 | count | 1 |
| LINC00426 | 1.5194566 | 1.0191151 | 1.491  | 0.137  | 4.37E-06 | count | 1 |
| PIBF1     | 0.319887  | 0.3654282 | 0.8754 | 0.382  | 4.37E-06 | count | 1 |
| GMDS      | 0.7294304 | 0.6421133 | 1.136  | 0.257  | 4.39E-06 | count | 1 |
| CCNYL1    | 0.7417019 | 0.6307616 | 1.1759 | 0.24   | 4.39E-06 | count | 1 |
| GALE      | 1.5194566 | 0.8220608 | 1.8484 | 0.0652 | 4.39E-06 | count | 1 |
| TBXAS1    | 0.7417019 | 0.6615102 | 1.1212 | 0.263  | 4.40E-06 | count | 1 |
| SLC20A2   | 0.7417019 | 0.7190736 | 1.0315 | 0.303  | 4.41E-06 | count | 1 |
| MTMR3     | 1.5194566 | 0.9037756 | 1.6812 | 0.0934 | 4.41E-06 | count | 1 |
| C18orf32  | 1.5194566 | 0.9037756 | 1.6812 | 0.0934 | 4.41E-06 | count | 1 |
| TCAF1     | 0.7417019 | 0.7446566 | 0.996  | 0.32   | 4.42E-06 | count | 1 |
| MBTD1     | 0.7417019 | 0.8714552 | 0.8511 | 0.395  | 4.42E-06 | count | 1 |
| RYK       | 0.7379223 | 0.5073198 | 1.4546 | 0.147  | 4.43E-06 | count | 1 |
| STK40     | 0.7453795 | 0.7083099 | 1.0523 | 0.293  | 4.43E-06 | count | 1 |
| PLEKHM2   | 0.7408405 | 0.4088366 | 1.8121 | 0.0707 | 4.44E-06 | count | 1 |
| GBA2      | 0.7493126 | 0.6614759 | 1.1328 | 0.258  | 4.44E-06 | count | 1 |
| EIF2B3    | 0.7467678 | 0.6319948 | 1.1816 | 0.238  | 4.45E-06 | count | 1 |
| CNBD2     | 0.7326579 | 0.7451858 | 0.9832 | 0.326  | 4.45E-06 | count | 1 |
| LPIN2     | 0.7379223 | 0.6177769 | 1.1945 | 0.233  | 4.46E-06 | count | 1 |
| RHOT2     | 0.738188  | 0.4607751 | 1.6021 | 0.11   | 4.46E-06 | count | 1 |
| GGA1      | 0.3234112 | 0.3086921 | 1.0477 | 0.295  | 4.48E-06 | count | 1 |
| PPWD1     | 0.7355255 | 0.4365769 | 1.6848 | 0.0927 | 4.48E-06 | count | 1 |
| RASAL3    | 0.328269  | 0.3031434 | 1.0829 | 0.279  | 4.49E-06 | count | 1 |
| ZNF34     | 0.7500078 | 0.6352112 | 1.1807 | 0.238  | 4.50E-06 | count | 1 |
| ATXN7L3B  | 0.3283807 | 0.2595942 | 1.265  | 0.207  | 4.50E-06 | count | 1 |
| PLXNA3    | 0.7493126 | 0.6177787 | 1.2129 | 0.226  | 4.51E-06 | count | 1 |
| TASP1     | 1.528967  | 0.8383705 | 1.8237 | 0.0689 | 4.51E-06 | count | 1 |
| EFHC1     | 0.7522586 | 0.5424976 | 1.3867 | 0.166  | 4.51E-06 | count | 1 |
| GNAI3     | 0.3310615 | 0.2259825 | 1.465  | 0.144  | 4.52E-06 | count | 1 |
| PRKRIP1   | 0.3308633 | 0.3899947 | 0.8484 | 0.397  | 4.54E-06 | count | 1 |
| ARL2BP    | 0.3310384 | 0.2909028 | 1.138  | 0.256  | 4.54E-06 | count | 1 |
| SNRNP70   | 0.3278228 | 0.2819355 | 1.1628 | 0.246  | 4.54E-06 | count | 1 |
| TRMT11    | 0.7391808 | 0.4139806 | 1.7855 | 0.0749 | 4.54E-06 | count | 1 |
| SPI1      | 0.3320814 | 0.2991718 | 1.11   | 0.268  | 4.54E-06 | count | 1 |

|            |           |           |        |        |          |       |   |
|------------|-----------|-----------|--------|--------|----------|-------|---|
| PRR14      | 0.7436324 | 0.5250084 | 1.4164 | 0.157  | 4.55E-06 | count | 1 |
| SAR1B      | 0.7551531 | 0.43684   | 1.7287 | 0.0846 | 4.55E-06 | count | 1 |
| CALHM6     | 0.7671149 | 0.6651495 | 1.1533 | 0.249  | 4.56E-06 | count | 1 |
| STK38      | 0.7660416 | 0.5586364 | 1.3713 | 0.171  | 4.56E-06 | count | 1 |
| MRPL17     | 0.7562277 | 0.4506773 | 1.678  | 0.0941 | 4.56E-06 | count | 1 |
| MSRB1      | 0.7660416 | 0.639213  | 1.1984 | 0.231  | 4.57E-06 | count | 1 |
| DNPEP      | 0.7570859 | 0.3999003 | 1.8932 | 0.059  | 4.57E-06 | count | 1 |
| PATL1      | 0.7519166 | 0.6200647 | 1.2126 | 0.226  | 4.60E-06 | count | 1 |
| C1orf112   | 1.5925433 | 1.4649334 | 1.0871 | 0.278  | 4.63E-06 | count | 1 |
| AC087623.3 | 1.5925433 | 1.4649334 | 1.0871 | 0.278  | 4.63E-06 | count | 1 |
| ABCC10     | 1.5925433 | 1.4649334 | 1.0871 | 0.278  | 4.63E-06 | count | 1 |
| FAM24B     | 1.5925433 | 1.4649334 | 1.0871 | 0.278  | 4.63E-06 | count | 1 |
| TRIM62     | 1.5925433 | 1.3115726 | 1.2142 | 0.225  | 4.63E-06 | count | 1 |
| TPRA1      | 1.5925433 | 1.3115726 | 1.2142 | 0.225  | 4.63E-06 | count | 1 |
| FAM222B    | 1.5925433 | 1.3115726 | 1.2142 | 0.225  | 4.63E-06 | count | 1 |
| PAM16      | 1.5925433 | 1.0423034 | 1.5279 | 0.127  | 4.63E-06 | count | 1 |
| SLC41A1    | 1.5925433 | 1.0423034 | 1.5279 | 0.127  | 4.63E-06 | count | 1 |
| GAR1       | 0.7655202 | 0.4763658 | 1.607  | 0.109  | 4.63E-06 | count | 1 |
| BRPF3      | 1.5925433 | 1.2297168 | 1.295  | 0.196  | 4.63E-06 | count | 1 |
| SLC25A20   | 1.5925433 | 1.2297168 | 1.295  | 0.196  | 4.63E-06 | count | 1 |
| GSDMB      | 1.5925433 | 1.2297168 | 1.295  | 0.196  | 4.63E-06 | count | 1 |
| MFSD9      | 1.5925433 | 1.2297168 | 1.295  | 0.196  | 4.63E-06 | count | 1 |
| SNAI3-AS1  | 1.5925433 | 1.2297168 | 1.295  | 0.196  | 4.63E-06 | count | 1 |
| WDR24      | 1.5925433 | 1.3921245 | 1.144  | 0.253  | 4.64E-06 | count | 1 |
| AL034417.3 | 1.5925433 | 1.3921245 | 1.144  | 0.253  | 4.64E-06 | count | 1 |
| AL008729.2 | 1.5925433 | 1.5374712 | 1.0358 | 0.301  | 4.64E-06 | count | 1 |
| AC092803.2 | 1.5925433 | 1.5374712 | 1.0358 | 0.301  | 4.64E-06 | count | 1 |
| TSPYL1     | 0.3380462 | 0.2714539 | 1.2453 | 0.214  | 4.64E-06 | count | 1 |
| FBXL3      | 0.3375017 | 0.3727217 | 0.9055 | 0.366  | 4.65E-06 | count | 1 |
| UMPS       | 1.5781661 | 0.5575622 | 2.8305 | 0.0049 | 4.67E-06 | count | 1 |
| MKRN1      | 0.340929  | 0.2555577 | 1.3341 | 0.183  | 4.68E-06 | count | 1 |
| VPS13D     | 0.7656396 | 0.5862385 | 1.306  | 0.192  | 4.71E-06 | count | 1 |
| OSBP       | 0.3398545 | 0.3031571 | 1.1211 | 0.263  | 4.72E-06 | count | 1 |
| HILPDA     | 0.7867023 | 0.7083905 | 1.1105 | 0.267  | 4.72E-06 | count | 1 |
| LPAR2      | 0.7797473 | 0.6118373 | 1.2744 | 0.203  | 4.72E-06 | count | 1 |
| MED23      | 0.7775577 | 0.5765775 | 1.3486 | 0.178  | 4.72E-06 | count | 1 |
| LUC7L      | 0.7717998 | 0.3722051 | 2.0736 | 0.0387 | 4.72E-06 | count | 1 |
| FSD1L      | 0.7828393 | 0.810857  | 0.9654 | 0.335  | 4.72E-06 | count | 1 |
| EIF1AD     | 0.7561832 | 0.5377648 | 1.4062 | 0.16   | 4.73E-06 | count | 1 |
| COPS8      | 0.7759259 | 0.5010518 | 1.5486 | 0.122  | 4.74E-06 | count | 1 |
| PEL1       | 0.344986  | 0.261764  | 1.3179 | 0.188  | 4.76E-06 | count | 1 |
| WIPI2      | 0.3454451 | 0.3275879 | 1.0545 | 0.292  | 4.80E-06 | count | 1 |
| DNM1L      | 0.7797473 | 0.4642222 | 1.6797 | 0.0937 | 4.80E-06 | count | 1 |
| BET1       | 0.7797473 | 0.6095198 | 1.2793 | 0.201  | 4.80E-06 | count | 1 |
| LGALS3     | 0.7775577 | 0.5923262 | 1.3127 | 0.19   | 4.80E-06 | count | 1 |

|            |           |           |        |        |          |       |   |
|------------|-----------|-----------|--------|--------|----------|-------|---|
| UBE3B      | 1.6034536 | 0.9700705 | 1.6529 | 0.0991 | 4.81E-06 | count | 1 |
| COX20      | 0.348902  | 0.263295  | 1.3251 | 0.186  | 4.82E-06 | count | 1 |
| ETV5       | 1.6034536 | 0.9517435 | 1.6848 | 0.0927 | 4.83E-06 | count | 1 |
| MTPAP      | 1.6034536 | 0.9840849 | 1.6294 | 0.104  | 4.83E-06 | count | 1 |
| SENP6      | 0.3519612 | 0.2641925 | 1.3322 | 0.183  | 4.85E-06 | count | 1 |
| RC3H2      | 0.7909304 | 0.5217834 | 1.5158 | 0.13   | 4.85E-06 | count | 1 |
| RCL1       | 1.6034536 | 1.0457715 | 1.5333 | 0.126  | 4.86E-06 | count | 1 |
| MED1       | 0.7875348 | 0.5288377 | 1.4892 | 0.137  | 4.86E-06 | count | 1 |
| RAB3IP     | 0.7846468 | 0.4226989 | 1.8563 | 0.0641 | 4.88E-06 | count | 1 |
| BAG5       | 0.3532568 | 0.2745442 | 1.2867 | 0.199  | 4.89E-06 | count | 1 |
| WDR36      | 0.7875348 | 0.5697774 | 1.3822 | 0.168  | 4.91E-06 | count | 1 |
| MRPS18A    | 0.7963569 | 0.446503  | 1.7835 | 0.0752 | 4.92E-06 | count | 1 |
| PHF6       | 0.3553777 | 0.2277065 | 1.5607 | 0.119  | 4.92E-06 | count | 1 |
| NAA15      | 0.3574787 | 0.3204705 | 1.1155 | 0.265  | 4.93E-06 | count | 1 |
| AC060780.1 | 0.8042747 | 0.6381981 | 1.2602 | 0.208  | 4.94E-06 | count | 1 |
| SRP14-AS1  | 0.816245  | 0.8085879 | 1.0095 | 0.313  | 4.96E-06 | count | 1 |
| SYTL3      | 0.8086506 | 0.6126186 | 1.32   | 0.188  | 4.96E-06 | count | 1 |
| JMJD8      | 0.8021301 | 0.5008082 | 1.6017 | 0.11   | 4.97E-06 | count | 1 |
| EMSY       | 0.8020233 | 0.6090606 | 1.3168 | 0.189  | 4.98E-06 | count | 1 |
| TCP11L2    | 0.7940473 | 0.4321444 | 1.8375 | 0.0668 | 4.98E-06 | count | 1 |
| RFC3       | 0.816245  | 0.7304645 | 1.1174 | 0.264  | 4.99E-06 | count | 1 |
| CCDC82     | 0.3577426 | 0.284085  | 1.2593 | 0.209  | 5.00E-06 | count | 1 |
| TEC        | 0.816245  | 0.5484389 | 1.4883 | 0.137  | 5.00E-06 | count | 1 |
| RASA1      | 0.8222157 | 0.720748  | 1.1408 | 0.255  | 5.00E-06 | count | 1 |
| 5-Mar      | 0.7963569 | 0.4879672 | 1.632  | 0.103  | 5.01E-06 | count | 1 |
| KLF7       | 0.8179238 | 0.6208701 | 1.3174 | 0.188  | 5.02E-06 | count | 1 |
| YTHDC2     | 0.3629277 | 0.4235816 | 0.8568 | 0.392  | 5.02E-06 | count | 1 |
| RIPK2      | 0.3629495 | 0.3113064 | 1.1659 | 0.244  | 5.03E-06 | count | 1 |
| CCDC142    | 1.6780274 | 1.231146  | 1.363  | 0.174  | 5.03E-06 | count | 1 |
| TOMM70     | 0.8086506 | 0.6556836 | 1.2333 | 0.218  | 5.04E-06 | count | 1 |
| TRUB2      | 0.8179238 | 0.5930407 | 1.3792 | 0.169  | 5.04E-06 | count | 1 |
| POGK       | 0.816245  | 0.5296233 | 1.5412 | 0.124  | 5.05E-06 | count | 1 |
| PNPT1      | 0.7955109 | 0.6345981 | 1.2536 | 0.211  | 5.05E-06 | count | 1 |
| MAN1A2     | 0.8219899 | 0.4339778 | 1.8941 | 0.0589 | 5.06E-06 | count | 1 |
| NT5DC1     | 0.3618312 | 0.2952607 | 1.2255 | 0.221  | 5.06E-06 | count | 1 |
| AK2        | 0.3629277 | 0.3472688 | 1.0451 | 0.297  | 5.06E-06 | count | 1 |
| METTL4     | 0.3565413 | 0.4936157 | 0.7223 | 0.47   | 5.07E-06 | count | 1 |
| DCAF4      | 1.6780274 | 1.135746  | 1.4775 | 0.14   | 5.07E-06 | count | 1 |
| POLR2E     | 0.3655542 | 0.2505337 | 1.4591 | 0.145  | 5.07E-06 | count | 1 |
| RAB20      | 0.8321552 | 0.7303588 | 1.1394 | 0.255  | 5.11E-06 | count | 1 |
| ISOC1      | 0.8220193 | 0.4645027 | 1.7697 | 0.0775 | 5.12E-06 | count | 1 |
| MAT2B      | 0.368411  | 0.2849151 | 1.2931 | 0.197  | 5.12E-06 | count | 1 |
| CTNNA1     | 0.8246862 | 0.5650211 | 1.4596 | 0.145  | 5.13E-06 | count | 1 |
| ZNF3       | 0.8321552 | 0.6984938 | 1.1914 | 0.234  | 5.14E-06 | count | 1 |
| CIZ1       | 1.6802498 | 0.833676  | 2.0155 | 0.0445 | 5.16E-06 | count | 1 |



|           |           |           |        |        |          |       |   |
|-----------|-----------|-----------|--------|--------|----------|-------|---|
| USP32     | 1.6792676 | 0.9852415 | 1.7044 | 0.089  | 5.17E-06 | count | 1 |
| UTP23     | 0.3720101 | 0.3386098 | 1.0986 | 0.273  | 5.18E-06 | count | 1 |
| COL19A1   | 0.8350193 | 0.4829401 | 1.729  | 0.0845 | 5.19E-06 | count | 1 |
| RRN3      | 0.8385374 | 0.5974729 | 1.4035 | 0.161  | 5.20E-06 | count | 1 |
| WARS      | 0.8246862 | 0.5090976 | 1.6199 | 0.106  | 5.21E-06 | count | 1 |
| ERF       | 0.8205992 | 0.37117   | 2.2108 | 0.0276 | 5.23E-06 | count | 1 |
| ZNF165    | 0.8219899 | 0.5022613 | 1.6366 | 0.102  | 5.23E-06 | count | 1 |
| TTN-AS1   | 0.8385374 | 0.7460434 | 1.124  | 0.262  | 5.23E-06 | count | 1 |
| RNF166    | 0.3760758 | 0.4307333 | 0.8731 | 0.383  | 5.24E-06 | count | 1 |
| ZC3H14    | 0.8292435 | 0.4916742 | 1.6866 | 0.0924 | 5.25E-06 | count | 1 |
| ZNF426    | 1.7076041 | 0.9098919 | 1.8767 | 0.0612 | 5.29E-06 | count | 1 |
| CXCR5     | 0.3760414 | 0.2930838 | 1.2831 | 0.2    | 5.30E-06 | count | 1 |
| SEC22A    | 0.8588049 | 0.6906923 | 1.2434 | 0.214  | 5.31E-06 | count | 1 |
| ENDOV     | 1.7076041 | 0.8008102 | 2.1323 | 0.0335 | 5.31E-06 | count | 1 |
| PPIL2     | 0.8415804 | 0.4824667 | 1.7443 | 0.0818 | 5.35E-06 | count | 1 |
| NUP50     | 0.8415013 | 0.4936737 | 1.7046 | 0.089  | 5.36E-06 | count | 1 |
| ATF7IP    | 0.3841111 | 0.2032156 | 1.8902 | 0.0594 | 5.36E-06 | count | 1 |
| NEK6      | 0.3813565 | 0.3257625 | 1.1707 | 0.242  | 5.37E-06 | count | 1 |
| MAP4K1    | 0.8467797 | 0.4601265 | 1.8403 | 0.0664 | 5.37E-06 | count | 1 |
| CLPB      | 1.7575337 | 1.0129654 | 1.735  | 0.0834 | 5.38E-06 | count | 1 |
| FER       | 1.7575337 | 1.1578832 | 1.5179 | 0.13   | 5.38E-06 | count | 1 |
| NOL12     | 1.7575337 | 1.1578832 | 1.5179 | 0.13   | 5.38E-06 | count | 1 |
| TMEM39A   | 1.7575337 | 1.1578832 | 1.5179 | 0.13   | 5.38E-06 | count | 1 |
| TAB3      | 1.7575337 | 1.1578832 | 1.5179 | 0.13   | 5.38E-06 | count | 1 |
| CHST15    | 1.7575337 | 1.1578832 | 1.5179 | 0.13   | 5.38E-06 | count | 1 |
| GAN       | 1.7575337 | 1.1578832 | 1.5179 | 0.13   | 5.38E-06 | count | 1 |
| GABARAPL1 | 1.7575337 | 1.28658   | 1.3661 | 0.173  | 5.39E-06 | count | 1 |
| KIAA1324L | 1.7575337 | 1.28658   | 1.3661 | 0.173  | 5.39E-06 | count | 1 |
| RDH13     | 1.7575337 | 1.28658   | 1.3661 | 0.173  | 5.39E-06 | count | 1 |
| MATN1     | 1.7575337 | 1.28658   | 1.3661 | 0.173  | 5.39E-06 | count | 1 |
| SELENOI   | 1.7575337 | 1.28658   | 1.3661 | 0.173  | 5.39E-06 | count | 1 |
| ZNF142    | 1.7575337 | 1.28658   | 1.3661 | 0.173  | 5.39E-06 | count | 1 |
| GIMAP2    | 1.7575337 | 1.28658   | 1.3661 | 0.173  | 5.39E-06 | count | 1 |
| TTLL5     | 1.7575337 | 1.28658   | 1.3661 | 0.173  | 5.39E-06 | count | 1 |
| LINC02245 | 1.7575337 | 1.4035251 | 1.2522 | 0.211  | 5.39E-06 | count | 1 |
| SGPP2     | 1.7575337 | 1.4035251 | 1.2522 | 0.211  | 5.39E-06 | count | 1 |
| HSD17B6   | 1.7575337 | 1.858745  | 0.9455 | 0.345  | 5.39E-06 | count | 1 |
| BMS1      | 0.849065  | 0.3875265 | 2.191  | 0.029  | 5.43E-06 | count | 1 |
| TRIB3     | 0.8689694 | 0.7134197 | 1.218  | 0.224  | 5.43E-06 | count | 1 |
| MTREX     | 0.8434363 | 0.4172657 | 2.0213 | 0.0438 | 5.43E-06 | count | 1 |
| RBM10     | 0.8689694 | 0.6755424 | 1.2863 | 0.199  | 5.43E-06 | count | 1 |
| PPIP5K2   | 0.3853241 | 0.3554246 | 1.0841 | 0.279  | 5.44E-06 | count | 1 |
| SUMF1     | 1.7654963 | 1.2214744 | 1.4454 | 0.149  | 5.45E-06 | count | 1 |
| TNPO2     | 1.7654963 | 1.0629335 | 1.661  | 0.0974 | 5.45E-06 | count | 1 |
| AFMID     | 0.8689694 | 0.7033769 | 1.2354 | 0.217  | 5.46E-06 | count | 1 |

|            |           |           |        |        |          |       |   |
|------------|-----------|-----------|--------|--------|----------|-------|---|
| PGM2       | 0.8640526 | 0.5092249 | 1.6968 | 0.0904 | 5.46E-06 | count | 1 |
| ELL2       | 0.3848756 | 0.3860022 | 0.9971 | 0.319  | 5.47E-06 | count | 1 |
| AC020915.3 | 1.7654963 | 0.9554853 | 1.8477 | 0.0653 | 5.47E-06 | count | 1 |
| PKD1       | 0.8689694 | 0.6911544 | 1.2573 | 0.209  | 5.50E-06 | count | 1 |
| NPTN       | 0.849065  | 0.4134897 | 2.0534 | 0.0406 | 5.50E-06 | count | 1 |
| ABHD5      | 0.3922746 | 0.3316345 | 1.1829 | 0.238  | 5.52E-06 | count | 1 |
| AC092683.1 | 0.8579239 | 0.5952955 | 1.4412 | 0.15   | 5.52E-06 | count | 1 |
| NDUFV3     | 0.8810994 | 0.5463988 | 1.6126 | 0.108  | 5.53E-06 | count | 1 |
| NPAT       | 0.391905  | 0.2986453 | 1.3123 | 0.19   | 5.54E-06 | count | 1 |
| SREBF1     | 1.7575337 | 0.8601307 | 2.0433 | 0.0416 | 5.55E-06 | count | 1 |
| PRR34-AS1  | 0.8772392 | 0.6425484 | 1.3653 | 0.173  | 5.56E-06 | count | 1 |
| RRP15      | 0.3952088 | 0.3529821 | 1.1196 | 0.263  | 5.56E-06 | count | 1 |
| PDLIM5     | 0.8772392 | 0.6724744 | 1.3045 | 0.193  | 5.56E-06 | count | 1 |
| DCUN1D5    | 0.3971906 | 0.3868795 | 1.0267 | 0.305  | 5.57E-06 | count | 1 |
| 6-Mar      | 0.3963667 | 0.2640483 | 1.5011 | 0.134  | 5.58E-06 | count | 1 |
| OSBPL3     | 0.8841113 | 0.6212649 | 1.4231 | 0.155  | 5.59E-06 | count | 1 |
| HSD17B8    | 0.8841113 | 0.6577326 | 1.3442 | 0.18   | 5.60E-06 | count | 1 |
| TIMM10B    | 0.8733052 | 0.4339851 | 2.0123 | 0.0448 | 5.61E-06 | count | 1 |
| MED15      | 0.8940539 | 0.7016475 | 1.2742 | 0.203  | 5.61E-06 | count | 1 |
| MRPL3      | 0.3999551 | 0.2424851 | 1.6494 | 0.0998 | 5.64E-06 | count | 1 |
| SDR42E2    | 1.7575337 | 1.1913615 | 1.4752 | 0.141  | 5.64E-06 | count | 1 |
| ABRAXAS1   | 0.9000948 | 0.6293647 | 1.4302 | 0.153  | 5.64E-06 | count | 1 |
| ZNF518B    | 0.8907528 | 0.5383418 | 1.6546 | 0.0987 | 5.65E-06 | count | 1 |
| FAM102A    | 0.4018913 | 0.3524704 | 1.1402 | 0.255  | 5.67E-06 | count | 1 |
| ACSS1      | 0.8978179 | 0.6062094 | 1.481  | 0.139  | 5.68E-06 | count | 1 |
| VIRMA      | 0.4018913 | 0.3685933 | 1.0903 | 0.276  | 5.71E-06 | count | 1 |
| SERPINB9   | 0.4058441 | 0.2021672 | 2.0075 | 0.0453 | 5.71E-06 | count | 1 |
| LAX1       | 0.9093577 | 0.7313711 | 1.2434 | 0.214  | 5.73E-06 | count | 1 |
| PDXDC1     | 0.9051149 | 0.6768777 | 1.3372 | 0.182  | 5.73E-06 | count | 1 |
| TOLLIP     | 0.9041796 | 0.4891186 | 1.8486 | 0.0652 | 5.78E-06 | count | 1 |
| CORO7      | 0.9051149 | 0.6045092 | 1.4973 | 0.135  | 5.78E-06 | count | 1 |
| GSR        | 0.9093577 | 0.6108224 | 1.4887 | 0.137  | 5.80E-06 | count | 1 |
| GTF3C1     | 0.9093577 | 0.7642883 | 1.1898 | 0.235  | 5.81E-06 | count | 1 |
| ANKH       | 0.9146242 | 0.7118241 | 1.2849 | 0.199  | 5.81E-06 | count | 1 |
| USP12      | 0.4092661 | 0.2553702 | 1.6026 | 0.11   | 5.82E-06 | count | 1 |
| ZNF484     | 1.84353   | 1.0510663 | 1.754  | 0.0801 | 5.83E-06 | count | 1 |
| POC1B-AS1  | 1.84353   | 1.1590426 | 1.5906 | 0.112  | 5.84E-06 | count | 1 |
| CENPU      | 1.8231984 | 0.868518  | 2.0992 | 0.0364 | 5.84E-06 | count | 1 |
| BRWD3      | 0.9146242 | 0.6812435 | 1.3426 | 0.18   | 5.85E-06 | count | 1 |
| GTF3C5     | 0.9051149 | 0.609002  | 1.4862 | 0.138  | 5.85E-06 | count | 1 |
| TUBB2A     | 0.4122171 | 0.317303  | 1.2991 | 0.195  | 5.85E-06 | count | 1 |
| TIPIN      | 0.9146242 | 0.8170832 | 1.1194 | 0.264  | 5.85E-06 | count | 1 |
| NOLC1      | 0.411623  | 0.3216517 | 1.2797 | 0.201  | 5.86E-06 | count | 1 |
| CARD19     | 0.9093577 | 0.6366088 | 1.4284 | 0.154  | 5.87E-06 | count | 1 |
| FBXL17     | 0.9146242 | 0.7470548 | 1.2243 | 0.221  | 5.88E-06 | count | 1 |

|            |           |           |        |        |          |       |   |
|------------|-----------|-----------|--------|--------|----------|-------|---|
| CLCN4      | 1.861063  | 0.9627601 | 1.933  | 0.0539 | 5.89E-06 | count | 1 |
| ADRB2      | 0.9168704 | 0.5046882 | 1.8167 | 0.0699 | 5.90E-06 | count | 1 |
| NCAPH2     | 0.9093577 | 0.5967941 | 1.5237 | 0.128  | 5.90E-06 | count | 1 |
| SAMD8      | 0.9041796 | 0.4956216 | 1.8243 | 0.0688 | 5.92E-06 | count | 1 |
| CEP135     | 0.9116034 | 0.5383006 | 1.6935 | 0.0911 | 5.93E-06 | count | 1 |
| IFITM1     | 0.9161464 | 0.572065  | 1.6015 | 0.11   | 5.93E-06 | count | 1 |
| PAF1       | 0.4183666 | 0.3459915 | 1.2092 | 0.227  | 5.95E-06 | count | 1 |
| SPG7       | 0.4170715 | 0.3798468 | 1.098  | 0.273  | 5.96E-06 | count | 1 |
| TMX4       | 0.4203299 | 0.2349239 | 1.7892 | 0.0743 | 5.98E-06 | count | 1 |
| KLHL7      | 0.9431771 | 0.6347236 | 1.486  | 0.138  | 6.01E-06 | count | 1 |
| ZFP82      | 1.8946201 | 1.2086754 | 1.5675 | 0.118  | 6.03E-06 | count | 1 |
| ADPRH      | 1.8946201 | 1.2086754 | 1.5675 | 0.118  | 6.03E-06 | count | 1 |
| PSEN2      | 1.8946201 | 1.2086754 | 1.5675 | 0.118  | 6.03E-06 | count | 1 |
| NANP       | 1.8946201 | 1.3070274 | 1.4496 | 0.148  | 6.04E-06 | count | 1 |
| ZNF222     | 1.8946201 | 1.2179944 | 1.5555 | 0.121  | 6.05E-06 | count | 1 |
| ZNF592     | 1.8946201 | 1.2179944 | 1.5555 | 0.121  | 6.05E-06 | count | 1 |
| TMEM187    | 1.8946201 | 1.2179944 | 1.5555 | 0.121  | 6.05E-06 | count | 1 |
| SYNGAP1    | 1.8946201 | 1.3156499 | 1.4401 | 0.151  | 6.06E-06 | count | 1 |
| NLRP3      | 1.8946201 | 1.3156499 | 1.4401 | 0.151  | 6.06E-06 | count | 1 |
| METTL22    | 1.8946201 | 1.3156499 | 1.4401 | 0.151  | 6.06E-06 | count | 1 |
| B9D2       | 0.9323241 | 0.5288027 | 1.7631 | 0.0786 | 6.06E-06 | count | 1 |
| MCM4       | 1.8946201 | 1.5726434 | 1.2047 | 0.229  | 6.07E-06 | count | 1 |
| MIA2       | 0.4251523 | 0.2801258 | 1.5177 | 0.13   | 6.08E-06 | count | 1 |
| POLR2D     | 0.9333391 | 0.5513698 | 1.6928 | 0.0912 | 6.08E-06 | count | 1 |
| LHPP       | 0.4211501 | 0.3910016 | 1.0771 | 0.282  | 6.08E-06 | count | 1 |
| RASSF6     | 0.4267812 | 0.4652411 | 0.9173 | 0.359  | 6.10E-06 | count | 1 |
| ASF1A      | 0.9258715 | 0.4336891 | 2.1349 | 0.0333 | 6.10E-06 | count | 1 |
| AC016831.7 | 0.4307093 | 0.2647688 | 1.6267 | 0.105  | 6.13E-06 | count | 1 |
| PPFIBP2    | 0.9459796 | 0.6461823 | 1.464  | 0.144  | 6.15E-06 | count | 1 |
| IFT27      | 1.8778592 | 0.777214  | 2.4161 | 0.0161 | 6.18E-06 | count | 1 |
| RFNG       | 0.9548145 | 0.5127098 | 1.8623 | 0.0632 | 6.20E-06 | count | 1 |
| ACTR8      | 1.8946201 | 0.8519741 | 2.2238 | 0.0267 | 6.20E-06 | count | 1 |
| ADA        | 1.8946201 | 0.9622059 | 1.969  | 0.0496 | 6.21E-06 | count | 1 |
| FAM161A    | 0.9379045 | 0.6872249 | 1.3648 | 0.173  | 6.21E-06 | count | 1 |
| PSMD6      | 0.4350956 | 0.2784453 | 1.5626 | 0.119  | 6.21E-06 | count | 1 |
| MAP3K2     | 0.4309536 | 0.2484629 | 1.7345 | 0.0835 | 6.21E-06 | count | 1 |
| NRIP1      | 0.9343386 | 0.4880499 | 1.9144 | 0.0562 | 6.23E-06 | count | 1 |
| CERS4      | 0.4350324 | 0.3249579 | 1.3387 | 0.181  | 6.25E-06 | count | 1 |
| JPX        | 0.4345045 | 0.3784926 | 1.148  | 0.252  | 6.25E-06 | count | 1 |
| SPECC1     | 0.9682726 | 0.7619952 | 1.2707 | 0.204  | 6.26E-06 | count | 1 |
| VMP1       | 0.436394  | 0.3419214 | 1.2763 | 0.203  | 6.28E-06 | count | 1 |
| GSTCD      | 1.9141174 | 0.9443192 | 2.027  | 0.0433 | 6.28E-06 | count | 1 |
| APMAP      | 0.9666808 | 0.599775  | 1.6117 | 0.108  | 6.30E-06 | count | 1 |
| FIP1L1     | 0.4391481 | 0.2651278 | 1.6564 | 0.0984 | 6.31E-06 | count | 1 |
| PPP4R1     | 0.9524116 | 0.4627243 | 2.0583 | 0.0401 | 6.34E-06 | count | 1 |

|            |           |           |        |        |          |       |   |
|------------|-----------|-----------|--------|--------|----------|-------|---|
| ZHX1       | 1.8946201 | 0.9576438 | 1.9784 | 0.0485 | 6.35E-06 | count | 1 |
| CCDC137    | 0.9663007 | 0.6392604 | 1.5116 | 0.131  | 6.38E-06 | count | 1 |
| MNT        | 0.9919779 | 0.8040224 | 1.2338 | 0.218  | 6.41E-06 | count | 1 |
| PFDN1      | 0.448822  | 0.2967465 | 1.5125 | 0.131  | 6.44E-06 | count | 1 |
| MOB4       | 0.4474964 | 0.2925604 | 1.5296 | 0.127  | 6.50E-06 | count | 1 |
| NSUN5      | 0.9904073 | 0.7214236 | 1.3729 | 0.17   | 6.50E-06 | count | 1 |
| LZTFL1     | 0.9904073 | 0.7407633 | 1.337  | 0.182  | 6.51E-06 | count | 1 |
| ZBTB40     | 0.9934295 | 0.6962178 | 1.4269 | 0.154  | 6.51E-06 | count | 1 |
| RCHY1      | 0.9971409 | 0.7718725 | 1.2918 | 0.197  | 6.55E-06 | count | 1 |
| POLR2J3    | 0.4522889 | 0.319179  | 1.417  | 0.157  | 6.55E-06 | count | 1 |
| AC013394.1 | 0.965971  | 0.5413939 | 1.7842 | 0.0751 | 6.57E-06 | count | 1 |
| SCAPER     | 0.450829  | 0.382484  | 1.1787 | 0.239  | 6.57E-06 | count | 1 |
| PAXBP1     | 0.4517475 | 0.3142669 | 1.4375 | 0.151  | 6.59E-06 | count | 1 |
| SLC35A4    | 0.9934295 | 0.7885149 | 1.2599 | 0.208  | 6.59E-06 | count | 1 |
| RABGGTB    | 0.4549683 | 0.2807022 | 1.6208 | 0.106  | 6.62E-06 | count | 1 |
| KIF18A     | 2.0122699 | 1.2589797 | 1.5983 | 0.111  | 6.63E-06 | count | 1 |
| KLHL21     | 2.0122699 | 1.3371435 | 1.5049 | 0.133  | 6.64E-06 | count | 1 |
| TNK1       | 2.0122699 | 1.4109839 | 1.4261 | 0.155  | 6.64E-06 | count | 1 |
| IQCE       | 2.0051576 | 0.9599694 | 2.0888 | 0.0373 | 6.65E-06 | count | 1 |
| DGKE       | 0.9951854 | 0.5568382 | 1.7872 | 0.0746 | 6.66E-06 | count | 1 |
| ZNF468     | 2.0122699 | 1.2543097 | 1.6043 | 0.109  | 6.66E-06 | count | 1 |
| RAPGEF2    | 2.0122699 | 1.3327474 | 1.5099 | 0.132  | 6.67E-06 | count | 1 |
| THAP6      | 0.9802063 | 0.5904839 | 1.66   | 0.0976 | 6.68E-06 | count | 1 |
| DENND2C    | 2.0122699 | 1.4068186 | 1.4304 | 0.153  | 6.68E-06 | count | 1 |
| SLMAP      | 1.0113514 | 0.5948946 | 1.7001 | 0.0898 | 6.70E-06 | count | 1 |
| RALGDS     | 1.0040591 | 0.5700313 | 1.7614 | 0.0789 | 6.70E-06 | count | 1 |
| ST3GAL5    | 0.4608667 | 0.374572  | 1.2304 | 0.219  | 6.71E-06 | count | 1 |
| TRMT6      | 0.9847763 | 0.5260987 | 1.8718 | 0.0619 | 6.71E-06 | count | 1 |
| ACTR1B     | 1.0113514 | 0.6918896 | 1.4617 | 0.145  | 6.72E-06 | count | 1 |
| NUDT4      | 0.4607007 | 0.2960438 | 1.5562 | 0.12   | 6.74E-06 | count | 1 |
| FBXW7      | 0.4637074 | 0.3299722 | 1.4053 | 0.161  | 6.76E-06 | count | 1 |
| KIF9       | 1.0074241 | 0.6310903 | 1.5963 | 0.111  | 6.77E-06 | count | 1 |
| UTP18      | 0.4652586 | 0.3221386 | 1.4443 | 0.149  | 6.79E-06 | count | 1 |
| MAP1LC3A   | 1.0032453 | 0.4748659 | 2.1127 | 0.0352 | 6.79E-06 | count | 1 |
| ODF2L      | 0.4688726 | 0.309365  | 1.5156 | 0.13   | 6.80E-06 | count | 1 |
| SLC16A3    | 0.4682476 | 0.3347488 | 1.3988 | 0.163  | 6.82E-06 | count | 1 |
| RIT1       | 0.47045   | 0.3311315 | 1.4207 | 0.156  | 6.84E-06 | count | 1 |
| FPGS       | 2.0122699 | 0.822677  | 2.446  | 0.0148 | 6.87E-06 | count | 1 |
| CORO2A     | 2.067353  | 1.807387  | 1.1438 | 0.253  | 6.89E-06 | count | 1 |
| ZNF775     | 2.067353  | 1.2296793 | 1.6812 | 0.0934 | 6.89E-06 | count | 1 |
| DVL1       | 2.067353  | 1.2296793 | 1.6812 | 0.0934 | 6.89E-06 | count | 1 |
| TMX1       | 0.4735835 | 0.2971001 | 1.594  | 0.112  | 6.89E-06 | count | 1 |
| EXOSC10    | 0.9985728 | 0.5141364 | 1.9422 | 0.0527 | 6.89E-06 | count | 1 |
| PARP12     | 2.0265014 | 1.0138705 | 1.9988 | 0.0462 | 6.91E-06 | count | 1 |
| DR1        | 0.4756845 | 0.3703096 | 1.2846 | 0.2    | 6.94E-06 | count | 1 |

|            |           |           |        |        |          |       |   |
|------------|-----------|-----------|--------|--------|----------|-------|---|
| DUS1L      | 0.4768027 | 0.3095146 | 1.5405 | 0.124  | 6.95E-06 | count | 1 |
| MRPL9      | 0.4742992 | 0.3447619 | 1.3757 | 0.17   | 6.96E-06 | count | 1 |
| RNF170     | 1.0434746 | 0.6230687 | 1.6747 | 0.0947 | 6.96E-06 | count | 1 |
| EEA1       | 0.4751597 | 0.3721001 | 1.277  | 0.202  | 6.96E-06 | count | 1 |
| HLTF       | 0.473539  | 0.4460522 | 1.0616 | 0.289  | 6.96E-06 | count | 1 |
| DNAJC16    | 2.067353  | 1.0358005 | 1.9959 | 0.0466 | 6.97E-06 | count | 1 |
| ASNSD1     | 1.012781  | 0.427661  | 2.3682 | 0.0183 | 7.00E-06 | count | 1 |
| UNC119     | 0.4818169 | 0.3897808 | 1.2361 | 0.217  | 7.01E-06 | count | 1 |
| CIAO1      | 1.0261151 | 0.4764122 | 2.1538 | 0.0318 | 7.01E-06 | count | 1 |
| SIGLEC10   | 0.4824177 | 0.3785536 | 1.2744 | 0.203  | 7.01E-06 | count | 1 |
| ZDHHC2     | 0.4804416 | 0.3740667 | 1.2844 | 0.2    | 7.04E-06 | count | 1 |
| RWDD4      | 0.4798106 | 0.4399182 | 1.0907 | 0.276  | 7.06E-06 | count | 1 |
| CSNK1G3    | 0.4869865 | 0.2431752 | 2.0026 | 0.0458 | 7.11E-06 | count | 1 |
| XPC        | 0.4837563 | 0.3839284 | 1.26   | 0.208  | 7.13E-06 | count | 1 |
| PRKACB     | 0.4862451 | 0.3390631 | 1.4341 | 0.152  | 7.13E-06 | count | 1 |
| SHC1       | 1.0635154 | 0.8893203 | 1.1959 | 0.232  | 7.14E-06 | count | 1 |
| C1GALT1C1  | 1.0605109 | 0.6855256 | 1.547  | 0.123  | 7.15E-06 | count | 1 |
| TENT4A     | 1.0635154 | 0.9439128 | 1.1267 | 0.26   | 7.17E-06 | count | 1 |
| ZNF430     | 0.4905578 | 0.3149688 | 1.5575 | 0.12   | 7.17E-06 | count | 1 |
| MIAT       | 1.0605109 | 0.7220977 | 1.4687 | 0.143  | 7.17E-06 | count | 1 |
| PDSS2      | 1.0605109 | 0.7220977 | 1.4687 | 0.143  | 7.17E-06 | count | 1 |
| SNX20      | 2.1155552 | 1.221752  | 1.7316 | 0.084  | 7.17E-06 | count | 1 |
| IL7        | 1.0635154 | 0.8952183 | 1.188  | 0.235  | 7.19E-06 | count | 1 |
| VAT1       | 1.0635154 | 0.9198415 | 1.1562 | 0.248  | 7.22E-06 | count | 1 |
| LSM14B     | 1.0700776 | 0.653111  | 1.6384 | 0.102  | 7.22E-06 | count | 1 |
| DNMT1      | 0.4936418 | 0.3804653 | 1.2975 | 0.195  | 7.27E-06 | count | 1 |
| RMI1       | 1.0733389 | 0.6666074 | 1.6102 | 0.108  | 7.27E-06 | count | 1 |
| PEX3       | 1.0660472 | 0.6115312 | 1.7432 | 0.082  | 7.27E-06 | count | 1 |
| ZNF800     | 0.4939236 | 0.3387841 | 1.4579 | 0.146  | 7.28E-06 | count | 1 |
| AC139530.1 | 1.0744138 | 0.6795246 | 1.5811 | 0.115  | 7.29E-06 | count | 1 |
| PATZ1      | 1.0815671 | 0.7679752 | 1.4083 | 0.16   | 7.29E-06 | count | 1 |
| KLHL24     | 0.4943971 | 0.2974972 | 1.6619 | 0.0972 | 7.31E-06 | count | 1 |
| ABHD2      | 1.0841443 | 0.7358727 | 1.4733 | 0.141  | 7.33E-06 | count | 1 |
| ATXN3      | 0.4883557 | 0.4250822 | 1.1489 | 0.251  | 7.36E-06 | count | 1 |
| GNA12      | 1.0731418 | 0.6027355 | 1.7805 | 0.0757 | 7.41E-06 | count | 1 |
| WDR6       | 1.0635154 | 0.6006686 | 1.7706 | 0.0773 | 7.43E-06 | count | 1 |
| CRNKL1     | 1.0421854 | 0.5060234 | 2.0596 | 0.04   | 7.47E-06 | count | 1 |
| MTCH1      | 0.5066426 | 0.3480485 | 1.4557 | 0.146  | 7.48E-06 | count | 1 |
| FAM215B    | 1.1067041 | 0.6776886 | 1.6331 | 0.103  | 7.56E-06 | count | 1 |
| PPIL1      | 2.1776636 | 1.1594092 | 1.8783 | 0.061  | 7.57E-06 | count | 1 |
| NETO1      | 1.1196422 | 0.7923212 | 1.4131 | 0.158  | 7.57E-06 | count | 1 |
| PEX19      | 2.1452046 | 0.9656878 | 2.2214 | 0.0268 | 7.58E-06 | count | 1 |
| ACYP2      | 1.0635154 | 0.5170611 | 2.0568 | 0.0403 | 7.60E-06 | count | 1 |
| PFDN4      | 0.5132155 | 0.3750802 | 1.3683 | 0.172  | 7.65E-06 | count | 1 |
| SLC15A3    | 1.0774911 | 0.7532044 | 1.4305 | 0.153  | 7.70E-06 | count | 1 |

|            |           |           |        |        |          |       |   |
|------------|-----------|-----------|--------|--------|----------|-------|---|
| MDM1       | 1.1105342 | 0.6223676 | 1.7844 | 0.075  | 7.77E-06 | count | 1 |
| SAP30L     | 1.1105342 | 0.6223676 | 1.7844 | 0.075  | 7.77E-06 | count | 1 |
| TTC17      | 0.5183392 | 0.3557569 | 1.457  | 0.146  | 7.80E-06 | count | 1 |
| VPS51      | 0.5242889 | 0.3072698 | 1.7063 | 0.0887 | 7.82E-06 | count | 1 |
| INSIG1     | 0.5217646 | 0.4410109 | 1.1831 | 0.237  | 7.86E-06 | count | 1 |
| UBXN2B     | 1.139148  | 0.7756672 | 1.4686 | 0.143  | 7.87E-06 | count | 1 |
| PPP1R9B    | 1.1405223 | 0.711252  | 1.6035 | 0.11   | 7.89E-06 | count | 1 |
| TRMT10B    | 1.1405223 | 0.7325183 | 1.557  | 0.12   | 7.91E-06 | count | 1 |
| ITPR2      | 0.5242889 | 0.3490665 | 1.502  | 0.134  | 7.92E-06 | count | 1 |
| METTL17    | 1.1113493 | 0.488983  | 2.2728 | 0.0235 | 7.96E-06 | count | 1 |
| PRELID3B   | 0.5330315 | 0.2846457 | 1.8726 | 0.0618 | 7.97E-06 | count | 1 |
| AC008555.5 | 2.2737179 | 1.0896261 | 2.0867 | 0.0375 | 7.98E-06 | count | 1 |
| RBM18      | 1.139148  | 0.7018033 | 1.6232 | 0.105  | 8.00E-06 | count | 1 |
| AC006504.5 | 1.1516553 | 0.8669859 | 1.3283 | 0.185  | 8.01E-06 | count | 1 |
| C12orf73   | 1.1516553 | 0.8921678 | 1.2909 | 0.197  | 8.02E-06 | count | 1 |
| FAM174A    | 1.1516553 | 0.784256  | 1.4685 | 0.143  | 8.02E-06 | count | 1 |
| FXN        | 1.1516553 | 0.7531466 | 1.5291 | 0.127  | 8.02E-06 | count | 1 |
| RNF25      | 1.1405223 | 0.7909893 | 1.4419 | 0.15   | 8.03E-06 | count | 1 |
| UBAP1      | 1.1468777 | 0.6187196 | 1.8536 | 0.0645 | 8.06E-06 | count | 1 |
| EGR1       | 0.5304265 | 0.4167862 | 1.2727 | 0.204  | 8.07E-06 | count | 1 |
| CARF       | 1.1516553 | 0.8367354 | 1.3764 | 0.169  | 8.08E-06 | count | 1 |
| DCTPP1     | 0.5397911 | 0.2657819 | 2.031  | 0.0429 | 8.09E-06 | count | 1 |
| KIAA0753   | 1.1468777 | 0.755005  | 1.519  | 0.129  | 8.11E-06 | count | 1 |
| TMEM126A   | 0.5386922 | 0.3626145 | 1.4856 | 0.138  | 8.12E-06 | count | 1 |
| CA5B       | 1.1156363 | 0.4755239 | 2.3461 | 0.0194 | 8.13E-06 | count | 1 |
| RPL7L1     | 0.5425426 | 0.2886987 | 1.8793 | 0.0609 | 8.16E-06 | count | 1 |
| BAP1       | 1.18133   | 0.996329  | 1.1857 | 0.236  | 8.17E-06 | count | 1 |
| WIPF2      | 1.151875  | 0.5407132 | 2.1303 | 0.0337 | 8.17E-06 | count | 1 |
| TEX30      | 1.1277726 | 0.6172903 | 1.827  | 0.0684 | 8.19E-06 | count | 1 |
| LRRC75A    | 1.1192486 | 0.4888598 | 2.2895 | 0.0225 | 8.21E-06 | count | 1 |
| SNX24      | 2.2911488 | 1.1505507 | 1.9913 | 0.0471 | 8.22E-06 | count | 1 |
| ALDH6A1    | 2.2911488 | 1.2058441 | 1.9    | 0.0581 | 8.24E-06 | count | 1 |
| RBMXL1     | 1.1786999 | 0.5813816 | 2.0274 | 0.0432 | 8.27E-06 | count | 1 |
| AC245140.2 | 2.3102042 | 0.848136  | 2.7239 | 0.0067 | 8.36E-06 | count | 1 |
| REPIN1     | 1.1488708 | 0.5255286 | 2.1861 | 0.0293 | 8.37E-06 | count | 1 |
| MPI        | 1.1867075 | 0.6712906 | 1.7678 | 0.0778 | 8.43E-06 | count | 1 |
| WDR53      | 2.3590799 | 1.0518997 | 2.2427 | 0.0254 | 8.46E-06 | count | 1 |
| TP53INP1   | 0.5582717 | 0.2540319 | 2.1976 | 0.0285 | 8.46E-06 | count | 1 |
| BX890604.1 | 2.3590799 | 1.157865  | 2.0374 | 0.0422 | 8.47E-06 | count | 1 |
| KIAA1324   | 2.3590799 | 1.6746608 | 1.4087 | 0.16   | 8.47E-06 | count | 1 |
| FBXO46     | 2.3590799 | 1.3449787 | 1.754  | 0.0801 | 8.49E-06 | count | 1 |
| PYROXD2    | 2.3542825 | 1.6650445 | 1.4139 | 0.158  | 8.49E-06 | count | 1 |
| WRNIP1     | 1.1442134 | 0.5481888 | 2.0873 | 0.0374 | 8.56E-06 | count | 1 |
| COG6       | 1.1879625 | 0.7282317 | 1.6313 | 0.104  | 8.59E-06 | count | 1 |
| ZNF804A    | 2.3673322 | 1.289876  | 1.8353 | 0.0671 | 8.64E-06 | count | 1 |

|            |           |           |        |        |          |       |   |
|------------|-----------|-----------|--------|--------|----------|-------|---|
| TIAM2      | 1.2050144 | 0.7500162 | 1.6067 | 0.109  | 8.66E-06 | count | 1 |
| XPO1       | 0.5671475 | 0.2576036 | 2.2016 | 0.0282 | 8.66E-06 | count | 1 |
| AC099524.1 | 2.3673322 | 1.1808882 | 2.0047 | 0.0456 | 8.70E-06 | count | 1 |
| ZC2HC1A    | 0.5660875 | 0.3586621 | 1.5783 | 0.115  | 8.73E-06 | count | 1 |
| ZFR        | 0.5778888 | 0.3055582 | 1.8913 | 0.0592 | 8.74E-06 | count | 1 |
| GMFB       | 1.2244396 | 0.7630601 | 1.6046 | 0.109  | 8.76E-06 | count | 1 |
| FAM126B    | 1.2057067 | 0.6296331 | 1.9149 | 0.0561 | 8.81E-06 | count | 1 |
| BLZF1      | 1.2320593 | 0.8245156 | 1.4943 | 0.136  | 8.82E-06 | count | 1 |
| IRAK2      | 1.2050144 | 0.6616333 | 1.8213 | 0.0692 | 8.84E-06 | count | 1 |
| ADAM8      | 1.2062694 | 0.6268101 | 1.9245 | 0.0549 | 8.84E-06 | count | 1 |
| MIR222HG   | 1.2277419 | 0.7123628 | 1.7235 | 0.0855 | 8.86E-06 | count | 1 |
| RPP21      | 1.2320593 | 0.7638492 | 1.613  | 0.107  | 8.89E-06 | count | 1 |
| PYGO2      | 1.2320593 | 0.8151757 | 1.5114 | 0.131  | 8.91E-06 | count | 1 |
| SATB1      | 2.4360871 | 1.1154971 | 2.1839 | 0.0295 | 8.92E-06 | count | 1 |
| ATP2A2     | 1.2320593 | 0.8141441 | 1.5133 | 0.131  | 8.93E-06 | count | 1 |
| GPATCH4    | 0.5793514 | 0.3613392 | 1.6033 | 0.11   | 8.94E-06 | count | 1 |
| NONO       | 0.5824781 | 0.2802627 | 2.0783 | 0.0383 | 8.95E-06 | count | 1 |
| NOP14-AS1  | 2.4360871 | 1.4227248 | 1.7123 | 0.0875 | 8.95E-06 | count | 1 |
| AL021453.1 | 1.2358678 | 0.6400817 | 1.9308 | 0.0541 | 8.96E-06 | count | 1 |
| PAPOLG     | 1.2277419 | 0.7169176 | 1.7125 | 0.0875 | 8.96E-06 | count | 1 |
| PLA2G16    | 1.2219547 | 0.6931982 | 1.7628 | 0.0786 | 9.02E-06 | count | 1 |
| ADO        | 1.2439625 | 0.6007074 | 2.0708 | 0.039  | 9.09E-06 | count | 1 |
| SKAP1      | 1.2634839 | 0.5042219 | 2.5058 | 0.0126 | 9.14E-06 | count | 1 |
| PDLIM7     | 1.2534467 | 1.0146498 | 1.2353 | 0.217  | 9.16E-06 | count | 1 |
| PTPMT1     | 1.2431066 | 0.6098035 | 2.0385 | 0.0421 | 9.17E-06 | count | 1 |
| CRIP2      | 1.2439625 | 0.856688  | 1.4521 | 0.147  | 9.30E-06 | count | 1 |
| RIOK2      | 1.1958627 | 0.5516229 | 2.1679 | 0.0307 | 9.31E-06 | count | 1 |
| DNTTIP1    | 1.2187631 | 0.6404019 | 1.9031 | 0.0577 | 9.40E-06 | count | 1 |
| S100A9     | 0.6006772 | 0.9172339 | 0.6549 | 0.513  | 9.50E-06 | count | 1 |
| ZNF860     | 2.5026172 | 1.3106013 | 1.9095 | 0.0568 | 9.54E-06 | count | 1 |
| ZNF586     | 2.508451  | 0.9350677 | 2.6826 | 0.0076 | 9.61E-06 | count | 1 |
| PNPLA2     | 1.2407919 | 0.4095166 | 3.0299 | 0.0026 | 9.68E-06 | count | 1 |
| OGDH       | 2.5710832 | 1.247939  | 2.0603 | 0.04   | 9.68E-06 | count | 1 |
| SETD9      | 1.3059891 | 0.7240734 | 1.8037 | 0.072  | 9.68E-06 | count | 1 |
| APOOL      | 1.2507496 | 0.7231011 | 1.7297 | 0.0844 | 9.72E-06 | count | 1 |
| KCNN4      | 0.6267235 | 0.3365669 | 1.8621 | 0.0632 | 9.84E-06 | count | 1 |
| MTMR12     | 1.2697669 | 0.5701545 | 2.2271 | 0.0264 | 9.90E-06 | count | 1 |
| ABI1       | 0.6367561 | 0.3271331 | 1.9465 | 0.0522 | 9.94E-06 | count | 1 |
| HSBP1      | 0.6352562 | 0.2710808 | 2.3434 | 0.0195 | 9.96E-06 | count | 1 |
| PRNP       | 0.6369278 | 0.3105608 | 2.0509 | 0.0409 | 9.98E-06 | count | 1 |
| UTP25      | 1.3417097 | 0.7807376 | 1.7185 | 0.0864 | 1.00E-05 | count | 1 |
| RHEX       | 2.6432224 | 1.6723581 | 1.5805 | 0.115  | 1.00E-05 | count | 1 |
| BAZ2B      | 1.31401   | 0.619272  | 2.1219 | 0.0344 | 1.00E-05 | count | 1 |
| KLHL8      | 2.6311319 | 1.2094945 | 2.1754 | 0.0301 | 1.02E-05 | count | 1 |
| PIK3AP1    | 0.6473854 | 0.3006446 | 2.1533 | 0.0318 | 1.03E-05 | count | 1 |

|            |           |           |        |        |          |       |   |
|------------|-----------|-----------|--------|--------|----------|-------|---|
| BRD9       | 0.6530671 | 0.4097726 | 1.5937 | 0.112  | 1.03E-05 | count | 1 |
| IFT43      | 1.3307409 | 0.545027  | 2.4416 | 0.015  | 1.03E-05 | count | 1 |
| KLF10      | 0.6649622 | 0.3133886 | 2.1218 | 0.0344 | 1.05E-05 | count | 1 |
| NEPRO      | 1.3473066 | 0.5392601 | 2.4984 | 0.0128 | 1.05E-05 | count | 1 |
| TCF12      | 1.3372883 | 0.528951  | 2.5282 | 0.0118 | 1.05E-05 | count | 1 |
| GPKOW      | 1.3744211 | 0.7571789 | 1.8152 | 0.0702 | 1.05E-05 | count | 1 |
| SYNGR3     | 1.3744211 | 0.7992546 | 1.7196 | 0.0862 | 1.06E-05 | count | 1 |
| ADCK1      | 2.7742989 | 1.2398617 | 2.2376 | 0.0257 | 1.07E-05 | count | 1 |
| AC245060.5 | 2.7742989 | 1.2398617 | 2.2376 | 0.0257 | 1.07E-05 | count | 1 |
| DYNC1L1    | 0.6778545 | 0.2485434 | 2.7273 | 0.0066 | 1.08E-05 | count | 1 |
| NCOA2      | 1.3837941 | 0.661782  | 2.091  | 0.0371 | 1.08E-05 | count | 1 |
| MPHOSPH9   | 1.4140375 | 0.8166451 | 1.7315 | 0.0841 | 1.09E-05 | count | 1 |
| ZXDC       | 1.4140375 | 0.7048041 | 2.0063 | 0.0454 | 1.09E-05 | count | 1 |
| MBOAT7     | 2.7397939 | 1.3826501 | 1.9816 | 0.0481 | 1.09E-05 | count | 1 |
| THOC1      | 0.6817789 | 0.409552  | 1.6647 | 0.0967 | 1.10E-05 | count | 1 |
| SGMS1      | 1.3973755 | 0.6212664 | 2.2492 | 0.025  | 1.10E-05 | count | 1 |
| ZBTB10     | 0.6914993 | 0.3605645 | 1.9178 | 0.0558 | 1.10E-05 | count | 1 |
| PBXIP1     | 0.6909434 | 0.3227216 | 2.141  | 0.0328 | 1.10E-05 | count | 1 |
| SLC12A6    | 1.3837941 | 0.5719302 | 2.4195 | 0.0159 | 1.11E-05 | count | 1 |
| LAS1L      | 1.3621476 | 0.6205509 | 2.1951 | 0.0287 | 1.11E-05 | count | 1 |
| CHP1       | 1.4473935 | 0.6917854 | 2.0923 | 0.037  | 1.13E-05 | count | 1 |
| KLHL28     | 0.6929664 | 0.328525  | 2.1093 | 0.0355 | 1.13E-05 | count | 1 |
| PIK3IP1    | 0.699105  | 0.3366802 | 2.0765 | 0.0384 | 1.13E-05 | count | 1 |
| TP53I13    | 1.386996  | 0.4598076 | 3.0165 | 0.0027 | 1.14E-05 | count | 1 |
| ASXL1      | 0.7110667 | 0.2528493 | 2.8122 | 0.0051 | 1.15E-05 | count | 1 |
| R3HDM4     | 0.7248173 | 0.2684966 | 2.6995 | 0.0072 | 1.18E-05 | count | 1 |
| MOB2       | 1.3913634 | 0.5092083 | 2.7324 | 0.0065 | 1.18E-05 | count | 1 |
| SRF        | 1.4806731 | 0.8193116 | 1.8072 | 0.0714 | 1.18E-05 | count | 1 |
| ZYX        | 1.4411839 | 0.5005701 | 2.8791 | 0.0042 | 1.20E-05 | count | 1 |
| ZNF84      | 1.4977258 | 0.7329908 | 2.0433 | 0.0416 | 1.21E-05 | count | 1 |
| TMEM127    | 1.445552  | 0.6651077 | 2.1734 | 0.0303 | 1.21E-05 | count | 1 |
| RPA1       | 1.4742943 | 0.771403  | 1.9112 | 0.0566 | 1.22E-05 | count | 1 |
| AC020916.1 | 0.7495944 | 0.2967    | 2.5264 | 0.0119 | 1.23E-05 | count | 1 |
| IL4R       | 0.7632099 | 0.4709339 | 1.6206 | 0.106  | 1.23E-05 | count | 1 |
| SNRK       | 0.7544627 | 0.3805653 | 1.9825 | 0.048  | 1.24E-05 | count | 1 |
| JAGN1      | 0.7562047 | 0.3159456 | 2.3935 | 0.0171 | 1.26E-05 | count | 1 |
| SMAGP      | 0.7538439 | 0.4037108 | 1.8673 | 0.0625 | 1.26E-05 | count | 1 |
| MATN1-AS1  | 1.5550164 | 0.6410559 | 2.4257 | 0.0157 | 1.27E-05 | count | 1 |
| SHQ1       | 1.5424743 | 0.800432  | 1.9271 | 0.0546 | 1.28E-05 | count | 1 |
| ZNF441     | 1.5925433 | 1.0043059 | 1.5857 | 0.114  | 1.29E-05 | count | 1 |
| FBXO33     | 0.7713052 | 0.3900766 | 1.9773 | 0.0486 | 1.30E-05 | count | 1 |
| HMGCS1     | 0.7920149 | 0.3426171 | 2.3117 | 0.0213 | 1.30E-05 | count | 1 |
| PLAUR      | 1.5424743 | 1.1699257 | 1.3184 | 0.188  | 1.31E-05 | count | 1 |
| CIITA      | 0.7817513 | 0.3503495 | 2.2313 | 0.0262 | 1.32E-05 | count | 1 |
| RFXAP      | 3.2110634 | 1.7021341 | 1.8865 | 0.0599 | 1.32E-05 | count | 1 |



|            |           |           |        |          |             |       |   |
|------------|-----------|-----------|--------|----------|-------------|-------|---|
| SMIM20     | 0.7907388 | 0.3261792 | 2.4242 | 0.0157   | 1.33E-05    | count | 1 |
| MRPL24     | 1.6065366 | 0.7309164 | 2.198  | 0.0285   | 1.36E-05    | count | 1 |
| AC245014.3 | 0.8258084 | 0.3878447 | 2.1292 | 0.0338   | 1.40E-05    | count | 1 |
| SBNO1      | 0.8141109 | 0.3118736 | 2.6104 | 0.0094   | 1.40E-05    | count | 1 |
| TRMT1L     | 1.6370832 | 0.7495768 | 2.184  | 0.0295   | 1.44E-05    | count | 1 |
| ARHGEF1    | 0.8452277 | 0.2822591 | 2.9945 | 0.0029   | 1.45E-05    | count | 1 |
| TARSL2     | 0.8499631 | 0.33085   | 2.569  | 0.0105   | 1.45E-05    | count | 1 |
| SUN2       | 0.8369794 | 0.4060501 | 2.0613 | 0.0399   | 1.47E-05    | count | 1 |
| PSMD5      | 1.7510125 | 0.9105251 | 1.9231 | 0.0551   | 1.52E-05    | count | 1 |
| PGAM5      | 1.7510125 | 0.9381089 | 1.8665 | 0.0626   | 1.52E-05    | count | 1 |
| GNPTAB     | 0.8724072 | 0.4032639 | 2.1634 | 0.031    | 1.54E-05    | count | 1 |
| XKR6       | 1.7575337 | 0.7514792 | 2.3388 | 0.0198   | 1.55E-05    | count | 1 |
| PRPF39     | 1.6949789 | 0.6878261 | 2.4643 | 0.0141   | 1.57E-05    | count | 1 |
| PRDM8      | 1.7530499 | 0.7746888 | 2.2629 | 0.0241   | 1.60E-05    | count | 1 |
| PIAS3      | 1.8166445 | 0.9310919 | 1.9511 | 0.0517   | 1.61E-05    | count | 1 |
| HIPK2      | 1.6802498 | 0.8385473 | 2.0038 | 0.0457   | 1.63E-05    | count | 1 |
| GPATCH2    | 0.916563  | 0.4002053 | 2.2902 | 0.0225   | 1.63E-05    | count | 1 |
| BCL2L11    | 0.9400315 | 0.3633423 | 2.5872 | 0.01     | 1.69E-05    | count | 1 |
| TMCC3      | 1.8946201 | 1.3070273 | 1.4496 | 0.148    | 1.70E-05    | count | 1 |
| DCAF8      | 1.955503  | 1.1711836 | 1.6697 | 0.0957   | 1.77E-05    | count | 1 |
| CCDC43     | 1.8831726 | 0.710844  | 2.6492 | 0.0084   | 1.80E-05    | count | 1 |
| MED31      | 0.9548409 | 0.369379  | 2.585  | 0.0101   | 1.81E-05    | count | 1 |
| MMD        | 1.9356969 | 0.7186377 | 2.6936 | 0.0073   | 1.85E-05    | count | 1 |
| TEDC1      | 1.9106637 | 0.7050213 | 2.7101 | 0.007    | 1.85E-05    | count | 1 |
| KIAA0319L  | 1.9914655 | 0.7747138 | 2.5706 | 0.0105   | 1.91E-05    | count | 1 |
| LINC00667  | 1.9763066 | 0.5921117 | 3.3377 | 9.00E-04 | 1.95E-05    | count | 1 |
| CCDC77     | 1.9748529 | 0.8684518 | 2.274  | 0.0234   | 1.96E-05    | count | 1 |
| AC120193.1 | 2.2110563 | 0.8752798 | 2.5261 | 0.0119   | 2.21E-05    | count | 1 |
| ZC3HC1     | 2.3241429 | 1.199234  | 1.938  | 0.0533   | 2.38E-05    | count | 1 |
| SEC24B     | 2.2287011 | 0.8122374 | 2.7439 | 0.0063   | 2.44E-05    | count | 1 |
| PINX1      | 2.3634065 | 0.9846454 | 2.4003 | 0.0168   | 2.48E-05    | count | 1 |
| LRRC42     | 2.6943146 | 0.9048633 | 2.9776 | 0.0031   | 3.06E-05    | count | 1 |
| LMNA       | 1.0026426 | 0.2942727 | 3.4072 | 7.00E-04 | 5.00E-05    | count | 1 |
| RBM5       | 0.0008691 | 0.316416  | 0.0027 | 0.9978   | 0.00115035  | count | 1 |
| TLE3       | 0.0009394 | 0.2555757 | 0.0037 | 0.997    | 0.001325456 | count | 1 |
| AFF3       | 0.0015535 | 0.2516793 | 0.0062 | 0.9951   | 0.00214477  | count | 1 |
| MGAT4A     | 0.0016241 | 0.3241461 | 0.005  | 0.996    | 0.002274878 | count | 1 |
| UPF2       | 0.0016378 | 0.1407002 | 0.0116 | 0.9907   | 0.002346611 | count | 1 |
| RHOA       | 0.0019275 | 0.1029065 | 0.0187 | 0.9851   | 0.002767694 | count | 1 |
| PHAX       | 0.0020176 | 0.3646894 | 0.0055 | 0.9956   | 0.002846779 | count | 1 |
| ZC3H15     | 0.0024619 | 0.1644977 | 0.015  | 0.988    | 0.003448417 | count | 1 |
| MEA1       | 0.0032516 | 0.3032793 | 0.0107 | 0.9915   | 0.00430418  | count | 1 |
| EXOG       | 0.0031244 | 0.4650604 | 0.0067 | 0.995    | 0.004313677 | count | 1 |
| COPS2      | 0.0033972 | 0.2757981 | 0.0123 | 0.99     | 0.004758555 | count | 1 |
| SNRPC      | 0.0038829 | 0.2316992 | 0.0168 | 0.9866   | 0.005139943 | count | 1 |

|           |           |           |        |        |             |       |   |
|-----------|-----------|-----------|--------|--------|-------------|-------|---|
| LRPAP1    | 0.0041208 | 0.2350513 | 0.0175 | 0.986  | 0.005879025 | count | 1 |
| PHF3      | 0.0042394 | 0.183947  | 0.023  | 0.982  | 0.006008192 | count | 1 |
| CLECL1    | 0.0047054 | 0.2428897 | 0.0194 | 0.985  | 0.006228882 | count | 1 |
| EEF1AKMT2 | 0.0047206 | 0.3831049 | 0.0123 | 0.9902 | 0.00651763  | count | 1 |
| NCF1      | 0.0046801 | 0.1548434 | 0.0302 | 0.976  | 0.006697261 | count | 1 |
| SMIM26    | 0.0051677 | 0.1974889 | 0.0262 | 0.9791 | 0.006840963 | count | 1 |
| LST1      | 0.0052002 | 0.5300165 | 0.0098 | 0.992  | 0.006883994 | count | 1 |
| PAIP2     | 0.0049678 | 0.1689707 | 0.0294 | 0.977  | 0.00708744  | count | 1 |
| RPL10A    | 0.0050423 | 0.0446391 | 0.113  | 0.91   | 0.007267406 | count | 1 |
| TNIP2     | 0.0052002 | 0.2965273 | 0.0175 | 0.986  | 0.007284217 | count | 1 |
| PIP4K2A   | 0.0053862 | 0.2479104 | 0.0217 | 0.9827 | 0.007436692 | count | 1 |
| RALY      | 0.0057069 | 0.233637  | 0.0244 | 0.981  | 0.007554882 | count | 1 |
| SLC25A3   | 0.0053012 | 0.1200511 | 0.0442 | 0.9648 | 0.007612032 | count | 1 |
| UBE2H     | 0.0056994 | 0.2676821 | 0.0213 | 0.983  | 0.007869167 | count | 1 |
| ATP5MPL   | 0.0060611 | 0.1964031 | 0.0309 | 0.975  | 0.008590061 | count | 1 |
| MIS18BP1  | 0.0065962 | 0.2051681 | 0.0322 | 0.974  | 0.009307424 | count | 1 |
| SMIM4     | 0.0070381 | 0.4132988 | 0.017  | 0.9864 | 0.009317542 | count | 1 |
| LINC00926 | 0.0068922 | 0.1887149 | 0.0365 | 0.971  | 0.009516256 | count | 1 |
| HINT1     | 0.0068022 | 0.0778591 | 0.0874 | 0.93   | 0.00978975  | count | 1 |
| ANXA5     | 0.0071165 | 0.2044173 | 0.0348 | 0.972  | 0.00982599  | count | 1 |
| VASP      | 0.0070243 | 0.1595192 | 0.044  | 0.965  | 0.009911521 | count | 1 |
| UQCRC2    | 0.0072012 | 0.2260433 | 0.0319 | 0.975  | 0.010205941 | count | 1 |
| RPS3A     | 0.0070975 | 0.0379281 | 0.1871 | 0.852  | 0.010236223 | count | 1 |
| FAM177A1  | 0.00749   | 0.2230198 | 0.0336 | 0.973  | 0.010568681 | count | 1 |
| SCIMP     | 0.0076093 | 0.2135898 | 0.0356 | 0.972  | 0.010784354 | count | 1 |
| LSM3      | 0.0077156 | 0.2081283 | 0.0371 | 0.97   | 0.010807988 | count | 1 |
| BAK1      | 0.0085631 | 0.4382883 | 0.0195 | 0.9844 | 0.011336998 | count | 1 |
| FTSJ1     | 0.0082262 | 0.6626534 | 0.0124 | 0.9901 | 0.011358399 | count | 1 |
| TARBP1    | 0.0082262 | 0.6913512 | 0.0119 | 0.9905 | 0.011358399 | count | 1 |
| C2orf74   | 0.0082262 | 0.6912915 | 0.0119 | 0.9905 | 0.011358399 | count | 1 |
| THAP7     | 0.0086096 | 0.3640216 | 0.0237 | 0.9811 | 0.011887858 | count | 1 |
| MORF4L1   | 0.0085159 | 0.1079803 | 0.0789 | 0.937  | 0.012069316 | count | 1 |
| RILPL2    | 0.0088169 | 0.1193918 | 0.0738 | 0.941  | 0.012559174 | count | 1 |
| HSPA9     | 0.0093693 | 0.2144052 | 0.0437 | 0.965  | 0.013220657 | count | 1 |
| METTL8    | 0.00961   | 0.2577524 | 0.0373 | 0.97   | 0.013461944 | count | 1 |
| PRPF38B   | 0.0095961 | 0.159402  | 0.0602 | 0.952  | 0.013600349 | count | 1 |
| KDM2A     | 0.0098026 | 0.2639949 | 0.0371 | 0.97   | 0.013731773 | count | 1 |
| BANK1     | 0.0096841 | 0.0896494 | 0.108  | 0.914  | 0.013875502 | count | 1 |
| E2F4      | 0.0106686 | 0.3015646 | 0.0354 | 0.9718 | 0.014125493 | count | 1 |
| PPP1R35   | 0.0102672 | 0.3141362 | 0.0327 | 0.9739 | 0.014177009 | count | 1 |
| ARL6IP5   | 0.0099323 | 0.1200501 | 0.0827 | 0.934  | 0.014244144 | count | 1 |
| HPS5      | 0.0105136 | 0.4041483 | 0.026  | 0.9793 | 0.014517299 | count | 1 |
| ATP6V0A2  | 0.0110312 | 0.6551437 | 0.0168 | 0.987  | 0.014605753 | count | 1 |
| TMEM230   | 0.0116388 | 0.2274363 | 0.0512 | 0.9592 | 0.015410538 | count | 1 |
| TROVE2    | 0.0113941 | 0.2613027 | 0.0436 | 0.965  | 0.015961479 | count | 1 |

|          |           |           |        |        |             |       |   |
|----------|-----------|-----------|--------|--------|-------------|-------|---|
| NCF4     | 0.0114812 | 0.1965816 | 0.0584 | 0.953  | 0.016083509 | count | 1 |
| PSME1    | 0.0114566 | 0.1063864 | 0.1077 | 0.914  | 0.016394835 | count | 1 |
| IRF2BP2  | 0.0119277 | 0.2163937 | 0.0551 | 0.956  | 0.016709075 | count | 1 |
| POLR3H   | 0.0127778 | 0.495694  | 0.0258 | 0.9794 | 0.016919262 | count | 1 |
| NXT1     | 0.0119438 | 0.1488216 | 0.0803 | 0.936  | 0.017013527 | count | 1 |
| KANSL1   | 0.012856  | 0.2504959 | 0.0513 | 0.9591 | 0.01702285  | count | 1 |
| WDR83OS  | 0.0121661 | 0.1596152 | 0.0762 | 0.939  | 0.017293786 | count | 1 |
| RAD21    | 0.0127066 | 0.2197741 | 0.0578 | 0.954  | 0.017800363 | count | 1 |
| TRA2B    | 0.0128467 | 0.144809  | 0.0887 | 0.929  | 0.017996653 | count | 1 |
| RPL7A    | 0.0124937 | 0.0349661 | 0.3573 | 0.721  | 0.018017459 | count | 1 |
| SRSF11   | 0.0138976 | 0.1511629 | 0.0919 | 0.927  | 0.019755262 | count | 1 |
| PTP4A2   | 0.0143868 | 0.1863244 | 0.0772 | 0.938  | 0.020154493 | count | 1 |
| HEBP2    | 0.014755  | 0.1965593 | 0.0751 | 0.94   | 0.020375305 | count | 1 |
| COA6     | 0.0152479 | 0.4438538 | 0.0344 | 0.9726 | 0.021056127 | count | 1 |
| CDC42SE2 | 0.0150389 | 0.1694649 | 0.0887 | 0.929  | 0.021315104 | count | 1 |
| PLCG2    | 0.0150656 | 0.1686354 | 0.0893 | 0.929  | 0.021494659 | count | 1 |
| TRAP1    | 0.0165026 | 0.4481048 | 0.0368 | 0.971  | 0.021853905 | count | 1 |
| 7-Mar    | 0.0161777 | 0.2634765 | 0.0614 | 0.951  | 0.022340449 | count | 1 |
| PPP1R18  | 0.0161805 | 0.245543  | 0.0659 | 0.947  | 0.022832995 | count | 1 |
| PCF11    | 0.0178468 | 0.1959831 | 0.0911 | 0.9275 | 0.023634996 | count | 1 |
| MT-ND5   | 0.0167297 | 0.0708633 | 0.2361 | 0.8135 | 0.023970974 | count | 1 |
| COPE     | 0.0169707 | 0.1560453 | 0.1088 | 0.913  | 0.024174763 | count | 1 |
| ATP6V0E1 | 0.0173893 | 0.1064707 | 0.1633 | 0.87   | 0.024901946 | count | 1 |
| SNRPA1   | 0.0182081 | 0.2429875 | 0.0749 | 0.94   | 0.025508847 | count | 1 |
| ATP5MC3  | 0.0182459 | 0.1448315 | 0.126  | 0.9    | 0.025936954 | count | 1 |
| HDAC1    | 0.0181408 | 0.2106018 | 0.0861 | 0.9314 | 0.025939818 | count | 1 |
| RPL11    | 0.0181072 | 0.0308405 | 0.5871 | 0.557  | 0.026116402 | count | 1 |
| CCDC12   | 0.0188031 | 0.1823818 | 0.1031 | 0.918  | 0.026650903 | count | 1 |
| CEBPG    | 0.0188117 | 0.2628366 | 0.0716 | 0.943  | 0.026741337 | count | 1 |
| SMC6     | 0.0190094 | 0.2463301 | 0.0772 | 0.939  | 0.026943343 | count | 1 |
| PPP3CA   | 0.0190702 | 0.191748  | 0.0995 | 0.921  | 0.027029531 | count | 1 |
| TMEM243  | 0.0189349 | 0.1202238 | 0.1575 | 0.875  | 0.027144063 | count | 1 |
| CCM2     | 0.0198955 | 0.3079814 | 0.0646 | 0.949  | 0.027873354 | count | 1 |
| LSM4     | 0.0199806 | 0.2853381 | 0.07   | 0.944  | 0.027992605 | count | 1 |
| PPP1R11  | 0.0204789 | 0.2223009 | 0.0921 | 0.9266 | 0.028282159 | count | 1 |
| MPG      | 0.0198831 | 0.2170251 | 0.0916 | 0.927  | 0.028323878 | count | 1 |
| DRAP1    | 0.0199048 | 0.2050318 | 0.0971 | 0.9227 | 0.028434395 | count | 1 |
| YWHAB    | 0.0199278 | 0.1091796 | 0.1825 | 0.855  | 0.028579578 | count | 1 |
| GNAS     | 0.0201306 | 0.0741383 | 0.2715 | 0.786  | 0.028961495 | count | 1 |
| IL2RG    | 0.0205431 | 0.1649486 | 0.1245 | 0.9009 | 0.029449609 | count | 1 |
| ELOB     | 0.0208636 | 0.1349904 | 0.1546 | 0.877  | 0.029857488 | count | 1 |
| DDRKG1   | 0.0230146 | 0.3412909 | 0.0674 | 0.946  | 0.030483828 | count | 1 |
| HEBP1    | 0.0233775 | 0.5335282 | 0.0438 | 0.965  | 0.030964859 | count | 1 |
| COX8A    | 0.0222005 | 0.1585225 | 0.14   | 0.889  | 0.031625416 | count | 1 |
| VAPA     | 0.0226555 | 0.16962   | 0.1336 | 0.894  | 0.031741055 | count | 1 |

|          |           |           |        |        |             |       |   |
|----------|-----------|-----------|--------|--------|-------------|-------|---|
| RBPJ     | 0.0231649 | 0.3163594 | 0.0732 | 0.9417 | 0.031993044 | count | 1 |
| ZDHHC24  | 0.0231796 | 0.3691107 | 0.0628 | 0.95   | 0.032013353 | count | 1 |
| XKR8     | 0.0244297 | 0.7453194 | 0.0328 | 0.974  | 0.032359632 | count | 1 |
| NCOA7    | 0.0231796 | 0.3295971 | 0.0703 | 0.944  | 0.032475525 | count | 1 |
| TMEM167B | 0.0237009 | 0.4052478 | 0.0585 | 0.9534 | 0.032733601 | count | 1 |
| CDC5L    | 0.0233197 | 0.1998478 | 0.1167 | 0.907  | 0.033219937 | count | 1 |
| LIAS     | 0.0244297 | 0.5711641 | 0.0428 | 0.9659 | 0.033740559 | count | 1 |
| BPNT1    | 0.0244297 | 0.5927107 | 0.0412 | 0.9671 | 0.033740559 | count | 1 |
| C3orf14  | 0.0245091 | 0.6191949 | 0.0396 | 0.968  | 0.033850265 | count | 1 |
| USP8     | 0.0258413 | 0.2068381 | 0.1249 | 0.9006 | 0.034230962 | count | 1 |
| UBE2L3   | 0.0249913 | 0.2277243 | 0.1097 | 0.9127 | 0.03451652  | count | 1 |
| NR4A1    | 0.0242272 | 0.140573  | 0.1723 | 0.8632 | 0.034789207 | count | 1 |
| ZNF638   | 0.0253781 | 0.3012198 | 0.0843 | 0.933  | 0.035050967 | count | 1 |
| STK17A   | 0.025231  | 0.1268591 | 0.1989 | 0.842  | 0.035943    | count | 1 |
| RPL22L1  | 0.0251215 | 0.1326214 | 0.1894 | 0.85   | 0.035951359 | count | 1 |
| RPL32    | 0.0250743 | 0.0323694 | 0.7746 | 0.439  | 0.036164526 | count | 1 |
| CNOT7    | 0.0273073 | 0.2013985 | 0.1356 | 0.8922 | 0.036174582 | count | 1 |
| THRAP3   | 0.0255318 | 0.1531777 | 0.1667 | 0.868  | 0.03637156  | count | 1 |
| METTL6   | 0.0266892 | 0.6945482 | 0.0384 | 0.9694 | 0.037394067 | count | 1 |
| SRSF9    | 0.026593  | 0.1375841 | 0.1933 | 0.847  | 0.037529803 | count | 1 |
| CDKN1A   | 0.0269811 | 0.2672613 | 0.101  | 0.92   | 0.037803169 | count | 1 |
| DNAJA1   | 0.0264739 | 0.1027499 | 0.2577 | 0.7968 | 0.03781942  | count | 1 |
| EXOSC9   | 0.0277917 | 0.3545956 | 0.0784 | 0.9376 | 0.038386029 | count | 1 |
| CCL5     | 0.027203  | 0.2540184 | 0.1071 | 0.9148 | 0.038671625 | count | 1 |
| IGHD     | 0.0273031 | 0.2693687 | 0.1014 | 0.919  | 0.038813948 | count | 1 |
| BSG      | 0.0273413 | 0.2108252 | 0.1297 | 0.8969 | 0.039010898 | count | 1 |
| EIF4E2   | 0.0280768 | 0.3272977 | 0.0858 | 0.9317 | 0.039624332 | count | 1 |
| PPHLN1   | 0.0283455 | 0.2499408 | 0.1134 | 0.91   | 0.039715427 | count | 1 |
| MTIF3    | 0.0302197 | 0.2473962 | 0.1222 | 0.903  | 0.040036362 | count | 1 |
| LMO4     | 0.0284681 | 0.1999102 | 0.1424 | 0.887  | 0.040352388 | count | 1 |
| AHCTF1   | 0.0296141 | 0.4383335 | 0.0676 | 0.946  | 0.040904356 | count | 1 |
| TOMM7    | 0.0291656 | 0.0747438 | 0.3902 | 0.6966 | 0.04189067  | count | 1 |
| DNAJB6   | 0.0302665 | 0.1582035 | 0.1913 | 0.848  | 0.042407877 | count | 1 |
| KDM4B    | 0.0308287 | 0.4860602 | 0.0634 | 0.949  | 0.042582862 | count | 1 |
| B2M      | 0.0295896 | 0.0304148 | 0.9729 | 0.331  | 0.042681452 | count | 1 |
| TSR2     | 0.0326643 | 0.3221108 | 0.1014 | 0.9193 | 0.043278386 | count | 1 |
| RECQL5   | 0.0320067 | 0.9915885 | 0.0323 | 0.9743 | 0.044210852 | count | 1 |
| NPC1     | 0.0320067 | 0.9915885 | 0.0323 | 0.9743 | 0.044210852 | count | 1 |
| TBC1D22A | 0.0320744 | 0.325894  | 0.0984 | 0.9216 | 0.044304415 | count | 1 |
| SESN1    | 0.0324613 | 0.3967088 | 0.0818 | 0.935  | 0.044839123 | count | 1 |
| COX7C    | 0.0312075 | 0.0714312 | 0.4369 | 0.6624 | 0.044841659 | count | 1 |
| RPL35A   | 0.0311885 | 0.0348735 | 0.8943 | 0.372  | 0.044967726 | count | 1 |
| SLC25A17 | 0.0320067 | 0.8064679 | 0.0397 | 0.968  | 0.045172017 | count | 1 |
| PPA1     | 0.0342332 | 0.2418469 | 0.1415 | 0.8875 | 0.045359317 | count | 1 |
| SVIP     | 0.0319587 | 0.2081947 | 0.1535 | 0.8781 | 0.045599948 | count | 1 |

|             |           |           |        |        |             |       |   |
|-------------|-----------|-----------|--------|--------|-------------|-------|---|
| HLA-DOB     | 0.0345589 | 0.2095478 | 0.1649 | 0.8691 | 0.045791339 | count | 1 |
| RPS13       | 0.0320178 | 0.0375452 | 0.8528 | 0.394  | 0.0461719   | count | 1 |
| ZNF480      | 0.0335925 | 0.4156225 | 0.0808 | 0.9356 | 0.046402517 | count | 1 |
| PSMB6       | 0.0343498 | 0.1730449 | 0.1985 | 0.8427 | 0.047449187 | count | 1 |
| TMF1        | 0.0344841 | 0.1955408 | 0.1764 | 0.8601 | 0.047634807 | count | 1 |
| RAB39B      | 0.0346305 | 0.5286833 | 0.0655 | 0.9478 | 0.047837151 | count | 1 |
| ATP5PD      | 0.0365115 | 0.196664  | 0.1857 | 0.8528 | 0.048381527 | count | 1 |
| STX7        | 0.0346201 | 0.2212312 | 0.1565 | 0.876  | 0.049074622 | count | 1 |
| RPS23       | 0.0341016 | 0.0316883 | 1.0762 | 0.282  | 0.049185284 | count | 1 |
| CYTH1       | 0.0374697 | 0.2454818 | 0.1526 | 0.8788 | 0.049652725 | count | 1 |
| CLIC1       | 0.0347141 | 0.079068  | 0.439  | 0.661  | 0.049923526 | count | 1 |
| WBP4        | 0.0363795 | 0.3160294 | 0.1151 | 0.908  | 0.050254578 | count | 1 |
| CBX7        | 0.0353868 | 0.4277789 | 0.0827 | 0.934  | 0.050307971 | count | 1 |
| C1orf43     | 0.036771  | 0.2555959 | 0.1439 | 0.8857 | 0.050795718 | count | 1 |
| FAM50A      | 0.0359131 | 0.3215286 | 0.1117 | 0.9111 | 0.05116289  | count | 1 |
| SYNGR1      | 0.0370925 | 0.1774299 | 0.2091 | 0.8345 | 0.051240108 | count | 1 |
| PLAC8       | 0.0359521 | 0.2752362 | 0.1306 | 0.8961 | 0.051298751 | count | 1 |
| RPP38       | 0.0367685 | 0.321078  | 0.1145 | 0.909  | 0.051521838 | count | 1 |
| GPATCH8     | 0.0373339 | 0.2918078 | 0.1279 | 0.898  | 0.051573784 | count | 1 |
| TMEM248     | 0.0361625 | 0.2334701 | 0.1549 | 0.877  | 0.051712492 | count | 1 |
| ZBTB7A      | 0.036922  | 0.18353   | 0.2012 | 0.841  | 0.052490951 | count | 1 |
| SNX17       | 0.0368604 | 0.2937815 | 0.1255 | 0.9    | 0.052594972 | count | 1 |
| ZFAND1      | 0.0396981 | 0.3110205 | 0.1276 | 0.8985 | 0.052609326 | count | 1 |
| TRMT112     | 0.0367762 | 0.114562  | 0.321  | 0.7483 | 0.052697151 | count | 1 |
| RAP1A       | 0.0384604 | 0.203393  | 0.1891 | 0.85   | 0.053130924 | count | 1 |
| MOB1A       | 0.0389857 | 0.1451275 | 0.2686 | 0.7883 | 0.053857056 | count | 1 |
| THUMPD3-AS1 | 0.0408978 | 0.2330315 | 0.1755 | 0.8608 | 0.054201232 | count | 1 |
| RASSF5      | 0.0387914 | 0.2901555 | 0.1337 | 0.894  | 0.054357632 | count | 1 |
| BIRC3       | 0.0381566 | 0.1611276 | 0.2368 | 0.8129 | 0.054359632 | count | 1 |
| FAM117B     | 0.0412006 | 0.5726894 | 0.0719 | 0.9427 | 0.054603043 | count | 1 |
| ABRAXAS2    | 0.0388343 | 0.4934733 | 0.0787 | 0.937  | 0.055049874 | count | 1 |
| TSPO        | 0.0389671 | 0.2525089 | 0.1543 | 0.877  | 0.055399042 | count | 1 |
| SCAF11      | 0.0401245 | 0.1394139 | 0.2878 | 0.7736 | 0.055431282 | count | 1 |
| RNF138      | 0.0401949 | 0.3537334 | 0.1136 | 0.9096 | 0.056325195 | count | 1 |
| PDE7A       | 0.0432654 | 0.2805648 | 0.1542 | 0.8775 | 0.057343193 | count | 1 |
| TRPM7       | 0.0434693 | 0.4148592 | 0.1048 | 0.9166 | 0.057613802 | count | 1 |
| SIAH1       | 0.0434693 | 0.442255  | 0.0983 | 0.9217 | 0.057613802 | count | 1 |
| ACP1        | 0.0411965 | 0.2390772 | 0.1723 | 0.863  | 0.057729372 | count | 1 |
| TPM4        | 0.0404614 | 0.1609674 | 0.2514 | 0.802  | 0.057733999 | count | 1 |
| RPS14       | 0.0406799 | 0.0343907 | 1.1829 | 0.237  | 0.058673921 | count | 1 |
| PMAIP1      | 0.0415315 | 0.1699696 | 0.2443 | 0.807  | 0.058874367 | count | 1 |
| RPS29       | 0.0410947 | 0.0369721 | 1.1115 | 0.267  | 0.059235674 | count | 1 |
| P2RY10      | 0.0428863 | 0.2389497 | 0.1795 | 0.858  | 0.059249307 | count | 1 |
| PIK3C2A     | 0.0429855 | 0.4734658 | 0.0908 | 0.9277 | 0.059386452 | count | 1 |
| CACYBP      | 0.0425688 | 0.2589068 | 0.1644 | 0.869  | 0.059653295 | count | 1 |

|           |           |           |        |        |             |       |   |
|-----------|-----------|-----------|--------|--------|-------------|-------|---|
| MICAL3    | 0.0433422 | 0.4085137 | 0.1061 | 0.916  | 0.059879594 | count | 1 |
| RABAC1    | 0.0426187 | 0.1814999 | 0.2348 | 0.814  | 0.060154345 | count | 1 |
| NDUFB7    | 0.0423476 | 0.1992442 | 0.2125 | 0.8318 | 0.060331527 | count | 1 |
| SNRNP25   | 0.0455239 | 0.3807773 | 0.1196 | 0.9049 | 0.060340792 | count | 1 |
| BUD31     | 0.0424672 | 0.2203089 | 0.1928 | 0.847  | 0.060376264 | count | 1 |
| NACA      | 0.0420757 | 0.0450578 | 0.9338 | 0.351  | 0.060660107 | count | 1 |
| EIF3J     | 0.0429969 | 0.2498309 | 0.1721 | 0.863  | 0.060688346 | count | 1 |
| MED6      | 0.0467384 | 0.338542  | 0.1381 | 0.8903 | 0.061952911 | count | 1 |
| GPATCH2L  | 0.0477174 | 0.3929678 | 0.1214 | 0.9034 | 0.063252514 | count | 1 |
| ARID4B    | 0.0459794 | 0.1626827 | 0.2826 | 0.778  | 0.063525732 | count | 1 |
| MCOLN2    | 0.0456404 | 0.3922512 | 0.1164 | 0.907  | 0.063959791 | count | 1 |
| RPS7      | 0.0445412 | 0.0339368 | 1.3125 | 0.19   | 0.06423539  | count | 1 |
| RNASET2   | 0.0447269 | 0.1072503 | 0.417  | 0.677  | 0.06435982  | count | 1 |
| MSL3      | 0.0486308 | 0.3397661 | 0.1431 | 0.886  | 0.064465105 | count | 1 |
| RPL34     | 0.0448964 | 0.0333976 | 1.3443 | 0.18   | 0.064748719 | count | 1 |
| JHY       | 0.0462838 | 0.5767464 | 0.0802 | 0.9361 | 0.064861897 | count | 1 |
| RPL30     | 0.0455029 | 0.0289999 | 1.5691 | 0.117  | 0.06563064  | count | 1 |
| YWHAQ     | 0.0475774 | 0.1835277 | 0.2592 | 0.7956 | 0.065735242 | count | 1 |
| MYL12B    | 0.0458101 | 0.0981586 | 0.4667 | 0.6409 | 0.065812876 | count | 1 |
| SELL      | 0.0471725 | 0.1748088 | 0.2699 | 0.787  | 0.066584323 | count | 1 |
| PSMC1     | 0.0470232 | 0.2609602 | 0.1802 | 0.8571 | 0.066855283 | count | 1 |
| PSMB8-AS1 | 0.0476214 | 0.2391983 | 0.1991 | 0.842  | 0.067705998 | count | 1 |
| IGKC      | 0.0470454 | 0.1023789 | 0.4595 | 0.646  | 0.067839038 | count | 1 |
| HLA-B     | 0.0470707 | 0.0398242 | 1.182  | 0.238  | 0.067873787 | count | 1 |
| EMB       | 0.0492063 | 0.1928508 | 0.2552 | 0.7987 | 0.067987591 | count | 1 |
| HNRNPA2B1 | 0.0477296 | 0.0779309 | 0.6125 | 0.5405 | 0.068522874 | count | 1 |
| EPS15L1   | 0.0522502 | 0.456003  | 0.1146 | 0.9088 | 0.069270723 | count | 1 |
| GEMIN7    | 0.0522502 | 0.5027157 | 0.1039 | 0.9173 | 0.069270723 | count | 1 |
| TTC1      | 0.0488944 | 0.2545524 | 0.1921 | 0.848  | 0.069516381 | count | 1 |
| RPS27A    | 0.0484948 | 0.0311653 | 1.5561 | 0.12   | 0.069948318 | count | 1 |
| NDUFB1    | 0.0501807 | 0.1997889 | 0.2512 | 0.802  | 0.070325975 | count | 1 |
| CPNE3     | 0.050182  | 0.2418652 | 0.2075 | 0.836  | 0.070327798 | count | 1 |
| PDIA6     | 0.04974   | 0.180949  | 0.2749 | 0.784  | 0.070718956 | count | 1 |
| MT-ND6    | 0.0501991 | 0.2518907 | 0.1993 | 0.842  | 0.071165493 | count | 1 |
| CCDC85B   | 0.0504736 | 0.1595336 | 0.3164 | 0.752  | 0.071911202 | count | 1 |
| PDE12     | 0.0521472 | 0.4224386 | 0.1234 | 0.9018 | 0.07205439  | count | 1 |
| CIR1      | 0.0522744 | 0.1965376 | 0.266  | 0.79   | 0.072230296 | count | 1 |
| CHMP1A    | 0.052171  | 0.4716989 | 0.1106 | 0.912  | 0.073116869 | count | 1 |
| DOCK8     | 0.0515954 | 0.1877487 | 0.2748 | 0.784  | 0.07314565  | count | 1 |
| RPS27     | 0.0509213 | 0.0305895 | 1.6647 | 0.0967 | 0.073420994 | count | 1 |
| EIF2B2    | 0.0556001 | 0.5463881 | 0.1018 | 0.919  | 0.07371945  | count | 1 |
| CENPH     | 0.0559548 | 0.5957869 | 0.0939 | 0.9252 | 0.07419055  | count | 1 |
| POLR1D    | 0.0523888 | 0.1838137 | 0.285  | 0.776  | 0.074486032 | count | 1 |
| TMEM59    | 0.052098  | 0.1607564 | 0.3241 | 0.746  | 0.074563549 | count | 1 |
| PRMT1     | 0.053339  | 0.1680022 | 0.3175 | 0.751  | 0.07475475  | count | 1 |

|           |           |           |        |        |             |       |   |
|-----------|-----------|-----------|--------|--------|-------------|-------|---|
| TMEM250   | 0.0543536 | 0.7241907 | 0.0751 | 0.9402 | 0.075105738 | count | 1 |
| RPL31     | 0.0529249 | 0.0710279 | 0.7451 | 0.4566 | 0.076019287 | count | 1 |
| ZC3H13    | 0.0552207 | 0.2851848 | 0.1936 | 0.8466 | 0.076304955 | count | 1 |
| TMEM87A   | 0.0555006 | 0.3533847 | 0.1571 | 0.875  | 0.076692069 | count | 1 |
| HPRT1     | 0.0545244 | 0.3442215 | 0.1584 | 0.8742 | 0.076966221 | count | 1 |
| SURF1     | 0.0549945 | 0.3179098 | 0.173  | 0.863  | 0.077076318 | count | 1 |
| KLF13     | 0.0552662 | 0.1855637 | 0.2978 | 0.766  | 0.077457341 | count | 1 |
| COPS9     | 0.0560939 | 0.2067832 | 0.2713 | 0.7863 | 0.077512641 | count | 1 |
| NUP88     | 0.0589852 | 0.3484467 | 0.1693 | 0.8657 | 0.078215832 | count | 1 |
| ROCK1     | 0.0556319 | 0.1842121 | 0.302  | 0.763  | 0.078870198 | count | 1 |
| CDC37     | 0.0573616 | 0.1893335 | 0.303  | 0.7621 | 0.079266001 | count | 1 |
| PLP2      | 0.0560904 | 0.1255708 | 0.4467 | 0.6553 | 0.079915737 | count | 1 |
| DNAJC21   | 0.0563579 | 0.2385366 | 0.2363 | 0.8133 | 0.080421875 | count | 1 |
| MALAT1    | 0.0560518 | 0.0334414 | 1.6761 | 0.0944 | 0.080863482 | count | 1 |
| SERPINB6  | 0.0586756 | 0.2654427 | 0.221  | 0.8252 | 0.081083472 | count | 1 |
| CMPK1     | 0.0573112 | 0.2073471 | 0.2764 | 0.782  | 0.081486866 | count | 1 |
| SARAF     | 0.0576978 | 0.0981976 | 0.5876 | 0.5571 | 0.082206528 | count | 1 |
| NIT1      | 0.0598228 | 0.8548882 | 0.07   | 0.9442 | 0.082670293 | count | 1 |
| PABPC1    | 0.0574994 | 0.0788683 | 0.7291 | 0.466  | 0.082684497 | count | 1 |
| CD40      | 0.0579005 | 0.1541577 | 0.3756 | 0.707  | 0.082803899 | count | 1 |
| ERCC3     | 0.0625019 | 0.5683286 | 0.11   | 0.9125 | 0.082887979 | count | 1 |
| GTF3C6    | 0.058076  | 0.2204928 | 0.2634 | 0.7924 | 0.082974493 | count | 1 |
| RPL29     | 0.0577391 | 0.0379074 | 1.5232 | 0.128  | 0.083264159 | count | 1 |
| ATP5F1C   | 0.0590242 | 0.2038925 | 0.2895 | 0.772  | 0.083321162 | count | 1 |
| TFAM      | 0.0604303 | 0.2366848 | 0.2553 | 0.7986 | 0.083510617 | count | 1 |
| GAPDH     | 0.0582631 | 0.0744338 | 0.7828 | 0.434  | 0.083856418 | count | 1 |
| TNPO1     | 0.061145  | 0.3866527 | 0.1581 | 0.8744 | 0.084499246 | count | 1 |
| SYAP1     | 0.0598957 | 0.2401172 | 0.2494 | 0.803  | 0.084552009 | count | 1 |
| INIP      | 0.0598566 | 0.4702728 | 0.1273 | 0.8988 | 0.084861967 | count | 1 |
| CD37      | 0.0595393 | 0.0592603 | 1.0047 | 0.316  | 0.085827145 | count | 1 |
| DES12     | 0.0649165 | 0.4119684 | 0.1576 | 0.8749 | 0.086096486 | count | 1 |
| CHD4      | 0.0652729 | 0.2733145 | 0.2388 | 0.8114 | 0.086570108 | count | 1 |
| PABPC4    | 0.0626646 | 0.2911309 | 0.2152 | 0.8297 | 0.086601349 | count | 1 |
| CHCHD2    | 0.0606577 | 0.094518  | 0.6418 | 0.521  | 0.08706025  | count | 1 |
| LIMS1     | 0.0657896 | 0.3493781 | 0.1883 | 0.8507 | 0.08725677  | count | 1 |
| TAPBP     | 0.0622015 | 0.1568527 | 0.3966 | 0.692  | 0.087808647 | count | 1 |
| PDHA1     | 0.0664055 | 0.3441232 | 0.193  | 0.8471 | 0.088075291 | count | 1 |
| ADAM28    | 0.0625873 | 0.1894748 | 0.3303 | 0.741  | 0.08835355  | count | 1 |
| PPIL4     | 0.0639871 | 0.1705863 | 0.3751 | 0.708  | 0.088430879 | count | 1 |
| GIGYF2    | 0.062642  | 0.4252296 | 0.1473 | 0.883  | 0.088812596 | count | 1 |
| APH1A     | 0.0633867 | 0.2366552 | 0.2678 | 0.789  | 0.088846254 | count | 1 |
| UHRF1BP1L | 0.0645403 | 0.6228518 | 0.1036 | 0.9175 | 0.08919619  | count | 1 |
| CLEC17A   | 0.0645403 | 0.7041873 | 0.0917 | 0.927  | 0.08919619  | count | 1 |
| HLA-E     | 0.0620714 | 0.0577235 | 1.0753 | 0.283  | 0.089401855 | count | 1 |
| LENG1     | 0.0641039 | 0.3407172 | 0.1881 | 0.851  | 0.089852213 | count | 1 |

|            |           |           |        |        |             |       |   |
|------------|-----------|-----------|--------|--------|-------------|-------|---|
| PRPS1      | 0.0679362 | 0.2766467 | 0.2456 | 0.8061 | 0.090109694 | count | 1 |
| FGD5-AS1   | 0.0656905 | 0.3494055 | 0.188  | 0.851  | 0.09078745  | count | 1 |
| NIFK       | 0.0646682 | 0.2507026 | 0.2579 | 0.797  | 0.091292665 | count | 1 |
| CYB5B      | 0.0654649 | 0.3667784 | 0.1785 | 0.858  | 0.091761219 | count | 1 |
| EIF3M      | 0.0646312 | 0.1637573 | 0.3947 | 0.693  | 0.092088072 | count | 1 |
| SEC61B     | 0.064823  | 0.1335478 | 0.4854 | 0.628  | 0.092171157 | count | 1 |
| RPL10      | 0.0639057 | 0.0337754 | 1.8921 | 0.0591 | 0.092181527 | count | 1 |
| ASCC3      | 0.0697858 | 0.3941614 | 0.177  | 0.86   | 0.092568183 | count | 1 |
| CNOT2      | 0.0670565 | 0.2618586 | 0.2561 | 0.798  | 0.092677334 | count | 1 |
| CDC42SE1   | 0.0670731 | 0.1966142 | 0.3411 | 0.733  | 0.092700301 | count | 1 |
| HIF1A      | 0.0652233 | 0.211558  | 0.3083 | 0.758  | 0.092740541 | count | 1 |
| SUMO4      | 0.07008   | 0.5128463 | 0.1366 | 0.8914 | 0.092959258 | count | 1 |
| MTF2       | 0.0673607 | 0.2487548 | 0.2708 | 0.7867 | 0.093098211 | count | 1 |
| FAM32A     | 0.0674521 | 0.3325697 | 0.2028 | 0.839  | 0.093224669 | count | 1 |
| SSBP1      | 0.0668515 | 0.1669882 | 0.4003 | 0.689  | 0.093706188 | count | 1 |
| CCDC18     | 0.0665604 | 0.4369621 | 0.1523 | 0.879  | 0.09396534  | count | 1 |
| AMD1       | 0.0659386 | 0.1803589 | 0.3656 | 0.715  | 0.094097091 | count | 1 |
| CLIC4      | 0.0683965 | 0.4890688 | 0.1399 | 0.8888 | 0.094531324 | count | 1 |
| SLC1A5     | 0.0683965 | 0.5013443 | 0.1364 | 0.8915 | 0.094531324 | count | 1 |
| SNRPB      | 0.0661554 | 0.1289213 | 0.5131 | 0.6081 | 0.094979049 | count | 1 |
| CNOT4      | 0.0688053 | 0.3099211 | 0.222  | 0.824  | 0.095096945 | count | 1 |
| SRSF2      | 0.0688295 | 0.1515483 | 0.4542 | 0.65   | 0.095130429 | count | 1 |
| PRPSAP2    | 0.0688908 | 0.4066969 | 0.1694 | 0.8656 | 0.095215245 | count | 1 |
| PCNP       | 0.0675711 | 0.2112885 | 0.3198 | 0.749  | 0.095392955 | count | 1 |
| DPP7       | 0.0674501 | 0.2088011 | 0.323  | 0.747  | 0.095632417 | count | 1 |
| MT-CYB     | 0.0663354 | 0.0437397 | 1.5166 | 0.13   | 0.095654864 | count | 1 |
| PHTF2      | 0.0721217 | 0.3803548 | 0.1896 | 0.8497 | 0.095673444 | count | 1 |
| LYRM4      | 0.0723447 | 0.4173982 | 0.1733 | 0.862  | 0.095969915 | count | 1 |
| RNF19A     | 0.0672325 | 0.1607775 | 0.4182 | 0.676  | 0.096059801 | count | 1 |
| RPL6       | 0.0666893 | 0.0418415 | 1.5939 | 0.112  | 0.096162986 | count | 1 |
| ARHGAP17   | 0.0686581 | 0.4157793 | 0.1651 | 0.869  | 0.096240372 | count | 1 |
| ARHGDIB    | 0.0671021 | 0.0821653 | 0.8167 | 0.415  | 0.096494375 | count | 1 |
| CNPY3      | 0.0675583 | 0.1612533 | 0.419  | 0.6754 | 0.096859251 | count | 1 |
| NDUFB11    | 0.0676171 | 0.1148044 | 0.589  | 0.5562 | 0.097124957 | count | 1 |
| KBTBD4     | 0.0704949 | 0.552276  | 0.1276 | 0.8985 | 0.097434771 | count | 1 |
| ARF4       | 0.070508  | 0.1846959 | 0.3818 | 0.7028 | 0.097452897 | count | 1 |
| GADD45GIP1 | 0.0708238 | 0.1891678 | 0.3744 | 0.7083 | 0.09788987  | count | 1 |
| SMYD3      | 0.0708531 | 0.4490574 | 0.1578 | 0.8747 | 0.097930412 | count | 1 |
| ITPA       | 0.0698657 | 0.2972367 | 0.2351 | 0.814  | 0.097934369 | count | 1 |
| ATXN2L     | 0.0743352 | 0.4271089 | 0.174  | 0.8619 | 0.098616385 | count | 1 |
| DSTN       | 0.0699168 | 0.2871318 | 0.2435 | 0.808  | 0.099131351 | count | 1 |
| RPA3       | 0.0701447 | 0.2150436 | 0.3262 | 0.7444 | 0.100101087 | count | 1 |
| BTN2A2     | 0.0717027 | 0.2364655 | 0.3032 | 0.762  | 0.100511357 | count | 1 |
| MSH6       | 0.0757826 | 0.2518616 | 0.3009 | 0.7636 | 0.10054097  | count | 1 |
| BUB3       | 0.0727724 | 0.1984198 | 0.3668 | 0.714  | 0.10058624  | count | 1 |



|           |           |           |        |        |             |       |   |
|-----------|-----------|-----------|--------|--------|-------------|-------|---|
| AIP       | 0.0709824 | 0.217111  | 0.3269 | 0.744  | 0.100642903 | count | 1 |
| IQGAP1    | 0.071333  | 0.2203763 | 0.3237 | 0.746  | 0.100706843 | count | 1 |
| FAM3A     | 0.0729972 | 0.4759643 | 0.1534 | 0.8782 | 0.100897316 | count | 1 |
| STRAP     | 0.0721683 | 0.2423621 | 0.2978 | 0.766  | 0.101164528 | count | 1 |
| CHTF8     | 0.0736997 | 0.6474255 | 0.1138 | 0.909  | 0.101869445 | count | 1 |
| SF1       | 0.0717235 | 0.1130451 | 0.6345 | 0.526  | 0.102196725 | count | 1 |
| FAM49B    | 0.0717392 | 0.1544326 | 0.4645 | 0.6425 | 0.102680406 | count | 1 |
| LIX1L     | 0.0743747 | 0.4029727 | 0.1846 | 0.8537 | 0.102803539 | count | 1 |
| KRIT1     | 0.0734144 | 0.3080181 | 0.2383 | 0.812  | 0.10291266  | count | 1 |
| CD46      | 0.0725072 | 0.2268302 | 0.3197 | 0.749  | 0.103101536 | count | 1 |
| CHCHD10   | 0.072418  | 0.1113751 | 0.6502 | 0.516  | 0.103720426 | count | 1 |
| TMEM14B   | 0.0739955 | 0.1803621 | 0.4103 | 0.682  | 0.10372789  | count | 1 |
| BLM       | 0.0753492 | 0.6055056 | 0.1244 | 0.901  | 0.104152127 | count | 1 |
| ST13      | 0.0730592 | 0.1412999 | 0.5171 | 0.605  | 0.104261506 | count | 1 |
| SUMO1     | 0.0737239 | 0.1697186 | 0.4344 | 0.664  | 0.105048011 | count | 1 |
| OS9       | 0.0754241 | 0.3484309 | 0.2165 | 0.829  | 0.105732127 | count | 1 |
| EVI2A     | 0.0799832 | 0.1822121 | 0.439  | 0.6609 | 0.106127365 | count | 1 |
| RPLP1     | 0.0739547 | 0.0353133 | 2.0942 | 0.0368 | 0.106674221 | count | 1 |
| ECH1      | 0.0748199 | 0.1687324 | 0.4434 | 0.658  | 0.106774933 | count | 1 |
| PJA2      | 0.0775851 | 0.1810629 | 0.4285 | 0.6685 | 0.107246488 | count | 1 |
| NIPBL     | 0.0767798 | 0.243807  | 0.3149 | 0.753  | 0.107634144 | count | 1 |
| DYNLRB1   | 0.0759762 | 0.2109283 | 0.3602 | 0.719  | 0.107726873 | count | 1 |
| EPC2      | 0.078228  | 0.3655705 | 0.214  | 0.8307 | 0.108136265 | count | 1 |
| HADHA     | 0.0759319 | 0.1881474 | 0.4036 | 0.6867 | 0.108597141 | count | 1 |
| SECISBP2  | 0.077825  | 0.2161823 | 0.36   | 0.719  | 0.109100574 | count | 1 |
| PHF23     | 0.0778975 | 0.2129741 | 0.3658 | 0.715  | 0.109202293 | count | 1 |
| ANXA4     | 0.0770343 | 0.2888529 | 0.2667 | 0.7898 | 0.109227901 | count | 1 |
| SPTAN1    | 0.0824062 | 0.3163142 | 0.2605 | 0.7946 | 0.109350344 | count | 1 |
| TMEM18    | 0.0792027 | 0.3059878 | 0.2588 | 0.7959 | 0.109485288 | count | 1 |
| SNW1      | 0.0792724 | 0.1975743 | 0.4012 | 0.688  | 0.109581757 | count | 1 |
| CBWD1     | 0.0801332 | 0.3926187 | 0.2041 | 0.8384 | 0.110773173 | count | 1 |
| PSMD12    | 0.0776925 | 0.2756513 | 0.2819 | 0.7782 | 0.11087569  | count | 1 |
| EID1      | 0.0839275 | 0.1829711 | 0.4587 | 0.6467 | 0.111374149 | count | 1 |
| RPN2      | 0.0790014 | 0.240642  | 0.3283 | 0.743  | 0.112018494 | count | 1 |
| REST      | 0.0802257 | 0.2246916 | 0.357  | 0.721  | 0.113269504 | count | 1 |
| TAX1BP1   | 0.0809567 | 0.1580229 | 0.5123 | 0.609  | 0.113494576 | count | 1 |
| SCFD1     | 0.0855811 | 0.3794884 | 0.2255 | 0.8217 | 0.113574157 | count | 1 |
| SGO1      | 0.0813223 | 0.7121118 | 0.1142 | 0.909  | 0.114007558 | count | 1 |
| GABARAPL2 | 0.0804254 | 0.1499374 | 0.5364 | 0.592  | 0.115025381 | count | 1 |
| H3F3B     | 0.080525  | 0.0786496 | 1.0238 | 0.306  | 0.116066387 | count | 1 |
| IPO5      | 0.0840019 | 0.4487964 | 0.1872 | 0.8516 | 0.116128147 | count | 1 |
| CDKN2D    | 0.0813248 | 0.1502719 | 0.5412 | 0.589  | 0.116403584 | count | 1 |
| STAT5A    | 0.0842639 | 0.7016889 | 0.1201 | 0.9045 | 0.116490825 | count | 1 |
| TALDO1    | 0.0822958 | 0.2049535 | 0.4015 | 0.6882 | 0.117026587 | count | 1 |
| SSNA1     | 0.0849778 | 0.230802  | 0.3682 | 0.7129 | 0.117479066 | count | 1 |

|          |           |           |        |        |             |       |   |
|----------|-----------|-----------|--------|--------|-------------|-------|---|
| C19orf70 | 0.0838403 | 0.2019897 | 0.4151 | 0.678  | 0.117540726 | count | 1 |
| DYNLT1   | 0.0838425 | 0.2293471 | 0.3656 | 0.715  | 0.117543812 | count | 1 |
| WTAP     | 0.0829769 | 0.1765294 | 0.47   | 0.639  | 0.117658478 | count | 1 |
| TRAM1    | 0.083792  | 0.1904169 | 0.44   | 0.66   | 0.118308079 | count | 1 |
| SMC3     | 0.083356  | 0.220186  | 0.3786 | 0.705  | 0.118777918 | count | 1 |
| COQ8B    | 0.0837709 | 0.6068502 | 0.138  | 0.89   | 0.118784948 | count | 1 |
| HUWE1    | 0.0850514 | 0.3901816 | 0.218  | 0.828  | 0.119240162 | count | 1 |
| ADI1     | 0.0845031 | 0.2873266 | 0.2941 | 0.769  | 0.119312775 | count | 1 |
| CCDC130  | 0.0863814 | 0.3559684 | 0.2427 | 0.8084 | 0.119422111 | count | 1 |
| CHPT1    | 0.090211  | 0.1808901 | 0.4987 | 0.6182 | 0.119735056 | count | 1 |
| GNPAT    | 0.0856445 | 0.4887424 | 0.1752 | 0.861  | 0.120072426 | count | 1 |
| RPL17    | 0.0858283 | 0.1745526 | 0.4917 | 0.623  | 0.120330344 | count | 1 |
| VOPP1    | 0.087454  | 0.2259774 | 0.387  | 0.6989 | 0.120906998 | count | 1 |
| SELENOS  | 0.0862645 | 0.2486352 | 0.347  | 0.729  | 0.120942447 | count | 1 |
| RHOT1    | 0.0868087 | 0.636852  | 0.1363 | 0.8916 | 0.12170611  | count | 1 |
| RSBN1    | 0.0880343 | 0.239925  | 0.3669 | 0.714  | 0.121710375 | count | 1 |
| SRSF10   | 0.0855482 | 0.1577394 | 0.5423 | 0.588  | 0.121902914 | count | 1 |
| SLC38A2  | 0.0859921 | 0.2533375 | 0.3394 | 0.734  | 0.121936284 | count | 1 |
| CD47     | 0.0854977 | 0.1332049 | 0.6419 | 0.521  | 0.122526041 | count | 1 |
| AKAP13   | 0.0888487 | 0.1542612 | 0.576  | 0.565  | 0.122837866 | count | 1 |
| PHF14    | 0.0889376 | 0.2477859 | 0.3589 | 0.72   | 0.122960945 | count | 1 |
| HPCAL1   | 0.0871081 | 0.2785817 | 0.3127 | 0.755  | 0.122993411 | count | 1 |
| CD86     | 0.0881646 | 0.2438904 | 0.3615 | 0.718  | 0.12360885  | count | 1 |
| NPC2     | 0.0872183 | 0.202286  | 0.4312 | 0.667  | 0.124283694 | count | 1 |
| SYF2     | 0.0881073 | 0.1398672 | 0.6299 | 0.529  | 0.124405232 | count | 1 |
| RAP2C    | 0.0937368 | 0.3615033 | 0.2593 | 0.7955 | 0.124427855 | count | 1 |
| MRPL15   | 0.090034  | 0.3957188 | 0.2275 | 0.8201 | 0.124478897 | count | 1 |
| ATP5PB   | 0.087677  | 0.2202248 | 0.3981 | 0.691  | 0.124682367 | count | 1 |
| SUPT4H1  | 0.0890286 | 0.2160732 | 0.412  | 0.681  | 0.124821332 | count | 1 |
| BRD4     | 0.0891086 | 0.2240638 | 0.3977 | 0.691  | 0.1249336   | count | 1 |
| FASTK    | 0.0887737 | 0.4255233 | 0.2086 | 0.8348 | 0.125346835 | count | 1 |
| PHIP     | 0.0895173 | 0.3673297 | 0.2437 | 0.8076 | 0.12639753  | count | 1 |
| TGFBR2   | 0.0954411 | 0.231288  | 0.4127 | 0.6801 | 0.126696599 | count | 1 |
| HSD17B11 | 0.0956365 | 0.2479598 | 0.3857 | 0.6999 | 0.126956727 | count | 1 |
| KRR1     | 0.0958451 | 0.244968  | 0.3913 | 0.6958 | 0.127234431 | count | 1 |
| SPPL2A   | 0.092078  | 0.3169944 | 0.2905 | 0.772  | 0.127308923 | count | 1 |
| PTPRC    | 0.0886958 | 0.1050105 | 0.8446 | 0.3988 | 0.127345407 | count | 1 |
| MRPS22   | 0.0914931 | 0.3049963 | 0.3    | 0.7643 | 0.128279968 | count | 1 |
| WIPF1    | 0.0916    | 0.2105441 | 0.4351 | 0.664  | 0.128429994 | count | 1 |
| PTPN6    | 0.0904481 | 0.1568763 | 0.5766 | 0.565  | 0.129085953 | count | 1 |
| LYPLAL1  | 0.0921039 | 0.252436  | 0.3649 | 0.715  | 0.129137181 | count | 1 |
| UXT      | 0.0904863 | 0.1211077 | 0.7472 | 0.455  | 0.129738338 | count | 1 |
| UBB      | 0.0902752 | 0.0783279 | 1.1525 | 0.2497 | 0.129821461 | count | 1 |
| LEPROT   | 0.0939562 | 0.3478775 | 0.2701 | 0.7872 | 0.129909541 | count | 1 |
| NUDC     | 0.0980126 | 0.1918776 | 0.5108 | 0.6097 | 0.130120165 | count | 1 |

|         |           |           |        |         |             |       |   |
|---------|-----------|-----------|--------|---------|-------------|-------|---|
| PSMD7   | 0.0917756 | 0.2105663 | 0.4359 | 0.663   | 0.130513688 | count | 1 |
| CCDC47  | 0.0930516 | 0.269465  | 0.3453 | 0.73    | 0.131391603 | count | 1 |
| FCHSD2  | 0.095063  | 0.2044293 | 0.465  | 0.642   | 0.131442121 | count | 1 |
| APC     | 0.0991756 | 0.4674408 | 0.2122 | 0.8321  | 0.13166869  | count | 1 |
| PRH1    | 0.0953826 | 0.4283047 | 0.2227 | 0.8239  | 0.131884679 | count | 1 |
| MT-ND2  | 0.0915776 | 0.0626288 | 1.4622 | 0.144   | 0.131930563 | count | 1 |
| CALM2   | 0.0923619 | 0.0897493 | 1.0291 | 0.304   | 0.132292121 | count | 1 |
| HNRNPD  | 0.0931512 | 0.1578463 | 0.5901 | 0.555   | 0.13247089  | count | 1 |
| JMJD1C  | 0.0945917 | 0.1801104 | 0.5252 | 0.6     | 0.132628733 | count | 1 |
| MAVS    | 0.0959291 | 0.7693349 | 0.1247 | 0.9008  | 0.13264144  | count | 1 |
| ATP6V1D | 0.0939404 | 0.4138785 | 0.227  | 0.8206  | 0.132647546 | count | 1 |
| LLPH    | 0.0932848 | 0.3546487 | 0.263  | 0.7926  | 0.132660978 | count | 1 |
| CNBP    | 0.0936666 | 0.113573  | 0.8247 | 0.41    | 0.13282517  | count | 1 |
| ATRX    | 0.0933753 | 0.1695713 | 0.5507 | 0.582   | 0.133060994 | count | 1 |
| PCBP1   | 0.0932074 | 0.1169613 | 0.7969 | 0.426   | 0.133577297 | count | 1 |
| C1D     | 0.0946146 | 0.259247  | 0.365  | 0.715   | 0.133600255 | count | 1 |
| RPS3    | 0.0927646 | 0.0351951 | 2.6357 | 0.00869 | 0.133767867 | count | 1 |
| BECN1   | 0.0954765 | 0.3922758 | 0.2434 | 0.808   | 0.134818215 | count | 1 |
| BBC3    | 0.0976426 | 0.2578932 | 0.3786 | 0.705   | 0.135014275 | count | 1 |
| DDX3Y   | 0.0980896 | 0.1911564 | 0.5131 | 0.6081  | 0.135633295 | count | 1 |
| CUTC    | 0.0981198 | 0.3059384 | 0.3207 | 0.7486  | 0.135675117 | count | 1 |
| RALBP1  | 0.0952631 | 0.2480032 | 0.3841 | 0.7011  | 0.1357523   | count | 1 |
| FOXN3   | 0.0982208 | 0.317136  | 0.3097 | 0.757   | 0.135814987 | count | 1 |
| WNK1    | 0.098298  | 0.3230961 | 0.3042 | 0.761   | 0.135921897 | count | 1 |
| MRPL13  | 0.0972643 | 0.3401522 | 0.2859 | 0.7751  | 0.137344625 | count | 1 |
| COX5A   | 0.0968246 | 0.1866331 | 0.5188 | 0.604   | 0.137697534 | count | 1 |
| NABP1   | 0.1045854 | 0.2774805 | 0.3769 | 0.7064  | 0.138873136 | count | 1 |
| HNRNPM  | 0.1046922 | 0.1576025 | 0.6643 | 0.5069  | 0.139015389 | count | 1 |
| BRD2    | 0.0995383 | 0.1878273 | 0.5299 | 0.596   | 0.139571653 | count | 1 |
| FAM133B | 0.097603  | 0.1934464 | 0.5045 | 0.6141  | 0.139709896 | count | 1 |
| CEBPZ   | 0.1021806 | 0.2632757 | 0.3881 | 0.698   | 0.141299025 | count | 1 |
| HNRNPK  | 0.1009173 | 0.1130714 | 0.8925 | 0.3726  | 0.141507305 | count | 1 |
| MS4A1   | 0.0983643 | 0.0825621 | 1.1914 | 0.234   | 0.141568745 | count | 1 |
| MAP4K4  | 0.1001125 | 0.2339041 | 0.428  | 0.669   | 0.141971657 | count | 1 |
| RPL8    | 0.0987262 | 0.0348852 | 2.83   | 0.00487 | 0.142374923 | count | 1 |
| NSRP1   | 0.1031736 | 0.2614192 | 0.3947 | 0.693   | 0.142674358 | count | 1 |
| LAPTM4A | 0.1007098 | 0.1648663 | 0.6109 | 0.542   | 0.14373715  | count | 1 |
| RNF13   | 0.1043437 | 0.2778433 | 0.3755 | 0.707   | 0.144295032 | count | 1 |
| CCNK    | 0.1043551 | 0.3327525 | 0.3136 | 0.754   | 0.144310822 | count | 1 |
| CTDSP1  | 0.1046729 | 0.2714862 | 0.3856 | 0.7     | 0.144751007 | count | 1 |
| LMAN2   | 0.1022073 | 0.2289298 | 0.4465 | 0.6555  | 0.145356582 | count | 1 |
| EIF4H   | 0.1036955 | 0.2404248 | 0.4313 | 0.666   | 0.145407122 | count | 1 |
| ZNF148  | 0.1033057 | 0.2728956 | 0.3786 | 0.705   | 0.145882468 | count | 1 |
| TERF2IP | 0.1028618 | 0.1077532 | 0.9546 | 0.34    | 0.146809825 | count | 1 |
| SNRPD2  | 0.1025688 | 0.1062576 | 0.9653 | 0.335   | 0.146820102 | count | 1 |

|          |           |           |        |          |             |       |   |
|----------|-----------|-----------|--------|----------|-------------|-------|---|
| STAU1    | 0.1065534 | 0.2670187 | 0.399  | 0.69     | 0.147355779 | count | 1 |
| PRMT2    | 0.1065534 | 0.3039998 | 0.3505 | 0.726    | 0.147355779 | count | 1 |
| CBX5     | 0.1066913 | 0.2734954 | 0.3901 | 0.6966   | 0.147546796 | count | 1 |
| NRDC     | 0.1046028 | 0.2284632 | 0.4579 | 0.647    | 0.14771566  | count | 1 |
| NFE2L2   | 0.1042473 | 0.1692244 | 0.616  | 0.538    | 0.147839155 | count | 1 |
| THAP5    | 0.1070339 | 0.3415488 | 0.3134 | 0.754    | 0.148021365 | count | 1 |
| TMEM65   | 0.107285  | 0.5119334 | 0.2096 | 0.8341   | 0.148369192 | count | 1 |
| CASP2    | 0.1120541 | 0.8137498 | 0.1377 | 0.891    | 0.148823112 | count | 1 |
| CEP76    | 0.1120541 | 0.816909  | 0.1372 | 0.891    | 0.148823112 | count | 1 |
| TP53I11  | 0.1080474 | 0.5235195 | 0.2064 | 0.8366   | 0.149425292 | count | 1 |
| RAB3GAP1 | 0.108223  | 0.3014162 | 0.359  | 0.7197   | 0.149668542 | count | 1 |
| PFN1     | 0.1041108 | 0.0694888 | 1.4982 | 0.135    | 0.14981891  | count | 1 |
| RPL22    | 0.1041645 | 0.0483258 | 2.1555 | 0.0317   | 0.150143695 | count | 1 |
| RPL37    | 0.1041711 | 0.0388577 | 2.6808 | 0.00762  | 0.150170087 | count | 1 |
| DDX18    | 0.1065611 | 0.1664649 | 0.6401 | 0.522    | 0.150483393 | count | 1 |
| GPBP1    | 0.1057446 | 0.1296525 | 0.8156 | 0.415    | 0.150695851 | count | 1 |
| RRAGB    | 0.1137744 | 0.5277012 | 0.2156 | 0.8294   | 0.151115526 | count | 1 |
| UBE2R2   | 0.1079037 | 0.2512335 | 0.4295 | 0.668    | 0.151314668 | count | 1 |
| TM2D1    | 0.1082552 | 0.3189061 | 0.3395 | 0.734    | 0.151808133 | count | 1 |
| DCP1A    | 0.1098598 | 0.3092345 | 0.3553 | 0.7226   | 0.151935979 | count | 1 |
| RPS28    | 0.1055946 | 0.0352597 | 2.9948 | 0.0029   | 0.152263812 | count | 1 |
| SPOCK2   | 0.1149679 | 0.2919313 | 0.3938 | 0.6939   | 0.152706074 | count | 1 |
| HIST1H4C | 0.1074971 | 0.1528746 | 0.7032 | 0.4823   | 0.153976813 | count | 1 |
| UBE2Q1   | 0.1086645 | 0.3715742 | 0.2924 | 0.7701   | 0.154545084 | count | 1 |
| SF3B1    | 0.1102557 | 0.1303401 | 0.8459 | 0.3981   | 0.154616663 | count | 1 |
| NAPA     | 0.109858  | 0.3555584 | 0.309  | 0.7575   | 0.155143198 | count | 1 |
| RPS8     | 0.1079635 | 0.0342467 | 3.1525 | 0.00173  | 0.155725023 | count | 1 |
| SUZ12    | 0.1128567 | 0.2299488 | 0.4908 | 0.6238   | 0.156087824 | count | 1 |
| BBX      | 0.1101356 | 0.1812188 | 0.6077 | 0.544    | 0.156195465 | count | 1 |
| PPIH     | 0.11396   | 0.3448528 | 0.3305 | 0.7412   | 0.157616405 | count | 1 |
| SMC1A    | 0.1125529 | 0.2884019 | 0.3903 | 0.697    | 0.157841868 | count | 1 |
| EEF1B2   | 0.1097024 | 0.0537298 | 2.0417 | 0.0418   | 0.1581494   | count | 1 |
| CDC42EP3 | 0.1146084 | 0.2640207 | 0.4341 | 0.664    | 0.158514761 | count | 1 |
| PNRC2    | 0.1133446 | 0.1679296 | 0.675  | 0.5      | 0.158953427 | count | 1 |
| RBM23    | 0.1153238 | 0.3008501 | 0.3833 | 0.702    | 0.159505966 | count | 1 |
| PRPF3    | 0.1126729 | 0.3604486 | 0.3126 | 0.7547   | 0.159796424 | count | 1 |
| PSMB10   | 0.1155368 | 0.3193234 | 0.3618 | 0.718    | 0.159801087 | count | 1 |
| FAM210B  | 0.1139584 | 1.0047618 | 0.1134 | 0.9098   | 0.159815223 | count | 1 |
| RPS26    | 0.1113861 | 0.0414946 | 2.6844 | 0.00754  | 0.160575695 | count | 1 |
| OTUD1    | 0.1127207 | 0.2523616 | 0.4467 | 0.6553   | 0.160642475 | count | 1 |
| BZW1     | 0.1125384 | 0.1282058 | 0.8778 | 0.381    | 0.160970282 | count | 1 |
| NANS     | 0.1164248 | 0.3766617 | 0.3091 | 0.7574   | 0.161031469 | count | 1 |
| EEF1A1   | 0.1117411 | 0.0295516 | 3.7812 | 0.000177 | 0.16118001  | count | 1 |
| MIOS     | 0.1168755 | 0.2980321 | 0.3922 | 0.6951   | 0.161655955 | count | 1 |
| DDX10    | 0.1168896 | 0.5429203 | 0.2153 | 0.8296   | 0.161675492 | count | 1 |

|          |           |           |        |          |             |       |   |
|----------|-----------|-----------|--------|----------|-------------|-------|---|
| HMG20B   | 0.1218561 | 0.446537  | 0.2729 | 0.7851   | 0.161887861 | count | 1 |
| SNAP29   | 0.1218561 | 0.514496  | 0.2368 | 0.8129   | 0.161887861 | count | 1 |
| OARD1    | 0.1218563 | 0.3376537 | 0.3609 | 0.7184   | 0.161888128 | count | 1 |
| IRF3     | 0.1170508 | 0.2688728 | 0.4353 | 0.664    | 0.161898852 | count | 1 |
| MMP24OS  | 0.1147823 | 0.3055997 | 0.3756 | 0.707    | 0.162103578 | count | 1 |
| RSBN1L   | 0.1163061 | 0.1672129 | 0.6956 | 0.487    | 0.163111571 | count | 1 |
| PPP2R3C  | 0.1180471 | 0.3323309 | 0.3552 | 0.7226   | 0.163279353 | count | 1 |
| UQCRC1   | 0.1185452 | 0.3575797 | 0.3315 | 0.7404   | 0.163969549 | count | 1 |
| SCAF8    | 0.1170849 | 0.5092725 | 0.2299 | 0.8183   | 0.164205098 | count | 1 |
| ZFPM1    | 0.1170849 | 0.5678837 | 0.2062 | 0.8367   | 0.164205098 | count | 1 |
| DNAJC3   | 0.1166324 | 0.4084828 | 0.2855 | 0.7754   | 0.16471878  | count | 1 |
| DCXR     | 0.1177004 | 0.214476  | 0.5488 | 0.583    | 0.166228481 | count | 1 |
| SPTLC2   | 0.1205898 | 0.4197259 | 0.2873 | 0.774    | 0.166802769 | count | 1 |
| RPL18    | 0.1158597 | 0.0344638 | 3.3618 | 0.000841 | 0.167090491 | count | 1 |
| RPL39    | 0.1158767 | 0.0357097 | 3.245  | 0.00126  | 0.167104179 | count | 1 |
| RPS4X    | 0.1160508 | 0.0390168 | 2.9744 | 0.0031   | 0.167348415 | count | 1 |
| SELENOK  | 0.116895  | 0.1329921 | 0.879  | 0.38     | 0.167534136 | count | 1 |
| CCNL1    | 0.1176674 | 0.1431572 | 0.8219 | 0.412    | 0.168149844 | count | 1 |
| COMMD8   | 0.1265702 | 0.4034811 | 0.3137 | 0.754    | 0.168173646 | count | 1 |
| RUVBL1   | 0.1199416 | 0.3628007 | 0.3306 | 0.741    | 0.168216383 | count | 1 |
| EXOSC8   | 0.1206938 | 0.2863353 | 0.4215 | 0.674    | 0.169272635 | count | 1 |
| SNRPG    | 0.1187465 | 0.1386378 | 0.8565 | 0.392    | 0.169692543 | count | 1 |
| STK17B   | 0.1196835 | 0.1049643 | 1.1402 | 0.2548   | 0.169746495 | count | 1 |
| BLOC1S4  | 0.1189422 | 0.2522455 | 0.4715 | 0.6375   | 0.169771359 | count | 1 |
| SEPHS2   | 0.1207734 | 0.3589427 | 0.3365 | 0.7367   | 0.171293453 | count | 1 |
| ATAD2    | 0.1242397 | 0.4129439 | 0.3009 | 0.7637   | 0.171860879 | count | 1 |
| AGTPBP1  | 0.1227188 | 0.4966295 | 0.2471 | 0.8049   | 0.172116251 | count | 1 |
| IL27RA   | 0.1229005 | 0.3225649 | 0.381  | 0.703    | 0.172371409 | count | 1 |
| ALG13    | 0.1247119 | 0.1989473 | 0.6269 | 0.531    | 0.172515302 | count | 1 |
| N4BP2L2  | 0.120911  | 0.1281598 | 0.9434 | 0.346    | 0.173372921 | count | 1 |
| 9-Sep    | 0.1223117 | 0.2208103 | 0.5539 | 0.58     | 0.173966791 | count | 1 |
| PDCL3    | 0.1265132 | 0.3039219 | 0.4163 | 0.677    | 0.175011811 | count | 1 |
| SEC13    | 0.1316993 | 0.3457646 | 0.3809 | 0.7035   | 0.175014637 | count | 1 |
| TGS1     | 0.1228938 | 0.3064687 | 0.401  | 0.6886   | 0.175148486 | count | 1 |
| ASCC2    | 0.1266371 | 0.3786812 | 0.3344 | 0.7382   | 0.175183534 | count | 1 |
| ZNRD1    | 0.1271574 | 0.2207662 | 0.576  | 0.565    | 0.17590467  | count | 1 |
| GLIPR1   | 0.1245674 | 0.1739399 | 0.7162 | 0.474    | 0.175936078 | count | 1 |
| ZNF675   | 0.1274479 | 0.4155421 | 0.3067 | 0.7592   | 0.176307307 | count | 1 |
| HIST1H1D | 0.1240872 | 0.3314292 | 0.3744 | 0.7083   | 0.176493746 | count | 1 |
| DAP3     | 0.1328462 | 0.2724196 | 0.4877 | 0.626    | 0.176544589 | count | 1 |
| ACTB     | 0.1237376 | 0.0574258 | 2.1547 | 0.0317   | 0.178426519 | count | 1 |
| TTC31    | 0.1290679 | 0.678532  | 0.1902 | 0.8492   | 0.178552712 | count | 1 |
| KLHDC1   | 0.129136  | 0.7350237 | 0.1757 | 0.8606   | 0.178647104 | count | 1 |
| CMTM3    | 0.129136  | 0.7350237 | 0.1757 | 0.8606   | 0.178647104 | count | 1 |
| DBI      | 0.124737  | 0.161918  | 0.7704 | 0.441    | 0.178996892 | count | 1 |

|            |           |           |        |          |             |       |   |
|------------|-----------|-----------|--------|----------|-------------|-------|---|
| BTF3       | 0.1245286 | 0.065249  | 1.9085 | 0.057    | 0.179126405 | count | 1 |
| SRSF5      | 0.1255286 | 0.1511729 | 0.8304 | 0.407    | 0.179177007 | count | 1 |
| C8orf59    | 0.12702   | 0.1699254 | 0.7475 | 0.455    | 0.179403453 | count | 1 |
| SON        | 0.1249868 | 0.0858824 | 1.4553 | 0.1463   | 0.179583649 | count | 1 |
| ZCCHC7     | 0.1268791 | 0.2478511 | 0.5119 | 0.609    | 0.181319394 | count | 1 |
| TM9SF3     | 0.1311702 | 0.3115061 | 0.4211 | 0.6739   | 0.181466764 | count | 1 |
| DYNC1I2    | 0.1370618 | 0.3278562 | 0.4181 | 0.676    | 0.182168972 | count | 1 |
| MBIP       | 0.1319034 | 0.4765183 | 0.2768 | 0.782    | 0.182483112 | count | 1 |
| ALYREF     | 0.1296025 | 0.2925993 | 0.4429 | 0.658    | 0.183825826 | count | 1 |
| SHISA8     | 0.1329874 | 0.3055266 | 0.4353 | 0.664    | 0.183985771 | count | 1 |
| GLS        | 0.1313517 | 0.1749733 | 0.7507 | 0.453    | 0.184240283 | count | 1 |
| LRMP       | 0.1335994 | 0.3245602 | 0.4116 | 0.681    | 0.184834155 | count | 1 |
| TMBIM6     | 0.1311618 | 0.1080568 | 1.2138 | 0.225    | 0.186039292 | count | 1 |
| NAA25      | 0.1309075 | 0.4572622 | 0.2863 | 0.775    | 0.186201046 | count | 1 |
| MAPKAPK5   | 0.140231  | 0.5315916 | 0.2638 | 0.7921   | 0.18639811  | count | 1 |
| SUCLG2     | 0.1407082 | 0.3902008 | 0.3606 | 0.719    | 0.187034972 | count | 1 |
| BCL2A1     | 0.1308115 | 0.1523653 | 0.8585 | 0.391    | 0.187485556 | count | 1 |
| PSMC4      | 0.1341063 | 0.2691004 | 0.4984 | 0.618    | 0.188109261 | count | 1 |
| SRGN       | 0.1319721 | 0.1006754 | 1.3109 | 0.1906   | 0.188924719 | count | 1 |
| ATP5ME     | 0.1350429 | 0.175312  | 0.7703 | 0.442    | 0.18942481  | count | 1 |
| RUNX3      | 0.1375157 | 0.2842599 | 0.4838 | 0.6288   | 0.190263472 | count | 1 |
| SFPQ       | 0.1339022 | 0.1036263 | 1.2922 | 0.197    | 0.190846962 | count | 1 |
| ANXA7      | 0.1352305 | 0.2093188 | 0.6461 | 0.519    | 0.191011984 | count | 1 |
| UBE2B      | 0.134152  | 0.1489135 | 0.9009 | 0.368    | 0.19149226  | count | 1 |
| UCHL3      | 0.1370419 | 0.3555623 | 0.3854 | 0.7001   | 0.192232686 | count | 1 |
| PFDN2      | 0.1345115 | 0.1553432 | 0.8659 | 0.387    | 0.192412875 | count | 1 |
| ELMSAN1    | 0.1373508 | 0.2695096 | 0.5096 | 0.611    | 0.192666588 | count | 1 |
| AL627171.1 | 0.1385524 | 0.5933597 | 0.2335 | 0.8155   | 0.194354465 | count | 1 |
| 3-Mar      | 0.1462341 | 0.5467233 | 0.2675 | 0.7892   | 0.194410924 | count | 1 |
| MT-CO1     | 0.1348453 | 0.0344212 | 3.9175 | 0.000104 | 0.194503833 | count | 1 |
| BCAP29     | 0.1465428 | 0.3014913 | 0.4861 | 0.6272   | 0.19482304  | count | 1 |
| THUMPD1    | 0.1472634 | 0.1927685 | 0.7639 | 0.4453   | 0.19578507  | count | 1 |
| WBP2       | 0.1387702 | 0.3066163 | 0.4526 | 0.6511   | 0.196017061 | count | 1 |
| SERP1      | 0.1364603 | 0.1082888 | 1.2602 | 0.2083   | 0.196032603 | count | 1 |
| ARHGAP45   | 0.139757  | 0.3205633 | 0.436  | 0.663    | 0.196046594 | count | 1 |
| USP47      | 0.1474785 | 0.3482586 | 0.4235 | 0.6722   | 0.196072245 | count | 1 |
| ANAPC16    | 0.1373472 | 0.1240726 | 1.107  | 0.2689   | 0.197027491 | count | 1 |
| SQSTM1     | 0.1396929 | 0.143046  | 0.9766 | 0.329    | 0.197321785 | count | 1 |
| DNAJC15    | 0.137578  | 0.1679828 | 0.819  | 0.4132   | 0.197428575 | count | 1 |
| CLDND1     | 0.1407883 | 0.2601844 | 0.5411 | 0.589    | 0.197495315 | count | 1 |
| CREBRF     | 0.1417462 | 0.2195886 | 0.6455 | 0.519    | 0.198840953 | count | 1 |
| HNRNPH2    | 0.1439665 | 0.2615792 | 0.5504 | 0.5823   | 0.199207762 | count | 1 |
| RPAIN      | 0.1500524 | 0.2683434 | 0.5592 | 0.576    | 0.199508851 | count | 1 |
| MRPL54     | 0.1446194 | 0.1884034 | 0.7676 | 0.4431   | 0.200113123 | count | 1 |
| CUL5       | 0.1508823 | 0.2825755 | 0.534  | 0.5936   | 0.200617012 | count | 1 |

|          |           |           |        |         |             |       |   |
|----------|-----------|-----------|--------|---------|-------------|-------|---|
| HNRNPDL  | 0.1397468 | 0.0823352 | 1.6973 | 0.0903  | 0.200660068 | count | 1 |
| C21orf91 | 0.1432081 | 0.4707458 | 0.3042 | 0.7611  | 0.200894645 | count | 1 |
| C12orf76 | 0.1521644 | 0.5515445 | 0.2759 | 0.783   | 0.20232909  | count | 1 |
| SIRT2    | 0.1462267 | 0.5342825 | 0.2737 | 0.7845  | 0.202341998 | count | 1 |
| SF3B2    | 0.1436846 | 0.1748702 | 0.8217 | 0.412   | 0.202966359 | count | 1 |
| CAPRIN1  | 0.1468857 | 0.3309657 | 0.4438 | 0.6574  | 0.203255876 | count | 1 |
| CCPG1    | 0.1472381 | 0.2807824 | 0.5244 | 0.6003  | 0.203744578 | count | 1 |
| BRAF     | 0.1462304 | 0.4005758 | 0.3651 | 0.7152  | 0.205140584 | count | 1 |
| FASTKD2  | 0.148273  | 0.4953937 | 0.2993 | 0.7648  | 0.205179788 | count | 1 |
| FAM129C  | 0.1463171 | 0.3475204 | 0.421  | 0.674   | 0.20526239  | count | 1 |
| SEC61G   | 0.1454169 | 0.2038792 | 0.7133 | 0.476   | 0.205416065 | count | 1 |
| POLR2L   | 0.1443511 | 0.2041422 | 0.7071 | 0.4799  | 0.206058795 | count | 1 |
| EIF1     | 0.1434327 | 0.04877   | 2.941  | 0.00344 | 0.206714662 | count | 1 |
| AKAP9    | 0.1460592 | 0.2164082 | 0.6749 | 0.5     | 0.207768671 | count | 1 |
| BTG2     | 0.1448486 | 0.1141206 | 1.2693 | 0.205   | 0.207791607 | count | 1 |
| ZCCHC17  | 0.1502872 | 0.3201167 | 0.4695 | 0.639   | 0.207973218 | count | 1 |
| TUBB     | 0.156736  | 0.145474  | 1.0774 | 0.2819  | 0.208434814 | count | 1 |
| BTG3     | 0.1512129 | 0.2370631 | 0.6379 | 0.524   | 0.209257094 | count | 1 |
| RAC2     | 0.1471559 | 0.1077121 | 1.3662 | 0.173   | 0.209749232 | count | 1 |
| COX6B1   | 0.146994  | 0.1275134 | 1.1528 | 0.25    | 0.209833606 | count | 1 |
| MBNL2    | 0.151668  | 0.3599781 | 0.4213 | 0.6737  | 0.209888295 | count | 1 |
| UBALD2   | 0.1466336 | 0.1443867 | 1.0156 | 0.31    | 0.209922002 | count | 1 |
| PCMTD1   | 0.1521847 | 0.2315884 | 0.6571 | 0.5114  | 0.210604942 | count | 1 |
| POLE4    | 0.1489605 | 0.248524  | 0.5994 | 0.5492  | 0.211307807 | count | 1 |
| NMT1     | 0.152945  | 0.3554285 | 0.4303 | 0.6672  | 0.211659473 | count | 1 |
| TRBC2    | 0.1477587 | 0.1653699 | 0.8935 | 0.3721  | 0.211668851 | count | 1 |
| UBC      | 0.1470834 | 0.0591928 | 2.4848 | 0.0133  | 0.211856053 | count | 1 |
| CTSS     | 0.1481491 | 0.1181673 | 1.2537 | 0.211   | 0.212527749 | count | 1 |
| SKIL     | 0.1484914 | 0.1550898 | 0.9575 | 0.339   | 0.212582741 | count | 1 |
| CRIP3    | 0.1515924 | 1.2485439 | 0.1214 | 0.903   | 0.212674086 | count | 1 |
| NAA20    | 0.1537225 | 0.2778956 | 0.5532 | 0.5804  | 0.212737884 | count | 1 |
| ZDHHC16  | 0.1540153 | 0.8258129 | 0.1865 | 0.8521  | 0.21314401  | count | 1 |
| DEF6     | 0.1511093 | 0.2967428 | 0.5092 | 0.6108  | 0.21346631  | count | 1 |
| RNFT1    | 0.1544017 | 0.3970962 | 0.3888 | 0.698   | 0.213679969 | count | 1 |
| TRAF5    | 0.1544031 | 0.2590814 | 0.596  | 0.552   | 0.21368191  | count | 1 |
| CLEC2B   | 0.1526164 | 0.3958285 | 0.3856 | 0.7     | 0.214112871 | count | 1 |
| DPM2     | 0.1610745 | 0.4038676 | 0.3988 | 0.6902  | 0.214230575 | count | 1 |
| NFKBIZ   | 0.1535885 | 0.31173   | 0.4927 | 0.622   | 0.215478758 | count | 1 |
| LEMD3    | 0.162139  | 0.5003999 | 0.324  | 0.7461  | 0.215652832 | count | 1 |
| PARK7    | 0.1506709 | 0.1376182 | 1.0948 | 0.274   | 0.215704252 | count | 1 |
| EIF3I    | 0.157341  | 0.1785346 | 0.8813 | 0.3786  | 0.217757129 | count | 1 |
| KRT10    | 0.1528248 | 0.1379652 | 1.1077 | 0.269   | 0.217834772 | count | 1 |
| FOKK1    | 0.1574449 | 0.5634725 | 0.2794 | 0.7801  | 0.217901256 | count | 1 |
| TMEM30A  | 0.1639694 | 0.3876202 | 0.423  | 0.6725  | 0.218098579 | count | 1 |
| ANKRD13A | 0.1643208 | 0.2132666 | 0.7705 | 0.4414  | 0.21856814  | count | 1 |

|            |           |           |        |          |             |       |   |
|------------|-----------|-----------|--------|----------|-------------|-------|---|
| EMP3       | 0.152208  | 0.1150548 | 1.3229 | 0.1865   | 0.218744481 | count | 1 |
| 2-Mar      | 0.15813   | 0.4237871 | 0.3731 | 0.7092   | 0.218851621 | count | 1 |
| SLC25A1    | 0.158161  | 0.3515765 | 0.4499 | 0.653    | 0.218894625 | count | 1 |
| LAMTOR3    | 0.1590478 | 0.4960728 | 0.3206 | 0.749    | 0.220124815 | count | 1 |
| ADAM19     | 0.1656403 | 0.3498223 | 0.4735 | 0.6361   | 0.220331407 | count | 1 |
| GLYR1      | 0.1561258 | 0.425784  | 0.3667 | 0.714    | 0.220561223 | count | 1 |
| PCIF1      | 0.1577095 | 0.3428918 | 0.4599 | 0.6458   | 0.221269404 | count | 1 |
| NBN        | 0.1664066 | 0.3837211 | 0.4337 | 0.6647   | 0.221355482 | count | 1 |
| DDX21      | 0.1549027 | 0.1138328 | 1.3608 | 0.174    | 0.221765197 | count | 1 |
| AL137796.1 | 0.1603797 | 0.8343821 | 0.1922 | 0.8477   | 0.221972512 | count | 1 |
| RPL5       | 0.1542051 | 0.0398789 | 3.8668 | 0.000127 | 0.22237356  | count | 1 |
| GHITM      | 0.1563852 | 0.1851638 | 0.8446 | 0.399    | 0.22246895  | count | 1 |
| HSPA1A     | 0.1672557 | 0.3441025 | 0.4861 | 0.627    | 0.222490257 | count | 1 |
| ATF7       | 0.1672826 | 0.6925323 | 0.2416 | 0.8092   | 0.222526207 | count | 1 |
| SNX2       | 0.1565197 | 0.1148502 | 1.3628 | 0.174    | 0.222660436 | count | 1 |
| NME4       | 0.1595831 | 0.5410903 | 0.2949 | 0.7682   | 0.223902249 | count | 1 |
| CRCP       | 0.1687189 | 0.3240822 | 0.5206 | 0.6029   | 0.22444586  | count | 1 |
| NDUFAF3    | 0.1571795 | 0.2047197 | 0.7678 | 0.443    | 0.224854042 | count | 1 |
| SRSF4      | 0.1626399 | 0.2653943 | 0.6128 | 0.54     | 0.225108161 | count | 1 |
| TECR       | 0.1626671 | 0.2825137 | 0.5758 | 0.5651   | 0.225145898 | count | 1 |
| PAFAH1B1   | 0.159552  | 0.1836259 | 0.8689 | 0.385    | 0.225407236 | count | 1 |
| SYTL1      | 0.1633561 | 0.3083702 | 0.5297 | 0.5966   | 0.226101809 | count | 1 |
| DHX9       | 0.1609109 | 0.252264  | 0.6379 | 0.524    | 0.227329326 | count | 1 |
| APLF       | 0.1710548 | 1.0719332 | 0.1596 | 0.8733   | 0.227568155 | count | 1 |
| LARP7      | 0.1644843 | 0.242758  | 0.6776 | 0.498    | 0.227667099 | count | 1 |
| STXBP2     | 0.1647635 | 0.3935908 | 0.4186 | 0.676    | 0.228054476 | count | 1 |
| GRASP      | 0.1605095 | 0.1593735 | 1.0071 | 0.314    | 0.228340775 | count | 1 |
| UVRAG      | 0.1722284 | 0.1975174 | 0.872  | 0.3837   | 0.229136999 | count | 1 |
| HEXA       | 0.1634011 | 0.3858611 | 0.4235 | 0.6722   | 0.229267709 | count | 1 |
| MPV17      | 0.1625454 | 0.4452503 | 0.3651 | 0.7152   | 0.229641285 | count | 1 |
| MPC2       | 0.160482  | 0.2334814 | 0.6873 | 0.4922   | 0.229756282 | count | 1 |
| SAR1A      | 0.1661584 | 0.2625997 | 0.6327 | 0.527    | 0.229989873 | count | 1 |
| HIGD2A     | 0.1603048 | 0.1288326 | 1.2443 | 0.2141   | 0.230186984 | count | 1 |
| ALG5       | 0.1669377 | 0.4324636 | 0.386  | 0.6997   | 0.231071168 | count | 1 |
| EBNA1BP2   | 0.1647254 | 0.3090292 | 0.533  | 0.5943   | 0.231128844 | count | 1 |
| TRAPPC2L   | 0.1644038 | 0.3299345 | 0.4983 | 0.619    | 0.232270009 | count | 1 |
| MPPE1      | 0.1680401 | 0.5492175 | 0.306  | 0.7598   | 0.232600811 | count | 1 |
| RSRC2      | 0.1634678 | 0.1360671 | 1.2014 | 0.23     | 0.233364452 | count | 1 |
| TSR3       | 0.1664894 | 0.2942696 | 0.5658 | 0.572    | 0.233607991 | count | 1 |
| RNH1       | 0.166231  | 0.210072  | 0.7913 | 0.429    | 0.234854664 | count | 1 |
| BASP1      | 0.1642156 | 0.1446867 | 1.135  | 0.257    | 0.235666304 | count | 1 |
| SIPA1L1    | 0.1775719 | 0.3112416 | 0.5705 | 0.5686   | 0.23628127  | count | 1 |
| CIRBP      | 0.1667882 | 0.0984248 | 1.6946 | 0.0909   | 0.237280281 | count | 1 |
| IFNGR2     | 0.1676032 | 0.2234173 | 0.7502 | 0.454    | 0.237779978 | count | 1 |
| POLR1E     | 0.1722817 | 0.4453438 | 0.3869 | 0.699    | 0.238486693 | count | 1 |



|          |           |           |        |        |             |       |   |
|----------|-----------|-----------|--------|--------|-------------|-------|---|
| RSL1D1   | 0.1663718 | 0.1362205 | 1.2213 | 0.223  | 0.238677974 | count | 1 |
| DNAJB1   | 0.1705601 | 0.2578455 | 0.6615 | 0.509  | 0.239329306 | count | 1 |
| PAXX     | 0.1752367 | 0.248167  | 0.7061 | 0.4805 | 0.242587613 | count | 1 |
| NDFIP1   | 0.1825615 | 0.3039375 | 0.6007 | 0.5484 | 0.242954142 | count | 1 |
| MYC      | 0.1701112 | 0.2125107 | 0.8005 | 0.424  | 0.243136759 | count | 1 |
| AK3      | 0.1756394 | 0.4343621 | 0.4044 | 0.6861 | 0.243146501 | count | 1 |
| MRPS21   | 0.171048  | 0.1706449 | 1.0024 | 0.317  | 0.243828975 | count | 1 |
| BCL7C    | 0.1834512 | 0.2606012 | 0.704  | 0.4818 | 0.244144167 | count | 1 |
| HELLS    | 0.1835772 | 0.4491321 | 0.4087 | 0.683  | 0.244312702 | count | 1 |
| MRPS33   | 0.1744207 | 0.3159605 | 0.552  | 0.5812 | 0.244755716 | count | 1 |
| COPB2    | 0.1841035 | 0.2714044 | 0.6783 | 0.4979 | 0.245016689 | count | 1 |
| TUFM     | 0.1779212 | 0.2037138 | 0.8734 | 0.3829 | 0.246313415 | count | 1 |
| CRELD2   | 0.1850786 | 0.4076728 | 0.454  | 0.6501 | 0.246321047 | count | 1 |
| ADSS     | 0.174014  | 0.2927034 | 0.5945 | 0.5525 | 0.246884417 | count | 1 |
| ZEB2     | 0.1860217 | 0.3015506 | 0.6169 | 0.5376 | 0.247582659 | count | 1 |
| CDKN2AIP | 0.1790386 | 0.3143206 | 0.5696 | 0.5692 | 0.247864325 | count | 1 |
| PSMA3    | 0.1752481 | 0.2105284 | 0.8324 | 0.406  | 0.249326158 | count | 1 |
| POP4     | 0.1777598 | 0.3658427 | 0.4859 | 0.6273 | 0.249449417 | count | 1 |
| PANK2    | 0.1777598 | 0.3873326 | 0.4589 | 0.6465 | 0.249449417 | count | 1 |
| BTBD2    | 0.1874625 | 0.4695532 | 0.3992 | 0.6899 | 0.249510177 | count | 1 |
| ZNF273   | 0.1804015 | 0.6218177 | 0.2901 | 0.7719 | 0.249756043 | count | 1 |
| LRRFIP1  | 0.1756345 | 0.1221935 | 1.4373 | 0.151  | 0.249876368 | count | 1 |
| VPS26A   | 0.1880543 | 0.2676895 | 0.7025 | 0.483  | 0.250301933 | count | 1 |
| FXVD5    | 0.1742042 | 0.1024083 | 1.7011 | 0.0896 | 0.250318181 | count | 1 |
| NDUFA6   | 0.1758983 | 0.2151866 | 0.8174 | 0.4141 | 0.250748241 | count | 1 |
| GTPBP6   | 0.1820026 | 0.3019058 | 0.6028 | 0.5469 | 0.251978473 | count | 1 |
| CTSZ     | 0.1787335 | 0.1380135 | 1.295  | 0.196  | 0.253587326 | count | 1 |
| SASH3    | 0.1838155 | 0.3900815 | 0.4712 | 0.6377 | 0.254495008 | count | 1 |
| NUP160   | 0.1919261 | 0.4272246 | 0.4492 | 0.653  | 0.255482518 | count | 1 |
| SDCCAG8  | 0.1920927 | 0.3423978 | 0.561  | 0.5751 | 0.255705457 | count | 1 |
| ZBTB22   | 0.1847646 | 0.5268297 | 0.3507 | 0.726  | 0.255812527 | count | 1 |
| SNRNP40  | 0.1923207 | 0.2701627 | 0.7119 | 0.4769 | 0.256010561 | count | 1 |
| NUP62    | 0.1818679 | 0.3690304 | 0.4928 | 0.6224 | 0.256976394 | count | 1 |
| SRSF6    | 0.1833648 | 0.3077087 | 0.5959 | 0.552  | 0.257328875 | count | 1 |
| NDUFB5   | 0.1837873 | 0.2108718 | 0.8716 | 0.3839 | 0.257922854 | count | 1 |
| LYSMD2   | 0.1825649 | 0.2469274 | 0.7393 | 0.46   | 0.257962559 | count | 1 |
| NRDE2    | 0.1864356 | 0.4768448 | 0.391  | 0.696  | 0.25813225  | count | 1 |
| ILF2     | 0.1844548 | 0.2031364 | 0.908  | 0.364  | 0.258861278 | count | 1 |
| PBDC1    | 0.185029  | 0.3140707 | 0.5891 | 0.556  | 0.259668543 | count | 1 |
| BNIP3L   | 0.1838622 | 0.2205963 | 0.8335 | 0.405  | 0.259798094 | count | 1 |
| ZSWIM8   | 0.1956082 | 0.768004  | 0.2547 | 0.7991 | 0.260410213 | count | 1 |
| VAV3     | 0.196052  | 0.4267883 | 0.4594 | 0.646  | 0.261004207 | count | 1 |
| SF3B6    | 0.1847451 | 0.1835715 | 1.0064 | 0.315  | 0.261047317 | count | 1 |
| LACTB    | 0.1861462 | 0.2565002 | 0.7257 | 0.468  | 0.261239233 | count | 1 |
| ATOX1    | 0.1840913 | 0.357456  | 0.515  | 0.6068 | 0.261918799 | count | 1 |

|             |           |           |        |        |             |       |   |
|-------------|-----------|-----------|--------|--------|-------------|-------|---|
| CEP78       | 0.1893353 | 0.7597929 | 0.2492 | 0.8033 | 0.262157927 | count | 1 |
| RBM22       | 0.1978521 | 0.2450692 | 0.8073 | 0.4199 | 0.263413636 | count | 1 |
| CFAP97      | 0.1860896 | 0.2380366 | 0.7818 | 0.435  | 0.26403557  | count | 1 |
| VDAC2       | 0.1853161 | 0.1391574 | 1.3317 | 0.184  | 0.264576274 | count | 1 |
| RWDD1       | 0.18651   | 0.1985097 | 0.9396 | 0.348  | 0.265363182 | count | 1 |
| C1orf122    | 0.1916782 | 0.3279157 | 0.5845 | 0.5592 | 0.265410816 | count | 1 |
| VDAC1       | 0.1893732 | 0.2144701 | 0.883  | 0.378  | 0.2657763   | count | 1 |
| CCT8        | 0.1862916 | 0.1912778 | 0.9739 | 0.3306 | 0.265969952 | count | 1 |
| VHL         | 0.2010252 | 0.3709049 | 0.542  | 0.5881 | 0.267661348 | count | 1 |
| SET         | 0.1868388 | 0.1025231 | 1.8224 | 0.0691 | 0.267678454 | count | 1 |
| PSMG4       | 0.1909443 | 0.3565452 | 0.5355 | 0.5925 | 0.267985314 | count | 1 |
| UQCRRF51    | 0.1914783 | 0.2116317 | 0.9048 | 0.366  | 0.268736148 | count | 1 |
| TMED10      | 0.1904329 | 0.2091401 | 0.9106 | 0.363  | 0.26909539  | count | 1 |
| ZMPSTE24    | 0.1908797 | 0.4682908 | 0.4076 | 0.684  | 0.270839637 | count | 1 |
| DAZAP2      | 0.191287  | 0.1756352 | 1.0891 | 0.277  | 0.272166152 | count | 1 |
| LINC00623   | 0.1956082 | 0.4565432 | 0.4285 | 0.6685 | 0.274543255 | count | 1 |
| PDLIM1      | 0.1924345 | 0.1655098 | 1.1627 | 0.246  | 0.274746406 | count | 1 |
| MDM4        | 0.198899  | 0.2224352 | 0.8942 | 0.372  | 0.275437442 | count | 1 |
| EIF1B       | 0.1936129 | 0.1330343 | 1.4554 | 0.146  | 0.27766307  | count | 1 |
| ATRAID      | 0.194001  | 0.2048342 | 0.9471 | 0.3441 | 0.277769388 | count | 1 |
| TNRC6B      | 0.2086922 | 0.1702085 | 1.2261 | 0.2208 | 0.277927636 | count | 1 |
| ARFIP1      | 0.2006948 | 0.4328126 | 0.4637 | 0.6431 | 0.277931336 | count | 1 |
| COX7B       | 0.1973467 | 0.145803  | 1.3535 | 0.177  | 0.278879034 | count | 1 |
| OCIAD2      | 0.1974498 | 0.2040888 | 0.9675 | 0.334  | 0.279024937 | count | 1 |
| MRPS35      | 0.2096715 | 0.3898155 | 0.5379 | 0.5909 | 0.279239219 | count | 1 |
| PPP4C       | 0.1960565 | 0.2261499 | 0.8669 | 0.3864 | 0.279508001 | count | 1 |
| RBAK-RBAKDN | 0.2019762 | 0.4272472 | 0.4727 | 0.637  | 0.279710933 | count | 1 |
| CD24        | 0.2101703 | 0.1656592 | 1.2687 | 0.205  | 0.279907291 | count | 1 |
| CHCHD3      | 0.2021687 | 0.2778862 | 0.7275 | 0.4673 | 0.279978281 | count | 1 |
| FGD3        | 0.1982696 | 0.5279792 | 0.3755 | 0.7074 | 0.280185088 | count | 1 |
| FOLR2       | 0.2112265 | 0.5620544 | 0.3758 | 0.707  | 0.281321974 | count | 1 |
| NCSTN       | 0.2112265 | 0.5679301 | 0.3719 | 0.71   | 0.281321974 | count | 1 |
| SLC2A6      | 0.2113134 | 0.3611508 | 0.5851 | 0.5588 | 0.281438372 | count | 1 |
| HCLS1       | 0.1985876 | 0.1579256 | 1.2575 | 0.209  | 0.281789001 | count | 1 |
| ETF1        | 0.2035387 | 0.3396072 | 0.5993 | 0.549  | 0.281881    | count | 1 |
| RHEB        | 0.2120083 | 0.2401711 | 0.8827 | 0.3779 | 0.28236917  | count | 1 |
| FUCA2       | 0.2125145 | 0.5748715 | 0.3697 | 0.7118 | 0.283047229 | count | 1 |
| KMT2E       | 0.1976664 | 0.1111261 | 1.7788 | 0.076  | 0.28359094  | count | 1 |
| DPY30       | 0.2051861 | 0.282557  | 0.7262 | 0.468  | 0.284169073 | count | 1 |
| EED         | 0.2057687 | 0.3291735 | 0.6251 | 0.532  | 0.284978269 | count | 1 |
| JCHAIN      | 0.2018065 | 0.2976566 | 0.678  | 0.498  | 0.285190522 | count | 1 |
| AC243960.1  | 0.2010314 | 0.2825004 | 0.7116 | 0.477  | 0.285260698 | count | 1 |
| SLC25A37    | 0.2002863 | 0.2466249 | 0.8121 | 0.4172 | 0.285543231 | count | 1 |
| MBP         | 0.2008723 | 0.2032776 | 0.9882 | 0.324  | 0.286379372 | count | 1 |
| LRRRC37B    | 0.2068128 | 0.8673558 | 0.2384 | 0.8116 | 0.286428491 | count | 1 |

|         |           |           |        |          |             |       |   |
|---------|-----------|-----------|--------|----------|-------------|-------|---|
| DLD     | 0.2045463 | 0.4351768 | 0.47   | 0.6386   | 0.287112668 | count | 1 |
| ALMS1   | 0.2076937 | 0.7254342 | 0.2863 | 0.7748   | 0.287652063 | count | 1 |
| USF2    | 0.2029207 | 0.2000858 | 1.0142 | 0.311    | 0.287944725 | count | 1 |
| PRR13   | 0.201676  | 0.149408  | 1.3498 | 0.178    | 0.287950552 | count | 1 |
| PRDX6   | 0.2039299 | 0.1788033 | 1.1405 | 0.255    | 0.289378463 | count | 1 |
| ANXA6   | 0.2050817 | 0.2080312 | 0.9858 | 0.325    | 0.289825804 | count | 1 |
| SUCLG1  | 0.2177588 | 0.2947894 | 0.7387 | 0.4605   | 0.290073007 | count | 1 |
| EBP     | 0.2097685 | 0.3790768 | 0.5534 | 0.5803   | 0.290534073 | count | 1 |
| CCDC59  | 0.2055581 | 0.2274937 | 0.9036 | 0.367    | 0.292491473 | count | 1 |
| COMMD6  | 0.2047668 | 0.0931121 | 2.1991 | 0.0284   | 0.294124422 | count | 1 |
| ACOT13  | 0.2125145 | 0.425651  | 0.4993 | 0.6178   | 0.294348649 | count | 1 |
| FOXJ3   | 0.2107803 | 0.3834728 | 0.5497 | 0.583    | 0.295880523 | count | 1 |
| NR3C1   | 0.2113059 | 0.2404096 | 0.8789 | 0.38     | 0.296619801 | count | 1 |
| BLVRA   | 0.2144502 | 0.4804587 | 0.4463 | 0.656    | 0.297037765 | count | 1 |
| SP110   | 0.2084961 | 0.1369538 | 1.5224 | 0.129    | 0.298036902 | count | 1 |
| DEDD2   | 0.2154032 | 0.3429212 | 0.6281 | 0.5302   | 0.29836174  | count | 1 |
| TM2D3   | 0.2103188 | 0.2983819 | 0.7049 | 0.4813   | 0.298455318 | count | 1 |
| SYNGR2  | 0.2080494 | 0.1200337 | 1.7333 | 0.0837   | 0.298841006 | count | 1 |
| CUTA    | 0.2084476 | 0.1558004 | 1.3379 | 0.1816   | 0.298946959 | count | 1 |
| RRM2B   | 0.2162048 | 0.4139685 | 0.5223 | 0.602    | 0.299475406 | count | 1 |
| BEX2    | 0.214171  | 0.3064239 | 0.6989 | 0.485    | 0.300649791 | count | 1 |
| ZRANB2  | 0.2262076 | 0.2199311 | 1.0285 | 0.3043   | 0.301395602 | count | 1 |
| SFT2D1  | 0.2264665 | 0.2740426 | 0.8264 | 0.409    | 0.301742639 | count | 1 |
| PIK3CA  | 0.2269936 | 0.4132882 | 0.5492 | 0.5831   | 0.302449189 | count | 1 |
| PTRHD1  | 0.2138616 | 0.2535603 | 0.8434 | 0.3994   | 0.303488914 | count | 1 |
| CARMIL1 | 0.2192336 | 0.5019128 | 0.4368 | 0.662    | 0.303683528 | count | 1 |
| MED10   | 0.2150618 | 0.1895433 | 1.1346 | 0.257    | 0.303951519 | count | 1 |
| TCERG1  | 0.2196991 | 0.3183903 | 0.69   | 0.4905   | 0.304330308 | count | 1 |
| HMG3    | 0.214182  | 0.2581222 | 0.8298 | 0.4071   | 0.304775112 | count | 1 |
| ZDHHC12 | 0.2172408 | 0.3870069 | 0.5613 | 0.5749   | 0.304967927 | count | 1 |
| TATDN1  | 0.2218744 | 0.3254254 | 0.6818 | 0.4957   | 0.307352835 | count | 1 |
| SETD3   | 0.2307885 | 0.5456773 | 0.4229 | 0.6725   | 0.307536582 | count | 1 |
| ELOC    | 0.2220085 | 0.1928548 | 1.1512 | 0.2503   | 0.307539169 | count | 1 |
| BFAR    | 0.2181052 | 0.279914  | 0.7792 | 0.436    | 0.308259472 | count | 1 |
| ZNF518A | 0.2184102 | 0.5410764 | 0.4037 | 0.6867   | 0.30869121  | count | 1 |
| MVB12A  | 0.2321155 | 0.6722915 | 0.3453 | 0.7301   | 0.309315758 | count | 1 |
| UQCRQ   | 0.223411  | 0.2114156 | 1.0567 | 0.2912   | 0.309488003 | count | 1 |
| VPS37A  | 0.22351   | 0.5051655 | 0.4424 | 0.6584   | 0.30962557  | count | 1 |
| POLR2A  | 0.2192482 | 0.3512516 | 0.6242 | 0.5328   | 0.309877439 | count | 1 |
| HNRNPA1 | 0.2159853 | 0.0934307 | 2.3117 | 0.0213   | 0.309990698 | count | 1 |
| CTBP1   | 0.2326425 | 0.4012299 | 0.5798 | 0.5623   | 0.310022365 | count | 1 |
| RNF168  | 0.2243967 | 0.2522938 | 0.8894 | 0.374    | 0.310857716 | count | 1 |
| DDX1    | 0.2250451 | 0.4524488 | 0.4974 | 0.6192   | 0.311758741 | count | 1 |
| PNRC1   | 0.2165064 | 0.0572638 | 3.7809 | 0.000178 | 0.311934632 | count | 1 |
| VPREB3  | 0.2176116 | 0.1436269 | 1.5151 | 0.13     | 0.311953948 | count | 1 |

|            |           |           |        |          |             |       |          |
|------------|-----------|-----------|--------|----------|-------------|-------|----------|
| CCT2       | 0.2210714 | 0.180428  | 1.2253 | 0.221    | 0.312458309 | count | 1        |
| SCAMP2     | 0.2203322 | 0.2590429 | 0.8506 | 0.3955   | 0.312682788 | count | 1        |
| GTPBP8     | 0.2261396 | 0.4794468 | 0.4717 | 0.6374   | 0.313279704 | count | 1        |
| TIMM29     | 0.2265565 | 0.6218666 | 0.3643 | 0.7158   | 0.313859056 | count | 1        |
| TRMT44     | 0.2265565 | 0.7997896 | 0.2833 | 0.7771   | 0.313859056 | count | 1        |
| ACTL6A     | 0.2363927 | 0.4267056 | 0.554  | 0.5799   | 0.31505118  | count | 1        |
| FAM111A    | 0.2274478 | 0.3353571 | 0.6782 | 0.498    | 0.315097688 | count | 1        |
| COPA       | 0.2238701 | 0.3197294 | 0.7002 | 0.4842   | 0.316420183 | count | 1        |
| PHF5A      | 0.2288305 | 0.2292455 | 0.9982 | 0.3187   | 0.317019267 | count | 1        |
| TPD52      | 0.2242921 | 0.2260873 | 0.9921 | 0.322    | 0.318309587 | count | 1        |
| SLC25A33   | 0.2300264 | 0.339857  | 0.6768 | 0.4989   | 0.318681298 | count | 1        |
| RBM3       | 0.2229325 | 0.1240727 | 1.7968 | 0.073    | 0.318978973 | count | 1        |
| C15orf61   | 0.2396963 | 0.4110687 | 0.5831 | 0.5601   | 0.319481867 | count | 1        |
| TOMM22     | 0.224644  | 0.1874727 | 1.1983 | 0.231    | 0.319678111 | count | 1        |
| HAX1       | 0.2279385 | 0.1946689 | 1.1709 | 0.242    | 0.320017599 | count | 1        |
| RASSF3     | 0.2403729 | 0.3775797 | 0.6366 | 0.525    | 0.320389387 | count | 1        |
| CD74       | 0.2223057 | 0.0333608 | 6.6637 | 7.93E-11 | 0.320670803 | count | 1.93E-06 |
| CSRNP1     | 0.2258193 | 0.2670501 | 0.8456 | 0.3982   | 0.321978667 | count | 1        |
| ORC3       | 0.2295904 | 0.5470676 | 0.4197 | 0.675    | 0.322341755 | count | 1        |
| GTF2H3     | 0.229719  | 0.5067476 | 0.4533 | 0.6505   | 0.322522692 | count | 1        |
| MRM3       | 0.229719  | 0.5637136 | 0.4075 | 0.6838   | 0.322522692 | count | 1        |
| OLA1       | 0.2332034 | 0.2916865 | 0.7995 | 0.4244   | 0.323096849 | count | 1        |
| TGOLN2     | 0.2428199 | 0.1899048 | 1.2786 | 0.2017   | 0.323671777 | count | 1        |
| DHRS7      | 0.2278024 | 0.1983682 | 1.1484 | 0.2514   | 0.324808824 | count | 1        |
| GCHFR      | 0.2446368 | 0.5758084 | 0.4249 | 0.671    | 0.326109199 | count | 1        |
| ORAI1      | 0.2291605 | 0.171398  | 1.337  | 0.182    | 0.326747044 | count | 1        |
| MYCBP      | 0.232775  | 0.4990558 | 0.4664 | 0.6411   | 0.326822537 | count | 1        |
| SYNE2      | 0.2474929 | 0.4004371 | 0.6181 | 0.5369   | 0.329941153 | count | 1        |
| KXD1       | 0.2486583 | 0.3473775 | 0.7158 | 0.4745   | 0.331504886 | count | 1        |
| RHBDD2     | 0.2369525 | 0.4589269 | 0.5163 | 0.6059   | 0.332700703 | count | 1        |
| EIF4G3     | 0.2497734 | 0.3474382 | 0.7189 | 0.473    | 0.333001207 | count | 1        |
| FBXW11     | 0.2499741 | 0.2888667 | 0.8654 | 0.387    | 0.33327053  | count | 1        |
| SMIM12     | 0.2409296 | 0.3675088 | 0.6556 | 0.5124   | 0.333836531 | count | 1        |
| GOPC       | 0.2366685 | 0.3331468 | 0.7104 | 0.4778   | 0.334539538 | count | 1        |
| RYBP       | 0.2429567 | 0.3868607 | 0.628  | 0.53     | 0.336654604 | count | 1        |
| KDELR2     | 0.2430435 | 0.2741386 | 0.8866 | 0.3758   | 0.336775277 | count | 1        |
| PKIG       | 0.2528965 | 0.1858238 | 1.3609 | 0.1742   | 0.337192415 | count | 1        |
| TMED4      | 0.2444851 | 0.2451528 | 0.9973 | 0.319    | 0.338779476 | count | 1        |
| FLYWCH2    | 0.2546384 | 0.4342545 | 0.5864 | 0.5579   | 0.339530311 | count | 1        |
| IL15       | 0.2552477 | 0.6147368 | 0.4152 | 0.6782   | 0.340348127 | count | 1        |
| TNKS       | 0.2552499 | 0.4611364 | 0.5535 | 0.58     | 0.34035108  | count | 1        |
| AC087190.1 | 0.2425657 | 0.596568  | 0.4066 | 0.6845   | 0.340599679 | count | 1        |
| UIMC1      | 0.2554579 | 0.4400576 | 0.5805 | 0.562    | 0.340630269 | count | 1        |
| NUP93      | 0.2557786 | 0.7207842 | 0.3549 | 0.723    | 0.341060736 | count | 1        |
| DDIT3      | 0.2560192 | 0.2009655 | 1.2739 | 0.2033   | 0.341383688 | count | 1        |

|         |           |           |        |        |             |       |   |
|---------|-----------|-----------|--------|--------|-------------|-------|---|
| NKTR    | 0.2415216 | 0.2313439 | 1.044  | 0.297  | 0.341411077 | count | 1 |
| CEP19   | 0.2566593 | 0.783807  | 0.3275 | 0.7435 | 0.342242902 | count | 1 |
| CCDC125 | 0.2566593 | 1.0117967 | 0.2537 | 0.7999 | 0.342242902 | count | 1 |
| R3HDM2  | 0.2442644 | 0.218608  | 1.1174 | 0.264  | 0.342990257 | count | 1 |
| CDK2AP2 | 0.2436133 | 0.248431  | 0.9806 | 0.3273 | 0.345767159 | count | 1 |
| TAF3    | 0.2446017 | 0.3368329 | 0.7262 | 0.4681 | 0.345772425 | count | 1 |
| MRPL33  | 0.2463802 | 0.2487108 | 0.9906 | 0.322  | 0.345967911 | count | 1 |
| MRPS25  | 0.2464862 | 0.3362215 | 0.7331 | 0.464  | 0.346117092 | count | 1 |
| DUSP11  | 0.2497864 | 0.2916159 | 0.8566 | 0.3922 | 0.346150262 | count | 1 |
| GPCPD1  | 0.2609409 | 0.2660537 | 0.9808 | 0.3272 | 0.347990792 | count | 1 |
| PPM1A   | 0.2480694 | 0.4215051 | 0.5885 | 0.5565 | 0.348345268 | count | 1 |
| LYN     | 0.2454547 | 0.1526461 | 1.608  | 0.109  | 0.348384268 | count | 1 |
| COX14   | 0.2438135 | 0.1829754 | 1.3325 | 0.1834 | 0.349352097 | count | 1 |
| PPIE    | 0.2627222 | 0.4057819 | 0.6474 | 0.5177 | 0.350382455 | count | 1 |
| BSDC1   | 0.2627222 | 0.4068791 | 0.6457 | 0.5188 | 0.350382455 | count | 1 |
| GPR65   | 0.2469347 | 0.2570331 | 0.9607 | 0.3372 | 0.350487768 | count | 1 |
| ETNK1   | 0.2505464 | 0.2989988 | 0.838  | 0.4025 | 0.351831479 | count | 1 |
| GNG7    | 0.2461467 | 0.1882666 | 1.3074 | 0.1917 | 0.352479048 | count | 1 |
| SLAIN2  | 0.2548003 | 0.3652371 | 0.6976 | 0.486  | 0.353122316 | count | 1 |
| NDEL1   | 0.2548936 | 0.3902202 | 0.6532 | 0.514  | 0.353252061 | count | 1 |
| DUSP1   | 0.2457152 | 0.1870835 | 1.3134 | 0.1897 | 0.353329454 | count | 1 |
| ZC3H12A | 0.2552512 | 0.3013615 | 0.847  | 0.397  | 0.353749353 | count | 1 |
| SENP7   | 0.2554344 | 0.3691364 | 0.692  | 0.4893 | 0.35400412  | count | 1 |
| USO1    | 0.2654392 | 0.5401579 | 0.4914 | 0.623  | 0.354030806 | count | 1 |
| NAXE    | 0.2504751 | 0.3290414 | 0.7612 | 0.4469 | 0.354089477 | count | 1 |
| FAAP20  | 0.2479656 | 0.2480971 | 0.9995 | 0.3181 | 0.354100469 | count | 1 |
| DDX54   | 0.2555226 | 0.4608703 | 0.5544 | 0.5796 | 0.354126774 | count | 1 |
| TUBB4B  | 0.265886  | 0.2070796 | 1.284  | 0.2    | 0.354630807 | count | 1 |
| GON4L   | 0.2513435 | 0.285969  | 0.8789 | 0.3799 | 0.355319228 | count | 1 |
| RAB10   | 0.267113  | 0.3043181 | 0.8777 | 0.3806 | 0.356278585 | count | 1 |
| SNF8    | 0.2548949 | 0.2497592 | 1.0206 | 0.308  | 0.357952037 | count | 1 |
| TMEM39B | 0.2583983 | 0.7802535 | 0.3312 | 0.7407 | 0.358126008 | count | 1 |
| ERH     | 0.2506229 | 0.1669245 | 1.5014 | 0.134  | 0.358302962 | count | 1 |
| RPAP3   | 0.2693491 | 0.2991332 | 0.9004 | 0.3684 | 0.359281756 | count | 1 |
| UFSP2   | 0.2558761 | 0.4561189 | 0.561  | 0.5751 | 0.359333146 | count | 1 |
| POLR2J  | 0.2527897 | 0.2081084 | 1.2147 | 0.2251 | 0.359777833 | count | 1 |
| ZNF593  | 0.2703479 | 0.372942  | 0.7249 | 0.469  | 0.360623281 | count | 1 |
| UBE2I   | 0.2527679 | 0.147878  | 1.7093 | 0.0881 | 0.360964273 | count | 1 |
| CPNE5   | 0.2605058 | 0.3391365 | 0.7681 | 0.4428 | 0.361057081 | count | 1 |
| SUGP2   | 0.2712366 | 0.5783043 | 0.469  | 0.6393 | 0.361816976 | count | 1 |
| EPS15   | 0.2614295 | 0.2907221 | 0.8992 | 0.369  | 0.362341791 | count | 1 |
| LRRK1   | 0.2717257 | 0.4649956 | 0.5844 | 0.5593 | 0.362473953 | count | 1 |
| MFS10   | 0.2554843 | 0.2944526 | 0.8677 | 0.3861 | 0.362639772 | count | 1 |
| IGHA2   | 0.2561039 | 0.257675  | 0.9939 | 0.321  | 0.363520482 | count | 1 |
| WBP11   | 0.2589507 | 0.2142444 | 1.2087 | 0.227  | 0.363661002 | count | 1 |

|           |           |           |        |         |             |       |   |
|-----------|-----------|-----------|--------|---------|-------------|-------|---|
| CDK11A    | 0.2732864 | 0.382409  | 0.7146 | 0.4752  | 0.364570439 | count | 1 |
| TTC38     | 0.2634221 | 1.0041787 | 0.2623 | 0.7932  | 0.365113255 | count | 1 |
| CALCOCO2  | 0.2639079 | 0.2787856 | 0.9466 | 0.344   | 0.365788964 | count | 1 |
| RAB11A    | 0.2751298 | 0.2584644 | 1.0645 | 0.2877  | 0.36704686  | count | 1 |
| ZNF622    | 0.2602664 | 0.3230526 | 0.8056 | 0.4209  | 0.367955804 | count | 1 |
| TNFRSF13C | 0.2581889 | 0.120743  | 2.1383 | 0.033   | 0.369461489 | count | 1 |
| NAB1      | 0.2635243 | 0.8427727 | 0.3127 | 0.755   | 0.370099267 | count | 1 |
| ZKSCAN8   | 0.2635243 | 1.0116135 | 0.2605 | 0.7946  | 0.370099267 | count | 1 |
| SRPRA     | 0.2645147 | 0.2014786 | 1.3129 | 0.19    | 0.371493516 | count | 1 |
| UBE3A     | 0.2789382 | 0.2887148 | 0.9661 | 0.3345  | 0.372163711 | count | 1 |
| CD83      | 0.2593179 | 0.0814493 | 3.1838 | 0.00156 | 0.373405579 | count | 1 |
| SCP2      | 0.2621478 | 0.2217783 | 1.182  | 0.2378  | 0.373830791 | count | 1 |
| SAMD9     | 0.2623664 | 0.2779548 | 0.9439 | 0.3457  | 0.374142841 | count | 1 |
| NSUN6     | 0.2704133 | 0.5422063 | 0.4987 | 0.6182  | 0.374838187 | count | 1 |
| MRPL12    | 0.2651407 | 0.4338225 | 0.6112 | 0.5414  | 0.374859339 | count | 1 |
| RNF34     | 0.2652175 | 0.4214719 | 0.6293 | 0.5295  | 0.374968115 | count | 1 |
| MGMT      | 0.2651867 | 0.2399148 | 1.1053 | 0.27    | 0.376431529 | count | 1 |
| STIM2     | 0.2715953 | 0.2637834 | 1.0296 | 0.304   | 0.376482536 | count | 1 |
| TMEM107   | 0.266363  | 0.369893  | 0.7201 | 0.4718  | 0.376590561 | count | 1 |
| MOB3A     | 0.2725494 | 0.3403742 | 0.8007 | 0.424   | 0.377809871 | count | 1 |
| DDT       | 0.2672318 | 0.1576571 | 1.695  | 0.0908  | 0.377821114 | count | 1 |
| SDF4      | 0.2691221 | 0.3769499 | 0.7139 | 0.4756  | 0.377979932 | count | 1 |
| LFNG      | 0.2735002 | 0.4515528 | 0.6057 | 0.545   | 0.379132646 | count | 1 |
| ERGIC3    | 0.2842511 | 0.3301472 | 0.861  | 0.3897  | 0.379303408 | count | 1 |
| SBDS      | 0.2648005 | 0.1250153 | 2.1181 | 0.0347  | 0.379442053 | count | 1 |
| MAPK11P1L | 0.2685375 | 0.1956609 | 1.3725 | 0.171   | 0.379670508 | count | 1 |
| TMX2      | 0.2853544 | 0.4746783 | 0.6012 | 0.548   | 0.38078628  | count | 1 |
| STAT6     | 0.2684656 | 0.4174212 | 0.6432 | 0.5205  | 0.381092707 | count | 1 |
| PRPF4B    | 0.2756696 | 0.1626506 | 1.6949 | 0.0908  | 0.382150871 | count | 1 |
| KRTCAP2   | 0.2872279 | 0.2219797 | 1.2939 | 0.1964  | 0.38330449  | count | 1 |
| TBCC      | 0.2768223 | 0.2953516 | 0.9373 | 0.3491  | 0.383754652 | count | 1 |
| LARP1     | 0.2881747 | 0.3125401 | 0.922  | 0.357   | 0.38457718  | count | 1 |
| IFT57     | 0.2741247 | 0.1562366 | 1.7545 | 0.08    | 0.385023252 | count | 1 |
| MRPL14    | 0.2699546 | 0.2926965 | 0.9223 | 0.357   | 0.385530418 | count | 1 |
| HNRNPH1   | 0.2716309 | 0.1532684 | 1.7723 | 0.077   | 0.385592531 | count | 1 |
| ADIPOR1   | 0.2750377 | 0.3261804 | 0.8432 | 0.4     | 0.386308753 | count | 1 |
| CCR7      | 0.2707127 | 0.1262086 | 2.145  | 0.0325  | 0.386614081 | count | 1 |
| CCDC106   | 0.2900463 | 0.5989224 | 0.4843 | 0.6284  | 0.387093147 | count | 1 |
| COA5      | 0.2905595 | 0.4382363 | 0.663  | 0.5077  | 0.38778307  | count | 1 |
| KDM3B     | 0.2797622 | 0.4471189 | 0.6257 | 0.532   | 0.387845202 | count | 1 |
| NDUFS3    | 0.2797848 | 0.28889   | 0.9685 | 0.3333  | 0.387876649 | count | 1 |
| MRPS6     | 0.276458  | 0.2406305 | 1.1489 | 0.251   | 0.388308566 | count | 1 |
| TRRAP     | 0.2802746 | 0.5226166 | 0.5363 | 0.592   | 0.38855818  | count | 1 |
| SMIM14    | 0.271525  | 0.1292949 | 2.1    | 0.0363  | 0.388559302 | count | 1 |
| RHOG      | 0.2912599 | 0.1627598 | 1.7895 | 0.0742  | 0.388724684 | count | 1 |

|          |           |           |        |        |             |       |   |
|----------|-----------|-----------|--------|--------|-------------|-------|---|
| AKAP8L   | 0.2770553 | 0.2940486 | 0.9422 | 0.347  | 0.389149592 | count | 1 |
| TANK     | 0.2826315 | 0.2115298 | 1.3361 | 0.182  | 0.391837787 | count | 1 |
| JKAMP    | 0.2798699 | 0.404955  | 0.6911 | 0.4899 | 0.393112777 | count | 1 |
| RPN1     | 0.2767989 | 0.3285741 | 0.8424 | 0.4    | 0.393991462 | count | 1 |
| CCT6A    | 0.2782456 | 0.2086548 | 1.3335 | 0.183  | 0.394996494 | count | 1 |
| FXR1     | 0.2820705 | 0.2023239 | 1.3942 | 0.164  | 0.396211521 | count | 1 |
| PDCD7    | 0.2971271 | 0.2853088 | 1.0414 | 0.2982 | 0.396613629 | count | 1 |
| MYH9     | 0.297229  | 0.2541023 | 1.1697 | 0.2427 | 0.396750659 | count | 1 |
| TKT      | 0.2806074 | 0.2055188 | 1.3654 | 0.173  | 0.396767665 | count | 1 |
| CHM      | 0.2973275 | 0.3570927 | 0.8326 | 0.405  | 0.396883121 | count | 1 |
| ACAT1    | 0.2974655 | 0.4578801 | 0.6497 | 0.5162 | 0.397068699 | count | 1 |
| RAD23A   | 0.2773748 | 0.1770106 | 1.567  | 0.1178 | 0.397677641 | count | 1 |
| ANKRD39  | 0.2870531 | 0.5073769 | 0.5658 | 0.5718 | 0.397990881 | count | 1 |
| SRSF3    | 0.2806001 | 0.1438047 | 1.9513 | 0.0517 | 0.398343971 | count | 1 |
| SSB      | 0.2799704 | 0.1816715 | 1.5411 | 0.124  | 0.398511405 | count | 1 |
| ZC3H8    | 0.2985842 | 0.3687244 | 0.8098 | 0.419  | 0.398573134 | count | 1 |
| FAM107B  | 0.2805788 | 0.1325214 | 2.1172 | 0.0348 | 0.40116596  | count | 1 |
| MTCH2    | 0.2911372 | 0.4609871 | 0.6316 | 0.528  | 0.403674857 | count | 1 |
| DNAJC4   | 0.3035722 | 0.2235049 | 1.3582 | 0.1751 | 0.405281918 | count | 1 |
| METTL21A | 0.3044538 | 0.2455832 | 1.2397 | 0.2157 | 0.406467807 | count | 1 |
| TRABD    | 0.2894801 | 0.2494042 | 1.1607 | 0.2464 | 0.406646012 | count | 1 |
| GORASP2  | 0.3046771 | 0.3712199 | 0.8207 | 0.4122 | 0.406768189 | count | 1 |
| HAT1     | 0.293658  | 0.2893166 | 1.015  | 0.3107 | 0.4071834   | count | 1 |
| DIP2B    | 0.3053793 | 0.7302347 | 0.4182 | 0.676  | 0.407712795 | count | 1 |
| MORF4L2  | 0.2883485 | 0.3062493 | 0.9415 | 0.3469 | 0.407734289 | count | 1 |
| HLA-DOA  | 0.2944681 | 0.354789  | 0.83   | 0.407  | 0.408310968 | count | 1 |
| MPP6     | 0.287664  | 0.6135033 | 0.4689 | 0.6394 | 0.408387413 | count | 1 |
| DNASE2   | 0.2870019 | 0.4908869 | 0.5847 | 0.5591 | 0.408532919 | count | 1 |
| ETFA     | 0.307077  | 0.2803942 | 1.0952 | 0.274  | 0.40999668  | count | 1 |
| IKBIP    | 0.3073253 | 0.2603266 | 1.1805 | 0.2384 | 0.410330729 | count | 1 |
| ARHGDI1A | 0.2890534 | 0.1830224 | 1.5793 | 0.115  | 0.410362937 | count | 1 |
| TANGO6   | 0.2923524 | 1.0025705 | 0.2916 | 0.7707 | 0.410691215 | count | 1 |
| MFSD8    | 0.2962442 | 0.4983346 | 0.5945 | 0.5525 | 0.410783173 | count | 1 |
| C9orf78  | 0.2865115 | 0.1883949 | 1.5208 | 0.129  | 0.410966975 | count | 1 |
| YIPF3    | 0.3087716 | 0.3963908 | 0.779  | 0.4364 | 0.41227656  | count | 1 |
| CCAR1    | 0.2975891 | 0.344542  | 0.8637 | 0.3882 | 0.412655243 | count | 1 |
| FKBP2    | 0.2977701 | 0.2182186 | 1.3645 | 0.1731 | 0.412907196 | count | 1 |
| FBXO7    | 0.2991045 | 0.2997526 | 0.9978 | 0.3189 | 0.414764713 | count | 1 |
| PKN2     | 0.3109981 | 0.2641224 | 1.1775 | 0.2396 | 0.415272295 | count | 1 |
| SMG1     | 0.3112921 | 0.2764441 | 1.1261 | 0.2607 | 0.415667892 | count | 1 |
| MTHFS    | 0.3117297 | 0.5469733 | 0.5699 | 0.569  | 0.41625672  | count | 1 |
| SOBP     | 0.2965964 | 0.8574205 | 0.3459 | 0.7296 | 0.416668573 | count | 1 |
| CYB5R3   | 0.3120511 | 0.3026094 | 1.0312 | 0.303  | 0.416689196 | count | 1 |
| MT-ATP8  | 0.3134791 | 0.2890002 | 1.0847 | 0.2786 | 0.418610793 | count | 1 |
| GTF2B    | 0.2931658 | 0.1528352 | 1.9182 | 0.0557 | 0.418711774 | count | 1 |

|           |           |           |        |        |             |       |   |
|-----------|-----------|-----------|--------|--------|-------------|-------|---|
| SOCS1     | 0.3140151 | 0.377748  | 0.8313 | 0.406  | 0.419332094 | count | 1 |
| CCDC90B   | 0.3031066 | 0.3129281 | 0.9686 | 0.3333 | 0.420336063 | count | 1 |
| RALA      | 0.2967176 | 0.2939229 | 1.0095 | 0.3133 | 0.421260761 | count | 1 |
| RAN       | 0.2934633 | 0.1091671 | 2.6882 | 0.0074 | 0.421371588 | count | 1 |
| TTI2      | 0.3157066 | 0.5899957 | 0.5351 | 0.593  | 0.421608472 | count | 1 |
| TMEM11    | 0.3001529 | 0.4458776 | 0.6732 | 0.5012 | 0.421677932 | count | 1 |
| ARID4A    | 0.3041632 | 0.2387606 | 1.2739 | 0.203  | 0.421807046 | count | 1 |
| MRPL16    | 0.3158842 | 0.3170327 | 0.9964 | 0.3196 | 0.421847491 | count | 1 |
| TBC1D32   | 0.2965964 | 0.768038  | 0.3862 | 0.6996 | 0.422208176 | count | 1 |
| TUBA1A    | 0.2942336 | 0.1567868 | 1.8766 | 0.0612 | 0.422211429 | count | 1 |
| SMARCB1   | 0.2956965 | 0.1699969 | 1.7394 | 0.0827 | 0.422329783 | count | 1 |
| LPIN1     | 0.3050208 | 0.3279241 | 0.9302 | 0.3528 | 0.423001009 | count | 1 |
| KDM4C     | 0.2983975 | 0.4079853 | 0.7314 | 0.465  | 0.423649535 | count | 1 |
| NDUFAF6   | 0.3174942 | 0.4418054 | 0.7186 | 0.4727 | 0.424014353 | count | 1 |
| TSN       | 0.3179965 | 0.4622682 | 0.6879 | 0.4919 | 0.424690419 | count | 1 |
| ARF1      | 0.2989753 | 0.1502552 | 1.9898 | 0.0472 | 0.425599031 | count | 1 |
| PFKL      | 0.3188654 | 0.5495846 | 0.5802 | 0.5621 | 0.425859935 | count | 1 |
| C14orf119 | 0.3195732 | 0.2643892 | 1.2087 | 0.2274 | 0.426812651 | count | 1 |
| IER5      | 0.3083378 | 0.1725794 | 1.7866 | 0.0747 | 0.427619196 | count | 1 |
| CHMP6     | 0.3089499 | 0.5763728 | 0.536  | 0.5922 | 0.428471446 | count | 1 |
| RRP7A     | 0.3050524 | 0.3325372 | 0.9173 | 0.359  | 0.428579352 | count | 1 |
| CD44      | 0.3021983 | 0.1308261 | 2.3099 | 0.0214 | 0.429054305 | count | 1 |
| TSG101    | 0.3100835 | 0.2816742 | 1.1009 | 0.272  | 0.430049831 | count | 1 |
| PAPOLA    | 0.3105527 | 0.1743391 | 1.7813 | 0.0755 | 0.430703139 | count | 1 |
| FOXN2     | 0.3240924 | 0.2729694 | 1.1873 | 0.2358 | 0.432896249 | count | 1 |
| JARID2    | 0.3084072 | 0.4462637 | 0.6911 | 0.4899 | 0.433305203 | count | 1 |
| TXN       | 0.3046946 | 0.1771226 | 1.7202 | 0.0861 | 0.433751499 | count | 1 |
| CGAS      | 0.3092805 | 0.3622756 | 0.8537 | 0.3937 | 0.434535445 | count | 1 |
| STRADB    | 0.3253386 | 0.6507881 | 0.4999 | 0.6174 | 0.434574046 | count | 1 |
| CCSER2    | 0.3133456 | 0.2914616 | 1.0751 | 0.2829 | 0.434592081 | count | 1 |
| ADPGK     | 0.3133456 | 0.311893  | 1.0047 | 0.3156 | 0.434592081 | count | 1 |
| CDC42     | 0.3027762 | 0.0969971 | 3.1215 | 0.0019 | 0.434621601 | count | 1 |
| FOSB      | 0.3071526 | 0.2070381 | 1.4836 | 0.139  | 0.436099641 | count | 1 |
| RNF135    | 0.3108848 | 0.5663438 | 0.5489 | 0.5833 | 0.436795507 | count | 1 |
| ADAMTS6   | 0.3273797 | 0.4019881 | 0.8144 | 0.4159 | 0.437322225 | count | 1 |
| PDZD11    | 0.327776  | 0.5512534 | 0.5946 | 0.5524 | 0.437855837 | count | 1 |
| ARID5B    | 0.3160336 | 0.1349674 | 2.3416 | 0.0196 | 0.438335179 | count | 1 |
| ASCC1     | 0.328188  | 0.4893806 | 0.6706 | 0.5028 | 0.4384106   | count | 1 |
| COMMD9    | 0.328188  | 0.5047156 | 0.6502 | 0.5159 | 0.4384106   | count | 1 |
| OFD1      | 0.310441  | 0.2313973 | 1.3416 | 0.18   | 0.439037502 | count | 1 |
| CTSB      | 0.3084072 | 0.3514903 | 0.8774 | 0.3807 | 0.439043742 | count | 1 |
| SIRT6     | 0.3126306 | 0.6359802 | 0.4916 | 0.6233 | 0.439254969 | count | 1 |
| ACAP2     | 0.3095826 | 0.2061518 | 1.5017 | 0.134  | 0.439555373 | count | 1 |
| MCUB      | 0.3291063 | 0.2112029 | 1.5582 | 0.1199 | 0.439647134 | count | 1 |
| NFIX      | 0.3173878 | 0.7010628 | 0.4527 | 0.651  | 0.440221014 | count | 1 |



|           |           |           |        |        |             |       |   |
|-----------|-----------|-----------|--------|--------|-------------|-------|---|
| TNFRSF13B | 0.3078793 | 0.1607241 | 1.9156 | 0.0561 | 0.440626151 | count | 1 |
| UBE2N     | 0.3076609 | 0.1435261 | 2.1436 | 0.0326 | 0.441126909 | count | 1 |
| SELENOM   | 0.318626  | 0.2171487 | 1.4673 | 0.143  | 0.441945357 | count | 1 |
| RAB6A     | 0.3310839 | 0.3728757 | 0.8879 | 0.3751 | 0.442310228 | count | 1 |
| COA4      | 0.3311092 | 0.3025416 | 1.0944 | 0.2744 | 0.442344297 | count | 1 |
| BID       | 0.3190105 | 0.3935584 | 0.8106 | 0.418  | 0.44248083  | count | 1 |
| HADH      | 0.3314017 | 0.4671141 | 0.7095 | 0.4784 | 0.442738207 | count | 1 |
| MRPL23    | 0.3111784 | 0.3214236 | 0.9681 | 0.3335 | 0.442994131 | count | 1 |
| MRPS23    | 0.331608  | 0.4678921 | 0.7087 | 0.4789 | 0.443016032 | count | 1 |
| EML4      | 0.3106546 | 0.1624013 | 1.9129 | 0.0564 | 0.443085218 | count | 1 |
| SIRT7     | 0.3154005 | 0.2888273 | 1.092  | 0.275  | 0.443157297 | count | 1 |
| MAPKAPK3  | 0.3324014 | 0.834778  | 0.3982 | 0.6907 | 0.444084532 | count | 1 |
| SYNPO     | 0.3324014 | 0.8428498 | 0.3944 | 0.693  | 0.444084532 | count | 1 |
| CAPZA1    | 0.3112714 | 0.1553273 | 2.004  | 0.0457 | 0.444597543 | count | 1 |
| GPR108    | 0.3335597 | 0.3725249 | 0.8954 | 0.3711 | 0.445644516 | count | 1 |
| MAGOH     | 0.3213182 | 0.1900233 | 1.6909 | 0.0915 | 0.445694733 | count | 1 |
| GLO1      | 0.3337697 | 0.2840803 | 1.1749 | 0.2407 | 0.445927346 | count | 1 |
| NFKBID    | 0.3110616 | 0.1361342 | 2.285  | 0.0228 | 0.446005935 | count | 1 |
| PRDM2     | 0.3136976 | 0.1393284 | 2.2515 | 0.0248 | 0.44743052  | count | 1 |
| ARL8A     | 0.3362626 | 0.3094203 | 1.0868 | 0.2777 | 0.449285034 | count | 1 |
| ERLEC1    | 0.324401  | 0.3384392 | 0.9585 | 0.338  | 0.449988353 | count | 1 |
| THYN1     | 0.3280008 | 0.3679611 | 0.8914 | 0.3732 | 0.455002394 | count | 1 |
| ATIC      | 0.3408981 | 0.3809501 | 0.8949 | 0.3713 | 0.455529496 | count | 1 |
| FDFT1     | 0.3202638 | 0.2599992 | 1.2318 | 0.2187 | 0.455946082 | count | 1 |
| UBXN4     | 0.3198487 | 0.1700967 | 1.8804 | 0.0607 | 0.458613158 | count | 1 |
| SMU1      | 0.3437491 | 0.2361321 | 1.4557 | 0.1462 | 0.459370649 | count | 1 |
| DENND2D   | 0.3324014 | 0.5672515 | 0.586  | 0.5582 | 0.46113236  | count | 1 |
| GZF1      | 0.3333343 | 0.3762568 | 0.8859 | 0.3761 | 0.462444068 | count | 1 |
| TRMT10C   | 0.3468971 | 0.2556447 | 1.357  | 0.175  | 0.463612461 | count | 1 |
| STXBP3    | 0.334843  | 0.3364687 | 0.9952 | 0.32   | 0.464533718 | count | 1 |
| CD22      | 0.3309197 | 0.2655903 | 1.246  | 0.213  | 0.465024175 | count | 1 |
| RARRES3   | 0.335238  | 0.2700407 | 1.2414 | 0.2151 | 0.465084002 | count | 1 |
| GTDC1     | 0.3482245 | 0.5490844 | 0.6342 | 0.5263 | 0.465401242 | count | 1 |
| UBE2S     | 0.3270287 | 0.2180884 | 1.4995 | 0.134  | 0.466467865 | count | 1 |
| MLST8     | 0.3364817 | 0.5487191 | 0.6132 | 0.54   | 0.466816664 | count | 1 |
| IBTK      | 0.3364817 | 0.5594617 | 0.6014 | 0.5479 | 0.466816664 | count | 1 |
| ATPAF1    | 0.3496431 | 0.5219442 | 0.6699 | 0.503  | 0.46731303  | count | 1 |
| ATF4      | 0.3304213 | 0.1884568 | 1.7533 | 0.0802 | 0.467354514 | count | 1 |
| MACF1     | 0.3314186 | 0.3025351 | 1.0955 | 0.274  | 0.468768095 | count | 1 |
| HDLBP     | 0.3507392 | 0.4914068 | 0.7137 | 0.4758 | 0.468790271 | count | 1 |
| MRPL37    | 0.3337761 | 0.3792759 | 0.88   | 0.3793 | 0.469049432 | count | 1 |
| CBX1      | 0.3386238 | 0.3290072 | 1.0292 | 0.3039 | 0.469801038 | count | 1 |
| COX16     | 0.3361909 | 0.5457739 | 0.616  | 0.5382 | 0.472452511 | count | 1 |
| CHURC1    | 0.3551507 | 0.2507942 | 1.4161 | 0.1574 | 0.474736412 | count | 1 |
| SUMF2     | 0.3424319 | 0.3294423 | 1.0394 | 0.2992 | 0.475106811 | count | 1 |

|         |           |           |        |        |             |       |   |
|---------|-----------|-----------|--------|--------|-------------|-------|---|
| PRKDC   | 0.3376225 | 0.2183104 | 1.5465 | 0.123  | 0.47756189  | count | 1 |
| YBEY    | 0.3445194 | 0.3882449 | 0.8874 | 0.3754 | 0.478015476 | count | 1 |
| USP14   | 0.336791  | 0.3316761 | 1.0154 | 0.3105 | 0.478253799 | count | 1 |
| PANK3   | 0.3580388 | 0.6078663 | 0.589  | 0.5562 | 0.478629765 | count | 1 |
| CHMP2B  | 0.3583533 | 0.2225459 | 1.6102 | 0.1081 | 0.47905376  | count | 1 |
| KANSL2  | 0.3455697 | 0.4826427 | 0.716  | 0.474  | 0.479478982 | count | 1 |
| TTY15   | 0.358834  | 0.3407116 | 1.0532 | 0.2928 | 0.479701829 | count | 1 |
| CYLD    | 0.339746  | 0.2121466 | 1.6015 | 0.11   | 0.480572004 | count | 1 |
| AHNAK   | 0.3604616 | 0.1901293 | 1.8959 | 0.0586 | 0.481896209 | count | 1 |
| TOB1    | 0.340255  | 0.4075045 | 0.835  | 0.4042 | 0.483181289 | count | 1 |
| BUD23   | 0.3416687 | 0.2661573 | 1.2837 | 0.2    | 0.483297538 | count | 1 |
| SHMT2   | 0.3484427 | 0.3969652 | 0.8778 | 0.3805 | 0.483482432 | count | 1 |
| CMTM6   | 0.3441763 | 0.1207253 | 2.8509 | 0.0046 | 0.483706832 | count | 1 |
| TLN1    | 0.3443073 | 0.1729994 | 1.9902 | 0.0472 | 0.483891468 | count | 1 |
| MRPL18  | 0.3620199 | 0.2388209 | 1.5159 | 0.1303 | 0.483997284 | count | 1 |
| SPIB    | 0.3389025 | 0.1350747 | 2.509  | 0.0125 | 0.486163461 | count | 1 |
| CCND2   | 0.3437918 | 0.3483339 | 0.987  | 0.3242 | 0.488212485 | count | 1 |
| TXNDC12 | 0.3453646 | 0.2864862 | 1.2055 | 0.2286 | 0.488536836 | count | 1 |
| STX10   | 0.3656004 | 0.3234653 | 1.1303 | 0.259  | 0.488825407 | count | 1 |
| SH3KBP1 | 0.3688749 | 0.2450305 | 1.5054 | 0.1329 | 0.493241495 | count | 1 |
| GOLGB1  | 0.3488385 | 0.2044295 | 1.7064 | 0.0886 | 0.493461613 | count | 1 |
| BRF1    | 0.3524591 | 0.6161971 | 0.572  | 0.5676 | 0.495381618 | count | 1 |
| TMBIM1  | 0.3502961 | 0.3529025 | 0.9926 | 0.3214 | 0.495528034 | count | 1 |
| SLC3A2  | 0.3477043 | 0.1798863 | 1.9329 | 0.0539 | 0.495996555 | count | 1 |
| APEX1   | 0.3575388 | 0.2007374 | 1.7811 | 0.0756 | 0.496159161 | count | 1 |
| MCFD2   | 0.3595221 | 0.5326876 | 0.6749 | 0.5001 | 0.498923486 | count | 1 |
| MIGA1   | 0.3595221 | 0.5584038 | 0.6438 | 0.52   | 0.498923486 | count | 1 |
| VPS8    | 0.3595542 | 0.6638516 | 0.5416 | 0.588  | 0.498968228 | count | 1 |
| RPL26L1 | 0.3596555 | 0.7217866 | 0.4983 | 0.6185 | 0.499109423 | count | 1 |
| INTS13  | 0.373623  | 0.6293227 | 0.5937 | 0.553  | 0.499645919 | count | 1 |
| LYPLA1  | 0.3556059 | 0.2709865 | 1.3123 | 0.19   | 0.499817451 | count | 1 |
| COX17   | 0.3567136 | 0.1790927 | 1.9918 | 0.047  | 0.501378946 | count | 1 |
| PIGC    | 0.3625327 | 0.3836365 | 0.945  | 0.3452 | 0.503119875 | count | 1 |
| BRIX1   | 0.3768742 | 0.4160656 | 0.9058 | 0.3655 | 0.504031939 | count | 1 |
| SMCO4   | 0.3768864 | 0.8002689 | 0.4709 | 0.638  | 0.504048397 | count | 1 |
| ZFP36L1 | 0.3508866 | 0.1092785 | 3.2109 | 0.0014 | 0.504114436 | count | 1 |
| ZNF644  | 0.36339   | 0.2215457 | 1.6402 | 0.1017 | 0.504314888 | count | 1 |
| SRSF1   | 0.3654321 | 0.3310117 | 1.104  | 0.2702 | 0.507161507 | count | 1 |
| NSFL1C  | 0.3663836 | 0.3366524 | 1.0883 | 0.277  | 0.508487906 | count | 1 |
| CENPC   | 0.3803096 | 0.2291629 | 1.6596 | 0.0977 | 0.508667043 | count | 1 |
| USP48   | 0.3684615 | 0.2923848 | 1.2602 | 0.2083 | 0.511384603 | count | 1 |
| SETDB1  | 0.3687195 | 0.6709955 | 0.5495 | 0.5829 | 0.511744276 | count | 1 |
| COPB1   | 0.3614358 | 0.2443259 | 1.4793 | 0.1398 | 0.513313784 | count | 1 |
| LMAN1   | 0.3655247 | 0.2524756 | 1.4478 | 0.148  | 0.513800562 | count | 1 |
| NSD3    | 0.3596467 | 0.120417  | 2.9867 | 0.003  | 0.514333154 | count | 1 |

|          |           |           |        |          |             |       |   |
|----------|-----------|-----------|--------|----------|-------------|-------|---|
| GSTM4    | 0.3712562 | 0.7582019 | 0.4897 | 0.6246   | 0.515280744 | count | 1 |
| ZNF585A  | 0.3712562 | 0.7982409 | 0.4651 | 0.6421   | 0.515280744 | count | 1 |
| SLC35C2  | 0.3673478 | 0.3828536 | 0.9595 | 0.3378   | 0.516370896 | count | 1 |
| CCDC28A  | 0.3726219 | 0.3394928 | 1.0976 | 0.273    | 0.517184769 | count | 1 |
| APIP     | 0.373623  | 0.503338  | 0.7423 | 0.458    | 0.518580511 | count | 1 |
| TMEM19   | 0.3653801 | 0.3422286 | 1.0676 | 0.2863   | 0.518925657 | count | 1 |
| FAM199X  | 0.3881136 | 0.598877  | 0.6481 | 0.517    | 0.51919859  | count | 1 |
| YIPF4    | 0.374116  | 0.3536282 | 1.0579 | 0.2907   | 0.519267866 | count | 1 |
| PQBP1    | 0.3741444 | 0.2520292 | 1.4845 | 0.1384   | 0.519307461 | count | 1 |
| RNASEK   | 0.364141  | 0.2161292 | 1.6848 | 0.0927   | 0.519473909 | count | 1 |
| HIVEP1   | 0.3743294 | 0.3110968 | 1.2033 | 0.2295   | 0.519565394 | count | 1 |
| N4BP3    | 0.3885595 | 0.5585895 | 0.6956 | 0.487    | 0.519800429 | count | 1 |
| CYB5A    | 0.3700105 | 0.3700372 | 0.9999 | 0.318    | 0.52012507  | count | 1 |
| KLHL5    | 0.3900708 | 0.4673449 | 0.8347 | 0.4044   | 0.521840329 | count | 1 |
| CMTM7    | 0.3770078 | 0.2904247 | 1.2981 | 0.1949   | 0.523299828 | count | 1 |
| FRG1     | 0.3777181 | 0.294516  | 1.2825 | 0.2003   | 0.524290217 | count | 1 |
| KRCC1    | 0.3730936 | 0.2860986 | 1.3041 | 0.193    | 0.524472137 | count | 1 |
| HEXDC    | 0.3694321 | 0.3585357 | 1.0304 | 0.3034   | 0.524690949 | count | 1 |
| CALM3    | 0.36796   | 0.2705736 | 1.3599 | 0.1745   | 0.524929101 | count | 1 |
| MEI1     | 0.3784236 | 0.483287  | 0.783  | 0.434    | 0.525273927 | count | 1 |
| BCL7B    | 0.3716616 | 0.2179714 | 1.7051 | 0.0889   | 0.525821181 | count | 1 |
| MEF2D    | 0.3931293 | 0.4741286 | 0.8292 | 0.4075   | 0.52596894  | count | 1 |
| INO80C   | 0.3813069 | 0.3433994 | 1.1104 | 0.2674   | 0.529294377 | count | 1 |
| CD69     | 0.3686292 | 0.1388632 | 2.6546 | 0.0082   | 0.530821048 | count | 1 |
| ATP13A3  | 0.3977447 | 0.5725974 | 0.6946 | 0.4876   | 0.532200068 | count | 1 |
| ACP5     | 0.3849954 | 0.2504455 | 1.5372 | 0.1249   | 0.534437923 | count | 1 |
| PRKAR1B  | 0.3851705 | 1.0538548 | 0.3655 | 0.7149   | 0.534682106 | count | 1 |
| DAGLB    | 0.3851705 | 1.0538548 | 0.3655 | 0.7149   | 0.534682106 | count | 1 |
| ARHGEF37 | 0.3851705 | 1.3347236 | 0.2886 | 0.773    | 0.534682106 | count | 1 |
| TSFM     | 0.3803489 | 0.3344249 | 1.1373 | 0.256    | 0.534702568 | count | 1 |
| AKR7A2   | 0.3997552 | 0.3423233 | 1.1678 | 0.2435   | 0.534914722 | count | 1 |
| MRPL1    | 0.4000035 | 0.4302907 | 0.9296 | 0.3531   | 0.535250001 | count | 1 |
| CWF19L2  | 0.3810756 | 0.2326365 | 1.6381 | 0.102    | 0.535727315 | count | 1 |
| PRPF31   | 0.4016985 | 0.3185183 | 1.2611 | 0.2079   | 0.537538832 | count | 1 |
| CLPP     | 0.3792618 | 0.3249061 | 1.1673 | 0.2437   | 0.538677689 | count | 1 |
| TBC1D9   | 0.3891132 | 0.3204063 | 1.2144 | 0.225    | 0.540180553 | count | 1 |
| KIAA1191 | 0.3845487 | 0.4744587 | 0.8105 | 0.4181   | 0.540624997 | count | 1 |
| CTR9     | 0.4042672 | 0.394804  | 1.024  | 0.306    | 0.541007731 | count | 1 |
| ITFG2    | 0.3849468 | 0.4701153 | 0.8188 | 0.4133   | 0.541186403 | count | 1 |
| GGCX     | 0.3905662 | 0.5274269 | 0.7405 | 0.4594   | 0.542206996 | count | 1 |
| GCA      | 0.3910105 | 0.3237982 | 1.2076 | 0.2279   | 0.542826656 | count | 1 |
| MANF     | 0.3923818 | 0.334238  | 1.174  | 0.241    | 0.544739224 | count | 1 |
| MT-ND4L  | 0.3851637 | 0.1138347 | 3.3835 | 8.00E-04 | 0.544968542 | count | 1 |
| TBC1D20  | 0.3929624 | 0.5492386 | 0.7155 | 0.4747   | 0.545549008 | count | 1 |
| RBM42    | 0.4076727 | 0.3064724 | 1.3302 | 0.1841   | 0.545607184 | count | 1 |

|            |           |           |        |          |             |       |   |
|------------|-----------|-----------|--------|----------|-------------|-------|---|
| MRPL43     | 0.3864788 | 0.2376371 | 1.6263 | 0.105    | 0.546833624 | count | 1 |
| FNTA       | 0.4091984 | 0.3566231 | 1.1474 | 0.2518   | 0.547667973 | count | 1 |
| ATP2A3     | 0.3947814 | 0.4406214 | 0.896  | 0.371    | 0.548086094 | count | 1 |
| POLR2B     | 0.394973  | 0.303106  | 1.3031 | 0.1932   | 0.548353336 | count | 1 |
| ACAP1      | 0.3876331 | 0.1895099 | 2.0455 | 0.0414   | 0.54847068  | count | 1 |
| MYO1F      | 0.3908416 | 0.559167  | 0.699  | 0.4849   | 0.549499657 | count | 1 |
| VPS25      | 0.3964581 | 0.6235981 | 0.6358 | 0.5253   | 0.550424782 | count | 1 |
| ATP6V1B2   | 0.3964581 | 0.6601874 | 0.6005 | 0.5485   | 0.550424782 | count | 1 |
| DENND4A    | 0.4118363 | 0.271434  | 1.5173 | 0.1299   | 0.551231298 | count | 1 |
| UCHL5      | 0.4132366 | 0.3016567 | 1.3699 | 0.1714   | 0.553122988 | count | 1 |
| WDR33      | 0.3909185 | 0.2652982 | 1.4735 | 0.141    | 0.553130211 | count | 1 |
| NOM1       | 0.4135043 | 0.4695666 | 0.8806 | 0.379    | 0.553484641 | count | 1 |
| SPATA33    | 0.4000346 | 0.7292817 | 0.5485 | 0.5836   | 0.555413588 | count | 1 |
| TAGAP      | 0.3910646 | 0.1311939 | 2.9808 | 0.003    | 0.555473405 | count | 1 |
| FUNDC2     | 0.3902942 | 0.2366288 | 1.6494 | 0.0998   | 0.55820921  | count | 1 |
| SDCBP      | 0.3930523 | 0.1541308 | 2.5501 | 0.0111   | 0.55830211  | count | 1 |
| UBE2M      | 0.394973  | 0.2229106 | 1.7719 | 0.0771   | 0.558880726 | count | 1 |
| ARL8B      | 0.4028034 | 0.368075  | 1.0944 | 0.2744   | 0.559275977 | count | 1 |
| ZDHHC23    | 0.4036312 | 0.5048186 | 0.7996 | 0.4244   | 0.56043077  | count | 1 |
| CELF2      | 0.3990016 | 0.2170053 | 1.8387 | 0.0666   | 0.561008494 | count | 1 |
| ANO6       | 0.419387  | 0.5890923 | 0.7119 | 0.4769   | 0.561432797 | count | 1 |
| PSMD11     | 0.394398  | 0.323396  | 1.2196 | 0.2233   | 0.561661248 | count | 1 |
| PARD6A     | 0.4058964 | 0.4411536 | 0.9201 | 0.358    | 0.563590853 | count | 1 |
| ATP2B1-AS1 | 0.3957836 | 0.2614988 | 1.5135 | 0.1309   | 0.563637613 | count | 1 |
| CREM       | 0.398726  | 0.2522777 | 1.5805 | 0.115    | 0.564203823 | count | 1 |
| MCM5       | 0.4218526 | 0.3268757 | 1.2906 | 0.1975   | 0.564764582 | count | 1 |
| PRIM2      | 0.3993889 | 0.5764565 | 0.6928 | 0.4888   | 0.565144072 | count | 1 |
| SLC39A1    | 0.4224016 | 0.3532581 | 1.1957 | 0.2324   | 0.56550649  | count | 1 |
| DNAJB11    | 0.409054  | 0.3150534 | 1.2984 | 0.1948   | 0.567996106 | count | 1 |
| MRPL47     | 0.4257783 | 0.2898087 | 1.4692 | 0.1425   | 0.570070013 | count | 1 |
| DUT        | 0.3992662 | 0.1615932 | 2.4708 | 0.0139   | 0.571054967 | count | 1 |
| SNAP23     | 0.4067749 | 0.2338124 | 1.7397 | 0.0826   | 0.571973041 | count | 1 |
| CD55       | 0.405591  | 0.104739  | 3.8724 | 1.00E-04 | 0.573941344 | count | 1 |
| ARAF       | 0.4292706 | 0.5136491 | 0.8357 | 0.4038   | 0.574790339 | count | 1 |
| GK         | 0.4292706 | 0.7138182 | 0.6014 | 0.548    | 0.574790339 | count | 1 |
| PTBP1      | 0.4147416 | 0.3451958 | 1.2015 | 0.2302   | 0.575931678 | count | 1 |
| GLG1       | 0.4315907 | 0.3760264 | 1.1478 | 0.2517   | 0.577926593 | count | 1 |
| SNX8       | 0.4170054 | 0.2925723 | 1.4253 | 0.1548   | 0.579090456 | count | 1 |
| UNKL       | 0.4188688 | 0.8206458 | 0.5104 | 0.61     | 0.581690638 | count | 1 |
| ZNF24      | 0.4346    | 0.2135889 | 2.0348 | 0.0425   | 0.581994865 | count | 1 |
| SIN3B      | 0.4347115 | 0.5132689 | 0.8469 | 0.3975   | 0.582145612 | count | 1 |
| CCDC115    | 0.4142034 | 0.3289324 | 1.2592 | 0.2086   | 0.582452232 | count | 1 |
| TXLNA      | 0.4361124 | 0.7921496 | 0.5505 | 0.5822   | 0.584039643 | count | 1 |
| FRY        | 0.4206331 | 1.2782253 | 0.3291 | 0.7423   | 0.584152618 | count | 1 |
| AC005363.2 | 0.4206331 | 1.2782253 | 0.3291 | 0.7423   | 0.584152618 | count | 1 |

|            |           |           |        |          |             |       |   |
|------------|-----------|-----------|--------|----------|-------------|-------|---|
| CYTIP      | 0.4075038 | 0.1015673 | 4.0122 | 7.06E-05 | 0.585365634 | count | 1 |
| NIP7       | 0.4218808 | 0.3765657 | 1.1203 | 0.263    | 0.585893758 | count | 1 |
| PHF20      | 0.4090972 | 0.1802633 | 2.2694 | 0.0237   | 0.586046651 | count | 1 |
| TWISTNB    | 0.4232601 | 0.2508574 | 1.6873 | 0.0923   | 0.587818591 | count | 1 |
| IVNS1ABP   | 0.4239302 | 0.2690892 | 1.5754 | 0.1159   | 0.588753743 | count | 1 |
| DCTN2      | 0.415564  | 0.3353184 | 1.2393 | 0.2159   | 0.590341628 | count | 1 |
| TINF2      | 0.4171925 | 0.2356952 | 1.7701 | 0.0774   | 0.59039869  | count | 1 |
| CASP8      | 0.4137035 | 0.2826366 | 1.4637 | 0.144    | 0.591726758 | count | 1 |
| YIPF5      | 0.4267642 | 0.4480457 | 0.9525 | 0.341    | 0.592708828 | count | 1 |
| HARS       | 0.4427821 | 0.3841156 | 1.1527 | 0.2496   | 0.593058397 | count | 1 |
| HTT        | 0.4460037 | 0.520176  | 0.8574 | 0.3917   | 0.597415375 | count | 1 |
| EIF2A      | 0.4309389 | 0.2307925 | 1.8672 | 0.0625   | 0.598535339 | count | 1 |
| P4HB       | 0.422718  | 0.2943371 | 1.4362 | 0.1517   | 0.600524612 | count | 1 |
| AKT2       | 0.4490668 | 0.4744592 | 0.9465 | 0.3444   | 0.601558438 | count | 1 |
| SRP19      | 0.4334397 | 0.266748  | 1.6249 | 0.105    | 0.602025845 | count | 1 |
| CD99       | 0.4202139 | 0.1327577 | 3.1653 | 0.0017   | 0.602338378 | count | 1 |
| ACO2       | 0.4511617 | 0.3966012 | 1.1376 | 0.2559   | 0.604392188 | count | 1 |
| TTF1       | 0.4248107 | 0.3625103 | 1.1719 | 0.2419   | 0.60615048  | count | 1 |
| ERO1A      | 0.4366649 | 0.4111158 | 1.0621 | 0.289    | 0.606527664 | count | 1 |
| PIKFYVE    | 0.4534143 | 0.2794409 | 1.6226 | 0.1054   | 0.607439476 | count | 1 |
| CNN2       | 0.4276748 | 0.2309635 | 1.8517 | 0.0647   | 0.607580423 | count | 1 |
| USP6NL     | 0.438457  | 0.3846715 | 1.1398 | 0.255    | 0.609029235 | count | 1 |
| PRPF8      | 0.4364488 | 0.2723139 | 1.6027 | 0.1097   | 0.613838947 | count | 1 |
| RAB29      | 0.4426332 | 0.3411785 | 1.2974 | 0.195    | 0.614859051 | count | 1 |
| BRMS1      | 0.4429167 | 0.3439747 | 1.2876 | 0.1985   | 0.615254821 | count | 1 |
| DNAJC1     | 0.4318032 | 0.3874787 | 1.1144 | 0.2657   | 0.61614224  | count | 1 |
| FUNDC1     | 0.4357499 | 0.4972705 | 0.8763 | 0.3814   | 0.616727017 | count | 1 |
| TMTC3      | 0.444416  | 0.911238  | 0.4877 | 0.626    | 0.617347902 | count | 1 |
| WDR46      | 0.4395184 | 0.4448535 | 0.988  | 0.3237   | 0.618170601 | count | 1 |
| KRAS       | 0.4369207 | 0.1792224 | 2.4379 | 0.0152   | 0.618388238 | count | 1 |
| BAG2       | 0.4397447 | 0.5067022 | 0.8679 | 0.3859   | 0.618489949 | count | 1 |
| IDS        | 0.4464346 | 0.1672893 | 2.6686 | 0.0079   | 0.620166031 | count | 1 |
| RNF149     | 0.4478303 | 0.3670432 | 1.2201 | 0.2231   | 0.6221146   | count | 1 |
| RELB       | 0.4495142 | 0.2704934 | 1.6618 | 0.0973   | 0.624465593 | count | 1 |
| ADGRE2     | 0.4686194 | 0.9361118 | 0.5006 | 0.6169   | 0.628014747 | count | 1 |
| BLNK       | 0.4522234 | 0.2412292 | 1.8747 | 0.0615   | 0.628248212 | count | 1 |
| HIPK1      | 0.4690863 | 0.5052483 | 0.9284 | 0.3537   | 0.628646708 | count | 1 |
| OTUB1      | 0.4429886 | 0.3185077 | 1.3908 | 0.165    | 0.629380618 | count | 1 |
| OCIAD1     | 0.4424798 | 0.1774318 | 2.4938 | 0.013    | 0.630253248 | count | 1 |
| TYW3       | 0.4497832 | 0.3243498 | 1.3867 | 0.166    | 0.632656863 | count | 1 |
| SEC11C     | 0.4728885 | 0.2010176 | 2.3525 | 0.0191   | 0.633793464 | count | 1 |
| MCL1       | 0.4462624 | 0.1608656 | 2.7741 | 0.0058   | 0.634041396 | count | 1 |
| AC058791.1 | 0.4568823 | 0.2210208 | 2.0671 | 0.0393   | 0.634753437 | count | 1 |
| TMEM9B     | 0.4574801 | 0.2648139 | 1.7276 | 0.0848   | 0.635588185 | count | 1 |
| RANBP2     | 0.4521583 | 0.3135166 | 1.4422 | 0.15     | 0.636008985 | count | 1 |

|            |           |           |        |        |             |       |   |
|------------|-----------|-----------|--------|--------|-------------|-------|---|
| THAP9-AS1  | 0.459219  | 0.3943359 | 1.1645 | 0.245  | 0.63801637  | count | 1 |
| VPS4A      | 0.4599878 | 0.3792889 | 1.2128 | 0.226  | 0.639089937 | count | 1 |
| MALSU1     | 0.4556205 | 0.3887281 | 1.1721 | 0.2418 | 0.640895562 | count | 1 |
| A1BG       | 0.4781416 | 0.3056798 | 1.5642 | 0.1185 | 0.640905238 | count | 1 |
| SNAPC2     | 0.4561975 | 0.4356178 | 1.0472 | 0.2956 | 0.641709962 | count | 1 |
| OPN3       | 0.4621914 | 0.4758938 | 0.9712 | 0.332  | 0.642167169 | count | 1 |
| NTMT1      | 0.4634022 | 0.3202955 | 1.4468 | 0.1487 | 0.643858047 | count | 1 |
| ANKRD13C   | 0.4581019 | 0.7309993 | 0.6267 | 0.5312 | 0.644397948 | count | 1 |
| EXOSC3     | 0.482041  | 0.3952793 | 1.2195 | 0.2233 | 0.646185114 | count | 1 |
| COMMD5     | 0.4651336 | 0.3903602 | 1.1915 | 0.234  | 0.646276001 | count | 1 |
| SNRNP35    | 0.460391  | 0.3478073 | 1.3237 | 0.186  | 0.647629    | count | 1 |
| HERPUD2    | 0.4666911 | 0.3283045 | 1.4215 | 0.1559 | 0.648451159 | count | 1 |
| FGD4       | 0.4686194 | 0.6964323 | 0.6729 | 0.5014 | 0.651144244 | count | 1 |
| OPTN       | 0.4697022 | 0.3954012 | 1.1879 | 0.236  | 0.652656531 | count | 1 |
| MRPS18B    | 0.4612508 | 0.2928283 | 1.5752 | 0.1159 | 0.652913554 | count | 1 |
| GALNT1     | 0.4705446 | 0.2938756 | 1.6012 | 0.1101 | 0.653833084 | count | 1 |
| DDX11      | 0.4881342 | 0.5783902 | 0.844  | 0.3992 | 0.654436756 | count | 1 |
| SDR39U1    | 0.4722316 | 0.5182656 | 0.9112 | 0.3627 | 0.656189312 | count | 1 |
| TMEM50B    | 0.4728053 | 0.4103487 | 1.1522 | 0.25   | 0.656990613 | count | 1 |
| SLC50A1    | 0.4626003 | 0.307203  | 1.5058 | 0.1328 | 0.657302606 | count | 1 |
| FAM98A     | 0.4674121 | 0.5513028 | 0.8478 | 0.397  | 0.657539766 | count | 1 |
| ST6GALNAC4 | 0.4628496 | 0.4408273 | 1.05   | 0.294  | 0.657657569 | count | 1 |
| SMIM10L1   | 0.4915024 | 0.3523823 | 1.3948 | 0.1638 | 0.658998781 | count | 1 |
| APOBEC3C   | 0.4669921 | 0.2415012 | 1.9337 | 0.0538 | 0.661061732 | count | 1 |
| AREG       | 0.462673  | 0.350004  | 1.3219 | 0.187  | 0.661153263 | count | 1 |
| MAP1S      | 0.4939068 | 0.5989176 | 0.8247 | 0.41   | 0.662255695 | count | 1 |
| ABTB1      | 0.4941372 | 0.3961795 | 1.2473 | 0.213  | 0.662567798 | count | 1 |
| PIM3       | 0.4647433 | 0.1810026 | 2.5676 | 0.0106 | 0.663215983 | count | 1 |
| ENSA       | 0.4786715 | 0.180955  | 2.6453 | 0.0084 | 0.665184507 | count | 1 |
| PRR7       | 0.4683282 | 0.3522204 | 1.3296 | 0.1843 | 0.665458367 | count | 1 |
| BACH1      | 0.4671527 | 0.2070461 | 2.2563 | 0.0245 | 0.665458539 | count | 1 |
| EHMT1      | 0.4753946 | 0.3394572 | 1.4005 | 0.162  | 0.668808564 | count | 1 |
| COPS3      | 0.4768717 | 0.2641614 | 1.8052 | 0.0717 | 0.670893877 | count | 1 |
| FOXP1      | 0.4733014 | 0.2205492 | 2.146  | 0.0324 | 0.672539791 | count | 1 |
| INTS14     | 0.4843913 | 0.6252537 | 0.7747 | 0.4389 | 0.673174669 | count | 1 |
| MECP2      | 0.5023277 | 0.2936216 | 1.7108 | 0.0878 | 0.673664248 | count | 1 |
| RIC3       | 0.4789776 | 0.234852  | 2.0395 | 0.042  | 0.673866965 | count | 1 |
| UCP2       | 0.4710148 | 0.1496916 | 3.1466 | 0.0018 | 0.674367646 | count | 1 |
| SIAH2      | 0.4734806 | 0.2109201 | 2.2448 | 0.0253 | 0.674488499 | count | 1 |
| SNX10      | 0.5035104 | 0.3238689 | 1.5547 | 0.121  | 0.675266794 | count | 1 |
| NDUFB3     | 0.4754944 | 0.2931323 | 1.6221 | 0.1055 | 0.675662517 | count | 1 |
| DCTN5      | 0.4877643 | 0.6286116 | 0.7759 | 0.4382 | 0.677886862 | count | 1 |
| NDUFA13    | 0.482526  | 0.265831  | 1.8152 | 0.0702 | 0.678876716 | count | 1 |
| MTX1       | 0.4795839 | 0.3978098 | 1.2056 | 0.2286 | 0.678933667 | count | 1 |
| GNL1       | 0.4811734 | 0.3201015 | 1.5032 | 0.1335 | 0.681189827 | count | 1 |

|          |           |           |        |          |             |       |            |
|----------|-----------|-----------|--------|----------|-------------|-------|------------|
| MRTO4    | 0.4907528 | 0.4015786 | 1.2221 | 0.2223   | 0.68206211  | count | 1          |
| PPP1CB   | 0.5111498 | 0.2253712 | 2.268  | 0.0238   | 0.685619504 | count | 1          |
| CCNDBP1  | 0.4820487 | 0.2178126 | 2.2131 | 0.0274   | 0.686715751 | count | 1          |
| BCLAF1   | 0.4862162 | 0.1602249 | 3.0346 | 0.0026   | 0.688347846 | count | 1          |
| RAB9A    | 0.4850317 | 0.3092195 | 1.5686 | 0.1175   | 0.689243699 | count | 1          |
| ZNF287   | 0.4959289 | 0.6650833 | 0.7457 | 0.4563   | 0.689294135 | count | 1          |
| NUP210   | 0.5141492 | 0.4764542 | 1.0791 | 0.2811   | 0.68968486  | count | 1          |
| ZNF568   | 0.5162244 | 0.6950194 | 0.7427 | 0.458    | 0.692497785 | count | 1          |
| BRWD1    | 0.4983165 | 0.439086  | 1.1349 | 0.257    | 0.692630277 | count | 1          |
| AZIN1    | 0.4985704 | 0.3533869 | 1.4108 | 0.159    | 0.692985055 | count | 1          |
| BABAM2   | 0.5200699 | 0.4820091 | 1.079  | 0.2812   | 0.697710795 | count | 1          |
| PPP1R15A | 0.4871663 | 0.1456319 | 3.3452 | 9.00E-04 | 0.6979971   | count | 1          |
| SMARCE1  | 0.5208751 | 0.442812  | 1.1763 | 0.2401   | 0.698802413 | count | 1          |
| DERL2    | 0.4982413 | 0.3182134 | 1.5657 | 0.1181   | 0.701066417 | count | 1          |
| PTPN1    | 0.4982829 | 0.1672181 | 2.9798 | 0.003    | 0.70112516  | count | 1          |
| KLF3     | 0.4993    | 0.3425359 | 1.4577 | 0.146    | 0.702561415 | count | 1          |
| DNAAF2   | 0.5057661 | 0.2743058 | 1.8438 | 0.0659   | 0.703040256 | count | 1          |
| DYNLT3   | 0.5248722 | 0.3018186 | 1.739  | 0.0827   | 0.704221692 | count | 1          |
| CD19     | 0.5006127 | 0.2061855 | 2.428  | 0.0156   | 0.704415112 | count | 1          |
| ACADS    | 0.5069629 | 1.0988012 | 0.4614 | 0.6448   | 0.704712764 | count | 1          |
| AP3S1    | 0.500978  | 0.2900311 | 1.7273 | 0.0848   | 0.704930965 | count | 1          |
| YWHAH    | 0.5072058 | 0.178601  | 2.8399 | 0.0047   | 0.705052215 | count | 1          |
| MEF2A    | 0.5264705 | 0.2538069 | 2.0743 | 0.0386   | 0.70638885  | count | 1          |
| LTA4H    | 0.5277009 | 0.3520603 | 1.4989 | 0.1346   | 0.708057237 | count | 1          |
| MKRN2    | 0.5115021 | 0.6407154 | 0.7983 | 0.4251   | 0.711056494 | count | 1          |
| FRS2     | 0.5115021 | 0.6919751 | 0.7392 | 0.4602   | 0.711056494 | count | 1          |
| NUDT15   | 0.5123202 | 0.5250007 | 0.9758 | 0.3297   | 0.712199871 | count | 1          |
| B4GALT1  | 0.532354  | 0.2346777 | 2.2684 | 0.0238   | 0.714367246 | count | 1          |
| HAGH     | 0.5326449 | 0.4281268 | 1.2441 | 0.214    | 0.714761764 | count | 1          |
| FAM216A  | 0.5327136 | 0.7326656 | 0.7271 | 0.4676   | 0.714854932 | count | 1          |
| NSMCE1   | 0.5045813 | 0.4349229 | 1.1602 | 0.2466   | 0.717085099 | count | 1          |
| 8-Mar    | 0.5137156 | 0.6362068 | 0.8075 | 0.4198   | 0.722919436 | count | 1          |
| PREX1    | 0.5207448 | 0.3753416 | 1.3874 | 0.166    | 0.723974933 | count | 1          |
| FAM53C   | 0.5231823 | 0.3681481 | 1.4211 | 0.156    | 0.727382107 | count | 1          |
| YPEL5    | 0.5074856 | 0.1286904 | 3.9435 | 9.33E-05 | 0.728206427 | count | 1          |
| NR1H2    | 0.5122413 | 0.2154541 | 2.3775 | 0.0179   | 0.729807133 | count | 1          |
| KIAA0100 | 0.5449811 | 0.4871135 | 1.1188 | 0.2638   | 0.731494954 | count | 1          |
| TDP2     | 0.5167522 | 0.3946148 | 1.3095 | 0.191    | 0.731698463 | count | 1          |
| SNAPC1   | 0.5300761 | 0.3084511 | 1.7185 | 0.0864   | 0.737019032 | count | 1          |
| EPC1     | 0.530126  | 0.2374753 | 2.2323 | 0.0261   | 0.737088793 | count | 1          |
| TMEM170A | 0.5305669 | 0.305954  | 1.7341 | 0.0836   | 0.737705165 | count | 1          |
| MARCKS   | 0.5139985 | 0.1028647 | 4.9968 | 8.40E-07 | 0.738054935 | count | 0.02040948 |
| NFKBIE   | 0.5203665 | 0.242723  | 2.1439 | 0.0326   | 0.73956797  | count | 1          |
| MAP3K1   | 0.552177  | 0.2825603 | 1.9542 | 0.0513   | 0.741258388 | count | 1          |
| ANKZF1   | 0.5274128 | 0.5694828 | 0.9261 | 0.3549   | 0.742265706 | count | 1          |

|          |           |           |        |          |             |       |          |
|----------|-----------|-----------|--------|----------|-------------|-------|----------|
| SMARCC2  | 0.5542457 | 0.3310622 | 1.6741 | 0.0948   | 0.744065576 | count | 1        |
| SLC4A7   | 0.5359986 | 0.4037379 | 1.3276 | 0.185    | 0.745298953 | count | 1        |
| TPRKB    | 0.5304241 | 0.3472314 | 1.5276 | 0.127    | 0.746519299 | count | 1        |
| EGR2     | 0.5381215 | 0.5024607 | 1.071  | 0.285    | 0.748267038 | count | 1        |
| UBE2Z    | 0.5407345 | 0.4296995 | 1.2584 | 0.209    | 0.751920469 | count | 1        |
| ASTE1    | 0.5414743 | 0.5644674 | 0.9593 | 0.3379   | 0.752954864 | count | 1        |
| VAC14    | 0.5619825 | 0.9023484 | 0.6228 | 0.5337   | 0.754565676 | count | 1        |
| ATP2B1   | 0.5371097 | 0.1276002 | 4.2093 | 3.10E-05 | 0.755963453 | count | 0.752959 |
| LYRM1    | 0.5445415 | 0.3862178 | 1.4099 | 0.1593   | 0.757243571 | count | 1        |
| CNIH4    | 0.5458745 | 0.3242491 | 1.6835 | 0.093    | 0.759107492 | count | 1        |
| TMEM69   | 0.5657727 | 0.6452804 | 0.8768 | 0.3811   | 0.759710405 | count | 1        |
| PCCB     | 0.5657727 | 0.7645101 | 0.74   | 0.4597   | 0.759710405 | count | 1        |
| RNPS1    | 0.5403    | 0.1912428 | 2.8252 | 0.0049   | 0.76047432  | count | 1        |
| CXCR3    | 0.5473304 | 0.4836542 | 1.1317 | 0.258    | 0.761143306 | count | 1        |
| CD70     | 0.5426867 | 0.1838972 | 2.951  | 0.0033   | 0.76384206  | count | 1        |
| SF3A3    | 0.5433911 | 0.3427578 | 1.5854 | 0.1136   | 0.764837193 | count | 1        |
| FDX1     | 0.5447358 | 0.2829095 | 1.9255 | 0.0548   | 0.766736922 | count | 1        |
| PARP11   | 0.5724246 | 0.7200553 | 0.795  | 0.4271   | 0.768740815 | count | 1        |
| SNRPA    | 0.5439369 | 0.3678327 | 1.4788 | 0.1399   | 0.770299945 | count | 1        |
| ADARB1   | 0.5498085 | 0.6523998 | 0.8427 | 0.3998   | 0.773903615 | count | 1        |
| MED13    | 0.5565272 | 0.3550385 | 1.5675 | 0.1177   | 0.774004345 | count | 1        |
| GHDC     | 0.5566368 | 0.8490741 | 0.6556 | 0.5124   | 0.774157621 | count | 1        |
| TNPO3    | 0.5774798 | 0.6285877 | 0.9187 | 0.359    | 0.775604665 | count | 1        |
| EFHD2    | 0.5584069 | 0.2537662 | 2.2005 | 0.0283   | 0.77663317  | count | 1        |
| ARL4D    | 0.5484197 | 0.6854739 | 0.8001 | 0.4241   | 0.776666132 | count | 1        |
| VAPB     | 0.5587107 | 0.6285761 | 0.8889 | 0.3746   | 0.77705805  | count | 1        |
| TGIF2    | 0.5526141 | 0.3042797 | 1.8161 | 0.07     | 0.777867506 | count | 1        |
| FBXL15   | 0.5453286 | 0.337366  | 1.6164 | 0.1067   | 0.778409025 | count | 1        |
| EIF2S1   | 0.5503616 | 0.3179286 | 1.7311 | 0.0841   | 0.779423959 | count | 1        |
| IRAK4    | 0.5806325 | 0.3659087 | 1.5868 | 0.1133   | 0.779885798 | count | 1        |
| PPT1     | 0.5547785 | 0.4327728 | 1.2819 | 0.2005   | 0.780925549 | count | 1        |
| MVP      | 0.5518486 | 0.4432721 | 1.2449 | 0.2138   | 0.781535777 | count | 1        |
| ITGAX    | 0.5619825 | 0.7092234 | 0.7924 | 0.4286   | 0.781633958 | count | 1        |
| SAMSN1   | 0.5468955 | 0.1563434 | 3.498  | 5.00E-04 | 0.783136406 | count | 1        |
| TYSND1   | 0.5521267 | 0.5893795 | 0.9368 | 0.3494   | 0.78481053  | count | 1        |
| CDIP1    | 0.5843992 | 0.6009422 | 0.9725 | 0.3313   | 0.785001163 | count | 1        |
| PRMT5    | 0.5854876 | 0.882766  | 0.6632 | 0.508    | 0.78647936  | count | 1        |
| BAG4     | 0.5859332 | 0.4120807 | 1.4219 | 0.1558   | 0.787084557 | count | 1        |
| PAIP1    | 0.5619945 | 0.4050222 | 1.3876 | 0.166    | 0.795945441 | count | 1        |
| RAMMET   | 0.5956197 | 0.3336967 | 1.7849 | 0.075    | 0.80024211  | count | 1        |
| AFTPH    | 0.5685339 | 0.265246  | 2.1434 | 0.0326   | 0.800361761 | count | 1        |
| ARL4A    | 0.5760292 | 0.2200255 | 2.618  | 0.0092   | 0.801281869 | count | 1        |
| NUDT16L1 | 0.5709608 | 0.387581  | 1.4731 | 0.1414   | 0.808680632 | count | 1        |
| SAP30BP  | 0.5826902 | 0.3378284 | 1.7248 | 0.0853   | 0.810600284 | count | 1        |
| CLP1     | 0.6053009 | 0.5117192 | 1.1829 | 0.2375   | 0.813395685 | count | 1        |



|            |           |           |        |          |             |       |            |
|------------|-----------|-----------|--------|----------|-------------|-------|------------|
| KLF2       | 0.5644803 | 0.119102  | 4.7395 | 2.89E-06 | 0.813480886 | count | 0.07021544 |
| KLF16      | 0.6057058 | 0.3331287 | 1.8182 | 0.0697   | 0.813945884 | count | 1          |
| AASDHPPT   | 0.6058113 | 0.5334244 | 1.1357 | 0.2567   | 0.81408924  | count | 1          |
| S100A10    | 0.5718333 | 0.1539639 | 3.7141 | 2.00E-04 | 0.820285956 | count | 1          |
| FARSA      | 0.5772797 | 0.4767996 | 1.2107 | 0.2266   | 0.820646943 | count | 1          |
| MIF        | 0.5778077 | 0.1855116 | 3.1147 | 0.002    | 0.821399258 | count | 1          |
| ZBTB2      | 0.6135746 | 0.550889  | 1.1138 | 0.266    | 0.824639434 | count | 1          |
| SPAST      | 0.614154  | 0.6744085 | 0.9107 | 0.363    | 0.82542691  | count | 1          |
| RALGAPB    | 0.6146646 | 0.6467195 | 0.9504 | 0.3424   | 0.826120889 | count | 1          |
| C1orf56    | 0.5870461 | 0.2504689 | 2.3438 | 0.0195   | 0.826523111 | count | 1          |
| UBE2D1     | 0.5836817 | 0.280101  | 2.0838 | 0.0377   | 0.829768897 | count | 1          |
| CTNNB1     | 0.6186217 | 0.284641  | 2.1733 | 0.0303   | 0.831499431 | count | 1          |
| METAP1D    | 0.6254353 | 0.6512982 | 0.9603 | 0.3374   | 0.840761764 | count | 1          |
| AL121603.2 | 0.5899238 | 0.4784175 | 1.2331 | 0.218    | 0.842172806 | count | 1          |
| PKHD1L1    | 0.6053819 | 0.7002146 | 0.8646 | 0.3877   | 0.842350953 | count | 1          |
| CBLB       | 0.6062523 | 0.5907572 | 1.0262 | 0.3053   | 0.843569017 | count | 1          |
| CCDC122    | 0.6074588 | 0.6760846 | 0.8985 | 0.3694   | 0.84525745  | count | 1          |
| SF3B4      | 0.6012467 | 0.3299078 | 1.8225 | 0.0691   | 0.846594212 | count | 1          |
| NGDN       | 0.6334126 | 0.3039256 | 2.0841 | 0.0377   | 0.851607909 | count | 1          |
| TMEM60     | 0.6053295 | 0.4090864 | 1.4797 | 0.1397   | 0.852365285 | count | 1          |
| JUND       | 0.5946124 | 0.0605309 | 9.8233 | 9.70E-21 | 0.857267929 | count | 2.36E-16   |
| FAM111A-DT | 0.6090247 | 1.09982   | 0.5537 | 0.58     | 0.857588653 | count | 1          |
| PSD3       | 0.6100205 | 0.8236408 | 0.7406 | 0.459    | 0.858996297 | count | 1          |
| DHRS4      | 0.6407269 | 0.8003744 | 0.8005 | 0.4238   | 0.861554384 | count | 1          |
| MRPS9      | 0.643789  | 0.389105  | 1.6545 | 0.0987   | 0.865718932 | count | 1          |
| ATP11C     | 0.6441986 | 0.5796917 | 1.1113 | 0.2671   | 0.866276019 | count | 1          |
| SETD6      | 0.6233635 | 0.8163459 | 0.7636 | 0.4455   | 0.867517597 | count | 1          |
| TXNDC15    | 0.6466097 | 0.3828396 | 1.689  | 0.0919   | 0.869555422 | count | 1          |
| TRAF4      | 0.6178204 | 0.2575183 | 2.3991 | 0.0168   | 0.870022498 | count | 1          |
| CYC1       | 0.625481  | 0.2622549 | 2.385  | 0.0175   | 0.870481564 | count | 1          |
| USF3       | 0.6204413 | 0.3729964 | 1.6634 | 0.0969   | 0.873727647 | count | 1          |
| EPHB6      | 0.6310504 | 0.3997797 | 1.5785 | 0.1152   | 0.87827768  | count | 1          |
| YIPF6      | 0.6245939 | 0.4140898 | 1.5084 | 0.1322   | 0.879598312 | count | 1          |
| UBE4B      | 0.6192193 | 0.6901988 | 0.8972 | 0.37     | 0.88041052  | count | 1          |
| TAPT1      | 0.6333851 | 0.5434958 | 1.1654 | 0.2445   | 0.881545975 | count | 1          |
| CD1C       | 0.6555639 | 0.5077743 | 1.2911 | 0.197    | 0.881735802 | count | 1          |
| PRCC       | 0.6560259 | 0.4234099 | 1.5494 | 0.122    | 0.882364324 | count | 1          |
| BCL10      | 0.6563787 | 0.1907055 | 3.4418 | 6.00E-04 | 0.882844291 | count | 1          |
| RAD1       | 0.6274317 | 0.5059181 | 1.2402 | 0.2156   | 0.883610316 | count | 1          |
| IRF1       | 0.6155662 | 0.1440502 | 4.2733 | 2.36E-05 | 0.883741177 | count | 0.5732912  |
| ANKRD28    | 0.6351618 | 0.3106278 | 2.0448 | 0.0415   | 0.884033198 | count | 1          |
| PYCR2      | 0.657372  | 0.4144889 | 1.586  | 0.1135   | 0.884195652 | count | 1          |
| TMEM263    | 0.6366656 | 0.4089385 | 1.5569 | 0.1202   | 0.886138426 | count | 1          |
| CNPPD1     | 0.632261  | 0.2846621 | 2.2211 | 0.0268   | 0.890438052 | count | 1          |
| FCER2      | 0.642316  | 0.3422613 | 1.8767 | 0.0612   | 0.894048965 | count | 1          |

|          |           |           |        |          |             |       |             |
|----------|-----------|-----------|--------|----------|-------------|-------|-------------|
| MLLT6    | 0.646807  | 0.4403246 | 1.4689 | 0.1426   | 0.900336714 | count | 1           |
| RPP25L   | 0.6695122 | 0.6748632 | 0.9921 | 0.3217   | 0.900714407 | count | 1           |
| SAYSD1   | 0.6695122 | 0.7266875 | 0.9213 | 0.3574   | 0.900714407 | count | 1           |
| KLF6     | 0.6301474 | 0.1257272 | 5.012  | 7.79E-07 | 0.907360843 | count | 0.018928142 |
| ZNF195   | 0.6407269 | 0.4757758 | 1.3467 | 0.1788   | 0.90779762  | count | 1           |
| WDR73    | 0.6754849 | 0.5588324 | 1.2087 | 0.2274   | 0.908842828 | count | 1           |
| NOP14    | 0.6781495 | 0.3989849 | 1.6997 | 0.0899   | 0.912469486 | count | 1           |
| ZFP36    | 0.6378424 | 0.1409414 | 4.5256 | 7.74E-06 | 0.914135557 | count | 0.1880433   |
| TOR3A    | 0.6438115 | 0.2429553 | 2.6499 | 0.0083   | 0.915459971 | count | 1           |
| WEE1     | 0.6615096 | 0.2091625 | 3.1627 | 0.0017   | 0.931795582 | count | 1           |
| MON2     | 0.6701146 | 0.531832  | 1.26   | 0.2083   | 0.932974223 | count | 1           |
| OMA1     | 0.6737723 | 0.5214522 | 1.2921 | 0.197    | 0.93809683  | count | 1           |
| ISCA2    | 0.6739546 | 0.3546103 | 1.9006 | 0.058    | 0.938352143 | count | 1           |
| RAB30    | 0.7015365 | 0.3186865 | 2.2013 | 0.0282   | 0.944308846 | count | 1           |
| NOC4L    | 0.7018917 | 0.8214971 | 0.8544 | 0.3933   | 0.944792536 | count | 1           |
| GORAB    | 0.7023147 | 0.5852201 | 1.2001 | 0.2307   | 0.945368554 | count | 1           |
| TMEM101  | 0.7023147 | 0.7634575 | 0.9199 | 0.358    | 0.945368554 | count | 1           |
| STX11    | 0.7043201 | 0.6491675 | 1.085  | 0.279    | 0.948099458 | count | 1           |
| TSC22D3  | 0.6608833 | 0.0968903 | 6.8209 | 2.97E-11 | 0.948527673 | count | 7.22E-07    |
| ANKIB1   | 0.6817214 | 0.4415004 | 1.5441 | 0.1233   | 0.949230214 | count | 1           |
| ANAPC1   | 0.6828559 | 0.560734  | 1.2178 | 0.224    | 0.950819254 | count | 1           |
| ZNF487   | 0.6828559 | 0.5831057 | 1.1711 | 0.2422   | 0.950819254 | count | 1           |
| RASGEF1B | 0.663639  | 0.1891685 | 3.5082 | 5.00E-04 | 0.95210816  | count | 1           |
| MLH1     | 0.6839428 | 0.5418335 | 1.2623 | 0.2075   | 0.952341638 | count | 1           |
| MSMO1    | 0.7114728 | 0.5380483 | 1.3223 | 0.1867   | 0.957840692 | count | 1           |
| AP3B1    | 0.713377  | 0.3710969 | 1.9223 | 0.0552   | 0.960434241 | count | 1           |
| ZDHHC20  | 0.6901325 | 0.5192119 | 1.3292 | 0.1845   | 0.961011666 | count | 1           |
| ZNF691   | 0.6822097 | 0.899264  | 0.7586 | 0.4485   | 0.961070893 | count | 1           |
| FBXO4    | 0.6842899 | 0.6096804 | 1.1224 | 0.2623   | 0.964013072 | count | 1           |
| PAN3     | 0.6941595 | 0.2951058 | 2.3522 | 0.0191   | 0.96665265  | count | 1           |
| TARS2    | 0.7206312 | 0.7943562 | 0.9072 | 0.3648   | 0.970315407 | count | 1           |
| HSDL2    | 0.7206312 | 0.7943562 | 0.9072 | 0.3648   | 0.970315407 | count | 1           |
| LCORL    | 0.6904069 | 0.5561677 | 1.2414 | 0.2151   | 0.972665026 | count | 1           |
| MFSD1    | 0.7001281 | 0.5049771 | 1.3865 | 0.1663   | 0.975013827 | count | 1           |
| INO80D   | 0.6884674 | 0.3039506 | 2.2651 | 0.024    | 0.979114661 | count | 1           |
| TXNDC9   | 0.6954339 | 0.3879243 | 1.7927 | 0.0737   | 0.97977554  | count | 1           |
| TAGLN2   | 0.6825098 | 0.0896202 | 7.6156 | 1.60E-13 | 0.981813543 | count | 3.89E-09    |
| RAB27A   | 0.7330815 | 0.693028  | 1.0578 | 0.291    | 0.987277392 | count | 1           |
| ZNF511   | 0.7373228 | 0.3996274 | 1.845  | 0.0657   | 0.993056505 | count | 1           |
| GGA3     | 0.7400411 | 0.5972971 | 1.239  | 0.216    | 0.996760634 | count | 1           |
| RGCC     | 0.7027024 | 0.2281948 | 3.0794 | 0.0022   | 1.004749769 | count | 1           |
| ISY1     | 0.7218184 | 0.4966989 | 1.4532 | 0.1469   | 1.005402962 | count | 1           |
| NFKBIA   | 0.6982326 | 0.1066973 | 6.5441 | 1.65E-10 | 1.006186101 | count | 4.01E-06    |
| LDLRAD4  | 0.7142828 | 0.2322978 | 3.0749 | 0.0022   | 1.00643872  | count | 1           |
| MRFAP1L1 | 0.7472473 | 0.4396743 | 1.6995 | 0.0899   | 1.006581094 | count | 1           |

|            |           |           |        |          |             |       |             |
|------------|-----------|-----------|--------|----------|-------------|-------|-------------|
| ZNF574     | 0.749421  | 0.8386437 | 0.8936 | 0.372    | 1.009543609 | count | 1           |
| ARL6IP6    | 0.7184257 | 0.3741455 | 1.9202 | 0.0555   | 1.01229959  | count | 1           |
| AC007952.4 | 0.7238072 | 0.3730507 | 1.9402 | 0.053    | 1.019912903 | count | 1           |
| IMPDH1     | 0.7259285 | 0.5264176 | 1.379  | 0.1686   | 1.022914017 | count | 1           |
| JUN        | 0.7127143 | 0.1919315 | 3.7134 | 2.00E-04 | 1.025502751 | count | 1           |
| MED8       | 0.7383207 | 0.507727  | 1.4542 | 0.1466   | 1.028527538 | count | 1           |
| KIF20B     | 0.7422821 | 0.4158012 | 1.7852 | 0.0749   | 1.034079125 | count | 1           |
| FOXP4      | 0.7443342 | 0.7491412 | 0.9936 | 0.321    | 1.036955053 | count | 1           |
| PEA15      | 0.74486   | 0.3153693 | 2.3619 | 0.0186   | 1.037691949 | count | 1           |
| CMIP       | 0.7457985 | 0.5057461 | 1.4747 | 0.141    | 1.039007237 | count | 1           |
| RAB11FIP1  | 0.7237959 | 0.128025  | 5.6536 | 2.82E-08 | 1.03925648  | count | 0.000685316 |
| ZNF92      | 0.7461626 | 0.4039996 | 1.8469 | 0.0654   | 1.039517521 | count | 1           |
| JAZF1      | 0.7378927 | 0.4547085 | 1.6228 | 0.1053   | 1.039841105 | count | 1           |
| VMA21      | 0.7380887 | 0.3767467 | 1.9591 | 0.0507   | 1.040118419 | count | 1           |
| TRAF3      | 0.7487965 | 0.3783624 | 1.979  | 0.0484   | 1.043208947 | count | 1           |
| UBL4A      | 0.7494211 | 0.6548921 | 1.1443 | 0.2531   | 1.044084341 | count | 1           |
| C2orf76    | 0.7762027 | 0.6264595 | 1.239  | 0.216    | 1.046052777 | count | 1           |
| FBXO42     | 0.779443  | 0.7288822 | 1.0694 | 0.2855   | 1.050471047 | count | 1           |
| DPAGT1     | 0.7795081 | 0.7232545 | 1.0778 | 0.2817   | 1.050559811 | count | 1           |
| NNT-AS1    | 0.7795081 | 0.8760708 | 0.8898 | 0.374    | 1.050559811 | count | 1           |
| MAP4K5     | 0.754116  | 0.4273715 | 1.7645 | 0.0783   | 1.05066451  | count | 1           |
| GARS       | 0.7545163 | 0.5673626 | 1.3299 | 0.1842   | 1.051225567 | count | 1           |
| YY1AP1     | 0.7463684 | 0.6207912 | 1.2023 | 0.2299   | 1.051833335 | count | 1           |
| MGA        | 0.7593746 | 0.4706072 | 1.6136 | 0.1073   | 1.058035042 | count | 1           |
| DPH3       | 0.7448053 | 0.3107231 | 2.397  | 0.0169   | 1.059437703 | count | 1           |
| KCTD9      | 0.7458214 | 0.6186088 | 1.2056 | 0.229    | 1.060886545 | count | 1           |
| ELK3       | 0.7871763 | 0.4394117 | 1.7914 | 0.0739   | 1.061016569 | count | 1           |
| EIF2AK1    | 0.791765  | 0.3528374 | 2.244  | 0.0253   | 1.067274538 | count | 1           |
| ADPRHL2    | 0.7666849 | 0.396226  | 1.935  | 0.0536   | 1.068281787 | count | 1           |
| DNAJC17    | 0.7538064 | 0.5473378 | 1.3772 | 0.1691   | 1.072272407 | count | 1           |
| ALG14      | 0.7705648 | 0.8412228 | 0.916  | 0.3602   | 1.07372043  | count | 1           |
| PHKG1      | 0.799639  | 1.0180299 | 0.7855 | 0.4326   | 1.078013889 | count | 1           |
| RIC8A      | 0.801684  | 0.4652199 | 1.7232 | 0.0855   | 1.080803258 | count | 1           |
| GLI4       | 0.8030943 | 0.6002901 | 1.3378 | 0.1816   | 1.082726951 | count | 1           |
| EIF3C      | 0.7783976 | 0.870988  | 0.8937 | 0.372    | 1.084700542 | count | 1           |
| TRNT1      | 0.7794738 | 0.5193785 | 1.5008 | 0.1341   | 1.086209223 | count | 1           |
| TCIRG1     | 0.7688152 | 0.434694  | 1.7686 | 0.0776   | 1.089872026 | count | 1           |
| TIMM9      | 0.784178  | 0.4434161 | 1.7685 | 0.0777   | 1.092803994 | count | 1           |
| HDAC9      | 0.766858  | 0.4209846 | 1.8216 | 0.0692   | 1.095253851 | count | 1           |
| KLK1       | 0.7738847 | 0.7299942 | 1.0601 | 0.29     | 1.097080353 | count | 1           |
| TERF2      | 0.8141006 | 0.4199151 | 1.9387 | 0.0532   | 1.097741171 | count | 1           |
| ITGB7      | 0.7795942 | 0.3665632 | 2.1268 | 0.034    | 1.098849755 | count | 1           |
| FOPNL      | 0.7891694 | 0.4935984 | 1.5988 | 0.1106   | 1.099801639 | count | 1           |
| C5orf15    | 0.7913553 | 0.457028  | 1.7315 | 0.0841   | 1.102866223 | count | 1           |
| ADD3       | 0.782836  | 0.3452016 | 2.2678 | 0.0238   | 1.103437525 | count | 1           |

|             |           |           |        |          |             |       |   |
|-------------|-----------|-----------|--------|----------|-------------|-------|---|
| MTMR6       | 0.8212542 | 0.3344309 | 2.4557 | 0.0144   | 1.107500933 | count | 1 |
| ZNF557      | 0.7963503 | 0.5747828 | 1.3855 | 0.1666   | 1.109869281 | count | 1 |
| DUSP10      | 0.7974268 | 0.4854086 | 1.6428 | 0.101    | 1.111378582 | count | 1 |
| CPD         | 0.7889354 | 0.9471145 | 0.833  | 0.4053   | 1.112069542 | count | 1 |
| HBS1L       | 0.8251128 | 0.4588928 | 1.7981 | 0.0728   | 1.112765661 | count | 1 |
| AP005329.3  | 0.799639  | 0.8133513 | 0.9831 | 0.3261   | 1.114480217 | count | 1 |
| E2F5        | 0.8277176 | 0.41017   | 2.018  | 0.0442   | 1.116319827 | count | 1 |
| CCDC167     | 0.8287922 | 0.3240401 | 2.5577 | 0.0109   | 1.11778612  | count | 1 |
| ZNHIT2      | 0.8044455 | 0.6384144 | 1.2601 | 0.2083   | 1.121219383 | count | 1 |
| CPSF2       | 0.7969782 | 0.5419855 | 1.4705 | 0.1421   | 1.123452298 | count | 1 |
| TNFAIP3     | 0.8334207 | 0.2998831 | 2.7792 | 0.0057   | 1.124101952 | count | 1 |
| RNF214      | 0.8084268 | 0.5435081 | 1.4874 | 0.1376   | 1.126801713 | count | 1 |
| CFAP298     | 0.8132235 | 0.3822454 | 2.1275 | 0.0339   | 1.13352754  | count | 1 |
| PCGF3       | 0.8444408 | 0.80289   | 1.0518 | 0.2935   | 1.139140884 | count | 1 |
| ZNF267      | 0.8173641 | 0.3104602 | 2.6328 | 0.0088   | 1.139333571 | count | 1 |
| RNF14       | 0.8176179 | 0.7686412 | 1.0637 | 0.288    | 1.13968946  | count | 1 |
| AAED1       | 0.8213269 | 0.2279092 | 3.6037 | 3.00E-04 | 1.144890434 | count | 1 |
| BCAT2       | 0.8505329 | 0.6215716 | 1.3684 | 0.1719   | 1.147455516 | count | 1 |
| C18orf21    | 0.8510671 | 0.5534604 | 1.5377 | 0.1248   | 1.148184629 | count | 1 |
| CYSLTR1     | 0.8083986 | 0.2473203 | 3.2686 | 0.0012   | 1.15012336  | count | 1 |
| AC073111.5  | 0.8138068 | 0.6358565 | 1.2799 | 0.201    | 1.15385032  | count | 1 |
| NFKB1       | 0.8593876 | 0.3084816 | 2.7859 | 0.0056   | 1.159541633 | count | 1 |
| LTN1        | 0.8185159 | 0.3711817 | 2.2052 | 0.028    | 1.164552411 | count | 1 |
| RNF6        | 0.8307309 | 0.6441221 | 1.2897 | 0.1978   | 1.171226085 | count | 1 |
| DOK3        | 0.8693763 | 0.6368141 | 1.3652 | 0.1729   | 1.173177011 | count | 1 |
| TPP2        | 0.8693763 | 0.6947882 | 1.2513 | 0.2115   | 1.173177011 | count | 1 |
| TMSB4Y      | 0.872793  | 1.3940752 | 0.6261 | 0.5316   | 1.177841415 | count | 1 |
| MCMBP       | 0.8464799 | 0.4855418 | 1.7434 | 0.082    | 1.180164579 | count | 1 |
| FAM117A     | 0.8388071 | 0.5357691 | 1.5656 | 0.1182   | 1.182658195 | count | 1 |
| LAMP1       | 0.8869009 | 0.2967436 | 2.9888 | 0.003    | 1.197102926 | count | 1 |
| CPSF6       | 0.8547024 | 0.4559503 | 1.8746 | 0.0615   | 1.205159528 | count | 1 |
| TAF11       | 0.8551709 | 0.4372717 | 1.9557 | 0.0511   | 1.205822755 | count | 1 |
| GFER        | 0.8667216 | 0.4368125 | 1.9842 | 0.0478   | 1.208554904 | count | 1 |
| GTF3C2      | 0.8986356 | 0.757851  | 1.1858 | 0.2363   | 1.213126305 | count | 1 |
| PYCR3       | 0.9013782 | 0.9630915 | 0.9359 | 0.3498   | 1.216871485 | count | 1 |
| EEF1AKMT1   | 0.9013782 | 1.0472688 | 0.8607 | 0.3899   | 1.216871485 | count | 1 |
| HIST1H2AK   | 0.872793  | 0.9991922 | 0.8735 | 0.383    | 1.217071024 | count | 1 |
| DNAJC27-AS1 | 0.872793  | 1.3940752 | 0.6261 | 0.5316   | 1.217071032 | count | 1 |
| ALDH1L2     | 0.872793  | 1.3940752 | 0.6261 | 0.5316   | 1.217071032 | count | 1 |
| AL031666.1  | 0.872793  | 1.3940752 | 0.6261 | 0.5316   | 1.217071032 | count | 1 |
| TCL1A       | 0.8550888 | 0.474867  | 1.8007 | 0.0724   | 1.225111714 | count | 1 |
| WDR91       | 0.910365  | 0.749816  | 1.2141 | 0.2253   | 1.229144138 | count | 1 |
| ZNF569      | 0.872793  | 0.8266589 | 1.0558 | 0.292    | 1.230770071 | count | 1 |
| CYTH2       | 0.8839058 | 0.4490508 | 1.9684 | 0.0496   | 1.232659211 | count | 1 |
| MORN2       | 0.8851023 | 0.9274929 | 0.9543 | 0.3404   | 1.23433762  | count | 1 |

|          |           |           |        |        |             |       |   |
|----------|-----------|-----------|--------|--------|-------------|-------|---|
| EHD1     | 0.9143879 | 0.485278  | 1.8843 | 0.0602 | 1.234638234 | count | 1 |
| G2E3     | 0.8838561 | 0.4066408 | 2.1736 | 0.0303 | 1.246432678 | count | 1 |
| RARS2    | 0.9013782 | 0.6140912 | 1.4678 | 0.1429 | 1.257169766 | count | 1 |
| EMC10    | 0.9022797 | 0.3706324 | 2.4344 | 0.0153 | 1.258434454 | count | 1 |
| L3MBTL3  | 0.9350772 | 0.4726768 | 1.9783 | 0.0485 | 1.262896486 | count | 1 |
| ZNF827   | 0.9359007 | 0.6973637 | 1.3421 | 0.1803 | 1.264021341 | count | 1 |
| ENO2     | 0.8976107 | 0.6327234 | 1.4186 | 0.1567 | 1.265906507 | count | 1 |
| HIST1H1C | 0.904325  | 0.3982977 | 2.2705 | 0.0237 | 1.282594285 | count | 1 |
| SVBP     | 0.9530314 | 0.3937907 | 2.4201 | 0.0159 | 1.287422425 | count | 1 |
| DYRK1B   | 0.9533535 | 0.6793631 | 1.4033 | 0.161  | 1.287862446 | count | 1 |
| COL4A3   | 0.9035223 | 0.6486475 | 1.3929 | 0.164  | 1.288715172 | count | 1 |
| GNG2     | 0.956451  | 0.3041365 | 3.1448 | 0.0018 | 1.292094013 | count | 1 |
| AP1B1    | 0.9234255 | 0.506415  | 1.8235 | 0.0689 | 1.302457207 | count | 1 |
| LPCAT1   | 0.9252212 | 0.6438402 | 1.437  | 0.1514 | 1.304999792 | count | 1 |
| MLXIP    | 0.9288167 | 0.7144324 | 1.3001 | 0.1942 | 1.310090799 | count | 1 |
| CENPM    | 0.9274719 | 0.4648899 | 1.995  | 0.0466 | 1.315520422 | count | 1 |
| CEP89    | 0.944107  | 0.6815976 | 1.3851 | 0.1667 | 1.317117556 | count | 1 |
| NXT2     | 0.944107  | 0.7731465 | 1.2211 | 0.2227 | 1.317117556 | count | 1 |
| HELZ2    | 0.9808631 | 1.0220202 | 0.9597 | 0.338  | 1.32544653  | count | 1 |
| PECR     | 0.9495084 | 1.0570496 | 0.8983 | 0.3695 | 1.33938974  | count | 1 |
| SDHD     | 0.9947936 | 0.311051  | 3.1982 | 0.0015 | 1.344480588 | count | 1 |
| NEU1     | 0.9662678 | 0.3735282 | 2.5869 | 0.01   | 1.34821204  | count | 1 |
| KATNA1   | 0.9667948 | 0.4918411 | 1.9657 | 0.05   | 1.348951513 | count | 1 |
| RGPD2    | 0.9691398 | 1.012047  | 0.9576 | 0.3388 | 1.352241959 | count | 1 |
| GPM6A    | 1.0087164 | 1.5149152 | 0.6659 | 0.506  | 1.36350519  | count | 1 |
| POLR2C   | 0.9804144 | 0.3769113 | 2.6012 | 0.0096 | 1.368062467 | count | 1 |
| C1orf109 | 0.9838727 | 0.7550966 | 1.303  | 0.1933 | 1.388051123 | count | 1 |
| HYI      | 1.0292065 | 0.9474798 | 1.0863 | 0.278  | 1.391505117 | count | 1 |
| MTIF2    | 1.0346118 | 0.6220474 | 1.6632 | 0.097  | 1.39889176  | count | 1 |
| UBA1     | 1.002626  | 0.7302079 | 1.3731 | 0.1704 | 1.399230777 | count | 1 |
| ANAPC4   | 1.0366032 | 0.8222952 | 1.2606 | 0.2081 | 1.401613136 | count | 1 |
| CDC73    | 0.988614  | 0.3692028 | 2.6777 | 0.0077 | 1.40249967  | count | 1 |
| C16orf54 | 1.0058535 | 0.3623603 | 2.7758 | 0.0057 | 1.419178064 | count | 1 |
| RCE1     | 1.053724  | 0.4663312 | 2.2596 | 0.0243 | 1.425010182 | count | 1 |
| R3HCC1   | 1.0545767 | 0.603289  | 1.748  | 0.0811 | 1.426175484 | count | 1 |
| RFX5     | 1.0654804 | 0.443031  | 2.405  | 0.0166 | 1.441076574 | count | 1 |
| ITPR1    | 1.0366303 | 0.4846445 | 2.1389 | 0.033  | 1.446948949 | count | 1 |
| NFKBIB   | 1.0574831 | 0.4053955 | 2.6085 | 0.0094 | 1.476212173 | count | 1 |
| CIAPIN1  | 1.0991285 | 0.5951532 | 1.8468 | 0.0654 | 1.487060352 | count | 1 |
| MLF1     | 1.059806  | 0.9152882 | 1.1579 | 0.248  | 1.495581856 | count | 1 |
| KLHL17   | 1.0598062 | 1.0493977 | 1.0099 | 0.3131 | 1.495582141 | count | 1 |
| DDX55    | 1.077814  | 0.5973323 | 1.8044 | 0.0718 | 1.504743    | count | 1 |
| MAP9     | 1.0777494 | 0.4466957 | 2.4127 | 0.0162 | 1.529308129 | count | 1 |
| KLHL12   | 1.0963352 | 0.8912518 | 1.2301 | 0.2193 | 1.530733953 | count | 1 |
| KIAA1468 | 1.1395801 | 1.0075588 | 1.131  | 0.2587 | 1.542338893 | count | 1 |

|            |           |           |        |          |             |       |             |
|------------|-----------|-----------|--------|----------|-------------|-------|-------------|
| FANCB      | 1.148899  | 0.8472407 | 1.356  | 0.1758   | 1.55507259  | count | 1           |
| PACS1      | 1.1508161 | 0.5577484 | 2.0633 | 0.0397   | 1.557692128 | count | 1           |
| ALAD       | 1.1206266 | 1.027872  | 1.0902 | 0.2762   | 1.564821465 | count | 1           |
| TFB2M      | 1.1652218 | 0.748866  | 1.556  | 0.1204   | 1.577375532 | count | 1           |
| FBXO2      | 1.1687651 | 0.7164251 | 1.6314 | 0.1035   | 1.58221676  | count | 1           |
| ARSK       | 1.1365612 | 1.1293225 | 1.0064 | 0.3148   | 1.58718135  | count | 1           |
| AC016394.1 | 1.1365612 | 1.1293225 | 1.0064 | 0.3148   | 1.58718135  | count | 1           |
| CXorf21    | 1.1081258 | 0.3727554 | 2.9728 | 0.00311  | 1.589063046 | count | 1           |
| ANKRD54    | 1.1386072 | 0.7428357 | 1.5328 | 0.126    | 1.607172382 | count | 1           |
| TTC27      | 1.1496897 | 0.7875228 | 1.4599 | 0.145    | 1.622865497 | count | 1           |
| PTRH2      | 1.1555138 | 0.5095801 | 2.2676 | 0.0238   | 1.631112455 | count | 1           |
| JAK2       | 1.2046067 | 0.6598004 | 1.8257 | 0.0686   | 1.631182088 | count | 1           |
| SPTSSA     | 1.168268  | 0.5723276 | 2.0413 | 0.0418   | 1.631670806 | count | 1           |
| SLC39A4    | 1.2060801 | 0.6808697 | 1.7714 | 0.0772   | 1.633194753 | count | 1           |
| MYADM      | 1.1681557 | 0.280479  | 4.1649 | 3.74E-05 | 1.649013131 | count | 0.9083712   |
| FLAD1      | 1.2196768 | 0.5875126 | 2.076  | 0.0385   | 1.651766885 | count | 1           |
| NFRKB      | 1.2367482 | 0.9451413 | 1.3085 | 0.1914   | 1.675082486 | count | 1           |
| MED9       | 1.2367482 | 0.9451413 | 1.3085 | 0.1914   | 1.675082486 | count | 1           |
| ZDHHC18    | 1.2367482 | 1.0273269 | 1.2039 | 0.2293   | 1.675082496 | count | 1           |
| DUSP8      | 1.2049534 | 0.4957373 | 2.4306 | 0.0155   | 1.683140623 | count | 1           |
| ATF5       | 1.2051133 | 0.4739905 | 2.5425 | 0.0113   | 1.683364952 | count | 1           |
| MED7       | 1.2059588 | 0.7965477 | 1.514  | 0.1307   | 1.684551108 | count | 1           |
| PIK3CB     | 1.2059588 | 0.8457082 | 1.426  | 0.1546   | 1.684551108 | count | 1           |
| MIR155HG   | 1.1968515 | 0.3157866 | 3.7901 | 2.00E-04 | 1.68964393  | count | 1           |
| B3GALT6    | 1.2254794 | 0.7211157 | 1.6994 | 0.0899   | 1.711935541 | count | 1           |
| ZMYM1      | 1.2355197 | 0.8388271 | 1.4729 | 0.1415   | 1.726019626 | count | 1           |
| ASB6       | 1.2436714 | 0.8743678 | 1.4224 | 0.1556   | 1.737453964 | count | 1           |
| AC093323.1 | 1.2436714 | 0.8955282 | 1.3888 | 0.1656   | 1.737453964 | count | 1           |
| CRIP1      | 1.2374203 | 0.2076515 | 5.9591 | 5.17E-09 | 1.747080435 | count | 0.000125652 |
| MACO1      | 1.2915554 | 0.5664602 | 2.28   | 0.0231   | 1.749912094 | count | 1           |
| ETV6       | 1.2678776 | 0.3760579 | 3.3715 | 8.00E-04 | 1.790196144 | count | 1           |
| BCL7A      | 1.3036419 | 1.1401346 | 1.1434 | 0.2535   | 1.821558367 | count | 1           |
| MMP11      | 1.3249529 | 0.9937685 | 1.3333 | 0.1831   | 1.851437834 | count | 1           |
| TFIP11     | 1.313389  | 0.7426918 | 1.7684 | 0.0777   | 1.854612647 | count | 1           |
| G6PC3      | 1.3719018 | 0.8904268 | 1.5407 | 0.1241   | 1.859524025 | count | 1           |
| UBA5       | 1.4244655 | 0.520768  | 2.7353 | 0.0065   | 1.931161996 | count | 1           |
| IFT20      | 1.3759079 | 0.5450503 | 2.5244 | 0.0119   | 1.943077819 | count | 1           |
| NDUFV2-AS1 | 1.3996025 | 0.5986657 | 2.3379 | 0.0198   | 1.956062501 | count | 1           |
| SMARCAL1   | 1.4457495 | 0.7381428 | 1.9586 | 0.0508   | 2.020703889 | count | 1           |
| UTP15      | 1.4659346 | 0.719507  | 2.0374 | 0.0422   | 2.048968784 | count | 1           |
| SLC30A6    | 1.472388  | 0.7763369 | 1.8966 | 0.0585   | 2.05800402  | count | 1           |
| EML5       | 1.4723884 | 1.2275679 | 1.1994 | 0.231    | 2.058004602 | count | 1           |
| IL6        | 1.4582907 | 0.867783  | 1.6805 | 0.0936   | 2.059598772 | count | 1           |
| IKBKE      | 1.5772424 | 1.4237646 | 1.1078 | 0.2685   | 2.138947611 | count | 1           |
| SH3TC1     | 1.5832662 | 0.8789546 | 1.8013 | 0.0723   | 2.147124689 | count | 1           |

|            |            |             |         |          |             |       |          |
|------------|------------|-------------|---------|----------|-------------|-------|----------|
| TOP1MT     | 1.5931965  | 0.8642202   | 1.8435  | 0.0659   | 2.160601772 | count | 1        |
| DYNC2L1    | 1.6049616  | 0.8732919   | 1.8378  | 0.0668   | 2.176564166 | count | 1        |
| FADD       | 1.5603326  | 0.619069    | 2.5205  | 0.0121   | 2.181061923 | count | 1        |
| FO393401.1 | 1.6839001  | 0.7269348   | 2.3164  | 0.021    | 2.283520574 | count | 1        |
| HEATR3     | 1.7718242  | 1.0854651   | 1.6323  | 0.1033   | 2.402322254 | count | 1        |
| CDKN3      | 1.7884971  | 1.5873644   | 1.1267  | 0.2605   | 2.42480698  | count | 1        |
| ZNF620     | 1.818793   | 0.633557    | 2.8708  | 0.00429  | 2.465625304 | count | 1        |
| MTERF3     | 1.788497   | 0.7248636   | 2.4674  | 0.014    | 2.539099986 | count | 1        |
| METTL1     | 1.843278   | 0.8061572   | 2.2865  | 0.0227   | 2.602887291 | count | 1        |
| PLAA       | 1.9382136  | 0.8041364   | 2.4103  | 0.0163   | 2.626003772 | count | 1        |
| DDX51      | 1.9395039  | 0.9903465   | 1.9584  | 0.0508   | 2.627731742 | count | 1        |
| CTPS1      | 1.9395039  | 1.0577737   | 1.8336  | 0.0674   | 2.627731742 | count | 1        |
| S100A8     | 1.995365   | 1.3495731   | 1.4785  | 0.14     | 2.70243329  | count | 1        |
| PAIP2B     | 2.038322   | 0.7071294   | 2.8825  | 0.00414  | 2.846454994 | count | 1        |
| ZNF665     | 2.079442   | 0.1775712   | 11.7105 | 8.67E-28 | 2.903324593 | count | 2.11E-23 |
| RMC1       | 2.2400475  | 0.8998097   | 2.4895  | 0.0132   | 3.02681852  | count | 1        |
| DEAF1      | 2.2638244  | 1.5068445   | 1.5024  | 0.134    | 3.058062747 | count | 1        |
| AC022098.1 | 2.3503881  | 1.2492605   | 1.8814  | 0.0606   | 3.171340595 | count | 1        |
| RORA-AS1   | 2.4363995  | 1.066995    | 2.2834  | 0.0229   | 3.283111254 | count | 1        |
| GRAMD4     | 18.5920837 | 2055.90075  | 0.009   | 0.9928   | 6.658210267 | count | 1        |
| GID4       | 18.7653396 | 1619.642587 | 0.0116  | 0.9908   | 6.658210461 | count | 1        |
| WASHC5     | 19.03719   | 1782.864668 | 0.0107  | 0.991    | 6.658210704 | count | 1        |
| MBLAC2     | 19.1318349 | 2932.851783 | 0.0065  | 0.9948   | 6.658210774 | count | 1        |
| ZNF232     | 19.647329  | 2718.495218 | 0.0072  | 0.994    | 6.65821106  | count | 1        |
| TSPAN32    | 19.8062953 | 4001.432166 | 0.0049  | 0.9961   | 6.658211122 | count | 1        |
