# Supplementary material for: Decoding the transcriptome of calcified atherosclerotic plaque at single-cell resolution
Source: PubMed Central journal article supplement (PMC9556750; doi:10.1038/s42003-022-04056-7), 2022-10-12
Supplement: 42003_2022_4056_MOESM6_ESM.pdf [file 42003_2022_4056_MOESM6_ESM.pdf]

## Full differential gene expression results for NKT cells.

| gene_short_name | estimate    | std_err     | test_val | p_value  | normalized_effect | model_component | q_value  |
|-----------------|-------------|-------------|----------|----------|-------------------|-----------------|----------|
| ITLN1           | -18.2092193 | 1940.675848 | -0.0094  | 0.993    | -5.302374675      | count           | 1        |
| FABP4           | -18.0224398 | 1386.559223 | -0.013   | 0.99     | -4.752830404      | count           | 1        |
| LYZ             | -18.1086113 | 1531.232534 | -0.0118  | 0.991    | -4.700439171      | count           | 1        |
| APOC1           | -17.996985  | 1574.930343 | -0.0114  | 0.991    | -4.646073588      | count           | 1        |
| IGKC            | -3.5589412  | 0.4281817   | -8.3118  | 2.63E-15 | -4.621374634      | count           | 6.40E-11 |
| CD68            | -18.8235365 | 1973.402103 | -0.0095  | 0.992    | -4.405468543      | count           | 1        |
| APOE            | -3.6237701  | 1.3378808   | -2.7086  | 0.00712  | -4.368028938      | count           | 1        |
| SPP1            | -3.1104657  | 0.944079    | -3.2947  | 0.0011   | -4.184372664      | count           | 1        |
| C17orf80        | -17.4391946 | 1988.920425 | -0.0088  | 0.993    | -3.854148574      | count           | 1        |
| SPIRE1          | -17.839187  | 1709.968985 | -0.0104  | 0.992    | -3.854148208      | count           | 1        |
| CD14            | -17.826345  | 1781.912414 | -0.01    | 0.992    | -3.854148204      | count           | 1        |
| POLR3F          | -17.581876  | 1797.638639 | -0.0098  | 0.992    | -3.854148106      | count           | 1        |
| ZMIZ1           | -18.1420647 | 2250.5915   | -0.0081  | 0.994    | -3.648288282      | count           | 1        |
| TMEM204         | -17.599713  | 1492.719383 | -0.0118  | 0.991    | -3.648288123      | count           | 1        |
| UBE2E2          | -17.32499   | 2839.976206 | -0.0061  | 0.995    | -3.53317901       | count           | 1        |
| PRR12           | -17.32499   | 2839.976206 | -0.0061  | 0.995    | -3.53317901       | count           | 1        |
| LRRC45          | -17.9664017 | 3311.351897 | -0.0054  | 0.996    | -3.408084528      | count           | 1        |
| URGCP           | -17.2458277 | 2257.96026  | -0.0076  | 0.9939   | -3.408084298      | count           | 1        |
| AC034236.2      | -17.839717  | 2110.407802 | -0.0085  | 0.993    | -3.408084237      | count           | 1        |
| SYNGAP1         | -17.508759  | 3159.754246 | -0.0055  | 0.996    | -3.40808414       | count           | 1        |
| NAPEPLD         | -18.27311   | 2630.783423 | -0.0069  | 0.994    | -3.271104107      | count           | 1        |
| FCGR2A          | -18.25931   | 2944.371466 | -0.0062  | 0.995    | -3.271104105      | count           | 1        |
| ARMC2           | -17.7023065 | 2644.792316 | -0.0067  | 0.995    | -3.271103608      | count           | 1        |
| MCAT            | -17.4071471 | 1420.341086 | -0.0123  | 0.99     | -3.27110352       | count           | 1        |
| MZB1            | -3.1649566  | 1.2698391   | -2.4924  | 0.0132   | -3.247344749      | count           | 1        |
| TMEM161B-AS1    | -18.182468  | 2353.503978 | -0.0077  | 0.994    | -3.11973956       | count           | 1        |
| TNK1            | -18.16949   | 2756.793651 | -0.0066  | 0.995    | -3.119739558      | count           | 1        |
| ZNF485          | -18.16397   | 2995.299773 | -0.0061  | 0.995    | -3.119739557      | count           | 1        |
| AC019205.1      | -18.148105  | 3407.870732 | -0.0053  | 0.996    | -3.119739555      | count           | 1        |
| LANCL2          | -18.148105  | 3407.870732 | -0.0053  | 0.996    | -3.119739555      | count           | 1        |
| NXPH4           | -18.148105  | 3407.870732 | -0.0053  | 0.996    | -3.119739555      | count           | 1        |
| RNASE1          | -18.0527492 | 2747.493587 | -0.0066  | 0.995    | -3.11973903       | count           | 1        |
| ZNF420          | -17.85706   | 1591.399702 | -0.0112  | 0.991    | -3.119738995      | count           | 1        |
| MPHOSPH9        | -2.9381018  | 1.4143196   | -2.0774  | 0.0386   | -3.061847813      | count           | 1        |
| ABCA1           | -18.4468488 | 2585.083844 | -0.0071  | 0.994    | -2.950611816      | count           | 1        |
| SPSB1           | -18.0333761 | 1919.112093 | -0.0094  | 0.993    | -2.950611767      | count           | 1        |
| PHF7            | -18.0316444 | 2015.21758  | -0.0089  | 0.993    | -2.950611767      | count           | 1        |
| MGLL            | -18.0273064 | 2103.887245 | -0.0086  | 0.993    | -2.950611766      | count           | 1        |
| TM6SF1          | -18.0251886 | 2190.658885 | -0.0082  | 0.993    | -2.950611766      | count           | 1        |
| SCAI            | -17.8633744 | 2509.66105  | -0.0071  | 0.994    | -2.950611741      | count           | 1        |
| CCDC144A        | -17.6114186 | 2024.521006 | -0.0087  | 0.993    | -2.950611692      | count           | 1        |
| ITFG2-AS1       | -18.068353  | 2292.65868  | -0.0079  | 0.994    | -2.950611521      | count           | 1        |
| C7orf31         | -18.059902  | 2622.226168 | -0.0069  | 0.995    | -2.95061152       | count           | 1        |
| GYPE            | -18.041281  | 3413.087098 | -0.0053  | 0.996    | -2.950611517      | count           | 1        |

|            |             |             |         |        |              |       |   |
|------------|-------------|-------------|---------|--------|--------------|-------|---|
| AP001107.9 | -18.041281  | 3413.087098 | -0.0053 | 0.996  | -2.950611517 | count | 1 |
| CHTF18     | -18.041281  | 3413.087098 | -0.0053 | 0.996  | -2.950611517 | count | 1 |
| DDAH1      | -18.032346  | 3844.881507 | -0.0047 | 0.996  | -2.950611516 | count | 1 |
| ZNF112     | -18.012425  | 4387.724358 | -0.0041 | 0.997  | -2.950611513 | count | 1 |
| MAML3      | -2.6604677  | 1.3463586   | -1.976  | 0.049  | -2.830248679 | count | 1 |
| KIAA0355   | -2.4643556  | 1.3896585   | -1.7734 | 0.0771 | -2.808919825 | count | 1 |
| SMIM10     | -18.280513  | 3202.803524 | -0.0057 | 0.995  | -2.758992333 | count | 1 |
| ZC3HC1     | -17.91699   | 2943.623308 | -0.0061 | 0.995  | -2.758992291 | count | 1 |
| SOWAHD     | -17.91699   | 2943.623308 | -0.0061 | 0.995  | -2.758992291 | count | 1 |
| ENTPD5     | -17.91699   | 2943.623308 | -0.0061 | 0.995  | -2.758992291 | count | 1 |
| CPNE2      | -17.91699   | 2943.623308 | -0.0061 | 0.995  | -2.758992291 | count | 1 |
| AC004816.1 | -17.915224  | 3103.151685 | -0.0058 | 0.995  | -2.758992291 | count | 1 |
| PAK6       | -17.915224  | 3103.151685 | -0.0058 | 0.995  | -2.758992291 | count | 1 |
| AC009118.3 | -17.915224  | 3103.151685 | -0.0058 | 0.995  | -2.758992291 | count | 1 |
| AC007448.3 | -17.915224  | 3103.151685 | -0.0058 | 0.995  | -2.758992291 | count | 1 |
| COL9A3     | -17.915224  | 3103.151685 | -0.0058 | 0.995  | -2.758992291 | count | 1 |
| EEF1AKMT3  | -17.909133  | 3534.539695 | -0.0051 | 0.996  | -2.75899229  | count | 1 |
| MECOM      | -17.893723  | 4134.88489  | -0.0043 | 0.997  | -2.758992288 | count | 1 |
| PFAS       | -17.893723  | 4134.88489  | -0.0043 | 0.997  | -2.758992288 | count | 1 |
| COL1A1     | -17.893723  | 4134.88489  | -0.0043 | 0.997  | -2.758992288 | count | 1 |
| CD40       | -17.893723  | 4134.88489  | -0.0043 | 0.997  | -2.758992288 | count | 1 |
| AIF1       | -17.855652  | 1943.61915  | -0.0092 | 0.993  | -2.758992283 | count | 1 |
| IFNGR2     | -17.84416   | 2363.039369 | -0.0076 | 0.994  | -2.758992281 | count | 1 |
| AC136475.1 | -17.607295  | 1900.098687 | -0.0093 | 0.993  | -2.758992241 | count | 1 |
| GEN1       | -17.589866  | 2476.160348 | -0.0071 | 0.994  | -2.758992238 | count | 1 |
| NUBPL      | -18.6613116 | 3113.289209 | -0.006  | 0.995  | -2.758991872 | count | 1 |
| VWF        | -18.5053871 | 3499.450077 | -0.0053 | 0.996  | -2.758991861 | count | 1 |
| UGDH       | -18.4955206 | 2088.859947 | -0.0089 | 0.993  | -2.75899186  | count | 1 |
| CYR61      | -18.4073537 | 2376.431264 | -0.0077 | 0.994  | -2.758991853 | count | 1 |
| AC073896.2 | -18.3998217 | 3079.902081 | -0.006  | 0.995  | -2.758991852 | count | 1 |
| KIAA0319L  | -18.2207192 | 1922.281537 | -0.0095 | 0.992  | -2.758991836 | count | 1 |
| AL138724.1 | -18.2207192 | 1922.281537 | -0.0095 | 0.992  | -2.758991836 | count | 1 |
| CLN5       | -18.2207192 | 1922.281537 | -0.0095 | 0.992  | -2.758991836 | count | 1 |
| AC012306.2 | -18.0062515 | 1936.214194 | -0.0093 | 0.993  | -2.758991811 | count | 1 |
| VPS52      | -17.9974565 | 2441.849293 | -0.0074 | 0.994  | -2.75899181  | count | 1 |
| TPK1       | -17.9714325 | 1980.215326 | -0.0091 | 0.993  | -2.758991807 | count | 1 |
| LETM2      | -17.9699045 | 2089.903444 | -0.0086 | 0.993  | -2.758991807 | count | 1 |
| IFT46      | -17.9626824 | 2384.070273 | -0.0075 | 0.994  | -2.758991806 | count | 1 |
| LGMN       | -17.955546  | 2236.097507 | -0.008  | 0.994  | -2.758991805 | count | 1 |
| GORASP1    | -17.9449103 | 3018.902436 | -0.0059 | 0.995  | -2.758991803 | count | 1 |
| RAB33A     | -2.1042928  | 0.945196    | -2.2263 | 0.0267 | -2.719858904 | count | 1 |
| HIST1H2AC  | -2.2173949  | 1.2825797   | -1.7289 | 0.0848 | -2.647602441 | count | 1 |
| GLE1       | -2.4695697  | 1.9468805   | -1.2685 | 0.2055 | -2.644608335 | count | 1 |
| MS4A6A     | -18.6453778 | 2795.681254 | -0.0067 | 0.995  | -2.53796495  | count | 1 |
| SLC38A5    | -18.5891892 | 3082.148622 | -0.006  | 0.995  | -2.537964947 | count | 1 |

|            |             |             |         |       |              |       |   |
|------------|-------------|-------------|---------|-------|--------------|-------|---|
| C5AR1      | -18.5724008 | 4242.782293 | -0.0044 | 0.997 | -2.537964946 | count | 1 |
| AC027031.2 | -18.4466117 | 2614.730464 | -0.0071 | 0.994 | -2.537964938 | count | 1 |
| DMKN       | -18.3591223 | 2161.410661 | -0.0085 | 0.993 | -2.537964932 | count | 1 |
| NCF2       | -18.1653462 | 3030.670042 | -0.006  | 0.995 | -2.537964916 | count | 1 |
| KIF9-AS1   | -18.1653462 | 3030.670042 | -0.006  | 0.995 | -2.537964916 | count | 1 |
| AMZ1       | -18.1653462 | 3030.670042 | -0.006  | 0.995 | -2.537964916 | count | 1 |
| MED9       | -18.1653462 | 3030.670042 | -0.006  | 0.995 | -2.537964916 | count | 1 |
| RFC5       | -18.1634089 | 2128.494571 | -0.0085 | 0.993 | -2.537964916 | count | 1 |
| AL357054.4 | -18.10746   | 2341.880007 | -0.0077 | 0.994 | -2.53796491  | count | 1 |
| PPIAL4G    | -17.8989704 | 2419.928873 | -0.0074 | 0.994 | -2.537964888 | count | 1 |
| TYMS       | -17.764284  | 2025.094063 | -0.0088 | 0.993 | -2.537964872 | count | 1 |
| AL606807.1 | -17.763955  | 2823.595649 | -0.0063 | 0.995 | -2.537964872 | count | 1 |
| AC017100.1 | -17.761097  | 2301.62549  | -0.0077 | 0.994 | -2.537964871 | count | 1 |
| CYP4F22    | -17.761097  | 2301.62549  | -0.0077 | 0.994 | -2.537964871 | count | 1 |
| UBXN10     | -17.755421  | 2769.991833 | -0.0064 | 0.995 | -2.53796487  | count | 1 |
| KCNK12     | -17.755421  | 2769.991833 | -0.0064 | 0.995 | -2.53796487  | count | 1 |
| RETSAT     | -17.755421  | 2769.991833 | -0.0064 | 0.995 | -2.53796487  | count | 1 |
| CHST10     | -17.755421  | 2769.991833 | -0.0064 | 0.995 | -2.53796487  | count | 1 |
| SLC49A3    | -17.755421  | 2769.991833 | -0.0064 | 0.995 | -2.53796487  | count | 1 |
| AC098818.2 | -17.755421  | 2769.991833 | -0.0064 | 0.995 | -2.53796487  | count | 1 |
| AC008393.1 | -17.755421  | 2769.991833 | -0.0064 | 0.995 | -2.53796487  | count | 1 |
| HIST1H2BG  | -17.755421  | 2769.991833 | -0.0064 | 0.995 | -2.53796487  | count | 1 |
| C9orf66    | -17.755421  | 2769.991833 | -0.0064 | 0.995 | -2.53796487  | count | 1 |
| MMP7       | -17.755421  | 2769.991833 | -0.0064 | 0.995 | -2.53796487  | count | 1 |
| RNLS       | -17.755421  | 2769.991833 | -0.0064 | 0.995 | -2.53796487  | count | 1 |
| SLC14A1    | -17.755421  | 2769.991833 | -0.0064 | 0.995 | -2.53796487  | count | 1 |
| SIRPA      | -17.755421  | 2769.991833 | -0.0064 | 0.995 | -2.53796487  | count | 1 |
| ZNF133     | -17.755421  | 2769.991833 | -0.0064 | 0.995 | -2.53796487  | count | 1 |
| TBX1       | -17.755421  | 2769.991833 | -0.0064 | 0.995 | -2.53796487  | count | 1 |
| FAM166B    | -17.752031  | 3169.242827 | -0.0056 | 0.996 | -2.53796487  | count | 1 |
| ZBTB42     | -17.752031  | 3169.242827 | -0.0056 | 0.996 | -2.53796487  | count | 1 |
| AC106782.2 | -17.752031  | 3169.242827 | -0.0056 | 0.996 | -2.53796487  | count | 1 |
| AL669831.5 | -17.741413  | 3831.684559 | -0.0046 | 0.996 | -2.537964869 | count | 1 |
| IBA57-DT   | -17.741413  | 3831.684559 | -0.0046 | 0.996 | -2.537964869 | count | 1 |
| AC073263.2 | -17.741413  | 3831.684559 | -0.0046 | 0.996 | -2.537964869 | count | 1 |
| AC108047.1 | -17.741413  | 3831.684559 | -0.0046 | 0.996 | -2.537964869 | count | 1 |
| PTPN23     | -17.741413  | 3831.684559 | -0.0046 | 0.996 | -2.537964869 | count | 1 |
| FZD3       | -17.741413  | 3831.684559 | -0.0046 | 0.996 | -2.537964869 | count | 1 |
| PCAT7      | -17.741413  | 3831.684559 | -0.0046 | 0.996 | -2.537964869 | count | 1 |
| AL136295.5 | -17.741413  | 3831.684559 | -0.0046 | 0.996 | -2.537964869 | count | 1 |
| WDR24      | -17.741413  | 3831.684559 | -0.0046 | 0.996 | -2.537964869 | count | 1 |
| RPGRIP1L   | -17.741413  | 3831.684559 | -0.0046 | 0.996 | -2.537964869 | count | 1 |
| MT1H       | -17.741413  | 3831.684559 | -0.0046 | 0.996 | -2.537964869 | count | 1 |
| AC011447.3 | -17.741413  | 3831.684559 | -0.0046 | 0.996 | -2.537964869 | count | 1 |
| DLL3       | -17.741413  | 3831.684559 | -0.0046 | 0.996 | -2.537964869 | count | 1 |

|            |             |             |         |         |              |       |   |
|------------|-------------|-------------|---------|---------|--------------|-------|---|
| AC008079.2 | -17.741413  | 3831.684559 | -0.0046 | 0.996   | -2.537964869 | count | 1 |
| CNTLN      | -17.516075  | 2009.064822 | -0.0087 | 0.993   | -2.537964834 | count | 1 |
| AC011416.3 | -17.512105  | 2254.830629 | -0.0078 | 0.994   | -2.537964833 | count | 1 |
| YIPF5      | -1.8834806  | 0.7220299   | -2.6086 | 0.0095  | -2.511282587 | count | 1 |
| AP5M1      | -2.101706   | 0.9825674   | -2.139  | 0.0332  | -2.394200706 | count | 1 |
| PBX3       | -2.1153037  | 1.0474038   | -2.0196 | 0.0443  | -2.366880564 | count | 1 |
| C1QA       | -1.9653751  | 0.865449    | -2.2709 | 0.0238  | -2.330635929 | count | 1 |
| RASSF8     | -2.3796706  | 1.236925    | -1.9239 | 0.0552  | -2.318947053 | count | 1 |
| SPINK2     | -1.8673944  | 1.0662122   | -1.7514 | 0.08082 | -2.314802068 | count | 1 |
| OSBPL11    | -2.8175542  | 1.4060394   | -2.0039 | 0.0459  | -2.311157926 | count | 1 |
| CAMKK2     | -2.3666283  | 1.3734852   | -1.7231 | 0.0858  | -2.310936852 | count | 1 |
| LRRC41     | -2.0440575  | 1.0793981   | -1.8937 | 0.0592  | -2.305746659 | count | 1 |
| EXOC5      | -1.9065855  | 0.8495022   | -2.2444 | 0.0255  | -2.297124516 | count | 1 |
| PPP1R9A    | -2.7431959  | 1.3154251   | -2.0854 | 0.0378  | -2.28185263  | count | 1 |
| FAM30A     | -18.8284263 | 2685.087575 | -0.007  | 0.994   | -2.276840212 | count | 1 |
| DCAF4      | -18.4906552 | 3730.935886 | -0.005  | 0.996   | -2.276840197 | count | 1 |
| TMCC3      | -18.4742814 | 3858.390578 | -0.0048 | 0.996   | -2.276840196 | count | 1 |
| RILPL1     | -18.4168481 | 3001.995938 | -0.0061 | 0.995   | -2.276840193 | count | 1 |
| HERC6      | -18.3015083 | 1961.910542 | -0.0093 | 0.993   | -2.276840186 | count | 1 |
| ANO9       | -18.3015083 | 1961.910542 | -0.0093 | 0.993   | -2.276840186 | count | 1 |
| SETD9      | -18.2982157 | 2038.662236 | -0.009  | 0.993   | -2.276840186 | count | 1 |
| TOLLIP-AS1 | -18.2955009 | 2857.14303  | -0.0064 | 0.995   | -2.276840186 | count | 1 |
| TSPAN18    | -18.2952585 | 3127.472681 | -0.0058 | 0.995   | -2.276840186 | count | 1 |
| COLQ       | -18.2928864 | 3821.752308 | -0.0048 | 0.996   | -2.276840186 | count | 1 |
| AC007541.1 | -18.2928864 | 3821.752308 | -0.0048 | 0.996   | -2.276840186 | count | 1 |
| AC133919.1 | -18.2928864 | 3821.752308 | -0.0048 | 0.996   | -2.276840186 | count | 1 |
| SERPINE1   | -18.1696836 | 2240.483114 | -0.0081 | 0.994   | -2.276840178 | count | 1 |
| CCDC146    | -18.0416744 | 2319.025726 | -0.0078 | 0.994   | -2.276840168 | count | 1 |
| TRGV7      | -18.0247012 | 2715.058593 | -0.0066 | 0.995   | -2.276840166 | count | 1 |
| NCAPG2     | -18.0247012 | 2715.058593 | -0.0066 | 0.995   | -2.276840166 | count | 1 |
| RCN1       | -17.8649386 | 1957.723591 | -0.0091 | 0.993   | -2.276840152 | count | 1 |
| CDCA7      | -17.8281178 | 1820.535821 | -0.0098 | 0.992   | -2.276840149 | count | 1 |
| USP19      | -17.8271419 | 1999.957553 | -0.0089 | 0.993   | -2.276840148 | count | 1 |
| CYP4V2     | -17.8271419 | 1999.957553 | -0.0089 | 0.993   | -2.276840148 | count | 1 |
| AF117829.1 | -17.8271419 | 1999.957553 | -0.0089 | 0.993   | -2.276840148 | count | 1 |
| FAM167B    | -17.8264696 | 2164.576583 | -0.0082 | 0.993   | -2.276840148 | count | 1 |
| BAP1       | -17.8264696 | 2164.576583 | -0.0082 | 0.993   | -2.276840148 | count | 1 |
| CRKL       | -17.8264696 | 2164.576583 | -0.0082 | 0.993   | -2.276840148 | count | 1 |
| NRP2       | -17.8224005 | 2592.822695 | -0.0069 | 0.995   | -2.276840148 | count | 1 |
| CTNND1     | -17.8224005 | 2592.822695 | -0.0069 | 0.995   | -2.276840148 | count | 1 |
| CRAMP1     | -17.8224005 | 2592.822695 | -0.0069 | 0.995   | -2.276840148 | count | 1 |
| STXBP4     | -17.8224005 | 2592.822695 | -0.0069 | 0.995   | -2.276840148 | count | 1 |
| COL1A2     | -17.5789379 | 1648.673998 | -0.0107 | 0.991   | -2.27684012  | count | 1 |
| GM2A       | -17.4776366 | 1755.46735  | -0.01   | 0.992   | -2.276840106 | count | 1 |
| AC002467.1 | -17.4074645 | 2446.332378 | -0.0071 | 0.994   | -2.276840096 | count | 1 |

|              |             |             |         |       |              |       |   |
|--------------|-------------|-------------|---------|-------|--------------|-------|---|
| TBC1D13      | -17.4074645 | 2446.332378 | -0.0071 | 0.994 | -2.276840096 | count | 1 |
| A4GALT       | -17.4074645 | 2446.332378 | -0.0071 | 0.994 | -2.276840096 | count | 1 |
| JCHAIN       | -19.306995  | 1689.904168 | -0.0114 | 0.991 | -2.276839654 | count | 1 |
| ANXA9        | -17.550609  | 2115.584996 | -0.0083 | 0.993 | -2.276839544 | count | 1 |
| AGMAT        | -17.548459  | 2448.255539 | -0.0072 | 0.994 | -2.276839544 | count | 1 |
| RSAD2        | -17.548459  | 2448.255539 | -0.0072 | 0.994 | -2.276839544 | count | 1 |
| CD28         | -17.548459  | 2448.255539 | -0.0072 | 0.994 | -2.276839544 | count | 1 |
| LINC00884    | -17.548459  | 2448.255539 | -0.0072 | 0.994 | -2.276839544 | count | 1 |
| SRD5A1       | -17.548459  | 2448.255539 | -0.0072 | 0.994 | -2.276839544 | count | 1 |
| ECSCR        | -17.548459  | 2448.255539 | -0.0072 | 0.994 | -2.276839544 | count | 1 |
| PRELID2      | -17.548459  | 2448.255539 | -0.0072 | 0.994 | -2.276839544 | count | 1 |
| TMSB15B-AS1  | -17.548459  | 2448.255539 | -0.0072 | 0.994 | -2.276839544 | count | 1 |
| NARS2        | -17.548459  | 2448.255539 | -0.0072 | 0.994 | -2.276839544 | count | 1 |
| LIG4         | -17.548459  | 2448.255539 | -0.0072 | 0.994 | -2.276839544 | count | 1 |
| AC051619.5   | -17.548459  | 2448.255539 | -0.0072 | 0.994 | -2.276839544 | count | 1 |
| C15orf48     | -17.548459  | 2448.255539 | -0.0072 | 0.994 | -2.276839544 | count | 1 |
| VPS33B       | -17.548459  | 2448.255539 | -0.0072 | 0.994 | -2.276839544 | count | 1 |
| S1PR5        | -17.548459  | 2448.255539 | -0.0072 | 0.994 | -2.276839544 | count | 1 |
| AL139260.1   | -17.547294  | 2740.997978 | -0.0064 | 0.995 | -2.276839544 | count | 1 |
| NT5DC2       | -17.547294  | 2740.997978 | -0.0064 | 0.995 | -2.276839544 | count | 1 |
| LRRC1        | -17.547294  | 2740.997978 | -0.0064 | 0.995 | -2.276839544 | count | 1 |
| EEPDI        | -17.547294  | 2740.997978 | -0.0064 | 0.995 | -2.276839544 | count | 1 |
| ZHX1-C8orf76 | -17.547294  | 2740.997978 | -0.0064 | 0.995 | -2.276839544 | count | 1 |
| NDOR1        | -17.547294  | 2740.997978 | -0.0064 | 0.995 | -2.276839544 | count | 1 |
| PCLAF        | -17.547294  | 2740.997978 | -0.0064 | 0.995 | -2.276839544 | count | 1 |
| KDELR3       | -17.547294  | 2740.997978 | -0.0064 | 0.995 | -2.276839544 | count | 1 |
| MMEL1        | -17.541476  | 3467.161152 | -0.0051 | 0.996 | -2.276839543 | count | 1 |
| AL139011.1   | -17.541476  | 3467.161152 | -0.0051 | 0.996 | -2.276839543 | count | 1 |
| FLVCR1       | -17.541476  | 3467.161152 | -0.0051 | 0.996 | -2.276839543 | count | 1 |
| MAL          | -17.541476  | 3467.161152 | -0.0051 | 0.996 | -2.276839543 | count | 1 |
| IL1R2        | -17.541476  | 3467.161152 | -0.0051 | 0.996 | -2.276839543 | count | 1 |
| TMEM163      | -17.541476  | 3467.161152 | -0.0051 | 0.996 | -2.276839543 | count | 1 |
| AC012510.1   | -17.541476  | 3467.161152 | -0.0051 | 0.996 | -2.276839543 | count | 1 |
| PLA1A        | -17.541476  | 3467.161152 | -0.0051 | 0.996 | -2.276839543 | count | 1 |
| KIAA1257     | -17.541476  | 3467.161152 | -0.0051 | 0.996 | -2.276839543 | count | 1 |
| RBM47        | -17.541476  | 3467.161152 | -0.0051 | 0.996 | -2.276839543 | count | 1 |
| ODAPH        | -17.541476  | 3467.161152 | -0.0051 | 0.996 | -2.276839543 | count | 1 |
| LY86         | -17.541476  | 3467.161152 | -0.0051 | 0.996 | -2.276839543 | count | 1 |
| TNFRSF21     | -17.541476  | 3467.161152 | -0.0051 | 0.996 | -2.276839543 | count | 1 |
| CPVL         | -17.541476  | 3467.161152 | -0.0051 | 0.996 | -2.276839543 | count | 1 |
| PILRA        | -17.541476  | 3467.161152 | -0.0051 | 0.996 | -2.276839543 | count | 1 |
| POLR2J3      | -17.541476  | 3467.161152 | -0.0051 | 0.996 | -2.276839543 | count | 1 |
| AC006333.2   | -17.541476  | 3467.161152 | -0.0051 | 0.996 | -2.276839543 | count | 1 |
| HEY1         | -17.541476  | 3467.161152 | -0.0051 | 0.996 | -2.276839543 | count | 1 |
| C8orf88      | -17.541476  | 3467.161152 | -0.0051 | 0.996 | -2.276839543 | count | 1 |

|            |            |             |         |         |              |       |   |
|------------|------------|-------------|---------|---------|--------------|-------|---|
| NRIP3      | -17.541476 | 3467.161152 | -0.0051 | 0.996   | -2.276839543 | count | 1 |
| MSRB3      | -17.541476 | 3467.161152 | -0.0051 | 0.996   | -2.276839543 | count | 1 |
| GLT1D1     | -17.541476 | 3467.161152 | -0.0051 | 0.996   | -2.276839543 | count | 1 |
| RNASE2     | -17.541476 | 3467.161152 | -0.0051 | 0.996   | -2.276839543 | count | 1 |
| NUPR1      | -17.541476 | 3467.161152 | -0.0051 | 0.996   | -2.276839543 | count | 1 |
| AC010542.2 | -17.541476 | 3467.161152 | -0.0051 | 0.996   | -2.276839543 | count | 1 |
| ZNF19      | -17.541476 | 3467.161152 | -0.0051 | 0.996   | -2.276839543 | count | 1 |
| PMFBP1     | -17.541476 | 3467.161152 | -0.0051 | 0.996   | -2.276839543 | count | 1 |
| VMO1       | -17.541476 | 3467.161152 | -0.0051 | 0.996   | -2.276839543 | count | 1 |
| SERPINB2   | -17.541476 | 3467.161152 | -0.0051 | 0.996   | -2.276839543 | count | 1 |
| ZNF283     | -17.541476 | 3467.161152 | -0.0051 | 0.996   | -2.276839543 | count | 1 |
| AC008440.2 | -17.541476 | 3467.161152 | -0.0051 | 0.996   | -2.276839543 | count | 1 |
| MRPL30     | -2.4633791 | 1.5718366   | -1.5672 | 0.118   | -2.272205718 | count | 1 |
| UBXN11     | -2.2860046 | 1.3025854   | -1.755  | 0.0802  | -2.260103894 | count | 1 |
| TRIM73     | -1.9907712 | 1.2667634   | -1.5715 | 0.117   | -2.258900336 | count | 1 |
| IFI44L     | -1.7836579 | 1.0670693   | -1.6715 | 0.0956  | -2.239290336 | count | 1 |
| ELMO2      | -2.2227    | 1.0677234   | -2.0817 | 0.0382  | -2.218594821 | count | 1 |
| ZNF609     | -2.345694  | 1.0588105   | -2.2154 | 0.0274  | -2.206470043 | count | 1 |
| ZNF814     | -1.7768205 | 0.9149445   | -1.942  | 0.053   | -2.201067918 | count | 1 |
| ORMDL3     | -1.8284998 | 0.9013972   | -2.0285 | 0.0433  | -2.195193793 | count | 1 |
| TIGAR      | -1.7867434 | 0.8862685   | -2.016  | 0.0446  | -2.193995414 | count | 1 |
| PDE6B      | -2.4608141 | 1.2955823   | -1.8994 | 0.0584  | -2.155651434 | count | 1 |
| PIGG       | -2.2568181 | 1.3439437   | -1.6793 | 0.0941  | -2.153704921 | count | 1 |
| RBMX2      | -1.7346977 | 0.8063134   | -2.1514 | 0.0322  | -2.138563176 | count | 1 |
| MARCKS     | -1.8201715 | 2.1008407   | -0.8664 | 0.3869  | -2.134069966 | count | 1 |
| ORC2       | -2.0115534 | 1.6082061   | -1.2508 | 0.212   | -2.13397057  | count | 1 |
| SMIM8      | -1.7374717 | 0.8345959   | -2.0818 | 0.0381  | -2.122809768 | count | 1 |
| MYCBP      | -1.9210084 | 0.7522513   | -2.5537 | 0.0111  | -2.113104252 | count | 1 |
| QTRT1      | -2.0686756 | 0.911639    | -2.2692 | 0.0239  | -2.111706288 | count | 1 |
| TMEM127    | -2.7004844 | 1.4432042   | -1.8712 | 0.0622  | -2.111649097 | count | 1 |
| SCRN1      | -2.692677  | 1.4627825   | -1.8408 | 0.0666  | -2.108772524 | count | 1 |
| MRPL46     | -1.792142  | 0.8445238   | -2.1221 | 0.0346  | -2.106791016 | count | 1 |
| PLEKHA5    | -2.6349912 | 1.3149566   | -2.0039 | 0.0459  | -2.087002085 | count | 1 |
| DHRS4-AS1  | -1.7004284 | 0.982076    | -1.7315 | 0.0843  | -2.08355599  | count | 1 |
| PGRMC2     | -1.5162246 | 0.5922086   | -2.5603 | 0.0109  | -2.055817606 | count | 1 |
| DNPH1      | -1.5969999 | 0.565591    | -2.8236 | 0.00504 | -2.051088424 | count | 1 |
| CCNYL1     | -2.5286371 | 1.3807804   | -1.8313 | 0.068   | -2.044417114 | count | 1 |
| ASMTL      | -1.8322736 | 0.9133405   | -2.0061 | 0.0457  | -2.036350935 | count | 1 |
| RABEPK     | -1.750203  | 1.0713693   | -1.6336 | 0.103   | -2.035827374 | count | 1 |
| HVCN1      | -1.776957  | 0.8149153   | -2.1805 | 0.0299  | -2.026954587 | count | 1 |
| FADD       | -1.6468697 | 0.7575802   | -2.1739 | 0.0304  | -2.026149491 | count | 1 |
| CTSB       | -1.593522  | 0.8018769   | -1.9872 | 0.0477  | -2.025301904 | count | 1 |
| LDOC1      | -1.593522  | 0.9539704   | -1.6704 | 0.0958  | -2.025301904 | count | 1 |
| CBY1       | -1.736774  | 1.1002012   | -1.5786 | 0.115   | -2.022834289 | count | 1 |
| DAPK3      | -2.2104497 | 1.384328    | -1.5968 | 0.111   | -2.022614129 | count | 1 |

|            |             |             |         |          |              |       |   |
|------------|-------------|-------------|---------|----------|--------------|-------|---|
| ADCY3      | -2.4487727  | 1.1578919   | -2.1149 | 0.0352   | -2.010280549 | count | 1 |
| MGP        | -1.4424291  | 0.3789014   | -3.8069 | 2.00E-04 | -2.008203637 | count | 1 |
| PIK3R4     | -1.9263874  | 1.3485401   | -1.4285 | 0.154    | -2.005542736 | count | 1 |
| JMJD4      | -1.9263874  | 1.5037913   | -1.281  | 0.201    | -2.005542736 | count | 1 |
| PHLDA2     | -1.881515   | 1.0281305   | -1.83   | 0.0682   | -1.970594758 | count | 1 |
| IGLC2      | -1.7134873  | 0.7274564   | -2.3555 | 0.0191   | -1.967330346 | count | 1 |
| NAE1       | -1.5089076  | 0.6087889   | -2.4785 | 0.0137   | -1.964327583 | count | 1 |
| FBXO48     | -1.8019997  | 1.216617    | -1.4812 | 0.14     | -1.962428145 | count | 1 |
| MOSPD1     | -1.8019997  | 1.3490289   | -1.3358 | 0.183    | -1.962428145 | count | 1 |
| DIRC2      | -18.7380547 | 3108.2316   | -0.006  | 0.995    | -1.957771746 | count | 1 |
| FKTN       | -18.7380547 | 3108.2316   | -0.006  | 0.995    | -1.957771746 | count | 1 |
| C1R        | -18.7380547 | 3108.2316   | -0.006  | 0.995    | -1.957771746 | count | 1 |
| IZUMO4     | -18.6354211 | 2554.488298 | -0.0073 | 0.994    | -1.957771742 | count | 1 |
| ST6GALNAC6 | -18.4735674 | 2421.521715 | -0.0076 | 0.994    | -1.957771736 | count | 1 |
| ZNF410     | -18.4465369 | 2508.817515 | -0.0074 | 0.994    | -1.957771735 | count | 1 |
| HMOX1      | -18.3281331 | 2486.073278 | -0.0074 | 0.994    | -1.95777173  | count | 1 |
| CALHM6     | -18.2946073 | 2814.463459 | -0.0065 | 0.995    | -1.957771729 | count | 1 |
| CMC4       | -18.2946073 | 2814.463459 | -0.0065 | 0.995    | -1.957771729 | count | 1 |
| TBCE       | -18.2909465 | 3589.135805 | -0.0051 | 0.996    | -1.957771728 | count | 1 |
| SLC5A6     | -18.2909465 | 3589.135805 | -0.0051 | 0.996    | -1.957771728 | count | 1 |
| KIAA1211L  | -18.2909465 | 3589.135805 | -0.0051 | 0.996    | -1.957771728 | count | 1 |
| AMT        | -18.2909465 | 3589.135805 | -0.0051 | 0.996    | -1.957771728 | count | 1 |
| SLC39A8    | -18.2909465 | 3589.135805 | -0.0051 | 0.996    | -1.957771728 | count | 1 |
| SGMS2      | -18.2909465 | 3589.135805 | -0.0051 | 0.996    | -1.957771728 | count | 1 |
| IGHG4      | -18.2909465 | 3589.135805 | -0.0051 | 0.996    | -1.957771728 | count | 1 |
| DHX34      | -18.2909465 | 3589.135805 | -0.0051 | 0.996    | -1.957771728 | count | 1 |
| FUK        | -18.1630976 | 3243.319423 | -0.0056 | 0.996    | -1.957771722 | count | 1 |
| RASSF8-AS1 | -18.1583734 | 3376.618256 | -0.0054 | 0.996    | -1.957771722 | count | 1 |
| YJEFN3     | -18.1583734 | 3376.618256 | -0.0054 | 0.996    | -1.957771722 | count | 1 |
| IL1RN      | -18.1573313 | 2661.995379 | -0.0068 | 0.995    | -1.957771722 | count | 1 |
| ORAOV1     | -18.1573313 | 2661.995379 | -0.0068 | 0.995    | -1.957771722 | count | 1 |
| BCAS3      | -18.1573313 | 2661.995379 | -0.0068 | 0.995    | -1.957771722 | count | 1 |
| TIGD7      | -18.0983244 | 2539.360022 | -0.0071 | 0.994    | -1.957771718 | count | 1 |
| MRPS24     | -18.0295171 | 2252.613041 | -0.008  | 0.994    | -1.957771714 | count | 1 |
| KCNMB4     | -18.0218995 | 2428.589325 | -0.0074 | 0.994    | -1.957771714 | count | 1 |
| IL23A      | -18.0183146 | 2022.325508 | -0.0089 | 0.993    | -1.957771714 | count | 1 |
| MKL1       | -17.8749756 | 1974.099997 | -0.0091 | 0.993    | -1.957771704 | count | 1 |
| AFF3       | -17.848519  | 2519.780525 | -0.0071 | 0.994    | -1.957771702 | count | 1 |
| STXBP5     | -17.848519  | 2519.780525 | -0.0071 | 0.994    | -1.957771702 | count | 1 |
| AFAP1L2    | -17.848519  | 2519.780525 | -0.0071 | 0.994    | -1.957771702 | count | 1 |
| TRAK1      | -17.8462389 | 3277.449289 | -0.0054 | 0.996    | -1.957771702 | count | 1 |
| ACACB      | -17.8462389 | 3277.449289 | -0.0054 | 0.996    | -1.957771702 | count | 1 |
| MDP1       | -17.8462389 | 3277.449289 | -0.0054 | 0.996    | -1.957771702 | count | 1 |
| PNPO       | -17.8462389 | 3277.449289 | -0.0054 | 0.996    | -1.957771702 | count | 1 |
| FBF1       | -17.8462389 | 3277.449289 | -0.0054 | 0.996    | -1.957771702 | count | 1 |

|            |             |             |         |       |              |       |   |
|------------|-------------|-------------|---------|-------|--------------|-------|---|
| AC145207.5 | -17.8462389 | 3277.449289 | -0.0054 | 0.996 | -1.957771702 | count | 1 |
| ZNF90      | -17.8462389 | 3277.449289 | -0.0054 | 0.996 | -1.957771702 | count | 1 |
| LINC01954  | -17.7375446 | 2321.214442 | -0.0076 | 0.994 | -1.957771693 | count | 1 |
| EPAS1      | -17.7375446 | 2321.214442 | -0.0076 | 0.994 | -1.957771693 | count | 1 |
| C6orf52    | -17.7375446 | 2321.214442 | -0.0076 | 0.994 | -1.957771693 | count | 1 |
| PHACTR1    | -17.7375446 | 2321.214442 | -0.0076 | 0.994 | -1.957771693 | count | 1 |
| HIST1H2AL  | -17.7375446 | 2321.214442 | -0.0076 | 0.994 | -1.957771693 | count | 1 |
| TBC1D32    | -17.7375446 | 2321.214442 | -0.0076 | 0.994 | -1.957771693 | count | 1 |
| GPRASP1    | -17.7375446 | 2321.214442 | -0.0076 | 0.994 | -1.957771693 | count | 1 |
| INPP5A     | -17.7375446 | 2321.214442 | -0.0076 | 0.994 | -1.957771693 | count | 1 |
| PARPBP     | -17.7375446 | 2321.214442 | -0.0076 | 0.994 | -1.957771693 | count | 1 |
| SPHK1      | -17.7375446 | 2321.214442 | -0.0076 | 0.994 | -1.957771693 | count | 1 |
| ZNF57      | -17.5972148 | 2323.778459 | -0.0076 | 0.994 | -1.957771681 | count | 1 |
| SLC35B4    | -18.645741  | 1732.906111 | -0.0108 | 0.991 | -1.957771314 | count | 1 |
| MTA3       | -18.528884  | 1778.620216 | -0.0104 | 0.992 | -1.95777131  | count | 1 |
| CHAF1A     | -18.51206   | 2608.775498 | -0.0071 | 0.994 | -1.957771309 | count | 1 |
| MAP4K2     | -18.355876  | 3415.934334 | -0.0054 | 0.996 | -1.957771303 | count | 1 |
| LPAR5      | -18.270601  | 2854.190206 | -0.0064 | 0.995 | -1.957771299 | count | 1 |
| UQCRHL     | -18.270415  | 3706.224659 | -0.0049 | 0.996 | -1.957771299 | count | 1 |
| LINC00954  | -18.270415  | 3706.224659 | -0.0049 | 0.996 | -1.957771299 | count | 1 |
| MAP3K20    | -18.270415  | 3706.224659 | -0.0049 | 0.996 | -1.957771299 | count | 1 |
| EBLN2      | -18.270415  | 3706.224659 | -0.0049 | 0.996 | -1.957771299 | count | 1 |
| GPR15      | -18.270415  | 3706.224659 | -0.0049 | 0.996 | -1.957771299 | count | 1 |
| PFN2       | -18.270415  | 3706.224659 | -0.0049 | 0.996 | -1.957771299 | count | 1 |
| AC107464.3 | -18.270415  | 3706.224659 | -0.0049 | 0.996 | -1.957771299 | count | 1 |
| FAM13A-AS1 | -18.270415  | 3706.224659 | -0.0049 | 0.996 | -1.957771299 | count | 1 |
| AL356481.1 | -18.270415  | 3706.224659 | -0.0049 | 0.996 | -1.957771299 | count | 1 |
| IDE        | -18.270415  | 3706.224659 | -0.0049 | 0.996 | -1.957771299 | count | 1 |
| FGF7       | -18.270415  | 3706.224659 | -0.0049 | 0.996 | -1.957771299 | count | 1 |
| ANPEP      | -18.270415  | 3706.224659 | -0.0049 | 0.996 | -1.957771299 | count | 1 |
| PRC1       | -18.270415  | 3706.224659 | -0.0049 | 0.996 | -1.957771299 | count | 1 |
| CTF1       | -18.270415  | 3706.224659 | -0.0049 | 0.996 | -1.957771299 | count | 1 |
| PRAM1      | -18.270415  | 3706.224659 | -0.0049 | 0.996 | -1.957771299 | count | 1 |
| PINLYP     | -18.270415  | 3706.224659 | -0.0049 | 0.996 | -1.957771299 | count | 1 |
| ATAD3B     | -18.268912  | 4988.095595 | -0.0037 | 0.997 | -1.957771299 | count | 1 |
| ENO1-AS1   | -18.268912  | 4988.095595 | -0.0037 | 0.997 | -1.957771299 | count | 1 |
| AL035413.1 | -18.268912  | 4988.095595 | -0.0037 | 0.997 | -1.957771299 | count | 1 |
| TFAP2E     | -18.268912  | 4988.095595 | -0.0037 | 0.997 | -1.957771299 | count | 1 |
| RAD54L     | -18.268912  | 4988.095595 | -0.0037 | 0.997 | -1.957771299 | count | 1 |
| GNG12      | -18.268912  | 4988.095595 | -0.0037 | 0.997 | -1.957771299 | count | 1 |
| PTGER3     | -18.268912  | 4988.095595 | -0.0037 | 0.997 | -1.957771299 | count | 1 |
| FRRS1      | -18.268912  | 4988.095595 | -0.0037 | 0.997 | -1.957771299 | count | 1 |
| FCGR1A     | -18.268912  | 4988.095595 | -0.0037 | 0.997 | -1.957771299 | count | 1 |
| AL356356.1 | -18.268912  | 4988.095595 | -0.0037 | 0.997 | -1.957771299 | count | 1 |
| AXDND1     | -18.268912  | 4988.095595 | -0.0037 | 0.997 | -1.957771299 | count | 1 |



|              |            |             |         |       |              |       |   |
|--------------|------------|-------------|---------|-------|--------------|-------|---|
| TRAPPC12-AS1 | -18.268912 | 4988.095595 | -0.0037 | 0.997 | -1.957771299 | count | 1 |
| TTC27        | -18.268912 | 4988.095595 | -0.0037 | 0.997 | -1.957771299 | count | 1 |
| LBX2-AS1     | -18.268912 | 4988.095595 | -0.0037 | 0.997 | -1.957771299 | count | 1 |
| ANKRD23      | -18.268912 | 4988.095595 | -0.0037 | 0.997 | -1.957771299 | count | 1 |
| HNMT         | -18.268912 | 4988.095595 | -0.0037 | 0.997 | -1.957771299 | count | 1 |
| CYBRD1       | -18.268912 | 4988.095595 | -0.0037 | 0.997 | -1.957771299 | count | 1 |
| PLCL1        | -18.268912 | 4988.095595 | -0.0037 | 0.997 | -1.957771299 | count | 1 |
| IDH1-AS1     | -18.268912 | 4988.095595 | -0.0037 | 0.997 | -1.957771299 | count | 1 |
| MAP2         | -18.268912 | 4988.095595 | -0.0037 | 0.997 | -1.957771299 | count | 1 |
| AC021016.3   | -18.268912 | 4988.095595 | -0.0037 | 0.997 | -1.957771299 | count | 1 |
| TRPM8        | -18.268912 | 4988.095595 | -0.0037 | 0.997 | -1.957771299 | count | 1 |
| AC073352.2   | -18.268912 | 4988.095595 | -0.0037 | 0.997 | -1.957771299 | count | 1 |
| PODXL2       | -18.268912 | 4988.095595 | -0.0037 | 0.997 | -1.957771299 | count | 1 |
| CAMK2N2      | -18.268912 | 4988.095595 | -0.0037 | 0.997 | -1.957771299 | count | 1 |
| FAT4         | -18.268912 | 4988.095595 | -0.0037 | 0.997 | -1.957771299 | count | 1 |
| GATB         | -18.268912 | 4988.095595 | -0.0037 | 0.997 | -1.957771299 | count | 1 |
| SLC12A7      | -18.268912 | 4988.095595 | -0.0037 | 0.997 | -1.957771299 | count | 1 |
| LHFPL2       | -18.268912 | 4988.095595 | -0.0037 | 0.997 | -1.957771299 | count | 1 |
| LUCAT1       | -18.268912 | 4988.095595 | -0.0037 | 0.997 | -1.957771299 | count | 1 |
| RFESD        | -18.268912 | 4988.095595 | -0.0037 | 0.997 | -1.957771299 | count | 1 |
| DBN1         | -18.268912 | 4988.095595 | -0.0037 | 0.997 | -1.957771299 | count | 1 |
| CD109        | -18.268912 | 4988.095595 | -0.0037 | 0.997 | -1.957771299 | count | 1 |
| HMG3-AS1     | -18.268912 | 4988.095595 | -0.0037 | 0.997 | -1.957771299 | count | 1 |
| CENPW        | -18.268912 | 4988.095595 | -0.0037 | 0.997 | -1.957771299 | count | 1 |
| PSMG3-AS1    | -18.268912 | 4988.095595 | -0.0037 | 0.997 | -1.957771299 | count | 1 |
| IGF2BP3      | -18.268912 | 4988.095595 | -0.0037 | 0.997 | -1.957771299 | count | 1 |
| HOXA4        | -18.268912 | 4988.095595 | -0.0037 | 0.997 | -1.957771299 | count | 1 |
| HOXA6        | -18.268912 | 4988.095595 | -0.0037 | 0.997 | -1.957771299 | count | 1 |
| KCTD7        | -18.268912 | 4988.095595 | -0.0037 | 0.997 | -1.957771299 | count | 1 |
| CADPS2       | -18.268912 | 4988.095595 | -0.0037 | 0.997 | -1.957771299 | count | 1 |
| AC016831.1   | -18.268912 | 4988.095595 | -0.0037 | 0.997 | -1.957771299 | count | 1 |
| AC074386.1   | -18.268912 | 4988.095595 | -0.0037 | 0.997 | -1.957771299 | count | 1 |
| KIF4A        | -18.268912 | 4988.095595 | -0.0037 | 0.997 | -1.957771299 | count | 1 |
| NHSL2        | -18.268912 | 4988.095595 | -0.0037 | 0.997 | -1.957771299 | count | 1 |
| MAGEE1       | -18.268912 | 4988.095595 | -0.0037 | 0.997 | -1.957771299 | count | 1 |
| NAT1         | -18.268912 | 4988.095595 | -0.0037 | 0.997 | -1.957771299 | count | 1 |
| EPHX2        | -18.268912 | 4988.095595 | -0.0037 | 0.997 | -1.957771299 | count | 1 |
| FUT10        | -18.268912 | 4988.095595 | -0.0037 | 0.997 | -1.957771299 | count | 1 |
| FAM83H       | -18.268912 | 4988.095595 | -0.0037 | 0.997 | -1.957771299 | count | 1 |
| C9orf47      | -18.268912 | 4988.095595 | -0.0037 | 0.997 | -1.957771299 | count | 1 |
| WDR34        | -18.268912 | 4988.095595 | -0.0037 | 0.997 | -1.957771299 | count | 1 |
| CARNS1       | -18.268912 | 4988.095595 | -0.0037 | 0.997 | -1.957771299 | count | 1 |
| AP005019.1   | -18.268912 | 4988.095595 | -0.0037 | 0.997 | -1.957771299 | count | 1 |
| SIAE         | -18.268912 | 4988.095595 | -0.0037 | 0.997 | -1.957771299 | count | 1 |
| HECTD2       | -18.268912 | 4988.095595 | -0.0037 | 0.997 | -1.957771299 | count | 1 |

|            |            |             |         |        |              |       |   |
|------------|------------|-------------|---------|--------|--------------|-------|---|
| UBTD1      | -18.268912 | 4988.095595 | -0.0037 | 0.997  | -1.957771299 | count | 1 |
| PI4K2A     | -18.268912 | 4988.095595 | -0.0037 | 0.997  | -1.957771299 | count | 1 |
| SH3PXD2A   | -18.268912 | 4988.095595 | -0.0037 | 0.997  | -1.957771299 | count | 1 |
| ABCD2      | -18.268912 | 4988.095595 | -0.0037 | 0.997  | -1.957771299 | count | 1 |
| KRT85      | -18.268912 | 4988.095595 | -0.0037 | 0.997  | -1.957771299 | count | 1 |
| HIP1R      | -18.268912 | 4988.095595 | -0.0037 | 0.997  | -1.957771299 | count | 1 |
| KBTBD7     | -18.268912 | 4988.095595 | -0.0037 | 0.997  | -1.957771299 | count | 1 |
| CTSG       | -18.268912 | 4988.095595 | -0.0037 | 0.997  | -1.957771299 | count | 1 |
| EML5       | -18.268912 | 4988.095595 | -0.0037 | 0.997  | -1.957771299 | count | 1 |
| AC055876.5 | -18.268912 | 4988.095595 | -0.0037 | 0.997  | -1.957771299 | count | 1 |
| AC100830.3 | -18.268912 | 4988.095595 | -0.0037 | 0.997  | -1.957771299 | count | 1 |
| SLC24A1    | -18.268912 | 4988.095595 | -0.0037 | 0.997  | -1.957771299 | count | 1 |
| STOML1     | -18.268912 | 4988.095595 | -0.0037 | 0.997  | -1.957771299 | count | 1 |
| AC090826.2 | -18.268912 | 4988.095595 | -0.0037 | 0.997  | -1.957771299 | count | 1 |
| AC008731.1 | -18.268912 | 4988.095595 | -0.0037 | 0.997  | -1.957771299 | count | 1 |
| ZNF778     | -18.268912 | 4988.095595 | -0.0037 | 0.997  | -1.957771299 | count | 1 |
| AC092123.1 | -18.268912 | 4988.095595 | -0.0037 | 0.997  | -1.957771299 | count | 1 |
| KCNAB3     | -18.268912 | 4988.095595 | -0.0037 | 0.997  | -1.957771299 | count | 1 |
| RDM1       | -18.268912 | 4988.095595 | -0.0037 | 0.997  | -1.957771299 | count | 1 |
| TBKBP1     | -18.268912 | 4988.095595 | -0.0037 | 0.997  | -1.957771299 | count | 1 |
| BTBD17     | -18.268912 | 4988.095595 | -0.0037 | 0.997  | -1.957771299 | count | 1 |
| LINC01970  | -18.268912 | 4988.095595 | -0.0037 | 0.997  | -1.957771299 | count | 1 |
| SOX12      | -18.268912 | 4988.095595 | -0.0037 | 0.997  | -1.957771299 | count | 1 |
| SPTLC3     | -18.268912 | 4988.095595 | -0.0037 | 0.997  | -1.957771299 | count | 1 |
| CD93       | -18.268912 | 4988.095595 | -0.0037 | 0.997  | -1.957771299 | count | 1 |
| PEX11G     | -18.268912 | 4988.095595 | -0.0037 | 0.997  | -1.957771299 | count | 1 |
| FBXW9      | -18.268912 | 4988.095595 | -0.0037 | 0.997  | -1.957771299 | count | 1 |
| COX7A1     | -18.268912 | 4988.095595 | -0.0037 | 0.997  | -1.957771299 | count | 1 |
| ZNF793     | -18.268912 | 4988.095595 | -0.0037 | 0.997  | -1.957771299 | count | 1 |
| AC005614.1 | -18.268912 | 4988.095595 | -0.0037 | 0.997  | -1.957771299 | count | 1 |
| LIPE-AS1   | -18.268912 | 4988.095595 | -0.0037 | 0.997  | -1.957771299 | count | 1 |
| PPP5D1     | -18.268912 | 4988.095595 | -0.0037 | 0.997  | -1.957771299 | count | 1 |
| AC020922.3 | -18.268912 | 4988.095595 | -0.0037 | 0.997  | -1.957771299 | count | 1 |
| AC005498.2 | -18.268912 | 4988.095595 | -0.0037 | 0.997  | -1.957771299 | count | 1 |
| AIFM3      | -18.268912 | 4988.095595 | -0.0037 | 0.997  | -1.957771299 | count | 1 |
| MB         | -18.268912 | 4988.095595 | -0.0037 | 0.997  | -1.957771299 | count | 1 |
| FSD1L      | -18.23898  | 2268.449126 | -0.008  | 0.994  | -1.957771297 | count | 1 |
| SERP2      | -18.23898  | 2268.449126 | -0.008  | 0.994  | -1.957771297 | count | 1 |
| TM9SF1     | -18.234327 | 1835.28681  | -0.0099 | 0.992  | -1.957771297 | count | 1 |
| LRRC59     | -1.6161612 | 0.6904573   | -2.3407 | 0.0199 | -1.953511661 | count | 1 |
| PIK3CB     | -1.5788604 | 1.0462181   | -1.5091 | 0.132  | -1.952174673 | count | 1 |
| SNAPC5     | -1.4612429 | 0.5840029   | -2.5021 | 0.0128 | -1.948246686 | count | 1 |
| TNFSF13B   | -1.7689936 | 1.2475987   | -1.4179 | 0.157  | -1.934044962 | count | 1 |
| CRTC2      | -1.522472  | 1.2017739   | -1.2669 | 0.206  | -1.931702072 | count | 1 |
| CD27       | -1.5024751 | 0.7249785   | -2.0724 | 0.039  | -1.919887301 | count | 1 |

|            |            |           |         |         |              |       |   |
|------------|------------|-----------|---------|---------|--------------|-------|---|
| RRS1       | -1.6147351 | 0.7607158 | -2.1227 | 0.0345  | -1.902255523 | count | 1 |
| EVA1C      | -2.1971963 | 1.683263  | -1.3053 | 0.193   | -1.889988345 | count | 1 |
| LARP1B     | -1.625418  | 0.8745708 | -1.8585 | 0.064   | -1.882516622 | count | 1 |
| KATNB1     | -1.5834623 | 1.2652956 | -1.2515 | 0.2117  | -1.870648441 | count | 1 |
| EMC1       | -1.6893817 | 1.0582683 | -1.5964 | 0.111   | -1.864092463 | count | 1 |
| HACL1      | -1.4974236 | 0.5784854 | -2.5885 | 0.0101  | -1.862064588 | count | 1 |
| ERLIN2     | -2.1425119 | 1.1633872 | -1.8416 | 0.0664  | -1.861175103 | count | 1 |
| VPS45      | -1.945289  | 1.3750281 | -1.4147 | 0.158   | -1.858657519 | count | 1 |
| MFHAS1     | -2.4827267 | 1.2131178 | -2.0466 | 0.0415  | -1.848617522 | count | 1 |
| MSRB2      | -2.4827267 | 1.5377923 | -1.6145 | 0.107   | -1.848617522 | count | 1 |
| ASL        | -1.8109047 | 0.9537677 | -1.8987 | 0.0585  | -1.847480374 | count | 1 |
| MYL6B      | -1.7295106 | 1.2833638 | -1.3476 | 0.179   | -1.847050728 | count | 1 |
| ZNF384     | -1.9185736 | 1.2877962 | -1.4898 | 0.137   | -1.84079219  | count | 1 |
| SNTB1      | -1.9185736 | 1.4321529 | -1.3396 | 0.181   | -1.84079219  | count | 1 |
| AC009403.1 | -1.7925831 | 1.216459  | -1.4736 | 0.142   | -1.833413926 | count | 1 |
| GTF3C1     | -2.0823123 | 1.3697141 | -1.5203 | 0.129   | -1.828320903 | count | 1 |
| RBMXL1     | -1.5404693 | 0.9478416 | -1.6252 | 0.105   | -1.826737759 | count | 1 |
| NADK       | -1.6454457 | 0.866464  | -1.899  | 0.0584  | -1.824597142 | count | 1 |
| DNAJC13    | -1.6921124 | 1.3216209 | -1.2803 | 0.201   | -1.815450669 | count | 1 |
| DNAJC14    | -1.7587789 | 1.6628773 | -1.0577 | 0.291   | -1.807156231 | count | 1 |
| MTPAP      | -1.47887   | 0.8858479 | -1.6694 | 0.096   | -1.806769028 | count | 1 |
| EPST11     | -1.3000449 | 0.5544959 | -2.3446 | 0.0197  | -1.791171115 | count | 1 |
| KLHL22     | -1.45897   | 1.164602  | -1.2528 | 0.211   | -1.785092268 | count | 1 |
| SELL       | -1.3242722 | 0.6372275 | -2.0782 | 0.0385  | -1.778450129 | count | 1 |
| EFL1       | -1.8217329 | 1.3855688 | -1.3148 | 0.19    | -1.773953768 | count | 1 |
| CCL2       | -1.3731569 | 0.8253562 | -1.6637 | 0.0971  | -1.767163304 | count | 1 |
| NUDT9      | -1.9738518 | 1.3063823 | -1.5109 | 0.132   | -1.76608265  | count | 1 |
| GLRX2      | -1.3947145 | 0.6165015 | -2.2623 | 0.0243  | -1.759605181 | count | 1 |
| KCTD18     | -1.9479014 | 1.2024897 | -1.6199 | 0.106   | -1.750604686 | count | 1 |
| RASSF4     | -1.7887196 | 1.1187867 | -1.5988 | 0.111   | -1.750424163 | count | 1 |
| MRPS16     | -1.330474  | 0.6585057 | -2.0204 | 0.0442  | -1.746525726 | count | 1 |
| C15orf40   | -1.3197569 | 0.5654321 | -2.3341 | 0.0202  | -1.745177985 | count | 1 |
| STAT1      | -1.2365899 | 0.459983  | -2.6883 | 0.0076  | -1.738286392 | count | 1 |
| PGM2L1     | -1.5450661 | 0.6417154 | -2.4077 | 0.0166  | -1.732041624 | count | 1 |
| ZNF324     | -1.4642468 | 1.1214633 | -1.3057 | 0.193   | -1.721296754 | count | 1 |
| YIF1A      | -1.2916149 | 0.4722638 | -2.7349 | 0.00658 | -1.71992183  | count | 1 |
| SETD4      | -1.5788605 | 1.4547651 | -1.0853 | 0.279   | -1.716921736 | count | 1 |
| GPR183     | -1.2278774 | 0.3785113 | -3.244  | 0.0013  | -1.716388741 | count | 1 |
| ATP9B      | -1.5284148 | 0.8590451 | -1.7792 | 0.0761  | -1.716381581 | count | 1 |
| CPOX       | -1.8876176 | 1.2261005 | -1.5395 | 0.125   | -1.713767031 | count | 1 |
| ATR        | -1.4851892 | 0.7389713 | -2.0098 | 0.0453  | -1.711633495 | count | 1 |
| UBE2Z      | -1.3486756 | 0.6107677 | -2.2082 | 0.0279  | -1.706229313 | count | 1 |
| FBLN5      | -1.47553   | 0.9549717 | -1.5451 | 0.123   | -1.702066551 | count | 1 |
| FAM102A    | -1.2662778 | 0.5556043 | -2.2791 | 0.0233  | -1.700185251 | count | 1 |
| AP001157.1 | -1.6249973 | 1.3028213 | -1.2473 | 0.213   | -1.699403775 | count | 1 |

|            |            |           |         |         |              |       |   |
|------------|------------|-----------|---------|---------|--------------|-------|---|
| PXN        | -1.7187322 | 1.4576903 | -1.1791 | 0.239   | -1.699294227 | count | 1 |
| IP6K1      | -1.2913006 | 0.5947052 | -2.1713 | 0.0306  | -1.697975339 | count | 1 |
| FN1        | -1.3394495 | 0.8977914 | -1.4919 | 0.137   | -1.695478722 | count | 1 |
| AGA        | -1.502408  | 0.8463348 | -1.7752 | 0.0768  | -1.691751394 | count | 1 |
| ZNF213-AS1 | -1.5499937 | 1.2257807 | -1.2645 | 0.207   | -1.691136784 | count | 1 |
| CPNE7      | -1.3014215 | 0.8041293 | -1.6184 | 0.107   | -1.689343667 | count | 1 |
| ATF7       | -1.705162  | 0.7514759 | -2.2691 | 0.0239  | -1.689184714 | count | 1 |
| MIR4458HG  | -2.730497  | 1.3098044 | -2.0847 | 0.0379  | -1.687314573 | count | 1 |
| HNRNPLL    | -1.607952  | 1.2952347 | -1.2414 | 0.215   | -1.685239719 | count | 1 |
| TRPT1      | -1.317008  | 0.6218276 | -2.118  | 0.0349  | -1.680433599 | count | 1 |
| TMEM209    | -1.6020961 | 1.2161352 | -1.3174 | 0.189   | -1.680351221 | count | 1 |
| NOM1       | -1.3168142 | 0.651016  | -2.0227 | 0.0439  | -1.680204311 | count | 1 |
| MAPK9      | -1.4514442 | 0.8061102 | -1.8006 | 0.0727  | -1.678091751 | count | 1 |
| KLHL42     | -1.4478863 | 0.9662518 | -1.4985 | 0.135   | -1.674535996 | count | 1 |
| LIG1       | -1.3943835 | 0.6660448 | -2.0935 | 0.0371  | -1.673710466 | count | 1 |
| NPEPPS     | -1.5275882 | 0.7631394 | -2.0017 | 0.0461  | -1.670938548 | count | 1 |
| TRMU       | -1.6802885 | 1.2900216 | -1.3025 | 0.194   | -1.670489912 | count | 1 |
| HGH1       | -1.6802885 | 1.4316149 | -1.1737 | 0.241   | -1.670489912 | count | 1 |
| NUP133     | -1.4409299 | 1.6946908 | -0.8503 | 0.3958  | -1.667573157 | count | 1 |
| EXOC3      | -1.5817507 | 1.093483  | -1.4465 | 0.149   | -1.663277911 | count | 1 |
| DESI1      | -1.3832762 | 0.940837  | -1.4703 | 0.142   | -1.661841966 | count | 1 |
| SMUG1      | -1.3832761 | 1.0978861 | -1.2599 | 0.209   | -1.661841862 | count | 1 |
| GCDH       | -1.3100927 | 0.742279  | -1.765  | 0.0785  | -1.661153106 | count | 1 |
| THEM4      | -1.4020903 | 0.686331  | -2.0429 | 0.0419  | -1.657140376 | count | 1 |
| HIPK2      | -1.4290542 | 0.683612  | -2.0904 | 0.0374  | -1.655654299 | count | 1 |
| FAM217B    | -1.3128541 | 0.6822821 | -1.9242 | 0.0552  | -1.652064731 | count | 1 |
| AP3S2      | -1.395864  | 1.2879546 | -1.0838 | 0.279   | -1.650655176 | count | 1 |
| SRGAP3     | -1.1796297 | 0.3557812 | -3.3156 | 0.001   | -1.64197653  | count | 1 |
| UBR7       | -1.493638  | 0.7266094 | -2.0556 | 0.0406  | -1.640027771 | count | 1 |
| ASNS       | -1.2787922 | 0.9819147 | -1.3023 | 0.194   | -1.635075734 | count | 1 |
| ACOT7      | -1.2854887 | 0.7821217 | -1.6436 | 0.101   | -1.632248415 | count | 1 |
| SMARCC2    | -1.2108069 | 0.4280479 | -2.8287 | 0.00497 | -1.632089504 | count | 1 |
| AK9        | -1.3506899 | 0.9130129 | -1.4794 | 0.14    | -1.626838613 | count | 1 |
| PRAG1      | -1.752678  | 1.222892  | -1.4332 | 0.153   | -1.626814553 | count | 1 |
| SMG5       | -1.7482809 | 1.3719259 | -1.2743 | 0.203   | -1.623876261 | count | 1 |
| CC2D1A     | -1.7482809 | 1.3719259 | -1.2743 | 0.203   | -1.623876261 | count | 1 |
| GAA        | -1.6175747 | 1.1601485 | -1.3943 | 0.164   | -1.622413453 | count | 1 |
| TAP2       | -1.4290328 | 0.5924825 | -2.4119 | 0.0164  | -1.621149518 | count | 1 |
| ZFYVE16    | -1.2967997 | 0.5405001 | -2.3993 | 0.017   | -1.619952869 | count | 1 |
| CEP152     | -1.528026  | 0.9711074 | -1.5735 | 0.117   | -1.617533855 | count | 1 |
| FBXO3      | -1.3400364 | 0.6858813 | -1.9537 | 0.0516  | -1.615336037 | count | 1 |
| CRACR2A    | -1.9563067 | 0.8847709 | -2.2111 | 0.0277  | -1.614887984 | count | 1 |
| ABHD13     | -1.304096  | 0.704883  | -1.8501 | 0.0652  | -1.613077741 | count | 1 |
| SLFN12     | -1.4177274 | 1.0269966 | -1.3805 | 0.168   | -1.610127833 | count | 1 |
| AC006369.1 | -1.459244  | 1.5033546 | -0.9707 | 0.332   | -1.608342387 | count | 1 |

|            |             |             |         |         |              |       |   |
|------------|-------------|-------------|---------|---------|--------------|-------|---|
| NAB1       | -1.936279   | 0.9150199   | -2.1161 | 0.0351  | -1.604314736 | count | 1 |
| METTL1     | -1.710639   | 1.3426761   | -1.2741 | 0.204   | -1.59845141  | count | 1 |
| C1orf109   | -1.290874   | 1.2129404   | -1.0643 | 0.288   | -1.598130641 | count | 1 |
| ZNF595     | -1.2885435  | 0.8530846   | -1.5105 | 0.1319  | -1.595491963 | count | 1 |
| SNRNP25    | -1.1575454  | 0.5300909   | -2.1837 | 0.0297  | -1.593816459 | count | 1 |
| CD300A     | -1.1597417  | 0.5536458   | -2.0947 | 0.037   | -1.593474707 | count | 1 |
| THAP8      | -2.37003    | 1.3216633   | -1.7932 | 0.07387 | -1.585025336 | count | 1 |
| XPNPEP1    | -1.3899918  | 0.8138922   | -1.7078 | 0.0886  | -1.582928409 | count | 1 |
| MFSD5      | -1.4863226  | 1.5464886   | -0.9611 | 0.337   | -1.581371717 | count | 1 |
| SLC35A5    | -2.3455858  | 1.5645857   | -1.4992 | 0.135   | -1.576999153 | count | 1 |
| OSGEPL1    | -1.881515   | 1.200352    | -1.5675 | 0.118   | -1.574741081 | count | 1 |
| TAF1C      | -1.881515   | 1.2821448   | -1.4675 | 0.143   | -1.574741081 | count | 1 |
| YEATS4     | -1.1529647  | 0.5545394   | -2.0791 | 0.0384  | -1.572680022 | count | 1 |
| PIGBOS1    | -1.218872   | 0.6969427   | -1.7489 | 0.0813  | -1.572468333 | count | 1 |
| KANSL1L    | -2.331795   | 1.6349042   | -1.4263 | 0.155   | -1.572405662 | count | 1 |
| PAICS      | -1.3791346  | 0.7254279   | -1.9011 | 0.0582  | -1.572219677 | count | 1 |
| FAM160B1   | -1.377316   | 0.9374241   | -1.4693 | 0.143   | -1.570422593 | count | 1 |
| SEC22A     | -1.8727329  | 1.0133761   | -1.848  | 0.0655  | -1.569907421 | count | 1 |
| USP30-AS1  | -1.2234106  | 0.683868    | -1.789  | 0.0746  | -1.568844609 | count | 1 |
| HMGB3      | -2.317554   | 1.2241892   | -1.8931 | 0.0592  | -1.567612325 | count | 1 |
| DLG3       | -1.2146221  | 0.9829638   | -1.2357 | 0.217   | -1.567313684 | count | 1 |
| TMEM115    | -2.3028277  | 1.1913701   | -1.9329 | 0.0541  | -1.562601545 | count | 1 |
| SPRYD7     | -1.2335001  | 0.6615802   | -1.8645 | 0.0632  | -1.559491768 | count | 1 |
| HSBP1L1    | -1.4003652  | 1.17568     | -1.1911 | 0.234   | -1.553247089 | count | 1 |
| SLC39A11   | -18.6344385 | 3015.40259  | -0.0062 | 0.995   | -1.547487791 | count | 1 |
| FAM124B    | -18.6321587 | 3295.112049 | -0.0057 | 0.995   | -1.54748779  | count | 1 |
| TMEM44     | -18.6321587 | 3295.112049 | -0.0057 | 0.995   | -1.54748779  | count | 1 |
| CYTL1      | -18.6321587 | 3295.112049 | -0.0057 | 0.995   | -1.54748779  | count | 1 |
| PLA2G12A   | -18.6321587 | 3295.112049 | -0.0057 | 0.995   | -1.54748779  | count | 1 |
| KCNK5      | -18.6321587 | 3295.112049 | -0.0057 | 0.995   | -1.54748779  | count | 1 |
| ZC3H3      | -18.6321587 | 3295.112049 | -0.0057 | 0.995   | -1.54748779  | count | 1 |
| C11orf74   | -18.6321587 | 3295.112049 | -0.0057 | 0.995   | -1.54748779  | count | 1 |
| AKR1C3     | -18.6321587 | 3295.112049 | -0.0057 | 0.995   | -1.54748779  | count | 1 |
| PLAU       | -18.6321587 | 3295.112049 | -0.0057 | 0.995   | -1.54748779  | count | 1 |
| FAM234B    | -18.6321587 | 3295.112049 | -0.0057 | 0.995   | -1.54748779  | count | 1 |
| SLC30A4    | -18.6321587 | 3295.112049 | -0.0057 | 0.995   | -1.54748779  | count | 1 |
| BICDL2     | -18.6321587 | 3295.112049 | -0.0057 | 0.995   | -1.54748779  | count | 1 |
| AC005224.3 | -18.6321587 | 3295.112049 | -0.0057 | 0.995   | -1.54748779  | count | 1 |
| CCL8       | -18.6321587 | 3295.112049 | -0.0057 | 0.995   | -1.54748779  | count | 1 |
| EPB41L3    | -18.6321587 | 3295.112049 | -0.0057 | 0.995   | -1.54748779  | count | 1 |
| SLC23A2    | -18.6321587 | 3295.112049 | -0.0057 | 0.995   | -1.54748779  | count | 1 |
| ZNF681     | -18.6321587 | 3295.112049 | -0.0057 | 0.995   | -1.54748779  | count | 1 |
| PLEKHA4    | -18.6321587 | 3295.112049 | -0.0057 | 0.995   | -1.54748779  | count | 1 |
| ZSCAN22    | -18.6321587 | 3295.112049 | -0.0057 | 0.995   | -1.54748779  | count | 1 |
| SNX8       | -18.6306614 | 2670.688587 | -0.007  | 0.994   | -1.54748779  | count | 1 |

|            |             |             |         |       |              |       |   |
|------------|-------------|-------------|---------|-------|--------------|-------|---|
| AP000894.4 | -18.6306614 | 2670.688587 | -0.007  | 0.994 | -1.54748779  | count | 1 |
| CCL18      | -18.4668501 | 2133.121065 | -0.0087 | 0.993 | -1.547487786 | count | 1 |
| PLAC9      | -18.2330226 | 2115.573401 | -0.0086 | 0.993 | -1.547487779 | count | 1 |
| RNF123     | -18.1883911 | 2132.141326 | -0.0085 | 0.993 | -1.547487778 | count | 1 |
| CPT2       | -18.1424078 | 3042.716765 | -0.006  | 0.995 | -1.547487776 | count | 1 |
| MORN2      | -18.1424078 | 3042.716765 | -0.006  | 0.995 | -1.547487776 | count | 1 |
| FANCE      | -18.1424078 | 3042.716765 | -0.006  | 0.995 | -1.547487776 | count | 1 |
| KCNK17     | -18.1424078 | 3042.716765 | -0.006  | 0.995 | -1.547487776 | count | 1 |
| TUSC1      | -18.1424078 | 3042.716765 | -0.006  | 0.995 | -1.547487776 | count | 1 |
| SS18L1     | -18.1424078 | 3042.716765 | -0.006  | 0.995 | -1.547487776 | count | 1 |
| ZNF256     | -18.1424078 | 3042.716765 | -0.006  | 0.995 | -1.547487776 | count | 1 |
| CENPE      | -18.1367444 | 2070.444394 | -0.0088 | 0.993 | -1.547487776 | count | 1 |
| RNASEL     | -18.0161185 | 2133.181508 | -0.0084 | 0.993 | -1.547487771 | count | 1 |
| PRDM8      | -18.0097075 | 2220.347307 | -0.0081 | 0.994 | -1.547487771 | count | 1 |
| ZNF674     | -18.0097075 | 2220.347307 | -0.0081 | 0.994 | -1.547487771 | count | 1 |
| ACSM3      | -18.0097075 | 2220.347307 | -0.0081 | 0.994 | -1.547487771 | count | 1 |
| MLC1       | -18.0097075 | 2220.347307 | -0.0081 | 0.994 | -1.547487771 | count | 1 |
| ANKFY1     | -17.8751865 | 1984.706628 | -0.009  | 0.993 | -1.547487765 | count | 1 |
| NUAK2      | -17.872533  | 2150.052248 | -0.0083 | 0.993 | -1.547487765 | count | 1 |
| GRHL1      | -17.872533  | 2150.052248 | -0.0083 | 0.993 | -1.547487765 | count | 1 |
| KDELC1     | -17.8710988 | 2028.98584  | -0.0088 | 0.993 | -1.547487765 | count | 1 |
| FTO        | -17.804693  | 1970.922728 | -0.009  | 0.993 | -1.547487762 | count | 1 |
| PAQR4      | -17.6646633 | 2050.767092 | -0.0086 | 0.993 | -1.547487754 | count | 1 |
| SULT1A1    | -17.6646633 | 2050.767092 | -0.0086 | 0.993 | -1.547487754 | count | 1 |
| WWC3       | -17.6617971 | 1673.381404 | -0.0106 | 0.992 | -1.547487754 | count | 1 |
| MATN1      | -17.622966  | 2733.953826 | -0.0064 | 0.995 | -1.547487751 | count | 1 |
| AC139887.2 | -17.622966  | 2733.953826 | -0.0064 | 0.995 | -1.547487751 | count | 1 |
| DGKQ       | -17.622966  | 2733.953826 | -0.0064 | 0.995 | -1.547487751 | count | 1 |
| MFAP3      | -17.622966  | 2733.953826 | -0.0064 | 0.995 | -1.547487751 | count | 1 |
| TMEM170B   | -17.622966  | 2733.953826 | -0.0064 | 0.995 | -1.547487751 | count | 1 |
| TREM2      | -17.622966  | 2733.953826 | -0.0064 | 0.995 | -1.547487751 | count | 1 |
| TMEM176B   | -17.622966  | 2733.953826 | -0.0064 | 0.995 | -1.547487751 | count | 1 |
| SPIN3      | -17.622966  | 2733.953826 | -0.0064 | 0.995 | -1.547487751 | count | 1 |
| ANGPT2     | -17.622966  | 2733.953826 | -0.0064 | 0.995 | -1.547487751 | count | 1 |
| SIT1       | -17.622966  | 2733.953826 | -0.0064 | 0.995 | -1.547487751 | count | 1 |
| TRIM3      | -17.622966  | 2733.953826 | -0.0064 | 0.995 | -1.547487751 | count | 1 |
| PEAK1      | -17.622966  | 2733.953826 | -0.0064 | 0.995 | -1.547487751 | count | 1 |
| PALB2      | -17.622966  | 2733.953826 | -0.0064 | 0.995 | -1.547487751 | count | 1 |
| NAT14      | -17.622966  | 2733.953826 | -0.0064 | 0.995 | -1.547487751 | count | 1 |
| FP565260.6 | -17.622966  | 2733.953826 | -0.0064 | 0.995 | -1.547487751 | count | 1 |
| CU638689.4 | -17.622966  | 2733.953826 | -0.0064 | 0.995 | -1.547487751 | count | 1 |
| AP001462.1 | -17.4803529 | 1993.785119 | -0.0088 | 0.993 | -1.547487742 | count | 1 |
| MAPKBP1    | -17.4803529 | 1993.785119 | -0.0088 | 0.993 | -1.547487742 | count | 1 |
| PI4KA      | -17.4803529 | 1993.785119 | -0.0088 | 0.993 | -1.547487742 | count | 1 |
| C1QC       | -19.159542  | 3191.552823 | -0.006  | 0.995 | -1.547487515 | count | 1 |

|            |            |             |         |       |              |       |   |
|------------|------------|-------------|---------|-------|--------------|-------|---|
| CTPS1      | -18.942818 | 3160.108784 | -0.006  | 0.995 | -1.547487512 | count | 1 |
| CD40LG     | -18.942818 | 3160.108784 | -0.006  | 0.995 | -1.547487512 | count | 1 |
| GCN1       | -18.942818 | 3160.108784 | -0.006  | 0.995 | -1.547487512 | count | 1 |
| ABCF2      | -18.459772 | 1917.603771 | -0.0096 | 0.992 | -1.547487502 | count | 1 |
| HNRNPA1P48 | -18.429709 | 2090.968367 | -0.0088 | 0.993 | -1.547487501 | count | 1 |
| TMEM44-AS1 | -18.427185 | 2888.535923 | -0.0064 | 0.995 | -1.547487501 | count | 1 |
| F13A1      | -18.427185 | 2888.535923 | -0.0064 | 0.995 | -1.547487501 | count | 1 |
| MSR1       | -18.427185 | 2888.535923 | -0.0064 | 0.995 | -1.547487501 | count | 1 |
| OTUD6B     | -18.395697 | 2089.471975 | -0.0088 | 0.993 | -1.5474875   | count | 1 |
| FZD6       | -18.33416  | 1876.271632 | -0.0098 | 0.992 | -1.547487498 | count | 1 |
| VPS37C     | -18.279811 | 2273.189949 | -0.008  | 0.994 | -1.547487496 | count | 1 |
| WDR47      | -18.254484 | 2065.06617  | -0.0088 | 0.993 | -1.547487495 | count | 1 |
| TAF9B      | -18.254484 | 2065.06617  | -0.0088 | 0.993 | -1.547487495 | count | 1 |
| CAPN10-DT  | -18.238232 | 2731.655048 | -0.0067 | 0.995 | -1.547487495 | count | 1 |
| RCC1       | -18.212967 | 2902.773387 | -0.0063 | 0.995 | -1.547487494 | count | 1 |
| AC004241.1 | -18.212967 | 2902.773387 | -0.0063 | 0.995 | -1.547487494 | count | 1 |
| CDC42BPB   | -17.998179 | 2689.320456 | -0.0067 | 0.995 | -1.547487486 | count | 1 |
| CEP76      | -17.998179 | 2689.320456 | -0.0067 | 0.995 | -1.547487486 | count | 1 |
| CFAP45     | -17.990943 | 2846.199342 | -0.0063 | 0.995 | -1.547487486 | count | 1 |
| TCEAL2     | -17.990943 | 2846.199342 | -0.0063 | 0.995 | -1.547487486 | count | 1 |
| OMD        | -17.990943 | 2846.199342 | -0.0063 | 0.995 | -1.547487486 | count | 1 |
| MS4A4A     | -17.990943 | 2846.199342 | -0.0063 | 0.995 | -1.547487486 | count | 1 |
| ZDHHC16    | -17.990943 | 2846.199342 | -0.0063 | 0.995 | -1.547487486 | count | 1 |
| SYCE1L     | -17.990943 | 2846.199342 | -0.0063 | 0.995 | -1.547487486 | count | 1 |
| PLEKHN1    | -17.869595 | 4085.301308 | -0.0044 | 0.997 | -1.54748748  | count | 1 |
| MORN1      | -17.869595 | 4085.301308 | -0.0044 | 0.997 | -1.54748748  | count | 1 |
| AL031848.2 | -17.869595 | 4085.301308 | -0.0044 | 0.997 | -1.54748748  | count | 1 |
| PIK3CD-AS1 | -17.869595 | 4085.301308 | -0.0044 | 0.997 | -1.54748748  | count | 1 |
| SH3D21     | -17.869595 | 4085.301308 | -0.0044 | 0.997 | -1.54748748  | count | 1 |
| FAAH       | -17.869595 | 4085.301308 | -0.0044 | 0.997 | -1.54748748  | count | 1 |
| LRP8       | -17.869595 | 4085.301308 | -0.0044 | 0.997 | -1.54748748  | count | 1 |
| ERICH3     | -17.869595 | 4085.301308 | -0.0044 | 0.997 | -1.54748748  | count | 1 |
| SORT1      | -17.869595 | 4085.301308 | -0.0044 | 0.997 | -1.54748748  | count | 1 |
| AL157904.1 | -17.869595 | 4085.301308 | -0.0044 | 0.997 | -1.54748748  | count | 1 |
| AC246785.3 | -17.869595 | 4085.301308 | -0.0044 | 0.997 | -1.54748748  | count | 1 |
| ITGA10     | -17.869595 | 4085.301308 | -0.0044 | 0.997 | -1.54748748  | count | 1 |
| NOTCH2NL   | -17.869595 | 4085.301308 | -0.0044 | 0.997 | -1.54748748  | count | 1 |
| OAZ3       | -17.869595 | 4085.301308 | -0.0044 | 0.997 | -1.54748748  | count | 1 |
| S100A5     | -17.869595 | 4085.301308 | -0.0044 | 0.997 | -1.54748748  | count | 1 |
| MEX3A      | -17.869595 | 4085.301308 | -0.0044 | 0.997 | -1.54748748  | count | 1 |
| AL021068.1 | -17.869595 | 4085.301308 | -0.0044 | 0.997 | -1.54748748  | count | 1 |
| C1orf53    | -17.869595 | 4085.301308 | -0.0044 | 0.997 | -1.54748748  | count | 1 |
| CHIT1      | -17.869595 | 4085.301308 | -0.0044 | 0.997 | -1.54748748  | count | 1 |
| MIR29B2CHG | -17.869595 | 4085.301308 | -0.0044 | 0.997 | -1.54748748  | count | 1 |
| INTS7      | -17.869595 | 4085.301308 | -0.0044 | 0.997 | -1.54748748  | count | 1 |

|             |            |             |         |       |             |       |   |
|-------------|------------|-------------|---------|-------|-------------|-------|---|
| WDR64       | -17.869595 | 4085.301308 | -0.0044 | 0.997 | -1.54748748 | count | 1 |
| MBOAT2      | -17.869595 | 4085.301308 | -0.0044 | 0.997 | -1.54748748 | count | 1 |
| GTF3C2-AS1  | -17.869595 | 4085.301308 | -0.0044 | 0.997 | -1.54748748 | count | 1 |
| AC074117.1  | -17.869595 | 4085.301308 | -0.0044 | 0.997 | -1.54748748 | count | 1 |
| KRTCAP3     | -17.869595 | 4085.301308 | -0.0044 | 0.997 | -1.54748748 | count | 1 |
| SPDYA       | -17.869595 | 4085.301308 | -0.0044 | 0.997 | -1.54748748 | count | 1 |
| APLF        | -17.869595 | 4085.301308 | -0.0044 | 0.997 | -1.54748748 | count | 1 |
| SLC4A5      | -17.869595 | 4085.301308 | -0.0044 | 0.997 | -1.54748748 | count | 1 |
| MRPL53      | -17.869595 | 4085.301308 | -0.0044 | 0.997 | -1.54748748 | count | 1 |
| EVA1A       | -17.869595 | 4085.301308 | -0.0044 | 0.997 | -1.54748748 | count | 1 |
| IGKV3-20    | -17.869595 | 4085.301308 | -0.0044 | 0.997 | -1.54748748 | count | 1 |
| C2orf27B    | -17.869595 | 4085.301308 | -0.0044 | 0.997 | -1.54748748 | count | 1 |
| ZEB2-AS1    | -17.869595 | 4085.301308 | -0.0044 | 0.997 | -1.54748748 | count | 1 |
| LINC01806   | -17.869595 | 4085.301308 | -0.0044 | 0.997 | -1.54748748 | count | 1 |
| CHN1        | -17.869595 | 4085.301308 | -0.0044 | 0.997 | -1.54748748 | count | 1 |
| OSGEPL1-AS1 | -17.869595 | 4085.301308 | -0.0044 | 0.997 | -1.54748748 | count | 1 |
| AC064836.3  | -17.869595 | 4085.301308 | -0.0044 | 0.997 | -1.54748748 | count | 1 |
| AC007383.2  | -17.869595 | 4085.301308 | -0.0044 | 0.997 | -1.54748748 | count | 1 |
| AC007038.2  | -17.869595 | 4085.301308 | -0.0044 | 0.997 | -1.54748748 | count | 1 |
| AC079834.2  | -17.869595 | 4085.301308 | -0.0044 | 0.997 | -1.54748748 | count | 1 |
| FARP2       | -17.869595 | 4085.301308 | -0.0044 | 0.997 | -1.54748748 | count | 1 |
| AC112220.4  | -17.869595 | 4085.301308 | -0.0044 | 0.997 | -1.54748748 | count | 1 |
| DLEC1       | -17.869595 | 4085.301308 | -0.0044 | 0.997 | -1.54748748 | count | 1 |
| LRRC2       | -17.869595 | 4085.301308 | -0.0044 | 0.997 | -1.54748748 | count | 1 |
| ARF4-AS1    | -17.869595 | 4085.301308 | -0.0044 | 0.997 | -1.54748748 | count | 1 |
| SUCLG2-AS1  | -17.869595 | 4085.301308 | -0.0044 | 0.997 | -1.54748748 | count | 1 |
| GBE1        | -17.869595 | 4085.301308 | -0.0044 | 0.997 | -1.54748748 | count | 1 |
| PDIA5       | -17.869595 | 4085.301308 | -0.0044 | 0.997 | -1.54748748 | count | 1 |
| PLXNA1      | -17.869595 | 4085.301308 | -0.0044 | 0.997 | -1.54748748 | count | 1 |
| RAB43       | -17.869595 | 4085.301308 | -0.0044 | 0.997 | -1.54748748 | count | 1 |
| PPP2R3A     | -17.869595 | 4085.301308 | -0.0044 | 0.997 | -1.54748748 | count | 1 |
| AC097103.2  | -17.869595 | 4085.301308 | -0.0044 | 0.997 | -1.54748748 | count | 1 |
| AC007620.2  | -17.869595 | 4085.301308 | -0.0044 | 0.997 | -1.54748748 | count | 1 |
| AC016773.1  | -17.869595 | 4085.301308 | -0.0044 | 0.997 | -1.54748748 | count | 1 |
| HS3ST1      | -17.869595 | 4085.301308 | -0.0044 | 0.997 | -1.54748748 | count | 1 |
| AC025539.1  | -17.869595 | 4085.301308 | -0.0044 | 0.997 | -1.54748748 | count | 1 |
| SEPSECS     | -17.869595 | 4085.301308 | -0.0044 | 0.997 | -1.54748748 | count | 1 |
| TLR6        | -17.869595 | 4085.301308 | -0.0044 | 0.997 | -1.54748748 | count | 1 |
| WDR19       | -17.869595 | 4085.301308 | -0.0044 | 0.997 | -1.54748748 | count | 1 |
| EXOC1L      | -17.869595 | 4085.301308 | -0.0044 | 0.997 | -1.54748748 | count | 1 |
| TMPRSS11E   | -17.869595 | 4085.301308 | -0.0044 | 0.997 | -1.54748748 | count | 1 |
| IBSP        | -17.869595 | 4085.301308 | -0.0044 | 0.997 | -1.54748748 | count | 1 |
| AC004069.1  | -17.869595 | 4085.301308 | -0.0044 | 0.997 | -1.54748748 | count | 1 |
| SEC24B-AS1  | -17.869595 | 4085.301308 | -0.0044 | 0.997 | -1.54748748 | count | 1 |
| 1-Mar       | -17.869595 | 4085.301308 | -0.0044 | 0.997 | -1.54748748 | count | 1 |



|            |            |             |         |       |             |       |   |
|------------|------------|-------------|---------|-------|-------------|-------|---|
| WWC2       | -17.869595 | 4085.301308 | -0.0044 | 0.997 | -1.54748748 | count | 1 |
| GPX8       | -17.869595 | 4085.301308 | -0.0044 | 0.997 | -1.54748748 | count | 1 |
| FOXD1      | -17.869595 | 4085.301308 | -0.0044 | 0.997 | -1.54748748 | count | 1 |
| RGMB       | -17.869595 | 4085.301308 | -0.0044 | 0.997 | -1.54748748 | count | 1 |
| CDO1       | -17.869595 | 4085.301308 | -0.0044 | 0.997 | -1.54748748 | count | 1 |
| PCDHGA10   | -17.869595 | 4085.301308 | -0.0044 | 0.997 | -1.54748748 | count | 1 |
| ARHGEF37   | -17.869595 | 4085.301308 | -0.0044 | 0.997 | -1.54748748 | count | 1 |
| AC091982.3 | -17.869595 | 4085.301308 | -0.0044 | 0.997 | -1.54748748 | count | 1 |
| GEMIN5     | -17.869595 | 4085.301308 | -0.0044 | 0.997 | -1.54748748 | count | 1 |
| NRN1       | -17.869595 | 4085.301308 | -0.0044 | 0.997 | -1.54748748 | count | 1 |
| CAGE1      | -17.869595 | 4085.301308 | -0.0044 | 0.997 | -1.54748748 | count | 1 |
| AL353759.1 | -17.869595 | 4085.301308 | -0.0044 | 0.997 | -1.54748748 | count | 1 |
| ENPP5      | -17.869595 | 4085.301308 | -0.0044 | 0.997 | -1.54748748 | count | 1 |
| CRISP3     | -17.869595 | 4085.301308 | -0.0044 | 0.997 | -1.54748748 | count | 1 |
| TPBG       | -17.869595 | 4085.301308 | -0.0044 | 0.997 | -1.54748748 | count | 1 |
| AL024507.2 | -17.869595 | 4085.301308 | -0.0044 | 0.997 | -1.54748748 | count | 1 |
| AL356417.3 | -17.869595 | 4085.301308 | -0.0044 | 0.997 | -1.54748748 | count | 1 |
| PRKN       | -17.869595 | 4085.301308 | -0.0044 | 0.997 | -1.54748748 | count | 1 |
| HOXA-AS2   | -17.869595 | 4085.301308 | -0.0044 | 0.997 | -1.54748748 | count | 1 |
| TFR2       | -17.869595 | 4085.301308 | -0.0044 | 0.997 | -1.54748748 | count | 1 |
| RASA4      | -17.869595 | 4085.301308 | -0.0044 | 0.997 | -1.54748748 | count | 1 |
| POT1-AS1   | -17.869595 | 4085.301308 | -0.0044 | 0.997 | -1.54748748 | count | 1 |
| SVOPL      | -17.869595 | 4085.301308 | -0.0044 | 0.997 | -1.54748748 | count | 1 |
| AC083880.1 | -17.869595 | 4085.301308 | -0.0044 | 0.997 | -1.54748748 | count | 1 |
| EPHB6      | -17.869595 | 4085.301308 | -0.0044 | 0.997 | -1.54748748 | count | 1 |
| NOS3       | -17.869595 | 4085.301308 | -0.0044 | 0.997 | -1.54748748 | count | 1 |
| KLF8       | -17.869595 | 4085.301308 | -0.0044 | 0.997 | -1.54748748 | count | 1 |
| MTMR8      | -17.869595 | 4085.301308 | -0.0044 | 0.997 | -1.54748748 | count | 1 |
| CXorf57    | -17.869595 | 4085.301308 | -0.0044 | 0.997 | -1.54748748 | count | 1 |
| PAK3       | -17.869595 | 4085.301308 | -0.0044 | 0.997 | -1.54748748 | count | 1 |
| PLS3       | -17.869595 | 4085.301308 | -0.0044 | 0.997 | -1.54748748 | count | 1 |
| KLHL13     | -17.869595 | 4085.301308 | -0.0044 | 0.997 | -1.54748748 | count | 1 |
| AL121601.1 | -17.869595 | 4085.301308 | -0.0044 | 0.997 | -1.54748748 | count | 1 |
| CD99L2     | -17.869595 | 4085.301308 | -0.0044 | 0.997 | -1.54748748 | count | 1 |
| HCFC1-AS1  | -17.869595 | 4085.301308 | -0.0044 | 0.997 | -1.54748748 | count | 1 |
| AC145124.1 | -17.869595 | 4085.301308 | -0.0044 | 0.997 | -1.54748748 | count | 1 |
| MTUS1      | -17.869595 | 4085.301308 | -0.0044 | 0.997 | -1.54748748 | count | 1 |
| AC107959.1 | -17.869595 | 4085.301308 | -0.0044 | 0.997 | -1.54748748 | count | 1 |
| ESCO2      | -17.869595 | 4085.301308 | -0.0044 | 0.997 | -1.54748748 | count | 1 |
| PLAG1      | -17.869595 | 4085.301308 | -0.0044 | 0.997 | -1.54748748 | count | 1 |
| AC011978.2 | -17.869595 | 4085.301308 | -0.0044 | 0.997 | -1.54748748 | count | 1 |
| AC103706.1 | -17.869595 | 4085.301308 | -0.0044 | 0.997 | -1.54748748 | count | 1 |
| ZNF517     | -17.869595 | 4085.301308 | -0.0044 | 0.997 | -1.54748748 | count | 1 |
| AL391834.2 | -17.869595 | 4085.301308 | -0.0044 | 0.997 | -1.54748748 | count | 1 |
| ACO1       | -17.869595 | 4085.301308 | -0.0044 | 0.997 | -1.54748748 | count | 1 |

|            |            |             |         |       |             |       |   |
|------------|------------|-------------|---------|-------|-------------|-------|---|
| AL162231.1 | -17.869595 | 4085.301308 | -0.0044 | 0.997 | -1.54748748 | count | 1 |
| FAM95B1    | -17.869595 | 4085.301308 | -0.0044 | 0.997 | -1.54748748 | count | 1 |
| AL512625.1 | -17.869595 | 4085.301308 | -0.0044 | 0.997 | -1.54748748 | count | 1 |
| PSAT1      | -17.869595 | 4085.301308 | -0.0044 | 0.997 | -1.54748748 | count | 1 |
| ASPN       | -17.869595 | 4085.301308 | -0.0044 | 0.997 | -1.54748748 | count | 1 |
| PTGR1      | -17.869595 | 4085.301308 | -0.0044 | 0.997 | -1.54748748 | count | 1 |
| MIR181A2HG | -17.869595 | 4085.301308 | -0.0044 | 0.997 | -1.54748748 | count | 1 |
| SLC2A6     | -17.869595 | 4085.301308 | -0.0044 | 0.997 | -1.54748748 | count | 1 |
| BDNF-AS    | -17.869595 | 4085.301308 | -0.0044 | 0.997 | -1.54748748 | count | 1 |
| TNKS1BP1   | -17.869595 | 4085.301308 | -0.0044 | 0.997 | -1.54748748 | count | 1 |
| AP003108.2 | -17.869595 | 4085.301308 | -0.0044 | 0.997 | -1.54748748 | count | 1 |
| PPP1R32    | -17.869595 | 4085.301308 | -0.0044 | 0.997 | -1.54748748 | count | 1 |
| AP001160.3 | -17.869595 | 4085.301308 | -0.0044 | 0.997 | -1.54748748 | count | 1 |
| CADM1      | -17.869595 | 4085.301308 | -0.0044 | 0.997 | -1.54748748 | count | 1 |
| TIRAP      | -17.869595 | 4085.301308 | -0.0044 | 0.997 | -1.54748748 | count | 1 |
| HACD1      | -17.869595 | 4085.301308 | -0.0044 | 0.997 | -1.54748748 | count | 1 |
| ZEB1-AS1   | -17.869595 | 4085.301308 | -0.0044 | 0.997 | -1.54748748 | count | 1 |
| AGAP6      | -17.869595 | 4085.301308 | -0.0044 | 0.997 | -1.54748748 | count | 1 |
| PALD1      | -17.869595 | 4085.301308 | -0.0044 | 0.997 | -1.54748748 | count | 1 |
| UNC5B-AS1  | -17.869595 | 4085.301308 | -0.0044 | 0.997 | -1.54748748 | count | 1 |
| CFAP70     | -17.869595 | 4085.301308 | -0.0044 | 0.997 | -1.54748748 | count | 1 |
| TNKS2-AS1  | -17.869595 | 4085.301308 | -0.0044 | 0.997 | -1.54748748 | count | 1 |
| CCNJ       | -17.869595 | 4085.301308 | -0.0044 | 0.997 | -1.54748748 | count | 1 |
| AL158835.1 | -17.869595 | 4085.301308 | -0.0044 | 0.997 | -1.54748748 | count | 1 |
| RBP5       | -17.869595 | 4085.301308 | -0.0044 | 0.997 | -1.54748748 | count | 1 |
| LINC01252  | -17.869595 | 4085.301308 | -0.0044 | 0.997 | -1.54748748 | count | 1 |
| LINC00941  | -17.869595 | 4085.301308 | -0.0044 | 0.997 | -1.54748748 | count | 1 |
| ETFBKMT    | -17.869595 | 4085.301308 | -0.0044 | 0.997 | -1.54748748 | count | 1 |
| TMEM117    | -17.869595 | 4085.301308 | -0.0044 | 0.997 | -1.54748748 | count | 1 |
| ESPL1      | -17.869595 | 4085.301308 | -0.0044 | 0.997 | -1.54748748 | count | 1 |
| SPRYD4     | -17.869595 | 4085.301308 | -0.0044 | 0.997 | -1.54748748 | count | 1 |
| LINC02453  | -17.869595 | 4085.301308 | -0.0044 | 0.997 | -1.54748748 | count | 1 |
| PHETA1     | -17.869595 | 4085.301308 | -0.0044 | 0.997 | -1.54748748 | count | 1 |
| ALDH2      | -17.869595 | 4085.301308 | -0.0044 | 0.997 | -1.54748748 | count | 1 |
| OAS3       | -17.869595 | 4085.301308 | -0.0044 | 0.997 | -1.54748748 | count | 1 |
| AL138966.2 | -17.869595 | 4085.301308 | -0.0044 | 0.997 | -1.54748748 | count | 1 |
| LRRC63     | -17.869595 | 4085.301308 | -0.0044 | 0.997 | -1.54748748 | count | 1 |
| FARP1-AS1  | -17.869595 | 4085.301308 | -0.0044 | 0.997 | -1.54748748 | count | 1 |
| GAS6-AS1   | -17.869595 | 4085.301308 | -0.0044 | 0.997 | -1.54748748 | count | 1 |
| TRAV27     | -17.869595 | 4085.301308 | -0.0044 | 0.997 | -1.54748748 | count | 1 |
| HAUS4      | -17.869595 | 4085.301308 | -0.0044 | 0.997 | -1.54748748 | count | 1 |
| IPO4       | -17.869595 | 4085.301308 | -0.0044 | 0.997 | -1.54748748 | count | 1 |
| PTPN21     | -17.869595 | 4085.301308 | -0.0044 | 0.997 | -1.54748748 | count | 1 |
| DICER1-AS1 | -17.869595 | 4085.301308 | -0.0044 | 0.997 | -1.54748748 | count | 1 |
| INF2       | -17.869595 | 4085.301308 | -0.0044 | 0.997 | -1.54748748 | count | 1 |

|            |            |             |         |       |             |       |   |
|------------|------------|-------------|---------|-------|-------------|-------|---|
| MKRN3      | -17.869595 | 4085.301308 | -0.0044 | 0.997 | -1.54748748 | count | 1 |
| ACTC1      | -17.869595 | 4085.301308 | -0.0044 | 0.997 | -1.54748748 | count | 1 |
| C15orf62   | -17.869595 | 4085.301308 | -0.0044 | 0.997 | -1.54748748 | count | 1 |
| OIP5       | -17.869595 | 4085.301308 | -0.0044 | 0.997 | -1.54748748 | count | 1 |
| NUSAP1     | -17.869595 | 4085.301308 | -0.0044 | 0.997 | -1.54748748 | count | 1 |
| C2CD4B     | -17.869595 | 4085.301308 | -0.0044 | 0.997 | -1.54748748 | count | 1 |
| TMC3-AS1   | -17.869595 | 4085.301308 | -0.0044 | 0.997 | -1.54748748 | count | 1 |
| ADAMTSL3   | -17.869595 | 4085.301308 | -0.0044 | 0.997 | -1.54748748 | count | 1 |
| EEF2KMT    | -17.869595 | 4085.301308 | -0.0044 | 0.997 | -1.54748748 | count | 1 |
| MYH11      | -17.869595 | 4085.301308 | -0.0044 | 0.997 | -1.54748748 | count | 1 |
| KIAA0895L  | -17.869595 | 4085.301308 | -0.0044 | 0.997 | -1.54748748 | count | 1 |
| LINC02166  | -17.869595 | 4085.301308 | -0.0044 | 0.997 | -1.54748748 | count | 1 |
| TLCD2      | -17.869595 | 4085.301308 | -0.0044 | 0.997 | -1.54748748 | count | 1 |
| CXCL16     | -17.869595 | 4085.301308 | -0.0044 | 0.997 | -1.54748748 | count | 1 |
| ZNF594     | -17.869595 | 4085.301308 | -0.0044 | 0.997 | -1.54748748 | count | 1 |
| SLC16A11   | -17.869595 | 4085.301308 | -0.0044 | 0.997 | -1.54748748 | count | 1 |
| NEURL4     | -17.869595 | 4085.301308 | -0.0044 | 0.997 | -1.54748748 | count | 1 |
| NLGN2      | -17.869595 | 4085.301308 | -0.0044 | 0.997 | -1.54748748 | count | 1 |
| AC093484.3 | -17.869595 | 4085.301308 | -0.0044 | 0.997 | -1.54748748 | count | 1 |
| MTRNR2L1   | -17.869595 | 4085.301308 | -0.0044 | 0.997 | -1.54748748 | count | 1 |
| KSR1       | -17.869595 | 4085.301308 | -0.0044 | 0.997 | -1.54748748 | count | 1 |
| PROCA1     | -17.869595 | 4085.301308 | -0.0044 | 0.997 | -1.54748748 | count | 1 |
| RAB34      | -17.869595 | 4085.301308 | -0.0044 | 0.997 | -1.54748748 | count | 1 |
| HCRT       | -17.869595 | 4085.301308 | -0.0044 | 0.997 | -1.54748748 | count | 1 |
| AC100793.2 | -17.869595 | 4085.301308 | -0.0044 | 0.997 | -1.54748748 | count | 1 |
| 10-Mar     | -17.869595 | 4085.301308 | -0.0044 | 0.997 | -1.54748748 | count | 1 |
| CD300LF    | -17.869595 | 4085.301308 | -0.0044 | 0.997 | -1.54748748 | count | 1 |
| CDK3       | -17.869595 | 4085.301308 | -0.0044 | 0.997 | -1.54748748 | count | 1 |
| LIPG       | -17.869595 | 4085.301308 | -0.0044 | 0.997 | -1.54748748 | count | 1 |
| ACTL10     | -17.869595 | 4085.301308 | -0.0044 | 0.997 | -1.54748748 | count | 1 |
| LPIN3      | -17.869595 | 4085.301308 | -0.0044 | 0.997 | -1.54748748 | count | 1 |
| ZNF334     | -17.869595 | 4085.301308 | -0.0044 | 0.997 | -1.54748748 | count | 1 |
| ADNP-AS1   | -17.869595 | 4085.301308 | -0.0044 | 0.997 | -1.54748748 | count | 1 |
| BCAS1      | -17.869595 | 4085.301308 | -0.0044 | 0.997 | -1.54748748 | count | 1 |
| LINGO3     | -17.869595 | 4085.301308 | -0.0044 | 0.997 | -1.54748748 | count | 1 |
| GNG7       | -17.869595 | 4085.301308 | -0.0044 | 0.997 | -1.54748748 | count | 1 |
| C3         | -17.869595 | 4085.301308 | -0.0044 | 0.997 | -1.54748748 | count | 1 |
| ZNF69      | -17.869595 | 4085.301308 | -0.0044 | 0.997 | -1.54748748 | count | 1 |
| LYL1       | -17.869595 | 4085.301308 | -0.0044 | 0.997 | -1.54748748 | count | 1 |
| HOMER3     | -17.869595 | 4085.301308 | -0.0044 | 0.997 | -1.54748748 | count | 1 |
| TDRD12     | -17.869595 | 4085.301308 | -0.0044 | 0.997 | -1.54748748 | count | 1 |
| AC010616.1 | -17.869595 | 4085.301308 | -0.0044 | 0.997 | -1.54748748 | count | 1 |
| ZNF235     | -17.869595 | 4085.301308 | -0.0044 | 0.997 | -1.54748748 | count | 1 |
| PPM1N      | -17.869595 | 4085.301308 | -0.0044 | 0.997 | -1.54748748 | count | 1 |
| AC010331.1 | -17.869595 | 4085.301308 | -0.0044 | 0.997 | -1.54748748 | count | 1 |

|            |            |             |         |         |              |       |   |
|------------|------------|-------------|---------|---------|--------------|-------|---|
| ZNF114     | -17.869595 | 4085.301308 | -0.0044 | 0.997   | -1.54748748  | count | 1 |
| AC006942.1 | -17.869595 | 4085.301308 | -0.0044 | 0.997   | -1.54748748  | count | 1 |
| LILRB2     | -17.869595 | 4085.301308 | -0.0044 | 0.997   | -1.54748748  | count | 1 |
| LILRB4     | -17.869595 | 4085.301308 | -0.0044 | 0.997   | -1.54748748  | count | 1 |
| ZSCAN5A    | -17.869595 | 4085.301308 | -0.0044 | 0.997   | -1.54748748  | count | 1 |
| AC005261.3 | -17.869595 | 4085.301308 | -0.0044 | 0.997   | -1.54748748  | count | 1 |
| ZNF749     | -17.869595 | 4085.301308 | -0.0044 | 0.997   | -1.54748748  | count | 1 |
| ZNF772     | -17.869595 | 4085.301308 | -0.0044 | 0.997   | -1.54748748  | count | 1 |
| ZIK1       | -17.869595 | 4085.301308 | -0.0044 | 0.997   | -1.54748748  | count | 1 |
| USP9Y      | -17.869595 | 4085.301308 | -0.0044 | 0.997   | -1.54748748  | count | 1 |
| AC007663.3 | -17.869595 | 4085.301308 | -0.0044 | 0.997   | -1.54748748  | count | 1 |
| AL022323.4 | -17.869595 | 4085.301308 | -0.0044 | 0.997   | -1.54748748  | count | 1 |
| RASD2      | -17.869595 | 4085.301308 | -0.0044 | 0.997   | -1.54748748  | count | 1 |
| RBFOX2     | -17.869595 | 4085.301308 | -0.0044 | 0.997   | -1.54748748  | count | 1 |
| AL022322.2 | -17.869595 | 4085.301308 | -0.0044 | 0.997   | -1.54748748  | count | 1 |
| Z83851.1   | -17.869595 | 4085.301308 | -0.0044 | 0.997   | -1.54748748  | count | 1 |
| SHISAL1    | -17.869595 | 4085.301308 | -0.0044 | 0.997   | -1.54748748  | count | 1 |
| C22orf34   | -17.869595 | 4085.301308 | -0.0044 | 0.997   | -1.54748748  | count | 1 |
| U62317.3   | -17.869595 | 4085.301308 | -0.0044 | 0.997   | -1.54748748  | count | 1 |
| CU633967.1 | -17.869595 | 4085.301308 | -0.0044 | 0.997   | -1.54748748  | count | 1 |
| MPIG6B     | -17.868205 | 2872.690294 | -0.0062 | 0.995   | -1.54748748  | count | 1 |
| TBC1D4     | -17.868205 | 2872.690294 | -0.0062 | 0.995   | -1.54748748  | count | 1 |
| ST6GALNAC1 | -17.868205 | 2872.690294 | -0.0062 | 0.995   | -1.54748748  | count | 1 |
| NDC80      | -17.868205 | 2872.690294 | -0.0062 | 0.995   | -1.54748748  | count | 1 |
| THBD       | -17.868205 | 2872.690294 | -0.0062 | 0.995   | -1.54748748  | count | 1 |
| ZNF701     | -1.445849  | 0.9583754   | -1.5086 | 0.132   | -1.545737087 | count | 1 |
| CUL3       | -1.2033413 | 0.4241724   | -2.8369 | 0.00484 | -1.544701805 | count | 1 |
| PHF2       | -1.5148485 | 1.4378315   | -1.0536 | 0.293   | -1.540778621 | count | 1 |
| ACP5       | -1.1923343 | 0.6240006   | -1.9108 | 0.0569  | -1.540228694 | count | 1 |
| RMDN1      | -1.312973  | 0.6640741   | -1.9771 | 0.0489  | -1.537058279 | count | 1 |
| ZNF382     | -1.8123541 | 1.510493    | -1.1998 | 0.231   | -1.53599272  | count | 1 |
| PAFAH1B3   | -1.196045  | 0.6540439   | -1.8287 | 0.0684  | -1.535906267 | count | 1 |
| CELF1      | -1.3807887 | 0.7091265   | -1.9472 | 0.0524  | -1.534693401 | count | 1 |
| LINC01089  | -1.5940525 | 1.7019365   | -0.9366 | 0.35    | -1.516626518 | count | 1 |
| HLA-DQA1   | -1.2687841 | 0.6325778   | -2.0057 | 0.0457  | -1.516043112 | count | 1 |
| NIPSNAP1   | -1.2918451 | 0.813323    | -1.5884 | 0.113   | -1.515074358 | count | 1 |
| HDAC3      | -1.2053735 | 0.5588876   | -2.1567 | 0.0318  | -1.514194157 | count | 1 |
| CHTF8      | -1.185801  | 1.0653459   | -1.1131 | 0.267   | -1.513909582 | count | 1 |
| GEM        | -1.290503  | 0.8851085   | -1.458  | 0.146   | -1.513673927 | count | 1 |
| QRSL1      | -1.290503  | 0.9705305   | -1.3297 | 0.185   | -1.513673927 | count | 1 |
| CTSL       | -1.290503  | 1.0490195   | -1.2302 | 0.22    | -1.513673927 | count | 1 |
| PRKCSH     | -1.1464801 | 0.5995309   | -1.9123 | 0.0567  | -1.510984562 | count | 1 |
| COG5       | -1.3171848 | 0.8946253   | -1.4723 | 0.142   | -1.510466525 | count | 1 |
| ZNF667     | -1.3171848 | 1.1718067   | -1.1241 | 0.262   | -1.510466525 | count | 1 |
| PLPP5      | -1.212011  | 0.6361817   | -1.9051 | 0.0576  | -1.508167499 | count | 1 |

|            |            |           |         |        |              |       |   |
|------------|------------|-----------|---------|--------|--------------|-------|---|
| DOPEY2     | -1.743949  | 1.2385015 | -1.4081 | 0.16   | -1.496116954 | count | 1 |
| SQOR       | -1.1384168 | 0.4925822 | -2.3111 | 0.0215 | -1.495031247 | count | 1 |
| CERK       | -1.247437  | 0.8971948 | -1.3904 | 0.165  | -1.493022073 | count | 1 |
| SLC25A16   | -1.3761407 | 1.0087013 | -1.3643 | 0.173  | -1.483137779 | count | 1 |
| ORC3       | -1.3249135 | 0.7887109 | -1.6798 | 0.094  | -1.481103539 | count | 1 |
| SYCP2      | -1.7076408 | 1.6446552 | -1.0383 | 0.3    | -1.474320104 | count | 1 |
| GATC       | -1.5353348 | 0.8588547 | -1.7877 | 0.0748 | -1.473661258 | count | 1 |
| TMEM251    | -1.278395  | 0.7738519 | -1.652  | 0.0995 | -1.471246109 | count | 1 |
| AC064807.1 | -1.168197  | 1.2446562 | -0.9386 | 0.349  | -1.470692646 | count | 1 |
| NOP56      | -1.0965436 | 0.4391993 | -2.4967 | 0.013  | -1.470084525 | count | 1 |
| FRMD8      | -1.3597897 | 1.0386996 | -1.3091 | 0.191  | -1.468232973 | count | 1 |
| ZUP1       | -1.2466294 | 0.6942678 | -1.7956 | 0.0735 | -1.467627598 | count | 1 |
| PLGRKT     | -1.132132  | 0.4548166 | -2.4892 | 0.0133 | -1.466638624 | count | 1 |
| TFB1M      | -1.0955305 | 0.5937092 | -1.8452 | 0.0659 | -1.460883934 | count | 1 |
| INAFM1     | -1.1836546 | 0.7006244 | -1.6894 | 0.0921 | -1.460433144 | count | 1 |
| ATG2B      | -1.1836546 | 0.7427427 | -1.5936 | 0.112  | -1.460433144 | count | 1 |
| BICD1      | -1.3003325 | 0.9515599 | -1.3665 | 0.173  | -1.457234757 | count | 1 |
| ZNFX1      | -1.2611531 | 0.6715651 | -1.8779 | 0.0613 | -1.453678579 | count | 1 |
| SFXN3      | -1.6715658 | 1.101129  | -1.518  | 0.13   | -1.452228164 | count | 1 |
| RAMP1      | -1.6680811 | 1.2758673 | -1.3074 | 0.192  | -1.450071169 | count | 1 |
| ARAP1      | -1.6680811 | 1.3245241 | -1.2594 | 0.209  | -1.450071169 | count | 1 |
| BRCC3      | -1.2042785 | 0.7733625 | -1.5572 | 0.12   | -1.446133491 | count | 1 |
| PCGF3      | -1.3353639 | 0.821415  | -1.6257 | 0.105  | -1.445812967 | count | 1 |
| ERMP1      | -1.9915389 | 1.3948185 | -1.4278 | 0.154  | -1.443213621 | count | 1 |
| LINC01684  | -1.6554612 | 1.0987387 | -1.5067 | 0.133  | -1.442225494 | count | 1 |
| CAMK2N1    | -1.3924211 | 0.856336  | -1.626  | 0.105  | -1.438893874 | count | 1 |
| SWT1       | -1.4839551 | 0.9956881 | -1.4904 | 0.137  | -1.435107913 | count | 1 |
| CSTF2T     | -1.1030296 | 0.7650455 | -1.4418 | 0.15   | -1.430846063 | count | 1 |
| GRN        | -1.2359025 | 0.7071908 | -1.7476 | 0.0815 | -1.427804081 | count | 1 |
| CAT        | -1.0777248 | 0.5286434 | -2.0387 | 0.0423 | -1.424160462 | count | 1 |
| C6orf136   | -1.4694619 | 1.1453587 | -1.283  | 0.2    | -1.424072025 | count | 1 |
| RPE        | -1.4694619 | 1.3873525 | -1.0592 | 0.29   | -1.424072025 | count | 1 |
| PDIK1L     | -1.4694619 | 1.544725  | -0.9513 | 0.342  | -1.424072025 | count | 1 |
| DNAJC3-DT  | -1.6245612 | 1.2560316 | -1.2934 | 0.197  | -1.422790332 | count | 1 |
| ZNF81      | -1.6245612 | 1.559039  | -1.042  | 0.298  | -1.422790332 | count | 1 |
| LSG1       | -1.1813013 | 0.8136256 | -1.4519 | 0.147  | -1.420985052 | count | 1 |
| PDZD4      | -1.3040959 | 1.1623974 | -1.1219 | 0.263  | -1.416844802 | count | 1 |
| MTA2       | -1.1577879 | 0.8286034 | -1.3973 | 0.163  | -1.414267418 | count | 1 |
| PDK2       | -1.1559227 | 0.9293048 | -1.2439 | 0.214  | -1.412169331 | count | 1 |
| CHCHD6     | -1.2541973 | 1.0479649 | -1.1968 | 0.232  | -1.411961843 | count | 1 |
| MFSD6      | -1.2190513 | 0.8721751 | -1.3977 | 0.163  | -1.41044032  | count | 1 |
| IGHG1      | -1.251484  | 0.6791505 | -1.8427 | 0.0663 | -1.40928022  | count | 1 |
| TLL10      | -1.1518756 | 0.6963578 | -1.6541 | 0.0991 | -1.40761424  | count | 1 |
| MADD       | -1.3554799 | 1.1513729 | -1.1773 | 0.24   | -1.407190501 | count | 1 |
| ACAD9      | -1.596402  | 1.1254875 | -1.4184 | 0.157  | -1.404800369 | count | 1 |

|             |            |           |         |        |              |       |   |
|-------------|------------|-----------|---------|--------|--------------|-------|---|
| SLC16A1-AS1 | -1.290874  | 1.3987504 | -0.9229 | 0.357  | -1.404505818 | count | 1 |
| PHLPP1      | -1.290874  | 1.3987504 | -0.9229 | 0.357  | -1.404505818 | count | 1 |
| PRPF40B     | -1.290874  | 1.5626198 | -0.8261 | 0.409  | -1.404505818 | count | 1 |
| FAM161B     | -1.290874  | 1.6384199 | -0.7879 | 0.431  | -1.404505818 | count | 1 |
| VSIG4       | -1.2908735 | 1.9742378 | -0.6539 | 0.5137 | -1.404505266 | count | 1 |
| TRIM4       | -1.2101435 | 0.6399838 | -1.8909 | 0.0595 | -1.401230759 | count | 1 |
| TLR1        | -1.4362962 | 0.9617971 | -1.4933 | 0.136  | -1.398553149 | count | 1 |
| RILP        | -1.586022  | 1.0130172 | -1.5656 | 0.118  | -1.398101942 | count | 1 |
| CCR1        | -1.0691853 | 0.6888489 | -1.5521 | 0.122  | -1.395936953 | count | 1 |
| TMEM254     | -1.2022728 | 1.0163133 | -1.183  | 0.238  | -1.393075806 | count | 1 |
| IFI44       | -1.0269913 | 0.4686592 | -2.1913 | 0.0291 | -1.391737748 | count | 1 |
| MTERF3      | -1.0710542 | 0.8790105 | -1.2185 | 0.224  | -1.391361291 | count | 1 |
| TRMT61A     | -1.8728864 | 1.3005351 | -1.4401 | 0.151  | -1.390521812 | count | 1 |
| PFKP        | -1.1349734 | 0.6125975 | -1.8527 | 0.0648 | -1.388550804 | count | 1 |
| LZIC        | -1.1968009 | 0.7158349 | -1.6719 | 0.0955 | -1.38739656  | count | 1 |
| CCDC102A    | -1.1064512 | 0.6866169 | -1.6115 | 0.108  | -1.385672642 | count | 1 |
| DUSP12      | -1.0393761 | 0.5000377 | -2.0786 | 0.0384 | -1.384553035 | count | 1 |
| SERPINI1    | -1.078531  | 0.7858153 | -1.3725 | 0.171  | -1.384496066 | count | 1 |
| AL133342.1  | -1.1437621 | 0.8005264 | -1.4288 | 0.154  | -1.379627352 | count | 1 |
| LST1        | -1.263891  | 0.7286804 | -1.7345 | 0.0838 | -1.379160552 | count | 1 |
| RMND1       | -1.4104564 | 1.2478555 | -1.1303 | 0.259  | -1.378416779 | count | 1 |
| RAB13       | -1.4104564 | 1.3159676 | -1.0718 | 0.285  | -1.378416779 | count | 1 |
| BRCA1       | -1.4104564 | 1.3344344 | -1.057  | 0.291  | -1.378416779 | count | 1 |
| SFXN5       | -1.8423155 | 1.0621211 | -1.7346 | 0.0838 | -1.376268697 | count | 1 |
| ZNF512      | -1.8423155 | 1.2139292 | -1.5176 | 0.13   | -1.376268697 | count | 1 |
| RCAN1       | -1.8423155 | 1.5215859 | -1.2108 | 0.227  | -1.376268697 | count | 1 |
| CLCN3       | -1.3172252 | 0.9093777 | -1.4485 | 0.148  | -1.373899153 | count | 1 |
| PEX6        | -1.3168142 | 1.128621  | -1.1667 | 0.244  | -1.373538964 | count | 1 |
| EDRF1       | -1.4021484 | 0.9716639 | -1.443  | 0.15   | -1.371895388 | count | 1 |
| SEC24B      | -1.2131483 | 1.0368135 | -1.1701 | 0.243  | -1.371168693 | count | 1 |
| VIM-AS1     | -1.1789015 | 0.6560375 | -1.797  | 0.0733 | -1.368763665 | count | 1 |
| ITGA1       | -1.0161687 | 0.5674689 | -1.7907 | 0.0743 | -1.365751843 | count | 1 |
| ARMT1       | -1.079109  | 0.9259652 | -1.1654 | 0.245  | -1.365338231 | count | 1 |
| UCHL5       | -0.988693  | 0.4417124 | -2.2383 | 0.0259 | -1.363333841 | count | 1 |
| MASTL       | -1.1733804 | 1.000693  | -1.1726 | 0.242  | -1.362999313 | count | 1 |
| CNOT3       | -1.147732  | 0.9341604 | -1.2286 | 0.2201 | -1.362012886 | count | 1 |
| SUPT7L      | -1.041661  | 0.8012537 | -1.3    | 0.195  | -1.361570917 | count | 1 |
| FANCG       | -1.8093842 | 1.3585858 | -1.3318 | 0.184  | -1.360599343 | count | 1 |
| MCRS1       | -1.0510065 | 0.6359507 | -1.6527 | 0.0994 | -1.35912764  | count | 1 |
| TMEM120A    | -1.1237772 | 0.7030602 | -1.5984 | 0.111  | -1.357474736 | count | 1 |
| PIK3C3      | -1.380985  | 0.918802  | -1.503  | 0.134  | -1.355179956 | count | 1 |
| ATP6V0A2    | -1.0537873 | 1.0046623 | -1.0489 | 0.295  | -1.354357287 | count | 1 |
| KIT         | -2.701943  | 1.1814107 | -2.287  | 0.0228 | -1.351556506 | count | 1 |
| TSPAN17     | -1.232187  | 1.0870127 | -1.1336 | 0.258  | -1.349103177 | count | 1 |
| FBXO22      | -1.1907717 | 0.7377269 | -1.6141 | 0.107  | -1.348732402 | count | 1 |

|            |            |           |         |        |              |       |   |
|------------|------------|-----------|---------|--------|--------------|-------|---|
| ITPR3      | -1.1596455 | 1.0146479 | -1.1429 | 0.254  | -1.348624742 | count | 1 |
| SDHAF2     | -0.9703277 | 0.4034695 | -2.405  | 0.0167 | -1.348502556 | count | 1 |
| AC104532.2 | -1.5085524 | 1.2655482 | -1.192  | 0.234  | -1.346969467 | count | 1 |
| JRKL       | -1.1578467 | 0.9884948 | -1.1713 | 0.242  | -1.346738552 | count | 1 |
| AC008124.1 | -1.2287346 | 0.8947828 | -1.3732 | 0.171  | -1.345812079 | count | 1 |
| EIF2B5     | -1.3654529 | 1.1101479 | -1.23   | 0.22   | -1.342818271 | count | 1 |
| FAM78A     | -1.0932999 | 0.6758764 | -1.6176 | 0.107  | -1.341279328 | count | 1 |
| C1QB       | -1.1518756 | 0.8026453 | -1.4351 | 0.152  | -1.340471293 | count | 1 |
| LYRM4      | -1.1275887 | 0.68964   | -1.635  | 0.103  | -1.340202196 | count | 1 |
| OLMALINC   | -1.498191  | 1.2897207 | -1.1616 | 0.246  | -1.33997821  | count | 1 |
| RTL6       | -1.498191  | 1.587852  | -0.9435 | 0.346  | -1.33997821  | count | 1 |
| JAML       | -1.498191  | 1.67273   | -0.8957 | 0.371  | -1.33997821  | count | 1 |
| SMARCAD1   | -1.0291144 | 0.6800218 | -1.5134 | 0.131  | -1.339327087 | count | 1 |
| MAP4K1     | -1.0773023 | 0.7279535 | -1.4799 | 0.14   | -1.338173155 | count | 1 |
| UHRF2      | -1.0274402 | 0.5421121 | -1.8953 | 0.0589 | -1.337244279 | count | 1 |
| KXD1       | -0.9750144 | 0.384303  | -2.5371 | 0.0116 | -1.335596279 | count | 1 |
| ATP1A1     | -1.146311  | 0.4785681 | -2.3953 | 0.0172 | -1.334622517 | count | 1 |
| ZRANB1     | -1.354076  | 0.8819988 | -1.5352 | 0.126  | -1.333713284 | count | 1 |
| THBS1      | -1.0284819 | 1.0440413 | -0.9851 | 0.3253 | -1.331357962 | count | 1 |
| JPT2       | -1.050425  | 1.0613552 | -0.9897 | 0.323  | -1.331096639 | count | 1 |
| RRP1       | -1.2653061 | 0.8694776 | -1.4552 | 0.147  | -1.32797675  | count | 1 |
| TMEM150A   | -1.039189  | 0.8500589 | -1.2225 | 0.222  | -1.327603411 | count | 1 |
| PPM1B      | -1.0808009 | 0.578223  | -1.8692 | 0.0625 | -1.327027859 | count | 1 |
| LZTR1      | -1.7374814 | 1.2432018 | -1.3976 | 0.163  | -1.325235566 | count | 1 |
| EEF1AKMT1  | -1.7374814 | 1.4325659 | -1.2128 | 0.226  | -1.325235566 | count | 1 |
| FAM210B    | -1.091938  | 1.0541556 | -1.0358 | 0.301  | -1.321992129 | count | 1 |
| PAK1       | -1.2569    | 0.7378818 | -1.7034 | 0.0895 | -1.320462179 | count | 1 |
| PDGFA      | -1.0595807 | 0.8817172 | -1.2017 | 0.23   | -1.317572209 | count | 1 |
| MTMR10     | -1.1985309 | 0.9778713 | -1.2257 | 0.221  | -1.31687062  | count | 1 |
| TRIM21     | -1.3300526 | 1.1789822 | -1.1281 | 0.26   | -1.314347951 | count | 1 |
| OSER1-DT   | -1.2443901 | 1.2317361 | -1.0103 | 0.313  | -1.309238957 | count | 1 |
| GDI1       | -0.9894054 | 0.6249121 | -1.5833 | 0.114  | -1.306886704 | count | 1 |
| ARSG       | -1.1879984 | 1.1079849 | -1.0722 | 0.284  | -1.306715772 | count | 1 |
| EHBP1L1    | -1.309766  | 0.626995  | -2.089  | 0.0375 | -1.297848255 | count | 1 |
| APOL1      | -2.419425  | 1.2595681 | -1.9208 | 0.0556 | -1.293649268 | count | 1 |
| TPGS2      | -0.9717378 | 0.4967542 | -1.9562 | 0.0513 | -1.293363473 | count | 1 |
| AC015982.1 | -1.038322  | 0.8803191 | -1.1795 | 0.239  | -1.292776364 | count | 1 |
| HAGHL      | -1.673048  | 0.7040321 | -2.3764 | 0.0181 | -1.292187039 | count | 1 |
| HDAC2      | -0.9645312 | 0.461551  | -2.0898 | 0.0374 | -1.291714068 | count | 1 |
| DKC1       | -0.9435554 | 0.4819638 | -1.9577 | 0.0511 | -1.29165734  | count | 1 |
| NDRG3      | -1.0818993 | 0.8234131 | -1.3139 | 0.19   | -1.290368051 | count | 1 |
| CPTP       | -1.0473899 | 0.7127652 | -1.4695 | 0.143  | -1.28876939  | count | 1 |
| LINC01871  | -1.032259  | 0.4242089 | -2.4334 | 0.0155 | -1.285688095 | count | 1 |
| TLK2       | -0.976693  | 0.5364882 | -1.8205 | 0.0696 | -1.285582997 | count | 1 |
| ILVBL      | -1.4191243 | 0.9075274 | -1.5637 | 0.119  | -1.285447407 | count | 1 |

|           |            |           |         |        |              |       |   |
|-----------|------------|-----------|---------|--------|--------------|-------|---|
| NECAB3    | -1.4191243 | 0.9328912 | -1.5212 | 0.129  | -1.285447407 | count | 1 |
| SPTSSB    | -0.9474418 | 0.6620396 | -1.4311 | 0.153  | -1.284190169 | count | 1 |
| SLC25A43  | -0.989728  | 0.986044  | -1.0037 | 0.316  | -1.283392259 | count | 1 |
| OXSM      | -1.2915397 | 1.0828419 | -1.1927 | 0.234  | -1.282910553 | count | 1 |
| ZW10      | -1.2915397 | 1.1358498 | -1.1371 | 0.256  | -1.282910553 | count | 1 |
| BPGM      | -0.9942849 | 0.9801369 | -1.0144 | 0.311  | -1.281462586 | count | 1 |
| PPM1D     | -0.9820777 | 0.7845038 | -1.2518 | 0.212  | -1.280649761 | count | 1 |
| GIT1      | -1.1232546 | 0.6350015 | -1.7689 | 0.0779 | -1.280202481 | count | 1 |
| B3GNL1    | -1.027487  | 0.9677665 | -1.0617 | 0.289  | -1.280104149 | count | 1 |
| MTRNR2L8  | -1.054353  | 0.4737352 | -2.2256 | 0.0267 | -1.279812334 | count | 1 |
| BRD8      | -1.0936244 | 0.8267962 | -1.3227 | 0.187  | -1.278852968 | count | 1 |
| ZFP90     | -1.0244985 | 0.585046  | -1.7511 | 0.0809 | -1.276604813 | count | 1 |
| TRUB2     | -1.0132926 | 0.8384708 | -1.2085 | 0.228  | -1.275721127 | count | 1 |
| METTL14   | -1.205895  | 0.9228055 | -1.3068 | 0.192  | -1.274400979 | count | 1 |
| LYAR      | -1.0011852 | 0.6071639 | -1.649  | 0.1    | -1.271968007 | count | 1 |
| RUFY1     | -1.0646673 | 0.6780542 | -1.5702 | 0.117  | -1.271444422 | count | 1 |
| ADK       | -0.9995966 | 0.7550087 | -1.324  | 0.186  | -1.270053198 | count | 1 |
| DYRK1A    | -1.0449209 | 0.6201665 | -1.6849 | 0.093  | -1.269178043 | count | 1 |
| LIMD1     | -1.1492314 | 0.8630664 | -1.3316 | 0.184  | -1.269063861 | count | 1 |
| BAG6      | -1.2738704 | 0.8279647 | -1.5386 | 0.125  | -1.268326932 | count | 1 |
| DYRK1B    | -1.2738704 | 0.8843267 | -1.4405 | 0.151  | -1.268326932 | count | 1 |
| INTS6-AS1 | -1.0437836 | 0.8586331 | -1.2156 | 0.225  | -1.267894475 | count | 1 |
| SLC4A2    | -1.1987086 | 1.0079668 | -1.1892 | 0.235  | -1.267847128 | count | 1 |
| SLC9A8    | -1.625412  | 1.4262891 | -1.1396 | 0.255  | -1.266918255 | count | 1 |
| IL7R      | -0.9580044 | 0.3902595 | -2.4548 | 0.0146 | -1.26684997  | count | 1 |
| PTPN11    | -0.9961456 | 0.4678789 | -2.1291 | 0.034  | -1.265892032 | count | 1 |
| DPY19L4   | -1.1450806 | 1.8202051 | -0.6291 | 0.53   | -1.265007042 | count | 1 |
| HLA-DRA   | -0.9043749 | 0.3448942 | -2.6222 | 0.0092 | -1.262723686 | count | 1 |
| NANP      | -1.2668163 | 1.4849494 | -0.8531 | 0.394  | -1.2624767   | count | 1 |
| NBEAL1    | -0.9624152 | 0.4621702 | -2.0824 | 0.0381 | -1.262005759 | count | 1 |
| TUBE1     | -1.1419356 | 1.1425293 | -0.9995 | 0.318  | -1.261930012 | count | 1 |
| ATG4C     | -1.1406945 | 0.9787206 | -1.1655 | 0.245  | -1.260714962 | count | 1 |
| PDE6D     | -1.1393333 | 0.6682229 | -1.705  | 0.0891 | -1.259381833 | count | 1 |
| HMGXB3    | -1.0356558 | 0.8186542 | -1.2651 | 0.207  | -1.258713128 | count | 1 |
| FXD1      | -1.3793182 | 1.025085  | -1.3456 | 0.179  | -1.257206046 | count | 1 |
| PLCG1     | -1.3793182 | 1.1102197 | -1.2424 | 0.215  | -1.257206046 | count | 1 |
| HYOU1     | -1.1866702 | 0.8385747 | -1.4151 | 0.158  | -1.256833451 | count | 1 |
| SHLD2     | -1.130415  | 0.8049813 | -1.4043 | 0.161  | -1.25063446  | count | 1 |
| STT3B     | -0.9321065 | 0.3783112 | -2.4639 | 0.0143 | -1.249529968 | count | 1 |
| ZNF770    | -0.9311367 | 0.5751962 | -1.6188 | 0.106  | -1.248266464 | count | 1 |
| Z93930.2  | -1.1759432 | 0.8909061 | -1.3199 | 0.188  | -1.246982757 | count | 1 |
| TASP1     | -1.0902013 | 1.0082528 | -1.0813 | 0.28   | -1.246207346 | count | 1 |
| SLC27A2   | -1.3627618 | 1.1513352 | -1.1836 | 0.237  | -1.245305028 | count | 1 |
| RGS10     | -0.8815519 | 0.3097531 | -2.846  | 0.0047 | -1.245190494 | count | 1 |
| ZC3H6     | -0.9179179 | 0.5383119 | -1.7052 | 0.0891 | -1.245119762 | count | 1 |



|            |            |           |         |        |              |       |   |
|------------|------------|-----------|---------|--------|--------------|-------|---|
| STARD9     | -1.5796165 | 1.2471063 | -1.2666 | 0.206  | -1.241950426 | count | 1 |
| HPS5       | -1.0378235 | 0.8242008 | -1.2592 | 0.209  | -1.241828066 | count | 1 |
| PRKAG1     | -0.9664624 | 0.5716696 | -1.6906 | 0.0919 | -1.23907186  | count | 1 |
| TMEM184C   | -2.200989  | 1.28408   | -1.7141 | 0.0875 | -1.238739498 | count | 1 |
| AGPAT5     | -1.0038551 | 0.8513967 | -1.1791 | 0.239  | -1.238569993 | count | 1 |
| AL450326.1 | -1.0824584 | 1.0408716 | -1.04   | 0.299  | -1.238202297 | count | 1 |
| EXOC2      | -1.0157827 | 0.6535706 | -1.5542 | 0.121  | -1.236203818 | count | 1 |
| TAF13      | -0.9571465 | 0.8174043 | -1.171  | 0.242  | -1.235675708 | count | 1 |
| PLIN2      | -0.8850754 | 0.3307654 | -2.6758 | 0.0078 | -1.235424082 | count | 1 |
| CXCL3      | -1.163261  | 1.3255389 | -0.8776 | 0.381  | -1.235292029 | count | 1 |
| AC005520.2 | -1.163261  | 1.3255389 | -0.8776 | 0.381  | -1.235292029 | count | 1 |
| ST6GAL1    | -1.163261  | 1.380033  | -0.8429 | 0.4    | -1.235292029 | count | 1 |
| SDHAF4     | -1.163261  | 1.380033  | -0.8429 | 0.4    | -1.235292029 | count | 1 |
| VPS4A      | -0.9206828 | 0.5225722 | -1.7618 | 0.079  | -1.234640023 | count | 1 |
| QPCT       | -2.1831301 | 1.5339783 | -1.4232 | 0.1556 | -1.233815892 | count | 1 |
| KLHL26     | -1.5624047 | 1.1682112 | -1.3374 | 0.182  | -1.232394436 | count | 1 |
| CACNB1     | -1.0760046 | 1.1712213 | -0.9187 | 0.359  | -1.231518045 | count | 1 |
| MPST       | -0.8942049 | 0.3572091 | -2.5033 | 0.0128 | -1.231413067 | count | 1 |
| HDHD5      | -0.9675101 | 0.6281099 | -1.5404 | 0.124  | -1.231284032 | count | 1 |
| CEP290     | -1.229029  | 0.6123102 | -2.0072 | 0.0456 | -1.230867435 | count | 1 |
| FBXO25     | -1.1083666 | 0.7740554 | -1.4319 | 0.153  | -1.228913199 | count | 1 |
| TIAM1      | -1.2264214 | 0.8928664 | -1.3736 | 0.171  | -1.228669481 | count | 1 |
| HMGA1      | -0.9059867 | 0.3586081 | -2.5264 | 0.012  | -1.226883716 | count | 1 |
| NMT1       | -0.9191652 | 0.6950103 | -1.3225 | 0.187  | -1.225501908 | count | 1 |
| EEFSEC     | -0.9191652 | 0.6507679 | -1.4124 | 0.159  | -1.225501899 | count | 1 |
| CALCOCO1   | -1.070175  | 0.5247666 | -2.0393 | 0.0422 | -1.225470883 | count | 1 |
| ALG10      | -1.1518756 | 1.0920003 | -1.0548 | 0.292  | -1.22475586  | count | 1 |
| ZSCAN30    | -1.1518756 | 1.1982847 | -0.9613 | 0.337  | -1.22475586  | count | 1 |
| N4BP2L1    | -0.9129775 | 0.4658365 | -1.9599 | 0.0509 | -1.224588675 | count | 1 |
| PINX1      | -1.1475368 | 0.8715524 | -1.3167 | 0.189  | -1.220730517 | count | 1 |
| INTS13     | -1.0620094 | 0.8535777 | -1.2442 | 0.214  | -1.216986031 | count | 1 |
| VIPR2      | -1.014382  | 1.0269169 | -0.9878 | 0.324  | -1.215830628 | count | 1 |
| CENPK      | -0.9255837 | 0.777383  | -1.1906 | 0.235  | -1.215429533 | count | 1 |
| UQCC1      | -1.2099965 | 1.1548554 | -1.0477 | 0.296  | -1.214775079 | count | 1 |
| ZMYND19    | -1.5284148 | 1.2106369 | -1.2625 | 0.208  | -1.213246071 | count | 1 |
| SIK1       | -1.5284148 | 1.2106369 | -1.2625 | 0.208  | -1.213246071 | count | 1 |
| NBPF11     | -1.5284148 | 1.4337801 | -1.066  | 0.287  | -1.213246071 | count | 1 |
| USP51      | -1.5284148 | 1.4337801 | -1.066  | 0.287  | -1.213246071 | count | 1 |
| RFC3       | -1.5284148 | 1.4337801 | -1.066  | 0.287  | -1.213246071 | count | 1 |
| PDP1       | -1.208047  | 0.6785475 | -1.7803 | 0.076  | -1.213120248 | count | 1 |
| ANKRD17    | -0.9702875 | 0.7275776 | -1.3336 | 0.183  | -1.212828813 | count | 1 |
| RAB32      | -0.9049301 | 0.5814269 | -1.5564 | 0.121  | -1.210707152 | count | 1 |
| IRF2BP1    | -2.082852  | 1.2181599 | -1.7098 | 0.0883 | -1.204875334 | count | 1 |
| TCP11L2    | -1.024263  | 0.504013  | -2.0322 | 0.0429 | -1.204381426 | count | 1 |
| NIPSNAP3A  | -0.952996  | 0.7622354 | -1.2503 | 0.212  | -1.203691253 | count | 1 |

|          |            |           |         |          |              |       |           |
|----------|------------|-----------|---------|----------|--------------|-------|-----------|
| IGHA1    | -2.070828  | 0.4858739 | -4.2621 | 2.66E-05 | -1.201254133 | count | 0.6467524 |
| RBM28    | -1.12627   | 0.4744516 | -2.3738 | 0.0182   | -1.200919868 | count | 1         |
| TYMP     | -0.8565794 | 0.4345296 | -1.9713 | 0.0495   | -1.200776801 | count | 1         |
| PER2     | -0.9842319 | 0.7490233 | -1.314  | 0.19     | -1.20029472  | count | 1         |
| AK6      | -0.9495194 | 0.6097354 | -1.5573 | 0.12     | -1.199518285 | count | 1         |
| C12orf43 | -0.9494017 | 0.6694191 | -1.4182 | 0.157    | -1.199376973 | count | 1         |
| ICMT     | -1.1227294 | 0.9813147 | -1.1441 | 0.253    | -1.19760861  | count | 1         |
| ARHGAP5  | -1.122145  | 0.5316664 | -2.1106 | 0.0356   | -1.197061699 | count | 1         |
| MEF2A    | -0.9387961 | 0.4912177 | -1.9112 | 0.0569   | -1.196440695 | count | 1         |
| UPF3B    | -0.9805734 | 0.5859852 | -1.6734 | 0.0952   | -1.196117303 | count | 1         |
| SPATA2L  | -0.9045553 | 0.5560079 | -1.6269 | 0.105    | -1.19379266  | count | 1         |
| UACA     | -1.2913006 | 1.2365958 | -1.0442 | 0.297    | -1.192900811 | count | 1         |
| ERMARD   | -1.2913006 | 1.2435488 | -1.0384 | 0.3      | -1.192900811 | count | 1         |
| NUP205   | -1.2913006 | 1.2435488 | -1.0384 | 0.3      | -1.192900811 | count | 1         |
| SGSM3    | -1.2913006 | 1.568748  | -0.8231 | 0.411    | -1.192900811 | count | 1         |
| ATP2A2   | -2.0426953 | 1.211915  | -1.6855 | 0.0929   | -1.192651454 | count | 1         |
| CLIC5    | -2.0426953 | 1.4632227 | -1.396  | 0.164    | -1.192651454 | count | 1         |
| GNPAT    | -1.0086866 | 0.647599  | -1.5576 | 0.12     | -1.187497925 | count | 1         |
| CRTC3    | -1.033072  | 0.6579108 | -1.5702 | 0.117    | -1.186779422 | count | 1         |
| BRWD3    | -1.2826996 | 1.0004087 | -1.2822 | 0.201    | -1.186480549 | count | 1         |
| CD38     | -0.9111215 | 0.7116706 | -1.2803 | 0.201    | -1.185400867 | count | 1         |
| HIC1     | -0.8634114 | 0.594843  | -1.4515 | 0.1476   | -1.183972968 | count | 1         |
| MPRIP    | -1.107929  | 0.6917877 | -1.6015 | 0.11     | -1.183727804 | count | 1         |
| SUPT6H   | -0.9360394 | 0.6126036 | -1.528  | 0.127    | -1.183318163 | count | 1         |
| GPR132   | -1.0605549 | 0.7236678 | -1.4655 | 0.144    | -1.181348859 | count | 1         |
| CEP135   | -0.9826601 | 0.7389105 | -1.3299 | 0.184    | -1.180453662 | count | 1         |
| SDE2     | -0.8939158 | 0.55151   | -1.6209 | 0.106    | -1.180197596 | count | 1         |
| PPP6R2   | -1.272464  | 0.8054181 | -1.5799 | 0.115    | -1.17880855  | count | 1         |
| CXCL8    | -1.056722  | 1.4106576 | -0.7491 | 0.454    | -1.177508782 | count | 1         |
| ERAP2    | -1.464946  | 0.9017991 | -1.6245 | 0.105    | -1.176501927 | count | 1         |
| PAPSS1   | -0.9789219 | 0.6842922 | -1.4306 | 0.154    | -1.176270067 | count | 1         |
| IPO7     | -1.0991942 | 0.7775735 | -1.4136 | 0.158    | -1.17550563  | count | 1         |
| CDK19    | -1.0991942 | 0.8801037 | -1.2489 | 0.213    | -1.17550563  | count | 1         |
| RPA1     | -0.9778221 | 0.7627146 | -1.282  | 0.201    | -1.175038638 | count | 1         |
| FCGRT    | -0.8892345 | 0.6797906 | -1.3081 | 0.192    | -1.174211353 | count | 1         |
| MRPS28   | -1.2653061 | 1.0718012 | -1.1805 | 0.239    | -1.173423344 | count | 1         |
| NARFL    | -1.2653061 | 1.091697  | -1.159  | 0.247    | -1.173423344 | count | 1         |
| GFM2     | -1.458776  | 0.9245169 | -1.5779 | 0.116    | -1.172861123 | count | 1         |
| ERMN     | -1.4518193 | 1.4688121 | -0.9884 | 0.324    | -1.168741249 | count | 1         |
| ALG8     | -1.256215  | 0.8720737 | -1.4405 | 0.151    | -1.166559479 | count | 1         |
| ARL3     | -0.9415271 | 0.8361481 | -1.126  | 0.261    | -1.166037816 | count | 1         |
| SOS1     | -0.8695412 | 0.5100848 | -1.7047 | 0.0892   | -1.164602889 | count | 1         |
| STK38L   | -1.251583  | 0.8005243 | -1.5635 | 0.119    | -1.163051958 | count | 1         |
| PDRG1    | -0.9184997 | 0.5511692 | -1.6665 | 0.0966   | -1.162191915 | count | 1         |
| C6orf48  | -0.9104255 | 0.4032212 | -2.2579 | 0.0246   | -1.161879226 | count | 1         |

|            |            |           |         |         |              |       |   |
|------------|------------|-----------|---------|---------|--------------|-------|---|
| CETN3      | -0.8919857 | 0.8491844 | -1.0504 | 0.294   | -1.161409706 | count | 1 |
| TAF1       | -1.438536  | 0.8388264 | -1.7149 | 0.0873  | -1.160831611 | count | 1 |
| SLC25A45   | -0.909181  | 0.5531619 | -1.6436 | 0.101   | -1.160360133 | count | 1 |
| VRK3       | -0.8686187 | 0.7141754 | -1.2163 | 0.225   | -1.159952509 | count | 1 |
| CISD1      | -0.8553311 | 0.6083641 | -1.406  | 0.161   | -1.159779538 | count | 1 |
| IFFO2      | -0.8811667 | 0.5602628 | -1.5728 | 0.117   | -1.159019004 | count | 1 |
| IMMT       | -0.8561984 | 0.4408432 | -1.9422 | 0.053   | -1.158535844 | count | 1 |
| ARID3B     | -1.0808009 | 1.0025589 | -1.078  | 0.282   | -1.158119723 | count | 1 |
| ENOX2      | -0.9624891 | 0.888898  | -1.0828 | 0.28    | -1.157843144 | count | 1 |
| MON2       | -0.9996128 | 0.8982599 | -1.1128 | 0.267   | -1.151588786 | count | 1 |
| SAMM50     | -0.8880177 | 0.5752527 | -1.5437 | 0.124   | -1.149883509 | count | 1 |
| CAMKMT     | -1.9024405 | 1.2550459 | -1.5158 | 0.131   | -1.146975338 | count | 1 |
| AC027097.1 | -0.994454  | 1.1093935 | -0.8964 | 0.371   | -1.146138239 | count | 1 |
| TM7SF2     | -1.1291612 | 0.9055686 | -1.2469 | 0.213   | -1.145164337 | count | 1 |
| RAB5IF     | -0.8244193 | 0.3515794 | -2.3449 | 0.0196  | -1.14504423  | count | 1 |
| ZNF266     | -1.2276265 | 1.0274763 | -1.1948 | 0.233   | -1.144800325 | count | 1 |
| TCF7       | -0.8262314 | 0.5484954 | -1.5064 | 0.133   | -1.143744515 | count | 1 |
| ZNF439     | -1.0640118 | 1.0305066 | -1.0325 | 0.303   | -1.142165231 | count | 1 |
| PDCD2L     | -1.1253205 | 1.0585136 | -1.0631 | 0.289   | -1.14180669  | count | 1 |
| FAM8A1     | -1.1253205 | 1.061318  | -1.0603 | 0.29    | -1.14180669  | count | 1 |
| LINC00528  | -1.1253205 | 1.3053063 | -0.8621 | 0.389   | -1.14180669  | count | 1 |
| APOL3      | -1.0635364 | 1.0088049 | -1.0543 | 0.293   | -1.141712279 | count | 1 |
| CARD11     | -1.0631526 | 0.7647643 | -1.3902 | 0.165   | -1.141346555 | count | 1 |
| DDX60L     | -0.9658387 | 0.6378638 | -1.5142 | 0.131   | -1.140760667 | count | 1 |
| GNLY       | -0.790979  | 0.2502255 | -3.1611 | 0.00172 | -1.139355112 | count | 1 |
| ZNF280D    | -0.9644335 | 0.760528  | -1.2681 | 0.206   | -1.139220731 | count | 1 |
| ACSF2      | -1.2191519 | 1.0763201 | -1.1327 | 0.258   | -1.138299375 | count | 1 |
| DGCR2      | -1.2191519 | 1.0763201 | -1.1327 | 0.258   | -1.138299375 | count | 1 |
| C14orf119  | -0.8153728 | 0.3917407 | -2.0814 | 0.0382  | -1.135814665 | count | 1 |
| THADA      | -0.927237  | 1.0337567 | -0.897  | 0.37    | -1.134902866 | count | 1 |
| TMTC3      | -1.1153982 | 1.0960187 | -1.0177 | 0.31    | -1.133111494 | count | 1 |
| ZFR        | -0.8330798 | 0.365414  | -2.2798 | 0.0233  | -1.132399225 | count | 1 |
| RAB3GAP1   | -1.0113621 | 0.5559982 | -1.819  | 0.0698  | -1.131764792 | count | 1 |
| MAD2L1     | -1.3899918 | 1.3516673 | -1.0284 | 0.305   | -1.131443704 | count | 1 |
| PORCN      | -1.3899918 | 1.3516673 | -1.0284 | 0.305   | -1.131443704 | count | 1 |
| PRRT3      | -1.3899918 | 1.556503  | -0.893  | 0.373   | -1.131443704 | count | 1 |
| EDC4       | -1.3899918 | 1.556503  | -0.893  | 0.373   | -1.131443704 | count | 1 |
| DGCR8      | -1.3899918 | 1.556503  | -0.893  | 0.373   | -1.131443704 | count | 1 |
| BLVRB      | -0.8329196 | 0.4564863 | -1.8246 | 0.069   | -1.130015334 | count | 1 |
| HIF1A      | -0.8231429 | 0.3794041 | -2.1696 | 0.0308  | -1.129677385 | count | 1 |
| CALD1      | -0.9337287 | 0.8641195 | -1.0806 | 0.2807  | -1.125452314 | count | 1 |
| VANGL1     | -1.2013076 | 0.9846442 | -1.22   | 0.223   | -1.124535264 | count | 1 |
| PPP2R2D    | -0.8529186 | 0.7383932 | -1.1551 | 0.249   | -1.123010344 | count | 1 |
| ZNF10      | -1.103764  | 0.8896854 | -1.2406 | 0.216   | -1.122877859 | count | 1 |
| DENR       | -0.8282868 | 0.4217021 | -1.9642 | 0.0504  | -1.121563112 | count | 1 |

|            |            |           |         |        |              |       |   |
|------------|------------|-----------|---------|--------|--------------|-------|---|
| FAM76A     | -1.041797  | 0.4730227 | -2.2024 | 0.0283 | -1.120931369 | count | 1 |
| CCDC115    | -0.8175175 | 0.4114765 | -1.9868 | 0.0478 | -1.120573299 | count | 1 |
| USP36      | -0.8909237 | 0.6317912 | -1.4102 | 0.159  | -1.11847556  | count | 1 |
| TAP1       | -0.8021148 | 0.3624429 | -2.2131 | 0.0276 | -1.118262787 | count | 1 |
| FASTK      | -0.8615172 | 0.5392731 | -1.5976 | 0.111  | -1.116807598 | count | 1 |
| ZC3H7B     | -0.9098328 | 0.8231472 | -1.1053 | 0.27   | -1.114803676 | count | 1 |
| EP300      | -0.8648103 | 0.5444811 | -1.5883 | 0.113  | -1.113893455 | count | 1 |
| AP002360.1 | -1.09288   | 0.9111717 | -1.1994 | 0.231  | -1.113267051 | count | 1 |
| NR2C2      | -1.09288   | 0.956527  | -1.1426 | 0.254  | -1.113267051 | count | 1 |
| AC006504.5 | -1.09288   | 1.0188948 | -1.0726 | 0.284  | -1.113267051 | count | 1 |
| CALY       | -1.358131  | 1.1276511 | -1.2044 | 0.229  | -1.111743469 | count | 1 |
| NELL2      | -1.8027355 | 1.349242  | -1.3361 | 0.182  | -1.111563108 | count | 1 |
| ZNF827     | -1.8027355 | 1.4445437 | -1.248  | 0.213  | -1.111563108 | count | 1 |
| FILIP1L    | -1.1836879 | 1.3251764 | -0.8932 | 0.372  | -1.110844162 | count | 1 |
| FBXO11     | -0.8277924 | 0.4638088 | -1.7848 | 0.0752 | -1.110040652 | count | 1 |
| SUN1       | -0.9602589 | 0.8563101 | -1.1214 | 0.263  | -1.109844271 | count | 1 |
| TMEM222    | -0.8271005 | 0.6123569 | -1.3507 | 0.178  | -1.109134866 | count | 1 |
| ADO        | -0.8914051 | 0.6052411 | -1.4728 | 0.142  | -1.10716645  | count | 1 |
| PEMT       | -0.8412506 | 0.7072046 | -1.1895 | 0.235  | -1.103082267 | count | 1 |
| G2E3       | -0.931339  | 0.7787826 | -1.1959 | 0.233  | -1.102823041 | count | 1 |
| ASXL2      | -0.9130061 | 0.671595  | -1.3595 | 0.175  | -1.102004983 | count | 1 |
| ACTR1A     | -0.8324855 | 0.6091684 | -1.3666 | 0.173  | -1.101428489 | count | 1 |
| ZNF33A     | -0.854392  | 0.5759102 | -1.4836 | 0.139  | -1.100974374 | count | 1 |
| ZSCAN32    | -0.9293189 | 1.015309  | -0.9153 | 0.361  | -1.100593316 | count | 1 |
| AAR2       | -1.1698096 | 0.8305699 | -1.4084 | 0.16   | -1.099990408 | count | 1 |
| POLR2M     | -1.1698096 | 0.87546   | -1.3362 | 0.182  | -1.099990408 | count | 1 |
| USP7       | -0.8847696 | 0.5416298 | -1.6335 | 0.103  | -1.099337465 | count | 1 |
| TMEM129    | -0.9793649 | 0.8412114 | -1.1642 | 0.245  | -1.099169981 | count | 1 |
| CACUL1     | -0.8304886 | 0.5383392 | -1.5427 | 0.124  | -1.098860308 | count | 1 |
| BRAP       | -0.845357  | 0.6003469 | -1.4081 | 0.16   | -1.096588354 | count | 1 |
| ARAF       | -0.8715989 | 0.7141042 | -1.2205 | 0.223  | -1.095330688 | count | 1 |
| ZNF596     | -1.0718302 | 1.133042  | -0.946  | 0.345  | -1.094578195 | count | 1 |
| DHX32      | -1.1623886 | 0.8737079 | -1.3304 | 0.184  | -1.09416152  | count | 1 |
| HLA-DQB1   | -0.8799769 | 0.5067402 | -1.7365 | 0.0834 | -1.093677713 | count | 1 |
| UBE4A      | -0.8915736 | 0.586634  | -1.5198 | 0.13   | -1.093652846 | count | 1 |
| ISG20      | -0.7661219 | 0.2539698 | -3.0166 | 0.0028 | -1.093484256 | count | 1 |
| MPPE1      | -0.8902319 | 0.7345499 | -1.2119 | 0.226  | -1.0920961   | count | 1 |
| UBE2O      | -0.9017211 | 0.7217308 | -1.2494 | 0.212  | -1.089198358 | count | 1 |
| PLAA       | -0.968581  | 0.8410074 | -1.1517 | 0.25   | -1.088124836 | count | 1 |
| ADGRG5     | -1.315793  | 1.2350137 | -1.0654 | 0.287  | -1.08506039  | count | 1 |
| TMEM182    | -1.004095  | 1.1079643 | -0.9063 | 0.365  | -1.084576538 | count | 1 |
| R3HDM4     | -0.8186698 | 0.5051287 | -1.6207 | 0.106  | -1.083650701 | count | 1 |
| NAB2       | -0.8714932 | 0.7210865 | -1.2086 | 0.228  | -1.083648914 | count | 1 |
| KIR2DL4    | -0.7835095 | 0.3681377 | -2.1283 | 0.0341 | -1.08229149  | count | 1 |
| FAM161A    | -1.7243603 | 1.0038578 | -1.7177 | 0.0868 | -1.081933773 | count | 1 |

|          |            |           |         |         |              |       |   |
|----------|------------|-----------|---------|---------|--------------|-------|---|
| BOD1     | -1.057212  | 0.7005937 | -1.509  | 0.132   | -1.081521536 | count | 1 |
| PPP1R3E  | -1.1450019 | 0.9750354 | -1.1743 | 0.241   | -1.080436494 | count | 1 |
| TRMT1    | -0.9324256 | 0.7343382 | -1.2697 | 0.205   | -1.080093973 | count | 1 |
| LRCH4    | -0.9323084 | 0.9109552 | -1.0234 | 0.307   | -1.079968327 | count | 1 |
| ATAD2    | -0.7974003 | 0.5634281 | -1.4153 | 0.158   | -1.078236423 | count | 1 |
| PPIE     | -0.7703699 | 0.3177026 | -2.4248 | 0.0159  | -1.078045384 | count | 1 |
| MCCC2    | -0.890499  | 0.7539714 | -1.1811 | 0.238   | -1.07643699  | count | 1 |
| STARD4   | -1.0500345 | 0.9095257 | -1.1545 | 0.249   | -1.075087377 | count | 1 |
| RHBDD2   | -0.7792729 | 0.4807485 | -1.621  | 0.106   | -1.074241503 | count | 1 |
| HACD3    | -0.8879024 | 0.6595436 | -1.3462 | 0.179   | -1.073480544 | count | 1 |
| VWA5A    | -1.1358705 | 0.9959938 | -1.1404 | 0.255   | -1.073189862 | count | 1 |
| C12orf4  | -1.1349734 | 1.1491783 | -0.9876 | 0.324   | -1.072476519 | count | 1 |
| SPG21    | -0.8312715 | 0.7278642 | -1.1421 | 0.254   | -1.07224698  | count | 1 |
| SLC25A44 | -1.1325668 | 1.2804641 | -0.8845 | 0.377   | -1.070561592 | count | 1 |
| NCEH1    | -1.1325668 | 1.2804641 | -0.8845 | 0.377   | -1.070561592 | count | 1 |
| KLF7     | -1.1325668 | 1.3416153 | -0.8442 | 0.399   | -1.070561592 | count | 1 |
| SLC43A3  | -1.1325668 | 1.3416153 | -0.8442 | 0.399   | -1.070561592 | count | 1 |
| CHKB     | -1.1325668 | 1.3949058 | -0.8119 | 0.417   | -1.070561592 | count | 1 |
| SFR1     | -0.8418112 | 0.7897452 | -1.0659 | 0.287   | -1.069213429 | count | 1 |
| MICAL3   | -1.6903706 | 0.8955875 | -1.8874 | 0.06    | -1.068580436 | count | 1 |
| RYK      | -0.8182668 | 0.6510236 | -1.2569 | 0.21    | -1.068512352 | count | 1 |
| MICAL2   | -0.9874217 | 0.839039  | -1.1768 | 0.24    | -1.068373024 | count | 1 |
| SART3    | -0.9203594 | 0.7512153 | -1.2252 | 0.221   | -1.067139519 | count | 1 |
| KIAA1147 | -0.9468638 | 0.6511065 | -1.4542 | 0.147   | -1.065791155 | count | 1 |
| MRPS27   | -0.8809518 | 0.9693354 | -0.9088 | 0.364   | -1.065559905 | count | 1 |
| PSMD6    | -0.7774603 | 0.4080318 | -1.9054 | 0.0576  | -1.063455556 | count | 1 |
| DENND1B  | -0.7812292 | 0.5945916 | -1.3139 | 0.19    | -1.063196781 | count | 1 |
| PTOV1    | -0.7961787 | 0.5275981 | -1.5091 | 0.132   | -1.06219188  | count | 1 |
| LLPH     | -0.8177834 | 0.5223393 | -1.5656 | 0.118   | -1.062004553 | count | 1 |
| RBBP5    | -1.2782515 | 1.1675028 | -1.0949 | 0.2744  | -1.060918688 | count | 1 |
| IGFBP2   | -0.7399255 | 0.2497239 | -2.963  | 0.00327 | -1.060194991 | count | 1 |
| ENG      | -0.9129424 | 0.9585543 | -0.9524 | 0.342   | -1.059159517 | count | 1 |
| CRELD1   | -0.8410736 | 0.6916151 | -1.2161 | 0.225   | -1.058640268 | count | 1 |
| ALG14    | -1.665026  | 1.0068087 | -1.6538 | 0.09914 | -1.058421798 | count | 1 |
| YTHDF3   | -1.665026  | 1.0101288 | -1.6483 | 0.1     | -1.058421798 | count | 1 |
| USP39    | -0.8059949 | 0.8075512 | -0.9981 | 0.319   | -1.058214736 | count | 1 |
| BRWD1    | -0.7881224 | 0.5041965 | -1.5631 | 0.119   | -1.058028924 | count | 1 |
| VGLL4    | -0.8323527 | 0.6418252 | -1.2969 | 0.196   | -1.057679189 | count | 1 |
| WASHC5   | -1.2716466 | 0.8447641 | -1.5053 | 0.1332  | -1.056624515 | count | 1 |
| PTPN22   | -0.7587041 | 0.3137003 | -2.4186 | 0.0161  | -1.056307521 | count | 1 |
| SH2B3    | -0.9734428 | 1.0680309 | -0.9114 | 0.363   | -1.054729373 | count | 1 |
| KLHL23   | -1.6554612 | 1.2979899 | -1.2754 | 0.203   | -1.05454323  | count | 1 |
| ZCCHC2   | -0.780706  | 0.4761868 | -1.6395 | 0.102   | -1.053678878 | count | 1 |
| PACSIN2  | -0.8452333 | 0.9532381 | -0.8867 | 0.376   | -1.052524018 | count | 1 |
| ARID2    | -0.8211507 | 0.7153666 | -1.1479 | 0.252   | -1.052284957 | count | 1 |

|            |            |           |         |         |              |       |   |
|------------|------------|-----------|---------|---------|--------------|-------|---|
| C12orf45   | -0.8146195 | 0.586215  | -1.3896 | 0.166   | -1.051508716 | count | 1 |
| MED17      | -1.106168  | 0.7036848 | -1.572  | 0.117   | -1.049436481 | count | 1 |
| DTX3L      | -0.7832973 | 0.6119431 | -1.28   | 0.201   | -1.048672084 | count | 1 |
| HLA-DRB5   | -0.7720359 | 0.4193807 | -1.8409 | 0.0666  | -1.046837238 | count | 1 |
| TWISTNB    | -0.7671241 | 0.3932862 | -1.9505 | 0.052   | -1.046171165 | count | 1 |
| SNRPN      | -0.741792  | 0.2843002 | -2.6092 | 0.0095  | -1.044266298 | count | 1 |
| IFNL1      | -1.0991942 | 1.0890046 | -1.0094 | 0.314   | -1.04381948  | count | 1 |
| MFSD4B     | -1.014382  | 1.2149497 | -0.8349 | 0.404   | -1.042902097 | count | 1 |
| CBWD6      | -1.014382  | 1.4270923 | -0.7108 | 0.478   | -1.042902097 | count | 1 |
| C20orf96   | -1.014382  | 1.4270923 | -0.7108 | 0.478   | -1.042902097 | count | 1 |
| MARS       | -0.9612838 | 0.9033767 | -1.0641 | 0.288   | -1.042818751 | count | 1 |
| INPP5F     | -0.9612838 | 0.9361136 | -1.0269 | 0.305   | -1.042818751 | count | 1 |
| HUS1       | -0.8977912 | 0.6974379 | -1.2873 | 0.199   | -1.042818366 | count | 1 |
| RANGRF     | -0.7658178 | 0.4450275 | -1.7208 | 0.0862  | -1.04258481  | count | 1 |
| LAMP2      | -0.8067488 | 0.6080806 | -1.3267 | 0.186   | -1.041692813 | count | 1 |
| NAPRT      | -0.7925859 | 0.5796294 | -1.3674 | 0.172   | -1.041109052 | count | 1 |
| CNP        | -0.8461008 | 0.7283    | -1.1617 | 0.246   | -1.040698959 | count | 1 |
| BPHL       | -0.8113763 | 0.732606  | -1.1075 | 0.269   | -1.040211436 | count | 1 |
| PMS1       | -0.7991572 | 0.5129994 | -1.5578 | 0.12    | -1.038583853 | count | 1 |
| RAD54L2    | -1.243507  | 0.8800561 | -1.413  | 0.159   | -1.038173222 | count | 1 |
| FLII       | -0.8434623 | 0.6770495 | -1.2458 | 0.214   | -1.037614346 | count | 1 |
| JAKMIP1    | -0.8724953 | 0.67696   | -1.2888 | 0.198   | -1.037504922 | count | 1 |
| ZNF282     | -1.2411454 | 1.2867413 | -0.9646 | 0.335   | -1.036613002 | count | 1 |
| CCDC171    | -1.2411454 | 1.6043919 | -0.7736 | 0.44    | -1.036613002 | count | 1 |
| GATD1      | -1.6104518 | 1.290376  | -1.248  | 0.213   | -1.035956632 | count | 1 |
| ADPRM      | -1.6104518 | 1.3178754 | -1.222  | 0.223   | -1.035956632 | count | 1 |
| ZNF74      | -1.6104518 | 1.3178754 | -1.222  | 0.223   | -1.035956632 | count | 1 |
| DNTTIP1    | -0.891066  | 0.7205427 | -1.2367 | 0.217   | -1.035547942 | count | 1 |
| ZDHC13     | -1.2393147 | 1.0527827 | -1.1772 | 0.24    | -1.035402442 | count | 1 |
| XRRA1      | -1.2393146 | 1.1775956 | -1.0524 | 0.293   | -1.03540238  | count | 1 |
| AC020928.1 | -1.6031865 | 1.145417  | -1.3997 | 0.1626  | -1.03290447  | count | 1 |
| KLHDC4     | -0.7823442 | 0.4551731 | -1.7188 | 0.0866  | -1.032615327 | count | 1 |
| R3HCC1     | -0.7943289 | 0.610428  | -1.3013 | 0.194   | -1.032505071 | count | 1 |
| PCK2       | -1.600732  | 0.8258504 | -1.9383 | 0.05346 | -1.031869982 | count | 1 |
| LEF1       | -0.8104449 | 0.7932993 | -1.0216 | 0.308   | -1.030909158 | count | 1 |
| MKLN1      | -0.8502526 | 0.6669848 | -1.2748 | 0.203   | -1.030459336 | count | 1 |
| AC009133.1 | -0.8655498 | 0.9944192 | -0.8704 | 0.385   | -1.029745669 | count | 1 |
| CBLB       | -0.8357773 | 0.4335523 | -1.9277 | 0.0548  | -1.028622563 | count | 1 |
| NBPF14     | -0.9094991 | 0.8152868 | -1.1156 | 0.265   | -1.027087268 | count | 1 |
| PPCDC      | -0.8629102 | 0.676743  | -1.2751 | 0.203   | -1.026794101 | count | 1 |
| NAF1       | -0.8145845 | 0.5220043 | -1.5605 | 0.12    | -1.026674113 | count | 1 |
| CCDC152    | -0.7944461 | 0.6661345 | -1.1926 | 0.234   | -1.026332039 | count | 1 |
| SP140      | -0.7738345 | 0.5067892 | -1.5269 | 0.128   | -1.025805226 | count | 1 |
| SLC25A42   | -0.9955613 | 0.5861587 | -1.6985 | 0.0904  | -1.025761666 | count | 1 |
| OSBPL9     | -0.8044254 | 0.4289182 | -1.8755 | 0.0616  | -1.023540536 | count | 1 |

|              |            |           |         |        |              |       |   |
|--------------|------------|-----------|---------|--------|--------------|-------|---|
| TMLHE        | -1.0741208 | 1.1414793 | -0.941  | 0.347  | -1.023498811 | count | 1 |
| TIMP2        | -0.9058898 | 1.0145697 | -0.8929 | 0.373  | -1.023330191 | count | 1 |
| TXNDC11      | -0.7558589 | 0.6485253 | -1.1655 | 0.245  | -1.023117938 | count | 1 |
| MKRN1        | -0.7570567 | 0.3748771 | -2.0195 | 0.0443 | -1.022376071 | count | 1 |
| HSPA4        | -0.7737584 | 0.4857466 | -1.5929 | 0.112  | -1.021577594 | count | 1 |
| PPFIBP1      | -1.0711526 | 0.8451032 | -1.2675 | 0.206  | -1.021080329 | count | 1 |
| CMTR2        | -0.9036102 | 0.6682091 | -1.3523 | 0.177  | -1.020955601 | count | 1 |
| TSPAN32      | -0.7587381 | 0.4397928 | -1.7252 | 0.0854 | -1.019402242 | count | 1 |
| QDPR         | -0.7747158 | 0.5631269 | -1.3757 | 0.17   | -1.018278057 | count | 1 |
| PDXK         | -0.7490091 | 0.4584115 | -1.6339 | 0.103  | -1.018186434 | count | 1 |
| DESI2        | -0.815945  | 0.5059699 | -1.6126 | 0.108  | -1.017665353 | count | 1 |
| GLYR1        | -0.8542768 | 0.696583  | -1.2264 | 0.221  | -1.017130047 | count | 1 |
| LRR1         | -0.9347279 | 0.7599183 | -1.23   | 0.22   | -1.016666849 | count | 1 |
| ACOT8        | -0.9342163 | 0.5780067 | -1.6163 | 0.107  | -1.016161192 | count | 1 |
| PRMT7        | -0.8057037 | 0.7352382 | -1.0958 | 0.274  | -1.015931133 | count | 1 |
| TMEM159      | -0.7602993 | 0.6572524 | -1.1568 | 0.248  | -1.015405219 | count | 1 |
| WDR54        | -0.7763195 | 0.5231551 | -1.4839 | 0.139  | -1.015330304 | count | 1 |
| MRPL19       | -0.7478331 | 0.4908557 | -1.5235 | 0.129  | -1.014600576 | count | 1 |
| BTN3A1       | -0.8233437 | 0.4096691 | -2.0098 | 0.0453 | -1.014051504 | count | 1 |
| CALU         | -0.982297  | 0.5692135 | -1.7257 | 0.0854 | -1.013620109 | count | 1 |
| CNST         | -0.7954019 | 0.7192309 | -1.1059 | 0.27   | -1.012484133 | count | 1 |
| TP53BP2      | -0.8687857 | 0.5381087 | -1.6145 | 0.107  | -1.011387209 | count | 1 |
| AFG3L2       | -0.9282942 | 0.6561244 | -1.4148 | 0.158  | -1.010302686 | count | 1 |
| C12orf10     | -0.7584587 | 0.6084477 | -1.2465 | 0.213  | -1.009606577 | count | 1 |
| TSPAN4       | -0.7584587 | 0.8868448 | -0.8552 | 0.3931 | -1.009606577 | count | 1 |
| HEXDC        | -0.8195499 | 0.5671289 | -1.4451 | 0.149  | -1.009599838 | count | 1 |
| PIK3CA       | -0.9778221 | 1.0178233 | -0.9607 | 0.337  | -1.009512385 | count | 1 |
| ANAPC13      | -0.8668525 | 0.5700485 | -1.5207 | 0.129  | -1.009285538 | count | 1 |
| CCT3         | -0.7159248 | 0.273207  | -2.6204 | 0.0092 | -1.009040486 | count | 1 |
| TM2D1        | -0.7553674 | 0.411952  | -1.8336 | 0.0676 | -1.00896358  | count | 1 |
| STK11        | -0.8069624 | 0.8339884 | -0.9676 | 0.334  | -1.006944409 | count | 1 |
| RABL6        | -0.7588968 | 0.513153  | -1.4789 | 0.14   | -1.006482503 | count | 1 |
| LSM1         | -0.7188082 | 0.3413801 | -2.1056 | 0.036  | -1.004947299 | count | 1 |
| TNFRSF14-AS1 | -0.9221341 | 0.6960216 | -1.3249 | 0.186  | -1.004198897 | count | 1 |
| ARMC8        | -0.795891  | 0.5383434 | -1.4784 | 0.14   | -1.004045902 | count | 1 |
| PIGP         | -0.7762776 | 0.5095757 | -1.5234 | 0.129  | -1.003608771 | count | 1 |
| DYNC1L1      | -0.7223361 | 0.3744269 | -1.9292 | 0.0546 | -1.003236021 | count | 1 |
| CCNG2        | -0.9704156 | 0.5947436 | -1.6317 | 0.104  | -1.002701206 | count | 1 |
| ARFIP1       | -0.7526356 | 0.4960764 | -1.5172 | 0.13   | -1.002031971 | count | 1 |
| AL359504.2   | -0.8850382 | 0.9354143 | -0.9461 | 0.345  | -1.001562222 | count | 1 |
| GPRC5D-AS1   | -0.8850382 | 0.9354143 | -0.9461 | 0.345  | -1.001562222 | count | 1 |
| CKMT2-AS1    | -0.8850382 | 0.9999142 | -0.8851 | 0.377  | -1.001562222 | count | 1 |
| WDR53        | -0.8850382 | 1.1723114 | -0.755  | 0.451  | -1.001562222 | count | 1 |
| ACVR1        | -0.8850382 | 1.540436  | -0.5745 | 0.566  | -1.001562222 | count | 1 |
| CDC42EP1     | -0.8850382 | 1.540436  | -0.5745 | 0.566  | -1.001562222 | count | 1 |

|             |            |           |         |        |              |       |   |
|-------------|------------|-----------|---------|--------|--------------|-------|---|
| HDAC6       | -1.0446102 | 1.2005549 | -0.8701 | 0.385  | -0.999332816 | count | 1 |
| C1orf162    | -0.716084  | 0.3469131 | -2.0642 | 0.0398 | -0.998845613 | count | 1 |
| RPRD1A      | -0.9652617 | 0.7827612 | -1.2331 | 0.218  | -0.99795232  | count | 1 |
| PTBP2       | -0.8370065 | 1.1465183 | -0.73   | 0.466  | -0.997750869 | count | 1 |
| ABHD12      | -0.9639501 | 0.8696984 | -1.1084 | 0.269  | -0.996742564 | count | 1 |
| GK5         | -0.9639501 | 0.9516911 | -1.0129 | 0.312  | -0.996742564 | count | 1 |
| PRPS2       | -0.8800258 | 0.6904201 | -1.2746 | 0.203  | -0.996313718 | count | 1 |
| CDK10       | -0.807574  | 0.5950807 | -1.3571 | 0.176  | -0.995529999 | count | 1 |
| ILF2        | -0.7034153 | 0.2516676 | -2.795  | 0.0055 | -0.995242268 | count | 1 |
| FBXW7       | -0.7435341 | 0.4638536 | -1.6029 | 0.11   | -0.993497809 | count | 1 |
| ACOT9       | -0.8491546 | 0.7134252 | -1.1903 | 0.235  | -0.990006058 | count | 1 |
| CDK16       | -0.9073101 | 0.9558876 | -0.9492 | 0.343  | -0.989469385 | count | 1 |
| IDUA        | -0.9073101 | 1.0973257 | -0.8268 | 0.409  | -0.989469385 | count | 1 |
| B3GNT5      | -0.9073101 | 1.1828398 | -0.7671 | 0.444  | -0.989469385 | count | 1 |
| SPATS2      | -1.502476  | 0.8103679 | -1.8541 | 0.0646 | -0.98908529  | count | 1 |
| CLASRP      | -0.8280468 | 0.6681806 | -1.2393 | 0.216  | -0.987672558 | count | 1 |
| LGALS8      | -0.7821784 | 0.522064  | -1.4982 | 0.135  | -0.987411058 | count | 1 |
| ID1         | -1.028552  | 0.636808  | -1.6152 | 0.107  | -0.986070487 | count | 1 |
| MT2A        | -0.6978777 | 0.2451229 | -2.8471 | 0.0047 | -0.985138073 | count | 1 |
| FUCA2       | -0.7551289 | 0.5467575 | -1.3811 | 0.168  | -0.983038396 | count | 1 |
| IKBKB       | -1.4879427 | 1.224483  | -1.2152 | 0.2252 | -0.982526879 | count | 1 |
| SWAP70      | -1.0241381 | 0.9153213 | -1.1189 | 0.264  | -0.982411402 | count | 1 |
| TACC1       | -0.7118165 | 0.3849393 | -1.8492 | 0.0653 | -0.982399602 | count | 1 |
| IGLC3       | -0.714273  | 0.3827941 | -1.8659 | 0.063  | -0.982298541 | count | 1 |
| TCEAL8      | -0.7234457 | 0.4151577 | -1.7426 | 0.0824 | -0.982068358 | count | 1 |
| OGFOD1      | -0.9479696 | 1.0812064 | -0.8768 | 0.381  | -0.98196383  | count | 1 |
| SAE1        | -0.7773705 | 0.5075226 | -1.5317 | 0.127  | -0.981571436 | count | 1 |
| SARS2       | -1.1577285 | 1.3289648 | -0.8712 | 0.3843 | -0.980368524 | count | 1 |
| MINPP1      | -1.1577283 | 1.0196022 | -1.1355 | 0.257  | -0.980368396 | count | 1 |
| PLAUR       | -0.8647612 | 1.1450993 | -0.7552 | 0.451  | -0.980292673 | count | 1 |
| NCOA6       | -1.481836  | 1.0263676 | -1.4438 | 0.15   | -0.979752972 | count | 1 |
| SYNE1       | -0.7245555 | 0.4602495 | -1.5743 | 0.116  | -0.97927492  | count | 1 |
| ZNF714      | -1.4807516 | 1.3009089 | -1.1382 | 0.256  | -0.979259536 | count | 1 |
| ACAT2       | -0.7234246 | 0.5294359 | -1.3664 | 0.173  | -0.977773516 | count | 1 |
| MIGA1       | -0.8368965 | 0.5412204 | -1.5463 | 0.123  | -0.976611485 | count | 1 |
| MFN2        | -1.1518756 | 1.3272722 | -0.8679 | 0.386  | -0.9763392   | count | 1 |
| ACTN1       | -1.1518756 | 1.3272722 | -0.8679 | 0.386  | -0.9763392   | count | 1 |
| MAST2       | -1.1518756 | 1.4439566 | -0.7977 | 0.426  | -0.9763392   | count | 1 |
| TMEM147-AS1 | -1.1518756 | 1.4439566 | -0.7977 | 0.426  | -0.9763392   | count | 1 |
| METTL6      | -1.1517449 | 1.0011688 | -1.1504 | 0.251  | -0.976249096 | count | 1 |
| MMRN1       | -0.8030745 | 0.8230053 | -0.9758 | 0.33   | -0.976153802 | count | 1 |
| DPP8        | -0.7542181 | 0.6804702 | -1.1084 | 0.269  | -0.975958117 | count | 1 |
| FOXN3-AS1   | -0.8024372 | 0.9306007 | -0.8623 | 0.389  | -0.975417279 | count | 1 |
| EXOSC6      | -0.7050139 | 0.4172094 | -1.6898 | 0.092  | -0.975127457 | count | 1 |
| STK32C      | -0.8021455 | 0.6395647 | -1.2542 | 0.211  | -0.975080137 | count | 1 |



|            |             |             |         |       |              |       |   |
|------------|-------------|-------------|---------|-------|--------------|-------|---|
| CDK11A     | -0.8595937  | 0.5557796   | -1.5466 | 0.123 | -0.974856399 | count | 1 |
| R3HDM1     | -0.7372965  | 0.5089977   | -1.4485 | 0.148 | -0.974608412 | count | 1 |
| ELK1       | -0.8350259  | 0.9050683   | -0.9226 | 0.357 | -0.974564519 | count | 1 |
| LIN7C      | -0.8350259  | 0.9050683   | -0.9226 | 0.357 | -0.974564519 | count | 1 |
| GOLPH3L    | -0.8350259  | 0.972214    | -0.8589 | 0.391 | -0.974564519 | count | 1 |
| AARS       | -0.8350259  | 1.3594119   | -0.6143 | 0.539 | -0.974564519 | count | 1 |
| TRIM26     | -0.937761   | 0.8002265   | -1.1719 | 0.242 | -0.97248507  | count | 1 |
| ABCC5      | -0.8143913  | 1.0631604   | -0.766  | 0.444 | -0.972280277 | count | 1 |
| NF2        | -0.8143913  | 1.0814931   | -0.753  | 0.452 | -0.972280277 | count | 1 |
| URB2       | -17.9460694 | 2338.232952 | -0.0077 | 0.994 | -0.971985601 | count | 1 |
| FBLN7      | -17.9460694 | 2338.232952 | -0.0077 | 0.994 | -0.971985601 | count | 1 |
| C3orf33    | -17.9460694 | 2338.232952 | -0.0077 | 0.994 | -0.971985601 | count | 1 |
| LINC00504  | -17.9460694 | 2338.232952 | -0.0077 | 0.994 | -0.971985601 | count | 1 |
| ARL17A     | -17.9460694 | 2338.232952 | -0.0077 | 0.994 | -0.971985601 | count | 1 |
| SMCR5      | -17.7702582 | 1599.589687 | -0.0111 | 0.991 | -0.971985597 | count | 1 |
| ASH2L      | -19.062968  | 2542.540249 | -0.0075 | 0.994 | -0.971985545 | count | 1 |
| C12orf66   | -18.834651  | 2488.842238 | -0.0076 | 0.994 | -0.971985543 | count | 1 |
| ST7        | -18.821666  | 2887.532543 | -0.0065 | 0.995 | -0.971985543 | count | 1 |
| PGLYRP2    | -18.821666  | 2887.532543 | -0.0065 | 0.995 | -0.971985543 | count | 1 |
| DYRK3      | -18.776763  | 3608.969544 | -0.0052 | 0.996 | -0.971985543 | count | 1 |
| KLHL2      | -18.776763  | 3608.969544 | -0.0052 | 0.996 | -0.971985543 | count | 1 |
| CDCA7L     | -18.776763  | 3608.969544 | -0.0052 | 0.996 | -0.971985543 | count | 1 |
| CD4        | -18.776763  | 3608.969544 | -0.0052 | 0.996 | -0.971985543 | count | 1 |
| CLPB       | -18.502376  | 2297.736204 | -0.0081 | 0.994 | -0.97198554  | count | 1 |
| AREL1      | -18.500018  | 1683.31026  | -0.011  | 0.991 | -0.97198554  | count | 1 |
| AL359915.2 | -18.498626  | 2646.033991 | -0.007  | 0.994 | -0.97198554  | count | 1 |
| ZNF514     | -18.498626  | 2646.033991 | -0.007  | 0.994 | -0.97198554  | count | 1 |
| AC016596.1 | -18.498626  | 2646.033991 | -0.007  | 0.994 | -0.97198554  | count | 1 |
| GPR150     | -18.498626  | 2646.033991 | -0.007  | 0.994 | -0.97198554  | count | 1 |
| ALDH5A1    | -18.498626  | 2646.033991 | -0.007  | 0.994 | -0.97198554  | count | 1 |
| HIST1H2BK  | -18.498626  | 2646.033991 | -0.007  | 0.994 | -0.97198554  | count | 1 |
| OSBPL5     | -18.498626  | 2646.033991 | -0.007  | 0.994 | -0.97198554  | count | 1 |
| TIGD3      | -18.498626  | 2646.033991 | -0.007  | 0.994 | -0.97198554  | count | 1 |
| ERBB3      | -18.498626  | 2646.033991 | -0.007  | 0.994 | -0.97198554  | count | 1 |
| LATS2      | -18.498626  | 2646.033991 | -0.007  | 0.994 | -0.97198554  | count | 1 |
| L3HYPDH    | -18.498626  | 2646.033991 | -0.007  | 0.994 | -0.97198554  | count | 1 |
| CAPN15     | -18.498626  | 2646.033991 | -0.007  | 0.994 | -0.97198554  | count | 1 |
| RBM10      | -18.430452  | 1909.193345 | -0.0097 | 0.992 | -0.971985539 | count | 1 |
| HOXA7      | -18.316107  | 3348.681508 | -0.0055 | 0.996 | -0.971985537 | count | 1 |
| HRASLS2    | -18.316107  | 3348.681508 | -0.0055 | 0.996 | -0.971985537 | count | 1 |
| LIN52      | -18.316107  | 3348.681508 | -0.0055 | 0.996 | -0.971985537 | count | 1 |
| FBXL22     | -18.316107  | 3348.681508 | -0.0055 | 0.996 | -0.971985537 | count | 1 |
| PLTP       | -18.235801  | 1700.211079 | -0.0107 | 0.991 | -0.971985536 | count | 1 |
| CYP4X1     | -18.173803  | 4756.440964 | -0.0038 | 0.997 | -0.971985535 | count | 1 |
| AC105277.1 | -18.173803  | 4756.440964 | -0.0038 | 0.997 | -0.971985535 | count | 1 |

|            |            |             |         |       |              |       |   |
|------------|------------|-------------|---------|-------|--------------|-------|---|
| RAVER2     | -18.173803 | 4756.440964 | -0.0038 | 0.997 | -0.971985535 | count | 1 |
| AK4        | -18.173803 | 4756.440964 | -0.0038 | 0.997 | -0.971985535 | count | 1 |
| ST6GALNAC3 | -18.173803 | 4756.440964 | -0.0038 | 0.997 | -0.971985535 | count | 1 |
| ADAM15     | -18.173803 | 4756.440964 | -0.0038 | 0.997 | -0.971985535 | count | 1 |
| FAM189B    | -18.173803 | 4756.440964 | -0.0038 | 0.997 | -0.971985535 | count | 1 |
| MSTO1      | -18.173803 | 4756.440964 | -0.0038 | 0.997 | -0.971985535 | count | 1 |
| KLHDC9     | -18.173803 | 4756.440964 | -0.0038 | 0.997 | -0.971985535 | count | 1 |
| AC017083.1 | -18.173803 | 4756.440964 | -0.0038 | 0.997 | -0.971985535 | count | 1 |
| AC009961.1 | -18.173803 | 4756.440964 | -0.0038 | 0.997 | -0.971985535 | count | 1 |
| ZNF142     | -18.173803 | 4756.440964 | -0.0038 | 0.997 | -0.971985535 | count | 1 |
| PDCD1      | -18.173803 | 4756.440964 | -0.0038 | 0.997 | -0.971985535 | count | 1 |
| DNAH1      | -18.173803 | 4756.440964 | -0.0038 | 0.997 | -0.971985535 | count | 1 |
| FAM53A     | -18.173803 | 4756.440964 | -0.0038 | 0.997 | -0.971985535 | count | 1 |
| AC019131.2 | -18.173803 | 4756.440964 | -0.0038 | 0.997 | -0.971985535 | count | 1 |
| STOX2      | -18.173803 | 4756.440964 | -0.0038 | 0.997 | -0.971985535 | count | 1 |
| LINC02363  | -18.173803 | 4756.440964 | -0.0038 | 0.997 | -0.971985535 | count | 1 |
| TPPP       | -18.173803 | 4756.440964 | -0.0038 | 0.997 | -0.971985535 | count | 1 |
| C1QTNF3    | -18.173803 | 4756.440964 | -0.0038 | 0.997 | -0.971985535 | count | 1 |
| CCNB1      | -18.173803 | 4756.440964 | -0.0038 | 0.997 | -0.971985535 | count | 1 |
| ZNF300     | -18.173803 | 4756.440964 | -0.0038 | 0.997 | -0.971985535 | count | 1 |
| ZNF311     | -18.173803 | 4756.440964 | -0.0038 | 0.997 | -0.971985535 | count | 1 |
| CCHCR1     | -18.173803 | 4756.440964 | -0.0038 | 0.997 | -0.971985535 | count | 1 |
| AL662796.1 | -18.173803 | 4756.440964 | -0.0038 | 0.997 | -0.971985535 | count | 1 |
| AARS2      | -18.173803 | 4756.440964 | -0.0038 | 0.997 | -0.971985535 | count | 1 |
| CENPQ      | -18.173803 | 4756.440964 | -0.0038 | 0.997 | -0.971985535 | count | 1 |
| SMPDL3A    | -18.173803 | 4756.440964 | -0.0038 | 0.997 | -0.971985535 | count | 1 |
| RADIL      | -18.173803 | 4756.440964 | -0.0038 | 0.997 | -0.971985535 | count | 1 |
| AC004895.1 | -18.173803 | 4756.440964 | -0.0038 | 0.997 | -0.971985535 | count | 1 |
| AC007029.1 | -18.173803 | 4756.440964 | -0.0038 | 0.997 | -0.971985535 | count | 1 |
| JAZF1-AS1  | -18.173803 | 4756.440964 | -0.0038 | 0.997 | -0.971985535 | count | 1 |
| AC004921.1 | -18.173803 | 4756.440964 | -0.0038 | 0.997 | -0.971985535 | count | 1 |
| ZBED6CL    | -18.173803 | 4756.440964 | -0.0038 | 0.997 | -0.971985535 | count | 1 |
| POLA1      | -18.173803 | 4756.440964 | -0.0038 | 0.997 | -0.971985535 | count | 1 |
| KCNE5      | -18.173803 | 4756.440964 | -0.0038 | 0.997 | -0.971985535 | count | 1 |
| TMEM164    | -18.173803 | 4756.440964 | -0.0038 | 0.997 | -0.971985535 | count | 1 |
| PRRG3      | -18.173803 | 4756.440964 | -0.0038 | 0.997 | -0.971985535 | count | 1 |
| MSC        | -18.173803 | 4756.440964 | -0.0038 | 0.997 | -0.971985535 | count | 1 |
| DSCC1      | -18.173803 | 4756.440964 | -0.0038 | 0.997 | -0.971985535 | count | 1 |
| AC040970.1 | -18.173803 | 4756.440964 | -0.0038 | 0.997 | -0.971985535 | count | 1 |
| ZBTB26     | -18.173803 | 4756.440964 | -0.0038 | 0.997 | -0.971985535 | count | 1 |
| CDC42EP2   | -18.173803 | 4756.440964 | -0.0038 | 0.997 | -0.971985535 | count | 1 |
| ACY3       | -18.173803 | 4756.440964 | -0.0038 | 0.997 | -0.971985535 | count | 1 |
| KCTD21     | -18.173803 | 4756.440964 | -0.0038 | 0.997 | -0.971985535 | count | 1 |
| FUT4       | -18.173803 | 4756.440964 | -0.0038 | 0.997 | -0.971985535 | count | 1 |
| MCAM       | -18.173803 | 4756.440964 | -0.0038 | 0.997 | -0.971985535 | count | 1 |

|              |            |             |         |       |              |       |   |
|--------------|------------|-------------|---------|-------|--------------|-------|---|
| IGSF9B       | -18.173803 | 4756.440964 | -0.0038 | 0.997 | -0.971985535 | count | 1 |
| AL392046.1   | -18.173803 | 4756.440964 | -0.0038 | 0.997 | -0.971985535 | count | 1 |
| ANKRD22      | -18.173803 | 4756.440964 | -0.0038 | 0.997 | -0.971985535 | count | 1 |
| AL157400.4   | -18.173803 | 4756.440964 | -0.0038 | 0.997 | -0.971985535 | count | 1 |
| CRTAC1       | -18.173803 | 4756.440964 | -0.0038 | 0.997 | -0.971985535 | count | 1 |
| AL353719.1   | -18.173803 | 4756.440964 | -0.0038 | 0.997 | -0.971985535 | count | 1 |
| AC008035.1   | -18.173803 | 4756.440964 | -0.0038 | 0.997 | -0.971985535 | count | 1 |
| TARBP2       | -18.173803 | 4756.440964 | -0.0038 | 0.997 | -0.971985535 | count | 1 |
| ZNF385A      | -18.173803 | 4756.440964 | -0.0038 | 0.997 | -0.971985535 | count | 1 |
| AC020656.2   | -18.173803 | 4756.440964 | -0.0038 | 0.997 | -0.971985535 | count | 1 |
| TMPO-AS1     | -18.173803 | 4756.440964 | -0.0038 | 0.997 | -0.971985535 | count | 1 |
| ALDH1L2      | -18.173803 | 4756.440964 | -0.0038 | 0.997 | -0.971985535 | count | 1 |
| HCAR2        | -18.173803 | 4756.440964 | -0.0038 | 0.997 | -0.971985535 | count | 1 |
| AC137767.1   | -18.173803 | 4756.440964 | -0.0038 | 0.997 | -0.971985535 | count | 1 |
| AC127070.2   | -18.173803 | 4756.440964 | -0.0038 | 0.997 | -0.971985535 | count | 1 |
| LINC02315    | -18.173803 | 4756.440964 | -0.0038 | 0.997 | -0.971985535 | count | 1 |
| TMEM260      | -18.173803 | 4756.440964 | -0.0038 | 0.997 | -0.971985535 | count | 1 |
| AC087386.1   | -18.173803 | 4756.440964 | -0.0038 | 0.997 | -0.971985535 | count | 1 |
| INAFM2       | -18.173803 | 4756.440964 | -0.0038 | 0.997 | -0.971985535 | count | 1 |
| PPIP5K1      | -18.173803 | 4756.440964 | -0.0038 | 0.997 | -0.971985535 | count | 1 |
| ALDH1A2      | -18.173803 | 4756.440964 | -0.0038 | 0.997 | -0.971985535 | count | 1 |
| NRG4         | -18.173803 | 4756.440964 | -0.0038 | 0.997 | -0.971985535 | count | 1 |
| SAXO2        | -18.173803 | 4756.440964 | -0.0038 | 0.997 | -0.971985535 | count | 1 |
| C17orf107    | -18.173803 | 4756.440964 | -0.0038 | 0.997 | -0.971985535 | count | 1 |
| FAM215A      | -18.173803 | 4756.440964 | -0.0038 | 0.997 | -0.971985535 | count | 1 |
| AC110285.6   | -18.173803 | 4756.440964 | -0.0038 | 0.997 | -0.971985535 | count | 1 |
| C18orf54     | -18.173803 | 4756.440964 | -0.0038 | 0.997 | -0.971985535 | count | 1 |
| AC036176.1   | -18.173803 | 4756.440964 | -0.0038 | 0.997 | -0.971985535 | count | 1 |
| MCM8         | -18.173803 | 4756.440964 | -0.0038 | 0.997 | -0.971985535 | count | 1 |
| SOGA1        | -18.173803 | 4756.440964 | -0.0038 | 0.997 | -0.971985535 | count | 1 |
| TSHZ2        | -18.173803 | 4756.440964 | -0.0038 | 0.997 | -0.971985535 | count | 1 |
| MIR646HG     | -18.173803 | 4756.440964 | -0.0038 | 0.997 | -0.971985535 | count | 1 |
| MIR1-1HG-AS1 | -18.173803 | 4756.440964 | -0.0038 | 0.997 | -0.971985535 | count | 1 |
| C20orf204    | -18.173803 | 4756.440964 | -0.0038 | 0.997 | -0.971985535 | count | 1 |
| STAP2        | -18.173803 | 4756.440964 | -0.0038 | 0.997 | -0.971985535 | count | 1 |
| PSPN         | -18.173803 | 4756.440964 | -0.0038 | 0.997 | -0.971985535 | count | 1 |
| MCOLN1       | -18.173803 | 4756.440964 | -0.0038 | 0.997 | -0.971985535 | count | 1 |
| NANOS3       | -18.173803 | 4756.440964 | -0.0038 | 0.997 | -0.971985535 | count | 1 |
| ASF1B        | -18.173803 | 4756.440964 | -0.0038 | 0.997 | -0.971985535 | count | 1 |
| ZNF30        | -18.173803 | 4756.440964 | -0.0038 | 0.997 | -0.971985535 | count | 1 |
| UPK1A        | -18.173803 | 4756.440964 | -0.0038 | 0.997 | -0.971985535 | count | 1 |
| PPP1R13L     | -18.173803 | 4756.440964 | -0.0038 | 0.997 | -0.971985535 | count | 1 |
| SPACA6       | -18.173803 | 4756.440964 | -0.0038 | 0.997 | -0.971985535 | count | 1 |
| ZNF530       | -18.173803 | 4756.440964 | -0.0038 | 0.997 | -0.971985535 | count | 1 |
| AC012313.6   | -18.173803 | 4756.440964 | -0.0038 | 0.997 | -0.971985535 | count | 1 |

|            |            |             |         |        |              |       |   |
|------------|------------|-------------|---------|--------|--------------|-------|---|
| LINC01311  | -18.173803 | 4756.440964 | -0.0038 | 0.997  | -0.971985535 | count | 1 |
| PDXP       | -18.173803 | 4756.440964 | -0.0038 | 0.997  | -0.971985535 | count | 1 |
| DMC1       | -18.173803 | 4756.440964 | -0.0038 | 0.997  | -0.971985535 | count | 1 |
| AP000251.1 | -18.173803 | 4756.440964 | -0.0038 | 0.997  | -0.971985535 | count | 1 |
| N6AMT1     | -18.037854 | 2290.605303 | -0.0079 | 0.994  | -0.971985532 | count | 1 |
| AL359220.1 | -17.760971 | 1563.245566 | -0.0114 | 0.991  | -0.971985526 | count | 1 |
| CHEK1      | -17.756888 | 1763.471006 | -0.0101 | 0.992  | -0.971985526 | count | 1 |
| CACNA2D4   | -17.756888 | 1763.471006 | -0.0101 | 0.992  | -0.971985526 | count | 1 |
| UBR5       | -0.7339228 | 0.5208688   | -1.409  | 0.16   | -0.970254904 | count | 1 |
| USP25      | -0.8879231 | 0.6897206   | -1.2874 | 0.199  | -0.97011923  | count | 1 |
| TTC1       | -0.692761  | 0.3199286   | -2.1654 | 0.0311 | -0.969838471 | count | 1 |
| SF3A3      | -0.7152302 | 0.45649     | -1.5668 | 0.118  | -0.969065022 | count | 1 |
| MNAT1      | -0.710528  | 0.3533375   | -2.0109 | 0.0452 | -0.968481743 | count | 1 |
| IFI6       | -0.7000515 | 0.4575943   | -1.5299 | 0.127  | -0.968340306 | count | 1 |
| SURF1      | -0.7018135 | 0.3935026   | -1.7835 | 0.0754 | -0.966562226 | count | 1 |
| SVIP       | -0.6916708 | 0.2978282   | -2.3224 | 0.0208 | -0.96509342  | count | 1 |
| COIL       | -0.7087998 | 0.515195    | -1.3758 | 0.17   | -0.962507642 | count | 1 |
| PTRH2      | -0.8476659 | 1.0768478   | -0.7872 | 0.432  | -0.962283867 | count | 1 |
| PLSCR1     | -0.6887911 | 0.4347314   | -1.5844 | 0.1141 | -0.962257016 | count | 1 |
| TM9SF4     | -0.7788943 | 0.7756248   | -1.0042 | 0.316  | -0.961730483 | count | 1 |
| EFCAB14    | -0.7146142 | 0.4954773   | -1.4423 | 0.15   | -0.961245155 | count | 1 |
| JMJD1C     | -0.6824316 | 0.2953025   | -2.311  | 0.0215 | -0.960922711 | count | 1 |
| BAG2       | -0.8043055 | 0.4371147   | -1.84   | 0.0667 | -0.960887198 | count | 1 |
| BORCS6     | -0.7333214 | 0.5873105   | -1.2486 | 0.213  | -0.960585788 | count | 1 |
| KIAA1586   | -0.713942  | 0.5853037   | -1.2198 | 0.223  | -0.960357766 | count | 1 |
| FKBP5      | -0.8219701 | 0.4041296   | -2.0339 | 0.0428 | -0.960256344 | count | 1 |
| DLEU2      | -0.9949668 | 0.7400045   | -1.3445 | 0.18   | -0.958079447 | count | 1 |
| PAXIP1-AS1 | -0.7350081 | 0.8693467   | -0.8455 | 0.398  | -0.957570486 | count | 1 |
| SLC25A36   | -0.6889497 | 0.3283942   | -2.0979 | 0.0367 | -0.956560053 | count | 1 |
| TTC9C      | -0.9925734 | 0.8458116   | -1.1735 | 0.241  | -0.956071678 | count | 1 |
| TMEM161B   | -0.799884  | 1.0073727   | -0.794  | 0.428  | -0.955886076 | count | 1 |
| PLEC       | -0.7369749 | 0.9252289   | -0.7965 | 0.426  | -0.954298843 | count | 1 |
| CTBS       | -0.6944428 | 0.4825087   | -1.4392 | 0.151  | -0.954139584 | count | 1 |
| DFFA       | -0.7625832 | 0.5116399   | -1.4905 | 0.137  | -0.953775479 | count | 1 |
| HSPA9      | -0.6771624 | 0.2718063   | -2.4913 | 0.0132 | -0.952907313 | count | 1 |
| FHOD1      | -1.4191243 | 1.0969403   | -1.2937 | 0.197  | -0.950655174 | count | 1 |
| ZNF684     | -1.4191243 | 1.2798928   | -1.1088 | 0.268  | -0.950655174 | count | 1 |
| ZBED3      | -1.4191243 | 1.2913349   | -1.099  | 0.273  | -0.950655174 | count | 1 |
| NOXA1      | -1.4191243 | 1.2913349   | -1.099  | 0.273  | -0.950655174 | count | 1 |
| NME6       | -0.7691685 | 0.587714    | -1.3087 | 0.192  | -0.950235232 | count | 1 |
| SMARCC1    | -0.7125011 | 0.394108    | -1.8079 | 0.0716 | -0.949729368 | count | 1 |
| ACOX1      | -0.8673766 | 0.8775255   | -0.9884 | 0.324  | -0.949505694 | count | 1 |
| TNFRSF12A  | -0.7167453 | 0.3869915   | -1.8521 | 0.0649 | -0.948069006 | count | 1 |
| AHCY       | -0.982585  | 0.9625152   | -1.0209 | 0.308  | -0.947674109 | count | 1 |
| PER3       | -0.982585  | 1.0778568   | -0.9116 | 0.363  | -0.947674109 | count | 1 |

|            |            |           |         |        |              |       |   |
|------------|------------|-----------|---------|--------|--------------|-------|---|
| LINC01126  | -0.982585  | 1.2079461 | -0.8134 | 0.417  | -0.947674109 | count | 1 |
| GDPD1      | -0.982585  | 1.3017195 | -0.7548 | 0.451  | -0.947674109 | count | 1 |
| PDK3       | -0.9108349 | 0.8388471 | -1.0858 | 0.278  | -0.947343919 | count | 1 |
| DSTYK      | -1.4085244 | 1.0501124 | -1.3413 | 0.181  | -0.945625586 | count | 1 |
| SSH1       | -0.754747  | 0.7414452 | -1.0179 | 0.309  | -0.944353085 | count | 1 |
| SATB1      | -0.7050636 | 0.4369403 | -1.6136 | 0.108  | -0.943121248 | count | 1 |
| EPB41L2    | -0.8279525 | 0.8569032 | -0.9662 | 0.335  | -0.941431097 | count | 1 |
| SRPK2      | -0.675193  | 0.3395994 | -1.9882 | 0.0476 | -0.938390877 | count | 1 |
| PSMA2      | -0.6857914 | 0.3845563 | -1.7833 | 0.0755 | -0.938357757 | count | 1 |
| TEC        | -0.7829398 | 0.8098933 | -0.9667 | 0.334  | -0.936684149 | count | 1 |
| TRAF4      | -0.7473952 | 0.5856566 | -1.2762 | 0.203  | -0.935503996 | count | 1 |
| TDP1       | -0.7473616 | 0.5736813 | -1.3027 | 0.194  | -0.935463532 | count | 1 |
| FOXK2      | -1.0929722 | 1.0014519 | -1.0914 | 0.2759 | -0.935187252 | count | 1 |
| PSMC1      | -0.6770488 | 0.3170363 | -2.1356 | 0.0335 | -0.934953414 | count | 1 |
| TRAK2      | -0.8970899 | 0.8549217 | -1.0493 | 0.295  | -0.934432367 | count | 1 |
| NR2C2AP    | -0.9667786 | 0.927207  | -1.0427 | 0.298  | -0.934324103 | count | 1 |
| ZNF786     | -0.7666178 | 1.086104  | -0.7058 | 0.481  | -0.933897036 | count | 1 |
| RDX        | -0.780294  | 0.5678341 | -1.3742 | 0.17   | -0.933680607 | count | 1 |
| NIFK       | -0.6707035 | 0.3287034 | -2.0405 | 0.0421 | -0.93360238  | count | 1 |
| REC8       | -0.9656743 | 0.9929244 | -0.9726 | 0.331  | -0.933388631 | count | 1 |
| CYB561     | -0.9656743 | 1.1989848 | -0.8054 | 0.421  | -0.933388631 | count | 1 |
| ITGAX      | -1.382707  | 0.757237  | -1.826  | 0.0688 | -0.933239996 | count | 1 |
| OSBPL2     | -0.7374796 | 0.5351063 | -1.3782 | 0.169  | -0.932980343 | count | 1 |
| MCM6       | -1.377856  | 0.8724802 | -1.5792 | 0.115  | -0.930891435 | count | 1 |
| TIMM23     | -1.377856  | 0.8724802 | -1.5792 | 0.115  | -0.930891435 | count | 1 |
| DDT        | -0.6575617 | 0.2455141 | -2.6783 | 0.0078 | -0.930678652 | count | 1 |
| PIK3AP1    | -0.6993448 | 0.5370141 | -1.3023 | 0.194  | -0.929208085 | count | 1 |
| IFT22      | -0.7512285 | 0.6884033 | -1.0913 | 0.276  | -0.928987907 | count | 1 |
| AL117339.5 | -1.083314  | 1.0252442 | -1.0566 | 0.291  | -0.92833569  | count | 1 |
| TRAF3IP1   | -0.7413875 | 0.7629795 | -0.9717 | 0.332  | -0.928266209 | count | 1 |
| ANKIB1     | -0.7410203 | 0.4827214 | -1.5351 | 0.126  | -0.92782363  | count | 1 |
| CDK4       | -0.6980056 | 0.3657267 | -1.9085 | 0.0572 | -0.927466038 | count | 1 |
| UBAP2      | -0.8147679 | 0.9201287 | -0.8855 | 0.377  | -0.927433686 | count | 1 |
| SMIM7      | -0.6578181 | 0.3437856 | -1.9135 | 0.0566 | -0.926769795 | count | 1 |
| PHF13      | -1.368324  | 0.9913999 | -1.3802 | 0.168  | -0.926256351 | count | 1 |
| EPHA1      | -0.7252049 | 0.8136523 | -0.8913 | 0.373  | -0.926053251 | count | 1 |
| EIPR1      | -1.0798043 | 0.8849414 | -1.2202 | 0.223  | -0.925838829 | count | 1 |
| CINP       | -0.6992647 | 0.53613   | -1.3043 | 0.193  | -0.925458445 | count | 1 |
| PDCD11     | -0.8104449 | 1.1457154 | -0.7074 | 0.48   | -0.9228354   | count | 1 |
| SLC10A3    | -0.7872713 | 0.8175681 | -0.9629 | 0.336  | -0.922048853 | count | 1 |
| CDC23      | -0.7872713 | 0.9267683 | -0.8495 | 0.396  | -0.922048853 | count | 1 |
| RHNO1      | -0.7453175 | 0.6214085 | -1.1994 | 0.231  | -0.92197496  | count | 1 |
| EI24       | -0.6995131 | 0.5140269 | -1.3608 | 0.175  | -0.921783321 | count | 1 |
| HPGD       | -1.073919  | 0.6566855 | -1.6354 | 0.103  | -0.921643167 | count | 1 |
| NPTN       | -0.7215608 | 0.5905245 | -1.2219 | 0.223  | -0.921546644 | count | 1 |

|          |            |           |         |        |              |       |   |
|----------|------------|-----------|---------|--------|--------------|-------|---|
| IQSEC1   | -1.0735307 | 1.2052085 | -0.8907 | 0.374  | -0.921365922 | count | 1 |
| NOC4L    | -0.7062212 | 0.6686385 | -1.0562 | 0.292  | -0.921044799 | count | 1 |
| COX20    | -0.6600871 | 0.3253078 | -2.0291 | 0.0433 | -0.919597614 | count | 1 |
| PGGHG    | -0.8374641 | 0.7318017 | -1.1444 | 0.253  | -0.919303265 | count | 1 |
| CHCHD4   | -0.8809518 | 1.0921406 | -0.8066 | 0.42   | -0.919206501 | count | 1 |
| MED12    | -0.8809518 | 1.1103439 | -0.7934 | 0.428  | -0.919206501 | count | 1 |
| LHX4     | -0.8809518 | 1.2043    | -0.7315 | 0.465  | -0.919206501 | count | 1 |
| WDR44    | -0.8801663 | 0.6750523 | -1.3038 | 0.193  | -0.918463596 | count | 1 |
| PPP1R13B | -0.8801663 | 0.7822526 | -1.1252 | 0.261  | -0.918463596 | count | 1 |
| SUMF2    | -0.6788123 | 0.4017468 | -1.6897 | 0.0921 | -0.918458388 | count | 1 |
| PCYT2    | -0.7836132 | 1.0112214 | -0.7749 | 0.439  | -0.918005789 | count | 1 |
| NOP14    | -0.7080701 | 0.6378669 | -1.1101 | 0.268  | -0.917903463 | count | 1 |
| MUM1     | -0.7411074 | 0.5505627 | -1.3461 | 0.179  | -0.916976348 | count | 1 |
| POLR3K   | -0.6637524 | 0.3876841 | -1.7121 | 0.0878 | -0.916789382 | count | 1 |
| AHI1     | -0.6846442 | 0.4889618 | -1.4002 | 0.162  | -0.916323693 | count | 1 |
| DEF8     | -0.723243  | 0.8363448 | -0.8648 | 0.3878 | -0.915579291 | count | 1 |
| ZBED4    | -0.943855  | 0.7950545 | -1.1872 | 0.236  | -0.914830932 | count | 1 |
| USP37    | -0.7806766 | 0.6774753 | -1.1523 | 0.25   | -0.914758093 | count | 1 |
| ATG14    | -0.7046018 | 0.609476  | -1.1561 | 0.249  | -0.913529089 | count | 1 |
| LPCAT4   | -1.3410737 | 1.2189883 | -1.1002 | 0.272  | -0.912860608 | count | 1 |
| TTC33    | -0.7767124 | 0.840188  | -0.9245 | 0.356  | -0.910371046 | count | 1 |
| SRFBP1   | -0.6641557 | 0.4922934 | -1.3491 | 0.178  | -0.909136761 | count | 1 |
| MIS12    | -0.7112969 | 0.584165  | -1.2176 | 0.224  | -0.908843229 | count | 1 |
| PDSS2    | -0.7972732 | 0.6532477 | -1.2205 | 0.223  | -0.908798387 | count | 1 |
| DDX39B   | -0.744819  | 0.4111711 | -1.8115 | 0.071  | -0.908511982 | count | 1 |
| ZCCHC17  | -0.6498177 | 0.3906904 | -1.6633 | 0.0972 | -0.907165974 | count | 1 |
| UBXN8    | -1.0519169 | 1.073992  | -0.9794 | 0.328  | -0.905862002 | count | 1 |
| FBXO2    | -0.6828449 | 0.5368618 | -1.2719 | 0.204  | -0.904190024 | count | 1 |
| PTGER2   | -0.6587727 | 0.3733591 | -1.7644 | 0.0786 | -0.901861515 | count | 1 |
| KRI1     | -0.7686218 | 0.7238162 | -1.0619 | 0.289  | -0.901407162 | count | 1 |
| TLE3     | -0.8618684 | 0.7117825 | -1.2109 | 0.227  | -0.901110194 | count | 1 |
| COL23A1  | -1.0452544 | 0.8770177 | -1.1918 | 0.234  | -0.901053631 | count | 1 |
| CD3G     | -0.7504996 | 0.6232227 | -1.2042 | 0.229  | -0.899762304 | count | 1 |
| ERO1B    | -0.6893732 | 0.4386132 | -1.5717 | 0.117  | -0.899620197 | count | 1 |
| PIGV     | -0.9260269 | 0.9933707 | -0.9322 | 0.352  | -0.899563569 | count | 1 |
| CAPRIN2  | -0.6803626 | 0.6635266 | -1.0254 | 0.306  | -0.897107594 | count | 1 |
| BRI3BP   | -0.6946662 | 0.8418155 | -0.8252 | 0.41   | -0.894987331 | count | 1 |
| C2orf76  | -0.8536818 | 0.7622074 | -1.12   | 0.264  | -0.893316858 | count | 1 |
| FUZ      | -0.7448048 | 0.8571094 | -0.869  | 0.386  | -0.893259519 | count | 1 |
| FBXO42   | -1.3011332 | 0.9775119 | -1.3311 | 0.1841 | -0.892836289 | count | 1 |
| GHDC     | -0.6922202 | 0.7108835 | -0.9737 | 0.331  | -0.891923628 | count | 1 |
| CSTF1    | -0.7802936 | 0.7957513 | -0.9806 | 0.328  | -0.890644816 | count | 1 |
| EMG1     | -0.6964108 | 0.5245469 | -1.3276 | 0.185  | -0.890392497 | count | 1 |
| TAF3     | -0.7094374 | 0.4874967 | -1.4553 | 0.147  | -0.889676861 | count | 1 |
| U2AF1L4  | -0.7180221 | 0.5095826 | -1.409  | 0.16   | -0.889513766 | count | 1 |

|            |            |           |         |        |              |       |   |
|------------|------------|-----------|---------|--------|--------------|-------|---|
| ZNF226     | -0.6471662 | 0.5692121 | -1.137  | 0.256  | -0.888747722 | count | 1 |
| MRPS6      | -0.6235242 | 0.2196812 | -2.8383 | 0.0048 | -0.888493829 | count | 1 |
| VPS13D     | -0.8069623 | 1.2647452 | -0.638  | 0.524  | -0.888275066 | count | 1 |
| LINC01003  | -0.7169291 | 0.6162004 | -1.1635 | 0.245  | -0.888211295 | count | 1 |
| NUP93      | -1.291799  | 1.0013868 | -1.29   | 0.198  | -0.88808933  | count | 1 |
| PET117     | -1.291799  | 1.0265543 | -1.2584 | 0.209  | -0.88808933  | count | 1 |
| MPZL1      | -1.291799  | 1.0511193 | -1.229  | 0.22   | -0.88808933  | count | 1 |
| ERI3       | -0.6724556 | 0.5297125 | -1.2695 | 0.205  | -0.886907506 | count | 1 |
| BRD9       | -0.6785216 | 0.4833933 | -1.4037 | 0.161  | -0.885802694 | count | 1 |
| TKFC       | -0.8455401 | 0.9406603 | -0.8989 | 0.369  | -0.885548399 | count | 1 |
| FAN1       | -0.7738345 | 1.1795981 | -0.656  | 0.5123 | -0.883722009 | count | 1 |
| RPS6KB2    | -0.6557282 | 0.4775375 | -1.3731 | 0.171  | -0.883354907 | count | 1 |
| LIAS       | -0.9063392 | 0.8362525 | -1.0838 | 0.279  | -0.882595614 | count | 1 |
| UBXN2B     | -0.9063392 | 0.8582105 | -1.0561 | 0.292  | -0.882595614 | count | 1 |
| SENP1      | -0.9063392 | 0.9284436 | -0.9762 | 0.33   | -0.882595614 | count | 1 |
| JPT1       | -0.6315545 | 0.2786646 | -2.2664 | 0.0241 | -0.882388538 | count | 1 |
| CD3D       | -0.6892869 | 0.8033716 | -0.858  | 0.392  | -0.88155172  | count | 1 |
| CDK12      | -0.6468361 | 0.3388269 | -1.909  | 0.0571 | -0.881247748 | count | 1 |
| IKBKE      | -1.0179335 | 0.9249467 | -1.1005 | 0.272  | -0.881192414 | count | 1 |
| NRROS      | -1.0179335 | 1.1607216 | -0.877  | 0.3811 | -0.881192414 | count | 1 |
| NRIP1      | -0.903831  | 0.6075533 | -1.4877 | 0.138  | -0.880425844 | count | 1 |
| BASP1      | -0.8388038 | 1.0359141 | -0.8097 | 0.419  | -0.879107523 | count | 1 |
| ZNF213     | -0.8388038 | 1.1208189 | -0.7484 | 0.455  | -0.879107523 | count | 1 |
| ZNF117     | -0.8388038 | 1.2320053 | -0.6808 | 0.496  | -0.879107523 | count | 1 |
| NAGA       | -0.8388038 | 1.2320053 | -0.6808 | 0.496  | -0.879107523 | count | 1 |
| ARSA       | -0.8388038 | 1.2320053 | -0.6808 | 0.496  | -0.879107523 | count | 1 |
| RCOR3      | -0.7005608 | 0.483409  | -1.4492 | 0.148  | -0.878927013 | count | 1 |
| NCBP3      | -0.6726968 | 0.3574641 | -1.8819 | 0.0608 | -0.878380092 | count | 1 |
| ARID5B     | -0.65781   | 0.5344589 | -1.2308 | 0.219  | -0.878195683 | count | 1 |
| PTMS       | -0.7314096 | 0.5805164 | -1.2599 | 0.209  | -0.877939125 | count | 1 |
| DDX54      | -0.7303379 | 0.5569701 | -1.3113 | 0.191  | -0.876711906 | count | 1 |
| FBXO34     | -0.6278301 | 0.3029013 | -2.0727 | 0.039  | -0.876702428 | count | 1 |
| SHMT2      | -0.6797629 | 0.5683063 | -1.1961 | 0.233  | -0.876308126 | count | 1 |
| ANKRD10    | -0.6672237 | 0.3587965 | -1.8596 | 0.0638 | -0.875998935 | count | 1 |
| NSFL1C     | -0.6437777 | 0.4823085 | -1.3348 | 0.183  | -0.875461207 | count | 1 |
| MTMR6      | -0.8977912 | 0.8528466 | -1.0527 | 0.293  | -0.875193425 | count | 1 |
| AC008736.1 | -0.8977912 | 1.2162501 | -0.7382 | 0.461  | -0.875193425 | count | 1 |
| ZFP64      | -1.2653061 | 1.3184107 | -0.9597 | 0.338  | -0.874477859 | count | 1 |
| AL031316.1 | -1.2653061 | 1.4280147 | -0.8861 | 0.376  | -0.874477859 | count | 1 |
| CTSH       | -1.2653061 | 1.4280147 | -0.8861 | 0.376  | -0.874477859 | count | 1 |
| MAP2K7     | -0.6768334 | 0.5931815 | -1.141  | 0.255  | -0.872632981 | count | 1 |
| UBXN2A     | -0.65474   | 0.3859114 | -1.6966 | 0.0907 | -0.871087187 | count | 1 |
| EMC8       | -0.7612642 | 0.7967023 | -0.9555 | 0.34   | -0.870222412 | count | 1 |
| ZNF276     | -0.6436174 | 0.5396239 | -1.1927 | 0.234  | -0.869499382 | count | 1 |
| DNAJC8     | -0.611901  | 0.2285367 | -2.6775 | 0.0078 | -0.869341085 | count | 1 |

|            |            |           |         |        |              |       |   |
|------------|------------|-----------|---------|--------|--------------|-------|---|
| SSH2       | -0.6317532 | 0.3973934 | -1.5897 | 0.113  | -0.868972861 | count | 1 |
| FAM129A    | -0.6915981 | 0.5526701 | -1.2514 | 0.212  | -0.868060429 | count | 1 |
| IFIH1      | -0.6891285 | 0.6655872 | -1.0354 | 0.301  | -0.865064039 | count | 1 |
| POLRMT     | -1.246891  | 0.8084318 | -1.5424 | 0.124  | -0.864895362 | count | 1 |
| SCLT1      | -0.6543053 | 0.5024822 | -1.3021 | 0.194  | -0.863467839 | count | 1 |
| CPQ        | -0.6541268 | 0.5889014 | -1.1108 | 0.267  | -0.863237143 | count | 1 |
| ARRDC2     | -0.634652  | 0.4959268 | -1.2797 | 0.202  | -0.863218605 | count | 1 |
| MRPL57     | -0.6090817 | 0.2327337 | -2.6171 | 0.0093 | -0.861999561 | count | 1 |
| ZNF638     | -0.6247308 | 0.3636744 | -1.7178 | 0.0868 | -0.861521312 | count | 1 |
| EIF4G3     | -0.6450386 | 0.4419095 | -1.4597 | 0.145  | -0.861449468 | count | 1 |
| GDAP2      | -0.8811667 | 1.0598703 | -0.8314 | 0.406  | -0.860736945 | count | 1 |
| AC004918.1 | -0.8811667 | 1.1140363 | -0.791  | 0.43   | -0.860736945 | count | 1 |
| ARFGEF2    | -0.8811667 | 1.1368712 | -0.7751 | 0.439  | -0.860736945 | count | 1 |
| ICA1       | -0.8811667 | 1.2391637 | -0.7111 | 0.478  | -0.860736945 | count | 1 |
| HOXB4      | -0.7320456 | 0.8082524 | -0.9057 | 0.366  | -0.860712816 | count | 1 |
| PLEKHA3    | -0.637809  | 0.4107789 | -1.5527 | 0.121  | -0.859592692 | count | 1 |
| TMEM191B   | -0.8791748 | 1.1437183 | -0.7687 | 0.443  | -0.858999467 | count | 1 |
| NNMT       | -0.7767124 | 0.9035857 | -0.8596 | 0.391  | -0.857277531 | count | 1 |
| PMM1       | -0.6697304 | 0.5977781 | -1.1204 | 0.263  | -0.857245982 | count | 1 |
| LRRC42     | -0.7283315 | 0.8169471 | -0.8915 | 0.373  | -0.856565159 | count | 1 |
| IFT74      | -0.7283315 | 0.911141  | -0.7994 | 0.425  | -0.856565159 | count | 1 |
| ANKRD26    | -0.6639438 | 0.634587  | -1.0463 | 0.296  | -0.856449301 | count | 1 |
| MYH9       | -0.6086561 | 0.2912001 | -2.0902 | 0.0374 | -0.85613433  | count | 1 |
| NDUFV3     | -0.6217228 | 0.4661258 | -1.3338 | 0.183  | -0.855323319 | count | 1 |
| CBWD5      | -0.746612  | 0.709019  | -1.053  | 0.293  | -0.854442632 | count | 1 |
| TMEM128    | -0.8125926 | 0.8576383 | -0.9475 | 0.344  | -0.853931259 | count | 1 |
| ZDHC24     | -0.6176636 | 0.4019368 | -1.5367 | 0.125  | -0.85374989  | count | 1 |
| FAM228B    | -0.7100749 | 0.5928519 | -1.1977 | 0.232  | -0.853467514 | count | 1 |
| UCP2       | -0.5988473 | 0.2247736 | -2.6642 | 0.0081 | -0.852800731 | count | 1 |
| FAM215B    | -0.9785837 | 0.7989606 | -1.2248 | 0.222  | -0.852183558 | count | 1 |
| ZNF267     | -0.6250896 | 0.4352748 | -1.4361 | 0.152  | -0.852000447 | count | 1 |
| SLFN5      | -0.6057119 | 0.3261735 | -1.857  | 0.0642 | -0.851698569 | count | 1 |
| MGAT2      | -0.6709585 | 0.554566  | -1.2099 | 0.227  | -0.851413839 | count | 1 |
| SLC25A19   | -0.7707736 | 0.8734718 | -0.8824 | 0.378  | -0.851165972 | count | 1 |
| FCRL3      | -0.7707736 | 1.0291847 | -0.7489 | 0.454  | -0.851165972 | count | 1 |
| LENG1      | -0.6275689 | 0.367847  | -1.7061 | 0.089  | -0.850124368 | count | 1 |
| LEO1       | -0.6469433 | 0.5409969 | -1.1958 | 0.233  | -0.84994515  | count | 1 |
| PER1       | -0.7691291 | 0.5401439 | -1.4239 | 0.155  | -0.849472153 | count | 1 |
| PCNA       | -0.663188  | 0.5630171 | -1.1779 | 0.24   | -0.849103112 | count | 1 |
| POLR1C     | -0.7058834 | 0.6442814 | -1.0956 | 0.274  | -0.848649645 | count | 1 |
| TBL3       | -0.9734428 | 1.3465819 | -0.7229 | 0.47   | -0.848358731 | count | 1 |
| RNF185     | -0.9734428 | 1.5702551 | -0.6199 | 0.536  | -0.848358731 | count | 1 |
| HELLS      | -0.7668314 | 0.7154129 | -1.0719 | 0.285  | -0.847104438 | count | 1 |
| TARDBP     | -0.8655216 | 0.570517  | -1.5171 | 0.13   | -0.847059748 | count | 1 |
| LSM14A     | -0.6167378 | 0.3430664 | -1.7977 | 0.0732 | -0.846234284 | count | 1 |



|          |            |           |         |        |              |       |   |
|----------|------------|-----------|---------|--------|--------------|-------|---|
| MPHOSPH6 | -0.6662878 | 0.5799014 | -1.149  | 0.251  | -0.845662397 | count | 1 |
| KIR3DL2  | -0.6289096 | 0.5837205 | -1.0774 | 0.282  | -0.845474309 | count | 1 |
| ATP7A    | -0.7181967 | 0.6804836 | -1.0554 | 0.292  | -0.84523308  | count | 1 |
| SMARCA2  | -0.6132987 | 0.3145541 | -1.9497 | 0.0521 | -0.844910345 | count | 1 |
| FDXACB1  | -0.8030745 | 1.1497844 | -0.6985 | 0.485  | -0.844744224 | count | 1 |
| ZNF180   | -0.8030745 | 1.1531825 | -0.6964 | 0.487  | -0.844744224 | count | 1 |
| KIF1C    | -0.8030745 | 1.1761577 | -0.6828 | 0.495  | -0.844744224 | count | 1 |
| RNF149   | -0.6344156 | 0.4414197 | -1.4372 | 0.152  | -0.844538378 | count | 1 |
| ANKHD1   | -0.6651317 | 0.7430945 | -0.8951 | 0.371  | -0.844238308 | count | 1 |
| HDLBP    | -0.6719727 | 0.5321447 | -1.2628 | 0.208  | -0.844222945 | count | 1 |
| AP4M1    | -0.7172414 | 0.6914326 | -1.0373 | 0.3    | -0.844163861 | count | 1 |
| OSTC     | -0.5944278 | 0.2062288 | -2.8824 | 0.0042 | -0.843755918 | count | 1 |
| SPHK2    | -1.2065374 | 1.053955  | -1.1448 | 0.253  | -0.843548763 | count | 1 |
| PRKAR2B  | -0.6791582 | 0.7459083 | -0.9105 | 0.363  | -0.843080034 | count | 1 |
| GALM     | -0.8010116 | 0.7757132 | -1.0326 | 0.303  | -0.842749984 | count | 1 |
| TIMP1    | -0.5944843 | 0.2973848 | -1.999  | 0.0464 | -0.842104019 | count | 1 |
| POC1B    | -0.621458  | 0.6277996 | -0.9899 | 0.323  | -0.841961467 | count | 1 |
| PDZD11   | -0.6571371 | 0.6167439 | -1.0655 | 0.287  | -0.841566826 | count | 1 |
| EFHC1    | -0.698611  | 0.7388158 | -0.9456 | 0.345  | -0.840282689 | count | 1 |
| ATP6V1E2 | -0.698611  | 0.8920436 | -0.7832 | 0.434  | -0.840282689 | count | 1 |
| EXOSC5   | -0.6678708 | 0.4843752 | -1.3788 | 0.169  | -0.839233267 | count | 1 |
| USP48    | -0.6152992 | 0.4600671 | -1.3374 | 0.182  | -0.838822109 | count | 1 |
| IRF7     | -0.6070644 | 0.5185871 | -1.1706 | 0.243  | -0.838339246 | count | 1 |
| THUMPD3  | -0.6148321 | 0.488867  | -1.2577 | 0.209  | -0.838193202 | count | 1 |
| COL6A1   | -0.8553782 | 1.0089268 | -0.8478 | 0.397  | -0.838154956 | count | 1 |
| TATDN1   | -0.6286933 | 0.4806562 | -1.308  | 0.192  | -0.837056371 | count | 1 |
| NCAPD3   | -0.7569136 | 0.7396842 | -1.0233 | 0.307  | -0.836870008 | count | 1 |
| HLA-DPA1 | -0.5932704 | 0.2727119 | -2.1754 | 0.0303 | -0.836800502 | count | 1 |
| TLK1     | -0.6064983 | 0.3118119 | -1.9451 | 0.0526 | -0.836624349 | count | 1 |
| RBBP7    | -0.6062129 | 0.3755573 | -1.6142 | 0.107  | -0.836234478 | count | 1 |
| MCPH1    | -0.6477172 | 0.5014279 | -1.2917 | 0.197  | -0.836045417 | count | 1 |
| ATXN10   | -0.6024066 | 0.3905941 | -1.5423 | 0.124  | -0.836020779 | count | 1 |
| TMEM241  | -1.192168  | 1.0688858 | -1.1153 | 0.266  | -0.835832092 | count | 1 |
| TRAPPC5  | -1.192168  | 1.0688858 | -1.1153 | 0.266  | -0.835832092 | count | 1 |
| ZMYND8   | -0.6827878 | 0.6400916 | -1.0667 | 0.287  | -0.835808094 | count | 1 |
| NT5C     | -0.5917279 | 0.2791143 | -2.12   | 0.0348 | -0.835785734 | count | 1 |
| NAA30    | -0.755732  | 0.6550616 | -1.1537 | 0.249  | -0.835649126 | count | 1 |
| LAPTM4B  | -0.7290897 | 1.362379  | -0.5352 | 0.593  | -0.835509886 | count | 1 |
| NUDT16   | -0.6825139 | 0.6859336 | -0.995  | 0.32   | -0.835485563 | count | 1 |
| URB1-AS1 | -0.6427507 | 0.8458986 | -0.7598 | 0.448  | -0.835265999 | count | 1 |
| TMEM14C  | -0.5920227 | 0.3622192 | -1.6344 | 0.1031 | -0.834546121 | count | 1 |
| TTLL3    | -0.9547448 | 1.1204865 | -0.8521 | 0.395  | -0.834379788 | count | 1 |
| DTNBP1   | -0.621539  | 0.456276  | -1.3622 | 0.174  | -0.833260998 | count | 1 |
| TMCC1    | -0.7269542 | 0.7683413 | -0.9461 | 0.345  | -0.83319791  | count | 1 |
| TGIF1    | -0.6016709 | 0.3121097 | -1.9278 | 0.0548 | -0.831847792 | count | 1 |

|           |            |           |         |        |              |       |   |
|-----------|------------|-----------|---------|--------|--------------|-------|---|
| PIN4      | -0.608978  | 0.3728715 | -1.6332 | 0.103  | -0.831781476 | count | 1 |
| TTC38     | -0.6486636 | 0.4935828 | -1.3142 | 0.19   | -0.83100496  | count | 1 |
| PEA15     | -0.7042319 | 0.5269575 | -1.3364 | 0.182  | -0.829584694 | count | 1 |
| TACC3     | -0.9478618 | 0.9494413 | -0.9983 | 0.319  | -0.829207305 | count | 1 |
| FAM13A    | -0.9478618 | 1.0090167 | -0.9394 | 0.348  | -0.829207305 | count | 1 |
| PDS5B     | -0.6118046 | 0.446878  | -1.3691 | 0.172  | -0.829060636 | count | 1 |
| PDHA1     | -0.600526  | 0.4162412 | -1.4427 | 0.15   | -0.828464902 | count | 1 |
| PDHX      | -0.8443534 | 0.8895215 | -0.9492 | 0.343  | -0.828443348 | count | 1 |
| SPATA20   | -0.7225249 | 1.0476473 | -0.6897 | 0.491  | -0.828399432 | count | 1 |
| PPM1G     | -0.5855202 | 0.2360981 | -2.48   | 0.0136 | -0.82825097  | count | 1 |
| TRIOBP    | -0.6587461 | 0.7666838 | -0.8592 | 0.391  | -0.82812459  | count | 1 |
| PRPF6     | -0.5928713 | 0.3253677 | -1.8222 | 0.0694 | -0.827720805 | count | 1 |
| P2RY11    | -0.702567  | 0.7046868 | -0.997  | 0.32   | -0.827716464 | count | 1 |
| ARMCX6    | -0.6263947 | 0.5780611 | -1.0836 | 0.279  | -0.827355112 | count | 1 |
| NUB1      | -0.5899509 | 0.2794644 | -2.111  | 0.0355 | -0.826832773 | count | 1 |
| FAM193B   | -0.9442809 | 0.8911492 | -1.0596 | 0.2901 | -0.826510636 | count | 1 |
| SOX4      | -0.6447025 | 0.5419973 | -1.1895 | 0.235  | -0.826064327 | count | 1 |
| PHF14     | -0.5950174 | 0.3584827 | -1.6598 | 0.0979 | -0.825122961 | count | 1 |
| ZFYVE19   | -0.7819842 | 0.9733588 | -0.8034 | 0.422  | -0.824303624 | count | 1 |
| ADD3      | -0.6063083 | 0.5208087 | -1.1642 | 0.245  | -0.823491384 | count | 1 |
| PIK3C2A   | -0.7438703 | 0.7550807 | -0.9852 | 0.325  | -0.823374827 | count | 1 |
| FDX1      | -0.5964854 | 0.3488114 | -1.7101 | 0.0882 | -0.822943432 | count | 1 |
| SMS       | -0.5963361 | 0.3957057 | -1.507  | 0.133  | -0.822739395 | count | 1 |
| CD83      | -0.5970401 | 0.3930429 | -1.519  | 0.1297 | -0.822730887 | count | 1 |
| RNF214    | -0.6154882 | 0.5314634 | -1.1581 | 0.248  | -0.822643651 | count | 1 |
| FAM102B   | -0.6323117 | 0.6260439 | -1.01   | 0.313  | -0.822010871 | count | 1 |
| TPRG1L    | -0.6823178 | 0.7008903 | -0.9735 | 0.331  | -0.821501661 | count | 1 |
| MRPL45    | -0.619162  | 0.658166  | -0.9407 | 0.348  | -0.821436833 | count | 1 |
| PPP2CB    | -0.6356611 | 0.696611  | -0.9125 | 0.362  | -0.820864039 | count | 1 |
| GARS      | -0.635655  | 0.5295519 | -1.2004 | 0.231  | -0.820856351 | count | 1 |
| RUSC1     | -0.6523593 | 0.5551964 | -1.175  | 0.241  | -0.820341689 | count | 1 |
| GGH       | -0.8350259 | 1.2380923 | -0.6744 | 0.501  | -0.820200148 | count | 1 |
| NR2F2     | -0.8350259 | 1.3229663 | -0.6312 | 0.528  | -0.820200148 | count | 1 |
| MTERF1    | -0.8350259 | 1.3360296 | -0.625  | 0.532  | -0.820200148 | count | 1 |
| RIC1      | -0.8350259 | 1.3360296 | -0.625  | 0.532  | -0.820200148 | count | 1 |
| HCFC2     | -0.8350259 | 1.3360296 | -0.625  | 0.532  | -0.820200148 | count | 1 |
| TTLL12    | -0.8350259 | 1.3360296 | -0.625  | 0.532  | -0.820200148 | count | 1 |
| SNCA      | -0.8350259 | 1.4272624 | -0.5851 | 0.559  | -0.820200148 | count | 1 |
| LINC02076 | -0.8350259 | 1.4272624 | -0.5851 | 0.559  | -0.820200148 | count | 1 |
| IFNG-AS1  | -0.8350259 | 1.6713425 | -0.4996 | 0.618  | -0.820200148 | count | 1 |
| ANKRD49   | -0.6080748 | 0.5401996 | -1.1256 | 0.261  | -0.82010355  | count | 1 |
| MINCR     | -0.7141088 | 0.9083449 | -0.7862 | 0.432  | -0.819270213 | count | 1 |
| CPSF6     | -0.6796108 | 0.5357004 | -1.2686 | 0.205  | -0.818376601 | count | 1 |
| MRPL40    | -0.5853019 | 0.3065569 | -1.9093 | 0.0571 | -0.817721562 | count | 1 |
| SURF6     | -0.8319344 | 0.6398744 | -1.3002 | 0.194  | -0.817462643 | count | 1 |

|            |            |           |         |        |              |       |   |
|------------|------------|-----------|---------|--------|--------------|-------|---|
| TRABD2A    | -0.7122912 | 0.9744187 | -0.731  | 0.465  | -0.817296602 | count | 1 |
| SMDT1      | -0.5729385 | 0.1893094 | -3.0265 | 0.0027 | -0.815510957 | count | 1 |
| GOLGA7     | -0.5856163 | 0.3264485 | -1.7939 | 0.0738 | -0.815475149 | count | 1 |
| ACAP3      | -0.9288323 | 0.7845146 | -1.184  | 0.237  | -0.814832539 | count | 1 |
| PPIL3      | -0.6140108 | 0.6417728 | -0.9567 | 0.339  | -0.814725197 | count | 1 |
| RNF19A     | -0.5732748 | 0.2008488 | -2.8543 | 0.0046 | -0.814189057 | count | 1 |
| TEX30      | -0.5991815 | 0.5063428 | -1.1834 | 0.238  | -0.813934713 | count | 1 |
| KIAA0232   | -0.6637624 | 0.580693  | -1.1431 | 0.254  | -0.813374899 | count | 1 |
| AC084018.2 | -0.8271545 | 1.0235295 | -0.8081 | 0.42   | -0.81322479  | count | 1 |
| THAP5      | -0.594082  | 0.473224  | -1.2554 | 0.21   | -0.813012739 | count | 1 |
| ERBIN      | -0.5959482 | 0.4021489 | -1.4819 | 0.139  | -0.812755005 | count | 1 |
| RRAD       | -0.586193  | 1.0615473 | -0.5522 | 0.5812 | -0.812239354 | count | 1 |
| ARHGAP35   | -0.6119846 | 0.6152108 | -0.9948 | 0.321  | -0.81208449  | count | 1 |
| NUP98      | -0.9250738 | 0.6552254 | -1.4118 | 0.159  | -0.811980538 | count | 1 |
| CCDC28B    | -0.6164557 | 0.504162  | -1.2227 | 0.222  | -0.810693226 | count | 1 |
| VBP1       | -0.589651  | 0.3607476 | -1.6345 | 0.103  | -0.810577306 | count | 1 |
| NUDT18     | -0.6519073 | 0.8192922 | -0.7957 | 0.427  | -0.810375159 | count | 1 |
| TMEM242    | -0.6077523 | 0.4716135 | -1.2887 | 0.198  | -0.809648992 | count | 1 |
| TMPO       | -0.6000097 | 0.2940118 | -2.0408 | 0.0421 | -0.809380024 | count | 1 |
| ZNF721     | -0.6083093 | 0.5125742 | -1.1868 | 0.236  | -0.807293519 | count | 1 |
| JARID2     | -0.6349832 | 0.6740334 | -0.9421 | 0.3469 | -0.80703457  | count | 1 |
| MT-ND6     | -0.6687273 | 0.4050288 | -1.6511 | 0.0997 | -0.805798817 | count | 1 |
| FDXR       | -0.6828449 | 0.8196032 | -0.8331 | 0.405  | -0.805544194 | count | 1 |
| GEMIN8     | -0.6828449 | 0.8646632 | -0.7897 | 0.43   | -0.805544194 | count | 1 |
| QARS       | -0.6280669 | 0.5090982 | -1.2337 | 0.218  | -0.805292309 | count | 1 |
| PRAF2      | -0.6026388 | 0.6329555 | -0.9521 | 0.342  | -0.802950216 | count | 1 |
| HS2ST1     | -2.209837  | 1.0189852 | -2.1687 | 0.0308 | -0.802819062 | count | 1 |
| PPP1R35    | -0.5773342 | 0.3319861 | -1.739  | 0.083  | -0.802816014 | count | 1 |
| SNAPC1     | -0.5913388 | 0.3689717 | -1.6027 | 0.11   | -0.801686564 | count | 1 |
| ZNF441     | -0.624365  | 0.9489833 | -0.6579 | 0.511  | -0.800665007 | count | 1 |
| SEMA4D     | -0.588028  | 0.368421  | -1.5961 | 0.111  | -0.80057523  | count | 1 |
| CYB5D2     | -0.6527661 | 0.8288428 | -0.7876 | 0.432  | -0.800380996 | count | 1 |
| TMEM200A   | -0.7571933 | 0.9139368 | -0.8285 | 0.408  | -0.800130254 | count | 1 |
| TERF1      | -0.6520752 | 0.5048156 | -1.2917 | 0.197  | -0.799563903 | count | 1 |
| JMY        | -0.6289412 | 0.5176405 | -1.215  | 0.225  | -0.799563385 | count | 1 |
| LEMD3      | -0.7207293 | 0.6012606 | -1.1987 | 0.232  | -0.799334049 | count | 1 |
| ANKRD16    | -2.187695  | 1.114439  | -1.963  | 0.0505 | -0.799330401 | count | 1 |
| HSPH1      | -0.5937063 | 0.4444868 | -1.3357 | 0.183  | -0.79884084  | count | 1 |
| BCL2L11    | -0.7195713 | 0.5623511 | -1.2796 | 0.202  | -0.79812776  | count | 1 |
| USP24      | -0.6762468 | 0.8245841 | -0.8201 | 0.413  | -0.798109342 | count | 1 |
| IMMP2L     | -0.6262481 | 0.8403076 | -0.7453 | 0.457  | -0.796231631 | count | 1 |
| AC138150.1 | -0.6603505 | 1.040497  | -0.6346 | 0.526  | -0.796103372 | count | 1 |
| ZNF549     | -0.6603505 | 1.040497  | -0.6346 | 0.526  | -0.796103372 | count | 1 |
| EHBP1      | -0.6921232 | 0.6303362 | -1.098  | 0.273  | -0.795350255 | count | 1 |
| ZNF260     | -0.6921232 | 1.0242816 | -0.6757 | 0.4997 | -0.795350255 | count | 1 |

|            |            |           |         |        |              |       |   |
|------------|------------|-----------|---------|--------|--------------|-------|---|
| SETD2      | -0.5714561 | 0.3747706 | -1.5248 | 0.1283 | -0.795312388 | count | 1 |
| ATRIP      | -1.1172501 | 1.423455  | -0.7849 | 0.4331 | -0.794614021 | count | 1 |
| BRPF3      | -0.7161945 | 0.9534074 | -0.7512 | 0.453  | -0.794608359 | count | 1 |
| MRPS9      | -0.588547  | 0.4805967 | -1.2246 | 0.222  | -0.794129961 | count | 1 |
| FH         | -0.6381942 | 0.6021856 | -1.0598 | 0.29   | -0.793873121 | count | 1 |
| MAGED1     | -0.6098768 | 0.900314  | -0.6774 | 0.499  | -0.793480055 | count | 1 |
| CEACAM21   | -0.8985417 | 0.8537852 | -1.0524 | 0.293  | -0.791727503 | count | 1 |
| GTF2IRD2   | -0.8985417 | 0.9029431 | -0.9951 | 0.32   | -0.791727503 | count | 1 |
| TNFRSF25   | -0.8985417 | 0.9360397 | -0.9599 | 0.338  | -0.791727503 | count | 1 |
| DOHH       | -0.6445595 | 0.9034666 | -0.7134 | 0.476  | -0.790670378 | count | 1 |
| ZDHHC17    | -0.7475321 | 0.6739266 | -1.1092 | 0.268  | -0.790667437 | count | 1 |
| OTUD4      | -0.6871006 | 0.9955437 | -0.6902 | 0.4906 | -0.789871389 | count | 1 |
| ZC3H4      | -0.6198347 | 0.6084025 | -1.0188 | 0.309  | -0.788293344 | count | 1 |
| AP1AR      | -0.6022277 | 0.8612467 | -0.6993 | 0.485  | -0.788269022 | count | 1 |
| ANKRD36C   | -0.6260866 | 0.5955807 | -1.0512 | 0.294  | -0.788262624 | count | 1 |
| BRD3       | -0.5956171 | 0.5477142 | -1.0875 | 0.278  | -0.787439379 | count | 1 |
| NLRC5      | -0.8922144 | 0.8754402 | -1.0192 | 0.309  | -0.786866656 | count | 1 |
| TRGC1      | -0.5640628 | 0.3486599 | -1.6178 | 0.1067 | -0.78675801  | count | 1 |
| NRARP      | -2.1111524 | 1.9217427 | -1.0986 | 0.2728 | -0.78675569  | count | 1 |
| ARCN1      | -0.5826086 | 0.4341666 | -1.3419 | 0.181  | -0.786225349 | count | 1 |
| RIOK2      | -0.5772631 | 0.4337499 | -1.3309 | 0.184  | -0.786089689 | count | 1 |
| ECHDC2     | -0.6001596 | 0.6560889 | -0.9148 | 0.361  | -0.785616026 | count | 1 |
| PFKFB3     | -0.7071861 | 0.5111443 | -1.3835 | 0.167  | -0.78520676  | count | 1 |
| KDM2B      | -0.6647355 | 0.7026611 | -0.946  | 0.345  | -0.785117996 | count | 1 |
| S1PR1      | -1.0991942 | 1.4148668 | -0.7769 | 0.438  | -0.78443301  | count | 1 |
| AC018816.1 | -1.0991942 | 1.4679464 | -0.7488 | 0.455  | -0.78443301  | count | 1 |
| ZNF48      | -0.7063517 | 1.0317342 | -0.6846 | 0.494  | -0.784335    | count | 1 |
| MRPL37     | -0.5905169 | 0.4391244 | -1.3448 | 0.18   | -0.78408152  | count | 1 |
| TMEM205    | -0.5797599 | 0.507923  | -1.1414 | 0.255  | -0.782432453 | count | 1 |
| MGAT5      | -0.5892154 | 0.5226483 | -1.1274 | 0.26   | -0.782382384 | count | 1 |
| CHD8       | -0.5839538 | 0.5995686 | -0.974  | 0.331  | -0.781144755 | count | 1 |
| IP6K2      | -0.5701636 | 0.3977926 | -1.4333 | 0.153  | -0.780622849 | count | 1 |
| COL21A1    | -0.7027166 | 1.4350119 | -0.4897 | 0.625  | -0.78053529  | count | 1 |
| AGPAT1     | -0.5831666 | 0.7517237 | -0.7758 | 0.438  | -0.78010768  | count | 1 |
| FAM214B    | -0.6590804 | 0.9221465 | -0.7147 | 0.475  | -0.778726447 | count | 1 |
| WRAP53     | -0.8814049 | 0.9381283 | -0.9395 | 0.348  | -0.778535071 | count | 1 |
| TRRAP      | -0.8814049 | 1.2206139 | -0.7221 | 0.471  | -0.778535071 | count | 1 |
| SMARCD3    | -0.8814049 | 1.2206139 | -0.7221 | 0.471  | -0.778535071 | count | 1 |
| SLC9A6     | -0.8814049 | 1.2206139 | -0.7221 | 0.471  | -0.778535071 | count | 1 |
| POLD1      | -0.8814049 | 1.2206139 | -0.7221 | 0.471  | -0.778535071 | count | 1 |
| MMADHC     | -0.5694276 | 0.3621518 | -1.5723 | 0.117  | -0.776988252 | count | 1 |
| VPS11      | -0.8792581 | 1.0366183 | -0.8482 | 0.397  | -0.776876258 | count | 1 |
| MFN1       | -0.8782515 | 0.6629779 | -1.3247 | 0.186  | -0.776098032 | count | 1 |
| COG4       | -0.8782515 | 0.7500531 | -1.1709 | 0.242  | -0.776098032 | count | 1 |
| EZH1       | -0.6314788 | 0.6056336 | -1.0427 | 0.298  | -0.775169317 | count | 1 |

|            |            |           |         |        |              |       |   |
|------------|------------|-----------|---------|--------|--------------|-------|---|
| SCYL3      | -0.7842849 | 0.8442482 | -0.929  | 0.3536 | -0.774933449 | count | 1 |
| KCNQ1OT1   | -1.0813319 | 1.3355243 | -0.8097 | 0.4187 | -0.774266807 | count | 1 |
| UCK1       | -1.0813319 | 1.4552987 | -0.743  | 0.458  | -0.774266807 | count | 1 |
| C17orf75   | -0.5844356 | 0.4778215 | -1.2231 | 0.222  | -0.772914326 | count | 1 |
| PANK2      | -0.8732257 | 0.5114241 | -1.7074 | 0.0887 | -0.772207894 | count | 1 |
| TRANK1     | -0.6125499 | 0.5826943 | -1.0512 | 0.294  | -0.771695044 | count | 1 |
| DPM1       | -1.076403  | 0.575093  | -1.8717 | 0.0621 | -0.771445169 | count | 1 |
| CD6        | -0.5747426 | 0.7294534 | -0.7879 | 0.431  | -0.771435976 | count | 1 |
| ZBTB40     | -1.0751829 | 0.8100789 | -1.3273 | 0.185  | -0.77074545  | count | 1 |
| LRPPRC     | -0.6520157 | 0.6266222 | -1.0405 | 0.299  | -0.770733127 | count | 1 |
| UBA6       | -0.6276225 | 0.5880688 | -1.0673 | 0.287  | -0.770594101 | count | 1 |
| HPS1       | -0.5618364 | 0.4198019 | -1.3383 | 0.182  | -0.770523739 | count | 1 |
| ZNF678     | -0.7767124 | 1.1818269 | -0.6572 | 0.512  | -0.7681172   | count | 1 |
| PTS        | -0.6095914 | 0.5405377 | -1.1278 | 0.26   | -0.768070635 | count | 1 |
| SH3BGRL    | -0.5436705 | 0.2204782 | -2.4659 | 0.0142 | -0.767984482 | count | 1 |
| ARF3       | -0.6893052 | 0.6371838 | -1.0818 | 0.28   | -0.76649058  | count | 1 |
| AC006449.6 | -0.6079746 | 0.8173866 | -0.7438 | 0.458  | -0.766089396 | count | 1 |
| EDEM2      | -0.6335581 | 0.591173  | -1.0717 | 0.285  | -0.765009346 | count | 1 |
| METTL9     | -0.5458565 | 0.2789391 | -1.9569 | 0.0512 | -0.763390391 | count | 1 |
| SMIM4      | -0.6321591 | 0.7476483 | -0.8455 | 0.398  | -0.76338226  | count | 1 |
| SCO1       | -0.6321591 | 0.782483  | -0.8079 | 0.42   | -0.76338226  | count | 1 |
| BISPR      | -0.6321591 | 0.8108955 | -0.7796 | 0.436  | -0.76338226  | count | 1 |
| AC092069.1 | -0.6321591 | 1.0804492 | -0.5851 | 0.559  | -0.76338226  | count | 1 |
| FBXO32     | -0.5826561 | 0.6224926 | -0.936  | 0.35   | -0.763143509 | count | 1 |
| APPBP2     | -0.6624954 | 0.5602599 | -1.1825 | 0.238  | -0.762954917 | count | 1 |
| DIAPH2     | -0.6310459 | 0.6694155 | -0.9427 | 0.347  | -0.762087318 | count | 1 |
| PHF8       | -1.059795  | 1.0513302 | -1.0081 | 0.314  | -0.761884656 | count | 1 |
| NBPF3      | -1.0597951 | 1.4141984 | -0.7494 | 0.4542 | -0.76188456  | count | 1 |
| N4BP2      | -0.7696044 | 0.6203172 | -1.2407 | 0.216  | -0.761704897 | count | 1 |
| FAM120A    | -0.6042883 | 0.4920213 | -1.2282 | 0.22   | -0.761570784 | count | 1 |
| PTGES2     | -0.5687981 | 0.4639871 | -1.2259 | 0.221  | -0.761168735 | count | 1 |
| KRAS       | -0.5376861 | 0.241916  | -2.2226 | 0.0269 | -0.761166433 | count | 1 |
| RIPK3      | -0.7686218 | 1.1119685 | -0.6912 | 0.49   | -0.760817392 | count | 1 |
| C2orf68    | -0.619162  | 0.9169163 | -0.6753 | 0.5    | -0.760547851 | count | 1 |
| G3BP1      | -0.5501082 | 0.4400019 | -1.2502 | 0.2121 | -0.760342432 | count | 1 |
| NAALADL1   | -0.5472061 | 0.4312529 | -1.2689 | 0.205  | -0.759321438 | count | 1 |
| NEK4       | -1.959276  | 1.215447  | -1.612  | 0.108  | -0.759311192 | count | 1 |
| ZNF611     | -0.7141906 | 0.8144975 | -0.8768 | 0.381  | -0.757831224 | count | 1 |
| TP53BP1    | -0.6082582 | 0.7583613 | -0.8021 | 0.423  | -0.757747883 | count | 1 |
| USP14      | -0.5611221 | 0.4044863 | -1.3872 | 0.166  | -0.757601513 | count | 1 |
| PRMT3      | -0.6571371 | 0.9019678 | -0.7286 | 0.467  | -0.757076697 | count | 1 |
| MRS2       | -0.7640223 | 0.7565661 | -1.0099 | 0.313  | -0.756659552 | count | 1 |
| PPP3CB     | -0.7632275 | 0.5139065 | -1.4851 | 0.138  | -0.755940488 | count | 1 |
| DDX11      | -0.6149073 | 0.643911  | -0.955  | 0.34   | -0.755491309 | count | 1 |
| NUDT2      | -0.5736495 | 0.5215036 | -1.1    | 0.272  | -0.755414519 | count | 1 |

|            |            |           |         |        |              |       |   |
|------------|------------|-----------|---------|--------|--------------|-------|---|
| HADHB      | -0.5625638 | 0.3997689 | -1.4072 | 0.16   | -0.75531544  | count | 1 |
| ALG12      | -0.6370271 | 0.7390859 | -0.8619 | 0.389  | -0.753743001 | count | 1 |
| IL9R       | -0.7092586 | 0.9161543 | -0.7742 | 0.439  | -0.752950596 | count | 1 |
| STRBP      | -0.5458147 | 0.397694  | -1.3724 | 0.171  | -0.752753076 | count | 1 |
| VAMP5      | -0.5407415 | 0.3489354 | -1.5497 | 0.122  | -0.752282791 | count | 1 |
| TPM2       | -0.5907712 | 0.7606072 | -0.7767 | 0.438  | -0.752249796 | count | 1 |
| DDX50      | -0.5656313 | 0.4852072 | -1.1658 | 0.245  | -0.751565079 | count | 1 |
| PSMB4      | -0.534956  | 0.2757156 | -1.9402 | 0.0532 | -0.751188623 | count | 1 |
| KLHL21     | -0.7578963 | 1.0988815 | -0.6897 | 0.491  | -0.751112929 | count | 1 |
| TAF10      | -0.5279901 | 0.2405911 | -2.1946 | 0.0289 | -0.75065985  | count | 1 |
| ANAPC5     | -0.5568375 | 0.3760714 | -1.4807 | 0.14   | -0.749891201 | count | 1 |
| RAB5C      | -0.5298017 | 0.256983  | -2.0616 | 0.04   | -0.748848594 | count | 1 |
| ARHGEF12   | -0.7551356 | 0.9039804 | -0.8353 | 0.404  | -0.748610017 | count | 1 |
| TAF6L      | -1.903522  | 1.037463  | -1.8348 | 0.0675 | -0.748352698 | count | 1 |
| GCSH       | -0.7535113 | 0.8622845 | -0.8739 | 0.383  | -0.747136434 | count | 1 |
| AC093673.1 | -0.5639015 | 0.4569388 | -1.2341 | 0.218  | -0.746207926 | count | 1 |
| KLF11      | -0.7023969 | 0.8219995 | -0.8545 | 0.393  | -0.746150481 | count | 1 |
| NFKB1      | -0.5692895 | 0.3431992 | -1.6588 | 0.0981 | -0.745960071 | count | 1 |
| DYNC1L12   | -0.6065657 | 0.6438863 | -0.942  | 0.347  | -0.745569187 | count | 1 |
| PARP9      | -0.5757389 | 0.5954588 | -0.9669 | 0.334  | -0.745143001 | count | 1 |
| C16orf91   | -0.5547063 | 0.5057844 | -1.0967 | 0.274  | -0.744908293 | count | 1 |
| RIMKLB     | -0.701066  | 1.1387133 | -0.6157 | 0.5385 | -0.744830192 | count | 1 |
| LONP2      | -0.5683864 | 0.5408231 | -1.051  | 0.294  | -0.744798401 | count | 1 |
| HS3ST3B1   | -0.5973561 | 0.9489624 | -0.6295 | 0.529  | -0.744558005 | count | 1 |
| HSDL1      | -0.5973561 | 1.1370347 | -0.5254 | 0.6    | -0.744558005 | count | 1 |
| DLG1       | -0.6286952 | 0.6334097 | -0.9926 | 0.322  | -0.744280215 | count | 1 |
| CDKN1A     | -0.6283649 | 0.4781022 | -1.3143 | 0.19   | -0.743904822 | count | 1 |
| SLC35E1    | -0.5445369 | 0.4140639 | -1.3151 | 0.189  | -0.743376984 | count | 1 |
| DCTN3      | -0.5233769 | 0.2450691 | -2.1356 | 0.0335 | -0.743312535 | count | 1 |
| RUVBL1     | -0.5741729 | 0.6246179 | -0.9192 | 0.359  | -0.743158344 | count | 1 |
| TMEM18     | -0.5548622 | 0.4478361 | -1.239  | 0.216  | -0.742782957 | count | 1 |
| FXR2       | -0.6988862 | 1.0139584 | -0.6893 | 0.491  | -0.742666827 | count | 1 |
| AC023157.3 | -1.0241381 | 1.194282  | -0.8575 | 0.392  | -0.741084818 | count | 1 |
| DIP2A      | -0.602564  | 0.5258127 | -1.146  | 0.253  | -0.740805308 | count | 1 |
| MBD4       | -0.5337298 | 0.3261877 | -1.6363 | 0.103  | -0.740754564 | count | 1 |
| PPP1R12A   | -0.5207355 | 0.1934307 | -2.6921 | 0.0075 | -0.740085731 | count | 1 |
| MCM7       | -0.7455367 | 0.4831313 | -1.5431 | 0.124  | -0.739891582 | count | 1 |
| CIAPIN1    | -0.5709271 | 0.5931587 | -0.9625 | 0.337  | -0.739043898 | count | 1 |
| AC027644.3 | -0.5709271 | 0.6904624 | -0.8269 | 0.409  | -0.739043898 | count | 1 |
| PI4K2B     | -0.6946662 | 1.090297  | -0.6371 | 0.524  | -0.73847539  | count | 1 |
| NOA1       | -0.5533953 | 0.615803  | -0.8987 | 0.37   | -0.738317582 | count | 1 |
| DCUN1D5    | -0.6097036 | 0.4730618 | -1.2888 | 0.198  | -0.737219109 | count | 1 |
| MIS18BP1   | -0.5301646 | 0.3238692 | -1.637  | 0.103  | -0.736475858 | count | 1 |
| PSMC4      | -0.5310729 | 0.3271522 | -1.6233 | 0.105  | -0.73642805  | count | 1 |
| CD2BP2     | -0.5726908 | 0.4507396 | -1.2706 | 0.205  | -0.735890403 | count | 1 |

|            |            |           |         |          |              |       |   |
|------------|------------|-----------|---------|----------|--------------|-------|---|
| TUSC2      | -0.5775774 | 0.6144214 | -0.94   | 0.348    | -0.735850237 | count | 1 |
| SNRPA1     | -0.5334493 | 0.3760568 | -1.4185 | 0.157    | -0.735839462 | count | 1 |
| ABCG1      | -0.5395181 | 0.4903965 | -1.1002 | 0.272    | -0.735236269 | count | 1 |
| RFX7       | -0.6079746 | 0.7269847 | -0.8363 | 0.404    | -0.735201022 | count | 1 |
| CHD1L      | -0.6079746 | 0.9630379 | -0.6313 | 0.528    | -0.735201022 | count | 1 |
| AC062017.1 | -0.6079746 | 1.1244085 | -0.5407 | 0.589    | -0.735201022 | count | 1 |
| SEPHS2     | -0.5373547 | 0.4063578 | -1.3224 | 0.187    | -0.734940673 | count | 1 |
| KLHDC10    | -0.8252644 | 1.0446251 | -0.79   | 0.43     | -0.73471233  | count | 1 |
| UQCRC1     | -0.5468706 | 0.4773486 | -1.1456 | 0.253    | -0.734524982 | count | 1 |
| CDC14A     | -0.7394231 | 0.6368418 | -1.1611 | 0.246    | -0.734325901 | count | 1 |
| AIG1       | -0.5713788 | 0.6534297 | -0.8744 | 0.383    | -0.734241435 | count | 1 |
| DMTF1      | -0.5546247 | 0.4013934 | -1.3817 | 0.168    | -0.734129212 | count | 1 |
| THAP9-AS1  | -0.5660992 | 0.4579256 | -1.2362 | 0.217    | -0.732921672 | count | 1 |
| CLPX       | -0.5590211 | 0.6199249 | -0.9018 | 0.368    | -0.73274664  | count | 1 |
| EMC7       | -0.5298564 | 0.3237531 | -1.6366 | 0.103    | -0.732568224 | count | 1 |
| FBP1       | -0.5657684 | 0.5524139 | -1.0242 | 0.307    | -0.732502089 | count | 1 |
| CYFIP2     | -0.5384927 | 0.3546487 | -1.5184 | 0.13     | -0.732406585 | count | 1 |
| ASCC1      | -0.6341805 | 0.7967655 | -0.7959 | 0.427    | -0.73182638  | count | 1 |
| LRRC58     | -0.5516972 | 0.6001064 | -0.9193 | 0.359    | -0.730315794 | count | 1 |
| ZNF217     | -0.5281191 | 0.4009194 | -1.3173 | 0.189    | -0.730184645 | count | 1 |
| CRNKL1     | -0.5487069 | 0.4930816 | -1.1128 | 0.267    | -0.729418043 | count | 1 |
| NOB1       | -0.5384637 | 0.5476674 | -0.9832 | 0.326    | -0.729161111 | count | 1 |
| SMARCD2    | -0.6027254 | 0.6448943 | -0.9346 | 0.351    | -0.729071073 | count | 1 |
| ARPC1A     | -0.546197  | 0.5354677 | -1.02   | 0.308    | -0.728851538 | count | 1 |
| REL        | -0.5079495 | 0.1462043 | -3.4742 | 0.000582 | -0.727579457 | count | 1 |
| RBM42      | -0.5244656 | 0.3594286 | -1.4592 | 0.145    | -0.727330644 | count | 1 |
| HDDC3      | -0.6010426 | 0.5897261 | -1.0192 | 0.309    | -0.727104918 | count | 1 |
| ZBTB37     | -1.7965343 | 1.6469978 | -1.0908 | 0.2762   | -0.725907603 | count | 1 |
| C2orf49    | -0.5384191 | 0.515512  | -1.0444 | 0.297    | -0.72539695  | count | 1 |
| TRIM5      | -0.5892154 | 0.7801686 | -0.7552 | 0.451    | -0.724895883 | count | 1 |
| CHMP7      | -0.5637415 | 0.679118  | -0.8301 | 0.407    | -0.724638401 | count | 1 |
| NDUFS6     | -0.514279  | 0.2821417 | -1.8228 | 0.0693   | -0.723983513 | count | 1 |
| SMARCE1    | -0.5436462 | 0.431847  | -1.2589 | 0.209    | -0.722790586 | count | 1 |
| AL445686.2 | -0.586787  | 0.9524231 | -0.6161 | 0.538    | -0.721998593 | count | 1 |
| TNFSF4     | -0.9918337 | 1.0773217 | -0.9206 | 0.358    | -0.721919326 | count | 1 |
| RBM41      | -0.5504445 | 0.7471034 | -0.7368 | 0.462    | -0.721701756 | count | 1 |
| RFNG       | -0.5504319 | 0.5931899 | -0.9279 | 0.354    | -0.721685529 | count | 1 |
| MVB12A     | -0.5661469 | 0.5215499 | -1.0855 | 0.279    | -0.721624058 | count | 1 |
| YEATS2     | -0.8087072 | 0.7904747 | -1.0231 | 0.307    | -0.721613215 | count | 1 |
| FAM126B    | -0.624365  | 1.0342467 | -0.6037 | 0.546    | -0.720997765 | count | 1 |
| ERCC6L2    | -0.5607053 | 0.6574625 | -0.8528 | 0.394    | -0.720818756 | count | 1 |
| WDR55      | -0.5604572 | 0.6246374 | -0.8973 | 0.37     | -0.720506586 | count | 1 |
| COX19      | -0.5199211 | 0.3812399 | -1.3638 | 0.174    | -0.720393164 | count | 1 |
| CYBC1      | -0.5149362 | 0.3328213 | -1.5472 | 0.123    | -0.7203846   | count | 1 |
| CDIPT      | -0.5333953 | 0.4494582 | -1.1868 | 0.236    | -0.718711311 | count | 1 |

|           |            |           |         |        |              |       |   |
|-----------|------------|-----------|---------|--------|--------------|-------|---|
| RPAP3     | -0.5360275 | 0.5693931 | -0.9414 | 0.347  | -0.717907958 | count | 1 |
| GZMB      | -0.5105746 | 0.2496873 | -2.0449 | 0.0417 | -0.71770671  | count | 1 |
| UBXN7     | -0.6212707 | 0.6517588 | -0.9532 | 0.341  | -0.717580099 | count | 1 |
| QKI       | -0.5157863 | 0.3839844 | -1.3432 | 0.18   | -0.717222899 | count | 1 |
| SLC30A6   | -0.982585  | 1.2902886 | -0.7615 | 0.447  | -0.716376152 | count | 1 |
| TPCN2     | -0.982585  | 1.2902886 | -0.7615 | 0.447  | -0.716376152 | count | 1 |
| AFMID     | -0.982585  | 1.2902886 | -0.7615 | 0.447  | -0.716376152 | count | 1 |
| DPH2      | -0.982585  | 1.3017195 | -0.7548 | 0.451  | -0.716376152 | count | 1 |
| SERPING1  | -0.982585  | 1.3017195 | -0.7548 | 0.451  | -0.716376152 | count | 1 |
| BSCL2     | -0.982585  | 1.3017195 | -0.7548 | 0.451  | -0.716376152 | count | 1 |
| MKL2      | -0.982585  | 1.3017195 | -0.7548 | 0.451  | -0.716376152 | count | 1 |
| EEF1AKMT2 | -0.5232063 | 0.4418451 | -1.1841 | 0.237  | -0.715772123 | count | 1 |
| CCNG1     | -0.6190797 | 0.6471096 | -0.9567 | 0.339  | -0.715158995 | count | 1 |
| TXNL1     | -0.5061266 | 0.2910627 | -1.7389 | 0.083  | -0.714164031 | count | 1 |
| SCAF4     | -0.6691992 | 0.7450308 | -0.8982 | 0.37   | -0.713089506 | count | 1 |
| RBM7      | -0.5275618 | 0.4817956 | -1.095  | 0.274  | -0.712822413 | count | 1 |
| CSNK2A1   | -0.5879313 | 0.6308149 | -0.932  | 0.352  | -0.711769569 | count | 1 |
| YTHDC1    | -0.5104882 | 0.2438328 | -2.0936 | 0.0371 | -0.711506034 | count | 1 |
| HADH      | -0.5580204 | 0.6597931 | -0.8458 | 0.398  | -0.711499734 | count | 1 |
| ASTE1     | -0.5486617 | 0.5701427 | -0.9623 | 0.337  | -0.710786868 | count | 1 |
| ITPK1     | -0.5323535 | 0.4995488 | -1.0657 | 0.287  | -0.710634109 | count | 1 |
| MAPK14    | -0.548203  | 0.7037312 | -0.779  | 0.437  | -0.710204132 | count | 1 |
| WWP2      | -0.5481342 | 0.8111714 | -0.6757 | 0.5    | -0.710116728 | count | 1 |
| TMEM65    | -0.5380464 | 0.6169398 | -0.8721 | 0.384  | -0.709295011 | count | 1 |
| OTUD5     | -0.5743856 | 0.4903353 | -1.1714 | 0.242  | -0.707188274 | count | 1 |
| SLAIN2    | -0.5177201 | 0.4168287 | -1.242  | 0.215  | -0.707119994 | count | 1 |
| SCCPDH    | -0.5313738 | 0.4750163 | -1.1186 | 0.264  | -0.706709129 | count | 1 |
| ZNF85     | -0.6113605 | 0.8089783 | -0.7557 | 0.45   | -0.706621504 | count | 1 |
| EFNA4     | -0.6113605 | 0.9187651 | -0.6654 | 0.506  | -0.706621504 | count | 1 |
| NSMCE1    | -0.516402  | 0.3724088 | -1.3867 | 0.167  | -0.706549137 | count | 1 |
| CMIP      | -0.5537268 | 0.5450103 | -1.016  | 0.31   | -0.706147181 | count | 1 |
| OGFOD3    | -0.5727581 | 0.6643172 | -0.8622 | 0.389  | -0.705242866 | count | 1 |
| NCSTN     | -0.5727581 | 0.7653469 | -0.7484 | 0.455  | -0.705242866 | count | 1 |
| JAKMIP2   | -0.6312572 | 0.4848241 | -1.302  | 0.194  | -0.705239417 | count | 1 |
| REEP5     | -0.4939236 | 0.2014905 | -2.4513 | 0.0148 | -0.705148277 | count | 1 |
| C2CD3     | -0.7867003 | 1.0219014 | -0.7698 | 0.442  | -0.70408101  | count | 1 |
| POLR2I    | -0.511852  | 0.3906215 | -1.3104 | 0.191  | -0.703577266 | count | 1 |
| HTATSF1   | -0.5158888 | 0.3644826 | -1.4154 | 0.158  | -0.703352503 | count | 1 |
| YOD1      | -0.5924712 | 1.162291  | -0.5097 | 0.611  | -0.702990527 | count | 1 |
| PEX11B    | -0.9586092 | 1.1327992 | -0.8462 | 0.398  | -0.701890333 | count | 1 |
| RECK      | -0.9586092 | 1.1327992 | -0.8462 | 0.398  | -0.701890333 | count | 1 |
| HILPDA    | -0.9586092 | 1.3688137 | -0.7003 | 0.4842 | -0.701890333 | count | 1 |
| POLG2     | -0.6271565 | 0.7200273 | -0.871  | 0.384  | -0.70088462  | count | 1 |
| CORO2A    | -1.686474  | 1.1093    | -1.5203 | 0.129  | -0.700772798 | count | 1 |
| UBR4      | -0.7823347 | 0.6441303 | -1.2146 | 0.225  | -0.700586661 | count | 1 |



|            |            |           |         |        |              |       |   |
|------------|------------|-----------|---------|--------|--------------|-------|---|
| EXOC6      | -0.5403151 | 0.592591  | -0.9118 | 0.363  | -0.700179571 | count | 1 |
| AKR7A2     | -0.5065241 | 0.4195362 | -1.2073 | 0.228  | -0.699782879 | count | 1 |
| NDUFB10    | -0.4930898 | 0.2177899 | -2.2641 | 0.0242 | -0.699050772 | count | 1 |
| GKAP1      | -0.5479795 | 0.5194774 | -1.0549 | 0.292  | -0.698978732 | count | 1 |
| ZNF160     | -0.6549488 | 0.6138395 | -1.067  | 0.287  | -0.698816923 | count | 1 |
| KAT8       | -0.5321031 | 0.5744068 | -0.9264 | 0.355  | -0.698056311 | count | 1 |
| PCSK7      | -0.5175764 | 0.3762267 | -1.3757 | 0.17   | -0.697646962 | count | 1 |
| ELP2       | -0.5345795 | 0.646024  | -0.8275 | 0.409  | -0.697304298 | count | 1 |
| DCAF12     | -0.6237523 | 0.7116038 | -0.8765 | 0.381  | -0.697266726 | count | 1 |
| TCP11L1    | -0.9502505 | 0.8125296 | -1.1695 | 0.243  | -0.696800802 | count | 1 |
| UROD       | -0.5516125 | 0.7206084 | -0.7655 | 0.445  | -0.696794691 | count | 1 |
| SNRPF      | -0.4944809 | 0.2988361 | -1.6547 | 0.099  | -0.695977019 | count | 1 |
| RFXAP      | -0.5450321 | 0.7842032 | -0.695  | 0.488  | -0.695300896 | count | 1 |
| LIMS1      | -0.4923042 | 0.3425997 | -1.437  | 0.1517 | -0.694732112 | count | 1 |
| PIH1D1     | -0.5067744 | 0.3718106 | -1.363  | 0.174  | -0.69461045  | count | 1 |
| TPP2       | -0.6001175 | 0.4264315 | -1.4073 | 0.16   | -0.694165722 | count | 1 |
| NBPF19     | -0.5634947 | 0.7657516 | -0.7359 | 0.462  | -0.694162208 | count | 1 |
| CCDC9      | -0.6953996 | 0.777294  | -0.8946 | 0.372  | -0.693956768 | count | 1 |
| MCCC1      | -0.6953996 | 0.824424  | -0.8435 | 0.4    | -0.693956768 | count | 1 |
| ATXN2      | -0.6953996 | 0.8392971 | -0.8286 | 0.408  | -0.693956768 | count | 1 |
| KLHL18     | -0.6953996 | 0.9873942 | -0.7043 | 0.482  | -0.693956768 | count | 1 |
| MBD1       | -0.6206246 | 0.7723223 | -0.8036 | 0.422  | -0.693940514 | count | 1 |
| MED13L     | -0.5127794 | 0.5277363 | -0.9717 | 0.332  | -0.693071787 | count | 1 |
| TBC1D17    | -0.9434204 | 0.6755355 | -1.3966 | 0.164  | -0.692626979 | count | 1 |
| ECHS1      | -0.5002784 | 0.3113635 | -1.6067 | 0.109  | -0.691966637 | count | 1 |
| DOCK11     | -0.5243478 | 0.6345627 | -0.8263 | 0.409  | -0.691516804 | count | 1 |
| RNF227     | -0.7707736 | 1.2593929 | -0.612  | 0.541  | -0.691306814 | count | 1 |
| CBLL1      | -0.5268387 | 0.5410762 | -0.9737 | 0.331  | -0.69126318  | count | 1 |
| ATAD1      | -0.512612  | 0.4363799 | -1.1747 | 0.241  | -0.691032476 | count | 1 |
| THOC2      | -0.5055662 | 0.3717608 | -1.3599 | 0.175  | -0.690672703 | count | 1 |
| TIMM21     | -1.6424179 | 1.6701261 | -0.9834 | 0.3261 | -0.690103076 | count | 1 |
| RAMP2      | -1.6424179 | 1.7082628 | -0.9615 | 0.337  | -0.690103076 | count | 1 |
| SMCO4      | -1.642418  | 1.038786  | -1.5811 | 0.115  | -0.690102863 | count | 1 |
| NRBP1      | -0.4966729 | 0.3186899 | -1.5585 | 0.12   | -0.68965666  | count | 1 |
| MX1        | -0.4928497 | 0.4641574 | -1.0618 | 0.2891 | -0.689252805 | count | 1 |
| ARFGEF1    | -0.5035694 | 0.3918793 | -1.285  | 0.2    | -0.689147373 | count | 1 |
| AKR1B1     | -0.4960689 | 0.3417989 | -1.4513 | 0.148  | -0.687565818 | count | 1 |
| SPEN       | -0.614435  | 0.4898239 | -1.2544 | 0.211  | -0.687351846 | count | 1 |
| PHKG2      | -0.5060671 | 0.4292267 | -1.179  | 0.239  | -0.687302366 | count | 1 |
| HSD17B8    | -0.5264391 | 0.688554  | -0.7646 | 0.445  | -0.686869531 | count | 1 |
| AL450998.2 | -0.6131922 | 0.6695397 | -0.9158 | 0.36   | -0.686028033 | count | 1 |
| C21orf2    | -0.5376019 | 0.5688354 | -0.9451 | 0.345  | -0.686024483 | count | 1 |
| PSMG2      | -0.491213  | 0.2760911 | -1.7792 | 0.0761 | -0.685716835 | count | 1 |
| NRAS       | -0.5650908 | 0.7098834 | -0.796  | 0.427  | -0.684986088 | count | 1 |
| ZFAND5     | -0.4906741 | 0.2880917 | -1.7032 | 0.0895 | -0.684516502 | count | 1 |

|            |            |           |         |        |              |       |   |
|------------|------------|-----------|---------|--------|--------------|-------|---|
| ZBTB4      | -0.761596  | 0.5182341 | -1.4696 | 0.143  | -0.683913151 | count | 1 |
| KAT6A      | -0.5233876 | 0.4859385 | -1.0771 | 0.282  | -0.682956163 | count | 1 |
| RRAS       | -0.5403738 | 0.6699274 | -0.8066 | 0.42   | -0.682925451 | count | 1 |
| NCLN       | -0.9275932 | 0.9720756 | -0.9542 | 0.341  | -0.682903185 | count | 1 |
| TLE1       | -0.6386909 | 0.4654491 | -1.3722 | 0.171  | -0.682475311 | count | 1 |
| CCDC6      | -0.6828449 | 0.9628661 | -0.7092 | 0.479  | -0.682351662 | count | 1 |
| PDE6G      | -0.6828449 | 1.1048365 | -0.6181 | 0.537  | -0.682351662 | count | 1 |
| APC        | -0.5199193 | 0.6008031 | -0.8654 | 0.387  | -0.6823302   | count | 1 |
| XIAP       | -0.5105507 | 0.4222547 | -1.2091 | 0.228  | -0.681909284 | count | 1 |
| ROMO1      | -0.488527  | 0.3207661 | -1.523  | 0.129  | -0.681069648 | count | 1 |
| DCUN1D1    | -0.5291398 | 0.5339657 | -0.991  | 0.322  | -0.681042578 | count | 1 |
| EIF3I      | -0.4828144 | 0.2711231 | -1.7808 | 0.0759 | -0.680770848 | count | 1 |
| HIST1H1B   | -0.6079746 | 0.9383138 | -0.6479 | 0.517  | -0.680466398 | count | 1 |
| GASAL1     | -0.6079746 | 1.142242  | -0.5323 | 0.595  | -0.680466398 | count | 1 |
| ZFYVE1     | -0.6079746 | 1.1429054 | -0.532  | 0.595  | -0.680466398 | count | 1 |
| ETV5       | -0.6079746 | 1.5615897 | -0.3893 | 0.6973 | -0.680466398 | count | 1 |
| WEE1       | -0.5445066 | 0.7310297 | -0.7448 | 0.457  | -0.680370542 | count | 1 |
| AL118516.1 | -0.4998079 | 0.4584497 | -1.0902 | 0.276  | -0.680306072 | count | 1 |
| DNAL1      | -0.9231594 | 1.1239824 | -0.8213 | 0.412  | -0.680166147 | count | 1 |
| USP18      | -0.9231594 | 1.1239824 | -0.8213 | 0.412  | -0.680166147 | count | 1 |
| WAPL       | -0.4933256 | 0.451767  | -1.092  | 0.276  | -0.68008503  | count | 1 |
| DCP2       | -0.4931572 | 0.3255599 | -1.5148 | 0.131  | -0.679854605 | count | 1 |
| ADPRHL2    | -0.5108084 | 0.5394539 | -0.9469 | 0.344  | -0.679730662 | count | 1 |
| ADAT1      | -0.5603885 | 0.8223199 | -0.6815 | 0.496  | -0.67946135  | count | 1 |
| TCHP       | -0.5038411 | 0.5248165 | -0.96   | 0.338  | -0.679341751 | count | 1 |
| GRB2       | -0.4781175 | 0.2454626 | -1.9478 | 0.0523 | -0.67899892  | count | 1 |
| CNOT11     | -0.5230755 | 0.6813941 | -0.7677 | 0.443  | -0.678245786 | count | 1 |
| RTF1       | -0.4775814 | 0.2634769 | -1.8126 | 0.0708 | -0.677710242 | count | 1 |
| CNOT6      | -0.5487813 | 0.7365242 | -0.7451 | 0.457  | -0.676535416 | count | 1 |
| MIR181A1HG | -0.632491  | 0.618558  | -1.0225 | 0.307  | -0.676227224 | count | 1 |
| GTPBP8     | -0.517888  | 0.3652954 | -1.4177 | 0.157  | -0.675900764 | count | 1 |
| SLC1A4     | -0.7513052 | 1.0242561 | -0.7335 | 0.464  | -0.675594811 | count | 1 |
| IFIT2      | -0.5477375 | 1.032124  | -0.5307 | 0.596  | -0.67528369  | count | 1 |
| DCAKD      | -0.7502056 | 0.8667059 | -0.8656 | 0.387  | -0.674704193 | count | 1 |
| ZNF624     | -0.6025173 | 0.8848504 | -0.6809 | 0.496  | -0.674643129 | count | 1 |
| PPP1R14A   | -0.6025173 | 1.0609615 | -0.5679 | 0.57   | -0.674643129 | count | 1 |
| SMARCAL1   | -1.5800295 | 1.2183296 | -1.2969 | 0.1956 | -0.674376023 | count | 1 |
| FRS2       | -0.7495736 | 0.960769  | -0.7802 | 0.436  | -0.674192151 | count | 1 |
| BMPR2      | -0.6019522 | 1.0460245 | -0.5755 | 0.565  | -0.67403978  | count | 1 |
| COX10      | -0.6019522 | 1.1083868 | -0.5431 | 0.587  | -0.67403978  | count | 1 |
| ZBTB8OS    | -0.4869359 | 0.3669743 | -1.3269 | 0.185  | -0.673637438 | count | 1 |
| RAB5B      | -0.6295078 | 0.9856665 | -0.6387 | 0.523  | -0.673217674 | count | 1 |
| FAAP20     | -0.4755596 | 0.3123382 | -1.5226 | 0.1288 | -0.67290426  | count | 1 |
| KPNA2      | -0.4891311 | 0.3487943 | -1.4023 | 0.162  | -0.672590624 | count | 1 |
| DYNLT1     | -0.4721234 | 0.2242868 | -2.105  | 0.0361 | -0.6722545   | count | 1 |

|            |            |           |         |        |              |       |   |
|------------|------------|-----------|---------|--------|--------------|-------|---|
| SP110      | -0.4745712 | 0.237329  | -1.9996 | 0.0464 | -0.671659967 | count | 1 |
| GEMIN6     | -0.5178258 | 0.8466047 | -0.6117 | 0.541  | -0.671560075 | count | 1 |
| MRRF       | -0.579465  | 0.9054214 | -0.64   | 0.523  | -0.671221476 | count | 1 |
| AC111182.1 | -0.5643997 | 0.7966988 | -0.7084 | 0.479  | -0.670830474 | count | 1 |
| DNAJC5     | -0.5643997 | 1.0167467 | -0.5551 | 0.5792 | -0.670830474 | count | 1 |
| CYB561D1   | -0.6702334 | 1.0405721 | -0.6441 | 0.52   | -0.670653297 | count | 1 |
| NASP       | -0.4779457 | 0.247668  | -1.9298 | 0.0545 | -0.670590149 | count | 1 |
| ANKRD39    | -0.5246076 | 0.5299576 | -0.9899 | 0.323  | -0.669784901 | count | 1 |
| CREBZF     | -0.489859  | 0.3715483 | -1.3184 | 0.188  | -0.668188146 | count | 1 |
| NLRP1      | -0.50885   | 0.47497   | -1.0713 | 0.285  | -0.668029715 | count | 1 |
| EGR3       | -0.624074  | 1.0564063 | -0.5908 | 0.555  | -0.667730586 | count | 1 |
| ZCCHC7     | -0.4882254 | 0.3972696 | -1.229  | 0.22   | -0.667190493 | count | 1 |
| PLCXD2     | -1.550804  | 0.7391958 | -2.098  | 0.0367 | -0.666754446 | count | 1 |
| LHFPL6     | -0.9000457 | 1.2276632 | -0.7331 | 0.464  | -0.665806049 | count | 1 |
| CPNE1      | -0.4840624 | 0.3174757 | -1.5247 | 0.128  | -0.665674116 | count | 1 |
| ATOX1      | -0.5213201 | 0.4537285 | -1.149  | 0.251  | -0.665673053 | count | 1 |
| IKZF2      | -0.8993468 | 1.0888175 | -0.826  | 0.4094 | -0.665369436 | count | 1 |
| ZNF764     | -0.8993468 | 1.1060553 | -0.8131 | 0.4168 | -0.665369436 | count | 1 |
| SCML1      | -0.5737494 | 0.6743974 | -0.8508 | 0.396  | -0.664857177 | count | 1 |
| CEP44      | -0.5585359 | 0.6321184 | -0.8836 | 0.378  | -0.664095058 | count | 1 |
| UQCR11     | -0.4638425 | 0.2020253 | -2.296  | 0.0223 | -0.661911086 | count | 1 |
| HELZ       | -0.4771098 | 0.3685263 | -1.2946 | 0.196  | -0.661453966 | count | 1 |
| PEX2       | -0.478432  | 0.3578977 | -1.3368 | 0.182  | -0.661238379 | count | 1 |
| ZNF706     | -0.4661712 | 0.2188689 | -2.1299 | 0.0339 | -0.661110505 | count | 1 |
| AK3        | -0.4946041 | 0.5522654 | -0.8956 | 0.371  | -0.660874638 | count | 1 |
| LGALS9     | -0.4946041 | 0.5663242 | -0.8734 | 0.383  | -0.660874638 | count | 1 |
| CAPN2      | -0.4983691 | 0.4457335 | -1.1181 | 0.264  | -0.660709404 | count | 1 |
| CENPF      | -0.491043  | 0.7690808 | -0.6385 | 0.524  | -0.660404673 | count | 1 |
| SCAMP2     | -0.473889  | 0.3040603 | -1.5585 | 0.12   | -0.660301559 | count | 1 |
| CBR1       | -0.4772231 | 0.445159  | -1.072  | 0.285  | -0.66028917  | count | 1 |
| ALG5       | -0.4902585 | 0.4759691 | -1.03   | 0.304  | -0.659361407 | count | 1 |
| MACF1      | -0.4728117 | 0.2619317 | -1.8051 | 0.072  | -0.657809994 | count | 1 |
| RGP1       | -0.541491  | 0.6185003 | -0.8755 | 0.382  | -0.657222527 | count | 1 |
| ZNF200     | -0.5667857 | 0.8076734 | -0.7018 | 0.483  | -0.657094718 | count | 1 |
| NKRF       | -0.6135246 | 0.7333876 | -0.8366 | 0.403  | -0.657058363 | count | 1 |
| MPND       | -0.5252276 | 0.7047121 | -0.7453 | 0.457  | -0.656856257 | count | 1 |
| AC073332.1 | -0.5252276 | 0.7299722 | -0.7195 | 0.472  | -0.656856257 | count | 1 |
| PRKAA1     | -0.5096991 | 0.4514806 | -1.129  | 0.26   | -0.656486669 | count | 1 |
| SNX12      | -1.511263  | 1.155218  | -1.3082 | 0.192  | -0.65617998  | count | 1 |
| C14orf28   | -1.511263  | 1.155218  | -1.3082 | 0.192  | -0.65617998  | count | 1 |
| CCNB1IP1   | -0.4996609 | 0.416083  | -1.2009 | 0.231  | -0.656149058 | count | 1 |
| DZIP3      | -0.4816091 | 0.3778518 | -1.2746 | 0.203  | -0.655762095 | count | 1 |
| UBAP2L     | -0.5400731 | 0.6530339 | -0.827  | 0.409  | -0.655551579 | count | 1 |
| MAPKAPK3   | -0.4791427 | 0.4542726 | -1.0547 | 0.292  | -0.654883804 | count | 1 |
| RSL24D1    | -0.462571  | 0.2390255 | -1.9352 | 0.0538 | -0.654122729 | count | 1 |

|            |            |           |         |          |              |       |   |
|------------|------------|-----------|---------|----------|--------------|-------|---|
| MRPL4      | -0.468067  | 0.3390087 | -1.3807 | 0.168    | -0.653982296 | count | 1 |
| STK19      | -0.5075665 | 0.7292394 | -0.696  | 0.487    | -0.653790287 | count | 1 |
| SDHAF3     | -0.4890956 | 0.5326867 | -0.9182 | 0.359    | -0.653603672 | count | 1 |
| MTCH1      | -0.4745591 | 0.3865815 | -1.2276 | 0.22     | -0.65357314  | count | 1 |
| SYTL2      | -0.5069808 | 0.4433325 | -1.1436 | 0.254    | -0.653049662 | count | 1 |
| TC2N       | -0.4754522 | 0.364499  | -1.3044 | 0.193    | -0.652999233 | count | 1 |
| KDM3B      | -0.8793473 | 1.1440842 | -0.7686 | 0.4427   | -0.652816052 | count | 1 |
| MAP2K3     | -0.4716903 | 0.3998946 | -1.1795 | 0.239    | -0.652683467 | count | 1 |
| SH2D3A     | -0.650897  | 0.6765006 | -0.9622 | 0.337    | -0.652638401 | count | 1 |
| AC009831.1 | -0.5288534 | 0.88405   | -0.5982 | 0.55     | -0.65260962  | count | 1 |
| REXO4      | -0.5104746 | 0.6331553 | -0.8062 | 0.421    | -0.65209866  | count | 1 |
| TEP1       | -1.489955  | 1.5334263 | -0.9717 | 0.3319   | -0.650353959 | count | 1 |
| MYSM1      | -0.47577   | 0.4395799 | -1.0823 | 0.28     | -0.65031268  | count | 1 |
| PRR3       | -0.5081301 | 0.7532357 | -0.6746 | 0.5      | -0.649162364 | count | 1 |
| IER5L      | -0.4823814 | 0.465104  | -1.0371 | 0.3      | -0.648883379 | count | 1 |
| SLA        | -0.4533869 | 0.164552  | -2.7553 | 0.0062   | -0.648210799 | count | 1 |
| RPL27A     | -0.4516531 | 0.1124254 | -4.0174 | 7.32E-05 | -0.647719844 | count | 1 |
| XRN2       | -0.4605769 | 0.2542104 | -1.8118 | 0.0709   | -0.647705022 | count | 1 |
| COMMD3     | -0.4679465 | 0.3363097 | -1.3914 | 0.165    | -0.64753621  | count | 1 |
| PXMP2      | -0.5328353 | 0.8567993 | -0.6219 | 0.534    | -0.647017214 | count | 1 |
| AVEN       | -0.5171045 | 0.5712373 | -0.9052 | 0.366    | -0.646933198 | count | 1 |
| RAB18      | -0.4985053 | 0.4250183 | -1.1729 | 0.242    | -0.646928675 | count | 1 |
| RALA       | -0.4600891 | 0.31379   | -1.4662 | 0.1436   | -0.646762792 | count | 1 |
| FDFT1      | -0.4680304 | 0.3599064 | -1.3004 | 0.194    | -0.646226186 | count | 1 |
| TMED4      | -0.4614171 | 0.2804848 | -1.6451 | 0.1009   | -0.64621432  | count | 1 |
| ALKBH7     | -0.4608569 | 0.263291  | -1.7504 | 0.081    | -0.646095891 | count | 1 |
| ARHGAP12   | -0.5053717 | 0.4619209 | -1.0941 | 0.275    | -0.645706853 | count | 1 |
| AP2A2      | -0.5751418 | 0.7586294 | -0.7581 | 0.449    | -0.645337981 | count | 1 |
| NCR1       | -0.4769583 | 0.4579004 | -1.0416 | 0.298    | -0.645146235 | count | 1 |
| ZAP70      | -0.4621545 | 0.3123502 | -1.4796 | 0.14     | -0.644933402 | count | 1 |
| PSMG3      | -0.530021  | 0.5660408 | -0.9364 | 0.35     | -0.643696527 | count | 1 |
| CWC15      | -0.4659993 | 0.3117104 | -1.495  | 0.136    | -0.643440469 | count | 1 |
| AC147651.4 | -0.5401638 | 0.9002289 | -0.6    | 0.549    | -0.642953413 | count | 1 |
| HINT3      | -0.5401638 | 0.9735099 | -0.5549 | 0.579    | -0.642953413 | count | 1 |
| EIF5       | -0.4498562 | 0.1542051 | -2.9173 | 0.0038   | -0.641747162 | count | 1 |
| LINC00476  | -0.5526346 | 0.759178  | -0.7279 | 0.467    | -0.641292311 | count | 1 |
| MIER3      | -0.5526346 | 0.9173473 | -0.6024 | 0.547    | -0.641292311 | count | 1 |
| FAHD2B     | -0.6386347 | 1.1335634 | -0.5634 | 0.574    | -0.641165323 | count | 1 |
| POMGNT2    | -0.6386347 | 1.1335634 | -0.5634 | 0.574    | -0.641165323 | count | 1 |
| ZNF665     | -0.6386347 | 1.1335634 | -0.5634 | 0.574    | -0.641165323 | count | 1 |
| PSKH1      | -0.6386347 | 1.2377364 | -0.516  | 0.606    | -0.641165323 | count | 1 |
| ANO10      | -1.456537  | 0.8439093 | -1.7259 | 0.0853   | -0.641035377 | count | 1 |
| USF1       | -0.5061837 | 0.900948  | -0.5618 | 0.575    | -0.640630784 | count | 1 |
| ROCK2      | -0.5381235 | 0.5379342 | -1.0004 | 0.318    | -0.640601955 | count | 1 |
| TMEM60     | -0.5174229 | 0.8542397 | -0.6057 | 0.545    | -0.638859403 | count | 1 |

|            |            |           |         |        |              |       |   |
|------------|------------|-----------|---------|--------|--------------|-------|---|
| UNC50      | -0.4563598 | 0.3290479 | -1.3869 | 0.166  | -0.637703269 | count | 1 |
| BTBD10     | -0.4989611 | 0.6558504 | -0.7608 | 0.447  | -0.6376726   | count | 1 |
| CLK4       | -0.4823689 | 0.413335  | -1.167  | 0.244  | -0.636924739 | count | 1 |
| RIPK1      | -0.4732222 | 0.4575574 | -1.0342 | 0.302  | -0.63669406  | count | 1 |
| GPKOW      | -0.5670697 | 0.5806023 | -0.9767 | 0.329  | -0.636667393 | count | 1 |
| BCLAF3     | -0.4870065 | 0.768047  | -0.6341 | 0.526  | -0.636224862 | count | 1 |
| PITPNM2    | -0.8530539 | 1.3395575 | -0.6368 | 0.5247 | -0.636137742 | count | 1 |
| AHDC1      | -0.8530539 | 1.0367938 | -0.8228 | 0.411  | -0.636137712 | count | 1 |
| DUS3L      | -0.8530539 | 1.0426127 | -0.8182 | 0.414  | -0.636137712 | count | 1 |
| MYPOP      | -0.8530539 | 1.048068  | -0.8139 | 0.416  | -0.636137712 | count | 1 |
| DUS2       | -0.8530539 | 1.0516909 | -0.8111 | 0.418  | -0.636137712 | count | 1 |
| PLEKHO2    | -0.5665567 | 0.6939779 | -0.8164 | 0.415  | -0.636115912 | count | 1 |
| LAPTM4A    | -0.449461  | 0.2561907 | -1.7544 | 0.0803 | -0.635789757 | count | 1 |
| DLD        | -0.4814228 | 0.4543468 | -1.0596 | 0.29   | -0.635692482 | count | 1 |
| PDCD5      | -0.4527398 | 0.2780914 | -1.628  | 0.104  | -0.635072744 | count | 1 |
| TP53       | -0.5917163 | 0.8388774 | -0.7054 | 0.481  | -0.634915822 | count | 1 |
| SURF2      | -0.460604  | 0.3873911 | -1.189  | 0.235  | -0.634487425 | count | 1 |
| HDHD2      | -1.4333099 | 0.9892093 | -1.4489 | 0.148  | -0.634426421 | count | 1 |
| LIN54      | -0.5649568 | 0.9560364 | -0.5909 | 0.555  | -0.634395642 | count | 1 |
| NAAA       | -0.5061465 | 0.6996008 | -0.7235 | 0.47   | -0.633532748 | count | 1 |
| ABHD14A    | -0.4549025 | 0.363137  | -1.2527 | 0.211  | -0.633515382 | count | 1 |
| ERCC3      | -0.6994773 | 0.7678638 | -0.9109 | 0.363  | -0.633253236 | count | 1 |
| HAPLN3     | -1.4276404 | 0.9304807 | -1.5343 | 0.1259 | -0.63279661  | count | 1 |
| PPA2       | -0.4731883 | 0.5691383 | -0.8314 | 0.406  | -0.632592942 | count | 1 |
| MSH2       | -0.494614  | 0.5283862 | -0.9361 | 0.35   | -0.632221679 | count | 1 |
| AC074044.1 | -0.6971753 | 0.8708148 | -0.8006 | 0.424  | -0.631355461 | count | 1 |
| DOCK10     | -0.4565867 | 0.2956076 | -1.5446 | 0.123  | -0.631238516 | count | 1 |
| PBRM1      | -0.4653379 | 0.3587637 | -1.2971 | 0.196  | -0.631088131 | count | 1 |
| PHF23      | -0.477742  | 0.4207943 | -1.1353 | 0.257  | -0.630897592 | count | 1 |
| ENSA       | -0.4432298 | 0.1963915 | -2.2569 | 0.0247 | -0.630565949 | count | 1 |
| GXYLT1     | -0.477392  | 0.7345547 | -0.6499 | 0.516  | -0.630441592 | count | 1 |
| PRELID3B   | -0.4699091 | 0.4675998 | -1.0049 | 0.316  | -0.630356205 | count | 1 |
| OTULINL    | -0.4563193 | 0.375489  | -1.2153 | 0.225  | -0.630161294 | count | 1 |
| SLC27A4    | -1.416411  | 0.8855599 | -1.5995 | 0.111  | -0.629549052 | count | 1 |
| HMGN3      | -0.4432469 | 0.2347872 | -1.8879 | 0.0599 | -0.629402557 | count | 1 |
| MIB1       | -0.5178843 | 0.8807185 | -0.588  | 0.557  | -0.629361707 | count | 1 |
| TTC3       | -0.4484278 | 0.3432722 | -1.3063 | 0.1924 | -0.629343912 | count | 1 |
| RPAIN      | -0.4539931 | 0.3104341 | -1.4624 | 0.145  | -0.628985162 | count | 1 |
| POLK       | -0.4737429 | 0.529122  | -0.8953 | 0.371  | -0.628479213 | count | 1 |
| TBXAS1     | -0.5160097 | 1.005934  | -0.513  | 0.608  | -0.627145528 | count | 1 |
| ZNF207     | -0.4634344 | 0.3353007 | -1.3821 | 0.168  | -0.627028994 | count | 1 |
| FAM193A    | -0.5579833 | 0.7622663 | -0.732  | 0.465  | -0.626891423 | count | 1 |
| ZC3H8      | -0.4744784 | 0.4910815 | -0.9662 | 0.335  | -0.626645149 | count | 1 |
| MARK3      | -0.4590149 | 0.3890123 | -1.1799 | 0.239  | -0.62646553  | count | 1 |
| WDR75      | -0.5573756 | 0.741257  | -0.7519 | 0.453  | -0.626237012 | count | 1 |

|            |            |           |         |        |              |       |   |
|------------|------------|-----------|---------|--------|--------------|-------|---|
| SUPV3L1    | -0.5573755 | 0.7524691 | -0.7407 | 0.459  | -0.626236907 | count | 1 |
| KANSL1-AS1 | -0.4564515 | 0.3687366 | -1.2379 | 0.217  | -0.626159688 | count | 1 |
| WBP4       | -0.4679639 | 0.4854899 | -0.9639 | 0.336  | -0.625687992 | count | 1 |
| MSL2       | -0.4891607 | 0.5493734 | -0.8904 | 0.374  | -0.625380504 | count | 1 |
| SLMAP      | -0.5143974 | 0.6834269 | -0.7527 | 0.452  | -0.625239008 | count | 1 |
| WDR76      | -0.6893052 | 0.7675764 | -0.898  | 0.37   | -0.62485649  | count | 1 |
| SEC24C     | -0.6893052 | 0.907106  | -0.7599 | 0.448  | -0.62485649  | count | 1 |
| HLA-DMA    | -0.4778741 | 0.497865  | -0.9598 | 0.338  | -0.624473132 | count | 1 |
| TMEM131    | -0.4746522 | 0.5291337 | -0.897  | 0.37   | -0.623773541 | count | 1 |
| TMEM219    | -0.441548  | 0.2850135 | -1.5492 | 0.1223 | -0.62277801  | count | 1 |
| SPINT2     | -1.393097  | 0.5998043 | -2.3226 | 0.0208 | -0.62272481  | count | 1 |
| MPZL3      | -0.4828708 | 0.7033041 | -0.6866 | 0.493  | -0.622528373 | count | 1 |
| ZCCHC8     | -0.5792386 | 0.6300774 | -0.9193 | 0.359  | -0.622198786 | count | 1 |
| INTS11     | -0.4443434 | 0.3909172 | -1.1367 | 0.2565 | -0.622070262 | count | 1 |
| PTPN4      | -0.4377487 | 0.2292065 | -1.9098 | 0.057  | -0.621706825 | count | 1 |
| TTC13      | -0.5350196 | 0.7631283 | -0.7011 | 0.484  | -0.621569712 | count | 1 |
| SLC33A1    | -0.5350196 | 0.8057873 | -0.664  | 0.507  | -0.621569712 | count | 1 |
| HIST1H2AK  | -0.6174351 | 0.9082907 | -0.6798 | 0.497  | -0.621241912 | count | 1 |
| DNAJB2     | -0.5212718 | 0.6389794 | -0.8158 | 0.415  | -0.621153247 | count | 1 |
| TIPRL      | -0.4441913 | 0.2967254 | -1.497  | 0.135  | -0.621151223 | count | 1 |
| MSH6       | -0.450427  | 0.446373  | -1.0091 | 0.314  | -0.620562581 | count | 1 |
| SPAG1      | -0.5205669 | 0.4627866 | -1.1249 | 0.261  | -0.620338667 | count | 1 |
| TSEN2      | -0.6827678 | 1.0444484 | -0.6537 | 0.514  | -0.619445257 | count | 1 |
| GK         | -0.6827678 | 1.0444484 | -0.6537 | 0.514  | -0.619445257 | count | 1 |
| SLBP       | -0.4483778 | 0.3503819 | -1.2797 | 0.202  | -0.619263652 | count | 1 |
| RCHY1      | -0.4797063 | 0.5784872 | -0.8292 | 0.408  | -0.618517541 | count | 1 |
| MRNIP      | -0.5186133 | 0.8753247 | -0.5925 | 0.554  | -0.618080673 | count | 1 |
| CDK7       | -0.4877751 | 0.8067289 | -0.6046 | 0.546  | -0.61779641  | count | 1 |
| UIMC1      | -0.4789711 | 0.5438192 | -0.8808 | 0.379  | -0.617585553 | count | 1 |
| PPIL4      | -0.4408113 | 0.2880925 | -1.5301 | 0.127  | -0.617478498 | count | 1 |
| PITPNA-AS1 | -0.4826066 | 0.6386014 | -0.7557 | 0.45   | -0.617153722 | count | 1 |
| LRCH3      | -0.8232185 | 0.8215073 | -1.0021 | 0.317  | -0.616974171 | count | 1 |
| MT1X       | -0.4475549 | 0.4163998 | -1.0748 | 0.283  | -0.616631837 | count | 1 |
| DDX18      | -0.438893  | 0.2823223 | -1.5546 | 0.121  | -0.616014816 | count | 1 |
| PCIF1      | -0.5300624 | 0.4751206 | -1.1156 | 0.265  | -0.616009098 | count | 1 |
| STAMBP     | -0.4621723 | 0.503863  | -0.9173 | 0.36   | -0.615782924 | count | 1 |
| NRL        | -1.3683244 | 1.6207993 | -0.8442 | 0.3992 | -0.61535074  | count | 1 |
| SEH1L      | -1.368324  | 1.162731  | -1.1768 | 0.24   | -0.615350718 | count | 1 |
| KDM5C      | -0.5162097 | 0.9895098 | -0.5217 | 0.602  | -0.615301672 | count | 1 |
| LRIF1      | -0.4768698 | 0.4892515 | -0.9747 | 0.33   | -0.614921486 | count | 1 |
| MAPKAP1    | -0.4906943 | 0.5120596 | -0.9583 | 0.339  | -0.614608804 | count | 1 |
| DOCK8      | -0.4394834 | 0.2490468 | -1.7647 | 0.0786 | -0.614596898 | count | 1 |
| NDUFAF7    | -0.4848344 | 0.8124406 | -0.5968 | 0.551  | -0.614144772 | count | 1 |
| IFITM3     | -0.4456319 | 0.2902765 | -1.5352 | 0.126  | -0.613189375 | count | 1 |
| PAPOLA     | -0.4327051 | 0.2364584 | -1.8299 | 0.0682 | -0.612954417 | count | 1 |

|            |            |           |         |        |              |       |   |
|------------|------------|-----------|---------|--------|--------------|-------|---|
| OAS2       | -0.4478126 | 0.5154796 | -0.8687 | 0.386  | -0.612395395 | count | 1 |
| BMT2       | -0.6736959 | 1.0748386 | -0.6268 | 0.531  | -0.611917022 | count | 1 |
| RAB14      | -0.4353599 | 0.26752   | -1.6274 | 0.105  | -0.611618105 | count | 1 |
| SKIV2L     | -0.4827289 | 0.623963  | -0.7737 | 0.44   | -0.611529583 | count | 1 |
| SIK3       | -0.4942319 | 0.502746  | -0.9831 | 0.326  | -0.610903633 | count | 1 |
| AC114760.2 | -0.4775651 | 0.4730888 | -1.0095 | 0.314  | -0.61082214  | count | 1 |
| ATP6V1D    | -0.4581267 | 0.372765  | -1.229  | 0.22   | -0.610454768 | count | 1 |
| GPR18      | -0.4463336 | 0.4582645 | -0.974  | 0.331  | -0.609294967 | count | 1 |
| AOAH       | -0.4314557 | 0.2963374 | -1.456  | 0.1464 | -0.608774075 | count | 1 |
| GPR137     | -0.5660992 | 0.7835055 | -0.7225 | 0.47   | -0.608769994 | count | 1 |
| LRRC37B    | -0.5411759 | 0.7500206 | -0.7215 | 0.471  | -0.608764658 | count | 1 |
| EXOSC7     | -0.4429253 | 0.4292732 | -1.0318 | 0.303  | -0.60863877  | count | 1 |
| CTSA       | -0.4337096 | 0.3178721 | -1.3644 | 0.1734 | -0.608483591 | count | 1 |
| PRKCB      | -0.4756534 | 0.5110912 | -0.9307 | 0.353  | -0.608420471 | count | 1 |
| ZMYM4      | -0.4756534 | 0.5847896 | -0.8134 | 0.417  | -0.608420471 | count | 1 |
| TRPS1      | -0.5406569 | 0.8192569 | -0.6599 | 0.51   | -0.608204018 | count | 1 |
| KLHL8      | -0.5406569 | 0.8622982 | -0.627  | 0.531  | -0.608204018 | count | 1 |
| BTN2A2     | -0.5406569 | 0.8747489 | -0.6181 | 0.537  | -0.608204018 | count | 1 |
| CAB39      | -0.4715669 | 0.448327  | -1.0518 | 0.294  | -0.608196204 | count | 1 |
| TPRN       | -1.3431062 | 1.2123803 | -1.1078 | 0.2688 | -0.607712945 | count | 1 |
| C1orf35    | -0.4399416 | 0.3585419 | -1.227  | 0.221  | -0.607683871 | count | 1 |
| B3GALNT2   | -0.5400731 | 0.8521618 | -0.6338 | 0.527  | -0.607573313 | count | 1 |
| NTPCR      | -0.4848702 | 0.5163724 | -0.939  | 0.348  | -0.607467889 | count | 1 |
| PPIF       | -0.4790638 | 0.5743915 | -0.834  | 0.405  | -0.60697594  | count | 1 |
| JTB        | -0.427822  | 0.2105048 | -2.0324 | 0.0429 | -0.60674751  | count | 1 |
| KDM6B      | -0.4421614 | 0.403711  | -1.0952 | 0.2742 | -0.606696183 | count | 1 |
| FOXO3      | -0.4703496 | 0.5175731 | -0.9088 | 0.364  | -0.606651957 | count | 1 |
| CACYBP     | -0.4315525 | 0.2849575 | -1.5144 | 0.1309 | -0.606024526 | count | 1 |
| HDAC7      | -0.4734931 | 0.5212341 | -0.9084 | 0.364  | -0.605705977 | count | 1 |
| IFT27      | -0.4563636 | 0.5638112 | -0.8094 | 0.419  | -0.605701791 | count | 1 |
| APOL6      | -0.4379163 | 0.3562593 | -1.2292 | 0.22   | -0.605580898 | count | 1 |
| PRR14      | -0.507769  | 0.5761272 | -0.8813 | 0.379  | -0.605535069 | count | 1 |
| LINC00467  | -0.4778893 | 0.8383161 | -0.5701 | 0.569  | -0.605516352 | count | 1 |
| NLE1       | -0.6657116 | 0.9430185 | -0.7059 | 0.481  | -0.605273011 | count | 1 |
| SMURF2     | -0.4625435 | 0.4735402 | -0.9768 | 0.329  | -0.604726764 | count | 1 |
| LZTS2      | -0.5199377 | 0.9454088 | -0.55   | 0.583  | -0.604638068 | count | 1 |
| TMEM187    | -0.5199377 | 0.9942639 | -0.5229 | 0.601  | -0.604638068 | count | 1 |
| ZNF736     | -0.5199377 | 1.030973  | -0.5043 | 0.614  | -0.604638068 | count | 1 |
| ALDH16A1   | -0.4888509 | 0.6703426 | -0.7293 | 0.466  | -0.604406045 | count | 1 |
| TRIM27     | -0.438041  | 0.5140583 | -0.8521 | 0.395  | -0.604360871 | count | 1 |
| WDR12      | -0.4963944 | 0.7811113 | -0.6355 | 0.526  | -0.603923482 | count | 1 |
| PYCARD     | -0.4266851 | 0.2965035 | -1.4391 | 0.1511 | -0.603798642 | count | 1 |
| CLN8       | -0.6637279 | 0.8076619 | -0.8218 | 0.412  | -0.603619666 | count | 1 |
| VPS25      | -0.4420583 | 0.4950981 | -0.8929 | 0.373  | -0.603504041 | count | 1 |
| MCM5       | -0.4637564 | 0.5864644 | -0.7908 | 0.43   | -0.602527433 | count | 1 |

|            |            |           |         |        |              |       |   |
|------------|------------|-----------|---------|--------|--------------|-------|---|
| UBE2G2     | -0.4430319 | 0.3809304 | -1.163  | 0.246  | -0.602427697 | count | 1 |
| TRG-AS1    | -0.4265809 | 0.29044   | -1.4687 | 0.1429 | -0.602269278 | count | 1 |
| IDH3A      | -0.4744784 | 0.5603299 | -0.8468 | 0.398  | -0.601276554 | count | 1 |
| FKBP3      | -0.4356033 | 0.4037909 | -1.0788 | 0.281  | -0.60027053  | count | 1 |
| EXOSC3     | -0.4542363 | 0.4197871 | -1.0821 | 0.28   | -0.60024841  | count | 1 |
| XAB2       | -0.473517  | 0.6035921 | -0.7845 | 0.433  | -0.600081264 | count | 1 |
| TSPAN3     | -0.7958682 | 0.6652891 | -1.1963 | 0.232  | -0.599185587 | count | 1 |
| EEA1       | -0.4312825 | 0.3934531 | -1.0961 | 0.274  | -0.597093781 | count | 1 |
| CAMLG      | -0.428941  | 0.3254635 | -1.3179 | 0.188  | -0.597079748 | count | 1 |
| MAPKAPK2   | -0.4459527 | 0.4982489 | -0.895  | 0.371  | -0.596572722 | count | 1 |
| SLC39A6    | -0.5127524 | 0.773021  | -0.6633 | 0.508  | -0.596557042 | count | 1 |
| HINFP      | -1.3055691 | 1.1311801 | -1.1542 | 0.2493 | -0.596096905 | count | 1 |
| TBC1D22A   | -0.4380042 | 0.5756473 | -0.7609 | 0.447  | -0.595647137 | count | 1 |
| SLC25A46   | -0.4893471 | 0.6276013 | -0.7797 | 0.436  | -0.595565973 | count | 1 |
| ANGEL2     | -0.4990912 | 0.5575    | -0.8952 | 0.371  | -0.595481817 | count | 1 |
| POU2F2     | -0.5282964 | 0.8770156 | -0.6024 | 0.547  | -0.594836058 | count | 1 |
| DUSP23     | -0.4273827 | 0.3616265 | -1.1818 | 0.238  | -0.594446803 | count | 1 |
| B3GAT3     | -0.4252084 | 0.3716893 | -1.144  | 0.253  | -0.594363013 | count | 1 |
| THAP6      | -0.4740669 | 0.8015568 | -0.5914 | 0.555  | -0.59421014  | count | 1 |
| PEX1       | -0.4280913 | 0.4472576 | -0.9571 | 0.339  | -0.593867973 | count | 1 |
| SLC35F6    | -0.5273223 | 0.7477505 | -0.7052 | 0.481  | -0.593781282 | count | 1 |
| PCBP4      | -0.4795731 | 0.8333333 | -0.5755 | 0.565  | -0.59319345  | count | 1 |
| SEC63      | -0.4448481 | 0.3433682 | -1.2955 | 0.196  | -0.592957158 | count | 1 |
| LMBR1      | -0.7860112 | 0.8534093 | -0.921  | 0.3577 | -0.59272304  | count | 1 |
| TNFRSF4    | -0.4229762 | 0.3194478 | -1.3241 | 0.1864 | -0.59259529  | count | 1 |
| TMEM181    | -1.292911  | 0.8519915 | -1.5175 | 0.13   | -0.592112516 | count | 1 |
| TRIM32     | -1.291799  | 1.121591  | -1.1518 | 0.25   | -0.591760872 | count | 1 |
| MVB12B     | -1.291799  | 1.121591  | -1.1518 | 0.25   | -0.591760872 | count | 1 |
| TDRKH      | -1.2917987 | 1.5152105 | -0.8526 | 0.3945 | -0.591760828 | count | 1 |
| UBXN6      | -0.5493689 | 0.7811094 | -0.7033 | 0.482  | -0.591616369 | count | 1 |
| MBD3       | -0.5493409 | 0.663012  | -0.8286 | 0.408  | -0.591587624 | count | 1 |
| PHKB       | -0.4379713 | 0.4944823 | -0.8857 | 0.376  | -0.591365251 | count | 1 |
| ENOPH1     | -0.4583057 | 0.4313867 | -1.0624 | 0.289  | -0.591364528 | count | 1 |
| MOGS       | -0.4580106 | 0.5491295 | -0.8341 | 0.405  | -0.590989754 | count | 1 |
| RASGRP2    | -0.4493642 | 0.6362281 | -0.7063 | 0.481  | -0.590976062 | count | 1 |
| FAM222B    | -0.5487327 | 0.9887834 | -0.555  | 0.579  | -0.590962872 | count | 1 |
| YJU2       | -0.5246909 | 0.589259  | -0.8904 | 0.374  | -0.590931014 | count | 1 |
| WIPF3      | -0.585289  | 0.7788961 | -0.7514 | 0.453  | -0.590820849 | count | 1 |
| NDFIP2     | -0.4318092 | 0.3974945 | -1.0863 | 0.278  | -0.590670496 | count | 1 |
| SLC25A37   | -0.46558   | 0.4558084 | -1.0214 | 0.308  | -0.590208986 | count | 1 |
| TMED3      | -0.4339727 | 0.4169587 | -1.0408 | 0.299  | -0.59020896  | count | 1 |
| UXT        | -0.4139083 | 0.1747369 | -2.3688 | 0.0184 | -0.590063022 | count | 1 |
| TST        | -0.523786  | 0.7707776 | -0.6796 | 0.497  | -0.589950535 | count | 1 |
| AL645568.1 | -0.523786  | 0.8782313 | -0.5964 | 0.551  | -0.589950535 | count | 1 |
| CWC27      | -0.427428  | 0.4223714 | -1.012  | 0.312  | -0.589806916 | count | 1 |



|            |            |           |         |        |              |       |   |
|------------|------------|-----------|---------|--------|--------------|-------|---|
| CLDND1     | -0.4112659 | 0.1853693 | -2.2186 | 0.0272 | -0.589729579 | count | 1 |
| ZFX        | -0.4376013 | 0.4699337 | -0.9312 | 0.352  | -0.589230207 | count | 1 |
| GRAMD2B    | -1.282625  | 0.8108801 | -1.5818 | 0.115  | -0.588849748 | count | 1 |
| TRIM33     | -0.4560436 | 0.4946071 | -0.922  | 0.357  | -0.588491469 | count | 1 |
| BCL2       | -0.4219155 | 0.2944673 | -1.4328 | 0.153  | -0.587795213 | count | 1 |
| ARV1       | -0.4686312 | 0.5997101 | -0.7814 | 0.435  | -0.587533694 | count | 1 |
| ETFB       | -0.4158528 | 0.2997285 | -1.3874 | 0.1663 | -0.587491351 | count | 1 |
| 5-Mar      | -0.474677  | 0.4431483 | -1.0711 | 0.285  | -0.587271451 | count | 1 |
| SIL1       | -0.4684155 | 0.587007  | -0.798  | 0.425  | -0.587268681 | count | 1 |
| FBXO4      | -0.4684155 | 0.6290018 | -0.7447 | 0.457  | -0.587268681 | count | 1 |
| DYNC2L11   | -0.7767124 | 1.4359754 | -0.5409 | 0.589  | -0.586601527 | count | 1 |
| AC009948.1 | -0.7767124 | 1.4359754 | -0.5409 | 0.589  | -0.586601527 | count | 1 |
| POLR3G     | -0.7767124 | 1.4359754 | -0.5409 | 0.589  | -0.586601527 | count | 1 |
| HMGA1P4    | -0.7767124 | 1.4359754 | -0.5409 | 0.589  | -0.586601527 | count | 1 |
| RAB11B-AS1 | -0.7767124 | 1.4359754 | -0.5409 | 0.589  | -0.586601527 | count | 1 |
| JPX        | -0.4263994 | 0.3517845 | -1.2121 | 0.226  | -0.586079241 | count | 1 |
| RIPOR2     | -0.4413602 | 0.4170155 | -1.0584 | 0.291  | -0.586017568 | count | 1 |
| MRPS30     | -0.4206121 | 0.3492105 | -1.2045 | 0.229  | -0.584588731 | count | 1 |
| ZNF287     | -0.5787267 | 0.8995074 | -0.6434 | 0.52   | -0.584579993 | count | 1 |
| GOT2       | -0.5014738 | 1.0675816 | -0.4697 | 0.639  | -0.583853781 | count | 1 |
| SNTB2      | -0.4274935 | 0.3580589 | -1.1939 | 0.233  | -0.58376791  | count | 1 |
| UBE2R2     | -0.4196482 | 0.3327278 | -1.2612 | 0.208  | -0.583741237 | count | 1 |
| ZBTB11-AS1 | -0.4884047 | 0.7568054 | -0.6454 | 0.519  | -0.583084516 | count | 1 |
| AHSA1      | -0.4327505 | 0.3177604 | -1.3619 | 0.174  | -0.582759593 | count | 1 |
| SLC35B1    | -0.4303358 | 0.488019  | -0.8818 | 0.379  | -0.582636277 | count | 1 |
| FBXO6      | -0.4179928 | 0.4140603 | -1.0095 | 0.313  | -0.582355561 | count | 1 |
| PILRB      | -0.4185486 | 0.3767703 | -1.1109 | 0.267  | -0.582219053 | count | 1 |
| HNRNPUL1   | -0.4448433 | 0.3479423 | -1.2785 | 0.202  | -0.581899614 | count | 1 |
| ISCA1      | -0.4163984 | 0.2772068 | -1.5021 | 0.134  | -0.581738947 | count | 1 |
| ZNF292     | -0.4422014 | 0.3535379 | -1.2508 | 0.212  | -0.581675428 | count | 1 |
| STAT3      | -0.4138842 | 0.277015  | -1.4941 | 0.1361 | -0.581553718 | count | 1 |
| CRTAM      | -0.4090751 | 0.2814375 | -1.4535 | 0.147  | -0.581236516 | count | 1 |
| FAIM       | -0.4326932 | 0.5110445 | -0.8467 | 0.398  | -0.580926868 | count | 1 |
| PWWP2B     | -0.4355037 | 0.5834462 | -0.7464 | 0.456  | -0.580635249 | count | 1 |
| GOLGB1     | -0.4176463 | 0.2698811 | -1.5475 | 0.123  | -0.580487019 | count | 1 |
| TM9SF2     | -0.4389079 | 0.3603006 | -1.2182 | 0.224  | -0.580235204 | count | 1 |
| PPIG       | -0.4062029 | 0.194521  | -2.0882 | 0.0376 | -0.579974665 | count | 1 |
| RASA3      | -0.4855928 | 0.6996632 | -0.694  | 0.488  | -0.579819362 | count | 1 |
| DDX39A     | -0.4162274 | 0.3785098 | -1.0996 | 0.272  | -0.579466123 | count | 1 |
| KDSR       | -0.4278186 | 0.616137  | -0.6944 | 0.488  | -0.579257165 | count | 1 |
| GTF2H3     | -0.467478  | 0.7402673 | -0.6315 | 0.528  | -0.578557954 | count | 1 |
| TARBP1     | -0.7640223 | 1.1291146 | -0.6767 | 0.499  | -0.578208563 | count | 1 |
| EEF1AKMT4  | -0.7640223 | 1.1291146 | -0.6767 | 0.499  | -0.578208563 | count | 1 |
| TLR2       | -0.7640223 | 1.1291146 | -0.6767 | 0.499  | -0.578208563 | count | 1 |
| AC144652.1 | -0.7640223 | 1.1291146 | -0.6767 | 0.499  | -0.578208563 | count | 1 |

|           |            |           |         |         |              |       |   |
|-----------|------------|-----------|---------|---------|--------------|-------|---|
| MTM1      | -0.7640223 | 1.1291146 | -0.6767 | 0.499   | -0.578208563 | count | 1 |
| SLC39A14  | -0.7640223 | 1.3165791 | -0.5803 | 0.5621  | -0.578208563 | count | 1 |
| MDH1      | -0.4084455 | 0.2425117 | -1.6842 | 0.0931  | -0.578052934 | count | 1 |
| TBK1      | -0.4318894 | 0.4342255 | -0.9946 | 0.321   | -0.57795083  | count | 1 |
| EMC9      | -0.4669643 | 0.7602932 | -0.6142 | 0.54    | -0.577935906 | count | 1 |
| SIDT1-AS1 | -0.6327033 | 0.8893754 | -0.7114 | 0.477   | -0.577625619 | count | 1 |
| CCT2      | -0.4092551 | 0.2530154 | -1.6175 | 0.1067  | -0.577185605 | count | 1 |
| CLEC2B    | -0.401719  | 0.1380791 | -2.9093 | 0.00387 | -0.577133583 | count | 1 |
| TPRKB     | -0.421754  | 0.4191983 | -1.0061 | 0.315   | -0.577013016 | count | 1 |
| FAM41C    | -0.4661883 | 1.001378  | -0.4655 | 0.642   | -0.576996172 | count | 1 |
| BZW2      | -0.4270963 | 0.51626   | -0.8273 | 0.409   | -0.576811204 | count | 1 |
| TXN2      | -0.4115775 | 0.352076  | -1.169  | 0.2433  | -0.576379518 | count | 1 |
| METTL5    | -0.4123223 | 0.3859611 | -1.0683 | 0.286   | -0.574909755 | count | 1 |
| PPME1     | -0.4640184 | 0.7313046 | -0.6345 | 0.526   | -0.574367985 | count | 1 |
| ST20      | -0.4805833 | 0.8855933 | -0.5427 | 0.588   | -0.573999214 | count | 1 |
| STX10     | -0.4091967 | 0.4004035 | -1.022  | 0.3076  | -0.573657966 | count | 1 |
| RFFL      | -0.4478866 | 0.8252568 | -0.5427 | 0.588   | -0.573489623 | count | 1 |
| SDHB      | -0.411793  | 0.2892476 | -1.4237 | 0.156   | -0.573321176 | count | 1 |
| DYNC1H1   | -0.4335605 | 0.4026196 | -1.0768 | 0.282   | -0.573248663 | count | 1 |
| ARFIP2    | -0.4475181 | 0.6228433 | -0.7185 | 0.473   | -0.573025457 | count | 1 |
| ZNF649    | -0.4475181 | 0.6556143 | -0.6826 | 0.495   | -0.573025457 | count | 1 |
| RBMX      | -0.4095924 | 0.2421727 | -1.6913 | 0.0917  | -0.572624141 | count | 1 |
| TFDP2     | -0.4261562 | 0.3869143 | -1.1014 | 0.272   | -0.572233963 | count | 1 |
| ACVR1B    | -0.4617621 | 0.7039119 | -0.656  | 0.512   | -0.571634463 | count | 1 |
| GPR137B   | -0.4903372 | 1.0164464 | -0.4824 | 0.63    | -0.571288342 | count | 1 |
| ZNF548    | -0.4903372 | 1.2553082 | -0.3906 | 0.6963  | -0.571288342 | count | 1 |
| LTC4S     | -0.4779555 | 0.5608072 | -0.8523 | 0.395   | -0.570944569 | count | 1 |
| ZNF182    | -0.5643997 | 1.0961706 | -0.5149 | 0.607   | -0.570919126 | count | 1 |
| MED16     | -0.5643997 | 1.1623293 | -0.4856 | 0.628   | -0.570919126 | count | 1 |
| AMN1      | -0.5643997 | 1.2918172 | -0.4369 | 0.662   | -0.570919126 | count | 1 |
| TRMT1L    | -0.5288538 | 0.8837351 | -0.5984 | 0.55    | -0.570499535 | count | 1 |
| MYO1G     | -0.4494844 | 0.5209575 | -0.8628 | 0.389   | -0.570165322 | count | 1 |
| ZNF615    | -0.5629518 | 0.9765921 | -0.5764 | 0.565   | -0.569535854 | count | 1 |
| ATF7IP2   | -0.4142084 | 0.3898968 | -1.0624 | 0.289   | -0.569428306 | count | 1 |
| CLASP2    | -0.5275458 | 0.8032616 | -0.6568 | 0.512   | -0.569150126 | count | 1 |
| MOB1B     | -0.5275458 | 0.8846377 | -0.5963 | 0.551   | -0.569150126 | count | 1 |
| SETX      | -0.4479423 | 0.4066969 | -1.1014 | 0.272   | -0.568243329 | count | 1 |
| RUFY2     | -0.4583532 | 0.6816564 | -0.6724 | 0.502   | -0.567503229 | count | 1 |
| COQ10A    | -0.447251  | 0.5253044 | -0.8514 | 0.395   | -0.567381638 | count | 1 |
| RAB1A     | -0.4176033 | 0.4668998 | -0.8944 | 0.372   | -0.566875364 | count | 1 |
| GLUL      | -0.4148933 | 0.3780583 | -1.0974 | 0.273   | -0.566684083 | count | 1 |
| NEU3      | -1.213602  | 1.290623  | -0.9403 | 0.348   | -0.566366799 | count | 1 |
| TAF5L     | -0.7453501 | 0.8356759 | -0.8919 | 0.373   | -0.565777755 | count | 1 |
| TOR1B     | -0.744819  | 0.9328458 | -0.7984 | 0.425   | -0.565422805 | count | 1 |
| ALMS1     | -0.744819  | 0.9683761 | -0.7691 | 0.442   | -0.565422805 | count | 1 |

|            |            |           |         |        |              |       |   |
|------------|------------|-----------|---------|--------|--------------|-------|---|
| SETBP1     | -0.744819  | 0.9683761 | -0.7691 | 0.442  | -0.565422805 | count | 1 |
| INIP       | -0.4223742 | 0.5376761 | -0.7856 | 0.433  | -0.56534276  | count | 1 |
| BORCS8     | -0.473046  | 0.5328148 | -0.8878 | 0.375  | -0.565234615 | count | 1 |
| LINC00891  | -0.7438702 | 1.2883667 | -0.5774 | 0.5641 | -0.564788413 | count | 1 |
| ZNF347     | -0.7438702 | 1.3124827 | -0.5668 | 0.5713 | -0.564788413 | count | 1 |
| AC022706.1 | -0.4450335 | 0.6703832 | -0.6638 | 0.507  | -0.56461718  | count | 1 |
| WDR36      | -0.4449473 | 0.5898336 | -0.7544 | 0.451  | -0.564509708 | count | 1 |
| NDUFAF2    | -0.4110113 | 0.4434293 | -0.9269 | 0.355  | -0.564231143 | count | 1 |
| TMEM259    | -0.406572  | 0.3026716 | -1.3433 | 0.18   | -0.563627306 | count | 1 |
| STRADA     | -1.204677  | 0.6839903 | -1.7612 | 0.0791 | -0.563384279 | count | 1 |
| SLC25A32   | -0.4988523 | 0.595802  | -0.8373 | 0.403  | -0.56287173  | count | 1 |
| MCFD2      | -0.4706258 | 0.465099  | -1.0119 | 0.312  | -0.562418397 | count | 1 |
| EIF4EBP1   | -0.4028911 | 0.3297107 | -1.222  | 0.223  | -0.562207763 | count | 1 |
| FGR        | -0.4248933 | 0.4529943 | -0.938  | 0.349  | -0.56191946  | count | 1 |
| ANXA4      | -0.4350885 | 0.5684918 | -0.7653 | 0.445  | -0.561850723 | count | 1 |
| GPN2       | -0.4970674 | 0.6171773 | -0.8054 | 0.421  | -0.560928686 | count | 1 |
| RAB22A     | -0.4045063 | 0.4250956 | -0.9516 | 0.342  | -0.560778079 | count | 1 |
| FBXO7      | -0.4021424 | 0.3176353 | -1.2661 | 0.206  | -0.560369782 | count | 1 |
| TOX4       | -0.3984129 | 0.2664986 | -1.495  | 0.136  | -0.560120949 | count | 1 |
| MLYCD      | -0.4302151 | 0.7169724 | -0.6    | 0.549  | -0.559550976 | count | 1 |
| TET1       | -0.495341  | 1.0257737 | -0.4829 | 0.629  | -0.559048741 | count | 1 |
| CERS2      | -0.410124  | 0.4236545 | -0.9681 | 0.334  | -0.55801862  | count | 1 |
| TCOF1      | -0.4938716 | 0.5443557 | -0.9073 | 0.365  | -0.5574482   | count | 1 |
| TATDN2     | -0.6079746 | 1.2232387 | -0.497  | 0.62   | -0.556725465 | count | 1 |
| DUSP7      | -0.6079746 | 1.2232387 | -0.497  | 0.62   | -0.556725465 | count | 1 |
| VIPAS39    | -0.6079746 | 1.2232387 | -0.497  | 0.62   | -0.556725465 | count | 1 |
| CDKN3      | -0.6079746 | 1.2975654 | -0.4686 | 0.64   | -0.556725465 | count | 1 |
| PROX2      | -0.6079746 | 1.2975654 | -0.4686 | 0.64   | -0.556725465 | count | 1 |
| TLL1       | -0.6079746 | 1.2975654 | -0.4686 | 0.64   | -0.556725465 | count | 1 |
| AL080276.2 | -0.6079746 | 1.5615898 | -0.3893 | 0.697  | -0.556725465 | count | 1 |
| CHD7       | -0.6079746 | 1.5615898 | -0.3893 | 0.697  | -0.556725465 | count | 1 |
| NAV2       | -0.6079746 | 1.5615898 | -0.3893 | 0.697  | -0.556725465 | count | 1 |
| PLCE1      | -0.6079746 | 1.5615898 | -0.3893 | 0.697  | -0.556725465 | count | 1 |
| BMP2       | -0.6079746 | 1.5615898 | -0.3893 | 0.697  | -0.556725465 | count | 1 |
| FITM2      | -0.6079746 | 1.5615898 | -0.3893 | 0.697  | -0.556725465 | count | 1 |
| HAR1A      | -0.6079746 | 1.5615898 | -0.3893 | 0.697  | -0.556725465 | count | 1 |
| ZNF845     | -0.6079746 | 1.5615898 | -0.3893 | 0.697  | -0.556725465 | count | 1 |
| PRDM15     | -0.6079746 | 1.5615898 | -0.3893 | 0.697  | -0.556725465 | count | 1 |
| TNIP1      | -0.4435794 | 0.4700115 | -0.9438 | 0.346  | -0.556714434 | count | 1 |
| AGO2       | -0.4054773 | 0.4234493 | -0.9576 | 0.339  | -0.556681684 | count | 1 |
| CD244      | -0.4128919 | 0.4809243 | -0.8585 | 0.391  | -0.556252482 | count | 1 |
| ZNF92      | -0.416896  | 0.5347301 | -0.7796 | 0.436  | -0.556077796 | count | 1 |
| NCOA4      | -0.4245369 | 0.4603656 | -0.9222 | 0.357  | -0.555674357 | count | 1 |
| FLOT2      | -0.437831  | 0.5914122 | -0.7403 | 0.46   | -0.555634121 | count | 1 |
| GTF2E2     | -0.4334038 | 0.4917329 | -0.8814 | 0.379  | -0.555235512 | count | 1 |

|          |            |           |         |        |              |       |   |
|----------|------------|-----------|---------|--------|--------------|-------|---|
| ANKRA2   | -0.4552254 | 0.7320646 | -0.6218 | 0.534  | -0.554995165 | count | 1 |
| KDM7A    | -0.4551148 | 0.6743016 | -0.6749 | 0.5    | -0.554863387 | count | 1 |
| STAU1    | -0.3978824 | 0.2901236 | -1.3714 | 0.171  | -0.554861422 | count | 1 |
| HLA-DPB1 | -0.3921577 | 0.2359773 | -1.6618 | 0.0975 | -0.554800277 | count | 1 |
| SNHG9    | -0.406054  | 0.4209378 | -0.9646 | 0.335  | -0.554694065 | count | 1 |
| RNMT     | -0.3920472 | 0.2579134 | -1.5201 | 0.1295 | -0.5545117   | count | 1 |
| COMT     | -0.3991667 | 0.3762098 | -1.061  | 0.289  | -0.554441708 | count | 1 |
| ABI3     | -0.3923892 | 0.3123641 | -1.2562 | 0.21   | -0.55396668  | count | 1 |
| HSD17B10 | -0.4230625 | 0.3586002 | -1.1798 | 0.239  | -0.553768691 | count | 1 |
| CCDC174  | -0.4098578 | 0.3651998 | -1.1223 | 0.263  | -0.553724543 | count | 1 |
| OSER1    | -0.3929578 | 0.3090964 | -1.2713 | 0.2045 | -0.55352812  | count | 1 |
| MED18    | -0.7268501 | 0.8585463 | -0.8466 | 0.398  | -0.553366503 | count | 1 |
| DMAC2    | -0.4537669 | 0.7215768 | -0.6289 | 0.53   | -0.553257174 | count | 1 |
| APOOL    | -0.4193688 | 0.6200954 | -0.6763 | 0.499  | -0.551997087 | count | 1 |
| NAGK     | -0.4216737 | 0.5706637 | -0.7389 | 0.46   | -0.551973475 | count | 1 |
| APOPT1   | -0.3963486 | 0.3659792 | -1.083  | 0.28   | -0.551021998 | count | 1 |
| CLTC     | -0.4300551 | 0.5084644 | -0.8458 | 0.398  | -0.55101149  | count | 1 |
| VMP1     | -0.3989674 | 0.3567112 | -1.1185 | 0.264  | -0.550751771 | count | 1 |
| LRRC40   | -0.600213  | 0.7101851 | -0.8452 | 0.399  | -0.550132798 | count | 1 |
| RPAP2    | -0.4228348 | 0.4193881 | -1.0082 | 0.314  | -0.550079479 | count | 1 |
| ATAD5    | -0.5997137 | 0.8920357 | -0.6723 | 0.502  | -0.549708161 | count | 1 |
| MPI      | -0.5997137 | 0.9479657 | -0.6326 | 0.527  | -0.549708161 | count | 1 |
| LMCD1    | -0.5997137 | 0.9849558 | -0.6089 | 0.543  | -0.549708161 | count | 1 |
| VDAC1    | -0.3881936 | 0.2599349 | -1.4934 | 0.1363 | -0.549700196 | count | 1 |
| TPST2    | -0.3995251 | 0.2908177 | -1.3738 | 0.17   | -0.549363362 | count | 1 |
| SUSD3    | -0.4374185 | 0.5537964 | -0.7899 | 0.43   | -0.549122944 | count | 1 |
| RABGAP1  | -0.5986609 | 0.6799153 | -0.8805 | 0.379  | -0.548812595 | count | 1 |
| DENND4B  | -0.5412192 | 0.6637607 | -0.8154 | 0.415  | -0.548713929 | count | 1 |
| GSR      | -0.4497566 | 0.5172693 | -0.8695 | 0.385  | -0.548476793 | count | 1 |
| 8-Mar    | -0.5978272 | 0.8389132 | -0.7126 | 0.477  | -0.548103194 | count | 1 |
| BIRC3    | -0.3969941 | 0.3015042 | -1.3167 | 0.189  | -0.548042515 | count | 1 |
| PLEKHA2  | -0.4852119 | 0.477327  | -1.0165 | 0.31   | -0.548007342 | count | 1 |
| RAB27B   | -0.540033  | 0.7396394 | -0.7301 | 0.466  | -0.547574257 | count | 1 |
| CCNDBP1  | -0.3863795 | 0.2564781 | -1.5065 | 0.1329 | -0.546514492 | count | 1 |
| MAPK3    | -0.4680531 | 0.6035903 | -0.7754 | 0.439  | -0.546080116 | count | 1 |
| HSPE1    | -0.3811396 | 0.1831951 | -2.0805 | 0.0383 | -0.545570066 | count | 1 |
| DIAPH1   | -0.3976705 | 0.3501678 | -1.1357 | 0.257  | -0.545180802 | count | 1 |
| IKZF1    | -0.3877611 | 0.2518724 | -1.5395 | 0.1247 | -0.544965492 | count | 1 |
| SAAL1    | -0.4187311 | 0.762293  | -0.5493 | 0.583  | -0.544810686 | count | 1 |
| ERCC1    | -0.3884716 | 0.3611523 | -1.0756 | 0.2829 | -0.544704316 | count | 1 |
| STYXL1   | -0.4214382 | 0.5782515 | -0.7288 | 0.467  | -0.544471887 | count | 1 |
| SLC12A9  | -0.4214382 | 0.6760963 | -0.6233 | 0.533  | -0.544471887 | count | 1 |
| TIGD5    | -0.4214382 | 0.6845066 | -0.6157 | 0.539  | -0.544471887 | count | 1 |
| SASH3    | -0.3912331 | 0.348922  | -1.1213 | 0.263  | -0.54394215  | count | 1 |
| FAM172A  | -0.4071218 | 0.4846338 | -0.8401 | 0.401  | -0.543167523 | count | 1 |

|            |            |           |         |        |              |       |   |
|------------|------------|-----------|---------|--------|--------------|-------|---|
| RC3H2      | -0.4277006 | 0.5345451 | -0.8001 | 0.424  | -0.542989014 | count | 1 |
| ZC3H7A     | -0.40854   | 0.3960204 | -1.0316 | 0.303  | -0.542892995 | count | 1 |
| TMEM256    | -0.3891728 | 0.3654498 | -1.0649 | 0.288  | -0.542373032 | count | 1 |
| CEP85      | -1.1416252 | 1.1136746 | -1.0251 | 0.3061 | -0.541816197 | count | 1 |
| RPTOR      | -1.1416252 | 1.2274959 | -0.93   | 0.353  | -0.541816197 | count | 1 |
| ETHE1      | -0.3895288 | 0.3431997 | -1.135  | 0.257  | -0.541115972 | count | 1 |
| GAN        | -0.5330816 | 0.8876354 | -0.6006 | 0.549  | -0.540889006 | count | 1 |
| EFEMP1     | -0.5330816 | 1.0939565 | -0.4873 | 0.626  | -0.540889006 | count | 1 |
| DPM3       | -0.3919661 | 0.3750407 | -1.0451 | 0.297  | -0.540473934 | count | 1 |
| GABPB1-AS1 | -0.3831446 | 0.2891972 | -1.3249 | 0.1862 | -0.540113026 | count | 1 |
| FUBP1      | -0.4123255 | 0.3225192 | -1.2785 | 0.202  | -0.539884968 | count | 1 |
| CCDC91     | -0.3887779 | 0.3229622 | -1.2038 | 0.23   | -0.539589523 | count | 1 |
| CLTA       | -0.3809927 | 0.2490465 | -1.5298 | 0.127  | -0.53940904  | count | 1 |
| TAPBPL     | -0.4341066 | 0.4487566 | -0.9674 | 0.334  | -0.538073379 | count | 1 |
| SF1        | -0.3792621 | 0.1823135 | -2.0803 | 0.0383 | -0.537726495 | count | 1 |
| MRPL23     | -0.3986777 | 0.4741178 | -0.8409 | 0.401  | -0.537262789 | count | 1 |
| HIST1H1D   | -0.3866375 | 0.3672448 | -1.0528 | 0.293  | -0.537117634 | count | 1 |
| SAP30BP    | -0.3923607 | 0.3266628 | -1.2011 | 0.231  | -0.537057729 | count | 1 |
| PPP1R12C   | -0.3985028 | 0.7167403 | -0.556  | 0.579  | -0.537029043 | count | 1 |
| KNOP1      | -0.4100462 | 0.6088884 | -0.6734 | 0.501  | -0.536936296 | count | 1 |
| IFIT3      | -0.3909674 | 0.7936855 | -0.4926 | 0.6226 | -0.536879927 | count | 1 |
| GTF3C5     | -0.4184126 | 0.6121753 | -0.6835 | 0.495  | -0.536316164 | count | 1 |
| TALDO1     | -0.3786561 | 0.2336131 | -1.6209 | 0.106  | -0.536224347 | count | 1 |
| CORO1B     | -0.3937968 | 0.4400691 | -0.8949 | 0.372  | -0.535960944 | count | 1 |
| INTS12     | -0.4090783 | 0.6053608 | -0.6758 | 0.5    | -0.535684001 | count | 1 |
| CD47       | -0.3925575 | 0.2855202 | -1.3749 | 0.17   | -0.535367524 | count | 1 |
| MAP1S      | -0.426262  | 0.7032934 | -0.6061 | 0.545  | -0.535363789 | count | 1 |
| HEMK1      | -0.473517  | 0.8522251 | -0.5556 | 0.579  | -0.535235072 | count | 1 |
| OGG1       | -0.404086  | 0.5495808 | -0.7353 | 0.463  | -0.53469548  | count | 1 |
| SCOC       | -0.3911172 | 0.4247393 | -0.9208 | 0.358  | -0.53442324  | count | 1 |
| PPP1R3B    | -1.11725   | 1.281588  | -0.8718 | 0.384  | -0.533243021 | count | 1 |
| CRYAB      | -1.1172502 | 1.5335223 | -0.7286 | 0.4668 | -0.533242944 | count | 1 |
| PIK3R6     | -1.1172502 | 1.5335223 | -0.7286 | 0.4668 | -0.533242944 | count | 1 |
| LINS1      | -0.436952  | 0.4880654 | -0.8953 | 0.371  | -0.533197814 | count | 1 |
| APOBEC3F   | -0.4924999 | 0.6457041 | -0.7627 | 0.446  | -0.532860407 | count | 1 |
| DHODH      | -0.4450764 | 0.8052944 | -0.5527 | 0.581  | -0.532631944 | count | 1 |
| GOLIM4     | -0.3797747 | 0.3611107 | -1.0517 | 0.2937 | -0.531998815 | count | 1 |
| NDUFB7     | -0.3753487 | 0.2584178 | -1.4525 | 0.1473 | -0.531880577 | count | 1 |
| SLC6A6     | -0.4060579 | 0.5733875 | -0.7082 | 0.479  | -0.531775584 | count | 1 |
| SSR1       | -0.3848495 | 0.3817449 | -1.0081 | 0.314  | -0.531364623 | count | 1 |
| CHKA       | -0.6940016 | 0.7905894 | -0.8778 | 0.3807 | -0.531097885 | count | 1 |
| SMAD4      | -0.4281146 | 0.6169626 | -0.6939 | 0.488  | -0.530788315 | count | 1 |
| KLHL28     | -0.3936804 | 0.3989061 | -0.9869 | 0.324  | -0.530583314 | count | 1 |
| EIF4G2     | -0.3765931 | 0.2262932 | -1.6642 | 0.097  | -0.529957235 | count | 1 |
| COMMD2     | -0.3798572 | 0.3534202 | -1.0748 | 0.283  | -0.529824808 | count | 1 |

|            |            |           |         |        |              |       |   |
|------------|------------|-----------|---------|--------|--------------|-------|---|
| TCTA       | -0.4098323 | 0.6241179 | -0.6567 | 0.512  | -0.529680726 | count | 1 |
| UBE2H      | -0.3915006 | 0.3811467 | -1.0272 | 0.305  | -0.529118098 | count | 1 |
| CRBN       | -0.3833268 | 0.375354  | -1.0212 | 0.308  | -0.528624749 | count | 1 |
| HAGH       | -0.3827742 | 0.3469216 | -1.1033 | 0.271  | -0.528513997 | count | 1 |
| UPP1       | -0.3762992 | 0.3285878 | -1.1452 | 0.253  | -0.528202567 | count | 1 |
| FCHSD2     | -0.4158375 | 0.5438896 | -0.7646 | 0.445  | -0.528165913 | count | 1 |
| CPSF2      | -0.4119117 | 0.8655174 | -0.4759 | 0.6345 | -0.528104214 | count | 1 |
| WBP2       | -0.3917705 | 0.3945595 | -0.9929 | 0.321  | -0.528030068 | count | 1 |
| SLC25A29   | -0.3956382 | 0.69544   | -0.5689 | 0.57   | -0.52799005  | count | 1 |
| CMPK2      | -0.4025209 | 1.0954532 | -0.3674 | 0.7135 | -0.52719762  | count | 1 |
| DEF6       | -0.3787977 | 0.2752556 | -1.3762 | 0.17   | -0.52716046  | count | 1 |
| CYTOR      | -0.3792675 | 0.2660709 | -1.4254 | 0.155  | -0.526449464 | count | 1 |
| TMED5      | -0.3832994 | 0.3749977 | -1.0221 | 0.307  | -0.526411077 | count | 1 |
| BBS7       | -0.4394458 | 0.8102929 | -0.5423 | 0.588  | -0.526053877 | count | 1 |
| TMEM167A   | -0.3783638 | 0.3473342 | -1.0893 | 0.277  | -0.525674256 | count | 1 |
| MAX        | -0.3898737 | 0.3414019 | -1.142  | 0.254  | -0.525494093 | count | 1 |
| EID3       | -0.4181531 | 0.6384365 | -0.655  | 0.513  | -0.525353532 | count | 1 |
| CAPN7      | -0.4034819 | 0.4775754 | -0.8449 | 0.399  | -0.525217699 | count | 1 |
| RNF114     | -0.3875137 | 0.4129404 | -0.9384 | 0.349  | -0.525096075 | count | 1 |
| NOL8       | -0.3895355 | 0.421742  | -0.9236 | 0.356  | -0.5250419   | count | 1 |
| RPL36A     | -0.3746793 | 0.2487802 | -1.5061 | 0.133  | -0.524885279 | count | 1 |
| CTU2       | -0.4384125 | 0.8729995 | -0.5022 | 0.616  | -0.524846167 | count | 1 |
| RGL2       | -0.3981982 | 0.5343432 | -0.7452 | 0.457  | -0.524437713 | count | 1 |
| UBE2F      | -0.3927212 | 0.4246039 | -0.9249 | 0.356  | -0.52413316  | count | 1 |
| WAC-AS1    | -0.3801847 | 0.4737188 | -0.8026 | 0.423  | -0.522918206 | count | 1 |
| WRAP73     | -0.4009822 | 0.5670269 | -0.7072 | 0.48   | -0.522003814 | count | 1 |
| CHPT1      | -0.3896195 | 0.4345613 | -0.8966 | 0.371  | -0.521889856 | count | 1 |
| ITGB3BP    | -0.4036878 | 0.6141068 | -0.6574 | 0.511  | -0.521844292 | count | 1 |
| CHMP6      | -0.3824252 | 0.4796783 | -0.7973 | 0.426  | -0.521639592 | count | 1 |
| ACSS1      | -0.4462749 | 0.6538453 | -0.6825 | 0.495  | -0.521361948 | count | 1 |
| COX18      | -0.5660734 | 0.9517409 | -0.5948 | 0.5524 | -0.520951796 | count | 1 |
| POMZP3     | -0.4343334 | 0.7778697 | -0.5584 | 0.577  | -0.520076971 | count | 1 |
| RINT1      | -0.4192981 | 0.6798901 | -0.6167 | 0.538  | -0.520060624 | count | 1 |
| EXOC3-AS1  | -0.4795731 | 0.9722222 | -0.4933 | 0.622  | -0.519410534 | count | 1 |
| AC116407.2 | -0.4795731 | 0.9722222 | -0.4933 | 0.622  | -0.519410534 | count | 1 |
| APOM       | -0.4795731 | 1.3220004 | -0.3628 | 0.717  | -0.519410534 | count | 1 |
| IGF1R      | -0.4795731 | 1.3220004 | -0.3628 | 0.717  | -0.519410534 | count | 1 |
| PRKCH      | -0.3739862 | 0.317187  | -1.1791 | 0.239  | -0.519151002 | count | 1 |
| PTBP3      | -0.3747772 | 0.3392205 | -1.1048 | 0.27   | -0.51869647  | count | 1 |
| CARS2      | -0.6756436 | 0.8753133 | -0.7719 | 0.441  | -0.518524792 | count | 1 |
| CSNK1D     | -0.3843129 | 0.3657749 | -1.0507 | 0.294  | -0.518058056 | count | 1 |
| REST       | -0.3674778 | 0.2746725 | -1.3379 | 0.1819 | -0.51791228  | count | 1 |
| MRPS12     | -0.3712506 | 0.3054767 | -1.2153 | 0.225  | -0.517866409 | count | 1 |
| TRGC2      | -0.4071387 | 0.5720685 | -0.7117 | 0.477  | -0.517286364 | count | 1 |
| JHY        | -0.6733847 | 0.9014265 | -0.747  | 0.456  | -0.516971398 | count | 1 |

|            |            |           |         |        |              |       |   |
|------------|------------|-----------|---------|--------|--------------|-------|---|
| AC109826.1 | -0.6733847 | 1.00893   | -0.6674 | 0.505  | -0.516971398 | count | 1 |
| CD74       | -0.3592061 | 0.1482745 | -2.4226 | 0.016  | -0.516289867 | count | 1 |
| TDG        | -0.379769  | 0.3273368 | -1.1602 | 0.247  | -0.515879202 | count | 1 |
| C12orf57   | -0.3605717 | 0.1853549 | -1.9453 | 0.0526 | -0.51527331  | count | 1 |
| ISG15      | -0.3614289 | 0.2589069 | -1.396  | 0.1637 | -0.514974198 | count | 1 |
| WDCP       | -0.4752285 | 0.9636995 | -0.4931 | 0.622  | -0.514882467 | count | 1 |
| SIDT2      | -0.4752285 | 0.9926038 | -0.4788 | 0.632  | -0.514882467 | count | 1 |
| DOCK7      | -0.4752285 | 1.0541472 | -0.4508 | 0.652  | -0.514882467 | count | 1 |
| ZNF101     | -0.4212924 | 0.5980384 | -0.7045 | 0.482  | -0.514480316 | count | 1 |
| EVA1B      | -0.3749977 | 0.4218787 | -0.8889 | 0.375  | -0.513433913 | count | 1 |
| GSKIP      | -0.386059  | 0.5689075 | -0.6786 | 0.498  | -0.513303802 | count | 1 |
| MANBA      | -0.5569338 | 0.4958728 | -1.1231 | 0.262  | -0.513089598 | count | 1 |
| S1PR4      | -0.3874357 | 0.4662171 | -0.831  | 0.407  | -0.512884506 | count | 1 |
| ELOVL1     | -0.3718314 | 0.3954447 | -0.9403 | 0.348  | -0.512852998 | count | 1 |
| HOXB2      | -0.3696461 | 0.4736434 | -0.7804 | 0.4357 | -0.512668716 | count | 1 |
| CARHSP1    | -0.3676391 | 0.3134257 | -1.173  | 0.242  | -0.512479299 | count | 1 |
| BLCAP      | -0.3993268 | 0.5262463 | -0.7588 | 0.449  | -0.512194032 | count | 1 |
| DGUOK      | -0.3624189 | 0.2906538 | -1.2469 | 0.2133 | -0.511902578 | count | 1 |
| TESK1      | -0.4190293 | 0.6580869 | -0.6367 | 0.525  | -0.511772435 | count | 1 |
| KATNA1     | -0.3796128 | 0.4286104 | -0.8857 | 0.376  | -0.511771374 | count | 1 |
| PSMB8      | -0.3579611 | 0.1820703 | -1.9661 | 0.0502 | -0.510893945 | count | 1 |
| RAB6A      | -0.3808127 | 0.4060037 | -0.938  | 0.349  | -0.510193317 | count | 1 |
| MYC        | -0.3759747 | 0.4919174 | -0.7643 | 0.445  | -0.509571393 | count | 1 |
| POLR1D     | -0.3585387 | 0.2449471 | -1.4637 | 0.144  | -0.509098336 | count | 1 |
| OTULIN     | -0.3623665 | 0.3325654 | -1.0896 | 0.2767 | -0.508704991 | count | 1 |
| GINS3      | -1.04836   | 0.8580964 | -1.2217 | 0.223  | -0.508295671 | count | 1 |
| NRDC       | -0.3614786 | 0.297526  | -1.2149 | 0.225  | -0.507917987 | count | 1 |
| TMEM165    | -0.3606733 | 0.2923422 | -1.2337 | 0.218  | -0.507418867 | count | 1 |
| SIPA1L1    | -0.4339823 | 0.6330041 | -0.6856 | 0.493  | -0.507374705 | count | 1 |
| POLR3D     | -0.4339823 | 0.662963  | -0.6546 | 0.513  | -0.507374705 | count | 1 |
| DEDD2      | -0.3749986 | 0.3939729 | -0.9518 | 0.342  | -0.50697986  | count | 1 |
| PRIMPOL    | -0.4032264 | 0.6452768 | -0.6249 | 0.532  | -0.506905869 | count | 1 |
| ATL2       | -0.3987864 | 0.6619656 | -0.6024 | 0.547  | -0.506832095 | count | 1 |
| TTY15      | -0.378142  | 0.5670127 | -0.6669 | 0.505  | -0.506645199 | count | 1 |
| RHEBL1     | -0.6583915 | 0.6294333 | -1.046  | 0.296  | -0.50662628  | count | 1 |
| ERO1A      | -0.3985906 | 0.5181899 | -0.7692 | 0.442  | -0.506586923 | count | 1 |
| RPGR       | -0.422215  | 0.5825356 | -0.7248 | 0.469  | -0.505893425 | count | 1 |
| NEDD9      | -0.3574351 | 0.2864166 | -1.248  | 0.2129 | -0.505782716 | count | 1 |
| SEL1L      | -0.3819738 | 0.4771532 | -0.8005 | 0.424  | -0.50572478  | count | 1 |
| ZNHIT2     | -0.4661883 | 1.0961925 | -0.4253 | 0.671  | -0.505448285 | count | 1 |
| TTBK2      | -0.4661883 | 1.1326687 | -0.4116 | 0.681  | -0.505448285 | count | 1 |
| AL132639.2 | -0.4661883 | 1.2366528 | -0.377  | 0.706  | -0.505448285 | count | 1 |
| PLXDC1     | -0.4661883 | 1.2366528 | -0.377  | 0.706  | -0.505448285 | count | 1 |
| FCGR3B     | -0.4661883 | 1.376901  | -0.3386 | 0.735  | -0.505448285 | count | 1 |
| NAPG       | -0.3834866 | 0.5491339 | -0.6983 | 0.485  | -0.505263669 | count | 1 |

|            |            |           |         |        |              |       |   |
|------------|------------|-----------|---------|--------|--------------|-------|---|
| MPHOSPH10  | -0.3682924 | 0.4210781 | -0.8746 | 0.382  | -0.505134994 | count | 1 |
| AAAS       | -0.5474049 | 0.5699326 | -0.9605 | 0.338  | -0.504870266 | count | 1 |
| SREK1      | -0.3638685 | 0.3488056 | -1.0432 | 0.298  | -0.504191749 | count | 1 |
| CD320      | -0.3843976 | 0.4737373 | -0.8114 | 0.418  | -0.50372276  | count | 1 |
| IPP        | -0.5458695 | 0.7455499 | -0.7322 | 0.465  | -0.503543769 | count | 1 |
| FKBP4      | -0.3866077 | 0.5976357 | -0.6469 | 0.518  | -0.503510875 | count | 1 |
| MTG2       | -0.4305034 | 0.9904719 | -0.4346 | 0.664  | -0.503411671 | count | 1 |
| TBP        | -0.4305034 | 0.8476173 | -0.5079 | 0.612  | -0.503411662 | count | 1 |
| MTRF1L     | -0.3957203 | 0.6736277 | -0.5874 | 0.557  | -0.502992398 | count | 1 |
| RPS10      | -0.3509135 | 0.1457404 | -2.4078 | 0.0166 | -0.50255584  | count | 1 |
| AC245297.3 | -0.3663599 | 0.3566145 | -1.0273 | 0.305  | -0.502499237 | count | 1 |
| JAK2       | -0.4048798 | 0.7950649 | -0.5092 | 0.611  | -0.502494953 | count | 1 |
| ORAI1      | -0.3609769 | 0.2849749 | -1.2667 | 0.206  | -0.502457845 | count | 1 |
| RAB11A     | -0.3608419 | 0.3098269 | -1.1647 | 0.245  | -0.50227067  | count | 1 |
| SYVN1      | -0.4628729 | 0.8708202 | -0.5315 | 0.595  | -0.501984272 | count | 1 |
| ZNF273     | -1.030847  | 1.1169414 | -0.9229 | 0.3567 | -0.501783524 | count | 1 |
| UBR2       | -0.3640861 | 0.3953077 | -0.921  | 0.358  | -0.501576196 | count | 1 |
| BTBD1      | -0.4621599 | 0.5889194 | -0.7848 | 0.433  | -0.501239031 | count | 1 |
| RGS2       | -0.3873441 | 0.4511229 | -0.8586 | 0.391  | -0.500981762 | count | 1 |
| DDHD2      | -0.3783182 | 0.6179826 | -0.6122 | 0.541  | -0.500931497 | count | 1 |
| EMC10      | -0.3779645 | 0.3347371 | -1.1291 | 0.26   | -0.500467661 | count | 1 |
| AP3M2      | -0.4277544 | 0.7700775 | -0.5555 | 0.579  | -0.500278688 | count | 1 |
| ZCWPW1     | -0.4277544 | 0.9770794 | -0.4378 | 0.662  | -0.500278688 | count | 1 |
| PLEKHO1    | -0.3551178 | 0.3089687 | -1.1494 | 0.2513 | -0.500187807 | count | 1 |
| ING3       | -0.3677691 | 0.4150579 | -0.8861 | 0.376  | -0.499686837 | count | 1 |
| SEC23IP    | -0.5411759 | 1.0374862 | -0.5216 | 0.602  | -0.499485105 | count | 1 |
| NAA80      | -0.4602413 | 0.7910412 | -0.5818 | 0.561  | -0.499233148 | count | 1 |
| RAP2A      | -0.4602413 | 0.9213616 | -0.4995 | 0.618  | -0.499233148 | count | 1 |
| ATP8B2     | -0.4598186 | 0.8225752 | -0.559  | 0.577  | -0.498791116 | count | 1 |
| PLK2       | -0.4598186 | 0.9300084 | -0.4944 | 0.6213 | -0.498791116 | count | 1 |
| EXT1       | -0.5400731 | 1.0354673 | -0.5216 | 0.602  | -0.498530715 | count | 1 |
| ZNF443     | -0.5400731 | 1.0354673 | -0.5216 | 0.602  | -0.498530715 | count | 1 |
| FOXJ2      | -0.5400731 | 1.1517456 | -0.4689 | 0.639  | -0.498530715 | count | 1 |
| CEP112     | -0.5400731 | 1.2668311 | -0.4263 | 0.67   | -0.498530715 | count | 1 |
| DDRGK1     | -0.3568756 | 0.3451906 | -1.0339 | 0.302  | -0.498229564 | count | 1 |
| TXNDC9     | -0.3605909 | 0.3693717 | -0.9762 | 0.33   | -0.498031187 | count | 1 |
| PTGES3     | -0.3489012 | 0.1723394 | -2.0245 | 0.0437 | -0.497868136 | count | 1 |
| RARS       | -0.4580262 | 0.6752582 | -0.6783 | 0.498  | -0.496916365 | count | 1 |
| LYST       | -0.3552042 | 0.3111169 | -1.1417 | 0.254  | -0.496847787 | count | 1 |
| VHL        | -0.3735596 | 0.5182248 | -0.7208 | 0.472  | -0.496835198 | count | 1 |
| RPS27L     | -0.3482422 | 0.2005545 | -1.7364 | 0.0834 | -0.496440498 | count | 1 |
| PAPOLG     | -0.4138903 | 0.5651611 | -0.7323 | 0.464  | -0.4961372   | count | 1 |
| LARS       | -0.3549364 | 0.3353124 | -1.0585 | 0.2906 | -0.495858428 | count | 1 |
| SEC23B     | -0.4568744 | 0.7776924 | -0.5875 | 0.557  | -0.495711301 | count | 1 |
| SPOPL      | -0.4568744 | 0.8078378 | -0.5656 | 0.572  | -0.495711301 | count | 1 |



|            |            |           |         |        |              |       |   |
|------------|------------|-----------|---------|--------|--------------|-------|---|
| CAB39L     | -0.4568744 | 0.8982408 | -0.5086 | 0.611  | -0.495711301 | count | 1 |
| ZNF700     | -0.4568744 | 0.9145467 | -0.4996 | 0.618  | -0.495711301 | count | 1 |
| SDHAF1     | -0.3758259 | 0.4891959 | -0.7683 | 0.443  | -0.495271983 | count | 1 |
| ANKRD54    | -0.4560161 | 0.6456056 | -0.7063 | 0.48   | -0.494813147 | count | 1 |
| MRPL14     | -0.3508054 | 0.2841207 | -1.2347 | 0.2178 | -0.494638003 | count | 1 |
| NR1H2      | -0.3537667 | 0.2934679 | -1.2055 | 0.229  | -0.494542762 | count | 1 |
| ARF5       | -0.3493812 | 0.2534916 | -1.3783 | 0.1691 | -0.494409606 | count | 1 |
| SORL1      | -0.4554742 | 0.5375598 | -0.8473 | 0.397  | -0.494246001 | count | 1 |
| CCDC92     | -0.3685324 | 0.5184873 | -0.7108 | 0.478  | -0.493874346 | count | 1 |
| PML        | -0.3976266 | 0.5557761 | -0.7154 | 0.475  | -0.493648321 | count | 1 |
| DNASE2     | -0.3976266 | 0.5717331 | -0.6955 | 0.487  | -0.493648321 | count | 1 |
| TIA1       | -0.4541778 | 0.4773992 | -0.9514 | 0.342  | -0.492888983 | count | 1 |
| GLIPR2     | -0.3441765 | 0.2061892 | -1.6692 | 0.096  | -0.49248855  | count | 1 |
| SOD3       | -0.4028863 | 0.9606927 | -0.4194 | 0.675  | -0.492436056 | count | 1 |
| RNFT1      | -0.3562275 | 0.4600559 | -0.7743 | 0.439  | -0.492032766 | count | 1 |
| PIEZO1     | -0.453194  | 0.6782149 | -0.6682 | 0.504  | -0.49185895  | count | 1 |
| SEC11A     | -0.3447521 | 0.1730256 | -1.9925 | 0.0472 | -0.49184117  | count | 1 |
| PARP3      | -0.401905  | 0.7294895 | -0.5509 | 0.582  | -0.491259473 | count | 1 |
| AC139530.1 | -0.3956382 | 0.9752144 | -0.4057 | 0.685  | -0.491221925 | count | 1 |
| ALG3       | -0.3665111 | 0.4478906 | -0.8183 | 0.414  | -0.49118728  | count | 1 |
| PKM        | -0.3451048 | 0.2335744 | -1.4775 | 0.1405 | -0.490881628 | count | 1 |
| ECI2       | -0.3499413 | 0.3159333 | -1.1076 | 0.269  | -0.490338156 | count | 1 |
| ARL5B      | -0.3604543 | 0.4252982 | -0.8475 | 0.397  | -0.489812305 | count | 1 |
| MXD4       | -0.3465336 | 0.2832584 | -1.2234 | 0.2221 | -0.489780461 | count | 1 |
| HPS4       | -0.4180266 | 0.553569  | -0.7551 | 0.451  | -0.489182187 | count | 1 |
| PCBD1      | -0.3846592 | 0.7019664 | -0.548  | 0.584  | -0.489131788 | count | 1 |
| PPT1       | -0.3559016 | 0.5370793 | -0.6627 | 0.508  | -0.488982199 | count | 1 |
| TMEM238    | -0.353107  | 0.3149165 | -1.1213 | 0.263  | -0.488837133 | count | 1 |
| LRBA       | -0.3885016 | 0.4778996 | -0.8129 | 0.417  | -0.488681498 | count | 1 |
| COPA       | -0.393316  | 0.3804609 | -1.0338 | 0.302  | -0.488387582 | count | 1 |
| UPF1       | -0.6321238 | 0.9456408 | -0.6685 | 0.504  | -0.488357053 | count | 1 |
| GADD45GIP1 | -0.3442457 | 0.2544967 | -1.3527 | 0.1771 | -0.487692143 | count | 1 |
| MCRIP2     | -0.3799388 | 0.5800605 | -0.655  | 0.513  | -0.48765038  | count | 1 |
| NUBP2      | -0.3544086 | 0.4070927 | -0.8706 | 0.385  | -0.487645287 | count | 1 |
| HAUS1      | -0.4156803 | 0.5463931 | -0.7608 | 0.447  | -0.48650346  | count | 1 |
| P2RX4      | -0.4055675 | 0.6958513 | -0.5828 | 0.56   | -0.486372828 | count | 1 |
| GMCL1      | -0.3556602 | 0.4190711 | -0.8487 | 0.397  | -0.486255889 | count | 1 |
| RNF40      | -0.3863222 | 0.733012  | -0.527  | 0.599  | -0.485981945 | count | 1 |
| SH3BP2     | -0.6287241 | 0.653505  | -0.9621 | 0.3367 | -0.485979181 | count | 1 |
| PARL       | -0.3558253 | 0.444111  | -0.8012 | 0.424  | -0.485573194 | count | 1 |
| TRAF6      | -0.3858466 | 0.704253  | -0.5479 | 0.584  | -0.485392763 | count | 1 |
| LSM2       | -0.3394726 | 0.2183769 | -1.5545 | 0.121  | -0.484465176 | count | 1 |
| ZNF667-AS1 | -0.365561  | 0.4677838 | -0.7815 | 0.435  | -0.484195664 | count | 1 |
| STARD10    | -0.3713365 | 0.7154664 | -0.519  | 0.604  | -0.48384311  | count | 1 |
| SBNO1      | -0.5227429 | 0.4946268 | -1.0568 | 0.291  | -0.483493133 | count | 1 |

|            |            |           |         |        |              |       |   |
|------------|------------|-----------|---------|--------|--------------|-------|---|
| LAX1       | -0.3645852 | 0.49222   | -0.7407 | 0.459  | -0.482915008 | count | 1 |
| SELPLG     | -0.3499996 | 0.3254935 | -1.0753 | 0.283  | -0.482883314 | count | 1 |
| RGS1       | -0.3401816 | 0.2879475 | -1.1814 | 0.2383 | -0.482841039 | count | 1 |
| UBE2J2     | -0.3537938 | 0.4073609 | -0.8685 | 0.386  | -0.482817133 | count | 1 |
| WDR61      | -0.4124306 | 0.4517737 | -0.9129 | 0.362  | -0.482791858 | count | 1 |
| CIP2A      | -0.623168  | 0.7924962 | -0.7863 | 0.432  | -0.482086351 | count | 1 |
| FAM213B    | -0.623168  | 0.8092983 | -0.77   | 0.442  | -0.482086351 | count | 1 |
| SCUBE1     | -0.623168  | 0.8283017 | -0.7523 | 0.452  | -0.482086351 | count | 1 |
| FABP5      | -0.3412574 | 0.3087024 | -1.1055 | 0.2698 | -0.482078151 | count | 1 |
| ZMAT3      | -0.3879456 | 0.7301079 | -0.5314 | 0.5955 | -0.481830107 | count | 1 |
| ATP5MD     | -0.3394174 | 0.2221336 | -1.528  | 0.1275 | -0.481423421 | count | 1 |
| KIN        | -0.3459657 | 0.3690313 | -0.9375 | 0.349  | -0.481249032 | count | 1 |
| PSME2      | -0.3356835 | 0.1531896 | -2.1913 | 0.0291 | -0.481211251 | count | 1 |
| AC012615.1 | -0.3870998 | 0.6007141 | -0.6444 | 0.52   | -0.48079702  | count | 1 |
| FLT3LG     | -0.348475  | 0.3984676 | -0.8745 | 0.382  | -0.480789629 | count | 1 |
| PUM1       | -0.3815818 | 0.5035435 | -0.7578 | 0.449  | -0.480108234 | count | 1 |
| GFOD1      | -0.4099411 | 0.452983  | -0.905  | 0.366  | -0.479947357 | count | 1 |
| SLC25A11   | -0.3440651 | 0.3479492 | -0.9888 | 0.323  | -0.479734575 | count | 1 |
| PFDN2      | -0.3397633 | 0.2357892 | -1.441  | 0.1506 | -0.479698545 | count | 1 |
| UTP3       | -0.3636488 | 0.5393981 | -0.6742 | 0.501  | -0.47937955  | count | 1 |
| CPNE3      | -0.3411822 | 0.3119129 | -1.0938 | 0.275  | -0.479266399 | count | 1 |
| POLM       | -0.6188676 | 0.7806847 | -0.7927 | 0.429  | -0.47906788  | count | 1 |
| CD70       | -0.6188676 | 0.8356069 | -0.7406 | 0.459  | -0.47906788  | count | 1 |
| CYLD       | -0.33839   | 0.2417395 | -1.3998 | 0.1625 | -0.478167057 | count | 1 |
| HOOK3      | -0.3664095 | 0.4799508 | -0.7634 | 0.446  | -0.477493036 | count | 1 |
| SAMD10     | -0.5153692 | 1.005194  | -0.5127 | 0.609  | -0.477072596 | count | 1 |
| NPIPB5     | -0.5153692 | 1.08989   | -0.4729 | 0.637  | -0.477072596 | count | 1 |
| TNFRSF18   | -0.3334394 | 0.2165456 | -1.5398 | 0.1246 | -0.476904113 | count | 1 |
| PTPN2      | -0.3386396 | 0.2704736 | -1.252  | 0.2115 | -0.476861851 | count | 1 |
| TTC5       | -0.3788127 | 0.5725073 | -0.6617 | 0.509  | -0.476675898 | count | 1 |
| DYM        | -0.3968567 | 0.5889131 | -0.6739 | 0.501  | -0.476142266 | count | 1 |
| RELA       | -0.3576389 | 0.4693596 | -0.762  | 0.447  | -0.475841598 | count | 1 |
| DZANK1     | -0.5122765 | 1.1584368 | -0.4422 | 0.659  | -0.47437573  | count | 1 |
| GNPNAT1    | -0.4050578 | 0.6581258 | -0.6155 | 0.539  | -0.474364805 | count | 1 |
| HCFC1R1    | -0.3467398 | 0.4263452 | -0.8133 | 0.417  | -0.474127332 | count | 1 |
| FAM98A     | -0.4042438 | 0.5771249 | -0.7004 | 0.484  | -0.473433873 | count | 1 |
| INPP5B     | -0.3801588 | 0.6914654 | -0.5498 | 0.583  | -0.472315691 | count | 1 |
| VAMP3      | -0.3465859 | 0.505538  | -0.6856 | 0.493  | -0.472093667 | count | 1 |
| SNHG7      | -0.3358233 | 0.2535461 | -1.3245 | 0.186  | -0.471965443 | count | 1 |
| NFKBID     | -0.3350619 | 0.3071292 | -1.0909 | 0.2761 | -0.471291028 | count | 1 |
| KBTBD2     | -0.349153  | 0.3898913 | -0.8955 | 0.371  | -0.470994668 | count | 1 |
| UTP15      | -0.38489   | 0.7976115 | -0.4826 | 0.63   | -0.470837595 | count | 1 |
| MFSD4A     | -0.401702  | 1.0928416 | -0.3676 | 0.713  | -0.470526284 | count | 1 |
| CRK        | -0.3735494 | 0.5865811 | -0.6368 | 0.525  | -0.470149494 | count | 1 |
| HNRNPC     | -0.3313094 | 0.1764096 | -1.8781 | 0.0613 | -0.47010897  | count | 1 |

|           |            |           |         |        |              |       |   |
|-----------|------------|-----------|---------|--------|--------------|-------|---|
| DCAF5     | -0.3692675 | 0.4855499 | -0.7605 | 0.448  | -0.469822087 | count | 1 |
| EID1      | -0.3291417 | 0.2133257 | -1.5429 | 0.124  | -0.469116011 | count | 1 |
| ZNF780B   | -0.4004076 | 0.6789413 | -0.5898 | 0.556  | -0.469045186 | count | 1 |
| HNRNPU    | -0.3284007 | 0.1861291 | -1.7644 | 0.0786 | -0.468974431 | count | 1 |
| ARL6IP1   | -0.3351456 | 0.3116271 | -1.0755 | 0.283  | -0.468877423 | count | 1 |
| AKAP9     | -0.3309908 | 0.2341296 | -1.4137 | 0.1584 | -0.468647496 | count | 1 |
| PDE12     | -0.3677917 | 0.686907  | -0.5354 | 0.593  | -0.467969259 | count | 1 |
| LINC02273 | -0.3643204 | 0.9090237 | -0.4008 | 0.689  | -0.467850391 | count | 1 |
| DYNLL2    | -0.35886   | 0.5641285 | -0.6361 | 0.525  | -0.467758708 | count | 1 |
| PSMB5     | -0.3393062 | 0.4386401 | -0.7735 | 0.44   | -0.467597551 | count | 1 |
| FCMR      | -0.341001  | 0.4026413 | -0.8469 | 0.398  | -0.467133544 | count | 1 |
| MRPL36    | -0.3398127 | 0.4226713 | -0.804  | 0.422  | -0.466985909 | count | 1 |
| CKS1B     | -0.3816356 | 0.6224493 | -0.6131 | 0.54   | -0.466927113 | count | 1 |
| RDH11     | -0.3413887 | 0.4546689 | -0.7509 | 0.453  | -0.466849779 | count | 1 |
| CSNK2B    | -0.3280988 | 0.1924818 | -1.7046 | 0.0892 | -0.466356652 | count | 1 |
| PRPF3     | -0.388217  | 0.5313885 | -0.7306 | 0.466  | -0.465984206 | count | 1 |
| SARS      | -0.3341499 | 0.3445896 | -0.9697 | 0.333  | -0.465610645 | count | 1 |
| IFT57     | -0.3694542 | 0.5027933 | -0.7348 | 0.463  | -0.4650693   | count | 1 |
| ZNF264    | -0.3591022 | 0.6090508 | -0.5896 | 0.556  | -0.464869371 | count | 1 |
| C7orf50   | -0.3298236 | 0.2943034 | -1.1207 | 0.2632 | -0.464808117 | count | 1 |
| HLA-DRB1  | -0.3271955 | 0.2344744 | -1.3954 | 0.1638 | -0.464438498 | count | 1 |
| CTCF      | -0.3361519 | 0.3111891 | -1.0802 | 0.281  | -0.464424104 | count | 1 |
| ZSCAN16   | -0.5005176 | 0.8404781 | -0.5955 | 0.552  | -0.464100737 | count | 1 |
| RBM12B    | -0.5005176 | 0.9509669 | -0.5263 | 0.599  | -0.464100737 | count | 1 |
| MEMO1     | -0.5005176 | 1.0356068 | -0.4833 | 0.6292 | -0.464100737 | count | 1 |
| SYNGR3    | -0.4085589 | 0.8493655 | -0.481  | 0.631  | -0.463836693 | count | 1 |
| YIPF1     | -0.355798  | 0.5431265 | -0.6551 | 0.513  | -0.463809091 | count | 1 |
| MTHFD1    | -0.3863225 | 0.7667128 | -0.5039 | 0.615  | -0.463755305 | count | 1 |
| TSPAN2    | -0.3456532 | 0.5264686 | -0.6566 | 0.512  | -0.463442802 | count | 1 |
| CSK       | -0.3331322 | 0.2978831 | -1.1183 | 0.264  | -0.462656691 | count | 1 |
| PRKD3     | -0.348867  | 0.6331385 | -0.551  | 0.582  | -0.462275872 | count | 1 |
| TOR1AIP1  | -0.3368078 | 0.3468264 | -0.9711 | 0.332  | -0.462169909 | count | 1 |
| HINT1     | -0.3222901 | 0.1252137 | -2.5739 | 0.0105 | -0.462125332 | count | 1 |
| OSBPL3    | -0.3943379 | 0.8396989 | -0.4696 | 0.6389 | -0.462096535 | count | 1 |
| BLOC1S5   | -0.3503868 | 0.5218653 | -0.6714 | 0.502  | -0.462057302 | count | 1 |
| RAB24     | -0.9275932 | 1.309575  | -0.7083 | 0.479  | -0.461977369 | count | 1 |
| NFIA      | -0.9275932 | 1.40554   | -0.66   | 0.51   | -0.461977369 | count | 1 |
| ALCAM     | -0.9275932 | 1.40554   | -0.66   | 0.51   | -0.461977369 | count | 1 |
| GALNT1    | -0.3370882 | 0.300719  | -1.1209 | 0.263  | -0.461800944 | count | 1 |
| RNF2      | -0.3483887 | 0.5367263 | -0.6491 | 0.517  | -0.461647527 | count | 1 |
| PITPNM1   | -0.3713365 | 0.8134027 | -0.4565 | 0.648  | -0.461526902 | count | 1 |
| YAE1D1    | -0.4970674 | 0.7978117 | -0.623  | 0.534  | -0.461079608 | count | 1 |
| TIMM10B   | -0.3438698 | 0.4638611 | -0.7413 | 0.459  | -0.461069204 | count | 1 |
| NAA38     | -0.3345211 | 0.3210667 | -1.0419 | 0.298  | -0.460409409 | count | 1 |
| UBTF      | -0.328509  | 0.3053153 | -1.076  | 0.2827 | -0.460392936 | count | 1 |

|            |            |           |         |        |              |       |   |
|------------|------------|-----------|---------|--------|--------------|-------|---|
| CNOT8      | -0.3343954 | 0.4235017 | -0.7896 | 0.43   | -0.459576796 | count | 1 |
| FIBP       | -0.328277  | 0.3442802 | -0.9535 | 0.341  | -0.459563703 | count | 1 |
| SCAPER     | -0.3467051 | 0.4626095 | -0.7495 | 0.454  | -0.459435638 | count | 1 |
| LAT        | -0.3243068 | 0.2864751 | -1.1321 | 0.2584 | -0.459098261 | count | 1 |
| SLC39A3    | -0.3822165 | 0.6480458 | -0.5898 | 0.556  | -0.458922773 | count | 1 |
| THRA       | -0.3641914 | 0.6444462 | -0.5651 | 0.572  | -0.458537825 | count | 1 |
| CASP10     | -0.374518  | 0.6024741 | -0.6216 | 0.535  | -0.458369686 | count | 1 |
| TUT4       | -0.325456  | 0.2535121 | -1.2838 | 0.2001 | -0.458340637 | count | 1 |
| MATR3      | -0.5891033 | 0.8078637 | -0.7292 | 0.466  | -0.458042742 | count | 1 |
| DDX20      | -0.3741158 | 0.6826118 | -0.5481 | 0.584  | -0.457885925 | count | 1 |
| ABI2       | -0.3741158 | 0.6828942 | -0.5478 | 0.584  | -0.457885925 | count | 1 |
| CCNK       | -0.3403572 | 0.4068903 | -0.8365 | 0.403  | -0.457860727 | count | 1 |
| RNF38      | -0.3558705 | 0.781297  | -0.4555 | 0.649  | -0.457127805 | count | 1 |
| KIF5B      | -0.3247418 | 0.2762278 | -1.1756 | 0.2406 | -0.456623672 | count | 1 |
| COX7C      | -0.3182114 | 0.1278731 | -2.4885 | 0.0133 | -0.456587822 | count | 1 |
| MRFAP1     | -0.3219429 | 0.2314364 | -1.3911 | 0.1652 | -0.456243823 | count | 1 |
| UBL7-AS1   | -0.3580677 | 0.7110456 | -0.5036 | 0.615  | -0.455755188 | count | 1 |
| RPUSD2     | -0.585289  | 0.9673892 | -0.605  | 0.546  | -0.455331681 | count | 1 |
| PDE3B      | -0.585289  | 1.082415  | -0.5407 | 0.589  | -0.455331681 | count | 1 |
| COL9A2     | -0.4450764 | 1.0349246 | -0.4301 | 0.667  | -0.455310783 | count | 1 |
| MRPL17     | -0.3328841 | 0.4355459 | -0.7643 | 0.445  | -0.455280432 | count | 1 |
| SPIN2B     | -0.4449709 | 1.0020206 | -0.4441 | 0.657  | -0.455207171 | count | 1 |
| ZSWIM8     | -0.4448709 | 0.7666623 | -0.5803 | 0.562  | -0.455108967 | count | 1 |
| ABCA7      | -0.4448709 | 0.9027655 | -0.4928 | 0.6225 | -0.455108967 | count | 1 |
| RPS6KB1    | -0.4447844 | 0.6170843 | -0.7208 | 0.472  | -0.45502401  | count | 1 |
| FOSL2      | -0.3209372 | 0.2398214 | -1.3382 | 0.1818 | -0.45482101  | count | 1 |
| ODC1       | -0.3266089 | 0.3313653 | -0.9856 | 0.325  | -0.454033132 | count | 1 |
| EXOSC4     | -0.3301622 | 0.4189454 | -0.7881 | 0.431  | -0.453786199 | count | 1 |
| MRPS18B    | -0.3362555 | 0.4214385 | -0.7979 | 0.426  | -0.453710942 | count | 1 |
| PRCP       | -0.3706199 | 0.5851956 | -0.6333 | 0.527  | -0.45368018  | count | 1 |
| ZNF77      | -0.3993312 | 1.0110221 | -0.395  | 0.693  | -0.453633234 | count | 1 |
| RCBTB2     | -0.3993312 | 1.0546166 | -0.3787 | 0.705  | -0.453633234 | count | 1 |
| NOL12      | -0.5825833 | 0.9656388 | -0.6033 | 0.547  | -0.453406303 | count | 1 |
| SIVA1      | -0.3187099 | 0.2315738 | -1.3763 | 0.17   | -0.453030166 | count | 1 |
| PTK2B      | -0.3434639 | 0.5088614 | -0.675  | 0.5    | -0.453009233 | count | 1 |
| NDUFV2-AS1 | -0.352579  | 0.8443323 | -0.4176 | 0.677  | -0.452949079 | count | 1 |
| ACADVL     | -0.3471083 | 0.3617227 | -0.9596 | 0.338  | -0.452595827 | count | 1 |
| HABP4      | -0.4155304 | 0.7198495 | -0.5772 | 0.564  | -0.452282792 | count | 1 |
| SMIM29     | -0.3337187 | 0.3845025 | -0.8679 | 0.386  | -0.451526551 | count | 1 |
| IK         | -0.3200683 | 0.222362  | -1.4394 | 0.151  | -0.451090867 | count | 1 |
| AQP3       | -0.3399342 | 0.5559473 | -0.6115 | 0.541  | -0.45053793  | count | 1 |
| METTL25    | -0.3749374 | 0.8524853 | -0.4398 | 0.66   | -0.45034971  | count | 1 |
| LANCL1     | -0.3749374 | 0.8652142 | -0.4333 | 0.665  | -0.45034971  | count | 1 |
| SMIM37     | -0.3285838 | 0.4454624 | -0.7376 | 0.461  | -0.450208043 | count | 1 |
| ATP11C     | -0.3367989 | 0.7833177 | -0.43   | 0.6675 | -0.450071316 | count | 1 |

|            |            |           |         |        |              |       |   |
|------------|------------|-----------|---------|--------|--------------|-------|---|
| RC3H1      | -0.3837636 | 0.6117633 | -0.6273 | 0.531  | -0.449977096 | count | 1 |
| GNL3       | -0.3353755 | 0.4140955 | -0.8099 | 0.419  | -0.44976086  | count | 1 |
| SCML4      | -0.3353426 | 0.4065396 | -0.8249 | 0.41   | -0.449717051 | count | 1 |
| TSC22D2    | -0.3377839 | 0.484087  | -0.6978 | 0.486  | -0.449633576 | count | 1 |
| DHX30      | -0.3416066 | 0.561404  | -0.6085 | 0.543  | -0.448181513 | count | 1 |
| ZNF107     | -0.3941879 | 0.6175344 | -0.6383 | 0.524  | -0.447939677 | count | 1 |
| MOSMO      | -0.359762  | 0.8429708 | -0.4268 | 0.67   | -0.447357903 | count | 1 |
| IRF2BP2    | -0.3168617 | 0.2559139 | -1.2382 | 0.2166 | -0.447162961 | count | 1 |
| HIPK3      | -0.3239241 | 0.3818822 | -0.8482 | 0.397  | -0.447060809 | count | 1 |
| MMP23B     | -0.3548453 | 0.6814939 | -0.5207 | 0.603  | -0.446930918 | count | 1 |
| MPG        | -0.3136774 | 0.2216099 | -1.4154 | 0.1579 | -0.446794486 | count | 1 |
| MRPL48     | -0.3444285 | 0.4976071 | -0.6922 | 0.489  | -0.446076187 | count | 1 |
| ANXA11     | -0.3142613 | 0.2169686 | -1.4484 | 0.1485 | -0.445718049 | count | 1 |
| NOP10      | -0.3134985 | 0.2293742 | -1.3668 | 0.173  | -0.445693845 | count | 1 |
| RPP38      | -0.3246624 | 0.442963  | -0.7329 | 0.464  | -0.445583045 | count | 1 |
| HOXB-AS1   | -0.3494067 | 0.8594435 | -0.4065 | 0.685  | -0.444867818 | count | 1 |
| SCAF11     | -0.3129003 | 0.2235228 | -1.3999 | 0.1625 | -0.444593096 | count | 1 |
| TMEM120B   | -0.3202018 | 0.3591264 | -0.8916 | 0.373  | -0.444349796 | count | 1 |
| ZC3H15     | -0.311662  | 0.2251759 | -1.3841 | 0.167  | -0.443927175 | count | 1 |
| NCALD      | -0.3624767 | 0.5935461 | -0.6107 | 0.542  | -0.443877251 | count | 1 |
| PEX19      | -0.3780719 | 0.7475765 | -0.5057 | 0.613  | -0.443446456 | count | 1 |
| XRCC4      | -0.5680949 | 0.7859061 | -0.7229 | 0.47   | -0.443064105 | count | 1 |
| IRS2       | -0.5680949 | 0.8883984 | -0.6395 | 0.523  | -0.443064105 | count | 1 |
| 2-Sep      | -0.3153382 | 0.2457167 | -1.2833 | 0.2    | -0.443052955 | count | 1 |
| LPP        | -0.3280681 | 0.50278   | -0.6525 | 0.515  | -0.442733784 | count | 1 |
| AC016065.1 | -0.8794432 | 0.8776674 | -1.002  | 0.3171 | -0.442584722 | count | 1 |
| PISD       | -0.5673512 | 0.7082716 | -0.801  | 0.424  | -0.442531781 | count | 1 |
| PIAS2      | -0.3681907 | 0.627435  | -0.5868 | 0.558  | -0.442396921 | count | 1 |
| RIOK1      | -0.3173595 | 0.4087838 | -0.7764 | 0.4381 | -0.442290348 | count | 1 |
| ZBTB41     | -0.4057759 | 0.8597401 | -0.472  | 0.637  | -0.441988315 | count | 1 |
| PAFAH1B2   | -0.3301915 | 0.421916  | -0.7826 | 0.434  | -0.441305947 | count | 1 |
| C18orf21   | -0.3499444 | 0.6248884 | -0.56   | 0.576  | -0.440840541 | count | 1 |
| MAP3K2     | -0.3265399 | 0.3880792 | -0.8414 | 0.401  | -0.440684415 | count | 1 |
| N4BP1      | -0.3125668 | 0.2779271 | -1.1246 | 0.2616 | -0.44054127  | count | 1 |
| DPH7       | -0.3666032 | 0.5631525 | -0.651  | 0.516  | -0.440524683 | count | 1 |
| TPM3       | -0.3066785 | 0.1211654 | -2.5311 | 0.0118 | -0.440362045 | count | 1 |
| SERPIN8    | -0.3455383 | 0.5964118 | -0.5794 | 0.563  | -0.440002455 | count | 1 |
| CPD        | -0.3490458 | 0.4502507 | -0.7752 | 0.439  | -0.439723549 | count | 1 |
| POLR1B     | -0.5629518 | 1.1453275 | -0.4915 | 0.623  | -0.439379851 | count | 1 |
| LRSAM1     | -0.5629518 | 1.1453275 | -0.4915 | 0.623  | -0.439379851 | count | 1 |
| MIGA2      | -0.5629518 | 1.1453275 | -0.4915 | 0.623  | -0.439379851 | count | 1 |
| ZNF529-AS1 | -0.5629518 | 1.1453275 | -0.4915 | 0.623  | -0.439379851 | count | 1 |
| SSB        | -0.3120671 | 0.2200706 | -1.418  | 0.157  | -0.439195743 | count | 1 |
| METTL15    | -0.5625402 | 0.5835171 | -0.9641 | 0.336  | -0.439084704 | count | 1 |
| GATAD2B    | -0.3528296 | 0.428424  | -0.8236 | 0.411  | -0.438863746 | count | 1 |

|           |            |           |         |        |              |       |   |
|-----------|------------|-----------|---------|--------|--------------|-------|---|
| WAC       | -0.3161231 | 0.355852  | -0.8884 | 0.375  | -0.438282353 | count | 1 |
| POLB      | -0.3332485 | 0.5555415 | -0.5999 | 0.549  | -0.437314753 | count | 1 |
| DMAP1     | -0.3433683 | 0.5132218 | -0.669  | 0.504  | -0.437272516 | count | 1 |
| RNF146    | -0.3433683 | 0.5395399 | -0.6364 | 0.525  | -0.437272516 | count | 1 |
| METAP2    | -0.3113409 | 0.3534731 | -0.8808 | 0.3791 | -0.437253597 | count | 1 |
| L3MBTL3   | -0.3401344 | 0.687871  | -0.4945 | 0.621  | -0.43714028  | count | 1 |
| NUP160    | -0.3722855 | 0.6170542 | -0.6033 | 0.547  | -0.436802012 | count | 1 |
| RAB10     | -0.317729  | 0.377466  | -0.8417 | 0.401  | -0.436774069 | count | 1 |
| ST20-AS1  | -0.3838686 | 1.0933939 | -0.3511 | 0.726  | -0.436502684 | count | 1 |
| ADCK2     | -0.3563409 | 0.5798644 | -0.6145 | 0.539  | -0.43648513  | count | 1 |
| RBM26     | -0.3220435 | 0.4209553 | -0.765  | 0.445  | -0.435824033 | count | 1 |
| PSIP1     | -0.3077521 | 0.2726415 | -1.1288 | 0.2598 | -0.435291716 | count | 1 |
| EIF1AY    | -0.3091045 | 0.3311918 | -0.9333 | 0.3514 | -0.435035589 | count | 1 |
| PDGFD     | -0.317116  | 0.4510955 | -0.703  | 0.483  | -0.434569972 | count | 1 |
| ARIH1     | -0.3987001 | 0.4736577 | -0.8417 | 0.401  | -0.434509543 | count | 1 |
| TMBIM1    | -0.3330236 | 0.4714622 | -0.7064 | 0.48   | -0.434406567 | count | 1 |
| SRPRA     | -0.3131919 | 0.3531419 | -0.8869 | 0.376  | -0.434233156 | count | 1 |
| PHF12     | -0.8578948 | 0.5892329 | -1.456  | 0.1464 | -0.433734506 | count | 1 |
| KIAA1551  | -0.3044824 | 0.2098131 | -1.4512 | 0.1477 | -0.433173626 | count | 1 |
| CRADD     | -0.3973126 | 0.8600866 | -0.4619 | 0.644  | -0.433041912 | count | 1 |
| PLXNC1    | -0.3430887 | 0.8327499 | -0.412  | 0.681  | -0.432316396 | count | 1 |
| CANX      | -0.3100183 | 0.2564747 | -1.2088 | 0.228  | -0.431410732 | count | 1 |
| IBTK      | -0.3215985 | 0.5317689 | -0.6048 | 0.546  | -0.431409515 | count | 1 |
| POLDIP2   | -0.3521288 | 0.7716849 | -0.4563 | 0.648  | -0.431407758 | count | 1 |
| FTX       | -0.3324925 | 0.4843482 | -0.6865 | 0.493  | -0.430774414 | count | 1 |
| NUDT19    | -0.3233688 | 0.6844969 | -0.4724 | 0.6369 | -0.430588042 | count | 1 |
| PLAC8     | -0.3075121 | 0.3246646 | -0.9472 | 0.344  | -0.430573025 | count | 1 |
| C10orf143 | -0.3581415 | 0.947219  | -0.3781 | 0.706  | -0.430539289 | count | 1 |
| PTPN7     | -0.3029573 | 0.2522667 | -1.2009 | 0.2307 | -0.429465899 | count | 1 |
| NUDCD3    | -0.356377  | 0.5249273 | -0.6789 | 0.498  | -0.42845581  | count | 1 |
| EIF2S1    | -0.3085523 | 0.4132489 | -0.7466 | 0.456  | -0.428239812 | count | 1 |
| SLFN12L   | -0.3087974 | 0.3743708 | -0.8248 | 0.41   | -0.428161932 | count | 1 |
| TNRC6A    | -0.3180163 | 0.5936621 | -0.5357 | 0.593  | -0.42799904  | count | 1 |
| SLC37A1   | -0.3439427 | 1.0732478 | -0.3205 | 0.749  | -0.427966305 | count | 1 |
| NFYB      | -0.3212857 | 0.4961944 | -0.6475 | 0.518  | -0.427834574 | count | 1 |
| AP5Z1     | -0.3643994 | 0.6159013 | -0.5917 | 0.554  | -0.427738192 | count | 1 |
| BAZ1B     | -0.3278434 | 0.4764314 | -0.6881 | 0.492  | -0.427712378 | count | 1 |
| HSP90AA1  | -0.2973314 | 0.1445236 | -2.0573 | 0.0405 | -0.427337314 | count | 1 |
| ATP5PD    | -0.3002214 | 0.2201058 | -1.364  | 0.1735 | -0.426724512 | count | 1 |
| ITFG1     | -0.4160311 | 0.639494  | -0.6506 | 0.516  | -0.426696359 | count | 1 |
| UBL7      | -0.3349316 | 0.6987471 | -0.4793 | 0.632  | -0.426654163 | count | 1 |
| WDR45     | -0.308011  | 0.499684  | -0.6164 | 0.538  | -0.426638675 | count | 1 |
| ZBTB1     | -0.305979  | 0.2922812 | -1.0469 | 0.296  | -0.426150512 | count | 1 |
| ITGAE     | -0.3090107 | 0.3501786 | -0.8824 | 0.378  | -0.426019028 | count | 1 |
| SLF2      | -0.3423287 | 0.5264526 | -0.6503 | 0.516  | -0.425986151 | count | 1 |

|          |            |           |         |         |              |       |   |
|----------|------------|-----------|---------|---------|--------------|-------|---|
| FLOT1    | -0.3061667 | 0.3255573 | -0.9404 | 0.348   | -0.42570939  | count | 1 |
| ARSK     | -0.3539433 | 0.5772085 | -0.6132 | 0.54    | -0.42558139  | count | 1 |
| MX2      | -0.3241359 | 0.7477452 | -0.4335 | 0.665   | -0.425460421 | count | 1 |
| RPLP0    | -0.2954044 | 0.0913659 | -3.2332 | 0.00135 | -0.425384438 | count | 1 |
| KHSRP    | -0.8370355 | 0.778594  | -1.0751 | 0.2831  | -0.425066246 | count | 1 |
| UTRN     | -0.3005548 | 0.2880164 | -1.0435 | 0.2975  | -0.424801469 | count | 1 |
| CTNNBL1  | -0.3465307 | 0.5244246 | -0.6608 | 0.509   | -0.424656127 | count | 1 |
| DDX10    | -0.3890484 | 0.6055676 | -0.6425 | 0.521   | -0.424293003 | count | 1 |
| C9orf16  | -0.296117  | 0.1932704 | -1.5321 | 0.126   | -0.424212653 | count | 1 |
| LGALS1   | -0.2949961 | 0.2068063 | -1.4264 | 0.155   | -0.423797007 | count | 1 |
| SLC39A1  | -0.322773  | 0.4271156 | -0.7557 | 0.45    | -0.423686876 | count | 1 |
| NABP2    | -0.3720343 | 0.7046853 | -0.5279 | 0.598   | -0.42336437  | count | 1 |
| ACSL4    | -0.3720343 | 0.7219865 | -0.5153 | 0.607   | -0.42336437  | count | 1 |
| C14orf93 | -0.3870998 | 0.8059149 | -0.4803 | 0.631   | -0.422228251 | count | 1 |
| IFI27L2  | -0.3029005 | 0.3258103 | -0.9297 | 0.353   | -0.422200641 | count | 1 |
| MAD2L2   | -0.3103611 | 0.3957268 | -0.7843 | 0.433   | -0.422108257 | count | 1 |
| TOP2B    | -0.3120577 | 0.3961314 | -0.7878 | 0.431   | -0.421256227 | count | 1 |
| HSF1     | -0.3208817 | 0.3771396 | -0.8508 | 0.395   | -0.421225467 | count | 1 |
| DXO      | -0.3700397 | 0.906253  | -0.4083 | 0.683   | -0.421147665 | count | 1 |
| FGD3     | -0.3225963 | 0.4534994 | -0.7113 | 0.477   | -0.420929367 | count | 1 |
| TEN1     | -0.3125365 | 0.4612348 | -0.6776 | 0.499   | -0.42066972  | count | 1 |
| COQ4     | -0.3203763 | 0.5003893 | -0.6403 | 0.522   | -0.420567673 | count | 1 |
| IL6ST    | -0.5368051 | 0.5223408 | -1.0277 | 0.305   | -0.420545315 | count | 1 |
| CDCA4    | -0.3202876 | 0.627206  | -0.5107 | 0.61    | -0.420452225 | count | 1 |
| CCT6A    | -0.2999937 | 0.2884378 | -1.0401 | 0.299   | -0.420306373 | count | 1 |
| SAPCD2   | -0.8255779 | 0.9659119 | -0.8547 | 0.393   | -0.42026266  | count | 1 |
| FAM160A2 | -0.3488142 | 0.7332838 | -0.4757 | 0.635   | -0.419520808 | count | 1 |
| STX3     | -0.5352781 | 0.7772208 | -0.6887 | 0.491   | -0.419440003 | count | 1 |
| RBM4B    | -0.5352781 | 0.7937833 | -0.6743 | 0.501   | -0.419440003 | count | 1 |
| FAM89B   | -0.2966676 | 0.2473742 | -1.1993 | 0.2313  | -0.419427542 | count | 1 |
| ZNF493   | -0.3369125 | 0.6702062 | -0.5027 | 0.616   | -0.419338946 | count | 1 |
| LGALS3   | -0.2998133 | 0.39486   | -0.7593 | 0.4482  | -0.419067056 | count | 1 |
| RRP8     | -0.3232787 | 0.5608162 | -0.5764 | 0.565   | -0.418953482 | count | 1 |
| CBX8     | -0.8209959 | 0.7684216 | -1.0684 | 0.286   | -0.41833326  | count | 1 |
| NUP214   | -0.3409783 | 0.7750197 | -0.44   | 0.66    | -0.417955638 | count | 1 |
| KMT2B    | -0.3079142 | 0.4523804 | -0.6807 | 0.497   | -0.416810224 | count | 1 |
| SLC27A3  | -0.3128336 | 0.4580577 | -0.683  | 0.495   | -0.416659325 | count | 1 |
| CERS6    | -0.5312739 | 0.5410749 | -0.9819 | 0.327   | -0.416538767 | count | 1 |
| SUPT16H  | -0.3125557 | 0.3699751 | -0.8448 | 0.399   | -0.416291803 | count | 1 |
| EIF2D    | -0.3236348 | 0.7369185 | -0.4392 | 0.661   | -0.416156846 | count | 1 |
| TRAT1    | -0.2992514 | 0.4459495 | -0.671  | 0.503   | -0.416124566 | count | 1 |
| GTF2I    | -0.2998158 | 0.3736844 | -0.8023 | 0.423   | -0.41575116  | count | 1 |
| ENTPD6   | -0.3184401 | 0.7535373 | -0.4226 | 0.673   | -0.415554895 | count | 1 |
| ACLY     | -0.3449582 | 0.7660255 | -0.4503 | 0.653   | -0.414962119 | count | 1 |
| DNAJC19  | -0.2949948 | 0.3176938 | -0.9286 | 0.354   | -0.414888216 | count | 1 |

|              |            |           |         |         |              |       |   |
|--------------|------------|-----------|---------|---------|--------------|-------|---|
| LMNB1        | -0.3143053 | 0.5995063 | -0.5243 | 0.6     | -0.414857836 | count | 1 |
| FCGR3A       | -0.3001284 | 0.5024302 | -0.5974 | 0.551   | -0.414841414 | count | 1 |
| MAP2K4       | -0.3225575 | 0.6345176 | -0.5084 | 0.612   | -0.414785864 | count | 1 |
| NFKBIZ       | -0.2943523 | 0.3263907 | -0.9018 | 0.3678  | -0.41477623  | count | 1 |
| ZMYM6        | -0.3524228 | 0.9046398 | -0.3896 | 0.697   | -0.413954847 | count | 1 |
| PYURF        | -0.2917681 | 0.2232787 | -1.3067 | 0.1922  | -0.413785696 | count | 1 |
| PRRC1        | -0.4028675 | 0.6761039 | -0.5959 | 0.552   | -0.413669878 | count | 1 |
| BBS9         | -0.3319653 | 0.8596247 | -0.3862 | 0.7     | -0.413264314 | count | 1 |
| GFM1         | -0.3628536 | 0.6162699 | -0.5888 | 0.556   | -0.413155871 | count | 1 |
| BTF3L4       | -0.2964113 | 0.3648024 | -0.8125 | 0.417   | -0.412865193 | count | 1 |
| DNAJA2       | -0.2936052 | 0.2870431 | -1.0229 | 0.307   | -0.412402101 | count | 1 |
| H1FX         | -0.2876134 | 0.2163847 | -1.3292 | 0.185   | -0.412173137 | count | 1 |
| LPCAT1       | -0.3061629 | 0.5086376 | -0.6019 | 0.548   | -0.412142581 | count | 1 |
| G3BP2        | -0.2907088 | 0.1944217 | -1.4952 | 0.1358  | -0.411423556 | count | 1 |
| VILL         | -0.4407027 | 0.8530654 | -0.5166 | 0.606   | -0.41132552  | count | 1 |
| AKAP11       | -0.3171216 | 0.5156715 | -0.615  | 0.539   | -0.411049868 | count | 1 |
| APH1B        | -0.8037987 | 0.7621661 | -1.0546 | 0.292   | -0.411049057 | count | 1 |
| USP38        | -0.3495859 | 0.694712  | -0.5032 | 0.615   | -0.410686806 | count | 1 |
| RNF181       | -0.2930376 | 0.3189581 | -0.9187 | 0.359   | -0.410357299 | count | 1 |
| EPB41L4A-AS1 | -0.3014247 | 0.3900537 | -0.7728 | 0.44    | -0.410015714 | count | 1 |
| DCTPP1       | -0.3089976 | 0.4591608 | -0.673  | 0.501   | -0.409839831 | count | 1 |
| RPP14        | -0.3597765 | 0.8187639 | -0.4394 | 0.661   | -0.40973115  | count | 1 |
| NOL9         | -0.3597765 | 0.9348301 | -0.3849 | 0.701   | -0.40973115  | count | 1 |
| CCDC88C      | -0.2993706 | 0.3831846 | -0.7813 | 0.435   | -0.409654796 | count | 1 |
| FZR1         | -0.3748609 | 0.7546515 | -0.4967 | 0.62    | -0.409243799 | count | 1 |
| ARHGAP26     | -0.3013254 | 0.4776141 | -0.6309 | 0.529   | -0.408947046 | count | 1 |
| EEF2         | -0.2863598 | 0.1811659 | -1.5806 | 0.1149  | -0.40864534  | count | 1 |
| RPL7         | -0.2842613 | 0.0924533 | -3.0746 | 0.00229 | -0.408618836 | count | 1 |
| COX17        | -0.2887482 | 0.2793614 | -1.0336 | 0.3021  | -0.408032564 | count | 1 |
| NAIP         | -0.5191498 | 0.656263  | -0.7911 | 0.429   | -0.407729704 | count | 1 |
| ADARB1       | -0.3386182 | 0.7141617 | -0.4741 | 0.636   | -0.407462323 | count | 1 |
| EBPL         | -0.3025632 | 0.3927562 | -0.7704 | 0.442   | -0.407325493 | count | 1 |
| CFD          | -0.3269292 | 1.0208381 | -0.3203 | 0.749   | -0.407077573 | count | 1 |
| AGK          | -0.3083194 | 0.461748  | -0.6677 | 0.505   | -0.407017634 | count | 1 |
| VCP          | -0.2962725 | 0.3161342 | -0.9372 | 0.349   | -0.406784379 | count | 1 |
| NSUN4        | -0.4352895 | 0.9953795 | -0.4373 | 0.6622  | -0.406508268 | count | 1 |
| PSMA4        | -0.2871959 | 0.2570113 | -1.1174 | 0.2646  | -0.406363302 | count | 1 |
| C15orf61     | -0.2942527 | 0.3695014 | -0.7964 | 0.426   | -0.406263477 | count | 1 |
| COQ9         | -0.3220301 | 0.6249626 | -0.5153 | 0.607   | -0.406100292 | count | 1 |
| TRAF7        | -0.3091704 | 0.5864105 | -0.5272 | 0.598   | -0.40597748  | count | 1 |
| USP4         | -0.3109146 | 0.510025  | -0.6096 | 0.543   | -0.405819754 | count | 1 |
| GTPBP4       | -0.299583  | 0.4084978 | -0.7334 | 0.464   | -0.405593544 | count | 1 |
| MCM3         | -0.4342267 | 0.5601463 | -0.7752 | 0.439   | -0.4055617   | count | 1 |
| DBR1         | -0.3713365 | 1.0384519 | -0.3576 | 0.721   | -0.405499589 | count | 1 |
| PSMD5        | -0.3713365 | 1.2678789 | -0.2929 | 0.77    | -0.405499589 | count | 1 |



|            |            |           |         |        |              |       |   |
|------------|------------|-----------|---------|--------|--------------|-------|---|
| DDA1       | -0.3084253 | 0.4622887 | -0.6672 | 0.505  | -0.405006994 | count | 1 |
| RFX5       | -0.5153692 | 1.1008728 | -0.4681 | 0.64   | -0.404975284 | count | 1 |
| TGFBRAP1   | -0.5153692 | 1.210807  | -0.4256 | 0.671  | -0.404975284 | count | 1 |
| ZNF682     | -0.5153692 | 1.280646  | -0.4024 | 0.688  | -0.404975284 | count | 1 |
| ZNF573     | -0.5153692 | 1.280646  | -0.4024 | 0.688  | -0.404975284 | count | 1 |
| ZNF284     | -0.5153692 | 1.280646  | -0.4024 | 0.688  | -0.404975284 | count | 1 |
| USP35      | -0.5153692 | 1.3222633 | -0.3898 | 0.697  | -0.404975284 | count | 1 |
| COPS8      | -0.2928902 | 0.3941734 | -0.743  | 0.458  | -0.404872468 | count | 1 |
| SLC25A51   | -0.4333256 | 0.851146  | -0.5091 | 0.611  | -0.404758938 | count | 1 |
| RAB30      | -0.4333256 | 0.8664014 | -0.5001 | 0.617  | -0.404758938 | count | 1 |
| SUCLG1     | -0.2912199 | 0.3415631 | -0.8526 | 0.395  | -0.404261863 | count | 1 |
| TXNIP      | -0.280953  | 0.1190316 | -2.3603 | 0.0189 | -0.403900879 | count | 1 |
| HERC3      | -0.3543936 | 0.6186234 | -0.5729 | 0.567  | -0.403736377 | count | 1 |
| PRDM2      | -0.2898947 | 0.318537  | -0.9101 | 0.363  | -0.403491446 | count | 1 |
| SPSB2      | -0.343225  | 0.6670603 | -0.5145 | 0.607  | -0.403354818 | count | 1 |
| TCEA1      | -0.2838363 | 0.2190881 | -1.2955 | 0.1961 | -0.403104293 | count | 1 |
| C19orf70   | -0.2843654 | 0.2480123 | -1.1466 | 0.2524 | -0.402733367 | count | 1 |
| CDC16      | -0.3190651 | 0.5288252 | -0.6033 | 0.547  | -0.402405234 | count | 1 |
| ELAC1      | -0.3122742 | 0.8773309 | -0.3559 | 0.722  | -0.4016937   | count | 1 |
| ST3GAL5    | -0.3073399 | 0.5273083 | -0.5828 | 0.56   | -0.401193766 | count | 1 |
| MTURN      | -0.3072336 | 0.512612  | -0.5993 | 0.549  | -0.401056189 | count | 1 |
| PYM1       | -0.3145204 | 0.5598181 | -0.5618 | 0.575  | -0.400934485 | count | 1 |
| INO80E     | -0.3145204 | 0.6049056 | -0.5199 | 0.603  | -0.400934485 | count | 1 |
| FNDC3B     | -0.3517566 | 0.6237668 | -0.5639 | 0.573  | -0.400797893 | count | 1 |
| FYN        | -0.2814466 | 0.2574549 | -1.0932 | 0.275  | -0.400764179 | count | 1 |
| IDH3B      | -0.309009  | 0.393573  | -0.7851 | 0.433  | -0.400630846 | count | 1 |
| AC087190.1 | -0.3261412 | 0.6797986 | -0.4798 | 0.632  | -0.400031439 | count | 1 |
| KLHL20     | -0.3211143 | 0.7595021 | -0.4228 | 0.673  | -0.399930412 | count | 1 |
| ZEB1       | -0.3062278 | 0.4394772 | -0.6968 | 0.486  | -0.399754389 | count | 1 |
| GLCC1      | -0.2860194 | 0.2873932 | -0.9952 | 0.32   | -0.399578207 | count | 1 |
| PANK3      | -0.3885974 | 0.6231877 | -0.6236 | 0.533  | -0.399508161 | count | 1 |
| SPCS1      | -0.2791962 | 0.1620729 | -1.7227 | 0.0859 | -0.399282036 | count | 1 |
| RHEB       | -0.2853717 | 0.2470167 | -1.1553 | 0.249  | -0.399180906 | count | 1 |
| TOP3B      | -0.388217  | 0.9241688 | -0.4201 | 0.675  | -0.39913008  | count | 1 |
| ZDHHC6     | -0.2909    | 0.4346814 | -0.6693 | 0.504  | -0.398797585 | count | 1 |
| TFRC       | -0.339214  | 0.5605659 | -0.6051 | 0.546  | -0.398728409 | count | 1 |
| PRPF19     | -0.3249359 | 0.5969746 | -0.5443 | 0.587  | -0.398574137 | count | 1 |
| FEZ2       | -0.2923028 | 0.4746732 | -0.6158 | 0.538  | -0.398508735 | count | 1 |
| TRAM1      | -0.2820296 | 0.2262175 | -1.2467 | 0.2134 | -0.398444158 | count | 1 |
| CD96       | -0.2794373 | 0.1827101 | -1.5294 | 0.1271 | -0.398343852 | count | 1 |
| MAPRE2     | -0.2967265 | 0.3767682 | -0.7876 | 0.432  | -0.398248018 | count | 1 |
| NUP50      | -0.3194346 | 0.4241997 | -0.753  | 0.452  | -0.397865144 | count | 1 |
| UHRF1BP1L  | -0.424802  | 0.8138002 | -0.522  | 0.602  | -0.397156355 | count | 1 |
| C11orf71   | -0.424802  | 0.8259058 | -0.5143 | 0.607  | -0.397156355 | count | 1 |
| SMIM12     | -0.2843723 | 0.355694  | -0.7995 | 0.425  | -0.397015962 | count | 1 |

|           |            |           |         |          |              |       |   |
|-----------|------------|-----------|---------|----------|--------------|-------|---|
| HAUS8     | -0.3481338 | 0.8395547 | -0.4147 | 0.679    | -0.396759051 | count | 1 |
| DHRS4L2   | -0.2927672 | 0.4643996 | -0.6304 | 0.529    | -0.39641419  | count | 1 |
| PTRHD1    | -0.290645  | 0.3960766 | -0.7338 | 0.464    | -0.396259051 | count | 1 |
| PNN       | -0.2779858 | 0.1858555 | -1.4957 | 0.1357   | -0.39612706  | count | 1 |
| TPR       | -0.2778215 | 0.1970562 | -1.4099 | 0.16     | -0.395733957 | count | 1 |
| RTRAF     | -0.2786295 | 0.2098132 | -1.328  | 0.1851   | -0.395591895 | count | 1 |
| DNAJC3    | -0.2857443 | 0.3216367 | -0.8884 | 0.375    | -0.395474813 | count | 1 |
| CDC5L     | -0.2809513 | 0.2824846 | -0.9946 | 0.321    | -0.395337141 | count | 1 |
| SUB1      | -0.2758265 | 0.1212123 | -2.2756 | 0.0235   | -0.395071883 | count | 1 |
| WASF1     | -0.7640223 | 1.1291146 | -0.6767 | 0.499    | -0.393942588 | count | 1 |
| POLA2     | -0.7640223 | 1.1291146 | -0.6767 | 0.499    | -0.393942588 | count | 1 |
| RIC8B     | -0.7640223 | 1.1291146 | -0.6767 | 0.499    | -0.393942588 | count | 1 |
| LRR8C-DT  | -0.7640223 | 1.470594  | -0.5195 | 0.604    | -0.393942588 | count | 1 |
| POLR1A    | -0.7640223 | 1.470594  | -0.5195 | 0.604    | -0.393942588 | count | 1 |
| TCF19     | -0.7640223 | 1.470594  | -0.5195 | 0.604    | -0.393942588 | count | 1 |
| LINC01006 | -0.7640223 | 1.470594  | -0.5195 | 0.604    | -0.393942588 | count | 1 |
| SPIN4     | -0.7640223 | 1.470594  | -0.5195 | 0.604    | -0.393942588 | count | 1 |
| HMG5      | -0.7640223 | 1.470594  | -0.5195 | 0.604    | -0.393942588 | count | 1 |
| TKTL1     | -0.7640223 | 1.470594  | -0.5195 | 0.604    | -0.393942588 | count | 1 |
| RTN4RL2   | -0.7640223 | 1.470594  | -0.5195 | 0.604    | -0.393942588 | count | 1 |
| AGAP4     | -0.7640223 | 1.470594  | -0.5195 | 0.604    | -0.393942588 | count | 1 |
| IL34      | -0.7640223 | 1.470594  | -0.5195 | 0.604    | -0.393942588 | count | 1 |
| CDH13     | -0.7640223 | 1.470594  | -0.5195 | 0.604    | -0.393942588 | count | 1 |
| FAM157C   | -0.7640223 | 1.470594  | -0.5195 | 0.604    | -0.393942588 | count | 1 |
| P2RX5     | -0.7640223 | 1.470594  | -0.5195 | 0.604    | -0.393942588 | count | 1 |
| NGDN      | -0.2894055 | 0.3806631 | -0.7603 | 0.448    | -0.393744925 | count | 1 |
| PYGO2     | -0.4996654 | 0.9292052 | -0.5377 | 0.591    | -0.393495939 | count | 1 |
| TMEM220   | -0.3206461 | 0.858752  | -0.3734 | 0.709    | -0.393385982 | count | 1 |
| APBB1     | -0.3206461 | 0.9684087 | -0.3311 | 0.741    | -0.393385982 | count | 1 |
| BAZ2A     | -0.3013049 | 0.4210535 | -0.7156 | 0.475    | -0.393381485 | count | 1 |
| ADSS      | -0.2875559 | 0.34983   | -0.822  | 0.412    | -0.392837103 | count | 1 |
| RBM33     | -0.2833572 | 0.3177861 | -0.8917 | 0.373    | -0.392182014 | count | 1 |
| MICU2     | -0.2868022 | 0.4323773 | -0.6633 | 0.508    | -0.391811981 | count | 1 |
| CENPV     | -0.2901269 | 0.5150725 | -0.5633 | 0.574    | -0.391811778 | count | 1 |
| RPL13A    | -0.2720724 | 0.0708829 | -3.8383 | 0.000149 | -0.39175784  | count | 1 |
| BCAS4     | -0.358319  | 0.5525439 | -0.6485 | 0.517    | -0.39165064  | count | 1 |
| CBFB      | -0.3581149 | 0.5040219 | -0.7105 | 0.478    | -0.391433263 | count | 1 |
| GOSR1     | -0.2819333 | 0.3250365 | -0.8674 | 0.386    | -0.391410204 | count | 1 |
| SNU13     | -0.2740664 | 0.1848673 | -1.4825 | 0.139    | -0.391146669 | count | 1 |
| ARHGEF7   | -0.3426252 | 0.9543731 | -0.359  | 0.72     | -0.390613739 | count | 1 |
| NDUFA13   | -0.2870735 | 0.4420642 | -0.6494 | 0.517    | -0.390587143 | count | 1 |
| LAGE3     | -0.2824763 | 0.3382563 | -0.8351 | 0.404    | -0.390526133 | count | 1 |
| FKBP1A    | -0.2772241 | 0.2775511 | -0.9988 | 0.319    | -0.389615092 | count | 1 |
| CEP78     | -0.3124314 | 0.5721507 | -0.5461 | 0.585    | -0.389250889 | count | 1 |
| SYAP1     | -0.2777294 | 0.2445475 | -1.1357 | 0.257    | -0.389185345 | count | 1 |

|           |            |           |         |         |              |       |   |
|-----------|------------|-----------|---------|---------|--------------|-------|---|
| XRCC5     | -0.2725318 | 0.1826853 | -1.4918 | 0.1367  | -0.389015552 | count | 1 |
| MTHFD2    | -0.2945255 | 0.411238  | -0.7162 | 0.474   | -0.388940286 | count | 1 |
| BRI3      | -0.2782938 | 0.3474753 | -0.8009 | 0.424   | -0.388812695 | count | 1 |
| EPHA1-AS1 | -0.3048792 | 0.605647  | -0.5034 | 0.615   | -0.388771165 | count | 1 |
| RHOQ      | -0.2885119 | 0.5287561 | -0.5456 | 0.586   | -0.3885146   | count | 1 |
| RPIA      | -0.286137  | 0.39596   | -0.7226 | 0.47    | -0.388435172 | count | 1 |
| TIGD1     | -0.3074903 | 0.8967324 | -0.3429 | 0.732   | -0.387971388 | count | 1 |
| IL2RB     | -0.2716968 | 0.2030002 | -1.3384 | 0.182   | -0.38796068  | count | 1 |
| NSRP1     | -0.2745237 | 0.3115984 | -0.881  | 0.379   | -0.38751856  | count | 1 |
| TEX261    | -0.3762652 | 0.9054258 | -0.4156 | 0.678   | -0.387236326 | count | 1 |
| THEMIS2   | -0.3762652 | 0.9094075 | -0.4137 | 0.679   | -0.387236326 | count | 1 |
| AKAP10    | -0.3762652 | 0.9094075 | -0.4137 | 0.679   | -0.387236326 | count | 1 |
| L3MBTL4   | -0.3762652 | 0.9620008 | -0.3911 | 0.696   | -0.387236326 | count | 1 |
| CHMP1A    | -0.3153216 | 0.4158002 | -0.7583 | 0.449   | -0.386943262 | count | 1 |
| PSMB2     | -0.2748924 | 0.2970875 | -0.9253 | 0.3555  | -0.386828041 | count | 1 |
| NELFA     | -0.296002  | 0.6615056 | -0.4475 | 0.655   | -0.386514391 | count | 1 |
| ZDHC12    | -0.2878022 | 0.443463  | -0.649  | 0.517   | -0.386339769 | count | 1 |
| TMEM243   | -0.2737598 | 0.2616522 | -1.0463 | 0.2962  | -0.386323164 | count | 1 |
| TMEM160   | -0.272573  | 0.2434085 | -1.1198 | 0.2636  | -0.386139324 | count | 1 |
| FCF1      | -0.3204394 | 0.8109441 | -0.3951 | 0.693   | -0.385927656 | count | 1 |
| FGD4      | -0.3202876 | 0.7382121 | -0.4339 | 0.665   | -0.385747646 | count | 1 |
| STK24     | -0.2855745 | 0.4926165 | -0.5797 | 0.563   | -0.385696171 | count | 1 |
| PAXBP1    | -0.282305  | 0.3330596 | -0.8476 | 0.397   | -0.385694671 | count | 1 |
| CD52      | -0.2701548 | 0.207291  | -1.3033 | 0.1934  | -0.385480687 | count | 1 |
| ERH       | -0.2718221 | 0.2284806 | -1.1897 | 0.235   | -0.38538971  | count | 1 |
| DCAF16    | -0.302162  | 0.5611046 | -0.5385 | 0.591   | -0.385341472 | count | 1 |
| FAM136A   | -0.2767758 | 0.3142822 | -0.8807 | 0.379   | -0.385283146 | count | 1 |
| CFAP97    | -0.2735746 | 0.3094504 | -0.8841 | 0.3773  | -0.385273298 | count | 1 |
| FUT11     | -0.488303  | 0.8072017 | -0.6049 | 0.546   | -0.385152082 | count | 1 |
| RCBTB1    | -0.4883029 | 1.0667257 | -0.4578 | 0.6474  | -0.385152029 | count | 1 |
| CDK2      | -0.4883029 | 1.0040523 | -0.4863 | 0.6271  | -0.385152012 | count | 1 |
| ARPP19    | -0.2836315 | 0.2764616 | -1.0259 | 0.306   | -0.385050309 | count | 1 |
| SERF2     | -0.2673895 | 0.0865798 | -3.0884 | 0.00219 | -0.385030403 | count | 1 |
| ATG4A     | -0.3516162 | 0.7782235 | -0.4518 | 0.652   | -0.384507791 | count | 1 |
| ZNF580    | -0.2881925 | 0.4196616 | -0.6867 | 0.493   | -0.384050774 | count | 1 |
| C19orf48  | -0.2887205 | 0.6151625 | -0.4693 | 0.639   | -0.383126531 | count | 1 |
| FUT8      | -0.3356193 | 0.5934469 | -0.5655 | 0.572   | -0.382790965 | count | 1 |
| DHRS11    | -0.4085589 | 1.0149685 | -0.4025 | 0.688   | -0.382622931 | count | 1 |
| UBIAD1    | -0.4085589 | 1.1313827 | -0.3611 | 0.718   | -0.382622931 | count | 1 |
| RAD52     | -0.4085589 | 1.3663303 | -0.299  | 0.7651  | -0.382622931 | count | 1 |
| CD9       | -0.2762881 | 0.3953173 | -0.6989 | 0.485   | -0.382429543 | count | 1 |
| CCT4      | -0.2733297 | 0.2849342 | -0.9593 | 0.338   | -0.381894363 | count | 1 |
| RRP1B     | -0.2844184 | 0.4486523 | -0.6339 | 0.527   | -0.381823252 | count | 1 |
| TMEM141   | -0.2825728 | 0.370918  | -0.7618 | 0.447   | -0.381663093 | count | 1 |
| CCR7      | -0.7357194 | 0.5861966 | -1.2551 | 0.21    | -0.381551124 | count | 1 |

|            |            |           |         |        |              |       |   |
|------------|------------|-----------|---------|--------|--------------|-------|---|
| TWF1       | -0.2990897 | 0.5426081 | -0.5512 | 0.582  | -0.38146269  | count | 1 |
| PTP4A2     | -0.2702062 | 0.2261818 | -1.1946 | 0.2331 | -0.381316883 | count | 1 |
| C12orf65   | -0.2700771 | 0.3293524 | -0.82   | 0.4128 | -0.381135003 | count | 1 |
| CORO7      | -0.3337464 | 0.4469466 | -0.7467 | 0.456  | -0.380698358 | count | 1 |
| NDUFA2     | -0.2707943 | 0.2632223 | -1.0288 | 0.304  | -0.380427504 | count | 1 |
| USE1       | -0.282413  | 0.4802183 | -0.5881 | 0.557  | -0.380346117 | count | 1 |
| U2AF2      | -0.2931269 | 0.4631346 | -0.6329 | 0.527  | -0.38021653  | count | 1 |
| RAB21      | -0.2743425 | 0.352712  | -0.7778 | 0.437  | -0.380150597 | count | 1 |
| HEBP2      | -0.2683278 | 0.2562436 | -1.0472 | 0.2958 | -0.380052124 | count | 1 |
| PPCS       | -0.2699624 | 0.3247991 | -0.8312 | 0.4065 | -0.379903739 | count | 1 |
| FADS3      | -0.7307055 | 0.8300264 | -0.8803 | 0.3793 | -0.379336992 | count | 1 |
| TM2D3      | -0.2721866 | 0.374063  | -0.7276 | 0.467  | -0.379214423 | count | 1 |
| NUDT1      | -0.2737781 | 0.4313847 | -0.6346 | 0.526  | -0.378966319 | count | 1 |
| ATE1       | -0.2868432 | 0.5299291 | -0.5413 | 0.589  | -0.378866188 | count | 1 |
| INO80      | -0.2831241 | 0.3967198 | -0.7137 | 0.476  | -0.378780846 | count | 1 |
| HNRNPDL    | -0.2637174 | 0.1253686 | -2.1035 | 0.0362 | -0.378658307 | count | 1 |
| UQCRFS1    | -0.268924  | 0.2163725 | -1.2429 | 0.215  | -0.378592804 | count | 1 |
| PSMG4      | -0.2849725 | 0.4263372 | -0.6684 | 0.504  | -0.378185653 | count | 1 |
| NOL7       | -0.2676545 | 0.2418478 | -1.1067 | 0.2692 | -0.37795086  | count | 1 |
| MAF1       | -0.2703984 | 0.2465472 | -1.0967 | 0.274  | -0.377808751 | count | 1 |
| AL157938.3 | -0.7268501 | 0.9234616 | -0.7871 | 0.432  | -0.377630574 | count | 1 |
| CLIP4      | -0.330419  | 0.702362  | -0.4704 | 0.638  | -0.376979225 | count | 1 |
| MRPS34     | -0.2665817 | 0.2522426 | -1.0568 | 0.2914 | -0.376957557 | count | 1 |
| JAK3       | -0.3203449 | 0.5624885 | -0.5695 | 0.569  | -0.376932196 | count | 1 |
| ZFAND1     | -0.2747754 | 0.3756648 | -0.7314 | 0.465  | -0.376778504 | count | 1 |
| MTOR       | -0.3439427 | 1.005009  | -0.3422 | 0.732  | -0.376320659 | count | 1 |
| BET1L      | -0.3439427 | 1.014456  | -0.339  | 0.735  | -0.376320659 | count | 1 |
| AC078883.1 | -0.3439427 | 1.1099391 | -0.3099 | 0.757  | -0.376320659 | count | 1 |
| NSUN2      | -0.4755719 | 0.747647  | -0.6361 | 0.525  | -0.375765493 | count | 1 |
| DNAJC24    | -0.2808527 | 0.5483549 | -0.5122 | 0.609  | -0.375759785 | count | 1 |
| AC106795.2 | -0.2944869 | 0.8157778 | -0.361  | 0.718  | -0.375649904 | count | 1 |
| TMED1      | -0.2708686 | 0.4339419 | -0.6242 | 0.533  | -0.374951583 | count | 1 |
| MRPS25     | -0.2838361 | 0.5662299 | -0.5013 | 0.617  | -0.374921668 | count | 1 |
| PTTG1IP    | -0.2792478 | 0.4850947 | -0.5757 | 0.565  | -0.374920439 | count | 1 |
| UBE2L6     | -0.2636368 | 0.2505954 | -1.052  | 0.294  | -0.374885237 | count | 1 |
| MRPS5      | -0.2696773 | 0.3879675 | -0.6951 | 0.487  | -0.374787965 | count | 1 |
| NCOA1      | -0.2703995 | 0.396175  | -0.6825 | 0.495  | -0.374703533 | count | 1 |
| SYNRG      | -0.26781   | 0.2871745 | -0.9326 | 0.3517 | -0.374441465 | count | 1 |
| UAP1       | -0.293335  | 0.5792348 | -0.5064 | 0.613  | -0.374194868 | count | 1 |
| NDUFS8     | -0.2627233 | 0.2281308 | -1.1516 | 0.2503 | -0.373961135 | count | 1 |
| DDX28      | -0.3628536 | 1.024562  | -0.3542 | 0.723  | -0.373855785 | count | 1 |
| AC245060.5 | -0.3628536 | 1.024562  | -0.3542 | 0.723  | -0.373855785 | count | 1 |
| PDS5A      | -0.2959745 | 0.5356573 | -0.5525 | 0.581  | -0.373596985 | count | 1 |
| ESD        | -0.2661917 | 0.3297003 | -0.8074 | 0.42   | -0.373250294 | count | 1 |
| TTI1       | -0.3270534 | 0.7818189 | -0.4183 | 0.676  | -0.373215592 | count | 1 |

|            |            |           |         |        |              |       |   |
|------------|------------|-----------|---------|--------|--------------|-------|---|
| LIMK2      | -0.3270534 | 0.8349452 | -0.3917 | 0.696  | -0.373215592 | count | 1 |
| AC008105.3 | -0.2799059 | 0.4326935 | -0.6469 | 0.518  | -0.37307546  | count | 1 |
| NSMCE4A    | -0.2759816 | 0.4262029 | -0.6475 | 0.518  | -0.372805361 | count | 1 |
| YKT6       | -0.2766744 | 0.6339905 | -0.4364 | 0.663  | -0.372658179 | count | 1 |
| MEA1       | -0.2650326 | 0.2957575 | -0.8961 | 0.371  | -0.372514463 | count | 1 |
| RPS20      | -0.2596233 | 0.1046595 | -2.4806 | 0.0136 | -0.372368923 | count | 1 |
| CALCOCO2   | -0.2670506 | 0.3057271 | -0.8735 | 0.383  | -0.372077546 | count | 1 |
| BUD23      | -0.2674522 | 0.2926866 | -0.9138 | 0.362  | -0.372028954 | count | 1 |
| DGAT1      | -0.3395991 | 0.7441354 | -0.4564 | 0.648  | -0.37168168  | count | 1 |
| ATP13A1    | -0.3395991 | 0.8550084 | -0.3972 | 0.691  | -0.37168168  | count | 1 |
| NSF        | -0.3961349 | 0.7477403 | -0.5298 | 0.597  | -0.371466793 | count | 1 |
| DDX23      | -0.395827  | 0.5856381 | -0.6759 | 0.5    | -0.371189879 | count | 1 |
| PTDSS1     | -0.297757  | 0.5877669 | -0.5066 | 0.613  | -0.371182577 | count | 1 |
| SH3YL1     | -0.3249359 | 0.7687719 | -0.4227 | 0.673  | -0.370846748 | count | 1 |
| DUS1L      | -0.2703068 | 0.3402474 | -0.7944 | 0.428  | -0.370674441 | count | 1 |
| SNX27      | -0.3148567 | 0.8571003 | -0.3674 | 0.714  | -0.370582897 | count | 1 |
| FBXL5      | -0.2733578 | 0.4167235 | -0.656  | 0.512  | -0.3702599   | count | 1 |
| CASK       | -0.2680018 | 0.3549533 | -0.755  | 0.451  | -0.370139593 | count | 1 |
| COPZ1      | -0.2633299 | 0.2882955 | -0.9134 | 0.362  | -0.369791921 | count | 1 |
| ZZEF1      | -0.3238913 | 0.623063  | -0.5198 | 0.604  | -0.369677896 | count | 1 |
| MRPL24     | -0.2728522 | 0.4992351 | -0.5465 | 0.585  | -0.369578325 | count | 1 |
| KPNA4      | -0.2714834 | 0.4377712 | -0.6201 | 0.536  | -0.369469255 | count | 1 |
| TYSND1     | -0.2846604 | 0.6120667 | -0.4651 | 0.642  | -0.369324964 | count | 1 |
| ZNF148     | -0.2633719 | 0.3368854 | -0.7818 | 0.435  | -0.369109351 | count | 1 |
| SPAG7      | -0.2644474 | 0.3539835 | -0.7471 | 0.456  | -0.369008864 | count | 1 |
| DENND1A    | -0.3579857 | 1.0020362 | -0.3573 | 0.721  | -0.368990335 | count | 1 |
| NGLY1      | -0.2723335 | 0.323324  | -0.8423 | 0.4    | -0.368879075 | count | 1 |
| WASHC2C    | -0.312926  | 0.615918  | -0.5081 | 0.612  | -0.368348235 | count | 1 |
| LYSMD3     | -0.2886621 | 0.4162832 | -0.6934 | 0.489  | -0.368290903 | count | 1 |
| RABEP1     | -0.2785293 | 0.540321  | -0.5155 | 0.607  | -0.367958921 | count | 1 |
| ZNF22      | -0.2648828 | 0.3765777 | -0.7034 | 0.482  | -0.3678063   | count | 1 |
| TWF2       | -0.2602743 | 0.2893998 | -0.8994 | 0.3691 | -0.367207725 | count | 1 |
| HIST2H2AC  | -0.2988214 | 0.458236  | -0.6521 | 0.515  | -0.366955718 | count | 1 |
| PCM1       | -0.2599761 | 0.2484857 | -1.0462 | 0.2962 | -0.36690337  | count | 1 |
| NEPRO      | -0.2690168 | 0.438187  | -0.6139 | 0.54   | -0.366896355 | count | 1 |
| HIGD1A     | -0.2775416 | 0.417354  | -0.665  | 0.507  | -0.366662789 | count | 1 |
| ZDHHC2     | -0.3344983 | 0.5904502 | -0.5665 | 0.571  | -0.366229772 | count | 1 |
| SNW1       | -0.2595256 | 0.2448066 | -1.0601 | 0.2899 | -0.365912106 | count | 1 |
| ACADM      | -0.2667954 | 0.3964498 | -0.673  | 0.501  | -0.365877276 | count | 1 |
| PCMT1      | -0.2586928 | 0.246066  | -1.0513 | 0.2939 | -0.365818585 | count | 1 |
| SF3B5      | -0.2574503 | 0.2217109 | -1.1612 | 0.2464 | -0.36555716  | count | 1 |
| AGO3       | -0.3201871 | 0.6230341 | -0.5139 | 0.608  | -0.365531681 | count | 1 |
| SIPA1      | -0.2647062 | 0.40797   | -0.6488 | 0.517  | -0.365144675 | count | 1 |
| ELK4       | -0.2681053 | 0.4291721 | -0.6247 | 0.533  | -0.364891746 | count | 1 |
| INTS6L     | -0.3331617 | 0.8214902 | -0.4056 | 0.685  | -0.364800408 | count | 1 |

|            |            |           |         |          |              |       |   |
|------------|------------|-----------|---------|----------|--------------|-------|---|
| CHRAC1     | -0.26797   | 0.328776  | -0.8151 | 0.416    | -0.364708395 | count | 1 |
| FIS1       | -0.2556897 | 0.1856907 | -1.377  | 0.169    | -0.364487067 | count | 1 |
| AKIRIN1    | -0.2623757 | 0.3060301 | -0.8574 | 0.392    | -0.364334748 | count | 1 |
| CHD4       | -0.2612793 | 0.30158   | -0.8664 | 0.387    | -0.36433368  | count | 1 |
| ELAC2      | -0.2966488 | 0.6789675 | -0.4369 | 0.662    | -0.364321472 | count | 1 |
| TUFM       | -0.2563016 | 0.2258143 | -1.135  | 0.2572   | -0.364044058 | count | 1 |
| AGPAT2     | -0.2672057 | 0.3894957 | -0.686  | 0.493    | -0.363672643 | count | 1 |
| RSBN1L     | -0.2553287 | 0.1994133 | -1.2804 | 0.201    | -0.363487624 | count | 1 |
| TMEM69     | -0.2909    | 0.696878  | -0.4175 | 0.677    | -0.362713634 | count | 1 |
| FARSA      | -0.2840716 | 0.5513114 | -0.5153 | 0.607    | -0.362488983 | count | 1 |
| SENP7      | -0.2638437 | 0.2986005 | -0.8836 | 0.378    | -0.362421649 | count | 1 |
| PSENEEN    | -0.2567366 | 0.2942576 | -0.8725 | 0.3836   | -0.362107143 | count | 1 |
| PARP4      | -0.2901303 | 0.4834863 | -0.6001 | 0.549    | -0.361782396 | count | 1 |
| KDM5A      | -0.2587323 | 0.3161737 | -0.8183 | 0.414    | -0.361053175 | count | 1 |
| UTP23      | -0.2585435 | 0.4391048 | -0.5888 | 0.5564   | -0.36079034  | count | 1 |
| COX6C      | -0.2519098 | 0.1541898 | -1.6338 | 0.1033   | -0.360598986 | count | 1 |
| MT-ATP6    | -0.2501956 | 0.071967  | -3.4765 | 0.000577 | -0.360565133 | count | 1 |
| FHIT       | -0.3838686 | 1.0933939 | -0.3511 | 0.726    | -0.360418766 | count | 1 |
| DAGLB      | -0.3838686 | 1.0933939 | -0.3511 | 0.726    | -0.360418766 | count | 1 |
| CNIH2      | -0.3838686 | 1.0933939 | -0.3511 | 0.726    | -0.360418766 | count | 1 |
| RMDN2      | -0.3838686 | 1.3917829 | -0.2758 | 0.783    | -0.360418766 | count | 1 |
| RLN2       | -0.3838686 | 1.3917829 | -0.2758 | 0.783    | -0.360418766 | count | 1 |
| AC106739.1 | -0.3838686 | 1.3917829 | -0.2758 | 0.783    | -0.360418766 | count | 1 |
| RXRA       | -0.2723869 | 0.5326905 | -0.5113 | 0.609    | -0.359897262 | count | 1 |
| FAM120AOS  | -0.2607347 | 0.3748456 | -0.6956 | 0.487    | -0.359683967 | count | 1 |
| SERP1      | -0.2517905 | 0.1726922 | -1.458  | 0.146    | -0.359457275 | count | 1 |
| SNAPIN     | -0.258156  | 0.4544513 | -0.5681 | 0.57     | -0.359430311 | count | 1 |
| SLC16A7    | -0.2646048 | 0.421189  | -0.6282 | 0.53     | -0.359334893 | count | 1 |
| CAST       | -0.2522998 | 0.2199816 | -1.1469 | 0.252    | -0.359220305 | count | 1 |
| RPA2       | -0.2561461 | 0.3206596 | -0.7988 | 0.425    | -0.35919315  | count | 1 |
| UBR3       | -0.3481477 | 0.7488623 | -0.4649 | 0.642    | -0.359143076 | count | 1 |
| NDUFA11    | -0.2529697 | 0.2516312 | -1.0053 | 0.3155   | -0.358894669 | count | 1 |
| STAT2      | -0.2712665 | 0.7368218 | -0.3682 | 0.713    | -0.358426483 | count | 1 |
| SYTL3      | -0.2545836 | 0.2375417 | -1.0717 | 0.2846   | -0.357855164 | count | 1 |
| CASP9      | -0.3129969 | 0.7659126 | -0.4087 | 0.683    | -0.357477331 | count | 1 |
| GPATCH8    | -0.2598524 | 0.2989101 | -0.8693 | 0.385    | -0.35695837  | count | 1 |
| MYLIP      | -0.2654668 | 0.3800495 | -0.6985 | 0.485    | -0.356514634 | count | 1 |
| TRIQQ      | -0.3793719 | 0.8811568 | -0.4305 | 0.667    | -0.356360409 | count | 1 |
| COX7A2     | -0.2482238 | 0.1599487 | -1.5519 | 0.122    | -0.355678949 | count | 1 |
| PNPLA2     | -0.2578033 | 0.401353  | -0.6423 | 0.521    | -0.35565297  | count | 1 |
| ERF        | -0.2786342 | 0.4920903 | -0.5662 | 0.572    | -0.355614032 | count | 1 |
| EPN1       | -0.3242812 | 0.662824  | -0.4892 | 0.625    | -0.355295673 | count | 1 |
| AP4S1      | -0.6768916 | 0.8048009 | -0.8411 | 0.4009   | -0.355214368 | count | 1 |
| CCDC122    | -0.2944869 | 0.8372159 | -0.3517 | 0.725    | -0.35510789  | count | 1 |
| HSPD1      | -0.2499392 | 0.2108465 | -1.1854 | 0.2367   | -0.354960971 | count | 1 |

|            |            |           |         |         |              |       |   |
|------------|------------|-----------|---------|---------|--------------|-------|---|
| ARAP2      | -0.2562783 | 0.336205  | -0.7623 | 0.446   | -0.353555795 | count | 1 |
| RPL27      | -0.2459461 | 0.0965868 | -2.5464 | 0.0113  | -0.353516311 | count | 1 |
| TRIB2      | -0.2673727 | 0.6127034 | -0.4364 | 0.663   | -0.353314288 | count | 1 |
| SERINC3    | -0.2571701 | 0.3575711 | -0.7192 | 0.473   | -0.353286465 | count | 1 |
| TRIM56     | -0.2832377 | 0.5601734 | -0.5056 | 0.613   | -0.353281462 | count | 1 |
| NCL        | -0.2455199 | 0.1117107 | -2.1978 | 0.0287  | -0.353081078 | count | 1 |
| ZFPL1      | -0.29275   | 0.6284432 | -0.4658 | 0.642   | -0.353042102 | count | 1 |
| SHLD1      | -0.2636632 | 0.6857879 | -0.3845 | 0.701   | -0.35288634  | count | 1 |
| NDUFS5     | -0.2464482 | 0.1762311 | -1.3984 | 0.1629  | -0.352576561 | count | 1 |
| HMGB2      | -0.2477938 | 0.2020617 | -1.2263 | 0.221   | -0.351972825 | count | 1 |
| YAF2       | -0.262686  | 0.4216835 | -0.6229 | 0.534   | -0.351585456 | count | 1 |
| C20orf27   | -0.275165  | 0.5210064 | -0.5281 | 0.598   | -0.351226154 | count | 1 |
| SEC31A     | -0.2623757 | 0.3909054 | -0.6712 | 0.503   | -0.351172359 | count | 1 |
| RPL36      | -0.2437633 | 0.0816212 | -2.9865 | 0.00304 | -0.350560057 | count | 1 |
| PAXIP1-AS2 | -0.2699417 | 0.6671321 | -0.4046 | 0.686   | -0.350375729 | count | 1 |
| SSNA1      | -0.2470778 | 0.2468757 | -1.0008 | 0.318   | -0.350281232 | count | 1 |
| TNFSF12    | -0.247508  | 0.2558728 | -0.9673 | 0.3341  | -0.350023919 | count | 1 |
| GMPPA      | -0.2970075 | 0.7765788 | -0.3825 | 0.702   | -0.349903334 | count | 1 |
| IL1R1      | -0.3386182 | 0.9275252 | -0.3651 | 0.715   | -0.349586626 | count | 1 |
| HYI        | -0.3386182 | 0.9386931 | -0.3607 | 0.719   | -0.349586626 | count | 1 |
| SLC35E2A   | -0.3386182 | 1.0411808 | -0.3252 | 0.745   | -0.349586626 | count | 1 |
| TSGA10     | -0.3386182 | 1.0411808 | -0.3252 | 0.745   | -0.349586626 | count | 1 |
| SP140L     | -0.2504926 | 0.3226486 | -0.7764 | 0.438   | -0.34932792  | count | 1 |
| PSMF1      | -0.2478251 | 0.2778615 | -0.8919 | 0.373   | -0.349321544 | count | 1 |
| EVI2A      | -0.2480754 | 0.278928  | -0.8894 | 0.3745  | -0.349156273 | count | 1 |
| LPXN       | -0.2521394 | 0.35018   | -0.72   | 0.472   | -0.349100262 | count | 1 |
| GPR65      | -0.2473816 | 0.2124983 | -1.1642 | 0.2452  | -0.349045995 | count | 1 |
| TRIM11     | -0.2606469 | 0.5337322 | -0.4883 | 0.626   | -0.348870736 | count | 1 |
| PDHB       | -0.2479345 | 0.3031801 | -0.8178 | 0.4141  | -0.348818662 | count | 1 |
| MED1       | -0.662282  | 0.8598257 | -0.7703 | 0.4417  | -0.348552695 | count | 1 |
| PMPCB      | -0.2545345 | 0.3757983 | -0.6773 | 0.499   | -0.348530553 | count | 1 |
| GPATCH1    | -0.3048792 | 0.9297223 | -0.3279 | 0.7432  | -0.348374295 | count | 1 |
| ATP5MPL    | -0.2447971 | 0.2467331 | -0.9922 | 0.3219  | -0.348075219 | count | 1 |
| LEPROT     | -0.2496923 | 0.362458  | -0.6889 | 0.491   | -0.347950732 | count | 1 |
| TRIM28     | -0.2700918 | 0.4059859 | -0.6653 | 0.506   | -0.347886004 | count | 1 |
| TRMT11     | -0.3043778 | 0.5663103 | -0.5375 | 0.591   | -0.347811695 | count | 1 |
| TMEM116    | -0.3367247 | 0.6606202 | -0.5097 | 0.611   | -0.347685684 | count | 1 |
| APBA3      | -0.3170993 | 0.9284999 | -0.3415 | 0.733   | -0.347598941 | count | 1 |
| APBB3      | -0.3170993 | 1.0495392 | -0.3021 | 0.7627  | -0.347598941 | count | 1 |
| ATP6V1G1   | -0.242908  | 0.1604399 | -1.514  | 0.131   | -0.347416894 | count | 1 |
| ALDOA      | -0.2880208 | 0.6699086 | -0.4299 | 0.668   | -0.347415429 | count | 1 |
| EPOR       | -0.263866  | 0.553849  | -0.4764 | 0.634   | -0.346889538 | count | 1 |
| GMFG       | -0.2417791 | 0.1488433 | -1.6244 | 0.105   | -0.346714884 | count | 1 |
| DAP3       | -0.2558915 | 0.4401619 | -0.5814 | 0.561   | -0.346706391 | count | 1 |
| ZBED5      | -0.2939646 | 0.5680332 | -0.5175 | 0.605   | -0.346373415 | count | 1 |

|            |            |           |         |        |              |       |   |
|------------|------------|-----------|---------|--------|--------------|-------|---|
| NPC2       | -0.245372  | 0.3146859 | -0.7797 | 0.436  | -0.34492974  | count | 1 |
| ZNF829     | -0.4324632 | 0.8335101 | -0.5188 | 0.604  | -0.343690306 | count | 1 |
| RPS11      | -0.2391    | 0.0956328 | -2.5002 | 0.0129 | -0.343628104 | count | 1 |
| BCCIP      | -0.2564423 | 0.4212541 | -0.6088 | 0.543  | -0.3432722   | count | 1 |
| ZC3H14     | -0.2686819 | 0.5684687 | -0.4726 | 0.637  | -0.343023196 | count | 1 |
| DBI        | -0.2396493 | 0.1852284 | -1.2938 | 0.1967 | -0.342298778 | count | 1 |
| ST13       | -0.2427391 | 0.220484  | -1.1009 | 0.272  | -0.342280937 | count | 1 |
| VAMP8      | -0.2389089 | 0.1541071 | -1.5503 | 0.1221 | -0.341716967 | count | 1 |
| BTAF1      | -0.6467153 | 0.7083161 | -0.913  | 0.362  | -0.341401846 | count | 1 |
| TM2D2      | -0.2701405 | 0.5686252 | -0.4751 | 0.635  | -0.34129997  | count | 1 |
| PPP1R8     | -0.2701405 | 0.7659329 | -0.3527 | 0.725  | -0.34129997  | count | 1 |
| ABRAXAS1   | -0.3625237 | 0.6620229 | -0.5476 | 0.584  | -0.341115559 | count | 1 |
| JAGN1      | -0.2499842 | 0.5083055 | -0.4918 | 0.623  | -0.341038545 | count | 1 |
| SLC25A38   | -0.2474024 | 0.386092  | -0.6408 | 0.522  | -0.340897117 | count | 1 |
| PRMT5      | -0.2892374 | 0.9067817 | -0.319  | 0.75   | -0.340887055 | count | 1 |
| ESRRA      | -0.2521526 | 0.4690152 | -0.5376 | 0.591  | -0.340761842 | count | 1 |
| MTX1       | -0.2463465 | 0.4446512 | -0.554  | 0.58   | -0.340721175 | count | 1 |
| RRAGC      | -0.276991  | 0.705102  | -0.3928 | 0.695  | -0.340461082 | count | 1 |
| STAT5A     | -0.2974311 | 0.5910741 | -0.5032 | 0.615  | -0.340013151 | count | 1 |
| TNFRSF9    | -0.2566574 | 0.442426  | -0.5801 | 0.562  | -0.339240482 | count | 1 |
| MSL1       | -0.3092733 | 0.5414178 | -0.5712 | 0.568  | -0.339201833 | count | 1 |
| NUDT8      | -0.249677  | 0.5532819 | -0.4513 | 0.652  | -0.339146143 | count | 1 |
| PRKACB     | -0.242604  | 0.2894998 | -0.838  | 0.403  | -0.33883153  | count | 1 |
| TMEM167B   | -0.2755919 | 0.5625217 | -0.4899 | 0.625  | -0.338761133 | count | 1 |
| TMEM192    | -0.2805489 | 0.7617089 | -0.3683 | 0.713  | -0.338519736 | count | 1 |
| ZNF605     | -0.2803886 | 0.8375218 | -0.3348 | 0.738  | -0.33832881  | count | 1 |
| CSTB       | -0.2357435 | 0.1601392 | -1.4721 | 0.142  | -0.337741891 | count | 1 |
| MTERF2     | -0.326725  | 0.7496069 | -0.4359 | 0.663  | -0.337635255 | count | 1 |
| SAP130     | -0.326725  | 0.8984723 | -0.3636 | 0.716  | -0.337635255 | count | 1 |
| ZNF470     | -0.326725  | 0.8984723 | -0.3636 | 0.716  | -0.337635255 | count | 1 |
| AC004982.2 | -0.326725  | 0.9317423 | -0.3507 | 0.726  | -0.337635255 | count | 1 |
| PTP4A1     | -0.2432372 | 0.309366  | -0.7862 | 0.432  | -0.337504139 | count | 1 |
| RNF115     | -0.241094  | 0.2859492 | -0.8431 | 0.3998 | -0.337372889 | count | 1 |
| COPS3      | -0.242704  | 0.4038132 | -0.601  | 0.548  | -0.337088211 | count | 1 |
| KMT2C      | -0.2517372 | 0.392494  | -0.6414 | 0.522  | -0.337005935 | count | 1 |
| RABL2A     | -0.2944869 | 0.9565926 | -0.3078 | 0.758  | -0.336705678 | count | 1 |
| DUSP4      | -0.2387571 | 0.2863855 | -0.8337 | 0.4051 | -0.336440667 | count | 1 |
| SPN        | -0.2447147 | 0.3873089 | -0.6318 | 0.528  | -0.336231797 | count | 1 |
| DHX40      | -0.4221085 | 0.7616266 | -0.5542 | 0.58   | -0.3359198   | count | 1 |
| PPAT       | -0.3061689 | 0.9651456 | -0.3172 | 0.751  | -0.335867997 | count | 1 |
| UBA2       | -0.241968  | 0.3291274 | -0.7352 | 0.463  | -0.335410386 | count | 1 |
| LACTB      | -0.2448522 | 0.4479599 | -0.5466 | 0.585  | -0.335318789 | count | 1 |
| PSMB9      | -0.2336089 | 0.1380704 | -1.692  | 0.0916 | -0.335162482 | count | 1 |
| HRAS       | -0.2494189 | 0.4455543 | -0.5598 | 0.576  | -0.335066752 | count | 1 |
| FBXW11     | -0.2683272 | 0.5568339 | -0.4819 | 0.63   | -0.334873909 | count | 1 |



|         |            |           |         |        |              |       |   |
|---------|------------|-----------|---------|--------|--------------|-------|---|
| CD84    | -0.2840033 | 0.7542687 | -0.3765 | 0.707  | -0.334808755 | count | 1 |
| LAIR1   | -0.2840033 | 0.7546776 | -0.3763 | 0.707  | -0.334808755 | count | 1 |
| CHID1   | -0.2518662 | 0.567779  | -0.4436 | 0.658  | -0.334500138 | count | 1 |
| PEF1    | -0.2518617 | 0.4141387 | -0.6082 | 0.544  | -0.334494197 | count | 1 |
| WWP1    | -0.2481645 | 0.4802729 | -0.5167 | 0.606  | -0.334435321 | count | 1 |
| MCRIP1  | -0.2430449 | 0.3166988 | -0.7674 | 0.443  | -0.333944915 | count | 1 |
| NDUFB1  | -0.2367923 | 0.3000002 | -0.7893 | 0.4305 | -0.333907955 | count | 1 |
| NUP37   | -0.2493254 | 0.5261971 | -0.4738 | 0.636  | -0.333793366 | count | 1 |
| HTT     | -0.2831257 | 0.6391684 | -0.443  | 0.658  | -0.333789234 | count | 1 |
| HERC5   | -0.2569104 | 0.5749353 | -0.4469 | 0.655  | -0.333583642 | count | 1 |
| ZNF585B | -0.4186267 | 0.7768508 | -0.5389 | 0.59   | -0.333301277 | count | 1 |
| PRKCA   | -0.4186267 | 0.8491201 | -0.493  | 0.622  | -0.333301277 | count | 1 |
| TRAPPC4 | -0.2357139 | 0.2668888 | -0.8832 | 0.3778 | -0.333191432 | count | 1 |
| ACD     | -0.2446187 | 0.6070349 | -0.403  | 0.6872 | -0.333050389 | count | 1 |
| EXOSC8  | -0.2380255 | 0.3219196 | -0.7394 | 0.46   | -0.33288358  | count | 1 |
| TULP4   | -0.2821785 | 0.5631306 | -0.5011 | 0.617  | -0.332688744 | count | 1 |
| SSR3    | -0.2372124 | 0.291702  | -0.8132 | 0.417  | -0.332335596 | count | 1 |
| CHMP2A  | -0.2347482 | 0.2649532 | -0.886  | 0.3763 | -0.33145096  | count | 1 |
| PUF60   | -0.2353755 | 0.3239361 | -0.7266 | 0.468  | -0.331178095 | count | 1 |
| RHOG    | -0.2329372 | 0.2221859 | -1.0484 | 0.2952 | -0.330620868 | count | 1 |
| ZDHHC14 | -0.623168  | 0.9003132 | -0.6922 | 0.489  | -0.330481839 | count | 1 |
| RAPGEF2 | -0.623168  | 0.9582367 | -0.6503 | 0.516  | -0.330481839 | count | 1 |
| MBNL3   | -0.623168  | 1.021126  | -0.6103 | 0.542  | -0.330481839 | count | 1 |
| TTC9    | -0.623168  | 1.021126  | -0.6103 | 0.542  | -0.330481839 | count | 1 |
| FES     | -0.623168  | 1.021126  | -0.6103 | 0.542  | -0.330481839 | count | 1 |
| NFS1    | -0.623168  | 1.021126  | -0.6103 | 0.542  | -0.330481839 | count | 1 |
| ZNF585A | -0.623168  | 1.021126  | -0.6103 | 0.542  | -0.330481839 | count | 1 |
| SLC44A2 | -0.2564398 | 0.7312817 | -0.3507 | 0.726  | -0.330437094 | count | 1 |
| SH2D1A  | -0.2320682 | 0.2434333 | -0.9533 | 0.341  | -0.329606297 | count | 1 |
| TMEM154 | -0.3002236 | 0.7032701 | -0.4269 | 0.67   | -0.329478724 | count | 1 |
| PAG1    | -0.3182769 | 0.7078866 | -0.4496 | 0.653  | -0.329129446 | count | 1 |
| FER     | -0.3182769 | 0.836992  | -0.3803 | 0.704  | -0.329129446 | count | 1 |
| OPA3    | -0.3489449 | 0.6028524 | -0.5788 | 0.563  | -0.328784625 | count | 1 |
| SPAG16  | -0.2599772 | 0.5732812 | -0.4535 | 0.65   | -0.328575465 | count | 1 |
| TMEM42  | -0.2485251 | 0.6727446 | -0.3694 | 0.712  | -0.328553827 | count | 1 |
| TAGLN   | -0.2598639 | 0.4838896 | -0.537  | 0.592  | -0.328433555 | count | 1 |
| BDH1    | -0.3171607 | 0.8166377 | -0.3884 | 0.698  | -0.328004617 | count | 1 |
| DLL1    | -0.3171607 | 0.818793  | -0.3874 | 0.699  | -0.328004617 | count | 1 |
| ACTR8   | -0.3171006 | 0.4647269 | -0.6823 | 0.496  | -0.327944041 | count | 1 |
| UBXN4   | -0.2296567 | 0.2043103 | -1.1241 | 0.262  | -0.327809051 | count | 1 |
| NUCB2   | -0.2300061 | 0.1981747 | -1.1606 | 0.2466 | -0.327713749 | count | 1 |
| FLI1    | -0.2463881 | 0.3946302 | -0.6244 | 0.533  | -0.3272643   | count | 1 |
| ATP5MC1 | -0.2323161 | 0.255181  | -0.9104 | 0.3633 | -0.327136855 | count | 1 |
| CHTOP   | -0.2501088 | 0.4234518 | -0.5906 | 0.555  | -0.326988515 | count | 1 |
| RLF     | -0.2771814 | 0.5491473 | -0.5047 | 0.614  | -0.326880873 | count | 1 |

|          |            |           |         |          |              |       |   |
|----------|------------|-----------|---------|----------|--------------|-------|---|
| IGHMBP2  | -0.6150267 | 0.8978128 | -0.685  | 0.494    | -0.326677603 | count | 1 |
| GPX4     | -0.2285863 | 0.164716  | -1.3878 | 0.166    | -0.326628652 | count | 1 |
| LFNG     | -0.236072  | 0.3535562 | -0.6677 | 0.505    | -0.326548949 | count | 1 |
| CDKN2D   | -0.2283251 | 0.1919954 | -1.1892 | 0.235    | -0.326196084 | count | 1 |
| BEX2     | -0.2363105 | 0.3932862 | -0.6009 | 0.548    | -0.325203521 | count | 1 |
| NFKB2    | -0.2572049 | 0.5243883 | -0.4905 | 0.624    | -0.325102741 | count | 1 |
| ACAP2    | -0.2311117 | 0.2995128 | -0.7716 | 0.441    | -0.325054506 | count | 1 |
| HLA-A    | -0.2254337 | 0.0624949 | -3.6072 | 0.000358 | -0.324928492 | count | 1 |
| PRPF8    | -0.246845  | 0.5224592 | -0.4725 | 0.637    | -0.324649557 | count | 1 |
| 11-Sep   | -0.2355634 | 0.3403376 | -0.6921 | 0.489    | -0.323697173 | count | 1 |
| ORC5     | -0.2679294 | 0.6745582 | -0.3972 | 0.691    | -0.323479482 | count | 1 |
| GSTK1    | -0.2266789 | 0.2009893 | -1.1278 | 0.2602   | -0.323163021 | count | 1 |
| NCAM1    | -0.2332786 | 0.3675923 | -0.6346 | 0.526    | -0.323054563 | count | 1 |
| HIGD2A   | -0.22592   | 0.1647878 | -1.371  | 0.171    | -0.322762122 | count | 1 |
| HNRNPA1  | -0.2249112 | 0.1292063 | -1.7407 | 0.0827   | -0.322688026 | count | 1 |
| TTPAL    | -0.4038403 | 0.9780545 | -0.4129 | 0.68     | -0.322149394 | count | 1 |
| C7orf43  | -0.4038403 | 0.9810557 | -0.4116 | 0.681    | -0.322149394 | count | 1 |
| NOTCH2   | -0.6053709 | 0.7267358 | -0.833  | 0.405    | -0.322146525 | count | 1 |
| LLGL2    | -0.2382428 | 0.5456742 | -0.4366 | 0.663    | -0.322042517 | count | 1 |
| USP3     | -0.2330519 | 0.4084761 | -0.5705 | 0.569    | -0.322003776 | count | 1 |
| MTMR14   | -0.2413092 | 0.6063095 | -0.398  | 0.691    | -0.32189576  | count | 1 |
| FASLG    | -0.2260112 | 0.232491  | -0.9721 | 0.332    | -0.321748942 | count | 1 |
| DCTN2    | -0.2348653 | 0.3437097 | -0.6833 | 0.495    | -0.321687051 | count | 1 |
| HSPA14   | -0.3105344 | 0.6852709 | -0.4532 | 0.651    | -0.321322238 | count | 1 |
| FAM207A  | -0.2308942 | 0.4830298 | -0.478  | 0.633    | -0.321293509 | count | 1 |
| TES      | -0.2269731 | 0.2901949 | -0.7821 | 0.4347   | -0.321100511 | count | 1 |
| EMC3     | -0.2323693 | 0.3404349 | -0.6826 | 0.495    | -0.32106319  | count | 1 |
| RPL15    | -0.2228044 | 0.0711773 | -3.1303 | 0.00191  | -0.320937069 | count | 1 |
| TMEM131L | -0.255883  | 0.6553773 | -0.3904 | 0.696    | -0.319492741 | count | 1 |
| ANKRD46  | -0.263866  | 0.791289  | -0.3335 | 0.739    | -0.318632368 | count | 1 |
| SND1     | -0.2783265 | 0.6114342 | -0.4552 | 0.649    | -0.318527844 | count | 1 |
| PARP14   | -0.2308353 | 0.3771393 | -0.6121 | 0.541    | -0.318134591 | count | 1 |
| BLOC1S1  | -0.2243356 | 0.238661  | -0.94   | 0.3479   | -0.317881128 | count | 1 |
| NAPA     | -0.2280599 | 0.3409308 | -0.6689 | 0.504    | -0.31787037  | count | 1 |
| DGKD     | -0.2428977 | 0.537552  | -0.4519 | 0.652    | -0.317620203 | count | 1 |
| ELAVL1   | -0.2335833 | 0.423674  | -0.5513 | 0.582    | -0.317367947 | count | 1 |
| RPSA     | -0.2202959 | 0.0763583 | -2.885  | 0.00418  | -0.317302037 | count | 1 |
| CEP95    | -0.2398232 | 0.4535685 | -0.5287 | 0.597    | -0.317113538 | count | 1 |
| LRCH1    | -0.245962  | 0.671889  | -0.3661 | 0.715    | -0.31703412  | count | 1 |
| NIF3L1   | -0.2381603 | 0.636221  | -0.3743 | 0.708    | -0.316392722 | count | 1 |
| RPS18    | -0.219382  | 0.058125  | -3.7743 | 0.000191 | -0.316254222 | count | 1 |
| ODR4     | -0.2569734 | 0.9403927 | -0.2733 | 0.785    | -0.316117479 | count | 1 |
| ESYT2    | -0.3955123 | 0.5876004 | -0.6731 | 0.501    | -0.315846053 | count | 1 |
| NIPSNAP2 | -0.2297588 | 0.5033782 | -0.4564 | 0.648    | -0.3152463   | count | 1 |
| BAG1     | -0.2255319 | 0.33499   | -0.6732 | 0.501    | -0.315243809 | count | 1 |

|              |            |           |         |        |              |       |   |
|--------------|------------|-----------|---------|--------|--------------|-------|---|
| SPAG9        | -0.2314874 | 0.2967516 | -0.7801 | 0.436  | -0.315236208 | count | 1 |
| SNRPE        | -0.223984  | 0.2566606 | -0.8727 | 0.383  | -0.315174415 | count | 1 |
| RFC1         | -0.2250745 | 0.2800914 | -0.8036 | 0.422  | -0.31480566  | count | 1 |
| IRAK4        | -0.2275463 | 0.3671059 | -0.6198 | 0.536  | -0.314786067 | count | 1 |
| NDUFA10      | -0.2253287 | 0.3224747 | -0.6987 | 0.485  | -0.314751868 | count | 1 |
| BRD7         | -0.2240485 | 0.2799661 | -0.8003 | 0.424  | -0.314260857 | count | 1 |
| ERN1         | -0.2458202 | 0.4019291 | -0.6116 | 0.541  | -0.314065197 | count | 1 |
| TOMM70       | -0.240118  | 0.6868157 | -0.3496 | 0.727  | -0.314007882 | count | 1 |
| HERC1        | -0.2596448 | 0.584173  | -0.4445 | 0.657  | -0.313594844 | count | 1 |
| ZNF138       | -0.2595962 | 0.5841967 | -0.4444 | 0.657  | -0.313536835 | count | 1 |
| GPS1         | -0.2392303 | 0.5706147 | -0.4193 | 0.675  | -0.312854159 | count | 1 |
| GTF2H1       | -0.2392303 | 0.5948436 | -0.4022 | 0.688  | -0.312854159 | count | 1 |
| PNRC2        | -0.2212417 | 0.2252108 | -0.9824 | 0.3266 | -0.312674435 | count | 1 |
| CDKN1C       | -0.3900709 | 0.5478605 | -0.712  | 0.477  | -0.311718885 | count | 1 |
| RSF1         | -0.2218965 | 0.2445076 | -0.9075 | 0.365  | -0.311556112 | count | 1 |
| CNOT1        | -0.2323185 | 0.4297213 | -0.5406 | 0.589  | -0.311129758 | count | 1 |
| LTB          | -0.2188731 | 0.2989812 | -0.7321 | 0.4647 | -0.31088275  | count | 1 |
| FAM173A      | -0.2211388 | 0.2938282 | -0.7526 | 0.452  | -0.310780871 | count | 1 |
| HEMGN        | -0.3885974 | 0.9783416 | -0.3972 | 0.691  | -0.310600093 | count | 1 |
| SNX25        | -0.3885974 | 1.092391  | -0.3557 | 0.722  | -0.310600093 | count | 1 |
| RABL2B       | -0.2826814 | 0.9375739 | -0.3015 | 0.763  | -0.310591985 | count | 1 |
| ZNF397       | -0.2826814 | 1.1846096 | -0.2386 | 0.812  | -0.310591985 | count | 1 |
| DDX27        | -0.2262687 | 0.3554722 | -0.6365 | 0.525  | -0.310472136 | count | 1 |
| FLNA         | -0.2335655 | 0.4184357 | -0.5582 | 0.577  | -0.310319567 | count | 1 |
| PIAS4        | -0.2995148 | 0.7154947 | -0.4186 | 0.676  | -0.310191207 | count | 1 |
| ACER3        | -0.2995148 | 0.8113396 | -0.3692 | 0.712  | -0.310191207 | count | 1 |
| ELOA         | -0.2294173 | 0.387609  | -0.5919 | 0.554  | -0.310160081 | count | 1 |
| RPL4         | -0.2164252 | 0.117258  | -1.8457 | 0.0658 | -0.310066875 | count | 1 |
| ABCA5        | -0.2626516 | 0.683835  | -0.3841 | 0.701  | -0.309974272 | count | 1 |
| DNMT1        | -0.2218581 | 0.2748321 | -0.8072 | 0.42   | -0.309699583 | count | 1 |
| XAF1         | -0.2221401 | 0.3625233 | -0.6128 | 0.54   | -0.309636323 | count | 1 |
| MKNK1        | -0.28177   | 0.7517039 | -0.3748 | 0.708  | -0.309609338 | count | 1 |
| LMAN1        | -0.2232693 | 0.2931193 | -0.7617 | 0.447  | -0.309552966 | count | 1 |
| POLE3        | -0.221206  | 0.3502797 | -0.6315 | 0.528  | -0.309404867 | count | 1 |
| LTA4H        | -0.2308859 | 0.4814835 | -0.4795 | 0.632  | -0.309219862 | count | 1 |
| KLHDC1       | -0.2557172 | 1.0710706 | -0.2387 | 0.811  | -0.308905727 | count | 1 |
| TEX10        | -0.2472455 | 0.6741387 | -0.3668 | 0.714  | -0.308807042 | count | 1 |
| MT-ND4L      | -0.2164787 | 0.1925145 | -1.1245 | 0.262  | -0.308767149 | count | 1 |
| CAV1         | -0.2439524 | 0.8039655 | -0.3034 | 0.762  | -0.308491517 | count | 1 |
| JKAMP        | -0.2321776 | 0.5090928 | -0.4561 | 0.649  | -0.308484846 | count | 1 |
| DERL2        | -0.2238047 | 0.3729093 | -0.6002 | 0.549  | -0.308471619 | count | 1 |
| MAPKAPK5-AS1 | -0.2285598 | 0.4488146 | -0.5093 | 0.611  | -0.308124794 | count | 1 |
| DNAJC4       | -0.2208959 | 0.3477626 | -0.6352 | 0.526  | -0.307905593 | count | 1 |
| COMMD9       | -0.2408044 | 0.5484851 | -0.439  | 0.661  | -0.307705434 | count | 1 |
| CHCHD3       | -0.2200695 | 0.3705328 | -0.5939 | 0.553  | -0.307622856 | count | 1 |

|            |            |           |         |        |              |       |   |
|------------|------------|-----------|---------|--------|--------------|-------|---|
| SMC3       | -0.2205914 | 0.2688456 | -0.8205 | 0.413  | -0.307240377 | count | 1 |
| DHX9       | -0.2223209 | 0.3509188 | -0.6335 | 0.527  | -0.307215078 | count | 1 |
| GCHFR      | -0.2174953 | 0.3406131 | -0.6385 | 0.5236 | -0.307212298 | count | 1 |
| TMEM126B   | -0.2300494 | 0.3942721 | -0.5835 | 0.56   | -0.306947136 | count | 1 |
| NFYA       | -0.3249359 | 0.9941228 | -0.3269 | 0.744  | -0.306886727 | count | 1 |
| DPF3       | -0.3249359 | 1.1289699 | -0.2878 | 0.774  | -0.306886727 | count | 1 |
| GANC       | -0.3249359 | 1.1563685 | -0.281  | 0.779  | -0.306886727 | count | 1 |
| AC002310.1 | -0.3249359 | 1.2867139 | -0.2525 | 0.8008 | -0.306886727 | count | 1 |
| REV3L      | -0.2359489 | 0.4935741 | -0.478  | 0.633  | -0.306543376 | count | 1 |
| SDAD1      | -0.2203791 | 0.3255113 | -0.677  | 0.499  | -0.306428471 | count | 1 |
| MT-ND5     | -0.2130046 | 0.0960895 | -2.2167 | 0.0273 | -0.306373521 | count | 1 |
| FXYD5      | -0.2129348 | 0.1340914 | -1.588  | 0.113  | -0.306079658 | count | 1 |
| APRT       | -0.2134592 | 0.16715   | -1.2771 | 0.202  | -0.305911579 | count | 1 |
| ZMYM2      | -0.2291757 | 0.3870962 | -0.592  | 0.554  | -0.305786873 | count | 1 |
| ZFPM1      | -0.266936  | 0.6890902 | -0.3874 | 0.699  | -0.305691817 | count | 1 |
| HMG2       | -0.2133315 | 0.1620849 | -1.3162 | 0.189  | -0.305470131 | count | 1 |
| CEP41      | -0.2944869 | 1.0229845 | -0.2879 | 0.774  | -0.305104996 | count | 1 |
| CTPS2      | -0.2944869 | 1.0229845 | -0.2879 | 0.774  | -0.305104996 | count | 1 |
| BEST4      | -0.2944869 | 1.1603475 | -0.2538 | 0.8    | -0.305104996 | count | 1 |
| C8orf58    | -0.2944869 | 1.1603475 | -0.2538 | 0.8    | -0.305104996 | count | 1 |
| TCFL5      | -0.2944869 | 1.1603475 | -0.2538 | 0.8    | -0.305104996 | count | 1 |
| ATP8B3     | -0.2944869 | 1.1603475 | -0.2538 | 0.8    | -0.305104996 | count | 1 |
| ZNF888     | -0.2944869 | 1.1603475 | -0.2538 | 0.8    | -0.305104996 | count | 1 |
| SMIM3      | -0.2944869 | 1.1904567 | -0.2474 | 0.805  | -0.305104996 | count | 1 |
| CAMKK1     | -0.2944869 | 1.1904567 | -0.2474 | 0.805  | -0.305104996 | count | 1 |
| AC127521.1 | -0.2944869 | 1.1904567 | -0.2474 | 0.805  | -0.305104996 | count | 1 |
| ALKBH1     | -0.2944869 | 1.2609403 | -0.2335 | 0.815  | -0.305104996 | count | 1 |
| GRAP2      | -0.2944869 | 1.2609403 | -0.2335 | 0.815  | -0.305104996 | count | 1 |
| XPNPEP3    | -0.2944869 | 1.2609403 | -0.2335 | 0.815  | -0.305104996 | count | 1 |
| KIF27      | -0.2944869 | 1.4520057 | -0.2028 | 0.839  | -0.305104996 | count | 1 |
| TSPAN15    | -0.2944869 | 1.4520057 | -0.2028 | 0.839  | -0.305104996 | count | 1 |
| VAMP1      | -0.2944869 | 1.4520057 | -0.2028 | 0.839  | -0.305104996 | count | 1 |
| AC024909.2 | -0.2944869 | 1.4520057 | -0.2028 | 0.839  | -0.305104996 | count | 1 |
| BEX3       | -0.5689046 | 0.9238843 | -0.6158 | 0.538  | -0.304848079 | count | 1 |
| CCDC25     | -0.2189813 | 0.4045472 | -0.5413 | 0.589  | -0.304751656 | count | 1 |
| CDK13      | -0.2197296 | 0.3504709 | -0.627  | 0.531  | -0.304656778 | count | 1 |
| SRSF4      | -0.22159   | 0.356422  | -0.6217 | 0.535  | -0.304551061 | count | 1 |
| FYTTD1     | -0.220752  | 0.2988875 | -0.7386 | 0.461  | -0.304275352 | count | 1 |
| STAU2      | -0.2380569 | 0.540324  | -0.4406 | 0.66   | -0.304220783 | count | 1 |
| NFATC3     | -0.2256253 | 0.3823866 | -0.59   | 0.556  | -0.304184716 | count | 1 |
| TAOK1      | -0.3789335 | 0.4850416 | -0.7812 | 0.435  | -0.303250244 | count | 1 |
| ZNF683     | -0.2173614 | 0.3895538 | -0.558  | 0.5772 | -0.302988723 | count | 1 |
| EZR        | -0.2114679 | 0.1775945 | -1.1907 | 0.2346 | -0.302918647 | count | 1 |
| SMARCB1    | -0.2187719 | 0.3503706 | -0.6244 | 0.533  | -0.302677368 | count | 1 |
| HIST1H1C   | -0.2267171 | 0.4510179 | -0.5027 | 0.616  | -0.302521625 | count | 1 |

|            |            |           |         |        |              |       |   |
|------------|------------|-----------|---------|--------|--------------|-------|---|
| TBC1D10C   | -0.2121982 | 0.1877429 | -1.1303 | 0.259  | -0.30235918  | count | 1 |
| TXN        | -0.2114213 | 0.1711637 | -1.2352 | 0.218  | -0.301861034 | count | 1 |
| LZTFL1     | -0.2338727 | 0.6024043 | -0.3882 | 0.698  | -0.301558011 | count | 1 |
| ZBTB44     | -0.2382857 | 0.6701837 | -0.3556 | 0.722  | -0.30138341  | count | 1 |
| C11orf49   | -0.2552589 | 0.6136068 | -0.416  | 0.678  | -0.301361325 | count | 1 |
| NFE2L3     | -0.2552589 | 0.7904911 | -0.3229 | 0.747  | -0.301361325 | count | 1 |
| SF3A2      | -0.2630351 | 0.7393053 | -0.3558 | 0.722  | -0.301291453 | count | 1 |
| NDUFB9     | -0.2131146 | 0.2486566 | -0.8571 | 0.392  | -0.301032045 | count | 1 |
| MORC3      | -0.2273118 | 0.4001922 | -0.568  | 0.57   | -0.300655788 | count | 1 |
| TAF1B      | -0.2734289 | 0.5137155 | -0.5323 | 0.595  | -0.300609788 | count | 1 |
| CUEDC2     | -0.214671  | 0.4502063 | -0.4768 | 0.6338 | -0.300463332 | count | 1 |
| HNRNPK     | -0.2097726 | 0.1509104 | -1.39   | 0.1655 | -0.300118936 | count | 1 |
| PSMB6      | -0.2110622 | 0.1929305 | -1.094  | 0.2748 | -0.300065346 | count | 1 |
| RB1CC1     | -0.2326717 | 0.3471942 | -0.6701 | 0.503  | -0.300019874 | count | 1 |
| IL18RAP    | -0.2221361 | 0.3702367 | -0.6    | 0.549  | -0.299499244 | count | 1 |
| AC100810.1 | -0.2174219 | 0.4690681 | -0.4635 | 0.643  | -0.299280723 | count | 1 |
| MAML2      | -0.2217345 | 0.4489923 | -0.4938 | 0.622  | -0.298959914 | count | 1 |
| KPNB1      | -0.2224073 | 0.4170846 | -0.5332 | 0.594  | -0.298931944 | count | 1 |
| GSDMD      | -0.2198687 | 0.3449515 | -0.6374 | 0.524  | -0.298799058 | count | 1 |
| COMMD7     | -0.2102394 | 0.2276335 | -0.9236 | 0.3564 | -0.298484983 | count | 1 |
| APBB1IP    | -0.2088954 | 0.1693014 | -1.2339 | 0.218  | -0.298102652 | count | 1 |
| CENPC      | -0.2122483 | 0.2510712 | -0.8454 | 0.399  | -0.297885699 | count | 1 |
| MACO1      | -0.2382136 | 0.4233886 | -0.5626 | 0.574  | -0.297625084 | count | 1 |
| SDCBP      | -0.2080707 | 0.1719011 | -1.2104 | 0.227  | -0.297293851 | count | 1 |
| ILF3       | -0.2186722 | 0.3179437 | -0.6878 | 0.492  | -0.297178622 | count | 1 |
| WDR18      | -0.2235386 | 0.5381016 | -0.4154 | 0.678  | -0.297061788 | count | 1 |
| ECD        | -0.2235386 | 0.609167  | -0.367  | 0.714  | -0.297061788 | count | 1 |
| PPP1R14B   | -0.2074796 | 0.1810223 | -1.1462 | 0.2526 | -0.296991924 | count | 1 |
| UBE2W      | -0.2250043 | 0.4793166 | -0.4694 | 0.639  | -0.296081017 | count | 1 |
| TUBGCP2    | -0.2164292 | 0.359773  | -0.6016 | 0.548  | -0.295978704 | count | 1 |
| TCF12      | -0.2274438 | 0.6568025 | -0.3463 | 0.729  | -0.29556172  | count | 1 |
| TMOD3      | -0.2094086 | 0.2574124 | -0.8135 | 0.4165 | -0.295440467 | count | 1 |
| SPTLC1     | -0.2183714 | 0.5806617 | -0.3761 | 0.707  | -0.295282367 | count | 1 |
| DNAJA1     | -0.2057754 | 0.1426879 | -1.4421 | 0.15   | -0.295181225 | count | 1 |
| RHOH       | -0.2074596 | 0.2068293 | -1.003  | 0.317  | -0.295068058 | count | 1 |
| MRPL16     | -0.223051  | 0.4077922 | -0.547  | 0.585  | -0.295048612 | count | 1 |
| MRPL11     | -0.2156166 | 0.4081503 | -0.5283 | 0.598  | -0.294870805 | count | 1 |
| CCDC66     | -0.2124102 | 0.3565177 | -0.5958 | 0.552  | -0.294531109 | count | 1 |
| GTF2B      | -0.2072078 | 0.249449  | -0.8307 | 0.4068 | -0.294506062 | count | 1 |
| CFAP20     | -0.2109086 | 0.3863605 | -0.5459 | 0.586  | -0.294231817 | count | 1 |
| FUS        | -0.2058575 | 0.1550823 | -1.3274 | 0.1853 | -0.293471805 | count | 1 |
| TMEM199    | -0.2558365 | 0.7413214 | -0.3451 | 0.73   | -0.293165287 | count | 1 |
| MCUB       | -0.2095425 | 0.2719686 | -0.7705 | 0.442  | -0.292933696 | count | 1 |
| CBX3       | -0.2055362 | 0.2142926 | -0.9591 | 0.338  | -0.292930795 | count | 1 |
| FBXO9      | -0.2184695 | 0.4080673 | -0.5354 | 0.593  | -0.292661627 | count | 1 |

|           |            |           |         |        |              |       |   |
|-----------|------------|-----------|---------|--------|--------------|-------|---|
| KRT86     | -0.2033484 | 0.1810982 | -1.1229 | 0.262  | -0.292071648 | count | 1 |
| EAF1      | -0.21597   | 0.4880459 | -0.4425 | 0.658  | -0.292047082 | count | 1 |
| TSN       | -0.2207694 | 0.5845048 | -0.3777 | 0.706  | -0.292045545 | count | 1 |
| BNIP3L    | -0.2086114 | 0.3110217 | -0.6707 | 0.5029 | -0.291818887 | count | 1 |
| IFI35     | -0.2102377 | 0.3447711 | -0.6098 | 0.542  | -0.291525329 | count | 1 |
| GSAP      | -0.254381  | 0.6429832 | -0.3956 | 0.693  | -0.291521322 | count | 1 |
| RABEP2    | -0.5406675 | 0.7490635 | -0.7218 | 0.471  | -0.291252323 | count | 1 |
| RAPGEF6   | -0.5406675 | 0.7742375 | -0.6983 | 0.485  | -0.291252323 | count | 1 |
| HUS1B     | -0.3628536 | 1.184476  | -0.3063 | 0.76   | -0.290973637 | count | 1 |
| FAM200A   | -0.3628536 | 1.184476  | -0.3063 | 0.76   | -0.290973637 | count | 1 |
| IGHM      | -0.3628536 | 1.184476  | -0.3063 | 0.76   | -0.290973637 | count | 1 |
| CASS4     | -0.5400105 | 0.7776775 | -0.6944 | 0.488  | -0.290933899 | count | 1 |
| TTYH3     | -0.5400105 | 0.8205527 | -0.6581 | 0.511  | -0.290933899 | count | 1 |
| EIF5B     | -0.2049294 | 0.2550164 | -0.8036 | 0.4222 | -0.290802125 | count | 1 |
| LINC00996 | -0.2115212 | 0.4128566 | -0.5123 | 0.609  | -0.290750098 | count | 1 |
| PMF1      | -0.2074159 | 0.3502317 | -0.5922 | 0.554  | -0.290658635 | count | 1 |
| AP2B1     | -0.2111215 | 0.4788408 | -0.4409 | 0.66   | -0.290630932 | count | 1 |
| DNAJC15   | -0.2059072 | 0.257054  | -0.801  | 0.4237 | -0.290410995 | count | 1 |
| IGFBP4    | -0.2455462 | 0.8953949 | -0.2742 | 0.784  | -0.290034381 | count | 1 |
| NIP7      | -0.2106058 | 0.431773  | -0.4878 | 0.626  | -0.289922862 | count | 1 |
| TLN1      | -0.2024981 | 0.1493152 | -1.3562 | 0.176  | -0.289816964 | count | 1 |
| TBC1D2B   | -0.2111045 | 0.4102924 | -0.5145 | 0.607  | -0.289722932 | count | 1 |
| SMG1      | -0.2097981 | 0.4033898 | -0.5201 | 0.603  | -0.289215133 | count | 1 |
| ARPC2     | -0.2008366 | 0.1036078 | -1.9384 | 0.0534 | -0.288876337 | count | 1 |
| RRAGA     | -0.207499  | 0.3662028 | -0.5666 | 0.571  | -0.288803647 | count | 1 |
| ERP44     | -0.2064065 | 0.290366  | -0.7108 | 0.478  | -0.288739736 | count | 1 |
| CHPF2     | -0.3597932 | 0.7747358 | -0.4644 | 0.643  | -0.288630485 | count | 1 |
| WDR43     | -0.2108518 | 0.3580918 | -0.5888 | 0.556  | -0.288373901 | count | 1 |
| MCUR1     | -0.2306684 | 0.4904105 | -0.4704 | 0.638  | -0.288277275 | count | 1 |
| XRCC6     | -0.203156  | 0.2246743 | -0.9042 | 0.3665 | -0.287647585 | count | 1 |
| ANP32A    | -0.2059719 | 0.2645232 | -0.7787 | 0.437  | -0.287357388 | count | 1 |
| NLRC3     | -0.2610984 | 0.4681893 | -0.5577 | 0.577  | -0.28728516  | count | 1 |
| GYPC      | -0.1999462 | 0.1379931 | -1.449  | 0.148  | -0.286863396 | count | 1 |
| RHOB      | -0.2203342 | 0.641766  | -0.3433 | 0.732  | -0.286377515 | count | 1 |
| FAM114A2  | -0.2757949 | 0.5925463 | -0.4654 | 0.642  | -0.286155677 | count | 1 |
| KCTD9     | -0.2757949 | 0.7271327 | -0.3793 | 0.705  | -0.286155677 | count | 1 |
| TTC17     | -0.2364371 | 0.4343082 | -0.5444 | 0.587  | -0.285860139 | count | 1 |
| PREB      | -0.2417774 | 0.6386621 | -0.3786 | 0.705  | -0.28563586  | count | 1 |
| RPS6KA5   | -0.2257242 | 0.4966303 | -0.4545 | 0.65   | -0.285615717 | count | 1 |
| EPS8L2    | -0.2068547 | 0.418026  | -0.4948 | 0.621  | -0.285540689 | count | 1 |
| RALGDS    | -0.2091182 | 0.4316479 | -0.4845 | 0.628  | -0.285460331 | count | 1 |
| MSL3      | -0.2119324 | 0.4987399 | -0.4249 | 0.671  | -0.284907957 | count | 1 |
| MTDH      | -0.1996469 | 0.1972362 | -1.0122 | 0.312  | -0.28462355  | count | 1 |
| PIK3R1    | -0.1978984 | 0.1531541 | -1.2922 | 0.197  | -0.284180511 | count | 1 |
| MED7      | -0.2306846 | 0.6321239 | -0.3649 | 0.715  | -0.284078272 | count | 1 |

|           |            |           |         |        |              |       |   |
|-----------|------------|-----------|---------|--------|--------------|-------|---|
| AP1B1     | -0.5235629 | 0.754497  | -0.6939 | 0.4882 | -0.282932051 | count | 1 |
| TXNRD1    | -0.2071683 | 0.4272306 | -0.4849 | 0.628  | -0.28280655  | count | 1 |
| S1PR2     | -0.2173754 | 0.7497784 | -0.2899 | 0.772  | -0.282554158 | count | 1 |
| GOLGA1    | -0.2463132 | 0.543223  | -0.4534 | 0.651  | -0.282403305 | count | 1 |
| SPATA5L1  | -0.522041  | 0.7249721 | -0.7201 | 0.472  | -0.282188648 | count | 1 |
| SBK1      | -0.2714363 | 0.9153138 | -0.2965 | 0.767  | -0.281727991 | count | 1 |
| TXK       | -0.197893  | 0.215849  | -0.9168 | 0.36   | -0.281614924 | count | 1 |
| SRSF8     | -0.2015253 | 0.3437031 | -0.5863 | 0.558  | -0.281366263 | count | 1 |
| KLF9      | -0.2115979 | 0.3017301 | -0.7013 | 0.484  | -0.281265118 | count | 1 |
| HSPA8     | -0.1955231 | 0.1150787 | -1.699  | 0.0903 | -0.281219612 | count | 1 |
| OPA1      | -0.2553465 | 0.5819378 | -0.4388 | 0.661  | -0.281061132 | count | 1 |
| GOSR2     | -0.2104967 | 0.566126  | -0.3718 | 0.71   | -0.280970145 | count | 1 |
| ARID4A    | -0.2026357 | 0.2895294 | -0.6999 | 0.485  | -0.280712176 | count | 1 |
| CEBPB     | -0.1989376 | 0.2542228 | -0.7825 | 0.4345 | -0.280592814 | count | 1 |
| FMC1      | -0.2174066 | 0.5067984 | -0.429  | 0.668  | -0.280459101 | count | 1 |
| MED28     | -0.2078462 | 0.4136551 | -0.5025 | 0.616  | -0.280303212 | count | 1 |
| CREB3L2   | -0.2273495 | 0.5521593 | -0.4117 | 0.681  | -0.280008171 | count | 1 |
| PLEKHB2   | -0.2102487 | 0.4116672 | -0.5107 | 0.61   | -0.279479657 | count | 1 |
| SCAMP1    | -0.2100714 | 0.4760519 | -0.4413 | 0.659  | -0.279245019 | count | 1 |
| FAM13B    | -0.2233366 | 0.529796  | -0.4216 | 0.674  | -0.279188285 | count | 1 |
| TIMM13    | -0.2027855 | 0.3546923 | -0.5717 | 0.568  | -0.279184137 | count | 1 |
| EXO5      | -0.5153692 | 1.2108158 | -0.4256 | 0.671  | -0.278923846 | count | 1 |
| PRMT6     | -0.5153692 | 1.280644  | -0.4024 | 0.688  | -0.278923846 | count | 1 |
| DHFR      | -0.5153692 | 1.280644  | -0.4024 | 0.688  | -0.278923846 | count | 1 |
| CAMK4     | -0.5153692 | 1.280644  | -0.4024 | 0.688  | -0.278923846 | count | 1 |
| LINC01431 | -0.5153692 | 1.322215  | -0.3898 | 0.697  | -0.278923846 | count | 1 |
| TSPO      | -0.1945524 | 0.1539082 | -1.2641 | 0.207  | -0.278879774 | count | 1 |
| SRPK1     | -0.2066999 | 0.3807765 | -0.5428 | 0.588  | -0.278762882 | count | 1 |
| CREBBP    | -0.2144049 | 0.5402686 | -0.3968 | 0.692  | -0.278714999 | count | 1 |
| TAF9      | -0.1984366 | 0.3419398 | -0.5803 | 0.562  | -0.278664103 | count | 1 |
| AIMP1     | -0.198213  | 0.3594602 | -0.5514 | 0.5817 | -0.278215933 | count | 1 |
| CYTIP     | -0.1938886 | 0.1445696 | -1.3411 | 0.181  | -0.27795815  | count | 1 |
| EIF4E     | -0.2024312 | 0.314734  | -0.6432 | 0.521  | -0.277851026 | count | 1 |
| SMAD5     | -0.2195308 | 0.5037521 | -0.4358 | 0.663  | -0.277836003 | count | 1 |
| SF3B6     | -0.1954955 | 0.2138025 | -0.9144 | 0.3612 | -0.277747809 | count | 1 |
| RBPJ      | -0.2006043 | 0.3277096 | -0.6121 | 0.541  | -0.277274198 | count | 1 |
| FBXO28    | -0.2217202 | 0.8593237 | -0.258  | 0.797  | -0.277183754 | count | 1 |
| CAMTA1    | -0.2033533 | 0.3714563 | -0.5474 | 0.584  | -0.277041509 | count | 1 |
| SLC5A3    | -0.1990265 | 0.3653129 | -0.5448 | 0.586  | -0.276285935 | count | 1 |
| COX5B     | -0.1929565 | 0.1680297 | -1.1483 | 0.2517 | -0.276265278 | count | 1 |
| MRPL20    | -0.1944073 | 0.2540575 | -0.7652 | 0.4447 | -0.276202981 | count | 1 |
| PPP2R2A   | -0.1979338 | 0.2762823 | -0.7164 | 0.474  | -0.276162762 | count | 1 |
| RALB      | -0.2181754 | 0.5387249 | -0.405  | 0.686  | -0.276132962 | count | 1 |
| NVL       | -0.2059579 | 0.5176191 | -0.3979 | 0.691  | -0.275967324 | count | 1 |
| ARHGAP45  | -0.2012536 | 0.3529467 | -0.5702 | 0.569  | -0.275776891 | count | 1 |

|          |            |           |         |        |              |       |   |
|----------|------------|-----------|---------|--------|--------------|-------|---|
| RALGPS2  | -0.2136094 | 0.656293  | -0.3255 | 0.745  | -0.275590347 | count | 1 |
| EPS15    | -0.20184   | 0.340945  | -0.592  | 0.554  | -0.275553968 | count | 1 |
| GLUD1    | -0.2054804 | 0.3824491 | -0.5373 | 0.591  | -0.275330015 | count | 1 |
| NDE1     | -0.2272688 | 0.5517276 | -0.4119 | 0.681  | -0.27488557  | count | 1 |
| RNF7     | -0.1923566 | 0.1744092 | -1.1029 | 0.2709 | -0.274693471 | count | 1 |
| RAF1     | -0.2112632 | 0.5059529 | -0.4176 | 0.677  | -0.274653829 | count | 1 |
| MMGT1    | -0.2112632 | 0.5075196 | -0.4163 | 0.677  | -0.274653829 | count | 1 |
| ATG101   | -0.1952161 | 0.2914917 | -0.6697 | 0.504  | -0.274518986 | count | 1 |
| KLRC3    | -0.2268978 | 0.9129104 | -0.2485 | 0.804  | -0.27444127  | count | 1 |
| SERAC1   | -0.3410616 | 1.0020928 | -0.3403 | 0.7338 | -0.274243226 | count | 1 |
| ITPA     | -0.2033162 | 0.3130802 | -0.6494 | 0.517  | -0.274215662 | count | 1 |
| YTHDF1   | -0.2390524 | 0.6074    | -0.3936 | 0.694  | -0.274189337 | count | 1 |
| RAB1B    | -0.1991193 | 0.3580152 | -0.5562 | 0.578  | -0.274148966 | count | 1 |
| SAMSN1   | -0.1937575 | 0.2297817 | -0.8432 | 0.3997 | -0.274089243 | count | 1 |
| CEP83    | -0.2165299 | 0.5760571 | -0.3759 | 0.707  | -0.274065184 | count | 1 |
| AKAP5    | -0.2164702 | 0.5806304 | -0.3728 | 0.71   | -0.27399016  | count | 1 |
| CEP63    | -0.2007805 | 0.4283685 | -0.4687 | 0.64   | -0.273546867 | count | 1 |
| MGAT4A   | -0.2138215 | 0.5410861 | -0.3952 | 0.693  | -0.273453807 | count | 1 |
| DNAJB14  | -0.1942964 | 0.2642082 | -0.7354 | 0.463  | -0.273227364 | count | 1 |
| CCDC86   | -0.2381603 | 0.8897059 | -0.2677 | 0.789  | -0.273179607 | count | 1 |
| PPP2R3B  | -0.2381603 | 0.9615241 | -0.2477 | 0.805  | -0.273179607 | count | 1 |
| OFD1     | -0.192534  | 0.2446055 | -0.7871 | 0.4318 | -0.273178363 | count | 1 |
| NUDCD1   | -0.5028715 | 0.592957  | -0.8481 | 0.397  | -0.272782262 | count | 1 |
| SRP9     | -0.1923678 | 0.190915  | -1.0076 | 0.3144 | -0.27268083  | count | 1 |
| UFL1     | -0.1977263 | 0.4657404 | -0.4245 | 0.671  | -0.272612774 | count | 1 |
| SNTA1    | -0.2472455 | 0.9168821 | -0.2697 | 0.788  | -0.272286252 | count | 1 |
| FAM120C  | -0.2472455 | 0.996421  | -0.2481 | 0.804  | -0.272286252 | count | 1 |
| SRM      | -0.1934741 | 0.3093342 | -0.6255 | 0.532  | -0.271954068 | count | 1 |
| DGCR6L   | -0.19246   | 0.2771122 | -0.6945 | 0.4878 | -0.271888077 | count | 1 |
| KTN1     | -0.191957  | 0.210922  | -0.9101 | 0.3634 | -0.271806044 | count | 1 |
| PIM3     | -0.1935916 | 0.2721375 | -0.7114 | 0.477  | -0.271738286 | count | 1 |
| MIA2     | -0.1943113 | 0.2783542 | -0.6981 | 0.486  | -0.27167523  | count | 1 |
| COA4     | -0.1949161 | 0.3162252 | -0.6164 | 0.538  | -0.271544384 | count | 1 |
| BBS4     | -0.2168424 | 0.6193484 | -0.3501 | 0.726  | -0.271133107 | count | 1 |
| BUB3     | -0.1908056 | 0.2195928 | -0.8689 | 0.3855 | -0.270916441 | count | 1 |
| SUMO4    | -0.2358451 | 0.7759673 | -0.3039 | 0.761  | -0.270558598 | count | 1 |
| KLF3     | -0.2093638 | 0.4172836 | -0.5017 | 0.616  | -0.270145256 | count | 1 |
| ARGLU1   | -0.1886193 | 0.1664391 | -1.1333 | 0.2579 | -0.269817964 | count | 1 |
| HTRA2    | -0.2006348 | 0.4996553 | -0.4015 | 0.688  | -0.269775703 | count | 1 |
| NARF     | -0.198908  | 0.4036194 | -0.4928 | 0.622  | -0.26975323  | count | 1 |
| SS18     | -0.2153713 | 0.5829919 | -0.3694 | 0.712  | -0.269307817 | count | 1 |
| FTL      | -0.1869013 | 0.0768537 | -2.4319 | 0.0156 | -0.26925849  | count | 1 |
| EIF3D    | -0.1944488 | 0.265589  | -0.7321 | 0.465  | -0.268784546 | count | 1 |
| P4HA1    | -0.2100334 | 0.6210414 | -0.3382 | 0.735  | -0.268640116 | count | 1 |
| C19orf25 | -0.196987  | 0.3888095 | -0.5066 | 0.613  | -0.268393598 | count | 1 |



|            |            |           |         |        |              |       |   |
|------------|------------|-----------|---------|--------|--------------|-------|---|
| IFI16      | -0.1874904 | 0.1824427 | -1.0277 | 0.3049 | -0.267466501 | count | 1 |
| AC005070.3 | -0.4920356 | 0.895252  | -0.5496 | 0.583  | -0.267430098 | count | 1 |
| PAQR3      | -0.4920356 | 1.043255  | -0.4716 | 0.638  | -0.267430098 | count | 1 |
| TMEM203    | -0.2029556 | 0.4568429 | -0.4443 | 0.657  | -0.267206087 | count | 1 |
| DPF2       | -0.2135688 | 0.5495166 | -0.3886 | 0.698  | -0.267071046 | count | 1 |
| THUMP3-AS1 | -0.1936094 | 0.3303778 | -0.586  | 0.558  | -0.266949577 | count | 1 |
| UQCRB      | -0.1861838 | 0.1440182 | -1.2928 | 0.197  | -0.266764079 | count | 1 |
| AKAP8      | -0.2131031 | 0.6763806 | -0.3151 | 0.753  | -0.266493092 | count | 1 |
| COX5A      | -0.1860697 | 0.1730797 | -1.0751 | 0.2832 | -0.26606707  | count | 1 |
| FAHD1      | -0.2559231 | 0.8168212 | -0.3133 | 0.754  | -0.265941417 | count | 1 |
| CEP85L     | -0.1956069 | 0.4224362 | -0.463  | 0.644  | -0.265290308 | count | 1 |
| GEMIN7     | -0.2791263 | 0.663269  | -0.4208 | 0.674  | -0.264776534 | count | 1 |
| USP12      | -0.2091005 | 0.4127735 | -0.5066 | 0.613  | -0.264726078 | count | 1 |
| TAF8       | -0.2783265 | 0.8263773 | -0.3368 | 0.736  | -0.264037583 | count | 1 |
| CHST2      | -0.2783265 | 0.9213267 | -0.3021 | 0.763  | -0.264037583 | count | 1 |
| SFMBT1     | -0.2783265 | 0.9658475 | -0.2882 | 0.773  | -0.264037583 | count | 1 |
| EXT2       | -0.2783265 | 1.0281531 | -0.2707 | 0.787  | -0.264037583 | count | 1 |
| GIGYF2     | -0.1962971 | 0.590916  | -0.3322 | 0.74   | -0.263963838 | count | 1 |
| CMTM6      | -0.1868957 | 0.2703057 | -0.6914 | 0.4898 | -0.263958294 | count | 1 |
| PTPA       | -0.2139941 | 0.7229124 | -0.296  | 0.767  | -0.263697359 | count | 1 |
| C17orf67   | -0.2139941 | 0.7923094 | -0.2701 | 0.787  | -0.263697359 | count | 1 |
| HMGB1      | -0.1831474 | 0.0939153 | -1.9501 | 0.052  | -0.263588763 | count | 1 |
| 6-Sep      | -0.1848622 | 0.2065383 | -0.8951 | 0.3714 | -0.263533745 | count | 1 |
| PGD        | -0.4840364 | 0.9176875 | -0.5275 | 0.598  | -0.263462882 | count | 1 |
| MAPK11     | -0.4840364 | 1.098382  | -0.4407 | 0.66   | -0.263462882 | count | 1 |
| HSPB1      | -0.1884492 | 0.333865  | -0.5644 | 0.573  | -0.263319059 | count | 1 |
| YIF1B      | -0.2010886 | 0.5601124 | -0.359  | 0.72   | -0.263226563 | count | 1 |
| SMAP2      | -0.19083   | 0.2710258 | -0.7041 | 0.482  | -0.263125894 | count | 1 |
| BCL2L13    | -0.1986337 | 0.529661  | -0.375  | 0.708  | -0.262892339 | count | 1 |
| PDAP1      | -0.1866886 | 0.2414513 | -0.7732 | 0.44   | -0.262863068 | count | 1 |
| RAD23A     | -0.186524  | 0.2353451 | -0.7926 | 0.429  | -0.262828913 | count | 1 |
| PCCB       | -0.276991  | 1.0159662 | -0.2726 | 0.785  | -0.262803403 | count | 1 |
| ICA1L      | -0.276991  | 1.0241058 | -0.2705 | 0.787  | -0.262803403 | count | 1 |
| COQ2       | -0.276991  | 1.0900012 | -0.2541 | 0.8    | -0.262803403 | count | 1 |
| PDCD4-AS1  | -0.2383297 | 0.7956339 | -0.2995 | 0.765  | -0.262616807 | count | 1 |
| FTSJ3      | -0.2284078 | 0.6763409 | -0.3377 | 0.736  | -0.262133813 | count | 1 |
| GAK        | -0.2284078 | 0.7180461 | -0.3181 | 0.751  | -0.262133813 | count | 1 |
| SMC4       | -0.1879917 | 0.4384522 | -0.4288 | 0.668  | -0.261914241 | count | 1 |
| WRB        | -0.2045366 | 0.7345682 | -0.2784 | 0.781  | -0.261652904 | count | 1 |
| GALK1      | -0.2091981 | 0.6869435 | -0.3045 | 0.761  | -0.261645982 | count | 1 |
| C12orf73   | -0.2091981 | 0.6981884 | -0.2996 | 0.765  | -0.261645982 | count | 1 |
| CHERP      | -0.2091981 | 0.7195382 | -0.2907 | 0.771  | -0.261645982 | count | 1 |
| FAM219B    | -0.2211916 | 0.5237574 | -0.4223 | 0.673  | -0.26157788  | count | 1 |
| PA2G4      | -0.1836523 | 0.1972016 | -0.9313 | 0.352  | -0.261362865 | count | 1 |
| ZNF14      | -0.1996317 | 0.5567562 | -0.3586 | 0.72   | -0.261328821 | count | 1 |

|           |            |           |         |        |              |       |   |
|-----------|------------|-----------|---------|--------|--------------|-------|---|
| RGS3      | -0.1917789 | 0.4653056 | -0.4122 | 0.68   | -0.261317615 | count | 1 |
| RUNX3     | -0.1892211 | 0.2307784 | -0.8199 | 0.413  | -0.261252231 | count | 1 |
| GOLGA3    | -0.2157971 | 0.5269599 | -0.4095 | 0.682  | -0.261139843 | count | 1 |
| DMTN      | -0.478837  | 0.8161571 | -0.5867 | 0.558  | -0.260876854 | count | 1 |
| ARHGEF19  | -0.3237338 | 0.8085331 | -0.4004 | 0.689  | -0.260865036 | count | 1 |
| MSANTD2   | -0.250851  | 0.7471493 | -0.3357 | 0.737  | -0.260770727 | count | 1 |
| JAK1      | -0.1815484 | 0.1239231 | -1.465  | 0.144  | -0.260544629 | count | 1 |
| MOB4      | -0.1886705 | 0.3267426 | -0.5774 | 0.564  | -0.260493659 | count | 1 |
| NT5C3A    | -0.1878536 | 0.3671477 | -0.5117 | 0.609  | -0.26027503  | count | 1 |
| MBOAT7    | -0.2266843 | 0.5561762 | -0.4076 | 0.684  | -0.260180362 | count | 1 |
| ACAA1     | -0.1898465 | 0.3691891 | -0.5142 | 0.607  | -0.259721162 | count | 1 |
| TRIM25    | -0.2192871 | 1.0543744 | -0.208  | 0.835  | -0.259349408 | count | 1 |
| EIF2AK1   | -0.1866366 | 0.3870366 | -0.4822 | 0.63   | -0.259118532 | count | 1 |
| LRPAP1    | -0.1858226 | 0.2622643 | -0.7085 | 0.479  | -0.259099077 | count | 1 |
| MRPL51    | -0.1823181 | 0.2366716 | -0.7703 | 0.4417 | -0.258786683 | count | 1 |
| CITED4    | -0.1988819 | 0.7427966 | -0.2677 | 0.789  | -0.258641564 | count | 1 |
| SRP54     | -0.1896841 | 0.3344075 | -0.5672 | 0.571  | -0.258471174 | count | 1 |
| TMEM70    | -0.186858  | 0.3817837 | -0.4894 | 0.625  | -0.258313538 | count | 1 |
| NAA50     | -0.1878345 | 0.3621736 | -0.5186 | 0.604  | -0.258267877 | count | 1 |
| SLC39A4   | -0.1932607 | 0.602907  | -0.3205 | 0.749  | -0.258051919 | count | 1 |
| VPS39     | -0.2131031 | 0.6492109 | -0.3282 | 0.743  | -0.257909593 | count | 1 |
| ODF2L     | -0.1856377 | 0.3241949 | -0.5726 | 0.567  | -0.257734253 | count | 1 |
| CD46      | -0.1842828 | 0.3150928 | -0.5849 | 0.559  | -0.257506261 | count | 1 |
| LINC01137 | -0.4719778 | 0.8752918 | -0.5392 | 0.59   | -0.257456575 | count | 1 |
| BCL7C     | -0.1807842 | 0.2391606 | -0.7559 | 0.4503 | -0.257049454 | count | 1 |
| INO80D    | -0.1881537 | 0.4475432 | -0.4204 | 0.674  | -0.256919259 | count | 1 |
| TMCO1     | -0.1821224 | 0.2340964 | -0.778  | 0.437  | -0.256633588 | count | 1 |
| RAB11FIP4 | -0.2026176 | 0.694363  | -0.2918 | 0.771  | -0.256572602 | count | 1 |
| TMEM223   | -0.1924364 | 0.5096732 | -0.3776 | 0.706  | -0.255897132 | count | 1 |
| CLIC3     | -0.1776285 | 0.2139239 | -0.8303 | 0.407  | -0.255232749 | count | 1 |
| MECP2     | -0.1849051 | 0.3482134 | -0.531  | 0.596  | -0.254622388 | count | 1 |
| NOL11     | -0.244635  | 0.5710559 | -0.4284 | 0.669  | -0.254427781 | count | 1 |
| ULK4      | -0.4655809 | 0.8580197 | -0.5426 | 0.5878 | -0.254257739 | count | 1 |
| PHF1      | -0.1896301 | 0.3612265 | -0.525  | 0.6    | -0.254167588 | count | 1 |
| FAM199X   | -0.196832  | 0.5166423 | -0.381  | 0.703  | -0.254064377 | count | 1 |
| FAM98C    | -0.1919273 | 0.5177599 | -0.3707 | 0.711  | -0.254053545 | count | 1 |
| RPN2      | -0.1816124 | 0.2631066 | -0.6903 | 0.491  | -0.253946574 | count | 1 |
| CCDC88B   | -0.2005298 | 0.5832336 | -0.3438 | 0.731  | -0.253945977 | count | 1 |
| YDJC      | -0.1917781 | 0.3739136 | -0.5129 | 0.608  | -0.253856874 | count | 1 |
| ORMDL1    | -0.1786199 | 0.2709049 | -0.6593 | 0.5101 | -0.253451574 | count | 1 |
| SCARB2    | -0.1905829 | 0.5431147 | -0.3509 | 0.726  | -0.253442074 | count | 1 |
| SEC11C    | -0.1816708 | 0.2811059 | -0.6463 | 0.519  | -0.25291609  | count | 1 |
| MAP1LC3A  | -0.1893052 | 0.4779055 | -0.3961 | 0.692  | -0.25278993  | count | 1 |
| RNF169    | -0.1893052 | 0.5222519 | -0.3625 | 0.717  | -0.25278993  | count | 1 |
| ZFC3H1    | -0.1825877 | 0.3825318 | -0.4773 | 0.633  | -0.252715089 | count | 1 |

|            |            |           |         |        |              |       |   |
|------------|------------|-----------|---------|--------|--------------|-------|---|
| SNX10      | -0.1793395 | 0.3239639 | -0.5536 | 0.58   | -0.252110064 | count | 1 |
| CPLANE1    | -0.2420896 | 1.057244  | -0.229  | 0.819  | -0.251828451 | count | 1 |
| CLCF1      | -0.3119108 | 1.083252  | -0.2879 | 0.774  | -0.251699268 | count | 1 |
| SENP5      | -0.2126663 | 0.5015249 | -0.424  | 0.672  | -0.251598769 | count | 1 |
| ADAM28     | -0.2077383 | 0.9236029 | -0.2249 | 0.822  | -0.251474407 | count | 1 |
| IL15RA     | -0.2008956 | 0.9508414 | -0.2113 | 0.833  | -0.251335446 | count | 1 |
| RBM3       | -0.1751647 | 0.172791  | -1.0137 | 0.311  | -0.250427085 | count | 1 |
| NCKAP1L    | -0.1865427 | 0.4660967 | -0.4002 | 0.689  | -0.250043823 | count | 1 |
| YBEY       | -0.1897766 | 0.5591475 | -0.3394 | 0.735  | -0.249930921 | count | 1 |
| RABGAP1L   | -0.1805171 | 0.3294569 | -0.5479 | 0.584  | -0.249854728 | count | 1 |
| MPC1       | -0.1795667 | 0.3766787 | -0.4767 | 0.634  | -0.249778419 | count | 1 |
| SRSF5      | -0.174652  | 0.1713645 | -1.0192 | 0.3089 | -0.249772615 | count | 1 |
| TBC1D15    | -0.1886705 | 0.4967317 | -0.3798 | 0.704  | -0.249760161 | count | 1 |
| YARS       | -0.1783746 | 0.3304766 | -0.5397 | 0.59   | -0.248915386 | count | 1 |
| C11orf58   | -0.1742251 | 0.1709397 | -1.0192 | 0.3089 | -0.248829716 | count | 1 |
| RNASEH2C   | -0.1787233 | 0.3115248 | -0.5737 | 0.567  | -0.248607208 | count | 1 |
| RAB3IP     | -0.1986726 | 0.6533916 | -0.3041 | 0.761  | -0.248573646 | count | 1 |
| ARPC1B     | -0.174185  | 0.2055403 | -0.8474 | 0.3974 | -0.248366491 | count | 1 |
| PPM1K      | -0.1757436 | 0.3006641 | -0.5845 | 0.5593 | -0.248072222 | count | 1 |
| MEF2D      | -0.190584  | 0.6344808 | -0.3004 | 0.764  | -0.247903699 | count | 1 |
| ULK3       | -0.1936629 | 0.6055211 | -0.3198 | 0.749  | -0.247823265 | count | 1 |
| S100A11    | -0.1723499 | 0.1473611 | -1.1696 | 0.243  | -0.247803377 | count | 1 |
| INPP4B     | -0.1955679 | 0.5754161 | -0.3399 | 0.734  | -0.24770191  | count | 1 |
| EIF2AK2    | -0.1760374 | 0.3611988 | -0.4874 | 0.6263 | -0.247684657 | count | 1 |
| CLTB       | -0.1744786 | 0.2653896 | -0.6574 | 0.5114 | -0.247579711 | count | 1 |
| TNK2       | -0.2602852 | 0.661769  | -0.3933 | 0.694  | -0.247335527 | count | 1 |
| DUSP28     | -0.208973  | 0.8378471 | -0.2494 | 0.803  | -0.247272812 | count | 1 |
| SNX16      | -0.2241576 | 0.8177091 | -0.2741 | 0.784  | -0.247221267 | count | 1 |
| AC009061.2 | -0.2241576 | 1.0258205 | -0.2185 | 0.827  | -0.247221267 | count | 1 |
| TMSB15B    | -0.2241576 | 1.073742  | -0.2088 | 0.835  | -0.247221267 | count | 1 |
| SUSD1      | -0.2240332 | 0.8682101 | -0.258  | 0.797  | -0.247085994 | count | 1 |
| JAZF1      | -0.1780475 | 0.4037853 | -0.4409 | 0.66   | -0.2469705   | count | 1 |
| SYNE2      | -0.1765154 | 0.3168898 | -0.557  | 0.5779 | -0.246829618 | count | 1 |
| ILKAP      | -0.1808691 | 0.3656702 | -0.4946 | 0.621  | -0.246491107 | count | 1 |
| TRAF2      | -0.2229445 | 0.6420345 | -0.3472 | 0.729  | -0.245902006 | count | 1 |
| DYRK4      | -0.2029556 | 0.5867636 | -0.3459 | 0.73   | -0.245734681 | count | 1 |
| CPSF4      | -0.1992104 | 0.7408798 | -0.2689 | 0.788  | -0.245619914 | count | 1 |
| RETREG1    | -0.2138215 | 0.6438719 | -0.3321 | 0.74   | -0.245588345 | count | 1 |
| AC108134.3 | -0.2225524 | 0.6970361 | -0.3193 | 0.75   | -0.245475542 | count | 1 |
| ELOB       | -0.171451  | 0.1523836 | -1.1251 | 0.2614 | -0.245324364 | count | 1 |
| RMDN3      | -0.1936719 | 0.563142  | -0.3439 | 0.731  | -0.245315388 | count | 1 |
| MED14      | -0.1936719 | 0.6324358 | -0.3062 | 0.76   | -0.245315388 | count | 1 |
| GIMAP4     | -0.1726098 | 0.2257328 | -0.7647 | 0.445  | -0.245255666 | count | 1 |
| CEP170     | -0.2221683 | 0.5668878 | -0.3919 | 0.695  | -0.245057761 | count | 1 |
| SEC16A     | -0.1869931 | 0.7066436 | -0.2646 | 0.791  | -0.244859561 | count | 1 |

|            |            |           |         |        |              |       |   |
|------------|------------|-----------|---------|--------|--------------|-------|---|
| RABGGTA    | -0.2131031 | 0.812288  | -0.2623 | 0.793  | -0.244772692 | count | 1 |
| TSPAN31    | -0.1813246 | 0.5660125 | -0.3204 | 0.749  | -0.244647501 | count | 1 |
| CAPN12     | -0.1720492 | 0.2317292 | -0.7425 | 0.4583 | -0.244532915 | count | 1 |
| ZNF579     | -0.2216286 | 0.9263609 | -0.2392 | 0.811  | -0.244470689 | count | 1 |
| ZNF800     | -0.1752841 | 0.2940158 | -0.5962 | 0.551  | -0.244427451 | count | 1 |
| BLOC1S2    | -0.1762781 | 0.3190015 | -0.5526 | 0.581  | -0.243998464 | count | 1 |
| HAUS3      | -0.1807398 | 0.4416323 | -0.4093 | 0.683  | -0.243860886 | count | 1 |
| RGCC       | -0.16916   | 0.1544876 | -1.095  | 0.274  | -0.243713262 | count | 1 |
| UBALD1     | -0.1923693 | 0.7048712 | -0.2729 | 0.785  | -0.243675602 | count | 1 |
| GCLC       | -0.1923693 | 0.7497363 | -0.2566 | 0.798  | -0.243675602 | count | 1 |
| GNGT2      | -0.2119591 | 0.9073727 | -0.2336 | 0.815  | -0.243473677 | count | 1 |
| CBX7       | -0.2337121 | 0.8645753 | -0.2703 | 0.7871 | -0.243265585 | count | 1 |
| PPP2R5C    | -0.1761504 | 0.2845577 | -0.619  | 0.536  | -0.24292625  | count | 1 |
| SUMO2      | -0.1690125 | 0.113434  | -1.49   | 0.137  | -0.242825396 | count | 1 |
| BTF3       | -0.1686143 | 0.1013379 | -1.6639 | 0.0971 | -0.242561049 | count | 1 |
| NDUFB4     | -0.1705438 | 0.2222885 | -0.7672 | 0.4435 | -0.24235877  | count | 1 |
| HSP90AB1   | -0.16831   | 0.1062927 | -1.5835 | 0.114  | -0.242186735 | count | 1 |
| DHX15      | -0.1827146 | 0.6070473 | -0.301  | 0.764  | -0.24190685  | count | 1 |
| BCKDK      | -0.254381  | 0.8037889 | -0.3165 | 0.752  | -0.241855853 | count | 1 |
| GTSF1      | -0.254381  | 0.9300945 | -0.2735 | 0.785  | -0.241855853 | count | 1 |
| CBX5       | -0.1747933 | 0.4751795 | -0.3678 | 0.713  | -0.241371323 | count | 1 |
| RANBP2     | -0.1832446 | 0.389944  | -0.4699 | 0.639  | -0.241364376 | count | 1 |
| MPV17L2    | -0.1926493 | 0.9110158 | -0.2115 | 0.833  | -0.241088039 | count | 1 |
| ARHGEF1    | -0.1735042 | 0.252314  | -0.6877 | 0.492  | -0.240917172 | count | 1 |
| CKAP2      | -0.1750978 | 0.4132202 | -0.4237 | 0.672  | -0.240792835 | count | 1 |
| RPS6       | -0.1672072 | 0.0706683 | -2.3661 | 0.0186 | -0.24078998  | count | 1 |
| BAG5       | -0.179435  | 0.3768156 | -0.4762 | 0.634  | -0.240548239 | count | 1 |
| PSMD2      | -0.1787662 | 0.3983284 | -0.4488 | 0.654  | -0.240464775 | count | 1 |
| MTX2       | -0.181555  | 0.4640861 | -0.3912 | 0.696  | -0.240377566 | count | 1 |
| RPUSD1     | -0.2306222 | 0.6849909 | -0.3367 | 0.737  | -0.240104285 | count | 1 |
| VT11B      | -0.1784408 | 0.3635287 | -0.4909 | 0.624  | -0.240028442 | count | 1 |
| HMBX1      | -0.2304824 | 0.7084095 | -0.3254 | 0.745  | -0.239961212 | count | 1 |
| SERTAD2    | -0.1973869 | 0.588885  | -0.3352 | 0.738  | -0.23904839  | count | 1 |
| UBA5       | -0.1795666 | 0.4839419 | -0.371  | 0.711  | -0.2388461   | count | 1 |
| C1orf174   | -0.1744628 | 0.4874234 | -0.3579 | 0.721  | -0.238724985 | count | 1 |
| EDF1       | -0.1666239 | 0.1437645 | -1.159  | 0.2473 | -0.238567038 | count | 1 |
| CALR       | -0.1665041 | 0.183575  | -0.907  | 0.365  | -0.238148246 | count | 1 |
| ARNTL      | -0.228703  | 0.5734939 | -0.3988 | 0.69   | -0.23813991  | count | 1 |
| KCNK6      | -0.2944869 | 1.1603475 | -0.2538 | 0.8    | -0.238136495 | count | 1 |
| STIMATE    | -0.2944869 | 1.1904567 | -0.2474 | 0.805  | -0.238136495 | count | 1 |
| SSBP3      | -0.2944869 | 1.4520056 | -0.2028 | 0.839  | -0.238136495 | count | 1 |
| HIST2H2BF  | -0.2944869 | 1.4520056 | -0.2028 | 0.839  | -0.238136495 | count | 1 |
| CHAC2      | -0.2944869 | 1.4520056 | -0.2028 | 0.839  | -0.238136495 | count | 1 |
| AC016727.1 | -0.2944869 | 1.4520056 | -0.2028 | 0.839  | -0.238136495 | count | 1 |
| ACVR2B     | -0.2944869 | 1.4520056 | -0.2028 | 0.839  | -0.238136495 | count | 1 |

|            |            |           |         |        |              |       |   |
|------------|------------|-----------|---------|--------|--------------|-------|---|
| THEMIS     | -0.2944869 | 1.4520056 | -0.2028 | 0.839  | -0.238136495 | count | 1 |
| FAM220A    | -0.2944869 | 1.4520056 | -0.2028 | 0.839  | -0.238136495 | count | 1 |
| CYP51A1    | -0.2944869 | 1.4520056 | -0.2028 | 0.839  | -0.238136495 | count | 1 |
| AC078846.1 | -0.2944869 | 1.4520056 | -0.2028 | 0.839  | -0.238136495 | count | 1 |
| LY96       | -0.2944869 | 1.4520056 | -0.2028 | 0.839  | -0.238136495 | count | 1 |
| AC067735.1 | -0.2944869 | 1.4520056 | -0.2028 | 0.839  | -0.238136495 | count | 1 |
| STK24-AS1  | -0.2944869 | 1.4520056 | -0.2028 | 0.839  | -0.238136495 | count | 1 |
| NOP9       | -0.2944869 | 1.4520056 | -0.2028 | 0.839  | -0.238136495 | count | 1 |
| SAV1       | -0.2944869 | 1.4520056 | -0.2028 | 0.839  | -0.238136495 | count | 1 |
| SORD       | -0.2944869 | 1.4520056 | -0.2028 | 0.839  | -0.238136495 | count | 1 |
| LYSMD4     | -0.2944869 | 1.4520056 | -0.2028 | 0.839  | -0.238136495 | count | 1 |
| AC027682.4 | -0.2944869 | 1.4520056 | -0.2028 | 0.839  | -0.238136495 | count | 1 |
| AC007114.1 | -0.2944869 | 1.4520056 | -0.2028 | 0.839  | -0.238136495 | count | 1 |
| CAPS       | -0.2944869 | 1.4520056 | -0.2028 | 0.839  | -0.238136495 | count | 1 |
| ZNF563     | -0.2944869 | 1.4520056 | -0.2028 | 0.839  | -0.238136495 | count | 1 |
| PTGER1     | -0.2944869 | 1.4520056 | -0.2028 | 0.839  | -0.238136495 | count | 1 |
| FUCA1      | -0.1928331 | 0.5566796 | -0.3464 | 0.729  | -0.237814686 | count | 1 |
| DNAJB4     | -0.1928331 | 0.6405445 | -0.301  | 0.764  | -0.237814686 | count | 1 |
| ELP6       | -0.1814849 | 0.5529737 | -0.3282 | 0.743  | -0.237678341 | count | 1 |
| DHCR7      | -0.1850672 | 0.6682656 | -0.2769 | 0.782  | -0.236883802 | count | 1 |
| SERINC1    | -0.1700963 | 0.3256439 | -0.5223 | 0.602  | -0.236827433 | count | 1 |
| PSMD9      | -0.1919343 | 0.5172836 | -0.371  | 0.711  | -0.236714294 | count | 1 |
| BTG1       | -0.1641662 | 0.0876561 | -1.8728 | 0.062  | -0.236675171 | count | 1 |
| ATAD2B     | -0.1749242 | 0.4326806 | -0.4043 | 0.686  | -0.236037382 | count | 1 |
| USP47      | -0.1759971 | 0.3814475 | -0.4614 | 0.645  | -0.235954356 | count | 1 |
| PLEK       | -0.1665365 | 0.3122215 | -0.5334 | 0.5941 | -0.23555513  | count | 1 |
| BNIP2      | -0.1694264 | 0.2973037 | -0.5699 | 0.569  | -0.235485079 | count | 1 |
| ASF1A      | -0.1699194 | 0.3724331 | -0.4562 | 0.649  | -0.235470446 | count | 1 |
| CALM2      | -0.1639066 | 0.1143498 | -1.4334 | 0.153  | -0.235358092 | count | 1 |
| TET2       | -0.1737292 | 0.4086396 | -0.4251 | 0.671  | -0.235090497 | count | 1 |
| INTS5      | -0.2045366 | 1.0312321 | -0.1983 | 0.843  | -0.23504106  | count | 1 |
| TCTN1      | -0.2045366 | 1.0390753 | -0.1968 | 0.844  | -0.23504106  | count | 1 |
| ACTR3      | -0.1646179 | 0.1703196 | -0.9665 | 0.335  | -0.234909908 | count | 1 |
| EIF2S3     | -0.1699121 | 0.3440673 | -0.4938 | 0.622  | -0.234643614 | count | 1 |
| GPBP1L1    | -0.171494  | 0.4416432 | -0.3883 | 0.698  | -0.234225256 | count | 1 |
| APMAP      | -0.1655735 | 0.2231496 | -0.742  | 0.4586 | -0.234133038 | count | 1 |
| PLXNA3     | -0.2893415 | 0.8066379 | -0.3587 | 0.72   | -0.234118917 | count | 1 |
| CD63       | -0.1629361 | 0.1269188 | -1.2838 | 0.2    | -0.234109792 | count | 1 |
| RHOF       | -0.1650574 | 0.2108226 | -0.7829 | 0.4342 | -0.233693571 | count | 1 |
| HLA-C      | -0.1620971 | 0.0631214 | -2.568  | 0.0107 | -0.233550247 | count | 1 |
| ATG16L1    | -0.2449986 | 0.8041204 | -0.3047 | 0.761  | -0.233134317 | count | 1 |
| C1GALT1    | -0.1689298 | 0.3095845 | -0.5457 | 0.586  | -0.23298766  | count | 1 |
| MLLT6      | -0.1768167 | 0.3890831 | -0.4544 | 0.65   | -0.232931592 | count | 1 |
| GPALPP1    | -0.1748856 | 0.6015594 | -0.2907 | 0.771  | -0.232641832 | count | 1 |
| SNAPC2     | -0.1727914 | 0.4047149 | -0.4269 | 0.67   | -0.232452221 | count | 1 |

|            |            |           |         |        |              |       |   |
|------------|------------|-----------|---------|--------|--------------|-------|---|
| AC079922.2 | -0.191891  | 0.7644358 | -0.251  | 0.802  | -0.232446093 | count | 1 |
| DELE1      | -0.1881537 | 0.6788417 | -0.2772 | 0.782  | -0.232084843 | count | 1 |
| HACD2      | -0.1881537 | 0.7257345 | -0.2593 | 0.796  | -0.232084843 | count | 1 |
| GOT1       | -0.1782611 | 0.5308865 | -0.3358 | 0.737  | -0.231947825 | count | 1 |
| EIF1AD     | -0.1782611 | 0.5860604 | -0.3042 | 0.761  | -0.231947825 | count | 1 |
| PMAIP1     | -0.1666911 | 0.2992457 | -0.557  | 0.578  | -0.231896127 | count | 1 |
| IFNAR2     | -0.1759406 | 0.4977933 | -0.3534 | 0.724  | -0.231782022 | count | 1 |
| SNX3       | -0.1629486 | 0.2354778 | -0.692  | 0.4894 | -0.231672917 | count | 1 |
| GATAD1     | -0.1683579 | 0.3760366 | -0.4477 | 0.655  | -0.231543094 | count | 1 |
| IRF2       | -0.1649725 | 0.2408457 | -0.685  | 0.494  | -0.231498214 | count | 1 |
| PHC1       | -0.2855542 | 0.9314062 | -0.3066 | 0.759  | -0.231158176 | count | 1 |
| DCLRE1B    | -0.2855542 | 1.056844  | -0.2702 | 0.787  | -0.231158176 | count | 1 |
| AL592494.3 | -0.2855542 | 1.0637037 | -0.2685 | 0.789  | -0.231158176 | count | 1 |
| SLC27A1    | -0.2855542 | 1.0637037 | -0.2685 | 0.789  | -0.231158176 | count | 1 |
| ELOVL5     | -0.1744736 | 0.3898353 | -0.4476 | 0.655  | -0.231036773 | count | 1 |
| MRPS21     | -0.162666  | 0.2172221 | -0.7488 | 0.4545 | -0.23078756  | count | 1 |
| TMEM50A    | -0.1612952 | 0.1742091 | -0.9259 | 0.3552 | -0.230501443 | count | 1 |
| PIP5K1C    | -0.2000083 | 0.6916306 | -0.2892 | 0.773  | -0.229892832 | count | 1 |
| FIP1L1     | -0.1652589 | 0.305194  | -0.5415 | 0.589  | -0.229701731 | count | 1 |
| MRPL22     | -0.1646802 | 0.3438396 | -0.4789 | 0.632  | -0.229483823 | count | 1 |
| RAB31      | -0.1700445 | 0.6011109 | -0.2829 | 0.777  | -0.229471599 | count | 1 |
| PAWR       | -0.1832144 | 0.5906167 | -0.3102 | 0.757  | -0.229355568 | count | 1 |
| VPS33A     | -0.1832144 | 0.6195239 | -0.2957 | 0.768  | -0.229355568 | count | 1 |
| TMEM267    | -0.1832144 | 0.6275756 | -0.2919 | 0.771  | -0.229355568 | count | 1 |
| CHRN1      | -0.1832144 | 0.6735811 | -0.272  | 0.786  | -0.229355568 | count | 1 |
| MMAB       | -0.2076154 | 0.6907854 | -0.3005 | 0.764  | -0.229212121 | count | 1 |
| CSTF3      | -0.1890995 | 0.7264379 | -0.2603 | 0.795  | -0.229091306 | count | 1 |
| DDX46      | -0.1612122 | 0.2041887 | -0.7895 | 0.4304 | -0.229071392 | count | 1 |
| BRK1       | -0.1606953 | 0.200276  | -0.8024 | 0.4229 | -0.228405591 | count | 1 |
| TMEM50B    | -0.1783058 | 0.5251184 | -0.3396 | 0.734  | -0.228274464 | count | 1 |
| ZDHHC18    | -0.2189731 | 0.5120616 | -0.4276 | 0.669  | -0.228171406 | count | 1 |
| WDR77      | -0.1925255 | 0.8071319 | -0.2385 | 0.812  | -0.22798732  | count | 1 |
| ALG1       | -0.1925255 | 0.9293133 | -0.2072 | 0.836  | -0.22798732  | count | 1 |
| AC009053.2 | -0.1925255 | 1.0629353 | -0.1811 | 0.856  | -0.22798732  | count | 1 |
| NCR3       | -0.1602458 | 0.2272296 | -0.7052 | 0.481  | -0.227985591 | count | 1 |
| SPG7       | -0.1723771 | 0.4645859 | -0.371  | 0.711  | -0.227105681 | count | 1 |
| LPGAT1     | -0.1652905 | 0.3842423 | -0.4302 | 0.667  | -0.226979762 | count | 1 |
| BORCS7     | -0.1666182 | 0.4138689 | -0.4026 | 0.688  | -0.226076812 | count | 1 |
| YWHAB      | -0.1565984 | 0.1168182 | -1.3405 | 0.181  | -0.224712524 | count | 1 |
| YIPF3      | -0.1647692 | 0.3460338 | -0.4762 | 0.634  | -0.224601705 | count | 1 |
| GAPDH      | -0.155748  | 0.0935194 | -1.6654 | 0.0968 | -0.224438416 | count | 1 |
| 9-Sep      | -0.1597235 | 0.2806074 | -0.5692 | 0.57   | -0.224359567 | count | 1 |
| RBM17      | -0.1597722 | 0.3020412 | -0.529  | 0.597  | -0.224320421 | count | 1 |
| MTRR       | -0.1890258 | 0.7240353 | -0.2611 | 0.794  | -0.223879465 | count | 1 |
| NAA16      | -0.1663417 | 0.5021994 | -0.3312 | 0.741  | -0.223800713 | count | 1 |

|            |            |           |         |         |              |       |   |
|------------|------------|-----------|---------|---------|--------------|-------|---|
| BRD1       | -0.165161  | 0.3261636 | -0.5064 | 0.613   | -0.223526632 | count | 1 |
| PRR13      | -0.1562257 | 0.1853817 | -0.8427 | 0.4     | -0.223384246 | count | 1 |
| NR4A2      | -0.1554495 | 0.1751399 | -0.8876 | 0.375   | -0.223268981 | count | 1 |
| LCLAT1     | -0.214089  | 0.7776396 | -0.2753 | 0.783   | -0.223161532 | count | 1 |
| CBFA2T2    | -0.214089  | 0.7796138 | -0.2746 | 0.784   | -0.223161532 | count | 1 |
| LINC00623  | -0.1578945 | 0.267934  | -0.5893 | 0.5561  | -0.223099056 | count | 1 |
| RASA2      | -0.163587  | 0.2799318 | -0.5844 | 0.559   | -0.222993949 | count | 1 |
| RCL1       | -0.2131031 | 0.8394628 | -0.2539 | 0.8     | -0.222149751 | count | 1 |
| C16orf70   | -0.2131031 | 0.8891469 | -0.2397 | 0.811   | -0.222149751 | count | 1 |
| ZNF525     | -0.2131031 | 0.9967506 | -0.2138 | 0.831   | -0.222149751 | count | 1 |
| SNRNP48    | -0.166673  | 0.5769665 | -0.2889 | 0.773   | -0.221753583 | count | 1 |
| MED30      | -0.1582648 | 0.2778805 | -0.5695 | 0.569   | -0.221740092 | count | 1 |
| TK2        | -0.4013238 | 0.7556402 | -0.5311 | 0.596   | -0.221647305 | count | 1 |
| RILPL2     | -0.1569707 | 0.3617949 | -0.4339 | 0.6647  | -0.221526363 | count | 1 |
| CSNK1A1    | -0.1562159 | 0.2135935 | -0.7314 | 0.4651  | -0.221426816 | count | 1 |
| COP1       | -0.4002009 | 0.7270667 | -0.5504 | 0.582   | -0.221069781 | count | 1 |
| RALGAPA2   | -0.2723212 | 0.7176356 | -0.3795 | 0.705   | -0.220789524 | count | 1 |
| BTN3A2     | -0.1563449 | 0.2613032 | -0.5983 | 0.55    | -0.220498403 | count | 1 |
| MRPL1      | -0.162063  | 0.3964079 | -0.4088 | 0.683   | -0.220435355 | count | 1 |
| KDM2A      | -0.1648857 | 0.3717762 | -0.4435 | 0.658   | -0.220284813 | count | 1 |
| LINC002481 | -0.1817414 | 0.6137232 | -0.2961 | 0.767   | -0.220244324 | count | 1 |
| ABRAXAS2   | -0.2308768 | 0.88664   | -0.2604 | 0.795   | -0.219975659 | count | 1 |
| ZNF511     | -0.1633394 | 0.4748837 | -0.344  | 0.731   | -0.219772753 | count | 1 |
| SLC25A3    | -0.1532875 | 0.1521585 | -1.0074 | 0.314   | -0.219761412 | count | 1 |
| NDUFA9     | -0.1580187 | 0.3470638 | -0.4553 | 0.649   | -0.219653123 | count | 1 |
| DCTN5      | -0.1657484 | 0.5885137 | -0.2816 | 0.778   | -0.219523418 | count | 1 |
| TSR2       | -0.1587837 | 0.3749492 | -0.4235 | 0.672   | -0.219019293 | count | 1 |
| RBM4       | -0.1682527 | 0.5334942 | -0.3154 | 0.753   | -0.218980611 | count | 1 |
| EPC1       | -0.1542624 | 0.2115731 | -0.7291 | 0.4664  | -0.218567611 | count | 1 |
| POLR2J3    | -0.1668063 | 0.3943397 | -0.423  | 0.673   | -0.2185311   | count | 1 |
| KIZ        | -0.1898969 | 0.6245265 | -0.3041 | 0.761   | -0.218387222 | count | 1 |
| BPNT1      | -0.2690065 | 1.0503801 | -0.2561 | 0.798   | -0.218186572 | count | 1 |
| SLC20A1    | -0.1614688 | 0.4756816 | -0.3394 | 0.734   | -0.217929873 | count | 1 |
| PIF1       | -0.1637794 | 0.5622425 | -0.2913 | 0.771   | -0.217916319 | count | 1 |
| COX6B1     | -0.1520757 | 0.1449556 | -1.0491 | 0.295   | -0.217822151 | count | 1 |
| AZI2       | -0.1764483 | 0.4841462 | -0.3645 | 0.716   | -0.217741945 | count | 1 |
| SYF2       | -0.1527823 | 0.1889855 | -0.8084 | 0.419   | -0.217695978 | count | 1 |
| KAT7       | -0.1835956 | 0.405902  | -0.4523 | 0.651   | -0.217502706 | count | 1 |
| THAP7      | -0.1711938 | 0.517379  | -0.3309 | 0.741   | -0.216997485 | count | 1 |
| FPGS       | -0.1666308 | 0.6145184 | -0.2712 | 0.786   | -0.216878541 | count | 1 |
| CTNBP1     | -0.1562239 | 0.3993743 | -0.3912 | 0.696   | -0.216745806 | count | 1 |
| MAPK6      | -0.1626876 | 0.643018  | -0.253  | 0.8     | -0.216468329 | count | 1 |
| TMED10     | -0.1528169 | 0.2510359 | -0.6087 | 0.5431  | -0.216375708 | count | 1 |
| HLA-B      | -0.1498381 | 0.0542158 | -2.7637 | 0.00604 | -0.216073825 | count | 1 |
| FIG4       | -0.2266843 | 0.7732118 | -0.2932 | 0.77    | -0.216061881 | count | 1 |

|            |            |           |         |        |              |       |   |
|------------|------------|-----------|---------|--------|--------------|-------|---|
| MNT        | -0.2266843 | 0.9699856 | -0.2337 | 0.815  | -0.216061881 | count | 1 |
| PDCD4      | -0.1511654 | 0.1622343 | -0.9318 | 0.352  | -0.21597806  | count | 1 |
| PFDN1      | -0.1567127 | 0.3299522 | -0.475  | 0.635  | -0.215871674 | count | 1 |
| NAA25      | -0.3893172 | 0.9741112 | -0.3997 | 0.6897 | -0.215458713 | count | 1 |
| IRF5       | -0.3893172 | 0.9869412 | -0.3945 | 0.6935 | -0.215458713 | count | 1 |
| DDOST      | -0.1541032 | 0.3070562 | -0.5019 | 0.616  | -0.215089485 | count | 1 |
| CTSW       | -0.1488425 | 0.0980751 | -1.5176 | 0.13   | -0.214471188 | count | 1 |
| CSNK2A2    | -0.160489  | 0.5608352 | -0.2862 | 0.775  | -0.214428729 | count | 1 |
| SRRM1      | -0.1495076 | 0.1498483 | -0.9977 | 0.319  | -0.214221722 | count | 1 |
| CEP104     | -0.1594623 | 0.5303411 | -0.3007 | 0.764  | -0.213850842 | count | 1 |
| SPTLC2     | -0.1762761 | 0.4056488 | -0.4346 | 0.664  | -0.213669272 | count | 1 |
| SLC27A5    | -0.1759406 | 0.641559  | -0.2742 | 0.784  | -0.213265543 | count | 1 |
| ARHGAP10   | -0.1617928 | 0.4573106 | -0.3538 | 0.724  | -0.213211156 | count | 1 |
| TECR       | -0.1521236 | 0.2678387 | -0.568  | 0.57   | -0.213022742 | count | 1 |
| ATP5F1B    | -0.1503098 | 0.2012623 | -0.7468 | 0.4557 | -0.213016557 | count | 1 |
| HDAC8      | -0.1850672 | 0.7373975 | -0.251  | 0.802  | -0.212886769 | count | 1 |
| ZNF76      | -0.1850672 | 0.9614124 | -0.1925 | 0.847  | -0.212886769 | count | 1 |
| ZNF808     | -0.2618311 | 0.6648812 | -0.3938 | 0.694  | -0.212544097 | count | 1 |
| COTL1      | -0.1478217 | 0.1575118 | -0.9385 | 0.349  | -0.212432094 | count | 1 |
| SUPT4H1    | -0.1510092 | 0.3227598 | -0.4679 | 0.6402 | -0.212415246 | count | 1 |
| KLHL24     | -0.1547891 | 0.3760115 | -0.4117 | 0.681  | -0.212235034 | count | 1 |
| DPY19L3    | -0.3830681 | 0.8337024 | -0.4595 | 0.6462 | -0.212226014 | count | 1 |
| KMT5B      | -0.1540441 | 0.4763013 | -0.3234 | 0.747  | -0.212202198 | count | 1 |
| FAM204A    | -0.1511955 | 0.3256881 | -0.4642 | 0.6428 | -0.21218602  | count | 1 |
| ANKRD40    | -0.1561317 | 0.5547157 | -0.2815 | 0.779  | -0.211881953 | count | 1 |
| LRP12      | -0.2607173 | 0.9052638 | -0.288  | 0.774  | -0.211667292 | count | 1 |
| ANKS1A     | -0.2607173 | 0.9146443 | -0.285  | 0.776  | -0.211667292 | count | 1 |
| MAP1B      | -0.2607173 | 1.0255572 | -0.2542 | 0.799  | -0.211667292 | count | 1 |
| RNF113A    | -0.1504255 | 0.2919015 | -0.5153 | 0.607  | -0.211503854 | count | 1 |
| BUD13      | -0.1782611 | 0.743281  | -0.2398 | 0.811  | -0.211234869 | count | 1 |
| PSEN2      | -0.1782611 | 0.8285401 | -0.2152 | 0.83   | -0.211234869 | count | 1 |
| CLDND2     | -0.1782611 | 0.8349278 | -0.2135 | 0.831  | -0.211234869 | count | 1 |
| TBC1D14    | -0.1782611 | 0.9247325 | -0.1928 | 0.847  | -0.211234869 | count | 1 |
| TOMM5      | -0.1665732 | 0.63064   | -0.2641 | 0.792  | -0.211170958 | count | 1 |
| ZNF224     | -0.1564354 | 0.407894  | -0.3835 | 0.702  | -0.211153918 | count | 1 |
| POLR2J     | -0.1508732 | 0.2928965 | -0.5151 | 0.607  | -0.211147243 | count | 1 |
| ANAPC11    | -0.1490694 | 0.2525381 | -0.5903 | 0.555  | -0.210316539 | count | 1 |
| NBDY       | -0.1492588 | 0.3006802 | -0.4964 | 0.6199 | -0.209771529 | count | 1 |
| AC118549.1 | -0.1574088 | 0.6572791 | -0.2395 | 0.811  | -0.209466396 | count | 1 |
| ICE1       | -0.1580861 | 0.3563729 | -0.4436 | 0.658  | -0.209408761 | count | 1 |
| PBDC1      | -0.148048  | 0.2969382 | -0.4986 | 0.6184 | -0.209256051 | count | 1 |
| REXO2      | -0.1500941 | 0.3384725 | -0.4434 | 0.658  | -0.209184464 | count | 1 |
| UFD1       | -0.1483235 | 0.3196469 | -0.464  | 0.6429 | -0.208972367 | count | 1 |
| ZNF350     | -0.1552539 | 0.5635827 | -0.2755 | 0.783  | -0.208922757 | count | 1 |
| IKBK       | -0.1563297 | 0.5207498 | -0.3002 | 0.764  | -0.208887858 | count | 1 |



|            |            |           |         |        |              |       |   |
|------------|------------|-----------|---------|--------|--------------|-------|---|
| RNF24      | -0.3756854 | 0.6415416 | -0.5856 | 0.5586 | -0.208396603 | count | 1 |
| MED19      | -0.1500099 | 0.4119462 | -0.3641 | 0.716  | -0.208341479 | count | 1 |
| NXT1       | -0.1466622 | 0.2239794 | -0.6548 | 0.5131 | -0.207850638 | count | 1 |
| EIF3K      | -0.1445072 | 0.1231137 | -1.1738 | 0.241  | -0.20754988  | count | 1 |
| PPP3R1     | -0.1620393 | 0.4984726 | -0.3251 | 0.745  | -0.207546852 | count | 1 |
| PRR5       | -0.1635424 | 0.567573  | -0.2881 | 0.773  | -0.207348149 | count | 1 |
| FAM241A    | -0.1800487 | 0.5871639 | -0.3066 | 0.759  | -0.20716803  | count | 1 |
| RPL29      | -0.1436726 | 0.0609719 | -2.3564 | 0.019  | -0.207110928 | count | 1 |
| ITGB7      | -0.1506199 | 0.3894372 | -0.3868 | 0.699  | -0.206871106 | count | 1 |
| ZNF544     | -0.1631541 | 0.5037821 | -0.3239 | 0.746  | -0.206858323 | count | 1 |
| WIPI2      | -0.1521465 | 0.4065578 | -0.3742 | 0.708  | -0.206486155 | count | 1 |
| MED4       | -0.1500159 | 0.3140628 | -0.4777 | 0.633  | -0.206362416 | count | 1 |
| ARHGEF6    | -0.1975017 | 0.5041626 | -0.3917 | 0.696  | -0.206117477 | count | 1 |
| TROVE2     | -0.1482281 | 0.3374626 | -0.4392 | 0.661  | -0.206062459 | count | 1 |
| STXBP2     | -0.1478095 | 0.3120801 | -0.4736 | 0.636  | -0.206004493 | count | 1 |
| ABRACL     | -0.1443079 | 0.1997442 | -0.7225 | 0.4705 | -0.205727069 | count | 1 |
| POGZ       | -0.1580237 | 0.6278135 | -0.2517 | 0.801  | -0.205720126 | count | 1 |
| C3orf38    | -0.156981  | 0.446297  | -0.3517 | 0.725  | -0.205706451 | count | 1 |
| TMSB4X     | -0.1422742 | 0.0634611 | -2.2419 | 0.0256 | -0.205156002 | count | 1 |
| TIMM10     | -0.1503822 | 0.403761  | -0.3725 | 0.71   | -0.205031801 | count | 1 |
| SZT2       | -0.3682373 | 0.82847   | -0.4445 | 0.657  | -0.204522023 | count | 1 |
| HIST1H4C   | -0.1431276 | 0.2045084 | -0.6999 | 0.485  | -0.20444582  | count | 1 |
| SH3BGRL3   | -0.1417906 | 0.0955975 | -1.4832 | 0.139  | -0.204217446 | count | 1 |
| PRRC2A     | -0.1566723 | 0.6556804 | -0.2389 | 0.811  | -0.203967666 | count | 1 |
| RAP2B      | -0.148211  | 0.4097389 | -0.3617 | 0.718  | -0.203568524 | count | 1 |
| GOLGA2     | -0.148211  | 0.5112075 | -0.2899 | 0.772  | -0.203568524 | count | 1 |
| SZRD1      | -0.1464523 | 0.3952515 | -0.3705 | 0.711  | -0.203407335 | count | 1 |
| CSF3R      | -0.1946475 | 1.258892  | -0.1546 | 0.8772 | -0.203180125 | count | 1 |
| OTUD6B-AS1 | -0.1451647 | 0.3827178 | -0.3793 | 0.705  | -0.203166977 | count | 1 |
| RERE       | -0.1673886 | 0.5234578 | -0.3198 | 0.749  | -0.202970167 | count | 1 |
| ARL8B      | -0.1548794 | 0.3704464 | -0.4181 | 0.676  | -0.202962457 | count | 1 |
| ZDHHC4     | -0.1517519 | 0.6173012 | -0.2458 | 0.806  | -0.202788376 | count | 1 |
| GGCT       | -0.1597318 | 0.4900734 | -0.3259 | 0.745  | -0.202540645 | count | 1 |
| PHACTR2    | -0.1469901 | 0.3661147 | -0.4015 | 0.688  | -0.202501359 | count | 1 |
| NSD3       | -0.1422487 | 0.2048897 | -0.6943 | 0.488  | -0.202313832 | count | 1 |
| CD44       | -0.141028  | 0.1396874 | -1.0096 | 0.313  | -0.202259088 | count | 1 |
| USP11      | -0.1752899 | 0.4606019 | -0.3806 | 0.704  | -0.201742182 | count | 1 |
| ZNF322     | -0.1701695 | 0.5813256 | -0.2927 | 0.77   | -0.201721071 | count | 1 |
| JOSD2      | -0.1467603 | 0.4472553 | -0.3281 | 0.743  | -0.201579523 | count | 1 |
| MFSD1      | -0.1546474 | 0.5652054 | -0.2736 | 0.785  | -0.201341587 | count | 1 |
| IAH1       | -0.1425674 | 0.2770074 | -0.5147 | 0.6071 | -0.201150397 | count | 1 |
| LSP1       | -0.1400165 | 0.1344833 | -1.0411 | 0.299  | -0.200794554 | count | 1 |
| LY6G5C     | -0.191891  | 0.9325687 | -0.2058 | 0.837  | -0.200342038 | count | 1 |
| TAS2R14    | -0.191891  | 0.9325687 | -0.2058 | 0.837  | -0.200342038 | count | 1 |
| MTFP1      | -0.191891  | 0.9325687 | -0.2058 | 0.837  | -0.200342038 | count | 1 |

|           |            |           |         |        |              |       |   |
|-----------|------------|-----------|---------|--------|--------------|-------|---|
| PQLC2     | -0.191891  | 1.2001371 | -0.1599 | 0.873  | -0.200342038 | count | 1 |
| PDE5A     | -0.191891  | 1.2001371 | -0.1599 | 0.873  | -0.200342038 | count | 1 |
| RAD50     | -0.191891  | 1.2001371 | -0.1599 | 0.873  | -0.200342038 | count | 1 |
| LINC02328 | -0.191891  | 1.2001371 | -0.1599 | 0.873  | -0.200342038 | count | 1 |
| ZNHIT1    | -0.1407274 | 0.2428706 | -0.5794 | 0.5627 | -0.20003904  | count | 1 |
| PSMC5     | -0.1414662 | 0.2836382 | -0.4988 | 0.6183 | -0.199725406 | count | 1 |
| PPOX      | -0.1682527 | 0.7745332 | -0.2172 | 0.828  | -0.199466234 | count | 1 |
| MIDN      | -0.1412239 | 0.2547735 | -0.5543 | 0.5797 | -0.199444542 | count | 1 |
| STUB1     | -0.1408113 | 0.2314566 | -0.6084 | 0.5434 | -0.199293464 | count | 1 |
| IER3      | -0.1428426 | 0.3615411 | -0.3951 | 0.693  | -0.199244052 | count | 1 |
| RPL26     | -0.1382447 | 0.0687153 | -2.0118 | 0.0451 | -0.199150596 | count | 1 |
| MSI2      | -0.1678668 | 0.541038  | -0.3103 | 0.757  | -0.199012227 | count | 1 |
| POU3F1    | -0.244635  | 0.8538123 | -0.2865 | 0.775  | -0.198978634 | count | 1 |
| MPP7      | -0.244635  | 0.9050929 | -0.2703 | 0.787  | -0.198978634 | count | 1 |
| SERPINA1  | -0.244635  | 0.9050929 | -0.2703 | 0.787  | -0.198978634 | count | 1 |
| MBTD1     | -0.244635  | 0.953481  | -0.2566 | 0.798  | -0.198978634 | count | 1 |
| FAM126A   | -0.244635  | 0.9554148 | -0.2561 | 0.7981 | -0.198978634 | count | 1 |
| NUDT22    | -0.1423492 | 0.3579946 | -0.3976 | 0.691  | -0.198977777 | count | 1 |
| CYC1      | -0.1416438 | 0.3014053 | -0.4699 | 0.639  | -0.198586742 | count | 1 |
| NDUFV2    | -0.1395563 | 0.2371631 | -0.5884 | 0.5566 | -0.198375223 | count | 1 |
| TRAPPC11  | -0.1723297 | 0.7820757 | -0.2203 | 0.826  | -0.198365558 | count | 1 |
| DHRS3     | -0.1404049 | 0.3045678 | -0.461  | 0.6451 | -0.198035609 | count | 1 |
| BBC3      | -0.1462014 | 0.3300353 | -0.443  | 0.658  | -0.197925943 | count | 1 |
| MIA3      | -0.1415973 | 0.3223749 | -0.4392 | 0.661  | -0.197509097 | count | 1 |
| RPF2      | -0.1515611 | 0.4566534 | -0.3319 | 0.74   | -0.197338432 | count | 1 |
| KDM4C     | -0.1437514 | 0.4713189 | -0.305  | 0.761  | -0.197128263 | count | 1 |
| H3F3A     | -0.1368761 | 0.0841027 | -1.6275 | 0.105  | -0.197065302 | count | 1 |
| SAT1      | -0.1381987 | 0.2419045 | -0.5713 | 0.568  | -0.197039651 | count | 1 |
| ASAP1     | -0.1454402 | 0.4875163 | -0.2983 | 0.766  | -0.196897765 | count | 1 |
| RPL5      | -0.1363795 | 0.0672998 | -2.0264 | 0.0435 | -0.196556703 | count | 1 |
| UBL5      | -0.1374851 | 0.1665948 | -0.8253 | 0.41   | -0.196426555 | count | 1 |
| EBLN3P    | -0.1464101 | 0.4143718 | -0.3533 | 0.724  | -0.196392571 | count | 1 |
| FRYL      | -0.1507174 | 0.3692709 | -0.4081 | 0.683  | -0.196243974 | count | 1 |
| PDIA6     | -0.1379958 | 0.2314703 | -0.5962 | 0.5515 | -0.196008024 | count | 1 |
| MSN       | -0.1375786 | 0.1971074 | -0.698  | 0.486  | -0.195980567 | count | 1 |
| AASDHPPT  | -0.1440267 | 0.458998  | -0.3138 | 0.754  | -0.195490084 | count | 1 |
| LITAF     | -0.1366259 | 0.1842657 | -0.7415 | 0.459  | -0.195426666 | count | 1 |
| SLC38A10  | -0.1871085 | 0.6058939 | -0.3088 | 0.758  | -0.195415123 | count | 1 |
| ARL16     | -0.1498654 | 0.4044456 | -0.3705 | 0.711  | -0.1951387   | count | 1 |
| BIN1      | -0.1379546 | 0.2879824 | -0.479  | 0.6322 | -0.194888685 | count | 1 |
| MTHFS     | -0.1477834 | 0.5721238 | -0.2583 | 0.796  | -0.194809325 | count | 1 |
| RPL12     | -0.1351029 | 0.0660776 | -2.0446 | 0.0417 | -0.194746354 | count | 1 |
| MICU3     | -0.1553913 | 0.6547286 | -0.2373 | 0.813  | -0.194708278 | count | 1 |
| KHNYN     | -0.1601378 | 0.9038536 | -0.1772 | 0.859  | -0.194235062 | count | 1 |
| ELF1      | -0.1353702 | 0.1366137 | -0.9909 | 0.322  | -0.19417285  | count | 1 |

|            |            |           |         |        |              |       |   |
|------------|------------|-----------|---------|--------|--------------|-------|---|
| RNH1       | -0.1375849 | 0.242463  | -0.5674 | 0.571  | -0.19354848  | count | 1 |
| EMP3       | -0.1348153 | 0.1558971 | -0.8648 | 0.388  | -0.193445447 | count | 1 |
| TMEM183A   | -0.1407496 | 0.3748516 | -0.3755 | 0.708  | -0.192314779 | count | 1 |
| INPP5K     | -0.2360691 | 0.6033565 | -0.3913 | 0.696  | -0.192198764 | count | 1 |
| SARAF      | -0.1338483 | 0.1242673 | -1.0771 | 0.282  | -0.192156625 | count | 1 |
| PPARA      | -0.1499706 | 0.8227575 | -0.1823 | 0.855  | -0.192154531 | count | 1 |
| IFNAR1     | -0.1418575 | 0.3502588 | -0.405  | 0.686  | -0.191522264 | count | 1 |
| TTF1       | -0.1421919 | 0.527318  | -0.2697 | 0.7876 | -0.191387804 | count | 1 |
| GPSM3      | -0.1341453 | 0.1763901 | -0.7605 | 0.448  | -0.191226853 | count | 1 |
| RANBP1     | -0.1369456 | 0.2725564 | -0.5024 | 0.616  | -0.191027989 | count | 1 |
| GPANK1     | -0.1489585 | 0.5371078 | -0.2773 | 0.782  | -0.190863182 | count | 1 |
| ZNF331     | -0.1326102 | 0.1870636 | -0.7089 | 0.479  | -0.190761674 | count | 1 |
| SRI        | -0.1341623 | 0.2061433 | -0.6508 | 0.5156 | -0.190683584 | count | 1 |
| GGNBP2     | -0.1348422 | 0.2209649 | -0.6102 | 0.5421 | -0.190549854 | count | 1 |
| LIMD2      | -0.132773  | 0.1699878 | -0.7811 | 0.435  | -0.190336746 | count | 1 |
| PRADC1     | -0.3410616 | 0.9393359 | -0.3631 | 0.717  | -0.190289809 | count | 1 |
| KIAA0753   | -0.3410616 | 0.9989457 | -0.3414 | 0.733  | -0.190289809 | count | 1 |
| HMBS       | -0.3410616 | 1.048884  | -0.3252 | 0.745  | -0.190289809 | count | 1 |
| NSD2       | -0.1652503 | 0.5869528 | -0.2815 | 0.778  | -0.190285671 | count | 1 |
| BABAM2     | -0.1447602 | 0.4468175 | -0.324  | 0.746  | -0.189746029 | count | 1 |
| SFXN1      | -0.1409099 | 0.3569361 | -0.3948 | 0.693  | -0.18966634  | count | 1 |
| MATK       | -0.1321499 | 0.1328331 | -0.9949 | 0.321  | -0.189621568 | count | 1 |
| RAB2B      | -0.1494366 | 0.6776211 | -0.2205 | 0.826  | -0.189545905 | count | 1 |
| MSH3       | -0.232186  | 0.543913  | -0.4269 | 0.67   | -0.189120469 | count | 1 |
| VTA1       | -0.1441262 | 0.5674481 | -0.254  | 0.8    | -0.188917756 | count | 1 |
| CREM       | -0.1331657 | 0.2445478 | -0.5445 | 0.5864 | -0.188811918 | count | 1 |
| GIGYF1     | -0.1499842 | 0.6000823 | -0.2499 | 0.803  | -0.187966715 | count | 1 |
| SURF4      | -0.1365887 | 0.4047677 | -0.3374 | 0.736  | -0.187921383 | count | 1 |
| TMUB2      | -0.1464541 | 0.4826119 | -0.3035 | 0.762  | -0.187667448 | count | 1 |
| ARHGAP25   | -0.1464541 | 0.5026304 | -0.2914 | 0.771  | -0.187667448 | count | 1 |
| MS4A1      | -0.141543  | 0.5302817 | -0.2669 | 0.79   | -0.187558896 | count | 1 |
| ERGIC3     | -0.1357087 | 0.3730297 | -0.3638 | 0.7162 | -0.187479167 | count | 1 |
| COX8A      | -0.1310438 | 0.1635226 | -0.8014 | 0.4235 | -0.187425911 | count | 1 |
| MAPRE1     | -0.1337428 | 0.3475267 | -0.3848 | 0.7006 | -0.18741646  | count | 1 |
| PGPEP1     | -0.16919   | 0.7158357 | -0.2364 | 0.813  | -0.187222425 | count | 1 |
| RPS5       | -0.1298233 | 0.0729971 | -1.7785 | 0.0763 | -0.187059742 | count | 1 |
| FUNDC1     | -0.1385018 | 0.5346138 | -0.2591 | 0.796  | -0.1870018   | count | 1 |
| LUZP1      | -0.1364649 | 0.3387318 | -0.4029 | 0.687  | -0.186823551 | count | 1 |
| PKNOX1     | -0.1538854 | 0.6552384 | -0.2349 | 0.814  | -0.186698231 | count | 1 |
| NPM1       | -0.1296573 | 0.1176351 | -1.1022 | 0.271  | -0.186169673 | count | 1 |
| RPUSD3     | -0.1467225 | 0.6248742 | -0.2348 | 0.815  | -0.186118646 | count | 1 |
| DNAJB6     | -0.129923  | 0.170339  | -0.7627 | 0.4462 | -0.185877043 | count | 1 |
| AC004817.3 | -0.1944359 | 0.8222701 | -0.2365 | 0.813  | -0.185849049 | count | 1 |
| CMAS       | -0.1359208 | 0.4670992 | -0.291  | 0.771  | -0.185728755 | count | 1 |
| UTP14A     | -0.1611837 | 0.6992898 | -0.2305 | 0.818  | -0.185641452 | count | 1 |

|           |            |           |         |        |              |       |   |
|-----------|------------|-----------|---------|--------|--------------|-------|---|
| FMNL3     | -0.1431704 | 0.5760839 | -0.2485 | 0.804  | -0.185066647 | count | 1 |
| IMPACT    | -0.1520964 | 0.761007  | -0.1999 | 0.842  | -0.184540956 | count | 1 |
| ETF1      | -0.1355385 | 0.3263039 | -0.4154 | 0.678  | -0.184427667 | count | 1 |
| MRPL33    | -0.1322826 | 0.3137387 | -0.4216 | 0.674  | -0.184388751 | count | 1 |
| NAT10     | -0.1928331 | 0.887205  | -0.2173 | 0.828  | -0.184342498 | count | 1 |
| NEIL2     | -0.1928331 | 0.9856874 | -0.1956 | 0.845  | -0.184342498 | count | 1 |
| KIR3DL1   | -0.1928331 | 1.1040453 | -0.1747 | 0.861  | -0.184342498 | count | 1 |
| BSDC1     | -0.1390015 | 0.5437571 | -0.2556 | 0.798  | -0.184200684 | count | 1 |
| ABI1      | -0.134736  | 0.3827484 | -0.352  | 0.725  | -0.183739308 | count | 1 |
| ARHGEF3   | -0.1321821 | 0.3923632 | -0.3369 | 0.736  | -0.183243873 | count | 1 |
| MEI1      | -0.1443976 | 0.5271989 | -0.2739 | 0.784  | -0.183182361 | count | 1 |
| THOC6     | -0.138781  | 0.578268  | -0.24   | 0.81   | -0.182977868 | count | 1 |
| SH2D1B    | -0.1296851 | 0.330357  | -0.3926 | 0.6949 | -0.18279939  | count | 1 |
| LRIG2     | -0.143682  | 0.8514643 | -0.1687 | 0.866  | -0.182278478 | count | 1 |
| FIGNL1    | -0.143682  | 0.9368335 | -0.1534 | 0.878  | -0.182278478 | count | 1 |
| FAM133B   | -0.1282653 | 0.2104052 | -0.6096 | 0.5426 | -0.182006605 | count | 1 |
| YY1AP1    | -0.149844  | 0.7696921 | -0.1947 | 0.846  | -0.181824406 | count | 1 |
| ZDHC21    | -0.1731588 | 0.5974013 | -0.2899 | 0.772  | -0.181023161 | count | 1 |
| COPS5     | -0.1298382 | 0.3526046 | -0.3682 | 0.713  | -0.18098522  | count | 1 |
| LINC01678 | -0.3228701 | 0.6747352 | -0.4785 | 0.633  | -0.180680098 | count | 1 |
| IARS      | -0.1351502 | 0.6049247 | -0.2234 | 0.823  | -0.180658659 | count | 1 |
| ZFAND6    | -0.1289062 | 0.3003054 | -0.4293 | 0.668  | -0.180645065 | count | 1 |
| ST8SIA6   | -0.1440452 | 0.71646   | -0.2011 | 0.841  | -0.180558947 | count | 1 |
| NME1      | -0.135561  | 0.5549922 | -0.2443 | 0.807  | -0.18046999  | count | 1 |
| GBP4      | -0.13356   | 0.3759919 | -0.3552 | 0.723  | -0.180343737 | count | 1 |
| RPS21     | -0.1252435 | 0.0880284 | -1.4228 | 0.156  | -0.180213081 | count | 1 |
| ARPC4     | -0.1264367 | 0.1916131 | -0.6599 | 0.51   | -0.18017143  | count | 1 |
| COG3      | -0.1458206 | 0.6659778 | -0.219  | 0.827  | -0.180148195 | count | 1 |
| NANS      | -0.1484394 | 0.4375952 | -0.3392 | 0.735  | -0.180130093 | count | 1 |
| ADAL      | -0.1882426 | 0.6658258 | -0.2827 | 0.778  | -0.180025103 | count | 1 |
| AIDA      | -0.1433662 | 0.4715912 | -0.304  | 0.761  | -0.179711824 | count | 1 |
| SP2       | -0.2203248 | 0.5997076 | -0.3674 | 0.714  | -0.179698845 | count | 1 |
| UBA52     | -0.1246578 | 0.0749409 | -1.6634 | 0.0972 | -0.179438383 | count | 1 |
| PCF11     | -0.1303209 | 0.3178563 | -0.41   | 0.682  | -0.179034775 | count | 1 |
| AP2S1     | -0.1272702 | 0.3169173 | -0.4016 | 0.688  | -0.178893688 | count | 1 |
| BPTF      | -0.1258013 | 0.2262225 | -0.5561 | 0.5785 | -0.17847908  | count | 1 |
| IL18R1    | -0.1352176 | 0.4421682 | -0.3058 | 0.76   | -0.178293266 | count | 1 |
| CEMIP2    | -0.1269009 | 0.2672574 | -0.4748 | 0.6352 | -0.178293205 | count | 1 |
| NELFE     | -0.1331978 | 0.4686774 | -0.2842 | 0.776  | -0.178055182 | count | 1 |
| TERF2IP   | -0.1244705 | 0.1652252 | -0.7533 | 0.452  | -0.177952643 | count | 1 |
| ZFAND3    | -0.141947  | 0.5836493 | -0.2432 | 0.808  | -0.17794109  | count | 1 |
| UBE2K     | -0.127856  | 0.3693148 | -0.3462 | 0.729  | -0.177774683 | count | 1 |
| SPOP      | -0.1274154 | 0.4111694 | -0.3099 | 0.757  | -0.177611614 | count | 1 |
| HMOX2     | -0.1256651 | 0.2801522 | -0.4486 | 0.654  | -0.177486016 | count | 1 |
| CTBP2     | -0.1347365 | 0.435839  | -0.3091 | 0.757  | -0.176647717 | count | 1 |

|          |            |           |         |        |              |       |   |
|----------|------------|-----------|---------|--------|--------------|-------|---|
| RPL31    | -0.1229919 | 0.1081402 | -1.1373 | 0.256  | -0.176623613 | count | 1 |
| TUBB     | -0.1237444 | 0.1691662 | -0.7315 | 0.465  | -0.176281408 | count | 1 |
| DCTN4    | -0.1842223 | 0.7063194 | -0.2608 | 0.794  | -0.1762409   | count | 1 |
| AFF1     | -0.1423967 | 0.5782225 | -0.2463 | 0.806  | -0.175939856 | count | 1 |
| DEK      | -0.1227981 | 0.1640491 | -0.7485 | 0.4547 | -0.175902279 | count | 1 |
| UBFD1    | -0.3128163 | 0.8694986 | -0.3598 | 0.7193 | -0.175341029 | count | 1 |
| RAB9A    | -0.126441  | 0.2624483 | -0.4818 | 0.63   | -0.175294743 | count | 1 |
| CCDC127  | -0.1353994 | 0.5151477 | -0.2628 | 0.793  | -0.175056825 | count | 1 |
| IQGAP1   | -0.1235918 | 0.1915221 | -0.6453 | 0.5192 | -0.174893613 | count | 1 |
| NDUFAF8  | -0.1256469 | 0.3133841 | -0.4009 | 0.689  | -0.174706544 | count | 1 |
| ZNF354A  | -0.1514641 | 0.6211738 | -0.2438 | 0.808  | -0.174532771 | count | 1 |
| SKAP1    | -0.1216209 | 0.167706  | -0.7252 | 0.4689 | -0.174233776 | count | 1 |
| MAP3K8   | -0.1220674 | 0.1986165 | -0.6146 | 0.539  | -0.174154597 | count | 1 |
| HNRNPR   | -0.12296   | 0.2078865 | -0.5915 | 0.5546 | -0.174124994 | count | 1 |
| SLC20A2  | -0.1302168 | 0.6952578 | -0.1873 | 0.852  | -0.174079703 | count | 1 |
| SNHG10   | -0.2131031 | 1.1327259 | -0.1881 | 0.851  | -0.173948824 | count | 1 |
| TRIB1    | -0.2131031 | 1.295856  | -0.1644 | 0.869  | -0.173948824 | count | 1 |
| RAB38    | -0.2131031 | 1.295856  | -0.1644 | 0.869  | -0.173948824 | count | 1 |
| GGA3     | -0.2131031 | 1.295856  | -0.1644 | 0.869  | -0.173948824 | count | 1 |
| RPL32    | -0.1205689 | 0.0575783 | -2.094  | 0.037  | -0.173823589 | count | 1 |
| ATF6B    | -0.1366393 | 0.5038078 | -0.2712 | 0.786  | -0.1733806   | count | 1 |
| LENG8    | -0.1656292 | 0.5921734 | -0.2797 | 0.78   | -0.173242019 | count | 1 |
| SKAP2    | -0.1231833 | 0.3047834 | -0.4042 | 0.686  | -0.173230222 | count | 1 |
| NDUFA4   | -0.1207597 | 0.1540068 | -0.7841 | 0.4335 | -0.172965198 | count | 1 |
| SEM1     | -0.1208643 | 0.2050776 | -0.5894 | 0.556  | -0.172409753 | count | 1 |
| RPL39L   | -0.1553913 | 0.9279779 | -0.1675 | 0.867  | -0.172091967 | count | 1 |
| KIAA0825 | -0.1553913 | 0.9279779 | -0.1675 | 0.867  | -0.172091967 | count | 1 |
| FBXO46   | -0.1553913 | 1.0323451 | -0.1505 | 0.88   | -0.172091967 | count | 1 |
| GSTZ1    | -0.1553913 | 1.0924668 | -0.1422 | 0.887  | -0.172091967 | count | 1 |
| FAM131A  | -0.1553913 | 1.1270892 | -0.1379 | 0.89   | -0.172091967 | count | 1 |
| SLC11A2  | -0.1553913 | 1.1824032 | -0.1314 | 0.896  | -0.172091967 | count | 1 |
| SNHG22   | -0.1553913 | 1.2959618 | -0.1199 | 0.905  | -0.172091967 | count | 1 |
| HELZ2    | -0.1388544 | 0.6194911 | -0.2241 | 0.823  | -0.171584808 | count | 1 |
| SETDB2   | -0.1388544 | 0.6625853 | -0.2096 | 0.834  | -0.171584808 | count | 1 |
| FAM111A  | -0.1226756 | 0.3428085 | -0.3579 | 0.721  | -0.171011295 | count | 1 |
| MCTS1    | -0.1247831 | 0.4257838 | -0.2931 | 0.77   | -0.170856151 | count | 1 |
| HNRNPH3  | -0.1243314 | 0.2816067 | -0.4415 | 0.659  | -0.170818476 | count | 1 |
| EIF3A    | -0.1234554 | 0.3273265 | -0.3772 | 0.706  | -0.170779829 | count | 1 |
| CDC123   | -0.1215802 | 0.2770711 | -0.4388 | 0.661  | -0.170742543 | count | 1 |
| POLR2D   | -0.1242347 | 0.5066167 | -0.2452 | 0.806  | -0.170685814 | count | 1 |
| ZBTB7A   | -0.1211909 | 0.2481461 | -0.4884 | 0.626  | -0.170503367 | count | 1 |
| PPP6R1   | -0.1263844 | 0.4184474 | -0.302  | 0.763  | -0.170155944 | count | 1 |
| ACTN4    | -0.120008  | 0.2169675 | -0.5531 | 0.5806 | -0.170096054 | count | 1 |
| ELOF1    | -0.1227831 | 0.3927533 | -0.3126 | 0.755  | -0.16919842  | count | 1 |
| NSA2     | -0.1189724 | 0.1917161 | -0.6206 | 0.5353 | -0.168972296 | count | 1 |

|           |            |           |         |        |              |       |   |
|-----------|------------|-----------|---------|--------|--------------|-------|---|
| ATP5F1A   | -0.1187114 | 0.2297477 | -0.5167 | 0.6057 | -0.168805604 | count | 1 |
| AZIN1     | -0.1240149 | 0.4230213 | -0.2932 | 0.77   | -0.168774812 | count | 1 |
| RIC8A     | -0.1287023 | 0.4952867 | -0.2599 | 0.795  | -0.168759494 | count | 1 |
| ABHD3     | -0.1363174 | 0.6229544 | -0.2188 | 0.827  | -0.168464984 | count | 1 |
| SELENOT   | -0.1195871 | 0.2762248 | -0.4329 | 0.665  | -0.168176713 | count | 1 |
| NOP14-AS1 | -0.1298913 | 0.640848  | -0.2027 | 0.84   | -0.167959201 | count | 1 |
| WBP11     | -0.1202809 | 0.2914317 | -0.4127 | 0.68   | -0.167676385 | count | 1 |
| WDHD1     | -0.1601378 | 0.9882328 | -0.162  | 0.871  | -0.167561567 | count | 1 |
| TTF2      | -0.1601378 | 0.9941096 | -0.1611 | 0.872  | -0.167561567 | count | 1 |
| NUP50-DT  | -0.1601378 | 1.072132  | -0.1494 | 0.881  | -0.167561567 | count | 1 |
| ZNF438    | -0.1601378 | 1.0775519 | -0.1486 | 0.882  | -0.167561567 | count | 1 |
| ZNF460    | -0.1601378 | 1.1520952 | -0.139  | 0.89   | -0.167561567 | count | 1 |
| RPS2      | -0.1161663 | 0.0625024 | -1.8586 | 0.064  | -0.167465605 | count | 1 |
| ZNF581    | -0.1335344 | 0.5424546 | -0.2462 | 0.806  | -0.167441044 | count | 1 |
| ZDHHC3    | -0.1208655 | 0.4086669 | -0.2958 | 0.768  | -0.167201519 | count | 1 |
| YY1       | -0.1173891 | 0.1866043 | -0.6291 | 0.53   | -0.167157574 | count | 1 |
| FAM122C   | -0.1448329 | 0.8660083 | -0.1672 | 0.867  | -0.166947051 | count | 1 |
| ALG2      | -0.128074  | 0.4916943 | -0.2605 | 0.795  | -0.166852348 | count | 1 |
| COL18A1   | -0.1505235 | 0.6677075 | -0.2254 | 0.822  | -0.166748001 | count | 1 |
| RANBP9    | -0.1349056 | 0.5511817 | -0.2448 | 0.807  | -0.166728585 | count | 1 |
| SNAP29    | -0.1242286 | 0.4497453 | -0.2762 | 0.783  | -0.166703055 | count | 1 |
| B9D2      | -0.1237792 | 0.570318  | -0.217  | 0.828  | -0.166655607 | count | 1 |
| LUC7L3    | -0.1183246 | 0.2481208 | -0.4769 | 0.634  | -0.16660912  | count | 1 |
| ZDBF2     | -0.1739947 | 0.7923429 | -0.2196 | 0.826  | -0.16660106  | count | 1 |
| RAB40B    | -0.1739947 | 0.8133547 | -0.2139 | 0.831  | -0.16660106  | count | 1 |
| ZNF675    | -0.1347371 | 0.4685586 | -0.2876 | 0.774  | -0.166521333 | count | 1 |
| STX12     | -0.1588704 | 0.5469631 | -0.2905 | 0.772  | -0.166249867 | count | 1 |
| PRELID1   | -0.1158003 | 0.1514902 | -0.7644 | 0.445  | -0.165958723 | count | 1 |
| PDE4D     | -0.1216646 | 0.4150334 | -0.2931 | 0.77   | -0.165943189 | count | 1 |
| NUS1      | -0.1732207 | 0.8812065 | -0.1966 | 0.844  | -0.165870797 | count | 1 |
| ZNF35     | -0.1732207 | 1.0292193 | -0.1683 | 0.866  | -0.165870797 | count | 1 |
| TAF1D     | -0.1166247 | 0.1963481 | -0.594  | 0.553  | -0.165612047 | count | 1 |
| HNRNPUL2  | -0.2019977 | 0.8050425 | -0.2509 | 0.802  | -0.165086558 | count | 1 |
| PSMB3     | -0.1156814 | 0.1877358 | -0.6162 | 0.5382 | -0.165046504 | count | 1 |
| MRPS22    | -0.1216504 | 0.4267489 | -0.2851 | 0.776  | -0.164750865 | count | 1 |
| YES1      | -0.1204738 | 0.3890107 | -0.3097 | 0.757  | -0.16465442  | count | 1 |
| PRPF4B    | -0.1156201 | 0.190113  | -0.6082 | 0.5435 | -0.164520882 | count | 1 |
| PSME1     | -0.114144  | 0.1142371 | -0.9992 | 0.318  | -0.164177941 | count | 1 |
| EIF1B     | -0.1149462 | 0.1976551 | -0.5815 | 0.5613 | -0.16368025  | count | 1 |
| CLPP      | -0.1165245 | 0.2655403 | -0.4388 | 0.661  | -0.163567521 | count | 1 |
| CPT1A     | -0.1274519 | 0.5712276 | -0.2231 | 0.824  | -0.163403897 | count | 1 |
| RPL3      | -0.1132798 | 0.0663359 | -1.7077 | 0.0887 | -0.163212564 | count | 1 |
| DUSP22    | -0.1342869 | 0.6506598 | -0.2064 | 0.837  | -0.163047042 | count | 1 |
| ILK       | -0.1155719 | 0.3099966 | -0.3728 | 0.71   | -0.162735764 | count | 1 |
| NRBF2     | -0.1167192 | 0.2942312 | -0.3967 | 0.692  | -0.16183176  | count | 1 |

|          |            |           |         |         |              |       |   |
|----------|------------|-----------|---------|---------|--------------|-------|---|
| VDAC3    | -0.115762  | 0.3353475 | -0.3452 | 0.73    | -0.161506537 | count | 1 |
| SLC25A39 | -0.1156132 | 0.3236836 | -0.3572 | 0.721   | -0.16129913  | count | 1 |
| CAMK1D   | -0.1237792 | 0.605632  | -0.2044 | 0.838   | -0.161273671 | count | 1 |
| LETM1    | -0.1398496 | 0.570716  | -0.245  | 0.807   | -0.161242836 | count | 1 |
| PTPRE    | -0.1150874 | 0.3099779 | -0.3713 | 0.711   | -0.161203484 | count | 1 |
| PGM3     | -0.145425  | 1.0797421 | -0.1347 | 0.893   | -0.16114726  | count | 1 |
| STAM     | -0.1199838 | 0.4375443 | -0.2742 | 0.784   | -0.161018647 | count | 1 |
| RPL28    | -0.1116037 | 0.0486577 | -2.2937 | 0.0225  | -0.160943    | count | 1 |
| PRRC2C   | -0.1125921 | 0.1578472 | -0.7133 | 0.4762  | -0.160861085 | count | 1 |
| TBCA     | -0.1126599 | 0.1819338 | -0.6192 | 0.536   | -0.160653687 | count | 1 |
| HINT2    | -0.1146775 | 0.344392  | -0.333  | 0.739   | -0.160534461 | count | 1 |
| GPATCH4  | -0.1215311 | 0.5826387 | -0.2086 | 0.835   | -0.160293212 | count | 1 |
| PDIA3    | -0.1116743 | 0.155546  | -0.7179 | 0.473   | -0.160087344 | count | 1 |
| GTF2A2   | -0.1132975 | 0.2452638 | -0.4619 | 0.644   | -0.160075799 | count | 1 |
| KIAA1109 | -0.1188264 | 0.4837692 | -0.2456 | 0.806   | -0.160000152 | count | 1 |
| BOD1L1   | -0.1122391 | 0.2089385 | -0.5372 | 0.592   | -0.159930489 | count | 1 |
| ATP6V0D1 | -0.1159821 | 0.3542475 | -0.3274 | 0.744   | -0.159838396 | count | 1 |
| VASP     | -0.1127551 | 0.2568087 | -0.4391 | 0.6609  | -0.15952675  | count | 1 |
| SHPRH    | -0.1156107 | 0.3766499 | -0.3069 | 0.759   | -0.159327206 | count | 1 |
| RPL10    | -0.1103463 | 0.0413085 | -2.6713 | 0.00794 | -0.159160499 | count | 1 |
| MED29    | -0.118523  | 0.499314  | -0.2374 | 0.813   | -0.159062215 | count | 1 |
| SLC25A6  | -0.1106867 | 0.1251998 | -0.8841 | 0.377   | -0.158978693 | count | 1 |
| CAPZA1   | -0.112482  | 0.2473347 | -0.4548 | 0.6496  | -0.158621722 | count | 1 |
| RTF2     | -0.1125192 | 0.273921  | -0.4108 | 0.6815  | -0.15861832  | count | 1 |
| WDR33    | -0.113137  | 0.255646  | -0.4426 | 0.658   | -0.158281887 | count | 1 |
| AHCTF1   | -0.1933455 | 0.6052851 | -0.3194 | 0.75    | -0.158165359 | count | 1 |
| DPY19L1  | -0.1931346 | 0.7376951 | -0.2618 | 0.794   | -0.15799647  | count | 1 |
| PTPN6    | -0.1109185 | 0.2457006 | -0.4514 | 0.652   | -0.157853053 | count | 1 |
| RSL1D1   | -0.1102414 | 0.2046763 | -0.5386 | 0.5905  | -0.156889792 | count | 1 |
| ARHGDI A | -0.1102258 | 0.2288473 | -0.4817 | 0.6304  | -0.156605104 | count | 1 |
| CHMP5    | -0.1104294 | 0.2754126 | -0.401  | 0.689   | -0.155728905 | count | 1 |
| NDUFA5   | -0.1101672 | 0.2680072 | -0.4111 | 0.6813  | -0.155609606 | count | 1 |
| STIM2    | -0.1118336 | 0.3150603 | -0.355  | 0.723   | -0.155518793 | count | 1 |
| CEBPG    | -0.1143434 | 0.4699529 | -0.2433 | 0.808   | -0.155267661 | count | 1 |
| RITA1    | -0.2752187 | 0.6938948 | -0.3966 | 0.692   | -0.155199727 | count | 1 |
| PQLC3    | -0.1140158 | 0.4333543 | -0.2631 | 0.793   | -0.155188311 | count | 1 |
| FAM177A1 | -0.1086777 | 0.192465  | -0.5647 | 0.573   | -0.155176043 | count | 1 |
| ABHD15   | -0.1129918 | 0.5032806 | -0.2245 | 0.823   | -0.155005372 | count | 1 |
| UFC1     | -0.1086074 | 0.1986091 | -0.5468 | 0.585   | -0.154943881 | count | 1 |
| NACA     | -0.1075261 | 0.0741034 | -1.451  | 0.148   | -0.154929588 | count | 1 |
| DDX19A   | -0.1611837 | 0.7795713 | -0.2068 | 0.836   | -0.154500502 | count | 1 |
| MLLT3    | -0.1125094 | 0.3995808 | -0.2816 | 0.778   | -0.154344492 | count | 1 |
| DIS3L2   | -0.1391045 | 0.78484   | -0.1772 | 0.859   | -0.154199188 | count | 1 |
| MSANTD4  | -0.1391045 | 0.7828418 | -0.1777 | 0.859   | -0.154199188 | count | 1 |
| GSTO1    | -0.1091796 | 0.2389428 | -0.4569 | 0.648   | -0.154120517 | count | 1 |

|            |            |           |         |        |              |       |   |
|------------|------------|-----------|---------|--------|--------------|-------|---|
| TNFSF9     | -0.1101487 | 0.4274485 | -0.2577 | 0.7968 | -0.154104562 | count | 1 |
| ARPC5      | -0.1077195 | 0.1789046 | -0.6021 | 0.548  | -0.154058388 | count | 1 |
| C2CD2L     | -0.2723212 | 0.8494413 | -0.3206 | 0.749  | -0.153636174 | count | 1 |
| AC097534.2 | -0.2723212 | 0.923874  | -0.2948 | 0.768  | -0.153636174 | count | 1 |
| LRR37A2    | -0.2723212 | 0.9218811 | -0.2954 | 0.768  | -0.153636174 | count | 1 |
| LRFN1      | -0.2723212 | 0.9744303 | -0.2795 | 0.7801 | -0.153636174 | count | 1 |
| TSPYL4     | -0.1876649 | 0.8547439 | -0.2196 | 0.8264 | -0.153613391 | count | 1 |
| PIGL       | -0.1463162 | 1.0193608 | -0.1435 | 0.886  | -0.153243473 | count | 1 |
| ZSWIM9     | -0.1463162 | 1.0155286 | -0.1441 | 0.886  | -0.153243473 | count | 1 |
| SERPINB6   | -0.1110175 | 0.2682602 | -0.4138 | 0.679  | -0.15321234  | count | 1 |
| CCDC57     | -0.1118365 | 0.4646883 | -0.2407 | 0.81   | -0.15315402  | count | 1 |
| POP5       | -0.1115377 | 0.2938202 | -0.3796 | 0.704  | -0.153013254 | count | 1 |
| BIN2       | -0.1069376 | 0.1795852 | -0.5955 | 0.5519 | -0.152587505 | count | 1 |
| DECR1      | -0.1098881 | 0.2865698 | -0.3835 | 0.702  | -0.152526351 | count | 1 |
| C19orf53   | -0.1066107 | 0.1593491 | -0.669  | 0.504  | -0.152433145 | count | 1 |
| HERPUD2    | -0.1081629 | 0.3103036 | -0.3486 | 0.728  | -0.151984897 | count | 1 |
| ADAM17     | -0.1364396 | 0.5132925 | -0.2658 | 0.791  | -0.151268057 | count | 1 |
| WASHC2A    | -0.1243652 | 0.8857263 | -0.1404 | 0.888  | -0.151058608 | count | 1 |
| MNDA       | -0.1243652 | 1.1850404 | -0.1049 | 0.9165 | -0.151058608 | count | 1 |
| GNAI2      | -0.1060859 | 0.1671257 | -0.6348 | 0.526  | -0.150996545 | count | 1 |
| IFITM2     | -0.1047555 | 0.1028138 | -1.0189 | 0.309  | -0.150889978 | count | 1 |
| ZBTB20     | -0.1174004 | 0.4393658 | -0.2672 | 0.789  | -0.150558208 | count | 1 |
| UBL4A      | -0.1217636 | 0.5601382 | -0.2174 | 0.828  | -0.150556022 | count | 1 |
| NCK1-DT    | -0.1163415 | 0.6061225 | -0.1919 | 0.848  | -0.150490014 | count | 1 |
| SLC3A2     | -0.1054871 | 0.206641  | -0.5105 | 0.61   | -0.150126067 | count | 1 |
| PPFIA1     | -0.1193895 | 0.6022295 | -0.1982 | 0.843  | -0.14977239  | count | 1 |
| TENT2      | -0.1155836 | 0.534561  | -0.2162 | 0.829  | -0.149512504 | count | 1 |
| ENDOD1     | -0.1155054 | 0.584816  | -0.1975 | 0.844  | -0.149411642 | count | 1 |
| CCSER2     | -0.1056782 | 0.2184    | -0.4839 | 0.6288 | -0.149400783 | count | 1 |
| GABPA      | -0.1207264 | 0.5968626 | -0.2023 | 0.84   | -0.149278959 | count | 1 |
| APP        | -0.1818506 | 0.7947369 | -0.2288 | 0.819  | -0.1489479   | count | 1 |
| HHLA3      | -0.1818506 | 1.078733  | -0.1686 | 0.866  | -0.1489479   | count | 1 |
| ICE2       | -0.1150074 | 0.5572022 | -0.2064 | 0.837  | -0.148769316 | count | 1 |
| SSSCA1     | -0.1059063 | 0.3068864 | -0.3451 | 0.73   | -0.148173799 | count | 1 |
| FAM122A    | -0.2620462 | 0.5842385 | -0.4485 | 0.6541 | -0.148078619 | count | 1 |
| URI1       | -0.105577  | 0.2665043 | -0.3962 | 0.692  | -0.147976416 | count | 1 |
| BAG4       | -0.1098241 | 0.5538243 | -0.1983 | 0.843  | -0.14790011  | count | 1 |
| RBM18      | -0.1142998 | 0.4902303 | -0.2332 | 0.816  | -0.147856617 | count | 1 |
| ATP6AP2    | -0.1045411 | 0.2231423 | -0.4685 | 0.64   | -0.14757627  | count | 1 |
| PDSS1      | -0.2607173 | 0.9454565 | -0.2758 | 0.783  | -0.147358375 | count | 1 |
| CHST14     | -0.2607173 | 0.9454565 | -0.2758 | 0.783  | -0.147358375 | count | 1 |
| OGDH       | -0.2607173 | 1.0255572 | -0.2542 | 0.799  | -0.147358375 | count | 1 |
| FBLIM1     | -0.2607173 | 1.1318227 | -0.2304 | 0.818  | -0.147358375 | count | 1 |
| TTC4       | -0.2607173 | 1.1318227 | -0.2304 | 0.818  | -0.147358375 | count | 1 |
| CCDC80     | -0.2607173 | 1.1318227 | -0.2304 | 0.818  | -0.147358375 | count | 1 |



|               |            |           |         |        |              |       |   |
|---------------|------------|-----------|---------|--------|--------------|-------|---|
| ADH1B         | -0.2607173 | 1.1318227 | -0.2304 | 0.818  | -0.147358375 | count | 1 |
| SSPN          | -0.2607173 | 1.1318227 | -0.2304 | 0.818  | -0.147358375 | count | 1 |
| TPTEP2-CSNK1E | -0.2607173 | 1.1318227 | -0.2304 | 0.818  | -0.147358375 | count | 1 |
| DDAH2         | -0.1048024 | 0.3061673 | -0.3423 | 0.732  | -0.147196418 | count | 1 |
| ZNF773        | -0.1237792 | 0.8879281 | -0.1394 | 0.889  | -0.147030931 | count | 1 |
| KIFC3         | -0.1237792 | 0.9203272 | -0.1345 | 0.893  | -0.147030931 | count | 1 |
| RDH5          | -0.1237792 | 1.125375  | -0.11   | 0.912  | -0.147030931 | count | 1 |
| THRAP3        | -0.103747  | 0.2004381 | -0.5176 | 0.6051 | -0.147027395 | count | 1 |
| PNISR         | -0.1032249 | 0.2099011 | -0.4918 | 0.6232 | -0.146831998 | count | 1 |
| TBC1D9B       | -0.1530405 | 0.753924  | -0.203  | 0.839  | -0.146794183 | count | 1 |
| NAP1L1        | -0.1033082 | 0.1969471 | -0.5245 | 0.6003 | -0.14675735  | count | 1 |
| PSMD10        | -0.1789818 | 0.7941753 | -0.2254 | 0.822  | -0.146643554 | count | 1 |
| NMI           | -0.1133245 | 0.4224754 | -0.2682 | 0.789  | -0.146598567 | count | 1 |
| SLC35C2       | -0.1141057 | 0.5183049 | -0.2202 | 0.826  | -0.146345981 | count | 1 |
| TRIM24        | -0.1141057 | 0.6386291 | -0.1787 | 0.858  | -0.146345981 | count | 1 |
| DDIT3         | -0.1031634 | 0.2425759 | -0.4253 | 0.6709 | -0.146035115 | count | 1 |
| CHML          | -0.1315365 | 0.7058521 | -0.1864 | 0.852  | -0.145872612 | count | 1 |
| EPS8          | -0.1315365 | 0.7739824 | -0.1699 | 0.865  | -0.145872612 | count | 1 |
| SMCHD1        | -0.1035221 | 0.2243976 | -0.4613 | 0.645  | -0.145835024 | count | 1 |
| MTF2          | -0.1085599 | 0.4186608 | -0.2593 | 0.796  | -0.145715969 | count | 1 |
| MRPL55        | -0.1084716 | 0.3946591 | -0.2748 | 0.784  | -0.145597663 | count | 1 |
| CCT5          | -0.1039009 | 0.3019357 | -0.3441 | 0.731  | -0.14554599  | count | 1 |
| STAT6         | -0.1102382 | 0.5453245 | -0.2022 | 0.84   | -0.145432713 | count | 1 |
| NPLOC4        | -0.1101487 | 0.8389688 | -0.1313 | 0.896  | -0.14531491  | count | 1 |
| NEAT1         | -0.1016817 | 0.142187  | -0.7151 | 0.475  | -0.14523934  | count | 1 |
| TMEM175       | -0.1099394 | 0.7304416 | -0.1505 | 0.88   | -0.145039417 | count | 1 |
| CLNS1A        | -0.1025321 | 0.29204   | -0.3511 | 0.7257 | -0.144914873 | count | 1 |
| MRPL52        | -0.1040485 | 0.2981966 | -0.3489 | 0.727  | -0.144702466 | count | 1 |
| GPN1          | -0.1096284 | 0.4357333 | -0.2516 | 0.802  | -0.144630055 | count | 1 |
| AC016831.5    | -0.2554884 | 0.4852657 | -0.5265 | 0.599  | -0.144521128 | count | 1 |
| NELFB         | -0.1044484 | 0.4901822 | -0.2131 | 0.831  | -0.144340424 | count | 1 |
| DCAF15        | -0.1056801 | 0.4391405 | -0.2407 | 0.81   | -0.143521404 | count | 1 |
| MED26         | -0.1180109 | 0.6716844 | -0.1757 | 0.861  | -0.143375459 | count | 1 |
| SELENOH       | -0.1003361 | 0.2196811 | -0.4567 | 0.6482 | -0.143071817 | count | 1 |
| CNOT6L        | -0.1006638 | 0.212424  | -0.4739 | 0.6359 | -0.142747871 | count | 1 |
| CFL1          | -0.0991163 | 0.088009  | -1.1262 | 0.261  | -0.14269743  | count | 1 |
| ARF1          | -0.0987392 | 0.135121  | -0.7307 | 0.465  | -0.1414816   | count | 1 |
| ZNF746        | -0.2494365 | 0.7475418 | -0.3337 | 0.7388 | -0.141230856 | count | 1 |
| COA6          | -0.1013874 | 0.3680465 | -0.2755 | 0.783  | -0.141004872 | count | 1 |
| PSMD4         | -0.0991401 | 0.2410896 | -0.4112 | 0.6812 | -0.140792528 | count | 1 |
| IGFLR1        | -0.1107122 | 0.5894891 | -0.1878 | 0.851  | -0.140589044 | count | 1 |
| MFSD14B       | -0.1106923 | 0.6880792 | -0.1609 | 0.872  | -0.140563854 | count | 1 |
| ABR           | -0.1106923 | 0.72466   | -0.1528 | 0.879  | -0.140563854 | count | 1 |
| MYO6          | -0.1180364 | 0.8280395 | -0.1425 | 0.887  | -0.140243892 | count | 1 |
| SNHG8         | -0.0980208 | 0.2064553 | -0.4748 | 0.635  | -0.139832807 | count | 1 |

|            |            |           |         |        |              |       |   |
|------------|------------|-----------|---------|--------|--------------|-------|---|
| AKT1       | -0.0997949 | 0.3413029 | -0.2924 | 0.77   | -0.139349235 | count | 1 |
| TSSC4      | -0.1005227 | 0.3528252 | -0.2849 | 0.776  | -0.138920906 | count | 1 |
| MAP3K13    | -0.1001813 | 0.4861829 | -0.2061 | 0.837  | -0.138773966 | count | 1 |
| MED10      | -0.0988144 | 0.2754242 | -0.3588 | 0.72   | -0.138343798 | count | 1 |
| RPL6       | -0.0958011 | 0.0600191 | -1.5962 | 0.111  | -0.1380915   | count | 1 |
| AKIRIN2    | -0.0996834 | 0.3352827 | -0.2973 | 0.766  | -0.137927967 | count | 1 |
| MTRNR2L12  | -0.096051  | 0.1934281 | -0.4966 | 0.6198 | -0.137225297 | count | 1 |
| EIF4E2     | -0.0969825 | 0.3256951 | -0.2978 | 0.766  | -0.136464433 | count | 1 |
| LSM4       | -0.096664  | 0.2569803 | -0.3762 | 0.707  | -0.136373318 | count | 1 |
| ABCD3      | -0.1181308 | 0.791207  | -0.1493 | 0.881  | -0.136346604 | count | 1 |
| RETREG2    | -0.1025917 | 0.4896026 | -0.2095 | 0.834  | -0.136049852 | count | 1 |
| SIGIRR     | -0.0957049 | 0.2101167 | -0.4555 | 0.6491 | -0.136023151 | count | 1 |
| HNRNPA3    | -0.0950834 | 0.1671097 | -0.569  | 0.5698 | -0.135788988 | count | 1 |
| INTS10     | -0.1000932 | 0.4988052 | -0.2007 | 0.841  | -0.135224583 | count | 1 |
| UBE2I      | -0.0950521 | 0.1780764 | -0.5338 | 0.5939 | -0.135210341 | count | 1 |
| FBXW5      | -0.0971913 | 0.3120326 | -0.3115 | 0.756  | -0.135049481 | count | 1 |
| ZSCAN26    | -0.1075787 | 0.665131  | -0.1617 | 0.872  | -0.135006176 | count | 1 |
| AC005332.1 | -0.1075787 | 0.6673784 | -0.1612 | 0.872  | -0.135006176 | count | 1 |
| MICU1      | -0.1134324 | 0.5925509 | -0.1914 | 0.848  | -0.134800138 | count | 1 |
| SRRM2      | -0.0939922 | 0.1489705 | -0.6309 | 0.5285 | -0.134588385 | count | 1 |
| MDC1       | -0.2372225 | 0.9236582 | -0.2568 | 0.797  | -0.134569411 | count | 1 |
| SLC35A1    | -0.2372225 | 0.9236582 | -0.2568 | 0.797  | -0.134569411 | count | 1 |
| AC006299.1 | -0.2372225 | 0.9236582 | -0.2568 | 0.797  | -0.134569411 | count | 1 |
| LINC00324  | -0.1037429 | 0.5376747 | -0.1929 | 0.847  | -0.134235661 | count | 1 |
| AC124016.1 | -0.1162429 | 0.8754813 | -0.1328 | 0.894  | -0.13417982  | count | 1 |
| ANP32B     | -0.0940443 | 0.1880235 | -0.5002 | 0.617  | -0.134172779 | count | 1 |
| SKP1       | -0.0933416 | 0.1186524 | -0.7867 | 0.432  | -0.134088933 | count | 1 |
| BST2       | -0.0935157 | 0.1591767 | -0.5875 | 0.5573 | -0.133998082 | count | 1 |
| TMEM161A   | -0.1066686 | 0.6739866 | -0.1583 | 0.874  | -0.133867854 | count | 1 |
| KLRK1      | -0.1275688 | 0.7218429 | -0.1767 | 0.86   | -0.133776237 | count | 1 |
| FNBP1      | -0.0951253 | 0.2644434 | -0.3597 | 0.719  | -0.133676039 | count | 1 |
| S100A6     | -0.0928405 | 0.1325335 | -0.7005 | 0.484  | -0.133347077 | count | 1 |
| LNPBK      | -0.1076327 | 0.4586736 | -0.2347 | 0.815  | -0.133148697 | count | 1 |
| RPLP1      | -0.0921124 | 0.0511896 | -1.7994 | 0.0729 | -0.13284678  | count | 1 |
| ATP10D     | -0.101212  | 0.4190012 | -0.2416 | 0.809  | -0.132793733 | count | 1 |
| KRIT1      | -0.0992936 | 0.3964054 | -0.2505 | 0.802  | -0.132277845 | count | 1 |
| CEP57      | -0.0957799 | 0.3309162 | -0.2894 | 0.772  | -0.13183647  | count | 1 |
| CHP1       | -0.1064362 | 0.5536533 | -0.1922 | 0.848  | -0.131673938 | count | 1 |
| EAPP       | -0.0929411 | 0.2815712 | -0.3301 | 0.7416 | -0.13166224  | count | 1 |
| SCPEP1     | -0.1024969 | 0.5042914 | -0.2032 | 0.839  | -0.131497925 | count | 1 |
| TAOK3      | -0.0951206 | 0.3050586 | -0.3118 | 0.755  | -0.131462432 | count | 1 |
| NT5DC1     | -0.0986305 | 0.4254029 | -0.2319 | 0.817  | -0.131396066 | count | 1 |
| TMEM134    | -0.0933144 | 0.2842428 | -0.3283 | 0.743  | -0.131305874 | count | 1 |
| ATG4B      | -0.1012394 | 0.5771951 | -0.1754 | 0.861  | -0.131004418 | count | 1 |
| TMBIM4     | -0.0919611 | 0.1947409 | -0.4722 | 0.637  | -0.130959501 | count | 1 |

|         |            |           |         |        |              |       |   |
|---------|------------|-----------|---------|--------|--------------|-------|---|
| BTN2A1  | -0.1019571 | 0.4920662 | -0.2072 | 0.836  | -0.130807262 | count | 1 |
| TSG101  | -0.0929886 | 0.2944221 | -0.3158 | 0.752  | -0.130734622 | count | 1 |
| MYL9    | -0.099007  | 0.5888827 | -0.1681 | 0.867  | -0.130646006 | count | 1 |
| TOPORS  | -0.0946346 | 0.386823  | -0.2446 | 0.807  | -0.130625049 | count | 1 |
| ZMYND11 | -0.0973599 | 0.4826571 | -0.2017 | 0.84   | -0.130231144 | count | 1 |
| ANKRD11 | -0.0927249 | 0.2223578 | -0.417  | 0.677  | -0.129974353 | count | 1 |
| NFKBIE  | -0.1238185 | 0.6390056 | -0.1938 | 0.846  | -0.129875638 | count | 1 |
| SNRPA   | -0.0948185 | 0.4067339 | -0.2331 | 0.816  | -0.12963294  | count | 1 |
| DPY30   | -0.0942749 | 0.3462048 | -0.2723 | 0.786  | -0.129568813 | count | 1 |
| CWF19L2 | -0.0923383 | 0.2990978 | -0.3087 | 0.758  | -0.129282932 | count | 1 |
| MAGT1   | -0.096641  | 0.4672061 | -0.2068 | 0.836  | -0.12927114  | count | 1 |
| HNRNPL  | -0.0929106 | 0.3145547 | -0.2954 | 0.768  | -0.128849772 | count | 1 |
| R3HDM2  | -0.0916779 | 0.2686524 | -0.3413 | 0.733  | -0.128773585 | count | 1 |
| EXOC8   | -0.1115317 | 0.7798348 | -0.143  | 0.886  | -0.128770835 | count | 1 |
| IFT52   | -0.1113225 | 0.5632358 | -0.1976 | 0.843  | -0.12853059  | count | 1 |
| STAM2   | -0.1037663 | 0.7723263 | -0.1344 | 0.893  | -0.128382661 | count | 1 |
| PIGS    | -0.0991748 | 0.6290798 | -0.1577 | 0.875  | -0.12833934  | count | 1 |
| CHST12  | -0.0898144 | 0.1902694 | -0.472  | 0.637  | -0.128274751 | count | 1 |
| RELB    | -0.0922511 | 0.3521472 | -0.262  | 0.794  | -0.128190529 | count | 1 |
| PRKDC   | -0.0926358 | 0.3122707 | -0.2967 | 0.767  | -0.128031474 | count | 1 |
| PRKAR2A | -0.0940174 | 0.4601837 | -0.2043 | 0.838  | -0.128003022 | count | 1 |
| SOS2    | -0.0930746 | 0.4136795 | -0.225  | 0.822  | -0.12748976  | count | 1 |
| NCOA2   | -0.0970419 | 0.6450209 | -0.1504 | 0.881  | -0.1273339   | count | 1 |
| EP400   | -0.1549441 | 0.8336005 | -0.1859 | 0.853  | -0.127274589 | count | 1 |
| EIF3M   | -0.0893255 | 0.2169847 | -0.4117 | 0.6809 | -0.126771201 | count | 1 |
| SYNCRIP | -0.0906811 | 0.2757602 | -0.3288 | 0.742  | -0.126539792 | count | 1 |
| RPL10A  | -0.0875789 | 0.0728777 | -1.2017 | 0.23   | -0.126140483 | count | 1 |
| CCNQ    | -0.0914531 | 0.4239991 | -0.2157 | 0.829  | -0.125694606 | count | 1 |
| AP4B1   | -0.0939343 | 0.5387817 | -0.1743 | 0.862  | -0.125656441 | count | 1 |
| PSTPIP1 | -0.0898979 | 0.2791405 | -0.3221 | 0.748  | -0.124802293 | count | 1 |
| RDH14   | -0.0910632 | 0.388285  | -0.2345 | 0.815  | -0.124737641 | count | 1 |
| CNOT7   | -0.0906389 | 0.3071657 | -0.2951 | 0.768  | -0.124576696 | count | 1 |
| DYNC1I2 | -0.0901179 | 0.399151  | -0.2258 | 0.822  | -0.124554627 | count | 1 |
| SLC2A3  | -0.0874884 | 0.1909741 | -0.4581 | 0.6472 | -0.124437485 | count | 1 |
| PDE4DIP | -0.0938134 | 0.5077659 | -0.1848 | 0.854  | -0.12442975  | count | 1 |
| PRKX    | -0.0989812 | 0.4449073 | -0.2225 | 0.824  | -0.124249961 | count | 1 |
| PPP6C   | -0.0914338 | 0.4228589 | -0.2162 | 0.829  | -0.12419867  | count | 1 |
| MRPS23  | -0.0914338 | 0.4486741 | -0.2038 | 0.839  | -0.12419867  | count | 1 |
| PSMD14  | -0.0895381 | 0.4459689 | -0.2008 | 0.841  | -0.124176593 | count | 1 |
| ABLIM1  | -0.0908208 | 0.4001312 | -0.227  | 0.821  | -0.124173586 | count | 1 |
| POLR2C  | -0.0896567 | 0.3414447 | -0.2626 | 0.793  | -0.12406655  | count | 1 |
| RNF5    | -0.0889714 | 0.3466614 | -0.2567 | 0.798  | -0.123962382 | count | 1 |
| PSMC3   | -0.0888146 | 0.3154802 | -0.2815 | 0.778  | -0.123937006 | count | 1 |
| TM9SF3  | -0.0896589 | 0.323846  | -0.2769 | 0.782  | -0.123419453 | count | 1 |
| PON2    | -0.0996648 | 0.7707161 | -0.1293 | 0.897  | -0.123325359 | count | 1 |

|            |            |           |         |        |              |       |   |
|------------|------------|-----------|---------|--------|--------------|-------|---|
| MLST8      | -0.0996648 | 0.794599  | -0.1254 | 0.9    | -0.123325359 | count | 1 |
| ZNF737     | -0.0996648 | 0.9731313 | -0.1024 | 0.918  | -0.123325359 | count | 1 |
| AC020915.3 | -0.0996648 | 1.0158003 | -0.0981 | 0.922  | -0.123325359 | count | 1 |
| COMMD8     | -0.0900356 | 0.3901979 | -0.2307 | 0.818  | -0.12310123  | count | 1 |
| MAP4K5     | -0.0905625 | 0.4315392 | -0.2099 | 0.834  | -0.12301663  | count | 1 |
| MT-ND4     | -0.0851003 | 0.0735439 | -1.1571 | 0.248  | -0.122639977 | count | 1 |
| RBM38      | -0.0860422 | 0.2088241 | -0.412  | 0.6806 | -0.12229395  | count | 1 |
| FGFR1OP2   | -0.0857828 | 0.2073981 | -0.4136 | 0.679  | -0.122106225 | count | 1 |
| RPS19      | -0.084583  | 0.0747979 | -1.1308 | 0.259  | -0.121926459 | count | 1 |
| PTMA       | -0.0845512 | 0.0507981 | -1.6645 | 0.097  | -0.121911585 | count | 1 |
| CYP2R1     | -0.1094297 | 0.7504121 | -0.1458 | 0.884  | -0.121506186 | count | 1 |
| PBX2       | -0.0998878 | 0.6570867 | -0.152  | 0.879  | -0.121440405 | count | 1 |
| NDRG1      | -0.0998878 | 0.6962532 | -0.1435 | 0.886  | -0.121440405 | count | 1 |
| TMEM273    | -0.0945567 | 0.6360855 | -0.1487 | 0.882  | -0.121336497 | count | 1 |
| SMARCA5    | -0.0860079 | 0.2695691 | -0.3191 | 0.7499 | -0.121219207 | count | 1 |
| RNF145     | -0.0905719 | 0.358772  | -0.2524 | 0.801  | -0.121165575 | count | 1 |
| RBFA       | -0.0951441 | 0.5428087 | -0.1753 | 0.861  | -0.12087361  | count | 1 |
| KLRC4      | -0.0867297 | 0.4486047 | -0.1933 | 0.847  | -0.120740448 | count | 1 |
| CTBP1-DT   | -0.1255337 | 0.8739573 | -0.1436 | 0.886  | -0.120680345 | count | 1 |
| VPS26A     | -0.0856179 | 0.2628717 | -0.3257 | 0.745  | -0.120430199 | count | 1 |
| GMPPB      | -0.1083218 | 0.6646767 | -0.163  | 0.871  | -0.120283354 | count | 1 |
| 7-Sep      | -0.0833589 | 0.0899313 | -0.9269 | 0.355  | -0.119977281 | count | 1 |
| FBXL15     | -0.0856238 | 0.3484209 | -0.2457 | 0.806  | -0.119958309 | count | 1 |
| GMD5-DT    | -0.1080159 | 0.6695887 | -0.1613 | 0.872  | -0.119945695 | count | 1 |
| GLI4       | -0.0955088 | 0.5512684 | -0.1733 | 0.863  | -0.119903955 | count | 1 |
| ABHD17A    | -0.0838509 | 0.1631173 | -0.5141 | 0.6076 | -0.119828519 | count | 1 |
| PPIB       | -0.0834132 | 0.1293143 | -0.645  | 0.519  | -0.11982016  | count | 1 |
| LCK        | -0.0839106 | 0.2158014 | -0.3888 | 0.6977 | -0.119441976 | count | 1 |
| ITM2B      | -0.0829426 | 0.0915206 | -0.9063 | 0.365  | -0.119330965 | count | 1 |
| RPS8       | -0.0827533 | 0.0536013 | -1.5439 | 0.124  | -0.119313865 | count | 1 |
| OCIAD2     | -0.0836846 | 0.2143115 | -0.3905 | 0.6964 | -0.119012437 | count | 1 |
| RPS16      | -0.0820918 | 0.0788863 | -1.0406 | 0.299  | -0.118166777 | count | 1 |
| POLD4      | -0.0971184 | 0.7047426 | -0.1378 | 0.89   | -0.118085681 | count | 1 |
| NCOA3      | -0.0966663 | 0.4152151 | -0.2328 | 0.816  | -0.117537956 | count | 1 |
| RHOC       | -0.0816526 | 0.1746956 | -0.4674 | 0.6405 | -0.116955596 | count | 1 |
| FAM162A    | -0.0838911 | 0.3684373 | -0.2277 | 0.82   | -0.116351017 | count | 1 |
| SNX4       | -0.0877021 | 0.5396521 | -0.1625 | 0.871  | -0.116337578 | count | 1 |
| NCOR2      | -0.0877021 | 0.558713  | -0.157  | 0.875  | -0.116337578 | count | 1 |
| MYL6       | -0.0806559 | 0.0937174 | -0.8606 | 0.39   | -0.116183439 | count | 1 |
| DEAF1      | -0.0914247 | 0.6304864 | -0.145  | 0.885  | -0.116160604 | count | 1 |
| ARRDC1-AS1 | -0.0884236 | 0.6625571 | -0.1335 | 0.894  | -0.116046815 | count | 1 |
| ARMC1      | -0.0896263 | 0.5431594 | -0.165  | 0.869  | -0.116009965 | count | 1 |
| UBLCP1     | -0.0859876 | 0.4400145 | -0.1954 | 0.845  | -0.115843288 | count | 1 |
| ERVK3-1    | -0.1204461 | 0.5518472 | -0.2183 | 0.827  | -0.115836645 | count | 1 |
| RPS14      | -0.0802412 | 0.049661  | -1.6158 | 0.107  | -0.11571127  | count | 1 |

|          |            |           |         |        |              |       |   |
|----------|------------|-----------|---------|--------|--------------|-------|---|
| CCDC107  | -0.081518  | 0.2009378 | -0.4057 | 0.6852 | -0.115673108 | count | 1 |
| LRRFIP1  | -0.0806377 | 0.1590808 | -0.5069 | 0.6126 | -0.115510053 | count | 1 |
| CISD3    | -0.0825756 | 0.3393876 | -0.2433 | 0.808  | -0.115236303 | count | 1 |
| RPS13    | -0.0795613 | 0.0615071 | -1.2935 | 0.197  | -0.114663688 | count | 1 |
| LRRC75A  | -0.087366  | 0.4755498 | -0.1837 | 0.854  | -0.114661408 | count | 1 |
| RPL41    | -0.0794943 | 0.041251  | -1.9271 | 0.0548 | -0.114642154 | count | 1 |
| APAF1    | -0.0921823 | 0.5360651 | -0.172  | 0.864  | -0.114095302 | count | 1 |
| RPL34    | -0.0787677 | 0.0576017 | -1.3675 | 0.172  | -0.113548779 | count | 1 |
| SYS1     | -0.0813142 | 0.3539156 | -0.2298 | 0.818  | -0.113477089 | count | 1 |
| DRAM2    | -0.0839447 | 0.4589182 | -0.1829 | 0.855  | -0.113435776 | count | 1 |
| TRIP4    | -0.0953371 | 0.7236524 | -0.1317 | 0.895  | -0.113382346 | count | 1 |
| C8orf33  | -0.0875283 | 0.4699458 | -0.1863 | 0.852  | -0.113300133 | count | 1 |
| RPL9     | -0.0785733 | 0.0712641 | -1.1026 | 0.271  | -0.113172924 | count | 1 |
| PARK7    | -0.0783604 | 0.1707225 | -0.459  | 0.647  | -0.112330762 | count | 1 |
| TRABD    | -0.0796084 | 0.2929755 | -0.2717 | 0.786  | -0.112028633 | count | 1 |
| PRMT1    | -0.0795064 | 0.2402721 | -0.3309 | 0.741  | -0.112018337 | count | 1 |
| CCDC71L  | -0.0890827 | 0.6071744 | -0.1467 | 0.883  | -0.111858534 | count | 1 |
| CAPNS1   | -0.078898  | 0.2885928 | -0.2734 | 0.7847 | -0.111554967 | count | 1 |
| PGLS     | -0.0778439 | 0.1863427 | -0.4177 | 0.6764 | -0.11123883  | count | 1 |
| ACP1     | -0.0786449 | 0.2752109 | -0.2858 | 0.7752 | -0.110805074 | count | 1 |
| PREX1    | -0.0783036 | 0.289845  | -0.2702 | 0.7872 | -0.110773766 | count | 1 |
| POLR2K   | -0.0776858 | 0.2001562 | -0.3881 | 0.6982 | -0.110622619 | count | 1 |
| FAM192A  | -0.0848077 | 0.4618143 | -0.1836 | 0.854  | -0.110596995 | count | 1 |
| VPS37B   | -0.0784412 | 0.2689724 | -0.2916 | 0.7708 | -0.110386838 | count | 1 |
| NLRP2    | -0.0906726 | 1.0336681 | -0.0877 | 0.93   | -0.11027468  | count | 1 |
| ATP5MC3  | -0.0767692 | 0.1736319 | -0.4421 | 0.6587 | -0.109886419 | count | 1 |
| ADGRG1   | -0.0886858 | 0.6312715 | -0.1405 | 0.888  | -0.109780495 | count | 1 |
| STX4     | -0.0789161 | 0.3820044 | -0.2066 | 0.836  | -0.109773863 | count | 1 |
| COX7A2L  | -0.0770046 | 0.2018716 | -0.3815 | 0.7031 | -0.109484071 | count | 1 |
| ARRB1    | -0.084244  | 0.5789239 | -0.1455 | 0.884  | -0.10905746  | count | 1 |
| SSR4     | -0.0757477 | 0.1326582 | -0.571  | 0.568  | -0.108759876 | count | 1 |
| ARIH2OS  | -0.0831363 | 0.7265554 | -0.1144 | 0.909  | -0.107626368 | count | 1 |
| MAT2A    | -0.0798733 | 0.3986631 | -0.2004 | 0.841  | -0.107616274 | count | 1 |
| TXNL4A   | -0.0762168 | 0.232961  | -0.3272 | 0.744  | -0.107257909 | count | 1 |
| RPL24    | -0.0743409 | 0.0633671 | -1.1732 | 0.242  | -0.107116613 | count | 1 |
| MRTO4    | -0.079428  | 0.4644732 | -0.171  | 0.864  | -0.107017042 | count | 1 |
| SH3KBP1  | -0.0753544 | 0.2652917 | -0.284  | 0.7766 | -0.106968144 | count | 1 |
| CASP4    | -0.0748713 | 0.1959949 | -0.382  | 0.703  | -0.106841531 | count | 1 |
| TIMM17B  | -0.0759504 | 0.3023645 | -0.2512 | 0.8018 | -0.106742787 | count | 1 |
| TRAPPC2L | -0.0791854 | 0.4472593 | -0.177  | 0.86   | -0.106690576 | count | 1 |
| DNAJC2   | -0.0764485 | 0.3518847 | -0.2173 | 0.828  | -0.106609843 | count | 1 |
| NXPE3    | -0.1858048 | 0.6739744 | -0.2757 | 0.783  | -0.106223968 | count | 1 |
| COX15    | -0.1009532 | 0.8353687 | -0.1208 | 0.904  | -0.106049537 | count | 1 |
| ANXA5    | -0.0758663 | 0.2967293 | -0.2557 | 0.798  | -0.105955616 | count | 1 |
| TUBA4A   | -0.0738003 | 0.1470737 | -0.5018 | 0.616  | -0.105903877 | count | 1 |

|           |            |           |         |        |              |       |   |
|-----------|------------|-----------|---------|--------|--------------|-------|---|
| TNFSF10   | -0.0742733 | 0.2594656 | -0.2863 | 0.7749 | -0.105886187 | count | 1 |
| TOMM22    | -0.0753375 | 0.257042  | -0.2931 | 0.77   | -0.105671847 | count | 1 |
| HCG18     | -0.0795991 | 0.3800085 | -0.2095 | 0.834  | -0.105605059 | count | 1 |
| UPF3A     | -0.0750326 | 0.2984625 | -0.2514 | 0.802  | -0.105547465 | count | 1 |
| HECTD1    | -0.0812985 | 0.4181719 | -0.1944 | 0.846  | -0.105251847 | count | 1 |
| ING2      | -0.0757119 | 0.3332796 | -0.2272 | 0.82   | -0.105223016 | count | 1 |
| ICK       | -0.0819019 | 0.6299662 | -0.13   | 0.897  | -0.105132302 | count | 1 |
| RASSF5    | -0.0747464 | 0.272964  | -0.2738 | 0.784  | -0.104726874 | count | 1 |
| LINC02001 | -0.0790641 | 0.5890326 | -0.1342 | 0.893  | -0.104371978 | count | 1 |
| CNDP2     | -0.076787  | 0.4427773 | -0.1734 | 0.862  | -0.104324255 | count | 1 |
| H2AFZ     | -0.0726308 | 0.1378036 | -0.5271 | 0.599  | -0.104187209 | count | 1 |
| RNF187    | -0.0749897 | 0.3751054 | -0.1999 | 0.842  | -0.104013787 | count | 1 |
| PITHD1    | -0.074711  | 0.2918008 | -0.256  | 0.798  | -0.103732776 | count | 1 |
| G0S2      | -0.0985631 | 0.9493361 | -0.1038 | 0.917  | -0.10355466  | count | 1 |
| GTF2H2    | -0.1255337 | 0.7682382 | -0.1634 | 0.87   | -0.103431758 | count | 1 |
| BCL11B    | -0.1255337 | 0.7682382 | -0.1634 | 0.87   | -0.103431758 | count | 1 |
| CACFD1    | -0.1255337 | 0.9429318 | -0.1331 | 0.894  | -0.103431758 | count | 1 |
| FBXO31    | -0.1255337 | 0.9818509 | -0.1279 | 0.898  | -0.103431758 | count | 1 |
| CLEC11A   | -0.1255337 | 0.9818509 | -0.1279 | 0.898  | -0.103431758 | count | 1 |
| FRAT1     | -0.0792391 | 0.7148089 | -0.1109 | 0.912  | -0.10334798  | count | 1 |
| RPS12     | -0.0714197 | 0.0532861 | -1.3403 | 0.181  | -0.102994596 | count | 1 |
| ZC3H18    | -0.0775661 | 0.5405279 | -0.1435 | 0.886  | -0.102911784 | count | 1 |
| GSPT1     | -0.0730952 | 0.3003803 | -0.2433 | 0.8079 | -0.102866801 | count | 1 |
| NORAD     | -0.0737754 | 0.3036422 | -0.243  | 0.808  | -0.10233062  | count | 1 |
| RBCK1     | -0.0722051 | 0.2605162 | -0.2772 | 0.7818 | -0.102249652 | count | 1 |
| IWS1      | -0.0743105 | 0.3870649 | -0.192  | 0.848  | -0.102153    | count | 1 |
| RPL36AL   | -0.0709256 | 0.0913063 | -0.7768 | 0.438  | -0.10201955  | count | 1 |
| MPC2      | -0.0719787 | 0.2188249 | -0.3289 | 0.7424 | -0.101997931 | count | 1 |
| RPL18     | -0.0706435 | 0.052687  | -1.3408 | 0.181  | -0.101845031 | count | 1 |
| SRA1      | -0.0724507 | 0.3252299 | -0.2228 | 0.824  | -0.101569337 | count | 1 |
| EIF4EBP2  | -0.0742736 | 0.4167752 | -0.1782 | 0.859  | -0.101367102 | count | 1 |
| EIF2S2    | -0.0718183 | 0.2468456 | -0.2909 | 0.771  | -0.101299907 | count | 1 |
| RPL18A    | -0.0702163 | 0.0572101 | -1.2273 | 0.221  | -0.101220265 | count | 1 |
| TXNL4B    | -0.1224604 | 0.8670692 | -0.1412 | 0.888  | -0.100931267 | count | 1 |
| AHCYL2    | -0.1224604 | 0.9205827 | -0.133  | 0.894  | -0.100931267 | count | 1 |
| ZNF280C   | -0.1224604 | 0.9205827 | -0.133  | 0.894  | -0.100931267 | count | 1 |
| DHX29     | -0.072965  | 0.3831851 | -0.1904 | 0.849  | -0.100864125 | count | 1 |
| CFLAR     | -0.0708347 | 0.2150744 | -0.3293 | 0.7421 | -0.100769449 | count | 1 |
| ITGB1     | -0.0705819 | 0.1815547 | -0.3888 | 0.6977 | -0.100542689 | count | 1 |
| MEX3C     | -0.0765291 | 0.450535  | -0.1699 | 0.865  | -0.100461794 | count | 1 |
| CBX1      | -0.0951563 | 0.507065  | -0.1877 | 0.851  | -0.099997114 | count | 1 |
| NOC2L     | -0.0735894 | 0.4728809 | -0.1556 | 0.876  | -0.099984276 | count | 1 |
| MUTYH     | -0.0863939 | 0.7604806 | -0.1136 | 0.91   | -0.099866079 | count | 1 |
| SUGP1     | -0.0863939 | 0.7646741 | -0.113  | 0.91   | -0.099866079 | count | 1 |
| SLC38A2   | -0.0704452 | 0.2464776 | -0.2858 | 0.775  | -0.099053737 | count | 1 |

|           |            |           |         |        |              |       |   |
|-----------|------------|-----------|---------|--------|--------------|-------|---|
| GANAB     | -0.0764469 | 0.4911465 | -0.1556 | 0.876  | -0.098982295 | count | 1 |
| RPL13     | -0.0686154 | 0.0487767 | -1.4067 | 0.16   | -0.09895142  | count | 1 |
| TOX       | -0.070393  | 0.3440749 | -0.2046 | 0.838  | -0.098889183 | count | 1 |
| HNRNPF    | -0.0693399 | 0.1860532 | -0.3727 | 0.7096 | -0.098681591 | count | 1 |
| UGP2      | -0.0697107 | 0.2967677 | -0.2349 | 0.8144 | -0.098513882 | count | 1 |
| LCP1      | -0.068471  | 0.1268568 | -0.5398 | 0.59   | -0.098404864 | count | 1 |
| LINC00987 | -0.1020523 | 0.7826278 | -0.1304 | 0.896  | -0.098289678 | count | 1 |
| ENKD1     | -0.1714953 | 1.0027159 | -0.171  | 0.8643 | -0.098250256 | count | 1 |
| CXXC5     | -0.0694699 | 0.2535445 | -0.274  | 0.7843 | -0.098085182 | count | 1 |
| RPL35A    | -0.067965  | 0.0625453 | -1.0867 | 0.278  | -0.0979538   | count | 1 |
| SP100     | -0.0684839 | 0.1833579 | -0.3735 | 0.709  | -0.097808311 | count | 1 |
| HIST1H1E  | -0.0684621 | 0.2285517 | -0.2995 | 0.7647 | -0.097656375 | count | 1 |
| TMX4      | -0.0684174 | 0.2427155 | -0.2819 | 0.778  | -0.097592625 | count | 1 |
| RPL37A    | -0.0678516 | 0.0960037 | -0.7068 | 0.48   | -0.097572023 | count | 1 |
| MRPL54    | -0.0686644 | 0.235925  | -0.291  | 0.7712 | -0.097539725 | count | 1 |
| ZNF277    | -0.1012406 | 0.7235149 | -0.1399 | 0.889  | -0.097514103 | count | 1 |
| 9-Mar     | -0.0717546 | 0.4344326 | -0.1652 | 0.869  | -0.097493794 | count | 1 |
| ARFGAP3   | -0.069304  | 0.32052   | -0.2162 | 0.829  | -0.097405642 | count | 1 |
| MDN1      | -0.1179663 | 0.7015147 | -0.1682 | 0.867  | -0.097271772 | count | 1 |
| RPL39     | -0.067085  | 0.0574838 | -1.167  | 0.244  | -0.096681657 | count | 1 |
| KIF13B    | -0.0811833 | 0.6691946 | -0.1213 | 0.904  | -0.096605845 | count | 1 |
| SMAP1     | -0.0680209 | 0.261974  | -0.2596 | 0.7953 | -0.096470741 | count | 1 |
| ARL6IP4   | -0.0675188 | 0.1721072 | -0.3923 | 0.695  | -0.096468443 | count | 1 |
| PDLIM2    | -0.0680658 | 0.2495724 | -0.2727 | 0.7852 | -0.096366942 | count | 1 |
| STAT5B    | -0.0999182 | 0.7018227 | -0.1424 | 0.887  | -0.096250328 | count | 1 |
| ITPR1     | -0.1670928 | 0.5752715 | -0.2905 | 0.772  | -0.095789721 | count | 1 |
| COPB2     | -0.071824  | 0.3841888 | -0.1869 | 0.852  | -0.09573044  | count | 1 |
| HMG1      | -0.0667343 | 0.1408084 | -0.4739 | 0.636  | -0.095698453 | count | 1 |
| ARPC3     | -0.065915  | 0.1078951 | -0.6109 | 0.542  | -0.094771732 | count | 1 |
| AGO4      | -0.0819019 | 0.8122975 | -0.1008 | 0.92   | -0.094693328 | count | 1 |
| RBM19     | -0.0819019 | 0.8740133 | -0.0937 | 0.925  | -0.094693328 | count | 1 |
| EZH2      | -0.0981699 | 0.7010169 | -0.14   | 0.889  | -0.094579111 | count | 1 |
| TSC2      | -0.0981699 | 0.7693592 | -0.1276 | 0.899  | -0.094579111 | count | 1 |
| GOLGA8R   | -0.0774602 | 0.5732876 | -0.1351 | 0.893  | -0.094251641 | count | 1 |
| KCTD10    | -0.074108  | 0.6985987 | -0.1061 | 0.916  | -0.094204191 | count | 1 |
| ERRFI1    | -0.076787  | 0.7330679 | -0.1047 | 0.917  | -0.093434796 | count | 1 |
| RPLP2     | -0.0648086 | 0.0556361 | -1.1649 | 0.245  | -0.093402574 | count | 1 |
| PSME3     | -0.0886642 | 0.6098518 | -0.1454 | 0.884  | -0.093213216 | count | 1 |
| ZNF326    | -0.0674183 | 0.4094808 | -0.1646 | 0.869  | -0.092685426 | count | 1 |
| FAM200B   | -0.068507  | 0.4051724 | -0.1691 | 0.866  | -0.092595652 | count | 1 |
| MAML1     | -0.0957505 | 0.9446371 | -0.1014 | 0.919  | -0.092265588 | count | 1 |
| NFATC1    | -0.0957505 | 0.9499341 | -0.1008 | 0.92   | -0.092265588 | count | 1 |
| MEX3D     | -0.0957505 | 0.9499341 | -0.1008 | 0.92   | -0.092265588 | count | 1 |
| LNPEP     | -0.0657673 | 0.3027319 | -0.2172 | 0.828  | -0.092253926 | count | 1 |
| LRMP      | -0.0678852 | 0.4116926 | -0.1649 | 0.869  | -0.092008533 | count | 1 |

|          |            |           |         |        |              |       |   |
|----------|------------|-----------|---------|--------|--------------|-------|---|
| SON      | -0.0642758 | 0.1321558 | -0.4864 | 0.627  | -0.092001776 | count | 1 |
| DERA     | -0.0710414 | 0.5991287 | -0.1186 | 0.906  | -0.09199516  | count | 1 |
| PURB     | -0.0731557 | 0.5618308 | -0.1302 | 0.896  | -0.091903722 | count | 1 |
| GSS      | -0.0721668 | 0.5759918 | -0.1253 | 0.9    | -0.091741488 | count | 1 |
| METAP1   | -0.0747378 | 0.6334559 | -0.118  | 0.906  | -0.090948084 | count | 1 |
| MZT2B    | -0.0634663 | 0.1666709 | -0.3808 | 0.7036 | -0.090802923 | count | 1 |
| RELL1    | -0.0695079 | 0.5853911 | -0.1187 | 0.906  | -0.090675664 | count | 1 |
| RRP36    | -0.0660059 | 0.4140302 | -0.1594 | 0.873  | -0.090441074 | count | 1 |
| GBP2     | -0.0635518 | 0.2686477 | -0.2366 | 0.8131 | -0.08991081  | count | 1 |
| RPL19    | -0.0619416 | 0.0465198 | -1.3315 | 0.184  | -0.089322739 | count | 1 |
| SCAP     | -0.0921823 | 0.8440568 | -0.1092 | 0.913  | -0.088851858 | count | 1 |
| ITGA6    | -0.0921823 | 1.0039462 | -0.0918 | 0.927  | -0.088851858 | count | 1 |
| ZXDC     | -0.0921823 | 1.0882733 | -0.0847 | 0.933  | -0.088851858 | count | 1 |
| TMEM80   | -0.0649815 | 0.5931644 | -0.1096 | 0.913  | -0.088299147 | count | 1 |
| PAIP2    | -0.0617713 | 0.1783271 | -0.3464 | 0.7293 | -0.088268805 | count | 1 |
| PSMD12   | -0.0632136 | 0.3521502 | -0.1795 | 0.858  | -0.088092562 | count | 1 |
| RNF220   | -0.0699798 | 0.6279119 | -0.1114 | 0.911  | -0.087922254 | count | 1 |
| RNF14    | -0.0699798 | 0.6755435 | -0.1036 | 0.918  | -0.087922254 | count | 1 |
| UBE2D2   | -0.0614612 | 0.1571247 | -0.3912 | 0.696  | -0.087791865 | count | 1 |
| VAPB     | -0.0736449 | 0.6657609 | -0.1106 | 0.912  | -0.087662206 | count | 1 |
| RBBP6    | -0.0625256 | 0.3078296 | -0.2031 | 0.839  | -0.087560117 | count | 1 |
| APOBEC3G | -0.0604035 | 0.1227983 | -0.4919 | 0.623  | -0.086914187 | count | 1 |
| EPB41    | -0.0616737 | 0.3093564 | -0.1994 | 0.842  | -0.086685312 | count | 1 |
| ASB8     | -0.062857  | 0.338223  | -0.1858 | 0.853  | -0.086550204 | count | 1 |
| ATF7IP   | -0.0641976 | 0.3117909 | -0.2059 | 0.837  | -0.086232572 | count | 1 |
| RPS23    | -0.0596031 | 0.0513738 | -1.1602 | 0.247  | -0.085935456 | count | 1 |
| ZNF669   | -0.0649815 | 0.7172182 | -0.0906 | 0.928  | -0.085805402 | count | 1 |
| LEMD2    | -0.0889001 | 0.6062391 | -0.1466 | 0.884  | -0.085709988 | count | 1 |
| HERC2    | -0.0622247 | 0.3896255 | -0.1597 | 0.873  | -0.085680132 | count | 1 |
| PABPC1   | -0.0593734 | 0.1153943 | -0.5145 | 0.607  | -0.085201061 | count | 1 |
| GNG5     | -0.059451  | 0.1764967 | -0.3368 | 0.7365 | -0.085081898 | count | 1 |
| BAD      | -0.0628783 | 0.3652742 | -0.1721 | 0.863  | -0.084994723 | count | 1 |
| KLF12    | -0.0807973 | 0.6798985 | -0.1188 | 0.905  | -0.084984842 | count | 1 |
| UTP25    | -0.0732796 | 0.7016532 | -0.1044 | 0.917  | -0.084758014 | count | 1 |
| RPL11    | -0.0585369 | 0.0500294 | -1.17   | 0.243  | -0.08440136  | count | 1 |
| JADE1    | -0.0654777 | 0.5601749 | -0.1169 | 0.907  | -0.084084845 | count | 1 |
| EIF6     | -0.0595114 | 0.2758983 | -0.2157 | 0.829  | -0.084002102 | count | 1 |
| C1orf56  | -0.0595622 | 0.28588   | -0.2083 | 0.8351 | -0.083988739 | count | 1 |
| ST3GAL1  | -0.0638311 | 0.4141183 | -0.1541 | 0.878  | -0.083814932 | count | 1 |
| CORO1A   | -0.0582215 | 0.1048518 | -0.5553 | 0.579  | -0.083772645 | count | 1 |
| C11orf1  | -0.0868564 | 0.6120355 | -0.1419 | 0.8872 | -0.083752819 | count | 1 |
| LCP2     | -0.0590069 | 0.2946202 | -0.2003 | 0.8414 | -0.083503784 | count | 1 |
| KIF22    | -0.06052   | 0.4148138 | -0.1459 | 0.884  | -0.083453139 | count | 1 |
| KANK3    | -0.0649065 | 0.6955321 | -0.0933 | 0.926  | -0.083352526 | count | 1 |
| CXorf21  | -0.0863939 | 1.1704642 | -0.0738 | 0.941  | -0.083309811 | count | 1 |



|            |            |           |         |        |              |       |   |
|------------|------------|-----------|---------|--------|--------------|-------|---|
| ZBTB20-AS1 | -0.0863939 | 1.311119  | -0.0659 | 0.9475 | -0.083309811 | count | 1 |
| GATA3      | -0.0585699 | 0.2262021 | -0.2589 | 0.7959 | -0.083147144 | count | 1 |
| CBX4       | -0.0599778 | 0.340648  | -0.1761 | 0.86   | -0.083114019 | count | 1 |
| NDUFB3     | -0.0595214 | 0.3023932 | -0.1968 | 0.844  | -0.083078096 | count | 1 |
| HLA-F      | -0.0580766 | 0.1701395 | -0.3413 | 0.7331 | -0.08303805  | count | 1 |
| TMSB10     | -0.0576102 | 0.0702716 | -0.8198 | 0.413  | -0.083013909 | count | 1 |
| DCLRE1C    | -0.0745941 | 0.7097872 | -0.1051 | 0.916  | -0.08298198  | count | 1 |
| TEDC1      | -0.0786583 | 0.7421502 | -0.106  | 0.916  | -0.082746078 | count | 1 |
| TGOLN2     | -0.0591774 | 0.2598085 | -0.2278 | 0.82   | -0.08271513  | count | 1 |
| OASL       | -0.0581328 | 0.2864578 | -0.2029 | 0.8393 | -0.082568898 | count | 1 |
| RAB28      | -0.0676996 | 0.5994786 | -0.1129 | 0.91   | -0.082404262 | count | 1 |
| MT-ND1     | -0.0570596 | 0.0905044 | -0.6305 | 0.529  | -0.082158287 | count | 1 |
| RNASSET2   | -0.0590017 | 0.3388068 | -0.1741 | 0.862  | -0.08201108  | count | 1 |
| POLR2G     | -0.057725  | 0.2552784 | -0.2261 | 0.8212 | -0.081903313 | count | 1 |
| UTY        | -0.0594131 | 0.4947776 | -0.1201 | 0.904  | -0.08181111  | count | 1 |
| RBBP4      | -0.0587695 | 0.3410636 | -0.1723 | 0.863  | -0.081688485 | count | 1 |
| TAF7       | -0.0579976 | 0.1927791 | -0.3008 | 0.764  | -0.081660208 | count | 1 |
| DNAJA3     | -0.0843914 | 0.6632999 | -0.1272 | 0.899  | -0.081391327 | count | 1 |
| PIP4P1     | -0.0633126 | 0.4518571 | -0.1401 | 0.889  | -0.080505145 | count | 1 |
| RPS4Y1     | -0.0559277 | 0.1252938 | -0.4464 | 0.656  | -0.080428737 | count | 1 |
| SRSF9      | -0.0561422 | 0.1921615 | -0.2922 | 0.77   | -0.080200436 | count | 1 |
| ZMAT5      | -0.0604334 | 0.4955872 | -0.1219 | 0.903  | -0.079806872 | count | 1 |
| CHM        | -0.0594043 | 0.4413982 | -0.1346 | 0.893  | -0.079511879 | count | 1 |
| LPCAT3     | -0.0685457 | 0.6689604 | -0.1025 | 0.918  | -0.079299728 | count | 1 |
| CCDC50     | -0.0685457 | 0.7620546 | -0.0899 | 0.928  | -0.079299728 | count | 1 |
| MZT2A      | -0.0555195 | 0.232375  | -0.2389 | 0.8113 | -0.079217405 | count | 1 |
| ACOT13     | -0.0591571 | 0.6315927 | -0.0937 | 0.925  | -0.079181327 | count | 1 |
| ARIH2      | -0.0684044 | 0.4836556 | -0.1414 | 0.888  | -0.079136768 | count | 1 |
| RPL23      | -0.0551152 | 0.1128963 | -0.4882 | 0.626  | -0.079073456 | count | 1 |
| TCIRG1     | -0.055957  | 0.3311259 | -0.169  | 0.866  | -0.078652867 | count | 1 |
| MT-ATP8    | -0.0584707 | 0.5582347 | -0.1047 | 0.917  | -0.07854709  | count | 1 |
| RPS15A     | -0.0544558 | 0.0503533 | -1.0815 | 0.28   | -0.078516181 | count | 1 |
| GPX7       | -0.0617334 | 0.6849482 | -0.0901 | 0.928  | -0.078500478 | count | 1 |
| MAGOH      | -0.0554235 | 0.219978  | -0.252  | 0.8012 | -0.078414007 | count | 1 |
| FAM53C     | -0.0571972 | 0.3997908 | -0.1431 | 0.886  | -0.078379372 | count | 1 |
| RPL22      | -0.0542627 | 0.0876323 | -0.6192 | 0.536  | -0.078115045 | count | 1 |
| CROT       | -0.0699798 | 0.8520379 | -0.0821 | 0.935  | -0.077867737 | count | 1 |
| F2R        | -0.056086  | 0.4851986 | -0.1156 | 0.908  | -0.077806636 | count | 1 |
| NHP2       | -0.0548502 | 0.2741678 | -0.2001 | 0.8416 | -0.077714321 | count | 1 |
| RPS9       | -0.0531405 | 0.0712636 | -0.7457 | 0.456  | -0.076533772 | count | 1 |
| PAXX       | -0.0535972 | 0.2080991 | -0.2576 | 0.7969 | -0.076481229 | count | 1 |
| MTPN       | -0.0539042 | 0.2214156 | -0.2435 | 0.8078 | -0.076339659 | count | 1 |
| ERCC5      | -0.0914581 | 0.737219  | -0.1241 | 0.901  | -0.075614604 | count | 1 |
| OAZ1       | -0.0525542 | 0.102009  | -0.5152 | 0.607  | -0.075593216 | count | 1 |
| GNAI3      | -0.0536792 | 0.2699501 | -0.1988 | 0.843  | -0.074926984 | count | 1 |

|             |            |           |         |        |              |       |   |
|-------------|------------|-----------|---------|--------|--------------|-------|---|
| MIR4435-2HG | -0.0549886 | 0.4750266 | -0.1158 | 0.908  | -0.074542386 | count | 1 |
| LSM6        | -0.0527189 | 0.3176882 | -0.1659 | 0.8683 | -0.074367421 | count | 1 |
| HBP1        | -0.0537109 | 0.2907959 | -0.1847 | 0.854  | -0.074261688 | count | 1 |
| CALM1       | -0.0515258 | 0.0753925 | -0.6834 | 0.495  | -0.074238227 | count | 1 |
| ERC1        | -0.0577282 | 0.5496882 | -0.105  | 0.916  | -0.07414756  | count | 1 |
| DHX8        | -0.0582109 | 0.5725313 | -0.1017 | 0.919  | -0.074028308 | count | 1 |
| MBP         | -0.0516803 | 0.1689235 | -0.3059 | 0.7598 | -0.073998545 | count | 1 |
| OST4        | -0.0515084 | 0.157712  | -0.3266 | 0.7442 | -0.073692643 | count | 1 |
| C11orf24    | -0.0584707 | 0.702774  | -0.0832 | 0.934  | -0.073487288 | count | 1 |
| ZNF131      | -0.0532332 | 0.3641237 | -0.1462 | 0.884  | -0.073410506 | count | 1 |
| PMM2        | -0.0631517 | 0.6582843 | -0.0959 | 0.924  | -0.073077337 | count | 1 |
| DNLZ        | -0.075387  | 1.0210028 | -0.0738 | 0.941  | -0.072757064 | count | 1 |
| HAUS5       | -0.075387  | 1.0224858 | -0.0737 | 0.941  | -0.072757064 | count | 1 |
| THOC5       | -0.075387  | 1.0224858 | -0.0737 | 0.941  | -0.072757064 | count | 1 |
| ERLIN1      | -0.075387  | 1.0567974 | -0.0713 | 0.943  | -0.072757064 | count | 1 |
| ZNF468      | -0.075387  | 1.1878685 | -0.0635 | 0.949  | -0.072757064 | count | 1 |
| AIFM1       | -0.075387  | 1.1929599 | -0.0632 | 0.95   | -0.072757064 | count | 1 |
| FAM206A     | -0.075387  | 1.1929599 | -0.0632 | 0.95   | -0.072757064 | count | 1 |
| ZNF317      | -0.075387  | 1.1929599 | -0.0632 | 0.95   | -0.072757064 | count | 1 |
| TRIM62      | -0.075387  | 1.4031558 | -0.0537 | 0.957  | -0.072757064 | count | 1 |
| ZFP69B      | -0.075387  | 1.4031558 | -0.0537 | 0.957  | -0.072757064 | count | 1 |
| ZYG11B      | -0.075387  | 1.4031558 | -0.0537 | 0.957  | -0.072757064 | count | 1 |
| RGS18       | -0.075387  | 1.4031558 | -0.0537 | 0.957  | -0.072757064 | count | 1 |
| TMEM177     | -0.075387  | 1.4031558 | -0.0537 | 0.957  | -0.072757064 | count | 1 |
| REBP        | -0.075387  | 1.4031558 | -0.0537 | 0.957  | -0.072757064 | count | 1 |
| INVS        | -0.075387  | 1.4031558 | -0.0537 | 0.957  | -0.072757064 | count | 1 |
| AGAP5       | -0.075387  | 1.4031558 | -0.0537 | 0.957  | -0.072757064 | count | 1 |
| IL17D       | -0.075387  | 1.4031558 | -0.0537 | 0.957  | -0.072757064 | count | 1 |
| AL139089.1  | -0.075387  | 1.4031558 | -0.0537 | 0.957  | -0.072757064 | count | 1 |
| ANGEL1      | -0.075387  | 1.4031558 | -0.0537 | 0.957  | -0.072757064 | count | 1 |
| NKD1        | -0.075387  | 1.4031558 | -0.0537 | 0.957  | -0.072757064 | count | 1 |
| GGT1        | -0.075387  | 1.4031558 | -0.0537 | 0.957  | -0.072757064 | count | 1 |
| SLC35E4     | -0.075387  | 1.4031558 | -0.0537 | 0.957  | -0.072757064 | count | 1 |
| PMPCA       | -0.0542745 | 0.4622389 | -0.1174 | 0.907  | -0.072651839 | count | 1 |
| XCL2        | -0.0505326 | 0.159613  | -0.3166 | 0.752  | -0.072647169 | count | 1 |
| PLCXD1      | -0.1255337 | 1.090304  | -0.1151 | 0.908  | -0.072395818 | count | 1 |
| AL353194.1  | -0.1255337 | 1.090304  | -0.1151 | 0.908  | -0.072395818 | count | 1 |
| HIST1H2AE   | -0.1255337 | 1.094848  | -0.1147 | 0.909  | -0.072395818 | count | 1 |
| MOK         | -0.1255337 | 1.094848  | -0.1147 | 0.909  | -0.072395818 | count | 1 |
| MBD6        | -0.0623203 | 0.5439561 | -0.1146 | 0.909  | -0.072117972 | count | 1 |
| METTL7A     | -0.0605498 | 0.6756079 | -0.0896 | 0.929  | -0.072112485 | count | 1 |
| SRSF1       | -0.0579763 | 0.4850286 | -0.1195 | 0.905  | -0.071838721 | count | 1 |
| ATP6V1F     | -0.0505039 | 0.2049839 | -0.2464 | 0.8055 | -0.071832172 | count | 1 |
| MRPS18C     | -0.0508478 | 0.3252037 | -0.1564 | 0.8758 | -0.071821117 | count | 1 |
| ARID1A      | -0.0536164 | 0.4205049 | -0.1275 | 0.899  | -0.071771681 | count | 1 |

|            |            |           |         |        |              |       |   |
|------------|------------|-----------|---------|--------|--------------|-------|---|
| LSM8       | -0.050626  | 0.2280927 | -0.222  | 0.8245 | -0.07160926  | count | 1 |
| PCBP1      | -0.0499534 | 0.1551126 | -0.322  | 0.7476 | -0.071564494 | count | 1 |
| NKIRAS2    | -0.0679475 | 0.6478509 | -0.1049 | 0.917  | -0.07152629  | count | 1 |
| OXSR1      | -0.0575227 | 0.5272956 | -0.1091 | 0.913  | -0.0712777   | count | 1 |
| HLA-E      | -0.0494923 | 0.0775239 | -0.6384 | 0.524  | -0.071253546 | count | 1 |
| GPR155     | -0.086101  | 0.9412103 | -0.0915 | 0.927  | -0.071223165 | count | 1 |
| PAXIP1     | -0.086101  | 0.9698615 | -0.0888 | 0.929  | -0.071223165 | count | 1 |
| AP2M1      | -0.0503383 | 0.2528463 | -0.1991 | 0.8423 | -0.071183334 | count | 1 |
| PSME4      | -0.0564719 | 0.5455424 | -0.1035 | 0.918  | -0.07097931  | count | 1 |
| TBC1D20    | -0.0525088 | 0.4855595 | -0.1081 | 0.914  | -0.070776475 | count | 1 |
| PIP4K2A    | -0.0496418 | 0.179658  | -0.2763 | 0.7825 | -0.070576282 | count | 1 |
| IFNGR1     | -0.0496256 | 0.2243675 | -0.2212 | 0.8251 | -0.070313358 | count | 1 |
| GID8       | -0.0509498 | 0.3439337 | -0.1481 | 0.882  | -0.070163401 | count | 1 |
| DDX3Y      | -0.0496036 | 0.3327247 | -0.1491 | 0.8816 | -0.069973951 | count | 1 |
| RIOK3      | -0.0498461 | 0.2667878 | -0.1868 | 0.852  | -0.069927779 | count | 1 |
| DTYMK      | -0.0525804 | 0.5226521 | -0.1006 | 0.92   | -0.069793837 | count | 1 |
| SMPD4      | -0.1204461 | 0.9883811 | -0.1219 | 0.903  | -0.06951158  | count | 1 |
| AC005921.2 | -0.0515661 | 0.6457499 | -0.0799 | 0.936  | -0.069506788 | count | 1 |
| RTCB       | -0.0534419 | 0.4112095 | -0.13   | 0.897  | -0.069233184 | count | 1 |
| GOLT1B     | -0.0510495 | 0.4471985 | -0.1142 | 0.909  | -0.069206287 | count | 1 |
| BIRC6      | -0.0516372 | 0.4502853 | -0.1147 | 0.909  | -0.069124532 | count | 1 |
| NSD1       | -0.0500362 | 0.2919313 | -0.1714 | 0.864  | -0.068571989 | count | 1 |
| KLHL5      | -0.0553026 | 0.7518607 | -0.0736 | 0.941  | -0.068531599 | count | 1 |
| ENC1       | -0.0614954 | 0.8321373 | -0.0739 | 0.941  | -0.068457334 | count | 1 |
| ETNK1      | -0.0485888 | 0.3441178 | -0.1412 | 0.8878 | -0.068234217 | count | 1 |
| B3GAT2     | -0.1179663 | 0.8241962 | -0.1431 | 0.886  | -0.068104152 | count | 1 |
| CPEB2      | -0.1179663 | 0.8867672 | -0.133  | 0.894  | -0.068104152 | count | 1 |
| TP53INP1   | -0.1179663 | 1.0188727 | -0.1158 | 0.9079 | -0.068104152 | count | 1 |
| TMEM250    | -0.0520436 | 0.5274064 | -0.0987 | 0.921  | -0.067918757 | count | 1 |
| MYCBP2     | -0.0477707 | 0.2218134 | -0.2154 | 0.8296 | -0.067906564 | count | 1 |
| GBP5       | -0.0480687 | 0.2257088 | -0.213  | 0.831  | -0.067785738 | count | 1 |
| TSR3       | -0.04854   | 0.2753087 | -0.1763 | 0.86   | -0.06765157  | count | 1 |
| PPIA       | -0.0470194 | 0.1037047 | -0.4534 | 0.651  | -0.067609527 | count | 1 |
| POLR2F     | -0.0478131 | 0.2716205 | -0.176  | 0.8604 | -0.067555861 | count | 1 |
| FXN        | -0.0553835 | 0.7683803 | -0.0721 | 0.943  | -0.067442645 | count | 1 |
| SNAP23     | -0.0503734 | 0.3901104 | -0.1291 | 0.897  | -0.067434128 | count | 1 |
| MSRB1      | -0.0535012 | 0.6988705 | -0.0766 | 0.939  | -0.067251283 | count | 1 |
| TRIAP1     | -0.0482607 | 0.3826261 | -0.1261 | 0.9    | -0.066729569 | count | 1 |
| NSMCE2     | -0.0491071 | 0.4956861 | -0.0991 | 0.921  | -0.06619468  | count | 1 |
| AMD1       | -0.0467269 | 0.203973  | -0.2291 | 0.8189 | -0.06614558  | count | 1 |
| EMSY       | -0.0626767 | 0.6096955 | -0.1028 | 0.918  | -0.065999308 | count | 1 |
| SLC7A5     | -0.0682213 | 0.5886743 | -0.1159 | 0.908  | -0.065877073 | count | 1 |
| COL4A3BP   | -0.0474596 | 0.3943742 | -0.1203 | 0.904  | -0.065844401 | count | 1 |
| MINDY3     | -0.0591397 | 0.6881012 | -0.0859 | 0.932  | -0.065842992 | count | 1 |
| NDUFB6     | -0.0464735 | 0.298809  | -0.1555 | 0.877  | -0.06543847  | count | 1 |

|          |            |           |         |        |              |       |   |
|----------|------------|-----------|---------|--------|--------------|-------|---|
| CTNNA1   | -0.0786583 | 0.9075032 | -0.0867 | 0.931  | -0.065114021 | count | 1 |
| HEATR3   | -0.0584707 | 1.1054303 | -0.0529 | 0.958  | -0.065100418 | count | 1 |
| RING1    | -0.0506633 | 0.6423133 | -0.0789 | 0.937  | -0.065084657 | count | 1 |
| DHX38    | -0.049552  | 0.5442487 | -0.091  | 0.928  | -0.065084403 | count | 1 |
| NUP153   | -0.049552  | 0.5532122 | -0.0896 | 0.929  | -0.065084403 | count | 1 |
| C1orf122 | -0.0467543 | 0.4636731 | -0.1008 | 0.92   | -0.064797276 | count | 1 |
| C22orf39 | -0.0476792 | 0.4311287 | -0.1106 | 0.912  | -0.064271279 | count | 1 |
| ELK3     | -0.0493268 | 0.6436162 | -0.0766 | 0.939  | -0.063908199 | count | 1 |
| BCAP31   | -0.044961  | 0.2351124 | -0.1912 | 0.8485 | -0.063883843 | count | 1 |
| MOB1A    | -0.0451509 | 0.2570236 | -0.1757 | 0.8607 | -0.063795188 | count | 1 |
| STK26    | -0.0460557 | 0.3486796 | -0.1321 | 0.895  | -0.06351702  | count | 1 |
| GNA13    | -0.0480592 | 0.5052188 | -0.0951 | 0.924  | -0.063480882 | count | 1 |
| PDCL3    | -0.0451837 | 0.2995008 | -0.1509 | 0.88   | -0.063388861 | count | 1 |
| MAD1L1   | -0.0453252 | 0.3510888 | -0.1291 | 0.897  | -0.062884341 | count | 1 |
| ASCC3    | -0.045837  | 0.3752946 | -0.1221 | 0.903  | -0.062820185 | count | 1 |
| ARL13B   | -0.0541981 | 0.6493819 | -0.0835 | 0.934  | -0.062741716 | count | 1 |
| RAB7A    | -0.0441772 | 0.2106678 | -0.2097 | 0.834  | -0.062695755 | count | 1 |
| TM7SF3   | -0.0557294 | 0.6741964 | -0.0827 | 0.934  | -0.062057086 | count | 1 |
| COPE     | -0.0433913 | 0.1855918 | -0.2338 | 0.815  | -0.06196177  | count | 1 |
| PIGC     | -0.0444842 | 0.3959708 | -0.1123 | 0.911  | -0.061949571 | count | 1 |
| TMEM123  | -0.0440691 | 0.2819539 | -0.1563 | 0.876  | -0.061470923 | count | 1 |
| H2AFV    | -0.0427871 | 0.1912082 | -0.2238 | 0.8231 | -0.06089776  | count | 1 |
| PAOX     | -0.049876  | 0.7041259 | -0.0708 | 0.944  | -0.060747731 | count | 1 |
| CDV3     | -0.0428736 | 0.217481  | -0.1971 | 0.8438 | -0.060720791 | count | 1 |
| CHCHD5   | -0.0443431 | 0.4056425 | -0.1093 | 0.913  | -0.060661424 | count | 1 |
| KIAA0040 | -0.0507785 | 0.392862  | -0.1293 | 0.897  | -0.060498591 | count | 1 |
| FXD7     | -0.0507736 | 0.824044  | -0.0616 | 0.951  | -0.060492764 | count | 1 |
| MVD      | -0.0466778 | 0.5663914 | -0.0824 | 0.934  | -0.060479812 | count | 1 |
| RPS4X    | -0.041544  | 0.0566955 | -0.7328 | 0.464  | -0.059884935 | count | 1 |
| CEP164   | -0.0469355 | 0.5275473 | -0.089  | 0.929  | -0.059707122 | count | 1 |
| TP53I11  | -0.0463879 | 0.8544039 | -0.0543 | 0.957  | -0.059598547 | count | 1 |
| RPL14    | -0.041325  | 0.0572227 | -0.7222 | 0.471  | -0.059570179 | count | 1 |
| DCTN1    | -0.055929  | 0.7791013 | -0.0718 | 0.943  | -0.058918214 | count | 1 |
| C4orf3   | -0.0412606 | 0.2033244 | -0.2029 | 0.839  | -0.058838517 | count | 1 |
| NOP58    | -0.0414788 | 0.249284  | -0.1664 | 0.868  | -0.058192538 | count | 1 |
| RPS24    | -0.04026   | 0.0482482 | -0.8344 | 0.405  | -0.058052774 | count | 1 |
| CNN2     | -0.0408193 | 0.2493026 | -0.1637 | 0.87   | -0.057837966 | count | 1 |
| OARD1    | -0.0447557 | 0.4235394 | -0.1057 | 0.916  | -0.057503824 | count | 1 |
| CNTRL    | -0.0440256 | 0.3407402 | -0.1292 | 0.897  | -0.057464877 | count | 1 |
| PLEKHF2  | -0.0471704 | 0.5351321 | -0.0881 | 0.93   | -0.057457823 | count | 1 |
| PRDX2    | -0.0405145 | 0.2730106 | -0.1484 | 0.8821 | -0.057430873 | count | 1 |
| CCND2    | -0.0403408 | 0.2038379 | -0.1979 | 0.8432 | -0.05740921  | count | 1 |
| ZC3H12A  | -0.0410104 | 0.3340563 | -0.1228 | 0.902  | -0.057367437 | count | 1 |
| TUBA1B   | -0.039967  | 0.1413095 | -0.2828 | 0.7775 | -0.057262387 | count | 1 |
| KMT5C    | -0.0690173 | 0.7337873 | -0.0941 | 0.925  | -0.057186659 | count | 1 |

|            |            |           |         |        |              |       |   |
|------------|------------|-----------|---------|--------|--------------|-------|---|
| RBM25      | -0.0398882 | 0.1671721 | -0.2386 | 0.812  | -0.057011705 | count | 1 |
| AIP        | -0.0403462 | 0.234984  | -0.1717 | 0.864  | -0.056973206 | count | 1 |
| CAPG       | -0.0393149 | 0.1992468 | -0.1973 | 0.844  | -0.056298583 | count | 1 |
| TAF15      | -0.0423595 | 0.3727876 | -0.1136 | 0.91   | -0.056237223 | count | 1 |
| REV1       | -0.0415781 | 0.5341924 | -0.0778 | 0.938  | -0.055667921 | count | 1 |
| LCORL      | -0.0447781 | 0.697813  | -0.0642 | 0.949  | -0.055508076 | count | 1 |
| SMG9       | -0.0522253 | 0.9336796 | -0.0559 | 0.955  | -0.05502895  | count | 1 |
| MAN1B1     | -0.0443431 | 0.8323813 | -0.0533 | 0.958  | -0.054969593 | count | 1 |
| CD48       | -0.0381603 | 0.1265304 | -0.3016 | 0.763  | -0.054783035 | count | 1 |
| AL357060.1 | -0.0563348 | 0.9456188 | -0.0596 | 0.953  | -0.05444746  | count | 1 |
| NCOR1      | -0.0378391 | 0.1872527 | -0.2021 | 0.84   | -0.054144999 | count | 1 |
| TYROBP     | -0.0374496 | 0.0796118 | -0.4704 | 0.638  | -0.053949415 | count | 1 |
| ZNF480     | -0.0452342 | 0.568503  | -0.0796 | 0.937  | -0.05390468  | count | 1 |
| WDR83OS    | -0.0375792 | 0.1455101 | -0.2583 | 0.7964 | -0.053763103 | count | 1 |
| LSS        | -0.0648134 | 1.1301249 | -0.0574 | 0.954  | -0.053725154 | count | 1 |
| TRPM2      | -0.0648134 | 1.2024079 | -0.0539 | 0.957  | -0.053725154 | count | 1 |
| DENND3     | -0.0449673 | 0.5769555 | -0.0779 | 0.938  | -0.053587178 | count | 1 |
| USP9X      | -0.0432103 | 0.5879277 | -0.0735 | 0.941  | -0.053567237 | count | 1 |
| CISD2      | -0.038446  | 0.3379394 | -0.1138 | 0.909  | -0.053448154 | count | 1 |
| CAMK1      | -0.0396592 | 0.5593875 | -0.0709 | 0.944  | -0.053292062 | count | 1 |
| RPL21      | -0.0369741 | 0.0648913 | -0.5698 | 0.569  | -0.053275788 | count | 1 |
| CLPTM1L    | -0.0410283 | 0.4443463 | -0.0923 | 0.926  | -0.053166684 | count | 1 |
| CYTH1      | -0.0425697 | 0.47097   | -0.0904 | 0.928  | -0.052774158 | count | 1 |
| ATP6V1E1   | -0.0383806 | 0.4215193 | -0.0911 | 0.928  | -0.052696259 | count | 1 |
| NDUFAB1    | -0.0371314 | 0.2514877 | -0.1476 | 0.8827 | -0.052667903 | count | 1 |
| ENDOV      | -0.0399041 | 0.5828608 | -0.0685 | 0.945  | -0.052422463 | count | 1 |
| RANGAP1    | -0.0429643 | 0.8279249 | -0.0519 | 0.959  | -0.052342087 | count | 1 |
| RSRC2      | -0.0363827 | 0.1718039 | -0.2118 | 0.8324 | -0.05190605  | count | 1 |
| ATP6V0E1   | -0.0359792 | 0.1515612 | -0.2374 | 0.8125 | -0.051552537 | count | 1 |
| RBM39      | -0.0359582 | 0.1243163 | -0.2892 | 0.773  | -0.051409757 | count | 1 |
| ZNF124     | -0.0618212 | 0.868193  | -0.0712 | 0.943  | -0.051259593 | count | 1 |
| TCEAL4     | -0.0378424 | 0.3654263 | -0.1036 | 0.918  | -0.05117107  | count | 1 |
| MAP3K4     | -0.041914  | 0.6732445 | -0.0623 | 0.95   | -0.051064402 | count | 1 |
| EMILIN2    | -0.0439965 | 0.8637345 | -0.0509 | 0.959  | -0.050955027 | count | 1 |
| TTC14      | -0.0373999 | 0.3558849 | -0.1051 | 0.916  | -0.050573028 | count | 1 |
| SPECC1     | -0.03628   | 0.375567  | -0.0966 | 0.923  | -0.050389622 | count | 1 |
| NOP16      | -0.0392057 | 0.6750494 | -0.0581 | 0.954  | -0.05037981  | count | 1 |
| SLU7       | -0.0367248 | 0.3390553 | -0.1083 | 0.914  | -0.050244006 | count | 1 |
| FAU        | -0.0347526 | 0.055547  | -0.6256 | 0.532  | -0.050101275 | count | 1 |
| MBD5       | -0.0365676 | 0.3872958 | -0.0944 | 0.925  | -0.050029028 | count | 1 |
| INTS3      | -0.0859272 | 0.8061831 | -0.1066 | 0.9152 | -0.049827795 | count | 1 |
| LY6E       | -0.0345888 | 0.1294089 | -0.2673 | 0.789  | -0.049719156 | count | 1 |
| B2M        | -0.0344013 | 0.0341687 | -1.0068 | 0.315  | -0.049622409 | count | 1 |
| SAMD9      | -0.0351959 | 0.274374  | -0.1283 | 0.898  | -0.049599983 | count | 1 |
| PDCD6      | -0.0348841 | 0.2189642 | -0.1593 | 0.8735 | -0.049582815 | count | 1 |

|            |            |           |         |        |              |       |   |
|------------|------------|-----------|---------|--------|--------------|-------|---|
| MANF       | -0.0360099 | 0.3204117 | -0.1124 | 0.911  | -0.04926634  | count | 1 |
| TOP1       | -0.0348983 | 0.2683801 | -0.13   | 0.897  | -0.049142697 | count | 1 |
| RPL8       | -0.0339886 | 0.0594741 | -0.5715 | 0.568  | -0.048993842 | count | 1 |
| SUZ12      | -0.0349542 | 0.2961477 | -0.118  | 0.906  | -0.048897721 | count | 1 |
| VPS36      | -0.0353265 | 0.3510813 | -0.1006 | 0.92   | -0.048851463 | count | 1 |
| SDR39U1    | -0.0420955 | 0.585944  | -0.0718 | 0.943  | -0.048757442 | count | 1 |
| DHR SX     | -0.0384133 | 0.7205141 | -0.0533 | 0.958  | -0.04830674  | count | 1 |
| KIR2DL3    | -0.0384133 | 0.7454623 | -0.0515 | 0.959  | -0.04830674  | count | 1 |
| FUBP3      | -0.0830228 | 0.7172559 | -0.1158 | 0.908  | -0.048162639 | count | 1 |
| SEL1L3     | -0.0386212 | 0.506476  | -0.0763 | 0.939  | -0.047885086 | count | 1 |
| PARVG      | -0.0342123 | 0.3379557 | -0.1012 | 0.919  | -0.047687834 | count | 1 |
| CARS       | -0.0424554 | 0.6738098 | -0.063  | 0.95   | -0.047308031 | count | 1 |
| FAM96A     | -0.0349495 | 0.4354427 | -0.0803 | 0.936  | -0.047120515 | count | 1 |
| AC007728.2 | -0.0364232 | 1.2346711 | -0.0295 | 0.9765 | -0.046807429 | count | 1 |
| CELF2      | -0.0331601 | 0.2192281 | -0.1513 | 0.88   | -0.046676523 | count | 1 |
| PRCC       | -0.0354439 | 0.4765602 | -0.0744 | 0.941  | -0.046567179 | count | 1 |
| MRPL49     | -0.0344394 | 0.4655867 | -0.074  | 0.941  | -0.046433119 | count | 1 |
| STIM1      | -0.0411775 | 0.668107  | -0.0616 | 0.951  | -0.045887041 | count | 1 |
| PSMA7      | -0.0317591 | 0.1269853 | -0.2501 | 0.803  | -0.04564923  | count | 1 |
| RBM8A      | -0.0317023 | 0.1552314 | -0.2042 | 0.8383 | -0.045274551 | count | 1 |
| GPR174     | -0.0321786 | 0.2755509 | -0.1168 | 0.907  | -0.045147428 | count | 1 |
| MOCS2      | -0.0356335 | 0.5845287 | -0.061  | 0.951  | -0.044814546 | count | 1 |
| CFH        | -0.0463281 | 0.935453  | -0.0495 | 0.961  | -0.044809148 | count | 1 |
| UBE4B      | -0.0343148 | 0.6680042 | -0.0514 | 0.959  | -0.044473725 | count | 1 |
| SGTB       | -0.0343148 | 0.6905681 | -0.0497 | 0.96   | -0.044473725 | count | 1 |
| PLA2G16    | -0.0313686 | 0.2318913 | -0.1353 | 0.8925 | -0.044407565 | count | 1 |
| GCC2       | -0.0314419 | 0.2125781 | -0.1479 | 0.8825 | -0.044401232 | count | 1 |
| ZNF414     | -0.0357181 | 0.7867007 | -0.0454 | 0.964  | -0.044289647 | count | 1 |
| TPGS1      | -0.0321852 | 0.3309144 | -0.0973 | 0.923  | -0.044116936 | count | 1 |
| CDC27      | -0.0354673 | 0.52954   | -0.067  | 0.947  | -0.043979004 | count | 1 |
| DEGS1      | -0.0319367 | 0.3707884 | -0.0861 | 0.931  | -0.043609089 | count | 1 |
| PSMD8      | -0.0305213 | 0.1935745 | -0.1577 | 0.8748 | -0.04359705  | count | 1 |
| HDGFL3     | -0.0333595 | 0.5612161 | -0.0594 | 0.953  | -0.043552686 | count | 1 |
| CDC40      | -0.0310239 | 0.2841402 | -0.1092 | 0.913  | -0.043428176 | count | 1 |
| TDRD3      | -0.0326401 | 0.453419  | -0.072  | 0.943  | -0.043341046 | count | 1 |
| PELP1      | -0.0386112 | 0.8554251 | -0.0451 | 0.964  | -0.043032812 | count | 1 |
| RNF144A    | -0.0386112 | 0.9748263 | -0.0396 | 0.968  | -0.043032812 | count | 1 |
| E2F4       | -0.0313311 | 0.4097423 | -0.0765 | 0.939  | -0.042867416 | count | 1 |
| SLC16A8    | -0.038025  | 0.9758953 | -0.039  | 0.969  | -0.04238074  | count | 1 |
| FAM213A    | -0.038025  | 1.046552  | -0.0363 | 0.971  | -0.04238074  | count | 1 |
| ZNF646     | -0.038025  | 1.2344916 | -0.0308 | 0.975  | -0.04238074  | count | 1 |
| ATF1       | -0.03148   | 0.4091024 | -0.0769 | 0.939  | -0.042306528 | count | 1 |
| PSMD7      | -0.0297642 | 0.2485367 | -0.1198 | 0.9048 | -0.042175547 | count | 1 |
| HAVCR2     | -0.0305403 | 0.4342204 | -0.0703 | 0.944  | -0.042002644 | count | 1 |
| PPP1R11    | -0.0297828 | 0.2906898 | -0.1025 | 0.918  | -0.041829242 | count | 1 |

|           |            |           |         |        |              |       |   |
|-----------|------------|-----------|---------|--------|--------------|-------|---|
| DPYSL2    | -0.0318098 | 0.5785584 | -0.055  | 0.956  | -0.041795601 | count | 1 |
| PEX16     | -0.033534  | 0.5549357 | -0.0604 | 0.952  | -0.041584236 | count | 1 |
| CNPY3     | -0.0294023 | 0.309264  | -0.0951 | 0.924  | -0.041420838 | count | 1 |
| ACTR10    | -0.0296738 | 0.3115633 | -0.0952 | 0.924  | -0.041293324 | count | 1 |
| NOP53     | -0.0286304 | 0.1526805 | -0.1875 | 0.8514 | -0.040876008 | count | 1 |
| SDF2L1    | -0.028759  | 0.3138134 | -0.0916 | 0.927  | -0.040371406 | count | 1 |
| BRX1      | -0.0296541 | 0.4245128 | -0.0699 | 0.944  | -0.040212751 | count | 1 |
| EHD4      | -0.0319577 | 0.4794271 | -0.0667 | 0.947  | -0.04019586  | count | 1 |
| SNRPG     | -0.0280633 | 0.2035674 | -0.1379 | 0.8904 | -0.039774295 | count | 1 |
| NFE2L2    | -0.0278084 | 0.2345803 | -0.1185 | 0.906  | -0.039641777 | count | 1 |
| LARP1     | -0.0296933 | 0.4664443 | -0.0637 | 0.949  | -0.03943019  | count | 1 |
| KRT81     | -0.027305  | 0.160136  | -0.1705 | 0.865  | -0.039247232 | count | 1 |
| ATP6V0B   | -0.0274014 | 0.208128  | -0.1317 | 0.8953 | -0.038868089 | count | 1 |
| SLC25A5   | -0.0268755 | 0.1365012 | -0.1969 | 0.844  | -0.038572993 | count | 1 |
| TAF12     | -0.0276266 | 0.3484223 | -0.0793 | 0.937  | -0.038569292 | count | 1 |
| LIPT1     | -0.0360756 | 0.8925219 | -0.0404 | 0.968  | -0.038049153 | count | 1 |
| NNT-AS1   | -0.0285242 | 0.7198009 | -0.0396 | 0.968  | -0.037691128 | count | 1 |
| P4HTM     | -0.0282726 | 0.5807723 | -0.0487 | 0.961  | -0.036915392 | count | 1 |
| CYHR1     | -0.0268297 | 0.380194  | -0.0706 | 0.944  | -0.036778205 | count | 1 |
| APEX1     | -0.0259113 | 0.2480961 | -0.1044 | 0.917  | -0.036517353 | count | 1 |
| CSNK1G3   | -0.0263098 | 0.3391455 | -0.0776 | 0.938  | -0.036508213 | count | 1 |
| FKBP11    | -0.025998  | 0.3301386 | -0.0787 | 0.937  | -0.036496158 | count | 1 |
| RPS6KA4   | -0.0345653 | 0.9237997 | -0.0374 | 0.97   | -0.036459501 | count | 1 |
| NAA20     | -0.0259549 | 0.3371101 | -0.077  | 0.939  | -0.036052061 | count | 1 |
| UNG       | -0.0275378 | 0.5453259 | -0.0505 | 0.96   | -0.035956519 | count | 1 |
| ISY1      | -0.0266189 | 0.4348077 | -0.0612 | 0.951  | -0.035506387 | count | 1 |
| ANAPC16   | -0.0247098 | 0.1595234 | -0.1549 | 0.877  | -0.03530325  | count | 1 |
| TGFB1     | -0.0245666 | 0.1446933 | -0.1698 | 0.865  | -0.035271814 | count | 1 |
| TRDC      | -0.024415  | 0.1235645 | -0.1976 | 0.843  | -0.035123106 | count | 1 |
| LINC00426 | -0.0264537 | 0.5656757 | -0.0468 | 0.963  | -0.034761761 | count | 1 |
| MLEC      | -0.0247874 | 0.2928287 | -0.0846 | 0.933  | -0.034720578 | count | 1 |
| CYTH4     | -0.0255613 | 0.486181  | -0.0526 | 0.958  | -0.034570258 | count | 1 |
| SLC7A6OS  | -0.0289598 | 0.5967907 | -0.0485 | 0.961  | -0.034532465 | count | 1 |
| RPL17     | -0.0248559 | 0.2721552 | -0.0913 | 0.927  | -0.034454641 | count | 1 |
| NDUFAF3   | -0.0241899 | 0.2441603 | -0.0991 | 0.9211 | -0.03434474  | count | 1 |
| PPIP5K2   | -0.0254856 | 0.39716   | -0.0642 | 0.949  | -0.033677892 | count | 1 |
| RNF25     | -0.0281769 | 0.6428162 | -0.0438 | 0.965  | -0.033599915 | count | 1 |
| GALNT2    | -0.0288994 | 0.6446537 | -0.0448 | 0.964  | -0.033492214 | count | 1 |
| TMC6      | -0.024751  | 0.3108069 | -0.0796 | 0.937  | -0.033474744 | count | 1 |
| UBE2V2    | -0.0234772 | 0.2729423 | -0.086  | 0.932  | -0.03315497  | count | 1 |
| FRG1      | -0.0235671 | 0.2938939 | -0.0802 | 0.936  | -0.033030726 | count | 1 |
| PFDN5     | -0.0227302 | 0.0934157 | -0.2433 | 0.808  | -0.032691769 | count | 1 |
| RACK1     | -0.0226504 | 0.0733514 | -0.3088 | 0.758  | -0.032635802 | count | 1 |
| CYBA      | -0.0225814 | 0.0979217 | -0.2306 | 0.818  | -0.032485886 | count | 1 |
| GOLGA8N   | -0.0254933 | 0.8352524 | -0.0305 | 0.976  | -0.032448503 | count | 1 |

|           |            |           |         |        |              |       |   |
|-----------|------------|-----------|---------|--------|--------------|-------|---|
| FASTKD2   | -0.0307395 | 0.5956108 | -0.0516 | 0.959  | -0.032431388 | count | 1 |
| PTPRC     | -0.0225141 | 0.0821572 | -0.274  | 0.784  | -0.032406924 | count | 1 |
| CASP8AP2  | -0.0249269 | 0.5184101 | -0.0481 | 0.962  | -0.032313316 | count | 1 |
| NSMCE3    | -0.0226685 | 0.21007   | -0.1079 | 0.914  | -0.032291759 | count | 1 |
| HPCAL1    | -0.0231144 | 0.3638453 | -0.0635 | 0.949  | -0.032194852 | count | 1 |
| IL10RB-DT | -0.0551436 | 0.7697527 | -0.0716 | 0.943  | -0.032109662 | count | 1 |
| BCL3      | -0.0235574 | 0.3533836 | -0.0667 | 0.947  | -0.03210185  | count | 1 |
| MECR      | -0.0302707 | 0.8996926 | -0.0336 | 0.973  | -0.031937669 | count | 1 |
| B3GLCT    | -0.0302707 | 1.0510681 | -0.0288 | 0.977  | -0.031937669 | count | 1 |
| SAFB      | -0.0240774 | 0.4033881 | -0.0597 | 0.952  | -0.031817854 | count | 1 |
| C1GALT1C1 | -0.0237439 | 0.4392659 | -0.0541 | 0.957  | -0.031672991 | count | 1 |
| PGRMC1    | -0.0237354 | 0.5033412 | -0.0472 | 0.962  | -0.031521882 | count | 1 |
| DNAJB11   | -0.0235947 | 0.3720377 | -0.0634 | 0.949  | -0.031474044 | count | 1 |
| ESYT1     | -0.0238926 | 0.5225751 | -0.0457 | 0.964  | -0.031397892 | count | 1 |
| PPP2R1A   | -0.0225256 | 0.3949108 | -0.057  | 0.955  | -0.031347809 | count | 1 |
| NDUFA3    | -0.0220195 | 0.232492  | -0.0947 | 0.9246 | -0.031325569 | count | 1 |
| DIDO1     | -0.0252449 | 0.6267549 | -0.0403 | 0.968  | -0.031313255 | count | 1 |
| ATG3      | -0.0222316 | 0.2984902 | -0.0745 | 0.941  | -0.031209556 | count | 1 |
| SSR2      | -0.0216856 | 0.1346306 | -0.1611 | 0.872  | -0.031101011 | count | 1 |
| NAP1L4    | -0.0218754 | 0.2578697 | -0.0848 | 0.932  | -0.030852386 | count | 1 |
| SNX18     | -0.0231142 | 0.6207459 | -0.0372 | 0.97   | -0.030697227 | count | 1 |
| DUT       | -0.0218007 | 0.2797979 | -0.0779 | 0.938  | -0.030648939 | count | 1 |
| CD37      | -0.0213631 | 0.1309143 | -0.1632 | 0.87   | -0.030639954 | count | 1 |
| XPC       | -0.0231955 | 0.5579399 | -0.0416 | 0.967  | -0.030482229 | count | 1 |
| ADGRE5    | -0.0211083 | 0.1950084 | -0.1082 | 0.914  | -0.030088139 | count | 1 |
| TMEM59    | -0.0210188 | 0.1674486 | -0.1255 | 0.9    | -0.030032025 | count | 1 |
| EML3      | -0.0360756 | 0.8407618 | -0.0429 | 0.966  | -0.029985357 | count | 1 |
| RABL3     | -0.0360756 | 0.9722677 | -0.0371 | 0.9704 | -0.029985357 | count | 1 |
| ACBD5     | -0.0218679 | 0.4483544 | -0.0488 | 0.961  | -0.029978183 | count | 1 |
| POR       | -0.0232133 | 0.5533263 | -0.042  | 0.967  | -0.02984087  | count | 1 |
| ATP13A3   | -0.0256958 | 0.7926732 | -0.0324 | 0.974  | -0.029783599 | count | 1 |
| ZNF281    | -0.02395   | 0.494336  | -0.0484 | 0.961  | -0.029708268 | count | 1 |
| CDKN1B    | -0.0203964 | 0.1919538 | -0.1063 | 0.9154 | -0.028964115 | count | 1 |
| GNPTAB    | -0.0205673 | 0.2659084 | -0.0773 | 0.938  | -0.028940605 | count | 1 |
| RXYLT1    | -0.0232403 | 0.7675054 | -0.0303 | 0.976  | -0.028828563 | count | 1 |
| ST8SIA4   | -0.0206448 | 0.2774098 | -0.0744 | 0.941  | -0.028823476 | count | 1 |
| IREB2     | -0.0217091 | 0.6146217 | -0.0353 | 0.972  | -0.028689435 | count | 1 |
| POLR2B    | -0.0210594 | 0.3137518 | -0.0671 | 0.947  | -0.028632564 | count | 1 |
| PPA1      | -0.0206695 | 0.310899  | -0.0665 | 0.947  | -0.028550988 | count | 1 |
| POLR1E    | -0.0221151 | 0.6598814 | -0.0335 | 0.973  | -0.028151095 | count | 1 |
| LSM7      | -0.0196011 | 0.2162619 | -0.0906 | 0.9278 | -0.027869791 | count | 1 |
| CATSPERG  | -0.0231153 | 0.7601054 | -0.0304 | 0.976  | -0.02756944  | count | 1 |
| A2M       | -0.0231153 | 0.822691  | -0.0281 | 0.978  | -0.02756944  | count | 1 |
| FUT7      | -0.0231153 | 0.9333818 | -0.0248 | 0.98   | -0.02756944  | count | 1 |
| BRAT1     | -0.0204203 | 0.4932461 | -0.0414 | 0.967  | -0.027447757 | count | 1 |



|             |            |           |         |        |              |       |   |
|-------------|------------|-----------|---------|--------|--------------|-------|---|
| IMP4        | -0.0202738 | 0.4110734 | -0.0493 | 0.961  | -0.027339833 | count | 1 |
| PPDPF       | -0.0184666 | 0.148751  | -0.1241 | 0.901  | -0.026483866 | count | 1 |
| POGK        | -0.0232787 | 0.6904989 | -0.0337 | 0.973  | -0.025964383 | count | 1 |
| SETD3       | -0.018728  | 0.4690757 | -0.0399 | 0.968  | -0.025463514 | count | 1 |
| GLS         | -0.0180197 | 0.2440506 | -0.0738 | 0.941  | -0.025194188 | count | 1 |
| PPP2R5D     | -0.0302707 | 0.9673911 | -0.0313 | 0.975  | -0.025174021 | count | 1 |
| ZWILCH      | -0.0302707 | 0.9673911 | -0.0313 | 0.975  | -0.025174021 | count | 1 |
| EEF2K       | -0.0302707 | 0.9673911 | -0.0313 | 0.975  | -0.025174021 | count | 1 |
| SEMA4A      | -0.0302707 | 1.2727098 | -0.0238 | 0.981  | -0.025174021 | count | 1 |
| VSIG8       | -0.0302707 | 1.2727098 | -0.0238 | 0.981  | -0.025174021 | count | 1 |
| SEMA4C      | -0.0302707 | 1.2727098 | -0.0238 | 0.981  | -0.025174021 | count | 1 |
| TRIM66      | -0.0302707 | 1.2727098 | -0.0238 | 0.981  | -0.025174021 | count | 1 |
| AC023509.4  | -0.0302707 | 1.2727098 | -0.0238 | 0.981  | -0.025174021 | count | 1 |
| CIITA       | -0.0302707 | 1.2727098 | -0.0238 | 0.981  | -0.025174021 | count | 1 |
| POLI        | -0.0302707 | 1.2727098 | -0.0238 | 0.981  | -0.025174021 | count | 1 |
| MAFB        | -0.0302707 | 1.2727098 | -0.0238 | 0.981  | -0.025174021 | count | 1 |
| RAB3D       | -0.0302707 | 1.2727098 | -0.0238 | 0.981  | -0.025174021 | count | 1 |
| AC008764.6  | -0.0302707 | 1.2727098 | -0.0238 | 0.981  | -0.025174021 | count | 1 |
| ZNF582-AS1  | -0.0302707 | 1.2727098 | -0.0238 | 0.981  | -0.025174021 | count | 1 |
| ZNF416      | -0.0302707 | 1.2727098 | -0.0238 | 0.981  | -0.025174021 | count | 1 |
| ADORA2A-AS1 | -0.0302707 | 1.2727098 | -0.0238 | 0.981  | -0.025174021 | count | 1 |
| LRRC75B     | -0.0302707 | 1.2727098 | -0.0238 | 0.981  | -0.025174021 | count | 1 |
| SIK1B       | -0.0302707 | 1.2727098 | -0.0238 | 0.981  | -0.025174021 | count | 1 |
| SOAT1       | -0.0182297 | 0.5312598 | -0.0343 | 0.973  | -0.024786156 | count | 1 |
| SCAND1      | -0.0171474 | 0.203575  | -0.0842 | 0.9329 | -0.024487534 | count | 1 |
| DNAJC10     | -0.0191998 | 0.4720394 | -0.0407 | 0.968  | -0.024441932 | count | 1 |
| GADD45B     | -0.0169704 | 0.1626666 | -0.1043 | 0.917  | -0.024435874 | count | 1 |
| TARSL2      | -0.0182187 | 0.3788795 | -0.0481 | 0.962  | -0.024401604 | count | 1 |
| COX6A1      | -0.0167042 | 0.1433219 | -0.1166 | 0.907  | -0.023943829 | count | 1 |
| GRK2        | -0.0171244 | 0.3485583 | -0.0491 | 0.961  | -0.023832207 | count | 1 |
| CD2         | -0.0164616 | 0.1887472 | -0.0872 | 0.9306 | -0.023586821 | count | 1 |
| TNFSF8      | -0.0193226 | 0.6797568 | -0.0284 | 0.977  | -0.023559181 | count | 1 |
| ATP5F1D     | -0.01615   | 0.1455214 | -0.111  | 0.9117 | -0.023140359 | count | 1 |
| AP3B1       | -0.0168198 | 0.3614433 | -0.0465 | 0.963  | -0.023135825 | count | 1 |
| AP3M1       | -0.0184295 | 0.6042871 | -0.0305 | 0.976  | -0.022864335 | count | 1 |
| TEFM        | -0.0196184 | 0.8521947 | -0.023  | 0.982  | -0.022745302 | count | 1 |
| TUBGCP3     | -0.0196184 | 0.9462351 | -0.0207 | 0.983  | -0.022745302 | count | 1 |
| GUK1        | -0.0156763 | 0.1270146 | -0.1234 | 0.902  | -0.022512413 | count | 1 |
| SUDS3       | -0.0162268 | 0.3463257 | -0.0469 | 0.963  | -0.022205399 | count | 1 |
| NDUFB2      | -0.0149048 | 0.1791406 | -0.0832 | 0.934  | -0.021288046 | count | 1 |
| FXR1        | -0.0151077 | 0.3192753 | -0.0473 | 0.962  | -0.021123196 | count | 1 |
| PTEN        | -0.0150469 | 0.3565435 | -0.0422 | 0.966  | -0.02095932  | count | 1 |
| HIVEP1      | -0.0355094 | 0.5734887 | -0.0619 | 0.951  | -0.02073031  | count | 1 |
| KLF13       | -0.0143531 | 0.2075586 | -0.0692 | 0.9449 | -0.020334891 | count | 1 |
| SERPINE2    | -0.0146798 | 0.4155416 | -0.0353 | 0.972  | -0.020251584 | count | 1 |

|          |            |           |         |        |              |       |   |
|----------|------------|-----------|---------|--------|--------------|-------|---|
| PHACTR4  | -0.0150482 | 0.5815029 | -0.0259 | 0.979  | -0.02022851  | count | 1 |
| ZNF12    | -0.0340722 | 0.7893655 | -0.0432 | 0.9656 | -0.019895    | count | 1 |
| BET1     | -0.0162409 | 0.5174774 | -0.0314 | 0.975  | -0.019803853 | count | 1 |
| DCXR     | -0.013923  | 0.2476039 | -0.0562 | 0.955  | -0.019591992 | count | 1 |
| ALKBH3   | -0.0146798 | 0.5377754 | -0.0273 | 0.978  | -0.019402424 | count | 1 |
| RAD21    | -0.0137116 | 0.2503364 | -0.0548 | 0.956  | -0.019083076 | count | 1 |
| ZNF143   | -0.0150882 | 0.5595075 | -0.027  | 0.979  | -0.018986642 | count | 1 |
| SNRNP200 | -0.0141841 | 0.4601171 | -0.0308 | 0.975  | -0.018747421 | count | 1 |
| SPART    | -0.0146859 | 0.4601    | -0.0319 | 0.975  | -0.018480603 | count | 1 |
| AP1S2    | -0.0131688 | 0.4016871 | -0.0328 | 0.974  | -0.018256086 | count | 1 |
| RAB37    | -0.0134482 | 0.4515078 | -0.0298 | 0.976  | -0.01824044  | count | 1 |
| LAS1L    | -0.0144707 | 0.5967063 | -0.0243 | 0.981  | -0.018209905 | count | 1 |
| MAP3K1   | -0.0162529 | 0.8059266 | -0.0202 | 0.984  | -0.018134286 | count | 1 |
| PKN2     | -0.0130605 | 0.2817932 | -0.0463 | 0.963  | -0.018041867 | count | 1 |
| HDAC10   | -0.0308198 | 0.8860365 | -0.0348 | 0.9723 | -0.018003511 | count | 1 |
| CD99     | -0.0123134 | 0.127406  | -0.0966 | 0.923  | -0.017710357 | count | 1 |
| MT-ND3   | -0.0122292 | 0.0859095 | -0.1423 | 0.887  | -0.017605274 | count | 1 |
| DNAJB1   | -0.0122074 | 0.2857062 | -0.0427 | 0.966  | -0.017470266 | count | 1 |
| TPT1     | -0.0120471 | 0.054071  | -0.2228 | 0.824  | -0.017370814 | count | 1 |
| HDGFL2   | -0.0125854 | 0.4521519 | -0.0278 | 0.978  | -0.01722306  | count | 1 |
| CUTA     | -0.0119782 | 0.1722073 | -0.0696 | 0.945  | -0.017106999 | count | 1 |
| ABCB7    | -0.0161744 | 0.7742752 | -0.0209 | 0.983  | -0.017079181 | count | 1 |
| WSB2     | -0.0161744 | 0.899773  | -0.018  | 0.986  | -0.017079181 | count | 1 |
| EHMT2    | -0.0124049 | 0.5104053 | -0.0243 | 0.981  | -0.016906522 | count | 1 |
| RPL35    | -0.0117351 | 0.0722152 | -0.1625 | 0.871  | -0.016896339 | count | 1 |
| NAMPT    | -0.0121409 | 0.3942537 | -0.0308 | 0.975  | -0.016849033 | count | 1 |
| UBE3A    | -0.0120832 | 0.3291669 | -0.0367 | 0.971  | -0.016785776 | count | 1 |
| AHNAK    | -0.0118104 | 0.2843331 | -0.0415 | 0.9669 | -0.016724956 | count | 1 |
| ADH5     | -0.0115706 | 0.2450046 | -0.0472 | 0.9624 | -0.016439571 | count | 1 |
| NUCKS1   | -0.0114577 | 0.1825646 | -0.0628 | 0.95   | -0.016337138 | count | 1 |
| WTAP     | -0.0115408 | 0.2346244 | -0.0492 | 0.961  | -0.016283205 | count | 1 |
| ARPC5L   | -0.0111704 | 0.1267554 | -0.0881 | 0.93   | -0.016046004 | count | 1 |
| LCOR     | -0.0123006 | 0.4465224 | -0.0275 | 0.978  | -0.015949987 | count | 1 |
| C6orf226 | -0.0117136 | 0.5116518 | -0.0229 | 0.982  | -0.015888074 | count | 1 |
| COQ8B    | -0.0190843 | 0.8289907 | -0.023  | 0.9816 | -0.015887441 | count | 1 |
| PPP1CA   | -0.0106415 | 0.1885147 | -0.0564 | 0.955  | -0.015199052 | count | 1 |
| PRDX1    | -0.0106958 | 0.2177958 | -0.0491 | 0.9609 | -0.015178378 | count | 1 |
| DNMT3A   | -0.010816  | 0.4509874 | -0.024  | 0.981  | -0.014994664 | count | 1 |
| SUGP2    | -0.0125613 | 0.5505907 | -0.0228 | 0.982  | -0.014987705 | count | 1 |
| DUSP2    | -0.0103756 | 0.111371  | -0.0932 | 0.926  | -0.014955516 | count | 1 |
| NMRK1    | -0.0105473 | 0.3319725 | -0.0318 | 0.9747 | -0.014848276 | count | 1 |
| RMND5A   | -0.0118309 | 0.5686965 | -0.0208 | 0.983  | -0.014680795 | count | 1 |
| ATP5PB   | -0.0102663 | 0.2377482 | -0.0432 | 0.9656 | -0.014531371 | count | 1 |
| M6PR     | -0.0102244 | 0.2972612 | -0.0344 | 0.973  | -0.01436844  | count | 1 |
| C9orf72  | -0.010907  | 0.73321   | -0.0149 | 0.988  | -0.013726698 | count | 1 |

|          |            |           |         |        |              |       |   |
|----------|------------|-----------|---------|--------|--------------|-------|---|
| MLKL     | -0.0118309 | 0.6386989 | -0.0185 | 0.985  | -0.013721118 | count | 1 |
| PPP1CB   | -0.0096681 | 0.1847843 | -0.0523 | 0.9583 | -0.013691317 | count | 1 |
| MYL12B   | -0.0094139 | 0.0941469 | -0.1    | 0.92   | -0.013548076 | count | 1 |
| ZCRB1    | -0.0095055 | 0.3088877 | -0.0308 | 0.975  | -0.013241068 | count | 1 |
| SHISAL2A | -0.0092807 | 0.4719022 | -0.0197 | 0.984  | -0.012766675 | count | 1 |
| MORF4L1  | -0.0088518 | 0.1588703 | -0.0557 | 0.956  | -0.012660216 | count | 1 |
| RPL23A   | -0.0087561 | 0.0688501 | -0.1272 | 0.899  | -0.012614468 | count | 1 |
| PIGT     | -0.0090042 | 0.4174199 | -0.0216 | 0.983  | -0.012532016 | count | 1 |
| OCEL1    | -0.0104648 | 0.6676968 | -0.0157 | 0.988  | -0.01248721  | count | 1 |
| TOPBP1   | -0.0094575 | 0.4650594 | -0.0203 | 0.984  | -0.012431812 | count | 1 |
| ASAH1    | -0.0085611 | 0.3334993 | -0.0257 | 0.98   | -0.012031101 | count | 1 |
| THOC7    | -0.0084114 | 0.2677387 | -0.0314 | 0.975  | -0.01185093  | count | 1 |
| CCDC18   | -0.0095005 | 0.7339505 | -0.0129 | 0.99   | -0.011789862 | count | 1 |
| MED20    | -0.0118309 | 1.0192039 | -0.0116 | 0.991  | -0.011471467 | count | 1 |
| RNF217   | -0.0095695 | 0.8663461 | -0.011  | 0.991  | -0.011419265 | count | 1 |
| ZNF862   | -0.0095695 | 0.8663461 | -0.011  | 0.991  | -0.011419265 | count | 1 |
| MYH10    | -0.0095695 | 1.1357001 | -0.0084 | 0.993  | -0.011419265 | count | 1 |
| HCST     | -0.0075019 | 0.0907323 | -0.0827 | 0.934  | -0.010798622 | count | 1 |
| SYNGR1   | -0.0077944 | 0.3331769 | -0.0234 | 0.981  | -0.010781213 | count | 1 |
| TMA16    | -0.0076407 | 0.4079265 | -0.0187 | 0.985  | -0.010604086 | count | 1 |
| JMJD8    | -0.007913  | 0.6303492 | -0.0126 | 0.99   | -0.010175887 | count | 1 |
| PDCD2    | -0.0072998 | 0.339546  | -0.0215 | 0.983  | -0.010159968 | count | 1 |
| ALKBH8   | -0.0094282 | 0.8517869 | -0.0111 | 0.991  | -0.009959482 | count | 1 |
| RASGRP1  | -0.0078131 | 0.6347167 | -0.0123 | 0.99   | -0.009696335 | count | 1 |
| NECAP1   | -0.0068696 | 0.4464388 | -0.0154 | 0.988  | -0.00938307  | count | 1 |
| NEK6     | -0.0074222 | 0.605143  | -0.0123 | 0.99   | -0.009341894 | count | 1 |
| ROCK1    | -0.006266  | 0.235847  | -0.0266 | 0.9788 | -0.008857543 | count | 1 |
| TRIR     | -0.0061593 | 0.1382649 | -0.0445 | 0.964  | -0.008827858 | count | 1 |
| NDUFA12  | -0.0062137 | 0.1900971 | -0.0327 | 0.9739 | -0.008825736 | count | 1 |
| CDC37    | -0.0061735 | 0.222426  | -0.0278 | 0.9779 | -0.008733933 | count | 1 |
| PPIL2    | -0.0061749 | 0.4510466 | -0.0137 | 0.989  | -0.008466451 | count | 1 |
| KRCC1    | -0.006072  | 0.3808655 | -0.0159 | 0.987  | -0.00846539  | count | 1 |
| TMEM126A | -0.0060141 | 0.4113543 | -0.0146 | 0.988  | -0.008197183 | count | 1 |
| GPR82    | -0.0073409 | 0.7296274 | -0.0101 | 0.992  | -0.008194219 | count | 1 |
| TLNRD1   | -0.0060526 | 0.6136603 | -0.0099 | 0.992  | -0.008187971 | count | 1 |
| LDHB     | -0.0057178 | 0.214069  | -0.0267 | 0.9787 | -0.008158692 | count | 1 |
| NKAPD1   | -0.0063895 | 0.6630038 | -0.0096 | 0.992  | -0.00813667  | count | 1 |
| HAUS7    | -0.0094282 | 0.8670266 | -0.0109 | 0.991  | -0.007855763 | count | 1 |
| UBP1     | -0.0094282 | 1.0402449 | -0.0091 | 0.993  | -0.007855763 | count | 1 |
| PRSS22   | -0.0094282 | 1.0402449 | -0.0091 | 0.993  | -0.007855763 | count | 1 |
| ZNF8     | -0.0094282 | 1.0419348 | -0.009  | 0.993  | -0.007855763 | count | 1 |
| EMID1    | -0.0094282 | 1.171829  | -0.008  | 0.994  | -0.007855763 | count | 1 |
| PRF1     | -0.0053178 | 0.1362138 | -0.039  | 0.969  | -0.007627895 | count | 1 |
| CHD9     | -0.0053567 | 0.2654433 | -0.0202 | 0.984  | -0.007479614 | count | 1 |
| KLF2     | -0.0050759 | 0.2184035 | -0.0232 | 0.9815 | -0.007284539 | count | 1 |

|            |            |           |           |        |              |       |   |
|------------|------------|-----------|-----------|--------|--------------|-------|---|
| RMND5B     | -0.0054171 | 0.7712053 | -0.007    | 0.994  | -0.006723296 | count | 1 |
| TSPYL2     | -0.0046664 | 0.256302  | -0.0182   | 0.9855 | -0.006569464 | count | 1 |
| FAM84B     | -0.0076968 | 0.9627934 | -0.008    | 0.994  | -0.006414131 | count | 1 |
| COA1       | -0.0045434 | 0.3135263 | -0.0145   | 0.988  | -0.00634403  | count | 1 |
| HSPB11     | -0.0044643 | 0.2530305 | -0.0176   | 0.9859 | -0.006329185 | count | 1 |
| LAMTOR4    | -0.0043331 | 0.2076822 | -0.0209   | 0.9834 | -0.006192579 | count | 1 |
| CD8B       | -0.0063163 | 0.9155858 | -0.0069   | 0.994  | -0.00612678  | count | 1 |
| GFOD2      | -0.0063163 | 0.8700611 | -0.0073   | 0.9942 | -0.00612678  | count | 1 |
| TRIM41     | -0.0063163 | 0.9262032 | -0.0068   | 0.995  | -0.00612678  | count | 1 |
| DDX21      | -0.0038212 | 0.2180713 | -0.0175   | 0.986  | -0.005412712 | count | 1 |
| MXD1       | -0.0045107 | 0.4833217 | -0.0093   | 0.993  | -0.005232982 | count | 1 |
| POMP       | -0.003609  | 0.1885937 | -0.0191   | 0.9847 | -0.005151742 | count | 1 |
| SERBP1     | -0.0035465 | 0.1390639 | -0.0255   | 0.98   | -0.005083938 | count | 1 |
| SNRPD2     | -0.0033654 | 0.1278026 | -0.0263   | 0.979  | -0.004828115 | count | 1 |
| CCT8       | -0.0032732 | 0.246797  | -0.0133   | 0.9894 | -0.004650706 | count | 1 |
| ZFAND2B    | -0.0033709 | 0.3452169 | -0.0098   | 0.992  | -0.004613529 | count | 1 |
| GCH1       | -0.0033517 | 0.4536867 | -0.0074   | 0.994  | -0.004430875 | count | 1 |
| RSRC1      | -0.0032563 | 0.4270722 | -0.0076   | 0.994  | -0.0043624   | count | 1 |
| ELP5       | -0.0032364 | 0.4504438 | -0.0072   | 0.994  | -0.004299622 | count | 1 |
| DIS3       | -0.0032364 | 0.48932   | -0.0066   | 0.995  | -0.004299622 | count | 1 |
| FAS        | -0.0035299 | 0.8392207 | -0.0042   | 0.997  | -0.004213163 | count | 1 |
| CCDC93     | -0.0032725 | 0.5752433 | -0.0057   | 0.995  | -0.004167671 | count | 1 |
| H3F3B      | -0.0028465 | 0.075535  | -0.0377   | 0.97   | -0.004103771 | count | 1 |
| ABHD14B    | -0.0027788 | 0.3538022 | -0.0079   | 0.994  | -0.003852623 | count | 1 |
| PHAX       | -0.0026908 | 0.3540569 | -0.0076   | 0.994  | -0.003675493 | count | 1 |
| IRAK1      | -0.0031202 | 0.6053798 | -0.0052   | 0.996  | -0.003297215 | count | 1 |
| RNF10      | -0.003316  | 0.7332824 | -0.0045   | 0.996  | -0.003217179 | count | 1 |
| SNRPD1     | -0.0019928 | 0.2529403 | -0.0079   | 0.9937 | -0.002825284 | count | 1 |
| PRPF39     | -0.002211  | 0.5118826 | -0.0043   | 0.997  | -0.002783253 | count | 1 |
| CHIC1      | -0.003316  | 0.8282987 | -0.004    | 0.997  | -0.002764481 | count | 1 |
| SF3B2      | -0.0019327 | 0.2132625 | -0.0091   | 0.9928 | -0.00274968  | count | 1 |
| PSAP       | -0.0019231 | 0.2739101 | -0.007    | 0.994  | -0.002703923 | count | 1 |
| RPS27A     | -0.0018093 | 0.0465813 | -0.0388   | 0.969  | -0.002609189 | count | 1 |
| SMC1A      | -0.0018268 | 0.3735942 | -0.0049   | 0.996  | -0.00253543  | count | 1 |
| THAP3      | -0.0017342 | 0.6297065 | -0.0028   | 0.998  | -0.002249224 | count | 1 |
| BTG3       | -0.0009646 | 0.2727199 | -0.0035   | 0.9972 | -0.001361499 | count | 1 |
| MAN1A2     | -0.0010159 | 0.4090084 | -0.0025   | 0.998  | -0.001293866 | count | 1 |
| FUOM       | -0.000857  | 0.4023536 | -0.0021   | 0.998  | -0.001182431 | count | 1 |
| SCAMP1-AS1 | -0.0009108 | 0.6646993 | -0.0014   | 0.999  | -0.001087203 | count | 1 |
| CAPRIN1    | -0.0009108 | 0.76839   | -0.0012   | 0.999  | -0.001087203 | count | 1 |
| HNRNPA2B1  | -0.0007102 | 0.0979956 | -0.0072   | 0.994  | -0.001020552 | count | 1 |
| USP46      | -8.00E-04  | 0.5715931 | -0.0014   | 0.999  | -0.000993036 | count | 1 |
| FNBP4      | -0.0005741 | 0.2776063 | -0.0021   | 0.998  | -0.00079836  | count | 1 |
| RPS26      | -0.0005266 | 0.0611463 | -0.0086   | 0.993  | -0.000758955 | count | 1 |
| MAEA       | -0.0004795 | 0.516478  | -9.00E-04 | 0.999  | -0.000626437 | count | 1 |

|              |            |           |           |          |              |       |   |
|--------------|------------|-----------|-----------|----------|--------------|-------|---|
| BFAR         | -0.0004043 | 0.3136096 | -0.0013   | 0.999    | -0.000558567 | count | 1 |
| DUSP11       | -0.0003324 | 0.3878293 | -9.00E-04 | 0.999    | -0.000457981 | count | 1 |
| NEMF         | -0.0002783 | 0.3013051 | -9.00E-04 | 0.999    | -0.000387013 | count | 1 |
| ZNF444       | -0.8007583 | 0.4943966 | -1.6197   | 0.106    | -1.49E-07    | count | 1 |
| POC5         | -0.6826825 | 0.4569712 | -1.4939   | 0.136    | -1.32E-07    | count | 1 |
| DHX16        | -0.6577807 | 0.5142068 | -1.2792   | 0.202    | -1.25E-07    | count | 1 |
| CEP68        | -2.5094188 | 0.7454543 | -3.3663   | 9.00E-04 | -1.16E-07    | count | 1 |
| CHUK         | -2.196169  | 1.1235336 | -1.9547   | 0.0515   | -1.09E-07    | count | 1 |
| LRRC47       | -0.5405425 | 0.4464009 | -1.2109   | 0.227    | -1.07E-07    | count | 1 |
| XYLT1        | -2.1186623 | 1.1510279 | -1.8407   | 0.0666   | -1.06E-07    | count | 1 |
| EIF2AK3      | -2.1592044 | 1.1952813 | -1.8064   | 0.0718   | -1.06E-07    | count | 1 |
| PLK3         | -1.8282528 | 0.9229594 | -1.9809   | 0.0485   | -1.00E-07    | count | 1 |
| C1QTNF6      | -1.962458  | 1.2055933 | -1.6278   | 0.105    | -1.00E-07    | count | 1 |
| MAN2C1       | -1.8941043 | 0.8410377 | -2.2521   | 0.025    | -9.86E-08    | count | 1 |
| TIMM23B      | -1.7928628 | 0.658271  | -2.7236   | 0.0068   | -9.75E-08    | count | 1 |
| HIVEP2       | -1.6801747 | 0.6847498 | -2.4537   | 0.0147   | -9.43E-08    | count | 1 |
| PGAP3        | -1.757256  | 0.9850819 | -1.7839   | 0.0754   | -9.38E-08    | count | 1 |
| KAT2A        | -1.7183582 | 1.1058757 | -1.5538   | 0.121    | -9.22E-08    | count | 1 |
| DPYD         | -0.4535077 | 0.5594151 | -0.8107   | 0.418    | -9.22E-08    | count | 1 |
| SNX11        | -1.7183582 | 0.8788968 | -1.9551   | 0.0514   | -9.21E-08    | count | 1 |
| SIRPG        | -1.7183582 | 0.8788968 | -1.9551   | 0.0514   | -9.21E-08    | count | 1 |
| AC083798.2   | -1.5957724 | 1.0105842 | -1.5791   | 0.115    | -8.84E-08    | count | 1 |
| PTRH1        | -1.5957724 | 1.0105842 | -1.5791   | 0.115    | -8.84E-08    | count | 1 |
| TMOD2        | -1.5957724 | 1.0105842 | -1.5791   | 0.115    | -8.84E-08    | count | 1 |
| GPD1L        | -1.4722259 | 0.8176784 | -1.8005   | 0.0727   | -8.59E-08    | count | 1 |
| ZNF93        | -1.3458185 | 0.7624249 | -1.7652   | 0.0785   | -8.41E-08    | count | 1 |
| NCKAP5L      | -1.4624435 | 0.9499338 | -1.5395   | 0.125    | -8.38E-08    | count | 1 |
| GOLGA8Q      | -1.4624435 | 0.9499338 | -1.5395   | 0.125    | -8.38E-08    | count | 1 |
| SMCR8        | -1.4236994 | 1.149167  | -1.2389   | 0.216    | -8.16E-08    | count | 1 |
| BLMH         | -0.406487  | 0.5568561 | -0.73     | 0.466    | -8.16E-08    | count | 1 |
| RARG         | -1.3975997 | 0.9527039 | -1.467    | 0.143    | -8.08E-08    | count | 1 |
| ACVR2A       | -1.3975997 | 0.9527039 | -1.467    | 0.143    | -8.08E-08    | count | 1 |
| LARS2        | -1.3975997 | 0.9527039 | -1.467    | 0.143    | -8.08E-08    | count | 1 |
| ATRN         | -1.3975997 | 0.9527039 | -1.467    | 0.143    | -8.08E-08    | count | 1 |
| ZNF248       | -1.3569881 | 0.7284359 | -1.8629   | 0.0634   | -8.08E-08    | count | 1 |
| FLYWCH1      | -0.3989847 | 0.5462345 | -0.7304   | 0.466    | -8.07E-08    | count | 1 |
| FAM53B       | -1.3975997 | 1.0347182 | -1.3507   | 0.178    | -8.07E-08    | count | 1 |
| SLC25A25-AS1 | -1.3975997 | 1.0347182 | -1.3507   | 0.178    | -8.07E-08    | count | 1 |
| EPS8L1       | -1.3975997 | 1.0347182 | -1.3507   | 0.178    | -8.07E-08    | count | 1 |
| AC007114.2   | -1.3569881 | 0.9297843 | -1.4595   | 0.145    | -8.07E-08    | count | 1 |
| MBOAT1       | -1.3569881 | 0.9297843 | -1.4595   | 0.145    | -8.07E-08    | count | 1 |
| UTP4         | -1.3609766 | 0.5897792 | -2.3076   | 0.0217   | -8.06E-08    | count | 1 |
| GPM6B        | -1.3188725 | 0.6859048 | -1.9228   | 0.0554   | -7.97E-08    | count | 1 |
| ECE1         | -1.3193112 | 0.8382979 | -1.5738   | 0.117    | -7.90E-08    | count | 1 |
| MFSD13A      | -1.3180527 | 1.1716777 | -1.1249   | 0.261    | -7.73E-08    | count | 1 |

|            |             |             |         |       |           |       |   |
|------------|-------------|-------------|---------|-------|-----------|-------|---|
| SREBF2     | -1.3180527  | 1.1091952   | -1.1883 | 0.236 | -7.72E-08 | count | 1 |
| MED24      | -1.2373194  | 0.9687682   | -1.2772 | 0.202 | -7.45E-08 | count | 1 |
| RASSF1-AS1 | -1.1904931  | 0.9303222   | -1.2797 | 0.202 | -7.40E-08 | count | 1 |
| TRIM39     | -1.1990289  | 1.1200553   | -1.0705 | 0.285 | -7.27E-08 | count | 1 |
| MYO19      | -1.1516788  | 0.7088294   | -1.6248 | 0.105 | -7.18E-08 | count | 1 |
| TADA1      | -1.137833   | 0.7607258   | -1.4957 | 0.136 | -7.06E-08 | count | 1 |
| AC005523.2 | -1.137833   | 0.7607258   | -1.4957 | 0.136 | -7.06E-08 | count | 1 |
| TSPOAP1    | -1.137833   | 0.7216878   | -1.5766 | 0.116 | -7.03E-08 | count | 1 |
| ELOVL6     | -1.137833   | 0.7216878   | -1.5766 | 0.116 | -7.03E-08 | count | 1 |
| RAB20      | -1.0986123  | 0.9522617   | -1.1537 | 0.249 | -6.93E-08 | count | 1 |
| RNASEH2A   | -1.0625706  | 1.1822428   | -0.8988 | 0.369 | -6.66E-08 | count | 1 |
| COG1       | -1.0381146  | 0.8175868   | -1.2697 | 0.205 | -6.60E-08 | count | 1 |
| BICD2      | -1.0036482  | 0.6985218   | -1.4368 | 0.152 | -6.54E-08 | count | 1 |
| NMD3       | -1.0036482  | 0.6702904   | -1.4973 | 0.135 | -6.48E-08 | count | 1 |
| MLLT11     | -1.0024566  | 0.7278213   | -1.3773 | 0.169 | -6.42E-08 | count | 1 |
| CNEP1R1    | -0.9804745  | 0.6507727   | -1.5066 | 0.133 | -6.42E-08 | count | 1 |
| AL049840.1 | -0.3039416  | 0.5489617   | -0.5537 | 0.58  | -6.29E-08 | count | 1 |
| FYCO1      | -0.3039416  | 0.5976226   | -0.5086 | 0.611 | -6.25E-08 | count | 1 |
| REPS1      | -0.9555114  | 0.5907378   | -1.6175 | 0.107 | -6.22E-08 | count | 1 |
| LMOD3      | -0.9329239  | 0.7769961   | -1.2007 | 0.231 | -6.13E-08 | count | 1 |
| BUB1       | -0.9329239  | 0.7142027   | -1.3062 | 0.192 | -6.10E-08 | count | 1 |
| TBX19      | -0.9329239  | 0.920362    | -1.0136 | 0.312 | -6.10E-08 | count | 1 |
| KCTD12     | -0.9023848  | 1.1447422   | -0.7883 | 0.431 | -5.91E-08 | count | 1 |
| SLC25A12   | -0.878374   | 0.5870885   | -1.4962 | 0.136 | -5.90E-08 | count | 1 |
| C10orf88   | -0.9023848  | 1.0149039   | -0.8891 | 0.375 | -5.89E-08 | count | 1 |
| MCM4       | -0.8795465  | 0.695953    | -1.2638 | 0.207 | -5.87E-08 | count | 1 |
| CARF       | -0.8930322  | 0.8893244   | -1.0042 | 0.316 | -5.87E-08 | count | 1 |
| ZNF211     | -0.8599177  | 0.7478177   | -1.1499 | 0.251 | -5.75E-08 | count | 1 |
| CCP110     | -0.8420815  | 0.6650804   | -1.2661 | 0.206 | -5.68E-08 | count | 1 |
| CTTNBP2NL  | -0.8501509  | 0.8798732   | -0.9662 | 0.335 | -5.66E-08 | count | 1 |
| ZNF562     | -0.8420815  | 0.7859676   | -1.0714 | 0.285 | -5.58E-08 | count | 1 |
| SLC35F2    | -0.8226154  | 0.9052051   | -0.9088 | 0.364 | -5.49E-08 | count | 1 |
| RFX2       | -0.8226154  | 0.9052051   | -0.9088 | 0.364 | -5.49E-08 | count | 1 |
| CRLS1      | -0.8226154  | 0.8690687   | -0.9465 | 0.345 | -5.48E-08 | count | 1 |
| TRIM23     | -0.8007583  | 0.8472163   | -0.9452 | 0.345 | -5.40E-08 | count | 1 |
| DDX51      | -19.4716276 | 2269.72964  | -0.0086 | 0.993 | -5.23E-08 | count | 1 |
| SNHG25     | -19.3353596 | 2582.609819 | -0.0075 | 0.994 | -5.15E-08 | count | 1 |
| UTP20      | -19.6013729 | 1500.108481 | -0.0131 | 0.99  | -5.10E-08 | count | 1 |
| AL645728.1 | -0.7323679  | 0.762583    | -0.9604 | 0.338 | -5.08E-08 | count | 1 |
| C15orf41   | -0.7323679  | 0.5970607   | -1.2266 | 0.221 | -5.01E-08 | count | 1 |
| ZNF559     | -0.7256476  | 0.5520906   | -1.3144 | 0.19  | -5.01E-08 | count | 1 |
| NUP188     | -0.7256476  | 0.7493889   | -0.9683 | 0.334 | -4.98E-08 | count | 1 |
| WDR7       | -0.7256476  | 0.8935014   | -0.8121 | 0.417 | -4.97E-08 | count | 1 |
| FAM135A    | -0.7256476  | 0.8935014   | -0.8121 | 0.417 | -4.97E-08 | count | 1 |
| GGACT      | -0.7256476  | 0.8268916   | -0.8776 | 0.381 | -4.96E-08 | count | 1 |

|            |             |             |         |       |           |       |   |
|------------|-------------|-------------|---------|-------|-----------|-------|---|
| GUCY1A1    | -19.0990251 | 2719.394109 | -0.007  | 0.994 | -4.93E-08 | count | 1 |
| TCAF2      | -19.2555692 | 1974.55557  | -0.0098 | 0.992 | -4.93E-08 | count | 1 |
| CRTC1      | -18.9227382 | 2530.252124 | -0.0075 | 0.994 | -4.90E-08 | count | 1 |
| SLC16A6    | -18.9227382 | 2530.252124 | -0.0075 | 0.994 | -4.90E-08 | count | 1 |
| LINC00672  | -0.7078998  | 0.8396955   | -0.843  | 0.4   | -4.90E-08 | count | 1 |
| PANO1      | -0.7078998  | 0.8396955   | -0.843  | 0.4   | -4.90E-08 | count | 1 |
| SLC2A14    | -0.7078998  | 0.8396955   | -0.843  | 0.4   | -4.90E-08 | count | 1 |
| CES2       | -0.7078998  | 0.6540662   | -1.0823 | 0.28  | -4.86E-08 | count | 1 |
| NEMP1      | -19.1113435 | 1905.300436 | -0.01   | 0.992 | -4.86E-08 | count | 1 |
| TMEM185B   | -0.7078998  | 0.7481441   | -0.9462 | 0.345 | -4.85E-08 | count | 1 |
| TNPO2      | -0.7078998  | 1.0595493   | -0.6681 | 0.505 | -4.85E-08 | count | 1 |
| CDC42EP4   | -0.7078998  | 0.992474    | -0.7133 | 0.476 | -4.85E-08 | count | 1 |
| GPATCH3    | -0.7078998  | 0.992474    | -0.7133 | 0.476 | -4.85E-08 | count | 1 |
| AL139393.2 | -0.7078998  | 1.0171308   | -0.696  | 0.487 | -4.85E-08 | count | 1 |
| NPIPB4     | -19.0392679 | 2086.043791 | -0.0091 | 0.993 | -4.83E-08 | count | 1 |
| ABCC10     | -19.1155726 | 2009.753474 | -0.0095 | 0.992 | -4.83E-08 | count | 1 |
| GRK4       | -19.1155726 | 2009.753474 | -0.0095 | 0.992 | -4.83E-08 | count | 1 |
| POMGNT1    | -19.1155726 | 2009.753474 | -0.0095 | 0.992 | -4.83E-08 | count | 1 |
| ZNF232     | -19.1155726 | 2009.753474 | -0.0095 | 0.992 | -4.83E-08 | count | 1 |
| AC005261.1 | -19.0246789 | 2139.047339 | -0.0089 | 0.993 | -4.80E-08 | count | 1 |
| FBXW8      | -18.8461958 | 2413.214989 | -0.0078 | 0.994 | -4.78E-08 | count | 1 |
| ABHD4      | -18.8461958 | 2413.214989 | -0.0078 | 0.994 | -4.78E-08 | count | 1 |
| SSH3       | -18.9474518 | 1778.79246  | -0.0107 | 0.992 | -4.77E-08 | count | 1 |
| NPW        | -18.8864994 | 2410.446831 | -0.0078 | 0.994 | -4.77E-08 | count | 1 |
| DHX33      | -18.8723293 | 2164.556707 | -0.0087 | 0.993 | -4.76E-08 | count | 1 |
| BACH2      | -18.8723293 | 2164.556707 | -0.0087 | 0.993 | -4.76E-08 | count | 1 |
| ATP10A     | -18.601161  | 2178.384365 | -0.0085 | 0.993 | -4.75E-08 | count | 1 |
| MPDU1      | -18.601161  | 2178.384365 | -0.0085 | 0.993 | -4.75E-08 | count | 1 |
| CCDC142    | -18.8848715 | 2022.383327 | -0.0093 | 0.993 | -4.74E-08 | count | 1 |
| EPOP       | -18.8992208 | 1911.964997 | -0.0099 | 0.992 | -4.73E-08 | count | 1 |
| ZNF687     | -18.8992208 | 1911.964997 | -0.0099 | 0.992 | -4.73E-08 | count | 1 |
| NEFM       | -18.315711  | 1693.279311 | -0.0108 | 0.991 | -4.72E-08 | count | 1 |
| SLC31A1    | -18.7473959 | 2280.955709 | -0.0082 | 0.993 | -4.72E-08 | count | 1 |
| AC104986.2 | -18.7473959 | 2280.955709 | -0.0082 | 0.993 | -4.72E-08 | count | 1 |
| ARL6       | -18.7473959 | 2280.955709 | -0.0082 | 0.993 | -4.72E-08 | count | 1 |
| DHTKD1     | -18.7473959 | 2280.955709 | -0.0082 | 0.993 | -4.72E-08 | count | 1 |
| KCNMA1     | -18.7473959 | 2280.955709 | -0.0082 | 0.993 | -4.72E-08 | count | 1 |
| MAP3K21    | -18.7473959 | 2280.955709 | -0.0082 | 0.993 | -4.72E-08 | count | 1 |
| CAVIN1     | -18.7562336 | 2059.012152 | -0.0091 | 0.993 | -4.70E-08 | count | 1 |
| USP43      | -18.7562336 | 2059.012152 | -0.0091 | 0.993 | -4.70E-08 | count | 1 |
| ITPRIPL1   | -18.508602  | 1733.644922 | -0.0107 | 0.991 | -4.65E-08 | count | 1 |
| KIAA1841   | -18.508602  | 1733.644922 | -0.0107 | 0.991 | -4.65E-08 | count | 1 |
| ATP8B4     | -0.2168605  | 0.3706315   | -0.5851 | 0.559 | -4.56E-08 | count | 1 |
| RTKN2      | -0.6427386  | 0.8223109   | -0.7816 | 0.435 | -4.49E-08 | count | 1 |
| PCDH9      | -0.635639   | 0.9843572   | -0.6457 | 0.519 | -4.44E-08 | count | 1 |

|           |            |           |         |        |           |       |   |
|-----------|------------|-----------|---------|--------|-----------|-------|---|
| INPPL1    | -0.6295027 | 0.716308  | -0.8788 | 0.38   | -4.44E-08 | count | 1 |
| PLEKHA8   | -0.5948222 | 0.7889023 | -0.754  | 0.451  | -4.21E-08 | count | 1 |
| ACAD10    | -0.5948222 | 0.8993865 | -0.6614 | 0.509  | -4.21E-08 | count | 1 |
| PAN2      | -0.5948222 | 0.9430664 | -0.6307 | 0.529  | -4.20E-08 | count | 1 |
| FAM239A   | -0.5948222 | 0.9430664 | -0.6307 | 0.529  | -4.20E-08 | count | 1 |
| PIK3R3    | -0.5948222 | 0.8805533 | -0.6755 | 0.5    | -4.19E-08 | count | 1 |
| ZNF501    | -0.5500463 | 0.7272346 | -0.7564 | 0.45   | -3.96E-08 | count | 1 |
| MAP2K5    | -2.2364453 | 0.7846915 | -2.8501 | 0.0046 | -3.96E-08 | count | 1 |
| MEF2C     | -0.1877838 | 0.7001476 | -0.2682 | 0.789  | -3.96E-08 | count | 1 |
| GPR89B    | -0.5500463 | 0.7686701 | -0.7156 | 0.475  | -3.94E-08 | count | 1 |
| ZNF589    | -0.5500463 | 0.7143093 | -0.77   | 0.442  | -3.94E-08 | count | 1 |
| KAT2B     | -0.5500463 | 0.6633596 | -0.8292 | 0.408  | -3.93E-08 | count | 1 |
| FANCM     | -0.5500463 | 0.9127212 | -0.6026 | 0.547  | -3.93E-08 | count | 1 |
| AMIGO2    | -0.5274773 | 0.662997  | -0.7956 | 0.427  | -3.81E-08 | count | 1 |
| PHOSPHO2  | -0.5259058 | 0.6399347 | -0.8218 | 0.412  | -3.78E-08 | count | 1 |
| ZNF445    | -0.5259058 | 0.8571521 | -0.6136 | 0.54   | -3.77E-08 | count | 1 |
| TRMT10A   | -2.0541237 | 0.7745967 | -2.6519 | 0.0084 | -3.76E-08 | count | 1 |
| DTHD1     | -0.510784  | 0.5756921 | -0.8873 | 0.376  | -3.69E-08 | count | 1 |
| ZBTB33    | -1.8309802 | 0.8740074 | -2.0949 | 0.037  | -3.53E-08 | count | 1 |
| THTPA     | -1.8309802 | 0.8169689 | -2.2412 | 0.0257 | -3.52E-08 | count | 1 |
| WDR25     | -0.4591644 | 0.7397176 | -0.6207 | 0.535  | -3.37E-08 | count | 1 |
| FANCD2    | -0.4591644 | 0.8714231 | -0.5269 | 0.599  | -3.35E-08 | count | 1 |
| PPM1F     | -0.4591644 | 0.9673509 | -0.4747 | 0.635  | -3.35E-08 | count | 1 |
| BRPF1     | -0.4591644 | 1.0076009 | -0.4557 | 0.649  | -3.34E-08 | count | 1 |
| TTC22     | -0.4591644 | 1.0076009 | -0.4557 | 0.649  | -3.34E-08 | count | 1 |
| MCM3AP    | -0.4591644 | 1.0076009 | -0.4557 | 0.649  | -3.34E-08 | count | 1 |
| LTBP2     | -0.4591644 | 1.0836252 | -0.4237 | 0.672  | -3.34E-08 | count | 1 |
| LY75      | -0.4591644 | 1.0836252 | -0.4237 | 0.672  | -3.34E-08 | count | 1 |
| CYTH3     | -0.4591644 | 1.0836252 | -0.4237 | 0.672  | -3.34E-08 | count | 1 |
| ANKRD52   | -0.4548283 | 0.7849187 | -0.5795 | 0.563  | -3.33E-08 | count | 1 |
| AACS      | -0.4548283 | 0.7485784 | -0.6076 | 0.544  | -3.32E-08 | count | 1 |
| RBL1      | -0.4446858 | 0.567918  | -0.783  | 0.434  | -3.26E-08 | count | 1 |
| RAB40C    | -0.4446858 | 0.6186405 | -0.7188 | 0.473  | -3.26E-08 | count | 1 |
| PTGR2     | -0.4446858 | 0.8819171 | -0.5042 | 0.614  | -3.26E-08 | count | 1 |
| DCUN1D3   | -0.4446858 | 0.8819171 | -0.5042 | 0.614  | -3.26E-08 | count | 1 |
| KIF18A    | -0.4446858 | 0.6531553 | -0.6808 | 0.496  | -3.25E-08 | count | 1 |
| NDUFA7    | -0.4446858 | 0.6531553 | -0.6808 | 0.496  | -3.25E-08 | count | 1 |
| ADAT3     | -0.4446858 | 0.6531553 | -0.6808 | 0.496  | -3.25E-08 | count | 1 |
| ZNF197    | -0.4446858 | 0.5866309 | -0.758  | 0.449  | -3.25E-08 | count | 1 |
| GLCE      | -0.4446858 | 0.8003771 | -0.5556 | 0.579  | -3.25E-08 | count | 1 |
| CYP2U1    | -1.5432981 | 0.8046504 | -1.918  | 0.056  | -3.16E-08 | count | 1 |
| ATN1      | -1.5432981 | 0.8046504 | -1.918  | 0.056  | -3.16E-08 | count | 1 |
| PRCD      | -1.5432981 | 0.8046504 | -1.918  | 0.056  | -3.16E-08 | count | 1 |
| LINC01115 | -1.5432981 | 0.8046504 | -1.918  | 0.056  | -3.16E-08 | count | 1 |
| NLRX1     | -1.3862944 | 0.7888106 | -1.7574 | 0.0798 | -2.97E-08 | count | 1 |



|             |            |           |         |        |           |       |   |
|-------------|------------|-----------|---------|--------|-----------|-------|---|
| TPX2        | -1.3975997 | 0.84564   | -1.6527 | 0.0994 | -2.96E-08 | count | 1 |
| INTS1       | -1.3975997 | 0.937072  | -1.4915 | 0.137  | -2.96E-08 | count | 1 |
| SEC31B      | -1.3862944 | 0.5577733 | -2.4854 | 0.0134 | -2.94E-08 | count | 1 |
| RDH13       | -0.3905682 | 0.5427577 | -0.7196 | 0.472  | -2.90E-08 | count | 1 |
| TNFSF11     | -0.1357302 | 0.5700014 | -0.2381 | 0.812  | -2.90E-08 | count | 1 |
| ZNF335      | -0.3778405 | 0.6070847 | -0.6224 | 0.534  | -2.81E-08 | count | 1 |
| ZNF557      | -0.3778405 | 0.611963  | -0.6174 | 0.537  | -2.81E-08 | count | 1 |
| FGFBP2      | -1.2373194 | 0.9037096 | -1.3692 | 0.172  | -2.73E-08 | count | 1 |
| DIP2B       | -0.3577913 | 1.0163326 | -0.352  | 0.725  | -2.67E-08 | count | 1 |
| AP5B1       | -0.3577913 | 1.0163326 | -0.352  | 0.725  | -2.67E-08 | count | 1 |
| ZNF554      | -1.1631508 | 0.6022079 | -1.9315 | 0.0543 | -2.61E-08 | count | 1 |
| DUSP16      | -1.1631508 | 0.496904  | -2.3408 | 0.0198 | -2.61E-08 | count | 1 |
| BOK         | -1.137833  | 0.9001029 | -1.2641 | 0.207  | -2.57E-08 | count | 1 |
| FAM19A2     | -1.137833  | 0.9001029 | -1.2641 | 0.207  | -2.57E-08 | count | 1 |
| PRMT5-AS1   | -1.137833  | 0.9001029 | -1.2641 | 0.207  | -2.57E-08 | count | 1 |
| C21orf58    | -1.137833  | 0.9001029 | -1.2641 | 0.207  | -2.57E-08 | count | 1 |
| AL050341.2  | -1.137833  | 0.9001029 | -1.2641 | 0.207  | -2.57E-08 | count | 1 |
| AC013400.1  | -1.137833  | 0.9001029 | -1.2641 | 0.207  | -2.57E-08 | count | 1 |
| ZKSCAN8     | -1.137833  | 0.9001029 | -1.2641 | 0.207  | -2.57E-08 | count | 1 |
| IER3-AS1    | -1.137833  | 0.9001029 | -1.2641 | 0.207  | -2.57E-08 | count | 1 |
| POLH        | -1.137833  | 0.9001029 | -1.2641 | 0.207  | -2.57E-08 | count | 1 |
| TRBV28      | -1.137833  | 0.9001029 | -1.2641 | 0.207  | -2.57E-08 | count | 1 |
| AMMECR1     | -1.137833  | 0.9001029 | -1.2641 | 0.207  | -2.57E-08 | count | 1 |
| SERINC2     | -1.137833  | 0.9001029 | -1.2641 | 0.207  | -2.57E-08 | count | 1 |
| HIST2H2BE   | -1.137833  | 0.9001029 | -1.2641 | 0.207  | -2.57E-08 | count | 1 |
| AJM1        | -1.137833  | 0.9001029 | -1.2641 | 0.207  | -2.57E-08 | count | 1 |
| EPG5        | -1.137833  | 0.9001029 | -1.2641 | 0.207  | -2.57E-08 | count | 1 |
| DERL3       | -1.137833  | 0.9001029 | -1.2641 | 0.207  | -2.57E-08 | count | 1 |
| PIGA        | -1.137833  | 0.9001029 | -1.2641 | 0.207  | -2.57E-08 | count | 1 |
| FOLR2       | -1.137833  | 0.7607258 | -1.4957 | 0.136  | -2.57E-08 | count | 1 |
| UBA7        | -1.137833  | 0.7607258 | -1.4957 | 0.136  | -2.57E-08 | count | 1 |
| AMOTL1      | -1.137833  | 0.7607258 | -1.4957 | 0.136  | -2.57E-08 | count | 1 |
| SCMH1       | -0.3356409 | 0.904907  | -0.3709 | 0.711  | -2.52E-08 | count | 1 |
| SETD6       | -0.3290647 | 0.702199  | -0.4686 | 0.64   | -2.48E-08 | count | 1 |
| TRIM47      | -0.3208124 | 0.7712308 | -0.416  | 0.678  | -2.42E-08 | count | 1 |
| NCAPD2      | -0.1107711 | 0.7873221 | -0.1407 | 0.888  | -2.38E-08 | count | 1 |
| YARS2       | -0.3134729 | 0.5404529 | -0.58   | 0.562  | -2.37E-08 | count | 1 |
| SLC35A3     | -0.1090663 | 0.4768609 | -0.2287 | 0.819  | -2.34E-08 | count | 1 |
| LOH12CR2    | -0.9329239 | 1.1052674 | -0.8441 | 0.399  | -2.23E-08 | count | 1 |
| TMEM63B     | -0.9329239 | 1.1052674 | -0.8441 | 0.399  | -2.23E-08 | count | 1 |
| STK33       | -0.9329239 | 1.1052674 | -0.8441 | 0.399  | -2.23E-08 | count | 1 |
| ADAMTSL4    | -0.9329239 | 1.1052674 | -0.8441 | 0.399  | -2.23E-08 | count | 1 |
| LMLN        | -0.9329239 | 1.1052674 | -0.8441 | 0.399  | -2.23E-08 | count | 1 |
| ARHGAP5-AS1 | -0.9329239 | 1.1052674 | -0.8441 | 0.399  | -2.23E-08 | count | 1 |
| TMEM98      | -0.9329239 | 1.1052674 | -0.8441 | 0.399  | -2.23E-08 | count | 1 |

|            |             |             |         |       |           |       |   |
|------------|-------------|-------------|---------|-------|-----------|-------|---|
| CDK2AP1    | -0.9329239  | 1.1052674   | -0.8441 | 0.399 | -2.23E-08 | count | 1 |
| Z68871.1   | -0.9329239  | 1.1052674   | -0.8441 | 0.399 | -2.23E-08 | count | 1 |
| GOLGA6L10  | -0.9329239  | 1.1052674   | -0.8441 | 0.399 | -2.23E-08 | count | 1 |
| SEMA4F     | -0.9329239  | 1.1052674   | -0.8441 | 0.399 | -2.23E-08 | count | 1 |
| AC010969.2 | -0.9329239  | 0.920362    | -1.0136 | 0.312 | -2.22E-08 | count | 1 |
| NIPAL2     | -0.9329239  | 0.920362    | -1.0136 | 0.312 | -2.22E-08 | count | 1 |
| PRKAB2     | -0.280039   | 0.8927699   | -0.3137 | 0.754 | -2.13E-08 | count | 1 |
| DAAM1      | -0.280039   | 0.8927699   | -0.3137 | 0.754 | -2.13E-08 | count | 1 |
| ZNF592     | -0.280039   | 0.9267946   | -0.3022 | 0.763 | -2.13E-08 | count | 1 |
| KIF13A     | -0.280039   | 0.9267946   | -0.3022 | 0.763 | -2.13E-08 | count | 1 |
| TFE3       | -0.280039   | 0.9267946   | -0.3022 | 0.763 | -2.13E-08 | count | 1 |
| ZNF490     | -0.280039   | 0.9267946   | -0.3022 | 0.763 | -2.13E-08 | count | 1 |
| CNN3       | -0.280039   | 0.9267946   | -0.3022 | 0.763 | -2.13E-08 | count | 1 |
| AC025181.2 | -0.280039   | 0.9267946   | -0.3022 | 0.763 | -2.13E-08 | count | 1 |
| LINC00299  | -0.280039   | 0.9267946   | -0.3022 | 0.763 | -2.13E-08 | count | 1 |
| SEMA7A     | -0.280039   | 0.9267946   | -0.3022 | 0.763 | -2.13E-08 | count | 1 |
| HCFC1      | -0.8754687  | 0.5367177   | -1.6312 | 0.104 | -2.12E-08 | count | 1 |
| NT5M       | -0.8754687  | 0.6728112   | -1.3012 | 0.194 | -2.12E-08 | count | 1 |
| ZNF165     | -0.8501509  | 0.6341072   | -1.3407 | 0.181 | -2.08E-08 | count | 1 |
| BAIAP3     | -0.8501509  | 0.7763435   | -1.0951 | 0.274 | -2.07E-08 | count | 1 |
| MCM9       | -0.2672575  | 0.6258672   | -0.427  | 0.67  | -2.06E-08 | count | 1 |
| AL731577.1 | -0.7078998  | 0.8396955   | -0.843  | 0.4   | -1.78E-08 | count | 1 |
| ICAM4      | -0.7078998  | 1.1102959   | -0.6376 | 0.524 | -1.78E-08 | count | 1 |
| KHK        | -0.7078998  | 1.1102959   | -0.6376 | 0.524 | -1.78E-08 | count | 1 |
| UBOX5      | -0.7078998  | 1.1102959   | -0.6376 | 0.524 | -1.78E-08 | count | 1 |
| NGFR       | -0.7078998  | 1.1102959   | -0.6376 | 0.524 | -1.78E-08 | count | 1 |
| BRICD5     | -0.7078998  | 1.1102959   | -0.6376 | 0.524 | -1.78E-08 | count | 1 |
| ZC3H11A    | -0.7078998  | 1.1102959   | -0.6376 | 0.524 | -1.78E-08 | count | 1 |
| IGHG2      | -20.1297638 | 2614.358201 | -0.0077 | 0.994 | -1.77E-08 | count | 1 |
| IGHG3      | -20.1297638 | 2614.358201 | -0.0077 | 0.994 | -1.77E-08 | count | 1 |
| NR2F6      | -20.1297638 | 2614.358201 | -0.0077 | 0.994 | -1.77E-08 | count | 1 |
| TSPAN6     | -0.6931472  | 0.6423818   | -1.079  | 0.281 | -1.77E-08 | count | 1 |
| GATA6      | -19.927454  | 3151.898989 | -0.0063 | 0.995 | -1.75E-08 | count | 1 |
| VPS54      | -19.9324507 | 2814.493507 | -0.0071 | 0.994 | -1.75E-08 | count | 1 |
| MS4A7      | -19.9324507 | 2814.493507 | -0.0071 | 0.994 | -1.75E-08 | count | 1 |
| AC087294.1 | -19.9324507 | 2814.493507 | -0.0071 | 0.994 | -1.75E-08 | count | 1 |
| AC040977.1 | -19.9324507 | 2814.493507 | -0.0071 | 0.994 | -1.75E-08 | count | 1 |
| CCDC102B   | -19.9324507 | 2814.493507 | -0.0071 | 0.994 | -1.75E-08 | count | 1 |
| CDHR1      | -19.9324507 | 2814.493507 | -0.0071 | 0.994 | -1.75E-08 | count | 1 |
| LINC02384  | -19.9324507 | 2814.493507 | -0.0071 | 0.994 | -1.75E-08 | count | 1 |
| TCF20      | -19.9324507 | 2814.493507 | -0.0071 | 0.994 | -1.75E-08 | count | 1 |
| TTLL4      | -19.9324507 | 2814.493507 | -0.0071 | 0.994 | -1.75E-08 | count | 1 |
| ZNF738     | -19.942652  | 2432.814453 | -0.0082 | 0.993 | -1.74E-08 | count | 1 |
| TNFRSF11A  | -19.3644529 | 2544.321406 | -0.0076 | 0.994 | -1.73E-08 | count | 1 |
| GOLT1A     | -19.6665497 | 3520.894373 | -0.0056 | 0.996 | -1.73E-08 | count | 1 |

|            |             |             |         |       |           |       |   |
|------------|-------------|-------------|---------|-------|-----------|-------|---|
| TTC21A     | -19.6665497 | 3520.894373 | -0.0056 | 0.996 | -1.73E-08 | count | 1 |
| CENPP      | -19.6665497 | 3520.894373 | -0.0056 | 0.996 | -1.73E-08 | count | 1 |
| CTNNAL1    | -19.6665497 | 3520.894373 | -0.0056 | 0.996 | -1.73E-08 | count | 1 |
| STAC3      | -19.6665497 | 3520.894373 | -0.0056 | 0.996 | -1.73E-08 | count | 1 |
| TPSAB1     | -19.6665497 | 3520.894373 | -0.0056 | 0.996 | -1.73E-08 | count | 1 |
| CST6       | -19.6665497 | 3520.894373 | -0.0056 | 0.996 | -1.73E-08 | count | 1 |
| IL17RC     | -19.6665497 | 3520.894373 | -0.0056 | 0.996 | -1.73E-08 | count | 1 |
| AC095055.1 | -19.6665497 | 3520.894373 | -0.0056 | 0.996 | -1.73E-08 | count | 1 |
| MTRNR2L6   | -19.6665497 | 3520.894373 | -0.0056 | 0.996 | -1.73E-08 | count | 1 |
| IL33       | -19.6665497 | 3520.894373 | -0.0056 | 0.996 | -1.73E-08 | count | 1 |
| SNCG       | -19.6665497 | 3520.894373 | -0.0056 | 0.996 | -1.73E-08 | count | 1 |
| GID4       | -19.6665497 | 3520.894373 | -0.0056 | 0.996 | -1.73E-08 | count | 1 |
| GNG11      | -19.6665497 | 3520.894373 | -0.0056 | 0.996 | -1.73E-08 | count | 1 |
| LINC01588  | -0.2239144  | 0.6901196   | -0.3245 | 0.746 | -1.72E-08 | count | 1 |
| CHI3L2     | -0.2239144  | 0.6103719   | -0.3668 | 0.714 | -1.72E-08 | count | 1 |
| SLC25A25   | -0.2239144  | 0.7902177   | -0.2834 | 0.777 | -1.72E-08 | count | 1 |
| AL035661.1 | -19.6791397 | 2619.245003 | -0.0075 | 0.994 | -1.72E-08 | count | 1 |
| FZD8       | -19.6791397 | 2619.245003 | -0.0075 | 0.994 | -1.72E-08 | count | 1 |
| LINC00294  | -19.6791397 | 2619.245003 | -0.0075 | 0.994 | -1.72E-08 | count | 1 |
| KDM4A      | -19.6791397 | 2619.245003 | -0.0075 | 0.994 | -1.72E-08 | count | 1 |
| ADHFE1     | -19.6791397 | 2619.245003 | -0.0075 | 0.994 | -1.72E-08 | count | 1 |
| CALCRL     | -19.6791397 | 2619.245003 | -0.0075 | 0.994 | -1.72E-08 | count | 1 |
| CCL21      | -19.6791397 | 2619.245003 | -0.0075 | 0.994 | -1.72E-08 | count | 1 |
| DENND5A    | -19.6791397 | 2619.245003 | -0.0075 | 0.994 | -1.72E-08 | count | 1 |
| CTHRC1     | -19.6791397 | 2619.245003 | -0.0075 | 0.994 | -1.72E-08 | count | 1 |
| REXO5      | -19.6791397 | 2619.245003 | -0.0075 | 0.994 | -1.72E-08 | count | 1 |
| TM4SF1     | -19.6791397 | 2619.245003 | -0.0075 | 0.994 | -1.72E-08 | count | 1 |
| CXCL12     | -19.6791397 | 2619.245003 | -0.0075 | 0.994 | -1.72E-08 | count | 1 |
| H2AFY2     | -19.5854843 | 3433.783865 | -0.0057 | 0.995 | -1.72E-08 | count | 1 |
| QPRT       | -19.5854843 | 3433.783865 | -0.0057 | 0.995 | -1.72E-08 | count | 1 |
| ZNF703     | -19.5854843 | 3433.783865 | -0.0057 | 0.995 | -1.72E-08 | count | 1 |
| AGAP9      | -19.5854843 | 3433.783865 | -0.0057 | 0.995 | -1.72E-08 | count | 1 |
| ZNF473     | -19.5854843 | 3433.783865 | -0.0057 | 0.995 | -1.72E-08 | count | 1 |
| LRRRC8C    | -19.5854843 | 3433.783865 | -0.0057 | 0.995 | -1.72E-08 | count | 1 |
| TTC24      | -19.5854843 | 3433.783865 | -0.0057 | 0.995 | -1.72E-08 | count | 1 |
| SLC45A4    | -19.5854843 | 3433.783865 | -0.0057 | 0.995 | -1.72E-08 | count | 1 |
| LPP-AS2    | -19.5854843 | 3433.783865 | -0.0057 | 0.995 | -1.72E-08 | count | 1 |
| DACT1      | -19.5854843 | 3433.783865 | -0.0057 | 0.995 | -1.72E-08 | count | 1 |
| CABLES2    | -19.5854843 | 3433.783865 | -0.0057 | 0.995 | -1.72E-08 | count | 1 |
| MPV17L     | -19.5854843 | 3433.783865 | -0.0057 | 0.995 | -1.72E-08 | count | 1 |
| ARRDC5     | -19.6855591 | 2009.884566 | -0.0098 | 0.992 | -1.71E-08 | count | 1 |
| AC244090.1 | -19.5891294 | 2678.600699 | -0.0073 | 0.994 | -1.71E-08 | count | 1 |
| AC108718.1 | -19.0959903 | 2843.648266 | -0.0067 | 0.995 | -1.71E-08 | count | 1 |
| AL354707.1 | -19.0959903 | 2843.648266 | -0.0067 | 0.995 | -1.71E-08 | count | 1 |
| AC136475.3 | -19.0959903 | 2843.648266 | -0.0067 | 0.995 | -1.71E-08 | count | 1 |

|               |             |             |         |       |           |       |   |
|---------------|-------------|-------------|---------|-------|-----------|-------|---|
| A2M-AS1       | -19.0959903 | 2843.648266 | -0.0067 | 0.995 | -1.71E-08 | count | 1 |
| AC048341.2    | -19.0959903 | 2843.648266 | -0.0067 | 0.995 | -1.71E-08 | count | 1 |
| KIF1B         | -0.2215423  | 0.5669117   | -0.3908 | 0.696 | -1.71E-08 | count | 1 |
| PPRC1         | -19.3312558 | 3091.416169 | -0.0063 | 0.995 | -1.70E-08 | count | 1 |
| PFKM          | -19.3312558 | 3091.416169 | -0.0063 | 0.995 | -1.70E-08 | count | 1 |
| DNMBP         | -19.3312558 | 3091.416169 | -0.0063 | 0.995 | -1.70E-08 | count | 1 |
| FLCN          | -19.3312558 | 3091.416169 | -0.0063 | 0.995 | -1.70E-08 | count | 1 |
| ZNF446        | -19.1854342 | 2109.967653 | -0.0091 | 0.993 | -1.70E-08 | count | 1 |
| AL390728.5    | -19.2950546 | 2924.043781 | -0.0066 | 0.995 | -1.70E-08 | count | 1 |
| CD302         | -19.2950546 | 2924.043781 | -0.0066 | 0.995 | -1.70E-08 | count | 1 |
| PDE1C         | -19.2950546 | 2924.043781 | -0.0066 | 0.995 | -1.70E-08 | count | 1 |
| AQP11         | -19.2950546 | 2924.043781 | -0.0066 | 0.995 | -1.70E-08 | count | 1 |
| OTOF          | -19.2950546 | 2924.043781 | -0.0066 | 0.995 | -1.70E-08 | count | 1 |
| LINC02580     | -19.2950546 | 2924.043781 | -0.0066 | 0.995 | -1.70E-08 | count | 1 |
| NCKAP1        | -19.2950546 | 2924.043781 | -0.0066 | 0.995 | -1.70E-08 | count | 1 |
| AL161729.1    | -19.2950546 | 2924.043781 | -0.0066 | 0.995 | -1.70E-08 | count | 1 |
| ITGA7         | -19.2950546 | 2924.043781 | -0.0066 | 0.995 | -1.70E-08 | count | 1 |
| IGHV4-28      | -19.2950546 | 2924.043781 | -0.0066 | 0.995 | -1.70E-08 | count | 1 |
| BAIAP2        | -19.2950546 | 2924.043781 | -0.0066 | 0.995 | -1.70E-08 | count | 1 |
| AL391244.3    | -19.2950546 | 2924.043781 | -0.0066 | 0.995 | -1.70E-08 | count | 1 |
| TMEM201       | -19.2950546 | 2924.043781 | -0.0066 | 0.995 | -1.70E-08 | count | 1 |
| PLA2G2D       | -19.2950546 | 2924.043781 | -0.0066 | 0.995 | -1.70E-08 | count | 1 |
| AMY2B         | -19.2950546 | 2924.043781 | -0.0066 | 0.995 | -1.70E-08 | count | 1 |
| AL355488.1    | -19.2950546 | 2924.043781 | -0.0066 | 0.995 | -1.70E-08 | count | 1 |
| PIFO          | -19.2950546 | 2924.043781 | -0.0066 | 0.995 | -1.70E-08 | count | 1 |
| DNAH6         | -19.2950546 | 2924.043781 | -0.0066 | 0.995 | -1.70E-08 | count | 1 |
| LINC01825     | -19.2950546 | 2924.043781 | -0.0066 | 0.995 | -1.70E-08 | count | 1 |
| HDAC11        | -19.2950546 | 2924.043781 | -0.0066 | 0.995 | -1.70E-08 | count | 1 |
| GAP43         | -19.2950546 | 2924.043781 | -0.0066 | 0.995 | -1.70E-08 | count | 1 |
| LIMCH1        | -19.2950546 | 2924.043781 | -0.0066 | 0.995 | -1.70E-08 | count | 1 |
| EBF1          | -19.2950546 | 2924.043781 | -0.0066 | 0.995 | -1.70E-08 | count | 1 |
| DDR1          | -19.2950546 | 2924.043781 | -0.0066 | 0.995 | -1.70E-08 | count | 1 |
| GRB10         | -19.2950546 | 2924.043781 | -0.0066 | 0.995 | -1.70E-08 | count | 1 |
| SRRM3         | -19.2950546 | 2924.043781 | -0.0066 | 0.995 | -1.70E-08 | count | 1 |
| CLDN15        | -19.2950546 | 2924.043781 | -0.0066 | 0.995 | -1.70E-08 | count | 1 |
| AC009275.1    | -19.2950546 | 2924.043781 | -0.0066 | 0.995 | -1.70E-08 | count | 1 |
| TRMT12        | -19.2950546 | 2924.043781 | -0.0066 | 0.995 | -1.70E-08 | count | 1 |
| PCSK5         | -19.2950546 | 2924.043781 | -0.0066 | 0.995 | -1.70E-08 | count | 1 |
| ANKS6         | -19.2950546 | 2924.043781 | -0.0066 | 0.995 | -1.70E-08 | count | 1 |
| DNAJC25-GNG10 | -19.2950546 | 2924.043781 | -0.0066 | 0.995 | -1.70E-08 | count | 1 |
| AL138781.1    | -19.2950546 | 2924.043781 | -0.0066 | 0.995 | -1.70E-08 | count | 1 |
| EGFL7         | -19.2950546 | 2924.043781 | -0.0066 | 0.995 | -1.70E-08 | count | 1 |
| FRMD4A        | -19.2950546 | 2924.043781 | -0.0066 | 0.995 | -1.70E-08 | count | 1 |
| ARHGAP22      | -19.2950546 | 2924.043781 | -0.0066 | 0.995 | -1.70E-08 | count | 1 |
| DNA2          | -19.2950546 | 2924.043781 | -0.0066 | 0.995 | -1.70E-08 | count | 1 |

|            |             |             |         |       |           |       |   |
|------------|-------------|-------------|---------|-------|-----------|-------|---|
| CD163      | -19.2950546 | 2924.043781 | -0.0066 | 0.995 | -1.70E-08 | count | 1 |
| LUM        | -19.2950546 | 2924.043781 | -0.0066 | 0.995 | -1.70E-08 | count | 1 |
| AL359232.1 | -19.2950546 | 2924.043781 | -0.0066 | 0.995 | -1.70E-08 | count | 1 |
| IGHV1-18   | -19.2950546 | 2924.043781 | -0.0066 | 0.995 | -1.70E-08 | count | 1 |
| GOLGA8H    | -19.2950546 | 2924.043781 | -0.0066 | 0.995 | -1.70E-08 | count | 1 |
| MNS1       | -19.2950546 | 2924.043781 | -0.0066 | 0.995 | -1.70E-08 | count | 1 |
| KDM8       | -19.2950546 | 2924.043781 | -0.0066 | 0.995 | -1.70E-08 | count | 1 |
| MMP2       | -19.2950546 | 2924.043781 | -0.0066 | 0.995 | -1.70E-08 | count | 1 |
| NOL3       | -19.2950546 | 2924.043781 | -0.0066 | 0.995 | -1.70E-08 | count | 1 |
| PRELID3A   | -19.2950546 | 2924.043781 | -0.0066 | 0.995 | -1.70E-08 | count | 1 |
| ZNF442     | -19.2950546 | 2924.043781 | -0.0066 | 0.995 | -1.70E-08 | count | 1 |
| AC006213.1 | -19.2950546 | 2924.043781 | -0.0066 | 0.995 | -1.70E-08 | count | 1 |
| AURKC      | -19.2950546 | 2924.043781 | -0.0066 | 0.995 | -1.70E-08 | count | 1 |
| ZNF837     | -19.2950546 | 2924.043781 | -0.0066 | 0.995 | -1.70E-08 | count | 1 |
| RSPH1      | -19.2950546 | 2924.043781 | -0.0066 | 0.995 | -1.70E-08 | count | 1 |
| AC007325.4 | -19.2950546 | 2924.043781 | -0.0066 | 0.995 | -1.70E-08 | count | 1 |
| AL162741.1 | -19.2950546 | 2924.043781 | -0.0066 | 0.995 | -1.70E-08 | count | 1 |
| SMPDL3B    | -19.2950546 | 2924.043781 | -0.0066 | 0.995 | -1.70E-08 | count | 1 |
| F3         | -19.2950546 | 2924.043781 | -0.0066 | 0.995 | -1.70E-08 | count | 1 |
| NBPF26     | -19.2950546 | 2924.043781 | -0.0066 | 0.995 | -1.70E-08 | count | 1 |
| ANKRD35    | -19.2950546 | 2924.043781 | -0.0066 | 0.995 | -1.70E-08 | count | 1 |
| FALEC      | -19.2950546 | 2924.043781 | -0.0066 | 0.995 | -1.70E-08 | count | 1 |
| SLC16A14   | -19.2950546 | 2924.043781 | -0.0066 | 0.995 | -1.70E-08 | count | 1 |
| CACNA2D2   | -19.2950546 | 2924.043781 | -0.0066 | 0.995 | -1.70E-08 | count | 1 |
| SFRP2      | -19.2950546 | 2924.043781 | -0.0066 | 0.995 | -1.70E-08 | count | 1 |
| RAB23      | -19.2950546 | 2924.043781 | -0.0066 | 0.995 | -1.70E-08 | count | 1 |
| NT5E       | -19.2950546 | 2924.043781 | -0.0066 | 0.995 | -1.70E-08 | count | 1 |
| AL023806.1 | -19.2950546 | 2924.043781 | -0.0066 | 0.995 | -1.70E-08 | count | 1 |
| AC124242.1 | -19.2950546 | 2924.043781 | -0.0066 | 0.995 | -1.70E-08 | count | 1 |
| ALDH1A1    | -19.2950546 | 2924.043781 | -0.0066 | 0.995 | -1.70E-08 | count | 1 |
| ZNF79      | -19.2950546 | 2924.043781 | -0.0066 | 0.995 | -1.70E-08 | count | 1 |
| NCR3LG1    | -19.2950546 | 2924.043781 | -0.0066 | 0.995 | -1.70E-08 | count | 1 |
| RIN1       | -19.2950546 | 2924.043781 | -0.0066 | 0.995 | -1.70E-08 | count | 1 |
| PTPN20     | -19.2950546 | 2924.043781 | -0.0066 | 0.995 | -1.70E-08 | count | 1 |
| MORN4      | -19.2950546 | 2924.043781 | -0.0066 | 0.995 | -1.70E-08 | count | 1 |
| TWNK       | -19.2950546 | 2924.043781 | -0.0066 | 0.995 | -1.70E-08 | count | 1 |
| FGF14-AS2  | -19.2950546 | 2924.043781 | -0.0066 | 0.995 | -1.70E-08 | count | 1 |
| EARS2      | -19.2950546 | 2924.043781 | -0.0066 | 0.995 | -1.70E-08 | count | 1 |
| FBXL19-AS1 | -19.2950546 | 2924.043781 | -0.0066 | 0.995 | -1.70E-08 | count | 1 |
| AL034549.1 | -19.2950546 | 2924.043781 | -0.0066 | 0.995 | -1.70E-08 | count | 1 |
| GNA15      | -19.2950546 | 2924.043781 | -0.0066 | 0.995 | -1.70E-08 | count | 1 |
| ZNF730     | -19.2950546 | 2924.043781 | -0.0066 | 0.995 | -1.70E-08 | count | 1 |
| CDC45      | -19.2950546 | 2924.043781 | -0.0066 | 0.995 | -1.70E-08 | count | 1 |
| IGLC7      | -19.2950546 | 2924.043781 | -0.0066 | 0.995 | -1.70E-08 | count | 1 |
| ATP5MGL    | -19.2950546 | 2924.043781 | -0.0066 | 0.995 | -1.70E-08 | count | 1 |

|             |             |             |         |       |           |       |   |
|-------------|-------------|-------------|---------|-------|-----------|-------|---|
| PINK1-AS    | -19.2950546 | 2924.043781 | -0.0066 | 0.995 | -1.70E-08 | count | 1 |
| LIN9        | -19.2950546 | 2924.043781 | -0.0066 | 0.995 | -1.70E-08 | count | 1 |
| AC012360.1  | -19.2950546 | 2924.043781 | -0.0066 | 0.995 | -1.70E-08 | count | 1 |
| CRYBG3      | -19.2950546 | 2924.043781 | -0.0066 | 0.995 | -1.70E-08 | count | 1 |
| LEKR1       | -19.2950546 | 2924.043781 | -0.0066 | 0.995 | -1.70E-08 | count | 1 |
| AC097460.1  | -19.2950546 | 2924.043781 | -0.0066 | 0.995 | -1.70E-08 | count | 1 |
| AC093297.2  | -19.2950546 | 2924.043781 | -0.0066 | 0.995 | -1.70E-08 | count | 1 |
| ZFP2        | -19.2950546 | 2924.043781 | -0.0066 | 0.995 | -1.70E-08 | count | 1 |
| AC008610.1  | -19.2950546 | 2924.043781 | -0.0066 | 0.995 | -1.70E-08 | count | 1 |
| HIST1H4J    | -19.2950546 | 2924.043781 | -0.0066 | 0.995 | -1.70E-08 | count | 1 |
| LAMB1       | -19.2950546 | 2924.043781 | -0.0066 | 0.995 | -1.70E-08 | count | 1 |
| ATG9B       | -19.2950546 | 2924.043781 | -0.0066 | 0.995 | -1.70E-08 | count | 1 |
| ZNF252P-AS1 | -19.2950546 | 2924.043781 | -0.0066 | 0.995 | -1.70E-08 | count | 1 |
| FRMPD1      | -19.2950546 | 2924.043781 | -0.0066 | 0.995 | -1.70E-08 | count | 1 |
| ANGPTL2     | -19.2950546 | 2924.043781 | -0.0066 | 0.995 | -1.70E-08 | count | 1 |
| FAM129B     | -19.2950546 | 2924.043781 | -0.0066 | 0.995 | -1.70E-08 | count | 1 |
| STKLD1      | -19.2950546 | 2924.043781 | -0.0066 | 0.995 | -1.70E-08 | count | 1 |
| NECTIN1     | -19.2950546 | 2924.043781 | -0.0066 | 0.995 | -1.70E-08 | count | 1 |
| JMJD1C-AS1  | -19.2950546 | 2924.043781 | -0.0066 | 0.995 | -1.70E-08 | count | 1 |
| AC079601.1  | -19.2950546 | 2924.043781 | -0.0066 | 0.995 | -1.70E-08 | count | 1 |
| POSTN       | -19.2950546 | 2924.043781 | -0.0066 | 0.995 | -1.70E-08 | count | 1 |
| ATP11A      | -19.2950546 | 2924.043781 | -0.0066 | 0.995 | -1.70E-08 | count | 1 |
| AC007216.2  | -19.2950546 | 2924.043781 | -0.0066 | 0.995 | -1.70E-08 | count | 1 |
| FGF11       | -19.2950546 | 2924.043781 | -0.0066 | 0.995 | -1.70E-08 | count | 1 |
| ADAM11      | -19.2950546 | 2924.043781 | -0.0066 | 0.995 | -1.70E-08 | count | 1 |
| HM13-AS1    | -19.2950546 | 2924.043781 | -0.0066 | 0.995 | -1.70E-08 | count | 1 |
| ZNF341      | -19.2950546 | 2924.043781 | -0.0066 | 0.995 | -1.70E-08 | count | 1 |
| SLC12A5-AS1 | -19.2950546 | 2924.043781 | -0.0066 | 0.995 | -1.70E-08 | count | 1 |
| AC011498.1  | -19.2950546 | 2924.043781 | -0.0066 | 0.995 | -1.70E-08 | count | 1 |
| CD79A       | -19.2950546 | 2924.043781 | -0.0066 | 0.995 | -1.70E-08 | count | 1 |
| ZNF222      | -19.2950546 | 2924.043781 | -0.0066 | 0.995 | -1.70E-08 | count | 1 |
| TTYH1       | -19.2950546 | 2924.043781 | -0.0066 | 0.995 | -1.70E-08 | count | 1 |
| AL008635.1  | -19.2950546 | 2924.043781 | -0.0066 | 0.995 | -1.70E-08 | count | 1 |
| FP565260.1  | -19.2950546 | 2924.043781 | -0.0066 | 0.995 | -1.70E-08 | count | 1 |
| AC239800.2  | -19.2950546 | 2924.043781 | -0.0066 | 0.995 | -1.70E-08 | count | 1 |
| FCRL5       | -19.2950546 | 2924.043781 | -0.0066 | 0.995 | -1.70E-08 | count | 1 |
| GAREM2      | -19.2950546 | 2924.043781 | -0.0066 | 0.995 | -1.70E-08 | count | 1 |
| AL662797.1  | -19.2950546 | 2924.043781 | -0.0066 | 0.995 | -1.70E-08 | count | 1 |
| TCIM        | -19.2950546 | 2924.043781 | -0.0066 | 0.995 | -1.70E-08 | count | 1 |
| TSPYL5      | -19.2950546 | 2924.043781 | -0.0066 | 0.995 | -1.70E-08 | count | 1 |
| RACGAP1     | -19.2950546 | 2924.043781 | -0.0066 | 0.995 | -1.70E-08 | count | 1 |
| MYRFL       | -19.2950546 | 2924.043781 | -0.0066 | 0.995 | -1.70E-08 | count | 1 |
| AC008149.1  | -19.2950546 | 2924.043781 | -0.0066 | 0.995 | -1.70E-08 | count | 1 |
| LINC00562   | -19.2950546 | 2924.043781 | -0.0066 | 0.995 | -1.70E-08 | count | 1 |
| ZSCAN2      | -19.2950546 | 2924.043781 | -0.0066 | 0.995 | -1.70E-08 | count | 1 |

|            |             |             |         |       |           |       |   |
|------------|-------------|-------------|---------|-------|-----------|-------|---|
| AC009021.1 | -19.2950546 | 2924.043781 | -0.0066 | 0.995 | -1.70E-08 | count | 1 |
| AC011446.2 | -19.2950546 | 2924.043781 | -0.0066 | 0.995 | -1.70E-08 | count | 1 |
| ZNF671     | -19.2950546 | 2924.043781 | -0.0066 | 0.995 | -1.70E-08 | count | 1 |
| CENPM      | -19.2950546 | 2924.043781 | -0.0066 | 0.995 | -1.70E-08 | count | 1 |
| AP000692.2 | -19.2950546 | 2924.043781 | -0.0066 | 0.995 | -1.70E-08 | count | 1 |
| AL590666.2 | -19.2950546 | 2924.043781 | -0.0066 | 0.995 | -1.70E-08 | count | 1 |
| C1orf74    | -19.2950546 | 2924.043781 | -0.0066 | 0.995 | -1.70E-08 | count | 1 |
| CENPO      | -19.2950546 | 2924.043781 | -0.0066 | 0.995 | -1.70E-08 | count | 1 |
| CACNB4     | -19.2950546 | 2924.043781 | -0.0066 | 0.995 | -1.70E-08 | count | 1 |
| NAALADL2   | -19.2950546 | 2924.043781 | -0.0066 | 0.995 | -1.70E-08 | count | 1 |
| SNX24      | -19.2950546 | 2924.043781 | -0.0066 | 0.995 | -1.70E-08 | count | 1 |
| IGIP       | -19.2950546 | 2924.043781 | -0.0066 | 0.995 | -1.70E-08 | count | 1 |
| AL137003.2 | -19.2950546 | 2924.043781 | -0.0066 | 0.995 | -1.70E-08 | count | 1 |
| GPR146     | -19.2950546 | 2924.043781 | -0.0066 | 0.995 | -1.70E-08 | count | 1 |
| ZDHHC9     | -19.2950546 | 2924.043781 | -0.0066 | 0.995 | -1.70E-08 | count | 1 |
| MPDZ       | -19.2950546 | 2924.043781 | -0.0066 | 0.995 | -1.70E-08 | count | 1 |
| TMEM268    | -19.2950546 | 2924.043781 | -0.0066 | 0.995 | -1.70E-08 | count | 1 |
| MAMDC4     | -19.2950546 | 2924.043781 | -0.0066 | 0.995 | -1.70E-08 | count | 1 |
| GALNT4     | -19.2950546 | 2924.043781 | -0.0066 | 0.995 | -1.70E-08 | count | 1 |
| AL157955.1 | -19.2950546 | 2924.043781 | -0.0066 | 0.995 | -1.70E-08 | count | 1 |
| FEM1A      | -19.2950546 | 2924.043781 | -0.0066 | 0.995 | -1.70E-08 | count | 1 |
| ZNF471     | -19.2950546 | 2924.043781 | -0.0066 | 0.995 | -1.70E-08 | count | 1 |
| PAXBP1-AS1 | -19.2950546 | 2924.043781 | -0.0066 | 0.995 | -1.70E-08 | count | 1 |
| ARAP3      | -19.2950546 | 2924.043781 | -0.0066 | 0.995 | -1.70E-08 | count | 1 |
| AC007349.2 | -19.2950546 | 2924.043781 | -0.0066 | 0.995 | -1.70E-08 | count | 1 |
| AC025423.1 | -19.2950546 | 2924.043781 | -0.0066 | 0.995 | -1.70E-08 | count | 1 |
| DECR2      | -19.2950546 | 2924.043781 | -0.0066 | 0.995 | -1.70E-08 | count | 1 |
| NETO2      | -19.2950546 | 2924.043781 | -0.0066 | 0.995 | -1.70E-08 | count | 1 |
| AC092747.4 | -19.2950546 | 2924.043781 | -0.0066 | 0.995 | -1.70E-08 | count | 1 |
| ACVRL1     | -19.2950546 | 2924.043781 | -0.0066 | 0.995 | -1.70E-08 | count | 1 |
| INSL3      | -19.2950546 | 2924.043781 | -0.0066 | 0.995 | -1.70E-08 | count | 1 |
| ZNF607     | -19.2950546 | 2924.043781 | -0.0066 | 0.995 | -1.70E-08 | count | 1 |
| TMCO6      | -19.2243508 | 1762.637602 | -0.0109 | 0.991 | -1.70E-08 | count | 1 |
| MRC2       | -19.297914  | 2049.332158 | -0.0094 | 0.992 | -1.70E-08 | count | 1 |
| AC010247.2 | -19.297914  | 2049.332158 | -0.0094 | 0.992 | -1.70E-08 | count | 1 |
| EFNA5      | -18.9818636 | 2685.923031 | -0.0071 | 0.994 | -1.70E-08 | count | 1 |
| ZNF813     | -18.9818636 | 2685.923031 | -0.0071 | 0.994 | -1.70E-08 | count | 1 |
| PLD1       | -18.9818636 | 2685.923031 | -0.0071 | 0.994 | -1.70E-08 | count | 1 |
| UNC119B    | -18.9818636 | 2685.923031 | -0.0071 | 0.994 | -1.70E-08 | count | 1 |
| MAPK8IP1   | -19.030773  | 2153.348379 | -0.0088 | 0.993 | -1.69E-08 | count | 1 |
| AMN        | -19.030773  | 2153.348379 | -0.0088 | 0.993 | -1.69E-08 | count | 1 |
| CXCL9      | -19.0871411 | 2703.28341  | -0.0071 | 0.994 | -1.69E-08 | count | 1 |
| DPPA4      | -19.0871411 | 2703.28341  | -0.0071 | 0.994 | -1.69E-08 | count | 1 |
| PDK4       | -19.0871411 | 2703.28341  | -0.0071 | 0.994 | -1.69E-08 | count | 1 |
| SLC31A2    | -19.0871411 | 2703.28341  | -0.0071 | 0.994 | -1.69E-08 | count | 1 |

|             |             |             |         |       |           |       |   |
|-------------|-------------|-------------|---------|-------|-----------|-------|---|
| DHX57       | -19.0871411 | 2703.28341  | -0.0071 | 0.994 | -1.69E-08 | count | 1 |
| SETD7       | -19.0871411 | 2703.28341  | -0.0071 | 0.994 | -1.69E-08 | count | 1 |
| ZWINT       | -19.0871411 | 2703.28341  | -0.0071 | 0.994 | -1.69E-08 | count | 1 |
| PKIA        | -19.0871411 | 2703.28341  | -0.0071 | 0.994 | -1.69E-08 | count | 1 |
| NBPF1       | -18.7865181 | 2435.986312 | -0.0077 | 0.994 | -1.69E-08 | count | 1 |
| DNM3        | -18.7865181 | 2435.986312 | -0.0077 | 0.994 | -1.69E-08 | count | 1 |
| CR1         | -18.7865181 | 2435.986312 | -0.0077 | 0.994 | -1.69E-08 | count | 1 |
| RPS6KB2-AS1 | -18.7865181 | 2435.986312 | -0.0077 | 0.994 | -1.69E-08 | count | 1 |
| CHRNA5      | -18.7865181 | 2435.986312 | -0.0077 | 0.994 | -1.69E-08 | count | 1 |
| ZNF710      | -18.7865181 | 2435.986312 | -0.0077 | 0.994 | -1.69E-08 | count | 1 |
| WISP2       | -18.7865181 | 2435.986312 | -0.0077 | 0.994 | -1.69E-08 | count | 1 |
| SCN1B       | -18.7865181 | 2435.986312 | -0.0077 | 0.994 | -1.69E-08 | count | 1 |
| KLHL3       | -18.7865181 | 2435.986312 | -0.0077 | 0.994 | -1.69E-08 | count | 1 |
| KDM4D       | -18.7865181 | 2435.986312 | -0.0077 | 0.994 | -1.69E-08 | count | 1 |
| AL122035.1  | -18.7865181 | 2435.986312 | -0.0077 | 0.994 | -1.69E-08 | count | 1 |
| AL691403.2  | -18.7865181 | 2435.986312 | -0.0077 | 0.994 | -1.69E-08 | count | 1 |
| BMF         | -18.7865181 | 2435.986312 | -0.0077 | 0.994 | -1.69E-08 | count | 1 |
| C20orf194   | -18.7865181 | 2435.986312 | -0.0077 | 0.994 | -1.69E-08 | count | 1 |
| SLCO4A1     | -18.7865181 | 2435.986312 | -0.0077 | 0.994 | -1.69E-08 | count | 1 |
| C7          | -18.7865181 | 2435.986312 | -0.0077 | 0.994 | -1.69E-08 | count | 1 |
| LINC00342   | -18.7865181 | 2435.986312 | -0.0077 | 0.994 | -1.69E-08 | count | 1 |
| STAB1       | -18.7865181 | 2435.986312 | -0.0077 | 0.994 | -1.69E-08 | count | 1 |
| GPX3        | -18.7865181 | 2435.986312 | -0.0077 | 0.994 | -1.69E-08 | count | 1 |
| CD24        | -18.7865181 | 2435.986312 | -0.0077 | 0.994 | -1.69E-08 | count | 1 |
| CLEC7A      | -18.7865181 | 2435.986312 | -0.0077 | 0.994 | -1.69E-08 | count | 1 |
| KIAA0391    | -18.8140271 | 1815.255033 | -0.0104 | 0.992 | -1.68E-08 | count | 1 |
| AL024508.2  | -18.8140271 | 1815.255033 | -0.0104 | 0.992 | -1.68E-08 | count | 1 |
| DNAJC11     | -18.8140271 | 1815.255033 | -0.0104 | 0.992 | -1.68E-08 | count | 1 |
| NDUFB2-AS1  | -18.8140271 | 1815.255033 | -0.0104 | 0.992 | -1.68E-08 | count | 1 |
| AC092718.3  | -18.8140271 | 1815.255033 | -0.0104 | 0.992 | -1.68E-08 | count | 1 |
| MYO1C       | -18.8140271 | 1815.255033 | -0.0104 | 0.992 | -1.68E-08 | count | 1 |
| DUSP3       | -18.827657  | 1385.256784 | -0.0136 | 0.989 | -1.68E-08 | count | 1 |
| ATP13A4     | -18.4443613 | 2052.940853 | -0.009  | 0.993 | -1.68E-08 | count | 1 |
| AC048341.1  | -18.4443613 | 2052.940853 | -0.009  | 0.993 | -1.68E-08 | count | 1 |
| DOCK9       | -18.4443613 | 2052.940853 | -0.009  | 0.993 | -1.68E-08 | count | 1 |
| CCDC78      | -18.4443613 | 2052.940853 | -0.009  | 0.993 | -1.68E-08 | count | 1 |
| EPHA2       | -18.4443613 | 2052.940853 | -0.009  | 0.993 | -1.68E-08 | count | 1 |
| CCDC17      | -18.4443613 | 2052.940853 | -0.009  | 0.993 | -1.68E-08 | count | 1 |
| S100A16     | -18.4443613 | 2052.940853 | -0.009  | 0.993 | -1.68E-08 | count | 1 |
| BGLAP       | -18.4443613 | 2052.940853 | -0.009  | 0.993 | -1.68E-08 | count | 1 |
| PRRX1       | -18.4443613 | 2052.940853 | -0.009  | 0.993 | -1.68E-08 | count | 1 |
| FMO2        | -18.4443613 | 2052.940853 | -0.009  | 0.993 | -1.68E-08 | count | 1 |
| AC092835.1  | -18.4443613 | 2052.940853 | -0.009  | 0.993 | -1.68E-08 | count | 1 |
| AC109587.1  | -18.4443613 | 2052.940853 | -0.009  | 0.993 | -1.68E-08 | count | 1 |
| ALG1L2      | -18.4443613 | 2052.940853 | -0.009  | 0.993 | -1.68E-08 | count | 1 |



|            |             |             |        |       |           |       |   |
|------------|-------------|-------------|--------|-------|-----------|-------|---|
| AC123595.1 | -18.4443613 | 2052.940853 | -0.009 | 0.993 | -1.68E-08 | count | 1 |
| ZNF354C    | -18.4443613 | 2052.940853 | -0.009 | 0.993 | -1.68E-08 | count | 1 |
| Z98200.1   | -18.4443613 | 2052.940853 | -0.009 | 0.993 | -1.68E-08 | count | 1 |
| CYBB       | -18.4443613 | 2052.940853 | -0.009 | 0.993 | -1.68E-08 | count | 1 |
| OR1L8      | -18.4443613 | 2052.940853 | -0.009 | 0.993 | -1.68E-08 | count | 1 |
| BX255925.3 | -18.4443613 | 2052.940853 | -0.009 | 0.993 | -1.68E-08 | count | 1 |
| PARVA      | -18.4443613 | 2052.940853 | -0.009 | 0.993 | -1.68E-08 | count | 1 |
| AL450384.2 | -18.4443613 | 2052.940853 | -0.009 | 0.993 | -1.68E-08 | count | 1 |
| AC137590.2 | -18.4443613 | 2052.940853 | -0.009 | 0.993 | -1.68E-08 | count | 1 |
| NEK5       | -18.4443613 | 2052.940853 | -0.009 | 0.993 | -1.68E-08 | count | 1 |
| SLX1A      | -18.4443613 | 2052.940853 | -0.009 | 0.993 | -1.68E-08 | count | 1 |
| SLC25A35   | -18.4443613 | 2052.940853 | -0.009 | 0.993 | -1.68E-08 | count | 1 |
| TOM1L2     | -18.4443613 | 2052.940853 | -0.009 | 0.993 | -1.68E-08 | count | 1 |
| CCL23      | -18.4443613 | 2052.940853 | -0.009 | 0.993 | -1.68E-08 | count | 1 |
| PCGF2      | -18.4443613 | 2052.940853 | -0.009 | 0.993 | -1.68E-08 | count | 1 |
| EFCAB13    | -18.4443613 | 2052.940853 | -0.009 | 0.993 | -1.68E-08 | count | 1 |
| AC005332.6 | -18.4443613 | 2052.940853 | -0.009 | 0.993 | -1.68E-08 | count | 1 |
| AC005332.8 | -18.4443613 | 2052.940853 | -0.009 | 0.993 | -1.68E-08 | count | 1 |
| ANKEF1     | -18.4443613 | 2052.940853 | -0.009 | 0.993 | -1.68E-08 | count | 1 |
| AC119396.1 | -18.4443613 | 2052.940853 | -0.009 | 0.993 | -1.68E-08 | count | 1 |
| Z95115.1   | -18.4443613 | 2052.940853 | -0.009 | 0.993 | -1.68E-08 | count | 1 |
| CDC20      | -18.4443613 | 2052.940853 | -0.009 | 0.993 | -1.68E-08 | count | 1 |
| KCNA2      | -18.4443613 | 2052.940853 | -0.009 | 0.993 | -1.68E-08 | count | 1 |
| ABCB10     | -18.4443613 | 2052.940853 | -0.009 | 0.993 | -1.68E-08 | count | 1 |
| SPEG       | -18.4443613 | 2052.940853 | -0.009 | 0.993 | -1.68E-08 | count | 1 |
| AC134772.1 | -18.4443613 | 2052.940853 | -0.009 | 0.993 | -1.68E-08 | count | 1 |
| WWTR1      | -18.4443613 | 2052.940853 | -0.009 | 0.993 | -1.68E-08 | count | 1 |
| TRMT44     | -18.4443613 | 2052.940853 | -0.009 | 0.993 | -1.68E-08 | count | 1 |
| RPL34-AS1  | -18.4443613 | 2052.940853 | -0.009 | 0.993 | -1.68E-08 | count | 1 |
| SORBS2     | -18.4443613 | 2052.940853 | -0.009 | 0.993 | -1.68E-08 | count | 1 |
| PCDHGB2    | -18.4443613 | 2052.940853 | -0.009 | 0.993 | -1.68E-08 | count | 1 |
| F12        | -18.4443613 | 2052.940853 | -0.009 | 0.993 | -1.68E-08 | count | 1 |
| PACSIN1    | -18.4443613 | 2052.940853 | -0.009 | 0.993 | -1.68E-08 | count | 1 |
| UHRF1BP1   | -18.4443613 | 2052.940853 | -0.009 | 0.993 | -1.68E-08 | count | 1 |
| ZNF275     | -18.4443613 | 2052.940853 | -0.009 | 0.993 | -1.68E-08 | count | 1 |
| SOX17      | -18.4443613 | 2052.940853 | -0.009 | 0.993 | -1.68E-08 | count | 1 |
| AC083843.3 | -18.4443613 | 2052.940853 | -0.009 | 0.993 | -1.68E-08 | count | 1 |
| AL136141.1 | -18.4443613 | 2052.940853 | -0.009 | 0.993 | -1.68E-08 | count | 1 |
| PTGDS      | -18.4443613 | 2052.940853 | -0.009 | 0.993 | -1.68E-08 | count | 1 |
| LBHD1      | -18.4443613 | 2052.940853 | -0.009 | 0.993 | -1.68E-08 | count | 1 |
| IQSEC3     | -18.4443613 | 2052.940853 | -0.009 | 0.993 | -1.68E-08 | count | 1 |
| AC009133.4 | -18.4443613 | 2052.940853 | -0.009 | 0.993 | -1.68E-08 | count | 1 |
| AC092140.1 | -18.4443613 | 2052.940853 | -0.009 | 0.993 | -1.68E-08 | count | 1 |
| CDH20      | -18.4443613 | 2052.940853 | -0.009 | 0.993 | -1.68E-08 | count | 1 |
| ZNF343     | -18.4443613 | 2052.940853 | -0.009 | 0.993 | -1.68E-08 | count | 1 |

|            |             |             |         |       |           |       |   |
|------------|-------------|-------------|---------|-------|-----------|-------|---|
| AL121761.2 | -18.4443613 | 2052.940853 | -0.009  | 0.993 | -1.68E-08 | count | 1 |
| AC008764.8 | -18.4443613 | 2052.940853 | -0.009  | 0.993 | -1.68E-08 | count | 1 |
| AC245884.8 | -18.4443613 | 2052.940853 | -0.009  | 0.993 | -1.68E-08 | count | 1 |
| AC003681.1 | -18.4443613 | 2052.940853 | -0.009  | 0.993 | -1.68E-08 | count | 1 |
| LINC02574  | -18.4443613 | 2052.940853 | -0.009  | 0.993 | -1.68E-08 | count | 1 |
| COL24A1    | -18.4443613 | 2052.940853 | -0.009  | 0.993 | -1.68E-08 | count | 1 |
| MOV10      | -18.4443613 | 2052.940853 | -0.009  | 0.993 | -1.68E-08 | count | 1 |
| AL591895.1 | -18.4443613 | 2052.940853 | -0.009  | 0.993 | -1.68E-08 | count | 1 |
| CPA3       | -18.4443613 | 2052.940853 | -0.009  | 0.993 | -1.68E-08 | count | 1 |
| AC107068.1 | -18.4443613 | 2052.940853 | -0.009  | 0.993 | -1.68E-08 | count | 1 |
| NHS        | -18.4443613 | 2052.940853 | -0.009  | 0.993 | -1.68E-08 | count | 1 |
| C5         | -18.4443613 | 2052.940853 | -0.009  | 0.993 | -1.68E-08 | count | 1 |
| AP006621.3 | -18.4443613 | 2052.940853 | -0.009  | 0.993 | -1.68E-08 | count | 1 |
| PHLDB1     | -18.4443613 | 2052.940853 | -0.009  | 0.993 | -1.68E-08 | count | 1 |
| CCDC168    | -18.4443613 | 2052.940853 | -0.009  | 0.993 | -1.68E-08 | count | 1 |
| AC021752.1 | -18.4443613 | 2052.940853 | -0.009  | 0.993 | -1.68E-08 | count | 1 |
| CDH5       | -18.4443613 | 2052.940853 | -0.009  | 0.993 | -1.68E-08 | count | 1 |
| AC004943.2 | -18.4443613 | 2052.940853 | -0.009  | 0.993 | -1.68E-08 | count | 1 |
| PIGU       | -18.4443613 | 2052.940853 | -0.009  | 0.993 | -1.68E-08 | count | 1 |
| BX640514.2 | -18.4443613 | 2052.940853 | -0.009  | 0.993 | -1.68E-08 | count | 1 |
| F2RL3      | -18.4443613 | 2052.940853 | -0.009  | 0.993 | -1.68E-08 | count | 1 |
| RBM11      | -18.4443613 | 2052.940853 | -0.009  | 0.993 | -1.68E-08 | count | 1 |
| ADCY7      | -0.0751656  | 0.4403441   | -0.1707 | 0.865 | -1.63E-08 | count | 1 |
| LSM11      | -0.1957076  | 0.82473     | -0.2373 | 0.813 | -1.52E-08 | count | 1 |
| GFPT1      | -0.0598225  | 0.5638159   | -0.1061 | 0.916 | -1.30E-08 | count | 1 |
| NOP2       | -0.4700036  | 0.5204165   | -0.9031 | 0.367 | -1.26E-08 | count | 1 |
| ZNF512B    | -0.4700036  | 0.4859127   | -0.9673 | 0.334 | -1.26E-08 | count | 1 |
| TFAP4      | -0.4700036  | 0.6123724   | -0.7675 | 0.443 | -1.26E-08 | count | 1 |
| HIRA       | -0.4700036  | 0.6123724   | -0.7675 | 0.443 | -1.26E-08 | count | 1 |
| RGPD2      | -0.1570037  | 0.6467578   | -0.2428 | 0.808 | -1.23E-08 | count | 1 |
| MYLK-AS1   | -0.4446858  | 0.7328281   | -0.6068 | 0.544 | -1.20E-08 | count | 1 |
| ZSCAN9     | -0.4446858  | 0.7328281   | -0.6068 | 0.544 | -1.20E-08 | count | 1 |
| GTF2IRD2B  | -0.4446858  | 0.7328281   | -0.6068 | 0.544 | -1.20E-08 | count | 1 |
| HIST1H3A   | -0.4446858  | 0.7328281   | -0.6068 | 0.544 | -1.20E-08 | count | 1 |
| PLBD1      | -0.4446858  | 0.8819171   | -0.5042 | 0.614 | -1.20E-08 | count | 1 |
| FARP1      | -0.4446858  | 0.8819171   | -0.5042 | 0.614 | -1.20E-08 | count | 1 |
| IQCH-AS1   | -0.4446858  | 0.8819171   | -0.5042 | 0.614 | -1.20E-08 | count | 1 |
| SREBF1     | -0.4446858  | 0.8819171   | -0.5042 | 0.614 | -1.20E-08 | count | 1 |
| TNFAIP1    | -0.4446858  | 0.8819171   | -0.5042 | 0.614 | -1.20E-08 | count | 1 |
| IGLV3-21   | -0.4446858  | 0.8819171   | -0.5042 | 0.614 | -1.20E-08 | count | 1 |
| RELL2      | -0.4446858  | 0.8819171   | -0.5042 | 0.614 | -1.20E-08 | count | 1 |
| TRMT2B     | -0.4446858  | 0.8819171   | -0.5042 | 0.614 | -1.20E-08 | count | 1 |
| TMOD1      | -0.4446858  | 0.8819171   | -0.5042 | 0.614 | -1.20E-08 | count | 1 |
| LRRC20     | -0.4446858  | 0.8819171   | -0.5042 | 0.614 | -1.20E-08 | count | 1 |
| ZNF558     | -0.4446858  | 0.8819171   | -0.5042 | 0.614 | -1.20E-08 | count | 1 |

|            |            |           |         |       |           |       |   |
|------------|------------|-----------|---------|-------|-----------|-------|---|
| TRIT1      | -0.4446858 | 0.8819171 | -0.5042 | 0.614 | -1.20E-08 | count | 1 |
| DTL        | -0.4446858 | 0.8819171 | -0.5042 | 0.614 | -1.20E-08 | count | 1 |
| PTP4A3     | -0.4446858 | 0.8819171 | -0.5042 | 0.614 | -1.20E-08 | count | 1 |
| MPZL2      | -0.4446858 | 0.8819171 | -0.5042 | 0.614 | -1.20E-08 | count | 1 |
| TEX2       | -0.4446858 | 0.8819171 | -0.5042 | 0.614 | -1.20E-08 | count | 1 |
| SPAG4      | -0.4446858 | 0.8819171 | -0.5042 | 0.614 | -1.20E-08 | count | 1 |
| SNAI1      | -0.4446858 | 0.8819171 | -0.5042 | 0.614 | -1.20E-08 | count | 1 |
| KIF5C      | -0.4446858 | 0.8819171 | -0.5042 | 0.614 | -1.20E-08 | count | 1 |
| DHX35      | -0.4446858 | 0.8819171 | -0.5042 | 0.614 | -1.20E-08 | count | 1 |
| CCDC112    | -0.4446858 | 0.7895928 | -0.5632 | 0.574 | -1.20E-08 | count | 1 |
| EVC2       | -0.4446858 | 0.8819171 | -0.5042 | 0.614 | -1.20E-08 | count | 1 |
| POU5F2     | -0.4446858 | 0.8819171 | -0.5042 | 0.614 | -1.20E-08 | count | 1 |
| TBC1D22B   | -0.4446858 | 0.8819171 | -0.5042 | 0.614 | -1.20E-08 | count | 1 |
| FBXO30     | -0.4446858 | 0.8819171 | -0.5042 | 0.614 | -1.20E-08 | count | 1 |
| AC018647.2 | -0.4446858 | 0.8819171 | -0.5042 | 0.614 | -1.20E-08 | count | 1 |
| ZNF711     | -0.4446858 | 0.8819171 | -0.5042 | 0.614 | -1.20E-08 | count | 1 |
| AMOT       | -0.4446858 | 0.8819171 | -0.5042 | 0.614 | -1.20E-08 | count | 1 |
| GINS4      | -0.4446858 | 0.8819171 | -0.5042 | 0.614 | -1.20E-08 | count | 1 |
| EMP1       | -0.4446858 | 0.8819171 | -0.5042 | 0.614 | -1.20E-08 | count | 1 |
| SLC16A13   | -0.4446858 | 0.8819171 | -0.5042 | 0.614 | -1.20E-08 | count | 1 |
| TEPSIN     | -0.4446858 | 0.8819171 | -0.5042 | 0.614 | -1.20E-08 | count | 1 |
| FBNP1L     | -0.4446858 | 0.8819171 | -0.5042 | 0.614 | -1.20E-08 | count | 1 |
| RHOBTB2    | -0.4446858 | 0.8819171 | -0.5042 | 0.614 | -1.20E-08 | count | 1 |
| IL7        | -0.4446858 | 0.8819171 | -0.5042 | 0.614 | -1.20E-08 | count | 1 |
| RAD54B     | -0.4446858 | 0.8819171 | -0.5042 | 0.614 | -1.20E-08 | count | 1 |
| MYO1E      | -0.4446858 | 0.8819171 | -0.5042 | 0.614 | -1.20E-08 | count | 1 |
| MAPK7      | -0.4446858 | 0.8819171 | -0.5042 | 0.614 | -1.20E-08 | count | 1 |
| GPD2       | -0.4446858 | 0.8819171 | -0.5042 | 0.614 | -1.20E-08 | count | 1 |
| SRP68      | -0.0544192 | 0.4128122 | -0.1318 | 0.895 | -1.18E-08 | count | 1 |
| MAP3K7     | -0.1503475 | 0.7159368 | -0.21   | 0.834 | -1.18E-08 | count | 1 |
| TGIF2      | -0.0416131 | 0.5180733 | -0.0803 | 0.936 | -9.07E-09 | count | 1 |
| CLOCK      | -0.0416131 | 0.5336387 | -0.078  | 0.938 | -9.06E-09 | count | 1 |
| TMEM143    | -0.1107711 | 1.0548781 | -0.105  | 0.916 | -8.75E-09 | count | 1 |
| PKD1       | -0.1107711 | 1.0548781 | -0.105  | 0.916 | -8.75E-09 | count | 1 |
| CAVIN3     | -0.1107711 | 1.0548781 | -0.105  | 0.916 | -8.75E-09 | count | 1 |
| ZNF367     | -0.1107711 | 1.0548781 | -0.105  | 0.916 | -8.75E-09 | count | 1 |
| GMEB2      | -0.1107711 | 1.0548781 | -0.105  | 0.916 | -8.75E-09 | count | 1 |
| PARP16     | -0.1107711 | 0.741645  | -0.1494 | 0.881 | -8.75E-09 | count | 1 |
| RBSN       | -0.1107711 | 0.800492  | -0.1384 | 0.89  | -8.75E-09 | count | 1 |
| AC055713.1 | -0.1107711 | 1.0786898 | -0.1027 | 0.918 | -8.74E-09 | count | 1 |
| TSTD3      | -0.1107711 | 1.0786898 | -0.1027 | 0.918 | -8.74E-09 | count | 1 |
| NT5C3B     | -0.1107711 | 1.0786898 | -0.1027 | 0.918 | -8.74E-09 | count | 1 |
| CTH        | -0.1107711 | 1.0786898 | -0.1027 | 0.918 | -8.74E-09 | count | 1 |
| MAGI2      | -0.1107711 | 1.0786898 | -0.1027 | 0.918 | -8.74E-09 | count | 1 |
| AK1        | -0.1107711 | 1.0786898 | -0.1027 | 0.918 | -8.74E-09 | count | 1 |

|             |            |             |         |       |           |       |   |
|-------------|------------|-------------|---------|-------|-----------|-------|---|
| ZNF519      | -0.1107711 | 1.0786898   | -0.1027 | 0.918 | -8.74E-09 | count | 1 |
| PNPLA6      | -0.1107711 | 1.0786898   | -0.1027 | 0.918 | -8.74E-09 | count | 1 |
| ZNF790      | -0.1107711 | 0.8865694   | -0.1249 | 0.901 | -8.74E-09 | count | 1 |
| AC008608.2  | -0.1107711 | 0.8595403   | -0.1289 | 0.898 | -8.74E-09 | count | 1 |
| TUBGCP6     | -0.1107711 | 0.8595403   | -0.1289 | 0.898 | -8.74E-09 | count | 1 |
| MCOLN2      | -0.1107711 | 0.8595403   | -0.1289 | 0.898 | -8.74E-09 | count | 1 |
| AC022075.1  | -0.1082136 | 0.5296928   | -0.2043 | 0.838 | -8.55E-09 | count | 1 |
| CPNE8       | -0.0361056 | 0.4465372   | -0.0809 | 0.936 | -7.91E-09 | count | 1 |
| SRGAP2      | -0.0784113 | 0.6250296   | -0.1255 | 0.9   | -6.24E-09 | count | 1 |
| ADAM22      | -19.613466 | 3428.672635 | -0.0057 | 0.995 | -6.22E-09 | count | 1 |
| BMP8B       | -19.613466 | 3428.672635 | -0.0057 | 0.995 | -6.22E-09 | count | 1 |
| AL033527.3  | -19.613466 | 3428.672635 | -0.0057 | 0.995 | -6.22E-09 | count | 1 |
| AL451074.2  | -19.613466 | 3428.672635 | -0.0057 | 0.995 | -6.22E-09 | count | 1 |
| AL353708.3  | -19.613466 | 3428.672635 | -0.0057 | 0.995 | -6.22E-09 | count | 1 |
| AL360091.3  | -19.613466 | 3428.672635 | -0.0057 | 0.995 | -6.22E-09 | count | 1 |
| AC009506.1  | -19.613466 | 3428.672635 | -0.0057 | 0.995 | -6.22E-09 | count | 1 |
| BBS5        | -19.613466 | 3428.672635 | -0.0057 | 0.995 | -6.22E-09 | count | 1 |
| OSBPL6      | -19.613466 | 3428.672635 | -0.0057 | 0.995 | -6.22E-09 | count | 1 |
| BHLHE40-AS1 | -19.613466 | 3428.672635 | -0.0057 | 0.995 | -6.22E-09 | count | 1 |
| AC084048.1  | -19.613466 | 3428.672635 | -0.0057 | 0.995 | -6.22E-09 | count | 1 |
| CXCL10      | -19.613466 | 3428.672635 | -0.0057 | 0.995 | -6.22E-09 | count | 1 |
| RASGRF2-AS1 | -19.613466 | 3428.672635 | -0.0057 | 0.995 | -6.22E-09 | count | 1 |
| SLCO4C1     | -19.613466 | 3428.672635 | -0.0057 | 0.995 | -6.22E-09 | count | 1 |
| PSORS1C1    | -19.613466 | 3428.672635 | -0.0057 | 0.995 | -6.22E-09 | count | 1 |
| AGER        | -19.613466 | 3428.672635 | -0.0057 | 0.995 | -6.22E-09 | count | 1 |
| PPARD       | -19.613466 | 3428.672635 | -0.0057 | 0.995 | -6.22E-09 | count | 1 |
| SNAP91      | -19.613466 | 3428.672635 | -0.0057 | 0.995 | -6.22E-09 | count | 1 |
| PTPRK       | -19.613466 | 3428.672635 | -0.0057 | 0.995 | -6.22E-09 | count | 1 |
| PDE7B       | -19.613466 | 3428.672635 | -0.0057 | 0.995 | -6.22E-09 | count | 1 |
| CD36        | -19.613466 | 3428.672635 | -0.0057 | 0.995 | -6.22E-09 | count | 1 |
| WDR91       | -19.613466 | 3428.672635 | -0.0057 | 0.995 | -6.22E-09 | count | 1 |
| LINC01504   | -19.613466 | 3428.672635 | -0.0057 | 0.995 | -6.22E-09 | count | 1 |
| AKAP2       | -19.613466 | 3428.672635 | -0.0057 | 0.995 | -6.22E-09 | count | 1 |
| MPPED2      | -19.613466 | 3428.672635 | -0.0057 | 0.995 | -6.22E-09 | count | 1 |
| ECHDC3      | -19.613466 | 3428.672635 | -0.0057 | 0.995 | -6.22E-09 | count | 1 |
| AL365203.2  | -19.613466 | 3428.672635 | -0.0057 | 0.995 | -6.22E-09 | count | 1 |
| EIF5AL1     | -19.613466 | 3428.672635 | -0.0057 | 0.995 | -6.22E-09 | count | 1 |
| CUZD1       | -19.613466 | 3428.672635 | -0.0057 | 0.995 | -6.22E-09 | count | 1 |
| EGLN3       | -19.613466 | 3428.672635 | -0.0057 | 0.995 | -6.22E-09 | count | 1 |
| POMT2       | -19.613466 | 3428.672635 | -0.0057 | 0.995 | -6.22E-09 | count | 1 |
| AL136040.1  | -19.613466 | 3428.672635 | -0.0057 | 0.995 | -6.22E-09 | count | 1 |
| WDR90       | -19.613466 | 3428.672635 | -0.0057 | 0.995 | -6.22E-09 | count | 1 |
| FBXL8       | -19.613466 | 3428.672635 | -0.0057 | 0.995 | -6.22E-09 | count | 1 |
| LIG3        | -19.613466 | 3428.672635 | -0.0057 | 0.995 | -6.22E-09 | count | 1 |
| AXIN2       | -19.613466 | 3428.672635 | -0.0057 | 0.995 | -6.22E-09 | count | 1 |

|            |            |             |         |       |           |       |   |
|------------|------------|-------------|---------|-------|-----------|-------|---|
| CYGB       | -19.613466 | 3428.672635 | -0.0057 | 0.995 | -6.22E-09 | count | 1 |
| TSPAN10    | -19.613466 | 3428.672635 | -0.0057 | 0.995 | -6.22E-09 | count | 1 |
| MMP9       | -19.613466 | 3428.672635 | -0.0057 | 0.995 | -6.22E-09 | count | 1 |
| SOX18      | -19.613466 | 3428.672635 | -0.0057 | 0.995 | -6.22E-09 | count | 1 |
| PLVAP      | -19.613466 | 3428.672635 | -0.0057 | 0.995 | -6.22E-09 | count | 1 |
| AC022150.1 | -19.613466 | 3428.672635 | -0.0057 | 0.995 | -6.22E-09 | count | 1 |
| ZNF552     | -19.613466 | 3428.672635 | -0.0057 | 0.995 | -6.22E-09 | count | 1 |
| Z82188.2   | -19.613466 | 3428.672635 | -0.0057 | 0.995 | -6.22E-09 | count | 1 |
| KLHDC7B    | -19.613466 | 3428.672635 | -0.0057 | 0.995 | -6.22E-09 | count | 1 |
| AC078785.1 | -19.613466 | 3428.672635 | -0.0057 | 0.995 | -6.22E-09 | count | 1 |
| NR3C2      | -19.613466 | 3428.672635 | -0.0057 | 0.995 | -6.22E-09 | count | 1 |
| KHDC1      | -19.613466 | 3428.672635 | -0.0057 | 0.995 | -6.22E-09 | count | 1 |
| ZC3H12D    | -19.613466 | 3428.672635 | -0.0057 | 0.995 | -6.22E-09 | count | 1 |
| ZP3        | -19.613466 | 3428.672635 | -0.0057 | 0.995 | -6.22E-09 | count | 1 |
| AL590764.1 | -19.613466 | 3428.672635 | -0.0057 | 0.995 | -6.22E-09 | count | 1 |
| TNFRSF10D  | -19.613466 | 3428.672635 | -0.0057 | 0.995 | -6.22E-09 | count | 1 |
| TLR4       | -19.613466 | 3428.672635 | -0.0057 | 0.995 | -6.22E-09 | count | 1 |
| NAA40      | -19.613466 | 3428.672635 | -0.0057 | 0.995 | -6.22E-09 | count | 1 |
| SCART1     | -19.613466 | 3428.672635 | -0.0057 | 0.995 | -6.22E-09 | count | 1 |
| TRAV17     | -19.613466 | 3428.672635 | -0.0057 | 0.995 | -6.22E-09 | count | 1 |
| XRCC3      | -19.613466 | 3428.672635 | -0.0057 | 0.995 | -6.22E-09 | count | 1 |
| CERNA1     | -19.613466 | 3428.672635 | -0.0057 | 0.995 | -6.22E-09 | count | 1 |
| UBE2Q2L    | -19.613466 | 3428.672635 | -0.0057 | 0.995 | -6.22E-09 | count | 1 |
| IRX5       | -19.613466 | 3428.672635 | -0.0057 | 0.995 | -6.22E-09 | count | 1 |
| AC055811.3 | -19.613466 | 3428.672635 | -0.0057 | 0.995 | -6.22E-09 | count | 1 |
| OPRL1      | -19.613466 | 3428.672635 | -0.0057 | 0.995 | -6.22E-09 | count | 1 |
| RGS9BP     | -19.613466 | 3428.672635 | -0.0057 | 0.995 | -6.22E-09 | count | 1 |
| LENG8-AS1  | -19.613466 | 3428.672635 | -0.0057 | 0.995 | -6.22E-09 | count | 1 |
| BIK        | -19.613466 | 3428.672635 | -0.0057 | 0.995 | -6.22E-09 | count | 1 |
| GATD3B     | -19.613466 | 3428.672635 | -0.0057 | 0.995 | -6.22E-09 | count | 1 |
| SPC25      | -19.613466 | 3428.672635 | -0.0057 | 0.995 | -6.22E-09 | count | 1 |
| XYLB       | -19.613466 | 3428.672635 | -0.0057 | 0.995 | -6.22E-09 | count | 1 |
| CCR9       | -19.613466 | 3428.672635 | -0.0057 | 0.995 | -6.22E-09 | count | 1 |
| EREG       | -19.613466 | 3428.672635 | -0.0057 | 0.995 | -6.22E-09 | count | 1 |
| C5orf17    | -19.613466 | 3428.672635 | -0.0057 | 0.995 | -6.22E-09 | count | 1 |
| TYW1B      | -19.613466 | 3428.672635 | -0.0057 | 0.995 | -6.22E-09 | count | 1 |
| GVQW3      | -19.613466 | 3428.672635 | -0.0057 | 0.995 | -6.22E-09 | count | 1 |
| USP6NL     | -19.613466 | 3428.672635 | -0.0057 | 0.995 | -6.22E-09 | count | 1 |
| SGSM2      | -19.613466 | 3428.672635 | -0.0057 | 0.995 | -6.22E-09 | count | 1 |
| UBE2C      | -19.613466 | 3428.672635 | -0.0057 | 0.995 | -6.22E-09 | count | 1 |
| ATP9A      | -19.613466 | 3428.672635 | -0.0057 | 0.995 | -6.22E-09 | count | 1 |
| NECTIN2    | -19.613466 | 3428.672635 | -0.0057 | 0.995 | -6.22E-09 | count | 1 |
| CHAF1B     | -19.613466 | 3428.672635 | -0.0057 | 0.995 | -6.22E-09 | count | 1 |
| AL121983.2 | -19.613466 | 3428.672635 | -0.0057 | 0.995 | -6.22E-09 | count | 1 |
| ZNF496     | -19.613466 | 3428.672635 | -0.0057 | 0.995 | -6.22E-09 | count | 1 |

|              |             |             |         |       |           |       |   |
|--------------|-------------|-------------|---------|-------|-----------|-------|---|
| PLEKHM3      | -19.613466  | 3428.672635 | -0.0057 | 0.995 | -6.22E-09 | count | 1 |
| SMAD1        | -19.613466  | 3428.672635 | -0.0057 | 0.995 | -6.22E-09 | count | 1 |
| PXDC1        | -19.613466  | 3428.672635 | -0.0057 | 0.995 | -6.22E-09 | count | 1 |
| FIRRE        | -19.613466  | 3428.672635 | -0.0057 | 0.995 | -6.22E-09 | count | 1 |
| MAMLD1       | -19.613466  | 3428.672635 | -0.0057 | 0.995 | -6.22E-09 | count | 1 |
| AC026979.1   | -19.613466  | 3428.672635 | -0.0057 | 0.995 | -6.22E-09 | count | 1 |
| ZBTB34       | -19.613466  | 3428.672635 | -0.0057 | 0.995 | -6.22E-09 | count | 1 |
| BOLA2-SMG1P6 | -19.613466  | 3428.672635 | -0.0057 | 0.995 | -6.22E-09 | count | 1 |
| FKBP10       | -19.613466  | 3428.672635 | -0.0057 | 0.995 | -6.22E-09 | count | 1 |
| AC008655.2   | -19.613466  | 3428.672635 | -0.0057 | 0.995 | -6.22E-09 | count | 1 |
| STIL         | -19.613466  | 3428.672635 | -0.0057 | 0.995 | -6.22E-09 | count | 1 |
| PALMD        | -19.613466  | 3428.672635 | -0.0057 | 0.995 | -6.22E-09 | count | 1 |
| EPHX1        | -19.613466  | 3428.672635 | -0.0057 | 0.995 | -6.22E-09 | count | 1 |
| SH3BP4       | -19.613466  | 3428.672635 | -0.0057 | 0.995 | -6.22E-09 | count | 1 |
| RBMS3        | -19.613466  | 3428.672635 | -0.0057 | 0.995 | -6.22E-09 | count | 1 |
| P2RY14       | -19.613466  | 3428.672635 | -0.0057 | 0.995 | -6.22E-09 | count | 1 |
| ANKRD50      | -19.613466  | 3428.672635 | -0.0057 | 0.995 | -6.22E-09 | count | 1 |
| TRIM7        | -19.613466  | 3428.672635 | -0.0057 | 0.995 | -6.22E-09 | count | 1 |
| GSTA4        | -19.613466  | 3428.672635 | -0.0057 | 0.995 | -6.22E-09 | count | 1 |
| BICC1        | -19.613466  | 3428.672635 | -0.0057 | 0.995 | -6.22E-09 | count | 1 |
| CC2D2B       | -19.613466  | 3428.672635 | -0.0057 | 0.995 | -6.22E-09 | count | 1 |
| CYP2E1       | -19.613466  | 3428.672635 | -0.0057 | 0.995 | -6.22E-09 | count | 1 |
| SLC8A3       | -19.613466  | 3428.672635 | -0.0057 | 0.995 | -6.22E-09 | count | 1 |
| AC068446.2   | -19.613466  | 3428.672635 | -0.0057 | 0.995 | -6.22E-09 | count | 1 |
| OSBPL1A      | -19.613466  | 3428.672635 | -0.0057 | 0.995 | -6.22E-09 | count | 1 |
| PYGB         | -19.613466  | 3428.672635 | -0.0057 | 0.995 | -6.22E-09 | count | 1 |
| AC104532.1   | -19.613466  | 3428.672635 | -0.0057 | 0.995 | -6.22E-09 | count | 1 |
| AC020922.4   | -19.613466  | 3428.672635 | -0.0057 | 0.995 | -6.22E-09 | count | 1 |
| AC004264.1   | -19.613466  | 3428.672635 | -0.0057 | 0.995 | -6.22E-09 | count | 1 |
| BACE2        | -19.613466  | 3428.672635 | -0.0057 | 0.995 | -6.22E-09 | count | 1 |
| AL031280.1   | -19.4516138 | 2360.280172 | -0.0082 | 0.993 | -6.17E-09 | count | 1 |
| RHBDD1       | -19.4516138 | 2360.280172 | -0.0082 | 0.993 | -6.17E-09 | count | 1 |
| KANTR        | -19.4516138 | 2360.280172 | -0.0082 | 0.993 | -6.17E-09 | count | 1 |
| RBPMS        | -19.4516138 | 2360.280172 | -0.0082 | 0.993 | -6.17E-09 | count | 1 |
| HOXA5        | -19.4516138 | 2360.280172 | -0.0082 | 0.993 | -6.17E-09 | count | 1 |
| ABTB2        | -19.4516138 | 2360.280172 | -0.0082 | 0.993 | -6.17E-09 | count | 1 |
| AL512408.1   | -18.7745077 | 2421.401479 | -0.0078 | 0.994 | -6.16E-09 | count | 1 |
| OSCP1        | -18.7745077 | 2421.401479 | -0.0078 | 0.994 | -6.16E-09 | count | 1 |
| AC008074.3   | -18.7745077 | 2421.401479 | -0.0078 | 0.994 | -6.16E-09 | count | 1 |
| PKP4         | -18.7745077 | 2421.401479 | -0.0078 | 0.994 | -6.16E-09 | count | 1 |
| LINC00880    | -18.7745077 | 2421.401479 | -0.0078 | 0.994 | -6.16E-09 | count | 1 |
| AC004951.1   | -18.7745077 | 2421.401479 | -0.0078 | 0.994 | -6.16E-09 | count | 1 |
| FBXL13       | -18.7745077 | 2421.401479 | -0.0078 | 0.994 | -6.16E-09 | count | 1 |
| AC090114.2   | -18.7745077 | 2421.401479 | -0.0078 | 0.994 | -6.16E-09 | count | 1 |
| PRDM11       | -18.7745077 | 2421.401479 | -0.0078 | 0.994 | -6.16E-09 | count | 1 |

|            |             |             |         |       |           |       |   |
|------------|-------------|-------------|---------|-------|-----------|-------|---|
| AP002433.1 | -18.7745077 | 2421.401479 | -0.0078 | 0.994 | -6.16E-09 | count | 1 |
| AC016957.2 | -18.7745077 | 2421.401479 | -0.0078 | 0.994 | -6.16E-09 | count | 1 |
| AC008083.2 | -18.7745077 | 2421.401479 | -0.0078 | 0.994 | -6.16E-09 | count | 1 |
| ADPRHL1    | -18.7745077 | 2421.401479 | -0.0078 | 0.994 | -6.16E-09 | count | 1 |
| AC007601.1 | -18.7745077 | 2421.401479 | -0.0078 | 0.994 | -6.16E-09 | count | 1 |
| AC046158.1 | -18.7745077 | 2421.401479 | -0.0078 | 0.994 | -6.16E-09 | count | 1 |
| KRT17      | -18.7745077 | 2421.401479 | -0.0078 | 0.994 | -6.16E-09 | count | 1 |
| ANKLE1     | -18.7745077 | 2421.401479 | -0.0078 | 0.994 | -6.16E-09 | count | 1 |
| ZNF492     | -18.7745077 | 2421.401479 | -0.0078 | 0.994 | -6.16E-09 | count | 1 |
| KDM4A-AS1  | -18.7745077 | 2421.401479 | -0.0078 | 0.994 | -6.16E-09 | count | 1 |
| MCOLN3     | -18.7745077 | 2421.401479 | -0.0078 | 0.994 | -6.16E-09 | count | 1 |
| FMOD       | -18.7745077 | 2421.401479 | -0.0078 | 0.994 | -6.16E-09 | count | 1 |
| SOX13      | -18.7745077 | 2421.401479 | -0.0078 | 0.994 | -6.16E-09 | count | 1 |
| LINC01119  | -18.7745077 | 2421.401479 | -0.0078 | 0.994 | -6.16E-09 | count | 1 |
| HK2        | -18.7745077 | 2421.401479 | -0.0078 | 0.994 | -6.16E-09 | count | 1 |
| AC009948.3 | -18.7745077 | 2421.401479 | -0.0078 | 0.994 | -6.16E-09 | count | 1 |
| GLB1L      | -18.7745077 | 2421.401479 | -0.0078 | 0.994 | -6.16E-09 | count | 1 |
| AC104078.1 | -18.7745077 | 2421.401479 | -0.0078 | 0.994 | -6.16E-09 | count | 1 |
| DKK2       | -18.7745077 | 2421.401479 | -0.0078 | 0.994 | -6.16E-09 | count | 1 |
| CKMT2      | -18.7745077 | 2421.401479 | -0.0078 | 0.994 | -6.16E-09 | count | 1 |
| PDGFRB     | -18.7745077 | 2421.401479 | -0.0078 | 0.994 | -6.16E-09 | count | 1 |
| RANBP17    | -18.7745077 | 2421.401479 | -0.0078 | 0.994 | -6.16E-09 | count | 1 |
| U91328.3   | -18.7745077 | 2421.401479 | -0.0078 | 0.994 | -6.16E-09 | count | 1 |
| AL031777.3 | -18.7745077 | 2421.401479 | -0.0078 | 0.994 | -6.16E-09 | count | 1 |
| ZSCAN31    | -18.7745077 | 2421.401479 | -0.0078 | 0.994 | -6.16E-09 | count | 1 |
| KLC4       | -18.7745077 | 2421.401479 | -0.0078 | 0.994 | -6.16E-09 | count | 1 |
| PLN        | -18.7745077 | 2421.401479 | -0.0078 | 0.994 | -6.16E-09 | count | 1 |
| INHBA      | -18.7745077 | 2421.401479 | -0.0078 | 0.994 | -6.16E-09 | count | 1 |
| TRBV3-1    | -18.7745077 | 2421.401479 | -0.0078 | 0.994 | -6.16E-09 | count | 1 |
| TCAF2C     | -18.7745077 | 2421.401479 | -0.0078 | 0.994 | -6.16E-09 | count | 1 |
| ZNF775     | -18.7745077 | 2421.401479 | -0.0078 | 0.994 | -6.16E-09 | count | 1 |
| PCAT1      | -18.7745077 | 2421.401479 | -0.0078 | 0.994 | -6.16E-09 | count | 1 |
| INSC       | -18.7745077 | 2421.401479 | -0.0078 | 0.994 | -6.16E-09 | count | 1 |
| AC073592.1 | -18.7745077 | 2421.401479 | -0.0078 | 0.994 | -6.16E-09 | count | 1 |
| ATL1       | -18.7745077 | 2421.401479 | -0.0078 | 0.994 | -6.16E-09 | count | 1 |
| FBN1       | -18.7745077 | 2421.401479 | -0.0078 | 0.994 | -6.16E-09 | count | 1 |
| SHC4       | -18.7745077 | 2421.401479 | -0.0078 | 0.994 | -6.16E-09 | count | 1 |
| AC022087.1 | -18.7745077 | 2421.401479 | -0.0078 | 0.994 | -6.16E-09 | count | 1 |
| SULT1A3    | -18.7745077 | 2421.401479 | -0.0078 | 0.994 | -6.16E-09 | count | 1 |
| AC132938.3 | -18.7745077 | 2421.401479 | -0.0078 | 0.994 | -6.16E-09 | count | 1 |
| SDCBP2-AS1 | -18.7745077 | 2421.401479 | -0.0078 | 0.994 | -6.16E-09 | count | 1 |
| C19orf38   | -18.7745077 | 2421.401479 | -0.0078 | 0.994 | -6.16E-09 | count | 1 |
| CCDC194    | -18.7745077 | 2421.401479 | -0.0078 | 0.994 | -6.16E-09 | count | 1 |
| CCDC106    | -18.7745077 | 2421.401479 | -0.0078 | 0.994 | -6.16E-09 | count | 1 |
| ZNF543     | -18.7745077 | 2421.401479 | -0.0078 | 0.994 | -6.16E-09 | count | 1 |

|            |             |             |         |       |           |       |   |
|------------|-------------|-------------|---------|-------|-----------|-------|---|
| CLDN5      | -18.7745077 | 2421.401479 | -0.0078 | 0.994 | -6.16E-09 | count | 1 |
| AGAP1      | -18.7745077 | 2421.401479 | -0.0078 | 0.994 | -6.16E-09 | count | 1 |
| TNIP3      | -18.7745077 | 2421.401479 | -0.0078 | 0.994 | -6.16E-09 | count | 1 |
| AL513548.1 | -18.7745077 | 2421.401479 | -0.0078 | 0.994 | -6.16E-09 | count | 1 |
| C7orf61    | -18.7745077 | 2421.401479 | -0.0078 | 0.994 | -6.16E-09 | count | 1 |
| TRBV6-2    | -18.7745077 | 2421.401479 | -0.0078 | 0.994 | -6.16E-09 | count | 1 |
| ZNF572     | -18.7745077 | 2421.401479 | -0.0078 | 0.994 | -6.16E-09 | count | 1 |
| ACRBP      | -18.7745077 | 2421.401479 | -0.0078 | 0.994 | -6.16E-09 | count | 1 |
| IGFBP6     | -18.7745077 | 2421.401479 | -0.0078 | 0.994 | -6.16E-09 | count | 1 |
| KSR2       | -18.7745077 | 2421.401479 | -0.0078 | 0.994 | -6.16E-09 | count | 1 |
| DGKH       | -18.7745077 | 2421.401479 | -0.0078 | 0.994 | -6.16E-09 | count | 1 |
| AC123768.4 | -18.7745077 | 2421.401479 | -0.0078 | 0.994 | -6.16E-09 | count | 1 |
| TRPV1      | -18.7745077 | 2421.401479 | -0.0078 | 0.994 | -6.16E-09 | count | 1 |
| PLEKHG2    | -18.7745077 | 2421.401479 | -0.0078 | 0.994 | -6.16E-09 | count | 1 |
| AL590822.2 | -18.7745077 | 2421.401479 | -0.0078 | 0.994 | -6.16E-09 | count | 1 |
| RHBDL2     | -18.7745077 | 2421.401479 | -0.0078 | 0.994 | -6.16E-09 | count | 1 |
| NID1       | -18.7745077 | 2421.401479 | -0.0078 | 0.994 | -6.16E-09 | count | 1 |
| AC231981.1 | -18.7745077 | 2421.401479 | -0.0078 | 0.994 | -6.16E-09 | count | 1 |
| TANC1      | -18.7745077 | 2421.401479 | -0.0078 | 0.994 | -6.16E-09 | count | 1 |
| LINC02478  | -18.7745077 | 2421.401479 | -0.0078 | 0.994 | -6.16E-09 | count | 1 |
| AC011405.1 | -18.7745077 | 2421.401479 | -0.0078 | 0.994 | -6.16E-09 | count | 1 |
| ZNF879     | -18.7745077 | 2421.401479 | -0.0078 | 0.994 | -6.16E-09 | count | 1 |
| FAM185A    | -18.7745077 | 2421.401479 | -0.0078 | 0.994 | -6.16E-09 | count | 1 |
| AC008264.2 | -18.7745077 | 2421.401479 | -0.0078 | 0.994 | -6.16E-09 | count | 1 |
| CCDC180    | -18.7745077 | 2421.401479 | -0.0078 | 0.994 | -6.16E-09 | count | 1 |
| SARDH      | -18.7745077 | 2421.401479 | -0.0078 | 0.994 | -6.16E-09 | count | 1 |
| ACCS       | -18.7745077 | 2421.401479 | -0.0078 | 0.994 | -6.16E-09 | count | 1 |
| CCDC15     | -18.7745077 | 2421.401479 | -0.0078 | 0.994 | -6.16E-09 | count | 1 |
| LINC00167  | -18.7745077 | 2421.401479 | -0.0078 | 0.994 | -6.16E-09 | count | 1 |
| AL157895.1 | -18.7745077 | 2421.401479 | -0.0078 | 0.994 | -6.16E-09 | count | 1 |
| VDR        | -18.7745077 | 2421.401479 | -0.0078 | 0.994 | -6.16E-09 | count | 1 |
| NDUFA4L2   | -18.7745077 | 2421.401479 | -0.0078 | 0.994 | -6.16E-09 | count | 1 |
| VSIG10     | -18.7745077 | 2421.401479 | -0.0078 | 0.994 | -6.16E-09 | count | 1 |
| ABCC4      | -18.7745077 | 2421.401479 | -0.0078 | 0.994 | -6.16E-09 | count | 1 |
| CBLN3      | -18.7745077 | 2421.401479 | -0.0078 | 0.994 | -6.16E-09 | count | 1 |
| HEATR5A    | -18.7745077 | 2421.401479 | -0.0078 | 0.994 | -6.16E-09 | count | 1 |
| ITPKA      | -18.7745077 | 2421.401479 | -0.0078 | 0.994 | -6.16E-09 | count | 1 |
| NTRK3      | -18.7745077 | 2421.401479 | -0.0078 | 0.994 | -6.16E-09 | count | 1 |
| CDRT4      | -18.7745077 | 2421.401479 | -0.0078 | 0.994 | -6.16E-09 | count | 1 |
| CACTIN     | -18.7745077 | 2421.401479 | -0.0078 | 0.994 | -6.16E-09 | count | 1 |
| AC092279.1 | -18.7745077 | 2421.401479 | -0.0078 | 0.994 | -6.16E-09 | count | 1 |
| MIF-AS1    | -18.7745077 | 2421.401479 | -0.0078 | 0.994 | -6.16E-09 | count | 1 |
| NEFH       | -18.7745077 | 2421.401479 | -0.0078 | 0.994 | -6.16E-09 | count | 1 |
| GIPC2      | -18.7745077 | 2421.401479 | -0.0078 | 0.994 | -6.16E-09 | count | 1 |
| PTGFRN     | -18.7745077 | 2421.401479 | -0.0078 | 0.994 | -6.16E-09 | count | 1 |



|            |             |             |         |       |           |       |   |
|------------|-------------|-------------|---------|-------|-----------|-------|---|
| NUDT17     | -18.7745077 | 2421.401479 | -0.0078 | 0.994 | -6.16E-09 | count | 1 |
| TMEM81     | -18.7745077 | 2421.401479 | -0.0078 | 0.994 | -6.16E-09 | count | 1 |
| STK11IP    | -18.7745077 | 2421.401479 | -0.0078 | 0.994 | -6.16E-09 | count | 1 |
| AC090948.2 | -18.7745077 | 2421.401479 | -0.0078 | 0.994 | -6.16E-09 | count | 1 |
| TRPC1      | -18.7745077 | 2421.401479 | -0.0078 | 0.994 | -6.16E-09 | count | 1 |
| MYOZ2      | -18.7745077 | 2421.401479 | -0.0078 | 0.994 | -6.16E-09 | count | 1 |
| FAM198B    | -18.7745077 | 2421.401479 | -0.0078 | 0.994 | -6.16E-09 | count | 1 |
| PALLD      | -18.7745077 | 2421.401479 | -0.0078 | 0.994 | -6.16E-09 | count | 1 |
| HAPLN1     | -18.7745077 | 2421.401479 | -0.0078 | 0.994 | -6.16E-09 | count | 1 |
| HBEGF      | -18.7745077 | 2421.401479 | -0.0078 | 0.994 | -6.16E-09 | count | 1 |
| U91328.1   | -18.7745077 | 2421.401479 | -0.0078 | 0.994 | -6.16E-09 | count | 1 |
| ZKSCAN4    | -18.7745077 | 2421.401479 | -0.0078 | 0.994 | -6.16E-09 | count | 1 |
| BEND3      | -18.7745077 | 2421.401479 | -0.0078 | 0.994 | -6.16E-09 | count | 1 |
| F8         | -18.7745077 | 2421.401479 | -0.0078 | 0.994 | -6.16E-09 | count | 1 |
| AC246817.2 | -18.7745077 | 2421.401479 | -0.0078 | 0.994 | -6.16E-09 | count | 1 |
| ADAMDEC1   | -18.7745077 | 2421.401479 | -0.0078 | 0.994 | -6.16E-09 | count | 1 |
| AZIN1-AS1  | -18.7745077 | 2421.401479 | -0.0078 | 0.994 | -6.16E-09 | count | 1 |
| TNFRSF11B  | -18.7745077 | 2421.401479 | -0.0078 | 0.994 | -6.16E-09 | count | 1 |
| DNAJB5     | -18.7745077 | 2421.401479 | -0.0078 | 0.994 | -6.16E-09 | count | 1 |
| S1PR3      | -18.7745077 | 2421.401479 | -0.0078 | 0.994 | -6.16E-09 | count | 1 |
| LAYN       | -18.7745077 | 2421.401479 | -0.0078 | 0.994 | -6.16E-09 | count | 1 |
| ZC3H10     | -18.7745077 | 2421.401479 | -0.0078 | 0.994 | -6.16E-09 | count | 1 |
| RASSF9     | -18.7745077 | 2421.401479 | -0.0078 | 0.994 | -6.16E-09 | count | 1 |
| ULK1       | -18.7745077 | 2421.401479 | -0.0078 | 0.994 | -6.16E-09 | count | 1 |
| ALG11      | -18.7745077 | 2421.401479 | -0.0078 | 0.994 | -6.16E-09 | count | 1 |
| EME2       | -18.7745077 | 2421.401479 | -0.0078 | 0.994 | -6.16E-09 | count | 1 |
| NOMO3      | -18.7745077 | 2421.401479 | -0.0078 | 0.994 | -6.16E-09 | count | 1 |
| C16orf86   | -18.7745077 | 2421.401479 | -0.0078 | 0.994 | -6.16E-09 | count | 1 |
| PLA2G15    | -18.7745077 | 2421.401479 | -0.0078 | 0.994 | -6.16E-09 | count | 1 |
| FAM57A     | -18.7745077 | 2421.401479 | -0.0078 | 0.994 | -6.16E-09 | count | 1 |
| TLCD1      | -18.7745077 | 2421.401479 | -0.0078 | 0.994 | -6.16E-09 | count | 1 |
| AC104984.4 | -18.7745077 | 2421.401479 | -0.0078 | 0.994 | -6.16E-09 | count | 1 |
| ACSS2      | -18.7745077 | 2421.401479 | -0.0078 | 0.994 | -6.16E-09 | count | 1 |
| ZSWIM3     | -18.7745077 | 2421.401479 | -0.0078 | 0.994 | -6.16E-09 | count | 1 |
| ZNF304     | -18.7745077 | 2421.401479 | -0.0078 | 0.994 | -6.16E-09 | count | 1 |
| SLC19A1    | -18.7745077 | 2421.401479 | -0.0078 | 0.994 | -6.16E-09 | count | 1 |
| MCM3AP-AS1 | -18.7745077 | 2421.401479 | -0.0078 | 0.994 | -6.16E-09 | count | 1 |
| TLR3       | -18.7745077 | 2421.401479 | -0.0078 | 0.994 | -6.16E-09 | count | 1 |
| PWAR6      | -18.7745077 | 2421.401479 | -0.0078 | 0.994 | -6.16E-09 | count | 1 |
| LPCAT2     | -18.7745077 | 2421.401479 | -0.0078 | 0.994 | -6.16E-09 | count | 1 |
| RASD1      | -0.0711948  | 0.6888352   | -0.1034 | 0.918 | -5.67E-09 | count | 1 |
| SRD5A3     | -0.0711948  | 0.6327446   | -0.1125 | 0.91  | -5.67E-09 | count | 1 |
| FMO5       | -0.1823216  | 0.4212709   | -0.4328 | 0.665 | -5.21E-09 | count | 1 |
| ABAT       | -0.0598225  | 0.6875839   | -0.087  | 0.931 | -4.78E-09 | count | 1 |
| MTRF1L     | -0.0598225  | 0.6901998   | -0.0867 | 0.931 | -4.77E-09 | count | 1 |

|            |            |           |         |       |           |       |   |
|------------|------------|-----------|---------|-------|-----------|-------|---|
| DTWD2      | -0.1107711 | 1.0548781 | -0.105  | 0.916 | -3.22E-09 | count | 1 |
| MT01       | -0.1107711 | 1.0548781 | -0.105  | 0.916 | -3.22E-09 | count | 1 |
| RAB15      | -0.1107711 | 1.0548781 | -0.105  | 0.916 | -3.22E-09 | count | 1 |
| VEGFA      | -0.1107711 | 1.0548781 | -0.105  | 0.916 | -3.22E-09 | count | 1 |
| ZNF653     | -0.1107711 | 1.0548781 | -0.105  | 0.916 | -3.22E-09 | count | 1 |
| ITGAD      | -0.1107711 | 1.0548781 | -0.105  | 0.916 | -3.22E-09 | count | 1 |
| BX890604.1 | -0.1107711 | 1.0548781 | -0.105  | 0.916 | -3.22E-09 | count | 1 |
| HIC2       | -0.1107711 | 1.0548781 | -0.105  | 0.916 | -3.22E-09 | count | 1 |
| ARL10      | -0.1107711 | 1.0548781 | -0.105  | 0.916 | -3.22E-09 | count | 1 |
| SLC43A2    | -0.1107711 | 1.0548781 | -0.105  | 0.916 | -3.22E-09 | count | 1 |
| AC245297.2 | -0.1107711 | 1.0548781 | -0.105  | 0.916 | -3.22E-09 | count | 1 |
| AC132872.1 | -0.1107711 | 1.0786899 | -0.1027 | 0.918 | -3.22E-09 | count | 1 |
| TIPARP-AS1 | -0.1107711 | 1.0786899 | -0.1027 | 0.918 | -3.22E-09 | count | 1 |
| MCTP1      | -0.1107711 | 1.0786899 | -0.1027 | 0.918 | -3.22E-09 | count | 1 |
| AC009414.2 | -0.1107711 | 1.0786899 | -0.1027 | 0.918 | -3.22E-09 | count | 1 |
| PTCD1      | -0.1107711 | 1.0786899 | -0.1027 | 0.918 | -3.22E-09 | count | 1 |
| LINC01473  | -0.1107711 | 1.0786899 | -0.1027 | 0.918 | -3.22E-09 | count | 1 |
| CHRFAM7A   | -0.1107711 | 1.0786899 | -0.1027 | 0.918 | -3.22E-09 | count | 1 |
| IMPA2      | -0.1107711 | 1.0786899 | -0.1027 | 0.918 | -3.22E-09 | count | 1 |
| NTNG2      | -0.1107711 | 1.0786899 | -0.1027 | 0.918 | -3.22E-09 | count | 1 |
| ACAD11     | -0.1107711 | 1.0786899 | -0.1027 | 0.918 | -3.22E-09 | count | 1 |
| CUL7       | -0.1107711 | 1.0786899 | -0.1027 | 0.918 | -3.22E-09 | count | 1 |
| MRM1       | -0.1107711 | 1.0786899 | -0.1027 | 0.918 | -3.22E-09 | count | 1 |
| GLS2       | -0.1107711 | 1.0786899 | -0.1027 | 0.918 | -3.22E-09 | count | 1 |
| URB1       | -0.1107711 | 1.0786899 | -0.1027 | 0.918 | -3.22E-09 | count | 1 |
| AL662884.4 | -0.1107711 | 1.0786899 | -0.1027 | 0.918 | -3.22E-09 | count | 1 |
| FKBP7      | -0.1107711 | 1.0786899 | -0.1027 | 0.918 | -3.22E-09 | count | 1 |
| PROS1      | -0.0392207 | 0.9198877 | -0.0426 | 0.966 | -3.14E-09 | count | 1 |
| FAM173B    | -0.0392207 | 0.9198877 | -0.0426 | 0.966 | -3.14E-09 | count | 1 |
| ZNF707     | -0.0392207 | 0.9198877 | -0.0426 | 0.966 | -3.14E-09 | count | 1 |
| FOXJ1      | -0.0392207 | 0.9198877 | -0.0426 | 0.966 | -3.14E-09 | count | 1 |
| ZNF565     | -0.0392207 | 0.9198877 | -0.0426 | 0.966 | -3.14E-09 | count | 1 |
| ZNF584     | -0.0392207 | 0.9198877 | -0.0426 | 0.966 | -3.14E-09 | count | 1 |
| SGO2       | -0.0392207 | 0.591434  | -0.0663 | 0.947 | -3.14E-09 | count | 1 |
| IL12RB2    | -0.0645385 | 0.4743959 | -0.136  | 0.892 | -1.89E-09 | count | 1 |
| VWA8       | -0.0392207 | 0.7607258 | -0.0516 | 0.959 | -1.16E-09 | count | 1 |
| POFUT2     | -0.0392207 | 0.7607258 | -0.0516 | 0.959 | -1.16E-09 | count | 1 |
| CACNB3     | -0.0392207 | 0.7607258 | -0.0516 | 0.959 | -1.16E-09 | count | 1 |
| AQR        | 0.0038238  | 0.4997515 | 0.0077  | 0.994 | 8.41E-10  | count | 1 |
| MIR3142HG  | 0.0584967  | 0.7436591 | 0.0787  | 0.937 | 1.76E-09  | count | 1 |
| CUL9       | 0.2231436  | 0.5665577 | 0.3939  | 0.694 | 2.55E-09  | count | 1 |
| MEGF9      | 0.2231436  | 0.5665577 | 0.3939  | 0.694 | 2.55E-09  | count | 1 |
| AC078925.1 | 0.2231436  | 0.5665577 | 0.3939  | 0.694 | 2.55E-09  | count | 1 |
| PROSER1    | 0.2231436  | 0.5665577 | 0.3939  | 0.694 | 2.55E-09  | count | 1 |
| ZNF500     | 0.2231436  | 0.5665577 | 0.3939  | 0.694 | 2.55E-09  | count | 1 |

|            |           |           |        |       |          |       |   |
|------------|-----------|-----------|--------|-------|----------|-------|---|
| CDCP1      | 0.2231436 | 0.5665577 | 0.3939 | 0.694 | 2.55E-09 | count | 1 |
| SEMA3A     | 0.2231436 | 0.5665577 | 0.3939 | 0.694 | 2.55E-09 | count | 1 |
| NME2       | 0.2231436 | 0.5665577 | 0.3939 | 0.694 | 2.55E-09 | count | 1 |
| ARL15      | 0.038238  | 0.7187062 | 0.0532 | 0.958 | 3.12E-09 | count | 1 |
| CASZ1      | 0.038238  | 0.7154097 | 0.0534 | 0.957 | 3.12E-09 | count | 1 |
| FAM66C     | 0.0584967 | 0.8182125 | 0.0715 | 0.943 | 4.79E-09 | count | 1 |
| SUMF1      | 0.0584967 | 0.8182125 | 0.0715 | 0.943 | 4.79E-09 | count | 1 |
| LRRC8A     | 0.0584967 | 0.8182125 | 0.0715 | 0.943 | 4.79E-09 | count | 1 |
| SCD        | 0.0584967 | 0.8182125 | 0.0715 | 0.943 | 4.79E-09 | count | 1 |
| TET3       | 0.0584967 | 0.8266191 | 0.0708 | 0.944 | 4.79E-09 | count | 1 |
| GPR107     | 0.0807794 | 0.6537478 | 0.1236 | 0.902 | 6.65E-09 | count | 1 |
| S100Z      | 0.2231436 | 0.5665577 | 0.3939 | 0.694 | 6.94E-09 | count | 1 |
| SYP        | 0.2231436 | 0.5665577 | 0.3939 | 0.694 | 6.94E-09 | count | 1 |
| MAN2A2     | 0.2231436 | 0.5665577 | 0.3939 | 0.694 | 6.94E-09 | count | 1 |
| FAM184A    | 0.2231436 | 0.5665577 | 0.3939 | 0.694 | 6.94E-09 | count | 1 |
| IPPK       | 0.2231436 | 0.496904  | 0.4491 | 0.654 | 6.95E-09 | count | 1 |
| ZFAND4     | 0.2231436 | 0.4714045 | 0.4734 | 0.636 | 6.96E-09 | count | 1 |
| NIPA1      | 0.2484614 | 0.7607258 | 0.3266 | 0.744 | 7.77E-09 | count | 1 |
| SMN2       | 0.2484614 | 0.7607258 | 0.3266 | 0.744 | 7.77E-09 | count | 1 |
| PRDM12     | 0.2484614 | 0.9694404 | 0.2563 | 0.798 | 7.77E-09 | count | 1 |
| ENO2       | 0.2484614 | 0.9694404 | 0.2563 | 0.798 | 7.77E-09 | count | 1 |
| AL049780.2 | 0.2484614 | 0.9694404 | 0.2563 | 0.798 | 7.77E-09 | count | 1 |
| AL117381.1 | 0.2484614 | 0.9694404 | 0.2563 | 0.798 | 7.77E-09 | count | 1 |
| PIK3C2B    | 0.2484614 | 0.9694404 | 0.2563 | 0.798 | 7.77E-09 | count | 1 |
| GDPD5      | 0.2484614 | 0.9694404 | 0.2563 | 0.798 | 7.77E-09 | count | 1 |
| ZNF578     | 0.2484614 | 0.9694404 | 0.2563 | 0.798 | 7.77E-09 | count | 1 |
| AGO1       | 0.2484614 | 0.9694404 | 0.2563 | 0.798 | 7.77E-09 | count | 1 |
| CCR4       | 0.2484614 | 0.9694404 | 0.2563 | 0.798 | 7.77E-09 | count | 1 |
| CDKL3      | 0.2484614 | 0.9694404 | 0.2563 | 0.798 | 7.77E-09 | count | 1 |
| HCG25      | 0.2484614 | 0.9694404 | 0.2563 | 0.798 | 7.77E-09 | count | 1 |
| SUV39H1    | 0.2484614 | 0.9694404 | 0.2563 | 0.798 | 7.77E-09 | count | 1 |
| AC044839.1 | 0.2484614 | 0.9694404 | 0.2563 | 0.798 | 7.77E-09 | count | 1 |
| ZG16B      | 0.2484614 | 0.9694404 | 0.2563 | 0.798 | 7.77E-09 | count | 1 |
| ALDH3A1    | 0.2484614 | 0.9694404 | 0.2563 | 0.798 | 7.77E-09 | count | 1 |
| AC004825.2 | 0.0992702 | 0.8945654 | 0.111  | 0.912 | 8.19E-09 | count | 1 |
| RANBP10    | 0.0992702 | 0.8945654 | 0.111  | 0.912 | 8.19E-09 | count | 1 |
| LIX1L-AS1  | 0.0992702 | 0.8945654 | 0.111  | 0.912 | 8.19E-09 | count | 1 |
| MAGIX      | 0.0992702 | 0.7921787 | 0.1253 | 0.9   | 8.19E-09 | count | 1 |
| RNF121     | 0.0992702 | 0.7886611 | 0.1259 | 0.9   | 8.20E-09 | count | 1 |
| SESTD1     | 0.0992702 | 0.9748727 | 0.1018 | 0.919 | 8.21E-09 | count | 1 |
| ZNF408     | 0.0992702 | 0.656589  | 0.1512 | 0.88  | 8.21E-09 | count | 1 |
| PITRM1     | 0.0992702 | 0.8390727 | 0.1183 | 0.906 | 8.24E-09 | count | 1 |
| GSTM4      | 0.040822  | 0.3966899 | 0.1029 | 0.918 | 9.07E-09 | count | 1 |
| LINC02446  | 0.11493   | 0.5543354 | 0.2073 | 0.836 | 9.54E-09 | count | 1 |
| ZNF628     | 0.136249  | 0.7931025 | 0.1718 | 0.864 | 1.13E-08 | count | 1 |

|            |            |             |        |       |          |       |   |
|------------|------------|-------------|--------|-------|----------|-------|---|
| MIOS       | 0.136249   | 0.7931025   | 0.1718 | 0.864 | 1.13E-08 | count | 1 |
| ZNF597     | 0.136249   | 0.7109495   | 0.1916 | 0.848 | 1.13E-08 | count | 1 |
| PRRT2      | 0.9162907  | 0.5892556   | 1.555  | 0.121 | 1.17E-08 | count | 1 |
| AMDHD2     | 0.9162907  | 0.5892556   | 1.555  | 0.121 | 1.17E-08 | count | 1 |
| MELTF      | 0.9162907  | 0.5892556   | 1.555  | 0.121 | 1.17E-08 | count | 1 |
| AC012358.3 | 0.9162907  | 0.5892556   | 1.555  | 0.121 | 1.17E-08 | count | 1 |
| AL158071.4 | 0.9162907  | 0.5892556   | 1.555  | 0.121 | 1.17E-08 | count | 1 |
| GPNUMB     | 0.9162907  | 0.5892556   | 1.555  | 0.121 | 1.17E-08 | count | 1 |
| CYB5D1     | 0.9162907  | 0.5892556   | 1.555  | 0.121 | 1.17E-08 | count | 1 |
| CLASP1     | 0.1431008  | 0.4630864   | 0.309  | 0.758 | 1.19E-08 | count | 1 |
| WDR92      | 0.1538865  | 0.6903526   | 0.2229 | 0.824 | 1.28E-08 | count | 1 |
| ZNF37A     | 0.1791866  | 0.5775537   | 0.3103 | 0.757 | 1.50E-08 | count | 1 |
| CTC1       | 0.4863575  | 0.9293277   | 0.5233 | 0.601 | 1.59E-08 | count | 1 |
| GRAP       | 0.4863575  | 0.9293277   | 0.5233 | 0.601 | 1.59E-08 | count | 1 |
| FUT8-AS1   | 0.4863575  | 1.1591267   | 0.4196 | 0.675 | 1.59E-08 | count | 1 |
| ZNF28      | 0.4863575  | 1.1591267   | 0.4196 | 0.675 | 1.59E-08 | count | 1 |
| TOM1       | 0.4863575  | 1.1591267   | 0.4196 | 0.675 | 1.59E-08 | count | 1 |
| D2HGDH     | 0.4863575  | 1.1591267   | 0.4196 | 0.675 | 1.59E-08 | count | 1 |
| SMC5-AS1   | 0.4863575  | 1.1591267   | 0.4196 | 0.675 | 1.59E-08 | count | 1 |
| MYO7A      | 0.4863575  | 1.1591267   | 0.4196 | 0.675 | 1.59E-08 | count | 1 |
| C17orf51   | 0.4863575  | 1.1591267   | 0.4196 | 0.675 | 1.59E-08 | count | 1 |
| CD274      | 0.4863575  | 1.1591267   | 0.4196 | 0.675 | 1.59E-08 | count | 1 |
| TBC1D16    | 0.4863575  | 1.1591267   | 0.4196 | 0.675 | 1.59E-08 | count | 1 |
| CABLES1    | 0.4863575  | 1.1591267   | 0.4196 | 0.675 | 1.59E-08 | count | 1 |
| MFAP4      | 0.4863575  | 1.1591267   | 0.4196 | 0.675 | 1.59E-08 | count | 1 |
| AC124016.2 | 0.4863575  | 1.1591267   | 0.4196 | 0.675 | 1.59E-08 | count | 1 |
| ARG2       | 0.4863575  | 1.1591267   | 0.4196 | 0.675 | 1.59E-08 | count | 1 |
| ZNF316     | 0.4863575  | 1.1591267   | 0.4196 | 0.675 | 1.59E-08 | count | 1 |
| SLC7A1     | 0.4863575  | 1.1591267   | 0.4196 | 0.675 | 1.59E-08 | count | 1 |
| CDA        | 18.3870749 | 3631.53755  | 0.0051 | 0.996 | 1.79E-08 | count | 1 |
| PLA2G4A    | 18.3870749 | 3631.53755  | 0.0051 | 0.996 | 1.79E-08 | count | 1 |
| BATF3      | 18.3870749 | 3631.53755  | 0.0051 | 0.996 | 1.79E-08 | count | 1 |
| SIX3-AS1   | 18.3870749 | 3631.537684 | 0.0051 | 0.996 | 1.79E-08 | count | 1 |
| HMMR       | 18.3870749 | 3631.537684 | 0.0051 | 0.996 | 1.79E-08 | count | 1 |
| TEAD3      | 18.3870749 | 3631.53755  | 0.0051 | 0.996 | 1.79E-08 | count | 1 |
| VGFB       | 18.3870749 | 3631.537684 | 0.0051 | 0.996 | 1.79E-08 | count | 1 |
| RIBC1      | 18.3870749 | 3631.53755  | 0.0051 | 0.996 | 1.79E-08 | count | 1 |
| AL132656.2 | 18.3870749 | 3631.53755  | 0.0051 | 0.996 | 1.79E-08 | count | 1 |
| CFAP54     | 18.3870749 | 3631.537684 | 0.0051 | 0.996 | 1.79E-08 | count | 1 |
| MORN3      | 18.3870749 | 3631.53755  | 0.0051 | 0.996 | 1.79E-08 | count | 1 |
| FRY        | 18.3870749 | 3631.53755  | 0.0051 | 0.996 | 1.79E-08 | count | 1 |
| ACP6       | 18.3870747 | 3631.537707 | 0.0051 | 0.996 | 1.79E-08 | count | 1 |
| TMEM79     | 18.3870748 | 3631.537483 | 0.0051 | 0.996 | 1.79E-08 | count | 1 |
| AL591846.2 | 18.3870748 | 3631.537483 | 0.0051 | 0.996 | 1.79E-08 | count | 1 |
| RBKS       | 18.3870748 | 3631.537483 | 0.0051 | 0.996 | 1.79E-08 | count | 1 |

|            |            |             |        |       |          |       |   |
|------------|------------|-------------|--------|-------|----------|-------|---|
| ATOH8      | 18.3870747 | 3631.537707 | 0.0051 | 0.996 | 1.79E-08 | count | 1 |
| AC053503.5 | 18.387075  | 3631.537729 | 0.0051 | 0.996 | 1.79E-08 | count | 1 |
| LINC02018  | 18.387075  | 3631.537729 | 0.0051 | 0.996 | 1.79E-08 | count | 1 |
| ZBTB20-AS4 | 18.387075  | 3631.537729 | 0.0051 | 0.996 | 1.79E-08 | count | 1 |
| AC111006.1 | 18.3870747 | 3631.537707 | 0.0051 | 0.996 | 1.79E-08 | count | 1 |
| TMEM232    | 18.387075  | 3631.537617 | 0.0051 | 0.996 | 1.79E-08 | count | 1 |
| TSLP       | 18.3870747 | 3631.537707 | 0.0051 | 0.996 | 1.79E-08 | count | 1 |
| NPM2       | 18.3870748 | 3631.537483 | 0.0051 | 0.996 | 1.79E-08 | count | 1 |
| NKX3-1     | 18.387075  | 3631.537729 | 0.0051 | 0.996 | 1.79E-08 | count | 1 |
| STK3       | 18.387075  | 3631.537729 | 0.0051 | 0.996 | 1.79E-08 | count | 1 |
| ANKRD20A2  | 18.3870747 | 3631.537707 | 0.0051 | 0.996 | 1.79E-08 | count | 1 |
| AC084337.2 | 18.387075  | 3631.537729 | 0.0051 | 0.996 | 1.79E-08 | count | 1 |
| AP001267.1 | 18.387075  | 3631.537617 | 0.0051 | 0.996 | 1.79E-08 | count | 1 |
| AP003486.1 | 18.387075  | 3631.537729 | 0.0051 | 0.996 | 1.79E-08 | count | 1 |
| AC073389.1 | 18.387075  | 3631.537617 | 0.0051 | 0.996 | 1.79E-08 | count | 1 |
| AC068888.1 | 18.387075  | 3631.537617 | 0.0051 | 0.996 | 1.79E-08 | count | 1 |
| LINC01465  | 18.387075  | 3631.537617 | 0.0051 | 0.996 | 1.79E-08 | count | 1 |
| ATXN2-AS   | 18.387075  | 3631.537617 | 0.0051 | 0.996 | 1.79E-08 | count | 1 |
| DIABLO     | 18.3870748 | 3631.537483 | 0.0051 | 0.996 | 1.79E-08 | count | 1 |
| ABCB9      | 18.387075  | 3631.537617 | 0.0051 | 0.996 | 1.79E-08 | count | 1 |
| AC073911.1 | 18.3870748 | 3631.537483 | 0.0051 | 0.996 | 1.79E-08 | count | 1 |
| LINC01198  | 18.387075  | 3631.537617 | 0.0051 | 0.996 | 1.79E-08 | count | 1 |
| C15orf53   | 18.387075  | 3631.537617 | 0.0051 | 0.996 | 1.79E-08 | count | 1 |
| AC020659.1 | 18.387075  | 3631.537617 | 0.0051 | 0.996 | 1.79E-08 | count | 1 |
| AC025219.1 | 18.3870747 | 3631.537707 | 0.0051 | 0.996 | 1.79E-08 | count | 1 |
| CRNDE      | 18.387075  | 3631.537617 | 0.0051 | 0.996 | 1.79E-08 | count | 1 |
| PIGW       | 18.3870748 | 3631.537483 | 0.0051 | 0.996 | 1.79E-08 | count | 1 |
| AC142472.1 | 18.3870748 | 3631.537483 | 0.0051 | 0.996 | 1.79E-08 | count | 1 |
| LKAAEAR1   | 18.3870748 | 3631.537483 | 0.0051 | 0.996 | 1.79E-08 | count | 1 |
| C19orf47   | 18.3870747 | 3631.537707 | 0.0051 | 0.996 | 1.79E-08 | count | 1 |
| RNF215     | 18.387075  | 3631.537729 | 0.0051 | 0.996 | 1.79E-08 | count | 1 |
| AL353622.1 | 18.3870749 | 3631.537774 | 0.0051 | 0.996 | 1.79E-08 | count | 1 |
| RWDD3      | 18.3870748 | 3631.537595 | 0.0051 | 0.996 | 1.79E-08 | count | 1 |
| ZNF662     | 18.3870747 | 3631.53755  | 0.0051 | 0.996 | 1.79E-08 | count | 1 |
| MCM2       | 18.3870749 | 3631.537774 | 0.0051 | 0.996 | 1.79E-08 | count | 1 |
| ABCG2      | 18.3870748 | 3631.537595 | 0.0051 | 0.996 | 1.79E-08 | count | 1 |
| AC096711.2 | 18.3870748 | 3631.537595 | 0.0051 | 0.996 | 1.79E-08 | count | 1 |
| HIST1H3H   | 18.3870747 | 3631.53755  | 0.0051 | 0.996 | 1.79E-08 | count | 1 |
| UNC5CL     | 18.3870747 | 3631.53755  | 0.0051 | 0.996 | 1.79E-08 | count | 1 |
| AL135905.1 | 18.3870748 | 3631.537595 | 0.0051 | 0.996 | 1.79E-08 | count | 1 |
| AC072061.1 | 18.3870748 | 3631.537595 | 0.0051 | 0.996 | 1.79E-08 | count | 1 |
| ZNF777     | 18.3870747 | 3631.53755  | 0.0051 | 0.996 | 1.79E-08 | count | 1 |
| MBTPS2     | 18.3870748 | 3631.537595 | 0.0051 | 0.996 | 1.79E-08 | count | 1 |
| IFITM10    | 18.3870747 | 3631.53755  | 0.0051 | 0.996 | 1.79E-08 | count | 1 |
| AC127164.1 | 18.3870749 | 3631.537774 | 0.0051 | 0.996 | 1.79E-08 | count | 1 |

|            |            |             |        |       |          |       |   |
|------------|------------|-------------|--------|-------|----------|-------|---|
| TRAV36DV7  | 18.3870747 | 3631.53755  | 0.0051 | 0.996 | 1.79E-08 | count | 1 |
| AC025580.3 | 18.3870749 | 3631.537774 | 0.0051 | 0.996 | 1.79E-08 | count | 1 |
| PRSS27     | 18.3870748 | 3631.537595 | 0.0051 | 0.996 | 1.79E-08 | count | 1 |
| AC092117.1 | 18.3870748 | 3631.537595 | 0.0051 | 0.996 | 1.79E-08 | count | 1 |
| GNAO1      | 18.3870748 | 3631.537595 | 0.0051 | 0.996 | 1.79E-08 | count | 1 |
| AL049712.1 | 18.3870747 | 3631.53755  | 0.0051 | 0.996 | 1.79E-08 | count | 1 |
| DLGAP4-AS1 | 18.3870747 | 3631.53755  | 0.0051 | 0.996 | 1.79E-08 | count | 1 |
| AC022098.4 | 18.3870747 | 3631.53755  | 0.0051 | 0.996 | 1.79E-08 | count | 1 |
| AC011462.1 | 18.3870747 | 3631.53755  | 0.0051 | 0.996 | 1.79E-08 | count | 1 |
| ZNF526     | 18.3870747 | 3631.53755  | 0.0051 | 0.996 | 1.79E-08 | count | 1 |
| CNFN       | 18.3870747 | 3631.53755  | 0.0051 | 0.996 | 1.79E-08 | count | 1 |
| CPLANE2    | 18.3870748 | 3631.537639 | 0.0051 | 0.996 | 1.79E-08 | count | 1 |
| ZFP69      | 18.3870748 | 3631.537483 | 0.0051 | 0.996 | 1.79E-08 | count | 1 |
| ACOXL      | 18.3870748 | 3631.537639 | 0.0051 | 0.996 | 1.79E-08 | count | 1 |
| PPM1L      | 18.3870749 | 3631.537528 | 0.0051 | 0.996 | 1.79E-08 | count | 1 |
| HIST1H2AH  | 18.3870749 | 3631.537528 | 0.0051 | 0.996 | 1.79E-08 | count | 1 |
| SLC29A1    | 18.3870748 | 3631.537639 | 0.0051 | 0.996 | 1.79E-08 | count | 1 |
| RPS6KA2    | 18.3870748 | 3631.537639 | 0.0051 | 0.996 | 1.79E-08 | count | 1 |
| RBAK       | 18.3870748 | 3631.537639 | 0.0051 | 0.996 | 1.79E-08 | count | 1 |
| TSPAN13    | 18.3870748 | 3631.537639 | 0.0051 | 0.996 | 1.79E-08 | count | 1 |
| HEPH       | 18.3870748 | 3631.537483 | 0.0051 | 0.996 | 1.79E-08 | count | 1 |
| NUGGC      | 18.3870748 | 3631.537639 | 0.0051 | 0.996 | 1.79E-08 | count | 1 |
| GLIS3      | 18.3870749 | 3631.537528 | 0.0051 | 0.996 | 1.79E-08 | count | 1 |
| TNC        | 18.3870748 | 3631.537483 | 0.0051 | 0.996 | 1.79E-08 | count | 1 |
| AP000787.1 | 18.3870748 | 3631.537483 | 0.0051 | 0.996 | 1.79E-08 | count | 1 |
| AP003392.6 | 18.3870748 | 3631.537483 | 0.0051 | 0.996 | 1.79E-08 | count | 1 |
| AL512598.1 | 18.3870748 | 3631.537483 | 0.0051 | 0.996 | 1.79E-08 | count | 1 |
| TPCN1      | 18.3870748 | 3631.537639 | 0.0051 | 0.996 | 1.79E-08 | count | 1 |
| MMP14      | 18.3870748 | 3631.537639 | 0.0051 | 0.996 | 1.79E-08 | count | 1 |
| HIF1A-AS2  | 18.3870748 | 3631.537483 | 0.0051 | 0.996 | 1.79E-08 | count | 1 |
| VASH1      | 18.3870748 | 3631.537483 | 0.0051 | 0.996 | 1.79E-08 | count | 1 |
| SENP8      | 18.3870748 | 3631.537483 | 0.0051 | 0.996 | 1.79E-08 | count | 1 |
| PRR11      | 18.3870748 | 3631.537639 | 0.0051 | 0.996 | 1.79E-08 | count | 1 |
| AC132872.2 | 18.3870748 | 3631.537639 | 0.0051 | 0.996 | 1.79E-08 | count | 1 |
| AC022726.2 | 18.3870748 | 3631.537639 | 0.0051 | 0.996 | 1.79E-08 | count | 1 |
| APOL4      | 18.3870748 | 3631.537639 | 0.0051 | 0.996 | 1.79E-08 | count | 1 |
| NPTXR      | 18.3870748 | 3631.537639 | 0.0051 | 0.996 | 1.79E-08 | count | 1 |
| AC011043.1 | 18.3870748 | 3631.537639 | 0.0051 | 0.996 | 1.79E-08 | count | 1 |
| WDPCP      | 18.3870746 | 3631.537505 | 0.0051 | 0.996 | 1.79E-08 | count | 1 |
| ABHD18     | 18.3870748 | 3631.537505 | 0.0051 | 0.996 | 1.79E-08 | count | 1 |
| TONSL      | 18.3870746 | 3631.537505 | 0.0051 | 0.996 | 1.79E-08 | count | 1 |
| AL354733.3 | 18.3870748 | 3631.537505 | 0.0051 | 0.996 | 1.79E-08 | count | 1 |
| ZNF365     | 18.3870748 | 3631.537505 | 0.0051 | 0.996 | 1.79E-08 | count | 1 |
| POLE2      | 18.3870748 | 3631.537505 | 0.0051 | 0.996 | 1.79E-08 | count | 1 |
| AC003102.1 | 18.3870746 | 3631.537505 | 0.0051 | 0.996 | 1.79E-08 | count | 1 |

|            |            |             |        |       |          |       |   |
|------------|------------|-------------|--------|-------|----------|-------|---|
| AL357033.4 | 18.3870746 | 3631.537505 | 0.0051 | 0.996 | 1.79E-08 | count | 1 |
| AC098484.2 | 18.3870748 | 3631.537639 | 0.0051 | 0.996 | 1.79E-08 | count | 1 |
| AC099063.4 | 18.3870748 | 3631.537639 | 0.0051 | 0.996 | 1.79E-08 | count | 1 |
| KIF14      | 18.3870746 | 3631.537505 | 0.0051 | 0.996 | 1.79E-08 | count | 1 |
| AC092803.2 | 18.3870746 | 3631.537505 | 0.0051 | 0.996 | 1.79E-08 | count | 1 |
| ALS2       | 18.3870743 | 3631.537729 | 0.0051 | 0.996 | 1.79E-08 | count | 1 |
| AC099778.1 | 18.3870746 | 3631.537505 | 0.0051 | 0.996 | 1.79E-08 | count | 1 |
| LNP1       | 18.3870746 | 3631.537505 | 0.0051 | 0.996 | 1.79E-08 | count | 1 |
| RAB6B      | 18.3870743 | 3631.537729 | 0.0051 | 0.996 | 1.79E-08 | count | 1 |
| TRIP13     | 18.3870746 | 3631.537505 | 0.0051 | 0.996 | 1.79E-08 | count | 1 |
| HIST1H3E   | 18.3870746 | 3631.537505 | 0.0051 | 0.996 | 1.79E-08 | count | 1 |
| DDO        | 18.3870746 | 3631.537505 | 0.0051 | 0.996 | 1.79E-08 | count | 1 |
| CAHM       | 18.3870746 | 3631.537505 | 0.0051 | 0.996 | 1.79E-08 | count | 1 |
| TTC26      | 18.3870746 | 3631.537505 | 0.0051 | 0.996 | 1.79E-08 | count | 1 |
| SAMD12     | 18.3870746 | 3631.537528 | 0.0051 | 0.996 | 1.79E-08 | count | 1 |
| ADGRB1     | 18.3870748 | 3631.537639 | 0.0051 | 0.996 | 1.79E-08 | count | 1 |
| CDC37L1-DT | 18.3870746 | 3631.537528 | 0.0051 | 0.996 | 1.79E-08 | count | 1 |
| ANKRD20A4  | 18.3870748 | 3631.537639 | 0.0051 | 0.996 | 1.79E-08 | count | 1 |
| AC011611.4 | 18.3870746 | 3631.537505 | 0.0051 | 0.996 | 1.79E-08 | count | 1 |
| HCAR1      | 18.3870746 | 3631.537505 | 0.0051 | 0.996 | 1.79E-08 | count | 1 |
| RBM26-AS1  | 18.3870746 | 3631.537528 | 0.0051 | 0.996 | 1.79E-08 | count | 1 |
| TMED8      | 18.3870746 | 3631.537505 | 0.0051 | 0.996 | 1.79E-08 | count | 1 |
| SERPINA11  | 18.3870746 | 3631.537528 | 0.0051 | 0.996 | 1.79E-08 | count | 1 |
| HEXA-AS1   | 18.3870748 | 3631.537639 | 0.0051 | 0.996 | 1.79E-08 | count | 1 |
| ARRDC4     | 18.3870748 | 3631.537639 | 0.0051 | 0.996 | 1.79E-08 | count | 1 |
| CDR2L      | 18.3870746 | 3631.537528 | 0.0051 | 0.996 | 1.79E-08 | count | 1 |
| RBFADN     | 18.3870746 | 3631.537505 | 0.0051 | 0.996 | 1.79E-08 | count | 1 |
| ZNF555     | 18.3870748 | 3631.537639 | 0.0051 | 0.996 | 1.79E-08 | count | 1 |
| ZNF233     | 18.3870743 | 3631.537729 | 0.0051 | 0.996 | 1.79E-08 | count | 1 |
| AP001437.1 | 18.3870748 | 3631.537639 | 0.0051 | 0.996 | 1.79E-08 | count | 1 |
| AL606491.1 | 18.3870746 | 3631.537416 | 0.0051 | 0.996 | 1.79E-08 | count | 1 |
| MEIS1      | 18.3870746 | 3631.537416 | 0.0051 | 0.996 | 1.79E-08 | count | 1 |
| FHL2       | 18.3870744 | 3631.537639 | 0.0051 | 0.996 | 1.79E-08 | count | 1 |
| AC005037.1 | 18.3870745 | 3631.537662 | 0.0051 | 0.996 | 1.79E-08 | count | 1 |
| EFCC1      | 18.3870744 | 3631.537639 | 0.0051 | 0.996 | 1.79E-08 | count | 1 |
| TRGV2      | 18.3870745 | 3631.537662 | 0.0051 | 0.996 | 1.79E-08 | count | 1 |
| ZMAT4      | 18.3870746 | 3631.537416 | 0.0051 | 0.996 | 1.79E-08 | count | 1 |
| AL354920.1 | 18.3870746 | 3631.537416 | 0.0051 | 0.996 | 1.79E-08 | count | 1 |
| RNF141     | 18.3870744 | 3631.537528 | 0.0051 | 0.996 | 1.79E-08 | count | 1 |
| CAPN5      | 18.3870745 | 3631.537662 | 0.0051 | 0.996 | 1.79E-08 | count | 1 |
| DIXDC1     | 18.3870745 | 3631.537662 | 0.0051 | 0.996 | 1.79E-08 | count | 1 |
| AC010864.1 | 18.3870745 | 3631.537662 | 0.0051 | 0.996 | 1.79E-08 | count | 1 |
| AC067750.1 | 18.3870745 | 3631.537662 | 0.0051 | 0.996 | 1.79E-08 | count | 1 |
| LAG3       | 18.3870744 | 3631.537528 | 0.0051 | 0.996 | 1.79E-08 | count | 1 |
| RERGL      | 18.3870744 | 3631.537639 | 0.0051 | 0.996 | 1.79E-08 | count | 1 |

|             |            |             |        |       |          |       |   |
|-------------|------------|-------------|--------|-------|----------|-------|---|
| LINC02323   | 18.3870746 | 3631.537416 | 0.0051 | 0.996 | 1.79E-08 | count | 1 |
| ZNF768      | 18.3870744 | 3631.537639 | 0.0051 | 0.996 | 1.79E-08 | count | 1 |
| AC123912.4  | 18.3870746 | 3631.537416 | 0.0051 | 0.996 | 1.79E-08 | count | 1 |
| GCAT        | 18.3870746 | 3631.537416 | 0.0051 | 0.996 | 1.79E-08 | count | 1 |
| WBP2NL      | 18.3870744 | 3631.537639 | 0.0051 | 0.996 | 1.79E-08 | count | 1 |
| MAP3K7CL    | 18.3870744 | 3631.537639 | 0.0051 | 0.996 | 1.79E-08 | count | 1 |
| BCAN        | 18.3870746 | 3631.537595 | 0.0051 | 0.996 | 1.79E-08 | count | 1 |
| LAMP3       | 18.3870746 | 3631.537595 | 0.0051 | 0.996 | 1.79E-08 | count | 1 |
| AL137003.1  | 18.3870746 | 3631.537595 | 0.0051 | 0.996 | 1.79E-08 | count | 1 |
| ACTR3C      | 18.3870746 | 3631.537595 | 0.0051 | 0.996 | 1.79E-08 | count | 1 |
| FAM168A     | 18.3870746 | 3631.537595 | 0.0051 | 0.996 | 1.79E-08 | count | 1 |
| AC005840.4  | 18.3870746 | 3631.537595 | 0.0051 | 0.996 | 1.79E-08 | count | 1 |
| ISLR        | 18.3870746 | 3631.537595 | 0.0051 | 0.996 | 1.79E-08 | count | 1 |
| CEACAM1     | 18.3870746 | 3631.537595 | 0.0051 | 0.996 | 1.79E-08 | count | 1 |
| APOBEC3A    | 18.3870746 | 3631.537595 | 0.0051 | 0.996 | 1.79E-08 | count | 1 |
| CRYBG2      | 18.3870746 | 3631.537572 | 0.0051 | 0.996 | 1.79E-08 | count | 1 |
| NFYC-AS1    | 18.3870744 | 3631.537438 | 0.0051 | 0.996 | 1.79E-08 | count | 1 |
| ECM1        | 18.3870744 | 3631.537371 | 0.0051 | 0.996 | 1.79E-08 | count | 1 |
| C2orf81     | 18.3870744 | 3631.537371 | 0.0051 | 0.996 | 1.79E-08 | count | 1 |
| EPB41L5     | 18.3870744 | 3631.537371 | 0.0051 | 0.996 | 1.79E-08 | count | 1 |
| USP40       | 18.3870743 | 3631.537393 | 0.0051 | 0.996 | 1.79E-08 | count | 1 |
| AC105760.2  | 18.3870746 | 3631.537572 | 0.0051 | 0.996 | 1.79E-08 | count | 1 |
| AC106707.1  | 18.3870743 | 3631.537393 | 0.0051 | 0.996 | 1.79E-08 | count | 1 |
| MCF2L2      | 18.3870744 | 3631.537371 | 0.0051 | 0.996 | 1.79E-08 | count | 1 |
| AL008729.2  | 18.3870744 | 3631.537438 | 0.0051 | 0.996 | 1.79E-08 | count | 1 |
| IGFBP3      | 18.3870746 | 3631.537572 | 0.0051 | 0.996 | 1.79E-08 | count | 1 |
| TRBV10-2    | 18.3870746 | 3631.537572 | 0.0051 | 0.996 | 1.79E-08 | count | 1 |
| OR2A1-AS1   | 18.3870743 | 3631.537393 | 0.0051 | 0.996 | 1.79E-08 | count | 1 |
| GPR173      | 18.3870745 | 3631.537729 | 0.0051 | 0.996 | 1.79E-08 | count | 1 |
| TSIX        | 18.3870746 | 3631.537572 | 0.0051 | 0.996 | 1.79E-08 | count | 1 |
| PYCR3       | 18.3870743 | 3631.537393 | 0.0051 | 0.996 | 1.79E-08 | count | 1 |
| NACC2       | 18.3870746 | 3631.537572 | 0.0051 | 0.996 | 1.79E-08 | count | 1 |
| AC103736.1  | 18.3870743 | 3631.537393 | 0.0051 | 0.996 | 1.79E-08 | count | 1 |
| AP000442.2  | 18.3870744 | 3631.537371 | 0.0051 | 0.996 | 1.79E-08 | count | 1 |
| RHOD        | 18.3870744 | 3631.537371 | 0.0051 | 0.996 | 1.79E-08 | count | 1 |
| AP000802.1  | 18.3870743 | 3631.537393 | 0.0051 | 0.996 | 1.79E-08 | count | 1 |
| TMEM136     | 18.3870744 | 3631.537371 | 0.0051 | 0.996 | 1.79E-08 | count | 1 |
| ASAH2       | 18.3870744 | 3631.537371 | 0.0051 | 0.996 | 1.79E-08 | count | 1 |
| ARHGAP19    | 18.3870744 | 3631.537438 | 0.0051 | 0.996 | 1.79E-08 | count | 1 |
| DPCD        | 18.3870743 | 3631.537393 | 0.0051 | 0.996 | 1.79E-08 | count | 1 |
| SUFU        | 18.3870743 | 3631.537393 | 0.0051 | 0.996 | 1.79E-08 | count | 1 |
| CLEC12A-AS1 | 18.3870744 | 3631.537438 | 0.0051 | 0.996 | 1.79E-08 | count | 1 |
| GLIPR1L2    | 18.3870746 | 3631.537572 | 0.0051 | 0.996 | 1.79E-08 | count | 1 |
| CEP83-DT    | 18.3870745 | 3631.537729 | 0.0051 | 0.996 | 1.79E-08 | count | 1 |
| AMDHD1      | 18.3870743 | 3631.537393 | 0.0051 | 0.996 | 1.79E-08 | count | 1 |



|             |            |             |        |       |          |       |   |
|-------------|------------|-------------|--------|-------|----------|-------|---|
| SLC25A30    | 18.3870744 | 3631.537371 | 0.0051 | 0.996 | 1.79E-08 | count | 1 |
| DNAJA4      | 18.3870745 | 3631.537729 | 0.0051 | 0.996 | 1.79E-08 | count | 1 |
| KRBA2       | 18.3870744 | 3631.537371 | 0.0051 | 0.996 | 1.79E-08 | count | 1 |
| AC087741.1  | 18.3870746 | 3631.537572 | 0.0051 | 0.996 | 1.79E-08 | count | 1 |
| AC027575.2  | 18.3870744 | 3631.537371 | 0.0051 | 0.996 | 1.79E-08 | count | 1 |
| AL035563.1  | 18.3870743 | 3631.537393 | 0.0051 | 0.996 | 1.79E-08 | count | 1 |
| LINC01597   | 18.3870744 | 3631.537371 | 0.0051 | 0.996 | 1.79E-08 | count | 1 |
| AL031663.3  | 18.3870746 | 3631.537572 | 0.0051 | 0.996 | 1.79E-08 | count | 1 |
| ADGRL1      | 18.3870743 | 3631.537393 | 0.0051 | 0.996 | 1.79E-08 | count | 1 |
| SLC5A5      | 18.3870746 | 3631.537572 | 0.0051 | 0.996 | 1.79E-08 | count | 1 |
| AC020928.2  | 18.3870744 | 3631.537371 | 0.0051 | 0.996 | 1.79E-08 | count | 1 |
| SRRM5       | 18.3870746 | 3631.537572 | 0.0051 | 0.996 | 1.79E-08 | count | 1 |
| SPIB        | 18.3870744 | 3631.537371 | 0.0051 | 0.996 | 1.79E-08 | count | 1 |
| Z83847.1    | 18.3870745 | 3631.537729 | 0.0051 | 0.996 | 1.79E-08 | count | 1 |
| AF165147.1  | 18.3870744 | 3631.537371 | 0.0051 | 0.996 | 1.79E-08 | count | 1 |
| CNIH3       | 18.9784852 | 1910.358008 | 0.0099 | 0.992 | 1.81E-08 | count | 1 |
| TTL         | 18.9784852 | 1910.358008 | 0.0099 | 0.992 | 1.81E-08 | count | 1 |
| AC132192.2  | 18.9784852 | 1910.358008 | 0.0099 | 0.992 | 1.81E-08 | count | 1 |
| ANKRD34A    | 18.9784852 | 1910.357976 | 0.0099 | 0.992 | 1.81E-08 | count | 1 |
| RHOU        | 18.9784852 | 1910.357976 | 0.0099 | 0.992 | 1.81E-08 | count | 1 |
| MSH5-SAPCD1 | 18.9784852 | 1910.357976 | 0.0099 | 0.992 | 1.81E-08 | count | 1 |
| TMEM67      | 18.9784852 | 1910.357976 | 0.0099 | 0.992 | 1.81E-08 | count | 1 |
| TTC16       | 18.9784852 | 1910.357976 | 0.0099 | 0.992 | 1.81E-08 | count | 1 |
| MOCOS       | 18.9784852 | 1910.357976 | 0.0099 | 0.992 | 1.81E-08 | count | 1 |
| AC093227.1  | 18.9784852 | 1910.357976 | 0.0099 | 0.992 | 1.81E-08 | count | 1 |
| LEXM        | 18.9784852 | 1910.357932 | 0.0099 | 0.992 | 1.81E-08 | count | 1 |
| AC098936.1  | 18.978485  | 1910.357845 | 0.0099 | 0.992 | 1.81E-08 | count | 1 |
| KIF9        | 18.9784852 | 1910.357932 | 0.0099 | 0.992 | 1.81E-08 | count | 1 |
| CCDC39      | 18.9784852 | 1910.357932 | 0.0099 | 0.992 | 1.81E-08 | count | 1 |
| AL365205.1  | 18.978485  | 1910.357845 | 0.0099 | 0.992 | 1.81E-08 | count | 1 |
| AL359711.2  | 18.9784852 | 1910.357932 | 0.0099 | 0.992 | 1.81E-08 | count | 1 |
| AGBL3       | 18.9784852 | 1910.357932 | 0.0099 | 0.992 | 1.81E-08 | count | 1 |
| GFI1B       | 18.9784852 | 1910.357932 | 0.0099 | 0.992 | 1.81E-08 | count | 1 |
| FCN1        | 18.9784852 | 1910.357932 | 0.0099 | 0.992 | 1.81E-08 | count | 1 |
| CCDC87      | 18.9784852 | 1910.357932 | 0.0099 | 0.992 | 1.81E-08 | count | 1 |
| FAR2        | 18.9784852 | 1910.357932 | 0.0099 | 0.992 | 1.81E-08 | count | 1 |
| DCN         | 18.9784852 | 1910.357932 | 0.0099 | 0.992 | 1.81E-08 | count | 1 |
| KTN1-AS1    | 18.9784852 | 1910.357932 | 0.0099 | 0.992 | 1.81E-08 | count | 1 |
| TTC7B       | 18.9784852 | 1910.357932 | 0.0099 | 0.992 | 1.81E-08 | count | 1 |
| TMEM106A    | 18.9784852 | 1910.357932 | 0.0099 | 0.992 | 1.81E-08 | count | 1 |
| HSF5        | 18.9784852 | 1910.357932 | 0.0099 | 0.992 | 1.81E-08 | count | 1 |
| AC100786.1  | 18.978485  | 1910.357845 | 0.0099 | 0.992 | 1.81E-08 | count | 1 |
| AC144831.1  | 18.9784852 | 1910.357932 | 0.0099 | 0.992 | 1.81E-08 | count | 1 |
| GREM2       | 18.978485  | 1910.357987 | 0.0099 | 0.992 | 1.81E-08 | count | 1 |
| AC012368.1  | 18.9784851 | 1910.357856 | 0.0099 | 0.992 | 1.81E-08 | count | 1 |

|            |            |             |        |       |          |       |   |
|------------|------------|-------------|--------|-------|----------|-------|---|
| C2orf15    | 18.978485  | 1910.357987 | 0.0099 | 0.992 | 1.81E-08 | count | 1 |
| MARS2      | 18.978485  | 1910.357987 | 0.0099 | 0.992 | 1.81E-08 | count | 1 |
| AL035701.1 | 18.978485  | 1910.357987 | 0.0099 | 0.992 | 1.81E-08 | count | 1 |
| FAM24B     | 18.978485  | 1910.357987 | 0.0099 | 0.992 | 1.81E-08 | count | 1 |
| AL359317.2 | 18.9784851 | 1910.357856 | 0.0099 | 0.992 | 1.81E-08 | count | 1 |
| C15orf65   | 18.978485  | 1910.357987 | 0.0099 | 0.992 | 1.81E-08 | count | 1 |
| TRIM72     | 18.978485  | 1910.357987 | 0.0099 | 0.992 | 1.81E-08 | count | 1 |
| MFSD6L     | 18.9784851 | 1910.357856 | 0.0099 | 0.992 | 1.81E-08 | count | 1 |
| AC103810.2 | 18.978485  | 1910.357987 | 0.0099 | 0.992 | 1.81E-08 | count | 1 |
| C1QTNF12   | 18.9784848 | 1910.357976 | 0.0099 | 0.992 | 1.81E-08 | count | 1 |
| AL139289.2 | 18.9784848 | 1910.357976 | 0.0099 | 0.992 | 1.81E-08 | count | 1 |
| RTL5       | 18.9784848 | 1910.357976 | 0.0099 | 0.992 | 1.81E-08 | count | 1 |
| LINC00630  | 18.9784848 | 1910.357976 | 0.0099 | 0.992 | 1.81E-08 | count | 1 |
| RFX3-AS1   | 18.9784848 | 1910.357976 | 0.0099 | 0.992 | 1.81E-08 | count | 1 |
| GARNL3     | 18.9784848 | 1910.357976 | 0.0099 | 0.992 | 1.81E-08 | count | 1 |
| HARBI1     | 18.9784848 | 1910.357976 | 0.0099 | 0.992 | 1.81E-08 | count | 1 |
| ATP6V0C    | 18.9784848 | 1910.357976 | 0.0099 | 0.992 | 1.81E-08 | count | 1 |
| PRR22      | 18.9784848 | 1910.357976 | 0.0099 | 0.992 | 1.81E-08 | count | 1 |
| AC010487.2 | 18.9784848 | 1910.357976 | 0.0099 | 0.992 | 1.81E-08 | count | 1 |
| C19orf18   | 18.9784848 | 1910.357976 | 0.0099 | 0.992 | 1.81E-08 | count | 1 |
| TCEANC2    | 18.9784848 | 1910.358052 | 0.0099 | 0.992 | 1.81E-08 | count | 1 |
| TPRG1      | 18.9784848 | 1910.358052 | 0.0099 | 0.992 | 1.81E-08 | count | 1 |
| CDC14B     | 18.9784848 | 1910.358052 | 0.0099 | 0.992 | 1.81E-08 | count | 1 |
| EGLN2      | 18.9784848 | 1910.358052 | 0.0099 | 0.992 | 1.81E-08 | count | 1 |
| AC008040.5 | 18.9784847 | 1910.357921 | 0.0099 | 0.992 | 1.81E-08 | count | 1 |
| SCRG1      | 18.9784847 | 1910.357921 | 0.0099 | 0.992 | 1.81E-08 | count | 1 |
| AC008549.2 | 18.9784847 | 1910.357921 | 0.0099 | 0.992 | 1.81E-08 | count | 1 |
| PVRIG      | 18.9784849 | 1910.357965 | 0.0099 | 0.992 | 1.81E-08 | count | 1 |
| FAM131B    | 18.9784849 | 1910.357965 | 0.0099 | 0.992 | 1.81E-08 | count | 1 |
| PDGFRL     | 18.9784849 | 1910.357965 | 0.0099 | 0.992 | 1.81E-08 | count | 1 |
| PLCB3      | 18.9784849 | 1910.357965 | 0.0099 | 0.992 | 1.81E-08 | count | 1 |
| ANK3       | 18.9784847 | 1910.357921 | 0.0099 | 0.992 | 1.81E-08 | count | 1 |
| ENTPD7     | 18.9784849 | 1910.357965 | 0.0099 | 0.992 | 1.81E-08 | count | 1 |
| CLECL1     | 18.9784849 | 1910.357965 | 0.0099 | 0.992 | 1.81E-08 | count | 1 |
| SCARB1     | 18.9784847 | 1910.357921 | 0.0099 | 0.992 | 1.81E-08 | count | 1 |
| CCDC198    | 18.9784847 | 1910.357921 | 0.0099 | 0.992 | 1.81E-08 | count | 1 |
| AC116913.1 | 18.9784847 | 1910.357921 | 0.0099 | 0.992 | 1.81E-08 | count | 1 |
| LINC01569  | 18.9784847 | 1910.357921 | 0.0099 | 0.992 | 1.81E-08 | count | 1 |
| PLEKHG4    | 18.9784849 | 1910.357965 | 0.0099 | 0.992 | 1.81E-08 | count | 1 |
| ZNF418     | 18.9784849 | 1910.357965 | 0.0099 | 0.992 | 1.81E-08 | count | 1 |
| AL137802.2 | 18.9784848 | 1910.357867 | 0.0099 | 0.992 | 1.81E-08 | count | 1 |
| UBXN10-AS1 | 18.9784847 | 1910.357899 | 0.0099 | 0.992 | 1.81E-08 | count | 1 |
| NBPF12     | 18.9784847 | 1910.357899 | 0.0099 | 0.992 | 1.81E-08 | count | 1 |
| RGS13      | 18.978485  | 1910.35803  | 0.0099 | 0.992 | 1.81E-08 | count | 1 |
| TRIM17     | 18.9784848 | 1910.357867 | 0.0099 | 0.992 | 1.81E-08 | count | 1 |

|              |            |             |        |       |          |       |   |
|--------------|------------|-------------|--------|-------|----------|-------|---|
| CD86         | 18.978485  | 1910.35803  | 0.0099 | 0.992 | 1.81E-08 | count | 1 |
| MELTF-AS1    | 18.9784848 | 1910.357867 | 0.0099 | 0.992 | 1.81E-08 | count | 1 |
| CCDC96       | 18.978485  | 1910.35803  | 0.0099 | 0.992 | 1.81E-08 | count | 1 |
| LNx1         | 18.9784848 | 1910.357867 | 0.0099 | 0.992 | 1.81E-08 | count | 1 |
| TNRC18       | 18.9784848 | 1910.357867 | 0.0099 | 0.992 | 1.81E-08 | count | 1 |
| CLIP2        | 18.9784848 | 1910.357867 | 0.0099 | 0.992 | 1.81E-08 | count | 1 |
| ADAM9        | 18.9784847 | 1910.357899 | 0.0099 | 0.992 | 1.81E-08 | count | 1 |
| LACC1        | 18.9784847 | 1910.357899 | 0.0099 | 0.992 | 1.81E-08 | count | 1 |
| AL049840.2   | 18.9784847 | 1910.357899 | 0.0099 | 0.992 | 1.81E-08 | count | 1 |
| ADSSL1       | 18.9784847 | 1910.357899 | 0.0099 | 0.992 | 1.81E-08 | count | 1 |
| LINC00235    | 18.9784848 | 1910.357867 | 0.0099 | 0.992 | 1.81E-08 | count | 1 |
| AC011933.4   | 18.9784848 | 1910.357867 | 0.0099 | 0.992 | 1.81E-08 | count | 1 |
| KCNN1        | 18.9784847 | 1910.357899 | 0.0099 | 0.992 | 1.81E-08 | count | 1 |
| LINC01393    | 18.9784847 | 1910.35803  | 0.0099 | 0.992 | 1.81E-08 | count | 1 |
| PRICKLE3     | 18.9784847 | 1910.35803  | 0.0099 | 0.992 | 1.81E-08 | count | 1 |
| STAM-AS1     | 18.9784847 | 1910.35803  | 0.0099 | 0.992 | 1.81E-08 | count | 1 |
| ZC2HC1C      | 18.9784847 | 1910.35803  | 0.0099 | 0.992 | 1.81E-08 | count | 1 |
| ZNF319       | 18.9784847 | 1910.35803  | 0.0099 | 0.992 | 1.81E-08 | count | 1 |
| SLC12A4      | 18.9784847 | 1910.35803  | 0.0099 | 0.992 | 1.81E-08 | count | 1 |
| LINC01572    | 18.9784847 | 1910.35803  | 0.0099 | 0.992 | 1.81E-08 | count | 1 |
| CRB3         | 18.9784847 | 1910.35803  | 0.0099 | 0.992 | 1.81E-08 | count | 1 |
| FRMPD3       | 19.6498981 | 2672.454325 | 0.0074 | 0.994 | 1.81E-08 | count | 1 |
| PDZD7        | 19.6498981 | 2672.454325 | 0.0074 | 0.994 | 1.81E-08 | count | 1 |
| AC009318.3   | 19.6498981 | 2672.454325 | 0.0074 | 0.994 | 1.81E-08 | count | 1 |
| HSD17B6      | 19.6498981 | 2672.454325 | 0.0074 | 0.994 | 1.81E-08 | count | 1 |
| PDE6A        | 19.6498978 | 2672.454354 | 0.0074 | 0.994 | 1.81E-08 | count | 1 |
| HPSE         | 19.6498979 | 2672.454354 | 0.0074 | 0.994 | 1.81E-08 | count | 1 |
| HIST1H4A     | 19.6498979 | 2672.454354 | 0.0074 | 0.994 | 1.81E-08 | count | 1 |
| FBXL18       | 19.6498979 | 2672.454354 | 0.0074 | 0.994 | 1.81E-08 | count | 1 |
| ATP6V0E2-AS1 | 19.6498979 | 2672.454354 | 0.0074 | 0.994 | 1.81E-08 | count | 1 |
| SNX30        | 19.6498979 | 2672.454354 | 0.0074 | 0.994 | 1.81E-08 | count | 1 |
| PDE2A        | 19.6498979 | 2672.454354 | 0.0074 | 0.994 | 1.81E-08 | count | 1 |
| AL355490.2   | 19.6498979 | 2672.454354 | 0.0074 | 0.994 | 1.81E-08 | count | 1 |
| ADAM21       | 19.6498979 | 2672.454354 | 0.0074 | 0.994 | 1.81E-08 | count | 1 |
| AC009093.2   | 19.6498979 | 2672.454354 | 0.0074 | 0.994 | 1.81E-08 | count | 1 |
| HOXB7        | 19.6498979 | 2672.454354 | 0.0074 | 0.994 | 1.81E-08 | count | 1 |
| AC005837.1   | 19.6498979 | 2672.454354 | 0.0074 | 0.994 | 1.81E-08 | count | 1 |
| ZNF865       | 19.6498979 | 2672.454354 | 0.0074 | 0.994 | 1.81E-08 | count | 1 |
| TMEM237      | 19.6498976 | 2672.454175 | 0.0074 | 0.994 | 1.81E-08 | count | 1 |
| LINC01011    | 19.6498976 | 2672.454175 | 0.0074 | 0.994 | 1.81E-08 | count | 1 |
| MFAP5        | 19.6498976 | 2672.454175 | 0.0074 | 0.994 | 1.81E-08 | count | 1 |
| HOXC4        | 19.6498976 | 2672.454175 | 0.0074 | 0.994 | 1.81E-08 | count | 1 |
| REM2         | 19.6498976 | 2672.454175 | 0.0074 | 0.994 | 1.81E-08 | count | 1 |
| SLC5A2       | 19.6498976 | 2672.454175 | 0.0074 | 0.994 | 1.81E-08 | count | 1 |
| ABCA9        | 19.6498976 | 2672.454175 | 0.0074 | 0.994 | 1.81E-08 | count | 1 |

|            |            |             |        |       |          |       |   |
|------------|------------|-------------|--------|-------|----------|-------|---|
| AL031731.1 | 19.649897  | 2672.454235 | 0.0074 | 0.994 | 1.81E-08 | count | 1 |
| RN7SL832P  | 19.649897  | 2672.454235 | 0.0074 | 0.994 | 1.81E-08 | count | 1 |
| PSMD6-AS2  | 19.649897  | 2672.454235 | 0.0074 | 0.994 | 1.81E-08 | count | 1 |
| AL163051.1 | 19.649897  | 2672.454235 | 0.0074 | 0.994 | 1.81E-08 | count | 1 |
| GOLGA6L4   | 19.649897  | 2672.454235 | 0.0074 | 0.994 | 1.81E-08 | count | 1 |
| SLPI       | 19.6498977 | 2672.453996 | 0.0074 | 0.994 | 1.81E-08 | count | 1 |
| GIPR       | 19.6498977 | 2672.453996 | 0.0074 | 0.994 | 1.81E-08 | count | 1 |
| KRBA1      | 19.6498977 | 2672.453937 | 0.0074 | 0.994 | 1.81E-08 | count | 1 |
| AC138356.1 | 19.6498977 | 2672.453937 | 0.0074 | 0.994 | 1.81E-08 | count | 1 |
| TMEM9B-AS1 | 19.6498977 | 2672.453937 | 0.0074 | 0.994 | 1.81E-08 | count | 1 |
| AP002807.1 | 19.6498977 | 2672.453937 | 0.0074 | 0.994 | 1.81E-08 | count | 1 |
| AL117336.3 | 19.6498977 | 2672.453937 | 0.0074 | 0.994 | 1.81E-08 | count | 1 |
| AC027020.2 | 19.6498977 | 2672.453937 | 0.0074 | 0.994 | 1.81E-08 | count | 1 |
| TCF3       | 19.6498977 | 2672.453937 | 0.0074 | 0.994 | 1.81E-08 | count | 1 |
| AC090061.1 | 19.6564336 | 1854.222492 | 0.0106 | 0.992 | 1.81E-08 | count | 1 |
| BTBD8      | 19.6564331 | 1854.222492 | 0.0106 | 0.992 | 1.81E-08 | count | 1 |
| SGCE       | 19.656432  | 1854.222221 | 0.0106 | 0.992 | 1.81E-08 | count | 1 |
| AL137779.1 | 19.6564321 | 1854.2222   | 0.0106 | 0.992 | 1.81E-08 | count | 1 |
| ANKDD1B    | 20.0230381 | 2358.376491 | 0.0085 | 0.993 | 1.82E-08 | count | 1 |
| AC000032.1 | 20.0230385 | 2358.376261 | 0.0085 | 0.993 | 1.82E-08 | count | 1 |
| COL4A4     | 20.0230378 | 2358.376363 | 0.0085 | 0.993 | 1.82E-08 | count | 1 |
| SF3B3      | 0.0867114  | 0.479071    | 0.181  | 0.856 | 1.94E-08 | count | 1 |
| GAB1       | 0.2376221  | 0.7771019   | 0.3058 | 0.76  | 2.02E-08 | count | 1 |
| EXOC6B     | 0.2376221  | 0.9069862   | 0.262  | 0.793 | 2.02E-08 | count | 1 |
| SIRT5      | 0.2376221  | 0.9069862   | 0.262  | 0.793 | 2.02E-08 | count | 1 |
| CNTROB     | 0.2376221  | 0.9069862   | 0.262  | 0.793 | 2.02E-08 | count | 1 |
| AC116366.3 | 0.2376221  | 0.9069862   | 0.262  | 0.793 | 2.02E-08 | count | 1 |
| ZNF503     | 0.2376221  | 0.9069862   | 0.262  | 0.793 | 2.02E-08 | count | 1 |
| SLC29A3    | 0.2376221  | 0.8209174   | 0.2895 | 0.772 | 2.02E-08 | count | 1 |
| STYK1      | 0.2376221  | 0.8142853   | 0.2918 | 0.771 | 2.02E-08 | count | 1 |
| MBLAC1     | 0.2376221  | 1.1117474   | 0.2137 | 0.831 | 2.02E-08 | count | 1 |
| MIEF1      | 0.2415624  | 0.7124033   | 0.3391 | 0.735 | 2.05E-08 | count | 1 |
| SPRED2     | 0.2415624  | 0.8117844   | 0.2976 | 0.766 | 2.06E-08 | count | 1 |
| ZNF550     | 0.2415624  | 0.8890411   | 0.2717 | 0.786 | 2.06E-08 | count | 1 |
| SLC36A4    | 0.2484614  | 0.6309898   | 0.3938 | 0.694 | 2.11E-08 | count | 1 |
| FOXP4      | 0.2484614  | 0.9694404   | 0.2563 | 0.798 | 2.12E-08 | count | 1 |
| ALDH18A1   | 0.6539265  | 0.8510463   | 0.7684 | 0.443 | 2.19E-08 | count | 1 |
| AC016876.1 | 0.6539265  | 1.0734353   | 0.6092 | 0.543 | 2.20E-08 | count | 1 |
| GDPD3      | 0.7113817  | 1.1568427   | 0.6149 | 0.539 | 2.40E-08 | count | 1 |
| CHRM3-AS2  | 0.7113817  | 1.1568427   | 0.6149 | 0.539 | 2.40E-08 | count | 1 |
| PROSER3    | 0.7113817  | 1.1568427   | 0.6149 | 0.539 | 2.40E-08 | count | 1 |
| ZNF510     | 0.7113817  | 1.1568427   | 0.6149 | 0.539 | 2.40E-08 | count | 1 |
| CASTOR1    | 0.7113817  | 0.8648567   | 0.8225 | 0.411 | 2.40E-08 | count | 1 |
| ABHD17C    | 0.7113817  | 0.8648567   | 0.8225 | 0.411 | 2.40E-08 | count | 1 |
| PGBD4      | 0.7113817  | 0.8648567   | 0.8225 | 0.411 | 2.40E-08 | count | 1 |

|            |            |             |        |        |          |       |   |
|------------|------------|-------------|--------|--------|----------|-------|---|
| IL6R       | 0.7113817  | 1.0748726   | 0.6618 | 0.509  | 2.41E-08 | count | 1 |
| AC103724.4 | 0.3285041  | 0.808494    | 0.4063 | 0.685  | 2.84E-08 | count | 1 |
| SGPL1      | 0.3683362  | 0.5638287   | 0.6533 | 0.514  | 3.22E-08 | count | 1 |
| AL078644.2 | 0.37328    | 1.0959203   | 0.3406 | 0.734  | 3.25E-08 | count | 1 |
| MYBBP1A    | 0.37328    | 1.0959203   | 0.3406 | 0.734  | 3.25E-08 | count | 1 |
| C3AR1      | 0.37328    | 1.0217972   | 0.3653 | 0.715  | 3.25E-08 | count | 1 |
| STRN4      | 0.37328    | 1.0217972   | 0.3653 | 0.715  | 3.25E-08 | count | 1 |
| LINC01136  | 0.37328    | 0.9202505   | 0.4056 | 0.685  | 3.25E-08 | count | 1 |
| LRRC8D     | 0.9416085  | 0.7905694   | 1.1911 | 0.235  | 3.29E-08 | count | 1 |
| LNK2       | 0.9416085  | 0.7905694   | 1.1911 | 0.235  | 3.29E-08 | count | 1 |
| AC091271.1 | 0.9416085  | 0.8806037   | 1.0693 | 0.286  | 3.29E-08 | count | 1 |
| NUDT7      | 0.9416085  | 0.8806037   | 1.0693 | 0.286  | 3.29E-08 | count | 1 |
| PIGQ       | 0.402612   | 0.6470404   | 0.6222 | 0.534  | 3.52E-08 | count | 1 |
| GSTM2      | 0.1551861  | 0.5875796   | 0.2641 | 0.792  | 3.52E-08 | count | 1 |
| TMEM68     | 0.402612   | 0.5945028   | 0.6772 | 0.499  | 3.53E-08 | count | 1 |
| UBA6-AS1   | 0.4140967  | 0.7322819   | 0.5655 | 0.572  | 3.63E-08 | count | 1 |
| AC026401.3 | 0.168851   | 0.7243147   | 0.2331 | 0.816  | 3.84E-08 | count | 1 |
| AC245140.2 | 0.1782168  | 0.8165819   | 0.2182 | 0.827  | 4.15E-08 | count | 1 |
| GSTM3      | 0.4716049  | 0.6609477   | 0.7135 | 0.476  | 4.18E-08 | count | 1 |
| NEMP2      | 0.4716049  | 0.6609477   | 0.7135 | 0.476  | 4.18E-08 | count | 1 |
| LIN7B      | 0.4716049  | 0.6609477   | 0.7135 | 0.476  | 4.18E-08 | count | 1 |
| HIF1AN     | 0.4716049  | 0.7101121   | 0.6641 | 0.507  | 4.18E-08 | count | 1 |
| RNF212     | 0.4716049  | 0.7994211   | 0.5899 | 0.556  | 4.19E-08 | count | 1 |
| PHRF1      | 1.1760574  | 0.7842112   | 1.4997 | 0.135  | 4.20E-08 | count | 1 |
| MAFK       | 1.1760574  | 0.841074    | 1.3983 | 0.163  | 4.21E-08 | count | 1 |
| AC026471.1 | 1.1760574  | 0.841074    | 1.3983 | 0.163  | 4.21E-08 | count | 1 |
| DFFB       | 0.4716049  | 1.0215275   | 0.4617 | 0.645  | 4.22E-08 | count | 1 |
| TTLL5      | 0.4716049  | 1.0215275   | 0.4617 | 0.645  | 4.22E-08 | count | 1 |
| CUEDC1     | 0.4716049  | 1.0215275   | 0.4617 | 0.645  | 4.22E-08 | count | 1 |
| PPP1R3D    | 0.4863575  | 0.8735424   | 0.5568 | 0.578  | 4.32E-08 | count | 1 |
| KDELC2     | 0.4863575  | 0.7553727   | 0.6439 | 0.52   | 4.32E-08 | count | 1 |
| C22orf46   | 0.4863575  | 0.9293277   | 0.5233 | 0.601  | 4.32E-08 | count | 1 |
| AC093512.1 | 0.4863575  | 0.9293277   | 0.5233 | 0.601  | 4.32E-08 | count | 1 |
| CCZ1B      | 0.4863575  | 0.6173509   | 0.7878 | 0.431  | 4.36E-08 | count | 1 |
| PGAM5      | 0.1956044  | 0.5388461   | 0.363  | 0.717  | 4.49E-08 | count | 1 |
| ADAMTS1    | 0.5041053  | 0.6860124   | 0.7348 | 0.463  | 4.50E-08 | count | 1 |
| SLC12A6    | 0.5041053  | 0.6446763   | 0.782  | 0.435  | 4.53E-08 | count | 1 |
| RASGRP3    | 1.3217558  | 0.6350529   | 2.0813 | 0.0382 | 4.78E-08 | count | 1 |
| CEP57L1    | 0.5340895  | 0.516631    | 1.0338 | 0.302  | 4.84E-08 | count | 1 |
| TNR        | 18.0815635 | 3117.08259  | 0.0058 | 0.995  | 4.86E-08 | count | 1 |
| FZD5       | 18.0815635 | 3117.08259  | 0.0058 | 0.995  | 4.86E-08 | count | 1 |
| HOXA10-AS  | 18.0815634 | 3117.082462 | 0.0058 | 0.995  | 4.86E-08 | count | 1 |
| WDR86      | 18.0815634 | 3117.082462 | 0.0058 | 0.995  | 4.86E-08 | count | 1 |
| AC103724.3 | 18.0815634 | 3117.082462 | 0.0058 | 0.995  | 4.86E-08 | count | 1 |
| PLAT       | 18.0815634 | 3117.082462 | 0.0058 | 0.995  | 4.86E-08 | count | 1 |

|            |            |             |        |       |          |       |   |
|------------|------------|-------------|--------|-------|----------|-------|---|
| CD44-AS1   | 18.0815635 | 3117.08259  | 0.0058 | 0.995 | 4.86E-08 | count | 1 |
| LINC02422  | 18.0815635 | 3117.08259  | 0.0058 | 0.995 | 4.86E-08 | count | 1 |
| TRMT5      | 18.0815634 | 3117.082462 | 0.0058 | 0.995 | 4.86E-08 | count | 1 |
| AC016355.1 | 18.0815635 | 3117.08259  | 0.0058 | 0.995 | 4.86E-08 | count | 1 |
| GOLGA6L9   | 18.0815635 | 3117.08259  | 0.0058 | 0.995 | 4.86E-08 | count | 1 |
| SEMA4B     | 18.0815635 | 3117.08259  | 0.0058 | 0.995 | 4.86E-08 | count | 1 |
| PLD2       | 18.0815634 | 3117.082462 | 0.0058 | 0.995 | 4.86E-08 | count | 1 |
| TMEM88     | 18.0815635 | 3117.08259  | 0.0058 | 0.995 | 4.86E-08 | count | 1 |
| AC005332.4 | 18.0815635 | 3117.08259  | 0.0058 | 0.995 | 4.86E-08 | count | 1 |
| ICAM5      | 18.0815635 | 3117.08259  | 0.0058 | 0.995 | 4.86E-08 | count | 1 |
| AC020907.3 | 18.0815634 | 3117.082462 | 0.0058 | 0.995 | 4.86E-08 | count | 1 |
| LINC01358  | 18.0815633 | 3117.082292 | 0.0058 | 0.995 | 4.86E-08 | count | 1 |
| NCKIPSD    | 18.0815633 | 3117.082292 | 0.0058 | 0.995 | 4.86E-08 | count | 1 |
| AC006160.1 | 18.0815633 | 3117.082561 | 0.0058 | 0.995 | 4.86E-08 | count | 1 |
| ULBP3      | 18.0815633 | 3117.082561 | 0.0058 | 0.995 | 4.86E-08 | count | 1 |
| LINC01176  | 18.0815633 | 3117.082561 | 0.0058 | 0.995 | 4.86E-08 | count | 1 |
| VPS37D     | 18.0815633 | 3117.082292 | 0.0058 | 0.995 | 4.86E-08 | count | 1 |
| IGSF22     | 18.0815633 | 3117.082561 | 0.0058 | 0.995 | 4.86E-08 | count | 1 |
| AL022341.1 | 18.0815633 | 3117.082292 | 0.0058 | 0.995 | 4.86E-08 | count | 1 |
| AC093525.4 | 18.0815633 | 3117.082292 | 0.0058 | 0.995 | 4.86E-08 | count | 1 |
| AC007613.1 | 18.0815633 | 3117.082561 | 0.0058 | 0.995 | 4.86E-08 | count | 1 |
| LINC02081  | 18.0815633 | 3117.082561 | 0.0058 | 0.995 | 4.86E-08 | count | 1 |
| ADCYAP1    | 18.0815633 | 3117.082292 | 0.0058 | 0.995 | 4.86E-08 | count | 1 |
| ZNF627     | 18.0815633 | 3117.082292 | 0.0058 | 0.995 | 4.86E-08 | count | 1 |
| CLTCL1     | 18.0815633 | 3117.082292 | 0.0058 | 0.995 | 4.86E-08 | count | 1 |
| LINC01679  | 18.0815633 | 3117.082561 | 0.0058 | 0.995 | 4.86E-08 | count | 1 |
| LAMA2      | 18.0815633 | 3117.08259  | 0.0058 | 0.995 | 4.86E-08 | count | 1 |
| AC104389.4 | 18.0815633 | 3117.08259  | 0.0058 | 0.995 | 4.86E-08 | count | 1 |
| AC010999.2 | 18.0815633 | 3117.08259  | 0.0058 | 0.995 | 4.86E-08 | count | 1 |
| CYB5RL     | 18.0815633 | 3117.082519 | 0.0058 | 0.995 | 4.86E-08 | count | 1 |
| GPSM2      | 18.0815633 | 3117.082618 | 0.0058 | 0.995 | 4.86E-08 | count | 1 |
| AC245014.1 | 18.0815633 | 3117.082575 | 0.0058 | 0.995 | 4.86E-08 | count | 1 |
| EFNA3      | 18.0815633 | 3117.082519 | 0.0058 | 0.995 | 4.86E-08 | count | 1 |
| AC092053.3 | 18.0815632 | 3117.082505 | 0.0058 | 0.995 | 4.86E-08 | count | 1 |
| MST1       | 18.0815632 | 3117.082505 | 0.0058 | 0.995 | 4.86E-08 | count | 1 |
| TRIM60     | 18.0815633 | 3117.082575 | 0.0058 | 0.995 | 4.86E-08 | count | 1 |
| CMYA5      | 18.0815632 | 3117.082505 | 0.0058 | 0.995 | 4.86E-08 | count | 1 |
| SERINC5    | 18.0815633 | 3117.082519 | 0.0058 | 0.995 | 4.86E-08 | count | 1 |
| AC139795.2 | 18.0815633 | 3117.082618 | 0.0058 | 0.995 | 4.86E-08 | count | 1 |
| BX322234.1 | 18.0815633 | 3117.082575 | 0.0058 | 0.995 | 4.86E-08 | count | 1 |
| ETV1       | 18.0815632 | 3117.082505 | 0.0058 | 0.995 | 4.86E-08 | count | 1 |
| MUC12      | 18.0815632 | 3117.082505 | 0.0058 | 0.995 | 4.86E-08 | count | 1 |
| NALT1      | 18.0815633 | 3117.082575 | 0.0058 | 0.995 | 4.86E-08 | count | 1 |
| BMPR1A     | 18.0815633 | 3117.082575 | 0.0058 | 0.995 | 4.86E-08 | count | 1 |
| MAP1A      | 18.0815633 | 3117.082575 | 0.0058 | 0.995 | 4.86E-08 | count | 1 |

|            |            |             |        |       |          |       |   |
|------------|------------|-------------|--------|-------|----------|-------|---|
| SLC12A5    | 18.0815633 | 3117.082519 | 0.0058 | 0.995 | 4.86E-08 | count | 1 |
| PIK3R2     | 18.0815633 | 3117.082519 | 0.0058 | 0.995 | 4.86E-08 | count | 1 |
| AP001065.1 | 18.0815633 | 3117.082618 | 0.0058 | 0.995 | 4.86E-08 | count | 1 |
| CD34       | 18.0815631 | 3117.082476 | 0.0058 | 0.995 | 4.86E-08 | count | 1 |
| AC020571.1 | 18.0815631 | 3117.082476 | 0.0058 | 0.995 | 4.86E-08 | count | 1 |
| AL513550.1 | 18.081563  | 3117.082349 | 0.0058 | 0.995 | 4.86E-08 | count | 1 |
| AL080317.3 | 18.081563  | 3117.082349 | 0.0058 | 0.995 | 4.86E-08 | count | 1 |
| STC1       | 18.0815631 | 3117.082476 | 0.0058 | 0.995 | 4.86E-08 | count | 1 |
| KANK1      | 18.081563  | 3117.082349 | 0.0058 | 0.995 | 4.86E-08 | count | 1 |
| STXBP1     | 18.081563  | 3117.082349 | 0.0058 | 0.995 | 4.86E-08 | count | 1 |
| KCTD21-AS1 | 18.081563  | 3117.082349 | 0.0058 | 0.995 | 4.86E-08 | count | 1 |
| PSD        | 18.081563  | 3117.082349 | 0.0058 | 0.995 | 4.86E-08 | count | 1 |
| CRY1       | 18.0815631 | 3117.082292 | 0.0058 | 0.995 | 4.86E-08 | count | 1 |
| LRRC3      | 18.081563  | 3117.082349 | 0.0058 | 0.995 | 4.86E-08 | count | 1 |
| AC096536.1 | 18.0815631 | 3117.082264 | 0.0058 | 0.995 | 4.86E-08 | count | 1 |
| LEPR       | 18.0815632 | 3117.082321 | 0.0058 | 0.995 | 4.86E-08 | count | 1 |
| AL121983.1 | 18.081563  | 3117.082434 | 0.0058 | 0.995 | 4.86E-08 | count | 1 |
| IRF6       | 18.0815632 | 3117.082377 | 0.0058 | 0.995 | 4.86E-08 | count | 1 |
| LYG1       | 18.0815631 | 3117.082264 | 0.0058 | 0.995 | 4.86E-08 | count | 1 |
| HECW2      | 18.081563  | 3117.082123 | 0.0058 | 0.995 | 4.86E-08 | count | 1 |
| LINC02019  | 18.0815632 | 3117.082377 | 0.0058 | 0.995 | 4.86E-08 | count | 1 |
| AC107027.1 | 18.0815629 | 3117.08225  | 0.0058 | 0.995 | 4.86E-08 | count | 1 |
| AC116651.1 | 18.0815629 | 3117.08225  | 0.0058 | 0.995 | 4.86E-08 | count | 1 |
| F2RL1      | 18.081563  | 3117.082123 | 0.0058 | 0.995 | 4.86E-08 | count | 1 |
| AC005618.1 | 18.0815631 | 3117.082264 | 0.0058 | 0.995 | 4.86E-08 | count | 1 |
| NOTCH4     | 18.0815631 | 3117.082264 | 0.0058 | 0.995 | 4.86E-08 | count | 1 |
| ELOVL4     | 18.081563  | 3117.082123 | 0.0058 | 0.995 | 4.86E-08 | count | 1 |
| AL137784.2 | 18.0815629 | 3117.082094 | 0.0058 | 0.995 | 4.86E-08 | count | 1 |
| SYNJ2      | 18.081563  | 3117.082123 | 0.0058 | 0.995 | 4.86E-08 | count | 1 |
| TSPAN33    | 18.0815629 | 3117.08225  | 0.0058 | 0.995 | 4.86E-08 | count | 1 |
| AC018643.1 | 18.0815631 | 3117.082264 | 0.0058 | 0.995 | 4.86E-08 | count | 1 |
| ZHX2       | 18.0815629 | 3117.082094 | 0.0058 | 0.995 | 4.86E-08 | count | 1 |
| EPPK1      | 18.081563  | 3117.082123 | 0.0058 | 0.995 | 4.86E-08 | count | 1 |
| ENTPD2     | 18.0815631 | 3117.082264 | 0.0058 | 0.995 | 4.86E-08 | count | 1 |
| AC026250.1 | 18.0815631 | 3117.082264 | 0.0058 | 0.995 | 4.86E-08 | count | 1 |
| AP006333.1 | 18.081563  | 3117.082123 | 0.0058 | 0.995 | 4.86E-08 | count | 1 |
| IDI2-AS1   | 18.0815631 | 3117.082264 | 0.0058 | 0.995 | 4.86E-08 | count | 1 |
| LINC00866  | 18.0815629 | 3117.08225  | 0.0058 | 0.995 | 4.86E-08 | count | 1 |
| ADRA2A     | 18.0815632 | 3117.082377 | 0.0058 | 0.995 | 4.86E-08 | count | 1 |
| AC025263.1 | 18.0815631 | 3117.082264 | 0.0058 | 0.995 | 4.86E-08 | count | 1 |
| THSD1      | 18.0815632 | 3117.082377 | 0.0058 | 0.995 | 4.86E-08 | count | 1 |
| AL357153.1 | 18.0815631 | 3117.082264 | 0.0058 | 0.995 | 4.86E-08 | count | 1 |
| AC141586.3 | 18.0815631 | 3117.082264 | 0.0058 | 0.995 | 4.86E-08 | count | 1 |
| AC092338.2 | 18.0815629 | 3117.08225  | 0.0058 | 0.995 | 4.86E-08 | count | 1 |
| TMEM231    | 18.081563  | 3117.082123 | 0.0058 | 0.995 | 4.86E-08 | count | 1 |

|                |            |             |        |       |          |       |   |
|----------------|------------|-------------|--------|-------|----------|-------|---|
| CDC6           | 18.0815632 | 3117.082377 | 0.0058 | 0.995 | 4.86E-08 | count | 1 |
| C17orf53       | 18.081563  | 3117.082123 | 0.0058 | 0.995 | 4.86E-08 | count | 1 |
| B4GALT6        | 18.0815631 | 3117.082264 | 0.0058 | 0.995 | 4.86E-08 | count | 1 |
| RPL17-C18orf32 | 18.0815632 | 3117.082377 | 0.0058 | 0.995 | 4.86E-08 | count | 1 |
| STARD6         | 18.0815631 | 3117.082264 | 0.0058 | 0.995 | 4.86E-08 | count | 1 |
| AC064801.1     | 18.0815629 | 3117.08225  | 0.0058 | 0.995 | 4.86E-08 | count | 1 |
| FSTL3          | 18.0815629 | 3117.08225  | 0.0058 | 0.995 | 4.86E-08 | count | 1 |
| AC027307.3     | 18.0815631 | 3117.082264 | 0.0058 | 0.995 | 4.86E-08 | count | 1 |
| THAP7-AS1      | 18.0815631 | 3117.082264 | 0.0058 | 0.995 | 4.86E-08 | count | 1 |
| FAM171B        | 18.0815628 | 3117.082292 | 0.0058 | 0.995 | 4.86E-08 | count | 1 |
| ST5            | 18.0815629 | 3117.082448 | 0.0058 | 0.995 | 4.86E-08 | count | 1 |
| AP004609.3     | 18.0815629 | 3117.082448 | 0.0058 | 0.995 | 4.86E-08 | count | 1 |
| MIR9-3HG       | 18.0815628 | 3117.082292 | 0.0058 | 0.995 | 4.86E-08 | count | 1 |
| AL031708.1     | 18.0815628 | 3117.082292 | 0.0058 | 0.995 | 4.86E-08 | count | 1 |
| ORC6           | 18.0815628 | 3117.082292 | 0.0058 | 0.995 | 4.86E-08 | count | 1 |
| CKLF-CMTM1     | 18.0815629 | 3117.082448 | 0.0058 | 0.995 | 4.86E-08 | count | 1 |
| MIRLET7BHG     | 18.0815629 | 3117.082448 | 0.0058 | 0.995 | 4.86E-08 | count | 1 |
| Z97192.1       | 18.0815628 | 3117.082292 | 0.0058 | 0.995 | 4.86E-08 | count | 1 |
| AZIN2          | 18.0815629 | 3117.08242  | 0.0058 | 0.995 | 4.86E-08 | count | 1 |
| ERMAP          | 18.0815629 | 3117.082151 | 0.0058 | 0.995 | 4.86E-08 | count | 1 |
| SLC9B1         | 18.0815629 | 3117.08242  | 0.0058 | 0.995 | 4.86E-08 | count | 1 |
| ZGRF1          | 18.0815629 | 3117.082151 | 0.0058 | 0.995 | 4.86E-08 | count | 1 |
| RSPH4A         | 18.0815629 | 3117.08242  | 0.0058 | 0.995 | 4.86E-08 | count | 1 |
| ZKSCAN5        | 18.0815629 | 3117.08242  | 0.0058 | 0.995 | 4.86E-08 | count | 1 |
| GIMAP5         | 18.081563  | 3117.082278 | 0.0058 | 0.995 | 4.86E-08 | count | 1 |
| AL022157.1     | 18.0815629 | 3117.082151 | 0.0058 | 0.995 | 4.86E-08 | count | 1 |
| TEK            | 18.0815629 | 3117.08242  | 0.0058 | 0.995 | 4.86E-08 | count | 1 |
| B4GALNT4       | 18.0815629 | 3117.08242  | 0.0058 | 0.995 | 4.86E-08 | count | 1 |
| FAM222A        | 18.0815629 | 3117.08242  | 0.0058 | 0.995 | 4.86E-08 | count | 1 |
| MAP3K9         | 18.0815628 | 3117.082406 | 0.0058 | 0.995 | 4.86E-08 | count | 1 |
| CLEC16A        | 18.081563  | 3117.082278 | 0.0058 | 0.995 | 4.86E-08 | count | 1 |
| AC124283.1     | 18.0815629 | 3117.08242  | 0.0058 | 0.995 | 4.86E-08 | count | 1 |
| MYOM1          | 18.0815629 | 3117.08242  | 0.0058 | 0.995 | 4.86E-08 | count | 1 |
| AC005523.1     | 18.0815629 | 3117.082151 | 0.0058 | 0.995 | 4.86E-08 | count | 1 |
| AC022098.2     | 18.0815628 | 3117.082406 | 0.0058 | 0.995 | 4.86E-08 | count | 1 |
| ZNF726         | 18.0815628 | 3117.082406 | 0.0058 | 0.995 | 4.86E-08 | count | 1 |
| AL358075.2     | 18.0815628 | 3117.082335 | 0.0058 | 0.995 | 4.86E-08 | count | 1 |
| AL450468.2     | 18.0815628 | 3117.082335 | 0.0058 | 0.995 | 4.86E-08 | count | 1 |
| NUF2           | 18.0815629 | 3117.08259  | 0.0058 | 0.995 | 4.86E-08 | count | 1 |
| XPR1           | 18.0815629 | 3117.082448 | 0.0058 | 0.995 | 4.86E-08 | count | 1 |
| IPO9-AS1       | 18.0815628 | 3117.082335 | 0.0058 | 0.995 | 4.86E-08 | count | 1 |
| AC104695.3     | 18.0815628 | 3117.082335 | 0.0058 | 0.995 | 4.86E-08 | count | 1 |
| PJKV           | 18.0815628 | 3117.082335 | 0.0058 | 0.995 | 4.86E-08 | count | 1 |
| EGOT           | 18.0815629 | 3117.082448 | 0.0058 | 0.995 | 4.86E-08 | count | 1 |
| ZNF660         | 18.0815628 | 3117.082335 | 0.0058 | 0.995 | 4.86E-08 | count | 1 |



|             |            |             |        |       |          |       |   |
|-------------|------------|-------------|--------|-------|----------|-------|---|
| CCR2        | 18.0815628 | 3117.082335 | 0.0058 | 0.995 | 4.86E-08 | count | 1 |
| PRKAR2A-AS1 | 18.0815629 | 3117.082222 | 0.0058 | 0.995 | 4.86E-08 | count | 1 |
| LINC01949   | 18.0815629 | 3117.08259  | 0.0058 | 0.995 | 4.86E-08 | count | 1 |
| GDF9        | 18.0815629 | 3117.082222 | 0.0058 | 0.995 | 4.86E-08 | count | 1 |
| HAVCR1      | 18.081563  | 3117.082519 | 0.0058 | 0.995 | 4.86E-08 | count | 1 |
| Z84485.1    | 18.0815628 | 3117.082335 | 0.0058 | 0.995 | 4.86E-08 | count | 1 |
| AC105446.1  | 18.0815629 | 3117.082448 | 0.0058 | 0.995 | 4.86E-08 | count | 1 |
| CLCN1       | 18.0815629 | 3117.082448 | 0.0058 | 0.995 | 4.86E-08 | count | 1 |
| NUDT11      | 18.0815629 | 3117.08259  | 0.0058 | 0.995 | 4.86E-08 | count | 1 |
| EXPH5       | 18.081563  | 3117.082519 | 0.0058 | 0.995 | 4.86E-08 | count | 1 |
| DDX47       | 18.0815629 | 3117.082448 | 0.0058 | 0.995 | 4.86E-08 | count | 1 |
| RBMS2       | 18.0815627 | 3117.082377 | 0.0058 | 0.995 | 4.86E-08 | count | 1 |
| RB1-DT      | 18.0815628 | 3117.082335 | 0.0058 | 0.995 | 4.86E-08 | count | 1 |
| EXD1        | 18.0815628 | 3117.082335 | 0.0058 | 0.995 | 4.86E-08 | count | 1 |
| AC009118.2  | 18.0815628 | 3117.082335 | 0.0058 | 0.995 | 4.86E-08 | count | 1 |
| AC005332.3  | 18.0815627 | 3117.082377 | 0.0058 | 0.995 | 4.86E-08 | count | 1 |
| SLC16A5     | 18.0815627 | 3117.082377 | 0.0058 | 0.995 | 4.86E-08 | count | 1 |
| AC090229.1  | 18.0815629 | 3117.082222 | 0.0058 | 0.995 | 4.86E-08 | count | 1 |
| PRX         | 18.0815629 | 3117.082222 | 0.0058 | 0.995 | 4.86E-08 | count | 1 |
| RIMBP3      | 18.0815628 | 3117.082335 | 0.0058 | 0.995 | 4.86E-08 | count | 1 |
| CHD5        | 18.0815629 | 3117.08242  | 0.0058 | 0.995 | 4.86E-08 | count | 1 |
| HIST2H2AB   | 18.0815628 | 3117.082406 | 0.0058 | 0.995 | 4.86E-08 | count | 1 |
| PIGR        | 18.0815628 | 3117.082222 | 0.0058 | 0.995 | 4.86E-08 | count | 1 |
| IGKV4-1     | 18.0815628 | 3117.082264 | 0.0058 | 0.995 | 4.86E-08 | count | 1 |
| FSIP2       | 18.0815628 | 3117.082222 | 0.0058 | 0.995 | 4.86E-08 | count | 1 |
| AC092053.2  | 18.0815628 | 3117.082222 | 0.0058 | 0.995 | 4.86E-08 | count | 1 |
| KALRN       | 18.0815629 | 3117.08242  | 0.0058 | 0.995 | 4.86E-08 | count | 1 |
| LINC01063   | 18.0815628 | 3117.082406 | 0.0058 | 0.995 | 4.86E-08 | count | 1 |
| AC106047.1  | 18.0815628 | 3117.082406 | 0.0058 | 0.995 | 4.86E-08 | count | 1 |
| FHDC1       | 18.0815628 | 3117.082278 | 0.0058 | 0.995 | 4.86E-08 | count | 1 |
| AC025171.4  | 18.0815629 | 3117.08242  | 0.0058 | 0.995 | 4.86E-08 | count | 1 |
| AGGF1       | 18.0815629 | 3117.08242  | 0.0058 | 0.995 | 4.86E-08 | count | 1 |
| EPB41L4A    | 18.0815626 | 3117.082222 | 0.0058 | 0.995 | 4.86E-08 | count | 1 |
| HIST1H2BI   | 18.0815629 | 3117.08242  | 0.0058 | 0.995 | 4.86E-08 | count | 1 |
| RPS10-NUDT3 | 18.0815629 | 3117.082476 | 0.0058 | 0.995 | 4.86E-08 | count | 1 |
| ULBP1       | 18.0815629 | 3117.08242  | 0.0058 | 0.995 | 4.86E-08 | count | 1 |
| TAB3        | 18.0815629 | 3117.08242  | 0.0058 | 0.995 | 4.86E-08 | count | 1 |
| STMN4       | 18.0815628 | 3117.082406 | 0.0058 | 0.995 | 4.86E-08 | count | 1 |
| AC023632.2  | 18.0815628 | 3117.082222 | 0.0058 | 0.995 | 4.86E-08 | count | 1 |
| ZNF623      | 18.0815628 | 3117.082406 | 0.0058 | 0.995 | 4.86E-08 | count | 1 |
| AL158152.1  | 18.0815626 | 3117.082222 | 0.0058 | 0.995 | 4.86E-08 | count | 1 |
| TPH1        | 18.0815629 | 3117.08242  | 0.0058 | 0.995 | 4.86E-08 | count | 1 |
| AC034102.6  | 18.0815628 | 3117.082406 | 0.0058 | 0.995 | 4.86E-08 | count | 1 |
| VASH1-AS1   | 18.0815628 | 3117.082278 | 0.0058 | 0.995 | 4.86E-08 | count | 1 |
| SHF         | 18.0815628 | 3117.082278 | 0.0058 | 0.995 | 4.86E-08 | count | 1 |

|            |            |             |        |       |          |       |   |
|------------|------------|-------------|--------|-------|----------|-------|---|
| Z69720.1   | 18.0815628 | 3117.082278 | 0.0058 | 0.995 | 4.86E-08 | count | 1 |
| AC020765.2 | 18.0815628 | 3117.082406 | 0.0058 | 0.995 | 4.86E-08 | count | 1 |
| AC027682.1 | 18.0815628 | 3117.082406 | 0.0058 | 0.995 | 4.86E-08 | count | 1 |
| AC087500.1 | 18.0815629 | 3117.082476 | 0.0058 | 0.995 | 4.86E-08 | count | 1 |
| TVP23C     | 18.0815628 | 3117.082406 | 0.0058 | 0.995 | 4.86E-08 | count | 1 |
| TEX14      | 18.0815628 | 3117.082222 | 0.0058 | 0.995 | 4.86E-08 | count | 1 |
| PLPP2      | 18.0815628 | 3117.082264 | 0.0058 | 0.995 | 4.86E-08 | count | 1 |
| SIPA1L3    | 18.0815628 | 3117.082222 | 0.0058 | 0.995 | 4.86E-08 | count | 1 |
| ATP1A3     | 18.0815628 | 3117.082278 | 0.0058 | 0.995 | 4.86E-08 | count | 1 |
| RTN4R      | 18.0815629 | 3117.08242  | 0.0058 | 0.995 | 4.86E-08 | count | 1 |
| PM20D1     | 18.0815627 | 3117.082335 | 0.0058 | 0.995 | 4.86E-08 | count | 1 |
| ARHGEF26   | 18.0815627 | 3117.082335 | 0.0058 | 0.995 | 4.86E-08 | count | 1 |
| TMEM217    | 18.0815627 | 3117.082335 | 0.0058 | 0.995 | 4.86E-08 | count | 1 |
| RMRP       | 18.0815627 | 3117.082335 | 0.0058 | 0.995 | 4.86E-08 | count | 1 |
| ZBTB5      | 18.0815627 | 3117.082335 | 0.0058 | 0.995 | 4.86E-08 | count | 1 |
| HMG2       | 18.0815627 | 3117.082335 | 0.0058 | 0.995 | 4.86E-08 | count | 1 |
| AC009065.4 | 18.0815626 | 3117.082236 | 0.0058 | 0.995 | 4.86E-08 | count | 1 |
| RARB       | 18.0815626 | 3117.082491 | 0.0058 | 0.995 | 4.86E-08 | count | 1 |
| EDIL3      | 18.0815626 | 3117.082491 | 0.0058 | 0.995 | 4.86E-08 | count | 1 |
| SLC22A5    | 18.0815626 | 3117.082491 | 0.0058 | 0.995 | 4.86E-08 | count | 1 |
| NPIPA5     | 18.0815626 | 3117.082491 | 0.0058 | 0.995 | 4.86E-08 | count | 1 |
| ZNF20      | 18.0815626 | 3117.082491 | 0.0058 | 0.995 | 4.86E-08 | count | 1 |
| LGALS4     | 18.0815626 | 3117.082491 | 0.0058 | 0.995 | 4.86E-08 | count | 1 |
| ATXN7      | 18.0805403 | 2188.630976 | 0.0083 | 0.993 | 4.87E-08 | count | 1 |
| AMMECR1L   | 18.08054   | 2188.630777 | 0.0083 | 0.993 | 4.87E-08 | count | 1 |
| AL365361.1 | 18.0805399 | 2188.630906 | 0.0083 | 0.993 | 4.87E-08 | count | 1 |
| FBXO41     | 18.0805397 | 2188.630688 | 0.0083 | 0.993 | 4.87E-08 | count | 1 |
| ZNF208     | 18.0805397 | 2188.630688 | 0.0083 | 0.993 | 4.87E-08 | count | 1 |
| GPR160     | 18.0805397 | 2188.630886 | 0.0083 | 0.993 | 4.87E-08 | count | 1 |
| IPO13      | 18.0805397 | 2188.630638 | 0.0083 | 0.993 | 4.87E-08 | count | 1 |
| BOLA3-AS1  | 18.0805395 | 2188.630896 | 0.0083 | 0.993 | 4.87E-08 | count | 1 |
| AC018638.7 | 18.0805396 | 2188.630728 | 0.0083 | 0.993 | 4.87E-08 | count | 1 |
| KLHL11     | 18.0805396 | 2188.630926 | 0.0083 | 0.993 | 4.87E-08 | count | 1 |
| TRIP10     | 18.0805396 | 2188.630926 | 0.0083 | 0.993 | 4.87E-08 | count | 1 |
| ZSCAN12    | 18.0805394 | 2188.630737 | 0.0083 | 0.993 | 4.87E-08 | count | 1 |
| HSPA1L     | 18.0805395 | 2188.630896 | 0.0083 | 0.993 | 4.87E-08 | count | 1 |
| ACP2       | 18.0805396 | 2188.630896 | 0.0083 | 0.993 | 4.87E-08 | count | 1 |
| SUV39H2    | 18.0805392 | 2188.630708 | 0.0083 | 0.993 | 4.87E-08 | count | 1 |
| PTDSS2     | 18.0805393 | 2188.630906 | 0.0083 | 0.993 | 4.87E-08 | count | 1 |
| IL1RAP     | 18.0805395 | 2188.630747 | 0.0083 | 0.993 | 4.87E-08 | count | 1 |
| PLXNA4     | 18.0805393 | 2188.630876 | 0.0083 | 0.993 | 4.87E-08 | count | 1 |
| C1S        | 18.0805394 | 2188.630737 | 0.0083 | 0.993 | 4.87E-08 | count | 1 |
| MROH8      | 18.4814459 | 2822.783744 | 0.0065 | 0.995 | 4.88E-08 | count | 1 |
| DDIT4-AS1  | 18.481446  | 2822.783527 | 0.0065 | 0.995 | 4.88E-08 | count | 1 |
| TBC1D12    | 18.4814459 | 2822.783744 | 0.0065 | 0.995 | 4.88E-08 | count | 1 |

|            |            |             |        |       |          |       |   |
|------------|------------|-------------|--------|-------|----------|-------|---|
| ARHGAP11B  | 18.481446  | 2822.783514 | 0.0065 | 0.995 | 4.88E-08 | count | 1 |
| TEPP       | 18.4814459 | 2822.783884 | 0.0065 | 0.995 | 4.88E-08 | count | 1 |
| EVI5L      | 18.481446  | 2822.783769 | 0.0065 | 0.995 | 4.88E-08 | count | 1 |
| AC240274.1 | 18.4814456 | 2822.783884 | 0.0065 | 0.995 | 4.88E-08 | count | 1 |
| ZSWIM6     | 18.4814461 | 2822.78354  | 0.0065 | 0.995 | 4.88E-08 | count | 1 |
| AFG1L      | 18.4814457 | 2822.783476 | 0.0065 | 0.995 | 4.88E-08 | count | 1 |
| ZNF41      | 18.4814458 | 2822.78354  | 0.0065 | 0.995 | 4.88E-08 | count | 1 |
| C12orf60   | 18.4814454 | 2822.783998 | 0.0065 | 0.995 | 4.88E-08 | count | 1 |
| ERI2       | 18.4814455 | 2822.783514 | 0.0065 | 0.995 | 4.88E-08 | count | 1 |
| FGGY       | 18.4814457 | 2822.783756 | 0.0065 | 0.995 | 4.88E-08 | count | 1 |
| PLCD1      | 18.4814451 | 2822.783323 | 0.0065 | 0.995 | 4.88E-08 | count | 1 |
| SAP25      | 18.4814455 | 2822.783629 | 0.0065 | 0.995 | 4.88E-08 | count | 1 |
| DDN-AS1    | 18.4814456 | 2822.783374 | 0.0065 | 0.995 | 4.88E-08 | count | 1 |
| LMAN2L     | 18.4814456 | 2822.783884 | 0.0065 | 0.995 | 4.88E-08 | count | 1 |
| RORB       | 18.4814452 | 2822.783578 | 0.0065 | 0.995 | 4.88E-08 | count | 1 |
| AL118506.1 | 18.4814456 | 2822.783731 | 0.0065 | 0.995 | 4.88E-08 | count | 1 |
| CXXC4      | 18.4814455 | 2822.783578 | 0.0065 | 0.995 | 4.88E-08 | count | 1 |
| AC006480.2 | 18.4814456 | 2822.783502 | 0.0065 | 0.995 | 4.88E-08 | count | 1 |
| SH2B2      | 18.4814453 | 2822.783846 | 0.0065 | 0.995 | 4.88E-08 | count | 1 |
| LINC02055  | 18.4814447 | 2822.783514 | 0.0065 | 0.995 | 4.88E-08 | count | 1 |
| LINC02021  | 18.4793167 | 3802.938881 | 0.0049 | 0.996 | 4.88E-08 | count | 1 |
| PYGM       | 18.4793167 | 3802.938881 | 0.0049 | 0.996 | 4.88E-08 | count | 1 |
| AC091132.5 | 18.4793167 | 3802.938881 | 0.0049 | 0.996 | 4.88E-08 | count | 1 |
| MINDY4     | 18.4793166 | 3802.938401 | 0.0049 | 0.996 | 4.88E-08 | count | 1 |
| AC005670.2 | 18.4793166 | 3802.938401 | 0.0049 | 0.996 | 4.88E-08 | count | 1 |
| TTC28      | 18.4793166 | 3802.938401 | 0.0049 | 0.996 | 4.88E-08 | count | 1 |
| KLF4       | 18.4793164 | 3802.938487 | 0.0049 | 0.996 | 4.88E-08 | count | 1 |
| SLC11A1    | 18.4793164 | 3802.938658 | 0.0049 | 0.996 | 4.88E-08 | count | 1 |
| IL2        | 18.479316  | 3802.938607 | 0.0049 | 0.996 | 4.88E-08 | count | 1 |
| CA2        | 18.479316  | 3802.938607 | 0.0049 | 0.996 | 4.88E-08 | count | 1 |
| CENPA      | 18.4793158 | 3802.938521 | 0.0049 | 0.996 | 4.88E-08 | count | 1 |
| KLHL6-AS1  | 18.4793158 | 3802.938521 | 0.0049 | 0.996 | 4.88E-08 | count | 1 |
| AC096733.2 | 18.4793158 | 3802.938521 | 0.0049 | 0.996 | 4.88E-08 | count | 1 |
| TNNI2      | 18.4793158 | 3802.938521 | 0.0049 | 0.996 | 4.88E-08 | count | 1 |
| AC090515.2 | 18.479316  | 3802.938572 | 0.0049 | 0.996 | 4.88E-08 | count | 1 |
| CCDC74B    | 18.479316  | 3802.93835  | 0.0049 | 0.996 | 4.88E-08 | count | 1 |
| SAG        | 18.4793157 | 3802.938538 | 0.0049 | 0.996 | 4.88E-08 | count | 1 |
| SETMAR     | 18.479316  | 3802.93835  | 0.0049 | 0.996 | 4.88E-08 | count | 1 |
| AC104041.1 | 18.479316  | 3802.93835  | 0.0049 | 0.996 | 4.88E-08 | count | 1 |
| HEATR9     | 18.479316  | 3802.93835  | 0.0049 | 0.996 | 4.88E-08 | count | 1 |
| LRFN4      | 18.7628637 | 2147.9853   | 0.0087 | 0.993 | 4.90E-08 | count | 1 |
| AC127070.1 | 18.7610411 | 2651.909962 | 0.0071 | 0.994 | 4.90E-08 | count | 1 |
| AC103702.2 | 18.7610408 | 2651.909843 | 0.0071 | 0.994 | 4.90E-08 | count | 1 |
| TMEM121    | 18.7610404 | 2651.910057 | 0.0071 | 0.994 | 4.90E-08 | count | 1 |
| H1FX-AS1   | 18.7585356 | 3071.831139 | 0.0061 | 0.995 | 4.91E-08 | count | 1 |

|              |            |             |        |       |          |       |   |
|--------------|------------|-------------|--------|-------|----------|-------|---|
| POU6F1       | 18.7585358 | 3071.831057 | 0.0061 | 0.995 | 4.91E-08 | count | 1 |
| PDP2         | 18.7585357 | 3071.831029 | 0.0061 | 0.995 | 4.91E-08 | count | 1 |
| RIC3         | 18.7585356 | 3071.831469 | 0.0061 | 0.995 | 4.91E-08 | count | 1 |
| AC026304.1   | 18.7585355 | 3071.831414 | 0.0061 | 0.995 | 4.91E-08 | count | 1 |
| FAM83D       | 18.7585354 | 3071.831414 | 0.0061 | 0.995 | 4.91E-08 | count | 1 |
| RSPH3        | 18.7585353 | 3071.831359 | 0.0061 | 0.995 | 4.91E-08 | count | 1 |
| OSR2         | 18.7585356 | 3071.831715 | 0.0061 | 0.995 | 4.91E-08 | count | 1 |
| LENG9        | 18.7585354 | 3071.831304 | 0.0061 | 0.995 | 4.91E-08 | count | 1 |
| RND1         | 18.7585355 | 3071.831139 | 0.0061 | 0.995 | 4.91E-08 | count | 1 |
| SLAMF8       | 18.7585353 | 3071.831112 | 0.0061 | 0.995 | 4.91E-08 | count | 1 |
| ABHD14A-ACY1 | 18.7585352 | 3071.831194 | 0.0061 | 0.995 | 4.91E-08 | count | 1 |
| HIST1H2AG    | 18.7585351 | 3071.831057 | 0.0061 | 0.995 | 4.91E-08 | count | 1 |
| LCMT2        | 18.7585352 | 3071.831084 | 0.0061 | 0.995 | 4.91E-08 | count | 1 |
| RASL11A      | 18.7585347 | 3071.831057 | 0.0061 | 0.995 | 4.91E-08 | count | 1 |
| AL451085.2   | 18.757204  | 3441.146195 | 0.0055 | 0.996 | 4.91E-08 | count | 1 |
| BAHD1        | 18.7572038 | 3441.146041 | 0.0055 | 0.996 | 4.91E-08 | count | 1 |
| RBBP9        | 18.7572036 | 3441.146011 | 0.0055 | 0.996 | 4.91E-08 | count | 1 |
| AC009163.7   | 18.7572037 | 3441.145949 | 0.0055 | 0.996 | 4.91E-08 | count | 1 |
| TSNARE1      | 18.5191307 | 2574.00515  | 0.0072 | 0.994 | 4.92E-08 | count | 1 |
| FLNB         | 18.5191318 | 2574.005714 | 0.0072 | 0.994 | 4.92E-08 | count | 1 |
| CCDC163      | 18.5191309 | 2574.005444 | 0.0072 | 0.994 | 4.92E-08 | count | 1 |
| CEP120       | 18.5191312 | 2574.006855 | 0.0072 | 0.994 | 4.92E-08 | count | 1 |
| ZNF610       | 18.5191323 | 2574.007113 | 0.0072 | 0.994 | 4.92E-08 | count | 1 |
| C11orf98     | 18.5191321 | 2574.005432 | 0.0072 | 0.994 | 4.92E-08 | count | 1 |
| LINC01534    | 18.5191311 | 2574.00488  | 0.0072 | 0.994 | 4.92E-08 | count | 1 |
| IL10RB       | 18.519131  | 2574.004597 | 0.0072 | 0.994 | 4.92E-08 | count | 1 |
| FNTB         | 18.5191302 | 2574.006867 | 0.0072 | 0.994 | 4.92E-08 | count | 1 |
| AC090948.1   | 18.5191285 | 2574.00661  | 0.0072 | 0.994 | 4.92E-08 | count | 1 |
| SIRT4        | 18.5191311 | 2574.006008 | 0.0072 | 0.994 | 4.92E-08 | count | 1 |
| TUBGCP4      | 18.5191312 | 2574.005456 | 0.0072 | 0.994 | 4.92E-08 | count | 1 |
| ZNF785       | 18.5191294 | 2574.006327 | 0.0072 | 0.994 | 4.92E-08 | count | 1 |
| PLD6         | 18.5191269 | 2574.005505 | 0.0072 | 0.994 | 4.92E-08 | count | 1 |
| BX284668.6   | 18.5191265 | 2574.004389 | 0.0072 | 0.994 | 4.92E-08 | count | 1 |
| ARHGAP31     | 18.8264065 | 2580.853401 | 0.0073 | 0.994 | 4.93E-08 | count | 1 |
| DVL1         | 18.8264646 | 3450.997299 | 0.0055 | 0.996 | 4.93E-08 | count | 1 |
| ANKRD9       | 18.8264628 | 3451.000523 | 0.0055 | 0.996 | 4.93E-08 | count | 1 |
| LINC01004    | 18.8264603 | 3450.998552 | 0.0055 | 0.996 | 4.93E-08 | count | 1 |
| ZNF784       | 18.8264639 | 3450.999437 | 0.0055 | 0.996 | 4.93E-08 | count | 1 |
| CLCN6        | 18.8264594 | 3451.00069  | 0.0055 | 0.996 | 4.93E-08 | count | 1 |
| CCDC134      | 18.8264618 | 3451.001592 | 0.0055 | 0.996 | 4.93E-08 | count | 1 |
| CSRNP2       | 18.8264577 | 3450.995528 | 0.0055 | 0.996 | 4.93E-08 | count | 1 |
| CNNM4        | 18.8264563 | 3450.999771 | 0.0055 | 0.996 | 4.93E-08 | count | 1 |
| CCDC144NL    | 18.8264569 | 3450.999738 | 0.0055 | 0.996 | 4.93E-08 | count | 1 |
| AC008267.5   | 18.8264572 | 3450.999771 | 0.0055 | 0.996 | 4.93E-08 | count | 1 |
| SNHG19       | 18.826458  | 3450.995562 | 0.0055 | 0.996 | 4.93E-08 | count | 1 |

|            |            |             |        |       |          |       |   |
|------------|------------|-------------|--------|-------|----------|-------|---|
| AC078881.1 | 18.8264591 | 3450.993423 | 0.0055 | 0.996 | 4.93E-08 | count | 1 |
| CCDC184    | 18.8264584 | 3450.997633 | 0.0055 | 0.996 | 4.93E-08 | count | 1 |
| ZNF569     | 18.8264557 | 3450.996681 | 0.0055 | 0.996 | 4.93E-08 | count | 1 |
| AC009779.2 | 18.8264542 | 3450.993674 | 0.0055 | 0.996 | 4.93E-08 | count | 1 |
| ATXN7      | 18.7506744 | 4355.55943  | 0.0043 | 0.997 | 4.93E-08 | count | 1 |
| HIST1H4L   | 18.7506744 | 4355.55943  | 0.0043 | 0.997 | 4.93E-08 | count | 1 |
| PRRG4      | 18.7506744 | 4355.55943  | 0.0043 | 0.997 | 4.93E-08 | count | 1 |
| AP000866.1 | 18.7506744 | 4355.55943  | 0.0043 | 0.997 | 4.93E-08 | count | 1 |
| AL365356.1 | 18.7506744 | 4355.55943  | 0.0043 | 0.997 | 4.93E-08 | count | 1 |
| SLC25A18   | 18.7506744 | 4355.55943  | 0.0043 | 0.997 | 4.93E-08 | count | 1 |
| AL022238.2 | 18.7506744 | 4355.55943  | 0.0043 | 0.997 | 4.93E-08 | count | 1 |
| AC068338.3 | 18.7506738 | 4355.559353 | 0.0043 | 0.997 | 4.93E-08 | count | 1 |
| ZNF527     | 18.9710989 | 2883.948415 | 0.0066 | 0.995 | 4.95E-08 | count | 1 |
| BRD3OS     | 18.9710995 | 2883.948236 | 0.0066 | 0.995 | 4.95E-08 | count | 1 |
| TTN-AS1    | 18.9710986 | 2883.948109 | 0.0066 | 0.995 | 4.95E-08 | count | 1 |
| AL360012.1 | 18.9710983 | 2883.94816  | 0.0066 | 0.995 | 4.95E-08 | count | 1 |
| AC108673.3 | 18.9897394 | 2514.38189  | 0.0076 | 0.994 | 4.95E-08 | count | 1 |
| LONP1      | 18.9693737 | 3196.25193  | 0.0059 | 0.995 | 4.95E-08 | count | 1 |
| AC055822.1 | 18.9822738 | 2792.19051  | 0.0068 | 0.995 | 4.95E-08 | count | 1 |
| SLC51A     | 18.9822716 | 2792.191248 | 0.0068 | 0.995 | 4.95E-08 | count | 1 |
| PUS7       | 18.9822723 | 2792.190051 | 0.0068 | 0.995 | 4.95E-08 | count | 1 |
| ZNF169     | 18.9822723 | 2792.190051 | 0.0068 | 0.995 | 4.95E-08 | count | 1 |
| HECTD3     | 18.9822702 | 2792.18958  | 0.0068 | 0.995 | 4.95E-08 | count | 1 |
| ZNF551     | 18.9822704 | 2792.190064 | 0.0068 | 0.995 | 4.95E-08 | count | 1 |
| AC135068.9 | 18.9983781 | 1929.454428 | 0.0098 | 0.992 | 4.95E-08 | count | 1 |
| AC019129.2 | 18.9983777 | 1929.454451 | 0.0098 | 0.992 | 4.95E-08 | count | 1 |
| AC109779.1 | 18.9983781 | 1929.454488 | 0.0098 | 0.992 | 4.95E-08 | count | 1 |
| AC092953.2 | 18.9983781 | 1929.454413 | 0.0098 | 0.992 | 4.95E-08 | count | 1 |
| MAPK8IP3   | 18.9983781 | 1929.454413 | 0.0098 | 0.992 | 4.95E-08 | count | 1 |
| AC135050.1 | 18.9983781 | 1929.454413 | 0.0098 | 0.992 | 4.95E-08 | count | 1 |
| MPRIP-AS1  | 19.052502  | 3177.490514 | 0.006  | 0.995 | 4.96E-08 | count | 1 |
| GDAP1      | 19.052497  | 3177.487159 | 0.006  | 0.995 | 4.96E-08 | count | 1 |
| COX6A2     | 19.2016197 | 2534.595272 | 0.0076 | 0.994 | 4.97E-08 | count | 1 |
| LDAH       | 19.2028109 | 3398.688985 | 0.0057 | 0.995 | 4.98E-08 | count | 1 |
| VCL        | 19.1945013 | 2817.923102 | 0.0068 | 0.995 | 4.98E-08 | count | 1 |
| AL158071.3 | 19.1944996 | 2817.921334 | 0.0068 | 0.995 | 4.98E-08 | count | 1 |
| AC015802.6 | 19.2763597 | 1307.610925 | 0.0147 | 0.988 | 4.98E-08 | count | 1 |
| ABHD8      | 19.2755925 | 2632.6388   | 0.0073 | 0.994 | 4.99E-08 | count | 1 |
| CLYBL      | 19.2510715 | 2943.001664 | 0.0065 | 0.995 | 5.00E-08 | count | 1 |
| TXNRD2     | 19.2510687 | 2943.001689 | 0.0065 | 0.995 | 5.00E-08 | count | 1 |
| PSTK       | 0.5774557  | 0.7629204   | 0.7569 | 0.45  | 5.21E-08 | count | 1 |
| ARSB       | 0.6010732  | 0.9149748   | 0.6569 | 0.512 | 5.44E-08 | count | 1 |
| PCTP       | 0.6010732  | 0.7703953   | 0.7802 | 0.436 | 5.45E-08 | count | 1 |
| TMEM206    | 0.6010732  | 0.6200613   | 0.9694 | 0.333 | 5.46E-08 | count | 1 |
| MAN1C1     | 0.2434013  | 1.0022622   | 0.2429 | 0.808 | 5.70E-08 | count | 1 |

|            |           |           |        |       |          |       |   |
|------------|-----------|-----------|--------|-------|----------|-------|---|
| MINK1      | 1.6094379 | 0.485118  | 3.3176 | 0.001 | 5.90E-08 | count | 1 |
| RIPOR1     | 0.6383754 | 0.6966088 | 0.9164 | 0.36  | 5.92E-08 | count | 1 |
| ZFP57      | 0.6539265 | 0.7508568 | 0.8709 | 0.384 | 5.99E-08 | count | 1 |
| CIB2       | 0.6539265 | 0.8190127 | 0.7984 | 0.425 | 6.00E-08 | count | 1 |
| MAVS       | 0.2932661 | 0.557886  | 0.5257 | 0.599 | 6.88E-08 | count | 1 |
| C17orf58   | 0.7374036 | 0.6587411 | 1.1194 | 0.264 | 6.89E-08 | count | 1 |
| NAT9       | 0.7487886 | 0.8067277 | 0.9282 | 0.354 | 6.97E-08 | count | 1 |
| HLA-DQA2   | 0.759287  | 0.5501901 | 1.38   | 0.169 | 7.12E-08 | count | 1 |
| SMAD3      | 0.7809143 | 0.9129876 | 0.8553 | 0.393 | 7.27E-08 | count | 1 |
| NINJ2      | 0.7809143 | 0.7310621 | 1.0682 | 0.286 | 7.28E-08 | count | 1 |
| AC022182.2 | 0.8080771 | 0.6840837 | 1.1813 | 0.238 | 7.57E-08 | count | 1 |
| PERP       | 0.3285041 | 0.4187482 | 0.7845 | 0.433 | 7.78E-08 | count | 1 |
| CDKAL1     | 0.8253689 | 0.5863472 | 1.4076 | 0.16  | 7.82E-08 | count | 1 |
| PCYOX1L    | 0.8410284 | 0.8713803 | 0.9652 | 0.335 | 7.87E-08 | count | 1 |
| CCDC157    | 0.8410284 | 1.0185403 | 0.8257 | 0.41  | 7.88E-08 | count | 1 |
| ZXDA       | 0.8410284 | 1.0185403 | 0.8257 | 0.41  | 7.88E-08 | count | 1 |
| AC087623.3 | 0.8410284 | 1.0185403 | 0.8257 | 0.41  | 7.88E-08 | count | 1 |
| USP5       | 0.8410284 | 1.0185403 | 0.8257 | 0.41  | 7.88E-08 | count | 1 |
| BANK1      | 0.8410284 | 1.0185403 | 0.8257 | 0.41  | 7.88E-08 | count | 1 |
| FAM229B    | 0.8410284 | 1.0083163 | 0.8341 | 0.405 | 7.88E-08 | count | 1 |
| CDT1       | 0.8410284 | 1.0083163 | 0.8341 | 0.405 | 7.88E-08 | count | 1 |
| TMEM176A   | 0.8410284 | 1.2624049 | 0.6662 | 0.506 | 7.90E-08 | count | 1 |
| CCDC3      | 0.8410284 | 1.2624049 | 0.6662 | 0.506 | 7.90E-08 | count | 1 |
| RTTN       | 0.8410284 | 1.2624049 | 0.6662 | 0.506 | 7.90E-08 | count | 1 |
| ANAPC2     | 0.8410284 | 1.2624049 | 0.6662 | 0.506 | 7.90E-08 | count | 1 |
| CHSY1      | 0.8410284 | 0.9104031 | 0.9238 | 0.356 | 7.97E-08 | count | 1 |
| MAPK8      | 0.8410284 | 0.6365345 | 1.3213 | 0.187 | 8.01E-08 | count | 1 |
| RRM1       | 0.8410284 | 0.5764825 | 1.4589 | 0.146 | 8.05E-08 | count | 1 |
| MYO18A     | 0.87707   | 0.9339348 | 0.9391 | 0.348 | 8.34E-08 | count | 1 |
| CKB        | 0.87707   | 0.7885621 | 1.1122 | 0.267 | 8.35E-08 | count | 1 |
| PRR14L     | 0.900806  | 0.6297587 | 1.4304 | 0.154 | 8.83E-08 | count | 1 |
| TMEM63A    | 0.9301366 | 0.7821192 | 1.1893 | 0.235 | 8.94E-08 | count | 1 |
| TOE1       | 0.9416085 | 0.6610002 | 1.4245 | 0.155 | 8.99E-08 | count | 1 |
| GNB4       | 0.9416085 | 1.1735905 | 0.8023 | 0.423 | 9.01E-08 | count | 1 |
| CNNM2      | 0.9774867 | 0.7748051 | 1.2616 | 0.208 | 9.41E-08 | count | 1 |
| ZNF383     | 0.9774867 | 0.8194263 | 1.1929 | 0.234 | 9.45E-08 | count | 1 |
| ZNF546     | 1.0157771 | 1.0174827 | 0.9983 | 0.319 | 9.71E-08 | count | 1 |
| TCF4       | 1.0157771 | 0.8138038 | 1.2482 | 0.213 | 9.72E-08 | count | 1 |
| SLX4       | 1.0157771 | 1.0324461 | 0.9839 | 0.326 | 9.73E-08 | count | 1 |
| HKR1       | 1.0157771 | 1.0324461 | 0.9839 | 0.326 | 9.73E-08 | count | 1 |
| SLC25A40   | 1.0157771 | 1.0324461 | 0.9839 | 0.326 | 9.73E-08 | count | 1 |
| IL17RA     | 1.0157771 | 0.8876477 | 1.1443 | 0.253 | 9.74E-08 | count | 1 |
| RAB30-AS1  | 1.0593916 | 0.6917024 | 1.5316 | 0.127 | 1.03E-07 | count | 1 |
| GUF1       | 1.0580061 | 0.7704542 | 1.3732 | 0.171 | 1.03E-07 | count | 1 |
| AGPAT4     | 1.0965104 | 0.8657231 | 1.2666 | 0.206 | 1.06E-07 | count | 1 |

|            |            |             |        |        |          |       |   |
|------------|------------|-------------|--------|--------|----------|-------|---|
| MARK4      | 1.0965104  | 0.8177857   | 1.3408 | 0.181  | 1.06E-07 | count | 1 |
| AKAP1      | 1.0965104  | 0.9668224   | 1.1341 | 0.258  | 1.06E-07 | count | 1 |
| EPN2       | 1.0965104  | 0.9668224   | 1.1341 | 0.258  | 1.06E-07 | count | 1 |
| AC007365.1 | 1.0965104  | 0.9668224   | 1.1341 | 0.258  | 1.06E-07 | count | 1 |
| HIPK1-AS1  | 1.0965104  | 0.9241441   | 1.1865 | 0.236  | 1.06E-07 | count | 1 |
| AL137077.2 | 1.0965104  | 0.9241441   | 1.1865 | 0.236  | 1.06E-07 | count | 1 |
| COA7       | 1.0965104  | 1.0583073   | 1.0361 | 0.301  | 1.06E-07 | count | 1 |
| CA13       | 1.0965104  | 1.0583073   | 1.0361 | 0.301  | 1.06E-07 | count | 1 |
| KCTD2      | 1.0965104  | 1.3642178   | 0.8038 | 0.422  | 1.07E-07 | count | 1 |
| PTPRF      | 1.0965104  | 1.3642178   | 0.8038 | 0.422  | 1.07E-07 | count | 1 |
| AL391121.1 | 1.0965104  | 1.3642178   | 0.8038 | 0.422  | 1.07E-07 | count | 1 |
| ZNF841     | 1.0977689  | 0.7454537   | 1.4726 | 0.142  | 1.07E-07 | count | 1 |
| ZMAT1      | 1.0965104  | 0.8920728   | 1.2292 | 0.22   | 1.08E-07 | count | 1 |
| AL359513.1 | 1.0965104  | 0.8456303   | 1.2967 | 0.196  | 1.09E-07 | count | 1 |
| SYMPK      | 1.1354458  | 0.9665308   | 1.1748 | 0.241  | 1.12E-07 | count | 1 |
| PRKCI      | 1.1354458  | 0.7550564   | 1.5038 | 0.134  | 1.12E-07 | count | 1 |
| MAN1B1-DT  | 1.1647521  | 0.9560722   | 1.2183 | 0.224  | 1.14E-07 | count | 1 |
| KIR2DL1    | 1.1647521  | 1.0701332   | 1.0884 | 0.277  | 1.14E-07 | count | 1 |
| ZCCHC3     | 1.17008    | 0.814326    | 1.4369 | 0.152  | 1.16E-07 | count | 1 |
| CCDC125    | 1.1647521  | 0.5993824   | 1.9433 | 0.0529 | 1.16E-07 | count | 1 |
| ANAPC7     | 0.478651   | 0.5435287   | 0.8806 | 0.379  | 1.16E-07 | count | 1 |
| PRRG2      | 1.2021571  | 0.8568684   | 1.403  | 0.162  | 1.20E-07 | count | 1 |
| DLAT       | 1.2409013  | 0.9337017   | 1.329  | 0.185  | 1.22E-07 | count | 1 |
| TBCK       | 1.2409013  | 1.0677158   | 1.1622 | 0.246  | 1.22E-07 | count | 1 |
| RPP21      | 1.2972003  | 0.8725615   | 1.4867 | 0.138  | 1.28E-07 | count | 1 |
| AC110769.2 | 1.2972003  | 1.0182278   | 1.274  | 0.204  | 1.28E-07 | count | 1 |
| NOCT       | 1.2972003  | 1.0182278   | 1.274  | 0.204  | 1.28E-07 | count | 1 |
| TXNRD3     | 1.2972003  | 1.4613101   | 0.8877 | 0.375  | 1.30E-07 | count | 1 |
| AMFR       | 1.3089436  | 0.7082003   | 1.8483 | 0.0655 | 1.33E-07 | count | 1 |
| RAP2C-AS1  | 17.9650267 | 2107.784756 | 0.0085 | 0.993  | 1.35E-07 | count | 1 |
| ASAH2B     | 17.9650266 | 2107.784736 | 0.0085 | 0.993  | 1.35E-07 | count | 1 |
| OXCT2      | 17.9650265 | 2107.784695 | 0.0085 | 0.993  | 1.35E-07 | count | 1 |
| CCDC136    | 17.9650264 | 2107.784783 | 0.0085 | 0.993  | 1.35E-07 | count | 1 |
| HIST1H1A   | 17.9614216 | 2413.147753 | 0.0074 | 0.994  | 1.35E-07 | count | 1 |
| AL049597.2 | 18.0497747 | 2504.469619 | 0.0072 | 0.994  | 1.35E-07 | count | 1 |
| AC009126.1 | 18.1971316 | 2191.232693 | 0.0083 | 0.993  | 1.36E-07 | count | 1 |
| ZNF761     | 18.1971323 | 2191.232338 | 0.0083 | 0.993  | 1.36E-07 | count | 1 |
| NRAV       | 18.1971297 | 2191.231323 | 0.0083 | 0.993  | 1.36E-07 | count | 1 |
| MIR210HG   | 18.1971292 | 2191.231861 | 0.0083 | 0.993  | 1.36E-07 | count | 1 |
| TAB1       | 18.1374087 | 1826.418727 | 0.0099 | 0.992  | 1.36E-07 | count | 1 |
| C5orf30    | 18.1374085 | 1826.418751 | 0.0099 | 0.992  | 1.36E-07 | count | 1 |
| RBP7       | 17.9501801 | 2918.902261 | 0.0061 | 0.995  | 1.36E-07 | count | 1 |
| ARRDC3-AS1 | 17.9501801 | 2918.902261 | 0.0061 | 0.995  | 1.36E-07 | count | 1 |
| PYGL       | 17.9501801 | 2918.902261 | 0.0061 | 0.995  | 1.36E-07 | count | 1 |
| CDH4       | 17.9501801 | 2918.902261 | 0.0061 | 0.995  | 1.36E-07 | count | 1 |

|            |            |             |        |        |          |       |   |
|------------|------------|-------------|--------|--------|----------|-------|---|
| GAB2       | 17.9501798 | 2918.902299 | 0.0061 | 0.995  | 1.36E-07 | count | 1 |
| ZNF771     | 17.9501798 | 2918.902299 | 0.0061 | 0.995  | 1.36E-07 | count | 1 |
| AC011451.1 | 17.9501798 | 2918.902299 | 0.0061 | 0.995  | 1.36E-07 | count | 1 |
| RFPL2      | 17.9501798 | 2918.902299 | 0.0061 | 0.995  | 1.36E-07 | count | 1 |
| CCNE2      | 18.2289445 | 2073.806788 | 0.0088 | 0.993  | 1.36E-07 | count | 1 |
| RYR1       | 18.2289426 | 2073.806942 | 0.0088 | 0.993  | 1.36E-07 | count | 1 |
| AC021054.1 | 0.5489882  | 0.9015589   | 0.6089 | 0.543  | 1.36E-07 | count | 1 |
| MAST4      | 1.3742301  | 1.0093309   | 1.3615 | 0.174  | 1.37E-07 | count | 1 |
| GNA12      | 18.276986  | 1873.45867  | 0.0098 | 0.992  | 1.37E-07 | count | 1 |
| FICD       | 18.276986  | 1873.458729 | 0.0098 | 0.992  | 1.37E-07 | count | 1 |
| GRK5       | 18.3639929 | 2048.478886 | 0.009  | 0.993  | 1.37E-07 | count | 1 |
| PBX4       | 18.3639943 | 2048.47885  | 0.009  | 0.993  | 1.37E-07 | count | 1 |
| ZBTB49     | 18.3639918 | 2048.478314 | 0.009  | 0.993  | 1.37E-07 | count | 1 |
| POPDC2     | 18.4487295 | 2105.304886 | 0.0088 | 0.993  | 1.37E-07 | count | 1 |
| FAM27C     | 18.4487293 | 2105.305167 | 0.0088 | 0.993  | 1.37E-07 | count | 1 |
| MTFMT      | 18.3758835 | 1964.715688 | 0.0094 | 0.993  | 1.37E-07 | count | 1 |
| TRIM61     | 18.2710113 | 1993.606505 | 0.0092 | 0.993  | 1.38E-07 | count | 1 |
| HAR1B      | 18.3647437 | 2593.053641 | 0.0071 | 0.994  | 1.38E-07 | count | 1 |
| GGT7       | 18.4275251 | 2250.847632 | 0.0082 | 0.993  | 1.38E-07 | count | 1 |
| CDAN1      | 18.4275252 | 2250.848221 | 0.0082 | 0.993  | 1.38E-07 | count | 1 |
| NPL        | 18.427524  | 2250.84778  | 0.0082 | 0.993  | 1.38E-07 | count | 1 |
| CBWD2      | 18.5848797 | 1966.744498 | 0.0094 | 0.992  | 1.39E-07 | count | 1 |
| MYO1D      | 18.6215892 | 2091.648323 | 0.0089 | 0.993  | 1.39E-07 | count | 1 |
| P3H4       | 18.5021127 | 2400.967661 | 0.0077 | 0.994  | 1.40E-07 | count | 1 |
| C15orf39   | 18.3551465 | 3120.676864 | 0.0059 | 0.995  | 1.40E-07 | count | 1 |
| SGCB       | 18.4781968 | 2326.583155 | 0.0079 | 0.994  | 1.42E-07 | count | 1 |
| VPS8       | 1.4208541  | 0.9322919   | 1.524  | 0.128  | 1.42E-07 | count | 1 |
| ASB3       | 18.7469836 | 2500.074413 | 0.0075 | 0.994  | 1.43E-07 | count | 1 |
| DLG5       | 18.8011165 | 2029.113066 | 0.0093 | 0.993  | 1.43E-07 | count | 1 |
| IL4I1      | 18.3199558 | 3511.685496 | 0.0052 | 0.996  | 1.45E-07 | count | 1 |
| C1orf159   | 18.7090844 | 3003.974011 | 0.0062 | 0.995  | 1.46E-07 | count | 1 |
| MFSD9      | 18.8062003 | 2336.247346 | 0.008  | 0.994  | 1.47E-07 | count | 1 |
| SSX2IP     | 1.4628909  | 1.0541365   | 1.3878 | 0.166  | 1.47E-07 | count | 1 |
| FAM69A     | 1.4628909  | 1.1044031   | 1.3246 | 0.186  | 1.47E-07 | count | 1 |
| PPP2R1B    | 1.4628909  | 1.1986289   | 1.2205 | 0.223  | 1.48E-07 | count | 1 |
| SHLD3      | 18.8770806 | 2273.060156 | 0.0083 | 0.993  | 1.48E-07 | count | 1 |
| IKZF4      | 18.9321368 | 2420.162325 | 0.0078 | 0.994  | 1.48E-07 | count | 1 |
| KIAA0556   | 1.4968159  | 0.8544726   | 1.7517 | 0.0808 | 1.50E-07 | count | 1 |
| ZNF792     | 18.8756969 | 2758.612987 | 0.0068 | 0.995  | 1.50E-07 | count | 1 |
| AP1S3      | 18.9465766 | 2664.824192 | 0.0071 | 0.994  | 1.53E-07 | count | 1 |
| CKAP4      | 18.4636791 | 3773.328201 | 0.0049 | 0.996  | 1.53E-07 | count | 1 |
| CCR5       | 1.5357137  | 0.7515177   | 2.0435 | 0.0418 | 1.54E-07 | count | 1 |
| FOCAD      | 1.5357137  | 1.0296118   | 1.4915 | 0.137  | 1.54E-07 | count | 1 |
| CCDC51     | 1.5357137  | 0.8872723   | 1.7308 | 0.0844 | 1.55E-07 | count | 1 |
| MLLT1      | 1.5357137  | 1.1100444   | 1.3835 | 0.167  | 1.55E-07 | count | 1 |



|            |            |            |          |        |             |       |   |
|------------|------------|------------|----------|--------|-------------|-------|---|
| OSBPL7     | 1.5357137  | 0.9292966  | 1.6526   | 0.0994 | 1.55E-07    | count | 1 |
| AC062029.1 | 1.5357137  | 1.1439137  | 1.3425   | 0.18   | 1.56E-07    | count | 1 |
| MAU2       | 0.618588   | 0.5588741  | 1.1068   | 0.269  | 1.57E-07    | count | 1 |
| KCTD17     | 0.629516   | 0.6097222  | 1.0325   | 0.303  | 1.58E-07    | count | 1 |
| SPON2      | 1.7008996  | 0.966302   | 1.7602   | 0.0793 | 1.75E-07    | count | 1 |
| S100A12    | 18.6659408 | 4174.89153 | 0.0045   | 0.996  | 1.76E-07    | count | 1 |
| AKT3       | 0.7016466  | 0.5662264  | 1.2392   | 0.216  | 1.77E-07    | count | 1 |
| TNPO3      | 1.8766819  | 1.0525294  | 1.783    | 0.0755 | 1.93E-07    | count | 1 |
| SLAMF1     | 1.7525388  | 1.5951744  | 1.0987   | 0.273  | 1.94E-07    | count | 1 |
| SYNE3      | 1.8766819  | 1.0148075  | 1.8493   | 0.0653 | 1.96E-07    | count | 1 |
| FBXO5      | 1.91663    | 0.8896157  | 2.1544   | 0.0319 | 1.99E-07    | count | 1 |
| LINC00513  | 0.7475178  | 0.6839933  | 1.0929   | 0.275  | 2.00E-07    | count | 1 |
| RNF19B     | 1.9919746  | 1.2450067  | 1.6      | 0.111  | 2.18E-07    | count | 1 |
| NT5C2      | 2.0402208  | 1.0180975  | 2.004    | 0.0459 | 2.20E-07    | count | 1 |
| BTBD9      | 2.1820194  | 0.9300197  | 2.3462   | 0.0196 | 2.26E-07    | count | 1 |
| CEP19      | 2.1306723  | 0.9165492  | 2.3247   | 0.0207 | 2.28E-07    | count | 1 |
| FOXO4      | 2.1441725  | 0.9028459  | 2.3749   | 0.0181 | 2.30E-07    | count | 1 |
| GRAMD1B    | 1.018864   | 0.7246131  | 1.4061   | 0.161  | 2.76E-07    | count | 1 |
| SESN2      | 1.1222732  | 0.8000325  | 1.4028   | 0.162  | 3.11E-07    | count | 1 |
| RPS6KC1    | 1.3049155  | 0.5824385  | 2.2404   | 0.0257 | 3.73E-07    | count | 1 |
| HSPA2      | 1.4824758  | 0.8283735  | 1.7896   | 0.0744 | 4.29E-07    | count | 1 |
| C6orf120   | 1.49913    | 1.0309861  | 1.4541   | 0.147  | 4.46E-07    | count | 1 |
| PCNX4      | 1.746981   | 0.6897025  | 2.5329   | 0.0118 | 5.76E-07    | count | 1 |
| MYO1F      | 3.76E-05   | 0.3543215  | 1.00E-04 | 1      | 5.15E-05    | count | 1 |
| NUDT5      | 0.0001201  | 0.3554876  | 3.00E-04 | 1      | 0.000166134 | count | 1 |
| TP53I13    | 0.0001657  | 0.3672787  | 5.00E-04 | 1      | 0.00023021  | count | 1 |
| KLRB1      | 0.0001911  | 0.1040461  | 0.0018   | 0.999  | 0.000275123 | count | 1 |
| MTHFR      | 0.0005205  | 0.5934903  | 9.00E-04 | 0.999  | 0.000305273 | count | 1 |
| SYNGR2     | 0.0002759  | 0.3615308  | 8.00E-04 | 0.999  | 0.000383677 | count | 1 |
| TMX3       | 0.0003172  | 0.4792302  | 7.00E-04 | 0.999  | 0.00042497  | count | 1 |
| LARP7      | 0.0004006  | 0.3249459  | 0.0012   | 0.999  | 0.00056326  | count | 1 |
| SERPINB9   | 0.0006997  | 0.4744417  | 0.0015   | 0.999  | 0.000583536 | count | 1 |
| MAF        | 0.0010667  | 0.7904468  | 0.0013   | 0.9989 | 0.000625662 | count | 1 |
| USP15      | 0.0004466  | 0.2011997  | 0.0022   | 0.9982 | 0.000634656 | count | 1 |
| DCP1A      | 0.0005608  | 0.5574499  | 0.001    | 0.999  | 0.000669452 | count | 1 |
| YPEL3      | 0.0005477  | 0.1878855  | 0.0029   | 0.9977 | 0.000783476 | count | 1 |
| WDR13      | 0.0006405  | 0.6088766  | 0.0011   | 0.999  | 0.000823827 | count | 1 |
| SNX13      | 0.0016003  | 0.6408857  | 0.0025   | 0.998  | 0.000938703 | count | 1 |
| KBTBD3     | 0.00085    | 0.6436149  | 0.0013   | 0.999  | 0.001014693 | count | 1 |
| DUSP8      | 0.001402   | 0.5849244  | 0.0024   | 0.998  | 0.001169313 | count | 1 |
| CDKN2A     | 0.000979   | 0.4834637  | 0.002    | 0.998  | 0.001311631 | count | 1 |
| TTC39B     | 0.0009942  | 0.4042734  | 0.0025   | 0.998  | 0.001336764 | count | 1 |
| IRF3       | 0.0011027  | 0.3263439  | 0.0034   | 0.997  | 0.001542941 | count | 1 |
| RPS15      | 0.0011329  | 0.0533798  | 0.0212   | 0.983  | 0.001633032 | count | 1 |
| OCIAD1     | 0.001328   | 0.2126246  | 0.0062   | 0.995  | 0.001891679 | count | 1 |

|           |           |           |        |        |             |       |   |
|-----------|-----------|-----------|--------|--------|-------------|-------|---|
| MT-CO2    | 0.0013646 | 0.0552439 | 0.0247 | 0.98   | 0.001967755 | count | 1 |
| DNAJC21   | 0.001549  | 0.2532474 | 0.0061 | 0.995  | 0.002176965 | count | 1 |
| UBE3C     | 0.0017238 | 0.8669535 | 0.002  | 0.998  | 0.002290294 | count | 1 |
| UBXN1     | 0.0021086 | 0.1682609 | 0.0125 | 0.99   | 0.003013138 | count | 1 |
| EIF3B     | 0.0023898 | 0.455774  | 0.0052 | 0.996  | 0.003099798 | count | 1 |
| AAGAB     | 0.0028825 | 0.6486938 | 0.0044 | 0.996  | 0.003345093 | count | 1 |
| SMIM24    | 0.0028825 | 1.0089237 | 0.0029 | 0.998  | 0.003345093 | count | 1 |
| NUP107    | 0.0029144 | 0.5519121 | 0.0053 | 0.996  | 0.003931431 | count | 1 |
| ATF4      | 0.003063  | 0.2581613 | 0.0119 | 0.9905 | 0.004333531 | count | 1 |
| MRPL27    | 0.0031803 | 0.3863146 | 0.0082 | 0.993  | 0.004393936 | count | 1 |
| ATP5PF    | 0.0034525 | 0.1642636 | 0.021  | 0.983  | 0.004932926 | count | 1 |
| TMEM230   | 0.0035165 | 0.2290664 | 0.0154 | 0.988  | 0.004998065 | count | 1 |
| S100A10   | 0.0035288 | 0.1430479 | 0.0247 | 0.98   | 0.005076928 | count | 1 |
| CLUAP1    | 0.0042637 | 0.6505218 | 0.0066 | 0.995  | 0.005368173 | count | 1 |
| PITPNA    | 0.0042637 | 0.6461366 | 0.0066 | 0.995  | 0.005368173 | count | 1 |
| SSBP2     | 0.0042533 | 0.6629314 | 0.0064 | 0.995  | 0.005417776 | count | 1 |
| CCND3     | 0.0039069 | 0.2056793 | 0.019  | 0.9849 | 0.005546562 | count | 1 |
| PHB2      | 0.0039278 | 0.2339691 | 0.0168 | 0.9866 | 0.0055721   | count | 1 |
| TSTA3     | 0.0041664 | 0.3926998 | 0.0106 | 0.992  | 0.005740714 | count | 1 |
| MALAT1    | 0.0040308 | 0.0430004 | 0.0937 | 0.9254 | 0.00581507  | count | 1 |
| CTSC      | 0.0044123 | 0.1604392 | 0.0275 | 0.9781 | 0.0063219   | count | 1 |
| UQCR10    | 0.0044406 | 0.2386062 | 0.0186 | 0.9852 | 0.006326875 | count | 1 |
| EVI5      | 0.0051797 | 0.8276837 | 0.0063 | 0.995  | 0.006521615 | count | 1 |
| ISCU      | 0.0047564 | 0.205619  | 0.0231 | 0.9816 | 0.006754945 | count | 1 |
| KARS      | 0.0056004 | 0.5178091 | 0.0108 | 0.991  | 0.007051386 | count | 1 |
| ITGAL     | 0.0054052 | 0.4010531 | 0.0135 | 0.989  | 0.007242186 | count | 1 |
| AKAP17A   | 0.0052237 | 0.3122131 | 0.0167 | 0.987  | 0.007271104 | count | 1 |
| ZNF652    | 0.005181  | 0.263144  | 0.0197 | 0.984  | 0.007297232 | count | 1 |
| TTC32     | 0.0055168 | 0.4192861 | 0.0132 | 0.99   | 0.007590106 | count | 1 |
| RFT1      | 0.0060636 | 0.7387478 | 0.0082 | 0.993  | 0.00763469  | count | 1 |
| LIPA      | 0.0063664 | 0.5814575 | 0.0109 | 0.991  | 0.008371084 | count | 1 |
| TMEM109   | 0.0063337 | 0.2507214 | 0.0253 | 0.98   | 0.008930904 | count | 1 |
| SWI5      | 0.0087482 | 0.5801644 | 0.0151 | 0.988  | 0.00925071  | count | 1 |
| ITGB2-AS1 | 0.0087482 | 0.6888289 | 0.0127 | 0.99   | 0.00925071  | count | 1 |
| POLR2E    | 0.0066916 | 0.2870807 | 0.0233 | 0.9814 | 0.009445292 | count | 1 |
| RAB27A    | 0.0070794 | 0.3329156 | 0.0213 | 0.983  | 0.009878507 | count | 1 |
| ENO1      | 0.0070339 | 0.1885902 | 0.0373 | 0.97   | 0.010056147 | count | 1 |
| MTHFD2L   | 0.0079829 | 0.6332219 | 0.0126 | 0.99   | 0.010355813 | count | 1 |
| CUL1      | 0.0085365 | 0.5199021 | 0.0164 | 0.987  | 0.010417751 | count | 1 |
| RNF103    | 0.0107622 | 0.7639336 | 0.0141 | 0.989  | 0.010451646 | count | 1 |
| DAG1      | 0.0107622 | 0.815163  | 0.0132 | 0.989  | 0.010451646 | count | 1 |
| RPS19BP1  | 0.0079404 | 0.235807  | 0.0337 | 0.9732 | 0.011234297 | count | 1 |
| MKNK2     | 0.00976   | 0.322351  | 0.0303 | 0.976  | 0.011329525 | count | 1 |
| DARS      | 0.0085112 | 0.3183191 | 0.0267 | 0.979  | 0.011744199 | count | 1 |
| CCNI      | 0.0082508 | 0.1442571 | 0.0572 | 0.954  | 0.011837034 | count | 1 |

|            |           |           |        |        |             |       |   |
|------------|-----------|-----------|--------|--------|-------------|-------|---|
| TRIM38     | 0.0086148 | 0.3382551 | 0.0255 | 0.98   | 0.011917699 | count | 1 |
| C8orf59    | 0.0086009 | 0.2135417 | 0.0403 | 0.9679 | 0.012243265 | count | 1 |
| ERG28      | 0.0093305 | 0.4734288 | 0.0197 | 0.984  | 0.012659071 | count | 1 |
| NDUFAF6    | 0.0097866 | 0.5696903 | 0.0172 | 0.986  | 0.012696146 | count | 1 |
| ATP5MC2    | 0.0090658 | 0.1073862 | 0.0844 | 0.933  | 0.013033963 | count | 1 |
| SEC61A1    | 0.0104274 | 0.5125173 | 0.0203 | 0.984  | 0.01328425  | count | 1 |
| ZNF330     | 0.0101359 | 0.4788111 | 0.0212 | 0.983  | 0.013402634 | count | 1 |
| KLRF1      | 0.0094363 | 0.1888893 | 0.05   | 0.9602 | 0.013511166 | count | 1 |
| SLC50A1    | 0.0101284 | 0.390936  | 0.0259 | 0.979  | 0.013775944 | count | 1 |
| CSRNP1     | 0.0098875 | 0.231645  | 0.0427 | 0.966  | 0.014003084 | count | 1 |
| C8orf76    | 0.0144448 | 0.6706714 | 0.0215 | 0.983  | 0.014031516 | count | 1 |
| ZDHHC5     | 0.0110481 | 0.5370207 | 0.0206 | 0.984  | 0.014213726 | count | 1 |
| C9orf78    | 0.0099679 | 0.1659298 | 0.0601 | 0.9521 | 0.014243213 | count | 1 |
| AGTPBP1    | 0.0104612 | 0.4414172 | 0.0237 | 0.981  | 0.014345932 | count | 1 |
| GTDC1      | 0.0110434 | 0.6051738 | 0.0182 | 0.985  | 0.014522064 | count | 1 |
| TIMM8A     | 0.0138038 | 0.9245496 | 0.0149 | 0.988  | 0.01460084  | count | 1 |
| TMEM64     | 0.0138038 | 1.000574  | 0.0138 | 0.989  | 0.01460084  | count | 1 |
| C3orf14    | 0.0138038 | 1.071627  | 0.0129 | 0.99   | 0.01460084  | count | 1 |
| ZNF816     | 0.0138038 | 1.260988  | 0.0109 | 0.991  | 0.01460084  | count | 1 |
| REEP3      | 0.0125854 | 0.599539  | 0.021  | 0.983  | 0.014610973 | count | 1 |
| DAPP1      | 0.0158503 | 0.8561944 | 0.0185 | 0.985  | 0.015398278 | count | 1 |
| SLTM       | 0.0109286 | 0.1863135 | 0.0587 | 0.9533 | 0.015500997 | count | 1 |
| SNX6       | 0.0109535 | 0.2030201 | 0.054  | 0.957  | 0.015566368 | count | 1 |
| PSMD1      | 0.0115724 | 0.4236374 | 0.0273 | 0.978  | 0.015701187 | count | 1 |
| PSMB1      | 0.0109799 | 0.1658077 | 0.0662 | 0.9472 | 0.015714185 | count | 1 |
| DET1       | 0.01899   | 1.0133365 | 0.0187 | 0.9851 | 0.015862961 | count | 1 |
| SELENOW    | 0.0111578 | 0.1909321 | 0.0584 | 0.9534 | 0.015886935 | count | 1 |
| NMNAT1     | 0.0270237 | 0.6475948 | 0.0417 | 0.967  | 0.015901701 | count | 1 |
| SRSF11     | 0.0113124 | 0.2019295 | 0.056  | 0.955  | 0.016166443 | count | 1 |
| TRAPPC1    | 0.0113685 | 0.1979836 | 0.0574 | 0.954  | 0.016232403 | count | 1 |
| N4BP2L2    | 0.0115078 | 0.171598  | 0.0671 | 0.947  | 0.016466747 | count | 1 |
| SNRPC      | 0.0119701 | 0.2287368 | 0.0523 | 0.9583 | 0.017000099 | count | 1 |
| WIPF1      | 0.0120495 | 0.2466303 | 0.0489 | 0.9611 | 0.017048249 | count | 1 |
| AC243829.1 | 0.0131959 | 0.7196413 | 0.0183 | 0.985  | 0.017120257 | count | 1 |
| RBM23      | 0.0127947 | 0.4850834 | 0.0264 | 0.979  | 0.017144941 | count | 1 |
| NDUFS3     | 0.0123214 | 0.2965549 | 0.0415 | 0.967  | 0.017193748 | count | 1 |
| ATP6V1C1   | 0.0150542 | 0.6514415 | 0.0231 | 0.982  | 0.017478877 | count | 1 |
| KMT2E      | 0.0123997 | 0.1292552 | 0.0959 | 0.9236 | 0.01776281  | count | 1 |
| IDI1       | 0.012506  | 0.2473831 | 0.0506 | 0.9597 | 0.017778182 | count | 1 |
| NIT1       | 0.0149712 | 0.806361  | 0.0186 | 0.985  | 0.018274302 | count | 1 |
| SC5D       | 0.0191341 | 0.5167467 | 0.037  | 0.97   | 0.018592581 | count | 1 |
| METRNL     | 0.0129921 | 0.1596018 | 0.0814 | 0.935  | 0.018649028 | count | 1 |
| ADA        | 0.0145122 | 0.6497524 | 0.0223 | 0.982  | 0.018671861 | count | 1 |
| ANXA6      | 0.0132333 | 0.2600558 | 0.0509 | 0.959  | 0.018697097 | count | 1 |
| OXLD1      | 0.0137078 | 0.3846742 | 0.0356 | 0.972  | 0.018764428 | count | 1 |

|           |           |           |        |        |             |       |   |
|-----------|-----------|-----------|--------|--------|-------------|-------|---|
| RPS25     | 0.0131126 | 0.0544833 | 0.2407 | 0.81   | 0.018896718 | count | 1 |
| EXOSC1    | 0.0140516 | 0.3965071 | 0.0354 | 0.972  | 0.01895803  | count | 1 |
| NEDD8     | 0.0133277 | 0.1667357 | 0.0799 | 0.9363 | 0.019083846 | count | 1 |
| PCBD2     | 0.022895  | 0.9650169 | 0.0237 | 0.981  | 0.019131464 | count | 1 |
| FAM221A   | 0.022895  | 0.9906623 | 0.0231 | 0.982  | 0.019131464 | count | 1 |
| CDK17     | 0.0171237 | 0.4838664 | 0.0354 | 0.972  | 0.019136495 | count | 1 |
| FAM49B    | 0.0133947 | 0.1727389 | 0.0775 | 0.938  | 0.019152345 | count | 1 |
| RSRP1     | 0.0134683 | 0.1416569 | 0.0951 | 0.9243 | 0.019290229 | count | 1 |
| DCAF10    | 0.0161894 | 0.8139449 | 0.0199 | 0.984  | 0.019336937 | count | 1 |
| GDF11     | 0.0174375 | 0.6032041 | 0.0289 | 0.977  | 0.019487467 | count | 1 |
| TMEM106B  | 0.0148296 | 0.4518338 | 0.0328 | 0.974  | 0.019610687 | count | 1 |
| ADIRF     | 0.0169345 | 0.8996175 | 0.0188 | 0.985  | 0.019663526 | count | 1 |
| GRPEL1    | 0.0144082 | 0.3075537 | 0.0468 | 0.963  | 0.020174844 | count | 1 |
| TRBC1     | 0.0141603 | 0.2084142 | 0.0679 | 0.946  | 0.020233937 | count | 1 |
| TMEM135   | 0.0344225 | 0.8199032 | 0.042  | 0.967  | 0.020273741 | count | 1 |
| MYNN      | 0.0148154 | 0.4554895 | 0.0325 | 0.974  | 0.020280847 | count | 1 |
| GRASP     | 0.0163197 | 0.3795473 | 0.043  | 0.9657 | 0.020553773 | count | 1 |
| VEZF1     | 0.015152  | 0.4812871 | 0.0315 | 0.975  | 0.020558827 | count | 1 |
| ZBTB48    | 0.0163853 | 0.6453003 | 0.0254 | 0.98   | 0.020877501 | count | 1 |
| PPAN      | 0.0159563 | 0.4599855 | 0.0347 | 0.972  | 0.021101049 | count | 1 |
| NDFIP1    | 0.0152693 | 0.2671164 | 0.0572 | 0.954  | 0.021450835 | count | 1 |
| GPR180    | 0.0184973 | 0.6990235 | 0.0265 | 0.979  | 0.021479536 | count | 1 |
| METTL3    | 0.0184973 | 0.7663523 | 0.0241 | 0.981  | 0.021479536 | count | 1 |
| FTH1      | 0.0149095 | 0.0835029 | 0.1786 | 0.858  | 0.021493958 | count | 1 |
| MLLT10    | 0.0169345 | 0.5189212 | 0.0326 | 0.974  | 0.021789657 | count | 1 |
| RGS14     | 0.0156667 | 0.2972106 | 0.0527 | 0.958  | 0.021963057 | count | 1 |
| AREG      | 0.0153991 | 0.2125313 | 0.0725 | 0.942  | 0.022146893 | count | 1 |
| CARD19    | 0.0158034 | 0.358105  | 0.0441 | 0.965  | 0.022222047 | count | 1 |
| COX11     | 0.0173528 | 0.5637404 | 0.0308 | 0.975  | 0.022515348 | count | 1 |
| SECISBP2  | 0.0162365 | 0.3840228 | 0.0423 | 0.966  | 0.022581825 | count | 1 |
| PPP2R2B   | 0.016602  | 0.3630294 | 0.0457 | 0.964  | 0.022682355 | count | 1 |
| HLA-DMB   | 0.0176383 | 0.4894042 | 0.036  | 0.971  | 0.022695596 | count | 1 |
| C16orf87  | 0.0170067 | 0.5147125 | 0.033  | 0.974  | 0.022700761 | count | 1 |
| TBCB      | 0.0160971 | 0.2004841 | 0.0803 | 0.9361 | 0.022975568 | count | 1 |
| PET100    | 0.0164365 | 0.3031015 | 0.0542 | 0.957  | 0.023000825 | count | 1 |
| NINJ1     | 0.0169524 | 0.4021875 | 0.0422 | 0.966  | 0.023393602 | count | 1 |
| MRPS33    | 0.0171633 | 0.4186921 | 0.041  | 0.967  | 0.023745418 | count | 1 |
| HERPUD1   | 0.0166208 | 0.1603055 | 0.1037 | 0.917  | 0.023781035 | count | 1 |
| LINC02256 | 0.0199947 | 0.6907812 | 0.0289 | 0.977  | 0.024410058 | count | 1 |
| CTSZ      | 0.0178239 | 0.3135523 | 0.0568 | 0.955  | 0.024741798 | count | 1 |
| IVNS1ABP  | 0.01806   | 0.2512088 | 0.0719 | 0.943  | 0.02495517  | count | 1 |
| SRRD      | 0.0186106 | 0.4783914 | 0.0389 | 0.969  | 0.02518459  | count | 1 |
| PRDX5     | 0.0178177 | 0.1765717 | 0.1009 | 0.9197 | 0.025373017 | count | 1 |
| SEC61B    | 0.0178705 | 0.1560652 | 0.1145 | 0.9089 | 0.025588832 | count | 1 |
| UTP18     | 0.0197718 | 0.4451658 | 0.0444 | 0.965  | 0.026004082 | count | 1 |

|          |           |           |        |        |             |       |   |
|----------|-----------|-----------|--------|--------|-------------|-------|---|
| IKZF3    | 0.0183288 | 0.2223226 | 0.0824 | 0.934  | 0.026115436 | count | 1 |
| COX7B    | 0.0183342 | 0.2015603 | 0.091  | 0.928  | 0.026117456 | count | 1 |
| RPS7     | 0.0181376 | 0.0517986 | 0.3502 | 0.726  | 0.026150159 | count | 1 |
| TRAC     | 0.0185454 | 0.2638018 | 0.0703 | 0.944  | 0.026218312 | count | 1 |
| SIRT1    | 0.0270247 | 0.5316449 | 0.0508 | 0.959  | 0.02627386  | count | 1 |
| PRIM1    | 0.0199464 | 0.5667425 | 0.0352 | 0.972  | 0.026379486 | count | 1 |
| EGR2     | 0.0191769 | 0.5004908 | 0.0383 | 0.9695 | 0.026978171 | count | 1 |
| MT1F     | 0.0199615 | 0.4989734 | 0.04   | 0.968  | 0.0272156   | count | 1 |
| P4HB     | 0.0194022 | 0.2457525 | 0.0789 | 0.937  | 0.027230025 | count | 1 |
| ARID3A   | 0.0244028 | 0.6912556 | 0.0353 | 0.972  | 0.027280475 | count | 1 |
| SNRNP40  | 0.0203224 | 0.3767843 | 0.0539 | 0.957  | 0.027644465 | count | 1 |
| INPP1    | 0.0216346 | 0.5752268 | 0.0376 | 0.97   | 0.027840214 | count | 1 |
| STMN1    | 0.0198487 | 0.2493296 | 0.0796 | 0.937  | 0.027946923 | count | 1 |
| ETV3     | 0.021204  | 0.4802074 | 0.0442 | 0.965  | 0.028043293 | count | 1 |
| WDR4     | 0.0265508 | 0.7653414 | 0.0347 | 0.972  | 0.028103658 | count | 1 |
| STRIP1   | 0.0265508 | 0.777841  | 0.0341 | 0.973  | 0.028103658 | count | 1 |
| AURKAIP1 | 0.019763  | 0.2254167 | 0.0877 | 0.9302 | 0.028152917 | count | 1 |
| GBP3     | 0.0213568 | 0.6295935 | 0.0339 | 0.973  | 0.02850925  | count | 1 |
| SELENOK  | 0.0199775 | 0.1461953 | 0.1366 | 0.8914 | 0.028633913 | count | 1 |
| MT-CO3   | 0.019909  | 0.0660249 | 0.3015 | 0.763  | 0.028705226 | count | 1 |
| MRPS31   | 0.0206544 | 0.3564693 | 0.0579 | 0.954  | 0.028922084 | count | 1 |
| LPIN2    | 0.0212444 | 0.4038847 | 0.0526 | 0.958  | 0.029083506 | count | 1 |
| FERMT3   | 0.0206764 | 0.264105  | 0.0783 | 0.938  | 0.029124114 | count | 1 |
| ATRX     | 0.020839  | 0.2380562 | 0.0875 | 0.9303 | 0.029444016 | count | 1 |
| SAP18    | 0.0205816 | 0.1560533 | 0.1319 | 0.8952 | 0.02950485  | count | 1 |
| USO1     | 0.0228865 | 0.5681021 | 0.0403 | 0.968  | 0.029698772 | count | 1 |
| ING1     | 0.0217426 | 0.3408443 | 0.0638 | 0.949  | 0.029707334 | count | 1 |
| RUNX1    | 0.0241789 | 0.4919942 | 0.0491 | 0.961  | 0.030035007 | count | 1 |
| SUGT1    | 0.0214717 | 0.2867178 | 0.0749 | 0.94   | 0.030134816 | count | 1 |
| ATP5MG   | 0.0212029 | 0.1254248 | 0.169  | 0.866  | 0.030417948 | count | 1 |
| YRDC     | 0.0277452 | 0.484484  | 0.0573 | 0.954  | 0.031021825 | count | 1 |
| RALGPS1  | 0.0529462 | 1.032924  | 0.0513 | 0.959  | 0.031253341 | count | 1 |
| CDKN2B   | 0.0529462 | 1.228266  | 0.0431 | 0.9656 | 0.031253341 | count | 1 |
| TLE4     | 0.0227178 | 0.2520271 | 0.0901 | 0.928  | 0.031260714 | count | 1 |
| MIEN1    | 0.0222242 | 0.289437  | 0.0768 | 0.939  | 0.031304532 | count | 1 |
| PPP4R3B  | 0.022519  | 0.3701822 | 0.0608 | 0.952  | 0.031376007 | count | 1 |
| EEF1A1   | 0.0218485 | 0.0465554 | 0.4693 | 0.639  | 0.031510357 | count | 1 |
| COMMD1   | 0.0240814 | 0.3853909 | 0.0625 | 0.95   | 0.031850363 | count | 1 |
| SUPT20H  | 0.0240814 | 0.4031111 | 0.0597 | 0.952  | 0.031850363 | count | 1 |
| PRMT2    | 0.0224093 | 0.209646  | 0.1069 | 0.9149 | 0.031852597 | count | 1 |
| PUS3     | 0.0285355 | 0.8192942 | 0.0348 | 0.972  | 0.031906621 | count | 1 |
| GLMP     | 0.0279203 | 0.7064208 | 0.0395 | 0.968  | 0.032434056 | count | 1 |
| CCDC43   | 0.0246026 | 0.4998378 | 0.0492 | 0.961  | 0.032539999 | count | 1 |
| DPM2     | 0.0237948 | 0.3854698 | 0.0617 | 0.951  | 0.032960535 | count | 1 |
| SKA2     | 0.0245465 | 0.3900844 | 0.0629 | 0.95   | 0.033122117 | count | 1 |

|            |           |           |        |        |             |       |   |
|------------|-----------|-----------|--------|--------|-------------|-------|---|
| TMEM33     | 0.025069  | 0.5959906 | 0.0421 | 0.966  | 0.033320246 | count | 1 |
| RBL2       | 0.0243997 | 0.3825099 | 0.0638 | 0.949  | 0.033338746 | count | 1 |
| GZMM       | 0.0237297 | 0.1504001 | 0.1578 | 0.875  | 0.034110211 | count | 1 |
| RABAC1     | 0.0239826 | 0.1699398 | 0.1411 | 0.8879 | 0.034345021 | count | 1 |
| CEPT1      | 0.0411579 | 0.8250521 | 0.0499 | 0.9602 | 0.034446508 | count | 1 |
| SMNDC1     | 0.0248371 | 0.2812647 | 0.0883 | 0.93   | 0.034513188 | count | 1 |
| NXF1       | 0.0355191 | 0.623383  | 0.057  | 0.955  | 0.034551857 | count | 1 |
| PSMA3      | 0.0244631 | 0.2433442 | 0.1005 | 0.92   | 0.034554665 | count | 1 |
| FAF1       | 0.0271277 | 0.5311686 | 0.0511 | 0.959  | 0.034913201 | count | 1 |
| MRPL18     | 0.0250415 | 0.3683309 | 0.068  | 0.946  | 0.035181017 | count | 1 |
| SQSTM1     | 0.0246612 | 0.1716212 | 0.1437 | 0.886  | 0.035244003 | count | 1 |
| RAB29      | 0.0262823 | 0.4380047 | 0.06   | 0.952  | 0.035465157 | count | 1 |
| TUBA1C     | 0.0253743 | 0.3104352 | 0.0817 | 0.935  | 0.035510123 | count | 1 |
| ENTR1      | 0.026761  | 0.4701165 | 0.0569 | 0.955  | 0.035726296 | count | 1 |
| CASP8      | 0.0256815 | 0.2770005 | 0.0927 | 0.926  | 0.035866808 | count | 1 |
| SART1      | 0.0308836 | 0.6399949 | 0.0483 | 0.962  | 0.03588066  | count | 1 |
| MYDGF      | 0.0255589 | 0.2273631 | 0.1124 | 0.9106 | 0.035972988 | count | 1 |
| AC242426.2 | 0.0340086 | 0.7782228 | 0.0437 | 0.965  | 0.036012282 | count | 1 |
| AL135925.1 | 0.0324605 | 0.6390217 | 0.0508 | 0.96   | 0.036301869 | count | 1 |
| NKG7       | 0.025327  | 0.0781028 | 0.3243 | 0.746  | 0.036515174 | count | 1 |
| WDR60      | 0.0272071 | 0.5392766 | 0.0505 | 0.96   | 0.036713525 | count | 1 |
| TOMM7      | 0.0259524 | 0.1180223 | 0.2199 | 0.826  | 0.037226034 | count | 1 |
| ZNF776     | 0.0322519 | 0.809088  | 0.0399 | 0.968  | 0.037472393 | count | 1 |
| GTPBP2     | 0.0322519 | 1.1116832 | 0.029  | 0.977  | 0.037472393 | count | 1 |
| CCDC167    | 0.026736  | 0.3111032 | 0.0859 | 0.932  | 0.037543429 | count | 1 |
| STK10      | 0.0272628 | 0.3488955 | 0.0781 | 0.938  | 0.037624996 | count | 1 |
| SNRNP27    | 0.0274921 | 0.3826089 | 0.0719 | 0.943  | 0.038083181 | count | 1 |
| VMA21      | 0.0280476 | 0.4194414 | 0.0669 | 0.947  | 0.038156476 | count | 1 |
| RPS6KA1    | 0.0320812 | 0.5112827 | 0.0627 | 0.95   | 0.038339984 | count | 1 |
| REX1BD     | 0.0270105 | 0.2086029 | 0.1295 | 0.8971 | 0.038426289 | count | 1 |
| ANXA7      | 0.0273095 | 0.2970191 | 0.0919 | 0.927  | 0.038468526 | count | 1 |
| ATXN1      | 0.0294342 | 0.5368814 | 0.0548 | 0.956  | 0.038476547 | count | 1 |
| PPWD1      | 0.0284156 | 0.4654839 | 0.061  | 0.951  | 0.038827596 | count | 1 |
| USP16      | 0.0276056 | 0.2506701 | 0.1101 | 0.912  | 0.038943167 | count | 1 |
| GOLGA4     | 0.0278565 | 0.2763944 | 0.1008 | 0.92   | 0.038984437 | count | 1 |
| ADNP       | 0.0280425 | 0.3706628 | 0.0757 | 0.94   | 0.039005092 | count | 1 |
| IFRD1      | 0.0280303 | 0.2873536 | 0.0975 | 0.922  | 0.039023125 | count | 1 |
| DNAJC1     | 0.0274402 | 0.2034237 | 0.1349 | 0.8928 | 0.039114659 | count | 1 |
| CD82       | 0.0303205 | 0.5151724 | 0.0589 | 0.953  | 0.039351563 | count | 1 |
| RSAD1      | 0.0333067 | 0.6945357 | 0.048  | 0.962  | 0.039806275 | count | 1 |
| DDI2       | 0.0333067 | 0.8682006 | 0.0384 | 0.969  | 0.039806275 | count | 1 |
| AP1G1      | 0.0316235 | 0.6647824 | 0.0476 | 0.962  | 0.039843998 | count | 1 |
| VAC14      | 0.0359259 | 0.8149183 | 0.0441 | 0.965  | 0.040183738 | count | 1 |
| ZNF75D     | 0.0359259 | 0.9233113 | 0.0389 | 0.969  | 0.040183738 | count | 1 |
| PSMA5      | 0.0282257 | 0.2323958 | 0.1215 | 0.9034 | 0.040185962 | count | 1 |

|           |           |           |        |        |             |       |   |
|-----------|-----------|-----------|--------|--------|-------------|-------|---|
| UBB       | 0.0280148 | 0.0807963 | 0.3467 | 0.729  | 0.040336057 | count | 1 |
| RARRES3   | 0.028283  | 0.1300062 | 0.2176 | 0.828  | 0.040601236 | count | 1 |
| AKAP13    | 0.028608  | 0.2064129 | 0.1386 | 0.8899 | 0.040693602 | count | 1 |
| LYPLA2    | 0.0296221 | 0.3547851 | 0.0835 | 0.934  | 0.040764004 | count | 1 |
| MLXIP     | 0.0352067 | 1.0688024 | 0.0329 | 0.9737 | 0.040910266 | count | 1 |
| YBX1      | 0.0286852 | 0.1187491 | 0.2416 | 0.809  | 0.041226954 | count | 1 |
| C6orf62   | 0.0306717 | 0.3914881 | 0.0783 | 0.938  | 0.041390584 | count | 1 |
| CD59      | 0.0319676 | 0.5499319 | 0.0581 | 0.954  | 0.041490655 | count | 1 |
| ATP5F1C   | 0.0293366 | 0.203367  | 0.1443 | 0.885  | 0.04180527  | count | 1 |
| ACAD8     | 0.0362082 | 0.6119879 | 0.0592 | 0.953  | 0.042075677 | count | 1 |
| RAD23B    | 0.0320374 | 0.5001117 | 0.0641 | 0.949  | 0.042145292 | count | 1 |
| UQCRH     | 0.0294551 | 0.1568611 | 0.1878 | 0.8512 | 0.042197485 | count | 1 |
| IMP3      | 0.030007  | 0.2163458 | 0.1387 | 0.8898 | 0.042639723 | count | 1 |
| RNF125    | 0.0305087 | 0.2186417 | 0.1395 | 0.889  | 0.043053812 | count | 1 |
| MDM4      | 0.031427  | 0.3104999 | 0.1012 | 0.919  | 0.043312961 | count | 1 |
| KLRC1     | 0.0306849 | 0.1529258 | 0.2007 | 0.841  | 0.044064067 | count | 1 |
| LINC00667 | 0.0315429 | 0.4178387 | 0.0755 | 0.94   | 0.044144451 | count | 1 |
| SNRNP70   | 0.0318427 | 0.3136594 | 0.1015 | 0.919  | 0.044250373 | count | 1 |
| UBALD2    | 0.030975  | 0.1433405 | 0.2161 | 0.8291 | 0.044345305 | count | 1 |
| BBS2      | 0.0529462 | 0.8631705 | 0.0613 | 0.951  | 0.04435684  | count | 1 |
| HS1BP3    | 0.0529462 | 0.9411381 | 0.0563 | 0.955  | 0.04435684  | count | 1 |
| ZNF263    | 0.0529462 | 0.9441485 | 0.0561 | 0.955  | 0.04435684  | count | 1 |
| INTS9     | 0.0529462 | 1.040638  | 0.0509 | 0.959  | 0.04435684  | count | 1 |
| PVT1      | 0.034264  | 0.5283908 | 0.0648 | 0.948  | 0.044473229 | count | 1 |
| CCDC12    | 0.031332  | 0.2159416 | 0.1451 | 0.8847 | 0.044597938 | count | 1 |
| NUDT21    | 0.0328384 | 0.3560062 | 0.0922 | 0.927  | 0.044676456 | count | 1 |
| TMEM138   | 0.0337202 | 0.6501387 | 0.0519 | 0.959  | 0.045021688 | count | 1 |
| PRDX4     | 0.0331912 | 0.5281215 | 0.0628 | 0.95   | 0.045045042 | count | 1 |
| WASHC3    | 0.032844  | 0.375755  | 0.0874 | 0.93   | 0.045127392 | count | 1 |
| ARID1B    | 0.0370082 | 0.3546258 | 0.1044 | 0.917  | 0.04520477  | count | 1 |
| RNF157    | 0.0359259 | 0.7237224 | 0.0496 | 0.96   | 0.045269815 | count | 1 |
| MHENCRCR  | 0.0338551 | 0.4890838 | 0.0692 | 0.945  | 0.045379922 | count | 1 |
| VIM       | 0.0315501 | 0.105988  | 0.2977 | 0.766  | 0.045479692 | count | 1 |
| RPS3A     | 0.0322306 | 0.0565732 | 0.5697 | 0.569  | 0.046467034 | count | 1 |
| LMO4      | 0.0328262 | 0.1906179 | 0.1722 | 0.8634 | 0.046667665 | count | 1 |
| C2CD5     | 0.0788885 | 0.7633163 | 0.1033 | 0.918  | 0.046709226 | count | 1 |
| KDM1B     | 0.0788885 | 0.7775426 | 0.1015 | 0.919  | 0.046709226 | count | 1 |
| SPIN1     | 0.0404203 | 0.5711679 | 0.0708 | 0.944  | 0.04697813  | count | 1 |
| ARFGAP1   | 0.0395035 | 0.8424487 | 0.0469 | 0.963  | 0.047222515 | count | 1 |
| IRF1      | 0.0328356 | 0.1248738 | 0.263  | 0.793  | 0.047280827 | count | 1 |
| NDUFC2    | 0.0332228 | 0.21941   | 0.1514 | 0.8797 | 0.047295399 | count | 1 |
| GMPS      | 0.03478   | 0.53934   | 0.0645 | 0.949  | 0.047319054 | count | 1 |
| EIF3L     | 0.0344097 | 0.3078772 | 0.1118 | 0.911  | 0.047986467 | count | 1 |
| KDELR1    | 0.0338844 | 0.2595238 | 0.1306 | 0.8962 | 0.04800391  | count | 1 |
| RPL30     | 0.0335004 | 0.0455149 | 0.736  | 0.462  | 0.048309095 | count | 1 |

|            |           |           |        |        |             |       |   |
|------------|-----------|-----------|--------|--------|-------------|-------|---|
| SRGN       | 0.0335554 | 0.0668081 | 0.5023 | 0.616  | 0.048374661 | count | 1 |
| NUTM2B-AS1 | 0.0355384 | 0.325246  | 0.1093 | 0.913  | 0.048461689 | count | 1 |
| TRMT10C    | 0.0351488 | 0.3000092 | 0.1172 | 0.907  | 0.048797461 | count | 1 |
| EIF3E      | 0.0344923 | 0.1923121 | 0.1794 | 0.8578 | 0.048876237 | count | 1 |
| CHAMP1     | 0.0380696 | 0.681884  | 0.0558 | 0.956  | 0.049007128 | count | 1 |
| VTI1A      | 0.0395012 | 0.490042  | 0.0806 | 0.936  | 0.049089628 | count | 1 |
| TSNAX      | 0.0349966 | 0.2828619 | 0.1237 | 0.902  | 0.049215578 | count | 1 |
| S100A4     | 0.0341743 | 0.1251657 | 0.273  | 0.785  | 0.049228365 | count | 1 |
| UROS       | 0.0352688 | 0.3203972 | 0.1101 | 0.912  | 0.049420326 | count | 1 |
| UNC119     | 0.0374097 | 0.5090701 | 0.0735 | 0.941  | 0.049489717 | count | 1 |
| GSTP1      | 0.0344261 | 0.1260251 | 0.2732 | 0.785  | 0.04957653  | count | 1 |
| ARRB2      | 0.0364801 | 0.4312186 | 0.0846 | 0.933  | 0.050204759 | count | 1 |
| PLEKHA1    | 0.0474963 | 0.5085139 | 0.0934 | 0.926  | 0.050331119 | count | 1 |
| SUCO       | 0.0369048 | 0.4962712 | 0.0744 | 0.941  | 0.050431989 | count | 1 |
| ITGB1BP1   | 0.0361365 | 0.2687211 | 0.1345 | 0.893  | 0.050541764 | count | 1 |
| EFR3A      | 0.0383792 | 0.4881838 | 0.0786 | 0.937  | 0.050773105 | count | 1 |
| MED11      | 0.0378251 | 0.5012696 | 0.0755 | 0.94   | 0.050884496 | count | 1 |
| RNASEH2B   | 0.0367356 | 0.3408332 | 0.1078 | 0.914  | 0.051051677 | count | 1 |
| NUDT14     | 0.0364896 | 0.327602  | 0.1114 | 0.911  | 0.051131332 | count | 1 |
| SLC39A7    | 0.039721  | 0.4796524 | 0.0828 | 0.934  | 0.051561891 | count | 1 |
| TMEM19     | 0.0395035 | 0.7254784 | 0.0545 | 0.957  | 0.05164909  | count | 1 |
| GSE1       | 0.0395035 | 0.7639625 | 0.0517 | 0.959  | 0.05164909  | count | 1 |
| CD2AP      | 0.0376681 | 0.495879  | 0.076  | 0.939  | 0.051670275 | count | 1 |
| H2AFJ      | 0.0363552 | 0.2239499 | 0.1623 | 0.871  | 0.051779547 | count | 1 |
| ZFX3       | 0.0492773 | 0.6662627 | 0.074  | 0.941  | 0.052223366 | count | 1 |
| SMIM19     | 0.0373972 | 0.3266995 | 0.1145 | 0.909  | 0.052305429 | count | 1 |
| ATG4D      | 0.0392389 | 0.4743267 | 0.0827 | 0.934  | 0.052394363 | count | 1 |
| EOMES      | 0.0380193 | 0.4345218 | 0.0875 | 0.93   | 0.052474855 | count | 1 |
| ACTL6A     | 0.0429896 | 0.6700548 | 0.0642 | 0.949  | 0.052520642 | count | 1 |
| SPARCL1    | 0.0429896 | 0.7980207 | 0.0539 | 0.957  | 0.052520642 | count | 1 |
| APPL1      | 0.0372934 | 0.333447  | 0.1118 | 0.911  | 0.052593542 | count | 1 |
| DNM2       | 0.0394389 | 0.3807362 | 0.1036 | 0.918  | 0.052661574 | count | 1 |
| ACTR6      | 0.0391282 | 0.4120793 | 0.095  | 0.924  | 0.05280823  | count | 1 |
| SSBP1      | 0.0372447 | 0.2026452 | 0.1838 | 0.8543 | 0.052980223 | count | 1 |
| DPH5       | 0.0446291 | 0.723426  | 0.0617 | 0.951  | 0.053359096 | count | 1 |
| RANBP6     | 0.0446291 | 0.7285437 | 0.0613 | 0.951  | 0.053359096 | count | 1 |
| PXK        | 0.0462251 | 0.6376136 | 0.0725 | 0.942  | 0.053736898 | count | 1 |
| FAM110A    | 0.0386702 | 0.3951316 | 0.0979 | 0.922  | 0.053885735 | count | 1 |
| GNL1       | 0.0450876 | 0.508418  | 0.0887 | 0.929  | 0.053908132 | count | 1 |
| CUL2       | 0.04415   | 0.5738116 | 0.0769 | 0.939  | 0.053940234 | count | 1 |
| SLC30A1    | 0.0509557 | 0.8560951 | 0.0595 | 0.953  | 0.054006921 | count | 1 |
| SNHG15     | 0.0384806 | 0.2867827 | 0.1342 | 0.893  | 0.054065586 | count | 1 |
| EEF1D      | 0.0376778 | 0.0904626 | 0.4165 | 0.677  | 0.054241849 | count | 1 |
| SGF29      | 0.0405464 | 0.4864623 | 0.0833 | 0.934  | 0.054354253 | count | 1 |
| ITM2A      | 0.0380157 | 0.1952883 | 0.1947 | 0.8458 | 0.05441666  | count | 1 |



|           |           |           |        |        |             |       |   |
|-----------|-----------|-----------|--------|--------|-------------|-------|---|
| ICOS      | 0.0437272 | 0.7679281 | 0.0569 | 0.955  | 0.055111107 | count | 1 |
| MRFAP1L1  | 0.0414127 | 0.3838373 | 0.1079 | 0.914  | 0.055298764 | count | 1 |
| CDK2AP2   | 0.0390046 | 0.1981084 | 0.1969 | 0.844  | 0.055646998 | count | 1 |
| UCK2      | 0.0450394 | 0.5857303 | 0.0769 | 0.939  | 0.055980792 | count | 1 |
| TRMT10B   | 0.0421519 | 0.6722249 | 0.0627 | 0.95   | 0.056041107 | count | 1 |
| CCDC61    | 0.0427085 | 0.680393  | 0.0628 | 0.95   | 0.056193825 | count | 1 |
| EIF3H     | 0.0394906 | 0.1646365 | 0.2399 | 0.811  | 0.056518193 | count | 1 |
| GTF3C6    | 0.0399183 | 0.2836436 | 0.1407 | 0.8882 | 0.056540308 | count | 1 |
| MT-CYB    | 0.0394212 | 0.0691616 | 0.57   | 0.569  | 0.056843987 | count | 1 |
| PECAM1    | 0.06793   | 0.6063702 | 0.112  | 0.911  | 0.056980972 | count | 1 |
| BZW1      | 0.0400148 | 0.1380283 | 0.2899 | 0.7721 | 0.057299266 | count | 1 |
| MCF2L-AS1 | 0.0471656 | 0.9176632 | 0.0514 | 0.959  | 0.057629869 | count | 1 |
| RAD51C    | 0.0433589 | 0.5874319 | 0.0738 | 0.941  | 0.057646913 | count | 1 |
| GPRIN3    | 0.0434547 | 0.3383271 | 0.1284 | 0.898  | 0.057774369 | count | 1 |
| SCP2      | 0.0414617 | 0.2704792 | 0.1533 | 0.878  | 0.058384141 | count | 1 |
| PITPNB    | 0.0421433 | 0.3283535 | 0.1283 | 0.898  | 0.05838551  | count | 1 |
| PHPT1     | 0.0414308 | 0.2524058 | 0.1641 | 0.8697 | 0.058669055 | count | 1 |
| NECAP2    | 0.0420092 | 0.3542175 | 0.1186 | 0.906  | 0.05871784  | count | 1 |
| TUBB4B    | 0.0414008 | 0.200327  | 0.2067 | 0.8364 | 0.05874     | count | 1 |
| SLC35D2   | 0.042745  | 0.3912059 | 0.1093 | 0.913  | 0.058830073 | count | 1 |
| HNRNPA0   | 0.041605  | 0.214949  | 0.1936 | 0.8466 | 0.059018268 | count | 1 |
| TRMT112   | 0.0413757 | 0.1536284 | 0.2693 | 0.7879 | 0.059238796 | count | 1 |
| PTPN1     | 0.0424334 | 0.276547  | 0.1534 | 0.878  | 0.059268945 | count | 1 |
| IL18      | 0.0428267 | 0.3796094 | 0.1128 | 0.91   | 0.059460234 | count | 1 |
| MAT2B     | 0.0431698 | 0.3192825 | 0.1352 | 0.893  | 0.059503284 | count | 1 |
| CIAO1     | 0.0438886 | 0.4521925 | 0.0971 | 0.923  | 0.059570499 | count | 1 |
| ITGAM     | 0.0571397 | 0.651614  | 0.0877 | 0.93   | 0.060580989 | count | 1 |
| RP9       | 0.0456912 | 0.4431951 | 0.1031 | 0.918  | 0.060749995 | count | 1 |
| NUPL2     | 0.0443863 | 0.3865879 | 0.1148 | 0.909  | 0.060889835 | count | 1 |
| MZF1      | 0.0442412 | 0.4685558 | 0.0944 | 0.925  | 0.060890136 | count | 1 |
| TDP2      | 0.1030786 | 0.5226969 | 0.1972 | 0.8438 | 0.061201489 | count | 1 |
| CDC26     | 0.0437229 | 0.2777597 | 0.1574 | 0.875  | 0.061371155 | count | 1 |
| INSIG2    | 0.0465706 | 0.5658604 | 0.0823 | 0.934  | 0.061618174 | count | 1 |
| FEN1      | 0.0485102 | 0.6222577 | 0.078  | 0.938  | 0.061856877 | count | 1 |
| PIKFYVE   | 0.0485102 | 0.6572492 | 0.0738 | 0.941  | 0.061856877 | count | 1 |
| CFAP36    | 0.0472144 | 0.4871283 | 0.0969 | 0.923  | 0.062127398 | count | 1 |
| CYTH2     | 0.0519603 | 0.5855645 | 0.0887 | 0.929  | 0.062139935 | count | 1 |
| PTPN18    | 0.0488327 | 0.4831728 | 0.1011 | 0.92   | 0.062268571 | count | 1 |
| RABIF     | 0.0468304 | 0.4390344 | 0.1067 | 0.915  | 0.062783823 | count | 1 |
| TTC7A     | 0.0644991 | 0.7297174 | 0.0884 | 0.93   | 0.062861314 | count | 1 |
| KIAA1328  | 0.0500158 | 0.6783459 | 0.0737 | 0.941  | 0.063046877 | count | 1 |
| ESCO1     | 0.046267  | 0.3230583 | 0.1432 | 0.886  | 0.063470979 | count | 1 |
| RPS3      | 0.044152  | 0.0483029 | 0.9141 | 0.361  | 0.063667239 | count | 1 |
| ANP32E    | 0.0453284 | 0.2208611 | 0.2052 | 0.838  | 0.063855668 | count | 1 |
| C9orf40   | 0.0769023 | 0.8881347 | 0.0866 | 0.931  | 0.064554639 | count | 1 |

|            |           |           |        |        |             |       |   |
|------------|-----------|-----------|--------|--------|-------------|-------|---|
| TGFBR1     | 0.0517669 | 0.6367584 | 0.0813 | 0.935  | 0.065257074 | count | 1 |
| ANXA2      | 0.0459787 | 0.2165448 | 0.2123 | 0.832  | 0.065423444 | count | 1 |
| NTHL1      | 0.0490572 | 0.5917189 | 0.0829 | 0.934  | 0.065513977 | count | 1 |
| AK2        | 0.0473353 | 0.3706426 | 0.1277 | 0.898  | 0.065653576 | count | 1 |
| NDUFS1     | 0.048732  | 0.4835122 | 0.1008 | 0.92   | 0.065777863 | count | 1 |
| SPARC      | 0.0787149 | 0.9809062 | 0.0802 | 0.936  | 0.06608597  | count | 1 |
| ITGA8      | 0.0787149 | 0.9809062 | 0.0802 | 0.936  | 0.06608597  | count | 1 |
| PATZ1      | 0.0787149 | 0.9809062 | 0.0802 | 0.936  | 0.06608597  | count | 1 |
| EXOC7      | 0.0511582 | 0.4712006 | 0.1086 | 0.914  | 0.066423741 | count | 1 |
| RPP30      | 0.0517609 | 0.4613189 | 0.1122 | 0.911  | 0.066651627 | count | 1 |
| CDADC1     | 0.0507279 | 0.5280518 | 0.0961 | 0.924  | 0.06675476  | count | 1 |
| ATP13A2    | 0.112523  | 1.00786   | 0.1116 | 0.911  | 0.06688     | count | 1 |
| NATD1      | 0.112523  | 1.1129826 | 0.1011 | 0.9195 | 0.06688     | count | 1 |
| ZNF91      | 0.0508878 | 0.4677062 | 0.1088 | 0.913  | 0.066965365 | count | 1 |
| TOB2       | 0.0501741 | 0.42302   | 0.1186 | 0.906  | 0.067006657 | count | 1 |
| NFU1       | 0.0487924 | 0.3841372 | 0.127  | 0.899  | 0.067256579 | count | 1 |
| MINOS1     | 0.0476609 | 0.2902181 | 0.1642 | 0.8697 | 0.067307734 | count | 1 |
| TRAF1      | 0.054532  | 0.5339489 | 0.1021 | 0.919  | 0.06779714  | count | 1 |
| EVI2B      | 0.0476397 | 0.2049818 | 0.2324 | 0.8164 | 0.0680066   | count | 1 |
| CCL4L2     | 0.0471938 | 0.2189905 | 0.2155 | 0.83   | 0.068050829 | count | 1 |
| GIMAP7     | 0.047506  | 0.1930738 | 0.2461 | 0.8058 | 0.068106671 | count | 1 |
| VPS18      | 0.0612402 | 1.1384392 | 0.0538 | 0.9571 | 0.068576049 | count | 1 |
| ADRM1      | 0.048711  | 0.2867136 | 0.1699 | 0.865  | 0.068621939 | count | 1 |
| B3GNT2     | 0.0516245 | 0.3519267 | 0.1467 | 0.883  | 0.068945114 | count | 1 |
| GALNT10    | 0.0650095 | 0.8849478 | 0.0735 | 0.941  | 0.068953108 | count | 1 |
| ZNF789     | 0.0650095 | 0.9533805 | 0.0682 | 0.946  | 0.068953108 | count | 1 |
| ZCCHC14    | 0.0650095 | 1.0138022 | 0.0641 | 0.949  | 0.068953108 | count | 1 |
| LTA        | 0.0548104 | 0.5281959 | 0.1038 | 0.917  | 0.069098946 | count | 1 |
| SNRNP35    | 0.0500043 | 0.4498181 | 0.1112 | 0.912  | 0.069114392 | count | 1 |
| VAMP7      | 0.057936  | 0.6863956 | 0.0844 | 0.933  | 0.069300357 | count | 1 |
| TPRA1      | 0.057936  | 0.697576  | 0.0831 | 0.934  | 0.069300357 | count | 1 |
| ETAA1      | 0.057936  | 0.7839897 | 0.0739 | 0.941  | 0.069300357 | count | 1 |
| GBP1       | 0.051342  | 0.4147383 | 0.1238 | 0.902  | 0.069506477 | count | 1 |
| RPL22L1    | 0.0486775 | 0.1750933 | 0.278  | 0.781  | 0.069631222 | count | 1 |
| HSBP1      | 0.049639  | 0.3379334 | 0.1469 | 0.8833 | 0.069901701 | count | 1 |
| SDHA       | 0.0509779 | 0.3863455 | 0.1319 | 0.895  | 0.069936798 | count | 1 |
| CAPS2      | 0.0625912 | 0.8318983 | 0.0752 | 0.94   | 0.070093049 | count | 1 |
| AL451085.1 | 0.0625912 | 0.8856241 | 0.0707 | 0.944  | 0.070093049 | count | 1 |
| METTL13    | 0.0625912 | 0.9866768 | 0.0634 | 0.949  | 0.070093049 | count | 1 |
| ZNF251     | 0.0625912 | 0.9866768 | 0.0634 | 0.949  | 0.070093049 | count | 1 |
| RER1       | 0.0495804 | 0.2406675 | 0.206  | 0.8369 | 0.070228177 | count | 1 |
| ITPR2      | 0.0604865 | 0.4746289 | 0.1274 | 0.899  | 0.070354477 | count | 1 |
| MAP4K4     | 0.0568705 | 0.5648544 | 0.1007 | 0.92   | 0.070709002 | count | 1 |
| JMJD6      | 0.0503045 | 0.3049917 | 0.1649 | 0.869  | 0.070946769 | count | 1 |
| B3GALT6    | 0.0533547 | 0.5402886 | 0.0988 | 0.921  | 0.070947673 | count | 1 |

|            |           |           |        |        |             |       |   |
|------------|-----------|-----------|--------|--------|-------------|-------|---|
| LAP3       | 0.0507941 | 0.3440724 | 0.1476 | 0.883  | 0.071048741 | count | 1 |
| STRAP      | 0.0508985 | 0.2598964 | 0.1958 | 0.845  | 0.071240976 | count | 1 |
| APOBEC3H   | 0.0531682 | 0.4687795 | 0.1134 | 0.91   | 0.072173676 | count | 1 |
| AC012645.3 | 0.0541137 | 0.5829823 | 0.0928 | 0.926  | 0.072812811 | count | 1 |
| PCID2      | 0.0541405 | 0.4199209 | 0.1289 | 0.897  | 0.072848898 | count | 1 |
| TNFSF14    | 0.0512752 | 0.2266677 | 0.2262 | 0.821  | 0.073129256 | count | 1 |
| ZNF891     | 0.075045  | 1.0853602 | 0.0691 | 0.945  | 0.073188403 | count | 1 |
| SNN        | 0.075045  | 1.3082038 | 0.0574 | 0.954  | 0.073188403 | count | 1 |
| ZNF45      | 0.075045  | 1.3082038 | 0.0574 | 0.954  | 0.073188403 | count | 1 |
| CNPY2      | 0.0527604 | 0.3276893 | 0.161  | 0.872  | 0.073527032 | count | 1 |
| PHB        | 0.0526975 | 0.27366   | 0.1926 | 0.847  | 0.07389194  | count | 1 |
| RNF165     | 0.0890332 | 0.8612467 | 0.1034 | 0.918  | 0.07481125  | count | 1 |
| PPP2R5B    | 0.0890332 | 0.9422612 | 0.0945 | 0.925  | 0.07481125  | count | 1 |
| ETS1       | 0.0524254 | 0.164863  | 0.318  | 0.7507 | 0.074861502 | count | 1 |
| LBR        | 0.0538328 | 0.2800777 | 0.1922 | 0.848  | 0.07489141  | count | 1 |
| RSBN1      | 0.0534502 | 0.2957211 | 0.1807 | 0.857  | 0.075329    | count | 1 |
| PNKD       | 0.0534684 | 0.2740564 | 0.1951 | 0.845  | 0.07551104  | count | 1 |
| COA3       | 0.0537465 | 0.3588015 | 0.1498 | 0.881  | 0.0755203   | count | 1 |
| RPS28      | 0.0524167 | 0.0588367 | 0.8909 | 0.374  | 0.075542187 | count | 1 |
| STK17A     | 0.0525302 | 0.1078871 | 0.4869 | 0.627  | 0.075551884 | count | 1 |
| EEF1B2     | 0.0527145 | 0.0846153 | 0.623  | 0.534  | 0.075911985 | count | 1 |
| RRN3       | 0.0779078 | 0.7346794 | 0.106  | 0.916  | 0.075994059 | count | 1 |
| LRRFIP2    | 0.0592653 | 0.5152259 | 0.115  | 0.908  | 0.076327042 | count | 1 |
| TRNT1      | 0.0593758 | 0.5594453 | 0.1061 | 0.916  | 0.076469531 | count | 1 |
| YBX3       | 0.0640774 | 0.4865061 | 0.1317 | 0.895  | 0.0766622   | count | 1 |
| VPS41      | 0.0603894 | 0.5394708 | 0.1119 | 0.911  | 0.077025387 | count | 1 |
| PCED1B     | 0.0603894 | 0.5647412 | 0.1069 | 0.915  | 0.077025387 | count | 1 |
| ARHGEF9    | 0.0566167 | 0.5304566 | 0.1067 | 0.915  | 0.077047502 | count | 1 |
| CST7       | 0.0536423 | 0.1015084 | 0.5285 | 0.598  | 0.07722832  | count | 1 |
| TNF        | 0.0541407 | 0.4001915 | 0.1353 | 0.892  | 0.077338377 | count | 1 |
| AL592183.1 | 0.0694756 | 0.648801  | 0.1071 | 0.915  | 0.077826007 | count | 1 |
| UBQLN1     | 0.0624163 | 0.5107276 | 0.1222 | 0.903  | 0.07870246  | count | 1 |
| FAM43A     | 0.0601913 | 0.3927089 | 0.1533 | 0.878  | 0.078727742 | count | 1 |
| CEP350     | 0.0570406 | 0.3687911 | 0.1547 | 0.877  | 0.078741238 | count | 1 |
| UBE2B      | 0.0553751 | 0.1758823 | 0.3148 | 0.7531 | 0.078774514 | count | 1 |
| CMTM8      | 0.132298  | 0.6388842 | 0.2071 | 0.836  | 0.078805888 | count | 1 |
| MAP7D3     | 0.0629781 | 0.5137167 | 0.1226 | 0.903  | 0.079411948 | count | 1 |
| RALY       | 0.0564822 | 0.2278061 | 0.2479 | 0.804  | 0.079439252 | count | 1 |
| CTDNEP1    | 0.0563794 | 0.2574525 | 0.219  | 0.827  | 0.079487902 | count | 1 |
| PIM1       | 0.0564282 | 0.2755508 | 0.2048 | 0.8379 | 0.079666558 | count | 1 |
| MKRN2      | 0.0685747 | 0.6355611 | 0.1079 | 0.914  | 0.079786655 | count | 1 |
| ECH1       | 0.0558878 | 0.1910412 | 0.2925 | 0.7701 | 0.079921318 | count | 1 |
| PPP2R3C    | 0.0598416 | 0.3607819 | 0.1659 | 0.868  | 0.08024203  | count | 1 |
| SUN2       | 0.0573393 | 0.2691525 | 0.213  | 0.831  | 0.080402688 | count | 1 |
| CARD16     | 0.0565377 | 0.2558729 | 0.221  | 0.8253 | 0.080417532 | count | 1 |

|           |           |           |        |        |             |       |   |
|-----------|-----------|-----------|--------|--------|-------------|-------|---|
| TRA2B     | 0.0566701 | 0.1787554 | 0.317  | 0.7514 | 0.080582949 | count | 1 |
| GTF2F2    | 0.0596945 | 0.4070701 | 0.1466 | 0.884  | 0.080586117 | count | 1 |
| GTF2A1    | 0.0615792 | 0.5447572 | 0.113  | 0.91   | 0.081049588 | count | 1 |
| HSPA1B    | 0.0583417 | 0.3241886 | 0.18   | 0.8573 | 0.081090566 | count | 1 |
| CYB561D2  | 0.0670647 | 0.8586799 | 0.0781 | 0.938  | 0.081992976 | count | 1 |
| TCP1      | 0.0588049 | 0.2920093 | 0.2014 | 0.841  | 0.082020348 | count | 1 |
| SUPT5H    | 0.0608166 | 0.4887233 | 0.1244 | 0.901  | 0.082102081 | count | 1 |
| TXLNG     | 0.0842364 | 0.6090562 | 0.1383 | 0.89   | 0.082199705 | count | 1 |
| LAMTOR5   | 0.0583686 | 0.2418015 | 0.2414 | 0.809  | 0.082230822 | count | 1 |
| KHDC4     | 0.0775588 | 0.8029931 | 0.0966 | 0.9231 | 0.082316866 | count | 1 |
| ENY2      | 0.0579416 | 0.2179037 | 0.2659 | 0.79   | 0.082391273 | count | 1 |
| TRAF3IP3  | 0.0580752 | 0.212273  | 0.2736 | 0.7846 | 0.082569177 | count | 1 |
| EIF5A     | 0.0577691 | 0.1592591 | 0.3627 | 0.717  | 0.082777133 | count | 1 |
| TIPARP    | 0.0580357 | 0.2010379 | 0.2887 | 0.773  | 0.082873732 | count | 1 |
| EIF1AX    | 0.0584694 | 0.2339755 | 0.2499 | 0.8028 | 0.082912343 | count | 1 |
| SRSF7     | 0.0581458 | 0.1412491 | 0.4117 | 0.6809 | 0.083113015 | count | 1 |
| RCSD1     | 0.0597077 | 0.2559737 | 0.2333 | 0.816  | 0.08328005  | count | 1 |
| GPAT4     | 0.0787149 | 0.7568012 | 0.104  | 0.917  | 0.083548817 | count | 1 |
| RNF219    | 0.0615676 | 0.5499224 | 0.112  | 0.911  | 0.083583653 | count | 1 |
| KLHDC3    | 0.0750475 | 0.5111494 | 0.1468 | 0.883  | 0.084087908 | count | 1 |
| KIAA2026  | 0.0607558 | 0.3743202 | 0.1623 | 0.871  | 0.084364078 | count | 1 |
| PABPN1    | 0.0614532 | 0.4159465 | 0.1477 | 0.883  | 0.084717908 | count | 1 |
| EBAG9     | 0.0623332 | 0.429537  | 0.1451 | 0.885  | 0.084832245 | count | 1 |
| IGSF8     | 0.0626756 | 0.4312433 | 0.1453 | 0.885  | 0.085298556 | count | 1 |
| ARFRP1    | 0.0630414 | 0.4322814 | 0.1458 | 0.884  | 0.085357116 | count | 1 |
| LINC02361 | 0.0874857 | 0.8724695 | 0.1003 | 0.92   | 0.085387664 | count | 1 |
| LY9       | 0.0606709 | 0.2869102 | 0.2115 | 0.833  | 0.085406128 | count | 1 |
| WDR74     | 0.0650592 | 0.3939272 | 0.1652 | 0.869  | 0.085635    | count | 1 |
| MMD       | 0.0645517 | 0.5115943 | 0.1262 | 0.9    | 0.086225762 | count | 1 |
| ATPAF1    | 0.0649048 | 0.593203  | 0.1094 | 0.913  | 0.086321533 | count | 1 |
| EYA3      | 0.0775754 | 0.5396569 | 0.1437 | 0.886  | 0.086929791 | count | 1 |
| BCLAF1    | 0.0616377 | 0.232523  | 0.2651 | 0.791  | 0.086934837 | count | 1 |
| EED       | 0.0682409 | 0.5472599 | 0.1247 | 0.901  | 0.087055232 | count | 1 |
| CBWD3     | 0.1035246 | 0.7146537 | 0.1449 | 0.885  | 0.08708826  | count | 1 |
| ETFA      | 0.0620574 | 0.2883182 | 0.2152 | 0.83   | 0.087159044 | count | 1 |
| WDR48     | 0.0658971 | 0.7553177 | 0.0872 | 0.9305 | 0.087216759 | count | 1 |
| ATP5F1E   | 0.0606736 | 0.0988687 | 0.6137 | 0.54   | 0.087327392 | count | 1 |
| UTS2      | 0.075045  | 0.8733782 | 0.0859 | 0.932  | 0.08733602  | count | 1 |
| RAD51B    | 0.075045  | 0.941949  | 0.0797 | 0.937  | 0.08733602  | count | 1 |
| FCHSD1    | 0.075045  | 1.0781411 | 0.0696 | 0.945  | 0.08733602  | count | 1 |
| ADAMTS17  | 0.0730775 | 0.785339  | 0.0931 | 0.926  | 0.087456006 | count | 1 |
| GPATCH2L  | 0.0649341 | 0.5879386 | 0.1104 | 0.912  | 0.087665198 | count | 1 |
| ZCCHC10   | 0.0645272 | 0.4173188 | 0.1546 | 0.877  | 0.087820288 | count | 1 |
| RNF167    | 0.0622701 | 0.3321605 | 0.1875 | 0.8514 | 0.087827026 | count | 1 |
| ORMDL2    | 0.0628424 | 0.3195221 | 0.1967 | 0.844  | 0.087907736 | count | 1 |

|            |           |           |        |        |             |       |   |
|------------|-----------|-----------|--------|--------|-------------|-------|---|
| SGTA       | 0.0787973 | 0.609784  | 0.1292 | 0.897  | 0.088303668 | count | 1 |
| ELMO1      | 0.0833724 | 0.7006036 | 0.119  | 0.905  | 0.088513271 | count | 1 |
| MALT1      | 0.0694688 | 0.4278182 | 0.1624 | 0.871  | 0.088624108 | count | 1 |
| TMEM99     | 0.0712987 | 0.7992025 | 0.0892 | 0.929  | 0.088682523 | count | 1 |
| ENTPD1-AS1 | 0.10549   | 0.760794  | 0.1387 | 0.89   | 0.088755357 | count | 1 |
| TFEB       | 0.10549   | 0.8760844 | 0.1204 | 0.904  | 0.088755357 | count | 1 |
| PES1       | 0.10549   | 0.8848722 | 0.1192 | 0.905  | 0.088755357 | count | 1 |
| FAM118A    | 0.0642921 | 0.3777083 | 0.1702 | 0.865  | 0.088756928 | count | 1 |
| LYRM1      | 0.0662152 | 0.472391  | 0.1402 | 0.889  | 0.088796205 | count | 1 |
| COPB1      | 0.0639934 | 0.2822681 | 0.2267 | 0.821  | 0.089032999 | count | 1 |
| EC1        | 0.06407   | 0.3988242 | 0.1606 | 0.872  | 0.089294837 | count | 1 |
| NR3C1      | 0.0637736 | 0.2610216 | 0.2443 | 0.807  | 0.089570222 | count | 1 |
| UQCRC2     | 0.0639644 | 0.2665434 | 0.24   | 0.81   | 0.089838289 | count | 1 |
| GNAS       | 0.0629544 | 0.113152  | 0.5564 | 0.578  | 0.090500301 | count | 1 |
| TPM4       | 0.0635002 | 0.1851391 | 0.343  | 0.732  | 0.090515138 | count | 1 |
| LAMP1      | 0.0643371 | 0.231961  | 0.2774 | 0.782  | 0.090605815 | count | 1 |
| IQGAP2     | 0.064438  | 0.233912  | 0.2755 | 0.783  | 0.090632197 | count | 1 |
| ACIN1      | 0.0655863 | 0.3297726 | 0.1989 | 0.842  | 0.090774623 | count | 1 |
| RPL38      | 0.0632863 | 0.1050063 | 0.6027 | 0.547  | 0.090825056 | count | 1 |
| TMEM14B    | 0.0642367 | 0.2436142 | 0.2637 | 0.7922 | 0.09092687  | count | 1 |
| ZSCAN21    | 0.0858663 | 1.0991702 | 0.0781 | 0.938  | 0.091172436 | count | 1 |
| GPBP1      | 0.0642024 | 0.1718672 | 0.3736 | 0.709  | 0.091468223 | count | 1 |
| AAK1       | 0.0655084 | 0.2512299 | 0.2608 | 0.794  | 0.091576736 | count | 1 |
| NABP1      | 0.069827  | 0.4824496 | 0.1447 | 0.885  | 0.091918112 | count | 1 |
| CDKN2AIPNL | 0.0704015 | 0.5918771 | 0.1189 | 0.905  | 0.092099313 | count | 1 |
| ID2        | 0.0644203 | 0.1504796 | 0.4281 | 0.669  | 0.092320075 | count | 1 |
| TDRD7      | 0.0737438 | 0.7565077 | 0.0975 | 0.922  | 0.093011337 | count | 1 |
| TIFA       | 0.0679182 | 0.4540909 | 0.1496 | 0.881  | 0.093023867 | count | 1 |
| ABHD5      | 0.0739156 | 0.5088366 | 0.1453 | 0.885  | 0.093228411 | count | 1 |
| PHF21A     | 0.0731057 | 0.5544978 | 0.1318 | 0.895  | 0.093271417 | count | 1 |
| INTS8      | 0.1108268 | 1.032662  | 0.1073 | 0.915  | 0.093284558 | count | 1 |
| PHLDB2     | 0.1108268 | 1.1067581 | 0.1001 | 0.92   | 0.093284558 | count | 1 |
| CATSPER2   | 0.1108268 | 1.1067581 | 0.1001 | 0.92   | 0.093284558 | count | 1 |
| BEND5      | 0.1108268 | 1.1193743 | 0.099  | 0.921  | 0.093284558 | count | 1 |
| CASP2      | 0.1562884 | 0.7570026 | 0.2065 | 0.8366 | 0.093337443 | count | 1 |
| ATP2B4     | 0.0682428 | 0.3663369 | 0.1863 | 0.852  | 0.093638069 | count | 1 |
| ACTR2      | 0.0660445 | 0.1955548 | 0.3377 | 0.7358 | 0.094039225 | count | 1 |
| TMEM147    | 0.068035  | 0.3701629 | 0.1838 | 0.854  | 0.094378597 | count | 1 |
| ZNF227     | 0.112523  | 0.7856762 | 0.1432 | 0.886  | 0.094724809 | count | 1 |
| KLHL36     | 0.0845287 | 0.592509  | 0.1427 | 0.887  | 0.094749728 | count | 1 |
| TRAPPC12   | 0.0775588 | 0.6337109 | 0.1224 | 0.903  | 0.094852304 | count | 1 |
| PACS2      | 0.0972718 | 0.7208656 | 0.1349 | 0.893  | 0.094996247 | count | 1 |
| SLC2A11    | 0.0972718 | 0.7616353 | 0.1277 | 0.898  | 0.094996247 | count | 1 |
| HNRNPAB    | 0.0667731 | 0.1962086 | 0.3403 | 0.7338 | 0.095141575 | count | 1 |
| WDR1       | 0.0682099 | 0.3249415 | 0.2099 | 0.834  | 0.095419129 | count | 1 |

|           |           |           |        |        |             |       |   |
|-----------|-----------|-----------|--------|--------|-------------|-------|---|
| GLIPR1    | 0.0670798 | 0.2332004 | 0.2876 | 0.7738 | 0.095466185 | count | 1 |
| LINC00662 | 0.0730775 | 0.6221484 | 0.1175 | 0.907  | 0.095604649 | count | 1 |
| SRSF6     | 0.0702906 | 0.4132233 | 0.1701 | 0.865  | 0.095670199 | count | 1 |
| NBAS      | 0.0769094 | 0.5349253 | 0.1438 | 0.886  | 0.095675439 | count | 1 |
| TRADD     | 0.0714207 | 0.4297002 | 0.1662 | 0.868  | 0.09578369  | count | 1 |
| TMEM216   | 0.0714207 | 0.4743683 | 0.1506 | 0.88   | 0.09578369  | count | 1 |
| RPS29     | 0.0668981 | 0.0690909 | 0.9683 | 0.334  | 0.096328562 | count | 1 |
| COA5      | 0.0697011 | 0.48295   | 0.1443 | 0.885  | 0.096354221 | count | 1 |
| PI4KB     | 0.0860641 | 0.5694867 | 0.1511 | 0.88   | 0.096477081 | count | 1 |
| GTF2H5    | 0.0699136 | 0.311995  | 0.2241 | 0.823  | 0.096648144 | count | 1 |
| SH3BP1    | 0.0685745 | 0.3308638 | 0.2073 | 0.8359 | 0.096819854 | count | 1 |
| CALM3     | 0.0683594 | 0.2317831 | 0.2949 | 0.7682 | 0.097164373 | count | 1 |
| EHMT1     | 0.0711527 | 0.4645085 | 0.1532 | 0.878  | 0.097267751 | count | 1 |
| CFL2      | 0.0707963 | 0.4682603 | 0.1512 | 0.88   | 0.097308182 | count | 1 |
| MESD      | 0.06945   | 0.2795601 | 0.2484 | 0.804  | 0.097335456 | count | 1 |
| COMMD6    | 0.0678071 | 0.1326409 | 0.5112 | 0.61   | 0.097341586 | count | 1 |
| MRPS7     | 0.0707715 | 0.3621084 | 0.1954 | 0.845  | 0.097427624 | count | 1 |
| GABPB1    | 0.0777361 | 0.4951562 | 0.157  | 0.875  | 0.098056171 | count | 1 |
| PQBP1     | 0.0698087 | 0.3501605 | 0.1994 | 0.842  | 0.098188652 | count | 1 |
| STARD3NL  | 0.069133  | 0.2847874 | 0.2428 | 0.8084 | 0.098362937 | count | 1 |
| RNF111    | 0.0762787 | 0.5648119 | 0.1351 | 0.893  | 0.099088554 | count | 1 |
| EVL       | 0.0692146 | 0.1260073 | 0.5493 | 0.583  | 0.099375457 | count | 1 |
| FAM49A    | 0.0735788 | 0.3919249 | 0.1877 | 0.851  | 0.100149236 | count | 1 |
| NKTR      | 0.0717407 | 0.2778057 | 0.2582 | 0.796  | 0.100360449 | count | 1 |
| SYPL1     | 0.0715001 | 0.2950269 | 0.2424 | 0.809  | 0.100426075 | count | 1 |
| OAT       | 0.0759361 | 0.4499792 | 0.1688 | 0.866  | 0.100519713 | count | 1 |
| STRN3     | 0.0759361 | 0.4898278 | 0.155  | 0.877  | 0.100519713 | count | 1 |
| IL4R      | 0.08117   | 0.575237  | 0.1411 | 0.888  | 0.100986952 | count | 1 |
| NFKBIL1   | 0.075045  | 0.5041664 | 0.1488 | 0.882  | 0.101328224 | count | 1 |
| RNF213    | 0.0713717 | 0.2021709 | 0.353  | 0.7243 | 0.101535061 | count | 1 |
| SLC39A10  | 0.0723227 | 0.2997915 | 0.2412 | 0.81   | 0.101679612 | count | 1 |
| HOXA9     | 0.0907138 | 1.0056103 | 0.0902 | 0.928  | 0.101709356 | count | 1 |
| RWDD2B    | 0.0907138 | 1.0056103 | 0.0902 | 0.928  | 0.101709356 | count | 1 |
| KNTC1     | 0.0907138 | 1.14036   | 0.0795 | 0.937  | 0.101709356 | count | 1 |
| ATP5PO    | 0.071857  | 0.2124667 | 0.3382 | 0.735  | 0.101741398 | count | 1 |
| C1RL      | 0.0850546 | 0.7510943 | 0.1132 | 0.91   | 0.101829452 | count | 1 |
| DOK2      | 0.0712725 | 0.1705425 | 0.4179 | 0.676  | 0.101985793 | count | 1 |
| UBA1      | 0.096043  | 0.7568116 | 0.1269 | 0.899  | 0.102029972 | count | 1 |
| SARNP     | 0.096043  | 0.8385758 | 0.1145 | 0.909  | 0.102029972 | count | 1 |
| CTDP1     | 0.0769176 | 0.4613786 | 0.1667 | 0.868  | 0.102316689 | count | 1 |
| DBT       | 0.1218302 | 0.8169296 | 0.1491 | 0.882  | 0.102633808 | count | 1 |
| MYL12A    | 0.0712491 | 0.0735693 | 0.9685 | 0.334  | 0.102673823 | count | 1 |
| GDE1      | 0.0796937 | 0.6981214 | 0.1142 | 0.909  | 0.102679951 | count | 1 |
| CPSF3     | 0.0793902 | 0.4973575 | 0.1596 | 0.873  | 0.103136595 | count | 1 |
| WHAMM     | 0.0773838 | 0.3384979 | 0.2286 | 0.819  | 0.103385313 | count | 1 |

|          |           |           |        |        |             |       |   |
|----------|-----------|-----------|--------|--------|-------------|-------|---|
| HOPX     | 0.0722911 | 0.154446  | 0.4681 | 0.64   | 0.103722209 | count | 1 |
| UBE2N    | 0.073036  | 0.2336528 | 0.3126 | 0.7548 | 0.1038743   | count | 1 |
| CCDC58   | 0.079448  | 0.6466619 | 0.1229 | 0.902  | 0.10395074  | count | 1 |
| SEC62    | 0.0732927 | 0.1748271 | 0.4192 | 0.675  | 0.104772841 | count | 1 |
| ERP29    | 0.0737694 | 0.1990272 | 0.3706 | 0.7111 | 0.104822697 | count | 1 |
| FGFBP3   | 0.1247805 | 0.8897265 | 0.1402 | 0.8886 | 0.105143061 | count | 1 |
| MIER1    | 0.0740716 | 0.197985  | 0.3741 | 0.7086 | 0.105181748 | count | 1 |
| CCNY     | 0.0824362 | 0.4261557 | 0.1934 | 0.847  | 0.105197351 | count | 1 |
| ZRSR2    | 0.0783078 | 0.4886858 | 0.1602 | 0.873  | 0.105400434 | count | 1 |
| FYB1     | 0.0741284 | 0.1678336 | 0.4417 | 0.659  | 0.105499495 | count | 1 |
| DR1      | 0.075245  | 0.3360937 | 0.2239 | 0.823  | 0.105578638 | count | 1 |
| ZFYVE27  | 0.0850545 | 0.5374704 | 0.1582 | 0.874  | 0.105830562 | count | 1 |
| CFAP298  | 0.0787493 | 0.3876926 | 0.2031 | 0.839  | 0.105995279 | count | 1 |
| AATF     | 0.0763186 | 0.3625377 | 0.2105 | 0.833  | 0.106090552 | count | 1 |
| CSNK1G2  | 0.0766818 | 0.3959872 | 0.1936 | 0.847  | 0.106263686 | count | 1 |
| ELMOD3   | 0.0947625 | 0.8750214 | 0.1083 | 0.914  | 0.106266885 | count | 1 |
| MRPL50   | 0.0779608 | 0.4786381 | 0.1629 | 0.871  | 0.10658189  | count | 1 |
| ADI1     | 0.0763967 | 0.3205207 | 0.2384 | 0.812  | 0.106651259 | count | 1 |
| STOM     | 0.0752793 | 0.2138026 | 0.3521 | 0.725  | 0.106818935 | count | 1 |
| RPL7A    | 0.0742783 | 0.0491186 | 1.5122 | 0.131  | 0.10710407  | count | 1 |
| SPPL2A   | 0.0762857 | 0.2772684 | 0.2751 | 0.783  | 0.107253324 | count | 1 |
| ECPAS    | 0.0896348 | 0.6750566 | 0.1328 | 0.894  | 0.107328806 | count | 1 |
| HSPA1A   | 0.0751303 | 0.2844168 | 0.2642 | 0.7918 | 0.107347056 | count | 1 |
| VCPKMT   | 0.0828507 | 0.5339824 | 0.1552 | 0.877  | 0.107639206 | count | 1 |
| INPP5D   | 0.0793209 | 0.4074562 | 0.1947 | 0.846  | 0.107707059 | count | 1 |
| RNF126   | 0.0770546 | 0.3408393 | 0.2261 | 0.8213 | 0.107797557 | count | 1 |
| DDX1     | 0.0807364 | 0.4804785 | 0.168  | 0.867  | 0.107869496 | count | 1 |
| STAP1    | 0.0962096 | 0.6856835 | 0.1403 | 0.889  | 0.107896199 | count | 1 |
| DENND1C  | 0.0926763 | 0.6757592 | 0.1371 | 0.891  | 0.107924986 | count | 1 |
| CHCHD2   | 0.075348  | 0.1261893 | 0.5971 | 0.551  | 0.108229688 | count | 1 |
| SH2D2A   | 0.0767712 | 0.2805152 | 0.2737 | 0.785  | 0.108286423 | count | 1 |
| PSMG1    | 0.0801318 | 0.4650358 | 0.1723 | 0.863  | 0.108519146 | count | 1 |
| GIPC1    | 0.080917  | 0.4515938 | 0.1792 | 0.858  | 0.108533211 | count | 1 |
| TNFRSF1A | 0.0778757 | 0.347732  | 0.224  | 0.823  | 0.108633303 | count | 1 |
| ATAD3A   | 0.1290218 | 0.7787838 | 0.1657 | 0.869  | 0.108752136 | count | 1 |
| G6PD     | 0.0796151 | 0.3695376 | 0.2154 | 0.83   | 0.108845311 | count | 1 |
| BAK1     | 0.0806332 | 0.4778721 | 0.1687 | 0.866  | 0.108881019 | count | 1 |
| RCN2     | 0.0782493 | 0.2914763 | 0.2685 | 0.789  | 0.108974438 | count | 1 |
| TFIP11   | 0.1116909 | 0.778236  | 0.1435 | 0.886  | 0.109173171 | count | 1 |
| SRP14    | 0.0762577 | 0.1057744 | 0.7209 | 0.471  | 0.109654177 | count | 1 |
| TNFRSF1B | 0.079105  | 0.3157229 | 0.2506 | 0.802  | 0.109857868 | count | 1 |
| TMEM189  | 0.112523  | 0.6360972 | 0.1769 | 0.86   | 0.109991985 | count | 1 |
| CNOT2    | 0.0784098 | 0.267855  | 0.2927 | 0.77   | 0.110134989 | count | 1 |
| RFTN1    | 0.0857519 | 0.5446645 | 0.1574 | 0.875  | 0.1104991   | count | 1 |
| IER3IP1  | 0.0806764 | 0.3201931 | 0.252  | 0.801  | 0.110711458 | count | 1 |

|            |           |           |        |        |             |       |   |
|------------|-----------|-----------|--------|--------|-------------|-------|---|
| C11orf96   | 0.0953301 | 0.7977954 | 0.1195 | 0.905  | 0.111026102 | count | 1 |
| KIAA1671   | 0.0953301 | 0.8006642 | 0.1191 | 0.905  | 0.111026102 | count | 1 |
| MRPS15     | 0.0805757 | 0.396576  | 0.2032 | 0.839  | 0.111097839 | count | 1 |
| ZNF83      | 0.0863442 | 0.447356  | 0.193  | 0.847  | 0.111263661 | count | 1 |
| PSMB10     | 0.0785223 | 0.3019964 | 0.26   | 0.795  | 0.111400238 | count | 1 |
| GTPBP3     | 0.0912704 | 0.7022766 | 0.13   | 0.897  | 0.111665424 | count | 1 |
| RPL37      | 0.0776931 | 0.0637146 | 1.2194 | 0.224  | 0.111924454 | count | 1 |
| OXA1L      | 0.0824656 | 0.4713482 | 0.175  | 0.861  | 0.112509993 | count | 1 |
| AGAP2      | 0.086634  | 0.5198647 | 0.1666 | 0.868  | 0.112562452 | count | 1 |
| THG1L      | 0.0905442 | 0.6050791 | 0.1496 | 0.881  | 0.112677263 | count | 1 |
| RAB11B     | 0.0808599 | 0.3226359 | 0.2506 | 0.802  | 0.112707338 | count | 1 |
| GLOD4      | 0.0811858 | 0.3667209 | 0.2214 | 0.825  | 0.112749262 | count | 1 |
| SLC44A1    | 0.1013421 | 0.5852206 | 0.1732 | 0.863  | 0.113676436 | count | 1 |
| AC008555.5 | 0.0893635 | 1.0049106 | 0.0889 | 0.929  | 0.114054544 | count | 1 |
| METTL8     | 0.1355811 | 0.789068  | 0.1718 | 0.864  | 0.114337834 | count | 1 |
| PRR7       | 0.0818951 | 0.3468961 | 0.2361 | 0.814  | 0.114495453 | count | 1 |
| SMIM30     | 0.1358085 | 0.5825512 | 0.2331 | 0.816  | 0.114531572 | count | 1 |
| HMGCS1     | 0.0865852 | 0.54235   | 0.1596 | 0.873  | 0.114635439 | count | 1 |
| TNPO1      | 0.0872323 | 0.4551392 | 0.1917 | 0.848  | 0.114863217 | count | 1 |
| HSDL2      | 0.1175538 | 0.7442431 | 0.158  | 0.875  | 0.114944058 | count | 1 |
| DCTN6      | 0.0837642 | 0.3342976 | 0.2506 | 0.802  | 0.114952089 | count | 1 |
| DNAJC17    | 0.0854863 | 0.5584782 | 0.1531 | 0.878  | 0.1157777   | count | 1 |
| ANKAR      | 0.0884766 | 0.6047702 | 0.1463 | 0.884  | 0.115782257 | count | 1 |
| TPI1       | 0.0806935 | 0.1283722 | 0.6286 | 0.53   | 0.115950834 | count | 1 |
| TRMT6      | 0.0853638 | 0.4624824 | 0.1846 | 0.854  | 0.11620467  | count | 1 |
| ATP5ME     | 0.0825037 | 0.221301  | 0.3728 | 0.7095 | 0.117308682 | count | 1 |
| RNF13      | 0.0841951 | 0.3390731 | 0.2483 | 0.804  | 0.117358638 | count | 1 |
| HUWE1      | 0.0886579 | 0.5735764 | 0.1546 | 0.877  | 0.117383376 | count | 1 |
| NUFIP2     | 0.0846959 | 0.3209644 | 0.2639 | 0.792  | 0.117505032 | count | 1 |
| TKT        | 0.0836326 | 0.3001104 | 0.2787 | 0.781  | 0.11764025  | count | 1 |
| RPRD1B     | 0.1108268 | 0.7868132 | 0.1409 | 0.888  | 0.117820898 | count | 1 |
| ERI1       | 0.1108268 | 0.9014895 | 0.1229 | 0.902  | 0.117820898 | count | 1 |
| YWHAE      | 0.083575  | 0.2372955 | 0.3522 | 0.725  | 0.117967501 | count | 1 |
| MMP25-AS1  | 0.0896403 | 0.4681832 | 0.1915 | 0.848  | 0.118038612 | count | 1 |
| DHRS13     | 0.1206981 | 1.1164681 | 0.1081 | 0.914  | 0.118040521 | count | 1 |
| PAFAH1B1   | 0.083473  | 0.2335276 | 0.3574 | 0.721  | 0.11816397  | count | 1 |
| LAPTM5     | 0.0830274 | 0.165043  | 0.5031 | 0.6153 | 0.118433531 | count | 1 |
| AC026979.2 | 0.0919855 | 0.5087117 | 0.1808 | 0.857  | 0.118546486 | count | 1 |
| PPP1R2     | 0.0833244 | 0.1706483 | 0.4883 | 0.626  | 0.118898478 | count | 1 |
| CUL4A      | 0.1119717 | 0.6208431 | 0.1804 | 0.857  | 0.119044667 | count | 1 |
| ATP11B     | 0.0916213 | 0.4591303 | 0.1996 | 0.842  | 0.119053464 | count | 1 |
| RAI1       | 0.1412428 | 0.8130535 | 0.1737 | 0.8622 | 0.11916319  | count | 1 |
| CHORDC1    | 0.0867439 | 0.2999895 | 0.2892 | 0.773  | 0.119244913 | count | 1 |
| FAM50B     | 0.0907138 | 0.5796321 | 0.1565 | 0.876  | 0.119454296 | count | 1 |
| MXRA7      | 0.0870784 | 0.4667276 | 0.1866 | 0.852  | 0.119503896 | count | 1 |



|            |           |           |        |        |             |       |   |
|------------|-----------|-----------|--------|--------|-------------|-------|---|
| RNF4       | 0.089904  | 0.4315453 | 0.2083 | 0.835  | 0.12013338  | count | 1 |
| C4orf48    | 0.0879907 | 0.471311  | 0.1867 | 0.852  | 0.120305907 | count | 1 |
| EBNA1BP2   | 0.0956244 | 0.5601519 | 0.1707 | 0.865  | 0.120671572 | count | 1 |
| SH3GLB1    | 0.085186  | 0.2440745 | 0.349  | 0.7273 | 0.120808269 | count | 1 |
| AGTRAP     | 0.0851279 | 0.2108667 | 0.4037 | 0.6867 | 0.120885681 | count | 1 |
| PAK2       | 0.0849502 | 0.1825814 | 0.4653 | 0.642  | 0.121084318 | count | 1 |
| PSMB7      | 0.0868322 | 0.3674328 | 0.2363 | 0.813  | 0.121134012 | count | 1 |
| CLNK       | 0.0903166 | 0.425513  | 0.2123 | 0.832  | 0.121155868 | count | 1 |
| HSPBP1     | 0.0910735 | 0.5255079 | 0.1733 | 0.863  | 0.121698078 | count | 1 |
| PURA       | 0.0875062 | 0.2650785 | 0.3301 | 0.742  | 0.122074775 | count | 1 |
| ZSCAN18    | 0.0918298 | 0.4206241 | 0.2183 | 0.827  | 0.122179852 | count | 1 |
| LRRRC61    | 0.0998771 | 0.8463176 | 0.118  | 0.906  | 0.122225188 | count | 1 |
| HMG20A     | 0.1250548 | 0.5201529 | 0.2404 | 0.81   | 0.122332665 | count | 1 |
| THUMPD2    | 0.1099291 | 0.7480519 | 0.147  | 0.883  | 0.123352191 | count | 1 |
| BRAF       | 0.1030242 | 0.5199099 | 0.1982 | 0.843  | 0.123413724 | count | 1 |
| SKI        | 0.0996467 | 0.5109118 | 0.195  | 0.845  | 0.124033763 | count | 1 |
| SHOC2      | 0.0917458 | 0.4219046 | 0.2175 | 0.828  | 0.124264124 | count | 1 |
| LXN        | 0.0957911 | 0.5912649 | 0.162  | 0.871  | 0.124481347 | count | 1 |
| MXI1       | 0.1272456 | 0.4760961 | 0.2673 | 0.789  | 0.124491757 | count | 1 |
| MFSD8      | 0.1019337 | 0.4955682 | 0.2057 | 0.837  | 0.124749179 | count | 1 |
| DHRS7      | 0.0872489 | 0.1621838 | 0.538  | 0.591  | 0.124754831 | count | 1 |
| UBE2L3     | 0.088492  | 0.2324546 | 0.3807 | 0.7037 | 0.126158903 | count | 1 |
| ADAP1      | 0.0902018 | 0.3717606 | 0.2426 | 0.808  | 0.126574773 | count | 1 |
| RFX3       | 0.1194899 | 0.9594418 | 0.1245 | 0.901  | 0.127083844 | count | 1 |
| FASTKD5    | 0.1194899 | 1.0901608 | 0.1096 | 0.913  | 0.127083844 | count | 1 |
| H2AFX      | 0.0951526 | 0.3808122 | 0.2499 | 0.803  | 0.127155949 | count | 1 |
| IL2RG      | 0.0892671 | 0.146733  | 0.6084 | 0.543  | 0.127720194 | count | 1 |
| ZBTB21     | 0.1204442 | 0.6016127 | 0.2002 | 0.841  | 0.128104653 | count | 1 |
| NDUFB11    | 0.0897084 | 0.1764236 | 0.5085 | 0.6115 | 0.128398865 | count | 1 |
| CENPJ      | 0.0965214 | 0.563732  | 0.1712 | 0.864  | 0.128430754 | count | 1 |
| CUL5       | 0.0929256 | 0.3408473 | 0.2726 | 0.785  | 0.128483119 | count | 1 |
| CASD1      | 0.1049842 | 0.5926047 | 0.1772 | 0.859  | 0.12849344  | count | 1 |
| TMEM156    | 0.0973507 | 0.4496756 | 0.2165 | 0.829  | 0.128909846 | count | 1 |
| NHLRC3     | 0.0972534 | 0.5138378 | 0.1893 | 0.85   | 0.129406112 | count | 1 |
| C9orf85    | 0.1026367 | 0.5817111 | 0.1764 | 0.86   | 0.129541711 | count | 1 |
| SLC35D1    | 0.1026367 | 0.657719  | 0.156  | 0.876  | 0.129541711 | count | 1 |
| AC093323.1 | 0.1043138 | 0.6899433 | 0.1512 | 0.88   | 0.129858428 | count | 1 |
| ANAPC1     | 0.0965435 | 0.5400638 | 0.1788 | 0.858  | 0.129975037 | count | 1 |
| GLG1       | 0.0943236 | 0.3585972 | 0.263  | 0.793  | 0.130248094 | count | 1 |
| PNPT1      | 0.1072739 | 0.7926633 | 0.1353 | 0.892  | 0.131304257 | count | 1 |
| COQ8A      | 0.1072739 | 1.0001498 | 0.1073 | 0.915  | 0.131304257 | count | 1 |
| URM1       | 0.095116  | 0.3611415 | 0.2634 | 0.792  | 0.13167502  | count | 1 |
| ZEB2       | 0.0944008 | 0.3065091 | 0.308  | 0.758  | 0.13169861  | count | 1 |
| MRPL2      | 0.1006807 | 0.5681828 | 0.1772 | 0.859  | 0.131780575 | count | 1 |
| ACTG1      | 0.0915398 | 0.0851387 | 1.0752 | 0.283  | 0.13192696  | count | 1 |

|            |           |           |        |        |             |       |   |
|------------|-----------|-----------|--------|--------|-------------|-------|---|
| NRF1       | 0.156278  | 0.9502708 | 0.1645 | 0.869  | 0.131995071 | count | 1 |
| DDX49      | 0.0996896 | 0.5652433 | 0.1764 | 0.86   | 0.132011659 | count | 1 |
| SUMO1      | 0.0931102 | 0.1978989 | 0.4705 | 0.6383 | 0.132224016 | count | 1 |
| IRF8       | 0.0950942 | 0.2517314 | 0.3778 | 0.706  | 0.132330771 | count | 1 |
| RNF135     | 0.1014723 | 0.6379027 | 0.1591 | 0.874  | 0.132818495 | count | 1 |
| CEBPZOS    | 0.0994002 | 0.4771913 | 0.2083 | 0.835  | 0.13283987  | count | 1 |
| IFT43      | 0.0983712 | 0.4841712 | 0.2032 | 0.839  | 0.132861272 | count | 1 |
| VPS28      | 0.0927539 | 0.1661603 | 0.5582 | 0.5771 | 0.132881957 | count | 1 |
| CDK5       | 0.1054367 | 0.6156679 | 0.1713 | 0.864  | 0.133084278 | count | 1 |
| SDCCAG8    | 0.1087862 | 0.5712915 | 0.1904 | 0.849  | 0.133160924 | count | 1 |
| PNKP       | 0.0986815 | 0.38096   | 0.259  | 0.796  | 0.133280854 | count | 1 |
| AC099791.2 | 0.1581641 | 1.0850246 | 0.1458 | 0.8842 | 0.133606592 | count | 1 |
| CEBPZ      | 0.0949222 | 0.2396477 | 0.3961 | 0.692  | 0.133801169 | count | 1 |
| ZBTB2      | 0.1038415 | 0.5385811 | 0.1928 | 0.847  | 0.133857293 | count | 1 |
| PJA2       | 0.0952225 | 0.2605543 | 0.3655 | 0.715  | 0.134008847 | count | 1 |
| PLCG2      | 0.0950743 | 0.2527709 | 0.3761 | 0.707  | 0.134065273 | count | 1 |
| STX7       | 0.1095563 | 0.5680367 | 0.1929 | 0.847  | 0.134106439 | count | 1 |
| METTL2A    | 0.1043504 | 0.5377136 | 0.1941 | 0.846  | 0.134514631 | count | 1 |
| PHF20      | 0.0958483 | 0.2371406 | 0.4042 | 0.686  | 0.134572721 | count | 1 |
| CCM2       | 0.0954152 | 0.2739446 | 0.3483 | 0.7278 | 0.134773316 | count | 1 |
| MIF4GD     | 0.0971477 | 0.4489664 | 0.2164 | 0.829  | 0.134931854 | count | 1 |
| GLRX5      | 0.0957698 | 0.2914292 | 0.3286 | 0.7427 | 0.135141768 | count | 1 |
| VPS4B      | 0.0978157 | 0.3204337 | 0.3053 | 0.76   | 0.135249485 | count | 1 |
| THEM6      | 0.1059584 | 0.6243106 | 0.1697 | 0.865  | 0.13528259  | count | 1 |
| DDX3X      | 0.0953856 | 0.1773997 | 0.5377 | 0.5912 | 0.135432319 | count | 1 |
| LMTK2      | 0.1383853 | 0.6884444 | 0.201  | 0.841  | 0.13547789  | count | 1 |
| TRAF5      | 0.0967566 | 0.2812385 | 0.344  | 0.731  | 0.135545837 | count | 1 |
| XRN1       | 0.0962929 | 0.3320193 | 0.29   | 0.772  | 0.135682199 | count | 1 |
| SRSF10     | 0.0959585 | 0.2108071 | 0.4552 | 0.6493 | 0.135738319 | count | 1 |
| TPD52      | 0.100601  | 0.5016152 | 0.2006 | 0.841  | 0.135876428 | count | 1 |
| SIN3A      | 0.1064715 | 0.5155011 | 0.2065 | 0.836  | 0.13593916  | count | 1 |
| SS18L2     | 0.0963045 | 0.2370774 | 0.4062 | 0.685  | 0.136029914 | count | 1 |
| ZFAND2A    | 0.0995192 | 0.4596362 | 0.2165 | 0.829  | 0.13608355  | count | 1 |
| POT1       | 0.2268603 | 1.08163   | 0.2097 | 0.834  | 0.136460377 | count | 1 |
| KBTBD8     | 0.2268603 | 1.136601  | 0.1996 | 0.842  | 0.136460377 | count | 1 |
| NLN        | 0.2268603 | 1.136601  | 0.1996 | 0.842  | 0.136460377 | count | 1 |
| AC087239.1 | 0.1025676 | 0.6381035 | 0.1607 | 0.872  | 0.136487612 | count | 1 |
| RAC1       | 0.0960597 | 0.1745168 | 0.5504 | 0.582  | 0.137171265 | count | 1 |
| DCAF7      | 0.0987575 | 0.4035188 | 0.2447 | 0.807  | 0.137303879 | count | 1 |
| PRKRIP1    | 0.1102797 | 0.5389631 | 0.2046 | 0.838  | 0.137305853 | count | 1 |
| PWP1       | 0.1020136 | 0.39828   | 0.2561 | 0.798  | 0.137348601 | count | 1 |
| YIPF6      | 0.1403453 | 0.9051387 | 0.1551 | 0.877  | 0.137412182 | count | 1 |
| TMEM62     | 0.1403453 | 0.9556683 | 0.1469 | 0.883  | 0.137412182 | count | 1 |
| NAGS       | 0.1403453 | 1.1278828 | 0.1244 | 0.9011 | 0.137412182 | count | 1 |
| FAM210A    | 0.1146978 | 0.6767435 | 0.1695 | 0.866  | 0.137447547 | count | 1 |

|            |           |           |        |        |             |       |   |
|------------|-----------|-----------|--------|--------|-------------|-------|---|
| MORC4      | 0.1146978 | 0.7720941 | 0.1486 | 0.882  | 0.137447547 | count | 1 |
| SLC16A3    | 0.0976232 | 0.2773667 | 0.352  | 0.725  | 0.137503129 | count | 1 |
| MPLKIP     | 0.0991525 | 0.3873068 | 0.256  | 0.798  | 0.137575937 | count | 1 |
| OSBPL8     | 0.0989249 | 0.2957592 | 0.3345 | 0.738  | 0.137903117 | count | 1 |
| ZNF791     | 0.0979297 | 0.31471   | 0.3112 | 0.756  | 0.137935021 | count | 1 |
| PTPRN2     | 0.1054709 | 0.5335585 | 0.1977 | 0.843  | 0.138061714 | count | 1 |
| MBIP       | 0.1026367 | 0.4497575 | 0.2282 | 0.82   | 0.138188583 | count | 1 |
| ABT1       | 0.0989927 | 0.3143788 | 0.3149 | 0.753  | 0.138594631 | count | 1 |
| IPCEF1     | 0.1029641 | 0.397843  | 0.2588 | 0.796  | 0.138629945 | count | 1 |
| WLS        | 0.2310177 | 1.367445  | 0.1689 | 0.866  | 0.139017124 | count | 1 |
| AC099568.2 | 0.2310177 | 1.371939  | 0.1684 | 0.866  | 0.139017124 | count | 1 |
| AMIGO1     | 0.2310177 | 1.371939  | 0.1684 | 0.866  | 0.139017124 | count | 1 |
| SMOG2      | 0.2310177 | 1.367445  | 0.1689 | 0.866  | 0.139017124 | count | 1 |
| COPG2      | 0.2310177 | 1.371939  | 0.1684 | 0.866  | 0.139017124 | count | 1 |
| AC005229.4 | 0.2310177 | 1.367445  | 0.1689 | 0.866  | 0.139017124 | count | 1 |
| SPIN2A     | 0.2310177 | 1.371939  | 0.1684 | 0.866  | 0.139017124 | count | 1 |
| PTK2       | 0.2310177 | 1.367445  | 0.1689 | 0.866  | 0.139017124 | count | 1 |
| GOLM1      | 0.2310177 | 1.371939  | 0.1684 | 0.866  | 0.139017124 | count | 1 |
| AL450306.1 | 0.2310177 | 1.371939  | 0.1684 | 0.866  | 0.139017124 | count | 1 |
| EPYC       | 0.2310177 | 1.371939  | 0.1684 | 0.866  | 0.139017124 | count | 1 |
| SAMD4A     | 0.2310177 | 1.367445  | 0.1689 | 0.866  | 0.139017124 | count | 1 |
| AF001548.2 | 0.2310177 | 1.371939  | 0.1684 | 0.866  | 0.139017124 | count | 1 |
| GEMIN4     | 0.2310177 | 1.367445  | 0.1689 | 0.866  | 0.139017124 | count | 1 |
| FASN       | 0.2310177 | 1.371939  | 0.1684 | 0.866  | 0.139017124 | count | 1 |
| MACROD2    | 0.2310177 | 1.367445  | 0.1689 | 0.866  | 0.139017124 | count | 1 |
| ZBTB45     | 0.2310177 | 1.367445  | 0.1689 | 0.866  | 0.139017124 | count | 1 |
| MTMR3      | 0.2310177 | 1.371939  | 0.1684 | 0.866  | 0.139017124 | count | 1 |
| ARL6IP5    | 0.0970215 | 0.131514  | 0.7377 | 0.461  | 0.13925503  | count | 1 |
| EFHD2      | 0.0973876 | 0.1964163 | 0.4958 | 0.62   | 0.139340448 | count | 1 |
| LETMD1     | 0.1043138 | 0.4727455 | 0.2207 | 0.825  | 0.139415746 | count | 1 |
| NDUFB5     | 0.1010899 | 0.3658186 | 0.2763 | 0.782  | 0.139598898 | count | 1 |
| UVRAG      | 0.1010352 | 0.4104135 | 0.2462 | 0.806  | 0.139704518 | count | 1 |
| TMEM179B   | 0.1001727 | 0.3348869 | 0.2991 | 0.765  | 0.140063618 | count | 1 |
| SMARCD1    | 0.1013826 | 0.419533  | 0.2417 | 0.809  | 0.14018525  | count | 1 |
| SRP19      | 0.0996316 | 0.2903176 | 0.3432 | 0.732  | 0.140333205 | count | 1 |
| PPM1M      | 0.1043755 | 0.4724819 | 0.2209 | 0.825  | 0.140532666 | count | 1 |
| DRAP1      | 0.0988322 | 0.1923964 | 0.5137 | 0.6078 | 0.14109934  | count | 1 |
| PPP4R2     | 0.1016095 | 0.3334404 | 0.3047 | 0.761  | 0.141761678 | count | 1 |
| NCAPH2     | 0.1110656 | 0.6887293 | 0.1613 | 0.872  | 0.141818422 | count | 1 |
| GNL3L      | 0.2357955 | 0.8610159 | 0.2739 | 0.784  | 0.141957523 | count | 1 |
| SRGAP2C    | 0.2357955 | 0.8976148 | 0.2627 | 0.793  | 0.141957523 | count | 1 |
| SMAGP      | 0.2357955 | 0.9240322 | 0.2552 | 0.799  | 0.141957523 | count | 1 |
| ZNF586     | 0.2357955 | 0.9828576 | 0.2399 | 0.8106 | 0.141957523 | count | 1 |
| PHYKPL     | 0.1020723 | 0.3368523 | 0.303  | 0.762  | 0.142173568 | count | 1 |
| KHDRBS1    | 0.1001491 | 0.2101624 | 0.4765 | 0.634  | 0.142271132 | count | 1 |

|         |           |           |        |        |             |       |   |
|---------|-----------|-----------|--------|--------|-------------|-------|---|
| DALRD3  | 0.1069513 | 0.4894823 | 0.2185 | 0.827  | 0.142329901 | count | 1 |
| ERLEC1  | 0.1059992 | 0.3401499 | 0.3116 | 0.756  | 0.142721664 | count | 1 |
| NTMT1   | 0.1048514 | 0.4477972 | 0.2341 | 0.815  | 0.14276195  | count | 1 |
| EXOC1   | 0.1048514 | 0.4677019 | 0.2242 | 0.823  | 0.14276195  | count | 1 |
| CRLF3   | 0.1035723 | 0.3751935 | 0.2761 | 0.783  | 0.142832583 | count | 1 |
| MAP2K1  | 0.1132188 | 0.6512562 | 0.1738 | 0.862  | 0.142932383 | count | 1 |
| SEC61G  | 0.1010764 | 0.2084508 | 0.4849 | 0.628  | 0.14305583  | count | 1 |
| ACTR5   | 0.1276488 | 0.7985375 | 0.1599 | 0.873  | 0.143338056 | count | 1 |
| SERTAD3 | 0.1017972 | 0.2473208 | 0.4116 | 0.6809 | 0.143878579 | count | 1 |
| NUCB1   | 0.1027854 | 0.2978386 | 0.3451 | 0.73   | 0.143996169 | count | 1 |
| PIN1    | 0.1014388 | 0.2289378 | 0.4431 | 0.658  | 0.144079543 | count | 1 |
| ATF6    | 0.1058694 | 0.4949828 | 0.2139 | 0.831  | 0.144149528 | count | 1 |
| ZNF140  | 0.1471804 | 0.8245142 | 0.1785 | 0.858  | 0.144160647 | count | 1 |
| RHOT1   | 0.1109921 | 0.6375776 | 0.1741 | 0.862  | 0.144275119 | count | 1 |
| FAM214A | 0.1160555 | 0.454747  | 0.2552 | 0.799  | 0.144517891 | count | 1 |
| OXR1    | 0.1055219 | 0.4576075 | 0.2306 | 0.818  | 0.144579108 | count | 1 |
| LTBP4   | 0.1121606 | 0.6080747 | 0.1845 | 0.854  | 0.144604437 | count | 1 |
| ARHGAP4 | 0.1065041 | 0.3896476 | 0.2733 | 0.785  | 0.145014665 | count | 1 |
| PABPC4  | 0.1060685 | 0.3997557 | 0.2653 | 0.791  | 0.145048202 | count | 1 |
| GMNN    | 0.1211634 | 0.437834  | 0.2767 | 0.782  | 0.145224343 | count | 1 |
| CCR6    | 0.2414647 | 0.9648708 | 0.2503 | 0.803  | 0.145449435 | count | 1 |
| TMEM168 | 0.2414647 | 0.9648708 | 0.2503 | 0.803  | 0.145449435 | count | 1 |
| CD200   | 0.2414647 | 1.032592  | 0.2338 | 0.815  | 0.145449435 | count | 1 |
| PUDP    | 0.2414647 | 1.032592  | 0.2338 | 0.815  | 0.145449435 | count | 1 |
| RDH10   | 0.2414647 | 1.032592  | 0.2338 | 0.815  | 0.145449435 | count | 1 |
| TUT1    | 0.2414647 | 1.032592  | 0.2338 | 0.815  | 0.145449435 | count | 1 |
| FERMT2  | 0.2414647 | 1.032592  | 0.2338 | 0.815  | 0.145449435 | count | 1 |
| CCT6B   | 0.2414647 | 1.032592  | 0.2338 | 0.815  | 0.145449435 | count | 1 |
| DNAJC9  | 0.1081706 | 0.4050153 | 0.2671 | 0.79   | 0.145649169 | count | 1 |
| ATP2A3  | 0.1122302 | 0.566001  | 0.1983 | 0.843  | 0.145887729 | count | 1 |
| ANKMY1  | 0.117316  | 0.7666914 | 0.153  | 0.878  | 0.146092083 | count | 1 |
| MBD2    | 0.1049184 | 0.2759175 | 0.3803 | 0.704  | 0.146140442 | count | 1 |
| SAMD4B  | 0.1194899 | 0.8067496 | 0.1481 | 0.882  | 0.146305991 | count | 1 |
| EIF3G   | 0.1021557 | 0.1490626 | 0.6853 | 0.494  | 0.146596849 | count | 1 |
| WDR5    | 0.244084  | 0.7475958 | 0.3265 | 0.744  | 0.147063815 | count | 1 |
| C5orf22 | 0.244084  | 0.785413  | 0.3108 | 0.756  | 0.147063815 | count | 1 |
| KRBOX4  | 0.244084  | 0.785413  | 0.3108 | 0.756  | 0.147063815 | count | 1 |
| ADM     | 0.244084  | 0.8853934 | 0.2757 | 0.783  | 0.147063815 | count | 1 |
| BCL7B   | 0.1083624 | 0.3309994 | 0.3274 | 0.744  | 0.147547707 | count | 1 |
| TMEM43  | 0.1121618 | 0.4686722 | 0.2393 | 0.811  | 0.147748382 | count | 1 |
| VPS37A  | 0.1088327 | 0.5381421 | 0.2022 | 0.84   | 0.147827611 | count | 1 |
| ZNF428  | 0.1046356 | 0.2606668 | 0.4014 | 0.688  | 0.147934799 | count | 1 |
| FN3KRP  | 0.118855  | 0.6930981 | 0.1715 | 0.864  | 0.14801419  | count | 1 |
| MANEA   | 0.1271605 | 0.8182447 | 0.1554 | 0.877  | 0.148263547 | count | 1 |
| TMEM38B | 0.1271605 | 0.8411639 | 0.1512 | 0.88   | 0.148263547 | count | 1 |

|           |           |           |        |        |             |       |   |
|-----------|-----------|-----------|--------|--------|-------------|-------|---|
| NRDE2     | 0.1163852 | 0.6259318 | 0.1859 | 0.853  | 0.148627413 | count | 1 |
| SYNJ2BP   | 0.1109128 | 0.588492  | 0.1885 | 0.851  | 0.148824308 | count | 1 |
| MVP       | 0.1119739 | 0.4709231 | 0.2378 | 0.812  | 0.149024477 | count | 1 |
| SERPINB1  | 0.1052697 | 0.2502542 | 0.4207 | 0.6743 | 0.149268948 | count | 1 |
| PPP1CC    | 0.1091965 | 0.3637301 | 0.3002 | 0.764  | 0.149330152 | count | 1 |
| PAQR6     | 0.1143845 | 0.6555964 | 0.1745 | 0.862  | 0.149752114 | count | 1 |
| MRPS10    | 0.109378  | 0.4640936 | 0.2357 | 0.814  | 0.149867762 | count | 1 |
| TRAPPC6A  | 0.1066484 | 0.2851791 | 0.374  | 0.709  | 0.150221071 | count | 1 |
| COG6      | 0.1781619 | 0.818037  | 0.2178 | 0.828  | 0.150716614 | count | 1 |
| HP1BP3    | 0.1058292 | 0.1860208 | 0.5689 | 0.57   | 0.150896102 | count | 1 |
| RAB2A     | 0.1068388 | 0.2440074 | 0.4379 | 0.662  | 0.150915674 | count | 1 |
| ZMYM5     | 0.1079012 | 0.3370055 | 0.3202 | 0.749  | 0.150977361 | count | 1 |
| DDX52     | 0.1094477 | 0.4516681 | 0.2423 | 0.809  | 0.151706151 | count | 1 |
| CD7       | 0.1054107 | 0.0935917 | 1.1263 | 0.261  | 0.151849772 | count | 1 |
| ZFYVE28   | 0.109837  | 0.3738193 | 0.2938 | 0.769  | 0.151885155 | count | 1 |
| TIMM29    | 0.1192034 | 0.535771  | 0.2225 | 0.824  | 0.152235206 | count | 1 |
| DPP3      | 0.1444705 | 0.76259   | 0.1894 | 0.85   | 0.153832673 | count | 1 |
| MRPL35    | 0.1175361 | 0.5949147 | 0.1976 | 0.844  | 0.153886267 | count | 1 |
| TANK      | 0.1113664 | 0.3234498 | 0.3443 | 0.731  | 0.154001811 | count | 1 |
| LSM10     | 0.1106297 | 0.3359272 | 0.3293 | 0.742  | 0.154101197 | count | 1 |
| GABARAPL2 | 0.1081373 | 0.1999062 | 0.5409 | 0.5889 | 0.154110302 | count | 1 |
| QSOX1     | 0.1145036 | 0.5333194 | 0.2147 | 0.83   | 0.154678867 | count | 1 |
| GAPVD1    | 0.1200475 | 0.4807611 | 0.2497 | 0.803  | 0.154796118 | count | 1 |
| DNAL4     | 0.1378135 | 0.7441797 | 0.1852 | 0.853  | 0.154814191 | count | 1 |
| PDXDC1    | 0.1146106 | 0.5166888 | 0.2218 | 0.825  | 0.154823599 | count | 1 |
| RNGTT     | 0.1327622 | 0.5774112 | 0.2299 | 0.818  | 0.154824525 | count | 1 |
| FKBP2     | 0.1091673 | 0.2509565 | 0.435  | 0.6639 | 0.15482944  | count | 1 |
| USP1      | 0.1123335 | 0.4094456 | 0.2744 | 0.784  | 0.154925676 | count | 1 |
| HMGCL     | 0.1230475 | 0.7622157 | 0.1614 | 0.872  | 0.155374902 | count | 1 |
| CCPG1     | 0.1101114 | 0.2545575 | 0.4326 | 0.666  | 0.155440465 | count | 1 |
| BAZ1A     | 0.1120726 | 0.2956549 | 0.3791 | 0.705  | 0.155677339 | count | 1 |
| VAMP4     | 0.1175912 | 0.4442511 | 0.2647 | 0.791  | 0.155759039 | count | 1 |
| RUNX2     | 0.1253119 | 0.5226759 | 0.2398 | 0.811  | 0.156079898 | count | 1 |
| CNOT10    | 0.1306743 | 0.7398904 | 0.1766 | 0.86   | 0.156669004 | count | 1 |
| USP22     | 0.1190275 | 0.4474814 | 0.266  | 0.79   | 0.15680927  | count | 1 |
| CHMP3     | 0.1473152 | 0.5454398 | 0.2701 | 0.787  | 0.156882253 | count | 1 |
| KDELR2    | 0.1107423 | 0.2384701 | 0.4644 | 0.6427 | 0.157297965 | count | 1 |
| ZNRD1     | 0.1107423 | 0.2478963 | 0.4467 | 0.6554 | 0.157297965 | count | 1 |
| CD247     | 0.1096681 | 0.1199019 | 0.9146 | 0.361  | 0.157604003 | count | 1 |
| SNRPB2    | 0.1108178 | 0.2252472 | 0.492  | 0.6231 | 0.157789117 | count | 1 |
| ZNF394    | 0.1176477 | 0.31586   | 0.3725 | 0.71   | 0.157874674 | count | 1 |
| BAZ2B     | 0.1165994 | 0.426384  | 0.2735 | 0.785  | 0.157970645 | count | 1 |
| ARHGAP18  | 0.1125465 | 0.2947046 | 0.3819 | 0.703  | 0.158109907 | count | 1 |
| PARP11    | 0.1226409 | 0.6584667 | 0.1863 | 0.852  | 0.158147985 | count | 1 |
| YIPF4     | 0.1168128 | 0.4742844 | 0.2463 | 0.806  | 0.158260131 | count | 1 |

|            |           |           |        |        |             |       |   |
|------------|-----------|-----------|--------|--------|-------------|-------|---|
| TMEM258    | 0.1119914 | 0.225446  | 0.4968 | 0.62   | 0.158468935 | count | 1 |
| MRPL21     | 0.1144682 | 0.3445101 | 0.3323 | 0.74   | 0.15884364  | count | 1 |
| NNT        | 0.1277475 | 0.5822117 | 0.2194 | 0.826  | 0.159122941 | count | 1 |
| AC073111.5 | 0.1302631 | 0.9301885 | 0.14   | 0.889  | 0.159543377 | count | 1 |
| UFSP2      | 0.1238733 | 0.5898431 | 0.21   | 0.834  | 0.159740918 | count | 1 |
| B3GNT7     | 0.1136762 | 0.3024452 | 0.3759 | 0.7073 | 0.161159226 | count | 1 |
| SFXN4      | 0.1441514 | 0.9879421 | 0.1459 | 0.884  | 0.161973904 | count | 1 |
| EIF4A1     | 0.1157181 | 0.2564921 | 0.4512 | 0.652  | 0.162025521 | count | 1 |
| SMIM20     | 0.1212161 | 0.4587862 | 0.2642 | 0.792  | 0.16204209  | count | 1 |
| DCPS       | 0.1213236 | 0.527604  | 0.23   | 0.818  | 0.162186025 | count | 1 |
| TFAM       | 0.1191267 | 0.3181436 | 0.3744 | 0.708  | 0.162222176 | count | 1 |
| RAN        | 0.1132222 | 0.1384108 | 0.818  | 0.414  | 0.162488906 | count | 1 |
| GLMN       | 0.1230078 | 0.5257538 | 0.234  | 0.815  | 0.162946668 | count | 1 |
| WASHC1     | 0.1230078 | 0.6032666 | 0.2039 | 0.839  | 0.162946668 | count | 1 |
| SMG6       | 0.117941  | 0.4007354 | 0.2943 | 0.769  | 0.16348855  | count | 1 |
| SHMT1      | 0.1257417 | 0.5708455 | 0.2203 | 0.826  | 0.163490464 | count | 1 |
| IER5       | 0.1164927 | 0.304268  | 0.3829 | 0.702  | 0.163656725 | count | 1 |
| GPCPD1     | 0.1336759 | 0.3382692 | 0.3952 | 0.693  | 0.163738221 | count | 1 |
| PYROXD1    | 0.1336981 | 0.7436249 | 0.1798 | 0.857  | 0.163765511 | count | 1 |
| IARS2      | 0.1255456 | 0.5421468 | 0.2316 | 0.817  | 0.164394574 | count | 1 |
| BID        | 0.1179605 | 0.3788889 | 0.3113 | 0.756  | 0.164458194 | count | 1 |
| TAPBP      | 0.1154014 | 0.1939444 | 0.595  | 0.552  | 0.164734225 | count | 1 |
| CTNNB1     | 0.1176205 | 0.3330336 | 0.3532 | 0.724  | 0.16498251  | count | 1 |
| ITM2C      | 0.1150679 | 0.1583349 | 0.7267 | 0.468  | 0.165446899 | count | 1 |
| SNRPB      | 0.1159551 | 0.1734633 | 0.6685 | 0.504  | 0.165575377 | count | 1 |
| NAA10      | 0.1176514 | 0.288253  | 0.4082 | 0.6834 | 0.165659811 | count | 1 |
| PCNX1      | 0.1558564 | 0.3546865 | 0.4394 | 0.661  | 0.166042788 | count | 1 |
| UBC        | 0.1153667 | 0.0825823 | 1.397  | 0.163  | 0.166128981 | count | 1 |
| RANBP3     | 0.1333604 | 0.7414971 | 0.1799 | 0.857  | 0.166136924 | count | 1 |
| ZNF620     | 0.1333604 | 0.8282187 | 0.161  | 0.872  | 0.166136924 | count | 1 |
| CIRBP      | 0.1159683 | 0.1432864 | 0.8093 | 0.4189 | 0.166256917 | count | 1 |
| SLC4A1AP   | 0.1213992 | 0.3627081 | 0.3347 | 0.738  | 0.166357012 | count | 1 |
| CERS5      | 0.156278  | 0.6859085 | 0.2278 | 0.82   | 0.166495133 | count | 1 |
| ANKRD13A   | 0.1427334 | 0.7009702 | 0.2036 | 0.839  | 0.166508746 | count | 1 |
| DBNL       | 0.1193163 | 0.2974551 | 0.4011 | 0.689  | 0.166731957 | count | 1 |
| SELENOM    | 0.1202031 | 0.4076614 | 0.2949 | 0.768  | 0.167446321 | count | 1 |
| GON7       | 0.1291388 | 0.595242  | 0.217  | 0.828  | 0.167917371 | count | 1 |
| LINC01353  | 0.1582329 | 0.8781713 | 0.1802 | 0.857  | 0.16859271  | count | 1 |
| COX4I1     | 0.1173537 | 0.0982869 | 1.194  | 0.233  | 0.168894338 | count | 1 |
| WDSUB1     | 0.1322332 | 0.5102623 | 0.2591 | 0.796  | 0.168920488 | count | 1 |
| KEAP1      | 0.1246709 | 0.5418519 | 0.2301 | 0.818  | 0.168920821 | count | 1 |
| PSMB8-AS1  | 0.1189431 | 0.2638165 | 0.4509 | 0.6524 | 0.168950181 | count | 1 |
| PUM3       | 0.1235457 | 0.344179  | 0.359  | 0.72   | 0.168975808 | count | 1 |
| DERL1      | 0.1211393 | 0.3128291 | 0.3872 | 0.699  | 0.169028481 | count | 1 |
| CCNH       | 0.1190407 | 0.2042633 | 0.5828 | 0.5604 | 0.16905987  | count | 1 |

|            |           |           |        |        |             |       |   |
|------------|-----------|-----------|--------|--------|-------------|-------|---|
| KIFAP3     | 0.1251362 | 0.4071472 | 0.3073 | 0.759  | 0.169062467 | count | 1 |
| LTBP3      | 0.1449173 | 0.6078932 | 0.2384 | 0.812  | 0.169068754 | count | 1 |
| CYB5A      | 0.1260666 | 0.477518  | 0.264  | 0.792  | 0.169781982 | count | 1 |
| FARS2      | 0.1250865 | 0.5656683 | 0.2211 | 0.825  | 0.169934076 | count | 1 |
| XCL1       | 0.1179432 | 0.1474821 | 0.7997 | 0.424  | 0.170056711 | count | 1 |
| POLG       | 0.1597298 | 0.7228487 | 0.221  | 0.825  | 0.170199095 | count | 1 |
| VDAC2      | 0.1195743 | 0.1981088 | 0.6036 | 0.5465 | 0.170482849 | count | 1 |
| CTSS       | 0.1202156 | 0.2349467 | 0.5117 | 0.6092 | 0.170729001 | count | 1 |
| AC010642.2 | 0.1338175 | 0.5377037 | 0.2489 | 0.804  | 0.170949795 | count | 1 |
| SIGMAR1    | 0.142544  | 0.6809331 | 0.2093 | 0.834  | 0.170960186 | count | 1 |
| VPS29      | 0.1210342 | 0.2178912 | 0.5555 | 0.579  | 0.171129373 | count | 1 |
| DCAF1      | 0.2831711 | 0.7084544 | 0.3997 | 0.6896 | 0.171231404 | count | 1 |
| UBE2M      | 0.1201919 | 0.1834953 | 0.655  | 0.5129 | 0.171459508 | count | 1 |
| RAB8B      | 0.120046  | 0.1825919 | 0.6575 | 0.5114 | 0.171547707 | count | 1 |
| LSM14B     | 0.1405021 | 0.6102445 | 0.2302 | 0.818  | 0.172130663 | count | 1 |
| HEBP1      | 0.1302631 | 0.4713653 | 0.2764 | 0.782  | 0.172575763 | count | 1 |
| ISOC1      | 0.1282102 | 0.4942498 | 0.2594 | 0.795  | 0.172673247 | count | 1 |
| CAPZA2     | 0.1230891 | 0.2763477 | 0.4454 | 0.656  | 0.172751676 | count | 1 |
| KIAA1143   | 0.1346357 | 0.5162623 | 0.2608 | 0.794  | 0.173654588 | count | 1 |
| STK4       | 0.1214259 | 0.1356241 | 0.8953 | 0.3713 | 0.173934257 | count | 1 |
| DNASE1L1   | 0.1423495 | 0.6753563 | 0.2108 | 0.833  | 0.1744024   | count | 1 |
| RPS27      | 0.1211431 | 0.0511761 | 2.3672 | 0.0185 | 0.17463428  | count | 1 |
| LSM3       | 0.1250769 | 0.3012256 | 0.4152 | 0.678  | 0.175026088 | count | 1 |
| MAPK13     | 0.1358345 | 0.5763614 | 0.2357 | 0.814  | 0.175204706 | count | 1 |
| AL451165.2 | 0.1562726 | 0.6903427 | 0.2264 | 0.821  | 0.175675381 | count | 1 |
| ARL4C      | 0.1228698 | 0.1725997 | 0.7119 | 0.477  | 0.175754362 | count | 1 |
| STK17B     | 0.1227689 | 0.1278405 | 0.9603 | 0.338  | 0.175946026 | count | 1 |
| AC025159.1 | 0.1329412 | 0.5949704 | 0.2234 | 0.823  | 0.176130533 | count | 1 |
| FOXN2      | 0.1264732 | 0.3107474 | 0.407  | 0.684  | 0.176187469 | count | 1 |
| OSBP       | 0.1357874 | 0.4683269 | 0.2899 | 0.772  | 0.176582786 | count | 1 |
| EPHA4      | 0.2919064 | 0.6910437 | 0.4224 | 0.673  | 0.176651188 | count | 1 |
| TIPIN      | 0.1401855 | 0.671248  | 0.2088 | 0.835  | 0.177082115 | count | 1 |
| SH3GL1     | 0.1324869 | 0.6087082 | 0.2177 | 0.828  | 0.177134789 | count | 1 |
| OSTM1      | 0.1304016 | 0.4494907 | 0.2901 | 0.772  | 0.177164478 | count | 1 |
| SLC25A24   | 0.1332921 | 0.4733605 | 0.2816 | 0.778  | 0.177448627 | count | 1 |
| PRPSAP1    | 0.1357551 | 0.4604526 | 0.2948 | 0.768  | 0.177792783 | count | 1 |
| PHF5A      | 0.127919  | 0.3320718 | 0.3852 | 0.7    | 0.177881277 | count | 1 |
| APOBEC3C   | 0.1249198 | 0.2195879 | 0.5689 | 0.5698 | 0.178205748 | count | 1 |
| PARN       | 0.1374258 | 0.5720366 | 0.2402 | 0.81   | 0.178718454 | count | 1 |
| ABHD17B    | 0.141844  | 0.579582  | 0.2447 | 0.807  | 0.179183553 | count | 1 |
| FOPNL      | 0.144313  | 0.6271612 | 0.2301 | 0.818  | 0.179828291 | count | 1 |
| VAV3       | 0.1336366 | 0.3284531 | 0.4069 | 0.684  | 0.179992887 | count | 1 |
| C4orf33    | 0.1502669 | 0.6527779 | 0.2302 | 0.818  | 0.180263312 | count | 1 |
| CBR4       | 0.1343168 | 0.5748421 | 0.2337 | 0.815  | 0.18028045  | count | 1 |
| SAFB2      | 0.1343174 | 0.336502  | 0.3992 | 0.69   | 0.180281257 | count | 1 |

|          |           |           |        |        |             |       |   |
|----------|-----------|-----------|--------|--------|-------------|-------|---|
| SPTSSA   | 0.136873  | 0.5400752 | 0.2534 | 0.8    | 0.180368574 | count | 1 |
| LIMK1    | 0.1370601 | 0.6367804 | 0.2152 | 0.83   | 0.18061564  | count | 1 |
| WASF2    | 0.1277657 | 0.2300042 | 0.5555 | 0.579  | 0.180799428 | count | 1 |
| NDUFAF4  | 0.1294958 | 0.3668379 | 0.353  | 0.724  | 0.180835118 | count | 1 |
| ACAP1    | 0.1267332 | 0.1726832 | 0.7339 | 0.4635 | 0.180840334 | count | 1 |
| TUBG1    | 0.1699701 | 0.8698534 | 0.1954 | 0.845  | 0.181193344 | count | 1 |
| ATP5MF   | 0.1276243 | 0.2281365 | 0.5594 | 0.5763 | 0.181458458 | count | 1 |
| NARS     | 0.135214  | 0.4620428 | 0.2926 | 0.77   | 0.181486651 | count | 1 |
| VOPP1    | 0.1513965 | 0.5384952 | 0.2811 | 0.779  | 0.181624354 | count | 1 |
| GON4L    | 0.1321072 | 0.3453518 | 0.3825 | 0.702  | 0.18167492  | count | 1 |
| PRNP     | 0.1321072 | 0.3447087 | 0.3832 | 0.702  | 0.18167492  | count | 1 |
| CHFR     | 0.151711  | 0.6820065 | 0.2224 | 0.824  | 0.182003302 | count | 1 |
| DNAJC30  | 0.1441514 | 0.7058623 | 0.2042 | 0.838  | 0.182107411 | count | 1 |
| ZMAT2    | 0.13033   | 0.3102348 | 0.4201 | 0.675  | 0.182133539 | count | 1 |
| ING4     | 0.146172  | 0.5934605 | 0.2463 | 0.806  | 0.182152762 | count | 1 |
| FBRS     | 0.1431743 | 0.5065599 | 0.2826 | 0.778  | 0.182937083 | count | 1 |
| RAD9A    | 0.1376815 | 0.5526688 | 0.2491 | 0.803  | 0.183302953 | count | 1 |
| AP3S1    | 0.1317862 | 0.3503412 | 0.3762 | 0.707  | 0.183433188 | count | 1 |
| GCA      | 0.1400722 | 0.6776483 | 0.2067 | 0.836  | 0.183459402 | count | 1 |
| CCNC     | 0.1386752 | 0.5433801 | 0.2552 | 0.799  | 0.183742354 | count | 1 |
| ASPSCR1  | 0.1386752 | 0.5858974 | 0.2367 | 0.813  | 0.183742354 | count | 1 |
| XKR8     | 0.1499859 | 0.7067705 | 0.2122 | 0.832  | 0.183794859 | count | 1 |
| YWHAH    | 0.1305487 | 0.2840011 | 0.4597 | 0.646  | 0.184046802 | count | 1 |
| SEC14L1  | 0.1335246 | 0.325117  | 0.4107 | 0.682  | 0.184181949 | count | 1 |
| COPST7A  | 0.1356137 | 0.6889433 | 0.1968 | 0.844  | 0.184255435 | count | 1 |
| RASGEF1B | 0.1294753 | 0.2867516 | 0.4515 | 0.6519 | 0.184317498 | count | 1 |
| BORCS5   | 0.1385102 | 0.5701337 | 0.2429 | 0.808  | 0.184408293 | count | 1 |
| OSGIN2   | 0.1581977 | 0.704009  | 0.2247 | 0.822  | 0.184643239 | count | 1 |
| UXS1     | 0.17415   | 0.6136303 | 0.2838 | 0.777  | 0.185683468 | count | 1 |
| TRAF3    | 0.1459137 | 0.7554735 | 0.1931 | 0.847  | 0.186447348 | count | 1 |
| TFPT     | 0.1446264 | 0.4966283 | 0.2912 | 0.771  | 0.18657498  | count | 1 |
| HENMT1   | 0.1446264 | 0.510659  | 0.2832 | 0.777  | 0.18657498  | count | 1 |
| KDM6A    | 0.1598598 | 0.9935113 | 0.1609 | 0.872  | 0.186593284 | count | 1 |
| PRKAB1   | 0.1598598 | 1.002287  | 0.1595 | 0.873  | 0.186593284 | count | 1 |
| RAB35    | 0.1523191 | 0.5210774 | 0.2923 | 0.77   | 0.186665246 | count | 1 |
| LBH      | 0.1309279 | 0.2046341 | 0.6398 | 0.5227 | 0.186674596 | count | 1 |
| FRAT2    | 0.142544  | 0.5390207 | 0.2644 | 0.792  | 0.186704191 | count | 1 |
| RRP15    | 0.1375554 | 0.4029991 | 0.3413 | 0.733  | 0.187351673 | count | 1 |
| FAM208B  | 0.1466956 | 0.5006233 | 0.293  | 0.77   | 0.187449337 | count | 1 |
| ARMCX3   | 0.1417214 | 0.4078814 | 0.3475 | 0.728  | 0.187786589 | count | 1 |
| PRPS1    | 0.1433924 | 0.3509475 | 0.4086 | 0.683  | 0.187817957 | count | 1 |
| VEZT     | 0.1411733 | 0.5767501 | 0.2448 | 0.807  | 0.187960543 | count | 1 |
| WDR83    | 0.1471241 | 0.6457254 | 0.2278 | 0.82   | 0.18799846  | count | 1 |
| DMXL1    | 0.1457798 | 0.6325281 | 0.2305 | 0.818  | 0.188066872 | count | 1 |
| ZNF570   | 0.1457798 | 0.6938934 | 0.2101 | 0.834  | 0.188066872 | count | 1 |



|           |           |           |        |         |             |       |   |
|-----------|-----------|-----------|--------|---------|-------------|-------|---|
| AKTIP     | 0.1612878 | 0.5670881 | 0.2844 | 0.776   | 0.188268813 | count | 1 |
| TTC19     | 0.1398768 | 0.4027344 | 0.3473 | 0.729   | 0.188411256 | count | 1 |
| SIRT7     | 0.1366036 | 0.3477775 | 0.3928 | 0.695   | 0.188692107 | count | 1 |
| SCYL2     | 0.1515883 | 0.6952024 | 0.218  | 0.828   | 0.188926246 | count | 1 |
| TMEM9B    | 0.1354609 | 0.2821446 | 0.4801 | 0.631   | 0.189171408 | count | 1 |
| PSMC6     | 0.1354609 | 0.3010456 | 0.45   | 0.653   | 0.189171408 | count | 1 |
| ZNF598    | 0.1774404 | 0.6971998 | 0.2545 | 0.799   | 0.189219044 | count | 1 |
| SIN3B     | 0.1456425 | 0.635919  | 0.229  | 0.819   | 0.189430569 | count | 1 |
| 7-Mar     | 0.1377745 | 0.287197  | 0.4797 | 0.632   | 0.189477359 | count | 1 |
| C19orf66  | 0.1352745 | 0.2797507 | 0.4836 | 0.629   | 0.189543075 | count | 1 |
| CRYZL1    | 0.1582151 | 0.6308505 | 0.2508 | 0.802   | 0.189841619 | count | 1 |
| MT-CO1    | 0.1316852 | 0.0459346 | 2.8668 | 0.00442 | 0.189949468 | count | 1 |
| CCDC59    | 0.1359066 | 0.2736364 | 0.4967 | 0.62    | 0.190191402 | count | 1 |
| CENPL     | 0.1789332 | 0.8719428 | 0.2052 | 0.838   | 0.190823368 | count | 1 |
| NSMAF     | 0.1440413 | 0.693017  | 0.2078 | 0.835   | 0.190866769 | count | 1 |
| MICAL1    | 0.1515247 | 0.7548472 | 0.2007 | 0.841   | 0.191452289 | count | 1 |
| UNKL      | 0.1702292 | 0.797891  | 0.2133 | 0.831   | 0.191465066 | count | 1 |
| VPS50     | 0.1702574 | 0.6776178 | 0.2513 | 0.802   | 0.191496982 | count | 1 |
| ITFG2     | 0.195167  | 0.6301468 | 0.3097 | 0.757   | 0.19166496  | count | 1 |
| AGL       | 0.1391737 | 0.4998303 | 0.2784 | 0.781   | 0.191982478 | count | 1 |
| PGK1      | 0.1343094 | 0.1605655 | 0.8365 | 0.404   | 0.192038339 | count | 1 |
| ANKRD44   | 0.1414471 | 0.2910252 | 0.486  | 0.627   | 0.192192436 | count | 1 |
| VSIR      | 0.1362561 | 0.2685154 | 0.5074 | 0.612   | 0.192429521 | count | 1 |
| DOCK2     | 0.142725  | 0.4415321 | 0.3232 | 0.747   | 0.192862948 | count | 1 |
| DDX58     | 0.1495549 | 0.5374006 | 0.2783 | 0.781   | 0.192950239 | count | 1 |
| SRSF2     | 0.1358167 | 0.172163  | 0.7889 | 0.4308  | 0.192958993 | count | 1 |
| LDLRAD4   | 0.1375982 | 0.3583315 | 0.384  | 0.701   | 0.193228812 | count | 1 |
| PNRC1     | 0.1343883 | 0.0811191 | 1.6567 | 0.0986  | 0.193616221 | count | 1 |
| PEX14     | 0.2281934 | 0.9932576 | 0.2297 | 0.818   | 0.193703058 | count | 1 |
| MAFA      | 0.2281934 | 1.042302  | 0.2189 | 0.827   | 0.193703058 | count | 1 |
| DCP1B     | 0.2281934 | 1.0797216 | 0.2113 | 0.8327  | 0.193703058 | count | 1 |
| EDARADD   | 0.2281934 | 1.146405  | 0.1991 | 0.842   | 0.193703058 | count | 1 |
| SPATA2    | 0.2281934 | 1.146405  | 0.1991 | 0.842   | 0.193703058 | count | 1 |
| HIST1H2BN | 0.2281934 | 1.149862  | 0.1985 | 0.843   | 0.193703058 | count | 1 |
| MED21     | 0.1434003 | 0.3373203 | 0.4251 | 0.671   | 0.193776898 | count | 1 |
| IDH1      | 0.1471451 | 0.6307618 | 0.2333 | 0.816   | 0.193934688 | count | 1 |
| ARRDC1    | 0.1421911 | 0.4025137 | 0.3533 | 0.724   | 0.194108068 | count | 1 |
| ATG12     | 0.1393586 | 0.2753222 | 0.5062 | 0.613   | 0.194152836 | count | 1 |
| SNAI3     | 0.1492667 | 0.5432018 | 0.2748 | 0.784   | 0.194156265 | count | 1 |
| ACAA2     | 0.1365895 | 0.2389602 | 0.5716 | 0.568   | 0.194347363 | count | 1 |
| DHRS1     | 0.1430935 | 0.414911  | 0.3449 | 0.73    | 0.194905013 | count | 1 |
| NDUFAF1   | 0.1527886 | 0.6558474 | 0.233  | 0.816   | 0.195258287 | count | 1 |
| SMAD7     | 0.1460786 | 0.4758361 | 0.307  | 0.759   | 0.195340491 | count | 1 |
| TERF2     | 0.153109  | 0.645729  | 0.2371 | 0.813   | 0.195668965 | count | 1 |
| CCS       | 0.1396553 | 0.331263  | 0.4216 | 0.674   | 0.19611944  | count | 1 |

|            |           |           |        |        |             |       |   |
|------------|-----------|-----------|--------|--------|-------------|-------|---|
| C3orf62    | 0.2310177 | 1.1653438 | 0.1982 | 0.843  | 0.19613685  | count | 1 |
| EFCAB7     | 0.2310177 | 1.2148767 | 0.1902 | 0.849  | 0.19613685  | count | 1 |
| LINC00957  | 0.2310177 | 1.2148767 | 0.1902 | 0.849  | 0.19613685  | count | 1 |
| SLC9A7     | 0.2310177 | 1.2148767 | 0.1902 | 0.849  | 0.19613685  | count | 1 |
| PRKACA     | 0.2310177 | 1.2148767 | 0.1902 | 0.849  | 0.19613685  | count | 1 |
| TINAGL1    | 0.2310177 | 1.367445  | 0.1689 | 0.866  | 0.19613685  | count | 1 |
| MIR4422HG  | 0.2310177 | 1.367445  | 0.1689 | 0.866  | 0.19613685  | count | 1 |
| MAP10      | 0.2310177 | 1.371939  | 0.1684 | 0.866  | 0.19613685  | count | 1 |
| FBXO36     | 0.2310177 | 1.367445  | 0.1689 | 0.866  | 0.19613685  | count | 1 |
| ZNF619     | 0.2310177 | 1.367445  | 0.1689 | 0.866  | 0.19613685  | count | 1 |
| CEP72      | 0.2310177 | 1.371939  | 0.1684 | 0.866  | 0.19613685  | count | 1 |
| MICALL2    | 0.2310177 | 1.371939  | 0.1684 | 0.866  | 0.19613685  | count | 1 |
| HOXA11     | 0.2310177 | 1.371939  | 0.1684 | 0.866  | 0.19613685  | count | 1 |
| FKBP14     | 0.2310177 | 1.371939  | 0.1684 | 0.866  | 0.19613685  | count | 1 |
| P2RY8      | 0.2310177 | 1.371939  | 0.1684 | 0.866  | 0.19613685  | count | 1 |
| AL683807.1 | 0.2310177 | 1.371939  | 0.1684 | 0.866  | 0.19613685  | count | 1 |
| AL034397.3 | 0.2310177 | 1.371939  | 0.1684 | 0.866  | 0.19613685  | count | 1 |
| LACTB2-AS1 | 0.2310177 | 1.371939  | 0.1684 | 0.866  | 0.19613685  | count | 1 |
| AC009812.1 | 0.2310177 | 1.371939  | 0.1684 | 0.866  | 0.19613685  | count | 1 |
| TLL11      | 0.2310177 | 1.367445  | 0.1689 | 0.866  | 0.19613685  | count | 1 |
| CAMSAP1    | 0.2310177 | 1.371939  | 0.1684 | 0.866  | 0.19613685  | count | 1 |
| AC136475.5 | 0.2310177 | 1.367445  | 0.1689 | 0.866  | 0.19613685  | count | 1 |
| DNHD1      | 0.2310177 | 1.367445  | 0.1689 | 0.866  | 0.19613685  | count | 1 |
| IPO8       | 0.2310177 | 1.371939  | 0.1684 | 0.866  | 0.19613685  | count | 1 |
| FAM216A    | 0.2310177 | 1.371939  | 0.1684 | 0.866  | 0.19613685  | count | 1 |
| HOMEZ      | 0.2310177 | 1.371939  | 0.1684 | 0.866  | 0.19613685  | count | 1 |
| NGRN       | 0.2310177 | 1.371939  | 0.1684 | 0.866  | 0.19613685  | count | 1 |
| MIR762HG   | 0.2310177 | 1.371939  | 0.1684 | 0.866  | 0.19613685  | count | 1 |
| HSD3B7     | 0.2310177 | 1.371939  | 0.1684 | 0.866  | 0.19613685  | count | 1 |
| PSMC3IP    | 0.2310177 | 1.371939  | 0.1684 | 0.866  | 0.19613685  | count | 1 |
| AC137723.1 | 0.2310177 | 1.371939  | 0.1684 | 0.866  | 0.19613685  | count | 1 |
| COLEC12    | 0.2310177 | 1.371939  | 0.1684 | 0.866  | 0.19613685  | count | 1 |
| STK35      | 0.2310177 | 1.371939  | 0.1684 | 0.866  | 0.19613685  | count | 1 |
| ZNF561     | 0.2310177 | 1.367445  | 0.1689 | 0.866  | 0.19613685  | count | 1 |
| ZNF345     | 0.2310177 | 1.367445  | 0.1689 | 0.866  | 0.19613685  | count | 1 |
| AC005498.3 | 0.2310177 | 1.371939  | 0.1684 | 0.866  | 0.19613685  | count | 1 |
| ZNF587B    | 0.2310177 | 1.371939  | 0.1684 | 0.866  | 0.19613685  | count | 1 |
| EMC4       | 0.1384182 | 0.2590513 | 0.5343 | 0.5935 | 0.196371774 | count | 1 |
| SMC5       | 0.1457867 | 0.3266048 | 0.4464 | 0.656  | 0.196385    | count | 1 |
| MAPK1      | 0.137684  | 0.2129473 | 0.6466 | 0.5184 | 0.196419535 | count | 1 |
| BTN3A3     | 0.2001911 | 0.6334342 | 0.316  | 0.752  | 0.196650685 | count | 1 |
| ERGIC1     | 0.1422263 | 0.3390233 | 0.4195 | 0.675  | 0.196720287 | count | 1 |
| ITGA4      | 0.1384639 | 0.2056188 | 0.6734 | 0.5012 | 0.196815897 | count | 1 |
| MTRF1      | 0.2324951 | 0.9282906 | 0.2505 | 0.802  | 0.197410261 | count | 1 |
| AGAP3      | 0.1853491 | 0.8420444 | 0.2201 | 0.8259 | 0.197720585 | count | 1 |

|            |           |           |        |        |             |       |   |
|------------|-----------|-----------|--------|--------|-------------|-------|---|
| AKT2       | 0.1696745 | 0.5305627 | 0.3198 | 0.749  | 0.198111949 | count | 1 |
| RRBP1      | 0.1421984 | 0.4068182 | 0.3495 | 0.727  | 0.198112528 | count | 1 |
| NFATC2     | 0.1590556 | 0.6792948 | 0.2341 | 0.815  | 0.198267071 | count | 1 |
| CKLF       | 0.138787  | 0.1777681 | 0.7807 | 0.436  | 0.198296538 | count | 1 |
| TOR3A      | 0.1617804 | 0.4948379 | 0.3269 | 0.744  | 0.198307918 | count | 1 |
| ALOX5AP    | 0.1379596 | 0.1269283 | 1.0869 | 0.278  | 0.198409522 | count | 1 |
| UBE2S      | 0.1388158 | 0.1785829 | 0.7773 | 0.438  | 0.198471785 | count | 1 |
| ZNF566     | 0.2341011 | 0.7788877 | 0.3006 | 0.764  | 0.198794752 | count | 1 |
| YWHAZ      | 0.1385558 | 0.1212309 | 1.1429 | 0.254  | 0.198873092 | count | 1 |
| DENND6A    | 0.1704987 | 0.7657095 | 0.2227 | 0.824  | 0.199079524 | count | 1 |
| AC084033.3 | 0.1704987 | 0.8947049 | 0.1906 | 0.849  | 0.199079524 | count | 1 |
| CD81       | 0.1384161 | 0.0941243 | 1.4706 | 0.142  | 0.199277419 | count | 1 |
| F11R       | 0.2347606 | 0.8699854 | 0.2698 | 0.787  | 0.199363347 | count | 1 |
| HARS2      | 0.2347606 | 0.9764656 | 0.2404 | 0.81   | 0.199363347 | count | 1 |
| FOXN3      | 0.1442152 | 0.3293899 | 0.4378 | 0.662  | 0.199474036 | count | 1 |
| IFT20      | 0.1509438 | 0.4672509 | 0.323  | 0.747  | 0.20003238  | count | 1 |
| MBNL1      | 0.1403781 | 0.1918699 | 0.7316 | 0.465  | 0.200112647 | count | 1 |
| ARMC10     | 0.1538844 | 0.5191852 | 0.2964 | 0.767  | 0.200178132 | count | 1 |
| ZNF121     | 0.1538848 | 0.621228  | 0.2477 | 0.805  | 0.200178654 | count | 1 |
| SPDL1      | 0.2357955 | 0.7932319 | 0.2973 | 0.766  | 0.200255686 | count | 1 |
| WHRN       | 0.1784672 | 0.7569075 | 0.2358 | 0.814  | 0.200791627 | count | 1 |
| LSR        | 0.1726492 | 0.471999  | 0.3658 | 0.715  | 0.201604318 | count | 1 |
| PDE4A      | 0.1577594 | 0.5341945 | 0.2953 | 0.768  | 0.201630176 | count | 1 |
| STOML2     | 0.1456908 | 0.3500097 | 0.4162 | 0.678  | 0.202419763 | count | 1 |
| AIFM2      | 0.2384761 | 0.9774451 | 0.244  | 0.807  | 0.202567481 | count | 1 |
| EDEM3      | 0.2384761 | 1.06302   | 0.2243 | 0.823  | 0.202567481 | count | 1 |
| LDB1       | 0.1546285 | 0.5234482 | 0.2954 | 0.768  | 0.202570953 | count | 1 |
| STAG2      | 0.1445701 | 0.2845045 | 0.5081 | 0.612  | 0.202695995 | count | 1 |
| IGBP1      | 0.1440144 | 0.297407  | 0.4842 | 0.629  | 0.20280274  | count | 1 |
| NIPA2      | 0.1587605 | 0.520029  | 0.3053 | 0.76   | 0.202913577 | count | 1 |
| SPCS2      | 0.1419133 | 0.149079  | 0.9519 | 0.342  | 0.2029791   | count | 1 |
| GHITM      | 0.1434769 | 0.2110935 | 0.6797 | 0.497  | 0.203146056 | count | 1 |
| ZNF567     | 0.1657351 | 0.5113885 | 0.3241 | 0.746  | 0.203175825 | count | 1 |
| SPOCK2     | 0.1496006 | 0.2771109 | 0.5399 | 0.59   | 0.203287541 | count | 1 |
| CARNMT1    | 0.2394985 | 0.7475496 | 0.3204 | 0.7489 | 0.203449384 | count | 1 |
| DDX42      | 0.1468441 | 0.4045396 | 0.363  | 0.717  | 0.203593784 | count | 1 |
| SRRT       | 0.1522559 | 0.439295  | 0.3466 | 0.729  | 0.203616595 | count | 1 |
| THAP2      | 0.1546124 | 0.5584235 | 0.2769 | 0.782  | 0.203798812 | count | 1 |
| AL139246.5 | 0.1548862 | 0.655769  | 0.2362 | 0.813  | 0.204160531 | count | 1 |
| ERICH6-AS1 | 0.1548862 | 0.6786723 | 0.2282 | 0.82   | 0.204160531 | count | 1 |
| EIF2B1     | 0.1492667 | 0.3688105 | 0.4047 | 0.686  | 0.204202133 | count | 1 |
| TRAPPC2B   | 0.144394  | 0.270529  | 0.5337 | 0.5939 | 0.204286973 | count | 1 |
| NCF4       | 0.1918665 | 0.7218463 | 0.2658 | 0.791  | 0.204730191 | count | 1 |
| TRMT13     | 0.1553181 | 0.6163053 | 0.252  | 0.801  | 0.204731122 | count | 1 |
| GPATCH11   | 0.1525165 | 0.4399183 | 0.3467 | 0.729  | 0.204752661 | count | 1 |

|           |           |           |        |        |             |       |   |
|-----------|-----------|-----------|--------|--------|-------------|-------|---|
| ZBED5-AS1 | 0.2414647 | 0.853302  | 0.283  | 0.777  | 0.205145656 | count | 1 |
| PCNT      | 0.2415255 | 0.5863069 | 0.4119 | 0.681  | 0.205198118 | count | 1 |
| DNAJC25   | 0.1624106 | 0.8086514 | 0.2008 | 0.841  | 0.205253612 | count | 1 |
| CREBRF    | 0.1473477 | 0.3217101 | 0.458  | 0.647  | 0.205292775 | count | 1 |
| HOTAIRM1  | 0.1582064 | 0.4071526 | 0.3886 | 0.698  | 0.205815104 | count | 1 |
| HSPA5     | 0.1436821 | 0.1556726 | 0.923  | 0.3567 | 0.205909863 | count | 1 |
| CLK3      | 0.153012  | 0.4607704 | 0.3321 | 0.74   | 0.206134758 | count | 1 |
| HSD17B11  | 0.1459626 | 0.241173  | 0.6052 | 0.545  | 0.206507275 | count | 1 |
| TCF25     | 0.1459561 | 0.2115705 | 0.6899 | 0.4908 | 0.206606055 | count | 1 |
| RNF130    | 0.1500242 | 0.3959831 | 0.3789 | 0.705  | 0.207517317 | count | 1 |
| TRIM22    | 0.1477686 | 0.2858835 | 0.5169 | 0.606  | 0.207624757 | count | 1 |
| NDUFA1    | 0.1456446 | 0.1820224 | 0.8001 | 0.424  | 0.207797485 | count | 1 |
| FBXL4     | 0.1780722 | 0.8495252 | 0.2096 | 0.834  | 0.207972478 | count | 1 |
| NBN       | 0.1505625 | 0.414509  | 0.3632 | 0.717  | 0.208262689 | count | 1 |
| HSD17B4   | 0.169938  | 0.629477  | 0.27   | 0.787  | 0.208350145 | count | 1 |
| RFXANK    | 0.155948  | 0.4478832 | 0.3482 | 0.728  | 0.208563644 | count | 1 |
| ALDH3A2   | 0.1605354 | 0.5690453 | 0.2821 | 0.778  | 0.208852987 | count | 1 |
| TBC1D5    | 0.1605354 | 0.6399596 | 0.2509 | 0.802  | 0.208852987 | count | 1 |
| ALAS1     | 0.1788321 | 0.7828666 | 0.2284 | 0.819  | 0.20886497  | count | 1 |
| ACBD4     | 0.1788321 | 0.7904766 | 0.2262 | 0.821  | 0.20886497  | count | 1 |
| HIST1H2BC | 0.1857963 | 1.0118846 | 0.1836 | 0.8544 | 0.20909317  | count | 1 |
| BDP1      | 0.1476934 | 0.2472206 | 0.5974 | 0.5506 | 0.209315741 | count | 1 |
| CDC42     | 0.145945  | 0.1068552 | 1.3658 | 0.173  | 0.209722353 | count | 1 |
| PRPF18    | 0.1612467 | 0.4540466 | 0.3551 | 0.723  | 0.209780828 | count | 1 |
| DAPL1     | 0.2135741 | 0.8136566 | 0.2625 | 0.793  | 0.209941902 | count | 1 |
| TMEM125   | 0.2135741 | 1.069354  | 0.1997 | 0.842  | 0.209941902 | count | 1 |
| CCDC24    | 0.2135741 | 1.069354  | 0.1997 | 0.842  | 0.209941902 | count | 1 |
| TMEM53    | 0.2135741 | 1.069354  | 0.1997 | 0.842  | 0.209941902 | count | 1 |
| ENPP6     | 0.2135741 | 1.069354  | 0.1997 | 0.842  | 0.209941902 | count | 1 |
| GPRIN1    | 0.2135741 | 1.069354  | 0.1997 | 0.842  | 0.209941902 | count | 1 |
| HIST1H4F  | 0.2135741 | 1.069354  | 0.1997 | 0.842  | 0.209941902 | count | 1 |
| PSPH      | 0.2135741 | 1.069354  | 0.1997 | 0.842  | 0.209941902 | count | 1 |
| TPST1     | 0.2135741 | 1.069354  | 0.1997 | 0.842  | 0.209941902 | count | 1 |
| NCS1      | 0.2135741 | 1.069354  | 0.1997 | 0.842  | 0.209941902 | count | 1 |
| ZCCHC24   | 0.2135741 | 1.069354  | 0.1997 | 0.842  | 0.209941902 | count | 1 |
| DOCK9-DT  | 0.2135741 | 1.069354  | 0.1997 | 0.842  | 0.209941902 | count | 1 |
| EMP2      | 0.2135741 | 1.069354  | 0.1997 | 0.842  | 0.209941902 | count | 1 |
| TLDC1     | 0.2135741 | 1.069354  | 0.1997 | 0.842  | 0.209941902 | count | 1 |
| NAPB      | 0.2135741 | 1.069354  | 0.1997 | 0.842  | 0.209941902 | count | 1 |
| PKIG      | 0.2135741 | 1.069354  | 0.1997 | 0.842  | 0.209941902 | count | 1 |
| FCGBP     | 0.2135741 | 1.069354  | 0.1997 | 0.842  | 0.209941902 | count | 1 |
| NAPA-AS1  | 0.2135741 | 1.069354  | 0.1997 | 0.842  | 0.209941902 | count | 1 |
| SYNJ1     | 0.2135741 | 1.069354  | 0.1997 | 0.842  | 0.209941902 | count | 1 |
| MED13     | 0.1626938 | 0.4029229 | 0.4038 | 0.687  | 0.209950805 | count | 1 |
| ZFP36L1   | 0.1464037 | 0.1632756 | 0.8967 | 0.371  | 0.21011512  | count | 1 |

|             |           |           |        |        |             |       |   |
|-------------|-----------|-----------|--------|--------|-------------|-------|---|
| MAGED2      | 0.1490467 | 0.2591553 | 0.5751 | 0.566  | 0.210292142 | count | 1 |
| PPHLN1      | 0.1510469 | 0.3323311 | 0.4545 | 0.65   | 0.210955257 | count | 1 |
| CGGBP1      | 0.1491352 | 0.2513531 | 0.5933 | 0.553  | 0.210998048 | count | 1 |
| ROGDI       | 0.156657  | 0.6463537 | 0.2424 | 0.809  | 0.211053804 | count | 1 |
| TIAL1       | 0.1493715 | 0.2675825 | 0.5582 | 0.577  | 0.2111551   | count | 1 |
| GABARAPL1   | 0.1483636 | 0.1685454 | 0.8803 | 0.3794 | 0.211215433 | count | 1 |
| VKORC1      | 0.152078  | 0.3382512 | 0.4496 | 0.653  | 0.211703219 | count | 1 |
| NDUFA8      | 0.1564931 | 0.4516677 | 0.3465 | 0.729  | 0.212108379 | count | 1 |
| MFF         | 0.1535884 | 0.386586  | 0.3973 | 0.691  | 0.212179531 | count | 1 |
| AC013264.1  | 0.3494271 | 0.683044  | 0.5116 | 0.609  | 0.212495008 | count | 1 |
| PSMD13      | 0.1519168 | 0.2853123 | 0.5325 | 0.595  | 0.212613914 | count | 1 |
| C2orf74     | 0.1574433 | 0.5400178 | 0.2916 | 0.771  | 0.212785275 | count | 1 |
| GATAD2A     | 0.1616001 | 0.422348  | 0.3826 | 0.702  | 0.213031065 | count | 1 |
| LSM12       | 0.1547437 | 0.3292448 | 0.47   | 0.639  | 0.213174481 | count | 1 |
| STX17       | 0.1609017 | 0.4340992 | 0.3707 | 0.711  | 0.213257804 | count | 1 |
| HIST3H2BB   | 0.2176737 | 0.9400361 | 0.2316 | 0.817  | 0.214016375 | count | 1 |
| ARMCX4      | 0.2176737 | 0.9400361 | 0.2316 | 0.817  | 0.214016375 | count | 1 |
| TMEM86B     | 0.2176737 | 0.9640998 | 0.2258 | 0.822  | 0.214016375 | count | 1 |
| CACNA1C-AS2 | 0.2176737 | 1.216585  | 0.1789 | 0.858  | 0.214016375 | count | 1 |
| MYLPF       | 0.2176737 | 1.216585  | 0.1789 | 0.858  | 0.214016375 | count | 1 |
| ERCC6       | 0.1748349 | 0.6142171 | 0.2846 | 0.776  | 0.214380027 | count | 1 |
| ABCA2       | 0.1905958 | 0.7407507 | 0.2573 | 0.797  | 0.214531467 | count | 1 |
| PHIP        | 0.1526414 | 0.3493998 | 0.4369 | 0.6625 | 0.215366828 | count | 1 |
| CD55        | 0.1554735 | 0.255036  | 0.6096 | 0.543  | 0.215570347 | count | 1 |
| TINF2       | 0.1571887 | 0.3858801 | 0.4074 | 0.684  | 0.215851349 | count | 1 |
| ARID5A      | 0.153172  | 0.2534338 | 0.6044 | 0.546  | 0.215960028 | count | 1 |
| SNX9        | 0.1848885 | 0.6631532 | 0.2788 | 0.781  | 0.215979364 | count | 1 |
| ANKZF1      | 0.1849153 | 0.5143065 | 0.3595 | 0.719  | 0.216010849 | count | 1 |
| CYB5B       | 0.1594793 | 0.4350742 | 0.3666 | 0.714  | 0.216162365 | count | 1 |
| MGAT1       | 0.1565717 | 0.288609  | 0.5425 | 0.588  | 0.217094599 | count | 1 |
| PLRG1       | 0.1698859 | 0.4810376 | 0.3532 | 0.724  | 0.217179042 | count | 1 |
| TRMO        | 0.16017   | 0.4674435 | 0.3427 | 0.732  | 0.217672423 | count | 1 |
| ERV3-1      | 0.1703626 | 0.6171043 | 0.2761 | 0.783  | 0.217790399 | count | 1 |
| NDUFV1      | 0.1572206 | 0.366171  | 0.4294 | 0.668  | 0.217995252 | count | 1 |
| OTUB1       | 0.1577095 | 0.3711397 | 0.4249 | 0.671  | 0.218159427 | count | 1 |
| RPN1        | 0.1648612 | 0.4088535 | 0.4032 | 0.687  | 0.218517399 | count | 1 |
| NAA15       | 0.1729755 | 0.4817033 | 0.3591 | 0.72   | 0.21865305  | count | 1 |
| PSMD11      | 0.1605359 | 0.3941156 | 0.4073 | 0.684  | 0.218698951 | count | 1 |
| MPHOSPH8    | 0.1539998 | 0.2099026 | 0.7337 | 0.4637 | 0.21880257  | count | 1 |
| SNX5        | 0.1590732 | 0.3884104 | 0.4095 | 0.682  | 0.218805762 | count | 1 |
| OLA1        | 0.1573426 | 0.3373709 | 0.4664 | 0.641  | 0.218836794 | count | 1 |
| CCL3        | 0.1518875 | 0.1894463 | 0.8017 | 0.423  | 0.218955849 | count | 1 |
| CCNT2       | 0.1789332 | 0.5580225 | 0.3207 | 0.749  | 0.219427483 | count | 1 |
| ZMYM1       | 0.1789332 | 0.5984521 | 0.299  | 0.765  | 0.219427483 | count | 1 |
| RBM48       | 0.1827859 | 0.5720269 | 0.3195 | 0.75   | 0.219474981 | count | 1 |

|            |           |           |        |        |             |       |   |
|------------|-----------|-----------|--------|--------|-------------|-------|---|
| PARP8      | 0.1563845 | 0.2511366 | 0.6227 | 0.534  | 0.220045979 | count | 1 |
| EIF4A2     | 0.1552378 | 0.1880638 | 0.8255 | 0.4097 | 0.220525437 | count | 1 |
| SASS6      | 0.1665117 | 0.548809  | 0.3034 | 0.762  | 0.220709978 | count | 1 |
| GAS7       | 0.1746957 | 0.5508607 | 0.3171 | 0.751  | 0.220835238 | count | 1 |
| KLHL7      | 0.1961688 | 0.6395689 | 0.3067 | 0.759  | 0.220848158 | count | 1 |
| IL32       | 0.1536104 | 0.1678314 | 0.9153 | 0.361  | 0.220981193 | count | 1 |
| HNRNPM     | 0.1562674 | 0.2136859 | 0.7313 | 0.4651 | 0.22179088  | count | 1 |
| BEX4       | 0.156732  | 0.2676382 | 0.5856 | 0.5585 | 0.222029844 | count | 1 |
| GALNT6     | 0.197253  | 0.6137817 | 0.3214 | 0.748  | 0.222077276 | count | 1 |
| HPRT1      | 0.1584257 | 0.3248126 | 0.4877 | 0.626  | 0.222261877 | count | 1 |
| PTBP1      | 0.1678142 | 0.3673242 | 0.4569 | 0.648  | 0.222440319 | count | 1 |
| SBDS       | 0.1559668 | 0.1772346 | 0.88   | 0.38   | 0.222566971 | count | 1 |
| MAP4       | 0.1599702 | 0.3038798 | 0.5264 | 0.599  | 0.222700021 | count | 1 |
| CLIP1      | 0.1631918 | 0.5451952 | 0.2993 | 0.765  | 0.223279098 | count | 1 |
| PRPF38A    | 0.1615202 | 0.3806099 | 0.4244 | 0.672  | 0.22370729  | count | 1 |
| NDUFS4     | 0.1596641 | 0.3322875 | 0.4805 | 0.631  | 0.223743724 | count | 1 |
| HSCB       | 0.1624457 | 0.4989654 | 0.3256 | 0.745  | 0.22412349  | count | 1 |
| RIT1       | 0.1702393 | 0.5387638 | 0.316  | 0.752  | 0.224447475 | count | 1 |
| PMEPA1     | 0.1641768 | 0.4179756 | 0.3928 | 0.695  | 0.224628665 | count | 1 |
| ARL14EP    | 0.1614364 | 0.3785701 | 0.4264 | 0.6701 | 0.224743083 | count | 1 |
| LAMTOR3    | 0.1654802 | 0.4697714 | 0.3523 | 0.725  | 0.224900515 | count | 1 |
| PLAGL1     | 0.2288792 | 0.9683051 | 0.2364 | 0.813  | 0.225160138 | count | 1 |
| RBM22      | 0.1616881 | 0.2995204 | 0.5398 | 0.59   | 0.225658508 | count | 1 |
| CSGALNACT2 | 0.1635694 | 0.5351415 | 0.3057 | 0.76   | 0.225675671 | count | 1 |
| PWWP2A     | 0.1661549 | 0.4392239 | 0.3783 | 0.705  | 0.225818941 | count | 1 |
| ZFAS1      | 0.1590773 | 0.1906715 | 0.8343 | 0.4047 | 0.226019571 | count | 1 |
| ARL8A      | 0.1648879 | 0.4643594 | 0.3551 | 0.723  | 0.226035085 | count | 1 |
| AUH        | 0.1844788 | 0.6813611 | 0.2708 | 0.787  | 0.226258776 | count | 1 |
| MTIF2      | 0.1709575 | 0.6440402 | 0.2654 | 0.791  | 0.226616331 | count | 1 |
| LINC01771  | 0.2310177 | 0.8937411 | 0.2585 | 0.796  | 0.227287993 | count | 1 |
| MBLAC2     | 0.2310177 | 1.0189065 | 0.2267 | 0.821  | 0.227287993 | count | 1 |
| WVOX       | 0.2310177 | 1.2333162 | 0.1873 | 0.852  | 0.227287993 | count | 1 |
| NRSN2      | 0.2310177 | 1.2333162 | 0.1873 | 0.852  | 0.227287993 | count | 1 |
| CTSK       | 0.2310177 | 1.371939  | 0.1684 | 0.8664 | 0.227287993 | count | 1 |
| CMPK1      | 0.1655897 | 0.3304105 | 0.5012 | 0.617  | 0.227402859 | count | 1 |
| PCNP       | 0.1629425 | 0.264952  | 0.615  | 0.539  | 0.227410738 | count | 1 |
| IFI27L1    | 0.1947625 | 0.7057908 | 0.2759 | 0.783  | 0.227583018 | count | 1 |
| EIF1       | 0.1580274 | 0.0632458 | 2.4986 | 0.013  | 0.227757269 | count | 1 |
| RNF20      | 0.1782619 | 0.5586912 | 0.3191 | 0.75   | 0.227922432 | count | 1 |
| CXXC1      | 0.1899118 | 0.657359  | 0.2889 | 0.773  | 0.22807542  | count | 1 |
| RTN4       | 0.1615823 | 0.2315501 | 0.6978 | 0.486  | 0.228143624 | count | 1 |
| IKBIP      | 0.1637796 | 0.3629085 | 0.4513 | 0.652  | 0.228208062 | count | 1 |
| DHX36      | 0.1603201 | 0.2272695 | 0.7054 | 0.4811 | 0.228271263 | count | 1 |
| CCDC85B    | 0.159572  | 0.1763038 | 0.9051 | 0.3661 | 0.22839605  | count | 1 |
| FAM98B     | 0.1786481 | 0.5236387 | 0.3412 | 0.733  | 0.228417856 | count | 1 |

|             |           |           |        |        |             |       |   |
|-------------|-----------|-----------|--------|--------|-------------|-------|---|
| RNF168      | 0.1613308 | 0.2520477 | 0.6401 | 0.5226 | 0.228437742 | count | 1 |
| DDB2        | 0.173293  | 0.5234097 | 0.3311 | 0.741  | 0.228483398 | count | 1 |
| USB1        | 0.1661498 | 0.4262321 | 0.3898 | 0.697  | 0.228552118 | count | 1 |
| TBX21       | 0.1656681 | 0.3669131 | 0.4515 | 0.652  | 0.228574688 | count | 1 |
| GNAQ        | 0.1790749 | 0.6306172 | 0.284  | 0.777  | 0.228965368 | count | 1 |
| TMF1        | 0.1645937 | 0.333941  | 0.4929 | 0.622  | 0.229142692 | count | 1 |
| FAR1        | 0.2329721 | 0.5983736 | 0.3893 | 0.6973 | 0.229232975 | count | 1 |
| THUMPD1     | 0.1623364 | 0.2258088 | 0.7189 | 0.473  | 0.229424747 | count | 1 |
| MDM2        | 0.172449  | 0.4390082 | 0.3928 | 0.695  | 0.229694432 | count | 1 |
| KAT6B       | 0.1655876 | 0.2923081 | 0.5665 | 0.571  | 0.230092236 | count | 1 |
| CRYBG1      | 0.1640212 | 0.2789311 | 0.588  | 0.557  | 0.230117901 | count | 1 |
| HDHD3       | 0.2340942 | 0.9772108 | 0.2396 | 0.8108 | 0.230349805 | count | 1 |
| SLC7A6      | 0.378265  | 0.6999909 | 0.5404 | 0.589  | 0.230557342 | count | 1 |
| VPS13C      | 0.1633863 | 0.2467321 | 0.6622 | 0.508  | 0.230615414 | count | 1 |
| GPS2        | 0.1703702 | 0.4447616 | 0.3831 | 0.702  | 0.230949298 | count | 1 |
| EMB         | 0.1634145 | 0.2243944 | 0.7282 | 0.467  | 0.23121118  | count | 1 |
| LEPROTL1    | 0.1614585 | 0.1423007 | 1.1346 | 0.2574 | 0.231528151 | count | 1 |
| RIPK2       | 0.1732913 | 0.5272195 | 0.3287 | 0.743  | 0.231806997 | count | 1 |
| PSMA1       | 0.1635053 | 0.2222623 | 0.7356 | 0.4625 | 0.232068165 | count | 1 |
| EHD1        | 0.2065638 | 0.4737864 | 0.436  | 0.663  | 0.232635766 | count | 1 |
| NUDT16L1    | 0.1667314 | 0.3017099 | 0.5526 | 0.581  | 0.232879931 | count | 1 |
| PFDN6       | 0.170562  | 0.4209173 | 0.4052 | 0.686  | 0.232897188 | count | 1 |
| AKT1S1      | 0.2368175 | 0.87426   | 0.2709 | 0.787  | 0.23306071  | count | 1 |
| FCHO1       | 0.2368175 | 0.986496  | 0.2401 | 0.81   | 0.23306071  | count | 1 |
| RAP1A       | 0.1646684 | 0.248022  | 0.6639 | 0.5072 | 0.233222858 | count | 1 |
| GNG10       | 0.3834854 | 1.063576  | 0.3606 | 0.719  | 0.23383294  | count | 1 |
| ZRANB2      | 0.1659689 | 0.2639123 | 0.6289 | 0.53   | 0.233925498 | count | 1 |
| LINC01184   | 0.1952331 | 0.6912328 | 0.2824 | 0.778  | 0.234499621 | count | 1 |
| IL16        | 0.1659355 | 0.2534009 | 0.6548 | 0.513  | 0.234583372 | count | 1 |
| RPS6KA3     | 0.1716184 | 0.4495751 | 0.3817 | 0.703  | 0.234825154 | count | 1 |
| GLRX3       | 0.1820823 | 0.5026351 | 0.3623 | 0.717  | 0.235049923 | count | 1 |
| RNASEH1-AS1 | 0.2205707 | 0.9783405 | 0.2255 | 0.822  | 0.2356399   | count | 1 |
| ZNF691      | 0.2205707 | 1.0832936 | 0.2036 | 0.839  | 0.2356399   | count | 1 |
| MED14OS     | 0.2205707 | 1.0832936 | 0.2036 | 0.839  | 0.2356399   | count | 1 |
| POLE        | 0.2205707 | 1.0832936 | 0.2036 | 0.839  | 0.2356399   | count | 1 |
| AL135999.1  | 0.2205707 | 1.171955  | 0.1882 | 0.851  | 0.2356399   | count | 1 |
| TYK2        | 0.1844718 | 0.7613582 | 0.2423 | 0.809  | 0.235889289 | count | 1 |
| RTCA        | 0.1771519 | 0.3596555 | 0.4926 | 0.623  | 0.235972356 | count | 1 |
| ZBTB10      | 0.2019675 | 0.5723216 | 0.3529 | 0.724  | 0.236053765 | count | 1 |
| PDCD10      | 0.1663575 | 0.2492346 | 0.6675 | 0.5049 | 0.236073215 | count | 1 |
| HMGCR       | 0.1892958 | 0.6269712 | 0.3019 | 0.763  | 0.236121839 | count | 1 |
| ZNF641      | 0.1892958 | 0.8276632 | 0.2287 | 0.819  | 0.236121839 | count | 1 |
| PYROXD2     | 0.2213671 | 0.9897572 | 0.2237 | 0.823  | 0.236498334 | count | 1 |
| POLR3B      | 0.2213671 | 1.261406  | 0.1755 | 0.861  | 0.236498334 | count | 1 |
| ACTB        | 0.1640211 | 0.0729204 | 2.2493 | 0.0252 | 0.236552374 | count | 1 |

|          |           |           |        |        |             |       |   |
|----------|-----------|-----------|--------|--------|-------------|-------|---|
| TSEN15   | 0.1737568 | 0.438995  | 0.3958 | 0.693  | 0.236738518 | count | 1 |
| TMEM186  | 0.221787  | 0.7771174 | 0.2854 | 0.776  | 0.236950961 | count | 1 |
| MT-ND2   | 0.1645979 | 0.0902075 | 1.8247 | 0.069  | 0.237109423 | count | 1 |
| KLRD1    | 0.1649552 | 0.1086523 | 1.5182 | 0.13   | 0.23733032  | count | 1 |
| SLC4A7   | 0.1807367 | 0.4485632 | 0.4029 | 0.687  | 0.238322576 | count | 1 |
| FAH      | 0.391561  | 0.8753498 | 0.4473 | 0.655  | 0.238903566 | count | 1 |
| CMTM7    | 0.1767437 | 0.4854271 | 0.3641 | 0.716  | 0.238917783 | count | 1 |
| CDK5RAP2 | 0.1748345 | 0.4381375 | 0.399  | 0.69   | 0.239232188 | count | 1 |
| MSRA     | 0.1855419 | 0.500016  | 0.3711 | 0.711  | 0.239529963 | count | 1 |
| TRGV9    | 0.1731248 | 0.3792373 | 0.4565 | 0.648  | 0.240071752 | count | 1 |
| NUMA1    | 0.1823159 | 0.4661834 | 0.3911 | 0.696  | 0.2404102   | count | 1 |
| ARHGAP9  | 0.1696377 | 0.1957088 | 0.8668 | 0.387  | 0.24048419  | count | 1 |
| ATP5IF1  | 0.1687481 | 0.1702724 | 0.991  | 0.3224 | 0.240749414 | count | 1 |
| TSEN54   | 0.1726133 | 0.2837791 | 0.6083 | 0.543  | 0.241102765 | count | 1 |
| PLD3     | 0.184104  | 0.5644214 | 0.3262 | 0.744  | 0.241292856 | count | 1 |
| CREB1    | 0.1854966 | 0.4548519 | 0.4078 | 0.684  | 0.241423833 | count | 1 |
| NR4A1    | 0.1697588 | 0.2126492 | 0.7983 | 0.4253 | 0.242371143 | count | 1 |
| MOB3A    | 0.1863104 | 0.4164091 | 0.4474 | 0.655  | 0.242486089 | count | 1 |
| S100A13  | 0.1943872 | 0.6038164 | 0.3219 | 0.748  | 0.242499393 | count | 1 |
| FCER1G   | 0.1687399 | 0.1138983 | 1.4815 | 0.139  | 0.242808871 | count | 1 |
| TNIP2    | 0.1763154 | 0.3993556 | 0.4415 | 0.659  | 0.242930467 | count | 1 |
| C6orf47  | 0.2852376 | 0.7391219 | 0.3859 | 0.7    | 0.242994306 | count | 1 |
| AAED1    | 0.1738014 | 0.3146508 | 0.5524 | 0.581  | 0.24310755  | count | 1 |
| SMAD2    | 0.215877  | 0.5464806 | 0.395  | 0.693  | 0.243202527 | count | 1 |
| SELENOO  | 0.2024511 | 0.5874765 | 0.3446 | 0.731  | 0.243216017 | count | 1 |
| CXCR3    | 0.1718175 | 0.259202  | 0.6629 | 0.5079 | 0.243467446 | count | 1 |
| POLDIP3  | 0.3991004 | 0.7016423 | 0.5688 | 0.57   | 0.24364107  | count | 1 |
| SCRN2    | 0.1932085 | 0.6636288 | 0.2911 | 0.771  | 0.244327885 | count | 1 |
| USP33    | 0.1768076 | 0.3996308 | 0.4424 | 0.658  | 0.244609321 | count | 1 |
| SRP72    | 0.1732923 | 0.2533548 | 0.684  | 0.494  | 0.244687355 | count | 1 |
| UCHL3    | 0.1788017 | 0.4075583 | 0.4387 | 0.661  | 0.24597933  | count | 1 |
| LMNB2    | 0.2310177 | 0.8497402 | 0.2719 | 0.786  | 0.246904138 | count | 1 |
| PCAT6    | 0.2310177 | 0.9124861 | 0.2532 | 0.8    | 0.246904138 | count | 1 |
| BCAR3    | 0.2310177 | 0.9665421 | 0.239  | 0.811  | 0.246904138 | count | 1 |
| FAM20B   | 0.2310177 | 0.9839011 | 0.2348 | 0.815  | 0.246904138 | count | 1 |
| HACE1    | 0.2310177 | 1.1653438 | 0.1982 | 0.843  | 0.246904138 | count | 1 |
| POMC     | 0.1789452 | 0.3285097 | 0.5447 | 0.586  | 0.24691655  | count | 1 |
| TSTD1    | 0.173081  | 0.2189445 | 0.7905 | 0.4298 | 0.246954569 | count | 1 |
| CD79B    | 0.1809567 | 0.4476141 | 0.4043 | 0.686  | 0.247113077 | count | 1 |
| GDI2     | 0.1772864 | 0.3326157 | 0.533  | 0.594  | 0.247448648 | count | 1 |
| TMBIM6   | 0.1724891 | 0.1279649 | 1.3479 | 0.179  | 0.247503486 | count | 1 |
| ZNF844   | 0.4062402 | 0.6864529 | 0.5918 | 0.554  | 0.248130623 | count | 1 |
| TGFBR2   | 0.1799632 | 0.3695021 | 0.487  | 0.627  | 0.248323    | count | 1 |
| CBX6     | 0.1864184 | 0.4017419 | 0.464  | 0.643  | 0.248344018 | count | 1 |
| AES      | 0.1733246 | 0.1484818 | 1.1673 | 0.2439 | 0.248465449 | count | 1 |



|            |           |           |        |        |             |       |   |
|------------|-----------|-----------|--------|--------|-------------|-------|---|
| SAMD9L     | 0.1773435 | 0.3294273 | 0.5383 | 0.591  | 0.248684187 | count | 1 |
| AP002387.2 | 0.1809371 | 0.4208661 | 0.4299 | 0.668  | 0.249306657 | count | 1 |
| B4GALT5    | 0.1949546 | 0.5866253 | 0.3323 | 0.74   | 0.249341339 | count | 1 |
| UBE2T      | 0.2135741 | 0.8136566 | 0.2625 | 0.793  | 0.249705611 | count | 1 |
| AC112907.3 | 0.2135741 | 0.8136566 | 0.2625 | 0.793  | 0.249705611 | count | 1 |
| ERCC8      | 0.2135741 | 0.8136566 | 0.2625 | 0.793  | 0.249705611 | count | 1 |
| SLC25A14   | 0.2135741 | 0.8136566 | 0.2625 | 0.793  | 0.249705611 | count | 1 |
| AARSD1     | 0.2135741 | 0.8136566 | 0.2625 | 0.793  | 0.249705611 | count | 1 |
| USP32      | 0.2135741 | 0.8136566 | 0.2625 | 0.793  | 0.249705611 | count | 1 |
| NKILA      | 0.2135741 | 1.069354  | 0.1997 | 0.842  | 0.249705611 | count | 1 |
| SHC1       | 0.2336293 | 0.8120291 | 0.2877 | 0.774  | 0.249721196 | count | 1 |
| PLEKHJ1    | 0.1842278 | 0.4183176 | 0.4404 | 0.66   | 0.249768044 | count | 1 |
| USP34      | 0.1775952 | 0.265621  | 0.6686 | 0.504  | 0.249800853 | count | 1 |
| IST1       | 0.1809798 | 0.40674   | 0.445  | 0.657  | 0.25038835  | count | 1 |
| ICAM3      | 0.1757537 | 0.1818507 | 0.9665 | 0.335  | 0.250790762 | count | 1 |
| ATRAID     | 0.1766767 | 0.236997  | 0.7455 | 0.4565 | 0.250818017 | count | 1 |
| USF2       | 0.1784027 | 0.2616956 | 0.6817 | 0.496  | 0.251049696 | count | 1 |
| HSP90B1    | 0.1751051 | 0.147246  | 1.1892 | 0.235  | 0.25125774  | count | 1 |
| ARID4B     | 0.1768681 | 0.2131989 | 0.8296 | 0.4074 | 0.25130807  | count | 1 |
| SCAMP3     | 0.1820555 | 0.511187  | 0.3561 | 0.722  | 0.251555999 | count | 1 |
| CEP295     | 0.2353923 | 0.6597381 | 0.3568 | 0.721  | 0.251623149 | count | 1 |
| MAN1A1     | 0.2353923 | 0.7447099 | 0.3161 | 0.752  | 0.251623149 | count | 1 |
| EMC6       | 0.1784838 | 0.3134517 | 0.5694 | 0.569  | 0.251671287 | count | 1 |
| NADSYN1    | 0.2233971 | 0.736698  | 0.3032 | 0.762  | 0.251738724 | count | 1 |
| MISP3      | 0.2234586 | 1.0691107 | 0.209  | 0.835  | 0.25180855  | count | 1 |
| CNBP       | 0.1758941 | 0.1402043 | 1.2546 | 0.211  | 0.251858673 | count | 1 |
| BCAP29     | 0.1814515 | 0.3672329 | 0.4941 | 0.622  | 0.251902674 | count | 1 |
| SCRIB      | 0.2235593 | 1.0012445 | 0.2233 | 0.823  | 0.25192288  | count | 1 |
| MAIP1      | 0.2235593 | 1.0312009 | 0.2168 | 0.829  | 0.25192288  | count | 1 |
| FGFR10P    | 0.2357625 | 0.8713901 | 0.2706 | 0.787  | 0.252022554 | count | 1 |
| OSTF1      | 0.1761801 | 0.1737081 | 1.0142 | 0.3112 | 0.252172672 | count | 1 |
| HACD4      | 0.1861488 | 0.5046137 | 0.3689 | 0.712  | 0.252377107 | count | 1 |
| PFN1       | 0.1751147 | 0.0726879 | 2.4091 | 0.0165 | 0.252396942 | count | 1 |
| SPAST      | 0.236362  | 0.7003981 | 0.3375 | 0.736  | 0.252669362 | count | 1 |
| STMN3      | 0.236362  | 0.7628856 | 0.3098 | 0.757  | 0.252669362 | count | 1 |
| APOBEC3D   | 0.236362  | 0.9416011 | 0.251  | 0.802  | 0.252669362 | count | 1 |
| ASH1L-AS1  | 0.2161831 | 0.8677849 | 0.2491 | 0.803  | 0.252775384 | count | 1 |
| CCAR1      | 0.1882228 | 0.4533149 | 0.4152 | 0.678  | 0.252790671 | count | 1 |
| HBS1L      | 0.1892958 | 0.4696465 | 0.4031 | 0.687  | 0.253263181 | count | 1 |
| DAZAP1     | 0.1814997 | 0.3003965 | 0.6042 | 0.546  | 0.253334952 | count | 1 |
| ITCH       | 0.188368  | 0.4712766 | 0.3997 | 0.69   | 0.253862695 | count | 1 |
| BUD31      | 0.1800561 | 0.2644058 | 0.681  | 0.496  | 0.253982419 | count | 1 |
| IDNK       | 0.1865041 | 0.464097  | 0.4019 | 0.688  | 0.254135257 | count | 1 |
| SAMD3      | 0.1771831 | 0.1695008 | 1.0453 | 0.297  | 0.254212979 | count | 1 |
| SLC15A4    | 0.1842308 | 0.382981  | 0.481  | 0.631  | 0.254219214 | count | 1 |

|            |           |           |        |        |             |       |   |
|------------|-----------|-----------|--------|--------|-------------|-------|---|
| COMTD1     | 0.1823158 | 0.3505167 | 0.5201 | 0.603  | 0.254475131 | count | 1 |
| BRD2       | 0.1797555 | 0.2170707 | 0.8281 | 0.4082 | 0.254540455 | count | 1 |
| IL10RA     | 0.1850284 | 0.2829344 | 0.654  | 0.514  | 0.254557227 | count | 1 |
| MAGOHB     | 0.184876  | 0.3670603 | 0.5037 | 0.615  | 0.254741117 | count | 1 |
| AC243960.1 | 0.1791    | 0.2674057 | 0.6698 | 0.5035 | 0.255305336 | count | 1 |
| G6PC3      | 0.1916831 | 0.8703395 | 0.2202 | 0.8258 | 0.255373919 | count | 1 |
| RAE1       | 0.2019781 | 0.5112539 | 0.3951 | 0.693  | 0.255461363 | count | 1 |
| RPS17      | 0.2019781 | 0.5456895 | 0.3701 | 0.712  | 0.255461363 | count | 1 |
| ZNF766     | 0.2087973 | 0.5105212 | 0.409  | 0.683  | 0.256232913 | count | 1 |
| EPRS       | 0.1820876 | 0.3238719 | 0.5622 | 0.574  | 0.256456213 | count | 1 |
| POLL       | 0.2193136 | 0.6943766 | 0.3158 | 0.752  | 0.256459254 | count | 1 |
| SET        | 0.1787795 | 0.1290524 | 1.3853 | 0.167  | 0.25647552  | count | 1 |
| DHPS       | 0.1832565 | 0.32313   | 0.5671 | 0.571  | 0.256514389 | count | 1 |
| KLHL6      | 0.1945714 | 0.5072473 | 0.3836 | 0.702  | 0.256613876 | count | 1 |
| GLRX       | 0.183179  | 0.2912792 | 0.6289 | 0.53   | 0.256724164 | count | 1 |
| RARA       | 0.1918932 | 0.48395   | 0.3965 | 0.692  | 0.256745959 | count | 1 |
| GIMAP6     | 0.2007452 | 0.5978952 | 0.3358 | 0.737  | 0.256773891 | count | 1 |
| SPNS1      | 0.2062974 | 0.5553713 | 0.3715 | 0.711  | 0.257422666 | count | 1 |
| IMPDH1     | 0.2098574 | 0.4948445 | 0.4241 | 0.672  | 0.257540184 | count | 1 |
| SPIDR      | 0.2285837 | 0.7093817 | 0.3222 | 0.747  | 0.257628129 | count | 1 |
| THOC1      | 0.206971  | 0.4913045 | 0.4213 | 0.674  | 0.258266856 | count | 1 |
| UPF2       | 0.1850826 | 0.3016282 | 0.6136 | 0.54   | 0.258901544 | count | 1 |
| PRKRA      | 0.1954688 | 0.482882  | 0.4048 | 0.686  | 0.259190452 | count | 1 |
| SLC9A3R1   | 0.1832946 | 0.2379065 | 0.7704 | 0.442  | 0.259284899 | count | 1 |
| AC058791.1 | 0.2631807 | 0.3858479 | 0.6821 | 0.496  | 0.259332628 | count | 1 |
| TMX2       | 0.2081021 | 0.5173779 | 0.4022 | 0.688  | 0.259684451 | count | 1 |
| CDC42SE2   | 0.1834886 | 0.2209146 | 0.8306 | 0.407  | 0.259698128 | count | 1 |
| ABHD10     | 0.2053504 | 0.5333015 | 0.3851 | 0.7    | 0.259743486 | count | 1 |
| TAX1BP1    | 0.1819786 | 0.1644975 | 1.1063 | 0.269  | 0.259762018 | count | 1 |
| CXCR4      | 0.180709  | 0.1026138 | 1.7611 | 0.0792 | 0.259940243 | count | 1 |
| HIST1H4B   | 0.2310177 | 1.371939  | 0.1684 | 0.8664 | 0.260392497 | count | 1 |
| ABHD2      | 0.2227145 | 0.546071  | 0.4078 | 0.684  | 0.260461926 | count | 1 |
| NFX1       | 0.2645549 | 0.7349384 | 0.36   | 0.7191 | 0.260703451 | count | 1 |
| SAP30L     | 0.2062425 | 0.5244165 | 0.3933 | 0.694  | 0.260876344 | count | 1 |
| MRPL41     | 0.1832934 | 0.2044148 | 0.8967 | 0.3706 | 0.261025843 | count | 1 |
| CHURC1     | 0.1844288 | 0.2705328 | 0.6817 | 0.4959 | 0.261161606 | count | 1 |
| TGFBR3     | 0.2319878 | 0.6844891 | 0.3389 | 0.735  | 0.261494368 | count | 1 |
| L3MBTL1    | 0.2179514 | 0.9042215 | 0.241  | 0.81   | 0.261943017 | count | 1 |
| FPGT       | 0.2179514 | 0.9108365 | 0.2393 | 0.811  | 0.261943017 | count | 1 |
| PSTPIP2    | 0.2048599 | 0.5083538 | 0.403  | 0.687  | 0.26205608  | count | 1 |
| MFAP1      | 0.194064  | 0.3693055 | 0.5255 | 0.6    | 0.262376518 | count | 1 |
| PPM1A      | 0.2016399 | 0.5078818 | 0.397  | 0.692  | 0.262499817 | count | 1 |
| ECSIT      | 0.2245288 | 0.7665328 | 0.2929 | 0.77   | 0.262597505 | count | 1 |
| LINC00910  | 0.4296416 | 0.9629145 | 0.4462 | 0.656  | 0.26286575  | count | 1 |
| SMURF1     | 0.2248048 | 0.9943309 | 0.2261 | 0.821  | 0.262922399 | count | 1 |

|          |           |           |        |        |             |       |   |
|----------|-----------|-----------|--------|--------|-------------|-------|---|
| ZNHIT3   | 0.1864707 | 0.3183795 | 0.5857 | 0.5585 | 0.263306937 | count | 1 |
| NUP85    | 0.2190888 | 0.8418175 | 0.2603 | 0.795  | 0.263317658 | count | 1 |
| PRDX6    | 0.1845755 | 0.1876353 | 0.9837 | 0.326  | 0.263337451 | count | 1 |
| OTUD3    | 0.225218  | 0.829306  | 0.2716 | 0.786  | 0.2634088   | count | 1 |
| TANGO2   | 0.225218  | 0.8475562 | 0.2657 | 0.791  | 0.2634088   | count | 1 |
| CEP97    | 0.225218  | 0.8670266 | 0.2598 | 0.795  | 0.2634088   | count | 1 |
| C1orf50  | 0.225218  | 0.9169979 | 0.2456 | 0.806  | 0.2634088   | count | 1 |
| NUP43    | 0.225218  | 0.9324881 | 0.2415 | 0.809  | 0.2634088   | count | 1 |
| FDPS     | 0.189107  | 0.3170121 | 0.5965 | 0.551  | 0.263754563 | count | 1 |
| CGRRF1   | 0.2086884 | 0.4207839 | 0.496  | 0.62   | 0.263982491 | count | 1 |
| ATP6V0E2 | 0.2014536 | 0.4315084 | 0.4669 | 0.641  | 0.264098047 | count | 1 |
| ZNHIT6   | 0.1982867 | 0.4886529 | 0.4058 | 0.685  | 0.26419266  | count | 1 |
| WRN      | 0.2343948 | 0.7578892 | 0.3093 | 0.757  | 0.264228546 | count | 1 |
| TMEM107  | 0.2048874 | 0.4059969 | 0.5047 | 0.614  | 0.264589355 | count | 1 |
| B4GALT3  | 0.1963243 | 0.4949362 | 0.3967 | 0.692  | 0.264607175 | count | 1 |
| MOSPD3   | 0.2006927 | 0.5499134 | 0.365  | 0.715  | 0.264708818 | count | 1 |
| OGA      | 0.1894378 | 0.3636388 | 0.521  | 0.603  | 0.26481652  | count | 1 |
| CCT7     | 0.1877623 | 0.2528233 | 0.7427 | 0.458  | 0.264953303 | count | 1 |
| PHLDA1   | 0.1916832 | 0.3613024 | 0.5305 | 0.596  | 0.265534906 | count | 1 |
| ORAI2    | 0.1972779 | 0.3914179 | 0.504  | 0.615  | 0.265895047 | count | 1 |
| FAM107B  | 0.1872342 | 0.2088443 | 0.8965 | 0.3706 | 0.265908344 | count | 1 |
| CANT1    | 0.3118853 | 0.8423631 | 0.3703 | 0.711  | 0.266109234 | count | 1 |
| RNF122   | 0.3118853 | 0.8960818 | 0.3481 | 0.728  | 0.266109234 | count | 1 |
| PCMTD2   | 0.2082326 | 0.5177518 | 0.4022 | 0.688  | 0.26638619  | count | 1 |
| PPP1R16B | 0.2706729 | 0.5622125 | 0.4814 | 0.631  | 0.266807983 | count | 1 |
| RWDD1    | 0.1865683 | 0.1757125 | 1.0618 | 0.2891 | 0.266823645 | count | 1 |
| EGR1     | 0.1918121 | 0.4067287 | 0.4716 | 0.638  | 0.266831343 | count | 1 |
| NEIL1    | 0.2139277 | 0.5057237 | 0.423  | 0.673  | 0.266986445 | count | 1 |
| FOXK1    | 0.3130136 | 0.858108  | 0.3648 | 0.716  | 0.267089081 | count | 1 |
| PARP1    | 0.1894957 | 0.2669132 | 0.71   | 0.478  | 0.267400917 | count | 1 |
| ACBD6    | 0.1932085 | 0.3331965 | 0.5799 | 0.562  | 0.269257232 | count | 1 |
| DDX24    | 0.1879964 | 0.1234649 | 1.5227 | 0.129  | 0.269837801 | count | 1 |
| IRF2BPL  | 0.1990425 | 0.4003076 | 0.4972 | 0.619  | 0.269891064 | count | 1 |
| MGST3    | 0.1910294 | 0.2534628 | 0.7537 | 0.4516 | 0.27015769  | count | 1 |
| CTU1     | 0.2310177 | 0.7570045 | 0.3052 | 0.76   | 0.270236903 | count | 1 |
| DYRK2    | 0.1983929 | 0.4263034 | 0.4654 | 0.642  | 0.270363234 | count | 1 |
| RNF6     | 0.2250868 | 0.6630359 | 0.3395 | 0.734  | 0.270567768 | count | 1 |
| RNPEPL1  | 0.1944476 | 0.2744072 | 0.7086 | 0.479  | 0.270985836 | count | 1 |
| ZNF253   | 0.2318882 | 0.7402571 | 0.3133 | 0.754  | 0.271261914 | count | 1 |
| SFT2D3   | 0.2257439 | 0.8613138 | 0.2621 | 0.793  | 0.271362148 | count | 1 |
| MFGE8    | 0.2213671 | 0.7581813 | 0.292  | 0.77   | 0.271736723 | count | 1 |
| CHN2     | 0.2213671 | 0.8653396 | 0.2558 | 0.798  | 0.271736723 | count | 1 |
| ZNF136   | 0.4440783 | 0.6622707 | 0.6705 | 0.503  | 0.271970491 | count | 1 |
| KIAA1191 | 0.2759365 | 0.6526932 | 0.4228 | 0.673  | 0.272062044 | count | 1 |
| DNM1L    | 0.2033354 | 0.4954573 | 0.4104 | 0.682  | 0.272090445 | count | 1 |

|            |           |           |        |        |             |       |   |
|------------|-----------|-----------|--------|--------|-------------|-------|---|
| PHF11      | 0.1961934 | 0.3824864 | 0.5129 | 0.608  | 0.272099557 | count | 1 |
| POLR2H     | 0.1978301 | 0.3807059 | 0.5196 | 0.604  | 0.272194835 | count | 1 |
| SLC38A1    | 0.1937669 | 0.2456835 | 0.7887 | 0.431  | 0.272308367 | count | 1 |
| PDLIM5     | 0.2330232 | 0.6961588 | 0.3347 | 0.738  | 0.27259843  | count | 1 |
| TTN        | 0.2764793 | 0.7825391 | 0.3533 | 0.724  | 0.272603972 | count | 1 |
| LDHA       | 0.1899843 | 0.1226176 | 1.5494 | 0.122  | 0.272740342 | count | 1 |
| DNTTIP2    | 0.192114  | 0.2206867 | 0.8705 | 0.3847 | 0.273193021 | count | 1 |
| TCEAL3     | 0.197632  | 0.3917046 | 0.5045 | 0.614  | 0.273785761 | count | 1 |
| CSRP1      | 0.1987658 | 0.4110338 | 0.4836 | 0.629  | 0.273906692 | count | 1 |
| SYK        | 0.205658  | 0.4936033 | 0.4166 | 0.677  | 0.274037933 | count | 1 |
| TRBC2      | 0.1908249 | 0.1606873 | 1.1876 | 0.236  | 0.274052032 | count | 1 |
| ANKRD12    | 0.1917935 | 0.1891033 | 1.0142 | 0.311  | 0.274072005 | count | 1 |
| PDE9A      | 0.2167592 | 0.8129725 | 0.2666 | 0.79   | 0.274233545 | count | 1 |
| IDH3G      | 0.1972879 | 0.3464758 | 0.5694 | 0.569  | 0.274708776 | count | 1 |
| RPF1       | 0.2115213 | 0.4811707 | 0.4396 | 0.661  | 0.275404644 | count | 1 |
| APOBR      | 0.2291107 | 0.7954454 | 0.288  | 0.774  | 0.275432635 | count | 1 |
| FKBP8      | 0.1937744 | 0.2191024 | 0.8844 | 0.3771 | 0.275472168 | count | 1 |
| CLIC1      | 0.1913061 | 0.086635  | 2.2082 | 0.0279 | 0.275502967 | count | 1 |
| RASSF2     | 0.2178415 | 0.8130133 | 0.2679 | 0.789  | 0.275608402 | count | 1 |
| WNK1       | 0.1989441 | 0.367154  | 0.5419 | 0.588  | 0.275919037 | count | 1 |
| BABAM1     | 0.1982619 | 0.3260439 | 0.6081 | 0.544  | 0.276536362 | count | 1 |
| AC016831.7 | 0.2126159 | 0.4347123 | 0.4891 | 0.625  | 0.276834346 | count | 1 |
| MITD1      | 0.1997341 | 0.3771185 | 0.5296 | 0.597  | 0.277016009 | count | 1 |
| AGFG1      | 0.2189556 | 0.4222566 | 0.5185 | 0.604  | 0.277023701 | count | 1 |
| CCNJL      | 0.222445  | 0.7672683 | 0.2899 | 0.772  | 0.277664797 | count | 1 |
| AKIP1      | 0.222445  | 0.7882094 | 0.2822 | 0.778  | 0.277664797 | count | 1 |
| RPP25L     | 0.2264363 | 0.7091563 | 0.3193 | 0.75   | 0.277991127 | count | 1 |
| TJAP1      | 0.2264363 | 0.7463443 | 0.3034 | 0.762  | 0.277991127 | count | 1 |
| VAPA       | 0.1946888 | 0.18857   | 1.0324 | 0.303  | 0.278017951 | count | 1 |
| BBX        | 0.1984669 | 0.2636516 | 0.7528 | 0.452  | 0.278169064 | count | 1 |
| CEBPD      | 0.1937244 | 0.2179253 | 0.8889 | 0.3747 | 0.278220775 | count | 1 |
| VPS53      | 0.23154   | 0.5511258 | 0.4201 | 0.675  | 0.27837001  | count | 1 |
| NMT2       | 0.2383057 | 0.58615   | 0.4066 | 0.685  | 0.278819685 | count | 1 |
| TRIP11     | 0.2043744 | 0.4010307 | 0.5096 | 0.611  | 0.279146835 | count | 1 |
| SLC25A26   | 0.2328147 | 0.6068689 | 0.3836 | 0.702  | 0.279911414 | count | 1 |
| AP4E1      | 0.2189594 | 0.7610598 | 0.2877 | 0.774  | 0.280160674 | count | 1 |
| ZNF655     | 0.2094123 | 0.5042665 | 0.4153 | 0.678  | 0.280241106 | count | 1 |
| PEPD       | 0.201607  | 0.3539632 | 0.5696 | 0.569  | 0.280472338 | count | 1 |
| BEX5       | 0.2397208 | 0.673926  | 0.3557 | 0.722  | 0.280486505 | count | 1 |
| UBN1       | 0.201028  | 0.3247672 | 0.619  | 0.536  | 0.280831878 | count | 1 |
| PAIP1      | 0.2017167 | 0.388526  | 0.5192 | 0.604  | 0.280882238 | count | 1 |
| RFC2       | 0.2091039 | 0.4537231 | 0.4609 | 0.645  | 0.280897786 | count | 1 |
| SLC2A4RG   | 0.2002513 | 0.2774942 | 0.7216 | 0.471  | 0.281818961 | count | 1 |
| MLH3       | 0.2637192 | 0.6177909 | 0.4269 | 0.67   | 0.282210024 | count | 1 |
| VRK1       | 0.2094102 | 0.4970966 | 0.4213 | 0.674  | 0.282281895 | count | 1 |

|            |           |           |        |        |             |       |   |
|------------|-----------|-----------|--------|--------|-------------|-------|---|
| MARF1      | 0.2300518 | 0.88427   | 0.2602 | 0.795  | 0.28245262  | count | 1 |
| TBC1D19    | 0.2265286 | 0.6847952 | 0.3308 | 0.741  | 0.282785523 | count | 1 |
| ABCB1      | 0.2044195 | 0.2924863 | 0.6989 | 0.485  | 0.282860032 | count | 1 |
| ACSL3      | 0.2051805 | 0.4290738 | 0.4782 | 0.633  | 0.283167827 | count | 1 |
| TRUB1      | 0.2148221 | 0.6144469 | 0.3496 | 0.727  | 0.283397832 | count | 1 |
| CCNL2      | 0.2214853 | 0.4044942 | 0.5476 | 0.584  | 0.283404807 | count | 1 |
| NAGPA      | 0.2310177 | 0.7489997 | 0.3084 | 0.758  | 0.283644626 | count | 1 |
| MBNL2      | 0.2151037 | 0.4286447 | 0.5018 | 0.616  | 0.283770362 | count | 1 |
| RRP7A      | 0.2017832 | 0.312845  | 0.645  | 0.519  | 0.283849998 | count | 1 |
| RUFY3      | 0.2275386 | 0.7858962 | 0.2895 | 0.772  | 0.284052139 | count | 1 |
| DDX5       | 0.1979048 | 0.0931408 | 2.1248 | 0.0344 | 0.284378775 | count | 1 |
| DNAJC7     | 0.2028131 | 0.2627178 | 0.772  | 0.441  | 0.285426999 | count | 1 |
| TMEM11     | 0.208539  | 0.4684305 | 0.4452 | 0.656  | 0.285428962 | count | 1 |
| GCNT1      | 0.2326454 | 0.6025105 | 0.3861 | 0.7    | 0.285653438 | count | 1 |
| CETN2      | 0.2294501 | 0.8359707 | 0.2745 | 0.784  | 0.286449411 | count | 1 |
| ZNF296     | 0.2218659 | 0.4183856 | 0.5303 | 0.596  | 0.286592983 | count | 1 |
| ATP6AP1    | 0.2153054 | 0.3942531 | 0.5461 | 0.585  | 0.286925242 | count | 1 |
| UBE2E1     | 0.2299025 | 0.4880805 | 0.471  | 0.638  | 0.287016802 | count | 1 |
| ELL2       | 0.2301473 | 0.6436313 | 0.3576 | 0.721  | 0.287323827 | count | 1 |
| FAM76B     | 0.2135176 | 0.4653839 | 0.4588 | 0.647  | 0.287830388 | count | 1 |
| NCBP2-AS2  | 0.207043  | 0.3966113 | 0.522  | 0.602  | 0.288043352 | count | 1 |
| CREB3L4    | 0.227948  | 0.6333559 | 0.3599 | 0.719  | 0.288448883 | count | 1 |
| KPNA3      | 0.2139817 | 0.4270402 | 0.5011 | 0.617  | 0.288457341 | count | 1 |
| DKK3       | 0.2218019 | 0.6235858 | 0.3557 | 0.722  | 0.288833979 | count | 1 |
| LINC00847  | 0.2218019 | 0.6511567 | 0.3406 | 0.734  | 0.288833979 | count | 1 |
| BTBD6      | 0.2122388 | 0.4058311 | 0.523  | 0.601  | 0.289265936 | count | 1 |
| EID2B      | 0.2194071 | 0.6611265 | 0.3319 | 0.74   | 0.28946359  | count | 1 |
| THAP4      | 0.2172613 | 0.590572  | 0.3679 | 0.713  | 0.289538272 | count | 1 |
| PPP4R1     | 0.2290393 | 0.5570002 | 0.4112 | 0.681  | 0.289835618 | count | 1 |
| S100PBP    | 0.2098479 | 0.3845657 | 0.5457 | 0.586  | 0.290011135 | count | 1 |
| C17orf49   | 0.2246543 | 0.5817884 | 0.3861 | 0.7    | 0.290207549 | count | 1 |
| YWHAG      | 0.2162144 | 0.4344931 | 0.4976 | 0.619  | 0.290471157 | count | 1 |
| PUSL1      | 0.3400478 | 0.9411558 | 0.3613 | 0.718  | 0.290592009 | count | 1 |
| BTRC       | 0.3400478 | 0.994572  | 0.3419 | 0.733  | 0.290592009 | count | 1 |
| GALC       | 0.3400478 | 0.9960114 | 0.3414 | 0.733  | 0.290592021 | count | 1 |
| ZNF668     | 0.3400478 | 1.0422589 | 0.3263 | 0.744  | 0.290592021 | count | 1 |
| AL441992.1 | 0.3400478 | 1.050507  | 0.3237 | 0.746  | 0.290592021 | count | 1 |
| EPC2       | 0.2172755 | 0.4520175 | 0.4807 | 0.631  | 0.290788915 | count | 1 |
| TFDP1      | 0.2204237 | 0.5437197 | 0.4054 | 0.685  | 0.290808583 | count | 1 |
| HES6       | 0.225218  | 0.6389907 | 0.3525 | 0.725  | 0.290938295 | count | 1 |
| BTG2       | 0.2025859 | 0.1344379 | 1.5069 | 0.133  | 0.291340176 | count | 1 |
| ZBTB17     | 0.34125   | 0.9826637 | 0.3473 | 0.729  | 0.29163827  | count | 1 |
| GRAMD4     | 0.34125   | 1.056735  | 0.3229 | 0.747  | 0.29163827  | count | 1 |
| ZNF181     | 0.34125   | 1.15515   | 0.2954 | 0.768  | 0.29163827  | count | 1 |
| MRPS11     | 0.2084782 | 0.3770202 | 0.553  | 0.581  | 0.292036772 | count | 1 |

|             |           |           |        |        |             |       |   |
|-------------|-----------|-----------|--------|--------|-------------|-------|---|
| SMIM26      | 0.2079499 | 0.3198415 | 0.6502 | 0.516  | 0.293140342 | count | 1 |
| TUT7        | 0.2202204 | 0.376001  | 0.5857 | 0.558  | 0.293491719 | count | 1 |
| ZNRF1       | 0.2170614 | 0.4177733 | 0.5196 | 0.604  | 0.293534231 | count | 1 |
| PATL2       | 0.2975711 | 0.9267444 | 0.3211 | 0.748  | 0.293676511 | count | 1 |
| KDM4B       | 0.3439742 | 0.589449  | 0.5836 | 0.56   | 0.294009459 | count | 1 |
| LSM5        | 0.2084716 | 0.2812086 | 0.7413 | 0.459  | 0.294297308 | count | 1 |
| NR1D2       | 0.2328101 | 0.475642  | 0.4895 | 0.625  | 0.294627569 | count | 1 |
| RAB8A       | 0.2106546 | 0.2987719 | 0.7051 | 0.481  | 0.295088296 | count | 1 |
| FBL         | 0.2130991 | 0.3187103 | 0.6686 | 0.504  | 0.295240513 | count | 1 |
| DENND6B     | 0.2993345 | 0.9070498 | 0.33   | 0.742  | 0.295439573 | count | 1 |
| ARHGDIB     | 0.2052491 | 0.0860155 | 2.3862 | 0.0176 | 0.295604856 | count | 1 |
| MRPS14      | 0.2288792 | 0.4754895 | 0.4814 | 0.631  | 0.295684687 | count | 1 |
| NFKBIB      | 0.2255412 | 0.5021441 | 0.4492 | 0.654  | 0.295774743 | count | 1 |
| RAD17       | 0.2769411 | 0.4986398 | 0.5554 | 0.579  | 0.296503505 | count | 1 |
| CWC22       | 0.2192619 | 0.4042238 | 0.5424 | 0.588  | 0.296516109 | count | 1 |
| BECN1       | 0.2208017 | 0.4809718 | 0.4591 | 0.646  | 0.296647944 | count | 1 |
| RAC2        | 0.2063134 | 0.116685  | 1.7681 | 0.078  | 0.29668383  | count | 1 |
| EIF4B       | 0.2125876 | 0.2618845 | 0.8118 | 0.418  | 0.296996919 | count | 1 |
| ZNRF2       | 0.2252763 | 0.4484798 | 0.5023 | 0.616  | 0.297229089 | count | 1 |
| RBAK-RBAKDN | 0.2282519 | 0.6050678 | 0.3772 | 0.706  | 0.297261072 | count | 1 |
| METTL21A    | 0.2192917 | 0.5156955 | 0.4252 | 0.671  | 0.297402962 | count | 1 |
| KLF10       | 0.216483  | 0.3275209 | 0.661  | 0.509  | 0.297408212 | count | 1 |
| TGS1        | 0.2138781 | 0.3511217 | 0.6091 | 0.543  | 0.297563473 | count | 1 |
| TSHZ1       | 0.3015918 | 0.7329733 | 0.4115 | 0.681  | 0.297696708 | count | 1 |
| TOB1        | 0.2353522 | 0.4364003 | 0.5393 | 0.59   | 0.297858361 | count | 1 |
| TEX264      | 0.2114165 | 0.33274   | 0.6354 | 0.526  | 0.29791514  | count | 1 |
| ATXN7L3     | 0.2783036 | 0.8173161 | 0.3405 | 0.734  | 0.297976999 | count | 1 |
| PGAM1       | 0.2099849 | 0.2248648 | 0.9338 | 0.3511 | 0.29823495  | count | 1 |
| APLP2       | 0.2364173 | 0.5124928 | 0.4613 | 0.645  | 0.29921208  | count | 1 |
| TSC22D4     | 0.2114009 | 0.2708175 | 0.7806 | 0.4356 | 0.29952163  | count | 1 |
| TSEN34      | 0.2208585 | 0.4005606 | 0.5514 | 0.582  | 0.299532048 | count | 1 |
| KAT5        | 0.2230083 | 0.5573855 | 0.4001 | 0.689  | 0.299619285 | count | 1 |
| SNX14       | 0.2217044 | 0.502224  | 0.4414 | 0.659  | 0.299826028 | count | 1 |
| CD160       | 0.2094362 | 0.2086121 | 1.004  | 0.316  | 0.300371247 | count | 1 |
| METTL26     | 0.2121893 | 0.2445736 | 0.8676 | 0.3863 | 0.300639305 | count | 1 |
| ZCCHC9      | 0.2249229 | 0.5787419 | 0.3886 | 0.698  | 0.301048583 | count | 1 |
| SNX20       | 0.2222266 | 0.5051412 | 0.4399 | 0.66   | 0.301391162 | count | 1 |
| FBXO33      | 0.2316738 | 0.4014949 | 0.577  | 0.564  | 0.301732355 | count | 1 |
| CCL5        | 0.2094339 | 0.0980825 | 2.1353 | 0.0335 | 0.30201647  | count | 1 |
| B4GALT1     | 0.2153549 | 0.3141943 | 0.6854 | 0.494  | 0.302204664 | count | 1 |
| ZFP36L2     | 0.2102011 | 0.0941012 | 2.2338 | 0.0262 | 0.302789495 | count | 1 |
| RORA        | 0.2129558 | 0.2188527 | 0.9731 | 0.3313 | 0.302888709 | count | 1 |
| GOLGA5      | 0.4930693 | 0.7783279 | 0.6335 | 0.527  | 0.302938072 | count | 1 |
| RBX1        | 0.2131003 | 0.2101163 | 1.0142 | 0.3112 | 0.30295914  | count | 1 |
| CASP7       | 0.3542565 | 0.8274963 | 0.4281 | 0.669  | 0.302963359 | count | 1 |

|          |           |           |        |        |             |       |   |
|----------|-----------|-----------|--------|--------|-------------|-------|---|
| PTPN12   | 0.221813  | 0.3353054 | 0.6615 | 0.509  | 0.303007929 | count | 1 |
| HDAC9    | 0.2685128 | 0.5564007 | 0.4826 | 0.63   | 0.303018842 | count | 1 |
| APH1A    | 0.2160581 | 0.2752447 | 0.785  | 0.433  | 0.303354768 | count | 1 |
| CIB1     | 0.2122856 | 0.1786262 | 1.1884 | 0.2355 | 0.303838042 | count | 1 |
| CISH     | 0.2228136 | 0.4245548 | 0.5248 | 0.6    | 0.304377196 | count | 1 |
| TMA7     | 0.2119092 | 0.110894  | 1.9109 | 0.0569 | 0.304476784 | count | 1 |
| ATP8A1   | 0.2254805 | 0.5095526 | 0.4425 | 0.658  | 0.304943382 | count | 1 |
| CST3     | 0.2186114 | 0.3650207 | 0.5989 | 0.55   | 0.305421199 | count | 1 |
| FAM96B   | 0.2138326 | 0.235099  | 0.9095 | 0.3637 | 0.305535625 | count | 1 |
| FAAP24   | 0.3573372 | 0.769551  | 0.4643 | 0.643  | 0.305647267 | count | 1 |
| PHF20L1  | 0.2181965 | 0.308163  | 0.7081 | 0.479  | 0.306025271 | count | 1 |
| PLPBP    | 0.3099338 | 0.5942316 | 0.5216 | 0.602  | 0.306040769 | count | 1 |
| PYHIN1   | 0.2151542 | 0.2319885 | 0.9274 | 0.3544 | 0.306060601 | count | 1 |
| CRIM1    | 0.2208129 | 0.4736935 | 0.4662 | 0.641  | 0.306288383 | count | 1 |
| BCL10    | 0.2215839 | 0.3505839 | 0.632  | 0.528  | 0.306643147 | count | 1 |
| SPRY1    | 0.2186495 | 0.2944957 | 0.7425 | 0.4583 | 0.30683204  | count | 1 |
| MYO5A    | 0.3588196 | 0.7111625 | 0.5046 | 0.614  | 0.306938936 | count | 1 |
| ACADS    | 0.5000605 | 0.9308161 | 0.5372 | 0.591  | 0.307365011 | count | 1 |
| ANKDD1A  | 0.5000605 | 0.9308161 | 0.5372 | 0.591  | 0.307365011 | count | 1 |
| COL6A2   | 0.5000605 | 0.9308161 | 0.5372 | 0.591  | 0.307365011 | count | 1 |
| EIF3C    | 0.5000605 | 0.9647492 | 0.5183 | 0.605  | 0.307365011 | count | 1 |
| RIN3     | 0.2241361 | 0.365774  | 0.6128 | 0.54   | 0.307396032 | count | 1 |
| GZMA     | 0.2133931 | 0.0957737 | 2.2281 | 0.0266 | 0.307459038 | count | 1 |
| TMIGD2   | 0.2150027 | 0.2069432 | 1.0389 | 0.2996 | 0.307501156 | count | 1 |
| SPATA5   | 0.2872405 | 0.6057581 | 0.4742 | 0.636  | 0.307644512 | count | 1 |
| IFNG     | 0.2159655 | 0.3292816 | 0.6559 | 0.512  | 0.30764541  | count | 1 |
| ZNF574   | 0.359953  | 0.7296289 | 0.4933 | 0.622  | 0.307926563 | count | 1 |
| GBF1     | 0.2875694 | 0.7368572 | 0.3903 | 0.697  | 0.308000383 | count | 1 |
| LTB4R    | 0.2875694 | 0.7507528 | 0.383  | 0.702  | 0.308000383 | count | 1 |
| ZNF765   | 0.2875694 | 0.8366442 | 0.3437 | 0.731  | 0.308000383 | count | 1 |
| TRAPPC10 | 0.2182825 | 0.2739439 | 0.7968 | 0.426  | 0.308052053 | count | 1 |
| EXOSC9   | 0.2229278 | 0.3875136 | 0.5753 | 0.566  | 0.308505425 | count | 1 |
| HMGXB4   | 0.2266058 | 0.5548895 | 0.4084 | 0.683  | 0.308883645 | count | 1 |
| RASAL3   | 0.2225055 | 0.3001504 | 0.7413 | 0.459  | 0.309283207 | count | 1 |
| EWSR1    | 0.22247   | 0.2909029 | 0.7648 | 0.445  | 0.310339491 | count | 1 |
| SLC25A53 | 0.2750334 | 0.7467442 | 0.3683 | 0.713  | 0.310439387 | count | 1 |
| CCNT1    | 0.2486241 | 0.4597907 | 0.5407 | 0.589  | 0.310503729 | count | 1 |
| C1D      | 0.2220923 | 0.290658  | 0.7641 | 0.445  | 0.310512313 | count | 1 |
| PCGF5    | 0.2215589 | 0.2790395 | 0.794  | 0.428  | 0.310745413 | count | 1 |
| SHARPIN  | 0.226968  | 0.4136127 | 0.5487 | 0.584  | 0.311286296 | count | 1 |
| TBRG1    | 0.229687  | 0.381027  | 0.6028 | 0.547  | 0.311529713 | count | 1 |
| HSPA6    | 0.2591517 | 0.6493819 | 0.3991 | 0.69   | 0.311775106 | count | 1 |
| BYSL     | 0.3159413 | 0.9732518 | 0.3246 | 0.746  | 0.31205227  | count | 1 |
| PAQR8    | 0.3159413 | 1.0659708 | 0.2964 | 0.767  | 0.31205227  | count | 1 |
| KIF21A   | 0.2279882 | 0.3743535 | 0.609  | 0.543  | 0.313239699 | count | 1 |

|          |           |           |        |        |             |       |   |
|----------|-----------|-----------|--------|--------|-------------|-------|---|
| PIM2     | 0.2241719 | 0.293439  | 0.7639 | 0.445  | 0.313422811 | count | 1 |
| DYNLRB1  | 0.2196009 | 0.1878165 | 1.1692 | 0.2432 | 0.313509127 | count | 1 |
| KCTD5    | 0.2778931 | 0.7051734 | 0.3941 | 0.694  | 0.313694428 | count | 1 |
| TRAPPC2  | 0.229383  | 0.4112938 | 0.5577 | 0.577  | 0.314008269 | count | 1 |
| MAZ      | 0.2215712 | 0.2495156 | 0.888  | 0.3752 | 0.314346416 | count | 1 |
| TCERG1   | 0.2317833 | 0.3706435 | 0.6254 | 0.532  | 0.314378728 | count | 1 |
| TRIM8    | 0.2317833 | 0.3815108 | 0.6075 | 0.544  | 0.314378728 | count | 1 |
| ARL1     | 0.226494  | 0.3573603 | 0.6338 | 0.527  | 0.315136644 | count | 1 |
| SNX17    | 0.2258516 | 0.2951301 | 0.7653 | 0.445  | 0.315773661 | count | 1 |
| UBE2D1   | 0.2290193 | 0.3654834 | 0.6266 | 0.531  | 0.316116298 | count | 1 |
| AIMP2    | 0.2801844 | 0.6905111 | 0.4058 | 0.685  | 0.316302786 | count | 1 |
| METTL2B  | 0.2801844 | 0.6992473 | 0.4007 | 0.689  | 0.316302786 | count | 1 |
| GLYCTK   | 0.2801844 | 0.7360765 | 0.3806 | 0.704  | 0.316302786 | count | 1 |
| THAP12   | 0.2302011 | 0.3804243 | 0.6051 | 0.546  | 0.316805378 | count | 1 |
| CCDC124  | 0.226022  | 0.3443623 | 0.6563 | 0.512  | 0.317010873 | count | 1 |
| UNC45A   | 0.258046  | 0.632416  | 0.408  | 0.684  | 0.317015247 | count | 1 |
| BGN      | 0.2966438 | 0.8907098 | 0.333  | 0.739  | 0.31782122  | count | 1 |
| SNF8     | 0.2262318 | 0.2807212 | 0.8059 | 0.421  | 0.317972812 | count | 1 |
| C12orf75 | 0.2266992 | 0.2758524 | 0.8218 | 0.412  | 0.318308698 | count | 1 |
| RGL4     | 0.2285728 | 0.351362  | 0.6505 | 0.516  | 0.318322708 | count | 1 |
| RAB33B   | 0.2974428 | 0.5830992 | 0.5101 | 0.61   | 0.318686148 | count | 1 |
| NEU1     | 0.2277225 | 0.3837447 | 0.5934 | 0.553  | 0.319020677 | count | 1 |
| ELP3     | 0.2654417 | 0.683357  | 0.3884 | 0.698  | 0.319389404 | count | 1 |
| TULP3    | 0.5200243 | 1.097944  | 0.4736 | 0.636  | 0.320015326 | count | 1 |
| GABARAP  | 0.2987472 | 0.8831202 | 0.3383 | 0.735  | 0.320098258 | count | 1 |
| CFDP1    | 0.230426  | 0.3503563 | 0.6577 | 0.511  | 0.320306269 | count | 1 |
| XRCC1    | 0.2666465 | 0.5913814 | 0.4509 | 0.652  | 0.320848049 | count | 1 |
| MRPL43   | 0.2281046 | 0.273639  | 0.8336 | 0.405  | 0.321320871 | count | 1 |
| CPEB4    | 0.274507  | 0.6422165 | 0.4274 | 0.669  | 0.321490716 | count | 1 |
| PPP1R7   | 0.2287622 | 0.2942357 | 0.7775 | 0.437  | 0.321685827 | count | 1 |
| POLR3C   | 0.2619765 | 0.6823719 | 0.3839 | 0.701  | 0.321870414 | count | 1 |
| TOGARAM1 | 0.3759501 | 0.7305375 | 0.5146 | 0.607  | 0.321874238 | count | 1 |
| HK1      | 0.2578638 | 0.6581347 | 0.3918 | 0.695  | 0.322099929 | count | 1 |
| NPAT     | 0.2677585 | 0.4034671 | 0.6636 | 0.507  | 0.322194387 | count | 1 |
| ENPP4    | 0.2678131 | 0.6981713 | 0.3836 | 0.702  | 0.322260498 | count | 1 |
| TRIM44   | 0.2331913 | 0.3267072 | 0.7138 | 0.476  | 0.322318618 | count | 1 |
| TBL1XR1  | 0.2355445 | 0.2705189 | 0.8707 | 0.385  | 0.322457633 | count | 1 |
| USPL1    | 0.3767419 | 0.6534184 | 0.5766 | 0.5646 | 0.322564957 | count | 1 |
| STN1     | 0.230125  | 0.2673729 | 0.8607 | 0.39   | 0.322584158 | count | 1 |
| TMEM87B  | 0.2522738 | 0.7427987 | 0.3396 | 0.734  | 0.322964614 | count | 1 |
| OGFRL1   | 0.2642408 | 0.6056272 | 0.4363 | 0.663  | 0.324667662 | count | 1 |
| NOL10    | 0.2877958 | 0.8265155 | 0.3482 | 0.728  | 0.324969202 | count | 1 |
| LAMTOR1  | 0.2276971 | 0.208197  | 1.0937 | 0.2749 | 0.324993318 | count | 1 |
| HDAC5    | 0.3798842 | 0.6675989 | 0.569  | 0.57   | 0.325306437 | count | 1 |
| FAM117A  | 0.2421037 | 0.4302863 | 0.5627 | 0.574  | 0.325336729 | count | 1 |



|                |           |           |        |        |             |       |   |
|----------------|-----------|-----------|--------|--------|-------------|-------|---|
| ZHX1           | 0.3799782 | 0.7493834 | 0.5071 | 0.612  | 0.325388454 | count | 1 |
| PARP6          | 0.3801539 | 0.9903167 | 0.3839 | 0.7013 | 0.32554175  | count | 1 |
| NIT2           | 0.2359174 | 0.4313357 | 0.5469 | 0.585  | 0.32609202  | count | 1 |
| AMZ2           | 0.2405982 | 0.4319161 | 0.557  | 0.578  | 0.326359621 | count | 1 |
| EIF2A          | 0.2366735 | 0.3025183 | 0.7823 | 0.435  | 0.326697056 | count | 1 |
| STK16          | 0.2451715 | 0.4113626 | 0.596  | 0.552  | 0.326835052 | count | 1 |
| DDX41          | 0.2616398 | 0.5254344 | 0.4979 | 0.619  | 0.32683981  | count | 1 |
| NONO           | 0.237132  | 0.3398289 | 0.6978 | 0.486  | 0.326860326 | count | 1 |
| SEC22B         | 0.2333187 | 0.375829  | 0.6208 | 0.535  | 0.327065294 | count | 1 |
| REXO1          | 0.2466931 | 0.4924712 | 0.5009 | 0.617  | 0.327315551 | count | 1 |
| FBH1           | 0.3822506 | 0.7331618 | 0.5214 | 0.602  | 0.327371319 | count | 1 |
| PHTF2          | 0.2720405 | 0.6834509 | 0.398  | 0.691  | 0.327379229 | count | 1 |
| GAMT           | 0.2899403 | 0.696478  | 0.4163 | 0.677  | 0.32741144  | count | 1 |
| CD151          | 0.2326122 | 0.3302342 | 0.7044 | 0.482  | 0.327540088 | count | 1 |
| OS9            | 0.2469326 | 0.4693556 | 0.5261 | 0.599  | 0.327634217 | count | 1 |
| IPO5           | 0.2798919 | 0.7559669 | 0.3702 | 0.711  | 0.327843066 | count | 1 |
| MCMBP          | 0.2798919 | 0.79098   | 0.3539 | 0.724  | 0.327843066 | count | 1 |
| TAF5           | 0.2798919 | 0.8286462 | 0.3378 | 0.736  | 0.327843066 | count | 1 |
| AKNA           | 0.2373347 | 0.3131937 | 0.7578 | 0.449  | 0.328053849 | count | 1 |
| ZC3H13         | 0.2368227 | 0.291962  | 0.8111 | 0.418  | 0.328153915 | count | 1 |
| ZNF816-ZNF321P | 0.3834854 | 1.0977883 | 0.3493 | 0.7271 | 0.328448898 | count | 1 |
| FUNDC2         | 0.2333108 | 0.3248661 | 0.7182 | 0.473  | 0.328660448 | count | 1 |
| HOXA10         | 0.2417356 | 0.5073277 | 0.4765 | 0.634  | 0.328759767 | count | 1 |
| FAM50A         | 0.2341575 | 0.3175276 | 0.7374 | 0.461  | 0.32912225  | count | 1 |
| NIPBL          | 0.2329626 | 0.3107215 | 0.7497 | 0.454  | 0.329212143 | count | 1 |
| NOSIP          | 0.2389789 | 0.3677772 | 0.6498 | 0.516  | 0.329409955 | count | 1 |
| OXCT1          | 0.2444945 | 0.5085842 | 0.4807 | 0.631  | 0.329686522 | count | 1 |
| GNPTG          | 0.2517134 | 0.4818833 | 0.5224 | 0.602  | 0.330210604 | count | 1 |
| EIF2AK4        | 0.2557015 | 0.5481659 | 0.4665 | 0.641  | 0.330469285 | count | 1 |
| DYNLT3         | 0.2366095 | 0.3020123 | 0.7834 | 0.434  | 0.330830667 | count | 1 |
| EIF4H          | 0.2387555 | 0.3022361 | 0.79   | 0.43   | 0.330835719 | count | 1 |
| SMU1           | 0.2408277 | 0.3052497 | 0.789  | 0.431  | 0.330909468 | count | 1 |
| RCAN3          | 0.2440008 | 0.3708276 | 0.658  | 0.511  | 0.330984669 | count | 1 |
| GOLGA8A        | 0.2523681 | 0.602336  | 0.419  | 0.676  | 0.331072244 | count | 1 |
| GMPR2          | 0.2423232 | 0.5310695 | 0.4563 | 0.648  | 0.331078229 | count | 1 |
| LTV1           | 0.240574  | 0.4242106 | 0.5671 | 0.571  | 0.331103452 | count | 1 |
| MIATNB         | 0.2475327 | 0.6546657 | 0.3781 | 0.706  | 0.331388952 | count | 1 |
| REPIN1         | 0.2411828 | 0.5780634 | 0.4172 | 0.677  | 0.331398191 | count | 1 |
| TRIM59         | 0.2476294 | 0.6864585 | 0.3607 | 0.7185 | 0.331518737 | count | 1 |
| PNPLA8         | 0.2399206 | 0.3435955 | 0.6983 | 0.486  | 0.33163332  | count | 1 |
| WDR41          | 0.2528053 | 0.5408291 | 0.4674 | 0.64   | 0.331647638 | count | 1 |
| ZNF26          | 0.387258  | 0.910632  | 0.4253 | 0.671  | 0.331741623 | count | 1 |
| POLD2          | 0.2478274 | 0.4502348 | 0.5504 | 0.582  | 0.331784482 | count | 1 |
| ATG2A          | 0.2591367 | 0.6166731 | 0.4202 | 0.675  | 0.331786656 | count | 1 |
| AL121944.1     | 0.262151  | 0.740656  | 0.3539 | 0.724  | 0.331930491 | count | 1 |

|           |           |           |        |        |             |       |   |
|-----------|-----------|-----------|--------|--------|-------------|-------|---|
| ZBP1      | 0.2429486 | 0.428725  | 0.5667 | 0.571  | 0.331934254 | count | 1 |
| CBL       | 0.2658874 | 0.7020185 | 0.3787 | 0.705  | 0.332172248 | count | 1 |
| GTPBP1    | 0.2761408 | 0.7360626 | 0.3752 | 0.708  | 0.332344729 | count | 1 |
| RAB12     | 0.2761408 | 0.771396  | 0.358  | 0.721  | 0.332344729 | count | 1 |
| ZNF836    | 0.2533525 | 0.6327485 | 0.4004 | 0.689  | 0.332367812 | count | 1 |
| MAPK1IP1L | 0.2396284 | 0.3189408 | 0.7513 | 0.453  | 0.332422223 | count | 1 |
| DDX6      | 0.2335715 | 0.1941668 | 1.2029 | 0.2299 | 0.332578358 | count | 1 |
| C6orf203  | 0.3366402 | 0.6975629 | 0.4826 | 0.63   | 0.332780308 | count | 1 |
| MRGBP     | 0.2557682 | 0.5270137 | 0.4853 | 0.628  | 0.333224803 | count | 1 |
| RUNDC1    | 0.3112564 | 0.8741081 | 0.3561 | 0.722  | 0.333644747 | count | 1 |
| RLIM      | 0.2503227 | 0.5213966 | 0.4801 | 0.631  | 0.333720526 | count | 1 |
| EIF4E3    | 0.2483876 | 0.6650485 | 0.3735 | 0.709  | 0.333801376 | count | 1 |
| VAMP2     | 0.2340762 | 0.1808395 | 1.2944 | 0.196  | 0.334155471 | count | 1 |
| KPNA5     | 0.2588156 | 0.8089172 | 0.32   | 0.749  | 0.33450913  | count | 1 |
| ANXA1     | 0.2326596 | 0.1536982 | 1.5137 | 0.131  | 0.334780327 | count | 1 |
| EIF3F     | 0.2339679 | 0.1398345 | 1.6732 | 0.0953 | 0.335161703 | count | 1 |
| MRPL34    | 0.2374053 | 0.2825128 | 0.8403 | 0.401  | 0.335693823 | count | 1 |
| MAD2L1BP  | 0.2511597 | 0.457894  | 0.5485 | 0.584  | 0.336257037 | count | 1 |
| TRAPPC13  | 0.2795579 | 0.8695081 | 0.3215 | 0.748  | 0.336483367 | count | 1 |
| LMAN2     | 0.2377948 | 0.2329847 | 1.0206 | 0.3082 | 0.33730801  | count | 1 |
| UBE2D3    | 0.2360213 | 0.1617588 | 1.4591 | 0.146  | 0.337607003 | count | 1 |
| ASB1      | 0.2667733 | 0.6837027 | 0.3902 | 0.697  | 0.337809617 | count | 1 |
| CYB5R4    | 0.2575674 | 0.5545866 | 0.4644 | 0.643  | 0.337915301 | count | 1 |
| NDUFS7    | 0.2397505 | 0.2450677 | 0.9783 | 0.329  | 0.338130923 | count | 1 |
| ZNF780A   | 0.2578035 | 0.6764536 | 0.3811 | 0.703  | 0.33822606  | count | 1 |
| SEC22C    | 0.2553279 | 0.5666796 | 0.4506 | 0.653  | 0.338805357 | count | 1 |
| SESN1     | 0.2420557 | 0.3149905 | 0.7685 | 0.443  | 0.339324766 | count | 1 |
| HSF2      | 0.5506668 | 0.5514885 | 0.9985 | 0.319  | 0.339454303 | count | 1 |
| LYN       | 0.2444951 | 0.3514403 | 0.6957 | 0.487  | 0.339544729 | count | 1 |
| SNRK      | 0.2433279 | 0.3135573 | 0.776  | 0.438  | 0.33999091  | count | 1 |
| CSE1L     | 0.2903554 | 0.8087839 | 0.359  | 0.72   | 0.340189926 | count | 1 |
| DNAJC27   | 0.2903554 | 0.8461894 | 0.3431 | 0.732  | 0.340189926 | count | 1 |
| YPEL2     | 0.2903554 | 0.8633823 | 0.3363 | 0.737  | 0.340189926 | count | 1 |
| RAB11FIP2 | 0.2615424 | 0.6624213 | 0.3948 | 0.693  | 0.340774188 | count | 1 |
| TVP23B    | 0.3020663 | 0.875635  | 0.345  | 0.73   | 0.341224938 | count | 1 |
| CBR3      | 0.3020663 | 0.875635  | 0.345  | 0.73   | 0.341224938 | count | 1 |
| PLXND1    | 0.3020663 | 0.9199476 | 0.3284 | 0.743  | 0.341224938 | count | 1 |
| CNIH4     | 0.2450084 | 0.3737385 | 0.6556 | 0.513  | 0.341816565 | count | 1 |
| PPP1R18   | 0.240038  | 0.1949947 | 1.231  | 0.2192 | 0.342406506 | count | 1 |
| FCHO2     | 0.3195293 | 0.9679464 | 0.3301 | 0.742  | 0.342607858 | count | 1 |
| PHTF1     | 0.2742714 | 0.5175862 | 0.5299 | 0.597  | 0.342699257 | count | 1 |
| MCL1      | 0.2390273 | 0.1519797 | 1.5728 | 0.117  | 0.343146613 | count | 1 |
| PRMT9     | 0.2529822 | 0.3774118 | 0.6703 | 0.503  | 0.343193729 | count | 1 |
| SPTAN1    | 0.2498581 | 0.3887312 | 0.6428 | 0.521  | 0.343338491 | count | 1 |
| CHST11    | 0.2538834 | 0.3503274 | 0.7247 | 0.469  | 0.343443226 | count | 1 |

|            |           |           |        |        |             |       |   |
|------------|-----------|-----------|--------|--------|-------------|-------|---|
| PRDX3      | 0.2449103 | 0.3535969 | 0.6926 | 0.489  | 0.343528786 | count | 1 |
| RBM14      | 0.3483503 | 0.9523283 | 0.3658 | 0.715  | 0.34451679  | count | 1 |
| NOD2       | 0.3483503 | 1.304145  | 0.2671 | 0.79   | 0.34451679  | count | 1 |
| ADAMTS10   | 0.3483503 | 1.304145  | 0.2671 | 0.79   | 0.34451679  | count | 1 |
| C1QBP      | 0.2436996 | 0.2805    | 0.8688 | 0.386  | 0.344600131 | count | 1 |
| CHMP4A     | 0.2432357 | 0.2296536 | 1.0591 | 0.2903 | 0.345100005 | count | 1 |
| NUDCD2     | 0.2504044 | 0.3447992 | 0.7262 | 0.468  | 0.345679751 | count | 1 |
| SNRPD3     | 0.2428982 | 0.1879098 | 1.2926 | 0.1971 | 0.346357168 | count | 1 |
| TENT5C     | 0.243077  | 0.1922926 | 1.2641 | 0.2071 | 0.346472242 | count | 1 |
| ZC3HAV1    | 0.2538819 | 0.2911365 | 0.872  | 0.384  | 0.34690031  | count | 1 |
| PPP4R3A    | 0.2572434 | 0.3616822 | 0.7112 | 0.477  | 0.346918119 | count | 1 |
| BMS1       | 0.2739966 | 0.5025846 | 0.5452 | 0.586  | 0.346998251 | count | 1 |
| CLCN7      | 0.4048782 | 1.2707481 | 0.3186 | 0.75   | 0.347129676 | count | 1 |
| ZNF461     | 0.4048782 | 1.2707481 | 0.3186 | 0.75   | 0.347129676 | count | 1 |
| SAT2       | 0.2467661 | 0.3398422 | 0.7261 | 0.468  | 0.347184684 | count | 1 |
| IFIT5      | 0.2744402 | 0.8904463 | 0.3082 | 0.758  | 0.347562597 | count | 1 |
| MRPL13     | 0.251437  | 0.4032061 | 0.6236 | 0.533  | 0.348432632 | count | 1 |
| EMILIN1    | 0.5649324 | 1.0434692 | 0.5414 | 0.589  | 0.348511418 | count | 1 |
| KLHDC8B    | 0.5649324 | 1.0434692 | 0.5414 | 0.589  | 0.348511418 | count | 1 |
| PCDH7      | 0.5649324 | 1.0434692 | 0.5414 | 0.589  | 0.348511418 | count | 1 |
| BHMT2      | 0.5649324 | 1.0434692 | 0.5414 | 0.589  | 0.348511418 | count | 1 |
| VARS       | 0.5649324 | 1.0434692 | 0.5414 | 0.589  | 0.348511418 | count | 1 |
| SLAIN1     | 0.5649324 | 1.0434692 | 0.5414 | 0.589  | 0.348511418 | count | 1 |
| NAXD       | 0.5649324 | 1.0434692 | 0.5414 | 0.589  | 0.348511418 | count | 1 |
| LARP6      | 0.5649324 | 1.0434692 | 0.5414 | 0.589  | 0.348511418 | count | 1 |
| CASTOR3    | 0.5649324 | 1.1741598 | 0.4811 | 0.631  | 0.348511418 | count | 1 |
| AC069185.1 | 0.5649324 | 1.1741598 | 0.4811 | 0.631  | 0.348511418 | count | 1 |
| NPDC1      | 0.5649324 | 1.1741598 | 0.4811 | 0.631  | 0.348511418 | count | 1 |
| RAD51AP1   | 0.5649324 | 1.1741598 | 0.4811 | 0.631  | 0.348511418 | count | 1 |
| ZDHC20     | 0.2584417 | 0.4532101 | 0.5702 | 0.569  | 0.348537905 | count | 1 |
| HMG20B     | 0.2505029 | 0.334036  | 0.7499 | 0.454  | 0.348901442 | count | 1 |
| ZMIZ2      | 0.4069713 | 0.8529053 | 0.4772 | 0.634  | 0.348958578 | count | 1 |
| CCL4       | 0.2419852 | 0.1206813 | 2.0052 | 0.0458 | 0.349084888 | count | 1 |
| GSK3B      | 0.2631291 | 0.5106947 | 0.5152 | 0.607  | 0.3491873   | count | 1 |
| UFM1       | 0.248241  | 0.278791  | 0.8904 | 0.374  | 0.349416154 | count | 1 |
| SLC2A1     | 0.2908403 | 0.8351976 | 0.3482 | 0.728  | 0.350151185 | count | 1 |
| XKR6       | 0.2908403 | 0.8724181 | 0.3334 | 0.739  | 0.350151185 | count | 1 |
| UQCRCQ     | 0.2456184 | 0.2071983 | 1.1854 | 0.2367 | 0.350168041 | count | 1 |
| CDKN2AIP   | 0.2518815 | 0.276024  | 0.9125 | 0.362  | 0.350505023 | count | 1 |
| RFLNB      | 0.255797  | 0.4202858 | 0.6086 | 0.543  | 0.350896127 | count | 1 |
| CCDC141    | 0.5686916 | 0.6332685 | 0.898  | 0.37   | 0.350898757 | count | 1 |
| IRF9       | 0.2637523 | 0.4523003 | 0.5831 | 0.56   | 0.351674047 | count | 1 |
| PRKD2      | 0.2616852 | 0.4422112 | 0.5918 | 0.554  | 0.351716155 | count | 1 |
| RNF34      | 0.2600367 | 0.427049  | 0.6089 | 0.543  | 0.351785802 | count | 1 |
| NDUFA6     | 0.2490858 | 0.2526677 | 0.9858 | 0.325  | 0.351791994 | count | 1 |

|          |           |           |        |        |             |       |   |
|----------|-----------|-----------|--------|--------|-------------|-------|---|
| CWC25    | 0.2531588 | 0.3135254 | 0.8075 | 0.42   | 0.351947542 | count | 1 |
| RHOA     | 0.2454439 | 0.1273845 | 1.9268 | 0.0549 | 0.352242193 | count | 1 |
| SGK3     | 0.4109933 | 0.706363  | 0.5818 | 0.561  | 0.352473439 | count | 1 |
| RASSF1   | 0.2504437 | 0.2595387 | 0.965  | 0.335  | 0.352669813 | count | 1 |
| ADAR     | 0.2559437 | 0.313019  | 0.8177 | 0.414  | 0.352831715 | count | 1 |
| PSEN1    | 0.2643329 | 0.4726211 | 0.5593 | 0.576  | 0.353939956 | count | 1 |
| CIC      | 0.3581299 | 0.7749207 | 0.4622 | 0.644  | 0.354323539 | count | 1 |
| KIAA0513 | 0.3581299 | 0.962755  | 0.372  | 0.71   | 0.354323539 | count | 1 |
| CEP192   | 0.5742486 | 0.825477  | 0.6957 | 0.487  | 0.354428215 | count | 1 |
| ZNF337   | 0.5742486 | 0.9184506 | 0.6252 | 0.5323 | 0.354428215 | count | 1 |
| YTHDF2   | 0.2567726 | 0.3391364 | 0.7571 | 0.45   | 0.354484427 | count | 1 |
| METRN    | 0.2575921 | 0.4097084 | 0.6287 | 0.53   | 0.354564356 | count | 1 |
| CRCP     | 0.2673513 | 0.5365732 | 0.4983 | 0.619  | 0.354806787 | count | 1 |
| C5orf15  | 0.2771716 | 0.5230226 | 0.5299 | 0.597  | 0.354976311 | count | 1 |
| BCL2L1   | 0.5756162 | 0.5716436 | 1.0069 | 0.315  | 0.355296903 | count | 1 |
| RECQL    | 0.2573649 | 0.3498322 | 0.7357 | 0.462  | 0.355303365 | count | 1 |
| TYW3     | 0.2629722 | 0.4666233 | 0.5636 | 0.573  | 0.355765938 | count | 1 |
| NSUN3    | 0.3598338 | 0.8478807 | 0.4244 | 0.672  | 0.356032624 | count | 1 |
| LONRF3   | 0.3598338 | 0.8725138 | 0.4124 | 0.68   | 0.356032624 | count | 1 |
| ZNF540   | 0.3598338 | 0.9599929 | 0.3748 | 0.708  | 0.356032624 | count | 1 |
| GIMAP2   | 0.2624959 | 0.4612275 | 0.5691 | 0.57   | 0.356127796 | count | 1 |
| ADRB1    | 0.296085  | 0.6255417 | 0.4733 | 0.636  | 0.356506315 | count | 1 |
| EXOC4    | 0.2646377 | 0.4915246 | 0.5384 | 0.591  | 0.356913653 | count | 1 |
| MGAT4B   | 0.2640417 | 0.4747904 | 0.5561 | 0.579  | 0.357216067 | count | 1 |
| EML2     | 0.2668338 | 0.4831617 | 0.5523 | 0.581  | 0.357297379 | count | 1 |
| TTY14    | 0.3617406 | 0.6932273 | 0.5218 | 0.602  | 0.357945388 | count | 1 |
| SCYL1    | 0.2865522 | 0.5275726 | 0.5432 | 0.587  | 0.358123114 | count | 1 |
| PRPF40A  | 0.2542641 | 0.2701651 | 0.9411 | 0.347  | 0.358201796 | count | 1 |
| SSU72    | 0.2524118 | 0.2223098 | 1.1354 | 0.257  | 0.358399208 | count | 1 |
| SENP6    | 0.2556009 | 0.2979737 | 0.8578 | 0.392  | 0.358538934 | count | 1 |
| ZNF644   | 0.2539639 | 0.2845061 | 0.8926 | 0.3727 | 0.359124388 | count | 1 |
| C2orf42  | 0.30648   | 0.7278231 | 0.4211 | 0.674  | 0.359225417 | count | 1 |
| BACH1    | 0.2694271 | 0.5022409 | 0.5364 | 0.592  | 0.359261529 | count | 1 |
| SLC25A4  | 0.3631748 | 0.5544464 | 0.655  | 0.513  | 0.359384183 | count | 1 |
| P2RY10   | 0.2632524 | 0.3513063 | 0.7494 | 0.454  | 0.359728482 | count | 1 |
| MRE11    | 0.2679464 | 0.5658213 | 0.4736 | 0.636  | 0.360152453 | count | 1 |
| LCMT1    | 0.2666492 | 0.3616475 | 0.7373 | 0.461  | 0.360751639 | count | 1 |
| SIKE1    | 0.260673  | 0.3988782 | 0.6535 | 0.514  | 0.360818811 | count | 1 |
| PRPF38B  | 0.2533513 | 0.1861198 | 1.3612 | 0.1744 | 0.360842391 | count | 1 |
| ATP6V1H  | 0.2695847 | 0.4761596 | 0.5662 | 0.572  | 0.360990553 | count | 1 |
| DENND4A  | 0.2818655 | 0.4774923 | 0.5903 | 0.555  | 0.361013267 | count | 1 |
| RARS2    | 0.5851876 | 0.6383022 | 0.9168 | 0.36   | 0.361377347 | count | 1 |
| TNRC6B   | 0.2568284 | 0.2661138 | 0.9651 | 0.335  | 0.361668218 | count | 1 |
| CNOT4    | 0.2589704 | 0.3272777 | 0.7913 | 0.429  | 0.362130793 | count | 1 |
| SF3B4    | 0.2596738 | 0.3158435 | 0.8222 | 0.412  | 0.362584866 | count | 1 |

|          |           |           |        |        |             |       |   |
|----------|-----------|-----------|--------|--------|-------------|-------|---|
| CAP1     | 0.2547792 | 0.1838389 | 1.3859 | 0.167  | 0.363777908 | count | 1 |
| PHC3     | 0.26994   | 0.4386823 | 0.6153 | 0.539  | 0.364081807 | count | 1 |
| NFIL3    | 0.2584335 | 0.3395388 | 0.7611 | 0.4471 | 0.364501582 | count | 1 |
| ZCCHC4   | 0.3400478 | 0.9045778 | 0.3759 | 0.707  | 0.36485173  | count | 1 |
| LAMTOR2  | 0.2584149 | 0.3146052 | 0.8214 | 0.412  | 0.364977627 | count | 1 |
| ITGB2    | 0.2551695 | 0.1525267 | 1.6729 | 0.0953 | 0.365266475 | count | 1 |
| BLOC1S3  | 0.3406194 | 1.03684   | 0.3285 | 0.7427 | 0.365471663 | count | 1 |
| WDR46    | 0.2741614 | 0.497064  | 0.5516 | 0.582  | 0.365591983 | count | 1 |
| RELT     | 0.34125   | 0.9796159 | 0.3484 | 0.728  | 0.366155586 | count | 1 |
| TUBA1A   | 0.255377  | 0.1626832 | 1.5698 | 0.1174 | 0.366376654 | count | 1 |
| MRPL32   | 0.2668128 | 0.3859464 | 0.6913 | 0.49   | 0.366676992 | count | 1 |
| DENND2D  | 0.2618745 | 0.2996115 | 0.874  | 0.383  | 0.366685974 | count | 1 |
| UBAC2    | 0.2626473 | 0.3449648 | 0.7614 | 0.447  | 0.36701582  | count | 1 |
| C19orf24 | 0.2595241 | 0.3140491 | 0.8264 | 0.4092 | 0.367096399 | count | 1 |
| AGPS     | 0.2867115 | 0.5984692 | 0.4791 | 0.632  | 0.367246444 | count | 1 |
| ZNF518A  | 0.2820436 | 0.6061009 | 0.4653 | 0.642  | 0.367584654 | count | 1 |
| IMPDH2   | 0.2735362 | 0.4735324 | 0.5777 | 0.564  | 0.367684681 | count | 1 |
| CHCHD10  | 0.2619262 | 0.2446227 | 1.0707 | 0.285  | 0.368533017 | count | 1 |
| TMEM101  | 0.3149278 | 0.6936973 | 0.454  | 0.65   | 0.369202176 | count | 1 |
| ARHGAP30 | 0.2682751 | 0.3286342 | 0.8163 | 0.415  | 0.369293604 | count | 1 |
| MFSD12   | 0.3270909 | 0.6565811 | 0.4982 | 0.619  | 0.369751902 | count | 1 |
| ATXN3    | 0.327131  | 0.6267417 | 0.522  | 0.602  | 0.369797635 | count | 1 |
| TBC1D25  | 0.3154544 | 0.6707386 | 0.4703 | 0.638  | 0.369824172 | count | 1 |
| MTMR2    | 0.2819574 | 0.698081  | 0.4039 | 0.687  | 0.370024463 | count | 1 |
| DPP9     | 0.2890633 | 0.5691715 | 0.5079 | 0.612  | 0.370271661 | count | 1 |
| PIK3IP1  | 0.2673171 | 0.2604708 | 1.0263 | 0.306  | 0.370470374 | count | 1 |
| NUP62    | 0.2806524 | 0.5931161 | 0.4732 | 0.636  | 0.370537305 | count | 1 |
| TAGLN2   | 0.2575973 | 0.1049662 | 2.4541 | 0.0146 | 0.370645099 | count | 1 |
| THAP11   | 0.2719432 | 0.3644064 | 0.7463 | 0.456  | 0.370812131 | count | 1 |
| KIAA2013 | 0.3753066 | 0.5228368 | 0.7178 | 0.473  | 0.37155842  | count | 1 |
| CYB561D2 | 0.2645821 | 0.3305575 | 0.8004 | 0.424  | 0.371742984 | count | 1 |
| ASCC2    | 0.2816479 | 0.4952619 | 0.5687 | 0.57   | 0.371855782 | count | 1 |
| ADAM10   | 0.283357  | 0.4460654 | 0.6352 | 0.526  | 0.371867416 | count | 1 |
| COMMD4   | 0.2664689 | 0.3298597 | 0.8078 | 0.42   | 0.3720839   | count | 1 |
| GADD45A  | 0.2658506 | 0.296956  | 0.8953 | 0.371  | 0.37271606  | count | 1 |
| ABCF1    | 0.263431  | 0.2605126 | 1.0112 | 0.313  | 0.372729081 | count | 1 |
| FHL3     | 0.2672089 | 0.3742504 | 0.714  | 0.476  | 0.372826359 | count | 1 |
| PDE4B    | 0.261849  | 0.1743188 | 1.5021 | 0.134  | 0.373037448 | count | 1 |
| HSD17B12 | 0.2830163 | 0.499164  | 0.567  | 0.571  | 0.373668171 | count | 1 |
| GCLM     | 0.2918776 | 0.4618373 | 0.632  | 0.528  | 0.373891995 | count | 1 |
| TOR1AIP2 | 0.2712616 | 0.4859285 | 0.5582 | 0.577  | 0.373982695 | count | 1 |
| ACYP2    | 0.2771918 | 0.5183666 | 0.5347 | 0.593  | 0.37504768  | count | 1 |
| LMNA     | 0.2657961 | 0.2670149 | 0.9954 | 0.3203 | 0.37541047  | count | 1 |
| RALBP1   | 0.2667689 | 0.241191  | 1.106  | 0.27   | 0.376534536 | count | 1 |
| GABPB2   | 0.4386356 | 0.9352981 | 0.469  | 0.639  | 0.376648196 | count | 1 |

|            |           |           |        |        |             |       |   |
|------------|-----------|-----------|--------|--------|-------------|-------|---|
| GTF2H2C    | 0.4386356 | 1.0237038 | 0.4285 | 0.669  | 0.376648196 | count | 1 |
| PHKG1      | 0.4386356 | 1.052617  | 0.4167 | 0.677  | 0.376648196 | count | 1 |
| HHEX       | 0.2941147 | 0.5322654 | 0.5526 | 0.581  | 0.376769954 | count | 1 |
| SELENOS    | 0.2672992 | 0.2402807 | 1.1124 | 0.267  | 0.376875762 | count | 1 |
| MRPS35     | 0.2725426 | 0.3483147 | 0.7825 | 0.435  | 0.377272876 | count | 1 |
| EIF4ENIF1  | 0.6102879 | 0.7289768 | 0.8372 | 0.403  | 0.377327766 | count | 1 |
| VPS13A     | 0.2745702 | 0.4106698 | 0.6686 | 0.504  | 0.377356385 | count | 1 |
| PHC2       | 0.2946427 | 0.5831673 | 0.5052 | 0.614  | 0.377449228 | count | 1 |
| CDK5RAP1   | 0.3812201 | 0.8156112 | 0.4674 | 0.641  | 0.377494849 | count | 1 |
| CDYL       | 0.3072171 | 0.4193804 | 0.7325 | 0.464  | 0.377792631 | count | 1 |
| TIGIT      | 0.2651898 | 0.2519359 | 1.0526 | 0.2933 | 0.377798965 | count | 1 |
| METTL23    | 0.2691965 | 0.2784895 | 0.9666 | 0.334  | 0.378598306 | count | 1 |
| ZFP91      | 0.3078845 | 0.7700152 | 0.3998 | 0.69   | 0.378618099 | count | 1 |
| TNFAIP8    | 0.266034  | 0.2210109 | 1.2037 | 0.23   | 0.378630521 | count | 1 |
| CTSF       | 0.2871028 | 0.5548857 | 0.5174 | 0.605  | 0.379080792 | count | 1 |
| CCDC138    | 0.3834854 | 0.7008088 | 0.5472 | 0.585  | 0.379769309 | count | 1 |
| SELENOF    | 0.2688561 | 0.2145254 | 1.2533 | 0.211  | 0.380410375 | count | 1 |
| APEH       | 0.2811851 | 0.4766359 | 0.5899 | 0.556  | 0.380463136 | count | 1 |
| CHCHD1     | 0.2804124 | 0.4279559 | 0.6552 | 0.513  | 0.380489362 | count | 1 |
| PRKAG2     | 0.2807149 | 0.3635709 | 0.7721 | 0.441  | 0.380900719 | count | 1 |
| ALG13      | 0.2773979 | 0.3776147 | 0.7346 | 0.463  | 0.381249373 | count | 1 |
| RNPEP      | 0.3171959 | 0.641954  | 0.4941 | 0.622  | 0.382096419 | count | 1 |
| ZNF354B    | 0.3171959 | 0.7380645 | 0.4298 | 0.668  | 0.382096419 | count | 1 |
| SBNO2      | 0.3171959 | 0.7611935 | 0.4167 | 0.677  | 0.382096419 | count | 1 |
| MEPCE      | 0.3380172 | 0.6007212 | 0.5627 | 0.574  | 0.382215125 | count | 1 |
| ACSL5      | 0.3380172 | 0.6842936 | 0.494  | 0.622  | 0.382215125 | count | 1 |
| CD200R1    | 0.3859464 | 0.8393922 | 0.4598 | 0.646  | 0.38224048  | count | 1 |
| AASDH      | 0.2956981 | 0.4876763 | 0.6063 | 0.545  | 0.382374636 | count | 1 |
| ERICH1     | 0.2708139 | 0.2803796 | 0.9659 | 0.335  | 0.382502969 | count | 1 |
| MMAA       | 0.6191356 | 1.004321  | 0.6165 | 0.538  | 0.382951332 | count | 1 |
| ZNF212     | 0.6191356 | 1.033409  | 0.5991 | 0.55   | 0.382951332 | count | 1 |
| CEP250     | 0.2886381 | 0.8249059 | 0.3499 | 0.7266 | 0.383143467 | count | 1 |
| ARHGAP15   | 0.2789436 | 0.3133696 | 0.8901 | 0.374  | 0.383377429 | count | 1 |
| CD3E       | 0.2692946 | 0.2521559 | 1.068  | 0.2863 | 0.38393679  | count | 1 |
| QTRT2      | 0.3033833 | 0.8710761 | 0.3483 | 0.7279 | 0.384395668 | count | 1 |
| DSTN       | 0.2740894 | 0.2592176 | 1.0574 | 0.291  | 0.384712316 | count | 1 |
| ANKRD37    | 0.2815373 | 0.4711564 | 0.5975 | 0.551  | 0.384763814 | count | 1 |
| LTN1       | 0.2788536 | 0.4279195 | 0.6516 | 0.515  | 0.385017139 | count | 1 |
| SENCR      | 0.3889579 | 1.0254704 | 0.3793 | 0.705  | 0.385264762 | count | 1 |
| GRK6       | 0.2732104 | 0.2907641 | 0.9396 | 0.348  | 0.385360345 | count | 1 |
| STARD3     | 0.2816232 | 0.5397634 | 0.5218 | 0.602  | 0.385663013 | count | 1 |
| AC004812.2 | 0.3594374 | 0.9414345 | 0.3818 | 0.703  | 0.385888024 | count | 1 |
| GAB3       | 0.2987472 | 0.6430367 | 0.4646 | 0.643  | 0.386333149 | count | 1 |
| SFMBT2     | 0.287736  | 0.4783472 | 0.6015 | 0.548  | 0.386821137 | count | 1 |
| STRN       | 0.314566  | 0.5234234 | 0.601  | 0.548  | 0.386882755 | count | 1 |

|           |           |           |        |        |             |       |   |
|-----------|-----------|-----------|--------|--------|-------------|-------|---|
| PRIM2     | 0.3019781 | 0.6282724 | 0.4806 | 0.631  | 0.386886928 | count | 1 |
| ITPKB     | 0.3098431 | 0.6393835 | 0.4846 | 0.628  | 0.387387056 | count | 1 |
| TBC1D10A  | 0.2895251 | 0.4303567 | 0.6728 | 0.502  | 0.387765122 | count | 1 |
| PDLIM7    | 0.3105108 | 0.70327   | 0.4415 | 0.659  | 0.388226211 | count | 1 |
| TTC37     | 0.290079  | 0.4493496 | 0.6456 | 0.519  | 0.388508955 | count | 1 |
| TOR1A     | 0.2914883 | 0.359818  | 0.8101 | 0.418  | 0.388764011 | count | 1 |
| MKKS      | 0.4525728 | 0.8904145 | 0.5083 | 0.612  | 0.388847719 | count | 1 |
| ACBD3     | 0.2824593 | 0.3248464 | 0.8695 | 0.385  | 0.388852173 | count | 1 |
| CCSAP     | 0.3037843 | 0.6163617 | 0.4929 | 0.622  | 0.389210968 | count | 1 |
| CLHC1     | 0.393196  | 0.9647533 | 0.4076 | 0.684  | 0.389521424 | count | 1 |
| SAMD8     | 0.393196  | 1.0375051 | 0.379  | 0.705  | 0.389521424 | count | 1 |
| CLSTN3    | 0.2969633 | 0.5081591 | 0.5844 | 0.559  | 0.389785852 | count | 1 |
| C16orf58  | 0.344734  | 0.8101147 | 0.4255 | 0.671  | 0.389878877 | count | 1 |
| SETD1B    | 0.344734  | 0.8499626 | 0.4056 | 0.685  | 0.389878877 | count | 1 |
| IFRD2     | 0.2991878 | 0.5523976 | 0.5416 | 0.588  | 0.390012249 | count | 1 |
| PLOD3     | 0.4542844 | 0.7589573 | 0.5986 | 0.55   | 0.390346355 | count | 1 |
| RRAGB     | 0.4542844 | 0.7854528 | 0.5784 | 0.563  | 0.390346355 | count | 1 |
| POC1B-AS1 | 0.3641291 | 0.8686995 | 0.4192 | 0.675  | 0.390980344 | count | 1 |
| ZNF568    | 0.3641291 | 0.8763564 | 0.4155 | 0.678  | 0.390980344 | count | 1 |
| NFKBIA    | 0.2717889 | 0.188262  | 1.4437 | 0.15   | 0.3917279   | count | 1 |
| GPR108    | 0.285262  | 0.3466454 | 0.8229 | 0.411  | 0.392076617 | count | 1 |
| SPATA13   | 0.2908571 | 0.498487  | 0.5835 | 0.56   | 0.392363833 | count | 1 |
| CMTM3     | 0.2776582 | 0.2723698 | 1.0194 | 0.3088 | 0.393276679 | count | 1 |
| PCGF1     | 0.3663383 | 0.8046812 | 0.4553 | 0.649  | 0.39337847  | count | 1 |
| B3GALT4   | 0.2979393 | 0.5338966 | 0.558  | 0.577  | 0.393435398 | count | 1 |
| CCRL2     | 0.3104992 | 0.6887677 | 0.4508 | 0.652  | 0.393454715 | count | 1 |
| EIF4G1    | 0.291921  | 0.4046507 | 0.7214 | 0.471  | 0.39380251  | count | 1 |
| GMEB1     | 0.3046031 | 0.5432845 | 0.5607 | 0.575  | 0.393936172 | count | 1 |
| ZYX       | 0.2800235 | 0.3465265 | 0.8081 | 0.42   | 0.394193103 | count | 1 |
| UPRT      | 0.3980405 | 0.8028385 | 0.4958 | 0.62   | 0.394387951 | count | 1 |
| SIRT2     | 0.2958599 | 0.3912792 | 0.7561 | 0.45   | 0.394611157 | count | 1 |
| NDUFB8    | 0.2765614 | 0.17631   | 1.5686 | 0.1177 | 0.395146428 | count | 1 |
| SPNS3     | 0.3118528 | 0.5965145 | 0.5228 | 0.601  | 0.395178085 | count | 1 |
| RNASEK    | 0.2844841 | 0.370176  | 0.7685 | 0.443  | 0.395556774 | count | 1 |
| ZSWIM7    | 0.2857906 | 0.3629194 | 0.7875 | 0.432  | 0.395639388 | count | 1 |
| EIF2B4    | 0.3685621 | 0.5876276 | 0.6272 | 0.531  | 0.395792622 | count | 1 |
| XBP1      | 0.2770954 | 0.1689488 | 1.6401 | 0.102  | 0.395827885 | count | 1 |
| SEC24A    | 0.4605672 | 0.9974968 | 0.4617 | 0.645  | 0.395848211 | count | 1 |
| TIMM50    | 0.2917933 | 0.4991403 | 0.5846 | 0.559  | 0.395966652 | count | 1 |
| YWHAQ     | 0.2796197 | 0.2381864 | 1.174  | 0.241  | 0.396244272 | count | 1 |
| KMT2D     | 0.4004373 | 0.8285534 | 0.4833 | 0.6292 | 0.396795959 | count | 1 |
| TNKS2     | 0.2906584 | 0.3873816 | 0.7503 | 0.454  | 0.397253818 | count | 1 |
| VCPIP1    | 0.3138329 | 0.4318488 | 0.7267 | 0.468  | 0.397699177 | count | 1 |
| GSK3A     | 0.3052737 | 0.5142944 | 0.5936 | 0.553  | 0.397975131 | count | 1 |
| DGKZ      | 0.282048  | 0.25258   | 1.1167 | 0.265  | 0.397979011 | count | 1 |

|           |           |           |        |        |             |       |   |
|-----------|-----------|-----------|--------|--------|-------------|-------|---|
| DNAJB9    | 0.2885751 | 0.3095041 | 0.9324 | 0.352  | 0.398461252 | count | 1 |
| ZBTB38    | 0.2851261 | 0.306738  | 0.9295 | 0.353  | 0.398464068 | count | 1 |
| ZNF274    | 0.3240301 | 0.5556302 | 0.5832 | 0.56   | 0.398591496 | count | 1 |
| IKZF5     | 0.3057628 | 0.6346746 | 0.4818 | 0.63   | 0.398615108 | count | 1 |
| LINC01934 | 0.3241203 | 0.5434215 | 0.5964 | 0.551  | 0.398703102 | count | 1 |
| ZNF593    | 0.3020663 | 0.5067308 | 0.5961 | 0.552  | 0.398902805 | count | 1 |
| PDIA4     | 0.2990751 | 0.4342306 | 0.6887 | 0.491  | 0.398911781 | count | 1 |
| SIAH2     | 0.2899854 | 0.2876067 | 1.0083 | 0.314  | 0.399230783 | count | 1 |
| NUP54     | 0.3062421 | 0.4672373 | 0.6554 | 0.513  | 0.399242269 | count | 1 |
| MCEE      | 0.3319253 | 0.7473437 | 0.4441 | 0.657  | 0.399959338 | count | 1 |
| GTF3C2    | 0.3319253 | 0.7873642 | 0.4216 | 0.674  | 0.399959338 | count | 1 |
| MAP2K2    | 0.2801372 | 0.1817154 | 1.5416 | 0.124  | 0.400117542 | count | 1 |
| COMMD5    | 0.3004903 | 0.5084136 | 0.591  | 0.555  | 0.400804794 | count | 1 |
| COPS9     | 0.2819014 | 0.2227831 | 1.2654 | 0.2066 | 0.401116938 | count | 1 |
| SLC30A5   | 0.4666474 | 0.7914108 | 0.5896 | 0.556  | 0.401173747 | count | 1 |
| CCDC71    | 0.3133391 | 0.724945  | 0.4322 | 0.666  | 0.401506389 | count | 1 |
| NMRAL1    | 0.3026223 | 0.5098056 | 0.5936 | 0.553  | 0.401763511 | count | 1 |
| ITPRIP    | 0.3213291 | 0.6858922 | 0.4685 | 0.64   | 0.401824069 | count | 1 |
| SHISA5    | 0.2855904 | 0.3097403 | 0.922  | 0.357  | 0.40203669  | count | 1 |
| MPP6      | 0.6511287 | 0.841395  | 0.7739 | 0.44   | 0.403287313 | count | 1 |
| APOLD1    | 0.3118639 | 0.5628138 | 0.5541 | 0.58   | 0.40336426  | count | 1 |
| DPP7      | 0.2864671 | 0.2457411 | 1.1657 | 0.245  | 0.404219528 | count | 1 |
| DAD1      | 0.2827504 | 0.1690426 | 1.6727 | 0.0954 | 0.404222871 | count | 1 |
| PLEKHF1   | 0.2901699 | 0.3455857 | 0.8396 | 0.402  | 0.404223327 | count | 1 |
| BIRC2     | 0.2903754 | 0.3069975 | 0.9459 | 0.345  | 0.404858115 | count | 1 |
| PDCL      | 0.2948859 | 0.4525495 | 0.6516 | 0.515  | 0.406608152 | count | 1 |
| ANXA2R    | 0.2875548 | 0.320127  | 0.8983 | 0.3697 | 0.406660227 | count | 1 |
| SPPL2B    | 0.4729587 | 0.5729481 | 0.8255 | 0.41   | 0.406702782 | count | 1 |
| SMYD2     | 0.3039816 | 0.4782448 | 0.6356 | 0.525  | 0.407180317 | count | 1 |
| INPP4A    | 0.3215639 | 0.5302606 | 0.6064 | 0.545  | 0.407543266 | count | 1 |
| SAR1B     | 0.3004297 | 0.4197283 | 0.7158 | 0.475  | 0.407712741 | count | 1 |
| CXorf38   | 0.3004297 | 0.4513872 | 0.6656 | 0.506  | 0.407712741 | count | 1 |
| SLC52A2   | 0.2966774 | 0.3792344 | 0.7823 | 0.435  | 0.407794453 | count | 1 |
| UCKL1     | 0.3128276 | 0.6002095 | 0.5212 | 0.603  | 0.407859778 | count | 1 |
| COPS7B    | 0.3483503 | 0.7229176 | 0.4819 | 0.63   | 0.408697578 | count | 1 |
| CAND1     | 0.2938522 | 0.3294838 | 0.8919 | 0.373  | 0.408989482 | count | 1 |
| C1orf52   | 0.2931126 | 0.3290691 | 0.8907 | 0.374  | 0.409013972 | count | 1 |
| RAB3GAP2  | 0.3325305 | 0.5729297 | 0.5804 | 0.562  | 0.409110021 | count | 1 |
| ST3GAL4   | 0.3327878 | 0.7021472 | 0.474  | 0.636  | 0.409428437 | count | 1 |
| APTX      | 0.3045224 | 0.5778907 | 0.527  | 0.599  | 0.409447427 | count | 1 |
| SNX1      | 0.3049201 | 0.4793392 | 0.6361 | 0.525  | 0.409983535 | count | 1 |
| 1-Sep     | 0.2870403 | 0.1864511 | 1.5395 | 0.1247 | 0.410178302 | count | 1 |
| SDHC      | 0.2951731 | 0.3082971 | 0.9574 | 0.339  | 0.410439324 | count | 1 |
| GPI       | 0.2914119 | 0.3251411 | 0.8963 | 0.371  | 0.410902341 | count | 1 |
| RNF166    | 0.2914417 | 0.2586592 | 1.1267 | 0.2607 | 0.411096915 | count | 1 |



|            |           |           |        |        |             |       |   |
|------------|-----------|-----------|--------|--------|-------------|-------|---|
| RPUSD4     | 0.334875  | 0.7424675 | 0.451  | 0.652  | 0.412011467 | count | 1 |
| AC007686.3 | 0.334875  | 0.7694054 | 0.4352 | 0.664  | 0.412011467 | count | 1 |
| ST3GAL2    | 0.6648664 | 0.6833256 | 0.973  | 0.3313 | 0.41201865  | count | 1 |
| TAPT1      | 0.4159296 | 0.9400222 | 0.4425 | 0.658  | 0.412365435 | count | 1 |
| HNRNPD     | 0.2921759 | 0.2150997 | 1.3583 | 0.175  | 0.412564015 | count | 1 |
| TMEM173    | 0.299755  | 0.3366245 | 0.8905 | 0.374  | 0.412704078 | count | 1 |
| WASHC4     | 0.322275  | 0.5436188 | 0.5928 | 0.554  | 0.413007184 | count | 1 |
| NAA35      | 0.3264469 | 0.5385672 | 0.6061 | 0.545  | 0.413761618 | count | 1 |
| TMEM208    | 0.2955533 | 0.3124001 | 0.9461 | 0.345  | 0.415301569 | count | 1 |
| XPA        | 0.2986507 | 0.3284274 | 0.9093 | 0.364  | 0.415676928 | count | 1 |
| PPP4C      | 0.2932585 | 0.2634035 | 1.1133 | 0.2664 | 0.415678814 | count | 1 |
| ILF3-DT    | 0.3024149 | 0.4042052 | 0.7482 | 0.455  | 0.415694911 | count | 1 |
| NELFCD     | 0.3091837 | 0.4361025 | 0.709  | 0.479  | 0.415731082 | count | 1 |
| SAR1A      | 0.2919378 | 0.1903929 | 1.5333 | 0.1262 | 0.41606091  | count | 1 |
| CYP20A1    | 0.3014358 | 0.3795893 | 0.7941 | 0.428  | 0.416248049 | count | 1 |
| NPRL3      | 0.3548263 | 0.6931628 | 0.5119 | 0.609  | 0.416354269 | count | 1 |
| STX6       | 0.3548263 | 0.7007415 | 0.5064 | 0.613  | 0.416354269 | count | 1 |
| AL139274.2 | 0.6719053 | 0.7757842 | 0.8661 | 0.387  | 0.416491851 | count | 1 |
| SPG11      | 0.3220498 | 0.4974064 | 0.6475 | 0.518  | 0.416592356 | count | 1 |
| SRF        | 0.3685133 | 0.7158454 | 0.5148 | 0.607  | 0.41702274  | count | 1 |
| MIS18A     | 0.3686085 | 0.832611  | 0.4427 | 0.658  | 0.417131445 | count | 1 |
| UMAD1      | 0.3686085 | 0.8635522 | 0.4269 | 0.67   | 0.417131445 | count | 1 |
| PARVB      | 0.3686085 | 0.896301  | 0.4113 | 0.681  | 0.417131445 | count | 1 |
| WDR82      | 0.3026342 | 0.4486836 | 0.6745 | 0.5    | 0.41730986  | count | 1 |
| AFTPH      | 0.3078079 | 0.4945538 | 0.6224 | 0.534  | 0.41774833  | count | 1 |
| TRPM7      | 0.3096812 | 0.4046919 | 0.7652 | 0.445  | 0.417821337 | count | 1 |
| PUM2       | 0.3406194 | 0.5813405 | 0.5859 | 0.558  | 0.419121049 | count | 1 |
| GORASP2    | 0.3061263 | 0.3852029 | 0.7947 | 0.427  | 0.419284204 | count | 1 |
| DOK1       | 0.3708961 | 0.5937487 | 0.6247 | 0.533  | 0.41974365  | count | 1 |
| PLPP1      | 0.3711432 | 0.894992  | 0.4147 | 0.679  | 0.420025824 | count | 1 |
| CCDC130    | 0.3185588 | 0.5169853 | 0.6162 | 0.538  | 0.420754827 | count | 1 |
| PGGT1B     | 0.322873  | 0.524744  | 0.6153 | 0.539  | 0.421006326 | count | 1 |
| CHD1       | 0.3010851 | 0.2742566 | 1.0978 | 0.273  | 0.421378645 | count | 1 |
| BOLA3      | 0.3149603 | 0.5332734 | 0.5906 | 0.555  | 0.421926872 | count | 1 |
| C18orf32   | 0.3926663 | 0.7606169 | 0.5162 | 0.606  | 0.421970665 | count | 1 |
| C7orf26    | 0.4256851 | 0.7006815 | 0.6075 | 0.544  | 0.422173433 | count | 1 |
| CSDE1      | 0.2998259 | 0.2368626 | 1.2658 | 0.206  | 0.42227399  | count | 1 |
| RREB1      | 0.4259869 | 0.6993217 | 0.6091 | 0.543  | 0.422476902 | count | 1 |
| SLC4A4     | 0.3240289 | 0.5116342 | 0.6333 | 0.527  | 0.422519184 | count | 1 |
| PLAGL2     | 0.3740078 | 0.8532271 | 0.4383 | 0.661  | 0.423297142 | count | 1 |
| TRIP12     | 0.3111949 | 0.4800224 | 0.6483 | 0.517  | 0.423445929 | count | 1 |
| EAF2       | 0.3521063 | 0.8791862 | 0.4005 | 0.689  | 0.424443552 | count | 1 |
| AC004865.2 | 0.3062658 | 0.5854895 | 0.5231 | 0.601  | 0.424531983 | count | 1 |
| ZNF677     | 0.345328  | 0.6705935 | 0.515  | 0.607  | 0.424949267 | count | 1 |
| GNL2       | 0.3161051 | 0.5188324 | 0.6093 | 0.543  | 0.425061999 | count | 1 |

|         |           |           |        |        |             |       |   |
|---------|-----------|-----------|--------|--------|-------------|-------|---|
| ABTB1   | 0.3031475 | 0.3125338 | 0.97   | 0.333  | 0.425062698 | count | 1 |
| EMD     | 0.304392  | 0.2819351 | 1.0797 | 0.281  | 0.425722651 | count | 1 |
| LUC7L2  | 0.3408054 | 0.4699208 | 0.7252 | 0.469  | 0.426311573 | count | 1 |
| POLR2L  | 0.2988046 | 0.2010775 | 1.486  | 0.138  | 0.426493677 | count | 1 |
| LMO7    | 0.3297375 | 0.7026068 | 0.4693 | 0.639  | 0.426577435 | count | 1 |
| SCX     | 0.3297375 | 0.7211626 | 0.4572 | 0.648  | 0.426577435 | count | 1 |
| RGS16   | 0.3214498 | 0.5031072 | 0.6389 | 0.523  | 0.426837496 | count | 1 |
| ARMC7   | 0.3371468 | 0.6742853 | 0.5    | 0.617  | 0.427389401 | count | 1 |
| DGKA    | 0.3419198 | 0.5496968 | 0.622  | 0.534  | 0.427712968 | count | 1 |
| MTMR9   | 0.3419198 | 0.5524206 | 0.6189 | 0.536  | 0.427712968 | count | 1 |
| PCBP2   | 0.3012474 | 0.2021649 | 1.4901 | 0.1372 | 0.428079076 | count | 1 |
| SAMHD1  | 0.3232019 | 0.3900604 | 0.8286 | 0.408  | 0.429171177 | count | 1 |
| ESF1    | 0.3084207 | 0.3633019 | 0.8489 | 0.397  | 0.429293453 | count | 1 |
| IFT80   | 0.3994443 | 0.8227441 | 0.4855 | 0.628  | 0.429335062 | count | 1 |
| ZBTB11  | 0.3207451 | 0.3833199 | 0.8368 | 0.403  | 0.42969767  | count | 1 |
| DCAF13  | 0.3085203 | 0.3670434 | 0.8406 | 0.401  | 0.429820131 | count | 1 |
| TIMM22  | 0.3222948 | 0.4603524 | 0.7001 | 0.484  | 0.42997497  | count | 1 |
| CHD3    | 0.3187086 | 0.3792859 | 0.8403 | 0.401  | 0.430031545 | count | 1 |
| CIR1    | 0.3026307 | 0.2266596 | 1.3352 | 0.1828 | 0.430116083 | count | 1 |
| GALT    | 0.3163866 | 0.4623063 | 0.6844 | 0.494  | 0.430525669 | count | 1 |
| CASP3   | 0.3047682 | 0.251023  | 1.2141 | 0.226  | 0.430635901 | count | 1 |
| RBM34   | 0.3501419 | 0.6574359 | 0.5326 | 0.595  | 0.430908356 | count | 1 |
| NBR1    | 0.3402699 | 0.490125  | 0.6943 | 0.488  | 0.431367541 | count | 1 |
| TMED2   | 0.3097231 | 0.3308104 | 0.9363 | 0.35   | 0.431497989 | count | 1 |
| PITPNC1 | 0.3081829 | 0.2838231 | 1.0858 | 0.278  | 0.431872671 | count | 1 |
| SPTBN1  | 0.3407405 | 0.5991047 | 0.5687 | 0.5699 | 0.431966999 | count | 1 |
| DUSP10  | 0.318265  | 0.3248178 | 0.9798 | 0.328  | 0.431972849 | count | 1 |
| MED25   | 0.358528  | 0.6974942 | 0.514  | 0.608  | 0.432236766 | count | 1 |
| CMC2    | 0.3049979 | 0.2579828 | 1.1822 | 0.238  | 0.432518685 | count | 1 |
| TSFM    | 0.3229914 | 0.4532332 | 0.7126 | 0.477  | 0.432715276 | count | 1 |
| COX14   | 0.3052692 | 0.2362651 | 1.2921 | 0.197  | 0.43290366  | count | 1 |
| KMT2A   | 0.3065866 | 0.2310508 | 1.3269 | 0.185  | 0.43292885  | count | 1 |
| OXNAD1  | 0.3070462 | 0.2849206 | 1.0777 | 0.282  | 0.433432459 | count | 1 |
| ETS2    | 0.3178959 | 0.5026741 | 0.6324 | 0.528  | 0.43360939  | count | 1 |
| ISYNA1  | 0.3265513 | 0.5588543 | 0.5843 | 0.559  | 0.433632473 | count | 1 |
| SOD1    | 0.3034654 | 0.1705752 | 1.7791 | 0.0762 | 0.433658031 | count | 1 |
| NAXE    | 0.3136226 | 0.3316992 | 0.9455 | 0.345  | 0.433683819 | count | 1 |
| COQ6    | 0.3424393 | 0.916562  | 0.3736 | 0.709  | 0.434130996 | count | 1 |
| ZNF740  | 0.7001958 | 0.9107743 | 0.7688 | 0.443  | 0.434464784 | count | 1 |
| SLIRP   | 0.331116  | 0.4533131 | 0.7304 | 0.466  | 0.434777417 | count | 1 |
| SGK1    | 0.331116  | 0.5394701 | 0.6138 | 0.54   | 0.434777417 | count | 1 |
| FANCB   | 0.3476637 | 0.8152883 | 0.4264 | 0.67   | 0.434936511 | count | 1 |
| RALGAPB | 0.4048782 | 1.0560385 | 0.3834 | 0.702  | 0.435240008 | count | 1 |
| PCOLCE  | 0.4048782 | 1.2259368 | 0.3303 | 0.7414 | 0.435240008 | count | 1 |
| PEBP1   | 0.3055012 | 0.1912583 | 1.5973 | 0.1112 | 0.435749254 | count | 1 |

|          |           |           |        |        |             |       |   |
|----------|-----------|-----------|--------|--------|-------------|-------|---|
| BCL2A1   | 0.3082901 | 0.3498217 | 0.8813 | 0.3788 | 0.436006189 | count | 1 |
| GRWD1    | 0.3719501 | 0.6339148 | 0.5868 | 0.558  | 0.436605537 | count | 1 |
| PHF3     | 0.3096812 | 0.2583707 | 1.1986 | 0.232  | 0.436684996 | count | 1 |
| ATM      | 0.3176885 | 0.329305  | 0.9647 | 0.335  | 0.436727989 | count | 1 |
| RNPS1    | 0.3090231 | 0.2230715 | 1.3853 | 0.167  | 0.437043611 | count | 1 |
| ATP5S    | 0.3178819 | 0.4049906 | 0.7849 | 0.433  | 0.437705359 | count | 1 |
| MVK      | 0.7057114 | 0.7584163 | 0.9305 | 0.353  | 0.43796745  | count | 1 |
| PSMC2    | 0.3134518 | 0.3113515 | 1.0067 | 0.315  | 0.438097377 | count | 1 |
| C6orf106 | 0.5095583 | 0.7472415 | 0.6819 | 0.496  | 0.438784337 | count | 1 |
| APOO     | 0.5095583 | 0.844268  | 0.6036 | 0.547  | 0.438784337 | count | 1 |
| TBL1X    | 0.3576256 | 0.8029487 | 0.4454 | 0.656  | 0.4401734   | count | 1 |
| MAN2A1   | 0.3751799 | 0.8481807 | 0.4423 | 0.659  | 0.440426064 | count | 1 |
| ALDH9A1  | 0.3221885 | 0.3716255 | 0.867  | 0.387  | 0.440436849 | count | 1 |
| IER2     | 0.3060206 | 0.1363288 | 2.2447 | 0.0255 | 0.440614907 | count | 1 |
| DPH3     | 0.321469  | 0.3832429 | 0.8388 | 0.402  | 0.441934397 | count | 1 |
| PAN3     | 0.3218209 | 0.3710756 | 0.8673 | 0.386  | 0.443138557 | count | 1 |
| CCNL1    | 0.3121101 | 0.1754748 | 1.7787 | 0.0762 | 0.443297243 | count | 1 |
| CCDC90B  | 0.3163767 | 0.3382247 | 0.9354 | 0.35   | 0.443632084 | count | 1 |
| MIF      | 0.3123256 | 0.2183539 | 1.4304 | 0.1536 | 0.443973589 | count | 1 |
| FAM3C    | 0.3196052 | 0.3009998 | 1.0618 | 0.289  | 0.444460005 | count | 1 |
| GINM1    | 0.3274565 | 0.4791484 | 0.6834 | 0.495  | 0.444476813 | count | 1 |
| NSMF     | 0.4482316 | 0.9145422 | 0.4901 | 0.624  | 0.444851263 | count | 1 |
| TAMM41   | 0.4482316 | 0.9410505 | 0.4763 | 0.634  | 0.444851263 | count | 1 |
| TMEM97   | 0.4482316 | 1.1990452 | 0.3738 | 0.7088 | 0.444851263 | count | 1 |
| CRY2     | 0.4482316 | 1.2044457 | 0.3721 | 0.71   | 0.444851263 | count | 1 |
| GCC1     | 0.3794361 | 0.9640715 | 0.3936 | 0.694  | 0.445461105 | count | 1 |
| NEK3     | 0.3794361 | 1.054902  | 0.3597 | 0.719  | 0.445461105 | count | 1 |
| SDF2     | 0.3180154 | 0.3506968 | 0.9068 | 0.365  | 0.446187653 | count | 1 |
| BCKDHB   | 0.3626239 | 0.7702889 | 0.4708 | 0.638  | 0.446362116 | count | 1 |
| SNX2     | 0.3223792 | 0.294838  | 1.0934 | 0.275  | 0.446372482 | count | 1 |
| ATXN7L3B | 0.3179939 | 0.2975648 | 1.0687 | 0.286  | 0.44640282  | count | 1 |
| FAM227B  | 0.5182716 | 0.8044368 | 0.6443 | 0.52   | 0.446425688 | count | 1 |
| NET1     | 0.5182716 | 0.9668224 | 0.5361 | 0.592  | 0.446425688 | count | 1 |
| CPSF1    | 0.5182716 | 1.112074  | 0.466  | 0.641  | 0.446425688 | count | 1 |
| ZFP82    | 0.5182716 | 1.3035372 | 0.3976 | 0.6912 | 0.446425688 | count | 1 |
| TRIM65   | 0.3525798 | 0.759891  | 0.464  | 0.643  | 0.447049477 | count | 1 |
| NTAN1    | 0.3314279 | 0.5613168 | 0.5904 | 0.555  | 0.447236983 | count | 1 |
| PIGH     | 0.5200243 | 0.8264836 | 0.6292 | 0.53   | 0.447962896 | count | 1 |
| TRGV10   | 0.5200243 | 0.9284741 | 0.5601 | 0.5758 | 0.447962896 | count | 1 |
| SLC35E2B | 0.5200243 | 0.9329862 | 0.5574 | 0.578  | 0.447962896 | count | 1 |
| WDR27    | 0.5200243 | 0.9545734 | 0.5448 | 0.586  | 0.447962896 | count | 1 |
| PARD6B   | 0.5200243 | 1.0005925 | 0.5197 | 0.6036 | 0.447962896 | count | 1 |
| ANAPC4   | 0.3411618 | 0.5941884 | 0.5742 | 0.566  | 0.448015053 | count | 1 |
| UQCC2    | 0.3346065 | 0.4700868 | 0.7118 | 0.477  | 0.448319643 | count | 1 |
| PAAF1    | 0.3398555 | 0.4884234 | 0.6958 | 0.487  | 0.448978584 | count | 1 |

|            |           |           |        |        |             |       |   |
|------------|-----------|-----------|--------|--------|-------------|-------|---|
| HPF1       | 0.3292454 | 0.5008552 | 0.6574 | 0.511  | 0.449122805 | count | 1 |
| ACO2       | 0.344432  | 0.4662538 | 0.7387 | 0.461  | 0.449226718 | count | 1 |
| BLOC1S4    | 0.3223051 | 0.3584597 | 0.8991 | 0.369  | 0.449434975 | count | 1 |
| 6-Mar      | 0.3316788 | 0.4305615 | 0.7703 | 0.442  | 0.450221062 | count | 1 |
| GMFB       | 0.3454465 | 0.5609618 | 0.6158 | 0.538  | 0.450554865 | count | 1 |
| GOLGA8B    | 0.3323415 | 0.5077918 | 0.6545 | 0.513  | 0.451122651 | count | 1 |
| EBP        | 0.3236674 | 0.3834744 | 0.844  | 0.399  | 0.452392281 | count | 1 |
| DICER1     | 0.3856432 | 0.6594693 | 0.5848 | 0.559  | 0.452804777 | count | 1 |
| PHKA2      | 0.4210596 | 1.0596245 | 0.3974 | 0.6914 | 0.452828649 | count | 1 |
| DMAC1      | 0.3231885 | 0.3121975 | 1.0352 | 0.301  | 0.452923916 | count | 1 |
| ATP2B1     | 0.3288347 | 0.2796483 | 1.1759 | 0.241  | 0.453501098 | count | 1 |
| TXNDC12    | 0.3234469 | 0.2847504 | 1.1359 | 0.257  | 0.454065611 | count | 1 |
| HEXIM1     | 0.3460879 | 0.4426676 | 0.7818 | 0.435  | 0.454506851 | count | 1 |
| NFYC       | 0.3772263 | 0.6172887 | 0.6111 | 0.542  | 0.454933965 | count | 1 |
| SLAMF6     | 0.3772263 | 0.6720037 | 0.5613 | 0.575  | 0.454933965 | count | 1 |
| ZNF43      | 0.3772263 | 0.7630578 | 0.4944 | 0.621  | 0.454933965 | count | 1 |
| RAP1B      | 0.318461  | 0.1574085 | 2.0232 | 0.0439 | 0.45515334  | count | 1 |
| TSPYL1     | 0.3224321 | 0.2862433 | 1.1264 | 0.261  | 0.455322335 | count | 1 |
| SDF4       | 0.3297273 | 0.3288905 | 1.0025 | 0.317  | 0.455381232 | count | 1 |
| SLC2A13    | 0.4596214 | 0.8165925 | 0.5629 | 0.574  | 0.456312015 | count | 1 |
| MEAF6      | 0.3213811 | 0.2189984 | 1.4675 | 0.1432 | 0.456472786 | count | 1 |
| CXorf56    | 0.4598506 | 1.0627402 | 0.4327 | 0.666  | 0.456542657 | count | 1 |
| TUBD1      | 0.3788268 | 0.8083171 | 0.4687 | 0.64   | 0.456877097 | count | 1 |
| BANF1      | 0.3207757 | 0.2081236 | 1.5413 | 0.1242 | 0.457179134 | count | 1 |
| MID1IP1    | 0.3369783 | 0.377911  | 0.8917 | 0.373  | 0.457431044 | count | 1 |
| RTL8A      | 0.3656228 | 0.6480642 | 0.5642 | 0.573  | 0.457526208 | count | 1 |
| SIRT6      | 0.3656228 | 0.650303  | 0.5622 | 0.574  | 0.457526208 | count | 1 |
| ZNF622     | 0.3374573 | 0.4061093 | 0.831  | 0.407  | 0.458082738 | count | 1 |
| PDCD7      | 0.3255455 | 0.288433  | 1.1287 | 0.26   | 0.458136072 | count | 1 |
| TMEM263    | 0.3309605 | 0.3754183 | 0.8816 | 0.379  | 0.458272678 | count | 1 |
| APPL2      | 0.4261971 | 0.9212647 | 0.4626 | 0.644  | 0.45841424  | count | 1 |
| CCDC97     | 0.3578871 | 0.5894143 | 0.6072 | 0.544  | 0.458856495 | count | 1 |
| JOSD1      | 0.3329079 | 0.3908565 | 0.8517 | 0.395  | 0.459127985 | count | 1 |
| DGLUCY     | 0.3910082 | 0.6153809 | 0.6354 | 0.526  | 0.459152836 | count | 1 |
| BRD4       | 0.3299116 | 0.2953581 | 1.117  | 0.265  | 0.459247797 | count | 1 |
| YTHDF3-AS1 | 0.533538  | 1.095022  | 0.4872 | 0.626  | 0.459816314 | count | 1 |
| ETV7       | 0.533538  | 1.10512   | 0.4828 | 0.63   | 0.459816314 | count | 1 |
| DONSON     | 0.533538  | 1.084308  | 0.4921 | 0.623  | 0.459816332 | count | 1 |
| ALDOC      | 0.3674946 | 0.6305231 | 0.5828 | 0.56   | 0.459880977 | count | 1 |
| ZNF680     | 0.3674946 | 0.6671739 | 0.5508 | 0.582  | 0.459880977 | count | 1 |
| SAP30      | 0.3329876 | 0.3861686 | 0.8623 | 0.389  | 0.459891328 | count | 1 |
| DUSP14     | 0.3676756 | 0.6003722 | 0.6124 | 0.541  | 0.460108688 | count | 1 |
| FRMD4B     | 0.3375709 | 0.6062942 | 0.5568 | 0.5781 | 0.460503557 | count | 1 |
| MTIF3      | 0.3257409 | 0.3232049 | 1.0078 | 0.3143 | 0.46057189  | count | 1 |
| DRG2       | 0.3376807 | 0.3997295 | 0.8448 | 0.399  | 0.460653654 | count | 1 |

|            |           |           |        |        |             |       |   |
|------------|-----------|-----------|--------|--------|-------------|-------|---|
| ZBTB24     | 0.3343732 | 0.4508241 | 0.7417 | 0.459  | 0.461152241 | count | 1 |
| FLYWCH2    | 0.3442058 | 0.4837029 | 0.7116 | 0.477  | 0.461217101 | count | 1 |
| UBE2A      | 0.330597  | 0.2839194 | 1.1644 | 0.245  | 0.461388268 | count | 1 |
| HIVEP3     | 0.368714  | 0.6543463 | 0.5635 | 0.573  | 0.461415052 | count | 1 |
| CCDC117    | 0.3688627 | 0.6597761 | 0.5591 | 0.576  | 0.461602128 | count | 1 |
| SMPD3      | 0.354303  | 0.5649239 | 0.6272 | 0.531  | 0.46215012  | count | 1 |
| ASH1L      | 0.3305778 | 0.3311673 | 0.9982 | 0.319  | 0.462703091 | count | 1 |
| RBMS1      | 0.3280244 | 0.2639088 | 1.2429 | 0.215  | 0.46290993  | count | 1 |
| STK38      | 0.3699419 | 0.4797502 | 0.7711 | 0.441  | 0.462959846 | count | 1 |
| SLC40A1    | 0.5374225 | 1.0405359 | 0.5165 | 0.606  | 0.463223917 | count | 1 |
| FOXRED1    | 0.5374225 | 1.140076  | 0.4714 | 0.638  | 0.463223917 | count | 1 |
| IFI30      | 0.5374225 | 1.1734248 | 0.458  | 0.647  | 0.463223917 | count | 1 |
| PADI4      | 0.5374225 | 1.226543  | 0.4382 | 0.662  | 0.463223917 | count | 1 |
| LRRIQ3     | 0.5374225 | 1.226543  | 0.4382 | 0.662  | 0.463223917 | count | 1 |
| AL353708.1 | 0.5374225 | 1.226543  | 0.4382 | 0.662  | 0.463223917 | count | 1 |
| AC018797.2 | 0.5374225 | 1.226543  | 0.4382 | 0.662  | 0.463223917 | count | 1 |
| COQ3       | 0.5374225 | 1.226543  | 0.4382 | 0.662  | 0.463223917 | count | 1 |
| TRAF3IP2   | 0.5374225 | 1.226543  | 0.4382 | 0.662  | 0.463223917 | count | 1 |
| SPRYD3     | 0.5374225 | 1.226543  | 0.4382 | 0.662  | 0.463223917 | count | 1 |
| KNSTRN     | 0.5374225 | 1.226543  | 0.4382 | 0.662  | 0.463223917 | count | 1 |
| RFWD3      | 0.5374225 | 1.226543  | 0.4382 | 0.662  | 0.463223917 | count | 1 |
| FAM171A2   | 0.5374225 | 1.226543  | 0.4382 | 0.662  | 0.463223917 | count | 1 |
| PEX26      | 0.5374225 | 1.226543  | 0.4382 | 0.662  | 0.463223917 | count | 1 |
| PHETA2     | 0.5374225 | 1.226543  | 0.4382 | 0.662  | 0.463223917 | count | 1 |
| ARHGEF35   | 0.5374225 | 1.3833575 | 0.3885 | 0.6979 | 0.463223917 | count | 1 |
| RPH3AL     | 0.5374225 | 1.3833575 | 0.3885 | 0.6979 | 0.463223917 | count | 1 |
| SF3A1      | 0.3437094 | 0.4659626 | 0.7376 | 0.461  | 0.463851917 | count | 1 |
| EIF4A3     | 0.3302052 | 0.2482755 | 1.33   | 0.184  | 0.464043153 | count | 1 |
| WDTTC1     | 0.4099452 | 0.6851413 | 0.5983 | 0.55   | 0.464355075 | count | 1 |
| GTF3C3     | 0.3851332 | 0.8592431 | 0.4482 | 0.654  | 0.464534092 | count | 1 |
| HDAC1      | 0.3322643 | 0.3002211 | 1.1067 | 0.269  | 0.464751531 | count | 1 |
| NRM        | 0.4682343 | 0.9290152 | 0.504  | 0.615  | 0.464980294 | count | 1 |
| UBL3       | 0.3395208 | 0.4428847 | 0.7666 | 0.444  | 0.465115235 | count | 1 |
| GLT8D1     | 0.3786346 | 0.4917407 | 0.77   | 0.442  | 0.466189332 | count | 1 |
| STX8       | 0.3383378 | 0.3218655 | 1.0512 | 0.294  | 0.466629265 | count | 1 |
| UNC93B1    | 0.3389486 | 0.4471997 | 0.7579 | 0.449  | 0.466764843 | count | 1 |
| LINC00526  | 0.4121035 | 0.9225921 | 0.4467 | 0.655  | 0.466821843 | count | 1 |
| LYRM9      | 0.4121035 | 0.9627246 | 0.4281 | 0.669  | 0.466821843 | count | 1 |
| TESPA1     | 0.3979939 | 0.5612304 | 0.7091 | 0.479  | 0.467419473 | count | 1 |
| SMPD1      | 0.3798162 | 0.6645814 | 0.5715 | 0.568  | 0.467652783 | count | 1 |
| MRPL3      | 0.3401743 | 0.3965867 | 0.8578 | 0.392  | 0.468455683 | count | 1 |
| ICAM2      | 0.3385494 | 0.3589043 | 0.9433 | 0.346  | 0.46935159  | count | 1 |
| UMPS       | 0.3892043 | 0.5548575 | 0.7014 | 0.484  | 0.469477468 | count | 1 |
| DBP        | 0.3518518 | 0.5667461 | 0.6208 | 0.535  | 0.469526788 | count | 1 |
| ZBTB25     | 0.3555258 | 0.5463532 | 0.6507 | 0.516  | 0.469749894 | count | 1 |

|             |           |           |        |          |             |       |   |
|-------------|-----------|-----------|--------|----------|-------------|-------|---|
| SWSAP1      | 0.3815188 | 0.6474852 | 0.5892 | 0.556    | 0.469761547 | count | 1 |
| TSPOAP1-AS1 | 0.5450243 | 0.6871776 | 0.7931 | 0.428    | 0.469892797 | count | 1 |
| HIPK1       | 0.3493605 | 0.3182111 | 1.0979 | 0.273    | 0.469902637 | count | 1 |
| SLC9A3R2    | 0.7565224 | 1.122504  | 0.674  | 0.501    | 0.470203293 | count | 1 |
| PIP4K2B     | 0.7565224 | 1.122504  | 0.674  | 0.501    | 0.470203293 | count | 1 |
| AC004585.1  | 0.7565224 | 1.122504  | 0.674  | 0.501    | 0.470203293 | count | 1 |
| AL158071.1  | 0.7565224 | 1.221282  | 0.6194 | 0.536    | 0.470203293 | count | 1 |
| RNF26       | 0.7565224 | 1.221282  | 0.6194 | 0.536    | 0.470203293 | count | 1 |
| LINC00920   | 0.7565224 | 1.221282  | 0.6194 | 0.536    | 0.470203293 | count | 1 |
| CENPS       | 0.7565224 | 1.417702  | 0.5336 | 0.594    | 0.470203293 | count | 1 |
| C5orf34     | 0.7565224 | 1.417702  | 0.5336 | 0.594    | 0.470203293 | count | 1 |
| JARID2-AS1  | 0.7565224 | 1.417702  | 0.5336 | 0.594    | 0.470203293 | count | 1 |
| TRAM2-AS1   | 0.7565224 | 1.417702  | 0.5336 | 0.594    | 0.470203293 | count | 1 |
| RARRES2     | 0.7565224 | 1.417702  | 0.5336 | 0.594    | 0.470203293 | count | 1 |
| SUOX        | 0.7565224 | 1.417702  | 0.5336 | 0.594    | 0.470203293 | count | 1 |
| AL356020.1  | 0.7565224 | 1.417702  | 0.5336 | 0.594    | 0.470203293 | count | 1 |
| KNL1        | 0.7565224 | 1.417702  | 0.5336 | 0.594    | 0.470203293 | count | 1 |
| FANCI       | 0.7565224 | 1.417702  | 0.5336 | 0.594    | 0.470203293 | count | 1 |
| IFT140      | 0.7565224 | 1.417702  | 0.5336 | 0.594    | 0.470203293 | count | 1 |
| SLC38A7     | 0.7565224 | 1.417702  | 0.5336 | 0.594    | 0.470203293 | count | 1 |
| RARA-AS1    | 0.7565224 | 1.417702  | 0.5336 | 0.594    | 0.470203293 | count | 1 |
| REEP6       | 0.7565224 | 1.417702  | 0.5336 | 0.594    | 0.470203293 | count | 1 |
| ETV2        | 0.7565224 | 1.417702  | 0.5336 | 0.594    | 0.470203293 | count | 1 |
| TCTN3       | 0.3711432 | 0.6094843 | 0.6089 | 0.543    | 0.470703034 | count | 1 |
| MAP7D1      | 0.3413152 | 0.426765  | 0.7998 | 0.424    | 0.470742563 | count | 1 |
| CENPH       | 0.4011721 | 0.750249  | 0.5347 | 0.593    | 0.471180761 | count | 1 |
| AKAP7       | 0.3483503 | 0.4568252 | 0.7625 | 0.446    | 0.471579074 | count | 1 |
| JUND        | 0.327125  | 0.0849226 | 3.852  | 0.000141 | 0.471645208 | count | 1 |
| PGAP2       | 0.4386356 | 0.7169134 | 0.6118 | 0.541    | 0.471939943 | count | 1 |
| C11orf54    | 0.4386356 | 0.8069753 | 0.5436 | 0.587    | 0.471939943 | count | 1 |
| TBPL1       | 0.3360059 | 0.3144205 | 1.0687 | 0.286    | 0.472656163 | count | 1 |
| SLC25A33    | 0.4172189 | 0.5435219 | 0.7676 | 0.443    | 0.472668736 | count | 1 |
| GOPC        | 0.337341  | 0.2960541 | 1.1395 | 0.255    | 0.47384066  | count | 1 |
| CRIP1       | 0.338605  | 0.3678918 | 0.9204 | 0.358    | 0.473951416 | count | 1 |
| SUCLG2      | 0.3475318 | 0.3417537 | 1.0169 | 0.31     | 0.474120668 | count | 1 |
| CD8A        | 0.3855465 | 0.6037782 | 0.6386 | 0.524    | 0.474750293 | count | 1 |
| ZFP62       | 0.419138  | 0.7489349 | 0.5596 | 0.576    | 0.474862395 | count | 1 |
| STT3A       | 0.419138  | 0.8507359 | 0.4927 | 0.623    | 0.474862395 | count | 1 |
| CLSTN1      | 0.3641631 | 0.664514  | 0.548  | 0.584    | 0.475060606 | count | 1 |
| NENF        | 0.342666  | 0.3868483 | 0.8858 | 0.376    | 0.475067211 | count | 1 |
| ASNSD1      | 0.3491694 | 0.4669221 | 0.7478 | 0.455    | 0.475236757 | count | 1 |
| USP8        | 0.3412122 | 0.3585504 | 0.9516 | 0.342    | 0.475427317 | count | 1 |
| SERGEF      | 0.4048782 | 0.7231792 | 0.5599 | 0.576    | 0.475567044 | count | 1 |
| LMBRD1      | 0.3565427 | 0.4325943 | 0.8242 | 0.41     | 0.475804885 | count | 1 |
| SFT2D1      | 0.339553  | 0.2970088 | 1.1432 | 0.254    | 0.475882878 | count | 1 |

|            |           |           |        |        |             |       |   |
|------------|-----------|-----------|--------|--------|-------------|-------|---|
| CD164      | 0.335537  | 0.222176  | 1.5102 | 0.132  | 0.47605237  | count | 1 |
| IDH2       | 0.3448229 | 0.2878635 | 1.1979 | 0.232  | 0.476264173 | count | 1 |
| SMC6       | 0.3871046 | 0.7586357 | 0.5103 | 0.61   | 0.476680243 | count | 1 |
| HNRNP1     | 0.3332077 | 0.1840368 | 1.8105 | 0.0711 | 0.477169574 | count | 1 |
| BCAS2      | 0.336722  | 0.266632  | 1.2629 | 0.2075 | 0.477328979 | count | 1 |
| CLEC2D     | 0.3596022 | 0.526248  | 0.6833 | 0.495  | 0.477663189 | count | 1 |
| ATG10      | 0.381921  | 0.5917683 | 0.6454 | 0.519  | 0.478031786 | count | 1 |
| TNFRSF10A  | 0.3962799 | 0.6971389 | 0.5684 | 0.57   | 0.478069818 | count | 1 |
| TMEM30A    | 0.3535504 | 0.4031477 | 0.877  | 0.381  | 0.478635553 | count | 1 |
| POM121C    | 0.373432  | 0.4466331 | 0.8361 | 0.404  | 0.478876664 | count | 1 |
| SPSB3      | 0.3415305 | 0.2756029 | 1.2392 | 0.216  | 0.478942134 | count | 1 |
| AC103591.3 | 0.4454234 | 0.675467  | 0.6594 | 0.51   | 0.479322303 | count | 1 |
| ZNF506     | 0.3619586 | 0.5868534 | 0.6168 | 0.538  | 0.480802903 | count | 1 |
| SIDT1      | 0.424343  | 0.6340589 | 0.6692 | 0.504  | 0.480812398 | count | 1 |
| GGA2       | 0.424343  | 0.6847467 | 0.6197 | 0.536  | 0.480812398 | count | 1 |
| DTX2       | 0.424343  | 0.7261684 | 0.5844 | 0.559  | 0.480812398 | count | 1 |
| RP2        | 0.3842758 | 0.6944484 | 0.5534 | 0.58   | 0.480994834 | count | 1 |
| EGLN1      | 0.3751101 | 0.6406269 | 0.5855 | 0.559  | 0.481038087 | count | 1 |
| TP53TG1    | 0.354336  | 0.4866232 | 0.7282 | 0.467  | 0.481048094 | count | 1 |
| INTS4      | 0.3987574 | 0.7115404 | 0.5604 | 0.576  | 0.481078609 | count | 1 |
| KLRG1      | 0.3694342 | 0.5222716 | 0.7074 | 0.48   | 0.481962932 | count | 1 |
| BLOC1S6    | 0.3524562 | 0.4175914 | 0.844  | 0.399  | 0.48287051  | count | 1 |
| THYN1      | 0.3447376 | 0.3202024 | 1.0766 | 0.282  | 0.483156997 | count | 1 |
| TRIM13     | 0.36127   | 0.4320135 | 0.8362 | 0.404  | 0.484146759 | count | 1 |
| ATP1B3     | 0.3566257 | 0.3272736 | 1.0897 | 0.277  | 0.484163679 | count | 1 |
| FKBPL      | 0.3686244 | 0.511984  | 0.72   | 0.472  | 0.48421042  | count | 1 |
| FSD1       | 0.3631843 | 0.6179312 | 0.5877 | 0.557  | 0.48469411  | count | 1 |
| CHIC2      | 0.3428601 | 0.2790582 | 1.2286 | 0.22   | 0.484935588 | count | 1 |
| CGAS       | 0.3882656 | 0.7761102 | 0.5003 | 0.617  | 0.486015394 | count | 1 |
| CASC3      | 0.3755724 | 0.636681  | 0.5899 | 0.556  | 0.486129837 | count | 1 |
| RETREG3    | 0.5636077 | 0.7059873 | 0.7983 | 0.4253 | 0.486196829 | count | 1 |
| C9orf64    | 0.5649324 | 0.9270064 | 0.6094 | 0.543  | 0.487359068 | count | 1 |
| GRPEL2     | 0.5649324 | 1.0434692 | 0.5414 | 0.589  | 0.487359068 | count | 1 |
| DEPP1      | 0.5649324 | 1.0434692 | 0.5414 | 0.589  | 0.487359068 | count | 1 |
| HTRA1      | 0.5649324 | 1.0434692 | 0.5414 | 0.589  | 0.487359068 | count | 1 |
| NCOA5      | 0.5649324 | 1.0434692 | 0.5414 | 0.589  | 0.487359068 | count | 1 |
| MIAT       | 0.5649324 | 1.0434692 | 0.5414 | 0.589  | 0.487359068 | count | 1 |
| ZNF419     | 0.5649324 | 1.1172337 | 0.5057 | 0.613  | 0.487359068 | count | 1 |
| KLHL15     | 0.5649324 | 1.1741598 | 0.4811 | 0.631  | 0.487359068 | count | 1 |
| FAM111A-DT | 0.5649324 | 1.1741598 | 0.4811 | 0.631  | 0.487359068 | count | 1 |
| TMTC4      | 0.5649324 | 1.1741598 | 0.4811 | 0.631  | 0.487359068 | count | 1 |
| ZNF223     | 0.5649324 | 1.1741598 | 0.4811 | 0.631  | 0.487359068 | count | 1 |
| C19orf73   | 0.5649324 | 1.1741598 | 0.4811 | 0.631  | 0.487359068 | count | 1 |
| MAP3K6     | 0.3958957 | 0.8271126 | 0.4786 | 0.633  | 0.487570124 | count | 1 |
| KIFC2      | 0.3958957 | 0.9787873 | 0.4045 | 0.686  | 0.487570124 | count | 1 |

|          |           |           |        |        |             |       |   |
|----------|-----------|-----------|--------|--------|-------------|-------|---|
| ODF2     | 0.370045  | 0.6532698 | 0.5665 | 0.571  | 0.488998036 | count | 1 |
| CKS2     | 0.3535738 | 0.303592  | 1.1646 | 0.245  | 0.489021373 | count | 1 |
| ZNF429   | 0.4319202 | 0.7278057 | 0.5935 | 0.553  | 0.489474988 | count | 1 |
| HSD17B7  | 0.3707064 | 0.5632917 | 0.6581 | 0.511  | 0.489874932 | count | 1 |
| EXOG     | 0.3656228 | 0.5347015 | 0.6838 | 0.495  | 0.489996206 | count | 1 |
| KRR1     | 0.3498814 | 0.3051509 | 1.1466 | 0.252  | 0.490070188 | count | 1 |
| CAPZB    | 0.3423082 | 0.1574674 | 2.1738 | 0.0304 | 0.490224903 | count | 1 |
| PGS1     | 0.3794361 | 0.7312904 | 0.5189 | 0.604  | 0.491151229 | count | 1 |
| KCTD20   | 0.3794361 | 0.7926181 | 0.4787 | 0.632  | 0.491151229 | count | 1 |
| CDIP1    | 0.3628703 | 0.5246401 | 0.6917 | 0.49   | 0.491283152 | count | 1 |
| ABCD4    | 0.367177  | 0.5774896 | 0.6358 | 0.525  | 0.49208484  | count | 1 |
| CD53     | 0.343024  | 0.1299402 | 2.6399 | 0.0087 | 0.492423396 | count | 1 |
| TRERF1   | 0.791917  | 0.8202961 | 0.9654 | 0.3351 | 0.492613035 | count | 1 |
| DYNLL1   | 0.3438905 | 0.1557944 | 2.2073 | 0.028  | 0.492674913 | count | 1 |
| SFPQ     | 0.3449948 | 0.1475441 | 2.3382 | 0.02   | 0.493120952 | count | 1 |
| CYB5R3   | 0.3547614 | 0.3263212 | 1.0872 | 0.278  | 0.4934204   | count | 1 |
| LRRCC1   | 0.3891479 | 0.7778006 | 0.5003 | 0.617  | 0.4936498   | count | 1 |
| ATF5     | 0.4204599 | 0.6851569 | 0.6137 | 0.54   | 0.494011099 | count | 1 |
| MRPL9    | 0.3599295 | 0.3728934 | 0.9652 | 0.335  | 0.494049663 | count | 1 |
| RIOX2    | 0.4096501 | 0.8252349 | 0.4964 | 0.62   | 0.494308391 | count | 1 |
| FNIP2    | 0.4096501 | 0.8533659 | 0.48   | 0.632  | 0.494308391 | count | 1 |
| SYTL1    | 0.3518308 | 0.2819384 | 1.2479 | 0.213  | 0.494938355 | count | 1 |
| PEX3     | 0.3728643 | 0.4685713 | 0.7957 | 0.427  | 0.495334643 | count | 1 |
| BNIP3    | 0.4602012 | 0.6071432 | 0.758  | 0.449  | 0.495397163 | count | 1 |
| DPP4     | 0.5742868 | 0.6557809 | 0.8757 | 0.382  | 0.495566337 | count | 1 |
| MROH1    | 0.5742868 | 0.8555858 | 0.6712 | 0.503  | 0.495566337 | count | 1 |
| ASNA1    | 0.366323  | 0.3408432 | 1.0748 | 0.283  | 0.495968829 | count | 1 |
| FAM104B  | 0.4380526 | 0.940206  | 0.4659 | 0.642  | 0.496486485 | count | 1 |
| GTF3A    | 0.3469213 | 0.1755126 | 1.9766 | 0.0489 | 0.496583661 | count | 1 |
| TIMM17A  | 0.3567866 | 0.3550193 | 1.005  | 0.316  | 0.496710467 | count | 1 |
| ARF4     | 0.3508078 | 0.257018  | 1.3649 | 0.173  | 0.496843206 | count | 1 |
| PBXIP1   | 0.3638179 | 0.3213238 | 1.1322 | 0.258  | 0.497465975 | count | 1 |
| C21orf91 | 0.3764939 | 0.4278506 | 0.88   | 0.38   | 0.497548126 | count | 1 |
| TAGAP    | 0.3468792 | 0.14384   | 2.4116 | 0.0164 | 0.497958708 | count | 1 |
| SCFD2    | 0.3978881 | 0.7562541 | 0.5261 | 0.599  | 0.498124791 | count | 1 |
| SOCS1    | 0.3468194 | 0.1608557 | 2.1561 | 0.0318 | 0.498312886 | count | 1 |
| BATF     | 0.3796782 | 0.4821349 | 0.7875 | 0.432  | 0.498781762 | count | 1 |
| QSER1    | 0.4244937 | 0.7581189 | 0.5599 | 0.576  | 0.498786538 | count | 1 |
| MTX3     | 0.8032806 | 0.9562247 | 0.8401 | 0.4015 | 0.499797676 | count | 1 |
| ADPGK    | 0.3830539 | 0.4155083 | 0.9219 | 0.357  | 0.499798996 | count | 1 |
| ANKRD13D | 0.3551286 | 0.3477595 | 1.0212 | 0.308  | 0.499808201 | count | 1 |
| C12orf29 | 0.3676453 | 0.4279126 | 0.8592 | 0.391  | 0.500439428 | count | 1 |
| COPS4    | 0.3959629 | 0.4287725 | 0.9235 | 0.356  | 0.502336582 | count | 1 |
| GTPBP10  | 0.4079214 | 0.6567034 | 0.6212 | 0.535  | 0.502468699 | count | 1 |
| CCDC14   | 0.5062907 | 0.6714177 | 0.7541 | 0.451  | 0.503294812 | count | 1 |



|             |           |           |        |        |             |       |   |
|-------------|-----------|-----------|--------|--------|-------------|-------|---|
| RIF1        | 0.3742496 | 0.4280174 | 0.8744 | 0.383  | 0.503469903 | count | 1 |
| SLC25A28    | 0.3790617 | 0.4809671 | 0.7881 | 0.431  | 0.503593141 | count | 1 |
| PLP2        | 0.3510701 | 0.1470712 | 2.3871 | 0.0176 | 0.503638352 | count | 1 |
| ELMSAN1     | 0.3773914 | 0.4959301 | 0.761  | 0.447  | 0.503710571 | count | 1 |
| RAP1GDS1    | 0.3633148 | 0.3122598 | 1.1635 | 0.245  | 0.504830056 | count | 1 |
| YPEL1       | 0.3640664 | 0.3239329 | 1.1239 | 0.262  | 0.505343872 | count | 1 |
| TMUB1       | 0.3622412 | 0.3391541 | 1.0681 | 0.286  | 0.505608684 | count | 1 |
| INTS14      | 0.5858147 | 0.8357128 | 0.701  | 0.484  | 0.505680309 | count | 1 |
| SLC17A5     | 0.5858147 | 0.9668089 | 0.6059 | 0.545  | 0.505680309 | count | 1 |
| COQ5        | 0.3944881 | 0.6446348 | 0.612  | 0.541  | 0.505999914 | count | 1 |
| MDH2        | 0.3587168 | 0.223421  | 1.6056 | 0.109  | 0.506079983 | count | 1 |
| TNFRSF10B   | 0.43101   | 0.6654462 | 0.6477 | 0.518  | 0.506501399 | count | 1 |
| GLO1        | 0.370901  | 0.4638397 | 0.7996 | 0.425  | 0.507170596 | count | 1 |
| PPP1R10     | 0.3572543 | 0.2314076 | 1.5438 | 0.1236 | 0.507180216 | count | 1 |
| LIMA1       | 0.3817806 | 0.5256757 | 0.7263 | 0.468  | 0.507216386 | count | 1 |
| SEPSECS-AS1 | 0.4714636 | 1.0858536 | 0.4342 | 0.664  | 0.507650145 | count | 1 |
| C4orf46     | 0.4714636 | 1.0858536 | 0.4342 | 0.664  | 0.507650145 | count | 1 |
| RBM6        | 0.3751104 | 0.3626598 | 1.0343 | 0.302  | 0.507894679 | count | 1 |
| SNHG12      | 0.3694293 | 0.3425936 | 1.0783 | 0.282  | 0.50799372  | count | 1 |
| TIMM8B      | 0.3656228 | 0.3610691 | 1.0126 | 0.312  | 0.508041552 | count | 1 |
| SLC41A3     | 0.4004715 | 0.6345964 | 0.6311 | 0.528  | 0.508083802 | count | 1 |
| CCDC82      | 0.3640885 | 0.3909317 | 0.9313 | 0.352  | 0.508190293 | count | 1 |
| ZNF24       | 0.3627625 | 0.2824661 | 1.2843 | 0.2    | 0.509843352 | count | 1 |
| KANSL2      | 0.3805481 | 0.4108504 | 0.9262 | 0.355  | 0.510054647 | count | 1 |
| CHMP2B      | 0.367361  | 0.3455406 | 1.0631 | 0.289  | 0.510460209 | count | 1 |
| DYNC2H1     | 0.5921355 | 0.8992451 | 0.6585 | 0.5107 | 0.511225604 | count | 1 |
| AC007384.1  | 0.3787981 | 0.4755647 | 0.7965 | 0.426  | 0.511329288 | count | 1 |
| EIF3J-DT    | 0.3919687 | 0.5663309 | 0.6921 | 0.489  | 0.511474711 | count | 1 |
| ARL4A       | 0.358491  | 0.2216033 | 1.6177 | 0.1067 | 0.51154983  | count | 1 |
| AL133453.1  | 0.51462   | 0.6590023 | 0.7809 | 0.435  | 0.51168262  | count | 1 |
| TBCC        | 0.3641251 | 0.2518956 | 1.4455 | 0.149  | 0.512009605 | count | 1 |
| BARD1       | 0.3809278 | 0.4401219 | 0.8655 | 0.387  | 0.512477516 | count | 1 |
| MPP5        | 0.4762861 | 0.9556646 | 0.4984 | 0.619  | 0.512897255 | count | 1 |
| KDM5D       | 0.4762861 | 0.979528  | 0.4862 | 0.627  | 0.512897255 | count | 1 |
| TBC1D23     | 0.4097021 | 0.5603233 | 0.7312 | 0.465  | 0.512993723 | count | 1 |
| RAB4A       | 0.3814332 | 0.4008141 | 0.9516 | 0.342  | 0.513159217 | count | 1 |
| GTF2F1      | 0.3667727 | 0.3424697 | 1.071  | 0.285  | 0.513424468 | count | 1 |
| TOMM20      | 0.3607568 | 0.2173577 | 1.6597 | 0.0979 | 0.513521334 | count | 1 |
| SMARCA4     | 0.3804927 | 0.4554345 | 0.8354 | 0.404  | 0.513622451 | count | 1 |
| TMX1        | 0.3693525 | 0.3577551 | 1.0324 | 0.303  | 0.514228075 | count | 1 |
| CENPX       | 0.3652361 | 0.2979693 | 1.2258 | 0.221  | 0.514487883 | count | 1 |
| PPP3CC      | 0.3720765 | 0.374319  | 0.994  | 0.321  | 0.514653386 | count | 1 |
| ARL4D       | 0.3945336 | 0.5898623 | 0.6689 | 0.504  | 0.51483411  | count | 1 |
| ASB2        | 0.4386356 | 0.6501016 | 0.6747 | 0.5    | 0.51553029  | count | 1 |
| KIAA0586    | 0.3797293 | 0.4011037 | 0.9467 | 0.344  | 0.515602927 | count | 1 |

|           |           |           |        |          |             |       |   |
|-----------|-----------|-----------|--------|----------|-------------|-------|---|
| RMC1      | 0.4387969 | 0.574063  | 0.7644 | 0.445    | 0.515721282 | count | 1 |
| PPP2CA    | 0.3668318 | 0.380321  | 0.9645 | 0.3355   | 0.516061284 | count | 1 |
| MRPS36    | 0.3681054 | 0.327135  | 1.1252 | 0.261    | 0.516250081 | count | 1 |
| PNO1      | 0.3868387 | 0.4233253 | 0.9138 | 0.361    | 0.516356943 | count | 1 |
| MRPL42    | 0.3684212 | 0.3868915 | 0.9523 | 0.342    | 0.516693442 | count | 1 |
| PRPSAP2   | 0.388933  | 0.4370384 | 0.8899 | 0.374    | 0.516748088 | count | 1 |
| RPA3      | 0.3731719 | 0.3416029 | 1.0924 | 0.275    | 0.516816484 | count | 1 |
| GPR35     | 0.4560561 | 0.6578181 | 0.6933 | 0.489    | 0.517073894 | count | 1 |
| CCDC186   | 0.3653349 | 0.2569745 | 1.4217 | 0.156    | 0.517169596 | count | 1 |
| KIF2A     | 0.3678217 | 0.2648315 | 1.3889 | 0.166    | 0.517212521 | count | 1 |
| CAPN10    | 0.4286323 | 0.7114164 | 0.6025 | 0.547    | 0.517367381 | count | 1 |
| SRSF3     | 0.3623396 | 0.1495085 | 2.4235 | 0.0159   | 0.517648733 | count | 1 |
| UBAC1     | 0.3900913 | 0.456572  | 0.8544 | 0.394    | 0.518291747 | count | 1 |
| NCK1      | 0.373689  | 0.3572389 | 1.046  | 0.296    | 0.518720009 | count | 1 |
| PTPRJ     | 0.4415382 | 0.5391079 | 0.819  | 0.413    | 0.518967225 | count | 1 |
| U2SURP    | 0.3648829 | 0.213004  | 1.713  | 0.0877   | 0.520072373 | count | 1 |
| CDC73     | 0.3786676 | 0.3457314 | 1.0953 | 0.274    | 0.52072005  | count | 1 |
| VPS51     | 0.3786127 | 0.3458266 | 1.0948 | 0.274    | 0.521486053 | count | 1 |
| CALHM2    | 0.4164626 | 0.5830129 | 0.7143 | 0.476    | 0.521503116 | count | 1 |
| GNAI1     | 0.6039805 | 1.00463   | 0.6012 | 0.548    | 0.521616502 | count | 1 |
| DLST      | 0.3895442 | 0.5344082 | 0.7289 | 0.467    | 0.522145575 | count | 1 |
| NFRKB     | 0.4444849 | 0.8498789 | 0.523  | 0.601    | 0.522456478 | count | 1 |
| ZNF528    | 0.4444849 | 0.9095132 | 0.4887 | 0.625    | 0.522456478 | count | 1 |
| EXD3      | 0.4444849 | 0.9316016 | 0.4771 | 0.634    | 0.522456478 | count | 1 |
| ZNF234    | 0.6057175 | 0.7899464 | 0.7668 | 0.444    | 0.523140159 | count | 1 |
| ELOC      | 0.3695538 | 0.2318081 | 1.5942 | 0.112    | 0.523539119 | count | 1 |
| FAM234A   | 0.4867348 | 0.757836  | 0.6423 | 0.521    | 0.524266699 | count | 1 |
| SLC41A2   | 0.4867348 | 1.0211    | 0.4767 | 0.634    | 0.524266699 | count | 1 |
| HLTF      | 0.3800429 | 0.3553735 | 1.0694 | 0.286    | 0.524992271 | count | 1 |
| ITGA5     | 0.5279743 | 0.8290933 | 0.6368 | 0.525    | 0.525131478 | count | 1 |
| BICDL1    | 0.4000617 | 0.5121345 | 0.7812 | 0.435    | 0.525654886 | count | 1 |
| SLC35A4   | 0.5285267 | 0.8266499 | 0.6394 | 0.523    | 0.525687794 | count | 1 |
| HEATR1    | 0.5285267 | 0.934024  | 0.5659 | 0.572    | 0.525687794 | count | 1 |
| FLVCR1-DT | 0.5285267 | 0.9480992 | 0.5575 | 0.578    | 0.525687794 | count | 1 |
| UQCC3     | 0.3814894 | 0.3910316 | 0.9756 | 0.33     | 0.526248924 | count | 1 |
| CUX1      | 0.4203157 | 0.704184  | 0.5969 | 0.551    | 0.526353199 | count | 1 |
| CMC1      | 0.3679092 | 0.2086054 | 1.7637 | 0.0787   | 0.526385656 | count | 1 |
| MGMT      | 0.3747045 | 0.2659699 | 1.4088 | 0.16     | 0.526643788 | count | 1 |
| CD69      | 0.3656209 | 0.1085816 | 3.3672 | 0.000851 | 0.527064396 | count | 1 |
| CD72      | 0.4154884 | 0.7385721 | 0.5626 | 0.574    | 0.527227805 | count | 1 |
| NUP155    | 0.4154884 | 0.7963363 | 0.5217 | 0.602    | 0.527227805 | count | 1 |
| SF3B1     | 0.3696651 | 0.1838402 | 2.0108 | 0.0452   | 0.527360033 | count | 1 |
| ANAPC15   | 0.3887636 | 0.4615982 | 0.8422 | 0.4      | 0.52789775  | count | 1 |
| CARD8     | 0.3809243 | 0.3739864 | 1.0186 | 0.309    | 0.528777886 | count | 1 |
| ZNF154    | 0.4382884 | 0.7247246 | 0.6048 | 0.546    | 0.529098964 | count | 1 |

|            |           |           |        |         |             |       |   |
|------------|-----------|-----------|--------|---------|-------------|-------|---|
| MRPS2      | 0.4385432 | 0.555365  | 0.7896 | 0.43    | 0.529408545 | count | 1 |
| GIT2       | 0.4230896 | 0.4603887 | 0.919  | 0.359   | 0.529844935 | count | 1 |
| TRAPPC8    | 0.4672977 | 0.5304353 | 0.881  | 0.379   | 0.529930789 | count | 1 |
| APEX2      | 0.4233786 | 0.7628855 | 0.555  | 0.579   | 0.530208723 | count | 1 |
| RMI1       | 0.4518476 | 0.6188796 | 0.7301 | 0.466   | 0.531175196 | count | 1 |
| FLAD1      | 0.3960543 | 0.4599228 | 0.8611 | 0.39    | 0.532881459 | count | 1 |
| C1orf43    | 0.3824538 | 0.3098421 | 1.2344 | 0.218   | 0.532969891 | count | 1 |
| KCNA3      | 0.4116228 | 0.6215185 | 0.6623 | 0.508   | 0.532988431 | count | 1 |
| MUS81      | 0.4417646 | 0.6656696 | 0.6636 | 0.507   | 0.533322574 | count | 1 |
| NISCH      | 0.4537968 | 0.7711622 | 0.5885 | 0.557   | 0.533483479 | count | 1 |
| SMPD2      | 0.4330618 | 0.7995059 | 0.5417 | 0.588   | 0.533620816 | count | 1 |
| CDC42EP3   | 0.388202  | 0.3250775 | 1.1942 | 0.233   | 0.533854739 | count | 1 |
| CCDC159    | 0.4207206 | 0.5417289 | 0.7766 | 0.438   | 0.533898497 | count | 1 |
| WRNIP1     | 0.4422752 | 0.7171487 | 0.6167 | 0.538   | 0.533942959 | count | 1 |
| WAS        | 0.3805994 | 0.2948446 | 1.2908 | 0.198   | 0.534094597 | count | 1 |
| ERGIC2     | 0.3862006 | 0.3296347 | 1.1716 | 0.242   | 0.534220815 | count | 1 |
| MAP1LC3B   | 0.3734525 | 0.1598518 | 2.3362 | 0.0201  | 0.534345829 | count | 1 |
| CHD2       | 0.3831488 | 0.3209112 | 1.1939 | 0.233   | 0.534394512 | count | 1 |
| SERTAD1    | 0.3764125 | 0.2133267 | 1.7645 | 0.0786  | 0.534494089 | count | 1 |
| NCK2       | 0.3975094 | 0.3781904 | 1.0511 | 0.294   | 0.534844302 | count | 1 |
| FBXL20     | 0.6191356 | 0.8154256 | 0.7593 | 0.448   | 0.534909028 | count | 1 |
| C19orf12   | 0.3914858 | 0.4603875 | 0.8503 | 0.396   | 0.53537573  | count | 1 |
| ADAM8      | 0.4035852 | 0.3774407 | 1.0693 | 0.286   | 0.536275712 | count | 1 |
| CTSD       | 0.373939  | 0.1301592 | 2.8729 | 0.00434 | 0.536648857 | count | 1 |
| UHMK1      | 0.3882785 | 0.3750305 | 1.0353 | 0.301   | 0.537099596 | count | 1 |
| KRT10      | 0.3775937 | 0.2087908 | 1.8085 | 0.0715  | 0.537569609 | count | 1 |
| ABHD6      | 0.8637374 | 0.8583598 | 1.0063 | 0.315   | 0.537919395 | count | 1 |
| HOOK1      | 0.4194504 | 0.6955645 | 0.603  | 0.547   | 0.538161196 | count | 1 |
| DCLRE1A    | 0.4305179 | 0.7191572 | 0.5986 | 0.55    | 0.539195879 | count | 1 |
| AL138762.1 | 0.4305179 | 0.8023976 | 0.5365 | 0.592   | 0.539195879 | count | 1 |
| DNASE1     | 0.6243083 | 0.9416575 | 0.663  | 0.508   | 0.53944529  | count | 1 |
| SFSWAP     | 0.392147  | 0.3809492 | 1.0294 | 0.304   | 0.540160169 | count | 1 |
| FEM1C      | 0.4386356 | 0.66236   | 0.6622 | 0.508   | 0.540528314 | count | 1 |
| DHX58      | 0.4598506 | 0.9703266 | 0.4739 | 0.636   | 0.540652705 | count | 1 |
| SP3        | 0.394774  | 0.3072427 | 1.2849 | 0.2     | 0.542908639 | count | 1 |
| GLTP       | 0.3990136 | 0.3602738 | 1.1075 | 0.269   | 0.543233727 | count | 1 |
| NKAP       | 0.3913369 | 0.2995776 | 1.3063 | 0.192   | 0.543252935 | count | 1 |
| CCAR2      | 0.545971  | 1.0059168 | 0.5428 | 0.588   | 0.543256129 | count | 1 |
| AL645933.2 | 0.545971  | 1.1373872 | 0.48   | 0.632   | 0.543256129 | count | 1 |
| IFFO1      | 0.4113128 | 0.4895921 | 0.8401 | 0.401   | 0.543718081 | count | 1 |
| ADD1       | 0.3905471 | 0.3383231 | 1.1544 | 0.249   | 0.544726243 | count | 1 |
| IGF2R      | 0.4081279 | 0.55211   | 0.7392 | 0.46    | 0.54485758  | count | 1 |
| ADIPOR2    | 0.4107714 | 0.5341866 | 0.769  | 0.442   | 0.545853612 | count | 1 |
| CAAP1      | 0.41549   | 0.5575109 | 0.7453 | 0.457   | 0.545997467 | count | 1 |
| TADA3      | 0.3861836 | 0.2663146 | 1.4501 | 0.148   | 0.54625943  | count | 1 |

|          |           |           |        |         |             |       |   |
|----------|-----------|-----------|--------|---------|-------------|-------|---|
| GNB2     | 0.3843088 | 0.2298615 | 1.6719 | 0.0955  | 0.546273919 | count | 1 |
| AKR1A1   | 0.3921511 | 0.3262658 | 1.2019 | 0.23    | 0.546966253 | count | 1 |
| DAXX     | 0.3965711 | 0.399556  | 0.9925 | 0.322   | 0.54708858  | count | 1 |
| SCFD1    | 0.4164785 | 0.5025142 | 0.8288 | 0.408   | 0.547300887 | count | 1 |
| SOCS3    | 0.4082729 | 0.4978505 | 0.8201 | 0.413   | 0.547319075 | count | 1 |
| ELF4     | 0.633634  | 1.1194632 | 0.566  | 0.5718  | 0.547622504 | count | 1 |
| COPS6    | 0.3871412 | 0.2427174 | 1.595  | 0.112   | 0.547767792 | count | 1 |
| TMEM71   | 0.4449625 | 0.6924394 | 0.6426 | 0.521   | 0.54836943  | count | 1 |
| DUSP5    | 0.3938821 | 0.2901206 | 1.3576 | 0.176   | 0.549383628 | count | 1 |
| ATF3     | 0.4283813 | 0.5270451 | 0.8128 | 0.4169  | 0.549669006 | count | 1 |
| SPCS3    | 0.3893787 | 0.2357944 | 1.6513 | 0.0996  | 0.549759802 | count | 1 |
| CSF1     | 0.4851508 | 0.7915408 | 0.6129 | 0.54    | 0.55035128  | count | 1 |
| KIF21B   | 0.4851508 | 0.8166812 | 0.5941 | 0.553   | 0.55035128  | count | 1 |
| RALGAPA1 | 0.4053756 | 0.4260804 | 0.9514 | 0.342   | 0.550506308 | count | 1 |
| TUBGCP5  | 0.4682343 | 0.5815762 | 0.8051 | 0.421   | 0.550581578 | count | 1 |
| ZNF32    | 0.3989302 | 0.4220123 | 0.9453 | 0.345   | 0.551126016 | count | 1 |
| JUNB     | 0.3828072 | 0.1258678 | 3.0413 | 0.00255 | 0.551497453 | count | 1 |
| ZNF430   | 0.4116128 | 0.4613385 | 0.8922 | 0.373   | 0.551808497 | count | 1 |
| LAT2     | 0.3875987 | 0.2111115 | 1.836  | 0.0673  | 0.552092351 | count | 1 |
| RPL7L1   | 0.3986763 | 0.3722686 | 1.0709 | 0.285   | 0.552842508 | count | 1 |
| TNFAIP3  | 0.3935916 | 0.2209916 | 1.781  | 0.0758  | 0.552936666 | count | 1 |
| AHCYL1   | 0.513227  | 0.6618787 | 0.7754 | 0.439   | 0.553096505 | count | 1 |
| PRRC2B   | 0.4073912 | 0.3720527 | 1.095  | 0.274   | 0.553249588 | count | 1 |
| SLC35B2  | 0.4276129 | 0.6333791 | 0.6751 | 0.5     | 0.553776184 | count | 1 |
| ESS2     | 0.4276129 | 0.8161745 | 0.5239 | 0.601   | 0.553776184 | count | 1 |
| SLC17A9  | 0.4591335 | 0.8012519 | 0.573  | 0.567   | 0.554427412 | count | 1 |
| DSE      | 0.4591335 | 0.8721299 | 0.5265 | 0.599   | 0.554427412 | count | 1 |
| SLC9A9   | 0.4255291 | 0.5908624 | 0.7202 | 0.472   | 0.555434988 | count | 1 |
| INTS6    | 0.403368  | 0.2954759 | 1.3651 | 0.173   | 0.556480726 | count | 1 |
| ZMPSTE24 | 0.4910551 | 0.8387935 | 0.5854 | 0.559   | 0.557105062 | count | 1 |
| SNAP47   | 0.4076569 | 0.5049085 | 0.8074 | 0.42    | 0.557534749 | count | 1 |
| NCOA7    | 0.4309417 | 0.4317006 | 0.9982 | 0.319   | 0.55810397  | count | 1 |
| GMIP     | 0.4532677 | 0.6849035 | 0.6618 | 0.509   | 0.558662735 | count | 1 |
| NUDC     | 0.3951111 | 0.2297565 | 1.7197 | 0.0864  | 0.558736331 | count | 1 |
| SINHCAF  | 0.3987033 | 0.347965  | 1.1458 | 0.253   | 0.559208764 | count | 1 |
| ATG5     | 0.4098485 | 0.312673  | 1.3108 | 0.191   | 0.559326879 | count | 1 |
| UNK      | 0.4935028 | 0.7718657 | 0.6394 | 0.523   | 0.559904948 | count | 1 |
| STK25    | 0.4047461 | 0.4195243 | 0.9648 | 0.335   | 0.559914846 | count | 1 |
| BCL2L12  | 0.4482316 | 0.5651783 | 0.7931 | 0.428   | 0.561496086 | count | 1 |
| RASSF7   | 0.4188525 | 0.4497316 | 0.9313 | 0.352   | 0.56154014  | count | 1 |
| UST      | 0.4655529 | 0.9109338 | 0.5111 | 0.61    | 0.562228091 | count | 1 |
| ZNF692   | 0.5649324 | 0.8185919 | 0.6901 | 0.491   | 0.562351467 | count | 1 |
| NQO1     | 0.5649324 | 1.1237013 | 0.5027 | 0.615   | 0.562351467 | count | 1 |
| GALE     | 0.4142397 | 0.510544  | 0.8114 | 0.418   | 0.56257069  | count | 1 |
| HSPA13   | 0.428127  | 0.5894257 | 0.7263 | 0.468   | 0.56266081  | count | 1 |

|            |           |           |        |        |             |       |   |
|------------|-----------|-----------|--------|--------|-------------|-------|---|
| SLC35B3    | 0.4960182 | 0.8577639 | 0.5783 | 0.563  | 0.562782309 | count | 1 |
| ERAP1      | 0.4283639 | 0.5632083 | 0.7606 | 0.447  | 0.5629732   | count | 1 |
| CTDSP1     | 0.4003606 | 0.2577337 | 1.5534 | 0.121  | 0.563012232 | count | 1 |
| CRTAP      | 0.4503468 | 0.6480898 | 0.6949 | 0.488  | 0.564159099 | count | 1 |
| RAB5A      | 0.4195902 | 0.4208743 | 0.9969 | 0.32   | 0.564631436 | count | 1 |
| SLA2       | 0.4128569 | 0.4296512 | 0.9609 | 0.337  | 0.564660461 | count | 1 |
| EIF3J      | 0.4082147 | 0.2870614 | 1.422  | 0.156  | 0.564720578 | count | 1 |
| ADNP2      | 0.9066608 | 0.9840893 | 0.9213 | 0.3576 | 0.564859848 | count | 1 |
| AP003774.4 | 0.4156119 | 0.4992631 | 0.8325 | 0.406  | 0.565880084 | count | 1 |
| YME1L1     | 0.4069314 | 0.3357296 | 1.2121 | 0.226  | 0.566085995 | count | 1 |
| LYRM2      | 0.4016615 | 0.3987255 | 1.0074 | 0.3145 | 0.566297048 | count | 1 |
| A1BG       | 0.4145048 | 0.436055  | 0.9506 | 0.343  | 0.566918645 | count | 1 |
| SLK        | 0.411475  | 0.3513322 | 1.1712 | 0.242  | 0.567683407 | count | 1 |
| TRIM52     | 0.4383834 | 0.5178751 | 0.8465 | 0.398  | 0.567779169 | count | 1 |
| POLR3GL    | 0.4013233 | 0.2333936 | 1.7195 | 0.0865 | 0.567848657 | count | 1 |
| WSB1       | 0.4108529 | 0.2946223 | 1.3945 | 0.164  | 0.56837582  | count | 1 |
| MLX        | 0.4149517 | 0.4392927 | 0.9446 | 0.346  | 0.568667177 | count | 1 |
| GCSAM      | 0.5012562 | 0.8056087 | 0.6222 | 0.534  | 0.568774084 | count | 1 |
| ADPRH      | 0.5012562 | 0.8056087 | 0.6222 | 0.534  | 0.568774084 | count | 1 |
| NDN        | 0.5012562 | 0.8056087 | 0.6222 | 0.534  | 0.568774084 | count | 1 |
| ZFP30      | 0.5012562 | 0.8056087 | 0.6222 | 0.534  | 0.568774084 | count | 1 |
| CHEK2      | 0.5012562 | 0.8056087 | 0.6222 | 0.534  | 0.568774084 | count | 1 |
| GPR157     | 0.5012562 | 1.0028252 | 0.4998 | 0.618  | 0.568774084 | count | 1 |
| TESK2      | 0.5012562 | 1.0028252 | 0.4998 | 0.618  | 0.568774084 | count | 1 |
| MRPS30-DT  | 0.5012562 | 1.0028252 | 0.4998 | 0.618  | 0.568774084 | count | 1 |
| HS6ST2     | 0.5012562 | 1.0028252 | 0.4998 | 0.618  | 0.568774084 | count | 1 |
| COL14A1    | 0.5012562 | 1.0028252 | 0.4998 | 0.618  | 0.568774084 | count | 1 |
| ARHGEF39   | 0.5012562 | 1.0028252 | 0.4998 | 0.618  | 0.568774084 | count | 1 |
| OGN        | 0.5012562 | 1.0028252 | 0.4998 | 0.618  | 0.568774084 | count | 1 |
| ZNF189     | 0.5012562 | 1.0028252 | 0.4998 | 0.618  | 0.568774084 | count | 1 |
| RNASE6     | 0.5012562 | 1.0028252 | 0.4998 | 0.618  | 0.568774084 | count | 1 |
| ASPHD2     | 0.5012562 | 1.0028252 | 0.4998 | 0.618  | 0.568774084 | count | 1 |
| GNG2       | 0.4061637 | 0.251045  | 1.6179 | 0.107  | 0.56968334  | count | 1 |
| UBE2G1     | 0.4336855 | 0.3110609 | 1.3942 | 0.164  | 0.569990596 | count | 1 |
| JADE2      | 0.4339043 | 0.5760105 | 0.7533 | 0.452  | 0.570279123 | count | 1 |
| POLE4      | 0.4164132 | 0.3898332 | 1.0682 | 0.286  | 0.570673802 | count | 1 |
| AC106739.2 | 0.6614843 | 0.8892948 | 0.7438 | 0.458  | 0.572032607 | count | 1 |
| LPAR2      | 0.6614843 | 0.9932448 | 0.666  | 0.5059 | 0.572032607 | count | 1 |
| TSPAN5     | 0.4114014 | 0.3370985 | 1.2204 | 0.223  | 0.572851076 | count | 1 |
| SOCS4      | 0.4276351 | 0.534868  | 0.7995 | 0.425  | 0.573346077 | count | 1 |
| CATSPER1   | 0.4276351 | 0.572471  | 0.747  | 0.456  | 0.573346077 | count | 1 |
| HSPA14     | 0.4468308 | 0.6102355 | 0.7322 | 0.465  | 0.573443496 | count | 1 |
| SYNC       | 0.4752627 | 0.7240906 | 0.6564 | 0.512  | 0.574027558 | count | 1 |
| RUBCN      | 0.4752627 | 0.8275551 | 0.5743 | 0.566  | 0.574027558 | count | 1 |
| ZNF451     | 0.4267597 | 0.4609869 | 0.9258 | 0.355  | 0.574303617 | count | 1 |

|            |           |           |        |       |             |       |   |
|------------|-----------|-----------|--------|-------|-------------|-------|---|
| ACADSB     | 0.6645411 | 0.971694  | 0.6839 | 0.495 | 0.57471069  | count | 1 |
| SPECC1L    | 0.6645411 | 0.9929239 | 0.6693 | 0.504 | 0.57471069  | count | 1 |
| RNF139     | 0.4324501 | 0.4337087 | 0.9971 | 0.319 | 0.574749108 | count | 1 |
| MUC20-OT1  | 0.4478516 | 0.4212419 | 1.0632 | 0.288 | 0.574758973 | count | 1 |
| DHRS4      | 0.4532828 | 0.670014  | 0.6765 | 0.499 | 0.575417505 | count | 1 |
| NFXL1      | 0.4444849 | 0.8803498 | 0.5049 | 0.614 | 0.575712133 | count | 1 |
| LINC02084  | 0.4158187 | 0.4087402 | 1.0173 | 0.31  | 0.575972609 | count | 1 |
| ZNF18      | 0.5350948 | 0.9029317 | 0.5926 | 0.554 | 0.576894774 | count | 1 |
| PHYH       | 0.4201835 | 0.499708  | 0.8409 | 0.401 | 0.576919356 | count | 1 |
| GPATCH2    | 0.4185566 | 0.4187214 | 0.9996 | 0.318 | 0.577469298 | count | 1 |
| AC013394.1 | 0.5799544 | 0.6759278 | 0.858  | 0.392 | 0.577477801 | count | 1 |
| MZT1       | 0.4215774 | 0.4179074 | 1.0088 | 0.314 | 0.577764255 | count | 1 |
| ZKSCAN1    | 0.4783994 | 0.6894006 | 0.6939 | 0.488 | 0.577839379 | count | 1 |
| ARL2       | 0.421316  | 0.4464198 | 0.9438 | 0.346 | 0.578477064 | count | 1 |
| ZNF84      | 0.4466322 | 0.5943778 | 0.7514 | 0.453 | 0.578504016 | count | 1 |
| PGP        | 0.4128139 | 0.2937876 | 1.4051 | 0.161 | 0.578678583 | count | 1 |
| IMPA1      | 0.4359021 | 0.52721   | 0.8268 | 0.409 | 0.579350465 | count | 1 |
| IL15       | 0.5374225 | 0.7267445 | 0.7395 | 0.46  | 0.579427897 | count | 1 |
| DOCK5      | 0.5374225 | 1.0743911 | 0.5002 | 0.617 | 0.579427897 | count | 1 |
| MRPL58     | 0.4260822 | 0.5330781 | 0.7993 | 0.425 | 0.580166069 | count | 1 |
| IPO11      | 0.4633942 | 0.6160787 | 0.7522 | 0.452 | 0.580586063 | count | 1 |
| NUP58      | 0.4633942 | 0.6796428 | 0.6818 | 0.496 | 0.580586063 | count | 1 |
| STX11      | 0.4113438 | 0.3284038 | 1.2526 | 0.211 | 0.580797155 | count | 1 |
| IRAK1BP1   | 0.6717374 | 1.0782189 | 0.623  | 0.534 | 0.581014415 | count | 1 |
| RBM27      | 0.6717374 | 1.0935923 | 0.6142 | 0.539 | 0.581014415 | count | 1 |
| CWF19L1    | 0.6717375 | 1.195157  | 0.562  | 0.574 | 0.581014489 | count | 1 |
| BCDIN3D    | 0.6717375 | 1.22355   | 0.549  | 0.583 | 0.581014489 | count | 1 |
| ARHGAP11A  | 0.6717375 | 1.31081   | 0.5125 | 0.609 | 0.581014489 | count | 1 |
| ZNF747     | 0.6717375 | 1.31081   | 0.5125 | 0.609 | 0.581014489 | count | 1 |
| AP001020.1 | 0.6717375 | 1.31081   | 0.5125 | 0.609 | 0.581014489 | count | 1 |
| ZNF486     | 0.6717375 | 1.31081   | 0.5125 | 0.609 | 0.581014489 | count | 1 |
| PIAS3      | 0.6717375 | 1.327908  | 0.5059 | 0.613 | 0.581014489 | count | 1 |
| SLC19A2    | 0.6717375 | 1.327908  | 0.5059 | 0.613 | 0.581014489 | count | 1 |
| MAK16      | 0.4714636 | 0.7651452 | 0.6162 | 0.538 | 0.581215638 | count | 1 |
| FAAP100    | 0.4943085 | 0.6854394 | 0.7212 | 0.471 | 0.581463632 | count | 1 |
| BRF2       | 0.4454284 | 0.6541227 | 0.681  | 0.496 | 0.581504152 | count | 1 |
| CASP1      | 0.4156817 | 0.3585718 | 1.1593 | 0.247 | 0.582702815 | count | 1 |
| PSD4       | 0.4364267 | 0.4680422 | 0.9325 | 0.352 | 0.582746156 | count | 1 |
| DGKE       | 0.4735284 | 0.5945042 | 0.7965 | 0.426 | 0.583774933 | count | 1 |
| DOPEY1     | 0.5875691 | 0.9220564 | 0.6372 | 0.524 | 0.585144487 | count | 1 |
| EPDR1      | 0.5875691 | 1.0216157 | 0.5751 | 0.566 | 0.585144487 | count | 1 |
| ZXDB       | 0.5875691 | 1.1179051 | 0.5256 | 0.6   | 0.585144487 | count | 1 |
| ZNF286A    | 0.5875691 | 1.1179051 | 0.5256 | 0.6   | 0.585144487 | count | 1 |
| ZDHHC8     | 0.5875691 | 1.1179051 | 0.5256 | 0.6   | 0.585144487 | count | 1 |
| ZNF518B    | 0.5884988 | 0.6661103 | 0.8835 | 0.378 | 0.586080483 | count | 1 |

|            |           |           |        |         |             |       |   |
|------------|-----------|-----------|--------|---------|-------------|-------|---|
| TMED9      | 0.4133843 | 0.2431516 | 1.7001 | 0.0901  | 0.58608133  | count | 1 |
| HECA       | 0.4413134 | 0.4514423 | 0.9776 | 0.329   | 0.58656356  | count | 1 |
| RXRB       | 0.4629359 | 0.7738367 | 0.5982 | 0.55    | 0.587726904 | count | 1 |
| ZNF787     | 0.4471462 | 0.5172583 | 0.8645 | 0.388   | 0.587741258 | count | 1 |
| OAZ2       | 0.4537968 | 0.5418058 | 0.8376 | 0.403   | 0.587819431 | count | 1 |
| GADD45G    | 0.4217962 | 0.3676137 | 1.1474 | 0.252   | 0.58786825  | count | 1 |
| LRRC57     | 0.4636295 | 0.7133684 | 0.6499 | 0.516   | 0.58861138  | count | 1 |
| CNOT9      | 0.4359578 | 0.4449681 | 0.9798 | 0.328   | 0.588687786 | count | 1 |
| BLM        | 0.5006466 | 0.7354202 | 0.6808 | 0.497   | 0.588970654 | count | 1 |
| GTF3C4     | 0.5006466 | 0.7716712 | 0.6488 | 0.517   | 0.588970654 | count | 1 |
| C1orf131   | 0.4306262 | 0.4631305 | 0.9298 | 0.353   | 0.589010911 | count | 1 |
| GZMK       | 0.4094028 | 0.1376635 | 2.9739 | 0.00316 | 0.589085683 | count | 1 |
| MTREX      | 0.4483853 | 0.5386429 | 0.8324 | 0.406   | 0.589375288 | count | 1 |
| THAP1      | 0.5194329 | 0.5801521 | 0.8953 | 0.371   | 0.589566583 | count | 1 |
| CCDC77     | 0.5017731 | 0.6730603 | 0.7455 | 0.457   | 0.590304922 | count | 1 |
| BIN3       | 0.5017731 | 0.7395701 | 0.6785 | 0.498   | 0.590304922 | count | 1 |
| MYO9B      | 0.4293538 | 0.3938304 | 1.0902 | 0.276   | 0.59055002  | count | 1 |
| MORF4L2    | 0.4271206 | 0.3429376 | 1.2455 | 0.214   | 0.590915198 | count | 1 |
| CAMK2G     | 0.4656607 | 0.5712062 | 0.8152 | 0.416   | 0.591201557 | count | 1 |
| PEX13      | 0.4661055 | 0.5405865 | 0.8622 | 0.389   | 0.591768762 | count | 1 |
| LDLRAP1    | 0.4289285 | 0.4719653 | 0.9088 | 0.364   | 0.5918022   | count | 1 |
| AUTS2      | 0.4336316 | 0.4546324 | 0.9538 | 0.341   | 0.591850631 | count | 1 |
| NPRL2      | 0.4570504 | 0.5202078 | 0.8786 | 0.38    | 0.592049809 | count | 1 |
| NPEPL1     | 0.4803516 | 0.7644965 | 0.6283 | 0.53    | 0.592232278 | count | 1 |
| IGFBP7     | 0.4174866 | 0.682986  | 0.6113 | 0.541   | 0.592853558 | count | 1 |
| PACS1      | 0.4541421 | 0.4790441 | 0.948  | 0.344   | 0.592920057 | count | 1 |
| TMEM214    | 0.550469  | 0.9675096 | 0.569  | 0.57    | 0.593625245 | count | 1 |
| ATG7       | 0.6865366 | 1.058215  | 0.6488 | 0.517   | 0.593973259 | count | 1 |
| BAX        | 0.4177537 | 0.2150249 | 1.9428 | 0.0529  | 0.594204221 | count | 1 |
| DTD1       | 0.4344414 | 0.3885989 | 1.118  | 0.264   | 0.594239241 | count | 1 |
| BCL6       | 0.5051325 | 0.7894952 | 0.6398 | 0.523   | 0.594283878 | count | 1 |
| ASB7       | 0.4630912 | 0.7512725 | 0.6164 | 0.538   | 0.594398289 | count | 1 |
| ATMIN      | 0.5240295 | 0.6279255 | 0.8345 | 0.405   | 0.594824592 | count | 1 |
| ASB6       | 0.5975332 | 0.8697242 | 0.687  | 0.493   | 0.595175441 | count | 1 |
| CHD6       | 0.4348114 | 0.4071579 | 1.0679 | 0.286   | 0.595934875 | count | 1 |
| RAB11FIP1  | 0.4162502 | 0.1733534 | 2.4012 | 0.0169  | 0.595955991 | count | 1 |
| SUCLA2     | 0.4444849 | 0.4863432 | 0.9139 | 0.361   | 0.595997031 | count | 1 |
| LINC00861  | 0.4508088 | 0.4174618 | 1.0799 | 0.281   | 0.596098954 | count | 1 |
| TNKS       | 0.4836268 | 0.4957393 | 0.9756 | 0.33    | 0.596291903 | count | 1 |
| ATP1B1     | 0.4202099 | 0.2440175 | 1.722  | 0.086   | 0.597954697 | count | 1 |
| AP001816.1 | 0.4955807 | 0.617447  | 0.8026 | 0.423   | 0.59871901  | count | 1 |
| MLF2       | 0.4275981 | 0.3062622 | 1.3962 | 0.164   | 0.599055982 | count | 1 |
| APOL2      | 0.4967813 | 0.7999693 | 0.621  | 0.535   | 0.600178057 | count | 1 |
| ARF6       | 0.4214757 | 0.1842915 | 2.287  | 0.0228  | 0.600369703 | count | 1 |
| RPL26L1    | 0.4348733 | 0.5066357 | 0.8584 | 0.391   | 0.600862507 | count | 1 |

|            |           |           |        |        |             |       |   |
|------------|-----------|-----------|--------|--------|-------------|-------|---|
| HCLS1      | 0.422337  | 0.2262231 | 1.8669 | 0.0628 | 0.601224452 | count | 1 |
| ZNF720     | 0.4685539 | 0.6284457 | 0.7456 | 0.456  | 0.601438233 | count | 1 |
| GPR171     | 0.4740543 | 0.5740763 | 0.8258 | 0.41   | 0.601905123 | count | 1 |
| GUSB       | 0.4459341 | 0.3768829 | 1.1832 | 0.238  | 0.602190762 | count | 1 |
| NOL4L      | 0.4746131 | 0.4979384 | 0.9532 | 0.341  | 0.602617713 | count | 1 |
| KCMF1      | 0.4438326 | 0.4065381 | 1.0917 | 0.276  | 0.602849722 | count | 1 |
| RCOR1      | 0.461921  | 0.5016588 | 0.9208 | 0.358  | 0.603111439 | count | 1 |
| TPMT       | 0.4812942 | 0.6590145 | 0.7303 | 0.466  | 0.603123413 | count | 1 |
| H2AFY      | 0.4284306 | 0.268012  | 1.5986 | 0.111  | 0.603337499 | count | 1 |
| VCAN       | 0.5132113 | 0.9655614 | 0.5315 | 0.595  | 0.60385256  | count | 1 |
| CXorf40A   | 0.4819187 | 0.624843  | 0.7713 | 0.441  | 0.603909708 | count | 1 |
| TNIK       | 0.4526294 | 0.4933109 | 0.9175 | 0.36   | 0.604440846 | count | 1 |
| KANSL3     | 0.4491148 | 0.6126867 | 0.733  | 0.464  | 0.60446333  | count | 1 |
| MOB2       | 0.4364987 | 0.4265178 | 1.0234 | 0.307  | 0.605368584 | count | 1 |
| CLINT1     | 0.42826   | 0.295503  | 1.4493 | 0.148  | 0.605469709 | count | 1 |
| LLGL1      | 0.9719013 | 1.152076  | 0.8436 | 0.4    | 0.605559423 | count | 1 |
| ZNF614     | 0.7001958 | 1.1405915 | 0.6139 | 0.5397 | 0.605927497 | count | 1 |
| STIP1      | 0.4461716 | 0.44306   | 1.007  | 0.315  | 0.607577459 | count | 1 |
| LHPP       | 0.6103198 | 0.8674447 | 0.7036 | 0.482  | 0.608045507 | count | 1 |
| GPHN       | 0.4854035 | 0.8242991 | 0.5889 | 0.556  | 0.608297365 | count | 1 |
| AAMDC      | 0.4741547 | 0.709247  | 0.6685 | 0.504  | 0.608656193 | count | 1 |
| ACSF3      | 0.4857254 | 0.6532044 | 0.7436 | 0.458  | 0.608702668 | count | 1 |
| ALG6       | 0.5649324 | 0.7859712 | 0.7188 | 0.473  | 0.609363009 | count | 1 |
| NEK1       | 0.4747949 | 0.608608  | 0.7801 | 0.436  | 0.60948125  | count | 1 |
| HAX1       | 0.4302937 | 0.2655125 | 1.6206 | 0.106  | 0.609501636 | count | 1 |
| SPINDOC    | 0.4714636 | 0.6697556 | 0.7039 | 0.482  | 0.610790345 | count | 1 |
| MAP3K12    | 0.4542391 | 0.5276124 | 0.8609 | 0.39   | 0.611376782 | count | 1 |
| ACACA      | 0.5195769 | 0.7844524 | 0.6623 | 0.508  | 0.611391981 | count | 1 |
| PDK1       | 0.50611   | 0.6879495 | 0.7357 | 0.462  | 0.611514788 | count | 1 |
| TBC1D1     | 0.4560409 | 0.4638528 | 0.9832 | 0.326  | 0.611532    | count | 1 |
| RNF8       | 0.5200243 | 0.5394032 | 0.9641 | 0.336  | 0.611921882 | count | 1 |
| PPP2R5E    | 0.4496727 | 0.3199633 | 1.4054 | 0.161  | 0.612354682 | count | 1 |
| LDB2       | 0.4422505 | 0.3279659 | 1.3485 | 0.178  | 0.614034773 | count | 1 |
| LPIN1      | 0.4436688 | 0.357767  | 1.2401 | 0.216  | 0.614606625 | count | 1 |
| PPP3CA     | 0.4395477 | 0.2950844 | 1.4896 | 0.137  | 0.615007417 | count | 1 |
| AL512791.2 | 0.6174267 | 1.2170048 | 0.5073 | 0.6123 | 0.615197475 | count | 1 |
| USP21      | 0.6174267 | 1.3933543 | 0.4431 | 0.658  | 0.615197475 | count | 1 |
| AEBP2      | 0.5092282 | 0.6696751 | 0.7604 | 0.448  | 0.615304152 | count | 1 |
| DDX60      | 0.4750682 | 0.6254759 | 0.7595 | 0.448  | 0.615477215 | count | 1 |
| CNPPD1     | 0.463015  | 0.4661632 | 0.9932 | 0.321  | 0.615491841 | count | 1 |
| SMIM27     | 0.4462545 | 0.4231028 | 1.0547 | 0.292  | 0.615745397 | count | 1 |
| TMEM87A    | 0.4501372 | 0.3413704 | 1.3186 | 0.188  | 0.615748959 | count | 1 |
| NHLRC2     | 0.5424818 | 0.7764204 | 0.6987 | 0.485  | 0.615931083 | count | 1 |
| CREBL2     | 0.5424818 | 0.7764204 | 0.6987 | 0.485  | 0.615931083 | count | 1 |
| TMEM39B    | 0.5424818 | 0.7778546 | 0.6974 | 0.486  | 0.615931083 | count | 1 |



|            |           |           |        |        |             |       |   |
|------------|-----------|-----------|--------|--------|-------------|-------|---|
| ARL6IP6    | 0.4477994 | 0.396194  | 1.1303 | 0.259  | 0.615964135 | count | 1 |
| OGT        | 0.4535136 | 0.3254526 | 1.3935 | 0.164  | 0.616026999 | count | 1 |
| ELF2       | 0.440156  | 0.2933285 | 1.5006 | 0.134  | 0.616272285 | count | 1 |
| AHR        | 0.5112925 | 0.7504206 | 0.6813 | 0.496  | 0.617812759 | count | 1 |
| CCDC22     | 0.5112925 | 0.7533897 | 0.6787 | 0.498  | 0.617812759 | count | 1 |
| AC239800.3 | 0.4527827 | 0.3751129 | 1.2071 | 0.228  | 0.618041019 | count | 1 |
| CTR9       | 0.4567122 | 0.4138007 | 1.1037 | 0.271  | 0.618660428 | count | 1 |
| SRBD1      | 0.4638741 | 0.63895   | 0.726  | 0.468  | 0.619497282 | count | 1 |
| CS         | 0.7161533 | 0.7703385 | 0.9297 | 0.353  | 0.619884477 | count | 1 |
| C18orf25   | 0.5028218 | 0.7670446 | 0.6555 | 0.513  | 0.620084214 | count | 1 |
| SACM1L     | 0.4439107 | 0.2876853 | 1.543  | 0.124  | 0.620228521 | count | 1 |
| TARS2      | 0.9957043 | 0.9760588 | 1.0201 | 0.308  | 0.620322987 | count | 1 |
| MED6       | 0.4510081 | 0.39782   | 1.1337 | 0.258  | 0.620385089 | count | 1 |
| FBXL12     | 0.4892309 | 0.6469167 | 0.7563 | 0.45   | 0.621258554 | count | 1 |
| AUP1       | 0.4444408 | 0.2620586 | 1.6958 | 0.0909 | 0.621379653 | count | 1 |
| CLP1       | 0.4796298 | 0.5897159 | 0.8133 | 0.417  | 0.621408414 | count | 1 |
| HIP1       | 0.528917  | 0.629708  | 0.8399 | 0.402  | 0.622454112 | count | 1 |
| NDUFAF5    | 0.528917  | 0.6342012 | 0.834  | 0.405  | 0.622454112 | count | 1 |
| ZNF718     | 0.4902123 | 0.7297515 | 0.6718 | 0.502  | 0.622510052 | count | 1 |
| MGA        | 0.4504642 | 0.4910524 | 0.9173 | 0.36   | 0.623259275 | count | 1 |
| CC2D1B     | 0.5782289 | 0.9342556 | 0.6189 | 0.5364 | 0.623829081 | count | 1 |
| PPIL1      | 0.5786154 | 0.7881307 | 0.7342 | 0.463  | 0.624249546 | count | 1 |
| HNRNPH2    | 0.4677342 | 0.4250502 | 1.1004 | 0.272  | 0.624665907 | count | 1 |
| CHST7      | 1.002758  | 0.8169999 | 1.2274 | 0.221  | 0.624688309 | count | 1 |
| PTGDR      | 0.4373816 | 0.2151303 | 2.0331 | 0.0429 | 0.624940472 | count | 1 |
| HIKESHI    | 0.4497418 | 0.3712375 | 1.2115 | 0.227  | 0.6257205   | count | 1 |
| VMAC       | 0.5183702 | 0.907927  | 0.5709 | 0.568  | 0.626413709 | count | 1 |
| ICAM1      | 0.464311  | 0.380661  | 1.2197 | 0.223  | 0.627064412 | count | 1 |
| MAFF       | 0.4383327 | 0.1785076 | 2.4555 | 0.0146 | 0.627208014 | count | 1 |
| GRIPAP1    | 0.4747973 | 0.5245791 | 0.9051 | 0.366  | 0.627915425 | count | 1 |
| ZNF880     | 0.4538992 | 0.4675526 | 0.9708 | 0.332  | 0.628018736 | count | 1 |
| ATXN2L     | 0.5835057 | 0.5515104 | 1.058  | 0.291  | 0.629569382 | count | 1 |
| CITED2     | 0.441425  | 0.2357742 | 1.8722 | 0.0621 | 0.629719309 | count | 1 |
| KANSL1     | 0.4538758 | 0.2693291 | 1.6852 | 0.0929 | 0.630197258 | count | 1 |
| SMIM13     | 0.5115564 | 0.647541  | 0.79   | 0.43   | 0.63091059  | count | 1 |
| OPTN       | 0.4458347 | 0.2558497 | 1.7426 | 0.0824 | 0.631831072 | count | 1 |
| AL662844.4 | 0.5857218 | 0.7788363 | 0.752  | 0.453  | 0.631980019 | count | 1 |
| C1orf21    | 0.451692  | 0.3342754 | 1.3513 | 0.178  | 0.63201766  | count | 1 |
| CDC37L1    | 0.4997641 | 0.6510384 | 0.7676 | 0.443  | 0.634690552 | count | 1 |
| LATS1      | 0.7331443 | 0.8719971 | 0.8408 | 0.401  | 0.63473386  | count | 1 |
| PICALM     | 0.4708741 | 0.4497702 | 1.0469 | 0.296  | 0.635947805 | count | 1 |
| PIP4P2     | 0.4957975 | 0.668556  | 0.7416 | 0.459  | 0.636548101 | count | 1 |
| PCCA       | 0.5900037 | 0.8316132 | 0.7095 | 0.479  | 0.636637569 | count | 1 |
| SMIM1      | 0.5605986 | 0.8863075 | 0.6325 | 0.527  | 0.636651342 | count | 1 |
| SETD5      | 0.4815803 | 0.4346545 | 1.108  | 0.269  | 0.636911906 | count | 1 |

|            |           |           |        |        |             |       |   |
|------------|-----------|-----------|--------|--------|-------------|-------|---|
| ARSD       | 0.639148  | 1.019399  | 0.627  | 0.531  | 0.637049659 | count | 1 |
| PAIP2B     | 0.639148  | 1.066667  | 0.5992 | 0.549  | 0.637049659 | count | 1 |
| FAM32A     | 0.4604764 | 0.3474505 | 1.3253 | 0.186  | 0.63713198  | count | 1 |
| MRPL15     | 0.5021963 | 0.6633035 | 0.7571 | 0.45   | 0.637792076 | count | 1 |
| UBN2       | 0.5619226 | 0.7168501 | 0.7839 | 0.434  | 0.638165488 | count | 1 |
| NUP88      | 0.5026698 | 0.6239798 | 0.8056 | 0.421  | 0.638395881 | count | 1 |
| PTPRA      | 0.4537799 | 0.2776075 | 1.6346 | 0.103  | 0.638503073 | count | 1 |
| ADIPOR1    | 0.4857412 | 0.432573  | 1.1229 | 0.262  | 0.638638628 | count | 1 |
| PGM2       | 0.4621973 | 0.4023661 | 1.1487 | 0.252  | 0.638673751 | count | 1 |
| CLK1       | 0.4500211 | 0.2510505 | 1.7926 | 0.074  | 0.638963121 | count | 1 |
| PSPC1      | 0.4788891 | 0.4113026 | 1.1643 | 0.245  | 0.639602178 | count | 1 |
| MLH1       | 0.5105162 | 0.568874  | 0.8974 | 0.37   | 0.639915963 | count | 1 |
| PRKAR1A    | 0.4555241 | 0.3177573 | 1.4336 | 0.153  | 0.640030392 | count | 1 |
| FAM117B    | 0.5189174 | 0.7317352 | 0.7092 | 0.479  | 0.640034204 | count | 1 |
| FO393401.1 | 0.4711702 | 0.4111813 | 1.1459 | 0.253  | 0.640060446 | count | 1 |
| HIBADH     | 0.5296965 | 0.7297518 | 0.7259 | 0.468  | 0.640177164 | count | 1 |
| NIPAL3     | 0.4798257 | 0.8269181 | 0.5803 | 0.5621 | 0.640856273 | count | 1 |
| MAP3K10    | 0.7407505 | 1.012306  | 0.7317 | 0.465  | 0.641377171 | count | 1 |
| FBXO44     | 0.545971  | 0.8225956 | 0.6637 | 0.507  | 0.642650936 | count | 1 |
| SPTY2D1    | 0.4746295 | 0.3214159 | 1.4767 | 0.141  | 0.642983482 | count | 1 |
| PDPK1      | 0.5321355 | 0.6360828 | 0.8366 | 0.403  | 0.643140881 | count | 1 |
| SYT11      | 0.7428239 | 0.7916756 | 0.9383 | 0.349  | 0.643187617 | count | 1 |
| ZNF639     | 0.4976479 | 0.7312095 | 0.6806 | 0.497  | 0.644836227 | count | 1 |
| PNMA1      | 1.0355134 | 0.6708851 | 1.5435 | 0.124  | 0.644899021 | count | 1 |
| LIX1L      | 0.4742667 | 0.4022551 | 1.179  | 0.239  | 0.645913244 | count | 1 |
| ECHDC1     | 0.462731  | 0.3101745 | 1.4918 | 0.137  | 0.647026972 | count | 1 |
| B4GALT4    | 0.535621  | 0.4722354 | 1.1342 | 0.258  | 0.647376194 | count | 1 |
| KLC1       | 0.4998741 | 0.5676138 | 0.8807 | 0.379  | 0.647730772 | count | 1 |
| SACS       | 0.5006466 | 0.6349412 | 0.7885 | 0.431  | 0.648735189 | count | 1 |
| BROX       | 0.467362  | 0.3762831 | 1.242  | 0.215  | 0.648946995 | count | 1 |
| PPP1R12B   | 1.0422407 | 1.0564084 | 0.9866 | 0.3246 | 0.649037055 | count | 1 |
| MRPL12     | 0.4699659 | 0.4005223 | 1.1734 | 0.242  | 0.649424082 | count | 1 |
| BSG        | 0.4560201 | 0.1888568 | 2.4146 | 0.0163 | 0.649442844 | count | 1 |
| HIRIP3     | 0.4910328 | 0.6112764 | 0.8033 | 0.422  | 0.64944895  | count | 1 |
| LRRC14     | 0.5265294 | 0.7091989 | 0.7424 | 0.458  | 0.649468631 | count | 1 |
| UBE2V1     | 0.5265294 | 0.8511773 | 0.6186 | 0.537  | 0.649468631 | count | 1 |
| SLC35F5    | 0.5265294 | 0.8819373 | 0.597  | 0.551  | 0.649468631 | count | 1 |
| ANAPC10    | 0.5064735 | 0.5616092 | 0.9018 | 0.368  | 0.650306402 | count | 1 |
| IMMP1L     | 0.4921081 | 0.6264783 | 0.7855 | 0.433  | 0.650875135 | count | 1 |
| L3MBTL2    | 0.5072649 | 0.7868601 | 0.6447 | 0.52   | 0.65132627  | count | 1 |
| SPATA33    | 0.7522634 | 0.8968733 | 0.8388 | 0.402  | 0.651427318 | count | 1 |
| RNF44      | 0.492932  | 0.5107995 | 0.965  | 0.335  | 0.651967878 | count | 1 |
| TMCO4      | 0.5140016 | 0.5532089 | 0.9291 | 0.354  | 0.652845836 | count | 1 |
| TBRG4      | 0.6057157 | 0.907866  | 0.6672 | 0.505  | 0.653725227 | count | 1 |
| PCNX2      | 0.6057157 | 0.9103884 | 0.6653 | 0.506  | 0.653725227 | count | 1 |

|            |           |           |        |          |             |       |   |
|------------|-----------|-----------|--------|----------|-------------|-------|---|
| P DPR      | 0.5759726 | 0.890329  | 0.6469 | 0.518    | 0.654231807 | count | 1 |
| X POT      | 0.5759726 | 0.9214513 | 0.6251 | 0.532    | 0.654231807 | count | 1 |
| MRPL10     | 0.4769499 | 0.3813728 | 1.2506 | 0.212    | 0.655001874 | count | 1 |
| MON1A      | 0.7565224 | 1.063215  | 0.7115 | 0.4773   | 0.655143492 | count | 1 |
| CCNF       | 0.7565224 | 1.122504  | 0.674  | 0.501    | 0.655143492 | count | 1 |
| TGFB111    | 0.7565224 | 1.122504  | 0.674  | 0.501    | 0.655143492 | count | 1 |
| MALINC1    | 0.7565224 | 1.221282  | 0.6194 | 0.536    | 0.655143492 | count | 1 |
| ULBP2      | 0.7565224 | 1.221282  | 0.6194 | 0.536    | 0.655143492 | count | 1 |
| SLC9A1     | 0.7565224 | 1.4177025 | 0.5336 | 0.594    | 0.655143492 | count | 1 |
| NME3       | 0.4611695 | 0.2538847 | 1.8165 | 0.0702   | 0.656084579 | count | 1 |
| PRH1       | 0.49388   | 0.6251431 | 0.79   | 0.43     | 0.656635416 | count | 1 |
| RBM5       | 0.4866123 | 0.3832219 | 1.2698 | 0.205    | 0.657249951 | count | 1 |
| BAALC      | 0.5119619 | 0.588433  | 0.87   | 0.385    | 0.657379224 | count | 1 |
| CRIP2      | 0.5244808 | 0.7491834 | 0.7001 | 0.484    | 0.657497457 | count | 1 |
| DDIT4      | 0.4571807 | 0.122598  | 3.7291 | 0.000227 | 0.657988609 | count | 1 |
| DDX17      | 0.4671353 | 0.1974047 | 2.3664 | 0.0186   | 0.658165094 | count | 1 |
| SPOUT1     | 0.5083758 | 0.7604262 | 0.6685 | 0.504    | 0.658784714 | count | 1 |
| PTAR1      | 0.4785056 | 0.5133151 | 0.9322 | 0.352    | 0.659326519 | count | 1 |
| KLHDC2     | 0.4820062 | 0.4293928 | 1.1225 | 0.262    | 0.660736271 | count | 1 |
| TCEA2      | 0.48558   | 0.4276792 | 1.1354 | 0.257    | 0.661350216 | count | 1 |
| IBA57      | 0.5361304 | 0.6086437 | 0.8809 | 0.379    | 0.661367761 | count | 1 |
| ARRDC3     | 0.4689883 | 0.286236  | 1.6385 | 0.102    | 0.661792746 | count | 1 |
| RAD1       | 0.4988697 | 0.570737  | 0.8741 | 0.383    | 0.663286658 | count | 1 |
| STX2       | 0.5019604 | 0.6553256 | 0.766  | 0.444    | 0.663942235 | count | 1 |
| FHL1       | 0.5233614 | 0.8665069 | 0.604  | 0.546    | 0.664780743 | count | 1 |
| DENND4C    | 0.5236085 | 0.6208321 | 0.8434 | 0.4      | 0.665095817 | count | 1 |
| MYO9A      | 0.5236085 | 0.6962499 | 0.752  | 0.453    | 0.665095817 | count | 1 |
| PELI2      | 1.07001   | 1.1435    | 0.9357 | 0.35     | 0.66606923  | count | 1 |
| AC067852.2 | 1.07001   | 1.1435    | 0.9357 | 0.35     | 0.66606923  | count | 1 |
| CLSPN      | 1.07001   | 1.303999  | 0.8206 | 0.412    | 0.66606923  | count | 1 |
| WDR26      | 1.07001   | 1.303999  | 0.8206 | 0.412    | 0.66606923  | count | 1 |
| FASTKD3    | 1.07001   | 1.303999  | 0.8206 | 0.412    | 0.66606923  | count | 1 |
| AP002748.3 | 1.07001   | 1.303999  | 0.8206 | 0.412    | 0.66606923  | count | 1 |
| ITPRIPL2   | 1.07001   | 1.505516  | 0.7107 | 0.4778   | 0.66606923  | count | 1 |
| GALNT3     | 0.5313308 | 0.6586039 | 0.8068 | 0.42     | 0.666121247 | count | 1 |
| DHDDS      | 0.5864007 | 0.7163053 | 0.8186 | 0.414    | 0.666154629 | count | 1 |
| NADK2      | 0.5864007 | 0.7288011 | 0.8046 | 0.422    | 0.666154629 | count | 1 |
| KDM3A      | 0.5864007 | 0.7817264 | 0.7501 | 0.454    | 0.666154629 | count | 1 |
| XPO1       | 0.5101746 | 0.3697659 | 1.3797 | 0.169    | 0.666330076 | count | 1 |
| FAHD2A     | 0.7696242 | 0.8740567 | 0.8805 | 0.379    | 0.666569473 | count | 1 |
| TSTD2      | 0.7696242 | 0.7429705 | 1.0359 | 0.301    | 0.666569499 | count | 1 |
| ZFP1       | 0.7696242 | 0.9743034 | 0.7899 | 0.4302   | 0.666569499 | count | 1 |
| TXNDC17    | 0.4747125 | 0.3600098 | 1.3186 | 0.188    | 0.667014929 | count | 1 |
| RICTOR     | 0.4940005 | 0.537568  | 0.919  | 0.359    | 0.667250001 | count | 1 |
| LYSMD2     | 0.4827577 | 0.3190383 | 1.5132 | 0.131    | 0.668004473 | count | 1 |

|          |           |           |        |          |             |       |   |
|----------|-----------|-----------|--------|----------|-------------|-------|---|
| YPEL5    | 0.4663841 | 0.1667503 | 2.7969 | 0.0055   | 0.668697611 | count | 1 |
| STK39    | 0.5266649 | 0.4132991 | 1.2743 | 0.203    | 0.668992999 | count | 1 |
| API5     | 0.5088074 | 0.5496097 | 0.9258 | 0.355    | 0.669056839 | count | 1 |
| ZNF184   | 0.6718417 | 0.7944793 | 0.8456 | 0.398    | 0.669915977 | count | 1 |
| PNPLA4   | 0.6218282 | 0.8605197 | 0.7226 | 0.47     | 0.671243237 | count | 1 |
| BMI1     | 0.6218282 | 0.8605197 | 0.7226 | 0.47     | 0.671243237 | count | 1 |
| UBQLN4   | 0.6218282 | 0.8648851 | 0.719  | 0.473    | 0.671243237 | count | 1 |
| MTR      | 0.5143214 | 0.5933092 | 0.8669 | 0.387    | 0.671762697 | count | 1 |
| RASSF3   | 0.5291076 | 0.6581511 | 0.8039 | 0.422    | 0.672107611 | count | 1 |
| ZNF831   | 0.7763873 | 0.5210961 | 1.4899 | 0.137    | 0.672463828 | count | 1 |
| HSH2D    | 0.4817804 | 0.3433032 | 1.4034 | 0.161    | 0.672682698 | count | 1 |
| CSNK1E   | 0.5566781 | 0.7218398 | 0.7712 | 0.441    | 0.672960778 | count | 1 |
| IL12RB1  | 0.6243083 | 0.8480897 | 0.7361 | 0.462    | 0.673939155 | count | 1 |
| KLF6     | 0.468371  | 0.1316991 | 3.5564 | 0.000432 | 0.674538185 | count | 1 |
| RWDD4    | 0.5032027 | 0.4676883 | 1.0759 | 0.283    | 0.674932819 | count | 1 |
| UBE2E3   | 0.4860884 | 0.3024974 | 1.6069 | 0.109    | 0.67498201  | count | 1 |
| EXOSC10  | 0.6254755 | 0.6935983 | 0.9018 | 0.368    | 0.67520787  | count | 1 |
| PHF10    | 0.5020323 | 0.4626961 | 1.085  | 0.279    | 0.675857037 | count | 1 |
| TMED7    | 0.5116306 | 0.5394309 | 0.9485 | 0.344    | 0.676767542 | count | 1 |
| TYW1     | 0.5751103 | 0.6884865 | 0.8353 | 0.404    | 0.677153664 | count | 1 |
| LRRC28   | 0.5751103 | 0.7589743 | 0.7577 | 0.449    | 0.677153664 | count | 1 |
| DCK      | 0.4910328 | 0.3919316 | 1.2529 | 0.211    | 0.67762619  | count | 1 |
| TRMT2A   | 0.5499727 | 0.6861163 | 0.8016 | 0.423    | 0.678522103 | count | 1 |
| MRPS26   | 0.4789511 | 0.3097058 | 1.5465 | 0.123    | 0.679098922 | count | 1 |
| HAUS6    | 0.550469  | 0.7211123 | 0.7634 | 0.446    | 0.679137118 | count | 1 |
| PRPF31   | 0.4945534 | 0.3796173 | 1.3028 | 0.194    | 0.679215619 | count | 1 |
| CYREN    | 0.5620164 | 0.8025772 | 0.7003 | 0.484    | 0.679446148 | count | 1 |
| RRM2B    | 0.5982858 | 0.8230926 | 0.7269 | 0.468    | 0.679741068 | count | 1 |
| SCAANT1  | 0.5982858 | 1.11043   | 0.5388 | 0.5904   | 0.679741068 | count | 1 |
| MBTPS1   | 0.5006811 | 0.4568137 | 1.096  | 0.274    | 0.680229062 | count | 1 |
| PMS2     | 0.6303681 | 0.7849379 | 0.8031 | 0.423    | 0.680525612 | count | 1 |
| GGCX     | 0.536495  | 0.7303871 | 0.7345 | 0.463    | 0.681526835 | count | 1 |
| IMPAD1   | 0.5153962 | 0.5676685 | 0.9079 | 0.365    | 0.681761655 | count | 1 |
| CYSTEM1  | 0.4866656 | 0.3403892 | 1.4297 | 0.154    | 0.681895142 | count | 1 |
| SH3GLB2  | 0.5052113 | 0.4712504 | 1.0721 | 0.284    | 0.682423776 | count | 1 |
| NFATC2IP | 0.5161949 | 0.5310477 | 0.972  | 0.332    | 0.682820918 | count | 1 |
| C8orf82  | 0.5137226 | 0.4952702 | 1.0373 | 0.3      | 0.683085049 | count | 1 |
| SPATC1L  | 0.5382917 | 0.654352  | 0.8226 | 0.411    | 0.683817638 | count | 1 |
| FNDC3A   | 0.6020204 | 0.5062199 | 1.1892 | 0.235    | 0.684009723 | count | 1 |
| TRNAU1AP | 0.5022007 | 0.4737668 | 1.06   | 0.29     | 0.684028773 | count | 1 |
| CASC4    | 0.4911739 | 0.4741247 | 1.036  | 0.301    | 0.684075268 | count | 1 |
| AP2A1    | 0.545971  | 0.8374803 | 0.6519 | 0.515    | 0.68455133  | count | 1 |
| MSANTD3  | 0.5669953 | 0.7009061 | 0.8089 | 0.419    | 0.685494584 | count | 1 |
| UGGT1    | 0.6874091 | 0.8630895 | 0.7965 | 0.426    | 0.685553051 | count | 1 |
| ZNF195   | 0.5250087 | 0.5327313 | 0.9855 | 0.325    | 0.68576348  | count | 1 |

|            |           |           |        |        |             |       |   |
|------------|-----------|-----------|--------|--------|-------------|-------|---|
| SUMO3      | 0.4946054 | 0.3063489 | 1.6145 | 0.107  | 0.686067297 | count | 1 |
| GIMAP1     | 0.4922472 | 0.3194144 | 1.5411 | 0.124  | 0.68618057  | count | 1 |
| EDEM1      | 0.5834019 | 0.7062326 | 0.8261 | 0.409  | 0.68696937  | count | 1 |
| OAS1       | 0.5057596 | 0.6899579 | 0.733  | 0.464  | 0.687141474 | count | 1 |
| BAG3       | 0.7966852 | 0.9022382 | 0.883  | 0.378  | 0.690138292 | count | 1 |
| PLEKHG3    | 0.7966852 | 0.9853351 | 0.8085 | 0.419  | 0.690138292 | count | 1 |
| AC079305.1 | 0.7966852 | 1.094321  | 0.728  | 0.467  | 0.690138292 | count | 1 |
| KCTD13     | 0.7966852 | 1.094321  | 0.728  | 0.467  | 0.690138292 | count | 1 |
| MAN2B1     | 0.7966852 | 1.094321  | 0.728  | 0.467  | 0.690138292 | count | 1 |
| FANCL      | 0.7966852 | 1.240273  | 0.6423 | 0.5211 | 0.690138292 | count | 1 |
| UBASH3B    | 0.5722324 | 0.6823568 | 0.8386 | 0.402  | 0.691856341 | count | 1 |
| ADCK5      | 0.5875691 | 0.8207821 | 0.7159 | 0.475  | 0.691902142 | count | 1 |
| ABCC1      | 0.5875691 | 0.9458158 | 0.6212 | 0.535  | 0.691902142 | count | 1 |
| VPS35L     | 0.5875691 | 0.9747148 | 0.6028 | 0.547  | 0.691902142 | count | 1 |
| TCF7L2     | 0.5875691 | 1.0216157 | 0.5751 | 0.566  | 0.691902142 | count | 1 |
| LMF1       | 0.5875691 | 1.1179051 | 0.5256 | 0.6    | 0.691902142 | count | 1 |
| HSD11B1L   | 0.5875691 | 1.1179051 | 0.5256 | 0.6    | 0.691902142 | count | 1 |
| MGRN1      | 0.5233381 | 0.5806864 | 0.9012 | 0.368  | 0.692294353 | count | 1 |
| PAF1       | 0.5236731 | 0.4894684 | 1.0699 | 0.285  | 0.692738629 | count | 1 |
| ARL2BP     | 0.497401  | 0.3274762 | 1.5189 | 0.13   | 0.692757443 | count | 1 |
| FOXJ3      | 0.5092815 | 0.384865  | 1.3233 | 0.187  | 0.69369016  | count | 1 |
| SUPT3H     | 0.5532832 | 0.5596753 | 0.9886 | 0.324  | 0.693755724 | count | 1 |
| NIFK-AS1   | 0.6106094 | 0.8514982 | 0.7171 | 0.474  | 0.693825882 | count | 1 |
| EPS15L1    | 0.695762  | 0.7078197 | 0.983  | 0.326  | 0.693939473 | count | 1 |
| GART       | 0.5216791 | 0.5689113 | 0.917  | 0.36   | 0.696895466 | count | 1 |
| ZNF302     | 0.7001958 | 0.6212952 | 1.127  | 0.261  | 0.698389968 | count | 1 |
| PTTG1      | 0.5127759 | 0.40512   | 1.2657 | 0.207  | 0.698458037 | count | 1 |
| PUS1       | 0.5931493 | 0.7302017 | 0.8123 | 0.417  | 0.698507038 | count | 1 |
| ZNF407     | 0.5931493 | 0.778279  | 0.7621 | 0.447  | 0.698507038 | count | 1 |
| SLC10A7    | 0.5931493 | 0.805902  | 0.736  | 0.462  | 0.698507038 | count | 1 |
| FBRSL1     | 0.5931493 | 0.8170019 | 0.726  | 0.468  | 0.698507038 | count | 1 |
| USF3       | 0.5498892 | 0.5694428 | 0.9657 | 0.335  | 0.698603858 | count | 1 |
| BDH2       | 0.5443732 | 0.549337  | 0.991  | 0.322  | 0.699143926 | count | 1 |
| CDC42SE1   | 0.4899215 | 0.1871678 | 2.6176 | 0.0093 | 0.699297393 | count | 1 |
| MRPL47     | 0.5113126 | 0.3868248 | 1.3218 | 0.187  | 0.699584506 | count | 1 |
| EDC3       | 1.1254871 | 1.0790465 | 1.043  | 0.2977 | 0.699844955 | count | 1 |
| GALNS      | 0.7019468 | 0.8356898 | 0.84   | 0.402  | 0.70014732  | count | 1 |
| PEX10      | 0.7019468 | 0.9495329 | 0.7393 | 0.46   | 0.70014732  | count | 1 |
| UBR1       | 0.5403903 | 0.5875003 | 0.9198 | 0.358  | 0.700407029 | count | 1 |
| COQ10B     | 0.5061903 | 0.2739389 | 1.8478 | 0.0655 | 0.700471597 | count | 1 |
| EMC2       | 0.5416242 | 0.5483794 | 0.9877 | 0.324  | 0.702011107 | count | 1 |
| MDM1       | 0.7045575 | 0.8318629 | 0.847  | 0.398  | 0.702767251 | count | 1 |
| DCAF6      | 0.7045575 | 0.8894962 | 0.7921 | 0.429  | 0.702767251 | count | 1 |
| TBC1D24    | 0.7045575 | 0.9253184 | 0.7614 | 0.447  | 0.702767251 | count | 1 |
| ALKBH5     | 0.5476459 | 0.5027489 | 1.0893 | 0.277  | 0.703360666 | count | 1 |

|            |           |           |        |        |             |       |   |
|------------|-----------|-----------|--------|--------|-------------|-------|---|
| STAT4      | 0.535621  | 0.332937  | 1.6088 | 0.109  | 0.704414298 | count | 1 |
| LRMDA      | 0.5828615 | 0.775378  | 0.7517 | 0.453  | 0.704766811 | count | 1 |
| SLC35C1    | 0.8142363 | 1.020122  | 0.7982 | 0.425  | 0.705400169 | count | 1 |
| TCTEX1D2   | 0.5718453 | 0.6251586 | 0.9147 | 0.361  | 0.705624118 | count | 1 |
| AC074032.1 | 0.6543103 | 0.9027299 | 0.7248 | 0.469  | 0.706538761 | count | 1 |
| BCOR       | 0.6544048 | 0.6654855 | 0.9833 | 0.326  | 0.706641404 | count | 1 |
| KCTD11     | 0.654561  | 1.182424  | 0.5536 | 0.5803 | 0.706811059 | count | 1 |
| SLC25A22   | 0.6548686 | 0.917004  | 0.7141 | 0.476  | 0.707145156 | count | 1 |
| GALNT11    | 0.5189174 | 0.4663052 | 1.1128 | 0.267  | 0.708484062 | count | 1 |
| NUDT4      | 0.526373  | 0.539236  | 0.9761 | 0.33   | 0.708694458 | count | 1 |
| CXCR6      | 0.5062272 | 0.2482825 | 2.0389 | 0.0423 | 0.709328888 | count | 1 |
| NDEL1      | 0.5309997 | 0.4088956 | 1.2986 | 0.195  | 0.709374305 | count | 1 |
| HM13       | 0.5098545 | 0.315318  | 1.617  | 0.107  | 0.709457841 | count | 1 |
| RGS19      | 0.5081134 | 0.3079988 | 1.6497 | 0.1    | 0.709487858 | count | 1 |
| PTGER4     | 0.5052214 | 0.2551262 | 1.9803 | 0.0485 | 0.70954994  | count | 1 |
| PDCD6IP    | 0.5156263 | 0.3403924 | 1.5148 | 0.131  | 0.710549647 | count | 1 |
| PFDN4      | 0.5410273 | 0.3988961 | 1.3563 | 0.176  | 0.71154273  | count | 1 |
| PGM1       | 0.5893853 | 0.6947632 | 0.8483 | 0.397  | 0.712689983 | count | 1 |
| C5orf24    | 0.5328411 | 0.5516363 | 0.9659 | 0.335  | 0.714773714 | count | 1 |
| CUL4B      | 0.5629764 | 0.6682323 | 0.8425 | 0.4    | 0.715287842 | count | 1 |
| AL109955.1 | 0.5797745 | 0.8400875 | 0.6901 | 0.491  | 0.715447577 | count | 1 |
| C5orf51    | 0.8260566 | 0.6956014 | 1.1875 | 0.236  | 0.715667066 | count | 1 |
| RAB39B     | 0.6627558 | 0.6725901 | 0.9854 | 0.325  | 0.715710609 | count | 1 |
| NEK7       | 0.5650043 | 0.5661636 | 0.998  | 0.319  | 0.717872916 | count | 1 |
| LRP10      | 0.5258013 | 0.3447973 | 1.525  | 0.128  | 0.717897615 | count | 1 |
| XPO4       | 0.7203559 | 0.7243804 | 0.9944 | 0.321  | 0.718615062 | count | 1 |
| KCNAB2     | 0.5733809 | 0.4987284 | 1.1497 | 0.251  | 0.719051165 | count | 1 |
| FAM91A1    | 0.5551243 | 0.6063835 | 0.9155 | 0.361  | 0.71956043  | count | 1 |
| IRF4       | 0.6333982 | 0.890656  | 0.7112 | 0.477  | 0.719862475 | count | 1 |
| AC147067.1 | 0.6333982 | 0.9466476 | 0.6691 | 0.504  | 0.719862475 | count | 1 |
| KCTD6      | 0.6333982 | 0.9878099 | 0.6412 | 0.522  | 0.719862475 | count | 1 |
| CYSLTR1    | 0.5251092 | 0.3797487 | 1.3828 | 0.168  | 0.719917397 | count | 1 |
| CTDSP2     | 0.5316782 | 0.5503059 | 0.9662 | 0.335  | 0.72042478  | count | 1 |
| FGD5-AS1   | 0.544563  | 0.3954383 | 1.3771 | 0.169  | 0.720441491 | count | 1 |
| C9orf3     | 1.160136  | 0.8195849 | 1.4155 | 0.158  | 0.720757029 | count | 1 |
| ADCK1      | 1.160136  | 0.8195849 | 1.4155 | 0.158  | 0.720757029 | count | 1 |
| PLS1       | 1.160136  | 1.196596  | 0.9695 | 0.333  | 0.720757029 | count | 1 |
| MIPEP      | 1.160136  | 1.196596  | 0.9695 | 0.333  | 0.720757029 | count | 1 |
| SNX29      | 0.5448859 | 0.6380617 | 0.854  | 0.394  | 0.720869674 | count | 1 |
| PTPN9      | 0.5842061 | 0.6201715 | 0.942  | 0.347  | 0.720937465 | count | 1 |
| DHRS7B     | 0.8321855 | 0.912337  | 0.9121 | 0.362  | 0.720986656 | count | 1 |
| MYBL1      | 0.5083562 | 0.2590937 | 1.9621 | 0.0506 | 0.721273076 | count | 1 |
| NEDD1      | 0.5680853 | 0.7050418 | 0.8057 | 0.421  | 0.721800331 | count | 1 |
| POLD3      | 0.7237997 | 0.9240372 | 0.7833 | 0.434  | 0.722068095 | count | 1 |
| CRIP1      | 0.5074517 | 0.2047456 | 2.4784 | 0.0137 | 0.722448594 | count | 1 |

|              |           |           |        |        |             |       |   |
|--------------|-----------|-----------|--------|--------|-------------|-------|---|
| NUTF2        | 0.5140512 | 0.3146921 | 1.6335 | 0.103  | 0.723044892 | count | 1 |
| FNIP1        | 0.5262776 | 0.380654  | 1.3826 | 0.168  | 0.724089569 | count | 1 |
| TOMM40       | 0.5257267 | 0.4705983 | 1.1171 | 0.265  | 0.724486666 | count | 1 |
| VEGFB        | 0.5170981 | 0.3420533 | 1.5117 | 0.1316 | 0.724574274 | count | 1 |
| SLC39A13     | 1.166515  | 0.7462153 | 1.5632 | 0.119  | 0.724590543 | count | 1 |
| RAMMET       | 0.5324414 | 0.4150116 | 1.283  | 0.2    | 0.725289441 | count | 1 |
| C16orf72     | 0.5597526 | 0.4909173 | 1.1402 | 0.255  | 0.725576569 | count | 1 |
| CCDC47       | 0.5240882 | 0.3673477 | 1.4267 | 0.155  | 0.726165758 | count | 1 |
| TRAF3IP2-AS1 | 0.6389425 | 0.8619292 | 0.7413 | 0.459  | 0.726194932 | count | 1 |
| ZNF106       | 0.5241306 | 0.3367263 | 1.5565 | 0.121  | 0.726224573 | count | 1 |
| ZFP14        | 0.6005347 | 0.6546949 | 0.9173 | 0.36   | 0.726229251 | count | 1 |
| HAUS2        | 0.5560954 | 0.49743   | 1.1179 | 0.264  | 0.726484128 | count | 1 |
| CDK11B       | 0.5273047 | 0.3715743 | 1.4191 | 0.157  | 0.726664034 | count | 1 |
| FBXO45       | 0.5564896 | 0.5874471 | 0.9473 | 0.344  | 0.727000444 | count | 1 |
| NAA60        | 0.5663619 | 0.5776225 | 0.9805 | 0.328  | 0.727473472 | count | 1 |
| LYPLA1       | 0.5228315 | 0.3279146 | 1.5944 | 0.112  | 0.727534148 | count | 1 |
| ARFGAP2      | 0.5532714 | 0.4862296 | 1.1379 | 0.256  | 0.727686316 | count | 1 |
| SPPL3        | 0.5677355 | 0.6491473 | 0.8746 | 0.382  | 0.729243005 | count | 1 |
| RNF11        | 0.5816665 | 0.5482288 | 1.061  | 0.289  | 0.729478131 | count | 1 |
| STX5         | 0.5399983 | 0.4617363 | 1.1695 | 0.243  | 0.729504946 | count | 1 |
| ITSN2        | 0.5197271 | 0.3481209 | 1.493  | 0.136  | 0.730682536 | count | 1 |
| ACYP1        | 0.5420466 | 0.4355356 | 1.2446 | 0.214  | 0.732276958 | count | 1 |
| PDLIM1       | 0.5229385 | 0.3635434 | 1.4384 | 0.151  | 0.732297516 | count | 1 |
| DMWD         | 0.5841647 | 0.6681049 | 0.8744 | 0.383  | 0.732621788 | count | 1 |
| KMT5A        | 0.5441401 | 0.4369618 | 1.2453 | 0.214  | 0.732661856 | count | 1 |
| MALSU1       | 0.5425387 | 0.5149417 | 1.0536 | 0.293  | 0.732942924 | count | 1 |
| IFT88        | 0.5845463 | 0.7465882 | 0.783  | 0.4342 | 0.733101974 | count | 1 |
| HADHA        | 0.5207964 | 0.2400572 | 2.1695 | 0.0308 | 0.733206445 | count | 1 |
| SLFN13       | 0.5324369 | 0.577589  | 0.9218 | 0.3573 | 0.733745522 | count | 1 |
| FBXL3        | 0.5579651 | 0.4521604 | 1.234  | 0.218  | 0.733874525 | count | 1 |
| DRAXIN       | 0.5553242 | 0.5565734 | 0.9978 | 0.319  | 0.734711114 | count | 1 |
| C3orf58      | 0.6465699 | 0.6388408 | 1.0121 | 0.312  | 0.734905196 | count | 1 |
| USP42        | 0.5955264 | 0.7564691 | 0.7872 | 0.432  | 0.734959701 | count | 1 |
| ZNF174       | 0.6808336 | 0.8395838 | 0.8109 | 0.418  | 0.735334923 | count | 1 |
| KMT2E-AS1    | 0.6808395 | 0.6491891 | 1.0488 | 0.295  | 0.735341329 | count | 1 |
| PGBD2        | 0.6808395 | 0.7274341 | 0.9359 | 0.35   | 0.735341329 | count | 1 |
| OSM          | 0.5307167 | 0.4365437 | 1.2157 | 0.225  | 0.735360366 | count | 1 |
| FKBP1B       | 0.7383038 | 1.0056691 | 0.7341 | 0.463  | 0.736604708 | count | 1 |
| GNPDA1       | 0.7383038 | 1.0056691 | 0.7341 | 0.463  | 0.736604708 | count | 1 |
| FRZB         | 0.5474284 | 0.8264919 | 0.6624 | 0.508  | 0.73709749  | count | 1 |
| TPD52L2      | 0.5577458 | 0.6502277 | 0.8578 | 0.392  | 0.73792209  | count | 1 |
| UNC13D       | 0.564989  | 0.4998072 | 1.1304 | 0.259  | 0.738132419 | count | 1 |
| GGA1         | 0.5482769 | 0.4062832 | 1.3495 | 0.178  | 0.738242028 | count | 1 |
| SPRTN        | 0.5697058 | 0.5289119 | 1.0771 | 0.282  | 0.738513579 | count | 1 |
| HERC4        | 0.5452682 | 0.4792804 | 1.1377 | 0.256  | 0.738870804 | count | 1 |

|            |           |           |        |        |             |       |   |
|------------|-----------|-----------|--------|--------|-------------|-------|---|
| ZNF839     | 0.8531766 | 0.8610911 | 0.9908 | 0.323  | 0.739184947 | count | 1 |
| FECH       | 0.570249  | 0.5212346 | 1.094  | 0.275  | 0.739219568 | count | 1 |
| ZBTB7B     | 0.6112918 | 0.7541947 | 0.8105 | 0.418  | 0.7392899   | count | 1 |
| TTC39C     | 0.5214331 | 0.2766451 | 1.8848 | 0.0603 | 0.739683129 | count | 1 |
| ACAT1      | 0.5821631 | 0.584394  | 0.9962 | 0.32   | 0.73974409  | count | 1 |
| PRDM1      | 0.528793  | 0.2663456 | 1.9854 | 0.0479 | 0.740009461 | count | 1 |
| NDUFC1     | 0.5319303 | 0.3562496 | 1.4931 | 0.136  | 0.740208035 | count | 1 |
| POP4       | 0.5262729 | 0.3820341 | 1.3776 | 0.169  | 0.7402478   | count | 1 |
| ZNF250     | 0.5711287 | 0.5769466 | 0.9899 | 0.323  | 0.740362948 | count | 1 |
| DPH6       | 0.5543033 | 0.6420162 | 0.8634 | 0.389  | 0.740571936 | count | 1 |
| MPV17      | 0.5465217 | 0.4569452 | 1.196  | 0.233  | 0.740572155 | count | 1 |
| DDX31      | 0.6519432 | 0.7454985 | 0.8745 | 0.382  | 0.741040322 | count | 1 |
| GTPBP6     | 0.5474501 | 0.4597381 | 1.1908 | 0.235  | 0.741832248 | count | 1 |
| HMCES      | 0.5492413 | 0.4422339 | 1.242  | 0.215  | 0.742013498 | count | 1 |
| LYPLAL1    | 0.6528065 | 0.7609238 | 0.8579 | 0.392  | 0.742025947 | count | 1 |
| IFITM1     | 0.5193832 | 0.1761473 | 2.9486 | 0.0034 | 0.742480776 | count | 1 |
| TIMMDC1    | 0.5397562 | 0.4038026 | 1.3367 | 0.182  | 0.74265855  | count | 1 |
| PTCH2      | 1.1969573 | 1.0323193 | 1.1595 | 0.2471 | 0.742813767 | count | 1 |
| WARS       | 1.1969573 | 1.0547999 | 1.1348 | 0.2573 | 0.742813767 | count | 1 |
| CDC34      | 0.5409585 | 0.3370123 | 1.6052 | 0.109  | 0.743042497 | count | 1 |
| HSPBAP1    | 0.8577227 | 0.8895384 | 0.9642 | 0.336  | 0.743121717 | count | 1 |
| PGAP1      | 0.8577227 | 0.8987968 | 0.9543 | 0.341  | 0.743121717 | count | 1 |
| SRPRB      | 0.5350537 | 0.4855731 | 1.1019 | 0.271  | 0.743826864 | count | 1 |
| INO80C     | 0.6328307 | 0.7732591 | 0.8184 | 0.414  | 0.745456939 | count | 1 |
| NFE2L1     | 0.6328307 | 0.8740446 | 0.724  | 0.47   | 0.745456939 | count | 1 |
| PLEKHM2    | 0.5805392 | 0.5889134 | 0.9858 | 0.325  | 0.745736247 | count | 1 |
| AP1M1      | 0.5690662 | 0.5223404 | 1.0895 | 0.277  | 0.74850949  | count | 1 |
| C12orf49   | 0.5440121 | 0.4386902 | 1.2401 | 0.216  | 0.748521581 | count | 1 |
| ZNF433     | 0.6190392 | 0.8260484 | 0.7494 | 0.454  | 0.748694881 | count | 1 |
| EXTL3      | 0.6190392 | 0.9286534 | 0.6666 | 0.506  | 0.748694881 | count | 1 |
| N4BP3      | 0.5731014 | 0.5879603 | 0.9747 | 0.33   | 0.748756838 | count | 1 |
| STX1A      | 0.6070875 | 0.7832056 | 0.7751 | 0.439  | 0.749277927 | count | 1 |
| TSPAN14    | 0.5834739 | 0.4815553 | 1.2116 | 0.227  | 0.749516331 | count | 1 |
| CTSO       | 0.6952708 | 0.8164954 | 0.8515 | 0.395  | 0.750998357 | count | 1 |
| ACSL1      | 0.867691  | 0.991747  | 0.8749 | 0.382  | 0.751748257 | count | 1 |
| TOMM34     | 0.867691  | 0.991747  | 0.8749 | 0.382  | 0.751748257 | count | 1 |
| AL355075.4 | 0.867691  | 1.17548   | 0.7382 | 0.461  | 0.751748257 | count | 1 |
| AMPD2      | 0.5999824 | 0.9546947 | 0.6285 | 0.53   | 0.752524032 | count | 1 |
| ZBTB43     | 0.6005224 | 0.5229906 | 1.1482 | 0.252  | 0.753203396 | count | 1 |
| DAP        | 0.5639459 | 0.4635385 | 1.2166 | 0.225  | 0.753479769 | count | 1 |
| KTI12      | 0.5732639 | 0.5156662 | 1.1117 | 0.267  | 0.754043141 | count | 1 |
| AL355001.2 | 0.7565224 | 0.9483539 | 0.7977 | 0.426  | 0.75484858  | count | 1 |
| COPZ2      | 0.7565224 | 1.053465  | 0.7181 | 0.473  | 0.75484858  | count | 1 |
| ENDOG      | 0.6640552 | 0.6676557 | 0.9946 | 0.321  | 0.754866272 | count | 1 |
| PAFAH2     | 0.5706688 | 0.6173209 | 0.9244 | 0.356  | 0.755056728 | count | 1 |



|         |           |           |        |        |             |       |   |
|---------|-----------|-----------|--------|--------|-------------|-------|---|
| COPRS   | 0.5642036 | 0.5610625 | 1.0056 | 0.315  | 0.756926825 | count | 1 |
| PSMD3   | 0.5587657 | 0.4384539 | 1.2744 | 0.203  | 0.757190172 | count | 1 |
| BNIP1   | 0.5605986 | 0.4579087 | 1.2243 | 0.222  | 0.75738256  | count | 1 |
| LASP1   | 0.5560679 | 0.3578581 | 1.5539 | 0.121  | 0.75752272  | count | 1 |
| TBCD    | 0.5409188 | 0.3268877 | 1.6548 | 0.0989 | 0.758442437 | count | 1 |
| POM121  | 0.6438866 | 0.5922092 | 1.0873 | 0.278  | 0.758531265 | count | 1 |
| AP1G2   | 0.6438866 | 0.6217705 | 1.0356 | 0.301  | 0.758531265 | count | 1 |
| NCF1    | 0.5414187 | 0.2821767 | 1.9187 | 0.0559 | 0.758680542 | count | 1 |
| PYCR2   | 0.5463956 | 0.3547446 | 1.5403 | 0.124  | 0.758821687 | count | 1 |
| SLAMF7  | 0.5547533 | 0.3839581 | 1.4448 | 0.149  | 0.759110108 | count | 1 |
| SNIP1   | 0.6294168 | 0.581763  | 1.0819 | 0.28   | 0.761290683 | count | 1 |
| GALNT7  | 0.6296961 | 0.7927453 | 0.7943 | 0.428  | 0.761629651 | count | 1 |
| NPM3    | 0.6296961 | 0.7927453 | 0.7943 | 0.428  | 0.761629651 | count | 1 |
| RFC4    | 0.5757033 | 0.4943945 | 1.1645 | 0.245  | 0.761731543 | count | 1 |
| ZNF146  | 0.5880963 | 0.5701305 | 1.0315 | 0.303  | 0.762414229 | count | 1 |
| HEG1    | 0.5938974 | 0.7538513 | 0.7878 | 0.431  | 0.762941478 | count | 1 |
| PATJ    | 0.6324784 | 0.5569471 | 1.1356 | 0.257  | 0.765006221 | count | 1 |
| PELI1   | 1.2343612 | 1.158777  | 1.0652 | 0.288  | 0.765034007 | count | 1 |
| DBF4    | 0.554286  | 0.3743577 | 1.4806 | 0.14   | 0.766100802 | count | 1 |
| PARP2   | 0.5963569 | 0.6203344 | 0.9613 | 0.337  | 0.76610901  | count | 1 |
| PPP2R5A | 0.6335257 | 0.6009639 | 1.0542 | 0.293  | 0.766277154 | count | 1 |
| COQ7    | 0.6740995 | 0.6118516 | 1.1017 | 0.271  | 0.766328239 | count | 1 |
| ADRB2   | 0.5442145 | 0.268117  | 2.0298 | 0.0432 | 0.767739967 | count | 1 |
| KPNA6   | 0.5749029 | 0.5189197 | 1.1079 | 0.269  | 0.768146118 | count | 1 |
| RTKN    | 0.6353502 | 0.7065015 | 0.8993 | 0.369  | 0.768491197 | count | 1 |
| CYB5R1  | 0.5931493 | 0.5450465 | 1.0883 | 0.277  | 0.768980447 | count | 1 |
| TRAPPC3 | 0.556141  | 0.3524048 | 1.5781 | 0.116  | 0.769675827 | count | 1 |
| CYCS    | 0.5401324 | 0.1800954 | 2.9991 | 0.0029 | 0.770440588 | count | 1 |
| GZMH    | 0.5400233 | 0.2554364 | 2.1141 | 0.0353 | 0.770833492 | count | 1 |
| DNPEP   | 0.5593869 | 0.4192418 | 1.3343 | 0.183  | 0.772079444 | count | 1 |
| CMTR1   | 0.6013026 | 0.7801565 | 0.7707 | 0.441  | 0.772478184 | count | 1 |
| POLR3H  | 0.7151939 | 0.8117597 | 0.881  | 0.379  | 0.772599362 | count | 1 |
| CKAP5   | 0.6261591 | 0.7867592 | 0.7959 | 0.427  | 0.772892059 | count | 1 |
| SAC3D1  | 0.7162687 | 0.9034109 | 0.7928 | 0.428  | 0.773764186 | count | 1 |
| MGST2   | 0.568217  | 0.4845532 | 1.1727 | 0.242  | 0.774096211 | count | 1 |
| FEZ1    | 0.5770791 | 0.5207313 | 1.1082 | 0.269  | 0.774230052 | count | 1 |
| HTATIP2 | 0.5647275 | 0.4787309 | 1.1796 | 0.239  | 0.774307721 | count | 1 |
| GPN3    | 0.5665567 | 0.4755543 | 1.1914 | 0.234  | 0.775282267 | count | 1 |
| FBXW2   | 0.5576908 | 0.4633055 | 1.2037 | 0.23   | 0.775326801 | count | 1 |
| ZADH2   | 0.5836977 | 0.5760326 | 1.0133 | 0.312  | 0.776341948 | count | 1 |
| MAP3K11 | 0.6590171 | 0.6230387 | 1.0577 | 0.291  | 0.776418487 | count | 1 |
| SBF2    | 0.5988799 | 0.8280775 | 0.7232 | 0.47   | 0.776426743 | count | 1 |
| GRSF1   | 0.5687236 | 0.4344678 | 1.309  | 0.191  | 0.776587402 | count | 1 |
| WNT10A  | 0.683664  | 0.9654447 | 0.7081 | 0.479  | 0.777239375 | count | 1 |
| AKAP8L  | 0.564221  | 0.3447778 | 1.6365 | 0.103  | 0.777599029 | count | 1 |

|            |           |           |        |        |             |       |   |
|------------|-----------|-----------|--------|--------|-------------|-------|---|
| TMEM41B    | 0.5852016 | 0.5050603 | 1.1587 | 0.247  | 0.778345754 | count | 1 |
| DEDD       | 1.259205  | 0.8121517 | 1.5505 | 0.122  | 0.779684176 | count | 1 |
| TMEM39A    | 0.6618946 | 0.7656166 | 0.8645 | 0.388  | 0.779819492 | count | 1 |
| GBA        | 0.6618946 | 0.7694962 | 0.8602 | 0.39   | 0.779819492 | count | 1 |
| WDR11      | 0.7819408 | 0.9397102 | 0.8321 | 0.406  | 0.780270599 | count | 1 |
| PCMTD1     | 0.5526378 | 0.2562761 | 2.1564 | 0.0318 | 0.780709676 | count | 1 |
| COPS2      | 0.56049   | 0.3665928 | 1.5289 | 0.127  | 0.780714182 | count | 1 |
| NXT2       | 0.7827662 | 1.01546   | 0.7708 | 0.441  | 0.781095449 | count | 1 |
| TANC2      | 0.6468942 | 0.948861  | 0.6818 | 0.496  | 0.782497937 | count | 1 |
| TYW5       | 0.6650288 | 0.8508551 | 0.7816 | 0.435  | 0.783523579 | count | 1 |
| STMP1      | 0.5582331 | 0.2921205 | 1.911  | 0.0569 | 0.784855302 | count | 1 |
| TGDS       | 0.6359237 | 0.6565993 | 0.9685 | 0.334  | 0.784979345 | count | 1 |
| BOLA1      | 0.9067213 | 0.942809  | 0.9617 | 0.337  | 0.785444092 | count | 1 |
| RND3       | 0.9067213 | 0.942809  | 0.9617 | 0.337  | 0.785444092 | count | 1 |
| GRAMD1C    | 0.9067213 | 0.942809  | 0.9617 | 0.337  | 0.785444092 | count | 1 |
| FGFR1      | 0.9067213 | 0.942809  | 0.9617 | 0.337  | 0.785444092 | count | 1 |
| SGMS1-AS1  | 0.9067213 | 0.942809  | 0.9617 | 0.337  | 0.785444092 | count | 1 |
| DOT1L      | 0.9067213 | 0.942809  | 0.9617 | 0.337  | 0.785444092 | count | 1 |
| FOSB       | 0.5472365 | 0.1661292 | 3.294  | 0.0011 | 0.785665936 | count | 1 |
| ARMC5      | 0.618239  | 0.9517989 | 0.6495 | 0.516  | 0.785713416 | count | 1 |
| NSUN5      | 0.6022612 | 0.6711396 | 0.8974 | 0.37   | 0.786939517 | count | 1 |
| CSAD       | 0.5917264 | 0.6240463 | 0.9482 | 0.344  | 0.787039138 | count | 1 |
| AP3D1      | 0.6277879 | 0.6849772 | 0.9165 | 0.36   | 0.787498815 | count | 1 |
| MED27      | 0.581311  | 0.471981  | 1.2316 | 0.219  | 0.787786606 | count | 1 |
| TNRC6C     | 0.5770189 | 0.5158822 | 1.1185 | 0.264  | 0.787928629 | count | 1 |
| C16orf54   | 0.5528894 | 0.2182915 | 2.5328 | 0.0118 | 0.788169653 | count | 1 |
| DNAJB12    | 0.584463  | 0.4413171 | 1.3244 | 0.186  | 0.789673333 | count | 1 |
| ZNF449     | 0.9121911 | 0.8819212 | 1.0343 | 0.302  | 0.790155428 | count | 1 |
| AC098487.1 | 0.9121911 | 1.172756  | 0.7778 | 0.437  | 0.790155428 | count | 1 |
| BTBD7      | 0.6305555 | 0.4616564 | 1.3659 | 0.173  | 0.790979151 | count | 1 |
| CEP126     | 0.6717375 | 0.7921386 | 0.848  | 0.397  | 0.791451072 | count | 1 |
| MTERF4     | 0.5835907 | 0.4353728 | 1.3404 | 0.181  | 0.793063114 | count | 1 |
| BOP1       | 0.7354035 | 0.8198254 | 0.897  | 0.37   | 0.794492368 | count | 1 |
| MTG1       | 0.699258  | 1.054058  | 0.6634 | 0.508  | 0.795021523 | count | 1 |
| CYFIP1     | 0.699258  | 1.054058  | 0.6634 | 0.508  | 0.795021523 | count | 1 |
| DLGAP4     | 0.6446756 | 0.5334766 | 1.2084 | 0.228  | 0.79581111  | count | 1 |
| PPID       | 0.6031171 | 0.5707301 | 1.0567 | 0.291  | 0.798072128 | count | 1 |
| SVIL       | 0.6363842 | 0.7057364 | 0.9017 | 0.368  | 0.798308362 | count | 1 |
| CIDEB      | 0.5914899 | 0.549587  | 1.0762 | 0.283  | 0.799180415 | count | 1 |
| MOB3C      | 0.9241973 | 0.8695966 | 1.0628 | 0.289  | 0.800487001 | count | 1 |
| RINL       | 0.5838642 | 0.4506701 | 1.2955 | 0.196  | 0.800576319 | count | 1 |
| GNE        | 1.297061  | 1.211043  | 1.071  | 0.285  | 0.801833551 | count | 1 |
| BHLHE40    | 0.5648428 | 0.1961731 | 2.8793 | 0.0043 | 0.802909199 | count | 1 |
| UAP1L1     | 0.9282238 | 0.8865019 | 1.0471 | 0.296  | 0.803948759 | count | 1 |
| C2orf69    | 0.9282238 | 1.0366397 | 0.8954 | 0.371  | 0.803948759 | count | 1 |

|            |           |           |        |        |             |       |   |
|------------|-----------|-----------|--------|--------|-------------|-------|---|
| ZNF3       | 0.9282238 | 1.0366397 | 0.8954 | 0.371  | 0.803948759 | count | 1 |
| ATXN7L1    | 0.9282238 | 1.12223   | 0.8271 | 0.409  | 0.803948759 | count | 1 |
| 8-Sep      | 0.9282238 | 1.4600855 | 0.6357 | 0.5254 | 0.803948759 | count | 1 |
| ISOC2      | 0.6033305 | 0.5231287 | 1.1533 | 0.25   | 0.806191796 | count | 1 |
| AC092683.1 | 0.7469682 | 0.7616178 | 0.9808 | 0.327  | 0.807011209 | count | 1 |
| PSMA3-AS1  | 0.5807621 | 0.3248167 | 1.788  | 0.0747 | 0.807428482 | count | 1 |
| NAGLU      | 0.7106368 | 0.6174101 | 1.151  | 0.251  | 0.807990784 | count | 1 |
| FCRL6      | 0.6357904 | 0.5423277 | 1.1723 | 0.242  | 0.808069563 | count | 1 |
| FBXO21     | 0.5962734 | 0.4797812 | 1.2428 | 0.215  | 0.808089787 | count | 1 |
| GEMIN2     | 0.9333181 | 0.756115  | 1.2344 | 0.218  | 0.808326281 | count | 1 |
| GOLPH3     | 0.5934615 | 0.4361221 | 1.3608 | 0.175  | 0.8085305   | count | 1 |
| 3-Mar      | 0.65517   | 0.74636   | 0.8778 | 0.381  | 0.808796912 | count | 1 |
| TRIM37     | 0.6366045 | 0.6324936 | 1.0065 | 0.315  | 0.809106373 | count | 1 |
| HCG11      | 0.8111461 | 0.8105531 | 1.0007 | 0.318  | 0.809429525 | count | 1 |
| EPM2AIP1   | 0.6126404 | 0.5448498 | 1.1244 | 0.262  | 0.810694268 | count | 1 |
| STARD7     | 0.5873592 | 0.3687771 | 1.5927 | 0.112  | 0.811857403 | count | 1 |
| KRTCAP2    | 0.5745797 | 0.2519669 | 2.2804 | 0.0232 | 0.813386981 | count | 1 |
| HELQ       | 0.6279808 | 0.5532997 | 1.135  | 0.257  | 0.814232229 | count | 1 |
| CUTC       | 0.5965425 | 0.4162085 | 1.4333 | 0.153  | 0.81461888  | count | 1 |
| VPS13B     | 0.6340375 | 0.6936325 | 0.9141 | 0.361  | 0.814624326 | count | 1 |
| CHCHD7     | 0.5848936 | 0.4790539 | 1.2209 | 0.223  | 0.814732688 | count | 1 |
| ANO6       | 0.7565224 | 0.6803872 | 1.1119 | 0.267  | 0.817348296 | count | 1 |
| AC006033.2 | 0.7565224 | 0.9523662 | 0.7944 | 0.428  | 0.817348296 | count | 1 |
| KIF3B      | 0.6313663 | 0.639258  | 0.9877 | 0.324  | 0.818629435 | count | 1 |
| TNFRSF14   | 0.5971138 | 0.3678769 | 1.6231 | 0.106  | 0.818762177 | count | 1 |
| USP10      | 0.6083962 | 0.5099723 | 1.193  | 0.234  | 0.819321595 | count | 1 |
| MPZ        | 0.8248891 | 1.177818  | 0.7004 | 0.484  | 0.823130335 | count | 1 |
| GPC1       | 0.8248891 | 1.177818  | 0.7004 | 0.484  | 0.823130335 | count | 1 |
| TTI2       | 0.8248891 | 1.177818  | 0.7004 | 0.484  | 0.823130335 | count | 1 |
| BRCA2      | 0.8248891 | 1.177818  | 0.7004 | 0.484  | 0.823130335 | count | 1 |
| DPEP2      | 0.8248891 | 1.177818  | 0.7004 | 0.484  | 0.823130335 | count | 1 |
| MTHFSD     | 0.8248891 | 1.177818  | 0.7004 | 0.484  | 0.823130335 | count | 1 |
| POLR2J2    | 0.8248891 | 1.299356  | 0.6348 | 0.526  | 0.823130335 | count | 1 |
| CDC7       | 0.8248891 | 1.4207827 | 0.5806 | 0.5619 | 0.823130335 | count | 1 |
| PRSS21     | 0.8248891 | 1.4207827 | 0.5806 | 0.5619 | 0.823130335 | count | 1 |
| C20orf197  | 0.8248891 | 1.4207827 | 0.5806 | 0.5619 | 0.823130335 | count | 1 |
| EML4       | 0.5773361 | 0.1929512 | 2.9921 | 0.003  | 0.823443064 | count | 1 |
| GZF1       | 0.6260639 | 0.6131629 | 1.021  | 0.308  | 0.823628376 | count | 1 |
| TBCCD1     | 0.9526674 | 1.0989739 | 0.8669 | 0.3867 | 0.824929415 | count | 1 |
| GRINA      | 0.7019468 | 0.6573348 | 1.0679 | 0.286  | 0.827129217 | count | 1 |
| RNF170     | 0.7019468 | 0.8335806 | 0.8421 | 0.4    | 0.827129217 | count | 1 |
| ACTA2      | 0.6089255 | 0.5766061 | 1.0561 | 0.292  | 0.827531973 | count | 1 |
| ABCE1      | 0.6293411 | 0.4896594 | 1.2853 | 0.2    | 0.827946054 | count | 1 |
| DDX59      | 0.6230221 | 0.5129083 | 1.2147 | 0.225  | 0.82872888  | count | 1 |
| MDFIC      | 0.5866831 | 0.2672679 | 2.1951 | 0.0289 | 0.828827757 | count | 1 |

|            |           |           |        |          |             |       |             |
|------------|-----------|-----------|--------|----------|-------------|-------|-------------|
| METTL17    | 0.652495  | 0.5803168 | 1.1244 | 0.262    | 0.829340987 | count | 1           |
| CDKL1      | 0.8314041 | 0.8576276 | 0.9694 | 0.333    | 0.829620493 | count | 1           |
| EXOSC2     | 0.8314041 | 0.9130464 | 0.9106 | 0.363    | 0.829620493 | count | 1           |
| IDS        | 0.5848573 | 0.2056854 | 2.8435 | 0.00475  | 0.830658511 | count | 1           |
| SEC23A     | 0.7309427 | 0.7595896 | 0.9623 | 0.337    | 0.831120865 | count | 1           |
| BRMS1      | 0.6006071 | 0.3734215 | 1.6084 | 0.109    | 0.831271075 | count | 1           |
| FMNL1      | 0.6011048 | 0.3143173 | 1.9124 | 0.0567   | 0.831960424 | count | 1           |
| EXTL2      | 0.8341701 | 1.0683029 | 0.7808 | 0.4355   | 0.832374982 | count | 1           |
| AC020916.1 | 0.5850129 | 0.2285749 | 2.5594 | 0.0109   | 0.833612106 | count | 1           |
| SLC1A5     | 0.7081422 | 0.4635581 | 1.5276 | 0.128    | 0.834441944 | count | 1           |
| COASY      | 0.6501341 | 0.5499233 | 1.1822 | 0.238    | 0.835341054 | count | 1           |
| KATNBL1    | 0.6255709 | 0.4950091 | 1.2638 | 0.207    | 0.835950091 | count | 1           |
| RNF138     | 0.6287019 | 0.4162265 | 1.5105 | 0.132    | 0.836293613 | count | 1           |
| FURIN      | 0.6593059 | 0.7680109 | 0.8585 | 0.391    | 0.838012029 | count | 1           |
| GYG1       | 0.5988406 | 0.2771411 | 2.1608 | 0.0314   | 0.838108176 | count | 1           |
| FIZ1       | 0.7760078 | 0.9091096 | 0.8536 | 0.394    | 0.838414444 | count | 1           |
| ZNF254     | 0.7760078 | 0.9619356 | 0.8067 | 0.42     | 0.838414444 | count | 1           |
| BCL9L      | 0.776541  | 0.6794316 | 1.1429 | 0.254    | 0.838990573 | count | 1           |
| RFK        | 0.6938449 | 0.476756  | 1.4553 | 0.147    | 0.83942478  | count | 1           |
| ORAI3      | 0.6691484 | 0.6655304 | 1.0054 | 0.315    | 0.839491971 | count | 1           |
| CARD8-AS1  | 1.3629408 | 1.1510569 | 1.1841 | 0.2372   | 0.839850959 | count | 1           |
| AFF4       | 0.6140868 | 0.5312589 | 1.1559 | 0.2486   | 0.840393852 | count | 1           |
| TBC1D31    | 0.7778429 | 0.5929611 | 1.3118 | 0.191    | 0.840397264 | count | 1           |
| SOD2       | 0.7778815 | 0.6634231 | 1.1725 | 0.242    | 0.840438982 | count | 1           |
| ATP6V1B2   | 0.629141  | 0.5305147 | 1.1859 | 0.237    | 0.840726359 | count | 1           |
| SARM1      | 0.9719011 | 1.152006  | 0.8437 | 0.399    | 0.841394665 | count | 1           |
| STARD5     | 0.9719013 | 1.172142  | 0.8292 | 0.408    | 0.841394837 | count | 1           |
| NSDHL      | 0.9719013 | 1.208813  | 0.804  | 0.422    | 0.841394837 | count | 1           |
| ALOX12-AS1 | 0.9719013 | 1.2701536 | 0.7652 | 0.4447   | 0.841394837 | count | 1           |
| STRADB     | 0.9719013 | 1.304071  | 0.7453 | 0.4566   | 0.841394837 | count | 1           |
| SPEF2      | 0.9719013 | 1.304071  | 0.7453 | 0.4566   | 0.841394837 | count | 1           |
| RBM15      | 0.6954983 | 0.8418389 | 0.8262 | 0.409    | 0.841428178 | count | 1           |
| KYAT3      | 0.7144461 | 0.7320301 | 0.976  | 0.33     | 0.841881159 | count | 1           |
| GSPT2      | 0.6716556 | 0.6895322 | 0.9741 | 0.331    | 0.842642298 | count | 1           |
| ALDH6A1    | 0.7151917 | 0.774889  | 0.923  | 0.357    | 0.842760921 | count | 1           |
| HOOK2      | 0.6338374 | 0.5426901 | 1.168  | 0.244    | 0.843132989 | count | 1           |
| CDS2       | 0.6376733 | 0.4447447 | 1.4338 | 0.153    | 0.843866328 | count | 1           |
| SLCO3A1    | 0.6377696 | 0.4885186 | 1.3055 | 0.193    | 0.84399392  | count | 1           |
| RPP40      | 0.7164165 | 0.8512267 | 0.8416 | 0.401    | 0.844206078 | count | 1           |
| CXCL2      | 0.7164165 | 1.0533107 | 0.6802 | 0.497    | 0.844206078 | count | 1           |
| TSC22D3    | 0.5866432 | 0.097753  | 6.0013 | 5.24E-09 | 0.844916571 | count | 0.000127421 |
| NOC3L      | 0.613297  | 0.4922809 | 1.2458 | 0.214    | 0.845298314 | count | 1           |
| SOCS2      | 0.6059554 | 0.3228704 | 1.8768 | 0.0614   | 0.846221295 | count | 1           |
| HDDC2      | 0.6156499 | 0.3933752 | 1.565  | 0.119    | 0.84719473  | count | 1           |
| ZNF236     | 0.6761244 | 0.6869336 | 0.9843 | 0.326    | 0.848256943 | count | 1           |

|            |           |           |        |         |             |       |   |
|------------|-----------|-----------|--------|---------|-------------|-------|---|
| FBXL6      | 0.6304571 | 0.5065205 | 1.2447 | 0.214   | 0.84906418  | count | 1 |
| ASXL1      | 0.6110946 | 0.3326266 | 1.8372 | 0.0671  | 0.849628728 | count | 1 |
| TATDN3     | 0.630948  | 0.7124276 | 0.8856 | 0.376   | 0.849725934 | count | 1 |
| ANKRD42    | 1.3816545 | 1.000183  | 1.3814 | 0.168   | 0.850521916 | count | 1 |
| XPO7       | 1.3816545 | 1.3988795 | 0.9877 | 0.324   | 0.850521916 | count | 1 |
| PPP1R15A   | 0.5932012 | 0.1844146 | 3.2167 | 0.0014  | 0.850630049 | count | 1 |
| GNB1L      | 0.748374  | 0.8722011 | 0.858  | 0.392   | 0.850961021 | count | 1 |
| HEXA       | 0.6407504 | 0.3885525 | 1.6491 | 0.1     | 0.85233895  | count | 1 |
| C1orf123   | 0.6308101 | 0.4059558 | 1.5539 | 0.121   | 0.852368983 | count | 1 |
| TMC8       | 0.644242  | 0.5285196 | 1.219  | 0.224   | 0.852569077 | count | 1 |
| CRELD2     | 0.6544405 | 0.4231583 | 1.5466 | 0.123   | 0.855231891 | count | 1 |
| NCBP2      | 0.6596811 | 0.4987095 | 1.3228 | 0.187   | 0.855396835 | count | 1 |
| ASPH       | 0.6820531 | 0.6020609 | 1.1329 | 0.258   | 0.855704944 | count | 1 |
| TFCP2      | 0.682521  | 0.7212146 | 0.9463 | 0.345   | 0.856292706 | count | 1 |
| LRRC27     | 0.682521  | 1.1679841 | 0.5844 | 0.5594  | 0.856292717 | count | 1 |
| CRYL1      | 0.6289429 | 0.4078364 | 1.5421 | 0.124   | 0.856918112 | count | 1 |
| GRAMD1A    | 0.6088077 | 0.2990695 | 2.0357 | 0.0426  | 0.85718653  | count | 1 |
| MMS19      | 0.6835777 | 0.6926198 | 0.9869 | 0.324   | 0.857620075 | count | 1 |
| DAZAP2     | 0.6082982 | 0.2205136 | 2.7586 | 0.00614 | 0.857867634 | count | 1 |
| AC044802.2 | 0.8598084 | 1.2618668 | 0.6814 | 0.4961  | 0.857878152 | count | 1 |
| IL21R      | 0.7966852 | 0.704335  | 1.1311 | 0.259   | 0.860744305 | count | 1 |
| ZNF66      | 0.7966852 | 0.9616556 | 0.8285 | 0.408   | 0.860744305 | count | 1 |
| LINC00909  | 0.6511828 | 0.5191057 | 1.2544 | 0.211   | 0.861763981 | count | 1 |
| ZNF329     | 0.7315828 | 0.8236766 | 0.8882 | 0.375   | 0.862095626 | count | 1 |
| PM20D2     | 0.7315828 | 0.9388608 | 0.7792 | 0.436   | 0.862095626 | count | 1 |
| FBXO38     | 1.402645  | 0.9335181 | 1.5025 | 0.134   | 0.862421424 | count | 1 |
| ID3        | 0.6170878 | 0.4054418 | 1.522  | 0.129   | 0.862432289 | count | 1 |
| TCAF1      | 0.6716744 | 0.9824991 | 0.6836 | 0.4947  | 0.863054867 | count | 1 |
| STX18      | 0.661381  | 0.6118375 | 1.081  | 0.281   | 0.864311768 | count | 1 |
| IQCB1      | 0.6446266 | 0.4587536 | 1.4052 | 0.161   | 0.864976136 | count | 1 |
| AC008741.2 | 0.8006537 | 1.0903752 | 0.7343 | 0.4633  | 0.865026834 | count | 1 |
| GAS6       | 0.8006537 | 1.0970371 | 0.7298 | 0.466   | 0.865026834 | count | 1 |
| CPSF7      | 0.7007272 | 0.7058684 | 0.9927 | 0.322   | 0.865132655 | count | 1 |
| MMP25      | 0.9999835 | 0.7983533 | 1.2526 | 0.211   | 0.865361979 | count | 1 |
| TNFAIP8L1  | 0.8013274 | 0.6612113 | 1.2119 | 0.226   | 0.865753756 | count | 1 |
| CCDC7      | 0.8013274 | 0.6747968 | 1.1875 | 0.236   | 0.865753756 | count | 1 |
| KIF1BP     | 0.7025692 | 0.7368052 | 0.9535 | 0.341   | 0.867409047 | count | 1 |
| MRPL28     | 0.6271906 | 0.3599015 | 1.7427 | 0.0823  | 0.868088314 | count | 1 |
| PARD6A     | 0.6566419 | 0.5601521 | 1.1723 | 0.242   | 0.868995365 | count | 1 |
| FMR1       | 0.6343158 | 0.4365286 | 1.4531 | 0.147   | 0.869815598 | count | 1 |
| MAP9       | 0.7383525 | 0.4502833 | 1.6398 | 0.102   | 0.870077599 | count | 1 |
| ISG20L2    | 0.6717441 | 0.4106614 | 1.6358 | 0.103   | 0.871055647 | count | 1 |
| SMC2       | 0.8077851 | 0.7255605 | 1.1133 | 0.266   | 0.872719952 | count | 1 |
| TSR1       | 0.8749389 | 0.7690328 | 1.1377 | 0.256   | 0.872903695 | count | 1 |
| ST6GALNAC4 | 0.8749389 | 0.9395257 | 0.9313 | 0.352   | 0.872903695 | count | 1 |

|            |           |           |        |        |             |       |   |
|------------|-----------|-----------|--------|--------|-------------|-------|---|
| ORC4       | 0.6873214 | 0.570223  | 1.2054 | 0.229  | 0.873666366 | count | 1 |
| CLEC12A    | 0.654014  | 0.5314185 | 1.2307 | 0.219  | 0.873997257 | count | 1 |
| CCDC69     | 0.633292  | 0.3745215 | 1.6909 | 0.0918 | 0.874173872 | count | 1 |
| PIGX       | 0.660741  | 0.4566735 | 1.4469 | 0.149  | 0.874424866 | count | 1 |
| COPG1      | 0.722818  | 0.8134235 | 0.8886 | 0.375  | 0.874516358 | count | 1 |
| ZNF654     | 0.7428269 | 0.6973386 | 1.0652 | 0.288  | 0.875352089 | count | 1 |
| TFG        | 0.6389882 | 0.346893  | 1.842  | 0.0664 | 0.876226669 | count | 1 |
| EFTUD2     | 0.6898537 | 0.6949321 | 0.9927 | 0.322  | 0.876888072 | count | 1 |
| RTN3       | 0.654134  | 0.3512387 | 1.8624 | 0.0635 | 0.877743716 | count | 1 |
| VPS16      | 0.6769238 | 0.595453  | 1.1368 | 0.256  | 0.877778294 | count | 1 |
| LPAR6      | 0.7256436 | 0.8445396 | 0.8592 | 0.391  | 0.877936904 | count | 1 |
| ADAM19     | 1.4317781 | 1.3734989 | 1.0424 | 0.298  | 0.878811074 | count | 1 |
| TAF1A      | 1.4317781 | 1.5331462 | 0.9339 | 0.3511 | 0.878811074 | count | 1 |
| CD58       | 0.6350905 | 0.3575109 | 1.7764 | 0.0766 | 0.880110095 | count | 1 |
| SLC35E3    | 0.6742525 | 0.7237658 | 0.9316 | 0.352  | 0.881148108 | count | 1 |
| ITGAV      | 0.7151889 | 0.8367093 | 0.8548 | 0.393  | 0.883001685 | count | 1 |
| EID2       | 0.7162687 | 0.5989067 | 1.196  | 0.233  | 0.884335595 | count | 1 |
| PANX1      | 1.0238786 | 1.133269  | 0.9035 | 0.367  | 0.885683591 | count | 1 |
| FBXO8      | 0.6789063 | 0.5424174 | 1.2516 | 0.212  | 0.887234511 | count | 1 |
| ZNF708     | 0.6792206 | 0.4624142 | 1.4689 | 0.143  | 0.88764554  | count | 1 |
| PIGF       | 0.6534502 | 0.5360354 | 1.219  | 0.224  | 0.888092061 | count | 1 |
| OGFR       | 0.6481413 | 0.3902252 | 1.6609 | 0.0977 | 0.888785052 | count | 1 |
| AC097376.2 | 0.6855881 | 0.6485942 | 1.057  | 0.291  | 0.889022082 | count | 1 |
| MED31      | 0.6458943 | 0.4076349 | 1.5845 | 0.114  | 0.890254303 | count | 1 |
| IRAK2      | 0.8242288 | 0.8101745 | 1.0173 | 0.31   | 0.890445647 | count | 1 |
| FOXO1      | 0.6590701 | 0.5135852 | 1.2833 | 0.2    | 0.890584047 | count | 1 |
| POLR2A     | 0.7213768 | 0.5527885 | 1.305  | 0.193  | 0.890645199 | count | 1 |
| MAP3K14    | 0.7560957 | 0.7949774 | 0.9511 | 0.342  | 0.890987957 | count | 1 |
| TIMM44     | 0.681778  | 0.5218125 | 1.3066 | 0.192  | 0.89098997  | count | 1 |
| SEC13      | 0.6457319 | 0.393818  | 1.6397 | 0.102  | 0.891354088 | count | 1 |
| NDUFS2     | 0.6874091 | 0.4084292 | 1.6831 | 0.0933 | 0.891384975 | count | 1 |
| GFI1       | 0.7565224 | 0.9222521 | 0.8203 | 0.413  | 0.891490641 | count | 1 |
| AAMP       | 0.6463066 | 0.4011037 | 1.6113 | 0.108  | 0.893390846 | count | 1 |
| ARHGEF2    | 0.6573981 | 0.4480171 | 1.4674 | 0.143  | 0.893460541 | count | 1 |
| ATP23      | 0.7030822 | 0.6528738 | 1.0769 | 0.282  | 0.893714885 | count | 1 |
| KLF16      | 0.6892709 | 0.5121202 | 1.3459 | 0.179  | 0.89380073  | count | 1 |
| TESC       | 0.6340527 | 0.3143042 | 2.0173 | 0.0445 | 0.893853935 | count | 1 |
| NIN        | 0.7125319 | 0.5629708 | 1.2657 | 0.207  | 0.893977203 | count | 1 |
| UTP6       | 0.7241971 | 0.5673091 | 1.2765 | 0.203  | 0.894128446 | count | 1 |
| TIMM9      | 0.6843061 | 0.4722327 | 1.4491 | 0.148  | 0.894295921 | count | 1 |
| AC093010.2 | 0.8283724 | 0.6614876 | 1.2523 | 0.211  | 0.894909304 | count | 1 |
| CDC25B     | 0.7042123 | 0.7063889 | 0.9969 | 0.32   | 0.895152138 | count | 1 |
| MTF1       | 0.7882692 | 0.7676568 | 1.0269 | 0.305  | 0.896309147 | count | 1 |
| CLK2       | 0.7882692 | 0.9237562 | 0.8533 | 0.394  | 0.896309147 | count | 1 |
| HIST1H4E   | 0.7890888 | 0.8651086 | 0.9121 | 0.362  | 0.897239831 | count | 1 |

|            |           |           |        |          |             |       |   |
|------------|-----------|-----------|--------|----------|-------------|-------|---|
| C11orf21   | 0.6829479 | 0.6128478 | 1.1144 | 0.266    | 0.898544058 | count | 1 |
| FOS        | 0.6243204 | 0.1556357 | 4.0114 | 7.50E-05 | 0.900141139 | count | 1 |
| CORO1C     | 0.8337364 | 0.8294052 | 1.0052 | 0.316    | 0.900685767 | count | 1 |
| TTC31      | 0.8337364 | 0.8937911 | 0.9328 | 0.352    | 0.900685767 | count | 1 |
| MTMR1      | 0.9032018 | 0.906752  | 0.9961 | 0.32     | 0.90091684  | count | 1 |
| TAF11      | 0.7190302 | 0.5364203 | 1.3404 | 0.181    | 0.90213316  | count | 1 |
| VPS35      | 0.6549982 | 0.3372507 | 1.9422 | 0.053    | 0.902807833 | count | 1 |
| RABGGTB    | 0.702783  | 0.4508271 | 1.5589 | 0.12     | 0.903058432 | count | 1 |
| RBBP8      | 0.6965149 | 0.6201786 | 1.1231 | 0.262    | 0.903199205 | count | 1 |
| AC108863.1 | 1.476417  | 0.9061021 | 1.6294 | 0.104    | 0.90363347  | count | 1 |
| TBC1D7     | 1.476417  | 0.9803792 | 1.506  | 0.133    | 0.90363347  | count | 1 |
| DSN1       | 1.4764173 | 1.4194699 | 1.0401 | 0.2991   | 0.903633631 | count | 1 |
| MFSD3      | 0.7952134 | 0.9776947 | 0.8134 | 0.417    | 0.904193187 | count | 1 |
| EIF2B2     | 0.6875527 | 0.4820334 | 1.4264 | 0.155    | 0.904605599 | count | 1 |
| DDX56      | 0.692883  | 0.5539617 | 1.2508 | 0.212    | 0.905510633 | count | 1 |
| PLIN3      | 0.6682984 | 0.5250922 | 1.2727 | 0.204    | 0.905787823 | count | 1 |
| METTL18    | 0.7693819 | 0.7276592 | 1.0573 | 0.291    | 0.906635598 | count | 1 |
| RNF216     | 0.6763746 | 0.4226659 | 1.6003 | 0.111    | 0.907604923 | count | 1 |
| BICRAL     | 1.0498464 | 1.0716705 | 0.9796 | 0.328    | 0.907688677 | count | 1 |
| IVD        | 0.6760136 | 0.4485263 | 1.5072 | 0.133    | 0.91046148  | count | 1 |
| NFAT5      | 0.7726448 | 0.581763  | 1.3281 | 0.185    | 0.910477045 | count | 1 |
| MIR22HG    | 0.7381845 | 0.4208574 | 1.754  | 0.0804   | 0.911399249 | count | 1 |
| KDM5B      | 0.6596904 | 0.3544986 | 1.8609 | 0.0637   | 0.911898216 | count | 1 |
| PPP1R15B   | 0.6856152 | 0.4123179 | 1.6628 | 0.0973   | 0.912064239 | count | 1 |
| MANEA-DT   | 0.9148697 | 0.7690343 | 1.1896 | 0.235    | 0.912460185 | count | 1 |
| MTSS1      | 0.741069  | 0.6776814 | 1.0935 | 0.275    | 0.914959874 | count | 1 |
| TXNDC15    | 0.6649677 | 0.4011603 | 1.6576 | 0.0984   | 0.915098448 | count | 1 |
| MARCKSL1   | 0.6823253 | 0.4642326 | 1.4698 | 0.143    | 0.915593092 | count | 1 |
| SDHD       | 0.6546313 | 0.3010956 | 2.1742 | 0.0304   | 0.919514845 | count | 1 |
| FCRLB      | 0.8105352 | 0.8372916 | 0.968  | 0.334    | 0.921578153 | count | 1 |
| MED15      | 0.6930998 | 0.5327312 | 1.301  | 0.194    | 0.92202409  | count | 1 |
| ZNF44      | 0.7827663 | 0.7305599 | 1.0715 | 0.285    | 0.92238957  | count | 1 |
| MTCH2      | 0.7064059 | 0.4875089 | 1.449  | 0.148    | 0.923188713 | count | 1 |
| SGMS1      | 0.7263685 | 0.6585644 | 1.103  | 0.271    | 0.923322017 | count | 1 |
| CERS4      | 0.6663768 | 0.4099706 | 1.6254 | 0.105    | 0.923482678 | count | 1 |
| E2F3       | 0.8550916 | 0.6712208 | 1.2739 | 0.204    | 0.923661774 | count | 1 |
| SEC24D     | 1.0692665 | 0.8837647 | 1.2099 | 0.227    | 0.924088684 | count | 1 |
| MAST3      | 1.0692665 | 1.2494034 | 0.8558 | 0.3927   | 0.924088684 | count | 1 |
| ENTPD3-AS1 | 1.513734  | 1.197349  | 1.2642 | 0.207    | 0.924105921 | count | 1 |
| AMBRA1     | 1.513734  | 1.197349  | 1.2642 | 0.207    | 0.924105921 | count | 1 |
| ZNF529     | 0.8555982 | 0.9289683 | 0.921  | 0.358    | 0.924206421 | count | 1 |
| NLRP3      | 1.07001   | 0.9405409 | 1.1377 | 0.256    | 0.924715558 | count | 1 |
| SDR42E2    | 1.07001   | 1.160414  | 0.9221 | 0.357    | 0.924715558 | count | 1 |
| MATN1-AS1  | 1.07001   | 1.2198777 | 0.8771 | 0.3811   | 0.924715558 | count | 1 |
| TAF4       | 1.07001   | 1.303999  | 0.8206 | 0.4125   | 0.924715558 | count | 1 |

|            |           |           |        |        |             |       |   |
|------------|-----------|-----------|--------|--------|-------------|-------|---|
| ZNF225     | 1.07001   | 1.303999  | 0.8206 | 0.4125 | 0.924715558 | count | 1 |
| RRAS2      | 0.764785  | 0.5602164 | 1.3652 | 0.173  | 0.925284414 | count | 1 |
| ARNT       | 0.7290691 | 0.5998636 | 1.2154 | 0.225  | 0.92675451  | count | 1 |
| MFSD11     | 0.686469  | 0.5704421 | 1.2034 | 0.23   | 0.927622861 | count | 1 |
| RBM15B     | 0.7675129 | 0.7039735 | 1.0903 | 0.276  | 0.928581601 | count | 1 |
| PRR34-AS1  | 0.8176692 | 0.6171948 | 1.3248 | 0.186  | 0.929667696 | count | 1 |
| COMMD10    | 0.6991909 | 0.4273597 | 1.6361 | 0.103  | 0.930128699 | count | 1 |
| SSFA2      | 0.8615628 | 0.7461675 | 1.1547 | 0.249  | 0.930617177 | count | 1 |
| CCDC84     | 0.7074071 | 0.5943693 | 1.1902 | 0.235  | 0.930735198 | count | 1 |
| KIF20B     | 0.7122787 | 0.5923818 | 1.2024 | 0.23   | 0.930864557 | count | 1 |
| MAPKAPK5   | 0.7078088 | 0.5662976 | 1.2499 | 0.212  | 0.931263753 | count | 1 |
| ADA2       | 1.0796774 | 0.8316202 | 1.2983 | 0.195  | 0.932859945 | count | 1 |
| PPP1R37    | 1.0797222 | 0.8739832 | 1.2354 | 0.218  | 0.932897669 | count | 1 |
| RIOX1      | 1.0797222 | 0.9513375 | 1.135  | 0.2572 | 0.932897669 | count | 1 |
| SLC25A1    | 0.6983756 | 0.470513  | 1.4843 | 0.139  | 0.933309616 | count | 1 |
| ME2        | 0.6992236 | 0.5182147 | 1.3493 | 0.178  | 0.934443028 | count | 1 |
| CBWD1      | 0.7025693 | 0.599028  | 1.1728 | 0.242  | 0.93462354  | count | 1 |
| SMIM10L1   | 0.66669   | 0.3109491 | 2.144  | 0.0328 | 0.934882954 | count | 1 |
| HDGF       | 0.6593246 | 0.2588103 | 2.5475 | 0.0113 | 0.9351601   | count | 1 |
| MARK2      | 0.727778  | 0.4731012 | 1.5383 | 0.125  | 0.935180083 | count | 1 |
| GUCD1      | 0.7219657 | 0.716878  | 1.0071 | 0.315  | 0.936208027 | count | 1 |
| UBE3B      | 0.7367578 | 0.7377999 | 0.9986 | 0.319  | 0.936525516 | count | 1 |
| MMP24OS    | 0.6778107 | 0.3160207 | 2.1448 | 0.0327 | 0.938177245 | count | 1 |
| MINDY2     | 0.7028381 | 0.4490565 | 1.5651 | 0.119  | 0.939273895 | count | 1 |
| FARSB      | 1.544769  | 0.8314128 | 1.858  | 0.0641 | 0.940932685 | count | 1 |
| RGS9       | 0.7203754 | 0.6500226 | 1.1082 | 0.269  | 0.941445522 | count | 1 |
| USP53      | 0.7636078 | 0.7007212 | 1.0897 | 0.277  | 0.942769771 | count | 1 |
| SFI1       | 0.7794053 | 0.6165061 | 1.2642 | 0.207  | 0.942951627 | count | 1 |
| MFSD10     | 0.6781291 | 0.3180238 | 2.1323 | 0.0337 | 0.945498757 | count | 1 |
| TMEM184B   | 0.8332211 | 0.6274245 | 1.328  | 0.185  | 0.947290939 | count | 1 |
| PIK3R5     | 0.8046421 | 0.7323262 | 1.0987 | 0.273  | 0.948116955 | count | 1 |
| PLEKHM1    | 0.8781377 | 0.6768591 | 1.2974 | 0.195  | 0.948416863 | count | 1 |
| DCBLD1     | 0.8781377 | 0.9452647 | 0.929  | 0.354  | 0.948416863 | count | 1 |
| EEF1E1     | 0.6965691 | 0.4481427 | 1.5543 | 0.121  | 0.949099451 | count | 1 |
| E2F6       | 0.8790045 | 1.0926558 | 0.8045 | 0.422  | 0.949347115 | count | 1 |
| VIRMA      | 0.7324654 | 0.5039657 | 1.4534 | 0.147  | 0.949820247 | count | 1 |
| AC090152.1 | 0.6927339 | 0.3903261 | 1.7748 | 0.0769 | 0.949952523 | count | 1 |
| TMEM248    | 0.6898078 | 0.350281  | 1.9693 | 0.0498 | 0.950798414 | count | 1 |
| BANP       | 0.6968213 | 0.5370286 | 1.2975 | 0.195  | 0.951641812 | count | 1 |
| SHKBP1     | 0.6884692 | 0.4292476 | 1.6039 | 0.11   | 0.951687268 | count | 1 |
| WDR70      | 0.8371707 | 0.6295684 | 1.3298 | 0.185  | 0.951763955 | count | 1 |
| NBL1       | 0.6939238 | 0.4161101 | 1.6676 | 0.0964 | 0.953328257 | count | 1 |
| STXBP3     | 0.6998215 | 0.405608  | 1.7254 | 0.0854 | 0.953531059 | count | 1 |
| DAB2IP     | 0.7725276 | 0.6488398 | 1.1906 | 0.235  | 0.953769455 | count | 1 |
| SGPP1      | 0.7725276 | 0.7723617 | 1.0002 | 0.318  | 0.953769455 | count | 1 |



|             |           |           |        |        |             |       |   |
|-------------|-----------|-----------|--------|--------|-------------|-------|---|
| IPO9        | 0.9574092 | 0.9897145 | 0.9674 | 0.334  | 0.954431511 | count | 1 |
| PSMA6       | 0.7739165 | 0.7234191 | 1.0698 | 0.286  | 0.955481881 | count | 1 |
| ARHGAP17    | 1.1075798 | 1.0501857 | 1.0547 | 0.2924 | 0.956294394 | count | 1 |
| AFDN        | 1.1075798 | 1.1425195 | 0.9694 | 0.3331 | 0.956294394 | count | 1 |
| ZNF431      | 0.7379858 | 0.5327391 | 1.3853 | 0.167  | 0.956975734 | count | 1 |
| P3H1        | 1.1090529 | 0.8255421 | 1.3434 | 0.18   | 0.95752854  | count | 1 |
| AVPI1       | 0.7760078 | 0.8541335 | 0.9085 | 0.364  | 0.958060169 | count | 1 |
| LMF2        | 0.7348415 | 0.4485348 | 1.6383 | 0.102  | 0.960345531 | count | 1 |
| STK40       | 0.8894486 | 0.9089617 | 0.9785 | 0.329  | 0.960550445 | count | 1 |
| SLC35G1     | 0.8894486 | 0.9938446 | 0.895  | 0.371  | 0.960550445 | count | 1 |
| PREP        | 0.7945575 | 0.5735068 | 1.3854 | 0.167  | 0.961250172 | count | 1 |
| ZNF484      | 1.1140764 | 1.0022284 | 1.1116 | 0.267  | 0.961734906 | count | 1 |
| TTC21B      | 0.8165871 | 0.8613832 | 0.948  | 0.344  | 0.962153294 | count | 1 |
| POP7        | 0.7064998 | 0.4745604 | 1.4887 | 0.138  | 0.962630119 | count | 1 |
| CDR2        | 0.7958525 | 0.8115496 | 0.9807 | 0.327  | 0.96281351  | count | 1 |
| MRPS18A     | 0.7493627 | 0.6248836 | 1.1992 | 0.231  | 0.962902852 | count | 1 |
| PIGO        | 0.8475912 | 0.9275903 | 0.9138 | 0.362  | 0.963560153 | count | 1 |
| TBCE        | 0.817906  | 1.107841  | 0.7383 | 0.4609 | 0.963702573 | count | 1 |
| LRRC23      | 0.7693715 | 0.8139752 | 0.9452 | 0.345  | 0.965262589 | count | 1 |
| PMVK        | 0.7043738 | 0.4452519 | 1.582  | 0.115  | 0.965914311 | count | 1 |
| TMEM8B      | 0.8506329 | 1.1027068 | 0.7714 | 0.441  | 0.96700196  | count | 1 |
| DGCR6       | 0.8506329 | 1.1027068 | 0.7714 | 0.441  | 0.96700196  | count | 1 |
| POU2F1      | 0.9706371 | 0.8739699 | 1.1106 | 0.268  | 0.967444201 | count | 1 |
| CLU         | 0.7008435 | 0.4462163 | 1.5706 | 0.117  | 0.967445439 | count | 1 |
| ZNF688      | 0.7461024 | 0.5388668 | 1.3846 | 0.167  | 0.967494618 | count | 1 |
| MAP2K6      | 0.772995  | 0.6519535 | 1.1857 | 0.237  | 0.969802616 | count | 1 |
| KLRC2       | 0.7005072 | 0.420667  | 1.6652 | 0.0968 | 0.970786057 | count | 1 |
| SLC37A3     | 0.899057  | 0.9442542 | 0.9521 | 0.342  | 0.970849049 | count | 1 |
| SLC26A2     | 0.8248891 | 0.7960162 | 1.0363 | 0.301  | 0.971903694 | count | 1 |
| IL2RA       | 0.8248891 | 0.8776166 | 0.9399 | 0.348  | 0.971903694 | count | 1 |
| SIRT3       | 0.8248891 | 1.0168574 | 0.8112 | 0.418  | 0.971903694 | count | 1 |
| VPS26C      | 0.7173006 | 0.4312651 | 1.6632 | 0.0972 | 0.972211966 | count | 1 |
| SECISBP2L   | 0.7078088 | 0.370149  | 1.9122 | 0.0567 | 0.974060776 | count | 1 |
| MFS14C      | 0.8065646 | 0.6445655 | 1.2513 | 0.212  | 0.975741891 | count | 1 |
| SELENOI     | 0.8289716 | 0.7827626 | 1.059  | 0.29   | 0.976696849 | count | 1 |
| DAPK2       | 0.859325  | 0.5708547 | 1.5053 | 0.133  | 0.976833653 | count | 1 |
| SCRN3       | 1.1336932 | 1.0271512 | 1.1037 | 0.2705 | 0.978125592 | count | 1 |
| PRKAR1B     | 0.9067213 | 0.7535922 | 1.2032 | 0.23   | 0.979058047 | count | 1 |
| ATAD3C      | 0.9067213 | 0.942809  | 0.9617 | 0.337  | 0.979058047 | count | 1 |
| FNDC10      | 0.9067213 | 0.942809  | 0.9617 | 0.337  | 0.979058047 | count | 1 |
| PANK4       | 0.9067213 | 0.942809  | 0.9617 | 0.337  | 0.979058047 | count | 1 |
| PIP5K1A     | 0.9067213 | 0.942809  | 0.9617 | 0.337  | 0.979058047 | count | 1 |
| HMCN1       | 0.9067213 | 0.942809  | 0.9617 | 0.337  | 0.979058047 | count | 1 |
| AC009237.14 | 0.9067213 | 0.942809  | 0.9617 | 0.337  | 0.979058047 | count | 1 |
| ITPR1-DT    | 0.9067213 | 0.942809  | 0.9617 | 0.337  | 0.979058047 | count | 1 |

|             |           |           |        |        |             |       |   |
|-------------|-----------|-----------|--------|--------|-------------|-------|---|
| LINC00685   | 0.9067213 | 0.942809  | 0.9617 | 0.337  | 0.979058047 | count | 1 |
| LY6E-DT     | 0.9067213 | 0.942809  | 0.9617 | 0.337  | 0.979058047 | count | 1 |
| RLN1        | 0.9067213 | 0.942809  | 0.9617 | 0.337  | 0.979058047 | count | 1 |
| AP000866.5  | 0.9067213 | 0.942809  | 0.9617 | 0.337  | 0.979058047 | count | 1 |
| GSTO2       | 0.9067213 | 0.942809  | 0.9617 | 0.337  | 0.979058047 | count | 1 |
| OR4D1       | 0.9067213 | 0.942809  | 0.9617 | 0.337  | 0.979058047 | count | 1 |
| ZNF229      | 0.9067213 | 0.942809  | 0.9617 | 0.337  | 0.979058047 | count | 1 |
| FOXP1       | 0.6997203 | 0.3070419 | 2.2789 | 0.0233 | 0.979334186 | count | 1 |
| ATL3        | 0.7563169 | 0.5501351 | 1.3748 | 0.17   | 0.980729224 | count | 1 |
| TMEM218     | 0.7949004 | 0.6117436 | 1.2994 | 0.195  | 0.981342639 | count | 1 |
| SMYD3       | 0.7824891 | 0.6513107 | 1.2014 | 0.23   | 0.981695406 | count | 1 |
| RASGEF1A    | 0.7824891 | 0.6965597 | 1.1234 | 0.262  | 0.981695406 | count | 1 |
| ATG16L2     | 0.7475477 | 0.7387308 | 1.0119 | 0.312  | 0.983531214 | count | 1 |
| ZNF135      | 1.625296  | 1.3950257 | 1.1651 | 0.2448 | 0.983723204 | count | 1 |
| 2-Mar       | 0.8350316 | 0.5301418 | 1.5751 | 0.116  | 0.983809796 | count | 1 |
| WDYHV1      | 0.7849055 | 0.684039  | 1.1475 | 0.252  | 0.98472167  | count | 1 |
| CNNM3       | 0.9121911 | 0.7181885 | 1.2701 | 0.205  | 0.984913331 | count | 1 |
| NSL1        | 0.7092068 | 0.3820585 | 1.8563 | 0.0643 | 0.985056428 | count | 1 |
| APIP        | 0.7214424 | 0.497822  | 1.4492 | 0.148  | 0.985262522 | count | 1 |
| HELB        | 0.7331106 | 0.3421466 | 2.1427 | 0.0329 | 0.993633389 | count | 1 |
| SMIM14      | 0.7331899 | 0.4822796 | 1.5203 | 0.129  | 0.993740817 | count | 1 |
| NUDT15      | 0.9206661 | 0.8572418 | 1.074  | 0.284  | 0.993980227 | count | 1 |
| TUBB2A      | 0.7282449 | 0.3187658 | 2.2846 | 0.023  | 0.994549637 | count | 1 |
| SHISA4      | 1.1544049 | 1.2165868 | 0.9489 | 0.3434 | 0.995368715 | count | 1 |
| CSNK1G1     | 0.9222768 | 0.9141173 | 1.0089 | 0.314  | 0.995702659 | count | 1 |
| C10orf95    | 0.8234066 | 0.9254076 | 0.8898 | 0.374  | 0.99605548  | count | 1 |
| MON1B       | 0.8078325 | 1.065624  | 0.7581 | 0.449  | 0.997269459 | count | 1 |
| GPAA1       | 0.7305647 | 0.4709813 | 1.5512 | 0.122  | 0.997716548 | count | 1 |
| VAT1        | 1.0021085 | 0.9965988 | 1.0055 | 0.315  | 0.998325097 | count | 1 |
| CPPED1      | 1.0021085 | 1.1398134 | 0.8792 | 0.38   | 0.998325097 | count | 1 |
| RAPGEF5     | 1.0021085 | 1.253658  | 0.7993 | 0.425  | 0.998325097 | count | 1 |
| UBA3        | 0.7869919 | 0.5411845 | 1.4542 | 0.147  | 1.000309704 | count | 1 |
| TMEM94      | 0.828203  | 0.787641  | 1.0515 | 0.294  | 1.00183756  | count | 1 |
| DDB1        | 0.9289124 | 0.7101224 | 1.3081 | 0.192  | 1.002795994 | count | 1 |
| CCDC126     | 0.7539911 | 0.6659429 | 1.1322 | 0.258  | 1.003004163 | count | 1 |
| RAD51D      | 1.0072793 | 0.9308954 | 1.0821 | 0.28   | 1.003387901 | count | 1 |
| USP45       | 1.0072793 | 0.9667552 | 1.0419 | 0.298  | 1.003387901 | count | 1 |
| RYBP        | 0.7582238 | 0.4715449 | 1.608  | 0.109  | 1.003434801 | count | 1 |
| B4GALT7     | 0.8014016 | 0.7550191 | 1.0614 | 0.289  | 1.005374013 | count | 1 |
| ZSCAN16-AS1 | 0.9313702 | 0.7272527 | 1.2807 | 0.201  | 1.005422273 | count | 1 |
| CABIN1      | 0.7287063 | 0.3612363 | 2.0173 | 0.0445 | 1.005899847 | count | 1 |
| CTDSPL2     | 0.752853  | 0.4659053 | 1.6159 | 0.107  | 1.006089015 | count | 1 |
| DIMT1       | 0.7577847 | 0.5147575 | 1.4721 | 0.142  | 1.008046144 | count | 1 |
| MIIP        | 0.7462557 | 0.6583996 | 1.1334 | 0.2579 | 1.00839601  | count | 1 |
| RCE1        | 0.785257  | 0.5576378 | 1.4082 | 0.16   | 1.008967459 | count | 1 |

|            |           |           |        |         |             |       |   |
|------------|-----------|-----------|--------|---------|-------------|-------|---|
| MTMR4      | 0.8890907 | 0.7861875 | 1.1309 | 0.259   | 1.010458383 | count | 1 |
| PREPL      | 0.8355893 | 0.5679779 | 1.4712 | 0.142   | 1.010739088 | count | 1 |
| FAM45A     | 0.7258523 | 0.4108741 | 1.7666 | 0.0782  | 1.011141051 | count | 1 |
| MIB2       | 0.7270253 | 0.3569435 | 2.0368 | 0.0425  | 1.01183479  | count | 1 |
| TPM1       | 0.7514421 | 0.5841531 | 1.2864 | 0.199   | 1.012033626 | count | 1 |
| ARHGAP21   | 1.684588  | 0.7232704 | 2.3291 | 0.0205  | 1.014397494 | count | 1 |
| ZNF75A     | 0.7430961 | 0.476031  | 1.561  | 0.119   | 1.014822262 | count | 1 |
| SPRY2      | 0.7157622 | 0.2532641 | 2.8261 | 0.005   | 1.015208614 | count | 1 |
| CDK5RAP3   | 0.7451117 | 0.4261552 | 1.7485 | 0.0813  | 1.01522225  | count | 1 |
| CCL3L1     | 0.7172305 | 0.3505073 | 2.0463 | 0.0415  | 1.017071157 | count | 1 |
| KPNA1      | 0.7923144 | 0.5361975 | 1.4777 | 0.14    | 1.018018629 | count | 1 |
| RBM12      | 0.9431666 | 0.7709051 | 1.2235 | 0.222   | 1.018019185 | count | 1 |
| TRAFD1     | 0.7801657 | 0.6423998 | 1.2145 | 0.225   | 1.019519623 | count | 1 |
| RTL8C      | 0.8136744 | 0.7569386 | 1.075  | 0.283   | 1.020730612 | count | 1 |
| LUC7L      | 0.7607177 | 0.4376163 | 1.7383 | 0.0831  | 1.020756802 | count | 1 |
| SLF1       | 0.7619753 | 0.4140867 | 1.8401 | 0.0667  | 1.022442691 | count | 1 |
| ACTR1B     | 0.7886981 | 0.5302412 | 1.4874 | 0.138   | 1.022660337 | count | 1 |
| USP44      | 0.7731899 | 0.485402  | 1.5929 | 0.112   | 1.023218722 | count | 1 |
| TCEAL1     | 0.9496566 | 0.8749347 | 1.0854 | 0.279   | 1.024943777 | count | 1 |
| HGS        | 0.9496566 | 0.8769812 | 1.0829 | 0.28    | 1.024943777 | count | 1 |
| WDR20      | 0.7905947 | 0.6068484 | 1.3028 | 0.194   | 1.025115079 | count | 1 |
| RCC2       | 1.029715  | 0.5900888 | 1.745  | 0.0819  | 1.02531792  | count | 1 |
| KBTBD4     | 1.191125  | 0.8433591 | 1.4124 | 0.159   | 1.02577548  | count | 1 |
| MORC2      | 1.191125  | 0.9619295 | 1.2383 | 0.217   | 1.02577548  | count | 1 |
| ZNF606     | 1.1911251 | 1.313826  | 0.9066 | 0.3653  | 1.025775746 | count | 1 |
| ZNF805     | 0.9039503 | 0.9800725 | 0.9223 | 0.357   | 1.027218042 | count | 1 |
| DLGAP1-AS1 | 0.8189417 | 0.70106   | 1.1681 | 0.244   | 1.027319155 | count | 1 |
| AL445472.1 | 0.8189417 | 0.7852244 | 1.0429 | 0.298   | 1.027319155 | count | 1 |
| DTWD1      | 0.7926899 | 0.6677264 | 1.1871 | 0.236   | 1.027826709 | count | 1 |
| ABCD1      | 0.9533127 | 0.878429  | 1.0852 | 0.279   | 1.028842841 | count | 1 |
| VKORC1L1   | 0.9533127 | 0.978175  | 0.9746 | 0.33    | 1.028842841 | count | 1 |
| HGSNAT     | 0.8743027 | 0.7845606 | 1.1144 | 0.266   | 1.029844736 | count | 1 |
| POLR3E     | 0.8743027 | 0.8016253 | 1.0907 | 0.276   | 1.029844736 | count | 1 |
| RNPC3      | 0.7541783 | 0.4891152 | 1.5419 | 0.124   | 1.032146889 | count | 1 |
| SELENOP    | 0.7973593 | 0.91951   | 0.8672 | 0.386   | 1.033869291 | count | 1 |
| IFI27      | 0.7973593 | 0.91951   | 0.8672 | 0.386   | 1.033869291 | count | 1 |
| TAB2       | 1.0398336 | 0.8120481 | 1.2805 | 0.201   | 1.035187929 | count | 1 |
| MFNG       | 0.7480393 | 0.3502213 | 2.1359 | 0.0334  | 1.037840438 | count | 1 |
| SSBP4      | 0.7325619 | 0.2452136 | 2.9874 | 0.00303 | 1.037850861 | count | 1 |
| SMKR1      | 0.7807523 | 0.58798   | 1.3279 | 0.185   | 1.038563031 | count | 1 |
| ZPR1       | 0.7644165 | 0.6563827 | 1.1646 | 0.245   | 1.038887183 | count | 1 |
| CTBP1      | 0.7716983 | 0.4809253 | 1.6046 | 0.11    | 1.039288844 | count | 1 |
| PTER       | 1.7399359 | 1.3592344 | 1.2801 | 0.2014  | 1.042373121 | count | 1 |
| LINC02352  | 0.885242  | 0.9345705 | 0.9472 | 0.344   | 1.042648796 | count | 1 |
| SP1        | 0.885242  | 0.9711888 | 0.9115 | 0.363   | 1.042648796 | count | 1 |

|            |           |           |        |         |             |       |   |
|------------|-----------|-----------|--------|---------|-------------|-------|---|
| CDK6       | 0.7569898 | 0.3828147 | 1.9774 | 0.0488  | 1.043371521 | count | 1 |
| ATF2       | 0.8125052 | 0.5264743 | 1.5433 | 0.124   | 1.043902069 | count | 1 |
| TXLNA      | 0.864079  | 0.8459246 | 1.0215 | 0.308   | 1.045041659 | count | 1 |
| CEP128     | 0.864079  | 0.9350901 | 0.9241 | 0.356   | 1.045041659 | count | 1 |
| GMPR       | 1.0511499 | 0.7971778 | 1.3186 | 0.188   | 1.046210959 | count | 1 |
| ITGBL1     | 1.0511499 | 0.9232129 | 1.1386 | 0.256   | 1.046210959 | count | 1 |
| ZNF318     | 1.0511499 | 0.9672923 | 1.0867 | 0.278   | 1.046210959 | count | 1 |
| RSU1       | 0.7709456 | 0.4485921 | 1.7186 | 0.0866  | 1.047752169 | count | 1 |
| CASP6      | 0.7971949 | 0.7221109 | 1.104  | 0.27    | 1.048763855 | count | 1 |
| F8A1       | 0.7884899 | 0.5262466 | 1.4983 | 0.135   | 1.048840377 | count | 1 |
| ANKH       | 0.8094174 | 0.6116186 | 1.3234 | 0.187   | 1.049469445 | count | 1 |
| LACTB2     | 0.8265928 | 0.6259516 | 1.3205 | 0.188   | 1.050517406 | count | 1 |
| ZNF830     | 0.7906292 | 0.481015  | 1.6437 | 0.101   | 1.051681538 | count | 1 |
| CDKN2C     | 0.7570535 | 0.4140533 | 1.8284 | 0.0684  | 1.052577366 | count | 1 |
| RAPGEF1    | 0.8708699 | 0.7046192 | 1.2359 | 0.217   | 1.053210416 | count | 1 |
| TENT5A     | 0.7673477 | 0.4831133 | 1.5883 | 0.113   | 1.054160107 | count | 1 |
| EOGT       | 1.2260577 | 1.1138037 | 1.1008 | 0.272   | 1.054499206 | count | 1 |
| AL118558.3 | 1.2260577 | 1.1138037 | 1.1008 | 0.272   | 1.054499206 | count | 1 |
| B4GALT2    | 1.2260577 | 1.508816  | 0.8126 | 0.417   | 1.054499206 | count | 1 |
| CLCC1      | 1.2260577 | 1.508816  | 0.8126 | 0.417   | 1.054499206 | count | 1 |
| MAP4K3     | 1.2260577 | 1.508816  | 0.8126 | 0.417   | 1.054499206 | count | 1 |
| LRP2BP     | 1.2260577 | 1.508816  | 0.8126 | 0.417   | 1.054499206 | count | 1 |
| AC106791.1 | 1.2260577 | 1.508816  | 0.8126 | 0.417   | 1.054499206 | count | 1 |
| AL021368.2 | 1.2260577 | 1.508816  | 0.8126 | 0.417   | 1.054499206 | count | 1 |
| AEBP1      | 1.2260577 | 1.508816  | 0.8126 | 0.417   | 1.054499206 | count | 1 |
| CLN3       | 1.2260577 | 1.508816  | 0.8126 | 0.417   | 1.054499206 | count | 1 |
| ZFP28      | 1.2260577 | 1.508816  | 0.8126 | 0.417   | 1.054499206 | count | 1 |
| UBE2Q1     | 0.7764932 | 0.4679785 | 1.6592 | 0.098   | 1.055283738 | count | 1 |
| PIBF1      | 0.7898181 | 0.4705441 | 1.6785 | 0.0942  | 1.055429115 | count | 1 |
| SCNM1      | 0.7593841 | 0.3400886 | 2.2329 | 0.0262  | 1.055815868 | count | 1 |
| NOTCH1     | 0.8165917 | 0.9133957 | 0.894  | 0.372   | 1.058748384 | count | 1 |
| MUT        | 0.9003194 | 0.8208256 | 1.0968 | 0.274   | 1.060281669 | count | 1 |
| GIN1       | 0.8767996 | 0.8697146 | 1.0081 | 0.314   | 1.060340732 | count | 1 |
| EIF2B3     | 0.8254799 | 0.5517379 | 1.4961 | 0.136   | 1.060525581 | count | 1 |
| STAG1      | 0.8128914 | 0.4789967 | 1.6971 | 0.0906  | 1.062201122 | count | 1 |
| CREG1      | 0.9350819 | 1.0936244 | 0.855  | 0.393   | 1.062269463 | count | 1 |
| PELO       | 0.9023759 | 0.5613994 | 1.6074 | 0.109   | 1.062685375 | count | 1 |
| BCAT2      | 0.8472446 | 0.680463  | 1.2451 | 0.214   | 1.062697073 | count | 1 |
| NFIC       | 0.7820269 | 0.4716797 | 1.658  | 0.0983  | 1.062795715 | count | 1 |
| GFER       | 0.7698017 | 0.4271291 | 1.8023 | 0.0724  | 1.064075506 | count | 1 |
| WDR45B     | 0.8372988 | 0.6429885 | 1.3022 | 0.194   | 1.064078287 | count | 1 |
| LMBR1L     | 1.070443  | 0.6098034 | 1.7554 | 0.0801  | 1.064965768 | count | 1 |
| S100A9     | 0.8819998 | 0.9890932 | 0.8917 | 0.3732  | 1.066591878 | count | 1 |
| SREK1IP1   | 0.7607197 | 0.3614683 | 2.1045 | 0.0361  | 1.066717149 | count | 1 |
| TRA2A      | 0.7687742 | 0.2425016 | 3.1702 | 0.00167 | 1.067758121 | count | 1 |

|          |           |           |        |         |             |       |   |
|----------|-----------|-----------|--------|---------|-------------|-------|---|
| ACOT4    | 0.9918561 | 1.1065707 | 0.8963 | 0.371   | 1.069863568 | count | 1 |
| PHF6     | 0.7778119 | 0.4294157 | 1.8113 | 0.071   | 1.070345298 | count | 1 |
| MGME1    | 0.853572  | 0.6838492 | 1.2482 | 0.213   | 1.070600306 | count | 1 |
| TAF2     | 0.8198105 | 0.6729127 | 1.2183 | 0.224   | 1.071219938 | count | 1 |
| PLCL2    | 0.8556816 | 0.5340519 | 1.6022 | 0.11    | 1.073234795 | count | 1 |
| SH2D3C   | 0.8556816 | 0.6034697 | 1.4179 | 0.157   | 1.073234795 | count | 1 |
| PIK3CG   | 0.8460119 | 0.5951593 | 1.4215 | 0.156   | 1.075110618 | count | 1 |
| MYD88    | 0.8915553 | 0.8124964 | 1.0973 | 0.273   | 1.078073657 | count | 1 |
| PPIH     | 0.7846886 | 0.3646427 | 2.1519 | 0.0321  | 1.079799    | count | 1 |
| PATL1    | 1.2578253 | 1.0412141 | 1.208  | 0.2279  | 1.080439933 | count | 1 |
| AGFG2    | 1.2578253 | 1.0537111 | 1.1937 | 0.2335  | 1.080439933 | count | 1 |
| TRDMT1   | 0.8506329 | 0.7911361 | 1.0752 | 0.283   | 1.080960052 | count | 1 |
| ALKBH6   | 0.9183236 | 0.7557544 | 1.2151 | 0.225   | 1.081314308 | count | 1 |
| PPP1R9B  | 1.8194344 | 1.3667132 | 1.3312 | 0.184   | 1.081411923 | count | 1 |
| CIZ1     | 0.9189099 | 1.1179489 | 0.822  | 0.412   | 1.081998792 | count | 1 |
| TMEM106C | 0.799679  | 0.4619196 | 1.7312 | 0.0844  | 1.083768059 | count | 1 |
| TMEM234  | 0.8364785 | 0.6916646 | 1.2094 | 0.227   | 1.084457774 | count | 1 |
| SSRP1    | 0.8651386 | 0.6569321 | 1.3169 | 0.189   | 1.085041757 | count | 1 |
| CNIH1    | 0.783395  | 0.4070868 | 1.9244 | 0.0552  | 1.085600223 | count | 1 |
| OTUD7B   | 1.2669049 | 1.037031  | 1.2217 | 0.223   | 1.087821485 | count | 1 |
| UTP11    | 0.7933705 | 0.4975206 | 1.5946 | 0.112   | 1.087877948 | count | 1 |
| HEXB     | 0.8469831 | 0.6301067 | 1.3442 | 0.18    | 1.088059058 | count | 1 |
| TRAPPC6B | 0.8082545 | 0.4594694 | 1.7591 | 0.0795  | 1.088448783 | count | 1 |
| SKIL     | 0.779516  | 0.2654743 | 2.9363 | 0.00356 | 1.088597785 | count | 1 |
| EIF5A2   | 0.8060562 | 0.5551025 | 1.4521 | 0.147   | 1.089106561 | count | 1 |
| DUSP6    | 0.7871868 | 0.2938894 | 2.6785 | 0.00777 | 1.094443018 | count | 1 |
| RTP4     | 0.9639811 | 0.6456752 | 1.493  | 0.136   | 1.094729067 | count | 1 |
| TCTE3    | 0.9639811 | 0.8428664 | 1.1437 | 0.254   | 1.094729067 | count | 1 |
| ALKBH2   | 0.8621215 | 0.6489953 | 1.3284 | 0.185   | 1.095497949 | count | 1 |
| CNBD2    | 0.8165899 | 0.5637361 | 1.4485 | 0.148   | 1.095614721 | count | 1 |
| UBE2Q2   | 0.7967311 | 0.3954502 | 2.0147 | 0.0448  | 1.096352097 | count | 1 |
| FNTA     | 0.824492  | 0.4309446 | 1.9132 | 0.0566  | 1.09663433  | count | 1 |
| PUS7L    | 0.8295518 | 0.4748698 | 1.7469 | 0.0816  | 1.097659068 | count | 1 |
| SFT2D2   | 1.0214217 | 0.8049603 | 1.2689 | 0.205   | 1.101219755 | count | 1 |
| ZER1     | 1.8647839 | 1.5230989 | 1.2243 | 0.2217  | 1.103064609 | count | 1 |
| QRICH1   | 1.2857372 | 0.7301179 | 1.761  | 0.0792  | 1.103084416 | count | 1 |
| THOP1    | 1.0237347 | 0.9926357 | 1.0313 | 0.303   | 1.103668603 | count | 1 |
| ZNF230   | 1.0238788 | 0.8860294 | 1.1556 | 0.249   | 1.103821165 | count | 1 |
| DRG1     | 0.8304263 | 0.5042531 | 1.6468 | 0.101   | 1.104508106 | count | 1 |
| CDK9     | 0.7927036 | 0.3223159 | 2.4594 | 0.0144  | 1.106115797 | count | 1 |
| ARMC6    | 0.8533424 | 0.614031  | 1.3897 | 0.166   | 1.106245554 | count | 1 |
| LRIG1    | 0.974312  | 1.0080438 | 0.9665 | 0.334   | 1.106313458 | count | 1 |
| SMIM15   | 0.8365726 | 0.4818451 | 1.7362 | 0.0835  | 1.106923995 | count | 1 |
| TOLLIP   | 0.7975042 | 0.4544361 | 1.7549 | 0.0802  | 1.10762718  | count | 1 |
| CAPN1    | 0.8157653 | 0.4338085 | 1.8805 | 0.0609  | 1.108579234 | count | 1 |

|            |           |           |        |        |             |       |   |
|------------|-----------|-----------|--------|--------|-------------|-------|---|
| FDX2       | 0.8437921 | 0.6161163 | 1.3695 | 0.172  | 1.109910109 | count | 1 |
| HIST1H2BH  | 0.9429965 | 1.093998  | 0.862  | 0.389  | 1.11009456  | count | 1 |
| CDK8       | 1.297061  | 0.9483635 | 1.3677 | 0.172  | 1.112230588 | count | 1 |
| BCR        | 0.888919  | 0.7319224 | 1.2145 | 0.225  | 1.114708351 | count | 1 |
| UBAP1      | 0.8686368 | 0.6868744 | 1.2646 | 0.207  | 1.115762708 | count | 1 |
| VAV1       | 0.861731  | 0.4837989 | 1.7812 | 0.0758 | 1.117078564 | count | 1 |
| FTSJ1      | 1.30316   | 0.6649205 | 1.9599 | 0.0509 | 1.117147238 | count | 1 |
| MAFG       | 0.8405485 | 0.4782261 | 1.7576 | 0.0798 | 1.117935605 | count | 1 |
| RAP2C      | 0.8060884 | 0.3602176 | 2.2378 | 0.0259 | 1.118311819 | count | 1 |
| TAZ        | 0.8628085 | 0.7341701 | 1.1752 | 0.241  | 1.118469802 | count | 1 |
| AC020910.4 | 0.9067213 | 0.7535922 | 1.2032 | 0.23   | 1.118744962 | count | 1 |
| MRM3       | 1.1267717 | 0.803937  | 1.4016 | 0.162  | 1.119430117 | count | 1 |
| KATNAL1    | 0.8725129 | 0.5883926 | 1.4829 | 0.139  | 1.120719275 | count | 1 |
| FRA10AC1   | 0.8476744 | 0.4760178 | 1.7808 | 0.0759 | 1.121570547 | count | 1 |
| ATP2C1     | 0.9302137 | 0.6679068 | 1.3927 | 0.165  | 1.124457865 | count | 1 |
| DNAAF2     | 0.8159876 | 0.3989512 | 2.0453 | 0.0416 | 1.124603085 | count | 1 |
| CLPTM1     | 0.8857703 | 0.5646617 | 1.5687 | 0.118  | 1.125401157 | count | 1 |
| TADA2A     | 0.8776476 | 0.7109295 | 1.2345 | 0.218  | 1.127284098 | count | 1 |
| DPAGT1     | 1.0462586 | 0.8257233 | 1.2671 | 0.206  | 1.127482526 | count | 1 |
| TMEM185A   | 0.872558  | 0.6197689 | 1.4079 | 0.16   | 1.131055581 | count | 1 |
| PDE7A      | 0.82439   | 0.3197107 | 2.5786 | 0.0104 | 1.132425403 | count | 1 |
| WASL       | 0.8575077 | 0.4986764 | 1.7196 | 0.0865 | 1.134539572 | count | 1 |
| WDFY2      | 0.9655603 | 0.826069  | 1.1689 | 0.243  | 1.136369037 | count | 1 |
| YTHDC2     | 0.8386302 | 0.442706  | 1.8943 | 0.0591 | 1.136456409 | count | 1 |
| SLFN11     | 1.1448803 | 1.0437996 | 1.0968 | 0.274  | 1.136842023 | count | 1 |
| WDR5B      | 1.1448803 | 1.0593198 | 1.0808 | 0.281  | 1.136842023 | count | 1 |
| NRG2       | 1.1448803 | 1.096296  | 1.0443 | 0.297  | 1.136842023 | count | 1 |
| ZNF853     | 1.1448803 | 1.096296  | 1.0443 | 0.297  | 1.136842023 | count | 1 |
| CARMIL2    | 1.1448803 | 1.096296  | 1.0443 | 0.297  | 1.136842023 | count | 1 |
| XXYL1      | 1.1448803 | 1.1106016 | 1.0309 | 0.303  | 1.136842023 | count | 1 |
| STAG3      | 1.1448803 | 1.199649  | 0.9543 | 0.341  | 1.136842023 | count | 1 |
| LONRF1     | 0.942836  | 0.6994021 | 1.3481 | 0.179  | 1.139578169 | count | 1 |
| GPR153     | 1.058174  | 0.9816403 | 1.078  | 0.282  | 1.140055665 | count | 1 |
| ATP6V1A    | 1.058174  | 1.0145089 | 1.043  | 0.298  | 1.140055665 | count | 1 |
| RPRD2      | 0.883894  | 0.5630956 | 1.5697 | 0.117  | 1.145683571 | count | 1 |
| SLC4A10    | 1.3389787 | 1.088482  | 1.2301 | 0.22   | 1.145878012 | count | 1 |
| AL121603.2 | 0.9492762 | 0.8925954 | 1.0635 | 0.288  | 1.147288052 | count | 1 |
| AC004687.1 | 0.8384489 | 0.3722726 | 2.2522 | 0.025  | 1.147321434 | count | 1 |
| SMN1       | 0.9067213 | 0.6440612 | 1.4078 | 0.16   | 1.151866621 | count | 1 |
| RBM43      | 0.8402013 | 0.5571685 | 1.508  | 0.133  | 1.151990794 | count | 1 |
| GGPS1      | 0.8667644 | 0.5647276 | 1.5348 | 0.126  | 1.152694441 | count | 1 |
| PRKCQ      | 0.8768787 | 0.616759  | 1.4218 | 0.156  | 1.153274614 | count | 1 |
| SMG7       | 0.9354181 | 0.6530056 | 1.4325 | 0.153  | 1.153878442 | count | 1 |
| HAT1       | 0.8904154 | 0.4836102 | 1.8412 | 0.0665 | 1.154095882 | count | 1 |
| PKN1       | 0.8264581 | 0.3563051 | 2.3195 | 0.021  | 1.154970466 | count | 1 |

|            |           |           |        |          |             |       |             |
|------------|-----------|-----------|--------|----------|-------------|-------|-------------|
| AXIN1      | 0.9364274 | 0.7730169 | 1.2114 | 0.227    | 1.15511306  | count | 1           |
| SETDB1     | 0.9223209 | 0.779329  | 1.1835 | 0.237    | 1.156319249 | count | 1           |
| TRAPPC9    | 0.8939051 | 0.6746148 | 1.3251 | 0.186    | 1.158596543 | count | 1           |
| ATP2B1-AS1 | 0.8448836 | 0.443055  | 1.9069 | 0.0574   | 1.160526257 | count | 1           |
| SLC12A2    | 0.9050298 | 0.6986844 | 1.2953 | 0.196    | 1.162269061 | count | 1           |
| MOAP1      | 0.9622535 | 0.6465178 | 1.4884 | 0.138    | 1.162813577 | count | 1           |
| DCAF11     | 0.8636464 | 0.5687886 | 1.5184 | 0.13     | 1.162863155 | count | 1           |
| INSIG1     | 0.8499262 | 0.3474375 | 2.4463 | 0.015    | 1.162994709 | count | 1           |
| MAGEH1     | 0.8746387 | 0.596864  | 1.4654 | 0.144    | 1.163129564 | count | 1           |
| LIF        | 1.365998  | 1.385359  | 0.986  | 0.3249   | 1.167385829 | count | 1           |
| PTCD3      | 0.9926032 | 0.6123643 | 1.6209 | 0.106    | 1.167798656 | count | 1           |
| IQCE       | 1.085203  | 0.9835142 | 1.1034 | 0.271    | 1.16851011  | count | 1           |
| PIGB       | 1.085203  | 0.9835142 | 1.1034 | 0.271    | 1.16851011  | count | 1           |
| GBP7       | 1.085203  | 1.0353084 | 1.0482 | 0.295    | 1.16851011  | count | 1           |
| RHOBTB3    | 1.085203  | 1.0353084 | 1.0482 | 0.295    | 1.16851011  | count | 1           |
| DNAJC18    | 1.085203  | 1.0353084 | 1.0482 | 0.295    | 1.16851011  | count | 1           |
| ZNF696     | 1.085203  | 1.0353084 | 1.0482 | 0.295    | 1.16851011  | count | 1           |
| GINS2      | 1.085203  | 1.0353084 | 1.0482 | 0.295    | 1.16851011  | count | 1           |
| DDX19B     | 0.8890005 | 0.5717556 | 1.5549 | 0.121    | 1.16914999  | count | 1           |
| GNB1       | 0.8588268 | 0.3359287 | 2.5566 | 0.011    | 1.169918909 | count | 1           |
| ZFP36      | 0.8135503 | 0.1458643 | 5.5774 | 5.15E-08 | 1.171667424 | count | 0.001252223 |
| AL162377.1 | 0.9238555 | 0.6702577 | 1.3784 | 0.169    | 1.173491224 | count | 1           |
| DTX3       | 2.0222668 | 1.5107732 | 1.3386 | 0.1817   | 1.174692965 | count | 1           |
| AC104506.1 | 1.0917765 | 1.1626557 | 0.939  | 0.3484   | 1.175415976 | count | 1           |
| H6PD       | 1.0367109 | 0.8693008 | 1.1926 | 0.234    | 1.176051322 | count | 1           |
| CAMTA2     | 1.0367109 | 0.870243  | 1.1913 | 0.234    | 1.176051322 | count | 1           |
| P2RX7      | 1.0367109 | 0.9107069 | 1.1384 | 0.256    | 1.176051322 | count | 1           |
| KCNQ5      | 1.1864469 | 0.8950754 | 1.3255 | 0.186    | 1.176619087 | count | 1           |
| A1BG-AS1   | 0.8809812 | 0.5799331 | 1.5191 | 0.13     | 1.176926678 | count | 1           |
| TOX2       | 0.8499334 | 0.3791436 | 2.2417 | 0.0257   | 1.177684527 | count | 1           |
| ODF3B      | 1.0021085 | 0.8918734 | 1.1236 | 0.262    | 1.178829491 | count | 1           |
| AC007952.4 | 1.3812771 | 0.7619207 | 1.8129 | 0.0708   | 1.17948392  | count | 1           |
| CDPF1      | 1.3816545 | 0.8978663 | 1.5388 | 0.125    | 1.179781994 | count | 1           |
| MTAP       | 0.9427315 | 0.7382515 | 1.277  | 0.203    | 1.181710073 | count | 1           |
| WARS2      | 2.038715  | 1.200323  | 1.6985 | 0.09038  | 1.181850855 | count | 1           |
| UGCG       | 0.8990661 | 0.4725068 | 1.9028 | 0.058    | 1.182327365 | count | 1           |
| NEK9       | 1.1924833 | 1.1035482 | 1.0806 | 0.281    | 1.182372819 | count | 1           |
| MEN1       | 1.0454179 | 0.9730535 | 1.0744 | 0.283    | 1.18574899  | count | 1           |
| ISCA2      | 0.8673064 | 0.5046006 | 1.7188 | 0.0866   | 1.186722322 | count | 1           |
| ANKRD6     | 1.3905821 | 0.9510067 | 1.4622 | 0.145    | 1.186828258 | count | 1           |
| PLOD1      | 1.3905821 | 1.1069648 | 1.2562 | 0.21     | 1.186828258 | count | 1           |
| AL136987.1 | 1.3905821 | 1.1069648 | 1.2562 | 0.21     | 1.186828258 | count | 1           |
| DOLPP1     | 1.3905821 | 1.1069648 | 1.2562 | 0.21     | 1.186828258 | count | 1           |
| PEX5       | 1.3905821 | 1.1069648 | 1.2562 | 0.21     | 1.186828258 | count | 1           |
| BBS10      | 1.3905821 | 1.1069648 | 1.2562 | 0.21     | 1.186828258 | count | 1           |

|            |           |           |        |          |             |       |             |
|------------|-----------|-----------|--------|----------|-------------|-------|-------------|
| FSIP1      | 1.3905821 | 1.1069648 | 1.2562 | 0.21     | 1.186828258 | count | 1           |
| AC009133.3 | 1.3905821 | 1.1069648 | 1.2562 | 0.21     | 1.186828258 | count | 1           |
| VPS9D1     | 1.3905821 | 1.1069648 | 1.2562 | 0.21     | 1.186828258 | count | 1           |
| DSEL       | 1.3905821 | 1.1069648 | 1.2562 | 0.21     | 1.186828258 | count | 1           |
| ADGRE2     | 1.3905821 | 1.1069648 | 1.2562 | 0.21     | 1.186828258 | count | 1           |
| FKRP       | 1.3905821 | 1.1069648 | 1.2562 | 0.21     | 1.186828258 | count | 1           |
| ZNF582     | 1.3905821 | 1.1069648 | 1.2562 | 0.21     | 1.186828258 | count | 1           |
| RAB3A      | 1.1979052 | 0.7318095 | 1.6369 | 0.103    | 1.187535815 | count | 1           |
| PEX11A     | 0.9848023 | 0.7201476 | 1.3675 | 0.172    | 1.189756595 | count | 1           |
| CCZ1       | 0.9120246 | 0.5241438 | 1.74   | 0.0828   | 1.191220327 | count | 1           |
| NQO2       | 0.8904402 | 0.4896164 | 1.8186 | 0.0699   | 1.194408377 | count | 1           |
| KIDINS220  | 0.9150693 | 0.5371066 | 1.7037 | 0.0894   | 1.195175606 | count | 1           |
| DUSP1      | 0.8302793 | 0.1388389 | 5.9802 | 5.89E-09 | 1.195996413 | count | 0.000143221 |
| GPR68      | 0.8784487 | 0.4434771 | 1.9808 | 0.0485   | 1.19657781  | count | 1           |
| SP4        | 0.9926422 | 0.8138105 | 1.2197 | 0.223    | 1.199114025 | count | 1           |
| PDZD8      | 0.9928224 | 0.5296248 | 1.8746 | 0.0618   | 1.199329036 | count | 1           |
| NOLC1      | 0.9070377 | 0.5139882 | 1.7647 | 0.0786   | 1.19980325  | count | 1           |
| TICAM1     | 1.0613836 | 0.9308574 | 1.1402 | 0.255    | 1.203508735 | count | 1           |
| TBC1D10B   | 1.0237958 | 0.6524844 | 1.5691 | 0.118    | 1.203964365 | count | 1           |
| METTL4     | 1.0237958 | 0.7566301 | 1.3531 | 0.177    | 1.203964365 | count | 1           |
| RASA1      | 0.9490812 | 0.6060374 | 1.566  | 0.118    | 1.20529443  | count | 1           |
| TSC1       | 1.1213572 | 0.9138585 | 1.2271 | 0.221    | 1.206421153 | count | 1           |
| PIGM       | 1.0262686 | 1.0409024 | 0.9859 | 0.325    | 1.206827285 | count | 1           |
| TMEM8A     | 0.9637119 | 0.7242468 | 1.3306 | 0.184    | 1.207779627 | count | 1           |
| ZNF626     | 0.9679337 | 0.6071739 | 1.5942 | 0.112    | 1.213021695 | count | 1           |
| STX16      | 1.0704951 | 0.6123002 | 1.7483 | 0.0814   | 1.213630788 | count | 1           |
| SNUPN      | 0.9702547 | 0.6765906 | 1.434  | 0.153    | 1.215903039 | count | 1           |
| CHRNE      | 1.2304734 | 1.0106503 | 1.2175 | 0.224    | 1.218446063 | count | 1           |
| CENPT      | 1.0375538 | 0.6516842 | 1.5921 | 0.112    | 1.219884881 | count | 1           |
| AP5S1      | 1.0794705 | 1.0496024 | 1.0285 | 0.305    | 1.223592013 | count | 1           |
| KIF3A      | 1.080859  | 0.5553828 | 1.9462 | 0.0525   | 1.225132185 | count | 1           |
| HPS3       | 0.8995667 | 0.5306139 | 1.6953 | 0.091    | 1.225256344 | count | 1           |
| MRPL39     | 1.014779  | 0.7861747 | 1.2908 | 0.198    | 1.225506223 | count | 1           |
| WIP1       | 0.9458696 | 0.5825036 | 1.6238 | 0.105    | 1.225538129 | count | 1           |
| TRIB3      | 0.9391    | 0.5476797 | 1.7147 | 0.0874   | 1.226376307 | count | 1           |
| IL27RA     | 0.8790457 | 0.4224435 | 2.0809 | 0.0382   | 1.22643292  | count | 1           |
| NUP35      | 1.0451635 | 0.7285619 | 1.4346 | 0.152    | 1.22868228  | count | 1           |
| NME7       | 1.4446205 | 1.247729  | 1.1578 | 0.248    | 1.229124876 | count | 1           |
| LINC02482  | 1.4446205 | 1.247729  | 1.1578 | 0.248    | 1.229124876 | count | 1           |
| JAG1       | 1.4446205 | 1.247729  | 1.1578 | 0.248    | 1.229124876 | count | 1           |
| IGFBP5     | 1.4446205 | 1.273192  | 1.1346 | 0.257    | 1.229124876 | count | 1           |
| SLC9B2     | 1.4446205 | 1.273192  | 1.1346 | 0.257    | 1.229124876 | count | 1           |
| AMER1      | 1.4446205 | 1.273192  | 1.1346 | 0.257    | 1.229124876 | count | 1           |
| NUP210     | 0.9683738 | 0.5698711 | 1.6993 | 0.0902   | 1.229589327 | count | 1           |
| AC005332.5 | 0.9597916 | 0.6420181 | 1.495  | 0.136    | 1.232106933 | count | 1           |



|            |           |           |        |          |             |       |           |
|------------|-----------|-----------|--------|----------|-------------|-------|-----------|
| E2F5       | 1.002046  | 0.7953046 | 1.26   | 0.209    | 1.235212737 | count | 1         |
| MYADM      | 0.8688225 | 0.2077321 | 4.1824 | 3.72E-05 | 1.236078928 | count | 0.9044436 |
| ANKRD28    | 0.8724422 | 0.2790305 | 3.1267 | 0.00193  | 1.23677782  | count | 1         |
| ABHD11     | 1.4547001 | 1.423075  | 1.0222 | 0.3074   | 1.236945571 | count | 1         |
| FANCF      | 1.0538599 | 0.6500448 | 1.6212 | 0.106    | 1.238728516 | count | 1         |
| WDR73      | 1.0055507 | 0.7395191 | 1.3597 | 0.175    | 1.239481049 | count | 1         |
| POLR3A     | 1.0055507 | 0.8085935 | 1.2436 | 0.215    | 1.239481049 | count | 1         |
| NUBP1      | 0.9686609 | 0.5455856 | 1.7755 | 0.0768   | 1.243400673 | count | 1         |
| DCTD       | 0.9536588 | 0.4995343 | 1.9091 | 0.0571   | 1.245263908 | count | 1         |
| FAM3A      | 1.0322663 | 0.6789447 | 1.5204 | 0.129    | 1.246322988 | count | 1         |
| TAX1BP3    | 0.9952769 | 0.7633973 | 1.3037 | 0.193    | 1.246940662 | count | 1         |
| HCCS       | 0.9234949 | 0.5092476 | 1.8134 | 0.0707   | 1.247303929 | count | 1         |
| MCTP2      | 0.9127413 | 0.3683395 | 2.478  | 0.0137   | 1.248710415 | count | 1         |
| AL392172.1 | 1.26511   | 0.8828195 | 1.433  | 0.153    | 1.25112     | count | 1         |
| ZNF398     | 1.1065949 | 0.8906867 | 1.2424 | 0.215    | 1.253636055 | count | 1         |
| SIAH1      | 1.0043759 | 0.6319301 | 1.5894 | 0.113    | 1.258215211 | count | 1         |
| PINK1      | 1.2734102 | 0.7981378 | 1.5955 | 0.112    | 1.258918383 | count | 1         |
| WDR35      | 1.1766515 | 0.8498921 | 1.3845 | 0.167    | 1.264048599 | count | 1         |
| SLC25A13   | 1.1766515 | 0.908797  | 1.2947 | 0.196    | 1.264048599 | count | 1         |
| TRPV2      | 0.9470009 | 0.5388163 | 1.7576 | 0.0798   | 1.264717885 | count | 1         |
| MR1        | 1.0767917 | 0.88747   | 1.2133 | 0.226    | 1.265180578 | count | 1         |
| ZFYVE21    | 0.932656  | 0.5782233 | 1.613  | 0.108    | 1.266949924 | count | 1         |
| ITK        | 0.945006  | 0.4915277 | 1.9226 | 0.0554   | 1.267273413 | count | 1         |
| RBM45      | 1.4945338 | 1.3013607 | 1.1484 | 0.2516   | 1.267634354 | count | 1         |
| JUN        | 0.8817594 | 0.2165543 | 4.0718 | 5.87E-05 | 1.268112611 | count | 1         |
| AL161772.1 | 0.9801807 | 0.6892427 | 1.4221 | 0.156    | 1.269653529 | count | 1         |
| TMEM191C   | 1.2852748 | 0.9250265 | 1.3894 | 0.166    | 1.270043974 | count | 1         |
| SCAF1      | 1.2852748 | 0.9669502 | 1.3292 | 0.185    | 1.270044013 | count | 1         |
| PCYOX1     | 1.1218177 | 0.8110515 | 1.3832 | 0.168    | 1.270457015 | count | 1         |
| ALYREF     | 0.915025  | 0.3718418 | 2.4608 | 0.0144   | 1.270554249 | count | 1         |
| AL355816.2 | 1.1850084 | 0.818102  | 1.4485 | 0.148    | 1.272718943 | count | 1         |
| LRRC43     | 1.1850084 | 0.8949272 | 1.3241 | 0.186    | 1.272718943 | count | 1         |
| SLC26A11   | 1.1850084 | 0.9472754 | 1.251  | 0.212    | 1.272718943 | count | 1         |
| BCO2       | 0.9177127 | 0.4425161 | 2.0739 | 0.0389   | 1.272875192 | count | 1         |
| DCUN1D4    | 1.0181326 | 0.7165214 | 1.4209 | 0.156    | 1.275248669 | count | 1         |
| C6orf89    | 1.034988  | 0.6300811 | 1.6426 | 0.101    | 1.275291045 | count | 1         |
| MED8       | 0.9405142 | 0.5167838 | 1.8199 | 0.0697   | 1.277580636 | count | 1         |
| TCAIM      | 0.9677255 | 0.5706001 | 1.696  | 0.0909   | 1.279616275 | count | 1         |
| MZF1-AS1   | 0.9881461 | 0.79972   | 1.2356 | 0.2175   | 1.279884702 | count | 1         |
| NR4A3      | 0.9425533 | 0.4722363 | 1.9959 | 0.0468   | 1.283588123 | count | 1         |
| FAF2       | 1.011653  | 0.5207793 | 1.9426 | 0.0529   | 1.283995665 | count | 1         |
| ATIC       | 0.9465476 | 0.457697  | 2.0681 | 0.0394   | 1.285741211 | count | 1         |
| FAM120B    | 1.002069  | 0.6517771 | 1.5374 | 0.125    | 1.285894605 | count | 1         |
| PIK3CD     | 1.3055759 | 0.9555745 | 1.3663 | 0.173    | 1.289020625 | count | 1         |
| POP1       | 1.004534  | 0.7707998 | 1.3032 | 0.193    | 1.289026907 | count | 1         |

|             |           |           |        |          |             |       |   |
|-------------|-----------|-----------|--------|----------|-------------|-------|---|
| KIAA0100    | 1.1396376 | 0.7116542 | 1.6014 | 0.11     | 1.290109618 | count | 1 |
| MRM2        | 1.0488373 | 0.7067976 | 1.4839 | 0.139    | 1.292111956 | count | 1 |
| KRT18       | 1.0488373 | 1.0917857 | 0.9607 | 0.3374   | 1.292111956 | count | 1 |
| NAP1L2      | 1.1008308 | 0.9370701 | 1.1748 | 0.241    | 1.292846985 | count | 1 |
| ADSL        | 1.3106747 | 0.9637602 | 1.36   | 0.175    | 1.293774699 | count | 1 |
| MICA        | 2.317798  | 1.075064  | 2.156  | 0.0318   | 1.293896007 | count | 1 |
| ZRANB3      | 1.102841  | 0.8921017 | 1.2362 | 0.217    | 1.295157421 | count | 1 |
| PPTC7       | 1.2074972 | 0.8611089 | 1.4023 | 0.162    | 1.295998022 | count | 1 |
| ABCB8       | 1.2074972 | 0.9081009 | 1.3297 | 0.185    | 1.295998022 | count | 1 |
| POGLUT1     | 1.075282  | 0.697618  | 1.5414 | 0.124    | 1.297402508 | count | 1 |
| MR11        | 1.075282  | 0.7768106 | 1.3842 | 0.167    | 1.297402508 | count | 1 |
| PIAS1       | 1.0753997 | 0.6572077 | 1.6363 | 0.103    | 1.297542017 | count | 1 |
| NMUR1       | 0.9643882 | 0.4850085 | 1.9884 | 0.0476   | 1.297923817 | count | 1 |
| TP53RK      | 0.9738419 | 0.5717202 | 1.7034 | 0.0895   | 1.300355663 | count | 1 |
| DDHD1       | 0.9663238 | 0.4252968 | 2.2721 | 0.0237   | 1.300514832 | count | 1 |
| PTPMT1      | 1.1498096 | 0.7218989 | 1.5928 | 0.112    | 1.301308904 | count | 1 |
| YIPF2       | 1.1498096 | 0.7357592 | 1.5628 | 0.119    | 1.301308904 | count | 1 |
| CYSLTR2     | 0.9976752 | 0.650509  | 1.5337 | 0.126    | 1.302294288 | count | 1 |
| FAM208A     | 1.0405625 | 0.4815606 | 2.1608 | 0.0314   | 1.302988178 | count | 1 |
| ETFRF1      | 0.9518015 | 0.4768432 | 1.996  | 0.0468   | 1.304543785 | count | 1 |
| SPATS2L     | 0.966597  | 0.4443708 | 2.1752 | 0.0303   | 1.305242067 | count | 1 |
| AC025164.1  | 0.9249214 | 0.3350213 | 2.7608 | 0.006095 | 1.305584647 | count | 1 |
| TMEM170A    | 0.9388768 | 0.3592705 | 2.6133 | 0.00939  | 1.30623365  | count | 1 |
| MSMO1       | 0.9783857 | 0.5454425 | 1.7937 | 0.0738   | 1.306385275 | count | 1 |
| UBE2J1      | 1.0010109 | 0.4807022 | 2.0824 | 0.0381   | 1.306611532 | count | 1 |
| VPS72       | 0.9544154 | 0.4485556 | 2.1278 | 0.0341   | 1.308112424 | count | 1 |
| TARS        | 0.9959349 | 0.5455298 | 1.8256 | 0.0688   | 1.308884044 | count | 1 |
| PHLDA3      | 1.2260577 | 1.0050681 | 1.2199 | 0.223    | 1.315150925 | count | 1 |
| ZNF33B      | 1.2260577 | 1.0050681 | 1.2199 | 0.223    | 1.315150925 | count | 1 |
| IL11RA      | 1.2260577 | 1.072573  | 1.1431 | 0.254    | 1.315150925 | count | 1 |
| NEO1        | 1.2260577 | 1.072573  | 1.1431 | 0.254    | 1.315150925 | count | 1 |
| RPP25       | 1.2260577 | 1.1138036 | 1.1008 | 0.272    | 1.315150925 | count | 1 |
| GDPGP1      | 1.2260577 | 1.1138036 | 1.1008 | 0.272    | 1.315150925 | count | 1 |
| MORC2-AS1   | 1.2260577 | 1.1138036 | 1.1008 | 0.272    | 1.315150925 | count | 1 |
| KLRC4-KLRK1 | 1.2260577 | 1.5088157 | 0.8126 | 0.417    | 1.315150925 | count | 1 |
| ATXN1L      | 1.2261553 | 0.6094526 | 2.0119 | 0.0451   | 1.315251503 | count | 1 |
| ZNF600      | 1.559978  | 0.8490768 | 1.8373 | 0.0671   | 1.317275427 | count | 1 |
| TELO2       | 1.093358  | 0.8054662 | 1.3574 | 0.176    | 1.318810912 | count | 1 |
| GTF2E1      | 1.093358  | 0.8733214 | 1.252  | 0.211    | 1.318810912 | count | 1 |
| HIBCH       | 1.1234716 | 0.7896336 | 1.4228 | 0.156    | 1.318842802 | count | 1 |
| ETV6        | 1.0946152 | 0.6786291 | 1.613  | 0.108    | 1.320298574 | count | 1 |
| ENOSF1      | 1.0443521 | 0.5709436 | 1.8292 | 0.0683   | 1.325009294 | count | 1 |
| CSKMT       | 0.9711701 | 0.4663669 | 2.0824 | 0.0381   | 1.325475443 | count | 1 |
| GAR1        | 0.9774477 | 0.4486887 | 2.1785 | 0.0301   | 1.327514285 | count | 1 |
| COG2        | 1.0781601 | 0.5882375 | 1.8329 | 0.0677   | 1.32766778  | count | 1 |

|            |           |           |        |         |             |       |   |
|------------|-----------|-----------|--------|---------|-------------|-------|---|
| ZNF358     | 1.061098  | 0.7832428 | 1.3547 | 0.176   | 1.32834761  | count | 1 |
| FAXDC2     | 1.5756762 | 1.242406  | 1.2682 | 0.206   | 1.329034616 | count | 1 |
| ZMYM3      | 1.5756762 | 1.242406  | 1.2682 | 0.206   | 1.329034616 | count | 1 |
| TOP3A      | 1.5756762 | 1.242406  | 1.2682 | 0.206   | 1.329034616 | count | 1 |
| AC245452.1 | 1.5756762 | 1.242406  | 1.2682 | 0.206   | 1.329034616 | count | 1 |
| TMEM245    | 1.5756762 | 1.4939874 | 1.0547 | 0.2924  | 1.329034616 | count | 1 |
| SNHG21     | 1.5756762 | 1.5831344 | 0.9953 | 0.3203  | 1.329034616 | count | 1 |
| SENP2      | 1.133748  | 0.7063182 | 1.6052 | 0.109   | 1.330621781 | count | 1 |
| BSPRY      | 1.13542   | 0.8760475 | 1.2961 | 0.196   | 1.332536948 | count | 1 |
| CENPN      | 1.13542   | 0.9248979 | 1.2276 | 0.22    | 1.332536948 | count | 1 |
| RRNAD1     | 1.13542   | 1.0204342 | 1.1127 | 0.267   | 1.332536948 | count | 1 |
| CHMP1B     | 0.9445214 | 0.3064354 | 3.0823 | 0.00223 | 1.333205913 | count | 1 |
| R3HCC1L    | 1.0055507 | 0.5514277 | 1.8235 | 0.0691  | 1.336215651 | count | 1 |
| CCDC28A    | 1.017185  | 0.5636871 | 1.8045 | 0.0721  | 1.336577853 | count | 1 |
| LARP4      | 1.1826913 | 0.6244203 | 1.8941 | 0.0591  | 1.337414664 | count | 1 |
| BBIP1      | 1.1838357 | 0.6015218 | 1.9681 | 0.0499  | 1.33866856  | count | 1 |
| FBXW4      | 1.1862314 | 0.5751687 | 2.0624 | 0.04    | 1.341292886 | count | 1 |
| ZNF571     | 1.1132428 | 0.8574297 | 1.2983 | 0.195   | 1.342321252 | count | 1 |
| ANKRD36    | 1.0606073 | 0.5739164 | 1.848  | 0.0655  | 1.34536636  | count | 1 |
| SH3BP5     | 1.031866  | 0.6074575 | 1.6987 | 0.0903  | 1.346512757 | count | 1 |
| SNX19      | 1.3693455 | 0.8892883 | 1.5398 | 0.125   | 1.348118646 | count | 1 |
| DIS3L      | 1.262541  | 0.8562668 | 1.4745 | 0.141   | 1.352635353 | count | 1 |
| ATG13      | 1.037766  | 0.9080315 | 1.1429 | 0.254   | 1.354135574 | count | 1 |
| TRPC4AP    | 1.068689  | 0.6239689 | 1.7127 | 0.0877  | 1.355479372 | count | 1 |
| ZBTB14     | 1.613911  | 1.1711837 | 1.378  | 0.169   | 1.357428535 | count | 1 |
| CNPY4      | 1.613911  | 1.264123  | 1.2767 | 0.203   | 1.357428535 | count | 1 |
| AC093462.1 | 1.613911  | 1.264123  | 1.2767 | 0.203   | 1.357428535 | count | 1 |
| PRPF4      | 1.0849718 | 0.6433534 | 1.6864 | 0.0927  | 1.357782995 | count | 1 |
| ATPAF2     | 1.104773  | 0.7795312 | 1.4172 | 0.157   | 1.359865858 | count | 1 |
| ULK2       | 1.2035404 | 1.099723  | 1.0944 | 0.2746  | 1.360229094 | count | 1 |
| AL161421.1 | 1.1293685 | 0.8436541 | 1.3387 | 0.182   | 1.36135525  | count | 1 |
| CEP162     | 1.3859052 | 1.125678  | 1.2312 | 0.219   | 1.363333742 | count | 1 |
| BLVRA      | 0.9790384 | 0.4283287 | 2.2857 | 0.0229  | 1.364437308 | count | 1 |
| CCDC32     | 1.0389446 | 0.5872479 | 1.7692 | 0.0778  | 1.364907442 | count | 1 |
| AP005482.1 | 0.9952769 | 0.5399234 | 1.8434 | 0.0662  | 1.366397677 | count | 1 |
| PFKL       | 1.0475851 | 0.5792002 | 1.8087 | 0.0714  | 1.366816713 | count | 1 |
| PJA1       | 1.1684736 | 0.8582114 | 1.3615 | 0.174   | 1.370327958 | count | 1 |
| TRAP1      | 1.2145815 | 0.9116275 | 1.3323 | 0.184   | 1.372285367 | count | 1 |
| PLCB1      | 1.0065094 | 0.5161851 | 1.9499 | 0.0521  | 1.373464402 | count | 1 |
| AC044849.1 | 0.982783  | 0.2973064 | 3.3056 | 0.00105 | 1.374940699 | count | 1 |
| AGPAT3     | 1.2847776 | 0.9179935 | 1.3995 | 0.163   | 1.375372413 | count | 1 |
| PARP10     | 1.0726862 | 0.6881397 | 1.5588 | 0.12    | 1.375456633 | count | 1 |
| DEXI       | 1.0545749 | 0.5671143 | 1.8595 | 0.0639  | 1.375839945 | count | 1 |
| C11orf68   | 1.1008308 | 0.7454391 | 1.4768 | 0.141   | 1.377307806 | count | 1 |
| SLC30A7    | 1.40477   | 0.9798008 | 1.4337 | 0.153   | 1.380598527 | count | 1 |

|            |           |           |        |        |             |       |   |
|------------|-----------|-----------|--------|--------|-------------|-------|---|
| HEATR6     | 1.1787741 | 0.740902  | 1.591  | 0.113  | 1.382076261 | count | 1 |
| CCDC137    | 1.055181  | 0.5940665 | 1.7762 | 0.0766 | 1.386026892 | count | 1 |
| FAM160B2   | 1.4127784 | 1.3061024 | 1.0817 | 0.2802 | 1.387905099 | count | 1 |
| ELFN1-AS1  | 1.0959197 | 1.0429382 | 1.0508 | 0.2941 | 1.389513948 | count | 1 |
| RCC1L      | 1.1856738 | 0.7266799 | 1.6316 | 0.104  | 1.389937993 | count | 1 |
| USP20      | 1.232477  | 0.9659538 | 1.2759 | 0.203  | 1.391787746 | count | 1 |
| IQCG       | 1.1883761 | 0.8138716 | 1.4602 | 0.145  | 1.393015362 | count | 1 |
| XYLT2      | 1.1883761 | 1.0037067 | 1.184  | 0.237  | 1.393015362 | count | 1 |
| WDFY1      | 1.1887864 | 0.6894928 | 1.7241 | 0.0856 | 1.393482544 | count | 1 |
| DHRS12     | 1.2377402 | 0.8131211 | 1.5222 | 0.129  | 1.397514322 | count | 1 |
| ARL5A      | 1.3113866 | 1.0410704 | 1.2597 | 0.209  | 1.402467079 | count | 1 |
| PLBD2      | 1.3113866 | 1.1202058 | 1.1707 | 0.243  | 1.402467079 | count | 1 |
| NMB        | 1.0682214 | 0.6075794 | 1.7582 | 0.0797 | 1.402976806 | count | 1 |
| PPP5C      | 1.0759969 | 0.5960349 | 1.8053 | 0.072  | 1.403472969 | count | 1 |
| RSPRY1     | 1.0622222 | 0.7192696 | 1.4768 | 0.141  | 1.403503296 | count | 1 |
| RNF41      | 1.054371  | 0.5880239 | 1.7931 | 0.0739 | 1.407062655 | count | 1 |
| ANKLE2     | 1.0317455 | 0.4311345 | 2.3931 | 0.0173 | 1.407704312 | count | 1 |
| PPP6R3     | 1.0556225 | 0.5162028 | 2.045  | 0.0417 | 1.408718256 | count | 1 |
| DCAF17     | 1.1126208 | 0.6553296 | 1.6978 | 0.0905 | 1.410356175 | count | 1 |
| TBL2       | 1.4379326 | 0.906682  | 1.5859 | 0.114  | 1.41076743  | count | 1 |
| CCL28      | 1.059452  | 0.6331294 | 1.6734 | 0.0952 | 1.41378375  | count | 1 |
| SPATA6     | 1.2530161 | 0.8921861 | 1.4044 | 0.161  | 1.414111073 | count | 1 |
| CENPU      | 1.6928166 | 0.9468643 | 1.7878 | 0.0747 | 1.414888097 | count | 1 |
| TMEM229B   | 1.6928166 | 0.9468643 | 1.7878 | 0.0747 | 1.414888097 | count | 1 |
| ZNF616     | 1.6928166 | 0.9468643 | 1.7878 | 0.0747 | 1.414888097 | count | 1 |
| KIAA1468   | 1.6928166 | 1.0287704 | 1.6455 | 0.101  | 1.414888097 | count | 1 |
| STAMBPL1   | 1.1330953 | 0.6026967 | 1.88   | 0.061  | 1.416956691 | count | 1 |
| NUMB       | 1.4472004 | 1.002918  | 1.443  | 0.15   | 1.41915667  | count | 1 |
| UVSSA      | 1.2119418 | 0.8052236 | 1.5051 | 0.133  | 1.419810384 | count | 1 |
| ZNF672     | 1.2610738 | 0.8471898 | 1.4885 | 0.138  | 1.422850865 | count | 1 |
| TECPR1     | 1.2610738 | 0.992468  | 1.2706 | 0.205  | 1.422850865 | count | 1 |
| AC025171.3 | 1.138115  | 0.6239989 | 1.8239 | 0.0691 | 1.423116111 | count | 1 |
| SPICE1     | 1.45659   | 0.987332  | 1.4753 | 0.141  | 1.427637135 | count | 1 |
| THOC3      | 1.1268147 | 0.6297853 | 1.7892 | 0.0745 | 1.428049847 | count | 1 |
| AC109446.3 | 1.075683  | 0.6064071 | 1.7739 | 0.077  | 1.428579901 | count | 1 |
| TAF6       | 1.1281493 | 0.6761298 | 1.6685 | 0.0962 | 1.429712584 | count | 1 |
| HARS       | 1.0687372 | 0.4837095 | 2.2095 | 0.0278 | 1.432000575 | count | 1 |
| BTBD2      | 1.1466079 | 0.9072995 | 1.2638 | 0.207  | 1.433531617 | count | 1 |
| TPP1       | 1.1189891 | 0.7937024 | 1.4098 | 0.16   | 1.433971009 | count | 1 |
| IPMK       | 1.3434403 | 1.0572792 | 1.2707 | 0.205  | 1.434936815 | count | 1 |
| SLC25A17   | 1.2260577 | 0.8575215 | 1.4298 | 0.154  | 1.435824279 | count | 1 |
| GBA2       | 1.7242335 | 1.223346  | 1.4094 | 0.16   | 1.437327282 | count | 1 |
| DRAM1      | 1.7242335 | 1.327128  | 1.2992 | 0.1948 | 1.437327282 | count | 1 |
| ZNF689     | 1.7242335 | 1.360303  | 1.2675 | 0.206  | 1.437327282 | count | 1 |
| AC243965.1 | 1.194403  | 0.7758464 | 1.5395 | 0.125  | 1.437812819 | count | 1 |

|            |           |           |        |         |             |       |   |
|------------|-----------|-----------|--------|---------|-------------|-------|---|
| FBXL17     | 1.1350064 | 0.7673364 | 1.4792 | 0.14    | 1.438252987 | count | 1 |
| ZBTB16     | 1.060694  | 0.4865238 | 2.1801 | 0.03    | 1.443549084 | count | 1 |
| PNP        | 1.0394719 | 0.3757829 | 2.7662 | 0.006   | 1.448354602 | count | 1 |
| CAMK2D     | 1.4798781 | 0.8044148 | 1.8397 | 0.0667  | 1.448587112 | count | 1 |
| SLX4IP     | 1.480467  | 0.974984  | 1.5185 | 0.13    | 1.449115477 | count | 1 |
| PCGF6      | 1.480467  | 1.0061003 | 1.4715 | 0.142   | 1.449115477 | count | 1 |
| VRK2       | 1.1041905 | 0.6010981 | 1.837  | 0.0671  | 1.449670287 | count | 1 |
| SAYSD1     | 1.2880696 | 0.8323352 | 1.5475 | 0.123   | 1.452056627 | count | 1 |
| CHMP4B     | 1.1146729 | 0.5279869 | 2.1112 | 0.0355  | 1.453279478 | count | 1 |
| MPP1       | 1.2091197 | 0.8269506 | 1.4621 | 0.145   | 1.455043255 | count | 1 |
| AC068338.2 | 1.1850084 | 0.7628342 | 1.5534 | 0.121   | 1.456493599 | count | 1 |
| SIK2       | 1.7533361 | 1.1726042 | 1.4952 | 0.136   | 1.457885126 | count | 1 |
| ZNF432     | 1.7533361 | 1.1726042 | 1.4952 | 0.136   | 1.457885126 | count | 1 |
| ARMCX2     | 1.7533361 | 1.2110188 | 1.4478 | 0.149   | 1.457885126 | count | 1 |
| BLZF1      | 1.139349  | 0.6918678 | 1.6468 | 0.101   | 1.459643341 | count | 1 |
| SLC43A1    | 1.2481701 | 0.8068465 | 1.547  | 0.123   | 1.460853557 | count | 1 |
| CSPP1      | 1.0950906 | 0.573818  | 1.9084 | 0.0572  | 1.460884423 | count | 1 |
| PLCB2      | 1.1221506 | 0.6129751 | 1.8307 | 0.0681  | 1.46289635  | count | 1 |
| ZNF7       | 1.1919909 | 0.7883564 | 1.512  | 0.132   | 1.464868998 | count | 1 |
| FAM174A    | 1.1105686 | 0.5284229 | 2.1017 | 0.0364  | 1.466677103 | count | 1 |
| METTL16    | 1.1949299 | 0.5491358 | 2.176  | 0.0303  | 1.468392607 | count | 1 |
| MTA1       | 1.1595371 | 0.6984845 | 1.6601 | 0.0979  | 1.468769389 | count | 1 |
| ERAL1      | 1.5029723 | 0.8310003 | 1.8086 | 0.0714  | 1.469243078 | count | 1 |
| WDR6       | 1.2563424 | 0.6570448 | 1.9121 | 0.0567  | 1.470086149 | count | 1 |
| GPR34      | 1.151049  | 0.6677946 | 1.7237 | 0.0857  | 1.474379765 | count | 1 |
| BTD        | 1.1425212 | 0.5869341 | 1.9466 | 0.0524  | 1.47729777  | count | 1 |
| DHX37      | 1.312186  | 0.8379502 | 1.5659 | 0.118   | 1.478046716 | count | 1 |
| AL117379.1 | 1.312186  | 0.8379502 | 1.5659 | 0.118   | 1.478046716 | count | 1 |
| TBCEL      | 1.312186  | 0.9198877 | 1.4265 | 0.155   | 1.478046716 | count | 1 |
| CLDN7      | 1.312186  | 0.9198877 | 1.4265 | 0.155   | 1.478046716 | count | 1 |
| GRHPR      | 1.083857  | 0.369233  | 2.9354 | 0.00357 | 1.481544192 | count | 1 |
| DVL3       | 1.206094  | 0.8783378 | 1.3732 | 0.171   | 1.481768238 | count | 1 |
| SLC46A3    | 1.206094  | 0.8901796 | 1.3549 | 0.176   | 1.481768238 | count | 1 |
| APBA2      | 1.189715  | 0.706164  | 1.6848 | 0.093   | 1.486282698 | count | 1 |
| RFX1       | 1.5242695 | 1.004668  | 1.5172 | 0.13    | 1.488184296 | count | 1 |
| GLB1       | 1.5242696 | 0.9835722 | 1.5497 | 0.122   | 1.488184368 | count | 1 |
| SLC25A20   | 1.110773  | 0.6293413 | 1.765  | 0.0785  | 1.493373189 | count | 1 |
| SLC30A9    | 1.3267967 | 0.9923737 | 1.337  | 0.182   | 1.493745484 | count | 1 |
| TENT4B     | 1.2498093 | 0.7189735 | 1.7383 | 0.0831  | 1.502537319 | count | 1 |
| NUTM2A-AS1 | 1.2498093 | 0.7727591 | 1.6173 | 0.107   | 1.502537319 | count | 1 |
| ANKMY2     | 1.3369735 | 0.8171054 | 1.6362 | 0.103   | 1.504658529 | count | 1 |
| HECTD4     | 1.2877746 | 0.7981049 | 1.6135 | 0.108   | 1.50550466  | count | 1 |
| PECR       | 1.5444939 | 1.2628992 | 1.223  | 0.2222  | 1.506074188 | count | 1 |
| CRAT       | 1.4185543 | 1.0213995 | 1.3888 | 0.166   | 1.510265126 | count | 1 |
| C16orf74   | 1.4185543 | 1.0251455 | 1.3838 | 0.167   | 1.510265126 | count | 1 |

|            |           |           |        |        |             |       |   |
|------------|-----------|-----------|--------|--------|-------------|-------|---|
| HPS6       | 1.8312402 | 1.3288467 | 1.3781 | 0.1691 | 1.511811539 | count | 1 |
| ZNF846     | 1.2399132 | 0.62291   | 1.9905 | 0.0474 | 1.522195673 | count | 1 |
| AC060780.1 | 1.8492796 | 1.214796  | 1.5223 | 0.129  | 1.524065319 | count | 1 |
| UBR5-AS1   | 1.8492796 | 1.304429  | 1.4177 | 0.1572 | 1.524065319 | count | 1 |
| PRDM4      | 1.8492796 | 1.4664753 | 1.261  | 0.2082 | 1.524065319 | count | 1 |
| RCCD1      | 1.8492796 | 1.4664753 | 1.261  | 0.2082 | 1.524065319 | count | 1 |
| CCDC88A    | 1.3569788 | 0.8543672 | 1.5883 | 0.113  | 1.526058733 | count | 1 |
| HIST4H4    | 1.3063889 | 0.8854163 | 1.4755 | 0.141  | 1.526409334 | count | 1 |
| AL096865.1 | 1.2704042 | 0.8399157 | 1.5125 | 0.131  | 1.526492106 | count | 1 |
| EFCAB2     | 1.2278944 | 0.758886  | 1.618  | 0.107  | 1.53283658  | count | 1 |
| FAM168B    | 1.1995053 | 0.5099322 | 2.3523 | 0.0193 | 1.535277997 | count | 1 |
| TACO1      | 1.4446205 | 0.9130638 | 1.5822 | 0.115  | 1.536144573 | count | 1 |
| ZBTB22     | 1.4446205 | 1.0408173 | 1.388  | 0.166  | 1.536144573 | count | 1 |
| HOMER1     | 1.4446205 | 1.07578   | 1.3429 | 0.18   | 1.536144573 | count | 1 |
| AC004854.2 | 1.4446205 | 1.07578   | 1.3429 | 0.18   | 1.536144573 | count | 1 |
| AC005332.7 | 1.8724918 | 1.2868589 | 1.4551 | 0.1466 | 1.539701844 | count | 1 |
| KLHL9      | 1.5839524 | 1.125255  | 1.4076 | 0.1602 | 1.540699757 | count | 1 |
| DCAF8      | 1.1764002 | 0.5776922 | 2.0364 | 0.0425 | 1.543128758 | count | 1 |
| PCYT1A     | 1.3760058 | 1.0262981 | 1.3407 | 0.181  | 1.546346768 | count | 1 |
| SAMD1      | 1.1886209 | 0.5207683 | 2.2824 | 0.0231 | 1.548187782 | count | 1 |
| SLC22A18   | 1.2147325 | 0.8457132 | 1.4363 | 0.152  | 1.554368939 | count | 1 |
| ZNF852     | 1.599868  | 0.9254628 | 1.7287 | 0.0848 | 1.554559592 | count | 1 |
| DUBR       | 1.599868  | 0.9254628 | 1.7287 | 0.0848 | 1.554559592 | count | 1 |
| LMNTD2     | 1.599868  | 0.9254628 | 1.7287 | 0.0848 | 1.554559592 | count | 1 |
| INCENP     | 1.599868  | 0.9254628 | 1.7287 | 0.0848 | 1.554559592 | count | 1 |
| ZNF426     | 1.4637711 | 1.026724  | 1.4257 | 0.155  | 1.555068797 | count | 1 |
| PRR5L      | 1.2040585 | 0.6913454 | 1.7416 | 0.0825 | 1.555462522 | count | 1 |
| NSUN6      | 1.3370099 | 0.7485188 | 1.7862 | 0.075  | 1.560680378 | count | 1 |
| TOR2A      | 1.3410963 | 0.7559829 | 1.774  | 0.077  | 1.565242576 | count | 1 |
| NUDT3      | 1.3056995 | 0.6497202 | 2.0096 | 0.0453 | 1.56740826  | count | 1 |
| NBEAL2     | 1.2577861 | 0.8643826 | 1.4551 | 0.147  | 1.569169405 | count | 1 |
| AP005329.3 | 1.4057798 | 0.8463981 | 1.6609 | 0.0977 | 1.577962398 | count | 1 |
| SERPINH1   | 1.4889357 | 1.17743   | 1.2646 | 0.207  | 1.579818491 | count | 1 |
| LGALS9C    | 1.9376846 | 1.227233  | 1.5789 | 0.115  | 1.58281981  | count | 1 |
| TMEM140    | 1.201254  | 0.6475896 | 1.855  | 0.0645 | 1.584737607 | count | 1 |
| ABL1       | 1.3591041 | 0.8400419 | 1.6179 | 0.107  | 1.585314693 | count | 1 |
| CROCC      | 1.3634309 | 0.8014346 | 1.7012 | 0.0899 | 1.590129545 | count | 1 |
| TMEM14A    | 1.2450068 | 0.5127327 | 2.4282 | 0.0157 | 1.592256472 | count | 1 |
| LINC02132  | 1.1667092 | 0.4734501 | 2.4643 | 0.0142 | 1.593847574 | count | 1 |
| CEP131     | 1.9577538 | 1.342665  | 1.4581 | 0.146  | 1.595853733 | count | 1 |
| USP28      | 1.2100245 | 0.5015496 | 2.4126 | 0.0164 | 1.596122941 | count | 1 |
| ZNF576     | 1.4233154 | 1.060517  | 1.3421 | 0.181  | 1.596505593 | count | 1 |
| ZNF134     | 1.5065776 | 0.9176806 | 1.6417 | 0.102  | 1.597088445 | count | 1 |
| SELENON    | 1.424885  | 0.9475326 | 1.5038 | 0.134  | 1.598162523 | count | 1 |
| KDM1A      | 1.206094  | 0.6912631 | 1.7448 | 0.082  | 1.599507525 | count | 1 |

|            |           |           |        |         |             |       |   |
|------------|-----------|-----------|--------|---------|-------------|-------|---|
| PLCH2      | 1.3058275 | 0.656812  | 1.9881 | 0.0476  | 1.600576537 | count | 1 |
| TMEM41A    | 1.2214341 | 0.5548961 | 2.2012 | 0.0284  | 1.601208484 | count | 1 |
| KLHL12     | 1.5120515 | 1.0612642 | 1.4248 | 0.155   | 1.60243317  | count | 1 |
| FAM104A    | 1.1982757 | 0.5746552 | 2.0852 | 0.0378  | 1.603554907 | count | 1 |
| COX16      | 1.657567  | 1.1016342 | 1.5046 | 0.133   | 1.604281406 | count | 1 |
| XPO6       | 1.657567  | 1.136693  | 1.4582 | 0.146   | 1.604281456 | count | 1 |
| REEP4      | 1.6575671 | 0.9737178 | 1.7023 | 0.0897  | 1.604281526 | count | 1 |
| NREP       | 1.34      | 0.6966082 | 1.9236 | 0.0553  | 1.606998463 | count | 1 |
| NAIF1      | 1.34      | 0.9316936 | 1.4382 | 0.151   | 1.606998463 | count | 1 |
| HDX        | 1.378714  | 0.815216  | 1.6912 | 0.0918  | 1.607111377 | count | 1 |
| LMBRD2     | 1.976884  | 1.115324  | 1.7725 | 0.07726 | 1.608171927 | count | 1 |
| NR2C1      | 1.2292177 | 0.6762057 | 1.8178 | 0.07    | 1.611229822 | count | 1 |
| PIGK       | 1.2771134 | 0.6881137 | 1.856  | 0.0644  | 1.614188498 | count | 1 |
| NUFIP1     | 1.6736336 | 0.9391389 | 1.7821 | 0.0757  | 1.617977068 | count | 1 |
| UBQLN2     | 1.2669834 | 0.7233465 | 1.7516 | 0.0808  | 1.619700648 | count | 1 |
| SVBP       | 1.1977416 | 0.5265691 | 2.2746 | 0.0236  | 1.624093411 | count | 1 |
| AL390728.6 | 1.5345365 | 0.8602969 | 1.7837 | 0.0754  | 1.624318202 | count | 1 |
| RNASEH1    | 1.211344  | 0.5588432 | 2.1676 | 0.0309  | 1.626967949 | count | 1 |
| ASRGL1     | 1.361382  | 0.9186599 | 1.4819 | 0.139   | 1.631588732 | count | 1 |
| LINC00893  | 1.361382  | 0.9822451 | 1.386  | 0.167   | 1.631588732 | count | 1 |
| PAK1IP1    | 1.2767567 | 0.7390852 | 1.7275 | 0.085   | 1.631889066 | count | 1 |
| SUSD6      | 1.457235  | 0.7438609 | 1.959  | 0.051   | 1.632207696 | count | 1 |
| WDR37      | 1.2948347 | 0.6455635 | 2.0057 | 0.0457  | 1.635975192 | count | 1 |
| ELP4       | 1.3672075 | 0.6958876 | 1.9647 | 0.0503  | 1.638276322 | count | 1 |
| PARG       | 1.340367  | 0.737244  | 1.8181 | 0.07    | 1.641417383 | count | 1 |
| OMA1       | 1.4671319 | 0.7530236 | 1.9483 | 0.0522  | 1.642582441 | count | 1 |
| PAN3-AS1   | 1.5550483 | 0.8440224 | 1.8424 | 0.0663  | 1.644184049 | count | 1 |
| CCND1      | 1.3209277 | 0.8284857 | 1.5944 | 0.112   | 1.645562803 | count | 1 |
| TNFAIP8L2  | 1.3794874 | 0.7926752 | 1.7403 | 0.0828  | 1.652355758 | count | 1 |
| ARMCX5     | 1.328603  | 0.7358847 | 1.8055 | 0.0719  | 1.654814803 | count | 1 |
| ANKRD36B   | 1.2379715 | 0.5963445 | 2.0759 | 0.0387  | 1.655908335 | count | 1 |
| ZNF333     | 2.0538338 | 1.2110753 | 1.6959 | 0.0909  | 1.65666534  | count | 1 |
| SCAF8      | 1.5756762 | 1.126616  | 1.3986 | 0.163   | 1.664065758 | count | 1 |
| HYLS1      | 1.3620873 | 0.8137746 | 1.6738 | 0.0951  | 1.667014628 | count | 1 |
| CMSS1      | 1.275611  | 0.7801561 | 1.6351 | 0.103   | 1.670851391 | count | 1 |
| INO80B     | 1.285876  | 0.7696636 | 1.6707 | 0.0957  | 1.672293856 | count | 1 |
| MOSPD2     | 1.4379326 | 0.8464338 | 1.6988 | 0.0903  | 1.672534154 | count | 1 |
| AEN        | 1.7469348 | 0.8744985 | 1.9976 | 0.0466  | 1.679608413 | count | 1 |
| AL021453.1 | 1.5952599 | 1.141105  | 1.398  | 0.163   | 1.682849941 | count | 1 |
| KIAA1958   | 1.753834  | 1.0920795 | 1.606  | 0.109   | 1.685335761 | count | 1 |
| SPATA7     | 1.753834  | 1.0920795 | 1.606  | 0.109   | 1.685335761 | count | 1 |
| PLA2G6     | 1.753834  | 1.0920795 | 1.606  | 0.109   | 1.685335761 | count | 1 |
| ZSCAN25    | 1.7538342 | 1.5992372 | 1.0967 | 0.2736  | 1.685336055 | count | 1 |
| DENND2C    | 1.7538342 | 1.7030961 | 1.0298 | 0.3039  | 1.685336055 | count | 1 |
| AL391069.2 | 1.7538342 | 1.7030961 | 1.0298 | 0.3039  | 1.685336055 | count | 1 |

|            |            |             |        |        |             |       |   |
|------------|------------|-------------|--------|--------|-------------|-------|---|
| ADGRG3     | 1.6001212  | 0.7030637   | 2.2759 | 0.0235 | 1.687498819 | count | 1 |
| ST7L       | 1.413372   | 0.9952713   | 1.4201 | 0.157  | 1.691081348 | count | 1 |
| IFIT1      | 1.243194   | 0.5973486   | 2.0812 | 0.0382 | 1.693453945 | count | 1 |
| PARP15     | 1.5197154  | 0.8983835   | 1.6916 | 0.0917 | 1.697374643 | count | 1 |
| MBNL1-AS1  | 1.5218306  | 1.4912965   | 1.0205 | 0.3083 | 1.699566816 | count | 1 |
| MANBAL     | 1.3957417  | 0.9346593   | 1.4933 | 0.136  | 1.706540756 | count | 1 |
| ZNF524     | 1.2685717  | 0.5462113   | 2.3225 | 0.0208 | 1.708596045 | count | 1 |
| OSGEP      | 1.2648492  | 0.500349    | 2.5279 | 0.0119 | 1.709017823 | count | 1 |
| TMCO3      | 1.3393751  | 0.5689064   | 2.3543 | 0.0192 | 1.70973146  | count | 1 |
| CXorf40B   | 1.4016069  | 0.7030907   | 1.9935 | 0.047  | 1.713412037 | count | 1 |
| ABCF3      | 1.5410242  | 0.8255303   | 1.8667 | 0.0628 | 1.719416047 | count | 1 |
| AL627171.1 | 1.4812228  | 0.7066949   | 2.096  | 0.0369 | 1.719962268 | count | 1 |
| CENPB      | 1.3029311  | 0.5971599   | 2.1819 | 0.0298 | 1.725617774 | count | 1 |
| VNN2       | 1.299644   | 0.7022821   | 1.8506 | 0.0651 | 1.729605564 | count | 1 |
| DUSP18     | 1.342437   | 0.7563541   | 1.7749 | 0.0769 | 1.729912562 | count | 1 |
| FAM241B    | 1.3716747  | 0.8558368   | 1.6027 | 0.11   | 1.73000651  | count | 1 |
| MICB       | 1.6464829  | 0.7929933   | 2.0763 | 0.0387 | 1.731551946 | count | 1 |
| YLPM1      | 1.3982471  | 0.7201113   | 1.9417 | 0.053  | 1.738405508 | count | 1 |
| AMPD3      | 1.5037163  | 0.7235951   | 2.0781 | 0.0385 | 1.744467602 | count | 1 |
| ELMOD2     | 1.3346662  | 0.6077094   | 2.1962 | 0.0288 | 1.746459239 | count | 1 |
| KIAA0930   | 1.4628906  | 0.8530659   | 1.7149 | 0.0873 | 1.747334317 | count | 1 |
| WIPF2      | 1.4366308  | 0.711924    | 2.018  | 0.0444 | 1.754334078 | count | 1 |
| AC105020.6 | 17.8785865 | 1594.587877 | 0.0112 | 0.991  | 1.757429555 | count | 1 |
| AURKA      | 18.0709546 | 1592.733055 | 0.0113 | 0.991  | 1.757429565 | count | 1 |
| AL359644.1 | 18.360456  | 2355.197545 | 0.0078 | 0.994  | 1.757429577 | count | 1 |
| CEP70      | 18.900429  | 2034.847419 | 0.0093 | 0.9926 | 1.757429592 | count | 1 |
| SORBS3     | 19.16758   | 3011.782619 | 0.0064 | 0.995  | 1.757429597 | count | 1 |
| ARHGAP33   | 19.3051864 | 2173.228641 | 0.0089 | 0.993  | 1.7574296   | count | 1 |
| STPG1      | 19.8395885 | 2787.354173 | 0.0071 | 0.994  | 1.757429605 | count | 1 |
| PTGS2      | 19.8395885 | 2787.354173 | 0.0071 | 0.994  | 1.757429605 | count | 1 |
| PACRGL     | 19.8395881 | 2787.354078 | 0.0071 | 0.994  | 1.757429605 | count | 1 |
| PTPN13     | 19.8395881 | 2787.354078 | 0.0071 | 0.994  | 1.757429605 | count | 1 |
| TRIM36     | 19.8395885 | 2787.354173 | 0.0071 | 0.994  | 1.757429605 | count | 1 |
| AIRN       | 19.8395881 | 2787.354078 | 0.0071 | 0.994  | 1.757429605 | count | 1 |
| AL022069.1 | 19.8395885 | 2787.354173 | 0.0071 | 0.994  | 1.757429605 | count | 1 |
| FAM86B1    | 19.8395885 | 2787.354173 | 0.0071 | 0.994  | 1.757429605 | count | 1 |
| C8orf48    | 19.8395881 | 2787.354078 | 0.0071 | 0.994  | 1.757429605 | count | 1 |
| PCNX3      | 19.8395885 | 2787.354173 | 0.0071 | 0.994  | 1.757429605 | count | 1 |
| ABCC9      | 19.8395885 | 2787.354173 | 0.0071 | 0.994  | 1.757429605 | count | 1 |
| CENPBD1    | 19.8395885 | 2787.354173 | 0.0071 | 0.994  | 1.757429605 | count | 1 |
| WDR81      | 19.8395885 | 2787.354173 | 0.0071 | 0.994  | 1.757429605 | count | 1 |
| SHPK       | 19.8395881 | 2787.354078 | 0.0071 | 0.994  | 1.757429605 | count | 1 |
| ZNF286B    | 19.8395885 | 2787.354173 | 0.0071 | 0.994  | 1.757429605 | count | 1 |
| AC145343.1 | 19.8395881 | 2787.354078 | 0.0071 | 0.994  | 1.757429605 | count | 1 |
| TAF4B      | 19.8395885 | 2787.354173 | 0.0071 | 0.994  | 1.757429605 | count | 1 |



|            |            |             |        |        |             |       |   |
|------------|------------|-------------|--------|--------|-------------|-------|---|
| CD3EAP     | 19.8395885 | 2787.354173 | 0.0071 | 0.994  | 1.757429605 | count | 1 |
| AC002470.1 | 19.8395885 | 2787.354173 | 0.0071 | 0.994  | 1.757429605 | count | 1 |
| DEPDC5     | 19.8395881 | 2787.354078 | 0.0071 | 0.994  | 1.757429605 | count | 1 |
| RNF32      | 17.8079955 | 1792.470512 | 0.0099 | 0.992  | 1.757429652 | count | 1 |
| FKBP15     | 17.8109202 | 1444.419182 | 0.0123 | 0.99   | 1.757429652 | count | 1 |
| ZNF268     | 17.8785872 | 1594.587863 | 0.0112 | 0.991  | 1.757429656 | count | 1 |
| SLC38A9    | 18.115192  | 1450.647897 | 0.0125 | 0.99   | 1.757429669 | count | 1 |
| AC107375.1 | 18.1209362 | 1515.241887 | 0.012  | 0.9905 | 1.757429669 | count | 1 |
| ANKS3      | 18.2764243 | 1528.219655 | 0.012  | 0.99   | 1.757429676 | count | 1 |
| ZNF346     | 18.3604553 | 2355.197622 | 0.0078 | 0.994  | 1.757429679 | count | 1 |
| SHROOM1    | 18.3604556 | 2355.197617 | 0.0078 | 0.994  | 1.757429679 | count | 1 |
| PXN-AS1    | 18.3604559 | 2355.197603 | 0.0078 | 0.994  | 1.757429679 | count | 1 |
| DROSHA     | 18.3604565 | 2355.197892 | 0.0078 | 0.994  | 1.757429679 | count | 1 |
| NEXN       | 18.3604571 | 2355.198201 | 0.0078 | 0.994  | 1.757429679 | count | 1 |
| HLA-G      | 18.3604571 | 2355.19821  | 0.0078 | 0.994  | 1.757429679 | count | 1 |
| SLC18B1    | 18.3604572 | 2355.198186 | 0.0078 | 0.994  | 1.757429679 | count | 1 |
| ARC        | 18.3604573 | 2355.198557 | 0.0078 | 0.994  | 1.757429679 | count | 1 |
| FAM219A    | 18.3604573 | 2355.198186 | 0.0078 | 0.994  | 1.757429679 | count | 1 |
| PDE8A      | 18.3604578 | 2355.198119 | 0.0078 | 0.994  | 1.757429679 | count | 1 |
| APOC2      | 18.3614894 | 1825.270621 | 0.0101 | 0.992  | 1.757429679 | count | 1 |
| NKIRAS1    | 18.3614897 | 1825.270902 | 0.0101 | 0.992  | 1.757429679 | count | 1 |
| PFKFB2     | 18.5062942 | 2765.445702 | 0.0067 | 0.995  | 1.757429684 | count | 1 |
| SOCS5      | 18.5104895 | 2177.942106 | 0.0085 | 0.993  | 1.757429684 | count | 1 |
| ZBTB6      | 18.5104898 | 2177.941567 | 0.0085 | 0.993  | 1.757429684 | count | 1 |
| MIER2      | 18.5104911 | 2177.942283 | 0.0085 | 0.993  | 1.757429684 | count | 1 |
| AC138696.2 | 18.5444952 | 2036.919652 | 0.0091 | 0.993  | 1.757429685 | count | 1 |
| ARHGEF40   | 18.6931945 | 2547.661659 | 0.0073 | 0.994  | 1.757429689 | count | 1 |
| WIZ        | 18.6931948 | 2547.66071  | 0.0073 | 0.994  | 1.757429689 | count | 1 |
| MED22      | 18.8117991 | 2032.458539 | 0.0093 | 0.993  | 1.757429692 | count | 1 |
| DNAJC16    | 18.8322926 | 1941.015534 | 0.0097 | 0.9923 | 1.757429693 | count | 1 |
| CA11       | 18.9004301 | 2034.847591 | 0.0093 | 0.9926 | 1.757429694 | count | 1 |
| CARD6      | 19.1675749 | 3011.781786 | 0.0064 | 0.995  | 1.757429699 | count | 1 |
| ZNF587     | 19.1675755 | 3011.78157  | 0.0064 | 0.995  | 1.757429699 | count | 1 |
| TCEA3      | 19.167577  | 3011.781087 | 0.0064 | 0.995  | 1.757429699 | count | 1 |
| FBXL19     | 19.1675778 | 3011.783135 | 0.0064 | 0.995  | 1.757429699 | count | 1 |
| LINC00092  | 19.1675798 | 3011.782569 | 0.0064 | 0.995  | 1.757429699 | count | 1 |
| ZFP3       | 19.1675801 | 3011.782636 | 0.0064 | 0.995  | 1.757429699 | count | 1 |
| MEGF6      | 19.3051837 | 2173.228941 | 0.0089 | 0.993  | 1.757429701 | count | 1 |
| GPR89A     | 19.3051843 | 2173.229956 | 0.0089 | 0.993  | 1.757429701 | count | 1 |
| SNX21      | 19.3051842 | 2173.22946  | 0.0089 | 0.993  | 1.757429701 | count | 1 |
| ATAT1      | 19.3051851 | 2173.229922 | 0.0089 | 0.993  | 1.757429701 | count | 1 |
| THAP9      | 19.3051861 | 2173.229241 | 0.0089 | 0.993  | 1.757429701 | count | 1 |
| PRUNE2     | 19.3051867 | 2173.22976  | 0.0089 | 0.993  | 1.757429701 | count | 1 |
| CTNS       | 19.3051862 | 2173.22923  | 0.0089 | 0.993  | 1.757429701 | count | 1 |
| DTNB       | 19.3051872 | 2173.230245 | 0.0089 | 0.993  | 1.757429701 | count | 1 |

|              |            |             |        |        |             |       |   |
|--------------|------------|-------------|--------|--------|-------------|-------|---|
| NDC1         | 19.5478988 | 2475.505684 | 0.0079 | 0.9937 | 1.757429704 | count | 1 |
| MAP3K14-AS1  | 19.547899  | 2475.506449 | 0.0079 | 0.9937 | 1.757429704 | count | 1 |
| ZNF280B      | 19.5478993 | 2475.505684 | 0.0079 | 0.9937 | 1.757429704 | count | 1 |
| CPE          | 19.5479003 | 2475.50522  | 0.0079 | 0.9937 | 1.757429704 | count | 1 |
| GSEC         | 19.5478997 | 2475.506424 | 0.0079 | 0.9937 | 1.757429704 | count | 1 |
| TAOK2        | 19.5479002 | 2475.505596 | 0.0079 | 0.9937 | 1.757429704 | count | 1 |
| GOLGA6L7     | 19.5582816 | 2117.525281 | 0.0092 | 0.993  | 1.757429704 | count | 1 |
| PERM1        | 19.8395882 | 2787.354078 | 0.0071 | 0.994  | 1.757429707 | count | 1 |
| HES4         | 19.8395882 | 2787.354078 | 0.0071 | 0.994  | 1.757429707 | count | 1 |
| SLC25A34-AS1 | 19.8395882 | 2787.354078 | 0.0071 | 0.994  | 1.757429707 | count | 1 |
| ARHGEF10L    | 19.8395882 | 2787.354078 | 0.0071 | 0.994  | 1.757429707 | count | 1 |
| HSPG2        | 19.8395882 | 2787.354078 | 0.0071 | 0.994  | 1.757429707 | count | 1 |
| ZNF436       | 19.8395882 | 2787.354078 | 0.0071 | 0.994  | 1.757429707 | count | 1 |
| EFCAB14-AS1  | 19.8395882 | 2787.354078 | 0.0071 | 0.994  | 1.757429707 | count | 1 |
| KIRREL1      | 19.8395882 | 2787.354078 | 0.0071 | 0.994  | 1.757429707 | count | 1 |
| PRELP        | 19.8395882 | 2787.354078 | 0.0071 | 0.994  | 1.757429707 | count | 1 |
| CDC42BPA     | 19.8395883 | 2787.353983 | 0.0071 | 0.994  | 1.757429707 | count | 1 |
| AC073195.1   | 19.8395882 | 2787.354078 | 0.0071 | 0.994  | 1.757429707 | count | 1 |
| LTBP1        | 19.8395882 | 2787.354078 | 0.0071 | 0.994  | 1.757429707 | count | 1 |
| PLEKHH2      | 19.8395882 | 2787.354078 | 0.0071 | 0.994  | 1.757429707 | count | 1 |
| LOXL3        | 19.8395882 | 2787.354078 | 0.0071 | 0.994  | 1.757429707 | count | 1 |
| C2orf40      | 19.8395882 | 2787.354078 | 0.0071 | 0.994  | 1.757429707 | count | 1 |
| STEAP3       | 19.8395882 | 2787.354078 | 0.0071 | 0.994  | 1.757429707 | count | 1 |
| KCNE4        | 19.8395882 | 2787.354078 | 0.0071 | 0.994  | 1.757429707 | count | 1 |
| IQCA1        | 19.8395881 | 2787.353964 | 0.0071 | 0.994  | 1.757429707 | count | 1 |
| SNED1        | 19.8395882 | 2787.354078 | 0.0071 | 0.994  | 1.757429707 | count | 1 |
| AC069277.1   | 19.8395883 | 2787.354116 | 0.0071 | 0.994  | 1.757429707 | count | 1 |
| CAND2        | 19.8395883 | 2787.353983 | 0.0071 | 0.994  | 1.757429707 | count | 1 |
| FGD5         | 19.8395883 | 2787.354097 | 0.0071 | 0.994  | 1.757429707 | count | 1 |
| TGM4         | 19.8395882 | 2787.354116 | 0.0071 | 0.994  | 1.757429707 | count | 1 |
| SHQ1         | 19.8395883 | 2787.354097 | 0.0071 | 0.994  | 1.757429707 | count | 1 |
| TMEM45A      | 19.8395882 | 2787.354078 | 0.0071 | 0.994  | 1.757429707 | count | 1 |
| CCDC191      | 19.8395883 | 2787.354097 | 0.0071 | 0.994  | 1.757429707 | count | 1 |
| ITGB5        | 19.8395882 | 2787.354078 | 0.0071 | 0.994  | 1.757429707 | count | 1 |
| CPNE4        | 19.8395882 | 2787.354078 | 0.0071 | 0.994  | 1.757429707 | count | 1 |
| IGSF10       | 19.8395882 | 2787.354078 | 0.0071 | 0.994  | 1.757429707 | count | 1 |
| SUCNR1       | 19.8395882 | 2787.354078 | 0.0071 | 0.994  | 1.757429707 | count | 1 |
| MYL5         | 19.8395884 | 2787.354116 | 0.0071 | 0.994  | 1.757429707 | count | 1 |
| FGFRL1       | 19.8395883 | 2787.354021 | 0.0071 | 0.994  | 1.757429707 | count | 1 |
| BMP2K        | 19.8395883 | 2787.354021 | 0.0071 | 0.994  | 1.757429707 | count | 1 |
| PDLIM3       | 19.8395882 | 2787.354078 | 0.0071 | 0.994  | 1.757429707 | count | 1 |
| CMBL         | 19.8395882 | 2787.354078 | 0.0071 | 0.994  | 1.757429707 | count | 1 |
| MYO10        | 19.8395883 | 2787.354116 | 0.0071 | 0.994  | 1.757429707 | count | 1 |
| AC010273.1   | 19.8395883 | 2787.353983 | 0.0071 | 0.994  | 1.757429707 | count | 1 |
| AC010226.1   | 19.8395883 | 2787.354021 | 0.0071 | 0.994  | 1.757429707 | count | 1 |

|            |            |             |        |       |             |       |   |
|------------|------------|-------------|--------|-------|-------------|-------|---|
| ALDH7A1    | 19.8395882 | 2787.354078 | 0.0071 | 0.994 | 1.757429707 | count | 1 |
| FOXC1      | 19.8395882 | 2787.354078 | 0.0071 | 0.994 | 1.757429707 | count | 1 |
| TFAP2A     | 19.8395882 | 2787.354078 | 0.0071 | 0.994 | 1.757429707 | count | 1 |
| HIST1H4D   | 19.8395884 | 2787.354135 | 0.0071 | 0.994 | 1.757429707 | count | 1 |
| ABHD16A    | 19.8395883 | 2787.354097 | 0.0071 | 0.994 | 1.757429707 | count | 1 |
| RCAN2      | 19.8395882 | 2787.354078 | 0.0071 | 0.994 | 1.757429707 | count | 1 |
| AL603910.1 | 19.8395882 | 2787.354078 | 0.0071 | 0.994 | 1.757429707 | count | 1 |
| METTL24    | 19.8395882 | 2787.354078 | 0.0071 | 0.994 | 1.757429707 | count | 1 |
| TPD52L1    | 19.8395883 | 2787.353945 | 0.0071 | 0.994 | 1.757429707 | count | 1 |
| AL159163.1 | 19.8395882 | 2787.354078 | 0.0071 | 0.994 | 1.757429707 | count | 1 |
| MACC1      | 19.8395883 | 2787.354097 | 0.0071 | 0.994 | 1.757429707 | count | 1 |
| INMT       | 19.8395882 | 2787.354078 | 0.0071 | 0.994 | 1.757429707 | count | 1 |
| AQP1       | 19.8395882 | 2787.354078 | 0.0071 | 0.994 | 1.757429707 | count | 1 |
| TNS3       | 19.8395882 | 2787.354078 | 0.0071 | 0.994 | 1.757429707 | count | 1 |
| AC211476.2 | 19.8395884 | 2787.354116 | 0.0071 | 0.994 | 1.757429707 | count | 1 |
| FZD1       | 19.8395882 | 2787.354078 | 0.0071 | 0.994 | 1.757429707 | count | 1 |
| LRRC17     | 19.8395882 | 2787.354078 | 0.0071 | 0.994 | 1.757429707 | count | 1 |
| LSMEM1     | 19.8395884 | 2787.354135 | 0.0071 | 0.994 | 1.757429707 | count | 1 |
| AC083862.2 | 19.8395882 | 2787.354116 | 0.0071 | 0.994 | 1.757429707 | count | 1 |
| ACTR3B     | 19.8395883 | 2787.354116 | 0.0071 | 0.994 | 1.757429707 | count | 1 |
| INE2       | 19.8395882 | 2787.354078 | 0.0071 | 0.994 | 1.757429707 | count | 1 |
| AC234772.3 | 19.8395883 | 2787.354097 | 0.0071 | 0.994 | 1.757429707 | count | 1 |
| LINC01560  | 19.8395883 | 2787.354116 | 0.0071 | 0.994 | 1.757429707 | count | 1 |
| PABPC5     | 19.8395882 | 2787.354078 | 0.0071 | 0.994 | 1.757429707 | count | 1 |
| ARHGEF10   | 19.8395882 | 2787.354078 | 0.0071 | 0.994 | 1.757429707 | count | 1 |
| MCPH1-AS1  | 19.8395882 | 2787.354078 | 0.0071 | 0.994 | 1.757429707 | count | 1 |
| NECAB1     | 19.8395883 | 2787.354021 | 0.0071 | 0.994 | 1.757429707 | count | 1 |
| PTPRD      | 19.8395881 | 2787.353964 | 0.0071 | 0.994 | 1.757429707 | count | 1 |
| CCL27      | 19.8395884 | 2787.354116 | 0.0071 | 0.994 | 1.757429707 | count | 1 |
| PRRX2      | 19.8395882 | 2787.354078 | 0.0071 | 0.994 | 1.757429707 | count | 1 |
| DBH-AS1    | 19.8395883 | 2787.354021 | 0.0071 | 0.994 | 1.757429707 | count | 1 |
| COL5A1     | 19.8395882 | 2787.354078 | 0.0071 | 0.994 | 1.757429707 | count | 1 |
| LMO2       | 19.8395882 | 2787.354078 | 0.0071 | 0.994 | 1.757429707 | count | 1 |
| ROM1       | 19.8395882 | 2787.354078 | 0.0071 | 0.994 | 1.757429707 | count | 1 |
| C11orf80   | 19.8395883 | 2787.354097 | 0.0071 | 0.994 | 1.757429707 | count | 1 |
| CACNA1C    | 19.8395882 | 2787.354078 | 0.0071 | 0.994 | 1.757429707 | count | 1 |
| LMO3       | 19.8395882 | 2787.354078 | 0.0071 | 0.994 | 1.757429707 | count | 1 |
| AC025031.2 | 19.8395883 | 2787.353983 | 0.0071 | 0.994 | 1.757429707 | count | 1 |
| ADCY6      | 19.8395882 | 2787.354078 | 0.0071 | 0.994 | 1.757429707 | count | 1 |
| AC025259.3 | 19.8395884 | 2787.354116 | 0.0071 | 0.994 | 1.757429707 | count | 1 |
| AC068790.8 | 19.8395881 | 2787.353964 | 0.0071 | 0.994 | 1.757429707 | count | 1 |
| UGGT2      | 19.8395882 | 2787.354078 | 0.0071 | 0.994 | 1.757429707 | count | 1 |
| EFNB2      | 19.8395884 | 2787.354116 | 0.0071 | 0.994 | 1.757429707 | count | 1 |
| SLC22A17   | 19.8395882 | 2787.354078 | 0.0071 | 0.994 | 1.757429707 | count | 1 |
| EFS        | 19.8395882 | 2787.354078 | 0.0071 | 0.994 | 1.757429707 | count | 1 |

|            |            |             |        |         |             |       |   |
|------------|------------|-------------|--------|---------|-------------|-------|---|
| ARMH4      | 19.8395882 | 2787.354078 | 0.0071 | 0.994   | 1.757429707 | count | 1 |
| TMEM30B    | 19.8395882 | 2787.354078 | 0.0071 | 0.994   | 1.757429707 | count | 1 |
| MEG3       | 19.8395882 | 2787.354078 | 0.0071 | 0.994   | 1.757429707 | count | 1 |
| AC123768.3 | 19.8395881 | 2787.353964 | 0.0071 | 0.994   | 1.757429707 | count | 1 |
| THSD4      | 19.8395882 | 2787.354078 | 0.0071 | 0.994   | 1.757429707 | count | 1 |
| LOXL1      | 19.8395882 | 2787.354078 | 0.0071 | 0.994   | 1.757429707 | count | 1 |
| SOX8       | 19.8395882 | 2787.354078 | 0.0071 | 0.994   | 1.757429707 | count | 1 |
| NOMO1      | 19.8395881 | 2787.353964 | 0.0071 | 0.994   | 1.757429707 | count | 1 |
| AC137932.3 | 19.8395883 | 2787.353983 | 0.0071 | 0.994   | 1.757429707 | count | 1 |
| SOCS7      | 19.8395882 | 2787.354078 | 0.0071 | 0.994   | 1.757429707 | count | 1 |
| C17orf82   | 19.8395882 | 2787.354078 | 0.0071 | 0.994   | 1.757429707 | count | 1 |
| GPRC5C     | 19.8395882 | 2787.354078 | 0.0071 | 0.994   | 1.757429707 | count | 1 |
| MRPL38     | 19.8395882 | 2787.354116 | 0.0071 | 0.994   | 1.757429707 | count | 1 |
| LGALS3BP   | 19.8395882 | 2787.354078 | 0.0071 | 0.994   | 1.757429707 | count | 1 |
| ENGASE     | 19.8395882 | 2787.354078 | 0.0071 | 0.994   | 1.757429707 | count | 1 |
| TWSG1      | 19.8395882 | 2787.354078 | 0.0071 | 0.994   | 1.757429707 | count | 1 |
| GATA6-AS1  | 19.8395882 | 2787.354078 | 0.0071 | 0.994   | 1.757429707 | count | 1 |
| CCDC68     | 19.8395882 | 2787.354078 | 0.0071 | 0.994   | 1.757429707 | count | 1 |
| ATP8B1     | 19.8395882 | 2787.354078 | 0.0071 | 0.994   | 1.757429707 | count | 1 |
| NEDD4L     | 19.8395881 | 2787.353964 | 0.0071 | 0.994   | 1.757429707 | count | 1 |
| CFAP61     | 19.8395882 | 2787.354078 | 0.0071 | 0.994   | 1.757429707 | count | 1 |
| PTGIS      | 19.8395882 | 2787.354078 | 0.0071 | 0.994   | 1.757429707 | count | 1 |
| DOK5       | 19.8395882 | 2787.354078 | 0.0071 | 0.994   | 1.757429707 | count | 1 |
| AC016588.2 | 19.8395883 | 2787.354116 | 0.0071 | 0.994   | 1.757429707 | count | 1 |
| PRSS57     | 19.8395883 | 2787.354021 | 0.0071 | 0.994   | 1.757429707 | count | 1 |
| ZNF823     | 19.8395884 | 2787.354116 | 0.0071 | 0.994   | 1.757429707 | count | 1 |
| CACNA1A    | 19.8395882 | 2787.354116 | 0.0071 | 0.994   | 1.757429707 | count | 1 |
| ZSWIM4     | 19.8395882 | 2787.354116 | 0.0071 | 0.994   | 1.757429707 | count | 1 |
| LRFN3      | 19.8395883 | 2787.354021 | 0.0071 | 0.994   | 1.757429707 | count | 1 |
| BCAM       | 19.8395882 | 2787.354078 | 0.0071 | 0.994   | 1.757429707 | count | 1 |
| DMPK       | 19.8395884 | 2787.354116 | 0.0071 | 0.994   | 1.757429707 | count | 1 |
| PLA2G4C    | 19.8395882 | 2787.354078 | 0.0071 | 0.994   | 1.757429707 | count | 1 |
| ZNF415     | 19.8395883 | 2787.354021 | 0.0071 | 0.994   | 1.757429707 | count | 1 |
| SSC5D      | 19.8395882 | 2787.354078 | 0.0071 | 0.994   | 1.757429707 | count | 1 |
| RTL10      | 19.8395882 | 2787.354078 | 0.0071 | 0.994   | 1.757429707 | count | 1 |
| TIMP3      | 19.8395882 | 2787.354078 | 0.0071 | 0.994   | 1.757429707 | count | 1 |
| ACR        | 19.8395882 | 2787.354078 | 0.0071 | 0.994   | 1.757429707 | count | 1 |
| TRIM69     | 1.394742   | 0.6827309   | 2.0429 | 0.0419  | 1.758089313 | count | 1 |
| RB1        | 1.3183404  | 0.5072012   | 2.5992 | 0.00977 | 1.7615503   | count | 1 |
| INTS2      | 1.5873809  | 1.0281776   | 1.5439 | 0.124   | 1.767031267 | count | 1 |
| USP27X     | 1.8567149  | 0.9722783   | 1.9097 | 0.0571  | 1.769194776 | count | 1 |
| RNF139-AS1 | 1.8567149  | 0.9722783   | 1.9097 | 0.0571  | 1.769194776 | count | 1 |
| AC104794.2 | 1.8567149  | 1.0743563   | 1.7282 | 0.0849  | 1.769194776 | count | 1 |
| UBE3D      | 1.8567149  | 1.0743563   | 1.7282 | 0.0849  | 1.769194776 | count | 1 |
| MTHFD1L    | 1.8567149  | 1.0743563   | 1.7282 | 0.0849  | 1.769194776 | count | 1 |

|            |           |           |        |        |             |       |   |
|------------|-----------|-----------|--------|--------|-------------|-------|---|
| FAM169A    | 1.8567149 | 1.21579   | 1.5272 | 0.128  | 1.769194776 | count | 1 |
| CHPF       | 1.4863183 | 0.8221858 | 1.8078 | 0.0716 | 1.773801777 | count | 1 |
| AC245595.1 | 1.8811598 | 0.9996251 | 1.8819 | 0.0608 | 1.788683863 | count | 1 |
| BCS1L      | 1.8811598 | 1.0752187 | 1.7496 | 0.0811 | 1.788683863 | count | 1 |
| SPA17      | 1.8811598 | 1.0752187 | 1.7496 | 0.0811 | 1.788683863 | count | 1 |
| MMS22L     | 1.8811598 | 1.1607976 | 1.6206 | 0.106  | 1.788683863 | count | 1 |
| ZKSCAN7    | 1.8811598 | 1.226498  | 1.5338 | 0.126  | 1.788683863 | count | 1 |
| MIEF2      | 1.8811598 | 1.226498  | 1.5338 | 0.126  | 1.788683863 | count | 1 |
| GOLGA8M    | 2.2801127 | 1.248353  | 1.8265 | 0.0687 | 1.789298707 | count | 1 |
| TSC22D1    | 1.3318059 | 0.5265195 | 2.5295 | 0.0119 | 1.792346835 | count | 1 |
| TMEM102    | 1.4450467 | 0.648464  | 2.2284 | 0.0265 | 1.794195119 | count | 1 |
| MED23      | 1.5074283 | 0.9274201 | 1.6254 | 0.1051 | 1.797567706 | count | 1 |
| ING5       | 1.3324179 | 0.5609259 | 2.3754 | 0.0181 | 1.804081649 | count | 1 |
| TOGARAM2   | 1.4581445 | 0.7378014 | 1.9763 | 0.049  | 1.809751225 | count | 1 |
| RGS5       | 1.379155  | 0.7885664 | 1.7489 | 0.0812 | 1.814391837 | count | 1 |
| NECTIN3    | 2.338135  | 1.1461068 | 2.0401 | 0.0422 | 1.82088657  | count | 1 |
| COLGALT1   | 1.5285532 | 0.7356234 | 2.0779 | 0.0385 | 1.821269853 | count | 1 |
| RRP9       | 1.4051418 | 0.7169104 | 1.96   | 0.0509 | 1.823215571 | count | 1 |
| CRYZ       | 1.397476  | 0.6508579 | 2.1471 | 0.0325 | 1.826495569 | count | 1 |
| CRACR2B    | 1.375383  | 0.699743  | 1.9656 | 0.0502 | 1.82828403  | count | 1 |
| SLC35A2    | 1.6490146 | 0.867742  | 1.9004 | 0.0583 | 1.8296004   | count | 1 |
| MAP3K5     | 1.5888408 | 0.8847776 | 1.7958 | 0.0735 | 1.836307483 | count | 1 |
| ENTPD4     | 1.5888408 | 1.001707  | 1.5861 | 0.114  | 1.836307483 | count | 1 |
| ERCC4      | 1.4611566 | 0.7193783 | 2.0311 | 0.0431 | 1.83854424  | count | 1 |
| FGL2       | 1.420533  | 0.7647369 | 1.8575 | 0.0641 | 1.842579343 | count | 1 |
| ZFY        | 1.4242295 | 0.5661895 | 2.5155 | 0.0124 | 1.847225855 | count | 1 |
| SH2B1      | 1.6668674 | 0.998979  | 1.6686 | 0.0962 | 1.84756143  | count | 1 |
| ZNF621     | 1.6668674 | 1.036901  | 1.6075 | 0.109  | 1.84756143  | count | 1 |
| LEAP2      | 1.599868  | 0.8136566 | 1.9663 | 0.0501 | 1.848096639 | count | 1 |
| IRGQ       | 1.599868  | 0.8136566 | 1.9663 | 0.0501 | 1.848096639 | count | 1 |
| ELP1       | 1.5549155 | 0.8307138 | 1.8718 | 0.0621 | 1.850732726 | count | 1 |
| HIST1H2BE  | 1.7755847 | 1.129819  | 1.5716 | 0.117  | 1.851406522 | count | 1 |
| VPS26B     | 1.5575652 | 0.7907891 | 1.9696 | 0.0497 | 1.85368682  | count | 1 |
| PUS10      | 2.4024239 | 1.4272894 | 1.6832 | 0.0933 | 1.854729137 | count | 1 |
| TECPR2     | 1.9707157 | 1.127274  | 1.7482 | 0.0814 | 1.858607123 | count | 1 |
| RIDA       | 1.9707157 | 1.225176  | 1.6085 | 0.109  | 1.858607123 | count | 1 |
| RABGEF1    | 1.9707157 | 1.7029115 | 1.1573 | 0.248  | 1.858607123 | count | 1 |
| RGPD5      | 1.7891734 | 0.9099003 | 1.9663 | 0.0501 | 1.863770355 | count | 1 |
| GIMAP8     | 1.7891734 | 0.976196  | 1.8328 | 0.0677 | 1.863770355 | count | 1 |
| SBF1       | 1.6839264 | 1.186679  | 1.419  | 0.157  | 1.86465386  | count | 1 |
| ZNF100     | 1.466337  | 0.6021163 | 2.4353 | 0.0154 | 1.866117555 | count | 1 |
| PAM        | 1.9904502 | 1.2630921 | 1.5759 | 0.116  | 1.873698062 | count | 1 |
| FANCA      | 1.9904502 | 1.37428   | 1.4484 | 0.148  | 1.873698062 | count | 1 |
| CD226      | 1.418141  | 0.7769001 | 1.8254 | 0.0689 | 1.874595195 | count | 1 |
| CCDC34     | 1.8023145 | 1.2080974 | 1.4919 | 0.1367 | 1.875679947 | count | 1 |

|            |           |           |        |         |             |       |   |
|------------|-----------|-----------|--------|---------|-------------|-------|---|
| TENT4A     | 2.4785287 | 1.5410785 | 1.6083 | 0.1087  | 1.893227672 | count | 1 |
| AC040162.1 | 1.510154  | 0.7667357 | 1.9696 | 0.0497  | 1.897499032 | count | 1 |
| RHBDF2     | 2.5111279 | 1.089531  | 2.3048 | 0.0218  | 1.909202519 | count | 1 |
| CDK5R1     | 1.8492796 | 1.0579651 | 1.748  | 0.0814  | 1.917860397 | count | 1 |
| CYB561A3   | 1.5109273 | 0.6910887 | 2.1863 | 0.0295  | 1.920539457 | count | 1 |
| AC243829.4 | 1.4015735 | 0.4636377 | 3.023  | 0.0027  | 1.921497389 | count | 1 |
| ELOA-AS1   | 1.51518   | 0.9342293 | 1.6219 | 0.106   | 1.925715288 | count | 1 |
| LARP4B     | 1.8610517 | 0.8671724 | 2.1461 | 0.0326  | 1.928338092 | count | 1 |
| FOSL1      | 1.560198  | 1.0542784 | 1.4799 | 0.1399  | 1.930042589 | count | 1 |
| AC012360.3 | 1.6777933 | 1.0492187 | 1.5991 | 0.111   | 1.930667322 | count | 1 |
| MUL1       | 1.753575  | 1.0791504 | 1.625  | 0.105   | 1.933710877 | count | 1 |
| GNS        | 1.6369333 | 0.8622161 | 1.8985 | 0.0585  | 1.941542136 | count | 1 |
| ZNF664     | 1.5704871 | 0.8241837 | 1.9055 | 0.0576  | 1.942076319 | count | 1 |
| SNAPC3     | 2.0865967 | 1.1364466 | 1.8361 | 0.0673  | 1.94554352  | count | 1 |
| GALK2      | 1.4396493 | 0.7364404 | 1.9549 | 0.0515  | 1.946493843 | count | 1 |
| SLC41A1    | 1.8831368 | 0.9531661 | 1.9757 | 0.049   | 1.947890424 | count | 1 |
| SIGLEC7    | 1.6489299 | 0.8529063 | 1.9333 | 0.0541  | 1.954712248 | count | 1 |
| CA5B       | 1.4571092 | 0.5271268 | 2.7642 | 0.00603 | 1.963762775 | count | 1 |
| AC245014.3 | 1.7115189 | 0.7205294 | 2.3754 | 0.0181  | 1.9659873   | count | 1 |
| FSCN1      | 1.9052827 | 1.1138492 | 1.7105 | 0.08812 | 1.967358568 | count | 1 |
| PRKAG2-AS1 | 1.5226988 | 0.8077632 | 1.8851 | 0.0603  | 1.970397794 | count | 1 |
| ZNF487     | 1.560814  | 0.7700715 | 2.0268 | 0.0435  | 1.981089703 | count | 1 |
| C12orf76   | 1.5073576 | 0.7166298 | 2.1034 | 0.0362  | 1.989062618 | count | 1 |
| ARHGAP1    | 1.5873809 | 0.7530239 | 2.108  | 0.0358  | 1.989679717 | count | 1 |
| ZNF699     | 1.5714886 | 0.6864334 | 2.2894 | 0.0227  | 1.993998359 | count | 1 |
| PQLC1      | 1.5203778 | 0.5416749 | 2.8068 | 0.00531 | 1.994489594 | count | 1 |
| UBE2D4     | 1.8175154 | 0.9838497 | 1.8474 | 0.0656  | 1.996041945 | count | 1 |
| RGS17      | 1.6217913 | 0.7515782 | 2.1578 | 0.0317  | 2.001808483 | count | 1 |
| WDR3       | 2.1726741 | 1.2763573 | 1.7022 | 0.0897  | 2.007458012 | count | 1 |
| CSTF2      | 1.753834  | 0.9890789 | 1.7732 | 0.0771  | 2.009932721 | count | 1 |
| PPP1R16A   | 1.753834  | 1.0105193 | 1.7356 | 0.0836  | 2.009932721 | count | 1 |
| AL035071.1 | 1.753834  | 1.0105193 | 1.7356 | 0.0836  | 2.009932721 | count | 1 |
| SEPHS1     | 1.5760811 | 0.6906506 | 2.282  | 0.0231  | 2.019451038 | count | 1 |
| Z93241.1   | 1.9821756 | 1.2385429 | 1.6004 | 0.1105  | 2.033860093 | count | 1 |
| TRMT61B    | 2.2283092 | 0.9329865 | 2.3884 | 0.0175  | 2.046243681 | count | 1 |
| GORAB      | 1.6009321 | 0.8447375 | 1.8952 | 0.059   | 2.04981662  | count | 1 |
| AL355353.1 | 2.005334  | 0.9643864 | 2.0794 | 0.0384  | 2.053549957 | count | 1 |
| LINC00484  | 2.005334  | 0.9643864 | 2.0794 | 0.0384  | 2.053549957 | count | 1 |
| NRSN2-AS1  | 2.005334  | 0.9643864 | 2.0794 | 0.0384  | 2.053549957 | count | 1 |
| RHOT2      | 1.5431325 | 0.6372148 | 2.4217 | 0.016   | 2.05409465  | count | 1 |
| OTUD1      | 1.6275429 | 0.7880243 | 2.0653 | 0.0397  | 2.061496588 | count | 1 |
| TMEM91     | 2.250755  | 1.4657288 | 1.5356 | 0.1256  | 2.061614932 | count | 1 |
| ZNF799     | 2.0160066 | 0.936272  | 2.1532 | 0.032   | 2.062570244 | count | 1 |
| PHF19      | 1.750688  | 0.7197824 | 2.4322 | 0.0155  | 2.065204967 | count | 1 |
| TMEM9      | 1.644143  | 0.7374713 | 2.2294 | 0.0265  | 2.081390543 | count | 1 |

|            |           |           |        |         |             |       |   |
|------------|-----------|-----------|--------|---------|-------------|-------|---|
| TADA2B     | 2.2831021 | 0.8347597 | 2.735  | 0.00658 | 2.08348552  | count | 1 |
| JAG2       | 1.7686507 | 1.057858  | 1.6719 | 0.0955  | 2.084474852 | count | 1 |
| PHLDB3     | 2.3223097 | 1.4425148 | 1.6099 | 0.1084  | 2.109547768 | count | 1 |
| GNPDA2     | 1.7961599 | 1.0009803 | 1.7944 | 0.0737  | 2.113844266 | count | 1 |
| TFB2M      | 1.711668  | 0.7630582 | 2.2432 | 0.0256  | 2.135966552 | count | 1 |
| AL355472.1 | 2.104453  | 1.013677  | 2.0761 | 0.0387  | 2.136000088 | count | 1 |
| LINC01943  | 1.8811598 | 1.0422574 | 1.8049 | 0.072   | 2.139557132 | count | 1 |
| SDC4       | 1.823012  | 0.7730411 | 2.3582 | 0.019   | 2.142343699 | count | 1 |
| S100A8     | 3.0955059 | 3.2032499 | 0.9664 | 0.335   | 2.145578458 | count | 1 |
| NF1        | 1.9835104 | 0.9874754 | 2.0087 | 0.0454  | 2.152786042 | count | 1 |
| UEVLD      | 1.753834  | 0.9190874 | 1.9082 | 0.0572  | 2.153335007 | count | 1 |
| SQLE       | 1.7647232 | 0.843945  | 2.091  | 0.0373  | 2.165680999 | count | 1 |
| DDX55      | 1.6565211 | 0.6412144 | 2.5834 | 0.0102  | 2.165900792 | count | 1 |
| HIST3H2A   | 1.6489777 | 0.5757037 | 2.8643 | 0.00445 | 2.180062568 | count | 1 |
| ZDHHC7     | 1.8128588 | 1.1823608 | 1.5333 | 0.1262  | 2.180252416 | count | 1 |
| CREB3      | 1.7117291 | 0.7567162 | 2.262  | 0.0244  | 2.184058048 | count | 1 |
| CSF2       | 1.5946703 | 0.5221701 | 3.0539 | 0.00245 | 2.222662801 | count | 1 |
| PRKCZ      | 1.8623018 | 0.9638555 | 1.9321 | 0.0542  | 2.23409309  | count | 1 |
| MRPL44     | 1.8274493 | 0.7233304 | 2.5264 | 0.012   | 2.236326346 | count | 1 |
| NPC1       | 2.2319795 | 1.3327882 | 1.6747 | 0.095   | 2.237607687 | count | 1 |
| ALKBH4     | 1.832412  | 0.9990959 | 1.8341 | 0.0676  | 2.241880444 | count | 1 |
| BRMS1L     | 1.9904502 | 1.1013175 | 1.8073 | 0.0716  | 2.247501422 | count | 1 |
| SRP14-AS1  | 1.943872  | 0.9724205 | 1.999  | 0.0464  | 2.268473752 | count | 1 |
| ZNF513     | 2.3220331 | 0.9665234 | 2.4025 | 0.0168  | 2.306231685 | count | 1 |
| SIMC1      | 2.3329316 | 1.4162221 | 1.6473 | 0.1005  | 2.314358102 | count | 1 |
| LANCL3     | 2.3329316 | 1.4501746 | 1.6087 | 0.1086  | 2.314358102 | count | 1 |
| PAK4       | 2.3329316 | 1.5467454 | 1.5083 | 0.1325  | 2.314358102 | count | 1 |
| ZNF821     | 1.809436  | 0.7115401 | 2.543  | 0.0115  | 2.32142867  | count | 1 |
| AP001160.1 | 2.3435506 | 1.1475081 | 2.0423 | 0.0419  | 2.322238621 | count | 1 |
| ZNF71      | 1.9977192 | 1.4305436 | 1.3965 | 0.1635  | 2.323487598 | count | 1 |
| FEM1B      | 2.0701606 | 0.9262477 | 2.235  | 0.0261  | 2.324173    | count | 1 |
| GNB5       | 1.8147572 | 0.9807554 | 1.8504 | 0.0652  | 2.327821083 | count | 1 |
| STYX       | 2.0279798 | 0.8750801 | 2.3175 | 0.0211  | 2.354070396 | count | 1 |
| CTGF       | 2.0299105 | 1.2715953 | 1.5963 | 0.1114  | 2.356013385 | count | 1 |
| GMDS       | 1.88755   | 0.949266  | 1.9884 | 0.04761 | 2.367586387 | count | 1 |
| E4F1       | 2.7676405 | 1.1509766 | 2.4046 | 0.0168  | 2.37100145  | count | 1 |
| ASB16-AS1  | 2.4456581 | 0.9213296 | 2.6545 | 0.00833 | 2.396120024 | count | 1 |
| FAM118B    | 1.927028  | 0.8494322 | 2.2686 | 0.0239  | 2.412945992 | count | 1 |
| ZNF395     | 2.293016  | 0.8871511 | 2.5847 | 0.0102  | 2.42359992  | count | 1 |
| KLC2       | 2.056507  | 0.8847051 | 2.3245 | 0.0207  | 2.439968514 | count | 1 |
| TIMELESS   | 2.056507  | 0.930749  | 2.2095 | 0.0278  | 2.439968514 | count | 1 |
| ETFDH      | 2.1995905 | 1.0206403 | 2.1551 | 0.0319  | 2.44476597  | count | 1 |
| ARMH3      | 2.1248138 | 1.163566  | 1.8261 | 0.0688  | 2.450267154 | count | 1 |
| AP1S1      | 1.9612554 | 0.7358311 | 2.6654 | 0.00808 | 2.452012554 | count | 1 |
| ZNF141     | 1.940743  | 0.7182819 | 2.7019 | 0.00726 | 2.47770229  | count | 1 |

|            |            |             |        |         |             |       |   |
|------------|------------|-------------|--------|---------|-------------|-------|---|
| TXNDC16    | 2.096204   | 0.8037237   | 2.6081 | 0.00953 | 2.48088161  | count | 1 |
| LYRM7      | 2.1036937  | 0.7157496   | 2.9391 | 0.00353 | 2.488554106 | count | 1 |
| RUVBL2     | 2.0811918  | 0.77895     | 2.6718 | 0.00793 | 2.513196806 | count | 1 |
| MIR155HG   | 2.2816216  | 1.0871243   | 2.0988 | 0.0366  | 2.51858501  | count | 1 |
| PIP4K2C    | 18.1805536 | 1596.82525  | 0.0114 | 0.991   | 2.526545653 | count | 1 |
| PPP1R21    | 18.2434034 | 1632.162045 | 0.0112 | 0.991   | 2.526545658 | count | 1 |
| MYEF2      | 18.2553848 | 1536.360692 | 0.0119 | 0.991   | 2.526545659 | count | 1 |
| GCFC2      | 18.3211532 | 1472.319031 | 0.0124 | 0.99    | 2.526545664 | count | 1 |
| NAP1L5     | 18.4766809 | 1495.394504 | 0.0124 | 0.99    | 2.526545675 | count | 1 |
| GLA        | 18.5027303 | 1658.005694 | 0.0112 | 0.991   | 2.526545677 | count | 1 |
| AL031963.3 | 18.7252336 | 2092.054582 | 0.009  | 0.993   | 2.52654569  | count | 1 |
| NEK8       | 18.7252336 | 2092.054553 | 0.009  | 0.993   | 2.52654569  | count | 1 |
| VSTM2L     | 18.7252338 | 2092.054578 | 0.009  | 0.993   | 2.52654569  | count | 1 |
| CARM1      | 18.8558015 | 2577.050752 | 0.0073 | 0.994   | 2.526545696 | count | 1 |
| OGFOD2     | 18.8558016 | 2577.052307 | 0.0073 | 0.994   | 2.526545696 | count | 1 |
| LIPE       | 18.8558022 | 2577.05214  | 0.0073 | 0.994   | 2.526545696 | count | 1 |
| SH3TC1     | 18.8558031 | 2577.051837 | 0.0073 | 0.994   | 2.526545696 | count | 1 |
| SLC9A3     | 18.8568435 | 2337.72746  | 0.0081 | 0.994   | 2.526545696 | count | 1 |
| UGDH-AS1   | 18.9581715 | 2974.511746 | 0.0064 | 0.995   | 2.5265457   | count | 1 |
| CPEB3      | 18.959471  | 2432.198361 | 0.0078 | 0.994   | 2.5265457   | count | 1 |
| PLK4       | 18.9690579 | 1837.029528 | 0.0103 | 0.992   | 2.526545701 | count | 1 |
| FAM110B    | 18.9690595 | 1837.029048 | 0.0103 | 0.992   | 2.526545701 | count | 1 |
| YPEL4      | 18.978224  | 2296.40595  | 0.0083 | 0.993   | 2.526545701 | count | 1 |
| ANKRD27    | 18.9782256 | 2296.406917 | 0.0083 | 0.993   | 2.526545701 | count | 1 |
| MEX3B      | 19.1230234 | 2471.400513 | 0.0077 | 0.994   | 2.526545706 | count | 1 |
| AL049795.1 | 19.5242198 | 2380.723145 | 0.0082 | 0.993   | 2.526545717 | count | 1 |
| AC114490.2 | 19.5242197 | 2380.723027 | 0.0082 | 0.993   | 2.526545717 | count | 1 |
| HIST2H4A   | 19.5242197 | 2380.723027 | 0.0082 | 0.993   | 2.526545717 | count | 1 |
| OCLM       | 19.52422   | 2380.723098 | 0.0082 | 0.993   | 2.526545717 | count | 1 |
| TAF1A-AS1  | 19.52422   | 2380.723098 | 0.0082 | 0.993   | 2.526545717 | count | 1 |
| AC098828.2 | 19.5242198 | 2380.723145 | 0.0082 | 0.993   | 2.526545717 | count | 1 |
| MAPRE3     | 19.52422   | 2380.723098 | 0.0082 | 0.993   | 2.526545717 | count | 1 |
| FMNL2      | 19.5242197 | 2380.72311  | 0.0082 | 0.993   | 2.526545717 | count | 1 |
| LINC01963  | 19.5242197 | 2380.722932 | 0.0082 | 0.993   | 2.526545717 | count | 1 |
| ZBTB20-AS2 | 19.5242197 | 2380.72311  | 0.0082 | 0.993   | 2.526545717 | count | 1 |
| EHHADH     | 19.5242197 | 2380.723027 | 0.0082 | 0.993   | 2.526545717 | count | 1 |
| AC025171.5 | 19.5242197 | 2380.72311  | 0.0082 | 0.993   | 2.526545717 | count | 1 |
| AC104109.2 | 19.5242197 | 2380.72311  | 0.0082 | 0.993   | 2.526545717 | count | 1 |
| TIGD6      | 19.5242197 | 2380.72311  | 0.0082 | 0.993   | 2.526545717 | count | 1 |
| AL512329.2 | 19.52422   | 2380.723098 | 0.0082 | 0.993   | 2.526545717 | count | 1 |
| HIST1H2BL  | 19.5242197 | 2380.723027 | 0.0082 | 0.993   | 2.526545717 | count | 1 |
| LRP11      | 19.5242197 | 2380.72311  | 0.0082 | 0.993   | 2.526545717 | count | 1 |
| IYD        | 19.5242198 | 2380.723145 | 0.0082 | 0.993   | 2.526545717 | count | 1 |
| KIAA1324L  | 19.5242198 | 2380.723145 | 0.0082 | 0.993   | 2.526545717 | count | 1 |
| RUNDC3B    | 19.5242197 | 2380.72311  | 0.0082 | 0.993   | 2.526545717 | count | 1 |



|            |            |             |        |       |             |       |   |
|------------|------------|-------------|--------|-------|-------------|-------|---|
| XRCC2      | 19.5242199 | 2380.72298  | 0.0082 | 0.993 | 2.526545717 | count | 1 |
| CHMP4C     | 19.5242197 | 2380.72311  | 0.0082 | 0.993 | 2.526545717 | count | 1 |
| JRK        | 19.52422   | 2380.723098 | 0.0082 | 0.993 | 2.526545717 | count | 1 |
| TBC1D2     | 19.52422   | 2380.723098 | 0.0082 | 0.993 | 2.526545717 | count | 1 |
| STX17-AS1  | 19.52422   | 2380.723098 | 0.0082 | 0.993 | 2.526545717 | count | 1 |
| AL133551.1 | 19.52422   | 2380.723098 | 0.0082 | 0.993 | 2.526545717 | count | 1 |
| KCNH3      | 19.5242198 | 2380.723145 | 0.0082 | 0.993 | 2.526545717 | count | 1 |
| MAP1LC3B2  | 19.5242197 | 2380.722932 | 0.0082 | 0.993 | 2.526545717 | count | 1 |
| AC117503.1 | 19.5242198 | 2380.723063 | 0.0082 | 0.993 | 2.526545717 | count | 1 |
| AL136962.1 | 19.5242197 | 2380.72311  | 0.0082 | 0.993 | 2.526545717 | count | 1 |
| SRRM2-AS1  | 19.52422   | 2380.723098 | 0.0082 | 0.993 | 2.526545717 | count | 1 |
| NPIPB2     | 19.5242199 | 2380.72298  | 0.0082 | 0.993 | 2.526545717 | count | 1 |
| NPIPA1     | 19.5242197 | 2380.72311  | 0.0082 | 0.993 | 2.526545717 | count | 1 |
| COG7       | 19.5242198 | 2380.723145 | 0.0082 | 0.993 | 2.526545717 | count | 1 |
| AC026471.2 | 19.52422   | 2380.723098 | 0.0082 | 0.993 | 2.526545717 | count | 1 |
| TMEM104    | 19.5242199 | 2380.72298  | 0.0082 | 0.993 | 2.526545717 | count | 1 |
| AC015819.1 | 19.52422   | 2380.723098 | 0.0082 | 0.993 | 2.526545717 | count | 1 |
| KAT14      | 19.5242199 | 2380.72298  | 0.0082 | 0.993 | 2.526545717 | count | 1 |
| PXMP4      | 19.52422   | 2380.723098 | 0.0082 | 0.993 | 2.526545717 | count | 1 |
| PCSK4      | 19.52422   | 2380.723098 | 0.0082 | 0.993 | 2.526545717 | count | 1 |
| ZNF599     | 19.5242198 | 2380.723145 | 0.0082 | 0.993 | 2.526545717 | count | 1 |
| AC008537.4 | 19.5242197 | 2380.72311  | 0.0082 | 0.993 | 2.526545717 | count | 1 |
| ZNF155     | 19.5242198 | 2380.723145 | 0.0082 | 0.993 | 2.526545717 | count | 1 |
| ERCC2      | 19.5242197 | 2380.722932 | 0.0082 | 0.993 | 2.526545717 | count | 1 |
| ZNF577     | 19.52422   | 2380.723098 | 0.0082 | 0.993 | 2.526545717 | count | 1 |
| RHBDD3     | 19.5242197 | 2380.72311  | 0.0082 | 0.993 | 2.526545717 | count | 1 |
| USP13      | 19.5242201 | 2380.723181 | 0.0082 | 0.993 | 2.526545717 | count | 1 |
| AKAP12     | 19.5242201 | 2380.723181 | 0.0082 | 0.993 | 2.526545717 | count | 1 |
| AC007349.3 | 19.5242201 | 2380.723181 | 0.0082 | 0.993 | 2.526545717 | count | 1 |
| TCEANC     | 19.5242201 | 2380.723181 | 0.0082 | 0.993 | 2.526545717 | count | 1 |
| NCBP1      | 19.5242201 | 2380.723181 | 0.0082 | 0.993 | 2.526545717 | count | 1 |
| AP005329.1 | 19.5242201 | 2380.723181 | 0.0082 | 0.993 | 2.526545717 | count | 1 |
| KLHL33     | 19.525939  | 1664.198982 | 0.0117 | 0.991 | 2.526545717 | count | 1 |
| HSD17B1    | 19.8090091 | 2775.661733 | 0.0071 | 0.994 | 2.526545723 | count | 1 |
| PLXNB2     | 19.8090119 | 2775.660737 | 0.0071 | 0.994 | 2.526545723 | count | 1 |
| C5orf63    | 18.0912624 | 1681.196594 | 0.0108 | 0.991 | 2.526545764 | count | 1 |
| PARP12     | 18.0912635 | 1681.197186 | 0.0108 | 0.991 | 2.526545764 | count | 1 |
| MCU        | 18.0912638 | 1681.19694  | 0.0108 | 0.991 | 2.526545764 | count | 1 |
| EFCAB11    | 18.0912638 | 1681.196476 | 0.0108 | 0.991 | 2.526545764 | count | 1 |
| XPO5       | 18.0912641 | 1681.196909 | 0.0108 | 0.991 | 2.526545764 | count | 1 |
| ALPL       | 18.1062216 | 2178.592053 | 0.0083 | 0.993 | 2.526545765 | count | 1 |
| ANTXR2     | 18.234442  | 1406.093699 | 0.013  | 0.99  | 2.526545777 | count | 1 |
| SKP2       | 18.3793459 | 1745.444956 | 0.0105 | 0.992 | 2.526545788 | count | 1 |
| PRKCD      | 18.4295126 | 1755.023299 | 0.0105 | 0.992 | 2.526545791 | count | 1 |
| AC091959.3 | 18.7252337 | 2092.054595 | 0.009  | 0.993 | 2.526545809 | count | 1 |

|            |            |             |        |       |             |       |   |
|------------|------------|-------------|--------|-------|-------------|-------|---|
| AC011773.4 | 18.7252337 | 2092.054599 | 0.009  | 0.993 | 2.526545809 | count | 1 |
| PCSK6      | 18.7252337 | 2092.054595 | 0.009  | 0.993 | 2.526545809 | count | 1 |
| PEX7       | 18.7252338 | 2092.054624 | 0.009  | 0.993 | 2.526545809 | count | 1 |
| ISPD       | 18.7252338 | 2092.054587 | 0.009  | 0.993 | 2.526545809 | count | 1 |
| CNR2       | 18.725234  | 2092.054703 | 0.009  | 0.993 | 2.526545809 | count | 1 |
| FAM184B    | 18.7252341 | 2092.054553 | 0.009  | 0.993 | 2.526545809 | count | 1 |
| KBTBD6     | 18.725234  | 2092.054703 | 0.009  | 0.993 | 2.526545809 | count | 1 |
| ADPGK-AS1  | 18.7252341 | 2092.054549 | 0.009  | 0.993 | 2.526545809 | count | 1 |
| CUBN       | 18.8558015 | 2577.052254 | 0.0073 | 0.994 | 2.526545815 | count | 1 |
| ERP27      | 18.8558016 | 2577.052307 | 0.0073 | 0.994 | 2.526545815 | count | 1 |
| TMEM25     | 18.8558017 | 2577.050741 | 0.0073 | 0.994 | 2.526545815 | count | 1 |
| HIST1H4H   | 18.855802  | 2577.052192 | 0.0073 | 0.994 | 2.526545815 | count | 1 |
| AL020996.1 | 18.8558023 | 2577.050491 | 0.0073 | 0.994 | 2.526545815 | count | 1 |
| HIST1H2BJ  | 18.8558023 | 2577.052098 | 0.0073 | 0.994 | 2.526545815 | count | 1 |
| NEDD4      | 18.8558023 | 2577.050491 | 0.0073 | 0.994 | 2.526545815 | count | 1 |
| DCST1-AS1  | 18.8558028 | 2577.05047  | 0.0073 | 0.994 | 2.526545815 | count | 1 |
| RTN4IP1    | 18.8558026 | 2577.052046 | 0.0073 | 0.994 | 2.526545815 | count | 1 |
| ZNF202     | 18.8558026 | 2577.050418 | 0.0073 | 0.994 | 2.526545815 | count | 1 |
| ZFR2       | 18.8558029 | 2577.051941 | 0.0073 | 0.994 | 2.526545815 | count | 1 |
| AC090948.3 | 18.8558057 | 2577.05263  | 0.0073 | 0.994 | 2.526545815 | count | 1 |
| PLPP6      | 18.8558056 | 2577.052599 | 0.0073 | 0.994 | 2.526545815 | count | 1 |
| SLC2A8     | 18.8558057 | 2577.05262  | 0.0073 | 0.994 | 2.526545815 | count | 1 |
| RAD18      | 18.9581709 | 2974.511904 | 0.0064 | 0.995 | 2.526545819 | count | 1 |
| BAMBI      | 18.9594696 | 2432.198619 | 0.0078 | 0.994 | 2.526545819 | count | 1 |
| AFAP1      | 18.9594708 | 2432.199382 | 0.0078 | 0.994 | 2.526545819 | count | 1 |
| ZBED1      | 18.9594712 | 2432.199372 | 0.0078 | 0.994 | 2.526545819 | count | 1 |
| ZNF583     | 18.9594724 | 2432.199154 | 0.0078 | 0.994 | 2.526545819 | count | 1 |
| SEC61A2    | 18.959473  | 2432.200055 | 0.0078 | 0.994 | 2.526545819 | count | 1 |
| KLHL17     | 18.9690572 | 1837.028915 | 0.0103 | 0.992 | 2.52654582  | count | 1 |
| ZNF2       | 18.9690586 | 1837.028776 | 0.0103 | 0.992 | 2.52654582  | count | 1 |
| UTP14C     | 18.9782216 | 2296.404246 | 0.0083 | 0.993 | 2.52654582  | count | 1 |
| MAGEF1     | 18.9782252 | 2296.406975 | 0.0083 | 0.993 | 2.52654582  | count | 1 |
| QPCTL      | 19.0402558 | 3308.595311 | 0.0058 | 0.995 | 2.526545823 | count | 1 |
| FAM89A     | 19.0454065 | 2775.307757 | 0.0069 | 0.995 | 2.526545823 | count | 1 |
| AC020978.5 | 19.0463108 | 2570.600195 | 0.0074 | 0.994 | 2.526545823 | count | 1 |
| MRPS17     | 19.0463135 | 2570.60244  | 0.0074 | 0.994 | 2.526545823 | count | 1 |
| DVL2       | 19.0463136 | 2570.601532 | 0.0074 | 0.994 | 2.526545823 | count | 1 |
| LINC01132  | 19.0709233 | 1942.887471 | 0.0098 | 0.992 | 2.526545824 | count | 1 |
| ZNF507     | 19.0947113 | 1745.413495 | 0.0109 | 0.991 | 2.526545824 | count | 1 |
| MTFR1      | 19.1186678 | 2797.635328 | 0.0068 | 0.995 | 2.526545825 | count | 1 |
| SYNM       | 19.1186684 | 2797.636746 | 0.0068 | 0.995 | 2.526545825 | count | 1 |
| DST        | 19.1811855 | 1753.650887 | 0.0109 | 0.991 | 2.526545827 | count | 1 |
| CLIC4      | 19.5242196 | 2380.722992 | 0.0082 | 0.993 | 2.526545837 | count | 1 |
| AL445524.1 | 19.5242196 | 2380.722992 | 0.0082 | 0.993 | 2.526545837 | count | 1 |
| ZNF717     | 19.5242196 | 2380.722992 | 0.0082 | 0.993 | 2.526545837 | count | 1 |

|             |            |             |        |       |             |       |   |
|-------------|------------|-------------|--------|-------|-------------|-------|---|
| WDR49       | 19.5242196 | 2380.722992 | 0.0082 | 0.993 | 2.526545837 | count | 1 |
| AC024243.1  | 19.5242196 | 2380.722992 | 0.0082 | 0.993 | 2.526545837 | count | 1 |
| TGFBI       | 19.5242196 | 2380.722992 | 0.0082 | 0.993 | 2.526545837 | count | 1 |
| SYNPO       | 19.5242196 | 2380.722992 | 0.0082 | 0.993 | 2.526545837 | count | 1 |
| SFRP4       | 19.5242196 | 2380.722992 | 0.0082 | 0.993 | 2.526545837 | count | 1 |
| ELN         | 19.5242196 | 2380.722992 | 0.0082 | 0.993 | 2.526545837 | count | 1 |
| TCEAL9      | 19.5242196 | 2380.722992 | 0.0082 | 0.993 | 2.526545837 | count | 1 |
| CABP4       | 19.5242196 | 2380.722992 | 0.0082 | 0.993 | 2.526545837 | count | 1 |
| NEURL1      | 19.5242196 | 2380.722992 | 0.0082 | 0.993 | 2.526545837 | count | 1 |
| AC091057.2  | 19.5242196 | 2380.722992 | 0.0082 | 0.993 | 2.526545837 | count | 1 |
| THAP10      | 19.5242196 | 2380.722992 | 0.0082 | 0.993 | 2.526545837 | count | 1 |
| COG8        | 19.5242196 | 2380.722992 | 0.0082 | 0.993 | 2.526545837 | count | 1 |
| AC002091.2  | 19.5242196 | 2380.722992 | 0.0082 | 0.993 | 2.526545837 | count | 1 |
| HPCA        | 19.5242197 | 2380.722909 | 0.0082 | 0.993 | 2.526545837 | count | 1 |
| TIE1        | 19.5242199 | 2380.723122 | 0.0082 | 0.993 | 2.526545837 | count | 1 |
| ORC1        | 19.52422   | 2380.723145 | 0.0082 | 0.993 | 2.526545837 | count | 1 |
| CCNT2-AS1   | 19.52422   | 2380.723098 | 0.0082 | 0.993 | 2.526545837 | count | 1 |
| METAP1D     | 19.5242199 | 2380.723181 | 0.0082 | 0.993 | 2.526545837 | count | 1 |
| STAC        | 19.52422   | 2380.723145 | 0.0082 | 0.993 | 2.526545837 | count | 1 |
| SLC35G2     | 19.5242199 | 2380.723181 | 0.0082 | 0.993 | 2.526545837 | count | 1 |
| HES1        | 19.52422   | 2380.723098 | 0.0082 | 0.993 | 2.526545837 | count | 1 |
| EDN1        | 19.5242199 | 2380.723181 | 0.0082 | 0.993 | 2.526545837 | count | 1 |
| ID4         | 19.52422   | 2380.723051 | 0.0082 | 0.993 | 2.526545837 | count | 1 |
| AL356417.1  | 19.5242198 | 2380.723003 | 0.0082 | 0.993 | 2.526545837 | count | 1 |
| AC083973.1  | 19.5242198 | 2380.723003 | 0.0082 | 0.993 | 2.526545837 | count | 1 |
| AC136475.7  | 19.52422   | 2380.723051 | 0.0082 | 0.993 | 2.526545837 | count | 1 |
| AC136475.9  | 19.5242199 | 2380.723181 | 0.0082 | 0.993 | 2.526545837 | count | 1 |
| PCF11-AS1   | 19.5242199 | 2380.723122 | 0.0082 | 0.993 | 2.526545837 | count | 1 |
| MANSC1      | 19.52422   | 2380.723051 | 0.0082 | 0.993 | 2.526545837 | count | 1 |
| CCDC65      | 19.5242197 | 2380.722909 | 0.0082 | 0.993 | 2.526545837 | count | 1 |
| ZNF219      | 19.52422   | 2380.723181 | 0.0082 | 0.993 | 2.526545837 | count | 1 |
| LINC02285   | 19.52422   | 2380.723181 | 0.0082 | 0.993 | 2.526545837 | count | 1 |
| TMEM202-AS1 | 19.5242198 | 2380.723003 | 0.0082 | 0.993 | 2.526545837 | count | 1 |
| AL031714.1  | 19.52422   | 2380.723145 | 0.0082 | 0.993 | 2.526545837 | count | 1 |
| ZNF469      | 19.5242199 | 2380.723098 | 0.0082 | 0.993 | 2.526545837 | count | 1 |
| AC010761.1  | 19.5242199 | 2380.723181 | 0.0082 | 0.993 | 2.526545837 | count | 1 |
| NR1D1       | 19.5242199 | 2380.723181 | 0.0082 | 0.993 | 2.526545837 | count | 1 |
| HEXIM2      | 19.5242197 | 2380.722909 | 0.0082 | 0.993 | 2.526545837 | count | 1 |
| ITCH-AS1    | 19.5242197 | 2380.722909 | 0.0082 | 0.993 | 2.526545837 | count | 1 |
| LINC01841   | 19.52422   | 2380.723098 | 0.0082 | 0.993 | 2.526545837 | count | 1 |
| ZNF781      | 19.5242199 | 2380.723098 | 0.0082 | 0.993 | 2.526545837 | count | 1 |
| CCDC114     | 19.5242198 | 2380.723003 | 0.0082 | 0.993 | 2.526545837 | count | 1 |
| LINC01547   | 19.52422   | 2380.723051 | 0.0082 | 0.993 | 2.526545837 | count | 1 |
| AC108488.1  | 19.5242201 | 2380.723134 | 0.0082 | 0.993 | 2.526545837 | count | 1 |
| PCDHGA3     | 19.5242201 | 2380.723134 | 0.0082 | 0.993 | 2.526545837 | count | 1 |

|            |            |             |        |         |             |       |   |
|------------|------------|-------------|--------|---------|-------------|-------|---|
| C12orf54   | 19.5242201 | 2380.723134 | 0.0082 | 0.993   | 2.526545837 | count | 1 |
| NACA2      | 19.5242201 | 2380.723134 | 0.0082 | 0.993   | 2.526545837 | count | 1 |
| C1orf54    | 19.5259389 | 1664.19894  | 0.0117 | 0.991   | 2.526545837 | count | 1 |
| CTDSPL     | 19.5259391 | 1664.198932 | 0.0117 | 0.991   | 2.526545837 | count | 1 |
| LTBR       | 19.5259391 | 1664.199023 | 0.0117 | 0.991   | 2.526545837 | count | 1 |
| HYPK       | 19.5259389 | 1664.19894  | 0.0117 | 0.991   | 2.526545837 | count | 1 |
| NDST2      | 19.5259393 | 1664.199023 | 0.0117 | 0.991   | 2.526545837 | count | 1 |
| PGBD1      | 19.809008  | 2775.659345 | 0.0071 | 0.994   | 2.526545842 | count | 1 |
| HCN2       | 19.8090102 | 2775.661206 | 0.0071 | 0.994   | 2.526545842 | count | 1 |
| MAPK12     | 19.8090099 | 2775.661396 | 0.0071 | 0.994   | 2.526545842 | count | 1 |
| SCLY       | 2.4227755  | 1.262863    | 1.9185 | 0.0559  | 2.528158393 | count | 1 |
| ZSCAN29    | 2.432077   | 1.2723894   | 1.9114 | 0.0568  | 2.535440862 | count | 1 |
| LRP5L      | 2.4852779  | 1.3869534   | 1.7919 | 0.0741  | 2.57653934  | count | 1 |
| FAM122B    | 2.226362   | 1.0092972   | 2.2059 | 0.0281  | 2.612038553 | count | 1 |
| TRIM35     | 2.7880046  | 1.2454293   | 2.2386 | 0.0259  | 2.618461619 | count | 1 |
| CCDC74A    | 2.5433774  | 1.1869908   | 2.1427 | 0.0329  | 2.620337498 | count | 1 |
| MAP3K3     | 2.9184731  | 1.330024    | 2.1943 | 0.02892 | 2.692920428 | count | 1 |
| TOMM40L    | 2.516159   | 0.9443791   | 2.6644 | 0.0081  | 2.717845675 | count | 1 |
| CEP89      | 2.5731878  | 2.0614188   | 1.2483 | 0.213   | 2.763559415 | count | 1 |
| WDR89      | 2.832185   | 1.124569    | 2.5185 | 0.0123  | 2.82100644  | count | 1 |
| SLC16A1    | 2.8627182  | 1.2509728   | 2.2884 | 0.0228  | 2.840552929 | count | 1 |
| MTMR12     | 2.4967167  | 0.9742974   | 2.5626 | 0.0108  | 2.86872464  | count | 1 |
| ANKRD13C   | 2.4227755  | 1.0054298   | 2.4097 | 0.0165  | 2.909626864 | count | 1 |
| DOK7       | 2.698481   | 0.8960935   | 3.0114 | 0.00281 | 2.962126713 | count | 1 |
| PAGR1      | 2.698481   | 0.9237938   | 2.9211 | 0.00373 | 2.962126713 | count | 1 |
| AL356512.1 | 2.8476816  | 1.5954277   | 1.7849 | 0.0752  | 2.968062612 | count | 1 |
| MIR222HG   | 2.6175433  | 1.0168099   | 2.5743 | 0.0105  | 2.976060708 | count | 1 |
| ROBO3      | 19.0562933 | 2305.105152 | 0.0083 | 0.9934  | 3.025534948 | count | 1 |
| CARMIL1    | 19.1177883 | 1958.425855 | 0.0098 | 0.992   | 3.025534952 | count | 1 |
| PPP1R3F    | 19.2548509 | 2886.568372 | 0.0067 | 0.995   | 3.025534958 | count | 1 |
| RRP12      | 19.3214304 | 2773.325606 | 0.007  | 0.994   | 3.025534961 | count | 1 |
| TRIM14     | 17.9837054 | 1147.878849 | 0.0157 | 0.988   | 3.02553497  | count | 1 |
| AL451007.2 | 19.9031556 | 2877.357494 | 0.0069 | 0.994   | 3.02553498  | count | 1 |
| NOSTRIN    | 19.9031559 | 2877.357494 | 0.0069 | 0.994   | 3.02553498  | count | 1 |
| ZNF391     | 19.9031559 | 2877.357494 | 0.0069 | 0.994   | 3.02553498  | count | 1 |
| ZNF618     | 19.9031559 | 2877.357494 | 0.0069 | 0.994   | 3.02553498  | count | 1 |
| BCL2L2     | 19.9031556 | 2877.357494 | 0.0069 | 0.994   | 3.02553498  | count | 1 |
| AC023908.3 | 19.9031556 | 2877.357494 | 0.0069 | 0.994   | 3.02553498  | count | 1 |
| CCDC183    | 19.912592  | 2133.672772 | 0.0093 | 0.993   | 3.02553498  | count | 1 |
| AC108134.2 | 20.1276186 | 2547.611649 | 0.0079 | 0.994   | 3.025534984 | count | 1 |
| NACC1      | 18.4277986 | 1716.012131 | 0.0107 | 0.991   | 3.025535027 | count | 1 |
| AC025171.2 | 18.4999582 | 1626.552722 | 0.0114 | 0.991   | 3.025535034 | count | 1 |
| SLC39A9    | 18.6504916 | 1822.730086 | 0.0102 | 0.992   | 3.025535048 | count | 1 |
| ZNF362     | 18.6834526 | 1603.834479 | 0.0116 | 0.991   | 3.02553505  | count | 1 |
| UBTD2      | 19.0562933 | 2305.10524  | 0.0083 | 0.9934  | 3.025535075 | count | 1 |

|             |            |             |        |          |             |       |   |
|-------------|------------|-------------|--------|----------|-------------|-------|---|
| DUS4L       | 19.0661532 | 1965.614269 | 0.0097 | 0.9923   | 3.025535076 | count | 1 |
| SPRED1      | 19.1636554 | 2755.057202 | 0.007  | 0.994    | 3.025535081 | count | 1 |
| DNAAF5      | 19.1636595 | 2755.057626 | 0.007  | 0.994    | 3.025535081 | count | 1 |
| AC020911.2  | 19.1636595 | 2755.057604 | 0.007  | 0.994    | 3.025535081 | count | 1 |
| PICK1       | 19.2544857 | 2328.601295 | 0.0083 | 0.993    | 3.025535085 | count | 1 |
| AL135791.1  | 19.3203049 | 2567.713286 | 0.0075 | 0.994    | 3.025535088 | count | 1 |
| C1RL-AS1    | 19.3258016 | 2248.640915 | 0.0086 | 0.993    | 3.025535088 | count | 1 |
| SLC26A6     | 19.9031552 | 2877.35748  | 0.0069 | 0.994    | 3.025535106 | count | 1 |
| DLX6-AS1    | 19.9031553 | 2877.357257 | 0.0069 | 0.994    | 3.025535106 | count | 1 |
| MTCP1       | 19.9031552 | 2877.35748  | 0.0069 | 0.994    | 3.025535106 | count | 1 |
| AC084346.2  | 19.9031552 | 2877.35748  | 0.0069 | 0.994    | 3.025535106 | count | 1 |
| LINC01505   | 19.9031552 | 2877.35748  | 0.0069 | 0.994    | 3.025535106 | count | 1 |
| AL117332.1  | 19.9031552 | 2877.35748  | 0.0069 | 0.994    | 3.025535106 | count | 1 |
| P4HA2       | 19.9125925 | 2133.672855 | 0.0093 | 0.993    | 3.025535106 | count | 1 |
| SLC25A15    | 19.9125924 | 2133.672824 | 0.0093 | 0.993    | 3.025535106 | count | 1 |
| RASL12      | 19.9125925 | 2133.672897 | 0.0093 | 0.993    | 3.025535106 | count | 1 |
| NKAPL       | 19.9125927 | 2133.672855 | 0.0093 | 0.993    | 3.025535106 | count | 1 |
| EFEMP2      | 19.9125927 | 2133.672855 | 0.0093 | 0.993    | 3.025535106 | count | 1 |
| SETD1A      | 19.9125927 | 2133.672855 | 0.0093 | 0.993    | 3.025535106 | count | 1 |
| PEAK3       | 19.9125927 | 2133.672939 | 0.0093 | 0.993    | 3.025535106 | count | 1 |
| UBASH3A     | 3.0214892  | 1.3007858   | 2.3228 | 0.0208   | 3.084068598 | count | 1 |
| DNAJC27-AS1 | 2.573188   | 1.089311    | 2.3622 | 0.0188   | 3.14313438  | count | 1 |
| ELL         | 2.6413238  | 0.7083506   | 3.7288 | 0.000227 | 3.210944706 | count | 1 |
| ENTPD1      | 2.9263991  | 1.7199329   | 1.7015 | 0.0898   | 3.228224631 | count | 1 |
| LINC00665   | 18.6208805 | 1631.63126  | 0.0114 | 0.991    | 3.395584968 | count | 1 |
| AVL9        | 18.7894889 | 1679.219801 | 0.0112 | 0.991    | 3.395584986 | count | 1 |
| PIDD1       | 18.9025407 | 1829.664666 | 0.0103 | 0.992    | 3.395584996 | count | 1 |
| NRBP2       | 19.2983973 | 2147.062575 | 0.009  | 0.9928   | 3.395585024 | count | 1 |
| SES3        | 19.3773259 | 2898.500436 | 0.0067 | 0.995    | 3.395585028 | count | 1 |
| AC133550.2  | 19.377326  | 2898.500403 | 0.0067 | 0.995    | 3.395585028 | count | 1 |
| MICALL1     | 19.4758234 | 2827.795063 | 0.0069 | 0.995    | 3.395585033 | count | 1 |
| HEATR5B     | 19.590908  | 2199.969706 | 0.0089 | 0.993    | 3.395585038 | count | 1 |
| AL606760.3  | 20.1525032 | 3259.410282 | 0.0062 | 0.995    | 3.395585056 | count | 1 |
| AC015712.1  | 20.1525032 | 3259.410282 | 0.0062 | 0.995    | 3.395585056 | count | 1 |
| AP001412.1  | 20.1525032 | 3259.410282 | 0.0062 | 0.995    | 3.395585056 | count | 1 |
| MYLK        | 20.1734655 | 2300.455952 | 0.0088 | 0.993    | 3.395585057 | count | 1 |
| IGHV1-3     | 20.1734655 | 2300.455886 | 0.0088 | 0.993    | 3.395585057 | count | 1 |
| AC022916.1  | 20.1734655 | 2300.455886 | 0.0088 | 0.993    | 3.395585057 | count | 1 |
| AGBL5       | 20.1734654 | 2300.455973 | 0.0088 | 0.993    | 3.395585057 | count | 1 |
| ALAD        | 20.1734658 | 2300.456017 | 0.0088 | 0.993    | 3.395585057 | count | 1 |
| LINC02470   | 20.1734656 | 2300.455908 | 0.0088 | 0.993    | 3.395585057 | count | 1 |
| MAN2B2      | 18.7025088 | 1764.528297 | 0.0106 | 0.992    | 3.395585108 | count | 1 |
| ZC4H2       | 18.7761047 | 1608.290043 | 0.0117 | 0.991    | 3.395585115 | count | 1 |
| SCAMP4      | 19.3022249 | 2020.295064 | 0.0096 | 0.9924   | 3.395585154 | count | 1 |
| IQC�        | 19.4420387 | 2310.362236 | 0.0084 | 0.993    | 3.395585162 | count | 1 |

|            |            |             |        |         |             |       |   |
|------------|------------|-------------|--------|---------|-------------|-------|---|
| AC092343.1 | 20.1525031 | 3259.410373 | 0.0062 | 0.995   | 3.395585187 | count | 1 |
| AC034111.1 | 20.1525031 | 3259.410373 | 0.0062 | 0.995   | 3.395585187 | count | 1 |
| BNC2       | 20.1525031 | 3259.410373 | 0.0062 | 0.995   | 3.395585187 | count | 1 |
| AC015726.1 | 20.1525031 | 3259.410161 | 0.0062 | 0.995   | 3.395585187 | count | 1 |
| ZNF835     | 20.1525031 | 3259.410373 | 0.0062 | 0.995   | 3.395585187 | count | 1 |
| NPHP3      | 3.1788954  | 1.5878372   | 2.002  | 0.0461  | 3.409745593 | count | 1 |
| HMGNA4     | 2.93049    | 0.982133    | 2.9838 | 0.00306 | 3.63143244  | count | 1 |
| SGSH       | 18.8321729 | 1603.192713 | 0.0117 | 0.991   | 3.689831379 | count | 1 |
| BRF1       | 19.0197874 | 1973.294743 | 0.0096 | 0.992   | 3.689831399 | count | 1 |
| TGFA       | 18.7298929 | 1300.063059 | 0.0144 | 0.9885  | 3.6898315   | count | 1 |
| TOR4A      | 19.5565854 | 2747.947687 | 0.0071 | 0.994   | 3.689831571 | count | 1 |
| PRKG2      | 20.3542574 | 2955.950535 | 0.0069 | 0.995   | 3.689831602 | count | 1 |
| ZNF547     | 20.3542578 | 2955.950481 | 0.0069 | 0.995   | 3.689831602 | count | 1 |
| SLC4A8     | 20.3542577 | 2955.950427 | 0.0069 | 0.995   | 3.689831602 | count | 1 |
| WBP1L      | 20.3763606 | 2139.313989 | 0.0095 | 0.992   | 3.689831602 | count | 1 |
| MLF1       | 18.9418697 | 1738.117368 | 0.0109 | 0.9913  | 3.934111873 | count | 1 |
| LRWD1      | 19.5052721 | 1740.525596 | 0.0112 | 0.991   | 3.934112061 | count | 1 |
| WDR59      | 19.8178608 | 2053.692526 | 0.0096 | 0.9923  | 4.142957852 | count | 1 |
| PIGN       | 18.9509546 | 1947.242207 | 0.0097 | 0.9922  | 4.325358807 | count | 1 |
| SOST       | 19.6562065 | 2543.142288 | 0.0077 | 0.994   | 4.325358888 | count | 1 |
| ZNF34      | 19.9177527 | 2557.976397 | 0.0078 | 0.9938  | 4.325358907 | count | 1 |
| VCAM1      | 19.6562066 | 2543.142316 | 0.0077 | 0.994   | 4.325359025 | count | 1 |
| TFPI       | 19.6562066 | 2543.142316 | 0.0077 | 0.994   | 4.325359025 | count | 1 |
| RAPH1      | 19.6562066 | 2543.142316 | 0.0077 | 0.994   | 4.325359025 | count | 1 |
| RPS6KL1    | 19.6562066 | 2543.142316 | 0.0077 | 0.994   | 4.325359025 | count | 1 |
| LINC00539  | 18.9946374 | 1649.622141 | 0.0115 | 0.9908  | 4.632821981 | count | 1 |
