# Supplementary material for: Decoding the transcriptome of calcified atherosclerotic plaque at single-cell resolution
Source: PubMed Central journal article supplement (PMC9556750; doi:10.1038/s42003-022-04056-7), 2022-10-12
Supplement: 42003_2022_4056_MOESM7_ESM.pdf [file 42003_2022_4056_MOESM7_ESM.pdf]

## Full differential gene expression results for VSMCs.

| gene_short_name | estimate    | std_err     | test_val | p_value  | normalized_effect | model_component | q_value     |
|-----------------|-------------|-------------|----------|----------|-------------------|-----------------|-------------|
| SPP1            | -5.1463304  | 0.8557049   | -6.0141  | 1.99E-09 | -5.449429276      | count           | 4.69E-05    |
| ITLN1           | -4.0624293  | 1.1501473   | -3.5321  | 4.00E-04 | -5.084395544      | count           | 1           |
| SFRP5           | -3.958646   | 0.5980948   | -6.6188  | 4.15E-11 | -4.359312075      | count           | 9.84E-07    |
| MMP9            | -4.5782513  | 4.5209904   | -1.0127  | 0.3113   | -4.11167556       | count           | 1           |
| IBSP            | -2.8901382  | 0.5491914   | -5.2625  | 1.50E-07 | -3.916537343      | count           | 0.0035097   |
| CRTAC1          | -2.3325481  | 0.2013085   | -11.5869 | 1.62E-30 | -3.217381776      | count           | 3.91E-26    |
| IGKC            | -2.3527145  | 0.4223459   | -5.5706  | 2.72E-08 | -3.078637789      | count           | 0.000638738 |
| DGKI            | -2.564935   | 0.6210194   | -4.1302  | 3.71E-05 | -2.783678264      | count           | 0.8493303   |
| APOC1           | -2.0602721  | 0.2567081   | -8.0257  | 1.35E-15 | -2.502924068      | count           | 3.22E-11    |
| GRIA2           | -1.9313205  | 0.2952037   | -6.5423  | 6.90E-11 | -2.478049134      | count           | 1.64E-06    |
| ACTC1           | -1.7278856  | 0.1938914   | -8.9116  | 7.77E-19 | -2.465308277      | count           | 1.86E-14    |
| LINC01497       | -3.352668   | 1.4024605   | -2.3906  | 0.0169   | -2.447618708      | count           | 1           |
| APOE            | -1.5760211  | 0.1441845   | -10.9306 | 2.17E-27 | -2.259213563      | count           | 5.23E-23    |
| SOX18           | -1.881135   | 0.4310552   | -4.364   | 1.31E-05 | -2.248716092      | count           | 0.3015882   |
| ACP5            | -2.4889989  | 0.5399751   | -4.6095  | 4.17E-06 | -2.244141755      | count           | 0.09646461  |
| POSTN           | -1.5617143  | 0.1670525   | -9.3486  | 1.50E-20 | -2.205699173      | count           | 3.60E-16    |
| BMX             | -2.430146   | 0.6449786   | -3.7678  | 0.000167 | -2.205324674      | count           | 1           |
| RAC2            | -3.5960875  | 0.9825723   | -3.6599  | 0.000256 | -2.188751893      | count           | 1           |
| CLDN5           | -4.035386   | 1.2168959   | -3.3161  | 0.000922 | -2.188265073      | count           | 1           |
| CRHBP           | -2.0698977  | 0.555014    | -3.7295  | 0.000195 | -2.159265097      | count           | 1           |
| KRT25           | -19.0812354 | 1371.940911 | -0.0139  | 0.989    | -2.141749698      | count           | 1           |
| IGHA2           | -19.775445  | 1852.612999 | -0.0107  | 0.991    | -2.141749153      | count           | 1           |
| IL1RN           | -19.028199  | 1021.085705 | -0.0186  | 0.985    | -2.141749139      | count           | 1           |
| RHBDF2          | -2.282556   | 0.5325886   | -4.2858  | 1.87E-05 | -2.132505112      | count           | 0.429726    |
| LYZ             | -1.9588466  | 0.3501165   | -5.5948  | 2.37E-08 | -2.131146478      | count           | 0.000556737 |
| ITGB7           | -3.633791   | 2.912447    | -1.2477  | 0.212    | -2.116092887      | count           | 1           |
| EGFL7           | -1.6899552  | 0.3729948   | -4.5308  | 6.06E-06 | -2.106602487      | count           | 0.13991934  |
| TRDC            | -4.0884795  | 1.9625158   | -2.0833  | 0.0373   | -2.104535704      | count           | 1           |
| MMP11           | -1.8168532  | 0.2781965   | -6.5308  | 7.44E-11 | -2.066451379      | count           | 1.76E-06    |
| KRT19           | -1.622397   | 0.310712    | -5.2215  | 1.87E-07 | -2.051846444      | count           | 0.00437206  |
| SERPINE1        | -1.4479772  | 0.180919    | -8.0035  | 1.61E-15 | -2.034609213      | count           | 3.85E-11    |
| TM6SF1          | -3.624478   | 0.8407978   | -4.3108  | 1.67E-05 | -2.026862054      | count           | 0.3840499   |
| THEMIS2         | -18.951456  | 1153.683444 | -0.0164  | 0.987    | -2.025621482      | count           | 1           |
| SEMA3F-AS1      | -3.6015481  | 2.9260245   | -1.2309  | 0.2185   | -2.022178875      | count           | 1           |
| PTGER3          | -1.6274289  | 0.1806505   | -9.0087  | 3.28E-19 | -2.017505948      | count           | 7.87E-15    |
| PLVAP           | -1.599063   | 0.5812171   | -2.7512  | 0.00597  | -2.014511149      | count           | 1           |
| C1QB            | -2.3314731  | 0.5018902   | -4.6454  | 3.51E-06 | -1.960364661      | count           | 0.08124597  |
| TFPI2           | -1.437435   | 0.173319    | -8.2936  | 1.53E-16 | -1.955316182      | count           | 3.66E-12    |
| C1QA            | -2.2970522  | 0.3261244   | -7.0435  | 2.23E-12 | -1.938554504      | count           | 5.30E-08    |
| KRT17           | -1.3863283  | 0.1830464   | -7.5736  | 4.57E-14 | -1.933729329      | count           | 1.09E-09    |
| FCER1G          | -1.9521839  | 0.3791022   | -5.1495  | 2.75E-07 | -1.922111899      | count           | 0.0064229   |
| IGHG1           | -2.2500423  | 0.5605866   | -4.0137  | 6.10E-05 | -1.867165052      | count           | 1           |
| SCGB3A2         | -1.9712293  | 0.6002059   | -3.2843  | 0.00103  | -1.866090822      | count           | 1           |
| SCX             | -1.373606   | 0.15561     | -8.8272  | 1.63E-18 | -1.864944121      | count           | 3.91E-14    |

|           |            |             |          |          |               |       |             |
|-----------|------------|-------------|----------|----------|---------------|-------|-------------|
| PART1     | -2.3012006 | 0.2448185   | -9.3996  | 9.35E-21 | -1.854618613  | count | 2.25E-16    |
| IL1B      | -2.934577  | 0.755731    | -3.8831  | 0.000105 | -1.841817131  | count | 1           |
| IGFBP3    | -1.2878751 | 0.1290118   | -9.9826  | 3.58E-23 | -1.837781294  | count | 8.62E-19    |
| CCL3      | -1.7695448 | 0.2860887   | -6.1853  | 6.88E-10 | -1.834887585  | count | 1.63E-05    |
| SUGCT     | -1.3323637 | 0.1009718   | -13.1954 | 7.07E-39 | -1.813426796  | count | 1.71E-34    |
| PLEKHS1   | -2.836432  | 0.9735939   | -2.9134  | 0.0036   | -1.807071795  | count | 1           |
| GSTA1     | -19.417297 | 1548.866452 | -0.0125  | 0.99     | -1.760893508  | count | 1           |
| SDS       | -3.8052394 | 1.5402865   | -2.4705  | 0.0135   | -1.745630006  | count | 1           |
| DSP       | -1.8182175 | 0.4029146   | -4.5127  | 6.60E-06 | -1.739551854  | count | 0.152361    |
| PDE4B     | -1.5068323 | 0.2532834   | -5.9492  | 2.95E-09 | -1.734406184  | count | 6.95E-05    |
| KRT14     | -2.2642053 | 0.7339715   | -3.0849  | 0.00205  | -1.734122447  | count | 1           |
| GCNT2     | -1.5265094 | 0.2408196   | -6.3388  | 2.60E-10 | -1.723045111  | count | 6.15E-06    |
| LINC02175 | -2.445575  | 0.9098811   | -2.6878  | 0.00723  | -1.713061681  | count | 1           |
| CCL4L2    | -1.3736547 | 0.429599    | -3.1975  | 0.0014   | -1.712485668  | count | 1           |
| FAM241B   | -1.4405319 | 0.2269387   | -6.3477  | 2.45E-10 | -1.706126679  | count | 5.80E-06    |
| CCL4      | -1.2678782 | 0.2481417   | -5.1095  | 3.39E-07 | -1.704956939  | count | 0.007912938 |
| TMEM255B  | -1.6637813 | 0.4315948   | -3.855   | 0.000118 | -1.702215089  | count | 1           |
| BAALC     | -3.310544  | 1.4303318   | -2.3145  | 0.0207   | -1.657968516  | count | 1           |
| TMEM217   | -2.224909  | 0.8043462   | -2.7661  | 0.0057   | -1.657317018  | count | 1           |
| ALOX5AP   | -2.1288663 | 0.6527412   | -3.2614  | 0.00112  | -1.653376591  | count | 1           |
| IGSF6     | -1.608787  | 0.8525784   | -1.887   | 0.0592   | -1.650076962  | count | 1           |
| F5        | -3.264322  | 1.9190407   | -1.701   | 0.089    | -1.647835113  | count | 1           |
| C5orf46   | -1.8052412 | 0.324361    | -5.5655  | 2.80E-08 | -1.621009532  | count | 0.000657496 |
| IGHG3     | -2.0053167 | 0.7806862   | -2.5687  | 0.0102   | -1.620907985  | count | 1           |
| TRIM14    | -2.0714591 | 0.7255137   | -2.8552  | 0.00433  | -1.617599798  | count | 1           |
| C1QC      | -2.5376631 | 0.5434073   | -4.6699  | 3.12E-06 | -1.610088656  | count | 0.07227168  |
| GOLGA6L7  | -19.260122 | 1215.99814  | -0.0158  | 0.987    | -1.607759633  | count | 1           |
| CCL7      | -19.260122 | 1215.99814  | -0.0158  | 0.987    | -1.607759633  | count | 1           |
| ADRA2C    | -1.5986445 | 0.2070341   | -7.7216  | 1.47E-14 | -1.606260264  | count | 3.51E-10    |
| CXCL8     | -1.3502726 | 0.5481147   | -2.4635  | 0.0138   | -1.602316993  | count | 1           |
| RHOH      | -3.6247609 | 1.0268748   | -3.5299  | 0.000421 | -1.59400415   | count | 1           |
| NRN1      | -2.03163   | 0.4692875   | -4.3292  | 1.54E-05 | -1.592253812  | count | 0.3542616   |
| SLC45A4   | -2.0203036 | 0.6894247   | -2.9304  | 0.00341  | -1.584968799  | count | 1           |
| DMKN      | -1.1510549 | 0.1355945   | -8.489   | 2.99E-17 | -1.578774365  | count | 7.16E-13    |
| PRUNE2    | -1.1485675 | 0.1395805   | -8.2287  | 2.60E-16 | -1.571636904  | count | 6.22E-12    |
| ST6GAL2   | -1.3120474 | 0.1950994   | -6.725   | 2.03E-11 | -1.568102974  | count | 4.82E-07    |
| IGHA1     | -1.4830842 | 0.2511776   | -5.9045  | 3.86E-09 | -1.55720873   | count | 9.10E-05    |
| DEF6      | -2.600571  | 1.7032667   | -1.5268  | 0.127    | -1.55082934   | count | 1           |
| KCNJ6     | -1.889239  | 0.6546662   | -2.8858  | 0.00393  | -1.541483488  | count | 1           |
| C5orf38   | -1.82574   | 0.2307768   | -7.9113  | 3.35E-15 | -1.53549376   | count | 8.00E-11    |
| OCIAD2    | -1.099652  | 0.1230927   | -8.9335  | 6.40E-19 | -1.519894324  | count | 1.54E-14    |
| HTR2B     | -1.2473499 | 0.2329898   | -5.3537  | 9.15E-08 | -1.513778579  | count | 0.002143205 |
| SGIP1     | -1.177621  | 0.1616191   | -7.2864  | 3.88E-13 | -1.5111762676 | count | 9.24E-09    |
| ALDH1B1   | -1.2307896 | 0.1347853   | -9.1315  | 1.09E-19 | -1.49788601   | count | 2.62E-15    |
| IFI27     | -1.0512711 | 0.1361526   | -7.7213  | 1.48E-14 | -1.494978407  | count | 3.53E-10    |

|              |            |             |          |          |              |       |             |
|--------------|------------|-------------|----------|----------|--------------|-------|-------------|
| HIST1H1D     | -1.2552042 | 0.2569639   | -4.8847  | 1.08E-06 | -1.4816045   | count | 0.02511432  |
| LINC01088    | -1.1994303 | 0.1558769   | -7.6947  | 1.81E-14 | -1.471012265 | count | 4.32E-10    |
| PLN          | -1.0279192 | 0.0562233   | -18.2828 | 1.56E-71 | -1.468519072 | count | 3.79E-67    |
| IGLC2        | -1.3820726 | 0.1474579   | -9.3727  | 1.20E-20 | -1.467888213 | count | 2.88E-16    |
| MYRFL        | -1.9097825 | 0.4372739   | -4.3675  | 1.29E-05 | -1.464913231 | count | 0.2970096   |
| TBXA2R       | -1.1148975 | 0.1485575   | -7.5048  | 7.68E-14 | -1.464299217 | count | 1.83E-09    |
| PDE4D        | -1.2400319 | 0.1965521   | -6.3089  | 3.14E-10 | -1.464004062 | count | 7.43E-06    |
| SLC25A34-AS1 | -1.2627416 | 0.211029    | -5.9837  | 2.39E-09 | -1.461412458 | count | 5.64E-05    |
| AC006064.4   | -1.7724995 | 0.6591908   | -2.6889  | 0.0072   | -1.458149408 | count | 1           |
| MKX-AS1      | -2.595864  | 0.933622    | -2.7804  | 0.00546  | -1.455350755 | count | 1           |
| JAK3         | -1.6335367 | 0.4291173   | -3.8067  | 0.000143 | -1.452965297 | count | 1           |
| DOCK10       | -1.1323378 | 0.193774    | -5.8436  | 5.55E-09 | -1.450500437 | count | 0.000130675 |
| MEGF10       | -2.1903246 | 0.6743166   | -3.2482  | 0.00117  | -1.449028018 | count | 1           |
| AREG         | -1.4613984 | 0.5523258   | -2.6459  | 0.00818  | -1.441431432 | count | 1           |
| QRFPR        | -20.077231 | 2154.353043 | -0.0093  | 0.993    | -1.436419921 | count | 1           |
| AC004908.1   | -20.077231 | 2154.353043 | -0.0093  | 0.993    | -1.436419921 | count | 1           |
| AC022148.1   | -20.077231 | 2154.353043 | -0.0093  | 0.993    | -1.436419921 | count | 1           |
| AC016027.1   | -20.077231 | 2154.353043 | -0.0093  | 0.993    | -1.436419921 | count | 1           |
| TREM2        | -20.075647 | 1773.687543 | -0.0113  | 0.991    | -1.436419921 | count | 1           |
| TBX5         | -20.072861 | 1132.468752 | -0.0177  | 0.986    | -1.436419921 | count | 1           |
| LINC01013    | -19.340453 | 1732.644027 | -0.0112  | 0.991    | -1.436419915 | count | 1           |
| ASPHD1       | -19.260238 | 918.1223843 | -0.021   | 0.983    | -1.436419915 | count | 1           |
| CD3D         | -2.0202555 | 0.5992529   | -3.3713  | 0.000756 | -1.423081243 | count | 1           |
| MRAP2        | -1.068512  | 0.134905    | -7.9205  | 3.11E-15 | -1.419290964 | count | 7.42E-11    |
| TRAF1        | -1.1642027 | 0.2508233   | -4.6415  | 3.58E-06 | -1.41783273  | count | 0.08285194  |
| KCNMA1       | -1.0380001 | 0.097464    | -10.6501 | 4.18E-26 | -1.416312553 | count | 1.01E-21    |
| KRT16        | -1.45255   | 0.780911    | -1.8601  | 0.063    | -1.414406385 | count | 1           |
| FBXO32       | -1.0174939 | 0.0881978   | -11.5365 | 2.86E-30 | -1.413488512 | count | 6.91E-26    |
| ANGPT2       | -1.0336287 | 0.0852137   | -12.1298 | 3.15E-33 | -1.409165254 | count | 7.61E-29    |
| BRINP1       | -2.7649027 | 0.6359284   | -4.3478  | 1.41E-05 | -1.404650006 | count | 0.3244833   |
| RPS6KA6      | -1.8135206 | 0.3343617   | -5.4238  | 6.21E-08 | -1.401060622 | count | 0.001455562 |
| SRGN         | -0.9988801 | 0.1230998   | -8.1144  | 6.60E-16 | -1.395911846 | count | 1.58E-11    |
| PCDH7        | -0.9798717 | 0.0757438   | -12.9367 | 1.82E-37 | -1.391132784 | count | 4.40E-33    |
| LINC00844    | -1.3584738 | 0.2819035   | -4.8189  | 1.50E-06 | -1.391094921 | count | 0.0348435   |
| SLC22A3      | -1.1586746 | 0.1885484   | -6.1452  | 8.84E-10 | -1.387523053 | count | 2.09E-05    |
| PHYHIPL      | -1.078271  | 0.2110253   | -5.1097  | 3.39E-07 | -1.378086818 | count | 0.007912938 |
| FCGR3A       | -2.0545676 | 0.678401    | -3.0285  | 0.00247  | -1.377833374 | count | 1           |
| TGM2         | -0.9897515 | 0.0977917   | -10.121  | 9.12E-24 | -1.37619183  | count | 2.20E-19    |
| NPTX2        | -1.024043  | 0.1611415   | -6.3549  | 2.34E-10 | -1.376181241 | count | 5.54E-06    |
| LINC00607    | -1.508875  | 0.5785485   | -2.608   | 0.00914  | -1.375991913 | count | 1           |
| ERG          | -1.0315834 | 0.1364947   | -7.5577  | 5.15E-14 | -1.373634802 | count | 1.23E-09    |
| GRP          | -3.1336443 | 0.7767894   | -4.0341  | 5.59E-05 | -1.371916191 | count | 1           |
| MAOB         | -1.1215147 | 0.1680102   | -6.6753  | 2.84E-11 | -1.369750586 | count | 6.74E-07    |
| CD86         | -3.118723  | 1.3887463   | -2.2457  | 0.0248   | -1.368798657 | count | 1           |
| CXCR4        | -1.594322  | 0.4537277   | -3.5138  | 0.000447 | -1.359122594 | count | 1           |

|            |            |             |          |          |              |       |             |
|------------|------------|-------------|----------|----------|--------------|-------|-------------|
| PTK7       | -1.3862116 | 0.4382828   | -3.1628  | 0.00158  | -1.352513679 | count | 1           |
| SLC16A3    | -1.1342019 | 0.2517757   | -4.5048  | 6.85E-06 | -1.349812538 | count | 0.1581117   |
| CTSC       | -0.9721123 | 0.1000796   | -9.7134  | 4.86E-22 | -1.348900924 | count | 1.17E-17    |
| F2R        | -0.9695621 | 0.101443    | -9.5577  | 2.13E-21 | -1.348466793 | count | 5.12E-17    |
| CCDC68     | -0.9638099 | 0.1530487   | -6.2974  | 3.38E-10 | -1.344884884 | count | 8.00E-06    |
| AL355974.2 | -1.1182298 | 0.2304229   | -4.8529  | 1.27E-06 | -1.339518609 | count | 0.02951226  |
| IGFBPL1    | -1.982009  | 0.710103    | -2.7912  | 0.00528  | -1.337933487 | count | 1           |
| GLDN       | -0.999762  | 0.1215303   | -8.2264  | 2.65E-16 | -1.337151792 | count | 6.34E-12    |
| INSC       | -2.294704  | 0.4956493   | -4.6297  | 3.79E-06 | -1.337053181 | count | 0.08769302  |
| ITGA8      | -0.9317047 | 0.0615741   | -15.1314 | 3.20E-50 | -1.336535251 | count | 7.76E-46    |
| TSPAN2     | -0.9589497 | 0.0962253   | -9.9657  | 4.23E-23 | -1.332226994 | count | 1.02E-18    |
| COL13A1    | -1.28551   | 0.2647195   | -4.8561  | 1.25E-06 | -1.331846554 | count | 0.0290525   |
| CDH2       | -1.0041608 | 0.1706838   | -5.8832  | 4.39E-09 | -1.329810679 | count | 0.00010345  |
| COLEC11    | -1.236257  | 0.2405955   | -5.1383  | 2.92E-07 | -1.32749923  | count | 0.006818784 |
| ANKRD1     | -1.353314  | 0.4087311   | -3.311   | 0.000939 | -1.321543253 | count | 1           |
| MS4A7      | -2.5058575 | 0.5876172   | -4.2644  | 2.05E-05 | -1.320685855 | count | 0.470926    |
| ZNF385D    | -0.9858262 | 0.1310279   | -7.5238  | 6.66E-14 | -1.318538444 | count | 1.59E-09    |
| CRNDE      | -0.9402899 | 0.0969056   | -9.7032  | 5.36E-22 | -1.310309353 | count | 1.29E-17    |
| FAT3       | -1.2271921 | 0.3119511   | -3.9339  | 8.51E-05 | -1.307414075 | count | 1           |
| P2RY6      | -1.1253811 | 0.284288    | -3.9586  | 7.68E-05 | -1.304478355 | count | 1           |
| AQP1       | -0.9136025 | 0.070255    | -13.0041 | 7.86E-38 | -1.301892783 | count | 1.90E-33    |
| MSR1       | -2.8173076 | 0.7939575   | -3.5484  | 0.000392 | -1.29782435  | count | 1           |
| OASL       | -1.6641729 | 0.635563    | -2.6184  | 0.00887  | -1.297692714 | count | 1           |
| AL022341.2 | -3.5444174 | 2.309397    | -1.5348  | 0.125    | -1.291341259 | count | 1           |
| RAMP3      | -1.0161939 | 0.3161247   | -3.2145  | 0.00132  | -1.280007528 | count | 1           |
| SARDH      | -1.999435  | 0.617196    | -3.2395  | 0.00121  | -1.277940239 | count | 1           |
| GAP43      | -0.9328598 | 0.1423128   | -6.555   | 6.34E-11 | -1.2729949   | count | 1.50E-06    |
| ATXN7      | -1.565783  | 0.6956813   | -2.2507  | 0.0245   | -1.266377911 | count | 1           |
| EDIL3      | -0.8874642 | 0.0553005   | -16.048  | 4.59E-56 | -1.264933185 | count | 1.11E-51    |
| HCCAT5     | -1.312205  | 0.3906569   | -3.359   | 0.00079  | -1.264636506 | count | 1           |
| GJD2       | -1.755708  | 0.4967261   | -3.5346  | 0.000413 | -1.262339539 | count | 1           |
| UNC5B      | -0.9373248 | 0.1515962   | -6.183   | 6.98E-10 | -1.258025338 | count | 1.65E-05    |
| SUSD3      | -1.0362891 | 0.2208587   | -4.6921  | 2.80E-06 | -1.256357195 | count | 0.0648844   |
| TSPAN15    | -2.3293461 | 0.4242644   | -5.4903  | 4.28E-08 | -1.255304586 | count | 0.001003874 |
| CCNO       | -1.2012603 | 0.3304428   | -3.6353  | 0.000281 | -1.24618428  | count | 1           |
| THEM6      | -1.030551  | 0.248998    | -4.1388  | 3.57E-05 | -1.245971572 | count | 0.8174586   |
| IGLV11-55  | -19.851654 | 1924.568222 | -0.0103  | 0.992    | -1.241954889 | count | 1           |
| CLDN14     | -19.850037 | 1518.712162 | -0.0131  | 0.99     | -1.241954889 | count | 1           |
| DHRS9      | -19.848632 | 1173.410041 | -0.0169  | 0.987    | -1.241954889 | count | 1           |
| LILRB4     | -19.264126 | 1430.600853 | -0.0135  | 0.989    | -1.241954886 | count | 1           |
| S1PR5      | -19.234956 | 1431.90428  | -0.0134  | 0.989    | -1.241954885 | count | 1           |
| MLC1       | -19.160767 | 1450.971294 | -0.0132  | 0.989    | -1.241954885 | count | 1           |
| CARD16     | -0.9558673 | 0.15261     | -6.2635  | 4.20E-10 | -1.235219144 | count | 9.93E-06    |
| GADD45A    | -0.8662438 | 0.0603848   | -14.3454 | 1.89E-45 | -1.22673916  | count | 4.58E-41    |
| TNFSF15    | -1.782384  | 0.727307    | -2.4507  | 0.0143   | -1.221817414 | count | 1           |

|               |            |           |          |          |              |       |             |
|---------------|------------|-----------|----------|----------|--------------|-------|-------------|
| ITGA10        | -0.8634184 | 0.1128029 | -7.6542  | 2.47E-14 | -1.206746918 | count | 5.89E-10    |
| ABLIM3        | -1.4854146 | 0.4278738 | -3.4716  | 0.000523 | -1.205303419 | count | 1           |
| PRSS35        | -0.8973226 | 0.1408813 | -6.3694  | 2.13E-10 | -1.202595583 | count | 5.04E-06    |
| ENPP1         | -0.8902364 | 0.1211915 | -7.3457  | 2.51E-13 | -1.202018495 | count | 5.98E-09    |
| LINC01238     | -2.995007  | 1.5295245 | -1.9581  | 0.0503   | -1.199111882 | count | 1           |
| TK1           | -1.3605115 | 0.5204086 | -2.6143  | 0.00898  | -1.197083861 | count | 1           |
| AIF1          | -2.1801782 | 0.4461516 | -4.8866  | 1.07E-06 | -1.194796597 | count | 0.02488606  |
| P4HA3         | -1.4685477 | 0.3436632 | -4.2732  | 1.98E-05 | -1.192332037 | count | 0.4549842   |
| LOXL2         | -1.5764794 | 0.3384394 | -4.6581  | 3.30E-06 | -1.191633535 | count | 0.0764148   |
| FNDC4         | -0.9047567 | 0.1405962 | -6.4351  | 1.39E-10 | -1.186885687 | count | 3.29E-06    |
| COL15A1       | -0.8820452 | 0.1291155 | -6.8314  | 9.80E-12 | -1.184898926 | count | 2.33E-07    |
| FXVD5         | -0.8285238 | 0.0635007 | -13.0475 | 4.57E-38 | -1.182339781 | count | 1.11E-33    |
| AP002026.1    | -1.3679135 | 0.3402249 | -4.0206  | 5.92E-05 | -1.175751604 | count | 1           |
| S100A3        | -0.9745463 | 0.1680504 | -5.7991  | 7.23E-09 | -1.174979279 | count | 0.000170165 |
| SPOCD1        | -1.621769  | 0.6257275 | -2.5918  | 0.00958  | -1.174974046 | count | 1           |
| NRP2          | -0.8815846 | 0.1569492 | -5.617   | 2.09E-08 | -1.173313178 | count | 0.000491046 |
| ARHGDI3       | -0.825788  | 0.0682251 | -12.1039 | 4.27E-33 | -1.172457293 | count | 1.03E-28    |
| TMEM130       | -0.9389131 | 0.209875  | -4.4737  | 7.92E-06 | -1.170114635 | count | 0.18265896  |
| TNIP3         | -2.112383  | 0.5331385 | -3.9622  | 7.57E-05 | -1.165713707 | count | 1           |
| IGFBP2        | -0.8060286 | 0.0540258 | -14.9193 | 6.53E-49 | -1.161095976 | count | 1.58E-44    |
| MYO18B        | -2.094624  | 0.568429  | -3.6849  | 0.000232 | -1.157933944 | count | 1           |
| VCAM1         | -0.8270859 | 0.0951275 | -8.6945  | 5.17E-18 | -1.157539882 | count | 1.24E-13    |
| MELTF-AS1     | -1.104057  | 0.3074693 | -3.5908  | 0.000334 | -1.15725539  | count | 1           |
| FBLIM1        | -0.8081709 | 0.0587186 | -13.7635 | 4.61E-42 | -1.154441167 | count | 1.12E-37    |
| ANK3          | -0.8510836 | 0.1637206 | -5.1984  | 2.12E-07 | -1.152568348 | count | 0.0049555   |
| CFAP58-DT     | -2.735274  | 1.3936723 | -1.9626  | 0.0498   | -1.140199635 | count | 1           |
| MSH4          | -2.735274  | 1.4592018 | -1.8745  | 0.0609   | -1.140199635 | count | 1           |
| TTN           | -1.0181639 | 0.5074921 | -2.0063  | 0.0449   | -1.140173712 | count | 1           |
| LINC02185     | -1.0980297 | 0.2848757 | -3.8544  | 0.000118 | -1.140058308 | count | 1           |
| FOLR2         | -1.8795133 | 0.5790518 | -3.2458  | 0.00118  | -1.140054819 | count | 1           |
| JCHAIN        | -1.876708  | 0.4360781 | -4.3036  | 1.72E-05 | -1.138595086 | count | 0.3954624   |
| NRL           | -1.3985224 | 0.5801693 | -2.4105  | 0.016    | -1.137945068 | count | 1           |
| ASS1          | -0.8317599 | 0.1320847 | -6.2972  | 3.39E-10 | -1.13526656  | count | 8.02E-06    |
| SELL          | -1.5609131 | 0.5758717 | -2.7105  | 0.00675  | -1.134084043 | count | 1           |
| AC093390.2    | -1.3914002 | 0.4585741 | -3.0342  | 0.00243  | -1.132367013 | count | 1           |
| TTLL7         | -0.8039797 | 0.078085  | -10.2962 | 1.58E-24 | -1.129428794 | count | 3.81E-20    |
| LGR6          | -0.9762055 | 0.2135135 | -4.5721  | 4.99E-06 | -1.127131844 | count | 0.11533886  |
| TGFB1         | -0.8103473 | 0.0939454 | -8.6257  | 9.33E-18 | -1.125429406 | count | 2.24E-13    |
| FN1           | -0.7814435 | 0.075089  | -10.4069 | 5.12E-25 | -1.125267496 | count | 1.23E-20    |
| ISG15         | -0.7975964 | 0.117367  | -6.7957  | 1.25E-11 | -1.121552604 | count | 2.97E-07    |
| ALDH1A2       | -0.9167688 | 0.1887954 | -4.8559  | 1.25E-06 | -1.120175008 | count | 0.0290525   |
| CCDC144NL-AS1 | -0.9166685 | 0.2227522 | -4.1152  | 3.95E-05 | -1.120052167 | count | 0.9039575   |
| BMP6          | -1.6168553 | 0.6243948 | -2.5895  | 0.00965  | -1.118984388 | count | 1           |
| ITGB2         | -1.6149565 | 0.4952233 | -3.2611  | 0.00112  | -1.117773065 | count | 1           |
| KALRN         | -0.8403986 | 0.2069029 | -4.0618  | 4.97E-05 | -1.117757467 | count | 1           |

|            |            |           |          |          |              |       |             |
|------------|------------|-----------|----------|----------|--------------|-------|-------------|
| CDC42EP3   | -0.7938265 | 0.1000869 | -7.9314  | 2.85E-15 | -1.116637162 | count | 6.80E-11    |
| SUSD5      | -0.8182655 | 0.1395734 | -5.8626  | 4.96E-09 | -1.114590655 | count | 0.000116848 |
| SV2A       | -0.9589668 | 0.2568458 | -3.7336  | 0.000192 | -1.112071465 | count | 1           |
| SLC13A3    | -1.2818394 | 0.5823702 | -2.2011  | 0.0278   | -1.103734763 | count | 1           |
| PGM2L1     | -0.8560359 | 0.1487378 | -5.7553  | 9.36E-09 | -1.102332986 | count | 0.000220222 |
| ASTN1      | -2.582386  | 0.7603565 | -3.3963  | 0.00069  | -1.100261529 | count | 1           |
| AL121983.1 | -2.582386  | 0.8531806 | -3.0268  | 0.00249  | -1.100261529 | count | 1           |
| AC073655.2 | -2.582386  | 0.8531806 | -3.0268  | 0.00249  | -1.100261529 | count | 1           |
| E2F3       | -0.9360071 | 0.1995304 | -4.6911  | 2.82E-06 | -1.098707758 | count | 0.06534222  |
| EFNB2      | -0.8460808 | 0.1736168 | -4.8733  | 1.14E-06 | -1.09665453  | count | 0.02650386  |
| DUSP26     | -0.8151442 | 0.1333776 | -6.1116  | 1.09E-09 | -1.095889179 | count | 2.57E-05    |
| RNF175     | -1.2424885 | 0.5011694 | -2.4792  | 0.0132   | -1.09566972  | count | 1           |
| ITGA3      | -0.8103495 | 0.1318059 | -6.1481  | 8.68E-10 | -1.094871204 | count | 2.05E-05    |
| AC093390.1 | -1.0891516 | 0.2219842 | -4.9064  | 9.68E-07 | -1.09482664  | count | 0.022522456 |
| CD300A     | -3.350815  | 1.2483092 | -2.6843  | 0.0073   | -1.09215888  | count | 1           |
| CSGALNACT1 | -0.8181118 | 0.1460848 | -5.6003  | 2.30E-08 | -1.089952597 | count | 0.000540316 |
| TSLP       | -0.9851882 | 0.2197433 | -4.4834  | 7.57E-06 | -1.089866752 | count | 0.17463233  |
| LINC00702  | -0.8782305 | 0.1680512 | -5.226   | 1.83E-07 | -1.087751243 | count | 0.004279089 |
| CYFIP2     | -0.7943635 | 0.1662864 | -4.7771  | 1.85E-06 | -1.083847678 | count | 0.04293295  |
| SVIL       | -0.7586309 | 0.0495413 | -15.3131 | 2.35E-51 | -1.082753066 | count | 5.70E-47    |
| SYNJ2      | -0.8657693 | 0.2404493 | -3.6006  | 0.000322 | -1.080819978 | count | 1           |
| FAM198B    | -0.8004376 | 0.1481983 | -5.4011  | 7.04E-08 | -1.077493111 | count | 0.001649542 |
| HDAC9      | -0.8452123 | 0.1555197 | -5.4348  | 5.84E-08 | -1.077398541 | count | 0.00136913  |
| CARMN      | -0.7566164 | 0.1743313 | -4.3401  | 1.46E-05 | -1.074960185 | count | 0.335946    |
| UNC5B-AS1  | -1.0822929 | 0.2826166 | -3.8295  | 0.000131 | -1.074651462 | count | 1           |
| SH3BGR     | -0.77071   | 0.0898672 | -8.5761  | 1.43E-17 | -1.073647309 | count | 3.42E-13    |
| IGLC3      | -0.8568293 | 0.163627  | -5.2365  | 1.73E-07 | -1.073554768 | count | 0.004045778 |
| ERP27      | -1.4079455 | 0.4189312 | -3.3608  | 0.000785 | -1.070744674 | count | 1           |
| GSG1L      | -1.1844605 | 0.3758928 | -3.1511  | 0.00164  | -1.067545321 | count | 1           |
| LOH12CR2   | -0.9851052 | 0.2998528 | -3.2853  | 0.00103  | -1.067485373 | count | 1           |
| AL359504.2 | -0.9310995 | 0.2931282 | -3.1764  | 0.0015   | -1.064915224 | count | 1           |
| GZMA       | -1.7384788 | 0.4913783 | -3.538   | 0.000408 | -1.064696207 | count | 1           |
| IFI6       | -0.7452725 | 0.0816929 | -9.1229  | 1.18E-19 | -1.061746232 | count | 2.83E-15    |
| AC012085.2 | -1.022404  | 0.3980878 | -2.5683  | 0.0103   | -1.061636801 | count | 1           |
| VAMP8      | -1.2003581 | 0.3354123 | -3.5788  | 0.00035  | -1.059001242 | count | 1           |
| IL13RA2    | -0.8012507 | 0.1999497 | -4.0073  | 6.26E-05 | -1.054952815 | count | 1           |
| RGS1       | -3.071165  | 0.6232851 | -4.9274  | 8.70E-07 | -1.049675902 | count | 0.02025273  |
| TPST2      | -0.8831965 | 0.1805857 | -4.8907  | 1.05E-06 | -1.047867481 | count | 0.02442195  |
| PAPPA      | -1.0280433 | 0.4007731 | -2.5652  | 0.0104   | -1.045377346 | count | 1           |
| PPP1R3C    | -0.7719598 | 0.1213094 | -6.3636  | 2.21E-10 | -1.042893867 | count | 5.23E-06    |
| ST6GAL1    | -0.9551362 | 0.2551649 | -3.7432  | 0.000184 | -1.042417516 | count | 1           |
| RAB38      | -1.2386647 | 0.2472268 | -5.0102  | 5.69E-07 | -1.04013696  | count | 0.013269649 |
| PPP1R16A   | -0.8000124 | 0.173304  | -4.6162  | 4.04E-06 | -1.039886325 | count | 0.0934654   |
| TEX9       | -0.8156924 | 0.2012544 | -4.053   | 5.16E-05 | -1.039634934 | count | 1           |
| SPINT1     | -1.8394515 | 0.5868912 | -3.1342  | 0.00174  | -1.038954066 | count | 1           |

|            |             |             |          |          |              |       |             |
|------------|-------------|-------------|----------|----------|--------------|-------|-------------|
| DUSP15     | -0.989705   | 0.2966929   | -3.3358  | 0.000859 | -1.037453247 | count | 1           |
| FAM227B    | -0.9806359  | 0.3179211   | -3.0845  | 0.00205  | -1.037217452 | count | 1           |
| CHSY3      | -0.970903   | 0.2401034   | -4.0437  | 5.37E-05 | -1.035662968 | count | 1           |
| NUPR2      | -0.9921964  | 0.3287418   | -3.0182  | 0.00256  | -1.030179788 | count | 1           |
| AC009309.1 | -1.819936   | 0.738071    | -2.4658  | 0.0137   | -1.029320858 | count | 1           |
| COL4A1     | -0.7280891  | 0.0915358   | -7.9541  | 2.38E-15 | -1.02558828  | count | 5.68E-11    |
| CD3E       | -2.014309   | 1.0768536   | -1.8706  | 0.0615   | -1.025095152 | count | 1           |
| LDHD       | -1.2932596  | 0.3817114   | -3.3881  | 0.000711 | -1.021704043 | count | 1           |
| RGS3       | -0.7295604  | 0.0888441   | -8.2117  | 2.99E-16 | -1.020050633 | count | 7.15E-12    |
| LIMCH1     | -0.7195824  | 0.0618376   | -11.6366 | 9.25E-31 | -1.019131305 | count | 2.23E-26    |
| SYNPO      | -0.72312    | 0.0911117   | -7.9362  | 2.75E-15 | -1.01815816  | count | 6.57E-11    |
| MYOM3      | -19.56107   | 1664.310577 | -0.0118  | 0.991    | -1.017131669 | count | 1           |
| SPATA16    | -19.56107   | 1664.310577 | -0.0118  | 0.991    | -1.017131669 | count | 1           |
| AC090971.1 | -19.56107   | 1664.310577 | -0.0118  | 0.991    | -1.017131669 | count | 1           |
| AC023906.3 | -19.56107   | 1664.310577 | -0.0118  | 0.991    | -1.017131669 | count | 1           |
| LINC02351  | -19.56107   | 1664.310577 | -0.0118  | 0.991    | -1.017131669 | count | 1           |
| C20orf204  | -19.56107   | 1664.310577 | -0.0118  | 0.991    | -1.017131669 | count | 1           |
| SOX11      | -19.55956   | 1237.866749 | -0.0158  | 0.987    | -1.017131669 | count | 1           |
| ST14       | -19.55956   | 1237.866749 | -0.0158  | 0.987    | -1.017131669 | count | 1           |
| KRT28      | -19.55956   | 1237.866749 | -0.0158  | 0.987    | -1.017131669 | count | 1           |
| AL157895.1 | -19.55848   | 956.3530192 | -0.0205  | 0.984    | -1.017131669 | count | 1           |
| FCER1A     | -18.79408   | 1404.911048 | -0.0134  | 0.989    | -1.017131664 | count | 1           |
| LINC01411  | -18.79408   | 1404.911048 | -0.0134  | 0.989    | -1.017131664 | count | 1           |
| RAB26      | -18.79296   | 1212.347305 | -0.0155  | 0.988    | -1.017131664 | count | 1           |
| MMP24      | -18.79296   | 1212.347305 | -0.0155  | 0.988    | -1.017131664 | count | 1           |
| ITGAM      | -19.1682999 | 2061.468093 | -0.0093  | 0.993    | -1.017131448 | count | 1           |
| HSPA2      | -0.7433058  | 0.1085818   | -6.8456  | 8.89E-12 | -1.016751386 | count | 2.11E-07    |
| POT1-AS1   | -1.1790218  | 0.442448    | -2.6648  | 0.00774  | -1.016356903 | count | 1           |
| TFPT       | -0.8612343  | 0.2307721   | -3.732   | 0.000193 | -1.01438601  | count | 1           |
| HPD        | -0.9484636  | 0.3256967   | -2.9121  | 0.00361  | -1.011604957 | count | 1           |
| SLC2A1-AS1 | -1.375638   | 0.517691    | -2.6573  | 0.00791  | -1.005526627 | count | 1           |
| LRRC61     | -1.012081   | 0.373364    | -2.7107  | 0.00675  | -1.004835114 | count | 1           |
| LINC00623  | -0.7659746  | 0.1478096   | -5.1822  | 2.31E-07 | -1.004414024 | count | 0.005398008 |
| SEMA3F     | -1.2297933  | 0.4658401   | -2.6399  | 0.00833  | -1.003743576 | count | 1           |
| PDGFC      | -0.7633478  | 0.1498046   | -5.0956  | 3.65E-07 | -1.002566649 | count | 0.00851837  |
| SMC4       | -0.7287177  | 0.1179922   | -6.176   | 7.29E-10 | -1.001594927 | count | 1.72E-05    |
| MEF2C      | -0.7069818  | 0.0576435   | -12.2647 | 6.41E-34 | -1.001085945 | count | 1.55E-29    |
| TES        | -0.7233054  | 0.099454    | -7.2728  | 4.28E-13 | -0.998857715 | count | 1.02E-08    |
| PDZK1IP1   | -1.0186221  | 0.3829418   | -2.66    | 0.00785  | -0.998078525 | count | 1           |
| MYH10      | -0.6936175  | 0.0588619   | -11.7838 | 1.74E-31 | -0.997700224 | count | 4.20E-27    |
| ITGA2      | -0.988355   | 0.3191915   | -3.0964  | 0.00197  | -0.99333964  | count | 1           |
| SMOC1      | -1.1250293  | 0.2194513   | -5.1266  | 3.10E-07 | -0.992912015 | count | 0.00723819  |
| MYH11      | -0.6893241  | 0.0516697   | -13.341  | 1.11E-39 | -0.99110804  | count | 2.69E-35    |
| ADRB2      | -1.1180003  | 0.5558766   | -2.0112  | 0.0444   | -0.986713781 | count | 1           |
| TNFRSF11B  | -0.6876403  | 0.1089501   | -6.3115  | 3.09E-10 | -0.984312144 | count | 7.31E-06    |

|            |            |           |          |          |              |       |            |
|------------|------------|-----------|----------|----------|--------------|-------|------------|
| CRLF1      | -0.7364385 | 0.186669  | -3.9452  | 8.12E-05 | -0.98355159  | count | 1          |
| EEPD1      | -0.9895532 | 0.2738932 | -3.6129  | 0.000307 | -0.982349407 | count | 1          |
| QPCT       | -1.2879793 | 0.395277  | -3.2584  | 0.00113  | -0.98186788  | count | 1          |
| FAM53A     | -1.7250563 | 0.6705763 | -2.5725  | 0.0101   | -0.981469824 | count | 1          |
| COL4A2     | -0.6894599 | 0.0756809 | -9.1101  | 1.32E-19 | -0.979813319 | count | 3.17E-15   |
| CCL3L1     | -0.9070894 | 0.4486827 | -2.0217  | 0.0433   | -0.975017264 | count | 1          |
| RGS5       | -0.6769104 | 0.070024  | -9.6668  | 7.58E-22 | -0.974908821 | count | 1.82E-17   |
| ATP6AP1L   | -0.8016881 | 0.1997091 | -4.0143  | 6.08E-05 | -0.971314551 | count | 1          |
| MYH9       | -0.678927  | 0.0546016 | -12.4342 | 8.49E-35 | -0.97092395  | count | 2.05E-30   |
| KCNJ3      | -1.1886417 | 0.8369581 | -1.4202  | 0.156    | -0.97043192  | count | 1          |
| AC018816.1 | -1.3256242 | 0.4751723 | -2.7898  | 0.0053   | -0.969892548 | count | 1          |
| AL592183.1 | -0.9634318 | 0.2712141 | -3.5523  | 0.000387 | -0.968124098 | count | 1          |
| INO80B     | -1.0722885 | 0.3166376 | -3.3865  | 0.000715 | -0.966695284 | count | 1          |
| ARL4C      | -0.7650291 | 0.2172655 | -3.5212  | 0.000435 | -0.964587454 | count | 1          |
| GAS6-DT    | -1.454444  | 0.4427313 | -3.2852  | 0.00103  | -0.960253788 | count | 1          |
| SPRY3      | -2.618042  | 1.4588005 | -1.7947  | 0.0728   | -0.958951711 | count | 1          |
| GMFG       | -1.0422892 | 0.3641935 | -2.8619  | 0.00423  | -0.958057844 | count | 1          |
| KCNT2      | -0.8976115 | 0.191756  | -4.681   | 2.96E-06 | -0.956974569 | count | 0.06857432 |
| DNAJC22    | -2.6083564 | 0.7070486 | -3.6891  | 0.000228 | -0.956686179 | count | 1          |
| CD93       | -0.795371  | 0.3825008 | -2.0794  | 0.0377   | -0.952388954 | count | 1          |
| KCTD11     | -0.80859   | 0.2072446 | -3.9016  | 9.73E-05 | -0.951962971 | count | 1          |
| CDH13      | -0.66829   | 0.0792903 | -8.4284  | 4.97E-17 | -0.949250268 | count | 1.19E-12   |
| LGALS9     | -1.8388323 | 0.7237079 | -2.5408  | 0.0111   | -0.948732893 | count | 1          |
| ARMC9      | -0.7818363 | 0.2089349 | -3.742   | 0.000185 | -0.947097077 | count | 1          |
| PARD6B     | -1.0719784 | 0.3333274 | -3.216   | 0.00131  | -0.946012421 | count | 1          |
| PRKG1      | -0.6812163 | 0.0790248 | -8.6203  | 9.78E-18 | -0.945342421 | count | 2.34E-13   |
| STAC2      | -1.4304846 | 0.5552738 | -2.5762  | 0.01     | -0.945039231 | count | 1          |
| MYLK       | -0.6637553 | 0.0594856 | -11.1583 | 1.86E-28 | -0.944746646 | count | 4.49E-24   |
| SLC16A5    | -1.027072  | 0.4614598 | -2.2257  | 0.0261   | -0.94398452  | count | 1          |
| RGS2       | -0.7176295 | 0.1478513 | -4.8537  | 1.26E-06 | -0.943753215 | count | 0.02928114 |
| STEAP1     | -0.7406966 | 0.1184968 | -6.2508  | 4.55E-10 | -0.943608385 | count | 1.08E-05   |
| MYO1D      | -0.6830734 | 0.0947773 | -7.2071  | 6.90E-13 | -0.941855513 | count | 1.64E-08   |
| LIG1       | -1.0239674 | 0.281324  | -3.6398  | 0.000277 | -0.941110803 | count | 1          |
| PDE8B      | -0.9149214 | 0.3145403 | -2.9088  | 0.00365  | -0.939791832 | count | 1          |
| NXPH4      | -1.516429  | 0.4857199 | -3.122   | 0.00181  | -0.938481171 | count | 1          |
| ASPN       | -0.6529601 | 0.0710133 | -9.1949  | 6.13E-20 | -0.93739393  | count | 1.47E-15   |
| A2M        | -0.6531757 | 0.0515116 | -12.6802 | 4.31E-36 | -0.93728937  | count | 1.04E-31   |
| COL23A1    | -1.5128026 | 0.578703  | -2.6141  | 0.00898  | -0.936350586 | count | 1          |
| BATF3      | -0.8065968 | 0.2003707 | -4.0255  | 5.80E-05 | -0.934448596 | count | 1          |
| GPC1       | -0.7084711 | 0.1278121 | -5.5431  | 3.18E-08 | -0.934426981 | count | 0.0007466  |
| FBXL22     | -0.7224611 | 0.1924741 | -3.7536  | 0.000177 | -0.933859566 | count | 1          |
| SORBS1     | -0.6752864 | 0.09841   | -6.862   | 7.94E-12 | -0.932730701 | count | 1.89E-07   |
| COL18A1    | -0.6535381 | 0.068983  | -9.4739  | 4.68E-21 | -0.931170707 | count | 1.12E-16   |
| SUGP1      | -0.8804479 | 0.243086  | -3.622   | 0.000296 | -0.930507007 | count | 1          |
| ATP2A3     | -0.7960217 | 0.2382116 | -3.3417  | 0.000841 | -0.929823872 | count | 1          |



|            |            |           |          |          |              |       |             |
|------------|------------|-----------|----------|----------|--------------|-------|-------------|
| SCLY       | -1.1750774 | 0.5382788 | -2.183   | 0.0291   | -0.929263267 | count | 1           |
| RGS4       | -0.6886009 | 0.1436578 | -4.7933  | 1.71E-06 | -0.928114464 | count | 0.03969765  |
| LMOD1      | -0.6467875 | 0.0474095 | -13.6426 | 2.25E-41 | -0.927901551 | count | 5.45E-37    |
| DNASE1L1   | -0.7481989 | 0.1743438 | -4.2915  | 1.82E-05 | -0.927840115 | count | 0.418327    |
| C8orf34    | -0.7630766 | 0.2441631 | -3.1253  | 0.00179  | -0.926708423 | count | 1           |
| C4orf48    | -0.7357187 | 0.1782012 | -4.1286  | 3.73E-05 | -0.925885396 | count | 0.8538716   |
| MAGI1      | -0.7661297 | 0.2929431 | -2.6153  | 0.00895  | -0.925342184 | count | 1           |
| ABRACL     | -0.6931541 | 0.1287024 | -5.3857  | 7.67E-08 | -0.921911665 | count | 0.001796928 |
| PPFIA2     | -1.097203  | 0.2599792 | -4.2203  | 2.50E-05 | -0.92181348  | count | 0.573475    |
| LSM11      | -0.8512458 | 0.4593801 | -1.853   | 0.064    | -0.921491284 | count | 1           |
| EDN1       | -0.7613518 | 0.2815177 | -2.7045  | 0.00687  | -0.916877325 | count | 1           |
| KIF15      | -2.445575  | 0.8900069 | -2.7478  | 0.00603  | -0.916442391 | count | 1           |
| DNAAF1     | -2.445575  | 0.9603513 | -2.5465  | 0.0109   | -0.916442391 | count | 1           |
| HRASLS2    | -2.445575  | 1.7545922 | -1.3938  | 0.163    | -0.916442391 | count | 1           |
| AC005261.2 | -2.445575  | 1.862547  | -1.313   | 0.189    | -0.916442391 | count | 1           |
| ALPK3      | -0.7363056 | 0.2092844 | -3.5182  | 0.00044  | -0.914842267 | count | 1           |
| BGN        | -0.6326916 | 0.0379339 | -16.6788 | 2.94E-60 | -0.911525286 | count | 7.14E-56    |
| SPHK1      | -0.8050906 | 0.2317352 | -3.4742  | 0.000518 | -0.910475385 | count | 1           |
| PNP        | -0.7579011 | 0.2346927 | -3.2293  | 0.00125  | -0.909971337 | count | 1           |
| GPLD1      | -1.0310131 | 0.473422  | -2.1778  | 0.0295   | -0.909624135 | count | 1           |
| PLOD1      | -0.7291343 | 0.170704  | -4.2713  | 1.99E-05 | -0.909407815 | count | 0.4572622   |
| EOGT       | -0.7274992 | 0.1599385 | -4.5486  | 5.57E-06 | -0.909056304 | count | 0.12865029  |
| CCDC102B   | -0.6747574 | 0.1145117 | -5.8925  | 4.15E-09 | -0.909014518 | count | 9.78E-05    |
| TENT5B     | -0.7548038 | 0.1971682 | -3.8282  | 0.000131 | -0.908927443 | count | 1           |
| AKAP6      | -0.6958915 | 0.1932323 | -3.6013  | 0.000321 | -0.905726981 | count | 1           |
| SULF1      | -0.6353354 | 0.0740267 | -8.5825  | 1.35E-17 | -0.903019683 | count | 3.23E-13    |
| ATP8B1     | -0.6975376 | 0.1513895 | -4.6076  | 4.21E-06 | -0.900489959 | count | 0.0973773   |
| AC113383.1 | -0.9469371 | 0.2412329 | -3.9254  | 8.82E-05 | -0.900261072 | count | 1           |
| C5AR1      | -1.2275106 | 0.4800301 | -2.5572  | 0.0106   | -0.899017578 | count | 1           |
| RBPM5-AS1  | -1.0419264 | 0.3781326 | -2.7555  | 0.00589  | -0.898004968 | count | 1           |
| UPP1       | -0.6670281 | 0.1460986 | -4.5656  | 5.14E-06 | -0.89582034  | count | 0.11878026  |
| FAM13C     | -0.6698725 | 0.1111431 | -6.0271  | 1.83E-09 | -0.895279178 | count | 4.32E-05    |
| SMPX       | -0.7757773 | 0.3584403 | -2.1643  | 0.0305   | -0.894439708 | count | 1           |
| BEX5       | -0.6887865 | 0.1521056 | -4.5283  | 6.13E-06 | -0.892912535 | count | 0.14152944  |
| AC068446.2 | -1.27759   | 0.6669822 | -1.9155  | 0.0555   | -0.892871647 | count | 1           |
| ECSCR      | -1.2177033 | 0.7075959 | -1.7209  | 0.0854   | -0.891868949 | count | 1           |
| C3orf80    | -1.2760871 | 0.837063  | -1.5245  | 0.127    | -0.89183276  | count | 1           |
| CTSZ       | -0.6246576 | 0.0448295 | -13.9341 | 4.83E-43 | -0.891645561 | count | 1.17E-38    |
| PSRC1      | -0.9378925 | 0.3508641 | -2.6731  | 0.00755  | -0.891558636 | count | 1           |
| ASB2       | -0.9224367 | 0.343079  | -2.6887  | 0.00721  | -0.890276522 | count | 1           |
| CDKN2A     | -0.6843062 | 0.1571011 | -4.3558  | 1.36E-05 | -0.889718671 | count | 0.313072    |
| AC068620.2 | -1.943974  | 0.7779399 | -2.4989  | 0.0125   | -0.888546034 | count | 1           |
| RAB31      | -0.6362685 | 0.0849589 | -7.4891  | 8.64E-14 | -0.888366112 | count | 2.06E-09    |
| AL606491.1 | -0.8955781 | 0.4668459 | -1.9184  | 0.0551   | -0.888191326 | count | 1           |
| TIMP1      | -0.6160313 | 0.0549614 | -11.2084 | 1.08E-28 | -0.888126128 | count | 2.61E-24    |

|            |            |           |          |          |              |       |             |
|------------|------------|-----------|----------|----------|--------------|-------|-------------|
| SGCA       | -0.6337701 | 0.0725017 | -8.7415  | 3.44E-18 | -0.887200141 | count | 8.25E-14    |
| DTNA       | -0.7758726 | 0.1855892 | -4.1806  | 2.98E-05 | -0.886146098 | count | 0.6829266   |
| AC231981.1 | -1.3387499 | 0.4640865 | -2.8847  | 0.00394  | -0.886023243 | count | 1           |
| ECT2       | -1.0273489 | 0.3752436 | -2.7378  | 0.00621  | -0.885320765 | count | 1           |
| RERG       | -0.6451882 | 0.0922189 | -6.9963  | 3.11E-12 | -0.883745497 | count | 7.39E-08    |
| HIP1R      | -1.0823683 | 0.4534836 | -2.3868  | 0.017    | -0.883556539 | count | 1           |
| PAIP2B     | -0.8227256 | 0.2689276 | -3.0593  | 0.00223  | -0.883450815 | count | 1           |
| SERPINA1   | -2.3202835 | 0.8926988 | -2.5992  | 0.00938  | -0.882642921 | count | 1           |
| COL21A1    | -0.6232017 | 0.0800018 | -7.7898  | 8.67E-15 | -0.881164212 | count | 2.07E-10    |
| ACTN1      | -0.6166113 | 0.0561582 | -10.9799 | 1.28E-27 | -0.88072731  | count | 3.09E-23    |
| ROM1       | -0.7019615 | 0.1505524 | -4.6626  | 3.23E-06 | -0.880096923 | count | 0.07480357  |
| AC099792.1 | -2.294704  | 0.6762309 | -3.3934  | 0.000698 | -0.875438309 | count | 1           |
| AL445493.3 | -2.294704  | 0.7268375 | -3.1571  | 0.00161  | -0.875438309 | count | 1           |
| SHCBP1     | -2.294704  | 0.7268375 | -3.1571  | 0.00161  | -0.875438309 | count | 1           |
| AC010976.2 | -2.294704  | 0.8187195 | -2.8028  | 0.00509  | -0.875438309 | count | 1           |
| AC092620.3 | -2.294704  | 0.8187195 | -2.8028  | 0.00509  | -0.875438309 | count | 1           |
| C9orf16    | -0.612019  | 0.0443623 | -13.7959 | 3.01E-42 | -0.873775559 | count | 7.29E-38    |
| MARCO      | -1.902059  | 1.0953524 | -1.7365  | 0.0826   | -0.872136023 | count | 1           |
| ESRRG      | -1.902059  | 1.1561964 | -1.6451  | 0.1      | -0.872136023 | count | 1           |
| AQP9       | -1.902059  | 1.5877129 | -1.198   | 0.231    | -0.872136023 | count | 1           |
| ART4       | -0.6534533 | 0.1690022 | -3.8665  | 0.000112 | -0.871853191 | count | 1           |
| ANGPT1     | -0.6238675 | 0.0676606 | -9.2205  | 4.86E-20 | -0.871670119 | count | 1.17E-15    |
| ENG        | -0.6105938 | 0.0703488 | -8.6795  | 5.88E-18 | -0.869451018 | count | 1.41E-13    |
| AC092747.4 | -1.008189  | 0.4550087 | -2.2158  | 0.0268   | -0.868625058 | count | 1           |
| SALL2      | -0.8759628 | 0.420987  | -2.0807  | 0.0375   | -0.868477684 | count | 1           |
| IFI44L     | -0.7031966 | 0.179938  | -3.908   | 9.47E-05 | -0.867951016 | count | 1           |
| ARNTL2     | -1.0976852 | 0.4857693 | -2.2597  | 0.0239   | -0.867885932 | count | 1           |
| MIR497HG   | -0.6448347 | 0.1212853 | -5.3167  | 1.12E-07 | -0.864691202 | count | 0.002622256 |
| SPEG       | -0.6275209 | 0.1555928 | -4.0331  | 5.62E-05 | -0.86377056  | count | 1           |
| ACTR5      | -0.8602038 | 0.2474736 | -3.4759  | 0.000515 | -0.863297753 | count | 1           |
| AJ011932.1 | -0.738841  | 0.2236995 | -3.3028  | 0.000966 | -0.862413449 | count | 1           |
| RILPL2     | -0.6111855 | 0.0701463 | -8.713   | 4.40E-18 | -0.862297621 | count | 1.05E-13    |
| WWTR1      | -0.6095298 | 0.0743474 | -8.1984  | 3.33E-16 | -0.861873331 | count | 7.96E-12    |
| CSPG4      | -0.6390523 | 0.1816206 | -3.5186  | 0.000439 | -0.861455404 | count | 1           |
| PTPRE      | -0.8309768 | 0.2889924 | -2.8754  | 0.00406  | -0.861340559 | count | 1           |
| AC087741.1 | -1.175968  | 0.714751  | -1.6453  | 0.1      | -0.861330488 | count | 1           |
| MALRD1     | -1.088619  | 0.493855  | -2.2043  | 0.0276   | -0.860659041 | count | 1           |
| F2RL1      | -1.2995594 | 0.5077276 | -2.5596  | 0.0105   | -0.860469987 | count | 1           |
| KY         | -2.2415358 | 1.0050729 | -2.2302  | 0.0258   | -0.860132225 | count | 1           |
| OSBPL7     | -1.0215327 | 0.407634  | -2.506   | 0.0123   | -0.8577152   | count | 1           |
| ENHO       | -1.050739  | 0.5886509 | -1.785   | 0.0743   | -0.857498165 | count | 1           |
| GLRB       | -0.766278  | 0.2213261 | -3.4622  | 0.000542 | -0.856441129 | count | 1           |
| LNP1       | -0.6318042 | 0.1421553 | -4.4445  | 9.07E-06 | -0.855863194 | count | 0.2090635   |
| SLC7A7     | -1.121516  | 0.3181328 | -3.5253  | 0.000428 | -0.855477711 | count | 1           |
| ATRNL1     | -0.8169832 | 0.3628465 | -2.2516  | 0.0244   | -0.854844528 | count | 1           |

|            |            |           |          |          |              |       |             |
|------------|------------|-----------|----------|----------|--------------|-------|-------------|
| CLIC5      | -0.7560825 | 0.3641658 | -2.0762  | 0.0379   | -0.854461275 | count | 1           |
| PRRG4      | -0.9475224 | 0.4035343 | -2.3481  | 0.0189   | -0.853210589 | count | 1           |
| TSC22D1    | -0.5976516 | 0.0484054 | -12.3468 | 2.42E-34 | -0.853176204 | count | 5.85E-30    |
| AL031714.1 | -1.634238  | 0.8850339 | -1.8465  | 0.0649   | -0.852870013 | count | 1           |
| ANKH       | -0.6089404 | 0.1016863 | -5.9884  | 2.32E-09 | -0.852521114 | count | 5.47E-05    |
| LINC00574  | -1.2191781 | 0.7295716 | -1.6711  | 0.0948   | -0.852295022 | count | 1           |
| COL27A1    | -0.7928926 | 0.2171301 | -3.6517  | 0.000264 | -0.851009273 | count | 1           |
| BCAS4      | -0.7283713 | 0.2066261 | -3.5251  | 0.000429 | -0.850064286 | count | 1           |
| CDC42EP5   | -0.6131713 | 0.0976538 | -6.279   | 3.80E-10 | -0.849782148 | count | 8.99E-06    |
| CNTN3      | -0.8199119 | 0.3417033 | -2.3995  | 0.0165   | -0.849709661 | count | 1           |
| NPNT       | -0.6524267 | 0.1416253 | -4.6067  | 4.23E-06 | -0.8496574   | count | 0.09783567  |
| AC093635.1 | -1.113106  | 0.6942021 | -1.6034  | 0.109    | -0.849015354 | count | 1           |
| HCST       | -1.8410405 | 0.5373731 | -3.426   | 0.000619 | -0.847731379 | count | 1           |
| TNC        | -0.6235476 | 0.2725672 | -2.2877  | 0.0222   | -0.847193637 | count | 1           |
| PPP1R3B    | -0.6424479 | 0.1623956 | -3.9561  | 7.76E-05 | -0.845715585 | count | 1           |
| PDE3A      | -0.6364401 | 0.1038475 | -6.1286  | 9.80E-10 | -0.845663296 | count | 2.31E-05    |
| KCNN4      | -0.9790534 | 0.3982558 | -2.4584  | 0.014    | -0.843187677 | count | 1           |
| LINC02544  | -0.6315674 | 0.1712724 | -3.6875  | 0.00023  | -0.84252824  | count | 1           |
| LRRFIP1    | -0.5897027 | 0.0579549 | -10.1752 | 5.31E-24 | -0.842525621 | count | 1.28E-19    |
| MXRA5      | -0.7537678 | 0.2289693 | -3.292   | 0.001    | -0.842287583 | count | 1           |
| FAP        | -0.6167977 | 0.1071742 | -5.7551  | 9.37E-09 | -0.841720727 | count | 0.000220448 |
| MFGE8      | -0.5854095 | 0.0400755 | -14.6077 | 5.12E-47 | -0.841074653 | count | 1.24E-42    |
| MTTP       | -2.9412025 | 1.0333744 | -2.8462  | 0.00445  | -0.839410086 | count | 1           |
| MPP7       | -0.6708557 | 0.1581197 | -4.2427  | 2.26E-05 | -0.839312305 | count | 0.518896    |
| GJA1       | -0.5984145 | 0.1005384 | -5.9521  | 2.90E-09 | -0.839272466 | count | 6.84E-05    |
| TSTD1      | -0.6057886 | 0.1268265 | -4.7765  | 1.85E-06 | -0.838664954 | count | 0.04293295  |
| LINC01137  | -0.7332894 | 0.2372797 | -3.0904  | 0.00201  | -0.836977859 | count | 1           |
| MAST4-AS1  | -1.1408947 | 0.4685631 | -2.4349  | 0.0149   | -0.835529564 | count | 1           |
| HIST1H2BG  | -2.1579491 | 0.7040956 | -3.0649  | 0.00219  | -0.835171425 | count | 1           |
| ALS2CR12   | -1.593668  | 0.8495964 | -1.8758  | 0.0608   | -0.833066563 | count | 1           |
| FAM129B    | -0.6689395 | 0.1537805 | -4.35    | 1.40E-05 | -0.832180274 | count | 0.322196    |
| LINC01615  | -0.6523338 | 0.1620991 | -4.0243  | 5.83E-05 | -0.831515234 | count | 1           |
| SNAP25     | -1.2508229 | 0.5241797 | -2.3862  | 0.0171   | -0.828436435 | count | 1           |
| SDK2       | -1.250816  | 0.5655338 | -2.2117  | 0.027    | -0.828431644 | count | 1           |
| ALCAM      | -0.5923927 | 0.0890488 | -6.6524  | 3.31E-11 | -0.826837262 | count | 7.85E-07    |
| RRM2       | -2.8604659 | 1.493859  | -1.9148  | 0.0556   | -0.826609738 | count | 1           |
| TIPARP-AS1 | -1.1818041 | 0.4692571 | -2.5185  | 0.0118   | -0.826137646 | count | 1           |
| PPP1R14A   | -0.5737368 | 0.0470205 | -12.2018 | 1.35E-33 | -0.825707518 | count | 3.26E-29    |
| AC020915.3 | -0.7191692 | 0.22098   | -3.2545  | 0.00115  | -0.824648909 | count | 1           |
| SLC14A1    | -0.6071375 | 0.1838734 | -3.3019  | 0.000969 | -0.823744105 | count | 1           |
| CUBN       | -1.0400659 | 0.3800853 | -2.7364  | 0.00624  | -0.821841379 | count | 1           |
| HOXB4      | -0.7918808 | 0.1858131 | -4.2617  | 2.08E-05 | -0.820228841 | count | 0.4777552   |
| BTC        | -0.6674394 | 0.1634789 | -4.0827  | 4.55E-05 | -0.819764618 | count | 1           |
| IL17B      | -0.7218477 | 0.4158786 | -1.7357  | 0.0827   | -0.819614349 | count | 1           |
| ARHGAP22   | -0.7426929 | 0.2943933 | -2.5228  | 0.0117   | -0.819568685 | count | 1           |

|            |            |           |          |          |              |       |             |
|------------|------------|-----------|----------|----------|--------------|-------|-------------|
| ITLN2      | -0.8766207 | 0.3969651 | -2.2083  | 0.0273   | -0.818706397 | count | 1           |
| ASTN2      | -0.8069872 | 0.3412734 | -2.3646  | 0.0181   | -0.818575274 | count | 1           |
| AC073941.1 | -1.2356662 | 0.525028  | -2.3535  | 0.0186   | -0.818420136 | count | 1           |
| DACT3      | -0.5990712 | 0.1023363 | -5.8539  | 5.22E-09 | -0.817453271 | count | 0.000122957 |
| NDC80      | -0.8477367 | 0.2998263 | -2.8274  | 0.00472  | -0.817134426 | count | 1           |
| AL121992.1 | -1.766361  | 0.698538  | -2.5287  | 0.0115   | -0.817055818 | count | 1           |
| CACFD1     | -0.7885938 | 0.3014316 | -2.6162  | 0.00893  | -0.81677054  | count | 1           |
| CHN1       | -0.672873  | 0.1766296 | -3.8095  | 0.000142 | -0.816270377 | count | 1           |
| LNX1       | -0.8890116 | 0.2624251 | -3.3877  | 0.000712 | -0.815579212 | count | 1           |
| ENPP2      | -0.5780805 | 0.1048754 | -5.5121  | 3.79E-08 | -0.814463239 | count | 0.000889437 |
| CCSAP      | -0.8694515 | 0.2983253 | -2.9144  | 0.00358  | -0.811891879 | count | 1           |
| ANKRD44    | -0.6639501 | 0.2133    | -3.1128  | 0.00187  | -0.811566251 | count | 1           |
| AL136295.6 | -1.5496906 | 0.7467552 | -2.0752  | 0.038    | -0.811328051 | count | 1           |
| HHEX       | -1.3044538 | 0.4697342 | -2.777   | 0.00551  | -0.810783739 | count | 1           |
| RAMP1      | -0.5640455 | 0.0535673 | -10.5297 | 1.46E-25 | -0.810700158 | count | 3.52E-21    |
| CD82       | -0.6116443 | 0.1237204 | -4.9438  | 8.01E-07 | -0.810547822 | count | 0.018652086 |
| SPECC1     | -0.5819613 | 0.09119   | -6.3819  | 1.97E-10 | -0.808183355 | count | 4.66E-06    |
| CDH11      | -0.5773115 | 0.11094   | -5.2038  | 2.06E-07 | -0.807082894 | count | 0.004815456 |
| PTN        | -0.561449  | 0.1074901 | -5.2233  | 1.86E-07 | -0.805207426 | count | 0.004348866 |
| LAPTM5     | -1.151343  | 0.4644817 | -2.4788  | 0.0132   | -0.80471658  | count | 1           |
| FAM89A     | -0.6667687 | 0.1781985 | -3.7417  | 0.000186 | -0.804323752 | count | 1           |
| ZNF608     | -0.8023089 | 0.2560508 | -3.1334  | 0.00174  | -0.804306235 | count | 1           |
| FGF1       | -0.678901  | 0.1949877 | -3.4818  | 0.000504 | -0.80371449  | count | 1           |
| MSC        | -0.6124293 | 0.1166763 | -5.249   | 1.62E-07 | -0.803506957 | count | 0.003789504 |
| AC005837.1 | -1.2908568 | 0.5298651 | -2.4362  | 0.0149   | -0.80239628  | count | 1           |
| AC106897.1 | -0.7272943 | 0.287729  | -2.5277  | 0.0115   | -0.802342563 | count | 1           |
| IFIT2      | -0.5942476 | 0.189915  | -3.129   | 0.00177  | -0.802117144 | count | 1           |
| PXMP2      | -0.5846281 | 0.1255473 | -4.6566  | 3.33E-06 | -0.801500863 | count | 0.07710282  |
| RYR2       | -0.8732782 | 0.309868  | -2.8182  | 0.00485  | -0.800881797 | count | 1           |
| BX004987.1 | -0.8283672 | 0.8295256 | -0.9986  | 0.318    | -0.798133425 | count | 1           |
| TMEM102    | -1.3851946 | 0.4138835 | -3.3468  | 0.000826 | -0.797783252 | count | 1           |
| C9orf3     | -0.5596844 | 0.0501938 | -11.1505 | 2.03E-28 | -0.797639958 | count | 4.90E-24    |
| ASAP1      | -0.6001056 | 0.1287447 | -4.6612  | 3.26E-06 | -0.797639246 | count | 0.07549182  |
| USP3-AS1   | -1.139898  | 0.4156279 | -2.7426  | 0.00613  | -0.796646056 | count | 1           |
| PPP2R2B    | -0.6772898 | 0.1530704 | -4.4247  | 9.94E-06 | -0.795989794 | count | 0.22902754  |
| UNC13C     | -1.515395  | 0.4356208 | -3.4787  | 0.00051  | -0.794187465 | count | 1           |
| TM4SF1     | -0.5554254 | 0.0747346 | -7.432   | 1.32E-13 | -0.793881045 | count | 3.14E-09    |
| NECAB1     | -0.8499779 | 0.3279091 | -2.5921  | 0.00958  | -0.793372056 | count | 1           |
| TRIM59     | -0.7816271 | 0.4719149 | -1.6563  | 0.0977   | -0.792423234 | count | 1           |
| EHD3       | -0.7577208 | 0.2780659 | -2.725   | 0.00646  | -0.7919219   | count | 1           |
| AL355001.2 | -0.7271876 | 0.2548635 | -2.8532  | 0.00435  | -0.791358102 | count | 1           |
| CFH        | -0.5508368 | 0.0566565 | -9.7224  | 4.46E-22 | -0.790304819 | count | 1.07E-17    |
| LIMD2      | -0.6312639 | 0.2371005 | -2.6624  | 0.00779  | -0.789392044 | count | 1           |
| CCDC151    | -0.5896337 | 0.1381246 | -4.2689  | 2.01E-05 | -0.788821188 | count | 0.4618176   |
| LRRC15     | -1.6949637 | 0.5804346 | -2.9202  | 0.00352  | -0.786933986 | count | 1           |

|            |            |           |          |          |              |       |             |
|------------|------------|-----------|----------|----------|--------------|-------|-------------|
| NCAM1      | -0.6270815 | 0.2929234 | -2.1408  | 0.0324   | -0.786904869 | count | 1           |
| MPPED2     | -0.6230414 | 0.1931692 | -3.2254  | 0.00127  | -0.785715732 | count | 1           |
| CASKIN2    | -0.7581794 | 0.2964794 | -2.5573  | 0.0106   | -0.784760675 | count | 1           |
| SFTA1P     | -1.6876389 | 0.3217073 | -5.2459  | 1.64E-07 | -0.783801473 | count | 0.003835796 |
| PDE1A      | -0.5740492 | 0.0937428 | -6.1237  | 1.01E-09 | -0.781637257 | count | 2.39E-05    |
| RHOD       | -0.5671514 | 0.0933552 | -6.0752  | 1.36E-09 | -0.781209157 | count | 3.21E-05    |
| ITPR1      | -0.6012314 | 0.2123949 | -2.8307  | 0.00467  | -0.781115396 | count | 1           |
| SYNGR2     | -0.5649786 | 0.1038993 | -5.4377  | 5.75E-08 | -0.780679503 | count | 0.001348145 |
| AC243964.2 | -2.600285  | 0.7831342 | -3.3204  | 0.000908 | -0.780069971 | count | 1           |
| PCDH11X    | -0.987957  | 0.2992506 | -3.3014  | 0.000971 | -0.779991255 | count | 1           |
| ZNF529-AS1 | -0.752937  | 0.3901299 | -1.93    | 0.0537   | -0.779241627 | count | 1           |
| AKAP1      | -0.5919692 | 0.1262696 | -4.6881  | 2.86E-06 | -0.778926197 | count | 0.0662662   |
| CRISPLD1   | -0.5772043 | 0.0965625 | -5.9775  | 2.48E-09 | -0.778088229 | count | 5.85E-05    |
| NRCAM      | -1.9782003 | 0.7770081 | -2.5459  | 0.0109   | -0.777837726 | count | 1           |
| AC023590.1 | -1.9782003 | 0.9427748 | -2.0983  | 0.0359   | -0.777837726 | count | 1           |
| SNX10      | -0.9850601 | 0.913509  | -1.0783  | 0.281    | -0.777659644 | count | 1           |
| MSH3       | -0.6169469 | 0.1549154 | -3.9825  | 6.95E-05 | -0.776703539 | count | 1           |
| MYEF2      | -0.5895135 | 0.1877089 | -3.1406  | 0.0017   | -0.776254457 | count | 1           |
| SMIM1      | -0.6250499 | 0.1955371 | -3.1966  | 0.0014   | -0.775587272 | count | 1           |
| EMILIN1    | -0.555669  | 0.0776083 | -7.1599  | 9.71E-13 | -0.775405814 | count | 2.31E-08    |
| RASL11B    | -0.6506068 | 0.2774533 | -2.3449  | 0.0191   | -0.775083691 | count | 1           |
| SPRED3     | -1.4752105 | 0.5610665 | -2.6293  | 0.00859  | -0.773903252 | count | 1           |
| ZDHHC13    | -0.8158362 | 0.3102315 | -2.6298  | 0.00858  | -0.773742681 | count | 1           |
| PPP1R12B   | -0.5448966 | 0.0834861 | -6.5268  | 7.64E-11 | -0.77352863  | count | 1.81E-06    |
| ADGRE2     | -1.957735  | 0.4796876 | -4.0813  | 4.57E-05 | -0.771000931 | count | 1           |
| ACSS2      | -0.6373672 | 0.2243576 | -2.8409  | 0.00452  | -0.77067339  | count | 1           |
| ACTN2      | -0.9458914 | 0.3510972 | -2.6941  | 0.00709  | -0.770605532 | count | 1           |
| MYL3       | -1.9538146 | 0.8673817 | -2.2525  | 0.0243   | -0.769684403 | count | 1           |
| CHCHD10    | -0.5395608 | 0.0528407 | -10.2111 | 3.71E-24 | -0.769375578 | count | 8.94E-20    |
| IL34       | -0.5691375 | 0.1030429 | -5.5233  | 3.56E-08 | -0.76898099  | count | 0.000835603 |
| FCGR2B     | -2.5368997 | 1.84454   | -1.3754  | 0.169    | -0.767457867 | count | 1           |
| OSBPL3     | -2.5368993 | 1.1477412 | -2.2103  | 0.0271   | -0.767457833 | count | 1           |
| SCG2       | -0.6069419 | 0.2557361 | -2.3733  | 0.0177   | -0.766472085 | count | 1           |
| CHST1      | -0.6573239 | 0.1826035 | -3.5997  | 0.000323 | -0.766236418 | count | 1           |
| AC026801.2 | -0.8074048 | 0.3617082 | -2.2322  | 0.0257   | -0.765585022 | count | 1           |
| SMOC2      | -0.5413892 | 0.0599446 | -9.0315  | 2.68E-19 | -0.765577571 | count | 6.43E-15    |
| MYBL1      | -0.6711865 | 0.323881  | -2.0723  | 0.0383   | -0.765231914 | count | 1           |
| NSUN7      | -1.9397488 | 0.6855673 | -2.8294  | 0.00469  | -0.76494183  | count | 1           |
| PPP1R26    | -1.0949455 | 0.4097071 | -2.6725  | 0.00756  | -0.764840058 | count | 1           |
| CCDC167    | -0.5896043 | 0.1347675 | -4.375   | 1.25E-05 | -0.763617484 | count | 0.28785     |
| LMO7       | -0.536169  | 0.0970115 | -5.5269  | 3.49E-08 | -0.763302671 | count | 0.000819243 |
| SLC30A3    | -0.8873043 | 0.3688414 | -2.4057  | 0.0162   | -0.762768799 | count | 1           |
| SFTPD      | -0.8873043 | 0.4855845 | -1.8273  | 0.0677   | -0.762768799 | count | 1           |
| AKAP2      | -0.9345938 | 0.3332118 | -2.8048  | 0.00506  | -0.761204503 | count | 1           |
| PURG       | -0.9068729 | 0.5471909 | -1.6573  | 0.0975   | -0.759840061 | count | 1           |

|            |             |             |         |          |              |       |          |
|------------|-------------|-------------|---------|----------|--------------|-------|----------|
| GRIK5      | -0.732557   | 0.3084166   | -2.3752 | 0.0176   | -0.757783086 | count | 1        |
| LEF1       | -1.218903   | 0.9155823   | -1.3313 | 0.183    | -0.757682434 | count | 1        |
| ATP6V1FNB  | -2.4891165  | 1.4594523   | -1.7055 | 0.0882   | -0.757610553 | count | 1        |
| SYNPO2     | -0.5343949  | 0.0660647   | -8.089  | 8.10E-16 | -0.757316912 | count | 1.94E-11 |
| AC007728.2 | -1.9171876  | 0.9856698   | -1.9451 | 0.0518   | -0.757274758 | count | 1        |
| TRBC2      | -1.9165443  | 0.6679175   | -2.8694 | 0.00414  | -0.757055063 | count | 1        |
| CIB2       | -0.5994299  | 0.1629482   | -3.6787 | 0.000238 | -0.756910359 | count | 1        |
| GPRC5D-AS1 | -0.7060084  | 0.3780288   | -1.8676 | 0.0619   | -0.756424358 | count | 1        |
| MIR34AHG   | -0.723625   | 0.3922448   | -1.8448 | 0.0651   | -0.755692377 | count | 1        |
| VCAN       | -0.5238434  | 0.0598202   | -8.757  | 3.01E-18 | -0.753952988 | count | 7.22E-14 |
| HIF1A      | -0.542124   | 0.0857916   | -6.3191 | 2.95E-10 | -0.753307719 | count | 6.98E-06 |
| AC024901.1 | -1.1348773  | 0.3823679   | -2.968  | 0.00302  | -0.751237743 | count | 1        |
| KCNMB1     | -0.5334789  | 0.0746025   | -7.151  | 1.04E-12 | -0.751114892 | count | 2.47E-08 |
| NRIP3      | -0.8966566  | 0.3973053   | -2.2568 | 0.0241   | -0.751086994 | count | 1        |
| CLEC5A     | -20.151112  | 1577.974186 | -0.0128 | 0.99     | -0.750687231 | count | 1        |
| IL11       | -20.151112  | 1577.974186 | -0.0128 | 0.99     | -0.750687231 | count | 1        |
| DPF1       | -19.466711  | 2102.986181 | -0.0093 | 0.993    | -0.750687229 | count | 1        |
| LILRB2     | -19.466711  | 2102.986181 | -0.0093 | 0.993    | -0.750687229 | count | 1        |
| LILRB1     | -19.466711  | 2102.986181 | -0.0093 | 0.993    | -0.750687229 | count | 1        |
| AC012313.5 | -19.466711  | 2102.986181 | -0.0093 | 0.993    | -0.750687229 | count | 1        |
| AL031283.2 | -19.152289  | 1356.651203 | -0.0141 | 0.989    | -0.750687228 | count | 1        |
| SGO1       | -19.152289  | 1356.651203 | -0.0141 | 0.989    | -0.750687228 | count | 1        |
| PF4        | -19.152289  | 1356.651203 | -0.0141 | 0.989    | -0.750687228 | count | 1        |
| LINC02562  | -19.152289  | 1356.651203 | -0.0141 | 0.989    | -0.750687228 | count | 1        |
| MYB        | -19.152289  | 1356.651203 | -0.0141 | 0.989    | -0.750687228 | count | 1        |
| HCFC1-AS1  | -19.152289  | 1356.651203 | -0.0141 | 0.989    | -0.750687228 | count | 1        |
| AC084082.1 | -19.152289  | 1356.651203 | -0.0141 | 0.989    | -0.750687228 | count | 1        |
| AP002812.5 | -19.152289  | 1356.651203 | -0.0141 | 0.989    | -0.750687228 | count | 1        |
| CYP17A1    | -19.152289  | 1356.651203 | -0.0141 | 0.989    | -0.750687228 | count | 1        |
| AC002563.1 | -19.152289  | 1356.651203 | -0.0141 | 0.989    | -0.750687228 | count | 1        |
| AC138627.1 | -19.152289  | 1356.651203 | -0.0141 | 0.989    | -0.750687228 | count | 1        |
| AQP4       | -19.152289  | 1356.651203 | -0.0141 | 0.989    | -0.750687228 | count | 1        |
| PLIN5      | -19.152289  | 1356.651203 | -0.0141 | 0.989    | -0.750687228 | count | 1        |
| DENND1C    | -19.152289  | 1356.651203 | -0.0141 | 0.989    | -0.750687228 | count | 1        |
| SIGLEC9    | -19.152289  | 1356.651203 | -0.0141 | 0.989    | -0.750687228 | count | 1        |
| Z95114.2   | -19.152289  | 1356.651203 | -0.0141 | 0.989    | -0.750687228 | count | 1        |
| GTSE1      | -19.152289  | 1356.651203 | -0.0141 | 0.989    | -0.750687228 | count | 1        |
| GDF9       | -19.7391907 | 1983.758551 | -0.01   | 0.992    | -0.750686996 | count | 1        |
| CCR6       | -19.5191637 | 1722.275698 | -0.0113 | 0.991    | -0.750686995 | count | 1        |
| AC015967.1 | -19.5191637 | 1722.275698 | -0.0113 | 0.991    | -0.750686995 | count | 1        |
| HIST1H2AL  | -19.5184067 | 1394.947268 | -0.014  | 0.989    | -0.750686995 | count | 1        |
| HOXA11-AS  | -19.5184067 | 1394.947268 | -0.014  | 0.989    | -0.750686995 | count | 1        |
| KCNG1      | -19.5184067 | 1394.947268 | -0.014  | 0.989    | -0.750686995 | count | 1        |
| AC245128.3 | -19.0454545 | 2306.449155 | -0.0083 | 0.993    | -0.750686993 | count | 1        |
| AP003721.4 | -18.8091862 | 1514.391015 | -0.0124 | 0.99     | -0.750686992 | count | 1        |

|            |             |             |          |          |              |       |             |
|------------|-------------|-------------|----------|----------|--------------|-------|-------------|
| SNX20      | -18.7687748 | 1461.142901 | -0.0128  | 0.99     | -0.750686992 | count | 1           |
| SH2D1A     | -18.5380059 | 1426.773436 | -0.013   | 0.99     | -0.75068699  | count | 1           |
| NREP       | -0.6342876  | 0.1694757   | -3.7426  | 0.000185 | -0.750319386 | count | 1           |
| DUSP23     | -0.5492984  | 0.1045319   | -5.2548  | 1.57E-07 | -0.750129508 | count | 0.003672858 |
| DMTN       | -0.6355814  | 0.2789529   | -2.2785  | 0.0228   | -0.749183756 | count | 1           |
| TUBA4A     | -0.5459265  | 0.1093315   | -4.9933  | 6.21E-07 | -0.74912858  | count | 0.014477373 |
| AC110285.6 | -1.1315513  | 0.4824543   | -2.3454  | 0.0191   | -0.749005359 | count | 1           |
| PATJ       | -0.5876966  | 0.2027833   | -2.8982  | 0.00378  | -0.74855593  | count | 1           |
| LRRC1      | -0.7303404  | 0.3009231   | -2.427   | 0.0153   | -0.74768309  | count | 1           |
| CCDC110    | -0.6253156  | 0.1906186   | -3.2805  | 0.00105  | -0.74702597  | count | 1           |
| SPOUT1     | -0.6194536  | 0.2478767   | -2.499   | 0.0125   | -0.746675735 | count | 1           |
| ADAMTS12   | -0.9795374  | 0.3812646   | -2.5692  | 0.0102   | -0.745642313 | count | 1           |
| SLMAP      | -0.5407849  | 0.0925658   | -5.8422  | 5.60E-09 | -0.745346502 | count | 0.000131846 |
| DGKH       | -0.6395525  | 0.1816509   | -3.5208  | 0.000436 | -0.745266094 | count | 1           |
| MSC-AS1    | -0.5660636  | 0.1176981   | -4.8095  | 1.57E-06 | -0.745208249 | count | 0.03646168  |
| KCNS3      | -0.6639444  | 0.1748824   | -3.7965  | 0.000149 | -0.744916587 | count | 1           |
| TPH1       | -0.5593848  | 0.1760736   | -3.177   | 0.0015   | -0.744560156 | count | 1           |
| TPM2       | -0.5164719  | 0.0402046   | -12.8461 | 5.61E-37 | -0.744539512 | count | 1.36E-32    |
| IFNAR2     | -0.6061588  | 0.2292712   | -2.6439  | 0.00823  | -0.743826858 | count | 1           |
| NMRK1      | -0.5450736  | 0.1093695   | -4.9838  | 6.52E-07 | -0.743119895 | count | 0.015198772 |
| NEU3       | -0.8449336  | 0.4045634   | -2.0885  | 0.0368   | -0.742962671 | count | 1           |
| ETV6       | -0.5743457  | 0.1643603   | -3.4944  | 0.000481 | -0.7429529   | count | 1           |
| LINC00982  | -0.552347   | 0.1507042   | -3.6651  | 0.000251 | -0.74255581  | count | 1           |
| IDO1       | -1.0623728  | 0.7931487   | -1.3394  | 0.181    | -0.741695828 | count | 1           |
| NKG7       | -0.7955982  | 0.5833818   | -1.3638  | 0.173    | -0.741595979 | count | 1           |
| TPM4       | -0.5158421  | 0.0342929   | -15.0422 | 1.14E-49 | -0.741044937 | count | 2.77E-45    |
| LINC01106  | -1.0131688  | 0.6982262   | -1.4511  | 0.147    | -0.740694019 | count | 1           |
| HIST1H2BE  | -1.1915595  | 0.6316374   | -1.8865  | 0.0593   | -0.740557423 | count | 1           |
| AL138762.1 | -0.8242802  | 0.3292423   | -2.5036  | 0.0123   | -0.740241716 | count | 1           |
| DMD        | -0.527064   | 0.1105511   | -4.7676  | 1.94E-06 | -0.739901671 | count | 0.04500606  |
| SERTAD4    | -0.5964072  | 0.1652718   | -3.6086  | 0.000312 | -0.739733195 | count | 1           |
| AC046143.1 | -2.405396   | 0.8877461   | -2.7096  | 0.00677  | -0.739646763 | count | 1           |
| MAD2L1     | -0.8412018  | 0.3402176   | -2.4725  | 0.0135   | -0.739604631 | count | 1           |
| PRKCZ      | -0.9377482  | 0.51873     | -1.8078  | 0.0707   | -0.739516177 | count | 1           |
| SCN9A      | -1.0580124  | 0.4565951   | -2.3172  | 0.0205   | -0.738591902 | count | 1           |
| TREM1      | -1.188077   | 0.8424692   | -1.4102  | 0.159    | -0.738371435 | count | 1           |
| VOPP1      | -0.5995987  | 0.1216424   | -4.9292  | 8.62E-07 | -0.737388381 | count | 0.02006736  |
| MECOM      | -0.5283658  | 0.1834844   | -2.8796  | 0.004    | -0.735198604 | count | 1           |
| DLX3       | -0.638692   | 0.4137114   | -1.5438  | 0.123    | -0.734671669 | count | 1           |
| NPY2R      | -0.6413918  | 0.2765343   | -2.3194  | 0.0204   | -0.734377332 | count | 1           |
| ITGA6      | -0.6621675  | 0.3040435   | -2.1779  | 0.0295   | -0.734127975 | count | 1           |
| RPL27A     | -0.511674   | 0.0287694   | -17.7854 | 6.06E-68 | -0.733908794 | count | 1.47E-63    |
| FLNA       | -0.5107631  | 0.0549045   | -9.3028  | 2.29E-20 | -0.733870742 | count | 5.50E-16    |
| LDOC1      | -0.520176   | 0.0721708   | -7.2076  | 6.88E-13 | -0.733266106 | count | 1.64E-08    |
| NUDT10     | -0.9635973  | 0.3635039   | -2.6509  | 0.00806  | -0.733229583 | count | 1           |

|             |            |           |          |           |              |       |             |
|-------------|------------|-----------|----------|-----------|--------------|-------|-------------|
| PRR26       | -1.2715843 | 0.4976442 | -2.5552  | 0.0107    | -0.732885682 | count | 1           |
| CST7        | -2.37185   | 0.8033431 | -2.9525  | 0.00317   | -0.732193671 | count | 1           |
| SERTAD4-AS1 | -0.5364576 | 0.0933619 | -5.746   | 9.88E-09  | -0.731942258 | count | 0.000232427 |
| ACTA2       | -0.5072385 | 0.0440577 | -11.513  | 3.72E-30  | -0.731434206 | count | 8.98E-26    |
| SCRG1       | -0.5159925 | 0.1066776 | -4.8369  | 1.37E-06  | -0.731270825 | count | 0.03183195  |
| HIST2H2BE   | -1.1765873 | 0.395464  | -2.9752  | 0.00295   | -0.73115213  | count | 1           |
| CORO7       | -1.104163  | 0.5298963 | -2.0837  | 0.0373    | -0.730589429 | count | 1           |
| HACD4       | -0.5896921 | 0.1575292 | -3.7434  | 0.000184  | -0.729826903 | count | 1           |
| MKX         | -0.8711945 | 0.3593158 | -2.4246  | 0.0154    | -0.729254955 | count | 1           |
| TMEM44      | -0.8488624 | 0.4785407 | -1.7739  | 0.0762    | -0.728967861 | count | 1           |
| THY1        | -0.5248322 | 0.1164427 | -4.5072  | 6.77E-06  | -0.728480991 | count | 0.15627191  |
| LINC00839   | -0.7365585 | 0.6201393 | -1.1877  | 0.235     | -0.7280151   | count | 1           |
| EMB         | -0.7566036 | 0.4961623 | -1.5249  | 0.127     | -0.727655156 | count | 1           |
| COPRS       | -0.5107486 | 0.0518894 | -9.843   | 1.40E-22  | -0.727630856 | count | 3.37E-18    |
| CCL5        | -0.6795133 | 0.2478688 | -2.7414  | 0.00615   | -0.727567011 | count | 1           |
| KIF4A       | -2.3505854 | 1.0069089 | -2.3345  | 0.0196    | -0.727393418 | count | 1           |
| STARD6      | -2.3505854 | 1.0069089 | -2.3345  | 0.0196    | -0.727393418 | count | 1           |
| BX293535.1  | -2.3505854 | 1.797346  | -1.3078  | 0.191     | -0.727393418 | count | 1           |
| TOX2        | -0.9556907 | 0.2828367 | -3.3789  | 0.000735  | -0.727067893 | count | 1           |
| AC098829.1  | -1.095546  | 0.4304249 | -2.5453  | 0.011     | -0.724783483 | count | 1           |
| FAH         | -0.5906967 | 0.2011527 | -2.9366  | 0.00334   | -0.724668904 | count | 1           |
| PTPN6       | -1.8232486 | 0.7375443 | -2.4721  | 0.0135    | -0.724571576 | count | 1           |
| CCDC9B      | -0.7763978 | 0.2860356 | -2.7143  | 0.00667   | -0.723299703 | count | 1           |
| CAMK2G      | -0.5272941 | 0.1176019 | -4.4837  | 7.56E-06  | -0.722664516 | count | 0.1744092   |
| CASTOR1     | -0.7627305 | 0.5283921 | -1.4435  | 0.149     | -0.722338211 | count | 1           |
| CASK        | -0.5650077 | 0.1335525 | -4.2306  | 2.39E-05  | -0.722323215 | count | 0.548505    |
| SLC9A3R2    | -0.5113547 | 0.0796378 | -6.421   | 1.53E-10  | -0.722301298 | count | 3.62E-06    |
| LIMD1       | -0.7306429 | 0.3291237 | -2.22    | 0.0265    | -0.72204674  | count | 1           |
| SOS1        | -0.5396594 | 0.1049615 | -5.1415  | 2.87E-07  | -0.722032044 | count | 0.006702311 |
| TMSB4X      | -0.5006112 | 0.0236112 | -21.2023 | 3.30E-94  | -0.721271922 | count | 8.02E-90    |
| GAPDH       | -0.4997753 | 0.0225266 | -22.186  | 1.94E-102 | -0.720431555 | count | 4.72E-98    |
| CCDC112     | -0.5339597 | 0.1264253 | -4.2235  | 2.46E-05  | -0.720140214 | count | 0.564447    |
| EMCN        | -0.6726308 | 0.3875666 | -1.7355  | 0.0827    | -0.720070889 | count | 1           |
| SNAI1       | -0.6349837 | 0.2342533 | -2.7107  | 0.00675   | -0.719731923 | count | 1           |
| DIAPH3      | -1.1581329 | 0.5989532 | -1.9336  | 0.0532    | -0.719533346 | count | 1           |
| INHBA-AS1   | -1.0874926 | 0.3640744 | -2.987   | 0.00284   | -0.719352974 | count | 1           |
| NRM         | -0.6018886 | 0.1741332 | -3.4565  | 0.000553  | -0.718726774 | count | 1           |
| CPPED1      | -0.5494656 | 0.1348404 | -4.0749  | 4.70E-05  | -0.718050431 | count | 1           |
| IQGAP2      | -0.9439188 | 0.5584724 | -1.6902  | 0.0911    | -0.717888593 | count | 1           |
| HIPK1-AS1   | -1.5358444 | 0.5897445 | -2.6043  | 0.00924   | -0.717230857 | count | 1           |
| AC023043.1  | -0.7453626 | 0.2447366 | -3.0456  | 0.00234   | -0.71660828  | count | 1           |
| RNF150      | -0.6748353 | 0.1887332 | -3.5756  | 0.000354  | -0.716553979 | count | 1           |
| AL354836.1  | -2.2990979 | 1.0143649 | -2.2665  | 0.0235    | -0.715526875 | count | 1           |
| AL135791.1  | -0.8330168 | 0.3456576 | -2.4099  | 0.016     | -0.71502271  | count | 1           |
| MIS18A-AS1  | -2.293069  | 0.9453857 | -2.4255  | 0.0153    | -0.714115058 | count | 1           |



|            |            |           |          |          |              |       |           |
|------------|------------|-----------|----------|----------|--------------|-------|-----------|
| AC001226.1 | -2.293069  | 1.0755985 | -2.1319  | 0.0331   | -0.714115058 | count | 1         |
| AC130469.1 | -2.293069  | 1.3573634 | -1.6894  | 0.0912   | -0.714115058 | count | 1         |
| AC018742.1 | -1.1493178 | 0.4901538 | -2.3448  | 0.0191   | -0.71397365  | count | 1         |
| CIRBP-AS1  | -2.2908437 | 1.2090352 | -1.8948  | 0.0582   | -0.713592441 | count | 1         |
| JAK2       | -0.5522451 | 0.1551847 | -3.5586  | 0.000378 | -0.713415022 | count | 1         |
| HAPLN3     | -0.5515532 | 0.1474333 | -3.741   | 0.000186 | -0.713274356 | count | 1         |
| UACA       | -0.5025381 | 0.0791702 | -6.3476  | 2.45E-10 | -0.712641727 | count | 5.80E-06  |
| C12orf75   | -0.4973668 | 0.0510455 | -9.7436  | 3.64E-22 | -0.712333189 | count | 8.76E-18  |
| SERINC2    | -1.5231677 | 0.5375606 | -2.8335  | 0.00463  | -0.71153691  | count | 1         |
| ADARB1     | -0.5524896 | 0.1703473 | -3.2433  | 0.00119  | -0.711365021 | count | 1         |
| INHBA      | -0.5049839 | 0.0984794 | -5.1278  | 3.08E-07 | -0.711264493 | count | 0.0071918 |
| SMIM10L2B  | -1.3521393 | 0.4408369 | -3.0672  | 0.00218  | -0.710552971 | count | 1         |
| TCEAL4     | -0.4948345 | 0.040248  | -12.2946 | 4.50E-34 | -0.709823289 | count | 1.09E-29  |
| CALD1      | -0.4916902 | 0.0293639 | -16.7447 | 1.05E-60 | -0.708847249 | count | 2.55E-56  |
| AC027702.1 | -1.3482342 | 0.6124197 | -2.2015  | 0.0278   | -0.708515051 | count | 1         |
| NTN1       | -0.6853587 | 0.217147  | -3.1562  | 0.00161  | -0.708076375 | count | 1         |
| AC103706.1 | -0.7475189 | 0.4885787 | -1.53    | 0.126    | -0.707606603 | count | 1         |
| GMDS       | -0.4969645 | 0.0623301 | -7.9731  | 2.05E-15 | -0.707367358 | count | 4.90E-11  |
| STN1       | -0.5578677 | 0.1564963 | -3.5647  | 0.000369 | -0.70724697  | count | 1         |
| REPS2      | -1.0678445 | 0.4459569 | -2.3945  | 0.0167   | -0.706084836 | count | 1         |
| PRKAR1B    | -0.6966049 | 0.2611571 | -2.6674  | 0.00768  | -0.704676616 | count | 1         |
| SLC29A2    | -1.5066735 | 0.6747008 | -2.2331  | 0.0256   | -0.704099395 | count | 1         |
| GKAP1      | -0.5483264 | 0.1351426 | -4.0574  | 5.07E-05 | -0.703477989 | count | 1         |
| NEXN       | -0.489952  | 0.0547028 | -8.9566  | 5.21E-19 | -0.703053785 | count | 1.25E-14  |
| TSPAN5     | -0.638502  | 0.1958544 | -3.2601  | 0.00112  | -0.702986855 | count | 1         |
| C1QTNF1    | -0.4972522 | 0.0671506 | -7.405   | 1.62E-13 | -0.702783113 | count | 3.86E-09  |
| DLX4       | -0.633363  | 0.2954393 | -2.1438  | 0.0321   | -0.701704469 | count | 1         |
| PSTPIP1    | -1.0063068 | 0.5954673 | -1.6899  | 0.0911   | -0.701695351 | count | 1         |
| AC090409.1 | -0.8895276 | 0.4412268 | -2.016   | 0.0439   | -0.700536757 | count | 1         |
| ST6GALNAC5 | -1.7556834 | 0.6674351 | -2.6305  | 0.00856  | -0.700300014 | count | 1         |
| PTPRC      | -1.1265181 | 0.4652219 | -2.4215  | 0.0155   | -0.699566031 | count | 1         |
| LRIG1      | -0.5509723 | 0.1543731 | -3.5691  | 0.000363 | -0.699454954 | count | 1         |
| FERMT3     | -1.0029765 | 0.3508934 | -2.8584  | 0.00428  | -0.699313615 | count | 1         |
| SLC2A1     | -0.6697636 | 0.3082129 | -2.1731  | 0.0298   | -0.698447121 | count | 1         |
| DUSP27     | -1.4922156 | 0.7070914 | -2.1104  | 0.0349   | -0.697553718 | count | 1         |
| LAMA5      | -0.542721  | 0.1705992 | -3.1813  | 0.00148  | -0.697071397 | count | 1         |
| C1orf122   | -0.4921645 | 0.0571697 | -8.6088  | 1.08E-17 | -0.696362641 | count | 2.59E-13  |
| LDB3       | -0.5508318 | 0.2064201 | -2.6685  | 0.00765  | -0.696149601 | count | 1         |
| RFLNA      | -0.8321623 | 0.4775184 | -1.7427  | 0.0815   | -0.695749594 | count | 1         |
| COL5A2     | -0.5049343 | 0.1077762 | -4.685   | 2.90E-06 | -0.695669101 | count | 0.0671901 |
| INKA1      | -0.5727341 | 0.2233398 | -2.5644  | 0.0104   | -0.695490304 | count | 1         |
| GPR65      | -1.2053505 | 0.6546893 | -1.8411  | 0.0657   | -0.694446058 | count | 1         |
| CMC4       | -0.6069401 | 0.3638356 | -1.6682  | 0.0954   | -0.694395604 | count | 1         |
| NCALD      | -0.5160568 | 0.128208  | -4.0252  | 5.81E-05 | -0.694164474 | count | 1         |
| UBE2E1-AS1 | -1.7368628 | 0.9015314 | -1.9266  | 0.0541   | -0.693431671 | count | 1         |

|            |            |           |          |          |              |       |             |
|------------|------------|-----------|----------|----------|--------------|-------|-------------|
| HNRNPA1P48 | -0.7727787 | 0.259908  | -2.9733  | 0.00297  | -0.692898266 | count | 1           |
| GPR34      | -0.9928451 | 0.7003901 | -1.4176  | 0.156    | -0.692064421 | count | 1           |
| CCDC88B    | -0.743224  | 0.5173486 | -1.4366  | 0.151    | -0.691677609 | count | 1           |
| ADSSL1     | -0.5688174 | 0.2093664 | -2.7169  | 0.00662  | -0.690683322 | count | 1           |
| LPCAT2     | -0.5395881 | 0.1916347 | -2.8157  | 0.00489  | -0.690469905 | count | 1           |
| CYP4F11    | -1.4766121 | 0.5315501 | -2.7779  | 0.0055   | -0.690462298 | count | 1           |
| IFFO2      | -0.7698689 | 0.3781517 | -2.0359  | 0.0418   | -0.690222274 | count | 1           |
| MYOZ2      | -0.5056045 | 0.1815002 | -2.7857  | 0.00537  | -0.68932021  | count | 1           |
| DUSP2      | -0.5689474 | 0.3291357 | -1.7286  | 0.084    | -0.689000391 | count | 1           |
| TCAF2      | -0.9873237 | 1.106856  | -0.892   | 0.372    | -0.68811164  | count | 1           |
| C4orf47    | -1.1944599 | 0.4825704 | -2.4752  | 0.0134   | -0.688088738 | count | 1           |
| GBP7       | -1.1083897 | 0.3965946 | -2.7948  | 0.00522  | -0.68808321  | count | 1           |
| ELFN1      | -2.1847235 | 0.8088693 | -2.701   | 0.00695  | -0.687935137 | count | 1           |
| AL590705.1 | -2.1847235 | 1.1505997 | -1.8988  | 0.0577   | -0.687935137 | count | 1           |
| NUAK1      | -0.5201543 | 0.248868  | -2.0901  | 0.0367   | -0.68781942  | count | 1           |
| AC079089.1 | -0.940414  | 0.4091189 | -2.2986  | 0.0216   | -0.686208856 | count | 1           |
| TEAD4      | -0.7354568 | 0.2673834 | -2.7506  | 0.00598  | -0.684272681 | count | 1           |
| PDLIM3     | -0.4760303 | 0.0457963 | -10.3945 | 5.81E-25 | -0.684254478 | count | 1.40E-20    |
| RABGAP1    | -0.4928059 | 0.0977444 | -5.0418  | 4.84E-07 | -0.683557968 | count | 0.011289784 |
| KCNMB4     | -0.5818516 | 0.2310588 | -2.5182  | 0.0118   | -0.682555572 | count | 1           |
| CDKN2C     | -0.4887765 | 0.0880958 | -5.5482  | 3.09E-08 | -0.682403368 | count | 0.000725501 |
| GUK1       | -0.4747084 | 0.0316037 | -15.0206 | 1.55E-49 | -0.681962926 | count | 3.76E-45    |
| FYB1       | -0.9345769 | 0.6090501 | -1.5345  | 0.125    | -0.681827107 | count | 1           |
| LPP        | -0.4767237 | 0.0520627 | -9.1567  | 8.67E-20 | -0.681509139 | count | 2.08E-15    |
| CHMP1A     | -0.5311201 | 0.1181789 | -4.4942  | 7.20E-06 | -0.681242914 | count | 0.1661544   |
| RTN1       | -0.5206678 | 0.2051239 | -2.5383  | 0.0112   | -0.680189306 | count | 1           |
| EPAS1      | -0.4784074 | 0.0648684 | -7.375   | 2.02E-13 | -0.679688307 | count | 4.81E-09    |
| MIAT       | -1.0282134 | 0.5129652 | -2.0045  | 0.0451   | -0.679249049 | count | 1           |
| RND1       | -1.2912724 | 0.5823627 | -2.2173  | 0.0267   | -0.678615983 | count | 1           |
| AC010883.1 | -1.4492848 | 0.6600098 | -2.1959  | 0.0282   | -0.677976857 | count | 1           |
| LINC00672  | -0.5714243 | 0.1941658 | -2.943   | 0.00327  | -0.677450235 | count | 1           |
| AC108134.2 | -1.1751344 | 0.4603765 | -2.5526  | 0.0107   | -0.676784064 | count | 1           |
| P2RY2      | -0.9700208 | 0.5738741 | -1.6903  | 0.0911   | -0.675715091 | count | 1           |
| CARTPT     | -1.6872908 | 1.237577  | -1.3634  | 0.173    | -0.675125028 | count | 1           |
| AP003548.1 | -0.8568634 | 0.3591663 | -2.3857  | 0.0171   | -0.674088655 | count | 1           |
| SLX4IP     | -0.6125284 | 0.2061264 | -2.9716  | 0.00298  | -0.673929433 | count | 1           |
| PRKX       | -0.7520238 | 0.3855783 | -1.9504  | 0.0512   | -0.673809799 | count | 1           |
| PPM1L      | -0.5385074 | 0.1620472 | -3.3232  | 0.000899 | -0.67368309  | count | 1           |
| AC009831.1 | -2.1261508 | 0.9939085 | -2.1392  | 0.0325   | -0.673152507 | count | 1           |
| PRMT5-AS1  | -1.2800841 | 0.6624894 | -1.9322  | 0.0534   | -0.672706966 | count | 1           |
| ZNF436-AS1 | -0.7505572 | 0.339625  | -2.21    | 0.0272   | -0.672460877 | count | 1           |
| TMEM25     | -0.501034  | 0.1274186 | -3.9322  | 8.57E-05 | -0.67206191  | count | 1           |
| SEMA3E     | -0.9213032 | 0.3196442 | -2.8823  | 0.00397  | -0.671858171 | count | 1           |
| GSTT2B     | -0.4808632 | 0.0871562 | -5.5173  | 3.68E-08 | -0.671141298 | count | 0.000863659 |
| APLP1      | -0.6438734 | 0.2629702 | -2.4485  | 0.0144   | -0.670934121 | count | 1           |

|            |            |           |          |          |              |       |             |
|------------|------------|-----------|----------|----------|--------------|-------|-------------|
| SLC35F1    | -1.0157387 | 0.3974758 | -2.5555  | 0.0106   | -0.670783619 | count | 1           |
| LINC00327  | -2.116126  | 0.9526674 | -2.2213  | 0.0264   | -0.670578812 | count | 1           |
| KLRC1      | -2.116126  | 1.682196  | -1.258   | 0.208    | -0.670578812 | count | 1           |
| SESN3      | -0.4954106 | 0.1001974 | -4.9443  | 7.98E-07 | -0.670470835 | count | 0.018584622 |
| ZNF512     | -0.5335621 | 0.1572495 | -3.3931  | 0.000698 | -0.669777831 | count | 1           |
| CKMT2      | -0.5503658 | 0.150955  | -3.6459  | 0.00027  | -0.669776761 | count | 1           |
| DAPK2      | -1.2735329 | 0.5342543 | -2.3838  | 0.0172   | -0.669241737 | count | 1           |
| EPHA4      | -0.780932  | 0.2705635 | -2.8863  | 0.00392  | -0.669150456 | count | 1           |
| TAGLN      | -0.4635139 | 0.0362971 | -12.77   | 1.43E-36 | -0.668531607 | count | 3.46E-32    |
| AC062017.1 | -0.7982204 | 0.3883828 | -2.0552  | 0.0399   | -0.666587749 | count | 1           |
| DOK2       | -2.0998946 | 1.000448  | -2.099   | 0.0359   | -0.666384095 | count | 1           |
| CDKN2D     | -0.4887907 | 0.1134124 | -4.3099  | 1.68E-05 | -0.666316136 | count | 0.386316    |
| LINC01094  | -0.9568334 | 0.7148466 | -1.3385  | 0.181    | -0.666258267 | count | 1           |
| PARP12     | -0.652184  | 0.2813306 | -2.3182  | 0.0205   | -0.666170863 | count | 1           |
| RELB       | -0.5371599 | 0.2420042 | -2.2196  | 0.0265   | -0.66559203  | count | 1           |
| PLS3       | -0.4644274 | 0.0391173 | -11.8727 | 6.26E-32 | -0.665482737 | count | 1.51E-27    |
| AC018647.2 | -0.7965506 | 0.3241354 | -2.4575  | 0.014    | -0.665152707 | count | 1           |
| LINC02447  | -0.875121  | 0.3626579 | -2.4131  | 0.0159   | -0.664135678 | count | 1           |
| MMP28      | -0.6570254 | 0.3042509 | -2.1595  | 0.0309   | -0.663823422 | count | 1           |
| ARHGAP31   | -0.6311198 | 0.3159555 | -1.9975  | 0.0458   | -0.663492781 | count | 1           |
| PLXNA2     | -0.5248987 | 0.1954133 | -2.6861  | 0.00726  | -0.663108057 | count | 1           |
| AL080317.3 | -0.9086249 | 0.6483933 | -1.4013  | 0.161    | -0.662330748 | count | 1           |
| TCAP       | -2.0839489 | 0.642821  | -3.2419  | 0.0012   | -0.662231038 | count | 1           |
| ZNF503-AS1 | -1.0029193 | 0.4208672 | -2.383   | 0.0172   | -0.662076048 | count | 1           |
| LAMB1      | -0.5120696 | 0.1784348 | -2.8698  | 0.00413  | -0.661874542 | count | 1           |
| BOP1       | -0.5786297 | 0.1936927 | -2.9874  | 0.00283  | -0.661551452 | count | 1           |
| ANO4       | -0.8710255 | 0.7071133 | -1.2318  | 0.218    | -0.660931169 | count | 1           |
| CX3CL1     | -0.4875177 | 0.1315594 | -3.7057  | 0.000214 | -0.65998069  | count | 1           |
| AC015909.2 | -1.2544974 | 0.6743348 | -1.8603  | 0.0629   | -0.659151644 | count | 1           |
| PHACTR1    | -0.5818166 | 0.2333181 | -2.4937  | 0.0127   | -0.65861485  | count | 1           |
| PREX1      | -0.5568205 | 0.1901986 | -2.9276  | 0.00344  | -0.657633457 | count | 1           |
| SMTN       | -0.4903813 | 0.1377325 | -3.5604  | 0.000375 | -0.657399672 | count | 1           |
| ADAMTS8    | -0.7061204 | 0.3005499 | -2.3494  | 0.0189   | -0.656304422 | count | 1           |
| CEP170B    | -0.6135465 | 0.3056511 | -2.0073  | 0.0448   | -0.655733124 | count | 1           |
| SFI1       | -0.6420258 | 0.3340278 | -1.9221  | 0.0547   | -0.655579288 | count | 1           |
| FAM193B    | -0.6236839 | 0.265945  | -2.3452  | 0.0191   | -0.655524762 | count | 1           |
| PALLD      | -0.4582756 | 0.0423273 | -10.8269 | 6.52E-27 | -0.655523439 | count | 1.57E-22    |
| NALCN      | -0.7474321 | 0.4140395 | -1.8052  | 0.0711   | -0.655142406 | count | 1           |
| GABBR1     | -0.5308501 | 0.2461594 | -2.1565  | 0.0311   | -0.654945887 | count | 1           |
| FAM178B    | -1.245977  | 0.5107607 | -2.4395  | 0.0148   | -0.654625213 | count | 1           |
| AC093673.1 | -0.5158371 | 0.1589401 | -3.2455  | 0.00118  | -0.654502706 | count | 1           |
| BEX2       | -0.4941171 | 0.2399581 | -2.0592  | 0.0395   | -0.654485799 | count | 1           |
| MSRB3      | -0.4592648 | 0.0515786 | -8.9042  | 8.29E-19 | -0.653994201 | count | 1.99E-14    |
| ENKUR      | -1.630852  | 0.9311253 | -1.7515  | 0.0799   | -0.653914905 | count | 1           |
| GLIS3      | -0.5362478 | 0.1919879 | -2.7931  | 0.00525  | -0.652413523 | count | 1           |

|             |            |           |          |          |              |       |             |
|-------------|------------|-----------|----------|----------|--------------|-------|-------------|
| SYNDIG1L    | -0.9369389 | 0.6751091 | -1.3878  | 0.165    | -0.651978754 | count | 1           |
| TNS3        | -0.4849956 | 0.1623765 | -2.9869  | 0.00284  | -0.651342841 | count | 1           |
| ZNF524      | -0.4764252 | 0.1048482 | -4.544   | 5.70E-06 | -0.650464978 | count | 0.1316472   |
| RPS10       | -0.4561329 | 0.0390863 | -11.6699 | 6.35E-31 | -0.650418431 | count | 1.53E-26    |
| TCEAL3      | -0.455914  | 0.0524596 | -8.6908  | 5.34E-18 | -0.650338065 | count | 1.28E-13    |
| FAM198B-AS1 | -0.5840952 | 0.3334451 | -1.7517  | 0.0799   | -0.650236254 | count | 1           |
| LHPP        | -0.5383809 | 0.1969748 | -2.7332  | 0.0063   | -0.649788761 | count | 1           |
| C1orf115    | -1.0481314 | 0.3345974 | -3.1325  | 0.00175  | -0.649761482 | count | 1           |
| PFKFB3      | -0.5206445 | 0.183673  | -2.8346  | 0.00461  | -0.648745465 | count | 1           |
| GRAMD1A     | -0.5067976 | 0.1605642 | -3.1564  | 0.00161  | -0.647368795 | count | 1           |
| SAA2        | -1.3826567 | 0.9169406 | -1.5079  | 0.132    | -0.647203211 | count | 1           |
| SMAGP       | -0.5686123 | 0.307213  | -1.8509  | 0.0643   | -0.64674873  | count | 1           |
| ADAMDEC1    | -3.2217065 | 1.81446   | -1.7756  | 0.0759   | -0.64652334  | count | 1           |
| HTR4        | -1.6110459 | 0.6261216 | -2.5731  | 0.0101   | -0.646382541 | count | 1           |
| DDIT4L      | -0.6944024 | 0.2087123 | -3.3271  | 0.000886 | -0.645133878 | count | 1           |
| HIST1H2BC   | -0.9270996 | 0.557838  | -1.662   | 0.0966   | -0.644911267 | count | 1           |
| NUDT22      | -0.4783201 | 0.1108488 | -4.3151  | 1.64E-05 | -0.644796981 | count | 0.3771836   |
| PEBP4       | -0.6029624 | 0.2522156 | -2.3907  | 0.0169   | -0.64421286  | count | 1           |
| ZNF460-AS1  | -1.6053248 | 0.7884727 | -2.036   | 0.0418   | -0.644198372 | count | 1           |
| CALM3       | -0.4531841 | 0.0476698 | -9.5067  | 3.44E-21 | -0.644189302 | count | 8.27E-17    |
| STMN1       | -0.4575029 | 0.1384031 | -3.3056  | 0.000957 | -0.644025043 | count | 1           |
| PKIG        | -0.4526751 | 0.0557707 | -8.1167  | 6.47E-16 | -0.643610344 | count | 1.55E-11    |
| LYNX1       | -0.5193197 | 0.1772631 | -2.9297  | 0.00341  | -0.64327686  | count | 1           |
| GCNT1       | -1.2241441 | 0.5986043 | -2.045   | 0.0409   | -0.642999623 | count | 1           |
| MBNL1-AS1   | -0.4550569 | 0.0857663 | -5.3058  | 1.19E-07 | -0.642576462 | count | 0.002785433 |
| AC116407.2  | -0.6360255 | 0.3520604 | -1.8066  | 0.0709   | -0.642154126 | count | 1           |
| AMN1        | -0.5160935 | 0.1579488 | -3.2675  | 0.0011   | -0.64179269  | count | 1           |
| MST1        | -1.035415  | 0.591976  | -1.7491  | 0.0804   | -0.64164779  | count | 1           |
| RAB29       | -0.4783853 | 0.1518652 | -3.1501  | 0.00165  | -0.641544605 | count | 1           |
| AC108718.1  | -1.3691085 | 0.6117788 | -2.2379  | 0.0253   | -0.640891366 | count | 1           |
| DOCK5       | -0.4987626 | 0.1803076 | -2.7662  | 0.0057   | -0.640212706 | count | 1           |
| AL161421.1  | -0.6872178 | 0.3464006 | -1.9839  | 0.0473   | -0.638285495 | count | 1           |
| SHISA4      | -0.4622243 | 0.0840892 | -5.4968  | 4.13E-08 | -0.638239774 | count | 0.000968898 |
| GIN1        | -0.5302806 | 0.2037526 | -2.6026  | 0.00929  | -0.63619845  | count | 1           |
| PMEPA1      | -0.4462479 | 0.0608673 | -7.3315  | 2.79E-13 | -0.635939392 | count | 6.64E-09    |
| MASP1       | -0.5860966 | 0.368791  | -1.5892  | 0.112    | -0.635522453 | count | 1           |
| MRPL49      | -0.4680099 | 0.1116886 | -4.1903  | 2.85E-05 | -0.63519092  | count | 0.6533055   |
| CSF3R       | -0.9135597 | 0.6632925 | -1.3773  | 0.169    | -0.635180675 | count | 1           |
| SEZ6L2      | -0.6722439 | 0.3647944 | -1.8428  | 0.0654   | -0.634702311 | count | 1           |
| PTPA        | -0.4770879 | 0.1301979 | -3.6643  | 0.000251 | -0.634505424 | count | 1           |
| HSPB7       | -0.4526062 | 0.1050033 | -4.3104  | 1.67E-05 | -0.634233342 | count | 0.3840499   |
| FRK         | -0.5633733 | 0.2449667 | -2.2998  | 0.0215   | -0.634020156 | count | 1           |
| METAP1      | -0.4868387 | 0.1314611 | -3.7033  | 0.000216 | -0.633440838 | count | 1           |
| AL450332.1  | -0.8350145 | 0.3816838 | -2.1877  | 0.0288   | -0.632739633 | count | 1           |
| ETV2        | -0.8055938 | 0.3704663 | -2.1745  | 0.0297   | -0.632530697 | count | 1           |

|            |            |           |          |          |              |       |            |
|------------|------------|-----------|----------|----------|--------------|-------|------------|
| TMEM47     | -0.4462702 | 0.073065  | -6.1078  | 1.12E-09 | -0.632119748 | count | 2.64E-05   |
| ICAM3      | -0.5139589 | 0.1547559 | -3.3211  | 0.000905 | -0.631092903 | count | 1          |
| COL3A1     | -0.4403003 | 0.1079469 | -4.0789  | 4.62E-05 | -0.630226719 | count | 1          |
| MFAP3L     | -0.7046383 | 0.4269434 | -1.6504  | 0.0989   | -0.630226711 | count | 1          |
| RIPK3      | -1.9629149 | 1.1797973 | -1.6638  | 0.0962   | -0.629677349 | count | 1          |
| PTMS       | -0.4388511 | 0.0334045 | -13.1375 | 1.47E-38 | -0.629591819 | count | 3.56E-34   |
| FAM166B    | -1.3448701 | 0.5387727 | -2.4962  | 0.0126   | -0.629556244 | count | 1          |
| ADIRF      | -0.4369308 | 0.0314947 | -13.8732 | 1.08E-42 | -0.629475892 | count | 2.62E-38   |
| AL606760.3 | -1.09354   | 0.5628983 | -1.9427  | 0.0521   | -0.628758981 | count | 1          |
| PCLAF      | -1.09354   | 0.7808996 | -1.4004  | 0.161    | -0.628758981 | count | 1          |
| C1QL4      | -1.196092  | 0.513598  | -2.3288  | 0.0199   | -0.628008065 | count | 1          |
| ITGA1      | -0.4458572 | 0.1009765 | -4.4155  | 1.04E-05 | -0.627865783 | count | 0.2395744  |
| SPSB2      | -0.5089657 | 0.1787035 | -2.8481  | 0.00442  | -0.627682933 | count | 1          |
| PCDH10     | -0.4659081 | 0.1204413 | -3.8683  | 0.000111 | -0.627482129 | count | 1          |
| CDK6       | -0.5262962 | 0.236648  | -2.224   | 0.0262   | -0.627460165 | count | 1          |
| PGR        | -0.4803233 | 0.1428027 | -3.3635  | 0.000777 | -0.627164617 | count | 1          |
| DENND3     | -0.7328252 | 0.4458326 | -1.6437  | 0.1      | -0.626760733 | count | 1          |
| ESM1       | -1.558055  | 0.7381179 | -2.1108  | 0.0349   | -0.62601264  | count | 1          |
| RPS19      | -0.4345889 | 0.0253837 | -17.1208 | 2.81E-63 | -0.625937058 | count | 6.82E-59   |
| EEF2KMT    | -0.6199729 | 0.2514483 | -2.4656  | 0.0137   | -0.625594707 | count | 1          |
| VIM        | -0.4335081 | 0.0202375 | -21.421  | 5.16E-96 | -0.625309266 | count | 1.25E-91   |
| CD3G       | -2.9904324 | 1.427783  | -2.0945  | 0.0363   | -0.622920068 | count | 1          |
| RAB13      | -0.436276  | 0.0466722 | -9.3477  | 1.51E-20 | -0.622899272 | count | 3.63E-16   |
| AC090825.1 | -1.0059326 | 0.5949132 | -1.6909  | 0.0909   | -0.622806183 | count | 1          |
| MIB1       | -0.4733353 | 0.1397447 | -3.3871  | 0.000714 | -0.622018591 | count | 1          |
| RGS7BP     | -0.4447538 | 0.1107767 | -4.0149  | 6.07E-05 | -0.621824715 | count | 1          |
| PPFIA3     | -0.6227824 | 0.3310928 | -1.881   | 0.0601   | -0.621078888 | count | 1          |
| ANTXR1     | -0.4401488 | 0.0708033 | -6.2165  | 5.65E-10 | -0.620952247 | count | 1.34E-05   |
| TMEM191B   | -1.0019925 | 0.516103  | -1.9415  | 0.0523   | -0.620285192 | count | 1          |
| AP001267.3 | -0.9410071 | 0.4460399 | -2.1097  | 0.035    | -0.619922223 | count | 1          |
| ANO5       | -0.851718  | 0.3857117 | -2.2082  | 0.0273   | -0.619513621 | count | 1          |
| EVI2A      | -1.5405237 | 0.4754094 | -3.2404  | 0.0012   | -0.619206083 | count | 1          |
| PGM5       | -0.4767246 | 0.1332508 | -3.5776  | 0.000351 | -0.619016559 | count | 1          |
| CCDC7      | -0.7072742 | 0.2740361 | -2.581   | 0.00989  | -0.618954852 | count | 1          |
| FAM129A    | -0.4367998 | 0.0727342 | -6.0054  | 2.09E-09 | -0.618762064 | count | 4.93E-05   |
| GATA2      | -0.5258773 | 0.3001312 | -1.7522  | 0.0798   | -0.618395255 | count | 1          |
| FBXO28     | -0.4911482 | 0.208232  | -2.3587  | 0.0184   | -0.618148323 | count | 1          |
| SNRPN      | -0.4338216 | 0.0534628 | -8.1145  | 6.59E-16 | -0.616195032 | count | 1.57E-11   |
| LRRC23     | -0.4727288 | 0.1675069 | -2.8221  | 0.0048   | -0.616093253 | count | 1          |
| JMJD1C-AS1 | -0.9952697 | 0.4710047 | -2.1131  | 0.0347   | -0.615982247 | count | 1          |
| ME1        | -0.5605051 | 0.1885037 | -2.9734  | 0.00296  | -0.615763027 | count | 1          |
| LINC02269  | -0.6753644 | 0.3257002 | -2.0736  | 0.0382   | -0.615541373 | count | 1          |
| DTD2       | -0.6424235 | 0.2945469 | -2.1811  | 0.0292   | -0.615451816 | count | 1          |
| PRR7       | -0.623803  | 0.3831477 | -1.6281  | 0.104    | -0.614273991 | count | 1          |
| 4-Sep      | -0.4387008 | 0.0801208 | -5.4755  | 4.66E-08 | -0.613132837 | count | 0.00109291 |

|            |            |           |          |          |              |       |            |
|------------|------------|-----------|----------|----------|--------------|-------|------------|
| IRX3       | -0.5610073 | 0.2821988 | -1.988   | 0.0469   | -0.612172759 | count | 1          |
| LEFTY2     | -0.520614  | 0.2381026 | -2.1865  | 0.0288   | -0.612125953 | count | 1          |
| PTGER2     | -0.6711837 | 0.3941486 | -1.7029  | 0.0887   | -0.611625403 | count | 1          |
| AC018809.2 | -1.5210613 | 0.919671  | -1.6539  | 0.0982   | -0.611612324 | count | 1          |
| PWAR6      | -0.5879836 | 0.3158129 | -1.8618  | 0.0627   | -0.611574541 | count | 1          |
| LINC00670  | -0.6126212 | 0.3841591 | -1.5947  | 0.111    | -0.610714883 | count | 1          |
| AMBRA1     | -0.7143693 | 0.3642403 | -1.9613  | 0.0499   | -0.610499498 | count | 1          |
| BARD1      | -0.4701982 | 0.1378702 | -3.4104  | 0.000656 | -0.610485793 | count | 1          |
| P3H2       | -0.6467192 | 0.6714354 | -0.9632  | 0.336    | -0.609992968 | count | 1          |
| S1PR3      | -0.5761739 | 0.1776557 | -3.2432  | 0.00119  | -0.609975744 | count | 1          |
| TIMP4      | -0.4653825 | 0.1914098 | -2.4313  | 0.0151   | -0.609583982 | count | 1          |
| IHH        | -1.889239  | 0.7175362 | -2.633   | 0.0085   | -0.608993868 | count | 1          |
| SYK        | -1.889239  | 0.7175362 | -2.633   | 0.0085   | -0.608993868 | count | 1          |
| CDT1       | -1.889239  | 0.7175362 | -2.633   | 0.0085   | -0.608993868 | count | 1          |
| AC093484.3 | -1.889239  | 0.796667  | -2.3714  | 0.0178   | -0.608993868 | count | 1          |
| ZNF229     | -0.9249632 | 0.5732059 | -1.6137  | 0.107    | -0.608976412 | count | 1          |
| IL17RE     | -0.5474078 | 0.2769883 | -1.9763  | 0.0482   | -0.60874791  | count | 1          |
| RGS12      | -0.5250301 | 0.2836847 | -1.8508  | 0.0643   | -0.607650813 | count | 1          |
| AL020996.1 | -1.1580817 | 0.5345785 | -2.1663  | 0.0303   | -0.607604734 | count | 1          |
| TPX2       | -1.0574757 | 0.5271823 | -2.0059  | 0.0449   | -0.607401964 | count | 1          |
| ABHD17B    | -0.7287007 | 0.248065  | -2.9375  | 0.00333  | -0.606830328 | count | 1          |
| CPLANE2    | -0.7101377 | 0.4688014 | -1.5148  | 0.13     | -0.606771516 | count | 1          |
| REEP2      | -0.5121731 | 0.219103  | -2.3376  | 0.0195   | -0.606378467 | count | 1          |
| ZNF793     | -0.6932698 | 0.2862401 | -2.422   | 0.0155   | -0.606337972 | count | 1          |
| BCAR1      | -0.452873  | 0.1562797 | -2.8978  | 0.00378  | -0.606308602 | count | 1          |
| PAX9       | -0.6330582 | 0.4088935 | -1.5482  | 0.122    | -0.606254842 | count | 1          |
| ZNF587B    | -0.7711328 | 0.4484159 | -1.7197  | 0.0856   | -0.604582511 | count | 1          |
| GPR68      | -1.1513606 | 0.8325385 | -1.383   | 0.167    | -0.603987012 | count | 1          |
| ATG16L1    | -0.8699463 | 0.2924565 | -2.9746  | 0.00295  | -0.603805401 | count | 1          |
| AC068491.3 | -0.7695184 | 0.8609801 | -0.8938  | 0.372    | -0.603273158 | count | 1          |
| RIPK4      | -0.7688429 | 0.4386086 | -1.7529  | 0.0797   | -0.602725317 | count | 1          |
| OLA1       | -0.4354776 | 0.0822984 | -5.2914  | 1.28E-07 | -0.602461043 | count | 0.00299584 |
| TRAF2      | -0.8287657 | 0.3116818 | -2.659   | 0.00787  | -0.602227312 | count | 1          |
| SLC44A5    | -1.0486841 | 0.4676926 | -2.2423  | 0.025    | -0.602185612 | count | 1          |
| TMEM74B    | -1.0486841 | 0.4905849 | -2.1376  | 0.0326   | -0.602185612 | count | 1          |
| AOC3       | -0.4383497 | 0.1015213 | -4.3178  | 1.62E-05 | -0.602130764 | count | 0.3726162  |
| SCN1A      | -1.147514  | 0.553877  | -2.0718  | 0.0384   | -0.601915362 | count | 1          |
| BIRC3      | -0.5096692 | 0.2019186 | -2.5241  | 0.0116   | -0.601268444 | count | 1          |
| AL160272.1 | -1.2835605 | 0.5765107 | -2.2264  | 0.026    | -0.600654587 | count | 1          |
| PDP2       | -0.7937956 | 0.3384317 | -2.3455  | 0.0191   | -0.600449695 | count | 1          |
| TOMM7      | -0.4175318 | 0.0271276 | -15.3914 | 7.56E-52 | -0.599647959 | count | 1.83E-47   |
| PDE5A      | -0.4178849 | 0.0638383 | -6.546   | 6.73E-11 | -0.599602659 | count | 1.60E-06   |
| LTBP1      | -0.4179189 | 0.0521057 | -8.0206  | 1.40E-15 | -0.599337127 | count | 3.34E-11   |
| ZC3H8      | -0.4547757 | 0.1376992 | -3.3027  | 0.000967 | -0.599254613 | count | 1          |
| MIR193BHG  | -0.5079366 | 0.268989  | -1.8883  | 0.0591   | -0.599198328 | count | 1          |

|             |            |           |          |          |              |       |             |
|-------------|------------|-----------|----------|----------|--------------|-------|-------------|
| CEMIP       | -1.2793    | 0.4239719 | -3.0174  | 0.00257  | -0.59863474  | count | 1           |
| SPARCL1     | -0.4151542 | 0.0425648 | -9.7535  | 3.31E-22 | -0.598072313 | count | 7.96E-18    |
| ACOT4       | -0.9670122 | 0.4744275 | -2.0383  | 0.0416   | -0.597877046 | count | 1           |
| FGF13-AS1   | -0.9079528 | 0.3655834 | -2.4836  | 0.0131   | -0.597363608 | count | 1           |
| PLD5        | -0.5439135 | 0.2609354 | -2.0845  | 0.0372   | -0.597225652 | count | 1           |
| TNS1        | -0.4223092 | 0.0721735 | -5.8513  | 5.30E-09 | -0.596485817 | count | 0.000124831 |
| NAA40       | -0.6547488 | 0.4091799 | -1.6001  | 0.11     | -0.596234223 | count | 1           |
| LIMK2       | -0.642208  | 0.2962452 | -2.1678  | 0.0302   | -0.595398712 | count | 1           |
| CYLD        | -0.4524394 | 0.1317359 | -3.4344  | 6.00E-04 | -0.595292481 | count | 1           |
| SLC41A1     | -0.4788856 | 0.1634627 | -2.9296  | 0.00341  | -0.595100711 | count | 1           |
| ALOX5       | -2.758931  | 1.2178003 | -2.2655  | 0.0235   | -0.594870745 | count | 1           |
| AL162231.1  | -0.5139792 | 0.2059532 | -2.4956  | 0.0126   | -0.594683464 | count | 1           |
| MARVELD2    | -0.8183239 | 0.5442256 | -1.5036  | 0.133    | -0.594361368 | count | 1           |
| TRIM68      | -0.7345166 | 0.3433988 | -2.139   | 0.0325   | -0.59409664  | count | 1           |
| GUCY1A1     | -0.4157784 | 0.0515677 | -8.0628  | 1.00E-15 | -0.593987921 | count | 2.39E-11    |
| ARSE        | -0.8177903 | 0.5582943 | -1.4648  | 0.143    | -0.593959392 | count | 1           |
| IRF6        | -0.5660766 | 0.3371817 | -1.6788  | 0.0933   | -0.593832961 | count | 1           |
| STAP2       | -0.6943829 | 0.3561682 | -1.9496  | 0.0513   | -0.592893701 | count | 1           |
| GALNT13     | -0.7835002 | 0.3330746 | -2.3523  | 0.0187   | -0.592383113 | count | 1           |
| COL14A1     | -0.4119439 | 0.0400894 | -10.2756 | 1.94E-24 | -0.591771387 | count | 4.67E-20    |
| TPD52L1     | -0.4202074 | 0.0977083 | -4.3006  | 1.75E-05 | -0.591414691 | count | 0.4023425   |
| AL512791.2  | -1.2639758 | 0.8146438 | -1.5516  | 0.121    | -0.591357998 | count | 1           |
| PPP1R13L    | -0.4730086 | 0.2042704 | -2.3156  | 0.0206   | -0.591045964 | count | 1           |
| TOM1L1      | -0.5007478 | 0.190009  | -2.6354  | 0.00844  | -0.590610026 | count | 1           |
| EHD4        | -0.4770965 | 0.1875733 | -2.5435  | 0.011    | -0.590488423 | count | 1           |
| AC007920.2  | -1.1262974 | 0.4717994 | -2.3872  | 0.017    | -0.590472166 | count | 1           |
| AL512329.2  | -0.5999483 | 0.2800344 | -2.1424  | 0.0322   | -0.59023454  | count | 1           |
| MCM8        | -0.6752093 | 0.5552737 | -1.216   | 0.224    | -0.590071018 | count | 1           |
| CSRP1       | -0.4104424 | 0.0442228 | -9.2812  | 2.79E-20 | -0.589724573 | count | 6.70E-16    |
| SH2D3C      | -1.2559411 | 0.5467529 | -2.2971  | 0.0217   | -0.58753566  | count | 1           |
| CYBB        | -2.7035845 | 1.3954274 | -1.9375  | 0.0528   | -0.587462557 | count | 1           |
| PMAIP1      | -1.4591756 | 0.5402183 | -2.7011  | 0.00694  | -0.587214261 | count | 1           |
| NECTIN3-AS1 | -1.254726  | 0.9474398 | -1.3243  | 0.185    | -0.586957018 | count | 1           |
| TBX18       | -0.5114014 | 0.2071106 | -2.4692  | 0.0136   | -0.586398437 | count | 1           |
| RFX5        | -0.4989945 | 0.2475787 | -2.0155  | 0.0439   | -0.586382023 | count | 1           |
| AC009163.7  | -1.2529701 | 0.4711688 | -2.6593  | 0.00786  | -0.586121091 | count | 1           |
| FDX2        | -0.4935832 | 0.2723226 | -1.8125  | 0.07     | -0.586079073 | count | 1           |
| CHRNB1      | -0.4833525 | 0.1715813 | -2.817   | 0.00487  | -0.585861252 | count | 1           |
| HOPX        | -0.5370879 | 0.2547594 | -2.1082  | 0.0351   | -0.585619374 | count | 1           |
| VSIG8       | -0.9471167 | 0.696781  | -1.3593  | 0.174    | -0.585113425 | count | 1           |
| TC2N        | -0.4608057 | 0.19066   | -2.4169  | 0.0157   | -0.584981352 | count | 1           |
| TGFB1I1     | -0.4091918 | 0.0439166 | -9.3175  | 2.00E-20 | -0.584850415 | count | 4.80E-16    |
| GAL3ST1     | -1.2502545 | 0.7007534 | -1.7842  | 0.0745   | -0.58482751  | count | 1           |
| TSPAN9      | -0.4680635 | 0.1356219 | -3.4512  | 0.000564 | -0.584810712 | count | 1           |
| SMIM10      | -0.4156381 | 0.0777015 | -5.3492  | 9.38E-08 | -0.584426684 | count | 0.00219689  |

|             |            |           |          |          |              |       |             |
|-------------|------------|-----------|----------|----------|--------------|-------|-------------|
| DUSP7       | -0.519883  | 0.2254936 | -2.3055  | 0.0212   | -0.584334631 | count | 1           |
| KCND3       | -0.6414627 | 0.3631543 | -1.7664  | 0.0774   | -0.583795951 | count | 1           |
| SH2B3       | -0.5672052 | 0.3441275 | -1.6482  | 0.0994   | -0.583727974 | count | 1           |
| AC147651.1  | -0.58586   | 0.2677924 | -2.1877  | 0.0288   | -0.583432103 | count | 1           |
| SLC5A3      | -0.4487884 | 0.1975954 | -2.2712  | 0.0232   | -0.583068021 | count | 1           |
| ST20        | -0.5547315 | 0.2936517 | -1.8891  | 0.059    | -0.58169377  | count | 1           |
| CSDC2       | -0.4417007 | 0.1248511 | -3.5378  | 0.000408 | -0.581508224 | count | 1           |
| ASRGL1      | -1.4437131 | 0.6655607 | -2.1692  | 0.0301   | -0.581061279 | count | 1           |
| MXI1        | -0.4118196 | 0.0702323 | -5.8637  | 4.93E-09 | -0.580854946 | count | 0.000116146 |
| AJM1        | -1.0118651 | 0.4195173 | -2.412   | 0.0159   | -0.580302201 | count | 1           |
| DKK3        | -0.4052164 | 0.0456378 | -8.879   | 1.04E-18 | -0.579997723 | count | 2.49E-14    |
| RTN4R       | -0.569232  | 0.416389  | -1.3671  | 0.172    | -0.579739132 | count | 1           |
| MIR29B2CHG  | -0.4631315 | 0.2700375 | -1.7151  | 0.0864   | -0.579626456 | count | 1           |
| DEPTOR      | -0.5391793 | 0.3304702 | -1.6316  | 0.103    | -0.579406105 | count | 1           |
| RNF24       | -0.4218424 | 0.1261215 | -3.3447  | 0.000832 | -0.579386954 | count | 1           |
| SHROOM3     | -0.4347735 | 0.1725315 | -2.52    | 0.0118   | -0.578939392 | count | 1           |
| AL645728.1  | -0.9371088 | 0.5200878 | -1.8018  | 0.0717   | -0.578688752 | count | 1           |
| ADAMTS9-AS2 | -0.4890475 | 0.1877338 | -2.605   | 0.00922  | -0.578662496 | count | 1           |
| RIN3        | -1.0088827 | 0.3495353 | -2.8864  | 0.00392  | -0.578527219 | count | 1           |
| SNHG18      | -0.4184092 | 0.0991282 | -4.2209  | 2.49E-05 | -0.578518123 | count | 0.5712309   |
| PTMA        | -0.4008193 | 0.0229408 | -17.4719 | 1.00E-65 | -0.577798848 | count | 2.43E-61    |
| CCL27       | -1.4343215 | 0.6353845 | -2.2574  | 0.024    | -0.577313484 | count | 1           |
| RNF144B     | -1.4343215 | 0.6398704 | -2.2416  | 0.025    | -0.577313484 | count | 1           |
| FCGR1A      | -0.6941874 | 0.3228935 | -2.1499  | 0.0316   | -0.577172276 | count | 1           |
| FGD6        | -0.8329402 | 0.3049669 | -2.7312  | 0.00634  | -0.577157669 | count | 1           |
| RGS19       | -0.5552256 | 0.2609701 | -2.1275  | 0.0334   | -0.576817541 | count | 1           |
| GPSM3       | -0.646172  | 0.3230508 | -2.0002  | 0.0456   | -0.57648327  | count | 1           |
| ZNF747      | -0.5101851 | 0.2175451 | -2.3452  | 0.0191   | -0.576360472 | count | 1           |
| FANCE       | -0.7625734 | 0.2913521 | -2.6174  | 0.0089   | -0.575987123 | count | 1           |
| ZNF766      | -0.4442063 | 0.1384591 | -3.2082  | 0.00135  | -0.575953467 | count | 1           |
| GRAMD1C     | -1.0980525 | 0.7793649 | -1.4089  | 0.159    | -0.575199086 | count | 1           |
| FOXC2       | -0.4069207 | 0.0748849 | -5.4339  | 5.87E-08 | -0.574942181 | count | 0.001376104 |
| RASSF3      | -0.4273067 | 0.1141537 | -3.7433  | 0.000184 | -0.57479407  | count | 1           |
| RGS14       | -0.5773231 | 0.4107655 | -1.4055  | 0.16     | -0.574733196 | count | 1           |
| TMEM238     | -0.5348102 | 0.2071398 | -2.5819  | 0.00986  | -0.574623517 | count | 1           |
| PGAM2       | -0.4550673 | 0.2705731 | -1.6819  | 0.0927   | -0.574194791 | count | 1           |
| AL024508.2  | -0.7914782 | 0.4749611 | -1.6664  | 0.0957   | -0.574135878 | count | 1           |
| DDO         | -0.6727307 | 0.3123301 | -2.1539  | 0.0313   | -0.57382758  | count | 1           |
| RPS21       | -0.3995847 | 0.0277594 | -14.3946 | 9.66E-46 | -0.573750399 | count | 2.34E-41    |
| LRRRC8A     | -0.4407241 | 0.1585066 | -2.7805  | 0.00546  | -0.573598143 | count | 1           |
| HIST1H1A    | -0.4336299 | 0.1979687 | -2.1904  | 0.0286   | -0.572825772 | count | 1           |
| HBEGF       | -0.5185111 | 0.3125744 | -1.6588  | 0.0972   | -0.57255257  | count | 1           |
| WNK3        | -0.5277629 | 0.2709761 | -1.9476  | 0.0515   | -0.571183487 | count | 1           |
| PLA2G5      | -0.4906989 | 0.1660942 | -2.9543  | 0.00315  | -0.56977731  | count | 1           |
| LINC01091   | -1.4150781 | 0.5462992 | -2.5903  | 0.00963  | -0.569609784 | count | 1           |



|            |            |           |          |          |              |       |             |
|------------|------------|-----------|----------|----------|--------------|-------|-------------|
| TSPAN10    | -0.6261138 | 0.3325011 | -1.883   | 0.0598   | -0.569431971 | count | 1           |
| HK1        | -0.4206199 | 0.1280754 | -3.2842  | 0.00103  | -0.569077172 | count | 1           |
| HLA-DQA1   | -0.5220017 | 0.2320385 | -2.2496  | 0.0245   | -0.568881181 | count | 1           |
| CCND3      | -0.4258342 | 0.1190621 | -3.5766  | 0.000353 | -0.568209403 | count | 1           |
| RPL36A     | -0.4067952 | 0.068359  | -5.9509  | 2.92E-09 | -0.567994304 | count | 6.88E-05    |
| HPSE2      | -1.749235  | 0.527784  | -3.3143  | 0.000928 | -0.567981937 | count | 1           |
| ZCCHC18    | -0.819559  | 0.4970289 | -1.6489  | 0.0993   | -0.567518925 | count | 1           |
| SMCO4      | -0.445232  | 0.1496743 | -2.9747  | 0.00295  | -0.567403531 | count | 1           |
| PRDM8      | -1.081969  | 0.2724261 | -3.9716  | 7.28E-05 | -0.566483766 | count | 1           |
| GPR155     | -0.5129448 | 0.2315856 | -2.2149  | 0.0268   | -0.566302154 | count | 1           |
| KIF13B     | -0.4437669 | 0.1431896 | -3.0992  | 0.00196  | -0.56627137  | count | 1           |
| GALNT3     | -1.2113005 | 0.5072144 | -2.3881  | 0.017    | -0.566215635 | count | 1           |
| ZNF711     | -0.5192224 | 0.2180409 | -2.3813  | 0.0173   | -0.565798403 | count | 1           |
| PFKP       | -0.4343735 | 0.1475942 | -2.943   | 0.00327  | -0.5657969   | count | 1           |
| SHB        | -0.5683065 | 0.2700069 | -2.1048  | 0.0354   | -0.565548091 | count | 1           |
| LINC00310  | -0.5395184 | 0.232991  | -2.3156  | 0.0206   | -0.565422517 | count | 1           |
| TNFAIP6    | -0.4143412 | 0.2417995 | -1.7136  | 0.0867   | -0.564964469 | count | 1           |
| LIX1L      | -0.4119315 | 0.1078046 | -3.8211  | 0.000135 | -0.564751418 | count | 1           |
| ZDHHC14    | -0.4804965 | 0.2355978 | -2.0395  | 0.0415   | -0.564366169 | count | 1           |
| SPATA13    | -0.4992962 | 0.3474231 | -1.4371  | 0.151    | -0.563869867 | count | 1           |
| CHAC1      | -1.0758288 | 0.5084747 | -2.1158  | 0.0344   | -0.563153318 | count | 1           |
| GPM6B      | -0.4172386 | 0.1185084 | -3.5208  | 0.000436 | -0.562351886 | count | 1           |
| NPTXR      | -0.5719904 | 0.4064495 | -1.4073  | 0.159    | -0.562080873 | count | 1           |
| AL121832.2 | -0.9106882 | 0.4992485 | -1.8241  | 0.0682   | -0.561716296 | count | 1           |
| RPL15      | -0.3899748 | 0.0211309 | -18.4552 | 8.51E-73 | -0.56168705  | count | 2.07E-68    |
| GALNT7     | -0.4409579 | 0.1676753 | -2.6298  | 0.00858  | -0.56115388  | count | 1           |
| CSRP2      | -0.3939107 | 0.0673663 | -5.8473  | 5.43E-09 | -0.560833529 | count | 0.000127877 |
| A1BG-AS1   | -0.5259419 | 0.2603813 | -2.0199  | 0.0435   | -0.560463234 | count | 1           |
| NXNL2      | -0.7425757 | 0.3458694 | -2.147   | 0.0319   | -0.560321516 | count | 1           |
| LINC00987  | -0.9083623 | 0.502881  | -1.8063  | 0.071    | -0.560221477 | count | 1           |
| SGCG       | -0.422762  | 0.1979195 | -2.136   | 0.0327   | -0.559855651 | count | 1           |
| CHST11     | -0.4717455 | 0.2055159 | -2.2954  | 0.0218   | -0.559835193 | count | 1           |
| RPS16      | -0.388903  | 0.0219505 | -17.7172 | 1.85E-67 | -0.559774433 | count | 4.49E-63    |
| RPS11      | -0.3891273 | 0.0230673 | -16.8693 | 1.50E-61 | -0.55961997  | count | 3.64E-57    |
| HAAO       | -0.4179689 | 0.1121207 | -3.7278  | 0.000196 | -0.558813453 | count | 1           |
| NAP1L1     | -0.3906792 | 0.0387605 | -10.0793 | 1.38E-23 | -0.558507346 | count | 3.32E-19    |
| HDAC1      | -0.4121452 | 0.1266762 | -3.2535  | 0.00115  | -0.558154436 | count | 1           |
| MT1H       | -1.716466  | 0.8799621 | -1.9506  | 0.0512   | -0.558077418 | count | 1           |
| FGFRL1     | -0.4561067 | 0.2228814 | -2.0464  | 0.0408   | -0.558064466 | count | 1           |
| AL445472.1 | -0.5158465 | 0.2843605 | -1.8141  | 0.0698   | -0.55805361  | count | 1           |
| ADCY5      | -0.511539  | 0.2085439 | -2.4529  | 0.0142   | -0.557277496 | count | 1           |
| PTPN21     | -0.4383927 | 0.193889  | -2.2611  | 0.0238   | -0.557091954 | count | 1           |
| DUS4L      | -0.541458  | 0.2445398 | -2.2142  | 0.0269   | -0.556675846 | count | 1           |
| ABCA7      | -1.7109803 | 0.8449887 | -2.0249  | 0.043    | -0.556408569 | count | 1           |
| CENPM      | -1.7109803 | 1.0267081 | -1.6665  | 0.0957   | -0.556408569 | count | 1           |

|             |            |           |          |          |              |       |            |
|-------------|------------|-----------|----------|----------|--------------|-------|------------|
| A1BG        | -0.4275028 | 0.1284711 | -3.3276  | 0.000885 | -0.556280817 | count | 1          |
| TBC1D2      | -0.7674388 | 0.384137  | -1.9978  | 0.0458   | -0.55602522  | count | 1          |
| RBP7        | -0.5652927 | 0.4902774 | -1.153   | 0.249    | -0.555340187 | count | 1          |
| TLCD1       | -0.6511044 | 0.5798154 | -1.123   | 0.262    | -0.554794345 | count | 1          |
| LEAP2       | -1.0598681 | 0.5764342 | -1.8387  | 0.066    | -0.554488246 | count | 1          |
| BMF         | -1.0598681 | 0.5907176 | -1.7942  | 0.0729   | -0.554488246 | count | 1          |
| GSDMB       | -1.1868138 | 0.7852547 | -1.5114  | 0.131    | -0.554465339 | count | 1          |
| AL138963.3  | -1.1868138 | 0.8418608 | -1.4098  | 0.159    | -0.554465339 | count | 1          |
| AC010680.2  | -1.1868138 | 0.9529305 | -1.2454  | 0.213    | -0.554465339 | count | 1          |
| AC130343.2  | -0.5891798 | 0.8744834 | -0.6737  | 0.501    | -0.554346502 | count | 1          |
| NLN         | -0.6502457 | 0.3695692 | -1.7595  | 0.0786   | -0.554038835 | count | 1          |
| WFDC1       | -0.3993776 | 0.114693  | -3.4821  | 0.000503 | -0.553131431 | count | 1          |
| CDKL2       | -0.4509764 | 0.3634174 | -1.2409  | 0.215    | -0.553012889 | count | 1          |
| KRBOX1      | -0.452757  | 0.2098043 | -2.158   | 0.031    | -0.552593445 | count | 1          |
| AC012360.3  | -0.6199278 | 0.3450031 | -1.7969  | 0.0724   | -0.552383632 | count | 1          |
| ARG2        | -0.5779617 | 0.2804408 | -2.0609  | 0.0394   | -0.552195418 | count | 1          |
| CDHR3       | -0.5867929 | 0.5217439 | -1.1247  | 0.261    | -0.552040316 | count | 1          |
| MPND        | -0.4795312 | 0.2053413 | -2.3353  | 0.0196   | -0.551855318 | count | 1          |
| C8orf44     | -0.5546995 | 0.2914086 | -1.9035  | 0.0571   | -0.551692268 | count | 1          |
| SCMH1       | -0.4481642 | 0.177885  | -2.5194  | 0.0118   | -0.550778959 | count | 1          |
| BCDIN3D-AS1 | -0.7045362 | 0.5743507 | -1.2267  | 0.22     | -0.550585603 | count | 1          |
| PRR34-AS1   | -0.4204755 | 0.1184822 | -3.5489  | 0.000392 | -0.550420552 | count | 1          |
| TEPP        | -2.4511795 | 1.0974629 | -2.2335  | 0.0256   | -0.550060138 | count | 1          |
| PKIB        | -2.4511795 | 1.752925  | -1.3983  | 0.1621   | -0.550060138 | count | 1          |
| FAM207A     | -0.4210864 | 0.1204716 | -3.4953  | 0.000479 | -0.549837801 | count | 1          |
| ZSCAN16     | -0.5671624 | 0.2864875 | -1.9797  | 0.0478   | -0.549643699 | count | 1          |
| DERL3       | -0.8381137 | 0.4814838 | -1.7407  | 0.0818   | -0.549630818 | count | 1          |
| PTPN3       | -0.4976406 | 0.2679783 | -1.857   | 0.0634   | -0.549122901 | count | 1          |
| HABP4       | -0.3961508 | 0.0854034 | -4.6386  | 3.63E-06 | -0.548807905 | count | 0.08400183 |
| DSTN        | -0.3798189 | 0.0310247 | -12.2425 | 8.35E-34 | -0.547535037 | count | 2.02E-29   |
| NUDT4B      | -1.1722174 | 0.5220238 | -2.2455  | 0.0248   | -0.547443966 | count | 1          |
| DGKA        | -0.4463216 | 0.2455518 | -1.8176  | 0.0692   | -0.54724672  | count | 1          |
| PRDM11      | -0.4620303 | 0.2625699 | -1.7596  | 0.0786   | -0.546303505 | count | 1          |
| CCDC189     | -1.3572922 | 0.6730528 | -2.0166  | 0.0438   | -0.546289143 | count | 1          |
| PALM3       | -1.1694956 | 0.6164319 | -1.8972  | 0.0579   | -0.54613332  | count | 1          |
| MFSD12      | -0.4648241 | 0.1950241 | -2.3834  | 0.0172   | -0.545722201 | count | 1          |
| MYL9        | -0.3782799 | 0.0376732 | -10.0411 | 2.01E-23 | -0.545447316 | count | 4.84E-19   |
| GZMH        | -2.4204238 | 1.094336  | -2.2118  | 0.027    | -0.545088676 | count | 1          |
| POLE4       | -0.3888582 | 0.0646785 | -6.0122  | 2.01E-09 | -0.544751919 | count | 4.74E-05   |
| ZNF33B      | -0.4710951 | 0.174752  | -2.6958  | 0.00705  | -0.544398827 | count | 1          |
| PDGFA       | -0.382601  | 0.0641717 | -5.9621  | 2.72E-09 | -0.543599818 | count | 6.41E-05   |
| DLEU2       | -0.448409  | 0.240087  | -1.8677  | 0.0619   | -0.543056355 | count | 1          |
| CYB5D1      | -0.6096717 | 0.3151483 | -1.9346  | 0.0531   | -0.542971365 | count | 1          |
| LY6G5C      | -0.654042  | 0.3117031 | -2.0983  | 0.0359   | -0.542701741 | count | 1          |
| SORD        | -0.4712842 | 0.2127956 | -2.2147  | 0.0268   | -0.542229801 | count | 1          |

|            |            |           |          |          |              |       |             |
|------------|------------|-----------|----------|----------|--------------|-------|-------------|
| TSPO       | -0.3776687 | 0.0327631 | -11.5273 | 3.17E-30 | -0.541903397 | count | 7.65E-26    |
| KLRB1      | -2.399501  | 0.6425869 | -3.7341  | 0.000191 | -0.541654696 | count | 1           |
| AC096586.1 | -1.6624778 | 0.8461624 | -1.9647  | 0.0495   | -0.541522324 | count | 1           |
| ARPC5L     | -0.3955429 | 0.1011796 | -3.9093  | 9.42E-05 | -0.541460564 | count | 1           |
| MSRA       | -0.4249436 | 0.1285036 | -3.3069  | 0.000953 | -0.541350891 | count | 1           |
| LINC02478  | -0.8780972 | 0.5874103 | -1.4949  | 0.135    | -0.540762689 | count | 1           |
| ZDHC23     | -1.0337755 | 0.7784952 | -1.3279  | 0.184    | -0.540300071 | count | 1           |
| TSR2       | -0.3857327 | 0.0715158 | -5.3937  | 7.34E-08 | -0.540036964 | count | 0.001719689 |
| NDUFA4L2   | -0.3756698 | 0.0744737 | -5.0443  | 4.77E-07 | -0.539439317 | count | 0.011126979 |
| ASL        | -0.4249886 | 0.1628936 | -2.609   | 0.00912  | -0.539159844 | count | 1           |
| CTF1       | -0.426206  | 0.1667819 | -2.5555  | 0.0106   | -0.539133187 | count | 1           |
| KLHL21     | -0.4285064 | 0.1873626 | -2.287   | 0.0223   | -0.5386708   | count | 1           |
| FRZB       | -0.3740571 | 0.0545403 | -6.8584  | 8.14E-12 | -0.538607781 | count | 1.93E-07    |
| KIAA1324   | -1.652631  | 0.6931137 | -2.3844  | 0.0172   | -0.53847202  | count | 1           |
| PLA2G6     | -1.3376941 | 0.5493676 | -2.435   | 0.0149   | -0.538320066 | count | 1           |
| KCTD14     | -0.6043268 | 0.4305675 | -1.4036  | 0.161    | -0.538067664 | count | 1           |
| MAP4K4     | -0.4000123 | 0.1113285 | -3.5931  | 0.000331 | -0.537692531 | count | 1           |
| RASGRF2    | -0.6479266 | 0.3737024 | -1.7338  | 0.083    | -0.537454438 | count | 1           |
| AC092807.3 | -0.4194498 | 0.2283623 | -1.8368  | 0.0663   | -0.53705765  | count | 1           |
| FHL2       | -0.381791  | 0.0860694 | -4.4358  | 9.44E-06 | -0.537003778 | count | 0.21753536  |
| RAVER2     | -0.5176313 | 0.3195902 | -1.6197  | 0.105    | -0.536974166 | count | 1           |
| AC009549.1 | -0.7420681 | 0.5528753 | -1.3422  | 0.18     | -0.53691656  | count | 1           |
| RBMXL1     | -0.4219728 | 0.2008788 | -2.1006  | 0.0357   | -0.536807646 | count | 1           |
| S100A16    | -0.3798297 | 0.066293  | -5.7296  | 1.09E-08 | -0.536576506 | count | 0.00025639  |
| HIST1H4A   | -1.3330914 | 0.6795942 | -1.9616  | 0.0499   | -0.536444355 | count | 1           |
| SSFA2      | -0.3950361 | 0.1250673 | -3.1586  | 0.0016   | -0.535798832 | count | 1           |
| AC096733.2 | -0.7751754 | 0.5455587 | -1.4209  | 0.155    | -0.535548697 | count | 1           |
| C11orf1    | -0.4060326 | 0.1446661 | -2.8067  | 0.00503  | -0.535438461 | count | 1           |
| INSIG2     | -0.3868894 | 0.1028456 | -3.7618  | 0.000171 | -0.535238643 | count | 1           |
| SNX25      | -0.4609712 | 0.2054119 | -2.2441  | 0.0249   | -0.534798251 | count | 1           |
| AP000866.2 | -0.4690792 | 0.4322217 | -1.0853  | 0.278    | -0.534634998 | count | 1           |
| MALL       | -0.4689801 | 0.3516367 | -1.3337  | 0.182    | -0.534520369 | count | 1           |
| IRX1       | -0.8159644 | 0.2539351 | -3.2133  | 0.00132  | -0.534483984 | count | 1           |
| PICK1      | -0.4586029 | 0.1935706 | -2.3692  | 0.0179   | -0.534187258 | count | 1           |
| HSD17B1    | -0.7088033 | 0.3313356 | -2.1392  | 0.0325   | -0.533876989 | count | 1           |
| AC022613.1 | -2.3522028 | 0.6903169 | -3.4074  | 0.000663 | -0.533736394 | count | 1           |
| LINC01303  | -1.1434304 | 0.5273975 | -2.1681  | 0.0302   | -0.533561712 | count | 1           |
| RAPGEF5    | -0.4143078 | 0.1366466 | -3.032   | 0.00245  | -0.533549666 | count | 1           |
| FHL3       | -0.3917739 | 0.1137309 | -3.4447  | 0.000578 | -0.533331987 | count | 1           |
| GPR183     | -0.7719566 | 0.4076428 | -1.8937  | 0.0583   | -0.533230548 | count | 1           |
| KCNK6      | -0.4016165 | 0.2177088 | -1.8447  | 0.0652   | -0.5330258   | count | 1           |
| PNMT       | -2.3437867 | 1.0189694 | -2.3002  | 0.0215   | -0.532304856 | count | 1           |
| SLC41A3    | -0.3882091 | 0.0969958 | -4.0023  | 6.40E-05 | -0.531886223 | count | 1           |
| AC073611.1 | -1.3218006 | 0.6462381 | -2.0454  | 0.0409   | -0.53183655  | count | 1           |
| ANKRD28    | -0.4087167 | 0.1573236 | -2.5979  | 0.00942  | -0.531681628 | count | 1           |

|              |            |           |         |          |              |       |             |
|--------------|------------|-----------|---------|----------|--------------|-------|-------------|
| CYTIP        | -1.6296851 | 0.5422071 | -3.0057 | 0.00267  | -0.531328161 | count | 1           |
| WIF1         | -0.5478554 | 0.7544119 | -0.7262 | 0.468    | -0.530469293 | count | 1           |
| CCDC152      | -0.4158093 | 0.1980866 | -2.0991 | 0.0359   | -0.530329856 | count | 1           |
| SVIP         | -0.3815078 | 0.0903494 | -4.2226 | 2.47E-05 | -0.530139061 | count | 0.5667168   |
| SPI1         | -1.6251866 | 0.6477164 | -2.5091 | 0.0121   | -0.529921842 | count | 1           |
| COL8A1       | -0.3690857 | 0.102858  | -3.5883 | 0.000337 | -0.529358224 | count | 1           |
| MGST2        | -0.3796179 | 0.0945287 | -4.0159 | 6.04E-05 | -0.529256592 | count | 1           |
| AP002884.1   | -0.378783  | 0.103754  | -3.6508 | 0.000265 | -0.528706602 | count | 1           |
| C1orf162     | -0.6774058 | 0.4321625 | -1.5675 | 0.117    | -0.528608295 | count | 1           |
| SSX2IP       | -0.5138435 | 0.2477303 | -2.0742 | 0.0381   | -0.527689995 | count | 1           |
| ZFP28        | -0.6202797 | 0.3519632 | -1.7623 | 0.0781   | -0.527688504 | count | 1           |
| MERTK        | -0.544726  | 0.3004913 | -1.8128 | 0.0699   | -0.527362851 | count | 1           |
| C6orf48      | -0.3783006 | 0.0601323 | -6.2911 | 3.52E-10 | -0.527146855 | count | 8.33E-06    |
| RCBTB2       | -0.437397  | 0.1675339 | -2.6108 | 0.00907  | -0.526661797 | count | 1           |
| CLDN7        | -0.7623765 | 0.4825279 | -1.58   | 0.114    | -0.526331653 | count | 1           |
| ZNF561       | -0.4324812 | 0.2000259 | -2.1621 | 0.0307   | -0.526284244 | count | 1           |
| FANCG        | -0.5598525 | 0.3658538 | -1.5303 | 0.126    | -0.526025903 | count | 1           |
| SMYD2        | -0.459255  | 0.2271622 | -2.0217 | 0.0433   | -0.525778175 | count | 1           |
| EHBP1L1      | -0.3876667 | 0.1129134 | -3.4333 | 0.000603 | -0.525765849 | count | 1           |
| ZNF597       | -0.568764  | 0.4134558 | -1.3756 | 0.169    | -0.525529117 | count | 1           |
| EVI2B        | -1.1264503 | 0.6446235 | -1.7475 | 0.0806   | -0.5253533   | count | 1           |
| ARHGEF17     | -0.3906289 | 0.1328566 | -2.9402 | 0.0033   | -0.525250742 | count | 1           |
| RAI14        | -0.392104  | 0.1376059 | -2.8495 | 0.0044   | -0.525103494 | count | 1           |
| SBSPON       | -0.3995463 | 0.1194707 | -3.3443 | 0.000833 | -0.52492641  | count | 1           |
| MED20        | -0.6168106 | 0.3152695 | -1.9565 | 0.0505   | -0.52463994  | count | 1           |
| VGLL4        | -0.3702581 | 0.0633137 | -5.848  | 5.41E-09 | -0.52432403  | count | 0.000127411 |
| TNFAIP8      | -0.3949021 | 0.1214494 | -3.2516 | 0.00116  | -0.524068913 | count | 1           |
| CENPBD1      | -0.5888879 | 0.2945027 | -1.9996 | 0.0456   | -0.523909159 | count | 1           |
| MTRNR2L10    | -0.9172865 | 0.429275  | -2.1368 | 0.0327   | -0.523882769 | count | 1           |
| BX537318.1   | -0.5335838 | 0.4003442 | -1.3328 | 0.183    | -0.523451755 | count | 1           |
| ALDH1L1      | -0.5334797 | 0.4960653 | -1.0754 | 0.282    | -0.523347134 | count | 1           |
| DNAJB5       | -0.5047199 | 0.2148316 | -2.3494 | 0.0189   | -0.523303656 | count | 1           |
| DBF4         | -0.4808735 | 0.2799577 | -1.7177 | 0.0859   | -0.523292753 | count | 1           |
| APOBEC3G     | -0.4369944 | 0.1824273 | -2.3954 | 0.0167   | -0.523088506 | count | 1           |
| GLIPR1       | -0.3675081 | 0.0562182 | -6.5372 | 7.13E-11 | -0.522611917 | count | 1.69E-06    |
| UQCRH        | -0.3648807 | 0.0372159 | -9.8044 | 2.03E-22 | -0.522081163 | count | 4.88E-18    |
| VAV3         | -1.1193003 | 0.553941  | -2.0206 | 0.0434   | -0.521892741 | count | 1           |
| EPB41L4A-AS1 | -0.3776427 | 0.0762517 | -4.9526 | 7.65E-07 | -0.521845028 | count | 0.01781991  |
| GIMAP7       | -0.8484718 | 0.7077351 | -1.1989 | 0.231    | -0.521706208 | count | 1           |
| HEY2         | -0.3761683 | 0.0870992 | -4.3188 | 1.61E-05 | -0.521705293 | count | 0.3703483   |
| PAX8         | -0.7216795 | 0.5556027 | -1.2989 | 0.194    | -0.521566984 | count | 1           |
| MAGEE2       | -0.7216795 | 0.5991444 | -1.2045 | 0.228    | -0.521566984 | count | 1           |
| RPL27        | -0.3627569 | 0.0268549 | -13.508 | 1.29E-40 | -0.521055247 | count | 3.13E-36    |
| AC021097.1   | -0.9982825 | 0.7106015 | -1.4048 | 0.16     | -0.520961951 | count | 1           |
| CD109        | -0.404047  | 0.1379792 | -2.9283 | 0.00343  | -0.520820331 | count | 1           |

|            |            |           |          |          |              |       |             |
|------------|------------|-----------|----------|----------|--------------|-------|-------------|
| NINJ1      | -0.3698319 | 0.0756716 | -4.8873  | 1.07E-06 | -0.520816364 | count | 0.02488606  |
| RFC4       | -0.4692479 | 0.2319036 | -2.0235  | 0.0431   | -0.520497409 | count | 1           |
| CACNA1C    | -0.401465  | 0.2744729 | -1.4627  | 0.144    | -0.520183104 | count | 1           |
| PLEKHM3    | -0.484319  | 0.245553  | -1.9724  | 0.0486   | -0.519406632 | count | 1           |
| HMG20B     | -0.3734495 | 0.0780484 | -4.7848  | 1.78E-06 | -0.519286245 | count | 0.04131202  |
| GPR63      | -1.1131328 | 0.4213767 | -2.6417  | 0.00829  | -0.518905874 | count | 1           |
| BAX        | -0.3681768 | 0.0686352 | -5.3643  | 8.63E-08 | -0.518736983 | count | 0.002021578 |
| AC100810.1 | -0.3854927 | 0.124558  | -3.0949  | 0.00198  | -0.518535127 | count | 1           |
| AL136454.1 | -0.9936611 | 0.4720078 | -2.1052  | 0.0353   | -0.518441244 | count | 1           |
| TMEM144    | -0.4358288 | 0.2163536 | -2.0144  | 0.044    | -0.518414297 | count | 1           |
| HSPA1L     | -1.5871626 | 0.7161309 | -2.2163  | 0.0267   | -0.517960718 | count | 1           |
| ZNF780B    | -0.4525077 | 0.3763242 | -1.2024  | 0.229    | -0.517942103 | count | 1           |
| CTNNBIP1   | -0.415645  | 0.1782711 | -2.3315  | 0.0198   | -0.51780305  | count | 1           |
| TRMT9B     | -0.4393187 | 0.2250549 | -1.9521  | 0.051    | -0.517290628 | count | 1           |
| SORT1      | -0.3773619 | 0.1034887 | -3.6464  | 0.00027  | -0.51721389  | count | 1           |
| RPS23      | -0.3584007 | 0.0188131 | -19.0506 | 3.11E-77 | -0.516711754 | count | 7.56E-73    |
| NACC2      | -0.4246902 | 0.197783  | -2.1473  | 0.0318   | -0.516703677 | count | 1           |
| NUDT17     | -0.5593238 | 0.3355761 | -1.6668  | 0.0956   | -0.516562733 | count | 1           |
| AL354920.1 | -0.9896981 | 0.4642202 | -2.132   | 0.0331   | -0.516279166 | count | 1           |
| PODXL      | -0.6620211 | 0.3420535 | -1.9354  | 0.053    | -0.516154202 | count | 1           |
| AC110597.1 | -2.2497059 | 1.0449966 | -2.1528  | 0.0314   | -0.515839053 | count | 1           |
| EBF4       | -0.6853638 | 0.3120981 | -2.196   | 0.0282   | -0.515536776 | count | 1           |
| AC092835.1 | -0.6608    | 0.4363639 | -1.5143  | 0.13     | -0.515166009 | count | 1           |
| NRTN       | -0.9876    | 0.5798596 | -1.7032  | 0.0886   | -0.515134418 | count | 1           |
| NPW        | -0.9876    | 0.7486343 | -1.3192  | 0.187    | -0.515134418 | count | 1           |
| AC127496.5 | -1.280525  | 0.6165139 | -2.077   | 0.0379   | -0.514916817 | count | 1           |
| KIF23      | -1.1046863 | 0.4813164 | -2.2951  | 0.0218   | -0.514812576 | count | 1           |
| CTPS1      | -0.4402288 | 0.1576536 | -2.7924  | 0.00526  | -0.514525323 | count | 1           |
| AL136084.3 | -0.9851282 | 0.4653738 | -2.1169  | 0.0343   | -0.513785546 | count | 1           |
| PEX19      | -0.3932935 | 0.1163901 | -3.3791  | 0.000735 | -0.513770421 | count | 1           |
| KCTD15     | -0.5239238 | 0.3162692 | -1.6566  | 0.0977   | -0.513745737 | count | 1           |
| SAMD14     | -0.6382659 | 0.5463272 | -1.1683  | 0.243    | -0.513694215 | count | 1           |
| ABAT       | -0.744564  | 0.4652463 | -1.6004  | 0.11     | -0.51350761  | count | 1           |
| POLR2C     | -0.3673831 | 0.0766012 | -4.796   | 1.68E-06 | -0.513140524 | count | 0.03900456  |
| COL11A1    | -0.5231394 | 0.7672927 | -0.6818  | 0.495    | -0.512957799 | count | 1           |
| CAV1       | -0.3565025 | 0.0375428 | -9.4959  | 3.81E-21 | -0.512493594 | count | 9.16E-17    |
| RPL13A     | -0.3559229 | 0.0219462 | -16.218  | 3.51E-57 | -0.512293729 | count | 8.52E-53    |
| HSPB1      | -0.3556455 | 0.0279862 | -12.7079 | 3.07E-36 | -0.512189092 | count | 7.43E-32    |
| MX1        | -0.3710205 | 0.1071549 | -3.4625  | 0.000541 | -0.511461693 | count | 1           |
| CBL        | -0.4074953 | 0.1982496 | -2.0555  | 0.0399   | -0.511182008 | count | 1           |
| TMEM74     | -0.7411901 | 0.4856689 | -1.5261  | 0.127    | -0.511079154 | count | 1           |
| GYPE       | -0.6170732 | 0.5845521 | -1.0556  | 0.291    | -0.510999366 | count | 1           |
| CFAP221    | -0.6170732 | 0.7282245 | -0.8474  | 0.397    | -0.510999366 | count | 1           |
| DNHD1      | -0.8300878 | 0.478631  | -1.7343  | 0.0829   | -0.509879205 | count | 1           |
| ZBTB40     | -0.4621029 | 0.2144968 | -2.1544  | 0.0313   | -0.509267996 | count | 1           |

|            |            |           |          |          |              |       |             |
|------------|------------|-----------|----------|----------|--------------|-------|-------------|
| AC011043.1 | -0.6327174 | 0.3574888 | -1.7699  | 0.0768   | -0.509066951 | count | 1           |
| AC092164.1 | -0.3812666 | 0.1371892 | -2.7791  | 0.00548  | -0.508468071 | count | 1           |
| TMEM38A    | -0.4189326 | 0.2141219 | -1.9565  | 0.0505   | -0.50832096  | count | 1           |
| GNG5       | -0.3546571 | 0.0367354 | -9.6544  | 8.54E-22 | -0.508296251 | count | 2.05E-17    |
| EZR        | -0.3813652 | 0.1152118 | -3.3101  | 0.000942 | -0.507489133 | count | 1           |
| FAM177A1   | -0.3574934 | 0.058774  | -6.0825  | 1.30E-09 | -0.506939434 | count | 3.07E-05    |
| ZNF236-DT  | -1.5496906 | 0.9324226 | -1.662   | 0.0966   | -0.50604805  | count | 1           |
| AC092053.3 | -1.5496906 | 0.9498674 | -1.6315  | 0.103    | -0.50604805  | count | 1           |
| ITM2C      | -0.3587513 | 0.0751681 | -4.7727  | 1.89E-06 | -0.505838908 | count | 0.04385178  |
| MTMR11     | -0.4147727 | 0.1609219 | -2.5775  | 0.00999  | -0.505768583 | count | 1           |
| RPL37A     | -0.3514318 | 0.0240876 | -14.5898 | 6.57E-47 | -0.505528955 | count | 1.59E-42    |
| ZNF443     | -1.0855361 | 0.550112  | -1.9733  | 0.0485   | -0.505521038 | count | 1           |
| RPS18      | -0.3505701 | 0.020346  | -17.2304 | 4.89E-64 | -0.505211641 | count | 1.19E-59    |
| TMIE       | -1.5465477 | 0.5556203 | -2.7835  | 0.00541  | -0.505043429 | count | 1           |
| ZBTB47     | -0.4390362 | 0.2208705 | -1.9878  | 0.0469   | -0.504617608 | count | 1           |
| CD163      | -2.1879178 | 1.309791  | -1.6704  | 0.0949   | -0.504564567 | count | 1           |
| DNM1P35    | -2.1879178 | 1.3574289 | -1.6118  | 0.107    | -0.504564567 | count | 1           |
| LTBP2      | -0.3545591 | 0.0856227 | -4.1409  | 3.54E-05 | -0.504400877 | count | 0.8106954   |
| AC083973.1 | -1.5444734 | 0.914238  | -1.6894  | 0.0912   | -0.504379925 | count | 1           |
| ADGRL3     | -0.4238089 | 0.1904463 | -2.2253  | 0.0261   | -0.503947359 | count | 1           |
| CRIP2      | -0.3506133 | 0.0406544 | -8.6242  | 9.45E-18 | -0.50390552  | count | 2.26E-13    |
| RSAD2      | -0.5458397 | 0.333218  | -1.6381  | 0.101    | -0.503762407 | count | 1           |
| AMPD2      | -0.423645  | 0.194443  | -2.1788  | 0.0294   | -0.503750134 | count | 1           |
| SEC14L2    | -0.5453295 | 0.3532275 | -1.5438  | 0.123    | -0.50327826  | count | 1           |
| POLA1      | -0.5361396 | 0.306494  | -1.7493  | 0.0803   | -0.503153795 | count | 1           |
| DDX49      | -0.3999616 | 0.1322746 | -3.0237  | 0.00251  | -0.502491037 | count | 1           |
| AL157395.1 | -1.5381621 | 1.091685  | -1.409   | 0.159    | -0.502358961 | count | 1           |
| IFI27L2    | -0.3560238 | 0.0702841 | -5.0655  | 4.27E-07 | -0.502209783 | count | 0.00996191  |
| AC079610.2 | -0.7684848 | 0.5319969 | -1.4445  | 0.149    | -0.502021553 | count | 1           |
| AP003059.1 | -0.7684848 | 0.5444199 | -1.4116  | 0.158    | -0.502021553 | count | 1           |
| LGALS1     | -0.3481979 | 0.0219261 | -15.8805 | 5.65E-55 | -0.501871525 | count | 1.37E-50    |
| AC092809.4 | -1.2480574 | 0.8085381 | -1.5436  | 0.123    | -0.501530612 | count | 1           |
| DYRK4      | -0.3665132 | 0.1017998 | -3.6003  | 0.000322 | -0.50123451  | count | 1           |
| MYL6B      | -0.3568766 | 0.0744356 | -4.7944  | 1.70E-06 | -0.500236894 | count | 0.0394672   |
| VCL        | -0.3517567 | 0.0638285 | -5.511   | 3.81E-08 | -0.500010199 | count | 0.000894093 |
| AC093157.1 | -0.4914326 | 0.2839357 | -1.7308  | 0.0836   | -0.498876411 | count | 1           |
| SLC38A5    | -0.5736608 | 0.4729175 | -1.213   | 0.225    | -0.498768102 | count | 1           |
| HTRA1      | -0.3476526 | 0.0410534 | -8.4683  | 3.55E-17 | -0.498731069 | count | 8.50E-13    |
| SDC4       | -0.3672071 | 0.1158911 | -3.1686  | 0.00154  | -0.498401865 | count | 1           |
| CFAP36     | -0.3536649 | 0.0647273 | -5.4639  | 4.97E-08 | -0.498262072 | count | 0.001165465 |
| MRVI1      | -0.3564561 | 0.1084691 | -3.2862  | 0.00102  | -0.498026472 | count | 1           |
| PVR        | -0.5397889 | 0.2839408 | -1.9011  | 0.0574   | -0.498021275 | count | 1           |
| DYSF       | -0.8737868 | 0.7371232 | -1.1854  | 0.236    | -0.497876773 | count | 1           |
| INAFM1     | -0.3548356 | 0.0760049 | -4.6686  | 3.14E-06 | -0.497511386 | count | 0.07273182  |
| CLP1       | -0.4458353 | 0.217196  | -2.0527  | 0.0402   | -0.497056271 | count | 1           |

|            |            |           |          |          |              |       |             |
|------------|------------|-----------|----------|----------|--------------|-------|-------------|
| FAM27C     | -0.4484197 | 0.2303525 | -1.9467  | 0.0517   | -0.497021927 | count | 1           |
| LRRFIP2    | -0.3540629 | 0.0698362 | -5.0699  | 4.18E-07 | -0.496927971 | count | 0.009752776 |
| MIF4GD     | -0.3645576 | 0.0993739 | -3.6685  | 0.000247 | -0.496861876 | count | 1           |
| SZRD1      | -0.3559799 | 0.0854478 | -4.1661  | 3.17E-05 | -0.495665151 | count | 0.7262153   |
| LNK2       | -0.5461693 | 0.3863235 | -1.4138  | 0.158    | -0.494748965 | count | 1           |
| STARD10    | -0.3601466 | 0.1106896 | -3.2537  | 0.00115  | -0.494721814 | count | 1           |
| SLC25A4    | -0.3447549 | 0.0494504 | -6.9717  | 3.70E-12 | -0.493942134 | count | 8.79E-08    |
| ZNF682     | -0.6143107 | 0.3255481 | -1.887   | 0.0592   | -0.493724782 | count | 1           |
| ILK        | -0.3453217 | 0.046158  | -7.4813  | 9.16E-14 | -0.493673743 | count | 2.18E-09    |
| MZF1-AS1   | -0.5449329 | 0.3233015 | -1.6855  | 0.092    | -0.49359612  | count | 1           |
| PCA3       | -2.1291472 | 0.7362279 | -2.892   | 0.00385  | -0.493505565 | count | 1           |
| SSH1       | -0.4028569 | 0.2363598 | -1.7044  | 0.0884   | -0.493440273 | count | 1           |
| APOOL      | -0.3655051 | 0.106491  | -3.4323  | 0.000605 | -0.493319174 | count | 1           |
| CDK18      | -0.5256003 | 0.2445965 | -2.1488  | 0.0317   | -0.492996889 | count | 1           |
| AKAP5      | -0.7545177 | 0.4220125 | -1.7879  | 0.0739   | -0.492476904 | count | 1           |
| HIST1H2BB  | -1.058563  | 0.8821691 | -1.2     | 0.23     | -0.492410286 | count | 1           |
| HMG1       | -0.3465422 | 0.058972  | -5.8764  | 4.57E-09 | -0.492221265 | count | 0.000107678 |
| TOP1MT     | -0.7149501 | 0.3304177 | -2.1638  | 0.0305   | -0.49220001  | count | 1           |
| MAML2      | -0.3637854 | 0.1172143 | -3.1036  | 0.00193  | -0.491899724 | count | 1           |
| AC105383.1 | -0.5937836 | 0.3001487 | -1.9783  | 0.048    | -0.49105398  | count | 1           |
| TEX41      | -0.3706968 | 0.1302639 | -2.8457  | 0.00446  | -0.490877469 | count | 1           |
| EMX2       | -0.385199  | 0.201778  | -1.909   | 0.0563   | -0.490348242 | count | 1           |
| HCCS       | -0.3877573 | 0.2079929 | -1.8643  | 0.0624   | -0.490120084 | count | 1           |
| CD163L1    | -0.750673  | 0.4398563 | -1.7066  | 0.088    | -0.489850152 | count | 1           |
| SLC26A4    | -0.679356  | 0.3393572 | -2.0019  | 0.0454   | -0.489733223 | count | 1           |
| SMIM4      | -0.3612721 | 0.1111469 | -3.2504  | 0.00116  | -0.489676204 | count | 1           |
| RPRML      | -0.798263  | 0.5693678 | -1.402   | 0.161    | -0.489408032 | count | 1           |
| MFSD6      | -0.4876347 | 0.2984795 | -1.6337  | 0.102    | -0.489379275 | count | 1           |
| CHST6      | -1.4968329 | 0.5849775 | -2.5588  | 0.0105   | -0.489044737 | count | 1           |
| DCT        | -1.0515462 | 0.6224896 | -1.6893  | 0.0913   | -0.488995653 | count | 1           |
| NRGN       | -0.3436892 | 0.0832905 | -4.1264  | 3.77E-05 | -0.488790039 | count | 0.8628776   |
| CASP1      | -0.3910115 | 0.183933  | -2.1258  | 0.0336   | -0.488628484 | count | 1           |
| MGP        | -0.3386701 | 0.0458626 | -7.3844  | 1.88E-13 | -0.488547184 | count | 4.48E-09    |
| RPL26      | -0.339295  | 0.0218462 | -15.5311 | 9.86E-53 | -0.488497273 | count | 2.39E-48    |
| ATG7       | -0.4333124 | 0.1956991 | -2.2142  | 0.0269   | -0.488280431 | count | 1           |
| LTA4H      | -0.3645038 | 0.1107379 | -3.2916  | 0.00101  | -0.488212797 | count | 1           |
| RUBCN      | -0.4760606 | 0.2418001 | -1.9688  | 0.049    | -0.48808729  | count | 1           |
| ARHGAP45   | -1.0494677 | 0.9661422 | -1.0862  | 0.277    | -0.48798385  | count | 1           |
| MS4A4A     | -2.1003815 | 0.6200582 | -3.3874  | 0.000713 | -0.487974896 | count | 1           |
| ARPP21     | -1.493295  | 0.7936513 | -1.8815  | 0.06     | -0.487898623 | count | 1           |
| AC022382.1 | -1.493295  | 0.8157376 | -1.8306  | 0.0672   | -0.487898623 | count | 1           |
| GHRL       | -1.493295  | 0.9668718 | -1.5445  | 0.123    | -0.487898623 | count | 1           |
| AC023509.4 | -0.50461   | 0.3224057 | -1.5651  | 0.118    | -0.487582037 | count | 1           |
| BST2       | -0.3405828 | 0.0568608 | -5.9898  | 2.30E-09 | -0.487538334 | count | 5.42E-05    |
| TTC39B     | -0.3795272 | 0.1464619 | -2.5913  | 0.0096   | -0.487341914 | count | 1           |

|            |            |           |         |          |              |       |             |
|------------|------------|-----------|---------|----------|--------------|-------|-------------|
| NCK2       | -0.3744336 | 0.1237798 | -3.025  | 0.0025   | -0.487262927 | count | 1           |
| XK         | -1.0478654 | 0.5487756 | -1.9095 | 0.0563   | -0.487203776 | count | 1           |
| COLCA1     | -0.6490012 | 0.2725244 | -2.3814 | 0.0173   | -0.48711596  | count | 1           |
| ZNF746     | -0.4747809 | 0.3312231 | -1.4334 | 0.152    | -0.486747236 | count | 1           |
| MICAL2     | -0.3432321 | 0.0953199 | -3.6008 | 0.000321 | -0.486251437 | count | 1           |
| AC087164.1 | -1.2090481 | 0.6914823 | -1.7485 | 0.0805   | -0.485366815 | count | 1           |
| DLG3       | -0.3782792 | 0.1433886 | -2.6381 | 0.00837  | -0.485155142 | count | 1           |
| ZNF529     | -0.5462595 | 0.2836665 | -1.9257 | 0.0542   | -0.484869311 | count | 1           |
| PDLIM5     | -0.3418477 | 0.0588665 | -5.8072 | 6.89E-09 | -0.484706117 | count | 0.000162184 |
| GPC4       | -0.3995807 | 0.1959803 | -2.0389 | 0.0415   | -0.484595594 | count | 1           |
| CD48       | -2.082055  | 0.4552789 | -4.5731 | 4.96E-06 | -0.484411359 | count | 0.11465536  |
| RAPGEF6    | -0.5162908 | 0.3807295 | -1.3561 | 0.175    | -0.484029969 | count | 1           |
| PRKACB     | -0.3652969 | 0.154514  | -2.3642 | 0.0181   | -0.483382611 | count | 1           |
| TRAF3IP3   | -2.0767754 | 1.169396  | -1.7759 | 0.0758   | -0.483379029 | count | 1           |
| NFXL1      | -0.4223106 | 0.2831016 | -1.4917 | 0.136    | -0.482897154 | count | 1           |
| ANKS1B     | -0.9276009 | 0.3352172 | -2.7672 | 0.00568  | -0.482358103 | count | 1           |
| THRB       | -0.3577413 | 0.154998  | -2.308  | 0.0211   | -0.482236942 | count | 1           |
| NME4       | -0.3392254 | 0.0536682 | -6.3208 | 2.91E-10 | -0.482014563 | count | 6.89E-06    |
| AC040970.1 | -1.4743282 | 0.7290833 | -2.0222 | 0.0432   | -0.481738439 | count | 1           |
| PCP4       | -1.4743282 | 0.8490895 | -1.7364 | 0.0826   | -0.481738439 | count | 1           |
| AC002401.4 | -1.4743282 | 1.235694  | -1.1931 | 0.233    | -0.481738439 | count | 1           |
| IFI30      | -0.8467932 | 0.4173009 | -2.0292 | 0.0425   | -0.481733734 | count | 1           |
| ZNF781     | -0.5545339 | 0.3891813 | -1.4249 | 0.154    | -0.481616176 | count | 1           |
| VPREB3     | -2.0671009 | 0.8961838 | -2.3066 | 0.0211   | -0.481480691 | count | 1           |
| AL355472.1 | -0.5134681 | 0.3076391 | -1.6691 | 0.0952   | -0.481312084 | count | 1           |
| RRAD       | -0.3391007 | 0.0872779 | -3.8853 | 0.000104 | -0.480694496 | count | 1           |
| GAS6       | -0.3344638 | 0.0421137 | -7.9419 | 2.62E-15 | -0.480372275 | count | 6.26E-11    |
| CD53       | -1.4694272 | 0.5733111 | -2.5631 | 0.0104   | -0.480142234 | count | 1           |
| HAGLROS    | -1.196092  | 0.8288684 | -1.443  | 0.149    | -0.479980767 | count | 1           |
| HIST1H1B   | -1.196092  | 0.8288684 | -1.443  | 0.149    | -0.479980767 | count | 1           |
| AC083843.2 | -1.196092  | 0.8288684 | -1.443  | 0.149    | -0.479980767 | count | 1           |
| MYLIP      | -0.3566416 | 0.1018223 | -3.5026 | 0.000466 | -0.479971098 | count | 1           |
| PIN4       | -0.3430364 | 0.0798758 | -4.2946 | 1.80E-05 | -0.479968566 | count | 0.413766    |
| GALNT5     | -0.4554691 | 0.3744206 | -1.2165 | 0.224    | -0.47996177  | count | 1           |
| AC008443.5 | -0.6396072 | 0.3807745 | -1.6798 | 0.0931   | -0.479781157 | count | 1           |
| SCHIP1     | -1.0323884 | 0.5391658 | -1.9148 | 0.0556   | -0.479664972 | count | 1           |
| SGMS1-AS1  | -0.7829452 | 0.3877852 | -2.019  | 0.0436   | -0.479558159 | count | 1           |
| FGF13      | -0.4076557 | 0.1817025 | -2.2435 | 0.0249   | -0.479556079 | count | 1           |
| ZNF439     | -0.4678138 | 0.2619904 | -1.7856 | 0.0742   | -0.479453104 | count | 1           |
| PGM1       | -0.3588312 | 0.1265059 | -2.8365 | 0.00459  | -0.479405681 | count | 1           |
| DGKE       | -0.4353028 | 0.2371767 | -1.8354 | 0.0665   | -0.479250936 | count | 1           |
| AC006333.2 | -0.391233  | 0.215698  | -1.8138 | 0.0698   | -0.479062621 | count | 1           |
| AP1S2      | -0.3472347 | 0.0998956 | -3.476  | 0.000515 | -0.478326518 | count | 1           |
| AL359232.1 | -1.4632482 | 0.7258796 | -2.0158 | 0.0439   | -0.478127272 | count | 1           |
| CCDC141    | -0.4243175 | 0.4786192 | -0.8865 | 0.375    | -0.477991433 | count | 1           |



|            |            |           |          |          |              |       |             |
|------------|------------|-----------|----------|----------|--------------|-------|-------------|
| ANO1       | -0.3497193 | 0.1266294 | -2.7618  | 0.00578  | -0.477716456 | count | 1           |
| PDK2       | -0.3494098 | 0.1037895 | -3.3665  | 0.000769 | -0.477292314 | count | 1           |
| KIFC3      | -0.3863921 | 0.2502238 | -1.5442  | 0.123    | -0.477257585 | count | 1           |
| SMCO3      | -0.9181822 | 0.4801721 | -1.9122  | 0.0559   | -0.477207945 | count | 1           |
| PAFAH1B3   | -0.45262   | 0.2508385 | -1.8044  | 0.0712   | -0.476901022 | count | 1           |
| TXNDC17    | -0.3384945 | 0.0653173 | -5.1823  | 2.31E-07 | -0.47683667  | count | 0.005398008 |
| OSGIN2     | -0.3885084 | 0.1814815 | -2.1408  | 0.0324   | -0.476784624 | count | 1           |
| TPGS1      | -0.3402784 | 0.0733874 | -4.6367  | 3.66E-06 | -0.476216442 | count | 0.08468874  |
| SPATA6L    | -1.4572362 | 0.8086398 | -1.8021  | 0.0716   | -0.476164049 | count | 1           |
| RPS6       | -0.3304291 | 0.0222042 | -14.8814 | 1.12E-48 | -0.475889163 | count | 2.72E-44    |
| GGCT       | -0.3541699 | 0.1095492 | -3.233   | 0.00124  | -0.475822217 | count | 1           |
| ZNF579     | -0.3955413 | 0.1908427 | -2.0726  | 0.0383   | -0.475728372 | count | 1           |
| MCAM       | -0.3344096 | 0.0743614 | -4.4971  | 7.10E-06 | -0.475276578 | count | 0.1638609   |
| FXYD1      | -0.331211  | 0.0366584 | -9.0351  | 2.59E-19 | -0.475258576 | count | 6.21E-15    |
| KIF1C      | -0.3527856 | 0.1233958 | -2.859   | 0.00427  | -0.475149508 | count | 1           |
| KCTD9      | -0.3507815 | 0.1332937 | -2.6316  | 0.00853  | -0.475083506 | count | 1           |
| AC009228.1 | -0.835664  | 0.5193083 | -1.6092  | 0.108    | -0.475078417 | count | 1           |
| GABRA4     | -1.1836642 | 0.5792797 | -2.0433  | 0.0411   | -0.474806354 | count | 1           |
| TPK1       | -0.4311878 | 0.2606077 | -1.6545  | 0.0981   | -0.474645256 | count | 1           |
| DLGAP4-AS1 | -1.18324   | 0.8752465 | -1.3519  | 0.176    | -0.474629624 | count | 1           |
| C1orf112   | -0.9123684 | 0.4203282 | -2.1706  | 0.03     | -0.474028525 | count | 1           |
| AL592295.4 | -1.0202817 | 0.7964558 | -1.281   | 0.2      | -0.473763249 | count | 1           |
| RPL3       | -0.3286249 | 0.022708  | -14.4718 | 3.35E-46 | -0.473291182 | count | 8.12E-42    |
| RPL9       | -0.3284997 | 0.0214472 | -15.3167 | 2.23E-51 | -0.473075261 | count | 5.41E-47    |
| NCS1       | -0.3425066 | 0.0908877 | -3.7685  | 0.000167 | -0.472706488 | count | 1           |
| LPL        | -2.0217244 | 0.9397739 | -2.1513  | 0.03152  | -0.472463133 | count | 1           |
| ALDOC      | -0.3699798 | 0.1753067 | -2.1105  | 0.0349   | -0.472080767 | count | 1           |
| MRPS18C    | -0.3332662 | 0.0616441 | -5.4063  | 6.84E-08 | -0.471755547 | count | 0.001602954 |
| SAMMSON    | -1.4429295 | 0.6637737 | -2.1738  | 0.0298   | -0.471481693 | count | 1           |
| ASGR1      | -1.014925  | 0.6796136 | -1.4934  | 0.135    | -0.471150796 | count | 1           |
| CCDC24     | -0.4471793 | 0.2871598 | -1.5572  | 0.119    | -0.471057418 | count | 1           |
| ATP5F1E    | -0.3275168 | 0.0261036 | -12.5468 | 2.18E-35 | -0.471023668 | count | 5.27E-31    |
| LMO7-AS1   | -1.0146405 | 0.4569363 | -2.2205  | 0.0264   | -0.471012031 | count | 1           |
| MMS22L     | -0.4948982 | 0.4222191 | -1.1721  | 0.241    | -0.470920578 | count | 1           |
| TMEM204    | -0.339912  | 0.1164638 | -2.9186  | 0.00354  | -0.470854025 | count | 1           |
| KCNAB2     | -0.542516  | 0.4979546 | -1.0895  | 0.276    | -0.470848774 | count | 1           |
| HRCT1      | -0.3369407 | 0.1218554 | -2.7651  | 0.00572  | -0.470584083 | count | 1           |
| COMTD1     | -0.3458065 | 0.1157551 | -2.9874  | 0.00283  | -0.470410639 | count | 1           |
| SRP68      | -0.359831  | 0.1260484 | -2.8547  | 0.00433  | -0.470204696 | count | 1           |
| URB1       | -0.486786  | 0.2580788 | -1.8862  | 0.0593   | -0.469933998 | count | 1           |
| AMY2B      | -1.011938  | 0.5832675 | -1.7349  | 0.0828   | -0.469693765 | count | 1           |
| FAM49B     | -0.388162  | 0.2067801 | -1.8772  | 0.0606   | -0.469356917 | count | 1           |
| SMIM29     | -0.3493482 | 0.1241586 | -2.8137  | 0.00492  | -0.469317239 | count | 1           |
| AC244090.1 | -0.3961795 | 0.1915298 | -2.0685  | 0.0387   | -0.469157505 | count | 1           |
| SPATA24    | -0.6254702 | 0.4086054 | -1.5307  | 0.126    | -0.468749772 | count | 1           |

|            |            |           |          |          |              |       |            |
|------------|------------|-----------|----------|----------|--------------|-------|------------|
| CASC15     | -0.6507399 | 0.3952402 | -1.6464  | 0.0998   | -0.468240598 | count | 1          |
| TRIM26     | -0.472419  | 0.2373431 | -1.9904  | 0.0466   | -0.468082266 | count | 1          |
| TLR2       | -0.8236949 | 0.4602437 | -1.7897  | 0.0736   | -0.467921612 | count | 1          |
| NACC1      | -0.4847168 | 0.3024383 | -1.6027  | 0.109    | -0.467886419 | count | 1          |
| TMEM136    | -0.3620557 | 0.1316228 | -2.7507  | 0.00598  | -0.467845542 | count | 1          |
| MT-ATP8    | -0.3427748 | 0.0850273 | -4.0314  | 5.66E-05 | -0.467835858 | count | 1          |
| AL596202.1 | -0.8232797 | 0.6088092 | -1.3523  | 0.176    | -0.467673375 | count | 1          |
| PDLIM1     | -0.3279845 | 0.0489165 | -6.705   | 2.32E-11 | -0.467511684 | count | 5.51E-07   |
| SLC22A2    | -0.7178868 | 0.6120578 | -1.1729  | 0.241    | -0.467463205 | count | 1          |
| CHMP6      | -0.3585318 | 0.1783852 | -2.0099  | 0.0445   | -0.466868716 | count | 1          |
| UFC1       | -0.3275276 | 0.0524233 | -6.2477  | 4.64E-10 | -0.466836725 | count | 1.10E-05   |
| SLFN12L    | -1.9926871 | 1.2438508 | -1.602   | 0.109    | -0.466595278 | count | 1          |
| AC135050.1 | -1.9926871 | 1.558616  | -1.2785  | 0.201    | -0.466595278 | count | 1          |
| SPAG1      | -0.3913742 | 0.2288285 | -1.7103  | 0.0873   | -0.466435027 | count | 1          |
| MRPL23     | -0.3372591 | 0.0823444 | -4.0957  | 4.30E-05 | -0.466272746 | count | 0.983711   |
| CXorf56    | -0.3936999 | 0.2104717 | -1.8706  | 0.0615   | -0.466186177 | count | 1          |
| AC004825.2 | -0.5811561 | 0.4001749 | -1.4523  | 0.147    | -0.466127014 | count | 1          |
| TNK2       | -0.51513   | 0.3530791 | -1.459   | 0.145    | -0.465831477 | count | 1          |
| LTC4S      | -0.3362361 | 0.1224835 | -2.7452  | 0.00608  | -0.465815642 | count | 1          |
| MIR155HG   | -0.8971184 | 0.5686262 | -1.5777  | 0.115    | -0.465687578 | count | 1          |
| E2F5       | -0.5494857 | 0.4720578 | -1.164   | 0.244    | -0.465577899 | count | 1          |
| ALDH5A1    | -0.5802733 | 0.3193403 | -1.8171  | 0.0693   | -0.465392915 | count | 1          |
| Z84485.1   | -0.8959274 | 0.5352294 | -1.6739  | 0.0942   | -0.465036125 | count | 1          |
| ABHD1      | -0.8959274 | 0.6014067 | -1.4897  | 0.136    | -0.465036125 | count | 1          |
| EPSTI1     | -0.392252  | 0.2219152 | -1.7676  | 0.0772   | -0.464451279 | count | 1          |
| RPLP2      | -0.322444  | 0.0214505 | -15.032  | 1.32E-49 | -0.464249764 | count | 3.20E-45   |
| RANBP3L    | -0.3883416 | 0.1759088 | -2.2076  | 0.0273   | -0.464219098 | count | 1          |
| ZNF740     | -0.4336189 | 0.2391041 | -1.8135  | 0.0698   | -0.46407973  | count | 1          |
| PCDHGA6    | -0.4953113 | 0.4450908 | -1.1128  | 0.266    | -0.46384018  | count | 1          |
| PCDHB9     | -0.8155538 | 0.4602684 | -1.7719  | 0.0765   | -0.463054386 | count | 1          |
| KIAA1211   | -0.5772844 | 0.5220796 | -1.1057  | 0.269    | -0.462907695 | count | 1          |
| CSRNP3     | -0.5217237 | 0.2173039 | -2.4009  | 0.0164   | -0.462440573 | count | 1          |
| COX10      | -0.4286146 | 0.3618577 | -1.1845  | 0.236    | -0.462127351 | count | 1          |
| AC136475.5 | -1.4137698 | 0.6959465 | -2.0314  | 0.0423   | -0.461893812 | count | 1          |
| WDFY3-AS1  | -1.4137698 | 0.8637907 | -1.6367  | 0.102    | -0.461893812 | count | 1          |
| DESI1      | -0.3665674 | 0.1680016 | -2.1819  | 0.0292   | -0.46169654  | count | 1          |
| RBM20      | -0.6723948 | 0.3796578 | -1.7711  | 0.0766   | -0.461621401 | count | 1          |
| SRPK3      | -0.7090612 | 0.3835537 | -1.8487  | 0.0646   | -0.461441616 | count | 1          |
| IRX5       | -0.4928078 | 0.4249529 | -1.1597  | 0.246    | -0.461432623 | count | 1          |
| WDR1       | -0.330163  | 0.0689865 | -4.7859  | 1.77E-06 | -0.461425338 | count | 0.04108524 |
| RPL7       | -0.3203605 | 0.0236479 | -13.5471 | 7.79E-41 | -0.460904917 | count | 1.89E-36   |
| BCL2       | -0.4210975 | 0.1792224 | -2.3496  | 0.0188   | -0.46032966  | count | 1          |
| CCL14      | -1.147019  | 0.6831718 | -1.679   | 0.0932   | -0.459508686 | count | 1          |
| MSRB1      | -0.3487335 | 0.1320753 | -2.6404  | 0.00832  | -0.459496099 | count | 1          |
| CALM1      | -0.3187679 | 0.0245638 | -12.9771 | 1.10E-37 | -0.459141378 | count | 2.66E-33   |

|             |            |           |         |          |              |       |             |
|-------------|------------|-----------|---------|----------|--------------|-------|-------------|
| AC027031.2  | -0.3518819 | 0.1519883 | -2.3152 | 0.0207   | -0.458970525 | count | 1           |
| AIG1        | -0.3239204 | 0.0561418 | -5.7697 | 8.60E-09 | -0.458942085 | count | 0.000202367 |
| KLHL3       | -0.5718354 | 0.3578322 | -1.5981 | 0.11     | -0.458378188 | count | 1           |
| PKM         | -0.3202674 | 0.039607  | -8.0861 | 8.29E-16 | -0.458305178 | count | 1.98E-11    |
| ZNF771      | -0.3606068 | 0.1379523 | -2.614  | 0.00899  | -0.458187176 | count | 1           |
| RBPMS       | -0.321273  | 0.0537647 | -5.9755 | 2.51E-09 | -0.457664278 | count | 5.92E-05    |
| ZBTB2       | -0.4422559 | 0.2625112 | -1.6847 | 0.0921   | -0.457284568 | count | 1           |
| FBXW9       | -0.4512044 | 0.3031476 | -1.4884 | 0.137    | -0.45717973  | count | 1           |
| GNB5        | -0.3601435 | 0.128501  | -2.8027 | 0.0051   | -0.456953505 | count | 1           |
| KIF3C       | -1.945607  | 0.6357413 | -3.0604 | 0.00223  | -0.456922802 | count | 1           |
| AC027307.3  | -0.5885652 | 0.4259301 | -1.3818 | 0.167    | -0.456810087 | count | 1           |
| PTPN1       | -0.341035  | 0.1009354 | -3.3787 | 0.000736 | -0.456426621 | count | 1           |
| NXP3        | -0.3463926 | 0.1176585 | -2.9441 | 0.00326  | -0.456395372 | count | 1           |
| FAM189A2    | -0.8037014 | 0.5303597 | -1.5154 | 0.13     | -0.455969578 | count | 1           |
| ABCG2       | -0.8033454 | 0.6663272 | -1.2056 | 0.228    | -0.455756805 | count | 1           |
| CD200       | -0.3338787 | 0.0871931 | -3.8292 | 0.000131 | -0.455534663 | count | 1           |
| SCG5        | -0.568389  | 0.3631692 | -1.5651 | 0.118    | -0.455514164 | count | 1           |
| TBX15       | -0.568388  | 0.2723335 | -2.0871 | 0.0369   | -0.455513343 | count | 1           |
| TRPC6       | -0.5252272 | 0.2806823 | -1.8713 | 0.0614   | -0.455373005 | count | 1           |
| ADO         | -0.4042533 | 0.2111159 | -1.9148 | 0.0556   | -0.455055832 | count | 1           |
| AC004839.1  | -0.6992253 | 0.4644402 | -1.5055 | 0.132    | -0.454733492 | count | 1           |
| RPL39L      | -0.3360587 | 0.1332027 | -2.5229 | 0.0117   | -0.454595932 | count | 1           |
| AP002387.2  | -0.3703547 | 0.2078662 | -1.7817 | 0.0749   | -0.454294939 | count | 1           |
| KLHL5       | -0.3824745 | 0.1948568 | -1.9628 | 0.0497   | -0.454245821 | count | 1           |
| RAB40C      | -0.4434892 | 0.270926  | -1.6369 | 0.102    | -0.454008646 | count | 1           |
| TSPOAP1-AS1 | -0.6980133 | 0.4368643 | -1.5978 | 0.11     | -0.453907116 | count | 1           |
| MAST4       | -0.3446507 | 0.1426796 | -2.4156 | 0.0158   | -0.453765742 | count | 1           |
| EVA1B       | -0.3185636 | 0.0529711 | -6.0139 | 1.99E-09 | -0.453739136 | count | 4.69E-05    |
| TDRD7       | -0.4431772 | 0.2936192 | -1.5094 | 0.131    | -0.453682512 | count | 1           |
| KRT81       | -1.132721  | 0.8575073 | -1.3209 | 0.187    | -0.453525001 | count | 1           |
| NEDD4       | -0.3618132 | 0.1415082 | -2.5568 | 0.0106   | -0.453418836 | count | 1           |
| PEX11A      | -0.3483889 | 0.1901689 | -1.832  | 0.067    | -0.452749713 | count | 1           |
| SLC37A1     | -0.6596653 | 0.5066105 | -1.3021 | 0.193    | -0.452486409 | count | 1           |
| THAP9-AS1   | -0.3592811 | 0.1562655 | -2.2992 | 0.0216   | -0.452446347 | count | 1           |
| AL022328.3  | -1.3851137 | 1.0419244 | -1.3294 | 0.184    | -0.45241618  | count | 1           |
| CISD1       | -0.3246494 | 0.0761818 | -4.2615 | 2.08E-05 | -0.452336924 | count | 0.4777552   |
| NPM3        | -0.3977628 | 0.224617  | -1.7708 | 0.0767   | -0.452257483 | count | 1           |
| GJC1        | -0.4832088 | 0.2023331 | -2.3882 | 0.017    | -0.452205098 | count | 1           |
| MZT2B       | -0.3157912 | 0.0349826 | -9.0271 | 2.78E-19 | -0.451894194 | count | 6.67E-15    |
| AC079922.2  | -0.4331011 | 0.2906247 | -1.4902 | 0.136    | -0.451886032 | count | 1           |
| CMKLR1      | -0.3856542 | 0.2100331 | -1.8362 | 0.0664   | -0.451693281 | count | 1           |
| LAMA5-AS1   | -0.6946937 | 0.5808668 | -1.196  | 0.232    | -0.451643969 | count | 1           |
| C1orf226    | -0.739244  | 0.5842006 | -1.2654 | 0.206    | -0.451478563 | count | 1           |
| OSGEP       | -0.3395564 | 0.1232447 | -2.7551 | 0.0059   | -0.451343113 | count | 1           |
| TRNP1       | -0.3392698 | 0.1195018 | -2.839  | 0.00455  | -0.451217377 | count | 1           |

|            |            |           |          |          |              |       |           |
|------------|------------|-----------|----------|----------|--------------|-------|-----------|
| SLC8A1     | -0.4156966 | 0.188632  | -2.2037  | 0.0276   | -0.451209313 | count | 1         |
| DAP        | -0.3226668 | 0.0740714 | -4.3562  | 1.36E-05 | -0.451083873 | count | 0.313072  |
| TBL1X      | -0.3403167 | 0.1465235 | -2.3226  | 0.0203   | -0.451015861 | count | 1         |
| LMOD3      | -0.7383649 | 0.4498585 | -1.6413  | 0.101    | -0.45091407  | count | 1         |
| RPS27L     | -0.3135025 | 0.0306125 | -10.241  | 2.75E-24 | -0.450801127 | count | 6.62E-20  |
| AC245297.3 | -0.3321165 | 0.1052425 | -3.1557  | 0.00161  | -0.450465007 | count | 1         |
| PHKG1      | -0.3509223 | 0.1396289 | -2.5132  | 0.012    | -0.450365876 | count | 1         |
| S100A5     | -1.9137791 | 0.9669174 | -1.9793  | 0.0479   | -0.450274725 | count | 1         |
| SCAMP5     | -1.9137791 | 1.1519686 | -1.6613  | 0.0967   | -0.450274725 | count | 1         |
| WNT7B      | -1.9137791 | 1.1519686 | -1.6613  | 0.0967   | -0.450274725 | count | 1         |
| HCFC1R1    | -0.3137991 | 0.0375503 | -8.3568  | 9.03E-17 | -0.450177657 | count | 2.16E-12  |
| ORMDL3     | -0.3889101 | 0.235676  | -1.6502  | 0.099    | -0.450161392 | count | 1         |
| PLCL1      | -0.3376081 | 0.1292801 | -2.6114  | 0.00905  | -0.449987038 | count | 1         |
| JCAD       | -0.3798453 | 0.1796246 | -2.1147  | 0.0345   | -0.44958957  | count | 1         |
| SKAP1      | -0.9705423 | 0.7766818 | -1.2496  | 0.212    | -0.4494828   | count | 1         |
| GCDH       | -0.3618703 | 0.2015878 | -1.7951  | 0.0727   | -0.449396968 | count | 1         |
| UPK3A      | -1.9089572 | 0.6925562 | -2.7564  | 0.00587  | -0.449259984 | count | 1         |
| TMSB15B    | -0.4386948 | 0.3320696 | -1.3211  | 0.187    | -0.448997738 | count | 1         |
| AC079630.1 | -0.5990306 | 0.3801516 | -1.5758  | 0.115    | -0.448142491 | count | 1         |
| ATP1A2     | -0.3512369 | 0.1586978 | -2.2132  | 0.0269   | -0.447996119 | count | 1         |
| SLC16A10   | -0.7903535 | 0.4486384 | -1.7617  | 0.0782   | -0.447993108 | count | 1         |
| MTHFD2     | -0.3214923 | 0.0759259 | -4.2343  | 2.35E-05 | -0.447836162 | count | 0.5394425 |
| RPL23      | -0.3111291 | 0.0289168 | -10.7595 | 1.33E-26 | -0.447094671 | count | 3.21E-22  |
| AL049775.3 | -0.8630606 | 0.6239092 | -1.3833  | 0.167    | -0.447057601 | count | 1         |
| ADTRP      | -1.368833  | 0.7098946 | -1.9282  | 0.0539   | -0.447008309 | count | 1         |
| TMEM159    | -0.3189361 | 0.0683906 | -4.6634  | 3.22E-06 | -0.446471864 | count | 0.0745752 |
| POMGNT1    | -0.359522  | 0.191262  | -1.8797  | 0.0602   | -0.446455045 | count | 1         |
| CENPB      | -0.3355291 | 0.1326431 | -2.5296  | 0.0115   | -0.446219073 | count | 1         |
| RPL41      | -0.3092627 | 0.0176967 | -17.4757 | 9.44E-66 | -0.445883147 | count | 2.29E-61  |
| SAMSN1     | -0.5960795 | 0.6190925 | -0.9628  | 0.336    | -0.445844496 | count | 1         |
| NEK6       | -0.4132347 | 0.2302641 | -1.7946  | 0.0728   | -0.445255839 | count | 1         |
| MCRIP1     | -0.3147698 | 0.0657474 | -4.7876  | 1.75E-06 | -0.444731404 | count | 0.0406245 |
| ZNF44      | -0.3910919 | 0.2172688 | -1.8     | 0.0719   | -0.444565099 | count | 1         |
| MOCOS      | -0.9599159 | 0.5828386 | -1.647   | 0.0997   | -0.444290136 | count | 1         |
| SLC26A6    | -0.5543712 | 0.4673702 | -1.1862  | 0.236    | -0.443871904 | count | 1         |
| SIVA1      | -0.3105096 | 0.0418964 | -7.4114  | 1.54E-13 | -0.443736663 | count | 3.67E-09  |
| STX11      | -0.5120896 | 0.2763121 | -1.8533  | 0.0639   | -0.443624971 | count | 1         |
| KIAA0355   | -0.3384638 | 0.1747516 | -1.9368  | 0.0528   | -0.443571415 | count | 1         |
| ADAM23     | -0.5118714 | 0.301483  | -1.6978  | 0.0896   | -0.443429927 | count | 1         |
| PQBP1      | -0.3172081 | 0.0768832 | -4.1258  | 3.78E-05 | -0.443132869 | count | 0.8651286 |
| EFTUD2     | -0.3898362 | 0.2147108 | -1.8156  | 0.0695   | -0.443117399 | count | 1         |
| EDF1       | -0.30883   | 0.0315912 | -9.7758  | 2.67E-22 | -0.442854034 | count | 6.42E-18  |
| C9orf50    | -0.5111309 | 0.3860435 | -1.324   | 0.186    | -0.44276809  | count | 1         |
| ACTN4      | -0.3095013 | 0.0517115 | -5.9852  | 2.37E-09 | -0.442660439 | count | 5.59E-05  |
| NSUN6      | -0.3466054 | 0.1953454 | -1.7743  | 0.0761   | -0.44261644  | count | 1         |

|               |            |           |          |          |              |       |             |
|---------------|------------|-----------|----------|----------|--------------|-------|-------------|
| XRCC4         | -0.349904  | 0.2194427 | -1.5945  | 0.111    | -0.442578985 | count | 1           |
| MGAT4B        | -0.3274391 | 0.1208248 | -2.71    | 0.00676  | -0.442575711 | count | 1           |
| ASNS          | -0.3791656 | 0.2197137 | -1.7257  | 0.0845   | -0.442303067 | count | 1           |
| PIM3          | -0.3201078 | 0.1133191 | -2.8248  | 0.00476  | -0.442295151 | count | 1           |
| MRPL36        | -0.3169596 | 0.0731703 | -4.3318  | 1.52E-05 | -0.442045842 | count | 0.3496912   |
| AC005070.3    | -1.3531145 | 0.5911328 | -2.289   | 0.0221   | -0.441771957 | count | 1           |
| RGN           | -0.3199444 | 0.1044143 | -3.0642  | 0.0022   | -0.441711224 | count | 1           |
| HLCS          | -0.4721738 | 0.31408   | -1.5034  | 0.133    | -0.441604362 | count | 1           |
| FBXW2         | -0.3342711 | 0.1339077 | -2.4963  | 0.0126   | -0.441549593 | count | 1           |
| CMSS1         | -0.3290092 | 0.1070404 | -3.0737  | 0.00213  | -0.441493007 | count | 1           |
| UNC119        | -0.3415612 | 0.1527828 | -2.2356  | 0.0254   | -0.441196349 | count | 1           |
| PELI3         | -0.3845483 | 0.2109125 | -1.8233  | 0.0683   | -0.441175831 | count | 1           |
| SP100         | -0.3114272 | 0.0600617 | -5.1851  | 2.28E-07 | -0.441008257 | count | 0.005328132 |
| EML2          | -0.3507259 | 0.1746197 | -2.0085  | 0.0447   | -0.440878391 | count | 1           |
| PEG10         | -0.4190086 | 0.2195161 | -1.9088  | 0.0564   | -0.440828474 | count | 1           |
| B4GALT1-AS1   | -0.3637346 | 0.2133064 | -1.7052  | 0.0882   | -0.440690593 | count | 1           |
| ZNF787        | -0.3416635 | 0.1431017 | -2.3876  | 0.017    | -0.440389604 | count | 1           |
| PERM1         | -1.3482342 | 0.8211598 | -1.6419  | 0.101    | -0.440143217 | count | 1           |
| CDCA5         | -1.3482342 | 0.8211598 | -1.6419  | 0.101    | -0.440143217 | count | 1           |
| ITGB1         | -0.3062255 | 0.0334465 | -9.1557  | 8.76E-20 | -0.440069669 | count | 2.10E-15    |
| ZFAS1         | -0.3099509 | 0.0548927 | -5.6465  | 1.76E-08 | -0.439613918 | count | 0.000413635 |
| AL160006.1    | -0.7206901 | 0.5169214 | -1.3942  | 0.163    | -0.439570481 | count | 1           |
| ASB1          | -0.3560765 | 0.2352566 | -1.5136  | 0.13     | -0.439480343 | count | 1           |
| IFT46         | -0.3677585 | 0.1887565 | -1.9483  | 0.0515   | -0.439345838 | count | 1           |
| BIN2          | -1.8617402 | 0.8002464 | -2.3265  | 0.02     | -0.439220243 | count | 1           |
| POLN          | -1.8617402 | 0.9605255 | -1.9383  | 0.0527   | -0.439220243 | count | 1           |
| SH2D2A        | -1.8617402 | 1.140761  | -1.632   | 0.103    | -0.439220243 | count | 1           |
| ITGB1BP2      | -0.6120023 | 0.3676727 | -1.6645  | 0.0961   | -0.439198851 | count | 1           |
| MCOLN2        | -1.3448701 | 0.6307417 | -2.1322  | 0.0331   | -0.439019666 | count | 1           |
| SLC24A4       | -1.3448701 | 0.7879236 | -1.7069  | 0.0879   | -0.439019666 | count | 1           |
| HMGNA         | -0.413713  | 0.2447156 | -1.6906  | 0.091    | -0.438856926 | count | 1           |
| SYMPK         | -0.3772931 | 0.2366819 | -1.5941  | 0.111    | -0.4383459   | count | 1           |
| SERGEF        | -0.3214809 | 0.1326934 | -2.4227  | 0.0155   | -0.438089789 | count | 1           |
| ATP10A        | -0.375556  | 0.2079733 | -1.8058  | 0.071    | -0.438039636 | count | 1           |
| SEH1L         | -0.385421  | 0.2776105 | -1.3884  | 0.165    | -0.438027815 | count | 1           |
| POPDC2        | -0.3893425 | 0.2805387 | -1.3878  | 0.165    | -0.438025517 | count | 1           |
| RPL13         | -0.3034168 | 0.0176095 | -17.2303 | 4.90E-64 | -0.437447456 | count | 1.19E-59    |
| ACOT7         | -0.3528474 | 0.1962585 | -1.7979  | 0.0723   | -0.437237141 | count | 1           |
| EIF3G         | -0.3058147 | 0.038307  | -7.9833  | 1.89E-15 | -0.437076777 | count | 4.51E-11    |
| RASA4         | -0.3947435 | 0.2809836 | -1.4049  | 0.16     | -0.436626349 | count | 1           |
| NEXN-AS1      | -0.7712796 | 0.442484  | -1.7431  | 0.0814   | -0.436600164 | count | 1           |
| POU3F1        | -0.7160475 | 0.4109699 | -1.7423  | 0.0815   | -0.436592359 | count | 1           |
| TPTEP2-CSNK1E | -0.9441148 | 0.7544263 | -1.2514  | 0.211    | -0.436566494 | count | 1           |
| PCED1A        | -0.3915065 | 0.2253006 | -1.7377  | 0.0823   | -0.43559051  | count | 1           |
| TLN1          | -0.3031453 | 0.037663  | -8.0489  | 1.12E-15 | -0.434994338 | count | 2.68E-11    |

|          |            |           |          |          |              |       |             |
|----------|------------|-----------|----------|----------|--------------|-------|-------------|
| RHNO1    | -0.3728508 | 0.195946  | -1.9028  | 0.0571   | -0.434844894 | count | 1           |
| TMEM59L  | -1.3301629 | 0.6375723 | -2.0863  | 0.037    | -0.434100294 | count | 1           |
| CHI3L2   | -0.4028182 | 0.3318023 | -1.214   | 0.225    | -0.433837271 | count | 1           |
| MBD3     | -0.3376557 | 0.1451594 | -2.3261  | 0.0201   | -0.433731194 | count | 1           |
| ERO1A    | -0.3354462 | 0.1355265 | -2.4751  | 0.0134   | -0.433697171 | count | 1           |
| RPL23A   | -0.3010691 | 0.0228218 | -13.1922 | 7.37E-39 | -0.433498366 | count | 1.78E-34    |
| BIRC5    | -0.8379337 | 0.9271205 | -0.9038  | 0.366    | -0.433315335 | count | 1           |
| MRPS6    | -0.3048233 | 0.0638418 | -4.7747  | 1.87E-06 | -0.433184516 | count | 0.04339335  |
| C17orf82 | -0.4998846 | 0.2855604 | -1.7505  | 0.0801   | -0.432720668 | count | 1           |
| FOXL1    | -0.4078761 | 0.2393034 | -1.7044  | 0.0884   | -0.432551414 | count | 1           |
| TIGD7    | -0.4320499 | 0.28657   | -1.5077  | 0.132    | -0.432414893 | count | 1           |
| KLC2     | -0.3785743 | 0.1974757 | -1.9171  | 0.0553   | -0.432220339 | count | 1           |
| BEND5    | -0.3328102 | 0.1470449 | -2.2633  | 0.0237   | -0.431975793 | count | 1           |
| PRPF31   | -0.3102797 | 0.0808536 | -3.8375  | 0.000126 | -0.431622765 | count | 1           |
| TPD52    | -0.4035488 | 0.4517393 | -0.8933  | 0.372    | -0.431333778 | count | 1           |
| INAFM2   | -0.3293825 | 0.2186586 | -1.5064  | 0.132    | -0.431261434 | count | 1           |
| PAWR     | -0.3040082 | 0.0651544 | -4.666   | 3.18E-06 | -0.431261364 | count | 0.07365198  |
| GRK2     | -0.3695227 | 0.2195965 | -1.6827  | 0.0925   | -0.430915072 | count | 1           |
| TXNL4B   | -0.4977509 | 0.2976145 | -1.6725  | 0.0945   | -0.430815366 | count | 1           |
| ARHGEF9  | -0.3118559 | 0.1209349 | -2.5787  | 0.00996  | -0.430516923 | count | 1           |
| RPL35    | -0.2993567 | 0.0240967 | -12.4232 | 9.69E-35 | -0.430397601 | count | 2.34E-30    |
| SERP2    | -0.3533748 | 0.1652908 | -2.1379  | 0.0326   | -0.430201113 | count | 1           |
| LCMT2    | -0.4680207 | 0.4574908 | -1.023   | 0.306    | -0.430082184 | count | 1           |
| ANP32B   | -0.3015482 | 0.0477894 | -6.3099  | 3.12E-10 | -0.429909273 | count | 7.38E-06    |
| NFU1     | -0.3098088 | 0.0832997 | -3.7192  | 0.000203 | -0.42953582  | count | 1           |
| CCDC88A  | -0.310468  | 0.1192814 | -2.6028  | 0.00928  | -0.427784835 | count | 1           |
| COX7C    | -0.29755   | 0.0265378 | -11.2123 | 1.03E-28 | -0.427410446 | count | 2.49E-24    |
| LRMDA    | -0.3142686 | 0.1374993 | -2.2856  | 0.0223   | -0.427370185 | count | 1           |
| NUP93    | -0.3966105 | 0.2658022 | -1.4921  | 0.136    | -0.427035661 | count | 1           |
| DDX41    | -0.3348314 | 0.1979195 | -1.6918  | 0.0908   | -0.426925601 | count | 1           |
| UXT      | -0.3004346 | 0.0511206 | -5.877   | 4.55E-09 | -0.426884258 | count | 0.000107212 |
| C19orf24 | -0.3115413 | 0.0987743 | -3.1541  | 0.00162  | -0.426849877 | count | 1           |
| UQCC2    | -0.3106447 | 0.0877103 | -3.5417  | 0.000402 | -0.426542534 | count | 1           |
| OXLD1    | -0.3202177 | 0.1312679 | -2.4394  | 0.0148   | -0.426240997 | count | 1           |
| TBC1D22A | -0.3337917 | 0.1885008 | -1.7708  | 0.0767   | -0.426140395 | count | 1           |
| ZNF90    | -0.4360069 | 0.3484147 | -1.2514  | 0.211    | -0.425643674 | count | 1           |
| GSTO1    | -0.29816   | 0.0421494 | -7.0739  | 1.80E-12 | -0.425632421 | count | 4.28E-08    |
| PDZRN4   | -0.3982761 | 0.2731287 | -1.4582  | 0.145    | -0.425597737 | count | 1           |
| MAP1B    | -0.2957955 | 0.043151  | -6.8549  | 8.34E-12 | -0.42541637  | count | 1.98E-07    |
| RPS20    | -0.2961834 | 0.0275158 | -10.7641 | 1.27E-26 | -0.425103851 | count | 3.06E-22    |
| LDLRAD2  | -0.9202309 | 0.5388881 | -1.7076  | 0.0878   | -0.424888292 | count | 1           |
| WDFY4    | -0.9202309 | 0.8289403 | -1.1101  | 0.267    | -0.424888292 | count | 1           |
| SYP      | -0.3757357 | 0.1926655 | -1.9502  | 0.0512   | -0.424722236 | count | 1           |
| HSPB3    | -1.7940337 | 0.9310445 | -1.9269  | 0.0541   | -0.424505442 | count | 1           |
| TANC1    | -0.3229216 | 0.1735053 | -1.8612  | 0.0628   | -0.423752516 | count | 1           |

|            |             |             |         |       |              |       |   |
|------------|-------------|-------------|---------|-------|--------------|-------|---|
| FBXO24     | -19.0433874 | 1400.86744  | -0.0136 | 0.989 | -0.423628649 | count | 1 |
| AC062004.1 | -19.0433874 | 1400.86744  | -0.0136 | 0.989 | -0.423628649 | count | 1 |
| NDRG4      | -19.0433874 | 1400.86744  | -0.0136 | 0.989 | -0.423628649 | count | 1 |
| MATK       | -19.0433874 | 1400.86744  | -0.0136 | 0.989 | -0.423628649 | count | 1 |
| LY9        | -18.9640981 | 1866.083827 | -0.0102 | 0.992 | -0.423628648 | count | 1 |
| AC007879.3 | -18.9640981 | 1866.083827 | -0.0102 | 0.992 | -0.423628648 | count | 1 |
| NEIL3      | -18.9640981 | 1866.083827 | -0.0102 | 0.992 | -0.423628648 | count | 1 |
| AC008629.1 | -18.9640981 | 1866.083827 | -0.0102 | 0.992 | -0.423628648 | count | 1 |
| SHROOM2    | -18.9640981 | 1866.083827 | -0.0102 | 0.992 | -0.423628648 | count | 1 |
| PRSS3      | -18.9640981 | 1866.083827 | -0.0102 | 0.992 | -0.423628648 | count | 1 |
| CAVIN4     | -18.9640981 | 1866.083827 | -0.0102 | 0.992 | -0.423628648 | count | 1 |
| C9orf147   | -18.9640981 | 1866.083827 | -0.0102 | 0.992 | -0.423628648 | count | 1 |
| AC044839.3 | -18.9640981 | 1866.083827 | -0.0102 | 0.992 | -0.423628648 | count | 1 |
| AP001189.1 | -18.9640981 | 1866.083827 | -0.0102 | 0.992 | -0.423628648 | count | 1 |
| AL603756.1 | -18.9640981 | 1866.083827 | -0.0102 | 0.992 | -0.423628648 | count | 1 |
| PLK1       | -18.9640981 | 1866.083827 | -0.0102 | 0.992 | -0.423628648 | count | 1 |
| AC055811.3 | -18.9640981 | 1866.083827 | -0.0102 | 0.992 | -0.423628648 | count | 1 |
| IKZF3      | -18.9640981 | 1866.083827 | -0.0102 | 0.992 | -0.423628648 | count | 1 |
| SYT5       | -18.9640981 | 1866.083827 | -0.0102 | 0.992 | -0.423628648 | count | 1 |
| PRR11      | -18.6359527 | 1451.538387 | -0.0128 | 0.99  | -0.423628647 | count | 1 |
| AL592430.1 | -18.6157339 | 1997.672932 | -0.0093 | 0.993 | -0.423628647 | count | 1 |
| LYPLAL1-DT | -18.6153785 | 1624.944628 | -0.0115 | 0.991 | -0.423628647 | count | 1 |
| NRG1       | -18.5980341 | 1337.344144 | -0.0139 | 0.989 | -0.423628647 | count | 1 |
| CAMK1G     | -18.4477282 | 1139.249904 | -0.0162 | 0.987 | -0.423628646 | count | 1 |
| TAS1R1     | -18.3935957 | 1327.94079  | -0.0139 | 0.989 | -0.423628646 | count | 1 |
| GATA3      | -18.3935957 | 1327.94079  | -0.0139 | 0.989 | -0.423628646 | count | 1 |
| CPA3       | -18.3509279 | 1661.280281 | -0.011  | 0.991 | -0.423628646 | count | 1 |
| EOMES      | -17.9769516 | 1006.967756 | -0.0179 | 0.986 | -0.423628643 | count | 1 |
| MMP7       | -19.542027  | 1498.699749 | -0.013  | 0.99  | -0.423628503 | count | 1 |
| GRIK3      | -19.45604   | 1579.162469 | -0.0123 | 0.99  | -0.423628503 | count | 1 |
| CLCA2      | -19.45604   | 1579.162469 | -0.0123 | 0.99  | -0.423628503 | count | 1 |
| HIST2H2AA4 | -19.45604   | 1579.162469 | -0.0123 | 0.99  | -0.423628503 | count | 1 |
| AL451050.2 | -19.45604   | 1579.162469 | -0.0123 | 0.99  | -0.423628503 | count | 1 |
| LEMD1      | -19.45604   | 1579.162469 | -0.0123 | 0.99  | -0.423628503 | count | 1 |
| NEK2       | -19.45604   | 1579.162469 | -0.0123 | 0.99  | -0.423628503 | count | 1 |
| MTRNR2L11  | -19.45604   | 1579.162469 | -0.0123 | 0.99  | -0.423628503 | count | 1 |
| C2orf48    | -19.45604   | 1579.162469 | -0.0123 | 0.99  | -0.423628503 | count | 1 |
| LINC01954  | -19.45604   | 1579.162469 | -0.0123 | 0.99  | -0.423628503 | count | 1 |
| LINC00276  | -19.45604   | 1579.162469 | -0.0123 | 0.99  | -0.423628503 | count | 1 |
| KRTCAP3    | -19.45604   | 1579.162469 | -0.0123 | 0.99  | -0.423628503 | count | 1 |
| CAPN14     | -19.45604   | 1579.162469 | -0.0123 | 0.99  | -0.423628503 | count | 1 |
| LINC00211  | -19.45604   | 1579.162469 | -0.0123 | 0.99  | -0.423628503 | count | 1 |
| AC011306.1 | -19.45604   | 1579.162469 | -0.0123 | 0.99  | -0.423628503 | count | 1 |
| GPR39      | -19.45604   | 1579.162469 | -0.0123 | 0.99  | -0.423628503 | count | 1 |
| HOXD1      | -19.45604   | 1579.162469 | -0.0123 | 0.99  | -0.423628503 | count | 1 |

|              |           |             |         |      |              |       |   |
|--------------|-----------|-------------|---------|------|--------------|-------|---|
| AC020571.1   | -19.45604 | 1579.162469 | -0.0123 | 0.99 | -0.423628503 | count | 1 |
| AC112721.2   | -19.45604 | 1579.162469 | -0.0123 | 0.99 | -0.423628503 | count | 1 |
| AC026202.3   | -19.45604 | 1579.162469 | -0.0123 | 0.99 | -0.423628503 | count | 1 |
| AC123023.1   | -19.45604 | 1579.162469 | -0.0123 | 0.99 | -0.423628503 | count | 1 |
| C3orf67-AS1  | -19.45604 | 1579.162469 | -0.0123 | 0.99 | -0.423628503 | count | 1 |
| AC110491.1   | -19.45604 | 1579.162469 | -0.0123 | 0.99 | -0.423628503 | count | 1 |
| IGSF11       | -19.45604 | 1579.162469 | -0.0123 | 0.99 | -0.423628503 | count | 1 |
| AC079848.1   | -19.45604 | 1579.162469 | -0.0123 | 0.99 | -0.423628503 | count | 1 |
| NPHP3-ACAD11 | -19.45604 | 1579.162469 | -0.0123 | 0.99 | -0.423628503 | count | 1 |
| AC024933.1   | -19.45604 | 1579.162469 | -0.0123 | 0.99 | -0.423628503 | count | 1 |
| AC080013.6   | -19.45604 | 1579.162469 | -0.0123 | 0.99 | -0.423628503 | count | 1 |
| ARL14        | -19.45604 | 1579.162469 | -0.0123 | 0.99 | -0.423628503 | count | 1 |
| MAP6D1       | -19.45604 | 1579.162469 | -0.0123 | 0.99 | -0.423628503 | count | 1 |
| FABP2        | -19.45604 | 1579.162469 | -0.0123 | 0.99 | -0.423628503 | count | 1 |
| C4orf45      | -19.45604 | 1579.162469 | -0.0123 | 0.99 | -0.423628503 | count | 1 |
| GABRB2       | -19.45604 | 1579.162469 | -0.0123 | 0.99 | -0.423628503 | count | 1 |
| HMMR         | -19.45604 | 1579.162469 | -0.0123 | 0.99 | -0.423628503 | count | 1 |
| AL357052.1   | -19.45604 | 1579.162469 | -0.0123 | 0.99 | -0.423628503 | count | 1 |
| NRSN1        | -19.45604 | 1579.162469 | -0.0123 | 0.99 | -0.423628503 | count | 1 |
| HCG20        | -19.45604 | 1579.162469 | -0.0123 | 0.99 | -0.423628503 | count | 1 |
| HLA-DQB2     | -19.45604 | 1579.162469 | -0.0123 | 0.99 | -0.423628503 | count | 1 |
| PNPLA1       | -19.45604 | 1579.162469 | -0.0123 | 0.99 | -0.423628503 | count | 1 |
| AL355297.2   | -19.45604 | 1579.162469 | -0.0123 | 0.99 | -0.423628503 | count | 1 |
| PLG          | -19.45604 | 1579.162469 | -0.0123 | 0.99 | -0.423628503 | count | 1 |
| AC093620.1   | -19.45604 | 1579.162469 | -0.0123 | 0.99 | -0.423628503 | count | 1 |
| AC004895.1   | -19.45604 | 1579.162469 | -0.0123 | 0.99 | -0.423628503 | count | 1 |
| AL683807.1   | -19.45604 | 1579.162469 | -0.0123 | 0.99 | -0.423628503 | count | 1 |
| AL035425.1   | -19.45604 | 1579.162469 | -0.0123 | 0.99 | -0.423628503 | count | 1 |
| SPANXA2-OT1  | -19.45604 | 1579.162469 | -0.0123 | 0.99 | -0.423628503 | count | 1 |
| LINC01605    | -19.45604 | 1579.162469 | -0.0123 | 0.99 | -0.423628503 | count | 1 |
| AC069120.1   | -19.45604 | 1579.162469 | -0.0123 | 0.99 | -0.423628503 | count | 1 |
| AC022182.2   | -19.45604 | 1579.162469 | -0.0123 | 0.99 | -0.423628503 | count | 1 |
| AC090987.1   | -19.45604 | 1579.162469 | -0.0123 | 0.99 | -0.423628503 | count | 1 |
| LINC01410    | -19.45604 | 1579.162469 | -0.0123 | 0.99 | -0.423628503 | count | 1 |
| AL137067.1   | -19.45604 | 1579.162469 | -0.0123 | 0.99 | -0.423628503 | count | 1 |
| AL157935.2   | -19.45604 | 1579.162469 | -0.0123 | 0.99 | -0.423628503 | count | 1 |
| AL136141.1   | -19.45604 | 1579.162469 | -0.0123 | 0.99 | -0.423628503 | count | 1 |
| FIBCD1       | -19.45604 | 1579.162469 | -0.0123 | 0.99 | -0.423628503 | count | 1 |
| AC136475.7   | -19.45604 | 1579.162469 | -0.0123 | 0.99 | -0.423628503 | count | 1 |
| OR5AS1       | -19.45604 | 1579.162469 | -0.0123 | 0.99 | -0.423628503 | count | 1 |
| GAL3ST3      | -19.45604 | 1579.162469 | -0.0123 | 0.99 | -0.423628503 | count | 1 |
| DNAJB13      | -19.45604 | 1579.162469 | -0.0123 | 0.99 | -0.423628503 | count | 1 |
| AC016825.1   | -19.45604 | 1579.162469 | -0.0123 | 0.99 | -0.423628503 | count | 1 |
| AL157832.1   | -19.45604 | 1579.162469 | -0.0123 | 0.99 | -0.423628503 | count | 1 |
| OLR1         | -19.45604 | 1579.162469 | -0.0123 | 0.99 | -0.423628503 | count | 1 |



|             |            |             |         |       |              |       |   |
|-------------|------------|-------------|---------|-------|--------------|-------|---|
| KRT7-AS     | -19.45604  | 1579.162469 | -0.0123 | 0.99  | -0.423628503 | count | 1 |
| LRP1-AS     | -19.45604  | 1579.162469 | -0.0123 | 0.99  | -0.423628503 | count | 1 |
| AC012555.1  | -19.45604  | 1579.162469 | -0.0123 | 0.99  | -0.423628503 | count | 1 |
| AC069234.2  | -19.45604  | 1579.162469 | -0.0123 | 0.99  | -0.423628503 | count | 1 |
| PCDH20      | -19.45604  | 1579.162469 | -0.0123 | 0.99  | -0.423628503 | count | 1 |
| ACOT1       | -19.45604  | 1579.162469 | -0.0123 | 0.99  | -0.423628503 | count | 1 |
| AC005479.1  | -19.45604  | 1579.162469 | -0.0123 | 0.99  | -0.423628503 | count | 1 |
| KCNK13      | -19.45604  | 1579.162469 | -0.0123 | 0.99  | -0.423628503 | count | 1 |
| IGHV5-51    | -19.45604  | 1579.162469 | -0.0123 | 0.99  | -0.423628503 | count | 1 |
| AC055855.1  | -19.45604  | 1579.162469 | -0.0123 | 0.99  | -0.423628503 | count | 1 |
| ADPGK-AS1   | -19.45604  | 1579.162469 | -0.0123 | 0.99  | -0.423628503 | count | 1 |
| AC090260.1  | -19.45604  | 1579.162469 | -0.0123 | 0.99  | -0.423628503 | count | 1 |
| AC091078.1  | -19.45604  | 1579.162469 | -0.0123 | 0.99  | -0.423628503 | count | 1 |
| AC036108.2  | -19.45604  | 1579.162469 | -0.0123 | 0.99  | -0.423628503 | count | 1 |
| AC015712.1  | -19.45604  | 1579.162469 | -0.0123 | 0.99  | -0.423628503 | count | 1 |
| AC005606.1  | -19.45604  | 1579.162469 | -0.0123 | 0.99  | -0.423628503 | count | 1 |
| AC130456.5  | -19.45604  | 1579.162469 | -0.0123 | 0.99  | -0.423628503 | count | 1 |
| AC106745.1  | -19.45604  | 1579.162469 | -0.0123 | 0.99  | -0.423628503 | count | 1 |
| AC116552.1  | -19.45604  | 1579.162469 | -0.0123 | 0.99  | -0.423628503 | count | 1 |
| AC138028.2  | -19.45604  | 1579.162469 | -0.0123 | 0.99  | -0.423628503 | count | 1 |
| SLC52A1     | -19.45604  | 1579.162469 | -0.0123 | 0.99  | -0.423628503 | count | 1 |
| ALOX15B     | -19.45604  | 1579.162469 | -0.0123 | 0.99  | -0.423628503 | count | 1 |
| AC114684.1  | -19.45604  | 1579.162469 | -0.0123 | 0.99  | -0.423628503 | count | 1 |
| SPEF1       | -19.45604  | 1579.162469 | -0.0123 | 0.99  | -0.423628503 | count | 1 |
| BANF2       | -19.45604  | 1579.162469 | -0.0123 | 0.99  | -0.423628503 | count | 1 |
| GDAP1L1     | -19.45604  | 1579.162469 | -0.0123 | 0.99  | -0.423628503 | count | 1 |
| SLC12A5-AS1 | -19.45604  | 1579.162469 | -0.0123 | 0.99  | -0.423628503 | count | 1 |
| BIRC7       | -19.45604  | 1579.162469 | -0.0123 | 0.99  | -0.423628503 | count | 1 |
| AC004528.2  | -19.45604  | 1579.162469 | -0.0123 | 0.99  | -0.423628503 | count | 1 |
| FCER2       | -19.45604  | 1579.162469 | -0.0123 | 0.99  | -0.423628503 | count | 1 |
| LINC01842   | -19.45604  | 1579.162469 | -0.0123 | 0.99  | -0.423628503 | count | 1 |
| DLL3        | -19.45604  | 1579.162469 | -0.0123 | 0.99  | -0.423628503 | count | 1 |
| ADM5        | -19.45604  | 1579.162469 | -0.0123 | 0.99  | -0.423628503 | count | 1 |
| AC010320.1  | -19.45604  | 1579.162469 | -0.0123 | 0.99  | -0.423628503 | count | 1 |
| AC246785.3  | -19.241104 | 1879.694245 | -0.0102 | 0.992 | -0.423628502 | count | 1 |
| AC016737.2  | -19.241104 | 1879.694245 | -0.0102 | 0.992 | -0.423628502 | count | 1 |
| AC074183.1  | -19.241104 | 1879.694245 | -0.0102 | 0.992 | -0.423628502 | count | 1 |
| HTR7        | -19.241104 | 1879.694245 | -0.0102 | 0.992 | -0.423628502 | count | 1 |
| SLCO4A1     | -19.241104 | 1879.694245 | -0.0102 | 0.992 | -0.423628502 | count | 1 |
| AC114271.1  | -19.241104 | 1879.694245 | -0.0102 | 0.992 | -0.423628502 | count | 1 |
| ITGB2-AS1   | -18.987652 | 1949.379221 | -0.0097 | 0.992 | -0.423628502 | count | 1 |
| AC022784.1  | -18.241229 | 1484.288138 | -0.0123 | 0.99  | -0.423628498 | count | 1 |
| TOMM20L     | -18.241229 | 1484.288138 | -0.0123 | 0.99  | -0.423628498 | count | 1 |
| DOC2A       | -18.241229 | 1484.288138 | -0.0123 | 0.99  | -0.423628498 | count | 1 |
| MAP6        | -0.4896281 | 0.2983066   | -1.6414 | 0.101 | -0.423564857 | count | 1 |

|            |            |           |          |          |              |       |             |
|------------|------------|-----------|----------|----------|--------------|-------|-------------|
| SPRY1      | -0.3043598 | 0.0816616 | -3.7271  | 0.000197 | -0.423418826 | count | 1           |
| TNFSF11    | -1.787958  | 0.4443254 | -4.024   | 5.84E-05 | -0.423167266 | count | 1           |
| ARHGAP18   | -0.318869  | 0.1344159 | -2.3723  | 0.0177   | -0.422973202 | count | 1           |
| ADGRE5     | -0.3045237 | 0.1070725 | -2.8441  | 0.00448  | -0.422951981 | count | 1           |
| BNC2-AS1   | -0.9152499 | 0.5912945 | -1.5479  | 0.122    | -0.422452516 | count | 1           |
| NIPSNAP3B  | -0.417435  | 0.2458762 | -1.6977  | 0.0896   | -0.422253917 | count | 1           |
| AP2S1      | -0.298474  | 0.0557701 | -5.3519  | 9.24E-08 | -0.422114154 | count | 0.002164193 |
| AC007114.2 | -1.057056  | 0.4237446 | -2.4946  | 0.0127   | -0.421746027 | count | 1           |
| SYNM       | -0.3001563 | 0.0792525 | -3.7873  | 0.000155 | -0.421241468 | count | 1           |
| C3AR1      | -1.7768879 | 0.8733637 | -2.0345  | 0.042    | -0.420721535 | count | 1           |
| CD72       | -1.7768879 | 0.8808263 | -2.0173  | 0.0437   | -0.420721535 | count | 1           |
| WISP1      | -0.5263249 | 0.459246  | -1.1461  | 0.252    | -0.420613647 | count | 1           |
| CYHR1      | -0.3011154 | 0.0737605 | -4.0823  | 4.55E-05 | -0.420385141 | count | 1           |
| TNFAIP3    | -0.3509545 | 0.2626927 | -1.336   | 0.182    | -0.420324208 | count | 1           |
| NDUFA12    | -0.2947138 | 0.0475627 | -6.1963  | 6.42E-10 | -0.420286757 | count | 1.52E-05    |
| NHP2       | -0.2966448 | 0.053908  | -5.5028  | 3.99E-08 | -0.420235703 | count | 0.000936254 |
| PDLIM7     | -0.2949049 | 0.0616042 | -4.7871  | 1.76E-06 | -0.420189332 | count | 0.04085488  |
| CCNQ       | -0.3172045 | 0.1116253 | -2.8417  | 0.00451  | -0.419980395 | count | 1           |
| COPS9      | -0.2954786 | 0.045766  | -6.4563  | 1.21E-10 | -0.419658003 | count | 2.87E-06    |
| FAM136A    | -0.3129007 | 0.1267044 | -2.4695  | 0.0136   | -0.419018564 | count | 1           |
| AJUBA      | -0.4959874 | 0.3467973 | -1.4302  | 0.153    | -0.418820001 | count | 1           |
| UQCRB      | -0.2916817 | 0.0304232 | -9.5875  | 1.61E-21 | -0.41880103  | count | 3.87E-17    |
| B3GALNT1   | -0.3474638 | 0.1625184 | -2.138   | 0.0326   | -0.418506483 | count | 1           |
| BANF1      | -0.2932398 | 0.0457682 | -6.4071  | 1.67E-10 | -0.418230457 | count | 3.96E-06    |
| SNTA1      | -0.3033219 | 0.0774062 | -3.9186  | 9.07E-05 | -0.418209737 | count | 1           |
| PSME2      | -0.2943195 | 0.0601587 | -4.8924  | 1.04E-06 | -0.418204594 | count | 0.02419144  |
| GALNT18    | -0.3284232 | 0.1776503 | -1.8487  | 0.0646   | -0.418145772 | count | 1           |
| GPR62      | -1.2826185 | 0.7231291 | -1.7737  | 0.0762   | -0.418118084 | count | 1           |
| C9orf170   | -1.2826185 | 0.7835804 | -1.6369  | 0.102    | -0.418118084 | count | 1           |
| UBE2C      | -1.2826185 | 0.8679455 | -1.4778  | 0.14     | -0.418118084 | count | 1           |
| TRIR       | -0.2925921 | 0.0390839 | -7.4863  | 8.83E-14 | -0.418105453 | count | 2.10E-09    |
| AGPAT2     | -0.3032935 | 0.1008481 | -3.0074  | 0.00265  | -0.418023514 | count | 1           |
| LYPD1      | -0.6451645 | 0.4862286 | -1.3269  | 0.185    | -0.417926697 | count | 1           |
| LINC00324  | -0.4471091 | 0.2879221 | -1.5529  | 0.121    | -0.417556494 | count | 1           |
| CHMP4A     | -0.2997015 | 0.0746672 | -4.0138  | 6.09E-05 | -0.417467767 | count | 1           |
| SLC20A1    | -0.3148604 | 0.2249068 | -1.4     | 0.162    | -0.417378181 | count | 1           |
| SURF6      | -0.3168796 | 0.1326178 | -2.3894  | 0.0169   | -0.417316524 | count | 1           |
| JPH1       | -1.2800841 | 0.9135901 | -1.4012  | 0.161    | -0.41726295  | count | 1           |
| WDR62      | -1.2800841 | 0.9135901 | -1.4012  | 0.161    | -0.41726295  | count | 1           |
| CFP        | -1.2800841 | 0.9476061 | -1.3509  | 0.177    | -0.41726295  | count | 1           |
| AC026150.3 | -1.2800841 | 0.9476061 | -1.3509  | 0.177    | -0.41726295  | count | 1           |
| AL441883.1 | -1.7601881 | 0.77755   | -2.2638  | 0.0236   | -0.417014343 | count | 1           |
| NKX6-1     | -1.7601881 | 0.9279774 | -1.8968  | 0.0579   | -0.417014343 | count | 1           |
| NRK        | -0.4537575 | 0.3421858 | -1.3261  | 0.185    | -0.416619265 | count | 1           |
| RPL36      | -0.289844  | 0.0245017 | -11.8296 | 1.03E-31 | -0.416596499 | count | 2.49E-27    |

|            |            |           |          |          |              |       |             |
|------------|------------|-----------|----------|----------|--------------|-------|-------------|
| CLDND2     | -0.581582  | 0.4141419 | -1.4043  | 0.16     | -0.416444467 | count | 1           |
| AK9        | -0.4073878 | 0.201864  | -2.0181  | 0.0437   | -0.416313919 | count | 1           |
| TMEM160    | -0.2942913 | 0.0734864 | -4.0047  | 6.33E-05 | -0.415932251 | count | 1           |
| LRTOMT     | -0.3954753 | 0.2161841 | -1.8293  | 0.0674   | -0.415614304 | count | 1           |
| PLXNA4     | -0.4524955 | 0.4026925 | -1.1237  | 0.261    | -0.415428773 | count | 1           |
| DLG2       | -0.3606056 | 0.224983  | -1.6028  | 0.109    | -0.415200594 | count | 1           |
| LAYN       | -0.3000984 | 0.1114363 | -2.693   | 0.00711  | -0.414382779 | count | 1           |
| OSBPL6     | -0.6398064 | 0.3082434 | -2.0757  | 0.038    | -0.414285455 | count | 1           |
| LIMS1      | -0.2928356 | 0.05694   | -5.1429  | 2.85E-07 | -0.414061121 | count | 0.00665589  |
| FAM89B     | -0.2916471 | 0.0539823 | -5.4026  | 6.98E-08 | -0.413942189 | count | 0.001635693 |
| RPL21      | -0.2873585 | 0.0208201 | -13.8019 | 2.78E-42 | -0.413908681 | count | 6.74E-38    |
| TMEM158    | -0.5547222 | 0.424676  | -1.3062  | 0.192    | -0.413690521 | count | 1           |
| ZFP69B     | -0.7327902 | 0.5541023 | -1.3225  | 0.186    | -0.41363566  | count | 1           |
| WNK1       | -0.3071033 | 0.1067993 | -2.8755  | 0.00406  | -0.41305424  | count | 1           |
| KCTD21     | -0.6377063 | 0.4372024 | -1.4586  | 0.145    | -0.412858649 | count | 1           |
| EMC10      | -0.2979462 | 0.0818121 | -3.6418  | 0.000274 | -0.412358147 | count | 1           |
| RPS27A     | -0.2860211 | 0.0201243 | -14.2127 | 1.15E-44 | -0.412357796 | count | 2.79E-40    |
| MPP6       | -0.3581277 | 0.1670676 | -2.1436  | 0.0321   | -0.412310473 | count | 1           |
| IPO7       | -0.3020613 | 0.1099379 | -2.7476  | 0.00603  | -0.412103147 | count | 1           |
| CLSPN      | -1.7368628 | 0.889118  | -1.9535  | 0.0508   | -0.411801014 | count | 1           |
| AC098934.4 | -1.7368628 | 0.889118  | -1.9535  | 0.0508   | -0.411801014 | count | 1           |
| POTEE      | -1.7368628 | 0.889118  | -1.9535  | 0.0508   | -0.411801014 | count | 1           |
| AGR2       | -1.7368628 | 0.889118  | -1.9535  | 0.0508   | -0.411801014 | count | 1           |
| COLEC10    | -1.7368628 | 0.889118  | -1.9535  | 0.0508   | -0.411801014 | count | 1           |
| CDK1       | -1.7368628 | 0.889118  | -1.9535  | 0.0508   | -0.411801014 | count | 1           |
| MSMP       | -1.7368628 | 1.0255546 | -1.6936  | 0.0904   | -0.411801014 | count | 1           |
| AP002761.2 | -1.7368628 | 1.0255546 | -1.6936  | 0.0904   | -0.411801014 | count | 1           |
| CHCHD5     | -0.3000333 | 0.0889041 | -3.3748  | 0.000746 | -0.411759859 | count | 1           |
| ZFP91      | -0.3331183 | 0.1803661 | -1.8469  | 0.0648   | -0.411750384 | count | 1           |
| NECAP2     | -0.3052694 | 0.1280786 | -2.3835  | 0.0172   | -0.411732781 | count | 1           |
| NABP2      | -0.3043107 | 0.1064348 | -2.8591  | 0.00427  | -0.411646116 | count | 1           |
| ZNHIT3     | -0.2953127 | 0.0764719 | -3.8617  | 0.000115 | -0.411428243 | count | 1           |
| TRPV2      | -0.3987243 | 0.2685552 | -1.4847  | 0.138    | -0.411412501 | count | 1           |
| LMCD1      | -0.2870162 | 0.0618262 | -4.6423  | 3.57E-06 | -0.411182986 | count | 0.08262408  |
| AC124283.1 | -0.676381  | 0.3829744 | -1.7661  | 0.0775   | -0.411177814 | count | 1           |
| SGK3       | -0.3180888 | 0.1832318 | -1.736   | 0.0826   | -0.411120105 | count | 1           |
| AC090152.1 | -0.4998283 | 0.5736423 | -0.8713  | 0.384    | -0.410874899 | count | 1           |
| AC027288.3 | -1.7326871 | 1.095173  | -1.5821  | 0.114    | -0.410863416 | count | 1           |
| S1PR1      | -0.4021492 | 0.4213678 | -0.9544  | 0.34     | -0.410851507 | count | 1           |
| HS2ST1     | -0.3715195 | 0.2138231 | -1.7375  | 0.0824   | -0.41054733  | count | 1           |
| FHOD1      | -0.4991289 | 0.3529179 | -1.4143  | 0.157    | -0.410280098 | count | 1           |
| KBTBD8     | -1.7298899 | 0.8806206 | -1.9644  | 0.0496   | -0.410234681 | count | 1           |
| PCGF5      | -0.2904562 | 0.0810348 | -3.5843  | 0.000342 | -0.41015348  | count | 1           |
| SRGAP2C    | -0.3425242 | 0.1786615 | -1.9172  | 0.0553   | -0.410121124 | count | 1           |
| TAP1       | -0.328056  | 0.1662287 | -1.9735  | 0.0485   | -0.410075161 | count | 1           |

|             |            |           |          |          |              |       |             |
|-------------|------------|-----------|----------|----------|--------------|-------|-------------|
| BFSP1       | -0.6746348 | 0.4582657 | -1.4721  | 0.141    | -0.410060417 | count | 1           |
| LYRM9       | -0.3189774 | 0.1279753 | -2.4925  | 0.0127   | -0.410053954 | count | 1           |
| AC016065.1  | -0.4389482 | 0.2956588 | -1.4846  | 0.138    | -0.409736326 | count | 1           |
| ARHGEF26    | -0.3100517 | 0.1570985 | -1.9736  | 0.0485   | -0.409674829 | count | 1           |
| ZNF568      | -0.3381401 | 0.195345  | -1.731   | 0.0835   | -0.409379071 | count | 1           |
| PRDM16      | -0.3205889 | 0.2935606 | -1.0921  | 0.275    | -0.409170678 | count | 1           |
| SURF2       | -0.304029  | 0.0998919 | -3.0436  | 0.00235  | -0.409073338 | count | 1           |
| LUZP1       | -0.2970093 | 0.1034963 | -2.8698  | 0.00413  | -0.409045791 | count | 1           |
| MYO18A      | -0.3549342 | 0.365326  | -0.9716  | 0.331    | -0.408586264 | count | 1           |
| GGT5        | -0.3036731 | 0.1042182 | -2.9138  | 0.00359  | -0.408251143 | count | 1           |
| DGCR6L      | -0.2939823 | 0.0788784 | -3.727   | 0.000197 | -0.408180023 | count | 1           |
| EXOSC5      | -0.31309   | 0.1375651 | -2.2759  | 0.0229   | -0.408097382 | count | 1           |
| SIRT7       | -0.3282353 | 0.1699056 | -1.9319  | 0.0535   | -0.408063881 | count | 1           |
| NBPF19      | -0.5109325 | 0.3253547 | -1.5704  | 0.116    | -0.407870662 | count | 1           |
| ESS2        | -0.3690703 | 0.206585  | -1.7865  | 0.0741   | -0.407799063 | count | 1           |
| CTSD        | -0.2852305 | 0.0425315 | -6.7063  | 2.30E-11 | -0.407787044 | count | 5.46E-07    |
| ST6GALNAC4  | -0.3225003 | 0.1478646 | -2.1811  | 0.0292   | -0.40766678  | count | 1           |
| RIMKLB      | -0.3141825 | 0.1275922 | -2.4624  | 0.0138   | -0.407657574 | count | 1           |
| RPS9        | -0.2830585 | 0.0214485 | -13.1972 | 6.92E-39 | -0.407534717 | count | 1.68E-34    |
| TRAPPC1     | -0.2871944 | 0.060787  | -4.7246  | 2.39E-06 | -0.407523362 | count | 0.05540976  |
| GMPR        | -0.3101465 | 0.1530729 | -2.0261  | 0.0428   | -0.406901371 | count | 1           |
| DUSP19      | -0.3404678 | 0.1971198 | -1.7272  | 0.0842   | -0.406400035 | count | 1           |
| FRY         | -0.3060247 | 0.1485973 | -2.0594  | 0.0395   | -0.406339584 | count | 1           |
| C12orf57    | -0.2824473 | 0.027646  | -10.2166 | 3.51E-24 | -0.406058546 | count | 8.45E-20    |
| AC018653.3  | -0.8814504 | 0.6072388 | -1.4516  | 0.147    | -0.405923995 | count | 1           |
| SPINT2      | -0.2832793 | 0.0576394 | -4.9147  | 9.28E-07 | -0.405859204 | count | 0.021595488 |
| AC018797.2  | -0.37723   | 0.2423751 | -1.5564  | 0.12     | -0.405817319 | count | 1           |
| TRDMT1      | -0.3893991 | 0.2245851 | -1.7339  | 0.083    | -0.405446699 | count | 1           |
| HMOX1       | -0.327754  | 0.223678  | -1.4653  | 0.143    | -0.405062549 | count | 1           |
| RNASEH2B    | -0.2978507 | 0.0989765 | -3.0093  | 0.00264  | -0.404728627 | count | 1           |
| TMSB10      | -0.2810947 | 0.0404317 | -6.9523  | 4.23E-12 | -0.40469619  | count | 1.00E-07    |
| EVA1C       | -0.3095486 | 0.1666908 | -1.857   | 0.0634   | -0.40449196  | count | 1           |
| ZNF256      | -0.4490676 | 0.3940336 | -1.1397  | 0.254    | -0.404482617 | count | 1           |
| HIST1H4D    | -0.784612  | 0.7848253 | -0.9997  | 0.318    | -0.404178082 | count | 1           |
| LRRC28      | -0.3297936 | 0.1992162 | -1.6555  | 0.0979   | -0.404099488 | count | 1           |
| LRRC37B     | -0.3956481 | 0.3912336 | -1.0113  | 0.312    | -0.404075414 | count | 1           |
| TCEAL5      | -0.3541478 | 0.3327808 | -1.0642  | 0.287    | -0.403964778 | count | 1           |
| FGGY        | -0.3878671 | 0.2943736 | -1.3176  | 0.188    | -0.403821121 | count | 1           |
| HDDC2       | -0.286104  | 0.0676659 | -4.2282  | 2.41E-05 | -0.403657382 | count | 0.5530468   |
| UBA52       | -0.2803943 | 0.0214867 | -13.0497 | 4.44E-38 | -0.403448103 | count | 1.07E-33    |
| TCEAL2      | -0.2863303 | 0.106522  | -2.688   | 0.00722  | -0.40334047  | count | 1           |
| GALNT1      | -0.3003196 | 0.1028108 | -2.9211  | 0.00351  | -0.403203645 | count | 1           |
| RPL36AL     | -0.2804605 | 0.0251241 | -11.163  | 1.77E-28 | -0.403136759 | count | 4.27E-24    |
| ST8SIA6-AS1 | -1.2380979 | 0.7089141 | -1.7465  | 0.0808   | -0.403053578 | count | 1           |
| SPC24       | -1.2380979 | 0.7685614 | -1.6109  | 0.107    | -0.403053578 | count | 1           |

|             |            |           |          |          |              |       |            |
|-------------|------------|-----------|----------|----------|--------------|-------|------------|
| DNER        | -1.2380979 | 0.7783833 | -1.5906  | 0.112    | -0.403053578 | count | 1          |
| AL590004.4  | -1.2380979 | 0.8950049 | -1.3833  | 0.167    | -0.403053578 | count | 1          |
| ZNF446      | -0.4189524 | 0.2570353 | -1.6299  | 0.103    | -0.402953592 | count | 1          |
| COX20       | -0.2852646 | 0.0703267 | -4.0563  | 5.09E-05 | -0.402766687 | count | 1          |
| FGD1        | -0.5404937 | 0.3899941 | -1.3859  | 0.166    | -0.402652242 | count | 1          |
| SCUBE1      | -0.5898182 | 0.5923612 | -0.9957  | 0.319    | -0.402492458 | count | 1          |
| PCLO        | -0.8743791 | 0.7957395 | -1.0988  | 0.272    | -0.402466522 | count | 1          |
| NFKB2       | -0.3525039 | 0.2018065 | -1.7467  | 0.0808   | -0.402064494 | count | 1          |
| RAB3IP      | -0.4305927 | 0.3809026 | -1.1305  | 0.258    | -0.401734826 | count | 1          |
| CLEC7A      | -1.2334111 | 0.8207976 | -1.5027  | 0.133    | -0.401462675 | count | 1          |
| RPL4        | -0.2802506 | 0.033366  | -8.3993  | 6.34E-17 | -0.401355574 | count | 1.52E-12   |
| AC009948.1  | -0.4233598 | 0.2955456 | -1.4325  | 0.152    | -0.4012403   | count | 1          |
| CNN2        | -0.2872744 | 0.0944754 | -3.0407  | 0.00238  | -0.401209416 | count | 1          |
| CD151       | -0.2786763 | 0.032625  | -8.5418  | 1.91E-17 | -0.400815281 | count | 4.57E-13   |
| AC010201.2  | -1.6872908 | 1.07342   | -1.5719  | 0.116    | -0.400588714 | count | 1          |
| ASPRV1      | -1.6872908 | 1.188293  | -1.4199  | 0.156    | -0.400588714 | count | 1          |
| MYL6        | -0.2777748 | 0.026908  | -10.3231 | 1.20E-24 | -0.400400929 | count | 2.89E-20   |
| INPP5F      | -0.3582261 | 0.2035285 | -1.7601  | 0.0785   | -0.400319967 | count | 1          |
| RPS3        | -0.2778008 | 0.0223365 | -12.4371 | 8.20E-35 | -0.400290894 | count | 1.98E-30   |
| TIMM8B      | -0.2890502 | 0.0906001 | -3.1904  | 0.00143  | -0.400018682 | count | 1          |
| PARK7       | -0.2784128 | 0.0304647 | -9.1389  | 1.02E-19 | -0.399746086 | count | 2.45E-15   |
| CNKSR3      | -0.3248024 | 0.2745497 | -1.183   | 0.237    | -0.399699071 | count | 1          |
| FAM117A     | -0.3429472 | 0.1937612 | -1.7699  | 0.0768   | -0.399557313 | count | 1          |
| SNCAIP      | -0.3709074 | 0.206923  | -1.7925  | 0.0731   | -0.398900709 | count | 1          |
| ETV7        | -0.3588723 | 0.2353756 | -1.5247  | 0.127    | -0.398752671 | count | 1          |
| RNASEH1-AS1 | -0.3260823 | 0.1731668 | -1.8831  | 0.0598   | -0.39858717  | count | 1          |
| EEF1B2      | -0.2771513 | 0.0280814 | -9.8696  | 1.08E-22 | -0.398522819 | count | 2.60E-18   |
| PANO1       | -0.656588  | 0.5774664 | -1.137   | 0.256    | -0.398519847 | count | 1          |
| PLXNB2      | -0.2936511 | 0.1437912 | -2.0422  | 0.0412   | -0.398507955 | count | 1          |
| MCTS1       | -0.2917428 | 0.0946753 | -3.0815  | 0.00207  | -0.398499763 | count | 1          |
| AP001527.2  | -0.8659405 | 0.5037988 | -1.7188  | 0.0857   | -0.398340956 | count | 1          |
| KCNJ2-AS1   | -1.0012349 | 0.5853001 | -1.7106  | 0.0872   | -0.398213015 | count | 1          |
| MTRF1L      | -0.2911102 | 0.1099295 | -2.6482  | 0.00813  | -0.39812568  | count | 1          |
| NT5C3B      | -0.2872641 | 0.0799456 | -3.5932  | 0.000331 | -0.398050046 | count | 1          |
| PTPN14      | -0.30967   | 0.1765525 | -1.754   | 0.0795   | -0.398013678 | count | 1          |
| CCNI        | -0.2767449 | 0.0281516 | -9.8305  | 1.58E-22 | -0.397915847 | count | 3.80E-18   |
| CCDC9       | -0.4193696 | 0.2609824 | -1.6069  | 0.108    | -0.397364467 | count | 1          |
| PRMT2       | -0.2803715 | 0.0618444 | -4.5335  | 5.99E-06 | -0.397314206 | count | 0.13832108 |
| ABCF2       | -0.3423821 | 0.2448471 | -1.3984  | 0.162    | -0.397300478 | count | 1          |
| UFSP1       | -0.4835663 | 0.3222934 | -1.5004  | 0.134    | -0.397054508 | count | 1          |
| TGFBI       | -0.2975206 | 0.1315165 | -2.2622  | 0.0237   | -0.396961482 | count | 1          |
| CENPU       | -0.5554604 | 0.437536  | -1.2695  | 0.204    | -0.39694819  | count | 1          |
| ZNF620      | -0.3847109 | 0.2438019 | -1.578   | 0.115    | -0.396673511 | count | 1          |
| MTRNR2L8    | -0.2848148 | 0.0720531 | -3.9528  | 7.87E-05 | -0.396567083 | count | 1          |
| DAGLB       | -0.5813732 | 0.4926418 | -1.1801  | 0.238    | -0.396465399 | count | 1          |

|            |            |           |         |          |              |       |             |
|------------|------------|-----------|---------|----------|--------------|-------|-------------|
| ZCRB1      | -0.2798734 | 0.0579764 | -4.8274 | 1.44E-06 | -0.396420277 | count | 0.03345552  |
| UBXN1      | -0.2780676 | 0.0451666 | -6.1565 | 8.24E-10 | -0.396388923 | count | 1.95E-05    |
| RPS15A     | -0.2751477 | 0.0210293 | -13.084 | 2.89E-38 | -0.396347413 | count | 7.00E-34    |
| CCNJL      | -1.2183317 | 0.635713  | -1.9165 | 0.0554   | -0.396338144 | count | 1           |
| AL138737.1 | -0.7695184 | 0.5497348 | -1.3998 | 0.162    | -0.395940189 | count | 1           |
| LTB4R      | -0.531601  | 0.841464  | -0.6318 | 0.528    | -0.395760157 | count | 1           |
| RASSF1-AS1 | -0.9950554 | 0.7151065 | -1.3915 | 0.164    | -0.395604933 | count | 1           |
| EGLN2      | -0.9950554 | 0.827449  | -1.2026 | 0.229    | -0.395604933 | count | 1           |
| ARRDC3-AS1 | -0.7024809 | 0.618332  | -1.1361 | 0.256    | -0.395583188 | count | 1           |
| MAP7       | -1.2159087 | 0.4688084 | -2.5936 | 0.00954  | -0.395513916 | count | 1           |
| ICK        | -0.2905276 | 0.0995514 | -2.9184 | 0.00354  | -0.395446668 | count | 1           |
| AL139289.2 | -0.7678026 | 0.6869178 | -1.1178 | 0.264    | -0.39500409  | count | 1           |
| CD2AP      | -0.3040147 | 0.1443744 | -2.1057 | 0.0353   | -0.39476404  | count | 1           |
| LRRC32     | -0.2915379 | 0.1176715 | -2.4776 | 0.0133   | -0.394584242 | count | 1           |
| ZNF419     | -0.6099503 | 0.3607162 | -1.6909 | 0.0909   | -0.394022253 | count | 1           |
| PRAF2      | -0.2841572 | 0.0878164 | -3.2358 | 0.00122  | -0.393843482 | count | 1           |
| LINC01943  | -0.7656187 | 0.5079098 | -1.5074 | 0.132    | -0.393812729 | count | 1           |
| KLHL11     | -0.4792494 | 0.3616337 | -1.3252 | 0.185    | -0.393389074 | count | 1           |
| MAST3      | -0.3464085 | 0.3749071 | -0.924  | 0.356    | -0.39310717  | count | 1           |
| PPM1B      | -0.3041225 | 0.1333039 | -2.2814 | 0.0226   | -0.392961954 | count | 1           |
| RNF7       | -0.2749907 | 0.0480514 | -5.7228 | 1.13E-08 | -0.392805107 | count | 0.000265787 |
| FBXO4      | -0.3121902 | 0.1749773 | -1.7842 | 0.0745   | -0.392715272 | count | 1           |
| URM1       | -0.2852937 | 0.0996141 | -2.864  | 0.00421  | -0.392503953 | count | 1           |
| EID3       | -0.3170149 | 0.2342693 | -1.3532 | 0.176    | -0.392470992 | count | 1           |
| PFDN5      | -0.2724723 | 0.0256856 | -10.608 | 6.47E-26 | -0.392017875 | count | 1.56E-21    |
| CHTF18     | -0.8529849 | 0.5048923 | -1.6894 | 0.0912   | -0.392008336 | count | 1           |
| TPM1       | -0.2720592 | 0.034998  | -7.7736 | 9.84E-15 | -0.391982481 | count | 2.35E-10    |
| RNF180     | -0.285814  | 0.1341699 | -2.1302 | 0.0332   | -0.391768716 | count | 1           |
| C1orf54    | -0.2803585 | 0.0797264 | -3.5165 | 0.000443 | -0.391638146 | count | 1           |
| CCDC115    | -0.2803204 | 0.0741267 | -3.7816 | 0.000158 | -0.391480762 | count | 1           |
| KCNC4      | -0.4645945 | 0.3433191 | -1.3532 | 0.176    | -0.391472589 | count | 1           |
| CLIC4      | -0.275488  | 0.0608526 | -4.5271 | 6.17E-06 | -0.391455968 | count | 0.14244679  |
| MYO9B      | -0.3000626 | 0.1398198 | -2.1461 | 0.0319   | -0.39136506  | count | 1           |
| PAQR8      | -0.5739412 | 0.4010826 | -1.431  | 0.153    | -0.39116487  | count | 1           |
| FNDC1      | -0.4014572 | 0.3030363 | -1.3248 | 0.185    | -0.391160084 | count | 1           |
| BET1L      | -0.2998812 | 0.2225727 | -1.3473 | 0.178    | -0.391127172 | count | 1           |
| THNSL1     | -0.4640866 | 0.3198404 | -1.451  | 0.147    | -0.391030756 | count | 1           |
| PIANP      | -0.4432424 | 0.2493254 | -1.7778 | 0.0755   | -0.390955603 | count | 1           |
| CD9        | -0.2715301 | 0.0379813 | -7.1491 | 1.05E-12 | -0.390869382 | count | 2.50E-08    |
| AGAP2-AS1  | -0.3256533 | 0.2058637 | -1.5819 | 0.114    | -0.390861738 | count | 1           |
| NR2C2AP    | -0.3138823 | 0.1617804 | -1.9402 | 0.0524   | -0.390806983 | count | 1           |
| SNRPF      | -0.2774024 | 0.0619762 | -4.476  | 7.84E-06 | -0.39071045  | count | 0.1808296   |
| TRAPPC13   | -0.3234667 | 0.2379077 | -1.3596 | 0.174    | -0.390395755 | count | 1           |
| FOXS1      | -0.2849406 | 0.1277492 | -2.2305 | 0.0258   | -0.390215939 | count | 1           |
| ENPP5      | -0.3823071 | 0.3054003 | -1.2518 | 0.211    | -0.390179921 | count | 1           |

|            |            |           |          |          |              |       |            |
|------------|------------|-----------|----------|----------|--------------|-------|------------|
| TMEM203    | -0.2889952 | 0.0974585 | -2.9653  | 0.00304  | -0.390148887 | count | 1          |
| BHLHB9     | -0.4117359 | 0.3283724 | -1.2539  | 0.21     | -0.389953013 | count | 1          |
| MAPK4      | -1.640511  | 0.6020109 | -2.7251  | 0.00646  | -0.389849312 | count | 1          |
| HINT3      | -0.3145656 | 0.1506818 | -2.0876  | 0.0369   | -0.389413279 | count | 1          |
| CLYBL      | -0.4175998 | 0.2738049 | -1.5252  | 0.127    | -0.389303139 | count | 1          |
| LSM7       | -0.2743555 | 0.056355  | -4.8683  | 1.17E-06 | -0.388955698 | count | 0.02719899 |
| HELLS      | -0.4170942 | 0.2952772 | -1.4126  | 0.158    | -0.38881964  | count | 1          |
| HRAS       | -0.2808091 | 0.0899177 | -3.123   | 0.0018   | -0.388758102 | count | 1          |
| MMRN2      | -0.5223057 | 0.335099  | -1.5587  | 0.119    | -0.388562023 | count | 1          |
| EFR3B      | -1.634238  | 0.9884842 | -1.6533  | 0.0984   | -0.388397769 | count | 1          |
| LBX2       | -1.634238  | 0.9884842 | -1.6533  | 0.0984   | -0.388397769 | count | 1          |
| MYRIP      | -1.634238  | 0.9884842 | -1.6533  | 0.0984   | -0.388397769 | count | 1          |
| NSG1       | -1.634238  | 0.9884842 | -1.6533  | 0.0984   | -0.388397769 | count | 1          |
| FSCN3      | -1.634238  | 0.9884842 | -1.6533  | 0.0984   | -0.388397769 | count | 1          |
| MANCR      | -1.634238  | 0.9884842 | -1.6533  | 0.0984   | -0.388397769 | count | 1          |
| AC087564.1 | -1.634238  | 0.9884842 | -1.6533  | 0.0984   | -0.388397769 | count | 1          |
| AC044802.1 | -1.634238  | 0.9884842 | -1.6533  | 0.0984   | -0.388397769 | count | 1          |
| LINC00114  | -1.634238  | 0.9884842 | -1.6533  | 0.0984   | -0.388397769 | count | 1          |
| CAPN11     | -1.634238  | 1.422203  | -1.1491  | 0.251    | -0.388397769 | count | 1          |
| AP4B1-AS1  | -1.634238  | 1.492024  | -1.0953  | 0.273    | -0.388397769 | count | 1          |
| SSSCA1     | -0.2797159 | 0.0908331 | -3.0794  | 0.00209  | -0.388283426 | count | 1          |
| STX4       | -0.2906986 | 0.1083906 | -2.682   | 0.00735  | -0.388218826 | count | 1          |
| PQLC1      | -0.2990843 | 0.1238234 | -2.4154  | 0.0158   | -0.387956253 | count | 1          |
| DACT1      | -0.3038753 | 0.1981104 | -1.5339  | 0.125    | -0.387698622 | count | 1          |
| AL035701.1 | -0.9761937 | 0.8053039 | -1.2122  | 0.226    | -0.38764194  | count | 1          |
| AL592148.3 | -0.9761937 | 0.9017802 | -1.0825  | 0.279    | -0.38764194  | count | 1          |
| TMPPE      | -0.9761937 | 0.9343481 | -1.0448  | 0.296    | -0.38764194  | count | 1          |
| SMIM25     | -0.9761937 | 1.0459848 | -0.9333  | 0.351    | -0.38764194  | count | 1          |
| KIAA0895   | -0.6003781 | 0.3815327 | -1.5736  | 0.116    | -0.387535857 | count | 1          |
| BCL7C      | -0.2723374 | 0.0565719 | -4.814   | 1.54E-06 | -0.387440927 | count | 0.0357665  |
| PDK1       | -0.4029193 | 0.3672138 | -1.0972  | 0.273    | -0.387170428 | count | 1          |
| FADS3      | -0.2755527 | 0.0774425 | -3.5582  | 0.000378 | -0.386836325 | count | 1          |
| TBC1D7     | -0.3572898 | 0.2016673 | -1.7717  | 0.0765   | -0.386826261 | count | 1          |
| SHTN1      | -0.3196661 | 0.2424452 | -1.3185  | 0.187    | -0.386799581 | count | 1          |
| JADE1      | -0.2999843 | 0.173272  | -1.7313  | 0.0835   | -0.386767638 | count | 1          |
| CORO1A     | -0.5664895 | 0.4696199 | -1.2063  | 0.228    | -0.385853767 | count | 1          |
| GCA        | -0.2980026 | 0.1430173 | -2.0837  | 0.0373   | -0.385789725 | count | 1          |
| KXD1       | -0.2744432 | 0.0736294 | -3.7274  | 0.000196 | -0.385717918 | count | 1          |
| HGF        | -0.2870418 | 0.1171615 | -2.45    | 0.0143   | -0.385644618 | count | 1          |
| ERMARD     | -0.3819376 | 0.2642301 | -1.4455  | 0.148    | -0.385627055 | count | 1          |
| GEM        | -0.268736  | 0.057838  | -4.6464  | 3.50E-06 | -0.385521941 | count | 0.0810215  |
| C19orf53   | -0.2692769 | 0.0387629 | -6.9468  | 4.40E-12 | -0.385208026 | count | 1.05E-07   |
| FAU        | -0.2672106 | 0.0203128 | -13.1548 | 1.18E-38 | -0.385088855 | count | 2.86E-34   |
| CST6       | -0.2756727 | 0.1585611 | -1.7386  | 0.0822   | -0.384733387 | count | 1          |
| ACTG1      | -0.2667239 | 0.0190551 | -13.9975 | 2.07E-43 | -0.384477625 | count | 5.02E-39   |

|            |            |           |          |          |              |       |             |
|------------|------------|-----------|----------|----------|--------------|-------|-------------|
| AC008966.1 | -0.5382565 | 0.5335753 | -1.0088  | 0.313    | -0.384131742 | count | 1           |
| MT-ATP6    | -0.2660634 | 0.0215649 | -12.3378 | 2.69E-34 | -0.383554654 | count | 6.50E-30    |
| GGN        | -1.1804511 | 0.6234198 | -1.8935  | 0.0584   | -0.383427711 | count | 1           |
| TRPC4      | -0.7462048 | 0.3288732 | -2.269   | 0.0233   | -0.383227826 | count | 1           |
| EPS8       | -0.2706098 | 0.0541526 | -4.9972  | 6.09E-07 | -0.383083734 | count | 0.014199444 |
| CMPK2      | -0.5361727 | 0.3254702 | -1.6474  | 0.0996   | -0.382580749 | count | 1           |
| AL137186.2 | -0.4542833 | 0.50227   | -0.9045  | 0.366    | -0.382506543 | count | 1           |
| AC060780.1 | -0.4037029 | 0.2595961 | -1.5551  | 0.12     | -0.382158924 | count | 1           |
| BLVRA      | -0.2767583 | 0.0961553 | -2.8782  | 0.00402  | -0.382143532 | count | 1           |
| AC027237.3 | -0.6794169 | 0.6539614 | -1.0389  | 0.299    | -0.381869236 | count | 1           |
| SARNP      | -0.3190888 | 0.184466  | -1.7298  | 0.0838   | -0.381778098 | count | 1           |
| SLFN13     | -1.1754899 | 0.6103385 | -1.926   | 0.0542   | -0.381733235 | count | 1           |
| RPS4Y1     | -0.2655018 | 0.0412134 | -6.4421  | 1.33E-10 | -0.380680596 | count | 3.15E-06    |
| VIPR1      | -0.5114421 | 0.3965916 | -1.2896  | 0.197    | -0.380157171 | count | 1           |
| SLC47A1    | -0.8287087 | 0.4103379 | -2.0196  | 0.0435   | -0.380147835 | count | 1           |
| VIM-AS1    | -0.3688841 | 0.3574644 | -1.0319  | 0.302    | -0.38004489  | count | 1           |
| PPP1R14B   | -0.2663084 | 0.0468229 | -5.6876  | 1.39E-08 | -0.379925496 | count | 0.000326831 |
| DAAM1      | -0.2699503 | 0.0790464 | -3.4151  | 0.000645 | -0.379733747 | count | 1           |
| NOC4L      | -0.3285277 | 0.1851188 | -1.7747  | 0.076    | -0.379451192 | count | 1           |
| ZNF71      | -0.3647437 | 0.3352155 | -1.0881  | 0.277    | -0.379306476 | count | 1           |
| COX8A      | -0.2646176 | 0.0371353 | -7.1258  | 1.24E-12 | -0.378761832 | count | 2.95E-08    |
| RPS29      | -0.2635539 | 0.0275497 | -9.5665  | 1.96E-21 | -0.37853232  | count | 4.71E-17    |
| DHRS1      | -0.2810642 | 0.1285592 | -2.1863  | 0.0289   | -0.378524876 | count | 1           |
| AC011450.1 | -0.9540043 | 0.6411698 | -1.4879  | 0.137    | -0.378270811 | count | 1           |
| GOLGA6L10  | -0.9540043 | 0.819928  | -1.1635  | 0.245    | -0.378270811 | count | 1           |
| METTL3     | -0.3109182 | 0.16846   | -1.8456  | 0.065    | -0.378050448 | count | 1           |
| RBM45      | -0.3467226 | 0.2663623 | -1.3017  | 0.193    | -0.377821031 | count | 1           |
| LAP3       | -0.2746851 | 0.0877131 | -3.1316  | 0.00175  | -0.377579278 | count | 1           |
| AVEN       | -0.2820297 | 0.1301193 | -2.1675  | 0.0303   | -0.37715627  | count | 1           |
| AC084809.2 | -1.1615546 | 0.9222921 | -1.2594  | 0.208    | -0.376969524 | count | 1           |
| TMCC2      | -0.7339045 | 0.6175017 | -1.1885  | 0.235    | -0.376527387 | count | 1           |
| CCDC90B    | -0.2681967 | 0.0683095 | -3.9262  | 8.79E-05 | -0.376471286 | count | 1           |
| CPEB4      | -0.2867054 | 0.1325185 | -2.1635  | 0.0306   | -0.376282897 | count | 1           |
| METTL26    | -0.2647544 | 0.054873  | -4.8249  | 1.46E-06 | -0.376170065 | count | 0.03391872  |
| RILP       | -0.28759   | 0.1623454 | -1.7715  | 0.0766   | -0.375961998 | count | 1           |
| MCF2       | -1.1583788 | 0.4763779 | -2.4316  | 0.0151   | -0.375883071 | count | 1           |
| AC112229.3 | -0.620236  | 0.6758123 | -0.9178  | 0.359    | -0.37532101  | count | 1           |
| SPHK2      | -0.3379991 | 0.2613421 | -1.2933  | 0.196    | -0.37522788  | count | 1           |
| ITIH4      | -0.3292416 | 0.6047776 | -0.5444  | 0.586    | -0.37519297  | count | 1           |
| PDCD4-AS1  | -1.576569  | 0.831592  | -1.8958  | 0.0581   | -0.374936176 | count | 1           |
| MTX3       | -0.3243825 | 0.2529859 | -1.2822  | 0.2      | -0.374605205 | count | 1           |
| CDK2       | -0.3570903 | 0.327487  | -1.0904  | 0.276    | -0.374571318 | count | 1           |
| HEPH       | -0.3121441 | 0.1757507 | -1.7761  | 0.0758   | -0.374487093 | count | 1           |
| TM4SF18    | -1.5744017 | 1.14159   | -1.3791  | 0.168    | -0.37442608  | count | 1           |
| CYSLTR2    | -0.729731  | 0.5423994 | -1.3454  | 0.179    | -0.374255082 | count | 1           |



|            |            |           |          |          |              |       |             |
|------------|------------|-----------|----------|----------|--------------|-------|-------------|
| STAR13     | -0.3268761 | 0.2121745 | -1.5406  | 0.124    | -0.374207792 | count | 1           |
| UQCR11     | -0.2625661 | 0.0435184 | -6.0334  | 1.76E-09 | -0.373903257 | count | 4.15E-05    |
| AC092171.4 | -0.8155597 | 0.5099958 | -1.5991  | 0.11     | -0.37372764  | count | 1           |
| RPL24      | -0.2593327 | 0.0212717 | -12.1915 | 1.53E-33 | -0.373651148 | count | 3.70E-29    |
| DDAH1      | -0.3064686 | 0.2279422 | -1.3445  | 0.179    | -0.373507522 | count | 1           |
| MDFIC      | -0.2772061 | 0.1150291 | -2.4099  | 0.016    | -0.373459108 | count | 1           |
| AL645608.3 | -1.1511034 | 0.9303225 | -1.2373  | 0.216    | -0.373393053 | count | 1           |
| RPS25      | -0.259187  | 0.0205488 | -12.6133 | 9.75E-36 | -0.373371989 | count | 2.36E-31    |
| RPL19      | -0.258866  | 0.0180385 | -14.3508 | 1.76E-45 | -0.373213841 | count | 4.27E-41    |
| LFNG       | -0.6167902 | 0.4851492 | -1.2713  | 0.204    | -0.373125621 | count | 1           |
| CBWD5      | -0.3117294 | 0.2369691 | -1.3155  | 0.188    | -0.372884051 | count | 1           |
| ENC1       | -0.4549503 | 0.2713553 | -1.6766  | 0.0937   | -0.372784    | count | 1           |
| RNF25      | -0.3022477 | 0.179266  | -1.686   | 0.0919   | -0.372506141 | count | 1           |
| IFIT3      | -0.2686804 | 0.1617375 | -1.6612  | 0.0968   | -0.372399208 | count | 1           |
| RPS14      | -0.2582853 | 0.0193061 | -13.3784 | 6.86E-40 | -0.372325252 | count | 1.66E-35    |
| GFRA2      | -0.615022  | 0.5670498 | -1.0846  | 0.278    | -0.371999331 | count | 1           |
| MCRIP2     | -0.2957159 | 0.1747528 | -1.6922  | 0.0907   | -0.371842084 | count | 1           |
| CNST       | -0.2887701 | 0.1720023 | -1.6789  | 0.0933   | -0.371820061 | count | 1           |
| AL359258.2 | -0.4417065 | 0.3321232 | -1.3299  | 0.184    | -0.371582118 | count | 1           |
| MRPS12     | -0.2707267 | 0.087435  | -3.0963  | 0.00197  | -0.371438086 | count | 1           |
| HLA-C      | -0.2583252 | 0.0301012 | -8.5819  | 1.36E-17 | -0.371310845 | count | 3.26E-13    |
| FAM120C    | -0.3721558 | 0.2860211 | -1.3011  | 0.193    | -0.371270161 | count | 1           |
| NRAV       | -0.4530978 | 0.3443051 | -1.316   | 0.188    | -0.371215077 | count | 1           |
| POLR2G     | -0.2680482 | 0.0796868 | -3.3638  | 0.000777 | -0.371054426 | count | 1           |
| SERF2      | -0.257427  | 0.0205806 | -12.5082 | 3.48E-35 | -0.370829716 | count | 8.41E-31    |
| METTL5     | -0.2611559 | 0.0617757 | -4.2275  | 2.42E-05 | -0.370761713 | count | 0.5553174   |
| LRCH4      | -0.3380675 | 0.4175909 | -0.8096  | 0.418    | -0.370694287 | count | 1           |
| SAMD3      | -0.4654706 | 0.6941059 | -0.6706  | 0.503    | -0.370334594 | count | 1           |
| DUSP3      | -0.2769368 | 0.1244795 | -2.2248  | 0.0262   | -0.370318772 | count | 1           |
| STX6       | -0.289823  | 0.1807075 | -1.6038  | 0.109    | -0.3701259   | count | 1           |
| CMC2       | -0.2730837 | 0.1163162 | -2.3478  | 0.0189   | -0.370027438 | count | 1           |
| ORC6       | -0.9342865 | 0.6200478 | -1.5068  | 0.132    | -0.369942217 | count | 1           |
| AC010654.1 | -0.6590631 | 0.6546192 | -1.0068  | 0.314    | -0.369786029 | count | 1           |
| GADD45GIP1 | -0.2591794 | 0.0444317 | -5.8332  | 5.91E-09 | -0.369780279 | count | 0.000139133 |
| LMAN2L     | -0.3555894 | 0.2280058 | -1.5596  | 0.119    | -0.369612746 | count | 1           |
| AC108047.1 | -0.57382   | 0.5320771 | -1.0785  | 0.281    | -0.369567923 | count | 1           |
| BEND6      | -0.3307242 | 0.2434246 | -1.3586  | 0.174    | -0.369162295 | count | 1           |
| MTHFD1     | -0.3169871 | 0.1737346 | -1.8245  | 0.0682   | -0.368966839 | count | 1           |
| FDXACB1    | -0.4967837 | 0.463918  | -1.0708  | 0.284    | -0.368830419 | count | 1           |
| CNBD2      | -0.3741072 | 0.2587204 | -1.446   | 0.148    | -0.368720578 | count | 1           |
| COL1A1     | -0.2580248 | 0.1072578 | -2.4056  | 0.0162   | -0.368642746 | count | 1           |
| TBC1D1     | -0.2681804 | 0.0927818 | -2.8904  | 0.00387  | -0.368615845 | count | 1           |
| COPS7B     | -0.3234929 | 0.1941624 | -1.6661  | 0.0958   | -0.368557908 | count | 1           |
| SELENOM    | -0.255809  | 0.0250667 | -10.2051 | 3.94E-24 | -0.368346009 | count | 9.49E-20    |
| MRPL47     | -0.2679771 | 0.0850364 | -3.1513  | 0.00164  | -0.368188893 | count | 1           |

|            |            |           |         |          |              |       |             |
|------------|------------|-----------|---------|----------|--------------|-------|-------------|
| HOXB3      | -0.3649248 | 0.2384151 | -1.5306 | 0.126    | -0.368107366 | count | 1           |
| APOPT1     | -0.2681295 | 0.096795  | -2.7701 | 0.00563  | -0.368097813 | count | 1           |
| SELENOW    | -0.2557325 | 0.0274368 | -9.3208 | 1.94E-20 | -0.368051561 | count | 4.66E-16    |
| TNIP2      | -0.2745934 | 0.116341  | -2.3602 | 0.0183   | -0.368041075 | count | 1           |
| SLC25A38   | -0.2859347 | 0.1421643 | -2.0113 | 0.0444   | -0.36773995  | count | 1           |
| CAV2       | -0.2580863 | 0.0484854 | -5.323  | 1.08E-07 | -0.36771611  | count | 0.00252882  |
| LINC02298  | -0.426717  | 0.4512209 | -0.9457 | 0.344    | -0.367575378 | count | 1           |
| C1orf198   | -0.2643417 | 0.1044355 | -2.5311 | 0.0114   | -0.367304684 | count | 1           |
| CBX4       | -0.3044864 | 0.2281902 | -1.3344 | 0.182    | -0.367271969 | count | 1           |
| PPP1R18    | -0.2805625 | 0.1187172 | -2.3633 | 0.0182   | -0.367027834 | count | 1           |
| RANGAP1    | -0.3530525 | 0.286461  | -1.2325 | 0.218    | -0.366927534 | count | 1           |
| AC022613.2 | -0.7158549 | 0.4613481 | -1.5517 | 0.121    | -0.36670452  | count | 1           |
| AC026202.2 | -0.7158549 | 0.4959759 | -1.4433 | 0.149    | -0.36670452  | count | 1           |
| AK4        | -0.3064982 | 0.1733905 | -1.7677 | 0.0772   | -0.366563947 | count | 1           |
| EIF3L      | -0.2584929 | 0.051408  | -5.0283 | 5.19E-07 | -0.366351323 | count | 0.012104118 |
| BX284668.6 | -0.4353399 | 0.3774548 | -1.1534 | 0.249    | -0.366057046 | count | 1           |
| ZNF79      | -0.4928306 | 0.483095  | -1.0202 | 0.308    | -0.365778654 | count | 1           |
| NDUFB2     | -0.2561613 | 0.0415346 | -6.1674 | 7.69E-10 | -0.365755439 | count | 1.82E-05    |
| CHKB       | -0.4344795 | 0.3495616 | -1.2429 | 0.214    | -0.365310614 | count | 1           |
| IFIH1      | -0.3017422 | 0.1914686 | -1.5759 | 0.115    | -0.364910458 | count | 1           |
| LINC01198  | -1.1262975 | 0.6965175 | -1.617  | 0.106    | -0.364892508 | count | 1           |
| HDX        | -0.3202171 | 0.1666844 | -1.9211 | 0.0548   | -0.364778038 | count | 1           |
| TOP3B      | -0.3857055 | 0.5446519 | -0.7082 | 0.479    | -0.364716176 | count | 1           |
| SLC12A1    | -1.5325413 | 0.7558163 | -2.0277 | 0.0427   | -0.364521197 | count | 1           |
| LINC02453  | -1.5325413 | 0.9895773 | -1.5487 | 0.122    | -0.364521197 | count | 1           |
| CYP2E1     | -1.5325413 | 1.329332  | -1.1529 | 0.249    | -0.364521197 | count | 1           |
| FZR1       | -0.2983125 | 0.2432232 | -1.2265 | 0.22     | -0.364349264 | count | 1           |
| RCN2       | -0.2578219 | 0.0579886 | -4.4461 | 9.00E-06 | -0.364161627 | count | 0.207459    |
| FAM87B     | -0.6021344 | 0.4888549 | -1.2317 | 0.218    | -0.363795764 | count | 1           |
| MIS18A     | -0.3193537 | 0.1959122 | -1.6301 | 0.103    | -0.363781916 | count | 1           |
| NR1H2      | -0.2609983 | 0.0800765 | -3.2594 | 0.00113  | -0.363651128 | count | 1           |
| RANBP9     | -0.2803616 | 0.1489973 | -1.8817 | 0.06     | -0.363537471 | count | 1           |
| GNAI2      | -0.2556672 | 0.04872   | -5.2477 | 1.63E-07 | -0.363481954 | count | 0.003812733 |
| AL365259.1 | -0.4721071 | 0.4028459 | -1.1719 | 0.241    | -0.363335706 | count | 1           |
| CEP72      | -1.5271024 | 0.7086678 | -2.1549 | 0.0312   | -0.363226807 | count | 1           |
| RAB11FIP1  | -0.268537  | 0.1334089 | -2.0129 | 0.0442   | -0.363098365 | count | 1           |
| STAC       | -0.3035244 | 0.3205507 | -0.9469 | 0.344    | -0.362971874 | count | 1           |
| CNPY2      | -0.2570093 | 0.0672342 | -3.8226 | 0.000134 | -0.362901383 | count | 1           |
| MAPKAPK2   | -0.2845372 | 0.1440075 | -1.9759 | 0.0482   | -0.362869736 | count | 1           |
| SP4        | -0.3331786 | 0.2332187 | -1.4286 | 0.153    | -0.362836992 | count | 1           |
| RSU1       | -0.2569509 | 0.0601631 | -4.2709 | 2.00E-05 | -0.362601451 | count | 0.45954     |
| ARPC4      | -0.2576791 | 0.0635758 | -4.0531 | 5.16E-05 | -0.362188454 | count | 1           |
| AL365434.2 | -0.9155418 | 0.6837318 | -1.339  | 0.181    | -0.362024912 | count | 1           |
| TGFB2-AS1  | -0.9155418 | 0.7519871 | -1.2175 | 0.223    | -0.362024912 | count | 1           |
| LINC02055  | -0.9155418 | 0.7519871 | -1.2175 | 0.223    | -0.362024912 | count | 1           |

|            |            |           |          |          |              |       |             |
|------------|------------|-----------|----------|----------|--------------|-------|-------------|
| AL591501.1 | -0.9155418 | 0.9255333 | -0.9892  | 0.323    | -0.362024912 | count | 1           |
| GPR85      | -0.9155418 | 1.102495  | -0.8304  | 0.406    | -0.362024912 | count | 1           |
| IRX2       | -1.521986  | 0.3661466 | -4.1568  | 3.30E-05 | -0.36200767  | count | 0.755865    |
| AL669831.5 | -0.3207175 | 0.2366875 | -1.355   | 0.175    | -0.361736826 | count | 1           |
| H2AFZ      | -0.2531947 | 0.043365  | -5.8387  | 5.72E-09 | -0.361724057 | count | 0.000134666 |
| AC090673.1 | -1.5197381 | 0.8612777 | -1.7645  | 0.0777   | -0.361471511 | count | 1           |
| SH3BGRL3   | -0.2513337 | 0.0406923 | -6.1764  | 7.27E-10 | -0.361371765 | count | 1.72E-05    |
| HECTD3     | -0.3509649 | 0.2796933 | -1.2548  | 0.21     | -0.361241644 | count | 1           |
| GATA6-AS1  | -0.3080739 | 0.2623642 | -1.1742  | 0.24     | -0.361210888 | count | 1           |
| CKMT2-AS1  | -0.3316917 | 0.2216019 | -1.4968  | 0.135    | -0.361192848 | count | 1           |
| IL18BP     | -0.3665331 | 0.213805  | -1.7143  | 0.0866   | -0.361096218 | count | 1           |
| KLC4       | -0.3619409 | 0.293723  | -1.2323  | 0.218    | -0.360870101 | count | 1           |
| TNFAIP8L3  | -0.2757044 | 0.1309907 | -2.1048  | 0.0354   | -0.360345757 | count | 1           |
| PLCXD3     | -0.3811311 | 0.2569113 | -1.4835  | 0.138    | -0.360287145 | count | 1           |
| CCHCR1     | -0.3404145 | 0.2322678 | -1.4656  | 0.143    | -0.359846156 | count | 1           |
| MROH6      | -0.4089049 | 0.3025097 | -1.3517  | 0.177    | -0.359825679 | count | 1           |
| AC120036.4 | -1.1112669 | 0.8641516 | -1.286   | 0.199    | -0.359734462 | count | 1           |
| ATP5MC2    | -0.2505338 | 0.0313484 | -7.9919  | 1.76E-15 | -0.359631874 | count | 4.20E-11    |
| MVK        | -0.3650366 | 0.2429431 | -1.5026  | 0.133    | -0.359590366 | count | 1           |
| ZMAT3      | -0.2597357 | 0.1094252 | -2.3736  | 0.0177   | -0.359575384 | count | 1           |
| HAR1B      | -0.9088135 | 0.7919957 | -1.1475  | 0.251    | -0.359183364 | count | 1           |
| TCEA2      | -0.2563805 | 0.0791257 | -3.2402  | 0.00121  | -0.359179552 | count | 1           |
| ST7-AS1    | -0.3798481 | 0.2587215 | -1.4682  | 0.142    | -0.35904525  | count | 1           |
| MIEN1      | -0.2572749 | 0.0735313 | -3.4989  | 0.000473 | -0.359014742 | count | 1           |
| USP27X     | -0.4079372 | 0.3407974 | -1.197   | 0.231    | -0.358949842 | count | 1           |
| UBLCP1     | -0.2714249 | 0.1364223 | -1.9896  | 0.0467   | -0.358880012 | count | 1           |
| Z95114.4   | -0.9080273 | 0.6446864 | -1.4085  | 0.159    | -0.358851333 | count | 1           |
| DEDD       | -0.2762193 | 0.1620478 | -1.7046  | 0.0884   | -0.358815755 | count | 1           |
| RPL18A     | -0.2487268 | 0.0195776 | -12.7046 | 3.20E-36 | -0.358425465 | count | 7.74E-32    |
| XRN2       | -0.2535628 | 0.0608886 | -4.1644  | 3.19E-05 | -0.358112318 | count | 0.7307652   |
| MRFAP1     | -0.2504629 | 0.0370674 | -6.757   | 1.63E-11 | -0.357833764 | count | 3.87E-07    |
| TGFBR3L    | -0.5559025 | 0.4234286 | -1.3129  | 0.189    | -0.357471447 | count | 1           |
| APBB1      | -0.2837492 | 0.1701042 | -1.6681  | 0.0954   | -0.35725535  | count | 1           |
| NUBP2      | -0.2610456 | 0.0877404 | -2.9752  | 0.00295  | -0.357241485 | count | 1           |
| FMO3       | -0.4055667 | 0.238255  | -1.7022  | 0.0888   | -0.35680471  | count | 1           |
| POLR2I     | -0.2535781 | 0.0623283 | -4.0684  | 4.83E-05 | -0.356712916 | count | 1           |
| SCYL2      | -0.2772878 | 0.2227759 | -1.2447  | 0.213    | -0.356553731 | count | 1           |
| C3orf52    | -0.5545262 | 0.5234107 | -1.0594  | 0.289    | -0.356543184 | count | 1           |
| SS18       | -0.2700836 | 0.1182559 | -2.2839  | 0.0224   | -0.356154596 | count | 1           |
| AL022328.4 | -0.6964122 | 0.3005605 | -2.317   | 0.0206   | -0.356137455 | count | 1           |
| ZNF696     | -0.4135019 | 0.339672  | -1.2174  | 0.224    | -0.355855278 | count | 1           |
| IDH3A      | -0.2677825 | 0.1158755 | -2.3109  | 0.0209   | -0.355765544 | count | 1           |
| SMIM30     | -0.2631291 | 0.1282026 | -2.0524  | 0.0402   | -0.355762264 | count | 1           |
| BUD31      | -0.2527481 | 0.06966   | -3.6283  | 0.000289 | -0.355656856 | count | 1           |
| SOCS2      | -0.2606349 | 0.1247826 | -2.0887  | 0.0368   | -0.355524385 | count | 1           |

|            |            |           |         |          |              |       |             |
|------------|------------|-----------|---------|----------|--------------|-------|-------------|
| RPL38      | -0.2474064 | 0.0294065 | -8.4133 | 5.64E-17 | -0.354768811 | count | 1.35E-12    |
| TTC9       | -0.5517887 | 0.5868341 | -0.9403 | 0.347    | -0.354697234 | count | 1           |
| MYO10      | -0.5225853 | 0.618282  | -0.8452 | 0.398    | -0.354638024 | count | 1           |
| CKAP2      | -0.3556631 | 0.2789078 | -1.2752 | 0.202    | -0.354482899 | count | 1           |
| ZNF85      | -0.3694448 | 0.2647249 | -1.3956 | 0.163    | -0.354285511 | count | 1           |
| ARL6IP4    | -0.2476082 | 0.0368162 | -6.7255 | 2.02E-11 | -0.354216789 | count | 4.79E-07    |
| CDC25B     | -0.355313  | 0.2606671 | -1.3631 | 0.173    | -0.354126785 | count | 1           |
| FOXC1      | -0.2480718 | 0.0594269 | -4.1744 | 3.06E-05 | -0.354042307 | count | 0.7011378   |
| RWDD2A     | -0.3042469 | 0.2184224 | -1.3929 | 0.164    | -0.353970137 | count | 1           |
| IFITM10    | -0.6922721 | 0.6144798 | -1.1266 | 0.26     | -0.353889327 | count | 1           |
| CRELD1     | -0.2705503 | 0.1457878 | -1.8558 | 0.0636   | -0.353575545 | count | 1           |
| C19orf54   | -0.5498143 | 0.5323206 | -1.0329 | 0.302    | -0.353366187 | count | 1           |
| AC099778.1 | -0.3937005 | 0.3136767 | -1.2551 | 0.21     | -0.353318159 | count | 1           |
| FIGN       | -0.2878288 | 0.178247  | -1.6148 | 0.106    | -0.353052948 | count | 1           |
| ATP1B3     | -0.2532223 | 0.0733622 | -3.4517 | 0.000563 | -0.353045758 | count | 1           |
| RAPH1      | -0.2904669 | 0.1535776 | -1.8913 | 0.0587   | -0.352964343 | count | 1           |
| SPARC      | -0.2457618 | 0.0434603 | -5.6549 | 1.68E-08 | -0.352864404 | count | 0.000394867 |
| GCAT       | -0.3286578 | 0.1959264 | -1.6775 | 0.0935   | -0.352757175 | count | 1           |
| DHRS11     | -0.3678179 | 0.2641676 | -1.3924 | 0.164    | -0.352689713 | count | 1           |
| ELOA-AS1   | -0.4098685 | 0.3217357 | -1.2739 | 0.203    | -0.352635631 | count | 1           |
| SLC19A1    | -0.6893967 | 0.5677797 | -1.2142 | 0.225    | -0.352328388 | count | 1           |
| TMEM8A     | -0.2984661 | 0.1741868 | -1.7135 | 0.0867   | -0.352315163 | count | 1           |
| WSCD2      | -0.6886254 | 0.6989688 | -0.9852 | 0.325    | -0.351909763 | count | 1           |
| PAG1       | -0.4188403 | 0.358557  | -1.1681 | 0.243    | -0.351754636 | count | 1           |
| CDNF       | -0.6880195 | 0.4162893 | -1.6527 | 0.0985   | -0.351580902 | count | 1           |
| ABCB4      | -0.6880195 | 0.5625703 | -1.223  | 0.221    | -0.351580902 | count | 1           |
| VAV2       | -0.3996637 | 0.3392188 | -1.1782 | 0.239    | -0.351465117 | count | 1           |
| ZFY-AS1    | -0.3613833 | 0.445178  | -0.8118 | 0.417    | -0.35128145  | count | 1           |
| CD2BP2     | -0.2523971 | 0.0789734 | -3.196  | 0.00141  | -0.351237567 | count | 1           |
| SLC24A3    | -0.4292532 | 0.3814095 | -1.1254 | 0.26     | -0.351046739 | count | 1           |
| TMEM240    | -0.4737194 | 0.5749587 | -0.8239 | 0.41     | -0.351042687 | count | 1           |
| HINT1      | -0.244563  | 0.0300103 | -8.1493 | 4.97E-16 | -0.351032408 | count | 1.19E-11    |
| AC005618.1 | -0.6868515 | 0.512668  | -1.3398 | 0.18     | -0.350947022 | count | 1           |
| 9-Sep      | -0.2825641 | 0.1538952 | -1.8361 | 0.0664   | -0.350861288 | count | 1           |
| MT-ND6     | -0.2653507 | 0.120411  | -2.2037 | 0.0276   | -0.350813419 | count | 1           |
| C14orf28   | -0.2847798 | 0.1571298 | -1.8124 | 0.07     | -0.350804236 | count | 1           |
| FAM189B    | -0.2968967 | 0.2032212 | -1.461  | 0.144    | -0.350443152 | count | 1           |
| GNAQ       | -0.2574608 | 0.1242002 | -2.0729 | 0.0382   | -0.350410761 | count | 1           |
| CARD19     | -0.2540205 | 0.0921486 | -2.7566 | 0.00587  | -0.350268906 | count | 1           |
| ECE1       | -0.254752  | 0.1192491 | -2.1363 | 0.0327   | -0.350044627 | count | 1           |
| EIF3D      | -0.2491059 | 0.0619489 | -4.0212 | 5.91E-05 | -0.349570396 | count | 1           |
| C17orf100  | -0.4717149 | 0.5783062 | -0.8157 | 0.415    | -0.349498848 | count | 1           |
| CRYBG1     | -0.3430038 | 0.3084102 | -1.1122 | 0.266    | -0.349324711 | count | 1           |
| ATOX1      | -0.2459359 | 0.0550099 | -4.4708 | 8.03E-06 | -0.349114118 | count | 0.18518786  |
| MYL12A     | -0.242499  | 0.0316237 | -7.6683 | 2.22E-14 | -0.348977259 | count | 5.29E-10    |

|            |            |           |          |          |              |       |             |
|------------|------------|-----------|----------|----------|--------------|-------|-------------|
| TNIP1      | -0.2770805 | 0.1317113 | -2.1037  | 0.0355   | -0.348800844 | count | 1           |
| RILPL1     | -0.2580322 | 0.1228979 | -2.0996  | 0.0358   | -0.34872419  | count | 1           |
| JPH2       | -0.2983059 | 0.2636464 | -1.1315  | 0.258    | -0.348328876 | count | 1           |
| ZNF774     | -1.0779763 | 0.7178255 | -1.5017  | 0.133    | -0.348293693 | count | 1           |
| GOLGA7B    | -1.4632483 | 0.8329336 | -1.7567  | 0.079    | -0.347909741 | count | 1           |
| AC002398.2 | -1.4632483 | 0.9276172 | -1.5774  | 0.115    | -0.347909741 | count | 1           |
| HTRA2      | -0.2569788 | 0.0952342 | -2.6984  | 0.007    | -0.347903509 | count | 1           |
| KMT5A      | -0.252754  | 0.1046414 | -2.4154  | 0.0158   | -0.347830852 | count | 1           |
| ZNF20      | -0.8819037 | 0.7891869 | -1.1175  | 0.264    | -0.347821729 | count | 1           |
| KIF2C      | -1.0758288 | 0.719858  | -1.4945  | 0.135    | -0.347554988 | count | 1           |
| RPL10A     | -0.241246  | 0.0221628 | -10.8852 | 3.52E-27 | -0.347480182 | count | 8.49E-23    |
| TMEM121    | -0.3213539 | 0.2302328 | -1.3958  | 0.163    | -0.347333507 | count | 1           |
| STEAP2     | -0.2719137 | 0.165201  | -1.646   | 0.0999   | -0.347114298 | count | 1           |
| RPL5       | -0.2408094 | 0.02199   | -10.9509 | 1.75E-27 | -0.347093609 | count | 4.22E-23    |
| HPCAL1     | -0.2665403 | 0.1962349 | -1.3583  | 0.174    | -0.346810897 | count | 1           |
| KANK2      | -0.2467915 | 0.0689765 | -3.5779  | 0.000351 | -0.346765183 | count | 1           |
| TFB1M      | -0.2703043 | 0.1550095 | -1.7438  | 0.0813   | -0.34672774  | count | 1           |
| EMX2OS     | -0.3164286 | 0.3013278 | -1.0501  | 0.294    | -0.346624268 | count | 1           |
| GART       | -0.2722174 | 0.1704094 | -1.5974  | 0.11     | -0.346608082 | count | 1           |
| EIF1AY     | -0.2541779 | 0.0915071 | -2.7777  | 0.0055   | -0.346599977 | count | 1           |
| EXOSC2     | -0.2908024 | 0.2541302 | -1.1443  | 0.253    | -0.346551108 | count | 1           |
| CALCRL     | -0.2607203 | 0.1120604 | -2.3266  | 0.02     | -0.34594165  | count | 1           |
| ACAN       | -0.2561299 | 0.1916648 | -1.3363  | 0.182    | -0.345893552 | count | 1           |
| EIF5B      | -0.2425557 | 0.0522974 | -4.638   | 3.64E-06 | -0.34582011  | count | 0.0842296   |
| LRRC29     | -0.3556958 | 0.3157548 | -1.1265  | 0.26     | -0.345632854 | count | 1           |
| HMGB3      | -0.4349628 | 0.3999037 | -1.0877  | 0.277    | -0.345239218 | count | 1           |
| OCRL       | -0.3295426 | 0.2609685 | -1.2628  | 0.207    | -0.345186316 | count | 1           |
| RSL24D1    | -0.2422808 | 0.0452013 | -5.36    | 8.83E-08 | -0.345178632 | count | 0.002068339 |
| AC009414.2 | -0.2687455 | 0.1660908 | -1.6181  | 0.106    | -0.344716372 | count | 1           |
| TMEM208    | -0.2447848 | 0.0674022 | -3.6317  | 0.000285 | -0.344346506 | count | 1           |
| RPL35A     | -0.2388986 | 0.0199146 | -11.9962 | 1.50E-32 | -0.344236008 | count | 3.62E-28    |
| PLEKHO1    | -0.248845  | 0.1032268 | -2.4107  | 0.016    | -0.344165117 | count | 1           |
| ANO2       | -0.7545888 | 0.7392795 | -1.0207  | 0.307    | -0.344009588 | count | 1           |
| VMAC       | -0.2968613 | 0.2350189 | -1.2631  | 0.207    | -0.34389461  | count | 1           |
| AEN        | -0.3099432 | 0.2164213 | -1.4321  | 0.152    | -0.343657532 | count | 1           |
| BTF3       | -0.2386572 | 0.0230837 | -10.3388 | 1.02E-24 | -0.343564907 | count | 2.46E-20    |
| PGS1       | -0.2962356 | 0.19291   | -1.5356  | 0.125    | -0.343161497 | count | 1           |
| TESK2      | -0.3755471 | 0.2801867 | -1.3403  | 0.18     | -0.343080401 | count | 1           |
| RAET1E     | -1.4429524 | 0.7097969 | -2.0329  | 0.0421   | -0.342997282 | count | 1           |
| GSK3A      | -0.2710548 | 0.131901  | -2.055   | 0.04     | -0.342723886 | count | 1           |
| DGKD       | -0.5055131 | 0.2724118 | -1.8557  | 0.0636   | -0.342538064 | count | 1           |
| CPNE2      | -0.2724092 | 0.1566739 | -1.7387  | 0.0822   | -0.342334567 | count | 1           |
| AL354811.1 | -0.6709696 | 0.4447355 | -1.5087  | 0.131    | -0.342334015 | count | 1           |
| WDR4       | -0.4456507 | 0.3731374 | -1.1943  | 0.232    | -0.342241749 | count | 1           |
| STK26      | -0.6116324 | 0.3362728 | -1.8189  | 0.069    | -0.341710149 | count | 1           |

|             |            |           |          |          |              |       |             |
|-------------|------------|-----------|----------|----------|--------------|-------|-------------|
| TBCB        | -0.2400612 | 0.0469968 | -5.108   | 3.42E-07 | -0.341673071 | count | 0.00798228  |
| AC242426.2  | -0.3390393 | 0.328145  | -1.0332  | 0.302    | -0.34149691  | count | 1           |
| NME1        | -0.2447867 | 0.0784406 | -3.1207  | 0.00182  | -0.341430834 | count | 1           |
| HDGFL3      | -0.2430595 | 0.0683191 | -3.5577  | 0.000379 | -0.341392977 | count | 1           |
| CD7         | -2.8713996 | 1.8558506 | -1.5472  | 0.1219   | -0.341244206 | count | 1           |
| NUDT3       | -0.2548331 | 0.1719896 | -1.4817  | 0.139    | -0.34114341  | count | 1           |
| HDAC11      | -0.2933119 | 0.1779151 | -1.6486  | 0.0993   | -0.341107126 | count | 1           |
| AL162274.2  | -0.5656305 | 0.7037551 | -0.8037  | 0.422    | -0.340615343 | count | 1           |
| AL731571.1  | -0.443531  | 0.3389123 | -1.3087  | 0.191    | -0.340554332 | count | 1           |
| SPIRE1      | -0.2648721 | 0.1604642 | -1.6507  | 0.0989   | -0.34049762  | count | 1           |
| RNF208      | -0.4792028 | 0.3583702 | -1.3372  | 0.181    | -0.340303406 | count | 1           |
| ARVCF       | -0.2729538 | 0.2035003 | -1.3413  | 0.18     | -0.340102938 | count | 1           |
| TBC1D10C    | -2.854833  | 1.233759  | -2.3139  | 0.0207   | -0.340073255 | count | 1           |
| RPS3A       | -0.2359139 | 0.0209229 | -11.2754 | 5.18E-29 | -0.340065316 | count | 1.25E-24    |
| SUN2        | -0.243797  | 0.0744605 | -3.2742  | 0.00107  | -0.33971353  | count | 1           |
| CAMTA1      | -0.2381093 | 0.0495081 | -4.8095  | 1.57E-06 | -0.339695816 | count | 0.03646168  |
| RPS15       | -0.2357887 | 0.0186217 | -12.662  | 5.38E-36 | -0.339659469 | count | 1.30E-31    |
| RPLP1       | -0.2354096 | 0.0206996 | -11.3727 | 1.77E-29 | -0.339517776 | count | 4.27E-25    |
| GNPAT       | -0.2642994 | 0.148417  | -1.7808  | 0.075    | -0.338580468 | count | 1           |
| GNG2        | -0.2946309 | 0.3310799 | -0.8899  | 0.374    | -0.338385028 | count | 1           |
| CCDC163     | -0.8584931 | 0.5102313 | -1.6826  | 0.0925   | -0.337943811 | count | 1           |
| AC007620.2  | -0.8584931 | 0.6569588 | -1.3068  | 0.191    | -0.337943811 | count | 1           |
| SPATA5      | -0.3317617 | 0.2210034 | -1.5012  | 0.133    | -0.337662598 | count | 1           |
| ARHGAP4     | -2.8211883 | 1.077845  | -2.6174  | 0.0089   | -0.337653094 | count | 1           |
| TRIM13      | -0.2499177 | 0.114989  | -2.1734  | 0.0298   | -0.337600659 | count | 1           |
| ZC3H18      | -0.2631616 | 0.177912  | -1.4792  | 0.139    | -0.3375122   | count | 1           |
| MTM1        | -0.3763992 | 0.2567063 | -1.4663  | 0.143    | -0.3373849   | count | 1           |
| ATP5PF      | -0.235226  | 0.0327207 | -7.1889  | 7.88E-13 | -0.337307066 | count | 1.87E-08    |
| COLCA2      | -0.4558294 | 0.3597348 | -1.2671  | 0.205    | -0.337276266 | count | 1           |
| ATP13A3     | -0.2449543 | 0.1433567 | -1.7087  | 0.0876   | -0.33713574  | count | 1           |
| NFATC2      | -0.3626303 | 0.3910047 | -0.9274  | 0.354    | -0.336864635 | count | 1           |
| ARRDC2      | -0.2810015 | 0.2020511 | -1.3907  | 0.164    | -0.336780296 | count | 1           |
| PELO        | -0.2454738 | 0.1114138 | -2.2033  | 0.0276   | -0.336779543 | count | 1           |
| LIFR-AS1    | -0.2958431 | 0.2821461 | -1.0485  | 0.294    | -0.336677491 | count | 1           |
| ARHGAP5-AS1 | -0.2943568 | 0.1965095 | -1.4979  | 0.134    | -0.336543208 | count | 1           |
| DTNBP1      | -0.2531092 | 0.1137637 | -2.2249  | 0.0262   | -0.336384933 | count | 1           |
| PRKD1       | -0.3509769 | 0.2599678 | -1.3501  | 0.177    | -0.336184827 | count | 1           |
| PC          | -0.4116326 | 0.5075274 | -0.8111  | 0.417    | -0.336175348 | count | 1           |
| ATP6V0B     | -0.2368    | 0.0496601 | -4.7684  | 1.93E-06 | -0.33613541  | count | 0.044776    |
| TCEAL1      | -0.2394447 | 0.0742888 | -3.2232  | 0.00128  | -0.33568134  | count | 1           |
| FAM86B1     | -0.4232991 | 0.4148674 | -1.0203  | 0.308    | -0.335666586 | count | 1           |
| MINOS1      | -0.2359081 | 0.0511262 | -4.6142  | 4.08E-06 | -0.335630583 | count | 0.09438672  |
| POMP        | -0.2350103 | 0.0436849 | -5.3797  | 7.93E-08 | -0.335564762 | count | 0.001857761 |
| APPL2       | -0.2607075 | 0.1487099 | -1.7531  | 0.0797   | -0.335486492 | count | 1           |
| IGBP1       | -0.2402111 | 0.0652145 | -3.6834  | 0.000233 | -0.335227677 | count | 1           |

|            |            |           |          |          |              |       |             |
|------------|------------|-----------|----------|----------|--------------|-------|-------------|
| CAMLG      | -0.2374176 | 0.0563326 | -4.2146  | 2.56E-05 | -0.335169978 | count | 0.587136    |
| NBPF1      | -0.2788539 | 0.1941245 | -1.4365  | 0.151    | -0.335143218 | count | 1           |
| NPAS1      | -0.2743291 | 0.2725446 | -1.0065  | 0.314    | -0.334814364 | count | 1           |
| LONP1      | -0.3019865 | 0.2007718 | -1.5041  | 0.133    | -0.33471506  | count | 1           |
| CBLN4      | -0.3664487 | 0.4671024 | -0.7845  | 0.433    | -0.33456007  | count | 1           |
| FDXR       | -0.2888393 | 0.1777809 | -1.6247  | 0.104    | -0.3344976   | count | 1           |
| AP1G2      | -0.6563898 | 0.5011666 | -1.3097  | 0.19     | -0.334437877 | count | 1           |
| KRT86      | -0.4705893 | 0.6403555 | -0.7349  | 0.462    | -0.333934169 | count | 1           |
| FLI1       | -0.4931289 | 0.475144  | -1.0379  | 0.299    | -0.333775319 | count | 1           |
| KLHL4      | -1.404945  | 0.9165844 | -1.5328  | 0.125    | -0.333745409 | count | 1           |
| AC007786.1 | -1.404945  | 0.9165844 | -1.5328  | 0.125    | -0.333745409 | count | 1           |
| AGAP2      | -1.404945  | 0.9389051 | -1.4964  | 0.135    | -0.333745409 | count | 1           |
| PVT1       | -0.5202283 | 0.7009054 | -0.7422  | 0.458    | -0.333454948 | count | 1           |
| AL359643.3 | -0.434545  | 0.4391183 | -0.9896  | 0.322    | -0.333405477 | count | 1           |
| TGIF2      | -0.397611  | 0.3797494 | -1.047   | 0.295    | -0.333388663 | count | 1           |
| BCL6B      | -1.0337475 | 1.0723203 | -0.964   | 0.3351   | -0.333067193 | count | 1           |
| PHB        | -0.2355901 | 0.0635649 | -3.7063  | 0.000213 | -0.333065692 | count | 1           |
| PFKFB4     | -0.6538445 | 0.654862  | -0.9984  | 0.318    | -0.333060482 | count | 1           |
| SLC25A42   | -0.3082849 | 0.2231716 | -1.3814  | 0.167    | -0.332996216 | count | 1           |
| TRAF6      | -0.2812157 | 0.2082579 | -1.3503  | 0.177    | -0.332870153 | count | 1           |
| NACA       | -0.2309208 | 0.0210476 | -10.9714 | 1.40E-27 | -0.332770841 | count | 3.38E-23    |
| STK38L     | -0.2409554 | 0.1065854 | -2.2607  | 0.0238   | -0.33276701  | count | 1           |
| PPP1CB     | -0.2320759 | 0.0434491 | -5.3413  | 9.79E-08 | -0.332513495 | count | 0.002292818 |
| DEDD2      | -0.283773  | 0.1868306 | -1.5189  | 0.129    | -0.332422227 | count | 1           |
| PPARG      | -0.2847465 | 0.235935  | -1.2069  | 0.228    | -0.332326549 | count | 1           |
| C2orf42    | -0.4490291 | 0.3125877 | -1.4365  | 0.151    | -0.332050784 | count | 1           |
| SUPT4H1    | -0.2371015 | 0.070131  | -3.3808  | 0.00073  | -0.331859831 | count | 1           |
| LAMB3      | -0.5177872 | 0.4418208 | -1.1719  | 0.241    | -0.331815093 | count | 1           |
| HIST4H4    | -0.3776748 | 0.423853  | -0.8911  | 0.373    | -0.33160327  | count | 1           |
| DUSP6      | -0.2462342 | 0.1431583 | -1.72    | 0.0855   | -0.331597318 | count | 1           |
| TMEM106A   | -0.4899975 | 0.2941792 | -1.6656  | 0.0959   | -0.331561629 | count | 1           |
| RIMS3      | -0.4061512 | 0.3286947 | -1.2356  | 0.217    | -0.331555064 | count | 1           |
| TTC12      | -0.3857866 | 0.2993881 | -1.2886  | 0.198    | -0.33132683  | count | 1           |
| DCDC2C     | -0.4480795 | 0.5228768 | -0.857   | 0.392    | -0.331321434 | count | 1           |
| SLC25A3    | -0.2306817 | 0.0291881 | -7.9033  | 3.56E-15 | -0.331283787 | count | 8.50E-11    |
| RPS4X      | -0.2298141 | 0.0204265 | -11.2508 | 6.79E-29 | -0.331248399 | count | 1.64E-24    |
| BCAP29     | -0.2323113 | 0.0531915 | -4.3674  | 1.29E-05 | -0.331158901 | count | 0.2970096   |
| EIF3J      | -0.2373528 | 0.0837183 | -2.8351  | 0.00461  | -0.331108399 | count | 1           |
| AL022069.1 | -0.7279944 | 0.6509963 | -1.1183  | 0.264    | -0.331082264 | count | 1           |
| DMAC1      | -0.235671  | 0.07411   | -3.18    | 0.00148  | -0.331061645 | count | 1           |
| RBP1       | -0.2400494 | 0.1101659 | -2.179   | 0.0294   | -0.330962766 | count | 1           |
| RPL28      | -0.2295167 | 0.0214044 | -10.7229 | 1.95E-26 | -0.33065359  | count | 4.70E-22    |
| CCDC85B    | -0.230696  | 0.0420147 | -5.4908  | 4.27E-08 | -0.330271397 | count | 0.001001571 |
| NSA2       | -0.2318354 | 0.0449528 | -5.1573  | 2.64E-07 | -0.330217107 | count | 0.006166512 |
| AC008393.1 | -0.5486817 | 0.3474498 | -1.5792  | 0.114    | -0.329883255 | count | 1           |

|            |            |           |          |          |              |       |            |
|------------|------------|-----------|----------|----------|--------------|-------|------------|
| SMIM27     | -0.2826104 | 0.2336158 | -1.2097  | 0.226    | -0.329806769 | count | 1          |
| AC004130.1 | -0.2958365 | 0.2560596 | -1.1553  | 0.248    | -0.32971604  | count | 1          |
| LINC01759  | -0.3309563 | 0.2627725 | -1.2595  | 0.208    | -0.329379268 | count | 1          |
| FPGT       | -0.2800011 | 0.2334582 | -1.1994  | 0.23     | -0.329147067 | count | 1          |
| RACGAP1    | -0.5890508 | 0.4738284 | -1.2432  | 0.214    | -0.328389198 | count | 1          |
| GYPC       | -0.2305278 | 0.0483819 | -4.7648  | 1.96E-06 | -0.328389171 | count | 0.04546808 |
| ZNF296     | -1.0197631 | 0.70225   | -1.4521  | 0.147    | -0.328248515 | count | 1          |
| PHACTR2    | -0.2327514 | 0.0764196 | -3.0457  | 0.00234  | -0.328105973 | count | 1          |
| SEL1L3     | -0.8349703 | 0.8730292 | -0.9564  | 0.339    | -0.32802706  | count | 1          |
| CARD8      | -0.2856898 | 0.2947462 | -0.9693  | 0.332    | -0.327997829 | count | 1          |
| ERICH2     | -0.6444688 | 0.5776958 | -1.1156  | 0.265    | -0.327989801 | count | 1          |
| C1orf35    | -0.2416055 | 0.1030752 | -2.344   | 0.0191   | -0.32798768  | count | 1          |
| DOPEY2     | -0.3424562 | 0.3558643 | -0.9623  | 0.336    | -0.327844208 | count | 1          |
| KIAA1551   | -0.2448557 | 0.1088527 | -2.2494  | 0.0245   | -0.327583351 | count | 1          |
| CHMP3      | -0.2345877 | 0.0690409 | -3.3978  | 0.000687 | -0.327275866 | count | 1          |
| OGDHL      | -0.3466736 | 0.3690599 | -0.9393  | 0.348    | -0.326985436 | count | 1          |
| TRPS1      | -0.2447399 | 0.1343706 | -1.8214  | 0.0686   | -0.326949678 | count | 1          |
| GPR35      | -1.0157387 | 0.8228217 | -1.2345  | 0.217    | -0.326861558 | count | 1          |
| AL442663.3 | -0.8319987 | 0.7216809 | -1.1529  | 0.249    | -0.326775016 | count | 1          |
| UBL5       | -0.2283666 | 0.0364727 | -6.2613  | 4.26E-10 | -0.326679877 | count | 1.01E-05   |
| PIAS3      | -0.2559924 | 0.1737221 | -1.4736  | 0.141    | -0.326669528 | count | 1          |
| MS4A6A     | -2.6728653 | 1.0451949 | -2.5573  | 0.0106   | -0.326294604 | count | 1          |
| AIP        | -0.2317138 | 0.0616291 | -3.7598  | 0.000173 | -0.325989553 | count | 1          |
| CCT3       | -0.2302026 | 0.0530684 | -4.3378  | 1.48E-05 | -0.325762062 | count | 0.3405332  |
| STX10      | -0.2396583 | 0.099662  | -2.4047  | 0.0162   | -0.325733137 | count | 1          |
| COA4       | -0.231988  | 0.0708141 | -3.276   | 0.00106  | -0.32555973  | count | 1          |
| ITPKC      | -0.2789209 | 0.2186845 | -1.2754  | 0.202    | -0.32545533  | count | 1          |
| ZNF154     | -0.3448802 | 0.5056478 | -0.6821  | 0.495    | -0.325255238 | count | 1          |
| NUP88      | -0.2805739 | 0.2480342 | -1.1312  | 0.258    | -0.324820307 | count | 1          |
| TMEM177    | -0.3103972 | 0.2477427 | -1.2529  | 0.21     | -0.324801535 | count | 1          |
| RNF6       | -0.2637794 | 0.1992815 | -1.3237  | 0.186    | -0.324736161 | count | 1          |
| PLIN3      | -0.2322484 | 0.0755201 | -3.0753  | 0.00212  | -0.324613382 | count | 1          |
| ROGDI      | -0.2654211 | 0.1611593 | -1.6469  | 0.0997   | -0.324611193 | count | 1          |
| BLID       | -0.5826035 | 0.6631562 | -0.8785  | 0.38     | -0.324591928 | count | 1          |
| CNN1       | -0.2276236 | 0.0726851 | -3.1316  | 0.00175  | -0.32457569  | count | 1          |
| KAT14      | -0.4232826 | 0.4045983 | -1.0462  | 0.296    | -0.324456173 | count | 1          |
| RNF152     | -0.2650757 | 0.1549362 | -1.7109  | 0.0872   | -0.324185324 | count | 1          |
| DOK1       | -0.2908848 | 0.1985207 | -1.4653  | 0.143    | -0.324124959 | count | 1          |
| RPL22      | -0.2250622 | 0.020962  | -10.7367 | 1.69E-26 | -0.324091372 | count | 4.08E-22   |
| GOLGA8M    | -0.7133233 | 0.7508981 | -0.95    | 0.342    | -0.32396211  | count | 1          |
| DM1-AS     | -0.7133233 | 0.7749596 | -0.9205  | 0.357    | -0.32396211  | count | 1          |
| MORN3      | -0.7133233 | 0.7835438 | -0.9104  | 0.363    | -0.32396211  | count | 1          |
| NFIA-AS2   | -0.7133233 | 0.8134281 | -0.8769  | 0.381    | -0.32396211  | count | 1          |
| SEC61B     | -0.2257305 | 0.034735  | -6.4986  | 9.20E-11 | -0.323786643 | count | 2.18E-06   |
| LGI2       | -0.3066256 | 0.1841059 | -1.6655  | 0.0959   | -0.323564298 | count | 1          |



|            |            |           |          |          |              |       |            |
|------------|------------|-----------|----------|----------|--------------|-------|------------|
| RCN1       | -0.2293712 | 0.0625772 | -3.6654  | 0.00025  | -0.323478233 | count | 1          |
| OST4       | -0.225602  | 0.0319958 | -7.051   | 2.11E-12 | -0.323435515 | count | 5.02E-08   |
| FKBP10     | -0.2320512 | 0.0747429 | -3.1047  | 0.00192  | -0.323320083 | count | 1          |
| RCHY1      | -0.2482761 | 0.1425925 | -1.7412  | 0.0817   | -0.323218575 | count | 1          |
| LUC7L3     | -0.2274363 | 0.0667422 | -3.4077  | 0.000662 | -0.323217077 | count | 1          |
| RPL18      | -0.2240099 | 0.0201064 | -11.1412 | 2.24E-28 | -0.322851424 | count | 5.40E-24   |
| PDAP1      | -0.2268307 | 0.0483188 | -4.6945  | 2.77E-06 | -0.322361943 | count | 0.06419475 |
| KIF5B      | -0.2259874 | 0.0462915 | -4.8818  | 1.10E-06 | -0.322244995 | count | 0.0255761  |
| AMOT       | -0.2783651 | 0.2510582 | -1.1088  | 0.268    | -0.322235041 | count | 1          |
| GTF3C6     | -0.2280063 | 0.0640215 | -3.5614  | 0.000374 | -0.321945904 | count | 1          |
| TRIB2      | -0.2516826 | 0.1842722 | -1.3658  | 0.172    | -0.321937061 | count | 1          |
| TPT1       | -0.2232681 | 0.0183579 | -12.1619 | 2.16E-33 | -0.321931523 | count | 5.22E-29   |
| RNF126     | -0.2423304 | 0.1246006 | -1.9449  | 0.0519   | -0.321633504 | count | 1          |
| CRK        | -0.2409712 | 0.1003926 | -2.4003  | 0.0164   | -0.321572709 | count | 1          |
| AC004854.2 | -0.8194087 | 0.7678991 | -1.0671  | 0.286    | -0.321472498 | count | 1          |
| LSM10      | -0.2320114 | 0.0856234 | -2.7097  | 0.00677  | -0.321437454 | count | 1          |
| ATP10D     | -0.2393332 | 0.1145231 | -2.0898  | 0.0367   | -0.321337045 | count | 1          |
| SP110      | -0.2319601 | 0.0991567 | -2.3393  | 0.0194   | -0.321321975 | count | 1          |
| NCAPD2     | -0.3268081 | 0.3100894 | -1.0539  | 0.292    | -0.321190704 | count | 1          |
| KAT2B      | -0.2637732 | 0.1894378 | -1.3924  | 0.164    | -0.321052413 | count | 1          |
| CTBS       | -0.2307729 | 0.0875275 | -2.6366  | 0.00841  | -0.321024184 | count | 1          |
| GDF7       | -0.2436751 | 0.2096452 | -1.1623  | 0.245    | -0.320736448 | count | 1          |
| MPHOSPH9   | -0.3039181 | 0.292313  | -1.0397  | 0.299    | -0.320661292 | count | 1          |
| AL031777.3 | -0.7062743 | 0.464234  | -1.5214  | 0.128    | -0.320544208 | count | 1          |
| MAP1LC3B2  | -0.6303239 | 0.5160974 | -1.2213  | 0.222    | -0.320348897 | count | 1          |
| WFDC3      | -0.8166025 | 0.7196746 | -1.1347  | 0.257    | -0.3202911   | count | 1          |
| CFAP45     | -0.8166025 | 0.7388526 | -1.1052  | 0.269    | -0.3202911   | count | 1          |
| AC061992.1 | -0.8166025 | 0.7599551 | -1.0745  | 0.283    | -0.3202911   | count | 1          |
| CXorf40A   | -0.3011315 | 0.2295327 | -1.3119  | 0.19     | -0.320278939 | count | 1          |
| IL1RL1     | -2.5963558 | 0.896934  | -2.8947  | 0.0038   | -0.319986458 | count | 1          |
| RPS5       | -0.2220418 | 0.0227131 | -9.7759  | 2.67E-22 | -0.319696299 | count | 6.42E-18   |
| GABRB1     | -2.5906501 | 1.574429  | -1.6455  | 0.1      | -0.319503582 | count | 1          |
| MYO7A      | -2.5906501 | 1.6738963 | -1.5477  | 0.1218   | -0.319503582 | count | 1          |
| ARPC5      | -0.2227305 | 0.0366171 | -6.0827  | 1.30E-09 | -0.319421666 | count | 3.07E-05   |
| VEZT       | -0.2394745 | 0.1271405 | -1.8835  | 0.0597   | -0.319403939 | count | 1          |
| PIN1       | -0.22561   | 0.0520796 | -4.332   | 1.52E-05 | -0.319296848 | count | 0.3496912  |
| CSDE1      | -0.2241135 | 0.0466383 | -4.8054  | 1.61E-06 | -0.319189867 | count | 0.03738581 |
| LINC01123  | -1.3448701 | 0.7790187 | -1.7264  | 0.0844   | -0.318994709 | count | 1          |
| OLAH       | -1.3448701 | 0.7970633 | -1.6873  | 0.0916   | -0.318994709 | count | 1          |
| QPCTL      | -0.573065  | 0.5325401 | -1.0761  | 0.282    | -0.318979115 | count | 1          |
| ANTXR2     | -0.2451719 | 0.1271646 | -1.928   | 0.0539   | -0.318871965 | count | 1          |
| S100A4     | -0.2210142 | 0.0250277 | -8.8308  | 1.58E-18 | -0.318721605 | count | 3.79E-14   |
| MT-ND1     | -0.2212393 | 0.0256592 | -8.6222  | 9.62E-18 | -0.318608956 | count | 2.30E-13   |
| SPTY2D1OS  | -0.4497121 | 0.3786226 | -1.1878  | 0.235    | -0.318523763 | count | 1          |
| PACSIN2    | -0.2338874 | 0.0909991 | -2.5702  | 0.0102   | -0.318510602 | count | 1          |

|              |            |           |         |          |              |       |            |
|--------------|------------|-----------|---------|----------|--------------|-------|------------|
| RPS2         | -0.2208928 | 0.0236807 | -9.328  | 1.81E-20 | -0.318160965 | count | 4.35E-16   |
| NKIRAS2      | -0.2464563 | 0.1256893 | -1.9608 | 0.05     | -0.318071235 | count | 1          |
| IMP4         | -0.2328542 | 0.0963319 | -2.4172 | 0.0157   | -0.317944565 | count | 1          |
| PCDHB8       | -0.9876    | 0.8207322 | -1.2033 | 0.229    | -0.317161725 | count | 1          |
| CYP11A1      | -0.9876    | 1.0819795 | -0.9128 | 0.361    | -0.317161725 | count | 1          |
| MAPKAPK5-AS1 | -0.23826   | 0.1279403 | -1.8623 | 0.0626   | -0.317103743 | count | 1          |
| TUBD1        | -0.2750365 | 0.1803972 | -1.5246 | 0.127    | -0.317007565 | count | 1          |
| EFR3A        | -0.232652  | 0.0935339 | -2.4874 | 0.0129   | -0.316911649 | count | 1          |
| SNX18        | -0.2274294 | 0.0826863 | -2.7505 | 0.00598  | -0.316837806 | count | 1          |
| AL450306.1   | -0.6236129 | 0.37661   | -1.6559 | 0.0978   | -0.31672767  | count | 1          |
| ATPAF2       | -0.2827286 | 0.2529962 | -1.1175 | 0.264    | -0.316678412 | count | 1          |
| GOLGA8B      | -0.2516422 | 0.2024074 | -1.2432 | 0.214    | -0.316571309 | count | 1          |
| KLF15        | -0.2649461 | 0.219604  | -1.2065 | 0.228    | -0.316423359 | count | 1          |
| FAM228B      | -0.2359621 | 0.1465878 | -1.6097 | 0.108    | -0.316376218 | count | 1          |
| NDUFS5       | -0.2202868 | 0.0319544 | -6.8938 | 6.37E-12 | -0.316267809 | count | 1.51E-07   |
| NUTF2        | -0.2254619 | 0.0717541 | -3.1421 | 0.00169  | -0.316266333 | count | 1          |
| LCMT1        | -0.2327716 | 0.1132934 | -2.0546 | 0.04     | -0.316156167 | count | 1          |
| HGH1         | -0.3078495 | 0.2624822 | -1.1728 | 0.241    | -0.316110663 | count | 1          |
| LYPLA1       | -0.2349832 | 0.1165564 | -2.016  | 0.0439   | -0.316011849 | count | 1          |
| KCNK3        | -0.3254178 | 0.2178155 | -1.494  | 0.135    | -0.315612244 | count | 1          |
| NT5DC1       | -0.226779  | 0.0811217 | -2.7955 | 0.00521  | -0.315317028 | count | 1          |
| ITGA7        | -0.2312292 | 0.11442   | -2.0209 | 0.0434   | -0.315310128 | count | 1          |
| FMO2         | -0.2221761 | 0.076373  | -2.9091 | 0.00365  | -0.315283813 | count | 1          |
| LINC01597    | -0.6953036 | 0.4285312 | -1.6225 | 0.105    | -0.315229028 | count | 1          |
| GAK          | -0.2769566 | 0.2044143 | -1.3549 | 0.176    | -0.314933767 | count | 1          |
| MAP4         | -0.2210754 | 0.0484325 | -4.5646 | 5.17E-06 | -0.31491211  | count | 0.11946836 |
| EIF3K        | -0.2195422 | 0.0310516 | -7.0702 | 1.84E-12 | -0.314892808 | count | 4.37E-08   |
| AP001816.1   | -0.255204  | 0.1986794 | -1.2845 | 0.199    | -0.314758861 | count | 1          |
| C12orf76     | -0.2335893 | 0.1105195 | -2.1136 | 0.0346   | -0.314639343 | count | 1          |
| AC106791.1   | -1.3252965 | 0.7548538 | -1.7557 | 0.0792   | -0.314158339 | count | 1          |
| C17orf113    | -0.6188059 | 0.5753839 | -1.0755 | 0.282    | -0.314135453 | count | 1          |
| REM2         | -0.6188059 | 0.814535  | -0.7597 | 0.447    | -0.314135453 | count | 1          |
| GPR137C      | -0.6188059 | 0.9035756 | -0.6848 | 0.493    | -0.314135453 | count | 1          |
| BCAS3        | -0.2592361 | 0.2261004 | -1.1466 | 0.252    | -0.313901596 | count | 1          |
| LSM2         | -0.2221722 | 0.0623137 | -3.5654 | 0.000368 | -0.313889019 | count | 1          |
| RMDN3        | -0.2460291 | 0.1661032 | -1.4812 | 0.139    | -0.313881728 | count | 1          |
| GLS          | -0.2210674 | 0.0712493 | -3.1027 | 0.00193  | -0.3136588   | count | 1          |
| SEC31B       | -0.3505467 | 0.5404266 | -0.6486 | 0.517    | -0.313629963 | count | 1          |
| NDUFA2       | -0.22166   | 0.0566728 | -3.9112 | 9.35E-05 | -0.31361333  | count | 1          |
| CDKN2B-AS1   | -2.5211059 | 1.0333725 | -2.4397 | 0.0147   | -0.313477946 | count | 1          |
| ATP5IF1      | -0.2194775 | 0.0425368 | -5.1597 | 2.60E-07 | -0.313436205 | count | 0.00607334 |
| AC009812.1   | -0.4896372 | 0.3450987 | -1.4188 | 0.156    | -0.312939664 | count | 1          |
| AKT3         | -0.2283426 | 0.1010279 | -2.2602 | 0.0239   | -0.312670499 | count | 1          |
| COX7B        | -0.2192773 | 0.0446414 | -4.912  | 9.41E-07 | -0.312557569 | count | 0.02189707 |
| TMEM132A     | -0.7978839 | 0.3858178 | -2.068  | 0.0387   | -0.312415561 | count | 1          |

|            |            |           |         |          |              |       |             |
|------------|------------|-----------|---------|----------|--------------|-------|-------------|
| C16orf87   | -0.2448778 | 0.1612349 | -1.5188 | 0.129    | -0.31240436  | count | 1           |
| LMO2       | -0.2179878 | 0.1001194 | -2.1773 | 0.0295   | -0.312260525 | count | 1           |
| C19orf70   | -0.2193021 | 0.0488084 | -4.4931 | 7.23E-06 | -0.312240196 | count | 0.16683948  |
| IKBKG      | -0.2558792 | 0.1527497 | -1.6752 | 0.094    | -0.312117175 | count | 1           |
| CISD3      | -0.2233517 | 0.0815999 | -2.7372 | 0.00623  | -0.312000303 | count | 1           |
| BRK1       | -0.218057  | 0.0376905 | -5.7855 | 7.84E-09 | -0.311950534 | count | 0.000184507 |
| CETP       | -1.3160505 | 0.6953865 | -1.8925 | 0.0585   | -0.311869003 | count | 1           |
| CXorf36    | -1.3160505 | 1.112199  | -1.1833 | 0.237    | -0.311869003 | count | 1           |
| AC027644.3 | -0.2325965 | 0.108526  | -2.1432 | 0.0322   | -0.311848319 | count | 1           |
| AL590399.1 | -0.7963254 | 0.5581041 | -1.4268 | 0.154    | -0.311760226 | count | 1           |
| SMDT1      | -0.2190088 | 0.0497053 | -4.4061 | 1.08E-05 | -0.311729721 | count | 0.2487564   |
| PTPRD-AS1  | -0.237467  | 0.1632706 | -1.4544 | 0.146    | -0.311618941 | count | 1           |
| HENMT1     | -0.3479532 | 0.3657363 | -0.9514 | 0.341    | -0.31125055  | count | 1           |
| P2RX4      | -0.2598296 | 0.1698724 | -1.5296 | 0.126    | -0.311180991 | count | 1           |
| AC023632.2 | -0.7949279 | 0.6771258 | -1.174  | 0.24     | -0.311172654 | count | 1           |
| OVCH1-AS1  | -0.4610979 | 0.4411642 | -1.0452 | 0.296    | -0.311171565 | count | 1           |
| YBX1       | -0.2161026 | 0.0251711 | -8.5854 | 1.32E-17 | -0.311053639 | count | 3.16E-13    |
| TNFRSF4    | -2.4927738 | 0.8580334 | -2.9052 | 0.00369  | -0.310948628 | count | 1           |
| HSD17B10   | -0.2224598 | 0.0698932 | -3.1829 | 0.00147  | -0.310859542 | count | 1           |
| TRAPPC8    | -0.251523  | 0.2019752 | -1.2453 | 0.213    | -0.310820165 | count | 1           |
| RPL31      | -0.2166065 | 0.0324486 | -6.6754 | 2.84E-11 | -0.310635849 | count | 6.74E-07    |
| ATP5MG     | -0.2167384 | 0.0326323 | -6.6418 | 3.55E-11 | -0.310612634 | count | 8.42E-07    |
| ACACA      | -0.3056008 | 0.2479132 | -1.2327 | 0.218    | -0.310568416 | count | 1           |
| MMADHC     | -0.2210572 | 0.0705703 | -3.1324 | 0.00175  | -0.310489481 | count | 1           |
| B3GNT5     | -2.486318  | 0.7374952 | -3.3713 | 0.000756 | -0.310366334 | count | 1           |
| FBXW5      | -0.2213579 | 0.0752549 | -2.9414 | 0.00329  | -0.309981553 | count | 1           |
| TENT4A     | -0.3082701 | 0.2925757 | -1.0536 | 0.292    | -0.309943875 | count | 1           |
| AC006449.6 | -0.3804562 | 0.3081468 | -1.2347 | 0.217    | -0.309935735 | count | 1           |
| AEBP1      | -0.2155095 | 0.0482172 | -4.4696 | 8.07E-06 | -0.309813839 | count | 0.18610227  |
| PLPP5      | -0.2251386 | 0.0988011 | -2.2787 | 0.0227   | -0.309688072 | count | 1           |
| S100A2     | -0.4376687 | 0.3866653 | -1.1319 | 0.258    | -0.309652197 | count | 1           |
| RGL2       | -0.2364741 | 0.1731179 | -1.366  | 0.172    | -0.309592689 | count | 1           |
| GATD3A     | -0.9652953 | 0.7458149 | -1.2943 | 0.196    | -0.30947183  | count | 1           |
| AC124016.1 | -0.3798095 | 0.3674938 | -1.0335 | 0.301    | -0.309392454 | count | 1           |
| BMPR2      | -0.2240393 | 0.1025806 | -2.184  | 0.029    | -0.309309304 | count | 1           |
| TCTEX1D4   | -0.7904739 | 0.6096167 | -1.2967 | 0.195    | -0.309300405 | count | 1           |
| AL080317.2 | -0.7904739 | 0.7959744 | -0.9931 | 0.321    | -0.309300405 | count | 1           |
| MEGF9      | -0.247867  | 0.2003132 | -1.2374 | 0.216    | -0.309187177 | count | 1           |
| DYNC1LI2   | -0.2194251 | 0.061698  | -3.5564 | 0.000381 | -0.309158687 | count | 1           |
| FHL1       | -0.2146726 | 0.0454159 | -4.7268 | 2.37E-06 | -0.30911529  | count | 0.05494845  |
| FAM131A    | -0.2604687 | 0.2128117 | -1.2239 | 0.221    | -0.309092177 | count | 1           |
| CHURC1     | -0.2170494 | 0.0476882 | -4.5514 | 5.50E-06 | -0.309062117 | count | 0.12705     |
| HDHD5      | -0.257212  | 0.1875891 | -1.3711 | 0.17     | -0.308907149 | count | 1           |
| B3GAT3     | -0.2236563 | 0.0904725 | -2.4721 | 0.0135   | -0.30887867  | count | 1           |
| CFL1       | -0.2150133 | 0.0294211 | -7.3081 | 3.31E-13 | -0.308811089 | count | 7.88E-09    |

|            |            |           |         |          |              |       |             |
|------------|------------|-----------|---------|----------|--------------|-------|-------------|
| FZD6       | -0.2446725 | 0.1910087 | -1.2809 | 0.2      | -0.30869974  | count | 1           |
| YDJC       | -0.2542635 | 0.2070442 | -1.2281 | 0.22     | -0.308617409 | count | 1           |
| SMIM10L1   | -0.2210386 | 0.0901279 | -2.4525 | 0.0142   | -0.308600633 | count | 1           |
| GMDS-DT    | -0.2786337 | 0.2469121 | -1.1285 | 0.259    | -0.308498453 | count | 1           |
| AC025164.1 | -0.3686689 | 0.2518925 | -1.4636 | 0.143    | -0.308420168 | count | 1           |
| FBL        | -0.2288977 | 0.1049849 | -2.1803 | 0.0293   | -0.308177446 | count | 1           |
| TMEM87B    | -0.2403897 | 0.1636923 | -1.4685 | 0.142    | -0.308147642 | count | 1           |
| B3GNTL1    | -0.6806265 | 0.4977784 | -1.3673 | 0.172    | -0.308126679 | count | 1           |
| EVL        | -0.2289161 | 0.1306001 | -1.7528 | 0.0797   | -0.308078401 | count | 1           |
| PACSIN3    | -0.2414804 | 0.1484712 | -1.6264 | 0.104    | -0.308045146 | count | 1           |
| ANAPC11    | -0.2157442 | 0.0434374 | -4.9668 | 7.12E-07 | -0.30783366  | count | 0.016590312 |
| NOS1AP     | -0.2734464 | 0.3210745 | -0.8517 | 0.394    | -0.307792785 | count | 1           |
| OGN        | -0.2135792 | 0.0400559 | -5.332  | 1.03E-07 | -0.307623914 | count | 0.002411951 |
| BOD1       | -0.2241649 | 0.0812459 | -2.7591 | 0.00582  | -0.307543673 | count | 1           |
| DYNLRB1    | -0.2150161 | 0.0391456 | -5.4927 | 4.23E-08 | -0.307439966 | count | 0.000992231 |
| AC078909.1 | -0.3024972 | 0.2709648 | -1.1164 | 0.264    | -0.307358339 | count | 1           |
| HECA       | -0.2435916 | 0.1704861 | -1.4288 | 0.153    | -0.307327393 | count | 1           |
| ARF4-AS1   | -0.5531604 | 0.4580771 | -1.2076 | 0.227    | -0.307287019 | count | 1           |
| AC016394.1 | -0.3435822 | 0.3187655 | -1.0779 | 0.281    | -0.30724194  | count | 1           |
| ZNF570     | -0.2580653 | 0.189468  | -1.3621 | 0.173    | -0.307186482 | count | 1           |
| IRF7       | -0.2401907 | 0.1983985 | -1.2106 | 0.226    | -0.307155104 | count | 1           |
| GNLY       | -0.3769565 | 0.4799643 | -0.7854 | 0.432    | -0.306996274 | count | 1           |
| WDR66      | -0.3167114 | 0.668865  | -0.4735 | 0.636    | -0.306996153 | count | 1           |
| CSK        | -0.2484191 | 0.1644935 | -1.5102 | 0.131    | -0.306956436 | count | 1           |
| TRMT61A    | -0.2478446 | 0.1545758 | -1.6034 | 0.109    | -0.306852705 | count | 1           |
| TFIP11     | -0.2805767 | 0.2039913 | -1.3754 | 0.169    | -0.306826809 | count | 1           |
| MYO1B      | -0.2220858 | 0.1004768 | -2.2103 | 0.0271   | -0.30680258  | count | 1           |
| HDAC5      | -0.2304794 | 0.15254   | -1.5109 | 0.131    | -0.30671014  | count | 1           |
| DECR2      | -0.253309  | 0.2323495 | -1.0902 | 0.276    | -0.306664897 | count | 1           |
| DUSP5      | -0.3163598 | 0.3286736 | -0.9625 | 0.336    | -0.306648356 | count | 1           |
| MRPS33     | -0.2228958 | 0.0970576 | -2.2965 | 0.0217   | -0.306177064 | count | 1           |
| NTHL1      | -0.2301903 | 0.1189648 | -1.9349 | 0.0531   | -0.30615555  | count | 1           |
| L3HYPDH    | -0.2343544 | 0.1416861 | -1.654  | 0.0982   | -0.305803476 | count | 1           |
| AP4B1      | -0.3246124 | 0.3184235 | -1.0194 | 0.308    | -0.305723673 | count | 1           |
| LINC01971  | -0.9537942 | 0.623423  | -1.5299 | 0.126    | -0.305506968 | count | 1           |
| NUP43      | -0.2873689 | 0.1993635 | -1.4414 | 0.15     | -0.305420652 | count | 1           |
| C16orf91   | -0.2308572 | 0.1251008 | -1.8454 | 0.0651   | -0.305420117 | count | 1           |
| VASP       | -0.2230336 | 0.0990476 | -2.2518 | 0.0244   | -0.305383675 | count | 1           |
| B9D2       | -0.2639502 | 0.2380906 | -1.1086 | 0.268    | -0.305372224 | count | 1           |
| PHC2       | -0.2243276 | 0.0896612 | -2.5019 | 0.0124   | -0.305198265 | count | 1           |
| KLHL35     | -0.3192787 | 0.319032  | -1.0008 | 0.317    | -0.30519205  | count | 1           |
| FAM69C     | -0.7806583 | 0.5937179 | -1.3149 | 0.189    | -0.30517641  | count | 1           |
| MRPL33     | -0.2156122 | 0.0547642 | -3.9371 | 8.40E-05 | -0.30513525  | count | 1           |
| SLC6A8     | -0.3069967 | 0.333692  | -0.92   | 0.358    | -0.305088858 | count | 1           |
| AC024941.2 | -2.427714  | 1.304399  | -1.8612 | 0.0628   | -0.304976524 | count | 1           |

|            |            |           |          |          |              |       |             |
|------------|------------|-----------|----------|----------|--------------|-------|-------------|
| THAP8      | -0.2738153 | 0.3161065 | -0.8662  | 0.386    | -0.304866672 | count | 1           |
| COX6B1     | -0.2125756 | 0.0327551 | -6.4898  | 9.74E-11 | -0.304770969 | count | 2.31E-06    |
| RASSF7     | -0.3854207 | 0.4305002 | -0.8953  | 0.371    | -0.304668726 | count | 1           |
| DAP3       | -0.2303259 | 0.1214705 | -1.8961  | 0.058    | -0.304326013 | count | 1           |
| BIN3       | -0.2367259 | 0.2197222 | -1.0774  | 0.281    | -0.304124647 | count | 1           |
| IL27RA     | -0.9496623 | 0.611471  | -1.5531  | 0.12     | -0.304082674 | count | 1           |
| AL023581.2 | -1.2844415 | 0.6935323 | -1.852   | 0.0641   | -0.304021125 | count | 1           |
| STKLD1     | -1.2844415 | 0.7238301 | -1.7745  | 0.0761   | -0.304021125 | count | 1           |
| GALNT17    | -1.2844414 | 0.7976141 | -1.6104  | 0.107    | -0.304021112 | count | 1           |
| CAPRN2     | -0.2332828 | 0.1845993 | -1.2637  | 0.206    | -0.303875757 | count | 1           |
| MRPL51     | -0.212749  | 0.0433252 | -4.9105  | 9.48E-07 | -0.303668544 | count | 0.022059012 |
| SEMA3G     | -2.41279   | 1.384952  | -1.7421  | 0.0816   | -0.303574308 | count | 1           |
| TCF4-AS2   | -2.41279   | 1.384952  | -1.7421  | 0.0816   | -0.303574308 | count | 1           |
| PSMA2      | -0.2168519 | 0.0821049 | -2.6412  | 0.0083   | -0.302692084 | count | 1           |
| GULP1      | -0.2183206 | 0.0811658 | -2.6898  | 0.00718  | -0.302599842 | count | 1           |
| RPL8       | -0.2099078 | 0.0196034 | -10.7077 | 2.29E-26 | -0.30256282  | count | 5.52E-22    |
| NFKBIB     | -0.2558    | 0.1925455 | -1.3285  | 0.184    | -0.302506357 | count | 1           |
| FBLN7      | -0.2457527 | 0.1623225 | -1.514   | 0.13     | -0.302380075 | count | 1           |
| AC137767.1 | -0.3614863 | 0.3963583 | -0.912   | 0.362    | -0.302236854 | count | 1           |
| DDX20      | -0.2714009 | 0.1927024 | -1.4084  | 0.159    | -0.302144631 | count | 1           |
| THBS2      | -0.2127062 | 0.0827895 | -2.5692  | 0.0102   | -0.302084314 | count | 1           |
| PHKA1      | -0.3822423 | 0.4157729 | -0.9194  | 0.358    | -0.302074201 | count | 1           |
| ARHGEF39   | -2.3953702 | 1.34543   | -1.7804  | 0.0751   | -0.301922522 | count | 1           |
| RPS7       | -0.2094906 | 0.0213635 | -9.806   | 2.00E-22 | -0.301886248 | count | 4.81E-18    |
| TNFRSF25   | -0.9428747 | 0.5417182 | -1.7405  | 0.0819   | -0.301743119 | count | 1           |
| TSN        | -0.22411   | 0.1088879 | -2.0582  | 0.0396   | -0.301711137 | count | 1           |
| MRPL40     | -0.2129603 | 0.0696598 | -3.0571  | 0.00225  | -0.301425261 | count | 1           |
| TIMM10B    | -0.2273667 | 0.1192566 | -1.9065  | 0.0567   | -0.301157176 | count | 1           |
| VPS51      | -0.2172557 | 0.0770851 | -2.8184  | 0.00485  | -0.301121208 | count | 1           |
| TMEM222    | -0.2221434 | 0.1196011 | -1.8574  | 0.0633   | -0.301111809 | count | 1           |
| HBS1L      | -0.2270403 | 0.1286223 | -1.7652  | 0.0776   | -0.301085687 | count | 1           |
| NDUFB7     | -0.2103693 | 0.0382639 | -5.4979  | 4.11E-08 | -0.300819017 | count | 0.000964247 |
| NAA10      | -0.2137412 | 0.0701007 | -3.0491  | 0.00231  | -0.300755656 | count | 1           |
| KBTBD12    | -0.664999  | 0.4723734 | -1.4078  | 0.159    | -0.300575849 | count | 1           |
| PM20D2     | -0.238532  | 0.1728843 | -1.3797  | 0.168    | -0.300444408 | count | 1           |
| MAF1       | -0.2130405 | 0.0568202 | -3.7494  | 0.00018  | -0.300437309 | count | 1           |
| MTCP1      | -0.9387611 | 0.6783237 | -1.3839  | 0.166    | -0.300325364 | count | 1           |
| FOXD2      | -0.2200152 | 0.1361696 | -1.6157  | 0.106    | -0.300216604 | count | 1           |
| IFITM3     | -0.2083146 | 0.0236192 | -8.8197  | 1.74E-18 | -0.300207909 | count | 4.17E-14    |
| STEAP3     | -0.3056712 | 0.3729667 | -0.8196  | 0.413    | -0.300018244 | count | 1           |
| RABL6      | -0.2196759 | 0.1060394 | -2.0716  | 0.0384   | -0.299674412 | count | 1           |
| TAF6L      | -0.3052579 | 0.257996  | -1.1832  | 0.237    | -0.299604683 | count | 1           |
| ATF4       | -0.2113025 | 0.0573284 | -3.6858  | 0.000231 | -0.299567886 | count | 1           |
| MSTO1      | -0.2840423 | 0.2561135 | -1.109   | 0.267    | -0.29937048  | count | 1           |
| EXT1       | -0.216417  | 0.1266715 | -1.7085  | 0.0876   | -0.299366561 | count | 1           |

|            |            |           |          |          |              |       |             |
|------------|------------|-----------|----------|----------|--------------|-------|-------------|
| RAB33A     | -0.4688299 | 0.4967847 | -0.9437  | 0.345    | -0.299031289 | count | 1           |
| SUPT7L     | -0.2380893 | 0.1592225 | -1.4953  | 0.135    | -0.298935046 | count | 1           |
| GJA5       | -0.2451059 | 0.2253351 | -1.0877  | 0.277    | -0.298873641 | count | 1           |
| DUSP28     | -0.2885367 | 0.2617112 | -1.1025  | 0.27     | -0.298825048 | count | 1           |
| NPM1       | -0.2078993 | 0.0300434 | -6.92    | 5.31E-12 | -0.298666912 | count | 1.26E-07    |
| LINC00595  | -2.360759  | 1.7795435 | -1.3266  | 0.1847   | -0.298591779 | count | 1           |
| PRELID1    | -0.209607  | 0.0485268 | -4.3194  | 1.61E-05 | -0.298021345 | count | 0.3703483   |
| SERPINE2   | -0.211958  | 0.1944939 | -1.0898  | 0.276    | -0.29781721  | count | 1           |
| CPTP       | -0.2554227 | 0.1942046 | -1.3152  | 0.189    | -0.297764586 | count | 1           |
| TWSG1      | -0.214247  | 0.0819798 | -2.6134  | 0.009    | -0.297656085 | count | 1           |
| TOMM20     | -0.207895  | 0.0381084 | -5.4554  | 5.21E-08 | -0.297419823 | count | 0.001221693 |
| AL022322.2 | -0.6583662 | 0.9143586 | -0.72    | 0.472    | -0.297374798 | count | 1           |
| TRIM24     | -0.2511447 | 0.1966331 | -1.2772  | 0.202    | -0.296949688 | count | 1           |
| PLPP7      | -0.3022366 | 0.3310194 | -0.913   | 0.361    | -0.296582042 | count | 1           |
| SNRPE      | -0.2107969 | 0.0653436 | -3.226   | 0.00127  | -0.296450471 | count | 1           |
| SATB2      | -0.2918202 | 0.4481528 | -0.6512  | 0.515    | -0.296322134 | count | 1           |
| PTDSS1     | -0.2677346 | 0.2054151 | -1.3034  | 0.193    | -0.296278349 | count | 1           |
| ZNF223     | -0.4193861 | 0.4012776 | -1.0451  | 0.296    | -0.296211293 | count | 1           |
| RAB4A      | -0.2137925 | 0.0742218 | -2.8805  | 0.00399  | -0.296192212 | count | 1           |
| BCR        | -0.2618121 | 0.2310746 | -1.133   | 0.257    | -0.296057882 | count | 1           |
| C8orf33    | -0.2180466 | 0.1009119 | -2.1608  | 0.0308   | -0.296011979 | count | 1           |
| NUDT16     | -0.2155667 | 0.0932581 | -2.3115  | 0.0209   | -0.29590668  | count | 1           |
| FKBP1A     | -0.2079501 | 0.0477759 | -4.3526  | 1.38E-05 | -0.295854454 | count | 0.317607    |
| CHMP4B     | -0.2116989 | 0.0753998 | -2.8077  | 0.00502  | -0.295750786 | count | 1           |
| HOXB2      | -0.2153137 | 0.0957107 | -2.2496  | 0.0245   | -0.295739483 | count | 1           |
| CHSY1      | -0.2269639 | 0.1487775 | -1.5255  | 0.127    | -0.295606819 | count | 1           |
| GRM8       | -0.7574907 | 0.6557288 | -1.1552  | 0.248    | -0.295454506 | count | 1           |
| LINC01521  | -0.7574907 | 0.6770799 | -1.1188  | 0.263    | -0.295454506 | count | 1           |
| SRD5A1     | -0.337396  | 0.3123157 | -1.0803  | 0.28     | -0.295343981 | count | 1           |
| FIBP       | -0.2117493 | 0.082356  | -2.5711  | 0.0102   | -0.295311075 | count | 1           |
| SLCO5A1    | -0.3304745 | 0.3436067 | -0.9618  | 0.336    | -0.295232915 | count | 1           |
| RPL34      | -0.2048058 | 0.0199464 | -10.2678 | 2.10E-24 | -0.295204853 | count | 5.06E-20    |
| DAPK3      | -0.2241635 | 0.1032739 | -2.1706  | 0.03     | -0.295157196 | count | 1           |
| USP13      | -0.3135143 | 0.2985425 | -1.0501  | 0.294    | -0.295046336 | count | 1           |
| DPYSL3     | -0.2124743 | 0.0896497 | -2.3701  | 0.0178   | -0.295011336 | count | 1           |
| COA1       | -0.2212353 | 0.1303349 | -1.6974  | 0.0897   | -0.294992415 | count | 1           |
| FAM225A    | -1.2480574 | 0.8581752 | -1.4543  | 0.146    | -0.294950079 | count | 1           |
| YPEL5      | -0.20969   | 0.0700445 | -2.9937  | 0.00277  | -0.294939823 | count | 1           |
| TMEM183A   | -0.2174292 | 0.1035089 | -2.1006  | 0.0357   | -0.294893898 | count | 1           |
| FAF1       | -0.2372416 | 0.1574201 | -1.5071  | 0.132    | -0.294765048 | count | 1           |
| RHOC       | -0.2055959 | 0.0372502 | -5.5193  | 3.64E-08 | -0.294696743 | count | 0.000854344 |
| ZNF362     | -0.2314482 | 0.1434319 | -1.6136  | 0.107    | -0.294409132 | count | 1           |
| LYL1       | -0.2506243 | 0.2651105 | -0.9454  | 0.345    | -0.294287792 | count | 1           |
| TMEM251    | -0.2241313 | 0.1334013 | -1.6801  | 0.093    | -0.294265385 | count | 1           |
| FSD1L      | -0.4167273 | 0.3830686 | -1.0879  | 0.277    | -0.294259361 | count | 1           |

|            |            |           |         |          |              |       |             |
|------------|------------|-----------|---------|----------|--------------|-------|-------------|
| COMMD6     | -0.205136  | 0.0330453 | -6.2077 | 5.98E-10 | -0.294195679 | count | 1.41E-05    |
| TEX2       | -0.2543792 | 0.2206663 | -1.1528 | 0.249    | -0.294184639 | count | 1           |
| KLHL17     | -0.351724  | 0.40992   | -0.858  | 0.391    | -0.293841458 | count | 1           |
| UQCRQ      | -0.205267  | 0.0446189 | -4.6005 | 4.36E-06 | -0.29335643  | count | 0.100825    |
| GOLGA8A    | -0.2230868 | 0.219815  | -1.0149 | 0.31     | -0.293317238 | count | 1           |
| AP5Z1      | -0.2406619 | 0.3057666 | -0.7871 | 0.431    | -0.292704764 | count | 1           |
| RNF115     | -0.2095992 | 0.0832765 | -2.5169 | 0.0119   | -0.292527152 | count | 1           |
| SEC11C     | -0.208991  | 0.0716876 | -2.9153 | 0.00357  | -0.292508662 | count | 1           |
| ENO1       | -0.2045009 | 0.0440792 | -4.6394 | 3.62E-06 | -0.292447074 | count | 0.08377404  |
| E2F6       | -0.2675826 | 0.2477824 | -1.0799 | 0.28     | -0.292429669 | count | 1           |
| RNF181     | -0.206422  | 0.0554784 | -3.7208 | 0.000202 | -0.292318976 | count | 1           |
| SERBP1     | -0.2045091 | 0.0391432 | -5.2246 | 1.84E-07 | -0.292053005 | count | 0.004302288 |
| STYX       | -0.2350565 | 0.178421  | -1.3174 | 0.188    | -0.292031635 | count | 1           |
| TMEM141    | -0.209867  | 0.078765  | -2.6645 | 0.00774  | -0.291663755 | count | 1           |
| RPL26L1    | -0.2104731 | 0.0895884 | -2.3493 | 0.0189   | -0.291625124 | count | 1           |
| USP30-AS1  | -2.290156  | 1.10271   | -2.0768 | 0.0379   | -0.291597176 | count | 1           |
| AC073111.5 | -0.2933355 | 0.2544231 | -1.1529 | 0.249    | -0.29126414  | count | 1           |
| FREM1      | -0.4872401 | 0.3371806 | -1.445  | 0.149    | -0.291163194 | count | 1           |
| SRRM4      | -0.5251098 | 0.5223889 | -1.0052 | 0.315    | -0.290859879 | count | 1           |
| FOXO4      | -0.5251098 | 0.5449695 | -0.9636 | 0.335    | -0.290859879 | count | 1           |
| ZNF266     | -0.4863972 | 0.4239379 | -1.1473 | 0.251    | -0.29063418  | count | 1           |
| IQSEC2     | -0.2675403 | 0.2361653 | -1.1329 | 0.257    | -0.290428727 | count | 1           |
| RYR3       | -0.5745202 | 0.7134288 | -0.8053 | 0.421    | -0.290322552 | count | 1           |
| PSMB8-AS1  | -0.2801139 | 0.2607353 | -1.0743 | 0.283    | -0.289962071 | count | 1           |
| KCTD3      | -0.2517565 | 0.1723176 | -1.461  | 0.144    | -0.289897046 | count | 1           |
| YARS       | -0.2291008 | 0.1662485 | -1.3781 | 0.168    | -0.289793032 | count | 1           |
| ARMCX6     | -0.2170852 | 0.123291  | -1.7608 | 0.0784   | -0.289736324 | count | 1           |
| LINC00989  | -0.3793671 | 0.2371111 | -1.6    | 0.11     | -0.28967917  | count | 1           |
| HSD11B1L   | -0.2441049 | 0.1898396 | -1.2858 | 0.199    | -0.289500021 | count | 1           |
| HACD1      | -0.2093047 | 0.1028327 | -2.0354 | 0.0419   | -0.289467342 | count | 1           |
| RMND1      | -0.2232727 | 0.1550006 | -1.4405 | 0.15     | -0.289449554 | count | 1           |
| ARHGEF19   | -0.3179873 | 0.3167747 | -1.0038 | 0.316    | -0.289315386 | count | 1           |
| RPRD1A     | -0.2247156 | 0.1501205 | -1.4969 | 0.135    | -0.289256472 | count | 1           |
| CDK5       | -0.2453983 | 0.220706  | -1.1119 | 0.266    | -0.289108381 | count | 1           |
| SOX4       | -0.2057157 | 0.0951021 | -2.1631 | 0.0306   | -0.288647159 | count | 1           |
| EIF3E      | -0.2016109 | 0.035498  | -5.6795 | 1.46E-08 | -0.288524193 | count | 0.000343231 |
| MTUS2      | -0.2565211 | 0.2869529 | -0.8939 | 0.371    | -0.28852145  | count | 1           |
| GBP3       | -0.2124758 | 0.169971  | -1.2501 | 0.211    | -0.28842921  | count | 1           |
| SND1       | -0.2169018 | 0.1230634 | -1.7625 | 0.0781   | -0.288418795 | count | 1           |
| IGHG4      | -2.2578448 | 0.7065965 | -3.1954 | 0.00141  | -0.288307064 | count | 1           |
| C12orf73   | -0.2453785 | 0.207281  | -1.1838 | 0.237    | -0.288069666 | count | 1           |
| FOSL1      | -0.3770511 | 0.4511489 | -0.8358 | 0.403    | -0.287850624 | count | 1           |
| TMEM219    | -0.2023899 | 0.0526066 | -3.8472 | 0.000121 | -0.287659658 | count | 1           |
| SLC39A4    | -0.2314547 | 0.2262811 | -1.0229 | 0.306    | -0.287526656 | count | 1           |
| LINC01018  | -2.249899  | 0.9759097 | -2.3054 | 0.0212   | -0.287489425 | count | 1           |

|             |            |           |          |          |              |       |             |
|-------------|------------|-----------|----------|----------|--------------|-------|-------------|
| EIF6        | -0.2031388 | 0.0652476 | -3.1134  | 0.00186  | -0.287468364 | count | 1           |
| SET         | -0.2011973 | 0.0433322 | -4.6431  | 3.55E-06 | -0.287391814 | count | 0.0821683   |
| EIF2S3B     | -1.2178343 | 0.8056896 | -1.5115  | 0.131    | -0.287388319 | count | 1           |
| RPL11       | -0.1992425 | 0.0177146 | -11.2474 | 7.05E-29 | -0.28723544  | count | 1.70E-24    |
| HERC5       | -0.2194348 | 0.1315297 | -1.6683  | 0.0953   | -0.287189883 | count | 1           |
| UNK         | -0.2338341 | 0.1724948 | -1.3556  | 0.175    | -0.286988091 | count | 1           |
| FAM227A     | -0.7369416 | 0.5031002 | -1.4648  | 0.143    | -0.286846878 | count | 1           |
| AC009237.14 | -0.5679812 | 0.5143734 | -1.1042  | 0.27     | -0.286817613 | count | 1           |
| MRPL21      | -0.2045881 | 0.0687169 | -2.9773  | 0.00293  | -0.286815506 | count | 1           |
| RPP21       | -0.2434304 | 0.2301978 | -1.0575  | 0.29     | -0.28676839  | count | 1           |
| FOXN3-AS1   | -0.25913   | 0.254     | -1.0202  | 0.308    | -0.286638106 | count | 1           |
| TMCC1       | -0.2428827 | 0.1902424 | -1.2767  | 0.202    | -0.286117181 | count | 1           |
| GYS1        | -0.3042185 | 0.4071097 | -0.7473  | 0.455    | -0.286112876 | count | 1           |
| PKN3        | -0.8974853 | 0.6991531 | -1.2837  | 0.199    | -0.286107539 | count | 1           |
| AL137077.2  | -0.8974853 | 0.7661988 | -1.1713  | 0.242    | -0.286107539 | count | 1           |
| TRIM16L     | -0.362558  | 0.324223  | -1.1182  | 0.264    | -0.28602971  | count | 1           |
| MON1B       | -0.2346091 | 0.2059696 | -1.139   | 0.255    | -0.285977237 | count | 1           |
| ACTA2-AS1   | -0.8960137 | 0.6221916 | -1.4401  | 0.15     | -0.285600981 | count | 1           |
| CCDC124     | -0.202744  | 0.0646621 | -3.1354  | 0.00173  | -0.285396524 | count | 1           |
| ADORA2B     | -0.3613392 | 0.4629715 | -0.7805  | 0.435    | -0.285037644 | count | 1           |
| PYGM        | -0.4038959 | 0.2424032 | -1.6662  | 0.0958   | -0.284849475 | count | 1           |
| LINC02188   | -0.8936453 | 0.8320291 | -1.0741  | 0.283    | -0.284785768 | count | 1           |
| BEX1        | -0.4037493 | 0.4711199 | -0.857   | 0.392    | -0.284742065 | count | 1           |
| SF3B5       | -0.199707  | 0.0508262 | -3.9292  | 8.68E-05 | -0.284119929 | count | 1           |
| PGF         | -0.2007597 | 0.0873946 | -2.2972  | 0.0217   | -0.283888765 | count | 1           |
| PLS1        | -0.4025557 | 0.4805484 | -0.8377  | 0.402    | -0.283867613 | count | 1           |
| HEXIM2      | -0.2370369 | 0.2327081 | -1.0186  | 0.308    | -0.28365596  | count | 1           |
| CORO1C      | -0.2144627 | 0.1264963 | -1.6954  | 0.0901   | -0.283649194 | count | 1           |
| AC138696.2  | -0.6292    | 0.5364355 | -1.1729  | 0.241    | -0.283327193 | count | 1           |
| EFHD1       | -0.1995841 | 0.0621342 | -3.2121  | 0.00133  | -0.283272191 | count | 1           |
| ZNF25       | -0.2275778 | 0.2232377 | -1.0194  | 0.308    | -0.283203191 | count | 1           |
| MSANTD3     | -0.2131659 | 0.1427333 | -1.4935  | 0.135    | -0.282951594 | count | 1           |
| EIF5A       | -0.1983829 | 0.0431209 | -4.6006  | 4.35E-06 | -0.282911395 | count | 0.10060245  |
| STX18-AS1   | -0.7271314 | 0.5800908 | -1.2535  | 0.21     | -0.282743205 | count | 1           |
| DLGAP1-AS2  | -0.7271314 | 0.7632949 | -0.9526  | 0.341    | -0.282743205 | count | 1           |
| FOLR1       | -0.3703017 | 0.512694  | -0.7223  | 0.47     | -0.282525107 | count | 1           |
| KIAA0040    | -0.2071605 | 0.1076145 | -1.925   | 0.0543   | -0.282486058 | count | 1           |
| PSMC5       | -0.1986378 | 0.0474668 | -4.1848  | 2.92E-05 | -0.282420674 | count | 0.6693224   |
| ZNF341      | -0.4731443 | 0.4958238 | -0.9543  | 0.34     | -0.282324978 | count | 1           |
| NDUFC2      | -0.1971184 | 0.0381869 | -5.1619  | 2.57E-07 | -0.282209077 | count | 0.006003777 |
| RARRES3     | -0.2008427 | 0.0736396 | -2.7274  | 0.00641  | -0.282181945 | count | 1           |
| RCL1        | -0.2430448 | 0.1624671 | -1.496   | 0.135    | -0.282088496 | count | 1           |
| AP001437.1  | -0.5591485 | 0.740795  | -0.7548  | 0.45     | -0.282088047 | count | 1           |
| OCLM        | -1.196092  | 0.8288684 | -1.443   | 0.149    | -0.281935274 | count | 1           |
| AC010969.1  | -1.196092  | 0.8288684 | -1.443   | 0.149    | -0.281935274 | count | 1           |



|            |            |           |         |          |              |       |   |
|------------|------------|-----------|---------|----------|--------------|-------|---|
| AC073050.1 | -1.196092  | 0.8288684 | -1.443  | 0.149    | -0.281935274 | count | 1 |
| AC107294.2 | -1.196092  | 0.8288684 | -1.443  | 0.149    | -0.281935274 | count | 1 |
| LINC02432  | -1.196092  | 0.8288684 | -1.443  | 0.149    | -0.281935274 | count | 1 |
| AL031058.1 | -1.196092  | 0.8288684 | -1.443  | 0.149    | -0.281935274 | count | 1 |
| Z98200.1   | -1.196092  | 0.8288684 | -1.443  | 0.149    | -0.281935274 | count | 1 |
| SLC22A16   | -1.196092  | 0.8288684 | -1.443  | 0.149    | -0.281935274 | count | 1 |
| AL049548.1 | -1.196092  | 0.8288684 | -1.443  | 0.149    | -0.281935274 | count | 1 |
| CAMK2B     | -1.196092  | 0.8288684 | -1.443  | 0.149    | -0.281935274 | count | 1 |
| SMKR1      | -1.196092  | 0.8288684 | -1.443  | 0.149    | -0.281935274 | count | 1 |
| SYT7       | -1.196092  | 0.8288684 | -1.443  | 0.149    | -0.281935274 | count | 1 |
| AP000904.1 | -1.196092  | 0.8288684 | -1.443  | 0.149    | -0.281935274 | count | 1 |
| AC004816.2 | -1.196092  | 0.8288684 | -1.443  | 0.149    | -0.281935274 | count | 1 |
| HEATR4     | -1.196092  | 0.8288684 | -1.443  | 0.149    | -0.281935274 | count | 1 |
| LINC00677  | -1.196092  | 0.8288684 | -1.443  | 0.149    | -0.281935274 | count | 1 |
| AC023034.1 | -1.196092  | 0.8288684 | -1.443  | 0.149    | -0.281935274 | count | 1 |
| AC027801.3 | -1.196092  | 0.8288684 | -1.443  | 0.149    | -0.281935274 | count | 1 |
| C17orf64   | -1.196092  | 0.8288684 | -1.443  | 0.149    | -0.281935274 | count | 1 |
| AC011825.4 | -1.196092  | 0.8288684 | -1.443  | 0.149    | -0.281935274 | count | 1 |
| AC091551.1 | -1.196092  | 0.8288684 | -1.443  | 0.149    | -0.281935274 | count | 1 |
| AL031666.1 | -1.196092  | 0.8288684 | -1.443  | 0.149    | -0.281935274 | count | 1 |
| LKAAEAR1   | -1.196092  | 0.8288684 | -1.443  | 0.149    | -0.281935274 | count | 1 |
| TSSK6      | -1.196092  | 0.8288684 | -1.443  | 0.149    | -0.281935274 | count | 1 |
| KRTDAP     | -1.196092  | 0.8288684 | -1.443  | 0.149    | -0.281935274 | count | 1 |
| CCDC188    | -1.196092  | 0.8288684 | -1.443  | 0.149    | -0.281935274 | count | 1 |
| RAD51C     | -0.2128361 | 0.1155663 | -1.8417 | 0.0656   | -0.281839909 | count | 1 |
| MCTP2      | -0.3570477 | 0.9306993 | -0.3836 | 0.701    | -0.281545791 | count | 1 |
| EPDR1      | -0.2050309 | 0.0970592 | -2.1124 | 0.0347   | -0.281471666 | count | 1 |
| ZNF821     | -0.2454397 | 0.2548241 | -0.9632 | 0.336    | -0.281313596 | count | 1 |
| AC016907.2 | -2.1908187 | 1.062447  | -2.0621 | 0.0393   | -0.28130498  | count | 1 |
| SDF2L1     | -0.2034384 | 0.0895406 | -2.272  | 0.0231   | -0.281297637 | count | 1 |
| FBXO22     | -0.2112122 | 0.1671022 | -1.264  | 0.206    | -0.281285906 | count | 1 |
| ATP2A2     | -0.2075501 | 0.1021128 | -2.0326 | 0.0422   | -0.281278243 | count | 1 |
| ANKZF1     | -0.2671188 | 0.194053  | -1.3765 | 0.169    | -0.28127119  | count | 1 |
| MLLT11     | -0.224058  | 0.1856252 | -1.207  | 0.227    | -0.281210404 | count | 1 |
| SLIRP      | -0.200061  | 0.0645331 | -3.1001 | 0.00195  | -0.281082434 | count | 1 |
| ZCCHC8     | -0.2283988 | 0.1594077 | -1.4328 | 0.152    | -0.280877343 | count | 1 |
| TNIK       | -0.3146952 | 0.345392  | -0.9111 | 0.362    | -0.280800579 | count | 1 |
| MANEA-DT   | -0.2797174 | 0.3072127 | -0.9105 | 0.363    | -0.28074527  | count | 1 |
| ALKBH7     | -0.1977384 | 0.0527519 | -3.7485 | 0.000181 | -0.280663198 | count | 1 |
| DOCK9-DT   | -0.2940711 | 0.3816944 | -0.7704 | 0.441    | -0.280617677 | count | 1 |
| RNF11      | -0.2015486 | 0.0791172 | -2.5475 | 0.0109   | -0.280463243 | count | 1 |
| HAX1       | -0.1978483 | 0.0559014 | -3.5392 | 0.000406 | -0.280414469 | count | 1 |
| SYT11      | -0.2087454 | 0.1439087 | -1.4505 | 0.147    | -0.280385412 | count | 1 |
| LDLRAD4    | -0.2260838 | 0.1800774 | -1.2555 | 0.209    | -0.280276766 | count | 1 |
| EML4       | -0.2028857 | 0.114549  | -1.7712 | 0.0766   | -0.280229994 | count | 1 |

|            |            |           |          |          |              |       |            |
|------------|------------|-----------|----------|----------|--------------|-------|------------|
| GRSF1      | -0.2078361 | 0.1069425 | -1.9434  | 0.052    | -0.2798496   | count | 1          |
| CHI3L1     | -2.1766105 | 1.3843702 | -1.5723  | 0.116    | -0.279790242 | count | 1          |
| MPZL2      | -0.5061407 | 0.8916389 | -0.5677  | 0.57     | -0.279786518 | count | 1          |
| RPL10      | -0.1939588 | 0.0172096 | -11.2704 | 5.47E-29 | -0.279729871 | count | 1.32E-24   |
| RPL32      | -0.1940164 | 0.0189682 | -10.2285 | 3.12E-24 | -0.27968195  | count | 7.52E-20   |
| SACS-AS1   | -0.7197333 | 0.7539965 | -0.9546  | 0.34     | -0.279651086 | count | 1          |
| SGSM1      | -0.3351425 | 0.4449771 | -0.7532  | 0.451    | -0.27960532  | count | 1          |
| SYNGAP1    | -0.3664895 | 0.3143566 | -1.1658  | 0.244    | -0.279519364 | count | 1          |
| DGKQ       | -0.6212729 | 0.4413104 | -1.4078  | 0.159    | -0.279517613 | count | 1          |
| SSBP1      | -0.1958788 | 0.0429994 | -4.5554  | 5.40E-06 | -0.279501327 | count | 0.1247508  |
| VEGFC      | -0.4158518 | 0.4434187 | -0.9378  | 0.348    | -0.279404063 | count | 1          |
| WDR44      | -0.2470534 | 0.1907562 | -1.2951  | 0.195    | -0.279183825 | count | 1          |
| HOTAIRM1   | -0.2143333 | 0.1544319 | -1.3879  | 0.165    | -0.279083707 | count | 1          |
| UBE2Q2     | -0.2019329 | 0.0894341 | -2.2579  | 0.024    | -0.278641682 | count | 1          |
| GTF2F2     | -0.2066572 | 0.1243726 | -1.6616  | 0.0967   | -0.278583456 | count | 1          |
| CCDC42     | -0.3255474 | 0.3966464 | -0.8207  | 0.412    | -0.278277851 | count | 1          |
| C6orf226   | -0.2138958 | 0.1348349 | -1.5864  | 0.113    | -0.278265045 | count | 1          |
| TANC2      | -0.254718  | 0.2648042 | -0.9619  | 0.336    | -0.278190899 | count | 1          |
| TTY15      | -0.2159147 | 0.1935219 | -1.1157  | 0.265    | -0.278172162 | count | 1          |
| AL450998.2 | -0.242689  | 0.1790119 | -1.3557  | 0.175    | -0.278127913 | count | 1          |
| PRUNE1     | -0.2688042 | 0.2764864 | -0.9722  | 0.331    | -0.278072253 | count | 1          |
| SPATS2L    | -0.1959262 | 0.0612382 | -3.1994  | 0.00139  | -0.277969451 | count | 1          |
| IL18R1     | -0.6179858 | 0.461466  | -1.3392  | 0.181    | -0.27793903  | count | 1          |
| SLC1A4     | -0.224931  | 0.2953617 | -0.7615  | 0.446    | -0.277737605 | count | 1          |
| AC048382.6 | -0.7145233 | 0.5031529 | -1.4201  | 0.156    | -0.277474906 | count | 1          |
| HCG25      | -1.1776931 | 0.9329357 | -1.2624  | 0.207    | -0.277313431 | count | 1          |
| CD4        | -1.1776931 | 0.9329357 | -1.2624  | 0.207    | -0.277313431 | count | 1          |
| LAT2       | -1.1776931 | 1.036884  | -1.1358  | 0.256    | -0.277313431 | count | 1          |
| LUM        | -0.1929612 | 0.0715489 | -2.6969  | 0.00703  | -0.277156026 | count | 1          |
| TMEM134    | -0.206629  | 0.106844  | -1.9339  | 0.0532   | -0.277050178 | count | 1          |
| TSFM       | -0.2072948 | 0.1273403 | -1.6279  | 0.104    | -0.277039046 | count | 1          |
| ACTR2      | -0.1970101 | 0.0622076 | -3.167   | 0.00155  | -0.277010769 | count | 1          |
| HSP90AB1   | -0.1921493 | 0.0232736 | -8.2561  | 2.08E-16 | -0.276773799 | count | 4.97E-12   |
| SNRNP25    | -0.2070461 | 0.1078426 | -1.9199  | 0.0549   | -0.276705585 | count | 1          |
| ZNRF3      | -0.3166115 | 0.2761525 | -1.1465  | 0.252    | -0.276700497 | count | 1          |
| MCUR1      | -0.2007306 | 0.0875971 | -2.2915  | 0.022    | -0.276554471 | count | 1          |
| NDUFC1     | -0.1936041 | 0.0416708 | -4.646   | 3.50E-06 | -0.276348335 | count | 0.0810215  |
| MGME1      | -0.2603038 | 0.2109309 | -1.2341  | 0.217    | -0.276251709 | count | 1          |
| HK2        | -2.1429303 | 0.8993741 | -2.3827  | 0.0172   | -0.276157525 | count | 1          |
| AC109779.1 | -2.1429303 | 1.285352  | -1.6672  | 0.0956   | -0.276157525 | count | 1          |
| SLC38A4    | -2.1429303 | 1.285352  | -1.6672  | 0.0956   | -0.276157525 | count | 1          |
| ZNF3       | -0.2545291 | 0.285232  | -0.8924  | 0.372    | -0.27612013  | count | 1          |
| NFATC4     | -0.2260071 | 0.3087454 | -0.732   | 0.464    | -0.276063577 | count | 1          |
| CD247      | -1.1726359 | 0.9086806 | -1.2905  | 0.197    | -0.276041942 | count | 1          |
| SUB1       | -0.1929746 | 0.0423483 | -4.5568  | 5.36E-06 | -0.275998226 | count | 0.12383744 |

|            |            |           |         |          |              |       |             |
|------------|------------|-----------|---------|----------|--------------|-------|-------------|
| AKR1C2     | -0.1977563 | 0.0898397 | -2.2012 | 0.0278   | -0.275899165 | count | 1           |
| RRAS       | -0.1919821 | 0.0333475 | -5.757  | 9.26E-09 | -0.275480788 | count | 0.000217888 |
| BVES       | -0.308838  | 0.3390204 | -0.911  | 0.362    | -0.275450322 | count | 1           |
| IDH3G      | -0.196166  | 0.0639647 | -3.0668 | 0.00218  | -0.275302526 | count | 1           |
| LYPLA2     | -0.2148841 | 0.1417623 | -1.5158 | 0.13     | -0.27528804  | count | 1           |
| ITPRIP     | -0.2313729 | 0.2562985 | -0.9027 | 0.367    | -0.275145385 | count | 1           |
| LACC1      | -0.3489949 | 0.3205665 | -1.0887 | 0.276    | -0.274999019 | count | 1           |
| SSNA1      | -0.195131  | 0.067165  | -2.9052 | 0.00369  | -0.274947582 | count | 1           |
| SBNO2      | -0.2358474 | 0.3039536 | -0.7759 | 0.438    | -0.274728633 | count | 1           |
| AL135905.1 | -2.1291472 | 1.178569  | -1.8066 | 0.0709   | -0.274653941 | count | 1           |
| CAP1       | -0.1930294 | 0.0476419 | -4.0517 | 5.19E-05 | -0.274609874 | count | 1           |
| MED27      | -0.2032493 | 0.1080271 | -1.8815 | 0.06     | -0.274587262 | count | 1           |
| PITPNB     | -0.1951699 | 0.0678918 | -2.8747 | 0.00407  | -0.274450585 | count | 1           |
| LIMS2      | -0.1963395 | 0.0961712 | -2.0416 | 0.0413   | -0.274404777 | count | 1           |
| LRRC4C     | -0.4317048 | 0.266104  | -1.6223 | 0.105    | -0.274314981 | count | 1           |
| LMNB2      | -0.265051  | 0.2256102 | -1.1748 | 0.24     | -0.274129358 | count | 1           |
| PNPLA2     | -0.1964901 | 0.0809297 | -2.4279 | 0.0152   | -0.274078686 | count | 1           |
| AC002467.1 | -0.4081492 | 0.3597419 | -1.1346 | 0.257    | -0.274016357 | count | 1           |
| AK2        | -0.1983006 | 0.0876838 | -2.2615 | 0.0238   | -0.274013865 | count | 1           |
| UFD1       | -0.1945341 | 0.0684121 | -2.8436 | 0.00449  | -0.27380028  | count | 1           |
| AGAP6      | -0.328366  | 0.4282611 | -0.7667 | 0.443    | -0.273796111 | count | 1           |
| RNF207     | -0.3132422 | 0.3816087 | -0.8208 | 0.412    | -0.273682783 | count | 1           |
| EIF4H      | -0.1938947 | 0.0610351 | -3.1768 | 0.0015   | -0.273021883 | count | 1           |
| ALG12      | -0.213313  | 0.1939971 | -1.0996 | 0.272    | -0.272939826 | count | 1           |
| NCF1       | -0.7032794 | 0.6163621 | -1.141  | 0.254    | -0.272782316 | count | 1           |
| SMIM26     | -0.1926008 | 0.0571595 | -3.3695 | 0.000761 | -0.272475363 | count | 1           |
| EME2       | -0.326785  | 0.6895655 | -0.4739 | 0.636    | -0.272441535 | count | 1           |
| TMEM191C   | -0.493277  | 0.4664757 | -1.0575 | 0.29     | -0.272294434 | count | 1           |
| LINC01116  | -0.4055409 | 0.5021321 | -0.8076 | 0.419    | -0.272193349 | count | 1           |
| ROMO1      | -0.1929652 | 0.0565451 | -3.4126 | 0.00065  | -0.272170111 | count | 1           |
| FEZ2       | -0.1930286 | 0.0788722 | -2.4474 | 0.0144   | -0.271880001 | count | 1           |
| SYF2       | -0.191109  | 0.0496023 | -3.8528 | 0.000119 | -0.27187628  | count | 1           |
| ACSM5      | -0.8560795 | 0.5844925 | -1.4647 | 0.143    | -0.271867415 | count | 1           |
| DIS3       | -0.1975838 | 0.1152563 | -1.7143 | 0.0866   | -0.271814118 | count | 1           |
| ADAM12     | -0.8557676 | 0.7074466 | -1.2097 | 0.226    | -0.271760266 | count | 1           |
| AGO1       | -0.2224517 | 0.213794  | -1.0405 | 0.298    | -0.271689245 | count | 1           |
| FRG1       | -0.1937722 | 0.0674719 | -2.8719 | 0.0041   | -0.271634658 | count | 1           |
| CETN2      | -0.1965136 | 0.0875882 | -2.2436 | 0.0249   | -0.271581991 | count | 1           |
| TESK1      | -0.2248492 | 0.1454969 | -1.5454 | 0.122    | -0.271231242 | count | 1           |
| TCTA       | -0.2121647 | 0.1288147 | -1.6471 | 0.0996   | -0.271133322 | count | 1           |
| PHPT1      | -0.1894817 | 0.0381106 | -4.9719 | 6.93E-07 | -0.271081055 | count | 0.016151058 |
| SMAD6      | -0.2046934 | 0.180489  | -1.1341 | 0.257    | -0.271018443 | count | 1           |
| GBA2       | -0.2701814 | 0.2381161 | -1.1347 | 0.257    | -0.271012021 | count | 1           |
| FAM192A    | -0.2024243 | 0.1215079 | -1.6659 | 0.0958   | -0.270897944 | count | 1           |
| ZNF630     | -0.4905275 | 0.3621998 | -1.3543 | 0.176    | -0.270694914 | count | 1           |

|            |            |           |         |          |              |       |             |
|------------|------------|-----------|---------|----------|--------------|-------|-------------|
| RPS27      | -0.1879431 | 0.0208141 | -9.0296 | 2.72E-19 | -0.270638349 | count | 6.53E-15    |
| NPC2       | -0.1887141 | 0.0421161 | -4.4808 | 7.66E-06 | -0.270624878 | count | 0.17669322  |
| MRPL34     | -0.1903777 | 0.0518487 | -3.6718 | 0.000244 | -0.270576171 | count | 1           |
| SYT12      | -0.4899222 | 0.43944   | -1.1149 | 0.265    | -0.27034288  | count | 1           |
| ARID4A     | -0.1968871 | 0.0913113 | -2.1562 | 0.0311   | -0.270324039 | count | 1           |
| UTP4       | -0.2272206 | 0.2099088 | -1.0825 | 0.279    | -0.27016573  | count | 1           |
| ETNK2      | -0.2379672 | 0.2430289 | -0.9792 | 0.328    | -0.270135949 | count | 1           |
| SENCR      | -0.6969147 | 0.5794387 | -1.2027 | 0.229    | -0.270128472 | count | 1           |
| PGAP3      | -0.2874614 | 0.2520768 | -1.1404 | 0.254    | -0.270032461 | count | 1           |
| MMACHC     | -0.3428729 | 0.4699653 | -0.7296 | 0.466    | -0.270026799 | count | 1           |
| RPL6       | -0.1873004 | 0.0198091 | -9.4553 | 5.57E-21 | -0.269943372 | count | 1.34E-16    |
| AC132192.2 | -0.3026868 | 0.3773031 | -0.8022 | 0.422    | -0.269835666 | count | 1           |
| SH2B1      | -0.2355203 | 0.1715096 | -1.3732 | 0.17     | -0.269828556 | count | 1           |
| IQSEC1     | -0.2029496 | 0.1322822 | -1.5342 | 0.125    | -0.269803229 | count | 1           |
| SH3BGRL    | -0.1882261 | 0.0348407 | -5.4025 | 6.99E-08 | -0.269761925 | count | 0.001637967 |
| HIST1H2AG  | -0.600811  | 0.5636771 | -1.0659 | 0.287    | -0.269701881 | count | 1           |
| TCAF1      | -0.2025278 | 0.1495882 | -1.3539 | 0.176    | -0.269681665 | count | 1           |
| ASPSCR1    | -0.2121067 | 0.1540766 | -1.3766 | 0.169    | -0.269675207 | count | 1           |
| ESAM       | -0.1948055 | 0.0911557 | -2.1371 | 0.0327   | -0.269655166 | count | 1           |
| TPPP       | -0.3672007 | 0.5400553 | -0.6799 | 0.497    | -0.269525014 | count | 1           |
| ATP13A2    | -0.4016758 | 0.3634253 | -1.1053 | 0.269    | -0.269493238 | count | 1           |
| AP000866.1 | -0.5349521 | 0.4179869 | -1.2798 | 0.201    | -0.269161548 | count | 1           |
| MYL10      | -2.0767752 | 0.9687957 | -2.1437 | 0.0321   | -0.268851911 | count | 1           |
| CEP250     | -0.2576436 | 0.2666087 | -0.9664 | 0.334    | -0.268806704 | count | 1           |
| MCCC2      | -0.2597987 | 0.20881   | -1.2442 | 0.214    | -0.268614    | count | 1           |
| SMIM11A    | -0.4869069 | 0.6227358 | -0.7819 | 0.434    | -0.268589671 | count | 1           |
| DEXI       | -0.1920702 | 0.0854674 | -2.2473 | 0.0247   | -0.268585001 | count | 1           |
| TANGO2     | -0.2460258 | 0.2088688 | -1.1779 | 0.239    | -0.268578835 | count | 1           |
| RHBDD1     | -0.2573767 | 0.251017  | -1.0253 | 0.305    | -0.268524097 | count | 1           |
| CREB1      | -0.1977702 | 0.100501  | -1.9678 | 0.0492   | -0.268499643 | count | 1           |
| HMGB1      | -0.1864342 | 0.0231973 | -8.0369 | 1.23E-15 | -0.268330362 | count | 2.94E-11    |
| COPS8      | -0.191977  | 0.0723639 | -2.6529 | 0.00801  | -0.268322258 | count | 1           |
| POMT2      | -0.2812994 | 0.4982874 | -0.5645 | 0.572    | -0.268192651 | count | 1           |
| POP4       | -0.1970232 | 0.1044464 | -1.8864 | 0.0593   | -0.268190946 | count | 1           |
| LPP-AS2    | -0.2618649 | 0.407295  | -0.6429 | 0.52     | -0.268167237 | count | 1           |
| PSMB4      | -0.1894174 | 0.051801  | -3.6566 | 0.000259 | -0.268109463 | count | 1           |
| SFMBT1     | -0.5328952 | 0.3760405 | -1.4171 | 0.157    | -0.268064744 | count | 1           |
| NDUF8      | -0.1924209 | 0.0809502 | -2.377  | 0.0175   | -0.267997952 | count | 1           |
| C7orf50    | -0.1899246 | 0.0677806 | -2.8021 | 0.0051   | -0.267831722 | count | 1           |
| HMG20A     | -0.2130647 | 0.2376087 | -0.8967 | 0.37     | -0.267762012 | count | 1           |
| MRPL20     | -0.1879699 | 0.0468639 | -4.011  | 6.17E-05 | -0.26773814  | count | 1           |
| CDKN2AIPNL | -0.2105482 | 0.1401524 | -1.5023 | 0.133    | -0.26768308  | count | 1           |
| EIF4B      | -0.1887926 | 0.0502094 | -3.7601 | 0.000172 | -0.267612153 | count | 1           |
| NPPC       | -0.6907853 | 0.9850473 | -0.7013 | 0.483    | -0.267574545 | count | 1           |
| RPS8       | -0.1855067 | 0.0195298 | -9.4986 | 3.71E-21 | -0.267474785 | count | 8.92E-17    |

|            |            |           |         |          |              |       |            |
|------------|------------|-----------|---------|----------|--------------|-------|------------|
| TMCO4      | -0.2279389 | 0.180615  | -1.262  | 0.207    | -0.267412723 | count | 1          |
| ARSJ       | -0.2464605 | 0.2422058 | -1.0176 | 0.309    | -0.267254928 | count | 1          |
| ZSWIM7     | -0.1932366 | 0.1222741 | -1.5804 | 0.114    | -0.267246804 | count | 1          |
| RRM2B      | -0.20346   | 0.1396223 | -1.4572 | 0.145    | -0.267019777 | count | 1          |
| FAXC       | -1.1366081 | 0.7278302 | -1.5616 | 0.118    | -0.266971727 | count | 1          |
| EIF3H      | -0.1866885 | 0.0401011 | -4.6554 | 3.35E-06 | -0.266804905 | count | 0.07756255 |
| CLIP3      | -0.2156498 | 0.2440268 | -0.8837 | 0.377    | -0.266736097 | count | 1          |
| ORMDL2     | -0.1958123 | 0.1036215 | -1.8897 | 0.0589   | -0.266613253 | count | 1          |
| PCDHGA3    | -0.2603058 | 0.3775306 | -0.6895 | 0.491    | -0.266545447 | count | 1          |
| ZNF319     | -0.4475606 | 0.5647677 | -0.7925 | 0.428    | -0.266330531 | count | 1          |
| PCBP4      | -0.1981048 | 0.1386616 | -1.4287 | 0.153    | -0.266275403 | count | 1          |
| PPP1R12A   | -0.1869929 | 0.0499838 | -3.7411 | 0.000186 | -0.266198918 | count | 1          |
| IL11RA     | -0.1908262 | 0.1028527 | -1.8553 | 0.0636   | -0.266039867 | count | 1          |
| SNRPD2     | -0.1860929 | 0.0386999 | -4.8086 | 1.58E-06 | -0.265995862 | count | 0.03669076 |
| SYNCRIP    | -0.1901638 | 0.076198  | -2.4957 | 0.0126   | -0.2659798   | count | 1          |
| LINC02019  | -0.6868516 | 0.6173215 | -1.1126 | 0.266    | -0.265936397 | count | 1          |
| TMEM86A    | -0.4822359 | 0.5371247 | -0.8978 | 0.369    | -0.26587537  | count | 1          |
| AL117335.1 | -0.4822359 | 0.5489174 | -0.8785 | 0.38     | -0.26587537  | count | 1          |
| SMCR8      | -0.2714834 | 0.3031732 | -0.8955 | 0.371    | -0.265869192 | count | 1          |
| AP005329.3 | -0.2310395 | 0.2479899 | -0.9316 | 0.352    | -0.265807639 | count | 1          |
| RDX        | -0.1884864 | 0.0651325 | -2.8939 | 0.00383  | -0.265790229 | count | 1          |
| PMVK       | -0.1894692 | 0.0738264 | -2.5664 | 0.0103   | -0.265667834 | count | 1          |
| AC022034.2 | -0.4182162 | 0.3599716 | -1.1618 | 0.245    | -0.265368381 | count | 1          |
| CHCHD1     | -0.192762  | 0.0996495 | -1.9344 | 0.0531   | -0.265364532 | count | 1          |
| EPB41L1    | -0.202968  | 0.1794005 | -1.1314 | 0.258    | -0.265338766 | count | 1          |
| LINC01750  | -0.3182439 | 0.4766902 | -0.6676 | 0.504    | -0.265128606 | count | 1          |
| ADGRL2     | -0.2181372 | 0.1523707 | -1.4316 | 0.152    | -0.265110661 | count | 1          |
| STK17B     | -0.2001207 | 0.1361871 | -1.4695 | 0.142    | -0.265104224 | count | 1          |
| SCUBE3     | -0.1940309 | 0.1558437 | -1.245  | 0.213    | -0.265083424 | count | 1          |
| TRAF3IP1   | -0.2021304 | 0.1320215 | -1.531  | 0.126    | -0.264451395 | count | 1          |
| RND2       | -0.2512897 | 0.2443306 | -1.0285 | 0.304    | -0.264367555 | count | 1          |
| SETD9      | -0.2047013 | 0.1558174 | -1.3137 | 0.189    | -0.264212834 | count | 1          |
| PDCL3      | -0.1939774 | 0.0983421 | -1.9725 | 0.0486   | -0.264182177 | count | 1          |
| COG1       | -0.2435083 | 0.2347087 | -1.0375 | 0.3      | -0.264012805 | count | 1          |
| NASP       | -0.1937117 | 0.0942971 | -2.0543 | 0.04     | -0.263963629 | count | 1          |
| MPC2       | -0.1865137 | 0.0562211 | -3.3175 | 0.000917 | -0.263907074 | count | 1          |
| AC055874.1 | -0.6817055 | 0.6057185 | -1.1254 | 0.26     | -0.263794524 | count | 1          |
| PHF10      | -0.1951945 | 0.1126219 | -1.7332 | 0.0831   | -0.263770484 | count | 1          |
| AL022157.1 | -0.8321623 | 0.822956  | -1.0112 | 0.312    | -0.263656626 | count | 1          |
| AC007773.1 | -0.8321623 | 0.822956  | -1.0112 | 0.312    | -0.263656626 | count | 1          |
| AC092329.3 | -0.8321623 | 0.8623311 | -0.965  | 0.335    | -0.263656626 | count | 1          |
| FBR5       | -0.2091533 | 0.1977682 | -1.0576 | 0.29     | -0.263637192 | count | 1          |
| MET        | -0.5244559 | 0.4253434 | -1.233  | 0.218    | -0.263568203 | count | 1          |
| PEX10      | -0.238467  | 0.1895695 | -1.2579 | 0.208    | -0.263515143 | count | 1          |
| TMTC1      | -0.2027715 | 0.1335992 | -1.5178 | 0.129    | -0.263493113 | count | 1          |

|            |            |           |         |          |              |       |             |
|------------|------------|-----------|---------|----------|--------------|-------|-------------|
| ETHE1      | -0.1891984 | 0.0798571 | -2.3692 | 0.0179   | -0.263393485 | count | 1           |
| ST8SIA4    | -0.3085017 | 0.3752735 | -0.8221 | 0.411    | -0.263338244 | count | 1           |
| FOXP1      | -0.1847722 | 0.0608388 | -3.0371 | 0.0024   | -0.263119305 | count | 1           |
| RPS24      | -0.1822869 | 0.0196817 | -9.2617 | 3.33E-20 | -0.26274025  | count | 8.00E-16    |
| MT-ND2     | -0.1822338 | 0.0256865 | -7.0945 | 1.55E-12 | -0.262580495 | count | 3.69E-08    |
| PLP2       | -0.183264  | 0.0430069 | -4.2613 | 2.08E-05 | -0.262408424 | count | 0.4777552   |
| ARL10      | -0.2455195 | 0.3094981 | -0.7933 | 0.428    | -0.262391057 | count | 1           |
| AL353751.1 | -0.8284405 | 0.8498002 | -0.9749 | 0.33     | -0.262380092 | count | 1           |
| BCL2L1     | -0.1980132 | 0.1384363 | -1.4304 | 0.153    | -0.262302581 | count | 1           |
| GPT2       | -0.5850325 | 0.5955836 | -0.9823 | 0.326    | -0.262151116 | count | 1           |
| ABCC3      | -0.2178487 | 0.28495   | -0.7645 | 0.445    | -0.26200618  | count | 1           |
| DCAF4      | -0.3145232 | 0.2804327 | -1.1216 | 0.262    | -0.261945559 | count | 1           |
| DEPP1      | -0.1838563 | 0.0898077 | -2.0472 | 0.0407   | -0.261865184 | count | 1           |
| AC005332.7 | -0.3723505 | 0.288095  | -1.2925 | 0.196    | -0.261789673 | count | 1           |
| AGRN       | -0.261048  | 0.2881345 | -0.906  | 0.365    | -0.261698698 | count | 1           |
| RASL12     | -0.1962348 | 0.1141398 | -1.7192 | 0.0857   | -0.261686383 | count | 1           |
| ITGA4      | -0.3721929 | 0.4707661 | -0.7906 | 0.429    | -0.261674732 | count | 1           |
| IK         | -0.1845533 | 0.051571  | -3.5786 | 0.00035  | -0.261658685 | count | 1           |
| RRS1       | -0.2380248 | 0.2100071 | -1.1334 | 0.257    | -0.261411933 | count | 1           |
| ZNF623     | -0.2463278 | 0.2337376 | -1.0539 | 0.292    | -0.261216932 | count | 1           |
| EHHADH     | -0.3222261 | 0.3917174 | -0.8226 | 0.411    | -0.26119881  | count | 1           |
| MYLPF      | -0.6751062 | 0.5743579 | -1.1754 | 0.24     | -0.261049665 | count | 1           |
| FIS1       | -0.18232   | 0.0369629 | -4.9325 | 8.48E-07 | -0.26102892  | count | 0.019742288 |
| TTLL1      | -0.2502309 | 0.211367  | -1.1839 | 0.237    | -0.260960362 | count | 1           |
| F2RL2      | -2.0073508 | 1.219707  | -1.6458 | 0.0999   | -0.260947971 | count | 1           |
| SEMA3A     | -0.5824292 | 0.4931866 | -1.181  | 0.238    | -0.260906909 | count | 1           |
| PDE7B      | -0.6744662 | 0.5079859 | -1.3277 | 0.184    | -0.260783579 | count | 1           |
| PAQR4      | -0.5189357 | 0.4701301 | -1.1038 | 0.27     | -0.260630071 | count | 1           |
| ARMCX5     | -0.2296572 | 0.1862978 | -1.2327 | 0.218    | -0.26060453  | count | 1           |
| RTL8A      | -0.1848754 | 0.0666947 | -2.772  | 0.0056   | -0.260471369 | count | 1           |
| UBE4B      | -0.2274173 | 0.2490922 | -0.913  | 0.361    | -0.260452753 | count | 1           |
| HMCN1      | -0.1833797 | 0.1216248 | -1.5077 | 0.132    | -0.260409311 | count | 1           |
| CYB561A3   | -0.211834  | 0.1640923 | -1.2909 | 0.197    | -0.260370485 | count | 1           |
| ST20-AS1   | -0.3550857 | 0.3713427 | -0.9562 | 0.339    | -0.260328052 | count | 1           |
| CCNB1      | -0.3884738 | 0.4550388 | -0.8537 | 0.393    | -0.260282525 | count | 1           |
| COX14      | -0.184028  | 0.0554033 | -3.3216 | 0.000904 | -0.260236239 | count | 1           |
| PRICKLE2   | -0.2261435 | 0.2180314 | -1.0372 | 0.3      | -0.260119847 | count | 1           |
| DHX37      | -0.410255  | 0.3619537 | -1.1334 | 0.257    | -0.260096745 | count | 1           |
| ATP5MD     | -0.1821838 | 0.0461896 | -3.9443 | 8.15E-05 | -0.260088671 | count | 1           |
| POLR2F     | -0.1839228 | 0.0588467 | -3.1255 | 0.00179  | -0.260061335 | count | 1           |
| IMPDH1     | -0.2168338 | 0.1899402 | -1.1416 | 0.254    | -0.260043177 | count | 1           |
| KRT8       | -0.1844494 | 0.115215  | -1.6009 | 0.109    | -0.26002406  | count | 1           |
| SH3GLB1    | -0.183382  | 0.0606603 | -3.0231 | 0.00252  | -0.259923858 | count | 1           |
| EIF1AD     | -0.2155412 | 0.1858708 | -1.1596 | 0.246    | -0.259918317 | count | 1           |
| GLIPR1L2   | -0.2727795 | 0.2958697 | -0.922  | 0.357    | -0.259914023 | count | 1           |

|            |            |           |         |          |              |       |             |
|------------|------------|-----------|---------|----------|--------------|-------|-------------|
| ANKRD37    | -0.1888096 | 0.1300303 | -1.452  | 0.147    | -0.259913245 | count | 1           |
| HIVEP2     | -0.2113999 | 0.2052854 | -1.0298 | 0.303    | -0.259833325 | count | 1           |
| C4orf3     | -0.1812812 | 0.0359713 | -5.0396 | 4.89E-07 | -0.259812624 | count | 0.011405925 |
| LINC00865  | -0.471555  | 0.4974938 | -0.9479 | 0.343    | -0.259676124 | count | 1           |
| NF2        | -0.2222    | 0.2134189 | -1.0411 | 0.298    | -0.259668778 | count | 1           |
| BORCS8     | -0.196307  | 0.1188852 | -1.6512 | 0.0988   | -0.259551928 | count | 1           |
| MEF2C-AS1  | -0.2557991 | 0.2720162 | -0.9404 | 0.347    | -0.259173728 | count | 1           |
| NDST1-AS1  | -1.1051002 | 0.8218261 | -1.3447 | 0.179    | -0.259025367 | count | 1           |
| SPN        | -1.1051002 | 0.8218261 | -1.3447 | 0.179    | -0.259025367 | count | 1           |
| CDC25A     | -1.1051002 | 0.9060302 | -1.2197 | 0.223    | -0.259025367 | count | 1           |
| AL390208.1 | -1.1051002 | 1.251583  | -0.883  | 0.377    | -0.259025367 | count | 1           |
| AC127070.1 | -0.5157325 | 0.8191812 | -0.6296 | 0.529    | -0.258926307 | count | 1           |
| PPIL1      | -0.2066676 | 0.173132  | -1.1937 | 0.233    | -0.258831158 | count | 1           |
| SNHG8      | -0.1830921 | 0.0591199 | -3.097  | 0.00197  | -0.258797568 | count | 1           |
| ATL2       | -0.2134026 | 0.1558255 | -1.3695 | 0.171    | -0.258667673 | count | 1           |
| AL591895.1 | -0.3287943 | 0.4021955 | -0.8175 | 0.414    | -0.258608666 | count | 1           |
| RPL30      | -0.1793817 | 0.0183381 | -9.7819 | 2.52E-22 | -0.258590039 | count | 6.06E-18    |
| ZNF382     | -0.3525535 | 0.4681222 | -0.7531 | 0.451    | -0.258407866 | count | 1           |
| WFS1       | -0.2008607 | 0.1607548 | -1.2495 | 0.212    | -0.25840778  | count | 1           |
| AP1S1      | -0.1934543 | 0.1191417 | -1.6237 | 0.105    | -0.258357771 | count | 1           |
| RGMB       | -0.2549923 | 0.3211076 | -0.7941 | 0.427    | -0.258343234 | count | 1           |
| EFHB       | -0.6683103 | 0.6748289 | -0.9903 | 0.322    | -0.25822531  | count | 1           |
| FAM96B     | -0.1812088 | 0.0471361 | -3.8444 | 1.00E-04 | -0.258053212 | count | 1           |
| SRP14-AS1  | -0.2274306 | 0.2485087 | -0.9152 | 0.36     | -0.258051685 | count | 1           |
| EMC9       | -0.203785  | 0.1491642 | -1.3662 | 0.172    | -0.257970024 | count | 1           |
| TRPM3      | -0.3519605 | 0.5012103 | -0.7022 | 0.483    | -0.257958307 | count | 1           |
| PLEK       | -0.4341006 | 0.6556876 | -0.6621 | 0.508    | -0.257940919 | count | 1           |
| PARP10     | -0.2262624 | 0.2083272 | -1.0861 | 0.278    | -0.257935801 | count | 1           |
| ZNF580     | -0.1849735 | 0.0780941 | -2.3686 | 0.0179   | -0.257894296 | count | 1           |
| PPP1R9A    | -0.2495352 | 0.5514562 | -0.4525 | 0.651    | -0.25784463  | count | 1           |
| L3MBTL1    | -0.366177  | 0.4696016 | -0.7798 | 0.436    | -0.257289606 | count | 1           |
| CEP68      | -0.2127185 | 0.1699793 | -1.2514 | 0.211    | -0.257169699 | count | 1           |
| MSX2       | -0.1927542 | 0.1825406 | -1.056  | 0.291    | -0.257161672 | count | 1           |
| CTDSPL     | -0.1834186 | 0.0886084 | -2.07   | 0.0385   | -0.257121921 | count | 1           |
| SCARA3     | -0.1851344 | 0.0968259 | -1.912  | 0.0559   | -0.256865869 | count | 1           |
| PPP2R5B    | -0.2113895 | 0.2162154 | -0.9777 | 0.328    | -0.256851147 | count | 1           |
| GAD1       | -1.969782  | 0.5905551 | -3.3355 | 0.00086  | -0.256572003 | count | 1           |
| MEA1       | -0.1822101 | 0.0802113 | -2.2716 | 0.0232   | -0.256527924 | count | 1           |
| ZRSR2      | -0.1997782 | 0.1989189 | -1.0043 | 0.315    | -0.256436239 | count | 1           |
| RPL12      | -0.1778902 | 0.0201753 | -8.8172 | 1.78E-18 | -0.256418042 | count | 4.27E-14    |
| TOMM70     | -0.1881244 | 0.1062427 | -1.7707 | 0.0767   | -0.256332701 | count | 1           |
| RNF121     | -0.205638  | 0.1794059 | -1.1462 | 0.252    | -0.256200482 | count | 1           |
| PEF1       | -0.1852898 | 0.0832518 | -2.2257 | 0.0261   | -0.256161336 | count | 1           |
| EVI5L      | -0.3002568 | 0.3525631 | -0.8516 | 0.394    | -0.256124123 | count | 1           |
| SETDB2     | -0.2477678 | 0.2911159 | -0.8511 | 0.395    | -0.255991226 | count | 1           |

|            |            |           |         |          |              |       |            |
|------------|------------|-----------|---------|----------|--------------|-------|------------|
| PMPCB      | -0.184294  | 0.0787605 | -2.3399 | 0.0193   | -0.255950156 | count | 1          |
| POLR2J     | -0.180706  | 0.0513977 | -3.5158 | 0.000444 | -0.255912437 | count | 1          |
| ITPKB      | -0.2686224 | 0.3352965 | -0.8011 | 0.423    | -0.255877604 | count | 1          |
| RAC1       | -0.1780133 | 0.0273187 | -6.5162 | 8.19E-11 | -0.255865554 | count | 1.94E-06   |
| TLN2       | -0.1898159 | 0.1550868 | -1.2239 | 0.221    | -0.255819371 | count | 1          |
| GABPB1     | -0.2315035 | 0.2128011 | -1.0879 | 0.277    | -0.255731467 | count | 1          |
| UBE2F      | -0.1893472 | 0.1214413 | -1.5592 | 0.119    | -0.255664062 | count | 1          |
| RBSN       | -0.2041334 | 0.1695008 | -1.2043 | 0.229    | -0.255638809 | count | 1          |
| HINFP      | -0.2580248 | 0.3146794 | -0.82   | 0.412    | -0.255620356 | count | 1          |
| ARL16      | -0.1882772 | 0.0993458 | -1.8952 | 0.0581   | -0.255177491 | count | 1          |
| RPS19BP1   | -0.1798232 | 0.0578395 | -3.109  | 0.00189  | -0.255132238 | count | 1          |
| ABHD3      | -0.2468816 | 0.2902334 | -0.8506 | 0.395    | -0.255062028 | count | 1          |
| PDXK       | -0.1872243 | 0.1134861 | -1.6498 | 0.0991   | -0.254893212 | count | 1          |
| GIMAP4     | -0.5697328 | 0.6292145 | -0.9055 | 0.365    | -0.254845563 | count | 1          |
| IL7R       | -1.955112  | 0.4365145 | -4.4789 | 7.73E-06 | -0.254845025 | count | 0.17830018 |
| ACAA1      | -0.1867394 | 0.094747  | -1.9709 | 0.0488   | -0.254843785 | count | 1          |
| SLC2A6     | -0.4022774 | 0.3798709 | -1.059  | 0.29     | -0.254820944 | count | 1          |
| RCOR3      | -0.190293  | 0.122774  | -1.5499 | 0.121    | -0.254614441 | count | 1          |
| UBQLN4     | -0.2513149 | 0.3194892 | -0.7866 | 0.432    | -0.254558686 | count | 1          |
| RBKS       | -0.2669432 | 0.3409659 | -0.7829 | 0.434    | -0.254247713 | count | 1          |
| NAGS       | -0.6583857 | 0.6693297 | -0.9836 | 0.325    | -0.254104934 | count | 1          |
| AP003352.1 | -0.803538  | 0.6457038 | -1.2444 | 0.213    | -0.253847851 | count | 1          |
| ZNF572     | -1.084171  | 0.6135563 | -1.767  | 0.0773   | -0.253741706 | count | 1          |
| MTHFS      | -0.2047112 | 0.1930961 | -1.0602 | 0.289    | -0.253617305 | count | 1          |
| SLC25A14   | -0.2411826 | 0.2926328 | -0.8242 | 0.41     | -0.253587522 | count | 1          |
| AC074387.1 | -0.4607552 | 0.4989471 | -0.9235 | 0.356    | -0.253418568 | count | 1          |
| PTPN4      | -0.2194471 | 0.2363778 | -0.9284 | 0.353    | -0.253414563 | count | 1          |
| TEX14      | -1.941991  | 1.109726  | -1.75   | 0.0802   | -0.253291807 | count | 1          |
| CLEC20A    | -1.941991  | 1.147527  | -1.6923 | 0.0907   | -0.253291807 | count | 1          |
| AP002360.3 | -1.941991  | 1.219619  | -1.5923 | 0.111    | -0.253291807 | count | 1          |
| NPIP11     | -1.941991  | 1.219619  | -1.5923 | 0.111    | -0.253291807 | count | 1          |
| ZMYND8     | -0.1954456 | 0.1676722 | -1.1656 | 0.244    | -0.253220934 | count | 1          |
| CTDSP1     | -0.1819138 | 0.0816438 | -2.2281 | 0.0259   | -0.252905328 | count | 1          |
| LINC01423  | -0.360087  | 0.383363  | -0.9393 | 0.348    | -0.252854604 | count | 1          |
| NOL12      | -0.2275287 | 0.228517  | -0.9957 | 0.319    | -0.252771073 | count | 1          |
| LINC00562  | -1.079929  | 0.9178194 | -1.1766 | 0.239    | -0.252670381 | count | 1          |
| STAB1      | -1.0794642 | 0.7286747 | -1.4814 | 0.139    | -0.252552992 | count | 1          |
| TRIM58     | -1.9345168 | 0.9878416 | -1.9583 | 0.0503   | -0.252403331 | count | 1          |
| CSF1R      | -1.9345168 | 1.149644  | -1.6827 | 0.0925   | -0.252403331 | count | 1          |
| AC097461.1 | -1.9345168 | 1.264511  | -1.5299 | 0.126    | -0.252403331 | count | 1          |
| MPV17L2    | -0.2441619 | 0.2523614 | -0.9675 | 0.333    | -0.252210884 | count | 1          |
| AC109322.1 | -0.3443149 | 0.5823813 | -0.5912 | 0.554    | -0.252165632 | count | 1          |
| IQCD       | -0.3113661 | 0.4010426 | -0.7764 | 0.438    | -0.252151785 | count | 1          |
| NDUFA13    | -0.1796431 | 0.0665752 | -2.6983 | 0.007    | -0.252024623 | count | 1          |
| PRKAA2     | -0.2002587 | 0.2015266 | -0.9937 | 0.32     | -0.251975546 | count | 1          |



|            |            |           |         |          |              |       |             |
|------------|------------|-----------|---------|----------|--------------|-------|-------------|
| PKNOX2     | -0.3438715 | 0.3981971 | -0.8636 | 0.388    | -0.25182989  | count | 1           |
| AL451085.1 | -0.4578357 | 0.5072276 | -0.9026 | 0.367    | -0.251728857 | count | 1           |
| ALAD       | -0.1958841 | 0.1695837 | -1.1551 | 0.248    | -0.251697573 | count | 1           |
| AC005332.6 | -0.6524904 | 0.6222633 | -1.0486 | 0.294    | -0.25165985  | count | 1           |
| TUBG1      | -0.1959471 | 0.1728836 | -1.1334 | 0.257    | -0.251495468 | count | 1           |
| RTN4IP1    | -0.5624634 | 0.451478  | -1.2458 | 0.213    | -0.251380193 | count | 1           |
| PARS2      | -0.3970421 | 0.407712  | -0.9738 | 0.33     | -0.251362397 | count | 1           |
| RPL37      | -0.174493  | 0.0208942 | -8.3512 | 9.46E-17 | -0.251266896 | count | 2.26E-12    |
| PGBD4      | -0.5012472 | 0.3645372 | -1.375  | 0.169    | -0.251232314 | count | 1           |
| RSPRY1     | -0.1999395 | 0.1428635 | -1.3995 | 0.162    | -0.251175355 | count | 1           |
| DNTTIP1    | -0.1908672 | 0.1252376 | -1.524  | 0.128    | -0.251158591 | count | 1           |
| TNFRSF12A  | -0.1755637 | 0.076373  | -2.2988 | 0.0216   | -0.251028474 | count | 1           |
| RPSA       | -0.1745241 | 0.0258979 | -6.7389 | 1.85E-11 | -0.250934823 | count | 4.39E-07    |
| ETV1       | -0.1939827 | 0.1873474 | -1.0354 | 0.301    | -0.250825628 | count | 1           |
| COX6A1     | -0.1746347 | 0.031602  | -5.5261 | 3.50E-08 | -0.250626367 | count | 0.000821555 |
| UHRF1      | -0.7929207 | 0.6862369 | -1.1555 | 0.248    | -0.250215255 | count | 1           |
| CXCL9      | -0.3564244 | 0.3760941 | -0.9477 | 0.343    | -0.250189477 | count | 1           |
| ZNF514     | -0.2359829 | 0.2488629 | -0.9482 | 0.343    | -0.250100923 | count | 1           |
| SPATC1L    | -0.1990517 | 0.16695   | -1.1923 | 0.233    | -0.250053797 | count | 1           |
| CAB39      | -0.1921571 | 0.140154  | -1.371  | 0.17     | -0.249868778 | count | 1           |
| DDT        | -0.1764051 | 0.0575609 | -3.0647 | 0.00219  | -0.249707872 | count | 1           |
| USE1       | -0.1804605 | 0.0954294 | -1.891  | 0.0587   | -0.249548546 | count | 1           |
| ANOS1      | -0.2150215 | 0.2514902 | -0.855  | 0.393    | -0.249271955 | count | 1           |
| PIP4K2B    | -0.1974056 | 0.2032542 | -0.9712 | 0.332    | -0.249124343 | count | 1           |
| ROPN1B     | -0.6461512 | 0.7510254 | -0.8604 | 0.39     | -0.249032738 | count | 1           |
| MRPS7      | -0.1800098 | 0.0849815 | -2.1182 | 0.0342   | -0.248961159 | count | 1           |
| MIR181A1HG | -0.557109  | 0.5865508 | -0.9498 | 0.342    | -0.248830154 | count | 1           |
| POGLUT1    | -0.1905098 | 0.1479741 | -1.2875 | 0.198    | -0.248785331 | count | 1           |
| SLC40A1    | -0.175861  | 0.0782982 | -2.246  | 0.0248   | -0.248711183 | count | 1           |
| PDLIM4     | -0.17662   | 0.0791334 | -2.2319 | 0.0257   | -0.248588215 | count | 1           |
| MRPL14     | -0.1781198 | 0.0740268 | -2.4062 | 0.0162   | -0.248537529 | count | 1           |
| SNRPG      | -0.175819  | 0.0565815 | -3.1074 | 0.0019   | -0.248217307 | count | 1           |
| SLC25A40   | -0.2689654 | 0.3689718 | -0.729  | 0.466    | -0.248191926 | count | 1           |
| RPS26      | -0.1723332 | 0.0225024 | -7.6584 | 2.39E-14 | -0.248102945 | count | 5.70E-10    |
| C2orf27B   | -0.7861135 | 0.4985804 | -1.5767 | 0.115    | -0.247888009 | count | 1           |
| CPSF1      | -0.2400318 | 0.2657125 | -0.9034 | 0.366    | -0.247882674 | count | 1           |
| UBOX5      | -0.3386349 | 0.3890916 | -0.8703 | 0.384    | -0.247866618 | count | 1           |
| GOSR2      | -0.1868687 | 0.1275774 | -1.4647 | 0.143    | -0.247786972 | count | 1           |
| SNHG25     | -0.3059857 | 0.4956246 | -0.6174 | 0.537    | -0.24767482  | count | 1           |
| SF3B6      | -0.1734215 | 0.0443777 | -3.9079 | 9.48E-05 | -0.247509385 | count | 1           |
| GSAP       | -0.3257464 | 0.4708409 | -0.6918 | 0.489    | -0.247497701 | count | 1           |
| WDR83OS    | -0.1728225 | 0.0364647 | -4.7394 | 2.22E-06 | -0.247449872 | count | 0.0514818   |
| PSMB9      | -0.1756526 | 0.0814477 | -2.1566 | 0.0311   | -0.246937602 | count | 1           |
| POLR2K     | -0.1737115 | 0.0509757 | -3.4077 | 0.000662 | -0.246776432 | count | 1           |
| AC067735.1 | -0.7828368 | 0.6983964 | -1.1209 | 0.262    | -0.246768267 | count | 1           |

|            |            |           |         |          |              |       |             |
|------------|------------|-----------|---------|----------|--------------|-------|-------------|
| AP3M2      | -0.1995625 | 0.1588088 | -1.2566 | 0.209    | -0.246715101 | count | 1           |
| OXNAD1     | -0.2673402 | 0.2912562 | -0.9179 | 0.359    | -0.246661886 | count | 1           |
| NDUFAF2    | -0.1759576 | 0.0715819 | -2.4581 | 0.014    | -0.246651374 | count | 1           |
| BPNT1      | -0.2143771 | 0.2039794 | -1.051  | 0.293    | -0.246458946 | count | 1           |
| AC100803.3 | -0.3895606 | 0.324633  | -1.2    | 0.23     | -0.246425124 | count | 1           |
| EDA2R      | -0.2433796 | 0.2298587 | -1.0588 | 0.29     | -0.246397194 | count | 1           |
| RBM41      | -0.2193577 | 0.242579  | -0.9043 | 0.366    | -0.246293649 | count | 1           |
| SLC11A1    | -0.3509167 | 0.3734012 | -0.9398 | 0.347    | -0.246184596 | count | 1           |
| CROT       | -0.1933947 | 0.1588267 | -1.2176 | 0.223    | -0.246091605 | count | 1           |
| KIF20B     | -0.2169684 | 0.1781971 | -1.2176 | 0.223    | -0.246062465 | count | 1           |
| ZFAND2A    | -0.1906964 | 0.1482515 | -1.2863 | 0.198    | -0.246057237 | count | 1           |
| MYOCD      | -0.1861453 | 0.1677566 | -1.1096 | 0.267    | -0.245754241 | count | 1           |
| NIPSNAP2   | -0.1764497 | 0.0811986 | -2.1731 | 0.0298   | -0.245516046 | count | 1           |
| JRKL       | -0.1925233 | 0.1550092 | -1.242  | 0.214    | -0.245295218 | count | 1           |
| VPS28      | -0.1714699 | 0.0377786 | -4.5388 | 5.84E-06 | -0.245282666 | count | 0.13486312  |
| RACK1      | -0.1702383 | 0.0207316 | -8.2115 | 2.99E-16 | -0.245221411 | count | 7.15E-12    |
| EID1       | -0.1703518 | 0.0237303 | -7.1787 | 8.48E-13 | -0.245127086 | count | 2.02E-08    |
| IMPACT     | -0.1899656 | 0.1229414 | -1.5452 | 0.122    | -0.245110126 | count | 1           |
| FILIP1     | -0.1763589 | 0.073691  | -2.3932 | 0.0168   | -0.244972331 | count | 1           |
| RARB       | -0.3026998 | 0.3444111 | -0.8789 | 0.38     | -0.244942388 | count | 1           |
| PPIL3      | -0.1890724 | 0.1472152 | -1.2843 | 0.199    | -0.244928885 | count | 1           |
| AAK1       | -0.1784364 | 0.1226226 | -1.4552 | 0.146    | -0.244791393 | count | 1           |
| TPRKB      | -0.1774012 | 0.1025584 | -1.7298 | 0.0838   | -0.244610903 | count | 1           |
| NDUFS6     | -0.1724414 | 0.0497626 | -3.4653 | 0.000536 | -0.244535942 | count | 1           |
| DES        | -0.2064752 | 0.2083033 | -0.9912 | 0.322    | -0.244522199 | count | 1           |
| CDC37L1    | -0.1804902 | 0.09617   | -1.8768 | 0.0606   | -0.244437908 | count | 1           |
| SCNM1      | -0.1797197 | 0.1154077 | -1.5573 | 0.119    | -0.244374971 | count | 1           |
| NOTCH3     | -0.1751697 | 0.0910904 | -1.923  | 0.0546   | -0.244347703 | count | 1           |
| SLC25A29   | -0.1964442 | 0.2182237 | -0.9002 | 0.368    | -0.244234342 | count | 1           |
| PRKACA     | -0.1880975 | 0.1333785 | -1.4103 | 0.159    | -0.244122093 | count | 1           |
| ITIH2      | -1.8617402 | 0.9742791 | -1.9109 | 0.0561   | -0.243618285 | count | 1           |
| HIST1H2BH  | -1.8617402 | 1.218114  | -1.5284 | 0.127    | -0.243618285 | count | 1           |
| AC090337.1 | -1.8617402 | 1.218114  | -1.5284 | 0.127    | -0.243618285 | count | 1           |
| CTC1       | -0.293011  | 0.4668018 | -0.6277 | 0.53     | -0.243574167 | count | 1           |
| RPL7A      | -0.1688483 | 0.0194596 | -8.6769 | 6.02E-18 | -0.243392379 | count | 1.44E-13    |
| SLCO3A1    | -0.1786046 | 0.1007623 | -1.7725 | 0.0764   | -0.24333298  | count | 1           |
| SMIM37     | -0.1732164 | 0.0760503 | -2.2777 | 0.0228   | -0.243300169 | count | 1           |
| CCT8       | -0.1715775 | 0.059245  | -2.8961 | 0.0038   | -0.243030641 | count | 1           |
| CCDC159    | -0.2200984 | 0.1915214 | -1.1492 | 0.251    | -0.242992961 | count | 1           |
| PARM1      | -0.1867923 | 0.1298756 | -1.4382 | 0.15     | -0.24286448  | count | 1           |
| NARS2      | -0.2516    | 0.2482213 | -1.0138 | 0.311    | -0.242820013 | count | 1           |
| UBTD1      | -0.2003621 | 0.1774199 | -1.1293 | 0.259    | -0.242751135 | count | 1           |
| FAM83D     | -1.8516043 | 1.0528083 | -1.7587 | 0.0787   | -0.242375872 | count | 1           |
| ATP8B3     | -1.039182  | 0.7585154 | -1.37   | 0.171    | -0.242375561 | count | 1           |
| ELOB       | -0.1689108 | 0.0329968 | -5.119  | 3.23E-07 | -0.242311329 | count | 0.007540758 |

|            |            |           |         |          |              |       |             |
|------------|------------|-----------|---------|----------|--------------|-------|-------------|
| MRPS36     | -0.1718537 | 0.0647158 | -2.6555 | 0.00795  | -0.242284207 | count | 1           |
| AC093827.4 | -0.3455235 | 0.3018143 | -1.1448 | 0.252    | -0.242266412 | count | 1           |
| SAP30L-AS1 | -0.7695184 | 0.714698  | -1.0767 | 0.282    | -0.242220545 | count | 1           |
| AP1S3      | -0.7695184 | 0.8599033 | -0.8949 | 0.371    | -0.242220545 | count | 1           |
| NRG3       | -1.0383011 | 0.6815116 | -1.5235 | 0.128    | -0.242152955 | count | 1           |
| AC130650.2 | -1.0383011 | 0.7145681 | -1.453  | 0.146    | -0.242152955 | count | 1           |
| MTMR2      | -0.1901328 | 0.1491116 | -1.2751 | 0.202    | -0.241920435 | count | 1           |
| MKL2       | -0.1925713 | 0.1742097 | -1.1054 | 0.269    | -0.241868567 | count | 1           |
| STOX2      | -1.0370027 | 0.6367544 | -1.6286 | 0.103    | -0.241824839 | count | 1           |
| KAT7       | -0.1815695 | 0.1152979 | -1.5748 | 0.115    | -0.241817656 | count | 1           |
| CDKN2B     | -0.2473179 | 0.2894059 | -0.8546 | 0.393    | -0.241807401 | count | 1           |
| LIN7B      | -0.1893287 | 0.1986667 | -0.953  | 0.341    | -0.241512017 | count | 1           |
| PPCS       | -0.1716035 | 0.0626183 | -2.7405 | 0.00616  | -0.241471783 | count | 1           |
| NBPF11     | -0.2663757 | 0.3664041 | -0.727  | 0.467    | -0.241408567 | count | 1           |
| EEF1D      | -0.1677277 | 0.0264857 | -6.3328 | 2.70E-10 | -0.241310851 | count | 6.39E-06    |
| LINC00662  | -0.1870165 | 0.1578406 | -1.1848 | 0.236    | -0.241288388 | count | 1           |
| FBXL19     | -0.4823183 | 0.3734248 | -1.2916 | 0.197    | -0.241205174 | count | 1           |
| FBXL2      | -0.2136305 | 0.2054154 | -1.04   | 0.298    | -0.241040477 | count | 1           |
| ISG20      | -0.2022508 | 0.1949841 | -1.0373 | 0.3      | -0.240994881 | count | 1           |
| KDM5C      | -0.2022349 | 0.2545309 | -0.7945 | 0.427    | -0.24097579  | count | 1           |
| PDZD11     | -0.1736877 | 0.0873165 | -1.9892 | 0.0468   | -0.240774081 | count | 1           |
| SCML2      | -0.2975462 | 0.8391908 | -0.3546 | 0.723    | -0.240659499 | count | 1           |
| ST3GAL6    | -0.3600004 | 0.3828899 | -0.9402 | 0.347    | -0.240483012 | count | 1           |
| COX7A2     | -0.1677054 | 0.0337371 | -4.9709 | 6.97E-07 | -0.240464185 | count | 0.016243585 |
| RBX1       | -0.1688369 | 0.0465054 | -3.6305 | 0.000287 | -0.24045638  | count | 1           |
| ACTL10     | -0.3804304 | 0.4360135 | -0.8725 | 0.383    | -0.240408172 | count | 1           |
| SLC25A26   | -0.1852424 | 0.1355587 | -1.3665 | 0.172    | -0.240401411 | count | 1           |
| NDUFA4     | -0.1670791 | 0.0337933 | -4.9442 | 7.99E-07 | -0.240338969 | count | 0.018607112 |
| BX322562.1 | -0.2306294 | 0.2553223 | -0.9033 | 0.366    | -0.240239653 | count | 1           |
| AC104407.1 | -0.1847583 | 0.2140221 | -0.8633 | 0.388    | -0.240209255 | count | 1           |
| GOLGA6L9   | -0.5389578 | 0.9467043 | -0.5693 | 0.569    | -0.240201363 | count | 1           |
| PNMA8A     | -0.2426859 | 0.3395729 | -0.7147 | 0.475    | -0.240179    | count | 1           |
| HPX        | -1.83374   | 1.2548429 | -1.4613 | 0.144    | -0.240175212 | count | 1           |
| STK19      | -0.1803881 | 0.1197715 | -1.5061 | 0.132    | -0.239981456 | count | 1           |
| C2orf68    | -0.232426  | 0.2687355 | -0.8649 | 0.387    | -0.239916833 | count | 1           |
| DAAM2      | -0.1943709 | 0.1655085 | -1.1744 | 0.24     | -0.239774244 | count | 1           |
| RUSC1-AS1  | -0.623495  | 0.5202203 | -1.1985 | 0.231    | -0.239661917 | count | 1           |
| RPL29      | -0.1662977 | 0.0204472 | -8.133  | 5.67E-16 | -0.239628893 | count | 1.36E-11    |
| FYCO1      | -0.1831142 | 0.1766209 | -1.0368 | 0.3      | -0.239479179 | count | 1           |
| SYNC       | -0.1818883 | 0.1281954 | -1.4188 | 0.156    | -0.239469131 | count | 1           |
| NUDT2      | -0.1808199 | 0.1070836 | -1.6886 | 0.0914   | -0.239157987 | count | 1           |
| BTBD10     | -0.1862874 | 0.1258769 | -1.4799 | 0.139    | -0.239041365 | count | 1           |
| ZBTB10     | -0.1814396 | 0.1106864 | -1.6392 | 0.101    | -0.239040836 | count | 1           |
| FAM50B     | -0.1824558 | 0.163456  | -1.1162 | 0.264    | -0.238990355 | count | 1           |
| TMEM35A    | -0.2070655 | 0.2079472 | -0.9958 | 0.319    | -0.238988214 | count | 1           |

|             |            |           |         |          |              |       |            |
|-------------|------------|-----------|---------|----------|--------------|-------|------------|
| HNRNPUL2    | -0.1948433 | 0.1854395 | -1.0507 | 0.293    | -0.238834164 | count | 1          |
| UBQLN1      | -0.1814664 | 0.1248964 | -1.4529 | 0.146    | -0.23874477  | count | 1          |
| RNASEH2C    | -0.167823  | 0.0541217 | -3.1008 | 0.00194  | -0.238696467 | count | 1          |
| EPB41L4A-DT | -0.5357259 | 0.6266674 | -0.8549 | 0.393    | -0.238667593 | count | 1          |
| CYTOR       | -0.1751499 | 0.1007378 | -1.7387 | 0.0822   | -0.238284386 | count | 1          |
| RPS12       | -0.1652776 | 0.0197028 | -8.3885 | 6.94E-17 | -0.238272086 | count | 1.66E-12   |
| NDUFB8      | -0.1666279 | 0.0394583 | -4.2229 | 2.47E-05 | -0.238239538 | count | 0.5667168  |
| TBCA        | -0.1662883 | 0.0383807 | -4.3326 | 1.51E-05 | -0.237935722 | count | 0.3474057  |
| LRFN4       | -0.226383  | 0.2714896 | -0.8339 | 0.404    | -0.237821659 | count | 1          |
| MYBBP1A     | -0.1972393 | 0.243565  | -0.8098 | 0.418    | -0.23769276  | count | 1          |
| FAAH        | -0.2623233 | 0.4217841 | -0.6219 | 0.534    | -0.237660215 | count | 1          |
| F11R        | -0.3250103 | 0.5764211 | -0.5638 | 0.573    | -0.237570322 | count | 1          |
| KLF16       | -0.2724768 | 0.3171691 | -0.8591 | 0.39     | -0.237275908 | count | 1          |
| ZMAT2       | -0.1700712 | 0.0784982 | -2.1666 | 0.0303   | -0.237226799 | count | 1          |
| SCAPER      | -0.1786354 | 0.1532077 | -1.166  | 0.244    | -0.237111167 | count | 1          |
| AC008074.1  | -0.7545177 | 0.7290739 | -1.0349 | 0.301    | -0.23710553  | count | 1          |
| CERNA1      | -0.7545177 | 0.777346  | -0.9706 | 0.332    | -0.23710553  | count | 1          |
| SURF1       | -0.1693918 | 0.0821613 | -2.0617 | 0.0393   | -0.237059879 | count | 1          |
| MANF        | -0.1705996 | 0.0786578 | -2.1689 | 0.0302   | -0.236961066 | count | 1          |
| SNF8        | -0.1679213 | 0.0628623 | -2.6713 | 0.00759  | -0.236877333 | count | 1          |
| COX7A2L     | -0.1661528 | 0.0443784 | -3.744  | 0.000184 | -0.236858248 | count | 1          |
| PSMB6       | -0.1656668 | 0.0401448 | -4.1267 | 3.76E-05 | -0.236819642 | count | 0.860664   |
| IL10RB-DT   | -0.4737194 | 0.6367881 | -0.7439 | 0.457    | -0.236660587 | count | 1          |
| TTC38       | -0.2144153 | 0.2575993 | -0.8324 | 0.405    | -0.236650114 | count | 1          |
| LINC01556   | -0.6161095 | 0.7237094 | -0.8513 | 0.395    | -0.236613657 | count | 1          |
| FGF22       | -0.6161095 | 0.7237094 | -0.8513 | 0.395    | -0.236613657 | count | 1          |
| RSPO2       | -0.179545  | 0.2307264 | -0.7782 | 0.437    | -0.236536137 | count | 1          |
| GRWD1       | -0.1902308 | 0.1806931 | -1.0528 | 0.293    | -0.236464689 | count | 1          |
| GPD1L       | -0.209567  | 0.2411942 | -0.8689 | 0.385    | -0.236409963 | count | 1          |
| AL603839.3  | -0.3994109 | 0.8247959 | -0.4843 | 0.628    | -0.236403988 | count | 1          |
| PLL2        | -0.3741875 | 0.4672647 | -0.8008 | 0.423    | -0.236299385 | count | 1          |
| TMPO-AS1    | -0.3741875 | 0.6267264 | -0.5971 | 0.551    | -0.236299385 | count | 1          |
| PGM2        | -0.18479   | 0.1548268 | -1.1935 | 0.233    | -0.236277506 | count | 1          |
| ZNF628      | -0.3531024 | 0.4282844 | -0.8245 | 0.41     | -0.235700319 | count | 1          |
| SNCG        | -0.164615  | 0.0711871 | -2.3124 | 0.0208   | -0.235671199 | count | 1          |
| NUDT6       | -0.1990437 | 0.2267727 | -0.8777 | 0.38     | -0.235652611 | count | 1          |
| CACNA1C-AS2 | -0.6130067 | 0.8721434 | -0.7029 | 0.482    | -0.235334    | count | 1          |
| NCF4        | -1.7939495 | 0.7561129 | -2.3726 | 0.0177   | -0.235224397 | count | 1          |
| SENP8       | -0.3970865 | 0.3778018 | -1.051  | 0.293    | -0.234965448 | count | 1          |
| CAND2       | -0.2372124 | 0.2923518 | -0.8114 | 0.417    | -0.234675397 | count | 1          |
| ENO1-AS1    | -0.3716391 | 0.6434787 | -0.5775 | 0.564    | -0.234623416 | count | 1          |
| RSPH3       | -0.1968552 | 0.1960218 | -1.0043 | 0.315    | -0.23451731  | count | 1          |
| C1orf50     | -0.2068743 | 0.1991959 | -1.0385 | 0.299    | -0.234504455 | count | 1          |
| ARPC3       | -0.1636395 | 0.0369563 | -4.4279 | 9.79E-06 | -0.234467931 | count | 0.22558118 |
| HPS5        | -0.1840369 | 0.1868384 | -0.985  | 0.325    | -0.234431328 | count | 1          |

|            |            |           |         |          |              |       |            |
|------------|------------|-----------|---------|----------|--------------|-------|------------|
| MAP3K5     | -0.1726703 | 0.1358679 | -1.2709 | 0.204    | -0.234418778 | count | 1          |
| HNRNPUL1   | -0.1725705 | 0.0976208 | -1.7678 | 0.0772   | -0.234138402 | count | 1          |
| SPOCK2     | -0.7456789 | 0.8648624 | -0.8622 | 0.389    | -0.234095372 | count | 1          |
| VAC14      | -0.2308943 | 0.2911679 | -0.793  | 0.428    | -0.23357006  | count | 1          |
| HEBP2      | -0.1638689 | 0.0524799 | -3.1225 | 0.00181  | -0.233544742 | count | 1          |
| APBB2      | -0.1760292 | 0.1341254 | -1.3124 | 0.189    | -0.233368529 | count | 1          |
| GRAMD2A    | -1.7768878 | 1.128337  | -1.5748 | 0.115    | -0.233081263 | count | 1          |
| IL2RG      | -1.7768878 | 1.164764  | -1.5255 | 0.127    | -0.233081263 | count | 1          |
| TYRP1      | -1.7768878 | 1.164764  | -1.5255 | 0.127    | -0.233081263 | count | 1          |
| AP000426.1 | -1.7768878 | 1.202101  | -1.4782 | 0.139    | -0.233081263 | count | 1          |
| OSMR-AS1   | -0.3073177 | 0.32301   | -0.9514 | 0.341    | -0.233078394 | count | 1          |
| GAREM1     | -0.2066362 | 0.3033779 | -0.6811 | 0.496    | -0.233071165 | count | 1          |
| FAM124A    | -0.2677485 | 0.4057087 | -0.66   | 0.509    | -0.233066102 | count | 1          |
| TUSC3      | -0.2448106 | 0.2464425 | -0.9934 | 0.321    | -0.232795518 | count | 1          |
| GYG1       | -0.1670828 | 0.0742093 | -2.2515 | 0.0244   | -0.232614292 | count | 1          |
| ARHGAP1    | -0.1733963 | 0.1097177 | -1.5804 | 0.114    | -0.232578458 | count | 1          |
| HECW2      | -0.7409452 | 0.5043265 | -1.4692 | 0.142    | -0.232484463 | count | 1          |
| GRHL2      | -1.771413  | 0.8455104 | -2.0951 | 0.0362   | -0.232391085 | count | 1          |
| TSEN34     | -0.1664968 | 0.0784604 | -2.122  | 0.0339   | -0.232278248 | count | 1          |
| OARD1      | -0.1727583 | 0.1155242 | -1.4954 | 0.135    | -0.232214872 | count | 1          |
| THUMPD2    | -0.1706197 | 0.1120924 | -1.5221 | 0.128    | -0.232041351 | count | 1          |
| RAB34      | -0.1628622 | 0.0440634 | -3.6961 | 2.00E-04 | -0.232018073 | count | 1          |
| FAM222B    | -0.2291615 | 0.2751927 | -0.8327 | 0.405    | -0.231791201 | count | 1          |
| NDUFB10    | -0.1618425 | 0.0358601 | -4.5132 | 6.59E-06 | -0.231760894 | count | 0.15213674 |
| ISY1       | -0.1785774 | 0.156412  | -1.1417 | 0.254    | -0.23171738  | count | 1          |
| MRPS15     | -0.1660357 | 0.0786749 | -2.1104 | 0.0349   | -0.231612593 | count | 1          |
| SGTA       | -0.1833228 | 0.1419148 | -1.2918 | 0.197    | -0.231604086 | count | 1          |
| ARPC2      | -0.1613534 | 0.0368561 | -4.3779 | 1.23E-05 | -0.231463329 | count | 0.2832567  |
| FAM173A    | -0.1683977 | 0.0860583 | -1.9568 | 0.0504   | -0.231460898 | count | 1          |
| COQ3       | -0.1968209 | 0.2231314 | -0.8821 | 0.378    | -0.231434205 | count | 1          |
| AGPAT3     | -0.2337675 | 0.2317547 | -1.0087 | 0.313    | -0.231213316 | count | 1          |
| KLHL26     | -0.2948682 | 0.3553367 | -0.8298 | 0.407    | -0.231190765 | count | 1          |
| LRP5       | -0.1890073 | 0.2232734 | -0.8465 | 0.397    | -0.23111664  | count | 1          |
| DCBLD2     | -0.1708458 | 0.1217947 | -1.4027 | 0.161    | -0.230952282 | count | 1          |
| TMEM129    | -0.1857967 | 0.128696  | -1.4437 | 0.149    | -0.230921552 | count | 1          |
| MOAP1      | -0.1777987 | 0.1166004 | -1.5249 | 0.127    | -0.230916017 | count | 1          |
| BRWD3      | -0.2027609 | 0.3342924 | -0.6065 | 0.544    | -0.230896814 | count | 1          |
| URB2       | -0.4216621 | 0.4082222 | -1.0329 | 0.302    | -0.230861673 | count | 1          |
| USP40      | -0.1926562 | 0.2475223 | -0.7783 | 0.436    | -0.230841816 | count | 1          |
| CAVIN1     | -0.1610554 | 0.0362811 | -4.4391 | 9.30E-06 | -0.230806326 | count | 0.2143278  |
| TBCE       | -0.2651695 | 0.2669585 | -0.9933 | 0.321    | -0.230771086 | count | 1          |
| UCK1       | -0.1900648 | 0.1511962 | -1.2571 | 0.209    | -0.230770188 | count | 1          |
| OSBPL2     | -0.1863674 | 0.1599835 | -1.1649 | 0.244    | -0.230759661 | count | 1          |
| HARS       | -0.1709103 | 0.1029919 | -1.6595 | 0.0971   | -0.230624681 | count | 1          |
| WDR24      | -0.3900453 | 0.347239  | -1.1233 | 0.261    | -0.230611347 | count | 1          |

|            |            |           |         |          |              |       |          |
|------------|------------|-----------|---------|----------|--------------|-------|----------|
| LINC02001  | -0.1774393 | 0.1293392 | -1.3719 | 0.17     | -0.230234739 | count | 1        |
| PI15       | -0.5179001 | 0.4617863 | -1.1215 | 0.262    | -0.230222572 | count | 1        |
| AC004148.2 | -0.7341847 | 0.356238  | -2.0609 | 0.0394   | -0.230185257 | count | 1        |
| NTPCR      | -0.1674133 | 0.1019252 | -1.6425 | 0.101    | -0.23006069  | count | 1        |
| KCNQ4      | -0.3645761 | 0.4716468 | -0.773  | 0.44     | -0.229982289 | count | 1        |
| NDUFA8     | -0.1640703 | 0.0738483 | -2.2217 | 0.0264   | -0.229759016 | count | 1        |
| CAPNS1     | -0.1615288 | 0.0522184 | -3.0933 | 0.00199  | -0.229652724 | count | 1        |
| MAFA       | -0.4194952 | 0.418168  | -1.0032 | 0.316    | -0.229615849 | count | 1        |
| CCDC136    | -0.4600715 | 0.565227  | -0.814  | 0.416    | -0.229461473 | count | 1        |
| ANAPC15    | -0.1697986 | 0.1201496 | -1.4132 | 0.158    | -0.229288452 | count | 1        |
| HMG5       | -0.1776918 | 0.1406795 | -1.2631 | 0.207    | -0.229207534 | count | 1        |
| ALDH3A2    | -0.1672366 | 0.1023231 | -1.6344 | 0.102    | -0.229101972 | count | 1        |
| WDR45B     | -0.1707855 | 0.1063846 | -1.6054 | 0.109    | -0.228965933 | count | 1        |
| DYNLT1     | -0.1609379 | 0.0530831 | -3.0318 | 0.00245  | -0.22895893  | count | 1        |
| LSM4       | -0.1642265 | 0.0736718 | -2.2292 | 0.0259   | -0.228842839 | count | 1        |
| COG8       | -0.3133528 | 0.4037399 | -0.7761 | 0.438    | -0.228778535 | count | 1        |
| CBWD3      | -0.283106  | 0.3162034 | -0.8953 | 0.371    | -0.228676576 | count | 1        |
| FLVCR1-DT  | -0.3013006 | 0.3495421 | -0.862  | 0.389    | -0.228379474 | count | 1        |
| SAE1       | -0.1741916 | 0.1308221 | -1.3315 | 0.183    | -0.228302264 | count | 1        |
| TMEM126A   | -0.1649666 | 0.0917612 | -1.7978 | 0.0723   | -0.228090248 | count | 1        |
| DNAAF4     | -0.1828088 | 0.1868262 | -0.9785 | 0.328    | -0.228007554 | count | 1        |
| MRPL43     | -0.1605556 | 0.0520856 | -3.0825 | 0.00207  | -0.227911936 | count | 1        |
| TRIM46     | -0.4164628 | 0.5625791 | -0.7403 | 0.459    | -0.227873239 | count | 1        |
| NCBP2      | -0.1664358 | 0.0981565 | -1.6956 | 0.09     | -0.227797681 | count | 1        |
| CIPC       | -0.208944  | 0.2990247 | -0.6988 | 0.485    | -0.227654467 | count | 1        |
| MAP2       | -0.1812634 | 0.2187915 | -0.8285 | 0.407    | -0.227592123 | count | 1        |
| LYVE1      | -0.5122544 | 0.6076149 | -0.8431 | 0.399    | -0.227553209 | count | 1        |
| FNTB       | -0.2130986 | 0.2523737 | -0.8444 | 0.399    | -0.227329835 | count | 1        |
| CCDC92     | -0.1658069 | 0.1274405 | -1.3011 | 0.193    | -0.227288627 | count | 1        |
| PCM1       | -0.1607392 | 0.063736  | -2.522  | 0.0117   | -0.227210685 | count | 1        |
| NPL        | -0.3594298 | 0.5770682 | -0.6229 | 0.533    | -0.226604253 | count | 1        |
| MHENCN     | -0.3103069 | 0.2969809 | -1.0449 | 0.296    | -0.22648418  | count | 1        |
| LINC00957  | -0.323746  | 0.3593134 | -0.901  | 0.368    | -0.226480421 | count | 1        |
| LLGL2      | -0.2884046 | 0.4050579 | -0.712  | 0.477    | -0.225983265 | count | 1        |
| EHD1       | -0.1760952 | 0.1540238 | -1.1433 | 0.253    | -0.225645924 | count | 1        |
| TAF3       | -0.1730694 | 0.1217044 | -1.422  | 0.155    | -0.225547327 | count | 1        |
| FADS1      | -0.1735578 | 0.1328489 | -1.3064 | 0.191    | -0.225386844 | count | 1        |
| TTC31      | -0.2338311 | 0.3142145 | -0.7442 | 0.457    | -0.225377994 | count | 1        |
| PPIA       | -0.1567483 | 0.0259908 | -6.0309 | 1.79E-09 | -0.225359164 | count | 4.22E-05 |
| DYNLT3     | -0.159153  | 0.0593354 | -2.6823 | 0.00735  | -0.225343607 | count | 1        |
| TENT5A     | -0.1613328 | 0.0712886 | -2.2631 | 0.0237   | -0.225328306 | count | 1        |
| CARNMT1    | -0.2406884 | 0.2845892 | -0.8457 | 0.398    | -0.225317192 | count | 1        |
| AURKA      | -0.5881145 | 0.610403  | -0.9635 | 0.335    | -0.22508963  | count | 1        |
| PA2G4      | -0.1581505 | 0.0512193 | -3.0877 | 0.00203  | -0.225086589 | count | 1        |
| IER3       | -0.157691  | 0.0952324 | -1.6559 | 0.0978   | -0.225078041 | count | 1        |

|            |            |           |         |          |              |       |          |
|------------|------------|-----------|---------|----------|--------------|-------|----------|
| ZNF425     | -0.4517253 | 0.4488649 | -1.0064 | 0.314    | -0.225067524 | count | 1        |
| DNAJC30    | -0.169893  | 0.1518878 | -1.1185 | 0.263    | -0.224938038 | count | 1        |
| FAM218A    | -0.337396  | 0.4707549 | -0.7167 | 0.474    | -0.224831435 | count | 1        |
| KIF9       | -0.1812577 | 0.1874296 | -0.9671 | 0.334    | -0.224827609 | count | 1        |
| AL391834.1 | -0.5873584 | 0.7644413 | -0.7683 | 0.442    | -0.224779081 | count | 1        |
| AC016355.1 | -0.5873584 | 0.7644413 | -0.7683 | 0.442    | -0.224779081 | count | 1        |
| TRIP13     | -0.5873584 | 0.7955178 | -0.7383 | 0.46     | -0.224779081 | count | 1        |
| ZBTB20-AS4 | -0.5873584 | 0.7965715 | -0.7374 | 0.461    | -0.224779081 | count | 1        |
| ZC3H13     | -0.1593342 | 0.0620351 | -2.5685 | 0.0103   | -0.224773057 | count | 1        |
| PPP1R3G    | -0.2868463 | 0.3680622 | -0.7793 | 0.436    | -0.22472859  | count | 1        |
| PHF23      | -0.1759817 | 0.1817248 | -0.9684 | 0.333    | -0.224689629 | count | 1        |
| TMEM63A    | -0.1932136 | 0.3608134 | -0.5355 | 0.592    | -0.224665453 | count | 1        |
| TPD52L2    | -0.1628642 | 0.0830606 | -1.9608 | 0.05     | -0.224534168 | count | 1        |
| AL031663.3 | -1.709376  | 0.8750293 | -1.9535 | 0.0508   | -0.224486606 | count | 1        |
| ZNF114     | -1.709376  | 1.210781  | -1.4118 | 0.158    | -0.224486606 | count | 1        |
| IFT20      | -0.1626379 | 0.0865548 | -1.879  | 0.0603   | -0.224445535 | count | 1        |
| ZNF837     | -0.3799438 | 0.4549464 | -0.8351 | 0.404    | -0.224374396 | count | 1        |
| ARMC8      | -0.1758107 | 0.1594802 | -1.1024 | 0.27     | -0.224190128 | count | 1        |
| NFAM1      | -0.9664784 | 0.8132008 | -1.1885 | 0.235    | -0.224007468 | count | 1        |
| AGT        | -0.1608117 | 0.0915385 | -1.7568 | 0.079    | -0.223942415 | count | 1        |
| IKBIP      | -0.160357  | 0.0859749 | -1.8652 | 0.0622   | -0.223723237 | count | 1        |
| MAPKAPK3   | -0.2052838 | 0.2269641 | -0.9045 | 0.366    | -0.223622424 | count | 1        |
| TMED9      | -0.1575073 | 0.0508257 | -3.099  | 0.00196  | -0.223446904 | count | 1        |
| NPIPB2     | -0.5034631 | 0.7307055 | -0.689  | 0.491    | -0.223401745 | count | 1        |
| RFX8       | -0.5034631 | 0.7689852 | -0.6547 | 0.513    | -0.223401745 | count | 1        |
| TAP2       | -0.2110208 | 0.2095755 | -1.0069 | 0.314    | -0.22332391  | count | 1        |
| C19orf25   | -0.1666967 | 0.1334818 | -1.2488 | 0.212    | -0.223165999 | count | 1        |
| ZNF671     | -0.2344902 | 0.5496411 | -0.4266 | 0.67     | -0.222812262 | count | 1        |
| PSMC4      | -0.1593199 | 0.0704074 | -2.2628 | 0.0237   | -0.222792213 | count | 1        |
| SMURF1     | -0.1881446 | 0.2681859 | -0.7015 | 0.483    | -0.222652546 | count | 1        |
| ZNF789     | -0.2342283 | 0.2812581 | -0.8328 | 0.405    | -0.222559092 | count | 1        |
| FIBIN      | -0.1574532 | 0.0826806 | -1.9044 | 0.0569   | -0.222337629 | count | 1        |
| LINC00910  | -0.4463264 | 0.5332015 | -0.8371 | 0.403    | -0.222228749 | count | 1        |
| DIXDC1     | -0.1573641 | 0.0723328 | -2.1756 | 0.0297   | -0.222019107 | count | 1        |
| TP53       | -0.1869517 | 0.2314208 | -0.8078 | 0.419    | -0.221942429 | count | 1        |
| BRD7       | -0.157067  | 0.0678645 | -2.3144 | 0.0207   | -0.221914696 | count | 1        |
| PINX1      | -0.1791613 | 0.2137124 | -0.8383 | 0.402    | -0.221786596 | count | 1        |
| ENTPD3-AS1 | -0.2150825 | 0.259647  | -0.8284 | 0.408    | -0.22177603  | count | 1        |
| S100A6     | -0.1537234 | 0.0184946 | -8.3118 | 1.31E-16 | -0.221681474 | count | 3.13E-12 |
| SHROOM4    | -0.4997757 | 0.6069575 | -0.8234 | 0.41     | -0.221662387 | count | 1        |
| CALCB      | -1.6872908 | 0.9721114 | -1.7357 | 0.0827   | -0.221636949 | count | 1        |
| MPZL3      | -1.6872908 | 1.073708  | -1.5715 | 0.116    | -0.221636949 | count | 1        |
| LINC01828  | -1.6872908 | 1.125487  | -1.4992 | 0.134    | -0.221636949 | count | 1        |
| AC007014.1 | -1.6872908 | 1.125487  | -1.4992 | 0.134    | -0.221636949 | count | 1        |
| AL022328.2 | -1.6872908 | 1.125487  | -1.4992 | 0.134    | -0.221636949 | count | 1        |

|            |            |           |         |          |              |       |           |
|------------|------------|-----------|---------|----------|--------------|-------|-----------|
| AL050343.2 | -1.6872908 | 1.214319  | -1.3895 | 0.165    | -0.221636949 | count | 1         |
| AC005014.2 | -1.6872908 | 1.214319  | -1.3895 | 0.165    | -0.221636949 | count | 1         |
| JMJD8      | -0.1599781 | 0.0861714 | -1.8565 | 0.0635   | -0.221593621 | count | 1         |
| FBXO46     | -0.3035936 | 0.2925356 | -1.0378 | 0.299    | -0.221431445 | count | 1         |
| ZMYND15    | -0.708222  | 0.6459057 | -1.0965 | 0.273    | -0.22137253  | count | 1         |
| CIC        | -0.1763029 | 0.1872082 | -0.9417 | 0.346    | -0.221331959 | count | 1         |
| RPS13      | -0.1534457 | 0.0198212 | -7.7415 | 1.26E-14 | -0.221179425 | count | 3.01E-10  |
| AC090510.1 | -0.7073713 | 0.7067602 | -1.0009 | 0.317    | -0.22108426  | count | 1         |
| GPR150     | -0.7073713 | 0.7355026 | -0.9618 | 0.336    | -0.22108426  | count | 1         |
| POP7       | -0.1610877 | 0.0888511 | -1.813  | 0.0699   | -0.221041412 | count | 1         |
| LINC01588  | -0.4042202 | 0.6902741 | -0.5856 | 0.558    | -0.220847656 | count | 1         |
| AC112220.3 | -0.9537942 | 0.7549633 | -1.2634 | 0.207    | -0.220805748 | count | 1         |
| FAM111B    | -0.9537942 | 0.8447518 | -1.1291 | 0.259    | -0.220805748 | count | 1         |
| TTC25      | -0.3024701 | 0.4697073 | -0.644  | 0.52     | -0.220586412 | count | 1         |
| POLM       | -0.1820406 | 0.299258  | -0.6083 | 0.543    | -0.220410156 | count | 1         |
| TP53TG1    | -0.160746  | 0.0995584 | -1.6146 | 0.106    | -0.220385991 | count | 1         |
| KHK        | -0.2036704 | 0.2603393 | -0.7823 | 0.434    | -0.220346956 | count | 1         |
| FAM19A2    | -0.4968177 | 0.3866957 | -1.2848 | 0.199    | -0.220267902 | count | 1         |
| LINC01426  | -0.4966317 | 0.4518818 | -1.099  | 0.272    | -0.22018025  | count | 1         |
| AL136040.1 | -0.2811938 | 0.456051  | -0.6166 | 0.538    | -0.22018007  | count | 1         |
| IL15       | -0.1848166 | 0.1869599 | -0.9885 | 0.323    | -0.220073047 | count | 1         |
| PPIE       | -0.1588229 | 0.0851879 | -1.8644 | 0.0623   | -0.219991204 | count | 1         |
| NPIPB15    | -0.9505044 | 0.9279294 | -1.0243 | 0.306    | -0.219975586 | count | 1         |
| AC019205.1 | -0.2529998 | 0.3652445 | -0.6927 | 0.489    | -0.219952746 | count | 1         |
| TIMM10     | -0.1612442 | 0.0855568 | -1.8846 | 0.0596   | -0.219868443 | count | 1         |
| AC131025.2 | -0.9500349 | 0.6072915 | -1.5644 | 0.118    | -0.21985711  | count | 1         |
| INTS4      | -0.1911911 | 0.3028436 | -0.6313 | 0.528    | -0.219575457 | count | 1         |
| THG1L      | -0.1729259 | 0.2107062 | -0.8207 | 0.412    | -0.219336951 | count | 1         |
| MCM3AP-AS1 | -0.5735081 | 0.6575137 | -0.8722 | 0.383    | -0.219097028 | count | 1         |
| LINC01376  | -0.7008464 | 0.5969577 | -1.174  | 0.24     | -0.21887413  | count | 1         |
| PFN1       | -0.1521848 | 0.0315595 | -4.8222 | 1.48E-06 | -0.218831786 | count | 0.0343804 |
| C1GALT1C1L | -0.2637413 | 0.3687922 | -0.7151 | 0.475    | -0.218669455 | count | 1         |
| YPEL1      | -0.2141234 | 0.285072  | -0.7511 | 0.453    | -0.218624535 | count | 1         |
| SLC35E4    | -0.2162047 | 0.3047894 | -0.7094 | 0.478    | -0.21850085  | count | 1         |
| ATP5F1D    | -0.1523266 | 0.0358015 | -4.2547 | 2.15E-05 | -0.218164613 | count | 0.4937045 |
| TPMT       | -0.1710528 | 0.1620119 | -1.0558 | 0.291    | -0.218095911 | count | 1         |
| FOXP4      | -0.180504  | 0.2220314 | -0.813  | 0.416    | -0.21797249  | count | 1         |
| CREB3      | -0.1597093 | 0.0893305 | -1.7878 | 0.0739   | -0.217828245 | count | 1         |
| ROR1       | -0.1702469 | 0.1933306 | -0.8806 | 0.379    | -0.217601841 | count | 1         |
| MT1F       | -0.1667769 | 0.1588143 | -1.0501 | 0.294    | -0.217501745 | count | 1         |
| SPTBN4     | -1.6554446 | 1.0360119 | -1.5979 | 0.1102   | -0.217496442 | count | 1         |
| SLAIN2     | -0.1587641 | 0.0883762 | -1.7965 | 0.0725   | -0.217474306 | count | 1         |
| AKR1C3     | -0.1546184 | 0.0688721 | -2.245  | 0.0248   | -0.217459386 | count | 1         |
| VAMP5      | -0.1527249 | 0.0558997 | -2.7321 | 0.0063   | -0.217432    | count | 1         |
| C20orf96   | -0.1970806 | 0.2461687 | -0.8006 | 0.423    | -0.217322749 | count | 1         |



|            |            |           |         |          |              |       |             |
|------------|------------|-----------|---------|----------|--------------|-------|-------------|
| TMEM101    | -0.16354   | 0.1174128 | -1.3929 | 0.164    | -0.217262701 | count | 1           |
| NIFK-AS1   | -0.1736838 | 0.1639611 | -1.0593 | 0.29     | -0.216943849 | count | 1           |
| PDCD1LG2   | -0.2355092 | 0.342076  | -0.6885 | 0.491    | -0.216758992 | count | 1           |
| PTCHD4     | -0.3102266 | 0.3567096 | -0.8697 | 0.385    | -0.216709904 | count | 1           |
| ZNF98      | -0.6941281 | 0.4861985 | -1.4277 | 0.153    | -0.216600485 | count | 1           |
| POLR3K     | -0.1663968 | 0.136624  | -1.2179 | 0.223    | -0.216442547 | count | 1           |
| ZFH3       | -0.1533264 | 0.0804295 | -1.9063 | 0.0567   | -0.21608555  | count | 1           |
| PCAT6      | -0.4344532 | 0.4015143 | -1.082  | 0.279    | -0.215995722 | count | 1           |
| AC125807.2 | -0.9342865 | 0.8349807 | -1.1189 | 0.263    | -0.215884665 | count | 1           |
| BBOX1      | -0.9342865 | 0.8591729 | -1.0874 | 0.277    | -0.215884665 | count | 1           |
| LINC01534  | -0.3243236 | 0.3970049 | -0.8169 | 0.414    | -0.215808113 | count | 1           |
| NUCKS1     | -0.1502268 | 0.0295875 | -5.0774 | 4.02E-07 | -0.215793395 | count | 0.009380268 |
| METR1      | -0.1556696 | 0.0808713 | -1.9249 | 0.0543   | -0.215733694 | count | 1           |
| ATAD2      | -0.1713291 | 0.1785988 | -0.9593 | 0.337    | -0.215731919 | count | 1           |
| C9orf47    | -0.5651986 | 0.3358458 | -1.6829 | 0.0925   | -0.215694329 | count | 1           |
| TTC1       | -0.1533338 | 0.0677596 | -2.2629 | 0.0237   | -0.215651109 | count | 1           |
| ATP5MC1    | -0.15159   | 0.0469146 | -3.2312 | 0.00124  | -0.2156327   | count | 1           |
| PDE4DIP    | -0.156357  | 0.1032234 | -1.5147 | 0.13     | -0.215585448 | count | 1           |
| STAT1      | -0.1548698 | 0.0947436 | -1.6346 | 0.102    | -0.215475546 | count | 1           |
| MRPL52     | -0.1529601 | 0.0649651 | -2.3545 | 0.0186   | -0.215398094 | count | 1           |
| GDF11      | -0.1991437 | 0.2188609 | -0.9099 | 0.363    | -0.215395574 | count | 1           |
| TRIM38     | -0.159128  | 0.104647  | -1.5206 | 0.128    | -0.215299029 | count | 1           |
| ZBTB18     | -0.3082229 | 0.376765  | -0.8181 | 0.413    | -0.215263785 | count | 1           |
| H2AFV      | -0.1525302 | 0.0676469 | -2.2548 | 0.0242   | -0.214972229 | count | 1           |
| LINC02193  | -0.3414854 | 0.6561644 | -0.5204 | 0.603    | -0.214850047 | count | 1           |
| KRT18      | -0.1530498 | 0.2209989 | -0.6925 | 0.489    | -0.214831017 | count | 1           |
| WDR78      | -0.2080411 | 0.2725856 | -0.7632 | 0.445    | -0.214420543 | count | 1           |
| FOXP4-AS1  | -0.3407832 | 0.7157088 | -0.4761 | 0.634    | -0.214390862 | count | 1           |
| MLKL       | -0.2078579 | 0.2926273 | -0.7103 | 0.478    | -0.214229247 | count | 1           |
| FBXO25     | -0.1657213 | 0.1755515 | -0.944  | 0.345    | -0.21414275  | count | 1           |
| ARID5A     | -0.1566742 | 0.1003239 | -1.5617 | 0.118    | -0.214057945 | count | 1           |
| BABAM1     | -0.1537882 | 0.0775309 | -1.9836 | 0.0474   | -0.213991897 | count | 1           |
| PTPRM      | -0.1855709 | 0.2167781 | -0.856  | 0.392    | -0.213975995 | count | 1           |
| TSPAN1     | -0.3919385 | 0.8144866 | -0.4812 | 0.63     | -0.213815692 | count | 1           |
| STAU2      | -0.1770143 | 0.1764056 | -1.0035 | 0.316    | -0.21373113  | count | 1           |
| CABCOCO1   | -0.1962302 | 0.3770905 | -0.5204 | 0.603    | -0.213654996 | count | 1           |
| FZD10      | -0.4296114 | 0.5392331 | -0.7967 | 0.426    | -0.21345792  | count | 1           |
| IFI44      | -0.1809696 | 0.2414685 | -0.7495 | 0.454    | -0.213389006 | count | 1           |
| PRKN       | -0.4292608 | 0.4665072 | -0.9202 | 0.358    | -0.213274258 | count | 1           |
| ZNF74      | -0.3909647 | 0.416685  | -0.9383 | 0.348    | -0.213258833 | count | 1           |
| MPG        | -0.1497306 | 0.0497747 | -3.0082 | 0.00265  | -0.21312642  | count | 1           |
| C11orf68   | -0.1570521 | 0.1203876 | -1.3046 | 0.192    | -0.213105436 | count | 1           |
| SLN        | -0.6832324 | 0.4213143 | -1.6217 | 0.105    | -0.212917426 | count | 1           |
| C1orf216   | -0.184578  | 0.1959826 | -0.9418 | 0.346    | -0.212821615 | count | 1           |
| OSBPL10    | -0.1941798 | 0.2254878 | -0.8612 | 0.389    | -0.212772038 | count | 1           |

|             |            |           |         |          |              |       |            |
|-------------|------------|-----------|---------|----------|--------------|-------|------------|
| HAGH        | -0.1532101 | 0.0827608 | -1.8512 | 0.0642   | -0.212620885 | count | 1          |
| ATP5MF      | -0.1499871 | 0.0503099 | -2.9813 | 0.00289  | -0.212578929 | count | 1          |
| C2orf40     | -0.1479461 | 0.0734448 | -2.0144 | 0.044    | -0.21238953  | count | 1          |
| LAMTOR1     | -0.1490536 | 0.0499243 | -2.9856 | 0.00285  | -0.212260142 | count | 1          |
| PCDHGA8     | -1.6140093 | 0.9137748 | -1.7663 | 0.0774   | -0.212056104 | count | 1          |
| AL031280.1  | -1.6140093 | 1.107022  | -1.458  | 0.145    | -0.212056104 | count | 1          |
| EPHA1-AS1   | -0.388768  | 0.4364362 | -0.8908 | 0.373    | -0.212003074 | count | 1          |
| SPRED1      | -0.1593464 | 0.1395691 | -1.1417 | 0.254    | -0.211675588 | count | 1          |
| GPRASP2     | -0.2622355 | 0.2971458 | -0.8825 | 0.378    | -0.211404626 | count | 1          |
| FTL         | -0.1465794 | 0.024147  | -6.0703 | 1.41E-09 | -0.21136044  | count | 3.33E-05   |
| TNKS2-AS1   | -0.3587263 | 0.4878125 | -0.7354 | 0.462    | -0.211311789 | count | 1          |
| IMPDH2      | -0.1527382 | 0.0726991 | -2.101  | 0.0357   | -0.211126678 | count | 1          |
| AC027682.6  | -0.1873542 | 0.2775017 | -0.6751 | 0.5      | -0.211125248 | count | 1          |
| AC011472.1  | -0.6775383 | 0.6139778 | -1.1035 | 0.27     | -0.210994857 | count | 1          |
| GALK1       | -0.1593847 | 0.1193579 | -1.3354 | 0.182    | -0.21098385  | count | 1          |
| FHL5        | -0.1627917 | 0.1083598 | -1.5023 | 0.133    | -0.210959901 | count | 1          |
| RARS        | -0.1596052 | 0.153936  | -1.0368 | 0.3      | -0.210881509 | count | 1          |
| STX17-AS1   | -0.3171533 | 0.5860087 | -0.5412 | 0.588    | -0.210867759 | count | 1          |
| YAP1        | -0.1531371 | 0.0980637 | -1.5616 | 0.118    | -0.210768361 | count | 1          |
| PALB2       | -0.2085516 | 0.3079493 | -0.6772 | 0.498    | -0.210659874 | count | 1          |
| VPS26C      | -0.1663102 | 0.1710408 | -0.9723 | 0.331    | -0.210614843 | count | 1          |
| EMC8        | -0.1590555 | 0.1366787 | -1.1637 | 0.245    | -0.210546775 | count | 1          |
| SLC2A4RG    | -0.1501136 | 0.0658406 | -2.28   | 0.0227   | -0.210330834 | count | 1          |
| EFCAB14     | -0.1531269 | 0.092152  | -1.6617 | 0.0967   | -0.210312812 | count | 1          |
| TMSB15B-AS1 | -0.3570286 | 0.6149261 | -0.5806 | 0.562    | -0.210268841 | count | 1          |
| FAM71E1     | -0.475261  | 0.6393975 | -0.7433 | 0.457    | -0.210128189 | count | 1          |
| PLEC        | -0.1507103 | 0.1064557 | -1.4157 | 0.157    | -0.210007509 | count | 1          |
| CAVIN3      | -0.1461613 | 0.0328684 | -4.4469 | 8.97E-06 | -0.20996895  | count | 0.20679438 |
| BOLA3-AS1   | -0.1737422 | 0.2360205 | -0.7361 | 0.462    | -0.209755106 | count | 1          |
| ZNF540      | -0.1731384 | 0.2243533 | -0.7717 | 0.44     | -0.209564185 | count | 1          |
| NELL1       | -0.672753  | 0.4115935 | -1.6345 | 0.102    | -0.209380285 | count | 1          |
| MRPL55      | -0.1499903 | 0.0929694 | -1.6133 | 0.107    | -0.209377157 | count | 1          |
| SNCA        | -0.2767652 | 0.5593327 | -0.4948 | 0.621    | -0.209267049 | count | 1          |
| MYOM2       | -0.2997485 | 0.4048604 | -0.7404 | 0.459    | -0.209153281 | count | 1          |
| FCHSD2      | -0.1538838 | 0.1150729 | -1.3373 | 0.181    | -0.208925534 | count | 1          |
| EIF3F       | -0.1460507 | 0.0380342 | -3.84   | 1.00E-04 | -0.208753836 | count | 1          |
| TXNL1       | -0.147921  | 0.0629455 | -2.35   | 0.0188   | -0.208651739 | count | 1          |
| EIPR1       | -0.222968  | 0.2427213 | -0.9186 | 0.358    | -0.208445175 | count | 1          |
| PRRG2       | -0.4196855 | 0.3539068 | -1.1859 | 0.236    | -0.208262694 | count | 1          |
| KIAA1958    | -0.3132532 | 0.4059511 | -0.7717 | 0.44     | -0.208183306 | count | 1          |
| NLGN2       | -0.1899348 | 0.2312182 | -0.8215 | 0.411    | -0.208073104 | count | 1          |
| AP2M1       | -0.1466427 | 0.0509158 | -2.8801 | 0.004    | -0.208010694 | count | 1          |
| OTUD7B      | -0.1635624 | 0.2203737 | -0.7422 | 0.458    | -0.207966648 | count | 1          |
| SPRYD7      | -0.153455  | 0.1158211 | -1.3249 | 0.185    | -0.207951095 | count | 1          |
| EXOSC4      | -0.1541191 | 0.1422178 | -1.0837 | 0.279    | -0.207838206 | count | 1          |

|            |            |           |         |          |              |       |            |
|------------|------------|-----------|---------|----------|--------------|-------|------------|
| MRPL28     | -0.1503528 | 0.0864365 | -1.7395 | 0.082    | -0.207824654 | count | 1          |
| MRM1       | -0.4702516 | 0.4227252 | -1.1124 | 0.266    | -0.207777731 | count | 1          |
| KHDC4      | -0.1675474 | 0.3247844 | -0.5159 | 0.606    | -0.20773177  | count | 1          |
| NAA80      | -0.2015417 | 0.2511069 | -0.8026 | 0.422    | -0.207636267 | count | 1          |
| HMG2       | -0.1452062 | 0.0405673 | -3.5794 | 3.00E-04 | -0.207553765 | count | 1          |
| ICAM2      | -0.1670808 | 0.2377138 | -0.7029 | 0.482    | -0.207539202 | count | 1          |
| PSMA7      | -0.1446206 | 0.0316313 | -4.5721 | 4.99E-06 | -0.207529927 | count | 0.11533886 |
| PSMA5      | -0.1479981 | 0.0691053 | -2.1416 | 0.0323   | -0.207334542 | count | 1          |
| NIPAL2     | -0.1993084 | 0.2697464 | -0.7389 | 0.46     | -0.207216641 | count | 1          |
| AP003068.2 | -0.417387  | 0.3337703 | -1.2505 | 0.211    | -0.207061138 | count | 1          |
| UPRT       | -0.2071079 | 0.2430107 | -0.8523 | 0.394    | -0.206885217 | count | 1          |
| FAM24B     | -0.3796624 | 0.5431817 | -0.699  | 0.485    | -0.206803417 | count | 1          |
| TMEM163    | -1.5744017 | 0.8162086 | -1.9289 | 0.0538   | -0.206802732 | count | 1          |
| FAM225B    | -1.5744017 | 0.8162086 | -1.9289 | 0.0538   | -0.206802732 | count | 1          |
| RASL10A    | -1.5744017 | 1.0697243 | -1.4718 | 0.141    | -0.206802732 | count | 1          |
| MEIS1-AS3  | -1.5744017 | 1.14159   | -1.3791 | 0.168    | -0.206802732 | count | 1          |
| AL158850.1 | -1.5744017 | 1.14159   | -1.3791 | 0.168    | -0.206802732 | count | 1          |
| PSPC1      | -0.1732112 | 0.1610396 | -1.0756 | 0.282    | -0.206783478 | count | 1          |
| EFCAB11    | -0.2211699 | 0.2558615 | -0.8644 | 0.387    | -0.206735367 | count | 1          |
| GSTZ1      | -0.1753266 | 0.1990669 | -0.8807 | 0.379    | -0.206687114 | count | 1          |
| AL157938.3 | -0.2837286 | 0.3832995 | -0.7402 | 0.459    | -0.206514024 | count | 1          |
| PPP2R5D    | -0.182291  | 0.2444065 | -0.7459 | 0.456    | -0.206395799 | count | 1          |
| TAF8       | -0.1680767 | 0.1934358 | -0.8689 | 0.385    | -0.206290469 | count | 1          |
| RWDD1      | -0.1440066 | 0.0419677 | -3.4314 | 0.000607 | -0.206216249 | count | 1          |
| CIB1       | -0.1449513 | 0.0523011 | -2.7715 | 0.00561  | -0.206119185 | count | 1          |
| PLCB3      | -0.2280518 | 0.2480826 | -0.9193 | 0.358    | -0.206041729 | count | 1          |
| ZBTB8OS    | -0.1496558 | 0.0956842 | -1.5641 | 0.118    | -0.206006861 | count | 1          |
| GLCC11     | -0.1905444 | 0.2431864 | -0.7835 | 0.433    | -0.2059955   | count | 1          |
| FCHSD1     | -0.2111336 | 0.3463648 | -0.6096 | 0.542    | -0.205904923 | count | 1          |
| FIZ1       | -0.2110678 | 0.2571947 | -0.8207 | 0.412    | -0.20583978  | count | 1          |
| AL137145.2 | -1.566243  | 0.8258403 | -1.8965 | 0.058    | -0.205714444 | count | 1          |
| AC006160.1 | -1.566243  | 1.065013  | -1.4706 | 0.141    | -0.205714444 | count | 1          |
| DGUOK      | -0.1457081 | 0.0642758 | -2.2669 | 0.0235   | -0.20557048  | count | 1          |
| MRPL41     | -0.1448037 | 0.0554217 | -2.6128 | 0.00902  | -0.205356575 | count | 1          |
| LSM5       | -0.145765  | 0.0618507 | -2.3567 | 0.0185   | -0.205267792 | count | 1          |
| TMOD1      | -0.1519916 | 0.1035212 | -1.4682 | 0.142    | -0.205189667 | count | 1          |
| DDX47      | -0.4647221 | 0.5639724 | -0.824  | 0.41     | -0.205185834 | count | 1          |
| CKS2       | -0.2010131 | 0.2869799 | -0.7004 | 0.484    | -0.205064365 | count | 1          |
| AL162426.1 | -0.6598313 | 0.6400637 | -1.0309 | 0.303    | -0.205026184 | count | 1          |
| GAPLINC    | -0.4642347 | 0.6775647 | -0.6852 | 0.493    | -0.204957499 | count | 1          |
| ATG3       | -0.1474653 | 0.080572  | -1.8302 | 0.0673   | -0.204955531 | count | 1          |
| SOCS6      | -0.1952182 | 0.212923  | -0.9168 | 0.359    | -0.204699345 | count | 1          |
| AC104986.2 | -0.2619071 | 0.2722669 | -0.962  | 0.336    | -0.204691619 | count | 1          |
| TMEM170B   | -0.325855  | 0.4312105 | -0.7557 | 0.45     | -0.204643322 | count | 1          |
| LIX1L-AS1  | -0.2356805 | 0.2806115 | -0.8399 | 0.401    | -0.204589505 | count | 1          |

|              |            |           |         |          |              |       |          |
|--------------|------------|-----------|---------|----------|--------------|-------|----------|
| MSN          | -0.1448312 | 0.062397  | -2.3211 | 0.0203   | -0.204563073 | count | 1        |
| PPCDC        | -0.198593  | 0.2257998 | -0.8795 | 0.379    | -0.204559936 | count | 1        |
| KARS         | -0.1523569 | 0.1394088 | -1.0929 | 0.275    | -0.204467844 | count | 1        |
| PHB2         | -0.1439899 | 0.0506927 | -2.8404 | 0.00453  | -0.2044664   | count | 1        |
| CCT6A        | -0.1444702 | 0.0582597 | -2.4798 | 0.0132   | -0.204450313 | count | 1        |
| FOXK2        | -0.1823945 | 0.1807584 | -1.0091 | 0.313    | -0.204420288 | count | 1        |
| INTS2        | -0.2354871 | 0.3174436 | -0.7418 | 0.458    | -0.204418168 | count | 1        |
| POLR1D       | -0.1449266 | 0.0621398 | -2.3323 | 0.0197   | -0.204337918 | count | 1        |
| NEK9         | -0.1804653 | 0.2124269 | -0.8495 | 0.396    | -0.204310601 | count | 1        |
| SEPHS1       | -0.1610961 | 0.1357358 | -1.1868 | 0.235    | -0.204266076 | count | 1        |
| JAG1         | -0.1445255 | 0.0749256 | -1.9289 | 0.0538   | -0.204241259 | count | 1        |
| LTN1         | -0.1509734 | 0.107664  | -1.4023 | 0.161    | -0.204172446 | count | 1        |
| CHMP2A       | -0.1432104 | 0.0433733 | -3.3018 | 0.001    | -0.204049791 | count | 1        |
| TOR4A        | -0.2117997 | 0.3650591 | -0.5802 | 0.562    | -0.203815335 | count | 1        |
| PLOD2        | -0.1514636 | 0.1243419 | -1.2181 | 0.223    | -0.203773936 | count | 1        |
| NUDC         | -0.1431434 | 0.0482346 | -2.9677 | 0.00302  | -0.203712217 | count | 1        |
| FBNP1        | -0.1495349 | 0.1200386 | -1.2457 | 0.213    | -0.20365367  | count | 1        |
| GGPS1        | -0.1530315 | 0.1117392 | -1.3695 | 0.171    | -0.203600136 | count | 1        |
| BATF         | -1.550417  | 0.6299792 | -2.4611 | 0.0139   | -0.203597787 | count | 1        |
| ZNF441       | -0.1732814 | 0.2103958 | -0.8236 | 0.41     | -0.203556474 | count | 1        |
| C10orf143    | -0.2345061 | 0.2763639 | -0.8485 | 0.396    | -0.203549167 | count | 1        |
| NBDY         | -0.1438546 | 0.0609015 | -2.3621 | 0.0182   | -0.203362668 | count | 1        |
| SNURF        | -0.373507  | 0.4326075 | -0.8634 | 0.388    | -0.203293702 | count | 1        |
| PCBD2        | -0.1973652 | 0.2202345 | -0.8962 | 0.37     | -0.203279286 | count | 1        |
| ZNF829       | -0.3456096 | 0.3975024 | -0.8695 | 0.385    | -0.203262719 | count | 1        |
| YIPF2        | -0.1465671 | 0.0838483 | -1.748  | 0.0805   | -0.203261855 | count | 1        |
| CCDC191      | -0.1728862 | 0.2559639 | -0.6754 | 0.499    | -0.203088854 | count | 1        |
| ATP9B        | -0.1661658 | 0.2345097 | -0.7086 | 0.479    | -0.203027259 | count | 1        |
| ATP5ME       | -0.1423911 | 0.045197  | -3.1505 | 0.0016   | -0.20289995  | count | 1        |
| DIRAS3       | -0.1684943 | 0.1896725 | -0.8883 | 0.374    | -0.202837041 | count | 1        |
| VWA1         | -0.1968561 | 0.2284762 | -0.8616 | 0.389    | -0.20274833  | count | 1        |
| H3F3A        | -0.140759  | 0.0228847 | -6.1508 | 8.54E-10 | -0.202552378 | count | 2.02E-05 |
| FAM162A      | -0.1428614 | 0.0598112 | -2.3885 | 0.017    | -0.20249465  | count | 1        |
| ECHS1        | -0.143112  | 0.0585296 | -2.4451 | 0.0145   | -0.202451517 | count | 1        |
| PCDHGB4      | -0.8806705 | 0.7048497 | -1.2494 | 0.212    | -0.202384849 | count | 1        |
| AC023509.2   | -0.8806705 | 0.7944324 | -1.1086 | 0.268    | -0.202384849 | count | 1        |
| HAS3         | -0.8806705 | 0.9544646 | -0.9227 | 0.356    | -0.202384849 | count | 1        |
| SLC4A5       | -0.8806705 | 1.089788  | -0.8081 | 0.419    | -0.202384849 | count | 1        |
| RAB51F       | -0.1496234 | 0.102939  | -1.4535 | 0.146    | -0.202272849 | count | 1        |
| SERAC1       | -0.1928917 | 0.2941084 | -0.6559 | 0.512    | -0.202231059 | count | 1        |
| AC036108.3   | -0.531601  | 0.6657354 | -0.7985 | 0.425    | -0.20198585  | count | 1        |
| KCTD16       | -0.531601  | 0.7472395 | -0.7114 | 0.477    | -0.20198585  | count | 1        |
| TRAPPC12-AS1 | -0.531601  | 0.7517583 | -0.7071 | 0.48     | -0.20198585  | count | 1        |
| PRR16        | -0.1767123 | 0.1755989 | -1.0063 | 0.314    | -0.201915442 | count | 1        |
| MARK4        | -0.1893568 | 0.2486    | -0.7617 | 0.446    | -0.201724869 | count | 1        |

|             |            |           |         |          |              |       |           |
|-------------|------------|-----------|---------|----------|--------------|-------|-----------|
| RAPGEF2     | -0.1716419 | 0.2168953 | -0.7914 | 0.429    | -0.201616615 | count | 1         |
| SYTL1       | -0.5305844 | 0.8366642 | -0.6342 | 0.526    | -0.201572351 | count | 1         |
| TMEM126B    | -0.145774  | 0.0907506 | -1.6063 | 0.108    | -0.201394623 | count | 1         |
| IQCJ-SCHIP1 | -0.2190289 | 0.3175326 | -0.6898 | 0.49     | -0.201326688 | count | 1         |
| FAM110C     | -0.5299507 | 0.782761  | -0.677  | 0.498    | -0.20131463  | count | 1         |
| HS3ST2      | -0.529518  | 0.7394404 | -0.7161 | 0.474    | -0.201138639 | count | 1         |
| KCNA5       | -0.1710394 | 0.1630242 | -1.0492 | 0.294    | -0.200903794 | count | 1         |
| LDHB        | -0.1405443 | 0.0384207 | -3.658  | 3.00E-04 | -0.200878179 | count | 1         |
| CUTA        | -0.1406663 | 0.0413249 | -3.4039 | 7.00E-04 | -0.200850344 | count | 1         |
| HNRNPA3     | -0.1409931 | 0.047343  | -2.9781 | 0.0029   | -0.200842247 | count | 1         |
| MALSU1      | -0.1455671 | 0.0955436 | -1.5236 | 0.128    | -0.200652255 | count | 1         |
| DDX11-AS1   | -0.8723258 | 0.7540047 | -1.1569 | 0.247    | -0.200287971 | count | 1         |
| MCF2L2      | -1.525008  | 0.9288422 | -1.6418 | 0.101    | -0.200183881 | count | 1         |
| KRBOX4      | -0.1698428 | 0.195693  | -0.8679 | 0.386    | -0.200176947 | count | 1         |
| RTL8B       | -0.1481258 | 0.1266272 | -1.1698 | 0.242    | -0.200103174 | count | 1         |
| NLK         | -0.453853  | 0.3596639 | -1.2619 | 0.207    | -0.200099189 | count | 1         |
| ATP5MPL     | -0.1408663 | 0.0475962 | -2.9596 | 0.0031   | -0.200093375 | count | 1         |
| RGP1        | -0.1656193 | 0.2396359 | -0.6911 | 0.49     | -0.19988841  | count | 1         |
| HAR1A       | -0.2482301 | 0.4042965 | -0.614  | 0.539    | -0.199846223 | count | 1         |
| OSTC        | -0.1404562 | 0.0486491 | -2.8871 | 0.00391  | -0.199836436 | count | 1         |
| ZNF581      | -0.1565273 | 0.1433967 | -1.0916 | 0.275    | -0.199749371 | count | 1         |
| TTC33       | -0.1546462 | 0.1344376 | -1.1503 | 0.25     | -0.199576529 | count | 1         |
| COX6C       | -0.1391041 | 0.0329382 | -4.2232 | 2.47E-05 | -0.199439353 | count | 0.5667168 |
| SLC25A6     | -0.1389574 | 0.0335558 | -4.1411 | 3.53E-05 | -0.199417149 | count | 0.8084759 |
| C12orf65    | -0.144073  | 0.0974989 | -1.4777 | 0.14     | -0.199309059 | count | 1         |
| SERINC5     | -0.1689889 | 0.3051679 | -0.5538 | 0.58     | -0.199163464 | count | 1         |
| AC008267.5  | -0.1855928 | 0.2482878 | -0.7475 | 0.455    | -0.199159759 | count | 1         |
| MAGI2       | -0.1501108 | 0.1446882 | -1.0375 | 0.3      | -0.199146279 | count | 1         |
| HADH        | -0.1462734 | 0.1038832 | -1.4081 | 0.159    | -0.199093538 | count | 1         |
| NMD3        | -0.1503211 | 0.1049884 | -1.4318 | 0.152    | -0.199072931 | count | 1         |
| AC015917.2  | -0.3383801 | 0.5321385 | -0.6359 | 0.525    | -0.198835129 | count | 1         |
| AL137802.2  | -0.4506367 | 0.4833184 | -0.9324 | 0.351    | -0.198596045 | count | 1         |
| MDP1        | -0.1909552 | 0.2775811 | -0.6879 | 0.492    | -0.198428217 | count | 1         |
| PCNP        | -0.1401425 | 0.0517311 | -2.7091 | 0.00678  | -0.198416524 | count | 1         |
| CEP57       | -0.1456382 | 0.096503  | -1.5092 | 0.131    | -0.198390727 | count | 1         |
| ROBO2       | -0.2033168 | 0.4204542 | -0.4836 | 0.629    | -0.198169874 | count | 1         |
| AL513548.1  | -0.3158867 | 0.6625822 | -0.4768 | 0.634    | -0.198149824 | count | 1         |
| GPN2        | -0.1660152 | 0.2291074 | -0.7246 | 0.469    | -0.198136876 | count | 1         |
| MAGED2      | -0.1386748 | 0.0433745 | -3.1971 | 0.0014   | -0.197982984 | count | 1         |
| PLEKHN1     | -0.8630606 | 0.9510174 | -0.9075 | 0.364    | -0.197961377 | count | 1         |
| PRKAR2A-AS1 | -0.8630606 | 0.9510174 | -0.9075 | 0.364    | -0.197961377 | count | 1         |
| AC008522.1  | -0.8630606 | 0.9510174 | -0.9075 | 0.364    | -0.197961377 | count | 1         |
| AL022318.1  | -0.8630606 | 0.9510174 | -0.9075 | 0.364    | -0.197961377 | count | 1         |
| HIST1H3E    | -0.8630606 | 0.9811823 | -0.8796 | 0.379    | -0.197961377 | count | 1         |
| TOP2A       | -0.8630606 | 0.9811823 | -0.8796 | 0.379    | -0.197961377 | count | 1         |

|            |            |           |         |          |              |       |            |
|------------|------------|-----------|---------|----------|--------------|-------|------------|
| SAMD5      | -0.2617624 | 0.6065759 | -0.4315 | 0.666    | -0.197619264 | count | 1          |
| RNF169     | -0.1497139 | 0.120842  | -1.2389 | 0.215    | -0.197518539 | count | 1          |
| AC012640.2 | -0.6367471 | 0.4597565 | -1.385  | 0.166    | -0.197268746 | count | 1          |
| AL357060.1 | -0.6367471 | 0.5321475 | -1.1966 | 0.232    | -0.197268746 | count | 1          |
| PTPN11     | -0.1412425 | 0.104148  | -1.3562 | 0.175    | -0.197239947 | count | 1          |
| SEC11A     | -0.1376152 | 0.0362364 | -3.7977 | 0.000148 | -0.197112853 | count | 1          |
| PEA15      | -0.1404193 | 0.0790942 | -1.7753 | 0.0759   | -0.197012148 | count | 1          |
| CNTRL      | -0.1577951 | 0.1652891 | -0.9547 | 0.34     | -0.197002235 | count | 1          |
| PRPF40B    | -0.1767062 | 0.2594526 | -0.6811 | 0.496    | -0.196915937 | count | 1          |
| ZRANB3     | -0.2967104 | 0.3568117 | -0.8316 | 0.406    | -0.196818506 | count | 1          |
| SNU13      | -0.1380912 | 0.0452073 | -3.0546 | 0.0023   | -0.196680531 | count | 1          |
| CHCHD2     | -0.1368348 | 0.0257554 | -5.3129 | 1.14E-07 | -0.1966449   | count | 0.00266874 |
| AMDHD2     | -0.1807052 | 0.2289218 | -0.7894 | 0.43     | -0.196583092 | count | 1          |
| ROCK1      | -0.1385491 | 0.0553271 | -2.5042 | 0.0123   | -0.196565078 | count | 1          |
| SRP14      | -0.1364505 | 0.0225596 | -6.0484 | 1.61E-09 | -0.196470132 | count | 3.80E-05   |
| RCOR2      | -0.3612671 | 0.6152741 | -0.5872 | 0.557    | -0.196327463 | count | 1          |
| ZNF121     | -0.166044  | 0.2481134 | -0.6692 | 0.503    | -0.19632235  | count | 1          |
| GPANK1     | -0.1471081 | 0.1252802 | -1.1742 | 0.24     | -0.196211535 | count | 1          |
| EIF3I      | -0.1382347 | 0.0504329 | -2.741  | 0.00616  | -0.196154485 | count | 1          |
| RTF2       | -0.1384476 | 0.0598904 | -2.3117 | 0.0209   | -0.195992523 | count | 1          |
| MIR133A1HG | -0.6326099 | 0.755268  | -0.8376 | 0.402    | -0.19588142  | count | 1          |
| FRMD8      | -0.2010023 | 0.2609912 | -0.7701 | 0.441    | -0.195881036 | count | 1          |
| PDHA1      | -0.1421956 | 0.0929164 | -1.5304 | 0.126    | -0.195792747 | count | 1          |
| SAP30L     | -0.1458171 | 0.1262666 | -1.1548 | 0.248    | -0.19575462  | count | 1          |
| PTGES3     | -0.1366357 | 0.0347282 | -3.9344 | 8.49E-05 | -0.195682425 | count | 1          |
| CYB5R1     | -0.1395483 | 0.0841881 | -1.6576 | 0.0975   | -0.195178791 | count | 1          |
| TMEM220    | -0.1448046 | 0.1090155 | -1.3283 | 0.184    | -0.19517609  | count | 1          |
| CYTH2      | -0.1424386 | 0.0892639 | -1.5957 | 0.111    | -0.195031292 | count | 1          |
| DNAJC7     | -0.1397731 | 0.0927737 | -1.5066 | 0.132    | -0.194975194 | count | 1          |
| AL391832.2 | -0.4428085 | 0.7537234 | -0.5875 | 0.557    | -0.194941628 | count | 1          |
| SH3BP4     | -0.2026092 | 0.2586356 | -0.7834 | 0.433    | -0.194838231 | count | 1          |
| COL4A5     | -0.1477227 | 0.191152  | -0.7728 | 0.44     | -0.194754746 | count | 1          |
| GOLGB1     | -0.1370814 | 0.0695108 | -1.9721 | 0.0487   | -0.194687213 | count | 1          |
| FLOT2      | -0.1613306 | 0.1789823 | -0.9014 | 0.367    | -0.194681161 | count | 1          |
| PHF7       | -0.1949371 | 0.3205918 | -0.6081 | 0.543    | -0.194564488 | count | 1          |
| 2-Mar      | -0.1390763 | 0.0716589 | -1.9408 | 0.0524   | -0.19456368  | count | 1          |
| AL139353.1 | -0.2677558 | 0.3821682 | -0.7006 | 0.484    | -0.194557123 | count | 1          |
| LINC01725  | -1.4833929 | 0.6610983 | -2.2438 | 0.0249   | -0.194554165 | count | 1          |
| TANK       | -0.1422686 | 0.0977747 | -1.4551 | 0.146    | -0.194389494 | count | 1          |
| PSMC3      | -0.1372851 | 0.0549777 | -2.4971 | 0.0126   | -0.194374204 | count | 1          |
| ZNF780A    | -0.2048085 | 0.2541631 | -0.8058 | 0.42     | -0.194173663 | count | 1          |
| NR3C2      | -0.1866696 | 0.2453921 | -0.7607 | 0.447    | -0.193922467 | count | 1          |
| AKNA       | -0.1782776 | 0.2896213 | -0.6156 | 0.538    | -0.193915941 | count | 1          |
| ARSD       | -0.1883373 | 0.2690407 | -0.7    | 0.484    | -0.193868251 | count | 1          |
| CEP95      | -0.1541413 | 0.1599109 | -0.9639 | 0.335    | -0.193691516 | count | 1          |

|               |            |           |         |          |              |       |            |
|---------------|------------|-----------|---------|----------|--------------|-------|------------|
| SDHAF1        | -0.147865  | 0.1515574 | -0.9756 | 0.329    | -0.193691378 | count | 1          |
| ECSIT         | -0.1466284 | 0.1175304 | -1.2476 | 0.212    | -0.193687186 | count | 1          |
| ENO2          | -0.1468025 | 0.1450259 | -1.0122 | 0.311    | -0.19366641  | count | 1          |
| IDI1          | -0.1422886 | 0.116758  | -1.2187 | 0.223    | -0.193659744 | count | 1          |
| MTHFD1L       | -0.144776  | 0.1443601 | -1.0029 | 0.316    | -0.19365926  | count | 1          |
| RIN2          | -0.1419742 | 0.1115182 | -1.2731 | 0.203    | -0.193646611 | count | 1          |
| NDC1          | -0.2341317 | 0.3039094 | -0.7704 | 0.441    | -0.193588752 | count | 1          |
| BTBD3         | -0.1817729 | 0.2410286 | -0.7542 | 0.451    | -0.193558907 | count | 1          |
| AL359644.1    | -0.4394544 | 0.5098083 | -0.862  | 0.389    | -0.193377602 | count | 1          |
| MDH1B         | -0.4394544 | 0.5726434 | -0.7674 | 0.443    | -0.193377602 | count | 1          |
| WRNIP1        | -0.1497123 | 0.1500865 | -0.9975 | 0.319    | -0.19318606  | count | 1          |
| AC010642.2    | -0.1484013 | 0.148772  | -0.9975 | 0.319    | -0.193126879 | count | 1          |
| FCGR2A        | -0.1688512 | 0.1663016 | -1.0153 | 0.31     | -0.19286149  | count | 1          |
| MFN2          | -0.1855434 | 0.2519515 | -0.7364 | 0.462    | -0.192738778 | count | 1          |
| C7orf31       | -0.2031399 | 0.3573871 | -0.5684 | 0.57     | -0.19256703  | count | 1          |
| ULBP2         | -0.8414778 | 0.6724141 | -1.2514 | 0.211    | -0.192548552 | count | 1          |
| RUBCNL        | -0.8414778 | 0.7324801 | -1.1488 | 0.251    | -0.192548552 | count | 1          |
| EML5          | -0.8414778 | 0.7324801 | -1.1488 | 0.251    | -0.192548552 | count | 1          |
| ZKSCAN5       | -0.2465944 | 0.3739118 | -0.6595 | 0.51     | -0.192429992 | count | 1          |
| NOL3          | -0.1401622 | 0.1044406 | -1.342  | 0.18     | -0.192282791 | count | 1          |
| NHS           | -0.1490036 | 0.2529079 | -0.5892 | 0.556    | -0.192268254 | count | 1          |
| AL391834.2    | -0.2760783 | 0.4343455 | -0.6356 | 0.525    | -0.192135483 | count | 1          |
| DYNLL1        | -0.1334666 | 0.0270359 | -4.9366 | 8.30E-07 | -0.192057879 | count | 0.01932489 |
| BECN1         | -0.1415108 | 0.1441018 | -0.982  | 0.326    | -0.191976571 | count | 1          |
| ZFAND1        | -0.137181  | 0.072366  | -1.8957 | 0.0581   | -0.191864564 | count | 1          |
| MICALL1       | -0.506647  | 0.5123818 | -0.9888 | 0.323    | -0.19185852  | count | 1          |
| FBXL15        | -0.1394762 | 0.1032324 | -1.3511 | 0.177    | -0.191831992 | count | 1          |
| CATSPER3      | -1.4632481 | 1.142382  | -1.2809 | 0.2      | -0.191812755 | count | 1          |
| JMJD7-PLA2G4B | -1.4632481 | 1.142382  | -1.2809 | 0.2      | -0.191812755 | count | 1          |
| RAB3B         | -1.4632481 | 1.21346   | -1.2058 | 0.228    | -0.191812755 | count | 1          |
| AL590714.1    | -1.4632481 | 1.21346   | -1.2058 | 0.228    | -0.191812755 | count | 1          |
| LINC00570     | -1.4632481 | 1.21346   | -1.2058 | 0.228    | -0.191812755 | count | 1          |
| ABCB6         | -1.4632481 | 1.21346   | -1.2058 | 0.228    | -0.191812755 | count | 1          |
| IL31RA        | -1.4632481 | 1.21346   | -1.2058 | 0.228    | -0.191812755 | count | 1          |
| LINC02542     | -1.4632481 | 1.21346   | -1.2058 | 0.228    | -0.191812755 | count | 1          |
| GIMAP8        | -1.4632481 | 1.21346   | -1.2058 | 0.228    | -0.191812755 | count | 1          |
| AC124242.1    | -1.4632481 | 1.21346   | -1.2058 | 0.228    | -0.191812755 | count | 1          |
| LAMC3         | -1.4632481 | 1.21346   | -1.2058 | 0.228    | -0.191812755 | count | 1          |
| AC022021.1    | -1.4632481 | 1.21346   | -1.2058 | 0.228    | -0.191812755 | count | 1          |
| RNASE6        | -1.4632481 | 1.21346   | -1.2058 | 0.228    | -0.191812755 | count | 1          |
| CHRNA5        | -1.4632481 | 1.21346   | -1.2058 | 0.228    | -0.191812755 | count | 1          |
| AC239799.2    | -1.4632481 | 1.404365  | -1.0419 | 0.298    | -0.191812755 | count | 1          |
| LINC01807     | -1.4632481 | 1.404365  | -1.0419 | 0.298    | -0.191812755 | count | 1          |
| LINC00471     | -1.4632481 | 1.404365  | -1.0419 | 0.298    | -0.191812755 | count | 1          |
| ESPNL         | -1.4632481 | 1.404365  | -1.0419 | 0.298    | -0.191812755 | count | 1          |

|            |            |           |         |          |              |       |   |
|------------|------------|-----------|---------|----------|--------------|-------|---|
| AC016257.1 | -1.4632481 | 1.404365  | -1.0419 | 0.298    | -0.191812755 | count | 1 |
| AC027682.4 | -1.4632481 | 1.404365  | -1.0419 | 0.298    | -0.191812755 | count | 1 |
| MOB2       | -0.1376837 | 0.0856726 | -1.6071 | 0.108    | -0.191778178 | count | 1 |
| AC024610.2 | -0.3054841 | 0.6349227 | -0.4811 | 0.63     | -0.191386877 | count | 1 |
| AURKAIP1   | -0.1346411 | 0.057196  | -2.354  | 0.0186   | -0.191345648 | count | 1 |
| MC1R       | -0.3519233 | 0.4966338 | -0.7086 | 0.479    | -0.191021168 | count | 1 |
| ICOSLG     | -0.8352343 | 0.7647497 | -1.0922 | 0.275    | -0.190984644 | count | 1 |
| ZKSCAN2    | -0.2744383 | 0.6994287 | -0.3924 | 0.695    | -0.190959168 | count | 1 |
| MZT2A      | -0.1356474 | 0.0711639 | -1.9061 | 0.0567   | -0.190695032 | count | 1 |
| APLF       | -0.2113242 | 0.4599977 | -0.4594 | 0.646    | -0.190663951 | count | 1 |
| CSPP1      | -0.1489999 | 0.1442202 | -1.0331 | 0.302    | -0.190569266 | count | 1 |
| COMMD7     | -0.1389779 | 0.0975145 | -1.4252 | 0.154    | -0.190453088 | count | 1 |
| RPA3       | -0.1386039 | 0.1001849 | -1.3835 | 0.167    | -0.190258944 | count | 1 |
| STEAP4     | -0.1407211 | 0.149657  | -0.9403 | 0.347    | -0.190146812 | count | 1 |
| REEP3      | -0.1347275 | 0.0636786 | -2.1157 | 0.0344   | -0.190098986 | count | 1 |
| TIMELESS   | -0.6146508 | 0.6127889 | -1.003  | 0.316    | -0.189870033 | count | 1 |
| DLGAP1     | -0.6146508 | 0.6687775 | -0.9191 | 0.358    | -0.189870033 | count | 1 |
| TFRC       | -0.1723253 | 0.2162276 | -0.797  | 0.426    | -0.189774976 | count | 1 |
| CFAP97     | -0.1335536 | 0.0541378 | -2.4669 | 0.0137   | -0.189745621 | count | 1 |
| ARNTL      | -0.613839  | 0.3761105 | -1.6321 | 0.103    | -0.189598708 | count | 1 |
| MAPKBP1    | -0.2510026 | 0.3194971 | -0.7856 | 0.432    | -0.189284407 | count | 1 |
| TJAP1      | -0.1635924 | 0.2809126 | -0.5824 | 0.56     | -0.189222558 | count | 1 |
| CC2D1A     | -0.1680483 | 0.2439964 | -0.6887 | 0.491    | -0.18918857  | count | 1 |
| SRSF4      | -0.1354567 | 0.0740726 | -1.8287 | 0.0675   | -0.189168616 | count | 1 |
| ARID4B     | -0.1344559 | 0.0640196 | -2.1002 | 0.0358   | -0.189150206 | count | 1 |
| ENAH       | -0.1339608 | 0.0732031 | -1.83   | 0.0673   | -0.189106314 | count | 1 |
| EI24       | -0.1353554 | 0.0748136 | -1.8092 | 0.0705   | -0.188910104 | count | 1 |
| ADGRL4     | -0.2715569 | 0.6104912 | -0.4448 | 0.656    | -0.18889331  | count | 1 |
| AC024940.1 | -0.6117198 | 0.5767808 | -1.0606 | 0.289    | -0.188890656 | count | 1 |
| DEF8       | -0.1385004 | 0.1066136 | -1.2991 | 0.194    | -0.188801532 | count | 1 |
| FAIM       | -0.1391752 | 0.1104638 | -1.2599 | 0.208    | -0.188683407 | count | 1 |
| MAP2K4     | -0.1496691 | 0.1677476 | -0.8922 | 0.372    | -0.188626596 | count | 1 |
| CLTA       | -0.1318498 | 0.0382252 | -3.4493 | 0.000568 | -0.188600751 | count | 1 |
| FANCB      | -0.2846366 | 0.4625454 | -0.6154 | 0.538    | -0.188546446 | count | 1 |
| LHFPL6     | -0.1316102 | 0.0379352 | -3.4693 | 0.000528 | -0.188492665 | count | 1 |
| MXD3       | -0.8249596 | 0.7070016 | -1.1668 | 0.243    | -0.188413003 | count | 1 |
| MACF1      | -0.1329277 | 0.07545   | -1.7618 | 0.0782   | -0.188357689 | count | 1 |
| PPIP5K1    | -0.4284739 | 0.3736412 | -1.1468 | 0.252    | -0.188264903 | count | 1 |
| TMEM256    | -0.1350763 | 0.074134  | -1.8221 | 0.0685   | -0.188199118 | count | 1 |
| ASB8       | -0.1378164 | 0.0922665 | -1.4937 | 0.135    | -0.188109714 | count | 1 |
| NDUFB4     | -0.1315183 | 0.0390656 | -3.3666 | 0.000769 | -0.188009428 | count | 1 |
| ZNF569     | -0.179295  | 0.2633635 | -0.6808 | 0.496    | -0.187818157 | count | 1 |
| MMEL1      | -1.4336875 | 1.032174  | -1.389  | 0.165    | -0.187772199 | count | 1 |
| TSTA3      | -0.1384978 | 0.125435  | -1.1041 | 0.27     | -0.187703387 | count | 1 |
| IMMP1L     | -0.1454482 | 0.1385734 | -1.0496 | 0.294    | -0.187664238 | count | 1 |



|              |            |           |         |          |              |       |   |
|--------------|------------|-----------|---------|----------|--------------|-------|---|
| SMIM12       | -0.137041  | 0.1051798 | -1.3029 | 0.193    | -0.187628786 | count | 1 |
| DDTL         | -0.2333842 | 0.3918879 | -0.5955 | 0.552    | -0.187623233 | count | 1 |
| GNG7         | -0.2333484 | 0.2543375 | -0.9175 | 0.359    | -0.187593796 | count | 1 |
| NDUFA6       | -0.1328156 | 0.0597312 | -2.2236 | 0.0262   | -0.187567063 | count | 1 |
| SNHG10       | -0.2213863 | 0.2349597 | -0.9422 | 0.346    | -0.18754182  | count | 1 |
| TPI1         | -0.1308193 | 0.0358846 | -3.6456 | 0.000271 | -0.187460425 | count | 1 |
| HDGF         | -0.1339331 | 0.0804856 | -1.6641 | 0.0962   | -0.187447889 | count | 1 |
| TADA3        | -0.1344309 | 0.0734294 | -1.8308 | 0.0672   | -0.187280229 | count | 1 |
| SLC24A1      | -0.3793213 | 0.5077839 | -0.747  | 0.455    | -0.187241518 | count | 1 |
| C6orf163     | -0.4949957 | 0.7030941 | -0.704  | 0.481    | -0.187146633 | count | 1 |
| ARHGEF37     | -0.2480929 | 0.3617116 | -0.6859 | 0.493    | -0.187033211 | count | 1 |
| VDAC2        | -0.1307807 | 0.0410199 | -3.1882 | 0.00144  | -0.1869738   | count | 1 |
| GRK3         | -0.1972758 | 0.6644751 | -0.2969 | 0.767    | -0.186923562 | count | 1 |
| MRPL13       | -0.1334293 | 0.0718917 | -1.856  | 0.0635   | -0.186811777 | count | 1 |
| UBAP2L       | -0.1447606 | 0.1595885 | -0.9071 | 0.364    | -0.186580638 | count | 1 |
| CHD4         | -0.1348172 | 0.0911227 | -1.4795 | 0.139    | -0.18654198  | count | 1 |
| ZNF329       | -0.2152762 | 0.3273388 | -0.6577 | 0.511    | -0.186540817 | count | 1 |
| TAGAP        | -0.8170701 | 0.7533153 | -1.0846 | 0.278    | -0.186440115 | count | 1 |
| TSC22D1-AS1  | -0.3177643 | 0.4615438 | -0.6885 | 0.491    | -0.186244512 | count | 1 |
| SKA2         | -0.1361286 | 0.1177656 | -1.1559 | 0.248    | -0.185940661 | count | 1 |
| SRSF8        | -0.1346839 | 0.0869706 | -1.5486 | 0.122    | -0.185906559 | count | 1 |
| SLC25A21-AS1 | -0.1651093 | 0.2122799 | -0.7778 | 0.437    | -0.185852369 | count | 1 |
| PCDHGB3      | -0.3427903 | 0.8202017 | -0.4179 | 0.676    | -0.185844496 | count | 1 |
| BTLA         | -1.4190992 | 0.4875451 | -2.9107 | 0.00363  | -0.185770792 | count | 1 |
| RTRAF        | -0.1304569 | 0.0424873 | -3.0705 | 0.00215  | -0.185738267 | count | 1 |
| SNAP47       | -0.1474812 | 0.1532444 | -0.9624 | 0.336    | -0.185574574 | count | 1 |
| CYP26B1      | -0.1905104 | 0.3544479 | -0.5375 | 0.591    | -0.185514016 | count | 1 |
| ARPC1B       | -0.1307958 | 0.0650535 | -2.0106 | 0.0444   | -0.185249597 | count | 1 |
| FILIP1L      | -0.1290216 | 0.0544775 | -2.3683 | 0.0179   | -0.185226631 | count | 1 |
| RCAN3        | -0.1877709 | 0.3503634 | -0.5359 | 0.592    | -0.18512322  | count | 1 |
| NT5C2        | -0.1576824 | 0.2100669 | -0.7506 | 0.453    | -0.185109412 | count | 1 |
| KIAA1211L    | -0.8114852 | 0.7695692 | -1.0545 | 0.292    | -0.185044485 | count | 1 |
| EIF5A2       | -0.1477513 | 0.1659099 | -0.8906 | 0.373    | -0.185029281 | count | 1 |
| ESF1         | -0.1325651 | 0.0968698 | -1.3685 | 0.171    | -0.184944468 | count | 1 |
| ARSB         | -0.1737176 | 0.3113003 | -0.558  | 0.577    | -0.184892489 | count | 1 |
| AIMP1        | -0.1317161 | 0.0703599 | -1.872  | 0.0613   | -0.184860972 | count | 1 |
| AC239800.3   | -0.1922508 | 0.2888474 | -0.6656 | 0.506    | -0.184733294 | count | 1 |
| TPR          | -0.1297466 | 0.0605268 | -2.1436 | 0.0321   | -0.184575081 | count | 1 |
| SNRPD1       | -0.1310451 | 0.0640778 | -2.0451 | 0.0409   | -0.184189402 | count | 1 |
| FAAP20       | -0.131489  | 0.0802265 | -1.639  | 0.101    | -0.184146485 | count | 1 |
| ZNF134       | -0.1867763 | 0.2847662 | -0.6559 | 0.512    | -0.184129486 | count | 1 |
| CCSER2       | -0.1302956 | 0.065536  | -1.9882 | 0.0469   | -0.184125824 | count | 1 |
| SLC23A3      | -0.4874905 | 0.6754914 | -0.7217 | 0.471    | -0.184117277 | count | 1 |
| AC004754.1   | -0.4874905 | 0.7997646 | -0.6095 | 0.542    | -0.184117277 | count | 1 |
| GNB1         | -0.1316651 | 0.0798838 | -1.6482 | 0.0994   | -0.183931534 | count | 1 |

|              |            |           |         |          |              |       |             |
|--------------|------------|-----------|---------|----------|--------------|-------|-------------|
| TFAP2A       | -0.1770368 | 0.2692584 | -0.6575 | 0.511    | -0.183802743 | count | 1           |
| INTS6-AS1    | -0.1822705 | 0.3584915 | -0.5084 | 0.611    | -0.183786928 | count | 1           |
| PLAGL2       | -0.2532791 | 0.3392234 | -0.7466 | 0.455    | -0.183750074 | count | 1           |
| KTN1         | -0.1283879 | 0.042789  | -3.0005 | 0.00271  | -0.183743486 | count | 1           |
| NEDD8        | -0.1283295 | 0.0346553 | -3.703  | 0.000216 | -0.183736149 | count | 1           |
| NEMP2        | -0.2169015 | 0.3189745 | -0.68   | 0.497    | -0.183666733 | count | 1           |
| RNF185       | -0.1569185 | 0.2206596 | -0.7111 | 0.477    | -0.183549159 | count | 1           |
| ARMC2        | -0.2283772 | 0.3212792 | -0.7108 | 0.477    | -0.183507739 | count | 1           |
| AC091057.3   | -0.3718536 | 0.8291607 | -0.4485 | 0.654    | -0.183371675 | count | 1           |
| SLC25A23     | -0.1460154 | 0.1483817 | -0.9841 | 0.325    | -0.183144143 | count | 1           |
| TBC1D10B     | -0.1494343 | 0.2427693 | -0.6155 | 0.538    | -0.182889699 | count | 1           |
| FXN          | -0.1473273 | 0.2361737 | -0.6238 | 0.533    | -0.18288709  | count | 1           |
| PLEKHG3      | -0.14907   | 0.2542052 | -0.5864 | 0.558    | -0.182843354 | count | 1           |
| HCG27        | -1.397447  | 0.6726476 | -2.0775 | 0.0378   | -0.182791821 | count | 1           |
| AC004982.1   | -1.397447  | 1.013931  | -1.3782 | 0.168    | -0.182791821 | count | 1           |
| TNFRSF14-AS1 | -1.397447  | 1.122316  | -1.2451 | 0.2132   | -0.182791821 | count | 1           |
| LINC00624    | -1.397447  | 1.122316  | -1.2451 | 0.2132   | -0.182791821 | count | 1           |
| RPUSD4       | -0.1760475 | 0.1937151 | -0.9088 | 0.364    | -0.182764055 | count | 1           |
| MYO5A        | -0.1760449 | 0.2670084 | -0.6593 | 0.51     | -0.182761326 | count | 1           |
| LRP5L        | -0.3371049 | 0.5865995 | -0.5747 | 0.566    | -0.182626995 | count | 1           |
| AC073896.2   | -0.2419676 | 0.3090966 | -0.7828 | 0.434    | -0.182298017 | count | 1           |
| LINC00941    | -0.5915379 | 0.6901257 | -0.8571 | 0.391    | -0.182160594 | count | 1           |
| ZNF248       | -0.1443327 | 0.1801825 | -0.801  | 0.423    | -0.182143936 | count | 1           |
| NCOA4        | -0.1327703 | 0.0930624 | -1.4267 | 0.154    | -0.181893428 | count | 1           |
| LNPEP        | -0.1353125 | 0.109514  | -1.2356 | 0.217    | -0.181850606 | count | 1           |
| ZNF485       | -0.2333482 | 0.3364676 | -0.6935 | 0.488    | -0.181849148 | count | 1           |
| CENPX        | -0.1293309 | 0.0720766 | -1.7944 | 0.0728   | -0.1818283   | count | 1           |
| RTL6         | -0.1822994 | 0.2944498 | -0.6191 | 0.536    | -0.181790449 | count | 1           |
| SHOX2        | -0.1419624 | 0.1979154 | -0.7173 | 0.473    | -0.181749898 | count | 1           |
| PET100       | -0.13138   | 0.0797272 | -1.6479 | 0.0995   | -0.181647742 | count | 1           |
| SERPINB9P1   | -0.1890743 | 0.433248  | -0.4364 | 0.663    | -0.181637306 | count | 1           |
| TMEM167A     | -0.1285522 | 0.0642368 | -2.0012 | 0.0454   | -0.181602387 | count | 1           |
| DNAJC3-DT    | -0.1946661 | 0.2958111 | -0.6581 | 0.511    | -0.181581585 | count | 1           |
| POLD2        | -0.132465  | 0.0884561 | -1.4975 | 0.134    | -0.18122987  | count | 1           |
| SCAND1       | -0.1271801 | 0.0504338 | -2.5217 | 0.0117   | -0.18117762  | count | 1           |
| ZNF275       | -0.1885538 | 0.3383797 | -0.5572 | 0.577    | -0.181130123 | count | 1           |
| GSTP1        | -0.1256216 | 0.0238976 | -5.2567 | 1.55E-07 | -0.180889338 | count | 0.003626225 |
| UQCRHL       | -0.4125701 | 0.4087771 | -1.0093 | 0.313    | -0.180880671 | count | 1           |
| GNL3L        | -0.1756425 | 0.2261412 | -0.7767 | 0.437    | -0.180651123 | count | 1           |
| YRDC         | -0.1414998 | 0.1864286 | -0.759  | 0.448    | -0.180499962 | count | 1           |
| SOCS7        | -0.20842   | 0.2978834 | -0.6997 | 0.484    | -0.180488908 | count | 1           |
| IRF9         | -0.1362035 | 0.1703865 | -0.7994 | 0.424    | -0.180436722 | count | 1           |
| PUS3         | -0.1483462 | 0.1677407 | -0.8844 | 0.377    | -0.180289041 | count | 1           |
| ACTR1B       | -0.1381633 | 0.1166067 | -1.1849 | 0.236    | -0.180222942 | count | 1           |
| KCTD10       | -0.1344716 | 0.1336966 | -1.0058 | 0.315    | -0.18001158  | count | 1           |

|            |            |           |         |        |              |       |   |
|------------|------------|-----------|---------|--------|--------------|-------|---|
| ETS1       | -0.1381913 | 0.1359933 | -1.0162 | 0.31   | -0.179954354 | count | 1 |
| ASCC3      | -0.1317833 | 0.1070858 | -1.2306 | 0.219  | -0.179815761 | count | 1 |
| HIP1       | -0.1314284 | 0.1172918 | -1.1205 | 0.263  | -0.179809412 | count | 1 |
| APEX1      | -0.1276119 | 0.0675993 | -1.8878 | 0.0591 | -0.179788031 | count | 1 |
| AC109347.2 | -1.3754758 | 0.8585304 | -1.6021 | 0.109  | -0.179759343 | count | 1 |
| SLA        | -1.3754758 | 0.8933086 | -1.5398 | 0.124  | -0.179759343 | count | 1 |
| SOX5       | -0.1416089 | 0.1526052 | -0.9279 | 0.353  | -0.179704517 | count | 1 |
| HIPK2      | -0.1462088 | 0.1962295 | -0.7451 | 0.456  | -0.179700818 | count | 1 |
| CD44       | -0.1277868 | 0.0768483 | -1.6628 | 0.0964 | -0.179694688 | count | 1 |
| AL035563.1 | -0.4764045 | 0.4106329 | -1.1602 | 0.246  | -0.179651088 | count | 1 |
| ZNHIT6     | -0.1330996 | 0.1198083 | -1.1109 | 0.267  | -0.179634847 | count | 1 |
| SCAMP1-AS1 | -0.1630456 | 0.2786592 | -0.5851 | 0.559  | -0.179465197 | count | 1 |
| SERPINH1   | -0.1276778 | 0.0647498 | -1.9719 | 0.0487 | -0.17938176  | count | 1 |
| CCDC117    | -0.1555744 | 0.1996145 | -0.7794 | 0.436  | -0.179141748 | count | 1 |
| AC007365.1 | -0.2167753 | 0.5003728 | -0.4332 | 0.665  | -0.178942558 | count | 1 |
| SLC2A12    | -0.1917968 | 0.3162852 | -0.6064 | 0.544  | -0.178864005 | count | 1 |
| MECP2      | -0.1314586 | 0.1117923 | -1.1759 | 0.24   | -0.178843987 | count | 1 |
| BRAF       | -0.1369575 | 0.1688985 | -0.8109 | 0.417  | -0.178793005 | count | 1 |
| SHISAL2A   | -0.7860745 | 0.6924101 | -1.1353 | 0.256  | -0.178705218 | count | 1 |
| TMEM178A   | -0.7860745 | 0.9607565 | -0.8182 | 0.413  | -0.178705218 | count | 1 |
| ZNF197     | -0.1772908 | 0.2912829 | -0.6087 | 0.543  | -0.178704633 | count | 1 |
| AC084018.2 | -0.2464943 | 0.5467818 | -0.4508 | 0.652  | -0.178695139 | count | 1 |
| ACVR1      | -0.1461476 | 0.1874171 | -0.7798 | 0.436  | -0.178442381 | count | 1 |
| RPS6KC1    | -0.1513057 | 0.2189445 | -0.6911 | 0.49   | -0.178190069 | count | 1 |
| YTHDF3-AS1 | -0.2694615 | 0.477914  | -0.5638 | 0.573  | -0.178177307 | count | 1 |
| HSBP1L1    | -0.1389938 | 0.2159366 | -0.6437 | 0.52   | -0.178142308 | count | 1 |
| CENPV      | -0.1411544 | 0.2118203 | -0.6664 | 0.505  | -0.178116518 | count | 1 |
| MYL5       | -0.1713861 | 0.239621  | -0.7152 | 0.475  | -0.177871555 | count | 1 |
| MARVELD1   | -0.1302991 | 0.0942181 | -1.383  | 0.167  | -0.177832315 | count | 1 |
| LZTS1      | -0.2212766 | 0.3397252 | -0.6513 | 0.515  | -0.17767744  | count | 1 |
| AL590560.2 | -0.7814466 | 0.6679444 | -1.1699 | 0.242  | -0.177552674 | count | 1 |
| SULT2B1    | -0.4711403 | 0.5719015 | -0.8238 | 0.41   | -0.177533873 | count | 1 |
| CDK5RAP2   | -0.1296162 | 0.1038434 | -1.2482 | 0.212  | -0.177407408 | count | 1 |
| TXNL4A     | -0.1255922 | 0.0607309 | -2.068  | 0.0387 | -0.177312634 | count | 1 |
| ARMCX2     | -0.1415745 | 0.1247905 | -1.1345 | 0.257  | -0.177260495 | count | 1 |
| URI1       | -0.1278381 | 0.0796988 | -1.604  | 0.109  | -0.177142279 | count | 1 |
| BCS1L      | -0.141817  | 0.1645364 | -0.8619 | 0.389  | -0.176966022 | count | 1 |
| EIF4A2     | -0.1236804 | 0.0393369 | -3.1441 | 0.0017 | -0.176816447 | count | 1 |
| AC009404.1 | -0.5749262 | 0.6707797 | -0.8571 | 0.391  | -0.176639422 | count | 1 |
| ANP32A     | -0.1261149 | 0.0776145 | -1.6249 | 0.104  | -0.17662646  | count | 1 |
| RFESD      | -0.254395  | 0.3187114 | -0.7982 | 0.425  | -0.176612476 | count | 1 |
| P3H4       | -0.1377942 | 0.1546167 | -0.8912 | 0.373  | -0.176599317 | count | 1 |
| SNAPC5     | -0.1300055 | 0.1025478 | -1.2678 | 0.205  | -0.176555519 | count | 1 |
| TRIM69     | -0.1354302 | 0.1216714 | -1.1131 | 0.266  | -0.176498577 | count | 1 |
| AL441992.1 | -0.26697   | 0.6943367 | -0.3845 | 0.701  | -0.176477864 | count | 1 |

|            |            |           |         |          |              |       |   |
|------------|------------|-----------|---------|----------|--------------|-------|---|
| HLA-F      | -0.1275575 | 0.084523  | -1.5091 | 0.131    | -0.176356128 | count | 1 |
| RBMX       | -0.1255487 | 0.0627188 | -2.0018 | 0.0454   | -0.176347231 | count | 1 |
| FNIP2      | -0.1378399 | 0.1806637 | -0.763  | 0.446    | -0.176243896 | count | 1 |
| AC105760.2 | -0.2819886 | 0.354861  | -0.7946 | 0.427    | -0.176163792 | count | 1 |
| ZNF2       | -0.2819886 | 0.3563387 | -0.7913 | 0.429    | -0.176163792 | count | 1 |
| OXCT1      | -0.1357677 | 0.1269751 | -1.0692 | 0.285    | -0.176158855 | count | 1 |
| MED28      | -0.1298998 | 0.0921938 | -1.409  | 0.159    | -0.176141234 | count | 1 |
| PDCD5      | -0.1235638 | 0.0506008 | -2.4419 | 0.0147   | -0.175942936 | count | 1 |
| ARHGEF25   | -0.132103  | 0.1493234 | -0.8847 | 0.376    | -0.175877814 | count | 1 |
| ADCK1      | -0.4013167 | 0.4982782 | -0.8054 | 0.421    | -0.175670875 | count | 1 |
| NDUFB11    | -0.1228028 | 0.0408483 | -3.0063 | 0.00266  | -0.175625416 | count | 1 |
| SLC7A11    | -1.3448701 | 1.076167  | -1.2497 | 0.211    | -0.175520047 | count | 1 |
| SPRY4-AS1  | -1.3448701 | 1.076167  | -1.2497 | 0.211    | -0.175520047 | count | 1 |
| NOS3       | -1.3448701 | 1.076167  | -1.2497 | 0.211    | -0.175520047 | count | 1 |
| AL135744.1 | -1.3448701 | 1.076167  | -1.2497 | 0.211    | -0.175520047 | count | 1 |
| PAGR1      | -1.3448701 | 1.076167  | -1.2497 | 0.211    | -0.175520047 | count | 1 |
| DOC2B      | -1.3448701 | 1.076167  | -1.2497 | 0.211    | -0.175520047 | count | 1 |
| VWA3B      | -1.3448701 | 1.127783  | -1.1925 | 0.233    | -0.175520047 | count | 1 |
| RGMB-AS1   | -1.3448701 | 1.127783  | -1.1925 | 0.233    | -0.175520047 | count | 1 |
| KLHL32     | -1.3448701 | 1.127783  | -1.1925 | 0.233    | -0.175520047 | count | 1 |
| ARFGEF3    | -1.3448701 | 1.127783  | -1.1925 | 0.233    | -0.175520047 | count | 1 |
| BX649632.1 | -1.3448701 | 1.127783  | -1.1925 | 0.233    | -0.175520047 | count | 1 |
| AC124798.1 | -1.3448701 | 1.127783  | -1.1925 | 0.233    | -0.175520047 | count | 1 |
| FAM53B-AS1 | -1.3448701 | 1.127783  | -1.1925 | 0.233    | -0.175520047 | count | 1 |
| SSTR1      | -1.3448701 | 1.127783  | -1.1925 | 0.233    | -0.175520047 | count | 1 |
| AC090510.2 | -1.3448701 | 1.127783  | -1.1925 | 0.233    | -0.175520047 | count | 1 |
| AC105020.1 | -1.3448701 | 1.127783  | -1.1925 | 0.233    | -0.175520047 | count | 1 |
| AC074050.4 | -1.3448701 | 1.127783  | -1.1925 | 0.233    | -0.175520047 | count | 1 |
| AP005264.1 | -1.3448701 | 1.127783  | -1.1925 | 0.233    | -0.175520047 | count | 1 |
| AL512408.1 | -1.3448701 | 1.286614  | -1.0453 | 0.296    | -0.175520047 | count | 1 |
| CLMAT3     | -1.3448701 | 1.286614  | -1.0453 | 0.296    | -0.175520047 | count | 1 |
| AL031775.2 | -1.3448701 | 1.286614  | -1.0453 | 0.296    | -0.175520047 | count | 1 |
| TSGA13     | -1.3448701 | 1.286614  | -1.0453 | 0.296    | -0.175520047 | count | 1 |
| TRPV6      | -1.3448701 | 1.286614  | -1.0453 | 0.296    | -0.175520047 | count | 1 |
| RBM14-RBM4 | -1.3448701 | 1.286614  | -1.0453 | 0.296    | -0.175520047 | count | 1 |
| TMEM253    | -1.3448701 | 1.286614  | -1.0453 | 0.296    | -0.175520047 | count | 1 |
| AC015845.2 | -1.3448701 | 1.286614  | -1.0453 | 0.296    | -0.175520047 | count | 1 |
| APC2       | -1.3448701 | 1.286614  | -1.0453 | 0.296    | -0.175520047 | count | 1 |
| CCDC91     | -0.1281648 | 0.0963023 | -1.3309 | 0.183    | -0.175496759 | count | 1 |
| SLC39A1    | -0.1245241 | 0.0599779 | -2.0762 | 0.0379   | -0.175352298 | count | 1 |
| RRP9       | -0.1558317 | 0.1990085 | -0.783  | 0.434    | -0.175326739 | count | 1 |
| HAT1       | -0.1273677 | 0.0916255 | -1.3901 | 0.165    | -0.175316633 | count | 1 |
| ATP11C     | -0.14354   | 0.2114039 | -0.679  | 0.497    | -0.175242229 | count | 1 |
| BICD2      | -0.1378637 | 0.1564319 | -0.8813 | 0.378    | -0.175167833 | count | 1 |
| HNRNPA1    | -0.1220748 | 0.0347483 | -3.5131 | 0.000448 | -0.174843799 | count | 1 |

|               |            |           |         |          |              |       |   |
|---------------|------------|-----------|---------|----------|--------------|-------|---|
| PRPS2         | -0.1405239 | 0.1720285 | -0.8169 | 0.414    | -0.174724254 | count | 1 |
| MTO1          | -0.1443955 | 0.199177  | -0.725  | 0.469    | -0.174588295 | count | 1 |
| STON1-GTF2A1L | -0.7695184 | 0.8756485 | -0.8788 | 0.38     | -0.174584977 | count | 1 |
| TTC23L        | -0.7695184 | 0.8756485 | -0.8788 | 0.38     | -0.174584977 | count | 1 |
| AC026691.1    | -0.7695184 | 0.8756485 | -0.8788 | 0.38     | -0.174584977 | count | 1 |
| OTUD6A        | -0.7695184 | 0.8756485 | -0.8788 | 0.38     | -0.174584977 | count | 1 |
| PTK6          | -0.7695184 | 0.8756485 | -0.8788 | 0.38     | -0.174584977 | count | 1 |
| CAPN12        | -0.7695184 | 0.8756485 | -0.8788 | 0.38     | -0.174584977 | count | 1 |
| PASK          | -0.7695184 | 0.9079758 | -0.8475 | 0.397    | -0.174584977 | count | 1 |
| FOCAD-AS1     | -0.7695184 | 0.9079758 | -0.8475 | 0.397    | -0.174584977 | count | 1 |
| AC005944.1    | -0.7695184 | 0.9079758 | -0.8475 | 0.397    | -0.174584977 | count | 1 |
| AC093525.7    | -0.7695184 | 1.0382103 | -0.7412 | 0.459    | -0.174584977 | count | 1 |
| RUNDC3B       | -0.7695184 | 1.106138  | -0.6957 | 0.487    | -0.174584977 | count | 1 |
| IL1R2         | -0.7695184 | 1.238815  | -0.6212 | 0.535    | -0.174584977 | count | 1 |
| ZBED3-AS1     | -0.4629092 | 0.4875951 | -0.9494 | 0.342    | -0.174228161 | count | 1 |
| GPRC5C        | -0.1259735 | 0.0949202 | -1.3272 | 0.185    | -0.174214784 | count | 1 |
| URGCP         | -0.1416824 | 0.1883642 | -0.7522 | 0.452    | -0.17411039  | count | 1 |
| DCBLD1        | -0.1708623 | 0.2853446 | -0.5988 | 0.549    | -0.173956747 | count | 1 |
| AL031963.3    | -0.2784923 | 0.3631015 | -0.767  | 0.443    | -0.173904751 | count | 1 |
| LRRC75A       | -0.1278557 | 0.1115346 | -1.1463 | 0.252    | -0.173834856 | count | 1 |
| STUB1         | -0.1224033 | 0.0530588 | -2.3069 | 0.0211   | -0.173667421 | count | 1 |
| BBC3          | -0.1351565 | 0.1716206 | -0.7875 | 0.431    | -0.173598592 | count | 1 |
| CD274         | -0.7653857 | 0.4938488 | -1.5498 | 0.121    | -0.173557813 | count | 1 |
| CTNNBL1       | -0.1310025 | 0.1134622 | -1.1546 | 0.248    | -0.173425042 | count | 1 |
| TLL12         | -0.2965202 | 0.340666  | -0.8704 | 0.384    | -0.17332623  | count | 1 |
| GBE1          | -0.1342292 | 0.1396698 | -0.961  | 0.337    | -0.173317594 | count | 1 |
| HCN3          | -1.328581  | 0.7472257 | -1.778  | 0.0755   | -0.173257199 | count | 1 |
| ATP6V1F       | -0.1218286 | 0.0495087 | -2.4608 | 0.0139   | -0.173231524 | count | 1 |
| ZNF277        | -0.1412517 | 0.1430843 | -0.9872 | 0.324    | -0.17320654  | count | 1 |
| SLC39A3       | -0.1290795 | 0.1150988 | -1.1215 | 0.262    | -0.173163487 | count | 1 |
| RAP2C-AS1     | -0.1668837 | 0.315787  | -0.5285 | 0.597    | -0.173148424 | count | 1 |
| CIRBP         | -0.1206678 | 0.03096   | -3.8975 | 9.89E-05 | -0.173144759 | count | 1 |
| MOCS1         | -0.1700678 | 0.2348506 | -0.7242 | 0.469    | -0.173138541 | count | 1 |
| EIF4E2        | -0.126178  | 0.0924411 | -1.365  | 0.172    | -0.173070678 | count | 1 |
| ZSCAN32       | -0.1522277 | 0.2602435 | -0.5849 | 0.559    | -0.172932857 | count | 1 |
| LHFPL2        | -0.141619  | 0.2114692 | -0.6697 | 0.503    | -0.172885047 | count | 1 |
| GPRASP1       | -0.1544673 | 0.2933026 | -0.5266 | 0.598    | -0.172873549 | count | 1 |
| GTDC1         | -0.1440664 | 0.2013336 | -0.7156 | 0.474    | -0.17278959  | count | 1 |
| TIFA          | -0.1322015 | 0.1428512 | -0.9254 | 0.355    | -0.172706488 | count | 1 |
| MCU           | -0.1476167 | 0.2436806 | -0.6058 | 0.545    | -0.172598305 | count | 1 |
| PANK1         | -0.2611595 | 0.426572  | -0.6122 | 0.54     | -0.172517861 | count | 1 |
| ZNF213-AS1    | -0.16779   | 0.3230988 | -0.5193 | 0.604    | -0.172485332 | count | 1 |
| TMEM88        | -0.5621739 | 0.9304922 | -0.6042 | 0.546    | -0.172412617 | count | 1 |
| MDM2          | -0.126763  | 0.1221369 | -1.0379 | 0.299    | -0.172396053 | count | 1 |
| CERK          | -0.145377  | 0.1699042 | -0.8556 | 0.392    | -0.172295902 | count | 1 |

|            |            |           |         |          |              |       |             |
|------------|------------|-----------|---------|----------|--------------|-------|-------------|
| ZNF667     | -0.1794759 | 0.2889589 | -0.6211 | 0.535    | -0.172290247 | count | 1           |
| AATF       | -0.1338288 | 0.1396756 | -0.9581 | 0.338    | -0.172261654 | count | 1           |
| COG5       | -0.1466285 | 0.1743101 | -0.8412 | 0.4      | -0.172050658 | count | 1           |
| NMI        | -0.1315442 | 0.1470436 | -0.8946 | 0.371    | -0.171983002 | count | 1           |
| SARAF      | -0.1203628 | 0.0391495 | -3.0744 | 0.0021   | -0.171917325 | count | 1           |
| TERF2      | -0.138955  | 0.1574008 | -0.8828 | 0.377    | -0.171789298 | count | 1           |
| NUTM2A-AS1 | -0.1390705 | 0.190391  | -0.7304 | 0.465    | -0.171591872 | count | 1           |
| ESCO2      | -1.3156184 | 0.976409  | -1.3474 | 0.178    | -0.17145351  | count | 1           |
| AC137936.1 | -1.3156184 | 0.9837325 | -1.3374 | 0.181    | -0.17145351  | count | 1           |
| KLHL8      | -0.1901475 | 0.2495387 | -0.762  | 0.446    | -0.171250122 | count | 1           |
| LPGAT1     | -0.1266249 | 0.1181973 | -1.0713 | 0.284    | -0.171183456 | count | 1           |
| PSME3      | -0.148573  | 0.189967  | -0.7821 | 0.434    | -0.171023614 | count | 1           |
| TIMM9      | -0.1273964 | 0.1117639 | -1.1399 | 0.254    | -0.1709744   | count | 1           |
| MRPL54     | -0.121267  | 0.0671348 | -1.8063 | 0.071    | -0.170874227 | count | 1           |
| MPP2       | -0.2020581 | 0.3697764 | -0.5464 | 0.585    | -0.170861398 | count | 1           |
| ZNF839     | -0.1662036 | 0.3344679 | -0.4969 | 0.619    | -0.170836565 | count | 1           |
| RAB27A     | -0.1371416 | 0.170038  | -0.8065 | 0.42     | -0.170500146 | count | 1           |
| LINC01184  | -0.1299024 | 0.1530713 | -0.8486 | 0.396    | -0.170354199 | count | 1           |
| HMGCL      | -0.1259794 | 0.118854  | -1.06   | 0.289    | -0.170129711 | count | 1           |
| MZB1       | -1.3060137 | 0.7532807 | -1.7338 | 0.083    | -0.170115407 | count | 1           |
| TARSL2     | -0.1288488 | 0.1673694 | -0.7698 | 0.441    | -0.169692672 | count | 1           |
| AC105285.1 | -0.7495924 | 0.8465222 | -0.8855 | 0.376    | -0.16963749  | count | 1           |
| KIAA0232   | -0.1236624 | 0.0909962 | -1.359  | 0.174    | -0.169615234 | count | 1           |
| PPP1R21    | -0.1356944 | 0.1701384 | -0.7976 | 0.425    | -0.169583435 | count | 1           |
| MEF2A      | -0.1204689 | 0.073286  | -1.6438 | 0.1      | -0.16947733  | count | 1           |
| PPP1CA     | -0.1224238 | 0.085368  | -1.4341 | 0.152    | -0.16939772  | count | 1           |
| NDRG3      | -0.1284472 | 0.1441718 | -0.8909 | 0.373    | -0.169389435 | count | 1           |
| PDCD2      | -0.1227657 | 0.0844826 | -1.4531 | 0.146    | -0.169296701 | count | 1           |
| TNFSF12    | -0.1188382 | 0.047639  | -2.4946 | 0.0127   | -0.169085982 | count | 1           |
| LINC00476  | -0.1481068 | 0.228823  | -0.6473 | 0.518    | -0.168998478 | count | 1           |
| RPL14      | -0.117157  | 0.0206407 | -5.676  | 1.49E-08 | -0.168844065 | count | 0.000350269 |
| EIF4E      | -0.1228029 | 0.0905308 | -1.3565 | 0.175    | -0.168772802 | count | 1           |
| ADPRHL1    | -0.4490699 | 0.4938053 | -0.9094 | 0.363    | -0.168683266 | count | 1           |
| AC005229.4 | -0.1755194 | 0.2729715 | -0.643  | 0.52     | -0.168440915 | count | 1           |
| VPS4A      | -0.1253373 | 0.1045752 | -1.1985 | 0.231    | -0.168417639 | count | 1           |
| SACS       | -0.1254487 | 0.186964  | -0.671  | 0.502    | -0.168355072 | count | 1           |
| TMC3-AS1   | -0.3852462 | 0.6409887 | -0.601  | 0.548    | -0.168253435 | count | 1           |
| C1QL1      | -0.3852462 | 0.8986874 | -0.4287 | 0.668    | -0.168253435 | count | 1           |
| GSDMD      | -0.1229828 | 0.0943285 | -1.3038 | 0.192    | -0.16815912  | count | 1           |
| EBPL       | -0.1208852 | 0.0762611 | -1.5851 | 0.113    | -0.1680133   | count | 1           |
| TYRO3      | -0.1941666 | 0.3939149 | -0.4929 | 0.622    | -0.167928586 | count | 1           |
| ADPRHL2    | -0.1273211 | 0.1309072 | -0.9726 | 0.331    | -0.167900569 | count | 1           |
| AC011447.3 | -0.2542954 | 0.450892  | -0.564  | 0.573    | -0.167845856 | count | 1           |
| CADM1      | -0.1774105 | 0.4271942 | -0.4153 | 0.678    | -0.167839494 | count | 1           |
| RAB5C      | -0.1188493 | 0.0561993 | -2.1148 | 0.0345   | -0.167681286 | count | 1           |

|            |            |           |         |          |              |       |             |
|------------|------------|-----------|---------|----------|--------------|-------|-------------|
| AGBL5      | -0.2090426 | 0.3525925 | -0.5929 | 0.553    | -0.167648991 | count | 1           |
| MAN1B1     | -0.1262215 | 0.1532501 | -0.8236 | 0.41     | -0.167474936 | count | 1           |
| CLASP2     | -0.1272702 | 0.1966557 | -0.6472 | 0.518    | -0.167376701 | count | 1           |
| UBR5-AS1   | -0.1796025 | 0.5057286 | -0.3551 | 0.723    | -0.167326928 | count | 1           |
| MLF2       | -0.118295  | 0.0564729 | -2.0947 | 0.0363   | -0.167320243 | count | 1           |
| BRWD1-AS2  | -0.7398526 | 0.8084057 | -0.9152 | 0.36     | -0.167223934 | count | 1           |
| FOXD2-AS1  | -0.2085066 | 0.5788153 | -0.3602 | 0.719    | -0.167210115 | count | 1           |
| NOP10      | -0.1176405 | 0.0523629 | -2.2466 | 0.0247   | -0.167196828 | count | 1           |
| MXD4       | -0.1193803 | 0.0769459 | -1.5515 | 0.121    | -0.167088426 | count | 1           |
| AC006480.2 | -0.222242  | 0.518066  | -0.429  | 0.668    | -0.167085109 | count | 1           |
| ENDOD1     | -0.1205342 | 0.0896362 | -1.3447 | 0.179    | -0.167010075 | count | 1           |
| RAI1       | -0.17403   | 0.4371998 | -0.3981 | 0.691    | -0.166992398 | count | 1           |
| TIMM13     | -0.1196971 | 0.0710917 | -1.6837 | 0.0923   | -0.166849261 | count | 1           |
| SLAIN1     | -0.1623194 | 0.3851196 | -0.4215 | 0.673    | -0.166800975 | count | 1           |
| ACTG2      | -0.117648  | 0.1083686 | -1.0856 | 0.278    | -0.166794324 | count | 1           |
| SRM        | -0.1183138 | 0.0591885 | -1.9989 | 0.0457   | -0.166791887 | count | 1           |
| EIF2A      | -0.1183006 | 0.0630654 | -1.8758 | 0.0608   | -0.166582639 | count | 1           |
| LINC01985  | -1.279442  | 0.665292  | -1.9231 | 0.0545   | -0.166406817 | count | 1           |
| FTH1       | -0.1153687 | 0.021836  | -5.2834 | 1.34E-07 | -0.166385307 | count | 0.003136002 |
| ATRX       | -0.1170809 | 0.0609461 | -1.9211 | 0.0548   | -0.166131279 | count | 1           |
| NSF        | -0.1420485 | 0.2304032 | -0.6165 | 0.538    | -0.166046838 | count | 1           |
| PLXNA1     | -0.1460463 | 0.2434242 | -0.6    | 0.549    | -0.165859889 | count | 1           |
| SART1      | -0.1343901 | 0.1608657 | -0.8354 | 0.404    | -0.165790619 | count | 1           |
| COMMD1     | -0.1177088 | 0.072927  | -1.6141 | 0.107    | -0.16578816  | count | 1           |
| ISCU       | -0.1154151 | 0.0332971 | -3.4662 | 0.000534 | -0.165517192 | count | 1           |
| GOLGA8N    | -0.2199488 | 0.3096855 | -0.7102 | 0.478    | -0.165320168 | count | 1           |
| TWF2       | -0.1201291 | 0.0981105 | -1.2244 | 0.221    | -0.165279708 | count | 1           |
| DCTPP1     | -0.1232562 | 0.1106009 | -1.1144 | 0.265    | -0.165263399 | count | 1           |
| ZSCAN30    | -0.141312  | 0.231218  | -0.6112 | 0.541    | -0.165180502 | count | 1           |
| CTGF       | -0.1146092 | 0.0543483 | -2.1088 | 0.035    | -0.165118698 | count | 1           |
| LRRC73     | -0.3364645 | 0.6096671 | -0.5519 | 0.581    | -0.165118316 | count | 1           |
| PNPLA4     | -0.1352709 | 0.1723994 | -0.7846 | 0.433    | -0.165097655 | count | 1           |
| ERP29      | -0.1159056 | 0.0476421 | -2.4328 | 0.015    | -0.165066552 | count | 1           |
| BLMH       | -0.1427722 | 0.174571  | -0.8178 | 0.413    | -0.164982305 | count | 1           |
| ATF7       | -0.1225404 | 0.1182836 | -1.036  | 0.3      | -0.16491831  | count | 1           |
| RRP36      | -0.1207778 | 0.1053881 | -1.146  | 0.252    | -0.164733593 | count | 1           |
| TRAPPC3    | -0.1179821 | 0.0751722 | -1.5695 | 0.117    | -0.164503689 | count | 1           |
| COL5A1     | -0.1210717 | 0.1509253 | -0.8022 | 0.422    | -0.16450022  | count | 1           |
| CPSF2      | -0.1291448 | 0.1525632 | -0.8465 | 0.397    | -0.164476886 | count | 1           |
| UQCR10     | -0.1155432 | 0.0464133 | -2.4894 | 0.0128   | -0.164220822 | count | 1           |
| ADAMTS9    | -0.1792431 | 0.3603594 | -0.4974 | 0.619    | -0.164218762 | count | 1           |
| NTRK3      | -0.1219206 | 0.1390566 | -0.8768 | 0.381    | -0.164147008 | count | 1           |
| MYH7B      | -1.26276   | 0.7452815 | -1.6943 | 0.0903   | -0.164073992 | count | 1           |
| MTPN       | -0.1151095 | 0.0501438 | -2.2956 | 0.0218   | -0.164001749 | count | 1           |
| SARS2      | -0.2630682 | 0.3807298 | -0.691  | 0.49     | -0.163958745 | count | 1           |

|            |            |           |         |          |              |       |           |
|------------|------------|-----------|---------|----------|--------------|-------|-----------|
| VPS29      | -0.1151359 | 0.0482326 | -2.3871 | 0.017    | -0.163821415 | count | 1         |
| PSMG4      | -0.1195633 | 0.0960801 | -1.2444 | 0.213    | -0.163738217 | count | 1         |
| ELOF1      | -0.1203574 | 0.0984359 | -1.2227 | 0.222    | -0.163670327 | count | 1         |
| VAT1L      | -0.1486976 | 0.3014806 | -0.4932 | 0.622    | -0.16354302  | count | 1         |
| JUP        | -0.1338614 | 0.1915995 | -0.6987 | 0.485    | -0.163369024 | count | 1         |
| AL365356.5 | -0.4352834 | 0.6207034 | -0.7013 | 0.483    | -0.163176332 | count | 1         |
| CLNS1A     | -0.1167613 | 0.0706884 | -1.6518 | 0.0987   | -0.163161931 | count | 1         |
| NAA16      | -0.1356721 | 0.1850882 | -0.733  | 0.464    | -0.163119336 | count | 1         |
| 1-Mar      | -0.1979051 | 0.3085075 | -0.6415 | 0.521    | -0.163067304 | count | 1         |
| SAMD12     | -0.2471853 | 0.3909789 | -0.6322 | 0.527    | -0.163013397 | count | 1         |
| AC120053.1 | -1.2542062 | 0.8028973 | -1.5621 | 0.118    | -0.162876509 | count | 1         |
| AC010531.6 | -1.2542062 | 0.9188955 | -1.3649 | 0.172    | -0.162876509 | count | 1         |
| NKAIN2     | -1.2542062 | 0.9587684 | -1.3081 | 0.191    | -0.162876509 | count | 1         |
| SELPLG     | -1.2542062 | 1.055102  | -1.1887 | 0.235    | -0.162876509 | count | 1         |
| MARF1      | -0.1290697 | 0.1721887 | -0.7496 | 0.454    | -0.162809475 | count | 1         |
| CTU1       | -0.1357586 | 0.1886997 | -0.7194 | 0.472    | -0.162771961 | count | 1         |
| GPR157     | -0.2349561 | 0.4446556 | -0.5284 | 0.597    | -0.162752109 | count | 1         |
| TRAPPC12   | -0.1242931 | 0.1378003 | -0.902  | 0.367    | -0.162731436 | count | 1         |
| HIRIP3     | -0.1217388 | 0.120208  | -1.0127 | 0.311    | -0.162624067 | count | 1         |
| ILF2       | -0.1154124 | 0.0631465 | -1.8277 | 0.0677   | -0.162559313 | count | 1         |
| AP000487.1 | -0.2786683 | 0.6301781 | -0.4422 | 0.658    | -0.16251616  | count | 1         |
| HGS        | -0.1270394 | 0.1733486 | -0.7329 | 0.464    | -0.162387335 | count | 1         |
| DMWD       | -0.1234072 | 0.1756776 | -0.7025 | 0.482    | -0.162168466 | count | 1         |
| CCDC6      | -0.1164335 | 0.0883207 | -1.3183 | 0.187    | -0.161946132 | count | 1         |
| MMP24OS    | -0.1143512 | 0.0555871 | -2.0572 | 0.0397   | -0.161804927 | count | 1         |
| MAP3K13    | -0.117278  | 0.0992905 | -1.1812 | 0.238    | -0.161554391 | count | 1         |
| CLPP       | -0.1162413 | 0.0813271 | -1.4293 | 0.153    | -0.161552425 | count | 1         |
| USF2       | -0.1169655 | 0.0878795 | -1.331  | 0.183    | -0.161497446 | count | 1         |
| NADK2      | -0.1339643 | 0.2026024 | -0.6612 | 0.509    | -0.161489306 | count | 1         |
| PITHD1     | -0.1167426 | 0.0816156 | -1.4304 | 0.153    | -0.16145793  | count | 1         |
| GNAS       | -0.1121294 | 0.023598  | -4.7516 | 2.10E-06 | -0.161424684 | count | 0.0487032 |
| AC245297.2 | -0.2990067 | 0.4402037 | -0.6792 | 0.497    | -0.161168596 | count | 1         |
| LRP4       | -0.2326258 | 0.6575831 | -0.3538 | 0.724    | -0.161094189 | count | 1         |
| DIO2       | -0.1256854 | 0.1607294 | -0.782  | 0.434    | -0.160841741 | count | 1         |
| TYMP       | -0.1186444 | 0.0957185 | -1.2395 | 0.215    | -0.160750969 | count | 1         |
| ITPA       | -0.1187469 | 0.1043449 | -1.138  | 0.255    | -0.160732329 | count | 1         |
| SPRYD4     | -0.1331624 | 0.1833902 | -0.7261 | 0.468    | -0.160517657 | count | 1         |
| NOMO1      | -0.169677  | 0.3993112 | -0.4249 | 0.671    | -0.160424546 | count | 1         |
| NEURL2     | -0.156082  | 0.3149946 | -0.4955 | 0.62     | -0.160324412 | count | 1         |
| SRPK1      | -0.1191807 | 0.1162329 | -1.0254 | 0.305    | -0.160259974 | count | 1         |
| NIPSNAP3A  | -0.1183698 | 0.1231216 | -0.9614 | 0.336    | -0.160221012 | count | 1         |
| PTTG1IP    | -0.1122853 | 0.0530435 | -2.1169 | 0.0343   | -0.160182502 | count | 1         |
| NUDT4      | -0.1166431 | 0.0939832 | -1.2411 | 0.215    | -0.160170458 | count | 1         |
| DOK5       | -0.1180906 | 0.1526985 | -0.7734 | 0.439    | -0.159947568 | count | 1         |
| CHAF1A     | -0.5240936 | 0.3554432 | -1.4745 | 0.14     | -0.159854016 | count | 1         |



|            |            |           |         |          |              |       |           |
|------------|------------|-----------|---------|----------|--------------|-------|-----------|
| C8orf59    | -0.1124263 | 0.0503595 | -2.2325 | 0.0256   | -0.15979485  | count | 1         |
| PFN2       | -0.1117274 | 0.0638031 | -1.7511 | 0.08     | -0.159757959 | count | 1         |
| RBM17      | -0.1146722 | 0.0773648 | -1.4822 | 0.138    | -0.159744178 | count | 1         |
| CRTAP      | -0.1123243 | 0.0495333 | -2.2677 | 0.0234   | -0.159695297 | count | 1         |
| ELOVL1     | -0.1173224 | 0.1118449 | -1.049  | 0.294    | -0.159626871 | count | 1         |
| NKAPL      | -0.1263641 | 0.2418967 | -0.5224 | 0.601    | -0.159617124 | count | 1         |
| CINP       | -0.1184074 | 0.1087849 | -1.0885 | 0.276    | -0.159531424 | count | 1         |
| GPR161     | -0.1398559 | 0.2347393 | -0.5958 | 0.551    | -0.159519224 | count | 1         |
| AC007405.3 | -0.2123228 | 0.3392542 | -0.6259 | 0.531    | -0.159456401 | count | 1         |
| TRAPPC2L   | -0.1132315 | 0.0742385 | -1.5252 | 0.127    | -0.159337855 | count | 1         |
| FBXW11     | -0.1166859 | 0.122976  | -0.9489 | 0.343    | -0.159305237 | count | 1         |
| AC072061.1 | -0.2416607 | 0.5664958 | -0.4266 | 0.67     | -0.159263485 | count | 1         |
| CNTN1      | -0.1597968 | 0.3886212 | -0.4112 | 0.681    | -0.159095313 | count | 1         |
| THSD7B     | -1.226768  | 0.6161278 | -1.9911 | 0.0465   | -0.159030398 | count | 1         |
| ZNF182     | -0.1596664 | 0.428794  | -0.3724 | 0.71     | -0.158963986 | count | 1         |
| NDOR1      | -0.424501  | 0.4989618 | -0.8508 | 0.395    | -0.158881342 | count | 1         |
| AC092069.1 | -0.1412434 | 0.2222987 | -0.6354 | 0.525    | -0.158794215 | count | 1         |
| NAGK       | -0.1149141 | 0.0904288 | -1.2708 | 0.204    | -0.158784417 | count | 1         |
| TP53RK     | -0.1170172 | 0.1280116 | -0.9141 | 0.361    | -0.158742829 | count | 1         |
| ACOT13     | -0.1161288 | 0.1121672 | -1.0353 | 0.301    | -0.15866021  | count | 1         |
| MYH14      | -1.2239959 | 0.7783247 | -1.5726 | 0.116    | -0.158641356 | count | 1         |
| CD3EAP     | -0.1877382 | 0.2524021 | -0.7438 | 0.457    | -0.158537527 | count | 1         |
| GEMIN2     | -0.1479982 | 0.2121842 | -0.6975 | 0.486    | -0.15846455  | count | 1         |
| NAP1L3     | -0.1289763 | 0.1664448 | -0.7749 | 0.438    | -0.158425969 | count | 1         |
| PHACTR4    | -0.1211064 | 0.1697505 | -0.7134 | 0.476    | -0.158299849 | count | 1         |
| NAA20      | -0.1129792 | 0.0670043 | -1.6861 | 0.0919   | -0.158293926 | count | 1         |
| ZNF143     | -0.1226573 | 0.1640807 | -0.7475 | 0.455    | -0.158004413 | count | 1         |
| ZNF879     | -0.2395576 | 0.4234718 | -0.5657 | 0.572    | -0.157837121 | count | 1         |
| AC130466.1 | -0.7016829 | 0.4896784 | -1.4329 | 0.152    | -0.157797943 | count | 1         |
| HEYL       | -0.1340861 | 0.2405312 | -0.5575 | 0.577    | -0.157793894 | count | 1         |
| RSF1       | -0.1110493 | 0.0570898 | -1.9452 | 0.0518   | -0.157787179 | count | 1         |
| TMSB15B    | -0.2101467 | 0.3804118 | -0.5524 | 0.581    | -0.157784726 | count | 1         |
| CDC37      | -0.1115477 | 0.0609975 | -1.8287 | 0.0675   | -0.157704645 | count | 1         |
| AC092802.1 | -0.5174467 | 0.7544197 | -0.6859 | 0.493    | -0.157672029 | count | 1         |
| INE2       | -0.5174467 | 0.7774493 | -0.6656 | 0.506    | -0.157672029 | count | 1         |
| DKKL1      | -0.5174467 | 0.7780733 | -0.665  | 0.506    | -0.157672029 | count | 1         |
| AC018362.2 | -0.5174467 | 0.8736317 | -0.5923 | 0.554    | -0.157672029 | count | 1         |
| JPT2       | -0.1293774 | 0.2079202 | -0.6222 | 0.534    | -0.157502946 | count | 1         |
| EIF4ENIF1  | -0.1367231 | 0.1789948 | -0.7638 | 0.445    | -0.15729471  | count | 1         |
| ATG16L2    | -0.1367231 | 0.2080448 | -0.6572 | 0.511    | -0.15729471  | count | 1         |
| NME3       | -0.110148  | 0.0431351 | -2.5536 | 0.0107   | -0.157246317 | count | 1         |
| PANX1      | -0.156074  | 0.2386504 | -0.654  | 0.513    | -0.157085896 | count | 1         |
| DNAJC9     | -0.1244843 | 0.1323432 | -0.9406 | 0.347    | -0.157004008 | count | 1         |
| PEBP1      | -0.1090362 | 0.025713  | -4.2405 | 2.29E-05 | -0.156847539 | count | 0.5257611 |
| CYP39A1    | -0.1857269 | 0.3344966 | -0.5552 | 0.579    | -0.156808965 | count | 1         |

|                |            |           |         |        |              |       |   |
|----------------|------------|-----------|---------|--------|--------------|-------|---|
| TOMM22         | -0.1118807 | 0.0660738 | -1.6933 | 0.0905 | -0.156753645 | count | 1 |
| SWI5           | -0.114256  | 0.0893819 | -1.2783 | 0.201  | -0.156630081 | count | 1 |
| CYP17A1-AS1    | -0.2516    | 0.3926303 | -0.6409 | 0.522  | -0.156579212 | count | 1 |
| LRRC4B         | -0.2514635 | 0.4351197 | -0.5779 | 0.563  | -0.15649729  | count | 1 |
| BAIAP3         | -0.513288  | 0.9542624 | -0.5379 | 0.591  | -0.156308426 | count | 1 |
| AC010894.2     | -0.513288  | 0.9792892 | -0.5241 | 0.6    | -0.156308426 | count | 1 |
| PRDX2          | -0.1093207 | 0.0371524 | -2.9425 | 0.0033 | -0.156307692 | count | 1 |
| GMCL1          | -0.1211156 | 0.1264482 | -0.9578 | 0.338  | -0.156174744 | count | 1 |
| REXO4          | -0.1227894 | 0.1798127 | -0.6829 | 0.495  | -0.156153786 | count | 1 |
| PPP1R1C        | -0.2508305 | 0.4210882 | -0.5957 | 0.551  | -0.156090826 | count | 1 |
| MTG1           | -0.2008294 | 0.3809922 | -0.5271 | 0.598  | -0.155979792 | count | 1 |
| BCL2L11        | -0.1703095 | 0.2479315 | -0.6869 | 0.492  | -0.155916354 | count | 1 |
| OSBPL11        | -0.147861  | 0.2687107 | -0.5503 | 0.582  | -0.155881315 | count | 1 |
| POLR2H         | -0.1141786 | 0.101143  | -1.1289 | 0.259  | -0.155838224 | count | 1 |
| CKS1B          | -0.1122161 | 0.0991192 | -1.1321 | 0.258  | -0.155825645 | count | 1 |
| ZNF559         | -0.1386051 | 0.2255767 | -0.6144 | 0.539  | -0.155806718 | count | 1 |
| PROB1          | -0.6931799 | 0.7269151 | -0.9536 | 0.34   | -0.155705619 | count | 1 |
| AC079807.1     | -0.6931799 | 0.7786779 | -0.8902 | 0.373  | -0.155705619 | count | 1 |
| CDYL2          | -0.6931799 | 0.8414805 | -0.8238 | 0.41   | -0.155705619 | count | 1 |
| TRDN           | -0.6931799 | 0.9059977 | -0.7651 | 0.444  | -0.155705619 | count | 1 |
| ZNF416         | -0.2073792 | 0.3737616 | -0.5548 | 0.579  | -0.155659755 | count | 1 |
| COPE           | -0.1095187 | 0.0473219 | -2.3143 | 0.0207 | -0.155654924 | count | 1 |
| SPICE1         | -0.1476163 | 0.2196602 | -0.672  | 0.502  | -0.155620935 | count | 1 |
| AL392172.1     | -0.158163  | 0.3109989 | -0.5086 | 0.611  | -0.155595896 | count | 1 |
| SUPT5H         | -0.1199527 | 0.1679621 | -0.7142 | 0.475  | -0.155580381 | count | 1 |
| PALM2-AKAP2    | -0.215346  | 0.5188791 | -0.415  | 0.678  | -0.155572769 | count | 1 |
| FPR1           | -0.2671577 | 0.888796  | -0.3006 | 0.764  | -0.155568603 | count | 1 |
| MANBAL         | -0.112125  | 0.0850029 | -1.3191 | 0.187  | -0.155566499 | count | 1 |
| GZMK           | -0.3176938 | 0.8013269 | -0.3965 | 0.692  | -0.155495947 | count | 1 |
| PRRT3-AS1      | -0.2070885 | 0.3846089 | -0.5384 | 0.59   | -0.155436611 | count | 1 |
| CAP2           | -0.1121832 | 0.1002989 | -1.1185 | 0.263  | -0.15542686  | count | 1 |
| PGAP1          | -0.1513074 | 0.2510995 | -0.6026 | 0.547  | -0.155370057 | count | 1 |
| SLC7A2         | -0.1188512 | 0.1274266 | -0.9327 | 0.351  | -0.155344221 | count | 1 |
| ROCK2          | -0.1098576 | 0.0588518 | -1.8667 | 0.062  | -0.155195539 | count | 1 |
| GPBP1L1        | -0.1168531 | 0.133238  | -0.877  | 0.381  | -0.155192848 | count | 1 |
| IL33           | -0.1105583 | 0.0745604 | -1.4828 | 0.138  | -0.155183749 | count | 1 |
| COA5           | -0.1122839 | 0.0927348 | -1.2108 | 0.226  | -0.155145988 | count | 1 |
| DHDDS          | -0.124973  | 0.1762248 | -0.7092 | 0.478  | -0.155023537 | count | 1 |
| C17orf75       | -0.1247073 | 0.1740925 | -0.7163 | 0.474  | -0.154978408 | count | 1 |
| FRMD4B         | -0.1159102 | 0.2013582 | -0.5756 | 0.565  | -0.154896664 | count | 1 |
| ZNF776         | -0.2351254 | 0.397546  | -0.5914 | 0.554  | -0.154833201 | count | 1 |
| AC240274.1     | -0.1399637 | 0.2845555 | -0.4919 | 0.623  | -0.154782899 | count | 1 |
| PSMD7          | -0.1094767 | 0.0599554 | -1.826  | 0.0679 | -0.154759569 | count | 1 |
| HTATIP2        | -0.1155863 | 0.0960821 | -1.203  | 0.229  | -0.154751728 | count | 1 |
| ZNF816-ZNF321P | -0.2657452 | 0.3736924 | -0.7111 | 0.477  | -0.154717283 | count | 1 |

|            |            |           |         |         |              |       |   |
|------------|------------|-----------|---------|---------|--------------|-------|---|
| NELFE      | -0.1117266 | 0.0892249 | -1.2522 | 0.211   | -0.154709807 | count | 1 |
| UBE2N      | -0.1104131 | 0.067364  | -1.6391 | 0.101   | -0.154618935 | count | 1 |
| EIF1AX     | -0.1090029 | 0.0499206 | -2.1835 | 0.0291  | -0.154603519 | count | 1 |
| PPFIBP1    | -0.109311  | 0.0669051 | -1.6338 | 0.102   | -0.154596573 | count | 1 |
| AC103736.1 | -0.5080082 | 0.5117279 | -0.9927 | 0.321   | -0.154578969 | count | 1 |
| ASB16-AS1  | -0.178968  | 0.2897074 | -0.6178 | 0.537   | -0.154567308 | count | 1 |
| DYNC1LI1   | -0.1112574 | 0.0757488 | -1.4688 | 0.142   | -0.154565706 | count | 1 |
| NOL7       | -0.1082927 | 0.0471227 | -2.2981 | 0.0216  | -0.154545147 | count | 1 |
| HIST1H2BJ  | -0.2058691 | 0.4753114 | -0.4331 | 0.665   | -0.154500738 | count | 1 |
| PCSK7      | -0.1131341 | 0.1463361 | -0.7731 | 0.44    | -0.154449131 | count | 1 |
| SUDS3      | -0.1111734 | 0.0931428 | -1.1936 | 0.233   | -0.15437629  | count | 1 |
| PCDHGB6    | -0.1517824 | 0.2546428 | -0.5961 | 0.551   | -0.154329611 | count | 1 |
| AC112220.4 | -0.6868515 | 0.8225449 | -0.835  | 0.404   | -0.154150274 | count | 1 |
| PCDHGA4    | -0.6868515 | 0.8225449 | -0.835  | 0.404   | -0.154150274 | count | 1 |
| PROM1      | -0.6868515 | 0.9219685 | -0.745  | 0.456   | -0.154150274 | count | 1 |
| CARD9      | -0.6868515 | 0.9774949 | -0.7027 | 0.482   | -0.154150274 | count | 1 |
| EMILIN3    | -0.6868515 | 1.068788  | -0.6426 | 0.52    | -0.154150274 | count | 1 |
| GREB1L     | -0.1784782 | 0.608579  | -0.2933 | 0.769   | -0.154137273 | count | 1 |
| ZBTB49     | -0.2053402 | 0.352952  | -0.5818 | 0.561   | -0.154094878 | count | 1 |
| AP003486.1 | -0.506142  | 0.4363585 | -1.1599 | 0.246   | -0.153968156 | count | 1 |
| UBE2G1     | -0.1160572 | 0.1199826 | -0.9673 | 0.333   | -0.153958774 | count | 1 |
| POLR3GL    | -0.1102701 | 0.0787861 | -1.3996 | 0.162   | -0.153952117 | count | 1 |
| B4GALT7    | -0.1172445 | 0.1294817 | -0.9055 | 0.365   | -0.1539392   | count | 1 |
| ACP6       | -0.1681491 | 0.280067  | -0.6004 | 0.548   | -0.153910285 | count | 1 |
| HOMER2     | -0.1779538 | 0.4862029 | -0.366  | 0.714   | -0.153676902 | count | 1 |
| ZNF511     | -0.1120311 | 0.0972862 | -1.1516 | 0.25    | -0.153672862 | count | 1 |
| PCGF1      | -0.1278207 | 0.2112641 | -0.605  | 0.545   | -0.153632044 | count | 1 |
| ZDHHC20    | -0.1210369 | 0.1811258 | -0.6682 | 0.504   | -0.153508585 | count | 1 |
| ARF1       | -0.1071562 | 0.0351523 | -3.0483 | 0.00232 | -0.153429818 | count | 1 |
| TTC32      | -0.1195761 | 0.1354143 | -0.883  | 0.377   | -0.153352449 | count | 1 |
| NENF       | -0.106937  | 0.0345993 | -3.0907 | 0.00201 | -0.153301389 | count | 1 |
| KIF13A     | -0.1112199 | 0.1200299 | -0.9266 | 0.354   | -0.153252275 | count | 1 |
| TMEM242    | -0.1107472 | 0.0915938 | -1.2091 | 0.227   | -0.153245236 | count | 1 |
| NARFL      | -0.1326286 | 0.2125749 | -0.6239 | 0.533   | -0.153187842 | count | 1 |
| GNG11      | -0.1080837 | 0.0541417 | -1.9963 | 0.046   | -0.153075337 | count | 1 |
| TIAM2      | -0.1734576 | 0.454238  | -0.3819 | 0.703   | -0.152963142 | count | 1 |
| BCL2L2     | -0.120125  | 0.2486773 | -0.4831 | 0.629   | -0.152951054 | count | 1 |
| AL451007.2 | -0.5029448 | 0.7175362 | -0.7009 | 0.483   | -0.152922284 | count | 1 |
| LINC01612  | -0.5029448 | 0.7175362 | -0.7009 | 0.483   | -0.152922284 | count | 1 |
| CHRM2      | -0.5029448 | 0.7175362 | -0.7009 | 0.483   | -0.152922284 | count | 1 |
| ARX        | -0.5029448 | 0.7175362 | -0.7009 | 0.483   | -0.152922284 | count | 1 |
| MKI67      | -0.5029448 | 0.7175362 | -0.7009 | 0.483   | -0.152922284 | count | 1 |
| C1QTNF8    | -0.5029448 | 0.7175362 | -0.7009 | 0.483   | -0.152922284 | count | 1 |
| PITPNM3    | -0.5029448 | 0.7175362 | -0.7009 | 0.483   | -0.152922284 | count | 1 |
| ICAM5      | -0.5029448 | 0.7175362 | -0.7009 | 0.483   | -0.152922284 | count | 1 |

|             |            |           |         |          |              |       |            |
|-------------|------------|-----------|---------|----------|--------------|-------|------------|
| AL353596.1  | -0.5029448 | 0.9545277 | -0.5269 | 0.598    | -0.152922284 | count | 1          |
| LYRM7       | -0.1236695 | 0.1647378 | -0.7507 | 0.453    | -0.152812991 | count | 1          |
| PPM1J       | -0.1908381 | 0.3165162 | -0.6029 | 0.547    | -0.152766747 | count | 1          |
| AL353708.3  | -1.1820798 | 0.8099831 | -1.4594 | 0.145    | -0.152752419 | count | 1          |
| OSGEPL1-AS1 | -1.1820798 | 0.9585514 | -1.2332 | 0.218    | -0.152752419 | count | 1          |
| PPP4R3B     | -0.1116093 | 0.1026139 | -1.0877 | 0.277    | -0.15265751  | count | 1          |
| MT-ND3      | -0.1059974 | 0.0246905 | -4.2931 | 1.81E-05 | -0.152642707 | count | 0.4160466  |
| PSMF1       | -0.108522  | 0.0649459 | -1.671  | 0.0948   | -0.152528295 | count | 1          |
| DNAJC21     | -0.1081305 | 0.0666691 | -1.6219 | 0.105    | -0.152524798 | count | 1          |
| MRPS26      | -0.1083313 | 0.0694705 | -1.5594 | 0.119    | -0.152342937 | count | 1          |
| ZNF517      | -0.3504856 | 0.3993879 | -0.8776 | 0.38     | -0.152302846 | count | 1          |
| IL3RA       | -0.3503646 | 0.5090381 | -0.6883 | 0.491    | -0.152247558 | count | 1          |
| RAC3        | -0.3112219 | 0.646523  | -0.4814 | 0.63     | -0.152188118 | count | 1          |
| CHMP7       | -0.1421247 | 0.1791909 | -0.7931 | 0.428    | -0.152121495 | count | 1          |
| MT-ND5      | -0.1055322 | 0.0270895 | -3.8957 | 9.97E-05 | -0.151844064 | count | 1          |
| RPL39       | -0.10544   | 0.0230678 | -4.5709 | 5.02E-06 | -0.151829438 | count | 0.11601722 |
| NAALADL1    | -0.1154737 | 0.1310626 | -0.8811 | 0.378    | -0.15171759  | count | 1          |
| C22orf39    | -0.1106121 | 0.0994783 | -1.1119 | 0.266    | -0.151595783 | count | 1          |
| TRAPPC6B    | -0.1182609 | 0.1320819 | -0.8954 | 0.371    | -0.151486996 | count | 1          |
| FAM84A      | -1.172879  | 0.4630637 | -2.5329 | 0.0114   | -0.151458165 | count | 1          |
| INTS6L      | -0.2300768 | 0.3828219 | -0.601  | 0.548    | -0.151414977 | count | 1          |
| TUSC1       | -0.1085299 | 0.0883205 | -1.2288 | 0.219    | -0.151411898 | count | 1          |
| VPS16       | -0.133335  | 0.179931  | -0.741  | 0.459    | -0.151327638 | count | 1          |
| AC040169.1  | -0.2813964 | 0.5367381 | -0.5243 | 0.6      | -0.151311966 | count | 1          |
| FTSJ1       | -0.1222183 | 0.1713955 | -0.7131 | 0.476    | -0.151305796 | count | 1          |
| RBP5        | -0.2427266 | 0.4090321 | -0.5934 | 0.553    | -0.150892228 | count | 1          |
| TINAGL1     | -0.1056163 | 0.0544291 | -1.9404 | 0.0524   | -0.150867594 | count | 1          |
| C21orf2     | -0.1117462 | 0.1159709 | -0.9636 | 0.335    | -0.150766498 | count | 1          |
| ADSS        | -0.1113164 | 0.1200793 | -0.927  | 0.354    | -0.150757365 | count | 1          |
| CAMKMT      | -0.1304212 | 0.2289462 | -0.5697 | 0.569    | -0.150622554 | count | 1          |
| AL359633.2  | -0.3463562 | 0.7122149 | -0.4863 | 0.627    | -0.150416729 | count | 1          |
| DPH6        | -0.117989  | 0.1731514 | -0.6814 | 0.496    | -0.150412378 | count | 1          |
| 2-Sep       | -0.1057102 | 0.048919  | -2.1609 | 0.0308   | -0.150316892 | count | 1          |
| IGSF22      | -0.3456142 | 0.699743  | -0.4939 | 0.621    | -0.150078022 | count | 1          |
| RHOT2       | -0.1158063 | 0.1791386 | -0.6465 | 0.518    | -0.14990429  | count | 1          |
| ZSCAN16-AS1 | -0.1123517 | 0.1099875 | -1.0215 | 0.307    | -0.149837116 | count | 1          |
| PDHB        | -0.1069785 | 0.0716309 | -1.4935 | 0.135    | -0.149761864 | count | 1          |
| RBBP9       | -0.1318945 | 0.2090561 | -0.6309 | 0.528    | -0.149681851 | count | 1          |
| RANGRF      | -0.1094232 | 0.1098886 | -0.9958 | 0.319    | -0.149628474 | count | 1          |
| SDSL        | -0.1561338 | 0.2500865 | -0.6243 | 0.532    | -0.149611037 | count | 1          |
| C3orf14     | -0.1129094 | 0.1329406 | -0.8493 | 0.396    | -0.1495993   | count | 1          |
| NGDN        | -0.1103726 | 0.1053197 | -1.048  | 0.295    | -0.149477094 | count | 1          |
| PRMT5       | -0.1279503 | 0.1851939 | -0.6909 | 0.49     | -0.149472352 | count | 1          |
| MAIP1       | -0.1317096 | 0.1789578 | -0.736  | 0.462    | -0.149470619 | count | 1          |
| ABLIM2      | -0.4922956 | 0.5353499 | -0.9196 | 0.358    | -0.149444033 | count | 1          |

|             |            |           |         |        |              |       |   |
|-------------|------------|-----------|---------|--------|--------------|-------|---|
| ZNF607      | -0.2779871 | 0.4434225 | -0.6269 | 0.531  | -0.149408431 | count | 1 |
| DDX28       | -0.162552  | 0.2777762 | -0.5852 | 0.558  | -0.148716131 | count | 1 |
| VSNL1       | -1.152967  | 0.7467063 | -1.5441 | 0.123  | -0.148655888 | count | 1 |
| AC080013.5  | -1.152967  | 0.7899155 | -1.4596 | 0.144  | -0.148655888 | count | 1 |
| LINC02515   | -0.398437  | 0.3814917 | -1.0444 | 0.296  | -0.148543573 | count | 1 |
| RNF112      | -0.6639297 | 0.6300133 | -1.0538 | 0.292  | -0.148530445 | count | 1 |
| MRPS27      | -0.1170569 | 0.1297888 | -0.9019 | 0.367  | -0.148443797 | count | 1 |
| MRM3        | -0.1223723 | 0.207828  | -0.5888 | 0.556  | -0.148212077 | count | 1 |
| DNAJC8      | -0.1042217 | 0.0477954 | -2.1806 | 0.0293 | -0.148189374 | count | 1 |
| SPATA1      | -0.3032136 | 0.4525221 | -0.6701 | 0.503  | -0.148102127 | count | 1 |
| FAM98C      | -0.1120778 | 0.1296808 | -0.8643 | 0.388  | -0.14794616  | count | 1 |
| LRG1        | -1.1468879 | 0.9130326 | -1.2561 | 0.209  | -0.147800068 | count | 1 |
| CSNK2B      | -0.1036978 | 0.0503262 | -2.0605 | 0.0394 | -0.147610478 | count | 1 |
| TPRG1-AS1   | -0.4864378 | 0.6204249 | -0.784  | 0.433  | -0.147534307 | count | 1 |
| AL442128.2  | -0.4864378 | 0.6600538 | -0.737  | 0.461  | -0.147534307 | count | 1 |
| RBM44       | -0.4864378 | 0.8268976 | -0.5883 | 0.556  | -0.147534307 | count | 1 |
| KMT2E       | -0.1039505 | 0.0559272 | -1.8587 | 0.0632 | -0.147528419 | count | 1 |
| ABI2        | -0.1092189 | 0.1167801 | -0.9353 | 0.35   | -0.147457757 | count | 1 |
| AKIRIN1     | -0.1085092 | 0.1040878 | -1.0425 | 0.297  | -0.14744907  | count | 1 |
| SELENOH     | -0.1036818 | 0.0597944 | -1.734  | 0.083  | -0.147300894 | count | 1 |
| ARPP19      | -0.1060797 | 0.0883391 | -1.2008 | 0.23   | -0.147189125 | count | 1 |
| EIF3M       | -0.1039657 | 0.0562414 | -1.8486 | 0.0646 | -0.147098072 | count | 1 |
| KLHL13      | -0.14474   | 0.2678606 | -0.5404 | 0.589  | -0.147097032 | count | 1 |
| NUDT1       | -0.1084482 | 0.1075223 | -1.0086 | 0.313  | -0.147054528 | count | 1 |
| AC106707.1  | -0.135445  | 0.2964011 | -0.457  | 0.648  | -0.146964993 | count | 1 |
| LIN9        | -0.1431319 | 0.291838  | -0.4904 | 0.624  | -0.14689352  | count | 1 |
| REPIN1      | -0.1148751 | 0.1451516 | -0.7914 | 0.429  | -0.146789928 | count | 1 |
| BRSK1       | -0.393993  | 0.5937506 | -0.6636 | 0.507  | -0.146787445 | count | 1 |
| AC092803.2  | -0.2362634 | 0.3167137 | -0.746  | 0.456  | -0.146752836 | count | 1 |
| YY1AP1      | -0.1187467 | 0.1786532 | -0.6647 | 0.506  | -0.14670539  | count | 1 |
| SCRN3       | -0.123454  | 0.202278  | -0.6103 | 0.542  | -0.146639381 | count | 1 |
| PCIF1       | -0.1160209 | 0.1477828 | -0.7851 | 0.432  | -0.146507164 | count | 1 |
| CHCHD7      | -0.11156   | 0.1378293 | -0.8094 | 0.418  | -0.146457688 | count | 1 |
| MORF4L2     | -0.1031995 | 0.0468553 | -2.2025 | 0.0277 | -0.146402996 | count | 1 |
| TBC1D13     | -0.1455324 | 0.3106116 | -0.4685 | 0.639  | -0.146366264 | count | 1 |
| RBAK-RBAKDN | -0.1295398 | 0.1787834 | -0.7246 | 0.469  | -0.14628253  | count | 1 |
| HACL1       | -0.123449  | 0.175033  | -0.7053 | 0.481  | -0.146172335 | count | 1 |
| PCBD1       | -0.1034549 | 0.0587377 | -1.7613 | 0.0783 | -0.146103093 | count | 1 |
| IPCEF1      | -0.22204   | 1.213834  | -0.1829 | 0.855  | -0.145981247 | count | 1 |
| SMAP1       | -0.1046405 | 0.0833236 | -1.2558 | 0.209  | -0.145967814 | count | 1 |
| LRRC24      | -0.2717748 | 0.4703842 | -0.5778 | 0.563  | -0.145943835 | count | 1 |
| AGTPBP1     | -0.120369  | 0.2280461 | -0.5278 | 0.598  | -0.14577458  | count | 1 |
| TEX26       | -0.1822624 | 0.4280574 | -0.4258 | 0.67   | -0.145773153 | count | 1 |
| WDR13       | -0.1053507 | 0.0808544 | -1.303  | 0.193  | -0.145770175 | count | 1 |
| HS1BP3      | -0.1182175 | 0.1682594 | -0.7026 | 0.482  | -0.145758136 | count | 1 |

|            |            |           |         |          |              |       |   |
|------------|------------|-----------|---------|----------|--------------|-------|---|
| AC006449.2 | -0.3359821 | 0.5340989 | -0.6291 | 0.529    | -0.145686721 | count | 1 |
| SDC2       | -0.1030658 | 0.0604632 | -1.7046 | 0.0884   | -0.145475969 | count | 1 |
| TRIM35     | -0.1650618 | 0.298325  | -0.5533 | 0.58     | -0.145448592 | count | 1 |
| AC093297.2 | -0.3352861 | 0.557364  | -0.6016 | 0.548    | -0.145369809 | count | 1 |
| PAK1       | -0.1225904 | 0.1874948 | -0.6538 | 0.513    | -0.145150362 | count | 1 |
| RMRP       | -0.4788946 | 0.4972886 | -0.963  | 0.336    | -0.14507887  | count | 1 |
| AC104031.1 | -0.3344353 | 0.5071543 | -0.6594 | 0.51     | -0.144982499 | count | 1 |
| ZBTB26     | -0.1812723 | 0.4416532 | -0.4104 | 0.682    | -0.144966434 | count | 1 |
| EPB41L4A   | -0.1511868 | 0.2645933 | -0.5714 | 0.568    | -0.144814136 | count | 1 |
| UVRAG      | -0.1068783 | 0.1066043 | -1.0026 | 0.316    | -0.144784315 | count | 1 |
| COX7A1     | -0.1012745 | 0.04222   | -2.3987 | 0.0165   | -0.14477644  | count | 1 |
| AC120114.1 | -0.6480226 | 0.7193875 | -0.9008 | 0.368    | -0.144643615 | count | 1 |
| ADAMTS3    | -0.1609501 | 0.4034888 | -0.3989 | 0.69     | -0.144586266 | count | 1 |
| RALBP1     | -0.101951  | 0.0604659 | -1.6861 | 0.0919   | -0.144576684 | count | 1 |
| KIAA1671   | -0.1125253 | 0.1989798 | -0.5655 | 0.572    | -0.144445278 | count | 1 |
| CUL4B      | -0.115644  | 0.18555   | -0.6232 | 0.533    | -0.144433542 | count | 1 |
| AC092117.1 | -0.6461512 | 1.003904  | -0.6436 | 0.52     | -0.144187081 | count | 1 |
| CCDC59     | -0.1036274 | 0.0820424 | -1.2631 | 0.207    | -0.144180763 | count | 1 |
| AC114490.3 | -0.2192859 | 0.5254798 | -0.4173 | 0.676    | -0.144121359 | count | 1 |
| PRPF38A    | -0.1073137 | 0.1219365 | -0.8801 | 0.379    | -0.144096372 | count | 1 |
| ATP5PO     | -0.1007832 | 0.0400338 | -2.5175 | 0.0119   | -0.144016556 | count | 1 |
| RNASEH1    | -0.1092179 | 0.1277461 | -0.855  | 0.393    | -0.143974161 | count | 1 |
| PPM1G      | -0.1024055 | 0.0711515 | -1.4393 | 0.15     | -0.14397351  | count | 1 |
| AL133415.1 | -0.4753443 | 0.4828779 | -0.9844 | 0.325    | -0.143924674 | count | 1 |
| LINC01503  | -0.1309092 | 0.2471502 | -0.5297 | 0.596    | -0.143835008 | count | 1 |
| AC068338.3 | -0.1461825 | 0.5388107 | -0.2713 | 0.786    | -0.143681043 | count | 1 |
| FMC1       | -0.1074688 | 0.1193497 | -0.9005 | 0.368    | -0.143663029 | count | 1 |
| PKIA       | -0.3314633 | 0.4940601 | -0.6709 | 0.502    | -0.14363018  | count | 1 |
| HIGD1B     | -0.1520955 | 0.3603205 | -0.4221 | 0.673    | -0.143598017 | count | 1 |
| SERPINF2   | -0.3858602 | 0.7600482 | -0.5077 | 0.612    | -0.143578454 | count | 1 |
| ZFYVE27    | -0.1227441 | 0.1980619 | -0.6197 | 0.535    | -0.143356586 | count | 1 |
| IFITM2     | -0.099651  | 0.0312907 | -3.1847 | 0.00146  | -0.143346673 | count | 1 |
| NRSN2      | -0.1149487 | 0.1795289 | -0.6403 | 0.522    | -0.143315182 | count | 1 |
| NDUFA11    | -0.1003932 | 0.0436617 | -2.2993 | 0.0215   | -0.143285169 | count | 1 |
| 9-Mar      | -0.116194  | 0.1708718 | -0.68   | 0.497    | -0.143253142 | count | 1 |
| AC013565.1 | -0.6422332 | 0.4625661 | -1.3884 | 0.165    | -0.143231793 | count | 1 |
| EMG1       | -0.1086506 | 0.1130392 | -0.9612 | 0.337    | -0.143224645 | count | 1 |
| NBPF26     | -0.1985554 | 0.4093658 | -0.485  | 0.628    | -0.143167703 | count | 1 |
| TRIM16     | -0.1337424 | 0.2288916 | -0.5843 | 0.559    | -0.143076255 | count | 1 |
| 1-Sep      | -0.1090392 | 0.1241018 | -0.8786 | 0.38     | -0.143035804 | count | 1 |
| ZBTB42     | -0.2665265 | 0.5296878 | -0.5032 | 0.615    | -0.143020867 | count | 1 |
| CHST2      | -0.2665265 | 0.5393374 | -0.4942 | 0.621    | -0.143020867 | count | 1 |
| SLU7       | -0.1029031 | 0.077739  | -1.3237 | 0.186    | -0.143014489 | count | 1 |
| STK17A     | -0.1026427 | 0.113367  | -0.9054 | 0.365    | -0.14294344  | count | 1 |
| PPIB       | -0.0994112 | 0.0290397 | -3.4233 | 0.000625 | -0.142915021 | count | 1 |

|            |            |           |         |         |              |       |   |
|------------|------------|-----------|---------|---------|--------------|-------|---|
| PPDPF      | -0.0995897 | 0.0369301 | -2.6967 | 0.00703 | -0.142906714 | count | 1 |
| MRPS21     | -0.1002805 | 0.0460798 | -2.1762 | 0.0296  | -0.142832362 | count | 1 |
| NDUFA5     | -0.1005266 | 0.0500302 | -2.0093 | 0.0446  | -0.142599694 | count | 1 |
| EMP2       | -0.0995503 | 0.0401373 | -2.4802 | 0.0132  | -0.142598269 | count | 1 |
| NDUFB5     | -0.1007585 | 0.0573827 | -1.7559 | 0.0792  | -0.142287896 | count | 1 |
| TYMS       | -0.1248156 | 0.2192139 | -0.5694 | 0.569   | -0.142257956 | count | 1 |
| UBALD1     | -0.1211576 | 0.1948231 | -0.6219 | 0.534   | -0.142003787 | count | 1 |
| RBM12B     | -0.1175627 | 0.1811577 | -0.649  | 0.516   | -0.141998599 | count | 1 |
| BID        | -0.2160568 | 0.3336747 | -0.6475 | 0.517   | -0.141942133 | count | 1 |
| SETD5      | -0.1059129 | 0.1207848 | -0.8769 | 0.381   | -0.141841251 | count | 1 |
| HMGXB3     | -0.10694   | 0.1287426 | -0.8306 | 0.406   | -0.141839149 | count | 1 |
| KYAT1      | -0.1550385 | 0.3164897 | -0.4899 | 0.624   | -0.141750637 | count | 1 |
| MYCBP      | -0.1140472 | 0.1973154 | -0.578  | 0.563   | -0.141680684 | count | 1 |
| AL731537.1 | -0.3270495 | 0.4314281 | -0.7581 | 0.448   | -0.141623683 | count | 1 |
| ZNF280C    | -0.1680159 | 0.3890692 | -0.4318 | 0.666   | -0.14161356  | count | 1 |
| CLEC4A     | -0.2904526 | 0.6331941 | -0.4587 | 0.646   | -0.141607684 | count | 1 |
| DMPK       | -0.1091886 | 0.205295  | -0.5319 | 0.595   | -0.141582339 | count | 1 |
| TRIAP1     | -0.1053363 | 0.108596  | -0.97   | 0.332   | -0.141554015 | count | 1 |
| NBPF3      | -0.2050486 | 0.4727145 | -0.4338 | 0.664   | -0.141534531 | count | 1 |
| CSNK2A2    | -0.1041017 | 0.1054598 | -0.9871 | 0.324   | -0.141367691 | count | 1 |
| DET1       | -0.1601849 | 0.2727674 | -0.5873 | 0.557   | -0.141088356 | count | 1 |
| PCF11-AS1  | -0.4664396 | 0.6331791 | -0.7367 | 0.461   | -0.141033968 | count | 1 |
| WDR46      | -0.1074627 | 0.1284974 | -0.8363 | 0.403   | -0.140962925 | count | 1 |
| TAF15      | -0.1051329 | 0.1069305 | -0.9832 | 0.326   | -0.140920321 | count | 1 |
| GNA14      | -0.2427257 | 0.5112576 | -0.4748 | 0.635   | -0.140882264 | count | 1 |
| ATAD1      | -0.1043986 | 0.0961021 | -1.0863 | 0.277   | -0.140837091 | count | 1 |
| MIR762HG   | -0.1336171 | 0.2746361 | -0.4865 | 0.627   | -0.14073702  | count | 1 |
| CEMIP2     | -0.1358429 | 0.2661979 | -0.5103 | 0.61    | -0.140654222 | count | 1 |
| RAN        | -0.0982682 | 0.0372436 | -2.6385 | 0.00836 | -0.140598644 | count | 1 |
| AL034549.1 | -0.1948141 | 0.3358614 | -0.58   | 0.562   | -0.140409393 | count | 1 |
| ATP5PD     | -0.0980827 | 0.0421609 | -2.3264 | 0.0201  | -0.140195181 | count | 1 |
| CLTCL1     | -0.4636448 | 0.5852811 | -0.7922 | 0.428   | -0.140127953 | count | 1 |
| SETD1B     | -0.1317755 | 0.2439556 | -0.5402 | 0.589   | -0.139891467 | count | 1 |
| POLR1E     | -0.1081844 | 0.128598  | -0.8413 | 0.4     | -0.13987606  | count | 1 |
| JOSD2      | -0.099806  | 0.0858214 | -1.163  | 0.245   | -0.13987273  | count | 1 |
| BMPR1B-DT  | -0.2869928 | 0.8280816 | -0.3466 | 0.729   | -0.13985041  | count | 1 |
| TRIM5      | -0.1086731 | 0.1528743 | -0.7109 | 0.477   | -0.139791436 | count | 1 |
| PITRM1     | -0.1156322 | 0.2134716 | -0.5417 | 0.588   | -0.13965631  | count | 1 |
| PRDX6      | -0.0976358 | 0.0369483 | -2.6425 | 0.00826 | -0.139647256 | count | 1 |
| ZNF827     | -0.1243099 | 0.2486508 | -0.4999 | 0.617   | -0.139632586 | count | 1 |
| CHD5       | -0.4619844 | 0.9476759 | -0.4875 | 0.626   | -0.139589978 | count | 1 |
| LILRB3     | -0.4619844 | 1.101746  | -0.4193 | 0.675   | -0.139589978 | count | 1 |
| PIK3R3     | -0.1269988 | 0.3415908 | -0.3718 | 0.71    | -0.139507481 | count | 1 |
| ABHD17A    | -0.0995132 | 0.0739837 | -1.3451 | 0.179   | -0.139471621 | count | 1 |
| ATP11B     | -0.1099812 | 0.196891  | -0.5586 | 0.576   | -0.139442215 | count | 1 |

|            |            |           |         |          |              |       |   |
|------------|------------|-----------|---------|----------|--------------|-------|---|
| RALB       | -0.1055074 | 0.160495  | -0.6574 | 0.511    | -0.139343519 | count | 1 |
| CREB3L4    | -0.1417681 | 0.2591787 | -0.547  | 0.584    | -0.139295759 | count | 1 |
| BRMS1      | -0.1060062 | 0.1325883 | -0.7995 | 0.424    | -0.139250238 | count | 1 |
| PEX12      | -0.1549906 | 0.3772893 | -0.4108 | 0.681    | -0.139159036 | count | 1 |
| ABL2       | -0.1343755 | 0.196559  | -0.6836 | 0.494    | -0.139121136 | count | 1 |
| TMEM120A   | -0.1002995 | 0.0926778 | -1.0822 | 0.279    | -0.1389651   | count | 1 |
| UBE2E3     | -0.098561  | 0.059581  | -1.6542 | 0.0982   | -0.138912151 | count | 1 |
| STX17      | -0.1048242 | 0.1112487 | -0.9423 | 0.346    | -0.138864779 | count | 1 |
| LZTFL1     | -0.115507  | 0.1699533 | -0.6796 | 0.497    | -0.138763638 | count | 1 |
| AP1AR      | -0.114285  | 0.192475  | -0.5938 | 0.553    | -0.13871707  | count | 1 |
| RABAC1     | -0.0965215 | 0.0284594 | -3.3916 | 0.000702 | -0.138712296 | count | 1 |
| PRKCB      | -0.623495  | 0.7299677 | -0.8541 | 0.393    | -0.138672711 | count | 1 |
| STRA6      | -0.623495  | 0.7429218 | -0.8392 | 0.401    | -0.138672711 | count | 1 |
| COX6A2     | -0.623495  | 0.7429218 | -0.8392 | 0.401    | -0.138672711 | count | 1 |
| CELF4      | -0.623495  | 0.8169485 | -0.7632 | 0.445    | -0.138672711 | count | 1 |
| AKR7A3     | -0.623495  | 0.9383757 | -0.6644 | 0.506    | -0.138672711 | count | 1 |
| AL162632.3 | -0.623495  | 0.9383757 | -0.6644 | 0.506    | -0.138672711 | count | 1 |
| EMC6       | -0.0995894 | 0.0838215 | -1.1881 | 0.235    | -0.138659446 | count | 1 |
| THTPA      | -0.1188909 | 0.1543127 | -0.7705 | 0.441    | -0.138315114 | count | 1 |
| RALY       | -0.0977456 | 0.063688  | -1.5348 | 0.125    | -0.138289146 | count | 1 |
| CHEK1      | -0.2575181 | 0.4199935 | -0.6131 | 0.54     | -0.13801241  | count | 1 |
| ITGB3      | -0.1996997 | 0.5131156 | -0.3892 | 0.697    | -0.137753875 | count | 1 |
| GATA2-AS1  | -0.1153076 | 0.2606401 | -0.4424 | 0.658    | -0.137741951 | count | 1 |
| MIR181A2HG | -0.1996408 | 0.4712934 | -0.4236 | 0.672    | -0.137712269 | count | 1 |
| CCR7       | -1.074955  | 0.9278361 | -1.1586 | 0.247    | -0.137667679 | count | 1 |
| LINC01752  | -1.074955  | 0.9278361 | -1.1586 | 0.247    | -0.137667679 | count | 1 |
| GET4       | -1.074955  | 1.041201  | -1.0324 | 0.302    | -0.137667679 | count | 1 |
| POLR3H     | -0.1100545 | 0.1775901 | -0.6197 | 0.535    | -0.137659068 | count | 1 |
| FCF1       | -0.1110251 | 0.1557301 | -0.7129 | 0.476    | -0.137657337 | count | 1 |
| DCTN6      | -0.0980323 | 0.0677453 | -1.4471 | 0.148    | -0.137648948 | count | 1 |
| ST13       | -0.0961324 | 0.0402008 | -2.3913 | 0.0168   | -0.137578081 | count | 1 |
| TMEM150A   | -0.1103088 | 0.1601769 | -0.6887 | 0.491    | -0.137509439 | count | 1 |
| FAM131C    | -0.1594106 | 0.4036805 | -0.3949 | 0.693    | -0.137424022 | count | 1 |
| RNF8       | -0.1016252 | 0.1234235 | -0.8234 | 0.41     | -0.13733481  | count | 1 |
| CASTOR2    | -0.1833501 | 0.4162389 | -0.4405 | 0.66     | -0.137257886 | count | 1 |
| SLC2A11    | -0.1155082 | 0.278783  | -0.4143 | 0.679    | -0.13715518  | count | 1 |
| PSMG1      | -0.100693  | 0.1062467 | -0.9477 | 0.343    | -0.136892231 | count | 1 |
| TBCK       | -0.1238438 | 0.2357944 | -0.5252 | 0.599    | -0.136833664 | count | 1 |
| TMC4       | -0.4533804 | 0.5081813 | -0.8922 | 0.372    | -0.136805658 | count | 1 |
| NOP16      | -0.1155713 | 0.1690738 | -0.6836 | 0.494    | -0.136798287 | count | 1 |
| EHD2       | -0.0986282 | 0.0883409 | -1.1165 | 0.264    | -0.136665447 | count | 1 |
| TBL2       | -0.1041125 | 0.1486465 | -0.7004 | 0.484    | -0.136456723 | count | 1 |
| MYL12B     | -0.094722  | 0.0268657 | -3.5258 | 0.000427 | -0.136331626 | count | 1 |
| MBNL1      | -0.0952979 | 0.0570368 | -1.6708 | 0.0948   | -0.136162158 | count | 1 |
| HSF2       | -0.1272393 | 0.1829424 | -0.6955 | 0.487    | -0.136064725 | count | 1 |



|            |            |           |         |          |              |       |            |
|------------|------------|-----------|---------|----------|--------------|-------|------------|
| ABHD17C    | -0.2790833 | 0.4223405 | -0.6608 | 0.509    | -0.135838797 | count | 1          |
| AC005261.3 | -0.279034  | 0.4353112 | -0.641  | 0.522    | -0.13581382  | count | 1          |
| SMIM8      | -0.1029544 | 0.1328608 | -0.7749 | 0.438    | -0.135699747 | count | 1          |
| BCAN       | -1.06091   | 0.6936161 | -1.5295 | 0.126    | -0.135689465 | count | 1          |
| FCGR1B     | -1.06091   | 0.8158307 | -1.3004 | 0.194    | -0.135689465 | count | 1          |
| PSKH1      | -0.1165536 | 0.255394  | -0.4564 | 0.648    | -0.135581214 | count | 1          |
| SYTL3      | -0.3135945 | 0.5457522 | -0.5746 | 0.566    | -0.135520856 | count | 1          |
| AKT1       | -0.1002292 | 0.0885425 | -1.132  | 0.258    | -0.135492252 | count | 1          |
| COMMD3     | -0.0969009 | 0.077213  | -1.255  | 0.21     | -0.135272813 | count | 1          |
| FMR1       | -0.1006402 | 0.1203294 | -0.8364 | 0.403    | -0.13523274  | count | 1          |
| LOXL3      | -0.1331555 | 0.2564276 | -0.5193 | 0.604    | -0.135213854 | count | 1          |
| MVB12B     | -0.1455325 | 0.3771456 | -0.3859 | 0.7      | -0.135202953 | count | 1          |
| TMEM231    | -0.121556  | 0.2638898 | -0.4606 | 0.645    | -0.135060128 | count | 1          |
| SUCLG2     | -0.0981274 | 0.0857438 | -1.1444 | 0.253    | -0.135000452 | count | 1          |
| ATP2B1-AS1 | -0.109707  | 0.190552  | -0.5757 | 0.565    | -0.13494801  | count | 1          |
| NCOA6      | -0.116418  | 0.2046762 | -0.5688 | 0.57     | -0.134900111 | count | 1          |
| ALDH7A1    | -0.0995709 | 0.1174999 | -0.8474 | 0.397    | -0.134870707 | count | 1          |
| SKP1       | -0.0936856 | 0.024957  | -3.7539 | 0.000177 | -0.134797264 | count | 1          |
| ZNF557     | -0.1130269 | 0.2471528 | -0.4573 | 0.647    | -0.134605492 | count | 1          |
| MAGOHB     | -0.1008978 | 0.1159182 | -0.8704 | 0.384    | -0.134601166 | count | 1          |
| C10orf25   | -0.2170559 | 0.6293731 | -0.3449 | 0.73     | -0.134487026 | count | 1          |
| EEF1A1     | -0.0929589 | 0.019807  | -4.6932 | 2.79E-06 | -0.134068285 | count | 0.06465546 |
| FCN1       | -0.2753005 | 0.974856  | -0.2824 | 0.778    | -0.13392303  | count | 1          |
| TRMT112    | -0.0934851 | 0.0343253 | -2.7235 | 0.00649  | -0.133905578 | count | 1          |
| GAMT       | -0.0958276 | 0.0830765 | -1.1535 | 0.249    | -0.133831456 | count | 1          |
| ARHGEF33   | -0.203993  | 0.5438502 | -0.3751 | 0.708    | -0.133814408 | count | 1          |
| UIMC1      | -0.1054986 | 0.1480664 | -0.7125 | 0.476    | -0.13374131  | count | 1          |
| AC141928.1 | -1.046231  | 0.5237244 | -1.9977 | 0.0458   | -0.133622478 | count | 1          |
| SAMD1      | -0.10354   | 0.1490204 | -0.6948 | 0.487    | -0.133451695 | count | 1          |
| STX3       | -0.1214546 | 0.2489746 | -0.4878 | 0.626    | -0.133374931 | count | 1          |
| LRR8C      | -0.1312409 | 0.3927476 | -0.3342 | 0.738    | -0.133251606 | count | 1          |
| AP000692.2 | -0.1850073 | 0.549007  | -0.337  | 0.736    | -0.133189388 | count | 1          |
| RITA1      | -0.1090445 | 0.1975735 | -0.5519 | 0.581    | -0.132960061 | count | 1          |
| DCAF13     | -0.0985471 | 0.1126364 | -0.8749 | 0.382    | -0.132832322 | count | 1          |
| STAT4      | -0.5988679 | 0.7408152 | -0.8084 | 0.419    | -0.132706169 | count | 1          |
| CCM2       | -0.0999189 | 0.1237117 | -0.8077 | 0.419    | -0.132431661 | count | 1          |
| NDEL1      | -0.0998957 | 0.149084  | -0.6701 | 0.503    | -0.132400851 | count | 1          |
| CWC27      | -0.0985524 | 0.1058173 | -0.9313 | 0.352    | -0.132312644 | count | 1          |
| CCDC3      | -0.0954751 | 0.0741734 | -1.2872 | 0.198    | -0.132274751 | count | 1          |
| CMPK1      | -0.0940521 | 0.0614424 | -1.5307 | 0.126    | -0.132265096 | count | 1          |
| PRRT3      | -0.1277827 | 0.2264177 | -0.5644 | 0.573    | -0.132236664 | count | 1          |
| TLE2       | -0.0996698 | 0.1732504 | -0.5753 | 0.565    | -0.13186435  | count | 1          |
| C2orf74    | -0.0956546 | 0.0920124 | -1.0396 | 0.299    | -0.131666408 | count | 1          |
| DDA1       | -0.0968239 | 0.1125497 | -0.8603 | 0.39     | -0.131625062 | count | 1          |
| TRAPPC9    | -0.1239925 | 0.2559269 | -0.4845 | 0.628    | -0.131564364 | count | 1          |

|            |            |           |         |        |              |       |   |
|------------|------------|-----------|---------|--------|--------------|-------|---|
| CSTF2      | -0.1416582 | 0.2883755 | -0.4912 | 0.623  | -0.131560483 | count | 1 |
| HOXB-AS1   | -0.1025543 | 0.1301187 | -0.7882 | 0.431  | -0.131462722 | count | 1 |
| TNFAIP1    | -0.1061519 | 0.1835671 | -0.5783 | 0.563  | -0.131343651 | count | 1 |
| ZC3H4      | -0.1102968 | 0.1980615 | -0.5569 | 0.578  | -0.131339072 | count | 1 |
| ADRM1      | -0.0934188 | 0.0664826 | -1.4052 | 0.16   | -0.131198196 | count | 1 |
| PHC1       | -0.1075179 | 0.2899531 | -0.3708 | 0.711  | -0.131091157 | count | 1 |
| PTK2       | -0.0932384 | 0.0780566 | -1.1945 | 0.232  | -0.130841863 | count | 1 |
| DPM1       | -0.0982461 | 0.1208335 | -0.8131 | 0.416  | -0.130789165 | count | 1 |
| LINC00960  | -0.1288175 | 0.3861581 | -0.3336 | 0.739  | -0.130768602 | count | 1 |
| AC015982.1 | -0.4345503 | 0.4556785 | -0.9536 | 0.34   | -0.130732493 | count | 1 |
| NACA2      | -0.4344154 | 0.5991491 | -0.7251 | 0.468  | -0.130689083 | count | 1 |
| PLEKHJ1    | -0.0949818 | 0.1055752 | -0.8997 | 0.368  | -0.130668206 | count | 1 |
| AC022916.1 | -0.434287  | 0.6878351 | -0.6314 | 0.528  | -0.130647774 | count | 1 |
| NCBP2-AS2  | -0.0955064 | 0.0919461 | -1.0387 | 0.299  | -0.130605826 | count | 1 |
| AC020928.2 | -0.4339366 | 0.7969765 | -0.5445 | 0.586  | -0.130535037 | count | 1 |
| LINC00242  | -0.4339366 | 0.9272678 | -0.468  | 0.64   | -0.130535037 | count | 1 |
| MESP1      | -0.1272884 | 0.3080174 | -0.4133 | 0.679  | -0.13049133  | count | 1 |
| TRBC1      | -1.0238048 | 0.5921782 | -1.7289 | 0.0839 | -0.130466246 | count | 1 |
| SMAD7      | -0.098621  | 0.1962037 | -0.5026 | 0.615  | -0.130393878 | count | 1 |
| LINC02018  | -1.0232841 | 0.6185961 | -1.6542 | 0.0982 | -0.130392998 | count | 1 |
| ZNHIT1     | -0.0916161 | 0.0524076 | -1.7481 | 0.0805 | -0.130348085 | count | 1 |
| CENPP      | -0.154615  | 0.2203378 | -0.7017 | 0.483  | -0.130147494 | count | 1 |
| SERF1A     | -0.2677669 | 0.5314473 | -0.5038 | 0.614  | -0.1301132   | count | 1 |
| HNRNPR     | -0.0917804 | 0.0539877 | -1.7    | 0.0892 | -0.130022448 | count | 1 |
| UROS       | -0.0977561 | 0.1152122 | -0.8485 | 0.396  | -0.129782604 | count | 1 |
| MAPK8IP3   | -0.1625001 | 0.3703658 | -0.4388 | 0.661  | -0.129699406 | count | 1 |
| WASL       | -0.0916355 | 0.0583066 | -1.5716 | 0.116  | -0.129664857 | count | 1 |
| KANSL1-AS1 | -0.1027601 | 0.1104684 | -0.9302 | 0.352  | -0.129519572 | count | 1 |
| RELA       | -0.0957844 | 0.131414  | -0.7289 | 0.466  | -0.129519241 | count | 1 |
| LINC02104  | -0.2236402 | 0.4761901 | -0.4696 | 0.639  | -0.129468331 | count | 1 |
| FBXW4      | -0.1080473 | 0.1875453 | -0.5761 | 0.565  | -0.12940161  | count | 1 |
| DHRS4-AS1  | -0.1000864 | 0.1270229 | -0.7879 | 0.431  | -0.129379494 | count | 1 |
| TNFRSF10C  | -0.3496684 | 0.4881281 | -0.7163 | 0.474  | -0.129377624 | count | 1 |
| NAPA-AS1   | -0.1574992 | 0.349033  | -0.4512 | 0.652  | -0.129251129 | count | 1 |
| ARMC6      | -0.1156809 | 0.2920681 | -0.3961 | 0.692  | -0.129198239 | count | 1 |
| PGPEP1L    | -0.5842695 | 0.6421088 | -0.9099 | 0.363  | -0.129183491 | count | 1 |
| AC103691.1 | -0.5842695 | 0.6839219 | -0.8543 | 0.393  | -0.129183491 | count | 1 |
| AC018553.1 | -1.0139492 | 0.7556987 | -1.3417 | 0.18   | -0.129079961 | count | 1 |
| C2orf15    | -1.0139492 | 0.8040465 | -1.2611 | 0.207  | -0.129079961 | count | 1 |
| CCDC158    | -0.1793546 | 0.5567781 | -0.3221 | 0.747  | -0.129034486 | count | 1 |
| MITD1      | -0.0955848 | 0.1140483 | -0.8381 | 0.402  | -0.128976231 | count | 1 |
| AL132780.2 | -0.2989228 | 0.4620439 | -0.647  | 0.518  | -0.128890235 | count | 1 |
| BCL2A1     | -0.1965532 | 0.6383858 | -0.3079 | 0.758  | -0.128812957 | count | 1 |
| MED1       | -0.1033559 | 0.1757105 | -0.5882 | 0.556  | -0.128812596 | count | 1 |
| SDHAF4     | -0.1187993 | 0.2181156 | -0.5447 | 0.586  | -0.128776271 | count | 1 |

|             |            |           |         |        |              |       |   |
|-------------|------------|-----------|---------|--------|--------------|-------|---|
| SNRNP35     | -0.0937874 | 0.1036856 | -0.9045 | 0.366  | -0.128751547 | count | 1 |
| ADAMTS9-AS1 | -1.0114654 | 0.8207017 | -1.2324 | 0.2179 | -0.128730685 | count | 1 |
| DDR1        | -0.1165117 | 0.3723141 | -0.3129 | 0.754  | -0.128679363 | count | 1 |
| MLIP        | -0.4278758 | 0.5669668 | -0.7547 | 0.45   | -0.12858664  | count | 1 |
| CEP63       | -0.0937493 | 0.1037998 | -0.9032 | 0.366  | -0.128374711 | count | 1 |
| ADCY4       | -0.5808483 | 0.7085419 | -0.8198 | 0.412  | -0.128359502 | count | 1 |
| MTX2        | -0.0947945 | 0.1130522 | -0.8385 | 0.402  | -0.128134833 | count | 1 |
| CRYZL1      | -0.0950897 | 0.1108811 | -0.8576 | 0.391  | -0.128018175 | count | 1 |
| MSRB2       | -0.0903522 | 0.0584214 | -1.5466 | 0.122  | -0.127927434 | count | 1 |
| ZNF337      | -0.1145438 | 0.2485181 | -0.4609 | 0.645  | -0.127920336 | count | 1 |
| TSTD3       | -0.115161  | 0.2302114 | -0.5002 | 0.617  | -0.127909395 | count | 1 |
| RIPOR1      | -0.1010428 | 0.1771635 | -0.5703 | 0.568  | -0.127899437 | count | 1 |
| ODF3B       | -0.0972867 | 0.1172832 | -0.8295 | 0.407  | -0.127679782 | count | 1 |
| APTXX       | -0.1041684 | 0.166674  | -0.625  | 0.532  | -0.12756431  | count | 1 |
| TP53TG3D    | -0.2623858 | 0.5513113 | -0.4759 | 0.634  | -0.127396424 | count | 1 |
| GALNT14     | -1.0012349 | 0.8737926 | -1.1458 | 0.252  | -0.127292431 | count | 1 |
| ZNF697      | -1.0012349 | 0.9725637 | -1.0295 | 0.303  | -0.127292431 | count | 1 |
| ALDH1L1-AS2 | -1.0012349 | 1.049725  | -0.9538 | 0.34   | -0.127292431 | count | 1 |
| AC006547.3  | -1.0012349 | 1.049725  | -0.9538 | 0.34   | -0.127292431 | count | 1 |
| OXTR        | -0.1702668 | 0.5562957 | -0.3061 | 0.76   | -0.127275728 | count | 1 |
| GRPEL1      | -0.0947938 | 0.1108409 | -0.8552 | 0.392  | -0.127204537 | count | 1 |
| PLAUR       | -0.0943535 | 0.1393706 | -0.677  | 0.498  | -0.127171213 | count | 1 |
| STOML2      | -0.0907225 | 0.0689395 | -1.316  | 0.188  | -0.12692291  | count | 1 |
| LRRCC1      | -0.0953467 | 0.1357457 | -0.7024 | 0.482  | -0.126922447 | count | 1 |
| SEMA3B-AS1  | -0.5746117 | 0.5638804 | -1.019  | 0.308  | -0.12685899  | count | 1 |
| RNPC3       | -0.0926862 | 0.1400764 | -0.6617 | 0.508  | -0.126593918 | count | 1 |
| DDX60       | -0.1035221 | 0.2064336 | -0.5015 | 0.616  | -0.126488639 | count | 1 |
| PCDHGB5     | -0.2185849 | 0.4648067 | -0.4703 | 0.638  | -0.126453849 | count | 1 |
| GPC6        | -0.0937463 | 0.0949003 | -0.9878 | 0.323  | -0.12644556  | count | 1 |
| TRAPPC11    | -0.1046827 | 0.2104685 | -0.4974 | 0.619  | -0.126377438 | count | 1 |
| UNC45A      | -0.0953235 | 0.1153294 | -0.8265 | 0.409  | -0.126329472 | count | 1 |
| EXOC6B      | -0.0997794 | 0.1861661 | -0.536  | 0.592  | -0.126295475 | count | 1 |
| POU6F2      | -0.341468  | 0.4641026 | -0.7358 | 0.462  | -0.126178464 | count | 1 |
| CDK19       | -0.1122991 | 0.2492571 | -0.4505 | 0.652  | -0.126060557 | count | 1 |
| RPS17       | -0.0951568 | 0.1169445 | -0.8137 | 0.416  | -0.125882127 | count | 1 |
| EDEM2       | -0.0981235 | 0.2081013 | -0.4715 | 0.637  | -0.125623368 | count | 1 |
| ZNF426-DT   | -0.3399651 | 0.5265431 | -0.6457 | 0.519  | -0.125592893 | count | 1 |
| TDRKH       | -0.3390676 | 0.5526259 | -0.6136 | 0.54   | -0.125243322 | count | 1 |
| ITPR1-DT    | -0.3390676 | 0.6260135 | -0.5416 | 0.588  | -0.125243322 | count | 1 |
| PPP3CC      | -0.0996991 | 0.1732431 | -0.5755 | 0.565  | -0.125071174 | count | 1 |
| EFHD2       | -0.1050458 | 0.2244377 | -0.468  | 0.64   | -0.125058502 | count | 1 |
| BTN2A1      | -0.0963783 | 0.146279  | -0.6589 | 0.51   | -0.125047603 | count | 1 |
| IPO8        | -0.0997083 | 0.1554576 | -0.6414 | 0.521  | -0.124881641 | count | 1 |
| ZBED8       | -0.1449771 | 0.3138135 | -0.462  | 0.644  | -0.124809115 | count | 1 |
| CLUAP1      | -0.091666  | 0.1027064 | -0.8925 | 0.372  | -0.1247102   | count | 1 |

|            |            |           |         |        |              |       |   |
|------------|------------|-----------|---------|--------|--------------|-------|---|
| CGRRF1     | -0.0935407 | 0.1110848 | -0.8421 | 0.4    | -0.1246435   | count | 1 |
| HSPBP1     | -0.0954628 | 0.1521756 | -0.6273 | 0.53   | -0.124607562 | count | 1 |
| CD36       | -0.1128427 | 0.354851  | -0.318  | 0.751  | -0.124601284 | count | 1 |
| AC093827.5 | -0.337396  | 0.6524996 | -0.5171 | 0.605  | -0.12459246  | count | 1 |
| GNG8       | -0.337396  | 0.6555459 | -0.5147 | 0.607  | -0.12459246  | count | 1 |
| GIMAP2     | -0.337396  | 0.7011377 | -0.4812 | 0.63   | -0.12459246  | count | 1 |
| AP001830.1 | -0.337396  | 0.7096095 | -0.4755 | 0.634  | -0.12459246  | count | 1 |
| FAM184B    | -0.18097   | 0.3617517 | -0.5003 | 0.617  | -0.124550102 | count | 1 |
| ODC1       | -0.0912816 | 0.0929625 | -0.9819 | 0.326  | -0.124486315 | count | 1 |
| MAP4K3     | -0.0984337 | 0.1500194 | -0.6561 | 0.512  | -0.124232727 | count | 1 |
| PECAM1     | -0.1264741 | 0.73535   | -0.172  | 0.863  | -0.124123538 | count | 1 |
| RHOG       | -0.0900264 | 0.1055254 | -0.8531 | 0.394  | -0.12406326  | count | 1 |
| ZGPAT      | -0.3358706 | 0.7404936 | -0.4536 | 0.65   | -0.123998791 | count | 1 |
| GNRH2      | -0.3358706 | 0.7917011 | -0.4242 | 0.671  | -0.123998791 | count | 1 |
| MRPL57     | -0.0874986 | 0.056667  | -1.5441 | 0.123  | -0.123990329 | count | 1 |
| ANXA2R     | -0.255251  | 0.5884723 | -0.4338 | 0.664  | -0.123800108 | count | 1 |
| GLRX5      | -0.0880967 | 0.0609834 | -1.4446 | 0.149  | -0.123704915 | count | 1 |
| PAPOLA     | -0.0880892 | 0.073554  | -1.1976 | 0.231  | -0.123687026 | count | 1 |
| PPP1R11    | -0.0894749 | 0.0959864 | -0.9322 | 0.351  | -0.123563211 | count | 1 |
| POLR2J2    | -0.1273715 | 0.3522765 | -0.3616 | 0.718  | -0.123434934 | count | 1 |
| HPRT1      | -0.0910097 | 0.1126982 | -0.8076 | 0.419  | -0.123415311 | count | 1 |
| LIPT2      | -0.2309641 | 0.4552723 | -0.5073 | 0.612  | -0.123313736 | count | 1 |
| FAM229A    | -0.1790476 | 0.6315164 | -0.2835 | 0.777  | -0.123197953 | count | 1 |
| BBX        | -0.0871065 | 0.059684  | -1.4595 | 0.145  | -0.123131242 | count | 1 |
| CNOT7      | -0.0902553 | 0.1209138 | -0.7464 | 0.455  | -0.122988847 | count | 1 |
| ZNF577     | -0.1053635 | 0.2448631 | -0.4303 | 0.667  | -0.122958971 | count | 1 |
| AC026979.3 | -0.3331866 | 0.7331535 | -0.4545 | 0.65   | -0.122954782 | count | 1 |
| MBD2       | -0.0876967 | 0.0732329 | -1.1975 | 0.231  | -0.12289183  | count | 1 |
| CALR       | -0.0858586 | 0.0372113 | -2.3073 | 0.0211 | -0.122809057 | count | 1 |
| AC018647.1 | -0.1497484 | 0.2907296 | -0.5151 | 0.607  | -0.122792934 | count | 1 |
| IMPA1      | -0.0959975 | 0.1366243 | -0.7026 | 0.482  | -0.122750345 | count | 1 |
| TIGD5      | -0.118646  | 0.2974478 | -0.3989 | 0.69   | -0.12270515  | count | 1 |
| BORCS7     | -0.0876301 | 0.069124  | -1.2677 | 0.205  | -0.122703354 | count | 1 |
| TRIM66     | -0.2850601 | 0.478738  | -0.5954 | 0.552  | -0.122648725 | count | 1 |
| MTMR6      | -0.0944194 | 0.1172895 | -0.805  | 0.421  | -0.122611335 | count | 1 |
| RBAK       | -0.1394013 | 0.3380939 | -0.4123 | 0.68   | -0.122546587 | count | 1 |
| AC092794.1 | -0.9664784 | 0.7213596 | -1.3398 | 0.18   | -0.122411915 | count | 1 |
| ZFR        | -0.0873075 | 0.0706736 | -1.2354 | 0.217  | -0.122403911 | count | 1 |
| WIPF3      | -0.1492576 | 0.3404755 | -0.4384 | 0.661  | -0.122384299 | count | 1 |
| OSBPL5     | -0.1041242 | 0.2077224 | -0.5013 | 0.616  | -0.122371922 | count | 1 |
| TYW3       | -0.0877746 | 0.0767033 | -1.1443 | 0.253  | -0.122355073 | count | 1 |
| FBXL6      | -0.108981  | 0.236253  | -0.4613 | 0.645  | -0.12231401  | count | 1 |
| AP006623.1 | -0.251963  | 0.494685  | -0.5093 | 0.611  | -0.122145039 | count | 1 |
| VIPAS39    | -0.1093894 | 0.2004839 | -0.5456 | 0.585  | -0.122129549 | count | 1 |
| METTL18    | -0.0993119 | 0.186838  | -0.5315 | 0.595  | -0.122115816 | count | 1 |

|             |            |           |         |         |              |       |   |
|-------------|------------|-----------|---------|---------|--------------|-------|---|
| MORF4L2-AS1 | -0.2287288 | 0.5310688 | -0.4307 | 0.667   | -0.122080895 | count | 1 |
| BAG1        | -0.0862492 | 0.0609081 | -1.4161 | 0.157   | -0.122076775 | count | 1 |
| PAR6A       | -0.112642  | 0.2122898 | -0.5306 | 0.596   | -0.122056678 | count | 1 |
| TEAD3       | -0.0990214 | 0.163143  | -0.607  | 0.544   | -0.1220076   | count | 1 |
| TFAM        | -0.0887789 | 0.0958164 | -0.9266 | 0.354   | -0.121964824 | count | 1 |
| CMAS        | -0.0896981 | 0.110136  | -0.8144 | 0.415   | -0.121960716 | count | 1 |
| TUSC2       | -0.0897907 | 0.1034401 | -0.868  | 0.385   | -0.121945034 | count | 1 |
| USO1        | -0.0881307 | 0.0916135 | -0.962  | 0.336   | -0.121922553 | count | 1 |
| TLE6        | -0.4070629 | 0.6528032 | -0.6236 | 0.533   | -0.121918834 | count | 1 |
| UBALD2      | -0.0892483 | 0.0991742 | -0.8999 | 0.368   | -0.12189286  | count | 1 |
| C1D         | -0.0874607 | 0.0662135 | -1.3209 | 0.187   | -0.121858053 | count | 1 |
| ERAP1       | -0.0983229 | 0.1845301 | -0.5328 | 0.594   | -0.121855368 | count | 1 |
| C19orf66    | -0.089077  | 0.1100821 | -0.8092 | 0.418   | -0.121803597 | count | 1 |
| BEX3        | -0.0848715 | 0.0385885 | -2.1994 | 0.0279  | -0.12171093  | count | 1 |
| AC009812.4  | -0.4063158 | 0.686637  | -0.5917 | 0.554   | -0.121680156 | count | 1 |
| AF213884.3  | -0.4063158 | 0.8857935 | -0.4587 | 0.646   | -0.121680156 | count | 1 |
| COG4        | -0.0932654 | 0.1939498 | -0.4809 | 0.631   | -0.121633172 | count | 1 |
| UBE2M       | -0.0857238 | 0.0569199 | -1.506  | 0.132   | -0.12151786  | count | 1 |
| LARS2       | -0.210154  | 0.4579975 | -0.4589 | 0.646   | -0.121434806 | count | 1 |
| ATP5F1A     | -0.0852585 | 0.0534129 | -1.5962 | 0.111   | -0.121326402 | count | 1 |
| AC132872.1  | -0.4052065 | 0.6486255 | -0.6247 | 0.532   | -0.121325853 | count | 1 |
| PLXND1      | -0.0942525 | 0.1658698 | -0.5682 | 0.57    | -0.12132479  | count | 1 |
| AC002456.1  | -0.5514368 | 0.6704378 | -0.8225 | 0.411   | -0.121301136 | count | 1 |
| AC006483.2  | -0.5514368 | 0.7650159 | -0.7208 | 0.471   | -0.121301136 | count | 1 |
| CYTH4       | -0.5514368 | 0.8252858 | -0.6682 | 0.504   | -0.121301136 | count | 1 |
| SOD3        | -0.0841421 | 0.0316908 | -2.6551 | 0.00796 | -0.121165752 | count | 1 |
| SEC61G      | -0.0848071 | 0.0424132 | -1.9995 | 0.0456  | -0.12115679  | count | 1 |
| PLEKHA3     | -0.0865473 | 0.0777635 | -1.113  | 0.266   | -0.121077961 | count | 1 |
| ATF2        | -0.0916156 | 0.1243009 | -0.737  | 0.461   | -0.121038666 | count | 1 |
| PAK2        | -0.0856822 | 0.0664481 | -1.2895 | 0.197   | -0.120974606 | count | 1 |
| ZSCAN5A     | -0.1281834 | 0.4618991 | -0.2775 | 0.781   | -0.120783414 | count | 1 |
| AES         | -0.0847452 | 0.0512062 | -1.655  | 0.098   | -0.120715173 | count | 1 |
| AP4S1       | -0.1042342 | 0.2143012 | -0.4864 | 0.627   | -0.120711909 | count | 1 |
| AC243547.2  | -0.9537942 | 1.0293868 | -0.9266 | 0.354   | -0.120633396 | count | 1 |
| ASPM        | -0.9537942 | 1.0293868 | -0.9266 | 0.354   | -0.120633396 | count | 1 |
| LGALS8-AS1  | -0.9537942 | 1.0293868 | -0.9266 | 0.354   | -0.120633396 | count | 1 |
| MIR3945HG   | -0.9537942 | 1.0293868 | -0.9266 | 0.354   | -0.120633396 | count | 1 |
| GDNF-AS1    | -0.9537942 | 1.0293868 | -0.9266 | 0.354   | -0.120633396 | count | 1 |
| AC016596.1  | -0.9537942 | 1.0293868 | -0.9266 | 0.354   | -0.120633396 | count | 1 |
| AC084346.2  | -0.9537942 | 1.0293868 | -0.9266 | 0.354   | -0.120633396 | count | 1 |
| EPPK1       | -0.9537942 | 1.0293868 | -0.9266 | 0.354   | -0.120633396 | count | 1 |
| SCNN1A      | -0.9537942 | 1.0293868 | -0.9266 | 0.354   | -0.120633396 | count | 1 |
| CYP27B1     | -0.9537942 | 1.0293868 | -0.9266 | 0.354   | -0.120633396 | count | 1 |
| AC107032.2  | -0.9537942 | 1.0293868 | -0.9266 | 0.354   | -0.120633396 | count | 1 |
| AC026367.1  | -0.9537942 | 1.0293868 | -0.9266 | 0.354   | -0.120633396 | count | 1 |

|            |            |           |         |       |              |       |   |
|------------|------------|-----------|---------|-------|--------------|-------|---|
| MED4-AS1   | -0.9537942 | 1.0293868 | -0.9266 | 0.354 | -0.120633396 | count | 1 |
| LINC00565  | -0.9537942 | 1.0293868 | -0.9266 | 0.354 | -0.120633396 | count | 1 |
| AC024337.1 | -0.9537942 | 1.0293868 | -0.9266 | 0.354 | -0.120633396 | count | 1 |
| AC084809.1 | -0.9537942 | 1.0293868 | -0.9266 | 0.354 | -0.120633396 | count | 1 |
| AC020916.2 | -0.9537942 | 1.0293868 | -0.9266 | 0.354 | -0.120633396 | count | 1 |
| ZNF404     | -0.9537942 | 1.0293868 | -0.9266 | 0.354 | -0.120633396 | count | 1 |
| IFNLR1     | -0.9537942 | 1.1056466 | -0.8627 | 0.388 | -0.120633396 | count | 1 |
| NR5A2      | -0.9537942 | 1.1056466 | -0.8627 | 0.388 | -0.120633396 | count | 1 |
| AL512328.1 | -0.9537942 | 1.1056466 | -0.8627 | 0.388 | -0.120633396 | count | 1 |
| RGS7       | -0.9537942 | 1.1056466 | -0.8627 | 0.388 | -0.120633396 | count | 1 |
| C2orf50    | -0.9537942 | 1.1056466 | -0.8627 | 0.388 | -0.120633396 | count | 1 |
| MYCN       | -0.9537942 | 1.1056466 | -0.8627 | 0.388 | -0.120633396 | count | 1 |
| CFLAR-AS1  | -0.9537942 | 1.1056466 | -0.8627 | 0.388 | -0.120633396 | count | 1 |
| AC007370.2 | -0.9537942 | 1.1056466 | -0.8627 | 0.388 | -0.120633396 | count | 1 |
| 1-Mar      | -0.9537942 | 1.1056466 | -0.8627 | 0.388 | -0.120633396 | count | 1 |
| AC114947.2 | -0.9537942 | 1.1056466 | -0.8627 | 0.388 | -0.120633396 | count | 1 |
| FAM169A    | -0.9537942 | 1.1056466 | -0.8627 | 0.388 | -0.120633396 | count | 1 |
| LINC01933  | -0.9537942 | 1.1056466 | -0.8627 | 0.388 | -0.120633396 | count | 1 |
| AL096711.2 | -0.9537942 | 1.1056466 | -0.8627 | 0.388 | -0.120633396 | count | 1 |
| AC103724.4 | -0.9537942 | 1.1056466 | -0.8627 | 0.388 | -0.120633396 | count | 1 |
| TMEM229B   | -0.9537942 | 1.1056466 | -0.8627 | 0.388 | -0.120633396 | count | 1 |
| AC025043.1 | -0.9537942 | 1.1056466 | -0.8627 | 0.388 | -0.120633396 | count | 1 |
| PAQR5      | -0.9537942 | 1.1056466 | -0.8627 | 0.388 | -0.120633396 | count | 1 |
| AC046168.2 | -0.9537942 | 1.1056466 | -0.8627 | 0.388 | -0.120633396 | count | 1 |
| HBA2       | -0.9537942 | 1.1056466 | -0.8627 | 0.388 | -0.120633396 | count | 1 |
| BICDL2     | -0.9537942 | 1.1056466 | -0.8627 | 0.388 | -0.120633396 | count | 1 |
| AC087289.5 | -0.9537942 | 1.1056466 | -0.8627 | 0.388 | -0.120633396 | count | 1 |
| AC027601.4 | -0.9537942 | 1.1056466 | -0.8627 | 0.388 | -0.120633396 | count | 1 |
| MYO1F      | -0.9537942 | 1.1056466 | -0.8627 | 0.388 | -0.120633396 | count | 1 |
| NTN5       | -0.9537942 | 1.1056466 | -0.8627 | 0.388 | -0.120633396 | count | 1 |
| AC092070.3 | -0.9537942 | 1.1056466 | -0.8627 | 0.388 | -0.120633396 | count | 1 |
| HPF1       | -0.0862594 | 0.073571  | -1.1725 | 0.241 | -0.120550621 | count | 1 |
| NDUFB1     | -0.0846819 | 0.0511717 | -1.6549 | 0.098 | -0.120344501 | count | 1 |
| NQO2       | -0.0870979 | 0.0818729 | -1.0638 | 0.287 | -0.120314666 | count | 1 |
| AC145285.2 | -0.5464984 | 0.6478946 | -0.8435 | 0.399 | -0.12012054  | count | 1 |
| ASNA1      | -0.0870405 | 0.09224   | -0.9436 | 0.345 | -0.120084069 | count | 1 |
| EDARADD    | -0.9498162 | 0.7085965 | -1.3404 | 0.18  | -0.120075951 | count | 1 |
| BX890604.1 | -0.9498162 | 0.7085965 | -1.3404 | 0.18  | -0.120075951 | count | 1 |
| PFKL       | -0.0899819 | 0.1207792 | -0.745  | 0.456 | -0.11995453  | count | 1 |
| NSRP1      | -0.0847469 | 0.0639005 | -1.3262 | 0.185 | -0.119924485 | count | 1 |
| CMC1       | -0.0872885 | 0.0885826 | -0.9854 | 0.324 | -0.119722987 | count | 1 |
| KBTBD6     | -0.1192017 | 0.2612795 | -0.4562 | 0.648 | -0.119655917 | count | 1 |
| HAUS6      | -0.1083607 | 0.1828074 | -0.5928 | 0.553 | -0.119621713 | count | 1 |
| DCAF11     | -0.1004373 | 0.1779091 | -0.5645 | 0.572 | -0.119548563 | count | 1 |
| AL591846.2 | -0.1935136 | 0.4449749 | -0.4349 | 0.664 | -0.119527662 | count | 1 |

|            |            |           |         |         |              |       |   |
|------------|------------|-----------|---------|---------|--------------|-------|---|
| DHTKD1     | -0.1933904 | 0.3531116 | -0.5477 | 0.584   | -0.119449594 | count | 1 |
| ADAM32     | -0.2775538 | 0.483943  | -0.5735 | 0.566   | -0.119278783 | count | 1 |
| GRASP      | -0.0941198 | 0.1994753 | -0.4718 | 0.637   | -0.119276228 | count | 1 |
| KIAA0319L  | -0.101099  | 0.2450909 | -0.4125 | 0.68    | -0.119202286 | count | 1 |
| TRIP12     | -0.0870429 | 0.105886  | -0.822  | 0.411   | -0.119046704 | count | 1 |
| ATMIN      | -0.0898039 | 0.1412327 | -0.6359 | 0.525   | -0.118931201 | count | 1 |
| RANBP17    | -0.2056713 | 0.6348831 | -0.324  | 0.746   | -0.118770455 | count | 1 |
| TMEM200A   | -0.1052122 | 0.2481    | -0.4241 | 0.672   | -0.118659248 | count | 1 |
| CD2        | -0.9391266 | 0.6665373 | -1.409  | 0.159   | -0.118578801 | count | 1 |
| NHLRC1     | -0.1650327 | 0.4131938 | -0.3994 | 0.69    | -0.118529901 | count | 1 |
| USP27X-AS1 | -0.1650327 | 0.4923802 | -0.3352 | 0.738   | -0.118529901 | count | 1 |
| FANCA      | -0.2447543 | 1.031088  | -0.2374 | 0.812   | -0.118521471 | count | 1 |
| RAB11FIP3  | -0.1239755 | 0.2657217 | -0.4666 | 0.641   | -0.118490457 | count | 1 |
| CNBP       | -0.08256   | 0.0315206 | -2.6192 | 0.00885 | -0.118411248 | count | 1 |
| KLHDC3     | -0.0885591 | 0.1201901 | -0.7368 | 0.461   | -0.118288142 | count | 1 |
| DNAJC4     | -0.086709  | 0.1010569 | -0.858  | 0.391   | -0.118243129 | count | 1 |
| DPY30      | -0.0840403 | 0.0684301 | -1.2281 | 0.219   | -0.118107574 | count | 1 |
| RERE       | -0.0859588 | 0.1139793 | -0.7542 | 0.451   | -0.118040426 | count | 1 |
| SLC20A2    | -0.0938721 | 0.1557463 | -0.6027 | 0.547   | -0.117924977 | count | 1 |
| KDM4B      | -0.0964936 | 0.2312623 | -0.4172 | 0.677   | -0.117869922 | count | 1 |
| PRCC       | -0.0911015 | 0.1371086 | -0.6644 | 0.506   | -0.117738039 | count | 1 |
| CCNG1      | -0.0859451 | 0.1023232 | -0.8399 | 0.401   | -0.117624112 | count | 1 |
| PGAM5      | -0.1312253 | 0.3136329 | -0.4184 | 0.676   | -0.117569034 | count | 1 |
| FANCF      | -0.0987328 | 0.2065261 | -0.4781 | 0.633   | -0.117511171 | count | 1 |
| NEK3       | -0.0921194 | 0.2203468 | -0.4181 | 0.676   | -0.117494363 | count | 1 |
| SPIN4      | -0.1635024 | 0.4062228 | -0.4025 | 0.687   | -0.1174094   | count | 1 |
| NIN        | -0.0943987 | 0.1565489 | -0.603  | 0.547   | -0.117406296 | count | 1 |
| ZNF667-AS1 | -0.0855055 | 0.0940304 | -0.9093 | 0.363   | -0.117323146 | count | 1 |
| UPF3B      | -0.086984  | 0.12475   | -0.6973 | 0.486   | -0.117311882 | count | 1 |
| FAM161B    | -0.1089709 | 0.225701  | -0.4828 | 0.629   | -0.117241493 | count | 1 |
| CDC42SE2   | -0.0957299 | 0.1633073 | -0.5862 | 0.558   | -0.117194078 | count | 1 |
| CFAP57     | -0.391523  | 0.6979172 | -0.561  | 0.575   | -0.11696404  | count | 1 |
| EPM2A      | -0.0991962 | 0.3183322 | -0.3116 | 0.755   | -0.116948829 | count | 1 |
| IPO9-AS1   | -0.2192999 | 0.4247276 | -0.5163 | 0.606   | -0.116888344 | count | 1 |
| PITPNA-AS1 | -0.0920857 | 0.1369654 | -0.6723 | 0.501   | -0.116849298 | count | 1 |
| AL355488.1 | -0.9260301 | 0.8549891 | -1.0831 | 0.279   | -0.116746271 | count | 1 |
| AL139412.1 | -0.9260301 | 0.8549891 | -1.0831 | 0.279   | -0.116746271 | count | 1 |
| LINC01963  | -0.9260301 | 0.8549891 | -1.0831 | 0.279   | -0.116746271 | count | 1 |
| MYH3       | -0.9260301 | 0.8549891 | -1.0831 | 0.279   | -0.116746271 | count | 1 |
| AF129408.1 | -0.9260301 | 0.8549891 | -1.0831 | 0.279   | -0.116746271 | count | 1 |
| AP004609.1 | -0.9260301 | 0.9226737 | -1.0036 | 0.316   | -0.116746271 | count | 1 |
| AC005224.1 | -0.9260301 | 1.044973  | -0.8862 | 0.376   | -0.116746271 | count | 1 |
| PRTFDC1    | -0.0889319 | 0.1401123 | -0.6347 | 0.526   | -0.116693336 | count | 1 |
| VIPR2      | -0.1002126 | 0.2286084 | -0.4384 | 0.661   | -0.116482969 | count | 1 |
| RRM1       | -0.0951322 | 0.1487107 | -0.6397 | 0.522   | -0.116459783 | count | 1 |

|            |            |           |         |        |              |       |   |
|------------|------------|-----------|---------|--------|--------------|-------|---|
| LCP1       | -0.3164421 | 0.6090115 | -0.5196 | 0.603  | -0.116458873 | count | 1 |
| ZBTB7B     | -0.111577  | 0.2927323 | -0.3812 | 0.703  | -0.116368976 | count | 1 |
| PURA       | -0.0823603 | 0.0645723 | -1.2755 | 0.202  | -0.116367236 | count | 1 |
| KIF18A     | -0.201529  | 0.7053083 | -0.2857 | 0.775  | -0.116311076 | count | 1 |
| GFOD2      | -0.0993259 | 0.216824  | -0.4581 | 0.647  | -0.116300273 | count | 1 |
| RABIF      | -0.0941508 | 0.1633036 | -0.5765 | 0.564  | -0.116218775 | count | 1 |
| NT5C       | -0.0827358 | 0.065534  | -1.2625 | 0.207  | -0.116179968 | count | 1 |
| RNF20      | -0.0896615 | 0.1141337 | -0.7856 | 0.432  | -0.11587274  | count | 1 |
| MAN1B1-DT  | -0.1500058 | 0.2903651 | -0.5166 | 0.605  | -0.115866657 | count | 1 |
| PPP6R1     | -0.1180108 | 0.2220149 | -0.5315 | 0.595  | -0.115741784 | count | 1 |
| UBE2V1     | -0.1002936 | 0.199249  | -0.5034 | 0.615  | -0.115660382 | count | 1 |
| GFER       | -0.089222  | 0.1652235 | -0.54   | 0.589  | -0.11563517  | count | 1 |
| HNRNPD     | -0.0814661 | 0.0517493 | -1.5742 | 0.116  | -0.115453857 | count | 1 |
| CLIC3      | -0.0835228 | 0.1392524 | -0.5998 | 0.549  | -0.115336256 | count | 1 |
| PRKRA      | -0.0833418 | 0.0858655 | -0.9706 | 0.332  | -0.115308285 | count | 1 |
| AL034417.3 | -0.3134284 | 0.5036529 | -0.6223 | 0.534  | -0.115292904 | count | 1 |
| EREG       | -0.9149993 | 0.7209173 | -1.2692 | 0.204  | -0.115204374 | count | 1 |
| TOX3       | -0.100698  | 0.4693484 | -0.2145 | 0.83   | -0.1151461   | count | 1 |
| DALRD3     | -0.0863743 | 0.1262746 | -0.684  | 0.494  | -0.115137502 | count | 1 |
| FEM1B      | -0.0948568 | 0.1490788 | -0.6363 | 0.525  | -0.115049195 | count | 1 |
| MAML3      | -0.1760003 | 0.2830806 | -0.6217 | 0.534  | -0.115040428 | count | 1 |
| DR1        | -0.084274  | 0.1067643 | -0.7893 | 0.43   | -0.115035005 | count | 1 |
| FERMT2     | -0.0806424 | 0.0488692 | -1.6502 | 0.099  | -0.114978441 | count | 1 |
| ACSF2      | -0.1307643 | 0.37052   | -0.3529 | 0.724  | -0.114860626 | count | 1 |
| AGER       | -0.9123463 | 0.7534289 | -1.2109 | 0.226  | -0.114833756 | count | 1 |
| MREG       | -0.1670608 | 0.5592259 | -0.2987 | 0.765  | -0.114780009 | count | 1 |
| ARFRP1     | -0.0843728 | 0.1186119 | -0.7113 | 0.477  | -0.114776202 | count | 1 |
| LINC01089  | -0.1011711 | 0.230517  | -0.4389 | 0.661  | -0.114633446 | count | 1 |
| ZNF292     | -0.0829158 | 0.1040307 | -0.797  | 0.425  | -0.114443441 | count | 1 |
| MRPL37     | -0.0830743 | 0.1120525 | -0.7414 | 0.459  | -0.11427135  | count | 1 |
| ZFP62      | -0.1061927 | 0.2321894 | -0.4574 | 0.647  | -0.114232768 | count | 1 |
| AC104984.3 | -0.3823192 | 0.7893847 | -0.4843 | 0.628  | -0.114039235 | count | 1 |
| SRA1       | -0.0823403 | 0.0855768 | -0.9622 | 0.336  | -0.114016574 | count | 1 |
| BAP1       | -0.1001232 | 0.2174106 | -0.4605 | 0.645  | -0.11397165  | count | 1 |
| COA3       | -0.080731  | 0.0625384 | -1.2909 | 0.197  | -0.113963711 | count | 1 |
| EEF1AKMT4  | -0.1355234 | 0.3801672 | -0.3565 | 0.721  | -0.113860319 | count | 1 |
| SOCS4      | -0.0857816 | 0.1660726 | -0.5165 | 0.606  | -0.113858417 | count | 1 |
| FAM213B    | -0.1227644 | 0.409334  | -0.2999 | 0.764  | -0.113829021 | count | 1 |
| FAM3A      | -0.083691  | 0.1102676 | -0.759  | 0.448  | -0.113815621 | count | 1 |
| LINC01023  | -0.1388524 | 0.347887  | -0.3991 | 0.69   | -0.113730062 | count | 1 |
| ZC3HC1     | -0.1012935 | 0.2261135 | -0.448  | 0.654  | -0.113638692 | count | 1 |
| LINC00893  | -0.1205229 | 0.3141423 | -0.3837 | 0.701  | -0.113492195 | count | 1 |
| XAF1       | -0.0837241 | 0.1534898 | -0.5455 | 0.585  | -0.113487792 | count | 1 |
| HSPE1      | -0.0797368 | 0.0506681 | -1.5737 | 0.116  | -0.113456234 | count | 1 |
| LAMTOR4    | -0.0795504 | 0.0436613 | -1.822  | 0.0685 | -0.113454733 | count | 1 |



|            |            |           |         |        |              |       |   |
|------------|------------|-----------|---------|--------|--------------|-------|---|
| FMNL3      | -0.1000236 | 0.3154318 | -0.3171 | 0.751  | -0.113326428 | count | 1 |
| PARG       | -0.096783  | 0.184703  | -0.524  | 0.6    | -0.113309509 | count | 1 |
| TFE3       | -0.0933015 | 0.1934193 | -0.4824 | 0.63   | -0.113155936 | count | 1 |
| MORC2      | -0.1013949 | 0.3426299 | -0.2959 | 0.767  | -0.113154069 | count | 1 |
| RAB8A      | -0.0814849 | 0.092048  | -0.8852 | 0.376  | -0.11303706  | count | 1 |
| PTPN2      | -0.0836474 | 0.1076386 | -0.7771 | 0.437  | -0.11300841  | count | 1 |
| TMEM260    | -0.1035872 | 0.2524659 | -0.4103 | 0.682  | -0.112924265 | count | 1 |
| DIDO1      | -0.086098  | 0.1565042 | -0.5501 | 0.582  | -0.112884583 | count | 1 |
| AL358852.1 | -0.164335  | 0.4584749 | -0.3584 | 0.72   | -0.112868947 | count | 1 |
| ANAPC2     | -0.1285119 | 0.3383787 | -0.3798 | 0.704  | -0.112858147 | count | 1 |
| LANCL1     | -0.0884471 | 0.2505125 | -0.3531 | 0.724  | -0.112798706 | count | 1 |
| ARMCX4     | -0.103351  | 0.2449535 | -0.4219 | 0.673  | -0.112665185 | count | 1 |
| BARX1      | -0.0888969 | 0.2402026 | -0.3701 | 0.711  | -0.112639786 | count | 1 |
| R3HCC1     | -0.0826395 | 0.1064444 | -0.7764 | 0.438  | -0.112628933 | count | 1 |
| TEC        | -0.3776057 | 0.5238665 | -0.7208 | 0.471  | -0.112544209 | count | 1 |
| ZNF704     | -0.0808506 | 0.0897458 | -0.9009 | 0.368  | -0.112527807 | count | 1 |
| TOE1       | -0.0993161 | 0.2353872 | -0.4219 | 0.673  | -0.112520647 | count | 1 |
| FAM107B    | -0.0830974 | 0.1281804 | -0.6483 | 0.517  | -0.112455494 | count | 1 |
| PSMD8      | -0.0784838 | 0.0409653 | -1.9159 | 0.0555 | -0.112125872 | count | 1 |
| PEX26      | -0.0994438 | 0.2084883 | -0.477  | 0.633  | -0.112119094 | count | 1 |
| AC121247.1 | -0.1941666 | 0.6268793 | -0.3097 | 0.757  | -0.1119462   | count | 1 |
| ZNF654     | -0.0970812 | 0.2114462 | -0.4591 | 0.646  | -0.111938113 | count | 1 |
| MAZ        | -0.0823103 | 0.0894802 | -0.9199 | 0.358  | -0.111806817 | count | 1 |
| AIMP2      | -0.0850228 | 0.1300725 | -0.6537 | 0.513  | -0.111793367 | count | 1 |
| TMA7       | -0.0780125 | 0.0341128 | -2.2869 | 0.0223 | -0.111762356 | count | 1 |
| REEP4      | -0.1248097 | 0.4039053 | -0.309  | 0.757  | -0.111755395 | count | 1 |
| GTPBP6     | -0.0834095 | 0.1094831 | -0.7618 | 0.446  | -0.111609157 | count | 1 |
| ZNF185     | -0.1624781 | 0.5355305 | -0.3034 | 0.762  | -0.111567749 | count | 1 |
| BCOR       | -0.1005178 | 0.2744173 | -0.3663 | 0.714  | -0.111553613 | count | 1 |
| SLC6A1     | -0.8873819 | 0.5647996 | -1.5711 | 0.116  | -0.111350907 | count | 1 |
| FXR2       | -0.0956778 | 0.1904487 | -0.5024 | 0.615  | -0.111187899 | count | 1 |
| CCDC25     | -0.079169  | 0.0773494 | -1.0235 | 0.306  | -0.111094641 | count | 1 |
| FAM184A    | -0.0995535 | 0.2378397 | -0.4186 | 0.676  | -0.111087771 | count | 1 |
| MON1A      | -0.1197093 | 0.2735181 | -0.4377 | 0.662  | -0.110966894 | count | 1 |
| TICAM1     | -0.1197093 | 0.2870378 | -0.4171 | 0.677  | -0.110966894 | count | 1 |
| AP001160.3 | -0.1615068 | 0.4055017 | -0.3983 | 0.69   | -0.110887347 | count | 1 |
| KLHL42     | -0.082078  | 0.114914  | -0.7143 | 0.475  | -0.110807137 | count | 1 |
| SLC6A16    | -0.1544673 | 0.3538208 | -0.4366 | 0.662  | -0.110801474 | count | 1 |
| ACTR3      | -0.0787698 | 0.0611274 | -1.2886 | 0.198  | -0.11079809  | count | 1 |
| HACD2      | -0.0859705 | 0.1417328 | -0.6066 | 0.544  | -0.110755752 | count | 1 |
| LSM3       | -0.0780134 | 0.0589077 | -1.3243 | 0.185  | -0.110671786 | count | 1 |
| YWHAB      | -0.0771448 | 0.0322688 | -2.3907 | 0.0169 | -0.110627811 | count | 1 |
| CEBPB-AS1  | -0.1692319 | 0.3530648 | -0.4793 | 0.632  | -0.110519367 | count | 1 |
| AC005332.4 | -0.1387268 | 0.5128011 | -0.2705 | 0.787  | -0.110444215 | count | 1 |
| AC007563.2 | -0.1539562 | 0.4141869 | -0.3717 | 0.71   | -0.110428068 | count | 1 |

|            |            |           |         |        |              |       |   |
|------------|------------|-----------|---------|--------|--------------|-------|---|
| BAZ1B      | -0.0805473 | 0.1003437 | -0.8027 | 0.422  | -0.110398278 | count | 1 |
| FBXO9      | -0.0784141 | 0.0821645 | -0.9544 | 0.34   | -0.110239089 | count | 1 |
| MSI2       | -0.0853961 | 0.1788011 | -0.4776 | 0.633  | -0.110238817 | count | 1 |
| AL359555.4 | -0.2571989 | 0.4567533 | -0.5631 | 0.573  | -0.11017529  | count | 1 |
| DNAJA2     | -0.0788906 | 0.074939  | -1.0527 | 0.293  | -0.110143786 | count | 1 |
| FAM200B    | -0.0789592 | 0.0770616 | -1.0246 | 0.306  | -0.110048022 | count | 1 |
| SMC2       | -0.0852039 | 0.12432   | -0.6854 | 0.493  | -0.109990155 | count | 1 |
| PGLS       | -0.0776376 | 0.057135  | -1.3588 | 0.174  | -0.109958896 | count | 1 |
| HLA-G      | -0.5036685 | 0.7497424 | -0.6718 | 0.502  | -0.109938946 | count | 1 |
| EFNB1      | -0.094555  | 0.2540576 | -0.3722 | 0.71   | -0.109877191 | count | 1 |
| MAP3K4     | -0.0854039 | 0.1371424 | -0.6227 | 0.533  | -0.109791472 | count | 1 |
| ZBED3      | -0.0846923 | 0.171894  | -0.4927 | 0.622  | -0.109752055 | count | 1 |
| SLC9A6     | -0.1183231 | 0.2950194 | -0.4011 | 0.688  | -0.109668715 | count | 1 |
| BOLA3      | -0.0794079 | 0.097417  | -0.8151 | 0.415  | -0.109666212 | count | 1 |
| CGAS       | -0.0950321 | 0.2296573 | -0.4138 | 0.679  | -0.10956436  | count | 1 |
| PABPC1L    | -0.5019014 | 0.5982577 | -0.8389 | 0.402  | -0.109521148 | count | 1 |
| AC093525.6 | -0.36804   | 0.5597162 | -0.6575 | 0.511  | -0.109516185 | count | 1 |
| LITAF      | -0.077237  | 0.0589668 | -1.3098 | 0.19   | -0.10949432  | count | 1 |
| CXCL3      | -0.0892415 | 0.4107275 | -0.2173 | 0.828  | -0.109461611 | count | 1 |
| ZNF768     | -0.1010813 | 0.2417001 | -0.4182 | 0.676  | -0.109452852 | count | 1 |
| AP000911.1 | -0.2981412 | 0.7198339 | -0.4142 | 0.679  | -0.109393613 | count | 1 |
| AL121672.2 | -0.2981412 | 0.8137946 | -0.3664 | 0.714  | -0.109393613 | count | 1 |
| SBF2-AS1   | -0.1301775 | 0.3531213 | -0.3686 | 0.712  | -0.109309991 | count | 1 |
| VPS33A     | -0.1008924 | 0.2288381 | -0.4409 | 0.659  | -0.109247047 | count | 1 |
| ADCK2      | -0.0995424 | 0.2171579 | -0.4584 | 0.647  | -0.109173096 | count | 1 |
| USP4       | -0.0921553 | 0.1827256 | -0.5043 | 0.614  | -0.108969722 | count | 1 |
| SPDL1      | -0.1216969 | 0.278833  | -0.4365 | 0.663  | -0.108936959 | count | 1 |
| CCDC85C    | -0.4993458 | 0.585841  | -0.8524 | 0.394  | -0.108917241 | count | 1 |
| CLBA1      | -0.2539641 | 0.3246124 | -0.7824 | 0.434  | -0.108733306 | count | 1 |
| ELAC1      | -0.0921396 | 0.2391769 | -0.3852 | 0.7    | -0.10859496  | count | 1 |
| ARID3B     | -0.1761743 | 0.4671688 | -0.3771 | 0.706  | -0.10856384  | count | 1 |
| UBR7       | -0.0909582 | 0.2303905 | -0.3948 | 0.693  | -0.108221728 | count | 1 |
| PPAN       | -0.101336  | 0.1795176 | -0.5645 | 0.572  | -0.108188556 | count | 1 |
| AC087190.1 | -0.1148282 | 0.3104258 | -0.3699 | 0.711  | -0.108077692 | count | 1 |
| DZIP1L     | -0.0967406 | 0.2378976 | -0.4066 | 0.684  | -0.107932087 | count | 1 |
| PRDX5      | -0.0754312 | 0.0393707 | -1.9159 | 0.0555 | -0.10789748  | count | 1 |
| ETAA1      | -0.0828016 | 0.1531545 | -0.5406 | 0.589  | -0.107869707 | count | 1 |
| AC019069.1 | -0.8619626 | 0.7962952 | -1.0825 | 0.279  | -0.107813892 | count | 1 |
| SCAF1      | -0.1016971 | 0.2379093 | -0.4275 | 0.669  | -0.107752835 | count | 1 |
| AC053503.5 | -0.2938411 | 0.6120098 | -0.4801 | 0.631  | -0.107738832 | count | 1 |
| AL353708.1 | -0.2938411 | 0.6432623 | -0.4568 | 0.648  | -0.107738832 | count | 1 |
| GRB2       | -0.0772707 | 0.0778865 | -0.9921 | 0.321  | -0.107703535 | count | 1 |
| FMOD       | -0.0768018 | 0.0965382 | -0.7956 | 0.426  | -0.107674339 | count | 1 |
| RAG1       | -0.4938185 | 0.6828052 | -0.7232 | 0.47   | -0.107612438 | count | 1 |
| CCDC175    | -0.4938185 | 0.7710377 | -0.6405 | 0.522  | -0.107612438 | count | 1 |

|            |            |           |         |          |              |       |   |
|------------|------------|-----------|---------|----------|--------------|-------|---|
| C11orf21   | -0.4938185 | 0.7864668 | -0.6279 | 0.53     | -0.107612438 | count | 1 |
| ZNF672     | -0.0969129 | 0.2067608 | -0.4687 | 0.639    | -0.107530979 | count | 1 |
| FAM122B    | -0.1179749 | 0.2765363 | -0.4266 | 0.67     | -0.107512541 | count | 1 |
| SBDS       | -0.07486   | 0.0331793 | -2.2562 | 0.0241   | -0.107401554 | count | 1 |
| MAGOH      | -0.0763374 | 0.0668179 | -1.1425 | 0.253    | -0.107375043 | count | 1 |
| TMEM62     | -0.1094421 | 0.3017196 | -0.3627 | 0.717    | -0.107266109 | count | 1 |
| NTNG2      | -0.1081525 | 0.3085101 | -0.3506 | 0.726    | -0.107265252 | count | 1 |
| VPS72      | -0.079033  | 0.115082  | -0.6868 | 0.492    | -0.107188371 | count | 1 |
| TMEM104    | -0.22209   | 0.3537308 | -0.6279 | 0.53     | -0.107174496 | count | 1 |
| ARL3       | -0.0756817 | 0.0579997 | -1.3049 | 0.192    | -0.107055517 | count | 1 |
| RNF214     | -0.0799738 | 0.1074819 | -0.7441 | 0.457    | -0.107054158 | count | 1 |
| DTD1       | -0.0788168 | 0.1165421 | -0.6763 | 0.499    | -0.106927666 | count | 1 |
| TMEM189    | -0.0957727 | 0.2028252 | -0.4722 | 0.637    | -0.106846451 | count | 1 |
| GMPS       | -0.0791438 | 0.1007491 | -0.7856 | 0.432    | -0.106802568 | count | 1 |
| MT-ND4     | -0.0740877 | 0.0212099 | -3.4931 | 0.000483 | -0.106800005 | count | 1 |
| DERL1      | -0.0786793 | 0.1203602 | -0.6537 | 0.513    | -0.106740907 | count | 1 |
| PRKD2      | -0.088824  | 0.2820523 | -0.3149 | 0.753    | -0.106591972 | count | 1 |
| TOP1       | -0.0756466 | 0.072276  | -1.0466 | 0.295    | -0.106564122 | count | 1 |
| CCDC149    | -0.0871712 | 0.2032141 | -0.429  | 0.668    | -0.106444897 | count | 1 |
| PHF13      | -0.0820339 | 0.1919977 | -0.4273 | 0.669    | -0.106398427 | count | 1 |
| ANKRD34A   | -0.1846133 | 0.5515081 | -0.3347 | 0.738    | -0.10629461  | count | 1 |
| ING4       | -0.0812262 | 0.1205392 | -0.6739 | 0.5      | -0.106159607 | count | 1 |
| CD47       | -0.0749891 | 0.0585402 | -1.281  | 0.2      | -0.106010268 | count | 1 |
| MAP3K7     | -0.0849503 | 0.1654109 | -0.5136 | 0.608    | -0.105808601 | count | 1 |
| GAB1       | -0.0845623 | 0.1576311 | -0.5365 | 0.592    | -0.105685032 | count | 1 |
| RTF1       | -0.0746233 | 0.0586295 | -1.2728 | 0.203    | -0.105478784 | count | 1 |
| MKL1       | -0.100332  | 0.2593098 | -0.3869 | 0.699    | -0.105448297 | count | 1 |
| AC007114.1 | -0.1288557 | 0.2925526 | -0.4405 | 0.66     | -0.10543188  | count | 1 |
| PLEKHF2    | -0.0840577 | 0.166261  | -0.5056 | 0.613    | -0.105396376 | count | 1 |
| ABCG1      | -0.1288113 | 0.2588813 | -0.4976 | 0.619    | -0.105395057 | count | 1 |
| FUNDC2     | -0.0742514 | 0.0540626 | -1.3734 | 0.17     | -0.105333279 | count | 1 |
| CRADD      | -0.0960208 | 0.2428402 | -0.3954 | 0.693    | -0.10528893  | count | 1 |
| C3orf33    | -0.1286706 | 0.3665199 | -0.3511 | 0.726    | -0.105278378 | count | 1 |
| PCDHB6     | -0.4838723 | 0.4706406 | -1.0281 | 0.304    | -0.105269116 | count | 1 |
| EXOC3-AS1  | -0.1087135 | 0.271262  | -0.4008 | 0.689    | -0.105196853 | count | 1 |
| AC124312.1 | -0.1533402 | 0.3453675 | -0.444  | 0.657    | -0.105172583 | count | 1 |
| FAM229B    | -0.0763176 | 0.0913047 | -0.8359 | 0.403    | -0.105155552 | count | 1 |
| HHAT       | -0.3540365 | 0.4675614 | -0.7572 | 0.449    | -0.105098023 | count | 1 |
| DIS3L      | -0.0945477 | 0.2013241 | -0.4696 | 0.639    | -0.104892545 | count | 1 |
| NPTN       | -0.0738168 | 0.0571394 | -1.2919 | 0.196    | -0.104818341 | count | 1 |
| PFDN1      | -0.0745605 | 0.0653485 | -1.141  | 0.254    | -0.104737094 | count | 1 |
| CENPO      | -0.2857624 | 0.7456354 | -0.3832 | 0.702    | -0.10463548  | count | 1 |
| CDCA8      | -0.2857624 | 0.798196  | -0.358  | 0.72     | -0.10463548  | count | 1 |
| SLC44A2    | -0.0777359 | 0.15072   | -0.5158 | 0.606    | -0.104584032 | count | 1 |
| EIF3B      | -0.0793166 | 0.1298523 | -0.6108 | 0.541    | -0.104421077 | count | 1 |

|            |            |           |         |       |              |       |   |
|------------|------------|-----------|---------|-------|--------------|-------|---|
| ERI2       | -0.1109549 | 0.3633873 | -0.3053 | 0.76  | -0.10439776  | count | 1 |
| CREM       | -0.075665  | 0.1174549 | -0.6442 | 0.519 | -0.104394093 | count | 1 |
| HLA-A      | -0.0725498 | 0.030378  | -2.3882 | 0.017 | -0.104325939 | count | 1 |
| FAT4       | -0.079929  | 0.1537032 | -0.52   | 0.603 | -0.104293285 | count | 1 |
| EIF3J-DT   | -0.0766285 | 0.1104018 | -0.6941 | 0.488 | -0.104258955 | count | 1 |
| EBNA1BP2   | -0.0753735 | 0.0807346 | -0.9336 | 0.351 | -0.103974766 | count | 1 |
| ZNF333     | -0.1088699 | 0.2271515 | -0.4793 | 0.632 | -0.103924063 | count | 1 |
| DCXR       | -0.0747021 | 0.0695765 | -1.0737 | 0.283 | -0.103697241 | count | 1 |
| AL359736.1 | -0.8317595 | 0.6765568 | -1.2294 | 0.219 | -0.103624917 | count | 1 |
| ACTN1-AS1  | -0.8317595 | 0.6765568 | -1.2294 | 0.219 | -0.103624917 | count | 1 |
| AC091563.1 | -0.8317595 | 0.8078351 | -1.0296 | 0.303 | -0.103624917 | count | 1 |
| AC125494.2 | -0.8317595 | 0.8078351 | -1.0296 | 0.303 | -0.103624917 | count | 1 |
| ASB12      | -0.8317595 | 0.8638264 | -0.9629 | 0.336 | -0.103624917 | count | 1 |
| PACS1      | -0.0856692 | 0.1518899 | -0.564  | 0.573 | -0.103609975 | count | 1 |
| ANKRD54    | -0.0831426 | 0.1830259 | -0.4543 | 0.65  | -0.103550716 | count | 1 |
| UQCC1      | -0.1001793 | 0.3449306 | -0.2904 | 0.772 | -0.103474482 | count | 1 |
| PCDHGA12   | -0.0922296 | 0.2434169 | -0.3789 | 0.705 | -0.103418868 | count | 1 |
| TASP1      | -0.0854495 | 0.1534505 | -0.5569 | 0.578 | -0.103343357 | count | 1 |
| ATP9A      | -0.0855713 | 0.2110688 | -0.4054 | 0.685 | -0.103226246 | count | 1 |
| DENR       | -0.0748482 | 0.0907673 | -0.8246 | 0.41  | -0.103198716 | count | 1 |
| AC019171.1 | -0.15051   | 0.3625041 | -0.4152 | 0.678 | -0.103194608 | count | 1 |
| LINC00619  | -0.8274785 | 0.7906383 | -1.0466 | 0.295 | -0.103032478 | count | 1 |
| AL512353.1 | -0.1939876 | 0.6023962 | -0.322  | 0.747 | -0.103012008 | count | 1 |
| NOP14-AS1  | -0.093907  | 0.259482  | -0.3619 | 0.717 | -0.102958234 | count | 1 |
| CLASP1     | -0.0839323 | 0.216862  | -0.387  | 0.699 | -0.102929235 | count | 1 |
| TRIM39     | -0.133368  | 0.3660017 | -0.3644 | 0.716 | -0.102823676 | count | 1 |
| TRIM45     | -0.1936271 | 0.570448  | -0.3394 | 0.734 | -0.102815056 | count | 1 |
| TMEM42     | -0.080803  | 0.1536588 | -0.5259 | 0.599 | -0.102767815 | count | 1 |
| SERTAD2    | -0.078138  | 0.1618962 | -0.4826 | 0.629 | -0.102725281 | count | 1 |
| DUSP12     | -0.0774086 | 0.1326275 | -0.5837 | 0.559 | -0.102550503 | count | 1 |
| BUB3       | -0.0741015 | 0.0850349 | -0.8714 | 0.384 | -0.102543117 | count | 1 |
| TTC3       | -0.0721703 | 0.0658002 | -1.0968 | 0.273 | -0.102539951 | count | 1 |
| PSMB8      | -0.0728443 | 0.0645454 | -1.1286 | 0.259 | -0.102536998 | count | 1 |
| LINC02361  | -0.2397961 | 0.4694959 | -0.5108 | 0.61  | -0.102433184 | count | 1 |
| C5orf24    | -0.0729295 | 0.0690135 | -1.0567 | 0.291 | -0.102100603 | count | 1 |
| SGCB       | -0.0722244 | 0.065291  | -1.1062 | 0.269 | -0.101996744 | count | 1 |
| TMF1       | -0.0734659 | 0.0754533 | -0.9737 | 0.33  | -0.101955392 | count | 1 |
| DCUN1D5    | -0.074934  | 0.1026243 | -0.7302 | 0.465 | -0.101893852 | count | 1 |
| URB1-AS1   | -0.0947342 | 0.2938264 | -0.3224 | 0.747 | -0.101833813 | count | 1 |
| TGDS       | -0.0815963 | 0.1799442 | -0.4535 | 0.65  | -0.101795747 | count | 1 |
| VMO1       | -0.1914761 | 0.3844702 | -0.498  | 0.618 | -0.101640296 | count | 1 |
| DOPEY1     | -0.0888775 | 0.2081139 | -0.4271 | 0.669 | -0.101568302 | count | 1 |
| COX5A      | -0.0714405 | 0.0538066 | -1.3277 | 0.184 | -0.10148924  | count | 1 |
| LRCH2      | -0.0937193 | 0.2270277 | -0.4128 | 0.68  | -0.101435281 | count | 1 |
| TMEM230    | -0.0711857 | 0.0438212 | -1.6245 | 0.104 | -0.10137158  | count | 1 |

|            |            |           |         |        |              |       |   |
|------------|------------|-----------|---------|--------|--------------|-------|---|
| LINC01011  | -0.1236941 | 0.3376708 | -0.3663 | 0.714  | -0.101153601 | count | 1 |
| AL162258.2 | -0.2366673 | 0.5247584 | -0.451  | 0.652  | -0.101045331 | count | 1 |
| PYROXD1    | -0.0820309 | 0.182948  | -0.4484 | 0.654  | -0.1010113   | count | 1 |
| JMY        | -0.0778337 | 0.1405157 | -0.5539 | 0.58   | -0.100940123 | count | 1 |
| C8orf88    | -0.0773906 | 0.1267512 | -0.6106 | 0.542  | -0.100721604 | count | 1 |
| SFXN5      | -0.0844192 | 0.3035276 | -0.2781 | 0.781  | -0.100712795 | count | 1 |
| ATP5MC3    | -0.0703039 | 0.0361549 | -1.9445 | 0.0519 | -0.100706522 | count | 1 |
| NONO       | -0.0731715 | 0.0813577 | -0.8994 | 0.369  | -0.100675071 | count | 1 |
| ATP6V1G1   | -0.0702588 | 0.0356937 | -1.9684 | 0.0491 | -0.100602277 | count | 1 |
| EIF2B4     | -0.0782006 | 0.1453449 | -0.538  | 0.591  | -0.100511687 | count | 1 |
| RBM23      | -0.0782573 | 0.1363095 | -0.5741 | 0.566  | -0.100475113 | count | 1 |
| ANKRD13A   | -0.0788931 | 0.189921  | -0.4154 | 0.678  | -0.100461091 | count | 1 |
| RELN       | -0.8083895 | 0.860306  | -0.9397 | 0.347  | -0.100394936 | count | 1 |
| CUEDC2     | -0.0714912 | 0.0723366 | -0.9883 | 0.323  | -0.100340221 | count | 1 |
| CUX1       | -0.0713858 | 0.0866089 | -0.8242 | 0.41   | -0.100292614 | count | 1 |
| NDUFAB1    | -0.0703023 | 0.0430016 | -1.6349 | 0.102  | -0.100289754 | count | 1 |
| SIAE       | -0.1009625 | 0.3641297 | -0.2773 | 0.782  | -0.100079009 | count | 1 |
| LARP1B     | -0.0765064 | 0.170034  | -0.4499 | 0.653  | -0.10005851  | count | 1 |
| THBD       | -0.0742236 | 0.1280518 | -0.5796 | 0.562  | -0.099891992 | count | 1 |
| ZBTB48     | -0.0878065 | 0.225392  | -0.3896 | 0.697  | -0.099887397 | count | 1 |
| R3HDM1     | -0.0765534 | 0.1587735 | -0.4822 | 0.63   | -0.099880718 | count | 1 |
| METAP2     | -0.0707829 | 0.0688906 | -1.0275 | 0.304  | -0.099856118 | count | 1 |
| SAXO2      | -0.1616765 | 0.5606616 | -0.2884 | 0.773  | -0.099432741 | count | 1 |
| SOX8       | -0.118513  | 0.4642485 | -0.2553 | 0.799  | -0.099397315 | count | 1 |
| SNRPC      | -0.0706061 | 0.0683409 | -1.0331 | 0.302  | -0.099273269 | count | 1 |
| AC097534.2 | -0.0772352 | 0.172522  | -0.4477 | 0.654  | -0.099268253 | count | 1 |
| AC010491.1 | -0.14469   | 0.5603056 | -0.2582 | 0.796  | -0.099131209 | count | 1 |
| AC011374.2 | -0.4573836 | 0.5289812 | -0.8647 | 0.387  | -0.099058013 | count | 1 |
| CMTM5      | -0.1106618 | 0.3078338 | -0.3595 | 0.719  | -0.098957592 | count | 1 |
| UBE2G2     | -0.0717565 | 0.0985202 | -0.7283 | 0.466  | -0.098948958 | count | 1 |
| CA3        | -0.456719  | 0.7121164 | -0.6414 | 0.521  | -0.098902739 | count | 1 |
| C5orf51    | -0.0758106 | 0.1374841 | -0.5514 | 0.581  | -0.098828334 | count | 1 |
| C8orf58    | -0.1020698 | 0.2672722 | -0.3819 | 0.703  | -0.09871501  | count | 1 |
| CLPTM1     | -0.0736787 | 0.1217838 | -0.605  | 0.545  | -0.098616309 | count | 1 |
| PRDM1      | -0.4554749 | 0.4236306 | -1.0752 | 0.282  | -0.098612147 | count | 1 |
| AP000808.1 | -0.2048634 | 0.6196686 | -0.3306 | 0.741  | -0.098597138 | count | 1 |
| C11orf54   | -0.0722091 | 0.1397326 | -0.5168 | 0.605  | -0.098450556 | count | 1 |
| IRF2       | -0.0708051 | 0.0836282 | -0.8467 | 0.397  | -0.09844258  | count | 1 |
| SSB        | -0.0688602 | 0.0424019 | -1.624  | 0.1045 | -0.098374824 | count | 1 |
| VPS9D1     | -0.1100128 | 0.3068862 | -0.3585 | 0.72   | -0.098371278 | count | 1 |
| SENP3      | -0.1599103 | 0.4612876 | -0.3467 | 0.729  | -0.098322617 | count | 1 |
| LSM8       | -0.0700032 | 0.0744688 | -0.94   | 0.347  | -0.098195606 | count | 1 |
| SINHCAF    | -0.0779013 | 0.2083769 | -0.3738 | 0.709  | -0.098111415 | count | 1 |
| C3orf70    | -0.0912662 | 0.1874836 | -0.4868 | 0.626  | -0.098084483 | count | 1 |
| APBA3      | -0.0889501 | 0.3488885 | -0.255  | 0.799  | -0.098083965 | count | 1 |

|            |            |           |         |         |              |       |   |
|------------|------------|-----------|---------|---------|--------------|-------|---|
| KNL1       | -0.7913919 | 0.7416808 | -1.067  | 0.286   | -0.098052393 | count | 1 |
| HIF1AN     | -0.0796255 | 0.2069629 | -0.3847 | 0.7     | -0.097838825 | count | 1 |
| POGK       | -0.0791353 | 0.1764397 | -0.4485 | 0.654   | -0.097822908 | count | 1 |
| ARHGEF10L  | -0.0811059 | 0.1454243 | -0.5577 | 0.577   | -0.097821796 | count | 1 |
| LHFPL1     | -0.1842655 | 0.570879  | -0.3228 | 0.747   | -0.097707253 | count | 1 |
| BUD23      | -0.0706774 | 0.0983656 | -0.7185 | 0.472   | -0.097688588 | count | 1 |
| OSBPL8     | -0.0693418 | 0.0627386 | -1.1052 | 0.269   | -0.097678873 | count | 1 |
| AC006059.1 | -0.1364466 | 0.4002122 | -0.3409 | 0.733   | -0.09766138  | count | 1 |
| RNF38      | -0.0771583 | 0.1865807 | -0.4135 | 0.679   | -0.097596059 | count | 1 |
| OTUB1      | -0.0704212 | 0.1229853 | -0.5726 | 0.567   | -0.097566149 | count | 1 |
| ERGIC2     | -0.0690805 | 0.0658688 | -1.0488 | 0.294   | -0.097480855 | count | 1 |
| MOCS2      | -0.0691594 | 0.0689579 | -1.0029 | 0.316   | -0.097385431 | count | 1 |
| SMNDC1     | -0.070854  | 0.0859073 | -0.8248 | 0.41    | -0.097356528 | count | 1 |
| IDH1-AS1   | -0.3293331 | 0.662967  | -0.4968 | 0.619   | -0.097347353 | count | 1 |
| RIIAD1     | -0.3293331 | 0.756747  | -0.4352 | 0.663   | -0.097347353 | count | 1 |
| SLAMF8     | -0.3291882 | 0.6601318 | -0.4987 | 0.618   | -0.097302058 | count | 1 |
| ZNF788P    | -0.2281754 | 0.5630776 | -0.4052 | 0.685   | -0.097284889 | count | 1 |
| MRPS34     | -0.0686839 | 0.0577973 | -1.1884 | 0.235   | -0.097249226 | count | 1 |
| GAR1       | -0.0729689 | 0.1257438 | -0.5803 | 0.562   | -0.097143316 | count | 1 |
| C15orf65   | -0.0949063 | 0.2772645 | -0.3423 | 0.732   | -0.097072012 | count | 1 |
| MOXD1      | -0.1578177 | 0.51519   | -0.3063 | 0.759   | -0.097007973 | count | 1 |
| IPPK       | -0.1303307 | 0.3452315 | -0.3775 | 0.706   | -0.096974249 | count | 1 |
| USP22      | -0.0709115 | 0.1098268 | -0.6457 | 0.519   | -0.096895618 | count | 1 |
| PHTF2      | -0.0744873 | 0.1692033 | -0.4402 | 0.66    | -0.096502591 | count | 1 |
| TBX2       | -0.0704719 | 0.1081    | -0.6519 | 0.514   | -0.096339852 | count | 1 |
| ANLN       | -0.2638211 | 0.8871739 | -0.2974 | 0.766   | -0.096243883 | count | 1 |
| AC002066.1 | -0.2637068 | 0.578775  | -0.4556 | 0.649   | -0.096200312 | count | 1 |
| AL591845.1 | -0.2637068 | 0.602613  | -0.4376 | 0.662   | -0.096200312 | count | 1 |
| NOTCH1     | -0.097017  | 0.3205889 | -0.3026 | 0.762   | -0.096138749 | count | 1 |
| PEAK1      | -0.0739696 | 0.1713436 | -0.4317 | 0.666   | -0.095919559 | count | 1 |
| LIAS       | -0.0811154 | 0.180356  | -0.4498 | 0.653   | -0.095868215 | count | 1 |
| STARD4-AS1 | -0.4433145 | 0.4616365 | -0.9603 | 0.337   | -0.095777007 | count | 1 |
| PTP4A2     | -0.0679229 | 0.0617133 | -1.1006 | 0.271   | -0.095764135 | count | 1 |
| GPAA1      | -0.0682621 | 0.0711717 | -0.9591 | 0.338   | -0.095631115 | count | 1 |
| FAM161A    | -0.075944  | 0.1716024 | -0.4426 | 0.658   | -0.095495938 | count | 1 |
| TMEM273    | -0.7722294 | 0.6605386 | -1.1691 | 0.242   | -0.0954187   | count | 1 |
| AC010618.3 | -0.1238923 | 0.3756026 | -0.3298 | 0.742   | -0.095415595 | count | 1 |
| RPS28      | -0.0661291 | 0.022208  | -2.9777 | 0.00292 | -0.095222778 | count | 1 |
| SOD1       | -0.0662491 | 0.0291534 | -2.2724 | 0.0231  | -0.095165763 | count | 1 |
| AC147651.4 | -0.1655416 | 0.3604894 | -0.4592 | 0.646   | -0.095053883 | count | 1 |
| LINC01762  | -0.7695184 | 1.238814  | -0.6212 | 0.535   | -0.095046744 | count | 1 |
| CNTN2      | -0.7695184 | 1.238814  | -0.6212 | 0.535   | -0.095046744 | count | 1 |
| LINC01740  | -0.7695184 | 1.238814  | -0.6212 | 0.535   | -0.095046744 | count | 1 |
| AC104695.2 | -0.7695184 | 1.238814  | -0.6212 | 0.535   | -0.095046744 | count | 1 |
| LINC01829  | -0.7695184 | 1.238814  | -0.6212 | 0.535   | -0.095046744 | count | 1 |

|              |            |          |         |       |              |       |   |
|--------------|------------|----------|---------|-------|--------------|-------|---|
| AC074099.1   | -0.7695184 | 1.238814 | -0.6212 | 0.535 | -0.095046744 | count | 1 |
| AC010136.1   | -0.7695184 | 1.238814 | -0.6212 | 0.535 | -0.095046744 | count | 1 |
| AC022001.3   | -0.7695184 | 1.238814 | -0.6212 | 0.535 | -0.095046744 | count | 1 |
| BSN          | -0.7695184 | 1.238814 | -0.6212 | 0.535 | -0.095046744 | count | 1 |
| AC063944.3   | -0.7695184 | 1.238814 | -0.6212 | 0.535 | -0.095046744 | count | 1 |
| AC117402.1   | -0.7695184 | 1.238814 | -0.6212 | 0.535 | -0.095046744 | count | 1 |
| TIGIT        | -0.7695184 | 1.238814 | -0.6212 | 0.535 | -0.095046744 | count | 1 |
| EPHB1        | -0.7695184 | 1.238814 | -0.6212 | 0.535 | -0.095046744 | count | 1 |
| NME9         | -0.7695184 | 1.238814 | -0.6212 | 0.535 | -0.095046744 | count | 1 |
| AC022126.1   | -0.7695184 | 1.238814 | -0.6212 | 0.535 | -0.095046744 | count | 1 |
| PTCHD1       | -0.7695184 | 1.238814 | -0.6212 | 0.535 | -0.095046744 | count | 1 |
| AL109797.1   | -0.7695184 | 1.238814 | -0.6212 | 0.535 | -0.095046744 | count | 1 |
| CASC9        | -0.7695184 | 1.238814 | -0.6212 | 0.535 | -0.095046744 | count | 1 |
| AB015752.1   | -0.7695184 | 1.238814 | -0.6212 | 0.535 | -0.095046744 | count | 1 |
| AL162412.1   | -0.7695184 | 1.238814 | -0.6212 | 0.535 | -0.095046744 | count | 1 |
| AL359710.1   | -0.7695184 | 1.238814 | -0.6212 | 0.535 | -0.095046744 | count | 1 |
| BX649601.1   | -0.7695184 | 1.238814 | -0.6212 | 0.535 | -0.095046744 | count | 1 |
| ASCL2        | -0.7695184 | 1.238814 | -0.6212 | 0.535 | -0.095046744 | count | 1 |
| AC068733.3   | -0.7695184 | 1.238814 | -0.6212 | 0.535 | -0.095046744 | count | 1 |
| DDIAS        | -0.7695184 | 1.238814 | -0.6212 | 0.535 | -0.095046744 | count | 1 |
| AP003059.2   | -0.7695184 | 1.238814 | -0.6212 | 0.535 | -0.095046744 | count | 1 |
| LINC00940    | -0.7695184 | 1.238814 | -0.6212 | 0.535 | -0.095046744 | count | 1 |
| PTPRR        | -0.7695184 | 1.238814 | -0.6212 | 0.535 | -0.095046744 | count | 1 |
| TRAV38-2DV8  | -0.7695184 | 1.238814 | -0.6212 | 0.535 | -0.095046744 | count | 1 |
| TRAV39       | -0.7695184 | 1.238814 | -0.6212 | 0.535 | -0.095046744 | count | 1 |
| CPNE6        | -0.7695184 | 1.238814 | -0.6212 | 0.535 | -0.095046744 | count | 1 |
| PLEK2        | -0.7695184 | 1.238814 | -0.6212 | 0.535 | -0.095046744 | count | 1 |
| APBA2        | -0.7695184 | 1.238814 | -0.6212 | 0.535 | -0.095046744 | count | 1 |
| SLC24A5      | -0.7695184 | 1.238814 | -0.6212 | 0.535 | -0.095046744 | count | 1 |
| TVP23C-CDRT4 | -0.7695184 | 1.238814 | -0.6212 | 0.535 | -0.095046744 | count | 1 |
| WNK4         | -0.7695184 | 1.238814 | -0.6212 | 0.535 | -0.095046744 | count | 1 |
| AC005180.2   | -0.7695184 | 1.238814 | -0.6212 | 0.535 | -0.095046744 | count | 1 |
| AC006238.1   | -0.7695184 | 1.238814 | -0.6212 | 0.535 | -0.095046744 | count | 1 |
| AC027307.1   | -0.7695184 | 1.238814 | -0.6212 | 0.535 | -0.095046744 | count | 1 |
| CACTIN-AS1   | -0.7695184 | 1.238814 | -0.6212 | 0.535 | -0.095046744 | count | 1 |
| AC011511.5   | -0.7695184 | 1.238814 | -0.6212 | 0.535 | -0.095046744 | count | 1 |
| ZNF709       | -0.7695184 | 1.238814 | -0.6212 | 0.535 | -0.095046744 | count | 1 |
| MFNG         | -0.7695184 | 1.238814 | -0.6212 | 0.535 | -0.095046744 | count | 1 |
| PRKCZ-AS1    | -0.7695184 | 1.328646 | -0.5792 | 0.563 | -0.095046744 | count | 1 |
| IL10         | -0.7695184 | 1.328646 | -0.5792 | 0.563 | -0.095046744 | count | 1 |
| HOXD4        | -0.7695184 | 1.328646 | -0.5792 | 0.563 | -0.095046744 | count | 1 |
| CPO          | -0.7695184 | 1.328646 | -0.5792 | 0.563 | -0.095046744 | count | 1 |
| CNTN6        | -0.7695184 | 1.328646 | -0.5792 | 0.563 | -0.095046744 | count | 1 |
| ACVR2B-AS1   | -0.7695184 | 1.328646 | -0.5792 | 0.563 | -0.095046744 | count | 1 |
| SLCO2A1      | -0.7695184 | 1.328646 | -0.5792 | 0.563 | -0.095046744 | count | 1 |

|             |            |           |         |         |              |       |   |
|-------------|------------|-----------|---------|---------|--------------|-------|---|
| LNCSRLR     | -0.7695184 | 1.328646  | -0.5792 | 0.563   | -0.095046744 | count | 1 |
| AC110813.1  | -0.7695184 | 1.328646  | -0.5792 | 0.563   | -0.095046744 | count | 1 |
| ALDH8A1     | -0.7695184 | 1.328646  | -0.5792 | 0.563   | -0.095046744 | count | 1 |
| THRSP       | -0.7695184 | 1.328646  | -0.5792 | 0.563   | -0.095046744 | count | 1 |
| AC124947.1  | -0.7695184 | 1.328646  | -0.5792 | 0.563   | -0.095046744 | count | 1 |
| LINC00571   | -0.7695184 | 1.328646  | -0.5792 | 0.563   | -0.095046744 | count | 1 |
| AL355974.3  | -0.7695184 | 1.328646  | -0.5792 | 0.563   | -0.095046744 | count | 1 |
| PDIA2       | -0.7695184 | 1.328646  | -0.5792 | 0.563   | -0.095046744 | count | 1 |
| AL121761.2  | -0.7695184 | 1.328646  | -0.5792 | 0.563   | -0.095046744 | count | 1 |
| AC010327.3  | -0.7695184 | 1.328646  | -0.5792 | 0.563   | -0.095046744 | count | 1 |
| SCIN        | -0.1107602 | 0.2406539 | -0.4602 | 0.645   | -0.095033336 | count | 1 |
| ACAT2       | -0.0714227 | 0.1378239 | -0.5182 | 0.604   | -0.094981531 | count | 1 |
| DNAJB6      | -0.0673696 | 0.063793  | -1.0561 | 0.291   | -0.094899614 | count | 1 |
| TMEM147-AS1 | -0.197294  | 0.4909225 | -0.4019 | 0.688   | -0.09484136  | count | 1 |
| AC008124.1  | -0.076877  | 0.1704007 | -0.4512 | 0.652   | -0.094837591 | count | 1 |
| LSM14A      | -0.0680897 | 0.0727477 | -0.936  | 0.349   | -0.094736623 | count | 1 |
| RASAL2      | -0.0721458 | 0.1407351 | -0.5126 | 0.608   | -0.094700336 | count | 1 |
| RBBP7       | -0.0671704 | 0.0626828 | -1.0716 | 0.284   | -0.094579035 | count | 1 |
| ANKS6       | -0.0991314 | 0.3572814 | -0.2775 | 0.781   | -0.094551266 | count | 1 |
| TWIST1      | -0.0679092 | 0.0732263 | -0.9274 | 0.354   | -0.094434562 | count | 1 |
| NFYC        | -0.0734813 | 0.1334267 | -0.5507 | 0.582   | -0.094433826 | count | 1 |
| CPSF6       | -0.0710776 | 0.1323877 | -0.5369 | 0.591   | -0.094367104 | count | 1 |
| SLC44A3     | -0.115343  | 0.3081485 | -0.3743 | 0.708   | -0.094240885 | count | 1 |
| TRIM28      | -0.0695712 | 0.0968305 | -0.7185 | 0.473   | -0.094192853 | count | 1 |
| RHOF        | -0.1957296 | 0.4524635 | -0.4326 | 0.665   | -0.094066157 | count | 1 |
| ZNF496      | -0.0886896 | 0.3600335 | -0.2463 | 0.805   | -0.093890645 | count | 1 |
| PRMT1       | -0.0663253 | 0.0575815 | -1.1519 | 0.249   | -0.093867774 | count | 1 |
| SERPINB8    | -0.0825065 | 0.2641498 | -0.3123 | 0.755   | -0.093832077 | count | 1 |
| SUMO2       | -0.0652632 | 0.0248883 | -2.6222 | 0.00877 | -0.093821039 | count | 1 |
| CBX7        | -0.0701631 | 0.1320647 | -0.5313 | 0.595   | -0.093639337 | count | 1 |
| AQP11       | -0.1308797 | 0.4697766 | -0.2786 | 0.781   | -0.093612988 | count | 1 |
| PPHLN1      | -0.0687303 | 0.094199  | -0.7296 | 0.466   | -0.093502361 | count | 1 |
| GNG10       | -0.0923508 | 0.3100488 | -0.2979 | 0.766   | -0.093502173 | count | 1 |
| TMOD3       | -0.0664295 | 0.0658878 | -1.0082 | 0.313   | -0.093378242 | count | 1 |
| TAX1BP1     | -0.0653207 | 0.0465799 | -1.4023 | 0.1609  | -0.093139297 | count | 1 |
| SPDYE16     | -0.7544248 | 0.7501369 | -1.0057 | 0.315   | -0.092978858 | count | 1 |
| LINC00266-1 | -0.7544248 | 0.7652133 | -0.9859 | 0.324   | -0.092978858 | count | 1 |
| AC078909.2  | -0.7544248 | 0.8256365 | -0.9137 | 0.361   | -0.092978858 | count | 1 |
| FAS         | -0.0685152 | 0.1065975 | -0.6427 | 0.52    | -0.092937652 | count | 1 |
| C1orf43     | -0.0656676 | 0.0569566 | -1.1529 | 0.249   | -0.092905766 | count | 1 |
| XPO5        | -0.1081335 | 0.280768  | -0.3851 | 0.7     | -0.092755308 | count | 1 |
| HYLS1       | -0.0915499 | 0.2639405 | -0.3469 | 0.729   | -0.092685799 | count | 1 |
| AC092140.1  | -0.1750111 | 0.5785908 | -0.3025 | 0.762   | -0.0926708   | count | 1 |
| AL078639.1  | -0.0700237 | 0.1595104 | -0.439  | 0.661   | -0.092642351 | count | 1 |
| AL136295.2  | -0.4293775 | 0.5021361 | -0.8551 | 0.393   | -0.092539398 | count | 1 |



|            |            |           |         |       |              |       |   |
|------------|------------|-----------|---------|-------|--------------|-------|---|
| FBXO5      | -0.0996956 | 0.2507353 | -0.3976 | 0.691 | -0.092252668 | count | 1 |
| SH3KBP1    | -0.0700594 | 0.1289371 | -0.5434 | 0.587 | -0.092088156 | count | 1 |
| TSEN54     | -0.0951318 | 0.2653491 | -0.3585 | 0.72  | -0.09195307  | count | 1 |
| TBPL1      | -0.0706405 | 0.1422157 | -0.4967 | 0.619 | -0.091841707 | count | 1 |
| NDUFB6     | -0.0648478 | 0.0528144 | -1.2278 | 0.22  | -0.091826433 | count | 1 |
| PSMD4      | -0.0647143 | 0.055231  | -1.1717 | 0.241 | -0.091778898 | count | 1 |
| C2orf73    | -0.424501  | 0.6873272 | -0.6176 | 0.537 | -0.091409571 | count | 1 |
| UTP14C     | -0.0757807 | 0.2257219 | -0.3357 | 0.737 | -0.091379178 | count | 1 |
| KANK1      | -0.0659724 | 0.1122624 | -0.5877 | 0.557 | -0.091374099 | count | 1 |
| GIGYF2     | -0.0671248 | 0.1430729 | -0.4692 | 0.639 | -0.091212556 | count | 1 |
| NDUFV2     | -0.0638705 | 0.0431712 | -1.4795 | 0.139 | -0.091117469 | count | 1 |
| NDUFAF3    | -0.0638139 | 0.0449753 | -1.4189 | 0.156 | -0.091073226 | count | 1 |
| LRP10      | -0.0643016 | 0.0552149 | -1.1646 | 0.244 | -0.091062923 | count | 1 |
| MOB4       | -0.066107  | 0.0845594 | -0.7818 | 0.434 | -0.090996823 | count | 1 |
| CEP83-DT   | -0.7398526 | 0.9888716 | -0.7482 | 0.454 | -0.090987399 | count | 1 |
| AC130324.1 | -0.7398526 | 0.9888716 | -0.7482 | 0.454 | -0.090987399 | count | 1 |
| INTS6L-AS1 | -0.7398526 | 1.041304  | -0.7105 | 0.477 | -0.090987399 | count | 1 |
| SPART-AS1  | -0.7398526 | 1.110747  | -0.6661 | 0.505 | -0.090987399 | count | 1 |
| AC022098.4 | -0.7398526 | 1.110747  | -0.6661 | 0.505 | -0.090987399 | count | 1 |
| EEF2       | -0.0635392 | 0.0332373 | -1.9117 | 0.056 | -0.090968464 | count | 1 |
| RSAD1      | -0.0780471 | 0.1717131 | -0.4545 | 0.649 | -0.090963428 | count | 1 |
| UPF2       | -0.0655819 | 0.1066375 | -0.615  | 0.539 | -0.090770974 | count | 1 |
| HINT2      | -0.0645214 | 0.0671496 | -0.9609 | 0.337 | -0.090733865 | count | 1 |
| CAMSAP2    | -0.0682642 | 0.1139506 | -0.5991 | 0.549 | -0.090726608 | count | 1 |
| NALT1      | -0.1581283 | 0.5172591 | -0.3057 | 0.76  | -0.090699788 | count | 1 |
| AL021068.1 | -0.2492364 | 0.6661815 | -0.3741 | 0.708 | -0.090696233 | count | 1 |
| CCDC28B    | -0.0750127 | 0.1857798 | -0.4038 | 0.686 | -0.090682894 | count | 1 |
| ITGAV      | -0.0650021 | 0.0918857 | -0.7074 | 0.479 | -0.090389569 | count | 1 |
| CDC37L1-DT | -0.1574992 | 0.4717078 | -0.3339 | 0.738 | -0.090330693 | count | 1 |
| RGS5       | -0.1879269 | 0.5206532 | -0.3609 | 0.718 | -0.090204856 | count | 1 |
| COG8       | -0.0881793 | 0.3960203 | -0.2227 | 0.824 | -0.090147719 | count | 1 |
| C2orf92    | -0.306189  | 0.7580441 | -0.4039 | 0.686 | -0.090137347 | count | 1 |
| B3GALT4    | -0.0671579 | 0.143657  | -0.4675 | 0.64  | -0.089998445 | count | 1 |
| SNRNP70    | -0.0647697 | 0.0891247 | -0.7267 | 0.467 | -0.08999595  | count | 1 |
| PANK3      | -0.074316  | 0.1842673 | -0.4033 | 0.687 | -0.089838116 | count | 1 |
| HIST1H1C   | -0.065354  | 0.1107654 | -0.59   | 0.555 | -0.089827638 | count | 1 |
| UBE2Z      | -0.0664806 | 0.1106688 | -0.6007 | 0.548 | -0.089759847 | count | 1 |
| CMTM7      | -0.102459  | 0.3300126 | -0.3105 | 0.756 | -0.089754304 | count | 1 |
| TOX        | -0.0941219 | 0.5098938 | -0.1846 | 0.854 | -0.089735485 | count | 1 |
| PGBD1      | -0.0884919 | 0.3229689 | -0.274  | 0.784 | -0.089569564 | count | 1 |
| ATP5F1B    | -0.0631883 | 0.0481554 | -1.3122 | 0.19  | -0.08956388  | count | 1 |
| MED8       | -0.0661994 | 0.0981075 | -0.6748 | 0.5   | -0.089473342 | count | 1 |
| MPHOSPH6   | -0.0706465 | 0.1686671 | -0.4189 | 0.675 | -0.089465553 | count | 1 |
| SSC4D      | -0.4158518 | 0.8901929 | -0.4671 | 0.64  | -0.089409524 | count | 1 |
| AC090844.2 | -0.4158518 | 0.8901929 | -0.4671 | 0.64  | -0.089409524 | count | 1 |

|            |            |           |         |         |              |       |   |
|------------|------------|-----------|---------|---------|--------------|-------|---|
| AC021016.3 | -0.4158518 | 0.9526101 | -0.4365 | 0.662   | -0.089409524 | count | 1 |
| AL136162.1 | -0.4158518 | 0.9526101 | -0.4365 | 0.662   | -0.089409524 | count | 1 |
| BRIP1      | -0.4158518 | 1.18416   | -0.3512 | 0.725   | -0.089409524 | count | 1 |
| TRNT1      | -0.0672918 | 0.1497492 | -0.4494 | 0.653   | -0.089383616 | count | 1 |
| CYB561D2   | -0.1453471 | 0.3973831 | -0.3658 | 0.715   | -0.089188124 | count | 1 |
| ABHD12     | -0.0736795 | 0.1367176 | -0.5389 | 0.59    | -0.089066375 | count | 1 |
| ZC3H14     | -0.0655    | 0.1271831 | -0.515  | 0.607   | -0.089002587 | count | 1 |
| CHFR       | -0.0847169 | 0.3090085 | -0.2742 | 0.784   | -0.088943462 | count | 1 |
| NR2F2-AS1  | -0.0701803 | 0.177144  | -0.3962 | 0.692   | -0.088750636 | count | 1 |
| NSMCE4A    | -0.0655713 | 0.1108196 | -0.5917 | 0.554   | -0.088683773 | count | 1 |
| DOHH       | -0.0697294 | 0.1513562 | -0.4607 | 0.645   | -0.08853952  | count | 1 |
| PHF1       | -0.0645784 | 0.1080602 | -0.5976 | 0.55    | -0.088455557 | count | 1 |
| COPS6      | -0.0622381 | 0.051051  | -1.2191 | 0.223   | -0.088381748 | count | 1 |
| DFFB       | -0.1235695 | 0.4044881 | -0.3055 | 0.76    | -0.088304677 | count | 1 |
| DTWD2      | -0.092406  | 0.2365793 | -0.3906 | 0.696   | -0.088086826 | count | 1 |
| MFSD14C    | -0.0715158 | 0.1885157 | -0.3794 | 0.704   | -0.088029356 | count | 1 |
| PMM1       | -0.0636302 | 0.0870018 | -0.7314 | 0.465   | -0.08787519  | count | 1 |
| HOOK2      | -0.0713846 | 0.181801  | -0.3927 | 0.695   | -0.087867436 | count | 1 |
| HSD11B2    | -0.4091076 | 0.7722809 | -0.5297 | 0.596   | -0.087853459 | count | 1 |
| SNHG21     | -0.0829527 | 0.3335261 | -0.2487 | 0.804   | -0.087783932 | count | 1 |
| IGFBP7     | -0.0607865 | 0.023324  | -2.6062 | 0.00919 | -0.087680495 | count | 1 |
| DCTN4      | -0.0689544 | 0.1481931 | -0.4653 | 0.642   | -0.087553417 | count | 1 |
| ALDH3B1    | -0.0789661 | 0.3628164 | -0.2176 | 0.828   | -0.087527783 | count | 1 |
| SERPINB6   | -0.0616479 | 0.0545571 | -1.13   | 0.259   | -0.087509095 | count | 1 |
| NKAPD1     | -0.0654474 | 0.1105616 | -0.592  | 0.554   | -0.08746421  | count | 1 |
| POT1       | -0.0903093 | 0.2320493 | -0.3892 | 0.697   | -0.087257216 | count | 1 |
| ADGRF5     | -0.0858459 | 0.2924938 | -0.2935 | 0.769   | -0.086874255 | count | 1 |
| TSC1       | -0.0675798 | 0.2165568 | -0.3121 | 0.755   | -0.086835542 | count | 1 |
| MPHOSPH10  | -0.06272   | 0.0859751 | -0.7295 | 0.466   | -0.086669887 | count | 1 |
| SLC12A8    | -0.2384277 | 0.5599178 | -0.4258 | 0.67    | -0.086600814 | count | 1 |
| KLHDC10    | -0.0698165 | 0.1913747 | -0.3648 | 0.715   | -0.086440031 | count | 1 |
| ARMC1      | -0.0645645 | 0.1062636 | -0.6076 | 0.543   | -0.086403018 | count | 1 |
| GABARAPL2  | -0.0602132 | 0.0356766 | -1.6878 | 0.0915  | -0.086391612 | count | 1 |
| G3BP2      | -0.0619381 | 0.0791192 | -0.7828 | 0.434   | -0.086172854 | count | 1 |
| PFKM       | -0.0659051 | 0.1245225 | -0.5293 | 0.597   | -0.086104479 | count | 1 |
| AC011603.2 | -0.7028082 | 0.7094284 | -0.9907 | 0.322   | -0.08594822  | count | 1 |
| SUSD4      | -0.7028082 | 0.7155326 | -0.9822 | 0.326   | -0.08594822  | count | 1 |
| OSBP       | -0.0644798 | 0.1083711 | -0.595  | 0.552   | -0.08582769  | count | 1 |
| BAD        | -0.0607871 | 0.0590243 | -1.0299 | 0.303   | -0.085797444 | count | 1 |
| TCF19      | -0.1397724 | 0.376015  | -0.3717 | 0.71    | -0.085700564 | count | 1 |
| AC099791.2 | -0.0830587 | 0.3081032 | -0.2696 | 0.787   | -0.08568727  | count | 1 |
| 6-Mar      | -0.0620672 | 0.1009124 | -0.6151 | 0.539   | -0.085634429 | count | 1 |
| DDB2       | -0.0632532 | 0.1246574 | -0.5074 | 0.612   | -0.085545474 | count | 1 |
| BRD3OS     | -0.0721432 | 0.2361366 | -0.3055 | 0.76    | -0.085501294 | count | 1 |
| GMEB1      | -0.0714799 | 0.1847878 | -0.3868 | 0.699   | -0.085475627 | count | 1 |

|                |            |           |         |       |              |       |   |
|----------------|------------|-----------|---------|-------|--------------|-------|---|
| BCAT2          | -0.0667355 | 0.1515875 | -0.4402 | 0.66  | -0.085462553 | count | 1 |
| FDPS           | -0.061056  | 0.0740811 | -0.8242 | 0.41  | -0.085432241 | count | 1 |
| DNAJB11        | -0.0657663 | 0.1359533 | -0.4837 | 0.629 | -0.085418838 | count | 1 |
| COPS2          | -0.0608084 | 0.0644188 | -0.944  | 0.345 | -0.085386524 | count | 1 |
| PIP4K2A        | -0.0634449 | 0.1026192 | -0.6183 | 0.536 | -0.085370257 | count | 1 |
| SLC25A1        | -0.0627495 | 0.1180244 | -0.5317 | 0.595 | -0.085310624 | count | 1 |
| PSMD13         | -0.0613967 | 0.0742149 | -0.8273 | 0.408 | -0.08528702  | count | 1 |
| AP000317.1     | -0.2904526 | 0.7117026 | -0.4081 | 0.683 | -0.085264142 | count | 1 |
| CACNB2         | -0.0851555 | 0.2314909 | -0.3679 | 0.713 | -0.085262057 | count | 1 |
| SGTB           | -0.0648022 | 0.1329379 | -0.4875 | 0.626 | -0.085167939 | count | 1 |
| 5-Mar          | -0.065379  | 0.1394299 | -0.4689 | 0.639 | -0.085063809 | count | 1 |
| PRELID3A       | -0.0879721 | 0.3011187 | -0.2922 | 0.77  | -0.084982666 | count | 1 |
| AKAP9          | -0.0598573 | 0.0641905 | -0.9325 | 0.351 | -0.084884837 | count | 1 |
| WRAP53         | -0.1038302 | 0.2899076 | -0.3581 | 0.72  | -0.084729959 | count | 1 |
| MRPL10         | -0.0635618 | 0.1057866 | -0.6008 | 0.548 | -0.084648207 | count | 1 |
| YAF2           | -0.0637744 | 0.1161679 | -0.549  | 0.583 | -0.084464411 | count | 1 |
| RPL17-C18orf32 | -0.393993  | 0.774781  | -0.5085 | 0.611 | -0.084377289 | count | 1 |
| AL391684.1     | -0.393993  | 0.8665128 | -0.4547 | 0.649 | -0.084377289 | count | 1 |
| LRRC8B         | -0.1985197 | 0.5514195 | -0.36   | 0.719 | -0.084226367 | count | 1 |
| CHMP5          | -0.0592196 | 0.0473661 | -1.2503 | 0.211 | -0.084188835 | count | 1 |
| FNDC3A         | -0.060312  | 0.0807212 | -0.7472 | 0.455 | -0.084085641 | count | 1 |
| AC064807.1     | -0.0924663 | 0.3552822 | -0.2603 | 0.795 | -0.084071045 | count | 1 |
| ANXA7          | -0.0592331 | 0.0510596 | -1.1601 | 0.246 | -0.084034482 | count | 1 |
| AL133342.1     | -0.1976113 | 0.5217383 | -0.3788 | 0.705 | -0.083828197 | count | 1 |
| MRM2           | -0.0641599 | 0.1264634 | -0.5073 | 0.612 | -0.083820914 | count | 1 |
| ZNF641         | -0.0750572 | 0.2027371 | -0.3702 | 0.711 | -0.083637915 | count | 1 |
| STMP1          | -0.0590744 | 0.0625446 | -0.9445 | 0.345 | -0.083637043 | count | 1 |
| MAPK8          | -0.0758708 | 0.2046875 | -0.3707 | 0.711 | -0.083597304 | count | 1 |
| IL13RA1        | -0.0601935 | 0.084507  | -0.7123 | 0.476 | -0.083565729 | count | 1 |
| ZNF174         | -0.0809562 | 0.2696612 | -0.3002 | 0.764 | -0.083505728 | count | 1 |
| NDUFS4         | -0.0591086 | 0.0564115 | -1.0478 | 0.295 | -0.083495858 | count | 1 |
| OLMALINC       | -0.0901383 | 0.4135237 | -0.218  | 0.827 | -0.083337908 | count | 1 |
| PYGB           | -0.0636943 | 0.1634319 | -0.3897 | 0.697 | -0.083211715 | count | 1 |
| NPC1           | -0.0735428 | 0.2370663 | -0.3102 | 0.756 | -0.083206145 | count | 1 |
| LETM2          | -0.1048753 | 0.4497945 | -0.2332 | 0.816 | -0.083184523 | count | 1 |
| LPXN           | -0.1574729 | 0.4590279 | -0.3431 | 0.732 | -0.083161625 | count | 1 |
| TMED7          | -0.0598608 | 0.0911796 | -0.6565 | 0.512 | -0.083073648 | count | 1 |
| CP             | -0.0586301 | 0.0893441 | -0.6562 | 0.512 | -0.083064871 | count | 1 |
| TUFM           | -0.058691  | 0.0552234 | -1.0628 | 0.288 | -0.083024821 | count | 1 |
| DHRS4L2        | -0.060107  | 0.087331  | -0.6883 | 0.491 | -0.082967677 | count | 1 |
| DRAP1          | -0.0583899 | 0.0542858 | -1.0756 | 0.282 | -0.082839806 | count | 1 |
| LY75           | -0.1212335 | 0.3552975 | -0.3412 | 0.733 | -0.082811143 | count | 1 |
| C5orf49        | -0.679315  | 0.6785763 | -1.0011 | 0.317 | -0.082770843 | count | 1 |
| PRDM6          | -0.058834  | 0.1132717 | -0.5194 | 0.604 | -0.08258838  | count | 1 |
| PIDD1          | -0.1156103 | 0.3039833 | -0.3803 | 0.704 | -0.082535324 | count | 1 |

|            |            |           |         |       |              |       |   |
|------------|------------|-----------|---------|-------|--------------|-------|---|
| AC005498.3 | -0.1111316 | 0.6041983 | -0.1839 | 0.854 | -0.082500365 | count | 1 |
| TKT        | -0.0582372 | 0.0603045 | -0.9657 | 0.334 | -0.082467706 | count | 1 |
| MSH2       | -0.086486  | 0.2344562 | -0.3689 | 0.712 | -0.082402284 | count | 1 |
| PRPF40A    | -0.0586769 | 0.0743741 | -0.7889 | 0.43  | -0.082397157 | count | 1 |
| KHDC1      | -0.0937972 | 0.3104328 | -0.3021 | 0.763 | -0.082097178 | count | 1 |
| EEF1G      | -0.1554641 | 0.5731979 | -0.2712 | 0.786 | -0.082075462 | count | 1 |
| ZNF232     | -0.0937678 | 0.2441192 | -0.3841 | 0.701 | -0.082071212 | count | 1 |
| MRPL38     | -0.1554419 | 0.5906253 | -0.2632 | 0.792 | -0.082063456 | count | 1 |
| NANOS3     | -0.1263348 | 0.46312   | -0.2728 | 0.785 | -0.08203715  | count | 1 |
| CBFA2T2    | -0.07361   | 0.2725717 | -0.2701 | 0.787 | -0.082018488 | count | 1 |
| HNRNPC     | -0.0579242 | 0.0530443 | -1.092  | 0.275 | -0.081996371 | count | 1 |
| FAM66C     | -0.0884791 | 0.3106233 | -0.2848 | 0.776 | -0.081791728 | count | 1 |
| CD37       | -0.2254895 | 0.658569  | -0.3424 | 0.732 | -0.081716561 | count | 1 |
| STARD3NL   | -0.0627854 | 0.1311076 | -0.4789 | 0.632 | -0.081684068 | count | 1 |
| AC092903.2 | -0.154536  | 0.5393231 | -0.2865 | 0.774 | -0.08157384  | count | 1 |
| COIL       | -0.0599236 | 0.1181024 | -0.5074 | 0.612 | -0.081533827 | count | 1 |
| AAED1      | -0.0586403 | 0.0812146 | -0.722  | 0.47  | -0.081511374 | count | 1 |
| PAAF1      | -0.0656631 | 0.1540667 | -0.4262 | 0.67  | -0.081437735 | count | 1 |
| SPAG4      | -0.1700215 | 0.5220823 | -0.3257 | 0.745 | -0.081377128 | count | 1 |
| PLA1A      | -0.6683698 | 0.8140483 | -0.821  | 0.412 | -0.081295744 | count | 1 |
| AC105094.2 | -0.6683698 | 0.8140483 | -0.821  | 0.412 | -0.081295744 | count | 1 |
| AHCY       | -0.0622243 | 0.1396336 | -0.4456 | 0.656 | -0.081288426 | count | 1 |
| HIBCH      | -0.0590422 | 0.108042  | -0.5465 | 0.585 | -0.081236266 | count | 1 |
| NDUFB3     | -0.0575842 | 0.0608076 | -0.947  | 0.344 | -0.081147487 | count | 1 |
| ZDHHC2     | -0.0648244 | 0.1813711 | -0.3574 | 0.721 | -0.08096334  | count | 1 |
| SHROOM1    | -0.0759145 | 0.408639  | -0.1858 | 0.853 | -0.08091491  | count | 1 |
| MTA1       | -0.0639817 | 0.1494065 | -0.4282 | 0.669 | -0.080896255 | count | 1 |
| ZNF347     | -0.0799447 | 0.2336555 | -0.3421 | 0.732 | -0.080866734 | count | 1 |
| WDR54      | -0.0627632 | 0.1432293 | -0.4382 | 0.661 | -0.080807595 | count | 1 |
| AL138995.1 | -0.1686295 | 0.4212369 | -0.4003 | 0.689 | -0.080692787 | count | 1 |
| LINC01431  | -0.1903662 | 0.477175  | -0.3989 | 0.69  | -0.08065651  | count | 1 |
| SLC12A2    | -0.0668722 | 0.248292  | -0.2693 | 0.788 | -0.080607369 | count | 1 |
| DPM2       | -0.0591515 | 0.104866  | -0.5641 | 0.573 | -0.080526444 | count | 1 |
| PTPRG      | -0.0595931 | 0.1328103 | -0.4487 | 0.654 | -0.080508144 | count | 1 |
| PLPP1      | -0.0563568 | 0.0539106 | -1.0454 | 0.296 | -0.080289914 | count | 1 |
| PMS2       | -0.0691352 | 0.2354754 | -0.2936 | 0.769 | -0.080239227 | count | 1 |
| ARMCX3     | -0.0573421 | 0.0698854 | -0.8205 | 0.412 | -0.080190265 | count | 1 |
| UCK2       | -0.0981874 | 0.3288461 | -0.2986 | 0.765 | -0.080076443 | count | 1 |
| KATNA1     | -0.0599231 | 0.1197152 | -0.5005 | 0.617 | -0.080035201 | count | 1 |
| RPAIN      | -0.0570206 | 0.0763306 | -0.747  | 0.455 | -0.079961849 | count | 1 |
| UBA5       | -0.0601399 | 0.1158448 | -0.5191 | 0.604 | -0.079916114 | count | 1 |
| TUBB2A     | -0.0575118 | 0.1022017 | -0.5627 | 0.574 | -0.079905875 | count | 1 |
| MAN2B2     | -0.0628833 | 0.1588926 | -0.3958 | 0.692 | -0.079830128 | count | 1 |
| MCM3       | -0.0698435 | 0.1464128 | -0.477  | 0.633 | -0.079737534 | count | 1 |
| CNIH3      | -0.0836675 | 0.3561048 | -0.235  | 0.814 | -0.079697789 | count | 1 |

|            |            |           |         |        |              |       |   |
|------------|------------|-----------|---------|--------|--------------|-------|---|
| MIR210HG   | -0.0862061 | 0.3778408 | -0.2282 | 0.82   | -0.079674264 | count | 1 |
| ANAPC16    | -0.0557523 | 0.042684  | -1.3062 | 0.1916 | -0.079672455 | count | 1 |
| SLC25A15   | -0.1508996 | 0.8005092 | -0.1885 | 0.85   | -0.079609728 | count | 1 |
| ARFIP2     | -0.0635151 | 0.1464657 | -0.4337 | 0.665  | -0.079585277 | count | 1 |
| ZBTB5      | -0.1110843 | 0.4567056 | -0.2432 | 0.808  | -0.079259374 | count | 1 |
| HIVEP3     | -0.0999541 | 0.3244123 | -0.3081 | 0.758  | -0.079237554 | count | 1 |
| CTCF       | -0.058397  | 0.0984767 | -0.593  | 0.553  | -0.079224938 | count | 1 |
| DCK        | -0.0707207 | 0.1857076 | -0.3808 | 0.703  | -0.079205686 | count | 1 |
| TSPAN31    | -0.0580203 | 0.0926313 | -0.6264 | 0.531  | -0.079150513 | count | 1 |
| SLC25A11   | -0.0575387 | 0.0823534 | -0.6987 | 0.485  | -0.079122752 | count | 1 |
| PTEN       | -0.0563988 | 0.06572   | -0.8582 | 0.391  | -0.07909973  | count | 1 |
| DFFA       | -0.0597384 | 0.1279337 | -0.4669 | 0.641  | -0.079065412 | count | 1 |
| COPZ2      | -0.0555816 | 0.0537468 | -1.0341 | 0.301  | -0.078981877 | count | 1 |
| MRPL44     | -0.0606499 | 0.1281818 | -0.4732 | 0.636  | -0.078969066 | count | 1 |
| GMPR2      | -0.0578318 | 0.1066382 | -0.5423 | 0.588  | -0.078893159 | count | 1 |
| AC034111.1 | -0.1861888 | 0.7656057 | -0.2432 | 0.808  | -0.078830978 | count | 1 |
| CD226      | -0.1861888 | 1.162697  | -0.1601 | 0.873  | -0.078830978 | count | 1 |
| RNF138     | -0.0942003 | 0.2435391 | -0.3868 | 0.699  | -0.078807558 | count | 1 |
| DNAJC11    | -0.0737952 | 0.2304553 | -0.3202 | 0.749  | -0.078645075 | count | 1 |
| EXOC7      | -0.057692  | 0.1395428 | -0.4134 | 0.679  | -0.078361133 | count | 1 |
| COX5B      | -0.0546419 | 0.0321498 | -1.6996 | 0.0893 | -0.07833182  | count | 1 |
| AL139147.1 | -0.6461512 | 0.995902  | -0.6488 | 0.517  | -0.078311731 | count | 1 |
| AC097059.1 | -0.6461512 | 0.9978798 | -0.6475 | 0.517  | -0.078311731 | count | 1 |
| AC118553.2 | -0.6461512 | 1.024584  | -0.6306 | 0.528  | -0.078311731 | count | 1 |
| AL121655.1 | -0.6461512 | 1.024584  | -0.6306 | 0.528  | -0.078311731 | count | 1 |
| GPR83      | -0.6461512 | 1.024584  | -0.6306 | 0.528  | -0.078311731 | count | 1 |
| AP005329.1 | -0.6461512 | 1.024584  | -0.6306 | 0.528  | -0.078311731 | count | 1 |
| LINC01535  | -0.6461512 | 1.024584  | -0.6306 | 0.528  | -0.078311731 | count | 1 |
| TDRKH-AS1  | -0.6461512 | 1.026506  | -0.6295 | 0.529  | -0.078311731 | count | 1 |
| ANO7       | -0.6461512 | 1.026506  | -0.6295 | 0.529  | -0.078311731 | count | 1 |
| AC137630.2 | -0.6461512 | 1.026506  | -0.6295 | 0.529  | -0.078311731 | count | 1 |
| HIST1H4I   | -0.6461512 | 1.026506  | -0.6295 | 0.529  | -0.078311731 | count | 1 |
| MCMDC2     | -0.6461512 | 1.026506  | -0.6295 | 0.529  | -0.078311731 | count | 1 |
| TMEM92-AS1 | -0.6461512 | 1.026506  | -0.6295 | 0.529  | -0.078311731 | count | 1 |
| AC009318.4 | -0.6461512 | 1.171371  | -0.5516 | 0.581  | -0.078311731 | count | 1 |
| PIK3CA     | -0.0591642 | 0.1255355 | -0.4713 | 0.637  | -0.078257315 | count | 1 |
| CLEC2D     | -0.2162298 | 0.5117824 | -0.4225 | 0.673  | -0.078233196 | count | 1 |
| MRPS9      | -0.0579886 | 0.1142087 | -0.5077 | 0.612  | -0.078227311 | count | 1 |
| PIGZ       | -0.0764128 | 0.2563433 | -0.2981 | 0.766  | -0.078051572 | count | 1 |
| TRAM1L1    | -0.0831003 | 0.4259087 | -0.1951 | 0.845  | -0.078001544 | count | 1 |
| NOL10      | -0.064377  | 0.1741598 | -0.3696 | 0.712  | -0.077986518 | count | 1 |
| PRPF3      | -0.0635579 | 0.1869738 | -0.3399 | 0.734  | -0.077883695 | count | 1 |
| TRAF5      | -0.0588546 | 0.1695861 | -0.347  | 0.729  | -0.077799718 | count | 1 |
| VWF        | -0.127059  | 0.6277972 | -0.2024 | 0.84   | -0.077766048 | count | 1 |
| ANKRD42    | -0.0687294 | 0.2770996 | -0.248  | 0.804  | -0.077739957 | count | 1 |

|            |            |           |         |       |              |       |   |
|------------|------------|-----------|---------|-------|--------------|-------|---|
| SLC39A14   | -0.0612072 | 0.1364893 | -0.4484 | 0.654 | -0.077698374 | count | 1 |
| RSBN1L     | -0.0548006 | 0.0717949 | -0.7633 | 0.445 | -0.077531911 | count | 1 |
| HIST1H4H   | -0.0792741 | 0.3319025 | -0.2388 | 0.811 | -0.077511492 | count | 1 |
| MARCKS     | -0.054302  | 0.0612272 | -0.8869 | 0.375 | -0.077452199 | count | 1 |
| PREPL      | -0.0566167 | 0.1022165 | -0.5539 | 0.58  | -0.077234247 | count | 1 |
| ARIH2      | -0.0574937 | 0.1277796 | -0.4499 | 0.653 | -0.077067766 | count | 1 |
| AC126118.1 | -0.6362398 | 0.8499179 | -0.7486 | 0.454 | -0.076985273 | count | 1 |
| SLC35A3    | -0.0616646 | 0.1597902 | -0.3859 | 0.7   | -0.076877847 | count | 1 |
| CRBN       | -0.0548788 | 0.0689377 | -0.7961 | 0.426 | -0.076869023 | count | 1 |
| WDR77      | -0.0644479 | 0.1857161 | -0.347  | 0.729 | -0.076820263 | count | 1 |
| WIPI2      | -0.0564443 | 0.1137582 | -0.4962 | 0.62  | -0.076795941 | count | 1 |
| FAM104A    | -0.0591011 | 0.1456542 | -0.4058 | 0.685 | -0.07668004  | count | 1 |
| C1QTNF2    | -0.0561352 | 0.085904  | -0.6535 | 0.513 | -0.076537953 | count | 1 |
| DYNLL2     | -0.0566914 | 0.1181714 | -0.4797 | 0.631 | -0.07647574  | count | 1 |
| ANGPTL2    | -0.0579082 | 0.1442979 | -0.4013 | 0.688 | -0.076402811 | count | 1 |
| ZZEF1      | -0.0645448 | 0.2152881 | -0.2998 | 0.764 | -0.076226477 | count | 1 |
| RBM8A      | -0.0537392 | 0.0575523 | -0.9337 | 0.35  | -0.076202989 | count | 1 |
| ACADM      | -0.0550172 | 0.0864609 | -0.6363 | 0.525 | -0.07617171  | count | 1 |
| HSCB       | -0.059423  | 0.137343  | -0.4327 | 0.665 | -0.076168838 | count | 1 |
| SPRY4      | -0.0664323 | 0.3200046 | -0.2076 | 0.836 | -0.076160774 | count | 1 |
| SPOP       | -0.0547691 | 0.0899203 | -0.6091 | 0.543 | -0.076152814 | count | 1 |
| FANCL      | -0.0605625 | 0.1565456 | -0.3869 | 0.699 | -0.076116603 | count | 1 |
| PRPF6      | -0.0544885 | 0.0812955 | -0.6703 | 0.503 | -0.076066176 | count | 1 |
| CHRM3      | -0.2103866 | 0.5227528 | -0.4025 | 0.687 | -0.076040357 | count | 1 |
| ADPRH      | -0.0751286 | 0.5534025 | -0.1358 | 0.892 | -0.075967613 | count | 1 |
| ABCB8      | -0.0628457 | 0.2469377 | -0.2545 | 0.799 | -0.075936499 | count | 1 |
| POLR1C     | -0.0613404 | 0.1780606 | -0.3445 | 0.73  | -0.075922721 | count | 1 |
| CSNK1A1    | -0.0533291 | 0.0526843 | -1.0122 | 0.311 | -0.075896198 | count | 1 |
| RNPS1      | -0.0541294 | 0.0751316 | -0.7205 | 0.471 | -0.07589101  | count | 1 |
| YJEFN3     | -0.1793792 | 0.6502411 | -0.2759 | 0.783 | -0.075860246 | count | 1 |
| SCAP       | -0.0658868 | 0.2080492 | -0.3167 | 0.751 | -0.075851143 | count | 1 |
| LRRC37A3   | -0.1235739 | 0.4911042 | -0.2516 | 0.801 | -0.075595635 | count | 1 |
| WVOX       | -0.0599791 | 0.2205233 | -0.272  | 0.786 | -0.075496375 | count | 1 |
| FAM111A-DT | -0.0744762 | 0.2770427 | -0.2688 | 0.788 | -0.07530423  | count | 1 |
| CAPZA2     | -0.0529791 | 0.0528196 | -1.003  | 0.316 | -0.075245659 | count | 1 |
| TMEM11     | -0.0561283 | 0.1176749 | -0.477  | 0.633 | -0.075067264 | count | 1 |
| ZNF846     | -0.0662979 | 0.1907507 | -0.3476 | 0.728 | -0.074979742 | count | 1 |
| RCBTB1     | -0.1009739 | 0.2714919 | -0.3719 | 0.71  | -0.074867937 | count | 1 |
| MRPL11     | -0.0532797 | 0.0738904 | -0.7211 | 0.471 | -0.074563628 | count | 1 |
| PHF11      | -0.054243  | 0.1023616 | -0.5299 | 0.596 | -0.074517419 | count | 1 |
| ZCCHC17    | -0.0537032 | 0.0872672 | -0.6154 | 0.538 | -0.074411113 | count | 1 |
| UNC13D     | -0.2549809 | 0.62002   | -0.4112 | 0.681 | -0.074368092 | count | 1 |
| MRPL1      | -0.0545541 | 0.1142785 | -0.4774 | 0.633 | -0.074242609 | count | 1 |
| TMEM187    | -0.059974  | 0.1779284 | -0.3371 | 0.736 | -0.074227841 | count | 1 |
| PARVA      | -0.0534266 | 0.088365  | -0.6046 | 0.545 | -0.074112535 | count | 1 |

|             |            |           |         |        |              |       |   |
|-------------|------------|-----------|---------|--------|--------------|-------|---|
| NAP1L2      | -0.0907796 | 0.2534889 | -0.3581 | 0.72   | -0.073975546 | count | 1 |
| MARS        | -0.0612089 | 0.1825805 | -0.3352 | 0.737  | -0.073953774 | count | 1 |
| CAMK1       | -0.054499  | 0.0934643 | -0.5831 | 0.56   | -0.073909691 | count | 1 |
| B4GALT3     | -0.0607187 | 0.1785018 | -0.3402 | 0.734  | -0.073897835 | count | 1 |
| CBLL1       | -0.0608604 | 0.1963591 | -0.3099 | 0.757  | -0.073895605 | count | 1 |
| ENGASE      | -0.0931742 | 0.253887  | -0.367  | 0.714  | -0.073806603 | count | 1 |
| WDR61       | -0.0530619 | 0.0929456 | -0.5709 | 0.568  | -0.073761657 | count | 1 |
| GPAT4       | -0.0798414 | 0.2238292 | -0.3567 | 0.721  | -0.073749492 | count | 1 |
| NIP7        | -0.0569902 | 0.162288  | -0.3512 | 0.725  | -0.07373099  | count | 1 |
| THAP11      | -0.0541864 | 0.1012521 | -0.5352 | 0.593  | -0.073721524 | count | 1 |
| CYB5R2      | -0.0661809 | 0.26635   | -0.2485 | 0.804  | -0.07370932  | count | 1 |
| SAC3D1      | -0.0612651 | 0.1667065 | -0.3675 | 0.713  | -0.073635813 | count | 1 |
| FAM157C     | -0.2035794 | 0.6559794 | -0.3103 | 0.756  | -0.073490944 | count | 1 |
| CCDC184     | -0.077145  | 0.3315904 | -0.2327 | 0.816  | -0.073443873 | count | 1 |
| C2orf49     | -0.0539348 | 0.0999552 | -0.5396 | 0.59   | -0.073439    | count | 1 |
| BRPF3       | -0.080659  | 0.2812607 | -0.2868 | 0.774  | -0.073255638 | count | 1 |
| KRBA1       | -0.1281706 | 0.4121725 | -0.311  | 0.756  | -0.073193457 | count | 1 |
| PTP4A1      | -0.056112  | 0.1339574 | -0.4189 | 0.675  | -0.07317438  | count | 1 |
| ARHGEF7-AS2 | -0.2510238 | 0.4111467 | -0.6105 | 0.542  | -0.073160331 | count | 1 |
| AL354733.3  | -0.1731132 | 0.5523408 | -0.3134 | 0.754  | -0.073132236 | count | 1 |
| LAG3        | -0.1731132 | 0.9226438 | -0.1876 | 0.851  | -0.073132236 | count | 1 |
| ZNF502      | -0.0818887 | 0.3382719 | -0.2421 | 0.809  | -0.073028664 | count | 1 |
| ZNF470      | -0.0873231 | 0.3567999 | -0.2447 | 0.807  | -0.073001347 | count | 1 |
| EIF3A       | -0.0522596 | 0.0828287 | -0.6309 | 0.528  | -0.07296592  | count | 1 |
| RAD51AP2    | -0.6059481 | 0.8407578 | -0.7207 | 0.471  | -0.072949831 | count | 1 |
| EGOT        | -0.6059481 | 0.8407578 | -0.7207 | 0.471  | -0.072949831 | count | 1 |
| AC003986.2  | -0.6059481 | 0.8407578 | -0.7207 | 0.471  | -0.072949831 | count | 1 |
| PDE2A       | -0.6059481 | 0.8502984 | -0.7126 | 0.476  | -0.072949831 | count | 1 |
| USP6        | -0.6059481 | 0.9140813 | -0.6629 | 0.507  | -0.072949831 | count | 1 |
| AL136366.1  | -0.1526895 | 0.5824483 | -0.2622 | 0.793  | -0.072876637 | count | 1 |
| DPH5        | -0.0657698 | 0.189406  | -0.3472 | 0.728  | -0.072844618 | count | 1 |
| C6orf106    | -0.0551497 | 0.1325634 | -0.416  | 0.677  | -0.072711838 | count | 1 |
| PIGS        | -0.0590386 | 0.2473861 | -0.2386 | 0.811  | -0.072637475 | count | 1 |
| COL24A1     | -0.0717837 | 0.2967094 | -0.2419 | 0.809  | -0.072567056 | count | 1 |
| CD58        | -0.0524533 | 0.0933121 | -0.5621 | 0.574  | -0.072507123 | count | 1 |
| CDKL5       | -0.0606295 | 0.2346555 | -0.2584 | 0.796  | -0.07246674  | count | 1 |
| PSMB2       | -0.0511245 | 0.0551462 | -0.9271 | 0.354  | -0.07246062  | count | 1 |
| SSBP3       | -0.0544629 | 0.1118244 | -0.487  | 0.626  | -0.072403274 | count | 1 |
| C1QBP       | -0.0509959 | 0.05569   | -0.9157 | 0.36   | -0.072294532 | count | 1 |
| CIR1        | -0.0510354 | 0.0596415 | -0.8557 | 0.392  | -0.072275084 | count | 1 |
| PDLIM2      | -0.0506231 | 0.047913  | -1.0566 | 0.2908 | -0.072198802 | count | 1 |
| CACNA2D1    | -0.054244  | 0.129262  | -0.4196 | 0.675  | -0.072150495 | count | 1 |
| AC104596.1  | -0.150729  | 0.6041169 | -0.2495 | 0.803  | -0.071917901 | count | 1 |
| MYZAP       | -0.150729  | 0.6922472 | -0.2177 | 0.828  | -0.071917901 | count | 1 |
| AC083862.2  | -0.3390676 | 0.8457172 | -0.4009 | 0.689  | -0.071879134 | count | 1 |

|            |            |           |         |       |              |       |   |
|------------|------------|-----------|---------|-------|--------------|-------|---|
| AC069544.1 | -0.0820959 | 0.488585  | -0.168  | 0.867 | -0.071772707 | count | 1 |
| RBCK1      | -0.0518681 | 0.0909657 | -0.5702 | 0.569 | -0.071749522 | count | 1 |
| ZNF467     | -0.1698997 | 0.5103824 | -0.3329 | 0.739 | -0.071735271 | count | 1 |
| FKBP2      | -0.0501085 | 0.0405429 | -1.2359 | 0.217 | -0.071675152 | count | 1 |
| DDX54      | -0.0571184 | 0.1283127 | -0.4452 | 0.656 | -0.07166856  | count | 1 |
| PIP5K1B    | -0.0857398 | 0.2210106 | -0.3879 | 0.698 | -0.071665746 | count | 1 |
| SEM1       | -0.0500544 | 0.0406907 | -1.2301 | 0.219 | -0.071613757 | count | 1 |
| PITPNM1    | -0.0818767 | 0.3632398 | -0.2254 | 0.822 | -0.071579517 | count | 1 |
| UBR3       | -0.058013  | 0.1846587 | -0.3142 | 0.753 | -0.071517136 | count | 1 |
| LINC01703  | -0.3373959 | 0.9234101 | -0.3654 | 0.715 | -0.071502126 | count | 1 |
| AC112220.2 | -0.3373959 | 0.9234446 | -0.3654 | 0.715 | -0.071502126 | count | 1 |
| AL080317.1 | -0.3373959 | 0.9234446 | -0.3654 | 0.715 | -0.071502126 | count | 1 |
| AL078581.1 | -0.3373959 | 0.9234446 | -0.3654 | 0.715 | -0.071502126 | count | 1 |
| GLB1L2     | -0.3373959 | 0.9234101 | -0.3654 | 0.715 | -0.071502126 | count | 1 |
| FAM189A1   | -0.3373959 | 0.9234446 | -0.3654 | 0.715 | -0.071502126 | count | 1 |
| AC011471.2 | -0.3373959 | 0.9234446 | -0.3654 | 0.715 | -0.071502126 | count | 1 |
| NCAPG      | -0.3373959 | 0.9320857 | -0.362  | 0.717 | -0.071502126 | count | 1 |
| VPS33B-DT  | -0.3373959 | 0.9320857 | -0.362  | 0.717 | -0.071502126 | count | 1 |
| GTF2H4     | -0.3373959 | 1.078871  | -0.3127 | 0.755 | -0.071502126 | count | 1 |
| AC022390.1 | -0.3373959 | 1.078871  | -0.3127 | 0.755 | -0.071502126 | count | 1 |
| AC106881.1 | -0.0635086 | 0.3684068 | -0.1724 | 0.863 | -0.071463096 | count | 1 |
| NGEF       | -0.1101037 | 0.6013287 | -0.1831 | 0.855 | -0.071339675 | count | 1 |
| DNAJC15    | -0.0501201 | 0.0653365 | -0.7671 | 0.443 | -0.071227393 | count | 1 |
| ZBTB37     | -0.0643027 | 0.2458757 | -0.2615 | 0.794 | -0.071213559 | count | 1 |
| EIF2B1     | -0.0529853 | 0.1158379 | -0.4574 | 0.647 | -0.071139571 | count | 1 |
| COX17      | -0.0501407 | 0.0580304 | -0.864  | 0.388 | -0.071080133 | count | 1 |
| NAA38      | -0.0502119 | 0.0593691 | -0.8458 | 0.398 | -0.071029443 | count | 1 |
| PCYT2      | -0.0567778 | 0.161264  | -0.3521 | 0.725 | -0.071011948 | count | 1 |
| GUCY1B1    | -0.0513369 | 0.082524  | -0.6221 | 0.534 | -0.071004199 | count | 1 |
| ZFP69      | -0.3349521 | 0.5083101 | -0.659  | 0.51  | -0.07095136  | count | 1 |
| TEN1       | -0.0562045 | 0.178201  | -0.3154 | 0.752 | -0.070944755 | count | 1 |
| AC114760.2 | -0.5904452 | 0.5606523 | -1.0531 | 0.292 | -0.070895714 | count | 1 |
| LSS        | -0.0615348 | 0.2168491 | -0.2838 | 0.777 | -0.070825201 | count | 1 |
| PLA2R1     | -0.0516758 | 0.1903057 | -0.2715 | 0.786 | -0.070723869 | count | 1 |
| FLOT1      | -0.0504883 | 0.0790608 | -0.6386 | 0.523 | -0.070671283 | count | 1 |
| BAMBI      | -0.0538562 | 0.1766164 | -0.3049 | 0.76  | -0.070611963 | count | 1 |
| TACR2      | -0.1479926 | 0.6573468 | -0.2251 | 0.822 | -0.070580685 | count | 1 |
| ITIH1      | -0.3331866 | 0.9187006 | -0.3627 | 0.717 | -0.070553736 | count | 1 |
| TMEM151A   | -0.3331866 | 0.9187006 | -0.3627 | 0.717 | -0.070553736 | count | 1 |
| AL109924.2 | -0.3331866 | 0.9337596 | -0.3568 | 0.721 | -0.070553736 | count | 1 |
| CD300C     | -0.3331866 | 0.9337596 | -0.3568 | 0.721 | -0.070553736 | count | 1 |
| SPATA45    | -0.3331866 | 1.189264  | -0.2802 | 0.779 | -0.070553736 | count | 1 |
| AL390955.2 | -0.3331866 | 1.189264  | -0.2802 | 0.779 | -0.070553736 | count | 1 |
| AL390067.1 | -0.3331866 | 1.189264  | -0.2802 | 0.779 | -0.070553736 | count | 1 |
| AL928654.3 | -0.3331866 | 1.189264  | -0.2802 | 0.779 | -0.070553736 | count | 1 |



|            |            |           |         |        |              |       |   |
|------------|------------|-----------|---------|--------|--------------|-------|---|
| ZNF691     | -0.0690632 | 0.2845436 | -0.2427 | 0.808  | -0.070506176 | count | 1 |
| SCOC-AS1   | -0.5860484 | 0.7329593 | -0.7996 | 0.424  | -0.070314561 | count | 1 |
| AC093424.1 | -0.5860484 | 0.7795905 | -0.7517 | 0.452  | -0.070314561 | count | 1 |
| EAF1-AS1   | -0.5860484 | 0.7904078 | -0.7415 | 0.458  | -0.070314561 | count | 1 |
| MEIOC      | -0.5860484 | 0.8418973 | -0.6961 | 0.486  | -0.070314561 | count | 1 |
| IER5       | -0.0524753 | 0.1188352 | -0.4416 | 0.659  | -0.070303676 | count | 1 |
| SF3A2      | -0.0587901 | 0.1761241 | -0.3338 | 0.739  | -0.07026259  | count | 1 |
| LINC00271  | -0.1334021 | 0.5350878 | -0.2493 | 0.803  | -0.07018764  | count | 1 |
| AFTPH      | -0.0569244 | 0.1553481 | -0.3664 | 0.714  | -0.07017231  | count | 1 |
| REP15      | -0.1941666 | 0.7767046 | -0.25   | 0.803  | -0.06997499  | count | 1 |
| AC022784.3 | -0.1941666 | 0.8508702 | -0.2282 | 0.82   | -0.06997499  | count | 1 |
| AC011416.3 | -0.1941666 | 1.0133953 | -0.1916 | 0.848  | -0.06997499  | count | 1 |
| LINC02334  | -0.1941666 | 1.194887  | -0.1625 | 0.871  | -0.06997499  | count | 1 |
| SYNJ2BP    | -0.0509081 | 0.1179553 | -0.4316 | 0.666  | -0.069748713 | count | 1 |
| LIG3       | -0.0636392 | 0.2301289 | -0.2765 | 0.782  | -0.069646056 | count | 1 |
| SLC25A39   | -0.0514652 | 0.1293102 | -0.398  | 0.691  | -0.069613377 | count | 1 |
| THAP7      | -0.0513156 | 0.1052057 | -0.4878 | 0.626  | -0.069501727 | count | 1 |
| REM1       | -0.0537531 | 0.1509466 | -0.3561 | 0.722  | -0.069261863 | count | 1 |
| FOPNL      | -0.0528465 | 0.1199492 | -0.4406 | 0.66   | -0.069235154 | count | 1 |
| ALS2       | -0.0649847 | 0.2846466 | -0.2283 | 0.819  | -0.069215271 | count | 1 |
| CLK3       | -0.05339   | 0.1598525 | -0.334  | 0.738  | -0.069196702 | count | 1 |
| ARL17A     | -0.0648616 | 0.4342802 | -0.1494 | 0.881  | -0.069083593 | count | 1 |
| TINF2      | -0.0506172 | 0.1024465 | -0.4941 | 0.621  | -0.069078782 | count | 1 |
| ACTR1A     | -0.0508259 | 0.1018226 | -0.4992 | 0.618  | -0.06906817  | count | 1 |
| NDUFA1     | -0.0484674 | 0.0421414 | -1.1501 | 0.2502 | -0.069061375 | count | 1 |
| DNAJC19    | -0.0489089 | 0.0697577 | -0.7011 | 0.483  | -0.069046035 | count | 1 |
| TMEM8B     | -0.0647849 | 0.2019908 | -0.3207 | 0.748  | -0.069001549 | count | 1 |
| MPP1       | -0.0562608 | 0.1663912 | -0.3381 | 0.735  | -0.068922627 | count | 1 |
| ZFAND6     | -0.0498562 | 0.0819512 | -0.6084 | 0.543  | -0.068874141 | count | 1 |
| KBTBD4     | -0.0581489 | 0.205839  | -0.2825 | 0.778  | -0.068872276 | count | 1 |
| ZYX        | -0.0486901 | 0.0687516 | -0.7082 | 0.479  | -0.068775052 | count | 1 |
| ABCB10     | -0.0722444 | 0.2987333 | -0.2418 | 0.809  | -0.068749464 | count | 1 |
| AC097532.2 | -0.5741764 | 0.646358  | -0.8883 | 0.374  | -0.068748546 | count | 1 |
| ETFA       | -0.0495032 | 0.0783382 | -0.6319 | 0.527  | -0.068725681 | count | 1 |
| ARMC10     | -0.0500157 | 0.0934643 | -0.5351 | 0.593  | -0.068719745 | count | 1 |
| AC087623.3 | -0.1306546 | 0.5404336 | -0.2418 | 0.809  | -0.068712522 | count | 1 |
| RPE        | -0.0527826 | 0.1495112 | -0.353  | 0.724  | -0.0685328   | count | 1 |
| TRIM56     | -0.0501524 | 0.1420101 | -0.3532 | 0.724  | -0.068527059 | count | 1 |
| ZMYND11    | -0.0496872 | 0.0876399 | -0.5669 | 0.571  | -0.068332213 | count | 1 |
| LAMTOR5    | -0.0480797 | 0.0502789 | -0.9563 | 0.339  | -0.068293783 | count | 1 |
| TADA2B     | -0.0588704 | 0.2044071 | -0.288  | 0.773  | -0.068291048 | count | 1 |
| MAP3K12    | -0.0519825 | 0.1417797 | -0.3666 | 0.714  | -0.068202132 | count | 1 |
| AC026471.2 | -0.1115235 | 0.4536234 | -0.2459 | 0.806  | -0.068106634 | count | 1 |
| MRPS2      | -0.0500951 | 0.107143  | -0.4676 | 0.64   | -0.068093819 | count | 1 |
| MYLK-AS1   | -0.2343199 | 0.5197439 | -0.4508 | 0.652  | -0.068079552 | count | 1 |

|              |            |           |         |       |              |       |   |
|--------------|------------|-----------|---------|-------|--------------|-------|---|
| COLQ         | -0.3214209 | 0.6645757 | -0.4836 | 0.629 | -0.06790973  | count | 1 |
| ASF1A        | -0.0504734 | 0.1135081 | -0.4447 | 0.657 | -0.067528213 | count | 1 |
| OGFOD1       | -0.052872  | 0.204423  | -0.2586 | 0.796 | -0.067523474 | count | 1 |
| AL121917.1   | -0.1415901 | 0.8106787 | -0.1747 | 0.861 | -0.067456307 | count | 1 |
| RAB30-AS1    | -0.0520286 | 0.1403194 | -0.3708 | 0.711 | -0.067303152 | count | 1 |
| ZC3H12B      | -0.0769455 | 0.4072498 | -0.1889 | 0.85  | -0.067235552 | count | 1 |
| CFAP300      | -0.057477  | 0.1988759 | -0.289  | 0.773 | -0.067166773 | count | 1 |
| UBE2H        | -0.0476364 | 0.0665285 | -0.716  | 0.474 | -0.067072679 | count | 1 |
| PLA2G16      | -0.0474693 | 0.0646882 | -0.7338 | 0.463 | -0.067066883 | count | 1 |
| UBE2L6       | -0.0481147 | 0.0824316 | -0.5837 | 0.559 | -0.067041323 | count | 1 |
| NOV          | -0.0465604 | 0.074014  | -0.6291 | 0.529 | -0.066982235 | count | 1 |
| C16orf86     | -0.0615477 | 0.203146  | -0.303  | 0.762 | -0.066923174 | count | 1 |
| PILRB        | -0.0536385 | 0.2427625 | -0.221  | 0.825 | -0.066853106 | count | 1 |
| ASMTL        | -0.0514683 | 0.133723  | -0.3849 | 0.7   | -0.066702741 | count | 1 |
| RNF5         | -0.0481196 | 0.0833629 | -0.5772 | 0.564 | -0.066589666 | count | 1 |
| LDLRAP1      | -0.0532009 | 0.1913418 | -0.278  | 0.781 | -0.066530258 | count | 1 |
| BTN3A2       | -0.0496624 | 0.1269417 | -0.3912 | 0.696 | -0.0665022   | count | 1 |
| WDTC1        | -0.0596426 | 0.2136655 | -0.2791 | 0.78  | -0.066402134 | count | 1 |
| MIF-AS1      | -0.102541  | 0.5570855 | -0.1841 | 0.854 | -0.066370596 | count | 1 |
| SMN1         | -0.0670131 | 0.305455  | -0.2194 | 0.826 | -0.066250075 | count | 1 |
| PSMB1        | -0.0461781 | 0.0315331 | -1.4644 | 0.143 | -0.066211418 | count | 1 |
| ERBB4        | -0.054239  | 0.1850799 | -0.2931 | 0.769 | -0.066147039 | count | 1 |
| NSUN3        | -0.0602909 | 0.2030331 | -0.297  | 0.767 | -0.065968165 | count | 1 |
| TXN          | -0.0459657 | 0.0377395 | -1.218  | 0.223 | -0.065965957 | count | 1 |
| D2HGDH       | -0.0592398 | 0.2252777 | -0.263  | 0.793 | -0.06595214  | count | 1 |
| AC092745.1   | -0.5514368 | 0.8607435 | -0.6407 | 0.522 | -0.065762237 | count | 1 |
| FBXO41       | -0.5514368 | 0.9136269 | -0.6036 | 0.546 | -0.065762237 | count | 1 |
| AC091488.1   | -0.5514368 | 0.9136269 | -0.6036 | 0.546 | -0.065762237 | count | 1 |
| CNNM1        | -0.5514368 | 0.9136269 | -0.6036 | 0.546 | -0.065762237 | count | 1 |
| RNASEH2B-AS1 | -0.5514368 | 0.9136269 | -0.6036 | 0.546 | -0.065762237 | count | 1 |
| AL133523.1   | -0.5514368 | 0.9136269 | -0.6036 | 0.546 | -0.065762237 | count | 1 |
| HID1         | -0.5514368 | 0.9136269 | -0.6036 | 0.546 | -0.065762237 | count | 1 |
| LDLRAD4-AS1  | -0.5514368 | 0.9136269 | -0.6036 | 0.546 | -0.065762237 | count | 1 |
| LINC01311    | -0.5514368 | 0.9136269 | -0.6036 | 0.546 | -0.065762237 | count | 1 |
| CCIN         | -0.5514368 | 1.029234  | -0.5358 | 0.592 | -0.065762237 | count | 1 |
| MOBP         | -0.5514368 | 1.063363  | -0.5186 | 0.604 | -0.065762237 | count | 1 |
| CASS4        | -0.5514368 | 1.063363  | -0.5186 | 0.604 | -0.065762237 | count | 1 |
| OXCT2        | -0.226612  | 0.7426154 | -0.3052 | 0.76  | -0.065744679 | count | 1 |
| AL162311.3   | -0.226612  | 0.7425914 | -0.3052 | 0.76  | -0.065744679 | count | 1 |
| DOLPP1       | -0.0711984 | 0.2878274 | -0.2474 | 0.805 | -0.065714345 | count | 1 |
| VPS37A       | -0.0492906 | 0.1196825 | -0.4118 | 0.68  | -0.065658061 | count | 1 |
| TNRC6C       | -0.0490617 | 0.1439228 | -0.3409 | 0.733 | -0.065637785 | count | 1 |
| SLC9A7       | -0.137804  | 0.5485522 | -0.2512 | 0.802 | -0.065611613 | count | 1 |
| FBXL12       | -0.0501747 | 0.1219667 | -0.4114 | 0.681 | -0.065528131 | count | 1 |
| LANCL3       | -0.0919265 | 0.94768   | -0.097  | 0.923 | -0.065431837 | count | 1 |

|            |            |           |         |        |              |       |   |
|------------|------------|-----------|---------|--------|--------------|-------|---|
| TRAM2      | -0.0523484 | 0.1592818 | -0.3287 | 0.742  | -0.06524225  | count | 1 |
| PPP1R35    | -0.0486386 | 0.1187305 | -0.4097 | 0.682  | -0.065187476 | count | 1 |
| PGM5-AS1   | -0.0780152 | 0.3869257 | -0.2016 | 0.84   | -0.06515577  | count | 1 |
| ZNF33A     | -0.050418  | 0.1337388 | -0.377  | 0.706  | -0.065153982 | count | 1 |
| FAM120A    | -0.0487138 | 0.1154144 | -0.4221 | 0.673  | -0.065141961 | count | 1 |
| HAUS1      | -0.0494148 | 0.1564129 | -0.3159 | 0.752  | -0.065056175 | count | 1 |
| UTP6       | -0.0489091 | 0.1197465 | -0.4084 | 0.683  | -0.065012791 | count | 1 |
| RNF19B     | -0.0604608 | 0.2305821 | -0.2622 | 0.793  | -0.064849334 | count | 1 |
| CNNM3      | -0.0952342 | 0.3154935 | -0.3019 | 0.763  | -0.064830591 | count | 1 |
| PPIH       | -0.0487093 | 0.1211653 | -0.402  | 0.688  | -0.064815818 | count | 1 |
| AHCTF1     | -0.0500077 | 0.1385884 | -0.3608 | 0.718  | -0.06474693  | count | 1 |
| HAUS4      | -0.0654853 | 0.2628339 | -0.2492 | 0.803  | -0.064731771 | count | 1 |
| CFAP58     | -0.543233  | 0.8072434 | -0.6729 | 0.501  | -0.064689226 | count | 1 |
| AL137003.2 | -0.543233  | 0.8291265 | -0.6552 | 0.512  | -0.064689226 | count | 1 |
| SPAG5      | -0.543233  | 0.9155067 | -0.5934 | 0.553  | -0.064689226 | count | 1 |
| LINC01684  | -0.543233  | 1.03041   | -0.5272 | 0.598  | -0.064689226 | count | 1 |
| CBY1       | -0.0472725 | 0.099884  | -0.4733 | 0.636  | -0.06457412  | count | 1 |
| COL6A1     | -0.0451476 | 0.0540642 | -0.8351 | 0.404  | -0.06444666  | count | 1 |
| VXN        | -0.5413447 | 0.4046552 | -1.3378 | 0.181  | -0.064442583 | count | 1 |
| PRRC2B     | -0.0480014 | 0.1196476 | -0.4012 | 0.688  | -0.064388162 | count | 1 |
| EP400      | -0.0518514 | 0.2087114 | -0.2484 | 0.804  | -0.064276311 | count | 1 |
| FAM214B    | -0.054444  | 0.26207   | -0.2077 | 0.835  | -0.064267643 | count | 1 |
| AL132639.2 | -0.539181  | 0.7319947 | -0.7366 | 0.461  | -0.064160114 | count | 1 |
| SLCO1C1    | -0.5391166 | 0.3135557 | -1.7194 | 0.0856 | -0.06415171  | count | 1 |
| MPO        | -0.1783769 | 1.055665  | -0.169  | 0.866  | -0.064101538 | count | 1 |
| LAMTOR3    | -0.0485666 | 0.1198774 | -0.4051 | 0.685  | -0.064064673 | count | 1 |
| ARF3       | -0.0466422 | 0.1049646 | -0.4444 | 0.657  | -0.063858938 | count | 1 |
| AL357079.1 | -0.5367657 | 0.684724  | -0.7839 | 0.433  | -0.063845005 | count | 1 |
| STAMPB     | -0.0470815 | 0.1126641 | -0.4179 | 0.676  | -0.063783203 | count | 1 |
| RNF217     | -0.0480323 | 0.1522241 | -0.3155 | 0.752  | -0.063705045 | count | 1 |
| RP9        | -0.0469509 | 0.111082  | -0.4227 | 0.673  | -0.063646147 | count | 1 |
| NCL        | -0.0443475 | 0.0349758 | -1.2679 | 0.205  | -0.063592957 | count | 1 |
| TMUB1      | -0.048982  | 0.1561103 | -0.3138 | 0.754  | -0.063534638 | count | 1 |
| PSMB3      | -0.0445359 | 0.0439403 | -1.0136 | 0.311  | -0.0635127   | count | 1 |
| TSC2       | -0.0512877 | 0.1876946 | -0.2733 | 0.785  | -0.06345714  | count | 1 |
| NEMP1      | -0.0801084 | 0.4343991 | -0.1844 | 0.854  | -0.063362751 | count | 1 |
| GORASP2    | -0.0459312 | 0.0818238 | -0.5613 | 0.575  | -0.063265253 | count | 1 |
| MRPS35     | -0.0458543 | 0.0861698 | -0.5321 | 0.595  | -0.063233482 | count | 1 |
| C10orf88   | -0.0619611 | 0.2704172 | -0.2291 | 0.819  | -0.063222356 | count | 1 |
| PPP1R7     | -0.0451191 | 0.0625928 | -0.7208 | 0.471  | -0.063162363 | count | 1 |
| AP5S1      | -0.0664049 | 0.2787029 | -0.2383 | 0.812  | -0.063160627 | count | 1 |
| PIK3R2     | -0.1755194 | 0.730286  | -0.2403 | 0.81   | -0.063041908 | count | 1 |
| GGH        | -0.0534678 | 0.1995213 | -0.268  | 0.789  | -0.062904498 | count | 1 |
| MCM7       | -0.0582449 | 0.2371119 | -0.2456 | 0.806  | -0.062899825 | count | 1 |
| MIA2       | -0.0484822 | 0.1304581 | -0.3716 | 0.71   | -0.062769295 | count | 1 |

|            |            |           |         |       |              |       |   |
|------------|------------|-----------|---------|-------|--------------|-------|---|
| AL049629.2 | -0.2978864 | 0.6574869 | -0.4531 | 0.651 | -0.062651965 | count | 1 |
| DNPEP      | -0.0457924 | 0.1037454 | -0.4414 | 0.659 | -0.062595432 | count | 1 |
| TMEM268    | -0.1098586 | 0.3525792 | -0.3116 | 0.755 | -0.06256414  | count | 1 |
| TRIM62     | -0.1314196 | 0.5032524 | -0.2611 | 0.794 | -0.06250584  | count | 1 |
| MED13L     | -0.0457149 | 0.104034  | -0.4394 | 0.66  | -0.062503952 | count | 1 |
| NRBP1      | -0.0450755 | 0.0905948 | -0.4976 | 0.619 | -0.062400968 | count | 1 |
| ADNP-AS1   | -0.1187623 | 0.4488359 | -0.2646 | 0.791 | -0.06234142  | count | 1 |
| GPKOW      | -0.0499688 | 0.1973441 | -0.2532 | 0.8   | -0.06227138  | count | 1 |
| GPX4       | -0.0432446 | 0.0289676 | -1.4929 | 0.136 | -0.06217668  | count | 1 |
| SDF4       | -0.0439661 | 0.0580193 | -0.7578 | 0.449 | -0.062139793 | count | 1 |
| PNN        | -0.0438563 | 0.0654095 | -0.6705 | 0.503 | -0.061904359 | count | 1 |
| UBE3A      | -0.0451407 | 0.0951051 | -0.4746 | 0.635 | -0.061894466 | count | 1 |
| BRI3       | -0.0431435 | 0.0372923 | -1.1569 | 0.247 | -0.061862282 | count | 1 |
| ZCWPW2     | -0.0680204 | 0.3099575 | -0.2195 | 0.826 | -0.061703962 | count | 1 |
| TTC23      | -0.0517872 | 0.1939712 | -0.267  | 0.789 | -0.061694477 | count | 1 |
| USP9X      | -0.0466973 | 0.1217186 | -0.3837 | 0.701 | -0.061635755 | count | 1 |
| RNASEH2A   | -0.2129626 | 0.6924401 | -0.3076 | 0.758 | -0.061625076 | count | 1 |
| AC008764.6 | -0.2129626 | 0.7018394 | -0.3034 | 0.762 | -0.061625076 | count | 1 |
| ANKRD7     | -0.2129626 | 1.093022  | -0.1948 | 0.846 | -0.061625076 | count | 1 |
| PDK3       | -0.0477666 | 0.1700939 | -0.2808 | 0.779 | -0.061474219 | count | 1 |
| WDYHV1     | -0.0522394 | 0.179703  | -0.2907 | 0.771 | -0.061455735 | count | 1 |
| PGP        | -0.0451025 | 0.1171666 | -0.3849 | 0.7   | -0.061388308 | count | 1 |
| RAPGEF3    | -0.0754192 | 0.4362586 | -0.1729 | 0.863 | -0.061355033 | count | 1 |
| TMEM254    | -0.0585397 | 0.2367913 | -0.2472 | 0.805 | -0.061349683 | count | 1 |
| AC009133.1 | -0.0901383 | 0.383268  | -0.2352 | 0.814 | -0.061320064 | count | 1 |
| PCDH1      | -0.0900648 | 0.2816059 | -0.3198 | 0.749 | -0.061269464 | count | 1 |
| LYSMD2     | -0.044938  | 0.0975772 | -0.4605 | 0.645 | -0.061164264 | count | 1 |
| ITFG2-AS1  | -0.0826715 | 0.4681775 | -0.1766 | 0.86  | -0.06116069  | count | 1 |
| BLOC1S4    | -0.044772  | 0.1041256 | -0.43   | 0.667 | -0.061141643 | count | 1 |
| ZSWIM8     | -0.0507992 | 0.2145514 | -0.2368 | 0.813 | -0.061029454 | count | 1 |
| FZD3       | -0.0698186 | 0.2948238 | -0.2368 | 0.813 | -0.060964598 | count | 1 |
| EGFL6      | -0.0730052 | 0.4208479 | -0.1735 | 0.862 | -0.060939023 | count | 1 |
| AC023157.3 | -0.0534043 | 0.2099053 | -0.2544 | 0.799 | -0.060916442 | count | 1 |
| SND1-IT1   | -0.5142308 | 0.5130877 | -1.0022 | 0.316 | -0.060915003 | count | 1 |
| NSD2       | -0.0563763 | 0.3127731 | -0.1802 | 0.857 | -0.060874591 | count | 1 |
| IPO4       | -0.1160129 | 0.4220689 | -0.2749 | 0.783 | -0.060871683 | count | 1 |
| SMIM7      | -0.0429738 | 0.0572292 | -0.7509 | 0.453 | -0.060842491 | count | 1 |
| ZFPM1      | -0.0448251 | 0.1135871 | -0.3946 | 0.693 | -0.060799914 | count | 1 |
| IVNS1ABP   | -0.0485438 | 0.1919334 | -0.2529 | 0.8   | -0.060696707 | count | 1 |
| ARHGEF11   | -0.0569048 | 0.2567367 | -0.2216 | 0.825 | -0.060576744 | count | 1 |
| MTSS1L     | -0.0765364 | 0.3974099 | -0.1926 | 0.847 | -0.060512728 | count | 1 |
| NXN        | -0.0510839 | 0.3136939 | -0.1628 | 0.871 | -0.060484875 | count | 1 |
| MOB1A      | -0.0428244 | 0.0716635 | -0.5976 | 0.55  | -0.059917917 | count | 1 |
| AZIN1-AS1  | -0.0672059 | 0.3247676 | -0.2069 | 0.836 | -0.059849507 | count | 1 |
| FBXO31     | -0.0553872 | 0.2953807 | -0.1875 | 0.851 | -0.059802769 | count | 1 |

|            |            |           |         |        |              |       |   |
|------------|------------|-----------|---------|--------|--------------|-------|---|
| TMTC2      | -0.0628255 | 0.4815564 | -0.1305 | 0.896  | -0.059737559 | count | 1 |
| RPP25L     | -0.0458678 | 0.1302808 | -0.3521 | 0.725  | -0.059648936 | count | 1 |
| AL445228.2 | -0.2843111 | 0.7514683 | -0.3783 | 0.705  | -0.0596382   | count | 1 |
| AMT        | -0.2843111 | 0.7514683 | -0.3783 | 0.705  | -0.0596382   | count | 1 |
| NUP85      | -0.0530137 | 0.2328749 | -0.2276 | 0.82   | -0.05961861  | count | 1 |
| LAS1L      | -0.047587  | 0.1846908 | -0.2577 | 0.797  | -0.059595343 | count | 1 |
| YIF1B      | -0.0479945 | 0.1939449 | -0.2475 | 0.805  | -0.059261304 | count | 1 |
| PFDN6      | -0.0447416 | 0.1159051 | -0.386  | 0.7    | -0.059198019 | count | 1 |
| B2M        | -0.041033  | 0.0227857 | -1.8008 | 0.0718 | -0.059173563 | count | 1 |
| CCDC107    | -0.0414101 | 0.050029  | -0.8277 | 0.408  | -0.059133572 | count | 1 |
| DNM2       | -0.0477886 | 0.176098  | -0.2714 | 0.786  | -0.05912024  | count | 1 |
| TBC1D23    | -0.0443979 | 0.1232264 | -0.3603 | 0.719  | -0.059073715 | count | 1 |
| GOLGA8R    | -0.2044759 | 0.5744186 | -0.356  | 0.722  | -0.059073455 | count | 1 |
| NIFK       | -0.0422514 | 0.0860241 | -0.4912 | 0.623  | -0.059060945 | count | 1 |
| SAAL1      | -0.0515133 | 0.2056565 | -0.2505 | 0.802  | -0.059010957 | count | 1 |
| ASB7       | -0.066194  | 0.3028611 | -0.2186 | 0.827  | -0.058942562 | count | 1 |
| AC007389.5 | -0.1402651 | 0.7195604 | -0.1949 | 0.845  | -0.05892007  | count | 1 |
| KIT        | -0.1402651 | 0.8492474 | -0.1652 | 0.869  | -0.05892007  | count | 1 |
| TMLHE      | -0.0535427 | 0.2169075 | -0.2468 | 0.805  | -0.058916433 | count | 1 |
| DDX58      | -0.0497574 | 0.1687302 | -0.2949 | 0.768  | -0.058910671 | count | 1 |
| PFDN2      | -0.0415041 | 0.0557564 | -0.7444 | 0.457  | -0.058840301 | count | 1 |
| MAML1      | -0.0548358 | 0.2481897 | -0.2209 | 0.825  | -0.058794391 | count | 1 |
| HRH1       | -0.0447227 | 0.1306399 | -0.3423 | 0.732  | -0.058751188 | count | 1 |
| NAV2-AS3   | -0.0863963 | 0.4620558 | -0.187  | 0.852  | -0.058745122 | count | 1 |
| METTL24    | -0.0742284 | 0.5844586 | -0.127  | 0.899  | -0.058672409 | count | 1 |
| TTL        | -0.0475418 | 0.2727586 | -0.1743 | 0.862  | -0.058585667 | count | 1 |
| GIPC2      | -0.0719736 | 0.5856922 | -0.1229 | 0.902  | -0.058529654 | count | 1 |
| ZNF513     | -0.0563149 | 0.3077687 | -0.183  | 0.855  | -0.058508526 | count | 1 |
| SLC4A2     | -0.0481407 | 0.1940346 | -0.2481 | 0.804  | -0.058421527 | count | 1 |
| RCSD1      | -0.0469891 | 0.1925705 | -0.244  | 0.807  | -0.058345441 | count | 1 |
| AL359711.2 | -0.1022232 | 0.553689  | -0.1846 | 0.854  | -0.058148506 | count | 1 |
| APCDD1L    | -0.1022232 | 0.5604878 | -0.1824 | 0.855  | -0.058148506 | count | 1 |
| AC005332.1 | -0.4922956 | 0.8463    | -0.5817 | 0.561  | -0.058080768 | count | 1 |
| C9orf78    | -0.0409864 | 0.0653843 | -0.6269 | 0.531  | -0.058033088 | count | 1 |
| TMEM216    | -0.0438874 | 0.1487536 | -0.295  | 0.768  | -0.058031645 | count | 1 |
| PFDN4      | -0.0421522 | 0.0911923 | -0.4622 | 0.644  | -0.058027206 | count | 1 |
| TMEM17     | -0.1103848 | 0.377971  | -0.292  | 0.77   | -0.057866881 | count | 1 |
| LYRM4      | -0.0431349 | 0.1659894 | -0.2599 | 0.795  | -0.05785526  | count | 1 |
| EXD2       | -0.0600145 | 0.2787155 | -0.2153 | 0.83   | -0.057839851 | count | 1 |
| PLXNA3     | -0.0516543 | 0.2502701 | -0.2064 | 0.836  | -0.057788989 | count | 1 |
| FARP2      | -0.0555957 | 0.2306087 | -0.2411 | 0.81   | -0.057758339 | count | 1 |
| RPF1       | -0.044666  | 0.1446729 | -0.3087 | 0.758  | -0.057538662 | count | 1 |
| AC011611.4 | -0.1988937 | 0.6199876 | -0.3208 | 0.748  | -0.057399235 | count | 1 |
| WWP2       | -0.0435665 | 0.2055064 | -0.212  | 0.832  | -0.057230794 | count | 1 |
| FBXO30     | -0.0507272 | 0.2200421 | -0.2305 | 0.818  | -0.057039873 | count | 1 |

|            |            |           |         |       |              |       |   |
|------------|------------|-----------|---------|-------|--------------|-------|---|
| AC006942.1 | -0.0667341 | 0.3119574 | -0.2139 | 0.831 | -0.057002629 | count | 1 |
| HLA-DRA    | -0.0405574 | 0.1145837 | -0.354  | 0.723 | -0.057000855 | count | 1 |
| ID4        | -0.0396212 | 0.0537167 | -0.7376 | 0.461 | -0.056940796 | count | 1 |
| GSS        | -0.0457553 | 0.1819082 | -0.2515 | 0.801 | -0.056912639 | count | 1 |
| RANBP1     | -0.0402625 | 0.0622643 | -0.6466 | 0.518 | -0.0568283   | count | 1 |
| ZCCHC10    | -0.0431057 | 0.1367953 | -0.3151 | 0.753 | -0.056817404 | count | 1 |
| ZC3H15     | -0.0400537 | 0.0553989 | -0.723  | 0.47  | -0.056809438 | count | 1 |
| AL034417.2 | -0.0741538 | 0.3948246 | -0.1878 | 0.851 | -0.056779506 | count | 1 |
| CCNJ       | -0.0767396 | 0.4166629 | -0.1842 | 0.854 | -0.056730717 | count | 1 |
| OAZ1       | -0.0394308 | 0.0262482 | -1.5022 | 0.133 | -0.056703237 | count | 1 |
| CRYAB      | -0.0392973 | 0.0448933 | -0.8753 | 0.381 | -0.056576692 | count | 1 |
| NOA1       | -0.0454011 | 0.1397502 | -0.3249 | 0.745 | -0.056570063 | count | 1 |
| AL603910.1 | -0.4804742 | 0.7443654 | -0.6455 | 0.519 | -0.056560793 | count | 1 |
| FLG-AS1    | -0.4804742 | 0.8037706 | -0.5978 | 0.55  | -0.056560793 | count | 1 |
| AC005480.1 | -0.4804742 | 0.8037706 | -0.5978 | 0.55  | -0.056560793 | count | 1 |
| CAPS2      | -0.053938  | 0.2765224 | -0.1951 | 0.845 | -0.056508907 | count | 1 |
| MRPS28     | -0.0445928 | 0.1370541 | -0.3254 | 0.745 | -0.056503008 | count | 1 |
| MRPL27     | -0.040231  | 0.0725862 | -0.5543 | 0.579 | -0.056477311 | count | 1 |
| AC012358.3 | -0.0763995 | 0.3826017 | -0.1997 | 0.842 | -0.056476918 | count | 1 |
| ABCB1      | -0.1077779 | 0.878713  | -0.1227 | 0.902 | -0.056476806 | count | 1 |
| STOML1     | -0.0456948 | 0.173209  | -0.2638 | 0.792 | -0.056416945 | count | 1 |
| ACSL1      | -0.0470486 | 0.23131   | -0.2034 | 0.839 | -0.056359787 | count | 1 |
| EMC4       | -0.0396896 | 0.0527748 | -0.7521 | 0.452 | -0.056357608 | count | 1 |
| FAM32A     | -0.0403398 | 0.0781204 | -0.5164 | 0.606 | -0.056355842 | count | 1 |
| CTBP2      | -0.0413406 | 0.106179  | -0.3893 | 0.697 | -0.056339849 | count | 1 |
| AC007686.3 | -0.0645473 | 0.3462749 | -0.1864 | 0.852 | -0.056331931 | count | 1 |
| PTCD2      | -0.060133  | 0.2847202 | -0.2112 | 0.833 | -0.05632875  | count | 1 |
| WDR25      | -0.0517234 | 0.2108397 | -0.2453 | 0.806 | -0.056206087 | count | 1 |
| MKKS       | -0.0441537 | 0.1493592 | -0.2956 | 0.768 | -0.056166416 | count | 1 |
| CLIC1      | -0.0389957 | 0.0314882 | -1.2384 | 0.216 | -0.056022644 | count | 1 |
| SSR4       | -0.0389353 | 0.0327091 | -1.1904 | 0.234 | -0.055912796 | count | 1 |
| FN3KRP     | -0.0425887 | 0.1203228 | -0.354  | 0.723 | -0.055905358 | count | 1 |
| AGAP4      | -0.0669498 | 0.4148439 | -0.1614 | 0.872 | -0.055848196 | count | 1 |
| AC073389.1 | -0.0914634 | 0.4033066 | -0.2268 | 0.821 | -0.055694265 | count | 1 |
| ADAR       | -0.0410364 | 0.1252603 | -0.3276 | 0.743 | -0.055640663 | count | 1 |
| TIMM17B    | -0.0399895 | 0.0927505 | -0.4312 | 0.666 | -0.055576654 | count | 1 |
| AC237221.1 | -0.0974797 | 0.5353719 | -0.1821 | 0.856 | -0.055410194 | count | 1 |
| NBPF10     | -0.1320151 | 0.5223206 | -0.2527 | 0.8   | -0.05537438  | count | 1 |
| DAB2IP     | -0.0477108 | 0.2147698 | -0.2221 | 0.824 | -0.055314705 | count | 1 |
| WBP2       | -0.0397264 | 0.0810414 | -0.4902 | 0.624 | -0.055259124 | count | 1 |
| RYR1       | -0.1314778 | 0.6285447 | -0.2092 | 0.834 | -0.055143794 | count | 1 |
| MGAT5      | -0.0450994 | 0.1724908 | -0.2615 | 0.794 | -0.05510471  | count | 1 |
| KAT6A      | -0.0425255 | 0.1392977 | -0.3053 | 0.76  | -0.054721124 | count | 1 |
| ELMO2      | -0.0481643 | 0.3098987 | -0.1554 | 0.876 | -0.054674821 | count | 1 |
| MTCH1      | -0.0382247 | 0.0461221 | -0.8288 | 0.407 | -0.054495667 | count | 1 |

|            |            |           |         |       |              |       |   |
|------------|------------|-----------|---------|-------|--------------|-------|---|
| G6PD       | -0.0407181 | 0.1124919 | -0.362  | 0.717 | -0.054441632 | count | 1 |
| PPP6C      | -0.0398955 | 0.1198701 | -0.3328 | 0.739 | -0.054438466 | count | 1 |
| VRK2       | -0.0438907 | 0.170063  | -0.2581 | 0.796 | -0.054392388 | count | 1 |
| TMEM18     | -0.0385201 | 0.0742573 | -0.5187 | 0.604 | -0.054362169 | count | 1 |
| DPF3       | -0.4632961 | 0.5581464 | -0.8301 | 0.407 | -0.054361573 | count | 1 |
| MAGEF1     | -0.039521  | 0.097993  | -0.4033 | 0.687 | -0.054303817 | count | 1 |
| EIF5AL1    | -0.1293029 | 0.5420791 | -0.2385 | 0.811 | -0.054210843 | count | 1 |
| AC006157.1 | -0.4619697 | 0.6781531 | -0.6812 | 0.496 | -0.054192234 | count | 1 |
| LMNA       | -0.037781  | 0.0384178 | -0.9834 | 0.325 | -0.054189461 | count | 1 |
| POFUT1     | -0.0494339 | 0.2455791 | -0.2013 | 0.84  | -0.054052544 | count | 1 |
| TEX22      | -0.2589526 | 0.8192711 | -0.3161 | 0.752 | -0.054046576 | count | 1 |
| RIPPLY2    | -0.2589526 | 0.8218764 | -0.3151 | 0.753 | -0.054046576 | count | 1 |
| AL157392.5 | -0.2589526 | 0.8218764 | -0.3151 | 0.753 | -0.054046576 | count | 1 |
| ARMS2      | -0.2589526 | 0.8218764 | -0.3151 | 0.753 | -0.054046576 | count | 1 |
| IL1RAPL1   | -0.2589526 | 0.9447966 | -0.2741 | 0.784 | -0.054046576 | count | 1 |
| SLC17A3    | -0.2589526 | 0.9759874 | -0.2653 | 0.791 | -0.054046576 | count | 1 |
| GAS2       | -0.2589526 | 0.9971514 | -0.2597 | 0.795 | -0.054046576 | count | 1 |
| GTF3C5     | -0.0454401 | 0.1988022 | -0.2286 | 0.819 | -0.053955459 | count | 1 |
| QTRT1      | -0.0410103 | 0.1271752 | -0.3225 | 0.747 | -0.053944549 | count | 1 |
| HNRNPH3    | -0.0382632 | 0.0642134 | -0.5959 | 0.551 | -0.053935487 | count | 1 |
| LZIC       | -0.0392426 | 0.0833857 | -0.4706 | 0.638 | -0.053879409 | count | 1 |
| MTREX      | -0.0404452 | 0.1259491 | -0.3211 | 0.748 | -0.0538383   | count | 1 |
| TRIM6      | -0.1869178 | 0.5239133 | -0.3568 | 0.721 | -0.053818531 | count | 1 |
| CCL2       | -0.0375138 | 0.141854  | -0.2645 | 0.791 | -0.053816537 | count | 1 |
| SLC35B1    | -0.0404547 | 0.1345998 | -0.3006 | 0.764 | -0.053794365 | count | 1 |
| AL139089.1 | -0.1281487 | 0.5544396 | -0.2311 | 0.817 | -0.053716009 | count | 1 |
| ARHGDI     | -0.0380713 | 0.0641952 | -0.5931 | 0.553 | -0.053655598 | count | 1 |
| AC015802.6 | -0.1861579 | 0.5595688 | -0.3327 | 0.739 | -0.053591839 | count | 1 |
| ENY2       | -0.0376464 | 0.0562421 | -0.6694 | 0.503 | -0.053494103 | count | 1 |
| STARD3     | -0.0440242 | 0.2022904 | -0.2176 | 0.828 | -0.053416941 | count | 1 |
| VARS       | -0.0468373 | 0.237381  | -0.1973 | 0.844 | -0.053406854 | count | 1 |
| FAM13A-AS1 | -0.1490654 | 0.5104381 | -0.292  | 0.77  | -0.053280834 | count | 1 |
| CNOT3      | -0.0486935 | 0.19704   | -0.2471 | 0.805 | -0.053240516 | count | 1 |
| P4HB       | -0.0373614 | 0.0501918 | -0.7444 | 0.457 | -0.053205614 | count | 1 |
| DCLRE1B    | -0.069372  | 0.3871944 | -0.1792 | 0.858 | -0.053087761 | count | 1 |
| GLIDR      | -0.0693251 | 0.4399548 | -0.1576 | 0.875 | -0.053051573 | count | 1 |
| ADSL       | -0.0550416 | 0.2589579 | -0.2126 | 0.832 | -0.05302474  | count | 1 |
| UROD       | -0.0379696 | 0.0760674 | -0.4992 | 0.618 | -0.052965448 | count | 1 |
| AL355297.4 | -0.0779825 | 0.4991547 | -0.1562 | 0.876 | -0.052964443 | count | 1 |
| ZNF213     | -0.0572903 | 0.266511  | -0.215  | 0.83  | -0.052810014 | count | 1 |
| AKR7A2     | -0.0374052 | 0.0604541 | -0.6187 | 0.536 | -0.052788416 | count | 1 |
| SNRPD3     | -0.0371235 | 0.050583  | -0.7339 | 0.463 | -0.052776412 | count | 1 |
| MAN2A2     | -0.0507465 | 0.2439916 | -0.208  | 0.835 | -0.052702168 | count | 1 |
| HEY1       | -0.0631    | 0.3386839 | -0.1863 | 0.852 | -0.052614957 | count | 1 |
| ANK1       | -0.061529  | 0.5122979 | -0.1201 | 0.904 | -0.052528078 | count | 1 |

|             |            |           |         |        |              |       |   |
|-------------|------------|-----------|---------|--------|--------------|-------|---|
| RAB21       | -0.0376834 | 0.0814481 | -0.4627 | 0.644  | -0.052491621 | count | 1 |
| HOXA10      | -0.1822624 | 0.8880993 | -0.2052 | 0.837  | -0.052430724 | count | 1 |
| HIST2H4B    | -0.1822624 | 0.9635616 | -0.1892 | 0.85   | -0.052430724 | count | 1 |
| LMX1B       | -0.1822624 | 0.9708073 | -0.1877 | 0.851  | -0.052430724 | count | 1 |
| SLC22A17    | -0.0391923 | 0.1263868 | -0.3101 | 0.757  | -0.052222708 | count | 1 |
| FRY-AS1     | -0.4462791 | 0.5018522 | -0.8893 | 0.374  | -0.052194293 | count | 1 |
| ERCC1       | -0.0376085 | 0.0846423 | -0.4443 | 0.657  | -0.052193669 | count | 1 |
| MIR4435-2HG | -0.0393917 | 0.1272805 | -0.3095 | 0.757  | -0.052144701 | count | 1 |
| EIF5        | -0.0364597 | 0.0436512 | -0.8353 | 0.4036 | -0.052071071 | count | 1 |
| RNF141      | -0.0387671 | 0.1493475 | -0.2596 | 0.795  | -0.052058202 | count | 1 |
| CCDC102A    | -0.0388171 | 0.1465928 | -0.2648 | 0.791  | -0.051992119 | count | 1 |
| RIC8A       | -0.0385878 | 0.1040628 | -0.3708 | 0.711  | -0.051961121 | count | 1 |
| FAM78B      | -0.1453413 | 0.5136042 | -0.283  | 0.777  | -0.05191383  | count | 1 |
| MDH2        | -0.036456  | 0.0467448 | -0.7799 | 0.436  | -0.051903968 | count | 1 |
| AC007388.1  | -0.0408544 | 0.2187882 | -0.1867 | 0.852  | -0.0518975   | count | 1 |
| PLEKHG5     | -0.1092762 | 0.5079143 | -0.2151 | 0.83   | -0.051782038 | count | 1 |
| PIK3C3      | -0.0408664 | 0.1582586 | -0.2582 | 0.796  | -0.051775282 | count | 1 |
| SLC27A5     | -0.0399599 | 0.1564833 | -0.2554 | 0.798  | -0.05162476  | count | 1 |
| SAP18       | -0.0359851 | 0.0321394 | -1.1197 | 0.263  | -0.051611188 | count | 1 |
| MFAP1       | -0.0379208 | 0.0960153 | -0.3949 | 0.693  | -0.05144523  | count | 1 |
| PARP1       | -0.037713  | 0.1068598 | -0.3529 | 0.724  | -0.051393416 | count | 1 |
| MRPL58      | -0.0390457 | 0.1371396 | -0.2847 | 0.776  | -0.051286735 | count | 1 |
| TMEM245     | -0.0383533 | 0.1348175 | -0.2845 | 0.776  | -0.051103917 | count | 1 |
| FKBP8       | -0.0358456 | 0.0482917 | -0.7423 | 0.458  | -0.050973289 | count | 1 |
| AC024909.2  | -0.1772669 | 0.7380821 | -0.2402 | 0.81   | -0.050944114 | count | 1 |
| AC012510.1  | -0.1772669 | 0.7455539 | -0.2378 | 0.812  | -0.050944114 | count | 1 |
| CCDC168     | -0.1772669 | 0.8858339 | -0.2001 | 0.841  | -0.050944114 | count | 1 |
| AL359397.2  | -0.2444685 | 0.8884623 | -0.2752 | 0.783  | -0.050875367 | count | 1 |
| ADAM10      | -0.0380866 | 0.1430604 | -0.2662 | 0.79   | -0.050848564 | count | 1 |
| SHARPIN     | -0.0363478 | 0.090124  | -0.4033 | 0.687  | -0.050625574 | count | 1 |
| CDK2AP2     | -0.0359959 | 0.080727  | -0.4459 | 0.656  | -0.050607579 | count | 1 |
| TRPA1       | -0.2427801 | 0.4377817 | -0.5546 | 0.579  | -0.050506781 | count | 1 |
| LRFN3       | -0.0516615 | 0.2980454 | -0.1733 | 0.862  | -0.050398527 | count | 1 |
| NKRF        | -0.048897  | 0.2462911 | -0.1985 | 0.843  | -0.050319763 | count | 1 |
| ZCCHC14     | -0.0403114 | 0.1859771 | -0.2168 | 0.828  | -0.050305109 | count | 1 |
| TMSB15A     | -0.0680115 | 0.3574993 | -0.1902 | 0.849  | -0.050223902 | count | 1 |
| NSFL1C      | -0.0361866 | 0.0841877 | -0.4298 | 0.667  | -0.050131199 | count | 1 |
| ZNF212      | -0.065461  | 0.3369725 | -0.1943 | 0.846  | -0.050071343 | count | 1 |
| KIAA1755    | -0.0432295 | 0.2906475 | -0.1487 | 0.882  | -0.049911633 | count | 1 |
| SMIM20      | -0.0360229 | 0.0878634 | -0.41   | 0.682  | -0.049786292 | count | 1 |
| DNAJA3      | -0.0400361 | 0.2681569 | -0.1493 | 0.881  | -0.049515378 | count | 1 |
| PSMB7       | -0.0352456 | 0.0687619 | -0.5126 | 0.608  | -0.04950309  | count | 1 |
| AC006504.1  | -0.4246899 | 0.7750081 | -0.548  | 0.584  | -0.049461257 | count | 1 |
| SAMM50      | -0.0383885 | 0.126941  | -0.3024 | 0.762  | -0.049443428 | count | 1 |
| DTWD1       | -0.0354377 | 0.0836547 | -0.4236 | 0.672  | -0.049423501 | count | 1 |



|            |            |           |         |       |              |       |   |
|------------|------------|-----------|---------|-------|--------------|-------|---|
| PIK3C2A    | -0.0365709 | 0.1161283 | -0.3149 | 0.753 | -0.04938744  | count | 1 |
| C1orf56    | -0.0367154 | 0.1213785 | -0.3025 | 0.762 | -0.049341474 | count | 1 |
| PSAT1      | -0.1177323 | 0.821796  | -0.1433 | 0.886 | -0.049258857 | count | 1 |
| GAS6-AS1   | -0.4228335 | 0.4287704 | -0.9862 | 0.324 | -0.049227129 | count | 1 |
| APH1A      | -0.0356334 | 0.0810651 | -0.4396 | 0.66  | -0.049108639 | count | 1 |
| NMB        | -0.0392709 | 0.1612543 | -0.2435 | 0.808 | -0.049086715 | count | 1 |
| ZBTB46     | -0.0806524 | 0.4322677 | -0.1866 | 0.852 | -0.049033503 | count | 1 |
| NR2F6      | -0.0359835 | 0.1007857 | -0.357  | 0.721 | -0.049022505 | count | 1 |
| UBE2D2     | -0.0344792 | 0.0527719 | -0.6534 | 0.514 | -0.048993028 | count | 1 |
| PTBP2      | -0.0380933 | 0.1729712 | -0.2202 | 0.826 | -0.048959857 | count | 1 |
| AGAP9      | -0.2355062 | 0.4369124 | -0.539  | 0.59  | -0.048921454 | count | 1 |
| XKR9       | -0.1369898 | 0.7986615 | -0.1715 | 0.864 | -0.0488547   | count | 1 |
| C5orf17    | -0.1167782 | 0.7065376 | -0.1653 | 0.869 | -0.04885138  | count | 1 |
| SMOX       | -0.0560174 | 0.3831744 | -0.1462 | 0.884 | -0.048845529 | count | 1 |
| DNAJA4     | -0.0548949 | 0.4340778 | -0.1265 | 0.899 | -0.048827188 | count | 1 |
| ZNF605     | -0.0405478 | 0.1912207 | -0.212  | 0.832 | -0.048821977 | count | 1 |
| PTGES2     | -0.0358046 | 0.1098209 | -0.326  | 0.744 | -0.048739695 | count | 1 |
| CHD1L      | -0.0403457 | 0.2195275 | -0.1838 | 0.854 | -0.048704098 | count | 1 |
| SP5        | -0.0858258 | 0.4513972 | -0.1901 | 0.849 | -0.048698764 | count | 1 |
| FAR2       | -0.136329  | 0.4944304 | -0.2757 | 0.783 | -0.048613038 | count | 1 |
| GON7       | -0.0391603 | 0.1605712 | -0.2439 | 0.807 | -0.048521799 | count | 1 |
| SNHG7      | -0.0341696 | 0.0659205 | -0.5183 | 0.604 | -0.04847699  | count | 1 |
| MTHFD2L    | -0.0381845 | 0.1727113 | -0.2211 | 0.825 | -0.048438277 | count | 1 |
| CCDC8      | -0.0405595 | 0.185546  | -0.2186 | 0.827 | -0.048435514 | count | 1 |
| USP35      | -0.0632678 | 0.4010825 | -0.1577 | 0.875 | -0.048380999 | count | 1 |
| AL451085.2 | -0.044436  | 0.2626137 | -0.1692 | 0.866 | -0.048264775 | count | 1 |
| AC097634.1 | -0.1352887 | 0.4646113 | -0.2912 | 0.771 | -0.0482327   | count | 1 |
| SHC1       | -0.0373648 | 0.1685784 | -0.2216 | 0.825 | -0.048221158 | count | 1 |
| ST3GAL2    | -0.0488358 | 0.2466945 | -0.198  | 0.843 | -0.048209101 | count | 1 |
| POLR2E     | -0.0340399 | 0.0560816 | -0.607  | 0.544 | -0.048065494 | count | 1 |
| AL021707.2 | -0.0788607 | 0.7618539 | -0.1035 | 0.918 | -0.04793158  | count | 1 |
| ZNF284     | -0.0844002 | 0.4428075 | -0.1906 | 0.849 | -0.047879344 | count | 1 |
| ICE2       | -0.0364928 | 0.1648126 | -0.2214 | 0.825 | -0.047826978 | count | 1 |
| ZFY        | -0.0384771 | 0.1711388 | -0.2248 | 0.822 | -0.047761654 | count | 1 |
| AL034417.4 | -0.2301496 | 0.6241788 | -0.3687 | 0.712 | -0.047756706 | count | 1 |
| KIF6       | -0.410484  | 0.7948451 | -0.5164 | 0.606 | -0.047673209 | count | 1 |
| GATC       | -0.0406528 | 0.2292784 | -0.1773 | 0.859 | -0.047635457 | count | 1 |
| ANKMY1     | -0.0908131 | 0.5034201 | -0.1804 | 0.857 | -0.047457653 | count | 1 |
| MRPS11     | -0.0352216 | 0.1240751 | -0.2839 | 0.777 | -0.047407382 | count | 1 |
| CAPZB      | -0.0332033 | 0.0426167 | -0.7791 | 0.436 | -0.047400977 | count | 1 |
| MYO5B      | -0.1329366 | 0.715255  | -0.1859 | 0.853 | -0.047373266 | count | 1 |
| PARD6G-AS1 | -0.1329366 | 0.7157393 | -0.1857 | 0.853 | -0.047373266 | count | 1 |
| CPNE1      | -0.0348429 | 0.0953966 | -0.3652 | 0.715 | -0.04736436  | count | 1 |
| FAM168B    | -0.0356279 | 0.1464909 | -0.2432 | 0.808 | -0.047294104 | count | 1 |
| AL136088.1 | -0.1649027 | 0.4888183 | -0.3373 | 0.736 | -0.047276219 | count | 1 |

|            |            |           |         |       |              |       |   |
|------------|------------|-----------|---------|-------|--------------|-------|---|
| LRRC47     | -0.038877  | 0.1366667 | -0.2845 | 0.776 | -0.047273889 | count | 1 |
| ATP6V0D1   | -0.034445  | 0.0923379 | -0.373  | 0.709 | -0.047251769 | count | 1 |
| FARSA      | -0.0368437 | 0.1545494 | -0.2384 | 0.812 | -0.047248974 | count | 1 |
| THOC2      | -0.0340964 | 0.0875329 | -0.3895 | 0.697 | -0.047240719 | count | 1 |
| TMEM173    | -0.0339778 | 0.0942708 | -0.3604 | 0.719 | -0.047186718 | count | 1 |
| NARS       | -0.033564  | 0.0722403 | -0.4646 | 0.642 | -0.046906474 | count | 1 |
| LCP2       | -0.1635271 | 0.6054977 | -0.2701 | 0.787 | -0.046869165 | count | 1 |
| PRICKLE3   | -0.0990765 | 0.4557469 | -0.2174 | 0.828 | -0.046867873 | count | 1 |
| MED24      | -0.0690836 | 0.3183394 | -0.217  | 0.828 | -0.046864155 | count | 1 |
| LMCD1-AS1  | -0.0726658 | 0.8400194 | -0.0865 | 0.931 | -0.046838007 | count | 1 |
| MB21D2     | -0.1633914 | 0.3726023 | -0.4385 | 0.661 | -0.04682902  | count | 1 |
| GTF2A2     | -0.0330205 | 0.0545187 | -0.6057 | 0.545 | -0.046807877 | count | 1 |
| ERI1       | -0.0499695 | 0.275677  | -0.1813 | 0.856 | -0.046765422 | count | 1 |
| NME6       | -0.0359952 | 0.1397421 | -0.2576 | 0.797 | -0.046757436 | count | 1 |
| CENPE      | -0.1118009 | 0.4820075 | -0.2319 | 0.817 | -0.046727806 | count | 1 |
| TDP2       | -0.0357527 | 0.1366874 | -0.2616 | 0.794 | -0.046713581 | count | 1 |
| EEF1E1     | -0.0338697 | 0.0974368 | -0.3476 | 0.728 | -0.046637191 | count | 1 |
| ARFGAP3    | -0.0332178 | 0.0673517 | -0.4932 | 0.622 | -0.046433705 | count | 1 |
| PIGM       | -0.0375622 | 0.1899621 | -0.1977 | 0.843 | -0.046362021 | count | 1 |
| FAM50A     | -0.032981  | 0.0666479 | -0.4949 | 0.621 | -0.046319027 | count | 1 |
| MYSM1      | -0.036372  | 0.1662636 | -0.2188 | 0.827 | -0.046197092 | count | 1 |
| KAT6B      | -0.0337665 | 0.098948  | -0.3413 | 0.733 | -0.046159992 | count | 1 |
| AL355075.4 | -0.0974715 | 0.5273237 | -0.1848 | 0.853 | -0.046096068 | count | 1 |
| STIP1      | -0.0342226 | 0.1185944 | -0.2886 | 0.773 | -0.045951904 | count | 1 |
| NUDCD1     | -0.0389141 | 0.1963512 | -0.1982 | 0.843 | -0.045902234 | count | 1 |
| ACOT8      | -0.0360694 | 0.1685358 | -0.214  | 0.831 | -0.045871324 | count | 1 |
| PGRMC1     | -0.0321234 | 0.0447382 | -0.718  | 0.473 | -0.045847546 | count | 1 |
| EGR2       | -0.0562003 | 0.3129824 | -0.1796 | 0.858 | -0.045622259 | count | 1 |
| KIAA0391   | -0.2201659 | 0.5732491 | -0.3841 | 0.701 | -0.045591984 | count | 1 |
| TLE4       | -0.035181  | 0.1664493 | -0.2114 | 0.833 | -0.045489027 | count | 1 |
| CIART      | -0.0377757 | 0.194793  | -0.1939 | 0.846 | -0.045478809 | count | 1 |
| TMEM258    | -0.031918  | 0.0456026 | -0.6999 | 0.484 | -0.045397917 | count | 1 |
| ARFGAP2    | -0.0340801 | 0.1382072 | -0.2466 | 0.805 | -0.045287611 | count | 1 |
| ZFYVE19    | -0.0370011 | 0.191866  | -0.1928 | 0.847 | -0.045093636 | count | 1 |
| BCL7B      | -0.0327551 | 0.0874521 | -0.3745 | 0.708 | -0.045086031 | count | 1 |
| PEX14      | -0.0390576 | 0.2067917 | -0.1889 | 0.85  | -0.045085158 | count | 1 |
| C6orf52    | -0.2177654 | 0.9032004 | -0.2411 | 0.809 | -0.045072697 | count | 1 |
| CDC42EP1   | -0.0325464 | 0.0912775 | -0.3566 | 0.721 | -0.04505022  | count | 1 |
| LETMD1     | -0.0329068 | 0.0962852 | -0.3418 | 0.733 | -0.045045333 | count | 1 |
| TRPC1      | -0.0394336 | 0.1730655 | -0.2279 | 0.82  | -0.044946675 | count | 1 |
| C11orf74   | -0.0335757 | 0.1282779 | -0.2617 | 0.794 | -0.044800533 | count | 1 |
| SDHB       | -0.031987  | 0.0671028 | -0.4767 | 0.634 | -0.044705616 | count | 1 |
| ZNF22      | -0.031937  | 0.0788216 | -0.4052 | 0.685 | -0.044632113 | count | 1 |
| RPRD2      | -0.0333933 | 0.1357284 | -0.246  | 0.806 | -0.044621051 | count | 1 |
| TMEM14B    | -0.0313862 | 0.0497683 | -0.6306 | 0.528 | -0.044545193 | count | 1 |

|              |            |           |         |        |              |       |   |
|--------------|------------|-----------|---------|--------|--------------|-------|---|
| IP6K2        | -0.0324623 | 0.111141  | -0.2921 | 0.77   | -0.044512533 | count | 1 |
| TOM1L2       | -0.0345869 | 0.2301744 | -0.1503 | 0.881  | -0.044495989 | count | 1 |
| CBX8         | -0.0939454 | 0.585693  | -0.1604 | 0.873  | -0.044401867 | count | 1 |
| G6PC3        | -0.0349012 | 0.1519231 | -0.2297 | 0.818  | -0.044384071 | count | 1 |
| TATDN3       | -0.036483  | 0.2250303 | -0.1621 | 0.871  | -0.044358497 | count | 1 |
| TAF11        | -0.0326995 | 0.1160653 | -0.2817 | 0.778  | -0.044216973 | count | 1 |
| SUPT3H       | -0.0415031 | 0.2179455 | -0.1904 | 0.849  | -0.044135324 | count | 1 |
| ZNF710-AS1   | -0.3805105 | 0.8884097 | -0.4283 | 0.6684 | -0.043927925 | count | 1 |
| ZNF473       | -0.0722143 | 0.4507649 | -0.1602 | 0.873  | -0.043848843 | count | 1 |
| ENSA         | -0.0310059 | 0.0579541 | -0.535  | 0.593  | -0.043831166 | count | 1 |
| ME2          | -0.0350551 | 0.1639491 | -0.2138 | 0.831  | -0.043810779 | count | 1 |
| UBE2T        | -0.0554739 | 0.4500936 | -0.1232 | 0.902  | -0.043753249 | count | 1 |
| TUBB         | -0.0305664 | 0.0412177 | -0.7416 | 0.458  | -0.043746935 | count | 1 |
| CTNNAL1      | -0.031231  | 0.0995296 | -0.3138 | 0.754  | -0.043743817 | count | 1 |
| GLOD4        | -0.0315655 | 0.0844631 | -0.3737 | 0.709  | -0.043692022 | count | 1 |
| MAP3K10      | -0.0923801 | 0.3432232 | -0.2692 | 0.788  | -0.043650407 | count | 1 |
| UBE2D4       | -0.0328062 | 0.1211081 | -0.2709 | 0.786  | -0.043496932 | count | 1 |
| INTS3        | -0.0350602 | 0.2031412 | -0.1726 | 0.863  | -0.043435034 | count | 1 |
| C3orf58      | -0.0328284 | 0.1105269 | -0.297  | 0.766  | -0.043232441 | count | 1 |
| ABHD14A-ACY1 | -0.082615  | 0.5640167 | -0.1465 | 0.884  | -0.04311613  | count | 1 |
| CBX3         | -0.0306416 | 0.0663609 | -0.4617 | 0.644  | -0.04311178  | count | 1 |
| AC083798.2   | -0.0911996 | 0.3569331 | -0.2555 | 0.798  | -0.043083931 | count | 1 |
| RTCA-AS1     | -0.3730642 | 0.6899117 | -0.5407 | 0.589  | -0.04300336  | count | 1 |
| XAB2         | -0.0357051 | 0.1786321 | -0.1999 | 0.842  | -0.042750076 | count | 1 |
| TAB3         | -0.0470222 | 0.356544  | -0.1319 | 0.895  | -0.042570439 | count | 1 |
| AC124319.2   | -0.2061606 | 0.6554525 | -0.3145 | 0.753  | -0.042568891 | count | 1 |
| AP002449.1   | -0.2061606 | 0.6545544 | -0.315  | 0.753  | -0.042568891 | count | 1 |
| LINC00886    | -0.2061606 | 0.7920922 | -0.2603 | 0.795  | -0.042568891 | count | 1 |
| SNAP29       | -0.0315712 | 0.1084775 | -0.291  | 0.771  | -0.042539717 | count | 1 |
| AC090517.4   | -0.0447825 | 0.4861792 | -0.0921 | 0.927  | -0.042514117 | count | 1 |
| ARPC1A       | -0.0298806 | 0.0607494 | -0.4919 | 0.623  | -0.042349998 | count | 1 |
| USP42        | -0.039244  | 0.2645865 | -0.1483 | 0.882  | -0.042328273 | count | 1 |
| DSEL         | -0.0305709 | 0.122314  | -0.2499 | 0.803  | -0.042236157 | count | 1 |
| MAPRE3       | -0.0364362 | 0.1933789 | -0.1884 | 0.851  | -0.042053499 | count | 1 |
| ABHD2        | -0.0310676 | 0.1190938 | -0.2609 | 0.794  | -0.04205082  | count | 1 |
| CYS1         | -0.0307451 | 0.1163735 | -0.2642 | 0.792  | -0.041957518 | count | 1 |
| PRRC2C       | -0.0294179 | 0.0526171 | -0.5591 | 0.576  | -0.041898485 | count | 1 |
| NUS1         | -0.0333179 | 0.1763118 | -0.189  | 0.85   | -0.041837055 | count | 1 |
| SORL1        | -0.0399229 | 0.3354323 | -0.119  | 0.905  | -0.041784412 | count | 1 |
| LRRC41       | -0.0317608 | 0.1342549 | -0.2366 | 0.813  | -0.041769014 | count | 1 |
| KLLN         | -0.1000854 | 0.5423374 | -0.1845 | 0.854  | -0.041743551 | count | 1 |
| CFAP298      | -0.0302206 | 0.0985461 | -0.3067 | 0.759  | -0.041726684 | count | 1 |
| CEP290       | -0.0312816 | 0.1339166 | -0.2336 | 0.815  | -0.041654123 | count | 1 |
| LPCAT3       | -0.0388559 | 0.1933024 | -0.201  | 0.841  | -0.04161684  | count | 1 |
| CYB5R3       | -0.0289781 | 0.0348191 | -0.8322 | 0.405  | -0.041591674 | count | 1 |

|              |            |           |         |       |              |       |   |
|--------------|------------|-----------|---------|-------|--------------|-------|---|
| KLF12        | -0.039416  | 0.1932641 | -0.2039 | 0.838 | -0.041588216 | count | 1 |
| ATOH8        | -0.0302041 | 0.1431007 | -0.2111 | 0.833 | -0.041528354 | count | 1 |
| HNRNPM       | -0.0294206 | 0.0584103 | -0.5037 | 0.615 | -0.041514963 | count | 1 |
| HIST1H2AH    | -0.360795  | 0.7779136 | -0.4638 | 0.643 | -0.041485137 | count | 1 |
| ZNF395       | -0.0348401 | 0.2562078 | -0.136  | 0.892 | -0.041473645 | count | 1 |
| NNT-AS1      | -0.030166  | 0.1133439 | -0.2661 | 0.79  | -0.041345381 | count | 1 |
| TRMU         | -0.0331571 | 0.2195891 | -0.151  | 0.88  | -0.041223871 | count | 1 |
| SLC15A3      | -0.038681  | 0.3429455 | -0.1128 | 0.91  | -0.041126334 | count | 1 |
| YEATS2       | -0.0482245 | 0.2837687 | -0.1699 | 0.865 | -0.041112361 | count | 1 |
| ETS2         | -0.0292062 | 0.0711925 | -0.4102 | 0.682 | -0.041068619 | count | 1 |
| H2AFY2       | -0.0438167 | 0.2856732 | -0.1534 | 0.878 | -0.040984255 | count | 1 |
| TM4SF1-AS1   | -0.1987017 | 0.674576  | -0.2946 | 0.768 | -0.040965393 | count | 1 |
| MRGBP        | -0.0315169 | 0.1625294 | -0.1939 | 0.846 | -0.040707813 | count | 1 |
| HSPB11       | -0.0291123 | 0.07702   | -0.378  | 0.705 | -0.040706315 | count | 1 |
| BANP         | -0.0395517 | 0.239056  | -0.1654 | 0.869 | -0.040674363 | count | 1 |
| UGDH-AS1     | -0.0573654 | 0.3973822 | -0.1444 | 0.885 | -0.040649977 | count | 1 |
| BRF2         | -0.0322353 | 0.1501639 | -0.2147 | 0.83  | -0.040476166 | count | 1 |
| ATF6B        | -0.0307131 | 0.1321987 | -0.2323 | 0.816 | -0.040471559 | count | 1 |
| TSHZ1        | -0.0356351 | 0.2018193 | -0.1766 | 0.86  | -0.040424082 | count | 1 |
| RIF1         | -0.0294515 | 0.122602  | -0.2402 | 0.81  | -0.040348624 | count | 1 |
| NCOA3        | -0.0300551 | 0.1261057 | -0.2383 | 0.812 | -0.04011965  | count | 1 |
| TMEM56-RWDD3 | -0.1941666 | 1.080613  | -0.1797 | 0.857 | -0.039992683 | count | 1 |
| SULT1B1      | -0.1941666 | 1.080613  | -0.1797 | 0.857 | -0.039992683 | count | 1 |
| FBXO43       | -0.1941666 | 1.080613  | -0.1797 | 0.857 | -0.039992683 | count | 1 |
| AP003419.2   | -0.1941666 | 1.080613  | -0.1797 | 0.857 | -0.039992683 | count | 1 |
| AL158211.3   | -0.1941666 | 1.080613  | -0.1797 | 0.857 | -0.039992683 | count | 1 |
| RASGEF1A     | -0.1941666 | 1.080613  | -0.1797 | 0.857 | -0.039992683 | count | 1 |
| SEMA4G       | -0.1941666 | 1.080613  | -0.1797 | 0.857 | -0.039992683 | count | 1 |
| RAD9B        | -0.1941666 | 1.080613  | -0.1797 | 0.857 | -0.039992683 | count | 1 |
| RORA-AS1     | -0.1941666 | 1.080613  | -0.1797 | 0.857 | -0.039992683 | count | 1 |
| AC103740.1   | -0.1941666 | 1.080613  | -0.1797 | 0.857 | -0.039992683 | count | 1 |
| AC021739.2   | -0.1941666 | 1.080613  | -0.1797 | 0.857 | -0.039992683 | count | 1 |
| CFAP52       | -0.1941666 | 1.080613  | -0.1797 | 0.857 | -0.039992683 | count | 1 |
| MFSD2A       | -0.1941666 | 1.117097  | -0.1738 | 0.862 | -0.039992683 | count | 1 |
| TRIM54       | -0.1941666 | 1.117097  | -0.1738 | 0.862 | -0.039992683 | count | 1 |
| TRABD2A      | -0.1941666 | 1.117097  | -0.1738 | 0.862 | -0.039992683 | count | 1 |
| IRF5         | -0.1941666 | 1.117097  | -0.1738 | 0.862 | -0.039992683 | count | 1 |
| TROAP        | -0.1941666 | 1.117097  | -0.1738 | 0.862 | -0.039992683 | count | 1 |
| AL139385.1   | -0.1941666 | 1.117097  | -0.1738 | 0.862 | -0.039992683 | count | 1 |
| AC015722.2   | -0.1941666 | 1.117097  | -0.1738 | 0.862 | -0.039992683 | count | 1 |
| FAM169B      | -0.1941666 | 1.117097  | -0.1738 | 0.862 | -0.039992683 | count | 1 |
| ZNF730       | -0.1941666 | 1.117097  | -0.1738 | 0.862 | -0.039992683 | count | 1 |
| AC011481.2   | -0.1941666 | 1.117097  | -0.1738 | 0.862 | -0.039992683 | count | 1 |
| LRRC39       | -0.1941666 | 1.315578  | -0.1476 | 0.883 | -0.039992683 | count | 1 |
| HIST2H4A     | -0.1941666 | 1.315578  | -0.1476 | 0.883 | -0.039992683 | count | 1 |

|            |            |           |         |        |              |       |   |
|------------|------------|-----------|---------|--------|--------------|-------|---|
| LINC00487  | -0.1941666 | 1.315578  | -0.1476 | 0.883  | -0.039992683 | count | 1 |
| IL4        | -0.1941666 | 1.315578  | -0.1476 | 0.883  | -0.039992683 | count | 1 |
| C11orf72   | -0.1941666 | 1.315578  | -0.1476 | 0.883  | -0.039992683 | count | 1 |
| TSHR       | -0.1941666 | 1.315578  | -0.1476 | 0.883  | -0.039992683 | count | 1 |
| TBX21      | -0.1941666 | 1.315578  | -0.1476 | 0.883  | -0.039992683 | count | 1 |
| AL121772.1 | -0.1941666 | 1.315578  | -0.1476 | 0.883  | -0.039992683 | count | 1 |
| SDR39U1    | -0.0298865 | 0.1296032 | -0.2306 | 0.818  | -0.039875108 | count | 1 |
| AGPAT1     | -0.0307747 | 0.1516403 | -0.2029 | 0.839  | -0.039824904 | count | 1 |
| AC020910.4 | -0.1932657 | 0.4251115 | -0.4546 | 0.649  | -0.039799652 | count | 1 |
| BX322234.1 | -0.1931882 | 0.5659317 | -0.3414 | 0.733  | -0.03978305  | count | 1 |
| SETD3      | -0.030336  | 0.1268589 | -0.2391 | 0.811  | -0.039722521 | count | 1 |
| CRIPT      | -0.0286891 | 0.0942014 | -0.3046 | 0.761  | -0.039709389 | count | 1 |
| SRI        | -0.0278128 | 0.0442472 | -0.6286 | 0.5297 | -0.039697043 | count | 1 |
| AC008105.3 | -0.3458162 | 0.5524341 | -0.626  | 0.531  | -0.039640452 | count | 1 |
| PINK1      | -0.0289344 | 0.0934297 | -0.3097 | 0.757  | -0.039631428 | count | 1 |
| NOCT       | -0.0759763 | 0.6921809 | -0.1098 | 0.913  | -0.039608578 | count | 1 |
| MDK        | -0.0292217 | 0.1162603 | -0.2513 | 0.802  | -0.039443962 | count | 1 |
| C6orf203   | -0.0296084 | 0.1124897 | -0.2632 | 0.792  | -0.039383787 | count | 1 |
| LARP1      | -0.0294105 | 0.1152629 | -0.2552 | 0.799  | -0.039332666 | count | 1 |
| ZDHC21     | -0.030776  | 0.1688436 | -0.1823 | 0.855  | -0.039325436 | count | 1 |
| GNE        | -0.0393046 | 0.2622593 | -0.1499 | 0.881  | -0.039212938 | count | 1 |
| ZNF318     | -0.0384828 | 0.2549531 | -0.1509 | 0.88   | -0.039196692 | count | 1 |
| RBM10      | -0.0358301 | 0.1773267 | -0.2021 | 0.84   | -0.039144372 | count | 1 |
| SF3A3      | -0.028317  | 0.0864951 | -0.3274 | 0.743  | -0.039022127 | count | 1 |
| AMOTL1     | -0.0307077 | 0.1463816 | -0.2098 | 0.834  | -0.038944585 | count | 1 |
| PRPSAP1    | -0.0290208 | 0.1044204 | -0.2779 | 0.781  | -0.038863753 | count | 1 |
| MGST3      | -0.0269461 | 0.027085  | -0.9949 | 0.32   | -0.038753514 | count | 1 |
| COQ5       | -0.0316207 | 0.1558729 | -0.2029 | 0.839  | -0.03869999  | count | 1 |
| QSOX1      | -0.0279069 | 0.1162746 | -0.24   | 0.81   | -0.038599476 | count | 1 |
| SMUG1      | -0.0321242 | 0.1726379 | -0.1861 | 0.852  | -0.03856241  | count | 1 |
| PABPC1     | -0.0270558 | 0.0475096 | -0.5695 | 0.569  | -0.038513253 | count | 1 |
| U2AF1L4    | -0.0323305 | 0.1979472 | -0.1633 | 0.87   | -0.038481826 | count | 1 |
| MADD       | -0.0424961 | 0.3348595 | -0.1269 | 0.899  | -0.038456054 | count | 1 |
| DARS       | -0.0278504 | 0.0903517 | -0.3082 | 0.758  | -0.038359386 | count | 1 |
| DUS2       | -0.0920924 | 0.4111864 | -0.224  | 0.823  | -0.038354514 | count | 1 |
| ANKRD12    | -0.0268924 | 0.059378  | -0.4529 | 0.651  | -0.038333434 | count | 1 |
| PGK1       | -0.0269272 | 0.0493947 | -0.5451 | 0.586  | -0.038322923 | count | 1 |
| DHFR       | -0.0402729 | 0.2651556 | -0.1519 | 0.879  | -0.038217668 | count | 1 |
| AC011247.1 | -0.3334625 | 0.6362621 | -0.5241 | 0.6    | -0.038126441 | count | 1 |
| AC105942.1 | -0.0303406 | 0.1821472 | -0.1666 | 0.868  | -0.038094654 | count | 1 |
| DCUN1D2    | -0.0592065 | 0.4966701 | -0.1192 | 0.905  | -0.038089728 | count | 1 |
| EIF2S3     | -0.0271904 | 0.0714041 | -0.3808 | 0.703  | -0.038085826 | count | 1 |
| USP11      | -0.0281751 | 0.1070593 | -0.2632 | 0.792  | -0.038057213 | count | 1 |
| AL133338.1 | -0.0805417 | 0.4663122 | -0.1727 | 0.863  | -0.037979587 | count | 1 |
| AC079305.1 | -0.0805417 | 0.4892951 | -0.1646 | 0.869  | -0.037979587 | count | 1 |

|            |            |           |         |       |              |       |   |
|------------|------------|-----------|---------|-------|--------------|-------|---|
| AL513550.1 | -0.3312899 | 0.7498592 | -0.4418 | 0.659 | -0.037860873 | count | 1 |
| TMEM56     | -0.0292201 | 0.167912  | -0.174  | 0.862 | -0.037847006 | count | 1 |
| PSMC2      | -0.0271587 | 0.0782062 | -0.3473 | 0.728 | -0.037820014 | count | 1 |
| TRAM2-AS1  | -0.0304736 | 0.1768903 | -0.1723 | 0.863 | -0.03774647  | count | 1 |
| EIF4G2     | -0.026494  | 0.0555332 | -0.4771 | 0.633 | -0.037680615 | count | 1 |
| RFLNB      | -0.0338202 | 0.2891239 | -0.117  | 0.907 | -0.037595968 | count | 1 |
| DDX46      | -0.0265172 | 0.0722887 | -0.3668 | 0.714 | -0.037534792 | count | 1 |
| HELQ       | -0.0289208 | 0.1625727 | -0.1779 | 0.859 | -0.037459043 | count | 1 |
| ZC3H11B    | -0.3278246 | 0.7530165 | -0.4353 | 0.663 | -0.037437728 | count | 1 |
| AC099063.4 | -0.3278246 | 0.8081365 | -0.4057 | 0.685 | -0.037437728 | count | 1 |
| AC095055.1 | -0.0528634 | 0.6842204 | -0.0773 | 0.938 | -0.03743766  | count | 1 |
| SMARCA5    | -0.0265559 | 0.0708277 | -0.3749 | 0.708 | -0.037327277 | count | 1 |
| INCENP     | -0.0654642 | 0.4448694 | -0.1472 | 0.883 | -0.037028178 | count | 1 |
| AL022068.1 | -0.1298667 | 0.5193424 | -0.2501 | 0.803 | -0.036973294 | count | 1 |
| ZMAT5      | -0.0269202 | 0.1132056 | -0.2378 | 0.812 | -0.036855585 | count | 1 |
| FGF14      | -0.05204   | 0.3061962 | -0.17   | 0.865 | -0.036850543 | count | 1 |
| TRIM32     | -0.0372911 | 0.2710226 | -0.1376 | 0.891 | -0.036777813 | count | 1 |
| LRRC20     | -0.0543    | 0.4678097 | -0.1161 | 0.908 | -0.03676384  | count | 1 |
| TRMT1      | -0.0303829 | 0.2652168 | -0.1146 | 0.909 | -0.036754328 | count | 1 |
| AL390198.1 | -0.3214209 | 0.9207304 | -0.3491 | 0.727 | -0.03665718  | count | 1 |
| AL390115.1 | -0.3214209 | 0.9567816 | -0.3359 | 0.737 | -0.03665718  | count | 1 |
| ATP2A1-AS1 | -0.3214209 | 0.9567816 | -0.3359 | 0.737 | -0.03665718  | count | 1 |
| ERICH5     | -0.3214209 | 0.9798762 | -0.328  | 0.743 | -0.03665718  | count | 1 |
| XPO7       | -0.0324586 | 0.196045  | -0.1656 | 0.869 | -0.03664008  | count | 1 |
| LYST       | -0.0282056 | 0.1667286 | -0.1692 | 0.866 | -0.036565676 | count | 1 |
| VNN2       | -0.1281953 | 1.084656  | -0.1182 | 0.906 | -0.03648518  | count | 1 |
| PEPD       | -0.0261226 | 0.0668542 | -0.3907 | 0.696 | -0.03644243  | count | 1 |
| BBS5       | -0.0351075 | 0.2737465 | -0.1282 | 0.898 | -0.036092042 | count | 1 |
| ZNF263     | -0.0369794 | 0.2481209 | -0.149  | 0.882 | -0.036030994 | count | 1 |
| ZNF226     | -0.0273436 | 0.1909129 | -0.1432 | 0.886 | -0.036004902 | count | 1 |
| LINC01560  | -0.0431072 | 0.329076  | -0.131  | 0.896 | -0.035866136 | count | 1 |
| PSMD2      | -0.0261337 | 0.0768245 | -0.3402 | 0.734 | -0.035793988 | count | 1 |
| AC087645.2 | -0.1257576 | 0.7023062 | -0.1791 | 0.858 | -0.035773834 | count | 1 |
| SLC25A5    | -0.025011  | 0.0482544 | -0.5183 | 0.604 | -0.035598672 | count | 1 |
| AGA        | -0.0271424 | 0.1420595 | -0.1911 | 0.848 | -0.035538027 | count | 1 |
| EBAG9      | -0.0256797 | 0.0982848 | -0.2613 | 0.794 | -0.035465948 | count | 1 |
| IFRD2      | -0.0264304 | 0.1128902 | -0.2341 | 0.815 | -0.035408651 | count | 1 |
| AGBL3      | -0.0444248 | 0.3283105 | -0.1353 | 0.892 | -0.034993273 | count | 1 |
| ABI3       | -0.3064004 | 0.5638929 | -0.5434 | 0.587 | -0.034833529 | count | 1 |
| KLHDC9     | -0.0314464 | 0.2463144 | -0.1277 | 0.898 | -0.034757571 | count | 1 |
| DNAH5      | -0.0471031 | 0.6456942 | -0.0729 | 0.942 | -0.034692502 | count | 1 |
| GLI4       | -0.0269436 | 0.157793  | -0.1708 | 0.864 | -0.034581155 | count | 1 |
| IKZF4      | -0.0359429 | 0.3468336 | -0.1036 | 0.917 | -0.034569054 | count | 1 |
| CPNE5      | -0.0974797 | 0.6762309 | -0.1442 | 0.885 | -0.034505145 | count | 1 |
| KCNMB2-AS1 | -0.0974797 | 0.8319326 | -0.1172 | 0.907 | -0.034505145 | count | 1 |

|            |            |           |         |       |              |       |   |
|------------|------------|-----------|---------|-------|--------------|-------|---|
| AP000350.5 | -0.0974797 | 0.8319326 | -0.1172 | 0.907 | -0.034505145 | count | 1 |
| HOMER3-AS1 | -0.0974797 | 1.077849  | -0.0904 | 0.928 | -0.034505145 | count | 1 |
| ECI1       | -0.0245612 | 0.0747131 | -0.3287 | 0.742 | -0.034459027 | count | 1 |
| TEK        | -0.0467728 | 0.5704396 | -0.082  | 0.935 | -0.034447784 | count | 1 |
| INPP4B     | -0.0269067 | 0.1289714 | -0.2086 | 0.835 | -0.034294698 | count | 1 |
| CDKN1B     | -0.0246808 | 0.0797699 | -0.3094 | 0.757 | -0.034276368 | count | 1 |
| ACYP2      | -0.0256739 | 0.1386893 | -0.1851 | 0.853 | -0.034092478 | count | 1 |
| H2AFY      | -0.0245288 | 0.0778512 | -0.3151 | 0.753 | -0.034028776 | count | 1 |
| PEX16      | -0.0253518 | 0.1378013 | -0.184  | 0.854 | -0.033886394 | count | 1 |
| TMEM87A    | -0.0242833 | 0.0668554 | -0.3632 | 0.716 | -0.033872912 | count | 1 |
| HEATR3     | -0.0335467 | 0.4295203 | -0.0781 | 0.938 | -0.033813031 | count | 1 |
| TIMM50     | -0.0257829 | 0.1366658 | -0.1887 | 0.85  | -0.033756901 | count | 1 |
| CPED1      | -0.0244249 | 0.078687  | -0.3104 | 0.756 | -0.033651426 | count | 1 |
| AMIGO2     | -0.0258479 | 0.1795086 | -0.144  | 0.886 | -0.033625734 | count | 1 |
| EP300      | -0.0256272 | 0.1416711 | -0.1809 | 0.856 | -0.033602643 | count | 1 |
| ARFGEF1    | -0.0255894 | 0.1242819 | -0.2059 | 0.837 | -0.033553049 | count | 1 |
| IL7        | -0.0305062 | 0.2363312 | -0.1291 | 0.897 | -0.033520419 | count | 1 |
| FAM219A    | -0.0364198 | 0.2962952 | -0.1229 | 0.902 | -0.033506267 | count | 1 |
| MPLKIP     | -0.0242111 | 0.0891264 | -0.2716 | 0.786 | -0.033500411 | count | 1 |
| VAR52      | -0.052123  | 0.4456655 | -0.117  | 0.907 | -0.033498666 | count | 1 |
| AC005838.2 | -0.052123  | 0.5809481 | -0.0897 | 0.929 | -0.033498666 | count | 1 |
| C1orf109   | -0.0288035 | 0.1706598 | -0.1688 | 0.866 | -0.033488864 | count | 1 |
| C17orf51   | -0.0295169 | 0.1839956 | -0.1604 | 0.873 | -0.033472254 | count | 1 |
| UBL4A      | -0.0250596 | 0.1273376 | -0.1968 | 0.844 | -0.033448047 | count | 1 |
| BET1       | -0.0254884 | 0.1332737 | -0.1912 | 0.848 | -0.033395991 | count | 1 |
| LINC01936  | -0.0357289 | 0.3686467 | -0.0969 | 0.923 | -0.033394584 | count | 1 |
| ADGRL1     | -0.0470105 | 0.3777752 | -0.1244 | 0.901 | -0.033266978 | count | 1 |
| GNG12      | -0.0235039 | 0.059486  | -0.3951 | 0.693 | -0.033222523 | count | 1 |
| AC092040.1 | -0.0490924 | 0.2749095 | -0.1786 | 0.858 | -0.033211972 | count | 1 |
| MMP14      | -0.0245458 | 0.1299156 | -0.1889 | 0.85  | -0.033152971 | count | 1 |
| SELENOI    | -0.034938  | 0.3041566 | -0.1149 | 0.909 | -0.033139276 | count | 1 |
| ZNF639     | -0.0244785 | 0.1286045 | -0.1903 | 0.849 | -0.033038872 | count | 1 |
| CLCN6      | -0.035282  | 0.3216608 | -0.1097 | 0.913 | -0.032975531 | count | 1 |
| BRCC3      | -0.0261497 | 0.1632348 | -0.1602 | 0.873 | -0.032927457 | count | 1 |
| TIMM22     | -0.0260824 | 0.1481731 | -0.176  | 0.86  | -0.03284264  | count | 1 |
| XYLT2      | -0.0275752 | 0.2395297 | -0.1151 | 0.908 | -0.032814639 | count | 1 |
| REEP6      | -0.2896705 | 0.6862936 | -0.4221 | 0.673 | -0.032814355 | count | 1 |
| AC137932.3 | -0.2896705 | 0.7972428 | -0.3633 | 0.716 | -0.032814355 | count | 1 |
| TMEM44-AS1 | -0.0578557 | 0.3635856 | -0.1591 | 0.874 | -0.032685616 | count | 1 |
| AC138150.2 | -0.0577994 | 0.6125787 | -0.0944 | 0.925 | -0.032653519 | count | 1 |
| TNFRSF19   | -0.0577994 | 0.6864485 | -0.0842 | 0.933 | -0.032653519 | count | 1 |
| AC006213.1 | -0.0577994 | 0.7003238 | -0.0825 | 0.934 | -0.032653519 | count | 1 |
| RHOJ       | -0.0254923 | 0.1869984 | -0.1363 | 0.892 | -0.032606887 | count | 1 |
| SLTM       | -0.0230503 | 0.079027  | -0.2917 | 0.771 | -0.032481458 | count | 1 |
| C12orf43   | -0.0251494 | 0.125847  | -0.1998 | 0.842 | -0.032379823 | count | 1 |

|            |            |           |         |       |              |       |   |
|------------|------------|-----------|---------|-------|--------------|-------|---|
| CA9        | -0.1137885 | 0.8765256 | -0.1298 | 0.897 | -0.032290779 | count | 1 |
| AC005476.2 | -0.1137885 | 0.8817339 | -0.1291 | 0.897 | -0.032290779 | count | 1 |
| ATP5MGL    | -0.1137885 | 0.8817339 | -0.1291 | 0.897 | -0.032290779 | count | 1 |
| AL035587.1 | -0.1137885 | 0.9752571 | -0.1167 | 0.907 | -0.032290779 | count | 1 |
| ZNF354A    | -0.0270384 | 0.1847738 | -0.1463 | 0.884 | -0.032269262 | count | 1 |
| MINDY2     | -0.0231469 | 0.0822156 | -0.2815 | 0.778 | -0.032160331 | count | 1 |
| C2CD2      | -0.0257801 | 0.2625195 | -0.0982 | 0.922 | -0.032099851 | count | 1 |
| THRA       | -0.0228276 | 0.0796803 | -0.2865 | 0.775 | -0.031971519 | count | 1 |
| BLOC1S1    | -0.0224442 | 0.0498407 | -0.4503 | 0.653 | -0.031911901 | count | 1 |
| MRPL22     | -0.0227636 | 0.0749354 | -0.3038 | 0.761 | -0.031890716 | count | 1 |
| MNAT1      | -0.0229704 | 0.0944269 | -0.2433 | 0.808 | -0.03186631  | count | 1 |
| NAA30      | -0.0265643 | 0.1972975 | -0.1346 | 0.893 | -0.031792812 | count | 1 |
| SPCS1      | -0.0221593 | 0.0343957 | -0.6442 | 0.519 | -0.031765674 | count | 1 |
| RCAN2      | -0.0222907 | 0.0621617 | -0.3586 | 0.72  | -0.031732895 | count | 1 |
| DBNL       | -0.0231081 | 0.0928707 | -0.2488 | 0.804 | -0.031675572 | count | 1 |
| YBEY       | -0.0242423 | 0.1647534 | -0.1471 | 0.883 | -0.031395391 | count | 1 |
| CCDC86     | -0.0277187 | 0.2251272 | -0.1231 | 0.902 | -0.031127083 | count | 1 |
| GADL1      | -0.275502  | 0.6358043 | -0.4333 | 0.665 | -0.031114338 | count | 1 |
| AC012645.1 | -0.0439543 | 0.4427937 | -0.0993 | 0.921 | -0.03109168  | count | 1 |
| KIAA2013   | -0.0229458 | 0.1177562 | -0.1949 | 0.846 | -0.031001785 | count | 1 |
| CNTNAP3    | -0.0876385 | 0.7172442 | -0.1222 | 0.903 | -0.03096296  | count | 1 |
| ARNT2      | -0.2738274 | 0.7549586 | -0.3627 | 0.717 | -0.030914024 | count | 1 |
| HOMER3     | -0.0227636 | 0.1223644 | -0.186  | 0.852 | -0.030856004 | count | 1 |
| PNKD       | -0.0215502 | 0.0539422 | -0.3995 | 0.69  | -0.030604258 | count | 1 |
| TNFAIP8L1  | -0.0541397 | 0.5219981 | -0.1037 | 0.917 | -0.03056837  | count | 1 |
| VDAC1      | -0.0215534 | 0.0524708 | -0.4108 | 0.681 | -0.030554973 | count | 1 |
| GALT       | -0.0230313 | 0.1395774 | -0.165  | 0.869 | -0.030476934 | count | 1 |
| CTTNBP2NL  | -0.022801  | 0.1252776 | -0.182  | 0.856 | -0.030387154 | count | 1 |
| ZNF460     | -0.0295581 | 0.2514931 | -0.1175 | 0.906 | -0.03037437  | count | 1 |
| SNX2       | -0.0216    | 0.0643775 | -0.3355 | 0.737 | -0.030366722 | count | 1 |
| PSME1      | -0.0212073 | 0.0401364 | -0.5284 | 0.597 | -0.030334038 | count | 1 |
| DNAJC2     | -0.0221315 | 0.1182899 | -0.1871 | 0.852 | -0.030198951 | count | 1 |
| MED21      | -0.0217173 | 0.0945173 | -0.2298 | 0.818 | -0.030149254 | count | 1 |
| AC120049.1 | -0.085286  | 0.5963918 | -0.143  | 0.886 | -0.030118132 | count | 1 |
| CR381653.1 | -0.085286  | 0.5961087 | -0.1431 | 0.886 | -0.030118132 | count | 1 |
| PCDHB13    | -0.0425771 | 0.4368643 | -0.0975 | 0.922 | -0.030112    | count | 1 |
| CDK8       | -0.0338674 | 0.2870511 | -0.118  | 0.906 | -0.030060986 | count | 1 |
| TERF2IP    | -0.0210576 | 0.0503223 | -0.4185 | 0.676 | -0.030019525 | count | 1 |
| PCDH11Y    | -0.1467866 | 0.5156942 | -0.2846 | 0.776 | -0.029932773 | count | 1 |
| UBB        | -0.0207659 | 0.0259166 | -0.8013 | 0.423 | -0.029875684 | count | 1 |
| PELI2      | -0.0275083 | 0.2553122 | -0.1077 | 0.914 | -0.029846007 | count | 1 |
| PLK2       | -0.02099   | 0.0939686 | -0.2234 | 0.823 | -0.029838482 | count | 1 |
| AC099522.2 | -0.0842308 | 0.4968682 | -0.1695 | 0.865 | -0.029739429 | count | 1 |
| ADAT3      | -0.0402209 | 0.6644717 | -0.0605 | 0.952 | -0.029597671 | count | 1 |
| ENTPD1     | -0.0247978 | 0.2381633 | -0.1041 | 0.917 | -0.029592195 | count | 1 |



|            |            |           |         |       |              |       |   |
|------------|------------|-----------|---------|-------|--------------|-------|---|
| CDPF1      | -0.0307537 | 0.2868604 | -0.1072 | 0.915 | -0.029564849 | count | 1 |
| TP53BP2    | -0.0218543 | 0.1193064 | -0.1832 | 0.855 | -0.029546607 | count | 1 |
| UBE3B      | -0.0256138 | 0.1938713 | -0.1321 | 0.895 | -0.029545935 | count | 1 |
| FUCA1      | -0.0217992 | 0.1095641 | -0.199  | 0.842 | -0.029421263 | count | 1 |
| GIPC1      | -0.0215257 | 0.0944761 | -0.2278 | 0.82  | -0.029407643 | count | 1 |
| ZNF555     | -0.0432834 | 0.3500929 | -0.1236 | 0.902 | -0.029258609 | count | 1 |
| MINCR      | -0.0322971 | 0.2780452 | -0.1162 | 0.908 | -0.029197727 | count | 1 |
| KIF5C      | -0.0823817 | 0.3749419 | -0.2197 | 0.826 | -0.02907616  | count | 1 |
| ZEB1-AS1   | -0.0253063 | 0.240296  | -0.1053 | 0.916 | -0.029071827 | count | 1 |
| TMEM94     | -0.0288515 | 0.5029694 | -0.0574 | 0.954 | -0.029069805 | count | 1 |
| VPS37D     | -0.0427598 | 0.3816293 | -0.112  | 0.911 | -0.028902573 | count | 1 |
| RAB39B     | -0.0476788 | 0.5402118 | -0.0883 | 0.93  | -0.028844804 | count | 1 |
| PHC3       | -0.0219726 | 0.124335  | -0.1767 | 0.86  | -0.028765515 | count | 1 |
| GRID1      | -0.255792  | 0.5967228 | -0.4287 | 0.668 | -0.028764874 | count | 1 |
| AL928921.2 | -0.055351  | 0.3600404 | -0.1537 | 0.878 | -0.028758258 | count | 1 |
| C11orf58   | -0.0199962 | 0.0340488 | -0.5873 | 0.557 | -0.028657873 | count | 1 |
| TIGD2      | -0.254516  | 0.5896228 | -0.4317 | 0.666 | -0.02861342  | count | 1 |
| PYCARD-AS1 | -0.0689196 | 0.8372189 | -0.0823 | 0.934 | -0.028582579 | count | 1 |
| AC105446.1 | -0.1402983 | 0.4818289 | -0.2912 | 0.771 | -0.028569884 | count | 1 |
| CD83       | -0.0307548 | 0.3044177 | -0.101  | 0.92  | -0.028279297 | count | 1 |
| SNX30      | -0.0311419 | 0.3066273 | -0.1016 | 0.919 | -0.028150211 | count | 1 |
| FAM199X    | -0.0223816 | 0.160356  | -0.1396 | 0.889 | -0.02813702  | count | 1 |
| POMC       | -0.0271    | 0.2846261 | -0.0952 | 0.924 | -0.028095955 | count | 1 |
| OSER1-DT   | -0.0272731 | 0.2447975 | -0.1114 | 0.911 | -0.028021445 | count | 1 |
| DCTN3      | -0.0197037 | 0.0470049 | -0.4192 | 0.675 | -0.028019764 | count | 1 |
| MBTD1      | -0.0309841 | 0.2971229 | -0.1043 | 0.917 | -0.028007138 | count | 1 |
| HYOU1      | -0.0224794 | 0.2024865 | -0.111  | 0.912 | -0.027986699 | count | 1 |
| ZNF132     | -0.0982342 | 0.6356466 | -0.1545 | 0.877 | -0.027788527 | count | 1 |
| SMYD3      | -0.0224819 | 0.1777316 | -0.1265 | 0.899 | -0.02773303  | count | 1 |
| BRAP       | -0.0226608 | 0.202533  | -0.1119 | 0.911 | -0.027663347 | count | 1 |
| GALE       | -0.0317963 | 0.3169395 | -0.1003 | 0.92  | -0.027656555 | count | 1 |
| AC008014.1 | -0.0531648 | 0.6377324 | -0.0834 | 0.934 | -0.027612375 | count | 1 |
| KEAP1      | -0.0204118 | 0.122425  | -0.1667 | 0.868 | -0.027604953 | count | 1 |
| AC011479.1 | -0.0586271 | 0.6349131 | -0.0923 | 0.926 | -0.027540934 | count | 1 |
| COX16      | -0.0247852 | 0.2145561 | -0.1155 | 0.908 | -0.027537347 | count | 1 |
| AC145124.1 | -0.0224343 | 0.1740844 | -0.1289 | 0.897 | -0.027505793 | count | 1 |
| PPM1H      | -0.058532  | 0.7378397 | -0.0793 | 0.937 | -0.027495803 | count | 1 |
| CHAF1B     | -0.058532  | 0.7750005 | -0.0755 | 0.94  | -0.027495803 | count | 1 |
| AL662884.4 | -0.0971038 | 0.429847  | -0.2259 | 0.821 | -0.027462398 | count | 1 |
| AC091948.1 | -0.2444685 | 0.9167473 | -0.2667 | 0.79  | -0.02742333  | count | 1 |
| GFAP       | -0.2444685 | 0.9172351 | -0.2665 | 0.79  | -0.02742333  | count | 1 |
| RNF114     | -0.0199023 | 0.1016542 | -0.1958 | 0.845 | -0.027232991 | count | 1 |
| AC025159.1 | -0.0234411 | 0.2284198 | -0.1026 | 0.918 | -0.027036602 | count | 1 |
| SIL1       | -0.0195029 | 0.0929324 | -0.2099 | 0.834 | -0.027034733 | count | 1 |
| HHIPL1     | -0.0367305 | 0.4131227 | -0.0889 | 0.929 | -0.027017107 | count | 1 |

|             |            |           |         |       |              |       |   |
|-------------|------------|-----------|---------|-------|--------------|-------|---|
| CAMSAP1     | -0.0296279 | 0.2338728 | -0.1267 | 0.899 | -0.026777692 | count | 1 |
| PTPN20      | -0.0255291 | 0.4213902 | -0.0606 | 0.952 | -0.026691912 | count | 1 |
| HSD17B12    | -0.0187854 | 0.0636323 | -0.2952 | 0.768 | -0.026590271 | count | 1 |
| TAOK2       | -0.0258794 | 0.2761345 | -0.0937 | 0.925 | -0.026586707 | count | 1 |
| SYNE2       | -0.0190078 | 0.0932829 | -0.2038 | 0.839 | -0.026508041 | count | 1 |
| LINC00346   | -0.0251327 | 0.2987141 | -0.0841 | 0.933 | -0.026491204 | count | 1 |
| WIPF1       | -0.0204753 | 0.1289844 | -0.1587 | 0.874 | -0.026489303 | count | 1 |
| PLEKHG4     | -0.0927826 | 0.5198224 | -0.1785 | 0.858 | -0.026217036 | count | 1 |
| AC022364.1  | -0.0927826 | 0.5207613 | -0.1782 | 0.859 | -0.026217036 | count | 1 |
| CYC1        | -0.0184369 | 0.0579254 | -0.3183 | 0.75  | -0.026122686 | count | 1 |
| ITGB5       | -0.0184735 | 0.0640057 | -0.2886 | 0.773 | -0.02595947  | count | 1 |
| CALM2       | -0.0180289 | 0.0246712 | -0.7308 | 0.465 | -0.025951253 | count | 1 |
| PABPC4      | -0.0189799 | 0.1137476 | -0.1669 | 0.867 | -0.025897357 | count | 1 |
| TRIM27      | -0.0200329 | 0.1366756 | -0.1466 | 0.883 | -0.025891892 | count | 1 |
| OXER1       | -0.073426  | 0.5111982 | -0.1436 | 0.886 | -0.025870278 | count | 1 |
| NAXD        | -0.0212978 | 0.1769586 | -0.1204 | 0.904 | -0.02581744  | count | 1 |
| MAEA        | -0.0194065 | 0.1206439 | -0.1609 | 0.872 | -0.025752349 | count | 1 |
| FAM114A2    | -0.0201171 | 0.1397532 | -0.1439 | 0.886 | -0.025666704 | count | 1 |
| MMGT1       | -0.0191478 | 0.1108392 | -0.1728 | 0.863 | -0.025625929 | count | 1 |
| PTGIR       | -0.0186077 | 0.1080891 | -0.1722 | 0.863 | -0.025551407 | count | 1 |
| RCC1L       | -0.0196088 | 0.1246842 | -0.1573 | 0.875 | -0.02554812  | count | 1 |
| OGFOD3      | -0.0192008 | 0.1059933 | -0.1812 | 0.856 | -0.025534624 | count | 1 |
| TALDO1      | -0.01795   | 0.0488284 | -0.3676 | 0.713 | -0.025514868 | count | 1 |
| TIMM8A      | -0.0240996 | 0.2253709 | -0.1069 | 0.915 | -0.025400406 | count | 1 |
| PEX5        | -0.0228641 | 0.289698  | -0.0789 | 0.937 | -0.025258307 | count | 1 |
| IPO9        | -0.0210805 | 0.1999885 | -0.1054 | 0.916 | -0.025223478 | count | 1 |
| PSMD11      | -0.0182577 | 0.0853912 | -0.2138 | 0.831 | -0.025152728 | count | 1 |
| CDC42BPA    | -0.0183997 | 0.1037792 | -0.1773 | 0.859 | -0.025105488 | count | 1 |
| SEMA4F      | -0.0368104 | 0.5659428 | -0.065  | 0.948 | -0.024860681 | count | 1 |
| TSPAN3      | -0.0176153 | 0.0613213 | -0.2873 | 0.774 | -0.02481297  | count | 1 |
| FAM86C1     | -0.0315321 | 0.3913477 | -0.0806 | 0.936 | -0.024799828 | count | 1 |
| TBC1D8      | -0.0337109 | 0.308827  | -0.1092 | 0.913 | -0.024786447 | count | 1 |
| NDUFA9      | -0.0179056 | 0.0869343 | -0.206  | 0.837 | -0.024780799 | count | 1 |
| OAS2        | -0.0268822 | 0.345266  | -0.0779 | 0.938 | -0.024709314 | count | 1 |
| AC068282.1  | -0.2201659 | 0.7699784 | -0.2859 | 0.775 | -0.024564576 | count | 1 |
| USH1C       | -0.2201659 | 0.7699784 | -0.2859 | 0.775 | -0.024564576 | count | 1 |
| AC064801.1  | -0.2201659 | 0.7699784 | -0.2859 | 0.775 | -0.024564576 | count | 1 |
| AL353719.1  | -0.0697594 | 0.6194756 | -0.1126 | 0.91  | -0.024560859 | count | 1 |
| C16orf95    | -0.1205204 | 0.7383386 | -0.1632 | 0.87  | -0.024437705 | count | 1 |
| AC007663.3  | -0.1205204 | 0.7383386 | -0.1632 | 0.87  | -0.024437705 | count | 1 |
| AC021752.1  | -0.1205204 | 0.741087  | -0.1626 | 0.871 | -0.024437705 | count | 1 |
| CYP51A1-AS1 | -0.1205204 | 0.818635  | -0.1472 | 0.883 | -0.024437705 | count | 1 |
| AC008556.1  | -0.1205204 | 0.8209359 | -0.1468 | 0.883 | -0.024437705 | count | 1 |
| JAGN1       | -0.0175876 | 0.0870216 | -0.2021 | 0.84  | -0.024373039 | count | 1 |
| CDC44       | -0.022172  | 0.255435  | -0.0868 | 0.931 | -0.024350059 | count | 1 |

|            |            |           |         |       |              |       |   |
|------------|------------|-----------|---------|-------|--------------|-------|---|
| ERVK3-1    | -0.0193616 | 0.2346634 | -0.0825 | 0.934 | -0.02418424  | count | 1 |
| ARL6IP1    | -0.0175381 | 0.0937306 | -0.1871 | 0.852 | -0.02411868  | count | 1 |
| ITPRIPL2   | -0.0174656 | 0.0866691 | -0.2015 | 0.84  | -0.023982769 | count | 1 |
| RIC8B      | -0.0242471 | 0.2380337 | -0.1019 | 0.919 | -0.023887545 | count | 1 |
| TIMM17A    | -0.01756   | 0.1060412 | -0.1656 | 0.868 | -0.023698128 | count | 1 |
| CNN3       | -0.0165832 | 0.0448556 | -0.3697 | 0.712 | -0.023659786 | count | 1 |
| SLC26A11   | -0.0232302 | 0.2488012 | -0.0934 | 0.926 | -0.023633403 | count | 1 |
| RBMX2      | -0.01741   | 0.0981022 | -0.1775 | 0.859 | -0.023559682 | count | 1 |
| DESI2      | -0.0168171 | 0.0731607 | -0.2299 | 0.818 | -0.023549022 | count | 1 |
| AC016588.2 | -0.1160492 | 0.597085  | -0.1944 | 0.846 | -0.023508208 | count | 1 |
| ANKRD52    | -0.0298728 | 0.4662826 | -0.0641 | 0.949 | -0.02349015  | count | 1 |
| AP3D1      | -0.0179827 | 0.1588529 | -0.1132 | 0.91  | -0.023447781 | count | 1 |
| HADHB      | -0.0166851 | 0.0694074 | -0.2404 | 0.81  | -0.023383469 | count | 1 |
| AL035413.1 | -0.0286774 | 0.3316152 | -0.0865 | 0.931 | -0.023206921 | count | 1 |
| NRG4       | -0.2071737 | 0.6779011 | -0.3056 | 0.76  | -0.023047875 | count | 1 |
| ATP7B      | -0.2071737 | 0.7536923 | -0.2749 | 0.783 | -0.023047875 | count | 1 |
| AC008686.1 | -0.1136897 | 0.5532809 | -0.2055 | 0.837 | -0.023018399 | count | 1 |
| ZNF19      | -0.0275706 | 0.4582969 | -0.0602 | 0.952 | -0.022899957 | count | 1 |
| CDK3       | -0.0812217 | 0.6375418 | -0.1274 | 0.899 | -0.022895696 | count | 1 |
| TOR1A      | -0.0171611 | 0.1169097 | -0.1468 | 0.883 | -0.022808983 | count | 1 |
| AC018413.1 | -0.0485954 | 0.643131  | -0.0756 | 0.94  | -0.022788311 | count | 1 |
| PDZD2      | -0.0808059 | 0.5071109 | -0.1593 | 0.873 | -0.022776524 | count | 1 |
| CD320      | -0.0163808 | 0.0846074 | -0.1936 | 0.846 | -0.022770698 | count | 1 |
| AKT2       | -0.0181194 | 0.1315699 | -0.1377 | 0.89  | -0.022668746 | count | 1 |
| TRAPPC4    | -0.0162549 | 0.0756543 | -0.2149 | 0.83  | -0.022642575 | count | 1 |
| ERBIN      | -0.0173492 | 0.1475039 | -0.1176 | 0.906 | -0.022621393 | count | 1 |
| ARL8A      | -0.0166717 | 0.1045167 | -0.1595 | 0.873 | -0.022617003 | count | 1 |
| INO80C     | -0.0177178 | 0.1583472 | -0.1119 | 0.911 | -0.022548361 | count | 1 |
| COMMD4     | -0.0163816 | 0.0888465 | -0.1844 | 0.854 | -0.022424357 | count | 1 |
| ANKRD46    | -0.0188211 | 0.1906989 | -0.0987 | 0.921 | -0.022320661 | count | 1 |
| SLC16A12   | -0.053738  | 0.6003933 | -0.0895 | 0.929 | -0.022224053 | count | 1 |
| SENP6      | -0.0157621 | 0.0814988 | -0.1934 | 0.847 | -0.022071523 | count | 1 |
| SNAP23     | -0.0158828 | 0.0876412 | -0.1812 | 0.856 | -0.022045564 | count | 1 |
| PRKCA      | -0.0238647 | 0.2895562 | -0.0824 | 0.934 | -0.021929408 | count | 1 |
| LARP7      | -0.0155104 | 0.0641454 | -0.2418 | 0.809 | -0.021821604 | count | 1 |
| PLA2G12A   | -0.0170781 | 0.1840051 | -0.0928 | 0.926 | -0.021706306 | count | 1 |
| ADIPOR1    | -0.0158473 | 0.1057825 | -0.1498 | 0.881 | -0.021511172 | count | 1 |
| CCT5       | -0.0152371 | 0.0589495 | -0.2585 | 0.796 | -0.02149568  | count | 1 |
| MBOAT7     | -0.0184193 | 0.2289124 | -0.0805 | 0.936 | -0.021483017 | count | 1 |
| ZNF583     | -0.019122  | 0.2002997 | -0.0955 | 0.924 | -0.021352315 | count | 1 |
| DOK4       | -0.0175541 | 0.2002581 | -0.0877 | 0.93  | -0.021326827 | count | 1 |
| WDR5       | -0.0179178 | 0.22535   | -0.0795 | 0.937 | -0.021312804 | count | 1 |
| GOLGA7     | -0.0151683 | 0.0736596 | -0.2059 | 0.837 | -0.021236909 | count | 1 |
| SNX17      | -0.0151556 | 0.0652516 | -0.2323 | 0.816 | -0.021225139 | count | 1 |
| VAMP1      | -0.0210692 | 0.308694  | -0.0683 | 0.946 | -0.021215534 | count | 1 |

|            |            |           |         |        |              |       |   |
|------------|------------|-----------|---------|--------|--------------|-------|---|
| PDIA5      | -0.0157123 | 0.1558912 | -0.1008 | 0.92   | -0.021045442 | count | 1 |
| CMTM4      | -0.024134  | 0.3969073 | -0.0608 | 0.952  | -0.020975095 | count | 1 |
| MID2       | -0.0206776 | 0.3422409 | -0.0604 | 0.952  | -0.020820566 | count | 1 |
| RNF26      | -0.0179005 | 0.1986932 | -0.0901 | 0.928  | -0.020721695 | count | 1 |
| TSR3       | -0.0148445 | 0.0842528 | -0.1762 | 0.86   | -0.020599247 | count | 1 |
| ALG9       | -0.019998  | 0.3269246 | -0.0612 | 0.951  | -0.020535414 | count | 1 |
| TRPM4      | -0.0188956 | 0.373194  | -0.0506 | 0.96   | -0.020489876 | count | 1 |
| VTN        | -0.025321  | 0.4662193 | -0.0543 | 0.957  | -0.020482852 | count | 1 |
| LGALS8     | -0.0159964 | 0.1543787 | -0.1036 | 0.917  | -0.020478513 | count | 1 |
| GTPBP8     | -0.0155293 | 0.1697089 | -0.0915 | 0.927  | -0.020469732 | count | 1 |
| SRP9       | -0.0143442 | 0.0455863 | -0.3147 | 0.753  | -0.020439133 | count | 1 |
| BTAF1      | -0.0161505 | 0.187721  | -0.086  | 0.931  | -0.020417496 | count | 1 |
| PRR14      | -0.0170032 | 0.2066593 | -0.0823 | 0.934  | -0.020397316 | count | 1 |
| TXNDC11    | -0.0172377 | 0.2107412 | -0.0818 | 0.935  | -0.020377681 | count | 1 |
| KHSRP      | -0.0163148 | 0.1852773 | -0.0881 | 0.93   | -0.02034219  | count | 1 |
| FRA10AC1   | -0.014462  | 0.0909635 | -0.159  | 0.874  | -0.02023761  | count | 1 |
| PARP16     | -0.0191674 | 0.2595068 | -0.0739 | 0.941  | -0.020194919 | count | 1 |
| NSMCE1     | -0.0144399 | 0.0766051 | -0.1885 | 0.85   | -0.020131311 | count | 1 |
| BLOC1S6    | -0.014596  | 0.0888458 | -0.1643 | 0.87   | -0.020033808 | count | 1 |
| FOXJ3      | -0.01506   | 0.1456134 | -0.1035 | 0.918  | -0.020025702 | count | 1 |
| AC025171.2 | -0.0211295 | 0.3118267 | -0.0678 | 0.946  | -0.020016827 | count | 1 |
| FUBP1      | -0.0148193 | 0.1090926 | -0.1358 | 0.892  | -0.019954529 | count | 1 |
| C4orf33    | -0.0183537 | 0.2425271 | -0.0757 | 0.94   | -0.019901548 | count | 1 |
| ATIC       | -0.0150384 | 0.1353501 | -0.1111 | 0.912  | -0.019872538 | count | 1 |
| THAP6      | -0.0154107 | 0.1359817 | -0.1133 | 0.91   | -0.019772466 | count | 1 |
| NOB1       | -0.0146592 | 0.1018375 | -0.1439 | 0.886  | -0.019731378 | count | 1 |
| LTB        | -0.0350241 | 0.731876  | -0.0479 | 0.962  | -0.019715395 | count | 1 |
| ZNF548     | -0.0306228 | 0.2951665 | -0.1037 | 0.917  | -0.01961965  | count | 1 |
| RB1        | -0.0147602 | 0.1466069 | -0.1007 | 0.92   | -0.019606366 | count | 1 |
| MRPL2      | -0.0142772 | 0.0945689 | -0.151  | 0.88   | -0.01947454  | count | 1 |
| DMC1       | -0.0689251 | 0.5464891 | -0.1261 | 0.9    | -0.019379848 | count | 1 |
| DYNLRB2    | -0.0689251 | 0.5699492 | -0.1209 | 0.904  | -0.019379848 | count | 1 |
| VKORC1     | -0.0134478 | 0.0424677 | -0.3167 | 0.7515 | -0.019189953 | count | 1 |
| TARS2      | -0.0231073 | 0.3577817 | -0.0646 | 0.949  | -0.019183211 | count | 1 |
| ELK1       | -0.0183112 | 0.2419228 | -0.0757 | 0.94   | -0.019135236 | count | 1 |
| FOCAD      | -0.0196259 | 0.3186418 | -0.0616 | 0.951  | -0.019094319 | count | 1 |
| RHEB       | -0.013417  | 0.0550907 | -0.2435 | 0.808  | -0.019072472 | count | 1 |
| IKZF2      | -0.0259116 | 0.32767   | -0.0791 | 0.937  | -0.019032773 | count | 1 |
| CCDC130    | -0.0143387 | 0.1369888 | -0.1047 | 0.917  | -0.018959171 | count | 1 |
| RXRB       | -0.0154456 | 0.1507577 | -0.1025 | 0.918  | -0.018931993 | count | 1 |
| WDR73      | -0.0145799 | 0.15346   | -0.095  | 0.924  | -0.018877024 | count | 1 |
| VAMP7      | -0.0149669 | 0.1492073 | -0.1003 | 0.92   | -0.018839125 | count | 1 |
| DNASE1L2   | -0.1707256 | 0.904101  | -0.1888 | 0.85   | -0.018836663 | count | 1 |
| IGLV3-21   | -0.1707256 | 0.904101  | -0.1888 | 0.85   | -0.018836663 | count | 1 |
| DENND2D    | -0.1707256 | 0.9351945 | -0.1826 | 0.855  | -0.018836663 | count | 1 |

|            |            |           |         |       |              |       |   |
|------------|------------|-----------|---------|-------|--------------|-------|---|
| AC053503.2 | -0.1707256 | 0.9351945 | -0.1826 | 0.855 | -0.018836663 | count | 1 |
| LINC02469  | -0.1707256 | 0.9351945 | -0.1826 | 0.855 | -0.018836663 | count | 1 |
| ZNF804B    | -0.1707256 | 0.9351945 | -0.1826 | 0.855 | -0.018836663 | count | 1 |
| SNX15      | -0.1707256 | 0.9351945 | -0.1826 | 0.855 | -0.018836663 | count | 1 |
| AC026369.2 | -0.1707256 | 0.9351945 | -0.1826 | 0.855 | -0.018836663 | count | 1 |
| SLC25A41   | -0.1707256 | 0.9351945 | -0.1826 | 0.855 | -0.018836663 | count | 1 |
| AL078604.2 | -0.1707256 | 1.084979  | -0.1574 | 0.875 | -0.018836663 | count | 1 |
| IGLV2-14   | -0.1707256 | 1.084979  | -0.1574 | 0.875 | -0.018836663 | count | 1 |
| PODNL1     | -0.0151202 | 0.2443771 | -0.0619 | 0.951 | -0.018819543 | count | 1 |
| PCBP2      | -0.013212  | 0.0486713 | -0.2715 | 0.786 | -0.018810824 | count | 1 |
| NDUFA10    | -0.013409  | 0.0695376 | -0.1928 | 0.847 | -0.018765307 | count | 1 |
| NIM1K      | -0.0400678 | 0.5868769 | -0.0683 | 0.946 | -0.018761152 | count | 1 |
| SRSF12     | -0.0400678 | 0.5868982 | -0.0683 | 0.946 | -0.018761152 | count | 1 |
| TTC19      | -0.0145587 | 0.1384622 | -0.1051 | 0.916 | -0.018699147 | count | 1 |
| TRAK2      | -0.0141596 | 0.1475876 | -0.0959 | 0.924 | -0.018561103 | count | 1 |
| SATL1      | -0.1680394 | 0.9154787 | -0.1836 | 0.854 | -0.018528876 | count | 1 |
| LINC00894  | -0.1680394 | 0.9154787 | -0.1836 | 0.854 | -0.018528876 | count | 1 |
| AC107884.1 | -0.1680394 | 0.9154787 | -0.1836 | 0.854 | -0.018528876 | count | 1 |
| AP000941.1 | -0.1680394 | 0.9154787 | -0.1836 | 0.854 | -0.018528876 | count | 1 |
| PPFIA4     | -0.1680394 | 0.9300263 | -0.1807 | 0.857 | -0.018528876 | count | 1 |
| AC012603.1 | -0.1680394 | 0.9300263 | -0.1807 | 0.857 | -0.018528876 | count | 1 |
| APOBEC2    | -0.1680394 | 1.043769  | -0.161  | 0.872 | -0.018528876 | count | 1 |
| TBC1D25    | -0.0168602 | 0.2690228 | -0.0627 | 0.95  | -0.018510266 | count | 1 |
| P2RY1      | -0.0262271 | 0.3205064 | -0.0818 | 0.935 | -0.018508258 | count | 1 |
| ZNF214     | -0.0187636 | 0.3670999 | -0.0511 | 0.959 | -0.018476891 | count | 1 |
| ANXA6      | -0.0132039 | 0.0723883 | -0.1824 | 0.855 | -0.018467151 | count | 1 |
| LSM1       | -0.0133    | 0.0896592 | -0.1483 | 0.882 | -0.01842804  | count | 1 |
| AP001062.1 | -0.1669871 | 0.7484294 | -0.2231 | 0.823 | -0.018408399 | count | 1 |
| AC104794.4 | -0.1669871 | 0.7989405 | -0.209  | 0.834 | -0.018408399 | count | 1 |
| ACTB       | -0.012756  | 0.0219871 | -0.5802 | 0.562 | -0.018394573 | count | 1 |
| ATP5F1C    | -0.0126901 | 0.0424433 | -0.299  | 0.765 | -0.018133708 | count | 1 |
| CCT7       | -0.0127609 | 0.0518751 | -0.246  | 0.806 | -0.018067854 | count | 1 |
| YY1        | -0.0125783 | 0.0539853 | -0.233  | 0.816 | -0.017856476 | count | 1 |
| MOSPD2     | -0.0144623 | 0.1542046 | -0.0938 | 0.925 | -0.017726049 | count | 1 |
| MTMR7      | -0.1609339 | 0.7316451 | -0.22   | 0.826 | -0.017716436 | count | 1 |
| AL590999.1 | -0.1609339 | 0.7485209 | -0.215  | 0.83  | -0.017716436 | count | 1 |
| AAAS       | -0.0147489 | 0.1897099 | -0.0777 | 0.938 | -0.017642491 | count | 1 |
| SAR1B      | -0.0126547 | 0.087057  | -0.1454 | 0.884 | -0.017586581 | count | 1 |
| SLC1A1     | -0.1596445 | 0.5333523 | -0.2993 | 0.765 | -0.017569275 | count | 1 |
| CACNB1     | -0.0205806 | 0.3550225 | -0.058  | 0.954 | -0.017493536 | count | 1 |
| SUMO1      | -0.0122329 | 0.0478899 | -0.2554 | 0.798 | -0.017391871 | count | 1 |
| NECAB3     | -0.0147562 | 0.177595  | -0.0831 | 0.934 | -0.017268745 | count | 1 |
| YIF1A      | -0.0119715 | 0.0579255 | -0.2067 | 0.836 | -0.016968865 | count | 1 |
| FSBP       | -0.0410065 | 0.6216782 | -0.066  | 0.947 | -0.016918611 | count | 1 |
| ACO2       | -0.0127477 | 0.1174475 | -0.1085 | 0.914 | -0.016875034 | count | 1 |

|            |            |           |         |       |              |       |   |
|------------|------------|-----------|---------|-------|--------------|-------|---|
| GSPT1      | -0.01206   | 0.0744153 | -0.1621 | 0.871 | -0.016820767 | count | 1 |
| ZHX1       | -0.0122978 | 0.1016065 | -0.121  | 0.904 | -0.016806553 | count | 1 |
| IER3-AS1   | -0.0278224 | 0.4078286 | -0.0682 | 0.946 | -0.01678131  | count | 1 |
| DMAP1      | -0.0124885 | 0.1245352 | -0.1003 | 0.92  | -0.016688551 | count | 1 |
| NFE2L3     | -0.0475633 | 0.4400353 | -0.1081 | 0.914 | -0.016673204 | count | 1 |
| AC023355.1 | -0.0274777 | 0.5697768 | -0.0482 | 0.962 | -0.016572527 | count | 1 |
| NDUFAF6    | -0.0140449 | 0.2289646 | -0.0613 | 0.951 | -0.016547358 | count | 1 |
| SOX12      | -0.0140809 | 0.3515621 | -0.0401 | 0.968 | -0.016359077 | count | 1 |
| KHDRBS1    | -0.0114509 | 0.0564427 | -0.2029 | 0.839 | -0.016245435 | count | 1 |
| EMD        | -0.0115469 | 0.0781047 | -0.1478 | 0.882 | -0.01622525  | count | 1 |
| RFX1       | -0.0150887 | 0.2253985 | -0.0669 | 0.947 | -0.016134889 | count | 1 |
| ZNF586     | -0.0263774 | 0.362462  | -0.0728 | 0.942 | -0.015906223 | count | 1 |
| WDR11      | -0.0130412 | 0.185598  | -0.0703 | 0.944 | -0.015877933 | count | 1 |
| TMEM14C    | -0.0110767 | 0.0361222 | -0.3066 | 0.759 | -0.015868128 | count | 1 |
| MPDZ       | -0.0115656 | 0.135891  | -0.0851 | 0.932 | -0.01583773  | count | 1 |
| UBE2V2     | -0.0112514 | 0.0637252 | -0.1766 | 0.86  | -0.015800162 | count | 1 |
| RNF187     | -0.0113882 | 0.0816206 | -0.1395 | 0.889 | -0.015759813 | count | 1 |
| BCAP31     | -0.0110686 | 0.0532169 | -0.208  | 0.835 | -0.015672947 | count | 1 |
| VAMP4      | -0.0115183 | 0.1180009 | -0.0976 | 0.922 | -0.015569856 | count | 1 |
| ASH2L      | -0.0123578 | 0.2209793 | -0.0559 | 0.955 | -0.015553632 | count | 1 |
| PAXIP1-AS1 | -0.0125604 | 0.2106359 | -0.0596 | 0.952 | -0.015547711 | count | 1 |
| EPM2AIP1   | -0.0116687 | 0.1229198 | -0.0949 | 0.924 | -0.015547528 | count | 1 |
| SYCP2      | -0.0376637 | 0.5726055 | -0.0658 | 0.948 | -0.015529707 | count | 1 |
| FRYL       | -0.0115545 | 0.1604018 | -0.072  | 0.943 | -0.015418143 | count | 1 |
| C12orf10   | -0.0110231 | 0.0731862 | -0.1506 | 0.88  | -0.015416783 | count | 1 |
| COX4I1     | -0.0107191 | 0.0281083 | -0.3814 | 0.703 | -0.015399407 | count | 1 |
| PIGW       | -0.0226959 | 0.3997677 | -0.0568 | 0.955 | -0.015297938 | count | 1 |
| TBC1D15    | -0.0115687 | 0.1077542 | -0.1074 | 0.915 | -0.015237766 | count | 1 |
| ZNF148     | -0.0108832 | 0.0863863 | -0.126  | 0.9   | -0.015214002 | count | 1 |
| ERGIC3     | -0.0107298 | 0.0717973 | -0.1494 | 0.881 | -0.01505412  | count | 1 |
| MCPH1      | -0.0115909 | 0.1406255 | -0.0824 | 0.934 | -0.01504686  | count | 1 |
| APOM       | -0.0156201 | 0.3267551 | -0.0478 | 0.962 | -0.014996315 | count | 1 |
| AC004943.2 | -0.0533974 | 0.6259924 | -0.0853 | 0.932 | -0.014965172 | count | 1 |
| ZNF426     | -0.0116456 | 0.1996571 | -0.0583 | 0.953 | -0.014940064 | count | 1 |
| AC011498.1 | -0.0425771 | 0.7951711 | -0.0535 | 0.957 | -0.014910568 | count | 1 |
| LTB4R2     | -0.0425771 | 0.9444576 | -0.0451 | 0.964 | -0.014910568 | count | 1 |
| GLTP       | -0.0108723 | 0.1042592 | -0.1043 | 0.917 | -0.014833119 | count | 1 |
| FAM120AOS  | -0.0106323 | 0.0792303 | -0.1342 | 0.893 | -0.014827936 | count | 1 |
| TCF3       | -0.0133045 | 0.2198495 | -0.0605 | 0.952 | -0.01477154  | count | 1 |
| AC068888.1 | -0.010817  | 0.1030735 | -0.1049 | 0.916 | -0.014761307 | count | 1 |
| C11orf98   | -0.0230222 | 0.4368113 | -0.0527 | 0.958 | -0.014733635 | count | 1 |
| DNM3OS     | -0.0118547 | 0.1639694 | -0.0723 | 0.942 | -0.014700895 | count | 1 |
| MED13      | -0.010757  | 0.1254957 | -0.0857 | 0.932 | -0.014693612 | count | 1 |
| AC093677.2 | -0.1331058 | 0.5843862 | -0.2278 | 0.82  | -0.014558735 | count | 1 |
| AC239800.2 | -0.0724154 | 0.7424202 | -0.0975 | 0.922 | -0.014528848 | count | 1 |

|            |            |           |         |       |              |       |   |
|------------|------------|-----------|---------|-------|--------------|-------|---|
| CD81-AS1   | -0.0724154 | 0.7424202 | -0.0975 | 0.922 | -0.014528848 | count | 1 |
| SAMD10     | -0.0724154 | 0.8057406 | -0.0899 | 0.928 | -0.014528848 | count | 1 |
| ADH1A      | -0.0724154 | 0.8620485 | -0.084  | 0.933 | -0.014528848 | count | 1 |
| TEX12      | -0.0724154 | 0.9081478 | -0.0797 | 0.936 | -0.014528848 | count | 1 |
| FDX1       | -0.0106541 | 0.1049209 | -0.1015 | 0.919 | -0.014460732 | count | 1 |
| CMTM2      | -0.1313909 | 0.8506354 | -0.1545 | 0.877 | -0.014365409 | count | 1 |
| LURAP1     | -0.0119983 | 0.1987825 | -0.0604 | 0.952 | -0.014350464 | count | 1 |
| HIST1H2AE  | -0.025321  | 0.5390109 | -0.047  | 0.963 | -0.014231257 | count | 1 |
| AC116667.2 | -0.025321  | 0.5390109 | -0.047  | 0.963 | -0.014231257 | count | 1 |
| TOLLIP-AS1 | -0.015424  | 0.4584203 | -0.0336 | 0.973 | -0.013920725 | count | 1 |
| ASXL3      | -0.0267706 | 0.3107819 | -0.0861 | 0.931 | -0.013842563 | count | 1 |
| FASTKD5    | -0.0150544 | 0.2463419 | -0.0611 | 0.951 | -0.013821892 | count | 1 |
| MTBP       | -0.0330775 | 0.4176206 | -0.0792 | 0.937 | -0.013626966 | count | 1 |
| COTL1      | -0.0106127 | 0.1782232 | -0.0595 | 0.953 | -0.013568531 | count | 1 |
| PPIF       | -0.01288   | 0.2738783 | -0.047  | 0.962 | -0.013564381 | count | 1 |
| LINC00535  | -0.0224904 | 0.8498547 | -0.0265 | 0.979 | -0.013554174 | count | 1 |
| KPNB1      | -0.0097865 | 0.0838353 | -0.1167 | 0.907 | -0.013449788 | count | 1 |
| KIF7       | -0.012424  | 0.4456912 | -0.0279 | 0.978 | -0.013283003 | count | 1 |
| B4GALT2    | -0.0100922 | 0.1326223 | -0.0761 | 0.939 | -0.013265679 | count | 1 |
| LINC00921  | -0.0219563 | 0.4569785 | -0.048  | 0.962 | -0.013231204 | count | 1 |
| ZNF250     | -0.0121279 | 0.2566575 | -0.0473 | 0.962 | -0.013229684 | count | 1 |
| RAP1A      | -0.0093115 | 0.0613657 | -0.1517 | 0.879 | -0.013107554 | count | 1 |
| WDR45      | -0.0093473 | 0.0706587 | -0.1323 | 0.895 | -0.013020954 | count | 1 |
| HECTD4     | -0.0100525 | 0.2093509 | -0.048  | 0.962 | -0.012923489 | count | 1 |
| AC003681.1 | -0.1178102 | 0.5567852 | -0.2116 | 0.832 | -0.012839634 | count | 1 |
| PDZK1      | -0.0457422 | 0.8863286 | -0.0516 | 0.959 | -0.012799067 | count | 1 |
| LINC01600  | -0.0457422 | 0.8863286 | -0.0516 | 0.959 | -0.012799067 | count | 1 |
| AC005899.6 | -0.0457422 | 0.8863286 | -0.0516 | 0.959 | -0.012799067 | count | 1 |
| FGR        | -0.0457422 | 1.071181  | -0.0427 | 0.966 | -0.012799067 | count | 1 |
| MED31      | -0.0096223 | 0.1301942 | -0.0739 | 0.941 | -0.012721641 | count | 1 |
| AP3M1      | -0.0102202 | 0.1609676 | -0.0635 | 0.949 | -0.012696063 | count | 1 |
| NFYA       | -0.0179929 | 0.3544262 | -0.0508 | 0.96  | -0.012683353 | count | 1 |
| FAM13B     | -0.009553  | 0.1567013 | -0.061  | 0.951 | -0.012681174 | count | 1 |
| ARHGAP19   | -0.0307537 | 0.5482982 | -0.0561 | 0.955 | -0.012664092 | count | 1 |
| RTCB       | -0.0091971 | 0.0991644 | -0.0927 | 0.926 | -0.012571418 | count | 1 |
| HYI        | -0.0087986 | 0.0670846 | -0.1312 | 0.896 | -0.012405001 | count | 1 |
| AC091982.3 | -0.1130164 | 0.7363428 | -0.1535 | 0.878 | -0.012303278 | count | 1 |
| PAIP2      | -0.008641  | 0.0581015 | -0.1487 | 0.882 | -0.012197367 | count | 1 |
| MT-CO3     | -0.0084141 | 0.0223265 | -0.3769 | 0.706 | -0.012131348 | count | 1 |
| NCKAP1     | -0.0086812 | 0.0907187 | -0.0957 | 0.924 | -0.012116422 | count | 1 |
| PAPSS1     | -0.0088415 | 0.1081722 | -0.0817 | 0.935 | -0.01204995  | count | 1 |
| C16orf70   | -0.0138274 | 0.282339  | -0.049  | 0.961 | -0.01200452  | count | 1 |
| CLUH       | -0.0111359 | 0.3940294 | -0.0283 | 0.977 | -0.011988708 | count | 1 |
| RFXANK     | -0.0092238 | 0.1247041 | -0.074  | 0.941 | -0.011929346 | count | 1 |
| AC011978.2 | -0.0288872 | 0.6501981 | -0.0444 | 0.965 | -0.011891303 | count | 1 |

|            |            |           |         |       |              |       |   |
|------------|------------|-----------|---------|-------|--------------|-------|---|
| PTPRJ      | -0.0227787 | 0.4882686 | -0.0467 | 0.963 | -0.011770466 | count | 1 |
| PPP4R1     | -0.0093512 | 0.1714656 | -0.0545 | 0.957 | -0.011595248 | count | 1 |
| DHPS       | -0.0084252 | 0.08728   | -0.0965 | 0.923 | -0.011578727 | count | 1 |
| CEP85      | -0.0578557 | 0.6664315 | -0.0868 | 0.931 | -0.011569939 | count | 1 |
| TOMM40L    | -0.0178838 | 0.4216557 | -0.0424 | 0.966 | -0.011436536 | count | 1 |
| SF3A1      | -0.0087375 | 0.1260118 | -0.0693 | 0.945 | -0.011408543 | count | 1 |
| AL645568.1 | -0.0132946 | 0.4306532 | -0.0309 | 0.975 | -0.011291477 | count | 1 |
| CASC10     | -0.0160108 | 0.8355074 | -0.0192 | 0.985 | -0.011283124 | count | 1 |
| DDX19B     | -0.0100467 | 0.193446  | -0.0519 | 0.959 | -0.011270414 | count | 1 |
| RBMS3-AS3  | -0.0132287 | 0.2645114 | -0.05   | 0.96  | -0.011235425 | count | 1 |
| TACC3      | -0.1028604 | 0.8182657 | -0.1257 | 0.9   | -0.011170818 | count | 1 |
| NDUFS3     | -0.0079048 | 0.0712176 | -0.111  | 0.912 | -0.011090361 | count | 1 |
| FKBPL      | -0.0097052 | 0.2739181 | -0.0354 | 0.972 | -0.010941183 | count | 1 |
| TBX6       | -0.1007645 | 0.6411799 | -0.1572 | 0.875 | -0.010937764 | count | 1 |
| AC096642.1 | -0.1007645 | 0.7223404 | -0.1395 | 0.889 | -0.010937764 | count | 1 |
| LATS2-AS1  | -0.1007645 | 0.7971527 | -0.1264 | 0.899 | -0.010937764 | count | 1 |
| USP9Y      | -0.0108164 | 0.3212188 | -0.0337 | 0.973 | -0.0108826   | count | 1 |
| TUBA1B     | -0.0075534 | 0.0332648 | -0.2271 | 0.82  | -0.010858236 | count | 1 |
| AL450384.2 | -0.0177683 | 0.2906046 | -0.0611 | 0.951 | -0.010700544 | count | 1 |
| INTS1      | -0.0087133 | 0.2243504 | -0.0388 | 0.969 | -0.010606723 | count | 1 |
| GLRX       | -0.0075632 | 0.0958474 | -0.0789 | 0.937 | -0.010532389 | count | 1 |
| ZBTB22     | -0.0088    | 0.1914737 | -0.046  | 0.963 | -0.010431326 | count | 1 |
| OR51E1     | -0.0222188 | 0.2867248 | -0.0775 | 0.938 | -0.010370646 | count | 1 |
| GHITM      | -0.0073247 | 0.0548654 | -0.1335 | 0.894 | -0.010360824 | count | 1 |
| AC007406.3 | -0.0516536 | 0.5623905 | -0.0918 | 0.927 | -0.010315241 | count | 1 |
| L3MBTL2    | -0.0085485 | 0.1913308 | -0.0447 | 0.964 | -0.01030541  | count | 1 |
| STARD4     | -0.0291409 | 0.3655649 | -0.0797 | 0.936 | -0.010177916 | count | 1 |
| FBXO33     | -0.0079893 | 0.1854182 | -0.0431 | 0.966 | -0.010164405 | count | 1 |
| NTMT1      | -0.0075463 | 0.1278759 | -0.059  | 0.953 | -0.010114927 | count | 1 |
| SLC26A2    | -0.0082699 | 0.1701238 | -0.0486 | 0.961 | -0.010089632 | count | 1 |
| NDUFS7     | -0.0071092 | 0.0536382 | -0.1325 | 0.895 | -0.010075112 | count | 1 |
| NBPF12     | -0.0287452 | 0.4170445 | -0.0689 | 0.945 | -0.010038917 | count | 1 |
| PLGLB1     | -0.0925652 | 0.8167149 | -0.1133 | 0.91  | -0.010028187 | count | 1 |
| LINC01176  | -0.0925652 | 0.8167149 | -0.1133 | 0.91  | -0.010028187 | count | 1 |
| AC022509.1 | -0.0925652 | 0.8167149 | -0.1133 | 0.91  | -0.010028187 | count | 1 |
| AP003392.5 | -0.0925652 | 0.9178572 | -0.1008 | 0.92  | -0.010028187 | count | 1 |
| MLLT1      | -0.0082476 | 0.1976714 | -0.0417 | 0.967 | -0.010016272 | count | 1 |
| ZNF432     | -0.0089891 | 0.3757994 | -0.0239 | 0.981 | -0.009921852 | count | 1 |
| GATD1      | -0.0078103 | 0.1668477 | -0.0468 | 0.963 | -0.009813847 | count | 1 |
| WDR48      | -0.0074191 | 0.1505805 | -0.0493 | 0.961 | -0.009802326 | count | 1 |
| ELP2       | -0.0074748 | 0.147203  | -0.0508 | 0.96  | -0.009751742 | count | 1 |
| ATP6V1D    | -0.0070541 | 0.0887354 | -0.0795 | 0.937 | -0.009728061 | count | 1 |
| ZBTB16     | -0.0068528 | 0.0786052 | -0.0872 | 0.931 | -0.009522984 | count | 1 |
| FAM221A    | -0.01226   | 0.3167709 | -0.0387 | 0.969 | -0.009316604 | count | 1 |
| KCNB1      | -0.0153772 | 0.4566658 | -0.0337 | 0.973 | -0.00925714  | count | 1 |



|            |            |           |         |       |              |       |   |
|------------|------------|-----------|---------|-------|--------------|-------|---|
| ZNF420     | -0.008171  | 0.2406372 | -0.034  | 0.973 | -0.009210777 | count | 1 |
| PAXX       | -0.0066105 | 0.0916441 | -0.0721 | 0.943 | -0.009190298 | count | 1 |
| KIAA1468   | -0.0082756 | 0.2323461 | -0.0356 | 0.972 | -0.009080569 | count | 1 |
| GLO1       | -0.0064546 | 0.0627124 | -0.1029 | 0.918 | -0.009076256 | count | 1 |
| STRAP      | -0.0064853 | 0.0720683 | -0.09   | 0.928 | -0.00907337  | count | 1 |
| WTAP       | -0.0064456 | 0.0751939 | -0.0857 | 0.932 | -0.00904903  | count | 1 |
| SBNO1      | -0.0067842 | 0.1132814 | -0.0599 | 0.952 | -0.00903846  | count | 1 |
| TRMT10C    | -0.0063711 | 0.0962082 | -0.0662 | 0.947 | -0.008830354 | count | 1 |
| FOXN3      | -0.0063158 | 0.1017309 | -0.0621 | 0.951 | -0.008646253 | count | 1 |
| PSMD1      | -0.0062448 | 0.0849865 | -0.0735 | 0.941 | -0.00863423  | count | 1 |
| FOXN2      | -0.0070491 | 0.1423384 | -0.0495 | 0.961 | -0.00861878  | count | 1 |
| MIIP       | -0.0072453 | 0.1538028 | -0.0471 | 0.962 | -0.008613834 | count | 1 |
| SENP5      | -0.0065389 | 0.1501082 | -0.0436 | 0.965 | -0.008600213 | count | 1 |
| B3GALNT2   | -0.0069317 | 0.2092896 | -0.0331 | 0.974 | -0.008528651 | count | 1 |
| MDFI       | -0.0242311 | 0.4792391 | -0.0506 | 0.96  | -0.008454773 | count | 1 |
| NPLOC4     | -0.0069552 | 0.2404655 | -0.0289 | 0.977 | -0.008405333 | count | 1 |
| CDS2       | -0.0061551 | 0.1045918 | -0.0588 | 0.953 | -0.008390514 | count | 1 |
| CAPG       | -0.006199  | 0.1226149 | -0.0506 | 0.96  | -0.008345823 | count | 1 |
| AC123768.4 | -0.0418719 | 0.5668259 | -0.0739 | 0.941 | -0.008343371 | count | 1 |
| APEH       | -0.0065294 | 0.1484047 | -0.044  | 0.965 | -0.008327165 | count | 1 |
| POLR2A     | -0.0063309 | 0.1210008 | -0.0523 | 0.958 | -0.008291158 | count | 1 |
| YTHDC1     | -0.0059023 | 0.0834309 | -0.0707 | 0.944 | -0.008248056 | count | 1 |
| IMMT       | -0.0061264 | 0.1058792 | -0.0579 | 0.954 | -0.008218481 | count | 1 |
| TMEM250    | -0.0066638 | 0.155674  | -0.0428 | 0.966 | -0.008215283 | count | 1 |
| TJP1       | -0.0058418 | 0.0806559 | -0.0724 | 0.942 | -0.008185814 | count | 1 |
| LAMTOR2    | -0.0058556 | 0.0702428 | -0.0834 | 0.934 | -0.008162163 | count | 1 |
| TOLLIP     | -0.0062248 | 0.1363714 | -0.0456 | 0.964 | -0.008079641 | count | 1 |
| ARHGEF12   | -0.005728  | 0.1154046 | -0.0496 | 0.96  | -0.007769318 | count | 1 |
| KMT2A      | -0.005488  | 0.0624173 | -0.0879 | 0.93  | -0.007767386 | count | 1 |
| AC091959.3 | -0.038256  | 0.5007105 | -0.0764 | 0.939 | -0.007616624 | count | 1 |
| SLC9A3     | -0.0079121 | 0.266058  | -0.0297 | 0.976 | -0.007486437 | count | 1 |
| RAET1G     | -0.0160108 | 0.7001195 | -0.0229 | 0.982 | -0.007464743 | count | 1 |
| ENOX2      | -0.0062246 | 0.1461578 | -0.0426 | 0.966 | -0.007399985 | count | 1 |
| DHX40      | -0.0054808 | 0.1198273 | -0.0457 | 0.964 | -0.007355401 | count | 1 |
| GNB2       | -0.0051801 | 0.0516045 | -0.1004 | 0.92  | -0.007348494 | count | 1 |
| KDM1A      | -0.0057259 | 0.1294347 | -0.0442 | 0.965 | -0.007328018 | count | 1 |
| AL354696.2 | -0.0363411 | 0.8773723 | -0.0414 | 0.967 | -0.007232229 | count | 1 |
| AC025682.1 | -0.0363411 | 0.8790465 | -0.0413 | 0.967 | -0.007232229 | count | 1 |
| RHBDL3     | -0.0654728 | 0.7320924 | -0.0894 | 0.929 | -0.007047189 | count | 1 |
| FBP2       | -0.0654728 | 0.8576551 | -0.0763 | 0.939 | -0.007047189 | count | 1 |
| SFT2D3     | -0.0061971 | 0.19527   | -0.0317 | 0.975 | -0.007018265 | count | 1 |
| DKC1       | -0.0052338 | 0.1369222 | -0.0382 | 0.97  | -0.006833161 | count | 1 |
| PWP1       | -0.0049113 | 0.0803686 | -0.0611 | 0.951 | -0.00681782  | count | 1 |
| PDCD7      | -0.0047964 | 0.0901897 | -0.0532 | 0.958 | -0.006662169 | count | 1 |
| MBD6       | -0.0058854 | 0.2238798 | -0.0263 | 0.979 | -0.006600631 | count | 1 |

|            |            |           |         |       |              |       |   |
|------------|------------|-----------|---------|-------|--------------|-------|---|
| SRSF10     | -0.0046439 | 0.0655946 | -0.0708 | 0.944 | -0.006580895 | count | 1 |
| MANEA      | -0.0052475 | 0.1466221 | -0.0358 | 0.971 | -0.006562043 | count | 1 |
| EPHB4      | -0.008244  | 0.4418585 | -0.0187 | 0.985 | -0.006465718 | count | 1 |
| N4BP2L2    | -0.0044882 | 0.0503939 | -0.0891 | 0.929 | -0.006407796 | count | 1 |
| USP3       | -0.0049898 | 0.1433981 | -0.0348 | 0.972 | -0.006347685 | count | 1 |
| GNAL       | -0.0051898 | 0.1650124 | -0.0315 | 0.975 | -0.006301924 | count | 1 |
| GTF3A      | -0.0044433 | 0.0632854 | -0.0702 | 0.944 | -0.006267467 | count | 1 |
| COMMD9     | -0.0048128 | 0.1646533 | -0.0292 | 0.977 | -0.006246663 | count | 1 |
| AC009041.2 | -0.0048587 | 0.2184073 | -0.0222 | 0.982 | -0.006113645 | count | 1 |
| GEMIN4     | -0.0090806 | 0.3462205 | -0.0262 | 0.979 | -0.006108917 | count | 1 |
| IST1       | -0.0044553 | 0.1194784 | -0.0373 | 0.97  | -0.006006984 | count | 1 |
| MORF4L1    | -0.0041498 | 0.029924  | -0.1387 | 0.89  | -0.005958929 | count | 1 |
| NEK7       | -0.0042961 | 0.1081317 | -0.0397 | 0.968 | -0.005826991 | count | 1 |
| AP002360.1 | -0.0078094 | 0.2955411 | -0.0264 | 0.979 | -0.00572272  | count | 1 |
| OPTN       | -0.0040425 | 0.0588945 | -0.0686 | 0.945 | -0.005714762 | count | 1 |
| LPAR4      | -0.0204393 | 0.4821488 | -0.0424 | 0.966 | -0.005688415 | count | 1 |
| CA2        | -0.0528855 | 0.6559302 | -0.0806 | 0.936 | -0.005675049 | count | 1 |
| KIF5A      | -0.0087971 | 0.6412313 | -0.0137 | 0.989 | -0.005618113 | count | 1 |
| ZNF211     | -0.0087283 | 0.3551002 | -0.0246 | 0.98  | -0.005574118 | count | 1 |
| TMEM30A    | -0.0038424 | 0.0643845 | -0.0597 | 0.952 | -0.005421999 | count | 1 |
| MRPL4      | -0.0038958 | 0.0872095 | -0.0447 | 0.964 | -0.005408692 | count | 1 |
| CCT2       | -0.0038186 | 0.0660477 | -0.0578 | 0.954 | -0.005375152 | count | 1 |
| AC009113.1 | -0.0056861 | 0.2725515 | -0.0209 | 0.983 | -0.00521585  | count | 1 |
| ZCCHC2     | -0.0042211 | 0.184179  | -0.0229 | 0.982 | -0.005213492 | count | 1 |
| GPN3       | -0.0037662 | 0.0835579 | -0.0451 | 0.964 | -0.005201747 | count | 1 |
| CSF2RA     | -0.0247941 | 0.7102379 | -0.0349 | 0.972 | -0.004921304 | count | 1 |
| CKAP5      | -0.0038319 | 0.1467254 | -0.0261 | 0.979 | -0.004799287 | count | 1 |
| APCDD1     | -0.0040397 | 0.1625208 | -0.0249 | 0.98  | -0.004757154 | count | 1 |
| SRD5A3     | -0.0036694 | 0.1555485 | -0.0236 | 0.981 | -0.00474499  | count | 1 |
| THRAP3     | -0.0032813 | 0.050735  | -0.0647 | 0.948 | -0.004661966 | count | 1 |
| DCP2       | -0.0034927 | 0.1424548 | -0.0245 | 0.98  | -0.004577217 | count | 1 |
| LYG2       | -0.0230677 | 0.6792795 | -0.034  | 0.973 | -0.00457683  | count | 1 |
| FEZ1       | -0.0032282 | 0.0612068 | -0.0527 | 0.958 | -0.004563139 | count | 1 |
| SIRT6      | -0.0035888 | 0.2541208 | -0.0141 | 0.989 | -0.004501844 | count | 1 |
| ANKRD16    | -0.0041015 | 0.2291699 | -0.0179 | 0.986 | -0.004382565 | count | 1 |
| ZMYND10    | -0.01035   | 0.6987365 | -0.0148 | 0.988 | -0.004245595 | count | 1 |
| TEAD2      | -0.0033849 | 0.1615991 | -0.0209 | 0.983 | -0.004232566 | count | 1 |
| SPSB3      | -0.0030216 | 0.0858917 | -0.0352 | 0.972 | -0.004176994 | count | 1 |
| SARS       | -0.0028928 | 0.0743605 | -0.0389 | 0.969 | -0.00405817  | count | 1 |
| KPNA4      | -0.0028985 | 0.091297  | -0.0317 | 0.975 | -0.004022154 | count | 1 |
| AL445686.2 | -0.0363411 | 1.24365   | -0.0292 | 0.977 | -0.003884025 | count | 1 |
| AL360219.1 | -0.0363411 | 1.238916  | -0.0293 | 0.977 | -0.003884025 | count | 1 |
| LINC01142  | -0.0363411 | 1.24365   | -0.0292 | 0.977 | -0.003884025 | count | 1 |
| AL359921.1 | -0.0363411 | 1.24365   | -0.0292 | 0.977 | -0.003884025 | count | 1 |
| AC092053.2 | -0.0363411 | 1.238916  | -0.0293 | 0.977 | -0.003884025 | count | 1 |

|              |            |           |         |       |              |       |   |
|--------------|------------|-----------|---------|-------|--------------|-------|---|
| CACNA2D3-AS1 | -0.0363411 | 1.24098   | -0.0293 | 0.977 | -0.003884025 | count | 1 |
| AC131235.3   | -0.0363411 | 1.238916  | -0.0293 | 0.977 | -0.003884025 | count | 1 |
| CPA2         | -0.0363411 | 1.24365   | -0.0292 | 0.977 | -0.003884025 | count | 1 |
| FAM156A      | -0.0363411 | 1.24098   | -0.0293 | 0.977 | -0.003884025 | count | 1 |
| AC131902.1   | -0.0363411 | 1.238916  | -0.0293 | 0.977 | -0.003884025 | count | 1 |
| TRPM6        | -0.0363411 | 1.238916  | -0.0293 | 0.977 | -0.003884025 | count | 1 |
| FAM78A       | -0.0363411 | 1.238916  | -0.0293 | 0.977 | -0.003884025 | count | 1 |
| CEND1        | -0.0363411 | 1.238916  | -0.0293 | 0.977 | -0.003884025 | count | 1 |
| AP003774.1   | -0.0363411 | 1.238916  | -0.0293 | 0.977 | -0.003884025 | count | 1 |
| AP000654.1   | -0.0363411 | 1.238916  | -0.0293 | 0.977 | -0.003884025 | count | 1 |
| AC005342.1   | -0.0363411 | 1.238916  | -0.0293 | 0.977 | -0.003884025 | count | 1 |
| STAC3        | -0.0363411 | 1.238916  | -0.0293 | 0.977 | -0.003884025 | count | 1 |
| AC066613.1   | -0.0363411 | 1.238916  | -0.0293 | 0.977 | -0.003884025 | count | 1 |
| HEXA-AS1     | -0.0363411 | 1.24365   | -0.0292 | 0.977 | -0.003884025 | count | 1 |
| AC025287.2   | -0.0363411 | 1.238916  | -0.0293 | 0.977 | -0.003884025 | count | 1 |
| NOS2         | -0.0363411 | 1.24098   | -0.0293 | 0.977 | -0.003884025 | count | 1 |
| TAC4         | -0.0363411 | 1.24365   | -0.0292 | 0.977 | -0.003884025 | count | 1 |
| OGFR-AS1     | -0.0363411 | 1.24365   | -0.0292 | 0.977 | -0.003884025 | count | 1 |
| AC011444.1   | -0.0363411 | 1.238916  | -0.0293 | 0.977 | -0.003884025 | count | 1 |
| MEF2B        | -0.0363411 | 1.24098   | -0.0293 | 0.977 | -0.003884025 | count | 1 |
| NEFH         | -0.0363411 | 1.238916  | -0.0293 | 0.977 | -0.003884025 | count | 1 |
| Z73429.1     | -0.0363411 | 1.24365   | -0.0292 | 0.977 | -0.003884025 | count | 1 |
| MED4         | -0.0027488 | 0.071574  | -0.0384 | 0.969 | -0.003835989 | count | 1 |
| MCFD2        | -0.002706  | 0.068217  | -0.0397 | 0.968 | -0.003790393 | count | 1 |
| FKBP3        | -0.0026487 | 0.071308  | -0.0371 | 0.97  | -0.003696295 | count | 1 |
| CSTB         | -0.0025007 | 0.037496  | -0.0667 | 0.947 | -0.003589552 | count | 1 |
| STAU1        | -0.0024489 | 0.056961  | -0.043  | 0.966 | -0.003460044 | count | 1 |
| RBM3         | -0.0023898 | 0.0438162 | -0.0545 | 0.957 | -0.003403319 | count | 1 |
| PIGC         | -0.0024337 | 0.1139228 | -0.0214 | 0.983 | -0.003323146 | count | 1 |
| TTLL4        | -0.0080713 | 0.461519  | -0.0175 | 0.986 | -0.003309428 | count | 1 |
| BOLA2B       | -0.0054741 | 0.5965216 | -0.0092 | 0.993 | -0.003290372 | count | 1 |
| BDP1         | -0.0023223 | 0.0916262 | -0.0253 | 0.98  | -0.003262996 | count | 1 |
| CCDC181      | -0.0037276 | 0.3350361 | -0.0111 | 0.991 | -0.003232722 | count | 1 |
| B3GNT2       | -0.0024352 | 0.1289336 | -0.0189 | 0.985 | -0.003142816 | count | 1 |
| CBWD6        | -0.0075079 | 0.6226363 | -0.0121 | 0.99  | -0.003078089 | count | 1 |
| RGS17        | -0.0021167 | 0.1544355 | -0.0137 | 0.989 | -0.002948978 | count | 1 |
| ZNF32        | -0.0020895 | 0.0853894 | -0.0245 | 0.98  | -0.002871901 | count | 1 |
| MCM5         | -0.0027399 | 0.2412137 | -0.0114 | 0.991 | -0.002725375 | count | 1 |
| DPH7         | -0.0022534 | 0.1687103 | -0.0134 | 0.989 | -0.002693964 | count | 1 |
| PINK1-AS     | -0.0064955 | 0.8129266 | -0.008  | 0.994 | -0.00266251  | count | 1 |
| LINC01268    | -0.0064955 | 0.8129266 | -0.008  | 0.994 | -0.00266251  | count | 1 |
| BRD8         | -0.0020213 | 0.1110794 | -0.0182 | 0.985 | -0.002636653 | count | 1 |
| FKBP7        | -0.0018232 | 0.086307  | -0.0211 | 0.983 | -0.002535149 | count | 1 |
| TOX4         | -0.0017855 | 0.0673851 | -0.0265 | 0.979 | -0.002503015 | count | 1 |
| ARHGEF7      | -0.0019425 | 0.1389579 | -0.014  | 0.989 | -0.002485732 | count | 1 |

|            |            |           |           |          |              |       |            |
|------------|------------|-----------|-----------|----------|--------------|-------|------------|
| GTF2H5     | -0.0016682 | 0.0714734 | -0.0233   | 0.981    | -0.002340651 | count | 1          |
| GSTM4      | -0.0017261 | 0.1311516 | -0.0132   | 0.989    | -0.002312378 | count | 1          |
| ACP1       | -0.0016171 | 0.0677867 | -0.0239   | 0.981    | -0.002266341 | count | 1          |
| HTR1B      | -0.0062156 | 0.6592536 | -0.0094   | 0.992    | -0.0021609   | count | 1          |
| RAB1B      | -0.0015502 | 0.1017317 | -0.0152   | 0.988    | -0.002132596 | count | 1          |
| PPP4R3A    | -0.0015794 | 0.1451788 | -0.0109   | 0.991    | -0.002079832 | count | 1          |
| CATSPERE   | -0.0184003 | 0.7369031 | -0.025    | 0.98     | -0.001957933 | count | 1          |
| KIFC2      | -0.0055619 | 0.5386174 | -0.0103   | 0.992    | -0.00193338  | count | 1          |
| ELK4       | -0.0014828 | 0.150035  | -0.0099   | 0.992    | -0.001919138 | count | 1          |
| PRKAR2A    | -0.0013356 | 0.1011849 | -0.0132   | 0.989    | -0.001817177 | count | 1          |
| MZF1       | -0.0015936 | 0.2509757 | -0.0063   | 0.995    | -0.0017957   | count | 1          |
| CCAR1      | -0.0013161 | 0.1330176 | -0.0099   | 0.992    | -0.001743808 | count | 1          |
| CCNT2-AS1  | -0.0047912 | 0.7527485 | -0.0064   | 0.995    | -0.001665215 | count | 1          |
| UTP15      | -0.0015702 | 0.3140391 | -0.005    | 0.996    | -0.001543963 | count | 1          |
| USP1       | -0.0010715 | 0.0931327 | -0.0115   | 0.991    | -0.00146925  | count | 1          |
| FUOM       | -0.0010387 | 0.1555643 | -0.0067   | 0.995    | -0.001396671 | count | 1          |
| PTPRO      | -0.0014522 | 0.7260317 | -0.002    | 0.998    | -0.001231793 | count | 1          |
| TRIQQ      | -0.0009348 | 0.1233842 | -0.0076   | 0.994    | -0.001229322 | count | 1          |
| FYTTD1     | -0.0008271 | 0.0850847 | -0.0097   | 0.992    | -0.001141802 | count | 1          |
| ECHDC3     | -0.0010081 | 0.3809911 | -0.0026   | 0.998    | -0.000991208 | count | 1          |
| NQO1       | -0.0007031 | 0.1034747 | -0.0068   | 0.995    | -0.000971925 | count | 1          |
| GPR176     | -0.0008186 | 0.2304492 | -0.0036   | 0.997    | -0.000969982 | count | 1          |
| SFXN4      | -0.0007682 | 0.1724759 | -0.0045   | 0.996    | -0.000918329 | count | 1          |
| HEBP1      | -0.0005117 | 0.0535077 | -0.0096   | 0.992    | -0.000727478 | count | 1          |
| KDM8       | -0.0019866 | 0.5919893 | -0.0034   | 0.997    | -0.000690064 | count | 1          |
| GALM       | -0.0004961 | 0.1574107 | -0.0032   | 0.997    | -0.000627713 | count | 1          |
| CHAMP1     | -0.0004445 | 0.1469677 | -0.003    | 0.998    | -0.000537025 | count | 1          |
| ANKRD50    | -0.0003717 | 0.1767694 | -0.0021   | 0.998    | -0.000434675 | count | 1          |
| TM2D3      | -0.0002581 | 0.082962  | -0.0031   | 0.998    | -0.000358104 | count | 1          |
| COQ8B      | -0.0002732 | 0.1794537 | -0.0015   | 0.999    | -0.000271696 | count | 1          |
| HSPA8      | -0.000188  | 0.0339528 | -0.0055   | 0.996    | -0.000270015 | count | 1          |
| FAM20B     | -0.0001932 | 0.1601948 | -0.0012   | 0.999    | -0.000239038 | count | 1          |
| RIT1       | -0.0001741 | 0.1467111 | -0.0012   | 0.999    | -0.000229103 | count | 1          |
| CLDN12     | -0.0001797 | 0.2347034 | -8.00E-04 | 0.999    | -0.000190549 | count | 1          |
| NXT2       | -0.0001246 | 0.2696831 | -5.00E-04 | 1        | -0.000136649 | count | 1          |
| TMED2      | -6.55E-05  | 0.0538976 | -0.0012   | 0.999    | -9.25E-05    | count | 1          |
| AC067852.2 | -9.51E-05  | 0.2522444 | -4.00E-04 | 1        | -8.99E-05    | count | 1          |
| NELFA      | -3.86E-05  | 0.1774752 | -2.00E-04 | 1        | -4.64E-05    | count | 1          |
| TDO2       | -2.09004   | 0.3324813 | -6.2862   | 3.64E-10 | -2.46E-07    | count | 8.61E-06   |
| AL031846.2 | -1.4491529 | 0.4594266 | -3.1543   | 0.0016   | -1.59E-07    | count | 1          |
| CCL11      | -2.9848824 | 1.5818428 | -1.887    | 0.0592   | -1.23E-07    | count | 1          |
| AC009570.1 | -2.8105322 | 0.8221073 | -3.4187   | 6.00E-04 | -1.16E-07    | count | 1          |
| PPP1R14C   | -2.7761606 | 1.3916415 | -1.9949   | 0.0461   | -1.15E-07    | count | 1          |
| SPINK2     | -0.9919213 | 0.2167123 | -4.5771   | 4.87E-06 | -1.01E-07    | count | 0.11258953 |
| RELL2      | -2.1412418 | 1.0694506 | -2.0022   | 0.0453   | -8.95E-08    | count | 1          |

|            |             |             |         |          |           |       |          |
|------------|-------------|-------------|---------|----------|-----------|-------|----------|
| BANK1      | -2.1235303  | 0.9110805   | -2.3308 | 0.0198   | -8.90E-08 | count | 1        |
| DLL4       | -1.9957372  | 0.9647027   | -2.0688 | 0.0386   | -8.32E-08 | count | 1        |
| IGHG2      | -1.8101086  | 0.2310031   | -7.8359 | 6.05E-15 | -7.52E-08 | count | 1.44E-10 |
| IFNG       | -1.7269117  | 1.002165    | -1.7232 | 0.0849   | -7.08E-08 | count | 1        |
| LINC02397  | -1.6840772  | 0.8034613   | -2.096  | 0.0361   | -6.88E-08 | count | 1        |
| ITGAX      | -18.1050315 | 1445.678125 | -0.0125 | 0.99     | -6.30E-08 | count | 1        |
| RUNX3      | -18.5346051 | 1614.693832 | -0.0115 | 0.991    | -6.28E-08 | count | 1        |
| TNFRSF10A  | -1.3638902  | 0.6152854   | -2.2167 | 0.0267   | -5.38E-08 | count | 1        |
| AC022144.1 | -1.3596971  | 0.8183939   | -1.6614 | 0.0967   | -5.36E-08 | count | 1        |
| LINC00265  | -1.2293615  | 0.660126    | -1.8623 | 0.0626   | -4.76E-08 | count | 1        |
| IRF8       | -1.178367   | 0.4049013   | -2.9103 | 0.0036   | -4.53E-08 | count | 1        |
| TPSB2      | -2.8278514  | 1.2914431   | -2.1897 | 0.0286   | -4.28E-08 | count | 1        |
| AC005899.5 | -2.3407128  | 1.3955082   | -1.6773 | 0.0936   | -3.61E-08 | count | 1        |
| SERPINA3   | -0.9581477  | 0.6062427   | -1.5805 | 0.114    | -3.55E-08 | count | 1        |
| AC104170.2 | -2.2888549  | 1.1722729   | -1.9525 | 0.051    | -3.52E-08 | count | 1        |
| FEZF1-AS1  | -0.9487642  | 0.9313588   | -1.0187 | 0.308    | -3.51E-08 | count | 1        |
| CRB2       | -2.2500773  | 1.3254832   | -1.6976 | 0.0897   | -3.47E-08 | count | 1        |
| JAML       | -2.1479668  | 0.9988419   | -2.1505 | 0.0316   | -3.32E-08 | count | 1        |
| AC092542.1 | -2.1479668  | 0.843086    | -2.5477 | 0.0109   | -3.32E-08 | count | 1        |
| AC025580.3 | -0.9004349  | 0.7100416   | -1.2681 | 0.205    | -3.30E-08 | count | 1        |
| AC004231.1 | -2.1347042  | 1.0969249   | -1.9461 | 0.0517   | -3.28E-08 | count | 1        |
| TPSAB1     | -2.1347042  | 0.8129831   | -2.6258 | 0.0087   | -3.28E-08 | count | 1        |
| AC119396.2 | -2.1347042  | 1.2462411   | -1.7129 | 0.0868   | -3.28E-08 | count | 1        |
| C20orf202  | -2.0305427  | 0.7590207   | -2.6752 | 0.0075   | -3.13E-08 | count | 1        |
| POU3F3     | -2.0202002  | 1.0505327   | -1.923  | 0.0546   | -3.11E-08 | count | 1        |
| AP001330.5 | -2.0202002  | 1.0061432   | -2.0079 | 0.0447   | -3.10E-08 | count | 1        |
| AC005288.1 | -2.0202002  | 1.1492583   | -1.7578 | 0.0789   | -3.10E-08 | count | 1        |
| PLCB2      | -1.9601263  | 0.9492291   | -2.065  | 0.039    | -3.01E-08 | count | 1        |
| CDH7       | -1.9523827  | 0.8312332   | -2.3488 | 0.0189   | -2.98E-08 | count | 1        |
| AC124068.2 | -1.9523827  | 1.1755413   | -1.6608 | 0.0968   | -2.98E-08 | count | 1        |
| EVA1A      | -1.9270331  | 0.5382989   | -3.5799 | 3.00E-04 | -2.95E-08 | count | 1        |
| SH3RF2     | -1.8864505  | 0.8559163   | -2.204  | 0.0276   | -2.89E-08 | count | 1        |
| C11orf45   | -1.8094764  | 1.0804946   | -1.6747 | 0.0941   | -2.75E-08 | count | 1        |
| PITRM1-AS1 | -1.8094764  | 1.364634    | -1.326  | 0.185    | -2.75E-08 | count | 1        |
| SFXN2      | -0.7375616  | 0.4949434   | -1.4902 | 0.136    | -2.62E-08 | count | 1        |
| AL451074.2 | -1.7244152  | 0.8005191   | -2.1541 | 0.0313   | -2.61E-08 | count | 1        |
| PICSAR     | -1.7244152  | 0.8005191   | -2.1541 | 0.0313   | -2.61E-08 | count | 1        |
| H3F3C      | -1.7244152  | 0.8005191   | -2.1541 | 0.0313   | -2.61E-08 | count | 1        |
| CATSPER1   | -1.7244152  | 0.8005191   | -2.1541 | 0.0313   | -2.61E-08 | count | 1        |
| SLC9C1     | -1.7292391  | 1.1022246   | -1.5689 | 0.117    | -2.61E-08 | count | 1        |
| AC092140.2 | -1.7292391  | 1.1022246   | -1.5689 | 0.117    | -2.61E-08 | count | 1        |
| AC037487.1 | -1.7292391  | 1.1022246   | -1.5689 | 0.117    | -2.61E-08 | count | 1        |
| AC021851.1 | -1.6343281  | 1.0389215   | -1.5731 | 0.116    | -2.45E-08 | count | 1        |
| CSNK2A3    | -1.6343281  | 1.0389215   | -1.5731 | 0.116    | -2.45E-08 | count | 1        |
| AC013472.3 | -1.6343281  | 1.0389215   | -1.5731 | 0.116    | -2.45E-08 | count | 1        |

|            |             |             |         |        |           |       |   |
|------------|-------------|-------------|---------|--------|-----------|-------|---|
| AL137784.2 | -1.6343281  | 1.0389215   | -1.5731 | 0.116  | -2.45E-08 | count | 1 |
| AC083805.3 | -1.6343281  | 0.8538688   | -1.914  | 0.0557 | -2.45E-08 | count | 1 |
| AL512343.2 | -1.6343281  | 0.8538688   | -1.914  | 0.0557 | -2.45E-08 | count | 1 |
| LINC02145  | -1.6343281  | 1.1033479   | -1.4812 | 0.139  | -2.45E-08 | count | 1 |
| AL162586.1 | -1.5957077  | 0.8003929   | -1.9937 | 0.0463 | -2.37E-08 | count | 1 |
| AC133919.1 | -1.5876611  | 0.7267621   | -2.1846 | 0.029  | -2.37E-08 | count | 1 |
| CD300E     | -18.2085596 | 1095.079068 | -0.0166 | 0.987  | -2.34E-08 | count | 1 |
| VAV1       | -18.5361275 | 1636.733561 | -0.0113 | 0.991  | -2.34E-08 | count | 1 |
| ZNF831     | -18.2090949 | 1705.929494 | -0.0107 | 0.991  | -2.33E-08 | count | 1 |
| AC135457.1 | -18.2090949 | 1705.929494 | -0.0107 | 0.991  | -2.33E-08 | count | 1 |
| ARMC4      | -18.4090335 | 1093.165393 | -0.0168 | 0.987  | -2.33E-08 | count | 1 |
| ASIC2      | -18.4096386 | 1573.369689 | -0.0117 | 0.991  | -2.33E-08 | count | 1 |
| AL390957.1 | -18.4100385 | 1938.234467 | -0.0095 | 0.992  | -2.33E-08 | count | 1 |
| AC073389.3 | -18.5749681 | 1367.79808  | -0.0136 | 0.989  | -2.33E-08 | count | 1 |
| CDCA3      | -18.7846656 | 2150.508313 | -0.0087 | 0.993  | -2.33E-08 | count | 1 |
| GCKR       | -18.8398798 | 1896.953644 | -0.0099 | 0.992  | -2.32E-08 | count | 1 |
| INPP5J     | -18.8398798 | 1896.953644 | -0.0099 | 0.992  | -2.32E-08 | count | 1 |
| CST1       | -18.863377  | 1435.968965 | -0.0131 | 0.99   | -2.31E-08 | count | 1 |
| SOX3       | -18.4218324 | 881.3165526 | -0.0209 | 0.983  | -2.31E-08 | count | 1 |
| MMP13      | -19.4788083 | 1169.693011 | -0.0167 | 0.987  | -2.31E-08 | count | 1 |
| BTBD16     | -18.2406357 | 1631.602462 | -0.0112 | 0.991  | -2.31E-08 | count | 1 |
| DNAH17     | -18.2406357 | 1631.602462 | -0.0112 | 0.991  | -2.31E-08 | count | 1 |
| TRG-AS1    | -18.2406357 | 1631.602462 | -0.0112 | 0.991  | -2.31E-08 | count | 1 |
| AL137145.1 | -18.2413737 | 1980.045991 | -0.0092 | 0.993  | -2.31E-08 | count | 1 |
| IGHV4-59   | -18.2413737 | 1980.045991 | -0.0092 | 0.993  | -2.31E-08 | count | 1 |
| AC020741.1 | -18.2413737 | 1980.045991 | -0.0092 | 0.993  | -2.31E-08 | count | 1 |
| GCM1       | -18.2413737 | 1980.045991 | -0.0092 | 0.993  | -2.31E-08 | count | 1 |
| AC068831.1 | -18.2413737 | 1980.045991 | -0.0092 | 0.993  | -2.31E-08 | count | 1 |
| SLIT1      | -18.2413737 | 1980.045991 | -0.0092 | 0.993  | -2.31E-08 | count | 1 |
| DAPP1      | -18.2413737 | 1980.045991 | -0.0092 | 0.993  | -2.31E-08 | count | 1 |
| CXCR6      | -18.4241098 | 1843.16645  | -0.01   | 0.992  | -2.31E-08 | count | 1 |
| AC009148.1 | -18.4241098 | 1843.16645  | -0.01   | 0.992  | -2.31E-08 | count | 1 |
| P2RY13     | -18.4241098 | 1843.16645  | -0.01   | 0.992  | -2.31E-08 | count | 1 |
| LCK        | -18.5786107 | 1738.683578 | -0.0107 | 0.991  | -2.31E-08 | count | 1 |
| AC009119.2 | -18.5786107 | 1738.683578 | -0.0107 | 0.991  | -2.31E-08 | count | 1 |
| CHRM3-AS2  | -18.4248368 | 2170.270033 | -0.0085 | 0.993  | -2.30E-08 | count | 1 |
| AC108134.3 | -18.4248368 | 2170.270033 | -0.0085 | 0.993  | -2.30E-08 | count | 1 |
| AC009137.1 | -18.4248368 | 2170.270033 | -0.0085 | 0.993  | -2.30E-08 | count | 1 |
| AC097534.1 | -18.4248368 | 2170.270033 | -0.0085 | 0.993  | -2.30E-08 | count | 1 |
| AC007938.3 | -18.4248368 | 2170.270033 | -0.0085 | 0.993  | -2.30E-08 | count | 1 |
| AL590133.1 | -18.5799874 | 2345.331911 | -0.0079 | 0.994  | -2.30E-08 | count | 1 |
| AC092757.3 | -18.5799874 | 2345.331911 | -0.0079 | 0.994  | -2.30E-08 | count | 1 |
| CASR       | -18.5799874 | 2345.331911 | -0.0079 | 0.994  | -2.30E-08 | count | 1 |
| TAS2R13    | -18.714367  | 2508.328851 | -0.0075 | 0.994  | -2.30E-08 | count | 1 |
| VSIG4      | -19.0328975 | 1944.79818  | -0.0098 | 0.992  | -2.30E-08 | count | 1 |

|            |             |             |         |        |           |       |   |
|------------|-------------|-------------|---------|--------|-----------|-------|---|
| JAKMIP1    | -18.8328387 | 2661.400675 | -0.0071 | 0.994  | -2.30E-08 | count | 1 |
| IGKV1-27   | -19.0343868 | 2943.580294 | -0.0065 | 0.995  | -2.29E-08 | count | 1 |
| AL109811.2 | -1.5399464  | 0.9867587   | -1.5606 | 0.119  | -2.29E-08 | count | 1 |
| SELP       | -1.5399464  | 0.9867587   | -1.5606 | 0.119  | -2.29E-08 | count | 1 |
| ADAM11     | -1.5399464  | 0.9153425   | -1.6824 | 0.0926 | -2.29E-08 | count | 1 |
| AC069200.1 | -1.5399464  | 1.087675    | -1.4158 | 0.157  | -2.29E-08 | count | 1 |
| AC126283.1 | -1.5399464  | 1.2655929   | -1.2168 | 0.224  | -2.29E-08 | count | 1 |
| ERC2       | -1.5399464  | 1.2655929   | -1.2168 | 0.224  | -2.29E-08 | count | 1 |
| DPYSL4     | -1.5285774  | 0.7688238   | -1.9882 | 0.0469 | -2.27E-08 | count | 1 |
| LAIR1      | -1.441557   | 0.8290877   | -1.7387 | 0.0822 | -2.11E-08 | count | 1 |
| AC008280.3 | -0.5867672  | 0.7968702   | -0.7363 | 0.462  | -2.02E-08 | count | 1 |
| MYLK4      | -1.323774   | 0.8801098   | -1.5041 | 0.133  | -1.91E-08 | count | 1 |
| DNAJC5G    | -1.3152591  | 0.7798689   | -1.6865 | 0.0918 | -1.90E-08 | count | 1 |
| GZMM       | -1.2870266  | 1.2405674   | -1.0374 | 0.3    | -1.85E-08 | count | 1 |
| AC008040.1 | -1.2870266  | 0.8816535   | -1.4598 | 0.144  | -1.85E-08 | count | 1 |
| AL359555.2 | -1.2870266  | 0.8816535   | -1.4598 | 0.144  | -1.85E-08 | count | 1 |
| AC011352.1 | -1.2870266  | 0.8816535   | -1.4598 | 0.144  | -1.85E-08 | count | 1 |
| AL021807.1 | -1.2870266  | 0.8816535   | -1.4598 | 0.144  | -1.85E-08 | count | 1 |
| DEGS2      | -1.2870266  | 0.8816535   | -1.4598 | 0.144  | -1.85E-08 | count | 1 |
| MIR137HG   | -1.2870266  | 0.8816535   | -1.4598 | 0.144  | -1.85E-08 | count | 1 |
| ACOXL      | -1.2870266  | 1.308674    | -0.9835 | 0.325  | -1.85E-08 | count | 1 |
| ZFX4-AS1   | -1.2870266  | 1.308674    | -0.9835 | 0.325  | -1.85E-08 | count | 1 |
| LINC02454  | -1.2592355  | 0.8977282   | -1.4027 | 0.161  | -1.80E-08 | count | 1 |
| CCL18      | -0.5257874  | 0.626098    | -0.8398 | 0.401  | -1.78E-08 | count | 1 |
| AC004520.1 | -1.226038   | 0.7109192   | -1.7246 | 0.0847 | -1.75E-08 | count | 1 |
| AC084880.4 | -1.226038   | 0.7420341   | -1.6523 | 0.0986 | -1.75E-08 | count | 1 |
| AL359715.3 | -1.1902426  | 0.7565273   | -1.5733 | 0.116  | -1.68E-08 | count | 1 |
| AC098828.2 | -1.163766   | 1.0014914   | -1.162  | 0.245  | -1.65E-08 | count | 1 |
| AL592166.1 | -1.163766   | 1.0014914   | -1.162  | 0.245  | -1.65E-08 | count | 1 |
| AC073316.3 | -1.163766   | 1.0014914   | -1.162  | 0.245  | -1.65E-08 | count | 1 |
| AP005899.1 | -1.163766   | 0.9862304   | -1.18   | 0.238  | -1.65E-08 | count | 1 |
| AC009118.2 | -1.163766   | 1.0014914   | -1.162  | 0.245  | -1.65E-08 | count | 1 |
| AL138787.2 | -1.163766   | 0.9862304   | -1.18   | 0.238  | -1.65E-08 | count | 1 |
| AL022323.3 | -1.163766   | 1.0014914   | -1.162  | 0.245  | -1.65E-08 | count | 1 |
| FP565260.6 | -1.163766   | 1.0014914   | -1.162  | 0.245  | -1.65E-08 | count | 1 |
| GIPC3      | -1.163766   | 1.0014914   | -1.162  | 0.245  | -1.65E-08 | count | 1 |
| LINC02576  | -1.163766   | 0.9862304   | -1.18   | 0.238  | -1.65E-08 | count | 1 |
| PCSK4      | -1.163766   | 0.9862304   | -1.18   | 0.238  | -1.65E-08 | count | 1 |
| ARHGAP30   | -1.163766   | 1.0014914   | -1.162  | 0.245  | -1.65E-08 | count | 1 |
| AC125611.4 | -1.163766   | 0.9862304   | -1.18   | 0.238  | -1.65E-08 | count | 1 |
| SLC3A1     | -1.163766   | 1.0014914   | -1.162  | 0.245  | -1.65E-08 | count | 1 |
| AP000550.1 | -1.163766   | 1.0014914   | -1.162  | 0.245  | -1.65E-08 | count | 1 |
| LINC02362  | -1.163766   | 1.0014914   | -1.162  | 0.245  | -1.65E-08 | count | 1 |
| AC093525.4 | -1.163766   | 1.0014914   | -1.162  | 0.245  | -1.65E-08 | count | 1 |
| AL589843.1 | -1.163766   | 0.9862304   | -1.18   | 0.238  | -1.65E-08 | count | 1 |

|            |             |             |         |        |           |       |   |
|------------|-------------|-------------|---------|--------|-----------|-------|---|
| GHRHR      | -1.163766   | 0.9862304   | -1.18   | 0.238  | -1.65E-08 | count | 1 |
| RASAL3     | -1.163766   | 1.167921    | -0.9964 | 0.319  | -1.64E-08 | count | 1 |
| RGPD8      | -1.163766   | 1.167921    | -0.9964 | 0.319  | -1.64E-08 | count | 1 |
| AL133351.1 | -1.163766   | 1.167921    | -0.9964 | 0.319  | -1.64E-08 | count | 1 |
| ADH6       | -1.163766   | 1.167921    | -0.9964 | 0.319  | -1.64E-08 | count | 1 |
| ZAR1L      | -1.163766   | 1.167921    | -0.9964 | 0.319  | -1.64E-08 | count | 1 |
| AC025257.1 | -1.163766   | 1.167921    | -0.9964 | 0.319  | -1.64E-08 | count | 1 |
| HOXB7      | -1.163766   | 0.7023469   | -1.657  | 0.0976 | -1.64E-08 | count | 1 |
| U2AF1      | -0.480907   | 0.5734295   | -0.8387 | 0.402  | -1.61E-08 | count | 1 |
| SPNS3      | -1.1003822  | 1.017479    | -1.0815 | 0.28   | -1.54E-08 | count | 1 |
| TNFSF8     | -1.0457622  | 0.6931353   | -1.5087 | 0.131  | -1.45E-08 | count | 1 |
| VAX2       | -1.0457622  | 0.9763343   | -1.0711 | 0.284  | -1.45E-08 | count | 1 |
| PSMD6-AS2  | -1.0360919  | 0.8536597   | -1.2137 | 0.225  | -1.43E-08 | count | 1 |
| PAPOLB     | -1.0360919  | 0.6522547   | -1.5885 | 0.112  | -1.43E-08 | count | 1 |
| RHCE       | -0.4162561  | 0.553042    | -0.7527 | 0.452  | -1.38E-08 | count | 1 |
| FAM182B    | -0.4039857  | 0.8134582   | -0.4966 | 0.619  | -1.33E-08 | count | 1 |
| TARID      | -0.9729818  | 0.8315367   | -1.1701 | 0.242  | -1.33E-08 | count | 1 |
| HS3ST3B1   | -0.948045   | 0.7501739   | -1.2638 | 0.206  | -1.29E-08 | count | 1 |
| IGHM       | -0.9346399  | 0.3154293   | -2.9631 | 0.0031 | -1.27E-08 | count | 1 |
| PRPH2      | -0.3733942  | 0.7420614   | -0.5032 | 0.615  | -1.22E-08 | count | 1 |
| RNFT1-DT   | -0.8989193  | 0.8403485   | -1.0697 | 0.285  | -1.21E-08 | count | 1 |
| MS4A2      | -0.8537704  | 0.9403898   | -0.9079 | 0.364  | -1.14E-08 | count | 1 |
| AC017071.1 | -0.8537704  | 0.7835087   | -1.0897 | 0.276  | -1.14E-08 | count | 1 |
| AL359513.1 | -0.8239293  | 0.7661942   | -1.0754 | 0.282  | -1.10E-08 | count | 1 |
| AC009318.3 | -0.8239293  | 0.7661942   | -1.0754 | 0.282  | -1.10E-08 | count | 1 |
| AL512770.1 | -0.8239293  | 0.7661942   | -1.0754 | 0.282  | -1.10E-08 | count | 1 |
| AC012640.4 | -0.7484099  | 0.6000802   | -1.2472 | 0.212  | -9.80E-09 | count | 1 |
| AC090515.2 | -0.7484099  | 0.6000802   | -1.2472 | 0.212  | -9.80E-09 | count | 1 |
| LINC01970  | -0.7484099  | 0.8193575   | -0.9134 | 0.361  | -9.80E-09 | count | 1 |
| LRRC56     | -0.7484099  | 0.6782772   | -1.1034 | 0.27   | -9.80E-09 | count | 1 |
| AL008729.2 | -0.7484099  | 0.6782772   | -1.1034 | 0.27   | -9.80E-09 | count | 1 |
| IL10RA     | -0.2902166  | 0.4484979   | -0.6471 | 0.518  | -9.30E-09 | count | 1 |
| AL117381.1 | -18.5959179 | 1793.901735 | -0.0104 | 0.992  | -8.65E-09 | count | 1 |
| AC133555.3 | -18.5959179 | 1793.901735 | -0.0104 | 0.992  | -8.65E-09 | count | 1 |
| ATP6V1B1   | -18.5959179 | 1793.901735 | -0.0104 | 0.992  | -8.65E-09 | count | 1 |
| AC010271.2 | -18.5959179 | 1793.901735 | -0.0104 | 0.992  | -8.65E-09 | count | 1 |
| LINC02419  | -18.5959179 | 1793.901735 | -0.0104 | 0.992  | -8.65E-09 | count | 1 |
| AC116447.1 | -18.5959179 | 1793.901735 | -0.0104 | 0.992  | -8.65E-09 | count | 1 |
| PCDH12     | -18.5959179 | 1793.901735 | -0.0104 | 0.992  | -8.65E-09 | count | 1 |
| ZFP57      | -18.5959179 | 1793.901735 | -0.0104 | 0.992  | -8.65E-09 | count | 1 |
| XCL1       | -18.5959179 | 1793.901735 | -0.0104 | 0.992  | -8.65E-09 | count | 1 |
| IGKV3-20   | -18.5959179 | 1793.901735 | -0.0104 | 0.992  | -8.65E-09 | count | 1 |
| AC135178.2 | -18.5959179 | 1793.901735 | -0.0104 | 0.992  | -8.65E-09 | count | 1 |
| OR51E2     | -18.5959179 | 1793.901735 | -0.0104 | 0.992  | -8.65E-09 | count | 1 |
| BAIAP2L1   | -18.5959179 | 1793.901735 | -0.0104 | 0.992  | -8.65E-09 | count | 1 |



|            |             |             |         |       |           |       |   |
|------------|-------------|-------------|---------|-------|-----------|-------|---|
| CCDC192    | -18.5959179 | 1793.901735 | -0.0104 | 0.992 | -8.65E-09 | count | 1 |
| AC099669.1 | -18.5959179 | 1793.901735 | -0.0104 | 0.992 | -8.65E-09 | count | 1 |
| ZNF556     | -18.5959179 | 1793.901735 | -0.0104 | 0.992 | -8.65E-09 | count | 1 |
| AC010542.5 | -18.5959179 | 1793.901735 | -0.0104 | 0.992 | -8.65E-09 | count | 1 |
| S100A7     | -18.5959179 | 1793.901735 | -0.0104 | 0.992 | -8.65E-09 | count | 1 |
| SALL1      | -18.5959179 | 1793.901735 | -0.0104 | 0.992 | -8.65E-09 | count | 1 |
| CDKL4      | -18.5959179 | 1793.901735 | -0.0104 | 0.992 | -8.65E-09 | count | 1 |
| Z84484.1   | -18.5959179 | 1793.901735 | -0.0104 | 0.992 | -8.65E-09 | count | 1 |
| VCAN-AS1   | -19.0330879 | 1768.661923 | -0.0108 | 0.991 | -8.64E-09 | count | 1 |
| MYO1G      | -19.0338739 | 2010.586316 | -0.0095 | 0.992 | -8.63E-09 | count | 1 |
| CD8A       | -18.9530351 | 1805.813307 | -0.0105 | 0.992 | -8.62E-09 | count | 1 |
| OEPE       | -18.9530351 | 1805.813307 | -0.0105 | 0.992 | -8.62E-09 | count | 1 |
| TMEM169    | -18.9530351 | 1805.813307 | -0.0105 | 0.992 | -8.62E-09 | count | 1 |
| AC092614.1 | -18.9530351 | 1805.813307 | -0.0105 | 0.992 | -8.62E-09 | count | 1 |
| CALHM6     | -18.9530351 | 1805.813307 | -0.0105 | 0.992 | -8.62E-09 | count | 1 |
| AC107871.1 | -18.9530351 | 1805.813307 | -0.0105 | 0.992 | -8.62E-09 | count | 1 |
| AC114811.2 | -18.9530351 | 1805.813307 | -0.0105 | 0.992 | -8.62E-09 | count | 1 |
| HPGDS      | -19.2900704 | 1792.868627 | -0.0108 | 0.991 | -8.62E-09 | count | 1 |
| AC099066.2 | -19.3303245 | 1751.27951  | -0.011  | 0.991 | -8.62E-09 | count | 1 |
| LINC00691  | -18.953199  | 2362.963646 | -0.008  | 0.994 | -8.62E-09 | count | 1 |
| HCG22      | -19.0054086 | 886.7591823 | -0.0214 | 0.983 | -8.59E-09 | count | 1 |
| MS4A1      | -19.0064687 | 1147.979183 | -0.0166 | 0.987 | -8.58E-09 | count | 1 |
| LGALS2     | -19.0064687 | 1147.979183 | -0.0166 | 0.987 | -8.58E-09 | count | 1 |
| LINC02541  | -19.0064687 | 1147.979183 | -0.0166 | 0.987 | -8.58E-09 | count | 1 |
| IGHV3-49   | -19.0064687 | 1147.979183 | -0.0166 | 0.987 | -8.58E-09 | count | 1 |
| AC074327.1 | -19.0064687 | 1147.979183 | -0.0166 | 0.987 | -8.58E-09 | count | 1 |
| GJA3       | -19.2944903 | 885.7166195 | -0.0218 | 0.983 | -8.58E-09 | count | 1 |
| DMBX1      | -19.00795   | 1543.613871 | -0.0123 | 0.99  | -8.57E-09 | count | 1 |
| CIDEA      | -19.2964188 | 1258.505539 | -0.0153 | 0.988 | -8.57E-09 | count | 1 |
| AC016722.2 | -19.2983945 | 1784.875363 | -0.0108 | 0.991 | -8.56E-09 | count | 1 |
| TEX45      | -19.2983945 | 1784.875363 | -0.0108 | 0.991 | -8.56E-09 | count | 1 |
| AC026347.1 | -18.320579  | 1455.558747 | -0.0126 | 0.99  | -8.54E-09 | count | 1 |
| AOAH       | -18.320579  | 1455.558747 | -0.0126 | 0.99  | -8.54E-09 | count | 1 |
| C10orf105  | -18.320579  | 1455.558747 | -0.0126 | 0.99  | -8.54E-09 | count | 1 |
| AC121338.2 | -18.320579  | 1455.558747 | -0.0126 | 0.99  | -8.54E-09 | count | 1 |
| CD33       | -18.320579  | 1455.558747 | -0.0126 | 0.99  | -8.54E-09 | count | 1 |
| AC002470.1 | -18.320579  | 1455.558747 | -0.0126 | 0.99  | -8.54E-09 | count | 1 |
| ALX3       | -18.320579  | 1455.558747 | -0.0126 | 0.99  | -8.54E-09 | count | 1 |
| AC012442.1 | -18.320579  | 1455.558747 | -0.0126 | 0.99  | -8.54E-09 | count | 1 |
| AC078883.1 | -18.320579  | 1455.558747 | -0.0126 | 0.99  | -8.54E-09 | count | 1 |
| AC063944.1 | -18.320579  | 1455.558747 | -0.0126 | 0.99  | -8.54E-09 | count | 1 |
| TRGC1      | -18.320579  | 1455.558747 | -0.0126 | 0.99  | -8.54E-09 | count | 1 |
| COBL       | -18.320579  | 1455.558747 | -0.0126 | 0.99  | -8.54E-09 | count | 1 |
| PRNCR1     | -18.320579  | 1455.558747 | -0.0126 | 0.99  | -8.54E-09 | count | 1 |
| CRTAM      | -18.320579  | 1455.558747 | -0.0126 | 0.99  | -8.54E-09 | count | 1 |

|             |             |             |         |       |           |       |   |
|-------------|-------------|-------------|---------|-------|-----------|-------|---|
| GRAMD1B     | -18.320579  | 1455.558747 | -0.0126 | 0.99  | -8.54E-09 | count | 1 |
| SNX22       | -18.320579  | 1455.558747 | -0.0126 | 0.99  | -8.54E-09 | count | 1 |
| ASGR2       | -18.320579  | 1455.558747 | -0.0126 | 0.99  | -8.54E-09 | count | 1 |
| AC005695.3  | -18.320579  | 1455.558747 | -0.0126 | 0.99  | -8.54E-09 | count | 1 |
| GDF5        | -18.320579  | 1455.558747 | -0.0126 | 0.99  | -8.54E-09 | count | 1 |
| CATSPERD    | -18.320579  | 1455.558747 | -0.0126 | 0.99  | -8.54E-09 | count | 1 |
| AP001059.3  | -18.320579  | 1455.558747 | -0.0126 | 0.99  | -8.54E-09 | count | 1 |
| IGSF21      | -18.320579  | 1455.558747 | -0.0126 | 0.99  | -8.54E-09 | count | 1 |
| ACVR1C      | -18.320579  | 1455.558747 | -0.0126 | 0.99  | -8.54E-09 | count | 1 |
| ST3GAL6-AS1 | -18.320579  | 1455.558747 | -0.0126 | 0.99  | -8.54E-09 | count | 1 |
| TNF         | -18.320579  | 1455.558747 | -0.0126 | 0.99  | -8.54E-09 | count | 1 |
| GJB7        | -18.320579  | 1455.558747 | -0.0126 | 0.99  | -8.54E-09 | count | 1 |
| ARL11       | -18.320579  | 1455.558747 | -0.0126 | 0.99  | -8.54E-09 | count | 1 |
| LINC00652   | -18.320579  | 1455.558747 | -0.0126 | 0.99  | -8.54E-09 | count | 1 |
| DNAJB7      | -18.320579  | 1455.558747 | -0.0126 | 0.99  | -8.54E-09 | count | 1 |
| AC036214.1  | -19.5238571 | 1997.866581 | -0.0098 | 0.992 | -8.54E-09 | count | 1 |
| LINC00840   | -19.5238571 | 1997.866581 | -0.0098 | 0.992 | -8.54E-09 | count | 1 |
| AC098484.3  | -18.321061  | 2060.531032 | -0.0089 | 0.993 | -8.54E-09 | count | 1 |
| AP001267.1  | -18.321061  | 2060.531032 | -0.0089 | 0.993 | -8.54E-09 | count | 1 |
| AL022310.1  | -18.321061  | 2060.531032 | -0.0089 | 0.993 | -8.54E-09 | count | 1 |
| PROM2       | -18.321061  | 2060.531032 | -0.0089 | 0.993 | -8.54E-09 | count | 1 |
| GRK7        | -18.321061  | 2060.531032 | -0.0089 | 0.993 | -8.54E-09 | count | 1 |
| AC007370.1  | -18.321061  | 2060.531032 | -0.0089 | 0.993 | -8.54E-09 | count | 1 |
| AC016687.2  | -18.321061  | 2060.531032 | -0.0089 | 0.993 | -8.54E-09 | count | 1 |
| UPK3BL1     | -18.321061  | 2060.531032 | -0.0089 | 0.993 | -8.54E-09 | count | 1 |
| AC005586.1  | -18.321061  | 2060.531032 | -0.0089 | 0.993 | -8.54E-09 | count | 1 |
| FOXH1       | -18.321061  | 2060.531032 | -0.0089 | 0.993 | -8.54E-09 | count | 1 |
| AL935212.1  | -18.321061  | 2060.531032 | -0.0089 | 0.993 | -8.54E-09 | count | 1 |
| LMO1        | -18.321061  | 2060.531032 | -0.0089 | 0.993 | -8.54E-09 | count | 1 |
| PHOX2A      | -18.321061  | 2060.531032 | -0.0089 | 0.993 | -8.54E-09 | count | 1 |
| IGHV4-61    | -18.321061  | 2060.531032 | -0.0089 | 0.993 | -8.54E-09 | count | 1 |
| NPIP3       | -18.321061  | 2060.531032 | -0.0089 | 0.993 | -8.54E-09 | count | 1 |
| RASGRP4     | -18.321061  | 2060.531032 | -0.0089 | 0.993 | -8.54E-09 | count | 1 |
| BACH1-AS1   | -18.321061  | 2060.531032 | -0.0089 | 0.993 | -8.54E-09 | count | 1 |
| PTAFR       | -18.321061  | 2060.531032 | -0.0089 | 0.993 | -8.54E-09 | count | 1 |
| AL035409.1  | -18.321061  | 2060.531032 | -0.0089 | 0.993 | -8.54E-09 | count | 1 |
| LINC02022   | -18.321061  | 2060.531032 | -0.0089 | 0.993 | -8.54E-09 | count | 1 |
| AC069213.1  | -18.321061  | 2060.531032 | -0.0089 | 0.993 | -8.54E-09 | count | 1 |
| AC096564.2  | -18.321061  | 2060.531032 | -0.0089 | 0.993 | -8.54E-09 | count | 1 |
| ZCCHC23     | -18.321061  | 2060.531032 | -0.0089 | 0.993 | -8.54E-09 | count | 1 |
| AL355297.3  | -18.321061  | 2060.531032 | -0.0089 | 0.993 | -8.54E-09 | count | 1 |
| AC004862.1  | -18.321061  | 2060.531032 | -0.0089 | 0.993 | -8.54E-09 | count | 1 |
| TREH        | -18.321061  | 2060.531032 | -0.0089 | 0.993 | -8.54E-09 | count | 1 |
| AL606489.1  | -18.321061  | 2060.531032 | -0.0089 | 0.993 | -8.54E-09 | count | 1 |
| AL355472.3  | -18.321061  | 2060.531032 | -0.0089 | 0.993 | -8.54E-09 | count | 1 |

|            |             |             |         |        |           |       |   |
|------------|-------------|-------------|---------|--------|-----------|-------|---|
| YIPF7      | -18.321061  | 2060.531032 | -0.0089 | 0.993  | -8.54E-09 | count | 1 |
| RAB3C      | -18.321061  | 2060.531032 | -0.0089 | 0.993  | -8.54E-09 | count | 1 |
| MYOT       | -18.321061  | 2060.531032 | -0.0089 | 0.993  | -8.54E-09 | count | 1 |
| FGD2       | -18.321061  | 2060.531032 | -0.0089 | 0.993  | -8.54E-09 | count | 1 |
| PCAT5      | -18.321061  | 2060.531032 | -0.0089 | 0.993  | -8.54E-09 | count | 1 |
| AL356124.1 | -18.321061  | 2060.531032 | -0.0089 | 0.993  | -8.54E-09 | count | 1 |
| ECT2L      | -18.321061  | 2060.531032 | -0.0089 | 0.993  | -8.54E-09 | count | 1 |
| AL138895.1 | -18.321061  | 2060.531032 | -0.0089 | 0.993  | -8.54E-09 | count | 1 |
| AL138921.2 | -18.321061  | 2060.531032 | -0.0089 | 0.993  | -8.54E-09 | count | 1 |
| HCAR2      | -18.321061  | 2060.531032 | -0.0089 | 0.993  | -8.54E-09 | count | 1 |
| AC004585.1 | -18.321061  | 2060.531032 | -0.0089 | 0.993  | -8.54E-09 | count | 1 |
| ARHGAP9    | -18.7268099 | 1455.009215 | -0.0129 | 0.99   | -8.53E-09 | count | 1 |
| MYLK3      | -18.7268099 | 1455.009215 | -0.0129 | 0.99   | -8.53E-09 | count | 1 |
| LCN12      | -18.7268099 | 1455.009215 | -0.0129 | 0.99   | -8.53E-09 | count | 1 |
| KCNMA1-AS1 | -18.7268099 | 1455.009215 | -0.0129 | 0.99   | -8.53E-09 | count | 1 |
| TNFAIP8L2  | -18.7268099 | 1455.009215 | -0.0129 | 0.99   | -8.53E-09 | count | 1 |
| IKZF1      | -18.7268099 | 1455.009215 | -0.0129 | 0.99   | -8.53E-09 | count | 1 |
| P2RX1      | -18.7268099 | 1455.009215 | -0.0129 | 0.99   | -8.53E-09 | count | 1 |
| AC097652.1 | -18.7279145 | 2525.377262 | -0.0074 | 0.994  | -8.52E-09 | count | 1 |
| JSRP1      | -18.7279145 | 2525.377262 | -0.0074 | 0.994  | -8.52E-09 | count | 1 |
| LINC02535  | -18.7279145 | 2525.377262 | -0.0074 | 0.994  | -8.52E-09 | count | 1 |
| DBH-AS1    | -18.7279145 | 2525.377262 | -0.0074 | 0.994  | -8.52E-09 | count | 1 |
| PLD4       | -18.7279145 | 2525.377262 | -0.0074 | 0.994  | -8.52E-09 | count | 1 |
| AC135050.3 | -18.7279145 | 2525.377262 | -0.0074 | 0.994  | -8.52E-09 | count | 1 |
| AC091588.2 | -18.7279145 | 2525.377262 | -0.0074 | 0.994  | -8.52E-09 | count | 1 |
| GPR42      | -18.7279145 | 2525.377262 | -0.0074 | 0.994  | -8.52E-09 | count | 1 |
| ADORA2A    | -18.7279145 | 2525.377262 | -0.0074 | 0.994  | -8.52E-09 | count | 1 |
| KLHL40     | -18.7279145 | 2525.377262 | -0.0074 | 0.994  | -8.52E-09 | count | 1 |
| GNA15      | -19.0156278 | 1783.479694 | -0.0107 | 0.991  | -8.52E-09 | count | 1 |
| SLC8A1-AS1 | -19.0156278 | 1783.479694 | -0.0107 | 0.991  | -8.52E-09 | count | 1 |
| AC067747.1 | -19.2393718 | 1722.335877 | -0.0112 | 0.991  | -8.51E-09 | count | 1 |
| MUM1L1     | -19.0162411 | 2305.036456 | -0.0082 | 0.993  | -8.51E-09 | count | 1 |
| AC006146.1 | -19.0169584 | 2918.04075  | -0.0065 | 0.995  | -8.50E-09 | count | 1 |
| AC018682.1 | -19.0169584 | 2918.04075  | -0.0065 | 0.995  | -8.50E-09 | count | 1 |
| AC084819.1 | -19.0169584 | 2918.04075  | -0.0065 | 0.995  | -8.50E-09 | count | 1 |
| AC020651.1 | -19.0169584 | 2918.04075  | -0.0065 | 0.995  | -8.50E-09 | count | 1 |
| TM4SF19    | -19.0169584 | 2918.04075  | -0.0065 | 0.995  | -8.50E-09 | count | 1 |
| AC233280.1 | -0.6306268  | 0.5017463   | -1.2569 | 0.209  | -8.05E-09 | count | 1 |
| AC004865.2 | -0.6197487  | 0.8889773   | -0.6971 | 0.486  | -7.90E-09 | count | 1 |
| LINC01480  | -0.6197487  | 0.6027033   | -1.0283 | 0.304  | -7.89E-09 | count | 1 |
| AC026785.2 | -1.441557   | 0.7592876   | -1.8986 | 0.0577 | -7.78E-09 | count | 1 |
| AL008733.1 | -1.441557   | 0.7592876   | -1.8986 | 0.0577 | -7.78E-09 | count | 1 |
| ACTA1      | -1.441557   | 0.7592876   | -1.8986 | 0.0577 | -7.78E-09 | count | 1 |
| MRC1       | -1.441557   | 0.7592876   | -1.8986 | 0.0577 | -7.78E-09 | count | 1 |
| DNAJC9-AS1 | -1.441557   | 0.8581721   | -1.6798 | 0.0931 | -7.78E-09 | count | 1 |

|             |            |           |         |        |           |       |   |
|-------------|------------|-----------|---------|--------|-----------|-------|---|
| AC011815.1  | -1.441557  | 0.8581721 | -1.6798 | 0.0931 | -7.78E-09 | count | 1 |
| AL358781.2  | -1.441557  | 0.8581721 | -1.6798 | 0.0931 | -7.78E-09 | count | 1 |
| AC024592.3  | -1.4046435 | 0.5780188 | -2.4301 | 0.0151 | -7.55E-09 | count | 1 |
| INKA2       | -1.4046435 | 0.5780188 | -2.4301 | 0.0151 | -7.55E-09 | count | 1 |
| SPINK1      | -1.4046435 | 0.5780188 | -2.4301 | 0.0151 | -7.55E-09 | count | 1 |
| AP001189.5  | -1.4046435 | 0.5780188 | -2.4301 | 0.0151 | -7.55E-09 | count | 1 |
| AC091153.3  | -1.4046435 | 0.5780188 | -2.4301 | 0.0151 | -7.55E-09 | count | 1 |
| KCNS2       | -1.4046435 | 0.6667234 | -2.1068 | 0.0352 | -7.55E-09 | count | 1 |
| TRIM9       | -0.5889548 | 0.6694886 | -0.8797 | 0.379  | -7.45E-09 | count | 1 |
| AC138207.2  | -0.2263375 | 0.5206362 | -0.4347 | 0.664  | -7.14E-09 | count | 1 |
| SLCO2B1     | -0.5660883 | 0.7582156 | -0.7466 | 0.455  | -7.12E-09 | count | 1 |
| STC2        | -0.5272205 | 0.8166481 | -0.6456 | 0.519  | -6.58E-09 | count | 1 |
| AL022341.1  | -0.5272205 | 0.8166481 | -0.6456 | 0.519  | -6.58E-09 | count | 1 |
| LINC00887   | -0.5272205 | 0.8166481 | -0.6456 | 0.519  | -6.58E-09 | count | 1 |
| AC079447.1  | -0.5272205 | 0.8166481 | -0.6456 | 0.519  | -6.58E-09 | count | 1 |
| TIE1        | -0.5272205 | 0.8166481 | -0.6456 | 0.519  | -6.58E-09 | count | 1 |
| PATL2       | -0.5272205 | 0.8166481 | -0.6456 | 0.519  | -6.58E-09 | count | 1 |
| STX19       | -0.5272205 | 1.1034833 | -0.4778 | 0.633  | -6.58E-09 | count | 1 |
| SLC25A34    | -0.5272205 | 0.9698871 | -0.5436 | 0.587  | -6.58E-09 | count | 1 |
| FP565260.1  | -0.2000193 | 0.7148074 | -0.2798 | 0.78   | -6.27E-09 | count | 1 |
| ARMCX3-AS1  | -0.4654863 | 0.8563153 | -0.5436 | 0.587  | -5.73E-09 | count | 1 |
| AC010761.1  | -0.4654863 | 0.6632594 | -0.7018 | 0.483  | -5.73E-09 | count | 1 |
| PTPN7       | -0.4654863 | 0.6635308 | -0.7015 | 0.483  | -5.73E-09 | count | 1 |
| LCMT1-AS2   | -0.4346924 | 0.9996011 | -0.4349 | 0.664  | -5.31E-09 | count | 1 |
| LRRC4       | -0.4346924 | 0.9996011 | -0.4349 | 0.664  | -5.31E-09 | count | 1 |
| AC025031.4  | -0.4346924 | 0.8205706 | -0.5297 | 0.596  | -5.31E-09 | count | 1 |
| AC107214.1  | -0.4346924 | 0.8205706 | -0.5297 | 0.596  | -5.31E-09 | count | 1 |
| AC145212.1  | -0.4346924 | 0.801657  | -0.5422 | 0.588  | -5.31E-09 | count | 1 |
| AC011815.2  | -0.4346924 | 0.8205706 | -0.5297 | 0.596  | -5.31E-09 | count | 1 |
| ARHGEF18    | -0.4346924 | 0.8205706 | -0.5297 | 0.596  | -5.31E-09 | count | 1 |
| C6orf47-AS1 | -0.4346924 | 0.801657  | -0.5422 | 0.588  | -5.31E-09 | count | 1 |
| TF          | -0.4346924 | 0.9508882 | -0.4571 | 0.648  | -5.31E-09 | count | 1 |
| LHFPL4      | -0.4346924 | 0.9508882 | -0.4571 | 0.648  | -5.31E-09 | count | 1 |
| CLEC12A     | -0.4346924 | 0.9508882 | -0.4571 | 0.648  | -5.31E-09 | count | 1 |
| CACNA1C-AS1 | -0.4346924 | 0.9508882 | -0.4571 | 0.648  | -5.31E-09 | count | 1 |
| UTS2        | -1.0360919 | 0.8055999 | -1.2861 | 0.198  | -5.27E-09 | count | 1 |
| AL133245.1  | -1.0360919 | 0.8055999 | -1.2861 | 0.198  | -5.27E-09 | count | 1 |
| AC117498.2  | -1.0360919 | 0.8055999 | -1.2861 | 0.198  | -5.27E-09 | count | 1 |
| AL358334.2  | -1.0360919 | 0.8055999 | -1.2861 | 0.198  | -5.27E-09 | count | 1 |
| S1PR4       | -1.0360919 | 0.8055999 | -1.2861 | 0.198  | -5.27E-09 | count | 1 |
| PLB1        | -1.0360919 | 0.8055999 | -1.2861 | 0.198  | -5.27E-09 | count | 1 |
| OR4D9       | -1.0360919 | 0.8055999 | -1.2861 | 0.198  | -5.27E-09 | count | 1 |
| AC089984.1  | -1.0360919 | 0.8055999 | -1.2861 | 0.198  | -5.27E-09 | count | 1 |
| LINC02574   | -1.0360919 | 0.8055999 | -1.2861 | 0.198  | -5.27E-09 | count | 1 |
| AL645939.4  | -1.0360919 | 0.8055999 | -1.2861 | 0.198  | -5.27E-09 | count | 1 |

|             |             |             |         |        |           |       |   |
|-------------|-------------|-------------|---------|--------|-----------|-------|---|
| SIGLEC1     | -1.0360919  | 0.8055999   | -1.2861 | 0.198  | -5.27E-09 | count | 1 |
| ALDH3A1     | -1.0360919  | 0.8055999   | -1.2861 | 0.198  | -5.27E-09 | count | 1 |
| AC060766.4  | -1.0360919  | 0.9585891   | -1.0809 | 0.28   | -5.27E-09 | count | 1 |
| GPR160      | -1.0360919  | 0.9585891   | -1.0809 | 0.28   | -5.27E-09 | count | 1 |
| AC106886.5  | -1.0360919  | 0.9585891   | -1.0809 | 0.28   | -5.27E-09 | count | 1 |
| CRTC3-AS1   | -1.0360919  | 0.9585891   | -1.0809 | 0.28   | -5.27E-09 | count | 1 |
| NMU         | -0.9991784  | 0.5020104   | -1.9904 | 0.0466 | -5.05E-09 | count | 1 |
| TMEM232     | -0.1597089  | 0.6300549   | -0.2535 | 0.8    | -4.95E-09 | count | 1 |
| PCSK1       | -0.3703282  | 0.5844772   | -0.6336 | 0.526  | -4.45E-09 | count | 1 |
| AL590617.2  | -0.3429448  | 0.5365588   | -0.6392 | 0.523  | -4.10E-09 | count | 1 |
| SYCP3       | -0.3429448  | 0.6065197   | -0.5654 | 0.572  | -4.10E-09 | count | 1 |
| AL162431.2  | -0.3429448  | 0.8003089   | -0.4285 | 0.668  | -4.10E-09 | count | 1 |
| AL590648.3  | -0.7114963  | 0.4716615   | -1.5085 | 0.132  | -3.40E-09 | count | 1 |
| IGSF1       | -18.9031012 | 1464.775442 | -0.0129 | 0.99   | -3.17E-09 | count | 1 |
| AC010319.4  | -18.9031012 | 1464.775442 | -0.0129 | 0.99   | -3.17E-09 | count | 1 |
| C5orf64-AS1 | -18.9031012 | 1464.775442 | -0.0129 | 0.99   | -3.17E-09 | count | 1 |
| AC008609.1  | -18.9031012 | 1464.775442 | -0.0129 | 0.99   | -3.17E-09 | count | 1 |
| SOD2        | -18.9031012 | 1464.775442 | -0.0129 | 0.99   | -3.17E-09 | count | 1 |
| HECW1       | -18.9031012 | 1464.775442 | -0.0129 | 0.99   | -3.17E-09 | count | 1 |
| PAEP        | -18.9031012 | 1464.775442 | -0.0129 | 0.99   | -3.17E-09 | count | 1 |
| AL118558.4  | -18.9031012 | 1464.775442 | -0.0129 | 0.99   | -3.17E-09 | count | 1 |
| MAST1       | -18.9031012 | 1464.775442 | -0.0129 | 0.99   | -3.17E-09 | count | 1 |
| IGLV3-9     | -18.9031012 | 1464.775442 | -0.0129 | 0.99   | -3.17E-09 | count | 1 |
| LINC01136   | -18.9031012 | 1464.775442 | -0.0129 | 0.99   | -3.17E-09 | count | 1 |
| TREX1       | -18.9031012 | 1464.775442 | -0.0129 | 0.99   | -3.17E-09 | count | 1 |
| MEPE        | -18.9031012 | 1464.775442 | -0.0129 | 0.99   | -3.17E-09 | count | 1 |
| AC123595.1  | -18.9031012 | 1464.775442 | -0.0129 | 0.99   | -3.17E-09 | count | 1 |
| AL357497.1  | -18.9031012 | 1464.775442 | -0.0129 | 0.99   | -3.17E-09 | count | 1 |
| PTCRA       | -18.9031012 | 1464.775442 | -0.0129 | 0.99   | -3.17E-09 | count | 1 |
| LEP         | -18.9031012 | 1464.775442 | -0.0129 | 0.99   | -3.17E-09 | count | 1 |
| AC073878.1  | -18.9031012 | 1464.775442 | -0.0129 | 0.99   | -3.17E-09 | count | 1 |
| AC135371.1  | -18.9031012 | 1464.775442 | -0.0129 | 0.99   | -3.17E-09 | count | 1 |
| E2F7        | -18.9031012 | 1464.775442 | -0.0129 | 0.99   | -3.17E-09 | count | 1 |
| AC138123.1  | -18.9031012 | 1464.775442 | -0.0129 | 0.99   | -3.17E-09 | count | 1 |
| LINC02345   | -18.9031012 | 1464.775442 | -0.0129 | 0.99   | -3.17E-09 | count | 1 |
| AC087294.1  | -18.9031012 | 1464.775442 | -0.0129 | 0.99   | -3.17E-09 | count | 1 |
| AL031432.1  | -18.9031012 | 1464.775442 | -0.0129 | 0.99   | -3.17E-09 | count | 1 |
| SMPDL3B     | -18.9031012 | 1464.775442 | -0.0129 | 0.99   | -3.17E-09 | count | 1 |
| TMIGD3      | -18.9031012 | 1464.775442 | -0.0129 | 0.99   | -3.17E-09 | count | 1 |
| LINC01348   | -18.9031012 | 1464.775442 | -0.0129 | 0.99   | -3.17E-09 | count | 1 |
| TPO         | -18.9031012 | 1464.775442 | -0.0129 | 0.99   | -3.17E-09 | count | 1 |
| ADGRF3      | -18.9031012 | 1464.775442 | -0.0129 | 0.99   | -3.17E-09 | count | 1 |
| AC073257.2  | -18.9031012 | 1464.775442 | -0.0129 | 0.99   | -3.17E-09 | count | 1 |
| AC009495.3  | -18.9031012 | 1464.775442 | -0.0129 | 0.99   | -3.17E-09 | count | 1 |
| DAZL        | -18.9031012 | 1464.775442 | -0.0129 | 0.99   | -3.17E-09 | count | 1 |

|            |             |             |         |      |           |       |   |
|------------|-------------|-------------|---------|------|-----------|-------|---|
| P3H2-AS1   | -18.9031012 | 1464.775442 | -0.0129 | 0.99 | -3.17E-09 | count | 1 |
| NRROS      | -18.9031012 | 1464.775442 | -0.0129 | 0.99 | -3.17E-09 | count | 1 |
| AC079766.1 | -18.9031012 | 1464.775442 | -0.0129 | 0.99 | -3.17E-09 | count | 1 |
| BTNL9      | -18.9031012 | 1464.775442 | -0.0129 | 0.99 | -3.17E-09 | count | 1 |
| AL357054.2 | -18.9031012 | 1464.775442 | -0.0129 | 0.99 | -3.17E-09 | count | 1 |
| AL022724.1 | -18.9031012 | 1464.775442 | -0.0129 | 0.99 | -3.17E-09 | count | 1 |
| HIST1H3C   | -18.9031012 | 1464.775442 | -0.0129 | 0.99 | -3.17E-09 | count | 1 |
| NCR3       | -18.9031012 | 1464.775442 | -0.0129 | 0.99 | -3.17E-09 | count | 1 |
| HDAC2-AS2  | -18.9031012 | 1464.775442 | -0.0129 | 0.99 | -3.17E-09 | count | 1 |
| TMEM244    | -18.9031012 | 1464.775442 | -0.0129 | 0.99 | -3.17E-09 | count | 1 |
| CRHR2      | -18.9031012 | 1464.775442 | -0.0129 | 0.99 | -3.17E-09 | count | 1 |
| AC009542.1 | -18.9031012 | 1464.775442 | -0.0129 | 0.99 | -3.17E-09 | count | 1 |
| CTAGE6     | -18.9031012 | 1464.775442 | -0.0129 | 0.99 | -3.17E-09 | count | 1 |
| ADAM28     | -18.9031012 | 1464.775442 | -0.0129 | 0.99 | -3.17E-09 | count | 1 |
| AC137579.1 | -18.9031012 | 1464.775442 | -0.0129 | 0.99 | -3.17E-09 | count | 1 |
| DCSTAMP    | -18.9031012 | 1464.775442 | -0.0129 | 0.99 | -3.17E-09 | count | 1 |
| AL353770.4 | -18.9031012 | 1464.775442 | -0.0129 | 0.99 | -3.17E-09 | count | 1 |
| AC136475.9 | -18.9031012 | 1464.775442 | -0.0129 | 0.99 | -3.17E-09 | count | 1 |
| LINC01219  | -18.9031012 | 1464.775442 | -0.0129 | 0.99 | -3.17E-09 | count | 1 |
| AP001107.6 | -18.9031012 | 1464.775442 | -0.0129 | 0.99 | -3.17E-09 | count | 1 |
| CYP26A1    | -18.9031012 | 1464.775442 | -0.0129 | 0.99 | -3.17E-09 | count | 1 |
| AC089983.1 | -18.9031012 | 1464.775442 | -0.0129 | 0.99 | -3.17E-09 | count | 1 |
| AC243965.1 | -18.9031012 | 1464.775442 | -0.0129 | 0.99 | -3.17E-09 | count | 1 |
| AL121790.1 | -18.9031012 | 1464.775442 | -0.0129 | 0.99 | -3.17E-09 | count | 1 |
| SERPINA6   | -18.9031012 | 1464.775442 | -0.0129 | 0.99 | -3.17E-09 | count | 1 |
| IGHGP      | -18.9031012 | 1464.775442 | -0.0129 | 0.99 | -3.17E-09 | count | 1 |
| AC027237.2 | -18.9031012 | 1464.775442 | -0.0129 | 0.99 | -3.17E-09 | count | 1 |
| AC100835.2 | -18.9031012 | 1464.775442 | -0.0129 | 0.99 | -3.17E-09 | count | 1 |
| ACSM2B     | -18.9031012 | 1464.775442 | -0.0129 | 0.99 | -3.17E-09 | count | 1 |
| CPNE7      | -18.9031012 | 1464.775442 | -0.0129 | 0.99 | -3.17E-09 | count | 1 |
| AC244100.2 | -18.9031012 | 1464.775442 | -0.0129 | 0.99 | -3.17E-09 | count | 1 |
| PHOSPHO1   | -18.9031012 | 1464.775442 | -0.0129 | 0.99 | -3.17E-09 | count | 1 |
| ASIP       | -18.9031012 | 1464.775442 | -0.0129 | 0.99 | -3.17E-09 | count | 1 |
| AC004156.1 | -18.9031012 | 1464.775442 | -0.0129 | 0.99 | -3.17E-09 | count | 1 |
| AC020917.3 | -18.9031012 | 1464.775442 | -0.0129 | 0.99 | -3.17E-09 | count | 1 |
| AC022154.1 | -18.9031012 | 1464.775442 | -0.0129 | 0.99 | -3.17E-09 | count | 1 |
| VSTM1      | -18.9031012 | 1464.775442 | -0.0129 | 0.99 | -3.17E-09 | count | 1 |
| FASLG      | -18.9031012 | 1464.775442 | -0.0129 | 0.99 | -3.17E-09 | count | 1 |
| MYBPH      | -18.9031012 | 1464.775442 | -0.0129 | 0.99 | -3.17E-09 | count | 1 |
| IGKV1-39   | -18.9031012 | 1464.775442 | -0.0129 | 0.99 | -3.17E-09 | count | 1 |
| AC007879.2 | -18.9031012 | 1464.775442 | -0.0129 | 0.99 | -3.17E-09 | count | 1 |
| AC112907.1 | -18.9031012 | 1464.775442 | -0.0129 | 0.99 | -3.17E-09 | count | 1 |
| AC010343.3 | -18.9031012 | 1464.775442 | -0.0129 | 0.99 | -3.17E-09 | count | 1 |
| LINC01844  | -18.9031012 | 1464.775442 | -0.0129 | 0.99 | -3.17E-09 | count | 1 |
| KIF4B      | -18.9031012 | 1464.775442 | -0.0129 | 0.99 | -3.17E-09 | count | 1 |

|             |             |             |         |      |           |       |   |
|-------------|-------------|-------------|---------|------|-----------|-------|---|
| PPP1R2B     | -18.9031012 | 1464.775442 | -0.0129 | 0.99 | -3.17E-09 | count | 1 |
| AL359382.1  | -18.9031012 | 1464.775442 | -0.0129 | 0.99 | -3.17E-09 | count | 1 |
| AC020743.1  | -18.9031012 | 1464.775442 | -0.0129 | 0.99 | -3.17E-09 | count | 1 |
| MUC3A       | -18.9031012 | 1464.775442 | -0.0129 | 0.99 | -3.17E-09 | count | 1 |
| AL353732.1  | -18.9031012 | 1464.775442 | -0.0129 | 0.99 | -3.17E-09 | count | 1 |
| AL355574.1  | -18.9031012 | 1464.775442 | -0.0129 | 0.99 | -3.17E-09 | count | 1 |
| C8G         | -18.9031012 | 1464.775442 | -0.0129 | 0.99 | -3.17E-09 | count | 1 |
| AC079329.1  | -18.9031012 | 1464.775442 | -0.0129 | 0.99 | -3.17E-09 | count | 1 |
| AC018511.1  | -18.9031012 | 1464.775442 | -0.0129 | 0.99 | -3.17E-09 | count | 1 |
| OPN4        | -18.9031012 | 1464.775442 | -0.0129 | 0.99 | -3.17E-09 | count | 1 |
| GRIN2B      | -18.9031012 | 1464.775442 | -0.0129 | 0.99 | -3.17E-09 | count | 1 |
| TESPA1      | -18.9031012 | 1464.775442 | -0.0129 | 0.99 | -3.17E-09 | count | 1 |
| APOF        | -18.9031012 | 1464.775442 | -0.0129 | 0.99 | -3.17E-09 | count | 1 |
| PPFIA2-AS1  | -18.9031012 | 1464.775442 | -0.0129 | 0.99 | -3.17E-09 | count | 1 |
| AL161756.1  | -18.9031012 | 1464.775442 | -0.0129 | 0.99 | -3.17E-09 | count | 1 |
| ACSBG1      | -18.9031012 | 1464.775442 | -0.0129 | 0.99 | -3.17E-09 | count | 1 |
| AC126755.3  | -18.9031012 | 1464.775442 | -0.0129 | 0.99 | -3.17E-09 | count | 1 |
| AC026464.4  | -18.9031012 | 1464.775442 | -0.0129 | 0.99 | -3.17E-09 | count | 1 |
| HSH2D       | -18.9031012 | 1464.775442 | -0.0129 | 0.99 | -3.17E-09 | count | 1 |
| KIR3DX1     | -18.9031012 | 1464.775442 | -0.0129 | 0.99 | -3.17E-09 | count | 1 |
| CELSR1      | -18.9031012 | 1464.775442 | -0.0129 | 0.99 | -3.17E-09 | count | 1 |
| AL109761.1  | -18.9031012 | 1464.775442 | -0.0129 | 0.99 | -3.17E-09 | count | 1 |
| KCNE1       | -18.9031012 | 1464.775442 | -0.0129 | 0.99 | -3.17E-09 | count | 1 |
| AL844908.1  | -18.9031012 | 1464.775442 | -0.0129 | 0.99 | -3.17E-09 | count | 1 |
| DCST1-AS1   | -18.9031012 | 1464.775442 | -0.0129 | 0.99 | -3.17E-09 | count | 1 |
| SDC1        | -18.9031012 | 1464.775442 | -0.0129 | 0.99 | -3.17E-09 | count | 1 |
| TSPYL6      | -18.9031012 | 1464.775442 | -0.0129 | 0.99 | -3.17E-09 | count | 1 |
| EMX1        | -18.9031012 | 1464.775442 | -0.0129 | 0.99 | -3.17E-09 | count | 1 |
| CIDEC       | -18.9031012 | 1464.775442 | -0.0129 | 0.99 | -3.17E-09 | count | 1 |
| CCK         | -18.9031012 | 1464.775442 | -0.0129 | 0.99 | -3.17E-09 | count | 1 |
| AC010245.1  | -18.9031012 | 1464.775442 | -0.0129 | 0.99 | -3.17E-09 | count | 1 |
| LINC01366   | -18.9031012 | 1464.775442 | -0.0129 | 0.99 | -3.17E-09 | count | 1 |
| AL136307.1  | -18.9031012 | 1464.775442 | -0.0129 | 0.99 | -3.17E-09 | count | 1 |
| OPRM1       | -18.9031012 | 1464.775442 | -0.0129 | 0.99 | -3.17E-09 | count | 1 |
| TRBV28      | -18.9031012 | 1464.775442 | -0.0129 | 0.99 | -3.17E-09 | count | 1 |
| GUCY2F      | -18.9031012 | 1464.775442 | -0.0129 | 0.99 | -3.17E-09 | count | 1 |
| C8orf37-AS1 | -18.9031012 | 1464.775442 | -0.0129 | 0.99 | -3.17E-09 | count | 1 |
| PLPP4       | -18.9031012 | 1464.775442 | -0.0129 | 0.99 | -3.17E-09 | count | 1 |
| PABPC3      | -18.9031012 | 1464.775442 | -0.0129 | 0.99 | -3.17E-09 | count | 1 |
| ST20-MTHFS  | -18.9031012 | 1464.775442 | -0.0129 | 0.99 | -3.17E-09 | count | 1 |
| AC138207.7  | -18.9031012 | 1464.775442 | -0.0129 | 0.99 | -3.17E-09 | count | 1 |
| AC015961.1  | -18.9031012 | 1464.775442 | -0.0129 | 0.99 | -3.17E-09 | count | 1 |
| SLA2        | -18.9031012 | 1464.775442 | -0.0129 | 0.99 | -3.17E-09 | count | 1 |
| AC008759.3  | -18.9031012 | 1464.775442 | -0.0129 | 0.99 | -3.17E-09 | count | 1 |
| PDE4C       | -18.9031012 | 1464.775442 | -0.0129 | 0.99 | -3.17E-09 | count | 1 |

|                 |             |             |         |       |           |       |   |
|-----------------|-------------|-------------|---------|-------|-----------|-------|---|
| TMEM145         | -18.9031012 | 1464.775442 | -0.0129 | 0.99  | -3.17E-09 | count | 1 |
| FPR3            | -18.9031012 | 1464.775442 | -0.0129 | 0.99  | -3.17E-09 | count | 1 |
| SPECC1L-ADORA2A | -18.9031012 | 1464.775442 | -0.0129 | 0.99  | -3.17E-09 | count | 1 |
| TNFRSF13C       | -18.9031012 | 1464.775442 | -0.0129 | 0.99  | -3.17E-09 | count | 1 |
| BX539320.1      | -18.9031012 | 1464.775442 | -0.0129 | 0.99  | -3.17E-09 | count | 1 |
| AL033528.2      | -18.9031012 | 1464.775442 | -0.0129 | 0.99  | -3.17E-09 | count | 1 |
| BMP8A           | -18.9031012 | 1464.775442 | -0.0129 | 0.99  | -3.17E-09 | count | 1 |
| PKN2-AS1        | -18.9031012 | 1464.775442 | -0.0129 | 0.99  | -3.17E-09 | count | 1 |
| SLAMF7          | -18.9031012 | 1464.775442 | -0.0129 | 0.99  | -3.17E-09 | count | 1 |
| AL359551.1      | -18.9031012 | 1464.775442 | -0.0129 | 0.99  | -3.17E-09 | count | 1 |
| MYOSLID         | -18.9031012 | 1464.775442 | -0.0129 | 0.99  | -3.17E-09 | count | 1 |
| SSUH2           | -18.9031012 | 1464.775442 | -0.0129 | 0.99  | -3.17E-09 | count | 1 |
| SERPINI2        | -18.9031012 | 1464.775442 | -0.0129 | 0.99  | -3.17E-09 | count | 1 |
| MSH5-SAPCD1     | -18.9031012 | 1464.775442 | -0.0129 | 0.99  | -3.17E-09 | count | 1 |
| ATP5MF-PTCD1    | -18.9031012 | 1464.775442 | -0.0129 | 0.99  | -3.17E-09 | count | 1 |
| AL035427.1      | -18.9031012 | 1464.775442 | -0.0129 | 0.99  | -3.17E-09 | count | 1 |
| SIT1            | -18.9031012 | 1464.775442 | -0.0129 | 0.99  | -3.17E-09 | count | 1 |
| OBP2B           | -18.9031012 | 1464.775442 | -0.0129 | 0.99  | -3.17E-09 | count | 1 |
| SUCLA2-AS1      | -18.9031012 | 1464.775442 | -0.0129 | 0.99  | -3.17E-09 | count | 1 |
| IGHV4-34        | -18.9031012 | 1464.775442 | -0.0129 | 0.99  | -3.17E-09 | count | 1 |
| LINC00920       | -18.9031012 | 1464.775442 | -0.0129 | 0.99  | -3.17E-09 | count | 1 |
| AC009060.1      | -18.9031012 | 1464.775442 | -0.0129 | 0.99  | -3.17E-09 | count | 1 |
| CLEC3A          | -18.9031012 | 1464.775442 | -0.0129 | 0.99  | -3.17E-09 | count | 1 |
| AC243571.2      | -18.9031012 | 1464.775442 | -0.0129 | 0.99  | -3.17E-09 | count | 1 |
| WDR49           | -19.5982072 | 1463.482942 | -0.0134 | 0.989 | -3.16E-09 | count | 1 |
| CCDC88C         | -19.5982072 | 1463.482942 | -0.0134 | 0.989 | -3.16E-09 | count | 1 |
| AC109479.1      | -19.5982072 | 1463.482942 | -0.0134 | 0.989 | -3.16E-09 | count | 1 |
| LINC02502       | -19.5982072 | 1463.482942 | -0.0134 | 0.989 | -3.16E-09 | count | 1 |
| CXCR3           | -19.5982072 | 1463.482942 | -0.0134 | 0.989 | -3.16E-09 | count | 1 |
| LINC01641       | -19.5993524 | 2074.72277  | -0.0094 | 0.992 | -3.16E-09 | count | 1 |
| TNR             | -19.5993524 | 2074.72277  | -0.0094 | 0.992 | -3.16E-09 | count | 1 |
| MYPN            | -19.5993524 | 2074.72277  | -0.0094 | 0.992 | -3.16E-09 | count | 1 |
| KIF14           | -19.5993524 | 2074.72277  | -0.0094 | 0.992 | -3.16E-09 | count | 1 |
| CST2            | -19.5993524 | 2074.72277  | -0.0094 | 0.992 | -3.16E-09 | count | 1 |
| EDRF1-AS1       | -19.5993524 | 2074.72277  | -0.0094 | 0.992 | -3.16E-09 | count | 1 |
| CCDC62          | -19.5993524 | 2074.72277  | -0.0094 | 0.992 | -3.16E-09 | count | 1 |
| MGAM2           | -19.5993524 | 2074.72277  | -0.0094 | 0.992 | -3.16E-09 | count | 1 |
| AC104170.1      | -18.6265588 | 2400.585336 | -0.0078 | 0.994 | -3.15E-09 | count | 1 |
| DNASE2B         | -18.6265588 | 2400.585336 | -0.0078 | 0.994 | -3.15E-09 | count | 1 |
| AL606534.2      | -18.6265588 | 2400.585336 | -0.0078 | 0.994 | -3.15E-09 | count | 1 |
| AC017083.2      | -18.6265588 | 2400.585336 | -0.0078 | 0.994 | -3.15E-09 | count | 1 |
| VIL1            | -18.6265588 | 2400.585336 | -0.0078 | 0.994 | -3.15E-09 | count | 1 |
| CELSR3          | -18.6265588 | 2400.585336 | -0.0078 | 0.994 | -3.15E-09 | count | 1 |
| FAM19A1         | -18.6265588 | 2400.585336 | -0.0078 | 0.994 | -3.15E-09 | count | 1 |
| FAM160A1-DT     | -18.6265588 | 2400.585336 | -0.0078 | 0.994 | -3.15E-09 | count | 1 |



|            |             |             |         |       |           |       |   |
|------------|-------------|-------------|---------|-------|-----------|-------|---|
| LINC02102  | -18.6265588 | 2400.585336 | -0.0078 | 0.994 | -3.15E-09 | count | 1 |
| LINC02236  | -18.6265588 | 2400.585336 | -0.0078 | 0.994 | -3.15E-09 | count | 1 |
| AC093673.2 | -18.6265588 | 2400.585336 | -0.0078 | 0.994 | -3.15E-09 | count | 1 |
| LINC01545  | -18.6265588 | 2400.585336 | -0.0078 | 0.994 | -3.15E-09 | count | 1 |
| FAAH2      | -18.6265588 | 2400.585336 | -0.0078 | 0.994 | -3.15E-09 | count | 1 |
| AC138356.1 | -18.6265588 | 2400.585336 | -0.0078 | 0.994 | -3.15E-09 | count | 1 |
| TNNI2      | -18.6265588 | 2400.585336 | -0.0078 | 0.994 | -3.15E-09 | count | 1 |
| CXCR5      | -18.6265588 | 2400.585336 | -0.0078 | 0.994 | -3.15E-09 | count | 1 |
| AL157786.1 | -18.6265588 | 2400.585336 | -0.0078 | 0.994 | -3.15E-09 | count | 1 |
| AL359094.1 | -18.6265588 | 2400.585336 | -0.0078 | 0.994 | -3.15E-09 | count | 1 |
| AC131238.1 | -18.6265588 | 2400.585336 | -0.0078 | 0.994 | -3.15E-09 | count | 1 |
| AC243965.2 | -18.6265588 | 2400.585336 | -0.0078 | 0.994 | -3.15E-09 | count | 1 |
| PAK6       | -18.6265588 | 2400.585336 | -0.0078 | 0.994 | -3.15E-09 | count | 1 |
| AC007493.2 | -18.6265588 | 2400.585336 | -0.0078 | 0.994 | -3.15E-09 | count | 1 |
| AC005304.3 | -18.6265588 | 2400.585336 | -0.0078 | 0.994 | -3.15E-09 | count | 1 |
| AC090772.3 | -18.6265588 | 2400.585336 | -0.0078 | 0.994 | -3.15E-09 | count | 1 |
| AC017100.1 | -18.6265588 | 2400.585336 | -0.0078 | 0.994 | -3.15E-09 | count | 1 |
| AC011509.2 | -18.6265588 | 2400.585336 | -0.0078 | 0.994 | -3.15E-09 | count | 1 |
| AC003956.1 | -18.6265588 | 2400.585336 | -0.0078 | 0.994 | -3.15E-09 | count | 1 |
| PARVG      | -18.6265588 | 2400.585336 | -0.0078 | 0.994 | -3.15E-09 | count | 1 |
| AL121672.1 | -18.6265588 | 2400.585336 | -0.0078 | 0.994 | -3.15E-09 | count | 1 |
| AP000688.3 | -18.6265588 | 2400.585336 | -0.0078 | 0.994 | -3.15E-09 | count | 1 |
| LINC01160  | -18.6265588 | 2400.585336 | -0.0078 | 0.994 | -3.15E-09 | count | 1 |
| GPR17      | -18.6265588 | 2400.585336 | -0.0078 | 0.994 | -3.15E-09 | count | 1 |
| LINC02483  | -18.6265588 | 2400.585336 | -0.0078 | 0.994 | -3.15E-09 | count | 1 |
| AC104123.1 | -18.6265588 | 2400.585336 | -0.0078 | 0.994 | -3.15E-09 | count | 1 |
| PCDHA9     | -18.6265588 | 2400.585336 | -0.0078 | 0.994 | -3.15E-09 | count | 1 |
| ITK        | -18.6265588 | 2400.585336 | -0.0078 | 0.994 | -3.15E-09 | count | 1 |
| LINC01847  | -18.6265588 | 2400.585336 | -0.0078 | 0.994 | -3.15E-09 | count | 1 |
| HIST1H3G   | -18.6265588 | 2400.585336 | -0.0078 | 0.994 | -3.15E-09 | count | 1 |
| MPIG6B     | -18.6265588 | 2400.585336 | -0.0078 | 0.994 | -3.15E-09 | count | 1 |
| AL109947.1 | -18.6265588 | 2400.585336 | -0.0078 | 0.994 | -3.15E-09 | count | 1 |
| AC002480.3 | -18.6265588 | 2400.585336 | -0.0078 | 0.994 | -3.15E-09 | count | 1 |
| AC093668.3 | -18.6265588 | 2400.585336 | -0.0078 | 0.994 | -3.15E-09 | count | 1 |
| AC091736.1 | -18.6265588 | 2400.585336 | -0.0078 | 0.994 | -3.15E-09 | count | 1 |
| CSMD1      | -18.6265588 | 2400.585336 | -0.0078 | 0.994 | -3.15E-09 | count | 1 |
| AC011632.1 | -18.6265588 | 2400.585336 | -0.0078 | 0.994 | -3.15E-09 | count | 1 |
| AC090921.1 | -18.6265588 | 2400.585336 | -0.0078 | 0.994 | -3.15E-09 | count | 1 |
| SLURP1     | -18.6265588 | 2400.585336 | -0.0078 | 0.994 | -3.15E-09 | count | 1 |
| AL159169.2 | -18.6265588 | 2400.585336 | -0.0078 | 0.994 | -3.15E-09 | count | 1 |
| AL133417.1 | -18.6265588 | 2400.585336 | -0.0078 | 0.994 | -3.15E-09 | count | 1 |
| SPX        | -18.6265588 | 2400.585336 | -0.0078 | 0.994 | -3.15E-09 | count | 1 |
| AC127164.1 | -18.6265588 | 2400.585336 | -0.0078 | 0.994 | -3.15E-09 | count | 1 |
| CSNK1A1L   | -18.6265588 | 2400.585336 | -0.0078 | 0.994 | -3.15E-09 | count | 1 |
| DIAPH3-AS1 | -18.6265588 | 2400.585336 | -0.0078 | 0.994 | -3.15E-09 | count | 1 |

|             |             |             |         |       |           |       |   |
|-------------|-------------|-------------|---------|-------|-----------|-------|---|
| AL133279.1  | -18.6265588 | 2400.585336 | -0.0078 | 0.994 | -3.15E-09 | count | 1 |
| AC130456.3  | -18.6265588 | 2400.585336 | -0.0078 | 0.994 | -3.15E-09 | count | 1 |
| C16orf54    | -18.6265588 | 2400.585336 | -0.0078 | 0.994 | -3.15E-09 | count | 1 |
| 10-Mar      | -18.6265588 | 2400.585336 | -0.0078 | 0.994 | -3.15E-09 | count | 1 |
| HM13-AS1    | -18.6265588 | 2400.585336 | -0.0078 | 0.994 | -3.15E-09 | count | 1 |
| AC245884.10 | -18.6265588 | 2400.585336 | -0.0078 | 0.994 | -3.15E-09 | count | 1 |
| AL096855.1  | -18.6265588 | 2400.585336 | -0.0078 | 0.994 | -3.15E-09 | count | 1 |
| LINC01144   | -18.6265588 | 2400.585336 | -0.0078 | 0.994 | -3.15E-09 | count | 1 |
| AL513218.1  | -18.6265588 | 2400.585336 | -0.0078 | 0.994 | -3.15E-09 | count | 1 |
| AL513285.1  | -18.6265588 | 2400.585336 | -0.0078 | 0.994 | -3.15E-09 | count | 1 |
| AC092807.2  | -18.6265588 | 2400.585336 | -0.0078 | 0.994 | -3.15E-09 | count | 1 |
| KCNA3       | -18.6265588 | 2400.585336 | -0.0078 | 0.994 | -3.15E-09 | count | 1 |
| CD160       | -18.6265588 | 2400.585336 | -0.0078 | 0.994 | -3.15E-09 | count | 1 |
| TNN         | -18.6265588 | 2400.585336 | -0.0078 | 0.994 | -3.15E-09 | count | 1 |
| IBA57-DT    | -18.6265588 | 2400.585336 | -0.0078 | 0.994 | -3.15E-09 | count | 1 |
| SNORC       | -18.6265588 | 2400.585336 | -0.0078 | 0.994 | -3.15E-09 | count | 1 |
| CCR5        | -18.6265588 | 2400.585336 | -0.0078 | 0.994 | -3.15E-09 | count | 1 |
| AC093895.1  | -18.6265588 | 2400.585336 | -0.0078 | 0.994 | -3.15E-09 | count | 1 |
| AC034229.1  | -18.6265588 | 2400.585336 | -0.0078 | 0.994 | -3.15E-09 | count | 1 |
| PCDHA2      | -18.6265588 | 2400.585336 | -0.0078 | 0.994 | -3.15E-09 | count | 1 |
| AL121936.1  | -18.6265588 | 2400.585336 | -0.0078 | 0.994 | -3.15E-09 | count | 1 |
| LRFN2       | -18.6265588 | 2400.585336 | -0.0078 | 0.994 | -3.15E-09 | count | 1 |
| AC004014.1  | -18.6265588 | 2400.585336 | -0.0078 | 0.994 | -3.15E-09 | count | 1 |
| ERCC6L      | -18.6265588 | 2400.585336 | -0.0078 | 0.994 | -3.15E-09 | count | 1 |
| AC067817.2  | -18.6265588 | 2400.585336 | -0.0078 | 0.994 | -3.15E-09 | count | 1 |
| LINC01592   | -18.6265588 | 2400.585336 | -0.0078 | 0.994 | -3.15E-09 | count | 1 |
| AL590369.1  | -18.6265588 | 2400.585336 | -0.0078 | 0.994 | -3.15E-09 | count | 1 |
| AC015689.1  | -18.6265588 | 2400.585336 | -0.0078 | 0.994 | -3.15E-09 | count | 1 |
| FOLR3       | -18.6265588 | 2400.585336 | -0.0078 | 0.994 | -3.15E-09 | count | 1 |
| AP001189.6  | -18.6265588 | 2400.585336 | -0.0078 | 0.994 | -3.15E-09 | count | 1 |
| TMPRSS5     | -18.6265588 | 2400.585336 | -0.0078 | 0.994 | -3.15E-09 | count | 1 |
| RPEL1       | -18.6265588 | 2400.585336 | -0.0078 | 0.994 | -3.15E-09 | count | 1 |
| AL451069.1  | -18.6265588 | 2400.585336 | -0.0078 | 0.994 | -3.15E-09 | count | 1 |
| AC092490.1  | -18.6265588 | 2400.585336 | -0.0078 | 0.994 | -3.15E-09 | count | 1 |
| SCN8A       | -18.6265588 | 2400.585336 | -0.0078 | 0.994 | -3.15E-09 | count | 1 |
| AC121757.1  | -18.6265588 | 2400.585336 | -0.0078 | 0.994 | -3.15E-09 | count | 1 |
| AC126178.1  | -18.6265588 | 2400.585336 | -0.0078 | 0.994 | -3.15E-09 | count | 1 |
| RNF219-AS1  | -18.6265588 | 2400.585336 | -0.0078 | 0.994 | -3.15E-09 | count | 1 |
| AC022929.2  | -18.6265588 | 2400.585336 | -0.0078 | 0.994 | -3.15E-09 | count | 1 |
| AC104590.1  | -18.6265588 | 2400.585336 | -0.0078 | 0.994 | -3.15E-09 | count | 1 |
| AC027228.1  | -18.6265588 | 2400.585336 | -0.0078 | 0.994 | -3.15E-09 | count | 1 |
| AC105339.3  | -18.6265588 | 2400.585336 | -0.0078 | 0.994 | -3.15E-09 | count | 1 |
| AC243562.3  | -18.6265588 | 2400.585336 | -0.0078 | 0.994 | -3.15E-09 | count | 1 |
| Z69666.1    | -18.6265588 | 2400.585336 | -0.0078 | 0.994 | -3.15E-09 | count | 1 |
| CCDC154     | -18.6265588 | 2400.585336 | -0.0078 | 0.994 | -3.15E-09 | count | 1 |

|             |             |             |         |       |           |       |   |
|-------------|-------------|-------------|---------|-------|-----------|-------|---|
| GLIS2-AS1   | -18.6265588 | 2400.585336 | -0.0078 | 0.994 | -3.15E-09 | count | 1 |
| AC133550.1  | -18.6265588 | 2400.585336 | -0.0078 | 0.994 | -3.15E-09 | count | 1 |
| AC007496.2  | -18.6265588 | 2400.585336 | -0.0078 | 0.994 | -3.15E-09 | count | 1 |
| AC092723.4  | -18.6265588 | 2400.585336 | -0.0078 | 0.994 | -3.15E-09 | count | 1 |
| AC090617.2  | -18.6265588 | 2400.585336 | -0.0078 | 0.994 | -3.15E-09 | count | 1 |
| AC027796.3  | -18.6265588 | 2400.585336 | -0.0078 | 0.994 | -3.15E-09 | count | 1 |
| CDRT4       | -18.6265588 | 2400.585336 | -0.0078 | 0.994 | -3.15E-09 | count | 1 |
| SLC47A2     | -18.6265588 | 2400.585336 | -0.0078 | 0.994 | -3.15E-09 | count | 1 |
| HAP1        | -18.6265588 | 2400.585336 | -0.0078 | 0.994 | -3.15E-09 | count | 1 |
| AC064805.1  | -18.6265588 | 2400.585336 | -0.0078 | 0.994 | -3.15E-09 | count | 1 |
| AC145207.6  | -18.6265588 | 2400.585336 | -0.0078 | 0.994 | -3.15E-09 | count | 1 |
| AC024361.2  | -18.6265588 | 2400.585336 | -0.0078 | 0.994 | -3.15E-09 | count | 1 |
| AC091043.1  | -18.6265588 | 2400.585336 | -0.0078 | 0.994 | -3.15E-09 | count | 1 |
| SIRPB2      | -18.6265588 | 2400.585336 | -0.0078 | 0.994 | -3.15E-09 | count | 1 |
| AL135937.1  | -18.6265588 | 2400.585336 | -0.0078 | 0.994 | -3.15E-09 | count | 1 |
| AL118523.1  | -18.6265588 | 2400.585336 | -0.0078 | 0.994 | -3.15E-09 | count | 1 |
| AC010300.1  | -18.6265588 | 2400.585336 | -0.0078 | 0.994 | -3.15E-09 | count | 1 |
| FFAR3       | -18.6265588 | 2400.585336 | -0.0078 | 0.994 | -3.15E-09 | count | 1 |
| AC002116.2  | -18.6265588 | 2400.585336 | -0.0078 | 0.994 | -3.15E-09 | count | 1 |
| MAP4K1      | -18.6265588 | 2400.585336 | -0.0078 | 0.994 | -3.15E-09 | count | 1 |
| FCGBP       | -18.6265588 | 2400.585336 | -0.0078 | 0.994 | -3.15E-09 | count | 1 |
| SRRM5       | -18.6265588 | 2400.585336 | -0.0078 | 0.994 | -3.15E-09 | count | 1 |
| AC011453.1  | -18.6265588 | 2400.585336 | -0.0078 | 0.994 | -3.15E-09 | count | 1 |
| AC005498.1  | -18.6265588 | 2400.585336 | -0.0078 | 0.994 | -3.15E-09 | count | 1 |
| AC012313.6  | -18.6265588 | 2400.585336 | -0.0078 | 0.994 | -3.15E-09 | count | 1 |
| Z98885.2    | -18.6265588 | 2400.585336 | -0.0078 | 0.994 | -3.15E-09 | count | 1 |
| PLAC4       | -18.6265588 | 2400.585336 | -0.0078 | 0.994 | -3.15E-09 | count | 1 |
| COL18A1-AS1 | -18.6265588 | 2400.585336 | -0.0078 | 0.994 | -3.15E-09 | count | 1 |
| HES2        | -18.6265588 | 2400.585336 | -0.0078 | 0.994 | -3.15E-09 | count | 1 |
| AC244453.2  | -18.6265588 | 2400.585336 | -0.0078 | 0.994 | -3.15E-09 | count | 1 |
| FCRL6       | -18.6265588 | 2400.585336 | -0.0078 | 0.994 | -3.15E-09 | count | 1 |
| Z99943.1    | -18.6265588 | 2400.585336 | -0.0078 | 0.994 | -3.15E-09 | count | 1 |
| AL121983.2  | -18.6265588 | 2400.585336 | -0.0078 | 0.994 | -3.15E-09 | count | 1 |
| AL118511.1  | -18.6265588 | 2400.585336 | -0.0078 | 0.994 | -3.15E-09 | count | 1 |
| AL451007.3  | -18.6265588 | 2400.585336 | -0.0078 | 0.994 | -3.15E-09 | count | 1 |
| GCSAML      | -18.6265588 | 2400.585336 | -0.0078 | 0.994 | -3.15E-09 | count | 1 |
| AC009486.1  | -18.6265588 | 2400.585336 | -0.0078 | 0.994 | -3.15E-09 | count | 1 |
| AC007391.1  | -18.6265588 | 2400.585336 | -0.0078 | 0.994 | -3.15E-09 | count | 1 |
| AC019129.2  | -18.6265588 | 2400.585336 | -0.0078 | 0.994 | -3.15E-09 | count | 1 |
| AC093110.1  | -18.6265588 | 2400.585336 | -0.0078 | 0.994 | -3.15E-09 | count | 1 |
| AC096669.1  | -18.6265588 | 2400.585336 | -0.0078 | 0.994 | -3.15E-09 | count | 1 |
| AC012508.2  | -18.6265588 | 2400.585336 | -0.0078 | 0.994 | -3.15E-09 | count | 1 |
| ERMN        | -18.6265588 | 2400.585336 | -0.0078 | 0.994 | -3.15E-09 | count | 1 |
| LINC01825   | -18.6265588 | 2400.585336 | -0.0078 | 0.994 | -3.15E-09 | count | 1 |
| TM4SF20     | -18.6265588 | 2400.585336 | -0.0078 | 0.994 | -3.15E-09 | count | 1 |

|            |             |             |         |       |           |       |   |
|------------|-------------|-------------|---------|-------|-----------|-------|---|
| PLS1-AS1   | -18.6265588 | 2400.585336 | -0.0078 | 0.994 | -3.15E-09 | count | 1 |
| GPR171     | -18.6265588 | 2400.585336 | -0.0078 | 0.994 | -3.15E-09 | count | 1 |
| AC024560.3 | -18.6265588 | 2400.585336 | -0.0078 | 0.994 | -3.15E-09 | count | 1 |
| ODAPH      | -18.6265588 | 2400.585336 | -0.0078 | 0.994 | -3.15E-09 | count | 1 |
| AC104785.1 | -18.6265588 | 2400.585336 | -0.0078 | 0.994 | -3.15E-09 | count | 1 |
| AC092611.2 | -18.6265588 | 2400.585336 | -0.0078 | 0.994 | -3.15E-09 | count | 1 |
| LINC02226  | -18.6265588 | 2400.585336 | -0.0078 | 0.994 | -3.15E-09 | count | 1 |
| AC025178.1 | -18.6265588 | 2400.585336 | -0.0078 | 0.994 | -3.15E-09 | count | 1 |
| AC092354.2 | -18.6265588 | 2400.585336 | -0.0078 | 0.994 | -3.15E-09 | count | 1 |
| POU3F2     | -18.6265588 | 2400.585336 | -0.0078 | 0.994 | -3.15E-09 | count | 1 |
| LINC00222  | -18.6265588 | 2400.585336 | -0.0078 | 0.994 | -3.15E-09 | count | 1 |
| AC005537.1 | -18.6265588 | 2400.585336 | -0.0078 | 0.994 | -3.15E-09 | count | 1 |
| LINC01447  | -18.6265588 | 2400.585336 | -0.0078 | 0.994 | -3.15E-09 | count | 1 |
| AC005009.2 | -18.6265588 | 2400.585336 | -0.0078 | 0.994 | -3.15E-09 | count | 1 |
| AC004522.2 | -18.6265588 | 2400.585336 | -0.0078 | 0.994 | -3.15E-09 | count | 1 |
| OR9A4      | -18.6265588 | 2400.585336 | -0.0078 | 0.994 | -3.15E-09 | count | 1 |
| AC092681.3 | -18.6265588 | 2400.585336 | -0.0078 | 0.994 | -3.15E-09 | count | 1 |
| MAGEA8-AS1 | -18.6265588 | 2400.585336 | -0.0078 | 0.994 | -3.15E-09 | count | 1 |
| AC246817.2 | -18.6265588 | 2400.585336 | -0.0078 | 0.994 | -3.15E-09 | count | 1 |
| AC084024.3 | -18.6265588 | 2400.585336 | -0.0078 | 0.994 | -3.15E-09 | count | 1 |
| OPRK1      | -18.6265588 | 2400.585336 | -0.0078 | 0.994 | -3.15E-09 | count | 1 |
| AC083967.1 | -18.6265588 | 2400.585336 | -0.0078 | 0.994 | -3.15E-09 | count | 1 |
| AL138781.1 | -18.6265588 | 2400.585336 | -0.0078 | 0.994 | -3.15E-09 | count | 1 |
| AP001775.2 | -18.6265588 | 2400.585336 | -0.0078 | 0.994 | -3.15E-09 | count | 1 |
| AL732437.1 | -18.6265588 | 2400.585336 | -0.0078 | 0.994 | -3.15E-09 | count | 1 |
| PRF1       | -18.6265588 | 2400.585336 | -0.0078 | 0.994 | -3.15E-09 | count | 1 |
| AC092112.1 | -18.6265588 | 2400.585336 | -0.0078 | 0.994 | -3.15E-09 | count | 1 |
| AC084816.1 | -18.6265588 | 2400.585336 | -0.0078 | 0.994 | -3.15E-09 | count | 1 |
| AMDHD1     | -18.6265588 | 2400.585336 | -0.0078 | 0.994 | -3.15E-09 | count | 1 |
| AC007569.1 | -18.6265588 | 2400.585336 | -0.0078 | 0.994 | -3.15E-09 | count | 1 |
| ENOX1-AS1  | -18.6265588 | 2400.585336 | -0.0078 | 0.994 | -3.15E-09 | count | 1 |
| AL138960.1 | -18.6265588 | 2400.585336 | -0.0078 | 0.994 | -3.15E-09 | count | 1 |
| GPR18      | -18.6265588 | 2400.585336 | -0.0078 | 0.994 | -3.15E-09 | count | 1 |
| AC013451.1 | -18.6265588 | 2400.585336 | -0.0078 | 0.994 | -3.15E-09 | count | 1 |
| AC087457.1 | -18.6265588 | 2400.585336 | -0.0078 | 0.994 | -3.15E-09 | count | 1 |
| AC021483.1 | -18.6265588 | 2400.585336 | -0.0078 | 0.994 | -3.15E-09 | count | 1 |
| CEMP1      | -18.6265588 | 2400.585336 | -0.0078 | 0.994 | -3.15E-09 | count | 1 |
| AC022167.3 | -18.6265588 | 2400.585336 | -0.0078 | 0.994 | -3.15E-09 | count | 1 |
| AC109446.3 | -18.6265588 | 2400.585336 | -0.0078 | 0.994 | -3.15E-09 | count | 1 |
| AC099518.3 | -18.6265588 | 2400.585336 | -0.0078 | 0.994 | -3.15E-09 | count | 1 |
| AC009093.5 | -18.6265588 | 2400.585336 | -0.0078 | 0.994 | -3.15E-09 | count | 1 |
| AC009088.1 | -18.6265588 | 2400.585336 | -0.0078 | 0.994 | -3.15E-09 | count | 1 |
| AC138028.1 | -18.6265588 | 2400.585336 | -0.0078 | 0.994 | -3.15E-09 | count | 1 |
| AC098850.2 | -18.6265588 | 2400.585336 | -0.0078 | 0.994 | -3.15E-09 | count | 1 |
| RASL10B    | -18.6265588 | 2400.585336 | -0.0078 | 0.994 | -3.15E-09 | count | 1 |

|            |             |             |         |       |           |       |   |
|------------|-------------|-------------|---------|-------|-----------|-------|---|
| AC005920.1 | -18.6265588 | 2400.585336 | -0.0078 | 0.994 | -3.15E-09 | count | 1 |
| AC005920.3 | -18.6265588 | 2400.585336 | -0.0078 | 0.994 | -3.15E-09 | count | 1 |
| LINC01929  | -18.6265588 | 2400.585336 | -0.0078 | 0.994 | -3.15E-09 | count | 1 |
| AL161938.1 | -18.6265588 | 2400.585336 | -0.0078 | 0.994 | -3.15E-09 | count | 1 |
| LINC01775  | -18.6265588 | 2400.585336 | -0.0078 | 0.994 | -3.15E-09 | count | 1 |
| AC004637.1 | -18.6265588 | 2400.585336 | -0.0078 | 0.994 | -3.15E-09 | count | 1 |
| AC020908.3 | -18.6265588 | 2400.585336 | -0.0078 | 0.994 | -3.15E-09 | count | 1 |
| AC020928.3 | -18.6265588 | 2400.585336 | -0.0078 | 0.994 | -3.15E-09 | count | 1 |
| AC020909.3 | -18.6265588 | 2400.585336 | -0.0078 | 0.994 | -3.15E-09 | count | 1 |
| Z82243.1   | -18.6265588 | 2400.585336 | -0.0078 | 0.994 | -3.15E-09 | count | 1 |
| SMC1B      | -18.6265588 | 2400.585336 | -0.0078 | 0.994 | -3.15E-09 | count | 1 |
| U62317.5   | -18.6265588 | 2400.585336 | -0.0078 | 0.994 | -3.15E-09 | count | 1 |
| AC233755.1 | -18.6265588 | 2400.585336 | -0.0078 | 0.994 | -3.15E-09 | count | 1 |
| AL035706.1 | -18.6265588 | 2400.585336 | -0.0078 | 0.994 | -3.15E-09 | count | 1 |
| AC104836.1 | -18.6265588 | 2400.585336 | -0.0078 | 0.994 | -3.15E-09 | count | 1 |
| AL359962.2 | -18.6265588 | 2400.585336 | -0.0078 | 0.994 | -3.15E-09 | count | 1 |
| ATP2B2     | -18.6265588 | 2400.585336 | -0.0078 | 0.994 | -3.15E-09 | count | 1 |
| LINC01998  | -18.6265588 | 2400.585336 | -0.0078 | 0.994 | -3.15E-09 | count | 1 |
| AC055764.2 | -18.6265588 | 2400.585336 | -0.0078 | 0.994 | -3.15E-09 | count | 1 |
| AC112250.2 | -18.6265588 | 2400.585336 | -0.0078 | 0.994 | -3.15E-09 | count | 1 |
| FABP6      | -18.6265588 | 2400.585336 | -0.0078 | 0.994 | -3.15E-09 | count | 1 |
| AL023284.4 | -18.6265588 | 2400.585336 | -0.0078 | 0.994 | -3.15E-09 | count | 1 |
| MAS1       | -18.6265588 | 2400.585336 | -0.0078 | 0.994 | -3.15E-09 | count | 1 |
| AC073957.3 | -18.6265588 | 2400.585336 | -0.0078 | 0.994 | -3.15E-09 | count | 1 |
| TFEC       | -18.6265588 | 2400.585336 | -0.0078 | 0.994 | -3.15E-09 | count | 1 |
| WEE2       | -18.6265588 | 2400.585336 | -0.0078 | 0.994 | -3.15E-09 | count | 1 |
| AF196972.1 | -18.6265588 | 2400.585336 | -0.0078 | 0.994 | -3.15E-09 | count | 1 |
| P2RY10     | -18.6265588 | 2400.585336 | -0.0078 | 0.994 | -3.15E-09 | count | 1 |
| SASH3      | -18.6265588 | 2400.585336 | -0.0078 | 0.994 | -3.15E-09 | count | 1 |
| AP000943.3 | -18.6265588 | 2400.585336 | -0.0078 | 0.994 | -3.15E-09 | count | 1 |
| CARMIL3    | -18.6265588 | 2400.585336 | -0.0078 | 0.994 | -3.15E-09 | count | 1 |
| AL356756.1 | -18.6265588 | 2400.585336 | -0.0078 | 0.994 | -3.15E-09 | count | 1 |
| AL049870.2 | -18.6265588 | 2400.585336 | -0.0078 | 0.994 | -3.15E-09 | count | 1 |
| CA5A       | -18.6265588 | 2400.585336 | -0.0078 | 0.994 | -3.15E-09 | count | 1 |
| PIK3R5     | -18.6265588 | 2400.585336 | -0.0078 | 0.994 | -3.15E-09 | count | 1 |
| ABCA9-AS1  | -18.6265588 | 2400.585336 | -0.0078 | 0.994 | -3.15E-09 | count | 1 |
| QRICH2     | -18.6265588 | 2400.585336 | -0.0078 | 0.994 | -3.15E-09 | count | 1 |
| AC015819.2 | -18.6265588 | 2400.585336 | -0.0078 | 0.994 | -3.15E-09 | count | 1 |
| ZNF341-AS1 | -18.6265588 | 2400.585336 | -0.0078 | 0.994 | -3.15E-09 | count | 1 |
| FO393401.1 | -18.6265588 | 2400.585336 | -0.0078 | 0.994 | -3.15E-09 | count | 1 |
| AC012615.2 | -18.6265588 | 2400.585336 | -0.0078 | 0.994 | -3.15E-09 | count | 1 |
| KCNN1      | -18.6265588 | 2400.585336 | -0.0078 | 0.994 | -3.15E-09 | count | 1 |
| SLC5A9     | -18.6265588 | 2400.585336 | -0.0078 | 0.994 | -3.15E-09 | count | 1 |
| ZRANB2-AS1 | -18.6265588 | 2400.585336 | -0.0078 | 0.994 | -3.15E-09 | count | 1 |
| SETSP      | -18.6265588 | 2400.585336 | -0.0078 | 0.994 | -3.15E-09 | count | 1 |

|            |             |             |         |       |           |       |   |
|------------|-------------|-------------|---------|-------|-----------|-------|---|
| LINC01731  | -18.6265588 | 2400.585336 | -0.0078 | 0.994 | -3.15E-09 | count | 1 |
| AC012073.1 | -18.6265588 | 2400.585336 | -0.0078 | 0.994 | -3.15E-09 | count | 1 |
| AC106869.1 | -18.6265588 | 2400.585336 | -0.0078 | 0.994 | -3.15E-09 | count | 1 |
| RPRM       | -18.6265588 | 2400.585336 | -0.0078 | 0.994 | -3.15E-09 | count | 1 |
| HJURP      | -18.6265588 | 2400.585336 | -0.0078 | 0.994 | -3.15E-09 | count | 1 |
| LINC01967  | -18.6265588 | 2400.585336 | -0.0078 | 0.994 | -3.15E-09 | count | 1 |
| CD80       | -18.6265588 | 2400.585336 | -0.0078 | 0.994 | -3.15E-09 | count | 1 |
| LINC02014  | -18.6265588 | 2400.585336 | -0.0078 | 0.994 | -3.15E-09 | count | 1 |
| LINC02067  | -18.6265588 | 2400.585336 | -0.0078 | 0.994 | -3.15E-09 | count | 1 |
| AC093591.2 | -18.6265588 | 2400.585336 | -0.0078 | 0.994 | -3.15E-09 | count | 1 |
| STMN4      | -18.6265588 | 2400.585336 | -0.0078 | 0.994 | -3.15E-09 | count | 1 |
| CNGB3      | -18.6265588 | 2400.585336 | -0.0078 | 0.994 | -3.15E-09 | count | 1 |
| AC016405.2 | -18.6265588 | 2400.585336 | -0.0078 | 0.994 | -3.15E-09 | count | 1 |
| AL391987.2 | -18.6265588 | 2400.585336 | -0.0078 | 0.994 | -3.15E-09 | count | 1 |
| AL451065.1 | -18.6265588 | 2400.585336 | -0.0078 | 0.994 | -3.15E-09 | count | 1 |
| STPG3-AS1  | -18.6265588 | 2400.585336 | -0.0078 | 0.994 | -3.15E-09 | count | 1 |
| AC068385.1 | -18.6265588 | 2400.585336 | -0.0078 | 0.994 | -3.15E-09 | count | 1 |
| AP002360.2 | -18.6265588 | 2400.585336 | -0.0078 | 0.994 | -3.15E-09 | count | 1 |
| CFAP43     | -18.6265588 | 2400.585336 | -0.0078 | 0.994 | -3.15E-09 | count | 1 |
| TMEM52B    | -18.6265588 | 2400.585336 | -0.0078 | 0.994 | -3.15E-09 | count | 1 |
| AC025031.2 | -18.6265588 | 2400.585336 | -0.0078 | 0.994 | -3.15E-09 | count | 1 |
| AL590096.1 | -18.6265588 | 2400.585336 | -0.0078 | 0.994 | -3.15E-09 | count | 1 |
| C13orf42   | -18.6265588 | 2400.585336 | -0.0078 | 0.994 | -3.15E-09 | count | 1 |
| LINC01500  | -18.6265588 | 2400.585336 | -0.0078 | 0.994 | -3.15E-09 | count | 1 |
| AC084756.1 | -18.6265588 | 2400.585336 | -0.0078 | 0.994 | -3.15E-09 | count | 1 |
| AC090617.5 | -18.6265588 | 2400.585336 | -0.0078 | 0.994 | -3.15E-09 | count | 1 |
| AC068418.1 | -18.6265588 | 2400.585336 | -0.0078 | 0.994 | -3.15E-09 | count | 1 |
| AC104564.4 | -18.6265588 | 2400.585336 | -0.0078 | 0.994 | -3.15E-09 | count | 1 |
| AC139530.3 | -18.6265588 | 2400.585336 | -0.0078 | 0.994 | -3.15E-09 | count | 1 |
| AC132938.1 | -18.6265588 | 2400.585336 | -0.0078 | 0.994 | -3.15E-09 | count | 1 |
| CEACAM4    | -18.6265588 | 2400.585336 | -0.0078 | 0.994 | -3.15E-09 | count | 1 |
| FP236383.2 | -18.6265588 | 2400.585336 | -0.0078 | 0.994 | -3.15E-09 | count | 1 |
| LINC00165  | -18.6265588 | 2400.585336 | -0.0078 | 0.994 | -3.15E-09 | count | 1 |
| AL031432.3 | -18.6265588 | 2400.585336 | -0.0078 | 0.994 | -3.15E-09 | count | 1 |
| AL049795.1 | -18.6265588 | 2400.585336 | -0.0078 | 0.994 | -3.15E-09 | count | 1 |
| AC104458.1 | -18.6265588 | 2400.585336 | -0.0078 | 0.994 | -3.15E-09 | count | 1 |
| AC097059.2 | -18.6265588 | 2400.585336 | -0.0078 | 0.994 | -3.15E-09 | count | 1 |
| AC092894.1 | -18.6265588 | 2400.585336 | -0.0078 | 0.994 | -3.15E-09 | count | 1 |
| GPR156     | -18.6265588 | 2400.585336 | -0.0078 | 0.994 | -3.15E-09 | count | 1 |
| LINC02021  | -18.6265588 | 2400.585336 | -0.0078 | 0.994 | -3.15E-09 | count | 1 |
| AC110751.1 | -18.6265588 | 2400.585336 | -0.0078 | 0.994 | -3.15E-09 | count | 1 |
| AC034199.1 | -18.6265588 | 2400.585336 | -0.0078 | 0.994 | -3.15E-09 | count | 1 |
| AC018635.2 | -18.6265588 | 2400.585336 | -0.0078 | 0.994 | -3.15E-09 | count | 1 |
| CYSRT1     | -18.6265588 | 2400.585336 | -0.0078 | 0.994 | -3.15E-09 | count | 1 |
| AC131571.1 | -18.6265588 | 2400.585336 | -0.0078 | 0.994 | -3.15E-09 | count | 1 |

|            |             |             |         |       |           |       |   |
|------------|-------------|-------------|---------|-------|-----------|-------|---|
| AL731575.1 | -18.6265588 | 2400.585336 | -0.0078 | 0.994 | -3.15E-09 | count | 1 |
| KCNMA1-AS3 | -18.6265588 | 2400.585336 | -0.0078 | 0.994 | -3.15E-09 | count | 1 |
| FOXMI      | -18.6265588 | 2400.585336 | -0.0078 | 0.994 | -3.15E-09 | count | 1 |
| FAM186B    | -18.6265588 | 2400.585336 | -0.0078 | 0.994 | -3.15E-09 | count | 1 |
| NR1H4      | -18.6265588 | 2400.585336 | -0.0078 | 0.994 | -3.15E-09 | count | 1 |
| AC069503.1 | -18.6265588 | 2400.585336 | -0.0078 | 0.994 | -3.15E-09 | count | 1 |
| AL356259.1 | -18.6265588 | 2400.585336 | -0.0078 | 0.994 | -3.15E-09 | count | 1 |
| ITGAL      | -18.6265588 | 2400.585336 | -0.0078 | 0.994 | -3.15E-09 | count | 1 |
| AL121890.4 | -18.6265588 | 2400.585336 | -0.0078 | 0.994 | -3.15E-09 | count | 1 |
| TLDC2      | -18.6265588 | 2400.585336 | -0.0078 | 0.994 | -3.15E-09 | count | 1 |
| AL353803.1 | -18.6265588 | 2400.585336 | -0.0078 | 0.994 | -3.15E-09 | count | 1 |
| CCNA1      | -18.6265588 | 2400.585336 | -0.0078 | 0.994 | -3.15E-09 | count | 1 |
| AC010547.1 | -18.6265588 | 2400.585336 | -0.0078 | 0.994 | -3.15E-09 | count | 1 |
| AC127537.1 | -18.6265588 | 2400.585336 | -0.0078 | 0.994 | -3.15E-09 | count | 1 |
| TMPRSS2    | -18.6265588 | 2400.585336 | -0.0078 | 0.994 | -3.15E-09 | count | 1 |
| LRP4-AS1   | -0.2305118  | 0.7638701   | -0.3018 | 0.763 | -2.68E-09 | count | 1 |
| AP003555.2 | -0.0814593  | 0.5812796   | -0.1401 | 0.889 | -2.48E-09 | count | 1 |
| AC009154.2 | -0.2106951  | 0.6167365   | -0.3416 | 0.733 | -2.44E-09 | count | 1 |
| ATXN7      | -0.2106951  | 0.7026068   | -0.2999 | 0.764 | -2.44E-09 | count | 1 |
| RNF148     | -0.5272205  | 1.2050645   | -0.4375 | 0.662 | -2.42E-09 | count | 1 |
| AL354760.1 | -0.5272205  | 1.1034833   | -0.4778 | 0.633 | -2.42E-09 | count | 1 |
| HSD17B2    | -0.5272205  | 1.2050645   | -0.4375 | 0.662 | -2.42E-09 | count | 1 |
| SYTL5      | -0.5272205  | 1.1034833   | -0.4778 | 0.633 | -2.42E-09 | count | 1 |
| CATSPERB   | -0.5272205  | 1.1034833   | -0.4778 | 0.633 | -2.42E-09 | count | 1 |
| PGLYRP2    | -0.5272205  | 1.1034833   | -0.4778 | 0.633 | -2.42E-09 | count | 1 |
| IL12RB1    | -0.5272205  | 1.2050645   | -0.4375 | 0.662 | -2.42E-09 | count | 1 |
| AL590666.3 | -0.5272205  | 1.2050645   | -0.4375 | 0.662 | -2.42E-09 | count | 1 |
| AC021242.3 | -0.5272205  | 1.2050645   | -0.4375 | 0.662 | -2.42E-09 | count | 1 |
| ANKRD61    | -0.5272205  | 1.1034833   | -0.4778 | 0.633 | -2.42E-09 | count | 1 |
| NETO2      | -0.5272205  | 1.2050645   | -0.4375 | 0.662 | -2.42E-09 | count | 1 |
| TMEM81     | -0.5272205  | 1.1034833   | -0.4778 | 0.633 | -2.42E-09 | count | 1 |
| AC112715.1 | -0.5272205  | 1.2050645   | -0.4375 | 0.662 | -2.42E-09 | count | 1 |
| AC100803.1 | -0.5272205  | 1.2050645   | -0.4375 | 0.662 | -2.42E-09 | count | 1 |
| ERFE       | -0.5272205  | 1.2050645   | -0.4375 | 0.662 | -2.42E-09 | count | 1 |
| AC034243.1 | -0.5272205  | 1.2050645   | -0.4375 | 0.662 | -2.42E-09 | count | 1 |
| CORO2A     | -0.5272205  | 1.1034833   | -0.4778 | 0.633 | -2.42E-09 | count | 1 |
| AC027319.1 | -0.5272205  | 1.1034833   | -0.4778 | 0.633 | -2.42E-09 | count | 1 |
| SMIM11B    | -0.5272205  | 1.1034833   | -0.4778 | 0.633 | -2.42E-09 | count | 1 |
| AOC2       | -0.5272205  | 1.2050645   | -0.4375 | 0.662 | -2.42E-09 | count | 1 |
| AL353622.1 | -0.5272205  | 1.2050645   | -0.4375 | 0.662 | -2.42E-09 | count | 1 |
| FCRL5      | -0.5272205  | 1.1034833   | -0.4778 | 0.633 | -2.42E-09 | count | 1 |
| ABCA4      | -0.5272205  | 1.2050645   | -0.4375 | 0.662 | -2.42E-09 | count | 1 |
| FAM239A    | -0.5272205  | 1.2050645   | -0.4375 | 0.662 | -2.42E-09 | count | 1 |
| OSBP2      | -0.5272205  | 1.2050645   | -0.4375 | 0.662 | -2.42E-09 | count | 1 |
| AC008735.2 | -0.5272205  | 1.2050645   | -0.4375 | 0.662 | -2.42E-09 | count | 1 |

|              |            |           |         |       |           |       |   |
|--------------|------------|-----------|---------|-------|-----------|-------|---|
| CHRNA10      | -0.5272205 | 1.2050645 | -0.4375 | 0.662 | -2.42E-09 | count | 1 |
| AC006518.7   | -0.5272205 | 1.1034833 | -0.4778 | 0.633 | -2.42E-09 | count | 1 |
| POU2AF1      | -0.5272205 | 1.1034833 | -0.4778 | 0.633 | -2.42E-09 | count | 1 |
| AC120114.3   | -0.5272205 | 1.1034833 | -0.4778 | 0.633 | -2.42E-09 | count | 1 |
| OSM          | -0.5272205 | 1.1034833 | -0.4778 | 0.633 | -2.42E-09 | count | 1 |
| AC010904.2   | -0.5272205 | 1.1034833 | -0.4778 | 0.633 | -2.42E-09 | count | 1 |
| AC135012.1   | -0.5272205 | 1.2050645 | -0.4375 | 0.662 | -2.42E-09 | count | 1 |
| CTSG         | -0.5272205 | 1.2050645 | -0.4375 | 0.662 | -2.42E-09 | count | 1 |
| CDH3         | -0.5272205 | 1.1034833 | -0.4778 | 0.633 | -2.42E-09 | count | 1 |
| AC117490.2   | -0.5272205 | 1.2050645 | -0.4375 | 0.662 | -2.42E-09 | count | 1 |
| GPT          | -0.5272205 | 1.1034833 | -0.4778 | 0.633 | -2.42E-09 | count | 1 |
| KIAA1614-AS1 | -0.5272205 | 1.1034833 | -0.4778 | 0.633 | -2.42E-09 | count | 1 |
| AL136304.1   | -0.5272205 | 1.2050645 | -0.4375 | 0.662 | -2.42E-09 | count | 1 |
| AL139158.2   | -0.5272205 | 1.1034833 | -0.4778 | 0.633 | -2.42E-09 | count | 1 |
| AC015961.2   | -0.5272205 | 1.2050645 | -0.4375 | 0.662 | -2.42E-09 | count | 1 |
| FAM71D       | -0.5272205 | 1.1034833 | -0.4778 | 0.633 | -2.42E-09 | count | 1 |
| ROPN1        | -0.5272205 | 1.2050645 | -0.4375 | 0.662 | -2.42E-09 | count | 1 |
| AL137779.2   | -0.5272205 | 1.1034833 | -0.4778 | 0.633 | -2.42E-09 | count | 1 |
| FAM95B1      | -0.5272205 | 1.2050645 | -0.4375 | 0.662 | -2.42E-09 | count | 1 |
| TRAT1        | -0.5272205 | 1.2050645 | -0.4375 | 0.662 | -2.42E-09 | count | 1 |
| AC005614.1   | -0.5272205 | 1.2050645 | -0.4375 | 0.662 | -2.42E-09 | count | 1 |
| ZBTB8B       | -0.5272205 | 1.1034833 | -0.4778 | 0.633 | -2.42E-09 | count | 1 |
| AC025887.2   | -0.5272205 | 1.1034833 | -0.4778 | 0.633 | -2.42E-09 | count | 1 |
| PPEF1        | -0.5272205 | 1.2050645 | -0.4375 | 0.662 | -2.42E-09 | count | 1 |
| AL031666.2   | -0.5272205 | 1.2050645 | -0.4375 | 0.662 | -2.42E-09 | count | 1 |
| AC017002.3   | -0.5272205 | 1.1034833 | -0.4778 | 0.633 | -2.42E-09 | count | 1 |
| AL031665.2   | -0.5272205 | 1.2050645 | -0.4375 | 0.662 | -2.42E-09 | count | 1 |
| VWC2         | -0.5272205 | 1.2050645 | -0.4375 | 0.662 | -2.42E-09 | count | 1 |
| RTEL1        | -0.5272205 | 1.1034833 | -0.4778 | 0.633 | -2.42E-09 | count | 1 |
| HIST1H4J     | -0.5272205 | 1.1034833 | -0.4778 | 0.633 | -2.42E-09 | count | 1 |
| AL356020.1   | -0.5272205 | 1.2050645 | -0.4375 | 0.662 | -2.42E-09 | count | 1 |
| DSG2         | -0.5272205 | 1.2050645 | -0.4375 | 0.662 | -2.42E-09 | count | 1 |
| KLHL10       | -0.5272205 | 1.1034833 | -0.4778 | 0.633 | -2.42E-09 | count | 1 |
| TRIM72       | -0.5272205 | 1.2050645 | -0.4375 | 0.662 | -2.42E-09 | count | 1 |
| LY86         | -0.5272205 | 1.1034833 | -0.4778 | 0.633 | -2.42E-09 | count | 1 |
| AL157400.3   | -0.5272205 | 1.2050645 | -0.4375 | 0.662 | -2.42E-09 | count | 1 |
| AC074044.1   | -0.5272205 | 1.1034833 | -0.4778 | 0.633 | -2.42E-09 | count | 1 |
| PCYT1B       | -0.5272205 | 1.1034833 | -0.4778 | 0.633 | -2.42E-09 | count | 1 |
| AC090912.1   | -0.5272205 | 1.1034833 | -0.4778 | 0.633 | -2.42E-09 | count | 1 |
| UXT-AS1      | -0.5272205 | 1.1034833 | -0.4778 | 0.633 | -2.42E-09 | count | 1 |
| AC087393.2   | -0.5272205 | 1.2050645 | -0.4375 | 0.662 | -2.42E-09 | count | 1 |
| KCNC1        | -0.5272205 | 1.2050645 | -0.4375 | 0.662 | -2.42E-09 | count | 1 |
| SCML4        | -0.5272205 | 1.1034833 | -0.4778 | 0.633 | -2.42E-09 | count | 1 |
| AL132821.1   | -0.5272205 | 1.2050645 | -0.4375 | 0.662 | -2.42E-09 | count | 1 |
| AC073335.2   | -0.1555218 | 0.8253019 | -0.1884 | 0.851 | -1.77E-09 | count | 1 |



|              |            |           |         |       |           |       |   |
|--------------|------------|-----------|---------|-------|-----------|-------|---|
| AC002454.1   | -0.1555218 | 0.7409474 | -0.2099 | 0.834 | -1.77E-09 | count | 1 |
| LEKR1        | -0.1555218 | 0.7409474 | -0.2099 | 0.834 | -1.77E-09 | count | 1 |
| NFE4         | -0.1555218 | 0.7409474 | -0.2099 | 0.834 | -1.77E-09 | count | 1 |
| PCDHA7       | -0.3429448 | 0.8282103 | -0.4141 | 0.679 | -1.51E-09 | count | 1 |
| LINC00664    | -0.3429448 | 0.8282103 | -0.4141 | 0.679 | -1.51E-09 | count | 1 |
| IL1RL2       | -0.3429448 | 0.9305197 | -0.3686 | 0.712 | -1.51E-09 | count | 1 |
| FRMPD3       | -0.3429448 | 0.9305197 | -0.3686 | 0.712 | -1.51E-09 | count | 1 |
| DEPDC4       | -0.3429448 | 0.9305197 | -0.3686 | 0.712 | -1.51E-09 | count | 1 |
| AC006213.3   | -0.3429448 | 0.9305197 | -0.3686 | 0.712 | -1.51E-09 | count | 1 |
| AL603840.1   | -0.3429448 | 0.9305197 | -0.3686 | 0.712 | -1.51E-09 | count | 1 |
| KCNK12       | -0.3429448 | 0.9305197 | -0.3686 | 0.712 | -1.51E-09 | count | 1 |
| SH2D6        | -0.3429448 | 0.9305197 | -0.3686 | 0.712 | -1.51E-09 | count | 1 |
| ZAP70        | -0.3429448 | 0.9305197 | -0.3686 | 0.712 | -1.51E-09 | count | 1 |
| LINC01886    | -0.3429448 | 0.9305197 | -0.3686 | 0.712 | -1.51E-09 | count | 1 |
| AC010127.1   | -0.3429448 | 0.9305197 | -0.3686 | 0.712 | -1.51E-09 | count | 1 |
| LINC01208    | -0.3429448 | 0.9305197 | -0.3686 | 0.712 | -1.51E-09 | count | 1 |
| AC106047.1   | -0.3429448 | 0.9305197 | -0.3686 | 0.712 | -1.51E-09 | count | 1 |
| AC096586.2   | -0.3429448 | 0.9305197 | -0.3686 | 0.712 | -1.51E-09 | count | 1 |
| SPINK9       | -0.3429448 | 0.9305197 | -0.3686 | 0.712 | -1.51E-09 | count | 1 |
| AL133255.1   | -0.3429448 | 0.9305197 | -0.3686 | 0.712 | -1.51E-09 | count | 1 |
| AL391863.1   | -0.3429448 | 0.9305197 | -0.3686 | 0.712 | -1.51E-09 | count | 1 |
| ASIC3        | -0.3429448 | 0.9305197 | -0.3686 | 0.712 | -1.51E-09 | count | 1 |
| FGF20        | -0.3429448 | 0.9305197 | -0.3686 | 0.712 | -1.51E-09 | count | 1 |
| AC021785.1   | -0.3429448 | 0.9305197 | -0.3686 | 0.712 | -1.51E-09 | count | 1 |
| KCNK9        | -0.3429448 | 0.9305197 | -0.3686 | 0.712 | -1.51E-09 | count | 1 |
| LYNX1-SLURP2 | -0.3429448 | 0.9305197 | -0.3686 | 0.712 | -1.51E-09 | count | 1 |
| ANO9         | -0.3429448 | 0.9305197 | -0.3686 | 0.712 | -1.51E-09 | count | 1 |
| NAV2-AS2     | -0.3429448 | 0.9305197 | -0.3686 | 0.712 | -1.51E-09 | count | 1 |
| MPEG1        | -0.3429448 | 0.9305197 | -0.3686 | 0.712 | -1.51E-09 | count | 1 |
| LINC00167    | -0.3429448 | 0.9305197 | -0.3686 | 0.712 | -1.51E-09 | count | 1 |
| AL138820.1   | -0.3429448 | 0.9305197 | -0.3686 | 0.712 | -1.51E-09 | count | 1 |
| MAGEL2       | -0.3429448 | 0.9305197 | -0.3686 | 0.712 | -1.51E-09 | count | 1 |
| CPEB1-AS1    | -0.3429448 | 0.9305197 | -0.3686 | 0.712 | -1.51E-09 | count | 1 |
| SH3GL3       | -0.3429448 | 0.9305197 | -0.3686 | 0.712 | -1.51E-09 | count | 1 |
| AC019254.1   | -0.3429448 | 0.9305197 | -0.3686 | 0.712 | -1.51E-09 | count | 1 |
| AC008731.1   | -0.3429448 | 0.9305197 | -0.3686 | 0.712 | -1.51E-09 | count | 1 |
| AC106782.1   | -0.3429448 | 0.9305197 | -0.3686 | 0.712 | -1.51E-09 | count | 1 |
| AC106738.1   | -0.3429448 | 0.9305197 | -0.3686 | 0.712 | -1.51E-09 | count | 1 |
| AC080038.2   | -0.3429448 | 0.9305197 | -0.3686 | 0.712 | -1.51E-09 | count | 1 |
| AC087222.1   | -0.3429448 | 0.9305197 | -0.3686 | 0.712 | -1.51E-09 | count | 1 |
| MTRNR2L3     | -0.3429448 | 0.9305197 | -0.3686 | 0.712 | -1.51E-09 | count | 1 |
| AC010336.4   | -0.3429448 | 0.9305197 | -0.3686 | 0.712 | -1.51E-09 | count | 1 |
| OR7A17       | -0.3429448 | 0.9305197 | -0.3686 | 0.712 | -1.51E-09 | count | 1 |
| UNC13A       | -0.3429448 | 0.9305197 | -0.3686 | 0.712 | -1.51E-09 | count | 1 |
| CEACAM1      | -0.3429448 | 0.9305197 | -0.3686 | 0.712 | -1.51E-09 | count | 1 |

|            |            |           |         |       |           |       |   |
|------------|------------|-----------|---------|-------|-----------|-------|---|
| IGFL4      | -0.3429448 | 0.9305197 | -0.3686 | 0.712 | -1.51E-09 | count | 1 |
| PTPRH      | -0.3429448 | 0.9305197 | -0.3686 | 0.712 | -1.51E-09 | count | 1 |
| AC008735.4 | -0.3429448 | 0.9305197 | -0.3686 | 0.712 | -1.51E-09 | count | 1 |
| AL354956.1 | -0.3429448 | 0.9305197 | -0.3686 | 0.712 | -1.51E-09 | count | 1 |
| DAB1       | -0.3429448 | 0.9305197 | -0.3686 | 0.712 | -1.51E-09 | count | 1 |
| AL355472.4 | -0.3429448 | 0.9305197 | -0.3686 | 0.712 | -1.51E-09 | count | 1 |
| AC016722.3 | -0.3429448 | 0.9305197 | -0.3686 | 0.712 | -1.51E-09 | count | 1 |
| LINC01816  | -0.3429448 | 0.9305197 | -0.3686 | 0.712 | -1.51E-09 | count | 1 |
| AC012511.1 | -0.3429448 | 0.9305197 | -0.3686 | 0.712 | -1.51E-09 | count | 1 |
| CATIP      | -0.3429448 | 0.9305197 | -0.3686 | 0.712 | -1.51E-09 | count | 1 |
| AC026191.1 | -0.3429448 | 0.9305197 | -0.3686 | 0.712 | -1.51E-09 | count | 1 |
| AC105345.1 | -0.3429448 | 0.9305197 | -0.3686 | 0.712 | -1.51E-09 | count | 1 |
| ANKRD55    | -0.3429448 | 0.9305197 | -0.3686 | 0.712 | -1.51E-09 | count | 1 |
| LINC02147  | -0.3429448 | 0.9305197 | -0.3686 | 0.712 | -1.51E-09 | count | 1 |
| SNHG4      | -0.3429448 | 0.9305197 | -0.3686 | 0.712 | -1.51E-09 | count | 1 |
| LRRD1      | -0.3429448 | 0.9305197 | -0.3686 | 0.712 | -1.51E-09 | count | 1 |
| AC005064.1 | -0.3429448 | 0.9305197 | -0.3686 | 0.712 | -1.51E-09 | count | 1 |
| AC232271.1 | -0.3429448 | 0.9305197 | -0.3686 | 0.712 | -1.51E-09 | count | 1 |
| AC037459.4 | -0.3429448 | 0.9305197 | -0.3686 | 0.712 | -1.51E-09 | count | 1 |
| AGBL2      | -0.3429448 | 0.9305197 | -0.3686 | 0.712 | -1.51E-09 | count | 1 |
| ITGB1-DT   | -0.3429448 | 0.9305197 | -0.3686 | 0.712 | -1.51E-09 | count | 1 |
| BLNK       | -0.3429448 | 0.9305197 | -0.3686 | 0.712 | -1.51E-09 | count | 1 |
| KCNIP2     | -0.3429448 | 0.9305197 | -0.3686 | 0.712 | -1.51E-09 | count | 1 |
| CLIP1-AS1  | -0.3429448 | 0.9305197 | -0.3686 | 0.712 | -1.51E-09 | count | 1 |
| ELL3       | -0.3429448 | 0.9305197 | -0.3686 | 0.712 | -1.51E-09 | count | 1 |
| LINC02206  | -0.3429448 | 0.9305197 | -0.3686 | 0.712 | -1.51E-09 | count | 1 |
| PRC1-AS1   | -0.3429448 | 0.9305197 | -0.3686 | 0.712 | -1.51E-09 | count | 1 |
| ASB16      | -0.3429448 | 0.9305197 | -0.3686 | 0.712 | -1.51E-09 | count | 1 |
| AC005597.1 | -0.3429448 | 0.9305197 | -0.3686 | 0.712 | -1.51E-09 | count | 1 |
| AL022323.1 | -0.3429448 | 0.9305197 | -0.3686 | 0.712 | -1.51E-09 | count | 1 |
| AL359198.1 | -0.3429448 | 0.6575623 | -0.5215 | 0.602 | -1.51E-09 | count | 1 |
| AC092119.2 | -0.3429448 | 0.6575623 | -0.5215 | 0.602 | -1.51E-09 | count | 1 |
| ADGRG1     | -0.3429448 | 0.6575623 | -0.5215 | 0.602 | -1.51E-09 | count | 1 |
| AC092718.8 | -0.3429448 | 0.6575623 | -0.5215 | 0.602 | -1.51E-09 | count | 1 |
| AC097634.3 | -0.3429448 | 0.6575623 | -0.5215 | 0.602 | -1.51E-09 | count | 1 |
| AC080013.4 | -0.3429448 | 0.9305197 | -0.3686 | 0.712 | -1.51E-09 | count | 1 |
| AC239804.1 | -0.3429448 | 0.9305197 | -0.3686 | 0.712 | -1.51E-09 | count | 1 |
| BTK        | -0.3429448 | 0.7825106 | -0.4383 | 0.661 | -1.51E-09 | count | 1 |
| AL929472.2 | -0.3429448 | 0.7825106 | -0.4383 | 0.661 | -1.51E-09 | count | 1 |
| AP000704.1 | -0.3429448 | 0.7825106 | -0.4383 | 0.661 | -1.51E-09 | count | 1 |
| AC010457.1 | -0.3060312 | 0.704564  | -0.4344 | 0.664 | -1.33E-09 | count | 1 |
| NXP2       | -0.7114963 | 0.667847  | -1.0654 | 0.287 | -1.25E-09 | count | 1 |
| NUP210     | -0.7114963 | 0.667847  | -1.0654 | 0.287 | -1.25E-09 | count | 1 |
| GPR21      | -0.7114963 | 0.667847  | -1.0654 | 0.287 | -1.25E-09 | count | 1 |
| ADAMTS14   | -0.7114963 | 0.667847  | -1.0654 | 0.287 | -1.25E-09 | count | 1 |

|            |            |             |         |       |           |       |   |
|------------|------------|-------------|---------|-------|-----------|-------|---|
| KNDC1      | -0.7114963 | 0.667847    | -1.0654 | 0.287 | -1.25E-09 | count | 1 |
| AC079313.2 | -0.7114963 | 0.667847    | -1.0654 | 0.287 | -1.25E-09 | count | 1 |
| SCG3       | -0.7114963 | 0.667847    | -1.0654 | 0.287 | -1.25E-09 | count | 1 |
| AL451042.2 | -0.7114963 | 0.667847    | -1.0654 | 0.287 | -1.25E-09 | count | 1 |
| KIF26B     | -0.7114963 | 0.667847    | -1.0654 | 0.287 | -1.25E-09 | count | 1 |
| SATB2-AS1  | -0.7114963 | 0.667847    | -1.0654 | 0.287 | -1.25E-09 | count | 1 |
| CD28       | -0.7114963 | 0.667847    | -1.0654 | 0.287 | -1.25E-09 | count | 1 |
| ASIC4      | -0.7114963 | 0.667847    | -1.0654 | 0.287 | -1.25E-09 | count | 1 |
| AL138828.1 | -0.7114963 | 0.667847    | -1.0654 | 0.287 | -1.25E-09 | count | 1 |
| AC078845.1 | -0.7114963 | 0.667847    | -1.0654 | 0.287 | -1.25E-09 | count | 1 |
| AP003696.1 | -0.7114963 | 0.667847    | -1.0654 | 0.287 | -1.25E-09 | count | 1 |
| DDN        | -0.7114963 | 0.667847    | -1.0654 | 0.287 | -1.25E-09 | count | 1 |
| AC005759.1 | -0.7114963 | 0.667847    | -1.0654 | 0.287 | -1.25E-09 | count | 1 |
| AC010325.1 | -0.7114963 | 0.667847    | -1.0654 | 0.287 | -1.25E-09 | count | 1 |
| IGLV1-51   | -0.7114963 | 0.667847    | -1.0654 | 0.287 | -1.25E-09 | count | 1 |
| ADM2       | -0.7114963 | 0.667847    | -1.0654 | 0.287 | -1.25E-09 | count | 1 |
| AF127577.1 | -0.7114963 | 0.667847    | -1.0654 | 0.287 | -1.25E-09 | count | 1 |
| IGKV3-15   | -0.7114963 | 0.667847    | -1.0654 | 0.287 | -1.25E-09 | count | 1 |
| NEURL3     | -0.7114963 | 0.667847    | -1.0654 | 0.287 | -1.25E-09 | count | 1 |
| UBD        | -0.7114963 | 0.667847    | -1.0654 | 0.287 | -1.25E-09 | count | 1 |
| C10orf142  | -0.7114963 | 0.667847    | -1.0654 | 0.287 | -1.25E-09 | count | 1 |
| AL160313.1 | -0.7114963 | 0.667847    | -1.0654 | 0.287 | -1.25E-09 | count | 1 |
| ZNF385C    | -0.7114963 | 0.667847    | -1.0654 | 0.287 | -1.25E-09 | count | 1 |
| GHET1      | -0.0814593 | 0.8613961   | -0.0946 | 0.925 | -9.11E-10 | count | 1 |
| MTCL1      | -0.0814593 | 0.8552563   | -0.0952 | 0.924 | -9.11E-10 | count | 1 |
| C17orf53   | -0.0814593 | 0.8835152   | -0.0922 | 0.927 | -9.11E-10 | count | 1 |
| AC090630.1 | -0.0814593 | 0.7409615   | -0.1099 | 0.912 | -9.11E-10 | count | 1 |
| TTY10      | -0.0814593 | 0.9867007   | -0.0826 | 0.934 | -9.11E-10 | count | 1 |
| LINC01483  | -0.0086789 | 1.0464446   | -0.0083 | 0.993 | -9.52E-11 | count | 1 |
| CD96       | -0.0086789 | 0.7411999   | -0.0117 | 0.991 | -9.52E-11 | count | 1 |
| AL390728.5 | -0.0086789 | 0.7411999   | -0.0117 | 0.991 | -9.52E-11 | count | 1 |
| AC004540.1 | -0.0086789 | 0.7406361   | -0.0117 | 0.991 | -9.52E-11 | count | 1 |
| AC026367.3 | -0.0086789 | 0.7411999   | -0.0117 | 0.991 | -9.52E-11 | count | 1 |
| AC083837.1 | -0.0183491 | 0.5780188   | -0.0317 | 0.975 | -7.42E-11 | count | 1 |
| LYPD5      | -0.0183491 | 0.5780188   | -0.0317 | 0.975 | -7.42E-11 | count | 1 |
| AL360091.3 | -0.0183491 | 0.5780188   | -0.0317 | 0.975 | -7.42E-11 | count | 1 |
| C2CD4A     | -0.0183491 | 0.5780188   | -0.0317 | 0.975 | -7.42E-11 | count | 1 |
| MCHR1      | -0.0183491 | 0.747679    | -0.0245 | 0.98  | -7.42E-11 | count | 1 |
| APOA1      | 0.0459411  | 0.7447707   | 0.0617  | 0.951 | 4.96E-10  | count | 1 |
| ITPKA      | 0.0625204  | 0.6000802   | 0.1042  | 0.917 | 6.73E-10  | count | 1 |
| DRAXIN     | 0.0625204  | 0.8067835   | 0.0775  | 0.938 | 6.73E-10  | count | 1 |
| NT5C1A     | 18.1629337 | 2944.099178 | 0.0062  | 0.995 | 7.62E-10  | count | 1 |
| LINC01771  | 18.1629336 | 2944.099178 | 0.0062  | 0.995 | 7.62E-10  | count | 1 |
| GBP6       | 18.1629337 | 2944.099197 | 0.0062  | 0.995 | 7.62E-10  | count | 1 |
| BX005019.1 | 18.1629338 | 2944.099367 | 0.0062  | 0.995 | 7.62E-10  | count | 1 |

|            |            |             |        |       |          |       |   |
|------------|------------|-------------|--------|-------|----------|-------|---|
| TNFSF18    | 18.1629339 | 2944.0995   | 0.0062 | 0.995 | 7.62E-10 | count | 1 |
| AL449106.1 | 18.1629337 | 2944.099254 | 0.0062 | 0.995 | 7.62E-10 | count | 1 |
| LINC01873  | 18.1629336 | 2944.099538 | 0.0062 | 0.995 | 7.62E-10 | count | 1 |
| AC079354.1 | 18.1629335 | 2944.099121 | 0.0062 | 0.995 | 7.62E-10 | count | 1 |
| WNT10A     | 18.1629338 | 2944.0995   | 0.0062 | 0.995 | 7.62E-10 | count | 1 |
| AC009502.1 | 18.1629339 | 2944.099254 | 0.0062 | 0.995 | 7.62E-10 | count | 1 |
| AC008945.1 | 18.1629339 | 2944.099348 | 0.0062 | 0.995 | 7.62E-10 | count | 1 |
| AC008438.1 | 18.1629338 | 2944.099348 | 0.0062 | 0.995 | 7.62E-10 | count | 1 |
| AC104117.5 | 18.1629338 | 2944.099348 | 0.0062 | 0.995 | 7.62E-10 | count | 1 |
| C4A        | 18.1629338 | 2944.09931  | 0.0062 | 0.995 | 7.62E-10 | count | 1 |
| RIMS1      | 18.1629338 | 2944.099367 | 0.0062 | 0.995 | 7.62E-10 | count | 1 |
| AC004492.1 | 18.1629339 | 2944.099254 | 0.0062 | 0.995 | 7.62E-10 | count | 1 |
| AWAT2      | 18.1629337 | 2944.099254 | 0.0062 | 0.995 | 7.62E-10 | count | 1 |
| TEX11      | 18.1629336 | 2944.099348 | 0.0062 | 0.995 | 7.62E-10 | count | 1 |
| AC019257.1 | 18.1629338 | 2944.099386 | 0.0062 | 0.995 | 7.62E-10 | count | 1 |
| IGHEP2     | 18.1629336 | 2944.099538 | 0.0062 | 0.995 | 7.62E-10 | count | 1 |
| RLN2       | 18.1629338 | 2944.099462 | 0.0062 | 0.995 | 7.62E-10 | count | 1 |
| GLDC       | 18.1629339 | 2944.099254 | 0.0062 | 0.995 | 7.62E-10 | count | 1 |
| PDZD3      | 18.1629337 | 2944.099291 | 0.0062 | 0.995 | 7.62E-10 | count | 1 |
| AC129102.1 | 18.1629339 | 2944.099273 | 0.0062 | 0.995 | 7.62E-10 | count | 1 |
| AC079906.1 | 18.1629335 | 2944.099159 | 0.0062 | 0.995 | 7.62E-10 | count | 1 |
| AC023794.1 | 18.1629339 | 2944.0995   | 0.0062 | 0.995 | 7.62E-10 | count | 1 |
| GZMB       | 18.1629338 | 2944.099386 | 0.0062 | 0.995 | 7.62E-10 | count | 1 |
| G2E3-AS1   | 18.1629335 | 2944.099159 | 0.0062 | 0.995 | 7.62E-10 | count | 1 |
| SERPINA11  | 18.1629338 | 2944.099367 | 0.0062 | 0.995 | 7.62E-10 | count | 1 |
| EXD1       | 18.1629336 | 2944.099083 | 0.0062 | 0.995 | 7.62E-10 | count | 1 |
| AC005736.3 | 18.1629337 | 2944.099291 | 0.0062 | 0.995 | 7.62E-10 | count | 1 |
| LINC00922  | 18.1629336 | 2944.099216 | 0.0062 | 0.995 | 7.62E-10 | count | 1 |
| AC141424.1 | 18.1629335 | 2944.099159 | 0.0062 | 0.995 | 7.62E-10 | count | 1 |
| LPO        | 18.1629336 | 2944.099083 | 0.0062 | 0.995 | 7.62E-10 | count | 1 |
| ALPK2      | 18.1629337 | 2944.09931  | 0.0062 | 0.995 | 7.62E-10 | count | 1 |
| AL132655.1 | 18.1629338 | 2944.099367 | 0.0062 | 0.995 | 7.62E-10 | count | 1 |
| PLPPR3     | 18.1629335 | 2944.099121 | 0.0062 | 0.995 | 7.62E-10 | count | 1 |
| EXOC3L2    | 18.1629338 | 2944.099348 | 0.0062 | 0.995 | 7.62E-10 | count | 1 |
| IGLC6      | 18.1629335 | 2944.09914  | 0.0062 | 0.995 | 7.62E-10 | count | 1 |
| Z83844.1   | 18.1629339 | 2944.09931  | 0.0062 | 0.995 | 7.62E-10 | count | 1 |
| CACNA11    | 18.1629335 | 2944.099159 | 0.0062 | 0.995 | 7.62E-10 | count | 1 |
| AP001434.1 | 18.1629338 | 2944.09931  | 0.0062 | 0.995 | 7.62E-10 | count | 1 |
| PLCH2      | 18.1629336 | 2944.099216 | 0.0062 | 0.995 | 7.62E-10 | count | 1 |
| CELA2B     | 18.1629334 | 2944.098932 | 0.0062 | 0.995 | 7.62E-10 | count | 1 |
| AL136115.2 | 18.1629332 | 2944.099348 | 0.0062 | 0.995 | 7.62E-10 | count | 1 |
| LRRC53     | 18.1629332 | 2944.099424 | 0.0062 | 0.995 | 7.62E-10 | count | 1 |
| HIST2H3D   | 18.1629335 | 2944.099273 | 0.0062 | 0.995 | 7.62E-10 | count | 1 |
| HORMAD1    | 18.1629336 | 2944.099235 | 0.0062 | 0.995 | 7.62E-10 | count | 1 |
| AL391069.4 | 18.1629336 | 2944.099216 | 0.0062 | 0.995 | 7.62E-10 | count | 1 |

|            |            |             |        |       |          |       |   |
|------------|------------|-------------|--------|-------|----------|-------|---|
| AL589765.7 | 18.1629336 | 2944.098932 | 0.0062 | 0.995 | 7.62E-10 | count | 1 |
| MAEL       | 18.1629337 | 2944.099159 | 0.0062 | 0.995 | 7.62E-10 | count | 1 |
| AL031733.2 | 18.1629336 | 2944.099216 | 0.0062 | 0.995 | 7.62E-10 | count | 1 |
| AL359265.3 | 18.1629333 | 2944.09914  | 0.0062 | 0.995 | 7.62E-10 | count | 1 |
| CR1L       | 18.1629332 | 2944.099159 | 0.0062 | 0.995 | 7.62E-10 | count | 1 |
| MIR3681HG  | 18.1629336 | 2944.099216 | 0.0062 | 0.995 | 7.62E-10 | count | 1 |
| LINC01812  | 18.1629338 | 2944.099329 | 0.0062 | 0.995 | 7.62E-10 | count | 1 |
| MYO7B      | 18.1629335 | 2944.099064 | 0.0062 | 0.995 | 7.62E-10 | count | 1 |
| ABCB11     | 18.1629336 | 2944.09931  | 0.0062 | 0.995 | 7.62E-10 | count | 1 |
| AC078883.2 | 18.1629332 | 2944.099008 | 0.0062 | 0.995 | 7.62E-10 | count | 1 |
| LINC01802  | 18.1629334 | 2944.099159 | 0.0062 | 0.995 | 7.62E-10 | count | 1 |
| AC022384.1 | 18.1629336 | 2944.099216 | 0.0062 | 0.995 | 7.62E-10 | count | 1 |
| HDAC11-AS1 | 18.1629337 | 2944.0995   | 0.0062 | 0.995 | 7.62E-10 | count | 1 |
| KCNH8      | 18.1629332 | 2944.099008 | 0.0062 | 0.995 | 7.62E-10 | count | 1 |
| CCRL2      | 18.1629332 | 2944.099197 | 0.0062 | 0.995 | 7.62E-10 | count | 1 |
| AC128688.2 | 18.1629333 | 2944.09931  | 0.0062 | 0.995 | 7.62E-10 | count | 1 |
| UROC1      | 18.1629331 | 2944.099367 | 0.0062 | 0.995 | 7.62E-10 | count | 1 |
| LINC02015  | 18.1629333 | 2944.099424 | 0.0062 | 0.995 | 7.62E-10 | count | 1 |
| AC092953.2 | 18.1629332 | 2944.099367 | 0.0062 | 0.995 | 7.62E-10 | count | 1 |
| AC024559.1 | 18.1629335 | 2944.099064 | 0.0062 | 0.995 | 7.62E-10 | count | 1 |
| AC005699.1 | 18.1629336 | 2944.099216 | 0.0062 | 0.995 | 7.62E-10 | count | 1 |
| PHOX2B     | 18.1629334 | 2944.099008 | 0.0062 | 0.995 | 7.62E-10 | count | 1 |
| ALB        | 18.1629336 | 2944.099216 | 0.0062 | 0.995 | 7.62E-10 | count | 1 |
| AP001961.1 | 18.1629335 | 2944.099102 | 0.0062 | 0.995 | 7.62E-10 | count | 1 |
| AC021205.3 | 18.1629335 | 2944.099254 | 0.0062 | 0.995 | 7.62E-10 | count | 1 |
| PLK4       | 18.1629332 | 2944.099121 | 0.0062 | 0.995 | 7.62E-10 | count | 1 |
| PLEKHG4B   | 18.1629333 | 2944.099178 | 0.0062 | 0.995 | 7.62E-10 | count | 1 |
| AC091965.4 | 18.1629334 | 2944.099121 | 0.0062 | 0.995 | 7.62E-10 | count | 1 |
| AC008937.3 | 18.1629336 | 2944.099216 | 0.0062 | 0.995 | 7.62E-10 | count | 1 |
| DEPDC1B    | 18.1629336 | 2944.098932 | 0.0062 | 0.995 | 7.62E-10 | count | 1 |
| AC104113.1 | 18.1629333 | 2944.099329 | 0.0062 | 0.995 | 7.62E-10 | count | 1 |
| AC106732.1 | 18.1629336 | 2944.099329 | 0.0062 | 0.995 | 7.62E-10 | count | 1 |
| GRM6       | 18.1629336 | 2944.099329 | 0.0062 | 0.995 | 7.62E-10 | count | 1 |
| FO393415.1 | 18.1629336 | 2944.099045 | 0.0062 | 0.995 | 7.62E-10 | count | 1 |
| AL023806.2 | 18.1629336 | 2944.099386 | 0.0062 | 0.995 | 7.62E-10 | count | 1 |
| GRM1       | 18.1629337 | 2944.099254 | 0.0062 | 0.995 | 7.62E-10 | count | 1 |
| AC092171.2 | 18.1629332 | 2944.099083 | 0.0062 | 0.995 | 7.62E-10 | count | 1 |
| GRID2IP    | 18.1629338 | 2944.099254 | 0.0062 | 0.995 | 7.62E-10 | count | 1 |
| AC005162.2 | 18.1629336 | 2944.099216 | 0.0062 | 0.995 | 7.62E-10 | count | 1 |
| ZNF716     | 18.1629335 | 2944.099254 | 0.0062 | 0.995 | 7.62E-10 | count | 1 |
| AC092167.1 | 18.1629334 | 2944.099008 | 0.0062 | 0.995 | 7.62E-10 | count | 1 |
| NLRP2B     | 18.1629336 | 2944.09931  | 0.0062 | 0.995 | 7.62E-10 | count | 1 |
| ZIC3       | 18.1629336 | 2944.099216 | 0.0062 | 0.995 | 7.62E-10 | count | 1 |
| GPR50      | 18.1629334 | 2944.099008 | 0.0062 | 0.995 | 7.62E-10 | count | 1 |
| KC877982.1 | 18.1629334 | 2944.099008 | 0.0062 | 0.995 | 7.62E-10 | count | 1 |

|            |            |             |        |       |          |       |   |
|------------|------------|-------------|--------|-------|----------|-------|---|
| CSAG1      | 18.1629336 | 2944.099216 | 0.0062 | 0.995 | 7.62E-10 | count | 1 |
| AF106564.1 | 18.1629334 | 2944.099273 | 0.0062 | 0.995 | 7.62E-10 | count | 1 |
| AC013643.2 | 18.1629332 | 2944.09931  | 0.0062 | 0.995 | 7.62E-10 | count | 1 |
| MIR124-2HG | 18.1629336 | 2944.099291 | 0.0062 | 0.995 | 7.62E-10 | count | 1 |
| HNF4G      | 18.1629337 | 2944.099121 | 0.0062 | 0.995 | 7.62E-10 | count | 1 |
| AC018781.1 | 18.1629336 | 2944.099216 | 0.0062 | 0.995 | 7.62E-10 | count | 1 |
| LY6D       | 18.1629335 | 2944.098989 | 0.0062 | 0.995 | 7.62E-10 | count | 1 |
| AF186192.3 | 18.1629334 | 2944.099159 | 0.0062 | 0.995 | 7.62E-10 | count | 1 |
| DMRT2      | 18.1629336 | 2944.099216 | 0.0062 | 0.995 | 7.62E-10 | count | 1 |
| LINC01504  | 18.1629337 | 2944.099064 | 0.0062 | 0.995 | 7.62E-10 | count | 1 |
| AL354861.2 | 18.1629336 | 2944.099216 | 0.0062 | 0.995 | 7.62E-10 | count | 1 |
| C9orf84    | 18.1629336 | 2944.099216 | 0.0062 | 0.995 | 7.62E-10 | count | 1 |
| HMGA1P4    | 18.1629336 | 2944.099216 | 0.0062 | 0.995 | 7.62E-10 | count | 1 |
| PRDM12     | 18.1629338 | 2944.099291 | 0.0062 | 0.995 | 7.62E-10 | count | 1 |
| B4GALNT4   | 18.1629332 | 2944.099026 | 0.0062 | 0.995 | 7.62E-10 | count | 1 |
| AC091053.1 | 18.1629332 | 2944.099045 | 0.0062 | 0.995 | 7.62E-10 | count | 1 |
| AC116535.1 | 18.1629337 | 2944.09914  | 0.0062 | 0.995 | 7.62E-10 | count | 1 |
| FLRT1      | 18.1629335 | 2944.099405 | 0.0062 | 0.995 | 7.62E-10 | count | 1 |
| TMEM262    | 18.1629336 | 2944.099159 | 0.0062 | 0.995 | 7.62E-10 | count | 1 |
| ACY3       | 18.1629334 | 2944.099159 | 0.0062 | 0.995 | 7.62E-10 | count | 1 |
| LINC01488  | 18.1629336 | 2944.098932 | 0.0062 | 0.995 | 7.62E-10 | count | 1 |
| ZNF488     | 18.1629334 | 2944.098913 | 0.0062 | 0.995 | 7.62E-10 | count | 1 |
| MRLN       | 18.1629335 | 2944.099329 | 0.0062 | 0.995 | 7.62E-10 | count | 1 |
| ACSM6      | 18.1629336 | 2944.099197 | 0.0062 | 0.995 | 7.62E-10 | count | 1 |
| AL157834.2 | 18.1629337 | 2944.099159 | 0.0062 | 0.995 | 7.62E-10 | count | 1 |
| AL365273.2 | 18.1629336 | 2944.099273 | 0.0062 | 0.995 | 7.62E-10 | count | 1 |
| AL157888.1 | 18.1629336 | 2944.099216 | 0.0062 | 0.995 | 7.62E-10 | count | 1 |
| STYK1      | 18.1629335 | 2944.099178 | 0.0062 | 0.995 | 7.62E-10 | count | 1 |
| TAS2R10    | 18.1629338 | 2944.099329 | 0.0062 | 0.995 | 7.62E-10 | count | 1 |
| PDE6H      | 18.1629336 | 2944.099216 | 0.0062 | 0.995 | 7.62E-10 | count | 1 |
| AC024896.1 | 18.1629335 | 2944.099178 | 0.0062 | 0.995 | 7.62E-10 | count | 1 |
| AC012150.1 | 18.1629332 | 2944.099159 | 0.0062 | 0.995 | 7.62E-10 | count | 1 |
| AC090115.1 | 18.1629335 | 2944.099159 | 0.0062 | 0.995 | 7.62E-10 | count | 1 |
| CISTR      | 18.1629333 | 2944.099273 | 0.0062 | 0.995 | 7.62E-10 | count | 1 |
| HOXC9      | 18.1629332 | 2944.099083 | 0.0062 | 0.995 | 7.62E-10 | count | 1 |
| AC025569.1 | 18.1629334 | 2944.099159 | 0.0062 | 0.995 | 7.62E-10 | count | 1 |
| AC126175.1 | 18.1629336 | 2944.099216 | 0.0062 | 0.995 | 7.62E-10 | count | 1 |
| RPGRIP1    | 18.1629336 | 2944.099329 | 0.0062 | 0.995 | 7.62E-10 | count | 1 |
| IGHV3-11   | 18.1629336 | 2944.099235 | 0.0062 | 0.995 | 7.62E-10 | count | 1 |
| AC036103.1 | 18.1629333 | 2944.099329 | 0.0062 | 0.995 | 7.62E-10 | count | 1 |
| AC087632.1 | 18.1629333 | 2944.099329 | 0.0062 | 0.995 | 7.62E-10 | count | 1 |
| AC021422.1 | 18.1629332 | 2944.099367 | 0.0062 | 0.995 | 7.62E-10 | count | 1 |
| AC012184.1 | 18.1629332 | 2944.099367 | 0.0062 | 0.995 | 7.62E-10 | count | 1 |
| AC005224.4 | 18.1629332 | 2944.099045 | 0.0062 | 0.995 | 7.62E-10 | count | 1 |
| AC003101.1 | 18.1629334 | 2944.098932 | 0.0062 | 0.995 | 7.62E-10 | count | 1 |

|            |            |             |        |       |          |       |   |
|------------|------------|-------------|--------|-------|----------|-------|---|
| AC091180.2 | 18.1629335 | 2944.099064 | 0.0062 | 0.995 | 7.62E-10 | count | 1 |
| LINC00483  | 18.1629336 | 2944.09931  | 0.0062 | 0.995 | 7.62E-10 | count | 1 |
| AC007638.2 | 18.1629332 | 2944.099083 | 0.0062 | 0.995 | 7.62E-10 | count | 1 |
| AC021683.3 | 18.1629336 | 2944.098932 | 0.0062 | 0.995 | 7.62E-10 | count | 1 |
| CARD14     | 18.1629336 | 2944.099254 | 0.0062 | 0.995 | 7.62E-10 | count | 1 |
| AC132872.2 | 18.1629333 | 2944.099273 | 0.0062 | 0.995 | 7.62E-10 | count | 1 |
| CLUL1      | 18.1629336 | 2944.099197 | 0.0062 | 0.995 | 7.62E-10 | count | 1 |
| AP001020.1 | 18.1629337 | 2944.099083 | 0.0062 | 0.995 | 7.62E-10 | count | 1 |
| AP001033.1 | 18.1629334 | 2944.098913 | 0.0062 | 0.995 | 7.62E-10 | count | 1 |
| LINC00907  | 18.1629335 | 2944.099064 | 0.0062 | 0.995 | 7.62E-10 | count | 1 |
| LINC01926  | 18.1629332 | 2944.099424 | 0.0062 | 0.995 | 7.62E-10 | count | 1 |
| AL133396.2 | 18.1629334 | 2944.099159 | 0.0062 | 0.995 | 7.62E-10 | count | 1 |
| AL035448.1 | 18.1629336 | 2944.099159 | 0.0062 | 0.995 | 7.62E-10 | count | 1 |
| AL121906.1 | 18.1629336 | 2944.099216 | 0.0062 | 0.995 | 7.62E-10 | count | 1 |
| PHACTR3    | 18.1629333 | 2944.099102 | 0.0062 | 0.995 | 7.62E-10 | count | 1 |
| OR111      | 18.1629336 | 2944.099216 | 0.0062 | 0.995 | 7.62E-10 | count | 1 |
| INSL3      | 18.1629336 | 2944.099216 | 0.0062 | 0.995 | 7.62E-10 | count | 1 |
| AC010636.2 | 18.1629337 | 2944.099216 | 0.0062 | 0.995 | 7.62E-10 | count | 1 |
| AC008555.1 | 18.1629336 | 2944.098932 | 0.0062 | 0.995 | 7.62E-10 | count | 1 |
| AC020907.3 | 18.1629336 | 2944.099216 | 0.0062 | 0.995 | 7.62E-10 | count | 1 |
| CYP2S1     | 18.1629337 | 2944.099159 | 0.0062 | 0.995 | 7.62E-10 | count | 1 |
| CCDC114    | 18.1629334 | 2944.098913 | 0.0062 | 0.995 | 7.62E-10 | count | 1 |
| AC018766.1 | 18.1629332 | 2944.099348 | 0.0062 | 0.995 | 7.62E-10 | count | 1 |
| AC006116.8 | 18.1629335 | 2944.099102 | 0.0062 | 0.995 | 7.62E-10 | count | 1 |
| AC010722.1 | 18.1629332 | 2944.09931  | 0.0062 | 0.995 | 7.62E-10 | count | 1 |
| Z83847.1   | 18.1629338 | 2944.099254 | 0.0062 | 0.995 | 7.62E-10 | count | 1 |
| AL671710.1 | 18.1629333 | 2944.099008 | 0.0062 | 0.995 | 7.62E-10 | count | 1 |
| ACR        | 18.1629332 | 2944.099008 | 0.0062 | 0.995 | 7.62E-10 | count | 1 |
| AP001059.2 | 18.1629334 | 2944.099235 | 0.0062 | 0.995 | 7.62E-10 | count | 1 |
| AL391845.2 | 18.1629329 | 2944.098932 | 0.0062 | 0.995 | 7.62E-10 | count | 1 |
| ZNF683     | 18.1629334 | 2944.099216 | 0.0062 | 0.995 | 7.62E-10 | count | 1 |
| C1orf94    | 18.1629333 | 2944.099064 | 0.0062 | 0.995 | 7.62E-10 | count | 1 |
| AC093151.3 | 18.1629333 | 2944.099367 | 0.0062 | 0.995 | 7.62E-10 | count | 1 |
| AL358075.1 | 18.1629331 | 2944.099121 | 0.0062 | 0.995 | 7.62E-10 | count | 1 |
| AL121987.2 | 18.1629331 | 2944.098989 | 0.0062 | 0.995 | 7.62E-10 | count | 1 |
| SERPINC1   | 18.162933  | 2944.099102 | 0.0062 | 0.995 | 7.62E-10 | count | 1 |
| IL24       | 18.1629334 | 2944.099178 | 0.0062 | 0.995 | 7.62E-10 | count | 1 |
| NLRP3      | 18.1629332 | 2944.099008 | 0.0062 | 0.995 | 7.62E-10 | count | 1 |
| AC017076.1 | 18.1629332 | 2944.099121 | 0.0062 | 0.995 | 7.62E-10 | count | 1 |
| AC007681.1 | 18.1629332 | 2944.099159 | 0.0062 | 0.995 | 7.62E-10 | count | 1 |
| KCNH7      | 18.1629332 | 2944.098894 | 0.0062 | 0.995 | 7.62E-10 | count | 1 |
| AC079610.1 | 18.1629331 | 2944.099159 | 0.0062 | 0.995 | 7.62E-10 | count | 1 |
| SGPP2      | 18.1629333 | 2944.099008 | 0.0062 | 0.995 | 7.62E-10 | count | 1 |
| AC034198.2 | 18.162933  | 2944.099045 | 0.0062 | 0.995 | 7.62E-10 | count | 1 |
| BSN-DT     | 18.1629333 | 2944.099291 | 0.0062 | 0.995 | 7.62E-10 | count | 1 |

|            |            |             |        |       |          |       |   |
|------------|------------|-------------|--------|-------|----------|-------|---|
| AC078785.2 | 18.1629331 | 2944.099121 | 0.0062 | 0.995 | 7.62E-10 | count | 1 |
| LINC01096  | 18.162933  | 2944.099064 | 0.0062 | 0.995 | 7.62E-10 | count | 1 |
| KLB        | 18.1629333 | 2944.099367 | 0.0062 | 0.995 | 7.62E-10 | count | 1 |
| CXCL6      | 18.1629332 | 2944.099121 | 0.0062 | 0.995 | 7.62E-10 | count | 1 |
| CDC20B     | 18.1629332 | 2944.099216 | 0.0062 | 0.995 | 7.62E-10 | count | 1 |
| LINC02056  | 18.1629329 | 2944.098932 | 0.0062 | 0.995 | 7.62E-10 | count | 1 |
| HIST1H2BF  | 18.1629333 | 2944.099367 | 0.0062 | 0.995 | 7.62E-10 | count | 1 |
| HIST1H4L   | 18.1629333 | 2944.099367 | 0.0062 | 0.995 | 7.62E-10 | count | 1 |
| CRIP3      | 18.1629333 | 2944.099367 | 0.0062 | 0.995 | 7.62E-10 | count | 1 |
| Z97205.2   | 18.1629333 | 2944.099367 | 0.0062 | 0.995 | 7.62E-10 | count | 1 |
| AC005014.3 | 18.1629334 | 2944.099216 | 0.0062 | 0.995 | 7.62E-10 | count | 1 |
| AC018638.6 | 18.1629329 | 2944.099045 | 0.0062 | 0.995 | 7.62E-10 | count | 1 |
| AC073878.2 | 18.1629334 | 2944.099291 | 0.0062 | 0.995 | 7.62E-10 | count | 1 |
| ZNF157     | 18.1629333 | 2944.099291 | 0.0062 | 0.995 | 7.62E-10 | count | 1 |
| SPIN4-AS1  | 18.1629332 | 2944.098894 | 0.0062 | 0.995 | 7.62E-10 | count | 1 |
| AL353804.1 | 18.1629332 | 2944.09897  | 0.0062 | 0.995 | 7.62E-10 | count | 1 |
| AC234781.1 | 18.1629332 | 2944.099291 | 0.0062 | 0.995 | 7.62E-10 | count | 1 |
| FAM66E     | 18.1629329 | 2944.098932 | 0.0062 | 0.995 | 7.62E-10 | count | 1 |
| CLVS1      | 18.1629333 | 2944.099367 | 0.0062 | 0.995 | 7.62E-10 | count | 1 |
| LINC01607  | 18.1629335 | 2944.099235 | 0.0062 | 0.995 | 7.62E-10 | count | 1 |
| LINC00861  | 18.1629333 | 2944.099216 | 0.0062 | 0.995 | 7.62E-10 | count | 1 |
| GRIN3A     | 18.1629332 | 2944.098856 | 0.0062 | 0.995 | 7.62E-10 | count | 1 |
| AC011092.2 | 18.162933  | 2944.099064 | 0.0062 | 0.995 | 7.62E-10 | count | 1 |
| TIGD3      | 18.1629332 | 2944.09897  | 0.0062 | 0.995 | 7.62E-10 | count | 1 |
| CCDC83     | 18.1629332 | 2944.099159 | 0.0062 | 0.995 | 7.62E-10 | count | 1 |
| DDI1       | 18.1629335 | 2944.09931  | 0.0062 | 0.995 | 7.62E-10 | count | 1 |
| AP000936.1 | 18.1629331 | 2944.099026 | 0.0062 | 0.995 | 7.62E-10 | count | 1 |
| AL132657.1 | 18.162933  | 2944.099064 | 0.0062 | 0.995 | 7.62E-10 | count | 1 |
| BX248123.1 | 18.1629334 | 2944.099216 | 0.0062 | 0.995 | 7.62E-10 | count | 1 |
| AL390763.1 | 18.162933  | 2944.099045 | 0.0062 | 0.995 | 7.62E-10 | count | 1 |
| LINC02367  | 18.1629334 | 2944.099102 | 0.0062 | 0.995 | 7.62E-10 | count | 1 |
| CLECL1     | 18.1629334 | 2944.099102 | 0.0062 | 0.995 | 7.62E-10 | count | 1 |
| GSG1       | 18.1629329 | 2944.098932 | 0.0062 | 0.995 | 7.62E-10 | count | 1 |
| C12orf54   | 18.162933  | 2944.099064 | 0.0062 | 0.995 | 7.62E-10 | count | 1 |
| GALNT6     | 18.1629332 | 2944.099121 | 0.0062 | 0.995 | 7.62E-10 | count | 1 |
| AC034102.4 | 18.162933  | 2944.099064 | 0.0062 | 0.995 | 7.62E-10 | count | 1 |
| DAO        | 18.1629333 | 2944.099367 | 0.0062 | 0.995 | 7.62E-10 | count | 1 |
| ATXN2-AS   | 18.1629335 | 2944.09931  | 0.0062 | 0.995 | 7.62E-10 | count | 1 |
| PLA2G1B    | 18.1629335 | 2944.099273 | 0.0062 | 0.995 | 7.62E-10 | count | 1 |
| LINC00539  | 18.1629333 | 2944.099367 | 0.0062 | 0.995 | 7.62E-10 | count | 1 |
| AL355916.2 | 18.1629333 | 2944.099367 | 0.0062 | 0.995 | 7.62E-10 | count | 1 |
| PLEKHH1    | 18.1629334 | 2944.099254 | 0.0062 | 0.995 | 7.62E-10 | count | 1 |
| AL139193.2 | 18.1629331 | 2944.09914  | 0.0062 | 0.995 | 7.62E-10 | count | 1 |
| GPR132     | 18.1629334 | 2944.099102 | 0.0062 | 0.995 | 7.62E-10 | count | 1 |
| FAM30A     | 18.1629332 | 2944.099121 | 0.0062 | 0.995 | 7.62E-10 | count | 1 |



|              |            |             |        |       |          |       |   |
|--------------|------------|-------------|--------|-------|----------|-------|---|
| RAD51        | 18.162933  | 2944.099045 | 0.0062 | 0.995 | 7.62E-10 | count | 1 |
| AC084759.2   | 18.1629335 | 2944.099273 | 0.0062 | 0.995 | 7.62E-10 | count | 1 |
| AL031600.3   | 18.1629333 | 2944.099367 | 0.0062 | 0.995 | 7.62E-10 | count | 1 |
| RBFOX1       | 18.1629332 | 2944.099159 | 0.0062 | 0.995 | 7.62E-10 | count | 1 |
| AC007216.4   | 18.1629332 | 2944.09897  | 0.0062 | 0.995 | 7.62E-10 | count | 1 |
| AC093249.2   | 18.162933  | 2944.09914  | 0.0062 | 0.995 | 7.62E-10 | count | 1 |
| AC004943.1   | 18.1629332 | 2944.099083 | 0.0062 | 0.995 | 7.62E-10 | count | 1 |
| AC005725.1   | 18.1629333 | 2944.099367 | 0.0062 | 0.995 | 7.62E-10 | count | 1 |
| AC015849.2   | 18.1629332 | 2944.099102 | 0.0062 | 0.995 | 7.62E-10 | count | 1 |
| AC127496.6   | 18.1629334 | 2944.099197 | 0.0062 | 0.995 | 7.62E-10 | count | 1 |
| AC011825.2   | 18.1629333 | 2944.099197 | 0.0062 | 0.995 | 7.62E-10 | count | 1 |
| AL121772.3   | 18.1629333 | 2944.099367 | 0.0062 | 0.995 | 7.62E-10 | count | 1 |
| BPIFA2       | 18.1629332 | 2944.099159 | 0.0062 | 0.995 | 7.62E-10 | count | 1 |
| AL161937.2   | 18.1629334 | 2944.099102 | 0.0062 | 0.995 | 7.62E-10 | count | 1 |
| CLEC17A      | 18.1629334 | 2944.099102 | 0.0062 | 0.995 | 7.62E-10 | count | 1 |
| AC024075.3   | 18.162933  | 2944.099045 | 0.0062 | 0.995 | 7.62E-10 | count | 1 |
| FAM129C      | 18.1629331 | 2944.099291 | 0.0062 | 0.995 | 7.62E-10 | count | 1 |
| LINC01233    | 18.1629333 | 2944.099443 | 0.0062 | 0.995 | 7.62E-10 | count | 1 |
| UPK1A        | 18.1629331 | 2944.099083 | 0.0062 | 0.995 | 7.62E-10 | count | 1 |
| ATP1A3       | 18.1629332 | 2944.099121 | 0.0062 | 0.995 | 7.62E-10 | count | 1 |
| AC010247.2   | 18.1629335 | 2944.099216 | 0.0062 | 0.995 | 7.62E-10 | count | 1 |
| DPRX         | 18.1629333 | 2944.099367 | 0.0062 | 0.995 | 7.62E-10 | count | 1 |
| AC245052.1   | 18.162933  | 2944.099026 | 0.0062 | 0.995 | 7.62E-10 | count | 1 |
| LINC01694    | 18.1629333 | 2944.099008 | 0.0062 | 0.995 | 7.62E-10 | count | 1 |
| AL139423.1   | 18.1629333 | 2944.099216 | 0.0062 | 0.995 | 7.62E-10 | count | 1 |
| MYCL         | 18.1629331 | 2944.099026 | 0.0062 | 0.995 | 7.62E-10 | count | 1 |
| LINC01353    | 18.162933  | 2944.099026 | 0.0062 | 0.995 | 7.62E-10 | count | 1 |
| FLNB-AS1     | 18.1629331 | 2944.099026 | 0.0062 | 0.995 | 7.62E-10 | count | 1 |
| NADK2-AS1    | 18.1629327 | 2944.098856 | 0.0062 | 0.995 | 7.62E-10 | count | 1 |
| AC136604.2   | 18.1629333 | 2944.099216 | 0.0062 | 0.995 | 7.62E-10 | count | 1 |
| GUCA1B       | 18.162933  | 2944.098989 | 0.0062 | 0.995 | 7.62E-10 | count | 1 |
| AL591468.1   | 18.1629332 | 2944.099064 | 0.0062 | 0.995 | 7.62E-10 | count | 1 |
| AMZ1         | 18.1629331 | 2944.099102 | 0.0062 | 0.995 | 7.62E-10 | count | 1 |
| AC073934.1   | 18.162933  | 2944.098989 | 0.0062 | 0.995 | 7.62E-10 | count | 1 |
| AF131216.4   | 18.1629331 | 2944.099462 | 0.0062 | 0.995 | 7.62E-10 | count | 1 |
| AC107909.2   | 18.1629332 | 2944.099386 | 0.0062 | 0.995 | 7.62E-10 | count | 1 |
| AC103853.1   | 18.1629328 | 2944.099102 | 0.0062 | 0.995 | 7.62E-10 | count | 1 |
| AL591441.1   | 18.162933  | 2944.098951 | 0.0062 | 0.995 | 7.62E-10 | count | 1 |
| KC877392.1   | 18.1629332 | 2944.099178 | 0.0062 | 0.995 | 7.62E-10 | count | 1 |
| AC025822.2   | 18.162933  | 2944.09914  | 0.0062 | 0.995 | 7.62E-10 | count | 1 |
| NUTM2D       | 18.1629332 | 2944.099178 | 0.0062 | 0.995 | 7.62E-10 | count | 1 |
| SH3PXD2A-AS1 | 18.162933  | 2944.099008 | 0.0062 | 0.995 | 7.62E-10 | count | 1 |
| AC010168.1   | 18.1629331 | 2944.099235 | 0.0062 | 0.995 | 7.62E-10 | count | 1 |
| DENND5B-AS1  | 18.162933  | 2944.098932 | 0.0062 | 0.995 | 7.62E-10 | count | 1 |
| AC024257.4   | 18.1629333 | 2944.099083 | 0.0062 | 0.995 | 7.62E-10 | count | 1 |

|              |            |             |        |       |          |       |   |
|--------------|------------|-------------|--------|-------|----------|-------|---|
| AC011595.1   | 18.1629329 | 2944.099064 | 0.0062 | 0.995 | 7.62E-10 | count | 1 |
| TRAV41       | 18.1629329 | 2944.099064 | 0.0062 | 0.995 | 7.62E-10 | count | 1 |
| AL139353.2   | 18.1629333 | 2944.099083 | 0.0062 | 0.995 | 7.62E-10 | count | 1 |
| SLC10A1      | 18.162933  | 2944.09914  | 0.0062 | 0.995 | 7.62E-10 | count | 1 |
| AC010999.2   | 18.1629331 | 2944.099008 | 0.0062 | 0.995 | 7.62E-10 | count | 1 |
| LINC02259    | 18.1629331 | 2944.099462 | 0.0062 | 0.995 | 7.62E-10 | count | 1 |
| LINC02126    | 18.1629331 | 2944.099291 | 0.0062 | 0.995 | 7.62E-10 | count | 1 |
| LINC02182    | 18.1629332 | 2944.099178 | 0.0062 | 0.995 | 7.62E-10 | count | 1 |
| AC006449.3   | 18.162933  | 2944.098989 | 0.0062 | 0.995 | 7.62E-10 | count | 1 |
| CELF5        | 18.1629329 | 2944.099064 | 0.0062 | 0.995 | 7.62E-10 | count | 1 |
| FCHO1        | 18.1629332 | 2944.099178 | 0.0062 | 0.995 | 7.62E-10 | count | 1 |
| AC011477.4   | 18.1629331 | 2944.099008 | 0.0062 | 0.995 | 7.62E-10 | count | 1 |
| BCKDHA       | 18.162933  | 2944.09914  | 0.0062 | 0.995 | 7.62E-10 | count | 1 |
| SYCE3        | 18.1629331 | 2944.099008 | 0.0062 | 0.995 | 7.62E-10 | count | 1 |
| MUSK         | 0.0271347  | 0.522232    | 0.052  | 0.959 | 8.01E-10 | count | 1 |
| AC005332.8   | 0.0271347  | 0.7469202   | 0.0363 | 0.971 | 8.01E-10 | count | 1 |
| WWTR1-AS1    | 0.0338551  | 0.5931213   | 0.0571 | 0.954 | 9.98E-10 | count | 1 |
| AL157392.4   | 0.1093249  | 0.9850733   | 0.111  | 0.912 | 1.16E-09 | count | 1 |
| MED12L       | 0.1093249  | 0.9850733   | 0.111  | 0.912 | 1.16E-09 | count | 1 |
| AC005291.1   | 0.1093249  | 0.9850733   | 0.111  | 0.912 | 1.16E-09 | count | 1 |
| AARD         | 0.1093249  | 0.9850733   | 0.111  | 0.912 | 1.16E-09 | count | 1 |
| PRAG1        | 0.1093249  | 0.9850733   | 0.111  | 0.912 | 1.16E-09 | count | 1 |
| PYDC1        | 0.1093249  | 1.0118885   | 0.108  | 0.914 | 1.16E-09 | count | 1 |
| MDS2         | 0.1093249  | 0.9850733   | 0.111  | 0.912 | 1.16E-09 | count | 1 |
| AL160269.1   | 0.1093249  | 0.9850733   | 0.111  | 0.912 | 1.16E-09 | count | 1 |
| SHBG         | 0.1093249  | 1.0118885   | 0.108  | 0.914 | 1.16E-09 | count | 1 |
| AL353135.1   | 0.1093249  | 1.0118885   | 0.108  | 0.914 | 1.16E-09 | count | 1 |
| AC092652.1   | 0.1093249  | 1.0118885   | 0.108  | 0.914 | 1.16E-09 | count | 1 |
| GINS1        | 0.1093249  | 1.0118885   | 0.108  | 0.914 | 1.16E-09 | count | 1 |
| ATP6V0E2-AS1 | 0.1093249  | 0.9850733   | 0.111  | 0.912 | 1.16E-09 | count | 1 |
| KCNQ3        | 0.1093249  | 0.9850733   | 0.111  | 0.912 | 1.16E-09 | count | 1 |
| AC112229.2   | 0.3502024  | 1.0145479   | 0.3452 | 0.73  | 1.28E-09 | count | 1 |
| FUT2         | 0.3502024  | 1.0145479   | 0.3452 | 0.73  | 1.28E-09 | count | 1 |
| AC090527.3   | 0.3502024  | 1.0145479   | 0.3452 | 0.73  | 1.28E-09 | count | 1 |
| ITCH-AS1     | 0.3502024  | 1.0145479   | 0.3452 | 0.73  | 1.28E-09 | count | 1 |
| AGBL4        | 0.3502024  | 0.8055999   | 0.4347 | 0.664 | 1.28E-09 | count | 1 |
| MAP3K21      | 0.3502024  | 0.8055999   | 0.4347 | 0.664 | 1.28E-09 | count | 1 |
| AC137630.4   | 0.3502024  | 0.8055999   | 0.4347 | 0.664 | 1.28E-09 | count | 1 |
| AC009812.3   | 0.3502024  | 0.8055999   | 0.4347 | 0.664 | 1.28E-09 | count | 1 |
| AL928970.1   | 0.3502024  | 0.8055999   | 0.4347 | 0.664 | 1.28E-09 | count | 1 |
| PCAT7        | 0.3502024  | 0.8055999   | 0.4347 | 0.664 | 1.28E-09 | count | 1 |
| AP001107.4   | 0.3502024  | 0.8055999   | 0.4347 | 0.664 | 1.28E-09 | count | 1 |
| LINC01479    | 0.3502024  | 0.8055999   | 0.4347 | 0.664 | 1.28E-09 | count | 1 |
| WASF3-AS1    | 0.3502024  | 0.8055999   | 0.4347 | 0.664 | 1.28E-09 | count | 1 |
| BCL11B       | 0.3502024  | 0.8055999   | 0.4347 | 0.664 | 1.28E-09 | count | 1 |

|            |            |             |        |       |          |       |   |
|------------|------------|-------------|--------|-------|----------|-------|---|
| MMP15      | 0.3502024  | 0.8055999   | 0.4347 | 0.664 | 1.28E-09 | count | 1 |
| PAK5       | 0.3502024  | 0.8055999   | 0.4347 | 0.664 | 1.28E-09 | count | 1 |
| AL121583.1 | 0.3502024  | 0.8055999   | 0.4347 | 0.664 | 1.28E-09 | count | 1 |
| AMH        | 0.3502024  | 0.8055999   | 0.4347 | 0.664 | 1.28E-09 | count | 1 |
| Z97055.2   | 0.3502024  | 0.8055999   | 0.4347 | 0.664 | 1.28E-09 | count | 1 |
| AL357568.1 | 0.3502024  | 0.8055999   | 0.4347 | 0.664 | 1.28E-09 | count | 1 |
| AC022893.2 | 0.3502024  | 0.8055999   | 0.4347 | 0.664 | 1.28E-09 | count | 1 |
| LINC01117  | 0.1715969  | 0.9032599   | 0.19   | 0.849 | 1.79E-09 | count | 1 |
| TAS2R30    | 0.1715969  | 0.8634446   | 0.1987 | 0.842 | 1.79E-09 | count | 1 |
| RPL34-AS1  | 18.5575131 | 2833.387336 | 0.0065 | 0.995 | 2.07E-09 | count | 1 |
| GUCA1A     | 18.2683959 | 3103.330176 | 0.0059 | 0.995 | 2.07E-09 | count | 1 |
| IGDCC3     | 18.2683959 | 3103.330427 | 0.0059 | 0.995 | 2.07E-09 | count | 1 |
| VNN3       | 18.2683959 | 3103.330249 | 0.0059 | 0.995 | 2.07E-09 | count | 1 |
| GSN-AS1    | 18.2683954 | 3103.330043 | 0.0059 | 0.995 | 2.07E-09 | count | 1 |
| SPIC       | 18.2683955 | 3103.330205 | 0.0059 | 0.995 | 2.07E-09 | count | 1 |
| KCNK10     | 18.2683954 | 3103.329924 | 0.0059 | 0.995 | 2.07E-09 | count | 1 |
| AC092718.5 | 18.2668265 | 2309.586501 | 0.0079 | 0.994 | 2.07E-09 | count | 1 |
| MIR4500HG  | 18.2668265 | 2309.586666 | 0.0079 | 0.994 | 2.07E-09 | count | 1 |
| FOXL2      | 18.2668262 | 2309.586666 | 0.0079 | 0.994 | 2.07E-09 | count | 1 |
| AL031772.1 | 18.2668257 | 2309.586468 | 0.0079 | 0.994 | 2.07E-09 | count | 1 |
| AC037198.2 | 18.2668261 | 2309.586446 | 0.0079 | 0.994 | 2.07E-09 | count | 1 |
| IGLL5      | 18.266826  | 2309.586567 | 0.0079 | 0.994 | 2.07E-09 | count | 1 |
| SOX30      | 18.266826  | 2309.586677 | 0.0079 | 0.994 | 2.07E-09 | count | 1 |
| AC019186.1 | 17.8595768 | 2529.61333  | 0.0071 | 0.994 | 2.07E-09 | count | 1 |
| AC092652.2 | 17.8595766 | 2529.61279  | 0.0071 | 0.994 | 2.07E-09 | count | 1 |
| SLC17A4    | 17.8595765 | 2529.613078 | 0.0071 | 0.994 | 2.07E-09 | count | 1 |
| FOXD3-AS1  | 17.8595765 | 2529.612982 | 0.0071 | 0.994 | 2.07E-09 | count | 1 |
| GPR78      | 17.8595764 | 2529.61297  | 0.0071 | 0.994 | 2.07E-09 | count | 1 |
| LINC01179  | 17.8595765 | 2529.612982 | 0.0071 | 0.994 | 2.07E-09 | count | 1 |
| AC091167.6 | 17.8595764 | 2529.61297  | 0.0071 | 0.994 | 2.07E-09 | count | 1 |
| GALR2      | 17.8595765 | 2529.612982 | 0.0071 | 0.994 | 2.07E-09 | count | 1 |
| KIAA1257   | 17.8595765 | 2529.612958 | 0.0071 | 0.994 | 2.07E-09 | count | 1 |
| AC026726.1 | 17.8595764 | 2529.612862 | 0.0071 | 0.994 | 2.07E-09 | count | 1 |
| MACC1      | 17.8595765 | 2529.612958 | 0.0071 | 0.994 | 2.07E-09 | count | 1 |
| AL354710.2 | 17.8595762 | 2529.613174 | 0.0071 | 0.994 | 2.07E-09 | count | 1 |
| PLCE1-AS1  | 17.8595764 | 2529.612994 | 0.0071 | 0.994 | 2.07E-09 | count | 1 |
| AL162274.1 | 17.8595764 | 2529.61291  | 0.0071 | 0.994 | 2.07E-09 | count | 1 |
| AC025263.1 | 17.8595764 | 2529.612934 | 0.0071 | 0.994 | 2.07E-09 | count | 1 |
| AC073534.2 | 17.8595764 | 2529.61291  | 0.0071 | 0.994 | 2.07E-09 | count | 1 |
| ADCYAP1    | 17.8595763 | 2529.613078 | 0.0071 | 0.994 | 2.07E-09 | count | 1 |
| TAL1       | 17.859576  | 2529.612898 | 0.0071 | 0.994 | 2.07E-09 | count | 1 |
| AC011451.1 | 18.2657067 | 1786.038645 | 0.0102 | 0.992 | 2.07E-09 | count | 1 |
| C9orf129   | 18.2657061 | 1786.038586 | 0.0102 | 0.992 | 2.07E-09 | count | 1 |
| COL19A1    | 18.2657061 | 1786.038458 | 0.0102 | 0.992 | 2.07E-09 | count | 1 |
| AC078795.2 | 18.2657056 | 1786.038467 | 0.0102 | 0.992 | 2.07E-09 | count | 1 |

|                |            |             |        |       |          |       |   |
|----------------|------------|-------------|--------|-------|----------|-------|---|
| AC009021.1     | 18.2657054 | 1786.038704 | 0.0102 | 0.992 | 2.07E-09 | count | 1 |
| AC099062.1     | 17.8583763 | 1786.004203 | 0.01   | 0.992 | 2.07E-09 | count | 1 |
| HHIPL2         | 17.8583763 | 1786.004203 | 0.01   | 0.992 | 2.07E-09 | count | 1 |
| ARSD-AS1       | 17.858376  | 1786.004347 | 0.01   | 0.992 | 2.07E-09 | count | 1 |
| LINC01993      | 17.8583763 | 1786.004203 | 0.01   | 0.992 | 2.07E-09 | count | 1 |
| CAMK2A         | 17.8583759 | 1786.004398 | 0.01   | 0.992 | 2.07E-09 | count | 1 |
| AP002373.1     | 17.8583757 | 1786.004127 | 0.01   | 0.992 | 2.07E-09 | count | 1 |
| PXT1           | 17.8583759 | 1786.004304 | 0.01   | 0.992 | 2.07E-09 | count | 1 |
| AC005180.1     | 17.8583756 | 1786.00433  | 0.01   | 0.992 | 2.07E-09 | count | 1 |
| RTEL1-TNFRSF6B | 17.8583757 | 1786.004237 | 0.01   | 0.992 | 2.07E-09 | count | 1 |
| IGLV4-69       | 17.8583757 | 1786.004254 | 0.01   | 0.992 | 2.07E-09 | count | 1 |
| SLC5A7         | 17.8583756 | 1786.004372 | 0.01   | 0.992 | 2.07E-09 | count | 1 |
| AC008440.1     | 17.8583757 | 1786.004415 | 0.01   | 0.992 | 2.07E-09 | count | 1 |
| RSPH14         | 17.8583754 | 1786.004194 | 0.01   | 0.992 | 2.07E-09 | count | 1 |
| WWC3-AS1       | 17.8583754 | 1786.004321 | 0.01   | 0.992 | 2.07E-09 | count | 1 |
| IL1RAPL2       | 17.8583753 | 1786.00422  | 0.01   | 0.992 | 2.07E-09 | count | 1 |
| AC068389.4     | 17.8583753 | 1786.004237 | 0.01   | 0.992 | 2.07E-09 | count | 1 |
| MAPK15         | 17.8583755 | 1786.004262 | 0.01   | 0.992 | 2.07E-09 | count | 1 |
| AL158152.2     | 17.8583755 | 1786.00411  | 0.01   | 0.992 | 2.07E-09 | count | 1 |
| TTC36          | 17.8583754 | 1786.004254 | 0.01   | 0.992 | 2.07E-09 | count | 1 |
| POU2F3         | 17.8583754 | 1786.00433  | 0.01   | 0.992 | 2.07E-09 | count | 1 |
| AC121761.1     | 17.8583755 | 1786.004211 | 0.01   | 0.992 | 2.07E-09 | count | 1 |
| AC020558.1     | 17.8583756 | 1786.004415 | 0.01   | 0.992 | 2.07E-09 | count | 1 |
| AP000919.3     | 17.8583755 | 1786.004042 | 0.01   | 0.992 | 2.07E-09 | count | 1 |
| LINC00028      | 17.8583754 | 1786.004355 | 0.01   | 0.992 | 2.07E-09 | count | 1 |
| XCL2           | 17.8583754 | 1786.004254 | 0.01   | 0.992 | 2.07E-09 | count | 1 |
| ANKRD23        | 17.8583754 | 1786.004262 | 0.01   | 0.992 | 2.07E-09 | count | 1 |
| NFE2           | 17.8583754 | 1786.004279 | 0.01   | 0.992 | 2.07E-09 | count | 1 |
| KLHDC7B        | 17.8583752 | 1786.004144 | 0.01   | 0.992 | 2.07E-09 | count | 1 |
| SMCR5          | 18.7844431 | 2506.55172  | 0.0075 | 0.994 | 2.08E-09 | count | 1 |
| AC145207.2     | 18.7844434 | 2506.552121 | 0.0075 | 0.994 | 2.08E-09 | count | 1 |
| GRIP1          | 18.7844427 | 2506.551609 | 0.0075 | 0.994 | 2.08E-09 | count | 1 |
| AC122129.1     | 18.7844428 | 2506.551789 | 0.0075 | 0.994 | 2.08E-09 | count | 1 |
| AL139124.1     | 18.7844426 | 2506.551803 | 0.0075 | 0.994 | 2.08E-09 | count | 1 |
| LINC00485      | 18.7844426 | 2506.551817 | 0.0075 | 0.994 | 2.08E-09 | count | 1 |
| SEC23A-AS1     | 18.7844426 | 2506.551858 | 0.0075 | 0.994 | 2.08E-09 | count | 1 |
| LINC00648      | 18.7844429 | 2506.551969 | 0.0075 | 0.994 | 2.08E-09 | count | 1 |
| AL049874.3     | 18.7844429 | 2506.551886 | 0.0075 | 0.994 | 2.08E-09 | count | 1 |
| IMPG1          | 18.7844428 | 2506.552024 | 0.0075 | 0.994 | 2.08E-09 | count | 1 |
| AC055822.1     | 18.7844422 | 2506.551927 | 0.0075 | 0.994 | 2.08E-09 | count | 1 |
| SYN3           | 18.7844424 | 2506.55219  | 0.0075 | 0.994 | 2.08E-09 | count | 1 |
| AF230666.1     | 18.7844426 | 2506.552052 | 0.0075 | 0.994 | 2.08E-09 | count | 1 |
| ADGRB1         | 18.7844427 | 2506.5519   | 0.0075 | 0.994 | 2.08E-09 | count | 1 |
| MYH15          | 18.784442  | 2506.551969 | 0.0075 | 0.994 | 2.08E-09 | count | 1 |
| AC002553.2     | 18.7844422 | 2506.55183  | 0.0075 | 0.994 | 2.08E-09 | count | 1 |

|            |            |             |        |       |          |       |   |
|------------|------------|-------------|--------|-------|----------|-------|---|
| OR2A1      | 18.3785249 | 3547.818308 | 0.0052 | 0.996 | 2.08E-09 | count | 1 |
| PTH2       | 18.378525  | 3547.818485 | 0.0052 | 0.996 | 2.08E-09 | count | 1 |
| C6orf58    | 18.3785247 | 3547.81823  | 0.0052 | 0.996 | 2.08E-09 | count | 1 |
| AC005091.1 | 18.3785247 | 3547.81825  | 0.0052 | 0.996 | 2.08E-09 | count | 1 |
| AC023794.3 | 18.3785247 | 3547.818269 | 0.0052 | 0.996 | 2.08E-09 | count | 1 |
| HAL        | 18.3785245 | 3547.818308 | 0.0052 | 0.996 | 2.08E-09 | count | 1 |
| LINC00638  | 18.3785248 | 3547.818269 | 0.0052 | 0.996 | 2.08E-09 | count | 1 |
| AC136285.1 | 18.3785248 | 3547.818269 | 0.0052 | 0.996 | 2.08E-09 | count | 1 |
| NEUROD2    | 18.3785247 | 3547.81825  | 0.0052 | 0.996 | 2.08E-09 | count | 1 |
| RGS9BP     | 18.3785249 | 3547.818485 | 0.0052 | 0.996 | 2.08E-09 | count | 1 |
| SPACA6P-AS | 18.3785247 | 3547.81825  | 0.0052 | 0.996 | 2.08E-09 | count | 1 |
| LINC01460  | 18.3785246 | 3547.818269 | 0.0052 | 0.996 | 2.08E-09 | count | 1 |
| FAM153A    | 18.3785246 | 3547.818034 | 0.0052 | 0.996 | 2.08E-09 | count | 1 |
| AC138230.1 | 18.3785246 | 3547.818269 | 0.0052 | 0.996 | 2.08E-09 | count | 1 |
| AL513190.1 | 18.3785244 | 3547.818015 | 0.0052 | 0.996 | 2.08E-09 | count | 1 |
| AC004846.2 | 18.3785243 | 3547.818113 | 0.0052 | 0.996 | 2.08E-09 | count | 1 |
| LINC02554  | 18.3785247 | 3547.818211 | 0.0052 | 0.996 | 2.08E-09 | count | 1 |
| LRRC70     | 18.3785246 | 3547.818426 | 0.0052 | 0.996 | 2.08E-09 | count | 1 |
| FUT9       | 18.3785246 | 3547.818426 | 0.0052 | 0.996 | 2.08E-09 | count | 1 |
| UBQLNL     | 18.3785245 | 3547.81823  | 0.0052 | 0.996 | 2.08E-09 | count | 1 |
| AL354809.1 | 18.3785245 | 3547.81823  | 0.0052 | 0.996 | 2.08E-09 | count | 1 |
| LINC00605  | 18.3785246 | 3547.818054 | 0.0052 | 0.996 | 2.08E-09 | count | 1 |
| AC004477.2 | 18.3785248 | 3547.81823  | 0.0052 | 0.996 | 2.08E-09 | count | 1 |
| AC080162.1 | 18.3785244 | 3547.81825  | 0.0052 | 0.996 | 2.08E-09 | count | 1 |
| AC007250.1 | 18.3785244 | 3547.81825  | 0.0052 | 0.996 | 2.08E-09 | count | 1 |
| CPNE9      | 18.3785243 | 3547.818015 | 0.0052 | 0.996 | 2.08E-09 | count | 1 |
| EPHA5-AS1  | 18.3785245 | 3547.818406 | 0.0052 | 0.996 | 2.08E-09 | count | 1 |
| AC079340.2 | 18.3785245 | 3547.818367 | 0.0052 | 0.996 | 2.08E-09 | count | 1 |
| H3.Y       | 18.3785246 | 3547.818269 | 0.0052 | 0.996 | 2.08E-09 | count | 1 |
| AL356277.3 | 18.3785245 | 3547.817995 | 0.0052 | 0.996 | 2.08E-09 | count | 1 |
| AC093799.1 | 18.3785245 | 3547.818406 | 0.0052 | 0.996 | 2.08E-09 | count | 1 |
| AC092111.1 | 18.3785245 | 3547.818152 | 0.0052 | 0.996 | 2.08E-09 | count | 1 |
| SLITRK1    | 18.3785243 | 3547.818015 | 0.0052 | 0.996 | 2.08E-09 | count | 1 |
| CHRNA7     | 18.3785243 | 3547.817995 | 0.0052 | 0.996 | 2.08E-09 | count | 1 |
| AC108861.1 | 18.3785245 | 3547.818152 | 0.0052 | 0.996 | 2.08E-09 | count | 1 |
| AC138904.1 | 18.3785244 | 3547.818054 | 0.0052 | 0.996 | 2.08E-09 | count | 1 |
| DRC7       | 18.3785242 | 3547.81825  | 0.0052 | 0.996 | 2.08E-09 | count | 1 |
| TMED6      | 18.3785244 | 3547.818152 | 0.0052 | 0.996 | 2.08E-09 | count | 1 |
| AC004702.1 | 18.3785243 | 3547.818015 | 0.0052 | 0.996 | 2.08E-09 | count | 1 |
| ZBP1       | 18.3785247 | 3547.818289 | 0.0052 | 0.996 | 2.08E-09 | count | 1 |
| ZNF723     | 18.3785243 | 3547.818152 | 0.0052 | 0.996 | 2.08E-09 | count | 1 |
| Z97192.1   | 18.3785245 | 3547.818367 | 0.0052 | 0.996 | 2.08E-09 | count | 1 |
| LAX1       | 18.3785241 | 3547.818171 | 0.0052 | 0.996 | 2.08E-09 | count | 1 |
| AC016831.6 | 18.3785241 | 3547.818171 | 0.0052 | 0.996 | 2.08E-09 | count | 1 |
| LCTL       | 18.3785241 | 3547.818113 | 0.0052 | 0.996 | 2.08E-09 | count | 1 |

|            |            |             |        |       |          |       |   |
|------------|------------|-------------|--------|-------|----------|-------|---|
| Z99916.1   | 18.3785241 | 3547.818113 | 0.0052 | 0.996 | 2.08E-09 | count | 1 |
| AC073365.1 | 18.378524  | 3547.818093 | 0.0052 | 0.996 | 2.08E-09 | count | 1 |
| AC021224.1 | 18.378524  | 3547.818093 | 0.0052 | 0.996 | 2.08E-09 | count | 1 |
| HOXB-AS3   | 18.3777687 | 2506.387922 | 0.0073 | 0.994 | 2.08E-09 | count | 1 |
| LINC002481 | 18.3777685 | 2506.387867 | 0.0073 | 0.994 | 2.08E-09 | count | 1 |
| AC016877.3 | 18.3777681 | 2506.387604 | 0.0073 | 0.994 | 2.08E-09 | count | 1 |
| AL359636.1 | 18.3777684 | 2506.387908 | 0.0073 | 0.994 | 2.08E-09 | count | 1 |
| AL121749.1 | 18.3777682 | 2506.387674 | 0.0073 | 0.994 | 2.08E-09 | count | 1 |
| AC024941.1 | 18.3777683 | 2506.387687 | 0.0073 | 0.994 | 2.08E-09 | count | 1 |
| LINC00426  | 18.3777686 | 2506.387729 | 0.0073 | 0.994 | 2.08E-09 | count | 1 |
| TDRD9      | 18.3777683 | 2506.38777  | 0.0073 | 0.994 | 2.08E-09 | count | 1 |
| AC021755.3 | 18.3777683 | 2506.387729 | 0.0073 | 0.994 | 2.08E-09 | count | 1 |
| AP000253.1 | 18.3777683 | 2506.387853 | 0.0073 | 0.994 | 2.08E-09 | count | 1 |
| AL162591.2 | 18.377768  | 2506.387687 | 0.0073 | 0.994 | 2.08E-09 | count | 1 |
| AL139011.1 | 18.3777683 | 2506.387632 | 0.0073 | 0.994 | 2.08E-09 | count | 1 |
| TDGF1      | 18.3777682 | 2506.387618 | 0.0073 | 0.994 | 2.08E-09 | count | 1 |
| PRKG2      | 18.3777683 | 2506.387563 | 0.0073 | 0.994 | 2.08E-09 | count | 1 |
| AP000439.1 | 18.377768  | 2506.387508 | 0.0073 | 0.994 | 2.08E-09 | count | 1 |
| AC092490.2 | 18.3777683 | 2506.387632 | 0.0073 | 0.994 | 2.08E-09 | count | 1 |
| SLC28A1    | 18.3777682 | 2506.387591 | 0.0073 | 0.994 | 2.08E-09 | count | 1 |
| APOBR      | 18.3777687 | 2506.387867 | 0.0073 | 0.994 | 2.08E-09 | count | 1 |
| AC010632.1 | 18.3777683 | 2506.38777  | 0.0073 | 0.994 | 2.08E-09 | count | 1 |
| Z98885.3   | 18.3777682 | 2506.387674 | 0.0073 | 0.994 | 2.08E-09 | count | 1 |
| CAMP       | 18.3777681 | 2506.387756 | 0.0073 | 0.994 | 2.08E-09 | count | 1 |
| AC104118.1 | 18.3777682 | 2506.387784 | 0.0073 | 0.994 | 2.08E-09 | count | 1 |
| STK32A-AS1 | 18.3777681 | 2506.38777  | 0.0073 | 0.994 | 2.08E-09 | count | 1 |
| AC008610.1 | 18.3777681 | 2506.387812 | 0.0073 | 0.994 | 2.08E-09 | count | 1 |
| RNF182     | 18.3777685 | 2506.387798 | 0.0073 | 0.994 | 2.08E-09 | count | 1 |
| AC136475.2 | 18.3777682 | 2506.387922 | 0.0073 | 0.994 | 2.08E-09 | count | 1 |
| TLL2       | 18.377768  | 2506.387729 | 0.0073 | 0.994 | 2.08E-09 | count | 1 |
| AL731566.1 | 18.3777681 | 2506.387715 | 0.0073 | 0.994 | 2.08E-09 | count | 1 |
| HOXC8      | 18.3777684 | 2506.387743 | 0.0073 | 0.994 | 2.08E-09 | count | 1 |
| TRPV4      | 18.3777684 | 2506.387784 | 0.0073 | 0.994 | 2.08E-09 | count | 1 |
| ATP8A2     | 18.377768  | 2506.387895 | 0.0073 | 0.994 | 2.08E-09 | count | 1 |
| AC141586.2 | 18.3777681 | 2506.387743 | 0.0073 | 0.994 | 2.08E-09 | count | 1 |
| AC007608.1 | 18.3777683 | 2506.387743 | 0.0073 | 0.994 | 2.08E-09 | count | 1 |
| GNGT2      | 18.3777681 | 2506.387867 | 0.0073 | 0.994 | 2.08E-09 | count | 1 |
| LRRC25     | 18.3777683 | 2506.387687 | 0.0073 | 0.994 | 2.08E-09 | count | 1 |
| AL391244.3 | 18.3777681 | 2506.387756 | 0.0073 | 0.994 | 2.08E-09 | count | 1 |
| AL445231.1 | 18.377768  | 2506.387729 | 0.0073 | 0.994 | 2.08E-09 | count | 1 |
| AC096677.1 | 18.377768  | 2506.387784 | 0.0073 | 0.994 | 2.08E-09 | count | 1 |
| LINC01819  | 18.3777681 | 2506.387674 | 0.0073 | 0.994 | 2.08E-09 | count | 1 |
| PRKAG3     | 18.3777682 | 2506.387715 | 0.0073 | 0.994 | 2.08E-09 | count | 1 |
| SOX2       | 18.3777681 | 2506.387812 | 0.0073 | 0.994 | 2.08E-09 | count | 1 |
| AC104806.2 | 18.3777681 | 2506.387674 | 0.0073 | 0.994 | 2.08E-09 | count | 1 |

|            |            |             |        |       |          |       |   |
|------------|------------|-------------|--------|-------|----------|-------|---|
| CDS1       | 18.3777681 | 2506.387715 | 0.0073 | 0.994 | 2.08E-09 | count | 1 |
| AC244517.1 | 18.3777679 | 2506.387632 | 0.0073 | 0.994 | 2.08E-09 | count | 1 |
| SAPCD1-AS1 | 18.377768  | 2506.387784 | 0.0073 | 0.994 | 2.08E-09 | count | 1 |
| RAET1E-AS1 | 18.377768  | 2506.387604 | 0.0073 | 0.994 | 2.08E-09 | count | 1 |
| AC093627.5 | 18.3777681 | 2506.387784 | 0.0073 | 0.994 | 2.08E-09 | count | 1 |
| AL158055.1 | 18.3777678 | 2506.387729 | 0.0073 | 0.994 | 2.08E-09 | count | 1 |
| AC019270.1 | 18.3777684 | 2506.38777  | 0.0073 | 0.994 | 2.08E-09 | count | 1 |
| RDH10-AS1  | 18.3777681 | 2506.387687 | 0.0073 | 0.994 | 2.08E-09 | count | 1 |
| GLIS3-AS1  | 18.3777681 | 2506.387908 | 0.0073 | 0.994 | 2.08E-09 | count | 1 |
| IZUMO1R    | 18.377768  | 2506.387674 | 0.0073 | 0.994 | 2.08E-09 | count | 1 |
| SLC39A12   | 18.377768  | 2506.387563 | 0.0073 | 0.994 | 2.08E-09 | count | 1 |
| AC073912.2 | 18.3777682 | 2506.387784 | 0.0073 | 0.994 | 2.08E-09 | count | 1 |
| LINC00377  | 18.377768  | 2506.387798 | 0.0073 | 0.994 | 2.08E-09 | count | 1 |
| GPC5-AS1   | 18.377768  | 2506.387729 | 0.0073 | 0.994 | 2.08E-09 | count | 1 |
| F7         | 18.3777683 | 2506.387743 | 0.0073 | 0.994 | 2.08E-09 | count | 1 |
| AC022167.4 | 18.3777683 | 2506.387743 | 0.0073 | 0.994 | 2.08E-09 | count | 1 |
| AC027796.4 | 18.377768  | 2506.387743 | 0.0073 | 0.994 | 2.08E-09 | count | 1 |
| AC004223.2 | 18.3777683 | 2506.387812 | 0.0073 | 0.994 | 2.08E-09 | count | 1 |
| AP005205.2 | 18.3777679 | 2506.387604 | 0.0073 | 0.994 | 2.08E-09 | count | 1 |
| KIZ-AS1    | 18.3777681 | 2506.387826 | 0.0073 | 0.994 | 2.08E-09 | count | 1 |
| ISL1       | 18.377768  | 2506.387701 | 0.0073 | 0.994 | 2.08E-09 | count | 1 |
| LRRC19     | 18.3777679 | 2506.387646 | 0.0073 | 0.994 | 2.08E-09 | count | 1 |
| MCM10      | 18.3777682 | 2506.387853 | 0.0073 | 0.994 | 2.08E-09 | count | 1 |
| LINC00621  | 18.3777676 | 2506.387466 | 0.0073 | 0.994 | 2.08E-09 | count | 1 |
| AP002884.3 | 18.3777678 | 2506.387632 | 0.0073 | 0.994 | 2.08E-09 | count | 1 |
| AC025035.1 | 18.3777679 | 2506.387522 | 0.0073 | 0.994 | 2.08E-09 | count | 1 |
| LRRC18     | 18.3777678 | 2506.387701 | 0.0073 | 0.994 | 2.08E-09 | count | 1 |
| AC025423.4 | 18.3777676 | 2506.387549 | 0.0073 | 0.994 | 2.08E-09 | count | 1 |
| HPCAL4     | 17.6832648 | 2506.037739 | 0.0071 | 0.994 | 2.08E-09 | count | 1 |
| LINC01063  | 17.6832648 | 2506.037753 | 0.0071 | 0.994 | 2.08E-09 | count | 1 |
| TMPRSS11A  | 17.6832648 | 2506.037739 | 0.0071 | 0.994 | 2.08E-09 | count | 1 |
| AL049697.1 | 17.6832648 | 2506.037753 | 0.0071 | 0.994 | 2.08E-09 | count | 1 |
| AC087292.1 | 17.6832649 | 2506.037822 | 0.0071 | 0.994 | 2.08E-09 | count | 1 |
| RDM1       | 17.6832649 | 2506.037788 | 0.0071 | 0.994 | 2.08E-09 | count | 1 |
| PPP1R16B   | 17.6832648 | 2506.037739 | 0.0071 | 0.994 | 2.08E-09 | count | 1 |
| FAM83F     | 17.6832649 | 2506.037788 | 0.0071 | 0.994 | 2.08E-09 | count | 1 |
| AC254562.2 | 17.6832649 | 2506.037822 | 0.0071 | 0.994 | 2.08E-09 | count | 1 |
| CLCNKA     | 17.6832649 | 2506.037746 | 0.0071 | 0.994 | 2.08E-09 | count | 1 |
| RAD54L     | 17.6832649 | 2506.03785  | 0.0071 | 0.994 | 2.08E-09 | count | 1 |
| AC090948.1 | 17.6832648 | 2506.037753 | 0.0071 | 0.994 | 2.08E-09 | count | 1 |
| AC097382.2 | 17.6832648 | 2506.03785  | 0.0071 | 0.994 | 2.08E-09 | count | 1 |
| AC110609.1 | 17.6832648 | 2506.037767 | 0.0071 | 0.994 | 2.08E-09 | count | 1 |
| LINC01513  | 17.6832648 | 2506.037781 | 0.0071 | 0.994 | 2.08E-09 | count | 1 |
| AL031963.1 | 17.6832648 | 2506.037808 | 0.0071 | 0.994 | 2.08E-09 | count | 1 |
| SNAP91     | 17.6832648 | 2506.03785  | 0.0071 | 0.994 | 2.08E-09 | count | 1 |

|                |            |             |        |       |          |       |   |
|----------------|------------|-------------|--------|-------|----------|-------|---|
| AL731684.2     | 17.6832648 | 2506.037788 | 0.0071 | 0.994 | 2.08E-09 | count | 1 |
| AC019117.1     | 17.6832648 | 2506.037788 | 0.0071 | 0.994 | 2.08E-09 | count | 1 |
| URGCP-MRPS24   | 17.6832649 | 2506.03785  | 0.0071 | 0.994 | 2.08E-09 | count | 1 |
| CYP3A43        | 17.6832648 | 2506.037739 | 0.0071 | 0.994 | 2.08E-09 | count | 1 |
| PIK3CG         | 17.6832648 | 2506.037822 | 0.0071 | 0.994 | 2.08E-09 | count | 1 |
| AL391294.1     | 17.6832648 | 2506.037781 | 0.0071 | 0.994 | 2.08E-09 | count | 1 |
| AP000786.1     | 17.6832648 | 2506.037829 | 0.0071 | 0.994 | 2.08E-09 | count | 1 |
| AL022344.2     | 17.6832648 | 2506.037739 | 0.0071 | 0.994 | 2.08E-09 | count | 1 |
| NRAP           | 17.6832648 | 2506.037808 | 0.0071 | 0.994 | 2.08E-09 | count | 1 |
| AC009509.4     | 17.6832649 | 2506.03776  | 0.0071 | 0.994 | 2.08E-09 | count | 1 |
| HCAR3          | 17.6832648 | 2506.03785  | 0.0071 | 0.994 | 2.08E-09 | count | 1 |
| AC090970.2     | 17.6832648 | 2506.037815 | 0.0071 | 0.994 | 2.08E-09 | count | 1 |
| LINC00923      | 17.6832649 | 2506.037726 | 0.0071 | 0.994 | 2.08E-09 | count | 1 |
| OR2C1          | 17.6832648 | 2506.037836 | 0.0071 | 0.994 | 2.08E-09 | count | 1 |
| AC126763.1     | 17.6832649 | 2506.037815 | 0.0071 | 0.994 | 2.08E-09 | count | 1 |
| CKLF-CMTM1     | 17.6832648 | 2506.037739 | 0.0071 | 0.994 | 2.08E-09 | count | 1 |
| LINC00854      | 17.6832649 | 2506.03776  | 0.0071 | 0.994 | 2.08E-09 | count | 1 |
| MYADML2        | 17.6832648 | 2506.037912 | 0.0071 | 0.994 | 2.08E-09 | count | 1 |
| AL354813.1     | 17.6832648 | 2506.037767 | 0.0071 | 0.994 | 2.08E-09 | count | 1 |
| LINC00160      | 17.6832648 | 2506.037836 | 0.0071 | 0.994 | 2.08E-09 | count | 1 |
| LINC01424      | 17.6832648 | 2506.037836 | 0.0071 | 0.994 | 2.08E-09 | count | 1 |
| TMEM51-AS1     | 17.6832648 | 2506.037822 | 0.0071 | 0.994 | 2.08E-09 | count | 1 |
| GRHL3          | 17.6832648 | 2506.037698 | 0.0071 | 0.994 | 2.08E-09 | count | 1 |
| TMEM269        | 17.6832648 | 2506.037822 | 0.0071 | 0.994 | 2.08E-09 | count | 1 |
| STIL           | 17.6832647 | 2506.037705 | 0.0071 | 0.994 | 2.08E-09 | count | 1 |
| TSACC          | 17.6832647 | 2506.037719 | 0.0071 | 0.994 | 2.08E-09 | count | 1 |
| AIM2           | 17.6832646 | 2506.03776  | 0.0071 | 0.994 | 2.08E-09 | count | 1 |
| ELF3-AS1       | 17.6832648 | 2506.037843 | 0.0071 | 0.994 | 2.08E-09 | count | 1 |
| AC144450.1     | 17.6832648 | 2506.037753 | 0.0071 | 0.994 | 2.08E-09 | count | 1 |
| LINC01814      | 17.6832647 | 2506.037732 | 0.0071 | 0.994 | 2.08E-09 | count | 1 |
| SIX3-AS1       | 17.6832648 | 2506.037801 | 0.0071 | 0.994 | 2.08E-09 | count | 1 |
| AC013270.1     | 17.6832647 | 2506.037801 | 0.0071 | 0.994 | 2.08E-09 | count | 1 |
| AC018690.1     | 17.6832648 | 2506.037705 | 0.0071 | 0.994 | 2.08E-09 | count | 1 |
| AC092667.1     | 17.6832648 | 2506.037795 | 0.0071 | 0.994 | 2.08E-09 | count | 1 |
| AC092620.1     | 17.6832645 | 2506.037726 | 0.0071 | 0.994 | 2.08E-09 | count | 1 |
| AC016737.1     | 17.6832649 | 2506.037788 | 0.0071 | 0.994 | 2.08E-09 | count | 1 |
| AC073254.1     | 17.6832647 | 2506.037767 | 0.0071 | 0.994 | 2.08E-09 | count | 1 |
| TMEM110-MUSTN1 | 17.6832648 | 2506.03776  | 0.0071 | 0.994 | 2.08E-09 | count | 1 |
| MSANTD1        | 17.6832648 | 2506.03776  | 0.0071 | 0.994 | 2.08E-09 | count | 1 |
| AC025754.2     | 17.6832647 | 2506.037836 | 0.0071 | 0.994 | 2.08E-09 | count | 1 |
| AC092343.1     | 17.6832647 | 2506.037774 | 0.0071 | 0.994 | 2.08E-09 | count | 1 |
| AC025188.1     | 17.6832648 | 2506.037774 | 0.0071 | 0.994 | 2.08E-09 | count | 1 |
| TMED7-TICAM2   | 17.6832647 | 2506.037829 | 0.0071 | 0.994 | 2.08E-09 | count | 1 |
| ARL14EPL       | 17.6832648 | 2506.037781 | 0.0071 | 0.994 | 2.08E-09 | count | 1 |
| AC091979.2     | 17.6832647 | 2506.037746 | 0.0071 | 0.994 | 2.08E-09 | count | 1 |



|            |            |             |        |       |          |       |   |
|------------|------------|-------------|--------|-------|----------|-------|---|
| ZBTB12     | 17.6832648 | 2506.037767 | 0.0071 | 0.994 | 2.08E-09 | count | 1 |
| AL121574.1 | 17.6832648 | 2506.037864 | 0.0071 | 0.994 | 2.08E-09 | count | 1 |
| ADGRF1     | 17.6832648 | 2506.037719 | 0.0071 | 0.994 | 2.08E-09 | count | 1 |
| HCRTR2     | 17.6832648 | 2506.037815 | 0.0071 | 0.994 | 2.08E-09 | count | 1 |
| WISP3      | 17.6832646 | 2506.037753 | 0.0071 | 0.994 | 2.08E-09 | count | 1 |
| ATP1B4     | 17.6832648 | 2506.037698 | 0.0071 | 0.994 | 2.08E-09 | count | 1 |
| FAM87A     | 17.6832647 | 2506.037705 | 0.0071 | 0.994 | 2.08E-09 | count | 1 |
| RALYL      | 17.6832647 | 2506.037808 | 0.0071 | 0.994 | 2.08E-09 | count | 1 |
| AC083836.1 | 17.6832648 | 2506.037795 | 0.0071 | 0.994 | 2.08E-09 | count | 1 |
| MLANA      | 17.6832646 | 2506.037753 | 0.0071 | 0.994 | 2.08E-09 | count | 1 |
| AL161729.2 | 17.6832647 | 2506.037712 | 0.0071 | 0.994 | 2.08E-09 | count | 1 |
| DDIT4-AS1  | 17.6832648 | 2506.037774 | 0.0071 | 0.994 | 2.08E-09 | count | 1 |
| AC022400.7 | 17.6832647 | 2506.03776  | 0.0071 | 0.994 | 2.08E-09 | count | 1 |
| AC010997.3 | 17.6832647 | 2506.037801 | 0.0071 | 0.994 | 2.08E-09 | count | 1 |
| DNMBP-AS1  | 17.6832648 | 2506.037774 | 0.0071 | 0.994 | 2.08E-09 | count | 1 |
| AL138921.1 | 17.6832645 | 2506.037726 | 0.0071 | 0.994 | 2.08E-09 | count | 1 |
| AL360182.2 | 17.6832649 | 2506.03787  | 0.0071 | 0.994 | 2.08E-09 | count | 1 |
| OVCH1      | 17.6832646 | 2506.037808 | 0.0071 | 0.994 | 2.08E-09 | count | 1 |
| AC008083.2 | 17.6832646 | 2506.037753 | 0.0071 | 0.994 | 2.08E-09 | count | 1 |
| AC025259.1 | 17.6832648 | 2506.037864 | 0.0071 | 0.994 | 2.08E-09 | count | 1 |
| AC025262.1 | 17.6832649 | 2506.037767 | 0.0071 | 0.994 | 2.08E-09 | count | 1 |
| AC008149.1 | 17.6832649 | 2506.037815 | 0.0071 | 0.994 | 2.08E-09 | count | 1 |
| AC026765.2 | 17.6832648 | 2506.037795 | 0.0071 | 0.994 | 2.08E-09 | count | 1 |
| AC084018.1 | 17.6832648 | 2506.037815 | 0.0071 | 0.994 | 2.08E-09 | count | 1 |
| GALNT9     | 17.6832647 | 2506.03776  | 0.0071 | 0.994 | 2.08E-09 | count | 1 |
| OR11H4     | 17.6832646 | 2506.037732 | 0.0071 | 0.994 | 2.08E-09 | count | 1 |
| AL161668.3 | 17.6832648 | 2506.03776  | 0.0071 | 0.994 | 2.08E-09 | count | 1 |
| AL121594.1 | 17.6832646 | 2506.037795 | 0.0071 | 0.994 | 2.08E-09 | count | 1 |
| AL359237.1 | 17.6832647 | 2506.037732 | 0.0071 | 0.994 | 2.08E-09 | count | 1 |
| LINC02254  | 17.6832646 | 2506.037767 | 0.0071 | 0.994 | 2.08E-09 | count | 1 |
| AC015660.2 | 17.6832648 | 2506.037781 | 0.0071 | 0.994 | 2.08E-09 | count | 1 |
| AC092368.3 | 17.6832648 | 2506.037815 | 0.0071 | 0.994 | 2.08E-09 | count | 1 |
| CMTM1      | 17.6832647 | 2506.037705 | 0.0071 | 0.994 | 2.08E-09 | count | 1 |
| AC025287.4 | 17.6832648 | 2506.037801 | 0.0071 | 0.994 | 2.08E-09 | count | 1 |
| AC046158.1 | 17.6832647 | 2506.037705 | 0.0071 | 0.994 | 2.08E-09 | count | 1 |
| AC105411.1 | 17.6832647 | 2506.037705 | 0.0071 | 0.994 | 2.08E-09 | count | 1 |
| AC138028.4 | 17.6832649 | 2506.037788 | 0.0071 | 0.994 | 2.08E-09 | count | 1 |
| AC006435.3 | 17.6832649 | 2506.037767 | 0.0071 | 0.994 | 2.08E-09 | count | 1 |
| AC005696.2 | 17.6832645 | 2506.037726 | 0.0071 | 0.994 | 2.08E-09 | count | 1 |
| EFNB3      | 17.6832648 | 2506.037767 | 0.0071 | 0.994 | 2.08E-09 | count | 1 |
| AC015908.4 | 17.6832648 | 2506.037864 | 0.0071 | 0.994 | 2.08E-09 | count | 1 |
| ARL5C      | 17.6832648 | 2506.037801 | 0.0071 | 0.994 | 2.08E-09 | count | 1 |
| ITGA2B     | 17.6832646 | 2506.037753 | 0.0071 | 0.994 | 2.08E-09 | count | 1 |
| ANKFN1     | 17.6832648 | 2506.03776  | 0.0071 | 0.994 | 2.08E-09 | count | 1 |
| SCN4A      | 17.6832647 | 2506.037795 | 0.0071 | 0.994 | 2.08E-09 | count | 1 |

|            |            |             |        |       |          |       |   |
|------------|------------|-------------|--------|-------|----------|-------|---|
| AC037487.2 | 17.6832648 | 2506.037767 | 0.0071 | 0.994 | 2.08E-09 | count | 1 |
| KIF19      | 17.6832647 | 2506.037774 | 0.0071 | 0.994 | 2.08E-09 | count | 1 |
| AC027601.1 | 17.6832647 | 2506.037705 | 0.0071 | 0.994 | 2.08E-09 | count | 1 |
| AC139099.2 | 17.6832648 | 2506.037801 | 0.0071 | 0.994 | 2.08E-09 | count | 1 |
| AC011731.1 | 17.6832646 | 2506.037753 | 0.0071 | 0.994 | 2.08E-09 | count | 1 |
| ONCUT2     | 17.6832648 | 2506.037795 | 0.0071 | 0.994 | 2.08E-09 | count | 1 |
| LINC01730  | 17.6832648 | 2506.037836 | 0.0071 | 0.994 | 2.08E-09 | count | 1 |
| AL121782.1 | 17.6832646 | 2506.037753 | 0.0071 | 0.994 | 2.08E-09 | count | 1 |
| C19orf71   | 17.6832645 | 2506.037732 | 0.0071 | 0.994 | 2.08E-09 | count | 1 |
| TUBB4A     | 17.6832648 | 2506.037898 | 0.0071 | 0.994 | 2.08E-09 | count | 1 |
| AC008764.4 | 17.6832648 | 2506.037801 | 0.0071 | 0.994 | 2.08E-09 | count | 1 |
| AC004784.1 | 17.6832647 | 2506.037705 | 0.0071 | 0.994 | 2.08E-09 | count | 1 |
| AC020922.4 | 17.6832647 | 2506.037712 | 0.0071 | 0.994 | 2.08E-09 | count | 1 |
| AC000068.1 | 17.6832647 | 2506.037808 | 0.0071 | 0.994 | 2.08E-09 | count | 1 |
| 5-Sep      | 17.6832648 | 2506.037822 | 0.0071 | 0.994 | 2.08E-09 | count | 1 |
| AL008582.1 | 17.6832647 | 2506.037705 | 0.0071 | 0.994 | 2.08E-09 | count | 1 |
| SHISA8     | 17.6832648 | 2506.037781 | 0.0071 | 0.994 | 2.08E-09 | count | 1 |
| RSPH1      | 17.6832648 | 2506.03776  | 0.0071 | 0.994 | 2.08E-09 | count | 1 |
| LINC01786  | 17.6832647 | 2506.037698 | 0.0071 | 0.994 | 2.08E-09 | count | 1 |
| AL590822.1 | 17.6832647 | 2506.037643 | 0.0071 | 0.994 | 2.08E-09 | count | 1 |
| AL513320.1 | 17.6832646 | 2506.037726 | 0.0071 | 0.994 | 2.08E-09 | count | 1 |
| AL365330.1 | 17.6832648 | 2506.037822 | 0.0071 | 0.994 | 2.08E-09 | count | 1 |
| AGMAT      | 17.6832646 | 2506.037767 | 0.0071 | 0.994 | 2.08E-09 | count | 1 |
| AL031728.1 | 17.6832647 | 2506.037829 | 0.0071 | 0.994 | 2.08E-09 | count | 1 |
| SLC30A2    | 17.6832646 | 2506.037746 | 0.0071 | 0.994 | 2.08E-09 | count | 1 |
| GUCA2B     | 17.6832646 | 2506.037712 | 0.0071 | 0.994 | 2.08E-09 | count | 1 |
| AL357673.1 | 17.6832647 | 2506.037774 | 0.0071 | 0.994 | 2.08E-09 | count | 1 |
| AL353771.1 | 17.6832647 | 2506.037795 | 0.0071 | 0.994 | 2.08E-09 | count | 1 |
| AL450992.2 | 17.6832647 | 2506.037836 | 0.0071 | 0.994 | 2.08E-09 | count | 1 |
| SPRR2E     | 17.6832646 | 2506.037822 | 0.0071 | 0.994 | 2.08E-09 | count | 1 |
| LOR        | 17.6832646 | 2506.037677 | 0.0071 | 0.994 | 2.08E-09 | count | 1 |
| SLAMF9     | 17.6832647 | 2506.037801 | 0.0071 | 0.994 | 2.08E-09 | count | 1 |
| KCNJ9      | 17.6832648 | 2506.037815 | 0.0071 | 0.994 | 2.08E-09 | count | 1 |
| CASQ1      | 17.6832648 | 2506.037843 | 0.0071 | 0.994 | 2.08E-09 | count | 1 |
| AL139011.2 | 17.6832646 | 2506.037732 | 0.0071 | 0.994 | 2.08E-09 | count | 1 |
| CFAP126    | 17.6832648 | 2506.037815 | 0.0071 | 0.994 | 2.08E-09 | count | 1 |
| ILDR2      | 17.6832648 | 2506.037801 | 0.0071 | 0.994 | 2.08E-09 | count | 1 |
| AL031599.1 | 17.6832647 | 2506.03785  | 0.0071 | 0.994 | 2.08E-09 | count | 1 |
| AL590723.1 | 17.6832647 | 2506.03776  | 0.0071 | 0.994 | 2.08E-09 | count | 1 |
| AC104461.1 | 17.6832646 | 2506.037732 | 0.0071 | 0.994 | 2.08E-09 | count | 1 |
| AL513283.1 | 17.6832647 | 2506.037788 | 0.0071 | 0.994 | 2.08E-09 | count | 1 |
| PGBD5      | 17.6832646 | 2506.037712 | 0.0071 | 0.994 | 2.08E-09 | count | 1 |
| AL357556.4 | 17.6832649 | 2506.037836 | 0.0071 | 0.994 | 2.08E-09 | count | 1 |
| EXO1       | 17.6832647 | 2506.037767 | 0.0071 | 0.994 | 2.08E-09 | count | 1 |
| ATP6V1C2   | 17.6832648 | 2506.037781 | 0.0071 | 0.994 | 2.08E-09 | count | 1 |

|             |            |             |        |       |          |       |   |
|-------------|------------|-------------|--------|-------|----------|-------|---|
| AC018467.1  | 17.6832647 | 2506.03776  | 0.0071 | 0.994 | 2.08E-09 | count | 1 |
| MFS2B       | 17.6832647 | 2506.037746 | 0.0071 | 0.994 | 2.08E-09 | count | 1 |
| LINC01381   | 17.6832647 | 2506.037857 | 0.0071 | 0.994 | 2.08E-09 | count | 1 |
| AC013403.2  | 17.6832648 | 2506.037801 | 0.0071 | 0.994 | 2.08E-09 | count | 1 |
| C2orf91     | 17.6832647 | 2506.037767 | 0.0071 | 0.994 | 2.08E-09 | count | 1 |
| AC018682.2  | 17.6832646 | 2506.03776  | 0.0071 | 0.994 | 2.08E-09 | count | 1 |
| AC018462.1  | 17.6832646 | 2506.037705 | 0.0071 | 0.994 | 2.08E-09 | count | 1 |
| AC007040.2  | 17.6832647 | 2506.037857 | 0.0071 | 0.994 | 2.08E-09 | count | 1 |
| RAB6C       | 17.6832647 | 2506.037788 | 0.0071 | 0.994 | 2.08E-09 | count | 1 |
| LINC01124   | 17.6832648 | 2506.037815 | 0.0071 | 0.994 | 2.08E-09 | count | 1 |
| AC009948.4  | 17.6832646 | 2506.037767 | 0.0071 | 0.994 | 2.08E-09 | count | 1 |
| AC005037.1  | 17.6832647 | 2506.037753 | 0.0071 | 0.994 | 2.08E-09 | count | 1 |
| AC008269.1  | 17.6832646 | 2506.037712 | 0.0071 | 0.994 | 2.08E-09 | count | 1 |
| MOGAT1      | 17.6832647 | 2506.037795 | 0.0071 | 0.994 | 2.08E-09 | count | 1 |
| AC009950.1  | 17.6832645 | 2506.037808 | 0.0071 | 0.994 | 2.08E-09 | count | 1 |
| SYN2        | 17.6832647 | 2506.037746 | 0.0071 | 0.994 | 2.08E-09 | count | 1 |
| CYP8B1      | 17.6832647 | 2506.03787  | 0.0071 | 0.994 | 2.08E-09 | count | 1 |
| SPATA12     | 17.6832647 | 2506.037698 | 0.0071 | 0.994 | 2.08E-09 | count | 1 |
| AC073352.1  | 17.6832646 | 2506.037691 | 0.0071 | 0.994 | 2.08E-09 | count | 1 |
| AC107027.1  | 17.6832645 | 2506.037753 | 0.0071 | 0.994 | 2.08E-09 | count | 1 |
| AC117395.1  | 17.6832647 | 2506.037788 | 0.0071 | 0.994 | 2.08E-09 | count | 1 |
| YEATS2-AS1  | 17.6832646 | 2506.037726 | 0.0071 | 0.994 | 2.08E-09 | count | 1 |
| HRASLS      | 17.6832647 | 2506.037719 | 0.0071 | 0.994 | 2.08E-09 | count | 1 |
| LINC02026   | 17.6832646 | 2506.037836 | 0.0071 | 0.994 | 2.08E-09 | count | 1 |
| AC092574.1  | 17.6832646 | 2506.037712 | 0.0071 | 0.994 | 2.08E-09 | count | 1 |
| ERVMER34-1  | 17.6832646 | 2506.037705 | 0.0071 | 0.994 | 2.08E-09 | count | 1 |
| AC021146.12 | 17.6832647 | 2506.037774 | 0.0071 | 0.994 | 2.08E-09 | count | 1 |
| AC107072.2  | 17.6832648 | 2506.037788 | 0.0071 | 0.994 | 2.08E-09 | count | 1 |
| AC114781.2  | 17.6832645 | 2506.037677 | 0.0071 | 0.994 | 2.08E-09 | count | 1 |
| LINC02428   | 17.6832647 | 2506.037857 | 0.0071 | 0.994 | 2.08E-09 | count | 1 |
| AC004069.1  | 17.6832646 | 2506.037719 | 0.0071 | 0.994 | 2.08E-09 | count | 1 |
| AC096564.1  | 17.6832647 | 2506.037753 | 0.0071 | 0.994 | 2.08E-09 | count | 1 |
| AC079298.1  | 17.6832648 | 2506.037746 | 0.0071 | 0.994 | 2.08E-09 | count | 1 |
| AC091891.2  | 17.6832649 | 2506.037781 | 0.0071 | 0.994 | 2.08E-09 | count | 1 |
| AC008966.2  | 17.6832647 | 2506.037808 | 0.0071 | 0.994 | 2.08E-09 | count | 1 |
| AC025470.2  | 17.6832646 | 2506.037774 | 0.0071 | 0.994 | 2.08E-09 | count | 1 |
| LINC02197   | 17.6832646 | 2506.037726 | 0.0071 | 0.994 | 2.08E-09 | count | 1 |
| LIX1-AS1    | 17.6832647 | 2506.037774 | 0.0071 | 0.994 | 2.08E-09 | count | 1 |
| AC106786.2  | 17.6832648 | 2506.037836 | 0.0071 | 0.994 | 2.08E-09 | count | 1 |
| CTXN3       | 17.6832647 | 2506.037843 | 0.0071 | 0.994 | 2.08E-09 | count | 1 |
| PSD2        | 17.6832646 | 2506.037829 | 0.0071 | 0.994 | 2.08E-09 | count | 1 |
| SLC36A2     | 17.6832647 | 2506.037739 | 0.0071 | 0.994 | 2.08E-09 | count | 1 |
| AC025437.2  | 17.6832647 | 2506.037719 | 0.0071 | 0.994 | 2.08E-09 | count | 1 |
| LINC02227   | 17.6832647 | 2506.037801 | 0.0071 | 0.994 | 2.08E-09 | count | 1 |
| AC011365.2  | 17.6832647 | 2506.037746 | 0.0071 | 0.994 | 2.08E-09 | count | 1 |

|            |            |             |        |       |          |       |   |
|------------|------------|-------------|--------|-------|----------|-------|---|
| FGFR4      | 17.6832647 | 2506.037795 | 0.0071 | 0.994 | 2.08E-09 | count | 1 |
| AL031123.2 | 17.6832647 | 2506.037677 | 0.0071 | 0.994 | 2.08E-09 | count | 1 |
| AL157373.2 | 17.6832647 | 2506.037808 | 0.0071 | 0.994 | 2.08E-09 | count | 1 |
| AL008729.1 | 17.6832646 | 2506.037767 | 0.0071 | 0.994 | 2.08E-09 | count | 1 |
| HIST1H2BI  | 17.6832647 | 2506.037767 | 0.0071 | 0.994 | 2.08E-09 | count | 1 |
| LINC00243  | 17.6832645 | 2506.037753 | 0.0071 | 0.994 | 2.08E-09 | count | 1 |
| SFTA2      | 17.6832648 | 2506.037815 | 0.0071 | 0.994 | 2.08E-09 | count | 1 |
| AL021368.3 | 17.6832649 | 2506.037864 | 0.0071 | 0.994 | 2.08E-09 | count | 1 |
| AL445250.1 | 17.6832648 | 2506.037815 | 0.0071 | 0.994 | 2.08E-09 | count | 1 |
| EYS        | 17.6832647 | 2506.037746 | 0.0071 | 0.994 | 2.08E-09 | count | 1 |
| KHDC1L     | 17.6832648 | 2506.03787  | 0.0071 | 0.994 | 2.08E-09 | count | 1 |
| TRDN-AS1   | 17.6832648 | 2506.037884 | 0.0071 | 0.994 | 2.08E-09 | count | 1 |
| ULBP3      | 17.6832647 | 2506.037739 | 0.0071 | 0.994 | 2.08E-09 | count | 1 |
| AC073957.1 | 17.6832647 | 2506.037739 | 0.0071 | 0.994 | 2.08E-09 | count | 1 |
| AC073316.2 | 17.6832647 | 2506.037719 | 0.0071 | 0.994 | 2.08E-09 | count | 1 |
| AC011284.1 | 17.6832647 | 2506.037788 | 0.0071 | 0.994 | 2.08E-09 | count | 1 |
| AC005082.1 | 17.6832645 | 2506.037746 | 0.0071 | 0.994 | 2.08E-09 | count | 1 |
| AC006027.1 | 17.6832647 | 2506.037739 | 0.0071 | 0.994 | 2.08E-09 | count | 1 |
| AC005154.4 | 17.6832647 | 2506.037774 | 0.0071 | 0.994 | 2.08E-09 | count | 1 |
| AC010132.4 | 17.6832647 | 2506.037808 | 0.0071 | 0.994 | 2.08E-09 | count | 1 |
| UPK3B      | 17.6832646 | 2506.037767 | 0.0071 | 0.994 | 2.08E-09 | count | 1 |
| AC079760.2 | 17.6832647 | 2506.037698 | 0.0071 | 0.994 | 2.08E-09 | count | 1 |
| AC005096.1 | 17.6832646 | 2506.037857 | 0.0071 | 0.994 | 2.08E-09 | count | 1 |
| AC073130.2 | 17.6832646 | 2506.037726 | 0.0071 | 0.994 | 2.08E-09 | count | 1 |
| LRGUK      | 17.6832647 | 2506.037746 | 0.0071 | 0.994 | 2.08E-09 | count | 1 |
| SVOPL      | 17.6832646 | 2506.037815 | 0.0071 | 0.994 | 2.08E-09 | count | 1 |
| LINC01204  | 17.6832647 | 2506.037719 | 0.0071 | 0.994 | 2.08E-09 | count | 1 |
| FOXP3      | 17.6832647 | 2506.03776  | 0.0071 | 0.994 | 2.08E-09 | count | 1 |
| IGBP1-AS2  | 17.6832648 | 2506.037801 | 0.0071 | 0.994 | 2.08E-09 | count | 1 |
| ALG13-AS1  | 17.6832647 | 2506.03785  | 0.0071 | 0.994 | 2.08E-09 | count | 1 |
| FIRRE      | 17.6832646 | 2506.037767 | 0.0071 | 0.994 | 2.08E-09 | count | 1 |
| LINC00629  | 17.6832647 | 2506.037781 | 0.0071 | 0.994 | 2.08E-09 | count | 1 |
| PNMA5      | 17.6832646 | 2506.037767 | 0.0071 | 0.994 | 2.08E-09 | count | 1 |
| FAM167A    | 17.6832646 | 2506.037712 | 0.0071 | 0.994 | 2.08E-09 | count | 1 |
| CDCA2      | 17.6832647 | 2506.037795 | 0.0071 | 0.994 | 2.08E-09 | count | 1 |
| AC090103.1 | 17.6832645 | 2506.037705 | 0.0071 | 0.994 | 2.08E-09 | count | 1 |
| ADRA1A     | 17.6832646 | 2506.037836 | 0.0071 | 0.994 | 2.08E-09 | count | 1 |
| AC124067.4 | 17.6832647 | 2506.037781 | 0.0071 | 0.994 | 2.08E-09 | count | 1 |
| AC091173.1 | 17.6832647 | 2506.037753 | 0.0071 | 0.994 | 2.08E-09 | count | 1 |
| TRIM55     | 17.6832647 | 2506.037801 | 0.0071 | 0.994 | 2.08E-09 | count | 1 |
| AC018442.2 | 17.6832647 | 2506.037767 | 0.0071 | 0.994 | 2.08E-09 | count | 1 |
| AP003354.2 | 17.6832647 | 2506.037698 | 0.0071 | 0.994 | 2.08E-09 | count | 1 |
| AC012213.3 | 17.6832647 | 2506.037753 | 0.0071 | 0.994 | 2.08E-09 | count | 1 |
| TG         | 17.6832649 | 2506.037864 | 0.0071 | 0.994 | 2.08E-09 | count | 1 |
| RHPN1-AS1  | 17.6832646 | 2506.037739 | 0.0071 | 0.994 | 2.08E-09 | count | 1 |

|            |            |             |        |       |          |       |   |
|------------|------------|-------------|--------|-------|----------|-------|---|
| FAM83H     | 17.6832647 | 2506.037753 | 0.0071 | 0.994 | 2.08E-09 | count | 1 |
| C9orf92    | 17.6832647 | 2506.03776  | 0.0071 | 0.994 | 2.08E-09 | count | 1 |
| AL161909.2 | 17.6832647 | 2506.037795 | 0.0071 | 0.994 | 2.08E-09 | count | 1 |
| EQTN       | 17.6832648 | 2506.037829 | 0.0071 | 0.994 | 2.08E-09 | count | 1 |
| BANCR      | 17.6832646 | 2506.037705 | 0.0071 | 0.994 | 2.08E-09 | count | 1 |
| AL353768.1 | 17.6832647 | 2506.037815 | 0.0071 | 0.994 | 2.08E-09 | count | 1 |
| AL358937.1 | 17.6832647 | 2506.037781 | 0.0071 | 0.994 | 2.08E-09 | count | 1 |
| ACTL7B     | 17.6832646 | 2506.037795 | 0.0071 | 0.994 | 2.08E-09 | count | 1 |
| AL135787.1 | 17.6832647 | 2506.037774 | 0.0071 | 0.994 | 2.08E-09 | count | 1 |
| 1-Dec      | 17.6832646 | 2506.037739 | 0.0071 | 0.994 | 2.08E-09 | count | 1 |
| AL161908.1 | 17.6832647 | 2506.037698 | 0.0071 | 0.994 | 2.08E-09 | count | 1 |
| AL360268.2 | 17.6832647 | 2506.037801 | 0.0071 | 0.994 | 2.08E-09 | count | 1 |
| CEL        | 17.6832648 | 2506.037877 | 0.0071 | 0.994 | 2.08E-09 | count | 1 |
| TH         | 17.6832647 | 2506.037774 | 0.0071 | 0.994 | 2.08E-09 | count | 1 |
| RASSF10    | 17.6832647 | 2506.037719 | 0.0071 | 0.994 | 2.08E-09 | count | 1 |
| AC090589.2 | 17.6832645 | 2506.03765  | 0.0071 | 0.994 | 2.08E-09 | count | 1 |
| AP000781.1 | 17.6832646 | 2506.037836 | 0.0071 | 0.994 | 2.08E-09 | count | 1 |
| ZP1        | 17.6832647 | 2506.03776  | 0.0071 | 0.994 | 2.08E-09 | count | 1 |
| KCNK4      | 17.6832647 | 2506.037801 | 0.0071 | 0.994 | 2.08E-09 | count | 1 |
| ARL2-SNX15 | 17.6832646 | 2506.037857 | 0.0071 | 0.994 | 2.08E-09 | count | 1 |
| AP003716.1 | 17.6832648 | 2506.037788 | 0.0071 | 0.994 | 2.08E-09 | count | 1 |
| AP000446.1 | 17.6832648 | 2506.037746 | 0.0071 | 0.994 | 2.08E-09 | count | 1 |
| MMP1       | 17.6832647 | 2506.037719 | 0.0071 | 0.994 | 2.08E-09 | count | 1 |
| AP003063.1 | 17.6832647 | 2506.037739 | 0.0071 | 0.994 | 2.08E-09 | count | 1 |
| NXPE1      | 17.6832646 | 2506.037808 | 0.0071 | 0.994 | 2.08E-09 | count | 1 |
| TMPRSS4    | 17.6832647 | 2506.037795 | 0.0071 | 0.994 | 2.08E-09 | count | 1 |
| AP003393.1 | 17.6832647 | 2506.037829 | 0.0071 | 0.994 | 2.08E-09 | count | 1 |
| AP000866.5 | 17.6832646 | 2506.037774 | 0.0071 | 0.994 | 2.08E-09 | count | 1 |
| HEPACAM    | 17.6832645 | 2506.037663 | 0.0071 | 0.994 | 2.08E-09 | count | 1 |
| AP000842.1 | 17.6832645 | 2506.037712 | 0.0071 | 0.994 | 2.08E-09 | count | 1 |
| KCNJ5      | 17.6832648 | 2506.037781 | 0.0071 | 0.994 | 2.08E-09 | count | 1 |
| C10orf67   | 17.6832647 | 2506.037795 | 0.0071 | 0.994 | 2.08E-09 | count | 1 |
| ANTXRL     | 17.6832648 | 2506.037822 | 0.0071 | 0.994 | 2.08E-09 | count | 1 |
| GPRIN2     | 17.6832648 | 2506.037815 | 0.0071 | 0.994 | 2.08E-09 | count | 1 |
| NPFFR1     | 17.6832647 | 2506.037781 | 0.0071 | 0.994 | 2.08E-09 | count | 1 |
| SFTPD-AS1  | 17.6832646 | 2506.03785  | 0.0071 | 0.994 | 2.08E-09 | count | 1 |
| RGR        | 17.6832647 | 2506.03776  | 0.0071 | 0.994 | 2.08E-09 | count | 1 |
| AL121928.1 | 17.6832646 | 2506.037781 | 0.0071 | 0.994 | 2.08E-09 | count | 1 |
| AL731566.2 | 17.6832647 | 2506.037726 | 0.0071 | 0.994 | 2.08E-09 | count | 1 |
| AL160290.2 | 17.6832648 | 2506.037767 | 0.0071 | 0.994 | 2.08E-09 | count | 1 |
| AL354950.1 | 17.6832645 | 2506.037732 | 0.0071 | 0.994 | 2.08E-09 | count | 1 |
| LINC02398  | 17.6832647 | 2506.037753 | 0.0071 | 0.994 | 2.08E-09 | count | 1 |
| ESPL1      | 17.6832645 | 2506.037705 | 0.0071 | 0.994 | 2.08E-09 | count | 1 |
| AC073896.5 | 17.6832649 | 2506.037781 | 0.0071 | 0.994 | 2.08E-09 | count | 1 |
| MYF5       | 17.6832645 | 2506.037746 | 0.0071 | 0.994 | 2.08E-09 | count | 1 |

|            |            |             |        |       |          |       |   |
|------------|------------|-------------|--------|-------|----------|-------|---|
| C12orf50   | 17.6832647 | 2506.037698 | 0.0071 | 0.994 | 2.08E-09 | count | 1 |
| AC079907.2 | 17.6832646 | 2506.037726 | 0.0071 | 0.994 | 2.08E-09 | count | 1 |
| AC084880.3 | 17.6832647 | 2506.037753 | 0.0071 | 0.994 | 2.08E-09 | count | 1 |
| AC004263.1 | 17.6832646 | 2506.037836 | 0.0071 | 0.994 | 2.08E-09 | count | 1 |
| MSI1       | 17.6832647 | 2506.037795 | 0.0071 | 0.994 | 2.08E-09 | count | 1 |
| AC026333.4 | 17.6832647 | 2506.037739 | 0.0071 | 0.994 | 2.08E-09 | count | 1 |
| DNAH10OS   | 17.6832648 | 2506.037808 | 0.0071 | 0.994 | 2.08E-09 | count | 1 |
| AC073592.1 | 17.6832646 | 2506.037753 | 0.0071 | 0.994 | 2.08E-09 | count | 1 |
| GJB2       | 17.6832647 | 2506.037753 | 0.0071 | 0.994 | 2.08E-09 | count | 1 |
| USP12-AS2  | 17.6832645 | 2506.037753 | 0.0071 | 0.994 | 2.08E-09 | count | 1 |
| LINC00543  | 17.6832647 | 2506.037857 | 0.0071 | 0.994 | 2.08E-09 | count | 1 |
| VWA8-AS1   | 17.6832647 | 2506.037795 | 0.0071 | 0.994 | 2.08E-09 | count | 1 |
| AL138689.2 | 17.6832646 | 2506.037808 | 0.0071 | 0.994 | 2.08E-09 | count | 1 |
| LINC00551  | 17.6832648 | 2506.037815 | 0.0071 | 0.994 | 2.08E-09 | count | 1 |
| OR4K13     | 17.6832647 | 2506.037781 | 0.0071 | 0.994 | 2.08E-09 | count | 1 |
| LMLN2      | 17.6832647 | 2506.03776  | 0.0071 | 0.994 | 2.08E-09 | count | 1 |
| AL122125.1 | 17.6832646 | 2506.037739 | 0.0071 | 0.994 | 2.08E-09 | count | 1 |
| HIF1A-AS1  | 17.6832648 | 2506.037795 | 0.0071 | 0.994 | 2.08E-09 | count | 1 |
| AL359317.1 | 17.6832646 | 2506.037732 | 0.0071 | 0.994 | 2.08E-09 | count | 1 |
| AL049839.2 | 17.6832647 | 2506.037877 | 0.0071 | 0.994 | 2.08E-09 | count | 1 |
| MKRN3      | 17.6832647 | 2506.037795 | 0.0071 | 0.994 | 2.08E-09 | count | 1 |
| PLA2G4E    | 17.6832645 | 2506.037726 | 0.0071 | 0.994 | 2.08E-09 | count | 1 |
| AC025430.1 | 17.6832647 | 2506.037857 | 0.0071 | 0.994 | 2.08E-09 | count | 1 |
| AC100839.2 | 17.6832647 | 2506.037781 | 0.0071 | 0.994 | 2.08E-09 | count | 1 |
| EWSAT1     | 17.6832647 | 2506.037643 | 0.0071 | 0.994 | 2.08E-09 | count | 1 |
| LINC02204  | 17.6832646 | 2506.037739 | 0.0071 | 0.994 | 2.08E-09 | count | 1 |
| AC010931.3 | 17.6832648 | 2506.037808 | 0.0071 | 0.994 | 2.08E-09 | count | 1 |
| TMEM266    | 17.6832646 | 2506.037815 | 0.0071 | 0.994 | 2.08E-09 | count | 1 |
| AC104758.4 | 17.6832647 | 2506.037843 | 0.0071 | 0.994 | 2.08E-09 | count | 1 |
| SH2D7      | 17.6832647 | 2506.037801 | 0.0071 | 0.994 | 2.08E-09 | count | 1 |
| KIAA1024   | 17.6832647 | 2506.037739 | 0.0071 | 0.994 | 2.08E-09 | count | 1 |
| AC087286.1 | 17.6832647 | 2506.03776  | 0.0071 | 0.994 | 2.08E-09 | count | 1 |
| TLL13P     | 17.6832647 | 2506.037719 | 0.0071 | 0.994 | 2.08E-09 | count | 1 |
| HS3ST6     | 17.6832645 | 2506.037726 | 0.0071 | 0.994 | 2.08E-09 | count | 1 |
| AC009065.6 | 17.6832646 | 2506.037781 | 0.0071 | 0.994 | 2.08E-09 | count | 1 |
| MEFV       | 17.6832647 | 2506.037753 | 0.0071 | 0.994 | 2.08E-09 | count | 1 |
| NLRC3      | 17.6832648 | 2506.037829 | 0.0071 | 0.994 | 2.08E-09 | count | 1 |
| AC022167.2 | 17.6832645 | 2506.037746 | 0.0071 | 0.994 | 2.08E-09 | count | 1 |
| AF001548.1 | 17.6832646 | 2506.037753 | 0.0071 | 0.994 | 2.08E-09 | count | 1 |
| AC099518.4 | 17.6832648 | 2506.037815 | 0.0071 | 0.994 | 2.08E-09 | count | 1 |
| CHP2       | 17.6832647 | 2506.037836 | 0.0071 | 0.994 | 2.08E-09 | count | 1 |
| LINC01567  | 17.6832648 | 2506.037746 | 0.0071 | 0.994 | 2.08E-09 | count | 1 |
| AC023813.4 | 17.6832645 | 2506.037801 | 0.0071 | 0.994 | 2.08E-09 | count | 1 |
| CES5A      | 17.6832646 | 2506.037829 | 0.0071 | 0.994 | 2.08E-09 | count | 1 |
| KCTD19     | 17.6832647 | 2506.037864 | 0.0071 | 0.994 | 2.08E-09 | count | 1 |

|             |            |             |        |       |          |       |   |
|-------------|------------|-------------|--------|-------|----------|-------|---|
| AC027682.2  | 17.6832647 | 2506.037808 | 0.0071 | 0.994 | 2.08E-09 | count | 1 |
| AC027682.1  | 17.6832646 | 2506.037712 | 0.0071 | 0.994 | 2.08E-09 | count | 1 |
| AC020978.5  | 17.6832646 | 2506.037774 | 0.0071 | 0.994 | 2.08E-09 | count | 1 |
| LINC01572   | 17.6832646 | 2506.037753 | 0.0071 | 0.994 | 2.08E-09 | count | 1 |
| LINC01228   | 17.6832646 | 2506.03785  | 0.0071 | 0.994 | 2.08E-09 | count | 1 |
| AC134312.1  | 17.6832646 | 2506.037781 | 0.0071 | 0.994 | 2.08E-09 | count | 1 |
| AC134312.6  | 17.6832647 | 2506.037719 | 0.0071 | 0.994 | 2.08E-09 | count | 1 |
| AC137932.1  | 17.6832646 | 2506.037767 | 0.0071 | 0.994 | 2.08E-09 | count | 1 |
| AC118754.1  | 17.6832646 | 2506.037781 | 0.0071 | 0.994 | 2.08E-09 | count | 1 |
| AIPL1       | 17.6832646 | 2506.037746 | 0.0071 | 0.994 | 2.08E-09 | count | 1 |
| SLC5A10     | 17.6832649 | 2506.037864 | 0.0071 | 0.994 | 2.08E-09 | count | 1 |
| LINC02094   | 17.6832647 | 2506.037691 | 0.0071 | 0.994 | 2.08E-09 | count | 1 |
| AC130324.3  | 17.6832646 | 2506.037795 | 0.0071 | 0.994 | 2.08E-09 | count | 1 |
| AC099811.4  | 17.6832647 | 2506.037843 | 0.0071 | 0.994 | 2.08E-09 | count | 1 |
| PPY         | 17.6832647 | 2506.037781 | 0.0071 | 0.994 | 2.08E-09 | count | 1 |
| AC091152.2  | 17.6832647 | 2506.037788 | 0.0071 | 0.994 | 2.08E-09 | count | 1 |
| AC068234.3  | 17.6832646 | 2506.037719 | 0.0071 | 0.994 | 2.08E-09 | count | 1 |
| CACNA1G-AS1 | 17.6832649 | 2506.037864 | 0.0071 | 0.994 | 2.08E-09 | count | 1 |
| EFCAB3      | 17.6832647 | 2506.037801 | 0.0071 | 0.994 | 2.08E-09 | count | 1 |
| AC022966.1  | 17.6832647 | 2506.037746 | 0.0071 | 0.994 | 2.08E-09 | count | 1 |
| LINC02078   | 17.6832647 | 2506.037698 | 0.0071 | 0.994 | 2.08E-09 | count | 1 |
| NPTX1       | 17.6832646 | 2506.037829 | 0.0071 | 0.994 | 2.08E-09 | count | 1 |
| AC145207.4  | 17.6832647 | 2506.037829 | 0.0071 | 0.994 | 2.08E-09 | count | 1 |
| AP005482.1  | 17.6832647 | 2506.037753 | 0.0071 | 0.994 | 2.08E-09 | count | 1 |
| HRH4        | 17.6832646 | 2506.037739 | 0.0071 | 0.994 | 2.08E-09 | count | 1 |
| AC006305.1  | 17.6832647 | 2506.037836 | 0.0071 | 0.994 | 2.08E-09 | count | 1 |
| SRXN1       | 17.6832645 | 2506.037726 | 0.0071 | 0.994 | 2.08E-09 | count | 1 |
| AL136531.2  | 17.6832646 | 2506.03776  | 0.0071 | 0.994 | 2.08E-09 | count | 1 |
| NKX2-2      | 17.6832646 | 2506.037822 | 0.0071 | 0.994 | 2.08E-09 | count | 1 |
| GGTLC1      | 17.6832645 | 2506.037739 | 0.0071 | 0.994 | 2.08E-09 | count | 1 |
| XKR7        | 17.6832647 | 2506.037753 | 0.0071 | 0.994 | 2.08E-09 | count | 1 |
| AL035420.3  | 17.6832647 | 2506.037788 | 0.0071 | 0.994 | 2.08E-09 | count | 1 |
| LIME1       | 17.6832646 | 2506.037822 | 0.0071 | 0.994 | 2.08E-09 | count | 1 |
| PRTN3       | 17.6832646 | 2506.037739 | 0.0071 | 0.994 | 2.08E-09 | count | 1 |
| AC011446.1  | 17.6832646 | 2506.03776  | 0.0071 | 0.994 | 2.08E-09 | count | 1 |
| AC123912.4  | 17.6832646 | 2506.037719 | 0.0071 | 0.994 | 2.08E-09 | count | 1 |
| FXYD7       | 17.6832648 | 2506.037774 | 0.0071 | 0.994 | 2.08E-09 | count | 1 |
| AC002511.1  | 17.6832646 | 2506.037781 | 0.0071 | 0.994 | 2.08E-09 | count | 1 |
| MIA-RAB4B   | 17.6832647 | 2506.037691 | 0.0071 | 0.994 | 2.08E-09 | count | 1 |
| PSG2        | 17.6832647 | 2506.037864 | 0.0071 | 0.994 | 2.08E-09 | count | 1 |
| CD177       | 17.6832647 | 2506.037677 | 0.0071 | 0.994 | 2.08E-09 | count | 1 |
| AC005757.1  | 17.6832647 | 2506.037808 | 0.0071 | 0.994 | 2.08E-09 | count | 1 |
| FOXA3       | 17.6832647 | 2506.03776  | 0.0071 | 0.994 | 2.08E-09 | count | 1 |
| AC026803.2  | 17.6832647 | 2506.037843 | 0.0071 | 0.994 | 2.08E-09 | count | 1 |
| AC010522.1  | 17.6832646 | 2506.037739 | 0.0071 | 0.994 | 2.08E-09 | count | 1 |

|             |            |             |        |       |          |       |   |
|-------------|------------|-------------|--------|-------|----------|-------|---|
| AC012313.7  | 17.6832647 | 2506.037746 | 0.0071 | 0.994 | 2.08E-09 | count | 1 |
| Z82246.1    | 17.6832646 | 2506.037712 | 0.0071 | 0.994 | 2.08E-09 | count | 1 |
| AL021707.4  | 17.6832647 | 2506.037801 | 0.0071 | 0.994 | 2.08E-09 | count | 1 |
| AF130359.1  | 17.6832647 | 2506.037767 | 0.0071 | 0.994 | 2.08E-09 | count | 1 |
| IGSF5       | 17.6832646 | 2506.037719 | 0.0071 | 0.994 | 2.08E-09 | count | 1 |
| UBASH3A     | 17.6832647 | 2506.03776  | 0.0071 | 0.994 | 2.08E-09 | count | 1 |
| CENPS-CORT  | 17.6832646 | 2506.037753 | 0.0071 | 0.994 | 2.08E-09 | count | 1 |
| AL109811.4  | 17.6832646 | 2506.037705 | 0.0071 | 0.994 | 2.08E-09 | count | 1 |
| TNFRSF8     | 17.6832645 | 2506.037732 | 0.0071 | 0.994 | 2.08E-09 | count | 1 |
| UBXN10-AS1  | 17.6832645 | 2506.037705 | 0.0071 | 0.994 | 2.08E-09 | count | 1 |
| AC103923.1  | 17.6832645 | 2506.037767 | 0.0071 | 0.994 | 2.08E-09 | count | 1 |
| SPAG17      | 17.6832646 | 2506.037788 | 0.0071 | 0.994 | 2.08E-09 | count | 1 |
| AL355388.2  | 17.6832647 | 2506.037843 | 0.0071 | 0.994 | 2.08E-09 | count | 1 |
| LINC01732   | 17.6832645 | 2506.037801 | 0.0071 | 0.994 | 2.08E-09 | count | 1 |
| AL445470.1  | 17.6832645 | 2506.037753 | 0.0071 | 0.994 | 2.08E-09 | count | 1 |
| AC020594.1  | 17.6832646 | 2506.037829 | 0.0071 | 0.994 | 2.08E-09 | count | 1 |
| AC009229.3  | 17.6832646 | 2506.037829 | 0.0071 | 0.994 | 2.08E-09 | count | 1 |
| AC073082.1  | 17.6832646 | 2506.037726 | 0.0071 | 0.994 | 2.08E-09 | count | 1 |
| BHLHE40-AS1 | 17.6832644 | 2506.037753 | 0.0071 | 0.994 | 2.08E-09 | count | 1 |
| AC034187.1  | 17.6832645 | 2506.037739 | 0.0071 | 0.994 | 2.08E-09 | count | 1 |
| XIRP1       | 17.6832646 | 2506.037732 | 0.0071 | 0.994 | 2.08E-09 | count | 1 |
| XCR1        | 17.6832646 | 2506.037739 | 0.0071 | 0.994 | 2.08E-09 | count | 1 |
| AC096887.1  | 17.6832645 | 2506.037691 | 0.0071 | 0.994 | 2.08E-09 | count | 1 |
| OR5H14      | 17.6832646 | 2506.037753 | 0.0071 | 0.994 | 2.08E-09 | count | 1 |
| AC112503.1  | 17.6832646 | 2506.037788 | 0.0071 | 0.994 | 2.08E-09 | count | 1 |
| GP9         | 17.6832645 | 2506.037726 | 0.0071 | 0.994 | 2.08E-09 | count | 1 |
| AC139887.1  | 17.6832645 | 2506.037774 | 0.0071 | 0.994 | 2.08E-09 | count | 1 |
| AC097515.1  | 17.6832646 | 2506.037739 | 0.0071 | 0.994 | 2.08E-09 | count | 1 |
| GABRG1      | 17.6832646 | 2506.037663 | 0.0071 | 0.994 | 2.08E-09 | count | 1 |
| CSN1S1      | 17.6832647 | 2506.037808 | 0.0071 | 0.994 | 2.08E-09 | count | 1 |
| C4orf36     | 17.6832645 | 2506.037753 | 0.0071 | 0.994 | 2.08E-09 | count | 1 |
| LINC01019   | 17.6832645 | 2506.037746 | 0.0071 | 0.994 | 2.08E-09 | count | 1 |
| AC018754.1  | 17.6832646 | 2506.037732 | 0.0071 | 0.994 | 2.08E-09 | count | 1 |
| AC011365.1  | 17.6832645 | 2506.037767 | 0.0071 | 0.994 | 2.08E-09 | count | 1 |
| AC011389.1  | 17.6832644 | 2506.037705 | 0.0071 | 0.994 | 2.08E-09 | count | 1 |
| AL031118.1  | 17.6832644 | 2506.037705 | 0.0071 | 0.994 | 2.08E-09 | count | 1 |
| MOG         | 17.6832646 | 2506.037684 | 0.0071 | 0.994 | 2.08E-09 | count | 1 |
| C6orf141    | 17.6832645 | 2506.037705 | 0.0071 | 0.994 | 2.08E-09 | count | 1 |
| TFAP2B      | 17.6832644 | 2506.037753 | 0.0071 | 0.994 | 2.08E-09 | count | 1 |
| AL646090.1  | 17.6832646 | 2506.037753 | 0.0071 | 0.994 | 2.08E-09 | count | 1 |
| AL132996.1  | 17.6832646 | 2506.037705 | 0.0071 | 0.994 | 2.08E-09 | count | 1 |
| AL589740.1  | 17.6832645 | 2506.037746 | 0.0071 | 0.994 | 2.08E-09 | count | 1 |
| AL450344.2  | 17.6832644 | 2506.037732 | 0.0071 | 0.994 | 2.08E-09 | count | 1 |
| AC007029.1  | 17.6832647 | 2506.037795 | 0.0071 | 0.994 | 2.08E-09 | count | 1 |
| AC005550.2  | 17.6832644 | 2506.037719 | 0.0071 | 0.994 | 2.08E-09 | count | 1 |



|            |            |             |        |       |          |       |   |
|------------|------------|-------------|--------|-------|----------|-------|---|
| GRM3       | 17.6832645 | 2506.037726 | 0.0071 | 0.994 | 2.08E-09 | count | 1 |
| AC069294.1 | 17.6832645 | 2506.037753 | 0.0071 | 0.994 | 2.08E-09 | count | 1 |
| LINC01393  | 17.6832646 | 2506.037788 | 0.0071 | 0.994 | 2.08E-09 | count | 1 |
| AC234772.2 | 17.6832646 | 2506.03776  | 0.0071 | 0.994 | 2.08E-09 | count | 1 |
| AF131215.7 | 17.6832645 | 2506.037767 | 0.0071 | 0.994 | 2.08E-09 | count | 1 |
| PBK        | 17.6832644 | 2506.03767  | 0.0071 | 0.994 | 2.08E-09 | count | 1 |
| AC087362.1 | 17.6832644 | 2506.037712 | 0.0071 | 0.994 | 2.08E-09 | count | 1 |
| IDO2       | 17.6832644 | 2506.037712 | 0.0071 | 0.994 | 2.08E-09 | count | 1 |
| AC108860.2 | 17.6832644 | 2506.037691 | 0.0071 | 0.994 | 2.08E-09 | count | 1 |
| AP003550.1 | 17.6832645 | 2506.037691 | 0.0071 | 0.994 | 2.08E-09 | count | 1 |
| CASC11     | 17.6832644 | 2506.037726 | 0.0071 | 0.994 | 2.08E-09 | count | 1 |
| AC067930.2 | 17.6832644 | 2506.037691 | 0.0071 | 0.994 | 2.08E-09 | count | 1 |
| DNAI1      | 17.6832646 | 2506.03776  | 0.0071 | 0.994 | 2.08E-09 | count | 1 |
| AL138752.2 | 17.6832644 | 2506.037788 | 0.0071 | 0.994 | 2.08E-09 | count | 1 |
| LCNL1      | 17.6832645 | 2506.037795 | 0.0071 | 0.994 | 2.08E-09 | count | 1 |
| AC124657.1 | 17.6832645 | 2506.03776  | 0.0071 | 0.994 | 2.08E-09 | count | 1 |
| KRTAP5-7   | 17.6832644 | 2506.037788 | 0.0071 | 0.994 | 2.08E-09 | count | 1 |
| CHRD2      | 17.6832645 | 2506.037726 | 0.0071 | 0.994 | 2.08E-09 | count | 1 |
| GDPD4      | 17.6832646 | 2506.037815 | 0.0071 | 0.994 | 2.08E-09 | count | 1 |
| AP003086.1 | 17.6832645 | 2506.037767 | 0.0071 | 0.994 | 2.08E-09 | count | 1 |
| C11orf53   | 17.6832646 | 2506.037705 | 0.0071 | 0.994 | 2.08E-09 | count | 1 |
| AP002986.1 | 17.6832645 | 2506.03767  | 0.0071 | 0.994 | 2.08E-09 | count | 1 |
| C11orf44   | 17.6832646 | 2506.037788 | 0.0071 | 0.994 | 2.08E-09 | count | 1 |
| AC007406.4 | 17.6832645 | 2506.037753 | 0.0071 | 0.994 | 2.08E-09 | count | 1 |
| AC005833.1 | 17.6832646 | 2506.037726 | 0.0071 | 0.994 | 2.08E-09 | count | 1 |
| GPR19      | 17.6832646 | 2506.037788 | 0.0071 | 0.994 | 2.08E-09 | count | 1 |
| SP7        | 17.6832646 | 2506.03776  | 0.0071 | 0.994 | 2.08E-09 | count | 1 |
| AC069234.4 | 17.6832645 | 2506.037795 | 0.0071 | 0.994 | 2.08E-09 | count | 1 |
| LBHD2      | 17.6832647 | 2506.037795 | 0.0071 | 0.994 | 2.08E-09 | count | 1 |
| DUOX2      | 17.6832645 | 2506.037732 | 0.0071 | 0.994 | 2.08E-09 | count | 1 |
| AC068722.2 | 17.6832646 | 2506.037788 | 0.0071 | 0.994 | 2.08E-09 | count | 1 |
| AC068870.1 | 17.6832644 | 2506.037788 | 0.0071 | 0.994 | 2.08E-09 | count | 1 |
| AP3B2      | 17.6832645 | 2506.037753 | 0.0071 | 0.994 | 2.08E-09 | count | 1 |
| AC118658.1 | 17.6832645 | 2506.03776  | 0.0071 | 0.994 | 2.08E-09 | count | 1 |
| LMF1-AS1   | 17.6832645 | 2506.037774 | 0.0071 | 0.994 | 2.08E-09 | count | 1 |
| AC012645.4 | 17.6832645 | 2506.037712 | 0.0071 | 0.994 | 2.08E-09 | count | 1 |
| AC007493.1 | 17.6832645 | 2506.03776  | 0.0071 | 0.994 | 2.08E-09 | count | 1 |
| AC134312.3 | 17.6832645 | 2506.037732 | 0.0071 | 0.994 | 2.08E-09 | count | 1 |
| AC132825.3 | 17.6832645 | 2506.037691 | 0.0071 | 0.994 | 2.08E-09 | count | 1 |
| AC061975.1 | 17.6832645 | 2506.037691 | 0.0071 | 0.994 | 2.08E-09 | count | 1 |
| AC138207.5 | 17.6832646 | 2506.037781 | 0.0071 | 0.994 | 2.08E-09 | count | 1 |
| CCL23      | 17.6832645 | 2506.037705 | 0.0071 | 0.994 | 2.08E-09 | count | 1 |
| KRTAP9-6   | 17.6832645 | 2506.037732 | 0.0071 | 0.994 | 2.08E-09 | count | 1 |
| AC015909.4 | 17.6832645 | 2506.037795 | 0.0071 | 0.994 | 2.08E-09 | count | 1 |
| AC015845.1 | 17.6832646 | 2506.037732 | 0.0071 | 0.994 | 2.08E-09 | count | 1 |

|            |            |             |        |       |          |       |   |
|------------|------------|-------------|--------|-------|----------|-------|---|
| AC004687.1 | 17.6832646 | 2506.037781 | 0.0071 | 0.994 | 2.08E-09 | count | 1 |
| AC116025.1 | 17.6832647 | 2506.037788 | 0.0071 | 0.994 | 2.08E-09 | count | 1 |
| FAM83C-AS1 | 17.6832646 | 2506.037726 | 0.0071 | 0.994 | 2.08E-09 | count | 1 |
| AL354993.1 | 17.6832646 | 2506.037705 | 0.0071 | 0.994 | 2.08E-09 | count | 1 |
| LRRC8E     | 17.6832646 | 2506.037767 | 0.0071 | 0.994 | 2.08E-09 | count | 1 |
| AC010422.6 | 17.6832647 | 2506.037836 | 0.0071 | 0.994 | 2.08E-09 | count | 1 |
| AC138474.1 | 17.6832645 | 2506.037726 | 0.0071 | 0.994 | 2.08E-09 | count | 1 |
| AD000671.3 | 17.6832645 | 2506.037808 | 0.0071 | 0.994 | 2.08E-09 | count | 1 |
| AC007785.3 | 17.6832645 | 2506.037732 | 0.0071 | 0.994 | 2.08E-09 | count | 1 |
| AC010524.1 | 17.6832644 | 2506.037719 | 0.0071 | 0.994 | 2.08E-09 | count | 1 |
| SRY        | 17.6832645 | 2506.037746 | 0.0071 | 0.994 | 2.08E-09 | count | 1 |
| CCT8L2     | 17.6832646 | 2506.037753 | 0.0071 | 0.994 | 2.08E-09 | count | 1 |
| Z99774.1   | 17.6832645 | 2506.037726 | 0.0071 | 0.994 | 2.08E-09 | count | 1 |
| LINC01422  | 17.6832645 | 2506.037684 | 0.0071 | 0.994 | 2.08E-09 | count | 1 |
| AL049536.1 | 17.6832644 | 2506.037712 | 0.0071 | 0.994 | 2.08E-09 | count | 1 |
| BX324167.1 | 17.6832645 | 2506.037677 | 0.0071 | 0.994 | 2.08E-09 | count | 1 |
| AP001056.2 | 17.6832644 | 2506.037691 | 0.0071 | 0.994 | 2.08E-09 | count | 1 |
| AF064858.2 | 17.6832644 | 2506.037643 | 0.0071 | 0.994 | 2.08E-09 | count | 1 |
| AC084757.3 | 0.0792323  | 0.6534026   | 0.1213 | 0.903 | 2.31E-09 | count | 1 |
| AC112487.1 | 0.2325855  | 1.261577    | 0.1844 | 0.854 | 2.39E-09 | count | 1 |
| ELOVL3     | 0.2325855  | 1.261577    | 0.1844 | 0.854 | 2.39E-09 | count | 1 |
| SLC4A8     | 0.2325855  | 1.261577    | 0.1844 | 0.854 | 2.39E-09 | count | 1 |
| AC004257.1 | 0.2325855  | 1.261577    | 0.1844 | 0.854 | 2.39E-09 | count | 1 |
| AC084782.1 | 0.2325855  | 1.261577    | 0.1844 | 0.854 | 2.39E-09 | count | 1 |
| PPP4R4     | 0.2325855  | 0.9947438   | 0.2338 | 0.815 | 2.39E-09 | count | 1 |
| AL031775.1 | 0.2325855  | 0.9967705   | 0.2333 | 0.816 | 2.39E-09 | count | 1 |
| AC009005.1 | 0.2325855  | 1.261577    | 0.1844 | 0.854 | 2.39E-09 | count | 1 |
| LINC02181  | 0.2325855  | 0.9947438   | 0.2338 | 0.815 | 2.39E-09 | count | 1 |
| AL365181.1 | 0.2325855  | 0.9947438   | 0.2338 | 0.815 | 2.39E-09 | count | 1 |
| CD79A      | 0.2325855  | 0.9947438   | 0.2338 | 0.815 | 2.39E-09 | count | 1 |
| GAGE10     | 0.2325855  | 0.9947438   | 0.2338 | 0.815 | 2.39E-09 | count | 1 |
| AC010273.2 | 0.2325855  | 0.9967705   | 0.2333 | 0.816 | 2.39E-09 | count | 1 |
| AC006012.1 | 0.2325855  | 0.9947438   | 0.2338 | 0.815 | 2.39E-09 | count | 1 |
| AL451062.3 | 0.2325855  | 0.9947438   | 0.2338 | 0.815 | 2.39E-09 | count | 1 |
| AL121906.2 | 0.2325855  | 0.9967705   | 0.2333 | 0.816 | 2.39E-09 | count | 1 |
| XRCC2      | 0.2325855  | 0.9947438   | 0.2338 | 0.815 | 2.39E-09 | count | 1 |
| GYG2       | 0.2325855  | 0.9947438   | 0.2338 | 0.815 | 2.39E-09 | count | 1 |
| AP006287.2 | 0.2325855  | 0.9947438   | 0.2338 | 0.815 | 2.39E-09 | count | 1 |
| STXBP2     | 0.2325855  | 0.9947438   | 0.2338 | 0.815 | 2.39E-09 | count | 1 |
| JAKMIP3    | 0.2325855  | 0.9947438   | 0.2338 | 0.815 | 2.39E-09 | count | 1 |
| DMRT3      | 0.2325855  | 0.9967705   | 0.2333 | 0.816 | 2.39E-09 | count | 1 |
| AC126614.1 | 0.2325855  | 0.9947438   | 0.2338 | 0.815 | 2.39E-09 | count | 1 |
| PIK3AP1    | 0.2325855  | 0.9947438   | 0.2338 | 0.815 | 2.39E-09 | count | 1 |
| AC107081.2 | 0.2325855  | 0.9947438   | 0.2338 | 0.815 | 2.39E-09 | count | 1 |
| AC018557.1 | 0.2325855  | 0.9967705   | 0.2333 | 0.816 | 2.39E-09 | count | 1 |

|             |            |             |        |       |          |       |   |
|-------------|------------|-------------|--------|-------|----------|-------|---|
| LINC00842   | 0.2325855  | 0.9947438   | 0.2338 | 0.815 | 2.39E-09 | count | 1 |
| AC112907.3  | 0.2325855  | 0.9947438   | 0.2338 | 0.815 | 2.39E-09 | count | 1 |
| AC016745.2  | 0.7556675  | 1.1192119   | 0.6752 | 0.5   | 2.45E-09 | count | 1 |
| KCNA1       | 0.7556675  | 0.8954832   | 0.8439 | 0.399 | 2.45E-09 | count | 1 |
| TAF7L       | 0.7556675  | 0.7592876   | 0.9952 | 0.32  | 2.46E-09 | count | 1 |
| RNF165      | 0.7556675  | 0.7592876   | 0.9952 | 0.32  | 2.46E-09 | count | 1 |
| NPHP3-AS1   | 0.7556675  | 0.7592876   | 0.9952 | 0.32  | 2.46E-09 | count | 1 |
| SCNN1D      | 0.2921547  | 0.6962087   | 0.4196 | 0.675 | 2.95E-09 | count | 1 |
| AC107375.1  | 0.2921547  | 0.6962087   | 0.4196 | 0.675 | 2.95E-09 | count | 1 |
| AL139398.1  | 0.1093249  | 0.6074612   | 0.18   | 0.857 | 3.16E-09 | count | 1 |
| ZNF215      | 0.1201131  | 0.5094821   | 0.2358 | 0.814 | 3.46E-09 | count | 1 |
| AC018645.2  | 0.1201131  | 0.5084862   | 0.2362 | 0.813 | 3.46E-09 | count | 1 |
| CCDC178     | 0.3502024  | 0.780461    | 0.4487 | 0.654 | 3.48E-09 | count | 1 |
| AC119674.1  | 0.3502024  | 0.6472722   | 0.541  | 0.589 | 3.48E-09 | count | 1 |
| IGFLR1      | 0.1406114  | 0.5534234   | 0.2541 | 0.799 | 4.02E-09 | count | 1 |
| C1orf220    | 0.4741363  | 0.8264256   | 0.5737 | 0.566 | 4.54E-09 | count | 1 |
| LDHC        | 0.4855053  | 0.8960811   | 0.5418 | 0.588 | 4.64E-09 | count | 1 |
| AC012640.1  | 0.4855053  | 0.8960811   | 0.5418 | 0.588 | 4.64E-09 | count | 1 |
| TNFRSF18    | 0.4855053  | 0.8960811   | 0.5418 | 0.588 | 4.64E-09 | count | 1 |
| C8orf34-AS1 | 0.5043531  | 0.8500337   | 0.5933 | 0.553 | 4.79E-09 | count | 1 |
| GOLGA8Q     | 0.5043531  | 0.8829945   | 0.5712 | 0.568 | 4.79E-09 | count | 1 |
| OSBPL10-AS1 | 0.5243956  | 0.6673942   | 0.7857 | 0.432 | 4.95E-09 | count | 1 |
| LRRN2       | 0.53322    | 0.6661911   | 0.8004 | 0.424 | 5.02E-09 | count | 1 |
| AC012358.1  | 0.573346   | 1.0059935   | 0.5699 | 0.569 | 5.34E-09 | count | 1 |
| AC109454.2  | 0.573346   | 0.6108122   | 0.9387 | 0.348 | 5.34E-09 | count | 1 |
| AC005046.1  | 0.5798871  | 0.9117136   | 0.636  | 0.525 | 5.39E-09 | count | 1 |
| AC083829.2  | 0.5798871  | 0.9577211   | 0.6055 | 0.545 | 5.39E-09 | count | 1 |
| AC113349.2  | 0.5798871  | 0.9577211   | 0.6055 | 0.545 | 5.39E-09 | count | 1 |
| AL132656.2  | 0.5798871  | 0.9117136   | 0.636  | 0.525 | 5.39E-09 | count | 1 |
| AL009176.1  | 0.5798871  | 0.9577211   | 0.6055 | 0.545 | 5.39E-09 | count | 1 |
| NAGPA-AS1   | 0.5798871  | 0.9577211   | 0.6055 | 0.545 | 5.39E-09 | count | 1 |
| GCC2-AS1    | 0.5798871  | 0.9577211   | 0.6055 | 0.545 | 5.39E-09 | count | 1 |
| ACP7        | 18.3774856 | 3277.447611 | 0.0056 | 0.996 | 5.61E-09 | count | 1 |
| AC007998.3  | 18.2594744 | 3089.654953 | 0.0059 | 0.995 | 5.61E-09 | count | 1 |
| LTF         | 18.1250491 | 2888.789923 | 0.0063 | 0.995 | 5.61E-09 | count | 1 |
| ANKRD20A4   | 18.2573883 | 2376.774573 | 0.0077 | 0.994 | 5.61E-09 | count | 1 |
| GNA14-AS1   | 17.7848644 | 2436.945185 | 0.0073 | 0.994 | 5.62E-09 | count | 1 |
| TMX2-CTNND1 | 17.7848644 | 2436.945185 | 0.0073 | 0.994 | 5.62E-09 | count | 1 |
| AL031595.2  | 17.7832305 | 2007.054752 | 0.0089 | 0.993 | 5.62E-09 | count | 1 |
| TMEM184A    | 17.559039  | 2176.749364 | 0.0081 | 0.994 | 5.62E-09 | count | 1 |
| AC116096.1  | 17.5590385 | 2176.74928  | 0.0081 | 0.994 | 5.62E-09 | count | 1 |
| PACSIN1     | 18.6398744 | 4043.083036 | 0.0046 | 0.996 | 5.63E-09 | count | 1 |
| C7orf61     | 18.6398746 | 4043.083086 | 0.0046 | 0.996 | 5.63E-09 | count | 1 |
| CD40LG      | 18.6398744 | 4043.083384 | 0.0046 | 0.996 | 5.63E-09 | count | 1 |
| SHISA9      | 18.6398741 | 4043.0834   | 0.0046 | 0.996 | 5.63E-09 | count | 1 |

|               |            |             |        |       |          |       |   |
|---------------|------------|-------------|--------|-------|----------|-------|---|
| ZNF536        | 18.6398741 | 4043.0834   | 0.0046 | 0.996 | 5.63E-09 | count | 1 |
| NOD2          | 18.639007  | 3511.166017 | 0.0053 | 0.996 | 5.63E-09 | count | 1 |
| AC073283.1    | 18.6390067 | 3511.166103 | 0.0053 | 0.996 | 5.63E-09 | count | 1 |
| AC005393.1    | 18.6390069 | 3511.165773 | 0.0053 | 0.996 | 5.63E-09 | count | 1 |
| CXCL13        | 18.0330336 | 2820.803575 | 0.0064 | 0.995 | 5.63E-09 | count | 1 |
| TTC39A        | 18.4845575 | 3740.986243 | 0.0049 | 0.996 | 5.63E-09 | count | 1 |
| C1orf143      | 18.4845575 | 3740.986243 | 0.0049 | 0.996 | 5.63E-09 | count | 1 |
| AC099508.1    | 18.4845577 | 3740.986013 | 0.0049 | 0.996 | 5.63E-09 | count | 1 |
| AP001020.3    | 18.4845575 | 3740.986243 | 0.0049 | 0.996 | 5.63E-09 | count | 1 |
| AC011337.1    | 18.4845574 | 3740.986365 | 0.0049 | 0.996 | 5.63E-09 | count | 1 |
| LRRC74B       | 18.4845572 | 3740.986105 | 0.0049 | 0.996 | 5.63E-09 | count | 1 |
| AC008121.2    | 18.484557  | 3740.986151 | 0.0049 | 0.996 | 5.63E-09 | count | 1 |
| SYS1-DBNDD2   | 18.484557  | 3740.986151 | 0.0049 | 0.996 | 5.63E-09 | count | 1 |
| LINC01372     | 18.6381202 | 2997.265084 | 0.0062 | 0.995 | 5.63E-09 | count | 1 |
| NEFM          | 18.0315675 | 2269.017112 | 0.0079 | 0.994 | 5.63E-09 | count | 1 |
| PLIN1         | 18.0309607 | 2108.559905 | 0.0086 | 0.993 | 5.64E-09 | count | 1 |
| SYNJ2BP-COX16 | 18.0308661 | 2108.544521 | 0.0086 | 0.993 | 5.64E-09 | count | 1 |
| DOK3          | 18.4835792 | 3177.014559 | 0.0058 | 0.995 | 5.64E-09 | count | 1 |
| AL391988.1    | 18.3007573 | 3412.514095 | 0.0054 | 0.996 | 5.64E-09 | count | 1 |
| Z69720.1      | 18.3007573 | 3412.514095 | 0.0054 | 0.996 | 5.64E-09 | count | 1 |
| KRT23         | 18.3007573 | 3412.514095 | 0.0054 | 0.996 | 5.64E-09 | count | 1 |
| AC104452.1    | 18.3007572 | 3412.513955 | 0.0054 | 0.996 | 5.64E-09 | count | 1 |
| XIST          | 18.3007571 | 3412.513677 | 0.0054 | 0.996 | 5.64E-09 | count | 1 |
| LINC00958     | 18.3007571 | 3412.513677 | 0.0054 | 0.996 | 5.64E-09 | count | 1 |
| HFM1          | 18.0300013 | 1935.025237 | 0.0093 | 0.993 | 5.64E-09 | count | 1 |
| IGFL2         | 17.8457773 | 2581.051395 | 0.0069 | 0.994 | 5.64E-09 | count | 1 |
| AL162457.2    | 18.9931353 | 1518.128306 | 0.0125 | 0.99  | 5.64E-09 | count | 1 |
| AC145343.1    | 18.3067323 | 2466.086329 | 0.0074 | 0.994 | 5.64E-09 | count | 1 |
| LHCGR         | 18.7697189 | 1700.404407 | 0.011  | 0.991 | 5.64E-09 | count | 1 |
| NTRK1         | 18.2997083 | 2811.843358 | 0.0065 | 0.995 | 5.64E-09 | count | 1 |
| LYPD2         | 18.2997085 | 2811.843243 | 0.0065 | 0.995 | 5.64E-09 | count | 1 |
| SV2B          | 17.8446986 | 2181.792203 | 0.0082 | 0.993 | 5.64E-09 | count | 1 |
| AC116351.1    | 17.8446779 | 2181.812907 | 0.0082 | 0.993 | 5.64E-09 | count | 1 |
| FSIP2-AS1     | 17.8446288 | 2181.796022 | 0.0082 | 0.993 | 5.64E-09 | count | 1 |
| ZIC4          | 18.2992969 | 2457.780568 | 0.0074 | 0.994 | 5.64E-09 | count | 1 |
| AC010834.3    | 18.0758466 | 3049.549378 | 0.0059 | 0.995 | 5.64E-09 | count | 1 |
| AC138028.6    | 18.0758465 | 3049.549254 | 0.0059 | 0.995 | 5.64E-09 | count | 1 |
| AL391069.3    | 17.8439048 | 1951.949475 | 0.0091 | 0.993 | 5.64E-09 | count | 1 |
| CTNND2        | 17.8438505 | 1951.925751 | 0.0091 | 0.993 | 5.64E-09 | count | 1 |
| IGFN1         | 18.2987251 | 2259.756603 | 0.0081 | 0.994 | 5.64E-09 | count | 1 |
| DRD4          | 18.2987249 | 2259.756539 | 0.0081 | 0.994 | 5.64E-09 | count | 1 |
| AC233263.6    | 18.2987244 | 2259.756438 | 0.0081 | 0.994 | 5.64E-09 | count | 1 |
| AL121894.1    | 18.4809191 | 1756.993522 | 0.0105 | 0.992 | 5.64E-09 | count | 1 |
| AC015727.1    | 18.1617105 | 2625.327689 | 0.0069 | 0.994 | 5.64E-09 | count | 1 |
| CDH4          | 18.4803516 | 1519.935821 | 0.0122 | 0.99  | 5.64E-09 | count | 1 |

|                 |            |             |        |       |          |       |   |
|-----------------|------------|-------------|--------|-------|----------|-------|---|
| HTRA4           | 18.4803511 | 1519.93597  | 0.0122 | 0.99  | 5.64E-09 | count | 1 |
| AC023794.4      | 18.0747844 | 2408.821746 | 0.0075 | 0.994 | 5.64E-09 | count | 1 |
| MYO5C           | 18.0747841 | 2408.821736 | 0.0075 | 0.994 | 5.64E-09 | count | 1 |
| CAGE1           | 18.0747841 | 2408.821736 | 0.0075 | 0.994 | 5.64E-09 | count | 1 |
| GLYATL2         | 18.297869  | 1800.629365 | 0.0102 | 0.992 | 5.64E-09 | count | 1 |
| DOCK3           | 18.297869  | 1800.629218 | 0.0102 | 0.992 | 5.64E-09 | count | 1 |
| PSG5            | 17.6110657 | 2312.664472 | 0.0076 | 0.994 | 5.65E-09 | count | 1 |
| AC007529.2      | 18.2972559 | 1520.169728 | 0.012  | 0.99  | 5.65E-09 | count | 1 |
| RXFP2           | 18.2972558 | 1520.169653 | 0.012  | 0.99  | 5.65E-09 | count | 1 |
| GRIN2C          | 18.1604563 | 1985.758548 | 0.0091 | 0.993 | 5.65E-09 | count | 1 |
| LINC02518       | 18.0738632 | 1863.934274 | 0.0097 | 0.992 | 5.65E-09 | count | 1 |
| AL392046.1      | 18.0738629 | 1863.934168 | 0.0097 | 0.992 | 5.65E-09 | count | 1 |
| PPT2-EGFL8      | 18.0738628 | 1863.934221 | 0.0097 | 0.992 | 5.65E-09 | count | 1 |
| YBX2            | 18.0738625 | 1863.934183 | 0.0097 | 0.992 | 5.65E-09 | count | 1 |
| ANKHD1-EIF4EBP3 | 18.0738626 | 1863.934092 | 0.0097 | 0.992 | 5.65E-09 | count | 1 |
| AL034397.3      | 17.7861415 | 2638.317113 | 0.0067 | 0.995 | 5.65E-09 | count | 1 |
| SPDYE3          | 17.7861415 | 2638.317119 | 0.0067 | 0.995 | 5.65E-09 | count | 1 |
| TEKT2           | 17.7861414 | 2638.317097 | 0.0067 | 0.995 | 5.65E-09 | count | 1 |
| AC021086.1      | 17.7861412 | 2638.31706  | 0.0067 | 0.995 | 5.65E-09 | count | 1 |
| PCDHA11         | 17.7861414 | 2638.317113 | 0.0067 | 0.995 | 5.65E-09 | count | 1 |
| AC005486.1      | 17.7861412 | 2638.31706  | 0.0067 | 0.995 | 5.65E-09 | count | 1 |
| MAP3K9          | 17.7861413 | 2638.317087 | 0.0067 | 0.995 | 5.65E-09 | count | 1 |
| ZNF32-AS2       | 17.7861412 | 2638.317129 | 0.0067 | 0.995 | 5.65E-09 | count | 1 |
| P2RY12          | 17.6109407 | 2312.645203 | 0.0076 | 0.994 | 5.65E-09 | count | 1 |
| AP002807.1      | 18.456213  | 2296.620311 | 0.008  | 0.994 | 5.65E-09 | count | 1 |
| CLEC1A          | 17.6102641 | 1973.420137 | 0.0089 | 0.993 | 5.65E-09 | count | 1 |
| AC090136.3      | 17.610279  | 1973.419819 | 0.0089 | 0.993 | 5.65E-09 | count | 1 |
| MEX3A           | 17.6103041 | 1973.432825 | 0.0089 | 0.993 | 5.65E-09 | count | 1 |
| AC024243.1      | 17.6102419 | 1973.421065 | 0.0089 | 0.993 | 5.65E-09 | count | 1 |
| AC068733.1      | 17.6102298 | 1973.400766 | 0.0089 | 0.993 | 5.65E-09 | count | 1 |
| AC120498.10     | 17.610274  | 1973.405995 | 0.0089 | 0.993 | 5.65E-09 | count | 1 |
| KCNT1           | 17.6102355 | 1973.414505 | 0.0089 | 0.993 | 5.65E-09 | count | 1 |
| MST1R           | 17.6102621 | 1973.42029  | 0.0089 | 0.993 | 5.65E-09 | count | 1 |
| AL359317.2      | 17.6102579 | 1973.413547 | 0.0089 | 0.993 | 5.65E-09 | count | 1 |
| AC103746.1      | 18.0732041 | 1520.3005   | 0.0119 | 0.991 | 5.65E-09 | count | 1 |
| AP000962.1      | 18.0732041 | 1520.300481 | 0.0119 | 0.991 | 5.65E-09 | count | 1 |
| LRRTM1          | 18.0732038 | 1520.300469 | 0.0119 | 0.991 | 5.65E-09 | count | 1 |
| SERPINB2        | 18.0732038 | 1520.300481 | 0.0119 | 0.991 | 5.65E-09 | count | 1 |
| AC009802.1      | 17.6102376 | 1973.414331 | 0.0089 | 0.993 | 5.65E-09 | count | 1 |
| AC022893.1      | 18.2506818 | 2346.888515 | 0.0078 | 0.994 | 5.65E-09 | count | 1 |
| TNFRSF9         | 17.7851519 | 1964.66618  | 0.0091 | 0.993 | 5.65E-09 | count | 1 |
| AC100858.3      | 17.7851518 | 1964.666228 | 0.0091 | 0.993 | 5.65E-09 | count | 1 |
| AC006946.2      | 17.7851519 | 1964.666192 | 0.0091 | 0.993 | 5.65E-09 | count | 1 |
| Z97353.2        | 17.785152  | 1964.666216 | 0.0091 | 0.993 | 5.65E-09 | count | 1 |
| AC093151.2      | 17.7851518 | 1964.666192 | 0.0091 | 0.993 | 5.65E-09 | count | 1 |

|             |            |             |        |       |          |       |   |
|-------------|------------|-------------|--------|-------|----------|-------|---|
| AC114939.1  | 17.7851518 | 1964.666224 | 0.0091 | 0.993 | 5.65E-09 | count | 1 |
| AC009120.5  | 17.785152  | 1964.666308 | 0.0091 | 0.993 | 5.65E-09 | count | 1 |
| SLC37A2     | 17.7851517 | 1964.666196 | 0.0091 | 0.993 | 5.65E-09 | count | 1 |
| CCDC194     | 18.0739081 | 3004.747805 | 0.006  | 0.995 | 5.65E-09 | count | 1 |
| OR56B1      | 18.073913  | 3004.73424  | 0.006  | 0.995 | 5.65E-09 | count | 1 |
| LUCAT1      | 18.07388   | 3004.718305 | 0.006  | 0.995 | 5.65E-09 | count | 1 |
| AC011997.1  | 17.9864123 | 2341.218246 | 0.0077 | 0.994 | 5.65E-09 | count | 1 |
| AC004466.1  | 17.9860224 | 1997.903278 | 0.009  | 0.993 | 5.65E-09 | count | 1 |
| TMEM200C    | 18.2503805 | 2002.751078 | 0.0091 | 0.993 | 5.65E-09 | count | 1 |
| AC000403.1  | 18.2504028 | 2002.755123 | 0.0091 | 0.993 | 5.65E-09 | count | 1 |
| AL359715.1  | 17.9859811 | 1997.903991 | 0.009  | 0.993 | 5.65E-09 | count | 1 |
| TSPAN33     | 18.2503808 | 2002.755371 | 0.0091 | 0.993 | 5.65E-09 | count | 1 |
| SLC14A2-AS1 | 18.3072979 | 1991.657708 | 0.0092 | 0.993 | 5.65E-09 | count | 1 |
| AP000851.2  | 17.9859775 | 1997.894134 | 0.009  | 0.993 | 5.65E-09 | count | 1 |
| AL596325.1  | 18.3072675 | 1991.656137 | 0.0092 | 0.993 | 5.65E-09 | count | 1 |
| SLC10A6     | 17.9859421 | 1997.899634 | 0.009  | 0.993 | 5.65E-09 | count | 1 |
| AC008549.2  | 18.0733368 | 2381.020616 | 0.0076 | 0.994 | 5.65E-09 | count | 1 |
| CHGB        | 18.0733171 | 2381.014353 | 0.0076 | 0.994 | 5.65E-09 | count | 1 |
| AC100814.1  | 18.0732957 | 2380.999478 | 0.0076 | 0.994 | 5.65E-09 | count | 1 |
| AC024575.1  | 18.073296  | 2381.001607 | 0.0076 | 0.994 | 5.65E-09 | count | 1 |
| AC006064.2  | 18.0729318 | 1997.641004 | 0.009  | 0.993 | 5.65E-09 | count | 1 |
| MEG9        | 18.0729079 | 1997.644725 | 0.009  | 0.993 | 5.65E-09 | count | 1 |
| EME1        | 18.0728926 | 1997.625027 | 0.009  | 0.993 | 5.65E-09 | count | 1 |
| MCTP1       | 18.0728934 | 1997.646608 | 0.009  | 0.993 | 5.65E-09 | count | 1 |
| HSD17B13    | 18.0728786 | 1997.644875 | 0.009  | 0.993 | 5.65E-09 | count | 1 |
| VSIG10L2    | 18.072881  | 1997.641268 | 0.009  | 0.993 | 5.65E-09 | count | 1 |
| COL11A2     | 17.7618829 | 2557.261943 | 0.0069 | 0.994 | 5.65E-09 | count | 1 |
| AC021188.1  | 17.7618742 | 2557.249398 | 0.0069 | 0.994 | 5.65E-09 | count | 1 |
| AL162377.3  | 17.761897  | 2557.254163 | 0.0069 | 0.994 | 5.65E-09 | count | 1 |
| ADGRG3      | 17.7618976 | 2557.249104 | 0.0069 | 0.994 | 5.65E-09 | count | 1 |
| AC108058.1  | 17.7615388 | 2002.84211  | 0.0089 | 0.993 | 5.66E-09 | count | 1 |
| SMUG1-AS1   | 17.2917524 | 1998.158836 | 0.0087 | 0.993 | 5.66E-09 | count | 1 |
| AC002310.2  | 17.2917498 | 1998.148918 | 0.0087 | 0.993 | 5.66E-09 | count | 1 |
| AL357078.3  | 17.7615566 | 2002.847918 | 0.0089 | 0.993 | 5.66E-09 | count | 1 |
| AC015802.4  | 17.2917422 | 1998.148989 | 0.0087 | 0.993 | 5.66E-09 | count | 1 |
| LINC01798   | 17.2917415 | 1998.156537 | 0.0087 | 0.993 | 5.66E-09 | count | 1 |
| CFAP206     | 17.2917536 | 1998.158779 | 0.0087 | 0.993 | 5.66E-09 | count | 1 |
| AC099560.1  | 17.2917406 | 1998.151565 | 0.0087 | 0.993 | 5.66E-09 | count | 1 |
| NUF2        | 17.7615305 | 2002.83624  | 0.0089 | 0.993 | 5.66E-09 | count | 1 |
| DNA2        | 17.7615173 | 2002.844281 | 0.0089 | 0.993 | 5.66E-09 | count | 1 |
| AL161431.1  | 17.2917527 | 1998.156308 | 0.0087 | 0.993 | 5.66E-09 | count | 1 |
| ASB15       | 17.2917533 | 1998.161307 | 0.0087 | 0.993 | 5.66E-09 | count | 1 |
| AL512506.3  | 17.2917405 | 1998.149072 | 0.0087 | 0.993 | 5.66E-09 | count | 1 |
| UPB1        | 17.2917526 | 1998.156317 | 0.0087 | 0.993 | 5.66E-09 | count | 1 |
| ACY1        | 17.7615095 | 2002.844317 | 0.0089 | 0.993 | 5.66E-09 | count | 1 |

|            |            |             |        |       |          |       |   |
|------------|------------|-------------|--------|-------|----------|-------|---|
| LINC01351  | 17.7615474 | 2002.847985 | 0.0089 | 0.993 | 5.66E-09 | count | 1 |
| AL109976.1 | 17.2917532 | 1998.158792 | 0.0087 | 0.993 | 5.66E-09 | count | 1 |
| ACSL6      | 17.2917299 | 1998.154282 | 0.0087 | 0.993 | 5.66E-09 | count | 1 |
| ZBED9      | 17.2917516 | 1998.161373 | 0.0087 | 0.993 | 5.66E-09 | count | 1 |
| RB1-DT     | 17.2917307 | 1998.151732 | 0.0087 | 0.993 | 5.66E-09 | count | 1 |
| ATP11A-AS1 | 17.2917307 | 1998.156757 | 0.0087 | 0.993 | 5.66E-09 | count | 1 |
| SPINT1-AS1 | 17.2917307 | 1998.156757 | 0.0087 | 0.993 | 5.66E-09 | count | 1 |
| PEAK3      | 17.7615036 | 2002.826547 | 0.0089 | 0.993 | 5.66E-09 | count | 1 |
| GVQW2      | 17.7615345 | 2002.832209 | 0.0089 | 0.993 | 5.66E-09 | count | 1 |
| PCDHA6     | 17.2917409 | 1998.154057 | 0.0087 | 0.993 | 5.66E-09 | count | 1 |
| SMTNL2     | 17.2917387 | 1998.144144 | 0.0087 | 0.993 | 5.66E-09 | count | 1 |
| NPIPB6     | 17.7615053 | 2002.828501 | 0.0089 | 0.993 | 5.66E-09 | count | 1 |
| LINC01209  | 17.2917624 | 1998.163659 | 0.0087 | 0.993 | 5.66E-09 | count | 1 |
| ROPN1L     | 17.2917422 | 1998.151503 | 0.0087 | 0.993 | 5.66E-09 | count | 1 |
| KLHL41     | 17.7615262 | 2002.846195 | 0.0089 | 0.993 | 5.66E-09 | count | 1 |
| FOXA1      | 17.2917107 | 1998.159606 | 0.0087 | 0.993 | 5.66E-09 | count | 1 |
| IL17RB     | 17.2917528 | 1998.156304 | 0.0087 | 0.993 | 5.66E-09 | count | 1 |
| AC132938.3 | 17.2917409 | 1998.14905  | 0.0087 | 0.993 | 5.66E-09 | count | 1 |
| AC007786.2 | 17.2917499 | 1998.158929 | 0.0087 | 0.993 | 5.66E-09 | count | 1 |
| ADGRG6     | 17.7615387 | 2002.846075 | 0.0089 | 0.993 | 5.66E-09 | count | 1 |
| AL358790.1 | 17.2917145 | 1998.161958 | 0.0087 | 0.993 | 5.66E-09 | count | 1 |
| AC090061.1 | 17.2917301 | 1998.15677  | 0.0087 | 0.993 | 5.66E-09 | count | 1 |
| AC025423.1 | 17.2917499 | 1998.151429 | 0.0087 | 0.993 | 5.66E-09 | count | 1 |
| LINC01843  | 17.2917105 | 1998.154603 | 0.0087 | 0.993 | 5.66E-09 | count | 1 |
| SMILR      | 17.291743  | 1998.151464 | 0.0087 | 0.993 | 5.66E-09 | count | 1 |
| LINC01909  | 17.291731  | 1998.149226 | 0.0087 | 0.993 | 5.66E-09 | count | 1 |
| AC093157.2 | 17.2917118 | 1998.159562 | 0.0087 | 0.993 | 5.66E-09 | count | 1 |
| AC007494.2 | 17.2917308 | 1998.154238 | 0.0087 | 0.993 | 5.66E-09 | count | 1 |
| AP001432.1 | 17.2917024 | 1998.147191 | 0.0087 | 0.993 | 5.66E-09 | count | 1 |
| AC007448.3 | 17.2917312 | 1998.154225 | 0.0087 | 0.993 | 5.66E-09 | count | 1 |
| LINC02029  | 17.2917214 | 1998.14687  | 0.0087 | 0.993 | 5.66E-09 | count | 1 |
| AC006115.1 | 17.2917528 | 1998.166336 | 0.0087 | 0.993 | 5.66E-09 | count | 1 |
| AC016876.3 | 17.2917386 | 1998.146641 | 0.0087 | 0.993 | 5.66E-09 | count | 1 |
| ASCL1      | 17.2917141 | 1998.159465 | 0.0087 | 0.993 | 5.66E-09 | count | 1 |
| AC008747.1 | 17.2917032 | 1998.159676 | 0.0087 | 0.993 | 5.66E-09 | count | 1 |
| ELAVL4     | 17.2917207 | 1998.161931 | 0.0087 | 0.993 | 5.66E-09 | count | 1 |
| AL645504.1 | 17.2917002 | 1998.144768 | 0.0087 | 0.993 | 5.66E-09 | count | 1 |
| LINC00598  | 17.7614936 | 2002.832559 | 0.0089 | 0.993 | 5.66E-09 | count | 1 |
| MYL4       | 17.2917096 | 1998.149644 | 0.0087 | 0.993 | 5.66E-09 | count | 1 |
| NUP62CL    | 17.291713  | 1998.154497 | 0.0087 | 0.993 | 5.66E-09 | count | 1 |
| AC019080.4 | 17.2917515 | 1998.156361 | 0.0087 | 0.993 | 5.66E-09 | count | 1 |
| AC064807.2 | 17.2917123 | 1998.154528 | 0.0087 | 0.993 | 5.66E-09 | count | 1 |
| AL353803.4 | 17.2917333 | 1998.15914  | 0.0087 | 0.993 | 5.66E-09 | count | 1 |
| AC068305.2 | 17.2917199 | 1998.149437 | 0.0087 | 0.993 | 5.66E-09 | count | 1 |
| HIST1H4B   | 17.761496  | 2002.842491 | 0.0089 | 0.993 | 5.66E-09 | count | 1 |

|             |            |             |        |       |          |       |   |
|-------------|------------|-------------|--------|-------|----------|-------|---|
| AC079465.1  | 17.29173   | 1998.154269 | 0.0087 | 0.993 | 5.66E-09 | count | 1 |
| TMEM35B     | 17.7615112 | 2002.840338 | 0.0089 | 0.993 | 5.66E-09 | count | 1 |
| AL354872.2  | 17.2917422 | 1998.1465   | 0.0087 | 0.993 | 5.66E-09 | count | 1 |
| FER1L5      | 17.2917032 | 1998.154664 | 0.0087 | 0.993 | 5.66E-09 | count | 1 |
| JPH4        | 17.2917237 | 1998.156796 | 0.0087 | 0.993 | 5.66E-09 | count | 1 |
| SEPT4-AS1   | 17.2917124 | 1998.159535 | 0.0087 | 0.993 | 5.66E-09 | count | 1 |
| NOL4        | 17.2917109 | 1998.157095 | 0.0087 | 0.993 | 5.66E-09 | count | 1 |
| CDC20       | 17.7615125 | 2002.83045  | 0.0089 | 0.993 | 5.66E-09 | count | 1 |
| ASB9        | 17.2917232 | 1998.16183  | 0.0087 | 0.993 | 5.66E-09 | count | 1 |
| AC080112.1  | 17.2917127 | 1998.164525 | 0.0087 | 0.993 | 5.66E-09 | count | 1 |
| AC023509.3  | 17.2917307 | 1998.154255 | 0.0087 | 0.993 | 5.66E-09 | count | 1 |
| DDX39B-AS1  | 17.2917238 | 1998.161813 | 0.0087 | 0.993 | 5.66E-09 | count | 1 |
| AC093797.1  | 17.2917218 | 1998.154365 | 0.0087 | 0.993 | 5.66E-09 | count | 1 |
| AP000919.4  | 17.2917191 | 1998.149481 | 0.0087 | 0.993 | 5.66E-09 | count | 1 |
| AP003392.1  | 17.2917124 | 1998.15954  | 0.0087 | 0.993 | 5.66E-09 | count | 1 |
| SRRM2-AS1   | 17.2917332 | 1998.156647 | 0.0087 | 0.993 | 5.66E-09 | count | 1 |
| AL732314.4  | 17.2916916 | 1998.147402 | 0.0087 | 0.993 | 5.66E-09 | count | 1 |
| AL138976.2  | 17.2917316 | 1998.154211 | 0.0087 | 0.993 | 5.66E-09 | count | 1 |
| LINC00484   | 17.2917224 | 1998.151842 | 0.0087 | 0.993 | 5.66E-09 | count | 1 |
| LINC01797   | 17.2917223 | 1998.151842 | 0.0087 | 0.993 | 5.66E-09 | count | 1 |
| LINC01679   | 17.2916927 | 1998.149855 | 0.0087 | 0.993 | 5.66E-09 | count | 1 |
| AC009034.1  | 17.7615026 | 2002.828554 | 0.0089 | 0.993 | 5.66E-09 | count | 1 |
| IGLV5-52    | 17.2916893 | 1998.144992 | 0.0087 | 0.993 | 5.66E-09 | count | 1 |
| ENDOU       | 17.7614943 | 2002.824646 | 0.0089 | 0.993 | 5.66E-09 | count | 1 |
| AC010680.5  | 17.2917292 | 1998.149292 | 0.0087 | 0.993 | 5.66E-09 | count | 1 |
| RPS6KB2-AS1 | 17.2916922 | 1998.147384 | 0.0087 | 0.993 | 5.66E-09 | count | 1 |
| PITX2       | 17.2917305 | 1998.159267 | 0.0087 | 0.993 | 5.66E-09 | count | 1 |
| LINC01415   | 17.2917316 | 1998.161716 | 0.0087 | 0.993 | 5.66E-09 | count | 1 |
| SLC10A5     | 17.2917119 | 1998.154541 | 0.0087 | 0.993 | 5.66E-09 | count | 1 |
| AC104984.6  | 17.2917313 | 1998.159223 | 0.0087 | 0.993 | 5.66E-09 | count | 1 |
| AC022075.1  | 17.7614892 | 2002.838575 | 0.0089 | 0.993 | 5.66E-09 | count | 1 |
| ESR2        | 17.7614747 | 2002.826773 | 0.0089 | 0.993 | 5.66E-09 | count | 1 |
| AC025265.1  | 17.2916992 | 1998.149828 | 0.0087 | 0.993 | 5.66E-09 | count | 1 |
| SLC15A2     | 17.2917029 | 1998.154677 | 0.0087 | 0.993 | 5.66E-09 | count | 1 |
| AC090515.4  | 17.291721  | 1998.14439  | 0.0087 | 0.993 | 5.66E-09 | count | 1 |
| AC005856.1  | 17.2916922 | 1998.142372 | 0.0087 | 0.993 | 5.66E-09 | count | 1 |
| DAND5       | 17.2917033 | 1998.159667 | 0.0087 | 0.993 | 5.66E-09 | count | 1 |
| ERVMER61-1  | 17.2916919 | 1998.144878 | 0.0087 | 0.993 | 5.66E-09 | count | 1 |
| VSTM2A      | 17.291693  | 1998.149846 | 0.0087 | 0.993 | 5.66E-09 | count | 1 |
| LINC00513   | 0.2045122  | 0.3681196   | 0.5556 | 0.579 | 5.75E-09 | count | 1 |
| DLK2        | 0.6699741  | 1.0809014   | 0.6198 | 0.535 | 6.07E-09 | count | 1 |
| AC117382.2  | 0.6699741  | 1.1228825   | 0.5967 | 0.551 | 6.07E-09 | count | 1 |
| PARD3-AS1   | 0.6699741  | 1.1228825   | 0.5967 | 0.551 | 6.07E-09 | count | 1 |
| UCKL1-AS1   | 0.6699741  | 1.0809014   | 0.6198 | 0.535 | 6.07E-09 | count | 1 |
| AC092718.1  | 0.6699741  | 0.9272541   | 0.7225 | 0.47  | 6.07E-09 | count | 1 |



|            |           |           |        |        |          |       |   |
|------------|-----------|-----------|--------|--------|----------|-------|---|
| FBLL1      | 0.6699741 | 0.9272541 | 0.7225 | 0.47   | 6.07E-09 | count | 1 |
| GPR174     | 0.6699741 | 0.9272541 | 0.7225 | 0.47   | 6.07E-09 | count | 1 |
| ARHGAP11B  | 0.6699741 | 0.9272541 | 0.7225 | 0.47   | 6.07E-09 | count | 1 |
| DSC2       | 0.6699741 | 0.9272541 | 0.7225 | 0.47   | 6.07E-09 | count | 1 |
| AC127024.5 | 0.6699741 | 0.9272541 | 0.7225 | 0.47   | 6.07E-09 | count | 1 |
| CLEC4E     | 0.6699741 | 0.9272541 | 0.7225 | 0.47   | 6.07E-09 | count | 1 |
| AC004923.4 | 0.6699741 | 0.9272541 | 0.7225 | 0.47   | 6.07E-09 | count | 1 |
| AL354977.2 | 0.6699741 | 0.9272541 | 0.7225 | 0.47   | 6.07E-09 | count | 1 |
| Z99289.3   | 0.2325855 | 0.5739893 | 0.4052 | 0.685  | 6.49E-09 | count | 1 |
| SLC13A4    | 0.7550353 | 1.3518219 | 0.5585 | 0.577  | 6.67E-09 | count | 1 |
| AC087430.1 | 0.7550353 | 1.3518219 | 0.5585 | 0.577  | 6.67E-09 | count | 1 |
| CX3CR1     | 0.7550353 | 1.2165704 | 0.6206 | 0.535  | 6.67E-09 | count | 1 |
| AC087071.1 | 0.2518823 | 0.5957537 | 0.4228 | 0.672  | 6.99E-09 | count | 1 |
| WNT3       | 0.8320094 | 1.0330409 | 0.8054 | 0.421  | 7.18E-09 | count | 1 |
| Z69706.1   | 0.9056853 | 1.2727904 | 0.7116 | 0.477  | 7.65E-09 | count | 1 |
| AC080188.1 | 0.9056853 | 0.9139171 | 0.991  | 0.322  | 7.65E-09 | count | 1 |
| TKTL1      | 0.9657591 | 0.8182782 | 1.1802 | 0.238  | 8.01E-09 | count | 1 |
| ANKRD34C   | 0.9657591 | 1.1092708 | 0.8706 | 0.384  | 8.01E-09 | count | 1 |
| AL117339.4 | 0.9761016 | 1.1812369 | 0.8263 | 0.409  | 8.08E-09 | count | 1 |
| DCDC1      | 0.9761016 | 0.9959903 | 0.98   | 0.327  | 8.08E-09 | count | 1 |
| AC008763.2 | 0.9761016 | 0.9959903 | 0.98   | 0.327  | 8.08E-09 | count | 1 |
| AC009159.3 | 0.9761016 | 1.0926466 | 0.8933 | 0.372  | 8.08E-09 | count | 1 |
| Z99289.1   | 0.9761016 | 1.0926466 | 0.8933 | 0.372  | 8.08E-09 | count | 1 |
| CXorf21    | 1.0433496 | 1.2210385 | 0.8545 | 0.393  | 8.46E-09 | count | 1 |
| AC004908.3 | 1.0433496 | 1.2210385 | 0.8545 | 0.393  | 8.46E-09 | count | 1 |
| CPB2-AS1   | 1.0433496 | 1.0077399 | 1.0353 | 0.301  | 8.46E-09 | count | 1 |
| ADAM20     | 1.0433496 | 1.0077399 | 1.0353 | 0.301  | 8.46E-09 | count | 1 |
| AL512604.3 | 1.0935258 | 1.057704  | 1.0339 | 0.301  | 8.74E-09 | count | 1 |
| BDH1       | 1.0935258 | 0.8521515 | 1.2833 | 0.199  | 8.74E-09 | count | 1 |
| GPR173     | 0.3213738 | 0.5639853 | 0.5698 | 0.569  | 8.74E-09 | count | 1 |
| LIN37      | 1.1535831 | 0.8849726 | 1.3035 | 0.192  | 9.06E-09 | count | 1 |
| LINC00545  | 1.1535831 | 0.8849726 | 1.3035 | 0.192  | 9.06E-09 | count | 1 |
| TBC1D3L    | 1.1611326 | 1.2698741 | 0.9144 | 0.361  | 9.09E-09 | count | 1 |
| STMN2      | 0.3407593 | 0.6259968 | 0.5443 | 0.586  | 9.22E-09 | count | 1 |
| TRIM17     | 1.1956362 | 0.8565988 | 1.3958 | 0.163  | 9.27E-09 | count | 1 |
| AC110048.2 | 1.2112041 | 1.5933951 | 0.7601 | 0.447  | 9.34E-09 | count | 1 |
| AL158071.4 | 1.2112041 | 1.5933951 | 0.7601 | 0.447  | 9.34E-09 | count | 1 |
| AC012313.1 | 1.2112041 | 1.2785822 | 0.9473 | 0.344  | 9.35E-09 | count | 1 |
| AL354732.1 | 1.2112041 | 0.8650259 | 1.4002 | 0.162  | 9.35E-09 | count | 1 |
| NYAP1      | 1.2112041 | 1.0302444 | 1.1756 | 0.24   | 9.35E-09 | count | 1 |
| AL355916.1 | 1.2501532 | 0.9232185 | 1.3541 | 0.176  | 9.54E-09 | count | 1 |
| AC027020.2 | 1.2664932 | 0.9398485 | 1.3476 | 0.178  | 9.62E-09 | count | 1 |
| AC005696.1 | 1.2664932 | 0.7999455 | 1.5832 | 0.113  | 9.62E-09 | count | 1 |
| ZNF804A    | 1.2664932 | 0.7198691 | 1.7593 | 0.0786 | 9.62E-09 | count | 1 |
| NIPAL1     | 1.2862717 | 1.2268155 | 1.0485 | 0.294  | 9.70E-09 | count | 1 |

|                 |            |             |        |        |          |       |   |
|-----------------|------------|-------------|--------|--------|----------|-------|---|
| RHPN1           | 1.3531987  | 0.942626    | 1.4356 | 0.151  | 1.00E-08 | count | 1 |
| AC008914.1      | 1.3531987  | 0.8649299   | 1.5645 | 0.118  | 1.00E-08 | count | 1 |
| CILP2           | 0.375814   | 0.5297954   | 0.7094 | 0.478  | 1.01E-08 | count | 1 |
| AC239868.3      | 1.4018921  | 1.0334168   | 1.3566 | 0.175  | 1.02E-08 | count | 1 |
| LINC02210-CRHR1 | 0.3877741  | 0.515371    | 0.7524 | 0.452  | 1.04E-08 | count | 1 |
| SLC25A18        | 1.4488147  | 1.408015    | 1.029  | 0.304  | 1.04E-08 | count | 1 |
| CORIN           | 0.3996647  | 0.5604569   | 0.7131 | 0.476  | 1.06E-08 | count | 1 |
| AFF2            | 1.5200873  | 0.9290075   | 1.6362 | 0.102  | 1.07E-08 | count | 1 |
| LRRTM2          | 0.414868   | 0.9843027   | 0.4215 | 0.673  | 1.10E-08 | count | 1 |
| SOD2-OT1        | 1.6029654  | 1.4938207   | 1.0731 | 0.283  | 1.10E-08 | count | 1 |
| LINC01118       | 1.7364968  | 1.275089    | 1.3619 | 0.173  | 1.15E-08 | count | 1 |
| CERKL           | 1.8542798  | 1.652979    | 1.1218 | 0.262  | 1.18E-08 | count | 1 |
| SIRPB1          | 1.9596403  | 1.7273144   | 1.1345 | 0.257  | 1.21E-08 | count | 1 |
| AC009948.3      | 1.9596403  | 1.4266604   | 1.3736 | 0.17   | 1.21E-08 | count | 1 |
| S100P           | 1.9596403  | 1.0690577   | 1.8331 | 0.0669 | 1.22E-08 | count | 1 |
| HLA-DQA2        | 0.5206474  | 0.1904248   | 2.7341 | 0.0063 | 1.34E-08 | count | 1 |
| RAB40AL         | 17.4823145 | 2094.870082 | 0.0083 | 0.993  | 1.52E-08 | count | 1 |
| GSTM1           | 17.8134066 | 1799.249177 | 0.0099 | 0.992  | 1.52E-08 | count | 1 |
| MMP3            | 17.4409628 | 2081.778825 | 0.0084 | 0.993  | 1.53E-08 | count | 1 |
| CFAP161         | 18.0929958 | 3075.810695 | 0.0059 | 0.995  | 1.53E-08 | count | 1 |
| CYP4Z1          | 17.8924919 | 2782.407442 | 0.0064 | 0.995  | 1.53E-08 | count | 1 |
| LINC02033       | 17.8924919 | 2782.407442 | 0.0064 | 0.995  | 1.53E-08 | count | 1 |
| ZNF559-ZNF177   | 17.8924919 | 2782.407442 | 0.0064 | 0.995  | 1.53E-08 | count | 1 |
| SLCO6A1         | 18.1793658 | 2955.772972 | 0.0062 | 0.995  | 1.53E-08 | count | 1 |
| AC084782.2      | 18.1793657 | 2955.773026 | 0.0062 | 0.995  | 1.53E-08 | count | 1 |
| INPP5D          | 18.0925088 | 2546.203835 | 0.0071 | 0.994  | 1.53E-08 | count | 1 |
| PSG4            | 18.0925085 | 2546.203635 | 0.0071 | 0.994  | 1.53E-08 | count | 1 |
| AL117190.1      | 17.9971007 | 2381.155166 | 0.0076 | 0.994  | 1.53E-08 | count | 1 |
| AC005154.6      | 18.0011734 | 2276.468857 | 0.0079 | 0.994  | 1.53E-08 | count | 1 |
| TFAP2C          | 18.2586889 | 2850.107273 | 0.0064 | 0.995  | 1.53E-08 | count | 1 |
| SLC5A2          | 17.8915684 | 2249.013605 | 0.008  | 0.994  | 1.53E-08 | count | 1 |
| TCHH            | 18.1787147 | 2035.912596 | 0.0089 | 0.993  | 1.53E-08 | count | 1 |
| AC010680.4      | 17.9965599 | 2112.538261 | 0.0085 | 0.993  | 1.53E-08 | count | 1 |
| GNMT            | 17.7735089 | 2316.932843 | 0.0077 | 0.994  | 1.53E-08 | count | 1 |
| AC133540.1      | 17.7735088 | 2316.932745 | 0.0077 | 0.994  | 1.53E-08 | count | 1 |
| CDHR4           | 18.0916781 | 2032.912037 | 0.0089 | 0.993  | 1.53E-08 | count | 1 |
| AL358113.1      | 17.8907096 | 1826.071785 | 0.0098 | 0.992  | 1.53E-08 | count | 1 |
| ZNF451-AS1      | 17.7727354 | 2018.634844 | 0.0088 | 0.993  | 1.53E-08 | count | 1 |
| KANK4           | 17.798086  | 1424.485769 | 0.0125 | 0.99   | 1.53E-08 | count | 1 |
| SMIM5           | 17.911208  | 2491.320619 | 0.0072 | 0.994  | 1.53E-08 | count | 1 |
| AC079148.1      | 17.9112047 | 2491.318494 | 0.0072 | 0.994  | 1.53E-08 | count | 1 |
| ATP13A4         | 17.7923761 | 2629.163175 | 0.0068 | 0.995  | 1.53E-08 | count | 1 |
| AHRR            | 17.656318  | 2453.806794 | 0.0072 | 0.994  | 1.53E-08 | count | 1 |
| UGT8            | 18.5791772 | 1617.802838 | 0.0115 | 0.991  | 1.53E-08 | count | 1 |
| HAVCR2          | 17.4980695 | 2264.097691 | 0.0077 | 0.994  | 1.53E-08 | count | 1 |

|              |            |             |          |        |             |       |   |
|--------------|------------|-------------|----------|--------|-------------|-------|---|
| SPATA17      | 18.0809545 | 1353.951719 | 0.0134   | 0.989  | 1.53E-08    | count | 1 |
| TMEM178B     | 17.5130888 | 1314.709299 | 0.0133   | 0.989  | 1.53E-08    | count | 1 |
| TM4SF4       | 17.497362  | 1911.806413 | 0.0092   | 0.993  | 1.53E-08    | count | 1 |
| AC079341.2   | 18.5188584 | 3805.699828 | 0.0049   | 0.996  | 1.53E-08    | count | 1 |
| ARHGAP25     | 17.4966984 | 1597.697257 | 0.011    | 0.991  | 1.53E-08    | count | 1 |
| KCNK5        | 17.6537635 | 1322.445742 | 0.0133   | 0.989  | 1.53E-08    | count | 1 |
| HOXB5        | 17.7676149 | 1210.922499 | 0.0147   | 0.988  | 1.53E-08    | count | 1 |
| BCO1         | 0.6699741  | 1.1061953   | 0.6057   | 0.545  | 1.65E-08    | count | 1 |
| SLC25A25-AS1 | 0.727591   | 0.9553472   | 0.7616   | 0.446  | 1.76E-08    | count | 1 |
| AC104463.2   | 0.7554482  | 0.6911005   | 1.0931   | 0.274  | 1.81E-08    | count | 1 |
| AC005523.1   | 0.7953638  | 0.8220001   | 0.9676   | 0.333  | 1.89E-08    | count | 1 |
| CSF2RB       | 0.8725921  | 1.0928567   | 0.7985   | 0.425  | 2.02E-08    | count | 1 |
| NBEAL2       | 0.2868009  | 0.5565156   | 0.5154   | 0.606  | 2.14E-08    | count | 1 |
| AC005837.3   | 0.9761016  | 1.2461711   | 0.7833   | 0.434  | 2.19E-08    | count | 1 |
| LY6G5B       | 1.0101144  | 0.8348039   | 1.21     | 0.226  | 2.25E-08    | count | 1 |
| AC022306.2   | 1.1956362  | 1.3351257   | 0.8955   | 0.371  | 2.52E-08    | count | 1 |
| KCNA2        | 1.2391332  | 1.0331773   | 1.1993   | 0.23   | 2.58E-08    | count | 1 |
| LINC01678    | 1.384703   | 1.0520049   | 1.3163   | 0.188  | 2.76E-08    | count | 1 |
| HCK          | 1.4018921  | 1.3711573   | 1.0224   | 0.307  | 2.78E-08    | count | 1 |
| CBX2         | 1.4143603  | 1.2601186   | 1.1224   | 0.262  | 2.79E-08    | count | 1 |
| AC013565.3   | 1.5448519  | 1.1962644   | 1.2914   | 0.197  | 2.94E-08    | count | 1 |
| CNTNAP4      | 1.5622184  | 1.6315481   | 0.9575   | 0.338  | 2.95E-08    | count | 1 |
| RAB11FIP4    | 1.7004932  | 1.4607677   | 1.1641   | 0.244  | 3.09E-08    | count | 1 |
| LINC01914    | 1.7004932  | 0.9195294   | 1.8493   | 0.0645 | 3.09E-08    | count | 1 |
| AC010173.1   | 1.8057603  | 1.4935597   | 1.209    | 0.227  | 3.18E-08    | count | 1 |
| TIAF1        | 1.8690991  | 1.6775064   | 1.1142   | 0.265  | 3.23E-08    | count | 1 |
| AC005899.8   | 1.8839263  | 2.0604137   | 0.9143   | 0.361  | 3.24E-08    | count | 1 |
| AL359715.2   | 2.0282739  | 1.3454602   | 1.5075   | 0.132  | 3.35E-08    | count | 1 |
| FCGR3B       | 2.1174071  | 1.1377874   | 1.861    | 0.0628 | 3.41E-08    | count | 1 |
| AL358072.1   | 2.2961126  | 1.4984051   | 1.5324   | 0.126  | 3.52E-08    | count | 1 |
| AC108673.2   | 2.4110179  | 2.4286212   | 0.9928   | 0.321  | 3.59E-08    | count | 1 |
| RBM47        | 2.4902686  | 1.2612622   | 1.9744   | 0.0484 | 3.63E-08    | count | 1 |
| SLITRK5      | 2.4967849  | 1.8745516   | 1.3319   | 0.183  | 3.63E-08    | count | 1 |
| ZSCAN23      | 2.5139297  | 1.5475754   | 1.6244   | 0.104  | 3.64E-08    | count | 1 |
| AL731577.1   | 0.6117388  | 0.3718271   | 1.6452   | 0.1    | 4.16E-08    | count | 1 |
| AC244197.2   | 17.5940168 | 2389.827531 | 0.0074   | 0.994  | 4.17E-08    | count | 1 |
| S100A12      | 17.822499  | 2564.845638 | 0.0069   | 0.994  | 4.20E-08    | count | 1 |
| GPR82        | 0.6699741  | 0.5583292   | 1.2      | 0.23   | 4.48E-08    | count | 1 |
| AL356019.2   | 0.9483213  | 0.7204774   | 1.3162   | 0.188  | 5.85E-08    | count | 1 |
| SLC2A14      | 1.3612624  | 0.585752    | 2.324    | 0.0202 | 7.44E-08    | count | 1 |
| ITPK1-AS1    | 1.9451332  | 1.5220263   | 1.278    | 0.201  | 8.99E-08    | count | 1 |
| FAM204A      | 1.73E-05   | 0.0656841   | 3.00E-04 | 1      | 2.44E-05    | count | 1 |
| CCNA2        | 0.0012386  | 0.8191563   | 0.0015   | 0.999  | 0.000343107 | count | 1 |
| DUT          | 0.0002765  | 0.045775    | 0.006    | 0.995  | 0.000395013 | count | 1 |
| ATF7IP2      | 0.0003302  | 0.237584    | 0.0014   | 0.999  | 0.000397908 | count | 1 |

|            |           |           |        |       |             |       |   |
|------------|-----------|-----------|--------|-------|-------------|-------|---|
| WAC-AS1    | 0.0003146 | 0.1067464 | 0.0029 | 0.998 | 0.000417297 | count | 1 |
| CTDP1      | 0.000598  | 0.3449396 | 0.0017 | 0.999 | 0.000437729 | count | 1 |
| CS         | 0.0004073 | 0.2167987 | 0.0019 | 0.999 | 0.000476287 | count | 1 |
| AP001269.4 | 0.0018847 | 0.5781338 | 0.0033 | 0.997 | 0.000522011 | count | 1 |
| PIGK       | 0.0003822 | 0.1064741 | 0.0036 | 0.997 | 0.00052363  | count | 1 |
| AC012360.1 | 0.0016574 | 0.9355368 | 0.0018 | 0.999 | 0.000575287 | count | 1 |
| AL096865.1 | 0.0016574 | 0.9156616 | 0.0018 | 0.999 | 0.000575287 | count | 1 |
| CLOCK      | 0.0004766 | 0.1659037 | 0.0029 | 0.998 | 0.000585032 | count | 1 |
| POLL       | 0.0005272 | 0.1672133 | 0.0032 | 0.997 | 0.000614296 | count | 1 |
| AL355338.1 | 0.0006841 | 0.3073838 | 0.0022 | 0.998 | 0.000664399 | count | 1 |
| TMBIM1     | 0.0004695 | 0.0647879 | 0.0072 | 0.994 | 0.000665002 | count | 1 |
| ZNF317     | 0.0008257 | 0.3077727 | 0.0027 | 0.998 | 0.000715732 | count | 1 |
| TMEM170A   | 0.000553  | 0.1329828 | 0.0042 | 0.997 | 0.000717007 | count | 1 |
| LINC00504  | 0.0021576 | 0.6344151 | 0.0034 | 0.997 | 0.000748831 | count | 1 |
| EMG1       | 0.0021576 | 0.7013983 | 0.0031 | 0.998 | 0.000748831 | count | 1 |
| XXYLT1     | 0.0007629 | 0.3167439 | 0.0024 | 0.998 | 0.000820662 | count | 1 |
| TUT7       | 0.0006851 | 0.178555  | 0.0038 | 0.997 | 0.000881414 | count | 1 |
| SCART1     | 0.0016574 | 0.8577459 | 0.0019 | 0.998 | 0.000927439 | count | 1 |
| AC008040.5 | 0.0049313 | 0.5401573 | 0.0091 | 0.993 | 0.000972127 | count | 1 |
| ZNF181     | 0.0007779 | 0.1893283 | 0.0041 | 0.997 | 0.000988153 | count | 1 |
| MT-CO2     | 0.000719  | 0.0220535 | 0.0326 | 0.974 | 0.0010366   | count | 1 |
| ZNF428     | 0.0007587 | 0.0573613 | 0.0132 | 0.989 | 0.001075532 | count | 1 |
| MKLN1      | 0.0008232 | 0.1515217 | 0.0054 | 0.996 | 0.00109371  | count | 1 |
| SNRPB      | 0.0007784 | 0.0605262 | 0.0129 | 0.99  | 0.001097799 | count | 1 |
| KIN        | 0.0008509 | 0.1183514 | 0.0072 | 0.994 | 0.001170541 | count | 1 |
| DCTD       | 0.0009012 | 0.1070801 | 0.0084 | 0.993 | 0.00120563  | count | 1 |
| FBXL17     | 0.001035  | 0.2039983 | 0.0051 | 0.996 | 0.001222458 | count | 1 |
| PYCR3      | 0.001264  | 0.2567351 | 0.0049 | 0.996 | 0.001242579 | count | 1 |
| FKBP11     | 0.001037  | 0.1172857 | 0.0088 | 0.993 | 0.001396479 | count | 1 |
| APEX2      | 0.0015342 | 0.2341949 | 0.0066 | 0.995 | 0.0014504   | count | 1 |
| SNX12      | 0.0013105 | 0.1935763 | 0.0068 | 0.995 | 0.001476445 | count | 1 |
| STK10      | 0.0154886 | 0.6045277 | 0.0256 | 0.98  | 0.001634312 | count | 1 |
| LINC01355  | 0.005918  | 0.5256291 | 0.0113 | 0.991 | 0.001637694 | count | 1 |
| UFSP2      | 0.0012479 | 0.0907453 | 0.0138 | 0.989 | 0.001720766 | count | 1 |
| AUP1       | 0.0012598 | 0.0814805 | 0.0155 | 0.988 | 0.001756585 | count | 1 |
| SPRYD3     | 0.0013209 | 0.1038054 | 0.0127 | 0.99  | 0.001804413 | count | 1 |
| SLC25A43   | 0.0019665 | 0.1914218 | 0.0103 | 0.992 | 0.001859013 | count | 1 |
| EIF4A1     | 0.0014688 | 0.0760424 | 0.0193 | 0.985 | 0.002061451 | count | 1 |
| SDK1       | 0.001782  | 0.212293  | 0.0084 | 0.993 | 0.002068608 | count | 1 |
| GPR88      | 0.0026437 | 0.3332091 | 0.0079 | 0.994 | 0.002131578 | count | 1 |
| AC093901.1 | 0.0079307 | 0.7169286 | 0.0111 | 0.991 | 0.002193711 | count | 1 |
| AC022007.1 | 0.0079307 | 0.7169286 | 0.0111 | 0.991 | 0.002193711 | count | 1 |
| TMCC1-AS1  | 0.0079307 | 0.7169471 | 0.0111 | 0.991 | 0.002193711 | count | 1 |
| ARHGAP39   | 0.0079307 | 0.7169187 | 0.0111 | 0.991 | 0.002193711 | count | 1 |
| AL356056.2 | 0.0079307 | 0.7169187 | 0.0111 | 0.991 | 0.002193711 | count | 1 |

|            |           |           |        |       |             |       |   |
|------------|-----------|-----------|--------|-------|-------------|-------|---|
| AC104653.1 | 0.0079307 | 0.7912319 | 0.01   | 0.992 | 0.002193711 | count | 1 |
| AC145285.6 | 0.0079307 | 0.7912487 | 0.01   | 0.992 | 0.002193711 | count | 1 |
| RSPH9      | 0.0024937 | 0.3283614 | 0.0076 | 0.994 | 0.002246629 | count | 1 |
| DDX42      | 0.001643  | 0.0864579 | 0.019  | 0.985 | 0.002293538 | count | 1 |
| SLC39A13   | 0.0017233 | 0.1153585 | 0.0149 | 0.988 | 0.002328159 | count | 1 |
| RAB3GAP2   | 0.0018096 | 0.1397871 | 0.0129 | 0.99  | 0.002367658 | count | 1 |
| CBWD1      | 0.001838  | 0.1524375 | 0.0121 | 0.99  | 0.002433738 | count | 1 |
| NUDT13     | 0.005967  | 0.4814552 | 0.0124 | 0.99  | 0.002440039 | count | 1 |
| ATP5PB     | 0.0017672 | 0.052323  | 0.0338 | 0.973 | 0.002503322 | count | 1 |
| SNRPA1     | 0.0018754 | 0.0940478 | 0.0199 | 0.984 | 0.002573539 | count | 1 |
| RFX3-AS1   | 0.0135932 | 0.7134636 | 0.0191 | 0.985 | 0.002674297 | count | 1 |
| LRRIQ3     | 0.0135932 | 0.811841  | 0.0167 | 0.987 | 0.002674297 | count | 1 |
| LINC00884  | 0.0053089 | 0.5463765 | 0.0097 | 0.992 | 0.00273011  | count | 1 |
| NUB1       | 0.0020595 | 0.0702328 | 0.0293 | 0.977 | 0.002873688 | count | 1 |
| MTRNR2L1   | 0.0281128 | 0.73773   | 0.0381 | 0.97  | 0.002957018 | count | 1 |
| INHBB      | 0.0281128 | 0.788486  | 0.0357 | 0.972 | 0.002957018 | count | 1 |
| SERF1B     | 0.0281128 | 0.7872338 | 0.0357 | 0.972 | 0.002957018 | count | 1 |
| AC090568.2 | 0.0281128 | 0.7872338 | 0.0357 | 0.972 | 0.002957018 | count | 1 |
| XIAP       | 0.0022075 | 0.1149526 | 0.0192 | 0.985 | 0.002992907 | count | 1 |
| PDE3B      | 0.0051108 | 0.4948225 | 0.0103 | 0.992 | 0.003066921 | count | 1 |
| CDK2AP1    | 0.0025521 | 0.2208765 | 0.0116 | 0.991 | 0.003105216 | count | 1 |
| PPP1R9B    | 0.0028558 | 0.2750685 | 0.0104 | 0.992 | 0.003112201 | count | 1 |
| FAM208B    | 0.0024197 | 0.1302881 | 0.0186 | 0.985 | 0.00324271  | count | 1 |
| SRSF9      | 0.0023188 | 0.0465502 | 0.0498 | 0.96  | 0.003298364 | count | 1 |
| AC107959.1 | 0.0073967 | 0.4750069 | 0.0156 | 0.988 | 0.003433995 | count | 1 |
| ATP6V0A1   | 0.0026999 | 0.1832761 | 0.0147 | 0.988 | 0.003529742 | count | 1 |
| FKBP4      | 0.0026604 | 0.1177127 | 0.0226 | 0.982 | 0.003545492 | count | 1 |
| EPN1       | 0.0027678 | 0.1475193 | 0.0188 | 0.985 | 0.003591671 | count | 1 |
| CDC73      | 0.0025813 | 0.083053  | 0.0311 | 0.975 | 0.003594694 | count | 1 |
| VAMP3      | 0.0025752 | 0.0608581 | 0.0423 | 0.966 | 0.003636589 | count | 1 |
| LMNB1      | 0.0136496 | 0.5289853 | 0.0258 | 0.979 | 0.00377092  | count | 1 |
| CRIM1      | 0.0027438 | 0.074267  | 0.0369 | 0.971 | 0.003908455 | count | 1 |
| NCAPH      | 0.0380437 | 0.8748169 | 0.0435 | 0.965 | 0.003991605 | count | 1 |
| AC079322.1 | 0.0380437 | 0.8771772 | 0.0434 | 0.965 | 0.003991605 | count | 1 |
| FGF11      | 0.0380437 | 0.872655  | 0.0436 | 0.965 | 0.003991605 | count | 1 |
| PLAC8      | 0.0380437 | 0.9347921 | 0.0407 | 0.968 | 0.003991605 | count | 1 |
| RAB12      | 0.0030628 | 0.1225374 | 0.025  | 0.98  | 0.004004147 | count | 1 |
| MRPS5      | 0.0029271 | 0.0933221 | 0.0314 | 0.975 | 0.004069045 | count | 1 |
| AGPAT5     | 0.0033964 | 0.1811391 | 0.0188 | 0.985 | 0.004132354 | count | 1 |
| FKBP15     | 0.0037172 | 0.1999314 | 0.0186 | 0.985 | 0.004166551 | count | 1 |
| SPATA2L    | 0.0056757 | 0.3414737 | 0.0166 | 0.987 | 0.004303286 | count | 1 |
| PHLDA1     | 0.0032106 | 0.1093791 | 0.0294 | 0.977 | 0.004394699 | count | 1 |
| MAPK11     | 0.0420199 | 0.6152663 | 0.0683 | 0.946 | 0.004404375 | count | 1 |
| ZNF860     | 0.0079036 | 0.7143389 | 0.0111 | 0.991 | 0.004418111 | count | 1 |
| SOX17      | 0.0079036 | 1.344198  | 0.0059 | 0.995 | 0.004418111 | count | 1 |

|            |           |           |        |        |             |       |   |
|------------|-----------|-----------|--------|--------|-------------|-------|---|
| AL691432.2 | 0.0065956 | 0.3604122 | 0.0183 | 0.985  | 0.004427216 | count | 1 |
| SAP30      | 0.0032043 | 0.0854581 | 0.0375 | 0.97   | 0.004446225 | count | 1 |
| HOXD8      | 0.0234776 | 0.7368449 | 0.0319 | 0.975  | 0.004608297 | count | 1 |
| PEX7       | 0.0040173 | 0.2087628 | 0.0192 | 0.985  | 0.004696877 | count | 1 |
| CELF1      | 0.0036442 | 0.1754282 | 0.0208 | 0.983  | 0.004745142 | count | 1 |
| SNRNP40    | 0.0034842 | 0.0949637 | 0.0367 | 0.971  | 0.004771258 | count | 1 |
| PLGRKT     | 0.003585  | 0.1266723 | 0.0283 | 0.977  | 0.004784625 | count | 1 |
| KAT2A      | 0.0059427 | 0.2918961 | 0.0204 | 0.984  | 0.004789643 | count | 1 |
| VSIG10     | 0.0039102 | 0.1672934 | 0.0234 | 0.981  | 0.00483716  | count | 1 |
| PKN1       | 0.0036022 | 0.1174572 | 0.0307 | 0.976  | 0.004861308 | count | 1 |
| AIDA       | 0.0035858 | 0.0916857 | 0.0391 | 0.969  | 0.004972533 | count | 1 |
| DBI        | 0.0035666 | 0.0441026 | 0.0809 | 0.9356 | 0.005085423 | count | 1 |
| AC078802.1 | 0.0185424 | 0.5105601 | 0.0363 | 0.971  | 0.005117168 | count | 1 |
| CCNY       | 0.0038685 | 0.1163712 | 0.0332 | 0.973  | 0.005133785 | count | 1 |
| PCDHA3     | 0.0497617 | 0.8374784 | 0.0594 | 0.953  | 0.005205642 | count | 1 |
| NOP53      | 0.0036716 | 0.0427248 | 0.0859 | 0.932  | 0.005230327 | count | 1 |
| KDM4A      | 0.0051894 | 0.2667739 | 0.0195 | 0.984  | 0.005367115 | count | 1 |
| PRKAG1     | 0.003991  | 0.1149683 | 0.0347 | 0.972  | 0.005404054 | count | 1 |
| HSPA9      | 0.0038965 | 0.0791742 | 0.0492 | 0.961  | 0.005408602 | count | 1 |
| HS3ST1     | 0.0063899 | 0.3028107 | 0.0211 | 0.983  | 0.005415378 | count | 1 |
| ZNF235     | 0.0065237 | 0.4332817 | 0.0151 | 0.988  | 0.00552869  | count | 1 |
| RAB11FIP5  | 0.0048959 | 0.2337743 | 0.0209 | 0.983  | 0.005541102 | count | 1 |
| DMGDH      | 0.0079307 | 0.4937095 | 0.0161 | 0.987  | 0.005570638 | count | 1 |
| ZNF384     | 0.0051209 | 0.2127775 | 0.0241 | 0.981  | 0.005579836 | count | 1 |
| ERMAP      | 0.0054159 | 0.3911713 | 0.0138 | 0.989  | 0.005649748 | count | 1 |
| MAPK9      | 0.0044738 | 0.1869281 | 0.0239 | 0.981  | 0.005710485 | count | 1 |
| MPV17      | 0.0041635 | 0.0969302 | 0.043  | 0.966  | 0.005720972 | count | 1 |
| AC005726.5 | 0.011182  | 0.668935  | 0.0167 | 0.987  | 0.005744514 | count | 1 |
| RMI1       | 0.008653  | 0.3801973 | 0.0228 | 0.982  | 0.005806501 | count | 1 |
| FOXC2-AS1  | 0.0299214 | 0.8783813 | 0.0341 | 0.973  | 0.005864265 | count | 1 |
| LINC01358  | 0.0073274 | 0.4438958 | 0.0165 | 0.987  | 0.005904699 | count | 1 |
| PCDHB12    | 0.0127578 | 0.4594713 | 0.0278 | 0.978  | 0.005917143 | count | 1 |
| FAM219B    | 0.004571  | 0.137218  | 0.0333 | 0.973  | 0.006010374 | count | 1 |
| ATG5       | 0.0045133 | 0.1091201 | 0.0414 | 0.967  | 0.006050755 | count | 1 |
| RTCA       | 0.0046823 | 0.1602578 | 0.0292 | 0.977  | 0.006075731 | count | 1 |
| FAM174A    | 0.0045071 | 0.1041267 | 0.0433 | 0.965  | 0.006136626 | count | 1 |
| PCDHGA7    | 0.0133437 | 0.5865629 | 0.0227 | 0.982  | 0.006188223 | count | 1 |
| PSMG2      | 0.0043768 | 0.0538106 | 0.0813 | 0.935  | 0.006206083 | count | 1 |
| DNAJC18    | 0.0051076 | 0.1614551 | 0.0316 | 0.975  | 0.006255322 | count | 1 |
| MTURN      | 0.0045628 | 0.1011938 | 0.0451 | 0.964  | 0.006275394 | count | 1 |
| NDUFAF1    | 0.0053617 | 0.1614232 | 0.0332 | 0.974  | 0.006351343 | count | 1 |
| ZPR1       | 0.0049252 | 0.1527051 | 0.0323 | 0.974  | 0.006379314 | count | 1 |
| GCFC2      | 0.0050639 | 0.1663634 | 0.0304 | 0.976  | 0.00644794  | count | 1 |
| CRNKL1     | 0.0048897 | 0.1195125 | 0.0409 | 0.967  | 0.006474128 | count | 1 |
| CIAO1      | 0.0049239 | 0.1230074 | 0.04   | 0.968  | 0.006474345 | count | 1 |

|            |           |           |        |        |             |       |   |
|------------|-----------|-----------|--------|--------|-------------|-------|---|
| CDK5R1     | 0.0621488 | 0.7402387 | 0.084  | 0.933  | 0.006481063 | count | 1 |
| MAP3K20    | 0.0046541 | 0.0868228 | 0.0536 | 0.957  | 0.006488584 | count | 1 |
| AC003102.1 | 0.0159528 | 0.5169255 | 0.0309 | 0.975  | 0.006510886 | count | 1 |
| RCOR1      | 0.0054249 | 0.174925  | 0.031  | 0.975  | 0.006552441 | count | 1 |
| XPA        | 0.0047057 | 0.0808155 | 0.0582 | 0.954  | 0.006611883 | count | 1 |
| PTCD1      | 0.007647  | 0.3638815 | 0.021  | 0.983  | 0.006623708 | count | 1 |
| RASGEF1B   | 0.0060435 | 0.2371402 | 0.0255 | 0.98   | 0.006701897 | count | 1 |
| SSH3       | 0.0056768 | 0.2384249 | 0.0238 | 0.981  | 0.006724501 | count | 1 |
| LINC00847  | 0.0060313 | 0.2322509 | 0.026  | 0.979  | 0.00679314  | count | 1 |
| ZNF70      | 0.0067862 | 0.2727806 | 0.0249 | 0.98   | 0.006818    | count | 1 |
| TXNDC12    | 0.0049004 | 0.082882  | 0.0591 | 0.953  | 0.006820678 | count | 1 |
| KCNQ5      | 0.0079121 | 0.6681592 | 0.0118 | 0.991  | 0.006853137 | count | 1 |
| GEMIN7     | 0.0060314 | 0.2676503 | 0.0225 | 0.982  | 0.006857244 | count | 1 |
| ZNF48      | 0.0108255 | 0.3402468 | 0.0318 | 0.975  | 0.006893258 | count | 1 |
| ELL        | 0.0064846 | 0.2330361 | 0.0278 | 0.978  | 0.007190854 | count | 1 |
| SPRED2     | 0.006449  | 0.2556918 | 0.0252 | 0.98   | 0.007227398 | count | 1 |
| AC006441.1 | 0.0694756 | 0.9916614 | 0.0701 | 0.9442 | 0.007231609 | count | 1 |
| C19orf48   | 0.0062876 | 0.1821558 | 0.0345 | 0.972  | 0.007240499 | count | 1 |
| AC099518.5 | 0.0061365 | 0.180216  | 0.0341 | 0.973  | 0.007246133 | count | 1 |
| RALA       | 0.0052552 | 0.090981  | 0.0578 | 0.954  | 0.007275176 | count | 1 |
| PHKA2      | 0.0123274 | 0.4120899 | 0.0299 | 0.976  | 0.00738911  | count | 1 |
| RBM42      | 0.0053384 | 0.0771319 | 0.0692 | 0.945  | 0.007432534 | count | 1 |
| ERH        | 0.0052042 | 0.0393233 | 0.1323 | 0.895  | 0.007440475 | count | 1 |
| DIABLO     | 0.0380437 | 0.6164857 | 0.0617 | 0.951  | 0.007441935 | count | 1 |
| C18orf25   | 0.0069007 | 0.2730378 | 0.0253 | 0.98   | 0.007470133 | count | 1 |
| VPS54      | 0.0069083 | 0.2332186 | 0.0296 | 0.976  | 0.007526537 | count | 1 |
| ARHGFEF28  | 0.006655  | 0.2550259 | 0.0261 | 0.979  | 0.00756596  | count | 1 |
| DPP9       | 0.0064208 | 0.2410032 | 0.0266 | 0.979  | 0.00765118  | count | 1 |
| FUT8-AS1   | 0.0739881 | 0.6547982 | 0.113  | 0.91   | 0.007692438 | count | 1 |
| SMAD4      | 0.0059039 | 0.1439467 | 0.041  | 0.967  | 0.007740971 | count | 1 |
| ARHGAP27   | 0.0193336 | 0.8782221 | 0.022  | 0.982  | 0.007885537 | count | 1 |
| ETV5       | 0.0081514 | 0.2410639 | 0.0338 | 0.973  | 0.007911463 | count | 1 |
| AC132192.1 | 0.0766231 | 0.5221419 | 0.1467 | 0.883  | 0.007961028 | count | 1 |
| RAB9B      | 0.0070286 | 0.2452415 | 0.0287 | 0.977  | 0.008060272 | count | 1 |
| REST       | 0.0058197 | 0.0777636 | 0.0748 | 0.94   | 0.008108173 | count | 1 |
| ETFB       | 0.0058775 | 0.0568505 | 0.1034 | 0.918  | 0.008324026 | count | 1 |
| CHERP      | 0.0071672 | 0.2292476 | 0.0313 | 0.975  | 0.008378276 | count | 1 |
| TUBA1C     | 0.0059685 | 0.0676889 | 0.0882 | 0.93   | 0.008446471 | count | 1 |
| ZFP1       | 0.0075867 | 0.2021527 | 0.0375 | 0.97   | 0.008457926 | count | 1 |
| RAB40B     | 0.0065897 | 0.1372994 | 0.048  | 0.962  | 0.008542649 | count | 1 |
| SMARCA1    | 0.0062329 | 0.0956063 | 0.0652 | 0.948  | 0.00858857  | count | 1 |
| MIS12      | 0.0077183 | 0.2013263 | 0.0383 | 0.969  | 0.008649243 | count | 1 |
| THOP1      | 0.0082369 | 0.2308709 | 0.0357 | 0.972  | 0.008661329 | count | 1 |
| ANAPC7     | 0.0068622 | 0.1515437 | 0.0453 | 0.964  | 0.008853874 | count | 1 |
| CDH26      | 0.0456408 | 0.8478349 | 0.0538 | 0.957  | 0.008912072 | count | 1 |

|            |           |           |        |       |             |       |   |
|------------|-----------|-----------|--------|-------|-------------|-------|---|
| AC004803.1 | 0.0134142 | 0.4049292 | 0.0331 | 0.974 | 0.008995269 | count | 1 |
| ALAS1      | 0.0078198 | 0.2649735 | 0.0295 | 0.976 | 0.009108234 | count | 1 |
| TIPRL      | 0.0066237 | 0.0805165 | 0.0823 | 0.934 | 0.009183843 | count | 1 |
| VSTM4      | 0.0068299 | 0.1464151 | 0.0466 | 0.963 | 0.009241711 | count | 1 |
| NOC3L      | 0.0068858 | 0.1152841 | 0.0597 | 0.952 | 0.009292122 | count | 1 |
| FAM72A     | 0.0340114 | 0.6885535 | 0.0494 | 0.961 | 0.009354372 | count | 1 |
| AC092647.5 | 0.0344028 | 0.8750766 | 0.0393 | 0.969 | 0.009461206 | count | 1 |
| AL132780.1 | 0.0344028 | 0.8750766 | 0.0393 | 0.969 | 0.009461206 | count | 1 |
| DHDH       | 0.0344028 | 0.8721848 | 0.0394 | 0.969 | 0.009461206 | count | 1 |
| AC245123.1 | 0.0344028 | 1.0353676 | 0.0332 | 0.973 | 0.009461206 | count | 1 |
| MLST8      | 0.0074835 | 0.1683661 | 0.0444 | 0.965 | 0.009479177 | count | 1 |
| NBEAL1     | 0.006877  | 0.0860763 | 0.0799 | 0.936 | 0.009590126 | count | 1 |
| CARS       | 0.0076762 | 0.1489128 | 0.0515 | 0.959 | 0.009654716 | count | 1 |
| ZNF257     | 0.0281128 | 0.6524686 | 0.0431 | 0.966 | 0.009705211 | count | 1 |
| CAMK2D     | 0.0072355 | 0.112133  | 0.0645 | 0.949 | 0.009711971 | count | 1 |
| AL627309.1 | 0.0952007 | 1.094661  | 0.087  | 0.931 | 0.009844143 | count | 1 |
| NPPA-AS1   | 0.0952007 | 1.094661  | 0.087  | 0.931 | 0.009844143 | count | 1 |
| DLGAP3     | 0.0952007 | 1.094661  | 0.087  | 0.931 | 0.009844143 | count | 1 |
| AL109659.2 | 0.0952007 | 1.094661  | 0.087  | 0.931 | 0.009844143 | count | 1 |
| AL357078.1 | 0.0952007 | 1.094661  | 0.087  | 0.931 | 0.009844143 | count | 1 |
| LINC01799  | 0.0952007 | 1.094661  | 0.087  | 0.931 | 0.009844143 | count | 1 |
| MUSTN1     | 0.0952007 | 1.094661  | 0.087  | 0.931 | 0.009844143 | count | 1 |
| LRTM1      | 0.0952007 | 1.094661  | 0.087  | 0.931 | 0.009844143 | count | 1 |
| SCAANT1    | 0.0952007 | 1.094661  | 0.087  | 0.931 | 0.009844143 | count | 1 |
| CTBP1-AS   | 0.0952007 | 1.103682  | 0.0863 | 0.931 | 0.009844143 | count | 1 |
| PDE6A      | 0.0952007 | 1.094661  | 0.087  | 0.931 | 0.009844143 | count | 1 |
| AL024498.1 | 0.0952007 | 1.094661  | 0.087  | 0.931 | 0.009844143 | count | 1 |
| HCG14      | 0.0952007 | 1.094661  | 0.087  | 0.931 | 0.009844143 | count | 1 |
| SYNE1-AS1  | 0.0952007 | 1.094661  | 0.087  | 0.931 | 0.009844143 | count | 1 |
| FAM66D     | 0.0952007 | 1.094661  | 0.087  | 0.931 | 0.009844143 | count | 1 |
| LACTB2-AS1 | 0.0952007 | 1.094661  | 0.087  | 0.931 | 0.009844143 | count | 1 |
| RASEF      | 0.0952007 | 1.094661  | 0.087  | 0.931 | 0.009844143 | count | 1 |
| KIF12      | 0.0952007 | 1.103682  | 0.0863 | 0.931 | 0.009844143 | count | 1 |
| AL592211.1 | 0.0952007 | 1.103682  | 0.0863 | 0.931 | 0.009844143 | count | 1 |
| UBASH3B    | 0.0952007 | 1.094661  | 0.087  | 0.931 | 0.009844143 | count | 1 |
| AC137834.2 | 0.0952007 | 1.094661  | 0.087  | 0.931 | 0.009844143 | count | 1 |
| AC131212.1 | 0.0952007 | 1.094661  | 0.087  | 0.931 | 0.009844143 | count | 1 |
| AL691403.2 | 0.0952007 | 1.094661  | 0.087  | 0.931 | 0.009844143 | count | 1 |
| CHRFAM7A   | 0.0952007 | 1.103682  | 0.0863 | 0.931 | 0.009844143 | count | 1 |
| AC003965.1 | 0.0952007 | 1.094661  | 0.087  | 0.931 | 0.009844143 | count | 1 |
| AC135048.3 | 0.0952007 | 1.094661  | 0.087  | 0.931 | 0.009844143 | count | 1 |
| SPIRE2     | 0.0952007 | 1.094661  | 0.087  | 0.931 | 0.009844143 | count | 1 |
| RAPGEFL1   | 0.0952007 | 1.094661  | 0.087  | 0.931 | 0.009844143 | count | 1 |
| AC091588.3 | 0.0952007 | 1.094661  | 0.087  | 0.931 | 0.009844143 | count | 1 |
| AC100778.3 | 0.0952007 | 1.094661  | 0.087  | 0.931 | 0.009844143 | count | 1 |



|             |           |           |        |       |             |       |   |
|-------------|-----------|-----------|--------|-------|-------------|-------|---|
| AC005790.1  | 0.0952007 | 1.103682  | 0.0863 | 0.931 | 0.009844143 | count | 1 |
| PRR22       | 0.0952007 | 1.094661  | 0.087  | 0.931 | 0.009844143 | count | 1 |
| ANGPTL6     | 0.0952007 | 1.094661  | 0.087  | 0.931 | 0.009844143 | count | 1 |
| ANGPTL8     | 0.0952007 | 1.103682  | 0.0863 | 0.931 | 0.009844143 | count | 1 |
| AL022328.1  | 0.0952007 | 1.094661  | 0.087  | 0.931 | 0.009844143 | count | 1 |
| DSCR9       | 0.0952007 | 1.094661  | 0.087  | 0.931 | 0.009844143 | count | 1 |
| CRB1        | 0.0952007 | 1.365266  | 0.0697 | 0.944 | 0.009844143 | count | 1 |
| MTRF1       | 0.0119926 | 0.3439275 | 0.0349 | 0.972 | 0.009916407 | count | 1 |
| MIER1       | 0.0070347 | 0.0566763 | 0.1241 | 0.901 | 0.009964196 | count | 1 |
| ARID5B      | 0.0069732 | 0.0497394 | 0.1402 | 0.889 | 0.01000433  | count | 1 |
| GHDC        | 0.0079639 | 0.1928295 | 0.0413 | 0.967 | 0.010016471 | count | 1 |
| ZFP3        | 0.0124819 | 0.4146526 | 0.0301 | 0.976 | 0.01005222  | count | 1 |
| MALINC1     | 0.0219227 | 0.4060317 | 0.054  | 0.957 | 0.010150788 | count | 1 |
| RABL3       | 0.008231  | 0.1716611 | 0.0479 | 0.962 | 0.010217949 | count | 1 |
| PHF14       | 0.0073355 | 0.0864801 | 0.0848 | 0.932 | 0.010276417 | count | 1 |
| SPAG16      | 0.0074681 | 0.1134534 | 0.0658 | 0.948 | 0.01027992  | count | 1 |
| CDC42       | 0.0071882 | 0.0370167 | 0.1942 | 0.846 | 0.010296366 | count | 1 |
| AC144652.1  | 0.0299214 | 0.6208614 | 0.0482 | 0.962 | 0.01032572  | count | 1 |
| ZNF582      | 0.0115164 | 0.2790859 | 0.0413 | 0.967 | 0.010365909 | count | 1 |
| RSRC2       | 0.0073386 | 0.0563849 | 0.1302 | 0.896 | 0.010419733 | count | 1 |
| HSF1        | 0.0076696 | 0.1084565 | 0.0707 | 0.944 | 0.010424923 | count | 1 |
| ESD         | 0.007296  | 0.0356153 | 0.2049 | 0.838 | 0.01044408  | count | 1 |
| PPME1       | 0.0080554 | 0.1551834 | 0.0519 | 0.959 | 0.010451695 | count | 1 |
| HOGA1       | 0.0257723 | 0.548846  | 0.047  | 0.963 | 0.010498518 | count | 1 |
| ZNF784      | 0.0259054 | 0.4135019 | 0.0626 | 0.95  | 0.010552464 | count | 1 |
| RBM14       | 0.0099208 | 0.3119025 | 0.0318 | 0.975 | 0.010590288 | count | 1 |
| PTGS2       | 0.0082368 | 0.2272135 | 0.0363 | 0.971 | 0.01062702  | count | 1 |
| YPEL2       | 0.0076682 | 0.1031627 | 0.0743 | 0.941 | 0.010661603 | count | 1 |
| PTPRU       | 0.010863  | 0.3368388 | 0.0322 | 0.974 | 0.01079314  | count | 1 |
| SLC26A4-AS1 | 0.104701  | 0.7585703 | 0.138  | 0.89  | 0.0108      | count | 1 |
| ABCC5       | 0.0099971 | 0.2521875 | 0.0396 | 0.968 | 0.010819785 | count | 1 |
| ADH5        | 0.0075916 | 0.038716  | 0.1961 | 0.845 | 0.010867842 | count | 1 |
| YWHAG       | 0.0079371 | 0.1009842 | 0.0786 | 0.937 | 0.010960981 | count | 1 |
| KDM3B       | 0.0086228 | 0.1796357 | 0.048  | 0.962 | 0.011004967 | count | 1 |
| CROCC       | 0.0090092 | 0.1974787 | 0.0456 | 0.964 | 0.01100811  | count | 1 |
| PALM2       | 0.0184228 | 0.6287002 | 0.0293 | 0.977 | 0.011032091 | count | 1 |
| BAHCC1      | 0.0092688 | 0.2378405 | 0.039  | 0.969 | 0.01104345  | count | 1 |
| RNF31       | 0.0570238 | 0.7139058 | 0.0799 | 0.936 | 0.011104814 | count | 1 |
| AIFM3       | 0.0570238 | 0.7165881 | 0.0796 | 0.937 | 0.011104814 | count | 1 |
| SCYL1       | 0.0085204 | 0.1251331 | 0.0681 | 0.946 | 0.011137594 | count | 1 |
| RNF41       | 0.0086656 | 0.1343313 | 0.0645 | 0.949 | 0.011157647 | count | 1 |
| AC105277.1  | 0.0200486 | 0.6820557 | 0.0294 | 0.977 | 0.011184658 | count | 1 |
| DHRS12      | 0.0088421 | 0.2072656 | 0.0427 | 0.966 | 0.011229056 | count | 1 |
| OCIAD1      | 0.0080365 | 0.0451488 | 0.178  | 0.859 | 0.011475355 | count | 1 |
| NOP2        | 0.0591146 | 0.6150223 | 0.0961 | 0.923 | 0.011506262 | count | 1 |

|            |           |           |        |        |             |       |   |
|------------|-----------|-----------|--------|--------|-------------|-------|---|
| IMPAD1     | 0.0087286 | 0.0995702 | 0.0877 | 0.93   | 0.011659255 | count | 1 |
| MYOZ1      | 0.0087936 | 0.1614155 | 0.0545 | 0.957  | 0.011826678 | count | 1 |
| LRRRC69    | 0.1150625 | 0.5683492 | 0.2025 | 0.84   | 0.01183698  | count | 1 |
| GLYCTK     | 0.0257302 | 0.4528937 | 0.0568 | 0.955  | 0.011905405 | count | 1 |
| IFI35      | 0.0088768 | 0.0948556 | 0.0936 | 0.925  | 0.01208857  | count | 1 |
| GALNT2     | 0.0088443 | 0.1114604 | 0.0793 | 0.937  | 0.012133158 | count | 1 |
| AL160153.1 | 0.0155324 | 0.7116274 | 0.0218 | 0.983  | 0.012146463 | count | 1 |
| PSPN       | 0.0262944 | 0.6193417 | 0.0425 | 0.966  | 0.012165194 | count | 1 |
| RPLP0      | 0.0084625 | 0.0268701 | 0.3149 | 0.753  | 0.012185566 | count | 1 |
| MICALL2    | 0.0103302 | 0.2690224 | 0.0384 | 0.969  | 0.012233976 | count | 1 |
| FUBP3      | 0.0098173 | 0.1339682 | 0.0733 | 0.942  | 0.012249778 | count | 1 |
| CXorf38    | 0.0098612 | 0.2100568 | 0.0469 | 0.963  | 0.012324842 | count | 1 |
| HIKESHI    | 0.0088176 | 0.0779437 | 0.1131 | 0.91   | 0.012328281 | count | 1 |
| AC008906.1 | 0.02675   | 0.9326616 | 0.0287 | 0.977  | 0.012374938 | count | 1 |
| PUS1       | 0.0159291 | 0.3168557 | 0.0503 | 0.96   | 0.012456073 | count | 1 |
| P3H1       | 0.010174  | 0.1564241 | 0.065  | 0.948  | 0.012509458 | count | 1 |
| INTS14     | 0.0110288 | 0.2256831 | 0.0489 | 0.961  | 0.012535324 | count | 1 |
| SRP72      | 0.0089373 | 0.059959  | 0.1491 | 0.882  | 0.01262224  | count | 1 |
| NAB2       | 0.0109143 | 0.1864582 | 0.0585 | 0.953  | 0.012710554 | count | 1 |
| MOV10      | 0.0182645 | 0.3938059 | 0.0464 | 0.963  | 0.012810873 | count | 1 |
| PPP2R1A    | 0.0091931 | 0.0819499 | 0.1122 | 0.911  | 0.012817357 | count | 1 |
| TRIT1      | 0.0130232 | 0.3414276 | 0.0381 | 0.97   | 0.013077537 | count | 1 |
| HAUS3      | 0.0114081 | 0.2820687 | 0.0404 | 0.968  | 0.01307943  | count | 1 |
| SGSM3      | 0.0477089 | 0.4703406 | 0.1014 | 0.919  | 0.013082028 | count | 1 |
| ZNF136     | 0.0107222 | 0.1723449 | 0.0622 | 0.95   | 0.013183209 | count | 1 |
| MRGPRF-AS1 | 0.0226029 | 0.4284864 | 0.0528 | 0.958  | 0.013526279 | count | 1 |
| RNASE4     | 0.0134219 | 0.2812578 | 0.0477 | 0.962  | 0.01361542  | count | 1 |
| TBX3       | 0.0134219 | 0.3027784 | 0.0443 | 0.965  | 0.01361542  | count | 1 |
| CDC26      | 0.0097176 | 0.0826609 | 0.1176 | 0.906  | 0.013621489 | count | 1 |
| RCN3       | 0.0097198 | 0.0670871 | 0.1449 | 0.885  | 0.013640852 | count | 1 |
| SMN2       | 0.0396426 | 0.3768809 | 0.1052 | 0.916  | 0.01365291  | count | 1 |
| MATN1-AS1  | 0.0703333 | 0.619866  | 0.1135 | 0.91   | 0.013653385 | count | 1 |
| SOX7       | 0.0711791 | 0.928008  | 0.0767 | 0.939  | 0.013814783 | count | 1 |
| C5orf58    | 0.0272065 | 0.7239351 | 0.0376 | 0.97   | 0.013937735 | count | 1 |
| GM2A       | 0.0119307 | 0.2150835 | 0.0555 | 0.956  | 0.013943282 | count | 1 |
| SPATA5L1   | 0.0148551 | 0.3141905 | 0.0473 | 0.962  | 0.014026309 | count | 1 |
| TCEA1      | 0.0098466 | 0.0479843 | 0.2052 | 0.8374 | 0.014039306 | count | 1 |
| FAM49A     | 0.0132586 | 0.2916537 | 0.0455 | 0.964  | 0.014045572 | count | 1 |
| POLDIP3    | 0.0112249 | 0.1560345 | 0.0719 | 0.943  | 0.014051185 | count | 1 |
| CCDC34     | 0.0109212 | 0.1719161 | 0.0635 | 0.949  | 0.014156168 | count | 1 |
| LRRRC66    | 0.0518025 | 0.7961463 | 0.0651 | 0.948  | 0.014191615 | count | 1 |
| Z97832.2   | 0.0518025 | 0.9314596 | 0.0556 | 0.956  | 0.014191615 | count | 1 |
| NFATC2IP   | 0.0114181 | 0.145184  | 0.0786 | 0.937  | 0.014197801 | count | 1 |
| AC008608.2 | 0.0136575 | 0.4148096 | 0.0329 | 0.974  | 0.014238425 | count | 1 |
| AC005165.1 | 0.0415957 | 0.4693939 | 0.0886 | 0.929  | 0.014319737 | count | 1 |

|            |           |           |        |       |             |       |   |
|------------|-----------|-----------|--------|-------|-------------|-------|---|
| MRPS18B    | 0.0102968 | 0.0819252 | 0.1257 | 0.9   | 0.014375148 | count | 1 |
| RMDN1      | 0.0109367 | 0.1289245 | 0.0848 | 0.932 | 0.014503504 | count | 1 |
| TAX1BP3    | 0.0105519 | 0.0929331 | 0.1135 | 0.91  | 0.01451914  | count | 1 |
| MPP3       | 0.0360347 | 0.5007207 | 0.072  | 0.943 | 0.014649571 | count | 1 |
| TRIM47     | 0.0106092 | 0.0873501 | 0.1215 | 0.903 | 0.014674149 | count | 1 |
| COA7       | 0.0146368 | 0.2715526 | 0.0539 | 0.957 | 0.014695917 | count | 1 |
| PDXDC1     | 0.0119792 | 0.1529311 | 0.0783 | 0.938 | 0.014841938 | count | 1 |
| C16orf46   | 0.07694   | 0.6296071 | 0.1222 | 0.903 | 0.014912332 | count | 1 |
| TBKBP1     | 0.0185567 | 0.4421829 | 0.042  | 0.967 | 0.014933663 | count | 1 |
| RYK        | 0.0109705 | 0.1095385 | 0.1002 | 0.92  | 0.014987687 | count | 1 |
| AAMP       | 0.0108791 | 0.0809995 | 0.1343 | 0.893 | 0.015014099 | count | 1 |
| CNOT6L     | 0.0113913 | 0.1433459 | 0.0795 | 0.937 | 0.01503475  | count | 1 |
| ST8SIA1    | 0.0165018 | 0.3303763 | 0.0499 | 0.96  | 0.015104156 | count | 1 |
| FBXO21     | 0.0111395 | 0.1067071 | 0.1044 | 0.917 | 0.01512763  | count | 1 |
| BCAS2      | 0.0108619 | 0.0820327 | 0.1324 | 0.895 | 0.015138178 | count | 1 |
| MNDA       | 0.019447  | 0.3357204 | 0.0579 | 0.954 | 0.015200325 | count | 1 |
| DDX21      | 0.0108759 | 0.0672651 | 0.1617 | 0.872 | 0.015296299 | count | 1 |
| AC109347.1 | 0.079496  | 0.5557066 | 0.1431 | 0.886 | 0.015398292 | count | 1 |
| AC124016.2 | 0.079496  | 0.5910212 | 0.1345 | 0.893 | 0.015398292 | count | 1 |
| ROBO1      | 0.0135195 | 0.1704861 | 0.0793 | 0.937 | 0.015742372 | count | 1 |
| INF2       | 0.0119755 | 0.1586769 | 0.0755 | 0.94  | 0.015775286 | count | 1 |
| NHLRC2     | 0.0120788 | 0.1475976 | 0.0818 | 0.935 | 0.015787594 | count | 1 |
| OSER1      | 0.0115099 | 0.1138203 | 0.1011 | 0.919 | 0.015825739 | count | 1 |
| SH2B2      | 0.030922  | 0.5860793 | 0.0528 | 0.958 | 0.015830831 | count | 1 |
| CASC3      | 0.012299  | 0.1321198 | 0.0931 | 0.926 | 0.015834264 | count | 1 |
| AC100786.1 | 0.0462609 | 0.6021073 | 0.0768 | 0.939 | 0.015910306 | count | 1 |
| AGL        | 0.0115794 | 0.1246241 | 0.0929 | 0.926 | 0.015918366 | count | 1 |
| RPUSD1     | 0.0134342 | 0.1915927 | 0.0701 | 0.944 | 0.015956098 | count | 1 |
| BEST1      | 0.03127   | 0.3599341 | 0.0869 | 0.931 | 0.016008014 | count | 1 |
| FNDC5      | 0.0130806 | 0.2191231 | 0.0597 | 0.952 | 0.016048451 | count | 1 |
| ENTR1      | 0.0132972 | 0.1652906 | 0.0804 | 0.936 | 0.016055401 | count | 1 |
| PHRF1      | 0.0145333 | 0.242848  | 0.0598 | 0.952 | 0.016108045 | count | 1 |
| INTS9      | 0.0190611 | 0.3456456 | 0.0551 | 0.956 | 0.016131264 | count | 1 |
| ALKBH3     | 0.0125864 | 0.135539  | 0.0929 | 0.926 | 0.016153011 | count | 1 |
| WDFY1      | 0.0123147 | 0.1479909 | 0.0832 | 0.934 | 0.016200484 | count | 1 |
| RAB18      | 0.0117029 | 0.0813203 | 0.1439 | 0.886 | 0.016239245 | count | 1 |
| TAOK3      | 0.0120788 | 0.100797  | 0.1198 | 0.905 | 0.01655623  | count | 1 |
| MPHOSPH8   | 0.0117044 | 0.0505316 | 0.2316 | 0.817 | 0.016728307 | count | 1 |
| ZNF337-AS1 | 0.0221532 | 0.4825427 | 0.0459 | 0.963 | 0.016760937 | count | 1 |
| AP001528.1 | 0.0239414 | 0.3999629 | 0.0599 | 0.952 | 0.016779398 | count | 1 |
| MAP3K1     | 0.0186716 | 0.244724  | 0.0763 | 0.939 | 0.016794053 | count | 1 |
| AC068620.1 | 0.1655115 | 0.8678805 | 0.1907 | 0.849 | 0.016803435 | count | 1 |
| SLC2A5     | 0.1655115 | 0.8766229 | 0.1888 | 0.85  | 0.016803435 | count | 1 |
| CFHR3      | 0.1655115 | 0.9610876 | 0.1722 | 0.863 | 0.016803435 | count | 1 |
| GPX7       | 0.0124796 | 0.1299249 | 0.0961 | 0.923 | 0.016879338 | count | 1 |

|            |           |           |        |       |             |       |   |
|------------|-----------|-----------|--------|-------|-------------|-------|---|
| MRPL24     | 0.0122939 | 0.089048  | 0.1381 | 0.89  | 0.016939026 | count | 1 |
| RASGRP2    | 0.0131843 | 0.1407736 | 0.0937 | 0.925 | 0.017133966 | count | 1 |
| UNC13B     | 0.014473  | 0.3164622 | 0.0457 | 0.964 | 0.017136818 | count | 1 |
| SDAD1      | 0.0124908 | 0.0826955 | 0.151  | 0.88  | 0.017308813 | count | 1 |
| PDS5B      | 0.0130157 | 0.1154364 | 0.1128 | 0.91  | 0.017454068 | count | 1 |
| LRRC59     | 0.0131613 | 0.1048549 | 0.1255 | 0.9   | 0.017527341 | count | 1 |
| CANX       | 0.0124703 | 0.0474535 | 0.2628 | 0.793 | 0.017705602 | count | 1 |
| CHRAC1     | 0.0130419 | 0.0934185 | 0.1396 | 0.889 | 0.017725744 | count | 1 |
| GPR137     | 0.0156108 | 0.2175726 | 0.0717 | 0.943 | 0.017738548 | count | 1 |
| ZFYVE9     | 0.0147009 | 0.1577551 | 0.0932 | 0.926 | 0.017749164 | count | 1 |
| ZMIZ2      | 0.0160408 | 0.2421391 | 0.0662 | 0.947 | 0.017777204 | count | 1 |
| LINC00278  | 0.0652735 | 0.8887023 | 0.0734 | 0.941 | 0.017828464 | count | 1 |
| POLI       | 0.0141892 | 0.1751445 | 0.081  | 0.935 | 0.01786876  | count | 1 |
| ETNK1      | 0.0134627 | 0.157251  | 0.0856 | 0.932 | 0.01790089  | count | 1 |
| AC005363.2 | 0.0323182 | 0.7371179 | 0.0438 | 0.965 | 0.017992704 | count | 1 |
| DACT3-AS1  | 0.0352089 | 0.4626513 | 0.0761 | 0.939 | 0.018011953 | count | 1 |
| INTS12     | 0.0141556 | 0.1515838 | 0.0934 | 0.926 | 0.018278206 | count | 1 |
| COL26A1    | 0.0952007 | 0.7736334 | 0.1231 | 0.902 | 0.018370775 | count | 1 |
| SMIM2-AS1  | 0.0952007 | 0.7736334 | 0.1231 | 0.902 | 0.018370775 | count | 1 |
| FAM83G     | 0.0952007 | 0.7736334 | 0.1231 | 0.902 | 0.018370775 | count | 1 |
| AL136038.5 | 0.0952007 | 0.9269506 | 0.1027 | 0.918 | 0.018370775 | count | 1 |
| RNF43      | 0.0398301 | 0.5474698 | 0.0728 | 0.942 | 0.018381362 | count | 1 |
| TERF1      | 0.0134685 | 0.0857917 | 0.157  | 0.875 | 0.018518289 | count | 1 |
| MXRA7      | 0.0129937 | 0.039684  | 0.3274 | 0.743 | 0.018575234 | count | 1 |
| TPP2       | 0.0146232 | 0.1448647 | 0.1009 | 0.92  | 0.018614289 | count | 1 |
| AKAP8L     | 0.0143127 | 0.1354675 | 0.1057 | 0.916 | 0.018631444 | count | 1 |
| CC2D1B     | 0.0234101 | 0.3366301 | 0.0695 | 0.945 | 0.018828491 | count | 1 |
| MRPS22     | 0.0136996 | 0.0961227 | 0.1425 | 0.887 | 0.018829044 | count | 1 |
| WAS        | 0.1882233 | 0.8141833 | 0.2312 | 0.817 | 0.018994508 | count | 1 |
| CASP8      | 0.0199135 | 0.3038622 | 0.0655 | 0.948 | 0.019057197 | count | 1 |
| PARP15     | 0.0699854 | 0.9035895 | 0.0775 | 0.938 | 0.019095291 | count | 1 |
| PANX2      | 0.0699854 | 0.9887756 | 0.0708 | 0.944 | 0.019095291 | count | 1 |
| ULK2       | 0.0161961 | 0.229388  | 0.0706 | 0.944 | 0.019175454 | count | 1 |
| PFAS       | 0.0262916 | 0.5133645 | 0.0512 | 0.959 | 0.019179331 | count | 1 |
| GLUD2      | 0.0999938 | 0.7138968 | 0.1401 | 0.889 | 0.019273369 | count | 1 |
| ZNF492     | 0.0999938 | 0.8975967 | 0.1114 | 0.911 | 0.019273369 | count | 1 |
| NFATC1     | 0.0188874 | 0.2826323 | 0.0668 | 0.947 | 0.019336649 | count | 1 |
| DNAJB2     | 0.0151393 | 0.135855  | 0.1114 | 0.911 | 0.019340608 | count | 1 |
| MRPS31     | 0.0143871 | 0.1055284 | 0.1363 | 0.892 | 0.019445775 | count | 1 |
| LYPLAL1    | 0.0144238 | 0.1103999 | 0.1307 | 0.896 | 0.019514718 | count | 1 |
| LEO1       | 0.0150742 | 0.1133878 | 0.1329 | 0.894 | 0.019554683 | count | 1 |
| ISOC2      | 0.0142836 | 0.0955328 | 0.1495 | 0.881 | 0.019609196 | count | 1 |
| SNX31      | 0.1952013 | 0.6463593 | 0.302  | 0.763 | 0.019662104 | count | 1 |
| CSNK1G1    | 0.0172387 | 0.2588152 | 0.0666 | 0.947 | 0.019673567 | count | 1 |
| SF3B2      | 0.0139628 | 0.0517239 | 0.2699 | 0.787 | 0.019800929 | count | 1 |

|            |           |           |        |       |             |       |   |
|------------|-----------|-----------|--------|-------|-------------|-------|---|
| SZT2       | 0.0175107 | 0.4012316 | 0.0436 | 0.965 | 0.019803754 | count | 1 |
| PGAM1      | 0.0139204 | 0.0443503 | 0.3139 | 0.754 | 0.019814161 | count | 1 |
| PYGO1      | 0.0205357 | 0.283441  | 0.0725 | 0.942 | 0.019909344 | count | 1 |
| CDIPT      | 0.0143604 | 0.0723456 | 0.1985 | 0.843 | 0.020033568 | count | 1 |
| AC008622.2 | 0.1994457 | 0.6295775 | 0.3168 | 0.751 | 0.020066884 | count | 1 |
| UBE2O      | 0.018173  | 0.3679642 | 0.0494 | 0.961 | 0.020137509 | count | 1 |
| PDZRN3     | 0.0177382 | 0.1712778 | 0.1036 | 0.918 | 0.020153438 | count | 1 |
| ARHGAP29   | 0.0144778 | 0.0633358 | 0.2286 | 0.819 | 0.020305032 | count | 1 |
| CAHM       | 0.0340114 | 0.4379804 | 0.0777 | 0.938 | 0.020316471 | count | 1 |
| MRNIP      | 0.0150656 | 0.1496464 | 0.1007 | 0.92  | 0.020327536 | count | 1 |
| SDF2       | 0.0145008 | 0.0753177 | 0.1925 | 0.847 | 0.02034237  | count | 1 |
| BRSK2      | 0.0340603 | 0.418626  | 0.0814 | 0.935 | 0.020345522 | count | 1 |
| SLC7A5     | 0.0341536 | 0.5641609 | 0.0605 | 0.952 | 0.020400949 | count | 1 |
| AC093462.1 | 0.0341536 | 0.5954626 | 0.0574 | 0.954 | 0.020400949 | count | 1 |
| SCOC       | 0.0145588 | 0.0636679 | 0.2287 | 0.819 | 0.020408139 | count | 1 |
| CCNC       | 0.0155626 | 0.1181304 | 0.1317 | 0.895 | 0.02041492  | count | 1 |
| RAB7B      | 0.0192986 | 0.2404182 | 0.0803 | 0.936 | 0.020587307 | count | 1 |
| NPRL2      | 0.0167214 | 0.1575899 | 0.1061 | 0.916 | 0.020595612 | count | 1 |
| USP28      | 0.0176821 | 0.2128648 | 0.0831 | 0.934 | 0.020658757 | count | 1 |
| OCA2       | 0.0297339 | 0.5333388 | 0.0558 | 0.956 | 0.020822174 | count | 1 |
| TMEM120B   | 0.0253773 | 0.3259267 | 0.0779 | 0.938 | 0.020951368 | count | 1 |
| PDGFRB     | 0.0148445 | 0.0756258 | 0.1963 | 0.844 | 0.020986503 | count | 1 |
| CHUK       | 0.0178599 | 0.2720276 | 0.0657 | 0.948 | 0.021143603 | count | 1 |
| AC008741.2 | 0.0250705 | 0.5832035 | 0.043  | 0.966 | 0.021202632 | count | 1 |
| NET1       | 0.0152758 | 0.0721934 | 0.2116 | 0.832 | 0.02132347  | count | 1 |
| CYFIP1     | 0.0157429 | 0.1236859 | 0.1273 | 0.899 | 0.021458912 | count | 1 |
| ZNF763     | 0.0626992 | 0.6235517 | 0.1006 | 0.92  | 0.021489701 | count | 1 |
| DISC1      | 0.0626992 | 0.7072303 | 0.0887 | 0.929 | 0.021489701 | count | 1 |
| TMEM31     | 0.0628541 | 0.8454402 | 0.0743 | 0.941 | 0.021542088 | count | 1 |
| ANKRD2     | 0.0628541 | 0.8489386 | 0.074  | 0.941 | 0.021542088 | count | 1 |
| RNF32      | 0.0628541 | 0.9858339 | 0.0638 | 0.949 | 0.021542088 | count | 1 |
| CD1D       | 0.0628541 | 1.043079  | 0.0603 | 0.952 | 0.021542088 | count | 1 |
| PCOLCE-AS1 | 0.0628541 | 1.046091  | 0.0601 | 0.952 | 0.021542088 | count | 1 |
| HSP90AA1   | 0.0150786 | 0.0278198 | 0.542  | 0.588 | 0.021680678 | count | 1 |
| CTNNA1     | 0.0154227 | 0.0652695 | 0.2363 | 0.813 | 0.021701325 | count | 1 |
| COPS3      | 0.0159701 | 0.0982974 | 0.1625 | 0.871 | 0.021779507 | count | 1 |
| ZNF75D     | 0.0311968 | 0.3390444 | 0.092  | 0.927 | 0.021842127 | count | 1 |
| PABPC4L    | 0.0258755 | 0.5088086 | 0.0509 | 0.959 | 0.021881449 | count | 1 |
| ABCF1      | 0.0159171 | 0.088412  | 0.18   | 0.857 | 0.021888255 | count | 1 |
| BX284668.5 | 0.0176102 | 0.2394088 | 0.0736 | 0.941 | 0.022073992 | count | 1 |
| MED23      | 0.0185475 | 0.201405  | 0.0921 | 0.927 | 0.022089008 | count | 1 |
| CEP70      | 0.0184737 | 0.190005  | 0.0972 | 0.923 | 0.022125739 | count | 1 |
| CWC15      | 0.0157766 | 0.0714111 | 0.2209 | 0.825 | 0.022161938 | count | 1 |
| CDK10      | 0.018307  | 0.1991938 | 0.0919 | 0.927 | 0.022207691 | count | 1 |
| TARDBP     | 0.0173905 | 0.1220138 | 0.1425 | 0.887 | 0.022214982 | count | 1 |

|            |           |           |        |       |             |       |   |
|------------|-----------|-----------|--------|-------|-------------|-------|---|
| PHF8       | 0.02324   | 0.3053857 | 0.0761 | 0.939 | 0.022233872 | count | 1 |
| ZNF793-AS1 | 0.035098  | 0.429214  | 0.0818 | 0.935 | 0.022266752 | count | 1 |
| PHLDB1     | 0.0164956 | 0.1444983 | 0.1142 | 0.909 | 0.022386301 | count | 1 |
| MYORG      | 0.0827327 | 0.635025  | 0.1303 | 0.896 | 0.022508749 | count | 1 |
| ABTB2      | 0.0336954 | 0.3580626 | 0.0941 | 0.925 | 0.022528738 | count | 1 |
| RHOBTB2    | 0.0193178 | 0.2812915 | 0.0687 | 0.945 | 0.022567906 | count | 1 |
| RABEP1     | 0.0166751 | 0.1116131 | 0.1494 | 0.881 | 0.022609512 | count | 1 |
| ARRDC1-AS1 | 0.0197311 | 0.2390637 | 0.0825 | 0.934 | 0.022611286 | count | 1 |
| MT-CYB     | 0.0156846 | 0.020398  | 0.7689 | 0.442 | 0.022620546 | count | 1 |
| P4HTM      | 0.0164764 | 0.096833  | 0.1702 | 0.865 | 0.022669412 | count | 1 |
| AL021408.1 | 0.2273245 | 0.7634514 | 0.2978 | 0.766 | 0.022701434 | count | 1 |
| AMPD3      | 0.2273245 | 0.8674333 | 0.2621 | 0.793 | 0.022701434 | count | 1 |
| MED15      | 0.0187443 | 0.2003134 | 0.0936 | 0.925 | 0.022791088 | count | 1 |
| TEX261     | 0.0180917 | 0.1431905 | 0.1263 | 0.899 | 0.02281317  | count | 1 |
| ABHD4      | 0.0201755 | 0.2136944 | 0.0944 | 0.925 | 0.022813939 | count | 1 |
| PIH1D1     | 0.0164216 | 0.0794753 | 0.2066 | 0.836 | 0.02286559  | count | 1 |
| PPP1R13B   | 0.0327893 | 0.3332939 | 0.0984 | 0.922 | 0.022951956 | count | 1 |
| AC022706.1 | 0.0279782 | 0.4947687 | 0.0565 | 0.955 | 0.023091645 | count | 1 |
| SARM1      | 0.0273277 | 0.340005  | 0.0804 | 0.936 | 0.023105702 | count | 1 |
| AC009403.1 | 0.0296155 | 0.3356074 | 0.0882 | 0.93  | 0.023118931 | count | 1 |
| FAHD2B     | 0.0191854 | 0.1926046 | 0.0996 | 0.921 | 0.023216369 | count | 1 |
| ALMS1      | 0.0268765 | 0.2640709 | 0.1018 | 0.919 | 0.023231454 | count | 1 |
| WARS2      | 0.0181307 | 0.1445758 | 0.1254 | 0.9   | 0.023239085 | count | 1 |
| TAF12      | 0.0169555 | 0.0922055 | 0.1839 | 0.854 | 0.02326736  | count | 1 |
| RAD9A      | 0.0199253 | 0.2312987 | 0.0861 | 0.931 | 0.023276881 | count | 1 |
| CRACR2B    | 0.030922  | 0.4469017 | 0.0692 | 0.945 | 0.023368741 | count | 1 |
| TBC1D14    | 0.0208755 | 0.203446  | 0.1026 | 0.918 | 0.023374757 | count | 1 |
| DPP3       | 0.0368687 | 0.2918303 | 0.1263 | 0.899 | 0.02338376  | count | 1 |
| PSMD6      | 0.0169024 | 0.0862418 | 0.196  | 0.845 | 0.023414918 | count | 1 |
| SELENOK    | 0.0164366 | 0.0439874 | 0.3737 | 0.709 | 0.02345711  | count | 1 |
| ZNF853     | 0.0245631 | 0.2476706 | 0.0992 | 0.921 | 0.023805332 | count | 1 |
| TOR1AIP2   | 0.0174451 | 0.0917725 | 0.1901 | 0.849 | 0.024085022 | count | 1 |
| BRD2       | 0.0174509 | 0.1043875 | 0.1672 | 0.867 | 0.0241455   | count | 1 |
| SRRM1      | 0.0169648 | 0.0451324 | 0.3759 | 0.707 | 0.02418359  | count | 1 |
| YWHAQ      | 0.0170213 | 0.0446695 | 0.3811 | 0.703 | 0.024248808 | count | 1 |
| AC068338.2 | 0.0363711 | 0.5184423 | 0.0702 | 0.944 | 0.024308151 | count | 1 |
| PLCD4      | 0.2448162 | 0.7472089 | 0.3276 | 0.743 | 0.024332956 | count | 1 |
| SMAP2      | 0.0202502 | 0.185783  | 0.109  | 0.913 | 0.024380882 | count | 1 |
| TRAPPC6A   | 0.019047  | 0.1526395 | 0.1248 | 0.901 | 0.024517091 | count | 1 |
| RCC1       | 0.038723  | 0.4138595 | 0.0936 | 0.925 | 0.024552844 | count | 1 |
| FKTN       | 0.0233935 | 0.3386279 | 0.0691 | 0.945 | 0.024571471 | count | 1 |
| PPP4C      | 0.0176912 | 0.0932242 | 0.1898 | 0.849 | 0.024620691 | count | 1 |
| TAF1       | 0.0211325 | 0.2075822 | 0.1018 | 0.919 | 0.024685596 | count | 1 |
| SCUBE2     | 0.248714  | 0.6862635 | 0.3624 | 0.717 | 0.024694278 | count | 1 |
| GMIP       | 0.1291051 | 0.6316326 | 0.2044 | 0.838 | 0.024708872 | count | 1 |

|              |           |           |        |        |             |       |   |
|--------------|-----------|-----------|--------|--------|-------------|-------|---|
| RHBDL2       | 0.1291051 | 0.6576483 | 0.1963 | 0.844  | 0.024708872 | count | 1 |
| PSIP1        | 0.0173    | 0.0446876 | 0.3871 | 0.6987 | 0.024721169 | count | 1 |
| CAMKK1       | 0.0724728 | 0.5609197 | 0.1292 | 0.897  | 0.024788359 | count | 1 |
| GTF3C2       | 0.0240398 | 0.269815  | 0.0891 | 0.929  | 0.024827071 | count | 1 |
| SSU72        | 0.0177206 | 0.071147  | 0.2491 | 0.803  | 0.024973501 | count | 1 |
| MALAT1       | 0.0173277 | 0.0274896 | 0.6303 | 0.5285 | 0.024997742 | count | 1 |
| POP5         | 0.0181265 | 0.0948756 | 0.1911 | 0.848  | 0.025033162 | count | 1 |
| AL137026.1   | 0.0624398 | 0.544807  | 0.1146 | 0.909  | 0.025252299 | count | 1 |
| UBE2Q1       | 0.0190033 | 0.1346164 | 0.1412 | 0.888  | 0.025265052 | count | 1 |
| HLA-DQB1     | 0.0242797 | 0.3135134 | 0.0774 | 0.938  | 0.025292152 | count | 1 |
| LINC01139    | 0.2562621 | 0.8407535 | 0.3048 | 0.761  | 0.025391611 | count | 1 |
| KYAT3        | 0.0204673 | 0.1589641 | 0.1288 | 0.898  | 0.025485443 | count | 1 |
| CADM4        | 0.05561   | 0.4620393 | 0.1204 | 0.904  | 0.025588072 | count | 1 |
| KATNBL1      | 0.0187591 | 0.1187109 | 0.158  | 0.874  | 0.025619395 | count | 1 |
| AL121672.3   | 0.0952007 | 0.7187951 | 0.1324 | 0.895  | 0.025827926 | count | 1 |
| TMEM161B-AS1 | 0.0219546 | 0.2079287 | 0.1056 | 0.916  | 0.025904338 | count | 1 |
| RRP8         | 0.0205471 | 0.156819  | 0.131  | 0.896  | 0.025907182 | count | 1 |
| AC093772.1   | 0.1359728 | 0.8314621 | 0.1635 | 0.87   | 0.0259795   | count | 1 |
| AL078459.1   | 0.1359728 | 0.9781247 | 0.139  | 0.889  | 0.0259795   | count | 1 |
| PHF5A        | 0.0187401 | 0.0993578 | 0.1886 | 0.85   | 0.026014665 | count | 1 |
| SEMA5A       | 0.0187226 | 0.1261648 | 0.1484 | 0.882  | 0.026076662 | count | 1 |
| LPAR6        | 0.0195546 | 0.1402073 | 0.1395 | 0.889  | 0.026126637 | count | 1 |
| ZNF700       | 0.0568691 | 0.4774228 | 0.1191 | 0.905  | 0.026161235 | count | 1 |
| TRADD        | 0.019192  | 0.1041008 | 0.1844 | 0.854  | 0.026414135 | count | 1 |
| CCDC93       | 0.0207508 | 0.147142  | 0.141  | 0.888  | 0.026504717 | count | 1 |
| TMC7         | 0.0577167 | 0.7940703 | 0.0727 | 0.942  | 0.026546918 | count | 1 |
| AC123768.3   | 0.0481259 | 0.7621218 | 0.0631 | 0.95   | 0.026722151 | count | 1 |
| ITPR2        | 0.0199638 | 0.1551237 | 0.1287 | 0.898  | 0.026833624 | count | 1 |
| RPS6KA5      | 0.0274412 | 0.2459958 | 0.1116 | 0.911  | 0.026915152 | count | 1 |
| TMEM139      | 0.0529611 | 0.7503018 | 0.0706 | 0.944  | 0.027008362 | count | 1 |
| MGAT3        | 0.0529611 | 0.7503018 | 0.0706 | 0.944  | 0.027008362 | count | 1 |
| MTCH2        | 0.0198665 | 0.1197597 | 0.1659 | 0.868  | 0.027042819 | count | 1 |
| IRF2BP1      | 0.0224807 | 0.1708433 | 0.1316 | 0.895  | 0.027063638 | count | 1 |
| RBM22        | 0.0195553 | 0.0818579 | 0.2389 | 0.811  | 0.027092718 | count | 1 |
| AL359091.4   | 0.1424397 | 0.7630067 | 0.1867 | 0.852  | 0.02717189  | count | 1 |
| MRGPRF       | 0.0195649 | 0.0856932 | 0.2283 | 0.819  | 0.027175063 | count | 1 |
| SCML1        | 0.0213536 | 0.1704782 | 0.1253 | 0.9    | 0.027175745 | count | 1 |
| ZNF599       | 0.0235116 | 0.236334  | 0.0995 | 0.921  | 0.027363004 | count | 1 |
| MED10        | 0.0195046 | 0.065892  | 0.296  | 0.767  | 0.027462663 | count | 1 |
| SAT1         | 0.0193451 | 0.071995  | 0.2687 | 0.788  | 0.027519441 | count | 1 |
| LLPH         | 0.0202722 | 0.1051872 | 0.1927 | 0.847  | 0.027525977 | count | 1 |
| XKR6         | 0.2797692 | 0.5999643 | 0.4663 | 0.641  | 0.027543639 | count | 1 |
| ZNF316       | 0.0284833 | 0.3446382 | 0.0826 | 0.934  | 0.027594886 | count | 1 |
| DHX36        | 0.0195584 | 0.0679661 | 0.2878 | 0.774  | 0.027650991 | count | 1 |
| MAP9         | 0.0197069 | 0.0838136 | 0.2351 | 0.814  | 0.027697417 | count | 1 |

|            |           |           |        |       |             |       |   |
|------------|-----------|-----------|--------|-------|-------------|-------|---|
| CBR4       | 0.0225587 | 0.1798903 | 0.1254 | 0.9   | 0.027778899 | count | 1 |
| ENPP4      | 0.0216655 | 0.14651   | 0.1479 | 0.882 | 0.027797267 | count | 1 |
| GFM2       | 0.0262926 | 0.2176799 | 0.1208 | 0.904 | 0.027826943 | count | 1 |
| SREK1IP1   | 0.0198934 | 0.0961365 | 0.2069 | 0.836 | 0.027871912 | count | 1 |
| AC008079.2 | 0.0692225 | 0.665676  | 0.104  | 0.917 | 0.027957572 | count | 1 |
| PAN3-AS1   | 0.146744  | 0.5057995 | 0.2901 | 0.772 | 0.027963333 | count | 1 |
| SCRN1      | 0.0208513 | 0.1306401 | 0.1596 | 0.873 | 0.0279923   | count | 1 |
| RAB6A      | 0.020425  | 0.1053834 | 0.1938 | 0.846 | 0.028027122 | count | 1 |
| CNTD1      | 0.2867706 | 0.7923017 | 0.3619 | 0.717 | 0.028178836 | count | 1 |
| PORCN      | 0.0299214 | 0.2651748 | 0.1128 | 0.91  | 0.028211952 | count | 1 |
| TAF9       | 0.0207823 | 0.0970709 | 0.2141 | 0.83  | 0.028446285 | count | 1 |
| TRIM4      | 0.0214688 | 0.1303882 | 0.1647 | 0.869 | 0.028479773 | count | 1 |
| ZNF677     | 0.022197  | 0.1383565 | 0.1604 | 0.873 | 0.028509373 | count | 1 |
| FAM213A    | 0.0206605 | 0.1044135 | 0.1979 | 0.843 | 0.028659454 | count | 1 |
| ORMDL1     | 0.0203797 | 0.0652988 | 0.3121 | 0.755 | 0.028720467 | count | 1 |
| GTF2I      | 0.0204684 | 0.0740616 | 0.2764 | 0.782 | 0.028735212 | count | 1 |
| P2RY11     | 0.0564122 | 0.573168  | 0.0984 | 0.922 | 0.028750587 | count | 1 |
| RINL       | 0.0296821 | 0.2639074 | 0.1125 | 0.91  | 0.028753193 | count | 1 |
| KIAA0586   | 0.0230008 | 0.147467  | 0.156  | 0.876 | 0.029158397 | count | 1 |
| CENPK      | 0.0856665 | 0.6063025 | 0.1413 | 0.888 | 0.029219134 | count | 1 |
| AP001160.2 | 0.0856665 | 0.6057489 | 0.1414 | 0.888 | 0.029219134 | count | 1 |
| GDI1       | 0.0218831 | 0.1233083 | 0.1775 | 0.859 | 0.029289485 | count | 1 |
| CSAD       | 0.0215559 | 0.1416771 | 0.1521 | 0.879 | 0.029317938 | count | 1 |
| RNF113A    | 0.0224868 | 0.1779157 | 0.1264 | 0.899 | 0.029360661 | count | 1 |
| RASL11A    | 0.0211676 | 0.0896081 | 0.2362 | 0.813 | 0.029369816 | count | 1 |
| ARRB2      | 0.0278516 | 0.283953  | 0.0981 | 0.922 | 0.029693369 | count | 1 |
| LRMP       | 0.0425121 | 0.7629073 | 0.0557 | 0.956 | 0.029716886 | count | 1 |
| POLR3E     | 0.0299708 | 0.2143795 | 0.1398 | 0.889 | 0.029729815 | count | 1 |
| PSMC1      | 0.0211151 | 0.0664409 | 0.3178 | 0.751 | 0.029731334 | count | 1 |
| MAP4K2     | 0.0381541 | 0.5160749 | 0.0739 | 0.941 | 0.029752484 | count | 1 |
| GRTP1      | 0.0355081 | 0.2836762 | 0.1252 | 0.9   | 0.029994427 | count | 1 |
| ABCD3      | 0.0240912 | 0.1911078 | 0.1261 | 0.9   | 0.030044604 | count | 1 |
| NGLY1      | 0.0233264 | 0.1754842 | 0.1329 | 0.894 | 0.030052296 | count | 1 |
| IDH3B      | 0.0225073 | 0.1139126 | 0.1976 | 0.843 | 0.030083812 | count | 1 |
| PARL       | 0.0220596 | 0.0967393 | 0.228  | 0.82  | 0.030096361 | count | 1 |
| IDE        | 0.025403  | 0.2224488 | 0.1142 | 0.909 | 0.030154309 | count | 1 |
| POLR3F     | 0.0243082 | 0.212077  | 0.1146 | 0.909 | 0.030157737 | count | 1 |
| RNASET2    | 0.0215871 | 0.1140859 | 0.1892 | 0.85  | 0.030291025 | count | 1 |
| KIAA0895L  | 0.040138  | 0.3126647 | 0.1284 | 0.898 | 0.030297061 | count | 1 |
| IL6R-AS1   | 0.1595126 | 0.8705814 | 0.1832 | 0.855 | 0.030300774 | count | 1 |
| LINC00309  | 0.1595126 | 0.8705814 | 0.1832 | 0.855 | 0.030300774 | count | 1 |
| EVX1       | 0.1595126 | 0.8705814 | 0.1832 | 0.855 | 0.030300774 | count | 1 |
| GNAS-AS1   | 0.1595126 | 0.8705814 | 0.1832 | 0.855 | 0.030300774 | count | 1 |
| AL365356.4 | 0.1595126 | 0.8785495 | 0.1816 | 0.856 | 0.030300774 | count | 1 |
| AC110285.5 | 0.1595126 | 0.8785495 | 0.1816 | 0.856 | 0.030300774 | count | 1 |



|            |           |           |        |       |             |       |   |
|------------|-----------|-----------|--------|-------|-------------|-------|---|
| AC073352.2 | 0.1595126 | 1.0980881 | 0.1453 | 0.885 | 0.030300774 | count | 1 |
| PSD4       | 0.3119224 | 0.8258884 | 0.3777 | 0.706 | 0.030438913 | count | 1 |
| AC012409.3 | 0.3119224 | 0.9382947 | 0.3324 | 0.74  | 0.030438913 | count | 1 |
| VILL       | 0.0391525 | 0.3143188 | 0.1246 | 0.901 | 0.030527185 | count | 1 |
| PTPRB      | 0.3139016 | 0.9304082 | 0.3374 | 0.736 | 0.030615311 | count | 1 |
| RPP38      | 0.023011  | 0.1514919 | 0.1519 | 0.879 | 0.030668896 | count | 1 |
| MEI1       | 0.0903312 | 0.5455982 | 0.1656 | 0.869 | 0.030779534 | count | 1 |
| MRPL32     | 0.0218692 | 0.0630187 | 0.347  | 0.729 | 0.030849982 | count | 1 |
| THUMPD3    | 0.0228266 | 0.1260414 | 0.1811 | 0.856 | 0.030974972 | count | 1 |
| PMPCA      | 0.0239408 | 0.1443496 | 0.1659 | 0.868 | 0.031233219 | count | 1 |
| BPTF       | 0.022198  | 0.0857916 | 0.2587 | 0.796 | 0.031258799 | count | 1 |
| RTTN       | 0.1159875 | 0.4584094 | 0.253  | 0.8   | 0.031318634 | count | 1 |
| PPP2CB     | 0.0223966 | 0.0710606 | 0.3152 | 0.753 | 0.0313432   | count | 1 |
| VBP1       | 0.022726  | 0.0880312 | 0.2582 | 0.796 | 0.031354543 | count | 1 |
| OBSCN      | 0.1655115 | 0.7664602 | 0.2159 | 0.829 | 0.031393594 | count | 1 |
| DMAC2      | 0.0251523 | 0.2607534 | 0.0965 | 0.923 | 0.031469511 | count | 1 |
| MORN2      | 0.0235503 | 0.1240522 | 0.1898 | 0.849 | 0.031533813 | count | 1 |
| RFC1       | 0.0223508 | 0.0727473 | 0.3072 | 0.759 | 0.031586857 | count | 1 |
| TPGS2      | 0.0229733 | 0.0890642 | 0.2579 | 0.796 | 0.03165992  | count | 1 |
| AL590428.1 | 0.1675572 | 0.6157075 | 0.2721 | 0.786 | 0.031765474 | count | 1 |
| AL139246.5 | 0.0436582 | 0.3345569 | 0.1305 | 0.896 | 0.03177308  | count | 1 |
| TMEM147    | 0.0226159 | 0.0666399 | 0.3394 | 0.734 | 0.031899353 | count | 1 |
| KIAA0825   | 0.0322605 | 0.3140246 | 0.1027 | 0.918 | 0.031994824 | count | 1 |
| PSMA3-AS1  | 0.0239976 | 0.1449539 | 0.1656 | 0.869 | 0.032103973 | count | 1 |
| RNF144A    | 0.0459918 | 0.3977357 | 0.1156 | 0.908 | 0.032133386 | count | 1 |
| RANBP3     | 0.02693   | 0.1661147 | 0.1621 | 0.871 | 0.032151411 | count | 1 |
| GPATCH2    | 0.0239645 | 0.1198203 | 0.2    | 0.841 | 0.032169783 | count | 1 |
| C16orf72   | 0.0246282 | 0.1491688 | 0.1651 | 0.869 | 0.032228953 | count | 1 |
| HSF2BP     | 0.1198271 | 0.6026809 | 0.1988 | 0.842 | 0.03232693  | count | 1 |
| ARAP2      | 0.1198271 | 0.6082234 | 0.197  | 0.844 | 0.03232693  | count | 1 |
| LINC00472  | 0.0463113 | 0.3671514 | 0.1261 | 0.9   | 0.032355141 | count | 1 |
| GPC2       | 0.0952007 | 0.7938405 | 0.1199 | 0.905 | 0.032405022 | count | 1 |
| GRIA3      | 0.0344995 | 0.5872196 | 0.0588 | 0.953 | 0.032514342 | count | 1 |
| PSMB5      | 0.0228679 | 0.0461038 | 0.496  | 0.62  | 0.032575256 | count | 1 |
| LAMA3      | 0.0315637 | 0.3550063 | 0.0889 | 0.929 | 0.032578283 | count | 1 |
| LINC00937  | 0.0549082 | 0.5617544 | 0.0977 | 0.922 | 0.032688638 | count | 1 |
| NXPE3      | 0.0264148 | 0.2343668 | 0.1127 | 0.91  | 0.032709099 | count | 1 |
| MRPL17     | 0.0236335 | 0.0911368 | 0.2593 | 0.795 | 0.032762233 | count | 1 |
| HNRNPK     | 0.0229455 | 0.0408103 | 0.5622 | 0.574 | 0.032762897 | count | 1 |
| AKT1S1     | 0.0252336 | 0.1285568 | 0.1963 | 0.844 | 0.03278222  | count | 1 |
| KIAA1191   | 0.0246277 | 0.1367975 | 0.18   | 0.857 | 0.032885964 | count | 1 |
| NDUFS1     | 0.0239983 | 0.0964611 | 0.2488 | 0.804 | 0.032935316 | count | 1 |
| UBAC2      | 0.0245593 | 0.102211  | 0.2403 | 0.81  | 0.032981276 | count | 1 |
| SPAG7      | 0.0237663 | 0.0825609 | 0.2879 | 0.773 | 0.033005506 | count | 1 |
| ZNF749     | 0.0821122 | 0.6624398 | 0.124  | 0.901 | 0.033077889 | count | 1 |

|            |           |           |        |        |             |       |   |
|------------|-----------|-----------|--------|--------|-------------|-------|---|
| MYO15A     | 0.0821122 | 0.6894392 | 0.1191 | 0.905  | 0.033077889 | count | 1 |
| ELOC       | 0.0233422 | 0.0542543 | 0.4302 | 0.667  | 0.033102913 | count | 1 |
| MAPRE2     | 0.0246205 | 0.1190911 | 0.2067 | 0.836  | 0.033128512 | count | 1 |
| CEBPZ      | 0.0238019 | 0.0911027 | 0.2613 | 0.794  | 0.033233847 | count | 1 |
| HECTD1     | 0.0246432 | 0.1040987 | 0.2367 | 0.813  | 0.033256389 | count | 1 |
| ASH1L-AS1  | 0.0414477 | 0.3787075 | 0.1094 | 0.913  | 0.033263047 | count | 1 |
| RAB42      | 0.0498868 | 0.5228195 | 0.0954 | 0.924  | 0.033274651 | count | 1 |
| UBP1       | 0.029177  | 0.1997233 | 0.1461 | 0.884  | 0.033275381 | count | 1 |
| H2AFJ      | 0.0232383 | 0.0401506 | 0.5788 | 0.563  | 0.033293969 | count | 1 |
| THOC5      | 0.02784   | 0.1788771 | 0.1556 | 0.876  | 0.033329147 | count | 1 |
| MGA        | 0.0269904 | 0.1739587 | 0.1552 | 0.877  | 0.033358912 | count | 1 |
| DTX2       | 0.0354023 | 0.3595519 | 0.0985 | 0.922  | 0.033362323 | count | 1 |
| COX11      | 0.0247418 | 0.0986762 | 0.2507 | 0.802  | 0.033468617 | count | 1 |
| CNPY3      | 0.0248639 | 0.1058737 | 0.2348 | 0.814  | 0.033542258 | count | 1 |
| UBL7       | 0.0259974 | 0.1446459 | 0.1797 | 0.857  | 0.033831359 | count | 1 |
| PUF60      | 0.0241846 | 0.0694086 | 0.3484 | 0.728  | 0.033837482 | count | 1 |
| ASCC1      | 0.0272084 | 0.2062589 | 0.1319 | 0.895  | 0.033870759 | count | 1 |
| PSMG3      | 0.0253472 | 0.1094553 | 0.2316 | 0.817  | 0.033877755 | count | 1 |
| AFAP1      | 0.02623   | 0.1408768 | 0.1862 | 0.852  | 0.03398517  | count | 1 |
| VWA8       | 0.0323824 | 0.2816006 | 0.115  | 0.908  | 0.033990224 | count | 1 |
| TNRC18     | 0.0263666 | 0.1579851 | 0.1669 | 0.867  | 0.034033557 | count | 1 |
| RSL1D1     | 0.0239383 | 0.0475655 | 0.5033 | 0.615  | 0.034053447 | count | 1 |
| AK1        | 0.0259632 | 0.1516048 | 0.1713 | 0.864  | 0.034073794 | count | 1 |
| C12orf4    | 0.030875  | 0.2199726 | 0.1404 | 0.888  | 0.034370907 | count | 1 |
| POLE3      | 0.02562   | 0.1145217 | 0.2237 | 0.823  | 0.034446106 | count | 1 |
| AC108463.3 | 0.3585553 | 0.6656273 | 0.5387 | 0.59   | 0.034539135 | count | 1 |
| STARD7     | 0.0275283 | 0.1535759 | 0.1792 | 0.858  | 0.034547264 | count | 1 |
| DEK        | 0.0242152 | 0.0432408 | 0.56   | 0.5755 | 0.034596306 | count | 1 |
| UBE2I      | 0.0244482 | 0.057157  | 0.4277 | 0.669  | 0.034630908 | count | 1 |
| DCTN1      | 0.0267299 | 0.1325745 | 0.2016 | 0.84   | 0.03472472  | count | 1 |
| CDK15      | 0.3612359 | 0.6832558 | 0.5287 | 0.597  | 0.034771279 | count | 1 |
| TRIM33     | 0.0265977 | 0.1300274 | 0.2046 | 0.838  | 0.034804533 | count | 1 |
| EMID1      | 0.129783  | 0.843018  | 0.154  | 0.878  | 0.034932766 | count | 1 |
| AC111182.1 | 0.129783  | 0.9329663 | 0.1391 | 0.889  | 0.034932766 | count | 1 |
| MT1X       | 0.0244315 | 0.0711891 | 0.3432 | 0.7315 | 0.034968512 | count | 1 |
| ZCCHC3     | 0.0306552 | 0.1930119 | 0.1588 | 0.874  | 0.035108389 | count | 1 |
| ACHE       | 0.0483224 | 0.4687    | 0.1031 | 0.918  | 0.035145109 | count | 1 |
| ZSCAN22    | 0.1307675 | 0.7872989 | 0.1661 | 0.868  | 0.03518977  | count | 1 |
| DGKZ       | 0.0312998 | 0.2000551 | 0.1565 | 0.876  | 0.035200178 | count | 1 |
| AL023881.1 | 0.3664516 | 0.8361961 | 0.4382 | 0.661  | 0.035221862 | count | 1 |
| SPIN1      | 0.0260917 | 0.0976522 | 0.2672 | 0.789  | 0.035282247 | count | 1 |
| ELOVL4     | 0.0345433 | 0.2880198 | 0.1199 | 0.905  | 0.035320928 | count | 1 |
| RRAGA      | 0.0249467 | 0.054226  | 0.4601 | 0.646  | 0.035353337 | count | 1 |
| AMIGO1     | 0.0531171 | 0.3568392 | 0.1489 | 0.882  | 0.035412254 | count | 1 |
| ZNF552     | 0.0471569 | 0.4396305 | 0.1073 | 0.915  | 0.035562242 | count | 1 |

|            |           |           |        |       |             |       |   |
|------------|-----------|-----------|--------|-------|-------------|-------|---|
| SLC33A1    | 0.0316561 | 0.2276916 | 0.139  | 0.889 | 0.035600109 | count | 1 |
| MTMR12     | 0.029701  | 0.2280337 | 0.1302 | 0.896 | 0.035650329 | count | 1 |
| DYNC1I2    | 0.0252159 | 0.0518548 | 0.4863 | 0.627 | 0.035754787 | count | 1 |
| FGFR1OP2   | 0.0255815 | 0.077006  | 0.3322 | 0.74  | 0.035767149 | count | 1 |
| PWWP2B     | 0.0474936 | 0.4670466 | 0.1017 | 0.919 | 0.035814566 | count | 1 |
| NFE2L1     | 0.0263686 | 0.1023684 | 0.2576 | 0.797 | 0.035870721 | count | 1 |
| MAB21L2    | 0.0266609 | 0.1942279 | 0.1373 | 0.891 | 0.035872653 | count | 1 |
| SEC23B     | 0.0319004 | 0.2245554 | 0.1421 | 0.887 | 0.035874315 | count | 1 |
| GPHN       | 0.0313259 | 0.288924  | 0.1084 | 0.914 | 0.035875156 | count | 1 |
| C5orf34    | 0.0345088 | 0.4989247 | 0.0692 | 0.945 | 0.035919769 | count | 1 |
| SORBS2     | 0.025359  | 0.0852615 | 0.2974 | 0.766 | 0.035920895 | count | 1 |
| MCM4       | 0.0367739 | 0.347775  | 0.1057 | 0.916 | 0.036039353 | count | 1 |
| EFEMP2     | 0.0254767 | 0.0513438 | 0.4962 | 0.62  | 0.036196892 | count | 1 |
| ZNF790     | 0.032717  | 0.2793799 | 0.1171 | 0.907 | 0.036220245 | count | 1 |
| NR2F2      | 0.0253983 | 0.0490631 | 0.5177 | 0.605 | 0.036311003 | count | 1 |
| AC026461.3 | 0.3810401 | 1.129112  | 0.3375 | 0.736 | 0.036474429 | count | 1 |
| MRO        | 0.3810401 | 1.129112  | 0.3375 | 0.736 | 0.036474429 | count | 1 |
| DEFB124    | 0.3810401 | 1.129112  | 0.3375 | 0.736 | 0.036474429 | count | 1 |
| LINC02586  | 0.3810401 | 1.203576  | 0.3166 | 0.752 | 0.036474429 | count | 1 |
| RASGRP3    | 0.3810401 | 1.203576  | 0.3166 | 0.752 | 0.036474429 | count | 1 |
| LINC02388  | 0.3810401 | 1.203576  | 0.3166 | 0.752 | 0.036474429 | count | 1 |
| NETO1      | 0.3810401 | 1.297554  | 0.2937 | 0.769 | 0.036474429 | count | 1 |
| C3orf38    | 0.027647  | 0.1315003 | 0.2102 | 0.833 | 0.036475958 | count | 1 |
| C4orf46    | 0.0433112 | 0.3358488 | 0.129  | 0.897 | 0.036553281 | count | 1 |
| AC116913.1 | 0.0911153 | 0.4990992 | 0.1826 | 0.855 | 0.036638099 | count | 1 |
| APC        | 0.0274016 | 0.1154673 | 0.2373 | 0.812 | 0.036655353 | count | 1 |
| ZKSCAN3    | 0.1369004 | 0.5145557 | 0.2661 | 0.79  | 0.036788017 | count | 1 |
| PSEN2      | 0.0356795 | 0.2463656 | 0.1448 | 0.885 | 0.036814519 | count | 1 |
| SYNJ1      | 0.0348262 | 0.2718797 | 0.1281 | 0.898 | 0.036835527 | count | 1 |
| LRP2BP     | 0.0506904 | 0.4546034 | 0.1115 | 0.911 | 0.036855396 | count | 1 |
| SEC16A     | 0.0334191 | 0.2072725 | 0.1612 | 0.872 | 0.036995861 | count | 1 |
| GORASP1    | 0.0389649 | 0.221801  | 0.1757 | 0.861 | 0.037223819 | count | 1 |
| DDX10      | 0.0310376 | 0.1754908 | 0.1769 | 0.86  | 0.037252359 | count | 1 |
| CDH19      | 0.0377089 | 0.4415341 | 0.0854 | 0.932 | 0.037380829 | count | 1 |
| ACSF3      | 0.0351098 | 0.1844958 | 0.1903 | 0.849 | 0.037412054 | count | 1 |
| ZNF528     | 0.0363882 | 0.2670739 | 0.1362 | 0.892 | 0.037543676 | count | 1 |
| PRKCE      | 0.0445158 | 0.3701312 | 0.1203 | 0.904 | 0.037564737 | count | 1 |
| AC002553.1 | 0.3975927 | 0.7050897 | 0.5639 | 0.573 | 0.037881863 | count | 1 |
| ETV4       | 0.0568675 | 0.6254194 | 0.0909 | 0.928 | 0.037891387 | count | 1 |
| CTU2       | 0.034016  | 0.1997781 | 0.1703 | 0.865 | 0.03805774  | count | 1 |
| NLGN1      | 0.0321754 | 0.2522846 | 0.1275 | 0.899 | 0.038064337 | count | 1 |
| CLEC18A    | 0.1420166 | 0.45687   | 0.3108 | 0.756 | 0.038117683 | count | 1 |
| KLHL2      | 0.0394191 | 0.266418  | 0.148  | 0.882 | 0.038151875 | count | 1 |
| ATXN7L3    | 0.0338627 | 0.2475446 | 0.1368 | 0.891 | 0.038260006 | count | 1 |
| JPT1       | 0.0286259 | 0.1377064 | 0.2079 | 0.835 | 0.03834292  | count | 1 |

|            |           |           |        |        |             |       |   |
|------------|-----------|-----------|--------|--------|-------------|-------|---|
| AIFM2      | 0.0344694 | 0.2325845 | 0.1482 | 0.882  | 0.038363627 | count | 1 |
| MRPL39     | 0.0292587 | 0.1241776 | 0.2356 | 0.814  | 0.03836832  | count | 1 |
| TAF4       | 0.0696361 | 0.3578591 | 0.1946 | 0.846  | 0.038524179 | count | 1 |
| ACVR1B     | 0.0380537 | 0.243832  | 0.1561 | 0.876  | 0.038525131 | count | 1 |
| VAPA       | 0.0270326 | 0.043049  | 0.6279 | 0.5301 | 0.038567054 | count | 1 |
| WHRN       | 0.2066206 | 0.7980221 | 0.2589 | 0.796  | 0.038790061 | count | 1 |
| SERP1      | 0.0273277 | 0.0519164 | 0.5264 | 0.599  | 0.038882299 | count | 1 |
| GATAD2A    | 0.0312294 | 0.1769734 | 0.1765 | 0.86   | 0.038936443 | count | 1 |
| KCNJ15     | 0.410681  | 0.6533083 | 0.6286 | 0.53   | 0.03898439  | count | 1 |
| NUCB1      | 0.0275192 | 0.054581  | 0.5042 | 0.614  | 0.039037363 | count | 1 |
| RNF111     | 0.0302525 | 0.1485424 | 0.2037 | 0.839  | 0.03904502  | count | 1 |
| UNC5C      | 0.0328403 | 0.2521704 | 0.1302 | 0.896  | 0.039084174 | count | 1 |
| FASTK      | 0.0292968 | 0.1214727 | 0.2412 | 0.809  | 0.039189093 | count | 1 |
| AC068473.5 | 0.0774138 | 0.4208337 | 0.184  | 0.854  | 0.03930531  | count | 1 |
| SLC48A1    | 0.0301018 | 0.1223913 | 0.2459 | 0.806  | 0.039444576 | count | 1 |
| FAM41C     | 0.0479455 | 0.3948076 | 0.1214 | 0.903  | 0.039478533 | count | 1 |
| AC092171.3 | 0.1165285 | 0.7883414 | 0.1478 | 0.882  | 0.039483086 | count | 1 |
| SMC3       | 0.0280904 | 0.0648025 | 0.4335 | 0.665  | 0.039510844 | count | 1 |
| DHODH      | 0.0449057 | 0.2739419 | 0.1639 | 0.87   | 0.039533065 | count | 1 |
| TUBGCP5    | 0.0317482 | 0.16828   | 0.1887 | 0.85   | 0.039648175 | count | 1 |
| AL021154.1 | 0.148254  | 1.0209364 | 0.1452 | 0.885  | 0.039734257 | count | 1 |
| HOXA11     | 0.148254  | 1.0209364 | 0.1452 | 0.885  | 0.039734257 | count | 1 |
| TMEM229A   | 0.148254  | 1.0209364 | 0.1452 | 0.885  | 0.039734257 | count | 1 |
| CNIH2      | 0.148254  | 1.0209364 | 0.1452 | 0.885  | 0.039734257 | count | 1 |
| NOX5       | 0.148254  | 1.0209364 | 0.1452 | 0.885  | 0.039734257 | count | 1 |
| AC092115.3 | 0.148254  | 1.0209364 | 0.1452 | 0.885  | 0.039734257 | count | 1 |
| AC107982.3 | 0.148254  | 1.0209364 | 0.1452 | 0.885  | 0.039734257 | count | 1 |
| AL109741.1 | 0.148254  | 1.0524685 | 0.1409 | 0.888  | 0.039734257 | count | 1 |
| AC010680.1 | 0.148254  | 1.0524685 | 0.1409 | 0.888  | 0.039734257 | count | 1 |
| AC007336.1 | 0.148254  | 1.160805  | 0.1277 | 0.898  | 0.039734257 | count | 1 |
| AC026367.2 | 0.148254  | 1.188633  | 0.1247 | 0.901  | 0.039734257 | count | 1 |
| CALML4     | 0.148254  | 1.188633  | 0.1247 | 0.901  | 0.039734257 | count | 1 |
| AC083964.1 | 0.148254  | 1.42238   | 0.1042 | 0.917  | 0.039734257 | count | 1 |
| CCDC150    | 0.4197626 | 0.9141005 | 0.4592 | 0.646  | 0.039744044 | count | 1 |
| AC093503.2 | 0.4197626 | 0.9141005 | 0.4592 | 0.646  | 0.039744044 | count | 1 |
| ANP32E     | 0.0283946 | 0.0705912 | 0.4022 | 0.688  | 0.039771814 | count | 1 |
| OTUD4      | 0.0361526 | 0.2029798 | 0.1781 | 0.859  | 0.039788984 | count | 1 |
| GPR162     | 0.2129579 | 0.6015357 | 0.354  | 0.723  | 0.039915912 | count | 1 |
| AC013400.1 | 0.2129579 | 0.7904884 | 0.2694 | 0.788  | 0.039915912 | count | 1 |
| PML        | 0.0319522 | 0.1526703 | 0.2093 | 0.834  | 0.039967344 | count | 1 |
| GIMAP1     | 0.0673133 | 0.7537615 | 0.0893 | 0.929  | 0.03999276  | count | 1 |
| PCGF3      | 0.0367871 | 0.2275242 | 0.1617 | 0.872  | 0.039999154 | count | 1 |
| ATP6AP2    | 0.0280088 | 0.0384319 | 0.7288 | 0.4662 | 0.040030252 | count | 1 |
| DENND6A    | 0.0323703 | 0.1708388 | 0.1895 | 0.85   | 0.040074417 | count | 1 |
| MEMO1      | 0.0551586 | 0.3649977 | 0.1511 | 0.88   | 0.040079449 | count | 1 |

|            |           |           |        |       |             |       |   |
|------------|-----------|-----------|--------|-------|-------------|-------|---|
| PRELID2    | 0.0359002 | 0.209632  | 0.1713 | 0.864 | 0.040161135 | count | 1 |
| TIGAR      | 0.0477089 | 0.2398281 | 0.1989 | 0.842 | 0.040244482 | count | 1 |
| PRSS27     | 0.118864  | 0.7571422 | 0.157  | 0.875 | 0.040254063 | count | 1 |
| AC010245.2 | 0.118864  | 0.8141639 | 0.146  | 0.884 | 0.040254063 | count | 1 |
| MMRN1      | 0.118864  | 0.9358112 | 0.127  | 0.899 | 0.040254063 | count | 1 |
| DUSP22     | 0.0303662 | 0.105326  | 0.2883 | 0.773 | 0.040297106 | count | 1 |
| SIX5       | 0.0330241 | 0.1760611 | 0.1876 | 0.851 | 0.040310749 | count | 1 |
| TBX1       | 0.0605413 | 0.281542  | 0.215  | 0.83  | 0.040317128 | count | 1 |
| RAP1GDS1   | 0.0323368 | 0.1600931 | 0.202  | 0.84  | 0.040382357 | count | 1 |
| ZNF507     | 0.0342473 | 0.1794309 | 0.1909 | 0.849 | 0.040383709 | count | 1 |
| TRIM52     | 0.0331638 | 0.236855  | 0.14   | 0.889 | 0.040390936 | count | 1 |
| UTP25      | 0.0341625 | 0.1946096 | 0.1755 | 0.861 | 0.040534858 | count | 1 |
| AC005332.5 | 0.1517119 | 0.5521338 | 0.2748 | 0.784 | 0.040628361 | count | 1 |
| XPO1       | 0.0302809 | 0.1024201 | 0.2957 | 0.768 | 0.040643971 | count | 1 |
| EIF2S1     | 0.0295616 | 0.0869648 | 0.3399 | 0.734 | 0.040666212 | count | 1 |
| SUCNR1     | 0.0284301 | 0.1375448 | 0.2067 | 0.836 | 0.040668838 | count | 1 |
| ZNF483     | 0.0346357 | 0.1833417 | 0.1889 | 0.85  | 0.040708116 | count | 1 |
| WARS       | 0.0316075 | 0.1613967 | 0.1958 | 0.845 | 0.040831725 | count | 1 |
| IQCB1      | 0.0323004 | 0.1512416 | 0.2136 | 0.831 | 0.040880316 | count | 1 |
| AC079834.2 | 0.4342593 | 0.8696014 | 0.4994 | 0.618 | 0.040947586 | count | 1 |
| OXA1L      | 0.030025  | 0.1116151 | 0.269  | 0.788 | 0.041036891 | count | 1 |
| TOMM34     | 0.0449864 | 0.2881368 | 0.1561 | 0.876 | 0.041058635 | count | 1 |
| BYSL       | 0.05123   | 0.3551417 | 0.1443 | 0.885 | 0.041064308 | count | 1 |
| SMPD4      | 0.0335381 | 0.2396913 | 0.1399 | 0.889 | 0.041113061 | count | 1 |
| SLC49A3    | 0.0372908 | 0.3418592 | 0.1091 | 0.913 | 0.041271685 | count | 1 |
| CUL3       | 0.0310007 | 0.111093  | 0.2791 | 0.78  | 0.04144816  | count | 1 |
| ALG13      | 0.0304063 | 0.1070871 | 0.2839 | 0.776 | 0.041488941 | count | 1 |
| NPIPA1     | 0.038694  | 0.4793653 | 0.0807 | 0.936 | 0.041514124 | count | 1 |
| CCDC106    | 0.0336894 | 0.1683257 | 0.2001 | 0.841 | 0.041705311 | count | 1 |
| AP000880.1 | 0.1234411 | 0.7501635 | 0.1646 | 0.869 | 0.041762658 | count | 1 |
| SKIDA1     | 0.1234411 | 0.7501635 | 0.1646 | 0.869 | 0.041762658 | count | 1 |
| BX088651.4 | 0.1234411 | 0.8272644 | 0.1492 | 0.881 | 0.041762658 | count | 1 |
| C3orf49    | 0.1234411 | 1.0083033 | 0.1224 | 0.903 | 0.041762658 | count | 1 |
| ADAL       | 0.0384751 | 0.2355846 | 0.1633 | 0.87  | 0.041829739 | count | 1 |
| DUBR       | 0.0350812 | 0.1974491 | 0.1777 | 0.859 | 0.041866831 | count | 1 |
| AC008946.1 | 0.091682  | 0.4855018 | 0.1888 | 0.85  | 0.041898006 | count | 1 |
| SLC25A35   | 0.091682  | 0.5337271 | 0.1718 | 0.864 | 0.041898006 | count | 1 |
| MOGS       | 0.0387928 | 0.2009236 | 0.1931 | 0.847 | 0.041902492 | count | 1 |
| SH3RF3-AS1 | 0.4472376 | 0.6533146 | 0.6846 | 0.494 | 0.042015617 | count | 1 |
| SLC45A1    | 0.0435287 | 0.3441534 | 0.1265 | 0.899 | 0.042113614 | count | 1 |
| SAMD9      | 0.0320268 | 0.1598561 | 0.2003 | 0.841 | 0.042196168 | count | 1 |
| NUP98      | 0.0344375 | 0.188178  | 0.183  | 0.855 | 0.042386237 | count | 1 |
| ADI1       | 0.0296759 | 0.0393062 | 0.755  | 0.45  | 0.04246562  | count | 1 |
| LLGL1      | 0.1255781 | 0.3641552 | 0.3448 | 0.73  | 0.042465934 | count | 1 |
| TRMT5      | 0.0347009 | 0.1600998 | 0.2167 | 0.828 | 0.042624222 | count | 1 |

|               |           |           |        |       |             |       |   |
|---------------|-----------|-----------|--------|-------|-------------|-------|---|
| GOLPH3L       | 0.0339288 | 0.1924456 | 0.1763 | 0.86  | 0.042634558 | count | 1 |
| RANBP6        | 0.0347349 | 0.2106614 | 0.1649 | 0.869 | 0.042665926 | count | 1 |
| MEIS3         | 0.039019  | 0.2108842 | 0.185  | 0.853 | 0.042682456 | count | 1 |
| PARP9         | 0.0328346 | 0.1411595 | 0.2326 | 0.816 | 0.042684862 | count | 1 |
| CFB           | 0.0453601 | 0.2768873 | 0.1638 | 0.87  | 0.042705572 | count | 1 |
| LEPROTL1      | 0.0311582 | 0.1004503 | 0.3102 | 0.756 | 0.042714572 | count | 1 |
| CIITA         | 0.2289056 | 0.9203386 | 0.2487 | 0.804 | 0.042732067 | count | 1 |
| GTPBP3        | 0.0375784 | 0.2341273 | 0.1605 | 0.872 | 0.042836111 | count | 1 |
| ZNF786        | 0.0679688 | 0.3362147 | 0.2022 | 0.84  | 0.042901208 | count | 1 |
| ZNF727        | 0.0591466 | 0.4023876 | 0.147  | 0.883 | 0.042953576 | count | 1 |
| FAM228A       | 0.072505  | 0.6666591 | 0.1088 | 0.913 | 0.043040612 | count | 1 |
| RNF166        | 0.0365596 | 0.216327  | 0.169  | 0.866 | 0.043241546 | count | 1 |
| RTKN2         | 0.0595854 | 0.7065923 | 0.0843 | 0.933 | 0.043269619 | count | 1 |
| PTRHD1        | 0.0318472 | 0.1020728 | 0.312  | 0.755 | 0.043432679 | count | 1 |
| PPID          | 0.0323612 | 0.098966  | 0.327  | 0.744 | 0.043554491 | count | 1 |
| RING1         | 0.0328321 | 0.1149063 | 0.2857 | 0.775 | 0.043567075 | count | 1 |
| SDC3          | 0.0351494 | 0.2136447 | 0.1645 | 0.869 | 0.04358955  | count | 1 |
| AC005034.3    | 0.1633421 | 0.6974084 | 0.2342 | 0.815 | 0.043624403 | count | 1 |
| AC005498.2    | 0.1633421 | 0.6993159 | 0.2336 | 0.815 | 0.043624403 | count | 1 |
| TM2D1         | 0.0309929 | 0.0644048 | 0.4812 | 0.63  | 0.043628824 | count | 1 |
| PIP4K2C       | 0.043136  | 0.2445691 | 0.1764 | 0.86  | 0.043652095 | count | 1 |
| CARS2         | 0.0343047 | 0.1596376 | 0.2149 | 0.83  | 0.043746338 | count | 1 |
| NDE1          | 0.0358796 | 0.2003277 | 0.1791 | 0.858 | 0.043886192 | count | 1 |
| RXRA          | 0.033449  | 0.1435532 | 0.233  | 0.816 | 0.043889897 | count | 1 |
| MAN1A2        | 0.03159   | 0.0837494 | 0.3772 | 0.706 | 0.043925416 | count | 1 |
| TRMT2A        | 0.0368767 | 0.1893954 | 0.1947 | 0.846 | 0.044005857 | count | 1 |
| FRRS1L        | 0.4717911 | 0.7300773 | 0.6462 | 0.518 | 0.044011877 | count | 1 |
| AP001318.2    | 0.4717911 | 0.7300773 | 0.6462 | 0.518 | 0.044011877 | count | 1 |
| AP003108.2    | 0.0743442 | 0.545065  | 0.1364 | 0.892 | 0.044119039 | count | 1 |
| NT5M          | 0.1655115 | 0.5002382 | 0.3309 | 0.741 | 0.044181361 | count | 1 |
| TRMT2B        | 0.0429294 | 0.3885937 | 0.1105 | 0.912 | 0.04426978  | count | 1 |
| DNAJC25-GNG10 | 0.0970567 | 0.7231515 | 0.1342 | 0.893 | 0.044308397 | count | 1 |
| APOBEC3A      | 0.0970567 | 1.023311  | 0.0948 | 0.924 | 0.044308397 | count | 1 |
| TENT5C        | 0.044312  | 0.218207  | 0.2031 | 0.839 | 0.044380808 | count | 1 |
| GPR135        | 0.041406  | 0.3434472 | 0.1206 | 0.904 | 0.04441524  | count | 1 |
| MRPL45        | 0.0332739 | 0.1258616 | 0.2644 | 0.792 | 0.044423574 | count | 1 |
| SHC4          | 0.0378814 | 0.299158  | 0.1266 | 0.899 | 0.044515463 | count | 1 |
| LRSAM1        | 0.0402971 | 0.3269213 | 0.1233 | 0.902 | 0.044590284 | count | 1 |
| PCED1B        | 0.0489133 | 0.4253432 | 0.115  | 0.908 | 0.044624828 | count | 1 |
| BSG           | 0.03122   | 0.0348695 | 0.8953 | 0.371 | 0.044700884 | count | 1 |
| POLDIP2       | 0.0350011 | 0.1382289 | 0.2532 | 0.8   | 0.04473834  | count | 1 |
| TCP10L        | 0.2404492 | 0.5689789 | 0.4226 | 0.673 | 0.0447553   | count | 1 |
| AC136604.3    | 0.4812007 | 1.157761  | 0.4156 | 0.678 | 0.044768491 | count | 1 |
| PCDH19        | 0.4812007 | 1.157761  | 0.4156 | 0.678 | 0.044768491 | count | 1 |
| PPP1R42       | 0.4812007 | 1.157761  | 0.4156 | 0.678 | 0.044768491 | count | 1 |

|             |           |           |        |       |             |       |   |
|-------------|-----------|-----------|--------|-------|-------------|-------|---|
| AC001226.2  | 0.4812007 | 1.157761  | 0.4156 | 0.678 | 0.044768491 | count | 1 |
| XRCC3       | 0.4812007 | 1.157761  | 0.4156 | 0.678 | 0.044768491 | count | 1 |
| WSCD1       | 0.4812007 | 1.157761  | 0.4156 | 0.678 | 0.044768491 | count | 1 |
| AC090579.1  | 0.4812007 | 1.162495  | 0.4139 | 0.679 | 0.044768491 | count | 1 |
| AL158151.3  | 0.4812007 | 1.162495  | 0.4139 | 0.679 | 0.044768491 | count | 1 |
| AC068768.1  | 0.4812007 | 1.162495  | 0.4139 | 0.679 | 0.044768491 | count | 1 |
| AC005696.4  | 0.4812007 | 1.162495  | 0.4139 | 0.679 | 0.044768491 | count | 1 |
| METTL7B     | 0.4812007 | 1.204446  | 0.3995 | 0.69  | 0.044768491 | count | 1 |
| UBL7-AS1    | 0.0385057 | 0.2337213 | 0.1648 | 0.869 | 0.044777517 | count | 1 |
| FPGT-TNNI3K | 0.075584  | 0.5125502 | 0.1475 | 0.883 | 0.04484563  | count | 1 |
| TSSC4       | 0.0325168 | 0.0830077 | 0.3917 | 0.695 | 0.044938841 | count | 1 |
| POMZP3      | 0.0410943 | 0.247898  | 0.1658 | 0.868 | 0.044946365 | count | 1 |
| SEMA4D      | 0.0816679 | 0.5526416 | 0.1478 | 0.883 | 0.045086782 | count | 1 |
| LENG8-AS1   | 0.0599616 | 0.4111857 | 0.1458 | 0.884 | 0.045141929 | count | 1 |
| PJA1        | 0.0371223 | 0.1557617 | 0.2383 | 0.812 | 0.04530531  | count | 1 |
| SEMA6B      | 0.1131876 | 0.8016882 | 0.1412 | 0.888 | 0.045309679 | count | 1 |
| RPP14       | 0.0416855 | 0.2291044 | 0.1819 | 0.856 | 0.045310135 | count | 1 |
| TICAM2      | 0.0823552 | 0.6133193 | 0.1343 | 0.893 | 0.045460811 | count | 1 |
| DGCR2       | 0.0366252 | 0.166802  | 0.2196 | 0.826 | 0.045498016 | count | 1 |
| UCP2        | 0.0491022 | 0.3149008 | 0.1559 | 0.876 | 0.045523934 | count | 1 |
| ISCA1       | 0.0326773 | 0.0767854 | 0.4256 | 0.67  | 0.045575023 | count | 1 |
| ST6GALNAC6  | 0.0999706 | 0.5970898 | 0.1674 | 0.867 | 0.045613034 | count | 1 |
| AC022098.1  | 0.0999938 | 0.4511995 | 0.2216 | 0.825 | 0.045623415 | count | 1 |
| MTRNR2L6    | 0.2454984 | 0.6940438 | 0.3537 | 0.724 | 0.04563624  | count | 1 |
| GPR37       | 0.2454984 | 0.7539383 | 0.3256 | 0.745 | 0.04563624  | count | 1 |
| PJA2        | 0.0321543 | 0.0498122 | 0.6455 | 0.519 | 0.045654977 | count | 1 |
| PBXIP1      | 0.0327528 | 0.0771573 | 0.4245 | 0.671 | 0.045731932 | count | 1 |
| CDKL3       | 0.0396783 | 0.2428496 | 0.1634 | 0.87  | 0.045789844 | count | 1 |
| GABARAP     | 0.0394596 | 0.1993182 | 0.198  | 0.843 | 0.045884439 | count | 1 |
| GTPBP1      | 0.0428209 | 0.2942467 | 0.1455 | 0.884 | 0.045928354 | count | 1 |
| UPF3A       | 0.0326079 | 0.0744892 | 0.4378 | 0.662 | 0.045943679 | count | 1 |
| POLD4       | 0.0475981 | 0.3271967 | 0.1455 | 0.884 | 0.046033608 | count | 1 |
| KCNMB3      | 0.0497466 | 0.8187007 | 0.0608 | 0.952 | 0.046118425 | count | 1 |
| SPA17       | 0.037507  | 0.1718967 | 0.2182 | 0.827 | 0.046158476 | count | 1 |
| PCDHB15     | 0.0536992 | 0.3468307 | 0.1548 | 0.877 | 0.046278769 | count | 1 |
| PSMA1       | 0.0326057 | 0.0518532 | 0.6288 | 0.53  | 0.04629489  | count | 1 |
| CCDC40      | 0.1157364 | 0.5235177 | 0.2211 | 0.825 | 0.046305817 | count | 1 |
| PUM3        | 0.0335901 | 0.103481  | 0.3246 | 0.746 | 0.046461204 | count | 1 |
| CD59        | 0.0324518 | 0.0390568 | 0.8309 | 0.406 | 0.046517868 | count | 1 |
| ACSS3       | 0.046472  | 0.2334423 | 0.1991 | 0.842 | 0.046535638 | count | 1 |
| PRRT1       | 0.0403383 | 0.2823895 | 0.1428 | 0.886 | 0.0465498   | count | 1 |
| SEPHS2      | 0.0340897 | 0.1088527 | 0.3132 | 0.754 | 0.046631781 | count | 1 |
| VDR         | 0.2516069 | 0.847054  | 0.297  | 0.766 | 0.046698724 | count | 1 |
| POPDC3      | 0.2516069 | 1.041231  | 0.2416 | 0.809 | 0.046698724 | count | 1 |
| TMEM14A     | 0.0333242 | 0.0776656 | 0.4291 | 0.668 | 0.046718313 | count | 1 |

|            |           |           |        |       |             |       |   |
|------------|-----------|-----------|--------|-------|-------------|-------|---|
| TRPT1      | 0.035374  | 0.1181292 | 0.2995 | 0.765 | 0.046748473 | count | 1 |
| PPP2R5E    | 0.0341066 | 0.0999034 | 0.3414 | 0.733 | 0.046754619 | count | 1 |
| ZNF438     | 0.0416177 | 0.1791152 | 0.2324 | 0.816 | 0.046774422 | count | 1 |
| AL138724.1 | 0.1175984 | 0.4676149 | 0.2515 | 0.801 | 0.047032843 | count | 1 |
| THRIL      | 0.5097876 | 0.7157533 | 0.7122 | 0.476 | 0.047038661 | count | 1 |
| FRAS1      | 0.5097876 | 0.7364252 | 0.6922 | 0.489 | 0.047038661 | count | 1 |
| CPSF3      | 0.0403707 | 0.2845731 | 0.1419 | 0.887 | 0.047110863 | count | 1 |
| LUC7L2     | 0.0353731 | 0.1022759 | 0.3459 | 0.729 | 0.047132785 | count | 1 |
| GSTA4      | 0.0344587 | 0.113946  | 0.3024 | 0.762 | 0.047157097 | count | 1 |
| ATP5S      | 0.0361176 | 0.1249659 | 0.289  | 0.773 | 0.047214526 | count | 1 |
| TRAF4      | 0.0471727 | 0.3027243 | 0.1558 | 0.876 | 0.047234485 | count | 1 |
| FBXL3      | 0.0353127 | 0.0882642 | 0.4001 | 0.689 | 0.047333935 | count | 1 |
| LINC01852  | 0.0750863 | 0.4099222 | 0.1832 | 0.855 | 0.047340664 | count | 1 |
| MCM9       | 0.0498265 | 0.3086153 | 0.1615 | 0.872 | 0.04755171  | count | 1 |
| UEVLD      | 0.0457684 | 0.2576814 | 0.1776 | 0.859 | 0.047598425 | count | 1 |
| ACBD6      | 0.0344907 | 0.0865112 | 0.3987 | 0.69  | 0.047686261 | count | 1 |
| THAP5      | 0.0350385 | 0.098647  | 0.3552 | 0.722 | 0.047770674 | count | 1 |
| GTF2A1     | 0.037001  | 0.1229176 | 0.301  | 0.763 | 0.047791797 | count | 1 |
| KCTD21-AS1 | 0.1050628 | 0.4279081 | 0.2455 | 0.806 | 0.047889303 | count | 1 |
| OTUD6B     | 0.0415427 | 0.2348096 | 0.1769 | 0.86  | 0.047936458 | count | 1 |
| SP2        | 0.0424667 | 0.228061  | 0.1862 | 0.852 | 0.04795654  | count | 1 |
| CSTF1      | 0.0398842 | 0.1939884 | 0.2056 | 0.837 | 0.04797692  | count | 1 |
| CAPN10-DT  | 0.1424397 | 0.6317836 | 0.2255 | 0.822 | 0.047991021 | count | 1 |
| RPL22L1    | 0.0342456 | 0.0768446 | 0.4456 | 0.656 | 0.048166455 | count | 1 |
| GNL1       | 0.035851  | 0.1077168 | 0.3328 | 0.739 | 0.048284474 | count | 1 |
| RAB36      | 0.0875989 | 0.5204846 | 0.1683 | 0.866 | 0.048311411 | count | 1 |
| HNRNPA1L2  | 0.0875989 | 0.5833079 | 0.1502 | 0.881 | 0.048311411 | count | 1 |
| CSNK1G2    | 0.0380568 | 0.1522924 | 0.2499 | 0.803 | 0.048525276 | count | 1 |
| COPA       | 0.0352787 | 0.1008377 | 0.3499 | 0.726 | 0.048561459 | count | 1 |
| CRLS1      | 0.0373244 | 0.1215495 | 0.3071 | 0.759 | 0.048676293 | count | 1 |
| RBM7       | 0.0360572 | 0.097554  | 0.3696 | 0.712 | 0.04870048  | count | 1 |
| B3GNT10    | 0.2638866 | 0.5705488 | 0.4625 | 0.644 | 0.048823757 | count | 1 |
| ERCC2      | 0.0483157 | 0.2854641 | 0.1693 | 0.866 | 0.048872786 | count | 1 |
| C6orf47    | 0.0391323 | 0.1461981 | 0.2677 | 0.789 | 0.04901336  | count | 1 |
| AC004846.1 | 0.0476035 | 0.3481277 | 0.1367 | 0.891 | 0.049071659 | count | 1 |
| ELP3       | 0.0454733 | 0.3082987 | 0.1475 | 0.883 | 0.04909566  | count | 1 |
| GNA13      | 0.0406618 | 0.1731286 | 0.2349 | 0.814 | 0.049158179 | count | 1 |
| SNAPC2     | 0.0373703 | 0.1308185 | 0.2857 | 0.775 | 0.049197924 | count | 1 |
| AC015922.4 | 0.0503799 | 0.320393  | 0.1572 | 0.875 | 0.049313905 | count | 1 |
| HSPD1      | 0.034695  | 0.0495068 | 0.7008 | 0.483 | 0.049340007 | count | 1 |
| DIRAS1     | 0.5396547 | 0.8443051 | 0.6392 | 0.523 | 0.049364989 | count | 1 |
| PCDHB10    | 0.0977596 | 0.3199517 | 0.3055 | 0.76  | 0.049451827 | count | 1 |
| NEB        | 0.2687108 | 1.152558  | 0.2331 | 0.816 | 0.049654627 | count | 1 |
| C3orf67    | 0.2687108 | 1.152558  | 0.2331 | 0.816 | 0.049654627 | count | 1 |
| AC107204.1 | 0.2687108 | 1.193605  | 0.2251 | 0.822 | 0.049654627 | count | 1 |



|            |           |           |        |        |             |       |   |
|------------|-----------|-----------|--------|--------|-------------|-------|---|
| VEPH1      | 0.2687108 | 1.193605  | 0.2251 | 0.822  | 0.049654627 | count | 1 |
| PLS3-AS1   | 0.2687108 | 1.193605  | 0.2251 | 0.822  | 0.049654627 | count | 1 |
| AC100812.1 | 0.2687108 | 1.193605  | 0.2251 | 0.822  | 0.049654627 | count | 1 |
| AC069503.2 | 0.2687108 | 1.193605  | 0.2251 | 0.822  | 0.049654627 | count | 1 |
| AC021504.1 | 0.2687108 | 1.193605  | 0.2251 | 0.822  | 0.049654627 | count | 1 |
| CAMTA1-DT  | 0.2687108 | 1.338447  | 0.2008 | 0.841  | 0.049654627 | count | 1 |
| AC003991.1 | 0.2687108 | 1.338447  | 0.2008 | 0.841  | 0.049654627 | count | 1 |
| SALRNA2    | 0.2687108 | 1.338447  | 0.2008 | 0.841  | 0.049654627 | count | 1 |
| LINC01481  | 0.2687108 | 1.367249  | 0.1965 | 0.844  | 0.049654627 | count | 1 |
| CRYBB2     | 0.2687108 | 1.367249  | 0.1965 | 0.844  | 0.049654627 | count | 1 |
| PPIP5K2    | 0.0366821 | 0.1041025 | 0.3524 | 0.725  | 0.049673998 | count | 1 |
| ISOC1      | 0.04167   | 0.1736931 | 0.2399 | 0.81   | 0.049714405 | count | 1 |
| FAM181B    | 0.049727  | 0.2204218 | 0.2256 | 0.822  | 0.049781316 | count | 1 |
| TSPAN11    | 0.1094853 | 0.4205708 | 0.2603 | 0.795  | 0.049862428 | count | 1 |
| INCA1      | 0.1097083 | 0.5474834 | 0.2004 | 0.841  | 0.049961826 | count | 1 |
| AC073263.2 | 0.5478141 | 0.724575  | 0.756  | 0.45   | 0.049992477 | count | 1 |
| KBTBD7     | 0.0427206 | 0.1901601 | 0.2247 | 0.822  | 0.050020797 | count | 1 |
| R3HCC1L    | 0.0433832 | 0.212531  | 0.2041 | 0.838  | 0.050055108 | count | 1 |
| MEIG1      | 0.1887951 | 0.9619558 | 0.1963 | 0.844  | 0.05012136  | count | 1 |
| LINC01562  | 0.1887951 | 0.9767795 | 0.1933 | 0.847  | 0.05012136  | count | 1 |
| KIF11      | 0.1887951 | 0.9767795 | 0.1933 | 0.847  | 0.05012136  | count | 1 |
| COMMD5     | 0.0373324 | 0.1105164 | 0.3378 | 0.736  | 0.050162596 | count | 1 |
| C7orf43    | 0.0846821 | 0.4232657 | 0.2001 | 0.841  | 0.050168235 | count | 1 |
| MBTPS1     | 0.0359944 | 0.0919161 | 0.3916 | 0.695  | 0.050181588 | count | 1 |
| PROCA1     | 0.0610428 | 0.4819687 | 0.1267 | 0.899  | 0.050184322 | count | 1 |
| NUP50-DT   | 0.0584359 | 0.4101165 | 0.1425 | 0.887  | 0.050334169 | count | 1 |
| AC034236.2 | 0.0588733 | 0.3237777 | 0.1818 | 0.856  | 0.050708431 | count | 1 |
| PRX        | 0.5591479 | 0.6064416 | 0.922  | 0.357  | 0.050858384 | count | 1 |
| AGO2       | 0.0385906 | 0.1428154 | 0.2702 | 0.787  | 0.050868885 | count | 1 |
| RECQL      | 0.0370505 | 0.0870302 | 0.4257 | 0.67   | 0.050868983 | count | 1 |
| TSPYL4     | 0.0398047 | 0.1566606 | 0.2541 | 0.799  | 0.050870574 | count | 1 |
| PPIG       | 0.0357714 | 0.0487943 | 0.7331 | 0.4635 | 0.051026117 | count | 1 |
| YPEL3      | 0.0358865 | 0.0517037 | 0.6941 | 0.488  | 0.051059782 | count | 1 |
| VPS25      | 0.0370994 | 0.0910749 | 0.4073 | 0.684  | 0.051084051 | count | 1 |
| TMEM205    | 0.0365736 | 0.0763386 | 0.4791 | 0.632  | 0.051235128 | count | 1 |
| WDR70      | 0.0393949 | 0.181714  | 0.2168 | 0.828  | 0.051247424 | count | 1 |
| UGCG       | 0.0382456 | 0.1009896 | 0.3787 | 0.705  | 0.051368244 | count | 1 |
| TTN-AS1    | 0.0554677 | 0.2535865 | 0.2187 | 0.827  | 0.051392998 | count | 1 |
| CACYBP     | 0.036559  | 0.0583782 | 0.6262 | 0.531  | 0.051616899 | count | 1 |
| RANBP10    | 0.0542688 | 0.2914414 | 0.1862 | 0.852  | 0.051769517 | count | 1 |
| RFNG       | 0.0376613 | 0.0968645 | 0.3888 | 0.697  | 0.051775074 | count | 1 |
| MCRS1      | 0.0397776 | 0.1320105 | 0.3013 | 0.763  | 0.051830368 | count | 1 |
| MRPS23     | 0.0376294 | 0.0844727 | 0.4455 | 0.656  | 0.051907096 | count | 1 |
| GLRX2      | 0.0385431 | 0.1154755 | 0.3338 | 0.739  | 0.051926833 | count | 1 |
| EXO5       | 0.0691065 | 0.4584267 | 0.1507 | 0.88   | 0.051963086 | count | 1 |

|            |           |           |        |       |             |       |   |
|------------|-----------|-----------|--------|-------|-------------|-------|---|
| ZNF845     | 0.0603419 | 0.4296845 | 0.1404 | 0.888 | 0.051964769 | count | 1 |
| RPS6KB2    | 0.0410974 | 0.1646834 | 0.2496 | 0.803 | 0.052136406 | count | 1 |
| CYSTM1     | 0.0365441 | 0.0461753 | 0.7914 | 0.429 | 0.05219149  | count | 1 |
| GOLGA4     | 0.0369407 | 0.075705  | 0.488  | 0.626 | 0.052196175 | count | 1 |
| MARCKSL1   | 0.0396774 | 0.1934265 | 0.2051 | 0.837 | 0.052197683 | count | 1 |
| CRYGS      | 0.5770893 | 1.013155  | 0.5696 | 0.569 | 0.052215608 | count | 1 |
| AC108865.2 | 0.5770893 | 1.013155  | 0.5696 | 0.569 | 0.052215608 | count | 1 |
| AP001453.1 | 0.5770893 | 1.013155  | 0.5696 | 0.569 | 0.052215608 | count | 1 |
| AL139383.1 | 0.5770893 | 1.013155  | 0.5696 | 0.569 | 0.052215608 | count | 1 |
| AC092287.1 | 0.5770893 | 1.013155  | 0.5696 | 0.569 | 0.052215608 | count | 1 |
| AC005697.2 | 0.5770893 | 1.013155  | 0.5696 | 0.569 | 0.052215608 | count | 1 |
| HOXB6      | 0.5770893 | 1.013155  | 0.5696 | 0.569 | 0.052215608 | count | 1 |
| MIR646HG   | 0.5770893 | 1.013155  | 0.5696 | 0.569 | 0.052215608 | count | 1 |
| AL021707.1 | 0.5770893 | 1.013155  | 0.5696 | 0.569 | 0.052215608 | count | 1 |
| ZNF705E    | 0.5770893 | 1.108662  | 0.5205 | 0.603 | 0.052215608 | count | 1 |
| AC006441.4 | 0.5770893 | 1.108662  | 0.5205 | 0.603 | 0.052215608 | count | 1 |
| HIST1H4F   | 0.5770893 | 1.161013  | 0.4971 | 0.619 | 0.052215608 | count | 1 |
| ASMTL-AS1  | 0.5770893 | 1.161013  | 0.4971 | 0.619 | 0.052215608 | count | 1 |
| AC023813.3 | 0.5770893 | 1.161013  | 0.4971 | 0.619 | 0.052215608 | count | 1 |
| ZNRF3-AS1  | 0.5770893 | 1.161013  | 0.4971 | 0.619 | 0.052215608 | count | 1 |
| RPS6KA1    | 0.5770893 | 1.24523   | 0.4634 | 0.643 | 0.052215608 | count | 1 |
| SORCS3     | 0.5770893 | 1.24523   | 0.4634 | 0.643 | 0.052215608 | count | 1 |
| SCARF1     | 0.2838564 | 0.7424226 | 0.3823 | 0.702 | 0.05224861  | count | 1 |
| SPDYA      | 0.2838564 | 0.7588799 | 0.374  | 0.708 | 0.05224861  | count | 1 |
| PAM16      | 0.2842273 | 0.591524  | 0.4805 | 0.631 | 0.052311858 | count | 1 |
| PDHX       | 0.0435019 | 0.1998608 | 0.2177 | 0.828 | 0.052319936 | count | 1 |
| METTL16    | 0.0405944 | 0.1570185 | 0.2585 | 0.796 | 0.05232519  | count | 1 |
| PNMA8C     | 0.0885309 | 0.4484955 | 0.1974 | 0.844 | 0.052414887 | count | 1 |
| ALDH16A1   | 0.0456283 | 0.1847367 | 0.247  | 0.805 | 0.052428825 | count | 1 |
| RAB22A     | 0.0386818 | 0.0970664 | 0.3985 | 0.69  | 0.052476323 | count | 1 |
| DTX4       | 0.581812  | 0.8940836 | 0.6507 | 0.515 | 0.052570149 | count | 1 |
| ZNF674     | 0.0837214 | 0.3732062 | 0.2243 | 0.823 | 0.052712902 | count | 1 |
| TCF7       | 0.1571686 | 0.3851067 | 0.4081 | 0.683 | 0.052782316 | count | 1 |
| RBM4       | 0.0443952 | 0.165529  | 0.2682 | 0.789 | 0.052806381 | count | 1 |
| AC010864.1 | 0.1325963 | 0.5757998 | 0.2303 | 0.818 | 0.052867691 | count | 1 |
| MTERF4     | 0.0400082 | 0.1347175 | 0.297  | 0.766 | 0.052930209 | count | 1 |
| GID8       | 0.0390624 | 0.1025114 | 0.3811 | 0.703 | 0.05294445  | count | 1 |
| TCEAL9     | 0.0373372 | 0.0572326 | 0.6524 | 0.514 | 0.053034528 | count | 1 |
| SRSF2      | 0.0375783 | 0.0592133 | 0.6346 | 0.526 | 0.05309327  | count | 1 |
| ZNF254     | 0.0440895 | 0.1839277 | 0.2397 | 0.811 | 0.053293883 | count | 1 |
| PRPSAP2    | 0.0418636 | 0.1595113 | 0.2624 | 0.793 | 0.053372679 | count | 1 |
| POC1A      | 0.159357  | 0.8141958 | 0.1957 | 0.845 | 0.053491399 | count | 1 |
| DCTN2      | 0.0378842 | 0.0558659 | 0.6781 | 0.498 | 0.053530842 | count | 1 |
| HDAC2      | 0.0387886 | 0.093112  | 0.4166 | 0.677 | 0.053640972 | count | 1 |
| YKT6       | 0.044166  | 0.2266166 | 0.1949 | 0.845 | 0.053641989 | count | 1 |

|            |           |           |        |       |             |       |   |
|------------|-----------|-----------|--------|-------|-------------|-------|---|
| GATA6      | 0.0387172 | 0.0973477 | 0.3977 | 0.691 | 0.053676879 | count | 1 |
| TMEM181    | 0.0467878 | 0.2334069 | 0.2005 | 0.841 | 0.053757607 | count | 1 |
| ZNF239     | 0.0908575 | 0.4240037 | 0.2143 | 0.83  | 0.053771544 | count | 1 |
| GABRR1     | 0.2037583 | 0.5398446 | 0.3774 | 0.706 | 0.053902197 | count | 1 |
| SIRT4      | 0.2037583 | 0.5564189 | 0.3662 | 0.714 | 0.053902197 | count | 1 |
| MVB12A     | 0.0386886 | 0.0807739 | 0.479  | 0.632 | 0.053911206 | count | 1 |
| BTBD2      | 0.043674  | 0.2100369 | 0.2079 | 0.835 | 0.053943388 | count | 1 |
| ICE1       | 0.0399124 | 0.1058768 | 0.377  | 0.706 | 0.054028316 | count | 1 |
| PTS        | 0.0391729 | 0.0942318 | 0.4157 | 0.678 | 0.054077145 | count | 1 |
| SRRM3      | 0.0605278 | 0.3201628 | 0.1891 | 0.85  | 0.05420453  | count | 1 |
| EMC3       | 0.0388178 | 0.0841724 | 0.4612 | 0.645 | 0.05421993  | count | 1 |
| RPTOR      | 0.0548324 | 0.3533867 | 0.1552 | 0.877 | 0.054274497 | count | 1 |
| MEGF8      | 0.05373   | 0.2641088 | 0.2034 | 0.839 | 0.054325013 | count | 1 |
| AL023806.1 | 0.086723  | 0.4991231 | 0.1738 | 0.862 | 0.054576755 | count | 1 |
| COPZ1      | 0.0391739 | 0.0792165 | 0.4945 | 0.621 | 0.054739317 | count | 1 |
| GGA2       | 0.0451913 | 0.2033344 | 0.2223 | 0.824 | 0.054755531 | count | 1 |
| HNMT       | 0.0396107 | 0.0847951 | 0.4671 | 0.64  | 0.054894407 | count | 1 |
| HMG3       | 0.0384635 | 0.0496019 | 0.7754 | 0.438 | 0.054913283 | count | 1 |
| SIK1       | 0.2999463 | 0.8057957 | 0.3722 | 0.71  | 0.054980133 | count | 1 |
| TMEM185B   | 0.0492279 | 0.2336706 | 0.2107 | 0.833 | 0.055024926 | count | 1 |
| ARID1A     | 0.0426523 | 0.1506567 | 0.2831 | 0.777 | 0.055082164 | count | 1 |
| PDCD11     | 0.0551027 | 0.2778335 | 0.1983 | 0.843 | 0.05513758  | count | 1 |
| AZIN2      | 0.1007236 | 0.4756508 | 0.2118 | 0.832 | 0.0554227   | count | 1 |
| TIGD6      | 0.0590707 | 0.3839337 | 0.1539 | 0.878 | 0.055540042 | count | 1 |
| DDX11      | 0.0609864 | 0.2883689 | 0.2115 | 0.833 | 0.055570571 | count | 1 |
| CHMP2B     | 0.0394832 | 0.0667458 | 0.5915 | 0.554 | 0.055580113 | count | 1 |
| MIER3      | 0.0555578 | 0.2324717 | 0.239  | 0.811 | 0.055590804 | count | 1 |
| CFL2       | 0.0394371 | 0.063602  | 0.6201 | 0.535 | 0.055658751 | count | 1 |
| GOLGA8H    | 0.6244141 | 0.7985789 | 0.7819 | 0.434 | 0.055716759 | count | 1 |
| PSMD6-AS1  | 0.6244141 | 0.9749295 | 0.6405 | 0.522 | 0.055716759 | count | 1 |
| IRF3       | 0.0409467 | 0.1169491 | 0.3501 | 0.726 | 0.055734294 | count | 1 |
| ZNF394     | 0.0436072 | 0.1679664 | 0.2596 | 0.795 | 0.055787203 | count | 1 |
| RAD1       | 0.0433663 | 0.1816171 | 0.2388 | 0.811 | 0.055837346 | count | 1 |
| TRIM23     | 0.0445314 | 0.1310733 | 0.3397 | 0.734 | 0.056019707 | count | 1 |
| PUM2       | 0.0429034 | 0.1602296 | 0.2678 | 0.789 | 0.056075302 | count | 1 |
| NDUFV1     | 0.0401667 | 0.0825238 | 0.4867 | 0.626 | 0.056075336 | count | 1 |
| VSIG10L    | 0.1111865 | 0.4582754 | 0.2426 | 0.808 | 0.056105015 | count | 1 |
| PYGO2      | 0.0568186 | 0.2320168 | 0.2449 | 0.807 | 0.056230691 | count | 1 |
| TSR1       | 0.0452437 | 0.1882075 | 0.2404 | 0.81  | 0.056283685 | count | 1 |
| SMG8       | 0.0749566 | 0.4462595 | 0.168  | 0.867 | 0.056317635 | count | 1 |
| AC114490.2 | 0.3079026 | 0.8387598 | 0.3671 | 0.714 | 0.056321642 | count | 1 |
| UBE2L5     | 0.3079026 | 0.8387598 | 0.3671 | 0.714 | 0.056321642 | count | 1 |
| HMSD       | 0.3079026 | 0.8387598 | 0.3671 | 0.714 | 0.056321642 | count | 1 |
| MTRF2      | 0.3079026 | 1.049516  | 0.2934 | 0.769 | 0.056321642 | count | 1 |
| CENPJ      | 0.0494787 | 0.2125354 | 0.2328 | 0.816 | 0.056362277 | count | 1 |

|            |           |           |        |        |             |       |   |
|------------|-----------|-----------|--------|--------|-------------|-------|---|
| PSMC3IP    | 0.0686296 | 0.2809139 | 0.2443 | 0.807  | 0.056370009 | count | 1 |
| UCHL5      | 0.0426127 | 0.1160877 | 0.3671 | 0.714  | 0.056405516 | count | 1 |
| ZNF417     | 0.6340655 | 0.7075559 | 0.8961 | 0.37   | 0.05641685  | count | 1 |
| FKBP1B     | 0.0442741 | 0.1983805 | 0.2232 | 0.823  | 0.056508564 | count | 1 |
| AC136475.1 | 0.1120457 | 0.3892722 | 0.2878 | 0.773  | 0.056529591 | count | 1 |
| ATXN1      | 0.0427539 | 0.1456965 | 0.2934 | 0.769  | 0.05687188  | count | 1 |
| FCRLB      | 0.1258627 | 0.5818353 | 0.2163 | 0.829  | 0.057138537 | count | 1 |
| EDDM13     | 0.6444166 | 1.1814993 | 0.5454 | 0.5855 | 0.057162482 | count | 1 |
| AL118506.1 | 0.1440189 | 0.6073148 | 0.2371 | 0.813  | 0.057286217 | count | 1 |
| TMX1       | 0.0423175 | 0.0889251 | 0.4759 | 0.634  | 0.05748844  | count | 1 |
| RAB5B      | 0.0441171 | 0.1308862 | 0.3371 | 0.736  | 0.057570272 | count | 1 |
| MED29      | 0.0420137 | 0.124459  | 0.3376 | 0.736  | 0.057657016 | count | 1 |
| JTB        | 0.0406857 | 0.05161   | 0.7883 | 0.431  | 0.0577766   | count | 1 |
| TWISTNB    | 0.0421149 | 0.0956336 | 0.4404 | 0.66   | 0.057784454 | count | 1 |
| C1orf123   | 0.0408871 | 0.057558  | 0.7104 | 0.478  | 0.057796056 | count | 1 |
| MRPS17     | 0.054373  | 0.2821016 | 0.1927 | 0.847  | 0.057857344 | count | 1 |
| RGPD5      | 0.0567041 | 0.3121283 | 0.1817 | 0.856  | 0.05787665  | count | 1 |
| C20orf27   | 0.043368  | 0.1183487 | 0.3664 | 0.714  | 0.058072214 | count | 1 |
| RFC5       | 0.0522561 | 0.2415491 | 0.2163 | 0.829  | 0.058094127 | count | 1 |
| NSD3       | 0.0410382 | 0.0713186 | 0.5754 | 0.565  | 0.058133479 | count | 1 |
| API5       | 0.0447714 | 0.126791  | 0.3531 | 0.724  | 0.05818358  | count | 1 |
| MT-ND4L    | 0.040796  | 0.0396988 | 1.0276 | 0.304  | 0.058295156 | count | 1 |
| CUL4A      | 0.0474035 | 0.1577654 | 0.3005 | 0.764  | 0.058314138 | count | 1 |
| IVD        | 0.0428889 | 0.1295227 | 0.3311 | 0.741  | 0.058422011 | count | 1 |
| TMEM123    | 0.0417437 | 0.0820142 | 0.509  | 0.611  | 0.058555038 | count | 1 |
| NAPA       | 0.0421081 | 0.088294  | 0.4769 | 0.633  | 0.058556952 | count | 1 |
| WDPCP      | 0.0614619 | 0.2903736 | 0.2117 | 0.832  | 0.058591399 | count | 1 |
| TMED1      | 0.0434028 | 0.1034914 | 0.4194 | 0.675  | 0.058594004 | count | 1 |
| AC005253.1 | 0.32166   | 0.6861212 | 0.4688 | 0.639  | 0.058626882 | count | 1 |
| WEE2-AS1   | 0.32166   | 0.7373088 | 0.4363 | 0.663  | 0.058626882 | count | 1 |
| TNFSF13    | 0.32166   | 0.7425798 | 0.4332 | 0.665  | 0.058626882 | count | 1 |
| MBLAC1     | 0.0570204 | 0.3070338 | 0.1857 | 0.853  | 0.058734899 | count | 1 |
| AC004241.1 | 0.129783  | 0.6345855 | 0.2045 | 0.838  | 0.058873028 | count | 1 |
| ISPD       | 0.0996282 | 0.3791051 | 0.2628 | 0.793  | 0.058875982 | count | 1 |
| MCAT       | 0.0483882 | 0.1653219 | 0.2927 | 0.77   | 0.058894247 | count | 1 |
| MRPS30     | 0.0448154 | 0.1315258 | 0.3407 | 0.733  | 0.058909877 | count | 1 |
| ZKSCAN7    | 0.1482416 | 0.459041  | 0.3229 | 0.747  | 0.058914082 | count | 1 |
| PNPLA7     | 0.6692065 | 0.8365578 | 0.8    | 0.424  | 0.058926401 | count | 1 |
| AC068790.9 | 0.6692065 | 1.079592  | 0.6199 | 0.535  | 0.058926401 | count | 1 |
| DYM        | 0.0463188 | 0.1524719 | 0.3038 | 0.761  | 0.058972658 | count | 1 |
| PBLD       | 0.0785553 | 0.3195439 | 0.2458 | 0.806  | 0.058992818 | count | 1 |
| SMC6       | 0.0450719 | 0.1510563 | 0.2984 | 0.765  | 0.059165157 | count | 1 |
| HAPLN1     | 0.0444751 | 0.1610816 | 0.2761 | 0.782  | 0.059189607 | count | 1 |
| ORC4       | 0.045039  | 0.129879  | 0.3468 | 0.729  | 0.059203471 | count | 1 |
| LINC00630  | 0.0703766 | 0.5015451 | 0.1403 | 0.888  | 0.059209647 | count | 1 |

|            |           |           |        |        |             |       |   |
|------------|-----------|-----------|--------|--------|-------------|-------|---|
| TP63       | 0.673415  | 1.064351  | 0.6327 | 0.527  | 0.059222816 | count | 1 |
| CFAP74     | 0.673415  | 1.215035  | 0.5542 | 0.579  | 0.059222816 | count | 1 |
| AL451064.1 | 0.673415  | 1.215035  | 0.5542 | 0.579  | 0.059222816 | count | 1 |
| HTR2A      | 0.0674395 | 0.3248768 | 0.2076 | 0.836  | 0.059225433 | count | 1 |
| HSP90B1    | 0.0412173 | 0.0323675 | 1.2734 | 0.203  | 0.059284525 | count | 1 |
| TAGLN2     | 0.0412579 | 0.0336334 | 1.2267 | 0.22   | 0.059304877 | count | 1 |
| AKR1E2     | 0.1775119 | 0.6427107 | 0.2762 | 0.782  | 0.059346026 | count | 1 |
| ARHGAP10   | 0.042285  | 0.0706319 | 0.5987 | 0.549  | 0.059523053 | count | 1 |
| RAB23      | 0.0446366 | 0.1439326 | 0.3101 | 0.756  | 0.059579742 | count | 1 |
| TTL11      | 0.082379  | 0.2949892 | 0.2793 | 0.78   | 0.059632054 | count | 1 |
| ZNF773     | 0.0679808 | 0.3137523 | 0.2167 | 0.828  | 0.05969725  | count | 1 |
| ARHGAP28   | 0.1786434 | 0.5077517 | 0.3518 | 0.725  | 0.059709258 | count | 1 |
| ACTR10     | 0.0423535 | 0.0659445 | 0.6423 | 0.521  | 0.059717    | count | 1 |
| MFF        | 0.0429706 | 0.0836129 | 0.5139 | 0.607  | 0.05978704  | count | 1 |
| RAP2A      | 0.0447189 | 0.1475142 | 0.3031 | 0.762  | 0.059853299 | count | 1 |
| AC104187.1 | 0.329512  | 0.881733  | 0.3737 | 0.709  | 0.059934427 | count | 1 |
| PGM5P4-AS1 | 0.329512  | 0.9694193 | 0.3399 | 0.734  | 0.059934427 | count | 1 |
| TSPYL1     | 0.0425709 | 0.0696421 | 0.6113 | 0.541  | 0.060028379 | count | 1 |
| TCEA3      | 0.0430715 | 0.0765269 | 0.5628 | 0.574  | 0.060044148 | count | 1 |
| DCAF17     | 0.05347   | 0.2199788 | 0.2431 | 0.808  | 0.060051448 | count | 1 |
| YJU2       | 0.0488568 | 0.1666662 | 0.2931 | 0.769  | 0.060098345 | count | 1 |
| WDR59      | 0.055     | 0.2266138 | 0.2427 | 0.808  | 0.060099172 | count | 1 |
| METTL1     | 0.053666  | 0.206443  | 0.26   | 0.795  | 0.060270842 | count | 1 |
| PES1       | 0.0513276 | 0.2709625 | 0.1894 | 0.85   | 0.060274591 | count | 1 |
| C22orf46   | 0.0609771 | 0.2827342 | 0.2157 | 0.829  | 0.060324097 | count | 1 |
| SSRP1      | 0.0458623 | 0.1136059 | 0.4037 | 0.686  | 0.060325083 | count | 1 |
| SLC30A5    | 0.0477553 | 0.1418633 | 0.3366 | 0.736  | 0.060326054 | count | 1 |
| AC010331.1 | 0.0960396 | 0.5829925 | 0.1647 | 0.869  | 0.060350176 | count | 1 |
| RBFOX2     | 0.0432269 | 0.0828948 | 0.5215 | 0.602  | 0.060376114 | count | 1 |
| MRPL15     | 0.044897  | 0.1145159 | 0.3921 | 0.695  | 0.060457602 | count | 1 |
| TBC1D5     | 0.045336  | 0.117723  | 0.3851 | 0.7    | 0.060540887 | count | 1 |
| CCDC58     | 0.0480053 | 0.201987  | 0.2377 | 0.812  | 0.060556693 | count | 1 |
| PIAS4      | 0.0584127 | 0.2380902 | 0.2453 | 0.806  | 0.060688457 | count | 1 |
| DNM3       | 0.134092  | 0.3977597 | 0.3371 | 0.736  | 0.060776265 | count | 1 |
| ZNF367     | 0.1822803 | 0.7117826 | 0.2561 | 0.798  | 0.060875447 | count | 1 |
| ZNF81      | 0.1344907 | 0.4293772 | 0.3132 | 0.754  | 0.060952192 | count | 1 |
| TCEAL6     | 0.0485579 | 0.2534737 | 0.1916 | 0.848  | 0.060985307 | count | 1 |
| AC004771.3 | 0.3359506 | 0.7115411 | 0.4721 | 0.637  | 0.061002182 | count | 1 |
| DPF2       | 0.0462062 | 0.1277789 | 0.3616 | 0.718  | 0.061011077 | count | 1 |
| ABCF3      | 0.0538166 | 0.1874578 | 0.2871 | 0.774  | 0.06101462  | count | 1 |
| MPZ        | 0.6996507 | 1.2030919 | 0.5815 | 0.5609 | 0.061050875 | count | 1 |
| KIAA1522   | 0.1538579 | 0.5057527 | 0.3042 | 0.761  | 0.061074499 | count | 1 |
| SNRNP27    | 0.0445238 | 0.0995937 | 0.4471 | 0.655  | 0.061111566 | count | 1 |
| WDR35      | 0.0515553 | 0.2628514 | 0.1961 | 0.845  | 0.061119412 | count | 1 |
| TMEM39B    | 0.0520951 | 0.1688764 | 0.3085 | 0.758  | 0.061173433 | count | 1 |

|            |           |           |        |       |             |       |   |
|------------|-----------|-----------|--------|-------|-------------|-------|---|
| TMEM167B   | 0.0460725 | 0.1205002 | 0.3823 | 0.702 | 0.06121779  | count | 1 |
| ZNF169     | 0.1352412 | 0.4271792 | 0.3166 | 0.752 | 0.061283276 | count | 1 |
| HMG3-AS1   | 0.0613485 | 0.2666225 | 0.2301 | 0.818 | 0.061354439 | count | 1 |
| ATAT1      | 0.0663822 | 0.3355287 | 0.1978 | 0.843 | 0.061438447 | count | 1 |
| WDR18      | 0.04637   | 0.1266278 | 0.3662 | 0.714 | 0.06164515  | count | 1 |
| BDNF-AS    | 0.0795228 | 0.3040182 | 0.2616 | 0.794 | 0.061683272 | count | 1 |
| NUBP1      | 0.0463786 | 0.1543162 | 0.3005 | 0.764 | 0.061688648 | count | 1 |
| LSMEM1     | 0.1363641 | 0.4179066 | 0.3263 | 0.744 | 0.061778456 | count | 1 |
| TMEM135    | 0.0478689 | 0.1853439 | 0.2583 | 0.796 | 0.06186862  | count | 1 |
| MRPL16     | 0.0445242 | 0.0810538 | 0.5493 | 0.583 | 0.061954039 | count | 1 |
| GAL3ST4    | 0.0619732 | 0.2706004 | 0.229  | 0.819 | 0.061975866 | count | 1 |
| SLC35E1    | 0.0513197 | 0.1644761 | 0.312  | 0.755 | 0.062013205 | count | 1 |
| YES1       | 0.0479838 | 0.1428853 | 0.3358 | 0.737 | 0.062016916 | count | 1 |
| PPP2R2D    | 0.047256  | 0.1574657 | 0.3001 | 0.764 | 0.062278353 | count | 1 |
| F13A1      | 0.1869246 | 0.4652058 | 0.4018 | 0.688 | 0.062361747 | count | 1 |
| ARL9       | 0.1869991 | 0.4985908 | 0.3751 | 0.708 | 0.062385565 | count | 1 |
| METTL23    | 0.0456768 | 0.0904133 | 0.5052 | 0.613 | 0.062457499 | count | 1 |
| RBFA       | 0.0465272 | 0.1139437 | 0.4083 | 0.683 | 0.062506425 | count | 1 |
| AC093495.1 | 0.2384441 | 0.5681258 | 0.4197 | 0.675 | 0.062556102 | count | 1 |
| NHLRC4     | 0.1577499 | 0.6273304 | 0.2515 | 0.801 | 0.062568497 | count | 1 |
| POLR3C     | 0.0517978 | 0.1806263 | 0.2868 | 0.774 | 0.062589567 | count | 1 |
| DNAJC28    | 0.1060357 | 0.4680403 | 0.2266 | 0.821 | 0.062595219 | count | 1 |
| C14orf93   | 0.0783633 | 0.3043183 | 0.2575 | 0.797 | 0.062601517 | count | 1 |
| RBM4B      | 0.0573384 | 0.1890812 | 0.3032 | 0.762 | 0.062644415 | count | 1 |
| IFI16      | 0.0443628 | 0.0569776 | 0.7786 | 0.436 | 0.062797517 | count | 1 |
| RASAL2-AS1 | 0.1884594 | 0.5870519 | 0.321  | 0.748 | 0.062852205 | count | 1 |
| SLC31A1    | 0.0530515 | 0.2560707 | 0.2072 | 0.836 | 0.063075942 | count | 1 |
| PCBP1      | 0.0441661 | 0.0408352 | 1.0816 | 0.28  | 0.063164079 | count | 1 |
| PAQR3      | 0.0663474 | 0.2871441 | 0.2311 | 0.817 | 0.063219297 | count | 1 |
| CCDC190    | 0.0706989 | 0.7289188 | 0.097  | 0.923 | 0.063244507 | count | 1 |
| EDC4       | 0.2422342 | 0.6926299 | 0.3497 | 0.727 | 0.063492338 | count | 1 |
| NUDT9      | 0.046487  | 0.0949644 | 0.4895 | 0.625 | 0.063521147 | count | 1 |
| ARL2       | 0.0446089 | 0.04267   | 1.0454 | 0.296 | 0.063683566 | count | 1 |
| PTPN12     | 0.0462727 | 0.1072751 | 0.4313 | 0.666 | 0.063685855 | count | 1 |
| PPP2R3C    | 0.0475147 | 0.1239555 | 0.3833 | 0.702 | 0.063701391 | count | 1 |
| CHRNE      | 0.1266315 | 0.7684275 | 0.1648 | 0.869 | 0.063715649 | count | 1 |
| TMEM218    | 0.0507274 | 0.1351735 | 0.3753 | 0.707 | 0.063800023 | count | 1 |
| CHCHD3     | 0.0465208 | 0.0926747 | 0.502  | 0.616 | 0.063813138 | count | 1 |
| NPIPB4     | 0.2438284 | 0.6288524 | 0.3877 | 0.698 | 0.063885582 | count | 1 |
| TRPV1      | 0.741614  | 0.6039965 | 1.2278 | 0.22  | 0.063904579 | count | 1 |
| NAPEPLD    | 0.0510037 | 0.2421366 | 0.2106 | 0.833 | 0.063953927 | count | 1 |
| CAST       | 0.0446419 | 0.0324678 | 1.375  | 0.169 | 0.06400885  | count | 1 |
| DCAF15     | 0.0522624 | 0.246586  | 0.2119 | 0.832 | 0.064016264 | count | 1 |
| PIP5K1A    | 0.0563449 | 0.2013939 | 0.2798 | 0.78  | 0.064157768 | count | 1 |
| RGS16      | 0.0454449 | 0.1216017 | 0.3737 | 0.709 | 0.064186996 | count | 1 |

|            |           |           |        |       |             |       |   |
|------------|-----------|-----------|--------|-------|-------------|-------|---|
| AC044839.1 | 0.0705918 | 0.3024306 | 0.2334 | 0.815 | 0.064259043 | count | 1 |
| ZNF37A     | 0.0499699 | 0.1470816 | 0.3397 | 0.734 | 0.064261303 | count | 1 |
| TMUB2      | 0.0506098 | 0.1303403 | 0.3883 | 0.698 | 0.064266017 | count | 1 |
| AC016575.1 | 0.1623249 | 0.66304   | 0.2448 | 0.807 | 0.064321375 | count | 1 |
| TIMM29     | 0.0508672 | 0.1441081 | 0.353  | 0.724 | 0.064592314 | count | 1 |
| TMX4       | 0.0458261 | 0.067362  | 0.6803 | 0.496 | 0.064611827 | count | 1 |
| AC009283.1 | 0.2468488 | 0.8472325 | 0.2914 | 0.771 | 0.06462974  | count | 1 |
| LYG1       | 0.2468488 | 0.8618485 | 0.2864 | 0.775 | 0.06462974  | count | 1 |
| AL358472.5 | 0.2468488 | 0.9488804 | 0.2601 | 0.795 | 0.06462974  | count | 1 |
| LINC01301  | 0.2468488 | 0.9488804 | 0.2601 | 0.795 | 0.06462974  | count | 1 |
| PSMA4      | 0.0457649 | 0.0593553 | 0.771  | 0.441 | 0.064726298 | count | 1 |
| ADGRB2     | 0.7545388 | 1.133455  | 0.6657 | 0.506 | 0.06476628  | count | 1 |
| RAVER1     | 0.7545388 | 1.133455  | 0.6657 | 0.506 | 0.06476628  | count | 1 |
| CEACAM19   | 0.7545388 | 1.133455  | 0.6657 | 0.506 | 0.06476628  | count | 1 |
| HDHD5-AS1  | 0.7545388 | 1.133455  | 0.6657 | 0.506 | 0.06476628  | count | 1 |
| AL356056.1 | 0.7545388 | 1.214153  | 0.6215 | 0.534 | 0.06476628  | count | 1 |
| AC124045.1 | 0.7545388 | 1.232336  | 0.6123 | 0.54  | 0.06476628  | count | 1 |
| AC055713.1 | 0.3588804 | 0.6789567 | 0.5286 | 0.597 | 0.064772362 | count | 1 |
| EPOP       | 0.755089  | 0.8181255 | 0.923  | 0.356 | 0.064802761 | count | 1 |
| GINS4      | 0.755089  | 0.9196459 | 0.8211 | 0.412 | 0.064802761 | count | 1 |
| FAM214A    | 0.0542287 | 0.2168716 | 0.25   | 0.803 | 0.064839797 | count | 1 |
| SLC25A30   | 0.1182629 | 0.3327952 | 0.3554 | 0.722 | 0.064872848 | count | 1 |
| SUPV3L1    | 0.0573817 | 0.2323233 | 0.247  | 0.805 | 0.065042634 | count | 1 |
| NOL9       | 0.0522559 | 0.1491209 | 0.3504 | 0.726 | 0.065100262 | count | 1 |
| WDR17      | 0.248769  | 0.506938  | 0.4907 | 0.624 | 0.065102218 | count | 1 |
| C19orf47   | 0.1038469 | 0.3853393 | 0.2695 | 0.788 | 0.065174529 | count | 1 |
| ACAD8      | 0.0552441 | 0.1838432 | 0.3005 | 0.764 | 0.065279659 | count | 1 |
| VPS26A     | 0.0470259 | 0.0819786 | 0.5736 | 0.566 | 0.0653065   | count | 1 |
| FEM1A      | 0.0871087 | 0.3029604 | 0.2875 | 0.774 | 0.065340389 | count | 1 |
| AP001469.3 | 0.3630226 | 0.7398824 | 0.4906 | 0.624 | 0.06544804  | count | 1 |
| SCGB1B2P   | 0.3630226 | 0.8100198 | 0.4482 | 0.654 | 0.06544804  | count | 1 |
| AC015726.1 | 0.3630226 | 0.8388739 | 0.4327 | 0.665 | 0.06544804  | count | 1 |
| CYP4F3     | 0.3630226 | 1.02072   | 0.3557 | 0.722 | 0.06544804  | count | 1 |
| JADE3      | 0.3630226 | 1.107288  | 0.3278 | 0.743 | 0.06544804  | count | 1 |
| ZNF75A     | 0.0552331 | 0.1888987 | 0.2924 | 0.77  | 0.065662708 | count | 1 |
| ODF2       | 0.0638348 | 0.2225504 | 0.2868 | 0.774 | 0.065718225 | count | 1 |
| NBPF15     | 0.0824054 | 0.3742832 | 0.2202 | 0.826 | 0.065797048 | count | 1 |
| ST3GAL4    | 0.0483528 | 0.1084033 | 0.446  | 0.656 | 0.065892954 | count | 1 |
| ORC2       | 0.0584248 | 0.2556214 | 0.2286 | 0.819 | 0.065913695 | count | 1 |
| AC015712.2 | 0.3664516 | 0.7539237 | 0.4861 | 0.627 | 0.066006137 | count | 1 |
| TSPYL2     | 0.0480514 | 0.0955596 | 0.5028 | 0.615 | 0.066049902 | count | 1 |
| USP19      | 0.0786979 | 0.2976233 | 0.2644 | 0.791 | 0.066145832 | count | 1 |
| ROR2       | 0.0855267 | 0.4955    | 0.1726 | 0.863 | 0.066288241 | count | 1 |
| BRD3       | 0.0508788 | 0.1324887 | 0.384  | 0.701 | 0.066329048 | count | 1 |
| IGSF9B     | 0.1320533 | 1.079501  | 0.1223 | 0.903 | 0.066376418 | count | 1 |

|             |           |           |        |       |             |       |   |
|-------------|-----------|-----------|--------|-------|-------------|-------|---|
| BICD1       | 0.0525988 | 0.1880519 | 0.2797 | 0.78  | 0.066613662 | count | 1 |
| ZNF593      | 0.0485947 | 0.1012108 | 0.4801 | 0.631 | 0.066708361 | count | 1 |
| RSBN1       | 0.0488382 | 0.0990828 | 0.4929 | 0.622 | 0.066716093 | count | 1 |
| UCHL3       | 0.048695  | 0.1053755 | 0.4621 | 0.644 | 0.066793514 | count | 1 |
| DOCK2       | 0.3714836 | 0.9050357 | 0.4105 | 0.681 | 0.066823081 | count | 1 |
| MPRIP       | 0.0483631 | 0.0964825 | 0.5013 | 0.616 | 0.066938659 | count | 1 |
| ZBTB11      | 0.0542335 | 0.1758154 | 0.3085 | 0.758 | 0.066957364 | count | 1 |
| KLRD1       | 0.148254  | 0.9152901 | 0.162  | 0.871 | 0.067007574 | count | 1 |
| MYPOP       | 0.0636021 | 0.2336459 | 0.2722 | 0.785 | 0.0671276   | count | 1 |
| PRSS36      | 0.2571864 | 0.5728463 | 0.449  | 0.653 | 0.067167781 | count | 1 |
| APMAP       | 0.0504856 | 0.1126509 | 0.4482 | 0.654 | 0.067281023 | count | 1 |
| PPP1R26-AS1 | 0.7938802 | 0.7789855 | 1.0191 | 0.308 | 0.067339885 | count | 1 |
| OAZ2        | 0.0491567 | 0.092364  | 0.5322 | 0.595 | 0.067343836 | count | 1 |
| PCDHGB1     | 0.3747423 | 1.0285641 | 0.3643 | 0.716 | 0.067350835 | count | 1 |
| AP001922.5  | 0.3747423 | 1.0285641 | 0.3643 | 0.716 | 0.067350835 | count | 1 |
| AL731563.3  | 0.3747423 | 1.0285641 | 0.3643 | 0.716 | 0.067350835 | count | 1 |
| LBP         | 0.3747423 | 1.0285641 | 0.3643 | 0.716 | 0.067350835 | count | 1 |
| AL445423.1  | 0.3747423 | 1.0373804 | 0.3612 | 0.718 | 0.067350835 | count | 1 |
| NHEJ1       | 0.3747423 | 1.0373804 | 0.3612 | 0.718 | 0.067350835 | count | 1 |
| POLE2       | 0.3747423 | 1.0373804 | 0.3612 | 0.718 | 0.067350835 | count | 1 |
| P2RX6       | 0.3747423 | 1.0373804 | 0.3612 | 0.718 | 0.067350835 | count | 1 |
| NHSL2       | 0.0566872 | 0.2797626 | 0.2026 | 0.839 | 0.067386544 | count | 1 |
| ABHD15      | 0.0869792 | 0.427762  | 0.2033 | 0.839 | 0.067401177 | count | 1 |
| JRK         | 0.1492796 | 0.3394879 | 0.4397 | 0.66  | 0.067457398 | count | 1 |
| OCLN        | 0.2589115 | 0.7697882 | 0.3363 | 0.737 | 0.067589978 | count | 1 |
| HNRNPDL     | 0.0472098 | 0.0380171 | 1.2418 | 0.214 | 0.067625817 | count | 1 |
| DDX18       | 0.0478335 | 0.0646699 | 0.7397 | 0.46  | 0.067632121 | count | 1 |
| AASDHPPT    | 0.0495288 | 0.1033586 | 0.4792 | 0.632 | 0.067642971 | count | 1 |
| IFT80       | 0.0651522 | 0.266727  | 0.2443 | 0.807 | 0.067654651 | count | 1 |
| PRPS1       | 0.051289  | 0.1292343 | 0.3969 | 0.691 | 0.067672361 | count | 1 |
| CITED2      | 0.0480166 | 0.0776376 | 0.6185 | 0.536 | 0.067679524 | count | 1 |
| NCAPD3      | 0.0641574 | 0.2274182 | 0.2821 | 0.778 | 0.067710841 | count | 1 |
| AL139220.2  | 0.0905423 | 0.3533182 | 0.2563 | 0.798 | 0.067884192 | count | 1 |
| KLHL30      | 0.0808707 | 0.3942686 | 0.2051 | 0.837 | 0.067954641 | count | 1 |
| MSL3        | 0.0539986 | 0.1562744 | 0.3455 | 0.73  | 0.068005405 | count | 1 |
| VMA21       | 0.0506639 | 0.1138625 | 0.445  | 0.656 | 0.068031161 | count | 1 |
| REL         | 0.0513197 | 0.158257  | 0.3243 | 0.746 | 0.068181975 | count | 1 |
| CCDC89      | 0.1510816 | 0.5252529 | 0.2876 | 0.774 | 0.068247305 | count | 1 |
| DPH1        | 0.2619976 | 0.8224325 | 0.3186 | 0.75  | 0.068344298 | count | 1 |
| ILVBL       | 0.0523116 | 0.1413147 | 0.3702 | 0.711 | 0.068355021 | count | 1 |
| DHRS4       | 0.0555169 | 0.1601205 | 0.3467 | 0.729 | 0.068406716 | count | 1 |
| EEA1        | 0.0483039 | 0.0528432 | 0.9141 | 0.361 | 0.068414299 | count | 1 |
| EIF3C       | 0.0780397 | 0.437003  | 0.1786 | 0.858 | 0.0684544   | count | 1 |
| EPC2        | 0.0530356 | 0.1305576 | 0.4062 | 0.685 | 0.068536037 | count | 1 |
| TSPOAP1     | 0.0767556 | 0.4669448 | 0.1644 | 0.869 | 0.068618008 | count | 1 |



|            |           |           |        |       |             |       |   |
|------------|-----------|-----------|--------|-------|-------------|-------|---|
| AR         | 0.0498859 | 0.0851327 | 0.586  | 0.558 | 0.068655563 | count | 1 |
| LINC01354  | 0.1253455 | 0.3832635 | 0.327  | 0.744 | 0.068671597 | count | 1 |
| ABHD14B    | 0.0496153 | 0.0879136 | 0.5644 | 0.573 | 0.068725238 | count | 1 |
| ZNF689     | 0.0953211 | 0.2541326 | 0.3751 | 0.708 | 0.068874475 | count | 1 |
| RNF220     | 0.0555082 | 0.1907991 | 0.2909 | 0.771 | 0.068905096 | count | 1 |
| PIGP       | 0.0500145 | 0.0820399 | 0.6096 | 0.542 | 0.068947907 | count | 1 |
| PLEKHA4    | 0.0504734 | 0.1030848 | 0.4896 | 0.624 | 0.068964205 | count | 1 |
| SAMD13     | 0.1745823 | 0.5906458 | 0.2956 | 0.768 | 0.069000147 | count | 1 |
| LINC00240  | 0.3850642 | 0.7541841 | 0.5106 | 0.61  | 0.069015752 | count | 1 |
| NSMF       | 0.055055  | 0.1600466 | 0.344  | 0.731 | 0.069023617 | count | 1 |
| ARPIN      | 0.054637  | 0.1367311 | 0.3996 | 0.689 | 0.069097296 | count | 1 |
| PRKAR1A    | 0.0491606 | 0.0643015 | 0.7645 | 0.445 | 0.069112219 | count | 1 |
| SESN1      | 0.0539592 | 0.1395566 | 0.3866 | 0.699 | 0.06923695  | count | 1 |
| SPATA18    | 0.0761512 | 0.3196725 | 0.2382 | 0.812 | 0.069279569 | count | 1 |
| FAM208A    | 0.0525833 | 0.1127213 | 0.4665 | 0.641 | 0.069290216 | count | 1 |
| GRHPR      | 0.0493138 | 0.0616032 | 0.8005 | 0.423 | 0.069309191 | count | 1 |
| SSR2       | 0.0485277 | 0.0380397 | 1.2757 | 0.202 | 0.069310505 | count | 1 |
| SDCBP2-AS1 | 0.1759319 | 0.5896255 | 0.2984 | 0.765 | 0.069513736 | count | 1 |
| ZNF264     | 0.0562647 | 0.1731446 | 0.325  | 0.745 | 0.069589805 | count | 1 |
| AL356417.2 | 0.829803  | 0.7499451 | 1.1065 | 0.269 | 0.069625773 | count | 1 |
| GPI        | 0.0514663 | 0.104123  | 0.4943 | 0.621 | 0.069741826 | count | 1 |
| MUC20      | 0.8321307 | 0.7874477 | 1.0567 | 0.291 | 0.069771804 | count | 1 |
| TBX22      | 0.832253  | 1.100492  | 0.7563 | 0.45  | 0.069779469 | count | 1 |
| PIPOX      | 0.832253  | 1.100492  | 0.7563 | 0.45  | 0.069779469 | count | 1 |
| AC006449.5 | 0.832253  | 1.100492  | 0.7563 | 0.45  | 0.069779469 | count | 1 |
| DNMT3B     | 0.832253  | 1.100492  | 0.7563 | 0.45  | 0.069779469 | count | 1 |
| HSPB9      | 0.832253  | 1.268517  | 0.6561 | 0.512 | 0.069779469 | count | 1 |
| FST        | 0.0525765 | 0.1587894 | 0.3311 | 0.741 | 0.069994574 | count | 1 |
| ZNF18      | 0.1550746 | 0.3632293 | 0.4269 | 0.669 | 0.069995505 | count | 1 |
| MYNN       | 0.0555064 | 0.1510628 | 0.3674 | 0.713 | 0.070000521 | count | 1 |
| ZNF792     | 0.2691492 | 0.6803782 | 0.3956 | 0.692 | 0.070087612 | count | 1 |
| AL138885.3 | 0.1562053 | 0.4750029 | 0.3289 | 0.742 | 0.070490013 | count | 1 |
| ENOPH1     | 0.054911  | 0.1381342 | 0.3975 | 0.691 | 0.070677432 | count | 1 |
| ITSN1      | 0.0534102 | 0.1232903 | 0.4332 | 0.665 | 0.070680303 | count | 1 |
| CXCL11     | 0.1409082 | 0.7714039 | 0.1827 | 0.855 | 0.070709791 | count | 1 |
| SPEN       | 0.053089  | 0.1283809 | 0.4135 | 0.679 | 0.070815413 | count | 1 |
| CAMK2N2    | 0.2729651 | 0.8537323 | 0.3197 | 0.749 | 0.071015088 | count | 1 |
| TTYH3      | 0.0756986 | 0.6511888 | 0.1162 | 0.907 | 0.071058063 | count | 1 |
| AC092295.2 | 0.2144421 | 0.8685724 | 0.2469 | 0.805 | 0.071100433 | count | 1 |
| RNF40      | 0.0656825 | 0.217575  | 0.3019 | 0.763 | 0.071275439 | count | 1 |
| HADHA      | 0.0502127 | 0.0500748 | 1.0028 | 0.316 | 0.071289902 | count | 1 |
| TAPBP      | 0.0509492 | 0.0822081 | 0.6198 | 0.535 | 0.071345636 | count | 1 |
| ATP6V1A    | 0.0597391 | 0.1772396 | 0.3371 | 0.736 | 0.071409492 | count | 1 |
| PSMA3      | 0.0505373 | 0.0575256 | 0.8785 | 0.38  | 0.071460746 | count | 1 |
| MGAT4A     | 0.0651159 | 0.3476375 | 0.1873 | 0.851 | 0.071527955 | count | 1 |

|            |           |           |        |       |             |       |   |
|------------|-----------|-----------|--------|-------|-------------|-------|---|
| UBA6-AS1   | 0.0689198 | 0.308089  | 0.2237 | 0.823 | 0.071545647 | count | 1 |
| TGFBRAP1   | 0.0648346 | 0.2179923 | 0.2974 | 0.766 | 0.071627161 | count | 1 |
| NES        | 0.0559807 | 0.172359  | 0.3248 | 0.745 | 0.071826293 | count | 1 |
| PPP1R8     | 0.0596231 | 0.1815595 | 0.3284 | 0.743 | 0.071839638 | count | 1 |
| MRPS14     | 0.0527964 | 0.0956327 | 0.5521 | 0.581 | 0.072264908 | count | 1 |
| ARL5A      | 0.0569269 | 0.1901332 | 0.2994 | 0.765 | 0.072272314 | count | 1 |
| LARP4      | 0.0550118 | 0.1327364 | 0.4144 | 0.679 | 0.072294685 | count | 1 |
| C5orf22    | 0.067151  | 0.2525106 | 0.2659 | 0.79  | 0.072389275 | count | 1 |
| CPS1       | 0.4065733 | 0.565824  | 0.7186 | 0.472 | 0.072452292 | count | 1 |
| RPL17      | 0.0531421 | 0.0898213 | 0.5916 | 0.554 | 0.072504389 | count | 1 |
| TAF10      | 0.0516253 | 0.0648426 | 0.7962 | 0.426 | 0.072509033 | count | 1 |
| CHN2       | 0.8767336 | 0.7608607 | 1.1523 | 0.249 | 0.072521583 | count | 1 |
| ATP2C1     | 0.0579572 | 0.1737655 | 0.3335 | 0.739 | 0.072541201 | count | 1 |
| LIPE-AS1   | 0.1233718 | 0.4285595 | 0.2879 | 0.773 | 0.072615989 | count | 1 |
| TNK1       | 0.1844199 | 0.4726199 | 0.3902 | 0.696 | 0.072736675 | count | 1 |
| MIS18BP1   | 0.0546752 | 0.1323839 | 0.413  | 0.68  | 0.072821771 | count | 1 |
| FKRP       | 0.0737205 | 0.2617536 | 0.2816 | 0.778 | 0.072848699 | count | 1 |
| EIF2AK2    | 0.0521629 | 0.0804126 | 0.6487 | 0.517 | 0.07297111  | count | 1 |
| TEFM       | 0.0595472 | 0.1636237 | 0.3639 | 0.716 | 0.073068238 | count | 1 |
| ZNF665     | 0.0717148 | 0.3719393 | 0.1928 | 0.847 | 0.073107266 | count | 1 |
| UTP11      | 0.0541346 | 0.0975943 | 0.5547 | 0.579 | 0.073117979 | count | 1 |
| ZNF444     | 0.0595446 | 0.1888874 | 0.3152 | 0.753 | 0.073212923 | count | 1 |
| CEP112     | 0.0579806 | 0.2067758 | 0.2804 | 0.779 | 0.073317305 | count | 1 |
| MTIF3      | 0.0522669 | 0.0727349 | 0.7186 | 0.472 | 0.073354729 | count | 1 |
| PPP1R1A    | 0.0603081 | 0.1960944 | 0.3075 | 0.758 | 0.073363782 | count | 1 |
| ETF1       | 0.0547516 | 0.109005  | 0.5023 | 0.615 | 0.073484462 | count | 1 |
| ASTE1      | 0.0702666 | 0.2226119 | 0.3156 | 0.752 | 0.0735427   | count | 1 |
| KANTR      | 0.0736279 | 0.3055605 | 0.241  | 0.81  | 0.07355681  | count | 1 |
| KDEL3      | 0.0537989 | 0.0980318 | 0.5488 | 0.583 | 0.073603896 | count | 1 |
| YIPF6      | 0.0531276 | 0.0860132 | 0.6177 | 0.537 | 0.073661886 | count | 1 |
| LINC01099  | 0.8986992 | 1.221639  | 0.7357 | 0.462 | 0.073842265 | count | 1 |
| HEXIM1     | 0.0553523 | 0.1097002 | 0.5046 | 0.614 | 0.073935485 | count | 1 |
| IDS        | 0.0523224 | 0.0702871 | 0.7444 | 0.457 | 0.074031592 | count | 1 |
| MYO15B     | 0.9038917 | 0.9495319 | 0.9519 | 0.341 | 0.074151269 | count | 1 |
| FXR1       | 0.0528258 | 0.0711915 | 0.742  | 0.458 | 0.074219211 | count | 1 |
| UBAP1L     | 0.9061101 | 0.7944927 | 1.1405 | 0.254 | 0.074282916 | count | 1 |
| SLC1A5     | 0.0621562 | 0.1810103 | 0.3434 | 0.731 | 0.074290107 | count | 1 |
| PLEKHA7    | 0.9065383 | 1.070439  | 0.8469 | 0.397 | 0.0743083   | count | 1 |
| GRB7       | 0.9065383 | 1.070439  | 0.8469 | 0.397 | 0.0743083   | count | 1 |
| AC097359.2 | 0.9065383 | 1.606333  | 0.5644 | 0.573 | 0.0743083   | count | 1 |
| AC102953.2 | 0.9079474 | 0.8713905 | 1.042  | 0.298 | 0.074391779 | count | 1 |
| FRMD3      | 0.0695103 | 0.2348933 | 0.2959 | 0.767 | 0.074411398 | count | 1 |
| TECPR2     | 0.0612182 | 0.2018063 | 0.3034 | 0.762 | 0.074467906 | count | 1 |
| RAB11B     | 0.0534479 | 0.0766109 | 0.6977 | 0.485 | 0.074502137 | count | 1 |
| TRMT6      | 0.0575978 | 0.1654538 | 0.3481 | 0.728 | 0.074628469 | count | 1 |

|            |           |           |        |       |             |       |   |
|------------|-----------|-----------|--------|-------|-------------|-------|---|
| ANKLE2     | 0.0570057 | 0.1249886 | 0.4561 | 0.648 | 0.074701544 | count | 1 |
| ZFPL1      | 0.0549198 | 0.1121312 | 0.4898 | 0.624 | 0.074717128 | count | 1 |
| NADSYN1    | 0.0693383 | 0.2174694 | 0.3188 | 0.75  | 0.074735519 | count | 1 |
| HLA-B      | 0.051947  | 0.0367537 | 1.4134 | 0.158 | 0.07473722  | count | 1 |
| TRIM37     | 0.0596622 | 0.1579093 | 0.3778 | 0.706 | 0.074787052 | count | 1 |
| STYXL1     | 0.0636349 | 0.2579549 | 0.2467 | 0.805 | 0.074924286 | count | 1 |
| GPR108     | 0.0551176 | 0.1045248 | 0.5273 | 0.598 | 0.074945314 | count | 1 |
| C3orf18    | 0.084019  | 0.2861519 | 0.2936 | 0.769 | 0.075052522 | count | 1 |
| B3GLCT     | 0.073648  | 0.2374407 | 0.3102 | 0.756 | 0.07506595  | count | 1 |
| ZNF107     | 0.0723602 | 0.2326975 | 0.311  | 0.756 | 0.075096631 | count | 1 |
| PUM1       | 0.0554693 | 0.1088725 | 0.5095 | 0.61  | 0.075229388 | count | 1 |
| C17orf49   | 0.076183  | 0.2901772 | 0.2625 | 0.793 | 0.075265537 | count | 1 |
| IFT172     | 0.0771101 | 0.3474052 | 0.222  | 0.824 | 0.075296084 | count | 1 |
| USP47      | 0.0556796 | 0.1108903 | 0.5021 | 0.616 | 0.075302786 | count | 1 |
| ACSL4      | 0.0577636 | 0.1331209 | 0.4339 | 0.664 | 0.075350603 | count | 1 |
| DBNDD2     | 0.1915384 | 0.5986604 | 0.3199 | 0.749 | 0.075430077 | count | 1 |
| TCEAL8     | 0.053345  | 0.0623597 | 0.8554 | 0.392 | 0.075443841 | count | 1 |
| ZNF76      | 0.0660969 | 0.237091  | 0.2788 | 0.78  | 0.075544006 | count | 1 |
| BCAR3      | 0.0598777 | 0.1562734 | 0.3832 | 0.702 | 0.075711214 | count | 1 |
| RRP7A      | 0.0544787 | 0.0987764 | 0.5515 | 0.581 | 0.07582866  | count | 1 |
| GPR89B     | 0.1096448 | 0.4422781 | 0.2479 | 0.804 | 0.075899511 | count | 1 |
| RHOT1      | 0.0576109 | 0.1377355 | 0.4183 | 0.676 | 0.076002127 | count | 1 |
| SRP19      | 0.0546917 | 0.0911275 | 0.6002 | 0.548 | 0.076013775 | count | 1 |
| KLF5       | 0.0720771 | 0.2788071 | 0.2585 | 0.796 | 0.076023493 | count | 1 |
| FITM2      | 0.0822952 | 0.3324485 | 0.2475 | 0.805 | 0.076043505 | count | 1 |
| MIR4458HG  | 0.0601449 | 0.2063417 | 0.2915 | 0.771 | 0.076048362 | count | 1 |
| 10-Sep     | 0.0540655 | 0.0625805 | 0.8639 | 0.388 | 0.076066836 | count | 1 |
| CCDC12     | 0.0548164 | 0.0872951 | 0.6279 | 0.53  | 0.076119205 | count | 1 |
| AC112206.2 | 0.9418512 | 0.8762443 | 1.0749 | 0.283 | 0.076373505 | count | 1 |
| DDX50      | 0.0554632 | 0.10635   | 0.5215 | 0.602 | 0.076490797 | count | 1 |
| EXOSC7     | 0.0560865 | 0.0972068 | 0.577  | 0.564 | 0.076609438 | count | 1 |
| NME7       | 0.0578461 | 0.1244017 | 0.465  | 0.642 | 0.076630779 | count | 1 |
| HERC3      | 0.0645016 | 0.1813394 | 0.3557 | 0.722 | 0.076646128 | count | 1 |
| SPAG8      | 0.0991113 | 0.4409637 | 0.2248 | 0.822 | 0.076679756 | count | 1 |
| FAM185A    | 0.0717224 | 0.3239159 | 0.2214 | 0.825 | 0.076767068 | count | 1 |
| ZNRF2      | 0.0669824 | 0.1892252 | 0.354  | 0.723 | 0.076871582 | count | 1 |
| ARL13B     | 0.057793  | 0.1242868 | 0.465  | 0.642 | 0.076891407 | count | 1 |
| SYTL2      | 0.0575409 | 0.1576703 | 0.3649 | 0.715 | 0.076925794 | count | 1 |
| C18orf54   | 0.1541539 | 0.4988975 | 0.309  | 0.757 | 0.077163529 | count | 1 |
| YIPF5      | 0.0554348 | 0.075568  | 0.7336 | 0.463 | 0.077284464 | count | 1 |
| CCDC30     | 0.0812667 | 0.3291898 | 0.2469 | 0.805 | 0.077324242 | count | 1 |
| ZNF532     | 0.0574312 | 0.1321071 | 0.4347 | 0.664 | 0.077346539 | count | 1 |
| RNF34      | 0.061909  | 0.1476416 | 0.4193 | 0.675 | 0.077352431 | count | 1 |
| PNO1       | 0.0597079 | 0.1308713 | 0.4562 | 0.648 | 0.077357796 | count | 1 |
| MAD2L2     | 0.0608328 | 0.1478392 | 0.4115 | 0.681 | 0.077414621 | count | 1 |

|            |           |           |        |        |             |       |   |
|------------|-----------|-----------|--------|--------|-------------|-------|---|
| LINC01473  | 0.0946363 | 0.3449684 | 0.2743 | 0.784  | 0.077484561 | count | 1 |
| NCOR1      | 0.0548353 | 0.0678403 | 0.8083 | 0.419  | 0.077632749 | count | 1 |
| AC069185.1 | 0.1422261 | 0.7261546 | 0.1959 | 0.845  | 0.077684934 | count | 1 |
| MAPT       | 0.1727503 | 0.4550358 | 0.3796 | 0.704  | 0.077698888 | count | 1 |
| KCNAB3     | 0.9663716 | 0.9221078 | 1.048  | 0.295  | 0.077775012 | count | 1 |
| WBP11      | 0.0564431 | 0.0972585 | 0.5803 | 0.562  | 0.077791205 | count | 1 |
| AC008440.2 | 0.9669883 | 1.038452  | 0.9312 | 0.352  | 0.07780992  | count | 1 |
| AP001029.2 | 0.9669883 | 1.131061  | 0.8549 | 0.393  | 0.07780992  | count | 1 |
| COL6A2     | 0.0542396 | 0.0373386 | 1.4526 | 0.146  | 0.077842376 | count | 1 |
| MAFIP      | 0.441038  | 0.6914958 | 0.6378 | 0.524  | 0.077866356 | count | 1 |
| GMPPA      | 0.0632359 | 0.1637141 | 0.3863 | 0.699  | 0.077893154 | count | 1 |
| ZDHHC11B   | 0.4413583 | 0.4710904 | 0.9369 | 0.349  | 0.077916135 | count | 1 |
| ZC3H7A     | 0.0568346 | 0.100448  | 0.5658 | 0.572  | 0.077918196 | count | 1 |
| LIMK1      | 0.1246278 | 0.3532746 | 0.3528 | 0.724  | 0.077953905 | count | 1 |
| TAF1D      | 0.0555723 | 0.0726994 | 0.7644 | 0.445  | 0.077963598 | count | 1 |
| CCDC84     | 0.0614484 | 0.1893386 | 0.3245 | 0.746  | 0.078000704 | count | 1 |
| SLC38A1    | 0.0712115 | 0.1751206 | 0.4066 | 0.684  | 0.07819162  | count | 1 |
| TUBB6      | 0.0557545 | 0.066556  | 0.8377 | 0.402  | 0.078353552 | count | 1 |
| CELSR2     | 0.1994698 | 0.8568404 | 0.2328 | 0.816  | 0.078420791 | count | 1 |
| SLC25A27   | 0.1088462 | 0.4624208 | 0.2354 | 0.814  | 0.078495484 | count | 1 |
| VPS26B     | 0.0613595 | 0.15554   | 0.3945 | 0.693  | 0.078542043 | count | 1 |
| PAOX       | 0.0711939 | 0.3066669 | 0.2322 | 0.816  | 0.078619569 | count | 1 |
| OBSL1      | 0.0614233 | 0.1635204 | 0.3756 | 0.707  | 0.078623549 | count | 1 |
| TMEM65     | 0.0712343 | 0.2014453 | 0.3536 | 0.724  | 0.078663972 | count | 1 |
| LINC01715  | 0.1192491 | 0.4097993 | 0.291  | 0.771  | 0.078703865 | count | 1 |
| FUT8       | 0.0650928 | 0.1609288 | 0.4045 | 0.686  | 0.078798283 | count | 1 |
| NAP1L4     | 0.0565407 | 0.0813893 | 0.6947 | 0.487  | 0.078803627 | count | 1 |
| SECISBP2L  | 0.0572977 | 0.0912628 | 0.6278 | 0.53   | 0.078929129 | count | 1 |
| NDRG2      | 0.0574463 | 0.0949481 | 0.605  | 0.545  | 0.079198491 | count | 1 |
| TBL3       | 0.0706242 | 0.2045461 | 0.3453 | 0.73   | 0.079232119 | count | 1 |
| POC1B      | 0.0778068 | 0.2205101 | 0.3528 | 0.724  | 0.079277358 | count | 1 |
| SNRNP2     | 0.0561093 | 0.0664097 | 0.8449 | 0.398  | 0.079371484 | count | 1 |
| TVP23A     | 0.120463  | 0.5378249 | 0.224  | 0.823  | 0.079489976 | count | 1 |
| CYP19A1    | 0.4526087 | 0.6749011 | 0.6706 | 0.502  | 0.07965853  | count | 1 |
| MOSPD1     | 0.0670499 | 0.2147385 | 0.3122 | 0.755  | 0.079664097 | count | 1 |
| BRD4       | 0.0569896 | 0.0872599 | 0.6531 | 0.514  | 0.079708025 | count | 1 |
| U2AF1L5    | 0.1276862 | 0.6321277 | 0.202  | 0.84   | 0.079827059 | count | 1 |
| SPART      | 0.0573036 | 0.0683532 | 0.8383 | 0.402  | 0.079873741 | count | 1 |
| AL355353.1 | 0.3099229 | 0.6673844 | 0.4644 | 0.642  | 0.079900321 | count | 1 |
| HIST1H2AB  | 1.005042  | 1.094653  | 0.9181 | 0.359  | 0.079932013 | count | 1 |
| CPM        | 0.0896811 | 0.2631834 | 0.3408 | 0.733  | 0.08006119  | count | 1 |
| SEC16B     | 1.00756   | 0.6114883 | 1.6477 | 0.0995 | 0.080070258 | count | 1 |
| GTPBP2     | 0.1113042 | 0.4016015 | 0.2772 | 0.782  | 0.080239796 | count | 1 |
| CEBPZOS    | 0.0582425 | 0.0917326 | 0.6349 | 0.526  | 0.080256214 | count | 1 |
| DUSP8      | 0.0645848 | 0.191136  | 0.3379 | 0.735  | 0.08028403  | count | 1 |

|            |           |           |        |       |             |       |   |
|------------|-----------|-----------|--------|-------|-------------|-------|---|
| PIGV       | 0.0796153 | 0.1990705 | 0.3999 | 0.689 | 0.080321107 | count | 1 |
| COQ9       | 0.0620223 | 0.1564384 | 0.3965 | 0.692 | 0.08049379  | count | 1 |
| IGIP       | 0.070647  | 0.3701835 | 0.1908 | 0.849 | 0.080722824 | count | 1 |
| CNOT9      | 0.0639978 | 0.1480248 | 0.4323 | 0.666 | 0.08090915  | count | 1 |
| ZBTB38     | 0.0573024 | 0.0606976 | 0.9441 | 0.345 | 0.080940385 | count | 1 |
| TMEM184C   | 0.0711611 | 0.1960711 | 0.3629 | 0.717 | 0.080956959 | count | 1 |
| EIF2D      | 0.0602565 | 0.1275272 | 0.4725 | 0.637 | 0.080993279 | count | 1 |
| CBX1       | 0.0581666 | 0.0835022 | 0.6966 | 0.486 | 0.081105663 | count | 1 |
| ATG10      | 0.0693332 | 0.1982858 | 0.3497 | 0.727 | 0.081341869 | count | 1 |
| AC005162.3 | 1.031748  | 0.8685649 | 1.1879 | 0.235 | 0.081384229 | count | 1 |
| CNR1       | 1.032559  | 1.088325  | 0.9488 | 0.343 | 0.081427788 | count | 1 |
| AC012651.1 | 1.032559  | 1.088325  | 0.9488 | 0.343 | 0.081427788 | count | 1 |
| AC010487.2 | 1.032559  | 1.088325  | 0.9488 | 0.343 | 0.081427788 | count | 1 |
| AC087286.2 | 1.032559  | 1.36055   | 0.7589 | 0.448 | 0.081427788 | count | 1 |
| RNASE1     | 0.0672853 | 0.4492444 | 0.1498 | 0.881 | 0.081444282 | count | 1 |
| RHEBL1     | 0.2479682 | 0.5354506 | 0.4631 | 0.643 | 0.081590077 | count | 1 |
| PCNX1      | 0.073958  | 0.2019265 | 0.3663 | 0.714 | 0.081656945 | count | 1 |
| THAP7-AS1  | 0.0794311 | 0.2624834 | 0.3026 | 0.762 | 0.081671267 | count | 1 |
| KIF16B     | 0.0721315 | 0.2068331 | 0.3487 | 0.727 | 0.081688623 | count | 1 |
| ZNF227     | 0.087228  | 0.2819303 | 0.3094 | 0.757 | 0.081786958 | count | 1 |
| PIGG       | 0.0664206 | 0.384453  | 0.1728 | 0.863 | 0.081805244 | count | 1 |
| SRR        | 0.0900542 | 0.3273414 | 0.2751 | 0.783 | 0.081808417 | count | 1 |
| PAICS      | 0.0644259 | 0.1465418 | 0.4396 | 0.66  | 0.081875591 | count | 1 |
| STIMATE    | 0.0790443 | 0.4335826 | 0.1823 | 0.855 | 0.081989815 | count | 1 |
| TRIM44     | 0.0593033 | 0.1057221 | 0.5609 | 0.575 | 0.082081587 | count | 1 |
| ZNF646     | 0.0979022 | 0.4022558 | 0.2434 | 0.808 | 0.082099457 | count | 1 |
| LAGE3      | 0.0619104 | 0.1266068 | 0.489  | 0.625 | 0.082189008 | count | 1 |
| MTAP       | 0.0620207 | 0.1128449 | 0.5496 | 0.583 | 0.082199493 | count | 1 |
| SP1        | 0.0652515 | 0.1741142 | 0.3748 | 0.708 | 0.082377271 | count | 1 |
| GZF1       | 0.0713082 | 0.2353566 | 0.303  | 0.762 | 0.082464781 | count | 1 |
| GTF2F1     | 0.0598392 | 0.0890538 | 0.6719 | 0.502 | 0.082508222 | count | 1 |
| LARS       | 0.0595912 | 0.0798889 | 0.7459 | 0.456 | 0.082555516 | count | 1 |
| HDDC3      | 0.0666194 | 0.167419  | 0.3979 | 0.691 | 0.082806596 | count | 1 |
| NOSIP      | 0.0592247 | 0.0792372 | 0.7474 | 0.455 | 0.082826298 | count | 1 |
| BMI1       | 0.0641927 | 0.1545706 | 0.4153 | 0.678 | 0.08300491  | count | 1 |
| TRUB2      | 0.0652647 | 0.1436893 | 0.4542 | 0.65  | 0.083042285 | count | 1 |
| LAMP5      | 1.063444  | 0.7694516 | 1.3821 | 0.167 | 0.083068648 | count | 1 |
| KAT5       | 0.0639861 | 0.1499341 | 0.4268 | 0.67  | 0.083109794 | count | 1 |
| AC008771.1 | 0.0788455 | 0.2966231 | 0.2658 | 0.79  | 0.083119491 | count | 1 |
| CYB561D1   | 0.1154799 | 0.3841645 | 0.3006 | 0.764 | 0.083200104 | count | 1 |
| METTL4     | 0.0688033 | 0.2560435 | 0.2687 | 0.788 | 0.083275947 | count | 1 |
| UQCC3      | 0.0602454 | 0.0986878 | 0.6105 | 0.542 | 0.083406862 | count | 1 |
| CXXC5      | 0.0595311 | 0.0912202 | 0.6526 | 0.514 | 0.083535133 | count | 1 |
| DUSP1      | 0.0580542 | 0.0377617 | 1.5374 | 0.124 | 0.083543826 | count | 1 |
| WDR33      | 0.0609066 | 0.1048202 | 0.5811 | 0.561 | 0.083659278 | count | 1 |

|             |           |           |        |       |             |       |   |
|-------------|-----------|-----------|--------|-------|-------------|-------|---|
| CAMK4       | 0.3258825 | 0.8339037 | 0.3908 | 0.696 | 0.083682479 | count | 1 |
| AC093512.1  | 0.3258825 | 0.8832556 | 0.369  | 0.712 | 0.083682479 | count | 1 |
| FAM66B      | 0.3258825 | 0.8936007 | 0.3647 | 0.715 | 0.083682479 | count | 1 |
| C1QTNF1-AS1 | 0.3258825 | 1.268706  | 0.2569 | 0.797 | 0.083682479 | count | 1 |
| GBF1        | 0.0708841 | 0.1715558 | 0.4132 | 0.679 | 0.083693809 | count | 1 |
| FGFBP3      | 0.0938164 | 0.2885567 | 0.3251 | 0.745 | 0.083715198 | count | 1 |
| SPOPL       | 0.065081  | 0.1459163 | 0.446  | 0.656 | 0.083741555 | count | 1 |
| SDHC        | 0.0594875 | 0.0623555 | 0.954  | 0.34  | 0.083823568 | count | 1 |
| KLHL29      | 0.1430825 | 0.4659655 | 0.3071 | 0.759 | 0.083934166 | count | 1 |
| TRAPPC2B    | 0.0621741 | 0.1244276 | 0.4997 | 0.617 | 0.083935832 | count | 1 |
| KAZALD1     | 0.0619634 | 0.1385952 | 0.4471 | 0.655 | 0.083951306 | count | 1 |
| FBXO45      | 0.0769899 | 0.2023183 | 0.3805 | 0.704 | 0.084000961 | count | 1 |
| ZNF564      | 0.4812007 | 0.9409927 | 0.5114 | 0.609 | 0.084032398 | count | 1 |
| CHST8       | 1.0820754 | 0.9970211 | 1.0853 | 0.278 | 0.084039311 | count | 1 |
| TFR2        | 1.0820754 | 1.439933  | 0.7515 | 0.452 | 0.084039311 | count | 1 |
| NFKBIL1     | 0.0617975 | 0.113333  | 0.5453 | 0.586 | 0.084042028 | count | 1 |
| E2F4        | 0.0646347 | 0.1270621 | 0.5087 | 0.611 | 0.084162249 | count | 1 |
| ZBED4       | 0.0982066 | 0.36138   | 0.2718 | 0.786 | 0.084207281 | count | 1 |
| PBDC1       | 0.0607089 | 0.0845243 | 0.7182 | 0.473 | 0.084257461 | count | 1 |
| PPOX        | 0.0731935 | 0.237161  | 0.3086 | 0.758 | 0.084307949 | count | 1 |
| BAG6        | 0.0653066 | 0.1397223 | 0.4674 | 0.64  | 0.084362915 | count | 1 |
| AL035071.1  | 0.0875597 | 0.321871  | 0.272  | 0.786 | 0.084367077 | count | 1 |
| RNF167      | 0.0620372 | 0.0985927 | 0.6292 | 0.529 | 0.084435567 | count | 1 |
| LST1        | 0.2155229 | 0.6011021 | 0.3585 | 0.72  | 0.084440736 | count | 1 |
| ZNF706      | 0.0594749 | 0.0522031 | 1.1393 | 0.255 | 0.084514967 | count | 1 |
| ZNF613      | 0.2157496 | 0.4295571 | 0.5023 | 0.616 | 0.084525429 | count | 1 |
| HOXD-AS2    | 0.2575033 | 0.6840172 | 0.3765 | 0.707 | 0.08454169  | count | 1 |
| SLC45A3     | 0.2575033 | 0.7421672 | 0.347  | 0.729 | 0.08454169  | count | 1 |
| BACE1-AS    | 0.1034612 | 0.3452584 | 0.2997 | 0.764 | 0.084617544 | count | 1 |
| ZNF611      | 0.0815974 | 0.27116   | 0.3009 | 0.763 | 0.084620761 | count | 1 |
| CCNE2       | 0.1887951 | 0.7431253 | 0.2541 | 0.799 | 0.084641292 | count | 1 |
| CAPN2       | 0.0602654 | 0.0627081 | 0.961  | 0.337 | 0.084694611 | count | 1 |
| AL359921.2  | 1.0954617 | 1.064096  | 1.0295 | 0.303 | 0.084727896 | count | 1 |
| AL356258.1  | 1.0954617 | 1.064096  | 1.0295 | 0.303 | 0.084727896 | count | 1 |
| MSS51       | 1.0954617 | 1.064096  | 1.0295 | 0.303 | 0.084727896 | count | 1 |
| AC010359.1  | 1.0954617 | 1.150013  | 0.9526 | 0.341 | 0.084727896 | count | 1 |
| TATDN1      | 0.0618878 | 0.0928264 | 0.6667 | 0.505 | 0.084839921 | count | 1 |
| PHF2        | 0.0703813 | 0.1591331 | 0.4423 | 0.658 | 0.084972316 | count | 1 |
| DNASE1      | 0.0882395 | 0.366564  | 0.2407 | 0.81  | 0.085016608 | count | 1 |
| ZDHHC3      | 0.0629169 | 0.1159998 | 0.5424 | 0.588 | 0.085023733 | count | 1 |
| UQCRC1      | 0.0610279 | 0.0781897 | 0.7805 | 0.435 | 0.085131112 | count | 1 |
| INTS5       | 0.1069621 | 0.2732096 | 0.3915 | 0.695 | 0.085137423 | count | 1 |
| PPP1CC      | 0.0610585 | 0.06812   | 0.8963 | 0.37  | 0.085247045 | count | 1 |
| CHKB-DT     | 0.1566109 | 0.4525796 | 0.346  | 0.729 | 0.085320209 | count | 1 |
| UBE2E1      | 0.0634577 | 0.1137889 | 0.5577 | 0.577 | 0.085389255 | count | 1 |

|            |           |           |        |       |             |       |   |
|------------|-----------|-----------|--------|-------|-------------|-------|---|
| ZDHC12     | 0.0651789 | 0.1739171 | 0.3748 | 0.708 | 0.085393778 | count | 1 |
| PSMC6      | 0.0608562 | 0.0688939 | 0.8833 | 0.377 | 0.085403869 | count | 1 |
| THAP9      | 0.1019749 | 0.3990917 | 0.2555 | 0.798 | 0.085472986 | count | 1 |
| AL031316.1 | 0.333499  | 0.6814396 | 0.4894 | 0.625 | 0.085475798 | count | 1 |
| AC026904.3 | 0.333499  | 0.6826541 | 0.4885 | 0.625 | 0.085475798 | count | 1 |
| SAMD15     | 0.333499  | 0.6814396 | 0.4894 | 0.625 | 0.085475798 | count | 1 |
| AC079174.2 | 0.1713997 | 0.5010714 | 0.3421 | 0.732 | 0.085514901 | count | 1 |
| ATPAF1     | 0.0633518 | 0.1110097 | 0.5707 | 0.568 | 0.085553151 | count | 1 |
| IFNGR2     | 0.0622845 | 0.0946347 | 0.6582 | 0.51  | 0.085613694 | count | 1 |
| ZNF850     | 0.2186793 | 0.4525825 | 0.4832 | 0.629 | 0.085619145 | count | 1 |
| SMC5-AS1   | 0.2186793 | 0.4697864 | 0.4655 | 0.642 | 0.085619145 | count | 1 |
| CCDC14     | 0.0648645 | 0.1548788 | 0.4188 | 0.675 | 0.08581534  | count | 1 |
| MIGA2      | 0.1149146 | 0.2798163 | 0.4107 | 0.681 | 0.085868967 | count | 1 |
| BTF3L4     | 0.061666  | 0.0747485 | 0.825  | 0.409 | 0.086020718 | count | 1 |
| HIST1H2BN  | 0.0918136 | 0.360456  | 0.2547 | 0.799 | 0.086047043 | count | 1 |
| SUSD2      | 0.0832761 | 0.3136331 | 0.2655 | 0.791 | 0.086350034 | count | 1 |
| LRRC27     | 0.1199289 | 0.5385485 | 0.2227 | 0.824 | 0.086350061 | count | 1 |
| POLH       | 0.082635  | 0.3213259 | 0.2572 | 0.797 | 0.086404287 | count | 1 |
| NDUFV2-AS1 | 0.0841311 | 0.3741265 | 0.2249 | 0.822 | 0.086470525 | count | 1 |
| WDR75      | 0.0673958 | 0.1685328 | 0.3999 | 0.689 | 0.086533911 | count | 1 |
| FSIP1      | 0.4978077 | 1.1206532 | 0.4442 | 0.657 | 0.086537178 | count | 1 |
| ARHGAP24   | 0.0673454 | 0.1560411 | 0.4316 | 0.666 | 0.086649201 | count | 1 |
| AMFR       | 0.0680352 | 0.1375982 | 0.4944 | 0.621 | 0.086664949 | count | 1 |
| EIF2AK4    | 0.0629244 | 0.1036681 | 0.607  | 0.544 | 0.086800039 | count | 1 |
| ZP3        | 0.265025  | 0.3250056 | 0.8154 | 0.415 | 0.086860148 | count | 1 |
| RAB3GAP1   | 0.0634976 | 0.0990809 | 0.6409 | 0.522 | 0.086936058 | count | 1 |
| VCIPI1     | 0.0738785 | 0.2060166 | 0.3586 | 0.72  | 0.086938704 | count | 1 |
| AC009053.2 | 0.1942502 | 0.528031  | 0.3679 | 0.713 | 0.086990715 | count | 1 |
| CES2       | 0.0678384 | 0.179946  | 0.377  | 0.706 | 0.087008043 | count | 1 |
| CENPI      | 1.141097  | 1.139152  | 1.0017 | 0.317 | 0.087020796 | count | 1 |
| MAK        | 1.141097  | 1.266344  | 0.9011 | 0.368 | 0.087020796 | count | 1 |
| ZNF777     | 0.0943059 | 0.3204847 | 0.2943 | 0.769 | 0.087034423 | count | 1 |
| THAP4      | 0.0720561 | 0.158391  | 0.4549 | 0.649 | 0.087199982 | count | 1 |
| DAG1       | 0.0664976 | 0.1420689 | 0.4681 | 0.64  | 0.087303631 | count | 1 |
| ZNF576     | 0.0685062 | 0.1368204 | 0.5007 | 0.617 | 0.087367914 | count | 1 |
| DCAKD      | 0.0717019 | 0.1848337 | 0.3879 | 0.698 | 0.087376219 | count | 1 |
| NDUFV3     | 0.0631691 | 0.0805925 | 0.7838 | 0.433 | 0.087380814 | count | 1 |
| SMAD1      | 0.0796771 | 0.1978538 | 0.4027 | 0.687 | 0.087436686 | count | 1 |
| FBXW7      | 0.0697002 | 0.1615392 | 0.4315 | 0.666 | 0.087470872 | count | 1 |
| USP12      | 0.066116  | 0.1213617 | 0.5448 | 0.586 | 0.087519284 | count | 1 |
| TFDP2      | 0.0629258 | 0.0817115 | 0.7701 | 0.441 | 0.087569939 | count | 1 |
| ARMCX1     | 0.0637707 | 0.0868236 | 0.7345 | 0.463 | 0.087606311 | count | 1 |
| LINC02268  | 1.155775  | 0.9421319 | 1.2268 | 0.22  | 0.087740569 | count | 1 |
| ZNF491     | 0.2679433 | 0.7653961 | 0.3501 | 0.726 | 0.087757279 | count | 1 |
| ZNF14      | 0.0783345 | 0.258932  | 0.3025 | 0.762 | 0.08783932  | count | 1 |

|              |           |           |        |       |             |       |   |
|--------------|-----------|-----------|--------|-------|-------------|-------|---|
| SLK          | 0.0637104 | 0.0836309 | 0.7618 | 0.446 | 0.087990612 | count | 1 |
| ZNF527       | 0.1076891 | 0.3844276 | 0.2801 | 0.779 | 0.088029084 | count | 1 |
| BOD1L1       | 0.0621209 | 0.056713  | 1.0954 | 0.273 | 0.088076791 | count | 1 |
| TCP1         | 0.0629751 | 0.0713791 | 0.8823 | 0.378 | 0.088195345 | count | 1 |
| DHRS13       | 0.1506456 | 0.5166052 | 0.2916 | 0.771 | 0.088255578 | count | 1 |
| BUD13        | 0.0750482 | 0.1796125 | 0.4178 | 0.676 | 0.088309761 | count | 1 |
| ARV1         | 0.0674621 | 0.1307119 | 0.5161 | 0.606 | 0.0883154   | count | 1 |
| OXR1         | 0.0631281 | 0.0829602 | 0.7609 | 0.447 | 0.088391162 | count | 1 |
| ZFP90        | 0.068401  | 0.1796444 | 0.3808 | 0.703 | 0.088435526 | count | 1 |
| CHCHD6       | 0.0717648 | 0.14817   | 0.4843 | 0.628 | 0.088538308 | count | 1 |
| RBBP8        | 0.0828291 | 0.2606547 | 0.3178 | 0.751 | 0.088582637 | count | 1 |
| SACM1L       | 0.0690624 | 0.1710825 | 0.4037 | 0.686 | 0.088669147 | count | 1 |
| AC016394.2   | 1.176176  | 1.062028  | 1.1075 | 0.268 | 0.088726975 | count | 1 |
| CCR10        | 0.0791511 | 0.2143526 | 0.3693 | 0.712 | 0.088750399 | count | 1 |
| NNMT         | 0.0618346 | 0.040704  | 1.5191 | 0.129 | 0.088788505 | count | 1 |
| PEL1         | 0.0849531 | 0.2406955 | 0.3529 | 0.724 | 0.088811941 | count | 1 |
| PRPF4        | 0.0762701 | 0.1770569 | 0.4308 | 0.667 | 0.08883175  | count | 1 |
| CDR2         | 0.069956  | 0.1689515 | 0.4141 | 0.679 | 0.08888688  | count | 1 |
| PHF20        | 0.0639954 | 0.0843968 | 0.7583 | 0.448 | 0.088906709 | count | 1 |
| TBC1D31      | 0.3484067 | 0.4805567 | 0.725  | 0.468 | 0.088964011 | count | 1 |
| GEMIN8       | 0.071623  | 0.2171107 | 0.3299 | 0.742 | 0.089008444 | count | 1 |
| ZNF707       | 0.5149272 | 0.6642107 | 0.7752 | 0.438 | 0.089091904 | count | 1 |
| AC044802.2   | 0.5149272 | 0.7611952 | 0.6765 | 0.499 | 0.089091904 | count | 1 |
| GHRLOS       | 1.1838394 | 0.8986818 | 1.3173 | 0.188 | 0.089093317 | count | 1 |
| ILF3         | 0.0644258 | 0.0832732 | 0.7737 | 0.439 | 0.089142277 | count | 1 |
| FARS2        | 0.0777405 | 0.1930172 | 0.4028 | 0.687 | 0.089162191 | count | 1 |
| WDR74        | 0.0689308 | 0.1364785 | 0.5051 | 0.614 | 0.089201813 | count | 1 |
| SLC9A1       | 0.0847215 | 0.3153649 | 0.2686 | 0.788 | 0.089273691 | count | 1 |
| DIP2B        | 0.0940314 | 0.4733491 | 0.1987 | 0.843 | 0.089358663 | count | 1 |
| NOP56        | 0.0653985 | 0.1033059 | 0.6331 | 0.527 | 0.089516969 | count | 1 |
| ACSS1        | 0.0857117 | 0.3212277 | 0.2668 | 0.79  | 0.089599647 | count | 1 |
| ZNF138       | 0.0779449 | 0.2583708 | 0.3017 | 0.763 | 0.08975635  | count | 1 |
| ZNF625-ZNF20 | 1.197918  | 1.02869   | 1.1645 | 0.244 | 0.089760348 | count | 1 |
| PTPN22       | 1.197918  | 1.086894  | 1.1021 | 0.27  | 0.089760348 | count | 1 |
| TCF23        | 1.197918  | 1.147352  | 1.0441 | 0.297 | 0.089760348 | count | 1 |
| SUGT1        | 0.0635573 | 0.0565836 | 1.1232 | 0.261 | 0.0898151   | count | 1 |
| MOSPD3       | 0.067382  | 0.1269095 | 0.5309 | 0.595 | 0.089853415 | count | 1 |
| PNISR        | 0.0630341 | 0.0537558 | 1.1726 | 0.241 | 0.08993473  | count | 1 |
| SELENOT      | 0.0642765 | 0.0675232 | 0.9519 | 0.341 | 0.090047534 | count | 1 |
| MBIP         | 0.0660291 | 0.1083576 | 0.6094 | 0.542 | 0.090134104 | count | 1 |
| AKIP1        | 0.0675326 | 0.1156567 | 0.5839 | 0.559 | 0.090578249 | count | 1 |
| FAM47E       | 0.154879  | 0.4860048 | 0.3187 | 0.75  | 0.090669235 | count | 1 |
| NPIPB5       | 0.0836753 | 0.3508916 | 0.2385 | 0.812 | 0.090685219 | count | 1 |
| ZNF782       | 0.1822436 | 0.3676165 | 0.4957 | 0.62  | 0.090736176 | count | 1 |
| DPAGT1       | 0.0791637 | 0.1789494 | 0.4424 | 0.658 | 0.090786927 | count | 1 |



|            |           |           |        |       |             |       |   |
|------------|-----------|-----------|--------|-------|-------------|-------|---|
| FUT10      | 0.0783823 | 0.1949781 | 0.402  | 0.688 | 0.090950426 | count | 1 |
| UBA2       | 0.0643909 | 0.0626285 | 1.0281 | 0.304 | 0.090968038 | count | 1 |
| MCF2L      | 1.225336  | 0.8106763 | 1.5115 | 0.131 | 0.09103777  | count | 1 |
| ELP4       | 0.0745632 | 0.1787038 | 0.4172 | 0.677 | 0.091050824 | count | 1 |
| FAM160A2   | 0.0787842 | 0.2362006 | 0.3335 | 0.739 | 0.091071945 | count | 1 |
| IFT22      | 0.0665345 | 0.0930779 | 0.7148 | 0.475 | 0.091109314 | count | 1 |
| NUDT18     | 0.0778049 | 0.1887868 | 0.4121 | 0.68  | 0.091239758 | count | 1 |
| AC004918.1 | 0.1324093 | 0.4166636 | 0.3178 | 0.751 | 0.091345046 | count | 1 |
| RAD17      | 0.0720171 | 0.1526422 | 0.4718 | 0.637 | 0.091383316 | count | 1 |
| DDX56      | 0.0718417 | 0.1570921 | 0.4573 | 0.647 | 0.091390626 | count | 1 |
| CTDNBP1    | 0.0654746 | 0.0733627 | 0.8925 | 0.372 | 0.091393485 | count | 1 |
| POLR3D     | 0.0709972 | 0.1802235 | 0.3939 | 0.694 | 0.091429993 | count | 1 |
| NKIRAS1    | 0.0709456 | 0.1673405 | 0.424  | 0.672 | 0.0914546   | count | 1 |
| NANP       | 0.0844397 | 0.3514842 | 0.2402 | 0.81  | 0.091508678 | count | 1 |
| LRRIC7     | 0.3600621 | 0.6430787 | 0.5599 | 0.576 | 0.091671098 | count | 1 |
| CHD6       | 0.0676921 | 0.1211648 | 0.5587 | 0.576 | 0.091703764 | count | 1 |
| FRAT2      | 0.0929855 | 0.2904458 | 0.3201 | 0.749 | 0.091726838 | count | 1 |
| NAB1       | 0.0697106 | 0.1495511 | 0.4661 | 0.641 | 0.091820639 | count | 1 |
| NANOS1     | 0.1689857 | 0.476556  | 0.3546 | 0.723 | 0.091854874 | count | 1 |
| SNAPIN     | 0.0662659 | 0.0852314 | 0.7775 | 0.437 | 0.091876261 | count | 1 |
| EIF2S2     | 0.0646355 | 0.0572256 | 1.1295 | 0.259 | 0.091893879 | count | 1 |
| MKRN2      | 0.0742171 | 0.1450455 | 0.5117 | 0.609 | 0.091895995 | count | 1 |
| THAP3      | 0.0704632 | 0.1476574 | 0.4772 | 0.633 | 0.092099231 | count | 1 |
| GNRH1      | 0.3619542 | 0.8064092 | 0.4488 | 0.654 | 0.092108886 | count | 1 |
| WDR60      | 0.0675278 | 0.1101342 | 0.6131 | 0.54  | 0.092221359 | count | 1 |
| OFD1       | 0.0688009 | 0.1151955 | 0.5973 | 0.55  | 0.092238627 | count | 1 |
| SMIM10L2A  | 1.252605  | 1.058265  | 1.1836 | 0.237 | 0.092280128 | count | 1 |
| AL591848.4 | 1.252605  | 1.287744  | 0.9727 | 0.331 | 0.092280128 | count | 1 |
| FABP5      | 0.0690076 | 0.1612959 | 0.4278 | 0.669 | 0.092397254 | count | 1 |
| ZNF596     | 0.1405447 | 0.5280523 | 0.2662 | 0.79  | 0.092449082 | count | 1 |
| ZFAND2B    | 0.0680268 | 0.1055859 | 0.6443 | 0.519 | 0.092453403 | count | 1 |
| RBM26-AS1  | 0.170128  | 0.4177221 | 0.4073 | 0.684 | 0.092456501 | count | 1 |
| GARNL3     | 0.0892482 | 0.3704841 | 0.2409 | 0.81  | 0.092498113 | count | 1 |
| SGCD       | 0.0692119 | 0.1447705 | 0.4781 | 0.633 | 0.092506146 | count | 1 |
| USP16      | 0.0660385 | 0.0835171 | 0.7907 | 0.429 | 0.092539289 | count | 1 |
| NFKBIE     | 0.105867  | 0.3476316 | 0.3045 | 0.761 | 0.092574435 | count | 1 |
| SLC39A11   | 0.0880662 | 0.2587512 | 0.3404 | 0.734 | 0.092774157 | count | 1 |
| PLK3       | 0.0689195 | 0.1536082 | 0.4487 | 0.654 | 0.092798495 | count | 1 |
| SPATA33    | 0.0774989 | 0.2021323 | 0.3834 | 0.701 | 0.092812265 | count | 1 |
| LRR1       | 0.0964225 | 0.2734074 | 0.3527 | 0.724 | 0.092828376 | count | 1 |
| SRCAP      | 0.2082709 | 0.5712514 | 0.3646 | 0.715 | 0.093003602 | count | 1 |
| MAP7D3     | 0.0667586 | 0.0824329 | 0.8099 | 0.418 | 0.093111904 | count | 1 |
| SDHAF3     | 0.0703127 | 0.1271809 | 0.5529 | 0.58  | 0.093118767 | count | 1 |
| TROVE2     | 0.0663762 | 0.0702655 | 0.9446 | 0.345 | 0.093135347 | count | 1 |
| CAPN15     | 0.0980684 | 0.2966227 | 0.3306 | 0.741 | 0.093158194 | count | 1 |

|            |           |           |        |       |             |       |   |
|------------|-----------|-----------|--------|-------|-------------|-------|---|
| TXNDC15    | 0.0667696 | 0.0684911 | 0.9749 | 0.33  | 0.093371782 | count | 1 |
| SFN        | 0.1251595 | 0.5120473 | 0.2444 | 0.807 | 0.093390984 | count | 1 |
| ALG5       | 0.0682186 | 0.0942168 | 0.7241 | 0.469 | 0.093393293 | count | 1 |
| PTX3       | 0.0705237 | 0.253334  | 0.2784 | 0.781 | 0.093397745 | count | 1 |
| SLC4A1AP   | 0.069757  | 0.1084428 | 0.6433 | 0.52  | 0.093439468 | count | 1 |
| WASHC3     | 0.0665505 | 0.0698917 | 0.9522 | 0.341 | 0.093572321 | count | 1 |
| HMCES      | 0.0720835 | 0.1322267 | 0.5452 | 0.586 | 0.093605781 | count | 1 |
| ACOT2      | 0.2098829 | 0.6680624 | 0.3142 | 0.753 | 0.093692555 | count | 1 |
| GTPBP4     | 0.0700715 | 0.1193954 | 0.5869 | 0.557 | 0.09373748  | count | 1 |
| TRMT1L     | 0.0840635 | 0.1912976 | 0.4394 | 0.66  | 0.093753889 | count | 1 |
| OSCAR      | 1.2861864 | 0.7747779 | 1.6601 | 0.097 | 0.093772083 | count | 1 |
| DND1       | 1.2861864 | 0.9285504 | 1.3852 | 0.166 | 0.093772083 | count | 1 |
| AC105020.6 | 0.3692773 | 0.7530879 | 0.4904 | 0.624 | 0.093798902 | count | 1 |
| L3MBTL4    | 0.3694921 | 0.5338684 | 0.6921 | 0.489 | 0.093848373 | count | 1 |
| TIPIN      | 0.0798026 | 0.2056436 | 0.3881 | 0.698 | 0.093880797 | count | 1 |
| TMED4      | 0.0662223 | 0.0531384 | 1.2462 | 0.213 | 0.093974006 | count | 1 |
| ITGB1BP1   | 0.0665019 | 0.0557995 | 1.1918 | 0.233 | 0.094035434 | count | 1 |
| NLRP1      | 0.0690936 | 0.1428393 | 0.4837 | 0.629 | 0.094053785 | count | 1 |
| WLS        | 0.0689241 | 0.1018393 | 0.6768 | 0.499 | 0.094169988 | count | 1 |
| LGALS3BP   | 0.0662071 | 0.0556717 | 1.1892 | 0.234 | 0.094177643 | count | 1 |
| SHF        | 0.080085  | 0.1811848 | 0.442  | 0.659 | 0.094211611 | count | 1 |
| PARP14     | 0.0685964 | 0.1169374 | 0.5866 | 0.558 | 0.094366326 | count | 1 |
| NAT10      | 0.0946412 | 0.2504212 | 0.3779 | 0.706 | 0.094375404 | count | 1 |
| ANKRD36C   | 0.071484  | 0.1534642 | 0.4658 | 0.641 | 0.094388799 | count | 1 |
| PHAX       | 0.067843  | 0.0783511 | 0.8659 | 0.387 | 0.094389003 | count | 1 |
| B9D1       | 0.0780534 | 0.2297595 | 0.3397 | 0.734 | 0.09443167  | count | 1 |
| SEMA6C     | 0.118864  | 0.4357433 | 0.2728 | 0.785 | 0.094465322 | count | 1 |
| ID1        | 0.0661356 | 0.0877504 | 0.7537 | 0.451 | 0.09447296  | count | 1 |
| DEAF1      | 0.0723538 | 0.1414472 | 0.5115 | 0.609 | 0.094493292 | count | 1 |
| SPG7       | 0.0703067 | 0.1831515 | 0.3839 | 0.701 | 0.094556907 | count | 1 |
| TSNAXIP1   | 1.3052329 | 1.039459  | 1.2557 | 0.209 | 0.094600054 | count | 1 |
| APOBEC3D   | 1.3052329 | 1.25249   | 1.0421 | 0.297 | 0.094600054 | count | 1 |
| KCNC3      | 1.3052329 | 1.390615  | 0.9386 | 0.348 | 0.094600054 | count | 1 |
| MCM3AP     | 0.081551  | 0.2566786 | 0.3177 | 0.751 | 0.094610429 | count | 1 |
| TMX2       | 0.0686577 | 0.1104643 | 0.6215 | 0.534 | 0.09467206  | count | 1 |
| FAM135A    | 0.0860398 | 0.3033592 | 0.2836 | 0.777 | 0.09491953  | count | 1 |
| PPP1R3E    | 0.116313  | 0.2643579 | 0.44   | 0.66  | 0.094976092 | count | 1 |
| LRRN3      | 0.1749706 | 0.285247  | 0.6134 | 0.54  | 0.095004013 | count | 1 |
| SLC17A9    | 0.1322214 | 0.4279398 | 0.309  | 0.757 | 0.095031123 | count | 1 |
| CNRIP1     | 0.0696328 | 0.1008814 | 0.6902 | 0.49  | 0.0950707   | count | 1 |
| ZNF431     | 0.0833907 | 0.2055127 | 0.4058 | 0.685 | 0.095212001 | count | 1 |
| DBR1       | 0.088468  | 0.2121012 | 0.4171 | 0.677 | 0.09522269  | count | 1 |
| LRRC8C-DT  | 0.1112326 | 0.3374192 | 0.3297 | 0.742 | 0.095231462 | count | 1 |
| ATG4C      | 0.0794969 | 0.1817248 | 0.4375 | 0.662 | 0.095449296 | count | 1 |
| EAPP       | 0.0678351 | 0.0642351 | 1.056  | 0.291 | 0.095728271 | count | 1 |

|            |           |           |        |       |             |       |   |
|------------|-----------|-----------|--------|-------|-------------|-------|---|
| KLRG1      | 0.2460408 | 0.5713841 | 0.4306 | 0.667 | 0.095761652 | count | 1 |
| DLD        | 0.0719032 | 0.1194589 | 0.6019 | 0.547 | 0.095779393 | count | 1 |
| LINC02352  | 0.3779198 | 0.8219145 | 0.4598 | 0.646 | 0.095784435 | count | 1 |
| B3GALT1    | 0.3779198 | 0.8304104 | 0.4551 | 0.649 | 0.095784435 | count | 1 |
| PSD        | 0.1539457 | 0.9167462 | 0.1679 | 0.867 | 0.095828523 | count | 1 |
| AL355312.3 | 0.2944914 | 0.6895686 | 0.4271 | 0.669 | 0.095857875 | count | 1 |
| ZNF23      | 0.2944914 | 0.7555764 | 0.3898 | 0.697 | 0.095857875 | count | 1 |
| FAM210B    | 0.0690393 | 0.0960485 | 0.7188 | 0.472 | 0.095908932 | count | 1 |
| ALKBH4     | 0.0760578 | 0.1586091 | 0.4795 | 0.632 | 0.095982838 | count | 1 |
| ZNF274     | 0.0808459 | 0.2344441 | 0.3448 | 0.73  | 0.0959889   | count | 1 |
| TFB2M      | 0.0892457 | 0.2393634 | 0.3728 | 0.709 | 0.096054328 | count | 1 |
| EXT2       | 0.0749241 | 0.1327363 | 0.5645 | 0.572 | 0.096177273 | count | 1 |
| CCDC113    | 0.0937317 | 0.2904581 | 0.3227 | 0.747 | 0.096261863 | count | 1 |
| SNRNP200   | 0.0710497 | 0.1155584 | 0.6148 | 0.539 | 0.096419834 | count | 1 |
| VPS37C     | 0.0930985 | 0.2438371 | 0.3818 | 0.703 | 0.096458587 | count | 1 |
| OSGEPL1    | 0.0890502 | 0.215822  | 0.4126 | 0.68  | 0.09647342  | count | 1 |
| M6PR       | 0.0695185 | 0.0934085 | 0.7442 | 0.457 | 0.096486326 | count | 1 |
| STON1      | 0.0904525 | 0.234723  | 0.3854 | 0.7   | 0.096680917 | count | 1 |
| C9orf153   | 1.355888  | 0.9239322 | 1.4675 | 0.142 | 0.096739153 | count | 1 |
| C1orf229   | 1.355888  | 0.9854343 | 1.3759 | 0.169 | 0.096739153 | count | 1 |
| SBK1       | 1.355888  | 1.424062  | 0.9521 | 0.341 | 0.096739153 | count | 1 |
| CTIF       | 0.0769046 | 0.2056945 | 0.3739 | 0.709 | 0.096772977 | count | 1 |
| AMER1      | 0.1472825 | 0.4291359 | 0.3432 | 0.731 | 0.096777706 | count | 1 |
| KCTD12     | 0.0763869 | 0.1709846 | 0.4467 | 0.655 | 0.096913633 | count | 1 |
| SPCS2      | 0.067637  | 0.0358079 | 1.8889 | 0.059 | 0.096918796 | count | 1 |
| OPA1       | 0.0783149 | 0.1650654 | 0.4744 | 0.635 | 0.096953815 | count | 1 |
| ZC3H3      | 0.1786953 | 0.369495  | 0.4836 | 0.629 | 0.096960157 | count | 1 |
| AC022730.4 | 0.2983924 | 0.8356761 | 0.3571 | 0.721 | 0.097038929 | count | 1 |
| DIO3       | 0.2983924 | 0.9497041 | 0.3142 | 0.753 | 0.097038929 | count | 1 |
| UBE2L3     | 0.0686952 | 0.0558727 | 1.2295 | 0.219 | 0.097053088 | count | 1 |
| PDCD2L     | 0.0846955 | 0.2273261 | 0.3726 | 0.709 | 0.097099393 | count | 1 |
| WDR34      | 0.0741972 | 0.138588  | 0.5354 | 0.592 | 0.097115117 | count | 1 |
| ERI3       | 0.0708564 | 0.093747  | 0.7558 | 0.45  | 0.097142034 | count | 1 |
| MFSD11     | 0.0778779 | 0.1626644 | 0.4788 | 0.632 | 0.097245562 | count | 1 |
| C20orf194  | 0.0829637 | 0.2601993 | 0.3188 | 0.75  | 0.097262469 | count | 1 |
| ATM        | 0.0744424 | 0.1228517 | 0.606  | 0.545 | 0.097363172 | count | 1 |
| FAM173B    | 0.0893961 | 0.222971  | 0.4009 | 0.688 | 0.097452549 | count | 1 |
| ZNF326     | 0.072318  | 0.1210324 | 0.5975 | 0.55  | 0.097509697 | count | 1 |
| TEKT3      | 0.3001042 | 0.4518603 | 0.6642 | 0.507 | 0.097556455 | count | 1 |
| KANSL3     | 0.0880121 | 0.2403685 | 0.3662 | 0.714 | 0.097616831 | count | 1 |
| DGAT1      | 0.0864291 | 0.2582422 | 0.3347 | 0.738 | 0.097794621 | count | 1 |
| NCAPH2     | 0.0821414 | 0.1898611 | 0.4326 | 0.665 | 0.097804542 | count | 1 |
| ZSCAN21    | 0.0915551 | 0.2068624 | 0.4426 | 0.658 | 0.097851406 | count | 1 |
| HDGFL2     | 0.0732229 | 0.1044178 | 0.7012 | 0.483 | 0.097858861 | count | 1 |
| VRK1       | 0.0903774 | 0.2518721 | 0.3588 | 0.72  | 0.097901959 | count | 1 |

|            |           |           |        |        |             |       |   |
|------------|-----------|-----------|--------|--------|-------------|-------|---|
| ZNF627     | 0.1313298 | 0.3745746 | 0.3506 | 0.726  | 0.097910405 | count | 1 |
| STK32B     | 0.5761956 | 0.5903013 | 0.9761 | 0.329  | 0.098008674 | count | 1 |
| EGFLAM     | 0.0814534 | 0.167178  | 0.4872 | 0.626  | 0.098042349 | count | 1 |
| PCNA       | 0.0733275 | 0.1012066 | 0.7245 | 0.469  | 0.098042733 | count | 1 |
| SLC36A4    | 0.0830943 | 0.2280845 | 0.3643 | 0.716  | 0.098048418 | count | 1 |
| PIEZO1     | 0.1122842 | 0.2792452 | 0.4021 | 0.688  | 0.098114271 | count | 1 |
| HOOK1      | 0.5770893 | 0.9973476 | 0.5786 | 0.563  | 0.09813613  | count | 1 |
| AC084871.2 | 0.5770893 | 1.212531  | 0.4759 | 0.634  | 0.09813613  | count | 1 |
| MARK2      | 0.0821881 | 0.2298944 | 0.3575 | 0.721  | 0.098136391 | count | 1 |
| IGSF3      | 0.2203878 | 0.487442  | 0.4521 | 0.651  | 0.098170224 | count | 1 |
| ZFP64      | 0.0950552 | 0.2819089 | 0.3372 | 0.736  | 0.098470289 | count | 1 |
| CCDC71L    | 0.07162   | 0.1011802 | 0.7078 | 0.479  | 0.098504451 | count | 1 |
| ACTR6      | 0.0720229 | 0.094762  | 0.76   | 0.447  | 0.098617028 | count | 1 |
| SEPSECS    | 0.1179683 | 0.2988139 | 0.3948 | 0.693  | 0.098687204 | count | 1 |
| ZRANB1     | 0.0761598 | 0.1747289 | 0.4359 | 0.663  | 0.098714469 | count | 1 |
| HSPH1      | 0.0725498 | 0.1222108 | 0.5936 | 0.553  | 0.098726974 | count | 1 |
| LCLAT1     | 0.0854655 | 0.2164721 | 0.3948 | 0.693  | 0.098757736 | count | 1 |
| MTMR8      | 0.2544405 | 0.6976481 | 0.3647 | 0.715  | 0.098849074 | count | 1 |
| MTDH       | 0.0690192 | 0.0432618 | 1.5954 | 0.111  | 0.098851995 | count | 1 |
| ALKBH6     | 0.0855829 | 0.2308102 | 0.3708 | 0.711  | 0.098892732 | count | 1 |
| STK11      | 0.0780772 | 0.1570511 | 0.4971 | 0.619  | 0.098924053 | count | 1 |
| CEP19      | 0.0963562 | 0.3473344 | 0.2774 | 0.781  | 0.098935679 | count | 1 |
| RAB11A     | 0.0711279 | 0.0818605 | 0.8689 | 0.385  | 0.099015787 | count | 1 |
| NAPRT      | 0.0742391 | 0.1532276 | 0.4845 | 0.628  | 0.099259695 | count | 1 |
| CHCHD4     | 0.0895682 | 0.2020045 | 0.4434 | 0.658  | 0.099332482 | count | 1 |
| PLPBP      | 0.0726015 | 0.104776  | 0.6929 | 0.488  | 0.099344405 | count | 1 |
| PDSS2      | 0.0863676 | 0.2105516 | 0.4102 | 0.682  | 0.099406974 | count | 1 |
| AC008758.4 | 0.5865114 | 1.086248  | 0.5399 | 0.589  | 0.099475407 | count | 1 |
| SYDE1      | 0.0774214 | 0.1557161 | 0.4972 | 0.619  | 0.099582375 | count | 1 |
| MOB1B      | 0.0903942 | 0.2501933 | 0.3613 | 0.718  | 0.099693985 | count | 1 |
| PANK2      | 0.0763457 | 0.1709817 | 0.4465 | 0.655  | 0.099772203 | count | 1 |
| PUDP       | 0.1295211 | 0.4254682 | 0.3044 | 0.761  | 0.099799656 | count | 1 |
| AKAP11     | 0.0752638 | 0.1333617 | 0.5644 | 0.573  | 0.099939645 | count | 1 |
| TXLNB      | 0.1713123 | 0.3953171 | 0.4334 | 0.665  | 0.100002906 | count | 1 |
| MEIS2      | 0.072882  | 0.1103511 | 0.6605 | 0.509  | 0.100053895 | count | 1 |
| NDUFAF5    | 0.1145492 | 0.2879325 | 0.3978 | 0.691  | 0.100067562 | count | 1 |
| FAM98A     | 0.0738592 | 0.1057279 | 0.6986 | 0.485  | 0.100138995 | count | 1 |
| PEX2       | 0.0730791 | 0.1108093 | 0.6595 | 0.51   | 0.100206305 | count | 1 |
| ANXA5      | 0.0698289 | 0.0299687 | 2.3301 | 0.0199 | 0.100279854 | count | 1 |
| NDUFA3     | 0.0713241 | 0.0669681 | 1.065  | 0.287  | 0.100468098 | count | 1 |
| MIB2       | 0.0857307 | 0.195688  | 0.4381 | 0.661  | 0.100491405 | count | 1 |
| CNOT2      | 0.0731891 | 0.0965162 | 0.7583 | 0.448  | 0.100695923 | count | 1 |
| CA13       | 0.1620209 | 0.6769809 | 0.2393 | 0.811  | 0.100719624 | count | 1 |
| CYP20A1    | 0.0725322 | 0.0782175 | 0.9273 | 0.354  | 0.100801796 | count | 1 |
| FAAP100    | 0.120552  | 0.3251908 | 0.3707 | 0.711  | 0.100816873 | count | 1 |

|             |           |           |        |         |             |       |   |
|-------------|-----------|-----------|--------|---------|-------------|-------|---|
| TMEM202-AS1 | 0.4000241 | 0.6154138 | 0.65   | 0.516   | 0.10081845  | count | 1 |
| FGFR3       | 0.4009709 | 0.8441156 | 0.475  | 0.635   | 0.101032661 | count | 1 |
| AC226118.1  | 0.4009709 | 0.8441156 | 0.475  | 0.635   | 0.101032661 | count | 1 |
| GEMIN7-AS1  | 0.4009709 | 0.8441156 | 0.475  | 0.635   | 0.101032661 | count | 1 |
| TEDC2       | 0.4009709 | 0.9898277 | 0.4051 | 0.685   | 0.101032661 | count | 1 |
| SDE2        | 0.0927145 | 0.1902995 | 0.4872 | 0.626   | 0.101046435 | count | 1 |
| AAR2        | 0.0868278 | 0.1913936 | 0.4537 | 0.65    | 0.101069362 | count | 1 |
| WDR76       | 0.1274241 | 0.3254671 | 0.3915 | 0.695   | 0.101155405 | count | 1 |
| NPIPA5      | 1.477906  | 0.7987051 | 1.8504 | 0.0643  | 0.101532089 | count | 1 |
| TDRD6       | 1.479311  | 1.175916  | 1.258  | 0.208   | 0.10158446  | count | 1 |
| MRFAP1L1    | 0.0773869 | 0.118556  | 0.6527 | 0.514   | 0.101641588 | count | 1 |
| GGT7        | 0.0859521 | 0.212797  | 0.4039 | 0.686   | 0.101719521 | count | 1 |
| PLEKHH3     | 0.0749532 | 0.1122435 | 0.6678 | 0.504   | 0.101798084 | count | 1 |
| TXN2        | 0.072411  | 0.0631533 | 1.1466 | 0.252   | 0.10183408  | count | 1 |
| TACO1       | 0.0790978 | 0.1517383 | 0.5213 | 0.602   | 0.101836576 | count | 1 |
| NUDT16L1    | 0.0764637 | 0.1201581 | 0.6364 | 0.525   | 0.101844059 | count | 1 |
| CENPH       | 0.1218032 | 0.3202986 | 0.3803 | 0.704   | 0.101847692 | count | 1 |
| PAQR7       | 0.0941076 | 0.257751  | 0.3651 | 0.715   | 0.101915464 | count | 1 |
| GOT1        | 0.0860111 | 0.1705221 | 0.5044 | 0.614   | 0.102094784 | count | 1 |
| COLGALT1    | 0.0834688 | 0.1517266 | 0.5501 | 0.582   | 0.102103978 | count | 1 |
| AHSA1       | 0.0741802 | 0.0829294 | 0.8945 | 0.371   | 0.102344178 | count | 1 |
| AL157756.1  | 0.2643695 | 0.7899276 | 0.3347 | 0.738   | 0.102482656 | count | 1 |
| AL117379.1  | 0.2643695 | 0.9339838 | 0.2831 | 0.777   | 0.102482656 | count | 1 |
| RDH11       | 0.0744533 | 0.0946523 | 0.7866 | 0.432   | 0.102538781 | count | 1 |
| OPRL1       | 0.6088401 | 0.9137636 | 0.6663 | 0.505   | 0.102616287 | count | 1 |
| FSCN1       | 0.0858295 | 0.2424306 | 0.354  | 0.723   | 0.102747228 | count | 1 |
| STARD8      | 1.512793  | 1.153281  | 1.3117 | 0.19    | 0.102813315 | count | 1 |
| ZNF606      | 0.1116286 | 0.3394746 | 0.3288 | 0.742   | 0.10283614  | count | 1 |
| SEMA4B      | 0.1230335 | 0.3554148 | 0.3462 | 0.729   | 0.102860976 | count | 1 |
| IRS2        | 0.0789706 | 0.1725593 | 0.4576 | 0.647   | 0.102872141 | count | 1 |
| IQGAP1      | 0.0726682 | 0.0569568 | 1.2758 | 0.202   | 0.10301838  | count | 1 |
| AC022211.2  | 0.6121198 | 0.7801994 | 0.7846 | 0.433   | 0.10307374  | count | 1 |
| ERLIN2      | 0.080124  | 0.1362202 | 0.5882 | 0.556   | 0.103154517 | count | 1 |
| GINS2       | 0.2326122 | 0.7215406 | 0.3224 | 0.747   | 0.103354558 | count | 1 |
| RHOA        | 0.0719799 | 0.0310124 | 2.321  | 0.0203  | 0.10340712  | count | 1 |
| IFT52       | 0.0759925 | 0.1116709 | 0.6805 | 0.496   | 0.103487341 | count | 1 |
| MRPS30-DT   | 0.0911239 | 0.2300684 | 0.3961 | 0.692   | 0.103542507 | count | 1 |
| XRCC5       | 0.0730281 | 0.0499978 | 1.4606 | 0.144   | 0.10379931  | count | 1 |
| MTRNR2L12   | 0.072559  | 0.0435973 | 1.6643 | 0.0961  | 0.103906685 | count | 1 |
| KANSL1L     | 0.0817794 | 0.1522772 | 0.537  | 0.591   | 0.103997471 | count | 1 |
| TSEN15      | 0.0781845 | 0.1324275 | 0.5904 | 0.555   | 0.104027643 | count | 1 |
| ZNF582-AS1  | 0.1023981 | 0.2848864 | 0.3594 | 0.719   | 0.104117159 | count | 1 |
| UBC         | 0.0724163 | 0.0226624 | 3.1954 | 0.00141 | 0.104289318 | count | 1 |
| LOXL1-AS1   | 0.0983601 | 0.2834245 | 0.347  | 0.729   | 0.104318926 | count | 1 |
| NR2C2       | 0.0869286 | 0.2516708 | 0.3454 | 0.73    | 0.104334931 | count | 1 |

|            |           |           |        |        |             |       |   |
|------------|-----------|-----------|--------|--------|-------------|-------|---|
| HIST1H2AC  | 0.0817773 | 0.1890173 | 0.4326 | 0.665  | 0.104369685 | count | 1 |
| SLC44A1    | 0.0771753 | 0.115778  | 0.6666 | 0.505  | 0.104533535 | count | 1 |
| UTP23      | 0.0751241 | 0.0957408 | 0.7847 | 0.433  | 0.104543239 | count | 1 |
| HSD17B4    | 0.0780683 | 0.1044414 | 0.7475 | 0.455  | 0.104643426 | count | 1 |
| PMF1       | 0.0781374 | 0.1169073 | 0.6684 | 0.504  | 0.104647047 | count | 1 |
| ILF3-DT    | 0.0765443 | 0.1091582 | 0.7012 | 0.483  | 0.104687485 | count | 1 |
| PCDHB16    | 0.0980471 | 0.2565824 | 0.3821 | 0.702  | 0.104739051 | count | 1 |
| PIP5K1C    | 0.0858161 | 0.1667834 | 0.5145 | 0.607  | 0.104740066 | count | 1 |
| AC021054.1 | 0.1938237 | 0.3848021 | 0.5037 | 0.615  | 0.104875867 | count | 1 |
| ME3        | 0.0937234 | 0.2514931 | 0.3727 | 0.709  | 0.104992023 | count | 1 |
| FAM193A    | 0.0875698 | 0.2785631 | 0.3144 | 0.753  | 0.105101263 | count | 1 |
| RAD21      | 0.075435  | 0.0735915 | 1.0251 | 0.305  | 0.10512814  | count | 1 |
| ALDH4A1    | 0.1466484 | 0.3447177 | 0.4254 | 0.671  | 0.105177709 | count | 1 |
| CDH8       | 0.6276306 | 0.7981091 | 0.7864 | 0.432  | 0.105223676 | count | 1 |
| TSPAN32    | 0.6276306 | 0.8586843 | 0.7309 | 0.465  | 0.105223676 | count | 1 |
| FAM84B     | 0.6276306 | 0.9227112 | 0.6802 | 0.496  | 0.105223676 | count | 1 |
| RINT1      | 0.0961831 | 0.27596   | 0.3485 | 0.727  | 0.105430382 | count | 1 |
| ARMC7      | 0.1145292 | 0.2826241 | 0.4052 | 0.685  | 0.105476203 | count | 1 |
| PUS7       | 0.1027927 | 0.2457278 | 0.4183 | 0.676  | 0.105487948 | count | 1 |
| LRCH1      | 0.1097684 | 0.2135388 | 0.514  | 0.607  | 0.105541355 | count | 1 |
| CD302      | 0.0753254 | 0.0689243 | 1.0929 | 0.275  | 0.105626493 | count | 1 |
| AC090204.1 | 1.5938509 | 1.8642704 | 0.8549 | 0.3926 | 0.105645322 | count | 1 |
| AC139887.2 | 0.1236105 | 0.3234267 | 0.3822 | 0.702  | 0.105674349 | count | 1 |
| IFT74      | 0.0779164 | 0.1225662 | 0.6357 | 0.525  | 0.10593507  | count | 1 |
| TSG101     | 0.0756926 | 0.0721451 | 1.0492 | 0.294  | 0.10616748  | count | 1 |
| ABCD2      | 1.610801  | 1.068195  | 1.508  | 0.132  | 0.106212697 | count | 1 |
| COPS5      | 0.076061  | 0.0771241 | 0.9862 | 0.324  | 0.106248215 | count | 1 |
| MID1       | 0.0822569 | 0.1879307 | 0.4377 | 0.662  | 0.106305974 | count | 1 |
| C16orf58   | 0.0881579 | 0.1850514 | 0.4764 | 0.634  | 0.106345787 | count | 1 |
| SSR1       | 0.0762988 | 0.0790622 | 0.965  | 0.335  | 0.10635072  | count | 1 |
| NTAN1      | 0.0762966 | 0.0793313 | 0.9617 | 0.336  | 0.10635741  | count | 1 |
| NAF1       | 0.0843048 | 0.1517192 | 0.5557 | 0.578  | 0.106505678 | count | 1 |
| EYA3       | 0.0937959 | 0.2558493 | 0.3666 | 0.714  | 0.106561213 | count | 1 |
| AC027097.2 | 1.6279463 | 1.00853   | 1.6142 | 0.107  | 0.106778206 | count | 1 |
| CDH15      | 1.6279463 | 2.0201667 | 0.8058 | 0.4204 | 0.106778206 | count | 1 |
| SLC25A12   | 0.0830408 | 0.1488883 | 0.5577 | 0.577  | 0.106791567 | count | 1 |
| ZNF547     | 0.3310149 | 0.7331699 | 0.4515 | 0.652  | 0.106822461 | count | 1 |
| CLIP2      | 0.109735  | 0.3448206 | 0.3182 | 0.75   | 0.106829    | count | 1 |
| DCAF7      | 0.0833962 | 0.1502986 | 0.5549 | 0.579  | 0.106909238 | count | 1 |
| NIPSNAP1   | 0.089477  | 0.1756    | 0.5096 | 0.61   | 0.107094531 | count | 1 |
| SMAD2      | 0.0801268 | 0.1137226 | 0.7046 | 0.481  | 0.107166387 | count | 1 |
| NIPA1      | 0.1394645 | 0.324531  | 0.4297 | 0.667  | 0.107316155 | count | 1 |
| CASC2      | 0.4289829 | 0.8227634 | 0.5214 | 0.602  | 0.107317299 | count | 1 |
| AC003101.2 | 0.4289829 | 0.8227634 | 0.5214 | 0.602  | 0.107317299 | count | 1 |
| ACE2       | 0.4289829 | 0.950389  | 0.4514 | 0.652  | 0.107317299 | count | 1 |

|            |           |           |        |         |             |       |   |
|------------|-----------|-----------|--------|---------|-------------|-------|---|
| ANKIB1     | 0.0802885 | 0.1318761 | 0.6088 | 0.543   | 0.107334256 | count | 1 |
| SCARF2     | 0.0892178 | 0.1938067 | 0.4603 | 0.645   | 0.107618968 | count | 1 |
| AC027117.2 | 1.666221  | 1.274313  | 1.3075 | 0.191   | 0.108010365 | count | 1 |
| ABT1       | 0.0806996 | 0.1721455 | 0.4688 | 0.639   | 0.108072817 | count | 1 |
| TTYH2      | 0.6486624 | 0.604963  | 1.0722 | 0.284   | 0.108103478 | count | 1 |
| DCAF12     | 0.0925782 | 0.2421053 | 0.3824 | 0.702   | 0.108108606 | count | 1 |
| SH3BP5-AS1 | 0.2187074 | 0.5555894 | 0.3936 | 0.694   | 0.108122202 | count | 1 |
| ZNF888     | 0.6503105 | 0.6030978 | 1.0783 | 0.281   | 0.108327431 | count | 1 |
| STAT5A     | 0.0927762 | 0.2062899 | 0.4497 | 0.653   | 0.108338641 | count | 1 |
| CLTB       | 0.0760306 | 0.0454273 | 1.6737 | 0.0943  | 0.108342349 | count | 1 |
| ECD        | 0.08598   | 0.1835975 | 0.4683 | 0.64    | 0.108469855 | count | 1 |
| VPS37B     | 0.0917009 | 0.2588851 | 0.3542 | 0.723   | 0.108490602 | count | 1 |
| POLRMT     | 0.1145265 | 0.2274715 | 0.5035 | 0.615   | 0.108615391 | count | 1 |
| CSE1L      | 0.0874572 | 0.2141182 | 0.4085 | 0.683   | 0.108617722 | count | 1 |
| PEMT       | 0.0844898 | 0.1554013 | 0.5437 | 0.587   | 0.108760503 | count | 1 |
| ATP23      | 0.0981402 | 0.193936  | 0.506  | 0.613   | 0.108776705 | count | 1 |
| TRIP6      | 0.0774685 | 0.0693411 | 1.1172 | 0.264   | 0.10892037  | count | 1 |
| EXOSC9     | 0.0836472 | 0.1455831 | 0.5746 | 0.566   | 0.109037522 | count | 1 |
| MBD4       | 0.0790226 | 0.0958904 | 0.8241 | 0.41    | 0.109134097 | count | 1 |
| C9orf106   | 1.705752  | 1.22324   | 1.3945 | 0.163   | 0.109240107 | count | 1 |
| DECR1      | 0.0782298 | 0.0804919 | 0.9719 | 0.331   | 0.109293192 | count | 1 |
| SIKE1      | 0.0821883 | 0.1220102 | 0.6736 | 0.501   | 0.109400354 | count | 1 |
| PHIP       | 0.0791054 | 0.101503  | 0.7793 | 0.436   | 0.109579561 | count | 1 |
| KIZ        | 0.0860877 | 0.134025  | 0.6423 | 0.521   | 0.109594232 | count | 1 |
| ATL3       | 0.0782939 | 0.07747   | 1.0106 | 0.312   | 0.109758712 | count | 1 |
| PRIMPOL    | 0.0930798 | 0.2196381 | 0.4238 | 0.672   | 0.109773432 | count | 1 |
| VAMP2      | 0.0768439 | 0.0445917 | 1.7233 | 0.0849  | 0.109795614 | count | 1 |
| PRC1       | 0.1887951 | 0.5404742 | 0.3493 | 0.727   | 0.109869845 | count | 1 |
| ZDHHC4     | 0.0813588 | 0.114016  | 0.7136 | 0.476   | 0.109908728 | count | 1 |
| NAA35      | 0.0887865 | 0.1565419 | 0.5672 | 0.571   | 0.110068853 | count | 1 |
| PRELID3B   | 0.0853566 | 0.1542052 | 0.5535 | 0.58    | 0.110091013 | count | 1 |
| CD63       | 0.0765029 | 0.0209817 | 3.6462 | 0.00027 | 0.11020265  | count | 1 |
| GRK6       | 0.1039567 | 0.232638  | 0.4469 | 0.655   | 0.110207281 | count | 1 |
| PPM1K      | 0.080346  | 0.1016637 | 0.7903 | 0.429   | 0.110246541 | count | 1 |
| SYDE2      | 0.0893406 | 0.2633664 | 0.3392 | 0.734   | 0.110349967 | count | 1 |
| ARMH3      | 0.1096675 | 0.277666  | 0.395  | 0.693   | 0.110351926 | count | 1 |
| TST        | 0.0897085 | 0.1990692 | 0.4506 | 0.652   | 0.110379267 | count | 1 |
| WDR20      | 0.0853313 | 0.1605792 | 0.5314 | 0.595   | 0.110472937 | count | 1 |
| ZRANB2     | 0.0777309 | 0.0649972 | 1.1959 | 0.232   | 0.110473819 | count | 1 |
| MTUS1      | 0.0792363 | 0.0761136 | 1.041  | 0.298   | 0.110598137 | count | 1 |
| ZMPSTE24   | 0.0808128 | 0.1048407 | 0.7708 | 0.441   | 0.110661769 | count | 1 |
| AC084033.3 | 0.0851119 | 0.169124  | 0.5033 | 0.615   | 0.110762684 | count | 1 |
| RPS6KA2    | 0.0954374 | 0.3112679 | 0.3066 | 0.759   | 0.111037811 | count | 1 |
| RPA4       | 0.6706708 | 0.6489159 | 1.0335 | 0.301   | 0.111073599 | count | 1 |
| NUAK2      | 0.6706708 | 0.683493  | 0.9812 | 0.327   | 0.111073599 | count | 1 |

|            |           |           |        |        |             |       |   |
|------------|-----------|-----------|--------|--------|-------------|-------|---|
| ATR        | 0.1026695 | 0.2306484 | 0.4451 | 0.656  | 0.111119088 | count | 1 |
| C17orf107  | 0.3458168 | 0.5884858 | 0.5876 | 0.557  | 0.111206565 | count | 1 |
| PIK3CD     | 0.3458168 | 0.6367502 | 0.5431 | 0.587  | 0.111206565 | count | 1 |
| NANOG      | 0.6719999 | 1.131627  | 0.5938 | 0.553  | 0.111251553 | count | 1 |
| AC092718.3 | 0.6719999 | 1.131627  | 0.5938 | 0.553  | 0.111251553 | count | 1 |
| C19orf57   | 0.6719999 | 1.131627  | 0.5938 | 0.553  | 0.111251553 | count | 1 |
| AL049840.2 | 0.6719999 | 1.139617  | 0.5897 | 0.555  | 0.111251553 | count | 1 |
| TMEM92     | 0.6719999 | 1.139617  | 0.5897 | 0.555  | 0.111251553 | count | 1 |
| MB         | 0.6719999 | 1.139617  | 0.5897 | 0.555  | 0.111251553 | count | 1 |
| KCNK7      | 0.6719999 | 1.292406  | 0.52   | 0.603  | 0.111251553 | count | 1 |
| LINC02572  | 0.6719999 | 1.302785  | 0.5158 | 0.606  | 0.111251553 | count | 1 |
| MRPS10     | 0.0798689 | 0.0907056 | 0.8805 | 0.379  | 0.111260643 | count | 1 |
| GBP2       | 0.0800181 | 0.0766981 | 1.0433 | 0.297  | 0.111436269 | count | 1 |
| SMG7       | 0.089798  | 0.1992282 | 0.4507 | 0.652  | 0.111514402 | count | 1 |
| CHD2       | 0.0833969 | 0.1402981 | 0.5944 | 0.552  | 0.111532352 | count | 1 |
| ULK3       | 0.1087866 | 0.3013162 | 0.361  | 0.718  | 0.111583005 | count | 1 |
| HAPLN2     | 0.448268  | 0.6705931 | 0.6685 | 0.504  | 0.111584695 | count | 1 |
| RPP30      | 0.0832558 | 0.1056525 | 0.788  | 0.431  | 0.111723327 | count | 1 |
| BRCA2      | 0.3476177 | 0.4813906 | 0.7221 | 0.47   | 0.111737628 | count | 1 |
| DNAH14     | 1.791649  | 0.9317961 | 1.9228 | 0.0546 | 0.111768303 | count | 1 |
| LINC01474  | 0.2899991 | 0.8347096 | 0.3474 | 0.728  | 0.111781802 | count | 1 |
| GANAB      | 0.0829393 | 0.1143883 | 0.7251 | 0.468  | 0.111808563 | count | 1 |
| SETD1A     | 0.1136211 | 0.271924  | 0.4178 | 0.676  | 0.111871628 | count | 1 |
| CARD8-AS1  | 1.800954  | 1.162774  | 1.5488 | 0.122  | 0.112030806 | count | 1 |
| BTBD1      | 0.0914621 | 0.2061071 | 0.4438 | 0.657  | 0.112076591 | count | 1 |
| PHLDB2     | 0.0822281 | 0.098015  | 0.8389 | 0.402  | 0.11210958  | count | 1 |
| AL513314.2 | 1.8088187 | 1.597038  | 1.1326 | 0.257  | 0.112250911 | count | 1 |
| TRAPPC3L   | 0.4513644 | 0.5801361 | 0.778  | 0.437  | 0.112265366 | count | 1 |
| SNX11      | 0.1019352 | 0.2592131 | 0.3932 | 0.694  | 0.112334015 | count | 1 |
| PCMTD1     | 0.0795471 | 0.0609121 | 1.3059 | 0.192  | 0.112555202 | count | 1 |
| KATNAL1    | 0.093347  | 0.1932109 | 0.4831 | 0.629  | 0.112577802 | count | 1 |
| CAPN6      | 1.823408  | 1.30466   | 1.3976 | 0.162  | 0.112655254 | count | 1 |
| SPTSSB     | 1.824832  | 1.110211  | 1.6437 | 0.1    | 0.112694405 | count | 1 |
| WDR5B      | 0.1385049 | 0.2835194 | 0.4885 | 0.625  | 0.112779856 | count | 1 |
| CANT1      | 0.0950948 | 0.2115578 | 0.4495 | 0.653  | 0.112824636 | count | 1 |
| DDX39A     | 0.0871217 | 0.1493495 | 0.5833 | 0.56   | 0.112886538 | count | 1 |
| BNIP1      | 0.0958252 | 0.1971665 | 0.486  | 0.627  | 0.11299483  | count | 1 |
| SYCP2L     | 1.840688  | 1.651126  | 1.1148 | 0.265  | 0.113127207 | count | 1 |
| DZANK1     | 0.1826519 | 0.3925468 | 0.4653 | 0.642  | 0.11315177  | count | 1 |
| CITED1     | 0.2294644 | 0.6692262 | 0.3429 | 0.732  | 0.113200071 | count | 1 |
| TWNK       | 0.1948535 | 0.4707628 | 0.4139 | 0.679  | 0.113273858 | count | 1 |
| LRP12      | 0.1034106 | 0.220733  | 0.4685 | 0.639  | 0.113295766 | count | 1 |
| DDX55      | 0.09817   | 0.180748  | 0.5431 | 0.587  | 0.113355324 | count | 1 |
| BTN2A2     | 0.1151494 | 0.1894218 | 0.6079 | 0.543  | 0.113360384 | count | 1 |
| AC073610.3 | 0.2301897 | 0.5938145 | 0.3876 | 0.698  | 0.113541622 | count | 1 |



|            |           |           |        |        |             |       |   |
|------------|-----------|-----------|--------|--------|-------------|-------|---|
| AC073195.1 | 0.2301897 | 0.6191824 | 0.3718 | 0.71   | 0.113541622 | count | 1 |
| CARNS1     | 0.2301897 | 0.6433952 | 0.3578 | 0.721  | 0.113541622 | count | 1 |
| AP4E1      | 0.1302701 | 0.3581345 | 0.3637 | 0.716  | 0.113595524 | count | 1 |
| FRMD4A     | 0.0887341 | 0.1809546 | 0.4904 | 0.624  | 0.113608336 | count | 1 |
| FAM120B    | 0.0947268 | 0.2890348 | 0.3277 | 0.743  | 0.113651582 | count | 1 |
| TRIP4      | 0.0967008 | 0.1826636 | 0.5294 | 0.597  | 0.113657785 | count | 1 |
| ARHGEF2    | 0.0875362 | 0.2152279 | 0.4067 | 0.684  | 0.113719279 | count | 1 |
| ZNF397     | 0.0859171 | 0.1726253 | 0.4977 | 0.619  | 0.113807269 | count | 1 |
| MEAF6      | 0.0805133 | 0.0613264 | 1.3129 | 0.189  | 0.113957761 | count | 1 |
| LINC00908  | 1.8724403 | 1.057345  | 1.7709 | 0.0767 | 0.113975732 | count | 1 |
| ARMH1      | 1.8724403 | 2.0622754 | 0.9079 | 0.364  | 0.113975732 | count | 1 |
| LINC00909  | 0.0898884 | 0.1738583 | 0.517  | 0.605  | 0.113989793 | count | 1 |
| APLNR      | 0.4595148 | 0.6566327 | 0.6998 | 0.484  | 0.114051077 | count | 1 |
| BAG2       | 0.0824535 | 0.0894396 | 0.9219 | 0.357  | 0.114062012 | count | 1 |
| CCL13      | 1.878178  | 0.8773201 | 2.1408 | 0.0324 | 0.114126436 | count | 1 |
| ZNF841     | 0.1744847 | 0.3190627 | 0.5469 | 0.585  | 0.114153047 | count | 1 |
| AFMID      | 0.0897044 | 0.1847965 | 0.4854 | 0.627  | 0.114184457 | count | 1 |
| GPATCH11   | 0.0851856 | 0.1141258 | 0.7464 | 0.455  | 0.114214637 | count | 1 |
| INPP5K     | 0.0975317 | 0.2013073 | 0.4845 | 0.628  | 0.114251183 | count | 1 |
| TMX3       | 0.0852117 | 0.1093366 | 0.7794 | 0.436  | 0.114343497 | count | 1 |
| RRP12      | 0.1974834 | 0.3743553 | 0.5275 | 0.598  | 0.114749063 | count | 1 |
| LYPD3      | 0.1166093 | 0.3130615 | 0.3725 | 0.71   | 0.114782097 | count | 1 |
| ZNF510     | 0.1084909 | 0.2628983 | 0.4127 | 0.68   | 0.114973947 | count | 1 |
| WIPF2      | 0.0931171 | 0.2032109 | 0.4582 | 0.647  | 0.114996481 | count | 1 |
| SYN1       | 0.260523  | 0.5113168 | 0.5095 | 0.61   | 0.11508489  | count | 1 |
| AL356481.1 | 0.185958  | 0.4722501 | 0.3938 | 0.694  | 0.115135414 | count | 1 |
| KIF22      | 0.0853368 | 0.112082  | 0.7614 | 0.446  | 0.1151962   | count | 1 |
| ZNF778     | 0.2994941 | 0.3931338 | 0.7618 | 0.446  | 0.115197407 | count | 1 |
| ENDOG      | 0.0888409 | 0.1384281 | 0.6418 | 0.521  | 0.115210428 | count | 1 |
| LRWD1      | 0.1106985 | 0.2345701 | 0.4719 | 0.637  | 0.115489761 | count | 1 |
| IAH1       | 0.0817675 | 0.0654643 | 1.249  | 0.212  | 0.115578102 | count | 1 |
| BMP2K      | 0.1099022 | 0.2594626 | 0.4236 | 0.672  | 0.115580261 | count | 1 |
| UNC119B    | 0.1161677 | 0.2904912 | 0.3999 | 0.689  | 0.115618355 | count | 1 |
| PIAS1      | 0.086509  | 0.0996072 | 0.8685 | 0.385  | 0.115738035 | count | 1 |
| E4F1       | 0.1069929 | 0.2469307 | 0.4333 | 0.665  | 0.115761979 | count | 1 |
| PIK3IP1    | 0.0872828 | 0.1067084 | 0.818  | 0.413  | 0.115867226 | count | 1 |
| C1orf53    | 0.3014302 | 0.4855379 | 0.6208 | 0.535  | 0.115891924 | count | 1 |
| SQOR       | 0.0846644 | 0.0977442 | 0.8662 | 0.386  | 0.11590487  | count | 1 |
| PIBF1      | 0.085853  | 0.1212409 | 0.7081 | 0.479  | 0.115970433 | count | 1 |
| AC007878.1 | 1.953283  | 1.075153  | 1.8167 | 0.0693 | 0.116029426 | count | 1 |
| SLF2       | 0.0881015 | 0.1712398 | 0.5145 | 0.607  | 0.116065759 | count | 1 |
| ANKRD10    | 0.0840097 | 0.0944035 | 0.8899 | 0.374  | 0.116098878 | count | 1 |
| OGFOD2     | 0.1511888 | 0.356339  | 0.4243 | 0.671  | 0.116151097 | count | 1 |
| TBRG4      | 0.0944508 | 0.1842814 | 0.5125 | 0.608  | 0.116416455 | count | 1 |
| NSMAF      | 0.1012804 | 0.2597414 | 0.3899 | 0.697  | 0.116469607 | count | 1 |

|            |           |           |        |        |             |       |   |
|------------|-----------|-----------|--------|--------|-------------|-------|---|
| TMEM70     | 0.0873179 | 0.1125012 | 0.7762 | 0.438  | 0.116498785 | count | 1 |
| DDX24      | 0.0814725 | 0.0433316 | 1.8802 | 0.0602 | 0.116562225 | count | 1 |
| NUBPL      | 0.1046588 | 0.2103699 | 0.4975 | 0.619  | 0.116565666 | count | 1 |
| AC009779.3 | 1.9755683 | 1.072154  | 1.8426 | 0.0655 | 0.116569636 | count | 1 |
| THOC6      | 0.0960028 | 0.1885384 | 0.5092 | 0.611  | 0.116598246 | count | 1 |
| CCDC13     | 0.7134148 | 0.8328366 | 0.8566 | 0.392  | 0.116716312 | count | 1 |
| EPHA6      | 0.7134148 | 1.092133  | 0.6532 | 0.514  | 0.116716312 | count | 1 |
| DMTF1      | 0.0928357 | 0.2940954 | 0.3157 | 0.752  | 0.116751322 | count | 1 |
| SNW1       | 0.0831014 | 0.075017  | 1.1078 | 0.268  | 0.116823275 | count | 1 |
| IDH2       | 0.0969686 | 0.1612765 | 0.6013 | 0.548  | 0.116925368 | count | 1 |
| EMC2       | 0.0838002 | 0.0791766 | 1.0584 | 0.29   | 0.117041165 | count | 1 |
| ZNF304     | 0.1576484 | 0.4634121 | 0.3402 | 0.734  | 0.117093949 | count | 1 |
| EXOC3L1    | 0.3051487 | 0.4732262 | 0.6448 | 0.519  | 0.117223935 | count | 1 |
| ZC4H2      | 0.1193272 | 0.3210941 | 0.3716 | 0.71   | 0.117427816 | count | 1 |
| LAMC2      | 2.016044  | 1.160953  | 1.7365 | 0.0826 | 0.11752305  | count | 1 |
| EEF1AKMT2  | 0.089031  | 0.1357198 | 0.656  | 0.512  | 0.117579344 | count | 1 |
| TP53INP1   | 0.1067719 | 0.2327108 | 0.4588 | 0.646  | 0.117625076 | count | 1 |
| MAT2B      | 0.0924281 | 0.1418548 | 0.6516 | 0.515  | 0.117640527 | count | 1 |
| TBL1XR1    | 0.0842639 | 0.0763424 | 1.1038 | 0.27   | 0.117659346 | count | 1 |
| LINC02315  | 0.1902024 | 0.6789677 | 0.2801 | 0.779  | 0.117678524 | count | 1 |
| TMED10     | 0.082524  | 0.0460665 | 1.7914 | 0.0733 | 0.117689047 | count | 1 |
| CUL9       | 0.1011973 | 0.5060749 | 0.2    | 0.842  | 0.11770117  | count | 1 |
| SUV39H2    | 0.2028015 | 0.3728473 | 0.5439 | 0.587  | 0.117727627 | count | 1 |
| AL049597.2 | 0.4765997 | 0.5896172 | 0.8083 | 0.419  | 0.117766323 | count | 1 |
| JAKMIP2    | 0.4765997 | 0.9451159 | 0.5043 | 0.614  | 0.117766323 | count | 1 |
| RSRC1      | 0.0846848 | 0.0837844 | 1.0107 | 0.312  | 0.117836474 | count | 1 |
| HAUS7      | 0.1121093 | 0.4853515 | 0.231  | 0.817  | 0.117880849 | count | 1 |
| AP003392.6 | 0.3070508 | 0.8963671 | 0.3426 | 0.732  | 0.117904356 | count | 1 |
| TNRC6A     | 0.0847784 | 0.1456487 | 0.5821 | 0.561  | 0.117942605 | count | 1 |
| CDC7       | 0.7232624 | 0.7228533 | 1.0006 | 0.317  | 0.117992944 | count | 1 |
| DDX59      | 0.0920937 | 0.1443718 | 0.6379 | 0.524  | 0.118277444 | count | 1 |
| CEBPA-DT   | 0.4789962 | 0.7246285 | 0.661  | 0.509  | 0.118284431 | count | 1 |
| CDAN1      | 0.1593739 | 0.4282693 | 0.3721 | 0.71   | 0.118346329 | count | 1 |
| RAB2A      | 0.0828772 | 0.0411607 | 2.0135 | 0.0441 | 0.118411506 | count | 1 |
| MMP25-AS1  | 0.1496079 | 0.3990833 | 0.3749 | 0.708  | 0.118419123 | count | 1 |
| CENPN      | 0.1915384 | 0.4421222 | 0.4332 | 0.665  | 0.118478194 | count | 1 |
| MRPS24     | 0.2687108 | 0.8818089 | 0.3047 | 0.761  | 0.118497786 | count | 1 |
| GBP5       | 0.2687108 | 1.102286  | 0.2438 | 0.807  | 0.118497786 | count | 1 |
| CUL5       | 0.0860624 | 0.1028865 | 0.8365 | 0.403  | 0.118509093 | count | 1 |
| GLS2       | 0.7274162 | 1.171749  | 0.6208 | 0.535  | 0.118528828 | count | 1 |
| APOL2      | 0.0925676 | 0.1391242 | 0.6654 | 0.506  | 0.118631396 | count | 1 |
| COMMD10    | 0.0888493 | 0.1478906 | 0.6008 | 0.548  | 0.1187034   | count | 1 |
| AP001453.2 | 2.0691148 | 1.401183  | 1.4767 | 0.14   | 0.118721043 | count | 1 |
| NXF1       | 0.1017231 | 0.2181824 | 0.4662 | 0.641  | 0.118727589 | count | 1 |
| TBXAS1     | 0.4812007 | 0.7360837 | 0.6537 | 0.513  | 0.11876037  | count | 1 |

|            |           |           |        |        |             |       |   |
|------------|-----------|-----------|--------|--------|-------------|-------|---|
| NMRAL1     | 0.0904077 | 0.1362102 | 0.6637 | 0.507  | 0.118784302 | count | 1 |
| GATAD2B    | 0.0927052 | 0.1441256 | 0.6432 | 0.52   | 0.11880721  | count | 1 |
| EXD3       | 0.1067513 | 0.2475025 | 0.4313 | 0.666  | 0.118879727 | count | 1 |
| ELMOD2     | 0.0923604 | 0.1617562 | 0.571  | 0.568  | 0.118981792 | count | 1 |
| ALKBH8     | 0.1426694 | 0.2599771 | 0.5488 | 0.583  | 0.118989373 | count | 1 |
| GLRX3      | 0.0869723 | 0.1047115 | 0.8306 | 0.406  | 0.119060305 | count | 1 |
| ATP6V1C1   | 0.0919666 | 0.1496727 | 0.6145 | 0.539  | 0.119147214 | count | 1 |
| CWC25      | 0.0880604 | 0.1081375 | 0.8143 | 0.416  | 0.119254434 | count | 1 |
| NTS        | 2.0947539 | 2.3355517 | 0.8969 | 0.3698 | 0.119279211 | count | 1 |
| REEP5      | 0.0835394 | 0.0422561 | 1.977  | 0.0481 | 0.119308396 | count | 1 |
| RAD50      | 0.103383  | 0.2074468 | 0.4984 | 0.618  | 0.119338609 | count | 1 |
| KPNA6      | 0.0909013 | 0.1468171 | 0.6191 | 0.536  | 0.119431304 | count | 1 |
| SPATA2     | 0.1280455 | 0.3492475 | 0.3666 | 0.714  | 0.119561596 | count | 1 |
| UBE2D1     | 0.0871367 | 0.1023736 | 0.8512 | 0.395  | 0.119576154 | count | 1 |
| RAB1A      | 0.0850471 | 0.0621565 | 1.3683 | 0.171  | 0.119670682 | count | 1 |
| ADAT1      | 0.1374257 | 0.302168  | 0.4548 | 0.649  | 0.119735781 | count | 1 |
| RAB3A      | 0.132467  | 0.2869487 | 0.4616 | 0.644  | 0.119789916 | count | 1 |
| HTT        | 0.0957258 | 0.1992123 | 0.4805 | 0.631  | 0.119830075 | count | 1 |
| ALDH6A1    | 0.0905953 | 0.1130855 | 0.8011 | 0.423  | 0.119853433 | count | 1 |
| POM121     | 0.1076487 | 0.198761  | 0.5416 | 0.588  | 0.119871935 | count | 1 |
| ZNF165     | 0.1749176 | 0.5002187 | 0.3497 | 0.727  | 0.119885254 | count | 1 |
| NUP54      | 0.0903448 | 0.1155098 | 0.7821 | 0.434  | 0.11998744  | count | 1 |
| CCT4       | 0.084987  | 0.0598932 | 1.419  | 0.156  | 0.120008306 | count | 1 |
| CEP104     | 0.0984036 | 0.1681423 | 0.5852 | 0.558  | 0.120035934 | count | 1 |
| TET3       | 0.4872654 | 0.7970849 | 0.6113 | 0.541  | 0.120066467 | count | 1 |
| SLC10A7    | 0.1441168 | 0.3573518 | 0.4033 | 0.687  | 0.120174941 | count | 1 |
| RNF4       | 0.1023066 | 0.1765022 | 0.5796 | 0.562  | 0.120210314 | count | 1 |
| LRRC45     | 0.1380422 | 0.3070496 | 0.4496 | 0.653  | 0.120264293 | count | 1 |
| KIF1B      | 0.0920164 | 0.1459953 | 0.6303 | 0.529  | 0.120291176 | count | 1 |
| BTG1       | 0.0841281 | 0.0555137 | 1.5154 | 0.13   | 0.120334076 | count | 1 |
| ZNF575     | 0.1521578 | 0.3389099 | 0.449  | 0.653  | 0.120396591 | count | 1 |
| FAHD1      | 0.0943274 | 0.1378653 | 0.6842 | 0.494  | 0.120475981 | count | 1 |
| GCNT4      | 0.1845599 | 0.404906  | 0.4558 | 0.649  | 0.120547314 | count | 1 |
| EXOC3L4    | 0.4898388 | 0.8443964 | 0.5801 | 0.562  | 0.120619236 | count | 1 |
| ARL14EP    | 0.0881552 | 0.0986096 | 0.894  | 0.371  | 0.120677516 | count | 1 |
| AC010226.1 | 0.1095646 | 0.204638  | 0.5354 | 0.592  | 0.120678435 | count | 1 |
| ZEB1       | 0.0863218 | 0.0848853 | 1.0169 | 0.309  | 0.12068387  | count | 1 |
| AGO4       | 0.1123432 | 0.2883327 | 0.3896 | 0.697  | 0.120708362 | count | 1 |
| ZNF585A    | 0.1335072 | 0.3183922 | 0.4193 | 0.675  | 0.120716816 | count | 1 |
| BCL10      | 0.0889682 | 0.1159238 | 0.7675 | 0.443  | 0.120838158 | count | 1 |
| THOC7      | 0.0853924 | 0.0658241 | 1.2973 | 0.195  | 0.120846589 | count | 1 |
| EFCAB13    | 0.1276105 | 0.3388344 | 0.3766 | 0.706  | 0.120865676 | count | 1 |
| PYM1       | 0.0912641 | 0.1417912 | 0.6437 | 0.52   | 0.120874676 | count | 1 |
| THADA      | 0.1039439 | 0.209486  | 0.4962 | 0.62   | 0.120876984 | count | 1 |
| EEF1AKMT1  | 0.0923353 | 0.1288878 | 0.7164 | 0.474  | 0.120885712 | count | 1 |

|              |           |           |        |        |             |       |   |
|--------------|-----------|-----------|--------|--------|-------------|-------|---|
| TMEM186      | 0.105164  | 0.2144632 | 0.4904 | 0.624  | 0.120907918 | count | 1 |
| RNF219       | 0.0966475 | 0.1492635 | 0.6475 | 0.517  | 0.120979579 | count | 1 |
| UBE2R2       | 0.0870645 | 0.0855365 | 1.0179 | 0.309  | 0.121018708 | count | 1 |
| CALCOCO2     | 0.0855571 | 0.056719  | 1.5084 | 0.132  | 0.121185633 | count | 1 |
| ZNF578       | 0.2465281 | 0.3988423 | 0.6181 | 0.537  | 0.121207354 | count | 1 |
| MAGIX        | 0.176979  | 0.3518437 | 0.503  | 0.615  | 0.121259145 | count | 1 |
| GALK2        | 0.0975541 | 0.1835014 | 0.5316 | 0.595  | 0.121317184 | count | 1 |
| AC087289.2   | 2.1943323 | 1.8261671 | 1.2016 | 0.2296 | 0.121326201 | count | 1 |
| PCGF2        | 0.0908562 | 0.1338897 | 0.6786 | 0.497  | 0.121379412 | count | 1 |
| CCDC171      | 0.1026751 | 0.1978678 | 0.5189 | 0.604  | 0.12140449  | count | 1 |
| IMMP2L       | 0.0899753 | 0.1116374 | 0.806  | 0.42   | 0.121405411 | count | 1 |
| NCOA5        | 0.1423534 | 0.3142896 | 0.4529 | 0.651  | 0.121425539 | count | 1 |
| OXT          | 0.4939601 | 1.093741  | 0.4516 | 0.652  | 0.121502708 | count | 1 |
| LINC00852    | 0.4939601 | 1.186454  | 0.4163 | 0.677  | 0.121502708 | count | 1 |
| AC079601.1   | 0.4939601 | 1.186454  | 0.4163 | 0.677  | 0.121502708 | count | 1 |
| KCNJ14       | 0.4939601 | 1.186454  | 0.4163 | 0.677  | 0.121502708 | count | 1 |
| KIF26A       | 0.4939601 | 1.209452  | 0.4084 | 0.683  | 0.121502708 | count | 1 |
| AL049780.1   | 0.4939601 | 1.438641  | 0.3434 | 0.731  | 0.121502708 | count | 1 |
| ZNF197-AS1   | 0.4939601 | 1.485662  | 0.3325 | 0.74   | 0.121502708 | count | 1 |
| UGP2         | 0.0859283 | 0.0619654 | 1.3867 | 0.166  | 0.121536475 | count | 1 |
| ABTB1        | 0.0905597 | 0.1077362 | 0.8406 | 0.401  | 0.121555865 | count | 1 |
| RRP1         | 0.104537  | 0.227378  | 0.4597 | 0.646  | 0.121562632 | count | 1 |
| ZNF77        | 0.2765504 | 0.4300655 | 0.643  | 0.52   | 0.121753478 | count | 1 |
| TOP2B        | 0.0923131 | 0.1186826 | 0.7778 | 0.437  | 0.121754667 | count | 1 |
| KDM2B        | 0.1866068 | 0.399734  | 0.4668 | 0.641  | 0.12184364  | count | 1 |
| WARS2-IT1    | 0.7540321 | 0.9900006 | 0.7616 | 0.446  | 0.121926047 | count | 1 |
| ANXA9        | 0.7540321 | 0.9900006 | 0.7616 | 0.446  | 0.121926047 | count | 1 |
| AC099550.1   | 0.7540321 | 0.9900006 | 0.7616 | 0.446  | 0.121926047 | count | 1 |
| BX005266.2   | 0.7540321 | 0.9900006 | 0.7616 | 0.446  | 0.121926047 | count | 1 |
| MYCBPAP      | 0.7540321 | 0.9900006 | 0.7616 | 0.446  | 0.121926047 | count | 1 |
| AC004922.1   | 0.7540321 | 1.0173864 | 0.7411 | 0.459  | 0.121926047 | count | 1 |
| PRSS53       | 0.7540321 | 1.1505457 | 0.6554 | 0.512  | 0.121926047 | count | 1 |
| AC004076.2   | 0.7540321 | 1.168959  | 0.645  | 0.519  | 0.121926047 | count | 1 |
| RLF          | 0.0974619 | 0.1451726 | 0.6714 | 0.502  | 0.121995192 | count | 1 |
| AC245060.6   | 0.7548334 | 0.7833745 | 0.9636 | 0.335  | 0.12202734  | count | 1 |
| RGS18        | 0.7548334 | 1.5436632 | 0.489  | 0.6249 | 0.12202734  | count | 1 |
| ARHGAP42     | 0.0895006 | 0.1276096 | 0.7014 | 0.483  | 0.122070795 | count | 1 |
| OXSM         | 0.1203306 | 0.2732928 | 0.4403 | 0.66   | 0.122162144 | count | 1 |
| AL121658.1   | 0.277576  | 0.5646041 | 0.4916 | 0.623  | 0.122178527 | count | 1 |
| AC110769.2   | 0.277576  | 0.5820926 | 0.4769 | 0.633  | 0.122178527 | count | 1 |
| ALG3         | 0.0914608 | 0.124672  | 0.7336 | 0.463  | 0.122185542 | count | 1 |
| C21orf62-AS1 | 0.1503189 | 0.3682323 | 0.4082 | 0.683  | 0.122214376 | count | 1 |
| GCLM         | 0.0964838 | 0.1462963 | 0.6595 | 0.51   | 0.122481518 | count | 1 |
| C8orf82      | 0.0929577 | 0.1177477 | 0.7895 | 0.43   | 0.122678605 | count | 1 |
| SQLE         | 0.0981744 | 0.1751587 | 0.5605 | 0.575  | 0.122883673 | count | 1 |

|            |           |           |        |         |             |       |   |
|------------|-----------|-----------|--------|---------|-------------|-------|---|
| SIPA1      | 0.109321  | 0.2167934 | 0.5043 | 0.614   | 0.122940338 | count | 1 |
| ZMYM5      | 0.0925961 | 0.15062   | 0.6148 | 0.539   | 0.123035776 | count | 1 |
| RER1       | 0.0871124 | 0.0586232 | 1.486  | 0.137   | 0.12318012  | count | 1 |
| SUPT16H    | 0.0882802 | 0.0733232 | 1.204  | 0.229   | 0.123200665 | count | 1 |
| ZNF622     | 0.0938393 | 0.1475412 | 0.636  | 0.525   | 0.123282026 | count | 1 |
| ARHGAP5    | 0.0897057 | 0.098972  | 0.9064 | 0.365   | 0.123414308 | count | 1 |
| BORCS5     | 0.1021276 | 0.2102225 | 0.4858 | 0.627   | 0.1234186   | count | 1 |
| CDYL       | 0.0986054 | 0.1641677 | 0.6006 | 0.548   | 0.123421102 | count | 1 |
| GOLM1      | 0.0984598 | 0.1786632 | 0.5511 | 0.582   | 0.123429565 | count | 1 |
| ZC2HC1C    | 0.1481714 | 0.6139015 | 0.2414 | 0.809   | 0.123493666 | count | 1 |
| 7-Sep      | 0.0858654 | 0.0273753 | 3.1366 | 0.00172 | 0.123509228 | count | 1 |
| ZNF440     | 0.1804167 | 0.493936  | 0.3653 | 0.715   | 0.12354821  | count | 1 |
| MT1E       | 0.0870858 | 0.0650434 | 1.3389 | 0.181   | 0.123673699 | count | 1 |
| COBLL1     | 0.0901846 | 0.0984203 | 0.9163 | 0.36    | 0.123801009 | count | 1 |
| USP7       | 0.0913709 | 0.0993938 | 0.9193 | 0.358   | 0.123843775 | count | 1 |
| TMEM165    | 0.0876013 | 0.0599883 | 1.4603 | 0.144   | 0.124002678 | count | 1 |
| GRM7       | 0.7705595 | 0.7772777 | 0.9914 | 0.322   | 0.124003921 | count | 1 |
| TCEANC2    | 0.2141148 | 0.4351018 | 0.4921 | 0.623   | 0.124043685 | count | 1 |
| SPIN2B     | 0.0994708 | 0.1829286 | 0.5438 | 0.587   | 0.124104124 | count | 1 |
| SLITRK2    | 2.351122  | 1.08828   | 2.1604 | 0.0308  | 0.124189231 | count | 1 |
| TFG        | 0.0884394 | 0.0672977 | 1.3142 | 0.189   | 0.124208595 | count | 1 |
| RFFL       | 0.1619719 | 0.3191796 | 0.5075 | 0.612   | 0.124250004 | count | 1 |
| AC009961.1 | 2.355256  | 1.160644  | 2.0293 | 0.0425  | 0.124259129 | count | 1 |
| COQ7       | 0.0982019 | 0.1499642 | 0.6548 | 0.513   | 0.124333884 | count | 1 |
| AC015912.3 | 0.7740161 | 0.6669352 | 1.1606 | 0.246   | 0.124435439 | count | 1 |
| OTUB2      | 0.3913874 | 0.9600572 | 0.4077 | 0.684   | 0.12448763  | count | 1 |
| BTBD9      | 0.1204667 | 0.2634137 | 0.4573 | 0.647   | 0.124534756 | count | 1 |
| TRIM22     | 0.0920414 | 0.10981   | 0.8382 | 0.402   | 0.124558796 | count | 1 |
| CASP7      | 0.1037181 | 0.1517167 | 0.6836 | 0.494   | 0.124708118 | count | 1 |
| SYBU       | 0.254059  | 0.3757336 | 0.6762 | 0.499   | 0.12472251  | count | 1 |
| TELO2      | 0.1161173 | 0.2491332 | 0.4661 | 0.641   | 0.124728359 | count | 1 |
| TM9SF3     | 0.0883677 | 0.0617834 | 1.4303 | 0.153   | 0.124836129 | count | 1 |
| RAMMET     | 0.0914511 | 0.1127954 | 0.8108 | 0.418   | 0.124846915 | count | 1 |
| RPF2       | 0.0899059 | 0.0932498 | 0.9641 | 0.335   | 0.124868778 | count | 1 |
| FRMD6-AS1  | 0.1100792 | 0.35949   | 0.3062 | 0.759   | 0.124934795 | count | 1 |
| NANS       | 0.0909806 | 0.0897494 | 1.0137 | 0.311   | 0.124939651 | count | 1 |
| FAHD2A     | 0.0971715 | 0.1462084 | 0.6646 | 0.506   | 0.125035617 | count | 1 |
| AC048341.1 | 0.1384469 | 0.4782922 | 0.2895 | 0.772   | 0.125115421 | count | 1 |
| AKR1B10    | 2.408795  | 1.114202  | 2.1619 | 0.0307  | 0.125141084 | count | 1 |
| CXCL12     | 0.0876027 | 0.0686082 | 1.2769 | 0.202   | 0.125161449 | count | 1 |
| EXOC3      | 0.1016136 | 0.1593499 | 0.6377 | 0.524   | 0.12520705  | count | 1 |
| JAM3       | 0.0903399 | 0.0869454 | 1.039  | 0.299   | 0.125220461 | count | 1 |
| APRT       | 0.0882083 | 0.0518947 | 1.6998 | 0.0893  | 0.125259916 | count | 1 |
| ESYT3      | 2.4202467 | 2.3314626 | 1.0381 | 0.2993  | 0.125324024 | count | 1 |
| SLC9B1     | 0.7816111 | 0.6911271 | 1.1309 | 0.258   | 0.125379912 | count | 1 |

|            |           |           |        |        |             |       |   |
|------------|-----------|-----------|--------|--------|-------------|-------|---|
| MRPL42     | 0.0907593 | 0.0852668 | 1.0644 | 0.287  | 0.125452035 | count | 1 |
| AL445183.2 | 0.3954801 | 0.9667214 | 0.4091 | 0.682  | 0.125664397 | count | 1 |
| SLC26A5    | 0.3954801 | 0.9667214 | 0.4091 | 0.682  | 0.125664397 | count | 1 |
| AMN        | 0.3954801 | 0.9667214 | 0.4091 | 0.682  | 0.125664397 | count | 1 |
| AC138894.1 | 0.3954801 | 0.9667214 | 0.4091 | 0.682  | 0.125664397 | count | 1 |
| CKAP2L     | 0.3954801 | 1.066826  | 0.3707 | 0.711  | 0.125664397 | count | 1 |
| SEPT7-AS1  | 0.3954801 | 1.066826  | 0.3707 | 0.711  | 0.125664397 | count | 1 |
| PRR36      | 0.3954801 | 1.31477   | 0.3008 | 0.764  | 0.125664397 | count | 1 |
| R3HDM4     | 0.1024028 | 0.1726311 | 0.5932 | 0.553  | 0.125679588 | count | 1 |
| U62317.3   | 0.5136567 | 0.7791404 | 0.6593 | 0.51   | 0.125694662 | count | 1 |
| KLF6       | 0.0882038 | 0.0580798 | 1.5187 | 0.129  | 0.125869125 | count | 1 |
| RUSC1      | 0.095699  | 0.1671932 | 0.5724 | 0.567  | 0.125887139 | count | 1 |
| SAMD9L     | 0.0973259 | 0.1544524 | 0.6301 | 0.529  | 0.125956572 | count | 1 |
| TMEM97     | 0.1180992 | 0.3170036 | 0.3725 | 0.71   | 0.125968554 | count | 1 |
| ARIH2OS    | 0.1281765 | 0.2907237 | 0.4409 | 0.659  | 0.126032309 | count | 1 |
| LRPAP1     | 0.0884402 | 0.0412151 | 2.1458 | 0.032  | 0.126143106 | count | 1 |
| AC100793.2 | 0.0979578 | 0.2359223 | 0.4152 | 0.678  | 0.126294787 | count | 1 |
| MAP2K2     | 0.0896659 | 0.0608381 | 1.4738 | 0.141  | 0.126333233 | count | 1 |
| AL121761.1 | 0.3307909 | 0.654733  | 0.5052 | 0.613  | 0.126342469 | count | 1 |
| LRP11      | 0.1038916 | 0.2208706 | 0.4704 | 0.638  | 0.126419751 | count | 1 |
| SLC39A6    | 0.0928332 | 0.0927915 | 1.0004 | 0.317  | 0.126547155 | count | 1 |
| NDUFB9     | 0.0887585 | 0.044576  | 1.9912 | 0.0465 | 0.12666629  | count | 1 |
| SHMT2      | 0.0968772 | 0.1515164 | 0.6394 | 0.523  | 0.126723316 | count | 1 |
| SEC14L6    | 2.5158079 | 2.8454586 | 0.8841 | 0.3767 | 0.126776036 | count | 1 |
| RPA1       | 0.1003366 | 0.182213  | 0.5507 | 0.582  | 0.126858109 | count | 1 |
| ULK4       | 0.3323192 | 0.3138334 | 1.0589 | 0.29   | 0.126882242 | count | 1 |
| ARHGAP6    | 0.0959116 | 0.1355658 | 0.7075 | 0.479  | 0.126943646 | count | 1 |
| GTF2E1     | 0.1239518 | 0.3887941 | 0.3188 | 0.75   | 0.126975187 | count | 1 |
| CNIH4      | 0.090263  | 0.0655684 | 1.3766 | 0.169  | 0.126992962 | count | 1 |
| ZNRD1      | 0.0931494 | 0.1158904 | 0.8038 | 0.422  | 0.127040074 | count | 1 |
| DNAJB14    | 0.0905021 | 0.0700806 | 1.2914 | 0.197  | 0.127060414 | count | 1 |
| ZFX        | 0.0969246 | 0.1189897 | 0.8146 | 0.415  | 0.127060853 | count | 1 |
| ARHGAP35   | 0.0980104 | 0.1582249 | 0.6194 | 0.536  | 0.127067354 | count | 1 |
| MYO1C      | 0.0916729 | 0.1102968 | 0.8311 | 0.406  | 0.127158893 | count | 1 |
| MAP4K5     | 0.0922737 | 0.1006477 | 0.9168 | 0.359  | 0.127218061 | count | 1 |
| SMARCC1    | 0.0997588 | 0.1397838 | 0.7137 | 0.475  | 0.127389918 | count | 1 |
| ZNF322     | 0.0925313 | 0.0961726 | 0.9621 | 0.336  | 0.127448542 | count | 1 |
| PDSS1      | 0.1720934 | 0.377661  | 0.4557 | 0.649  | 0.12755774  | count | 1 |
| CHID1      | 0.0921058 | 0.0783385 | 1.1757 | 0.24   | 0.127681367 | count | 1 |
| ZNF330     | 0.0960004 | 0.1177523 | 0.8153 | 0.415  | 0.127809971 | count | 1 |
| SLC25A16   | 0.1116816 | 0.224088  | 0.4984 | 0.618  | 0.127831711 | count | 1 |
| LENG1      | 0.0943545 | 0.1168472 | 0.8075 | 0.419  | 0.127842311 | count | 1 |
| LATS1      | 0.0999872 | 0.1937926 | 0.5159 | 0.606  | 0.127968816 | count | 1 |
| DSTYK      | 0.1022706 | 0.1853358 | 0.5518 | 0.581  | 0.127990602 | count | 1 |
| MACROD1    | 0.0951637 | 0.106424  | 0.8942 | 0.371  | 0.128022849 | count | 1 |

|            |           |           |        |          |             |       |   |
|------------|-----------|-----------|--------|----------|-------------|-------|---|
| DAPL1      | 0.0952919 | 0.2166273 | 0.4399 | 0.66     | 0.128047632 | count | 1 |
| DNMT3A     | 0.1100959 | 0.2216396 | 0.4967 | 0.619    | 0.128440063 | count | 1 |
| AC009126.1 | 0.4054521 | 0.7415136 | 0.5468 | 0.585    | 0.12852059  | count | 1 |
| GNAI3      | 0.0925526 | 0.088549  | 1.0452 | 0.296    | 0.128541044 | count | 1 |
| TIMM23B    | 0.1293412 | 0.228016  | 0.5672 | 0.571    | 0.128575461 | count | 1 |
| SNHG12     | 0.1049109 | 0.2182829 | 0.4806 | 0.631    | 0.128743723 | count | 1 |
| CHD3       | 0.0940856 | 0.1091064 | 0.8623 | 0.389    | 0.128784412 | count | 1 |
| PCCB       | 0.1112529 | 0.1720722 | 0.6465 | 0.518    | 0.128850878 | count | 1 |
| ZBTB41     | 0.1017922 | 0.168846  | 0.6029 | 0.547    | 0.128863065 | count | 1 |
| PRDX4      | 0.09038   | 0.0501645 | 1.8017 | 0.0717   | 0.128891928 | count | 1 |
| RPRD1B     | 0.114662  | 0.2195604 | 0.5222 | 0.602    | 0.12890231  | count | 1 |
| NLE1       | 0.1311611 | 0.2620068 | 0.5006 | 0.617    | 0.12893094  | count | 1 |
| SC5D       | 0.1136647 | 0.1849728 | 0.6145 | 0.539    | 0.128975307 | count | 1 |
| CES4A      | 0.1519132 | 0.442318  | 0.3434 | 0.731    | 0.129430449 | count | 1 |
| FSIP2      | 0.8150673 | 0.6239503 | 1.3063 | 0.192    | 0.129480199 | count | 1 |
| C15orf40   | 0.0940948 | 0.1095128 | 0.8592 | 0.39     | 0.129534156 | count | 1 |
| MAP2K7     | 0.1096576 | 0.2231979 | 0.4913 | 0.623    | 0.129612999 | count | 1 |
| CRTC3      | 0.0981716 | 0.1368222 | 0.7175 | 0.473    | 0.12977676  | count | 1 |
| GDI2       | 0.0919141 | 0.0540783 | 1.6996 | 0.0893   | 0.12983886  | count | 1 |
| SMARCD3    | 0.0945184 | 0.1203974 | 0.7851 | 0.432    | 0.129887794 | count | 1 |
| EEF1AKMT3  | 0.1394222 | 0.3472744 | 0.4015 | 0.688    | 0.130030832 | count | 1 |
| KLHL25     | 0.2658265 | 0.7109875 | 0.3739 | 0.709    | 0.130191991 | count | 1 |
| AURKC      | 0.2658265 | 0.7615476 | 0.3491 | 0.727    | 0.130191991 | count | 1 |
| S100A11    | 0.090447  | 0.0271793 | 3.3278 | 0.000884 | 0.130278387 | count | 1 |
| LINC01569  | 0.3421646 | 0.7348976 | 0.4656 | 0.642    | 0.130349534 | count | 1 |
| ANKRD39    | 0.1024501 | 0.1598531 | 0.6409 | 0.522    | 0.130351489 | count | 1 |
| IFT81      | 0.0997731 | 0.1287828 | 0.7747 | 0.439    | 0.130501105 | count | 1 |
| PIGB       | 0.1286394 | 0.3819159 | 0.3368 | 0.736    | 0.130503023 | count | 1 |
| SH3RF3     | 0.1167721 | 0.2492541 | 0.4685 | 0.639    | 0.130615565 | count | 1 |
| OSBPL9     | 0.0946676 | 0.0994853 | 0.9516 | 0.341    | 0.130810721 | count | 1 |
| PAIP1      | 0.0935429 | 0.0659278 | 1.4189 | 0.156    | 0.130925196 | count | 1 |
| PRKCSH     | 0.0971559 | 0.1128754 | 0.8607 | 0.389    | 0.130938158 | count | 1 |
| AL603832.2 | 0.827882  | 1.0397854 | 0.7962 | 0.426    | 0.131024945 | count | 1 |
| PREP       | 0.1385266 | 0.25598   | 0.5412 | 0.588    | 0.131060066 | count | 1 |
| BBS7       | 0.1009607 | 0.141306  | 0.7145 | 0.475    | 0.13110822  | count | 1 |
| MAPKAP1    | 0.0988528 | 0.1129988 | 0.8748 | 0.382    | 0.13119104  | count | 1 |
| NEK5       | 0.2130618 | 0.3837894 | 0.5552 | 0.579    | 0.131307052 | count | 1 |
| TMTC4      | 0.5406289 | 0.6423399 | 0.8417 | 0.4      | 0.131353777 | count | 1 |
| NCBP3      | 0.0983035 | 0.1057372 | 0.9297 | 0.353    | 0.131367311 | count | 1 |
| GFOD1      | 0.3452516 | 0.374274  | 0.9225 | 0.356    | 0.131433137 | count | 1 |
| STX1A      | 0.2276136 | 0.5087821 | 0.4474 | 0.655    | 0.131543551 | count | 1 |
| PRDX1      | 0.0914966 | 0.0261256 | 3.5022 | 0.000467 | 0.131546064 | count | 1 |
| CASC1      | 0.832253  | 0.7776012 | 1.0703 | 0.285    | 0.131548594 | count | 1 |
| UMAD1      | 0.1084668 | 0.1572624 | 0.6897 | 0.49     | 0.131660396 | count | 1 |
| PRPF8      | 0.0957038 | 0.1103158 | 0.8675 | 0.386    | 0.131701309 | count | 1 |

|            |           |           |        |        |             |       |   |
|------------|-----------|-----------|--------|--------|-------------|-------|---|
| PURPL      | 2.931751  | 1.427437  | 2.0539 | 0.0401 | 0.131761934 | count | 1 |
| AAGAB      | 0.1156682 | 0.2101467 | 0.5504 | 0.582  | 0.131806645 | count | 1 |
| RFX3       | 0.2024287 | 0.3558028 | 0.5689 | 0.569  | 0.131832339 | count | 1 |
| ATP2B1     | 0.0974707 | 0.1147212 | 0.8496 | 0.396  | 0.131893286 | count | 1 |
| SNHG19     | 0.1359003 | 0.2032776 | 0.6685 | 0.504  | 0.131971691 | count | 1 |
| PAN2       | 0.1376556 | 0.3724798 | 0.3696 | 0.712  | 0.131994094 | count | 1 |
| CCNYL1     | 0.1187051 | 0.2471086 | 0.4804 | 0.631  | 0.132086161 | count | 1 |
| INIP       | 0.106509  | 0.137607  | 0.774  | 0.439  | 0.132177103 | count | 1 |
| SRFBP1     | 0.097317  | 0.0982713 | 0.9903 | 0.322  | 0.132376644 | count | 1 |
| AC090360.1 | 0.5456229 | 0.8886764 | 0.614  | 0.539  | 0.132391302 | count | 1 |
| HELZ2      | 0.1592896 | 0.3467477 | 0.4594 | 0.646  | 0.132575629 | count | 1 |
| KDEL1      | 0.0928456 | 0.0418498 | 2.2185 | 0.0266 | 0.132849115 | count | 1 |
| BCL7A      | 0.1229374 | 0.2155275 | 0.5704 | 0.568  | 0.13285804  | count | 1 |
| PBRM1      | 0.0971325 | 0.1245886 | 0.7796 | 0.436  | 0.132862747 | count | 1 |
| GABRE      | 0.1338372 | 0.3245556 | 0.4124 | 0.68   | 0.13299005  | count | 1 |
| AC005520.2 | 0.1798509 | 0.4316682 | 0.4166 | 0.677  | 0.133157879 | count | 1 |
| THYN1      | 0.0947486 | 0.0691266 | 1.3707 | 0.171  | 0.133192209 | count | 1 |
| CRKL       | 0.1085949 | 0.1992711 | 0.545  | 0.586  | 0.13324316  | count | 1 |
| PPM1N      | 0.3044551 | 0.717233  | 0.4245 | 0.671  | 0.133245743 | count | 1 |
| DCP1B      | 0.1241682 | 0.223525  | 0.5555 | 0.579  | 0.133295778 | count | 1 |
| DCAF10     | 0.10592   | 0.1757866 | 0.6025 | 0.547  | 0.133333911 | count | 1 |
| ADA2       | 0.1280362 | 0.3832101 | 0.3341 | 0.738  | 0.133389935 | count | 1 |
| SNAPC4     | 0.3513579 | 0.3870215 | 0.9079 | 0.364  | 0.133571556 | count | 1 |
| RP2        | 0.1214414 | 0.2464794 | 0.4927 | 0.622  | 0.133649851 | count | 1 |
| ARIH1      | 0.1016396 | 0.1631613 | 0.6229 | 0.533  | 0.133768773 | count | 1 |
| FABP3      | 0.1010203 | 0.1494375 | 0.676  | 0.499  | 0.133840403 | count | 1 |
| LRCH3      | 0.1018406 | 0.1857597 | 0.5482 | 0.584  | 0.133856007 | count | 1 |
| MANEAL     | 0.4244632 | 0.5812248 | 0.7303 | 0.465  | 0.133922256 | count | 1 |
| AC013468.1 | 0.4244632 | 0.6198557 | 0.6848 | 0.494  | 0.133922256 | count | 1 |
| FBXL4      | 0.1136837 | 0.1858203 | 0.6118 | 0.541  | 0.133925492 | count | 1 |
| SH3BP1     | 0.8533706 | 0.8525328 | 1.001  | 0.317  | 0.134055384 | count | 1 |
| RRAS2      | 0.1092604 | 0.1929318 | 0.5663 | 0.571  | 0.134055803 | count | 1 |
| CNTROB     | 0.3065253 | 0.4231513 | 0.7244 | 0.469  | 0.134092329 | count | 1 |
| BRIX1      | 0.0977787 | 0.0964252 | 1.014  | 0.311  | 0.134159685 | count | 1 |
| THNSL2     | 0.1513831 | 0.2731652 | 0.5542 | 0.579  | 0.13421802  | count | 1 |
| GNA12      | 0.1119697 | 0.1816266 | 0.6165 | 0.538  | 0.134225472 | count | 1 |
| TTBK2      | 0.1165706 | 0.1899381 | 0.6137 | 0.539  | 0.134457721 | count | 1 |
| TAPT1      | 0.1017975 | 0.1733252 | 0.5873 | 0.557  | 0.13455804  | count | 1 |
| RYBP       | 0.105776  | 0.1693332 | 0.6247 | 0.532  | 0.134567705 | count | 1 |
| PDCD10     | 0.0964545 | 0.0662869 | 1.4551 | 0.146  | 0.134597948 | count | 1 |
| THAP2      | 0.1058096 | 0.210777  | 0.502  | 0.616  | 0.134610294 | count | 1 |
| GSKIP      | 0.1192387 | 0.1945951 | 0.6128 | 0.54   | 0.134640621 | count | 1 |
| NRXN3      | 0.1238545 | 0.3860224 | 0.3208 | 0.748  | 0.134684929 | count | 1 |
| PRSS23     | 0.0942057 | 0.0611511 | 1.5405 | 0.1235 | 0.134751498 | count | 1 |
| DONSON     | 0.2188812 | 0.4724498 | 0.4633 | 0.643  | 0.134758059 | count | 1 |



|            |           |           |        |        |             |       |   |
|------------|-----------|-----------|--------|--------|-------------|-------|---|
| ZNF92      | 0.1256438 | 0.2295009 | 0.5475 | 0.584  | 0.134864855 | count | 1 |
| GNB4       | 0.0980751 | 0.1132551 | 0.866  | 0.387  | 0.134960224 | count | 1 |
| PPP3CB     | 0.1014584 | 0.1146659 | 0.8848 | 0.376  | 0.134992101 | count | 1 |
| PIGBOS1    | 0.1022414 | 0.1167151 | 0.876  | 0.381  | 0.135063065 | count | 1 |
| SLC12A6    | 0.1286807 | 0.2550238 | 0.5046 | 0.614  | 0.135126956 | count | 1 |
| POLR1A     | 0.1767075 | 0.3116713 | 0.567  | 0.571  | 0.135275646 | count | 1 |
| CYB5D2     | 0.1023052 | 0.139837  | 0.7316 | 0.464  | 0.135384999 | count | 1 |
| NUPL2      | 0.1022788 | 0.1479235 | 0.6914 | 0.489  | 0.135427409 | count | 1 |
| PICALM     | 0.0991766 | 0.1102325 | 0.8997 | 0.368  | 0.135471923 | count | 1 |
| MLXIP      | 0.1107071 | 0.1799835 | 0.6151 | 0.539  | 0.135544451 | count | 1 |
| GON4L      | 0.1015667 | 0.1280122 | 0.7934 | 0.428  | 0.135594252 | count | 1 |
| AC012467.2 | 0.8666032 | 1.041857  | 0.8318 | 0.406  | 0.135606746 | count | 1 |
| LMBR1      | 0.1213822 | 0.2186624 | 0.5551 | 0.579  | 0.135730867 | count | 1 |
| RBFADN     | 0.8679208 | 0.9571724 | 0.9068 | 0.365  | 0.135760389 | count | 1 |
| FBP1       | 0.1533219 | 0.548003  | 0.2798 | 0.78   | 0.135906849 | count | 1 |
| ZNF449     | 0.1294314 | 0.291855  | 0.4435 | 0.657  | 0.135907078 | count | 1 |
| SIRT5      | 0.1368908 | 0.280267  | 0.4884 | 0.625  | 0.135986149 | count | 1 |
| SLC7A8     | 0.1439707 | 0.2746694 | 0.5242 | 0.6    | 0.136135255 | count | 1 |
| RASA1      | 0.1176408 | 0.1909782 | 0.616  | 0.538  | 0.136198842 | count | 1 |
| BEND7      | 0.115691  | 0.2092224 | 0.553  | 0.58   | 0.136275459 | count | 1 |
| PPP2R5C    | 0.100408  | 0.104035  | 0.9651 | 0.335  | 0.136500524 | count | 1 |
| ZNF614     | 0.1390089 | 0.2498698 | 0.5563 | 0.578  | 0.136544454 | count | 1 |
| PROSER3    | 0.1444512 | 0.2734997 | 0.5282 | 0.597  | 0.136582912 | count | 1 |
| NELFB      | 0.1072539 | 0.1409316 | 0.761  | 0.447  | 0.136605682 | count | 1 |
| MED6       | 0.1020193 | 0.1136783 | 0.8974 | 0.37   | 0.136622004 | count | 1 |
| NOL11      | 0.1070769 | 0.1518802 | 0.705  | 0.481  | 0.136701349 | count | 1 |
| CBARP      | 0.2802331 | 0.7221138 | 0.3881 | 0.698  | 0.136849518 | count | 1 |
| ERICD      | 0.2802331 | 0.8754405 | 0.3201 | 0.749  | 0.136849518 | count | 1 |
| ARMC5      | 0.1921651 | 0.313053  | 0.6138 | 0.539  | 0.136887988 | count | 1 |
| KATNAL2    | 0.1609182 | 0.4768824 | 0.3374 | 0.736  | 0.136952695 | count | 1 |
| TBC1D8-AS1 | 0.3137563 | 0.4616615 | 0.6796 | 0.497  | 0.137042817 | count | 1 |
| RAD23A     | 0.0964338 | 0.0528624 | 1.8242 | 0.0682 | 0.137088553 | count | 1 |
| ZNF799     | 0.2228426 | 0.4654367 | 0.4788 | 0.632  | 0.137102924 | count | 1 |
| GPS2       | 0.1042422 | 0.142225  | 0.7329 | 0.464  | 0.137273523 | count | 1 |
| PYCR1      | 0.1195609 | 0.2727441 | 0.4384 | 0.661  | 0.137342347 | count | 1 |
| DACH1      | 0.1856733 | 0.5391453 | 0.3444 | 0.731  | 0.137352159 | count | 1 |
| ARID2      | 0.1121171 | 0.1846634 | 0.6071 | 0.544  | 0.137543552 | count | 1 |
| SF3B3      | 0.1147664 | 0.1984483 | 0.5783 | 0.563  | 0.137558953 | count | 1 |
| SPTB       | 0.362808  | 0.6479854 | 0.5599 | 0.576  | 0.137563341 | count | 1 |
| PKNOX1     | 0.1133564 | 0.1729075 | 0.6556 | 0.512  | 0.13756423  | count | 1 |
| REX1BD     | 0.0970162 | 0.057142  | 1.6978 | 0.0896 | 0.137570182 | count | 1 |
| LMAN2      | 0.0974648 | 0.0566065 | 1.7218 | 0.0852 | 0.137582492 | count | 1 |
| RFTN2      | 0.1087355 | 0.1469694 | 0.7399 | 0.459  | 0.13761859  | count | 1 |
| H1FX-AS1   | 0.1553821 | 0.3665545 | 0.4239 | 0.672  | 0.137700544 | count | 1 |
| CABYR      | 0.2018019 | 0.5977755 | 0.3376 | 0.736  | 0.137728405 | count | 1 |

|            |           |           |        |         |             |       |   |
|------------|-----------|-----------|--------|---------|-------------|-------|---|
| ZFP37      | 0.1387804 | 0.254062  | 0.5462 | 0.585   | 0.137839267 | count | 1 |
| PPP2R5A    | 0.1053282 | 0.1170847 | 0.8996 | 0.368   | 0.137847636 | count | 1 |
| FAM215B    | 0.17475   | 0.2261843 | 0.7726 | 0.44    | 0.137854118 | count | 1 |
| TMEM106C   | 0.0974835 | 0.0651681 | 1.4959 | 0.135   | 0.137862541 | count | 1 |
| ZSWIM1     | 0.3641731 | 0.4954879 | 0.735  | 0.462   | 0.138037725 | count | 1 |
| NKX3-1     | 0.3641731 | 0.6307761 | 0.5773 | 0.564   | 0.138037725 | count | 1 |
| PIGX       | 0.1063469 | 0.1512522 | 0.7031 | 0.482   | 0.138081016 | count | 1 |
| MAT2A      | 0.1047429 | 0.1306247 | 0.8019 | 0.423   | 0.138275698 | count | 1 |
| PLBD1-AS1  | 0.4400058 | 0.8175171 | 0.5382 | 0.59    | 0.138296038 | count | 1 |
| COG6       | 0.1148539 | 0.1767734 | 0.6497 | 0.516   | 0.138372588 | count | 1 |
| P4HA2      | 0.0997543 | 0.0850459 | 1.1729 | 0.241   | 0.138469417 | count | 1 |
| RMDN2      | 0.1118248 | 0.1981613 | 0.5643 | 0.573   | 0.13849832  | count | 1 |
| KRI1       | 0.1300042 | 0.2624282 | 0.4954 | 0.62    | 0.138540175 | count | 1 |
| MLEC       | 0.098051  | 0.0607077 | 1.6151 | 0.106   | 0.138576957 | count | 1 |
| CSTF3      | 0.1156376 | 0.1937549 | 0.5968 | 0.551   | 0.138597165 | count | 1 |
| TCERG1     | 0.1034088 | 0.120346  | 0.8593 | 0.39    | 0.138766609 | count | 1 |
| PTOV1      | 0.1004355 | 0.0868951 | 1.1558 | 0.248   | 0.138770864 | count | 1 |
| ZSWIM9     | 0.1223733 | 0.343471  | 0.3563 | 0.722   | 0.138781059 | count | 1 |
| NAT14      | 0.1107864 | 0.1834615 | 0.6039 | 0.546   | 0.138816551 | count | 1 |
| B3GAT2     | 0.2845889 | 0.5088163 | 0.5593 | 0.576   | 0.138854015 | count | 1 |
| SLC25A53   | 0.1632246 | 0.3127438 | 0.5219 | 0.602   | 0.138876485 | count | 1 |
| TAB1       | 0.1490655 | 0.2514292 | 0.5929 | 0.553   | 0.138884242 | count | 1 |
| ASPHD2     | 0.3668071 | 0.61447   | 0.5969 | 0.551   | 0.138952047 | count | 1 |
| AC008543.1 | 0.2413462 | 1.065427  | 0.2265 | 0.821   | 0.139132502 | count | 1 |
| ALOX12-AS1 | 0.1601728 | 0.2721961 | 0.5884 | 0.556   | 0.139182719 | count | 1 |
| ZBTB24     | 0.1072311 | 0.1594929 | 0.6723 | 0.501   | 0.13922545  | count | 1 |
| OGA        | 0.1019989 | 0.1113995 | 0.9156 | 0.36    | 0.139256235 | count | 1 |
| HTATSF1    | 0.1023088 | 0.1043361 | 0.9806 | 0.327   | 0.139301423 | count | 1 |
| HBZ        | 0.8986991 | 0.7235127 | 1.2421 | 0.214   | 0.139307893 | count | 1 |
| PTGR1      | 0.100019  | 0.0826499 | 1.2102 | 0.226   | 0.13938107  | count | 1 |
| WDR63      | 0.8994684 | 1.239206  | 0.7258 | 0.468   | 0.139395542 | count | 1 |
| AP000442.2 | 0.8994684 | 1.276525  | 0.7046 | 0.481   | 0.139395542 | count | 1 |
| LDHA       | 0.097052  | 0.032311  | 3.0037 | 0.00269 | 0.139481605 | count | 1 |
| TSNARE1    | 0.3201472 | 0.4491897 | 0.7127 | 0.476   | 0.13964207  | count | 1 |
| FURIN      | 0.1238221 | 0.2144344 | 0.5774 | 0.564   | 0.139775032 | count | 1 |
| AC016910.1 | 0.5819643 | 0.9530323 | 0.6106 | 0.541   | 0.139844878 | count | 1 |
| NAT9       | 0.1107154 | 0.1493904 | 0.7411 | 0.459   | 0.139927656 | count | 1 |
| PRPF39     | 0.1170989 | 0.2094919 | 0.559  | 0.576   | 0.139962349 | count | 1 |
| ZNF550     | 0.1966671 | 0.3941535 | 0.499  | 0.618   | 0.139999097 | count | 1 |
| SWT1       | 0.1611915 | 0.2751288 | 0.5859 | 0.558   | 0.140051022 | count | 1 |
| LMTK3      | 0.4466099 | 0.7190024 | 0.6212 | 0.535   | 0.14014293  | count | 1 |
| LINC00654  | 0.4466099 | 0.8370809 | 0.5335 | 0.594   | 0.14014293  | count | 1 |
| KMT5B      | 0.1059939 | 0.1288018 | 0.8229 | 0.411   | 0.140172702 | count | 1 |
| NARF       | 0.1115482 | 0.1358775 | 0.8209 | 0.412   | 0.14018591  | count | 1 |
| TMSB4Y     | 0.2280903 | 0.4134975 | 0.5516 | 0.581   | 0.140203801 | count | 1 |

|             |            |             |        |       |             |       |   |
|-------------|------------|-------------|--------|-------|-------------|-------|---|
| NT5DC2      | 0.1016323  | 0.0984134   | 1.0327 | 0.302 | 0.140213564 | count | 1 |
| AL139161.1  | 0.5839553  | 1.0158787   | 0.5748 | 0.565 | 0.140248334 | count | 1 |
| BEAN1       | 0.5839553  | 1.0158787   | 0.5748 | 0.565 | 0.140248334 | count | 1 |
| KCNE2       | 0.5839553  | 1.351645    | 0.432  | 0.666 | 0.140248334 | count | 1 |
| WAC         | 0.1010045  | 0.087838    | 1.1499 | 0.25  | 0.140282133 | count | 1 |
| GOLT1B      | 0.1045463  | 0.1213773   | 0.8613 | 0.389 | 0.140289777 | count | 1 |
| MRPL30      | 0.1110125  | 0.1740112   | 0.638  | 0.524 | 0.140301625 | count | 1 |
| SEMA6D      | 0.1689344  | 0.3451478   | 0.4895 | 0.625 | 0.140432075 | count | 1 |
| HTR1F       | 0.585246   | 0.6240021   | 0.9379 | 0.348 | 0.140509609 | count | 1 |
| LINC01119   | 0.585246   | 0.6885886   | 0.8499 | 0.395 | 0.140509609 | count | 1 |
| ZNF772      | 0.1691005  | 0.6765646   | 0.2499 | 0.803 | 0.140567197 | count | 1 |
| KLHDC1      | 0.1210557  | 0.2083002   | 0.5812 | 0.561 | 0.140639326 | count | 1 |
| SCRIB       | 0.1417153  | 0.3162875   | 0.4481 | 0.654 | 0.140716138 | count | 1 |
| STK32A      | 0.4493205  | 0.4884727   | 0.9198 | 0.358 | 0.140898991 | count | 1 |
| GORAB       | 0.1124584  | 0.1522063   | 0.7389 | 0.46  | 0.140902477 | count | 1 |
| ARHGEF1     | 0.1148895  | 0.2280234   | 0.5038 | 0.614 | 0.140927491 | count | 1 |
| C12orf66    | 0.1906898  | 0.3439155   | 0.5545 | 0.579 | 0.140959741 | count | 1 |
| DNAJC12     | 0.1419972  | 0.2260925   | 0.628  | 0.53  | 0.140992373 | count | 1 |
| SNX32       | 0.5877647  | 0.7780298   | 0.7555 | 0.45  | 0.141018868 | count | 1 |
| C19orf33    | 0.2449793  | 0.6708447   | 0.3652 | 0.715 | 0.141133324 | count | 1 |
| MUS81       | 0.1120204  | 0.1686809   | 0.6641 | 0.507 | 0.141181232 | count | 1 |
| PPP1R3F     | 0.1423451  | 0.3398344   | 0.4189 | 0.675 | 0.141333327 | count | 1 |
| ZNF358      | 0.1020789  | 0.0869391   | 1.1741 | 0.24  | 0.14136555  | count | 1 |
| FTX         | 0.10308    | 0.1181259   | 0.8726 | 0.383 | 0.141531116 | count | 1 |
| TESC        | 0.1598421  | 0.3029619   | 0.5276 | 0.598 | 0.141580493 | count | 1 |
| TNFRSF10D   | 0.1915541  | 0.362324    | 0.5287 | 0.597 | 0.141580716 | count | 1 |
| USP46-AS1   | 0.159912   | 0.2987729   | 0.5352 | 0.593 | 0.141641267 | count | 1 |
| AC021321.1  | 16.5947037 | 1621.382029 | 0.0102 | 0.992 | 0.141693261 | count | 1 |
| CYP4A22-AS1 | 16.5947075 | 1621.381723 | 0.0102 | 0.992 | 0.141693261 | count | 1 |
| AC016705.2  | 16.5947109 | 1621.387919 | 0.0102 | 0.992 | 0.141693261 | count | 1 |
| AP000915.1  | 16.8485482 | 1597.874705 | 0.0105 | 0.992 | 0.141693263 | count | 1 |
| LINC01987   | 16.9794687 | 1619.454502 | 0.0105 | 0.992 | 0.141693264 | count | 1 |
| AC117503.1  | 16.9992196 | 1122.653879 | 0.0151 | 0.988 | 0.141693264 | count | 1 |
| SLC26A7     | 17.0649909 | 1130.975395 | 0.0151 | 0.988 | 0.141693265 | count | 1 |
| AC135507.1  | 17.1340487 | 2278.67923  | 0.0075 | 0.994 | 0.141693265 | count | 1 |
| AC116651.1  | 17.1340487 | 2278.67923  | 0.0075 | 0.994 | 0.141693265 | count | 1 |
| LINC02242   | 17.1340487 | 2278.679235 | 0.0075 | 0.994 | 0.141693265 | count | 1 |
| AIRN        | 17.1340487 | 2278.679235 | 0.0075 | 0.994 | 0.141693265 | count | 1 |
| AC007285.1  | 17.1340487 | 2278.67923  | 0.0075 | 0.994 | 0.141693265 | count | 1 |
| BMS1P14     | 17.1340487 | 2278.679245 | 0.0075 | 0.994 | 0.141693265 | count | 1 |
| AC106782.6  | 17.1340487 | 2278.679245 | 0.0075 | 0.994 | 0.141693265 | count | 1 |
| PNMA3       | 17.1340488 | 2278.67924  | 0.0075 | 0.994 | 0.141693265 | count | 1 |
| AC092123.1  | 17.1340488 | 2278.67924  | 0.0075 | 0.994 | 0.141693265 | count | 1 |
| PDZRN3-AS1  | 17.1340499 | 2278.684147 | 0.0075 | 0.994 | 0.141693265 | count | 1 |
| TAS2R31     | 17.1340499 | 2278.684137 | 0.0075 | 0.994 | 0.141693265 | count | 1 |

|            |            |             |        |        |             |       |   |
|------------|------------|-------------|--------|--------|-------------|-------|---|
| RDH16      | 17.1340499 | 2278.684137 | 0.0075 | 0.994  | 0.141693265 | count | 1 |
| CCDC169    | 17.1340539 | 2278.676746 | 0.0075 | 0.994  | 0.141693265 | count | 1 |
| FSTL4      | 17.1340597 | 2278.676629 | 0.0075 | 0.994  | 0.141693265 | count | 1 |
| UNC5CL     | 17.1340597 | 2278.676629 | 0.0075 | 0.994  | 0.141693265 | count | 1 |
| HCRTR1     | 17.1340719 | 2278.678823 | 0.0075 | 0.994  | 0.141693265 | count | 1 |
| AC012360.2 | 17.1340719 | 2278.678823 | 0.0075 | 0.994  | 0.141693265 | count | 1 |
| AC115618.1 | 17.134072  | 2278.678834 | 0.0075 | 0.994  | 0.141693265 | count | 1 |
| AL139424.2 | 17.1701602 | 1893.203474 | 0.0091 | 0.993  | 0.141693265 | count | 1 |
| ZNF726     | 17.1704502 | 1783.653997 | 0.0096 | 0.992  | 0.141693265 | count | 1 |
| LINC01389  | 17.2318599 | 2216.836339 | 0.0078 | 0.994  | 0.141693266 | count | 1 |
| TMEM225B   | 17.4520931 | 1600.30099  | 0.0109 | 0.991  | 0.141693266 | count | 1 |
| C2CD4D     | 17.6207636 | 1592.147468 | 0.0111 | 0.9912 | 0.141693267 | count | 1 |
| CCSER1     | 17.6563212 | 2267.768629 | 0.0078 | 0.994  | 0.141693267 | count | 1 |
| DACH2      | 17.6563213 | 2267.764546 | 0.0078 | 0.994  | 0.141693267 | count | 1 |
| AL121894.2 | 17.6563393 | 2267.772476 | 0.0078 | 0.994  | 0.141693267 | count | 1 |
| TTC34      | 17.6563451 | 2267.770382 | 0.0078 | 0.994  | 0.141693267 | count | 1 |
| AL161935.3 | 17.6563451 | 2267.770382 | 0.0078 | 0.994  | 0.141693267 | count | 1 |
| LINC01270  | 17.6563451 | 2267.770382 | 0.0078 | 0.994  | 0.141693267 | count | 1 |
| AC233296.1 | 17.6978425 | 3947.637847 | 0.0045 | 0.996  | 0.141693267 | count | 1 |
| AC097724.1 | 17.6978428 | 3947.637951 | 0.0045 | 0.996  | 0.141693267 | count | 1 |
| FABP1      | 17.6978428 | 3947.637951 | 0.0045 | 0.996  | 0.141693267 | count | 1 |
| POTEF      | 17.6978428 | 3947.637951 | 0.0045 | 0.996  | 0.141693267 | count | 1 |
| LINC01980  | 17.6978428 | 3947.637951 | 0.0045 | 0.996  | 0.141693267 | count | 1 |
| LINC00971  | 17.6978428 | 3947.637951 | 0.0045 | 0.996  | 0.141693267 | count | 1 |
| AC095050.1 | 17.6978427 | 3947.63808  | 0.0045 | 0.996  | 0.141693267 | count | 1 |
| ADAMTS19   | 17.6978428 | 3947.637951 | 0.0045 | 0.996  | 0.141693267 | count | 1 |
| STK31      | 17.6978428 | 3947.637951 | 0.0045 | 0.996  | 0.141693267 | count | 1 |
| AC073133.2 | 17.6978427 | 3947.637899 | 0.0045 | 0.996  | 0.141693267 | count | 1 |
| AC025154.2 | 17.6978428 | 3947.637951 | 0.0045 | 0.996  | 0.141693267 | count | 1 |
| AL390816.2 | 17.6978428 | 3947.637951 | 0.0045 | 0.996  | 0.141693267 | count | 1 |
| VAC14-AS1  | 17.6978427 | 3947.638028 | 0.0045 | 0.996  | 0.141693267 | count | 1 |
| TLL9       | 17.6978427 | 3947.638028 | 0.0045 | 0.996  | 0.141693267 | count | 1 |
| AC008403.3 | 17.6978428 | 3947.637951 | 0.0045 | 0.996  | 0.141693267 | count | 1 |
| CU633980.1 | 17.6978428 | 3947.637951 | 0.0045 | 0.996  | 0.141693267 | count | 1 |
| AC133644.2 | 17.6978431 | 3947.638183 | 0.0045 | 0.996  | 0.141693267 | count | 1 |
| HOXD3      | 17.697843  | 3947.638132 | 0.0045 | 0.996  | 0.141693267 | count | 1 |
| AC006058.1 | 17.6978429 | 3947.638132 | 0.0045 | 0.996  | 0.141693267 | count | 1 |
| RAB43      | 17.697843  | 3947.638183 | 0.0045 | 0.996  | 0.141693267 | count | 1 |
| LINC02068  | 17.697843  | 3947.638002 | 0.0045 | 0.996  | 0.141693267 | count | 1 |
| AC025175.1 | 17.6978429 | 3947.638132 | 0.0045 | 0.996  | 0.141693267 | count | 1 |
| SOWAHA     | 17.697843  | 3947.638132 | 0.0045 | 0.996  | 0.141693267 | count | 1 |
| KIAA0319   | 17.6978431 | 3947.638183 | 0.0045 | 0.996  | 0.141693267 | count | 1 |
| AL356234.3 | 17.697843  | 3947.638132 | 0.0045 | 0.996  | 0.141693267 | count | 1 |
| AP003355.2 | 17.6978431 | 3947.638183 | 0.0045 | 0.996  | 0.141693267 | count | 1 |
| AL162724.2 | 17.6978431 | 3947.638183 | 0.0045 | 0.996  | 0.141693267 | count | 1 |

|               |            |             |        |        |             |       |   |
|---------------|------------|-------------|--------|--------|-------------|-------|---|
| AP000438.1    | 17.6978432 | 3947.638183 | 0.0045 | 0.996  | 0.141693267 | count | 1 |
| TECTA         | 17.6978432 | 3947.638183 | 0.0045 | 0.996  | 0.141693267 | count | 1 |
| AP000755.2    | 17.6978429 | 3947.638132 | 0.0045 | 0.996  | 0.141693267 | count | 1 |
| CEP55         | 17.697843  | 3947.638002 | 0.0045 | 0.996  | 0.141693267 | count | 1 |
| AC006064.1    | 17.697843  | 3947.638183 | 0.0045 | 0.996  | 0.141693267 | count | 1 |
| SKA3          | 17.697843  | 3947.638002 | 0.0045 | 0.996  | 0.141693267 | count | 1 |
| AL139384.2    | 17.697843  | 3947.638132 | 0.0045 | 0.996  | 0.141693267 | count | 1 |
| BCL2L2-PABPN1 | 17.697843  | 3947.638132 | 0.0045 | 0.996  | 0.141693267 | count | 1 |
| COX8C         | 17.6978432 | 3947.638183 | 0.0045 | 0.996  | 0.141693267 | count | 1 |
| PKMYT1        | 17.697843  | 3947.638002 | 0.0045 | 0.996  | 0.141693267 | count | 1 |
| FENDRR        | 17.697843  | 3947.638132 | 0.0045 | 0.996  | 0.141693267 | count | 1 |
| PIMREG        | 17.697843  | 3947.638002 | 0.0045 | 0.996  | 0.141693267 | count | 1 |
| AC003070.2    | 17.697843  | 3947.638132 | 0.0045 | 0.996  | 0.141693267 | count | 1 |
| AC005821.1    | 17.697843  | 3947.638132 | 0.0045 | 0.996  | 0.141693267 | count | 1 |
| ZACN          | 17.6978432 | 3947.638183 | 0.0045 | 0.996  | 0.141693267 | count | 1 |
| FOXJ1         | 17.697843  | 3947.638132 | 0.0045 | 0.996  | 0.141693267 | count | 1 |
| DLGAP1-AS5    | 17.6978431 | 3947.638002 | 0.0045 | 0.996  | 0.141693267 | count | 1 |
| AL157838.1    | 17.697843  | 3947.638183 | 0.0045 | 0.996  | 0.141693267 | count | 1 |
| PRSS57        | 17.697843  | 3947.638132 | 0.0045 | 0.996  | 0.141693267 | count | 1 |
| ZFR2          | 17.6978429 | 3947.637951 | 0.0045 | 0.996  | 0.141693267 | count | 1 |
| ASF1B         | 17.697843  | 3947.638002 | 0.0045 | 0.996  | 0.141693267 | count | 1 |
| AP001626.1    | 17.697843  | 3947.638132 | 0.0045 | 0.996  | 0.141693267 | count | 1 |
| AC079209.1    | 17.7655369 | 3156.015954 | 0.0056 | 0.996  | 0.141693268 | count | 1 |
| AC018904.1    | 17.765537  | 3156.015903 | 0.0056 | 0.996  | 0.141693268 | count | 1 |
| AL353653.1    | 17.765537  | 3156.016021 | 0.0056 | 0.996  | 0.141693268 | count | 1 |
| C4B           | 17.7655372 | 3156.016055 | 0.0056 | 0.996  | 0.141693268 | count | 1 |
| NPC1L1        | 17.7655372 | 3156.016055 | 0.0056 | 0.996  | 0.141693268 | count | 1 |
| AP000879.1    | 17.7655372 | 3156.016004 | 0.0056 | 0.996  | 0.141693268 | count | 1 |
| AC104035.1    | 17.7655372 | 3156.016004 | 0.0056 | 0.996  | 0.141693268 | count | 1 |
| AC092375.2    | 17.7655371 | 3156.015987 | 0.0056 | 0.996  | 0.141693268 | count | 1 |
| AC011921.1    | 17.7655371 | 3156.016038 | 0.0056 | 0.996  | 0.141693268 | count | 1 |
| AC107029.2    | 17.7655383 | 3156.019734 | 0.0056 | 0.996  | 0.141693268 | count | 1 |
| AC005323.2    | 17.7655474 | 3156.011616 | 0.0056 | 0.996  | 0.141693268 | count | 1 |
| AL358472.3    | 17.7655503 | 3156.022839 | 0.0056 | 0.996  | 0.141693268 | count | 1 |
| AC021683.2    | 17.7655506 | 3156.02289  | 0.0056 | 0.996  | 0.141693268 | count | 1 |
| AC093484.2    | 17.7655508 | 3156.022924 | 0.0056 | 0.996  | 0.141693268 | count | 1 |
| P2RX2         | 17.8197598 | 1234.749396 | 0.0144 | 0.9885 | 0.141693268 | count | 1 |
| GP6           | 17.8706869 | 2851.054535 | 0.0063 | 0.995  | 0.141693268 | count | 1 |
| SPSB4         | 17.9916271 | 2256.049821 | 0.008  | 0.994  | 0.141693268 | count | 1 |
| AC002429.2    | 17.9916339 | 2256.046011 | 0.008  | 0.994  | 0.141693268 | count | 1 |
| GPR22         | 17.9916461 | 2256.044077 | 0.008  | 0.994  | 0.141693268 | count | 1 |
| AC007495.1    | 17.9916504 | 2256.05527  | 0.008  | 0.994  | 0.141693268 | count | 1 |
| AL160408.2    | 18.240166  | 2246.916566 | 0.0081 | 0.9935 | 0.141693269 | count | 1 |
| GPD1          | 16.5946934 | 1621.382359 | 0.0102 | 0.992  | 0.141693275 | count | 1 |
| DENND6A-AS1   | 16.5946946 | 1621.378267 | 0.0102 | 0.992  | 0.141693275 | count | 1 |

|            |            |             |        |        |             |       |   |
|------------|------------|-------------|--------|--------|-------------|-------|---|
| RAD21-AS1  | 16.5946946 | 1621.37827  | 0.0102 | 0.992  | 0.141693275 | count | 1 |
| AD000090.1 | 16.5947037 | 1621.382029 | 0.0102 | 0.992  | 0.141693275 | count | 1 |
| APOL5      | 16.5947037 | 1621.382028 | 0.0102 | 0.992  | 0.141693275 | count | 1 |
| GDNF       | 16.5947038 | 1621.382032 | 0.0102 | 0.992  | 0.141693275 | count | 1 |
| AL162171.1 | 16.5947038 | 1621.382032 | 0.0102 | 0.992  | 0.141693275 | count | 1 |
| ST8SIA5    | 16.5947038 | 1621.382029 | 0.0102 | 0.992  | 0.141693275 | count | 1 |
| AC003975.1 | 16.5947047 | 1621.382001 | 0.0102 | 0.992  | 0.141693275 | count | 1 |
| UCP3       | 16.5947047 | 1621.381998 | 0.0102 | 0.992  | 0.141693275 | count | 1 |
| AC023794.2 | 16.5947076 | 1621.381723 | 0.0102 | 0.992  | 0.141693275 | count | 1 |
| AC055876.5 | 16.5947081 | 1621.387978 | 0.0102 | 0.992  | 0.141693275 | count | 1 |
| GP1BA      | 16.5947102 | 1621.383849 | 0.0102 | 0.992  | 0.141693275 | count | 1 |
| AL109811.1 | 16.5947109 | 1621.387915 | 0.0102 | 0.992  | 0.141693275 | count | 1 |
| NEK10      | 16.5947109 | 1621.387919 | 0.0102 | 0.992  | 0.141693275 | count | 1 |
| EIF4EBP3   | 16.5947109 | 1621.387915 | 0.0102 | 0.992  | 0.141693275 | count | 1 |
| ADCYAP1R1  | 16.594711  | 1621.387919 | 0.0102 | 0.992  | 0.141693275 | count | 1 |
| AC091057.2 | 16.594711  | 1621.387921 | 0.0102 | 0.992  | 0.141693275 | count | 1 |
| AL365181.4 | 16.7645929 | 1130.31624  | 0.0148 | 0.9882 | 0.141693276 | count | 1 |
| AC007292.2 | 16.7650892 | 1277.061672 | 0.0131 | 0.99   | 0.141693276 | count | 1 |
| VSIG2      | 16.7655758 | 1449.864148 | 0.0116 | 0.991  | 0.141693276 | count | 1 |
| AC090617.3 | 16.848528  | 1597.870755 | 0.0105 | 0.992  | 0.141693277 | count | 1 |
| Z95114.1   | 16.8485313 | 1597.873321 | 0.0105 | 0.992  | 0.141693277 | count | 1 |
| AL513122.2 | 16.8485367 | 1597.87522  | 0.0105 | 0.992  | 0.141693277 | count | 1 |
| PCDHA12    | 16.848546  | 1597.872143 | 0.0105 | 0.992  | 0.141693277 | count | 1 |
| FGF17      | 16.8485464 | 1597.874729 | 0.0105 | 0.992  | 0.141693277 | count | 1 |
| ADAMTS17   | 16.8485467 | 1597.874483 | 0.0105 | 0.992  | 0.141693277 | count | 1 |
| TRPC3      | 16.8485483 | 1597.874713 | 0.0105 | 0.992  | 0.141693277 | count | 1 |
| BX323046.1 | 16.8485486 | 1597.874466 | 0.0105 | 0.992  | 0.141693277 | count | 1 |
| EFCAB1     | 16.8485499 | 1597.879883 | 0.0105 | 0.992  | 0.141693277 | count | 1 |
| AC090229.1 | 16.8490673 | 1768.949303 | 0.0095 | 0.992  | 0.141693277 | count | 1 |
| AC126768.2 | 16.8698743 | 1027.322916 | 0.0164 | 0.9869 | 0.141693277 | count | 1 |
| AC012065.4 | 16.8903305 | 1556.099661 | 0.0109 | 0.991  | 0.141693277 | count | 1 |
| FRG1-DT    | 16.9794654 | 1619.450361 | 0.0105 | 0.992  | 0.141693278 | count | 1 |
| LIF        | 16.9794786 | 1619.451391 | 0.0105 | 0.992  | 0.141693278 | count | 1 |
| GAS5-AS1   | 16.9794794 | 1619.452921 | 0.0105 | 0.992  | 0.141693278 | count | 1 |
| AC053527.1 | 16.9794852 | 1619.451352 | 0.0105 | 0.992  | 0.141693278 | count | 1 |
| RNF183     | 16.9794852 | 1619.45135  | 0.0105 | 0.992  | 0.141693278 | count | 1 |
| AKAP3      | 16.979487  | 1619.452867 | 0.0105 | 0.992  | 0.141693278 | count | 1 |
| LINC02076  | 16.9794871 | 1619.452867 | 0.0105 | 0.992  | 0.141693278 | count | 1 |
| AC007064.2 | 16.9796278 | 1902.822003 | 0.0089 | 0.993  | 0.141693278 | count | 1 |
| AL606760.2 | 16.9796408 | 1902.823735 | 0.0089 | 0.993  | 0.141693278 | count | 1 |
| C19orf38   | 17.0420478 | 1576.432186 | 0.0108 | 0.9914 | 0.141693278 | count | 1 |
| FLRT3      | 17.0420516 | 1576.439022 | 0.0108 | 0.9914 | 0.141693278 | count | 1 |
| ZNF843     | 17.0420569 | 1576.4392   | 0.0108 | 0.9914 | 0.141693278 | count | 1 |
| CYP21A2    | 17.0420618 | 1576.438158 | 0.0108 | 0.9914 | 0.141693278 | count | 1 |
| PLPP2      | 17.0426398 | 1691.082884 | 0.0101 | 0.992  | 0.141693278 | count | 1 |

|             |            |             |        |       |             |       |   |
|-------------|------------|-------------|--------|-------|-------------|-------|---|
| AL355073.2  | 17.0434739 | 1899.706854 | 0.009  | 0.993 | 0.141693278 | count | 1 |
| AL445183.1  | 17.1340476 | 2278.674439 | 0.0075 | 0.994 | 0.141693279 | count | 1 |
| LINC01956   | 17.1340476 | 2278.674439 | 0.0075 | 0.994 | 0.141693279 | count | 1 |
| RHOXF1      | 17.1340476 | 2278.674455 | 0.0075 | 0.994 | 0.141693279 | count | 1 |
| AC022400.6  | 17.1340476 | 2278.674455 | 0.0075 | 0.994 | 0.141693279 | count | 1 |
| AC079328.2  | 17.1340476 | 2278.674445 | 0.0075 | 0.994 | 0.141693279 | count | 1 |
| NKAIN1      | 17.1340488 | 2278.679235 | 0.0075 | 0.994 | 0.141693279 | count | 1 |
| AL451062.1  | 17.1340488 | 2278.679245 | 0.0075 | 0.994 | 0.141693279 | count | 1 |
| FOXE3       | 17.1340488 | 2278.67925  | 0.0075 | 0.994 | 0.141693279 | count | 1 |
| BGLAP       | 17.1340487 | 2278.679225 | 0.0075 | 0.994 | 0.141693279 | count | 1 |
| CD1C        | 17.1340488 | 2278.67924  | 0.0075 | 0.994 | 0.141693279 | count | 1 |
| AL356441.1  | 17.1340488 | 2278.67924  | 0.0075 | 0.994 | 0.141693279 | count | 1 |
| AC116614.1  | 17.1340488 | 2278.679245 | 0.0075 | 0.994 | 0.141693279 | count | 1 |
| AC010967.1  | 17.1340488 | 2278.679245 | 0.0075 | 0.994 | 0.141693279 | count | 1 |
| AC009237.15 | 17.1340488 | 2278.67924  | 0.0075 | 0.994 | 0.141693279 | count | 1 |
| IL1A        | 17.1340488 | 2278.679245 | 0.0075 | 0.994 | 0.141693279 | count | 1 |
| UBE2E2-AS1  | 17.1340488 | 2278.67925  | 0.0075 | 0.994 | 0.141693279 | count | 1 |
| SNRK-AS1    | 17.1340488 | 2278.679235 | 0.0075 | 0.994 | 0.141693279 | count | 1 |
| BFSP2       | 17.1340488 | 2278.67924  | 0.0075 | 0.994 | 0.141693279 | count | 1 |
| AC105254.1  | 17.1340487 | 2278.679235 | 0.0075 | 0.994 | 0.141693279 | count | 1 |
| AC026741.1  | 17.1340487 | 2278.67923  | 0.0075 | 0.994 | 0.141693279 | count | 1 |
| HCG9        | 17.1340488 | 2278.679235 | 0.0075 | 0.994 | 0.141693279 | count | 1 |
| RFPL4B      | 17.1340488 | 2278.67924  | 0.0075 | 0.994 | 0.141693279 | count | 1 |
| HOXA6       | 17.1340488 | 2278.679235 | 0.0075 | 0.994 | 0.141693279 | count | 1 |
| AL672277.1  | 17.1340488 | 2278.679225 | 0.0075 | 0.994 | 0.141693279 | count | 1 |
| TREX2       | 17.1340488 | 2278.67924  | 0.0075 | 0.994 | 0.141693279 | count | 1 |
| SMC2-AS1    | 17.1340488 | 2278.679245 | 0.0075 | 0.994 | 0.141693279 | count | 1 |
| ABCC8       | 17.1340488 | 2278.679245 | 0.0075 | 0.994 | 0.141693279 | count | 1 |
| AL133215.2  | 17.1340488 | 2278.679235 | 0.0075 | 0.994 | 0.141693279 | count | 1 |
| AC005840.2  | 17.1340488 | 2278.67924  | 0.0075 | 0.994 | 0.141693279 | count | 1 |
| GALNT4      | 17.1340488 | 2278.679235 | 0.0075 | 0.994 | 0.141693279 | count | 1 |
| LRRC43      | 17.1340487 | 2278.679235 | 0.0075 | 0.994 | 0.141693279 | count | 1 |
| AC068790.8  | 17.1340487 | 2278.679235 | 0.0075 | 0.994 | 0.141693279 | count | 1 |
| OXGR1       | 17.1340488 | 2278.67925  | 0.0075 | 0.994 | 0.141693279 | count | 1 |
| TPM1-AS     | 17.1340487 | 2278.679225 | 0.0075 | 0.994 | 0.141693279 | count | 1 |
| LINC01579   | 17.1340488 | 2278.67923  | 0.0075 | 0.994 | 0.141693279 | count | 1 |
| BRICD5      | 17.1340487 | 2278.67924  | 0.0075 | 0.994 | 0.141693279 | count | 1 |
| AC009133.4  | 17.1340488 | 2278.679235 | 0.0075 | 0.994 | 0.141693279 | count | 1 |
| SMPD3       | 17.1340488 | 2278.67924  | 0.0075 | 0.994 | 0.141693279 | count | 1 |
| LINC01229   | 17.1340488 | 2278.679235 | 0.0075 | 0.994 | 0.141693279 | count | 1 |
| FAM209B     | 17.1340488 | 2278.679245 | 0.0075 | 0.994 | 0.141693279 | count | 1 |
| CRB3        | 17.1340488 | 2278.67924  | 0.0075 | 0.994 | 0.141693279 | count | 1 |
| HPN         | 17.1340488 | 2278.67924  | 0.0075 | 0.994 | 0.141693279 | count | 1 |
| AL138831.2  | 17.1340489 | 2278.679235 | 0.0075 | 0.994 | 0.141693279 | count | 1 |
| AC006042.4  | 17.1340489 | 2278.67925  | 0.0075 | 0.994 | 0.141693279 | count | 1 |

|            |            |             |        |       |             |       |   |
|------------|------------|-------------|--------|-------|-------------|-------|---|
| LINC01772  | 17.13405   | 2278.684137 | 0.0075 | 0.994 | 0.141693279 | count | 1 |
| KIF21B     | 17.13405   | 2278.684137 | 0.0075 | 0.994 | 0.141693279 | count | 1 |
| GNG4       | 17.13405   | 2278.684142 | 0.0075 | 0.994 | 0.141693279 | count | 1 |
| AC104667.2 | 17.13405   | 2278.684147 | 0.0075 | 0.994 | 0.141693279 | count | 1 |
| AC114730.2 | 17.13405   | 2278.684142 | 0.0075 | 0.994 | 0.141693279 | count | 1 |
| RBMS3-AS2  | 17.1340499 | 2278.684142 | 0.0075 | 0.994 | 0.141693279 | count | 1 |
| LINC02024  | 17.13405   | 2278.684142 | 0.0075 | 0.994 | 0.141693279 | count | 1 |
| ZFP92      | 17.13405   | 2278.684147 | 0.0075 | 0.994 | 0.141693279 | count | 1 |
| AP000640.1 | 17.13405   | 2278.684152 | 0.0075 | 0.994 | 0.141693279 | count | 1 |
| AP001107.7 | 17.13405   | 2278.684137 | 0.0075 | 0.994 | 0.141693279 | count | 1 |
| CFAP46     | 17.13405   | 2278.684147 | 0.0075 | 0.994 | 0.141693279 | count | 1 |
| SOAT2      | 17.13405   | 2278.684147 | 0.0075 | 0.994 | 0.141693279 | count | 1 |
| HOXC6      | 17.13405   | 2278.684147 | 0.0075 | 0.994 | 0.141693279 | count | 1 |
| CLDN10     | 17.13405   | 2278.684147 | 0.0075 | 0.994 | 0.141693279 | count | 1 |
| AK7        | 17.13405   | 2278.684142 | 0.0075 | 0.994 | 0.141693279 | count | 1 |
| AC084855.1 | 17.13405   | 2278.684147 | 0.0075 | 0.994 | 0.141693279 | count | 1 |
| AC022167.1 | 17.13405   | 2278.684147 | 0.0075 | 0.994 | 0.141693279 | count | 1 |
| ELMO3      | 17.13405   | 2278.684152 | 0.0075 | 0.994 | 0.141693279 | count | 1 |
| DNAH9      | 17.13405   | 2278.684142 | 0.0075 | 0.994 | 0.141693279 | count | 1 |
| AC110285.1 | 17.13405   | 2278.684142 | 0.0075 | 0.994 | 0.141693279 | count | 1 |
| LINC01441  | 17.13405   | 2278.684147 | 0.0075 | 0.994 | 0.141693279 | count | 1 |
| AC136469.1 | 17.1340499 | 2278.684142 | 0.0075 | 0.994 | 0.141693279 | count | 1 |
| AL357873.1 | 17.1340501 | 2278.684142 | 0.0075 | 0.994 | 0.141693279 | count | 1 |
| TFAP2E     | 17.1340501 | 2278.684147 | 0.0075 | 0.994 | 0.141693279 | count | 1 |
| AC098820.3 | 17.1340501 | 2278.684142 | 0.0075 | 0.994 | 0.141693279 | count | 1 |
| DLEC1      | 17.1340501 | 2278.684152 | 0.0075 | 0.994 | 0.141693279 | count | 1 |
| AL034374.1 | 17.1340501 | 2278.684152 | 0.0075 | 0.994 | 0.141693279 | count | 1 |
| NPAS4      | 17.1340501 | 2278.684142 | 0.0075 | 0.994 | 0.141693279 | count | 1 |
| C14orf178  | 17.1340501 | 2278.684147 | 0.0075 | 0.994 | 0.141693279 | count | 1 |
| AC007613.1 | 17.1340501 | 2278.684157 | 0.0075 | 0.994 | 0.141693279 | count | 1 |
| ERN2       | 17.1340501 | 2278.684157 | 0.0075 | 0.994 | 0.141693279 | count | 1 |
| AL031673.1 | 17.1340501 | 2278.684147 | 0.0075 | 0.994 | 0.141693279 | count | 1 |
| LINC01719  | 17.1340539 | 2278.676751 | 0.0075 | 0.994 | 0.141693279 | count | 1 |
| AC022784.8 | 17.134054  | 2278.676746 | 0.0075 | 0.994 | 0.141693279 | count | 1 |
| AC100771.2 | 17.134054  | 2278.676746 | 0.0075 | 0.994 | 0.141693279 | count | 1 |
| GPR158     | 17.134054  | 2278.676751 | 0.0075 | 0.994 | 0.141693279 | count | 1 |
| AC138331.1 | 17.134054  | 2278.676751 | 0.0075 | 0.994 | 0.141693279 | count | 1 |
| ENOX1      | 17.134054  | 2278.676746 | 0.0075 | 0.994 | 0.141693279 | count | 1 |
| LINC02125  | 17.134054  | 2278.676746 | 0.0075 | 0.994 | 0.141693279 | count | 1 |
| AC245407.2 | 17.1340598 | 2278.676634 | 0.0075 | 0.994 | 0.141693279 | count | 1 |
| HIST1H2BL  | 17.1340598 | 2278.676629 | 0.0075 | 0.994 | 0.141693279 | count | 1 |
| PRODH      | 17.1340597 | 2278.676634 | 0.0075 | 0.994 | 0.141693279 | count | 1 |
| Z99289.2   | 17.134072  | 2278.678828 | 0.0075 | 0.994 | 0.141693279 | count | 1 |
| AC073073.2 | 17.134072  | 2278.678828 | 0.0075 | 0.994 | 0.141693279 | count | 1 |
| AC091979.1 | 17.1340721 | 2278.678834 | 0.0075 | 0.994 | 0.141693279 | count | 1 |



|            |            |             |        |        |             |       |   |
|------------|------------|-------------|--------|--------|-------------|-------|---|
| GREB1      | 17.1664024 | 1160.991147 | 0.0148 | 0.9882 | 0.141693279 | count | 1 |
| HLA-DOB    | 17.1701521 | 1611.283955 | 0.0107 | 0.991  | 0.141693279 | count | 1 |
| RGPD2      | 17.2021469 | 1804.602414 | 0.0095 | 0.9924 | 0.141693279 | count | 1 |
| ERVK9-11   | 17.2031134 | 2020.552174 | 0.0085 | 0.9932 | 0.141693279 | count | 1 |
| AC233992.3 | 17.2309582 | 1898.120821 | 0.0091 | 0.993  | 0.141693279 | count | 1 |
| NR0B1      | 17.2309597 | 1898.124738 | 0.0091 | 0.993  | 0.141693279 | count | 1 |
| GCOM1      | 17.2309619 | 1898.12472  | 0.0091 | 0.993  | 0.141693279 | count | 1 |
| AL445483.1 | 17.230962  | 1898.124731 | 0.0091 | 0.993  | 0.141693279 | count | 1 |
| AL023583.1 | 17.230968  | 1898.125307 | 0.0091 | 0.993  | 0.141693279 | count | 1 |
| AC010319.3 | 17.2318579 | 2216.836365 | 0.0078 | 0.994  | 0.141693279 | count | 1 |
| ADGRV1     | 17.2318602 | 2216.83941  | 0.0078 | 0.994  | 0.141693279 | count | 1 |
| NR6A1      | 17.2406462 | 1521.317746 | 0.0113 | 0.991  | 0.141693279 | count | 1 |
| ZNF724     | 17.2406471 | 1521.318636 | 0.0113 | 0.991  | 0.141693279 | count | 1 |
| LINC02456  | 17.2413154 | 1796.946731 | 0.0096 | 0.992  | 0.141693279 | count | 1 |
| AC007611.1 | 17.2413193 | 1796.94882  | 0.0096 | 0.992  | 0.141693279 | count | 1 |
| AC078881.1 | 17.246022  | 1609.731345 | 0.0107 | 0.991  | 0.141693279 | count | 1 |
| TNNI3K     | 17.2460385 | 1609.738924 | 0.0107 | 0.991  | 0.141693279 | count | 1 |
| SYCE2      | 17.2460417 | 1609.73745  | 0.0107 | 0.991  | 0.141693279 | count | 1 |
| BCAS1      | 17.2460464 | 1609.737439 | 0.0107 | 0.991  | 0.141693279 | count | 1 |
| MCPH1-AS1  | 17.2463151 | 1802.627261 | 0.0096 | 0.992  | 0.141693279 | count | 1 |
| AC087241.3 | 17.3211474 | 1977.427597 | 0.0088 | 0.993  | 0.141693279 | count | 1 |
| SEMA7A     | 17.3380316 | 1920.009401 | 0.009  | 0.9928 | 0.14169328  | count | 1 |
| PCDHGA1    | 17.4024558 | 1803.126086 | 0.0097 | 0.992  | 0.14169328  | count | 1 |
| MAPK8IP2   | 17.4026341 | 2137.333892 | 0.0081 | 0.994  | 0.14169328  | count | 1 |
| EYA1       | 17.4384901 | 1486.345135 | 0.0117 | 0.9906 | 0.14169328  | count | 1 |
| AL353593.1 | 17.4384999 | 1486.345959 | 0.0117 | 0.9906 | 0.14169328  | count | 1 |
| PI3        | 17.4389572 | 1604.136135 | 0.0109 | 0.9913 | 0.14169328  | count | 1 |
| GRIA4      | 17.4399088 | 2007.266488 | 0.0087 | 0.993  | 0.14169328  | count | 1 |
| SMIM33     | 17.4406995 | 2342.399751 | 0.0074 | 0.994  | 0.14169328  | count | 1 |
| LINC01412  | 17.4482688 | 1672.187848 | 0.0104 | 0.9917 | 0.14169328  | count | 1 |
| BHMT       | 17.4488856 | 1834.206928 | 0.0095 | 0.9924 | 0.14169328  | count | 1 |
| LRRC37A    | 17.4524141 | 1746.24587  | 0.01   | 0.992  | 0.14169328  | count | 1 |
| PCDH9-AS1  | 17.4524253 | 1746.247128 | 0.01   | 0.992  | 0.14169328  | count | 1 |
| GALR1      | 17.519654  | 1070.097779 | 0.0164 | 0.9869 | 0.14169328  | count | 1 |
| AL355922.2 | 17.5288133 | 2093.445807 | 0.0084 | 0.993  | 0.14169328  | count | 1 |
| AC027306.1 | 17.5425953 | 1886.042078 | 0.0093 | 0.9926 | 0.14169328  | count | 1 |
| AC107959.4 | 17.542602  | 1886.042028 | 0.0093 | 0.9926 | 0.14169328  | count | 1 |
| PCDHA13    | 17.5435061 | 2102.873351 | 0.0083 | 0.9933 | 0.14169328  | count | 1 |
| FSD1       | 17.5447535 | 2480.561185 | 0.0071 | 0.9944 | 0.14169328  | count | 1 |
| C9orf135   | 17.5447658 | 2480.564969 | 0.0071 | 0.9944 | 0.14169328  | count | 1 |
| AC073896.3 | 17.6025631 | 1355.012965 | 0.013  | 0.9896 | 0.141693281 | count | 1 |
| GAL        | 17.6034624 | 1562.026791 | 0.0113 | 0.991  | 0.141693281 | count | 1 |
| SULT1A3    | 17.6036598 | 1655.764986 | 0.0106 | 0.9915 | 0.141693281 | count | 1 |
| LIPE       | 17.6207516 | 1592.140977 | 0.0111 | 0.9912 | 0.141693281 | count | 1 |
| CACNA1D    | 17.6210876 | 1709.395346 | 0.0103 | 0.9918 | 0.141693281 | count | 1 |

|            |            |             |        |       |             |       |   |
|------------|------------|-------------|--------|-------|-------------|-------|---|
| HUS1B      | 17.6215218 | 1922.557101 | 0.0092 | 0.993 | 0.141693281 | count | 1 |
| PCSK9      | 17.6563211 | 2267.768619 | 0.0078 | 0.994 | 0.141693281 | count | 1 |
| AL360270.3 | 17.6563213 | 2267.764556 | 0.0078 | 0.994 | 0.141693281 | count | 1 |
| CADM2      | 17.6563213 | 2267.768629 | 0.0078 | 0.994 | 0.141693281 | count | 1 |
| COL6A6     | 17.6563211 | 2267.768614 | 0.0078 | 0.994 | 0.141693281 | count | 1 |
| AL033397.2 | 17.6563213 | 2267.768639 | 0.0078 | 0.994 | 0.141693281 | count | 1 |
| AC073316.1 | 17.6563213 | 2267.768634 | 0.0078 | 0.994 | 0.141693281 | count | 1 |
| DGAT2      | 17.6563213 | 2267.764546 | 0.0078 | 0.994 | 0.141693281 | count | 1 |
| FAM90A1    | 17.6563213 | 2267.764556 | 0.0078 | 0.994 | 0.141693281 | count | 1 |
| RSPO1      | 17.6563214 | 2267.764551 | 0.0078 | 0.994 | 0.141693281 | count | 1 |
| AC097468.3 | 17.6563212 | 2267.768629 | 0.0078 | 0.994 | 0.141693281 | count | 1 |
| CCDC39     | 17.6563212 | 2267.768629 | 0.0078 | 0.994 | 0.141693281 | count | 1 |
| ZNF366     | 17.6563214 | 2267.764556 | 0.0078 | 0.994 | 0.141693281 | count | 1 |
| TFAP2A-AS1 | 17.6563212 | 2267.768629 | 0.0078 | 0.994 | 0.141693281 | count | 1 |
| TAS2R4     | 17.6563214 | 2267.764551 | 0.0078 | 0.994 | 0.141693281 | count | 1 |
| AC011773.4 | 17.6563214 | 2267.764551 | 0.0078 | 0.994 | 0.141693281 | count | 1 |
| HS6ST3     | 17.6563212 | 2267.768629 | 0.0078 | 0.994 | 0.141693281 | count | 1 |
| ATCAY      | 17.6563212 | 2267.768614 | 0.0078 | 0.994 | 0.141693281 | count | 1 |
| NMRK2      | 17.6563212 | 2267.768624 | 0.0078 | 0.994 | 0.141693281 | count | 1 |
| LPAR2      | 17.6563212 | 2267.768624 | 0.0078 | 0.994 | 0.141693281 | count | 1 |
| KLK1       | 17.6563214 | 2267.764561 | 0.0078 | 0.994 | 0.141693281 | count | 1 |
| LHX8       | 17.6563215 | 2267.764556 | 0.0078 | 0.994 | 0.141693281 | count | 1 |
| AC113349.1 | 17.6563215 | 2267.764556 | 0.0078 | 0.994 | 0.141693281 | count | 1 |
| KLF14      | 17.6563215 | 2267.764556 | 0.0078 | 0.994 | 0.141693281 | count | 1 |
| AC010761.2 | 17.6563393 | 2267.762361 | 0.0078 | 0.994 | 0.141693281 | count | 1 |
| CD244      | 17.6563451 | 2267.770392 | 0.0078 | 0.994 | 0.141693281 | count | 1 |
| GPR37L1    | 17.6563451 | 2267.770377 | 0.0078 | 0.994 | 0.141693281 | count | 1 |
| AFP        | 17.6563451 | 2267.770377 | 0.0078 | 0.994 | 0.141693281 | count | 1 |
| PCDHA4     | 17.6563451 | 2267.770392 | 0.0078 | 0.994 | 0.141693281 | count | 1 |
| TEX29      | 17.6563451 | 2267.770387 | 0.0078 | 0.994 | 0.141693281 | count | 1 |
| AC099518.6 | 17.6563451 | 2267.770392 | 0.0078 | 0.994 | 0.141693281 | count | 1 |
| BOLA2      | 17.6563452 | 2267.770387 | 0.0078 | 0.994 | 0.141693281 | count | 1 |
| AL136531.1 | 17.6563451 | 2267.770382 | 0.0078 | 0.994 | 0.141693281 | count | 1 |
| GATA5      | 17.6563451 | 2267.770397 | 0.0078 | 0.994 | 0.141693281 | count | 1 |
| ZIM2-AS1   | 17.6563451 | 2267.770372 | 0.0078 | 0.994 | 0.141693281 | count | 1 |
| AC064807.4 | 17.6563453 | 2267.770387 | 0.0078 | 0.994 | 0.141693281 | count | 1 |
| SPAAR      | 17.6563453 | 2267.770387 | 0.0078 | 0.994 | 0.141693281 | count | 1 |
| C15orf62   | 17.6563453 | 2267.770387 | 0.0078 | 0.994 | 0.141693281 | count | 1 |
| AC135178.5 | 17.6567511 | 2769.239659 | 0.0064 | 0.995 | 0.141693281 | count | 1 |
| AL137796.1 | 17.656757  | 2769.23964  | 0.0064 | 0.995 | 0.141693281 | count | 1 |
| EPHA1      | 17.6567571 | 2769.239647 | 0.0064 | 0.995 | 0.141693281 | count | 1 |
| PKP3       | 17.6567571 | 2769.239665 | 0.0064 | 0.995 | 0.141693281 | count | 1 |
| PPIAL4G    | 17.656763  | 2769.249458 | 0.0064 | 0.995 | 0.141693281 | count | 1 |
| AL121929.2 | 17.6567811 | 2769.241819 | 0.0064 | 0.995 | 0.141693281 | count | 1 |
| CNKSR1     | 17.6978427 | 3947.637873 | 0.0045 | 0.996 | 0.141693281 | count | 1 |

|            |            |             |        |       |             |       |   |
|------------|------------|-------------|--------|-------|-------------|-------|---|
| AL009181.1 | 17.6978427 | 3947.638054 | 0.0045 | 0.996 | 0.141693281 | count | 1 |
| CDCP2      | 17.6978425 | 3947.637899 | 0.0045 | 0.996 | 0.141693281 | count | 1 |
| AL121985.1 | 17.6978427 | 3947.638054 | 0.0045 | 0.996 | 0.141693281 | count | 1 |
| LINC01657  | 17.6978427 | 3947.637951 | 0.0045 | 0.996 | 0.141693281 | count | 1 |
| SNTG2      | 17.6978427 | 3947.638106 | 0.0045 | 0.996 | 0.141693281 | count | 1 |
| AC034195.1 | 17.6978427 | 3947.638054 | 0.0045 | 0.996 | 0.141693281 | count | 1 |
| IQCJ       | 17.6978427 | 3947.638002 | 0.0045 | 0.996 | 0.141693281 | count | 1 |
| LINC02054  | 17.6978426 | 3947.637795 | 0.0045 | 0.996 | 0.141693281 | count | 1 |
| AC017007.5 | 17.6978427 | 3947.637899 | 0.0045 | 0.996 | 0.141693281 | count | 1 |
| AC244517.5 | 17.6978427 | 3947.637951 | 0.0045 | 0.996 | 0.141693281 | count | 1 |
| CDX1       | 17.6978427 | 3947.637951 | 0.0045 | 0.996 | 0.141693281 | count | 1 |
| AL031768.1 | 17.6978427 | 3947.637976 | 0.0045 | 0.996 | 0.141693281 | count | 1 |
| AL034376.1 | 17.6978426 | 3947.637976 | 0.0045 | 0.996 | 0.141693281 | count | 1 |
| KHDC3L     | 17.6978426 | 3947.637976 | 0.0045 | 0.996 | 0.141693281 | count | 1 |
| HOXA9      | 17.6978427 | 3947.638183 | 0.0045 | 0.996 | 0.141693281 | count | 1 |
| MYL7       | 17.6978427 | 3947.637899 | 0.0045 | 0.996 | 0.141693281 | count | 1 |
| AC092634.3 | 17.6978427 | 3947.638054 | 0.0045 | 0.996 | 0.141693281 | count | 1 |
| MAP3K15    | 17.6978427 | 3947.638054 | 0.0045 | 0.996 | 0.141693281 | count | 1 |
| CXorf58    | 17.6978425 | 3947.637899 | 0.0045 | 0.996 | 0.141693281 | count | 1 |
| PNCK       | 17.6978427 | 3947.637976 | 0.0045 | 0.996 | 0.141693281 | count | 1 |
| NAT2       | 17.6978427 | 3947.638054 | 0.0045 | 0.996 | 0.141693281 | count | 1 |
| WDR97      | 17.6978427 | 3947.637925 | 0.0045 | 0.996 | 0.141693281 | count | 1 |
| AC131934.1 | 17.6978426 | 3947.637821 | 0.0045 | 0.996 | 0.141693281 | count | 1 |
| AC090791.1 | 17.6978426 | 3947.637821 | 0.0045 | 0.996 | 0.141693281 | count | 1 |
| MIR194-2HG | 17.6978426 | 3947.637795 | 0.0045 | 0.996 | 0.141693281 | count | 1 |
| C11orf87   | 17.6978427 | 3947.637899 | 0.0045 | 0.996 | 0.141693281 | count | 1 |
| SCN3B      | 17.6978426 | 3947.637769 | 0.0045 | 0.996 | 0.141693281 | count | 1 |
| AC233309.1 | 17.6978427 | 3947.637951 | 0.0045 | 0.996 | 0.141693281 | count | 1 |
| LINC02395  | 17.6978426 | 3947.637821 | 0.0045 | 0.996 | 0.141693281 | count | 1 |
| ADAM21     | 17.6978426 | 3947.638028 | 0.0045 | 0.996 | 0.141693281 | count | 1 |
| AC104041.1 | 17.6978427 | 3947.637899 | 0.0045 | 0.996 | 0.141693281 | count | 1 |
| FSD2       | 17.6978427 | 3947.637925 | 0.0045 | 0.996 | 0.141693281 | count | 1 |
| AC106820.5 | 17.6978427 | 3947.638183 | 0.0045 | 0.996 | 0.141693281 | count | 1 |
| AC106886.3 | 17.6978427 | 3947.638054 | 0.0045 | 0.996 | 0.141693281 | count | 1 |
| CES3       | 17.6978426 | 3947.637976 | 0.0045 | 0.996 | 0.141693281 | count | 1 |
| TUBB3      | 17.6978425 | 3947.637899 | 0.0045 | 0.996 | 0.141693281 | count | 1 |
| GRAP       | 17.6978427 | 3947.638183 | 0.0045 | 0.996 | 0.141693281 | count | 1 |
| KRT9       | 17.6978427 | 3947.637795 | 0.0045 | 0.996 | 0.141693281 | count | 1 |
| MGAT5B     | 17.6978427 | 3947.637899 | 0.0045 | 0.996 | 0.141693281 | count | 1 |
| AC127496.1 | 17.6978427 | 3947.637951 | 0.0045 | 0.996 | 0.141693281 | count | 1 |
| FUT6       | 17.6978427 | 3947.637951 | 0.0045 | 0.996 | 0.141693281 | count | 1 |
| ANKLE1     | 17.6978426 | 3947.638028 | 0.0045 | 0.996 | 0.141693281 | count | 1 |
| KLC3       | 17.6978427 | 3947.637821 | 0.0045 | 0.996 | 0.141693281 | count | 1 |
| NOP53-AS1  | 17.6978427 | 3947.637951 | 0.0045 | 0.996 | 0.141693281 | count | 1 |
| CRX        | 17.6978427 | 3947.638028 | 0.0045 | 0.996 | 0.141693281 | count | 1 |

|            |            |             |        |       |             |       |   |
|------------|------------|-------------|--------|-------|-------------|-------|---|
| PTOV1-AS2  | 17.6978427 | 3947.637925 | 0.0045 | 0.996 | 0.141693281 | count | 1 |
| NAPSA      | 17.6978425 | 3947.637899 | 0.0045 | 0.996 | 0.141693281 | count | 1 |
| CRYBB3     | 17.6978427 | 3947.637951 | 0.0045 | 0.996 | 0.141693281 | count | 1 |
| AL022238.4 | 17.6978427 | 3947.637847 | 0.0045 | 0.996 | 0.141693281 | count | 1 |
| AIRE       | 17.6978427 | 3947.637925 | 0.0045 | 0.996 | 0.141693281 | count | 1 |
| AL645608.7 | 17.697843  | 3947.638209 | 0.0045 | 0.996 | 0.141693281 | count | 1 |
| AL391244.2 | 17.6978429 | 3947.638002 | 0.0045 | 0.996 | 0.141693281 | count | 1 |
| LINC01672  | 17.697843  | 3947.637951 | 0.0045 | 0.996 | 0.141693281 | count | 1 |
| AL450998.3 | 17.697843  | 3947.637795 | 0.0045 | 0.996 | 0.141693281 | count | 1 |
| TRIM63     | 17.6978428 | 3947.637951 | 0.0045 | 0.996 | 0.141693281 | count | 1 |
| AL391650.1 | 17.6978429 | 3947.637976 | 0.0045 | 0.996 | 0.141693281 | count | 1 |
| AC114488.2 | 17.697843  | 3947.637976 | 0.0045 | 0.996 | 0.141693281 | count | 1 |
| AL139286.2 | 17.697843  | 3947.637795 | 0.0045 | 0.996 | 0.141693281 | count | 1 |
| SLFNL1-AS1 | 17.697843  | 3947.63808  | 0.0045 | 0.996 | 0.141693281 | count | 1 |
| SLFNL1     | 17.697843  | 3947.638132 | 0.0045 | 0.996 | 0.141693281 | count | 1 |
| RIMKLA     | 17.697843  | 3947.637795 | 0.0045 | 0.996 | 0.141693281 | count | 1 |
| FOXD3      | 17.697843  | 3947.638106 | 0.0045 | 0.996 | 0.141693281 | count | 1 |
| AL583808.1 | 17.697843  | 3947.638054 | 0.0045 | 0.996 | 0.141693281 | count | 1 |
| AC000032.1 | 17.697843  | 3947.637873 | 0.0045 | 0.996 | 0.141693281 | count | 1 |
| AL157904.1 | 17.6978428 | 3947.63808  | 0.0045 | 0.996 | 0.141693281 | count | 1 |
| FAM72B     | 17.697843  | 3947.638106 | 0.0045 | 0.996 | 0.141693281 | count | 1 |
| SRGAP2-AS1 | 17.697843  | 3947.637795 | 0.0045 | 0.996 | 0.141693281 | count | 1 |
| AC245100.7 | 17.697843  | 3947.638028 | 0.0045 | 0.996 | 0.141693281 | count | 1 |
| AL589765.6 | 17.6978428 | 3947.637821 | 0.0045 | 0.996 | 0.141693281 | count | 1 |
| DCST2      | 17.697843  | 3947.638054 | 0.0045 | 0.996 | 0.141693281 | count | 1 |
| AL590560.1 | 17.697843  | 3947.637795 | 0.0045 | 0.996 | 0.141693281 | count | 1 |
| ANKRD45    | 17.697843  | 3947.637795 | 0.0045 | 0.996 | 0.141693281 | count | 1 |
| AL513329.1 | 17.697843  | 3947.637795 | 0.0045 | 0.996 | 0.141693281 | count | 1 |
| AL133553.1 | 17.697843  | 3947.637795 | 0.0045 | 0.996 | 0.141693281 | count | 1 |
| C4BPB      | 17.697843  | 3947.637795 | 0.0045 | 0.996 | 0.141693281 | count | 1 |
| OBSCN-AS1  | 17.697843  | 3947.637795 | 0.0045 | 0.996 | 0.141693281 | count | 1 |
| SLC35F3    | 17.6978428 | 3947.63808  | 0.0045 | 0.996 | 0.141693281 | count | 1 |
| AC108488.2 | 17.697843  | 3947.637795 | 0.0045 | 0.996 | 0.141693281 | count | 1 |
| AC010096.1 | 17.697843  | 3947.638209 | 0.0045 | 0.996 | 0.141693281 | count | 1 |
| AC079145.1 | 17.6978429 | 3947.638054 | 0.0045 | 0.996 | 0.141693281 | count | 1 |
| TDRD15     | 17.6978429 | 3947.638106 | 0.0045 | 0.996 | 0.141693281 | count | 1 |
| AL121652.1 | 17.697843  | 3947.637795 | 0.0045 | 0.996 | 0.141693281 | count | 1 |
| LINC02590  | 17.6978428 | 3947.638002 | 0.0045 | 0.996 | 0.141693281 | count | 1 |
| AC009975.1 | 17.6978429 | 3947.638028 | 0.0045 | 0.996 | 0.141693281 | count | 1 |
| EML6       | 17.6978428 | 3947.637976 | 0.0045 | 0.996 | 0.141693281 | count | 1 |
| AC007743.1 | 17.697843  | 3947.637951 | 0.0045 | 0.996 | 0.141693281 | count | 1 |
| LIMS4      | 17.6978428 | 3947.638106 | 0.0045 | 0.996 | 0.141693281 | count | 1 |
| AC017074.1 | 17.697843  | 3947.638028 | 0.0045 | 0.996 | 0.141693281 | count | 1 |
| AC114763.1 | 17.697843  | 3947.637795 | 0.0045 | 0.996 | 0.141693281 | count | 1 |
| AC009480.1 | 17.6978428 | 3947.637951 | 0.0045 | 0.996 | 0.141693281 | count | 1 |

|               |            |             |        |       |             |       |   |
|---------------|------------|-------------|--------|-------|-------------|-------|---|
| HOXD9         | 17.6978428 | 3947.637951 | 0.0045 | 0.996 | 0.141693281 | count | 1 |
| AC074286.1    | 17.6978429 | 3947.638158 | 0.0045 | 0.996 | 0.141693281 | count | 1 |
| PTPRN         | 17.697843  | 3947.638028 | 0.0045 | 0.996 | 0.141693281 | count | 1 |
| AC010735.2    | 17.697843  | 3947.638002 | 0.0045 | 0.996 | 0.141693281 | count | 1 |
| CROCC2        | 17.6978429 | 3947.638002 | 0.0045 | 0.996 | 0.141693281 | count | 1 |
| SLC6A11       | 17.6978429 | 3947.638002 | 0.0045 | 0.996 | 0.141693281 | count | 1 |
| TMEM40        | 17.697843  | 3947.637795 | 0.0045 | 0.996 | 0.141693281 | count | 1 |
| SLC38A3       | 17.697843  | 3947.637795 | 0.0045 | 0.996 | 0.141693281 | count | 1 |
| AC012557.2    | 17.697843  | 3947.638054 | 0.0045 | 0.996 | 0.141693281 | count | 1 |
| AC107029.1    | 17.697843  | 3947.638054 | 0.0045 | 0.996 | 0.141693281 | count | 1 |
| NR1I2         | 17.6978429 | 3947.637976 | 0.0045 | 0.996 | 0.141693281 | count | 1 |
| PLSCR2        | 17.697843  | 3947.637795 | 0.0045 | 0.996 | 0.141693281 | count | 1 |
| LINC01213     | 17.697843  | 3947.637795 | 0.0045 | 0.996 | 0.141693281 | count | 1 |
| LINC02066     | 17.6978428 | 3947.638002 | 0.0045 | 0.996 | 0.141693281 | count | 1 |
| KLHL6         | 17.697843  | 3947.637951 | 0.0045 | 0.996 | 0.141693281 | count | 1 |
| AC131235.4    | 17.697843  | 3947.637795 | 0.0045 | 0.996 | 0.141693281 | count | 1 |
| FETUB         | 17.6978429 | 3947.638106 | 0.0045 | 0.996 | 0.141693281 | count | 1 |
| OSTN          | 17.697843  | 3947.637795 | 0.0045 | 0.996 | 0.141693281 | count | 1 |
| AC092535.1    | 17.697843  | 3947.637795 | 0.0045 | 0.996 | 0.141693281 | count | 1 |
| CFAP99        | 17.697843  | 3947.63808  | 0.0045 | 0.996 | 0.141693281 | count | 1 |
| NKX3-2        | 17.697843  | 3947.637795 | 0.0045 | 0.996 | 0.141693281 | count | 1 |
| TAPT1-AS1     | 17.697843  | 3947.637795 | 0.0045 | 0.996 | 0.141693281 | count | 1 |
| EXOC1L        | 17.697843  | 3947.637976 | 0.0045 | 0.996 | 0.141693281 | count | 1 |
| ADH7          | 17.6978428 | 3947.638054 | 0.0045 | 0.996 | 0.141693281 | count | 1 |
| ETNPPL        | 17.697843  | 3947.638054 | 0.0045 | 0.996 | 0.141693281 | count | 1 |
| AC004067.1    | 17.697843  | 3947.637795 | 0.0045 | 0.996 | 0.141693281 | count | 1 |
| NDST4         | 17.697843  | 3947.637951 | 0.0045 | 0.996 | 0.141693281 | count | 1 |
| AC079341.1    | 17.697843  | 3947.637795 | 0.0045 | 0.996 | 0.141693281 | count | 1 |
| LINC02516     | 17.697843  | 3947.637795 | 0.0045 | 0.996 | 0.141693281 | count | 1 |
| AC116563.1    | 17.6978428 | 3947.637899 | 0.0045 | 0.996 | 0.141693281 | count | 1 |
| AC112236.2    | 17.6978428 | 3947.637821 | 0.0045 | 0.996 | 0.141693281 | count | 1 |
| RBM46         | 17.6978429 | 3947.638106 | 0.0045 | 0.996 | 0.141693281 | count | 1 |
| AC021087.1    | 17.697843  | 3947.637795 | 0.0045 | 0.996 | 0.141693281 | count | 1 |
| NKD2          | 17.697843  | 3947.637795 | 0.0045 | 0.996 | 0.141693281 | count | 1 |
| AC091906.1    | 17.6978429 | 3947.638054 | 0.0045 | 0.996 | 0.141693281 | count | 1 |
| AC113386.1    | 17.697843  | 3947.637795 | 0.0045 | 0.996 | 0.141693281 | count | 1 |
| C1QTNF3-AMACR | 17.6978429 | 3947.637976 | 0.0045 | 0.996 | 0.141693281 | count | 1 |
| AC008957.1    | 17.697843  | 3947.638132 | 0.0045 | 0.996 | 0.141693281 | count | 1 |
| LINC00603     | 17.697843  | 3947.63808  | 0.0045 | 0.996 | 0.141693281 | count | 1 |
| SHISAL2B      | 17.6978429 | 3947.638002 | 0.0045 | 0.996 | 0.141693281 | count | 1 |
| KCNN2         | 17.697843  | 3947.638209 | 0.0045 | 0.996 | 0.141693281 | count | 1 |
| SLC27A6       | 17.6978429 | 3947.638002 | 0.0045 | 0.996 | 0.141693281 | count | 1 |
| CCNI2         | 17.697843  | 3947.637795 | 0.0045 | 0.996 | 0.141693281 | count | 1 |
| C5orf66       | 17.6978429 | 3947.637847 | 0.0045 | 0.996 | 0.141693281 | count | 1 |
| GFRA3         | 17.6978428 | 3947.638106 | 0.0045 | 0.996 | 0.141693281 | count | 1 |

|            |            |             |        |       |             |       |   |
|------------|------------|-------------|--------|-------|-------------|-------|---|
| PCDHAC2    | 17.697843  | 3947.637795 | 0.0045 | 0.996 | 0.141693281 | count | 1 |
| AC034213.1 | 17.6978429 | 3947.638002 | 0.0045 | 0.996 | 0.141693281 | count | 1 |
| AL590004.3 | 17.6978428 | 3947.63808  | 0.0045 | 0.996 | 0.141693281 | count | 1 |
| HIST1H3F   | 17.697843  | 3947.637795 | 0.0045 | 0.996 | 0.141693281 | count | 1 |
| HIST1H2AM  | 17.697843  | 3947.637795 | 0.0045 | 0.996 | 0.141693281 | count | 1 |
| HCG15      | 17.6978428 | 3947.63808  | 0.0045 | 0.996 | 0.141693281 | count | 1 |
| LINC02569  | 17.697843  | 3947.638028 | 0.0045 | 0.996 | 0.141693281 | count | 1 |
| KIFC1      | 17.697843  | 3947.637795 | 0.0045 | 0.996 | 0.141693281 | count | 1 |
| ARMC12     | 17.697843  | 3947.638054 | 0.0045 | 0.996 | 0.141693281 | count | 1 |
| AL136164.2 | 17.697843  | 3947.637795 | 0.0045 | 0.996 | 0.141693281 | count | 1 |
| NMBR       | 17.697843  | 3947.637795 | 0.0045 | 0.996 | 0.141693281 | count | 1 |
| AL355304.1 | 17.697843  | 3947.637795 | 0.0045 | 0.996 | 0.141693281 | count | 1 |
| AL590867.1 | 17.697843  | 3947.638028 | 0.0045 | 0.996 | 0.141693281 | count | 1 |
| LINC01558  | 17.697843  | 3947.637795 | 0.0045 | 0.996 | 0.141693281 | count | 1 |
| AC004080.1 | 17.697843  | 3947.637795 | 0.0045 | 0.996 | 0.141693281 | count | 1 |
| LINC01449  | 17.697843  | 3947.637795 | 0.0045 | 0.996 | 0.141693281 | count | 1 |
| CLDN4      | 17.697843  | 3947.637795 | 0.0045 | 0.996 | 0.141693281 | count | 1 |
| AC004023.1 | 17.697843  | 3947.637795 | 0.0045 | 0.996 | 0.141693281 | count | 1 |
| AC092849.1 | 17.6978429 | 3947.637976 | 0.0045 | 0.996 | 0.141693281 | count | 1 |
| EFCAB10    | 17.697843  | 3947.638235 | 0.0045 | 0.996 | 0.141693281 | count | 1 |
| CFTR       | 17.6978429 | 3947.638106 | 0.0045 | 0.996 | 0.141693281 | count | 1 |
| MESTIT1    | 17.697843  | 3947.637873 | 0.0045 | 0.996 | 0.141693281 | count | 1 |
| OR2A42     | 17.6978428 | 3947.637769 | 0.0045 | 0.996 | 0.141693281 | count | 1 |
| CNPY1      | 17.697843  | 3947.637795 | 0.0045 | 0.996 | 0.141693281 | count | 1 |
| LINC00106  | 17.697843  | 3947.637795 | 0.0045 | 0.996 | 0.141693281 | count | 1 |
| NXF3       | 17.697843  | 3947.637795 | 0.0045 | 0.996 | 0.141693281 | count | 1 |
| AL606763.1 | 17.697843  | 3947.638054 | 0.0045 | 0.996 | 0.141693281 | count | 1 |
| RTL9       | 17.6978428 | 3947.637821 | 0.0045 | 0.996 | 0.141693281 | count | 1 |
| HS6ST2     | 17.6978428 | 3947.637847 | 0.0045 | 0.996 | 0.141693281 | count | 1 |
| PLAC1      | 17.697843  | 3947.637795 | 0.0045 | 0.996 | 0.141693281 | count | 1 |
| AVPR2      | 17.6978428 | 3947.63808  | 0.0045 | 0.996 | 0.141693281 | count | 1 |
| AC245140.3 | 17.6978429 | 3947.637925 | 0.0045 | 0.996 | 0.141693281 | count | 1 |
| AC104964.4 | 17.697843  | 3947.637795 | 0.0045 | 0.996 | 0.141693281 | count | 1 |
| FAM86B2    | 17.6978429 | 3947.638002 | 0.0045 | 0.996 | 0.141693281 | count | 1 |
| STAR       | 17.697843  | 3947.637795 | 0.0045 | 0.996 | 0.141693281 | count | 1 |
| AC087623.1 | 17.697843  | 3947.638028 | 0.0045 | 0.996 | 0.141693281 | count | 1 |
| AC100821.2 | 17.6978429 | 3947.638158 | 0.0045 | 0.996 | 0.141693281 | count | 1 |
| TTPA       | 17.6978429 | 3947.638158 | 0.0045 | 0.996 | 0.141693281 | count | 1 |
| DNAJC5B    | 17.697843  | 3947.637795 | 0.0045 | 0.996 | 0.141693281 | count | 1 |
| AP003465.2 | 17.6978428 | 3947.63808  | 0.0045 | 0.996 | 0.141693281 | count | 1 |
| AP002907.1 | 17.697843  | 3947.638209 | 0.0045 | 0.996 | 0.141693281 | count | 1 |
| AP002852.1 | 17.697843  | 3947.637795 | 0.0045 | 0.996 | 0.141693281 | count | 1 |
| AC090922.1 | 17.697843  | 3947.63808  | 0.0045 | 0.996 | 0.141693281 | count | 1 |
| CCDC26     | 17.697843  | 3947.638339 | 0.0045 | 0.996 | 0.141693281 | count | 1 |
| AC011676.1 | 17.697843  | 3947.637976 | 0.0045 | 0.996 | 0.141693281 | count | 1 |

|             |            |             |        |       |             |       |   |
|-------------|------------|-------------|--------|-------|-------------|-------|---|
| PSCA        | 17.6978428 | 3947.637976 | 0.0045 | 0.996 | 0.141693281 | count | 1 |
| AC108002.1  | 17.697843  | 3947.637795 | 0.0045 | 0.996 | 0.141693281 | count | 1 |
| SH3GL2      | 17.697843  | 3947.637795 | 0.0045 | 0.996 | 0.141693281 | count | 1 |
| FAM205C     | 17.697843  | 3947.637795 | 0.0045 | 0.996 | 0.141693281 | count | 1 |
| BX255923.1  | 17.6978428 | 3947.638132 | 0.0045 | 0.996 | 0.141693281 | count | 1 |
| AL391987.4  | 17.697843  | 3947.637795 | 0.0045 | 0.996 | 0.141693281 | count | 1 |
| LINC01506   | 17.697843  | 3947.637795 | 0.0045 | 0.996 | 0.141693281 | count | 1 |
| AL359182.2  | 17.697843  | 3947.637795 | 0.0045 | 0.996 | 0.141693281 | count | 1 |
| AMBP        | 17.697843  | 3947.638209 | 0.0045 | 0.996 | 0.141693281 | count | 1 |
| OR1L8       | 17.697843  | 3947.637795 | 0.0045 | 0.996 | 0.141693281 | count | 1 |
| AL590226.1  | 17.697843  | 3947.638028 | 0.0045 | 0.996 | 0.141693281 | count | 1 |
| CCDC183-AS1 | 17.6978428 | 3947.638132 | 0.0045 | 0.996 | 0.141693281 | count | 1 |
| KCNQ1-AS1   | 17.6978429 | 3947.638158 | 0.0045 | 0.996 | 0.141693281 | count | 1 |
| SLC22A18AS  | 17.697843  | 3947.638054 | 0.0045 | 0.996 | 0.141693281 | count | 1 |
| OR51B5      | 17.6978429 | 3947.637821 | 0.0045 | 0.996 | 0.141693281 | count | 1 |
| AC091564.2  | 17.697843  | 3947.637795 | 0.0045 | 0.996 | 0.141693281 | count | 1 |
| NLRP14      | 17.6978428 | 3947.638235 | 0.0045 | 0.996 | 0.141693281 | count | 1 |
| SYT9        | 17.6978429 | 3947.638054 | 0.0045 | 0.996 | 0.141693281 | count | 1 |
| AC124276.2  | 17.697843  | 3947.638209 | 0.0045 | 0.996 | 0.141693281 | count | 1 |
| AC103974.1  | 17.697843  | 3947.637795 | 0.0045 | 0.996 | 0.141693281 | count | 1 |
| PTPN5       | 17.6978429 | 3947.638002 | 0.0045 | 0.996 | 0.141693281 | count | 1 |
| AP000808.2  | 17.6978428 | 3947.637925 | 0.0045 | 0.996 | 0.141693281 | count | 1 |
| AP005233.2  | 17.697843  | 3947.637795 | 0.0045 | 0.996 | 0.141693281 | count | 1 |
| AP000487.2  | 17.697843  | 3947.637925 | 0.0045 | 0.996 | 0.141693281 | count | 1 |
| KRTAP5-8    | 17.6978429 | 3947.638002 | 0.0045 | 0.996 | 0.141693281 | count | 1 |
| AP006216.1  | 17.697843  | 3947.637795 | 0.0045 | 0.996 | 0.141693281 | count | 1 |
| PKNOX2-AS1  | 17.6978428 | 3947.638002 | 0.0045 | 0.996 | 0.141693281 | count | 1 |
| AP001783.1  | 17.6978428 | 3947.638132 | 0.0045 | 0.996 | 0.141693281 | count | 1 |
| AP003025.2  | 17.6978428 | 3947.63808  | 0.0045 | 0.996 | 0.141693281 | count | 1 |
| AP001999.1  | 17.697843  | 3947.637795 | 0.0045 | 0.996 | 0.141693281 | count | 1 |
| AKR1C4      | 17.697843  | 3947.637795 | 0.0045 | 0.996 | 0.141693281 | count | 1 |
| NEBL        | 17.6978429 | 3947.638002 | 0.0045 | 0.996 | 0.141693281 | count | 1 |
| AL022344.1  | 17.6978429 | 3947.638106 | 0.0045 | 0.996 | 0.141693281 | count | 1 |
| AL358394.1  | 17.6978429 | 3947.638002 | 0.0045 | 0.996 | 0.141693281 | count | 1 |
| TMEM26-AS1  | 17.697843  | 3947.637795 | 0.0045 | 0.996 | 0.141693281 | count | 1 |
| AL451049.1  | 17.697843  | 3947.638106 | 0.0045 | 0.996 | 0.141693281 | count | 1 |
| ATOH7       | 17.697843  | 3947.63808  | 0.0045 | 0.996 | 0.141693281 | count | 1 |
| AC007848.1  | 17.697843  | 3947.637795 | 0.0045 | 0.996 | 0.141693281 | count | 1 |
| AC006581.2  | 17.697843  | 3947.637795 | 0.0045 | 0.996 | 0.141693281 | count | 1 |
| AC018630.2  | 17.697843  | 3947.637795 | 0.0045 | 0.996 | 0.141693281 | count | 1 |
| AC009318.1  | 17.697843  | 3947.638028 | 0.0045 | 0.996 | 0.141693281 | count | 1 |
| GPR84       | 17.6978429 | 3947.638209 | 0.0045 | 0.996 | 0.141693281 | count | 1 |
| AC135279.3  | 17.697843  | 3947.637795 | 0.0045 | 0.996 | 0.141693281 | count | 1 |
| AC133794.1  | 17.6978428 | 3947.638002 | 0.0045 | 0.996 | 0.141693281 | count | 1 |
| AC012464.3  | 17.697843  | 3947.637951 | 0.0045 | 0.996 | 0.141693281 | count | 1 |

|              |            |             |        |       |             |       |   |
|--------------|------------|-------------|--------|-------|-------------|-------|---|
| AC010205.1   | 17.697843  | 3947.637795 | 0.0045 | 0.996 | 0.141693281 | count | 1 |
| FAM222A      | 17.697843  | 3947.63808  | 0.0045 | 0.996 | 0.141693281 | count | 1 |
| AC127002.1   | 17.6978429 | 3947.637873 | 0.0045 | 0.996 | 0.141693281 | count | 1 |
| AC027290.1   | 17.697843  | 3947.637795 | 0.0045 | 0.996 | 0.141693281 | count | 1 |
| LINC02405    | 17.6978428 | 3947.638028 | 0.0045 | 0.996 | 0.141693281 | count | 1 |
| AC073911.1   | 17.697843  | 3947.63808  | 0.0045 | 0.996 | 0.141693281 | count | 1 |
| SLC25A30-AS1 | 17.697843  | 3947.638002 | 0.0045 | 0.996 | 0.141693281 | count | 1 |
| LMO7DN       | 17.697843  | 3947.637795 | 0.0045 | 0.996 | 0.141693281 | count | 1 |
| AL355922.5   | 17.697843  | 3947.638054 | 0.0045 | 0.996 | 0.141693281 | count | 1 |
| SLC39A2      | 17.697843  | 3947.63808  | 0.0045 | 0.996 | 0.141693281 | count | 1 |
| TRAV22       | 17.6978429 | 3947.638028 | 0.0045 | 0.996 | 0.141693281 | count | 1 |
| LINC02289    | 17.697843  | 3947.637795 | 0.0045 | 0.996 | 0.141693281 | count | 1 |
| AC008056.2   | 17.697843  | 3947.637795 | 0.0045 | 0.996 | 0.141693281 | count | 1 |
| LINC02328    | 17.697843  | 3947.638054 | 0.0045 | 0.996 | 0.141693281 | count | 1 |
| LINC02321    | 17.697843  | 3947.637795 | 0.0045 | 0.996 | 0.141693281 | count | 1 |
| AL137779.1   | 17.697843  | 3947.637795 | 0.0045 | 0.996 | 0.141693281 | count | 1 |
| TGM7         | 17.697843  | 3947.637795 | 0.0045 | 0.996 | 0.141693281 | count | 1 |
| CCDC33       | 17.697843  | 3947.638028 | 0.0045 | 0.996 | 0.141693281 | count | 1 |
| AC091100.1   | 17.6978429 | 3947.637925 | 0.0045 | 0.996 | 0.141693281 | count | 1 |
| AC103982.1   | 17.6978429 | 3947.637847 | 0.0045 | 0.996 | 0.141693281 | count | 1 |
| LINC00235    | 17.697843  | 3947.637976 | 0.0045 | 0.996 | 0.141693281 | count | 1 |
| AC093525.3   | 17.697843  | 3947.637795 | 0.0045 | 0.996 | 0.141693281 | count | 1 |
| AC092338.1   | 17.697843  | 3947.63808  | 0.0045 | 0.996 | 0.141693281 | count | 1 |
| AC009133.3   | 17.6978429 | 3947.638028 | 0.0045 | 0.996 | 0.141693281 | count | 1 |
| NPIPB13      | 17.697843  | 3947.637795 | 0.0045 | 0.996 | 0.141693281 | count | 1 |
| AC136944.2   | 17.6978428 | 3947.637951 | 0.0045 | 0.996 | 0.141693281 | count | 1 |
| CTRB1        | 17.697843  | 3947.638054 | 0.0045 | 0.996 | 0.141693281 | count | 1 |
| AC092718.2   | 17.6978428 | 3947.637821 | 0.0045 | 0.996 | 0.141693281 | count | 1 |
| LINC01996    | 17.697843  | 3947.638235 | 0.0045 | 0.996 | 0.141693281 | count | 1 |
| AC004771.5   | 17.697843  | 3947.638054 | 0.0045 | 0.996 | 0.141693281 | count | 1 |
| AC107926.1   | 17.6978429 | 3947.638054 | 0.0045 | 0.996 | 0.141693281 | count | 1 |
| SP6          | 17.697843  | 3947.637795 | 0.0045 | 0.996 | 0.141693281 | count | 1 |
| FLJ45513     | 17.697843  | 3947.638209 | 0.0045 | 0.996 | 0.141693281 | count | 1 |
| WFIKKN2      | 17.697843  | 3947.637795 | 0.0045 | 0.996 | 0.141693281 | count | 1 |
| AC015813.2   | 17.697843  | 3947.63808  | 0.0045 | 0.996 | 0.141693281 | count | 1 |
| CA4          | 17.697843  | 3947.638132 | 0.0045 | 0.996 | 0.141693281 | count | 1 |
| AC120024.1   | 17.6978429 | 3947.638106 | 0.0045 | 0.996 | 0.141693281 | count | 1 |
| PPP1R27      | 17.697843  | 3947.637795 | 0.0045 | 0.996 | 0.141693281 | count | 1 |
| PPP4R1-AS1   | 17.6978428 | 3947.638054 | 0.0045 | 0.996 | 0.141693281 | count | 1 |
| AC091198.1   | 17.697843  | 3947.637795 | 0.0045 | 0.996 | 0.141693281 | count | 1 |
| AC118757.1   | 17.697843  | 3947.637795 | 0.0045 | 0.996 | 0.141693281 | count | 1 |
| PRND         | 17.697843  | 3947.637795 | 0.0045 | 0.996 | 0.141693281 | count | 1 |
| AL158042.1   | 17.6978428 | 3947.637976 | 0.0045 | 0.996 | 0.141693281 | count | 1 |
| C20orf203    | 17.6978429 | 3947.638002 | 0.0045 | 0.996 | 0.141693281 | count | 1 |
| C20orf144    | 17.6978428 | 3947.637925 | 0.0045 | 0.996 | 0.141693281 | count | 1 |



|              |            |             |        |       |             |       |   |
|--------------|------------|-------------|--------|-------|-------------|-------|---|
| AL391097.2   | 17.697843  | 3947.638028 | 0.0045 | 0.996 | 0.141693281 | count | 1 |
| STX16-NPEPL1 | 17.6978429 | 3947.638261 | 0.0045 | 0.996 | 0.141693281 | count | 1 |
| AL121845.1   | 17.697843  | 3947.63808  | 0.0045 | 0.996 | 0.141693281 | count | 1 |
| AC006273.1   | 17.697843  | 3947.637847 | 0.0045 | 0.996 | 0.141693281 | count | 1 |
| AZU1         | 17.697843  | 3947.637847 | 0.0045 | 0.996 | 0.141693281 | count | 1 |
| AC010336.1   | 17.697843  | 3947.638054 | 0.0045 | 0.996 | 0.141693281 | count | 1 |
| AC010422.3   | 17.697843  | 3947.638054 | 0.0045 | 0.996 | 0.141693281 | count | 1 |
| HAPLN4       | 17.6978429 | 3947.638158 | 0.0045 | 0.996 | 0.141693281 | count | 1 |
| AC025809.1   | 17.6978428 | 3947.637976 | 0.0045 | 0.996 | 0.141693281 | count | 1 |
| HPN-AS1      | 17.697843  | 3947.638054 | 0.0045 | 0.996 | 0.141693281 | count | 1 |
| AC016590.1   | 17.697843  | 3947.638028 | 0.0045 | 0.996 | 0.141693281 | count | 1 |
| AC016590.3   | 17.6978429 | 3947.638002 | 0.0045 | 0.996 | 0.141693281 | count | 1 |
| AC011445.2   | 17.697843  | 3947.637795 | 0.0045 | 0.996 | 0.141693281 | count | 1 |
| HIPK4        | 17.697843  | 3947.63808  | 0.0045 | 0.996 | 0.141693281 | count | 1 |
| AC011481.1   | 17.697843  | 3947.637795 | 0.0045 | 0.996 | 0.141693281 | count | 1 |
| SLC8A2       | 17.697843  | 3947.637795 | 0.0045 | 0.996 | 0.141693281 | count | 1 |
| LHB          | 17.697843  | 3947.637795 | 0.0045 | 0.996 | 0.141693281 | count | 1 |
| IL411        | 17.6978428 | 3947.638054 | 0.0045 | 0.996 | 0.141693281 | count | 1 |
| ASPDH        | 17.697843  | 3947.638028 | 0.0045 | 0.996 | 0.141693281 | count | 1 |
| KLK13        | 17.697843  | 3947.638028 | 0.0045 | 0.996 | 0.141693281 | count | 1 |
| ZSCAN5B      | 17.697843  | 3947.638054 | 0.0045 | 0.996 | 0.141693281 | count | 1 |
| SMIM17       | 17.697843  | 3947.637795 | 0.0045 | 0.996 | 0.141693281 | count | 1 |
| ZIM2         | 17.697843  | 3947.638054 | 0.0045 | 0.996 | 0.141693281 | count | 1 |
| AL008638.6   | 17.6978428 | 3947.638002 | 0.0045 | 0.996 | 0.141693281 | count | 1 |
| FO393418.1   | 17.697843  | 3947.638002 | 0.0045 | 0.996 | 0.141693281 | count | 1 |
| AL022476.1   | 17.6978429 | 3947.638158 | 0.0045 | 0.996 | 0.141693281 | count | 1 |
| PHF21B       | 17.6978429 | 3947.638209 | 0.0045 | 0.996 | 0.141693281 | count | 1 |
| CU633967.1   | 17.697843  | 3947.637795 | 0.0045 | 0.996 | 0.141693281 | count | 1 |
| AP001605.1   | 17.6978428 | 3947.638002 | 0.0045 | 0.996 | 0.141693281 | count | 1 |
| BACH1-IT2    | 17.697843  | 3947.637795 | 0.0045 | 0.996 | 0.141693281 | count | 1 |
| AP000569.1   | 17.6978429 | 3947.638106 | 0.0045 | 0.996 | 0.141693281 | count | 1 |
| AP000322.1   | 17.697843  | 3947.637795 | 0.0045 | 0.996 | 0.141693281 | count | 1 |
| AF064858.1   | 17.697843  | 3947.637951 | 0.0045 | 0.996 | 0.141693281 | count | 1 |
| TSPEAR-AS2   | 17.697843  | 3947.637795 | 0.0045 | 0.996 | 0.141693281 | count | 1 |
| AP001468.1   | 17.697843  | 3947.637795 | 0.0045 | 0.996 | 0.141693281 | count | 1 |
| AL591163.1   | 17.6978431 | 3947.638028 | 0.0045 | 0.996 | 0.141693281 | count | 1 |
| UBXN10       | 17.6978433 | 3947.638183 | 0.0045 | 0.996 | 0.141693281 | count | 1 |
| GPR3         | 17.6978433 | 3947.638132 | 0.0045 | 0.996 | 0.141693281 | count | 1 |
| AL513327.1   | 17.6978431 | 3947.638106 | 0.0045 | 0.996 | 0.141693281 | count | 1 |
| AL354864.1   | 17.6978431 | 3947.637976 | 0.0045 | 0.996 | 0.141693281 | count | 1 |
| AL358075.2   | 17.6978432 | 3947.638209 | 0.0045 | 0.996 | 0.141693281 | count | 1 |
| LINC01738    | 17.6978431 | 3947.637976 | 0.0045 | 0.996 | 0.141693281 | count | 1 |
| LINC01135    | 17.6978431 | 3947.638106 | 0.0045 | 0.996 | 0.141693281 | count | 1 |
| LEMD1-AS1    | 17.6978431 | 3947.638158 | 0.0045 | 0.996 | 0.141693281 | count | 1 |
| AL451060.1   | 17.6978431 | 3947.638106 | 0.0045 | 0.996 | 0.141693281 | count | 1 |

|                 |            |             |        |       |             |       |   |
|-----------------|------------|-------------|--------|-------|-------------|-------|---|
| LINC01705       | 17.6978432 | 3947.638002 | 0.0045 | 0.996 | 0.141693281 | count | 1 |
| ALLC            | 17.6978431 | 3947.638028 | 0.0045 | 0.996 | 0.141693281 | count | 1 |
| AGBL5-AS1       | 17.6978431 | 3947.638158 | 0.0045 | 0.996 | 0.141693281 | count | 1 |
| TGFA            | 17.6978432 | 3947.638106 | 0.0045 | 0.996 | 0.141693281 | count | 1 |
| DCTN1-AS1       | 17.6978431 | 3947.638106 | 0.0045 | 0.996 | 0.141693281 | count | 1 |
| AC103563.7      | 17.6978432 | 3947.637899 | 0.0045 | 0.996 | 0.141693281 | count | 1 |
| AC009974.1      | 17.6978431 | 3947.637976 | 0.0045 | 0.996 | 0.141693281 | count | 1 |
| AC005237.1      | 17.6978431 | 3947.638054 | 0.0045 | 0.996 | 0.141693281 | count | 1 |
| AC099329.3      | 17.6978432 | 3947.638209 | 0.0045 | 0.996 | 0.141693281 | count | 1 |
| CSPG5           | 17.6978431 | 3947.638106 | 0.0045 | 0.996 | 0.141693281 | count | 1 |
| LINC02585       | 17.6978431 | 3947.63808  | 0.0045 | 0.996 | 0.141693281 | count | 1 |
| DENND6A-DT      | 17.6978431 | 3947.637899 | 0.0045 | 0.996 | 0.141693281 | count | 1 |
| AC078785.1      | 17.6978431 | 3947.638158 | 0.0045 | 0.996 | 0.141693281 | count | 1 |
| IQCJ-SCHIP1-AS1 | 17.6978431 | 3947.638028 | 0.0045 | 0.996 | 0.141693281 | count | 1 |
| AC107067.1      | 17.6978431 | 3947.638261 | 0.0045 | 0.996 | 0.141693281 | count | 1 |
| AC008808.1      | 17.6978431 | 3947.638028 | 0.0045 | 0.996 | 0.141693281 | count | 1 |
| ELOVL7          | 17.6978431 | 3947.638028 | 0.0045 | 0.996 | 0.141693281 | count | 1 |
| AC093206.1      | 17.6978432 | 3947.638209 | 0.0045 | 0.996 | 0.141693281 | count | 1 |
| AC011373.1      | 17.6978432 | 3947.638209 | 0.0045 | 0.996 | 0.141693281 | count | 1 |
| AC131025.1      | 17.6978432 | 3947.638028 | 0.0045 | 0.996 | 0.141693281 | count | 1 |
| AC008676.1      | 17.6978431 | 3947.638132 | 0.0045 | 0.996 | 0.141693281 | count | 1 |
| AC008637.1      | 17.6978432 | 3947.637976 | 0.0045 | 0.996 | 0.141693281 | count | 1 |
| AL445309.1      | 17.6978431 | 3947.638028 | 0.0045 | 0.996 | 0.141693281 | count | 1 |
| RPS10-NUDT3     | 17.6978432 | 3947.637976 | 0.0045 | 0.996 | 0.141693281 | count | 1 |
| AC003986.3      | 17.6978431 | 3947.637847 | 0.0045 | 0.996 | 0.141693281 | count | 1 |
| MIR503HG        | 17.6978431 | 3947.638106 | 0.0045 | 0.996 | 0.141693281 | count | 1 |
| KBTBD11-OT1     | 17.6978431 | 3947.638028 | 0.0045 | 0.996 | 0.141693281 | count | 1 |
| AC019257.2      | 17.6978431 | 3947.638235 | 0.0045 | 0.996 | 0.141693281 | count | 1 |
| NUGGC           | 17.6978431 | 3947.638028 | 0.0045 | 0.996 | 0.141693281 | count | 1 |
| AC091182.2      | 17.6978431 | 3947.638132 | 0.0045 | 0.996 | 0.141693281 | count | 1 |
| AP003465.1      | 17.6978431 | 3947.638287 | 0.0045 | 0.996 | 0.141693281 | count | 1 |
| AC104958.2      | 17.6978432 | 3947.638002 | 0.0045 | 0.996 | 0.141693281 | count | 1 |
| FAM221B         | 17.6978432 | 3947.638158 | 0.0045 | 0.996 | 0.141693281 | count | 1 |
| AL158154.2      | 17.6978433 | 3947.638132 | 0.0045 | 0.996 | 0.141693281 | count | 1 |
| AL161785.1      | 17.6978432 | 3947.638002 | 0.0045 | 0.996 | 0.141693281 | count | 1 |
| AL157938.2      | 17.6978431 | 3947.637847 | 0.0045 | 0.996 | 0.141693281 | count | 1 |
| AP002990.1      | 17.6978431 | 3947.638158 | 0.0045 | 0.996 | 0.141693281 | count | 1 |
| AP000721.2      | 17.6978432 | 3947.638209 | 0.0045 | 0.996 | 0.141693281 | count | 1 |
| AP003390.1      | 17.6978431 | 3947.638339 | 0.0045 | 0.996 | 0.141693281 | count | 1 |
| PROSER2-AS1     | 17.6978431 | 3947.638209 | 0.0045 | 0.996 | 0.141693281 | count | 1 |
| ANXA8           | 17.6978431 | 3947.638158 | 0.0045 | 0.996 | 0.141693281 | count | 1 |
| C10orf82        | 17.6978431 | 3947.638054 | 0.0045 | 0.996 | 0.141693281 | count | 1 |
| AC068896.1      | 17.6978432 | 3947.638028 | 0.0045 | 0.996 | 0.141693281 | count | 1 |
| MMP21           | 17.6978431 | 3947.638028 | 0.0045 | 0.996 | 0.141693281 | count | 1 |
| DPPA3           | 17.6978433 | 3947.638132 | 0.0045 | 0.996 | 0.141693281 | count | 1 |

|              |            |             |        |        |             |       |   |
|--------------|------------|-------------|--------|--------|-------------|-------|---|
| LINC00592    | 17.6978431 | 3947.638054 | 0.0045 | 0.996  | 0.141693281 | count | 1 |
| IL23A        | 17.6978431 | 3947.638106 | 0.0045 | 0.996  | 0.141693281 | count | 1 |
| POC1B-GALNT4 | 17.6978431 | 3947.638132 | 0.0045 | 0.996  | 0.141693281 | count | 1 |
| LINC02344    | 17.6978431 | 3947.638106 | 0.0045 | 0.996  | 0.141693281 | count | 1 |
| AL158196.1   | 17.6978431 | 3947.63808  | 0.0045 | 0.996  | 0.141693281 | count | 1 |
| TGM1         | 17.6978431 | 3947.638158 | 0.0045 | 0.996  | 0.141693281 | count | 1 |
| AL358335.2   | 17.6978431 | 3947.63808  | 0.0045 | 0.996  | 0.141693281 | count | 1 |
| AL627171.2   | 17.6978432 | 3947.638002 | 0.0045 | 0.996  | 0.141693281 | count | 1 |
| SYT16        | 17.6978431 | 3947.638158 | 0.0045 | 0.996  | 0.141693281 | count | 1 |
| AC013451.2   | 17.6978432 | 3947.638106 | 0.0045 | 0.996  | 0.141693281 | count | 1 |
| AL583810.1   | 17.6978432 | 3947.638002 | 0.0045 | 0.996  | 0.141693281 | count | 1 |
| AC025040.1   | 17.6978431 | 3947.63808  | 0.0045 | 0.996  | 0.141693281 | count | 1 |
| AC066613.2   | 17.6978431 | 3947.638132 | 0.0045 | 0.996  | 0.141693281 | count | 1 |
| AC025271.4   | 17.6978431 | 3947.638261 | 0.0045 | 0.996  | 0.141693281 | count | 1 |
| AC090907.2   | 17.6978432 | 3947.638158 | 0.0045 | 0.996  | 0.141693281 | count | 1 |
| NPIPB9       | 17.6978431 | 3947.638158 | 0.0045 | 0.996  | 0.141693281 | count | 1 |
| ATP2A1       | 17.6978431 | 3947.637976 | 0.0045 | 0.996  | 0.141693281 | count | 1 |
| AC009097.4   | 17.6978431 | 3947.638183 | 0.0045 | 0.996  | 0.141693281 | count | 1 |
| AC106729.1   | 17.6978431 | 3947.638158 | 0.0045 | 0.996  | 0.141693281 | count | 1 |
| LINC02170    | 17.6978431 | 3947.638106 | 0.0045 | 0.996  | 0.141693281 | count | 1 |
| ATP2C2       | 17.6978431 | 3947.638106 | 0.0045 | 0.996  | 0.141693281 | count | 1 |
| UNC45B       | 17.6978433 | 3947.638132 | 0.0045 | 0.996  | 0.141693281 | count | 1 |
| B4GALNT2     | 17.6978432 | 3947.638002 | 0.0045 | 0.996  | 0.141693281 | count | 1 |
| AC007423.1   | 17.6978432 | 3947.638209 | 0.0045 | 0.996  | 0.141693281 | count | 1 |
| LINC02080    | 17.6978431 | 3947.638158 | 0.0045 | 0.996  | 0.141693281 | count | 1 |
| C17orf99     | 17.6978431 | 3947.638028 | 0.0045 | 0.996  | 0.141693281 | count | 1 |
| LINC01254    | 17.6978431 | 3947.638054 | 0.0045 | 0.996  | 0.141693281 | count | 1 |
| AP001269.2   | 17.6978431 | 3947.63808  | 0.0045 | 0.996  | 0.141693281 | count | 1 |
| AC090125.1   | 17.6978431 | 3947.638235 | 0.0045 | 0.996  | 0.141693281 | count | 1 |
| AL121895.1   | 17.6978432 | 3947.638106 | 0.0045 | 0.996  | 0.141693281 | count | 1 |
| STK4-AS1     | 17.6978431 | 3947.638158 | 0.0045 | 0.996  | 0.141693281 | count | 1 |
| CDH22        | 17.6978431 | 3947.638054 | 0.0045 | 0.996  | 0.141693281 | count | 1 |
| TUBB1        | 17.6978431 | 3947.63808  | 0.0045 | 0.996  | 0.141693281 | count | 1 |
| SMIM24       | 17.6978431 | 3947.638158 | 0.0045 | 0.996  | 0.141693281 | count | 1 |
| TINCR        | 17.6978431 | 3947.638158 | 0.0045 | 0.996  | 0.141693281 | count | 1 |
| RTBDN        | 17.6978431 | 3947.638261 | 0.0045 | 0.996  | 0.141693281 | count | 1 |
| AF038458.2   | 17.6978432 | 3947.638028 | 0.0045 | 0.996  | 0.141693281 | count | 1 |
| DNAAF3       | 17.6978432 | 3947.638028 | 0.0045 | 0.996  | 0.141693281 | count | 1 |
| AC012313.8   | 17.6978432 | 3947.638132 | 0.0045 | 0.996  | 0.141693281 | count | 1 |
| AL031590.1   | 17.6978432 | 3947.637899 | 0.0045 | 0.996  | 0.141693281 | count | 1 |
| TPTE         | 17.6978431 | 3947.638028 | 0.0045 | 0.996  | 0.141693281 | count | 1 |
| AL391335.1   | 17.6978434 | 3947.638287 | 0.0045 | 0.996  | 0.141693281 | count | 1 |
| SLC26A8      | 17.6978434 | 3947.638313 | 0.0045 | 0.996  | 0.141693281 | count | 1 |
| AC134312.5   | 17.7386971 | 1600.443676 | 0.0111 | 0.9912 | 0.141693281 | count | 1 |
| AL353613.1   | 17.7439174 | 1444.32835  | 0.0123 | 0.9902 | 0.141693281 | count | 1 |

|            |            |             |        |        |             |       |   |
|------------|------------|-------------|--------|--------|-------------|-------|---|
| AC026316.5 | 17.7472113 | 2692.623307 | 0.0066 | 0.995  | 0.141693281 | count | 1 |
| AC100847.1 | 17.747214  | 2692.629275 | 0.0066 | 0.995  | 0.141693281 | count | 1 |
| SERPIND1   | 17.7641609 | 1683.124257 | 0.0106 | 0.9916 | 0.141693281 | count | 1 |
| SRCIN1     | 17.7655308 | 3156.012359 | 0.0056 | 0.996  | 0.141693281 | count | 1 |
| ODF3L2     | 17.765531  | 3156.016055 | 0.0056 | 0.996  | 0.141693281 | count | 1 |
| OR52N4     | 17.7655314 | 3156.016072 | 0.0056 | 0.996  | 0.141693281 | count | 1 |
| LINC01095  | 17.765537  | 3156.016038 | 0.0056 | 0.996  | 0.141693281 | count | 1 |
| AL158070.1 | 17.765537  | 3156.016038 | 0.0056 | 0.996  | 0.141693281 | count | 1 |
| LRRTM3     | 17.765537  | 3156.01597  | 0.0056 | 0.996  | 0.141693281 | count | 1 |
| ELN-AS1    | 17.7655373 | 3156.015987 | 0.0056 | 0.996  | 0.141693281 | count | 1 |
| PRR4       | 17.7655373 | 3156.016038 | 0.0056 | 0.996  | 0.141693281 | count | 1 |
| AC004801.6 | 17.7655372 | 3156.015903 | 0.0056 | 0.996  | 0.141693281 | count | 1 |
| AC126773.2 | 17.7655371 | 3156.016055 | 0.0056 | 0.996  | 0.141693281 | count | 1 |
| ERICH4     | 17.7655369 | 3156.015903 | 0.0056 | 0.996  | 0.141693281 | count | 1 |
| WBP2NL     | 17.7655373 | 3156.016055 | 0.0056 | 0.996  | 0.141693281 | count | 1 |
| SHANK3     | 17.7655371 | 3156.016004 | 0.0056 | 0.996  | 0.141693281 | count | 1 |
| AC119403.1 | 17.765538  | 3156.019667 | 0.0056 | 0.996  | 0.141693281 | count | 1 |
| AC135803.1 | 17.7655381 | 3156.019582 | 0.0056 | 0.996  | 0.141693281 | count | 1 |
| AP003680.1 | 17.7655382 | 3156.019734 | 0.0056 | 0.996  | 0.141693281 | count | 1 |
| LINC01894  | 17.7655381 | 3156.019633 | 0.0056 | 0.996  | 0.141693281 | count | 1 |
| AC026904.4 | 17.7655385 | 3156.0197   | 0.0056 | 0.996  | 0.141693281 | count | 1 |
| SYT8       | 17.7655383 | 3156.019683 | 0.0056 | 0.996  | 0.141693281 | count | 1 |
| AL078644.2 | 17.7655392 | 3156.02338  | 0.0056 | 0.996  | 0.141693281 | count | 1 |
| KCNH1      | 17.7655394 | 3156.023312 | 0.0056 | 0.996  | 0.141693281 | count | 1 |
| AC097381.1 | 17.7655392 | 3156.023396 | 0.0056 | 0.996  | 0.141693281 | count | 1 |
| BLM        | 17.7655431 | 3156.015768 | 0.0056 | 0.996  | 0.141693281 | count | 1 |
| SNAP25-AS1 | 17.7655449 | 3156.023278 | 0.0056 | 0.996  | 0.141693281 | count | 1 |
| AC087752.4 | 17.7655452 | 3156.023295 | 0.0056 | 0.996  | 0.141693281 | count | 1 |
| LINC00316  | 17.7655451 | 3156.023278 | 0.0056 | 0.996  | 0.141693281 | count | 1 |
| AC073862.1 | 17.7655476 | 3156.011616 | 0.0056 | 0.996  | 0.141693281 | count | 1 |
| AC093726.2 | 17.7655504 | 3156.022991 | 0.0056 | 0.996  | 0.141693281 | count | 1 |
| BX284668.2 | 17.7655506 | 3156.022856 | 0.0056 | 0.996  | 0.141693281 | count | 1 |
| AC006252.1 | 17.7655505 | 3156.02289  | 0.0056 | 0.996  | 0.141693281 | count | 1 |
| AC008494.3 | 17.7655506 | 3156.022975 | 0.0056 | 0.996  | 0.141693281 | count | 1 |
| WWC1       | 17.7655506 | 3156.022856 | 0.0056 | 0.996  | 0.141693281 | count | 1 |
| AC022087.1 | 17.7655505 | 3156.022941 | 0.0056 | 0.996  | 0.141693281 | count | 1 |
| AC005962.1 | 17.765551  | 3156.022991 | 0.0056 | 0.996  | 0.141693281 | count | 1 |
| ZNF497     | 17.7655505 | 3156.022958 | 0.0056 | 0.996  | 0.141693281 | count | 1 |
| AC005540.1 | 17.7655509 | 3156.022924 | 0.0056 | 0.996  | 0.141693281 | count | 1 |
| LINC02043  | 17.7655509 | 3156.022907 | 0.0056 | 0.996  | 0.141693281 | count | 1 |
| AC098484.2 | 17.7655518 | 3156.026603 | 0.0056 | 0.996  | 0.141693281 | count | 1 |
| LINC00449  | 17.7655524 | 3156.007802 | 0.0056 | 0.996  | 0.141693281 | count | 1 |
| MSTN       | 17.7655536 | 3156.01138  | 0.0056 | 0.996  | 0.141693281 | count | 1 |
| AC078927.1 | 17.7655533 | 3156.011363 | 0.0056 | 0.996  | 0.141693281 | count | 1 |
| AP000229.1 | 17.7655533 | 3156.011363 | 0.0056 | 0.996  | 0.141693281 | count | 1 |

|             |            |             |        |        |             |       |   |
|-------------|------------|-------------|--------|--------|-------------|-------|---|
| C19orf81    | 17.7655573 | 3156.026401 | 0.0056 | 0.996  | 0.141693281 | count | 1 |
| DPYS        | 17.7655592 | 3156.011329 | 0.0056 | 0.996  | 0.141693281 | count | 1 |
| CYP2D6      | 17.7655592 | 3156.011279 | 0.0056 | 0.996  | 0.141693281 | count | 1 |
| AC004477.3  | 17.7655593 | 3156.011312 | 0.0056 | 0.996  | 0.141693281 | count | 1 |
| LINC00843   | 17.8258007 | 2590.071115 | 0.0069 | 0.9945 | 0.141693281 | count | 1 |
| ADRB1       | 17.867124  | 1430.594729 | 0.0125 | 0.99   | 0.141693281 | count | 1 |
| PROK1       | 17.8695621 | 2279.883101 | 0.0078 | 0.9937 | 0.141693281 | count | 1 |
| OVGP1       | 17.869649  | 2179.174816 | 0.0082 | 0.9935 | 0.141693281 | count | 1 |
| SYT10       | 17.8701555 | 2559.321824 | 0.007  | 0.994  | 0.141693281 | count | 1 |
| RCVRN       | 17.8706832 | 2851.053762 | 0.0063 | 0.995  | 0.141693281 | count | 1 |
| GRHL1       | 17.9592217 | 1221.297426 | 0.0147 | 0.9883 | 0.141693282 | count | 1 |
| ADAMTS16    | 17.9762381 | 1347.560189 | 0.0133 | 0.9894 | 0.141693282 | count | 1 |
| SEC14L5     | 17.9788263 | 2192.812747 | 0.0082 | 0.9935 | 0.141693282 | count | 1 |
| AL356356.1  | 17.9801938 | 3000.617614 | 0.006  | 0.995  | 0.141693282 | count | 1 |
| IGF2-AS     | 17.9916161 | 2256.042409 | 0.008  | 0.994  | 0.141693282 | count | 1 |
| VSTM5       | 17.991616  | 2256.042389 | 0.008  | 0.994  | 0.141693282 | count | 1 |
| LINC00683   | 17.9916336 | 2256.047887 | 0.008  | 0.994  | 0.141693282 | count | 1 |
| WDR11-AS1   | 17.9916341 | 2256.04228  | 0.008  | 0.994  | 0.141693282 | count | 1 |
| AC068234.2  | 17.9916387 | 2256.053454 | 0.008  | 0.994  | 0.141693282 | count | 1 |
| AC040170.1  | 17.9916407 | 2256.03849  | 0.008  | 0.994  | 0.141693282 | count | 1 |
| AC016957.2  | 17.9916452 | 2256.049663 | 0.008  | 0.994  | 0.141693282 | count | 1 |
| TSSK3       | 17.9916461 | 2256.044077 | 0.008  | 0.994  | 0.141693282 | count | 1 |
| B3GNT4      | 17.9916462 | 2256.044077 | 0.008  | 0.994  | 0.141693282 | count | 1 |
| AC007566.1  | 17.9916504 | 2256.05527  | 0.008  | 0.994  | 0.141693282 | count | 1 |
| AC123768.2  | 17.9916513 | 2256.049663 | 0.008  | 0.994  | 0.141693282 | count | 1 |
| AC084824.5  | 17.9921098 | 2599.664381 | 0.0069 | 0.994  | 0.141693282 | count | 1 |
| AL035461.2  | 17.99211   | 2599.664393 | 0.0069 | 0.994  | 0.141693282 | count | 1 |
| FAM110D     | 17.992115  | 2599.670811 | 0.0069 | 0.994  | 0.141693282 | count | 1 |
| FGL1        | 17.9921217 | 2599.666441 | 0.0069 | 0.994  | 0.141693282 | count | 1 |
| UPK1B       | 17.9921218 | 2599.666452 | 0.0069 | 0.994  | 0.141693282 | count | 1 |
| ST3GAL5-AS1 | 17.9921226 | 2599.659966 | 0.0069 | 0.994  | 0.141693282 | count | 1 |
| CCM2L       | 17.9927969 | 3177.609495 | 0.0057 | 0.995  | 0.141693282 | count | 1 |
| AL954642.1  | 18.0018115 | 1278.919059 | 0.0141 | 0.9888 | 0.141693282 | count | 1 |
| AC016877.1  | 18.0765972 | 1897.710039 | 0.0095 | 0.9924 | 0.141693282 | count | 1 |
| COL7A1      | 18.0770925 | 2120.649208 | 0.0085 | 0.9932 | 0.141693282 | count | 1 |
| CAV3        | 18.1261928 | 1864.947218 | 0.0097 | 0.9922 | 0.141693282 | count | 1 |
| AL031847.1  | 18.1304908 | 2779.99488  | 0.0065 | 0.9948 | 0.141693282 | count | 1 |
| AC007216.2  | 18.2401427 | 2246.913122 | 0.0081 | 0.9935 | 0.141693282 | count | 1 |
| DDX25       | 18.2401591 | 2246.920195 | 0.0081 | 0.9935 | 0.141693282 | count | 1 |
| AL583839.1  | 18.2401605 | 2246.9148   | 0.0081 | 0.9935 | 0.141693282 | count | 1 |
| JMJD6       | 0.1126471  | 0.1397725   | 0.8059 | 0.42   | 0.141766391 | count | 1 |
| RAB5A       | 0.1041709  | 0.1088782   | 0.9568 | 0.339  | 0.141868901 | count | 1 |
| ERBB2       | 0.1079921  | 0.1422264   | 0.7593 | 0.448  | 0.141918553 | count | 1 |
| GOLIM4      | 0.0997209  | 0.0531359   | 1.8767 | 0.0606 | 0.142068041 | count | 1 |
| AARS2       | 0.3760279  | 0.519169    | 0.7243 | 0.469  | 0.142143001 | count | 1 |

|            |           |           |        |        |             |       |   |
|------------|-----------|-----------|--------|--------|-------------|-------|---|
| CTNS       | 0.1526498 | 0.2735509 | 0.558  | 0.577  | 0.142170069 | count | 1 |
| INO80E     | 0.1121226 | 0.1744599 | 0.6427 | 0.52   | 0.142255905 | count | 1 |
| COL5A3     | 0.1860949 | 0.3308168 | 0.5625 | 0.574  | 0.14227413  | count | 1 |
| MBOAT2     | 0.1234689 | 0.2467999 | 0.5003 | 0.617  | 0.14235649  | count | 1 |
| CBX5       | 0.1018111 | 0.0811669 | 1.2543 | 0.21   | 0.142507458 | count | 1 |
| AC026471.4 | 0.9272049 | 0.7194633 | 1.2887 | 0.198  | 0.142522593 | count | 1 |
| CDC34      | 0.1051321 | 0.1277215 | 0.8231 | 0.41   | 0.142546236 | count | 1 |
| DIP2C      | 0.1181673 | 0.2421802 | 0.4879 | 0.626  | 0.142693026 | count | 1 |
| STX12      | 0.1035169 | 0.0915746 | 1.1304 | 0.258  | 0.142698267 | count | 1 |
| BACH1      | 0.1082338 | 0.1440561 | 0.7513 | 0.453  | 0.142784408 | count | 1 |
| STX18      | 0.1159942 | 0.1703327 | 0.681  | 0.496  | 0.142838637 | count | 1 |
| ZNF84      | 0.1158307 | 0.1858427 | 0.6233 | 0.533  | 0.142910044 | count | 1 |
| ADCY6      | 0.108542  | 0.1533438 | 0.7078 | 0.479  | 0.142920061 | count | 1 |
| SAFB       | 0.1066041 | 0.1255872 | 0.8488 | 0.396  | 0.142928218 | count | 1 |
| LSM14B     | 0.1226414 | 0.1898738 | 0.6459 | 0.518  | 0.142974847 | count | 1 |
| DDX52      | 0.1065381 | 0.1279693 | 0.8325 | 0.405  | 0.143071014 | count | 1 |
| ZNF324     | 0.1267925 | 0.2625713 | 0.4829 | 0.629  | 0.143100816 | count | 1 |
| HNRNPAB    | 0.1014943 | 0.0676835 | 1.4995 | 0.134  | 0.143175153 | count | 1 |
| RPL7L1     | 0.1020243 | 0.0780382 | 1.3074 | 0.191  | 0.143207513 | count | 1 |
| HCLS1      | 0.1817488 | 0.4006561 | 0.4536 | 0.65   | 0.143239115 | count | 1 |
| SUZ12      | 0.105891  | 0.1152422 | 0.9189 | 0.358  | 0.143265333 | count | 1 |
| AP002761.3 | 0.379487  | 0.5808543 | 0.6533 | 0.514  | 0.14333611  | count | 1 |
| FAM81A     | 0.2687108 | 0.5824901 | 0.4613 | 0.645  | 0.143352545 | count | 1 |
| SPIDR      | 0.1200435 | 0.1965339 | 0.6108 | 0.541  | 0.143460516 | count | 1 |
| ZC3H10     | 0.162101  | 0.2806177 | 0.5777 | 0.564  | 0.143543979 | count | 1 |
| SATB1      | 0.1541707 | 0.2389863 | 0.6451 | 0.519  | 0.143563515 | count | 1 |
| CCDC122    | 0.1147994 | 0.2400281 | 0.4783 | 0.632  | 0.14360022  | count | 1 |
| AC013553.3 | 0.6009784 | 0.976888  | 0.6152 | 0.538  | 0.143677259 | count | 1 |
| CBWD2      | 0.1449165 | 0.1827129 | 0.7931 | 0.428  | 0.143852144 | count | 1 |
| NORAD      | 0.1007293 | 0.0502637 | 2.004  | 0.0451 | 0.143879314 | count | 1 |
| TUBB2B     | 0.2499776 | 0.521772  | 0.4791 | 0.632  | 0.143881228 | count | 1 |
| C18orf32   | 0.1248541 | 0.173029  | 0.7216 | 0.471  | 0.143941763 | count | 1 |
| SMARCB1    | 0.1055404 | 0.0875131 | 1.206  | 0.228  | 0.143945843 | count | 1 |
| DHX32      | 0.1205434 | 0.2023681 | 0.5957 | 0.551  | 0.144054282 | count | 1 |
| MRPS16     | 0.1053981 | 0.0899892 | 1.1712 | 0.242  | 0.144086963 | count | 1 |
| ZNF155     | 0.1887951 | 0.4221118 | 0.4473 | 0.655  | 0.144283491 | count | 1 |
| LYAR       | 0.1079641 | 0.10114   | 1.0675 | 0.286  | 0.144312089 | count | 1 |
| CCDC82     | 0.103235  | 0.0860273 | 1.2    | 0.23   | 0.144329664 | count | 1 |
| LCORL      | 0.152789  | 0.2343975 | 0.6518 | 0.515  | 0.144343222 | count | 1 |
| KLC1       | 0.1081801 | 0.1237358 | 0.8743 | 0.382  | 0.144469054 | count | 1 |
| AC067750.1 | 0.1347866 | 0.3223675 | 0.4181 | 0.676  | 0.14457855  | count | 1 |
| AC093627.6 | 0.332389  | 0.3648204 | 0.9111 | 0.362  | 0.144598684 | count | 1 |
| PCNT       | 0.1288426 | 0.1902025 | 0.6774 | 0.498  | 0.144710392 | count | 1 |
| MYD88      | 0.1237166 | 0.2752658 | 0.4494 | 0.653  | 0.144715539 | count | 1 |
| NDUFS8     | 0.1019023 | 0.0577891 | 1.7633 | 0.0779 | 0.144735645 | count | 1 |

|            |           |           |        |        |             |       |   |
|------------|-----------|-----------|--------|--------|-------------|-------|---|
| NRF1       | 0.1959537 | 0.3193293 | 0.6136 | 0.539  | 0.144739076 | count | 1 |
| WDR26      | 0.1180253 | 0.2226441 | 0.5301 | 0.596  | 0.144753929 | count | 1 |
| DPM3       | 0.1049391 | 0.0742509 | 1.4133 | 0.158  | 0.144791764 | count | 1 |
| DERL2      | 0.1043428 | 0.0882124 | 1.1829 | 0.237  | 0.144847933 | count | 1 |
| HMGB2      | 0.1037537 | 0.0860745 | 1.2054 | 0.228  | 0.144964241 | count | 1 |
| CRELD2     | 0.1056375 | 0.088573  | 1.1927 | 0.233  | 0.144982187 | count | 1 |
| PUSL1      | 0.1207201 | 0.2118526 | 0.5698 | 0.569  | 0.145030088 | count | 1 |
| KCTD7      | 0.146141  | 0.2826243 | 0.5171 | 0.605  | 0.145051178 | count | 1 |
| ARHGEF40   | 0.1183166 | 0.1965668 | 0.6019 | 0.547  | 0.145109329 | count | 1 |
| MEX3C      | 0.1292048 | 0.2475366 | 0.522  | 0.602  | 0.145113755 | count | 1 |
| PDCD6      | 0.1022361 | 0.0489191 | 2.0899 | 0.0367 | 0.145275755 | count | 1 |
| RCAN1      | 0.1100815 | 0.1357228 | 0.8111 | 0.417  | 0.145304041 | count | 1 |
| NFAT5      | 0.1074793 | 0.1117717 | 0.9616 | 0.336  | 0.145316771 | count | 1 |
| ADAM22     | 0.2990474 | 0.4735358 | 0.6315 | 0.528  | 0.145479623 | count | 1 |
| ITGAE      | 0.1057573 | 0.1048329 | 1.0088 | 0.313  | 0.145491268 | count | 1 |
| TCP11L1    | 0.1283512 | 0.2144329 | 0.5986 | 0.55   | 0.145505472 | count | 1 |
| PTPN18     | 0.1130246 | 0.150838  | 0.7493 | 0.454  | 0.145651549 | count | 1 |
| HOMEZ      | 0.1645706 | 0.3204997 | 0.5135 | 0.608  | 0.145689355 | count | 1 |
| ANKRD36    | 0.1117869 | 0.1827009 | 0.6119 | 0.541  | 0.145719209 | count | 1 |
| C1orf74    | 0.335226  | 0.7900511 | 0.4243 | 0.671  | 0.145743191 | count | 1 |
| C22orf15   | 0.335226  | 0.8126104 | 0.4125 | 0.68   | 0.145743191 | count | 1 |
| TBC1D30    | 0.335226  | 1.058425  | 0.3167 | 0.751  | 0.145743191 | count | 1 |
| LINC02550  | 0.611364  | 0.7447439 | 0.8209 | 0.412  | 0.145751056 | count | 1 |
| AC092587.1 | 0.611364  | 0.7583495 | 0.8062 | 0.42   | 0.145751056 | count | 1 |
| MAMDC4     | 0.611364  | 1.220886  | 0.5008 | 0.6166 | 0.145751056 | count | 1 |
| ACAP1      | 0.2734658 | 0.348551  | 0.7846 | 0.433  | 0.145755364 | count | 1 |
| TMEM116    | 0.1326617 | 0.3555011 | 0.3732 | 0.709  | 0.145883336 | count | 1 |
| ZNF66      | 0.3357614 | 0.4933477 | 0.6806 | 0.496  | 0.14595902  | count | 1 |
| TEX264     | 0.1057182 | 0.0873588 | 1.2102 | 0.226  | 0.145996605 | count | 1 |
| POLR2M     | 0.1148067 | 0.1413642 | 0.8121 | 0.417  | 0.146010659 | count | 1 |
| NEK4       | 0.1428119 | 0.2237641 | 0.6382 | 0.523  | 0.146058788 | count | 1 |
| EXOSC1     | 0.1086284 | 0.1168027 | 0.93   | 0.352  | 0.146152836 | count | 1 |
| TCTN2      | 0.1684341 | 0.2896772 | 0.5815 | 0.561  | 0.146217856 | count | 1 |
| CERS5      | 0.1117981 | 0.1819607 | 0.6144 | 0.539  | 0.146289221 | count | 1 |
| BCCIP      | 0.1094996 | 0.1073983 | 1.0196 | 0.308  | 0.146359679 | count | 1 |
| AP000254.1 | 0.3884785 | 0.9125675 | 0.4257 | 0.67   | 0.146427438 | count | 1 |
| BX470102.1 | 0.3884785 | 1.080722  | 0.3595 | 0.719  | 0.146427438 | count | 1 |
| DARS-AS1   | 0.3884785 | 1.1489    | 0.3381 | 0.735  | 0.146427438 | count | 1 |
| KCTD17     | 0.1189406 | 0.1739352 | 0.6838 | 0.494  | 0.146448274 | count | 1 |
| ING1       | 0.1090387 | 0.118538  | 0.9199 | 0.358  | 0.14647924  | count | 1 |
| SAFB2      | 0.1104078 | 0.1409428 | 0.7834 | 0.433  | 0.146486261 | count | 1 |
| LACTB      | 0.1089139 | 0.1321274 | 0.8243 | 0.41   | 0.146536129 | count | 1 |
| RBM26      | 0.1088979 | 0.1275478 | 0.8538 | 0.393  | 0.146569239 | count | 1 |
| PLEKHG2    | 0.128269  | 0.2893072 | 0.4434 | 0.658  | 0.146669479 | count | 1 |
| BICRAL     | 0.1212383 | 0.2075818 | 0.5841 | 0.559  | 0.146731691 | count | 1 |

|            |           |           |        |        |             |       |   |
|------------|-----------|-----------|--------|--------|-------------|-------|---|
| CYTH3      | 0.1125098 | 0.1420249 | 0.7922 | 0.428  | 0.146773633 | count | 1 |
| KIF3B      | 0.1148692 | 0.16118   | 0.7127 | 0.476  | 0.146778361 | count | 1 |
| ALG1L2     | 0.1727244 | 0.406085  | 0.4253 | 0.671  | 0.14678805  | count | 1 |
| RETREG3    | 0.124301  | 0.213859  | 0.5812 | 0.561  | 0.146806656 | count | 1 |
| PTHLH      | 0.1139452 | 0.2249338 | 0.5066 | 0.612  | 0.146833644 | count | 1 |
| NDUFS2     | 0.1084525 | 0.0915202 | 1.185  | 0.236  | 0.146906924 | count | 1 |
| KCNK15-AS1 | 0.2396153 | 0.4286342 | 0.559  | 0.576  | 0.146992286 | count | 1 |
| AC010997.5 | 0.1815369 | 0.4480714 | 0.4052 | 0.685  | 0.146996767 | count | 1 |
| PI4K2B     | 0.1924482 | 0.3644589 | 0.528  | 0.598  | 0.146999306 | count | 1 |
| LINC02062  | 0.9682344 | 1.087174  | 0.8906 | 0.373  | 0.147031719 | count | 1 |
| AC007249.2 | 0.9682344 | 1.258894  | 0.7691 | 0.442  | 0.147031719 | count | 1 |
| NFATC3     | 0.1209451 | 0.2336136 | 0.5177 | 0.605  | 0.147055605 | count | 1 |
| U91328.1   | 0.2562461 | 0.4067888 | 0.6299 | 0.529  | 0.147319659 | count | 1 |
| NUDT8      | 0.117176  | 0.1631777 | 0.7181 | 0.473  | 0.147440865 | count | 1 |
| SLC51A     | 0.972121  | 0.7633301 | 1.2735 | 0.203  | 0.147451754 | count | 1 |
| XRCC6      | 0.1044401 | 0.0530247 | 1.9697 | 0.049  | 0.147532047 | count | 1 |
| SLC35A2    | 0.1196101 | 0.1713467 | 0.6981 | 0.485  | 0.147549164 | count | 1 |
| UQCRRS1    | 0.1051972 | 0.0679458 | 1.5483 | 0.122  | 0.147614198 | count | 1 |
| PLCD3      | 0.1128828 | 0.1895925 | 0.5954 | 0.552  | 0.147811595 | count | 1 |
| UBE2W      | 0.1136221 | 0.125467  | 0.9056 | 0.365  | 0.147985732 | count | 1 |
| PRPF18     | 0.1242094 | 0.1711829 | 0.7256 | 0.468  | 0.147997627 | count | 1 |
| LSM12      | 0.1073514 | 0.0892665 | 1.2026 | 0.229  | 0.148023631 | count | 1 |
| RANBP2     | 0.1114896 | 0.1292731 | 0.8624 | 0.389  | 0.148152776 | count | 1 |
| TENM4      | 0.3416026 | 0.5065855 | 0.6743 | 0.5    | 0.148309919 | count | 1 |
| SYVN1      | 0.1309079 | 0.1961727 | 0.6673 | 0.505  | 0.148379797 | count | 1 |
| TMEM45A    | 0.1081986 | 0.0930921 | 1.1623 | 0.245  | 0.148405293 | count | 1 |
| AC016831.1 | 0.2289329 | 0.4879623 | 0.4692 | 0.639  | 0.148438934 | count | 1 |
| SLC12A4    | 0.1161862 | 0.1506316 | 0.7713 | 0.441  | 0.148454609 | count | 1 |
| MRPL18     | 0.1053299 | 0.0628468 | 1.676  | 0.0938 | 0.148553096 | count | 1 |
| DVL1       | 0.1234131 | 0.189266  | 0.6521 | 0.514  | 0.148622498 | count | 1 |
| SMAD5-AS1  | 0.2792124 | 0.6730594 | 0.4148 | 0.678  | 0.148652778 | count | 1 |
| BBIP1      | 0.1099265 | 0.1129034 | 0.9736 | 0.33   | 0.148714171 | count | 1 |
| TMEM199    | 0.1203435 | 0.1921639 | 0.6263 | 0.531  | 0.148725592 | count | 1 |
| NOP58      | 0.1097536 | 0.1021338 | 1.0746 | 0.283  | 0.148755868 | count | 1 |
| S100A9     | 0.1681772 | 0.4322758 | 0.3891 | 0.697  | 0.1488201   | count | 1 |
| CISD2      | 0.1096485 | 0.1056686 | 1.0377 | 0.299  | 0.148873638 | count | 1 |
| RMND5B     | 0.1130493 | 0.1353527 | 0.8352 | 0.404  | 0.148932701 | count | 1 |
| HSPA4      | 0.1086342 | 0.093688  | 1.1595 | 0.246  | 0.14900182  | count | 1 |
| CEP350     | 0.1107186 | 0.128911  | 0.8589 | 0.39   | 0.149230919 | count | 1 |
| ZNF346     | 0.1560906 | 0.4046473 | 0.3857 | 0.7    | 0.149395951 | count | 1 |
| RAB14      | 0.1054547 | 0.0562294 | 1.8754 | 0.0608 | 0.149459026 | count | 1 |
| SNRPA      | 0.108828  | 0.0960203 | 1.1334 | 0.257  | 0.149522303 | count | 1 |
| C12orf45   | 0.1102962 | 0.1260628 | 0.8749 | 0.382  | 0.149534434 | count | 1 |
| EIF4EBP2   | 0.1121341 | 0.1160677 | 0.9661 | 0.334  | 0.149597298 | count | 1 |
| CASP6      | 0.1196946 | 0.1916245 | 0.6246 | 0.532  | 0.149694745 | count | 1 |



|            |           |           |        |        |             |       |   |
|------------|-----------|-----------|--------|--------|-------------|-------|---|
| SUCLA2     | 0.1079255 | 0.0865801 | 1.2465 | 0.213  | 0.149746171 | count | 1 |
| TMCO3      | 0.1084873 | 0.1039253 | 1.0439 | 0.297  | 0.14974874  | count | 1 |
| AL135999.1 | 0.398589  | 0.7669717 | 0.5197 | 0.603  | 0.149886119 | count | 1 |
| CXXC1      | 0.1277445 | 0.2145231 | 0.5955 | 0.552  | 0.149891319 | count | 1 |
| CDC123     | 0.1077727 | 0.079871  | 1.3493 | 0.177  | 0.149987014 | count | 1 |
| CHMP4C     | 0.1215201 | 0.1858768 | 0.6538 | 0.513  | 0.150172189 | count | 1 |
| CA5B       | 0.1187577 | 0.1527097 | 0.7777 | 0.437  | 0.150248429 | count | 1 |
| EPHA3      | 0.1290488 | 0.1384811 | 0.9319 | 0.351  | 0.150389786 | count | 1 |
| WASHC4     | 0.1146342 | 0.1217887 | 0.9413 | 0.347  | 0.150416075 | count | 1 |
| NTN4       | 0.1129984 | 0.0975963 | 1.1578 | 0.247  | 0.150530897 | count | 1 |
| DCAF1      | 0.1473472 | 0.2995951 | 0.4918 | 0.623  | 0.150637969 | count | 1 |
| DCAF8      | 0.1206463 | 0.177825  | 0.6785 | 0.498  | 0.150640561 | count | 1 |
| GUCD1      | 0.1237121 | 0.1489515 | 0.8306 | 0.406  | 0.150734538 | count | 1 |
| UBAC1      | 0.1107393 | 0.1168692 | 0.9475 | 0.343  | 0.15087458  | count | 1 |
| PFKFB2     | 0.2218261 | 0.4421422 | 0.5017 | 0.616  | 0.150912164 | count | 1 |
| UBA3       | 0.1127586 | 0.1195933 | 0.9429 | 0.346  | 0.150969575 | count | 1 |
| SLC22A23   | 1.0057916 | 0.8959685 | 1.1226 | 0.262  | 0.151039211 | count | 1 |
| FBXL19-AS1 | 1.0057916 | 0.9129272 | 1.1017 | 0.271  | 0.151039211 | count | 1 |
| DNAAF2     | 0.1186776 | 0.1692549 | 0.7012 | 0.483  | 0.151096002 | count | 1 |
| ZNF644     | 0.109732  | 0.0851979 | 1.288  | 0.198  | 0.151130551 | count | 1 |
| DYRK1B     | 0.1420792 | 0.2926285 | 0.4855 | 0.627  | 0.151266221 | count | 1 |
| XYLB       | 1.008044  | 0.7344109 | 1.3726 | 0.17   | 0.15127594  | count | 1 |
| ADAM19     | 0.1582762 | 0.3238256 | 0.4888 | 0.625  | 0.151454511 | count | 1 |
| TPM3       | 0.107752  | 0.0730157 | 1.4757 | 0.14   | 0.151534271 | count | 1 |
| CHDH       | 0.6407154 | 0.4872494 | 1.315  | 0.189  | 0.151537808 | count | 1 |
| SP3        | 0.1145457 | 0.1346622 | 0.8506 | 0.395  | 0.151538182 | count | 1 |
| CCDC126    | 0.1204747 | 0.1785032 | 0.6749 | 0.5    | 0.151572666 | count | 1 |
| UCN        | 0.6409956 | 0.6674373 | 0.9604 | 0.337  | 0.151592524 | count | 1 |
| AC087672.2 | 0.6409956 | 0.7077946 | 0.9056 | 0.365  | 0.151592524 | count | 1 |
| GABRB3     | 0.6409956 | 0.7331627 | 0.8743 | 0.382  | 0.151592524 | count | 1 |
| PDIA6      | 0.1064199 | 0.0465416 | 2.2866 | 0.0223 | 0.151624611 | count | 1 |
| PTP4A3     | 0.112535  | 0.1045118 | 1.0768 | 0.282  | 0.151673786 | count | 1 |
| TUBG2      | 0.1182183 | 0.1736005 | 0.681  | 0.496  | 0.151701797 | count | 1 |
| IGHMBP2    | 0.1656375 | 0.2761228 | 0.5999 | 0.549  | 0.151711379 | count | 1 |
| SLC25A28   | 0.1193482 | 0.1275979 | 0.9353 | 0.35   | 0.151762379 | count | 1 |
| C19orf73   | 0.2232118 | 0.5252766 | 0.4249 | 0.671  | 0.1518211   | count | 1 |
| CNIH1      | 0.1078036 | 0.0637278 | 1.6916 | 0.0908 | 0.15186911  | count | 1 |
| TMEM209    | 0.1280148 | 0.2278117 | 0.5619 | 0.574  | 0.152067528 | count | 1 |
| PSMD10     | 0.1179179 | 0.1448426 | 0.8141 | 0.416  | 0.152081726 | count | 1 |
| USP30      | 0.1790991 | 0.263855  | 0.6788 | 0.497  | 0.152085842 | count | 1 |
| TIMMDC1    | 0.1092124 | 0.0819676 | 1.3324 | 0.183  | 0.152192548 | count | 1 |
| SHKBP1     | 0.1188905 | 0.1484125 | 0.8011 | 0.423  | 0.152234286 | count | 1 |
| AC062029.1 | 0.4055363 | 0.7707077 | 0.5262 | 0.599  | 0.152252045 | count | 1 |
| MYOZ3      | 0.286395  | 0.4919386 | 0.5822 | 0.56   | 0.152264202 | count | 1 |
| TXNDC9     | 0.1114903 | 0.1016288 | 1.097  | 0.273  | 0.152297697 | count | 1 |

|            |           |           |        |         |             |       |   |
|------------|-----------|-----------|--------|---------|-------------|-------|---|
| ANKRA2     | 0.1205504 | 0.1561852 | 0.7718 | 0.44    | 0.15230276  | count | 1 |
| KCND1      | 0.3141244 | 0.5227254 | 0.6009 | 0.548   | 0.152342579 | count | 1 |
| ERICH6-AS1 | 0.3516814 | 0.5544719 | 0.6343 | 0.526   | 0.152350616 | count | 1 |
| ZCWPW1     | 0.1386808 | 0.2182681 | 0.6354 | 0.525   | 0.152437479 | count | 1 |
| PPP2R3A    | 0.123624  | 0.2121201 | 0.5828 | 0.56    | 0.15247438  | count | 1 |
| CASP10     | 0.3520175 | 0.603292  | 0.5835 | 0.56    | 0.152485014 | count | 1 |
| C12orf60   | 0.3520175 | 0.610625  | 0.5765 | 0.564   | 0.152485014 | count | 1 |
| AP002433.1 | 0.3520175 | 0.7471432 | 0.4712 | 0.638   | 0.152485014 | count | 1 |
| NDP        | 0.6456334 | 0.7633152 | 0.8458 | 0.398   | 0.15249673  | count | 1 |
| UBE2D3     | 0.1072942 | 0.050097  | 2.1417 | 0.0323  | 0.152558202 | count | 1 |
| GID4       | 0.1414439 | 0.2231614 | 0.6338 | 0.526   | 0.152647594 | count | 1 |
| GNAI1      | 0.1194992 | 0.133491  | 0.8952 | 0.371   | 0.152670618 | count | 1 |
| ZNF681     | 0.2246337 | 0.3814885 | 0.5888 | 0.556   | 0.15275332  | count | 1 |
| AC233266.2 | 1.0223256 | 1.0589875 | 0.9654 | 0.334   | 0.152767621 | count | 1 |
| ZNF398     | 0.1799261 | 0.2783954 | 0.6463 | 0.518   | 0.152772472 | count | 1 |
| RCE1       | 0.125714  | 0.2205762 | 0.5699 | 0.569   | 0.152820103 | count | 1 |
| MRPL48     | 0.1154586 | 0.1446728 | 0.7981 | 0.425   | 0.152829977 | count | 1 |
| AXIN2      | 0.2664077 | 0.4117901 | 0.647  | 0.518   | 0.152875078 | count | 1 |
| AL021368.2 | 0.1391547 | 0.3800465 | 0.3662 | 0.714   | 0.15295325  | count | 1 |
| KCMF1      | 0.1145975 | 0.1127631 | 1.0163 | 0.31    | 0.153087549 | count | 1 |
| ZNF791     | 0.114666  | 0.1403074 | 0.8172 | 0.414   | 0.153108851 | count | 1 |
| ELOA       | 0.114066  | 0.1310106 | 0.8707 | 0.384   | 0.153156766 | count | 1 |
| OAS1       | 0.1214403 | 0.1860896 | 0.6526 | 0.514   | 0.153212761 | count | 1 |
| DAD1       | 0.1067849 | 0.0327801 | 3.2576 | 0.00113 | 0.153257585 | count | 1 |
| RNF145     | 0.1164187 | 0.1495475 | 0.7785 | 0.436   | 0.153260387 | count | 1 |
| HELB       | 0.1733044 | 0.3592159 | 0.4825 | 0.63    | 0.15326597  | count | 1 |
| AZI2       | 0.1117948 | 0.0981468 | 1.1391 | 0.255   | 0.153269097 | count | 1 |
| TXNDC16    | 0.1167346 | 0.177269  | 0.6585 | 0.51    | 0.153372292 | count | 1 |
| CASP9      | 0.1807864 | 0.3276448 | 0.5518 | 0.581   | 0.153486589 | count | 1 |
| PPIL4      | 0.1093059 | 0.064259  | 1.701  | 0.089   | 0.153532237 | count | 1 |
| TGIF1      | 0.1171909 | 0.140437  | 0.8345 | 0.404   | 0.153653274 | count | 1 |
| ZNF189     | 0.1629834 | 0.2874902 | 0.5669 | 0.571   | 0.153812193 | count | 1 |
| AC024060.1 | 1.032559  | 0.9837984 | 1.0496 | 0.294   | 0.153826434 | count | 1 |
| LIN52      | 0.1775119 | 0.2925302 | 0.6068 | 0.544   | 0.153931132 | count | 1 |
| NMT2       | 0.1263709 | 0.1775004 | 0.7119 | 0.477   | 0.153955226 | count | 1 |
| TLL1       | 1.0341975 | 0.958566  | 1.0789 | 0.281   | 0.153995299 | count | 1 |
| AC011405.1 | 1.0341975 | 1.1296772 | 0.9155 | 0.36    | 0.153995299 | count | 1 |
| RASGRP1    | 1.0341975 | 1.1296772 | 0.9155 | 0.36    | 0.153995299 | count | 1 |
| SAP25      | 1.0341975 | 1.2249558 | 0.8443 | 0.399   | 0.153995299 | count | 1 |
| NAPG       | 0.1115145 | 0.096584  | 1.1546 | 0.248   | 0.154101515 | count | 1 |
| AL359915.2 | 0.2382038 | 0.5243504 | 0.4543 | 0.65    | 0.154210102 | count | 1 |
| ALKBH5     | 0.1165145 | 0.1175836 | 0.9909 | 0.322   | 0.154223673 | count | 1 |
| COL10A1    | 0.4978077 | 0.7218837 | 0.6896 | 0.49    | 0.154227217 | count | 1 |
| TMEM9      | 0.1101898 | 0.0761463 | 1.4471 | 0.148   | 0.154309492 | count | 1 |
| COG2       | 0.1228442 | 0.1796138 | 0.6839 | 0.494   | 0.154315472 | count | 1 |

|            |           |           |        |        |             |       |   |
|------------|-----------|-----------|--------|--------|-------------|-------|---|
| LYRM2      | 0.111541  | 0.0913637 | 1.2208 | 0.222  | 0.154491686 | count | 1 |
| NBAS       | 0.121989  | 0.1341562 | 0.9093 | 0.363  | 0.154520811 | count | 1 |
| NEMF       | 0.1110787 | 0.0810265 | 1.3709 | 0.17   | 0.154688463 | count | 1 |
| FDFT1      | 0.1137332 | 0.1232955 | 0.9224 | 0.356  | 0.154705544 | count | 1 |
| TRMT13     | 0.1229115 | 0.1800717 | 0.6826 | 0.495  | 0.154844398 | count | 1 |
| OAS3       | 0.1579283 | 0.4103543 | 0.3849 | 0.7    | 0.15484943  | count | 1 |
| NFIC       | 0.108655  | 0.0457178 | 2.3766 | 0.0175 | 0.15491345  | count | 1 |
| CLK4       | 0.1188273 | 0.1317051 | 0.9022 | 0.367  | 0.15498733  | count | 1 |
| AGFG2      | 0.1869431 | 0.3543009 | 0.5276 | 0.598  | 0.155046328 | count | 1 |
| CCDC97     | 0.1357525 | 0.1981505 | 0.6851 | 0.493  | 0.155154924 | count | 1 |
| MUC12      | 0.1919529 | 0.404708  | 0.4743 | 0.635  | 0.155217045 | count | 1 |
| ZNHIT2     | 0.126697  | 0.2417817 | 0.524  | 0.6    | 0.155329634 | count | 1 |
| ZEB2       | 0.1107806 | 0.0682824 | 1.6224 | 0.105  | 0.155366852 | count | 1 |
| RUVBL1     | 0.1192484 | 0.1308992 | 0.911  | 0.362  | 0.155412517 | count | 1 |
| FBXO42     | 0.1230421 | 0.1881061 | 0.6541 | 0.513  | 0.155436488 | count | 1 |
| RGCC       | 0.1121719 | 0.1642771 | 0.6828 | 0.495  | 0.155481198 | count | 1 |
| YOD1       | 0.1648269 | 0.3906361 | 0.4219 | 0.673  | 0.155522219 | count | 1 |
| AXIN1      | 0.1728732 | 0.2637423 | 0.6555 | 0.512  | 0.155628132 | count | 1 |
| RFC3       | 0.1674699 | 0.3032804 | 0.5522 | 0.581  | 0.155727726 | count | 1 |
| TTI2       | 0.1341733 | 0.2328099 | 0.5763 | 0.564  | 0.155760925 | count | 1 |
| ZNF625     | 0.2935924 | 0.4172545 | 0.7036 | 0.482  | 0.155871863 | count | 1 |
| GATB       | 0.1465213 | 0.361989  | 0.4048 | 0.686  | 0.155941391 | count | 1 |
| TAB2       | 0.1314139 | 0.2148031 | 0.6118 | 0.541  | 0.156077435 | count | 1 |
| ZNF546     | 0.1801412 | 0.2851152 | 0.6318 | 0.528  | 0.156161836 | count | 1 |
| ZNF34      | 0.1246074 | 0.1780289 | 0.6999 | 0.484  | 0.156287487 | count | 1 |
| AFG1L      | 0.4176141 | 0.5588452 | 0.7473 | 0.455  | 0.156344501 | count | 1 |
| JPX        | 0.1155817 | 0.1141812 | 1.0123 | 0.311  | 0.156543796 | count | 1 |
| AC051619.5 | 0.2208837 | 0.3936192 | 0.5612 | 0.575  | 0.156654573 | count | 1 |
| LACTB2     | 0.1172764 | 0.1437826 | 0.8157 | 0.415  | 0.156657013 | count | 1 |
| GPALPP1    | 0.1179991 | 0.1323055 | 0.8919 | 0.373  | 0.15677908  | count | 1 |
| RMC1       | 0.1453408 | 0.2272657 | 0.6395 | 0.523  | 0.156807225 | count | 1 |
| STK16      | 0.1240014 | 0.132386  | 0.9367 | 0.349  | 0.156852574 | count | 1 |
| OAZ3       | 0.2955543 | 0.5831938 | 0.5068 | 0.612  | 0.156853317 | count | 1 |
| CREBBP     | 0.1168392 | 0.1352873 | 0.8636 | 0.388  | 0.156871421 | count | 1 |
| HECTD2     | 0.1242226 | 0.1722124 | 0.7213 | 0.471  | 0.156920949 | count | 1 |
| ZBED1      | 0.1261355 | 0.1558641 | 0.8093 | 0.418  | 0.156944336 | count | 1 |
| PCDHGA11   | 1.06434   | 0.8471399 | 1.2564 | 0.209  | 0.157062633 | count | 1 |
| RNF130     | 0.1124279 | 0.0704872 | 1.595  | 0.111  | 0.157071107 | count | 1 |
| ZSWIM3     | 0.6700929 | 0.5939994 | 1.1281 | 0.259  | 0.157220594 | count | 1 |
| CCDC120    | 0.6701223 | 0.5960313 | 1.1243 | 0.261  | 0.157226235 | count | 1 |
| GLIPR1L1   | 0.6702679 | 0.7952202 | 0.8429 | 0.399  | 0.157254127 | count | 1 |
| BRD9       | 0.1280934 | 0.1422221 | 0.9007 | 0.368  | 0.157347003 | count | 1 |
| GLIPR2     | 0.113462  | 0.0829495 | 1.3678 | 0.171  | 0.157491111 | count | 1 |
| MSH6       | 0.1202529 | 0.1218861 | 0.9866 | 0.324  | 0.157543474 | count | 1 |
| AC040977.1 | 0.671831  | 0.7558498 | 0.8888 | 0.374  | 0.157553407 | count | 1 |

|            |           |           |        |        |             |       |   |
|------------|-----------|-----------|--------|--------|-------------|-------|---|
| ADAP1      | 0.671831  | 0.8640853 | 0.7775 | 0.437  | 0.157553407 | count | 1 |
| AL365205.1 | 0.3647455 | 0.436779  | 0.8351 | 0.404  | 0.15755848  | count | 1 |
| SMIM3      | 0.1172025 | 0.1206204 | 0.9717 | 0.331  | 0.157602311 | count | 1 |
| COMMD2     | 0.1137333 | 0.0901301 | 1.2619 | 0.207  | 0.157700255 | count | 1 |
| MZT1       | 0.1193821 | 0.1253198 | 0.9526 | 0.341  | 0.157733089 | count | 1 |
| PLCB4      | 0.1951702 | 0.2440751 | 0.7996 | 0.424  | 0.157751163 | count | 1 |
| CRAMP1     | 0.2007032 | 0.3191389 | 0.6289 | 0.529  | 0.157767282 | count | 1 |
| TATDN2     | 0.297406  | 0.462507  | 0.643  | 0.52   | 0.157778875 | count | 1 |
| POLR1B     | 0.3261764 | 0.3190201 | 1.0224 | 0.307  | 0.157794608 | count | 1 |
| HIST1H4C   | 0.1106502 | 0.0555859 | 1.9906 | 0.0466 | 0.157808129 | count | 1 |
| LINC00667  | 0.1139177 | 0.0981304 | 1.1609 | 0.246  | 0.15781919  | count | 1 |
| SART3      | 0.1332979 | 0.1657188 | 0.8044 | 0.421  | 0.157834221 | count | 1 |
| ZDHC17     | 0.1225867 | 0.14612   | 0.8389 | 0.402  | 0.157926187 | count | 1 |
| IRAK4      | 0.1210009 | 0.1506949 | 0.803  | 0.422  | 0.157934844 | count | 1 |
| MAPRE1     | 0.1155471 | 0.1036157 | 1.1152 | 0.265  | 0.158041268 | count | 1 |
| AC015813.1 | 0.2584847 | 0.8558598 | 0.302  | 0.763  | 0.158042175 | count | 1 |
| ZNF852     | 0.2981444 | 0.403086  | 0.7397 | 0.46   | 0.158147742 | count | 1 |
| AC012485.3 | 0.512373  | 0.5888637 | 0.8701 | 0.384  | 0.1581585   | count | 1 |
| PSMD3      | 0.1163395 | 0.0840627 | 1.384  | 0.166  | 0.158158857 | count | 1 |
| AC008011.2 | 0.4230772 | 0.516526  | 0.8191 | 0.413  | 0.158186973 | count | 1 |
| PRADC1     | 0.119536  | 0.1167484 | 1.0239 | 0.306  | 0.158476645 | count | 1 |
| STK25      | 0.1154741 | 0.1090686 | 1.0587 | 0.29   | 0.158550348 | count | 1 |
| CCND1      | 0.110886  | 0.0764257 | 1.4509 | 0.147  | 0.15864114  | count | 1 |
| TRMT10B    | 0.1329274 | 0.2542787 | 0.5228 | 0.601  | 0.158753412 | count | 1 |
| HVCN1      | 0.1408223 | 0.2202173 | 0.6395 | 0.523  | 0.158790798 | count | 1 |
| FAM71F2    | 0.5150465 | 0.6760445 | 0.7619 | 0.446  | 0.158876471 | count | 1 |
| ERLEC1     | 0.1117381 | 0.0555296 | 2.0122 | 0.0443 | 0.158896871 | count | 1 |
| PRKRIP1    | 0.1231045 | 0.1348885 | 0.9126 | 0.361  | 0.158897087 | count | 1 |
| XPC        | 0.1182738 | 0.107203  | 1.1033 | 0.27   | 0.158917458 | count | 1 |
| AASS       | 0.1355298 | 0.1971301 | 0.6875 | 0.492  | 0.158957583 | count | 1 |
| SPPL3      | 0.1206151 | 0.1325446 | 0.91   | 0.363  | 0.158969286 | count | 1 |
| CEP192     | 0.1397232 | 0.2291554 | 0.6097 | 0.542  | 0.158979245 | count | 1 |
| TMEM52     | 1.0839071 | 1.132379  | 0.9572 | 0.339  | 0.159016018 | count | 1 |
| RBBP4      | 0.1169906 | 0.1098538 | 1.065  | 0.287  | 0.159252989 | count | 1 |
| HSBP1      | 0.111942  | 0.0493607 | 2.2678 | 0.0234 | 0.15929098  | count | 1 |
| NUFIP1     | 0.1377554 | 0.175962  | 0.7829 | 0.434  | 0.15929856  | count | 1 |
| AL162377.1 | 0.1972637 | 0.3043666 | 0.6481 | 0.517  | 0.159398856 | count | 1 |
| ZNF493     | 0.125247  | 0.1761945 | 0.7108 | 0.477  | 0.159423385 | count | 1 |
| AC027449.1 | 0.5171132 | 0.5391697 | 0.9591 | 0.338  | 0.159430701 | count | 1 |
| CDC40      | 0.1151804 | 0.0795265 | 1.4483 | 0.148  | 0.159484616 | count | 1 |
| AC008035.1 | 1.088674  | 0.8848818 | 1.2303 | 0.219  | 0.159487435 | count | 1 |
| TBCEL      | 0.1744058 | 0.4958084 | 0.3518 | 0.725  | 0.159588795 | count | 1 |
| AKTIP      | 0.1191399 | 0.1063989 | 1.1197 | 0.263  | 0.159693579 | count | 1 |
| AC067838.1 | 0.5185851 | 0.852813  | 0.6081 | 0.543  | 0.159825019 | count | 1 |
| ALKBH2     | 0.1238288 | 0.1364617 | 0.9074 | 0.364  | 0.159828352 | count | 1 |

|            |           |           |        |        |             |       |   |
|------------|-----------|-----------|--------|--------|-------------|-------|---|
| ATP1B1     | 0.1123676 | 0.1025087 | 1.0962 | 0.273  | 0.159884638 | count | 1 |
| SRPRB      | 0.1183809 | 0.1309268 | 0.9042 | 0.366  | 0.159971533 | count | 1 |
| ZNF584     | 0.1633799 | 0.3485131 | 0.4688 | 0.639  | 0.160110818 | count | 1 |
| AL109811.3 | 1.0954617 | 0.812558  | 1.3482 | 0.178  | 0.16015569  | count | 1 |
| TPRG1L     | 0.1208908 | 0.1119457 | 1.0799 | 0.28   | 0.160267564 | count | 1 |
| UFM1       | 0.1141596 | 0.0853833 | 1.337  | 0.181  | 0.160378749 | count | 1 |
| AK5        | 0.1816264 | 0.3408577 | 0.5329 | 0.594  | 0.160469926 | count | 1 |
| CENPQ      | 0.1469523 | 0.2022559 | 0.7266 | 0.468  | 0.160500977 | count | 1 |
| ZER1       | 0.1411155 | 0.2485061 | 0.5679 | 0.57   | 0.160549318 | count | 1 |
| MAX        | 0.1181108 | 0.109119  | 1.0824 | 0.279  | 0.160561999 | count | 1 |
| EXTL2      | 0.1188997 | 0.1162852 | 1.0225 | 0.307  | 0.16056455  | count | 1 |
| FAM216A    | 0.1438081 | 0.1901531 | 0.7563 | 0.45   | 0.160566725 | count | 1 |
| LINC01003  | 0.1418787 | 0.2312372 | 0.6136 | 0.54   | 0.16070217  | count | 1 |
| NACAD      | 0.2268706 | 0.3544563 | 0.6401 | 0.522  | 0.160751371 | count | 1 |
| HSPB2      | 0.1165728 | 0.106355  | 1.0961 | 0.273  | 0.1609169   | count | 1 |
| SETDB1     | 0.1456734 | 0.2502388 | 0.5821 | 0.561  | 0.160936405 | count | 1 |
| CDR1       | 0.3332801 | 0.5005346 | 0.6658 | 0.506  | 0.160993951 | count | 1 |
| TLK1       | 0.1170619 | 0.0928779 | 1.2604 | 0.208  | 0.161101466 | count | 1 |
| SPATA20    | 0.1309342 | 0.1439882 | 0.9093 | 0.363  | 0.161131496 | count | 1 |
| MDH1       | 0.1133081 | 0.050956  | 2.2236 | 0.0262 | 0.161198278 | count | 1 |
| GBP1       | 0.1171691 | 0.1191146 | 0.9837 | 0.325  | 0.161276184 | count | 1 |
| BABAM2     | 0.1212856 | 0.1362069 | 0.8905 | 0.373  | 0.161380362 | count | 1 |
| CD164      | 0.1136665 | 0.0516667 | 2.2    | 0.0279 | 0.161433028 | count | 1 |
| CBX6       | 0.1147068 | 0.067754  | 1.693  | 0.0905 | 0.161455046 | count | 1 |
| GGNBP2     | 0.1151697 | 0.0783353 | 1.4702 | 0.142  | 0.161526499 | count | 1 |
| KYNU       | 0.2823213 | 0.5953381 | 0.4742 | 0.635  | 0.161528993 | count | 1 |
| CCZ1B      | 0.1542167 | 0.2042094 | 0.7552 | 0.45   | 0.161606995 | count | 1 |
| TAS2R14    | 0.2122378 | 0.4832935 | 0.4391 | 0.661  | 0.161658411 | count | 1 |
| PET117     | 0.1365846 | 0.1937247 | 0.705  | 0.481  | 0.161697489 | count | 1 |
| ECM2       | 0.1152015 | 0.0763258 | 1.5093 | 0.131  | 0.161787898 | count | 1 |
| GCK        | 0.2003586 | 0.3657107 | 0.5479 | 0.584  | 0.16183287  | count | 1 |
| RUSC2      | 0.1321128 | 0.2387679 | 0.5533 | 0.58   | 0.161930135 | count | 1 |
| TRAIIP     | 1.115171  | 0.6576398 | 1.6957 | 0.09   | 0.162076179 | count | 1 |
| EXOSC3     | 0.1247159 | 0.1568293 | 0.7952 | 0.427  | 0.162117085 | count | 1 |
| MED19      | 0.1182439 | 0.111526  | 1.0602 | 0.289  | 0.162127602 | count | 1 |
| ELL2       | 0.1321012 | 0.1583478 | 0.8342 | 0.404  | 0.162241313 | count | 1 |
| UBE2B      | 0.1136738 | 0.0430891 | 2.6381 | 0.0084 | 0.162280083 | count | 1 |
| MINDY4     | 0.1526892 | 0.2585228 | 0.5906 | 0.555  | 0.162427134 | count | 1 |
| TIMM21     | 0.1300249 | 0.1783589 | 0.729  | 0.466  | 0.162547745 | count | 1 |
| TIMM44     | 0.1270886 | 0.1351243 | 0.9405 | 0.347  | 0.16268702  | count | 1 |
| TMEM131    | 0.1228917 | 0.1303954 | 0.9425 | 0.346  | 0.162731516 | count | 1 |
| MICAL3     | 0.1566455 | 0.2720614 | 0.5758 | 0.565  | 0.162808984 | count | 1 |
| MITF       | 0.1321596 | 0.139757  | 0.9456 | 0.344  | 0.162941871 | count | 1 |
| HSD17B6    | 0.4375258 | 0.8357934 | 0.5235 | 0.601  | 0.163033977 | count | 1 |
| LINC01004  | 1.1259362 | 0.8794734 | 1.2802 | 0.201  | 0.16311278  | count | 1 |

|            |           |           |        |        |             |       |   |
|------------|-----------|-----------|--------|--------|-------------|-------|---|
| COL4A3BP   | 0.1181786 | 0.1022785 | 1.1555 | 0.248  | 0.163297006 | count | 1 |
| FAM114A1   | 0.1152346 | 0.0582327 | 1.9789 | 0.0479 | 0.163385273 | count | 1 |
| GPAM       | 0.1709735 | 0.2415874 | 0.7077 | 0.479  | 0.163394444 | count | 1 |
| STRIP1     | 0.166843  | 0.2787218 | 0.5986 | 0.549  | 0.163449998 | count | 1 |
| SERINC1    | 0.1152158 | 0.05513   | 2.0899 | 0.0367 | 0.163492022 | count | 1 |
| TDRD1      | 0.3390937 | 0.5631014 | 0.6022 | 0.547  | 0.163604427 | count | 1 |
| ACOT11     | 0.1405133 | 0.4081614 | 0.3443 | 0.731  | 0.163642601 | count | 1 |
| MAPK6      | 0.1302025 | 0.1767089 | 0.7368 | 0.461  | 0.163750846 | count | 1 |
| TMEM54     | 0.1227222 | 0.1195497 | 1.0265 | 0.305  | 0.163760862 | count | 1 |
| AC142472.1 | 0.3808377 | 0.4369438 | 0.8716 | 0.383  | 0.163927315 | count | 1 |
| ZNF571     | 0.162092  | 0.3962471 | 0.4091 | 0.683  | 0.163953519 | count | 1 |
| AC078883.3 | 0.5346794 | 1.162632  | 0.4599 | 0.646  | 0.164114356 | count | 1 |
| PKD2       | 0.11699   | 0.0980005 | 1.1938 | 0.233  | 0.164447356 | count | 1 |
| DGCR6      | 0.1940697 | 0.3613211 | 0.5371 | 0.591  | 0.164491858 | count | 1 |
| NEDD9      | 0.1339738 | 0.1754463 | 0.7636 | 0.445  | 0.164527486 | count | 1 |
| DDRKG1     | 0.1180172 | 0.0827396 | 1.4264 | 0.154  | 0.164695531 | count | 1 |
| TMEM80     | 0.1198726 | 0.1013101 | 1.1832 | 0.237  | 0.164701288 | count | 1 |
| RAD51D     | 0.1628601 | 0.3130014 | 0.5203 | 0.603  | 0.164719059 | count | 1 |
| OTOA       | 1.1431876 | 1.0838064 | 1.0548 | 0.292  | 0.164755787 | count | 1 |
| RHPN2      | 1.1431876 | 1.0838064 | 1.0548 | 0.292  | 0.164755787 | count | 1 |
| AC107952.2 | 1.1431876 | 1.1745916 | 0.9733 | 0.33   | 0.164755787 | count | 1 |
| SIAH1      | 0.122466  | 0.1068301 | 1.1464 | 0.252  | 0.16484746  | count | 1 |
| RPN2       | 0.1164956 | 0.0551158 | 2.1137 | 0.0346 | 0.164849002 | count | 1 |
| NOMO3      | 0.4430755 | 0.8232412 | 0.5382 | 0.59   | 0.164885681 | count | 1 |
| SETD6      | 0.1601142 | 0.2621104 | 0.6109 | 0.541  | 0.164967591 | count | 1 |
| TRPM7      | 0.1248052 | 0.1532134 | 0.8146 | 0.415  | 0.164973191 | count | 1 |
| COA6       | 0.1221628 | 0.1063659 | 1.1485 | 0.251  | 0.16501588  | count | 1 |
| PHKG2      | 0.1383147 | 0.1989359 | 0.6953 | 0.487  | 0.165141635 | count | 1 |
| TCF4       | 0.1159051 | 0.0544911 | 2.127  | 0.0335 | 0.165168333 | count | 1 |
| AK6        | 0.119044  | 0.0872593 | 1.3643 | 0.173  | 0.16539492  | count | 1 |
| CTSB       | 0.1169489 | 0.0687265 | 1.7017 | 0.0889 | 0.165412279 | count | 1 |
| ARHGAP11A  | 0.7139304 | 0.7904548 | 0.9032 | 0.366  | 0.165499115 | count | 1 |
| ZNF415     | 0.1556418 | 0.3258041 | 0.4777 | 0.633  | 0.165529496 | count | 1 |
| STX5       | 0.1231517 | 0.1335954 | 0.9218 | 0.357  | 0.165706868 | count | 1 |
| AL356512.1 | 0.3439247 | 0.5181011 | 0.6638 | 0.507  | 0.165768298 | count | 1 |
| UBE2J2     | 0.1217107 | 0.1036825 | 1.1739 | 0.241  | 0.165792295 | count | 1 |
| SMARCAL1   | 0.150145  | 0.2463613 | 0.6095 | 0.542  | 0.165824452 | count | 1 |
| AP004609.3 | 0.3135776 | 0.4339843 | 0.7226 | 0.47   | 0.16583038  | count | 1 |
| AC012368.1 | 1.1550423 | 0.8720979 | 1.3244 | 0.185  | 0.165871971 | count | 1 |
| ARSI       | 0.3138205 | 0.735612  | 0.4266 | 0.67   | 0.165950885 | count | 1 |
| GINM1      | 0.1167568 | 0.0484319 | 2.4107 | 0.016  | 0.166076984 | count | 1 |
| UQCRC2     | 0.1182989 | 0.0688092 | 1.7192 | 0.0857 | 0.16612454  | count | 1 |
| DNAH11     | 1.158444  | 0.6086561 | 1.9033 | 0.0571 | 0.166190292 | count | 1 |
| SLC9A5     | 0.5425404 | 0.9001431 | 0.6027 | 0.547  | 0.166194601 | count | 1 |
| METTL22    | 0.1660689 | 0.2656047 | 0.6252 | 0.532  | 0.166258922 | count | 1 |

|            |           |           |        |        |             |       |   |
|------------|-----------|-----------|--------|--------|-------------|-------|---|
| FAM234A    | 0.1306275 | 0.1738092 | 0.7516 | 0.452  | 0.166438825 | count | 1 |
| VTA1       | 0.1271015 | 0.1300173 | 0.9776 | 0.328  | 0.166484624 | count | 1 |
| MAP1LC3B   | 0.1174644 | 0.0635438 | 1.8486 | 0.0646 | 0.166485858 | count | 1 |
| UBAP2      | 0.1370602 | 0.2164173 | 0.6333 | 0.527  | 0.166524007 | count | 1 |
| TRIP11     | 0.1188399 | 0.0728328 | 1.6317 | 0.103  | 0.166892837 | count | 1 |
| TAF9B      | 0.1307677 | 0.149364  | 0.8755 | 0.381  | 0.167002952 | count | 1 |
| CAMTA2     | 0.1512753 | 0.2322018 | 0.6515 | 0.515  | 0.167059492 | count | 1 |
| DMXL1      | 0.1250101 | 0.1514089 | 0.8256 | 0.409  | 0.167109558 | count | 1 |
| CDKAL1     | 0.159546  | 0.203539  | 0.7839 | 0.433  | 0.167118415 | count | 1 |
| CCNB1IP1   | 0.1219976 | 0.1129219 | 1.0804 | 0.28   | 0.167130193 | count | 1 |
| HDAC8      | 0.1308883 | 0.1934249 | 0.6767 | 0.499  | 0.167156277 | count | 1 |
| ANAPC10    | 0.1246583 | 0.1194014 | 1.044  | 0.297  | 0.167275718 | count | 1 |
| HYAL2      | 0.138046  | 0.1694703 | 0.8146 | 0.415  | 0.167331109 | count | 1 |
| CCDC157    | 0.2931042 | 0.5371255 | 0.5457 | 0.585  | 0.167360622 | count | 1 |
| WBP1L      | 0.1318785 | 0.1475065 | 0.8941 | 0.371  | 0.167414132 | count | 1 |
| ESYT1      | 0.1294482 | 0.149981  | 0.8631 | 0.388  | 0.167516955 | count | 1 |
| GAS8       | 0.1502991 | 0.2152868 | 0.6981 | 0.485  | 0.167740328 | count | 1 |
| CERS4      | 0.137807  | 0.1879984 | 0.733  | 0.464  | 0.167798483 | count | 1 |
| WDCP       | 0.1677451 | 0.2907464 | 0.5769 | 0.564  | 0.167911061 | count | 1 |
| POLR2L     | 0.1174955 | 0.0427194 | 2.7504 | 0.006  | 0.167923775 | count | 1 |
| CTDSP2     | 0.12299   | 0.120426  | 1.0213 | 0.307  | 0.167937205 | count | 1 |
| GEMIN6     | 0.1304477 | 0.1629693 | 0.8004 | 0.424  | 0.168175171 | count | 1 |
| ANKHD1     | 0.1633528 | 0.3142449 | 0.5198 | 0.603  | 0.168257447 | count | 1 |
| MCM2       | 0.453504  | 0.8277938 | 0.5478 | 0.584  | 0.168350197 | count | 1 |
| SLC25A44   | 0.2089151 | 0.3932054 | 0.5313 | 0.595  | 0.168550829 | count | 1 |
| USPL1      | 0.1518687 | 0.2578985 | 0.5889 | 0.556  | 0.168606326 | count | 1 |
| B4GALT6    | 0.3502888 | 0.652951  | 0.5365 | 0.592  | 0.168611407 | count | 1 |
| LINC00853  | 0.3503399 | 0.7095358 | 0.4938 | 0.622  | 0.168634193 | count | 1 |
| UBN2       | 0.1308955 | 0.1550078 | 0.8444 | 0.398  | 0.168750079 | count | 1 |
| PTPRD      | 0.1276334 | 0.1720529 | 0.7418 | 0.458  | 0.168797965 | count | 1 |
| SREK1      | 0.121908  | 0.1140766 | 1.0687 | 0.285  | 0.16893629  | count | 1 |
| DICER1     | 0.1249539 | 0.1311029 | 0.9531 | 0.341  | 0.168996983 | count | 1 |
| NOXA1      | 0.2776943 | 0.4202592 | 0.6608 | 0.509  | 0.169208171 | count | 1 |
| PHF19      | 0.1290431 | 0.1646373 | 0.7838 | 0.433  | 0.169256849 | count | 1 |
| RCC2       | 0.1918404 | 0.2568095 | 0.747  | 0.455  | 0.169290967 | count | 1 |
| GCHFR      | 0.1256869 | 0.1564035 | 0.8036 | 0.422  | 0.169295476 | count | 1 |
| ZNF710     | 0.4564892 | 0.6037394 | 0.7561 | 0.45   | 0.169338326 | count | 1 |
| SIPA1L3    | 0.2304391 | 0.4151596 | 0.5551 | 0.579  | 0.169341163 | count | 1 |
| CYTL1      | 0.1199559 | 0.4044151 | 0.2966 | 0.7668 | 0.16946225  | count | 1 |
| FAT1       | 0.1253165 | 0.1152647 | 1.0872 | 0.277  | 0.169486244 | count | 1 |
| KLHL24     | 0.1276583 | 0.1467849 | 0.8697 | 0.385  | 0.169662037 | count | 1 |
| AC020765.2 | 0.2051443 | 0.4598531 | 0.4461 | 0.656  | 0.169742768 | count | 1 |
| AC116366.1 | 0.2975698 | 0.4622411 | 0.6438 | 0.52   | 0.169768062 | count | 1 |
| ACSL3      | 0.1218644 | 0.0829197 | 1.4697 | 0.142  | 0.169786164 | count | 1 |
| CPNE3      | 0.1198119 | 0.0532737 | 2.249  | 0.0246 | 0.169863311 | count | 1 |

|              |           |           |        |          |             |       |             |
|--------------|-----------|-----------|--------|----------|-------------|-------|-------------|
| CSNK1G3      | 0.1233585 | 0.1169019 | 1.0552 | 0.291    | 0.169978036 | count | 1           |
| AC079949.2   | 1.2002195 | 1.0570567 | 1.1354 | 0.256    | 0.170030987 | count | 1           |
| AC021546.1   | 1.2002195 | 1.14096   | 1.0519 | 0.293    | 0.170030987 | count | 1           |
| ZHX1-C8orf76 | 1.2002195 | 1.14096   | 1.0519 | 0.293    | 0.170030987 | count | 1           |
| PDE6D        | 0.1324866 | 0.1632627 | 0.8115 | 0.417    | 0.170109493 | count | 1           |
| SSBP2        | 0.1224696 | 0.0748677 | 1.6358 | 0.102    | 0.170274993 | count | 1           |
| LAT          | 0.2414104 | 0.609176  | 0.3963 | 0.692    | 0.170666156 | count | 1           |
| HRH2         | 0.1433891 | 0.1773886 | 0.8083 | 0.419    | 0.170680231 | count | 1           |
| PLEKHA1      | 0.1236928 | 0.1190939 | 1.0386 | 0.299    | 0.17070405  | count | 1           |
| USP32        | 0.2064011 | 0.3206159 | 0.6438 | 0.52     | 0.170754784 | count | 1           |
| EFCAB6       | 0.5600335 | 0.787978  | 0.7107 | 0.477    | 0.170788892 | count | 1           |
| AC005076.1   | 0.3551782 | 0.4700837 | 0.7556 | 0.45     | 0.170789915 | count | 1           |
| EXOC1        | 0.128852  | 0.145048  | 0.8883 | 0.374    | 0.170882185 | count | 1           |
| ZSCAN18      | 0.1253089 | 0.1055324 | 1.1874 | 0.235    | 0.170935855 | count | 1           |
| FLII         | 0.1321516 | 0.1188794 | 1.1116 | 0.266    | 0.171001143 | count | 1           |
| CABIN1       | 0.1276122 | 0.1118005 | 1.1414 | 0.254    | 0.171019093 | count | 1           |
| H3F3B        | 0.1187154 | 0.021717  | 5.4665 | 4.90E-08 | 0.171053772 | count | 0.001149099 |
| SAMD4A       | 0.1396697 | 0.2112714 | 0.6611 | 0.509    | 0.171134363 | count | 1           |
| USP39        | 0.1340852 | 0.1756783 | 0.7632 | 0.445    | 0.171220212 | count | 1           |
| SNX3         | 0.1195138 | 0.0344751 | 3.4667 | 0.000533 | 0.171224733 | count | 1           |
| MRPL46       | 0.1268766 | 0.1154596 | 1.0989 | 0.272    | 0.171252874 | count | 1           |
| CFDP1        | 0.1215124 | 0.0702807 | 1.729  | 0.0839   | 0.171309562 | count | 1           |
| SON          | 0.1200132 | 0.0511865 | 2.3446 | 0.0191   | 0.171804857 | count | 1           |
| RNF217-AS1   | 0.3578859 | 0.5475764 | 0.6536 | 0.513    | 0.171994199 | count | 1           |
| BAK1         | 0.1586769 | 0.3567135 | 0.4448 | 0.656    | 0.172110428 | count | 1           |
| CYB5RL       | 0.565103  | 0.6242079 | 0.9053 | 0.365    | 0.172111319 | count | 1           |
| EDNRB        | 0.1672986 | 0.2489296 | 0.6721 | 0.502    | 0.172263018 | count | 1           |
| PUS10        | 0.219795  | 0.3706478 | 0.593  | 0.553    | 0.172317632 | count | 1           |
| TADA2A       | 0.1445599 | 0.2195405 | 0.6585 | 0.51     | 0.172542391 | count | 1           |
| LRP8         | 0.3272232 | 0.4902821 | 0.6674 | 0.505    | 0.172579848 | count | 1           |
| AP001627.1   | 0.753023  | 1.0683528 | 0.7048 | 0.481    | 0.172680048 | count | 1           |
| AC139795.2   | 0.753023  | 1.1689638 | 0.6442 | 0.519    | 0.172680048 | count | 1           |
| AC104109.2   | 0.753023  | 1.1727489 | 0.6421 | 0.521    | 0.172680048 | count | 1           |
| AC092687.3   | 0.753023  | 1.21119   | 0.6217 | 0.534    | 0.172680048 | count | 1           |
| CPA1         | 0.753023  | 1.21119   | 0.6217 | 0.534    | 0.172680048 | count | 1           |
| C11orf91     | 0.753023  | 1.30855   | 0.5755 | 0.565    | 0.172680048 | count | 1           |
| SCN2A        | 0.3595891 | 0.6298129 | 0.5709 | 0.568    | 0.172750935 | count | 1           |
| IFFO1        | 0.1452228 | 0.1563528 | 0.9288 | 0.353    | 0.172846284 | count | 1           |
| NSL1         | 0.1250996 | 0.0908415 | 1.3771 | 0.169    | 0.172894332 | count | 1           |
| MED16        | 0.1470775 | 0.1826526 | 0.8052 | 0.421    | 0.172948911 | count | 1           |
| CPNE8        | 0.1291538 | 0.1050776 | 1.2291 | 0.219    | 0.173007027 | count | 1           |
| GCH1         | 0.7549867 | 0.6286829 | 1.2009 | 0.23     | 0.173035792 | count | 1           |
| NAA15        | 0.1374607 | 0.1304052 | 1.0541 | 0.292    | 0.173078117 | count | 1           |
| NXT1         | 0.1257676 | 0.0895149 | 1.405  | 0.16     | 0.173207087 | count | 1           |
| AC018638.7   | 0.4045468 | 0.5915995 | 0.6838 | 0.494    | 0.173217597 | count | 1           |



|             |           |           |        |         |             |       |   |
|-------------|-----------|-----------|--------|---------|-------------|-------|---|
| SYT1        | 1.2391253 | 1.1875238 | 1.0435 | 0.297   | 0.173494662 | count | 1 |
| WDR41       | 0.1317701 | 0.1416475 | 0.9303 | 0.352   | 0.173621435 | count | 1 |
| GRAMD2B     | 0.1309107 | 0.1510111 | 0.8669 | 0.386   | 0.173697332 | count | 1 |
| LPAR1       | 0.1359196 | 0.2419089 | 0.5619 | 0.574   | 0.173747448 | count | 1 |
| ITFG1       | 0.12791   | 0.0951554 | 1.3442 | 0.179   | 0.174476663 | count | 1 |
| RBM15       | 0.1880684 | 0.4132887 | 0.4551 | 0.649   | 0.174494818 | count | 1 |
| SMG6        | 0.1287648 | 0.1313209 | 0.9805 | 0.327   | 0.174567248 | count | 1 |
| NUMA1       | 0.127599  | 0.1029536 | 1.2394 | 0.215   | 0.174568653 | count | 1 |
| MRPL9       | 0.1276529 | 0.0953287 | 1.3391 | 0.181   | 0.174642247 | count | 1 |
| RTL5        | 0.1764709 | 0.3097695 | 0.5697 | 0.569   | 0.174656407 | count | 1 |
| PCSK1N      | 1.252675  | 0.7167504 | 1.7477 | 0.0806  | 0.174675785 | count | 1 |
| YWHAZ       | 0.1224765 | 0.044734  | 2.7379 | 0.00621 | 0.174694019 | count | 1 |
| RFT1        | 0.1945406 | 0.2450519 | 0.7939 | 0.427   | 0.174702091 | count | 1 |
| HAUS5       | 0.2475547 | 0.3228544 | 0.7668 | 0.443   | 0.174841149 | count | 1 |
| KCNN3       | 1.2550742 | 0.9370972 | 1.3393 | 0.181   | 0.174883584 | count | 1 |
| CPXM1       | 1.2550742 | 1.1255899 | 1.115  | 0.265   | 0.174883584 | count | 1 |
| AC010997.4  | 1.2550742 | 1.284468  | 0.9771 | 0.329   | 0.174883584 | count | 1 |
| THUMPDI     | 0.1254519 | 0.0761553 | 1.6473 | 0.0996  | 0.17498286  | count | 1 |
| SNRK        | 0.1356715 | 0.2071945 | 0.6548 | 0.513   | 0.17521393  | count | 1 |
| CWC22       | 0.1293416 | 0.0920779 | 1.4047 | 0.16    | 0.175242767 | count | 1 |
| KDEL2       | 0.1230845 | 0.0489585 | 2.5141 | 0.012   | 0.175333612 | count | 1 |
| WDR6        | 0.1428711 | 0.2024297 | 0.7058 | 0.48    | 0.175384229 | count | 1 |
| NIT1        | 0.1352034 | 0.1297774 | 1.0418 | 0.298   | 0.175397528 | count | 1 |
| DNAJC27-AS1 | 0.3082139 | 0.3397734 | 0.9071 | 0.364   | 0.175488273 | count | 1 |
| CYBC1       | 0.131764  | 0.1154628 | 1.1412 | 0.254   | 0.175539793 | count | 1 |
| MAPK8IP1    | 0.2596559 | 0.3269794 | 0.7941 | 0.427   | 0.175566841 | count | 1 |
| RMND5A      | 0.1498254 | 0.2004447 | 0.7475 | 0.455   | 0.175583356 | count | 1 |
| PRPF38B     | 0.1259117 | 0.1030145 | 1.2223 | 0.222   | 0.175653838 | count | 1 |
| FAM174B     | 0.3336284 | 0.5095474 | 0.6548 | 0.513   | 0.175733941 | count | 1 |
| NUP155      | 0.1552971 | 0.2454055 | 0.6328 | 0.527   | 0.175748381 | count | 1 |
| BCL9        | 0.1818247 | 0.2801843 | 0.6489 | 0.516   | 0.175773189 | count | 1 |
| LINC00092   | 0.2246346 | 0.3895104 | 0.5767 | 0.564   | 0.17599261  | count | 1 |
| TRMT12      | 0.1778731 | 0.2570949 | 0.6919 | 0.489   | 0.176020687 | count | 1 |
| GTF2E2      | 0.1371715 | 0.1608545 | 0.8528 | 0.394   | 0.176097567 | count | 1 |
| ZNF225      | 0.1899536 | 0.4913898 | 0.3866 | 0.699   | 0.176207894 | count | 1 |
| USP38       | 0.1962861 | 0.290537  | 0.6756 | 0.499   | 0.176234205 | count | 1 |
| ZBTB25      | 0.1451466 | 0.2292766 | 0.6331 | 0.527   | 0.176281153 | count | 1 |
| TOPORS      | 0.1296773 | 0.113854  | 1.139  | 0.255   | 0.176345542 | count | 1 |
| FAM133A     | 0.1565788 | 0.4200983 | 0.3727 | 0.709   | 0.176375165 | count | 1 |
| ACD         | 0.1416212 | 0.1599204 | 0.8856 | 0.376   | 0.176393519 | count | 1 |
| CA11        | 0.1616895 | 0.2445192 | 0.6613 | 0.508   | 0.176406582 | count | 1 |
| NFRKB       | 0.1449619 | 0.2089843 | 0.6936 | 0.488   | 0.176451363 | count | 1 |
| PRDX3       | 0.1244599 | 0.0598642 | 2.079  | 0.0377  | 0.176456987 | count | 1 |
| NFASC       | 0.1527455 | 0.2450751 | 0.6233 | 0.533   | 0.176475112 | count | 1 |
| MRPL12      | 0.1291001 | 0.1052066 | 1.2271 | 0.22    | 0.176541475 | count | 1 |

|            |           |           |        |        |             |       |   |
|------------|-----------|-----------|--------|--------|-------------|-------|---|
| ANGEL2     | 0.1415262 | 0.1529628 | 0.9252 | 0.355  | 0.176563077 | count | 1 |
| EZH2       | 1.2750123 | 0.8561842 | 1.4892 | 0.137  | 0.176594962 | count | 1 |
| AC006206.2 | 0.4133459 | 0.8895614 | 0.4647 | 0.642  | 0.176637174 | count | 1 |
| AC008073.3 | 0.4133459 | 1.0824665 | 0.3819 | 0.703  | 0.176637174 | count | 1 |
| DIMT1      | 0.1329413 | 0.1135906 | 1.1704 | 0.242  | 0.176841302 | count | 1 |
| CREBRF     | 0.1266885 | 0.089131  | 1.4214 | 0.155  | 0.176956425 | count | 1 |
| TMEM108    | 0.241218  | 0.3255402 | 0.741  | 0.459  | 0.176974201 | count | 1 |
| AC107068.1 | 0.4801029 | 0.7433657 | 0.6459 | 0.518  | 0.177097813 | count | 1 |
| UMPS       | 0.1465748 | 0.1854055 | 0.7906 | 0.429  | 0.177179257 | count | 1 |
| GGA1       | 0.1449517 | 0.1916076 | 0.7565 | 0.449  | 0.177197574 | count | 1 |
| GJA4       | 0.127615  | 0.1164791 | 1.0956 | 0.273  | 0.177208145 | count | 1 |
| TARS       | 0.1318782 | 0.1401741 | 0.9408 | 0.347  | 0.177216023 | count | 1 |
| FAM122C    | 0.1835485 | 0.4028266 | 0.4557 | 0.649  | 0.177408962 | count | 1 |
| PJVK       | 0.4812007 | 0.5534454 | 0.8695 | 0.385  | 0.177456094 | count | 1 |
| CERCAM     | 0.1294651 | 0.0855233 | 1.5138 | 0.13   | 0.177588563 | count | 1 |
| APOBEC3H   | 0.5865114 | 0.9018653 | 0.6503 | 0.516  | 0.177651519 | count | 1 |
| CDH5       | 0.4161484 | 0.477061  | 0.8723 | 0.383  | 0.177723077 | count | 1 |
| MKRN1      | 0.1370079 | 0.1185977 | 1.1552 | 0.248  | 0.177728774 | count | 1 |
| SYPL1      | 0.1255849 | 0.056588  | 2.2193 | 0.0265 | 0.177771792 | count | 1 |
| B3GALT6    | 0.148997  | 0.1757836 | 0.8476 | 0.397  | 0.177797363 | count | 1 |
| STX16      | 0.1390614 | 0.1880361 | 0.7395 | 0.46   | 0.177941509 | count | 1 |
| PPP6R2     | 0.1572743 | 0.182287  | 0.8628 | 0.388  | 0.177963061 | count | 1 |
| AC009318.2 | 1.2912672 | 1.1459325 | 1.1268 | 0.26   | 0.177969899 | count | 1 |
| MAGT1      | 0.1313365 | 0.0969394 | 1.3548 | 0.176  | 0.177992539 | count | 1 |
| AKR1A1     | 0.1259825 | 0.0576989 | 2.1834 | 0.0291 | 0.178034533 | count | 1 |
| SRSF1      | 0.1319544 | 0.1132982 | 1.1647 | 0.244  | 0.178267966 | count | 1 |
| RAB24      | 0.2157902 | 0.4264634 | 0.506  | 0.613  | 0.178303797 | count | 1 |
| LSM6       | 0.1282832 | 0.0813532 | 1.5769 | 0.115  | 0.17830907  | count | 1 |
| NUP62      | 0.1475501 | 0.1924546 | 0.7667 | 0.443  | 0.178349702 | count | 1 |
| CTSO       | 0.1339207 | 0.1102077 | 1.2152 | 0.224  | 0.178404168 | count | 1 |
| SNAPC1     | 0.1340315 | 0.1144233 | 1.1714 | 0.242  | 0.178464234 | count | 1 |
| MVD        | 0.1530514 | 0.1916424 | 0.7986 | 0.425  | 0.178731894 | count | 1 |
| NEIL2      | 0.1620548 | 0.18899   | 0.8575 | 0.391  | 0.178827258 | count | 1 |
| DPH6-DT    | 0.4191788 | 0.6987682 | 0.5999 | 0.549  | 0.178895544 | count | 1 |
| TXNRD2     | 0.1460503 | 0.1985804 | 0.7355 | 0.462  | 0.178900626 | count | 1 |
| AC092171.5 | 0.4857122 | 0.7234592 | 0.6714 | 0.502  | 0.178926209 | count | 1 |
| CERS3-AS1  | 0.4857122 | 0.8960433 | 0.5421 | 0.588  | 0.178926209 | count | 1 |
| CNPY4      | 0.1347026 | 0.1143746 | 1.1777 | 0.239  | 0.178994352 | count | 1 |
| SLC52A2    | 0.1359018 | 0.1347808 | 1.0083 | 0.313  | 0.179046146 | count | 1 |
| ACBD3      | 0.1271321 | 0.0792975 | 1.6032 | 0.109  | 0.179097397 | count | 1 |
| TBCE       | 0.2538685 | 0.5192174 | 0.4889 | 0.625  | 0.179122044 | count | 1 |
| TCIRG1     | 0.1431453 | 0.1532062 | 0.9343 | 0.35   | 0.179134828 | count | 1 |
| RNASEK     | 0.1463033 | 0.1788393 | 0.8181 | 0.413  | 0.17920847  | count | 1 |
| DLG4       | 0.1933079 | 0.4818813 | 0.4012 | 0.688  | 0.179254052 | count | 1 |
| SCAI       | 0.1687832 | 0.2879001 | 0.5863 | 0.558  | 0.179318492 | count | 1 |

|            |           |           |        |          |             |       |   |
|------------|-----------|-----------|--------|----------|-------------|-------|---|
| IQCG       | 0.1776143 | 0.248426  | 0.715  | 0.475    | 0.179401918 | count | 1 |
| GSTCD      | 0.279059  | 0.3276289 | 0.8518 | 0.394    | 0.179406807 | count | 1 |
| ZNF365     | 0.1881615 | 0.4414106 | 0.4263 | 0.67     | 0.179504164 | count | 1 |
| APOBEC3F   | 0.2122709 | 0.4184675 | 0.5073 | 0.612    | 0.179507181 | count | 1 |
| LARP6      | 0.1282183 | 0.0785572 | 1.6322 | 0.103    | 0.179515921 | count | 1 |
| UBR4       | 0.1398734 | 0.1415114 | 0.9884 | 0.323    | 0.179550136 | count | 1 |
| HNRNPH2    | 0.132659  | 0.1033086 | 1.2841 | 0.199    | 0.179561663 | count | 1 |
| LINC00685  | 0.1533084 | 0.2927239 | 0.5237 | 0.6      | 0.179629726 | count | 1 |
| AC016876.1 | 0.1489953 | 0.1825807 | 0.8161 | 0.415    | 0.179648981 | count | 1 |
| NUDT15     | 0.1420637 | 0.1642989 | 0.8647 | 0.387    | 0.179817008 | count | 1 |
| DCLRE1A    | 0.4887958 | 0.4569628 | 1.0697 | 0.285    | 0.179928918 | count | 1 |
| HSD17B8    | 0.1521274 | 0.2041293 | 0.7453 | 0.456    | 0.179947059 | count | 1 |
| AC092279.1 | 0.4889095 | 0.5405695 | 0.9044 | 0.366    | 0.179965859 | count | 1 |
| C11orf80   | 0.4221363 | 0.4398142 | 0.9598 | 0.337    | 0.18003804  | count | 1 |
| PIK3CB     | 0.1542264 | 0.2880515 | 0.5354 | 0.592    | 0.180091869 | count | 1 |
| TAF1A-AS1  | 0.3763383 | 0.6552146 | 0.5744 | 0.566    | 0.180159983 | count | 1 |
| PHTF1      | 0.1616222 | 0.2215445 | 0.7295 | 0.466    | 0.180237862 | count | 1 |
| NPAS2      | 0.4228661 | 0.452253  | 0.935  | 0.35     | 0.180319697 | count | 1 |
| CARMIL1    | 0.1360748 | 0.1122409 | 1.2123 | 0.225    | 0.180330819 | count | 1 |
| CLN6       | 0.4229162 | 0.6610419 | 0.6398 | 0.522    | 0.180339031 | count | 1 |
| MTFR1L     | 0.1323825 | 0.0988772 | 1.3389 | 0.181    | 0.180342546 | count | 1 |
| 11-Sep     | 0.1273507 | 0.063548  | 2.004  | 0.0451   | 0.180347396 | count | 1 |
| FAM69B     | 1.322376  | 0.7430719 | 1.7796 | 0.0752   | 0.180551105 | count | 1 |
| NIT2       | 0.1310237 | 0.0995284 | 1.3164 | 0.188    | 0.180636729 | count | 1 |
| ACTR8      | 0.1518872 | 0.2609175 | 0.5821 | 0.561    | 0.180714801 | count | 1 |
| CCDC137    | 0.1402186 | 0.1603805 | 0.8743 | 0.382    | 0.180715546 | count | 1 |
| NDUFAF4    | 0.1361073 | 0.134985  | 1.0083 | 0.313    | 0.180854904 | count | 1 |
| YLPM1      | 0.1479969 | 0.2289559 | 0.6464 | 0.518    | 0.180894856 | count | 1 |
| MAP2K3     | 0.1416134 | 0.1851442 | 0.7649 | 0.444    | 0.180990576 | count | 1 |
| RNF135     | 0.1516996 | 0.1831787 | 0.8282 | 0.408    | 0.180996844 | count | 1 |
| TBRG1      | 0.1320193 | 0.0992925 | 1.3296 | 0.184    | 0.181014338 | count | 1 |
| VPS33B     | 0.378584  | 0.4298635 | 0.8807 | 0.379    | 0.181148886 | count | 1 |
| ZNF30      | 0.6003822 | 0.5884194 | 1.0203 | 0.308    | 0.181202786 | count | 1 |
| SPRTN      | 0.1568918 | 0.185992  | 0.8435 | 0.399    | 0.181220342 | count | 1 |
| CDK16      | 0.155224  | 0.2075638 | 0.7478 | 0.455    | 0.181246365 | count | 1 |
| ZNF471     | 0.1652223 | 0.3523528 | 0.4689 | 0.639    | 0.181266427 | count | 1 |
| MIF        | 0.1274621 | 0.0498548 | 2.5567 | 0.0106   | 0.181273691 | count | 1 |
| KRIT1      | 0.1309623 | 0.1123639 | 1.1655 | 0.244    | 0.181302595 | count | 1 |
| DENND4B    | 0.2145114 | 0.3526697 | 0.6083 | 0.543    | 0.181350311 | count | 1 |
| EIF1B      | 0.1270698 | 0.043548  | 2.9179 | 0.003545 | 0.181352215 | count | 1 |
| SEC24B     | 0.1475083 | 0.1901431 | 0.7758 | 0.438    | 0.181395237 | count | 1 |
| ADAT2      | 0.2254806 | 0.362921  | 0.6213 | 0.534    | 0.181509012 | count | 1 |
| NPM2       | 0.2476884 | 0.4914298 | 0.504  | 0.614    | 0.181543052 | count | 1 |
| ZC2HC1A    | 0.1318831 | 0.0855371 | 1.5418 | 0.123    | 0.181614224 | count | 1 |
| THSD1      | 0.2690228 | 0.4449062 | 0.6047 | 0.545    | 0.181619891 | count | 1 |

|            |           |           |        |        |             |       |   |
|------------|-----------|-----------|--------|--------|-------------|-------|---|
| NUDT7      | 0.1391129 | 0.1733008 | 0.8027 | 0.422  | 0.181620518 | count | 1 |
| PATL1      | 0.1675664 | 0.2859451 | 0.586  | 0.558  | 0.181631196 | count | 1 |
| ZNF200     | 0.1858367 | 0.3779879 | 0.4916 | 0.623  | 0.181720988 | count | 1 |
| KDM5D      | 0.145461  | 0.2551123 | 0.5702 | 0.569  | 0.18173232  | count | 1 |
| C21orf58   | 0.2828826 | 0.4986732 | 0.5673 | 0.571  | 0.181745086 | count | 1 |
| GCN1       | 0.180094  | 0.2685099 | 0.6707 | 0.502  | 0.181865454 | count | 1 |
| PRDM10     | 0.6030212 | 0.6218401 | 0.9697 | 0.332  | 0.181875002 | count | 1 |
| AC068870.2 | 0.6030212 | 0.7244465 | 0.8324 | 0.405  | 0.181875002 | count | 1 |
| TYK2       | 0.2260902 | 0.3505038 | 0.645  | 0.519  | 0.181984653 | count | 1 |
| AC079315.1 | 1.3415695 | 1.1554045 | 1.1611 | 0.246  | 0.182111202 | count | 1 |
| CADM3-AS1  | 1.3415695 | 1.2145885 | 1.1045 | 0.269  | 0.182111202 | count | 1 |
| UBA7       | 0.1642101 | 0.250859  | 0.6546 | 0.513  | 0.182151249 | count | 1 |
| IFT57      | 0.1303752 | 0.0694395 | 1.8775 | 0.0605 | 0.182213912 | count | 1 |
| LINC01554  | 0.4958979 | 1.0091784 | 0.4914 | 0.623  | 0.182231785 | count | 1 |
| LRRC37A2   | 0.4280116 | 0.3073393 | 1.3926 | 0.164  | 0.182302551 | count | 1 |
| GPN1       | 0.1492055 | 0.1970576 | 0.7572 | 0.449  | 0.182361951 | count | 1 |
| MISP3      | 0.1718726 | 0.2876521 | 0.5975 | 0.55   | 0.182555607 | count | 1 |
| MAPKAPK5   | 0.1494125 | 0.1818886 | 0.8215 | 0.411  | 0.182613205 | count | 1 |
| CLU        | 0.126701  | 0.0568155 | 2.23   | 0.0258 | 0.182640163 | count | 1 |
| DTX3       | 0.1401302 | 0.1601701 | 0.8749 | 0.382  | 0.182660982 | count | 1 |
| SLC26A10   | 0.4289829 | 0.8630915 | 0.497  | 0.619  | 0.182676264 | count | 1 |
| WWC3       | 0.1410579 | 0.1526322 | 0.9242 | 0.355  | 0.182800942 | count | 1 |
| ATG4D      | 0.1709094 | 0.252225  | 0.6776 | 0.498  | 0.182814648 | count | 1 |
| AL139274.2 | 0.1709284 | 0.6034509 | 0.2833 | 0.777  | 0.1828347   | count | 1 |
| EIF4G1     | 0.1341311 | 0.1254573 | 1.0691 | 0.285  | 0.182987793 | count | 1 |
| C7orf25    | 0.3485833 | 0.6112547 | 0.5703 | 0.569  | 0.183063012 | count | 1 |
| ZFP2       | 0.3485833 | 0.6221139 | 0.5603 | 0.575  | 0.183063012 | count | 1 |
| SRF        | 0.1518541 | 0.1704213 | 0.8911 | 0.373  | 0.183069977 | count | 1 |
| TGFBR1     | 0.1347192 | 0.1438818 | 0.9363 | 0.349  | 0.183234749 | count | 1 |
| EXOC2      | 0.1834291 | 0.2576424 | 0.712  | 0.477  | 0.183343061 | count | 1 |
| LTBP3      | 0.1297744 | 0.0654444 | 1.983  | 0.0474 | 0.183388854 | count | 1 |
| OPHN1      | 0.1726736 | 0.2254249 | 0.766  | 0.444  | 0.183394623 | count | 1 |
| PPARD      | 0.1835262 | 0.2984232 | 0.615  | 0.539  | 0.183438453 | count | 1 |
| PCID2      | 0.1349933 | 0.0961005 | 1.4047 | 0.16   | 0.183458804 | count | 1 |
| BRCA1      | 0.2083148 | 0.4184102 | 0.4979 | 0.619  | 0.183469986 | count | 1 |
| ZSWIM6     | 0.171547  | 0.3252253 | 0.5275 | 0.598  | 0.183487471 | count | 1 |
| SAT2       | 0.1303316 | 0.06902   | 1.8883 | 0.0591 | 0.18353591  | count | 1 |
| DCLK2      | 0.1415257 | 0.2495747 | 0.5671 | 0.571  | 0.18356415  | count | 1 |
| C6orf89    | 0.1332911 | 0.0950449 | 1.4024 | 0.161  | 0.18366942  | count | 1 |
| WDR91      | 0.1952915 | 0.3388732 | 0.5763 | 0.564  | 0.183678176 | count | 1 |
| TIGD4      | 0.2724904 | 0.5992942 | 0.4547 | 0.649  | 0.18385547  | count | 1 |
| KIF2A      | 0.133206  | 0.099751  | 1.3354 | 0.182  | 0.184026592 | count | 1 |
| CWF19L2    | 0.1331732 | 0.1049541 | 1.2689 | 0.205  | 0.184111033 | count | 1 |
| MAP1S      | 0.1535875 | 0.2587409 | 0.5936 | 0.553  | 0.18421196  | count | 1 |
| MTA2       | 0.1807278 | 0.2679298 | 0.6745 | 0.5    | 0.184221476 | count | 1 |

|            |           |           |        |        |             |       |   |
|------------|-----------|-----------|--------|--------|-------------|-------|---|
| PYCARD     | 0.1364204 | 0.1245057 | 1.0957 | 0.273  | 0.184224642 | count | 1 |
| KRR1       | 0.1314865 | 0.0694109 | 1.8943 | 0.0583 | 0.184351609 | count | 1 |
| RETREG2    | 0.1378282 | 0.1269214 | 1.0859 | 0.278  | 0.184434982 | count | 1 |
| GOLGA1     | 0.1533804 | 0.1777612 | 0.8628 | 0.388  | 0.184436631 | count | 1 |
| SLC3A2     | 0.1317536 | 0.075027  | 1.7561 | 0.0792 | 0.184459836 | count | 1 |
| PHF3       | 0.1315826 | 0.0750697 | 1.7528 | 0.0797 | 0.184463104 | count | 1 |
| UBA1       | 0.1434365 | 0.1314515 | 1.0912 | 0.275  | 0.18447904  | count | 1 |
| TRABD      | 0.1468456 | 0.147672  | 0.9944 | 0.32   | 0.184563722 | count | 1 |
| PAK1IP1    | 0.136466  | 0.1035103 | 1.3184 | 0.187  | 0.184701586 | count | 1 |
| TRAK1      | 0.1868331 | 0.2366906 | 0.7894 | 0.43   | 0.184729025 | count | 1 |
| SLC25A51   | 0.2139773 | 0.3316162 | 0.6453 | 0.519  | 0.18473124  | count | 1 |
| CYB5B      | 0.1365414 | 0.1298213 | 1.0518 | 0.293  | 0.184803377 | count | 1 |
| BORCS6     | 0.1486718 | 0.1599613 | 0.9294 | 0.353  | 0.184812921 | count | 1 |
| Z97989.1   | 0.5045933 | 0.6085604 | 0.8292 | 0.407  | 0.185038854 | count | 1 |
| TTC7B      | 0.1871615 | 0.3130792 | 0.5978 | 0.55   | 0.185047896 | count | 1 |
| RBM48      | 0.146868  | 0.1682643 | 0.8728 | 0.383  | 0.185115692 | count | 1 |
| POMK       | 0.2627362 | 0.5906478 | 0.4448 | 0.656  | 0.185118666 | count | 1 |
| SAYSD1     | 0.1489281 | 0.1704542 | 0.8737 | 0.382  | 0.18512954  | count | 1 |
| AC007541.1 | 0.1968798 | 0.2706205 | 0.7275 | 0.467  | 0.185140732 | count | 1 |
| MICB       | 0.6165337 | 0.5344937 | 1.1535 | 0.249  | 0.185300048 | count | 1 |
| APOO       | 0.1874584 | 0.2889344 | 0.6488 | 0.517  | 0.185336152 | count | 1 |
| PGAP2      | 0.1662659 | 0.2489738 | 0.6678 | 0.504  | 0.185357155 | count | 1 |
| GADD45G    | 0.1366061 | 0.1241091 | 1.1007 | 0.271  | 0.185386844 | count | 1 |
| PSMD12     | 0.1327221 | 0.0724653 | 1.8315 | 0.0671 | 0.185432179 | count | 1 |
| NUDT14     | 0.1612281 | 0.2955228 | 0.5456 | 0.585  | 0.185468689 | count | 1 |
| AC027277.1 | 0.2035975 | 0.3108343 | 0.655  | 0.513  | 0.185695483 | count | 1 |
| SF3B4      | 0.1336369 | 0.0879271 | 1.5199 | 0.129  | 0.185778789 | count | 1 |
| LEFTY1     | 0.8280816 | 1.1212265 | 0.7385 | 0.46   | 0.185942834 | count | 1 |
| LINC01220  | 0.8280816 | 1.1212265 | 0.7385 | 0.46   | 0.185942834 | count | 1 |
| AL136369.2 | 0.8280816 | 1.235648  | 0.6702 | 0.503  | 0.185942834 | count | 1 |
| AC093388.1 | 0.8280816 | 1.410754  | 0.587  | 0.557  | 0.185942834 | count | 1 |
| PITPNA     | 0.1432729 | 0.1378336 | 1.0395 | 0.299  | 0.185979621 | count | 1 |
| CHTF8      | 0.1471554 | 0.1581993 | 0.9302 | 0.352  | 0.185981159 | count | 1 |
| VIRMA      | 0.1388902 | 0.1236637 | 1.1231 | 0.261  | 0.186010397 | count | 1 |
| DDHD2      | 0.1486869 | 0.1574543 | 0.9443 | 0.345  | 0.186028426 | count | 1 |
| ANKS3      | 0.1483316 | 0.1738637 | 0.8531 | 0.394  | 0.186148095 | count | 1 |
| AP003392.4 | 0.390105  | 0.5074968 | 0.7687 | 0.442  | 0.186205367 | count | 1 |
| ZNF429     | 0.1566175 | 0.1843381 | 0.8496 | 0.396  | 0.186296137 | count | 1 |
| MTA3       | 0.1464725 | 0.1865916 | 0.785  | 0.433  | 0.186300752 | count | 1 |
| GABRD      | 0.5085595 | 0.8069674 | 0.6302 | 0.529  | 0.186314682 | count | 1 |
| ZNF805     | 0.1864962 | 0.2274076 | 0.8201 | 0.412  | 0.186355162 | count | 1 |
| IRAK1      | 0.1672449 | 0.187249  | 0.8932 | 0.372  | 0.186435965 | count | 1 |
| HIST1H4E   | 0.2647312 | 0.430743  | 0.6146 | 0.539  | 0.186465177 | count | 1 |
| TTYH1      | 0.3555686 | 0.6601754 | 0.5386 | 0.59   | 0.186469448 | count | 1 |
| ZBTB11-AS1 | 0.1983284 | 0.3096014 | 0.6406 | 0.522  | 0.186474176 | count | 1 |

|            |           |           |        |         |             |       |   |
|------------|-----------|-----------|--------|---------|-------------|-------|---|
| CHIC2      | 0.1385935 | 0.1200995 | 1.154  | 0.249   | 0.186495648 | count | 1 |
| ABR        | 0.15174   | 0.1769182 | 0.8577 | 0.391   | 0.186563848 | count | 1 |
| IZUMO4     | 0.5094556 | 0.3678276 | 1.385  | 0.166   | 0.186602553 | count | 1 |
| AC137630.3 | 0.832253  | 1.080506  | 0.7702 | 0.441   | 0.186659928 | count | 1 |
| SMC1A      | 0.1377351 | 0.1057578 | 1.3024 | 0.193   | 0.186753022 | count | 1 |
| FBXL20     | 0.1659389 | 0.2032017 | 0.8166 | 0.414   | 0.186802461 | count | 1 |
| SRSF3      | 0.1311852 | 0.0464324 | 2.8253 | 0.00475 | 0.186979566 | count | 1 |
| SCAMP1     | 0.1354654 | 0.0921329 | 1.4703 | 0.142   | 0.187088595 | count | 1 |
| ELAVL1     | 0.137288  | 0.1142423 | 1.2017 | 0.23    | 0.187194738 | count | 1 |
| ZNF268     | 0.2169225 | 0.3346486 | 0.6482 | 0.517   | 0.187205837 | count | 1 |
| EMSY       | 0.1565214 | 0.263138  | 0.5948 | 0.552   | 0.187209203 | count | 1 |
| ZNF490     | 0.3579578 | 0.6200024 | 0.5773 | 0.564   | 0.187632078 | count | 1 |
| RPS6KA3    | 0.1486948 | 0.1949044 | 0.7629 | 0.446   | 0.187662943 | count | 1 |
| ATXN10     | 0.1350651 | 0.0795696 | 1.6974 | 0.0897  | 0.187780947 | count | 1 |
| ATXN7L3B   | 0.1348303 | 0.084024  | 1.6047 | 0.109   | 0.187808064 | count | 1 |
| GOLGA5     | 0.1415232 | 0.1254553 | 1.1281 | 0.259   | 0.187830388 | count | 1 |
| BROX       | 0.1381812 | 0.1028525 | 1.3435 | 0.179   | 0.187882211 | count | 1 |
| APH1B      | 0.145682  | 0.1446284 | 1.0073 | 0.314   | 0.187904618 | count | 1 |
| TMCO1      | 0.1326501 | 0.0574943 | 2.3072 | 0.0211  | 0.187909938 | count | 1 |
| TCTE3      | 0.2480184 | 0.5218544 | 0.4753 | 0.635   | 0.18793217  | count | 1 |
| MRTO4      | 0.13952   | 0.1420806 | 0.982  | 0.326   | 0.188010916 | count | 1 |
| FES        | 0.168678  | 0.2191133 | 0.7698 | 0.441   | 0.188014894 | count | 1 |
| RTN4RL1    | 0.5142936 | 0.723495  | 0.7108 | 0.477   | 0.188154192 | count | 1 |
| ATP6V0E2   | 0.147703  | 0.1461749 | 1.0105 | 0.312   | 0.188303442 | count | 1 |
| METTL9     | 0.1360184 | 0.0835177 | 1.6286 | 0.103   | 0.188387427 | count | 1 |
| CBR1       | 0.1330924 | 0.054678  | 2.4341 | 0.015   | 0.188391035 | count | 1 |
| ANKRD27    | 0.184907  | 0.3609758 | 0.5122 | 0.609   | 0.188410956 | count | 1 |
| SERINC3    | 0.1340531 | 0.0739055 | 1.8138 | 0.0698  | 0.188426947 | count | 1 |
| UBE2A      | 0.1353424 | 0.0874242 | 1.5481 | 0.122   | 0.188484739 | count | 1 |
| PPA1       | 0.1331384 | 0.0505605 | 2.6333 | 0.00849 | 0.188522592 | count | 1 |
| PTH1R      | 0.1868576 | 0.4311361 | 0.4334 | 0.665   | 0.188578801 | count | 1 |
| ACSM1      | 0.6296761 | 0.8032902 | 0.7839 | 0.433   | 0.188603917 | count | 1 |
| ST7L       | 0.1472856 | 0.1432486 | 1.0282 | 0.304   | 0.188617676 | count | 1 |
| SPTLC2     | 0.1586878 | 0.1963028 | 0.8084 | 0.419   | 0.188737955 | count | 1 |
| SF3B1      | 0.1333186 | 0.0604837 | 2.2042 | 0.0276  | 0.188782584 | count | 1 |
| ZNF688     | 0.1413009 | 0.1078962 | 1.3096 | 0.19    | 0.188818631 | count | 1 |
| HSPA13     | 0.14719   | 0.1449057 | 1.0158 | 0.31    | 0.188896161 | count | 1 |
| ZFYVE21    | 0.133378  | 0.0621935 | 2.1446 | 0.0321  | 0.18892097  | count | 1 |
| NEO1       | 0.1406167 | 0.1309089 | 1.0742 | 0.283   | 0.18899714  | count | 1 |
| TOM1       | 0.1547321 | 0.1730944 | 0.8939 | 0.371   | 0.189068323 | count | 1 |
| MFN1       | 0.14474   | 0.1283331 | 1.1278 | 0.259   | 0.18907937  | count | 1 |
| RAD54L2    | 0.176864  | 0.3537971 | 0.4999 | 0.617   | 0.18909538  | count | 1 |
| COL25A1    | 0.8465201 | 0.7339681 | 1.1533 | 0.249   | 0.18909678  | count | 1 |
| SLC25A24   | 0.1385918 | 0.117079  | 1.1837 | 0.237   | 0.189193222 | count | 1 |
| MAOA       | 0.1408261 | 0.0935034 | 1.5061 | 0.132   | 0.189205098 | count | 1 |

|            |           |           |        |          |             |       |   |
|------------|-----------|-----------|--------|----------|-------------|-------|---|
| SETMAR     | 0.1698001 | 0.2347492 | 0.7233 | 0.47     | 0.189250938 | count | 1 |
| POU2F2     | 0.2294835 | 0.4530728 | 0.5065 | 0.613    | 0.189277091 | count | 1 |
| AC239868.2 | 0.2586937 | 0.4983935 | 0.5191 | 0.604    | 0.189291349 | count | 1 |
| CHORDC1    | 0.1395166 | 0.1142302 | 1.2214 | 0.222    | 0.189326789 | count | 1 |
| AF165147.1 | 1.436928  | 0.9216808 | 1.559  | 0.119    | 0.189506298 | count | 1 |
| RBM43      | 0.138083  | 0.0985646 | 1.4009 | 0.161    | 0.189566825 | count | 1 |
| MT2A       | 0.1319903 | 0.0655445 | 2.0138 | 0.0441   | 0.189593371 | count | 1 |
| LURAP1L    | 0.144927  | 0.1317772 | 1.0998 | 0.271    | 0.189602622 | count | 1 |
| DUSP11     | 0.1413585 | 0.1186947 | 1.1909 | 0.234    | 0.189618683 | count | 1 |
| FO704657.1 | 0.3982478 | 0.9711311 | 0.4101 | 0.682    | 0.189762228 | count | 1 |
| DOCK11     | 0.147175  | 0.1386068 | 1.0618 | 0.288    | 0.189821244 | count | 1 |
| XRCC1      | 0.1605663 | 0.1708549 | 0.9398 | 0.347    | 0.189841718 | count | 1 |
| FAM104B    | 0.1426195 | 0.1361    | 1.0479 | 0.295    | 0.189954195 | count | 1 |
| GRPEL2     | 0.259717  | 0.3778947 | 0.6873 | 0.492    | 0.190010344 | count | 1 |
| CPT2       | 0.1818    | 0.2590451 | 0.7018 | 0.483    | 0.190076198 | count | 1 |
| RRN3       | 0.1681001 | 0.2240972 | 0.7501 | 0.453    | 0.190078195 | count | 1 |
| AL133467.1 | 0.399056  | 0.5215115 | 0.7652 | 0.444    | 0.190114483 | count | 1 |
| AC011468.5 | 0.399056  | 0.5225773 | 0.7636 | 0.445    | 0.190114483 | count | 1 |
| MAN2A1     | 0.1502999 | 0.2179495 | 0.6896 | 0.49     | 0.19018388  | count | 1 |
| ZNF616     | 0.2367521 | 0.3268821 | 0.7243 | 0.469    | 0.190289582 | count | 1 |
| ARFGF2     | 0.1587271 | 0.1927986 | 0.8233 | 0.41     | 0.190326337 | count | 1 |
| AC025283.2 | 0.363839  | 0.5259601 | 0.6918 | 0.489    | 0.190488604 | count | 1 |
| HDAC3      | 0.1426016 | 0.1247444 | 1.1432 | 0.253    | 0.190551216 | count | 1 |
| KIF27      | 0.1809546 | 0.3182092 | 0.5687 | 0.57     | 0.190662732 | count | 1 |
| PPP1R37    | 0.1679109 | 0.3350693 | 0.5011 | 0.616    | 0.190707809 | count | 1 |
| AL117336.3 | 0.2373125 | 0.4856494 | 0.4886 | 0.625    | 0.190725359 | count | 1 |
| AC084036.1 | 0.8573943 | 0.6766712 | 1.2671 | 0.205    | 0.190937785 | count | 1 |
| TMEM221    | 0.8573943 | 0.6804662 | 1.26   | 0.208    | 0.190937785 | count | 1 |
| RIDA       | 0.1674127 | 0.2073235 | 0.8075 | 0.419    | 0.190960208 | count | 1 |
| GSTO2      | 0.173304  | 0.3019876 | 0.5739 | 0.566    | 0.191087016 | count | 1 |
| CUL1       | 0.1426081 | 0.1157249 | 1.2323 | 0.218    | 0.191133745 | count | 1 |
| WASF2      | 0.1338922 | 0.042096  | 3.1806 | 0.0015   | 0.191217663 | count | 1 |
| NUDT21     | 0.1414003 | 0.1107507 | 1.2767 | 0.202    | 0.191242094 | count | 1 |
| CLCN2      | 0.640399  | 0.4827589 | 1.3265 | 0.185    | 0.191279682 | count | 1 |
| GPATCH4    | 0.1437608 | 0.1530208 | 0.9395 | 0.348    | 0.191280834 | count | 1 |
| BMPR1A     | 0.1475112 | 0.1477154 | 0.9986 | 0.318    | 0.19129261  | count | 1 |
| ADAMTS7    | 0.1816917 | 0.3665878 | 0.4956 | 0.62     | 0.191427752 | count | 1 |
| SNAI3-AS1  | 0.4519139 | 0.849873  | 0.5317 | 0.595    | 0.191444436 | count | 1 |
| PRTG       | 1.4647812 | 1.1896019 | 1.2313 | 0.218    | 0.191557858 | count | 1 |
| TM7SF2     | 0.203947  | 0.3246697 | 0.6282 | 0.53     | 0.191641839 | count | 1 |
| ANO10      | 0.1492391 | 0.1838957 | 0.8115 | 0.417    | 0.191710711 | count | 1 |
| PPP2CA     | 0.1412726 | 0.097789  | 1.4447 | 0.149    | 0.191758183 | count | 1 |
| TMEM50A    | 0.134119  | 0.039047  | 3.4348 | 6.00E-04 | 0.191906297 | count | 1 |
| ZFPM2      | 0.145618  | 0.1588914 | 0.9165 | 0.359    | 0.191918208 | count | 1 |
| ANO3       | 1.470627  | 1.20471   | 1.2207 | 0.222    | 0.191982536 | count | 1 |

|           |           |           |        |        |             |       |   |
|-----------|-----------|-----------|--------|--------|-------------|-------|---|
| CCDC125   | 0.1706332 | 0.2405488 | 0.7093 | 0.478  | 0.192026687 | count | 1 |
| CENPF     | 0.5266323 | 0.5706322 | 0.9229 | 0.356  | 0.192092257 | count | 1 |
| FUNDC1    | 0.1465848 | 0.1655694 | 0.8853 | 0.376  | 0.192172701 | count | 1 |
| CACNB3    | 0.1825349 | 0.2921893 | 0.6247 | 0.532  | 0.192302771 | count | 1 |
| KMT2D     | 0.2077189 | 0.3472913 | 0.5981 | 0.55   | 0.192313551 | count | 1 |
| ARL1      | 0.1355789 | 0.0590928 | 2.2943 | 0.0218 | 0.192420117 | count | 1 |
| ZMYND12   | 0.8668685 | 0.7796392 | 1.1119 | 0.266  | 0.192530321 | count | 1 |
| LINC00857 | 0.8668685 | 0.830423  | 1.0439 | 0.297  | 0.192530321 | count | 1 |
| SPOCK3    | 0.8668685 | 1.362241  | 0.6364 | 0.525  | 0.192530321 | count | 1 |
| HIST2H2BF | 0.2740334 | 0.3754254 | 0.7299 | 0.465  | 0.192731156 | count | 1 |
| PIGQ      | 0.1578421 | 0.2099547 | 0.7518 | 0.452  | 0.192840588 | count | 1 |
| IL17RA    | 0.173991  | 0.2113794 | 0.8231 | 0.41   | 0.192868026 | count | 1 |
| SNRNP48   | 0.1485091 | 0.1714986 | 0.8659 | 0.387  | 0.192908702 | count | 1 |
| KIAA0753  | 0.1817748 | 0.2841689 | 0.6397 | 0.522  | 0.192919553 | count | 1 |
| ZNF652    | 0.1420651 | 0.1032771 | 1.3756 | 0.169  | 0.192939342 | count | 1 |
| USP5      | 0.1723271 | 0.2075411 | 0.8303 | 0.406  | 0.192988191 | count | 1 |
| TOMM40    | 0.1453552 | 0.1199668 | 1.2116 | 0.226  | 0.193000075 | count | 1 |
| DHX30     | 0.1534518 | 0.1553328 | 0.9879 | 0.323  | 0.193093833 | count | 1 |
| KRAS      | 0.1381206 | 0.0888392 | 1.5547 | 0.12   | 0.193112956 | count | 1 |
| DNAJB4    | 0.1380087 | 0.0820485 | 1.682  | 0.0926 | 0.193125465 | count | 1 |
| FAM92A    | 0.1394181 | 0.0914553 | 1.5244 | 0.127  | 0.193136893 | count | 1 |
| TMEM140   | 0.1478699 | 0.1276383 | 1.1585 | 0.247  | 0.193150773 | count | 1 |
| RASA2     | 0.150264  | 0.1677467 | 0.8958 | 0.37   | 0.193216795 | count | 1 |
| BRF1      | 0.1978922 | 0.2925402 | 0.6765 | 0.499  | 0.193279541 | count | 1 |
| HERC6     | 0.1834828 | 0.3734941 | 0.4913 | 0.623  | 0.19328629  | count | 1 |
| KLF7      | 0.1585518 | 0.1467409 | 1.0805 | 0.28   | 0.193290117 | count | 1 |
| RAP1B     | 0.135932  | 0.0483921 | 2.809  | 0.005  | 0.193403499 | count | 1 |
| CCDC138   | 0.3700159 | 0.4461906 | 0.8293 | 0.407  | 0.1934805   | count | 1 |
| ZSCAN26   | 0.154742  | 0.1715498 | 0.902  | 0.367  | 0.193557026 | count | 1 |
| PARP8     | 0.1610448 | 0.2561374 | 0.6287 | 0.53   | 0.193577889 | count | 1 |
| FIP1L1    | 0.1437878 | 0.1054632 | 1.3634 | 0.173  | 0.193606586 | count | 1 |
| ZNF202    | 0.3024824 | 0.6705298 | 0.4511 | 0.652  | 0.193677179 | count | 1 |
| LY6E      | 0.1356448 | 0.0596005 | 2.2759 | 0.0229 | 0.193715032 | count | 1 |
| ZNF101    | 0.6502838 | 0.5089453 | 1.2777 | 0.201  | 0.193730441 | count | 1 |
| SLFN12    | 0.1549332 | 0.1882779 | 0.8229 | 0.411  | 0.193794689 | count | 1 |
| NIPBL     | 0.1407307 | 0.0987003 | 1.4258 | 0.154  | 0.193806592 | count | 1 |
| SMAD5     | 0.1413164 | 0.092046  | 1.5353 | 0.125  | 0.19384868  | count | 1 |
| ARFIP1    | 0.1427055 | 0.0931483 | 1.532  | 0.126  | 0.19386049  | count | 1 |
| APOBEC3C  | 0.1439483 | 0.122284  | 1.1772 | 0.239  | 0.193891964 | count | 1 |
| ZBTB3     | 0.3431995 | 0.5232664 | 0.6559 | 0.512  | 0.194108701 | count | 1 |
| KTN1-AS1  | 0.5330956 | 0.61195   | 0.8711 | 0.384  | 0.19414413  | count | 1 |
| LINC00663 | 0.5330956 | 0.6834497 | 0.78   | 0.435  | 0.19414413  | count | 1 |
| MINDY3    | 0.1593129 | 0.1565573 | 1.0176 | 0.309  | 0.194211008 | count | 1 |
| BLZF1     | 0.1433867 | 0.1302099 | 1.1012 | 0.271  | 0.194280601 | count | 1 |
| MTMR1     | 0.276463  | 0.3482967 | 0.7938 | 0.427  | 0.19436434  | count | 1 |



|            |           |           |        |         |             |       |   |
|------------|-----------|-----------|--------|---------|-------------|-------|---|
| DGKB       | 1.504616  | 0.6199273 | 2.4271 | 0.0153  | 0.194409798 | count | 1 |
| PYCR2      | 0.1434018 | 0.1096199 | 1.3082 | 0.191   | 0.194416367 | count | 1 |
| KANSL1     | 0.1415833 | 0.1013359 | 1.3972 | 0.162   | 0.194680248 | count | 1 |
| ZNF286B    | 0.8798103 | 0.9737145 | 0.9036 | 0.366   | 0.194688574 | count | 1 |
| TMEM263    | 0.1411279 | 0.086939  | 1.6233 | 0.105   | 0.194808806 | count | 1 |
| ADAP2      | 0.2771246 | 0.3695315 | 0.7499 | 0.453   | 0.194808836 | count | 1 |
| SLC27A4    | 0.2259865 | 0.3466875 | 0.6518 | 0.515   | 0.194809126 | count | 1 |
| NLGN4X     | 0.4608044 | 0.4453203 | 1.0348 | 0.301   | 0.194815752 | count | 1 |
| PTTG1      | 0.1895744 | 0.41586   | 0.4559 | 0.649   | 0.194820505 | count | 1 |
| MED17      | 0.1836385 | 0.4294023 | 0.4277 | 0.669   | 0.194868151 | count | 1 |
| PARP11     | 0.1913766 | 0.2732291 | 0.7004 | 0.484   | 0.194889743 | count | 1 |
| AC026401.1 | 1.516333  | 1.477126  | 1.0265 | 0.305   | 0.195230487 | count | 1 |
| METTL25    | 0.1662082 | 0.153138  | 1.0853 | 0.278   | 0.195235087 | count | 1 |
| ABHD8      | 0.1647738 | 0.2159728 | 0.7629 | 0.446   | 0.195349723 | count | 1 |
| APPL1      | 0.1383689 | 0.0653104 | 2.1186 | 0.0342  | 0.195425108 | count | 1 |
| SOST       | 0.1365578 | 0.1454901 | 0.9386 | 0.348   | 0.195618538 | count | 1 |
| LINC01686  | 0.3057572 | 0.5523397 | 0.5536 | 0.58    | 0.195661993 | count | 1 |
| EPHA2      | 0.2149312 | 0.3561922 | 0.6034 | 0.546   | 0.195781337 | count | 1 |
| MYDGF      | 0.137466  | 0.0487697 | 2.8187 | 0.00485 | 0.195849873 | count | 1 |
| PYURF      | 0.1379575 | 0.0498533 | 2.7673 | 0.00568 | 0.19587192  | count | 1 |
| UBE2K      | 0.1432559 | 0.0933525 | 1.5346 | 0.125   | 0.195941029 | count | 1 |
| DICER1-AS1 | 0.2590573 | 0.3643065 | 0.7111 | 0.477   | 0.19597719  | count | 1 |
| PSTPIP2    | 0.5391356 | 0.3801726 | 1.4181 | 0.156   | 0.19605479  | count | 1 |
| NRG2       | 0.2192377 | 0.413202  | 0.5306 | 0.596   | 0.19631734  | count | 1 |
| ATG4A      | 0.1656345 | 0.285697  | 0.5798 | 0.562   | 0.196360957 | count | 1 |
| HIST2H2AB  | 1.5332787 | 1.0166779 | 1.5081 | 0.132   | 0.196403143 | count | 1 |
| TOR1AIP1   | 0.1445309 | 0.1144039 | 1.2633 | 0.207   | 0.196441123 | count | 1 |
| ZNF219     | 0.1896861 | 0.2318686 | 0.8181 | 0.413   | 0.196595804 | count | 1 |
| MUT        | 0.1552043 | 0.143993  | 1.0779 | 0.281   | 0.196608442 | count | 1 |
| COPS7A     | 0.1422012 | 0.0972846 | 1.4617 | 0.144   | 0.196730642 | count | 1 |
| SMARCA2    | 0.1435024 | 0.0913062 | 1.5717 | 0.116   | 0.196802599 | count | 1 |
| ZNF280D    | 0.1482162 | 0.1188789 | 1.2468 | 0.213   | 0.197089301 | count | 1 |
| AC026471.1 | 0.2288907 | 0.3352534 | 0.6827 | 0.495   | 0.197241316 | count | 1 |
| ZDHHC6     | 0.1616308 | 0.1632289 | 0.9902 | 0.322   | 0.197434486 | count | 1 |
| PLEKHH2    | 0.1452715 | 0.1392271 | 1.0434 | 0.297   | 0.197445153 | count | 1 |
| ZNF230     | 0.204762  | 0.3026532 | 0.6766 | 0.499   | 0.197488565 | count | 1 |
| PRDM4      | 0.2169638 | 0.3250158 | 0.6675 | 0.504   | 0.197587154 | count | 1 |
| NFX1       | 0.1568369 | 0.1701685 | 0.9217 | 0.357   | 0.197605147 | count | 1 |
| APOB       | 0.2170233 | 0.4700863 | 0.4617 | 0.644   | 0.197639998 | count | 1 |
| LCOR       | 0.1534213 | 0.1549455 | 0.9902 | 0.322   | 0.197646983 | count | 1 |
| NMT1       | 0.1457586 | 0.1122655 | 1.2983 | 0.194   | 0.197660938 | count | 1 |
| CASZ1      | 0.2401958 | 0.3564505 | 0.6739 | 0.5     | 0.197831182 | count | 1 |
| AMPH       | 0.2138996 | 0.3853795 | 0.555  | 0.579   | 0.197900773 | count | 1 |
| RAB11FIP2  | 0.1493995 | 0.1224043 | 1.2205 | 0.222   | 0.197924131 | count | 1 |
| GCC2       | 0.1407981 | 0.0720057 | 1.9554 | 0.0506  | 0.197948207 | count | 1 |

|             |           |           |        |        |             |       |   |
|-------------|-----------|-----------|--------|--------|-------------|-------|---|
| IARS        | 0.1559487 | 0.1610144 | 0.9685 | 0.333  | 0.198043892 | count | 1 |
| ALDH1L1-AS1 | 0.9002497 | 1.0965845 | 0.821  | 0.412  | 0.198056974 | count | 1 |
| UTS2B       | 0.9002497 | 1.0965845 | 0.821  | 0.412  | 0.198056974 | count | 1 |
| AL031708.1  | 0.9002497 | 1.099609  | 0.8187 | 0.413  | 0.198056974 | count | 1 |
| AC007881.3  | 0.9002497 | 1.1077486 | 0.8127 | 0.416  | 0.198056974 | count | 1 |
| AC007950.2  | 0.9002497 | 1.1077486 | 0.8127 | 0.416  | 0.198056974 | count | 1 |
| AC110792.3  | 0.9002497 | 1.212498  | 0.7425 | 0.458  | 0.198056974 | count | 1 |
| TGOLN2      | 0.1394509 | 0.0542618 | 2.57   | 0.0102 | 0.198196758 | count | 1 |
| KLHDC2      | 0.1418975 | 0.0908657 | 1.5616 | 0.118  | 0.1983567   | count | 1 |
| ANAPC1      | 0.1856864 | 0.2246043 | 0.8267 | 0.408  | 0.198389196 | count | 1 |
| LINC00882   | 0.1810464 | 0.2795387 | 0.6477 | 0.517  | 0.198397513 | count | 1 |
| HUS1        | 0.1597394 | 0.1916844 | 0.8333 | 0.405  | 0.198478617 | count | 1 |
| MAP3K3      | 0.1531166 | 0.2124691 | 0.7207 | 0.471  | 0.198527515 | count | 1 |
| WAPL        | 0.1532345 | 0.1316716 | 1.1638 | 0.245  | 0.198679658 | count | 1 |
| HNRNPA0     | 0.1404655 | 0.0553147 | 2.5394 | 0.0111 | 0.198705779 | count | 1 |
| APIP        | 0.1468581 | 0.103317  | 1.4214 | 0.155  | 0.198728209 | count | 1 |
| RPAP2       | 0.1482463 | 0.1400241 | 1.0587 | 0.29   | 0.198828834 | count | 1 |
| NR1D2       | 0.1434449 | 0.0976273 | 1.4693 | 0.142  | 0.199017812 | count | 1 |
| ATXN7L2     | 0.9061955 | 0.5512421 | 1.6439 | 0.1    | 0.199027653 | count | 1 |
| CACNA2D3    | 0.5486378 | 0.6971448 | 0.787  | 0.431  | 0.199047279 | count | 1 |
| AL080250.1  | 0.6719999 | 0.7957461 | 0.8445 | 0.398  | 0.199061352 | count | 1 |
| ZNF285      | 0.6719999 | 0.7985917 | 0.8415 | 0.4    | 0.199061352 | count | 1 |
| AP007216.2  | 0.6719999 | 0.8547756 | 0.7862 | 0.432  | 0.199061352 | count | 1 |
| HIST1H2BD   | 0.6719999 | 0.858391  | 0.7829 | 0.434  | 0.199061352 | count | 1 |
| AL158151.1  | 0.6719999 | 0.9043275 | 0.7431 | 0.457  | 0.199061352 | count | 1 |
| MRE11       | 0.1578082 | 0.1536498 | 1.0271 | 0.304  | 0.199095625 | count | 1 |
| MAATS1      | 0.2189028 | 0.3488306 | 0.6275 | 0.53   | 0.199308949 | count | 1 |
| CYREN       | 0.1625407 | 0.1862204 | 0.8728 | 0.383  | 0.19935247  | count | 1 |
| TPRA1       | 0.1542438 | 0.1294983 | 1.1911 | 0.234  | 0.19945041  | count | 1 |
| STX1B       | 0.6738472 | 1.054313  | 0.6391 | 0.523  | 0.199511464 | count | 1 |
| Z98752.4    | 0.6738472 | 1.139268  | 0.5915 | 0.554  | 0.199511464 | count | 1 |
| LTK         | 0.6738472 | 1.194952  | 0.5639 | 0.573  | 0.199511464 | count | 1 |
| TTC13       | 0.3122371 | 0.4088372 | 0.7637 | 0.445  | 0.199581873 | count | 1 |
| MTF1        | 0.1927091 | 0.2864197 | 0.6728 | 0.501  | 0.199676726 | count | 1 |
| RAB10       | 0.1429964 | 0.0735556 | 1.9441 | 0.052  | 0.199751489 | count | 1 |
| CALCOCO1    | 0.1460768 | 0.1117672 | 1.307  | 0.191  | 0.199790485 | count | 1 |
| LCA5        | 0.1549916 | 0.1302889 | 1.1896 | 0.234  | 0.199852505 | count | 1 |
| PAFAH1B1    | 0.1417352 | 0.0683823 | 2.0727 | 0.0383 | 0.2001752   | count | 1 |
| GDPGP1      | 0.2649712 | 0.3746445 | 0.7073 | 0.479  | 0.200275222 | count | 1 |
| PPIL6       | 0.2568371 | 0.3832429 | 0.6702 | 0.503  | 0.200305939 | count | 1 |
| CLPX        | 0.1532812 | 0.1319084 | 1.162  | 0.245  | 0.2003374   | count | 1 |
| S100PBP     | 0.1659382 | 0.2141601 | 0.7748 | 0.438  | 0.200394376 | count | 1 |
| ZBTB17      | 0.2054198 | 0.3165023 | 0.649  | 0.516  | 0.200481589 | count | 1 |
| SNHG15      | 0.1496961 | 0.1162392 | 1.2878 | 0.198  | 0.200519547 | count | 1 |
| CASP4       | 0.1451059 | 0.0910781 | 1.5932 | 0.111  | 0.200605474 | count | 1 |

|            |           |           |        |        |             |       |   |
|------------|-----------|-----------|--------|--------|-------------|-------|---|
| CNP        | 0.1542229 | 0.1163733 | 1.3252 | 0.185  | 0.200626912 | count | 1 |
| HLX-AS1    | 0.9163396 | 0.4281345 | 2.1403 | 0.0324 | 0.200674184 | count | 1 |
| PLA2G15    | 0.2242471 | 0.2890356 | 0.7758 | 0.438  | 0.200685045 | count | 1 |
| TMPO       | 0.1480414 | 0.119801  | 1.2357 | 0.217  | 0.200748249 | count | 1 |
| SPACA9     | 0.1676479 | 0.2149187 | 0.7801 | 0.435  | 0.200930776 | count | 1 |
| EID2B      | 0.165342  | 0.2547178 | 0.6491 | 0.516  | 0.201063825 | count | 1 |
| DELE1      | 0.1696464 | 0.1865463 | 0.9094 | 0.363  | 0.201073173 | count | 1 |
| STBD1      | 0.555332  | 0.4694198 | 1.183  | 0.237  | 0.20114567  | count | 1 |
| GASAL1     | 0.2995272 | 0.4351546 | 0.6883 | 0.491  | 0.201188353 | count | 1 |
| SRGAP3     | 0.9195633 | 0.8876855 | 1.0359 | 0.3    | 0.201194929 | count | 1 |
| DPP8       | 0.159066  | 0.1453504 | 1.0944 | 0.274  | 0.201210201 | count | 1 |
| TGS1       | 0.1497509 | 0.1034338 | 1.4478 | 0.148  | 0.201235899 | count | 1 |
| NEXMIF     | 0.2998142 | 0.4140672 | 0.7241 | 0.469  | 0.201371405 | count | 1 |
| CDC27      | 0.148627  | 0.0881446 | 1.6862 | 0.0918 | 0.201540183 | count | 1 |
| ATP6V1E1   | 0.1431167 | 0.0732291 | 1.9544 | 0.0507 | 0.201653443 | count | 1 |
| RNF14      | 0.156105  | 0.151583  | 1.0298 | 0.303  | 0.20166011  | count | 1 |
| SUV39H1    | 0.4789962 | 0.6052624 | 0.7914 | 0.429  | 0.201665036 | count | 1 |
| HPGD       | 0.4789962 | 0.6305637 | 0.7596 | 0.448  | 0.201665036 | count | 1 |
| ARRDC1     | 0.1706991 | 0.2171149 | 0.7862 | 0.432  | 0.201709406 | count | 1 |
| KPTN       | 0.2342992 | 0.4653272 | 0.5035 | 0.615  | 0.201765652 | count | 1 |
| ACSM3      | 0.4259892 | 0.5510766 | 0.773  | 0.44   | 0.201774145 | count | 1 |
| FRAT1      | 0.4794813 | 0.450727  | 1.0638 | 0.287  | 0.201846773 | count | 1 |
| TSNAX      | 0.1496613 | 0.0934723 | 1.6011 | 0.109  | 0.20198561  | count | 1 |
| C9orf85    | 0.1563824 | 0.1405107 | 1.113  | 0.266  | 0.202016675 | count | 1 |
| C1GALT1    | 0.148081  | 0.1113122 | 1.3303 | 0.183  | 0.202115737 | count | 1 |
| NUDT5      | 0.1481566 | 0.1069608 | 1.3851 | 0.166  | 0.202171276 | count | 1 |
| CLPTM1L    | 0.1571569 | 0.1194235 | 1.316  | 0.188  | 0.202235988 | count | 1 |
| USP21      | 0.2349117 | 0.5454427 | 0.4307 | 0.667  | 0.202277597 | count | 1 |
| AL355596.1 | 0.2677678 | 0.5055773 | 0.5296 | 0.596  | 0.202304784 | count | 1 |
| ZXDA       | 0.2885497 | 0.3904278 | 0.7391 | 0.46   | 0.202468043 | count | 1 |
| RNF10      | 0.1507468 | 0.1461921 | 1.0312 | 0.303  | 0.202491994 | count | 1 |
| AC091271.1 | 0.1606038 | 0.2231803 | 0.7196 | 0.472  | 0.202600959 | count | 1 |
| TAF5L      | 0.2265847 | 0.2944054 | 0.7696 | 0.442  | 0.20272128  | count | 1 |
| ZFC3H1     | 0.1476664 | 0.1174463 | 1.2573 | 0.209  | 0.202807989 | count | 1 |
| PXDC1      | 0.1432605 | 0.071446  | 2.0052 | 0.045  | 0.202918252 | count | 1 |
| AL645933.2 | 0.2603449 | 0.3420574 | 0.7611 | 0.447  | 0.202939554 | count | 1 |
| BCLAF1     | 0.1445389 | 0.0686981 | 2.104  | 0.0354 | 0.203063689 | count | 1 |
| CAAP1      | 0.1544598 | 0.1546777 | 0.9986 | 0.318  | 0.203135669 | count | 1 |
| LINC01990  | 0.3606781 | 0.5322481 | 0.6777 | 0.498  | 0.20330655  | count | 1 |
| C2orf88    | 0.3374581 | 0.4822082 | 0.6998 | 0.484  | 0.203402766 | count | 1 |
| PGPEP1     | 0.1608732 | 0.1984924 | 0.8105 | 0.418  | 0.203482386 | count | 1 |
| VKORC1L1   | 0.1606914 | 0.1425721 | 1.1271 | 0.26   | 0.203517823 | count | 1 |
| CCPG1      | 0.1424773 | 0.0435802 | 3.2693 | 0.0011 | 0.203539632 | count | 1 |
| SHISA5     | 0.1458413 | 0.0706201 | 2.0652 | 0.039  | 0.203554549 | count | 1 |
| UFL1       | 0.1455579 | 0.069508  | 2.0941 | 0.0363 | 0.203602466 | count | 1 |

|            |           |           |        |          |             |       |          |
|------------|-----------|-----------|--------|----------|-------------|-------|----------|
| ZNF414     | 0.1751843 | 0.1886565 | 0.9286 | 0.353    | 0.203606552 | count | 1        |
| AL122035.2 | 0.4842345 | 0.838685  | 0.5774 | 0.564    | 0.203625025 | count | 1        |
| THAP12     | 0.1507344 | 0.1153802 | 1.3064 | 0.191    | 0.203632795 | count | 1        |
| AC026979.2 | 0.2696638 | 0.4598354 | 0.5864 | 0.558    | 0.203679689 | count | 1        |
| CCDC17     | 0.4845517 | 0.6061656 | 0.7994 | 0.424    | 0.203743533 | count | 1        |
| OPA3       | 0.202219  | 0.2557186 | 0.7908 | 0.429    | 0.203792306 | count | 1        |
| SEC24D     | 0.1535483 | 0.1361732 | 1.1276 | 0.26     | 0.203944665 | count | 1        |
| USF1       | 0.178965  | 0.2509033 | 0.7133 | 0.476    | 0.20398641  | count | 1        |
| CAPN1      | 0.1532771 | 0.1034828 | 1.4812 | 0.139    | 0.203998133 | count | 1        |
| AC017033.1 | 0.9382389 | 0.8314536 | 1.1284 | 0.259    | 0.204188052 | count | 1        |
| DRAM2      | 0.1514987 | 0.11732   | 1.2913 | 0.197    | 0.204247657 | count | 1        |
| VPS53      | 0.1693201 | 0.187074  | 0.9051 | 0.365    | 0.204444055 | count | 1        |
| MUC1       | 0.2049733 | 0.3443336 | 0.5953 | 0.552    | 0.204460856 | count | 1        |
| AC073332.1 | 0.1928476 | 0.2265877 | 0.8511 | 0.395    | 0.20448734  | count | 1        |
| SNX29      | 0.157502  | 0.159604  | 0.9868 | 0.324    | 0.204534391 | count | 1        |
| MIA3       | 0.1457577 | 0.07444   | 1.9581 | 0.0503   | 0.204639114 | count | 1        |
| APLP2      | 0.1431255 | 0.043852  | 3.2638 | 0.00111  | 0.204673144 | count | 1        |
| NRIP1      | 0.1660134 | 0.1414751 | 1.1734 | 0.241    | 0.204760314 | count | 1        |
| ZNF562     | 0.1851622 | 0.2875969 | 0.6438 | 0.52     | 0.205088467 | count | 1        |
| DDX6       | 0.1463315 | 0.077665  | 1.8841 | 0.0596   | 0.205100369 | count | 1        |
| POLK       | 0.1481166 | 0.1092047 | 1.3563 | 0.175    | 0.205113484 | count | 1        |
| USF3       | 0.1587965 | 0.1679839 | 0.9453 | 0.345    | 0.205119434 | count | 1        |
| DLGAP1-AS1 | 0.1747517 | 0.1999613 | 0.8739 | 0.382    | 0.205170972 | count | 1        |
| DDX27      | 0.1503663 | 0.116129  | 1.2948 | 0.195    | 0.205369296 | count | 1        |
| BBS12      | 0.2562445 | 0.3161677 | 0.8105 | 0.418    | 0.205403853 | count | 1        |
| INTS11     | 0.1504227 | 0.1302571 | 1.1548 | 0.248    | 0.20544614  | count | 1        |
| TMEM198    | 0.4346187 | 0.5773725 | 0.7528 | 0.452    | 0.205477248 | count | 1        |
| HDAC6      | 0.1819203 | 0.2913802 | 0.6243 | 0.532    | 0.205517164 | count | 1        |
| AMZ2       | 0.1569218 | 0.1331571 | 1.1785 | 0.239    | 0.205520709 | count | 1        |
| EBLN2      | 0.4348474 | 0.6920539 | 0.6283 | 0.53     | 0.205575166 | count | 1        |
| STS        | 0.2192428 | 0.3978854 | 0.551  | 0.582    | 0.205675657 | count | 1        |
| NUP214     | 0.1630624 | 0.1640574 | 0.9939 | 0.32     | 0.205683062 | count | 1        |
| EMC7       | 0.1453544 | 0.0606693 | 2.3958 | 0.0166   | 0.205750399 | count | 1        |
| NBR1       | 0.1522321 | 0.1340604 | 1.1355 | 0.256    | 0.205783719 | count | 1        |
| MT-CO1     | 0.1427505 | 0.0225077 | 6.3423 | 2.54E-10 | 0.205875781 | count | 6.01E-06 |
| ZMYM3      | 0.191816  | 0.2560949 | 0.749  | 0.454    | 0.206210849 | count | 1        |
| MEF2D      | 0.1578238 | 0.1495524 | 1.0553 | 0.291    | 0.206247658 | count | 1        |
| LRRC40     | 0.1872697 | 0.1991217 | 0.9405 | 0.347    | 0.20627739  | count | 1        |
| GPD2       | 0.2574538 | 0.2379552 | 1.0819 | 0.279    | 0.20633857  | count | 1        |
| AC092155.1 | 1.6891705 | 1.3087664 | 1.2907 | 0.197    | 0.206429457 | count | 1        |
| MROH7      | 1.6891705 | 1.546291  | 1.0924 | 0.275    | 0.206429457 | count | 1        |
| PIGU       | 0.1777254 | 0.2350088 | 0.7562 | 0.45     | 0.206528631 | count | 1        |
| NUMB       | 0.158537  | 0.1479767 | 1.0714 | 0.284    | 0.206542833 | count | 1        |
| HGSNAT     | 0.1559141 | 0.1765319 | 0.8832 | 0.377    | 0.206634664 | count | 1        |
| PNPO       | 0.2146576 | 0.2196629 | 0.9772 | 0.329    | 0.206822895 | count | 1        |

|             |           |           |        |          |             |       |           |
|-------------|-----------|-----------|--------|----------|-------------|-------|-----------|
| QDPR        | 0.1532077 | 0.1065746 | 1.4376 | 0.151    | 0.206827036 | count | 1         |
| TMEM109     | 0.1458443 | 0.0510615 | 2.8562 | 0.00431  | 0.206860073 | count | 1         |
| ZDHHC5      | 0.1603172 | 0.1708757 | 0.9382 | 0.348    | 0.20688032  | count | 1         |
| SHQ1        | 0.2457701 | 0.2758829 | 0.8908 | 0.373    | 0.2069446   | count | 1         |
| HCG18       | 0.1575992 | 0.1973503 | 0.7986 | 0.425    | 0.207111104 | count | 1         |
| ZSCAN2      | 0.7054819 | 0.5276727 | 1.337  | 0.181    | 0.207137935 | count | 1         |
| TENT4B      | 0.17082   | 0.2026981 | 0.8427 | 0.399    | 0.207205081 | count | 1         |
| PEX1        | 0.1578894 | 0.1512913 | 1.0436 | 0.297    | 0.207213253 | count | 1         |
| VLDLR-AS1   | 0.4939601 | 0.8176814 | 0.6041 | 0.546    | 0.207249473 | count | 1         |
| MOB3B       | 0.2019742 | 0.2199714 | 0.9182 | 0.359    | 0.20733552  | count | 1         |
| SSH2        | 0.1661505 | 0.2263001 | 0.7342 | 0.463    | 0.207405543 | count | 1         |
| AL445623.2  | 0.9595679 | 1.060129  | 0.9051 | 0.365    | 0.207557275 | count | 1         |
| AC118553.1  | 0.9595679 | 1.2451205 | 0.7707 | 0.441    | 0.207557275 | count | 1         |
| AC083805.1  | 0.9595679 | 1.3002172 | 0.738  | 0.461    | 0.207557275 | count | 1         |
| TSEN2       | 0.2246337 | 0.3989622 | 0.563  | 0.573    | 0.207584243 | count | 1         |
| SEL1L       | 0.1504038 | 0.0978104 | 1.5377 | 0.124    | 0.20761847  | count | 1         |
| RNF123      | 0.2849022 | 0.3831096 | 0.7437 | 0.457    | 0.207627088 | count | 1         |
| TRA2A       | 0.1504041 | 0.0927783 | 1.6211 | 0.105    | 0.207769888 | count | 1         |
| SP140L      | 0.1636617 | 0.1768932 | 0.9252 | 0.355    | 0.208034908 | count | 1         |
| ATP6V0E1    | 0.1451526 | 0.033423  | 4.3429 | 1.44E-05 | 0.208136769 | count | 0.3313584 |
| MTF2        | 0.1658264 | 0.184476  | 0.8989 | 0.369    | 0.208264544 | count | 1         |
| NUP58       | 0.1844795 | 0.2208098 | 0.8355 | 0.404    | 0.208372743 | count | 1         |
| NSD1        | 0.1525069 | 0.1038202 | 1.469  | 0.142    | 0.208379845 | count | 1         |
| MAP3K2      | 0.1516429 | 0.1074146 | 1.4118 | 0.158    | 0.208482475 | count | 1         |
| AC116366.3  | 0.206993  | 0.310243  | 0.6672 | 0.505    | 0.208510703 | count | 1         |
| AC008429.1  | 1.725285  | 0.9857874 | 1.7502 | 0.0802   | 0.208565521 | count | 1         |
| ADAM8       | 1.725285  | 1.464535  | 1.178  | 0.239    | 0.208565521 | count | 1         |
| AC096992.2  | 1.725285  | 1.673489  | 1.031  | 0.303    | 0.208565521 | count | 1         |
| HMGA2       | 1.725285  | 1.738777  | 0.9922 | 0.321    | 0.208565521 | count | 1         |
| NEURL4      | 0.2767774 | 0.4324838 | 0.64   | 0.522    | 0.208830502 | count | 1         |
| STRN4       | 0.1930651 | 0.2873388 | 0.6719 | 0.502    | 0.208863594 | count | 1         |
| RUNDC1      | 0.1970629 | 0.2810982 | 0.701  | 0.483    | 0.208885101 | count | 1         |
| CDK11B      | 0.1584787 | 0.1365791 | 1.1603 | 0.246    | 0.208926747 | count | 1         |
| SLC16A1-AS1 | 0.1919985 | 0.2954872 | 0.6498 | 0.516    | 0.20900083  | count | 1         |
| AL358781.1  | 0.7134575 | 0.9550069 | 0.7471 | 0.455    | 0.209036357 | count | 1         |
| AL683813.1  | 0.4991747 | 0.501196  | 0.996  | 0.319    | 0.209185003 | count | 1         |
| FNTA        | 0.1514444 | 0.0893266 | 1.6954 | 0.0901   | 0.209409026 | count | 1         |
| LEPROT      | 0.1462406 | 0.0362348 | 4.0359 | 5.55E-05 | 0.209461842 | count | 1         |
| C11orf24    | 0.1605424 | 0.1560657 | 1.0287 | 0.304    | 0.209468137 | count | 1         |
| LONP2       | 0.151648  | 0.1035357 | 1.4647 | 0.143    | 0.209484848 | count | 1         |
| ZNF775      | 0.2148521 | 0.2703858 | 0.7946 | 0.427    | 0.209489268 | count | 1         |
| ZNF486      | 0.2203913 | 0.2678009 | 0.823  | 0.411    | 0.209544211 | count | 1         |
| CCDC186     | 0.1506926 | 0.0855653 | 1.7611 | 0.0783   | 0.209580002 | count | 1         |
| AP000787.1  | 0.3485777 | 0.5285654 | 0.6595 | 0.51     | 0.209672872 | count | 1         |
| ORC3        | 0.1629985 | 0.1428512 | 1.141  | 0.254    | 0.209712729 | count | 1         |

|             |           |           |        |        |             |       |   |
|-------------|-----------|-----------|--------|--------|-------------|-------|---|
| ADGRA3      | 0.199419  | 0.2259489 | 0.8826 | 0.378  | 0.209796028 | count | 1 |
| CSNK2A1     | 0.1527423 | 0.0993029 | 1.5381 | 0.124  | 0.209802241 | count | 1 |
| TCEANC      | 0.3492717 | 0.374421  | 0.9328 | 0.351  | 0.210063236 | count | 1 |
| INO80       | 0.1576033 | 0.1354278 | 1.1637 | 0.245  | 0.210334991 | count | 1 |
| SNX19       | 0.168253  | 0.2479876 | 0.6785 | 0.498  | 0.210341514 | count | 1 |
| ZNF17       | 0.4052071 | 0.425267  | 0.9528 | 0.341  | 0.21036379  | count | 1 |
| LINC02166   | 0.5852417 | 0.8079355 | 0.7244 | 0.469  | 0.210422367 | count | 1 |
| PMEL        | 0.5852417 | 0.8282374 | 0.7066 | 0.48   | 0.210422367 | count | 1 |
| CATSPERG    | 0.300522  | 0.3590464 | 0.837  | 0.403  | 0.21046037  | count | 1 |
| CTR9        | 0.1596902 | 0.130937  | 1.2196 | 0.223  | 0.210517174 | count | 1 |
| UBTF        | 0.1529497 | 0.093757  | 1.6313 | 0.103  | 0.21063298  | count | 1 |
| HDHD2       | 0.178383  | 0.179996  | 0.991  | 0.322  | 0.210699288 | count | 1 |
| PLSCR1      | 0.1496647 | 0.0711416 | 2.1038 | 0.0355 | 0.21072216  | count | 1 |
| SPNS1       | 0.1644931 | 0.1583399 | 1.0389 | 0.299  | 0.210756295 | count | 1 |
| FIG4        | 0.2059007 | 0.2709683 | 0.7599 | 0.447  | 0.211292218 | count | 1 |
| ZNRF1       | 0.1779513 | 0.2061925 | 0.863  | 0.388  | 0.211430223 | count | 1 |
| DVL2        | 0.1931791 | 0.183547  | 1.0525 | 0.293  | 0.211502965 | count | 1 |
| PPT1        | 0.1526029 | 0.0908073 | 1.6805 | 0.0929 | 0.211525012 | count | 1 |
| HSPB6       | 0.1512484 | 0.0756275 | 1.9999 | 0.0456 | 0.211535571 | count | 1 |
| AC010889.1  | 1.777956  | 1.2632975 | 1.4074 | 0.159  | 0.211562523 | count | 1 |
| AC087500.1  | 0.4078829 | 0.4838823 | 0.8429 | 0.399  | 0.211636199 | count | 1 |
| NKAP        | 0.1531628 | 0.0849394 | 1.8032 | 0.0714 | 0.211838073 | count | 1 |
| USP46       | 0.1579243 | 0.1404229 | 1.1246 | 0.261  | 0.211850384 | count | 1 |
| ERC1        | 0.155504  | 0.1226848 | 1.2675 | 0.205  | 0.211863705 | count | 1 |
| SEL1L2      | 0.5901105 | 1.074838  | 0.549  | 0.583  | 0.211917186 | count | 1 |
| ZNF252P-AS1 | 0.5901105 | 1.268135  | 0.4653 | 0.642  | 0.211917186 | count | 1 |
| SLC35G5     | 0.5901105 | 1.435639  | 0.411  | 0.681  | 0.211917186 | count | 1 |
| AL390066.1  | 0.5901105 | 1.6324559 | 0.3615 | 0.7178 | 0.211917186 | count | 1 |
| ARCN1       | 0.1520973 | 0.0849099 | 1.7913 | 0.0733 | 0.212035188 | count | 1 |
| IBTK        | 0.165149  | 0.1387163 | 1.1906 | 0.234  | 0.212035403 | count | 1 |
| AC006254.1  | 0.9891457 | 0.6417627 | 1.5413 | 0.123  | 0.212143609 | count | 1 |
| EPN2        | 0.1552649 | 0.1003472 | 1.5473 | 0.122  | 0.21223324  | count | 1 |
| ATG101      | 0.1565551 | 0.1054742 | 1.4843 | 0.138  | 0.212259908 | count | 1 |
| ACTR3C      | 0.7272463 | 0.664977  | 1.0936 | 0.274  | 0.212295559 | count | 1 |
| MTMR10      | 0.2130041 | 0.3295866 | 0.6463 | 0.518  | 0.212308582 | count | 1 |
| AC009065.4  | 0.7276107 | 0.6393406 | 1.1381 | 0.255  | 0.212381288 | count | 1 |
| AC074032.1  | 0.1918596 | 0.2183342 | 0.8787 | 0.38   | 0.21240475  | count | 1 |
| AC005523.2  | 0.2180339 | 0.427374  | 0.5102 | 0.61   | 0.212523619 | count | 1 |
| LY96        | 0.1680965 | 0.1428229 | 1.177  | 0.239  | 0.21256087  | count | 1 |
| CEP83       | 0.1818252 | 0.2160734 | 0.8415 | 0.4    | 0.212693591 | count | 1 |
| ZNF830      | 0.1593422 | 0.126831  | 1.2563 | 0.209  | 0.212744462 | count | 1 |
| MMP16       | 0.1831655 | 0.2628684 | 0.6968 | 0.486  | 0.212781093 | count | 1 |
| COX19       | 0.1646471 | 0.1502855 | 1.0956 | 0.273  | 0.21283251  | count | 1 |
| SHOC2       | 0.1560788 | 0.1002598 | 1.5567 | 0.12   | 0.212903383 | count | 1 |
| ZBTB1       | 0.1615875 | 0.1431544 | 1.1288 | 0.259  | 0.213007679 | count | 1 |

|            |           |           |        |          |             |       |           |
|------------|-----------|-----------|--------|----------|-------------|-------|-----------|
| BLOC1S3    | 0.2533082 | 0.2730318 | 0.9278 | 0.354    | 0.213082711 | count | 1         |
| UCKL1      | 0.1770917 | 0.1669092 | 1.061  | 0.289    | 0.213224782 | count | 1         |
| USP6NL     | 0.1880383 | 0.2655603 | 0.7081 | 0.479    | 0.213287166 | count | 1         |
| MAGED1     | 0.1599936 | 0.1151248 | 1.3897 | 0.165    | 0.213414566 | count | 1         |
| PREB       | 0.1703514 | 0.1819025 | 0.9365 | 0.349    | 0.213594587 | count | 1         |
| PDE8A      | 0.1805236 | 0.2301724 | 0.7843 | 0.433    | 0.213837792 | count | 1         |
| ZNF720     | 0.1751717 | 0.1676229 | 1.045  | 0.296    | 0.213838729 | count | 1         |
| STXBP5     | 0.2084759 | 0.2889089 | 0.7216 | 0.471    | 0.213885574 | count | 1         |
| TRAPPC5    | 1.0008351 | 0.8927822 | 1.121  | 0.262    | 0.213928901 | count | 1         |
| SMIM15     | 0.154963  | 0.0845398 | 1.833  | 0.0669   | 0.214054929 | count | 1         |
| USP51      | 0.1774723 | 0.1817056 | 0.9767 | 0.329    | 0.214199854 | count | 1         |
| ZNF728     | 0.249241  | 0.3616689 | 0.6891 | 0.491    | 0.214229666 | count | 1         |
| GXYLT1     | 0.1851383 | 0.2012225 | 0.9201 | 0.358    | 0.214274471 | count | 1         |
| RBBP6      | 0.1544126 | 0.1001555 | 1.5417 | 0.123    | 0.214496383 | count | 1         |
| RAPGEF4    | 1.8329016 | 1.6210346 | 1.1307 | 0.2583   | 0.214544286 | count | 1         |
| SHPRH      | 0.1573019 | 0.1100938 | 1.4288 | 0.153    | 0.214618268 | count | 1         |
| SFXN3      | 0.1660525 | 0.1478301 | 1.1233 | 0.261    | 0.214639582 | count | 1         |
| DYNC11I    | 0.1617297 | 0.1806181 | 0.8954 | 0.371    | 0.214768613 | count | 1         |
| JMJD1C     | 0.1531252 | 0.0725299 | 2.1112 | 0.0348   | 0.21519161  | count | 1         |
| ITPRIPL1   | 0.218438  | 0.3928771 | 0.556  | 0.578    | 0.215315308 | count | 1         |
| CGGBP1     | 0.1537906 | 0.0807923 | 1.9035 | 0.057    | 0.215328788 | count | 1         |
| YBX3       | 0.1500994 | 0.0340052 | 4.414  | 1.04E-05 | 0.21539449  | count | 0.2395744 |
| AC073349.1 | 0.3079473 | 0.5656677 | 0.5444 | 0.586    | 0.215399832 | count | 1         |
| AVPI1      | 0.1640507 | 0.1332378 | 1.2313 | 0.218    | 0.215408006 | count | 1         |
| AC026401.3 | 0.2860678 | 0.3935544 | 0.7269 | 0.467    | 0.215539098 | count | 1         |
| SETBP1     | 0.1628717 | 0.1374868 | 1.1846 | 0.236    | 0.215579138 | count | 1         |
| SHISAL1    | 0.4584988 | 0.7007621 | 0.6543 | 0.513    | 0.215641669 | count | 1         |
| KIAA1147   | 0.1982227 | 0.2905441 | 0.6822 | 0.495    | 0.215674331 | count | 1         |
| BOLA1      | 0.1663302 | 0.1343501 | 1.238  | 0.216    | 0.21575744  | count | 1         |
| NCLN       | 0.1903664 | 0.2066266 | 0.9213 | 0.357    | 0.21589469  | count | 1         |
| CFHR1      | 1.863643  | 1.013809  | 1.8383 | 0.0661   | 0.216150342 | count | 1         |
| ESYT2      | 0.1566022 | 0.103167  | 1.5179 | 0.129    | 0.216188995 | count | 1         |
| AC108488.1 | 0.2170585 | 0.3066635 | 0.7078 | 0.479    | 0.216265527 | count | 1         |
| EDA        | 0.2171088 | 0.2611012 | 0.8315 | 0.406    | 0.2163146   | count | 1         |
| GLE1       | 0.2343379 | 0.2564302 | 0.9138 | 0.361    | 0.216316694 | count | 1         |
| MTMR4      | 0.184982  | 0.2261882 | 0.8178 | 0.414    | 0.216346475 | count | 1         |
| HP1BP3     | 0.1521997 | 0.0532395 | 2.8588 | 0.00428  | 0.216358303 | count | 1         |
| GOT2       | 0.1776776 | 0.2108161 | 0.8428 | 0.399    | 0.216409463 | count | 1         |
| HLTF       | 0.1557732 | 0.0929783 | 1.6754 | 0.0939   | 0.21647604  | count | 1         |
| ZFYVE16    | 0.1579237 | 0.1136672 | 1.3894 | 0.165    | 0.216490561 | count | 1         |
| METTL14    | 0.1658746 | 0.172677  | 0.9606 | 0.337    | 0.216556031 | count | 1         |
| FAM53B     | 0.2876224 | 0.4295204 | 0.6696 | 0.503    | 0.216659635 | count | 1         |
| TRO        | 0.3409908 | 0.4766646 | 0.7154 | 0.474    | 0.216855071 | count | 1         |
| RIOX1      | 0.2154588 | 0.2592716 | 0.831  | 0.406    | 0.216866559 | count | 1         |
| INTS8      | 0.2047332 | 0.2280424 | 0.8978 | 0.369    | 0.216878886 | count | 1         |

|            |           |           |        |         |             |       |   |
|------------|-----------|-----------|--------|---------|-------------|-------|---|
| DIS3L2     | 0.2006211 | 0.2476809 | 0.81   | 0.418   | 0.216911051 | count | 1 |
| ZNF880     | 0.1636234 | 0.1634258 | 1.0012 | 0.317   | 0.216928101 | count | 1 |
| ZNF658     | 0.2711195 | 0.2992501 | 0.9062 | 0.365   | 0.216935219 | count | 1 |
| NATD1      | 0.2202426 | 0.383503  | 0.5743 | 0.566   | 0.217055528 | count | 1 |
| DIAPH1     | 0.1674016 | 0.1362674 | 1.2285 | 0.219   | 0.217140011 | count | 1 |
| C17orf67   | 0.1962    | 0.2593356 | 0.7565 | 0.449   | 0.217142132 | count | 1 |
| AC008764.8 | 0.5208962 | 0.4338555 | 1.2006 | 0.23    | 0.217189022 | count | 1 |
| WDR92      | 0.1962806 | 0.2806662 | 0.6993 | 0.484   | 0.217230066 | count | 1 |
| ASH1L      | 0.1552281 | 0.079186  | 1.9603 | 0.05    | 0.21733867  | count | 1 |
| SCFD1      | 0.1605782 | 0.1001251 | 1.6038 | 0.109   | 0.217372356 | count | 1 |
| SEC31A     | 0.1534098 | 0.0613775 | 2.4994 | 0.0125  | 0.217406486 | count | 1 |
| TMEM91     | 0.1690491 | 0.1324038 | 1.2768 | 0.202   | 0.217453664 | count | 1 |
| CYP46A1    | 0.3251958 | 0.6330878 | 0.5137 | 0.608   | 0.217481967 | count | 1 |
| N4BP2      | 0.2357254 | 0.222354  | 1.0601 | 0.289   | 0.217563533 | count | 1 |
| LINC01290  | 0.2720918 | 0.6301221 | 0.4318 | 0.666   | 0.217625226 | count | 1 |
| PPIC       | 0.1529182 | 0.050366  | 3.0361 | 0.00241 | 0.217725895 | count | 1 |
| SLC35E2B   | 0.1928708 | 0.2892195 | 0.6669 | 0.505   | 0.217728358 | count | 1 |
| PDRG1      | 0.166923  | 0.1299565 | 1.2845 | 0.199   | 0.217752458 | count | 1 |
| VPS52      | 0.2236762 | 0.308658  | 0.7247 | 0.469   | 0.217899163 | count | 1 |
| CRCP       | 0.1624528 | 0.1358136 | 1.1961 | 0.232   | 0.217903981 | count | 1 |
| MRPL50     | 0.159325  | 0.1107858 | 1.4381 | 0.15    | 0.21791144  | count | 1 |
| MROH8      | 0.5229716 | 0.5327945 | 0.9816 | 0.326   | 0.217948829 | count | 1 |
| MAP2K5     | 0.2029347 | 0.2505488 | 0.81   | 0.418   | 0.217972779 | count | 1 |
| CEP135     | 0.2126169 | 0.2390103 | 0.8896 | 0.374   | 0.218053012 | count | 1 |
| KSR1       | 0.3891779 | 0.5389908 | 0.722  | 0.47    | 0.218152968 | count | 1 |
| PMF1-BGLAP | 0.7525205 | 1.0098983 | 0.7451 | 0.456   | 0.21819413  | count | 1 |
| SLC30A4    | 0.2240233 | 0.2829774 | 0.7917 | 0.429   | 0.218229642 | count | 1 |
| BIRC6      | 0.1622015 | 0.1338091 | 1.2122 | 0.226   | 0.218238215 | count | 1 |
| SRP54      | 0.1594811 | 0.0873954 | 1.8248 | 0.0681  | 0.218309624 | count | 1 |
| STXBP3     | 0.1595281 | 0.116448  | 1.37   | 0.171   | 0.21832802  | count | 1 |
| ZNF354B    | 0.1943488 | 0.1862742 | 1.0433 | 0.297   | 0.218364598 | count | 1 |
| POLR3B     | 0.2405137 | 0.4200581 | 0.5726 | 0.567   | 0.218442204 | count | 1 |
| FAM20C     | 0.1690188 | 0.1384007 | 1.2212 | 0.222   | 0.218453095 | count | 1 |
| AAMDC      | 0.1545213 | 0.0606819 | 2.5464 | 0.0109  | 0.218505696 | count | 1 |
| PLEKHM2    | 0.1606405 | 0.1088282 | 1.4761 | 0.14    | 0.218564662 | count | 1 |
| TMEM241    | 0.2406848 | 0.3845674 | 0.6259 | 0.531   | 0.218593272 | count | 1 |
| ZNF343     | 0.2903338 | 0.5461721 | 0.5316 | 0.595   | 0.218612569 | count | 1 |
| FAM71A     | 1.033376  | 0.789695  | 1.3086 | 0.191   | 0.218818199 | count | 1 |
| FGF12      | 1.033376  | 0.8596402 | 1.2021 | 0.229   | 0.218818199 | count | 1 |
| NAIF1      | 0.2907042 | 0.3481373 | 0.835  | 0.404   | 0.218879217 | count | 1 |
| RMI2       | 0.6130426 | 0.8596477 | 0.7131 | 0.476   | 0.218900263 | count | 1 |
| CDK7       | 0.1828057 | 0.2345042 | 0.7795 | 0.436   | 0.21892494  | count | 1 |
| SCO1       | 0.1689699 | 0.1587549 | 1.0643 | 0.287   | 0.218974722 | count | 1 |
| SIAH2      | 0.1682122 | 0.1576517 | 1.067  | 0.286   | 0.219084628 | count | 1 |
| LEMD3      | 0.1850137 | 0.1899659 | 0.9739 | 0.33    | 0.219102168 | count | 1 |



|             |           |           |        |          |             |       |   |
|-------------|-----------|-----------|--------|----------|-------------|-------|---|
| SGK1        | 0.170711  | 0.1925358 | 0.8866 | 0.375    | 0.219135223 | count | 1 |
| MAGEH1      | 0.1572068 | 0.0812366 | 1.9352 | 0.053    | 0.219262276 | count | 1 |
| AL022323.4  | 1.0366488 | 0.6155845 | 1.684  | 0.0923   | 0.219303442 | count | 1 |
| PPP3CA      | 0.1593691 | 0.0910454 | 1.7504 | 0.0801   | 0.21938113  | count | 1 |
| YIPF3       | 0.1553297 | 0.0645493 | 2.4064 | 0.0162   | 0.219430463 | count | 1 |
| LINC01001   | 1.0383045 | 1.070923  | 0.9695 | 0.332    | 0.219548462 | count | 1 |
| CDC42SE1    | 0.1651855 | 0.1334732 | 1.2376 | 0.216    | 0.21956473  | count | 1 |
| SHPK        | 0.3287614 | 0.5944864 | 0.553  | 0.58     | 0.219732704 | count | 1 |
| KRT10       | 0.1541156 | 0.044691  | 3.4485 | 6.00E-04 | 0.219972985 | count | 1 |
| CCDC142     | 0.4689396 | 0.391571  | 1.1976 | 0.231    | 0.220047331 | count | 1 |
| ALG10       | 0.4257715 | 0.3462855 | 1.2295 | 0.219    | 0.220101351 | count | 1 |
| IP6K1       | 0.1890573 | 0.1974342 | 0.9576 | 0.338    | 0.220314752 | count | 1 |
| NSUN5       | 0.1732142 | 0.201333  | 0.8603 | 0.39     | 0.220365781 | count | 1 |
| ZSCAN20     | 0.6179361 | 0.5979147 | 1.0335 | 0.301    | 0.220378126 | count | 1 |
| AC005746.2  | 0.3938964 | 0.4887802 | 0.8059 | 0.42     | 0.220592802 | count | 1 |
| SGK494      | 0.3681701 | 0.8010697 | 0.4596 | 0.646    | 0.220649463 | count | 1 |
| CCNG2       | 0.1712755 | 0.1175695 | 1.4568 | 0.145    | 0.2207324   | count | 1 |
| CIAPIN1     | 0.1797868 | 0.1567553 | 1.1469 | 0.251    | 0.220766395 | count | 1 |
| IER3IP1     | 0.1599573 | 0.0825207 | 1.9384 | 0.0527   | 0.221002262 | count | 1 |
| COL12A1     | 0.1614424 | 0.1309167 | 1.2332 | 0.218    | 0.221214074 | count | 1 |
| HAUS8       | 0.2634119 | 0.2794852 | 0.9425 | 0.346    | 0.22128894  | count | 1 |
| ANKRD13C    | 0.190617  | 0.1835075 | 1.0387 | 0.299    | 0.221338085 | count | 1 |
| RPUSD3      | 0.1698899 | 0.1494916 | 1.1365 | 0.256    | 0.221432264 | count | 1 |
| FICD        | 0.1810739 | 0.2132332 | 0.8492 | 0.396    | 0.221442801 | count | 1 |
| AGPAT4      | 0.1971712 | 0.2632021 | 0.7491 | 0.454    | 0.221492901 | count | 1 |
| FAM20A      | 0.2701668 | 0.2644473 | 1.0216 | 0.307    | 0.221620471 | count | 1 |
| TMEM179B    | 0.1568418 | 0.0619123 | 2.5333 | 0.0113   | 0.221687394 | count | 1 |
| LYN         | 0.2369462 | 0.3710324 | 0.6386 | 0.523    | 0.221854642 | count | 1 |
| BMS1        | 0.1702245 | 0.1318058 | 1.2915 | 0.197    | 0.221866169 | count | 1 |
| HOMER1      | 0.2532945 | 0.4367417 | 0.58   | 0.562    | 0.221870617 | count | 1 |
| AC093323.1  | 0.1869582 | 0.2252586 | 0.83   | 0.407    | 0.222022648 | count | 1 |
| DLG5        | 0.1996595 | 0.2373064 | 0.8414 | 0.4      | 0.222065138 | count | 1 |
| DNAJA1      | 0.1555966 | 0.0530409 | 2.9335 | 0.0034   | 0.222110636 | count | 1 |
| NOL8        | 0.1673495 | 0.117305  | 1.4266 | 0.154    | 0.222200864 | count | 1 |
| GOSR1       | 0.1615087 | 0.0918752 | 1.7579 | 0.0788   | 0.222319715 | count | 1 |
| C17orf80    | 0.189569  | 0.2122491 | 0.8931 | 0.372    | 0.222378083 | count | 1 |
| FLYWCH2     | 0.1612969 | 0.090289  | 1.7864 | 0.0741   | 0.222421175 | count | 1 |
| AC099850.1  | 0.318588  | 0.342712  | 0.9296 | 0.353    | 0.222454846 | count | 1 |
| AP001505.1  | 1.0581053 | 0.6122118 | 1.7283 | 0.084    | 0.22245539  | count | 1 |
| GPATCH8     | 0.1614856 | 0.1081466 | 1.4932 | 0.135    | 0.222470198 | count | 1 |
| TMEM254-AS1 | 0.6249995 | 0.8223366 | 0.76   | 0.447    | 0.222503698 | count | 1 |
| SRL         | 1.0588056 | 0.7801811 | 1.3571 | 0.175    | 0.222557413 | count | 1 |
| POLA2       | 0.3977727 | 0.5278246 | 0.7536 | 0.451    | 0.222593272 | count | 1 |
| FNDC3B      | 0.1616014 | 0.1132181 | 1.4273 | 0.154    | 0.222629373 | count | 1 |
| CALHM5      | 0.187478  | 0.1616206 | 1.16   | 0.246    | 0.2226336   | count | 1 |

|            |           |           |        |         |             |       |   |
|------------|-----------|-----------|--------|---------|-------------|-------|---|
| KRT7       | 0.1599901 | 0.2025148 | 0.79   | 0.43    | 0.2227093   | count | 1 |
| SLC7A6OS   | 0.1785156 | 0.1824442 | 0.9785 | 0.328   | 0.222726555 | count | 1 |
| USP14      | 0.1614121 | 0.0949564 | 1.6999 | 0.0892  | 0.222880085 | count | 1 |
| TECR       | 0.1577782 | 0.065054  | 2.4253 | 0.0153  | 0.222885911 | count | 1 |
| PCGF6      | 0.1834748 | 0.1844673 | 0.9946 | 0.32    | 0.222918486 | count | 1 |
| EIF2B3     | 0.1655781 | 0.1203927 | 1.3753 | 0.169   | 0.222928294 | count | 1 |
| RFC2       | 0.1812219 | 0.1523512 | 1.1895 | 0.234   | 0.222944941 | count | 1 |
| TBC1D22B   | 0.3339518 | 0.5480925 | 0.6093 | 0.542   | 0.223003515 | count | 1 |
| HERPUD2    | 0.1690617 | 0.1598544 | 1.0576 | 0.29    | 0.22308772  | count | 1 |
| ZNF530     | 0.6271211 | 0.6656404 | 0.9421 | 0.346   | 0.223140416 | count | 1 |
| HIST1H3A   | 0.7742893 | 0.7748234 | 0.9993 | 0.318   | 0.223196784 | count | 1 |
| SLC30A7    | 0.1922812 | 0.1674228 | 1.1485 | 0.251   | 0.223248029 | count | 1 |
| IARS2      | 0.1658069 | 0.0963005 | 1.7218 | 0.0852  | 0.223394815 | count | 1 |
| LINC00665  | 0.2245153 | 0.2761301 | 0.8131 | 0.416   | 0.223534224 | count | 1 |
| AC073508.3 | 0.3733583 | 0.5262376 | 0.7095 | 0.478   | 0.223540864 | count | 1 |
| LIN7C      | 0.1688615 | 0.1187799 | 1.4216 | 0.155   | 0.223598195 | count | 1 |
| TTF2       | 0.2069584 | 0.259233  | 0.7983 | 0.425   | 0.223652567 | count | 1 |
| ARF5       | 0.1590065 | 0.0703883 | 2.259  | 0.0239  | 0.223692803 | count | 1 |
| A2M-AS1    | 0.2426046 | 0.3243342 | 0.748  | 0.455   | 0.223739005 | count | 1 |
| MSANTD4    | 0.1874553 | 0.1734341 | 1.0808 | 0.28    | 0.223843661 | count | 1 |
| CCDC50     | 0.1610172 | 0.0829727 | 1.9406 | 0.0524  | 0.223844444 | count | 1 |
| DENND5B    | 0.1908887 | 0.2954974 | 0.646  | 0.518   | 0.223909077 | count | 1 |
| DDX17      | 0.1573621 | 0.06234   | 2.5243 | 0.0116  | 0.223967162 | count | 1 |
| NAA50      | 0.1661629 | 0.1506338 | 1.1031 | 0.27    | 0.224106759 | count | 1 |
| YTHDF2     | 0.1649042 | 0.1009346 | 1.6338 | 0.102   | 0.224111446 | count | 1 |
| NEK8       | 0.3357269 | 0.3764826 | 0.8917 | 0.373   | 0.22412063  | count | 1 |
| ZFAND3     | 0.1672853 | 0.1258203 | 1.3296 | 0.184   | 0.224271872 | count | 1 |
| KCTD18     | 0.1830643 | 0.2288048 | 0.8001 | 0.424   | 0.224311599 | count | 1 |
| FBF1       | 0.5406289 | 0.5162389 | 1.0472 | 0.295   | 0.224378349 | count | 1 |
| TCTEX1D2   | 0.1919367 | 0.1838527 | 1.044  | 0.297   | 0.224388879 | count | 1 |
| PHLDB3     | 0.19981   | 0.2778532 | 0.7191 | 0.472   | 0.224416508 | count | 1 |
| PTGR2      | 0.2333703 | 0.2763721 | 0.8444 | 0.398   | 0.224417119 | count | 1 |
| TTC28      | 0.1851914 | 0.1662885 | 1.1137 | 0.265   | 0.224479061 | count | 1 |
| KCNK2      | 0.780746  | 0.7035214 | 1.1098 | 0.267   | 0.224666799 | count | 1 |
| PHF20L1    | 0.1620132 | 0.0924055 | 1.7533 | 0.0796  | 0.224834493 | count | 1 |
| AP3S1      | 0.1579073 | 0.056143  | 2.8126 | 0.00494 | 0.224877342 | count | 1 |
| MFS10      | 0.1628419 | 0.085097  | 1.9136 | 0.0557  | 0.224979267 | count | 1 |
| BICRA      | 0.3103776 | 0.4968877 | 0.6246 | 0.532   | 0.225290838 | count | 1 |
| FAM85B     | 2.0571899 | 1.298665  | 1.5841 | 0.113   | 0.225307824 | count | 1 |
| SPINDOC    | 0.2343211 | 0.3340353 | 0.7015 | 0.483   | 0.225309076 | count | 1 |
| PKP4       | 0.2485012 | 0.3307324 | 0.7514 | 0.452   | 0.225487309 | count | 1 |
| ABHD16A    | 0.3379314 | 0.7304825 | 0.4626 | 0.644   | 0.225506888 | count | 1 |
| HDLBP      | 0.1592146 | 0.0583997 | 2.7263 | 0.00644 | 0.225519158 | count | 1 |
| HEXDC      | 0.1769785 | 0.1721682 | 1.0279 | 0.304   | 0.225652273 | count | 1 |
| PI4KB      | 0.1838145 | 0.1839426 | 0.9993 | 0.318   | 0.225670285 | count | 1 |

|            |           |           |        |          |             |       |   |
|------------|-----------|-----------|--------|----------|-------------|-------|---|
| CLIP1      | 0.1629357 | 0.0913056 | 1.7845 | 0.0744   | 0.225708    | count | 1 |
| PAFAH1B2   | 0.1694815 | 0.1072048 | 1.5809 | 0.114    | 0.225807217 | count | 1 |
| AKAP10     | 0.2064559 | 0.242565  | 0.8511 | 0.395    | 0.225814615 | count | 1 |
| YPEL4      | 0.257984  | 0.2994882 | 0.8614 | 0.389    | 0.225847416 | count | 1 |
| ITGB4      | 0.4380407 | 0.478048  | 0.9163 | 0.36     | 0.225865667 | count | 1 |
| STX8       | 0.1635945 | 0.0878381 | 1.8625 | 0.0626   | 0.225984696 | count | 1 |
| 7-Mar      | 0.1655457 | 0.0961864 | 1.7211 | 0.0853   | 0.22604503  | count | 1 |
| KNSTRN     | 0.3117793 | 0.3373205 | 0.9243 | 0.355    | 0.226258129 | count | 1 |
| ZNF221     | 0.4838907 | 0.539486  | 0.8969 | 0.37     | 0.226315406 | count | 1 |
| ATG13      | 0.1923893 | 0.2391943 | 0.8043 | 0.421    | 0.226366839 | count | 1 |
| GPATCH1    | 0.197259  | 0.2393941 | 0.824  | 0.41     | 0.226406593 | count | 1 |
| HYAL1      | 2.0829904 | 1.2527209 | 1.6628 | 0.0964   | 0.226412108 | count | 1 |
| RAP1GAP2   | 1.0857584 | 1.0809956 | 1.0044 | 0.315    | 0.226443424 | count | 1 |
| AC011444.2 | 1.0857584 | 1.0809956 | 1.0044 | 0.315    | 0.226443424 | count | 1 |
| AC016708.1 | 1.0857584 | 1.345782  | 0.8068 | 0.42     | 0.226443424 | count | 1 |
| ACAT1      | 0.1621481 | 0.0786405 | 2.0619 | 0.0393   | 0.22660374  | count | 1 |
| ITGA9      | 0.1945598 | 0.2686137 | 0.7243 | 0.469    | 0.226652622 | count | 1 |
| PPA2       | 0.1696689 | 0.1288918 | 1.3164 | 0.188    | 0.226682549 | count | 1 |
| SEC24C     | 0.1947055 | 0.2513715 | 0.7746 | 0.439    | 0.226820382 | count | 1 |
| LAMP1      | 0.1598086 | 0.0485484 | 3.2917 | 0.00101  | 0.22691598  | count | 1 |
| ZNF283     | 0.2214576 | 0.3937457 | 0.5624 | 0.574    | 0.226938733 | count | 1 |
| AL121601.1 | 1.0896181 | 0.8001934 | 1.3617 | 0.173    | 0.226993461 | count | 1 |
| YWHAE      | 0.1591551 | 0.0443286 | 3.5904 | 0.000335 | 0.227030898 | count | 1 |
| MUTYH      | 0.236287  | 0.2738458 | 0.8628 | 0.388    | 0.22715269  | count | 1 |
| FBXO36     | 0.2648663 | 0.3284962 | 0.8063 | 0.42     | 0.227208135 | count | 1 |
| GSTM2      | 0.1875921 | 0.2757819 | 0.6802 | 0.496    | 0.227362025 | count | 1 |
| STAG3      | 0.6413081 | 0.6130149 | 1.0462 | 0.296    | 0.227377166 | count | 1 |
| AC010680.3 | 2.1082229 | 1.35027   | 1.5613 | 0.119    | 0.227467289 | count | 1 |
| ACAD10     | 0.3588631 | 0.4374612 | 0.8203 | 0.412    | 0.227491346 | count | 1 |
| MYO3A      | 0.642159  | 0.6897431 | 0.931  | 0.352    | 0.22763012  | count | 1 |
| RLIM       | 0.1827831 | 0.1949    | 0.9378 | 0.348    | 0.227643551 | count | 1 |
| PLA2G4C    | 0.196134  | 0.1830171 | 1.0717 | 0.284    | 0.227668147 | count | 1 |
| RARS2      | 0.1739552 | 0.1399446 | 1.243  | 0.214    | 0.227719252 | count | 1 |
| DCAF6      | 0.1795323 | 0.1610892 | 1.1145 | 0.265    | 0.227795242 | count | 1 |
| PWWP2A     | 0.168044  | 0.1295253 | 1.2974 | 0.195    | 0.227854719 | count | 1 |
| SEC13      | 0.1642743 | 0.0847174 | 1.9391 | 0.0526   | 0.22788759  | count | 1 |
| ERGIC1     | 0.1662899 | 0.0958305 | 1.7353 | 0.0828   | 0.228108062 | count | 1 |
| IKBKE      | 0.359936  | 0.5334749 | 0.6747 | 0.5      | 0.228127398 | count | 1 |
| BSCL2      | 0.6444684 | 0.7317276 | 0.8807 | 0.379    | 0.228316024 | count | 1 |
| CPSF4      | 0.1953559 | 0.1979876 | 0.9867 | 0.324    | 0.228340203 | count | 1 |
| FLVCR2     | 2.132908  | 0.9336709 | 2.2844 | 0.0224   | 0.228476212 | count | 1 |
| KDM1B      | 0.1969608 | 0.2064346 | 0.9541 | 0.34     | 0.228616399 | count | 1 |
| DDOST      | 0.1638564 | 0.0666116 | 2.4599 | 0.0139   | 0.228619036 | count | 1 |
| WDR47      | 0.2000633 | 0.1750465 | 1.1429 | 0.253    | 0.228667584 | count | 1 |
| SPG21      | 0.1703976 | 0.1285692 | 1.3253 | 0.185    | 0.228703238 | count | 1 |

|            |           |           |        |         |             |       |   |
|------------|-----------|-----------|--------|---------|-------------|-------|---|
| NPAS3      | 0.3430495 | 0.4168282 | 0.823  | 0.411   | 0.228720746 | count | 1 |
| AL118558.3 | 0.3609489 | 0.3464486 | 1.0419 | 0.298   | 0.228727625 | count | 1 |
| CD8B       | 0.4898922 | 0.766563  | 0.6391 | 0.523   | 0.228817952 | count | 1 |
| AL133453.1 | 0.2094196 | 0.2262567 | 0.9256 | 0.355   | 0.229005048 | count | 1 |
| SAP130     | 0.2795703 | 0.3169379 | 0.8821 | 0.378   | 0.229040361 | count | 1 |
| RTP4       | 0.2302068 | 0.2505472 | 0.9188 | 0.358   | 0.229074368 | count | 1 |
| KBTBD3     | 0.1850812 | 0.175761  | 1.053  | 0.292   | 0.22932157  | count | 1 |
| PRDM2      | 0.1732382 | 0.1400925 | 1.2366 | 0.216   | 0.229368123 | count | 1 |
| STK36      | 0.3838762 | 0.4725094 | 0.8124 | 0.417   | 0.229382821 | count | 1 |
| CDC23      | 0.2009293 | 0.1951011 | 1.0299 | 0.303   | 0.229644542 | count | 1 |
| NRDC       | 0.164978  | 0.0934166 | 1.766  | 0.0775  | 0.229728221 | count | 1 |
| ASAH1      | 0.1624171 | 0.0589964 | 2.753  | 0.00593 | 0.229795888 | count | 1 |
| MAP3K7CL   | 0.1821191 | 0.1449759 | 1.2562 | 0.209   | 0.229863134 | count | 1 |
| ADPRM      | 0.2030075 | 0.2133998 | 0.9513 | 0.342   | 0.230037624 | count | 1 |
| WDFY3      | 0.1822982 | 0.184714  | 0.9869 | 0.324   | 0.230087589 | count | 1 |
| SLFN5      | 0.1759442 | 0.1390532 | 1.2653 | 0.206   | 0.230144557 | count | 1 |
| SLBP       | 0.1663749 | 0.0951918 | 1.7478 | 0.0806  | 0.23034588  | count | 1 |
| NUP107     | 0.1860896 | 0.1516048 | 1.2275 | 0.22    | 0.230560828 | count | 1 |
| C1QTNF7    | 0.1698169 | 0.1356804 | 1.2516 | 0.211   | 0.230578257 | count | 1 |
| MRPL3      | 0.1664114 | 0.0778984 | 2.1363 | 0.0327  | 0.230792442 | count | 1 |
| SIMC1      | 0.2345774 | 0.2373047 | 0.9885 | 0.323   | 0.230854444 | count | 1 |
| QARS       | 0.1820486 | 0.1507325 | 1.2078 | 0.227   | 0.230966277 | count | 1 |
| ATG12      | 0.1668267 | 0.0904609 | 1.8442 | 0.0652  | 0.230970096 | count | 1 |
| ZNF300     | 0.2374768 | 0.3766195 | 0.6305 | 0.528   | 0.231018771 | count | 1 |
| UBR5       | 0.175204  | 0.1542597 | 1.1358 | 0.256   | 0.231155407 | count | 1 |
| KMT2B      | 0.1794296 | 0.1502635 | 1.1941 | 0.233   | 0.231178814 | count | 1 |
| PRR13      | 0.165165  | 0.0672641 | 2.4555 | 0.0141  | 0.231198998 | count | 1 |
| C1QTNF6    | 0.3470406 | 0.3414361 | 1.0164 | 0.309   | 0.23122245  | count | 1 |
| PHF21A     | 0.1846538 | 0.2128732 | 0.8674 | 0.386   | 0.231393549 | count | 1 |
| LARGE1     | 0.2985809 | 0.3793809 | 0.787  | 0.431   | 0.231454604 | count | 1 |
| IGFBP7-AS1 | 0.3878562 | 0.3889374 | 0.9972 | 0.319   | 0.231586539 | count | 1 |
| CEP41      | 0.2478258 | 0.4264392 | 0.5812 | 0.561   | 0.231763037 | count | 1 |
| FBXO8      | 0.1789301 | 0.1375481 | 1.3009 | 0.193   | 0.231809883 | count | 1 |
| MICU3      | 0.170812  | 0.1183256 | 1.4436 | 0.149   | 0.231925207 | count | 1 |
| CHD7       | 0.8131466 | 0.8566098 | 0.9493 | 0.343   | 0.231948825 | count | 1 |
| ALG14      | 0.1786314 | 0.147235  | 1.2132 | 0.225   | 0.232016573 | count | 1 |
| SSBP4      | 0.165671  | 0.0795605 | 2.0823 | 0.0374  | 0.232047017 | count | 1 |
| AP4M1      | 0.182939  | 0.1984449 | 0.9219 | 0.357   | 0.232088202 | count | 1 |
| FOXK1      | 0.1884086 | 0.2054981 | 0.9168 | 0.359   | 0.232149152 | count | 1 |
| MFSD4A     | 0.3889248 | 0.8498231 | 0.4577 | 0.647   | 0.232177569 | count | 1 |
| METTL6     | 0.2015822 | 0.2148486 | 0.9383 | 0.348   | 0.232201071 | count | 1 |
| CLK1       | 0.1683422 | 0.0976368 | 1.7242 | 0.0848  | 0.232255836 | count | 1 |
| ATL1       | 0.1805024 | 0.1208966 | 1.493  | 0.136   | 0.232326869 | count | 1 |
| NAGA       | 0.1963375 | 0.2078047 | 0.9448 | 0.345   | 0.23236592  | count | 1 |
| NUDT11     | 0.2839776 | 0.3399831 | 0.8353 | 0.404   | 0.232510638 | count | 1 |

|            |           |           |        |          |             |       |            |
|------------|-----------|-----------|--------|----------|-------------|-------|------------|
| ERAL1      | 0.1891038 | 0.1731209 | 1.0923 | 0.275    | 0.232557733 | count | 1          |
| FAM149B1   | 0.3210221 | 0.3957984 | 0.8111 | 0.417    | 0.232624367 | count | 1          |
| TMEM138    | 0.182153  | 0.1638435 | 1.1117 | 0.266    | 0.232732417 | count | 1          |
| PKP2       | 2.244948  | 1.0246826 | 2.1909 | 0.0285   | 0.232779691 | count | 1          |
| CDK5RAP3   | 0.1741032 | 0.1119081 | 1.5558 | 0.12     | 0.23278843  | count | 1          |
| ICA1       | 1.13111   | 1.187196  | 0.9528 | 0.341    | 0.232805754 | count | 1          |
| OTUD1      | 0.1905299 | 0.1512281 | 1.2599 | 0.208    | 0.23290281  | count | 1          |
| GTF2H1     | 0.1835922 | 0.1486119 | 1.2354 | 0.217    | 0.232911198 | count | 1          |
| ERG28      | 0.1719334 | 0.1005603 | 1.7098 | 0.0874   | 0.23337794  | count | 1          |
| CPNE4      | 0.1950234 | 0.3862602 | 0.5049 | 0.614    | 0.233406143 | count | 1          |
| EXOC8      | 0.2079696 | 0.248167  | 0.838  | 0.402    | 0.233449393 | count | 1          |
| PSMD14     | 0.1731733 | 0.111392  | 1.5546 | 0.12     | 0.23368769  | count | 1          |
| VPS35      | 0.1664676 | 0.0658886 | 2.5265 | 0.0116   | 0.233714619 | count | 1          |
| PRKAB1     | 0.2014864 | 0.2540857 | 0.793  | 0.428    | 0.233804909 | count | 1          |
| PACRGL     | 0.2038073 | 0.2403751 | 0.8479 | 0.397    | 0.233824935 | count | 1          |
| RGL3       | 0.1869094 | 0.2525323 | 0.7401 | 0.459    | 0.23384523  | count | 1          |
| WWC2       | 0.1792217 | 0.1768344 | 1.0135 | 0.311    | 0.233889399 | count | 1          |
| FTSJ3      | 0.1919043 | 0.1613943 | 1.189  | 0.235    | 0.234077933 | count | 1          |
| RNFT2      | 0.33652   | 0.5647635 | 0.5959 | 0.551    | 0.234281415 | count | 1          |
| TRPV3      | 2.287959  | 1.616762  | 1.4151 | 0.157    | 0.234317402 | count | 1          |
| GIMAP6     | 2.2879591 | 2.0474147 | 1.1175 | 0.2639   | 0.234317426 | count | 1          |
| AL512625.3 | 0.4569717 | 0.7112074 | 0.6425 | 0.521    | 0.234693068 | count | 1          |
| SLC35C2    | 0.1793189 | 0.1546475 | 1.1595 | 0.246    | 0.234704556 | count | 1          |
| NRXN2      | 0.2943841 | 0.293325  | 1.0036 | 0.316    | 0.234714639 | count | 1          |
| SRRM2      | 0.1638824 | 0.0429499 | 3.8157 | 0.000138 | 0.234740618 | count | 1          |
| ENO3       | 1.1452983 | 0.9536321 | 1.201  | 0.23     | 0.234751275 | count | 1          |
| AC011511.1 | 1.1452983 | 0.9536321 | 1.201  | 0.23     | 0.234751275 | count | 1          |
| GPM6A      | 1.1452983 | 0.9784685 | 1.1705 | 0.242    | 0.234751275 | count | 1          |
| AC087482.1 | 1.1452983 | 1.0460125 | 1.0949 | 0.274    | 0.234751275 | count | 1          |
| BATF2      | 0.2869569 | 0.360027  | 0.797  | 0.425    | 0.234853871 | count | 1          |
| TIGD1      | 0.4574658 | 0.4177889 | 1.095  | 0.274    | 0.23492238  | count | 1          |
| FAM220A    | 0.2316878 | 0.2612795 | 0.8867 | 0.375    | 0.235070516 | count | 1          |
| SIPA1L1    | 0.1771259 | 0.1664079 | 1.0644 | 0.287    | 0.23512494  | count | 1          |
| CLCF1      | 0.2640311 | 0.3823349 | 0.6906 | 0.49     | 0.235170227 | count | 1          |
| PTCD3      | 0.1864095 | 0.167829  | 1.1107 | 0.267    | 0.235239062 | count | 1          |
| MINDY1     | 0.2128674 | 0.3113771 | 0.6836 | 0.494    | 0.235303658 | count | 1          |
| TMEM59     | 0.1638978 | 0.0315884 | 5.1885 | 2.23E-07 | 0.235305657 | count | 0.00521151 |
| DEGS1      | 0.1670543 | 0.0651428 | 2.5644 | 0.0104   | 0.235331305 | count | 1          |
| TEX10      | 0.2421772 | 0.3126524 | 0.7746 | 0.439    | 0.235477911 | count | 1          |
| AL627171.1 | 0.2520141 | 0.3735031 | 0.6747 | 0.5      | 0.235570406 | count | 1          |
| NGRN       | 0.2169069 | 0.2154656 | 1.0067 | 0.314    | 0.235665526 | count | 1          |
| NBEA       | 0.2054732 | 0.3021594 | 0.68   | 0.497    | 0.235711091 | count | 1          |
| AC080038.1 | 0.2063525 | 0.2381565 | 0.8665 | 0.386    | 0.235759854 | count | 1          |
| SRSF5      | 0.1653402 | 0.0469479 | 3.5218 | 0.000434 | 0.235902495 | count | 1          |
| PITPNM2    | 0.6705094 | 0.5002331 | 1.3404 | 0.18     | 0.235984064 | count | 1          |

|            |           |           |        |         |             |       |   |
|------------|-----------|-----------|--------|---------|-------------|-------|---|
| SRSF11     | 0.1658989 | 0.0541705 | 3.0625 | 0.00221 | 0.236041531 | count | 1 |
| C15orf39   | 0.2651194 | 0.3501031 | 0.7573 | 0.449   | 0.236108457 | count | 1 |
| AP001107.9 | 0.5075491 | 0.6154438 | 0.8247 | 0.41    | 0.236135613 | count | 1 |
| REC8       | 0.6718735 | 0.6819696 | 0.9852 | 0.325   | 0.23638241  | count | 1 |
| CDK4       | 0.1709376 | 0.0758904 | 2.2524 | 0.0244  | 0.236432416 | count | 1 |
| SLC35F2    | 0.253012  | 0.304761  | 0.8302 | 0.406   | 0.236476973 | count | 1 |
| PRDM15     | 0.6724752 | 0.6594738 | 1.0197 | 0.308   | 0.236557992 | count | 1 |
| TAF5       | 0.3267874 | 0.3203624 | 1.0201 | 0.308   | 0.236584701 | count | 1 |
| GALNS      | 0.2191483 | 0.2457791 | 0.8916 | 0.373   | 0.236599353 | count | 1 |
| WNT9A      | 2.357348  | 1.398688  | 1.6854 | 0.092   | 0.236672443 | count | 1 |
| SMARCD1    | 0.1875578 | 0.1501765 | 1.2489 | 0.212   | 0.236677562 | count | 1 |
| MXD1       | 0.2063945 | 0.2407695 | 0.8572 | 0.391   | 0.236754006 | count | 1 |
| PLRG1      | 0.1730763 | 0.1036139 | 1.6704 | 0.0949  | 0.236818947 | count | 1 |
| ADCK5      | 0.249947  | 0.3822359 | 0.6539 | 0.513   | 0.236894664 | count | 1 |
| MYOM1      | 0.207569  | 0.2009521 | 1.0329 | 0.302   | 0.237130951 | count | 1 |
| MAGEE1     | 0.4261778 | 0.4615943 | 0.9233 | 0.356   | 0.237145439 | count | 1 |
| KLHL12     | 0.2664056 | 0.2530842 | 1.0526 | 0.293   | 0.237216947 | count | 1 |
| NOL4L      | 0.4268279 | 0.5555177 | 0.7683 | 0.442   | 0.237476282 | count | 1 |
| CERS2      | 0.1721116 | 0.0881244 | 1.9531 | 0.0509  | 0.237479918 | count | 1 |
| ADRA1B     | 0.3573304 | 0.6165943 | 0.5795 | 0.562   | 0.237654327 | count | 1 |
| RUFY1      | 0.1869303 | 0.1348349 | 1.3864 | 0.166   | 0.237696033 | count | 1 |
| ARHGEF6    | 0.2021404 | 0.2478679 | 0.8155 | 0.415   | 0.237706761 | count | 1 |
| PHF12      | 0.2191212 | 0.2281827 | 0.9603 | 0.337   | 0.238030534 | count | 1 |
| PRCD       | 0.512285  | 0.6277499 | 0.8161 | 0.415   | 0.238086925 | count | 1 |
| RAF1       | 0.1826016 | 0.154773  | 1.1798 | 0.238   | 0.238094495 | count | 1 |
| TM2D2      | 0.1753738 | 0.1043452 | 1.6807 | 0.0929  | 0.238099304 | count | 1 |
| C2CD2L     | 0.3424919 | 0.361713  | 0.9469 | 0.344   | 0.238202442 | count | 1 |
| VT11B      | 0.1713119 | 0.075818  | 2.2595 | 0.0239  | 0.238370122 | count | 1 |
| ZBED6      | 0.4286464 | 0.5613882 | 0.7635 | 0.445   | 0.238401187 | count | 1 |
| ST5        | 0.175012  | 0.1476401 | 1.1854 | 0.236   | 0.238421356 | count | 1 |
| MAFTRR     | 0.358616  | 0.5345625 | 0.6709 | 0.502   | 0.238456083 | count | 1 |
| STK40      | 0.203457  | 0.2175845 | 0.9351 | 0.35    | 0.238476732 | count | 1 |
| MTX1       | 0.173603  | 0.1085792 | 1.5989 | 0.11    | 0.23859765  | count | 1 |
| YTHDF3     | 0.1847502 | 0.1641614 | 1.1254 | 0.26    | 0.23866432  | count | 1 |
| ARSK       | 0.1866308 | 0.1542568 | 1.2099 | 0.226   | 0.238678364 | count | 1 |
| DNASE2     | 0.1751379 | 0.0893656 | 1.9598 | 0.0501  | 0.238824754 | count | 1 |
| AC091132.5 | 0.581085  | 0.4490208 | 1.2941 | 0.196   | 0.238874119 | count | 1 |
| ACADL      | 0.1898373 | 0.2052803 | 0.9248 | 0.355   | 0.238874591 | count | 1 |
| DDX23      | 0.1901569 | 0.1936926 | 0.9817 | 0.326   | 0.238934488 | count | 1 |
| CEP44      | 0.1842237 | 0.1321888 | 1.3936 | 0.164   | 0.239038166 | count | 1 |
| SLC25A25   | 0.2053853 | 0.1994278 | 1.0299 | 0.303   | 0.239108245 | count | 1 |
| LMO4       | 0.1687537 | 0.0703332 | 2.3993 | 0.0165  | 0.239148564 | count | 1 |
| AC009501.1 | 1.1782836 | 0.6833384 | 1.7243 | 0.0847  | 0.239193182 | count | 1 |
| DNTTIP2    | 0.1715544 | 0.0922918 | 1.8588 | 0.0631  | 0.239279514 | count | 1 |
| ABRAXAS1   | 0.1816549 | 0.1217599 | 1.4919 | 0.136   | 0.239332556 | count | 1 |

|            |           |           |        |          |             |       |        |
|------------|-----------|-----------|--------|----------|-------------|-------|--------|
| XPR1       | 0.2190705 | 0.3927486 | 0.5578 | 0.577    | 0.239383359 | count | 1      |
| AL080276.2 | 0.5826373 | 0.6876268 | 0.8473 | 0.397    | 0.239423792 | count | 1      |
| TIMM23     | 0.1872328 | 0.155416  | 1.2047 | 0.228    | 0.239702334 | count | 1      |
| EBLN3P     | 0.1755512 | 0.1017543 | 1.7252 | 0.0846   | 0.239722053 | count | 1      |
| RTL8C      | 0.1688554 | 0.056447  | 2.9914 | 0.0028   | 0.239849864 | count | 1      |
| U2AF2      | 0.1915035 | 0.1622102 | 1.1806 | 0.238    | 0.2399098   | count | 1      |
| SFSWAP     | 0.1784543 | 0.1213279 | 1.4708 | 0.141    | 0.239935286 | count | 1      |
| SPACA6     | 0.2237896 | 0.2694021 | 0.8307 | 0.406    | 0.239972707 | count | 1      |
| SQSTM1     | 0.1675206 | 0.0378737 | 4.4231 | 1.00E-05 | 0.240232693 | count | 0.2304 |
| AC020928.1 | 0.2256731 | 0.349115  | 0.6464 | 0.518    | 0.240332558 | count | 1      |
| AC027013.1 | 1.1872929 | 1.0193286 | 1.1648 | 0.244    | 0.240386812 | count | 1      |
| STK24-AS1  | 1.1872929 | 1.1945697 | 0.9939 | 0.32     | 0.240386812 | count | 1      |
| F8         | 0.3323532 | 0.3997776 | 0.8313 | 0.406    | 0.240400194 | count | 1      |
| STX7       | 0.1743248 | 0.0976586 | 1.785  | 0.0743   | 0.240490318 | count | 1      |
| FOXO6      | 0.3211671 | 0.5538364 | 0.5799 | 0.562    | 0.240694286 | count | 1      |
| ATRAID     | 0.1686541 | 0.0415221 | 4.0618 | 4.97E-05 | 0.240754002 | count | 1      |
| AC005884.1 | 0.5865114 | 0.6956742 | 0.8431 | 0.399    | 0.240793508 | count | 1      |
| MATR3      | 0.2261782 | 0.2660518 | 0.8501 | 0.395    | 0.240860457 | count | 1      |
| SETD2      | 0.1773348 | 0.1343112 | 1.3203 | 0.187    | 0.24088578  | count | 1      |
| AC120042.3 | 0.4047274 | 0.742477  | 0.5451 | 0.586    | 0.240885867 | count | 1      |
| FCHO2      | 0.1781038 | 0.1006852 | 1.7689 | 0.077    | 0.240941076 | count | 1      |
| ZNF24      | 0.1737706 | 0.084409  | 2.0587 | 0.0396   | 0.241117422 | count | 1      |
| PCMTD2     | 0.1879574 | 0.1306645 | 1.4385 | 0.15     | 0.241131369 | count | 1      |
| C15orf41   | 0.2625415 | 0.2606644 | 1.0072 | 0.314    | 0.241576123 | count | 1      |
| AL031848.2 | 0.5209092 | 0.8115921 | 0.6418 | 0.521    | 0.241627857 | count | 1      |
| SNUPN      | 0.1836608 | 0.1189797 | 1.5436 | 0.123    | 0.241811237 | count | 1      |
| ADCY7      | 0.2519713 | 0.4668957 | 0.5397 | 0.589    | 0.241831196 | count | 1      |
| FMN2       | 0.5895636 | 0.760124  | 0.7756 | 0.438    | 0.241870524 | count | 1      |
| DPH2       | 0.2770479 | 0.3020104 | 0.9173 | 0.359    | 0.241961052 | count | 1      |
| CDK17      | 0.2110088 | 0.240716  | 0.8766 | 0.381    | 0.241975384 | count | 1      |
| POLR2B     | 0.1805035 | 0.1129811 | 1.5976 | 0.11     | 0.242020886 | count | 1      |
| HIST1H1E   | 0.1766875 | 0.1304172 | 1.3548 | 0.176    | 0.242142946 | count | 1      |
| EID2       | 0.1840442 | 0.1424074 | 1.2924 | 0.196    | 0.242160167 | count | 1      |
| PIKFYVE    | 0.232689  | 0.2207601 | 1.054  | 0.292    | 0.242220918 | count | 1      |
| TMEM86B    | 0.6920301 | 1.143588  | 0.6051 | 0.545    | 0.242229507 | count | 1      |
| FASTKD2    | 0.1928007 | 0.1597284 | 1.2071 | 0.227    | 0.242230664 | count | 1      |
| BACE2      | 0.1749482 | 0.0801951 | 2.1815 | 0.0292   | 0.242282042 | count | 1      |
| ORAI2      | 0.1968397 | 0.1938701 | 1.0153 | 0.31     | 0.242444518 | count | 1      |
| AL024507.2 | 0.6928893 | 0.5900115 | 1.1744 | 0.24     | 0.242477152 | count | 1      |
| ATXN1L     | 0.2194726 | 0.2157689 | 1.0172 | 0.309    | 0.242487537 | count | 1      |
| P3H3       | 0.1823291 | 0.1161975 | 1.5691 | 0.117    | 0.242494793 | count | 1      |
| BAG3       | 0.1776567 | 0.1036495 | 1.714  | 0.0866   | 0.242533243 | count | 1      |
| PLCD1      | 0.2528435 | 0.2457387 | 1.0289 | 0.304    | 0.24264588  | count | 1      |
| XYLT1      | 0.3357142 | 0.525554  | 0.6388 | 0.523    | 0.242700514 | count | 1      |
| TMEM168    | 0.1954476 | 0.1935533 | 1.0098 | 0.313    | 0.242883623 | count | 1      |

|            |           |           |        |          |             |       |   |
|------------|-----------|-----------|--------|----------|-------------|-------|---|
| TMEM143    | 0.5924471 | 0.533132  | 1.1113 | 0.267    | 0.2428863   | count | 1 |
| PIP4P1     | 0.1817123 | 0.1295662 | 1.4025 | 0.161    | 0.242920256 | count | 1 |
| WDR83      | 0.1992691 | 0.1676254 | 1.1888 | 0.235    | 0.242974882 | count | 1 |
| TCF7L1     | 0.1844595 | 0.1471298 | 1.2537 | 0.21     | 0.243009229 | count | 1 |
| LINC01637  | 0.8640268 | 0.8114144 | 1.0648 | 0.287    | 0.243067947 | count | 1 |
| TDRD10     | 2.5791773 | 2.1056259 | 1.2249 | 0.2207   | 0.243254281 | count | 1 |
| PCMT1      | 0.172137  | 0.0606208 | 2.8396 | 0.00454  | 0.243267385 | count | 1 |
| YARS2      | 0.2083159 | 0.2072995 | 1.0049 | 0.315    | 0.24330121  | count | 1 |
| HAS2-AS1   | 0.865192  | 0.5454559 | 1.5862 | 0.113    | 0.243318127 | count | 1 |
| TMEM50B    | 0.1752305 | 0.0775763 | 2.2588 | 0.024    | 0.243329859 | count | 1 |
| BTRC       | 0.2214775 | 0.2291072 | 0.9667 | 0.334    | 0.243341737 | count | 1 |
| CLEC11A    | 0.188083  | 0.1204619 | 1.5613 | 0.119    | 0.243596935 | count | 1 |
| AC233723.1 | 0.5945318 | 0.5084628 | 1.1693 | 0.242    | 0.243619647 | count | 1 |
| CCT6B      | 0.5945318 | 0.5170565 | 1.1498 | 0.25     | 0.243619647 | count | 1 |
| UAP1L1     | 0.3508157 | 0.4672006 | 0.7509 | 0.453    | 0.243652951 | count | 1 |
| YEATS4     | 0.188166  | 0.1492731 | 1.2605 | 0.208    | 0.243703789 | count | 1 |
| SP2-AS1    | 0.337204  | 0.4580348 | 0.7362 | 0.462    | 0.243719272 | count | 1 |
| KHDRBS3    | 0.1921739 | 0.1268674 | 1.5148 | 0.13     | 0.243719544 | count | 1 |
| NCKAP5     | 0.2848644 | 0.3801025 | 0.7494 | 0.454    | 0.243734522 | count | 1 |
| AP003469.4 | 0.8671361 | 0.7722294 | 1.1229 | 0.262    | 0.243735023 | count | 1 |
| ANAPC5     | 0.1746939 | 0.0853236 | 2.0474 | 0.0407   | 0.244031114 | count | 1 |
| ZNF543     | 0.2917612 | 0.4382066 | 0.6658 | 0.506    | 0.244184462 | count | 1 |
| MTFMT      | 0.1924137 | 0.1518258 | 1.2673 | 0.205    | 0.244322875 | count | 1 |
| TMEM248    | 0.1757934 | 0.078227  | 2.2472 | 0.0247   | 0.244421333 | count | 1 |
| KRCC1      | 0.1769002 | 0.0956484 | 1.8495 | 0.0645   | 0.244425867 | count | 1 |
| MRPS18A    | 0.1805255 | 0.1029271 | 1.7539 | 0.0795   | 0.244504562 | count | 1 |
| NSMCE2     | 0.1888706 | 0.1426225 | 1.3243 | 0.185    | 0.244823017 | count | 1 |
| CDK5RAP1   | 0.204219  | 0.1956569 | 1.0438 | 0.297    | 0.244925474 | count | 1 |
| GARS       | 0.1823761 | 0.1356042 | 1.3449 | 0.179    | 0.245002408 | count | 1 |
| CCDC173    | 1.226056  | 1.0021999 | 1.2234 | 0.221    | 0.245428066 | count | 1 |
| TRIB3      | 0.3279607 | 0.5910314 | 0.5549 | 0.579    | 0.245528103 | count | 1 |
| TUBA1A     | 0.1710819 | 0.0472898 | 3.6177 | 0.000301 | 0.245614004 | count | 1 |
| GSK3B      | 0.1870499 | 0.1377901 | 1.3575 | 0.175    | 0.245614198 | count | 1 |
| CYP2R1     | 0.2380571 | 0.3172114 | 0.7505 | 0.453    | 0.245679386 | count | 1 |
| CD99L2     | 0.1974746 | 0.1495871 | 1.3201 | 0.187    | 0.245786699 | count | 1 |
| HCFC1      | 0.1981669 | 0.185722  | 1.067  | 0.286    | 0.245818162 | count | 1 |
| HKR1       | 0.2214409 | 0.2998746 | 0.7384 | 0.46     | 0.245906097 | count | 1 |
| SCAMP3     | 0.1864771 | 0.1535894 | 1.2141 | 0.225    | 0.246102316 | count | 1 |
| ZNF484     | 0.2253466 | 0.2498454 | 0.9019 | 0.367    | 0.246123488 | count | 1 |
| NVL        | 0.2123151 | 0.2317897 | 0.916  | 0.36     | 0.246206996 | count | 1 |
| MCCC1      | 0.2217571 | 0.1897132 | 1.1689 | 0.243    | 0.246251584 | count | 1 |
| TVP23B     | 0.1918564 | 0.1824578 | 1.0515 | 0.293    | 0.246353059 | count | 1 |
| TEDC1      | 0.2480184 | 0.3229859 | 0.7679 | 0.443    | 0.24636838  | count | 1 |
| BASP1      | 0.1776735 | 0.0872686 | 2.0359 | 0.0418   | 0.246378243 | count | 1 |
| CACNA1A    | 0.3550452 | 0.3660869 | 0.9698 | 0.332    | 0.246415894 | count | 1 |



|            |           |           |        |          |             |       |   |
|------------|-----------|-----------|--------|----------|-------------|-------|---|
| INPP1      | 0.1895069 | 0.1338109 | 1.4162 | 0.157    | 0.246463069 | count | 1 |
| SH3GL1     | 0.1883728 | 0.1748202 | 1.0775 | 0.281    | 0.246490353 | count | 1 |
| C2orf76    | 0.1983661 | 0.172743  | 1.1483 | 0.251    | 0.246886844 | count | 1 |
| ABCF2      | 0.4834475 | 0.5256103 | 0.9198 | 0.358    | 0.246902259 | count | 1 |
| AP5M1      | 0.1987618 | 0.1773221 | 1.1209 | 0.262    | 0.246966677 | count | 1 |
| EPHB3      | 0.604408  | 0.6115417 | 0.9883 | 0.323    | 0.247082007 | count | 1 |
| TCF25      | 0.1742437 | 0.0606912 | 2.871  | 0.00412  | 0.247131328 | count | 1 |
| TRAP1      | 0.1875032 | 0.1419316 | 1.3211 | 0.187    | 0.247150967 | count | 1 |
| HMBS       | 0.2780464 | 0.3351961 | 0.8295 | 0.407    | 0.247231745 | count | 1 |
| ZNF69      | 0.3727995 | 0.4252923 | 0.8766 | 0.381    | 0.2472745   | count | 1 |
| ZNF703     | 0.194088  | 0.1127202 | 1.7219 | 0.0852   | 0.247313984 | count | 1 |
| SGMS1      | 0.2037994 | 0.1603871 | 1.2707 | 0.204    | 0.247364571 | count | 1 |
| ZMIZ1-AS1  | 1.2415079 | 1.0616051 | 1.1695 | 0.242    | 0.247395392 | count | 1 |
| CRMP1      | 1.2415079 | 1.0751455 | 1.1547 | 0.248    | 0.247395392 | count | 1 |
| AC008397.2 | 1.2415079 | 1.1812049 | 1.0511 | 0.293    | 0.247395392 | count | 1 |
| WDR3       | 0.2111906 | 0.1886305 | 1.1196 | 0.263    | 0.247428884 | count | 1 |
| IMP3       | 0.174893  | 0.0653038 | 2.6781 | 0.00744  | 0.247492279 | count | 1 |
| RAB7A      | 0.1748839 | 0.0521933 | 3.3507 | 0.000814 | 0.247520751 | count | 1 |
| AEBP2      | 0.1809194 | 0.1126662 | 1.6058 | 0.108    | 0.247571645 | count | 1 |
| GNPDA2     | 0.1848677 | 0.1211834 | 1.5255 | 0.127    | 0.247646211 | count | 1 |
| CCDC66     | 0.1799551 | 0.0974555 | 1.8465 | 0.0649   | 0.247930242 | count | 1 |
| AL158835.1 | 0.6069496 | 0.4564126 | 1.3298 | 0.184    | 0.247969858 | count | 1 |
| PROSER1    | 0.3575209 | 0.3159461 | 1.1316 | 0.258    | 0.248031052 | count | 1 |
| GAB2       | 0.203059  | 0.314183  | 0.6463 | 0.518    | 0.248069813 | count | 1 |
| AFF1       | 0.1939284 | 0.1248365 | 1.5535 | 0.12     | 0.24821579  | count | 1 |
| AC104794.2 | 0.2527942 | 0.2726461 | 0.9272 | 0.354    | 0.248327252 | count | 1 |
| RAE1       | 0.1974397 | 0.1478707 | 1.3352 | 0.182    | 0.248365299 | count | 1 |
| CCDC153    | 0.4870384 | 0.5091891 | 0.9565 | 0.339    | 0.248545909 | count | 1 |
| MASTL      | 0.4870384 | 0.5975805 | 0.815  | 0.415    | 0.248545909 | count | 1 |
| PCCA       | 0.2335965 | 0.2159373 | 1.0818 | 0.279    | 0.248607954 | count | 1 |
| MAP3K6     | 0.2353765 | 0.2236757 | 1.0523 | 0.293    | 0.248703082 | count | 1 |
| CCDC174    | 0.182417  | 0.1029677 | 1.7716 | 0.0765   | 0.248719887 | count | 1 |
| LINC00461  | 0.2797971 | 0.6734329 | 0.4155 | 0.678    | 0.248735152 | count | 1 |
| PLAU       | 0.2064203 | 0.1920066 | 1.0751 | 0.282    | 0.248771098 | count | 1 |
| ST7        | 0.2111408 | 0.1895259 | 1.114  | 0.265    | 0.248929646 | count | 1 |
| ARHGAP17   | 0.196074  | 0.1779165 | 1.1021 | 0.271    | 0.248936462 | count | 1 |
| AC002074.1 | 1.2538372 | 0.9413657 | 1.3319 | 0.183    | 0.248948074 | count | 1 |
| ABCD4      | 0.1979412 | 0.1887718 | 1.0486 | 0.294    | 0.248991137 | count | 1 |
| CALU       | 0.175559  | 0.0541871 | 3.2399 | 0.00121  | 0.249197741 | count | 1 |
| GCLC       | 0.2713827 | 0.284661  | 0.9534 | 0.34     | 0.24945718  | count | 1 |
| FBNP4      | 0.1812132 | 0.1065202 | 1.7012 | 0.089    | 0.249619145 | count | 1 |
| PABPC5     | 0.2441084 | 0.2085236 | 1.1707 | 0.242    | 0.249633039 | count | 1 |
| NBPF14     | 0.2133405 | 0.2073421 | 1.0289 | 0.304    | 0.249915934 | count | 1 |
| KAT8       | 0.1875743 | 0.1142053 | 1.6424 | 0.101    | 0.249924635 | count | 1 |
| EVI5       | 0.1794931 | 0.0890518 | 2.0156 | 0.0439   | 0.250110167 | count | 1 |

|            |           |           |        |         |             |       |   |
|------------|-----------|-----------|--------|---------|-------------|-------|---|
| CDV3       | 0.1771065 | 0.066556  | 2.661  | 0.00782 | 0.250133394 | count | 1 |
| ZBTB6      | 0.235064  | 0.2135432 | 1.1008 | 0.271   | 0.25013933  | count | 1 |
| AHR        | 0.191695  | 0.1582344 | 1.2115 | 0.226   | 0.250263115 | count | 1 |
| GRINA      | 0.1838416 | 0.1092939 | 1.6821 | 0.0926  | 0.250286248 | count | 1 |
| LASP1      | 0.1879461 | 0.1189034 | 1.5807 | 0.114   | 0.250298216 | count | 1 |
| DHX29      | 0.1782401 | 0.0765244 | 2.3292 | 0.0199  | 0.250301425 | count | 1 |
| NEPRO      | 0.194791  | 0.150141  | 1.2974 | 0.195   | 0.250348654 | count | 1 |
| KMT2C      | 0.1859412 | 0.122729  | 1.5151 | 0.13    | 0.250506959 | count | 1 |
| FAM210A    | 0.2073794 | 0.1978836 | 1.048  | 0.295   | 0.250512188 | count | 1 |
| MORC2-AS1  | 0.3151626 | 0.3960496 | 0.7958 | 0.426   | 0.250534459 | count | 1 |
| SH3GLB2    | 0.1819737 | 0.1007958 | 1.8054 | 0.0711  | 0.250541821 | count | 1 |
| WBP1       | 0.4528947 | 0.7911375 | 0.5725 | 0.567   | 0.250659786 | count | 1 |
| ADNP       | 0.1825603 | 0.1005749 | 1.8152 | 0.0696  | 0.250919704 | count | 1 |
| INTS10     | 0.1892034 | 0.1046164 | 1.8085 | 0.0706  | 0.251081528 | count | 1 |
| MORC3      | 0.1882891 | 0.1134519 | 1.6596 | 0.0971  | 0.251108292 | count | 1 |
| TM7SF3     | 0.1958605 | 0.118438  | 1.6537 | 0.0983  | 0.251201466 | count | 1 |
| SUMO3      | 0.1804332 | 0.0709502 | 2.5431 | 0.011   | 0.251552566 | count | 1 |
| AC025171.3 | 1.2758589 | 0.8066255 | 1.5817 | 0.114   | 0.25168398  | count | 1 |
| RHOU       | 0.1960502 | 0.1457261 | 1.3453 | 0.179   | 0.251701735 | count | 1 |
| VLDLR      | 0.2739218 | 0.3122002 | 0.8774 | 0.38    | 0.251717211 | count | 1 |
| GLIS1      | 0.3367513 | 0.6146097 | 0.5479 | 0.584   | 0.251765808 | count | 1 |
| SMARCC2    | 0.1821768 | 0.1003905 | 1.8147 | 0.0697  | 0.251838911 | count | 1 |
| MRI1       | 0.2180928 | 0.1542224 | 1.4141 | 0.157   | 0.251900707 | count | 1 |
| BVES-AS1   | 1.27767   | 1.067468  | 1.1969 | 0.231   | 0.251906811 | count | 1 |
| HOXA2      | 0.2181088 | 0.2242512 | 0.9726 | 0.331   | 0.251918933 | count | 1 |
| ACADVL     | 0.1799739 | 0.0825221 | 2.1809 | 0.0293  | 0.251980144 | count | 1 |
| ATP2B4     | 0.1812658 | 0.0899766 | 2.0146 | 0.044   | 0.2519885   | count | 1 |
| PKD1       | 0.1882265 | 0.1558628 | 1.2076 | 0.227   | 0.252126678 | count | 1 |
| AC106782.2 | 0.7273468 | 0.7127387 | 1.0205 | 0.308   | 0.252299768 | count | 1 |
| BFAR       | 0.187481  | 0.1100895 | 1.703  | 0.0887  | 0.252484023 | count | 1 |
| MFSD3      | 0.3502579 | 0.3197005 | 1.0956 | 0.273   | 0.252622063 | count | 1 |
| GMEB2      | 0.3502699 | 0.3736343 | 0.9375 | 0.349   | 0.252630226 | count | 1 |
| ZNF699     | 0.2328267 | 0.2644032 | 0.8806 | 0.379   | 0.252648794 | count | 1 |
| ZEB2-AS1   | 0.3503222 | 0.4360614 | 0.8034 | 0.422   | 0.252665811 | count | 1 |
| AC139795.3 | 0.3503637 | 0.6431673 | 0.5447 | 0.586   | 0.252694047 | count | 1 |
| GOLPH3     | 0.1868592 | 0.1035599 | 1.8044 | 0.0713  | 0.252820969 | count | 1 |
| USP34      | 0.1808146 | 0.103308  | 1.7502 | 0.0802  | 0.253103564 | count | 1 |
| PPP3R1     | 0.2051938 | 0.1810544 | 1.1333 | 0.257   | 0.253106707 | count | 1 |
| THAP1      | 0.1932564 | 0.1347723 | 1.4339 | 0.152   | 0.253201885 | count | 1 |
| ZC3H12C    | 0.2415624 | 0.3301504 | 0.7317 | 0.464   | 0.253222205 | count | 1 |
| VANGL1     | 0.2169496 | 0.2409599 | 0.9004 | 0.368   | 0.25325381  | count | 1 |
| TVP23C     | 0.4975378 | 0.500053  | 0.995  | 0.32    | 0.253334893 | count | 1 |
| TSPYL5     | 0.2249366 | 0.2335771 | 0.963  | 0.336   | 0.253371677 | count | 1 |
| MMAB       | 0.1884531 | 0.1262783 | 1.4924 | 0.136   | 0.253419487 | count | 1 |
| TUT4       | 0.1809636 | 0.0841147 | 2.1514 | 0.0315  | 0.253563661 | count | 1 |

|            |           |           |        |          |             |       |          |
|------------|-----------|-----------|--------|----------|-------------|-------|----------|
| ZC3H6      | 0.1853069 | 0.0982122 | 1.8868 | 0.0593   | 0.253819319 | count | 1        |
| BTBD6      | 0.1867939 | 0.1055881 | 1.7691 | 0.077    | 0.253828617 | count | 1        |
| NAXE       | 0.1816509 | 0.0739041 | 2.4579 | 0.014    | 0.253830344 | count | 1        |
| AL445426.1 | 1.2937901 | 1.0819619 | 1.1958 | 0.232    | 0.253876689 | count | 1        |
| SCN2B      | 1.2937901 | 1.0819619 | 1.1958 | 0.232    | 0.253876689 | count | 1        |
| FANCD2     | 1.2937901 | 1.2276883 | 1.0538 | 0.292    | 0.253876689 | count | 1        |
| NCR3LG1    | 1.2937901 | 1.3319098 | 0.9714 | 0.331    | 0.253876689 | count | 1        |
| KCTD2      | 0.2483593 | 0.2892033 | 0.8588 | 0.391    | 0.253880452 | count | 1        |
| MRAS       | 0.1867545 | 0.1371884 | 1.3613 | 0.174    | 0.254043592 | count | 1        |
| GTF2IRD1   | 0.6248057 | 0.6270722 | 0.9964 | 0.319    | 0.254171165 | count | 1        |
| GANC       | 0.2237244 | 0.2130906 | 1.0499 | 0.294    | 0.254254777 | count | 1        |
| VDAC3      | 0.1805046 | 0.0659596 | 2.7366 | 0.00624  | 0.254297284 | count | 1        |
| MSANTD2    | 0.2280777 | 0.2285296 | 0.998  | 0.318    | 0.254428756 | count | 1        |
| MPC1       | 0.1799443 | 0.0601313 | 2.9925 | 0.00279  | 0.254582088 | count | 1        |
| ZNF445     | 0.2205732 | 0.2479506 | 0.8896 | 0.374    | 0.254725857 | count | 1        |
| ZNF131     | 0.1925261 | 0.1335079 | 1.4421 | 0.149    | 0.254779081 | count | 1        |
| FADD       | 0.2078456 | 0.1589136 | 1.3079 | 0.191    | 0.254887385 | count | 1        |
| PEX11G     | 0.3209188 | 0.3222173 | 0.996  | 0.319    | 0.254898156 | count | 1        |
| HIST1H2BK  | 0.430631  | 0.7206562 | 0.5976 | 0.55     | 0.255030197 | count | 1        |
| EIF1       | 0.1770647 | 0.0202569 | 8.7409 | 3.46E-18 | 0.255040584 | count | 8.29E-14 |
| CFAP20     | 0.1931096 | 0.1307767 | 1.4766 | 0.14     | 0.255110781 | count | 1        |
| METTL13    | 0.2287212 | 0.2799124 | 0.8171 | 0.414    | 0.255134829 | count | 1        |
| RPH3AL     | 0.2987576 | 0.4857737 | 0.615  | 0.539    | 0.255159529 | count | 1        |
| INTS7      | 0.3212868 | 0.3974543 | 0.8084 | 0.419    | 0.255176841 | count | 1        |
| WASHC1     | 0.2012915 | 0.151832  | 1.3258 | 0.185    | 0.255194403 | count | 1        |
| NUCB2      | 0.1786959 | 0.0500404 | 3.571  | 0.00036  | 0.255212084 | count | 1        |
| FAM111A    | 0.1903325 | 0.1509955 | 1.2605 | 0.208    | 0.25524698  | count | 1        |
| RFXAP      | 0.241791  | 0.2057985 | 1.1749 | 0.24     | 0.255341861 | count | 1        |
| TUT1       | 0.3215743 | 0.3974851 | 0.809  | 0.419    | 0.255394561 | count | 1        |
| CETN3      | 0.2043253 | 0.138002  | 1.4806 | 0.139    | 0.255449286 | count | 1        |
| SUMF2      | 0.1839407 | 0.0693914 | 2.6508 | 0.00807  | 0.255510329 | count | 1        |
| POLD1      | 0.4067809 | 0.6921778 | 0.5877 | 0.557    | 0.255624763 | count | 1        |
| ORAOV1     | 0.2524626 | 0.2367134 | 1.0665 | 0.286    | 0.255648964 | count | 1        |
| SCARB2     | 0.1818029 | 0.0780215 | 2.3302 | 0.0199   | 0.255815413 | count | 1        |
| SPAG9      | 0.180745  | 0.0648174 | 2.7885 | 0.00532  | 0.255870174 | count | 1        |
| TULP4      | 0.1947978 | 0.1265234 | 1.5396 | 0.124    | 0.255901488 | count | 1        |
| SMC5       | 0.1891625 | 0.1059779 | 1.7849 | 0.0744   | 0.256004686 | count | 1        |
| CPEB2      | 0.2407485 | 0.2338717 | 1.0294 | 0.303    | 0.25606734  | count | 1        |
| PARD3      | 0.207277  | 0.1648667 | 1.2572 | 0.209    | 0.256116304 | count | 1        |
| PINLYP     | 0.2391814 | 0.2522566 | 0.9482 | 0.343    | 0.256157304 | count | 1        |
| CASC4      | 0.1823742 | 0.068567  | 2.6598 | 0.00785  | 0.256167618 | count | 1        |
| FARP1      | 0.1928732 | 0.1530822 | 1.2599 | 0.208    | 0.256193121 | count | 1        |
| CD81       | 0.1778885 | 0.0213497 | 8.3321 | 1.11E-16 | 0.25627111  | count | 2.66E-12 |
| DRG1       | 0.1918307 | 0.1221882 | 1.57   | 0.117    | 0.256274425 | count | 1        |
| ENTPD5     | 0.2530993 | 0.318029  | 0.7958 | 0.426    | 0.256278233 | count | 1        |

|            |           |           |        |          |             |       |   |
|------------|-----------|-----------|--------|----------|-------------|-------|---|
| CDK11A     | 0.1969676 | 0.1521268 | 1.2948 | 0.195    | 0.256312715 | count | 1 |
| ZBTB45     | 0.2711027 | 0.2767911 | 0.9794 | 0.327    | 0.256353127 | count | 1 |
| AC005726.1 | 0.9278723 | 0.834251  | 1.1122 | 0.266    | 0.256481942 | count | 1 |
| AC007614.1 | 0.6316223 | 0.7702509 | 0.82   | 0.412    | 0.256521693 | count | 1 |
| EFCAB5     | 0.6316223 | 0.8822446 | 0.7159 | 0.474    | 0.256521693 | count | 1 |
| RAB6B      | 0.2888891 | 0.2409732 | 1.1988 | 0.231    | 0.256531266 | count | 1 |
| CEP170     | 0.1913971 | 0.108762  | 1.7598 | 0.0785   | 0.256565335 | count | 1 |
| BTBD7      | 0.190647  | 0.1395664 | 1.366  | 0.172    | 0.256730775 | count | 1 |
| AGGF1      | 0.2397546 | 0.2567719 | 0.9337 | 0.351    | 0.256759154 | count | 1 |
| TMEM63B    | 0.2841628 | 0.3477125 | 0.8172 | 0.414    | 0.256762726 | count | 1 |
| RIOK2      | 0.1981649 | 0.1624031 | 1.2202 | 0.222    | 0.256794719 | count | 1 |
| AC005339.1 | 0.5585281 | 0.8095769 | 0.6899 | 0.49     | 0.256885484 | count | 1 |
| FTO        | 0.2117528 | 0.1853469 | 1.1425 | 0.253    | 0.256916045 | count | 1 |
| ARAP3      | 0.3009262 | 0.7531208 | 0.3996 | 0.689    | 0.256938675 | count | 1 |
| SLC35A4    | 0.2369072 | 0.2132302 | 1.111  | 0.267    | 0.25699435  | count | 1 |
| EIF2B2     | 0.1936031 | 0.1237052 | 1.565  | 0.118    | 0.257025636 | count | 1 |
| PRR14L     | 0.2062842 | 0.1882895 | 1.0956 | 0.273    | 0.257069979 | count | 1 |
| COL6A3     | 0.1822415 | 0.0991847 | 1.8374 | 0.0662   | 0.257090856 | count | 1 |
| KIAA1328   | 0.2565241 | 0.2274224 | 1.128  | 0.259    | 0.257189059 | count | 1 |
| AL022238.2 | 1.3223328 | 0.9830871 | 1.3451 | 0.179    | 0.257302953 | count | 1 |
| GSDME      | 0.2296439 | 0.2258393 | 1.0168 | 0.309    | 0.257388534 | count | 1 |
| MFHAS1     | 0.2239253 | 0.3485671 | 0.6424 | 0.521    | 0.257572466 | count | 1 |
| AGAP3      | 0.2348339 | 0.2187988 | 1.0733 | 0.283    | 0.257757013 | count | 1 |
| CDC14B     | 0.1961239 | 0.1656344 | 1.1841 | 0.236    | 0.257802261 | count | 1 |
| CKLF       | 0.1875899 | 0.105631  | 1.7759 | 0.0758   | 0.257813408 | count | 1 |
| ZNF692     | 0.2960003 | 0.3053943 | 0.9692 | 0.332    | 0.25789519  | count | 1 |
| AC108471.2 | 1.3275772 | 1.1944274 | 1.1115 | 0.266    | 0.257924033 | count | 1 |
| ILKAP      | 0.1968926 | 0.1286889 | 1.53   | 0.126    | 0.257938921 | count | 1 |
| PCNX3      | 0.3581022 | 0.3561418 | 1.0055 | 0.315    | 0.257951395 | count | 1 |
| CD46       | 0.1819626 | 0.0604593 | 3.0097 | 0.00263  | 0.258074235 | count | 1 |
| ODF2L      | 0.1909001 | 0.1158243 | 1.6482 | 0.0994   | 0.258267962 | count | 1 |
| APAF1      | 0.223879  | 0.2943679 | 0.7605 | 0.447    | 0.25848961  | count | 1 |
| AL357055.3 | 0.9377042 | 0.7522419 | 1.2465 | 0.213    | 0.258495091 | count | 1 |
| GAS2L3     | 0.9377042 | 0.8592427 | 1.0913 | 0.275    | 0.258495091 | count | 1 |
| CRACR2A    | 0.4117426 | 1.3256103 | 0.3106 | 0.7561   | 0.258505634 | count | 1 |
| NECTIN2    | 0.1951727 | 0.1254191 | 1.5562 | 0.12     | 0.258964152 | count | 1 |
| AL731569.1 | 0.9400333 | 0.6461712 | 1.4548 | 0.146    | 0.258969958 | count | 1 |
| TMEM223    | 0.1900114 | 0.1274441 | 1.4909 | 0.136    | 0.25897824  | count | 1 |
| FLAD1      | 0.217957  | 0.2071975 | 1.0519 | 0.293    | 0.259123086 | count | 1 |
| RBL1       | 0.3104176 | 0.3541086 | 0.8766 | 0.381    | 0.259145945 | count | 1 |
| PIK3CD-AS2 | 0.3265733 | 0.358171  | 0.9118 | 0.362    | 0.259176753 | count | 1 |
| TOR3A      | 0.2035951 | 0.1322593 | 1.5394 | 0.124    | 0.259337753 | count | 1 |
| ECH1       | 0.1823747 | 0.0523384 | 3.4845 | 0.000499 | 0.259498802 | count | 1 |
| RRAGB      | 0.2049794 | 0.1725956 | 1.1876 | 0.235    | 0.259505341 | count | 1 |
| ATP6V0A2   | 0.2518489 | 0.2505272 | 1.0053 | 0.315    | 0.259588951 | count | 1 |

|            |           |           |        |         |             |       |   |
|------------|-----------|-----------|--------|---------|-------------|-------|---|
| RBM25      | 0.18346   | 0.0606488 | 3.025  | 0.0025  | 0.259667122 | count | 1 |
| TMEM206    | 0.3606597 | 0.2970538 | 1.2141 | 0.225   | 0.259685593 | count | 1 |
| PDCL       | 0.1912167 | 0.1067245 | 1.7917 | 0.0733  | 0.259817671 | count | 1 |
| ACOT9      | 0.1933058 | 0.1030862 | 1.8752 | 0.0608  | 0.259821135 | count | 1 |
| JADE2      | 0.225946  | 0.1962324 | 1.1514 | 0.25    | 0.259863106 | count | 1 |
| AC092376.2 | 1.3442031 | 0.9945135 | 1.3516 | 0.177   | 0.259875746 | count | 1 |
| OCEL1      | 0.1934341 | 0.115035  | 1.6815 | 0.0927  | 0.259894747 | count | 1 |
| MUL1       | 0.2342736 | 0.1753118 | 1.3363 | 0.182   | 0.259913422 | count | 1 |
| SCN3A      | 0.5661639 | 0.3894085 | 1.4539 | 0.146   | 0.259945069 | count | 1 |
| SETD7      | 0.1959261 | 0.1343767 | 1.458  | 0.145   | 0.259958853 | count | 1 |
| SEC61A1    | 0.192857  | 0.1248222 | 1.5451 | 0.122   | 0.26005764  | count | 1 |
| AC017083.1 | 0.3048063 | 0.5812024 | 0.5244 | 0.6     | 0.260119094 | count | 1 |
| AL121944.1 | 0.3194584 | 0.3601243 | 0.8871 | 0.375   | 0.260275867 | count | 1 |
| RCCD1      | 0.2415157 | 0.2247995 | 1.0744 | 0.283   | 0.260283898 | count | 1 |
| WDSUB1     | 0.2238556 | 0.2408336 | 0.9295 | 0.353   | 0.260318349 | count | 1 |
| U2SURP     | 0.1840836 | 0.0691432 | 2.6624 | 0.00779 | 0.260439234 | count | 1 |
| CNPPD1     | 0.1977643 | 0.130924  | 1.5105 | 0.131   | 0.26044269  | count | 1 |
| HYAL3      | 0.3490535 | 0.5119146 | 0.6819 | 0.495   | 0.260462848 | count | 1 |
| AC083843.3 | 0.3620079 | 0.7038467 | 0.5143 | 0.607   | 0.260599106 | count | 1 |
| USP31      | 0.2349214 | 0.31773   | 0.7394 | 0.46    | 0.260619751 | count | 1 |
| TAOK1      | 0.194792  | 0.1115323 | 1.7465 | 0.0808  | 0.260664105 | count | 1 |
| HARS2      | 0.2377324 | 0.3487999 | 0.6816 | 0.496   | 0.260881043 | count | 1 |
| RECQL5     | 0.4738238 | 0.5087642 | 0.9313 | 0.352   | 0.26112866  | count | 1 |
| AF001548.2 | 0.951268  | 0.7106869 | 1.3385 | 0.181   | 0.261249537 | count | 1 |
| GNL2       | 0.2039945 | 0.1317614 | 1.5482 | 0.122   | 0.261285262 | count | 1 |
| KIAA2026   | 0.1953662 | 0.1224016 | 1.5961 | 0.111   | 0.26142906  | count | 1 |
| KMT5C      | 0.4745652 | 0.4198746 | 1.1303 | 0.258   | 0.261497604 | count | 1 |
| ANKRD11    | 0.1858032 | 0.0859269 | 2.1623 | 0.0307  | 0.261532927 | count | 1 |
| DHX9       | 0.1913209 | 0.1026726 | 1.8634 | 0.0625  | 0.26153699  | count | 1 |
| POM121C    | 0.2084    | 0.1889892 | 1.1027 | 0.27    | 0.261663404 | count | 1 |
| SLC35B3    | 0.2183495 | 0.1978091 | 1.1038 | 0.27    | 0.261675759 | count | 1 |
| BCL2L13    | 0.2214671 | 0.1923757 | 1.1512 | 0.25    | 0.26173444  | count | 1 |
| MAP2K6     | 0.2950626 | 0.313314  | 0.9417 | 0.346   | 0.261813698 | count | 1 |
| RABGGTB    | 0.1977924 | 0.1281018 | 1.544  | 0.123   | 0.262001723 | count | 1 |
| AC087239.1 | 0.3641286 | 0.321643  | 1.1321 | 0.258   | 0.262035143 | count | 1 |
| LTV1       | 0.2011572 | 0.133898  | 1.5023 | 0.133   | 0.262142232 | count | 1 |
| PPP5C      | 0.2207102 | 0.1814138 | 1.2166 | 0.224   | 0.262356079 | count | 1 |
| DCLRE1C    | 0.2266475 | 0.2517181 | 0.9004 | 0.368   | 0.262593751 | count | 1 |
| PRRX2      | 0.1857265 | 0.0744446 | 2.4948 | 0.0126  | 0.262768489 | count | 1 |
| AF127577.4 | 0.6502024 | 0.7747094 | 0.8393 | 0.401   | 0.26288145  | count | 1 |
| CSGALNACT2 | 0.2036669 | 0.1342991 | 1.5165 | 0.129   | 0.262937857 | count | 1 |
| MPP4       | 0.9607345 | 1.0416213 | 0.9223 | 0.356   | 0.263156472 | count | 1 |
| VN1R1      | 0.9607345 | 1.0416213 | 0.9223 | 0.356   | 0.263156472 | count | 1 |
| WDR93      | 0.9607345 | 1.195073  | 0.8039 | 0.421   | 0.263156472 | count | 1 |
| KIAA1109   | 0.1907093 | 0.1036888 | 1.8392 | 0.066   | 0.263307403 | count | 1 |

|            |           |           |        |         |             |       |   |
|------------|-----------|-----------|--------|---------|-------------|-------|---|
| EXOC6      | 0.2361923 | 0.2341118 | 1.0089 | 0.313   | 0.263327112 | count | 1 |
| STAG2      | 0.1902433 | 0.0869287 | 2.1885 | 0.0287  | 0.263346192 | count | 1 |
| ABO        | 1.375823  | 1.0823945 | 1.2711 | 0.204   | 0.26351617  | count | 1 |
| AC004812.2 | 0.3161165 | 0.2999334 | 1.054  | 0.292   | 0.263699233 | count | 1 |
| TRAF3      | 0.2342592 | 0.3555476 | 0.6589 | 0.51    | 0.263701837 | count | 1 |
| HIPK1      | 0.2055207 | 0.1428241 | 1.439  | 0.15    | 0.26377391  | count | 1 |
| MMD        | 0.235449  | 0.2597331 | 0.9065 | 0.365   | 0.26378652  | count | 1 |
| FAM3C      | 0.188181  | 0.0643604 | 2.9239 | 0.00348 | 0.263841308 | count | 1 |
| PAXIP1-AS2 | 0.2185397 | 0.2035377 | 1.0737 | 0.283   | 0.263842352 | count | 1 |
| ZNF558     | 0.2834486 | 0.3952082 | 0.7172 | 0.473   | 0.264019319 | count | 1 |
| OSTM1      | 0.1936943 | 0.1020474 | 1.8981 | 0.0578  | 0.26404477  | count | 1 |
| LINC00115  | 0.4213598 | 0.4498985 | 0.9366 | 0.349   | 0.264072261 | count | 1 |
| MED30      | 0.1912864 | 0.0924674 | 2.0687 | 0.0386  | 0.264102129 | count | 1 |
| PTPRZ1     | 0.7697729 | 0.5637939 | 1.3653 | 0.172   | 0.264104972 | count | 1 |
| TM9SF1     | 0.2369277 | 0.2566038 | 0.9233 | 0.356   | 0.26413297  | count | 1 |
| ARHGAP26   | 0.2307707 | 0.2665229 | 0.8659 | 0.387   | 0.26429837  | count | 1 |
| SGO2       | 0.4479597 | 0.3487748 | 1.2844 | 0.199   | 0.264401451 | count | 1 |
| HIBADH     | 0.1954847 | 0.1103333 | 1.7718 | 0.0765  | 0.264609159 | count | 1 |
| MINK1      | 0.3103805 | 0.3479212 | 0.8921 | 0.372   | 0.264681724 | count | 1 |
| ZNF480     | 0.2256697 | 0.2484661 | 0.9083 | 0.364   | 0.265011744 | count | 1 |
| MDM1       | 0.2530931 | 0.2266208 | 1.1168 | 0.264   | 0.265043289 | count | 1 |
| AL391422.3 | 0.2989232 | 0.3033746 | 0.9853 | 0.325   | 0.265112458 | count | 1 |
| AP000894.4 | 0.9708151 | 1.000989  | 0.9699 | 0.332   | 0.265172993 | count | 1 |
| SAMD8      | 0.2082295 | 0.176922  | 1.177  | 0.239   | 0.265195582 | count | 1 |
| ZBED5      | 0.1959411 | 0.1250463 | 1.5669 | 0.117   | 0.265304893 | count | 1 |
| VCPKMT     | 0.2481508 | 0.2543034 | 0.9758 | 0.329   | 0.265567899 | count | 1 |
| SKI        | 0.1949719 | 0.1185417 | 1.6448 | 0.1     | 0.265586212 | count | 1 |
| DYRK3      | 0.2499439 | 0.2399651 | 1.0416 | 0.298   | 0.265643415 | count | 1 |
| GNPDA1     | 0.1987778 | 0.1129864 | 1.7593 | 0.0786  | 0.265745483 | count | 1 |
| SLC35A1    | 0.2155464 | 0.1602725 | 1.3449 | 0.179   | 0.265750576 | count | 1 |
| OTULIN     | 0.2127003 | 0.1719582 | 1.2369 | 0.216   | 0.265825948 | count | 1 |
| ZBTB34     | 0.4834282 | 0.4968098 | 0.9731 | 0.331   | 0.26589804  | count | 1 |
| TOMM5      | 0.2098054 | 0.1728294 | 1.2139 | 0.225   | 0.265901549 | count | 1 |
| ZNF883     | 0.4248634 | 0.5174927 | 0.821  | 0.412   | 0.266094516 | count | 1 |
| GFM1       | 0.2221314 | 0.1538005 | 1.4443 | 0.149   | 0.266154075 | count | 1 |
| RNF216     | 0.1975712 | 0.1276559 | 1.5477 | 0.122   | 0.266204399 | count | 1 |
| PPM1F      | 0.2524356 | 0.2814095 | 0.897  | 0.37    | 0.266340867 | count | 1 |
| MDC1       | 0.2489453 | 0.2582306 | 0.964  | 0.335   | 0.266400734 | count | 1 |
| PEX6       | 0.2346466 | 0.200069  | 1.1728 | 0.241   | 0.266471348 | count | 1 |
| EFNA4      | 0.3063846 | 0.3413057 | 0.8977 | 0.369   | 0.266589267 | count | 1 |
| TRAPPC10   | 0.2038218 | 0.1389625 | 1.4667 | 0.143   | 0.266775299 | count | 1 |
| EGLN1      | 0.2002172 | 0.1423465 | 1.4065 | 0.16    | 0.266815273 | count | 1 |
| MAPK3      | 0.1935072 | 0.090886  | 2.1291 | 0.0333  | 0.266842494 | count | 1 |
| REV1       | 0.2016315 | 0.131586  | 1.5323 | 0.126   | 0.26691391  | count | 1 |
| KPNA3      | 0.1999439 | 0.1223942 | 1.6336 | 0.102   | 0.267062653 | count | 1 |

|              |           |           |        |          |             |       |          |
|--------------|-----------|-----------|--------|----------|-------------|-------|----------|
| LINC02084    | 0.7806664 | 0.7057595 | 1.1061 | 0.269    | 0.267084941 | count | 1        |
| MAPK7        | 0.2668349 | 0.2666506 | 1.0007 | 0.317    | 0.267257738 | count | 1        |
| AP3B1        | 0.201052  | 0.1145144 | 1.7557 | 0.0792   | 0.267272977 | count | 1        |
| CCND2        | 0.1897686 | 0.0718505 | 2.6412 | 0.0083   | 0.267386673 | count | 1        |
| SETX         | 0.1981855 | 0.1280763 | 1.5474 | 0.122    | 0.26739479  | count | 1        |
| AL158212.2   | 0.2872575 | 0.3121091 | 0.9204 | 0.357    | 0.267451106 | count | 1        |
| DAZAP2       | 0.1904892 | 0.0673267 | 2.8293 | 0.00469  | 0.267576858 | count | 1        |
| NMNAT3       | 0.2518274 | 0.2776213 | 0.9071 | 0.364    | 0.267602856 | count | 1        |
| PRPF4B       | 0.1891498 | 0.0652322 | 2.8996 | 0.00376  | 0.267696575 | count | 1        |
| RRAGC        | 0.2009481 | 0.1353252 | 1.4849 | 0.138    | 0.267784577 | count | 1        |
| CD99         | 0.1862928 | 0.0307612 | 6.0561 | 1.54E-09 | 0.267803692 | count | 3.63E-05 |
| EAF1         | 0.2194729 | 0.187777  | 1.1688 | 0.243    | 0.267909044 | count | 1        |
| PRNP         | 0.1901844 | 0.0604645 | 3.1454 | 0.00167  | 0.2681035   | count | 1        |
| EPS15        | 0.1976089 | 0.0990066 | 1.9959 | 0.046    | 0.268251474 | count | 1        |
| DIAPH2       | 0.1942583 | 0.1025547 | 1.8942 | 0.0583   | 0.268309975 | count | 1        |
| TXNRD1       | 0.191245  | 0.075936  | 2.5185 | 0.0118   | 0.268337833 | count | 1        |
| RIOK3        | 0.1934721 | 0.0886586 | 2.1822 | 0.0292   | 0.268360041 | count | 1        |
| ZNF615       | 0.3086261 | 0.3474776 | 0.8882 | 0.374    | 0.268462509 | count | 1        |
| ZNF571-AS1   | 0.4289774 | 1.35144   | 0.3174 | 0.751    | 0.268465203 | count | 1        |
| USP37        | 0.258513  | 0.226191  | 1.1429 | 0.253    | 0.268487426 | count | 1        |
| ITGB3BP      | 0.2273051 | 0.177032  | 1.284  | 0.199    | 0.268543922 | count | 1        |
| ANKMY2       | 0.2051954 | 0.1446437 | 1.4186 | 0.156    | 0.268562339 | count | 1        |
| DNAJC16      | 0.2494688 | 0.2095155 | 1.1907 | 0.234    | 0.268682638 | count | 1        |
| MIR1-1HG-AS1 | 1.4224608 | 1.1842915 | 1.2011 | 0.23     | 0.268717942 | count | 1        |
| GOLGA6L4     | 0.2632633 | 0.484744  | 0.5431 | 0.587    | 0.268742754 | count | 1        |
| MAP7D1       | 0.1970376 | 0.1228886 | 1.6034 | 0.109    | 0.268841275 | count | 1        |
| NDFIP1       | 0.1886734 | 0.0470237 | 4.0123 | 6.13E-05 | 0.268841653 | count | 1        |
| USP8         | 0.1936452 | 0.0955338 | 2.027  | 0.0427   | 0.269046655 | count | 1        |
| GPBP1        | 0.1911271 | 0.076058  | 2.5129 | 0.012    | 0.269076615 | count | 1        |
| HR           | 0.3900222 | 0.4347984 | 0.897  | 0.37     | 0.269093037 | count | 1        |
| SOS2         | 0.2033102 | 0.1554708 | 1.3077 | 0.191    | 0.269124353 | count | 1        |
| C1orf131     | 0.2001515 | 0.1185716 | 1.688  | 0.0915   | 0.269281682 | count | 1        |
| COPS4        | 0.1964189 | 0.0928171 | 2.1162 | 0.0344   | 0.269415968 | count | 1        |
| TIRAP        | 0.2555563 | 0.4968651 | 0.5143 | 0.607    | 0.269561232 | count | 1        |
| CNOT4        | 0.1942038 | 0.0762085 | 2.5483 | 0.0109   | 0.269705101 | count | 1        |
| SPATS2       | 0.2146809 | 0.1634703 | 1.3133 | 0.189    | 0.269865209 | count | 1        |
| AL118516.1   | 0.2042338 | 0.1400115 | 1.4587 | 0.145    | 0.269883068 | count | 1        |
| N4BP1        | 0.2046249 | 0.1261044 | 1.6227 | 0.105    | 0.269921221 | count | 1        |
| CMTM8        | 0.3239657 | 0.3335792 | 0.9712 | 0.332    | 0.26995746  | count | 1        |
| ABHD10       | 0.2226474 | 0.177101  | 1.2572 | 0.209    | 0.269986012 | count | 1        |
| RBM19        | 0.2524822 | 0.2231743 | 1.1313 | 0.258    | 0.270106813 | count | 1        |
| PLD6         | 0.4319014 | 0.5182745 | 0.8333 | 0.405    | 0.270147585 | count | 1        |
| TAF6         | 0.2204669 | 0.1551663 | 1.4208 | 0.155    | 0.27020326  | count | 1        |
| CYB5R4       | 0.2391705 | 0.2007195 | 1.1916 | 0.234    | 0.270350798 | count | 1        |
| POGZ         | 0.2061575 | 0.1326149 | 1.5546 | 0.12     | 0.270375653 | count | 1        |

|             |            |             |        |         |             |       |   |
|-------------|------------|-------------|--------|---------|-------------|-------|---|
| DHX57       | 0.2426364  | 0.3292613   | 0.7369 | 0.461   | 0.270385366 | count | 1 |
| ERCC6       | 0.2000976  | 0.1673269   | 1.1958 | 0.232   | 0.270406675 | count | 1 |
| FUK         | 0.3414856  | 0.4782588   | 0.714  | 0.475   | 0.270422219 | count | 1 |
| SLC22A15    | 0.3414856  | 0.6577489   | 0.5192 | 0.604   | 0.270422219 | count | 1 |
| PARP3       | 0.2403692  | 0.2777997   | 0.8653 | 0.387   | 0.270464092 | count | 1 |
| VCP         | 0.1940101  | 0.0722321   | 2.6859 | 0.00727 | 0.270675286 | count | 1 |
| WDR89       | 0.2829686  | 0.268897    | 1.0523 | 0.293   | 0.270680773 | count | 1 |
| GRIN2D      | 16.6459795 | 1084.858678 | 0.0153 | 0.988   | 0.270706325 | count | 1 |
| AL050403.2  | 16.7047921 | 1150.713701 | 0.0145 | 0.988   | 0.270706326 | count | 1 |
| SPATA41     | 16.7051664 | 1045.335029 | 0.016  | 0.987   | 0.270706326 | count | 1 |
| LINC02489   | 16.7748    | 1912.462852 | 0.0088 | 0.993   | 0.270706327 | count | 1 |
| AC130371.2  | 16.8402356 | 1287.816896 | 0.0131 | 0.99    | 0.270706328 | count | 1 |
| AL669970.3  | 16.9396125 | 1079.9775   | 0.0157 | 0.987   | 0.270706329 | count | 1 |
| AL138899.1  | 16.9973174 | 2042.012911 | 0.0083 | 0.993   | 0.27070633  | count | 1 |
| CCNE1       | 17.0942834 | 1919.2197   | 0.0089 | 0.993   | 0.270706331 | count | 1 |
| AL158163.1  | 17.0942835 | 1919.219685 | 0.0089 | 0.993   | 0.270706331 | count | 1 |
| AP001412.1  | 17.0942921 | 1919.221531 | 0.0089 | 0.993   | 0.270706331 | count | 1 |
| PKD2L2      | 17.0942965 | 1919.221508 | 0.0089 | 0.993   | 0.270706331 | count | 1 |
| AC131011.1  | 17.0942964 | 1919.221504 | 0.0089 | 0.993   | 0.270706331 | count | 1 |
| AC099687.1  | 17.0942964 | 1919.221497 | 0.0089 | 0.993   | 0.270706331 | count | 1 |
| TMEM72-AS1  | 17.0942965 | 1919.221508 | 0.0089 | 0.993   | 0.270706331 | count | 1 |
| AC012377.1  | 17.0946843 | 2457.679804 | 0.007  | 0.994   | 0.270706331 | count | 1 |
| AP003031.2  | 17.0946962 | 2457.678865 | 0.007  | 0.994   | 0.270706331 | count | 1 |
| AC100830.1  | 17.0959134 | 975.6636031 | 0.0175 | 0.986   | 0.270706331 | count | 1 |
| TMEM9B-AS1  | 17.1250334 | 1379.103207 | 0.0124 | 0.99    | 0.270706331 | count | 1 |
| SLC25A10    | 17.1617533 | 1016.718678 | 0.0169 | 0.9865  | 0.270706332 | count | 1 |
| AC090739.1  | 17.2209353 | 1632.687449 | 0.0105 | 0.992   | 0.270706332 | count | 1 |
| CLGN        | 17.3510818 | 1535.154086 | 0.0113 | 0.991   | 0.270706333 | count | 1 |
| AC138393.3  | 17.3873791 | 2268.869257 | 0.0077 | 0.994   | 0.270706334 | count | 1 |
| B3GALT5-AS1 | 17.3873792 | 2268.869292 | 0.0077 | 0.994   | 0.270706334 | count | 1 |
| LINC01277   | 17.3874143 | 2268.89334  | 0.0077 | 0.994   | 0.270706334 | count | 1 |
| AC005041.1  | 17.3874144 | 2268.893335 | 0.0077 | 0.994   | 0.270706334 | count | 1 |
| SCT         | 17.3874145 | 2268.893345 | 0.0077 | 0.994   | 0.270706334 | count | 1 |
| AC007216.1  | 17.3874145 | 2268.89335  | 0.0077 | 0.994   | 0.270706334 | count | 1 |
| PKDREJ      | 17.3874145 | 2268.893345 | 0.0077 | 0.994   | 0.270706334 | count | 1 |
| C10orf95    | 17.3874184 | 2268.880219 | 0.0077 | 0.994   | 0.270706334 | count | 1 |
| SLX1A       | 17.3874184 | 2268.880254 | 0.0077 | 0.994   | 0.270706334 | count | 1 |
| AC091132.1  | 17.3877151 | 2789.470477 | 0.0062 | 0.995   | 0.270706334 | count | 1 |
| CTRB2       | 17.3877402 | 2789.476894 | 0.0062 | 0.995   | 0.270706334 | count | 1 |
| SPRR2A      | 17.3877408 | 2789.477264 | 0.0062 | 0.995   | 0.270706334 | count | 1 |
| 4-Mar       | 17.3924551 | 2394.788528 | 0.0073 | 0.994   | 0.270706334 | count | 1 |
| LMNTD2      | 17.3924551 | 2394.78847  | 0.0073 | 0.994   | 0.270706334 | count | 1 |
| AC008555.5  | 17.3924551 | 2394.788505 | 0.0073 | 0.994   | 0.270706334 | count | 1 |
| LINC01191   | 17.3924553 | 2394.788505 | 0.0073 | 0.994   | 0.270706334 | count | 1 |
| C7orf57     | 17.3924554 | 2394.788563 | 0.0073 | 0.994   | 0.270706334 | count | 1 |



|            |            |             |        |        |             |       |   |
|------------|------------|-------------|--------|--------|-------------|-------|---|
| CLEC2L     | 17.3924554 | 2394.788528 | 0.0073 | 0.994  | 0.270706334 | count | 1 |
| MRV11-AS1  | 17.3924553 | 2394.788366 | 0.0073 | 0.994  | 0.270706334 | count | 1 |
| ID12       | 17.3924554 | 2394.788621 | 0.0073 | 0.994  | 0.270706334 | count | 1 |
| AC036108.4 | 17.3924554 | 2394.788459 | 0.0073 | 0.994  | 0.270706334 | count | 1 |
| SYNE4      | 17.3924553 | 2394.788459 | 0.0073 | 0.994  | 0.270706334 | count | 1 |
| AL137003.1 | 17.3924555 | 2394.788528 | 0.0073 | 0.994  | 0.270706334 | count | 1 |
| AC009630.1 | 17.3924555 | 2394.788598 | 0.0073 | 0.994  | 0.270706334 | count | 1 |
| AL158211.1 | 17.3924555 | 2394.788494 | 0.0073 | 0.994  | 0.270706334 | count | 1 |
| BAIAP2L2   | 17.3924555 | 2394.788598 | 0.0073 | 0.994  | 0.270706334 | count | 1 |
| AL390719.2 | 17.3931978 | 3389.75149  | 0.0051 | 0.996  | 0.270706334 | count | 1 |
| DDR1-DT    | 17.393198  | 3389.751703 | 0.0051 | 0.996  | 0.270706334 | count | 1 |
| AC007938.2 | 17.393198  | 3389.751703 | 0.0051 | 0.996  | 0.270706334 | count | 1 |
| CA8        | 17.3931981 | 3389.751605 | 0.0051 | 0.996  | 0.270706334 | count | 1 |
| AP000842.2 | 17.393198  | 3389.751703 | 0.0051 | 0.996  | 0.270706334 | count | 1 |
| LINC02551  | 17.3931981 | 3389.751605 | 0.0051 | 0.996  | 0.270706334 | count | 1 |
| FITM1      | 17.3931981 | 3389.751654 | 0.0051 | 0.996  | 0.270706334 | count | 1 |
| DPEP3      | 17.393198  | 3389.751769 | 0.0051 | 0.996  | 0.270706334 | count | 1 |
| PPM1E      | 17.393198  | 3389.751687 | 0.0051 | 0.996  | 0.270706334 | count | 1 |
| AL121890.2 | 17.393198  | 3389.751703 | 0.0051 | 0.996  | 0.270706334 | count | 1 |
| AC010616.1 | 17.393198  | 3389.751703 | 0.0051 | 0.996  | 0.270706334 | count | 1 |
| MRAP       | 17.393198  | 3389.751703 | 0.0051 | 0.996  | 0.270706334 | count | 1 |
| HTR3A      | 17.3931982 | 3389.751802 | 0.0051 | 0.996  | 0.270706334 | count | 1 |
| SHISA2     | 17.4605024 | 2451.735991 | 0.0071 | 0.994  | 0.270706334 | count | 1 |
| FXYD3      | 17.4605025 | 2451.735972 | 0.0071 | 0.994  | 0.270706334 | count | 1 |
| TAL2       | 17.4611933 | 2710.540333 | 0.0064 | 0.995  | 0.270706334 | count | 1 |
| TERC       | 17.5018941 | 1815.976216 | 0.0096 | 0.992  | 0.270706335 | count | 1 |
| DUOXA1     | 17.5335346 | 1500.526534 | 0.0117 | 0.991  | 0.270706335 | count | 1 |
| CD19       | 17.5477289 | 1612.548982 | 0.0109 | 0.991  | 0.270706335 | count | 1 |
| NRXN1      | 17.5730266 | 2334.176175 | 0.0075 | 0.994  | 0.270706335 | count | 1 |
| PRR34      | 17.6890424 | 2547.653407 | 0.0069 | 0.994  | 0.270706336 | count | 1 |
| MFS14A     | 17.7859804 | 1653.711607 | 0.0108 | 0.9914 | 0.270706337 | count | 1 |
| ACER2      | 17.8279181 | 2278.259543 | 0.0078 | 0.994  | 0.270706337 | count | 1 |
| COL28A1    | 17.8279449 | 2278.273713 | 0.0078 | 0.994  | 0.270706337 | count | 1 |
| C22orf31   | 17.827945  | 2278.273734 | 0.0078 | 0.994  | 0.270706337 | count | 1 |
| EPB41L4B   | 17.8279937 | 2800.961392 | 0.0064 | 0.995  | 0.270706337 | count | 1 |
| SLC29A4    | 17.8280343 | 2800.990113 | 0.0064 | 0.995  | 0.270706337 | count | 1 |
| SPDYE5     | 17.8280356 | 2800.996037 | 0.0064 | 0.995  | 0.270706337 | count | 1 |
| BDKRB1     | 17.9350457 | 1675.563962 | 0.0107 | 0.9915 | 0.270706337 | count | 1 |
| PRLR       | 17.9364741 | 1797.37405  | 0.01   | 0.992  | 0.270706337 | count | 1 |
| FTCDNL1    | 18.1335465 | 1485.786071 | 0.0122 | 0.9903 | 0.270706338 | count | 1 |
| PGM5P3-AS1 | 16.5428028 | 1184.150921 | 0.014  | 0.989  | 0.270706347 | count | 1 |
| AC008736.1 | 16.6184776 | 979.7591828 | 0.017  | 0.986  | 0.270706349 | count | 1 |
| C9orf43    | 16.6184844 | 979.7617215 | 0.017  | 0.986  | 0.270706349 | count | 1 |
| ALX1       | 16.7051682 | 1045.335375 | 0.016  | 0.987  | 0.27070635  | count | 1 |
| LINC01436  | 16.7746691 | 1618.348491 | 0.0104 | 0.992  | 0.270706351 | count | 1 |

|             |            |             |        |        |             |       |   |
|-------------|------------|-------------|--------|--------|-------------|-------|---|
| MYBPC1      | 16.7746818 | 1618.348335 | 0.0104 | 0.992  | 0.270706351 | count | 1 |
| AC079907.1  | 16.774687  | 1618.350291 | 0.0104 | 0.992  | 0.270706351 | count | 1 |
| AL050343.1  | 16.7748001 | 1912.462857 | 0.0088 | 0.993  | 0.270706351 | count | 1 |
| AC015987.1  | 16.774807  | 1912.461942 | 0.0088 | 0.993  | 0.270706351 | count | 1 |
| TLR6        | 16.8253541 | 1061.676934 | 0.0158 | 0.9874 | 0.270706352 | count | 1 |
| AC109630.1  | 16.887869  | 964.2016019 | 0.0175 | 0.986  | 0.270706353 | count | 1 |
| LINC02356   | 16.9972423 | 1774.843708 | 0.0096 | 0.992  | 0.270706354 | count | 1 |
| NPFFR2      | 17.0942834 | 1919.219674 | 0.0089 | 0.993  | 0.270706356 | count | 1 |
| FKBP1C      | 17.0942835 | 1919.219719 | 0.0089 | 0.993  | 0.270706356 | count | 1 |
| AC092119.3  | 17.0942836 | 1919.219731 | 0.0089 | 0.993  | 0.270706356 | count | 1 |
| MTFP1       | 17.0942837 | 1919.219715 | 0.0089 | 0.993  | 0.270706356 | count | 1 |
| SPATA9      | 17.0942966 | 1919.221508 | 0.0089 | 0.993  | 0.270706356 | count | 1 |
| AC211476.2  | 17.0942966 | 1919.221516 | 0.0089 | 0.993  | 0.270706356 | count | 1 |
| AP002490.1  | 17.0946907 | 2457.673236 | 0.007  | 0.994  | 0.270706356 | count | 1 |
| MMP25       | 17.0946907 | 2457.673207 | 0.007  | 0.994  | 0.270706356 | count | 1 |
| AL138963.1  | 17.0947058 | 2457.684402 | 0.007  | 0.994  | 0.270706356 | count | 1 |
| PRR7-AS1    | 17.1153262 | 1920.803992 | 0.0089 | 0.993  | 0.270706356 | count | 1 |
| TM4SF19-AS1 | 17.1153313 | 1625.426694 | 0.0105 | 0.992  | 0.270706356 | count | 1 |
| HCG17       | 17.1153314 | 1625.426694 | 0.0105 | 0.992  | 0.270706356 | count | 1 |
| AL391262.1  | 17.1153398 | 1625.423102 | 0.0105 | 0.992  | 0.270706356 | count | 1 |
| AC108474.1  | 17.1153405 | 1625.426679 | 0.0105 | 0.992  | 0.270706356 | count | 1 |
| SLC26A1     | 17.1153449 | 1625.429607 | 0.0105 | 0.992  | 0.270706356 | count | 1 |
| CCR1        | 17.115345  | 1625.429619 | 0.0105 | 0.992  | 0.270706356 | count | 1 |
| ATG9A       | 17.1250253 | 1379.107164 | 0.0124 | 0.99   | 0.270706356 | count | 1 |
| ENTPD7      | 17.1250253 | 1379.107164 | 0.0124 | 0.99   | 0.270706356 | count | 1 |
| SIX3        | 17.1250325 | 1379.104199 | 0.0124 | 0.99   | 0.270706356 | count | 1 |
| LINC01960   | 17.1250334 | 1379.103207 | 0.0124 | 0.99   | 0.270706356 | count | 1 |
| DIRAS2      | 17.125038  | 1695.587448 | 0.0101 | 0.992  | 0.270706356 | count | 1 |
| ADAMTS13    | 17.12504   | 1695.585015 | 0.0101 | 0.992  | 0.270706356 | count | 1 |
| AC010207.1  | 17.1253902 | 1870.522914 | 0.0092 | 0.993  | 0.270706356 | count | 1 |
| MIA         | 17.1258402 | 1942.357586 | 0.0088 | 0.993  | 0.270706356 | count | 1 |
| ZNF878      | 17.1694247 | 1586.035198 | 0.0108 | 0.991  | 0.270706356 | count | 1 |
| AP000769.2  | 17.1694343 | 1874.362397 | 0.0092 | 0.993  | 0.270706356 | count | 1 |
| DLGAP2      | 17.2175464 | 1311.598464 | 0.0131 | 0.99   | 0.270706357 | count | 1 |
| MAMDC2-AS1  | 17.2351765 | 1613.859231 | 0.0107 | 0.991  | 0.270706357 | count | 1 |
| PAQR6       | 17.2424394 | 1717.74904  | 0.01   | 0.992  | 0.270706357 | count | 1 |
| KCTD8       | 17.3197228 | 1210.545775 | 0.0143 | 0.9886 | 0.270706358 | count | 1 |
| NXPE2       | 17.3507214 | 1375.228905 | 0.0126 | 0.99   | 0.270706358 | count | 1 |
| KCNJ16      | 17.3510526 | 1823.468404 | 0.0095 | 0.992  | 0.270706358 | count | 1 |
| AF129075.2  | 17.3510817 | 1535.154078 | 0.0113 | 0.991  | 0.270706358 | count | 1 |
| OIP5        | 17.3510818 | 1535.154081 | 0.0113 | 0.991  | 0.270706358 | count | 1 |
| SLC28A2     | 17.3510939 | 1535.155016 | 0.0113 | 0.991  | 0.270706358 | count | 1 |
| KLK10       | 17.3576077 | 1619.993819 | 0.0107 | 0.991  | 0.270706358 | count | 1 |
| GCNA        | 17.3577082 | 2081.277982 | 0.0083 | 0.993  | 0.270706358 | count | 1 |
| PITX1       | 17.3577487 | 1814.072969 | 0.0096 | 0.992  | 0.270706358 | count | 1 |

|             |            |             |        |       |             |       |   |
|-------------|------------|-------------|--------|-------|-------------|-------|---|
| AL021368.1  | 17.3577523 | 1814.08423  | 0.0096 | 0.992 | 0.270706358 | count | 1 |
| AL139424.3  | 17.3873753 | 2268.882472 | 0.0077 | 0.994 | 0.270706358 | count | 1 |
| AL513217.1  | 17.3873793 | 2268.869282 | 0.0077 | 0.994 | 0.270706358 | count | 1 |
| CDH10       | 17.3873793 | 2268.869257 | 0.0077 | 0.994 | 0.270706358 | count | 1 |
| KIF24       | 17.3873793 | 2268.869257 | 0.0077 | 0.994 | 0.270706358 | count | 1 |
| AICDA       | 17.3873792 | 2268.869292 | 0.0077 | 0.994 | 0.270706358 | count | 1 |
| OPLAH       | 17.3873794 | 2268.869287 | 0.0077 | 0.994 | 0.270706358 | count | 1 |
| AKR1B15     | 17.3874002 | 2268.88759  | 0.0077 | 0.994 | 0.270706358 | count | 1 |
| SLC44A4     | 17.3874047 | 2268.87467  | 0.0077 | 0.994 | 0.270706358 | count | 1 |
| MORN5       | 17.3874047 | 2268.87468  | 0.0077 | 0.994 | 0.270706358 | count | 1 |
| AC026250.1  | 17.3874047 | 2268.874715 | 0.0077 | 0.994 | 0.270706358 | count | 1 |
| ZGLP1       | 17.3874143 | 2268.89334  | 0.0077 | 0.994 | 0.270706358 | count | 1 |
| AC104184.1  | 17.3874144 | 2268.89334  | 0.0077 | 0.994 | 0.270706358 | count | 1 |
| HOXA1       | 17.3874144 | 2268.893345 | 0.0077 | 0.994 | 0.270706358 | count | 1 |
| AL139300.2  | 17.3874145 | 2268.893355 | 0.0077 | 0.994 | 0.270706358 | count | 1 |
| AL033527.5  | 17.3874146 | 2268.893335 | 0.0077 | 0.994 | 0.270706358 | count | 1 |
| APLN        | 17.3874146 | 2268.89334  | 0.0077 | 0.994 | 0.270706358 | count | 1 |
| MBOAT4      | 17.3874185 | 2268.880219 | 0.0077 | 0.994 | 0.270706358 | count | 1 |
| AC105053.1  | 17.3877151 | 2789.470471 | 0.0062 | 0.995 | 0.270706358 | count | 1 |
| AC008875.1  | 17.3877152 | 2789.470421 | 0.0062 | 0.995 | 0.270706358 | count | 1 |
| LINC00304   | 17.3877152 | 2789.470477 | 0.0062 | 0.995 | 0.270706358 | count | 1 |
| LRRC46      | 17.3877152 | 2789.470434 | 0.0062 | 0.995 | 0.270706358 | count | 1 |
| PLIN4       | 17.3877152 | 2789.470452 | 0.0062 | 0.995 | 0.270706358 | count | 1 |
| AC005013.1  | 17.3877405 | 2789.477233 | 0.0062 | 0.995 | 0.270706358 | count | 1 |
| LRRC3B      | 17.3877406 | 2789.477258 | 0.0062 | 0.995 | 0.270706358 | count | 1 |
| RET         | 17.3877408 | 2789.477283 | 0.0062 | 0.995 | 0.270706358 | count | 1 |
| AL122035.1  | 17.3877498 | 2789.4997   | 0.0062 | 0.995 | 0.270706358 | count | 1 |
| ITPKB-AS1   | 17.3924551 | 2394.788378 | 0.0073 | 0.994 | 0.270706359 | count | 1 |
| AC009962.1  | 17.3924551 | 2394.788459 | 0.0073 | 0.994 | 0.270706359 | count | 1 |
| STRIP2      | 17.3924551 | 2394.788494 | 0.0073 | 0.994 | 0.270706359 | count | 1 |
| OR52N1      | 17.3924551 | 2394.788401 | 0.0073 | 0.994 | 0.270706359 | count | 1 |
| AP001363.2  | 17.3924551 | 2394.788424 | 0.0073 | 0.994 | 0.270706359 | count | 1 |
| GLT1D1      | 17.3924551 | 2394.788505 | 0.0073 | 0.994 | 0.270706359 | count | 1 |
| GJB6        | 17.3924551 | 2394.788401 | 0.0073 | 0.994 | 0.270706359 | count | 1 |
| WFIKKN1     | 17.392455  | 2394.788517 | 0.0073 | 0.994 | 0.270706359 | count | 1 |
| VWA3A       | 17.3924551 | 2394.788505 | 0.0073 | 0.994 | 0.270706359 | count | 1 |
| EIF3CL      | 17.3924551 | 2394.788528 | 0.0073 | 0.994 | 0.270706359 | count | 1 |
| LINC02087   | 17.3924551 | 2394.788459 | 0.0073 | 0.994 | 0.270706359 | count | 1 |
| CTAGE1      | 17.392455  | 2394.788401 | 0.0073 | 0.994 | 0.270706359 | count | 1 |
| ADORA2A-AS1 | 17.3924551 | 2394.788366 | 0.0073 | 0.994 | 0.270706359 | count | 1 |
| AC105935.1  | 17.3924552 | 2394.788447 | 0.0073 | 0.994 | 0.270706359 | count | 1 |
| AC097358.2  | 17.3924552 | 2394.788598 | 0.0073 | 0.994 | 0.270706359 | count | 1 |
| AC067930.4  | 17.3924552 | 2394.788505 | 0.0073 | 0.994 | 0.270706359 | count | 1 |
| AP006333.1  | 17.3924552 | 2394.788459 | 0.0073 | 0.994 | 0.270706359 | count | 1 |
| LINC01435   | 17.3924552 | 2394.788355 | 0.0073 | 0.994 | 0.270706359 | count | 1 |

|             |            |             |        |       |             |       |   |
|-------------|------------|-------------|--------|-------|-------------|-------|---|
| KLRF1       | 17.3924552 | 2394.788389 | 0.0073 | 0.994 | 0.270706359 | count | 1 |
| AL079303.1  | 17.3924552 | 2394.788482 | 0.0073 | 0.994 | 0.270706359 | count | 1 |
| AC243829.1  | 17.3924552 | 2394.788505 | 0.0073 | 0.994 | 0.270706359 | count | 1 |
| AC139099.3  | 17.3924552 | 2394.788482 | 0.0073 | 0.994 | 0.270706359 | count | 1 |
| AL031432.5  | 17.3924554 | 2394.788494 | 0.0073 | 0.994 | 0.270706359 | count | 1 |
| AC096541.1  | 17.3924554 | 2394.788528 | 0.0073 | 0.994 | 0.270706359 | count | 1 |
| AC079354.3  | 17.3924553 | 2394.788621 | 0.0073 | 0.994 | 0.270706359 | count | 1 |
| ANKDD1B     | 17.3924553 | 2394.788482 | 0.0073 | 0.994 | 0.270706359 | count | 1 |
| LINC00491   | 17.3924554 | 2394.788366 | 0.0073 | 0.994 | 0.270706359 | count | 1 |
| SMIM32      | 17.3924553 | 2394.78847  | 0.0073 | 0.994 | 0.270706359 | count | 1 |
| SLC12A9-AS1 | 17.3924554 | 2394.788494 | 0.0073 | 0.994 | 0.270706359 | count | 1 |
| AL590708.1  | 17.3924553 | 2394.788482 | 0.0073 | 0.994 | 0.270706359 | count | 1 |
| AP001453.4  | 17.3924553 | 2394.788517 | 0.0073 | 0.994 | 0.270706359 | count | 1 |
| AF111167.2  | 17.3924553 | 2394.788551 | 0.0073 | 0.994 | 0.270706359 | count | 1 |
| AURKB       | 17.3924553 | 2394.788459 | 0.0073 | 0.994 | 0.270706359 | count | 1 |
| CSF3        | 17.3924553 | 2394.78847  | 0.0073 | 0.994 | 0.270706359 | count | 1 |
| AC018521.2  | 17.3924553 | 2394.788482 | 0.0073 | 0.994 | 0.270706359 | count | 1 |
| C18orf65    | 17.3924553 | 2394.788413 | 0.0073 | 0.994 | 0.270706359 | count | 1 |
| AL008635.1  | 17.3924554 | 2394.788389 | 0.0073 | 0.994 | 0.270706359 | count | 1 |
| AL008726.1  | 17.3924555 | 2394.78854  | 0.0073 | 0.994 | 0.270706359 | count | 1 |
| TMC1        | 17.3924556 | 2394.788528 | 0.0073 | 0.994 | 0.270706359 | count | 1 |
| AC174065.1  | 17.3924557 | 2394.788575 | 0.0073 | 0.994 | 0.270706359 | count | 1 |
| GNG3        | 17.3924556 | 2394.788494 | 0.0073 | 0.994 | 0.270706359 | count | 1 |
| COL9A1      | 17.3931978 | 3389.751474 | 0.0051 | 0.996 | 0.270706359 | count | 1 |
| CD27        | 17.3931978 | 3389.751539 | 0.0051 | 0.996 | 0.270706359 | count | 1 |
| TAS2R19     | 17.3931978 | 3389.751507 | 0.0051 | 0.996 | 0.270706359 | count | 1 |
| AC010536.1  | 17.3931978 | 3389.751474 | 0.0051 | 0.996 | 0.270706359 | count | 1 |
| SPRR2D      | 17.3931979 | 3389.751589 | 0.0051 | 0.996 | 0.270706359 | count | 1 |
| AL159169.3  | 17.3931979 | 3389.751572 | 0.0051 | 0.996 | 0.270706359 | count | 1 |
| C1QTNF9     | 17.3931979 | 3389.751654 | 0.0051 | 0.996 | 0.270706359 | count | 1 |
| AC004147.2  | 17.3931979 | 3389.751589 | 0.0051 | 0.996 | 0.270706359 | count | 1 |
| ST6GALNAC1  | 17.3931979 | 3389.751654 | 0.0051 | 0.996 | 0.270706359 | count | 1 |
| AC008397.1  | 17.3931979 | 3389.751605 | 0.0051 | 0.996 | 0.270706359 | count | 1 |
| FUT1        | 17.3931979 | 3389.751654 | 0.0051 | 0.996 | 0.270706359 | count | 1 |
| AC092958.1  | 17.3931981 | 3389.751802 | 0.0051 | 0.996 | 0.270706359 | count | 1 |
| TESMIN      | 17.3931981 | 3389.751671 | 0.0051 | 0.996 | 0.270706359 | count | 1 |
| AL133353.1  | 17.3931981 | 3389.751802 | 0.0051 | 0.996 | 0.270706359 | count | 1 |
| AC115676.1  | 17.393198  | 3389.751736 | 0.0051 | 0.996 | 0.270706359 | count | 1 |
| AC010542.4  | 17.393198  | 3389.751671 | 0.0051 | 0.996 | 0.270706359 | count | 1 |
| CECR2       | 17.3931981 | 3389.751736 | 0.0051 | 0.996 | 0.270706359 | count | 1 |
| FTCD        | 17.393198  | 3389.751589 | 0.0051 | 0.996 | 0.270706359 | count | 1 |
| AL606760.1  | 17.3931982 | 3389.751818 | 0.0051 | 0.996 | 0.270706359 | count | 1 |
| AC025034.1  | 17.3931982 | 3389.751736 | 0.0051 | 0.996 | 0.270706359 | count | 1 |
| AC019077.1  | 17.3931983 | 3389.751638 | 0.0051 | 0.996 | 0.270706359 | count | 1 |
| VCX3A       | 17.3931984 | 3389.751785 | 0.0051 | 0.996 | 0.270706359 | count | 1 |

|            |            |             |        |         |             |       |   |
|------------|------------|-------------|--------|---------|-------------|-------|---|
| OR5211     | 17.3931983 | 3389.751703 | 0.0051 | 0.996   | 0.270706359 | count | 1 |
| AP000911.2 | 17.3931983 | 3389.751802 | 0.0051 | 0.996   | 0.270706359 | count | 1 |
| AL161935.1 | 17.3931984 | 3389.751785 | 0.0051 | 0.996   | 0.270706359 | count | 1 |
| LINC02448  | 17.3931983 | 3389.751736 | 0.0051 | 0.996   | 0.270706359 | count | 1 |
| PCDH8      | 17.3931983 | 3389.751867 | 0.0051 | 0.996   | 0.270706359 | count | 1 |
| AC092755.2 | 17.3931984 | 3389.751785 | 0.0051 | 0.996   | 0.270706359 | count | 1 |
| UPK1A-AS1  | 17.3931983 | 3389.751736 | 0.0051 | 0.996   | 0.270706359 | count | 1 |
| AC011476.3 | 17.3931983 | 3389.751736 | 0.0051 | 0.996   | 0.270706359 | count | 1 |
| AL035530.2 | 17.4256452 | 1609.176384 | 0.0108 | 0.991   | 0.270706359 | count | 1 |
| NDST2      | 17.4602586 | 1914.486684 | 0.0091 | 0.993   | 0.270706359 | count | 1 |
| HCAR1      | 17.5330667 | 1686.410657 | 0.0104 | 0.992   | 0.27070636  | count | 1 |
| KRT24      | 17.5331355 | 1371.456699 | 0.0128 | 0.99    | 0.27070636  | count | 1 |
| CILP       | 17.7887112 | 949.191206  | 0.0187 | 0.985   | 0.270706361 | count | 1 |
| LINC02308  | 17.8186384 | 1678.761769 | 0.0106 | 0.9915  | 0.270706361 | count | 1 |
| BARX2      | 17.8217028 | 2717.73417  | 0.0066 | 0.995   | 0.270706361 | count | 1 |
| IRX6       | 17.8279179 | 2278.259533 | 0.0078 | 0.994   | 0.270706361 | count | 1 |
| SLC6A12    | 17.8279181 | 2278.259533 | 0.0078 | 0.994   | 0.270706361 | count | 1 |
| DGUOK-AS1  | 17.8279205 | 2278.269353 | 0.0078 | 0.994   | 0.270706361 | count | 1 |
| KLKB1      | 17.8279208 | 2278.269353 | 0.0078 | 0.994   | 0.270706361 | count | 1 |
| AL596094.1 | 17.8279297 | 2278.259513 | 0.0078 | 0.994   | 0.270706361 | count | 1 |
| AC109460.1 | 17.8279296 | 2278.259513 | 0.0078 | 0.994   | 0.270706361 | count | 1 |
| AC109460.2 | 17.8279298 | 2278.259513 | 0.0078 | 0.994   | 0.270706361 | count | 1 |
| DAGLA      | 17.8279449 | 2278.273744 | 0.0078 | 0.994   | 0.270706361 | count | 1 |
| LINC02106  | 17.827945  | 2278.273754 | 0.0078 | 0.994   | 0.270706361 | count | 1 |
| C16orf71   | 17.8279936 | 2800.961379 | 0.0064 | 0.995   | 0.270706361 | count | 1 |
| OTOGL      | 17.8279938 | 2800.961392 | 0.0064 | 0.995   | 0.270706361 | count | 1 |
| CHRNA3     | 17.8280345 | 2800.990101 | 0.0064 | 0.995   | 0.270706361 | count | 1 |
| SLCO4C1    | 17.8280356 | 2800.996062 | 0.0064 | 0.995   | 0.270706361 | count | 1 |
| AC108062.1 | 17.8281429 | 2782.041475 | 0.0064 | 0.995   | 0.270706361 | count | 1 |
| KCNIP2-AS1 | 17.8281429 | 2782.041438 | 0.0064 | 0.995   | 0.270706361 | count | 1 |
| RNF157     | 17.8281699 | 2782.058758 | 0.0064 | 0.995   | 0.270706361 | count | 1 |
| AL138966.2 | 17.9268481 | 2432.029114 | 0.0074 | 0.9941  | 0.270706362 | count | 1 |
| AC025165.5 | 17.9374636 | 2300.931005 | 0.0078 | 0.994   | 0.270706362 | count | 1 |
| NECAB2     | 18.1339141 | 1603.758872 | 0.0113 | 0.991   | 0.270706363 | count | 1 |
| PTPRQ      | 18.2194228 | 1580.606722 | 0.0115 | 0.9908  | 0.270706363 | count | 1 |
| SNX9       | 0.192271   | 0.0628844   | 3.0575 | 0.00225 | 0.270861911 | count | 1 |
| CLDN23     | 0.5936976  | 0.4306235   | 1.3787 | 0.168   | 0.270872629 | count | 1 |
| DST        | 0.1898399  | 0.0805986   | 2.3554 | 0.0186  | 0.270947482 | count | 1 |
| ETFRF1     | 0.1930889  | 0.0823453   | 2.3449 | 0.0191  | 0.271029205 | count | 1 |
| CEP164     | 0.2074208  | 0.1486165   | 1.3957 | 0.163   | 0.271067091 | count | 1 |
| ZNF16      | 0.2736415  | 0.3894514   | 0.7026 | 0.482   | 0.27112832  | count | 1 |
| DDX1       | 0.1950543  | 0.0874701   | 2.23   | 0.0258  | 0.271280101 | count | 1 |
| PURB       | 0.2072648  | 0.1647372   | 1.2582 | 0.208   | 0.271445194 | count | 1 |
| IDH1       | 0.2212867  | 0.1472127   | 1.5032 | 0.133   | 0.271728265 | count | 1 |
| DROSHA     | 0.2540656  | 0.2781924   | 0.9133 | 0.361   | 0.271765169 | count | 1 |

|            |           |           |        |          |             |       |             |
|------------|-----------|-----------|--------|----------|-------------|-------|-------------|
| PIR        | 0.2004428 | 0.1192986 | 1.6802 | 0.093    | 0.271776651 | count | 1           |
| SEC14L1    | 0.1967315 | 0.1153268 | 1.7059 | 0.0881   | 0.271793686 | count | 1           |
| PCDHB14    | 0.246548  | 0.3086489 | 0.7988 | 0.424    | 0.271853831 | count | 1           |
| SS18L2     | 0.203294  | 0.1187732 | 1.7116 | 0.0871   | 0.271872129 | count | 1           |
| NCBP1      | 0.2525423 | 0.2999307 | 0.842  | 0.4      | 0.271925137 | count | 1           |
| PPP1R2     | 0.1939561 | 0.0718464 | 2.6996 | 0.00697  | 0.272055604 | count | 1           |
| HEATR6     | 0.2124676 | 0.1700977 | 1.2491 | 0.212    | 0.272056107 | count | 1           |
| FAM160B1   | 0.2109857 | 0.1693995 | 1.2455 | 0.213    | 0.272066662 | count | 1           |
| TTF1       | 0.2040279 | 0.1203111 | 1.6958 | 0.09     | 0.272121924 | count | 1           |
| EDEM1      | 0.2513302 | 0.2253497 | 1.1153 | 0.265    | 0.27232928  | count | 1           |
| SMCHD1     | 0.1980381 | 0.1018426 | 1.9446 | 0.0519   | 0.272459913 | count | 1           |
| GAN        | 0.2500308 | 0.2161297 | 1.1569 | 0.247    | 0.27256279  | count | 1           |
| SH3BP5L    | 0.29745   | 0.2995291 | 0.9931 | 0.321    | 0.272588388 | count | 1           |
| USB1       | 0.2243366 | 0.1772027 | 1.266  | 0.206    | 0.272614845 | count | 1           |
| FGFR2      | 0.4362705 | 0.6271004 | 0.6957 | 0.487    | 0.27265746  | count | 1           |
| LINC00323  | 0.4364412 | 0.5053251 | 0.8637 | 0.388    | 0.272755439 | count | 1           |
| SIK3       | 0.2240325 | 0.1889058 | 1.1859 | 0.236    | 0.272838428 | count | 1           |
| PDIA4      | 0.1987696 | 0.0954898 | 2.0816 | 0.0375   | 0.272935987 | count | 1           |
| CCDC183    | 0.5991192 | 0.5116714 | 1.1709 | 0.242    | 0.273004989 | count | 1           |
| AC009118.3 | 1.4634017 | 0.9598005 | 1.5247 | 0.127    | 0.273123491 | count | 1           |
| YAE1D1     | 0.2093293 | 0.1549569 | 1.3509 | 0.177    | 0.273140495 | count | 1           |
| ZNF28      | 0.3806396 | 0.5356174 | 0.7107 | 0.477    | 0.273176727 | count | 1           |
| ZDHHC24    | 0.2213071 | 0.1413176 | 1.566  | 0.117    | 0.273277724 | count | 1           |
| TAF7       | 0.1931544 | 0.0571998 | 3.3768 | 0.000741 | 0.273319472 | count | 1           |
| ZNF573     | 0.2824901 | 0.3004134 | 0.9403 | 0.347    | 0.273523558 | count | 1           |
| AL139339.1 | 1.467549  | 1.0341104 | 1.4191 | 0.156    | 0.273561537 | count | 1           |
| AC116407.1 | 1.0140572 | 0.8919521 | 1.1369 | 0.256    | 0.273660234 | count | 1           |
| WSB2       | 0.2087552 | 0.1361567 | 1.5332 | 0.125    | 0.273946659 | count | 1           |
| MED14      | 0.2349479 | 0.2956649 | 0.7946 | 0.427    | 0.273964686 | count | 1           |
| PARP2      | 0.2196969 | 0.1667381 | 1.3176 | 0.188    | 0.274061749 | count | 1           |
| SMARCE1    | 0.2062928 | 0.0999201 | 2.0646 | 0.039    | 0.274066038 | count | 1           |
| CEBPG      | 0.2038128 | 0.142231  | 1.433  | 0.152    | 0.274085566 | count | 1           |
| ARGLU1     | 0.192145  | 0.0585399 | 3.2823 | 0.001    | 0.274263637 | count | 1           |
| AL135925.1 | 0.2091161 | 0.1895551 | 1.1032 | 0.27     | 0.274417424 | count | 1           |
| UHRF1BP1   | 0.3983451 | 0.4061006 | 0.9809 | 0.327    | 0.274443766 | count | 1           |
| MIOS       | 0.2690378 | 0.2864596 | 0.9392 | 0.348    | 0.274488667 | count | 1           |
| AGFG1      | 0.206426  | 0.1642792 | 1.2566 | 0.209    | 0.274517003 | count | 1           |
| HNRNPA2B1  | 0.1914363 | 0.0342574 | 5.5882 | 2.46E-08 | 0.274650521 | count | 0.000577854 |
| ZMAT1      | 0.2355548 | 0.2558508 | 0.9207 | 0.357    | 0.274662172 | count | 1           |
| GAS1RR     | 1.01936   | 0.6645201 | 1.534  | 0.125    | 0.274682961 | count | 1           |
| HES1       | 0.1944693 | 0.0872868 | 2.2279 | 0.0259   | 0.274725494 | count | 1           |
| GLIS2      | 0.2078156 | 0.1485476 | 1.399  | 0.162    | 0.274747221 | count | 1           |
| DBNDD1     | 0.3988463 | 0.5155629 | 0.7736 | 0.439    | 0.274765398 | count | 1           |
| CRTC1      | 0.3228188 | 0.3460242 | 0.9329 | 0.351    | 0.274835442 | count | 1           |
| OGDH       | 0.2307066 | 0.1599455 | 1.4424 | 0.149    | 0.274842843 | count | 1           |

|              |           |           |        |          |             |       |   |
|--------------|-----------|-----------|--------|----------|-------------|-------|---|
| C11orf49     | 0.2072397 | 0.1463608 | 1.416  | 0.157    | 0.275034822 | count | 1 |
| DDX51        | 0.274938  | 0.2261947 | 1.2155 | 0.224    | 0.275154616 | count | 1 |
| ZNF653       | 0.5022118 | 0.526902  | 0.9531 | 0.341    | 0.27516218  | count | 1 |
| FAM122A      | 0.2089049 | 0.1105953 | 1.8889 | 0.059    | 0.275200225 | count | 1 |
| OS9          | 0.1954726 | 0.059045  | 3.3106 | 0.00094  | 0.275353884 | count | 1 |
| WDR27        | 0.2593455 | 0.3684597 | 0.7039 | 0.482    | 0.275417179 | count | 1 |
| EWSR1        | 0.1984204 | 0.0916953 | 2.1639 | 0.0305   | 0.27545659  | count | 1 |
| ERCC4        | 0.2215606 | 0.1440565 | 1.538  | 0.124    | 0.275476797 | count | 1 |
| MPDU1        | 0.2347566 | 0.2059334 | 1.14   | 0.254    | 0.275534416 | count | 1 |
| UHRF2        | 0.2248678 | 0.2119094 | 1.0612 | 0.289    | 0.27553893  | count | 1 |
| C19orf12     | 0.2094299 | 0.131242  | 1.5958 | 0.111    | 0.275543418 | count | 1 |
| CDKL1        | 0.3057514 | 0.3710424 | 0.824  | 0.41     | 0.2755517   | count | 1 |
| CDR2L        | 0.3392381 | 0.3519869 | 0.9638 | 0.335    | 0.275619611 | count | 1 |
| SDHAF2       | 0.2066212 | 0.1074633 | 1.9227 | 0.0546   | 0.275814703 | count | 1 |
| AC021092.1   | 1.025412  | 1.1748906 | 0.8728 | 0.383    | 0.275845485 | count | 1 |
| IRGQ         | 0.3116626 | 0.3308308 | 0.9421 | 0.346    | 0.275972547 | count | 1 |
| TCF20        | 0.3317    | 0.3173603 | 1.0452 | 0.296    | 0.276109174 | count | 1 |
| MTR          | 0.2097597 | 0.1522128 | 1.3781 | 0.168    | 0.276148406 | count | 1 |
| ZBTB14       | 0.2519197 | 0.2290745 | 1.0997 | 0.272    | 0.276150044 | count | 1 |
| ZKSCAN1      | 0.2036046 | 0.1152662 | 1.7664 | 0.0774   | 0.276282477 | count | 1 |
| TMTC3        | 0.216289  | 0.1431474 | 1.511  | 0.131    | 0.276313491 | count | 1 |
| STAM2        | 0.2089072 | 0.1466158 | 1.4249 | 0.154    | 0.276492708 | count | 1 |
| CRLF3        | 0.2738715 | 0.2628461 | 1.0419 | 0.298    | 0.276761182 | count | 1 |
| BOLA2-SMG1P6 | 0.5055031 | 0.5342223 | 0.9462 | 0.344    | 0.276776793 | count | 1 |
| AC138150.1   | 0.4710827 | 0.5155647 | 0.9137 | 0.361    | 0.276792028 | count | 1 |
| GSTK1        | 0.1954931 | 0.0579788 | 3.3718 | 0.000755 | 0.27683407  | count | 1 |
| MACROD2      | 0.3723856 | 0.4135449 | 0.9005 | 0.368    | 0.276852747 | count | 1 |
| AC010969.2   | 0.4210148 | 0.6204627 | 0.6785 | 0.497    | 0.276876959 | count | 1 |
| NCK1-DT      | 0.4713703 | 0.4216205 | 1.118  | 0.264    | 0.276945305 | count | 1 |
| PPM1D        | 0.266937  | 0.2242534 | 1.1903 | 0.234    | 0.277026611 | count | 1 |
| NR1D1        | 0.2150742 | 0.1449441 | 1.4838 | 0.138    | 0.277037687 | count | 1 |
| UBXN2B       | 0.240202  | 0.2148321 | 1.1181 | 0.264    | 0.277048167 | count | 1 |
| MFSD8        | 0.2420874 | 0.1837495 | 1.3175 | 0.188    | 0.277052921 | count | 1 |
| ZMYM4        | 0.2040641 | 0.118072  | 1.7283 | 0.084    | 0.277057476 | count | 1 |
| RBM18        | 0.2174472 | 0.1576867 | 1.379  | 0.168    | 0.277159246 | count | 1 |
| CMIP         | 0.3257393 | 0.3638327 | 0.8953 | 0.371    | 0.277214026 | count | 1 |
| PAN3         | 0.2233774 | 0.1457125 | 1.533  | 0.125    | 0.277251945 | count | 1 |
| WDR55        | 0.2237915 | 0.1730126 | 1.2935 | 0.196    | 0.277288655 | count | 1 |
| PTPRK        | 0.2387729 | 0.2034603 | 1.1736 | 0.241    | 0.277409583 | count | 1 |
| MED11        | 0.2047499 | 0.1129738 | 1.8124 | 0.07     | 0.27743229  | count | 1 |
| AP000802.1   | 1.0341975 | 1.1056877 | 0.9353 | 0.35     | 0.277523917 | count | 1 |
| DDX19A       | 0.2372976 | 0.1981021 | 1.1979 | 0.231    | 0.277582363 | count | 1 |
| ARAF         | 0.2350982 | 0.1715587 | 1.3704 | 0.171    | 0.277625917 | count | 1 |
| POLG2        | 0.2580381 | 0.2503617 | 1.0307 | 0.303    | 0.27771861  | count | 1 |
| CCDC47       | 0.1965893 | 0.0713704 | 2.7545 | 0.00591  | 0.2777257   | count | 1 |

|            |           |           |        |         |             |       |   |
|------------|-----------|-----------|--------|---------|-------------|-------|---|
| CSTF2T     | 0.2352175 | 0.1922224 | 1.2237 | 0.221   | 0.277764877 | count | 1 |
| IL1R1      | 0.1996654 | 0.0957942 | 2.0843 | 0.0372  | 0.277870565 | count | 1 |
| ZMYM1      | 0.2229448 | 0.1912457 | 1.1658 | 0.244   | 0.278074437 | count | 1 |
| DXO        | 0.2567567 | 0.2329519 | 1.1022 | 0.27    | 0.278088737 | count | 1 |
| ZNF865     | 0.3086865 | 0.5282701 | 0.5843 | 0.559   | 0.278097639 | count | 1 |
| LINGO1     | 0.2780244 | 0.2424084 | 1.1469 | 0.251   | 0.278158752 | count | 1 |
| AL691447.2 | 0.6125842 | 0.6550295 | 0.9352 | 0.35    | 0.278273345 | count | 1 |
| SLC35D2    | 0.2151094 | 0.1677716 | 1.2822 | 0.2     | 0.278356932 | count | 1 |
| YTHDC2     | 0.2121759 | 0.140846  | 1.5064 | 0.132   | 0.278408252 | count | 1 |
| ANKRD40    | 0.2095161 | 0.123639  | 1.6946 | 0.0902  | 0.278466201 | count | 1 |
| AZIN1      | 0.2102943 | 0.1272813 | 1.6522 | 0.0986  | 0.27862332  | count | 1 |
| LPIN2      | 0.2055776 | 0.1096805 | 1.8743 | 0.061   | 0.278630806 | count | 1 |
| ZNF708     | 0.2172711 | 0.1512961 | 1.4361 | 0.151   | 0.278740056 | count | 1 |
| CHPF2      | 0.2399547 | 0.1880601 | 1.2759 | 0.202   | 0.2787621   | count | 1 |
| UHMK1      | 0.218484  | 0.1377578 | 1.586  | 0.113   | 0.278785372 | count | 1 |
| SAR1A      | 0.1978391 | 0.0650072 | 3.0433 | 0.00236 | 0.278799454 | count | 1 |
| TXLNA      | 0.2151496 | 0.1487699 | 1.4462 | 0.148   | 0.278891446 | count | 1 |
| AARS       | 0.2392772 | 0.1927979 | 1.2411 | 0.215   | 0.278938938 | count | 1 |
| CASP8AP2   | 0.2096647 | 0.1378651 | 1.5208 | 0.128   | 0.279208783 | count | 1 |
| NAP1L5     | 0.2296616 | 0.1890515 | 1.2148 | 0.225   | 0.279615611 | count | 1 |
| UTP14A     | 0.2218999 | 0.1493758 | 1.4855 | 0.137   | 0.27963247  | count | 1 |
| FAM151B    | 0.4484755 | 0.5056271 | 0.887  | 0.375   | 0.279643556 | count | 1 |
| MIPEP      | 0.2825688 | 0.3903282 | 0.7239 | 0.469   | 0.279721511 | count | 1 |
| CLASRP     | 0.2524898 | 0.2473497 | 1.0208 | 0.307   | 0.279746714 | count | 1 |
| RPS6KA4    | 0.245597  | 0.2067496 | 1.1879 | 0.235   | 0.279869554 | count | 1 |
| ERCC5      | 0.3010788 | 0.3425107 | 0.879  | 0.379   | 0.279875769 | count | 1 |
| SYAP1      | 0.2021246 | 0.0867571 | 2.3298 | 0.0199  | 0.27989259  | count | 1 |
| CDC5L      | 0.1991885 | 0.0772472 | 2.5786 | 0.00996 | 0.279908881 | count | 1 |
| ZNF500     | 0.2929399 | 0.4320515 | 0.678  | 0.498   | 0.279915297 | count | 1 |
| CCNF       | 0.617061  | 0.727618  | 0.8481 | 0.396   | 0.280016241 | count | 1 |
| ARL6IP6    | 0.2109316 | 0.1372696 | 1.5366 | 0.124   | 0.28005301  | count | 1 |
| SNX8       | 0.2722738 | 0.2390287 | 1.1391 | 0.255   | 0.280116721 | count | 1 |
| SNAPC3     | 0.2119192 | 0.1573623 | 1.3467 | 0.178   | 0.280141928 | count | 1 |
| AC245884.8 | 0.830245  | 0.8465413 | 0.9807 | 0.327   | 0.280385161 | count | 1 |
| SGF29      | 0.2173555 | 0.1170703 | 1.8566 | 0.0634  | 0.280481886 | count | 1 |
| AL449266.1 | 1.5360623 | 1.0260451 | 1.4971 | 0.134   | 0.280584385 | count | 1 |
| MADCAM1    | 0.4501958 | 0.7624746 | 0.5904 | 0.555   | 0.28062525  | count | 1 |
| ANO8       | 1.0517026 | 0.6034383 | 1.7429 | 0.0814  | 0.280836442 | count | 1 |
| SRGAP2B    | 0.248905  | 0.2223344 | 1.1195 | 0.263   | 0.281164633 | count | 1 |
| ZNF282     | 0.3240806 | 0.3571717 | 0.9074 | 0.364   | 0.281344756 | count | 1 |
| C14orf119  | 0.2027667 | 0.0815209 | 2.4873 | 0.0129  | 0.281381311 | count | 1 |
| RPA2       | 0.2052035 | 0.0942317 | 2.1776 | 0.0295  | 0.281480315 | count | 1 |
| GTF2IRD2   | 0.2616954 | 0.2914043 | 0.898  | 0.369   | 0.281570784 | count | 1 |
| BCL9L      | 0.2212044 | 0.1599739 | 1.3828 | 0.167   | 0.281583832 | count | 1 |
| TDRD3      | 0.2205639 | 0.1462302 | 1.5083 | 0.132   | 0.281730832 | count | 1 |



|            |           |           |        |          |             |       |             |
|------------|-----------|-----------|--------|----------|-------------|-------|-------------|
| BRWD1      | 0.2116661 | 0.1608043 | 1.3163 | 0.188    | 0.282126657 | count | 1           |
| DHX16      | 0.2404783 | 0.2363184 | 1.0176 | 0.309    | 0.282153686 | count | 1           |
| BAALC-AS1  | 0.5621599 | 1.0048963 | 0.5594 | 0.576    | 0.282255032 | count | 1           |
| ZNF26      | 0.3134945 | 0.3574371 | 0.8771 | 0.381    | 0.282263705 | count | 1           |
| L2HGDH     | 0.3135432 | 0.6177096 | 0.5076 | 0.612    | 0.282305873 | count | 1           |
| ABRA       | 1.0596793 | 0.8721076 | 1.2151 | 0.224    | 0.282331902 | count | 1           |
| TNFRSF10B  | 0.2358356 | 0.1956113 | 1.2056 | 0.228    | 0.282364862 | count | 1           |
| SEC62      | 0.196908  | 0.035684  | 5.5181 | 3.66E-08 | 0.282445656 | count | 0.000859002 |
| CHML       | 0.2449608 | 0.2321077 | 1.0554 | 0.291    | 0.28245061  | count | 1           |
| CORO1B     | 0.2055242 | 0.0838755 | 2.4503 | 0.0143   | 0.282962906 | count | 1           |
| CAND1      | 0.209971  | 0.1167805 | 1.798  | 0.0723   | 0.28303462  | count | 1           |
| TRMT44     | 0.4311863 | 0.3141297 | 1.3726 | 0.17     | 0.283047224 | count | 1           |
| ARF4       | 0.1983421 | 0.0489989 | 4.0479 | 5.27E-05 | 0.283091188 | count | 1           |
| ARL8B      | 0.205352  | 0.0945668 | 2.1715 | 0.03     | 0.283342806 | count | 1           |
| OTUD6B-AS1 | 0.2013405 | 0.0701759 | 2.8691 | 0.00414  | 0.283407713 | count | 1           |
| SUSD1      | 0.3412663 | 0.3450777 | 0.989  | 0.323    | 0.283697469 | count | 1           |
| TRNAU1AP   | 0.2170848 | 0.1359471 | 1.5968 | 0.11     | 0.283820403 | count | 1           |
| NLGN3      | 1.5696365 | 1.187622  | 1.3217 | 0.186    | 0.283882016 | count | 1           |
| ANKRD49    | 0.2247816 | 0.155998  | 1.4409 | 0.15     | 0.283987608 | count | 1           |
| RNGTT      | 0.2538245 | 0.1960657 | 1.2946 | 0.196    | 0.283999939 | count | 1           |
| SMG5       | 0.2936596 | 0.2365191 | 1.2416 | 0.214    | 0.284001076 | count | 1           |
| EFNA3      | 0.7134984 | 0.7793579 | 0.9155 | 0.36     | 0.284030296 | count | 1           |
| USP20      | 0.3156282 | 0.3100171 | 1.0181 | 0.309    | 0.284110745 | count | 1           |
| RAB2B      | 0.2255545 | 0.1604303 | 1.4059 | 0.16     | 0.284195949 | count | 1           |
| LMAN1      | 0.2001004 | 0.0519754 | 3.8499 | 0.00012  | 0.284250377 | count | 1           |
| HLA-DMA    | 0.2113298 | 0.1592588 | 1.327  | 0.185    | 0.28445857  | count | 1           |
| AL162231.2 | 0.4856093 | 0.4221635 | 1.1503 | 0.25     | 0.284509111 | count | 1           |
| TAMM41     | 0.2582611 | 0.205036  | 1.2596 | 0.208    | 0.284516895 | count | 1           |
| TMED3      | 0.2033686 | 0.0674454 | 3.0153 | 0.00258  | 0.284692001 | count | 1           |
| AC009779.2 | 0.2599965 | 0.2989461 | 0.8697 | 0.385    | 0.284826068 | count | 1           |
| MLLT10     | 0.2209672 | 0.1536981 | 1.4377 | 0.151    | 0.284841639 | count | 1           |
| ATG14      | 0.2154199 | 0.1563826 | 1.3775 | 0.168    | 0.284904276 | count | 1           |
| SWSAP1     | 0.272621  | 0.2530985 | 1.0771 | 0.281    | 0.285002176 | count | 1           |
| IDNK       | 0.224762  | 0.188209  | 1.1942 | 0.232    | 0.285047054 | count | 1           |
| OPCML      | 1.074624  | 1.2661587 | 0.8487 | 0.396    | 0.285110335 | count | 1           |
| RBM38      | 0.2602802 | 0.2688809 | 0.968  | 0.333    | 0.2851306   | count | 1           |
| TOB2       | 0.212599  | 0.1312182 | 1.6202 | 0.105    | 0.285415493 | count | 1           |
| TCHP       | 0.2202551 | 0.1615952 | 1.363  | 0.173    | 0.285462355 | count | 1           |
| CSNK1D     | 0.2221593 | 0.1359783 | 1.6338 | 0.102    | 0.285537522 | count | 1           |
| ARL6IP5    | 0.1985859 | 0.0307986 | 6.4479 | 1.28E-10 | 0.28554186  | count | 3.03E-06    |
| AP003119.2 | 1.587739  | 0.6551659 | 2.4234 | 0.0154   | 0.285621819 | count | 1           |
| AL356599.1 | 0.3074882 | 0.3528209 | 0.8715 | 0.384    | 0.285622387 | count | 1           |
| STRADB     | 0.2714378 | 0.2252987 | 1.2048 | 0.228    | 0.285919883 | count | 1           |
| TRIB1      | 0.2957727 | 0.3758831 | 0.7869 | 0.431    | 0.285980103 | count | 1           |
| MARS2      | 1.599399  | 1.078353  | 1.4832 | 0.138    | 0.286728453 | count | 1           |

|            |           |           |        |          |             |       |             |
|------------|-----------|-----------|--------|----------|-------------|-------|-------------|
| PCDHGA2    | 0.7217502 | 0.5149335 | 1.4016 | 0.161    | 0.28672876  | count | 1           |
| FBXO16     | 0.7217502 | 0.9044017 | 0.798  | 0.425    | 0.28672876  | count | 1           |
| ZFAND4     | 0.4372801 | 0.3506212 | 1.2472 | 0.212    | 0.286731293 | count | 1           |
| PDE4A      | 0.2402897 | 0.2066921 | 1.1625 | 0.245    | 0.286876762 | count | 1           |
| POU2F1     | 0.2312352 | 0.2369117 | 0.976  | 0.329    | 0.28690422  | count | 1           |
| MAP1LC3A   | 0.2051561 | 0.0835295 | 2.4561 | 0.0141   | 0.287030897 | count | 1           |
| TMEM161A   | 0.2309921 | 0.1877853 | 1.2301 | 0.219    | 0.287083835 | count | 1           |
| ZCCHC7     | 0.21212   | 0.1112541 | 1.9066 | 0.0566   | 0.287120407 | count | 1           |
| PDIA3      | 0.2004547 | 0.0350492 | 5.7192 | 1.16E-08 | 0.287139852 | count | 0.000272832 |
| DCP1A      | 0.2236819 | 0.1452963 | 1.5395 | 0.124    | 0.287191741 | count | 1           |
| ANXA4      | 0.2021608 | 0.0492889 | 4.1015 | 4.19E-05 | 0.287289618 | count | 0.958672    |
| UPF1       | 0.2362172 | 0.1773142 | 1.3322 | 0.183    | 0.287502918 | count | 1           |
| STAT5B     | 0.2252117 | 0.1905334 | 1.182  | 0.237    | 0.287618592 | count | 1           |
| ZNF598     | 0.2731357 | 0.2130789 | 1.2819 | 0.2      | 0.287665809 | count | 1           |
| AL121603.2 | 0.2977247 | 0.3008189 | 0.9897 | 0.322    | 0.287807354 | count | 1           |
| ZNF8       | 0.5283063 | 0.3756648 | 1.4063 | 0.16     | 0.287892226 | count | 1           |
| HYPK       | 0.3552622 | 0.3295073 | 1.0782 | 0.281    | 0.287978246 | count | 1           |
| TBX19      | 1.0905673 | 0.8224192 | 1.326  | 0.185    | 0.28804091  | count | 1           |
| NFYB       | 0.2092586 | 0.0918333 | 2.2787 | 0.0227   | 0.28813561  | count | 1           |
| SNX14      | 0.2283266 | 0.1494386 | 1.5279 | 0.127    | 0.288425678 | count | 1           |
| ACBD4      | 0.2444981 | 0.2003516 | 1.2203 | 0.222    | 0.288568297 | count | 1           |
| MND1       | 0.727444  | 0.6856835 | 1.0609 | 0.289    | 0.288582853 | count | 1           |
| CTSW       | 0.727444  | 0.8268963 | 0.8797 | 0.379    | 0.288582853 | count | 1           |
| PKD1L1     | 1.6210006 | 1.8846257 | 0.8601 | 0.3898   | 0.28874994  | count | 1           |
| DCTN5      | 0.2432945 | 0.2210065 | 1.1008 | 0.271    | 0.288834258 | count | 1           |
| ANGPT4     | 0.4939131 | 0.5415122 | 0.9121 | 0.362    | 0.288897056 | count | 1           |
| EML3       | 0.2669706 | 0.2184985 | 1.2218 | 0.222    | 0.288914145 | count | 1           |
| ZSCAN9     | 0.3270239 | 0.280987  | 1.1638 | 0.245    | 0.289015665 | count | 1           |
| PSENN      | 0.2068309 | 0.0764183 | 2.7066 | 0.00683  | 0.289053475 | count | 1           |
| TCFL5      | 0.3028514 | 0.2495871 | 1.2134 | 0.225    | 0.289071978 | count | 1           |
| BEND3      | 0.8642776 | 0.7817064 | 1.1056 | 0.269    | 0.289267907 | count | 1           |
| ACIN1      | 0.210749  | 0.1010364 | 2.0859 | 0.0371   | 0.289278813 | count | 1           |
| KLHL28     | 0.2314031 | 0.1434177 | 1.6135 | 0.107    | 0.289411121 | count | 1           |
| DCHS1      | 0.2643164 | 0.3039403 | 0.8696 | 0.385    | 0.289461475 | count | 1           |
| SAMD4B     | 0.2173478 | 0.1832856 | 1.1858 | 0.236    | 0.289523506 | count | 1           |
| UBE3D      | 0.3487078 | 0.3491595 | 0.9987 | 0.318    | 0.289584484 | count | 1           |
| PLCG1      | 0.3076615 | 0.3415285 | 0.9008 | 0.368    | 0.28973959  | count | 1           |
| AL353194.1 | 0.3077417 | 0.3701722 | 0.8313 | 0.406    | 0.289812504 | count | 1           |
| AP000766.1 | 1.63262   | 0.8423259 | 1.9382 | 0.0527   | 0.289822184 | count | 1           |
| ALG1L      | 0.4664481 | 0.598251  | 0.7797 | 0.436    | 0.289863086 | count | 1           |
| IQCH-AS1   | 0.406146  | 0.4228514 | 0.9605 | 0.337    | 0.290252014 | count | 1           |
| CHMP1B     | 0.2109971 | 0.1236282 | 1.7067 | 0.088    | 0.29028228  | count | 1           |
| RIBC1      | 1.6378051 | 1.0680021 | 1.5335 | 0.125    | 0.290297127 | count | 1           |
| AC139887.4 | 1.6378051 | 1.1993922 | 1.3655 | 0.172    | 0.290297127 | count | 1           |
| MED7       | 0.2227739 | 0.1388032 | 1.605  | 0.109    | 0.290343369 | count | 1           |

|            |           |           |        |          |             |       |           |
|------------|-----------|-----------|--------|----------|-------------|-------|-----------|
| DNAJC13    | 0.2273197 | 0.1764496 | 1.2883 | 0.198    | 0.29060596  | count | 1         |
| MAD1L1     | 0.2686059 | 0.2316787 | 1.1594 | 0.246    | 0.290645501 | count | 1         |
| SNX4       | 0.2179035 | 0.1203864 | 1.81   | 0.0704   | 0.290664962 | count | 1         |
| FAM76B     | 0.2170005 | 0.1991688 | 1.0895 | 0.276    | 0.290718656 | count | 1         |
| CNTN5      | 0.7340497 | 0.5971568 | 1.2292 | 0.219    | 0.290725845 | count | 1         |
| ITGA11     | 0.2217597 | 0.1402319 | 1.5814 | 0.114    | 0.29090313  | count | 1         |
| AC133550.2 | 0.6455306 | 0.6703474 | 0.963  | 0.336    | 0.290998313 | count | 1         |
| SLC39A9    | 0.2743693 | 0.2455411 | 1.1174 | 0.264    | 0.290999501 | count | 1         |
| PELP1      | 0.2458796 | 0.2067638 | 1.1892 | 0.234    | 0.291028957 | count | 1         |
| IL1RAP     | 0.4447294 | 0.4410649 | 1.0083 | 0.313    | 0.291221999 | count | 1         |
| HMOX2      | 0.2129617 | 0.1110433 | 1.9178 | 0.0552   | 0.291266106 | count | 1         |
| C12orf29   | 0.2183616 | 0.1113051 | 1.9618 | 0.0499   | 0.291405154 | count | 1         |
| SENP1      | 0.2581388 | 0.2046948 | 1.2611 | 0.207    | 0.291407124 | count | 1         |
| STK11IP    | 0.3695992 | 0.5066561 | 0.7295 | 0.466    | 0.291470604 | count | 1         |
| SIGMAR1    | 0.2225653 | 0.1232555 | 1.8057 | 0.071    | 0.291555322 | count | 1         |
| COQ8A      | 0.2607081 | 0.2046148 | 1.2741 | 0.203    | 0.291556669 | count | 1         |
| LRRC14     | 0.2982578 | 0.3121368 | 0.9555 | 0.339    | 0.291619155 | count | 1         |
| NAV2       | 0.217609  | 0.1971908 | 1.1035 | 0.27     | 0.291880942 | count | 1         |
| EHMT2      | 0.2301383 | 0.1894116 | 1.215  | 0.224    | 0.292161866 | count | 1         |
| FALEC      | 0.5848148 | 0.868314  | 0.6735 | 0.501    | 0.292166759 | count | 1         |
| APBA1      | 1.6590794 | 0.9237515 | 1.796  | 0.0726   | 0.292224401 | count | 1         |
| CAPRIN1    | 0.2131    | 0.0898036 | 2.3725 | 0.0177   | 0.292277868 | count | 1         |
| FAM107A    | 0.2737203 | 0.3462747 | 0.7905 | 0.429    | 0.29230963  | count | 1         |
| UTP3       | 0.2202534 | 0.1999883 | 1.1013 | 0.271    | 0.292360117 | count | 1         |
| BLOC1S2    | 0.2155893 | 0.110944  | 1.9432 | 0.0521   | 0.292560638 | count | 1         |
| CXXC4      | 0.8772335 | 0.555557  | 1.579  | 0.114    | 0.292597075 | count | 1         |
| LRBA       | 0.2499517 | 0.2165048 | 1.1545 | 0.248    | 0.293102052 | count | 1         |
| CIP2A      | 0.3958012 | 0.4145056 | 0.9549 | 0.34     | 0.293161949 | count | 1         |
| CNOT1      | 0.2297165 | 0.1842134 | 1.247  | 0.212    | 0.293323063 | count | 1         |
| RBM28      | 0.2320362 | 0.1570792 | 1.4772 | 0.14     | 0.293448812 | count | 1         |
| SPNS2      | 0.5399194 | 0.4251096 | 1.2701 | 0.204    | 0.293505114 | count | 1         |
| CRYM       | 1.1208368 | 0.8532944 | 1.3135 | 0.189    | 0.293510543 | count | 1         |
| DPY19L1    | 0.2446495 | 0.2385083 | 1.0257 | 0.305    | 0.293523085 | count | 1         |
| SEC22B     | 0.2102277 | 0.0861145 | 2.4413 | 0.0147   | 0.293586738 | count | 1         |
| MOSMO      | 0.2157383 | 0.1289772 | 1.6727 | 0.0945   | 0.293618054 | count | 1         |
| TMEM68     | 0.2558667 | 0.2051528 | 1.2472 | 0.212    | 0.293702877 | count | 1         |
| RUNX1      | 0.245462  | 0.2014621 | 1.2184 | 0.223    | 0.293735904 | count | 1         |
| CFAP70     | 0.4733873 | 0.6956844 | 0.6805 | 0.496    | 0.293787084 | count | 1         |
| EEFSEC     | 0.2432592 | 0.1826964 | 1.3315 | 0.183    | 0.293996421 | count | 1         |
| SSPN       | 0.2056462 | 0.0450385 | 4.566  | 5.13E-06 | 0.294090898 | count | 0.1185543 |
| ISYNA1     | 0.2074746 | 0.074999  | 2.7664 | 0.0057   | 0.294249346 | count | 1         |
| BBOF1      | 0.312652  | 0.2942635 | 1.0625 | 0.288    | 0.29427312  | count | 1         |
| TFCP2      | 0.2819382 | 0.2403426 | 1.1731 | 0.241    | 0.294497712 | count | 1         |
| LINC00342  | 0.5045903 | 0.5540215 | 0.9108 | 0.362    | 0.294514176 | count | 1         |
| DCUN1D4    | 0.2262318 | 0.1436101 | 1.5753 | 0.115    | 0.294590671 | count | 1         |

|            |           |           |        |          |             |       |           |
|------------|-----------|-----------|--------|----------|-------------|-------|-----------|
| RPS6KB1    | 0.2277977 | 0.2020416 | 1.1275 | 0.26     | 0.294652579 | count | 1         |
| RXRG       | 1.6877637 | 0.9037081 | 1.8676 | 0.0619   | 0.294768115 | count | 1         |
| PAF1       | 0.2223018 | 0.1303779 | 1.7051 | 0.0883   | 0.294910531 | count | 1         |
| YME1L1     | 0.2110319 | 0.0988807 | 2.1342 | 0.0329   | 0.29493435  | count | 1         |
| DNAH7      | 0.8866282 | 0.7586507 | 1.1687 | 0.243    | 0.29499316  | count | 1         |
| HPS1       | 0.2251823 | 0.1415525 | 1.5908 | 0.112    | 0.295163485 | count | 1         |
| MYO19      | 0.4311821 | 0.4196067 | 1.0276 | 0.304    | 0.295382178 | count | 1         |
| PRR5L      | 1.1314159 | 0.7051751 | 1.6044 | 0.109    | 0.295393337 | count | 1         |
| ZNF106     | 0.2098801 | 0.0730132 | 2.8745 | 0.00407  | 0.295814196 | count | 1         |
| SEC61A2    | 0.6582933 | 0.4858106 | 1.355  | 0.175    | 0.295864482 | count | 1         |
| FBXL5      | 0.2173463 | 0.106533  | 2.0402 | 0.0414   | 0.296092171 | count | 1         |
| FAM110A    | 0.3241785 | 0.4197474 | 0.7723 | 0.44     | 0.296140533 | count | 1         |
| FRS2       | 0.2348131 | 0.1755308 | 1.3377 | 0.181    | 0.296150203 | count | 1         |
| ZNF350-AS1 | 0.7511197 | 1.09815   | 0.684  | 0.494    | 0.296223653 | count | 1         |
| C11orf96   | 0.2057291 | 0.0595055 | 3.4573 | 0.000552 | 0.296427687 | count | 1         |
| GGT1       | 1.7113163 | 1.0219117 | 1.6746 | 0.0941   | 0.296810514 | count | 1         |
| LGR5       | 1.7113163 | 1.2957984 | 1.3207 | 0.187    | 0.296810514 | count | 1         |
| SESN2      | 0.2781223 | 0.3307344 | 0.8409 | 0.4      | 0.296900505 | count | 1         |
| PIWIL2     | 0.7532616 | 0.7390596 | 1.0192 | 0.308    | 0.296909423 | count | 1         |
| ARHGAP23   | 0.2494951 | 0.3280396 | 0.7606 | 0.447    | 0.296913125 | count | 1         |
| E2F1       | 0.8943033 | 0.9930085 | 0.9006 | 0.368    | 0.296939446 | count | 1         |
| TSC22D4    | 0.2320861 | 0.1505899 | 1.5412 | 0.123    | 0.296966958 | count | 1         |
| SCRN2      | 0.2310718 | 0.1489958 | 1.5509 | 0.121    | 0.297192725 | count | 1         |
| CNOT11     | 0.2633682 | 0.2039139 | 1.2916 | 0.197    | 0.297201189 | count | 1         |
| ERBB3      | 1.7161737 | 0.6640257 | 2.5845 | 0.00979  | 0.297226616 | count | 1         |
| ZNF430     | 0.261214  | 0.2099076 | 1.2444 | 0.213    | 0.297351034 | count | 1         |
| FPGS       | 0.2520857 | 0.2608008 | 0.9666 | 0.334    | 0.29739119  | count | 1         |
| EDNRA      | 0.2304097 | 0.1492882 | 1.5434 | 0.123    | 0.297470055 | count | 1         |
| GDPD1      | 0.5973489 | 0.4107542 | 1.4543 | 0.146    | 0.297599745 | count | 1         |
| APBB3      | 0.3082529 | 0.2773917 | 1.1113 | 0.267    | 0.29764779  | count | 1         |
| SRPRA      | 0.2114395 | 0.0688136 | 3.0726 | 0.00214  | 0.297706374 | count | 1         |
| GPATCH2L   | 0.2237509 | 0.1536885 | 1.4559 | 0.146    | 0.297720204 | count | 1         |
| LOXL1      | 0.2140079 | 0.0928196 | 2.3056 | 0.0212   | 0.29781142  | count | 1         |
| VEZF1      | 0.2170736 | 0.096161  | 2.2574 | 0.024    | 0.297985723 | count | 1         |
| TRPC4AP    | 0.2485589 | 0.180503  | 1.377  | 0.169    | 0.298150177 | count | 1         |
| ZNF207     | 0.2150842 | 0.1000716 | 2.1493 | 0.0317   | 0.298153163 | count | 1         |
| ZNF664     | 0.2608554 | 0.1981538 | 1.3164 | 0.188    | 0.298158464 | count | 1         |
| ATP6V1H    | 0.2294187 | 0.1599645 | 1.4342 | 0.152    | 0.298238114 | count | 1         |
| PNPLA8     | 0.2187751 | 0.0961632 | 2.275  | 0.023    | 0.298246903 | count | 1         |
| DHRS7      | 0.2096782 | 0.0498847 | 4.2033 | 2.69E-05 | 0.298247224 | count | 0.6167901 |
| LBH        | 0.2098899 | 0.0746152 | 2.813  | 0.00493  | 0.298267446 | count | 1         |
| AC027307.2 | 0.8998576 | 0.7926368 | 1.1353 | 0.256    | 0.298341696 | count | 1         |
| RIOK1      | 0.227331  | 0.1278249 | 1.7785 | 0.0754   | 0.29836247  | count | 1         |
| TRABD2B    | 0.2299663 | 0.1955149 | 1.1762 | 0.24     | 0.298456861 | count | 1         |
| VPS45      | 0.2424409 | 0.1832661 | 1.3229 | 0.186    | 0.298534668 | count | 1         |

|            |           |           |        |          |             |       |   |
|------------|-----------|-----------|--------|----------|-------------|-------|---|
| HBP1       | 0.2172799 | 0.094848  | 2.2908 | 0.022    | 0.298536996 | count | 1 |
| TACC2      | 0.2429079 | 0.1785065 | 1.3608 | 0.174    | 0.298542754 | count | 1 |
| TM9SF2     | 0.2129676 | 0.0806771 | 2.6398 | 0.00833  | 0.298654275 | count | 1 |
| CCL26      | 0.3271169 | 0.4903101 | 0.6672 | 0.505    | 0.298719353 | count | 1 |
| AC110285.2 | 1.1504973 | 1.1526825 | 0.9981 | 0.318    | 0.298751708 | count | 1 |
| EXOSC10    | 0.2426897 | 0.1650773 | 1.4702 | 0.142    | 0.298837522 | count | 1 |
| NUDCD2     | 0.2157101 | 0.0878222 | 2.4562 | 0.0141   | 0.298838454 | count | 1 |
| NPEPPS     | 0.2198903 | 0.1275458 | 1.724  | 0.0848   | 0.298859516 | count | 1 |
| HERC1      | 0.2331507 | 0.1733096 | 1.3453 | 0.179    | 0.298943542 | count | 1 |
| PHYH       | 0.2141235 | 0.0809637 | 2.6447 | 0.00821  | 0.29896793  | count | 1 |
| SRBD1      | 0.2353382 | 0.1798955 | 1.3082 | 0.191    | 0.299062578 | count | 1 |
| FANCC      | 0.9037114 | 0.5286421 | 1.7095 | 0.0874   | 0.299311556 | count | 1 |
| LZTS2      | 0.2174218 | 0.1116981 | 1.9465 | 0.0517   | 0.299436829 | count | 1 |
| CHPF       | 0.2146399 | 0.1064367 | 2.0166 | 0.0438   | 0.299467634 | count | 1 |
| PDZD4      | 0.5140967 | 0.8017181 | 0.6412 | 0.521    | 0.299491625 | count | 1 |
| AGAP5      | 0.3918715 | 0.966651  | 0.4054 | 0.685    | 0.299509406 | count | 1 |
| CTNNA3     | 0.5142278 | 0.3902895 | 1.3176 | 0.188    | 0.299560115 | count | 1 |
| IFT140     | 0.3335397 | 0.3158643 | 1.056  | 0.291    | 0.299572645 | count | 1 |
| KDM5A      | 0.2206585 | 0.1280847 | 1.7228 | 0.085    | 0.299658243 | count | 1 |
| LIN54      | 0.306768  | 0.2925709 | 1.0485 | 0.294    | 0.299671824 | count | 1 |
| LNPBK      | 0.2242128 | 0.1079341 | 2.0773 | 0.0378   | 0.299701092 | count | 1 |
| ATXN7L1    | 0.3282571 | 0.2745153 | 1.1958 | 0.232    | 0.299719466 | count | 1 |
| HERC2      | 0.2233084 | 0.1298769 | 1.7194 | 0.0856   | 0.29972149  | count | 1 |
| NELFCD     | 0.2269669 | 0.129394  | 1.7541 | 0.0795   | 0.299740261 | count | 1 |
| VPS41      | 0.2235005 | 0.1361607 | 1.6414 | 0.101    | 0.299743452 | count | 1 |
| SLC19A3    | 1.7465089 | 1.2122162 | 1.4408 | 0.15     | 0.299786148 | count | 1 |
| C1QTNF12   | 1.7465089 | 1.3218393 | 1.3213 | 0.186    | 0.299786148 | count | 1 |
| DNAJC24    | 0.2477309 | 0.1896591 | 1.3062 | 0.192    | 0.300016832 | count | 1 |
| ZNF592     | 0.3072191 | 0.2933227 | 1.0474 | 0.295    | 0.300098217 | count | 1 |
| TRIM3      | 0.2812594 | 0.2623308 | 1.0722 | 0.284    | 0.300169861 | count | 1 |
| KITLG      | 0.235159  | 0.1357172 | 1.7327 | 0.0832   | 0.300212135 | count | 1 |
| THEM4      | 0.2429298 | 0.2201824 | 1.1033 | 0.27     | 0.300215076 | count | 1 |
| CFLAR      | 0.2156221 | 0.1023984 | 2.1057 | 0.0353   | 0.300279834 | count | 1 |
| ALPK1      | 0.2538398 | 0.2343232 | 1.0833 | 0.279    | 0.300312232 | count | 1 |
| IL6ST      | 0.2116361 | 0.0547375 | 3.8664 | 0.000112 | 0.300393865 | count | 1 |
| PBX2       | 0.2394607 | 0.2346568 | 1.0205 | 0.308    | 0.300706966 | count | 1 |
| RFK        | 0.2270751 | 0.1160959 | 1.9559 | 0.0505   | 0.300724516 | count | 1 |
| ABCB9      | 0.6711466 | 0.5994833 | 1.1195 | 0.263    | 0.300729553 | count | 1 |
| DENND4A    | 0.270459  | 0.2456589 | 1.101  | 0.271    | 0.300774467 | count | 1 |
| ADAMTS6    | 0.2764993 | 0.3648651 | 0.7578 | 0.449    | 0.300786855 | count | 1 |
| LRR3       | 0.6715208 | 0.907712  | 0.7398 | 0.459    | 0.300870658 | count | 1 |
| ARC        | 0.4222532 | 0.4843457 | 0.8718 | 0.383    | 0.30094895  | count | 1 |
| PDPR       | 0.2820434 | 0.2500859 | 1.1278 | 0.259    | 0.300986605 | count | 1 |
| NOP9       | 0.7660839 | 0.4493541 | 1.7049 | 0.0883   | 0.300995932 | count | 1 |
| EXOC5      | 0.224818  | 0.1426703 | 1.5758 | 0.115    | 0.301014201 | count | 1 |

|            |           |           |        |          |             |       |             |
|------------|-----------|-----------|--------|----------|-------------|-------|-------------|
| TMBIM4     | 0.210466  | 0.0389921 | 5.3977 | 7.18E-08 | 0.30104878  | count | 0.001682274 |
| SAXO1      | 0.672246  | 0.7889098 | 0.8521 | 0.394    | 0.301144023 | count | 1           |
| CCDC81     | 0.672246  | 0.973443  | 0.6906 | 0.49     | 0.301144023 | count | 1           |
| AC002310.1 | 0.6731    | 0.6293086 | 1.0696 | 0.285    | 0.301465805 | count | 1           |
| MTIF2      | 0.2359432 | 0.1587591 | 1.4862 | 0.137    | 0.301534986 | count | 1           |
| PLCXD1     | 0.7681855 | 0.5183298 | 1.482  | 0.138    | 0.301662617 | count | 1           |
| TWF1       | 0.2221908 | 0.1024675 | 2.1684 | 0.0302   | 0.301730418 | count | 1           |
| TMEM259    | 0.2207939 | 0.105173  | 2.0993 | 0.0359   | 0.301743822 | count | 1           |
| ID3        | 0.2095723 | 0.0445144 | 4.708  | 2.59E-06 | 0.301890552 | count | 0.0600362   |
| FAM8A1     | 0.2397729 | 0.155812  | 1.5389 | 0.124    | 0.301936037 | count | 1           |
| MAN2C1     | 0.2493838 | 0.2577157 | 0.9677 | 0.333    | 0.301992698 | count | 1           |
| PDP1       | 0.2212124 | 0.1329366 | 1.664  | 0.0962   | 0.302045988 | count | 1           |
| KATNB1     | 0.3838456 | 0.3534794 | 1.0859 | 0.278    | 0.302059953 | count | 1           |
| NCOA1      | 0.226789  | 0.1298204 | 1.7469 | 0.0807   | 0.302172184 | count | 1           |
| WDR43      | 0.2255224 | 0.1092488 | 2.0643 | 0.0391   | 0.30219941  | count | 1           |
| AL139393.2 | 0.9153877 | 0.4451568 | 2.0563 | 0.0398   | 0.302234593 | count | 1           |
| HIGD1A     | 0.2135681 | 0.0587634 | 3.6344 | 0.000282 | 0.302444462 | count | 1           |
| AC007383.2 | 0.4890573 | 0.5303571 | 0.9221 | 0.357    | 0.302603558 | count | 1           |
| CEP76      | 0.3653349 | 0.3359605 | 1.0874 | 0.277    | 0.302687933 | count | 1           |
| SH3PXD2A   | 0.2401374 | 0.1999119 | 1.2012 | 0.23     | 0.302799921 | count | 1           |
| EPC1       | 0.2167619 | 0.0750426 | 2.8885 | 0.00389  | 0.302809701 | count | 1           |
| SMU1       | 0.2215961 | 0.0950624 | 2.3311 | 0.0198   | 0.302836017 | count | 1           |
| MAPK1IP1L  | 0.2212636 | 0.0972981 | 2.2741 | 0.023    | 0.302956025 | count | 1           |
| AL163051.1 | 1.174816  | 0.8774929 | 1.3388 | 0.181    | 0.302962528 | count | 1           |
| RAP2B      | 0.2447537 | 0.1483302 | 1.6501 | 0.099    | 0.302973321 | count | 1           |
| SORBS3     | 0.216487  | 0.0833877 | 2.5961 | 0.00947  | 0.303059478 | count | 1           |
| SPTSSA     | 0.2183322 | 0.0773059 | 2.8243 | 0.00476  | 0.303225305 | count | 1           |
| TACSTD2    | 0.4103729 | 0.3832831 | 1.0707 | 0.284    | 0.303240102 | count | 1           |
| SCAF11     | 0.2149982 | 0.0734105 | 2.9287 | 0.00342  | 0.303254101 | count | 1           |
| ZNF567     | 0.2350773 | 0.1750726 | 1.3427 | 0.179    | 0.303448192 | count | 1           |
| SAP30BP    | 0.2229184 | 0.0988846 | 2.2543 | 0.0242   | 0.303502907 | count | 1           |
| DBP        | 0.2240042 | 0.1104015 | 2.029  | 0.0425   | 0.303759748 | count | 1           |
| TBX2-AS1   | 0.2373413 | 0.1346113 | 1.7632 | 0.078    | 0.303954686 | count | 1           |
| TLE1       | 0.2317891 | 0.1306297 | 1.7744 | 0.0761   | 0.303970669 | count | 1           |
| GGA3       | 0.3079642 | 0.2734327 | 1.1263 | 0.26     | 0.304070424 | count | 1           |
| C9orf24    | 0.4664228 | 1.3881033 | 0.336  | 0.7369   | 0.304218927 | count | 1           |
| ZNF345     | 0.3119312 | 0.310208  | 1.0056 | 0.315    | 0.304549458 | count | 1           |
| ZNF112     | 0.377059  | 0.3736991 | 1.009  | 0.313    | 0.304684744 | count | 1           |
| CAPZA1     | 0.220949  | 0.0937475 | 2.3569 | 0.0185   | 0.304705534 | count | 1           |
| TIA1       | 0.2359218 | 0.140067  | 1.6843 | 0.0922   | 0.304806098 | count | 1           |
| USP18      | 0.3200352 | 0.2833724 | 1.1294 | 0.259    | 0.304893548 | count | 1           |
| ETFBKMT    | 0.2970972 | 0.2772227 | 1.0717 | 0.284    | 0.304948041 | count | 1           |
| C5         | 0.3398076 | 0.337722  | 1.0062 | 0.314    | 0.304964956 | count | 1           |
| TAF13      | 0.2425703 | 0.1590144 | 1.5255 | 0.127    | 0.305001972 | count | 1           |
| TLE3       | 0.2482527 | 0.1933063 | 1.2842 | 0.199    | 0.30503368  | count | 1           |

|            |           |           |        |          |             |       |           |
|------------|-----------|-----------|--------|----------|-------------|-------|-----------|
| CDKN3      | 0.4466449 | 0.5893502 | 0.7579 | 0.449    | 0.305146147 | count | 1         |
| KLHDC4     | 0.2731828 | 0.3187443 | 0.8571 | 0.391    | 0.305229621 | count | 1         |
| FAM217B    | 0.2343672 | 0.1440069 | 1.6275 | 0.104    | 0.305342937 | count | 1         |
| MAPK12     | 1.1895192 | 1.0793044 | 1.1021 | 0.27     | 0.305471247 | count | 1         |
| AL021707.6 | 1.1895192 | 1.1848582 | 1.0039 | 0.315    | 0.305471247 | count | 1         |
| HES6       | 0.3094619 | 0.3959115 | 0.7816 | 0.434    | 0.30550193  | count | 1         |
| POLG       | 0.3690982 | 0.2919543 | 1.2642 | 0.206    | 0.305643997 | count | 1         |
| FBH1       | 0.2479197 | 0.1750722 | 1.4161 | 0.157    | 0.305762283 | count | 1         |
| STAM-AS1   | 0.7811759 | 0.6334028 | 1.2333 | 0.218    | 0.305764325 | count | 1         |
| HIST1H2AK  | 0.9303005 | 0.7943036 | 1.1712 | 0.242    | 0.305934303 | count | 1         |
| SYT17      | 1.1925702 | 0.7531151 | 1.5835 | 0.113    | 0.305988309 | count | 1         |
| HUWE1      | 0.228382  | 0.1195947 | 1.9096 | 0.0563   | 0.306011203 | count | 1         |
| ERCC6L2    | 0.2301319 | 0.1929393 | 1.1928 | 0.233    | 0.30601201  | count | 1         |
| LINC01550  | 0.3176965 | 0.3058814 | 1.0386 | 0.299    | 0.30645292  | count | 1         |
| HES7       | 1.1954437 | 0.9632533 | 1.241  | 0.215    | 0.306474168 | count | 1         |
| DKK2       | 1.8302507 | 1.053483  | 1.7373 | 0.0824   | 0.306512226 | count | 1         |
| KIF1BP     | 0.2289977 | 0.121432  | 1.8858 | 0.0594   | 0.306706995 | count | 1         |
| FAM98B     | 0.2619118 | 0.1852204 | 1.4141 | 0.157    | 0.306904273 | count | 1         |
| AL662844.4 | 0.4967829 | 0.3275518 | 1.5167 | 0.129    | 0.306927382 | count | 1         |
| AC108866.1 | 0.9347191 | 0.7709417 | 1.2124 | 0.225    | 0.307023301 | count | 1         |
| NDUFB2-AS1 | 0.9347191 | 0.9956229 | 0.9388 | 0.348    | 0.307023301 | count | 1         |
| ZDHHC16    | 0.2901079 | 0.2091646 | 1.387  | 0.166    | 0.307274832 | count | 1         |
| FOXO3      | 0.2266141 | 0.1272019 | 1.7815 | 0.0749   | 0.307283374 | count | 1         |
| AC118549.1 | 0.2415858 | 0.1651461 | 1.4629 | 0.144    | 0.307291122 | count | 1         |
| TBC1D10A   | 0.2614745 | 0.1843558 | 1.4183 | 0.156    | 0.30736102  | count | 1         |
| MTG2       | 0.3152055 | 0.224095  | 1.4066 | 0.16     | 0.307639527 | count | 1         |
| FBXO7      | 0.225115  | 0.0971493 | 2.3172 | 0.0205   | 0.307693441 | count | 1         |
| USP33      | 0.2278955 | 0.1151624 | 1.9789 | 0.0479   | 0.307698686 | count | 1         |
| AC104260.1 | 1.8460448 | 0.9846016 | 1.8749 | 0.0609   | 0.307726647 | count | 1         |
| KMT2E-AS1  | 0.2588523 | 0.2079946 | 1.2445 | 0.213    | 0.307885248 | count | 1         |
| AC097376.2 | 0.2367852 | 0.1917578 | 1.2348 | 0.217    | 0.307988155 | count | 1         |
| HYKK       | 0.2834738 | 0.2426656 | 1.1682 | 0.243    | 0.30820174  | count | 1         |
| PCDHB2     | 0.3197626 | 0.3925553 | 0.8146 | 0.415    | 0.308376594 | count | 1         |
| TLCD2      | 0.2608811 | 0.2467075 | 1.0575 | 0.29     | 0.308515843 | count | 1         |
| RETSAT     | 0.3093845 | 0.2861238 | 1.0813 | 0.28     | 0.308565242 | count | 1         |
| AL139384.1 | 0.790909  | 0.7566002 | 1.0453 | 0.296    | 0.308815787 | count | 1         |
| ZNF462     | 0.275182  | 0.2017705 | 1.3638 | 0.173    | 0.308868704 | count | 1         |
| ZBTB7A     | 0.2202484 | 0.0856088 | 2.5727 | 0.0101   | 0.308917787 | count | 1         |
| AF186192.1 | 1.8619237 | 0.9985979 | 1.8645 | 0.0623   | 0.308930765 | count | 1         |
| EFL1       | 0.3649784 | 0.2662032 | 1.3711 | 0.17     | 0.308966543 | count | 1         |
| SNX6       | 0.217553  | 0.0526953 | 4.1285 | 3.73E-05 | 0.308999169 | count | 0.8538716 |
| CREB3L2    | 0.2270615 | 0.1226723 | 1.851  | 0.0643   | 0.309120499 | count | 1         |
| ELP1       | 0.2941839 | 0.369252  | 0.7967 | 0.426    | 0.309260715 | count | 1         |
| DOCK7      | 0.2299551 | 0.1331063 | 1.7276 | 0.0841   | 0.309625496 | count | 1         |
| TLR1       | 0.6955934 | 0.4537591 | 1.533  | 0.125    | 0.30988417  | count | 1         |

|            |           |           |        |          |             |       |            |
|------------|-----------|-----------|--------|----------|-------------|-------|------------|
| CTSL       | 0.218785  | 0.0572108 | 3.8242 | 0.000133 | 0.310044922 | count | 1          |
| PCNX4      | 0.2417476 | 0.1649094 | 1.4659 | 0.143    | 0.310187872 | count | 1          |
| PPAT       | 0.2853583 | 0.2373458 | 1.2023 | 0.229    | 0.310203624 | count | 1          |
| CCDC32     | 0.239348  | 0.1448007 | 1.6529 | 0.0984   | 0.310277988 | count | 1          |
| TXNRD3     | 0.326189  | 0.2826541 | 1.154  | 0.249    | 0.310542819 | count | 1          |
| SLC37A4    | 0.3116187 | 0.2727523 | 1.1425 | 0.253    | 0.310723238 | count | 1          |
| NFIA       | 0.2175322 | 0.0483049 | 4.5033 | 6.90E-06 | 0.310725966 | count | 0.1592589  |
| GALNTL6    | 0.4076663 | 0.8054534 | 0.5061 | 0.613    | 0.310812405 | count | 1          |
| STK39      | 0.2600394 | 0.2552546 | 1.0187 | 0.308    | 0.310929581 | count | 1          |
| PTBP3      | 0.239705  | 0.1646356 | 1.456  | 0.145    | 0.311254579 | count | 1          |
| AGK        | 0.2714888 | 0.2428662 | 1.1179 | 0.264    | 0.31131211  | count | 1          |
| AKAP7      | 0.256621  | 0.2338142 | 1.0975 | 0.272    | 0.311334949 | count | 1          |
| POLR3A     | 0.2774302 | 0.256868  | 1.08   | 0.28     | 0.311341462 | count | 1          |
| IL4R       | 0.2685281 | 0.2067239 | 1.299  | 0.194    | 0.311394909 | count | 1          |
| EMP3       | 0.2169903 | 0.0449423 | 4.8282 | 1.43E-06 | 0.31141022  | count | 0.03322462 |
| ATE1       | 0.2379038 | 0.155525  | 1.5297 | 0.126    | 0.31150658  | count | 1          |
| AKAP13     | 0.2227433 | 0.078345  | 2.8431 | 0.00449  | 0.311861776 | count | 1          |
| UBAP1      | 0.2495852 | 0.1731029 | 1.4418 | 0.149    | 0.311907014 | count | 1          |
| PHETA1     | 0.2888452 | 0.4106915 | 0.7033 | 0.482    | 0.312030757 | count | 1          |
| TRIM65     | 0.2947365 | 0.2636185 | 1.118  | 0.264    | 0.31205175  | count | 1          |
| RAD23B     | 0.2295793 | 0.1026363 | 2.2368 | 0.0254   | 0.312054054 | count | 1          |
| GTF2H3     | 0.2433041 | 0.1327393 | 1.8329 | 0.0669   | 0.312167619 | count | 1          |
| STXBP4     | 0.257322  | 0.198736  | 1.2948 | 0.195    | 0.312174103 | count | 1          |
| NFS1       | 0.2948788 | 0.2382154 | 1.2379 | 0.216    | 0.312198537 | count | 1          |
| LINC02158  | 1.9073181 | 1.566967  | 1.2172 | 0.224    | 0.312281715 | count | 1          |
| OTUD5      | 0.2507892 | 0.1674672 | 1.4975 | 0.134    | 0.312423599 | count | 1          |
| DENND1B    | 0.3241885 | 0.2791241 | 1.1614 | 0.246    | 0.312494098 | count | 1          |
| ANKRD13D   | 0.2349846 | 0.1540258 | 1.5256 | 0.127    | 0.312579545 | count | 1          |
| SYT15      | 1.9117347 | 1.414704  | 1.3513 | 0.177    | 0.312600619 | count | 1          |
| HMGXB4     | 0.2293897 | 0.110157  | 2.0824 | 0.0374   | 0.31265842  | count | 1          |
| ZBED5-AS1  | 0.2660996 | 0.2062193 | 1.2904 | 0.197    | 0.312710648 | count | 1          |
| CEP126     | 0.2282503 | 0.1160848 | 1.9662 | 0.0493   | 0.312859169 | count | 1          |
| RBM27      | 0.3434638 | 0.2359152 | 1.4559 | 0.146    | 0.313027819 | count | 1          |
| ACAD9      | 0.2681237 | 0.1903291 | 1.4087 | 0.159    | 0.313049782 | count | 1          |
| NMUR2      | 0.3079854 | 0.4248774 | 0.7249 | 0.469    | 0.313058833 | count | 1          |
| CENPT      | 0.2539392 | 0.2189787 | 1.1597 | 0.246    | 0.313097452 | count | 1          |
| SUSD6      | 0.2593803 | 0.2051472 | 1.2644 | 0.206    | 0.31321418  | count | 1          |
| CCNK       | 0.2462954 | 0.1578795 | 1.56   | 0.119    | 0.313225051 | count | 1          |
| ZNF566     | 0.2865211 | 0.2145848 | 1.3352 | 0.182    | 0.31323243  | count | 1          |
| CCBE1      | 0.805588  | 0.737807  | 1.0919 | 0.275    | 0.313382789 | count | 1          |
| AC012615.1 | 0.4251205 | 0.4523402 | 0.9398 | 0.347    | 0.313383868 | count | 1          |
| THOC1      | 0.2481037 | 0.1720451 | 1.4421 | 0.149    | 0.313567696 | count | 1          |
| ZNF286A    | 0.4414397 | 0.4871873 | 0.9061 | 0.365    | 0.313603165 | count | 1          |
| SCGN       | 0.6348519 | 0.7053619 | 0.9    | 0.368    | 0.313639354 | count | 1          |
| ANKFY1     | 0.2564552 | 0.2144964 | 1.1956 | 0.232    | 0.313761314 | count | 1          |



|            |           |           |        |          |             |       |           |
|------------|-----------|-----------|--------|----------|-------------|-------|-----------|
| PAXBP1     | 0.2380845 | 0.1494039 | 1.5936 | 0.111    | 0.31376843  | count | 1         |
| SLC35E2A   | 0.371069  | 0.4136306 | 0.8971 | 0.37     | 0.313860456 | count | 1         |
| BAG4       | 0.2330268 | 0.1312726 | 1.7751 | 0.076    | 0.313960072 | count | 1         |
| ZNF619     | 0.6359918 | 0.5313644 | 1.1969 | 0.231    | 0.314121801 | count | 1         |
| C8orf48    | 0.2891092 | 0.3035097 | 0.9526 | 0.341    | 0.314186122 | count | 1         |
| WEE1       | 0.2348704 | 0.1508165 | 1.5573 | 0.119    | 0.314269135 | count | 1         |
| HMGCRC     | 0.2909762 | 0.2424636 | 1.2001 | 0.23     | 0.314277767 | count | 1         |
| MLYCD      | 0.2701671 | 0.2101002 | 1.2859 | 0.199    | 0.314344197 | count | 1         |
| SH3YL1     | 0.2457914 | 0.1755194 | 1.4004 | 0.161    | 0.314345982 | count | 1         |
| AGMO       | 1.9368173 | 1.1714918 | 1.6533 | 0.0984   | 0.314388414 | count | 1         |
| GCSH       | 0.2257118 | 0.0821094 | 2.7489 | 0.00601  | 0.314439888 | count | 1         |
| PTGER4     | 0.274272  | 0.1997698 | 1.3729 | 0.17     | 0.314445009 | count | 1         |
| SGSH       | 0.2659851 | 0.2257684 | 1.1781 | 0.239    | 0.314457617 | count | 1         |
| CRYGN      | 1.2439083 | 1.0363822 | 1.2002 | 0.23     | 0.314510262 | count | 1         |
| GIT1       | 0.284579  | 0.2562538 | 1.1105 | 0.267    | 0.314537695 | count | 1         |
| UTP20      | 0.3264506 | 0.2280391 | 1.4316 | 0.152    | 0.314596812 | count | 1         |
| PIM2       | 0.4844158 | 0.4687597 | 1.0334 | 0.301    | 0.314907258 | count | 1         |
| ZNF621     | 0.2834817 | 0.2156283 | 1.3147 | 0.189    | 0.314950165 | count | 1         |
| AC024257.3 | 1.2470245 | 0.9556087 | 1.305  | 0.192    | 0.315016813 | count | 1         |
| GLYR1      | 0.2487199 | 0.1458586 | 1.7052 | 0.0882   | 0.315135629 | count | 1         |
| MAP3K8     | 0.2335681 | 0.1122096 | 2.0815 | 0.0375   | 0.315217306 | count | 1         |
| RABEPK     | 0.2434688 | 0.1594681 | 1.5268 | 0.127    | 0.315308229 | count | 1         |
| CYR61      | 0.2192383 | 0.0503455 | 4.3547 | 1.37E-05 | 0.315362165 | count | 0.3153192 |
| ACCS       | 0.3584268 | 0.4555484 | 0.7868 | 0.431    | 0.315499896 | count | 1         |
| TMEM127    | 0.2621268 | 0.1836036 | 1.4277 | 0.153    | 0.315738779 | count | 1         |
| RRAGD      | 0.2501785 | 0.2075576 | 1.2053 | 0.228    | 0.315751523 | count | 1         |
| USP25      | 0.2642651 | 0.1967632 | 1.3431 | 0.179    | 0.315907854 | count | 1         |
| PNRC1      | 0.2197568 | 0.0331866 | 6.6218 | 4.06E-11 | 0.316008578 | count | 9.63E-07  |
| CATSPER2   | 0.328017  | 0.5329195 | 0.6155 | 0.538    | 0.316052162 | count | 1         |
| AL662796.1 | 1.961717  | 0.8102061 | 2.4213 | 0.0155   | 0.316124234 | count | 1         |
| FMO4       | 0.2988168 | 0.313605  | 0.9528 | 0.341    | 0.316259183 | count | 1         |
| UNKL       | 0.3174847 | 0.2228031 | 1.425  | 0.154    | 0.31638386  | count | 1         |
| KCTD20     | 0.2408447 | 0.1193623 | 2.0178 | 0.0437   | 0.316389365 | count | 1         |
| USP36      | 0.2730263 | 0.2498467 | 1.0928 | 0.275    | 0.316520065 | count | 1         |
| IGSF8      | 0.2327099 | 0.106907  | 2.1767 | 0.0296   | 0.316618047 | count | 1         |
| AGO3       | 0.239859  | 0.1815154 | 1.3214 | 0.186    | 0.316654269 | count | 1         |
| JMJD4      | 0.2741659 | 0.2108347 | 1.3004 | 0.194    | 0.316687716 | count | 1         |
| PTOV1-AS1  | 0.713991  | 0.7643382 | 0.9341 | 0.35     | 0.316688365 | count | 1         |
| SCD        | 0.713991  | 0.801011  | 0.8914 | 0.373    | 0.316688365 | count | 1         |
| C2orf69    | 0.2836831 | 0.2340006 | 1.2123 | 0.225    | 0.316716694 | count | 1         |
| DDX3Y      | 0.2315331 | 0.1087297 | 2.1294 | 0.0333   | 0.31683353  | count | 1         |
| LINC01006  | 0.374906  | 0.4103979 | 0.9135 | 0.361    | 0.316938709 | count | 1         |
| ACO1       | 0.2450096 | 0.1359165 | 1.8026 | 0.0715   | 0.317012519 | count | 1         |
| AC004982.2 | 0.3672771 | 0.4956071 | 0.7411 | 0.459    | 0.317039549 | count | 1         |
| RNF168     | 0.2367757 | 0.1272571 | 1.8606 | 0.0629   | 0.317067244 | count | 1         |

|            |           |           |        |          |             |       |             |
|------------|-----------|-----------|--------|----------|-------------|-------|-------------|
| DAXX       | 0.2510312 | 0.1547517 | 1.6222 | 0.105    | 0.317230233 | count | 1           |
| MTPAP      | 0.2727097 | 0.2143516 | 1.2723 | 0.203    | 0.31725161  | count | 1           |
| EPG5       | 0.3068366 | 0.2610449 | 1.1754 | 0.24     | 0.317272221 | count | 1           |
| HIGD2A     | 0.2242149 | 0.0633987 | 3.5366 | 0.00041  | 0.317550508 | count | 1           |
| TTC8       | 0.2549566 | 0.1819965 | 1.4009 | 0.161    | 0.317556448 | count | 1           |
| EPHX3      | 0.9782293 | 0.805526  | 1.2144 | 0.225    | 0.317571935 | count | 1           |
| ZDHC1      | 0.2831516 | 0.2043472 | 1.3856 | 0.166    | 0.317630237 | count | 1           |
| WTIP       | 0.2257931 | 0.0970855 | 2.3257 | 0.0201   | 0.317908897 | count | 1           |
| BNIP3L     | 0.2235885 | 0.0531036 | 4.2104 | 2.61E-05 | 0.318036983 | count | 0.5984991   |
| HEATR5B    | 0.2965152 | 0.2612465 | 1.135  | 0.256    | 0.318115302 | count | 1           |
| ARRDC4     | 0.3689625 | 0.3011101 | 1.2253 | 0.221    | 0.318422817 | count | 1           |
| MBD1       | 0.2620293 | 0.1782139 | 1.4703 | 0.142    | 0.318501849 | count | 1           |
| METTL17    | 0.2779232 | 0.1682313 | 1.652  | 0.0986   | 0.31855296  | count | 1           |
| ZNF503-AS2 | 0.3556682 | 0.3235679 | 1.0992 | 0.272    | 0.31856696  | count | 1           |
| OAT        | 0.2268369 | 0.0662782 | 3.4225 | 0.000627 | 0.318587189 | count | 1           |
| PABPN1     | 0.233807  | 0.105894  | 2.2079 | 0.0273   | 0.318654023 | count | 1           |
| HRC        | 0.3108933 | 0.2554316 | 1.2171 | 0.224    | 0.318691979 | count | 1           |
| OTUD7A     | 1.271209  | 0.7117406 | 1.7861 | 0.0742   | 0.318906922 | count | 1           |
| NUP160     | 0.3171177 | 0.2035553 | 1.5579 | 0.119    | 0.319108236 | count | 1           |
| AC074117.1 | 0.9858038 | 0.666339  | 1.4794 | 0.139    | 0.319376066 | count | 1           |
| BAZ1A      | 0.2560656 | 0.1567423 | 1.6337 | 0.102    | 0.319423605 | count | 1           |
| RNF213     | 0.2348519 | 0.1224828 | 1.9174 | 0.0553   | 0.319519759 | count | 1           |
| AL354822.1 | 0.9866608 | 0.622896  | 1.584  | 0.113    | 0.319579603 | count | 1           |
| SEC22A     | 0.2768074 | 0.195286  | 1.4174 | 0.156    | 0.319683866 | count | 1           |
| NFKBID     | 0.470017  | 0.4996986 | 0.9406 | 0.347    | 0.31978689  | count | 1           |
| ANXA1      | 0.2222178 | 0.0314961 | 7.0554 | 2.05E-12 | 0.319865012 | count | 4.87E-08    |
| VAPB       | 0.2466085 | 0.1294144 | 1.9056 | 0.0568   | 0.319882304 | count | 1           |
| ZNF12      | 0.2644374 | 0.1876213 | 1.4094 | 0.159    | 0.319970084 | count | 1           |
| ZNF141     | 0.263855  | 0.1824731 | 1.446  | 0.148    | 0.319991316 | count | 1           |
| ZNF224     | 0.2543821 | 0.1841199 | 1.3816 | 0.167    | 0.320139607 | count | 1           |
| SLC16A9    | 0.2607225 | 0.2413918 | 1.0801 | 0.28     | 0.320162917 | count | 1           |
| SPPL2A     | 0.2286748 | 0.0711965 | 3.2119 | 0.00133  | 0.320212008 | count | 1           |
| AC007228.2 | 0.8280816 | 0.8298464 | 0.9979 | 0.318    | 0.320299377 | count | 1           |
| AC018529.1 | 1.2801133 | 1.19169   | 1.0742 | 0.283    | 0.320320839 | count | 1           |
| SPIB       | 1.2801133 | 1.341889  | 0.954  | 0.34     | 0.320320839 | count | 1           |
| ELMOD1     | 1.2801133 | 1.417355  | 0.9032 | 0.366    | 0.320320839 | count | 1           |
| MRPL35     | 0.2389723 | 0.1293268 | 1.8478 | 0.0647   | 0.320380195 | count | 1           |
| DDAH2      | 0.2240677 | 0.0421624 | 5.3144 | 1.13E-07 | 0.320446048 | count | 0.002645556 |
| PARN       | 0.264856  | 0.1566789 | 1.6904 | 0.091    | 0.320469534 | count | 1           |
| NUDCD3     | 0.2473367 | 0.1414619 | 1.7484 | 0.0805   | 0.320549744 | count | 1           |
| STX2       | 0.2351481 | 0.1065974 | 2.2059 | 0.0274   | 0.320626348 | count | 1           |
| DNAJC1     | 0.2290076 | 0.0755231 | 3.0323 | 0.00244  | 0.320698095 | count | 1           |
| SIX2       | 0.3290853 | 0.2914528 | 1.1291 | 0.259    | 0.320711187 | count | 1           |
| TMEM79     | 2.0308025 | 0.9576585 | 2.1206 | 0.034    | 0.320743574 | count | 1           |
| CCDC144A   | 0.2535377 | 0.3410671 | 0.7434 | 0.457    | 0.320775623 | count | 1           |

|            |           |           |        |         |             |       |   |
|------------|-----------|-----------|--------|---------|-------------|-------|---|
| BCL2L12    | 0.2846932 | 0.2032794 | 1.4005 | 0.161   | 0.320778877 | count | 1 |
| VPS8       | 0.2677582 | 0.2395822 | 1.1176 | 0.264   | 0.320841911 | count | 1 |
| SBF1       | 0.3885311 | 0.3915594 | 0.9923 | 0.321   | 0.320850996 | count | 1 |
| AC007255.1 | 2.033306  | 1.409957  | 1.4421 | 0.149   | 0.320905661 | count | 1 |
| RNF2       | 0.2848572 | 0.18845   | 1.5116 | 0.131   | 0.320959888 | count | 1 |
| ATP13A1    | 0.308057  | 0.285806  | 1.0779 | 0.281   | 0.321020748 | count | 1 |
| LG MN      | 0.2305779 | 0.0816722 | 2.8232 | 0.00478 | 0.321083577 | count | 1 |
| ZNF135     | 0.3133484 | 0.548961  | 0.5708 | 0.568   | 0.321133511 | count | 1 |
| GOLGA2     | 0.229424  | 0.081712  | 2.8077 | 0.00502 | 0.321151789 | count | 1 |
| CREBL2     | 0.2430881 | 0.1356918 | 1.7915 | 0.0733  | 0.321257559 | count | 1 |
| YIPF4      | 0.2331433 | 0.104146  | 2.2386 | 0.0252  | 0.321268991 | count | 1 |
| CHIC1      | 0.2959147 | 0.2406076 | 1.2299 | 0.219   | 0.32140483  | count | 1 |
| MMS19      | 0.3476539 | 0.3081115 | 1.1283 | 0.259   | 0.321413088 | count | 1 |
| CABLES1    | 0.3728947 | 0.3883591 | 0.9602 | 0.337   | 0.321647317 | count | 1 |
| PSPH       | 0.3383272 | 0.3370784 | 1.0037 | 0.316   | 0.321659844 | count | 1 |
| CCDC127    | 0.2410679 | 0.1191882 | 2.0226 | 0.0432  | 0.321961081 | count | 1 |
| SNTB1      | 0.3201985 | 0.3085361 | 1.0378 | 0.299   | 0.32210936  | count | 1 |
| CIZ1       | 0.2625186 | 0.176015  | 1.4915 | 0.136   | 0.322340378 | count | 1 |
| UTY        | 0.273692  | 0.226327  | 1.2093 | 0.227   | 0.322466454 | count | 1 |
| GLUD1      | 0.2338383 | 0.0794271 | 2.9441 | 0.00326 | 0.322566734 | count | 1 |
| AC106739.1 | 2.0596686 | 1.0146783 | 2.0299 | 0.0424  | 0.322590659 | count | 1 |
| PEX3       | 0.2519567 | 0.152756  | 1.6494 | 0.0991  | 0.32283705  | count | 1 |
| RASA3      | 0.2731924 | 0.2189298 | 1.2479 | 0.212   | 0.322841069 | count | 1 |
| SLC4A7     | 0.238782  | 0.1249559 | 1.9109 | 0.0561  | 0.322938373 | count | 1 |
| GNB1L      | 0.3355264 | 0.3825568 | 0.8771 | 0.381   | 0.323021226 | count | 1 |
| AC007325.4 | 0.5258506 | 0.4489622 | 1.1713 | 0.242   | 0.323059925 | count | 1 |
| KLHL7      | 0.2541326 | 0.2010835 | 1.2638 | 0.206   | 0.323094291 | count | 1 |
| RRNAD1     | 0.2718509 | 0.2268281 | 1.1985 | 0.231   | 0.323105372 | count | 1 |
| SMARCA4    | 0.249593  | 0.1857949 | 1.3434 | 0.179   | 0.323173578 | count | 1 |
| NAAA       | 0.2349748 | 0.1115472 | 2.1065 | 0.0352  | 0.323262423 | count | 1 |
| SPPL2B     | 0.2810183 | 0.1993257 | 1.4098 | 0.159   | 0.323263474 | count | 1 |
| HLA-DMB    | 0.3749111 | 0.5108302 | 0.7339 | 0.463   | 0.323299288 | count | 1 |
| XPO4       | 0.3129145 | 0.2728313 | 1.1469 | 0.251   | 0.323373421 | count | 1 |
| FAM91A1    | 0.2692983 | 0.1720816 | 1.5649 | 0.118   | 0.32346546  | count | 1 |
| PPTC7      | 0.332096  | 0.3090111 | 1.0747 | 0.283   | 0.323540748 | count | 1 |
| KLHL18     | 0.3158583 | 0.2691783 | 1.1734 | 0.241   | 0.323628192 | count | 1 |
| INTS13     | 0.3250351 | 0.3049808 | 1.0658 | 0.287   | 0.323658571 | count | 1 |
| UBXN11     | 0.2849274 | 0.2266763 | 1.257  | 0.209   | 0.32381535  | count | 1 |
| CFAP69     | 0.3755441 | 0.3628294 | 1.035  | 0.301   | 0.323817675 | count | 1 |
| SVBP       | 0.2345329 | 0.0917403 | 2.5565 | 0.0106  | 0.323942176 | count | 1 |
| CENPC      | 0.2307871 | 0.0849981 | 2.7152 | 0.00665 | 0.32400115  | count | 1 |
| CHD8       | 0.2511458 | 0.14117   | 1.779  | 0.0753  | 0.324012024 | count | 1 |
| MIEF2      | 0.3021743 | 0.2240982 | 1.3484 | 0.178   | 0.32403204  | count | 1 |
| GIGYF1     | 0.2603204 | 0.1803758 | 1.4432 | 0.149   | 0.324159709 | count | 1 |
| MAP3K14    | 0.6600281 | 0.5014793 | 1.3162 | 0.188   | 0.324224866 | count | 1 |

|            |           |           |        |          |             |       |            |
|------------|-----------|-----------|--------|----------|-------------|-------|------------|
| HMGA1      | 0.3509289 | 0.3148298 | 1.1147 | 0.265    | 0.324314303 | count | 1          |
| PRRG1      | 0.29525   | 0.230562  | 1.2806 | 0.2      | 0.324338406 | count | 1          |
| ABCD1      | 0.4268096 | 0.3877826 | 1.1006 | 0.271    | 0.324424659 | count | 1          |
| FHIT       | 0.3331119 | 0.3601187 | 0.925  | 0.355    | 0.324495055 | count | 1          |
| DHX8       | 0.2664546 | 0.2122773 | 1.2552 | 0.209    | 0.324497999 | count | 1          |
| HSDL2      | 0.2361115 | 0.0939431 | 2.5133 | 0.012    | 0.324600671 | count | 1          |
| ZC3H7B     | 0.2576587 | 0.2235176 | 1.1527 | 0.249    | 0.324660075 | count | 1          |
| AL136418.1 | 2.0965907 | 1.0527934 | 1.9915 | 0.0465   | 0.324884433 | count | 1          |
| ATAD3A     | 0.2847555 | 0.3319579 | 0.8578 | 0.391    | 0.324948677 | count | 1          |
| SNIP1      | 0.282563  | 0.1773475 | 1.5933 | 0.111    | 0.325007028 | count | 1          |
| PRPF19     | 0.261011  | 0.1382719 | 1.8877 | 0.0591   | 0.325009633 | count | 1          |
| SRPK2      | 0.2341159 | 0.0832512 | 2.8122 | 0.00495  | 0.325048806 | count | 1          |
| IFT43      | 0.2330998 | 0.091031  | 2.5607 | 0.0105   | 0.325159117 | count | 1          |
| ZBTB44     | 0.2469937 | 0.158059  | 1.5627 | 0.118    | 0.325229579 | count | 1          |
| NIPA2      | 0.256313  | 0.157415  | 1.6283 | 0.104    | 0.325452308 | count | 1          |
| DBF4B      | 0.7382338 | 0.6513522 | 1.1334 | 0.257    | 0.325542839 | count | 1          |
| CFAP53     | 1.0120107 | 1.094519  | 0.9246 | 0.355    | 0.325545027 | count | 1          |
| DSCC1      | 0.3342317 | 0.4199403 | 0.7959 | 0.426    | 0.325546692 | count | 1          |
| KCTD13     | 0.3237309 | 0.3989563 | 0.8114 | 0.417    | 0.325547815 | count | 1          |
| ZNF678     | 0.3237446 | 0.2520857 | 1.2843 | 0.199    | 0.32556115  | count | 1          |
| NNT        | 0.2772856 | 0.1977683 | 1.4021 | 0.161    | 0.325634995 | count | 1          |
| HIPK3      | 0.2370875 | 0.0931633 | 2.5449 | 0.011    | 0.325652599 | count | 1          |
| SIDT2      | 0.3106372 | 0.2219947 | 1.3993 | 0.162    | 0.326077989 | count | 1          |
| CPLX1      | 1.0155107 | 1.380009  | 0.7359 | 0.462    | 0.326360348 | count | 1          |
| JAK1       | 0.2308641 | 0.0567741 | 4.0664 | 4.88E-05 | 0.326603739 | count | 1          |
| NF1        | 0.242077  | 0.132455  | 1.8276 | 0.0677   | 0.326749673 | count | 1          |
| FBXL14     | 0.4448209 | 0.3606908 | 1.2332 | 0.218    | 0.326845628 | count | 1          |
| DTYMK      | 0.2522578 | 0.1462152 | 1.7252 | 0.0846   | 0.32687419  | count | 1          |
| CTDSPL2    | 0.2459101 | 0.1409783 | 1.7443 | 0.0812   | 0.327022176 | count | 1          |
| CENPL      | 0.4619719 | 0.4470792 | 1.0333 | 0.302    | 0.327038486 | count | 1          |
| FASTKD3    | 0.3094688 | 0.3155727 | 0.9807 | 0.327    | 0.327226995 | count | 1          |
| TSPAN12    | 0.2964409 | 0.1954244 | 1.5169 | 0.129    | 0.32734988  | count | 1          |
| NBL1       | 0.228559  | 0.0506816 | 4.5097 | 6.69E-06 | 0.327357555 | count | 0.15443196 |
| HEMK1      | 0.3034054 | 0.2688813 | 1.1284 | 0.259    | 0.327365757 | count | 1          |
| MED22      | 0.3225216 | 0.274195  | 1.1762 | 0.24     | 0.327370265 | count | 1          |
| EED        | 0.2609483 | 0.2065145 | 1.2636 | 0.206    | 0.327393442 | count | 1          |
| ZNF160     | 0.2629488 | 0.1593964 | 1.6497 | 0.0991   | 0.327394177 | count | 1          |
| KIDINS220  | 0.2366592 | 0.0871204 | 2.7165 | 0.00663  | 0.327484057 | count | 1          |
| MIEF1      | 0.312071  | 0.2785865 | 1.1202 | 0.263    | 0.327540833 | count | 1          |
| WASHC2A    | 0.2618569 | 0.1924224 | 1.3608 | 0.174    | 0.327561504 | count | 1          |
| ALYREF     | 0.2379822 | 0.1028761 | 2.3133 | 0.0208   | 0.327653826 | count | 1          |
| MCM6       | 0.2985272 | 0.2183985 | 1.3669 | 0.172    | 0.327854104 | count | 1          |
| CMBL       | 0.2378527 | 0.0990762 | 2.4007 | 0.0164   | 0.328036621 | count | 1          |
| ZBTB43     | 0.2718383 | 0.1945289 | 1.3974 | 0.162    | 0.328039941 | count | 1          |
| NUFIP2     | 0.2396212 | 0.1072503 | 2.2342 | 0.0255   | 0.328320295 | count | 1          |

|            |           |           |        |          |             |       |   |
|------------|-----------|-----------|--------|----------|-------------|-------|---|
| ZNF43      | 0.2583137 | 0.1531976 | 1.6861 | 0.0919   | 0.328356723 | count | 1 |
| ABCE1      | 0.241593  | 0.1079887 | 2.2372 | 0.0253   | 0.328565985 | count | 1 |
| CHST14     | 0.2592697 | 0.1889642 | 1.3721 | 0.17     | 0.328770218 | count | 1 |
| PHKB       | 0.249658  | 0.1223715 | 2.0402 | 0.0414   | 0.32891373  | count | 1 |
| CBLN3      | 0.6713057 | 0.4545477 | 1.4769 | 0.14     | 0.328919156 | count | 1 |
| LRIF1      | 0.2622203 | 0.1455231 | 1.8019 | 0.0716   | 0.328971487 | count | 1 |
| ADNP2      | 0.2995862 | 0.2086113 | 1.4361 | 0.151    | 0.328989728 | count | 1 |
| WBP4       | 0.2365366 | 0.0910238 | 2.5986 | 0.0094   | 0.329077036 | count | 1 |
| MED12      | 0.4482321 | 0.2663565 | 1.6828 | 0.0925   | 0.329166233 | count | 1 |
| COPB2      | 0.2359932 | 0.0711707 | 3.3159 | 0.000922 | 0.329348225 | count | 1 |
| WDR7       | 0.338432  | 0.2874781 | 1.1772 | 0.239    | 0.32948872  | count | 1 |
| CTH        | 0.5092069 | 0.4583378 | 1.111  | 0.267    | 0.32949689  | count | 1 |
| CXorf40B   | 0.2902736 | 0.2851982 | 1.0178 | 0.309    | 0.329768175 | count | 1 |
| B4GALNT3   | 0.6180139 | 0.821856  | 0.752  | 0.452    | 0.330406267 | count | 1 |
| TRMT10A    | 0.299297  | 0.2591492 | 1.1549 | 0.248    | 0.330430812 | count | 1 |
| ZNF461     | 0.5392968 | 0.4736649 | 1.1386 | 0.255    | 0.330449633 | count | 1 |
| KIAA1586   | 0.2586155 | 0.1444901 | 1.7898 | 0.0736   | 0.330589775 | count | 1 |
| ATF1       | 0.2505262 | 0.1189419 | 2.1063 | 0.0352   | 0.330639107 | count | 1 |
| GRB10      | 0.3581942 | 0.3416984 | 1.0483 | 0.295    | 0.330741098 | count | 1 |
| MORN4      | 0.3531217 | 0.3209104 | 1.1004 | 0.271    | 0.330820088 | count | 1 |
| STMN3      | 0.2570055 | 0.137526  | 1.8688 | 0.0617   | 0.330884668 | count | 1 |
| ERCC8      | 0.3261385 | 0.3749186 | 0.8699 | 0.384    | 0.330924039 | count | 1 |
| AC015908.2 | 0.7536847 | 0.6849713 | 1.1003 | 0.271    | 0.331120061 | count | 1 |
| ATP6AP1    | 0.2396665 | 0.0814817 | 2.9414 | 0.00329  | 0.331237943 | count | 1 |
| PLAG1      | 0.8645304 | 1.0187453 | 0.8486 | 0.396    | 0.331298226 | count | 1 |
| XPNPEP3    | 0.3329961 | 0.2580569 | 1.2904 | 0.197    | 0.331314994 | count | 1 |
| R3HDM2     | 0.2385249 | 0.0847793 | 2.8135 | 0.00493  | 0.331503225 | count | 1 |
| TBK1       | 0.2602194 | 0.1685321 | 1.544  | 0.123    | 0.331892961 | count | 1 |
| NAA60      | 0.2602334 | 0.2806306 | 0.9273 | 0.354    | 0.331910643 | count | 1 |
| C1orf159   | 0.6212915 | 0.428483  | 1.45   | 0.147    | 0.331922763 | count | 1 |
| TAF2       | 0.2764687 | 0.2045017 | 1.3519 | 0.176    | 0.331947365 | count | 1 |
| SLC25A22   | 0.413051  | 0.602117  | 0.686  | 0.493    | 0.332004359 | count | 1 |
| AC098487.1 | 0.5136567 | 0.3715497 | 1.3825 | 0.167    | 0.332098732 | count | 1 |
| HPS6       | 0.354581  | 0.2956523 | 1.1993 | 0.23     | 0.332130645 | count | 1 |
| FBXL8      | 0.3412729 | 0.282384  | 1.2085 | 0.227    | 0.332152613 | count | 1 |
| ITSN2      | 0.2399631 | 0.1001437 | 2.3962 | 0.0166   | 0.332209995 | count | 1 |
| LZTR1      | 0.2993924 | 0.2483167 | 1.2057 | 0.228    | 0.33222695  | count | 1 |
| SERTAD3    | 0.2406557 | 0.1098706 | 2.1904 | 0.0286   | 0.332229542 | count | 1 |
| NT5DC3     | 0.306163  | 0.227929  | 1.3432 | 0.179    | 0.332258299 | count | 1 |
| SOCS5      | 0.2591138 | 0.1624793 | 1.5947 | 0.111    | 0.332262189 | count | 1 |
| MTERF1     | 0.345603  | 0.2767296 | 1.2489 | 0.212    | 0.33235205  | count | 1 |
| FCMR       | 1.358692  | 0.7799877 | 1.7419 | 0.0816   | 0.332381125 | count | 1 |
| PGBD2      | 0.321949  | 0.2446142 | 1.3161 | 0.188    | 0.332427934 | count | 1 |
| MYO1E      | 0.2650411 | 0.1678952 | 1.5786 | 0.115    | 0.332470281 | count | 1 |
| LIFR       | 0.2725339 | 0.174535  | 1.5615 | 0.118    | 0.332490072 | count | 1 |

|            |           |           |        |          |             |       |            |
|------------|-----------|-----------|--------|----------|-------------|-------|------------|
| SHLD2      | 0.2744006 | 0.1565008 | 1.7533 | 0.0796   | 0.332597243 | count | 1          |
| AC108673.3 | 0.3418207 | 0.3139224 | 1.0889 | 0.276    | 0.332666055 | count | 1          |
| AC087477.2 | 0.3381161 | 0.4365369 | 0.7745 | 0.439    | 0.332791909 | count | 1          |
| CNTLN      | 0.2454452 | 0.1455852 | 1.6859 | 0.0919   | 0.332884262 | count | 1          |
| SLC7A1     | 0.4712354 | 0.3456623 | 1.3633 | 0.173    | 0.333063832 | count | 1          |
| TYSND1     | 0.3254059 | 0.2207295 | 1.4742 | 0.141    | 0.333105396 | count | 1          |
| CHST15     | 0.3665711 | 0.298736  | 1.2271 | 0.22     | 0.333142664 | count | 1          |
| BCORL1     | 0.4541054 | 0.330463  | 1.3741 | 0.169    | 0.333154598 | count | 1          |
| SCCPDH     | 0.2462247 | 0.098701  | 2.4947 | 0.0127   | 0.33315735  | count | 1          |
| DPH3       | 0.2462667 | 0.1150956 | 2.1397 | 0.0324   | 0.333314393 | count | 1          |
| MTOR       | 0.3257261 | 0.2792051 | 1.1666 | 0.243    | 0.333422892 | count | 1          |
| LINC01273  | 0.544846  | 0.5595979 | 0.9736 | 0.33     | 0.333485827 | count | 1          |
| SLC50A1    | 0.2679021 | 0.1569093 | 1.7074 | 0.0878   | 0.33348729  | count | 1          |
| AL049840.1 | 0.2962559 | 0.2607874 | 1.136  | 0.256    | 0.333529014 | count | 1          |
| CA12       | 0.3670327 | 0.3046781 | 1.2047 | 0.228    | 0.33354314  | count | 1          |
| PIP4P2     | 0.2394685 | 0.0835655 | 2.8656 | 0.00419  | 0.333643512 | count | 1          |
| DRG2       | 0.2512872 | 0.1350003 | 1.8614 | 0.0628   | 0.333796038 | count | 1          |
| VEGFB      | 0.2330016 | 0.0423242 | 5.5052 | 3.94E-08 | 0.333859277 | count | 0.00092456 |
| AL050341.2 | 0.2980056 | 0.2192804 | 1.359  | 0.174    | 0.333929523 | count | 1          |
| BNIP3      | 0.2411373 | 0.1028924 | 2.3436 | 0.0192   | 0.333954955 | count | 1          |
| RTN2       | 0.275132  | 0.1925293 | 1.429  | 0.153    | 0.33420228  | count | 1          |
| SUCLG1     | 0.2393255 | 0.0725184 | 3.3002 | 0.000975 | 0.334355543 | count | 1          |
| HOXA-AS2   | 0.3013573 | 0.2577167 | 1.1693 | 0.242    | 0.334357263 | count | 1          |
| CNGA1      | 0.6266645 | 0.4103768 | 1.527  | 0.127    | 0.334403125 | count | 1          |
| CLDND1     | 0.2380679 | 0.0696245 | 3.4193 | 0.000635 | 0.334417204 | count | 1          |
| NFYC-AS1   | 1.0507598 | 0.6611025 | 1.5894 | 0.112    | 0.334460296 | count | 1          |
| TYW5       | 0.343843  | 0.3065988 | 1.1215 | 0.262    | 0.334560948 | count | 1          |
| SUPT6H     | 0.2518737 | 0.1347534 | 1.8691 | 0.0617   | 0.334570022 | count | 1          |
| LRRC17     | 0.2376333 | 0.0764719 | 3.1075 | 0.0019   | 0.334621681 | count | 1          |
| FBNP1L     | 0.2575137 | 0.1561633 | 1.649  | 0.0992   | 0.334726957 | count | 1          |
| FBXO10     | 1.05214   | 1.0706073 | 0.9828 | 0.326    | 0.334773325 | count | 1          |
| N6AMT1     | 0.2685319 | 0.2057083 | 1.3054 | 0.192    | 0.334789343 | count | 1          |
| CMTM6      | 0.2455194 | 0.0956931 | 2.5657 | 0.0103   | 0.335168754 | count | 1          |
| LRPPRC     | 0.2532628 | 0.1428023 | 1.7735 | 0.0762   | 0.335171289 | count | 1          |
| HDHD3      | 0.2716015 | 0.2089533 | 1.2998 | 0.194    | 0.335197088 | count | 1          |
| TOGARAM1   | 0.2628627 | 0.2002451 | 1.3127 | 0.189    | 0.335230641 | count | 1          |
| AC234772.3 | 1.3784774 | 1.2632074 | 1.0913 | 0.275    | 0.335301542 | count | 1          |
| TMEM60     | 0.2540216 | 0.1296952 | 1.9586 | 0.0502   | 0.335414119 | count | 1          |
| TNPO3      | 0.2867682 | 0.2206414 | 1.2997 | 0.194    | 0.335516381 | count | 1          |
| PRKCH      | 0.7660286 | 0.5550627 | 1.3801 | 0.168    | 0.335538904 | count | 1          |
| AQR        | 0.2788565 | 0.1645493 | 1.6947 | 0.0902   | 0.335585941 | count | 1          |
| STT3B      | 0.2498299 | 0.1016387 | 2.458  | 0.014    | 0.335628928 | count | 1          |
| TSTD2      | 0.286153  | 0.1882603 | 1.52   | 0.129    | 0.33586627  | count | 1          |
| ALS2CL     | 0.4960582 | 0.5678723 | 0.8735 | 0.382    | 0.335931718 | count | 1          |
| KDM7A      | 0.298464  | 0.1983296 | 1.5049 | 0.132    | 0.335961126 | count | 1          |

|           |           |           |        |          |             |       |            |
|-----------|-----------|-----------|--------|----------|-------------|-------|------------|
| FAM241A   | 0.267941  | 0.1667729 | 1.6066 | 0.108    | 0.336066195 | count | 1          |
| MILR1     | 0.4433163 | 0.5660578 | 0.7832 | 0.434    | 0.336084924 | count | 1          |
| KDM4A-AS1 | 2.2986208 | 1.9739205 | 1.1645 | 0.2443   | 0.336161457 | count | 1          |
| STPG1     | 0.3417353 | 0.3156804 | 1.0825 | 0.279    | 0.336225469 | count | 1          |
| SMURF2    | 0.2701638 | 0.1477004 | 1.8291 | 0.0675   | 0.336268415 | count | 1          |
| USP48     | 0.245195  | 0.1107912 | 2.2131 | 0.027    | 0.336377354 | count | 1          |
| PDE12     | 0.2857771 | 0.2068174 | 1.3818 | 0.167    | 0.336459973 | count | 1          |
| ANXA11    | 0.2365008 | 0.0516119 | 4.5823 | 4.75E-06 | 0.336462798 | count | 0.10982475 |
| PPM1M     | 0.2810467 | 0.2169685 | 1.2953 | 0.195    | 0.33651588  | count | 1          |
| CCP110    | 0.2712982 | 0.1915482 | 1.4163 | 0.157    | 0.336563708 | count | 1          |
| MLH1      | 0.3019023 | 0.1849831 | 1.6321 | 0.103    | 0.336600058 | count | 1          |
| ZNF684    | 0.31861   | 0.2383305 | 1.3368 | 0.181    | 0.336620541 | count | 1          |
| PHLPP1    | 0.4192999 | 0.2510276 | 1.6703 | 0.0949   | 0.336713289 | count | 1          |
| HEATR1    | 0.302094  | 0.2003355 | 1.5079 | 0.132    | 0.336808931 | count | 1          |
| KCNE4     | 0.23979   | 0.0952948 | 2.5163 | 0.0119   | 0.336866552 | count | 1          |
| PRKCD     | 0.3105225 | 0.265642  | 1.169  | 0.242    | 0.336868966 | count | 1          |
| ZHX2      | 0.3069556 | 0.2613501 | 1.1745 | 0.24     | 0.3368864   | count | 1          |
| LRRC34    | 0.3166509 | 0.2700772 | 1.1724 | 0.241    | 0.336916388 | count | 1          |
| STAT6     | 0.25183   | 0.1489274 | 1.691  | 0.0909   | 0.336967854 | count | 1          |
| DAZAP1    | 0.2509608 | 0.1270168 | 1.9758 | 0.0483   | 0.337012912 | count | 1          |
| SASH1     | 0.2482654 | 0.1253645 | 1.9803 | 0.0477   | 0.337154177 | count | 1          |
| AKAP8     | 0.310866  | 0.1879331 | 1.6541 | 0.0982   | 0.337232086 | count | 1          |
| COX15     | 0.3040205 | 0.2332898 | 1.3032 | 0.193    | 0.337243509 | count | 1          |
| ZNF670    | 0.5226356 | 0.4052922 | 1.2895 | 0.197    | 0.337333078 | count | 1          |
| ITGBL1    | 0.2358561 | 0.0625376 | 3.7714 | 0.000165 | 0.337438105 | count | 1          |
| LARP4B    | 0.273451  | 0.2451368 | 1.1155 | 0.265    | 0.337449987 | count | 1          |
| CCDC148   | 2.3274046 | 1.2966371 | 1.795  | 0.0727   | 0.337605144 | count | 1          |
| UBE2S     | 0.2421206 | 0.0922998 | 2.6232 | 0.00875  | 0.337623866 | count | 1          |
| NPHP3     | 0.3014171 | 0.2335398 | 1.2906 | 0.197    | 0.337667258 | count | 1          |
| MARK1     | 0.3245874 | 0.2528513 | 1.2837 | 0.199    | 0.33773295  | count | 1          |
| INPP5A    | 0.2769288 | 0.1746275 | 1.5858 | 0.113    | 0.337776451 | count | 1          |
| DRC3      | 0.7725355 | 0.4197937 | 1.8403 | 0.0658   | 0.337855082 | count | 1          |
| FAM133B   | 0.2395493 | 0.0807039 | 2.9682 | 0.00301  | 0.337912391 | count | 1          |
| C17orf97  | 0.5529844 | 0.3475644 | 1.591  | 0.112    | 0.337924403 | count | 1          |
| AMD1      | 0.2422968 | 0.0904368 | 2.6792 | 0.00741  | 0.338067255 | count | 1          |
| RTL10     | 0.3200729 | 0.3745274 | 0.8546 | 0.393    | 0.338122212 | count | 1          |
| SNX27     | 0.2645933 | 0.1487903 | 1.7783 | 0.0754   | 0.338155654 | count | 1          |
| HSPA14    | 0.3667431 | 0.324605  | 1.1298 | 0.259    | 0.338286848 | count | 1          |
| BCKDK     | 0.257591  | 0.1240989 | 2.0757 | 0.038    | 0.338441475 | count | 1          |
| TFEB      | 0.2994024 | 0.2052598 | 1.4587 | 0.145    | 0.338480705 | count | 1          |
| HIC2      | 0.6356801 | 0.4445678 | 1.4299 | 0.153    | 0.338549334 | count | 1          |
| ASAP2     | 0.2442049 | 0.0989564 | 2.4678 | 0.0136   | 0.338555381 | count | 1          |
| HNRNPLL   | 0.2614743 | 0.1638601 | 1.5957 | 0.111    | 0.338712679 | count | 1          |
| SLC2A8    | 0.282248  | 0.2201055 | 1.2823 | 0.2      | 0.338778214 | count | 1          |
| TAF1A     | 0.3444846 | 0.2445289 | 1.4088 | 0.159    | 0.338831727 | count | 1          |

|            |           |           |        |          |             |       |         |
|------------|-----------|-----------|--------|----------|-------------|-------|---------|
| C2CD5      | 0.3070992 | 0.3078006 | 0.9977 | 0.318    | 0.338839317 | count | 1       |
| ISG20L2    | 0.2680218 | 0.1928047 | 1.3901 | 0.165    | 0.338902814 | count | 1       |
| CHTOP      | 0.2537402 | 0.1152826 | 2.201  | 0.0278   | 0.338930007 | count | 1       |
| TTC26      | 0.4803447 | 0.3517925 | 1.3654 | 0.172    | 0.338966799 | count | 1       |
| UBXN6      | 0.2575931 | 0.1295471 | 1.9884 | 0.0468   | 0.339083607 | count | 1       |
| DNM1L      | 0.2501278 | 0.111606  | 2.2412 | 0.0251   | 0.339107909 | count | 1       |
| DDX39B     | 0.2609431 | 0.1708137 | 1.5276 | 0.127    | 0.339146842 | count | 1       |
| TUBGCP3    | 0.300011  | 0.2148974 | 1.3961 | 0.163    | 0.339153969 | count | 1       |
| SLX4       | 0.7776378 | 0.4850882 | 1.6031 | 0.109    | 0.339664909 | count | 1       |
| SEC23IP    | 0.3078946 | 0.1919662 | 1.6039 | 0.109    | 0.339695876 | count | 1       |
| PPARA      | 0.2863627 | 0.194316  | 1.4737 | 0.141    | 0.340066874 | count | 1       |
| CXCL16     | 0.2677277 | 0.1751209 | 1.5288 | 0.126    | 0.340198324 | count | 1       |
| AL158071.1 | 1.076393  | 1.1400328 | 0.9442 | 0.345    | 0.340224273 | count | 1       |
| SIX4       | 0.5033432 | 0.5002337 | 1.0062 | 0.314    | 0.340416334 | count | 1       |
| COG3       | 0.2988105 | 0.255521  | 1.1694 | 0.242    | 0.340657041 | count | 1       |
| AC008467.1 | 0.6999583 | 1.0748255 | 0.6512 | 0.515    | 0.340713746 | count | 1       |
| DEPDC5     | 0.5038356 | 0.4845026 | 1.0399 | 0.298    | 0.340718935 | count | 1       |
| GTF3C3     | 0.2846437 | 0.2129204 | 1.3369 | 0.181    | 0.340754057 | count | 1       |
| NR2C1      | 0.2705994 | 0.1626705 | 1.6635 | 0.0963   | 0.340782474 | count | 1       |
| AHCYL1     | 0.2494759 | 0.0846184 | 2.9482 | 0.00322  | 0.340922122 | count | 1       |
| ACTRT3     | 0.483486  | 0.426344  | 1.134  | 0.257    | 0.340997311 | count | 1       |
| RIOX2      | 0.2829838 | 0.2019619 | 1.4012 | 0.161    | 0.341284798 | count | 1       |
| DNAJC3     | 0.2411488 | 0.0529831 | 4.5514 | 5.50E-06 | 0.341347752 | count | 0.12705 |
| TNFRSF1A   | 0.2430406 | 0.0631112 | 3.851  | 0.00012  | 0.341423595 | count | 1       |
| XPOT       | 0.2779089 | 0.2348595 | 1.1833 | 0.237    | 0.341626952 | count | 1       |
| PRKCI      | 0.2607505 | 0.142086  | 1.8352 | 0.0666   | 0.341656539 | count | 1       |
| SCFD2      | 0.3259412 | 0.2627955 | 1.2403 | 0.215    | 0.341669769 | count | 1       |
| ZNF222     | 0.5055404 | 0.4872487 | 1.0375 | 0.3      | 0.341766168 | count | 1       |
| TTC21B     | 0.2862963 | 0.1843299 | 1.5532 | 0.12     | 0.341819487 | count | 1       |
| PNPT1      | 0.2748111 | 0.1625347 | 1.6908 | 0.091    | 0.341981001 | count | 1       |
| ZNF717     | 0.3343658 | 0.3107891 | 1.0759 | 0.282    | 0.341981129 | count | 1       |
| IP6K3      | 1.4251868 | 0.9349852 | 1.5243 | 0.128    | 0.342016382 | count | 1       |
| CUL7       | 0.3712372 | 0.4443063 | 0.8355 | 0.403    | 0.342246416 | count | 1       |
| LINC00467  | 0.3660213 | 0.2563568 | 1.4278 | 0.153    | 0.34238693  | count | 1       |
| HNRNPL     | 0.2505598 | 0.111302  | 2.2512 | 0.0244   | 0.342396904 | count | 1       |
| MED9       | 0.3266581 | 0.2392513 | 1.3653 | 0.172    | 0.342398938 | count | 1       |
| GGACT      | 1.0871052 | 0.5388092 | 2.0176 | 0.0437   | 0.342601859 | count | 1       |
| TFAP4      | 0.3840069 | 0.2835546 | 1.3543 | 0.176    | 0.342714973 | count | 1       |
| EXOC4      | 0.2710794 | 0.1512238 | 1.7926 | 0.0731   | 0.342726401 | count | 1       |
| HSPA14     | 0.2842852 | 0.2369121 | 1.2    | 0.23     | 0.342830146 | count | 1       |
| ACTL6A     | 0.2601109 | 0.1153965 | 2.2541 | 0.0243   | 0.342994776 | count | 1       |
| FUZ        | 0.2837956 | 0.1652665 | 1.7172 | 0.086    | 0.343040871 | count | 1       |
| AC064836.3 | 0.3914999 | 0.4856324 | 0.8062 | 0.42     | 0.343127031 | count | 1       |
| GIT2       | 0.2946071 | 0.1980769 | 1.4873 | 0.137    | 0.343398762 | count | 1       |
| GOPC       | 0.2461776 | 0.0828444 | 2.9716 | 0.00298  | 0.343439223 | count | 1       |



|            |           |           |        |          |             |       |            |
|------------|-----------|-----------|--------|----------|-------------|-------|------------|
| SOWAHC     | 0.2978174 | 0.213074  | 1.3977 | 0.162    | 0.343472876 | count | 1          |
| PSMD5      | 0.2769581 | 0.2022758 | 1.3692 | 0.171    | 0.343495427 | count | 1          |
| PCDHGB2    | 1.0915215 | 0.7249338 | 1.5057 | 0.132    | 0.343576732 | count | 1          |
| PPP1R36    | 1.0915215 | 0.7874092 | 1.3862 | 0.166    | 0.343576732 | count | 1          |
| TTC4       | 0.3921821 | 0.3515212 | 1.1157 | 0.265    | 0.34369398  | count | 1          |
| PARD6G     | 0.4878556 | 0.3188724 | 1.5299 | 0.126    | 0.343817434 | count | 1          |
| MSL1       | 0.2638087 | 0.1478316 | 1.7845 | 0.0744   | 0.343904836 | count | 1          |
| KIAA1217   | 0.3629585 | 0.2698703 | 1.3449 | 0.179    | 0.344111579 | count | 1          |
| AC037459.2 | 0.790842  | 0.8975763 | 0.8811 | 0.378    | 0.344322645 | count | 1          |
| ARHGAP44   | 0.3795851 | 0.3505531 | 1.0828 | 0.279    | 0.344413342 | count | 1          |
| SNX7       | 0.2508409 | 0.0876394 | 2.8622 | 0.00423  | 0.344469289 | count | 1          |
| CLSTN1     | 0.2498581 | 0.0995433 | 2.51   | 0.0121   | 0.34473882  | count | 1          |
| CXorf57    | 0.7930474 | 0.7551342 | 1.0502 | 0.294    | 0.345096964 | count | 1          |
| ELF2       | 0.2471382 | 0.0872868 | 2.8313 | 0.00466  | 0.345347012 | count | 1          |
| ATP6V0C    | 0.4907398 | 0.5523734 | 0.8884 | 0.374    | 0.345676104 | count | 1          |
| AL451165.2 | 0.3102972 | 0.3669517 | 0.8456 | 0.398    | 0.345740988 | count | 1          |
| AC093249.6 | 0.411131  | 0.6775831 | 0.6068 | 0.544    | 0.345814772 | count | 1          |
| LINC01140  | 2.510935  | 0.9522125 | 2.6369 | 0.0084   | 0.345959036 | count | 1          |
| OGFR       | 0.2737189 | 0.1563854 | 1.7503 | 0.0802   | 0.346026278 | count | 1          |
| STEAP1B    | 2.5152371 | 1.2542845 | 2.0053 | 0.045    | 0.346138206 | count | 1          |
| Z68871.1   | 0.7134575 | 0.6152205 | 1.1597 | 0.246    | 0.346204931 | count | 1          |
| TNKS       | 0.2742369 | 0.1478326 | 1.855  | 0.0637   | 0.346227727 | count | 1          |
| FGD5-AS1   | 0.248685  | 0.0697889 | 3.5634 | 0.000371 | 0.346354503 | count | 1          |
| HLA-E      | 0.2418397 | 0.0418315 | 5.7813 | 8.03E-09 | 0.346459642 | count | 0.00018897 |
| PPIL2      | 0.305362  | 0.1961624 | 1.5567 | 0.12     | 0.34654131  | count | 1          |
| KNTC1      | 0.9177225 | 0.6373818 | 1.4398 | 0.15     | 0.346889887 | count | 1          |
| PSMA6      | 0.316311  | 0.2568456 | 1.2315 | 0.218    | 0.346896028 | count | 1          |
| DHX34      | 0.9185578 | 0.6815959 | 1.3477 | 0.178    | 0.347130417 | count | 1          |
| MTFR1      | 0.2824522 | 0.1737616 | 1.6255 | 0.104    | 0.347134839 | count | 1          |
| CEP295     | 0.2820061 | 0.2299539 | 1.2264 | 0.22     | 0.347236442 | count | 1          |
| RARA-AS1   | 0.2933584 | 0.1948641 | 1.5055 | 0.132    | 0.347256204 | count | 1          |
| MEX3D      | 0.3073602 | 0.1981723 | 1.551  | 0.121    | 0.347278739 | count | 1          |
| STAM       | 0.2622371 | 0.1314529 | 1.9949 | 0.0461   | 0.347339591 | count | 1          |
| FAM172A    | 0.2566309 | 0.1268692 | 2.0228 | 0.0432   | 0.347372999 | count | 1          |
| HIST1H3H   | 0.4131051 | 0.5446276 | 0.7585 | 0.448    | 0.347378662 | count | 1          |
| SEC23A     | 0.2553517 | 0.1117641 | 2.2847 | 0.0224   | 0.347453372 | count | 1          |
| WHAMM      | 0.2660031 | 0.1297507 | 2.0501 | 0.0404   | 0.347508636 | count | 1          |
| RNF103     | 0.2946555 | 0.2234869 | 1.3184 | 0.187    | 0.347758592 | count | 1          |
| AC005921.2 | 0.2724922 | 0.1374064 | 1.9831 | 0.0474   | 0.347768427 | count | 1          |
| SRC        | 0.383484  | 0.3805592 | 1.0077 | 0.314    | 0.347781749 | count | 1          |
| FAM160B2   | 0.3067211 | 0.256334  | 1.1966 | 0.232    | 0.348050158 | count | 1          |
| BACH2      | 1.112376  | 0.6565857 | 1.6942 | 0.0903   | 0.348138276 | count | 1          |
| PDE9A      | 0.6568351 | 0.5021438 | 1.3081 | 0.191    | 0.348200922 | count | 1          |
| LINC01465  | 0.922704  | 0.63466   | 1.4539 | 0.146    | 0.348322335 | count | 1          |
| COQ6       | 0.2869514 | 0.1800265 | 1.5939 | 0.111    | 0.348344248 | count | 1          |

|            |           |           |        |          |             |       |            |
|------------|-----------|-----------|--------|----------|-------------|-------|------------|
| MAFG       | 0.259777  | 0.1251676 | 2.0754 | 0.038    | 0.348379528 | count | 1          |
| LMTK2      | 0.3632339 | 0.2818894 | 1.2886 | 0.198    | 0.348620427 | count | 1          |
| TRIM21     | 0.3002228 | 0.2676859 | 1.1215 | 0.262    | 0.348644234 | count | 1          |
| ZFP41      | 1.1148235 | 1.1281819 | 0.9882 | 0.323    | 0.348669247 | count | 1          |
| GDE1       | 0.2735289 | 0.128223  | 2.1332 | 0.033    | 0.34907773  | count | 1          |
| ZNF140     | 0.3553482 | 0.2638794 | 1.3466 | 0.178    | 0.349113027 | count | 1          |
| TCOF1      | 0.3134436 | 0.2997395 | 1.0457 | 0.296    | 0.349163599 | count | 1          |
| DLGAP4     | 0.2547534 | 0.1089662 | 2.3379 | 0.0194   | 0.349238081 | count | 1          |
| ZNF334     | 0.5434271 | 0.5780603 | 0.9401 | 0.347    | 0.349372889 | count | 1          |
| CCDC51     | 0.2808569 | 0.1649689 | 1.7025 | 0.0887   | 0.349408577 | count | 1          |
| GSPT2      | 0.2715404 | 0.1613845 | 1.6826 | 0.0925   | 0.349417759 | count | 1          |
| AC104532.2 | 0.7216964 | 0.6627622 | 1.0889 | 0.276    | 0.349535696 | count | 1          |
| GPR27      | 1.1193128 | 0.5893711 | 1.8992 | 0.0576   | 0.349640533 | count | 1          |
| TBC1D9B    | 0.2789185 | 0.180789  | 1.5428 | 0.123    | 0.349669244 | count | 1          |
| LINC02482  | 0.3365774 | 0.2676302 | 1.2576 | 0.209    | 0.349818311 | count | 1          |
| FLYWCH1    | 0.30024   | 0.2107524 | 1.4246 | 0.154    | 0.349838997 | count | 1          |
| CBFB       | 0.2842754 | 0.1955156 | 1.454  | 0.146    | 0.349992136 | count | 1          |
| EIF4G3     | 0.2651294 | 0.116421  | 2.2773 | 0.0228   | 0.350173662 | count | 1          |
| GTF2H2C    | 0.3649281 | 0.2322914 | 1.571  | 0.116    | 0.350179813 | count | 1          |
| NUP188     | 0.3213305 | 0.3280488 | 0.9795 | 0.327    | 0.350306337 | count | 1          |
| RNF170     | 0.2772825 | 0.2064677 | 1.343  | 0.179    | 0.350480181 | count | 1          |
| TSPAN14    | 0.3322178 | 0.2476926 | 1.3413 | 0.18     | 0.350571717 | count | 1          |
| PPT2       | 0.4088051 | 0.3326042 | 1.2291 | 0.219    | 0.350912568 | count | 1          |
| TPRN       | 0.3535726 | 0.3528273 | 1.0021 | 0.316    | 0.35103751  | count | 1          |
| IGF1R      | 0.2604607 | 0.1420239 | 1.8339 | 0.0667   | 0.351075258 | count | 1          |
| CPAMD8     | 0.3435843 | 0.3758115 | 0.9142 | 0.361    | 0.351094585 | count | 1          |
| PREX2      | 0.2831701 | 0.166674  | 1.6989 | 0.0894   | 0.351098558 | count | 1          |
| HNRNPH1    | 0.2474138 | 0.0592988 | 4.1723 | 3.08E-05 | 0.351286868 | count | 0.7056896  |
| MAST2      | 0.3438388 | 0.3082564 | 1.1154 | 0.265    | 0.351345915 | count | 1          |
| ATXN2      | 0.2594402 | 0.1091729 | 2.3764 | 0.0175   | 0.351567427 | count | 1          |
| GFPT1      | 0.2609536 | 0.1207827 | 2.1605 | 0.0308   | 0.351735883 | count | 1          |
| TONSL      | 1.496708  | 1.262561  | 1.1855 | 0.236    | 0.351820686 | count | 1          |
| COQ4       | 0.2622474 | 0.1104954 | 2.3734 | 0.0177   | 0.352079053 | count | 1          |
| ESCO1      | 0.2658431 | 0.1191304 | 2.2315 | 0.0257   | 0.352081512 | count | 1          |
| GPCPD1     | 0.2636579 | 0.1227836 | 2.1473 | 0.0318   | 0.35224526  | count | 1          |
| TNFRSF1B   | 0.4526437 | 0.36513   | 1.2397 | 0.215    | 0.352455797 | count | 1          |
| ZNF501     | 0.523103  | 0.3250245 | 1.6094 | 0.108    | 0.352509801 | count | 1          |
| GTF2B      | 0.2579584 | 0.0988803 | 2.6088 | 0.00912  | 0.352538085 | count | 1          |
| PRH1       | 0.2772838 | 0.1934999 | 1.433  | 0.152    | 0.352621592 | count | 1          |
| CRY1       | 0.3552689 | 0.2641294 | 1.3451 | 0.179    | 0.352659081 | count | 1          |
| RAB20      | 0.2836414 | 0.1825568 | 1.5537 | 0.12     | 0.352827917 | count | 1          |
| COMT       | 0.2480569 | 0.0524399 | 4.7303 | 2.33E-06 | 0.352889842 | count | 0.05402571 |
| PCDHGB7    | 0.3202776 | 0.3077238 | 1.0408 | 0.298    | 0.353015296 | count | 1          |
| NPEPL1     | 0.2903449 | 0.1769    | 1.6413 | 0.101    | 0.353157617 | count | 1          |
| NCKIPSD    | 0.3640219 | 0.3096963 | 1.1754 | 0.24     | 0.353416142 | count | 1          |

|            |           |           |        |          |             |       |             |
|------------|-----------|-----------|--------|----------|-------------|-------|-------------|
| NOC2L      | 0.2651596 | 0.127392  | 2.0814 | 0.0375   | 0.353451103 | count | 1           |
| GPR4       | 0.4417594 | 0.3328984 | 1.327  | 0.185    | 0.353553127 | count | 1           |
| TK2        | 0.2683799 | 0.1296586 | 2.0699 | 0.0385   | 0.353604077 | count | 1           |
| ELAC2      | 0.2891724 | 0.1784652 | 1.6203 | 0.105    | 0.353913735 | count | 1           |
| LENG9      | 0.2903992 | 0.2150589 | 1.3503 | 0.177    | 0.353962478 | count | 1           |
| ELK3       | 0.2731501 | 0.1651846 | 1.6536 | 0.0983   | 0.353997796 | count | 1           |
| TMEM106B   | 0.2541247 | 0.07469   | 3.4024 | 0.000675 | 0.354005067 | count | 1           |
| MTERF3     | 0.2975958 | 0.2229989 | 1.3345 | 0.182    | 0.354139361 | count | 1           |
| PDPK1      | 0.2767341 | 0.1466403 | 1.8872 | 0.0592   | 0.354260991 | count | 1           |
| AC093702.1 | 0.7340246 | 0.5582913 | 1.3148 | 0.189    | 0.354490408 | count | 1           |
| SASS6      | 0.3015154 | 0.2216577 | 1.3603 | 0.174    | 0.354648679 | count | 1           |
| ADORA1     | 0.8205054 | 1.51244   | 0.5425 | 0.588    | 0.354650424 | count | 1           |
| SELENBP1   | 0.2547049 | 0.0725099 | 3.5127 | 0.000449 | 0.354746704 | count | 1           |
| PPP4R2     | 0.2565999 | 0.0932525 | 2.7517 | 0.00596  | 0.354749727 | count | 1           |
| MAMLD1     | 0.4702349 | 0.4946053 | 0.9507 | 0.342    | 0.354945333 | count | 1           |
| DHX33      | 0.3296955 | 0.3975169 | 0.8294 | 0.407    | 0.35494766  | count | 1           |
| ANO6       | 0.2548579 | 0.0797784 | 3.1946 | 0.00141  | 0.355023486 | count | 1           |
| AL139317.3 | 1.5218061 | 1.3652063 | 1.1147 | 0.265    | 0.355128154 | count | 1           |
| ZNF675     | 0.3132129 | 0.2304274 | 1.3593 | 0.174    | 0.355252683 | count | 1           |
| PKN2       | 0.2547353 | 0.0792639 | 3.2138 | 0.00132  | 0.3553153   | count | 1           |
| IPP        | 0.2904721 | 0.1829092 | 1.5881 | 0.112    | 0.355481154 | count | 1           |
| NT5C3A     | 0.2705022 | 0.144009  | 1.8784 | 0.0604   | 0.355497414 | count | 1           |
| Z95115.1   | 1.1473281 | 0.6590851 | 1.7408 | 0.0818   | 0.355630278 | count | 1           |
| ALDOA      | 0.2798413 | 0.1747772 | 1.6011 | 0.109    | 0.35583822  | count | 1           |
| ZNF100     | 0.3180817 | 0.2665774 | 1.1932 | 0.233    | 0.355894471 | count | 1           |
| DOCK1      | 0.2692272 | 0.1517661 | 1.774  | 0.0762   | 0.355946606 | count | 1           |
| DENND6B    | 0.4882969 | 0.4300862 | 1.1353 | 0.256    | 0.356191094 | count | 1           |
| ECPAS      | 0.2820297 | 0.158091  | 1.784  | 0.0745   | 0.356411086 | count | 1           |
| ANAPC4     | 0.291416  | 0.1920996 | 1.517  | 0.129    | 0.356619333 | count | 1           |
| Z93241.1   | 0.3767966 | 0.3151609 | 1.1956 | 0.232    | 0.356661268 | count | 1           |
| SLC22A4    | 0.9531452 | 0.6548479 | 1.4555 | 0.146    | 0.35697351  | count | 1           |
| ZNF142     | 0.4733117 | 0.4377893 | 1.0811 | 0.28     | 0.357088794 | count | 1           |
| ID2-AS1    | 0.953584  | 1.231418  | 0.7744 | 0.439    | 0.3570968   | count | 1           |
| GNPNAT1    | 0.2722716 | 0.1962304 | 1.3875 | 0.165    | 0.357107679 | count | 1           |
| PIGH       | 0.270448  | 0.1273012 | 2.1245 | 0.0337   | 0.357145182 | count | 1           |
| WNT6       | 0.8278326 | 0.6198481 | 1.3355 | 0.182    | 0.357172612 | count | 1           |
| DCAF12L2   | 1.5388554 | 1.1179576 | 1.3765 | 0.169    | 0.357336444 | count | 1           |
| RNF215     | 0.318086  | 0.2530521 | 1.257  | 0.209    | 0.357534562 | count | 1           |
| AL357054.4 | 0.9557191 | 0.5120453 | 1.8665 | 0.0621   | 0.357696925 | count | 1           |
| AC036176.1 | 0.3538273 | 0.3044399 | 1.1622 | 0.245    | 0.358033203 | count | 1           |
| C18orf21   | 0.3026528 | 0.1881769 | 1.6083 | 0.108    | 0.358059471 | count | 1           |
| PHOSPHO2   | 0.318566  | 0.238076  | 1.3381 | 0.181    | 0.358061414 | count | 1           |
| UBXN4      | 0.2510556 | 0.0437928 | 5.7328 | 1.07E-08 | 0.358321426 | count | 0.000251696 |
| HSPA5      | 0.2510092 | 0.0527066 | 4.7624 | 1.99E-06 | 0.358432604 | count | 0.04615805  |
| MR1        | 0.2781307 | 0.1746798 | 1.5922 | 0.111    | 0.358488333 | count | 1           |

|            |           |           |        |          |             |       |             |
|------------|-----------|-----------|--------|----------|-------------|-------|-------------|
| ELF1       | 0.2616944 | 0.1022319 | 2.5598 | 0.0105   | 0.358503781 | count | 1           |
| AL021453.1 | 0.510788  | 0.49256   | 1.037  | 0.3      | 0.358534602 | count | 1           |
| TMEM131L   | 0.3150706 | 0.1962006 | 1.6059 | 0.108    | 0.358786356 | count | 1           |
| ZADH2      | 0.3051315 | 0.1966663 | 1.5515 | 0.121    | 0.358822145 | count | 1           |
| IER5L      | 0.2535876 | 0.0774203 | 3.2755 | 0.00106  | 0.358974998 | count | 1           |
| LONRF1     | 0.2934729 | 0.1501368 | 1.9547 | 0.0507   | 0.359099174 | count | 1           |
| GAREM2     | 0.7457742 | 0.4228356 | 1.7637 | 0.0779   | 0.359180042 | count | 1           |
| TSPAN6     | 0.2879633 | 0.1652653 | 1.7424 | 0.0815   | 0.359258657 | count | 1           |
| MED25      | 0.3055996 | 0.210804  | 1.4497 | 0.147    | 0.359362241 | count | 1           |
| PNRC2      | 0.2532082 | 0.054804  | 4.6203 | 3.96E-06 | 0.359455353 | count | 0.09161856  |
| MPP5       | 0.3066508 | 0.232673  | 1.3179 | 0.188    | 0.359468177 | count | 1           |
| TMED8      | 0.3552996 | 0.2881062 | 1.2332 | 0.218    | 0.359469861 | count | 1           |
| STIM1      | 0.3299848 | 0.2157247 | 1.5297 | 0.126    | 0.35948669  | count | 1           |
| GLMP       | 0.2676861 | 0.1159517 | 2.3086 | 0.021    | 0.359606091 | count | 1           |
| AP1G1      | 0.2808003 | 0.1525964 | 1.8402 | 0.0658   | 0.359783799 | count | 1           |
| SNX16      | 0.3033666 | 0.18662   | 1.6256 | 0.104    | 0.359899631 | count | 1           |
| LINC01836  | 0.5940943 | 0.6212587 | 0.9563 | 0.339    | 0.360084557 | count | 1           |
| DNAH6      | 0.9644397 | 0.8337092 | 1.1568 | 0.247    | 0.360138762 | count | 1           |
| AL136295.5 | 0.9644397 | 0.8512522 | 1.133  | 0.257    | 0.360138762 | count | 1           |
| BISPR      | 0.3527834 | 0.3155605 | 1.118  | 0.264    | 0.360170074 | count | 1           |
| EFEMP1     | 0.2502982 | 0.0459608 | 5.4459 | 5.49E-08 | 0.360312062 | count | 0.001287295 |
| PIGL       | 0.3084407 | 0.2366779 | 1.3032 | 0.193    | 0.360381646 | count | 1           |
| REXO2      | 0.2525522 | 0.0486646 | 5.1896 | 2.22E-07 | 0.36057161  | count | 0.005188362 |
| ERCC3      | 0.2915807 | 0.1680324 | 1.7353 | 0.0828   | 0.360772712 | count | 1           |
| SPCS3      | 0.2555441 | 0.0748057 | 3.4161 | 0.000642 | 0.360867902 | count | 1           |
| CU638689.4 | 0.635246  | 0.6151426 | 1.0327 | 0.302    | 0.360949563 | count | 1           |
| ANKEF1     | 1.1730887 | 0.879586  | 1.3337 | 0.182    | 0.361030342 | count | 1           |
| AC012065.3 | 2.964113  | 2.4654399 | 1.2023 | 0.2293   | 0.361354322 | count | 1           |
| AL133346.1 | 1.5710542 | 1.0240883 | 1.5341 | 0.125    | 0.361423261 | count | 1           |
| RPP40      | 0.4136365 | 0.3801432 | 1.0881 | 0.277    | 0.361463347 | count | 1           |
| UNC93B1    | 0.2973383 | 0.2072022 | 1.435  | 0.151    | 0.361531891 | count | 1           |
| ZNF208     | 0.3339994 | 0.2483139 | 1.3451 | 0.179    | 0.36163327  | count | 1           |
| NTF3       | 0.2968251 | 0.1667121 | 1.7805 | 0.0751   | 0.361674856 | count | 1           |
| DANT2      | 0.7523071 | 0.8881935 | 0.847  | 0.397    | 0.361773751 | count | 1           |
| AL445524.1 | 0.5386238 | 0.4766988 | 1.1299 | 0.259    | 0.36193631  | count | 1           |
| CUL2       | 0.2775578 | 0.1292724 | 2.1471 | 0.0319   | 0.361940978 | count | 1           |
| DCUN1D1    | 0.2732354 | 0.13871   | 1.9698 | 0.0489   | 0.361992253 | count | 1           |
| BZW2       | 0.26759   | 0.1478416 | 1.81   | 0.0704   | 0.362017156 | count | 1           |
| POU5F2     | 2.989077  | 1.670967  | 1.7888 | 0.0737   | 0.362024888 | count | 1           |
| ZCCHC4     | 0.3691257 | 0.3265202 | 1.1305 | 0.258    | 0.362112465 | count | 1           |
| AC093627.4 | 0.7531883 | 0.910386  | 0.8273 | 0.408    | 0.362122866 | count | 1           |
| ATXN3      | 0.2669768 | 0.1212598 | 2.2017 | 0.0277   | 0.362135379 | count | 1           |
| TRIM41     | 0.4661517 | 0.3780387 | 1.2331 | 0.218    | 0.362203958 | count | 1           |
| ETV3       | 0.3518131 | 0.2478937 | 1.4192 | 0.156    | 0.362232263 | count | 1           |
| TMEM164    | 0.972121  | 0.5899656 | 1.6478 | 0.0995   | 0.362277708 | count | 1           |

|            |           |           |        |          |             |       |   |
|------------|-----------|-----------|--------|----------|-------------|-------|---|
| UNC50      | 0.2588023 | 0.0740618 | 3.4944 | 0.000481 | 0.362293801 | count | 1 |
| IFIT5      | 0.2805995 | 0.1459839 | 1.9221 | 0.0547   | 0.36229901  | count | 1 |
| HSD17B14   | 0.2956332 | 0.2242428 | 1.3184 | 0.187    | 0.362408358 | count | 1 |
| DNAL1      | 0.3001047 | 0.2065547 | 1.4529 | 0.146    | 0.362435715 | count | 1 |
| PSME4      | 0.35527   | 0.3197074 | 1.1112 | 0.267    | 0.362620014 | count | 1 |
| PATZ1      | 0.3739115 | 0.2803528 | 1.3337 | 0.182    | 0.362621887 | count | 1 |
| GALNT8     | 0.843842  | 0.6068324 | 1.3906 | 0.164    | 0.362643652 | count | 1 |
| LSG1       | 0.2943071 | 0.1323323 | 2.224  | 0.0262   | 0.36282371  | count | 1 |
| FAM149A    | 0.3214792 | 0.2186987 | 1.47   | 0.142    | 0.362860133 | count | 1 |
| CPSF7      | 0.3052109 | 0.1710372 | 1.7845 | 0.0744   | 0.363039829 | count | 1 |
| CCDC22     | 0.3070084 | 0.1895365 | 1.6198 | 0.105    | 0.363117437 | count | 1 |
| ZNF610     | 0.5674616 | 0.5718877 | 0.9923 | 0.321    | 0.363149329 | count | 1 |
| ZNF468     | 0.540639  | 0.5192469 | 1.0412 | 0.298    | 0.363155532 | count | 1 |
| ZNF518A    | 0.276581  | 0.1587247 | 1.7425 | 0.0815   | 0.363187957 | count | 1 |
| SPR        | 0.2857295 | 0.1678853 | 1.7019 | 0.0889   | 0.363241145 | count | 1 |
| ANAPC13    | 0.2609488 | 0.1047431 | 2.4913 | 0.0128   | 0.363249187 | count | 1 |
| DDX60L     | 0.3317356 | 0.2595684 | 1.278  | 0.201    | 0.363361924 | count | 1 |
| BBS1       | 0.5679066 | 0.5526944 | 1.0275 | 0.304    | 0.363402964 | count | 1 |
| AC009506.1 | 0.5186033 | 0.4052737 | 1.2796 | 0.201    | 0.363518064 | count | 1 |
| RXYLT1     | 0.2781812 | 0.1357126 | 2.0498 | 0.0405   | 0.363798008 | count | 1 |
| CTNNB1     | 0.2598865 | 0.0820976 | 3.1656 | 0.00156  | 0.363831839 | count | 1 |
| TTC37      | 0.2662148 | 0.0964131 | 2.7612 | 0.00579  | 0.363847388 | count | 1 |
| PCDHGA5    | 0.3710435 | 0.2867488 | 1.294  | 0.196    | 0.363918423 | count | 1 |
| C16orf45   | 0.262759  | 0.0968674 | 2.7126 | 0.00671  | 0.363973612 | count | 1 |
| RABEP2     | 0.3305265 | 0.2007796 | 1.6462 | 0.0998   | 0.36401677  | count | 1 |
| VPS18      | 0.3481578 | 0.2835808 | 1.2277 | 0.22     | 0.364215673 | count | 1 |
| DARS2      | 0.5693613 | 0.5215139 | 1.0917 | 0.275    | 0.364231744 | count | 1 |
| TTC30A     | 0.4836064 | 0.4356006 | 1.1102 | 0.267    | 0.364242104 | count | 1 |
| SYTL4      | 0.3907051 | 0.2986469 | 1.3083 | 0.191    | 0.364407285 | count | 1 |
| BPGM       | 0.276008  | 0.1389395 | 1.9865 | 0.047    | 0.364430598 | count | 1 |
| ANKAR      | 0.2766814 | 0.167984  | 1.6471 | 0.0996   | 0.364454619 | count | 1 |
| ZFP82      | 0.3484011 | 0.3172776 | 1.0981 | 0.272    | 0.364461984 | count | 1 |
| SMIM19     | 0.2586707 | 0.072493  | 3.5682 | 0.000364 | 0.364462297 | count | 1 |
| TBC1D20    | 0.2900646 | 0.1507644 | 1.924  | 0.0544   | 0.364495762 | count | 1 |
| TENM1      | 1.596949  | 1.0750574 | 1.4855 | 0.138    | 0.364631966 | count | 1 |
| COPG2      | 0.4350859 | 0.2775175 | 1.5678 | 0.117    | 0.364723112 | count | 1 |
| ZBTB8A     | 0.3608833 | 0.2396511 | 1.5059 | 0.132    | 0.364913934 | count | 1 |
| UHRF1BP1L  | 0.2881121 | 0.1646346 | 1.75   | 0.0802   | 0.364921688 | count | 1 |
| ASB3       | 0.6032217 | 0.3617002 | 1.6677 | 0.0955   | 0.364945412 | count | 1 |
| PIF1       | 0.6034169 | 0.5802638 | 1.0399 | 0.298    | 0.365049131 | count | 1 |
| DVL3       | 0.2865375 | 0.1801163 | 1.5908 | 0.112    | 0.36509053  | count | 1 |
| MMAA       | 0.5018332 | 0.3335438 | 1.5045 | 0.133    | 0.365224854 | count | 1 |
| AC147067.1 | 0.3520369 | 0.2893213 | 1.2168 | 0.224    | 0.365354876 | count | 1 |
| AC140912.1 | 1.605091  | 0.8792411 | 1.8255 | 0.068    | 0.365626556 | count | 1 |
| METTL2A    | 0.2927803 | 0.1598554 | 1.8315 | 0.0671   | 0.365745092 | count | 1 |

|            |           |           |        |          |             |       |             |
|------------|-----------|-----------|--------|----------|-------------|-------|-------------|
| BBS10      | 0.3923202 | 0.273961  | 1.432  | 0.152    | 0.365842879 | count | 1           |
| VASH1-AS1  | 1.608353  | 0.9587316 | 1.6776 | 0.0935   | 0.366023116 | count | 1           |
| RENBP      | 0.763084  | 0.5846992 | 1.3051 | 0.192    | 0.366031008 | count | 1           |
| UBXN7      | 0.3017585 | 0.1897026 | 1.5907 | 0.112    | 0.366032835 | count | 1           |
| SSR3       | 0.2568141 | 0.0493233 | 5.2068 | 2.03E-07 | 0.366215825 | count | 0.004745531 |
| SLC30A9    | 0.2766691 | 0.1374242 | 2.0132 | 0.0442   | 0.366311472 | count | 1           |
| UBE3C      | 0.2957727 | 0.1838662 | 1.6086 | 0.108    | 0.366508034 | count | 1           |
| LPIN1      | 0.2864486 | 0.167037  | 1.7149 | 0.0865   | 0.366563527 | count | 1           |
| CRYZ       | 0.2813294 | 0.1633332 | 1.7224 | 0.0851   | 0.366814976 | count | 1           |
| SLC25A17   | 0.3130525 | 0.222553  | 1.4066 | 0.16     | 0.366825232 | count | 1           |
| HSDL1      | 0.3265852 | 0.2141445 | 1.5251 | 0.127    | 0.36685692  | count | 1           |
| DNAJC17    | 0.2912273 | 0.1948451 | 1.4947 | 0.135    | 0.366934517 | count | 1           |
| ZNF814     | 0.3935736 | 0.5948127 | 0.6617 | 0.508    | 0.366956532 | count | 1           |
| PSMD9      | 0.2776622 | 0.1624918 | 1.7088 | 0.0876   | 0.367012586 | count | 1           |
| SMAD9      | 0.2651052 | 0.0946698 | 2.8003 | 0.00513  | 0.367212174 | count | 1           |
| MIPOL1     | 0.3021576 | 0.183874  | 1.6433 | 0.1      | 0.367298711 | count | 1           |
| GLMN       | 0.3394158 | 0.2093389 | 1.6214 | 0.105    | 0.367330922 | count | 1           |
| MSL2       | 0.3271415 | 0.2696743 | 1.2131 | 0.225    | 0.367466637 | count | 1           |
| DDX5       | 0.2563481 | 0.0402066 | 6.3758 | 2.05E-10 | 0.367586505 | count | 4.85E-06    |
| ZNF350     | 0.3288593 | 0.2205284 | 1.4912 | 0.136    | 0.367654997 | count | 1           |
| GDAP1      | 0.5058356 | 0.3325902 | 1.5209 | 0.128    | 0.367886511 | count | 1           |
| PDGFD      | 0.2619325 | 0.0905179 | 2.8937 | 0.00383  | 0.367998282 | count | 1           |
| PCDHB7     | 0.5491017 | 0.3247348 | 1.6909 | 0.0909   | 0.368263765 | count | 1           |
| LMBRD2     | 0.3310446 | 0.2569779 | 1.2882 | 0.198    | 0.368275106 | count | 1           |
| MGRN1      | 0.3448243 | 0.2520207 | 1.3682 | 0.171    | 0.368414553 | count | 1           |
| AREL1      | 0.4620487 | 0.3721286 | 1.2416 | 0.214    | 0.36865089  | count | 1           |
| AL731661.1 | 0.526812  | 0.4593277 | 1.1469 | 0.251    | 0.368734838 | count | 1           |
| HARBI1     | 0.6516695 | 0.5827939 | 1.1182 | 0.264    | 0.368997159 | count | 1           |
| TBCCD1     | 0.44069   | 0.3337925 | 1.3203 | 0.187    | 0.369124865 | count | 1           |
| PITPNC1    | 0.368898  | 0.2648412 | 1.3929 | 0.164    | 0.369266051 | count | 1           |
| ARF6       | 0.2704693 | 0.1032447 | 2.6197 | 0.00884  | 0.369312989 | count | 1           |
| MVP        | 0.2696945 | 0.0859551 | 3.1376 | 0.00172  | 0.369413891 | count | 1           |
| SS18L1     | 0.476395  | 0.3998047 | 1.1916 | 0.234    | 0.369563545 | count | 1           |
| FAM200A    | 0.3209484 | 0.2032312 | 1.5792 | 0.114    | 0.369576027 | count | 1           |
| AC008972.2 | 0.4764866 | 0.8095517 | 0.5886 | 0.556    | 0.369629217 | count | 1           |
| ZIC1       | 1.6405991 | 1.3155232 | 1.2471 | 0.212    | 0.369886309 | count | 1           |
| ADPGK      | 0.32055   | 0.1945715 | 1.6475 | 0.0995   | 0.370460463 | count | 1           |
| FBXL18     | 0.8670019 | 0.6169194 | 1.4054 | 0.16     | 0.370462149 | count | 1           |
| TOPBP1     | 0.3069258 | 0.2164763 | 1.4178 | 0.156    | 0.370535803 | count | 1           |
| KCNAB1     | 0.274922  | 0.1101094 | 2.4968 | 0.0126   | 0.370576129 | count | 1           |
| UBE2QL1    | 1.2212258 | 1.1646995 | 1.0485 | 0.294    | 0.370848742 | count | 1           |
| RBM34      | 0.3233409 | 0.3193616 | 1.0125 | 0.311    | 0.370885475 | count | 1           |
| MDM4       | 0.2752026 | 0.1350536 | 2.0377 | 0.0416   | 0.37095208  | count | 1           |
| ZNF7       | 0.3187829 | 0.1803399 | 1.7677 | 0.0772   | 0.371002053 | count | 1           |
| MAMSTR     | 0.4253812 | 0.2911053 | 1.4613 | 0.144    | 0.371140552 | count | 1           |

|            |           |           |        |          |             |       |            |
|------------|-----------|-----------|--------|----------|-------------|-------|------------|
| IQCE       | 0.3354406 | 0.2150528 | 1.5598 | 0.119    | 0.371193053 | count | 1          |
| SOD2       | 0.2602997 | 0.0968143 | 2.6886 | 0.0072   | 0.371341465 | count | 1          |
| RAB3D      | 0.3987525 | 0.3343023 | 1.1928 | 0.233    | 0.371553869 | count | 1          |
| CNNM4      | 0.511819  | 0.4296802 | 1.1912 | 0.234    | 0.371857498 | count | 1          |
| NKILA      | 0.6575513 | 0.4880512 | 1.3473 | 0.178    | 0.371862714 | count | 1          |
| NBPF20     | 0.494986  | 1.03841   | 0.4767 | 0.634    | 0.372116155 | count | 1          |
| ABRAXAS2   | 0.2856676 | 0.1526617 | 1.8712 | 0.0614   | 0.372139553 | count | 1          |
| UBE2E2     | 0.2678043 | 0.1049291 | 2.5522 | 0.0107   | 0.37221673  | count | 1          |
| DLST       | 0.2909486 | 0.1618197 | 1.798  | 0.0723   | 0.372258897 | count | 1          |
| LINC00526  | 0.4671612 | 0.3042593 | 1.5354 | 0.125    | 0.37243788  | count | 1          |
| AL117332.1 | 0.8734243 | 0.5338102 | 1.6362 | 0.102    | 0.372610161 | count | 1          |
| MCOLN1     | 0.299292  | 0.1845184 | 1.622  | 0.105    | 0.37262046  | count | 1          |
| PACRG      | 0.6177451 | 0.6775383 | 0.9117 | 0.362    | 0.372635383 | count | 1          |
| C10orf55   | 1.230666  | 1.077058  | 1.1426 | 0.253    | 0.372733171 | count | 1          |
| EPRS       | 0.2683095 | 0.0794532 | 3.377  | 0.000741 | 0.372763293 | count | 1          |
| XBP1       | 0.2643335 | 0.0701979 | 3.7655 | 0.000169 | 0.372805403 | count | 1          |
| PEG3       | 0.3849525 | 0.2725661 | 1.4123 | 0.158    | 0.372871855 | count | 1          |
| KIAA1324L  | 0.400316  | 0.3657681 | 1.0945 | 0.274    | 0.372940484 | count | 1          |
| CCZ1       | 0.2752634 | 0.1350796 | 2.0378 | 0.0416   | 0.372997692 | count | 1          |
| SELENOF    | 0.2637337 | 0.0528085 | 4.9942 | 6.18E-07 | 0.373099991 | count | 0.01440867 |
| CDC42BPB   | 0.2788887 | 0.1402504 | 1.9885 | 0.0468   | 0.373394094 | count | 1          |
| NOP14      | 0.2922966 | 0.2058424 | 1.42   | 0.156    | 0.373569666 | count | 1          |
| SLC37A3    | 0.3160627 | 0.2082822 | 1.5175 | 0.129    | 0.373622085 | count | 1          |
| SCAMP4     | 0.3284331 | 0.2003111 | 1.6396 | 0.101    | 0.373649485 | count | 1          |
| GLG1       | 0.2640282 | 0.0699051 | 3.777  | 0.000161 | 0.373700366 | count | 1          |
| SKIV2L     | 0.3476775 | 0.2950136 | 1.1785 | 0.239    | 0.373732294 | count | 1          |
| ZFP14      | 0.3104148 | 0.1802187 | 1.7224 | 0.0851   | 0.373804951 | count | 1          |
| AC037459.3 | 0.5868148 | 0.8441783 | 0.6951 | 0.487    | 0.374131815 | count | 1          |
| ZNF835     | 0.5153096 | 0.4259223 | 1.2099 | 0.226    | 0.374169611 | count | 1          |
| RAB15      | 1.2383351 | 0.6533236 | 1.8954 | 0.0581   | 0.374254201 | count | 1          |
| ZC3H12D    | 1.0169818 | 1.6568435 | 0.6138 | 0.5394   | 0.374549505 | count | 1          |
| FBXO11     | 0.2864815 | 0.1436841 | 1.9938 | 0.0462   | 0.374555893 | count | 1          |
| TMEM41B    | 0.2973997 | 0.1603653 | 1.8545 | 0.0637   | 0.374613517 | count | 1          |
| AFF4       | 0.2707793 | 0.0947017 | 2.8593 | 0.00427  | 0.374670442 | count | 1          |
| BOK        | 0.5882851 | 0.4355281 | 1.3507 | 0.177    | 0.374962125 | count | 1          |
| CLCC1      | 0.3100922 | 0.1569224 | 1.9761 | 0.0482   | 0.375143719 | count | 1          |
| KDM2A      | 0.2828134 | 0.1779467 | 1.5893 | 0.112    | 0.375550956 | count | 1          |
| SH3RF1     | 0.2978692 | 0.1881822 | 1.5829 | 0.114    | 0.37569368  | count | 1          |
| H1FX       | 0.2630599 | 0.0538746 | 4.8828 | 1.09E-06 | 0.37572479  | count | 0.02534577 |
| HPS3       | 0.3105871 | 0.2045671 | 1.5183 | 0.129    | 0.375732368 | count | 1          |
| SENP2      | 0.3092402 | 0.1716295 | 1.8018 | 0.0717   | 0.375767736 | count | 1          |
| ZSWIM5     | 1.0223256 | 1.1021132 | 0.9276 | 0.354    | 0.375986384 | count | 1          |
| RRP15      | 0.2746294 | 0.123324  | 2.2269 | 0.026    | 0.376216004 | count | 1          |
| RBMS3      | 0.2696611 | 0.0801646 | 3.3638 | 0.000777 | 0.376259201 | count | 1          |
| ORC5       | 0.3458539 | 0.2538116 | 1.3626 | 0.173    | 0.376281442 | count | 1          |

|            |           |           |        |          |             |       |            |
|------------|-----------|-----------|--------|----------|-------------|-------|------------|
| MBOAT1     | 0.562629  | 0.3774752 | 1.4905 | 0.136    | 0.376389237 | count | 1          |
| AQP7       | 1.0238597 | 0.8201746 | 1.2483 | 0.212    | 0.376397911 | count | 1          |
| PAM        | 0.2676534 | 0.0759713 | 3.5231 | 0.000432 | 0.376426696 | count | 1          |
| HIST2H2AC  | 0.2963018 | 0.1889829 | 1.5679 | 0.117    | 0.376523274 | count | 1          |
| CEP162     | 0.30155   | 0.1922589 | 1.5685 | 0.117    | 0.376552016 | count | 1          |
| ING5       | 0.2986183 | 0.154628  | 1.9312 | 0.0535   | 0.376626615 | count | 1          |
| EXOSC8     | 0.2753816 | 0.0936595 | 2.9402 | 0.0033   | 0.376942185 | count | 1          |
| THSD7A     | 1.0261973 | 0.7261203 | 1.4133 | 0.158    | 0.377024152 | count | 1          |
| LIPT1      | 0.3131368 | 0.1977183 | 1.5838 | 0.113    | 0.377905373 | count | 1          |
| NKTR       | 0.2701574 | 0.1046256 | 2.5821 | 0.00986  | 0.377993755 | count | 1          |
| TRARG1     | 0.367755  | 0.5717498 | 0.6432 | 0.52     | 0.378061862 | count | 1          |
| CTNND1     | 0.2942521 | 0.1662495 | 1.7699 | 0.0768   | 0.378333105 | count | 1          |
| TAF4B      | 0.6712566 | 0.4123468 | 1.6279 | 0.104    | 0.378505869 | count | 1          |
| COASY      | 0.3193702 | 0.1671855 | 1.9103 | 0.0562   | 0.378524014 | count | 1          |
| DYNC2L1    | 0.2778538 | 0.1314115 | 2.1144 | 0.0346   | 0.378561654 | count | 1          |
| SMS        | 0.2717814 | 0.0829736 | 3.2755 | 0.00106  | 0.378694299 | count | 1          |
| ENOSF1     | 0.2942621 | 0.1683313 | 1.7481 | 0.0805   | 0.37870697  | count | 1          |
| RBBP5      | 0.3224108 | 0.2009822 | 1.6042 | 0.109    | 0.37873531  | count | 1          |
| INPPL1     | 0.3227679 | 0.2835791 | 1.1382 | 0.255    | 0.379146328 | count | 1          |
| KIAA1143   | 0.2824363 | 0.1039315 | 2.7175 | 0.00661  | 0.379150399 | count | 1          |
| GTF2H2     | 0.3688744 | 0.2480344 | 1.4872 | 0.137    | 0.379171202 | count | 1          |
| ZC3HAV1    | 0.2915379 | 0.1442941 | 2.0204 | 0.0434   | 0.379424155 | count | 1          |
| RUNX2      | 0.4540586 | 0.5166437 | 0.8789 | 0.38     | 0.379591696 | count | 1          |
| MKNK2      | 0.2829156 | 0.1665577 | 1.6986 | 0.0895   | 0.379645453 | count | 1          |
| DYRK1A     | 0.3027616 | 0.1712377 | 1.7681 | 0.0771   | 0.379708217 | count | 1          |
| YWHAH      | 0.2675696 | 0.0547483 | 4.8873 | 1.07E-06 | 0.379942419 | count | 0.02488606 |
| TBCD       | 0.4773864 | 0.2542775 | 1.8774 | 0.0605   | 0.379990956 | count | 1          |
| NECTIN3    | 0.2862607 | 0.1287558 | 2.2233 | 0.0263   | 0.380654947 | count | 1          |
| CSKMT      | 0.2992869 | 0.1987848 | 1.5056 | 0.132    | 0.380711779 | count | 1          |
| STRBP      | 0.5458246 | 0.3341996 | 1.6332 | 0.103    | 0.380747649 | count | 1          |
| ERO1B      | 0.3322375 | 0.2022877 | 1.6424 | 0.101    | 0.380856102 | count | 1          |
| ZNF260     | 0.3445058 | 0.2223983 | 1.549  | 0.121    | 0.380952573 | count | 1          |
| RDH13      | 0.3365951 | 0.2587691 | 1.3008 | 0.193    | 0.381131225 | count | 1          |
| AC016727.1 | 0.5708171 | 0.4633567 | 1.2319 | 0.218    | 0.381283755 | count | 1          |
| MLLT6      | 0.2870408 | 0.1559155 | 1.841  | 0.0657   | 0.38131142  | count | 1          |
| PCDHGA9    | 0.5713466 | 0.4057957 | 1.408  | 0.159    | 0.381599661 | count | 1          |
| AC048382.5 | 0.5713466 | 0.5011619 | 1.14   | 0.254    | 0.381599661 | count | 1          |
| DNMT1      | 0.2927827 | 0.1292579 | 2.2651 | 0.0236   | 0.381607704 | count | 1          |
| NUP50      | 0.3194693 | 0.1622776 | 1.9687 | 0.0491   | 0.381685735 | count | 1          |
| DNAJC10    | 0.2751598 | 0.0882587 | 3.1177 | 0.00184  | 0.381796674 | count | 1          |
| ZNF91      | 0.2861606 | 0.1370988 | 2.0873 | 0.0369   | 0.381929215 | count | 1          |
| NRDE2      | 0.3102008 | 0.1812629 | 1.7113 | 0.0871   | 0.382120935 | count | 1          |
| PHLDA2     | 0.2715701 | 0.1041528 | 2.6074 | 0.00916  | 0.382339777 | count | 1          |
| NOTCH2     | 0.2861372 | 0.1542923 | 1.8545 | 0.0637   | 0.382394505 | count | 1          |
| PPP6R3     | 0.2901461 | 0.1404725 | 2.0655 | 0.0389   | 0.382498419 | count | 1          |



|            |           |           |        |          |             |       |             |
|------------|-----------|-----------|--------|----------|-------------|-------|-------------|
| TM9SF4     | 0.3163829 | 0.1602366 | 1.9745 | 0.0484   | 0.382623297 | count | 1           |
| SNX1       | 0.2833757 | 0.1128143 | 2.5119 | 0.0121   | 0.382652194 | count | 1           |
| FBXO3      | 0.2919825 | 0.1271917 | 2.2956 | 0.0218   | 0.382730954 | count | 1           |
| ICA1L      | 0.3395847 | 0.2830057 | 1.1999 | 0.23     | 0.382787091 | count | 1           |
| SECTM1     | 0.9042283 | 0.8425838 | 1.0732 | 0.283    | 0.382792103 | count | 1           |
| RAB17      | 1.2825732 | 1.0806983 | 1.1868 | 0.235    | 0.382858123 | count | 1           |
| AC087623.4 | 1.2825732 | 1.195665  | 1.0727 | 0.283    | 0.382858123 | count | 1           |
| CU638689.5 | 1.2825732 | 1.3292067 | 0.9649 | 0.335    | 0.382858123 | count | 1           |
| DGKG       | 0.6804309 | 0.3997642 | 1.7021 | 0.0888   | 0.382926225 | count | 1           |
| PCYOX1L    | 0.905376  | 0.4777565 | 1.8951 | 0.0582   | 0.383167581 | count | 1           |
| PPP5D1     | 0.6378388 | 0.5521328 | 1.1552 | 0.248    | 0.383184422 | count | 1           |
| TYW1B      | 0.682     | 0.5106944 | 1.3354 | 0.182    | 0.38368011  | count | 1           |
| KPNA5      | 0.3073759 | 0.1887603 | 1.6284 | 0.104    | 0.383725888 | count | 1           |
| MEST       | 0.4328991 | 0.3475214 | 1.2457 | 0.213    | 0.383899586 | count | 1           |
| AFDN-DT    | 1.7670534 | 1.1083789 | 1.5943 | 0.111    | 0.384062078 | count | 1           |
| ANKRD26    | 0.296098  | 0.2035721 | 1.4545 | 0.146    | 0.384077514 | count | 1           |
| MID1IP1    | 0.2843191 | 0.1138439 | 2.4974 | 0.0126   | 0.384160609 | count | 1           |
| AKNAD1     | 0.7381291 | 0.4994973 | 1.4777 | 0.14     | 0.384278334 | count | 1           |
| KRTCAP2    | 0.2704864 | 0.0527844 | 5.1244 | 3.14E-07 | 0.38437482  | count | 0.007331272 |
| ZNF45      | 0.6835337 | 0.4402612 | 1.5526 | 0.121    | 0.384416378 | count | 1           |
| DHX58      | 0.4264824 | 0.3285947 | 1.2979 | 0.194    | 0.384675422 | count | 1           |
| MGMT       | 0.2744818 | 0.0682338 | 4.0227 | 5.87E-05 | 0.384675973 | count | 1           |
| DENND4C    | 0.3081543 | 0.1989882 | 1.5486 | 0.122    | 0.38468406  | count | 1           |
| AC011472.4 | 1.2925265 | 0.7536757 | 1.715  | 0.0864   | 0.38475438  | count | 1           |
| RBM11      | 1.2925265 | 0.7544253 | 1.7133 | 0.0867   | 0.38475438  | count | 1           |
| C5AR2      | 1.292906  | 0.6612032 | 1.9554 | 0.0506   | 0.38482649  | count | 1           |
| PXDN       | 0.2871511 | 0.1632376 | 1.7591 | 0.0786   | 0.384993402 | count | 1           |
| ELOVL6     | 0.7400508 | 0.3657329 | 2.0235 | 0.0431   | 0.385111742 | count | 1           |
| BNIP2      | 0.2778398 | 0.0795831 | 3.4912 | 0.000487 | 0.385241264 | count | 1           |
| SLC12A9    | 0.3784879 | 0.258834  | 1.4623 | 0.144    | 0.385428405 | count | 1           |
| SLC36A1    | 0.7409313 | 0.4725293 | 1.568  | 0.117    | 0.385493281 | count | 1           |
| VPS4B      | 0.2781198 | 0.0854578 | 3.2545 | 0.00115  | 0.385494188 | count | 1           |
| BCL6       | 0.3031208 | 0.2054912 | 1.4751 | 0.14     | 0.38552996  | count | 1           |
| POMT1      | 0.3988726 | 0.2575607 | 1.5487 | 0.122    | 0.385752828 | count | 1           |
| GNA11      | 0.2859067 | 0.1322413 | 2.162  | 0.0307   | 0.385800596 | count | 1           |
| LINC01547  | 1.7842484 | 1.2743305 | 1.4001 | 0.162    | 0.385874525 | count | 1           |
| 8-Sep      | 0.2887709 | 0.1244717 | 2.32   | 0.0204   | 0.385889069 | count | 1           |
| TTC14      | 0.2813354 | 0.1105786 | 2.5442 | 0.011    | 0.386087126 | count | 1           |
| MRPL19     | 0.2801371 | 0.0928432 | 3.0173 | 0.00257  | 0.386288428 | count | 1           |
| STRADA     | 0.3949463 | 0.2984316 | 1.3234 | 0.186    | 0.386354114 | count | 1           |
| EFNA1      | 0.3647253 | 0.2471309 | 1.4758 | 0.14     | 0.386417117 | count | 1           |
| SH3D21     | 1.3013937 | 0.9651662 | 1.3484 | 0.178    | 0.386431622 | count | 1           |
| NCF2       | 1.301933  | 0.6248002 | 2.0838 | 0.0373   | 0.386533265 | count | 1           |
| PISD       | 0.3648608 | 0.2205105 | 1.6546 | 0.0981   | 0.386555944 | count | 1           |
| HSPA4L     | 0.3263474 | 0.1869765 | 1.7454 | 0.081    | 0.386630988 | count | 1           |

|            |            |             |        |          |             |       |   |
|------------|------------|-------------|--------|----------|-------------|-------|---|
| GRIPAP1    | 0.2964138  | 0.1738378   | 1.7051 | 0.0883   | 0.386865522 | count | 1 |
| SUPT20H    | 0.3053418  | 0.1501408   | 2.0337 | 0.0421   | 0.3869461   | count | 1 |
| PPWD1      | 0.2932042  | 0.1683667   | 1.7415 | 0.0817   | 0.38694673  | count | 1 |
| BMP8B      | 1.7947114  | 0.8007961   | 2.2412 | 0.0251   | 0.386964381 | count | 1 |
| AKIRIN2    | 0.3029189  | 0.1308972   | 2.3142 | 0.0207   | 0.386987825 | count | 1 |
| SECISBP2   | 0.2868553  | 0.1130892   | 2.5365 | 0.0112   | 0.38707266  | count | 1 |
| COPB1      | 0.2784031  | 0.079556    | 3.4995 | 0.000472 | 0.387244461 | count | 1 |
| IFNAR1     | 0.2780055  | 0.0825177   | 3.369  | 0.000762 | 0.387270338 | count | 1 |
| LMF2       | 0.2856203  | 0.1180836   | 2.4188 | 0.0156   | 0.387279539 | count | 1 |
| TIAL1      | 0.2769163  | 0.0924598   | 2.995  | 0.00276  | 0.387397417 | count | 1 |
| DHX38      | 0.3164097  | 0.1748576   | 1.8095 | 0.0705   | 0.387470531 | count | 1 |
| DZIP3      | 0.317138   | 0.1754928   | 1.8071 | 0.0708   | 0.387587639 | count | 1 |
| C9orf72    | 0.3685347  | 0.2210144   | 1.6675 | 0.0955   | 0.387612598 | count | 1 |
| C5orf63    | 0.8195831  | 0.5260548   | 1.558  | 0.119    | 0.387913894 | count | 1 |
| BTBD19     | 0.3972082  | 0.3228396   | 1.2304 | 0.219    | 0.38847011  | count | 1 |
| CCL19      | 0.2747103  | 0.2890595   | 0.9504 | 0.342    | 0.388578712 | count | 1 |
| SYNE1      | 0.275197   | 0.0848776   | 3.2423 | 0.0012   | 0.388846354 | count | 1 |
| ZSCAN12    | 0.5193764  | 0.3403932   | 1.5258 | 0.127    | 0.388874711 | count | 1 |
| FH         | 0.2958296  | 0.1268624   | 2.3319 | 0.0198   | 0.388980804 | count | 1 |
| ZNF205     | 0.3107207  | 0.2086618   | 1.4891 | 0.137    | 0.388994116 | count | 1 |
| PEAR1      | 0.3357727  | 0.2456604   | 1.3668 | 0.172    | 0.389017867 | count | 1 |
| RICTOR     | 0.3098472  | 0.153498    | 2.0186 | 0.0436   | 0.389020758 | count | 1 |
| DNAJB9     | 0.2842169  | 0.1005855   | 2.8256 | 0.00474  | 0.389055269 | count | 1 |
| RAD54B     | 16.8808857 | 982.1746968 | 0.0172 | 0.986    | 0.389123451 | count | 1 |
| AC097662.1 | 16.9175065 | 1808.455165 | 0.0094 | 0.993    | 0.389123452 | count | 1 |
| GATD3B     | 17.1167034 | 1599.838083 | 0.0107 | 0.991    | 0.389123456 | count | 1 |
| KCNH3      | 17.1170038 | 1771.056369 | 0.0097 | 0.992    | 0.389123456 | count | 1 |
| AC027575.2 | 17.2339363 | 1381.505271 | 0.0125 | 0.99     | 0.389123458 | count | 1 |
| AC090198.1 | 17.2340564 | 1600.041939 | 0.0108 | 0.991    | 0.389123458 | count | 1 |
| JAZF1-AS1  | 17.2341739 | 1591.934458 | 0.0108 | 0.991    | 0.389123458 | count | 1 |
| AC008758.6 | 17.3358118 | 2288.893607 | 0.0076 | 0.994    | 0.389123459 | count | 1 |
| AC146944.4 | 17.4307775 | 1032.130606 | 0.0169 | 0.987    | 0.38912346  | count | 1 |
| AC011484.1 | 17.4490585 | 1823.015451 | 0.0096 | 0.992    | 0.38912346  | count | 1 |
| NOVA2      | 17.5386185 | 948.0343016 | 0.0185 | 0.9852   | 0.389123461 | count | 1 |
| LINC01068  | 17.580595  | 2252.594165 | 0.0078 | 0.994    | 0.389123462 | count | 1 |
| AC092111.2 | 17.5805951 | 2252.594214 | 0.0078 | 0.994    | 0.389123462 | count | 1 |
| AL158071.3 | 17.5809849 | 2608.961002 | 0.0067 | 0.995    | 0.389123462 | count | 1 |
| HHATL      | 17.580986  | 2608.961844 | 0.0067 | 0.995    | 0.389123462 | count | 1 |
| AP005329.2 | 17.5809861 | 2608.961935 | 0.0067 | 0.995    | 0.389123462 | count | 1 |
| EPCAM      | 17.5809863 | 2608.961913 | 0.0067 | 0.995    | 0.389123462 | count | 1 |
| FAM171A2   | 17.6125986 | 1377.403694 | 0.0128 | 0.99     | 0.389123462 | count | 1 |
| HOXA7      | 17.6126084 | 1377.402704 | 0.0128 | 0.99     | 0.389123462 | count | 1 |
| CD8B2      | 17.7991681 | 2395.002873 | 0.0074 | 0.994    | 0.389123464 | count | 1 |
| RFPL1S     | 17.7991684 | 2395.003082 | 0.0074 | 0.994    | 0.389123464 | count | 1 |
| AC098614.4 | 17.7998778 | 3094.953374 | 0.0058 | 0.995    | 0.389123464 | count | 1 |

|                 |            |             |        |        |             |       |   |
|-----------------|------------|-------------|--------|--------|-------------|-------|---|
| TMEM125         | 17.799878  | 3094.953269 | 0.0058 | 0.995  | 0.389123464 | count | 1 |
| LINC01242       | 17.799878  | 3094.953209 | 0.0058 | 0.995  | 0.389123464 | count | 1 |
| PCDH15          | 17.799878  | 3094.953209 | 0.0058 | 0.995  | 0.389123464 | count | 1 |
| AC011446.2      | 17.868826  | 2812.321882 | 0.0064 | 0.995  | 0.389123464 | count | 1 |
| MAP1LC3C        | 18.1831322 | 1430.870193 | 0.0127 | 0.9899 | 0.389123467 | count | 1 |
| AC074386.1      | 18.4116127 | 1409.698062 | 0.0131 | 0.9896 | 0.389123468 | count | 1 |
| ZNF311          | 16.4491719 | 1211.697662 | 0.0136 | 0.989  | 0.389123474 | count | 1 |
| C15orf59        | 16.5838427 | 1319.651861 | 0.0126 | 0.99   | 0.389123478 | count | 1 |
| CSMD2           | 16.5839165 | 1108.036559 | 0.015  | 0.988  | 0.389123478 | count | 1 |
| AC018362.1      | 16.7880924 | 1095.066621 | 0.0153 | 0.988  | 0.389123483 | count | 1 |
| PROX1           | 16.8420009 | 1054.564431 | 0.016  | 0.987  | 0.389123485 | count | 1 |
| RNASEK-C17orf49 | 16.917493  | 1808.449493 | 0.0094 | 0.993  | 0.389123486 | count | 1 |
| AL445248.1      | 16.9650055 | 1380.014802 | 0.0123 | 0.99   | 0.389123487 | count | 1 |
| WNT4            | 16.9650211 | 1380.019411 | 0.0123 | 0.99   | 0.389123487 | count | 1 |
| LINC01915       | 16.9650211 | 1380.019407 | 0.0123 | 0.99   | 0.389123487 | count | 1 |
| SERTM1          | 16.9650218 | 1380.016988 | 0.0123 | 0.99   | 0.389123487 | count | 1 |
| AC078864.2      | 16.9652149 | 1598.294527 | 0.0106 | 0.992  | 0.389123487 | count | 1 |
| TMC3            | 16.9655007 | 1963.417738 | 0.0086 | 0.993  | 0.389123487 | count | 1 |
| PPARGC1B        | 16.9986868 | 979.5798124 | 0.0174 | 0.986  | 0.389123488 | count | 1 |
| AC013553.4      | 17.0160028 | 1830.418192 | 0.0093 | 0.993  | 0.389123488 | count | 1 |
| AL031055.1      | 17.0786245 | 1478.556064 | 0.0116 | 0.991  | 0.389123489 | count | 1 |
| POU3F4          | 17.2337043 | 1548.230018 | 0.0111 | 0.991  | 0.389123492 | count | 1 |
| LINC02302       | 17.2339364 | 1381.505275 | 0.0125 | 0.99   | 0.389123492 | count | 1 |
| CARD10          | 17.233951  | 1381.509448 | 0.0125 | 0.99   | 0.389123492 | count | 1 |
| B3GALT2         | 17.2342831 | 1784.957733 | 0.0097 | 0.992  | 0.389123492 | count | 1 |
| AC019197.1      | 17.2738483 | 1586.844866 | 0.0109 | 0.991  | 0.389123492 | count | 1 |
| LINC00997       | 17.2811723 | 971.7063938 | 0.0178 | 0.986  | 0.389123492 | count | 1 |
| PEX5L           | 17.3358101 | 2288.889937 | 0.0076 | 0.994  | 0.389123493 | count | 1 |
| AC027271.1      | 17.3364265 | 2894.236339 | 0.006  | 0.995  | 0.389123493 | count | 1 |
| AC022081.1      | 17.342405  | 1282.803741 | 0.0135 | 0.9892 | 0.389123493 | count | 1 |
| C6              | 17.3801188 | 1139.295059 | 0.0153 | 0.988  | 0.389123494 | count | 1 |
| KIAA1549        | 17.3843884 | 1620.608472 | 0.0107 | 0.991  | 0.389123494 | count | 1 |
| WNK2            | 17.3843895 | 1620.604282 | 0.0107 | 0.991  | 0.389123494 | count | 1 |
| PDE11A          | 17.3844358 | 1822.434844 | 0.0095 | 0.992  | 0.389123494 | count | 1 |
| AL035681.1      | 17.4125475 | 1458.418821 | 0.0119 | 0.9905 | 0.389123494 | count | 1 |
| AL157714.2      | 17.4421858 | 1379.897832 | 0.0126 | 0.99   | 0.389123494 | count | 1 |
| CYYR1           | 17.4425473 | 2079.444575 | 0.0084 | 0.993  | 0.389123494 | count | 1 |
| DEFB1           | 17.4729468 | 1062.241282 | 0.0164 | 0.9869 | 0.389123495 | count | 1 |
| AC013731.1      | 17.580595  | 2252.594214 | 0.0078 | 0.994  | 0.389123496 | count | 1 |
| TMEM132C        | 17.580595  | 2252.594135 | 0.0078 | 0.994  | 0.389123496 | count | 1 |
| IRF4            | 17.5805951 | 2252.594175 | 0.0078 | 0.994  | 0.389123496 | count | 1 |
| NELL2           | 17.5805952 | 2252.594224 | 0.0078 | 0.994  | 0.389123496 | count | 1 |
| C1orf87         | 17.5806155 | 2252.62426  | 0.0078 | 0.994  | 0.389123496 | count | 1 |
| AC010907.1      | 17.5806155 | 2252.624299 | 0.0078 | 0.994  | 0.389123496 | count | 1 |
| SLC6A13         | 17.580935  | 2608.948184 | 0.0067 | 0.995  | 0.389123496 | count | 1 |

|            |            |             |        |          |             |       |           |
|------------|------------|-------------|--------|----------|-------------|-------|-----------|
| AP002884.4 | 17.5809847 | 2608.960956 | 0.0067 | 0.995    | 0.389123496 | count | 1         |
| WNT5A-AS1  | 17.5809848 | 2608.961013 | 0.0067 | 0.995    | 0.389123496 | count | 1         |
| AL662797.1 | 17.5809848 | 2608.960979 | 0.0067 | 0.995    | 0.389123496 | count | 1         |
| GRIK2      | 17.5809848 | 2608.960956 | 0.0067 | 0.995    | 0.389123496 | count | 1         |
| AC002546.1 | 17.6110132 | 1022.026793 | 0.0172 | 0.9862   | 0.389123496 | count | 1         |
| LINC01028  | 17.6125795 | 1595.415064 | 0.011  | 0.991    | 0.389123496 | count | 1         |
| EN1        | 17.6125891 | 1377.396252 | 0.0128 | 0.99     | 0.389123496 | count | 1         |
| SEMA6A-AS1 | 17.6399354 | 1918.886566 | 0.0092 | 0.993    | 0.389123497 | count | 1         |
| AQP5       | 17.6500725 | 843.4476811 | 0.0209 | 0.9833   | 0.389123497 | count | 1         |
| ZYG11A     | 17.7991682 | 2395.00285  | 0.0074 | 0.994    | 0.389123498 | count | 1         |
| SIK1B      | 17.7991683 | 2395.002838 | 0.0074 | 0.994    | 0.389123498 | count | 1         |
| AC137723.1 | 17.7991684 | 2395.002966 | 0.0074 | 0.994    | 0.389123498 | count | 1         |
| AL732292.2 | 17.7991686 | 2395.002827 | 0.0074 | 0.994    | 0.389123498 | count | 1         |
| AL133551.1 | 17.7991685 | 2395.003024 | 0.0074 | 0.994    | 0.389123498 | count | 1         |
| PPP1R1B    | 17.7991686 | 2395.002827 | 0.0074 | 0.994    | 0.389123498 | count | 1         |
| AC026254.2 | 17.7991689 | 2395.003105 | 0.0074 | 0.994    | 0.389123498 | count | 1         |
| ZNF295-AS1 | 17.7991689 | 2395.003035 | 0.0074 | 0.994    | 0.389123498 | count | 1         |
| TMC5       | 17.7998779 | 3094.953135 | 0.0058 | 0.995    | 0.389123498 | count | 1         |
| AL109917.1 | 17.7998782 | 3094.953135 | 0.0058 | 0.995    | 0.389123498 | count | 1         |
| Z94721.1   | 17.7998782 | 3094.953329 | 0.0058 | 0.995    | 0.389123498 | count | 1         |
| ATAD3C     | 17.7998783 | 3094.953314 | 0.0058 | 0.995    | 0.389123498 | count | 1         |
| GCGR       | 17.7998783 | 3094.953194 | 0.0058 | 0.995    | 0.389123498 | count | 1         |
| AC005740.4 | 17.7998784 | 3094.953464 | 0.0058 | 0.995    | 0.389123498 | count | 1         |
| RRM1-AS1   | 17.8008903 | 4156.13498  | 0.0043 | 0.997    | 0.389123498 | count | 1         |
| COX6B2     | 17.8008903 | 4156.135181 | 0.0043 | 0.997    | 0.389123498 | count | 1         |
| COL22A1    | 17.8008904 | 4156.135121 | 0.0043 | 0.997    | 0.389123498 | count | 1         |
| GDA        | 17.8008904 | 4156.135302 | 0.0043 | 0.997    | 0.389123498 | count | 1         |
| AC009120.4 | 17.8008904 | 4156.135262 | 0.0043 | 0.997    | 0.389123498 | count | 1         |
| PSMA8      | 17.8008904 | 4156.135121 | 0.0043 | 0.997    | 0.389123498 | count | 1         |
| ZNF30-AS1  | 17.8008905 | 4156.135181 | 0.0043 | 0.997    | 0.389123498 | count | 1         |
| ALPL       | 17.8671008 | 1914.569597 | 0.0093 | 0.993    | 0.389123499 | count | 1         |
| PCDHA10    | 17.8671247 | 1914.577561 | 0.0093 | 0.993    | 0.389123499 | count | 1         |
| AL049870.3 | 17.8834089 | 1894.488013 | 0.0094 | 0.992    | 0.389123499 | count | 1         |
| REXO5      | 17.9939237 | 1529.383325 | 0.0118 | 0.9906   | 0.3891235   | count | 1         |
| CACNA1G    | 18.0934206 | 1576.377076 | 0.0115 | 0.9908   | 0.3891235   | count | 1         |
| ATG4B      | 0.3137845  | 0.2172019   | 1.4447 | 0.149    | 0.389143763 | count | 1         |
| FANCI      | 1.0722228  | 0.8602449   | 1.2464 | 0.213    | 0.389149974 | count | 1         |
| C11orf71   | 0.3295197  | 0.172824    | 1.9067 | 0.0566   | 0.389210176 | count | 1         |
| ZBTB20     | 0.2742548  | 0.0647057   | 4.2385 | 2.31E-05 | 0.389236504 | count | 0.5303067 |
| CEP89      | 0.3118739  | 0.1577457   | 1.9771 | 0.0481   | 0.389261644 | count | 1         |
| ZIK1       | 0.4664641  | 0.4662374   | 1.0005 | 0.317    | 0.389261953 | count | 1         |
| SHLD1      | 0.4393467  | 0.3192783   | 1.3761 | 0.169    | 0.389284821 | count | 1         |
| IKBKB      | 0.3522734  | 0.2604741   | 1.3524 | 0.176    | 0.38930229  | count | 1         |
| THOC3      | 0.3861281  | 0.2350284   | 1.6429 | 0.1      | 0.389438571 | count | 1         |
| FADS2      | 0.3247496  | 0.1943952   | 1.6706 | 0.0949   | 0.389817872 | count | 1         |

|            |           |           |        |          |             |       |            |
|------------|-----------|-----------|--------|----------|-------------|-------|------------|
| EIF2AK1    | 0.2935295 | 0.1128053 | 2.6021 | 0.0093   | 0.389863816 | count | 1          |
| AL158152.1 | 0.5604069 | 0.3414751 | 1.6411 | 0.101    | 0.389895056 | count | 1          |
| MGAT4C     | 1.075597  | 0.6063409 | 1.7739 | 0.0762   | 0.390023974 | count | 1          |
| FAR1       | 0.3057677 | 0.1966315 | 1.555  | 0.12     | 0.390162901 | count | 1          |
| LINC00649  | 0.9269943 | 0.7637008 | 1.2138 | 0.225    | 0.390189251 | count | 1          |
| TMEM53     | 0.3392909 | 0.2081624 | 1.6299 | 0.103    | 0.390208844 | count | 1          |
| CCS        | 0.280871  | 0.0864033 | 3.2507 | 0.00116  | 0.390235265 | count | 1          |
| SCD5       | 0.4331134 | 0.2721057 | 1.5917 | 0.112    | 0.390322995 | count | 1          |
| AL022322.1 | 0.6962517 | 0.5050754 | 1.3785 | 0.168    | 0.390498919 | count | 1          |
| ABHD13     | 0.3035607 | 0.1740627 | 1.744  | 0.0812   | 0.390909724 | count | 1          |
| TANGO6     | 0.5408494 | 0.3499632 | 1.5454 | 0.122    | 0.390986292 | count | 1          |
| OGG1       | 0.3302116 | 0.1808902 | 1.8255 | 0.068    | 0.391117511 | count | 1          |
| JKAMP      | 0.286177  | 0.0986075 | 2.9022 | 0.00373  | 0.391324557 | count | 1          |
| ZNF862     | 1.0807853 | 0.539714  | 2.0025 | 0.0453   | 0.391363231 | count | 1          |
| SLC35B2    | 0.2960956 | 0.137444  | 2.1543 | 0.0313   | 0.391393213 | count | 1          |
| MED14OS    | 0.6178136 | 0.4196343 | 1.4723 | 0.141    | 0.391516105 | count | 1          |
| SUFU       | 0.4214807 | 0.347813  | 1.2118 | 0.226    | 0.391650521 | count | 1          |
| SPTAN1     | 0.2780842 | 0.0952873 | 2.9184 | 0.00354  | 0.391658139 | count | 1          |
| ZNF737     | 0.3652672 | 0.312053  | 1.1705 | 0.242    | 0.39204228  | count | 1          |
| CLEC10A    | 1.3327153 | 1.4884847 | 0.8954 | 0.371    | 0.392265553 | count | 1          |
| CAPN10     | 0.4288964 | 0.2896351 | 1.4808 | 0.139    | 0.392601125 | count | 1          |
| CDK12      | 0.2880886 | 0.1336458 | 2.1556 | 0.0312   | 0.392617417 | count | 1          |
| SUMF1      | 0.3137382 | 0.1432965 | 2.1894 | 0.0286   | 0.392718822 | count | 1          |
| ADCY2      | 0.8322882 | 0.6338452 | 1.3131 | 0.189    | 0.392734147 | count | 1          |
| ACVR2B     | 0.4709379 | 0.3262003 | 1.4437 | 0.149    | 0.39273925  | count | 1          |
| DGCR8      | 0.3974934 | 0.3292737 | 1.2072 | 0.227    | 0.392807071 | count | 1          |
| ASB6       | 0.3524224 | 0.3028374 | 1.1637 | 0.245    | 0.393290079 | count | 1          |
| CHD9       | 0.2774381 | 0.0683295 | 4.0603 | 5.00E-05 | 0.393293589 | count | 1          |
| POC5       | 0.3665412 | 0.2325289 | 1.5763 | 0.115    | 0.393365936 | count | 1          |
| GAPVD1     | 0.3126084 | 0.1611117 | 1.9403 | 0.0524   | 0.393514742 | count | 1          |
| KDM3A      | 0.3263822 | 0.2225169 | 1.4668 | 0.143    | 0.393602191 | count | 1          |
| RTN3       | 0.2789626 | 0.0573194 | 4.8668 | 1.18E-06 | 0.393710072 | count | 0.02743028 |
| COQ10B     | 0.2860582 | 0.0915085 | 3.126  | 0.00179  | 0.393997448 | count | 1          |
| KTI12      | 0.3310559 | 0.1865305 | 1.7748 | 0.076    | 0.394233656 | count | 1          |
| PPP1R3D    | 0.3629068 | 0.2275459 | 1.5949 | 0.111    | 0.394272131 | count | 1          |
| RARA       | 0.3046586 | 0.1506814 | 2.0219 | 0.0433   | 0.39440763  | count | 1          |
| UBE2J1     | 0.2936217 | 0.1221534 | 2.4037 | 0.0163   | 0.39464832  | count | 1          |
| MEIS1-AS2  | 1.3463065 | 0.6142152 | 2.1919 | 0.0284   | 0.394753515 | count | 1          |
| SLC25A32   | 0.3091798 | 0.1795848 | 1.7216 | 0.0852   | 0.394890749 | count | 1          |
| SLC5A6     | 0.7628237 | 0.6181401 | 1.2341 | 0.217    | 0.394919593 | count | 1          |
| LINC01564  | 0.9419969 | 0.4357066 | 2.162  | 0.0307   | 0.395004812 | count | 1          |
| TADA1      | 0.4637805 | 0.2895867 | 1.6015 | 0.109    | 0.39506671  | count | 1          |
| ABHD11     | 0.3707088 | 0.2209142 | 1.6781 | 0.0934   | 0.395166202 | count | 1          |
| CAPN7      | 0.2931489 | 0.1327561 | 2.2082 | 0.0273   | 0.395250819 | count | 1          |
| USP10      | 0.3211279 | 0.1483253 | 2.165  | 0.0305   | 0.396075356 | count | 1          |

|            |           |           |        |          |             |       |            |
|------------|-----------|-----------|--------|----------|-------------|-------|------------|
| ERRF1      | 0.2863595 | 0.1030312 | 2.7793 | 0.00547  | 0.39639347  | count | 1          |
| COL1A2     | 0.2760379 | 0.0586047 | 4.7102 | 2.57E-06 | 0.396610842 | count | 0.05957517 |
| PIAS2      | 0.3323592 | 0.2332484 | 1.4249 | 0.154    | 0.396788012 | count | 1          |
| ELOVL5     | 0.3111054 | 0.1433416 | 2.1704 | 0.03     | 0.396891134 | count | 1          |
| ATP1A1     | 0.2849301 | 0.093341  | 3.0526 | 0.00229  | 0.396955466 | count | 1          |
| CHAC2      | 1.3589393 | 0.795713  | 1.7078 | 0.0878   | 0.397042636 | count | 1          |
| FLVCR1     | 1.104391  | 0.5219916 | 2.1157 | 0.0344   | 0.39739631  | count | 1          |
| PON2       | 0.2945733 | 0.1306452 | 2.2548 | 0.0242   | 0.397420202 | count | 1          |
| PDS5A      | 0.3067562 | 0.1735165 | 1.7679 | 0.0772   | 0.397428661 | count | 1          |
| JAZF1      | 0.3017726 | 0.1683154 | 1.7929 | 0.0731   | 0.397454082 | count | 1          |
| PHYHD1     | 0.302344  | 0.1332448 | 2.2691 | 0.0233   | 0.397715786 | count | 1          |
| RORA       | 0.2922373 | 0.1234939 | 2.3664 | 0.018    | 0.397858871 | count | 1          |
| SEC24B-AS1 | 0.7697874 | 0.5813444 | 1.3242 | 0.186    | 0.397893572 | count | 1          |
| ADH4       | 1.9052516 | 0.9135724 | 2.0855 | 0.0371   | 0.397896478 | count | 1          |
| UBXN8      | 0.3462183 | 0.2217893 | 1.561  | 0.119    | 0.397985672 | count | 1          |
| AC012306.2 | 0.3234227 | 0.1924237 | 1.6808 | 0.0929   | 0.398147874 | count | 1          |
| MYMX       | 1.9099568 | 1.1354112 | 1.6822 | 0.0926   | 0.398338948 | count | 1          |
| AC005899.7 | 1.9099568 | 1.8734548 | 1.0195 | 0.308    | 0.398338948 | count | 1          |
| BEX4       | 0.2825834 | 0.0695876 | 4.0608 | 4.99E-05 | 0.398351926 | count | 1          |
| FBXO34     | 0.3170252 | 0.1799216 | 1.762  | 0.0781   | 0.398458104 | count | 1          |
| TNPO2      | 0.3418397 | 0.2257815 | 1.514  | 0.13     | 0.398547335 | count | 1          |
| PPARGC1A   | 0.9534365 | 0.62666   | 1.5215 | 0.128    | 0.398645263 | count | 1          |
| FAM168A    | 0.3419259 | 0.1999609 | 1.71   | 0.0874   | 0.398645596 | count | 1          |
| MED18      | 0.3741459 | 0.2547513 | 1.4687 | 0.142    | 0.398707744 | count | 1          |
| AC013394.1 | 0.3295984 | 0.2105931 | 1.5651 | 0.118    | 0.399203821 | count | 1          |
| PLEKHB1    | 0.5534475 | 0.4756513 | 1.1636 | 0.245    | 0.399216028 | count | 1          |
| KCNJ8      | 0.3402739 | 0.1610795 | 2.1125 | 0.0347   | 0.399269274 | count | 1          |
| DNMBP      | 0.380048  | 0.32875   | 1.156  | 0.248    | 0.399295911 | count | 1          |
| LDLRAD3    | 0.4599315 | 0.377111  | 1.2196 | 0.223    | 0.399400003 | count | 1          |
| TFF3       | 1.9240927 | 1.1685277 | 1.6466 | 0.0997   | 0.39965727  | count | 1          |
| SLC41A2    | 0.3136837 | 0.1380676 | 2.272  | 0.0231   | 0.399699472 | count | 1          |
| CKAP4      | 0.2897485 | 0.1016984 | 2.8491 | 0.00441  | 0.39989283  | count | 1          |
| RNPEPL1    | 0.3146717 | 0.1766831 | 1.781  | 0.075    | 0.400036093 | count | 1          |
| CPE        | 0.2786271 | 0.0392757 | 7.0941 | 1.55E-12 | 0.400043131 | count | 3.69E-08   |
| ARNT       | 0.3310876 | 0.2011229 | 1.6462 | 0.0998   | 0.40008398  | count | 1          |
| FXYD2      | 1.11582   | 1.0307213 | 1.0826 | 0.279    | 0.400281335 | count | 1          |
| COL9A2     | 0.3198752 | 0.3013981 | 1.0613 | 0.289    | 0.400290561 | count | 1          |
| MYO6       | 0.3017923 | 0.1547106 | 1.9507 | 0.0512   | 0.400549302 | count | 1          |
| WDR53      | 0.4532762 | 0.3407016 | 1.3304 | 0.183    | 0.400882148 | count | 1          |
| TCF15      | 1.118808  | 0.5604888 | 1.9961 | 0.046    | 0.401031752 | count | 1          |
| LAMC1      | 0.2942039 | 0.0906837 | 3.2443 | 0.00119  | 0.401093429 | count | 1          |
| SMO        | 0.4458556 | 0.3268221 | 1.3642 | 0.173    | 0.401143529 | count | 1          |
| NOM1       | 0.3363001 | 0.2232716 | 1.5062 | 0.132    | 0.401400087 | count | 1          |
| WDR31      | 0.5571292 | 0.4573088 | 1.2183 | 0.223    | 0.401612896 | count | 1          |
| CEP78      | 0.3481879 | 0.3031064 | 1.1487 | 0.251    | 0.401651147 | count | 1          |

|           |           |           |        |          |             |       |             |
|-----------|-----------|-----------|--------|----------|-------------|-------|-------------|
| PER3      | 0.2886321 | 0.1120712 | 2.5754 | 0.0101   | 0.401914962 | count | 1           |
| S100A1    | 1.1233313 | 1.0509605 | 1.0689 | 0.285    | 0.402164711 | count | 1           |
| FOXJ2     | 0.3752797 | 0.3115069 | 1.2047 | 0.228    | 0.402435768 | count | 1           |
| ADCY1     | 0.6375858 | 0.4629255 | 1.3773 | 0.169    | 0.402470904 | count | 1           |
| COG7      | 0.3924671 | 0.2706072 | 1.4503 | 0.147    | 0.402486915 | count | 1           |
| ZFP30     | 0.4637545 | 0.3198446 | 1.4499 | 0.147    | 0.402507582 | count | 1           |
| BBS2      | 0.3217543 | 0.1843451 | 1.7454 | 0.081    | 0.402608005 | count | 1           |
| KLF8      | 0.5396199 | 0.3159644 | 1.7078 | 0.0877   | 0.402660803 | count | 1           |
| SOX15     | 0.3172247 | 0.2000602 | 1.5856 | 0.113    | 0.402771058 | count | 1           |
| MFSD13A   | 0.7812943 | 0.3937511 | 1.9842 | 0.0473   | 0.402782091 | count | 1           |
| LBX2-AS1  | 1.3914569 | 0.8200629 | 1.6968 | 0.0898   | 0.402832478 | count | 1           |
| AP1B1     | 0.3807802 | 0.264196  | 1.4413 | 0.15     | 0.402838834 | count | 1           |
| RUVBL2    | 0.3104212 | 0.1385179 | 2.241  | 0.0251   | 0.403112996 | count | 1           |
| TRMT11    | 0.295631  | 0.1007875 | 2.9332 | 0.00338  | 0.403396735 | count | 1           |
| PIGO      | 0.4565089 | 0.2964737 | 1.5398 | 0.124    | 0.403566315 | count | 1           |
| RASSF9    | 0.3971546 | 0.2285397 | 1.7378 | 0.0823   | 0.403676711 | count | 1           |
| FIGNL1    | 0.4009329 | 0.4333954 | 0.9251 | 0.355    | 0.403752431 | count | 1           |
| TNRC6B    | 0.2869266 | 0.0752169 | 3.8147 | 0.000139 | 0.403838367 | count | 1           |
| ZWILCH    | 0.5247731 | 0.4356243 | 1.2046 | 0.228    | 0.403938429 | count | 1           |
| TMEM38B   | 0.3194073 | 0.1600768 | 1.9953 | 0.0461   | 0.404038199 | count | 1           |
| FGFR10P   | 0.4239152 | 0.3159987 | 1.3415 | 0.18     | 0.404039019 | count | 1           |
| FGF14-AS2 | 0.3876691 | 0.2273052 | 1.7055 | 0.0882   | 0.404047851 | count | 1           |
| NAA25     | 0.3680188 | 0.1997221 | 1.8427 | 0.0655   | 0.404085455 | count | 1           |
| PRKD3     | 0.3037675 | 0.1277682 | 2.3775 | 0.0175   | 0.404700948 | count | 1           |
| TXLNG     | 0.3156835 | 0.1458497 | 2.1644 | 0.0305   | 0.404770406 | count | 1           |
| ACADSB    | 0.4147645 | 0.2212368 | 1.8748 | 0.0609   | 0.404851986 | count | 1           |
| SLC46A1   | 0.4761889 | 0.3426374 | 1.3898 | 0.165    | 0.404922049 | count | 1           |
| BZW1      | 0.2840657 | 0.0504948 | 5.6256 | 1.99E-08 | 0.404980141 | count | 0.00046761  |
| SELENOS   | 0.2842253 | 0.0509455 | 5.579  | 2.59E-08 | 0.405101198 | count | 0.000608287 |
| ALDH9A1   | 0.3012448 | 0.0871991 | 3.4547 | 0.000557 | 0.405115024 | count | 1           |
| KANSL2    | 0.3253634 | 0.1820457 | 1.7873 | 0.074    | 0.405224909 | count | 1           |
| DNALI1    | 0.3287029 | 0.2294691 | 1.4324 | 0.152    | 0.405266869 | count | 1           |
| BAZ2B     | 0.3013121 | 0.1523437 | 1.9778 | 0.048    | 0.40534884  | count | 1           |
| FBXO38    | 0.3570435 | 0.2377306 | 1.5019 | 0.133    | 0.405363108 | count | 1           |
| SDHD      | 0.2859753 | 0.0558527 | 5.1202 | 3.21E-07 | 0.405375528 | count | 0.007494387 |
| MANSC1    | 0.3125133 | 0.1439375 | 2.1712 | 0.03     | 0.405474456 | count | 1           |
| KDM6A     | 0.3864157 | 0.237212  | 1.629  | 0.103    | 0.405745151 | count | 1           |
| DHRS7B    | 0.3089557 | 0.1253864 | 2.464  | 0.0138   | 0.406080176 | count | 1           |
| MMP19     | 0.3929845 | 0.2576696 | 1.5251 | 0.127    | 0.406251869 | count | 1           |
| BBS4      | 0.3238247 | 0.1490411 | 2.1727 | 0.0299   | 0.406319704 | count | 1           |
| ZDHHC18   | 0.3964624 | 0.2716565 | 1.4594 | 0.145    | 0.406422768 | count | 1           |
| ADAMTS1   | 0.2893762 | 0.0757913 | 3.8181 | 0.000137 | 0.406519672 | count | 1           |
| PI4K2A    | 0.4323437 | 0.2806996 | 1.5402 | 0.124    | 0.406563278 | count | 1           |
| DDIT3     | 0.2911946 | 0.0936628 | 3.109  | 0.00189  | 0.406565411 | count | 1           |
| ADD1      | 0.2891674 | 0.0706958 | 4.0903 | 4.40E-05 | 0.406609749 | count | 1           |

|            |           |           |        |          |             |       |             |
|------------|-----------|-----------|--------|----------|-------------|-------|-------------|
| GINS3      | 1.4132131 | 0.8764448 | 1.6124 | 0.107    | 0.406624714 | count | 1           |
| EIF4EBP1   | 0.3019133 | 0.1194715 | 2.5271 | 0.0115   | 0.40671522  | count | 1           |
| MIGA1      | 0.3069535 | 0.1138006 | 2.6973 | 0.00702  | 0.40671579  | count | 1           |
| PCDHB11    | 0.5877248 | 0.2551901 | 2.3031 | 0.0213   | 0.406875684 | count | 1           |
| FXYD6      | 0.3516559 | 0.1787122 | 1.9677 | 0.0492   | 0.406985459 | count | 1           |
| KLHL9      | 0.3188421 | 0.1975478 | 1.614  | 0.107    | 0.40707848  | count | 1           |
| RBM39      | 0.2858198 | 0.0550651 | 5.1906 | 2.21E-07 | 0.40709934  | count | 0.005165212 |
| UBE2Q2L    | 2.0088642 | 1.025341  | 1.9592 | 0.0502   | 0.407229097 | count | 1           |
| MORC4      | 0.3061854 | 0.1332929 | 2.2971 | 0.0217   | 0.407326231 | count | 1           |
| FAM126A    | 0.3138249 | 0.1756235 | 1.7869 | 0.074    | 0.407486004 | count | 1           |
| ACTR3B     | 0.4397482 | 0.348034  | 1.2635 | 0.206    | 0.407708375 | count | 1           |
| PGGT1B     | 0.3076951 | 0.1541327 | 1.9963 | 0.046    | 0.40790191  | count | 1           |
| IFNGR1     | 0.2921384 | 0.0699443 | 4.1767 | 3.03E-05 | 0.407910625 | count | 0.6943548   |
| CUTC       | 0.3106282 | 0.1251302 | 2.4824 | 0.0131   | 0.408000466 | count | 1           |
| ZNF638     | 0.2925842 | 0.1020601 | 2.8668 | 0.00417  | 0.408531109 | count | 1           |
| SUCO       | 0.3129827 | 0.1512545 | 2.0692 | 0.0386   | 0.408568279 | count | 1           |
| COQ2       | 0.3989138 | 0.2361858 | 1.689  | 0.0913   | 0.40883588  | count | 1           |
| FANCM      | 0.4812528 | 0.3601891 | 1.3361 | 0.182    | 0.408932179 | count | 1           |
| AC013271.1 | 0.4193    | 0.3843508 | 1.0909 | 0.275    | 0.409071915 | count | 1           |
| MICU1      | 0.3060978 | 0.1128712 | 2.7119 | 0.00672  | 0.409212975 | count | 1           |
| CLN5       | 0.3006688 | 0.0958647 | 3.1364 | 0.00172  | 0.409271877 | count | 1           |
| DISP2      | 1.15232   | 1.153928  | 0.9986 | 0.318    | 0.409339291 | count | 1           |
| ZNF10      | 0.354016  | 0.4599021 | 0.7698 | 0.441    | 0.409651483 | count | 1           |
| AC025181.2 | 0.430155  | 0.2741958 | 1.5688 | 0.117    | 0.409686258 | count | 1           |
| ANGEL1     | 0.8778521 | 0.5584949 | 1.5718 | 0.116    | 0.409718455 | count | 1           |
| SUN1       | 0.3029378 | 0.1126234 | 2.6898 | 0.00718  | 0.409782342 | count | 1           |
| CNEP1R1    | 0.356767  | 0.2265377 | 1.5749 | 0.115    | 0.409811236 | count | 1           |
| AHCYL2     | 0.4363042 | 0.3851677 | 1.1328 | 0.257    | 0.410091824 | count | 1           |
| KCND2      | 0.737909  | 0.7396486 | 0.9976 | 0.319    | 0.410135046 | count | 1           |
| KCTD6      | 0.3359641 | 0.1821091 | 1.8449 | 0.0651   | 0.410193867 | count | 1           |
| RTKN       | 0.5341673 | 0.3216838 | 1.6605 | 0.0969   | 0.410539342 | count | 1           |
| TP53I13    | 0.2995295 | 0.1059158 | 2.828  | 0.00471  | 0.410549493 | count | 1           |
| WASHC2C    | 0.3833005 | 0.2385901 | 1.6065 | 0.108    | 0.410746404 | count | 1           |
| DPP7       | 0.2893834 | 0.06079   | 4.7604 | 2.01E-06 | 0.41094522  | count | 0.04661793  |
| SPSB1      | 0.3114124 | 0.1290979 | 2.4122 | 0.0159   | 0.410996568 | count | 1           |
| GABPA      | 0.3271632 | 0.1401381 | 2.3346 | 0.0196   | 0.411017499 | count | 1           |
| AC020915.1 | 1.4390626 | 1.3711115 | 1.0496 | 0.294    | 0.411046721 | count | 1           |
| BPI        | 1.1594438 | 0.7319806 | 1.584  | 0.113    | 0.411079689 | count | 1           |
| CPOX       | 0.5352566 | 0.2987883 | 1.7914 | 0.0733   | 0.411303169 | count | 1           |
| GABPB1-AS1 | 0.3003402 | 0.1758201 | 1.7082 | 0.0877   | 0.411576579 | count | 1           |
| PTPN23     | 0.3922059 | 0.2605943 | 1.505  | 0.132    | 0.411601727 | count | 1           |
| RB1CC1     | 0.2992017 | 0.0974368 | 3.0707 | 0.00215  | 0.411688828 | count | 1           |
| LY6E-DT    | 0.5956675 | 0.5937814 | 1.0032 | 0.316    | 0.411774533 | count | 1           |
| LGR4       | 0.3348443 | 0.2676492 | 1.2511 | 0.211    | 0.411973038 | count | 1           |
| DUSP10     | 0.6549158 | 0.4371161 | 1.4983 | 0.134    | 0.41198671  | count | 1           |



|            |           |           |        |          |             |       |             |
|------------|-----------|-----------|--------|----------|-------------|-------|-------------|
| PQLC2      | 0.4754608 | 0.2837462 | 1.6757 | 0.0939   | 0.411999045 | count | 1           |
| PTRH2      | 0.3227828 | 0.1590547 | 2.0294 | 0.0425   | 0.412046118 | count | 1           |
| ZNF551     | 1.1639959 | 0.914323  | 1.2731 | 0.203    | 0.412187164 | count | 1           |
| MBD5       | 0.3212248 | 0.1904683 | 1.6865 | 0.0918   | 0.412198833 | count | 1           |
| DTNB       | 0.6232565 | 0.4533434 | 1.3748 | 0.169    | 0.412201471 | count | 1           |
| HERC4      | 0.314284  | 0.1648005 | 1.9071 | 0.0566   | 0.412224748 | count | 1           |
| CCDC28A    | 0.3297118 | 0.1829248 | 1.8024 | 0.0716   | 0.412416748 | count | 1           |
| RGS9       | 0.3497579 | 0.1901676 | 1.8392 | 0.066    | 0.412597402 | count | 1           |
| GBA        | 0.3255213 | 0.1772968 | 1.836  | 0.0664   | 0.412674188 | count | 1           |
| VPS11      | 0.445528  | 0.2229359 | 1.9985 | 0.0457   | 0.412771295 | count | 1           |
| SRSF7      | 0.2912499 | 0.0545808 | 5.3361 | 1.01E-07 | 0.413553957 | count | 0.002365319 |
| RIPK1      | 0.3288067 | 0.1748749 | 1.8802 | 0.0602   | 0.413614518 | count | 1           |
| NAGLU      | 0.3068709 | 0.1016941 | 3.0176 | 0.00257  | 0.413626088 | count | 1           |
| HNRNPU     | 0.2901089 | 0.0632586 | 4.5861 | 4.67E-06 | 0.413734152 | count | 0.10797974  |
| MIER2      | 0.4690026 | 0.5147726 | 0.9111 | 0.362    | 0.413914195 | count | 1           |
| GNG12-AS1  | 0.8894073 | 0.7860921 | 1.1314 | 0.258    | 0.413950818 | count | 1           |
| THAP10     | 0.478209  | 0.4210251 | 1.1358 | 0.256    | 0.414221981 | count | 1           |
| CLN3       | 2.0956763 | 0.8239258 | 2.5435 | 0.011    | 0.414416595 | count | 1           |
| RAB4B      | 1.0040371 | 0.911831  | 1.1011 | 0.271    | 0.414423971 | count | 1           |
| GK         | 0.3894428 | 0.4364025 | 0.8924 | 0.372    | 0.41443868  | count | 1           |
| PTDSS2     | 0.3345503 | 0.2406681 | 1.3901 | 0.165    | 0.414484937 | count | 1           |
| ZNF714     | 0.6001804 | 0.4043032 | 1.4845 | 0.138    | 0.414550256 | count | 1           |
| SLC18B1    | 1.4605037 | 0.6843897 | 2.134  | 0.0329   | 0.414646563 | count | 1           |
| UBFD1      | 0.3442264 | 0.2182019 | 1.5776 | 0.115    | 0.414706758 | count | 1           |
| FMO5       | 0.4619653 | 0.3443275 | 1.3416 | 0.18     | 0.414763177 | count | 1           |
| SHLD3      | 0.8104414 | 0.6049474 | 1.3397 | 0.18     | 0.415021093 | count | 1           |
| PRRC1      | 0.3092606 | 0.1299432 | 2.38   | 0.0174   | 0.4150551   | count | 1           |
| C3orf62    | 0.413115  | 0.2969085 | 1.3914 | 0.164    | 0.415492027 | count | 1           |
| PIGF       | 0.3217501 | 0.1550667 | 2.0749 | 0.0381   | 0.415565313 | count | 1           |
| SIGLEC15   | 1.179103  | 1.1289796 | 1.0444 | 0.296    | 0.415836488 | count | 1           |
| STK4       | 0.3154436 | 0.1402876 | 2.2485 | 0.0246   | 0.416028543 | count | 1           |
| PROCR      | 0.2982645 | 0.0958294 | 3.1125 | 0.00187  | 0.416173014 | count | 1           |
| CIDEB      | 0.8955092 | 0.4453691 | 2.0107 | 0.0444   | 0.416173633 | count | 1           |
| WASHC5     | 0.3472245 | 0.1851277 | 1.8756 | 0.0608   | 0.416258981 | count | 1           |
| RBM33      | 0.3098567 | 0.1718567 | 1.803  | 0.0715   | 0.416463688 | count | 1           |
| AARSD1     | 0.3797888 | 0.2629898 | 1.4441 | 0.149    | 0.416605962 | count | 1           |
| DSC3       | 0.8972352 | 0.8279687 | 1.0837 | 0.279    | 0.41680086  | count | 1           |
| TRA2B      | 0.297414  | 0.0827041 | 3.5961 | 0.000327 | 0.416849526 | count | 1           |
| MESD       | 0.295038  | 0.0645215 | 4.5727 | 4.97E-06 | 0.417068349 | count | 0.11488155  |
| SLC35C1    | 0.4817872 | 0.2568785 | 1.8755 | 0.0608   | 0.417113254 | count | 1           |
| NR3C1      | 0.2959757 | 0.0616627 | 4.7999 | 1.65E-06 | 0.417171058 | count | 0.0383097   |
| SLC38A6    | 0.3432657 | 0.2032147 | 1.6892 | 0.0913   | 0.417236179 | count | 1           |
| ENTPD1-AS1 | 0.355969  | 0.2702426 | 1.3172 | 0.188    | 0.417266678 | count | 1           |
| AC106786.1 | 2.1343961 | 1.1404934 | 1.8715 | 0.0614   | 0.417447239 | count | 1           |
| BTBD8      | 0.4388456 | 0.2815421 | 1.5587 | 0.119    | 0.417535294 | count | 1           |

|            |           |           |        |          |             |       |            |
|------------|-----------|-----------|--------|----------|-------------|-------|------------|
| MAFG-DT    | 0.6051906 | 0.3391851 | 1.7842 | 0.0745   | 0.417625301 | count | 1          |
| RNF122     | 0.7544131 | 0.4036097 | 1.8692 | 0.0617   | 0.417792921 | count | 1          |
| PCYOX1     | 0.2984569 | 0.0714914 | 4.1747 | 3.05E-05 | 0.417942075 | count | 0.698877   |
| ZNF407     | 0.3589035 | 0.2579642 | 1.3913 | 0.164    | 0.417972745 | count | 1          |
| MFSD4B     | 0.4118556 | 0.3098164 | 1.3294 | 0.184    | 0.417991406 | count | 1          |
| PALMD      | 0.3337669 | 0.226663  | 1.4725 | 0.141    | 0.418016408 | count | 1          |
| BTG3       | 0.3024563 | 0.0855509 | 3.5354 | 0.000412 | 0.418044255 | count | 1          |
| ENPEP      | 0.5038116 | 0.4134361 | 1.2186 | 0.223    | 0.418125008 | count | 1          |
| TMEM267    | 0.3369843 | 0.1772716 | 1.9009 | 0.0574   | 0.418137831 | count | 1          |
| TMEM128    | 0.3267703 | 0.1421884 | 2.2982 | 0.0216   | 0.418385493 | count | 1          |
| SLC25A46   | 0.3318765 | 0.1656054 | 2.004  | 0.0451   | 0.418525101 | count | 1          |
| CCNT1      | 0.3451753 | 0.1980424 | 1.7429 | 0.0814   | 0.41862382  | count | 1          |
| CHP1       | 0.3061001 | 0.1050601 | 2.9136 | 0.00359  | 0.418935557 | count | 1          |
| IPO5       | 0.31683   | 0.1141016 | 2.7767 | 0.00552  | 0.419015123 | count | 1          |
| NUP205     | 0.5466866 | 0.3149161 | 1.736  | 0.0827   | 0.41929828  | count | 1          |
| DHX15      | 0.3200283 | 0.1363751 | 2.3467 | 0.019    | 0.419408024 | count | 1          |
| LINC02384  | 2.1621608 | 1.1781037 | 1.8353 | 0.0665   | 0.419556538 | count | 1          |
| PDZD7      | 1.1948339 | 0.8580319 | 1.3925 | 0.164    | 0.419594275 | count | 1          |
| NUTM2B-AS1 | 0.311535  | 0.1193299 | 2.6107 | 0.00907  | 0.419728014 | count | 1          |
| GPS1       | 0.3109326 | 0.162603  | 1.9122 | 0.0559   | 0.419878917 | count | 1          |
| SEMA4C     | 0.3632163 | 0.2101931 | 1.728  | 0.0841   | 0.420034882 | count | 1          |
| NOD1       | 0.5857562 | 0.4015669 | 1.4587 | 0.145    | 0.420122546 | count | 1          |
| SFR1       | 0.3350981 | 0.1542279 | 2.1727 | 0.0299   | 0.420253997 | count | 1          |
| SPTY2D1    | 0.3294945 | 0.1322917 | 2.4907 | 0.0128   | 0.420502784 | count | 1          |
| DIRC2      | 0.4480505 | 0.245631  | 1.8241 | 0.0682   | 0.420533648 | count | 1          |
| RC3H2      | 0.337331  | 0.2067537 | 1.6316 | 0.103    | 0.420542631 | count | 1          |
| IFI27L1    | 0.3526988 | 0.1775703 | 1.9862 | 0.0471   | 0.420564992 | count | 1          |
| GPR89A     | 0.5662269 | 0.3350761 | 1.6898 | 0.0911   | 0.420609097 | count | 1          |
| ZNF469     | 1.0246337 | 0.8675259 | 1.1811 | 0.238    | 0.420696283 | count | 1          |
| AC005670.2 | 1.0246337 | 1.1625115 | 0.8814 | 0.378    | 0.420696283 | count | 1          |
| KCTD1      | 0.3613406 | 0.2692743 | 1.3419 | 0.18     | 0.420742992 | count | 1          |
| AC023908.3 | 1.4994796 | 1.0661655 | 1.4064 | 0.16     | 0.421034879 | count | 1          |
| AC103810.2 | 1.4994796 | 1.1794941 | 1.2713 | 0.204    | 0.421034879 | count | 1          |
| AC008074.3 | 1.4994796 | 1.1839631 | 1.2665 | 0.205    | 0.421034879 | count | 1          |
| BHLHE22    | 1.02672   | 0.6452246 | 1.5913 | 0.112    | 0.421326822 | count | 1          |
| GMPPB      | 0.3685484 | 0.1697506 | 2.1711 | 0.03     | 0.421402287 | count | 1          |
| SFPQ       | 0.2972765 | 0.0636084 | 4.6735 | 3.07E-06 | 0.421606647 | count | 0.07111655 |
| AP2B1      | 0.314073  | 0.1287714 | 2.439  | 0.0148   | 0.421623748 | count | 1          |
| UXS1       | 0.320541  | 0.1406025 | 2.2798 | 0.0227   | 0.421681888 | count | 1          |
| MEX3B      | 0.7132835 | 0.4919642 | 1.4499 | 0.147    | 0.421851619 | count | 1          |
| CEPT1      | 0.3471381 | 0.207526  | 1.6727 | 0.0945   | 0.421854776 | count | 1          |
| SOX6       | 0.3705021 | 0.5049691 | 0.7337 | 0.463    | 0.421927805 | count | 1          |
| SLC35A5    | 0.3476202 | 0.1680088 | 2.0691 | 0.0386   | 0.422429613 | count | 1          |
| U47924.2   | 0.5512765 | 0.4289732 | 1.2851 | 0.199    | 0.42249868  | count | 1          |
| ZFAT       | 0.5898302 | 0.4502953 | 1.3099 | 0.19     | 0.422738292 | count | 1          |

|            |           |           |        |          |             |       |          |
|------------|-----------|-----------|--------|----------|-------------|-------|----------|
| QRICH1     | 0.3494425 | 0.2205913 | 1.5841 | 0.113    | 0.422777268 | count | 1        |
| TMEM234    | 0.3645946 | 0.2082901 | 1.7504 | 0.0801   | 0.423034395 | count | 1        |
| SMIM13     | 0.390586  | 0.2264851 | 1.7246 | 0.0847   | 0.423345637 | count | 1        |
| CAD        | 0.5368804 | 0.3520286 | 1.5251 | 0.127    | 0.423374107 | count | 1        |
| EARS2      | 0.5909165 | 0.5618497 | 1.0517 | 0.293    | 0.423434993 | count | 1        |
| TARBP2     | 0.5910147 | 0.3620811 | 1.6323 | 0.103    | 0.423497961 | count | 1        |
| PRKDC      | 0.3022975 | 0.0769612 | 3.9279 | 8.73E-05 | 0.423544359 | count | 1        |
| TMEM192    | 0.3342262 | 0.1758278 | 1.9009 | 0.0574   | 0.423556591 | count | 1        |
| SDHA       | 0.3168246 | 0.0970027 | 3.2661 | 0.0011   | 0.423616671 | count | 1        |
| TMBIM6     | 0.2955726 | 0.0333481 | 8.8632 | 1.19E-18 | 0.423636489 | count | 2.85E-14 |
| LINS1      | 0.390869  | 0.2393573 | 1.633  | 0.103    | 0.423642059 | count | 1        |
| RFX2       | 0.3640044 | 0.32358   | 1.1249 | 0.261    | 0.423769743 | count | 1        |
| WDFY2      | 0.3304361 | 0.204028  | 1.6196 | 0.105    | 0.423871177 | count | 1        |
| GALNT10    | 0.3460109 | 0.21672   | 1.5966 | 0.11     | 0.42388909  | count | 1        |
| CMTR1      | 0.4043807 | 0.2480888 | 1.63   | 0.103    | 0.42389175  | count | 1        |
| ZNF276     | 0.3807089 | 0.3062896 | 1.243  | 0.214    | 0.423921581 | count | 1        |
| NAIP       | 0.4811607 | 0.3956029 | 1.2163 | 0.224    | 0.423944358 | count | 1        |
| ARHGAP33   | 0.8323234 | 0.6685803 | 1.2449 | 0.213    | 0.424074376 | count | 1        |
| TJP2       | 0.6161432 | 0.7933529 | 0.7766 | 0.437    | 0.424323517 | count | 1        |
| NOTCH4     | 0.4185951 | 0.3311574 | 1.264  | 0.206    | 0.424536912 | count | 1        |
| PTPN9      | 0.3832185 | 0.2241839 | 1.7094 | 0.0875   | 0.424573488 | count | 1        |
| MEN1       | 0.5726389 | 0.4320925 | 1.3253 | 0.185    | 0.424905156 | count | 1        |
| AC006213.2 | 1.5245573 | 1.0222044 | 1.4914 | 0.136    | 0.425040874 | count | 1        |
| STRN3      | 0.3095024 | 0.1052678 | 2.9401 | 0.0033   | 0.425075774 | count | 1        |
| TMEM41A    | 0.3396629 | 0.1516794 | 2.2393 | 0.0252   | 0.425287232 | count | 1        |
| KLHDC8B    | 0.3235596 | 0.1432796 | 2.2582 | 0.024    | 0.425351951 | count | 1        |
| SFT2D2     | 0.3159601 | 0.1337513 | 2.3623 | 0.0182   | 0.425502909 | count | 1        |
| LMO3       | 0.3018891 | 0.0975563 | 3.0945 | 0.00199  | 0.425601999 | count | 1        |
| AC098818.2 | 0.5739188 | 0.457308  | 1.255  | 0.21     | 0.42576133  | count | 1        |
| CCDC77     | 0.442455  | 0.2525833 | 1.7517 | 0.0799   | 0.425775251 | count | 1        |
| ARMT1      | 0.3368619 | 0.1488017 | 2.2638 | 0.0236   | 0.425804098 | count | 1        |
| ZBTB39     | 0.5948307 | 0.4819885 | 1.2341 | 0.217    | 0.425942654 | count | 1        |
| ANKRD17    | 0.3331636 | 0.1443895 | 2.3074 | 0.0211   | 0.42602588  | count | 1        |
| ZNF655     | 0.322691  | 0.1712589 | 1.8842 | 0.0596   | 0.426224357 | count | 1        |
| SLC2A9     | 0.7220451 | 0.5692411 | 1.2684 | 0.205    | 0.426245531 | count | 1        |
| TSGA10     | 0.5032873 | 0.4765439 | 1.0561 | 0.291    | 0.426300833 | count | 1        |
| PRRC2A     | 0.3449637 | 0.1650177 | 2.0905 | 0.0366   | 0.426452349 | count | 1        |
| PTRH1      | 0.3383058 | 0.1680449 | 2.0132 | 0.0442   | 0.426514587 | count | 1        |
| ZCCHC9     | 0.3169854 | 0.1367214 | 2.3185 | 0.0205   | 0.426579633 | count | 1        |
| DENND5A    | 0.3417619 | 0.2236789 | 1.5279 | 0.127    | 0.42662267  | count | 1        |
| PPM1A      | 0.3331534 | 0.1283904 | 2.5948 | 0.0095   | 0.426886376 | count | 1        |
| CNOT6      | 0.3655761 | 0.2631373 | 1.3893 | 0.165    | 0.426926863 | count | 1        |
| CEP120     | 0.3421931 | 0.2785529 | 1.2285 | 0.219    | 0.427152409 | count | 1        |
| HMBOX1     | 0.368322  | 0.2209642 | 1.6669 | 0.0956   | 0.427251737 | count | 1        |
| FER        | 0.3253085 | 0.1343548 | 2.4213 | 0.0155   | 0.427361133 | count | 1        |

|            |           |           |        |          |             |       |   |
|------------|-----------|-----------|--------|----------|-------------|-------|---|
| PIK3C2B    | 0.5284017 | 0.3600998 | 1.4674 | 0.142    | 0.427375984 | count | 1 |
| LRRC49     | 0.3839848 | 0.215579  | 1.7812 | 0.075    | 0.427458846 | count | 1 |
| CLIC6      | 1.049003  | 0.465972  | 2.2512 | 0.0244   | 0.428006474 | count | 1 |
| DENND2C    | 0.4565143 | 0.2525566 | 1.8076 | 0.0708   | 0.428035666 | count | 1 |
| HIVEP1     | 0.3256654 | 0.1414458 | 2.3024 | 0.0214   | 0.428092807 | count | 1 |
| ZNF83      | 0.3200126 | 0.1429241 | 2.239  | 0.0252   | 0.428197464 | count | 1 |
| AC108863.1 | 1.0498237 | 0.6534116 | 1.6067 | 0.108    | 0.428250333 | count | 1 |
| DUS1L      | 0.3279939 | 0.1366615 | 2.4    | 0.0164   | 0.428262325 | count | 1 |
| RASSF8     | 0.305787  | 0.078783  | 3.8814 | 0.000106 | 0.428284613 | count | 1 |
| RALGAPA1   | 0.3260378 | 0.1344814 | 2.4244 | 0.0154   | 0.428309652 | count | 1 |
| TTC21A     | 1.232297  | 0.5309577 | 2.3209 | 0.0203   | 0.428371736 | count | 1 |
| ZNF195     | 0.3587042 | 0.2255896 | 1.5901 | 0.112    | 0.428666366 | count | 1 |
| BSDC1      | 0.3272063 | 0.1550486 | 2.1103 | 0.0349   | 0.428718442 | count | 1 |
| PDE6B      | 1.5484868 | 0.9588094 | 1.615  | 0.106    | 0.42878861  | count | 1 |
| DYRK2      | 0.3638513 | 0.1976385 | 1.841  | 0.0657   | 0.428843339 | count | 1 |
| LRIG2      | 0.3685745 | 0.2205745 | 1.671  | 0.0948   | 0.42895961  | count | 1 |
| FAF2       | 0.3229213 | 0.106423  | 3.0343 | 0.00243  | 0.428984565 | count | 1 |
| MSMO1      | 0.3335074 | 0.1403746 | 2.3758 | 0.0176   | 0.429001648 | count | 1 |
| HAUS2      | 0.3599788 | 0.1979861 | 1.8182 | 0.0691   | 0.429059122 | count | 1 |
| RABL2B     | 0.3565306 | 0.2512086 | 1.4193 | 0.156    | 0.429230457 | count | 1 |
| RBMS2      | 0.3424645 | 0.2042325 | 1.6768 | 0.0937   | 0.429350321 | count | 1 |
| EIF4A3     | 0.3094267 | 0.0945767 | 3.2717 | 0.00108  | 0.429482377 | count | 1 |
| CYP1B1     | 0.3269438 | 0.1466357 | 2.2296 | 0.0258   | 0.429487908 | count | 1 |
| FBXO6      | 0.4041563 | 0.2375133 | 1.7016 | 0.0889   | 0.429521713 | count | 1 |
| DNP1       | 0.3070931 | 0.0872102 | 3.5213 | 0.000435 | 0.429569401 | count | 1 |
| VMP1       | 0.307576  | 0.0824801 | 3.7291 | 0.000195 | 0.429940119 | count | 1 |
| CRAT       | 0.3378201 | 0.1900621 | 1.7774 | 0.0756   | 0.430039001 | count | 1 |
| HOOK3      | 0.3088314 | 0.0780142 | 3.9587 | 7.68E-05 | 0.430248182 | count | 1 |
| IL12A      | 1.2415079 | 1.412842  | 0.8787 | 0.38     | 0.430492864 | count | 1 |
| SUGP2      | 0.3429368 | 0.1982619 | 1.7297 | 0.0838   | 0.430532703 | count | 1 |
| PDGFB      | 0.7311572 | 0.4814151 | 1.5188 | 0.129    | 0.430793883 | count | 1 |
| AC010542.2 | 0.6896281 | 0.5057443 | 1.3636 | 0.173    | 0.43080495  | count | 1 |
| SLC35F5    | 0.3312314 | 0.1633551 | 2.0277 | 0.0427   | 0.430845453 | count | 1 |
| JAM2       | 0.3301484 | 0.1912191 | 1.7265 | 0.0843   | 0.431045183 | count | 1 |
| TNFSF4     | 1.2443747 | 0.7574111 | 1.6429 | 0.1      | 0.431150146 | count | 1 |
| NAE1       | 0.3199915 | 0.1138731 | 2.8101 | 0.00498  | 0.431183881 | count | 1 |
| AC245140.2 | 0.8497809 | 0.4571456 | 1.8589 | 0.0631   | 0.431214148 | count | 1 |
| ZNF626     | 0.3465892 | 0.1500747 | 2.3094 | 0.021    | 0.431230849 | count | 1 |
| DNLZ       | 1.0603421 | 0.4625727 | 2.2923 | 0.0219   | 0.431366708 | count | 1 |
| ANKRD35    | 0.3136315 | 0.0990228 | 3.1673 | 0.00155  | 0.431374614 | count | 1 |
| NEURL1     | 1.5653792 | 1.2413716 | 1.261  | 0.207    | 0.431390761 | count | 1 |
| LAPTM4B    | 0.3095126 | 0.0847553 | 3.6518 | 0.000264 | 0.431600326 | count | 1 |
| AC090114.2 | 0.4905083 | 0.2589488 | 1.8942 | 0.0583   | 0.431629104 | count | 1 |
| N4BP2L1    | 0.3362754 | 0.1473342 | 2.2824 | 0.0225   | 0.431689571 | count | 1 |
| PXDNL      | 2.3375401 | 1.4473759 | 1.615  | 0.106    | 0.431723237 | count | 1 |

|            |           |           |        |          |             |       |           |
|------------|-----------|-----------|--------|----------|-------------|-------|-----------|
| NAALADL2   | 0.3353343 | 0.1676865 | 1.9998 | 0.0456   | 0.431725536 | count | 1         |
| GUF1       | 0.4122205 | 0.2466419 | 1.6713 | 0.0947   | 0.431788169 | count | 1         |
| ERP44      | 0.3113861 | 0.0704506 | 4.4199 | 1.02E-05 | 0.431810131 | count | 0.2349774 |
| SLC16A1    | 0.3843868 | 0.2190166 | 1.7551 | 0.0793   | 0.431829706 | count | 1         |
| BAIAP2-DT  | 0.7853773 | 0.5697625 | 1.3784 | 0.168    | 0.431973909 | count | 1         |
| CDC42EP4   | 0.3382898 | 0.1546379 | 2.1876 | 0.0288   | 0.432039341 | count | 1         |
| ACAA2      | 0.313214  | 0.1020054 | 3.0706 | 0.00215  | 0.432493985 | count | 1         |
| DUSP4      | 1.0642195 | 1.1852011 | 0.8979 | 0.369    | 0.432509876 | count | 1         |
| MACO1      | 0.3251963 | 0.1223417 | 2.6581 | 0.00789  | 0.432602999 | count | 1         |
| METTL8     | 0.3650786 | 0.2022919 | 1.8047 | 0.0712   | 0.43269033  | count | 1         |
| RFX7       | 0.4232499 | 0.3545317 | 1.1938 | 0.233    | 0.432716554 | count | 1         |
| AC109587.1 | 0.6055196 | 0.6060385 | 0.9991 | 0.318    | 0.432768915 | count | 1         |
| CACNA2D4   | 2.3573723 | 1.0368764 | 2.2735 | 0.0231   | 0.432980742 | count | 1         |
| SIN3A      | 0.3403146 | 0.2265312 | 1.5023 | 0.133    | 0.43317071  | count | 1         |
| AL512625.1 | 0.788195  | 0.7066896 | 1.1153 | 0.265    | 0.433252301 | count | 1         |
| ERN1       | 0.3461489 | 0.2211497 | 1.5652 | 0.118    | 0.43328043  | count | 1         |
| AL136982.7 | 1.067358  | 1.362792  | 0.7832 | 0.434    | 0.43343279  | count | 1         |
| TCF7L2     | 0.3177518 | 0.0992964 | 3.2    | 0.00139  | 0.433501301 | count | 1         |
| CDIP1      | 0.3492872 | 0.2357251 | 1.4818 | 0.138    | 0.433846348 | count | 1         |
| SNED1      | 0.3580222 | 0.1896703 | 1.8876 | 0.0592   | 0.433898081 | count | 1         |
| RNH1       | 0.3032487 | 0.0388284 | 7.81   | 7.41E-15 | 0.433899997 | count | 1.77E-10  |
| CCNT2      | 0.3380315 | 0.1360829 | 2.484  | 0.013    | 0.433915054 | count | 1         |
| DUOX1      | 1.5840623 | 0.9342665 | 1.6955 | 0.0901   | 0.434227418 | count | 1         |
| PDE1B      | 0.552678  | 0.3334847 | 1.6573 | 0.0975   | 0.434730221 | count | 1         |
| COP1       | 0.3836842 | 0.214465  | 1.789  | 0.0737   | 0.434755792 | count | 1         |
| MPST       | 0.3185947 | 0.1046597 | 3.0441 | 0.00235  | 0.434838123 | count | 1         |
| SAV1       | 0.3203833 | 0.0905868 | 3.5368 | 0.00041  | 0.434939261 | count | 1         |
| CSNK1E     | 0.343024  | 0.1595726 | 2.1496 | 0.0316   | 0.435065298 | count | 1         |
| MAD2L1BP   | 0.3457233 | 0.1889286 | 1.8299 | 0.0673   | 0.435153319 | count | 1         |
| BRMS1L     | 0.3493438 | 0.1599549 | 2.184  | 0.029    | 0.435273963 | count | 1         |
| INTU       | 0.3251953 | 0.1571898 | 2.0688 | 0.0386   | 0.435427345 | count | 1         |
| RDH14      | 0.3149125 | 0.0900917 | 3.4955 | 0.000479 | 0.435524663 | count | 1         |
| LRP6       | 0.3338626 | 0.1745487 | 1.9127 | 0.0559   | 0.435527934 | count | 1         |
| CHD1       | 0.32279   | 0.1086886 | 2.9699 | 0.003    | 0.435639133 | count | 1         |
| PERP       | 0.3185491 | 0.1013058 | 3.1444 | 0.00168  | 0.435965469 | count | 1         |
| EXTL3      | 0.4230421 | 0.3154676 | 1.341  | 0.18     | 0.436031256 | count | 1         |
| SLC38A2    | 0.3073349 | 0.0699745 | 4.3921 | 1.15E-05 | 0.436044641 | count | 0.264845  |
| BRD1       | 0.3280019 | 0.128018  | 2.5622 | 0.0104   | 0.436095202 | count | 1         |
| PUS7L      | 0.3312719 | 0.1440054 | 2.3004 | 0.0215   | 0.436185217 | count | 1         |
| INPP5B     | 0.3902147 | 0.3489804 | 1.1182 | 0.264    | 0.436211865 | count | 1         |
| TMEM201    | 0.6997357 | 0.4951498 | 1.4132 | 0.158    | 0.436223589 | count | 1         |
| PIGA       | 0.5160692 | 0.3797463 | 1.359  | 0.174    | 0.436315675 | count | 1         |
| PXN-AS1    | 0.4727214 | 0.3283509 | 1.4397 | 0.15     | 0.436476258 | count | 1         |
| SCP2       | 0.3068956 | 0.048     | 6.3937 | 1.82E-10 | 0.436537123 | count | 4.31E-06  |
| RC3H1      | 0.3434507 | 0.2122684 | 1.618  | 0.106    | 0.436612675 | count | 1         |

|            |           |           |        |          |             |       |             |
|------------|-----------|-----------|--------|----------|-------------|-------|-------------|
| BEST4      | 1.2691883 | 1.0071032 | 1.2602 | 0.208    | 0.436781432 | count | 1           |
| KCNK15     | 0.3246009 | 0.1119478 | 2.8996 | 0.00376  | 0.436902974 | count | 1           |
| ZW10       | 0.4493679 | 0.2752611 | 1.6325 | 0.103    | 0.436919818 | count | 1           |
| ALG6       | 0.4357435 | 0.3653227 | 1.1928 | 0.233    | 0.437205032 | count | 1           |
| TUBGCP2    | 0.3228941 | 0.1245854 | 2.5917 | 0.00959  | 0.437234926 | count | 1           |
| ZNF764     | 0.5726279 | 0.3944355 | 1.4518 | 0.147    | 0.437309374 | count | 1           |
| CYP2U1     | 0.3345821 | 0.1421705 | 2.3534 | 0.0187   | 0.437386614 | count | 1           |
| KPNA2      | 0.3814925 | 0.2454641 | 1.5542 | 0.12     | 0.43745005  | count | 1           |
| DOCK6      | 0.5071624 | 0.3453642 | 1.4685 | 0.142    | 0.437518075 | count | 1           |
| HLA-DOA    | 0.955988  | 0.8777134 | 1.0892 | 0.276    | 0.437751525 | count | 1           |
| VHL        | 0.3902687 | 0.2062699 | 1.892  | 0.0586   | 0.438239489 | count | 1           |
| TUBB4B     | 0.3084377 | 0.0581145 | 5.3074 | 1.18E-07 | 0.438264612 | count | 0.002762262 |
| CASP2      | 0.4220586 | 0.2463372 | 1.7133 | 0.0867   | 0.438433194 | count | 1           |
| AL928654.1 | 0.8002719 | 0.6245991 | 1.2813 | 0.2      | 0.438708802 | count | 1           |
| ANKRD6     | 0.3516318 | 0.2674549 | 1.3147 | 0.189    | 0.438741937 | count | 1           |
| RBL2       | 0.3284937 | 0.1225756 | 2.6799 | 0.0074   | 0.439090121 | count | 1           |
| CARHSP1    | 0.310717  | 0.0729597 | 4.2587 | 2.11E-05 | 0.439131414 | count | 0.4845404   |
| NUP153     | 0.3762987 | 0.1952349 | 1.9274 | 0.054    | 0.439138081 | count | 1           |
| CYCS       | 0.3103888 | 0.0796308 | 3.8978 | 9.88E-05 | 0.439138964 | count | 1           |
| C7orf26    | 0.4341107 | 0.2371356 | 1.8306 | 0.0672   | 0.439565117 | count | 1           |
| POU6F1     | 0.8022306 | 0.4419044 | 1.8154 | 0.0695   | 0.439590274 | count | 1           |
| CHST3      | 0.3474445 | 0.2433923 | 1.4275 | 0.154    | 0.44006387  | count | 1           |
| SLC46A3    | 0.3694892 | 0.2035138 | 1.8155 | 0.0695   | 0.440142612 | count | 1           |
| ATN1       | 0.3469432 | 0.1691782 | 2.0508 | 0.0404   | 0.440481111 | count | 1           |
| RASSF8-AS1 | 0.3407082 | 0.1465477 | 2.3249 | 0.0201   | 0.440517046 | count | 1           |
| KIRREL1    | 0.3587781 | 0.214342  | 1.6739 | 0.0942   | 0.440883648 | count | 1           |
| MKS1       | 0.5466846 | 0.382224  | 1.4303 | 0.153    | 0.440908595 | count | 1           |
| TTC9C      | 0.3571603 | 0.1828136 | 1.9537 | 0.0508   | 0.441263864 | count | 1           |
| FASN       | 0.4400205 | 0.3025491 | 1.4544 | 0.146    | 0.441295185 | count | 1           |
| RNF227     | 0.5619989 | 0.3824422 | 1.4695 | 0.142    | 0.441397986 | count | 1           |
| BAG5       | 0.3229938 | 0.0910966 | 3.5456 | 0.000397 | 0.441654748 | count | 1           |
| RABGGTA    | 0.4082453 | 0.2121773 | 1.9241 | 0.0544   | 0.441810295 | count | 1           |
| NSMCE3     | 0.3227801 | 0.0982773 | 3.2844 | 0.00103  | 0.441811011 | count | 1           |
| SENP7      | 0.3291361 | 0.1296568 | 2.5385 | 0.0112   | 0.441850921 | count | 1           |
| L3MBTL3    | 0.3812477 | 0.200875  | 1.8979 | 0.0578   | 0.441857158 | count | 1           |
| PLCL2      | 0.454892  | 0.252825  | 1.7992 | 0.0721   | 0.442011652 | count | 1           |
| DUSP16     | 0.4553944 | 0.3044265 | 1.4959 | 0.135    | 0.442474366 | count | 1           |
| WDHD1      | 0.9697779 | 0.4831489 | 2.0072 | 0.0448   | 0.442556917 | count | 1           |
| RALGAPB    | 0.3875865 | 0.3270263 | 1.1852 | 0.236    | 0.442563782 | count | 1           |
| DCPS       | 0.3329301 | 0.1394863 | 2.3868 | 0.017    | 0.442588519 | count | 1           |
| AL391807.1 | 0.3806846 | 0.2056634 | 1.851  | 0.0642   | 0.442694094 | count | 1           |
| SCYL3      | 0.5040531 | 0.3094011 | 1.6291 | 0.103    | 0.442722766 | count | 1           |
| ELMOD3     | 0.3864041 | 0.2204601 | 1.7527 | 0.0797   | 0.442926916 | count | 1           |
| PRRT4      | 1.6433998 | 0.9887364 | 1.6621 | 0.0966   | 0.442954006 | count | 1           |
| CTTN       | 0.3127906 | 0.0617389 | 5.0663 | 4.26E-07 | 0.443001635 | count | 0.009939006 |

|            |           |           |        |          |             |       |   |
|------------|-----------|-----------|--------|----------|-------------|-------|---|
| ANKRD29    | 0.3700467 | 0.1725655 | 2.1444 | 0.0321   | 0.443027011 | count | 1 |
| QTRT2      | 0.3674044 | 0.2023267 | 1.8159 | 0.0695   | 0.443066134 | count | 1 |
| AL139260.1 | 0.8104529 | 0.5506386 | 1.4718 | 0.141    | 0.443279975 | count | 1 |
| ARRDC3     | 0.3385336 | 0.1192853 | 2.838  | 0.00456  | 0.443400882 | count | 1 |
| NRSN2-AS1  | 0.5251679 | 0.4604031 | 1.1407 | 0.254    | 0.443417448 | count | 1 |
| HLA-DPB1   | 0.3174204 | 0.104072  | 3.05   | 0.0023   | 0.44342648  | count | 1 |
| CCDC57     | 0.5050021 | 0.2931608 | 1.7226 | 0.085    | 0.443498172 | count | 1 |
| TBC1D17    | 0.3815913 | 0.1765681 | 2.1612 | 0.0307   | 0.443721361 | count | 1 |
| PLD2       | 0.4886869 | 0.4672041 | 1.046  | 0.296    | 0.44391851  | count | 1 |
| TOP3A      | 0.4106918 | 0.3703631 | 1.1089 | 0.268    | 0.444363114 | count | 1 |
| C14orf39   | 2.5564416 | 1.8196638 | 1.4049 | 0.16     | 0.444408315 | count | 1 |
| EPB41      | 0.3811239 | 0.2188386 | 1.7416 | 0.0817   | 0.444626556 | count | 1 |
| PRKAB2     | 0.35358   | 0.1756063 | 2.0135 | 0.0441   | 0.444888072 | count | 1 |
| POLR2J3    | 0.3208258 | 0.1360918 | 2.3574 | 0.0185   | 0.445141274 | count | 1 |
| LINC02580  | 0.8147265 | 0.4990303 | 1.6326 | 0.103    | 0.445190954 | count | 1 |
| NSDHL      | 0.4255692 | 0.2726265 | 1.561  | 0.119    | 0.445201314 | count | 1 |
| ULK1       | 0.4196808 | 0.2436312 | 1.7226 | 0.085    | 0.445384503 | count | 1 |
| ZYG11B     | 0.3454853 | 0.1552929 | 2.2247 | 0.0262   | 0.445440844 | count | 1 |
| COMMD8     | 0.329315  | 0.1165244 | 2.8261 | 0.00474  | 0.445609182 | count | 1 |
| AF117829.1 | 0.4097064 | 0.262713  | 1.5595 | 0.119    | 0.445861435 | count | 1 |
| AC048341.2 | 0.6824282 | 0.4228567 | 1.6139 | 0.107    | 0.446190499 | count | 1 |
| SLC39A7    | 0.3240219 | 0.0844164 | 3.8384 | 0.000126 | 0.446301465 | count | 1 |
| CLK2       | 0.43749   | 0.3055    | 1.432  | 0.152    | 0.446625966 | count | 1 |
| NPHP4      | 0.5293491 | 0.7483372 | 0.7074 | 0.479    | 0.446673345 | count | 1 |
| IFIT1      | 0.3239617 | 0.1658269 | 1.9536 | 0.0508   | 0.446884222 | count | 1 |
| NCAPG2     | 0.7641478 | 0.4061203 | 1.8816 | 0.06     | 0.447078901 | count | 1 |
| RIPOR2     | 1.114578  | 0.4363515 | 2.5543 | 0.0107   | 0.447084134 | count | 1 |
| ZNF180     | 0.5097885 | 0.316405  | 1.6112 | 0.107    | 0.447405316 | count | 1 |
| XRN1       | 0.3334454 | 0.1060299 | 3.1448 | 0.00168  | 0.447422414 | count | 1 |
| NPRL3      | 0.3594389 | 0.1922202 | 1.8699 | 0.0616   | 0.447638655 | count | 1 |
| NUDT12     | 0.4027156 | 0.1988534 | 2.0252 | 0.0429   | 0.447642744 | count | 1 |
| AC024337.2 | 0.8910022 | 0.632076  | 1.4096 | 0.159    | 0.447781718 | count | 1 |
| PPP1R32    | 0.6550651 | 0.7652594 | 0.856  | 0.392    | 0.447858558 | count | 1 |
| TMEM115    | 0.3402295 | 0.1071882 | 3.1741 | 0.00152  | 0.447858587 | count | 1 |
| ARL15      | 0.4390113 | 0.3513274 | 1.2496 | 0.212    | 0.448109118 | count | 1 |
| TRAF3IP2   | 0.4353543 | 0.2642842 | 1.6473 | 0.0996   | 0.448169238 | count | 1 |
| NDUFAF7    | 0.3692678 | 0.247175  | 1.494  | 0.135    | 0.448205355 | count | 1 |
| PBX1       | 0.325574  | 0.0998608 | 3.2603 | 0.00112  | 0.448359134 | count | 1 |
| GK5        | 0.3719812 | 0.2213495 | 1.6805 | 0.0929   | 0.448468388 | count | 1 |
| SDR42E2    | 0.6303857 | 0.3332336 | 1.8917 | 0.0586   | 0.448526036 | count | 1 |
| MAPK13     | 0.7674212 | 0.494292  | 1.5526 | 0.121    | 0.448679143 | count | 1 |
| MEIS1      | 0.3544388 | 0.1574516 | 2.2511 | 0.0244   | 0.448789856 | count | 1 |
| FAM167B    | 0.6566915 | 0.6604445 | 0.9943 | 0.32     | 0.448832877 | count | 1 |
| CEP97      | 0.4039566 | 0.1998559 | 2.0212 | 0.0433   | 0.44897753  | count | 1 |
| MGAT2      | 0.391946  | 0.1718166 | 2.2812 | 0.0226   | 0.449101203 | count | 1 |

|            |           |           |        |          |             |       |             |
|------------|-----------|-----------|--------|----------|-------------|-------|-------------|
| WDR12      | 0.406112  | 0.2035746 | 1.9949 | 0.0461   | 0.44910523  | count | 1           |
| GLT8D2     | 0.3215956 | 0.0675476 | 4.761  | 2.00E-06 | 0.449171213 | count | 0.046388    |
| COL4A4     | 0.3596811 | 0.2065491 | 1.7414 | 0.0817   | 0.449284046 | count | 1           |
| P4HA1      | 0.3259304 | 0.0912837 | 3.5705 | 0.000361 | 0.44932375  | count | 1           |
| REEP1      | 0.5448107 | 0.332299  | 1.6395 | 0.101    | 0.449371833 | count | 1           |
| PPFIA1     | 0.3306714 | 0.1206723 | 2.7402 | 0.00617  | 0.449511982 | count | 1           |
| AADAT      | 0.688458  | 0.4179806 | 1.6471 | 0.0996   | 0.449600261 | count | 1           |
| ACAP2      | 0.3237132 | 0.0983902 | 3.2901 | 0.00101  | 0.449608618 | count | 1           |
| CLEC2B     | 0.389914  | 0.2265179 | 1.7213 | 0.0853   | 0.45007932  | count | 1           |
| ZNF526     | 0.6106015 | 0.4301746 | 1.4194 | 0.156    | 0.450105367 | count | 1           |
| CAPN3      | 1.1252841 | 1.7461331 | 0.6444 | 0.5193   | 0.450118024 | count | 1           |
| IL6R       | 0.6896545 | 0.3636986 | 1.8962 | 0.058    | 0.450275678 | count | 1           |
| CDO1       | 0.3169515 | 0.0840653 | 3.7703 | 0.000166 | 0.450401817 | count | 1           |
| ZNF624     | 0.4696127 | 0.3172474 | 1.4803 | 0.139    | 0.45047488  | count | 1           |
| CLPB       | 0.4342374 | 0.2774458 | 1.5651 | 0.118    | 0.450545775 | count | 1           |
| PTBP1      | 0.3380574 | 0.1159643 | 2.9152 | 0.00358  | 0.450592416 | count | 1           |
| ZDHHC15    | 0.6337927 | 0.3810239 | 1.6634 | 0.0963   | 0.450671512 | count | 1           |
| RGS20      | 1.7001896 | 1.1514243 | 1.4766 | 0.14     | 0.450914741 | count | 1           |
| CEP295NL   | 1.7001896 | 1.256     | 1.3537 | 0.176    | 0.450914741 | count | 1           |
| CCDC121    | 0.3857505 | 0.2271666 | 1.6981 | 0.0896   | 0.451300184 | count | 1           |
| PTPRA      | 0.3216038 | 0.0701912 | 4.5818 | 4.76E-06 | 0.451447324 | count | 0.1100512   |
| DYNC2H1    | 0.3506806 | 0.1817203 | 1.9298 | 0.0537   | 0.451642005 | count | 1           |
| CCDC15     | 0.9008422 | 0.6270884 | 1.4365 | 0.151    | 0.451676241 | count | 1           |
| CCDC43     | 0.3496526 | 0.1496155 | 2.337  | 0.0195   | 0.451936234 | count | 1           |
| PIGT       | 0.3212337 | 0.0648527 | 4.9533 | 7.63E-07 | 0.452054763 | count | 0.017774085 |
| DCAF16     | 0.3829419 | 0.1851965 | 2.0678 | 0.0387   | 0.452093541 | count | 1           |
| AC078846.1 | 0.5255395 | 0.5409513 | 0.9715 | 0.331    | 0.452186396 | count | 1           |
| OSGIN1     | 0.5772595 | 0.2580542 | 2.237  | 0.0253   | 0.452262332 | count | 1           |
| SERPINI1   | 0.3472642 | 0.1397696 | 2.4845 | 0.013    | 0.452477233 | count | 1           |
| TTC17      | 0.3491911 | 0.144048  | 2.4241 | 0.0154   | 0.4524855   | count | 1           |
| ZMYM6      | 0.4475721 | 0.2401909 | 1.8634 | 0.0625   | 0.452557186 | count | 1           |
| XPNPEP1    | 0.3812554 | 0.2041796 | 1.8673 | 0.0619   | 0.452637031 | count | 1           |
| NIF3L1     | 0.3699707 | 0.1678871 | 2.2037 | 0.0276   | 0.452673546 | count | 1           |
| SURF4      | 0.3298442 | 0.1058645 | 3.1157 | 0.00185  | 0.45286092  | count | 1           |
| MROH1      | 0.7762833 | 0.5988025 | 1.2964 | 0.195    | 0.452997358 | count | 1           |
| LIPC       | 1.3442031 | 0.7006857 | 1.9184 | 0.0551   | 0.4531837   | count | 1           |
| FUS        | 0.3182714 | 0.0636403 | 5.0011 | 5.97E-07 | 0.453374399 | count | 0.013920846 |
| POR        | 0.3498969 | 0.1314993 | 2.6608 | 0.00783  | 0.453388776 | count | 1           |
| TCAIM      | 0.3678146 | 0.1725135 | 2.1321 | 0.0331   | 0.453399287 | count | 1           |
| BTN3A1     | 0.4146294 | 0.2873422 | 1.443  | 0.149    | 0.453500682 | count | 1           |
| KIF3A      | 0.3493517 | 0.1341365 | 2.6044 | 0.00924  | 0.453781458 | count | 1           |
| FAAP24     | 0.6167397 | 0.4933926 | 1.25   | 0.211    | 0.454142066 | count | 1           |
| HAS1       | 0.7338173 | 0.6561896 | 1.1183 | 0.264    | 0.454291734 | count | 1           |
| CCDC85A    | 1.7276475 | 0.9623277 | 1.7953 | 0.0727   | 0.454630748 | count | 1           |
| PSD3       | 0.3579549 | 0.1612883 | 2.2193 | 0.0265   | 0.454779042 | count | 1           |



|            |           |           |        |          |             |       |             |
|------------|-----------|-----------|--------|----------|-------------|-------|-------------|
| AC083880.1 | 1.3519046 | 0.809197  | 1.6707 | 0.0949   | 0.454815649 | count | 1           |
| SIRT3      | 0.4262268 | 0.2399666 | 1.7762 | 0.0758   | 0.454987696 | count | 1           |
| FKBP14     | 0.341015  | 0.1175028 | 2.9022 | 0.00373  | 0.455099934 | count | 1           |
| CLINT1     | 0.3255625 | 0.0803474 | 4.0519 | 5.18E-05 | 0.455157296 | count | 1           |
| WWC2-AS2   | 1.1438889 | 0.7164489 | 1.5966 | 0.11     | 0.455336344 | count | 1           |
| HNRNPF     | 0.3236389 | 0.0614268 | 5.2687 | 1.45E-07 | 0.455348592 | count | 0.003392855 |
| CEP57L1    | 0.3536358 | 0.1486754 | 2.3786 | 0.0174   | 0.45539783  | count | 1           |
| SEC63      | 0.3276337 | 0.0783505 | 4.1816 | 2.96E-05 | 0.455445371 | count | 0.6784024   |
| DHFR2      | 0.4358796 | 0.2257485 | 1.9308 | 0.0536   | 0.455533696 | count | 1           |
| LYSMD3     | 0.3573532 | 0.1594809 | 2.2407 | 0.0251   | 0.455548518 | count | 1           |
| FMNL1      | 1.355888  | 0.6149625 | 2.2048 | 0.0275   | 0.455656023 | count | 1           |
| DOT1L      | 0.7364579 | 0.5564048 | 1.3236 | 0.186    | 0.455678537 | count | 1           |
| EAF2       | 0.4645877 | 0.443414  | 1.0478 | 0.295    | 0.455722123 | count | 1           |
| FAM96A     | 0.3587675 | 0.1474735 | 2.4328 | 0.015    | 0.455796066 | count | 1           |
| CORT       | 1.008893  | 0.8756619 | 1.1521 | 0.249    | 0.455957635 | count | 1           |
| ZNF267     | 0.4149297 | 0.247248  | 1.6782 | 0.0934   | 0.456210361 | count | 1           |
| AC009275.1 | 1.009681  | 0.6224354 | 1.6221 | 0.105    | 0.456224055 | count | 1           |
| CD14       | 0.3595322 | 0.167558  | 2.1457 | 0.032    | 0.456224715 | count | 1           |
| UBE4A      | 0.347324  | 0.1504075 | 2.3092 | 0.021    | 0.456542642 | count | 1           |
| RWDD4      | 0.3292556 | 0.0904276 | 3.6411 | 0.000275 | 0.457507801 | count | 1           |
| HIF1A-AS2  | 0.6715208 | 0.8430949 | 0.7965 | 0.426    | 0.457682411 | count | 1           |
| TAF1C      | 0.477586  | 0.3868753 | 1.2345 | 0.217    | 0.457690913 | count | 1           |
| AC091729.3 | 0.6718146 | 0.5342108 | 1.2576 | 0.209    | 0.457857142 | count | 1           |
| PDZD8      | 0.3555885 | 0.1397022 | 2.5453 | 0.011    | 0.457879023 | count | 1           |
| AC026304.1 | 0.6027219 | 0.6644882 | 0.907  | 0.364    | 0.457967963 | count | 1           |
| MESP2      | 1.3670319 | 1.0532176 | 1.298  | 0.194    | 0.457993374 | count | 1           |
| MYO9A      | 0.3373938 | 0.1373559 | 2.4563 | 0.0141   | 0.457994685 | count | 1           |
| ERF        | 0.3744104 | 0.1800413 | 2.0796 | 0.0376   | 0.457997935 | count | 1           |
| ADHFE1     | 0.4050698 | 0.3349911 | 1.2092 | 0.227    | 0.458252151 | count | 1           |
| CCNDBP1    | 0.3260217 | 0.0692709 | 4.7065 | 2.61E-06 | 0.458328796 | count | 0.06049458  |
| MINPP1     | 0.4037395 | 0.2436373 | 1.6571 | 0.0976   | 0.458656172 | count | 1           |
| AP000845.1 | 0.7881129 | 1.5855386 | 0.4971 | 0.6192   | 0.458729333 | count | 1           |
| BLVRB      | 0.3228583 | 0.0527254 | 6.1234 | 1.01E-09 | 0.458885766 | count | 2.39E-05    |
| GATAD1     | 0.335977  | 0.11189   | 3.0027 | 0.00269  | 0.459011175 | count | 1           |
| ZSCAN31    | 0.4990078 | 0.319362  | 1.5625 | 0.118    | 0.459207049 | count | 1           |
| ZNF594     | 0.8473835 | 0.4190912 | 2.022  | 0.0433   | 0.459641354 | count | 1           |
| SEMA5B     | 0.9220351 | 0.5355037 | 1.7218 | 0.0852   | 0.459985448 | count | 1           |
| GSR        | 0.4371299 | 0.2125543 | 2.0566 | 0.0398   | 0.460026776 | count | 1           |
| SYPL2      | 1.769804  | 0.9134494 | 1.9375 | 0.0528   | 0.460171824 | count | 1           |
| PIM1       | 0.3849055 | 0.2124178 | 1.812  | 0.0701   | 0.460409654 | count | 1           |
| ZNF57      | 1.1623713 | 0.542659  | 2.142  | 0.0323   | 0.460453365 | count | 1           |
| SLC16A4    | 0.3439307 | 0.1160647 | 2.9633 | 0.00306  | 0.46048237  | count | 1           |
| RIPK2      | 0.4007294 | 0.1847062 | 2.1695 | 0.0301   | 0.46056791  | count | 1           |
| FLT3LG     | 0.3871915 | 0.1883233 | 2.056  | 0.0399   | 0.460733241 | count | 1           |
| SKP2       | 0.606785  | 0.446294  | 1.3596 | 0.174    | 0.460737612 | count | 1           |

|            |           |           |         |          |             |       |             |
|------------|-----------|-----------|---------|----------|-------------|-------|-------------|
| 8-Mar      | 0.414937  | 0.2676202 | 1.5505  | 0.121    | 0.460773942 | count | 1           |
| TLK2       | 0.3510275 | 0.1638167 | 2.1428  | 0.0322   | 0.460780819 | count | 1           |
| NME2       | 0.4871977 | 0.2784749 | 1.7495  | 0.0803   | 0.460854685 | count | 1           |
| SAMD11     | 0.3327061 | 0.1689658 | 1.9691  | 0.049    | 0.4610849   | count | 1           |
| FAM126B    | 0.4322658 | 0.2940338 | 1.4701  | 0.142    | 0.461179248 | count | 1           |
| EMC1       | 0.4270286 | 0.2067183 | 2.0658  | 0.0389   | 0.461376857 | count | 1           |
| AC016773.1 | 1.025412  | 0.7910761 | 1.2962  | 0.195    | 0.46151542  | count | 1           |
| WRB        | 0.3338651 | 0.1096009 | 3.0462  | 0.00233  | 0.461610768 | count | 1           |
| BACE1      | 0.35606   | 0.1524838 | 2.3351  | 0.0196   | 0.461650438 | count | 1           |
| RRP1B      | 0.3596952 | 0.1649426 | 2.1807  | 0.0293   | 0.461789662 | count | 1           |
| UBA6       | 0.3791426 | 0.1806699 | 2.0985  | 0.0359   | 0.461845521 | count | 1           |
| AC104695.3 | 0.8525983 | 0.8315524 | 1.0253  | 0.305    | 0.461923883 | count | 1           |
| QSOX2      | 0.6517717 | 0.5393298 | 1.2085  | 0.227    | 0.461939419 | count | 1           |
| GALNT11    | 0.3524058 | 0.1253959 | 2.8103  | 0.00498  | 0.461975454 | count | 1           |
| METTL21A   | 0.408649  | 0.2270163 | 1.8001  | 0.0719   | 0.462175925 | count | 1           |
| OSBPL1A    | 0.3329215 | 0.0743892 | 4.4754  | 7.86E-06 | 0.462294922 | count | 0.18128304  |
| LUC7L      | 0.346717  | 0.1250248 | 2.7732  | 0.00558  | 0.462438939 | count | 1           |
| KIFAP3     | 0.3325354 | 0.0882961 | 3.7661  | 0.000168 | 0.462762588 | count | 1           |
| CD40       | 0.3407901 | 0.113032  | 3.015   | 0.00259  | 0.462936033 | count | 1           |
| ALG10B     | 0.4963509 | 0.4191227 | 1.1843  | 0.236    | 0.463096813 | count | 1           |
| SLC35G1    | 0.4469113 | 0.294522  | 1.5174  | 0.129    | 0.463114235 | count | 1           |
| INO80D     | 0.3515991 | 0.1637423 | 2.1473  | 0.0318   | 0.463484185 | count | 1           |
| MRRF       | 0.4901662 | 0.2697178 | 1.8173  | 0.0692   | 0.463494606 | count | 1           |
| PTPMT1     | 0.3529626 | 0.1422735 | 2.4809  | 0.0132   | 0.463584915 | count | 1           |
| RBM6       | 0.3399721 | 0.1099802 | 3.0912  | 0.00201  | 0.463829789 | count | 1           |
| CADPS2     | 0.3644041 | 0.1532352 | 2.3781  | 0.0175   | 0.463894031 | count | 1           |
| PMM2       | 0.3717369 | 0.1861383 | 1.9971  | 0.0459   | 0.464081058 | count | 1           |
| PIH1D2     | 0.7535154 | 0.5116646 | 1.4727  | 0.141    | 0.464591556 | count | 1           |
| GEN1       | 0.9351877 | 0.5421373 | 1.725   | 0.0846   | 0.46508831  | count | 1           |
| LIPA       | 0.3553948 | 0.1252898 | 2.8366  | 0.00458  | 0.46523352  | count | 1           |
| LETM1      | 0.4115481 | 0.2010182 | 2.0473  | 0.0407   | 0.465352279 | count | 1           |
| NEDD1      | 0.4021821 | 0.1940149 | 2.0729  | 0.0382   | 0.465447787 | count | 1           |
| SNAI2      | 0.3707327 | 0.1477026 | 2.51    | 0.0121   | 0.465484457 | count | 1           |
| PTGES3L    | 0.5423328 | 0.7783377 | 0.6968  | 0.486    | 0.46550955  | count | 1           |
| AC245014.3 | 1.8127357 | 1.1260593 | 1.6098  | 0.108    | 0.465615608 | count | 1           |
| ZNF506     | 0.3647196 | 0.1793673 | 2.0334  | 0.0421   | 0.465795866 | count | 1           |
| ITM2B      | 0.3233716 | 0.026022  | 12.4268 | 9.27E-35 | 0.465930631 | count | 2.24E-30    |
| VT11A      | 0.4026309 | 0.2106092 | 1.9117  | 0.056    | 0.465952655 | count | 1           |
| ZNF701     | 0.424603  | 0.2952654 | 1.438   | 0.151    | 0.466468021 | count | 1           |
| MAPK1      | 0.342537  | 0.1127908 | 3.0369  | 0.00241  | 0.466557555 | count | 1           |
| TMA16      | 0.3393045 | 0.0959025 | 3.538   | 0.000408 | 0.46656894  | count | 1           |
| RPAP3      | 0.3627164 | 0.1553174 | 2.3353  | 0.0196   | 0.46693249  | count | 1           |
| CREG1      | 0.332989  | 0.0656276 | 5.0739  | 4.09E-07 | 0.467200188 | count | 0.009543197 |
| DLC1       | 0.3395719 | 0.0916455 | 3.7053  | 0.000214 | 0.467312116 | count | 1           |
| IRF2BP2    | 0.3336265 | 0.0778196 | 4.2872  | 1.86E-05 | 0.467662524 | count | 0.4274652   |

|             |           |           |        |          |             |       |             |
|-------------|-----------|-----------|--------|----------|-------------|-------|-------------|
| IFT27       | 0.3599965 | 0.1300465 | 2.7682 | 0.00566  | 0.468160256 | count | 1           |
| LSR         | 0.4159698 | 0.2400429 | 1.7329 | 0.0832   | 0.468210995 | count | 1           |
| ASPH        | 0.3289067 | 0.0562743 | 5.8447 | 5.52E-09 | 0.468211123 | count | 0.000129979 |
| LZTS3       | 0.7611143 | 0.4011498 | 1.8973 | 0.0579   | 0.468536842 | count | 1           |
| STT3A       | 0.360504  | 0.1303268 | 2.7662 | 0.0057   | 0.468812043 | count | 1           |
| CRY2        | 0.4067729 | 0.1892164 | 2.1498 | 0.0316   | 0.468984241 | count | 1           |
| SNX5        | 0.339912  | 0.0930742 | 3.6521 | 0.000264 | 0.469238005 | count | 1           |
| MCMBP       | 0.3792375 | 0.196916  | 1.9259 | 0.0542   | 0.469597546 | count | 1           |
| LMBR1L      | 0.4006283 | 0.2326805 | 1.7218 | 0.0852   | 0.469679177 | count | 1           |
| PTAR1       | 0.375845  | 0.1890031 | 1.9886 | 0.0468   | 0.469806367 | count | 1           |
| CITED4      | 0.3400585 | 0.1107773 | 3.0697 | 0.00216  | 0.469822629 | count | 1           |
| TCF21       | 1.425432  | 0.7021156 | 2.0302 | 0.0424   | 0.469921138 | count | 1           |
| PIGN        | 0.4158234 | 0.3263677 | 1.2741 | 0.203    | 0.470033419 | count | 1           |
| LTBR        | 0.3446726 | 0.1169988 | 2.946  | 0.00324  | 0.47020089  | count | 1           |
| RABGEF1     | 0.4507646 | 0.3222388 | 1.3989 | 0.162    | 0.470407249 | count | 1           |
| HEATR5A     | 0.4357378 | 0.2407627 | 1.8098 | 0.0704   | 0.470423258 | count | 1           |
| AC104506.1  | 0.4711179 | 0.4400153 | 1.0707 | 0.284    | 0.470900362 | count | 1           |
| HMGCS1      | 0.3838743 | 0.2385672 | 1.6091 | 0.108    | 0.471109439 | count | 1           |
| SLC30A6     | 0.4019003 | 0.3578067 | 1.1232 | 0.261    | 0.471130905 | count | 1           |
| PTER        | 0.5610014 | 0.3704614 | 1.5143 | 0.13     | 0.471164009 | count | 1           |
| RDH5        | 0.4338952 | 0.2559357 | 1.6953 | 0.0901   | 0.471196818 | count | 1           |
| MICA        | 0.3679226 | 0.1994945 | 1.8443 | 0.0652   | 0.471274548 | count | 1           |
| SPTLC1      | 0.3462434 | 0.09858   | 3.5123 | 0.00045  | 0.471347469 | count | 1           |
| TBCC        | 0.3534055 | 0.1313306 | 2.691  | 0.00716  | 0.471482778 | count | 1           |
| BAZ2A       | 0.366313  | 0.181152  | 2.0221 | 0.0432   | 0.471498533 | count | 1           |
| FBXO44      | 0.3987255 | 0.1997526 | 1.9961 | 0.046    | 0.471575323 | count | 1           |
| APTR        | 0.4521718 | 0.3539924 | 1.2773 | 0.202    | 0.471810711 | count | 1           |
| WDR86       | 1.8667004 | 1.051093  | 1.776  | 0.0758   | 0.472182173 | count | 1           |
| CNTNAP1     | 0.8765441 | 0.5395146 | 1.6247 | 0.104    | 0.472316956 | count | 1           |
| AC139530.1  | 0.4775291 | 0.3270091 | 1.4603 | 0.144    | 0.472450754 | count | 1           |
| MFSD9       | 1.4381802 | 0.6194917 | 2.3215 | 0.0203   | 0.472454053 | count | 1           |
| PRKAA1      | 0.3551116 | 0.1258285 | 2.8222 | 0.0048   | 0.472460313 | count | 1           |
| EHMT1       | 0.3585165 | 0.1363681 | 2.629  | 0.0086   | 0.472776538 | count | 1           |
| FGF2        | 0.3446515 | 0.1056191 | 3.2632 | 0.00111  | 0.472988809 | count | 1           |
| UGGT1       | 0.3821358 | 0.1808391 | 2.1131 | 0.0347   | 0.473118195 | count | 1           |
| GPATCH3     | 0.4574704 | 0.325504  | 1.4054 | 0.16     | 0.473556798 | count | 1           |
| PGRMC2      | 0.3401845 | 0.0743583 | 4.5749 | 4.92E-06 | 0.473623069 | count | 0.11373564  |
| CACUL1      | 0.36811   | 0.1638311 | 2.2469 | 0.0247   | 0.473779361 | count | 1           |
| LINC02256   | 0.4055138 | 0.260194  | 1.5585 | 0.119    | 0.473798973 | count | 1           |
| CTBP1-DT    | 0.4390456 | 0.2829172 | 1.5519 | 0.121    | 0.473854771 | count | 1           |
| SLC16A11    | 1.062888  | 0.8271144 | 1.2851 | 0.199    | 0.473902689 | count | 1           |
| THUMPD3-AS1 | 0.3470977 | 0.1129796 | 3.0722 | 0.00214  | 0.473903395 | count | 1           |
| CLTC        | 0.3435567 | 0.0947617 | 3.6255 | 0.000292 | 0.474044054 | count | 1           |
| HMGCLL1     | 1.8835887 | 0.7781167 | 2.4207 | 0.0155   | 0.474175624 | count | 1           |
| EGR3        | 0.3625664 | 0.20902   | 1.7346 | 0.0829   | 0.474190192 | count | 1           |

|            |           |           |        |          |             |       |             |
|------------|-----------|-----------|--------|----------|-------------|-------|-------------|
| AC080013.1 | 1.2135456 | 0.7640211 | 1.5884 | 0.112    | 0.474277189 | count | 1           |
| HPS4       | 0.4166985 | 0.2224496 | 1.8732 | 0.0611   | 0.474789947 | count | 1           |
| SLITRK6    | 0.6724787 | 0.8519956 | 0.7893 | 0.43     | 0.474804301 | count | 1           |
| RHOQ       | 0.3352652 | 0.0619002 | 5.4162 | 6.48E-08 | 0.47485725  | count | 0.001518718 |
| TTLL3      | 0.4106127 | 0.2399357 | 1.7113 | 0.0871   | 0.474925355 | count | 1           |
| B4GALT4    | 0.3661343 | 0.1452994 | 2.5199 | 0.0118   | 0.474925362 | count | 1           |
| ZNF589     | 0.6094411 | 0.4271546 | 1.4267 | 0.154    | 0.474958131 | count | 1           |
| GDAP2      | 0.4108918 | 0.2687779 | 1.5287 | 0.126    | 0.475238889 | count | 1           |
| ATP8B2     | 0.3803013 | 0.1997629 | 1.9038 | 0.057    | 0.47527739  | count | 1           |
| FLNC       | 0.4245146 | 0.287347  | 1.4774 | 0.14     | 0.475422464 | count | 1           |
| DISP1      | 0.6101896 | 0.5071896 | 1.2031 | 0.229    | 0.475482507 | count | 1           |
| TENT2      | 0.3830082 | 0.1698692 | 2.2547 | 0.0242   | 0.47570919  | count | 1           |
| AL358472.2 | 1.0690812 | 0.7279977 | 1.4685 | 0.142    | 0.475920283 | count | 1           |
| NINL       | 0.6743308 | 0.4042977 | 1.6679 | 0.0954   | 0.475949094 | count | 1           |
| SH2D3A     | 0.8242543 | 0.8393105 | 0.9821 | 0.326    | 0.476013753 | count | 1           |
| SLC25A36   | 0.3409093 | 0.0860496 | 3.9618 | 7.58E-05 | 0.476116301 | count | 1           |
| EPHX2      | 0.3903285 | 0.1695555 | 2.3021 | 0.0214   | 0.476132371 | count | 1           |
| UTP18      | 0.3974668 | 0.1964395 | 2.0234 | 0.0431   | 0.476240998 | count | 1           |
| MFSD1      | 0.3630777 | 0.1254878 | 2.8933 | 0.00383  | 0.476417494 | count | 1           |
| ZNF41      | 0.8253301 | 0.4809202 | 1.7161 | 0.0862   | 0.476522987 | count | 1           |
| RAP2C      | 0.4030729 | 0.2636035 | 1.5291 | 0.126    | 0.476585408 | count | 1           |
| RND3       | 0.341549  | 0.0884497 | 3.8615 | 0.000115 | 0.476676884 | count | 1           |
| NEIL1      | 0.4823767 | 0.288204  | 1.6737 | 0.0943   | 0.476988126 | count | 1           |
| AC040162.1 | 0.7063718 | 0.6862061 | 1.0294 | 0.303    | 0.478238496 | count | 1           |
| NFKBIA     | 0.333122  | 0.05756   | 5.7874 | 7.75E-09 | 0.478267703 | count | 0.000182396 |
| MLF1       | 0.3671677 | 0.1626172 | 2.2579 | 0.024    | 0.478441175 | count | 1           |
| NFIB       | 0.3370402 | 0.0504919 | 6.6751 | 2.84E-11 | 0.478761161 | count | 6.74E-07    |
| SMYD5      | 0.6788933 | 0.4377385 | 1.5509 | 0.121    | 0.478765036 | count | 1           |
| SF1        | 0.3393645 | 0.0689615 | 4.9211 | 8.99E-07 | 0.478892154 | count | 0.020924225 |
| ZDBF2      | 0.4629321 | 0.2887758 | 1.6031 | 0.109    | 0.478947902 | count | 1           |
| HS3ST3A1   | 1.9253098 | 1.1077888 | 1.738  | 0.0823   | 0.47897779  | count | 1           |
| PTPN13     | 0.3711891 | 0.1661842 | 2.2336 | 0.0256   | 0.478978272 | count | 1           |
| AP001462.1 | 0.8305711 | 0.5868922 | 1.4152 | 0.157    | 0.478999475 | count | 1           |
| GAA        | 0.3632741 | 0.1100352 | 3.3014 | 0.000971 | 0.479254656 | count | 1           |
| PHEX       | 1.2325216 | 0.6793874 | 1.8142 | 0.0697   | 0.479276077 | count | 1           |
| INSR       | 0.3606627 | 0.1230835 | 2.9302 | 0.00341  | 0.479548169 | count | 1           |
| ENKD1      | 0.4227441 | 0.2193039 | 1.9277 | 0.054    | 0.479561169 | count | 1           |
| NAMPT      | 0.3449993 | 0.0954122 | 3.6159 | 0.000303 | 0.479667924 | count | 1           |
| ADCY9      | 0.3858333 | 0.3548619 | 1.0873 | 0.277    | 0.479901303 | count | 1           |
| CEP85L     | 0.3886448 | 0.1799326 | 2.1599 | 0.0308   | 0.480218937 | count | 1           |
| REXO1      | 0.4402519 | 0.2041262 | 2.1568 | 0.0311   | 0.480470636 | count | 1           |
| PACS2      | 0.3875763 | 0.1861611 | 2.0819 | 0.0374   | 0.4805071   | count | 1           |
| LEMD2      | 0.4334064 | 0.2349037 | 1.845  | 0.0651   | 0.480560004 | count | 1           |
| TUFT1      | 1.9404585 | 1.3472106 | 1.4404 | 0.15     | 0.48067906  | count | 1           |
| TMEM107    | 0.3671266 | 0.1305446 | 2.8123 | 0.00495  | 0.481046332 | count | 1           |

|            |           |           |        |          |             |       |             |
|------------|-----------|-----------|--------|----------|-------------|-------|-------------|
| TDP1       | 0.6021955 | 0.4926763 | 1.2223 | 0.222    | 0.481423974 | count | 1           |
| IREB2      | 0.3788716 | 0.17029   | 2.2249 | 0.0262   | 0.481482084 | count | 1           |
| HYDIN      | 1.4851905 | 1.3514431 | 1.099  | 0.272    | 0.481579656 | count | 1           |
| DIP2A      | 0.397494  | 0.2768157 | 1.436  | 0.151    | 0.481705926 | count | 1           |
| NUSAP1     | 0.5882166 | 0.9779009 | 0.6015 | 0.548    | 0.481943706 | count | 1           |
| ZNF629     | 0.5882231 | 0.2775597 | 2.1193 | 0.0341   | 0.481948558 | count | 1           |
| KDM5B      | 0.3688538 | 0.1301725 | 2.8336 | 0.00463  | 0.481982179 | count | 1           |
| PPP2R1B    | 0.7468443 | 0.3178644 | 2.3496 | 0.0188   | 0.482098915 | count | 1           |
| CYTH1      | 0.4561018 | 0.3362353 | 1.3565 | 0.175    | 0.482387283 | count | 1           |
| HERPUD1    | 0.3387204 | 0.0545508 | 6.2093 | 5.92E-10 | 0.482482775 | count | 1.40E-05    |
| ANXA2      | 0.3357167 | 0.0335874 | 9.9953 | 3.16E-23 | 0.482542078 | count | 7.61E-19    |
| IQSEC3     | 0.9812652 | 0.6517544 | 1.5056 | 0.132    | 0.482640926 | count | 1           |
| NPAT       | 0.3993136 | 0.2083677 | 1.9164 | 0.0554   | 0.482818607 | count | 1           |
| MICU2      | 0.362795  | 0.1303337 | 2.7836 | 0.0054   | 0.48302695  | count | 1           |
| MED26      | 0.6044483 | 0.4529345 | 1.3345 | 0.182    | 0.483049859 | count | 1           |
| ABCB7      | 0.4075869 | 0.1913467 | 2.1301 | 0.0332   | 0.483103832 | count | 1           |
| PIWIL4     | 1.493947  | 0.8726368 | 1.712  | 0.087    | 0.483242604 | count | 1           |
| PAXBP1-AS1 | 0.8396172 | 0.382724  | 2.1938 | 0.0283   | 0.483257012 | count | 1           |
| PDCD6IP    | 0.3507441 | 0.0977132 | 3.5895 | 0.000336 | 0.483700394 | count | 1           |
| ZXDC       | 0.4646978 | 0.2745164 | 1.6928 | 0.0906   | 0.484283036 | count | 1           |
| TAZ        | 0.4147505 | 0.2446459 | 1.6953 | 0.0901   | 0.484290137 | count | 1           |
| MALT1      | 0.439233  | 0.2646315 | 1.6598 | 0.097    | 0.484405052 | count | 1           |
| PSEN1      | 0.3909012 | 0.2035262 | 1.9206 | 0.0549   | 0.48454926  | count | 1           |
| CXCL1      | 0.4651294 | 0.9258225 | 0.5024 | 0.615    | 0.484712132 | count | 1           |
| COL4A6     | 0.4496536 | 0.3648458 | 1.2324 | 0.218    | 0.484843275 | count | 1           |
| BDH2       | 0.3425512 | 0.06915   | 4.9537 | 7.61E-07 | 0.484899778 | count | 0.017728256 |
| DNAJB12    | 0.3562206 | 0.1215664 | 2.9303 | 0.00341  | 0.48529327  | count | 1           |
| BRI3BP     | 0.4697013 | 0.2299484 | 2.0426 | 0.0412   | 0.485619779 | count | 1           |
| TECPR1     | 0.5934121 | 0.3793556 | 1.5643 | 0.118    | 0.485806899 | count | 1           |
| RAPGEF1    | 0.4164724 | 0.2511334 | 1.6584 | 0.0973   | 0.486244179 | count | 1           |
| MBNL2      | 0.3492322 | 0.0786848 | 4.4384 | 9.33E-06 | 0.486296974 | count | 0.21500985  |
| ZNF335     | 0.7547413 | 0.3631545 | 2.0783 | 0.0378   | 0.486422172 | count | 1           |
| GLCE       | 0.4792692 | 0.314953  | 1.5217 | 0.128    | 0.487155931 | count | 1           |
| TNFRSF14   | 0.3691507 | 0.1570656 | 2.3503 | 0.0188   | 0.487195778 | count | 1           |
| CCAR2      | 0.4676878 | 0.2345488 | 1.994  | 0.0462   | 0.487254786 | count | 1           |
| UBQLN2     | 0.3800119 | 0.1801803 | 2.1091 | 0.035    | 0.487489059 | count | 1           |
| ZNF410     | 0.849183  | 0.517739  | 1.6402 | 0.101    | 0.487735749 | count | 1           |
| STK24      | 0.3809132 | 0.1275968 | 2.9853 | 0.00285  | 0.488149777 | count | 1           |
| TMEM214    | 0.3990156 | 0.1715931 | 2.3254 | 0.0201   | 0.488386289 | count | 1           |
| ZNF234     | 0.4946673 | 0.2965925 | 1.6678 | 0.0954   | 0.488465672 | count | 1           |
| PCTP       | 0.5184669 | 0.312716  | 1.6579 | 0.0974   | 0.488546856 | count | 1           |
| NOTCH2NL   | 0.7241057 | 0.3145982 | 2.3017 | 0.0214   | 0.488567768 | count | 1           |
| ARHGEF4    | 0.9149429 | 0.5633924 | 1.624  | 0.104    | 0.488681509 | count | 1           |
| TMEM26     | 0.6484064 | 0.626414  | 1.0351 | 0.301    | 0.488839566 | count | 1           |
| CTSS       | 0.3741984 | 0.1524873 | 2.454  | 0.0142   | 0.48887916  | count | 1           |

|            |           |           |        |          |             |       |          |
|------------|-----------|-----------|--------|----------|-------------|-------|----------|
| ALDH18A1   | 0.453636  | 0.2692317 | 1.6849 | 0.0921   | 0.488962089 | count | 1        |
| PRR12      | 0.7249838 | 0.3693575 | 1.9628 | 0.0497   | 0.489076926 | count | 1        |
| NID2       | 0.5978188 | 0.2781106 | 2.1496 | 0.0317   | 0.489077562 | count | 1        |
| TDG        | 0.3705518 | 0.1289374 | 2.8739 | 0.00408  | 0.489296695 | count | 1        |
| AC002070.1 | 1.271585  | 0.9863729 | 1.2892 | 0.197    | 0.489353375 | count | 1        |
| FBXO15     | 1.271585  | 1.359271  | 0.9355 | 0.35     | 0.489353375 | count | 1        |
| EPHX4      | 1.5273182 | 1.63891   | 0.9319 | 0.351    | 0.489475687 | count | 1        |
| ARHGEF5    | 0.6712426 | 0.5326704 | 1.2601 | 0.208    | 0.489517768 | count | 1        |
| AGAP1      | 0.4820545 | 0.2547193 | 1.8925 | 0.0585   | 0.489842925 | count | 1        |
| SLC39A10   | 0.3761521 | 0.1468898 | 2.5608 | 0.0105   | 0.490708325 | count | 1        |
| RNF139-AS1 | 0.85579   | 0.6132146 | 1.3956 | 0.163    | 0.490815121 | count | 1        |
| CCDC170    | 2.03678   | 0.8306374 | 2.4521 | 0.0143   | 0.49098703  | count | 1        |
| ST3GAL3    | 0.5538326 | 0.288708  | 1.9183 | 0.0551   | 0.491108718 | count | 1        |
| S100A13    | 0.3430671 | 0.0476807 | 7.1951 | 7.53E-13 | 0.491197501 | count | 1.79E-08 |
| ZNF595     | 0.4754029 | 0.2291373 | 2.0748 | 0.0381   | 0.491230948 | count | 1        |
| NCDN       | 0.9211294 | 0.9364103 | 0.9837 | 0.325    | 0.491283394 | count | 1        |
| RIC3       | 0.3990363 | 0.2022846 | 1.9726 | 0.0486   | 0.491956846 | count | 1        |
| PI4KA      | 0.4657949 | 0.298903  | 1.5583 | 0.119    | 0.492184327 | count | 1        |
| ABCA3      | 0.4658752 | 0.3042669 | 1.5311 | 0.126    | 0.49226541  | count | 1        |
| WASF1      | 0.5102461 | 0.3090687 | 1.6509 | 0.0988   | 0.492607285 | count | 1        |
| GUSB       | 0.3623329 | 0.0993086 | 3.6486 | 0.000267 | 0.492731822 | count | 1        |
| NAGPA      | 0.4347908 | 0.2373885 | 1.8316 | 0.0671   | 0.492775723 | count | 1        |
| SIK2       | 0.4406416 | 0.2340035 | 1.8831 | 0.0598   | 0.49285057  | count | 1        |
| PDPN       | 0.4117002 | 0.2790876 | 1.4752 | 0.14     | 0.492873795 | count | 1        |
| ZNF133     | 0.4699719 | 0.3636741 | 1.2923 | 0.196    | 0.49302543  | count | 1        |
| AL358472.4 | 1.5480831 | 0.8997163 | 1.7206 | 0.0854   | 0.493271706 | count | 1        |
| INPP4A     | 0.4738476 | 0.3509483 | 1.3502 | 0.177    | 0.493370329 | count | 1        |
| AC145207.5 | 1.0101549 | 0.7319675 | 1.3801 | 0.168    | 0.493390157 | count | 1        |
| NEURL1B    | 0.8614524 | 0.2834752 | 3.0389 | 0.00239  | 0.49344517  | count | 1        |
| MMP17      | 2.065633  | 0.8635565 | 2.392  | 0.0168   | 0.49390943  | count | 1        |
| AC007262.2 | 2.065633  | 1.4083957 | 1.4667 | 0.143    | 0.49390943  | count | 1        |
| COQ10A     | 0.4376878 | 0.2534586 | 1.7269 | 0.0843   | 0.493916585 | count | 1        |
| CEP128     | 1.2910363 | 0.544436  | 2.3713 | 0.0178   | 0.494265306 | count | 1        |
| AL390728.6 | 0.6052885 | 0.335388  | 1.8047 | 0.0712   | 0.494608966 | count | 1        |
| PLPPR2     | 0.4297694 | 0.1969344 | 2.1823 | 0.0292   | 0.494685784 | count | 1        |
| MPI        | 0.4330722 | 0.2298143 | 1.8844 | 0.0596   | 0.494737993 | count | 1        |
| NOMO2      | 1.5566271 | 0.7396603 | 2.1045 | 0.0354   | 0.494815455 | count | 1        |
| IRF1       | 0.3494898 | 0.1088796 | 3.2099 | 0.00134  | 0.494922975 | count | 1        |
| C2CD6      | 0.7704038 | 0.4215842 | 1.8274 | 0.0677   | 0.49494562  | count | 1        |
| H1F0       | 0.3531654 | 0.0945105 | 3.7368 | 0.000189 | 0.494984274 | count | 1        |
| RWDD3      | 1.0154262 | 0.5689116 | 1.7849 | 0.0744   | 0.495330289 | count | 1        |
| DHCR7      | 0.6388598 | 0.2812373 | 2.2716 | 0.0232   | 0.495448031 | count | 1        |
| ZNF891     | 0.4761496 | 0.2380771 | 2      | 0.0456   | 0.495653494 | count | 1        |
| PDCD4      | 0.3605669 | 0.10164   | 3.5475 | 0.000394 | 0.495714305 | count | 1        |
| TEF        | 0.4122566 | 0.2107635 | 1.956  | 0.0505   | 0.495863278 | count | 1        |

|            |            |             |        |          |             |       |   |
|------------|------------|-------------|--------|----------|-------------|-------|---|
| GOLGA3     | 0.3662707  | 0.124598    | 2.9396 | 0.00331  | 0.495937034 | count | 1 |
| FEM1C      | 0.4481108  | 0.2267485   | 1.9762 | 0.0482   | 0.496261838 | count | 1 |
| WDR82      | 0.3698624  | 0.1466617   | 2.5219 | 0.0117   | 0.496400351 | count | 1 |
| ZNF770     | 0.3791244  | 0.1361533   | 2.7845 | 0.00539  | 0.496573842 | count | 1 |
| CDADC1     | 0.4084786  | 0.2002078   | 2.0403 | 0.0414   | 0.496776829 | count | 1 |
| PCYT1A     | 0.4183793  | 0.1819422   | 2.2995 | 0.0215   | 0.496881394 | count | 1 |
| C22orf23   | 1.5681652  | 0.9684419   | 1.6193 | 0.105    | 0.496883578 | count | 1 |
| ZMYND19    | 0.5091692  | 0.2687088   | 1.8949 | 0.0582   | 0.496907171 | count | 1 |
| IL17RC     | 0.3936566  | 0.1759258   | 2.2376 | 0.0253   | 0.496989529 | count | 1 |
| TTC5       | 0.4124592  | 0.1715654   | 2.4041 | 0.0163   | 0.497231504 | count | 1 |
| GAB3       | 0.8176233  | 0.5076979   | 1.6105 | 0.107    | 0.497385594 | count | 1 |
| DDX31      | 0.4993534  | 0.5561776   | 0.8978 | 0.369    | 0.497574119 | count | 1 |
| RHBDD2     | 0.3701634  | 0.1277826   | 2.8968 | 0.00379  | 0.497694293 | count | 1 |
| C5orf15    | 0.3652544  | 0.1024064   | 3.5667 | 0.000366 | 0.497742651 | count | 1 |
| FAN1       | 0.4297686  | 0.3393837   | 1.2663 | 0.205    | 0.498089916 | count | 1 |
| DAPK1      | 0.47509    | 0.3800284   | 1.2501 | 0.211    | 0.498145386 | count | 1 |
| TPCN2      | 0.7763565  | 0.4756541   | 1.6322 | 0.103    | 0.498167227 | count | 1 |
| FHOD3      | 0.5839565  | 0.3358878   | 1.7385 | 0.0822   | 0.49819463  | count | 1 |
| RNASEL     | 0.4042321  | 0.1631106   | 2.4783 | 0.0132   | 0.498228844 | count | 1 |
| PLAA       | 0.4456546  | 0.2142327   | 2.0802 | 0.0376   | 0.498257129 | count | 1 |
| SLC27A2    | 16.4680609 | 980.890216  | 0.0168 | 0.987    | 0.498553813 | count | 1 |
| PPDPFL     | 16.4680786 | 1317.777797 | 0.0125 | 0.99     | 0.498553813 | count | 1 |
| RECQL4     | 16.5883384 | 1254.965498 | 0.0132 | 0.989    | 0.498553818 | count | 1 |
| CCDC39     | 16.7392869 | 1520.977775 | 0.011  | 0.991    | 0.498553823 | count | 1 |
| AC019131.2 | 16.7392921 | 1520.986317 | 0.011  | 0.991    | 0.498553823 | count | 1 |
| SPRR2B     | 16.7398804 | 1804.936134 | 0.0093 | 0.993    | 0.498553823 | count | 1 |
| AC090409.2 | 16.7398876 | 1804.935562 | 0.0093 | 0.993    | 0.498553823 | count | 1 |
| LINC02552  | 16.7405892 | 2162.305167 | 0.0077 | 0.994    | 0.498553823 | count | 1 |
| AC010201.1 | 16.7405892 | 2162.305173 | 0.0077 | 0.994    | 0.498553823 | count | 1 |
| AC012313.2 | 16.7405893 | 2162.30516  | 0.0077 | 0.994    | 0.498553823 | count | 1 |
| AC138969.1 | 16.7597367 | 1262.235542 | 0.0133 | 0.989    | 0.498553824 | count | 1 |
| AC104389.4 | 16.9586883 | 975.2573971 | 0.0174 | 0.986    | 0.498553829 | count | 1 |
| AC127070.2 | 16.9590172 | 1371.718128 | 0.0124 | 0.99     | 0.498553829 | count | 1 |
| AP000695.2 | 17.0391157 | 2364.820583 | 0.0072 | 0.994    | 0.498553831 | count | 1 |
| AL021391.1 | 17.0816022 | 1375.7978   | 0.0124 | 0.99     | 0.498553832 | count | 1 |
| AC009093.1 | 17.0816255 | 1375.791472 | 0.0124 | 0.99     | 0.498553832 | count | 1 |
| DEPDC1     | 17.0878499 | 1452.694639 | 0.0118 | 0.991    | 0.498553833 | count | 1 |
| AC008752.2 | 17.0878499 | 1452.694608 | 0.0118 | 0.991    | 0.498553833 | count | 1 |
| SELE       | 17.0885267 | 1781.011555 | 0.0096 | 0.992    | 0.498553833 | count | 1 |
| SPATA22    | 17.0885268 | 1781.011523 | 0.0096 | 0.992    | 0.498553833 | count | 1 |
| AC008264.2 | 17.0891921 | 2057.928755 | 0.0083 | 0.993    | 0.498553833 | count | 1 |
| DLEU7      | 17.0894844 | 2301.646618 | 0.0074 | 0.994    | 0.498553833 | count | 1 |
| NRN1L      | 17.0894845 | 2301.646668 | 0.0074 | 0.994    | 0.498553833 | count | 1 |
| AL161752.1 | 17.0906056 | 2913.914013 | 0.0059 | 0.995    | 0.498553833 | count | 1 |
| LINC01132  | 17.0906057 | 2913.914034 | 0.0059 | 0.995    | 0.498553833 | count | 1 |

|            |            |             |        |        |             |       |   |
|------------|------------|-------------|--------|--------|-------------|-------|---|
| SHOX       | 17.0906058 | 2913.914065 | 0.0059 | 0.995  | 0.498553833 | count | 1 |
| CLEC4M     | 17.0906058 | 2913.914065 | 0.0059 | 0.995  | 0.498553833 | count | 1 |
| STUM       | 17.1607747 | 1073.162621 | 0.016  | 0.987  | 0.498553834 | count | 1 |
| ART3       | 17.2196545 | 1593.816457 | 0.0108 | 0.991  | 0.498553835 | count | 1 |
| TRIM29     | 17.3282899 | 1547.458496 | 0.0112 | 0.991  | 0.498553837 | count | 1 |
| AC007529.1 | 17.3286805 | 2199.45009  | 0.0079 | 0.994  | 0.498553837 | count | 1 |
| AC119674.2 | 17.4493758 | 998.5787747 | 0.0175 | 0.9861 | 0.498553839 | count | 1 |
| LRR2       | 17.508991  | 1265.511916 | 0.0138 | 0.989  | 0.49855384  | count | 1 |
| KIF9-AS1   | 17.5226062 | 1821.065743 | 0.0096 | 0.992  | 0.49855384  | count | 1 |
| MGAM       | 17.5269911 | 1911.425389 | 0.0092 | 0.993  | 0.498553841 | count | 1 |
| FRMD1      | 17.5269914 | 1911.425411 | 0.0092 | 0.993  | 0.498553841 | count | 1 |
| AC010273.1 | 17.5279656 | 2448.996263 | 0.0072 | 0.994  | 0.498553841 | count | 1 |
| AC100793.4 | 17.6280854 | 1362.025188 | 0.0129 | 0.99   | 0.498553842 | count | 1 |
| VSTM2L     | 17.6282626 | 946.6754544 | 0.0186 | 0.9851 | 0.498553842 | count | 1 |
| AL109936.2 | 17.7902392 | 2688.499043 | 0.0066 | 0.995  | 0.498553844 | count | 1 |
| PDF        | 17.7907931 | 3282.569499 | 0.0054 | 0.996  | 0.498553844 | count | 1 |
| AC068580.4 | 17.9412033 | 3229.336941 | 0.0056 | 0.996  | 0.498553845 | count | 1 |
| AC092338.2 | 16.3205858 | 1451.061208 | 0.0112 | 0.991  | 0.498553849 | count | 1 |
| HPR        | 16.4875744 | 1007.359496 | 0.0164 | 0.987  | 0.498553856 | count | 1 |
| UBAC2-AS1  | 16.5286554 | 981.7635319 | 0.0168 | 0.987  | 0.498553858 | count | 1 |
| ELAVL2     | 16.7392955 | 1520.990898 | 0.011  | 0.991  | 0.498553865 | count | 1 |
| LINC01736  | 16.7405894 | 2162.305191 | 0.0077 | 0.994  | 0.498553865 | count | 1 |
| AC067863.1 | 16.7405894 | 2162.30518  | 0.0077 | 0.994  | 0.498553865 | count | 1 |
| TMEM132E   | 16.7818254 | 1389.860829 | 0.0121 | 0.99   | 0.498553867 | count | 1 |
| PIP5KL1    | 16.8371324 | 1049.967288 | 0.016  | 0.987  | 0.498553868 | count | 1 |
| LINC00517  | 16.9586506 | 1067.759771 | 0.0159 | 0.987  | 0.498553872 | count | 1 |
| CC2D2B     | 17.0380315 | 1597.149386 | 0.0107 | 0.991  | 0.498553874 | count | 1 |
| LINC01336  | 17.0885267 | 1781.011497 | 0.0096 | 0.992  | 0.498553875 | count | 1 |
| HEPN1      | 17.089192  | 2057.928791 | 0.0083 | 0.993  | 0.498553875 | count | 1 |
| AC116345.1 | 17.0891922 | 2057.928799 | 0.0083 | 0.993  | 0.498553875 | count | 1 |
| AC009226.1 | 17.0894846 | 2301.646626 | 0.0074 | 0.994  | 0.498553875 | count | 1 |
| PCAT19     | 17.0894845 | 2301.646643 | 0.0074 | 0.994  | 0.498553875 | count | 1 |
| PROK2      | 17.0906056 | 2913.914024 | 0.0059 | 0.995  | 0.498553875 | count | 1 |
| AADAC      | 17.0906057 | 2913.914013 | 0.0059 | 0.995  | 0.498553875 | count | 1 |
| VENTX      | 17.0906058 | 2913.914034 | 0.0059 | 0.995  | 0.498553875 | count | 1 |
| AC106028.4 | 17.0906058 | 2913.914034 | 0.0059 | 0.995  | 0.498553875 | count | 1 |
| AL606970.4 | 17.1510705 | 979.1692324 | 0.0175 | 0.986  | 0.498553876 | count | 1 |
| CLCNKB     | 17.3072669 | 1927.473606 | 0.009  | 0.993  | 0.498553879 | count | 1 |
| HOXA5      | 17.4571928 | 975.5622049 | 0.0179 | 0.986  | 0.498553882 | count | 1 |
| SFMBT2     | 17.470735  | 858.5730351 | 0.0203 | 0.9838 | 0.498553882 | count | 1 |
| KL         | 17.5223016 | 1541.763436 | 0.0114 | 0.991  | 0.498553883 | count | 1 |
| POU5F1     | 17.5274577 | 2196.589249 | 0.008  | 0.994  | 0.498553883 | count | 1 |
| RXFP1      | 17.5274579 | 2196.589378 | 0.008  | 0.994  | 0.498553883 | count | 1 |
| PON3       | 17.7389114 | 2237.276508 | 0.0079 | 0.9937 | 0.498553885 | count | 1 |
| AC004771.4 | 17.7894197 | 1919.232068 | 0.0093 | 0.993  | 0.498553886 | count | 1 |



|            |            |             |        |          |             |       |           |
|------------|------------|-------------|--------|----------|-------------|-------|-----------|
| AC087203.3 | 17.8212444 | 2837.387515 | 0.0063 | 0.995    | 0.498553886 | count | 1         |
| AL121821.1 | 17.8883917 | 1001.227825 | 0.0179 | 0.9857   | 0.498553887 | count | 1         |
| AC004889.1 | 17.9395382 | 1558.180335 | 0.0115 | 0.991    | 0.498553888 | count | 1         |
| SORCS2     | 17.9406203 | 2508.607557 | 0.0072 | 0.994    | 0.498553888 | count | 1         |
| DYNC1H1    | 0.3570857  | 0.0850831   | 4.1969 | 2.77E-05 | 0.498913605 | count | 0.6350779 |
| RNMT       | 0.3570276  | 0.0869263   | 4.1072 | 4.09E-05 | 0.498941018 | count | 0.9358738 |
| RALGPS1    | 1.0256107  | 0.7654399   | 1.3399 | 0.18     | 0.499060417 | count | 1         |
| CPQ        | 0.3516196  | 0.0518129   | 6.7863 | 1.34E-11 | 0.49922808  | count | 3.18E-07  |
| DMRTA1     | 0.5980428  | 0.509704    | 1.1733 | 0.241    | 0.499468472 | count | 1         |
| GNB3       | 0.9409202  | 0.7400721   | 1.2714 | 0.204    | 0.499542474 | count | 1         |
| AGPS       | 0.4165147  | 0.163182    | 2.5525 | 0.0107   | 0.499689304 | count | 1         |
| C2CD3      | 0.8224054  | 0.467956    | 1.7574 | 0.0789   | 0.499787231 | count | 1         |
| MUM1       | 0.3621617  | 0.1149988   | 3.1493 | 0.00165  | 0.499853599 | count | 1         |
| FBXO17     | 0.3660506  | 0.113814    | 3.2162 | 0.00131  | 0.500134354 | count | 1         |
| AC104825.1 | 0.688081   | 0.6095082   | 1.1289 | 0.259    | 0.500275922 | count | 1         |
| LRRC58     | 0.3845437  | 0.136718    | 2.8127 | 0.00494  | 0.500413629 | count | 1         |
| ACBD5      | 0.4109391  | 0.191357    | 2.1475 | 0.0318   | 0.500707378 | count | 1         |
| SERHL2     | 0.5997245  | 0.3895129   | 1.5397 | 0.124    | 0.500744313 | count | 1         |
| CCDC134    | 0.8772964  | 0.6331159   | 1.3857 | 0.166    | 0.500759565 | count | 1         |
| AC009093.2 | 2.1367709  | 1.2903756   | 1.6559 | 0.0978   | 0.500804422 | count | 1         |
| GRIA1      | 0.399967   | 0.4766827   | 0.8391 | 0.401    | 0.500820272 | count | 1         |
| IDUA       | 0.4307631  | 0.1786183   | 2.4116 | 0.0159   | 0.50084585  | count | 1         |
| AL391069.2 | 1.5908316  | 1.2034716   | 1.3219 | 0.186    | 0.500890946 | count | 1         |
| TNFSF10    | 0.3593972  | 0.1047869   | 3.4298 | 0.000611 | 0.500953269 | count | 1         |
| B3GNT8     | 0.4893712  | 0.3207523   | 1.5257 | 0.127    | 0.500997738 | count | 1         |
| AC245060.5 | 0.4114318  | 0.4766326   | 0.8632 | 0.388    | 0.501294043 | count | 1         |
| ZNF785     | 0.6146807  | 0.2710956   | 2.2674 | 0.0234   | 0.501541438 | count | 1         |
| SWAP70     | 0.3696563  | 0.1056844   | 3.4977 | 0.000475 | 0.501718515 | count | 1         |
| SLC9A3R1   | 0.4787959  | 0.2735296   | 1.7504 | 0.0801   | 0.501848801 | count | 1         |
| H2AFX      | 0.3906254  | 0.1467506   | 2.6618 | 0.00781  | 0.501856297 | count | 1         |
| KCNJ2      | 1.033376   | 0.5578031   | 1.8526 | 0.064    | 0.50188817  | count | 1         |
| SLC16A2    | 0.4582325  | 0.2122248   | 2.1592 | 0.0309   | 0.501974351 | count | 1         |
| NECAP1     | 0.4232517  | 0.1565014   | 2.7045 | 0.00687  | 0.502513689 | count | 1         |
| ZNF146     | 0.3996872  | 0.1985265   | 2.0133 | 0.0442   | 0.502525977 | count | 1         |
| COL16A1    | 0.3742495  | 0.1335489   | 2.8023 | 0.0051   | 0.502782013 | count | 1         |
| BBS9       | 0.6024493  | 0.313562    | 1.9213 | 0.0548   | 0.502809811 | count | 1         |
| CYP4F12    | 2.158537   | 0.6288632   | 3.4324 | 0.000605 | 0.502828611 | count | 1         |
| SMIM14     | 0.3541001  | 0.0599492   | 5.9067 | 3.81E-09 | 0.502842277 | count | 8.98E-05  |
| P2RX7      | 0.7489418  | 0.4283384   | 1.7485 | 0.0805   | 0.502885092 | count | 1         |
| GUCY1A2    | 0.7489865  | 0.240056    | 3.12   | 0.00182  | 0.502910706 | count | 1         |
| CENPS      | 0.4957132  | 0.2922769   | 1.696  | 0.09     | 0.502992045 | count | 1         |
| TMEM64     | 0.467574   | 0.2683822   | 1.7422 | 0.0816   | 0.503349682 | count | 1         |
| ZNF618     | 0.4020576  | 0.220322    | 1.8249 | 0.0681   | 0.503388605 | count | 1         |
| TRAM1      | 0.3538647  | 0.0514118   | 6.8829 | 6.87E-12 | 0.503738974 | count | 1.63E-07  |
| ATP7A      | 0.4333815  | 0.227598    | 1.9042 | 0.057    | 0.503798796 | count | 1         |

|            |           |           |        |          |             |       |             |
|------------|-----------|-----------|--------|----------|-------------|-------|-------------|
| NCOA2      | 0.4139652 | 0.176128  | 2.3504 | 0.0188   | 0.50430999  | count | 1           |
| ICMT       | 0.3842083 | 0.1369766 | 2.8049 | 0.00506  | 0.504440751 | count | 1           |
| PLAGL1     | 0.3740913 | 0.129645  | 2.8855 | 0.00393  | 0.504612003 | count | 1           |
| NEK1       | 0.3856056 | 0.1379315 | 2.7956 | 0.00521  | 0.504621058 | count | 1           |
| MAP10      | 2.178338  | 0.8191215 | 2.6594 | 0.00786  | 0.504636317 | count | 1           |
| ATAD2B     | 0.406802  | 0.2196085 | 1.8524 | 0.064    | 0.504668364 | count | 1           |
| BMP3       | 1.3335208 | 0.9108019 | 1.4641 | 0.143    | 0.504752387 | count | 1           |
| FZD1       | 0.365517  | 0.1373032 | 2.6621 | 0.0078   | 0.50487157  | count | 1           |
| SIGIRR     | 0.3680762 | 0.0968539 | 3.8003 | 0.000147 | 0.505022608 | count | 1           |
| HESX1      | 1.1615683 | 0.944584  | 1.2297 | 0.219    | 0.505069763 | count | 1           |
| AL161729.1 | 0.6959181 | 0.5692798 | 1.2225 | 0.222    | 0.50525539  | count | 1           |
| DSN1       | 0.4666396 | 0.2602196 | 1.7933 | 0.073    | 0.505290801 | count | 1           |
| STK32C     | 0.6057938 | 0.31128   | 1.9461 | 0.0517   | 0.505342158 | count | 1           |
| TMEM69     | 0.4203606 | 0.1773566 | 2.3701 | 0.0178   | 0.505367914 | count | 1           |
| AIFM1      | 0.4294995 | 0.2454337 | 1.75   | 0.0802   | 0.505536401 | count | 1           |
| TP53TG5    | 0.790246  | 0.6594261 | 1.1984 | 0.231    | 0.505645983 | count | 1           |
| NDN        | 0.356695  | 0.0559934 | 6.3703 | 2.12E-10 | 0.505664151 | count | 5.02E-06    |
| 6-Sep      | 0.4105298 | 0.1740112 | 2.3592 | 0.0184   | 0.505825626 | count | 1           |
| NOLC1      | 0.3796743 | 0.1212323 | 3.1318 | 0.00175  | 0.505950984 | count | 1           |
| PCDHB3     | 1.0447574 | 0.8121581 | 1.2864 | 0.198    | 0.506007337 | count | 1           |
| ARID1B     | 0.3731497 | 0.1314876 | 2.8379 | 0.00457  | 0.506017631 | count | 1           |
| LINC01315  | 0.464685  | 0.2400439 | 1.9358 | 0.053    | 0.506056679 | count | 1           |
| FAM102A    | 0.4219653 | 0.2244303 | 1.8802 | 0.0602   | 0.50606254  | count | 1           |
| ZFAND5     | 0.358898  | 0.0851547 | 4.2147 | 2.56E-05 | 0.506181382 | count | 0.587136    |
| RBMS1      | 0.3599589 | 0.0708593 | 5.0799 | 3.96E-07 | 0.506265949 | count | 0.009241452 |
| AC007038.2 | 0.7915223 | 0.5201084 | 1.5218 | 0.128    | 0.506330548 | count | 1           |
| SLC6A9     | 0.6071507 | 0.3573412 | 1.6991 | 0.0894   | 0.506368662 | count | 1           |
| CDK9       | 0.4051998 | 0.1730569 | 2.3414 | 0.0193   | 0.506528311 | count | 1           |
| PXMP4      | 0.4267646 | 0.2111519 | 2.0211 | 0.0433   | 0.506571901 | count | 1           |
| SNN        | 0.4405154 | 0.2942768 | 1.4969 | 0.134    | 0.506661317 | count | 1           |
| ZMYM2      | 0.3800658 | 0.1693394 | 2.2444 | 0.0249   | 0.506690678 | count | 1           |
| MAP2K1     | 0.4331586 | 0.1893574 | 2.2875 | 0.0222   | 0.506714507 | count | 1           |
| ARL2BP     | 0.3606784 | 0.0740532 | 4.8705 | 1.16E-06 | 0.506792442 | count | 0.02696768  |
| CPLANE1    | 0.4031711 | 0.221266  | 1.8221 | 0.0685   | 0.506825467 | count | 1           |
| AGTRAP     | 0.3695075 | 0.1021439 | 3.6175 | 0.000301 | 0.50724183  | count | 1           |
| STAT3      | 0.3569386 | 0.0648617 | 5.5031 | 3.99E-08 | 0.507371567 | count | 0.000936254 |
| TOR1B      | 0.4521404 | 0.2810196 | 1.6089 | 0.108    | 0.507481162 | count | 1           |
| ZNF823     | 0.6995065 | 0.3726239 | 1.8772 | 0.0606   | 0.507529469 | count | 1           |
| ZNF451     | 0.3812435 | 0.1656801 | 2.3011 | 0.0214   | 0.507564907 | count | 1           |
| SNX13      | 0.3845632 | 0.1532794 | 2.5089 | 0.0122   | 0.507584234 | count | 1           |
| SELENON    | 0.4315976 | 0.2126121 | 2.03   | 0.0424   | 0.507935751 | count | 1           |
| ING3       | 0.4058883 | 0.1504879 | 2.6972 | 0.00703  | 0.508093075 | count | 1           |
| OXSR1      | 0.3948242 | 0.1729155 | 2.2833 | 0.0225   | 0.508110682 | count | 1           |
| CCNL2      | 0.3803656 | 0.1305771 | 2.913  | 0.0036   | 0.508169194 | count | 1           |
| ARSG       | 0.4851529 | 0.2077171 | 2.3356 | 0.0196   | 0.508193968 | count | 1           |

|            |           |           |        |          |             |       |          |
|------------|-----------|-----------|--------|----------|-------------|-------|----------|
| ZSCAN29    | 0.7272248 | 0.5066346 | 1.4354 | 0.151    | 0.508231972 | count | 1        |
| MPV17L     | 0.5059296 | 0.2888551 | 1.7515 | 0.0799   | 0.508369892 | count | 1        |
| BORA       | 1.0514573 | 0.9094287 | 1.1562 | 0.248    | 0.508418063 | count | 1        |
| TEX30      | 0.4474716 | 0.2123821 | 2.1069 | 0.0352   | 0.508675974 | count | 1        |
| RBM5       | 0.3917863 | 0.1414385 | 2.77   | 0.00563  | 0.508935696 | count | 1        |
| ECI2       | 0.3653502 | 0.0847732 | 4.3097 | 1.68E-05 | 0.509085186 | count | 0.386316 |
| METTL2B    | 0.4147405 | 0.1700199 | 2.4394 | 0.0148   | 0.509090292 | count | 1        |
| IL10RB     | 0.8957565 | 0.7336382 | 1.221  | 0.222    | 0.509198747 | count | 1        |
| SMARCD2    | 0.3940178 | 0.1665794 | 2.3653 | 0.0181   | 0.509320767 | count | 1        |
| LINC01266  | 0.55774   | 0.4596728 | 1.2133 | 0.225    | 0.509328312 | count | 1        |
| TFPI       | 0.3569113 | 0.054447  | 6.5552 | 6.33E-11 | 0.509344051 | count | 1.50E-06 |
| B4GALNT1   | 1.0543417 | 0.488792  | 2.157  | 0.0311   | 0.509452707 | count | 1        |
| ZNF669     | 0.4901785 | 0.2465535 | 1.9881 | 0.0469   | 0.509540314 | count | 1        |
| IL32       | 0.3647991 | 0.105986  | 3.442  | 0.000584 | 0.509830703 | count | 1        |
| SNPH       | 2.2387829 | 0.9729307 | 2.3011 | 0.0214   | 0.509960265 | count | 1        |
| CREBZF     | 0.3745502 | 0.120885  | 3.0984 | 0.00196  | 0.510079795 | count | 1        |
| SNTB2      | 0.3711105 | 0.1014694 | 3.6574 | 0.000258 | 0.510203991 | count | 1        |
| EFCAB2     | 0.4349289 | 0.2545526 | 1.7086 | 0.0876   | 0.510253558 | count | 1        |
| ZNF408     | 0.588032  | 0.3629997 | 1.6199 | 0.105    | 0.510383866 | count | 1        |
| PER2       | 0.377072  | 0.1255231 | 3.004  | 0.00268  | 0.510441875 | count | 1        |
| LINC01197  | 0.4051368 | 0.1566798 | 2.5858 | 0.00975  | 0.510576383 | count | 1        |
| SLC25A45   | 0.4717474 | 0.2736413 | 1.724  | 0.0848   | 0.510587741 | count | 1        |
| AKR1B1     | 0.3740228 | 0.1001844 | 3.7333 | 0.000192 | 0.510625023 | count | 1        |
| FUCA2      | 0.3735741 | 0.0940106 | 3.9737 | 7.21E-05 | 0.510866826 | count | 1        |
| USP2-AS1   | 1.6499727 | 0.9724229 | 1.6968 | 0.0898   | 0.511008239 | count | 1        |
| TSC22D2    | 0.3999562 | 0.1646555 | 2.429  | 0.0152   | 0.511132246 | count | 1        |
| EGFL8      | 1.1829562 | 0.8048357 | 1.4698 | 0.142    | 0.511552161 | count | 1        |
| VASH1      | 0.4922295 | 0.4061007 | 1.2121 | 0.226    | 0.511566614 | count | 1        |
| CHM        | 0.3818995 | 0.111843  | 3.4146 | 0.000646 | 0.51162915  | count | 1        |
| RAB11B-AS1 | 0.4185218 | 0.2112733 | 1.981  | 0.0477   | 0.511721289 | count | 1        |
| LRRK2      | 0.4169941 | 0.1497183 | 2.7852 | 0.00538  | 0.511795077 | count | 1        |
| PCBP3      | 0.7332947 | 1.136205  | 0.6454 | 0.519    | 0.511885655 | count | 1        |
| IRS1       | 0.4758797 | 0.2539133 | 1.8742 | 0.061    | 0.511902553 | count | 1        |
| FECH       | 0.4789587 | 0.2330391 | 2.0553 | 0.0399   | 0.511977124 | count | 1        |
| RWDD2B     | 0.4164128 | 0.2269703 | 1.8347 | 0.0666   | 0.51201647  | count | 1        |
| NISCH      | 0.4366071 | 0.1983789 | 2.2009 | 0.0278   | 0.512164871 | count | 1        |
| RAB35      | 0.4380175 | 0.1960543 | 2.2342 | 0.0255   | 0.512229809 | count | 1        |
| CNOT10     | 0.4340861 | 0.2032766 | 2.1354 | 0.0328   | 0.51223023  | count | 1        |
| IRAK2      | 0.8492147 | 0.6766475 | 1.255  | 0.21     | 0.513136486 | count | 1        |
| AL391121.1 | 0.4690715 | 0.3039197 | 1.5434 | 0.123    | 0.513366286 | count | 1        |
| C9orf116   | 0.6166474 | 0.4999544 | 1.2334 | 0.218    | 0.513538209 | count | 1        |
| PGM3       | 0.3932057 | 0.1722785 | 2.2824 | 0.0225   | 0.513739609 | count | 1        |
| ZNF687     | 0.9756559 | 0.4505746 | 2.1654 | 0.0304   | 0.513801755 | count | 1        |
| FOXRED2    | 0.7681238 | 0.350844  | 2.1894 | 0.0286   | 0.513823898 | count | 1        |
| TBC1D32    | 0.5281749 | 0.3521395 | 1.4999 | 0.134    | 0.514310065 | count | 1        |

|            |           |           |        |          |             |       |           |
|------------|-----------|-----------|--------|----------|-------------|-------|-----------|
| PSMB10     | 0.3994048 | 0.1567623 | 2.5478 | 0.0109   | 0.514381692 | count | 1         |
| GPR107     | 0.4093986 | 0.1966275 | 2.0821 | 0.0374   | 0.514506771 | count | 1         |
| DNAJC27    | 0.4326149 | 0.3177118 | 1.3617 | 0.173    | 0.514666279 | count | 1         |
| AASDH      | 0.4079702 | 0.160191  | 2.5468 | 0.0109   | 0.514731882 | count | 1         |
| PLOD3      | 0.4125212 | 0.1670778 | 2.469  | 0.0136   | 0.514752919 | count | 1         |
| ZNF721     | 0.4003612 | 0.182339  | 2.1957 | 0.0282   | 0.515126482 | count | 1         |
| AP1M1      | 0.4123635 | 0.166388  | 2.4783 | 0.0132   | 0.515307244 | count | 1         |
| ZNF544     | 0.4555017 | 0.5018712 | 0.9076 | 0.364    | 0.515426689 | count | 1         |
| USP54      | 0.5567166 | 0.2726292 | 2.042  | 0.0412   | 0.515426914 | count | 1         |
| NFIX       | 0.3648843 | 0.0747888 | 4.8789 | 1.11E-06 | 0.515626931 | count | 0.0258075 |
| NRAS       | 0.4425984 | 0.2647458 | 1.6718 | 0.0947   | 0.51582578  | count | 1         |
| SIRT2      | 0.4009363 | 0.1364386 | 2.9386 | 0.00332  | 0.51585497  | count | 1         |
| ZNF442     | 1.0723915 | 0.5729559 | 1.8717 | 0.0613   | 0.515883339 | count | 1         |
| TMEM161B   | 0.4828794 | 0.2596457 | 1.8598 | 0.063    | 0.515979078 | count | 1         |
| AL359220.1 | 0.7403718 | 0.4982551 | 1.4859 | 0.137    | 0.516132305 | count | 1         |
| OSTF1      | 0.3787723 | 0.1034687 | 3.6607 | 0.000255 | 0.516262815 | count | 1         |
| BLOC1S5    | 0.396091  | 0.1658327 | 2.3885 | 0.017    | 0.516368259 | count | 1         |
| B4GALT5    | 0.439051  | 0.2304766 | 1.905  | 0.0569   | 0.516452959 | count | 1         |
| PDIK1L     | 0.4934546 | 0.2637877 | 1.8707 | 0.0615   | 0.516465837 | count | 1         |
| TCP11L2    | 0.427946  | 0.1802779 | 2.3738 | 0.0177   | 0.516582051 | count | 1         |
| EXOSC6     | 0.3870453 | 0.1244786 | 3.1093 | 0.00189  | 0.516786028 | count | 1         |
| ZNF236     | 0.5104303 | 0.2842665 | 1.7956 | 0.0726   | 0.517108472 | count | 1         |
| UVSSA      | 0.4232136 | 0.2667776 | 1.5864 | 0.113    | 0.51732527  | count | 1         |
| DDN-AS1    | 0.9851827 | 0.7229039 | 1.3628 | 0.173    | 0.517660121 | count | 1         |
| KLHL22     | 0.5517871 | 0.2522635 | 2.1873 | 0.0288   | 0.517770261 | count | 1         |
| STK35      | 0.5447274 | 0.3640074 | 1.4965 | 0.135    | 0.517800936 | count | 1         |
| PEX11B     | 0.4200379 | 0.2558323 | 1.6418 | 0.101    | 0.518174552 | count | 1         |
| PIK3R4     | 0.4763609 | 0.3501111 | 1.3606 | 0.174    | 0.518237284 | count | 1         |
| AC104051.2 | 0.6721649 | 0.5716349 | 1.1759 | 0.24     | 0.518345116 | count | 1         |
| ODR4       | 0.3979716 | 0.1413904 | 2.8147 | 0.00491  | 0.518410888 | count | 1         |
| C15orf61   | 0.3763341 | 0.1024931 | 3.6718 | 0.000244 | 0.51855372  | count | 1         |
| FBXO48     | 0.6543601 | 0.3059681 | 2.1387 | 0.0325   | 0.518699399 | count | 1         |
| PQLC3      | 0.3723715 | 0.0765657 | 4.8634 | 1.20E-06 | 0.518824496 | count | 0.0278928 |
| AC004951.1 | 0.9885167 | 0.4656562 | 2.1228 | 0.0338   | 0.519005055 | count | 1         |
| CEBPA      | 1.3937131 | 0.6034684 | 2.3095 | 0.021    | 0.519054114 | count | 1         |
| ZNF554     | 0.7779169 | 0.5513255 | 1.411  | 0.158    | 0.519368463 | count | 1         |
| SDCCAG8    | 0.3823014 | 0.1137015 | 3.3623 | 0.000781 | 0.519931299 | count | 1         |
| PCDHGC3    | 0.4934777 | 0.2235856 | 2.2071 | 0.0274   | 0.520043951 | count | 1         |
| GPR137B    | 0.4120253 | 0.1890122 | 2.1799 | 0.0293   | 0.52039974  | count | 1         |
| NRBF2      | 0.3776453 | 0.0947529 | 3.9856 | 6.86E-05 | 0.520426632 | count | 1         |
| AL117339.5 | 0.6126427 | 0.3712311 | 1.6503 | 0.099    | 0.520436782 | count | 1         |
| SEC22C     | 0.3853266 | 0.1147886 | 3.3568 | 0.000796 | 0.520601924 | count | 1         |
| FN3K       | 0.4604154 | 0.3117364 | 1.4769 | 0.14     | 0.52078797  | count | 1         |
| RASSF1     | 0.3893186 | 0.1207859 | 3.2232 | 0.00128  | 0.520855915 | count | 1         |
| BPHL       | 0.4516429 | 0.1907073 | 2.3683 | 0.0179   | 0.520860359 | count | 1         |

|            |           |           |        |          |             |       |            |
|------------|-----------|-----------|--------|----------|-------------|-------|------------|
| WRN        | 0.4347362 | 0.2216002 | 1.9618 | 0.0499   | 0.520975656 | count | 1          |
| USP15      | 0.379123  | 0.0897046 | 4.2264 | 2.43E-05 | 0.521063623 | count | 0.5575878  |
| NCKAP5L    | 0.4691568 | 0.2247652 | 2.0873 | 0.0369   | 0.521133576 | count | 1          |
| UGGT2      | 0.3938235 | 0.1427276 | 2.7593 | 0.00582  | 0.521338581 | count | 1          |
| BDNF       | 0.3991805 | 0.3197539 | 1.2484 | 0.212    | 0.521440774 | count | 1          |
| SLITRK3    | 1.2169636 | 0.8108424 | 1.5009 | 0.133    | 0.521662746 | count | 1          |
| DMXL2      | 0.5818326 | 0.3156073 | 1.8435 | 0.0653   | 0.521962866 | count | 1          |
| DDX43      | 0.6589955 | 0.6806645 | 0.9682 | 0.333    | 0.521973843 | count | 1          |
| SELENOO    | 0.4723539 | 0.2211125 | 2.1363 | 0.0327   | 0.522049453 | count | 1          |
| PGD        | 0.477901  | 0.2435504 | 1.9622 | 0.0498   | 0.522627209 | count | 1          |
| ZC3H11A    | 1.7217418 | 1.1635919 | 1.4797 | 0.139    | 0.522648111 | count | 1          |
| MCOLN3     | 0.5260965 | 0.4785891 | 1.0993 | 0.272    | 0.52265292  | count | 1          |
| AL136038.3 | 0.7517425 | 1.0265176 | 0.7323 | 0.464    | 0.522925344 | count | 1          |
| SNX24      | 0.4334945 | 0.200703  | 2.1599 | 0.0308   | 0.523109399 | count | 1          |
| NEDD4L     | 1.222343  | 1.0780575 | 1.1338 | 0.257    | 0.523240085 | count | 1          |
| GAS2L1     | 0.4100453 | 0.1855527 | 2.2099 | 0.0272   | 0.523265517 | count | 1          |
| SHMT1      | 0.5584958 | 0.2576945 | 2.1673 | 0.0303   | 0.523618041 | count | 1          |
| EGLN3      | 0.469356  | 0.2257148 | 2.0794 | 0.0376   | 0.523748558 | count | 1          |
| SPECC1L    | 0.4790307 | 0.2385701 | 2.0079 | 0.0447   | 0.523810872 | count | 1          |
| DLX6-AS1   | 0.3672534 | 0.150966  | 2.4327 | 0.015    | 0.524091069 | count | 1          |
| PHLDA3     | 0.372094  | 0.0749081 | 4.9673 | 7.10E-07 | 0.524259261 | count | 0.01654513 |
| CCDC74A    | 0.4411984 | 0.2265369 | 1.9476 | 0.0515   | 0.524593546 | count | 1          |
| RAD51AP1   | 0.8727529 | 0.6179079 | 1.4124 | 0.158    | 0.524696396 | count | 1          |
| DOK6       | 0.6629844 | 0.330626  | 2.0052 | 0.045    | 0.524786627 | count | 1          |
| ELP6       | 0.4045583 | 0.1252352 | 3.2304 | 0.00125  | 0.524877857 | count | 1          |
| AC093227.1 | 1.2280641 | 0.8428623 | 1.457  | 0.145    | 0.524911173 | count | 1          |
| RNFT1      | 0.4605492 | 0.1865715 | 2.4685 | 0.0136   | 0.525045398 | count | 1          |
| BTN3A3     | 0.4986668 | 0.2388599 | 2.0877 | 0.0369   | 0.525246191 | count | 1          |
| LYRM1      | 0.3906632 | 0.1153907 | 3.3856 | 0.000718 | 0.525543189 | count | 1          |
| SFXN1      | 0.4044889 | 0.1409064 | 2.8706 | 0.00412  | 0.525602441 | count | 1          |
| TAF1B      | 0.4164404 | 0.1414762 | 2.9435 | 0.00327  | 0.525872323 | count | 1          |
| GEMIN5     | 0.6077617 | 0.2383664 | 2.5497 | 0.0108   | 0.525994622 | count | 1          |
| MFAP4      | 0.3656507 | 0.0493015 | 7.4166 | 1.48E-13 | 0.526090909 | count | 3.53E-09   |
| DNAAF5     | 0.4673272 | 0.2221564 | 2.1036 | 0.0355   | 0.526138442 | count | 1          |
| PTGER1     | 0.9335655 | 0.5331227 | 1.7511 | 0.08     | 0.526205208 | count | 1          |
| TUBE1      | 0.4167546 | 0.1968394 | 2.1172 | 0.0343   | 0.526261679 | count | 1          |
| ZNF281     | 0.4239761 | 0.2417125 | 1.7541 | 0.0795   | 0.526351728 | count | 1          |
| ZNF273     | 0.4963644 | 0.2917438 | 1.7014 | 0.089    | 0.526388212 | count | 1          |
| UTRN       | 0.3759223 | 0.0903683 | 4.1599 | 3.26E-05 | 0.526403128 | count | 0.7467356  |
| GPRIN3     | 0.8301702 | 0.508346  | 1.6331 | 0.103    | 0.526844771 | count | 1          |
| PLEKHG1    | 1.0081493 | 0.5377127 | 1.8749 | 0.0609   | 0.52686899  | count | 1          |
| CCDC65     | 1.236055  | 0.9957667 | 1.2413 | 0.215    | 0.527233915 | count | 1          |
| MOV10L1    | 0.7923005 | 0.6602676 | 1.2    | 0.23     | 0.527462838 | count | 1          |
| PNMA1      | 0.4025368 | 0.1267643 | 3.1755 | 0.00151  | 0.527521549 | count | 1          |
| KCNE3      | 2.4737546 | 1.0627668 | 2.3277 | 0.02     | 0.528101738 | count | 1          |

|            |           |           |         |          |             |       |             |
|------------|-----------|-----------|---------|----------|-------------|-------|-------------|
| ZNF836     | 0.4917194 | 0.2478801 | 1.9837  | 0.0474   | 0.528170219 | count | 1           |
| NLRX1      | 0.6866036 | 0.4118668 | 1.6671  | 0.0956   | 0.528171997 | count | 1           |
| CASP3      | 0.437469  | 0.1733552 | 2.5235  | 0.0117   | 0.528934354 | count | 1           |
| LAPTM4A    | 0.3680568 | 0.0284877 | 12.9199 | 2.25E-37 | 0.529273068 | count | 5.44E-33    |
| MRPS25     | 0.4037168 | 0.1392738 | 2.8987  | 0.00377  | 0.529386385 | count | 1           |
| DBT        | 0.4519633 | 0.2313828 | 1.9533  | 0.0509   | 0.529630143 | count | 1           |
| EPOR       | 0.4820537 | 0.2448025 | 1.9692  | 0.049    | 0.529697671 | count | 1           |
| PARD3B     | 0.4276841 | 0.1782707 | 2.3991  | 0.0165   | 0.530016689 | count | 1           |
| BCL3       | 0.4055267 | 0.1621676 | 2.5007  | 0.0124   | 0.530338806 | count | 1           |
| IQCN       | 0.7358284 | 0.7788625 | 0.9447  | 0.345    | 0.530339032 | count | 1           |
| PCOLCE     | 0.3707518 | 0.0498315 | 7.4401  | 1.25E-13 | 0.530508986 | count | 2.98E-09    |
| CYP27A1    | 0.4046414 | 0.1140936 | 3.5466  | 0.000395 | 0.530582746 | count | 1           |
| FEN1       | 0.6714431 | 0.3147224 | 2.1334  | 0.033    | 0.530736026 | count | 1           |
| NLGN4Y     | 0.535232  | 0.3701629 | 1.4459  | 0.148    | 0.531178033 | count | 1           |
| ZDHHC7     | 0.4266777 | 0.1850037 | 2.3063  | 0.0211   | 0.531260876 | count | 1           |
| SERPINB1   | 0.3777294 | 0.0719911 | 5.2469  | 1.63E-07 | 0.531391612 | count | 0.003812733 |
| C1orf174   | 0.4086295 | 0.1405091 | 2.9082  | 0.00366  | 0.531704528 | count | 1           |
| ABCC4      | 1.7834368 | 1.0366915 | 1.7203  | 0.0855   | 0.532117322 | count | 1           |
| ALKBH1     | 0.5764344 | 0.362583  | 1.5898  | 0.112    | 0.532306511 | count | 1           |
| BIRC2      | 0.4118271 | 0.1309836 | 3.1441  | 0.00168  | 0.532436395 | count | 1           |
| SLC12A7    | 1.022851  | 0.6098468 | 1.6772  | 0.0936   | 0.532695132 | count | 1           |
| AC027097.1 | 0.7397711 | 0.3478081 | 2.127   | 0.0335   | 0.532792045 | count | 1           |
| KDR        | 1.7896193 | 1.1651358 | 1.536   | 0.125    | 0.533039696 | count | 1           |
| TMEM33     | 0.4087739 | 0.132822  | 3.0776  | 0.0021   | 0.533050222 | count | 1           |
| CEBPB      | 0.3741239 | 0.0594795 | 6.29    | 3.55E-10 | 0.533086035 | count | 8.40E-06    |
| MYOF       | 0.3889759 | 0.1011183 | 3.8467  | 0.000122 | 0.533115065 | count | 1           |
| GTF2IRD2B  | 0.5374069 | 0.3065311 | 1.7532  | 0.0797   | 0.53320446  | count | 1           |
| C9orf40    | 0.5434607 | 0.2532457 | 2.146   | 0.0319   | 0.533650905 | count | 1           |
| NEU1       | 0.3961886 | 0.1246467 | 3.1785  | 0.00149  | 0.533798205 | count | 1           |
| CALHM2     | 0.388877  | 0.0918414 | 4.2342  | 2.35E-05 | 0.53392993  | count | 0.5394425   |
| RABL2A     | 0.7168346 | 0.3969901 | 1.8057  | 0.0711   | 0.533961189 | count | 1           |
| C1GALT1C1  | 0.3866179 | 0.0870874 | 4.4394  | 9.29E-06 | 0.533988668 | count | 0.21410663  |
| LSMEM2     | 1.4599871 | 0.6279348 | 2.3251  | 0.0201   | 0.534066239 | count | 1           |
| AC044849.1 | 1.1250123 | 0.4694804 | 2.3963  | 0.0166   | 0.534202217 | count | 1           |
| AMMECR1    | 0.5445377 | 0.3506364 | 1.553   | 0.121    | 0.534641317 | count | 1           |
| LRIG3      | 0.4269541 | 0.1603891 | 2.662   | 0.0078   | 0.534675948 | count | 1           |
| SYNE3      | 0.4550945 | 0.1808379 | 2.5166  | 0.0119   | 0.53475211  | count | 1           |
| VWCE       | 0.771713  | 0.3913466 | 1.9719  | 0.0487   | 0.534766345 | count | 1           |
| EIF4E3     | 0.4565446 | 0.2484598 | 1.8375  | 0.0662   | 0.534832251 | count | 1           |
| GVQW3      | 0.6314422 | 0.4793064 | 1.3174  | 0.188    | 0.534885982 | count | 1           |
| SLC38A10   | 0.4108646 | 0.1471387 | 2.7924  | 0.00526  | 0.534964958 | count | 1           |
| RAB33B     | 0.4158873 | 0.1494661 | 2.7825  | 0.00542  | 0.535268425 | count | 1           |
| SULF2      | 0.4268573 | 0.1897293 | 2.2498  | 0.0245   | 0.535291762 | count | 1           |
| STAT2      | 0.4094025 | 0.1473845 | 2.7778  | 0.0055   | 0.53533766  | count | 1           |
| XRR1       | 0.4283901 | 0.3059189 | 1.4003  | 0.161    | 0.535686483 | count | 1           |

|             |           |           |        |          |             |       |             |
|-------------|-----------|-----------|--------|----------|-------------|-------|-------------|
| ATAD5       | 0.697846  | 0.4184549 | 1.6677 | 0.0955   | 0.535781506 | count | 1           |
| LYSMD4      | 0.5806513 | 0.321412  | 1.8066 | 0.0709   | 0.535902546 | count | 1           |
| PPP2R3B     | 0.5350553 | 0.4882219 | 1.0959 | 0.273    | 0.535907961 | count | 1           |
| EDEM3       | 0.4138618 | 0.1556012 | 2.6598 | 0.00785  | 0.535909139 | count | 1           |
| SMYD4       | 0.5255946 | 0.2153858 | 2.4402 | 0.0147   | 0.536027448 | count | 1           |
| MTMR9       | 0.4537416 | 0.210862  | 2.1518 | 0.0315   | 0.536216666 | count | 1           |
| TMEM243     | 0.3905696 | 0.0983717 | 3.9703 | 7.31E-05 | 0.536421256 | count | 1           |
| AP002748.3  | 0.4968599 | 0.4973596 | 0.999  | 0.318    | 0.536544924 | count | 1           |
| CERS6       | 0.4411691 | 0.2381094 | 1.8528 | 0.064    | 0.536631527 | count | 1           |
| TBC1D19     | 0.5103521 | 0.2684408 | 1.9012 | 0.0574   | 0.536937674 | count | 1           |
| ZBTB4       | 0.4101948 | 0.1396787 | 2.9367 | 0.00334  | 0.537421523 | count | 1           |
| OGFRL1      | 0.4319709 | 0.209607  | 2.0609 | 0.0394   | 0.53771072  | count | 1           |
| MORN1       | 0.6352451 | 0.6565595 | 0.9675 | 0.333    | 0.537796527 | count | 1           |
| CFAP54      | 1.8223195 | 0.9628817 | 1.8926 | 0.0585   | 0.537839646 | count | 1           |
| CNDP2       | 0.4725016 | 0.1918276 | 2.4632 | 0.0138   | 0.538182106 | count | 1           |
| SLC25A19    | 0.5921096 | 0.3057128 | 1.9368 | 0.0528   | 0.538222253 | count | 1           |
| LGALSL      | 0.4028199 | 0.1180885 | 3.4112 | 0.000654 | 0.538292629 | count | 1           |
| TRIM36      | 0.7239083 | 0.56604   | 1.2789 | 0.201    | 0.538548264 | count | 1           |
| CLMP        | 0.4120521 | 0.152141  | 2.7084 | 0.00679  | 0.538754117 | count | 1           |
| CWF19L1     | 0.4660684 | 0.3564726 | 1.3074 | 0.191    | 0.538768098 | count | 1           |
| AFAP1L1     | 1.8302507 | 0.8536705 | 2.144  | 0.0321   | 0.538984103 | count | 1           |
| HM13        | 0.3824555 | 0.0678671 | 5.6354 | 1.88E-08 | 0.539000639 | count | 0.000441819 |
| LDAH        | 0.5385566 | 0.2869952 | 1.8765 | 0.0607   | 0.539203885 | count | 1           |
| NBN         | 0.3988773 | 0.1012233 | 3.9406 | 8.28E-05 | 0.539385925 | count | 1           |
| DEPDC7      | 1.1404846 | 0.7044674 | 1.6189 | 0.106    | 0.539468192 | count | 1           |
| NMNAT1      | 0.5692622 | 0.2773682 | 2.0524 | 0.0402   | 0.539468361 | count | 1           |
| SYNGAP1-AS1 | 0.8546534 | 1.0367734 | 0.8243 | 0.41     | 0.539625566 | count | 1           |
| ZNF660      | 0.5342136 | 0.396404  | 1.3476 | 0.178    | 0.539806585 | count | 1           |
| BMT2        | 0.5450759 | 0.3099395 | 1.7587 | 0.0787   | 0.540340114 | count | 1           |
| MLX         | 0.406053  | 0.1163353 | 3.4904 | 0.000488 | 0.540468622 | count | 1           |
| POFUT2      | 0.4851552 | 0.2077331 | 2.3355 | 0.0196   | 0.540675271 | count | 1           |
| EXOG        | 0.4428909 | 0.1941489 | 2.2812 | 0.0226   | 0.54079069  | count | 1           |
| OMA1        | 0.4853306 | 0.187317  | 2.591  | 0.00961  | 0.540862899 | count | 1           |
| STIM2       | 0.4185169 | 0.1982073 | 2.1115 | 0.0348   | 0.540949766 | count | 1           |
| SULT1E1     | 1.1452983 | 1.208546  | 0.9477 | 0.343    | 0.541095412 | count | 1           |
| PLPPR4      | 0.9066959 | 0.4741613 | 1.9122 | 0.0559   | 0.541102165 | count | 1           |
| TMEM43      | 0.3861216 | 0.0771864 | 5.0025 | 5.93E-07 | 0.541216744 | count | 0.013828167 |
| UBR2        | 0.4052791 | 0.1298546 | 3.121  | 0.00182  | 0.541320508 | count | 1           |
| PHF6        | 0.4089019 | 0.1413829 | 2.8922 | 0.00385  | 0.541336977 | count | 1           |
| AL356275.1  | 0.7829173 | 0.4676872 | 1.674  | 0.0942   | 0.541359477 | count | 1           |
| WRAP73      | 0.4394343 | 0.1623642 | 2.7065 | 0.00683  | 0.541552414 | count | 1           |
| RPIA        | 0.4961788 | 0.2205568 | 2.2497 | 0.0245   | 0.541743315 | count | 1           |
| SDCBP2      | 0.7294078 | 0.5985654 | 1.2186 | 0.223    | 0.542104411 | count | 1           |
| ZUP1        | 0.5233179 | 0.2961907 | 1.7668 | 0.0773   | 0.542155965 | count | 1           |
| PLEKHM1     | 0.5527957 | 0.2561544 | 2.1581 | 0.031    | 0.542225313 | count | 1           |

|            |           |           |         |          |             |       |            |
|------------|-----------|-----------|---------|----------|-------------|-------|------------|
| ANKRD13B   | 1.2887656 | 0.669565  | 1.9248  | 0.0543   | 0.542229321 | count | 1          |
| SBF2       | 0.4459493 | 0.1763899 | 2.5282  | 0.0115   | 0.542298755 | count | 1          |
| MTERF2     | 0.4635291 | 0.1974276 | 2.3478  | 0.0189   | 0.542755713 | count | 1          |
| SLC10A3    | 0.4234845 | 0.1509531 | 2.8054  | 0.00505  | 0.542845964 | count | 1          |
| ALG8       | 0.4558232 | 0.1805594 | 2.5245  | 0.0116   | 0.542864115 | count | 1          |
| TULP3      | 0.415147  | 0.1343347 | 3.0904  | 0.00201  | 0.543820359 | count | 1          |
| CASD1      | 0.4269835 | 0.1744811 | 2.4472  | 0.0144   | 0.543917448 | count | 1          |
| ZWINT      | 0.8631336 | 0.537791  | 1.605   | 0.109    | 0.54401354  | count | 1          |
| C9orf64    | 0.4960695 | 0.2328844 | 2.1301  | 0.0332   | 0.544435919 | count | 1          |
| ELP5       | 0.4261421 | 0.1753053 | 2.4309  | 0.0151   | 0.544568938 | count | 1          |
| MTMR3      | 0.6319501 | 0.32596   | 1.9387  | 0.0526   | 0.544982177 | count | 1          |
| ESRRA      | 0.4361202 | 0.1880235 | 2.3195  | 0.0204   | 0.545149352 | count | 1          |
| AL356488.3 | 0.7894007 | 0.4535807 | 1.7404  | 0.0819   | 0.545158112 | count | 1          |
| MAFK       | 0.4458977 | 0.2301452 | 1.9375  | 0.0528   | 0.54540419  | count | 1          |
| ZNF563     | 0.866171  | 0.7763616 | 1.1157  | 0.265    | 0.545580239 | count | 1          |
| EPS15L1    | 0.4594762 | 0.2055772 | 2.2351  | 0.0255   | 0.54568967  | count | 1          |
| PSAP       | 0.3809415 | 0.0364764 | 10.4435 | 3.53E-25 | 0.545987246 | count | 8.51E-21   |
| ENDOV      | 0.4492777 | 0.2132214 | 2.1071  | 0.0352   | 0.546242603 | count | 1          |
| TRMT61B    | 0.4514175 | 0.1847725 | 2.4431  | 0.0146   | 0.546519177 | count | 1          |
| KLHL20     | 0.429754  | 0.1699023 | 2.5294  | 0.0115   | 0.546790314 | count | 1          |
| TMEM117    | 0.69445   | 0.3758022 | 1.8479  | 0.0647   | 0.546812417 | count | 1          |
| CTXN1      | 0.7626685 | 0.39036   | 1.9538  | 0.0508   | 0.546949034 | count | 1          |
| TRAFD1     | 0.4845028 | 0.2268013 | 2.1362  | 0.0327   | 0.546997884 | count | 1          |
| PNKP       | 0.4358009 | 0.2505107 | 1.7396  | 0.082    | 0.547014099 | count | 1          |
| HSD17B11   | 0.3954088 | 0.0841569 | 4.6985  | 2.72E-06 | 0.547036896 | count | 0.06304144 |
| PDE1C      | 1.059867  | 0.5111957 | 2.0733  | 0.0382   | 0.547129267 | count | 1          |
| VPS36      | 0.395528  | 0.0964663 | 4.1002  | 4.22E-05 | 0.54720084  | count | 0.9654938  |
| RASD2      | 1.3078867 | 1.0119903 | 1.2924  | 0.196    | 0.547530503 | count | 1          |
| ZNF418     | 1.3078867 | 1.378982  | 0.9484  | 0.343    | 0.547530503 | count | 1          |
| C6orf62    | 0.4145652 | 0.1389612 | 2.9833  | 0.00287  | 0.547584707 | count | 1          |
| HLF        | 0.4872416 | 0.1900755 | 2.5634  | 0.0104   | 0.547686213 | count | 1          |
| ZSWIM4     | 1.1658288 | 0.595763  | 1.9569  | 0.0504   | 0.547976721 | count | 1          |
| CDC16      | 0.4239972 | 0.1508216 | 2.8112  | 0.00496  | 0.548376908 | count | 1          |
| TMEM98     | 0.3888652 | 0.0650283 | 5.9799  | 2.45E-09 | 0.548414101 | count | 5.78E-05   |
| GBP4       | 0.4376261 | 0.2172255 | 2.0146  | 0.044    | 0.548516121 | count | 1          |
| RREB1      | 0.4881499 | 0.3153003 | 1.5482  | 0.122    | 0.548667029 | count | 1          |
| TENM2      | 1.8997097 | 1.2033332 | 1.5787  | 0.114    | 0.548685861 | count | 1          |
| DHX35      | 0.5874736 | 0.363489  | 1.6162  | 0.106    | 0.548736379 | count | 1          |
| IGF2R      | 0.4165076 | 0.1374549 | 3.0301  | 0.00246  | 0.548898496 | count | 1          |
| CLDN15     | 0.8727472 | 0.5556272 | 1.5707  | 0.116    | 0.548963792 | count | 1          |
| ABCC6      | 1.3135171 | 0.8926037 | 1.4716  | 0.141    | 0.549077609 | count | 1          |
| PLEKHG6    | 1.3135171 | 0.9371014 | 1.4017  | 0.161    | 0.549077609 | count | 1          |
| FZD8       | 0.4153083 | 0.2289238 | 1.8142  | 0.0697   | 0.549140288 | count | 1          |
| ZNF391     | 0.7180096 | 0.4584627 | 1.5661  | 0.117    | 0.549337013 | count | 1          |
| GMNN       | 0.4682686 | 0.1990426 | 2.3526  | 0.0187   | 0.54974313  | count | 1          |



|            |           |           |        |          |             |       |             |
|------------|-----------|-----------|--------|----------|-------------|-------|-------------|
| UBIAD1     | 0.520077  | 0.2261656 | 2.2995 | 0.0215   | 0.550270168 | count | 1           |
| POLD3      | 0.4622658 | 0.1633774 | 2.8294 | 0.00469  | 0.550311808 | count | 1           |
| FAM45A     | 0.4118001 | 0.1540173 | 2.6737 | 0.00753  | 0.550385922 | count | 1           |
| DERA       | 0.421319  | 0.1360256 | 3.0974 | 0.00197  | 0.55106687  | count | 1           |
| ARFGAP1    | 0.5210533 | 0.2482428 | 2.099  | 0.0359   | 0.551250583 | count | 1           |
| DCAF5      | 0.4275228 | 0.1693474 | 2.5245 | 0.0116   | 0.551460196 | count | 1           |
| THSD4      | 0.3973105 | 0.1624912 | 2.4451 | 0.0145   | 0.5519123   | count | 1           |
| TUBGCP6    | 0.8793986 | 0.3952988 | 2.2246 | 0.0262   | 0.552373683 | count | 1           |
| ASIC1      | 2.902624  | 1.551115  | 1.8713 | 0.0614   | 0.552590912 | count | 1           |
| S100A10    | 0.3836479 | 0.0491421 | 7.8069 | 7.59E-15 | 0.552651505 | count | 1.81E-10    |
| FBXL7      | 0.5708039 | 0.2552746 | 2.236  | 0.0254   | 0.552999841 | count | 1           |
| AC005225.2 | 0.8809237 | 0.6318162 | 1.3943 | 0.163    | 0.553153825 | count | 1           |
| RUFY2      | 0.4105637 | 0.1495938 | 2.7445 | 0.00609  | 0.553336238 | count | 1           |
| PLEKHO2    | 0.6016264 | 0.4179324 | 1.4395 | 0.15     | 0.553716444 | count | 1           |
| C15orf48   | 0.5932655 | 0.4539461 | 1.3069 | 0.191    | 0.553729292 | count | 1           |
| BAHD1      | 0.7476827 | 0.4416311 | 1.693  | 0.0905   | 0.553858159 | count | 1           |
| TSPAN13    | 0.3973821 | 0.2349915 | 1.691  | 0.0909   | 0.554147727 | count | 1           |
| LMBRD1     | 0.4018004 | 0.0922248 | 4.3567 | 1.36E-05 | 0.554219828 | count | 0.313072    |
| CD24       | 1.0796118 | 0.5780151 | 1.8678 | 0.0619   | 0.554691513 | count | 1           |
| NSUN4      | 0.5287936 | 0.3148673 | 1.6794 | 0.0932   | 0.555322486 | count | 1           |
| C21orf91   | 0.4579822 | 0.1887628 | 2.4262 | 0.0153   | 0.555413439 | count | 1           |
| B3GNT9     | 0.4542926 | 0.193437  | 2.3485 | 0.0189   | 0.555414122 | count | 1           |
| HEXA       | 0.3993568 | 0.0813475 | 4.9093 | 9.54E-07 | 0.555489905 | count | 0.022197672 |
| COX18      | 0.7275257 | 0.4152514 | 1.752  | 0.0799   | 0.555693119 | count | 1           |
| TBC1D4     | 0.8075667 | 0.3185989 | 2.5347 | 0.0113   | 0.555737132 | count | 1           |
| RPGR       | 0.5739864 | 0.2732962 | 2.1002 | 0.0358   | 0.555868906 | count | 1           |
| LRRRC57    | 0.4697344 | 0.1995807 | 2.3536 | 0.0186   | 0.55603584  | count | 1           |
| LINC00954  | 0.8872033 | 0.9373282 | 0.9465 | 0.344    | 0.556359168 | count | 1           |
| AJAP1      | 0.8087393 | 0.616617  | 1.3116 | 0.19     | 0.556416684 | count | 1           |
| KCTD5      | 0.5518209 | 0.3253126 | 1.6963 | 0.0899   | 0.556518209 | count | 1           |
| VPS50      | 0.5132598 | 0.2135737 | 2.4032 | 0.0163   | 0.556530575 | count | 1           |
| AC098850.3 | 0.4702076 | 0.4535032 | 1.0368 | 0.3      | 0.556578714 | count | 1           |
| PLEKHB2    | 0.4448878 | 0.1893822 | 2.3492 | 0.0189   | 0.556655341 | count | 1           |
| UBN1       | 0.4202116 | 0.1490628 | 2.819  | 0.00484  | 0.556968304 | count | 1           |
| TLR4       | 0.4400775 | 0.2387603 | 1.8432 | 0.0654   | 0.557142514 | count | 1           |
| ZNF302     | 0.4100393 | 0.1177025 | 3.4837 | 5.00E-04 | 0.557196257 | count | 1           |
| CCDC71     | 0.5478366 | 0.2691484 | 2.0354 | 0.0419   | 0.557374439 | count | 1           |
| SPTBN1     | 0.3915439 | 0.0552521 | 7.0865 | 1.64E-12 | 0.558217513 | count | 3.90E-08    |
| NUDT19     | 0.5590023 | 0.317785  | 1.7591 | 0.0787   | 0.558387263 | count | 1           |
| GLA        | 0.4577411 | 0.1731812 | 2.6431 | 0.00825  | 0.558459081 | count | 1           |
| C6orf120   | 0.438715  | 0.1393392 | 3.1485 | 0.00165  | 0.558582786 | count | 1           |
| ITPK1      | 0.4811508 | 0.2388118 | 2.0148 | 0.044    | 0.559244112 | count | 1           |
| HES4       | 0.3935046 | 0.0834691 | 4.7144 | 2.51E-06 | 0.559283819 | count | 0.05818682  |
| MNT        | 0.5410475 | 0.2409049 | 2.2459 | 0.0248   | 0.559495102 | count | 1           |
| ABCA1      | 0.4362944 | 0.1503949 | 2.901  | 0.00374  | 0.559515225 | count | 1           |

|            |           |           |         |          |             |       |             |
|------------|-----------|-----------|---------|----------|-------------|-------|-------------|
| SLC38A11   | 1.0931182 | 0.6304229 | 1.7339  | 0.083    | 0.559809648 | count | 1           |
| CGREF1     | 0.5297867 | 0.2228081 | 2.3778  | 0.0175   | 0.560010645 | count | 1           |
| UBR1       | 0.4352573 | 0.1871913 | 2.3252  | 0.0201   | 0.560279525 | count | 1           |
| NPB        | 0.4454929 | 0.2589376 | 1.7205  | 0.0854   | 0.560396223 | count | 1           |
| TCTN3      | 0.436596  | 0.172215  | 2.5352  | 0.0113   | 0.560949851 | count | 1           |
| NR2E3      | 0.8962488 | 1.1703008 | 0.7658  | 0.444    | 0.560957017 | count | 1           |
| PAK4       | 0.6295036 | 0.2863788 | 2.1982  | 0.028    | 0.560976568 | count | 1           |
| TTI1       | 0.6196719 | 0.3530239 | 1.7553  | 0.0793   | 0.5611556   | count | 1           |
| ZNF738     | 0.7358496 | 0.3359614 | 2.1903  | 0.0286   | 0.561231095 | count | 1           |
| SSTR2      | 0.7596503 | 0.3673387 | 2.068   | 0.0387   | 0.561502358 | count | 1           |
| WDR36      | 0.4641603 | 0.200813  | 2.3114  | 0.0209   | 0.561526294 | count | 1           |
| NMUR1      | 1.9991376 | 1.3510166 | 1.4797  | 0.139    | 0.56161063  | count | 1           |
| LINC01126  | 1.5935998 | 1.3668473 | 1.1659  | 0.244    | 0.56209198  | count | 1           |
| PSTK       | 0.6672102 | 0.3241307 | 2.0585  | 0.0396   | 0.562095901 | count | 1           |
| MAN2B1     | 0.8985398 | 0.5996158 | 1.4985  | 0.134    | 0.562117967 | count | 1           |
| TRMO       | 0.5579413 | 0.24754   | 2.2539  | 0.0243   | 0.562308678 | count | 1           |
| LGALS3     | 0.3908131 | 0.0322264 | 12.1271 | 3.25E-33 | 0.562345677 | count | 7.85E-29    |
| PCF11      | 0.4173462 | 0.1300581 | 3.2089  | 0.00134  | 0.562386103 | count | 1           |
| RARRES2    | 0.3930581 | 0.0493944 | 7.9575  | 2.32E-15 | 0.562786923 | count | 5.54E-11    |
| CARM1      | 0.4876131 | 0.2289179 | 2.1301  | 0.0332   | 0.562791194 | count | 1           |
| U73166.1   | 1.598213  | 0.9845913 | 1.6232  | 0.105    | 0.563008294 | count | 1           |
| UNC79      | 1.598213  | 1.1007039 | 1.452   | 0.147    | 0.563008294 | count | 1           |
| NIPAL3     | 0.5329548 | 0.4084084 | 1.305   | 0.192    | 0.563183912 | count | 1           |
| PCDHB4     | 0.4586548 | 0.1691616 | 2.7113  | 0.00673  | 0.563679847 | count | 1           |
| CAPN5      | 0.8586858 | 0.4101778 | 2.0934  | 0.0364   | 0.564060676 | count | 1           |
| POC1B-AS1  | 0.6337839 | 0.7212943 | 0.8787  | 0.38     | 0.56444804  | count | 1           |
| HIRA       | 0.6852671 | 0.4046285 | 1.6936  | 0.0904   | 0.564570315 | count | 1           |
| ATF7IP     | 0.4266053 | 0.1498585 | 2.8467  | 0.00444  | 0.564765099 | count | 1           |
| TRIM61     | 0.9569691 | 0.7488887 | 1.2779  | 0.201    | 0.564828769 | count | 1           |
| AC058791.1 | 0.4845638 | 0.2398919 | 2.0199  | 0.0435   | 0.564841266 | count | 1           |
| KCNB2      | 2.026218  | 1.0372434 | 1.9535  | 0.0508   | 0.564943223 | count | 1           |
| NLRC5      | 0.6344132 | 0.4475611 | 1.4175  | 0.156    | 0.56495801  | count | 1           |
| ATG2B      | 0.5511528 | 0.309365  | 1.7816  | 0.0749   | 0.565028945 | count | 1           |
| POLB       | 0.4863169 | 0.2138826 | 2.2738  | 0.023    | 0.565040675 | count | 1           |
| DPCD       | 0.43775   | 0.1645484 | 2.6603  | 0.00784  | 0.565397014 | count | 1           |
| DDX3X      | 0.4017932 | 0.0730293 | 5.5018  | 4.02E-08 | 0.565731617 | count | 0.000943172 |
| KCNRG      | 1.0248927 | 0.8862629 | 1.1564  | 0.248    | 0.565749884 | count | 1           |
| TOR2A      | 0.5731595 | 0.2690953 | 2.13    | 0.0332   | 0.566339843 | count | 1           |
| GABRA2     | 2.0382398 | 1.1346195 | 1.7964  | 0.0725   | 0.566397777 | count | 1           |
| PRMT3      | 0.5857538 | 0.2857769 | 2.0497  | 0.0405   | 0.566453751 | count | 1           |
| ZNF668     | 0.5860569 | 0.3093197 | 1.8947  | 0.0582   | 0.566725887 | count | 1           |
| CACNA2D2   | 0.9619809 | 0.5631703 | 1.7082  | 0.0877   | 0.567156788 | count | 1           |
| CRIP1      | 0.39894   | 0.0655982 | 6.0816  | 1.31E-09 | 0.567398516 | count | 3.09E-05    |
| CCDC61     | 0.499492  | 0.2084252 | 2.3965  | 0.0166   | 0.567740163 | count | 1           |
| C8orf76    | 0.4957485 | 0.2135621 | 2.3213  | 0.0203   | 0.567857864 | count | 1           |

|            |           |           |        |          |             |       |             |
|------------|-----------|-----------|--------|----------|-------------|-------|-------------|
| GPX8       | 0.4064363 | 0.0769142 | 5.2843 | 1.34E-07 | 0.568195314 | count | 0.003136002 |
| PXK        | 0.42386   | 0.1094867 | 3.8713 | 0.00011  | 0.568726496 | count | 1           |
| PLEKHA8    | 0.5508772 | 0.3206099 | 1.7182 | 0.0858   | 0.569074726 | count | 1           |
| MAFB       | 0.4174943 | 0.105362  | 3.9625 | 7.56E-05 | 0.569114631 | count | 1           |
| PAPOLG     | 0.482651  | 0.198591  | 2.4304 | 0.0151   | 0.569289826 | count | 1           |
| CARD6      | 0.5655476 | 0.2632506 | 2.1483 | 0.0318   | 0.569491511 | count | 1           |
| GNL3       | 0.4372661 | 0.1183321 | 3.6952 | 0.000223 | 0.569636116 | count | 1           |
| JOSD1      | 0.4379722 | 0.1498685 | 2.9224 | 0.00349  | 0.570129374 | count | 1           |
| TGFB2      | 0.4345735 | 0.2455937 | 1.7695 | 0.0769   | 0.570342499 | count | 1           |
| ENTPD4     | 0.5331097 | 0.2884326 | 1.8483 | 0.0646   | 0.570405585 | count | 1           |
| ZXDB       | 0.9692361 | 0.4790226 | 2.0234 | 0.0431   | 0.570514835 | count | 1           |
| HSPBAP1    | 0.7743069 | 0.4006438 | 1.9327 | 0.0534   | 0.570806757 | count | 1           |
| ATP6V1E2   | 0.5725716 | 0.3007467 | 1.9038 | 0.057    | 0.571058942 | count | 1           |
| MDN1       | 0.4781402 | 0.2561681 | 1.8665 | 0.062    | 0.571451487 | count | 1           |
| AC097103.2 | 1.3976753 | 0.6637917 | 2.1056 | 0.0353   | 0.57145963  | count | 1           |
| TBC1D8B    | 0.4706576 | 0.1763657 | 2.6686 | 0.00765  | 0.571532654 | count | 1           |
| ZKSCAN4    | 0.730789  | 0.4366143 | 1.6738 | 0.0943   | 0.571888787 | count | 1           |
| DNAL4      | 0.4836126 | 0.2382363 | 2.03   | 0.0424   | 0.57194057  | count | 1           |
| CTTNBP2    | 0.5282932 | 0.2278896 | 2.3182 | 0.0205   | 0.572043239 | count | 1           |
| GSEC       | 0.5922652 | 0.4239054 | 1.3972 | 0.162    | 0.572294742 | count | 1           |
| SYS1       | 0.4208477 | 0.1182459 | 3.5591 | 0.000377 | 0.572315525 | count | 1           |
| RPS6KL1    | 0.7527227 | 0.9175064 | 0.8204 | 0.412    | 0.572394346 | count | 1           |
| SYCE1L     | 0.874442  | 0.4831136 | 1.81   | 0.0704   | 0.572563129 | count | 1           |
| ARL6       | 0.5387077 | 0.2562613 | 2.1022 | 0.0356   | 0.572576015 | count | 1           |
| VPS13B     | 0.4804051 | 0.1888617 | 2.5437 | 0.011    | 0.572675561 | count | 1           |
| KHNYN      | 0.5802254 | 0.2631569 | 2.2049 | 0.0275   | 0.572848777 | count | 1           |
| ENO4       | 1.1281798 | 1.05811   | 1.0662 | 0.286    | 0.572889515 | count | 1           |
| EXPH5      | 0.624742  | 0.4203907 | 1.4861 | 0.137    | 0.573206066 | count | 1           |
| ASXL1      | 0.4241893 | 0.1154237 | 3.6751 | 0.000241 | 0.573451409 | count | 1           |
| FUT11      | 0.4660397 | 0.199409  | 2.3371 | 0.0195   | 0.573525637 | count | 1           |
| PACERR     | 1.6527233 | 1.1521037 | 1.4345 | 0.152    | 0.573581469 | count | 1           |
| C6orf136   | 0.511427  | 0.2225174 | 2.2984 | 0.0216   | 0.573742997 | count | 1           |
| APPBP2     | 0.4339303 | 0.1680258 | 2.5825 | 0.00985  | 0.574039767 | count | 1           |
| IWS1       | 0.4246207 | 0.1460272 | 2.9078 | 0.00366  | 0.574196136 | count | 1           |
| TXNDC5     | 0.9228617 | 0.9238117 | 0.999  | 0.318    | 0.574352597 | count | 1           |
| FAM234B    | 0.8400568 | 0.4351192 | 1.9306 | 0.0536   | 0.574420277 | count | 1           |
| ITGB8      | 0.6017366 | 0.2854391 | 2.1081 | 0.0351   | 0.574474907 | count | 1           |
| RAB37      | 1.6579842 | 0.8037984 | 2.0627 | 0.0392   | 0.574577738 | count | 1           |
| ZNF680     | 0.4462827 | 0.1669267 | 2.6735 | 0.00754  | 0.574735001 | count | 1           |
| MAK16      | 0.5101391 | 0.2085412 | 2.4462 | 0.0145   | 0.574760619 | count | 1           |
| LBR        | 0.4403733 | 0.1432255 | 3.0747 | 0.00212  | 0.575226128 | count | 1           |
| NHLRC3     | 0.4372924 | 0.1573415 | 2.7793 | 0.00548  | 0.575243975 | count | 1           |
| BCLAF3     | 0.4358132 | 0.1846919 | 2.3597 | 0.0183   | 0.575273373 | count | 1           |
| SLC6A6     | 0.5201576 | 0.3319351 | 1.567  | 0.117    | 0.575297446 | count | 1           |
| AC124066.1 | 2.114732  | 0.8950409 | 2.3627 | 0.0182   | 0.575304379 | count | 1           |

|            |           |           |        |          |             |       |             |
|------------|-----------|-----------|--------|----------|-------------|-------|-------------|
| FAM110B    | 0.4671421 | 0.2113414 | 2.2104 | 0.0271   | 0.5758304   | count | 1           |
| AK3        | 0.4163659 | 0.0943769 | 4.4117 | 1.05E-05 | 0.575991601 | count | 0.241857    |
| POLR2D     | 0.4962833 | 0.1916265 | 2.5898 | 0.00964  | 0.576208719 | count | 1           |
| CTBP1      | 0.4319493 | 0.1483558 | 2.9116 | 0.00362  | 0.576526777 | count | 1           |
| DNAJC14    | 0.759181  | 0.3200509 | 2.3721 | 0.0177   | 0.576644903 | count | 1           |
| LINC02035  | 0.9825685 | 0.7447059 | 1.3194 | 0.187    | 0.57664881  | count | 1           |
| TP53BP1    | 0.4496958 | 0.1857348 | 2.4212 | 0.0155   | 0.576936448 | count | 1           |
| AFAP1L2    | 0.7844219 | 0.3413217 | 2.2982 | 0.0216   | 0.577191214 | count | 1           |
| TPP1       | 0.4342387 | 0.1366015 | 3.1789 | 0.00149  | 0.577259424 | count | 1           |
| LYSMD1     | 0.6297333 | 0.2878837 | 2.1875 | 0.0288   | 0.577394697 | count | 1           |
| FAM69A     | 0.5224344 | 0.2019868 | 2.5865 | 0.00973  | 0.577702172 | count | 1           |
| TPCN1      | 0.4619615 | 0.1664654 | 2.7751 | 0.00555  | 0.578340483 | count | 1           |
| TIMP2      | 0.4036345 | 0.0430288 | 9.3806 | 1.12E-20 | 0.578383141 | count | 2.69E-16    |
| SYNDIG1    | 0.7041746 | 0.3282538 | 2.1452 | 0.032    | 0.578390463 | count | 1           |
| RFTN1      | 0.4203569 | 0.1364069 | 3.0816 | 0.00207  | 0.578796546 | count | 1           |
| SLC35B4    | 0.4730485 | 0.2151938 | 2.1982 | 0.028    | 0.578818217 | count | 1           |
| HAND2      | 0.4186575 | 0.1340405 | 3.1234 | 0.0018   | 0.578999214 | count | 1           |
| LCAT       | 0.607044  | 0.2945154 | 2.0612 | 0.0394   | 0.579154813 | count | 1           |
| ZNF217     | 0.4993622 | 0.1804284 | 2.7676 | 0.00567  | 0.579654914 | count | 1           |
| TMED5      | 0.4285853 | 0.1216104 | 3.5242 | 0.00043  | 0.580647693 | count | 1           |
| FARSB      | 0.497136  | 0.1783727 | 2.7871 | 0.00535  | 0.58075218  | count | 1           |
| SRGAP1     | 0.4550071 | 0.1899715 | 2.3951 | 0.0167   | 0.580753662 | count | 1           |
| EZH1       | 0.4289364 | 0.1239951 | 3.4593 | 0.000548 | 0.580798832 | count | 1           |
| GABPB2     | 0.4766721 | 0.2091445 | 2.2792 | 0.0227   | 0.580931069 | count | 1           |
| NUP37      | 0.4767127 | 0.179698  | 2.6529 | 0.00802  | 0.580979208 | count | 1           |
| AC092683.1 | 0.4973386 | 0.257069  | 1.9347 | 0.0531   | 0.580980593 | count | 1           |
| ABHD18     | 0.6351561 | 0.3798862 | 1.672  | 0.0946   | 0.581937427 | count | 1           |
| CLCN5      | 1.0643931 | 0.3810696 | 2.7932 | 0.00525  | 0.582186526 | count | 1           |
| OSCP1      | 0.5322336 | 0.3135731 | 1.6973 | 0.0897   | 0.582261739 | count | 1           |
| CLN8       | 0.5795811 | 0.2607215 | 2.223  | 0.0263   | 0.582704371 | count | 1           |
| AL360012.1 | 2.1829053 | 1.0631274 | 2.0533 | 0.0401   | 0.582753538 | count | 1           |
| BLCAP      | 0.4543573 | 0.1540839 | 2.9488 | 0.00321  | 0.58280633  | count | 1           |
| BCAT1      | 0.513324  | 0.189084  | 2.7148 | 0.00666  | 0.582829868 | count | 1           |
| TRAPPC2    | 0.4665192 | 0.184125  | 2.5337 | 0.0113   | 0.583105685 | count | 1           |
| LXN        | 0.4250853 | 0.1431695 | 2.9691 | 0.00301  | 0.583169781 | count | 1           |
| RAD52      | 0.6279559 | 0.4005815 | 1.5676 | 0.117    | 0.583439168 | count | 1           |
| HSPA1A     | 0.4057176 | 0.072217  | 5.618  | 2.08E-08 | 0.583475697 | count | 0.000488717 |
| C2         | 0.5919141 | 0.2541502 | 2.329  | 0.0199   | 0.583587044 | count | 1           |
| PLXNB1     | 0.490534  | 0.4008657 | 1.2237 | 0.221    | 0.584370401 | count | 1           |
| ZNF765     | 0.6207558 | 0.3052146 | 2.0338 | 0.042    | 0.584410945 | count | 1           |
| AVL9       | 0.6133177 | 0.3138727 | 1.954  | 0.0508   | 0.584676785 | count | 1           |
| PECR       | 0.6211446 | 0.2991778 | 2.0762 | 0.0379   | 0.584747507 | count | 1           |
| HSPG2      | 0.4179955 | 0.0981026 | 4.2608 | 2.09E-05 | 0.584866415 | count | 0.4799894   |
| NAV1       | 0.429015  | 0.1562561 | 2.7456 | 0.00607  | 0.585451001 | count | 1           |
| AFG3L2     | 0.4499448 | 0.1522628 | 2.9551 | 0.00315  | 0.585463017 | count | 1           |

|            |           |           |        |          |             |       |            |
|------------|-----------|-----------|--------|----------|-------------|-------|------------|
| YTHDF1     | 0.4903274 | 0.1794465 | 2.7324 | 0.00632  | 0.585565046 | count | 1          |
| CDK13      | 0.4456214 | 0.1353155 | 3.2932 | 0.001    | 0.586042313 | count | 1          |
| TMEM67     | 0.5002893 | 0.2196444 | 2.2777 | 0.0228   | 0.586044725 | count | 1          |
| MPPE1      | 0.4677024 | 0.1917309 | 2.4394 | 0.0148   | 0.586162834 | count | 1          |
| BTD        | 0.4582165 | 0.1549196 | 2.9578 | 0.00312  | 0.586533248 | count | 1          |
| AC002451.1 | 1.7244901 | 1.2429319 | 1.3874 | 0.165    | 0.586813728 | count | 1          |
| WSB1       | 0.4149775 | 0.0804039 | 5.1612 | 2.58E-07 | 0.58681443  | count | 0.00602688 |
| EPB41L5    | 0.6411782 | 0.3694473 | 1.7355 | 0.0827   | 0.586972461 | count | 1          |
| FRS3       | 0.9016656 | 0.4498528 | 2.0044 | 0.0451   | 0.58708716  | count | 1          |
| CCDC160    | 1.726395  | 0.8105212 | 2.13   | 0.0332   | 0.587154543 | count | 1          |
| ZNF175     | 1.0067736 | 0.4566305 | 2.2048 | 0.0275   | 0.587663163 | count | 1          |
| ZBTB21     | 0.4988754 | 0.2038254 | 2.4476 | 0.0144   | 0.587783473 | count | 1          |
| CAMKK2     | 0.4449626 | 0.1336224 | 3.33   | 0.000877 | 0.587816581 | count | 1          |
| FOXF1      | 1.1693494 | 0.5514506 | 2.1205 | 0.034    | 0.587870604 | count | 1          |
| AC053513.1 | 1.7304303 | 1.2733739 | 1.3589 | 0.174    | 0.587874799 | count | 1          |
| BCDIN3D    | 0.495544  | 0.2182814 | 2.2702 | 0.0233   | 0.588663618 | count | 1          |
| AP2A1      | 0.4513636 | 0.1418662 | 3.1816 | 0.00148  | 0.58895182  | count | 1          |
| RNF13      | 0.4207989 | 0.0668088 | 6.2986 | 3.36E-10 | 0.58896006  | count | 7.95E-06   |
| SPIN3      | 0.736244  | 0.3304375 | 2.2281 | 0.0259   | 0.58896374  | count | 1          |
| FKBP5      | 0.4271975 | 0.0965883 | 4.4229 | 1.00E-05 | 0.589093746 | count | 0.2304     |
| AP001347.1 | 1.1730887 | 0.5433007 | 2.1592 | 0.0309   | 0.589211255 | count | 1          |
| RRBP1      | 0.4146733 | 0.0630859 | 6.5732 | 5.62E-11 | 0.5892186   | count | 1.33E-06   |
| TTC27      | 0.5099036 | 0.2038795 | 2.501  | 0.0124   | 0.589520456 | count | 1          |
| CFAP44     | 0.611961  | 0.6889181 | 0.8883 | 0.374    | 0.589892596 | count | 1          |
| MKNK1      | 0.4609815 | 0.1573161 | 2.9303 | 0.00341  | 0.590004713 | count | 1          |
| RNF149     | 0.4405867 | 0.136238  | 3.234  | 0.00123  | 0.590257485 | count | 1          |
| APOL1      | 0.4746424 | 0.1540558 | 3.081  | 0.00208  | 0.590447229 | count | 1          |
| NPDC1      | 0.419856  | 0.0660962 | 6.3522 | 2.38E-10 | 0.590535678 | count | 5.63E-06   |
| MXRA8      | 0.4144575 | 0.0535741 | 7.7361 | 1.32E-14 | 0.590838323 | count | 3.15E-10   |
| TUB        | 0.6789702 | 0.6103843 | 1.1124 | 0.266    | 0.591335244 | count | 1          |
| PSORS1C1   | 0.7827172 | 0.4529009 | 1.7282 | 0.084    | 0.592030911 | count | 1          |
| DPT        | 0.4145936 | 0.1114151 | 3.7212 | 0.000201 | 0.592546277 | count | 1          |
| FOXF2      | 1.3065988 | 0.8122099 | 1.6087 | 0.108    | 0.592638396 | count | 1          |
| CLHC1      | 0.608302  | 0.3816615 | 1.5938 | 0.111    | 0.59273181  | count | 1          |
| TM6SF2     | 1.758915  | 0.9068588 | 1.9396 | 0.0525   | 0.592892057 | count | 1          |
| AC073320.1 | 1.758915  | 1.7299214 | 1.0168 | 0.3093   | 0.592892057 | count | 1          |
| DTX3L      | 0.4797897 | 0.1929841 | 2.4862 | 0.013    | 0.592983898 | count | 1          |
| FAM53C     | 0.493201  | 0.2336676 | 2.1107 | 0.0349   | 0.593021562 | count | 1          |
| NRBP2      | 0.5167255 | 0.2522903 | 2.0481 | 0.0406   | 0.59305148  | count | 1          |
| RALGAPA2   | 0.6822    | 0.3518152 | 1.9391 | 0.0526   | 0.593862603 | count | 1          |
| KDEL2      | 0.4431057 | 0.1028181 | 4.3096 | 1.68E-05 | 0.59403682  | count | 0.386316   |
| ADAMTS10   | 0.514016  | 0.2763832 | 1.8598 | 0.063    | 0.594094833 | count | 1          |
| TSHZ3      | 0.6167954 | 0.4629195 | 1.3324 | 0.183    | 0.594195876 | count | 1          |
| FAM206A    | 0.538126  | 0.2575845 | 2.0891 | 0.0368   | 0.594243916 | count | 1          |
| ASNSD1     | 0.4421128 | 0.1326828 | 3.3321 | 0.00087  | 0.594409436 | count | 1          |

|            |            |             |        |          |             |       |            |
|------------|------------|-------------|--------|----------|-------------|-------|------------|
| MRS2       | 0.4871773  | 0.2452718   | 1.9863 | 0.0471   | 0.5945162   | count | 1          |
| ACKR2      | 2.3005938  | 0.7818467   | 2.9425 | 0.00328  | 0.594599643 | count | 1          |
| LRRC42     | 0.4630445  | 0.1510595   | 3.0653 | 0.00219  | 0.594848219 | count | 1          |
| CRYL1      | 0.4351033  | 0.0937231   | 4.6424 | 3.56E-06 | 0.595378674 | count | 0.0823962  |
| ZNF124     | 0.6722412  | 0.4025469   | 1.67   | 0.095    | 0.595402452 | count | 1          |
| C11orf95   | 0.6183395  | 0.260893    | 2.3701 | 0.0178   | 0.595568986 | count | 1          |
| MOB3C      | 0.5079016  | 0.3151768   | 1.6115 | 0.107    | 0.596369673 | count | 1          |
| TACC1      | 0.4216968  | 0.0631238   | 6.6805 | 2.74E-11 | 0.596781685 | count | 6.50E-07   |
| C16orf74   | 1.1003802  | 0.59431     | 1.8515 | 0.0642   | 0.596813946 | count | 1          |
| ARTN       | 1.7853543  | 0.6157828   | 2.8993 | 0.00376  | 0.597445231 | count | 1          |
| SGCE       | 0.4260832  | 0.0740243   | 5.756  | 9.32E-09 | 0.597981434 | count | 0.00021929 |
| PTPDC1     | 0.536614   | 0.3734148   | 1.437  | 0.151    | 0.598129259 | count | 1          |
| NADK       | 0.493381   | 0.1970122   | 2.5043 | 0.0123   | 0.598328771 | count | 1          |
| PLPP6      | 0.6650901  | 0.3341536   | 1.9904 | 0.0466   | 0.598476317 | count | 1          |
| ADAM17     | 0.4697633  | 0.1772471   | 2.6503 | 0.00808  | 0.59858725  | count | 1          |
| MTRR       | 0.581427   | 0.2507987   | 2.3183 | 0.0205   | 0.598692368 | count | 1          |
| RFWD3      | 0.7934563  | 0.5343624   | 1.4849 | 0.138    | 0.598996559 | count | 1          |
| KDM4C      | 0.6560143  | 0.2759639   | 2.3772 | 0.0175   | 0.599332738 | count | 1          |
| PRR5       | 0.6568351  | 0.2873497   | 2.2858 | 0.0223   | 0.600014733 | count | 1          |
| C11orf65   | 1.3314249  | 1.1067207   | 1.203  | 0.229    | 0.600068262 | count | 1          |
| AATK       | 1.3314249  | 1.1670102   | 1.1409 | 0.254    | 0.600068262 | count | 1          |
| LATS2      | 0.4731371  | 0.1689234   | 2.8009 | 0.00512  | 0.600180567 | count | 1          |
| ZNF287     | 0.5784938  | 0.2975182   | 1.9444 | 0.0519   | 0.600236954 | count | 1          |
| CCDC116    | 16.3114776 | 1256.179975 | 0.013  | 0.99     | 0.600265764 | count | 1          |
| BEGAIN     | 16.4046319 | 1186.016491 | 0.0138 | 0.989    | 0.600265769 | count | 1          |
| AC007608.3 | 16.5619272 | 1400.582545 | 0.0118 | 0.991    | 0.600265777 | count | 1          |
| CDCA7      | 16.7532734 | 1045.330177 | 0.016  | 0.987    | 0.600265785 | count | 1          |
| FGF10-AS1  | 16.8223997 | 1024.3082   | 0.0164 | 0.9869   | 0.600265788 | count | 1          |
| FREM3      | 16.8736651 | 1348.813718 | 0.0125 | 0.99     | 0.60026579  | count | 1          |
| AL136979.1 | 16.8740907 | 1480.80187  | 0.0114 | 0.9909   | 0.60026579  | count | 1          |
| CPZ        | 16.8930152 | 1052.619238 | 0.016  | 0.987    | 0.600265791 | count | 1          |
| THPO       | 16.989836  | 1374.875966 | 0.0124 | 0.99     | 0.600265794 | count | 1          |
| SLC4A3     | 16.9899959 | 1313.143674 | 0.0129 | 0.99     | 0.600265794 | count | 1          |
| AC137630.1 | 17.0095847 | 975.7422585 | 0.0174 | 0.986    | 0.600265794 | count | 1          |
| ASAH2B     | 17.0314403 | 1121.367146 | 0.0152 | 0.988    | 0.600265795 | count | 1          |
| KBTBD11    | 17.051137  | 1242.101447 | 0.0137 | 0.989    | 0.600265796 | count | 1          |
| ZNF99      | 17.1438428 | 1708.284786 | 0.01   | 0.992    | 0.600265798 | count | 1          |
| RIBC2      | 17.1838233 | 1674.226682 | 0.0103 | 0.992    | 0.600265799 | count | 1          |
| PPP2R2C    | 17.184164  | 1785.792055 | 0.0096 | 0.992    | 0.600265799 | count | 1          |
| AL356488.2 | 17.1844078 | 1628.121941 | 0.0106 | 0.992    | 0.600265799 | count | 1          |
| AC104984.1 | 17.184973  | 2047.912978 | 0.0084 | 0.993    | 0.600265799 | count | 1          |
| ERVW-1     | 17.1849915 | 2047.921855 | 0.0084 | 0.993    | 0.600265799 | count | 1          |
| AL512638.2 | 17.1950236 | 1055.362348 | 0.0163 | 0.987    | 0.6002658   | count | 1          |
| KLHL33     | 17.2057313 | 1088.035983 | 0.0158 | 0.987    | 0.6002658   | count | 1          |
| RASA4B     | 17.31266   | 1720.659911 | 0.0101 | 0.992    | 0.600265802 | count | 1          |

|            |            |             |        |          |             |       |             |
|------------|------------|-------------|--------|----------|-------------|-------|-------------|
| FAM66A     | 17.313572  | 2159.395996 | 0.008  | 0.994    | 0.600265802 | count | 1           |
| AC007383.3 | 17.3146391 | 2687.028392 | 0.0064 | 0.995    | 0.600265802 | count | 1           |
| GH1        | 17.3146392 | 2687.028411 | 0.0064 | 0.995    | 0.600265802 | count | 1           |
| JAG2       | 17.3158005 | 3261.186301 | 0.0053 | 0.996    | 0.600265802 | count | 1           |
| AC007220.1 | 17.3158006 | 3261.186429 | 0.0053 | 0.996    | 0.600265802 | count | 1           |
| AC022509.3 | 17.3820734 | 1696.698888 | 0.0102 | 0.992    | 0.600265804 | count | 1           |
| SLC7A4     | 17.4123989 | 1751.881355 | 0.0099 | 0.992    | 0.600265804 | count | 1           |
| AADAQL2    | 17.5652695 | 1141.981234 | 0.0154 | 0.9877   | 0.600265807 | count | 1           |
| TSPAN19    | 17.5938371 | 1380.547798 | 0.0127 | 0.99     | 0.600265808 | count | 1           |
| RSPO4      | 17.5939835 | 1515.606861 | 0.0116 | 0.991    | 0.600265808 | count | 1           |
| ASPG       | 17.5939986 | 1515.611757 | 0.0116 | 0.991    | 0.600265808 | count | 1           |
| FMN1       | 17.5945107 | 2024.134275 | 0.0087 | 0.993    | 0.600265808 | count | 1           |
| LINC02449  | 17.5945797 | 2118.614297 | 0.0083 | 0.993    | 0.600265808 | count | 1           |
| AL365203.2 | 17.6873995 | 2346.023715 | 0.0075 | 0.994    | 0.600265809 | count | 1           |
| RTL3       | 17.6875795 | 2537.208382 | 0.007  | 0.994    | 0.600265809 | count | 1           |
| VNN1       | 17.6891752 | 3603.53122  | 0.0049 | 0.996    | 0.600265809 | count | 1           |
| SLC6A4     | 17.7319233 | 1196.841613 | 0.0148 | 0.9882   | 0.60026581  | count | 1           |
| HMX1       | 17.7456247 | 1380.648053 | 0.0129 | 0.99     | 0.60026581  | count | 1           |
| PTH2R      | 17.8764202 | 2136.029461 | 0.0084 | 0.993    | 0.600265812 | count | 1           |
| IQCH       | 17.9183207 | 2150.081195 | 0.0083 | 0.993    | 0.600265813 | count | 1           |
| DTX1       | 17.289978  | 1081.008061 | 0.016  | 0.987    | 0.600265851 | count | 1           |
| SUCLG2-AS1 | 0.7038828  | 0.4331955   | 1.6249 | 0.104    | 0.600449618 | count | 1           |
| SLC2A13    | 0.6043011  | 0.2851185   | 2.1195 | 0.0341   | 0.600500537 | count | 1           |
| LY6K       | 0.5049861  | 0.2755187   | 1.8329 | 0.0669   | 0.601024736 | count | 1           |
| SYNRG      | 0.464535   | 0.1410716   | 3.2929 | 0.001    | 0.601832112 | count | 1           |
| FLT1       | 0.8543081  | 0.5819607   | 1.468  | 0.142    | 0.602077348 | count | 1           |
| ZKSCAN8    | 0.618845   | 0.349008    | 1.7732 | 0.0763   | 0.602231417 | count | 1           |
| PEX13      | 0.472828   | 0.1852854   | 2.5519 | 0.0108   | 0.602412456 | count | 1           |
| DKK1       | 0.7758306  | 0.7117958   | 1.09   | 0.276    | 0.602428562 | count | 1           |
| TTLL5      | 1.0405398  | 0.4268345   | 2.4378 | 0.0148   | 0.602766214 | count | 1           |
| CLEC14A    | 0.6129069  | 0.4033985   | 1.5194 | 0.129    | 0.602781117 | count | 1           |
| OGT        | 0.44546    | 0.1394472   | 3.1945 | 0.00141  | 0.60294646  | count | 1           |
| XPO6       | 0.5493582  | 0.2854318   | 1.9247 | 0.0543   | 0.603107404 | count | 1           |
| SRRT       | 0.4866698  | 0.1564238   | 3.1112 | 0.00188  | 0.603187955 | count | 1           |
| ASCC2      | 0.503195   | 0.1796542   | 2.8009 | 0.00512  | 0.603287137 | count | 1           |
| ZNF674-AS1 | 0.6725961  | 0.6179689   | 1.0884 | 0.276    | 0.604587082 | count | 1           |
| FMNL2      | 0.4968177  | 0.1615525   | 3.0753 | 0.00212  | 0.604780199 | count | 1           |
| RAB28      | 0.4872312  | 0.1520463   | 3.2045 | 0.00136  | 0.604800419 | count | 1           |
| ERV3-1     | 0.5099724  | 0.2919251   | 1.7469 | 0.0807   | 0.60522927  | count | 1           |
| MATN3      | 0.9363694  | 0.6624473   | 1.4135 | 0.158    | 0.605296203 | count | 1           |
| CTPS2      | 0.6038798  | 0.4978015   | 1.2131 | 0.225    | 0.605460341 | count | 1           |
| RAB9A      | 0.4504141  | 0.1029725   | 4.3741 | 1.25E-05 | 0.605854858 | count | 0.28785     |
| EDRF1      | 0.5149089  | 0.25751     | 1.9996 | 0.0456   | 0.606010943 | count | 1           |
| VPS13C     | 0.4349734  | 0.087844    | 4.9517 | 7.69E-07 | 0.606581408 | count | 0.017912317 |
| SCPEP1     | 0.4295047  | 0.0585957   | 7.33   | 2.82E-13 | 0.606629955 | count | 6.71E-09    |

|            |           |           |        |          |             |       |             |
|------------|-----------|-----------|--------|----------|-------------|-------|-------------|
| TIAM1      | 1.3545281 | 0.6433652 | 2.1054 | 0.0353   | 0.606865117 | count | 1           |
| C5orf30    | 0.8058704 | 0.3386961 | 2.3793 | 0.0174   | 0.607005903 | count | 1           |
| ZGRF1      | 1.5433971 | 0.7912641 | 1.9505 | 0.0512   | 0.607039398 | count | 1           |
| ZNF331     | 0.446391  | 0.1588503 | 2.8101 | 0.00498  | 0.607162598 | count | 1           |
| ANG        | 0.4360955 | 0.0886287 | 4.9205 | 9.01E-07 | 0.60717734  | count | 0.020969874 |
| TAPBPL     | 0.4885813 | 0.1314848 | 3.7159 | 0.000206 | 0.607353594 | count | 1           |
| ATF6       | 0.4570061 | 0.1388332 | 3.2918 | 0.00101  | 0.6074045   | count | 1           |
| ANKRD36B   | 0.5139081 | 0.2081237 | 2.4692 | 0.0136   | 0.608158107 | count | 1           |
| KIAA0408   | 1.8549785 | 0.6634576 | 2.7959 | 0.0052   | 0.608969926 | count | 1           |
| SLC25A20   | 0.5970569 | 0.2662982 | 2.2421 | 0.025    | 0.609050696 | count | 1           |
| CASQ2      | 0.5037938 | 0.153502  | 3.282  | 0.00104  | 0.609316764 | count | 1           |
| TMEM237    | 0.4485949 | 0.1198441 | 3.7432 | 0.000185 | 0.609838586 | count | 1           |
| MFAP2      | 0.44353   | 0.0986527 | 4.4959 | 7.14E-06 | 0.610278562 | count | 0.16477692  |
| NCEH1      | 0.6508625 | 0.2911694 | 2.2353 | 0.0255   | 0.61034662  | count | 1           |
| CCDC96     | 1.2335643 | 0.7818323 | 1.5778 | 0.115    | 0.610434359 | count | 1           |
| SUOX       | 0.6429591 | 0.3490403 | 1.8421 | 0.0655   | 0.610619033 | count | 1           |
| ZFYVE1     | 0.5848768 | 0.3311762 | 1.7661 | 0.0775   | 0.61072291  | count | 1           |
| QKI        | 0.4337463 | 0.0712292 | 6.0894 | 1.25E-09 | 0.610994581 | count | 2.95E-05    |
| AC106739.2 | 1.2360077 | 0.486555  | 2.5403 | 0.0111   | 0.611273816 | count | 1           |
| MBTPS2     | 0.7045645 | 0.2645145 | 2.6636 | 0.00776  | 0.611279112 | count | 1           |
| RHBDD3     | 0.5419244 | 0.3091    | 1.7532 | 0.0796   | 0.611481256 | count | 1           |
| ZNFX1      | 0.4888137 | 0.1726874 | 2.8306 | 0.00467  | 0.611990113 | count | 1           |
| DNAJC5     | 0.5380977 | 0.3551992 | 1.5149 | 0.13     | 0.612091504 | count | 1           |
| CPT1C      | 1.3732054 | 0.7071356 | 1.9419 | 0.0522   | 0.612277907 | count | 1           |
| DDB1       | 0.4698856 | 0.1401597 | 3.3525 | 0.000809 | 0.612717014 | count | 1           |
| RHOBTB1    | 0.5309255 | 0.3427583 | 1.549  | 0.121    | 0.612868163 | count | 1           |
| ST3GAL1    | 0.494469  | 0.2027011 | 2.4394 | 0.0148   | 0.613553605 | count | 1           |
| LENG8      | 0.5064403 | 0.1979809 | 2.558  | 0.0106   | 0.613689206 | count | 1           |
| DOLK       | 0.5633528 | 0.2842828 | 1.9817 | 0.0476   | 0.614572369 | count | 1           |
| XKR8       | 0.5698583 | 0.2431965 | 2.3432 | 0.0192   | 0.614659354 | count | 1           |
| ALG11      | 0.709183  | 0.3282302 | 2.1606 | 0.0308   | 0.614857492 | count | 1           |
| AL450326.1 | 0.6034617 | 0.3055233 | 1.9752 | 0.0483   | 0.615149704 | count | 1           |
| HPSE       | 0.8186188 | 0.4486366 | 1.8247 | 0.0681   | 0.615183049 | count | 1           |
| ITCH       | 0.5110731 | 0.1620917 | 3.153  | 0.00163  | 0.6151986   | count | 1           |
| DNAJC6     | 1.5795573 | 1.281994  | 1.2321 | 0.218    | 0.615271478 | count | 1           |
| DLG1       | 0.4668725 | 0.1585474 | 2.9447 | 0.00325  | 0.615327181 | count | 1           |
| ZNF808     | 0.6406943 | 0.3215486 | 1.9925 | 0.0464   | 0.61537452  | count | 1           |
| CNNM2      | 0.5855034 | 0.2781381 | 2.1051 | 0.0354   | 0.615461524 | count | 1           |
| AC025171.4 | 2.5497638 | 1.2792214 | 1.9932 | 0.0463   | 0.61589526  | count | 1           |
| CDK14      | 0.5302208 | 0.2121031 | 2.4998 | 0.0125   | 0.616043654 | count | 1           |
| TTY14      | 0.6671586 | 0.3672404 | 1.8167 | 0.0693   | 0.616606108 | count | 1           |
| TGFB3      | 0.5020449 | 0.2077678 | 2.4164 | 0.0157   | 0.61661834  | count | 1           |
| IRF2BP1    | 0.4591338 | 0.1158912 | 3.9618 | 7.58E-05 | 0.61765558  | count | 1           |
| ABI1       | 0.4765995 | 0.1450409 | 3.286  | 0.00103  | 0.617665235 | count | 1           |
| PCDHGA10   | 0.5222819 | 0.2380149 | 2.1943 | 0.0283   | 0.617719695 | count | 1           |



|            |           |           |        |          |             |       |             |
|------------|-----------|-----------|--------|----------|-------------|-------|-------------|
| PGGHG      | 0.5577622 | 0.3132701 | 1.7805 | 0.0751   | 0.617766995 | count | 1           |
| RASSF5     | 0.8498963 | 0.672427  | 1.2639 | 0.206    | 0.617786274 | count | 1           |
| LMLN       | 0.8812524 | 0.4391902 | 2.0065 | 0.0449   | 0.617817936 | count | 1           |
| SLC30A1    | 0.555309  | 0.2255526 | 2.462  | 0.0139   | 0.617981443 | count | 1           |
| SULT1C4    | 0.759917  | 0.7093731 | 1.0713 | 0.284    | 0.618518601 | count | 1           |
| DENND1A    | 0.882794  | 0.3619132 | 2.4392 | 0.0148   | 0.618712063 | count | 1           |
| AC069224.1 | 0.7142416 | 0.3767058 | 1.896  | 0.058    | 0.618769618 | count | 1           |
| DPY19L4    | 0.4807737 | 0.1660474 | 2.8954 | 0.00381  | 0.618851321 | count | 1           |
| NDUFA7     | 0.7436307 | 0.3038391 | 2.4474 | 0.0144   | 0.618976516 | count | 1           |
| ZFYVE26    | 0.8256288 | 0.5104982 | 1.6173 | 0.106    | 0.619658744 | count | 1           |
| STK33      | 1.9234725 | 1.339826  | 1.4356 | 0.151    | 0.619672267 | count | 1           |
| FOXRED1    | 0.6137575 | 0.3034188 | 2.0228 | 0.0432   | 0.619898333 | count | 1           |
| ABCA5      | 0.598753  | 0.2030867 | 2.9483 | 0.00322  | 0.619928505 | count | 1           |
| CAPS       | 0.578572  | 0.2862649 | 2.0211 | 0.0433   | 0.619995808 | count | 1           |
| G2E3       | 0.4927208 | 0.1648988 | 2.988  | 0.00283  | 0.620005529 | count | 1           |
| SCAMP2     | 0.4502317 | 0.0943279 | 4.7731 | 1.89E-06 | 0.620083532 | count | 0.04385178  |
| MICAL1     | 0.519464  | 0.2896458 | 1.7934 | 0.073    | 0.620692194 | count | 1           |
| ALG2       | 0.4742601 | 0.1300108 | 3.6479 | 0.000268 | 0.62081136  | count | 1           |
| SCAF8      | 0.5105969 | 0.2017022 | 2.5314 | 0.0114   | 0.621053492 | count | 1           |
| PLXDC2     | 0.4424992 | 0.0757055 | 5.845  | 5.51E-09 | 0.621144319 | count | 0.000129749 |
| STAG1      | 0.479979  | 0.1552838 | 3.091  | 0.00201  | 0.621475591 | count | 1           |
| ICAM1      | 0.477586  | 0.2608065 | 1.8312 | 0.0672   | 0.621706095 | count | 1           |
| TMEM39A    | 0.5237648 | 0.2173884 | 2.4094 | 0.016    | 0.622607907 | count | 1           |
| EFCC1      | 1.9456272 | 1.5185696 | 1.2812 | 0.2      | 0.623003844 | count | 1           |
| AC007364.1 | 1.6180575 | 1.1416726 | 1.4173 | 0.156    | 0.623785209 | count | 1           |
| AC026150.1 | 1.6180575 | 1.6716576 | 0.9679 | 0.3331   | 0.623785209 | count | 1           |
| MAVS       | 0.5151261 | 0.2072701 | 2.4853 | 0.013    | 0.623889325 | count | 1           |
| DGLUCY     | 0.60777   | 0.2589441 | 2.3471 | 0.019    | 0.624040532 | count | 1           |
| GTF3C4     | 0.4944269 | 0.2458886 | 2.0108 | 0.0444   | 0.624399573 | count | 1           |
| ZNF433     | 0.7879221 | 0.3872782 | 2.0345 | 0.042    | 0.624807452 | count | 1           |
| ZNF383     | 0.5479031 | 0.2973597 | 1.8426 | 0.0655   | 0.6250769   | count | 1           |
| RGS22      | 0.7692553 | 0.7179477 | 1.0715 | 0.284    | 0.625150401 | count | 1           |
| HILPDA     | 0.4816634 | 0.1623584 | 2.9667 | 0.00303  | 0.62600815  | count | 1           |
| LAMA4      | 0.4599653 | 0.0965745 | 4.7628 | 1.98E-06 | 0.626322063 | count | 0.04593006  |
| NPR2       | 0.5814031 | 0.2661398 | 2.1846 | 0.029    | 0.626423432 | count | 1           |
| PRMT7      | 0.6792156 | 0.2888011 | 2.3518 | 0.0187   | 0.626718685 | count | 1           |
| TRIM2      | 0.5088807 | 0.1714268 | 2.9685 | 0.00301  | 0.626917774 | count | 1           |
| LIPH       | 2.71695   | 0.9732551 | 2.7916 | 0.00527  | 0.62769009  | count | 1           |
| PLXDC1     | 0.5114805 | 0.2278044 | 2.2453 | 0.0248   | 0.627876886 | count | 1           |
| RBM15B     | 0.5596845 | 0.1811151 | 3.0902 | 0.00202  | 0.628017378 | count | 1           |
| AP2A2      | 0.4864453 | 0.201767  | 2.4109 | 0.016    | 0.628158098 | count | 1           |
| TNPO1      | 0.4616956 | 0.102958  | 4.4843 | 7.54E-06 | 0.628219922 | count | 0.17395534  |
| TTPAL      | 0.7136608 | 0.3381691 | 2.1104 | 0.0349   | 0.628260744 | count | 1           |
| ZNF253     | 0.6482435 | 0.2660499 | 2.4365 | 0.0149   | 0.628559702 | count | 1           |
| TRIM8      | 0.4618614 | 0.1135436 | 4.0677 | 4.85E-05 | 0.628589632 | count | 1           |

|            |           |           |        |          |             |       |             |
|------------|-----------|-----------|--------|----------|-------------|-------|-------------|
| AKAP17A    | 0.5151505 | 0.1797568 | 2.8658 | 0.00418  | 0.628827345 | count | 1           |
| ZNF718     | 0.6821033 | 0.4086506 | 1.6692 | 0.0952   | 0.629134462 | count | 1           |
| ZNF585B    | 0.6564571 | 0.4709472 | 1.3939 | 0.163    | 0.629256349 | count | 1           |
| CHST10     | 1.183612  | 0.4618275 | 2.5629 | 0.0104   | 0.62939015  | count | 1           |
| NEGR1      | 0.501687  | 0.1593706 | 3.1479 | 0.00166  | 0.629390948 | count | 1           |
| AHNAK      | 0.4397085 | 0.0548238 | 8.0204 | 1.41E-15 | 0.629757226 | count | 3.37E-11    |
| HACD3      | 0.4540189 | 0.0909121 | 4.994  | 6.19E-07 | 0.629934274 | count | 0.014431366 |
| C9orf66    | 2.0004525 | 0.8713708 | 2.2958 | 0.0217   | 0.630983902 | count | 1           |
| SFT2D1     | 0.4553744 | 0.0891814 | 5.1062 | 3.45E-07 | 0.631056352 | count | 0.008051955 |
| ORAI1      | 0.5651745 | 0.2227071 | 2.5377 | 0.0112   | 0.631196369 | count | 1           |
| SLC27A3    | 0.4708958 | 0.1060223 | 4.4415 | 9.20E-06 | 0.631296453 | count | 0.2120416   |
| SLC35D1    | 0.5389008 | 0.2596309 | 2.0756 | 0.038    | 0.631398141 | count | 1           |
| ZFP36L1    | 0.4425663 | 0.0579474 | 7.6374 | 2.81E-14 | 0.631771775 | count | 6.70E-10    |
| AC016405.3 | 1.6554804 | 1.223422  | 1.3532 | 0.176    | 0.631817621 | count | 1           |
| LRRK1      | 0.7981891 | 0.3129232 | 2.5508 | 0.0108   | 0.631833209 | count | 1           |
| PDK4       | 0.4704582 | 0.0898489 | 5.2361 | 1.73E-07 | 0.631844416 | count | 0.004045778 |
| FAM118B    | 0.5609242 | 0.242725  | 2.3109 | 0.0209   | 0.631933063 | count | 1           |
| PYGL       | 0.5231278 | 0.1626098 | 3.2171 | 0.00131  | 0.631958008 | count | 1           |
| PRR3       | 0.6385567 | 0.2974037 | 2.1471 | 0.0319   | 0.631984229 | count | 1           |
| PPP1R12C   | 0.4872119 | 0.1605764 | 3.0341 | 0.00243  | 0.632139307 | count | 1           |
| PPRC1      | 0.8210195 | 0.4486222 | 1.8301 | 0.0673   | 0.63245939  | count | 1           |
| SNHG9      | 0.4872231 | 0.1535144 | 3.1738 | 0.00152  | 0.632631565 | count | 1           |
| BMP2       | 0.6529346 | 0.3007826 | 2.1708 | 0.03     | 0.632738797 | count | 1           |
| SLC25A33   | 0.6038228 | 0.204113  | 2.9583 | 0.00311  | 0.633525672 | count | 1           |
| USP45      | 0.5960809 | 0.2661452 | 2.2397 | 0.0252   | 0.633881366 | count | 1           |
| WWP1       | 0.5075155 | 0.2040086 | 2.4877 | 0.0129   | 0.633939083 | count | 1           |
| CASTOR3    | 0.7342685 | 0.2769084 | 2.6517 | 0.00804  | 0.634183235 | count | 1           |
| SIN3B      | 0.4935752 | 0.1760066 | 2.8043 | 0.00507  | 0.63443419  | count | 1           |
| SGSM2      | 0.6887431 | 0.3917584 | 1.7581 | 0.0788   | 0.634680071 | count | 1           |
| FZD5       | 0.8246556 | 0.4458331 | 1.8497 | 0.0644   | 0.634849111 | count | 1           |
| MTMR14     | 0.580019  | 0.2242928 | 2.586  | 0.00975  | 0.635008683 | count | 1           |
| PRIM2      | 0.6012167 | 0.2435627 | 2.4684 | 0.0136   | 0.63505829  | count | 1           |
| VPS13A     | 0.4640122 | 0.2410776 | 1.9247 | 0.0543   | 0.635545022 | count | 1           |
| SCLT1      | 0.5367395 | 0.2243316 | 2.3926 | 0.0168   | 0.635858942 | count | 1           |
| TRAF7      | 0.5465261 | 0.1799817 | 3.0366 | 0.00241  | 0.636197164 | count | 1           |
| B4GALT1    | 0.4639558 | 0.1006516 | 4.6095 | 4.17E-06 | 0.63626717  | count | 0.09646461  |
| ERAP2      | 0.516007  | 0.1810003 | 2.8509 | 0.00438  | 0.636504252 | count | 1           |
| SMG9       | 0.6572305 | 0.2301693 | 2.8554 | 0.00432  | 0.636560462 | count | 1           |
| KIAA0930   | 0.4849569 | 0.1431936 | 3.3867 | 0.000715 | 0.63656118  | count | 1           |
| SPTLC3     | 0.724452  | 0.31614   | 2.2916 | 0.022    | 0.636738638 | count | 1           |
| SLC38A9    | 0.7858041 | 0.3344391 | 2.3496 | 0.0188   | 0.636838461 | count | 1           |
| ADAMTS15   | 1.4618195 | 0.8540317 | 1.7117 | 0.087    | 0.63697766  | count | 1           |
| GRIN2A     | 0.7690529 | 0.2944547 | 2.6118 | 0.00904  | 0.637513742 | count | 1           |
| CRTC2      | 0.5828907 | 0.2936946 | 1.9847 | 0.0473   | 0.637985366 | count | 1           |
| ZNF574     | 0.7393533 | 0.3626376 | 2.0388 | 0.0415   | 0.638077757 | count | 1           |

|              |           |           |         |          |             |       |          |
|--------------|-----------|-----------|---------|----------|-------------|-------|----------|
| FAM76A       | 0.4752453 | 0.1191245 | 3.9895  | 6.75E-05 | 0.63819451  | count | 1        |
| SLC8B1       | 0.6282565 | 0.2650525 | 2.3703  | 0.0178   | 0.63865941  | count | 1        |
| DCUN1D3      | 0.5809565 | 0.2420516 | 2.4001  | 0.0164   | 0.63911086  | count | 1        |
| USP49        | 0.6850835 | 0.7222583 | 0.9485  | 0.343    | 0.639515246 | count | 1        |
| RTN4RL2      | 1.210438  | 0.4791073 | 2.5264  | 0.0116   | 0.639520739 | count | 1        |
| ERICH1       | 0.4626625 | 0.1173425 | 3.9428  | 8.20E-05 | 0.639662039 | count | 1        |
| THBS3        | 0.5069679 | 0.1610256 | 3.1484  | 0.00166  | 0.639860878 | count | 1        |
| TMEM61       | 1.6944795 | 0.8734907 | 1.9399  | 0.0525   | 0.639938886 | count | 1        |
| PNMA6A       | 1.0593172 | 0.6484596 | 1.6336  | 0.102    | 0.639953892 | count | 1        |
| ZNF324B      | 1.0593172 | 0.6840033 | 1.5487  | 0.122    | 0.639953892 | count | 1        |
| MBLAC2       | 0.5536872 | 0.2648818 | 2.0903  | 0.0367   | 0.640150235 | count | 1        |
| TMCC3        | 1.0047789 | 0.5113764 | 1.9649  | 0.0495   | 0.640187968 | count | 1        |
| AP000547.3   | 1.0599717 | 0.469965  | 2.2554  | 0.0242   | 0.640256173 | count | 1        |
| NCOR2        | 0.4876617 | 0.164364  | 2.967   | 0.00303  | 0.640817629 | count | 1        |
| HCFC2        | 0.5072145 | 0.1428374 | 3.551   | 0.000389 | 0.640926928 | count | 1        |
| CISH         | 0.9603758 | 0.3415561 | 2.8118  | 0.00495  | 0.640945752 | count | 1        |
| FJX1         | 0.7434077 | 0.4621498 | 1.6086  | 0.108    | 0.64117756  | count | 1        |
| MAPK14       | 0.5018954 | 0.187243  | 2.6804  | 0.00739  | 0.64125783  | count | 1        |
| INTS6        | 0.4676671 | 0.1243777 | 3.7601  | 0.000173 | 0.641312688 | count | 1        |
| NPHP1        | 0.5249629 | 0.2115682 | 2.4813  | 0.0131   | 0.641630213 | count | 1        |
| ZNF525       | 0.8605716 | 0.6964057 | 1.2357  | 0.217    | 0.641749087 | count | 1        |
| PANK4        | 0.7592452 | 0.3432473 | 2.2119  | 0.027    | 0.642102363 | count | 1        |
| MIDN         | 0.4661263 | 0.1244183 | 3.7464  | 0.000182 | 0.643339676 | count | 1        |
| CCDC144NL    | 0.5769337 | 0.4013752 | 1.4374  | 0.151    | 0.643681056 | count | 1        |
| TRAF3IP2-AS1 | 0.5749922 | 0.2022279 | 2.8433  | 0.00449  | 0.644363033 | count | 1        |
| EIF2B5       | 0.5365289 | 0.1776995 | 3.0193  | 0.00255  | 0.6448137   | count | 1        |
| MOB3A        | 0.6828319 | 0.2934348 | 2.327   | 0.02     | 0.645127124 | count | 1        |
| DRD1         | 1.3392125 | 0.6740184 | 1.9869  | 0.047    | 0.645473375 | count | 1        |
| ENTPD6       | 0.6543824 | 0.3303272 | 1.981   | 0.0477   | 0.646421797 | count | 1        |
| TLDC1        | 0.6264627 | 0.3981347 | 1.5735  | 0.116    | 0.646691424 | count | 1        |
| TMEM246      | 0.5137378 | 0.1945765 | 2.6403  | 0.00832  | 0.647411411 | count | 1        |
| MFSD5        | 0.5578013 | 0.2360523 | 2.363   | 0.0182   | 0.648786692 | count | 1        |
| ETFDH        | 0.5162423 | 0.184344  | 2.8004  | 0.00513  | 0.648866988 | count | 1        |
| FAM118A      | 0.4608104 | 0.1251394 | 3.6824  | 0.000234 | 0.649115916 | count | 1        |
| MX2          | 0.5620828 | 0.3085273 | 1.8218  | 0.0686   | 0.649446029 | count | 1        |
| RGS11        | 0.6796951 | 0.2694607 | 2.5224  | 0.0117   | 0.649594219 | count | 1        |
| TMEM220-AS1  | 1.0246336 | 0.7654621 | 1.3386  | 0.181    | 0.650066053 | count | 1        |
| MTHFR        | 0.557674  | 0.2292561 | 2.4325  | 0.015    | 0.650606811 | count | 1        |
| MTHFSD       | 0.6212411 | 0.3080804 | 2.0165  | 0.0438   | 0.650622674 | count | 1        |
| TMEM200B     | 0.6260617 | 0.2650489 | 2.3621  | 0.0182   | 0.650904172 | count | 1        |
| MLLT3        | 0.5091535 | 0.2137677 | 2.3818  | 0.0173   | 0.650969389 | count | 1        |
| NUPR1        | 0.4534277 | 0.0388746 | 11.6639 | 6.80E-31 | 0.651035246 | count | 1.64E-26 |
| CUEDC1       | 0.5264185 | 0.2123507 | 2.479   | 0.0132   | 0.651075471 | count | 1        |
| ZNF662       | 0.9055859 | 0.4228816 | 2.1415  | 0.0323   | 0.65131184  | count | 1        |
| EPHB6        | 0.5149296 | 0.178746  | 2.8808  | 0.00399  | 0.651953307 | count | 1        |

|            |           |           |        |          |             |       |             |
|------------|-----------|-----------|--------|----------|-------------|-------|-------------|
| ATRIP      | 0.7894384 | 0.4610061 | 1.7124 | 0.0869   | 0.652237821 | count | 1           |
| STOX1      | 2.1619515 | 1.0864803 | 1.9899 | 0.0467   | 0.652419322 | count | 1           |
| GPR180     | 0.5650713 | 0.2430822 | 2.3246 | 0.0201   | 0.652751445 | count | 1           |
| SLF1       | 0.6074659 | 0.22423   | 2.7091 | 0.00678  | 0.65286291  | count | 1           |
| SLC9A8     | 0.6761301 | 0.3988278 | 1.6953 | 0.0901   | 0.653312437 | count | 1           |
| BIVM       | 0.6388587 | 0.3766732 | 1.6961 | 0.09     | 0.653723303 | count | 1           |
| SNX21      | 0.4903414 | 0.1125653 | 4.3561 | 1.36E-05 | 0.654211949 | count | 0.313072    |
| SYCE1      | 1.250304  | 1.369505  | 0.913  | 0.361    | 0.654248224 | count | 1           |
| FKBP9      | 0.4761009 | 0.0866504 | 5.4945 | 4.18E-08 | 0.65431007  | count | 0.000980586 |
| VRK3       | 0.5965543 | 0.2141815 | 2.7853 | 0.00538  | 0.65534506  | count | 1           |
| CC2D2A     | 0.5077984 | 0.1286359 | 3.9476 | 8.04E-05 | 0.656258447 | count | 1           |
| EGFR       | 0.5001471 | 0.1332798 | 3.7526 | 0.000178 | 0.657334235 | count | 1           |
| PMS1       | 0.5283682 | 0.1802174 | 2.9318 | 0.00339  | 0.65740196  | count | 1           |
| ANKRD9     | 0.5149323 | 0.1603678 | 3.2109 | 0.00133  | 0.657543312 | count | 1           |
| PRIM1      | 0.6483558 | 0.2826384 | 2.2939 | 0.0219   | 0.657597619 | count | 1           |
| TMEM175    | 0.5235276 | 0.1569643 | 3.3353 | 0.00086  | 0.657789887 | count | 1           |
| G0S2       | 0.4736328 | 0.128012  | 3.6999 | 0.000219 | 0.6581475   | count | 1           |
| TCF12      | 0.4922619 | 0.1309252 | 3.7599 | 0.000173 | 0.658571525 | count | 1           |
| MPRIP-AS1  | 0.817012  | 0.4610253 | 1.7722 | 0.0765   | 0.658654809 | count | 1           |
| FUT4       | 0.7091572 | 0.3056616 | 2.3201 | 0.0204   | 0.659833416 | count | 1           |
| AC016831.7 | 0.6074934 | 0.2388752 | 2.5431 | 0.011    | 0.660013925 | count | 1           |
| ADIPOR2    | 0.5268094 | 0.1756882 | 2.9985 | 0.00273  | 0.660088057 | count | 1           |
| SMG1       | 0.5027    | 0.1667356 | 3.015  | 0.00259  | 0.660243709 | count | 1           |
| GSE1       | 0.5685576 | 0.2988428 | 1.9025 | 0.0572   | 0.66077281  | count | 1           |
| GPR20      | 0.7693512 | 0.2760163 | 2.7873 | 0.00534  | 0.660896127 | count | 1           |
| CYB561     | 0.5587339 | 0.2047269 | 2.7292 | 0.00638  | 0.660925728 | count | 1           |
| MARK3      | 0.4907506 | 0.1630111 | 3.0105 | 0.00263  | 0.660956977 | count | 1           |
| ANPEP      | 0.6579659 | 0.2293416 | 2.8689 | 0.00414  | 0.661187578 | count | 1           |
| CYP1B1-AS1 | 1.5555371 | 0.8319108 | 1.8698 | 0.0616   | 0.661389561 | count | 1           |
| IFRD1      | 0.4740014 | 0.0920159 | 5.1513 | 2.72E-07 | 0.661893469 | count | 0.006353104 |
| APOL3      | 0.5757031 | 0.1431629 | 4.0213 | 5.90E-05 | 0.662298386 | count | 1           |
| KBTBD2     | 0.5295708 | 0.2382365 | 2.2229 | 0.0263   | 0.662569041 | count | 1           |
| KDSR       | 0.4749604 | 0.0835526 | 5.6846 | 1.41E-08 | 0.66327271  | count | 0.000331505 |
| ZNF512B    | 0.745938  | 0.3015818 | 2.4734 | 0.0134   | 0.663430234 | count | 1           |
| C8orf37    | 0.6802635 | 0.2753487 | 2.4706 | 0.0135   | 0.663555334 | count | 1           |
| TMEM182    | 1.0032413 | 0.6281915 | 1.597  | 0.11     | 0.663631789 | count | 1           |
| GALC       | 0.6350545 | 0.2543892 | 2.4964 | 0.0126   | 0.664126169 | count | 1           |
| SCN4B      | 2.2698643 | 1.0483567 | 2.1652 | 0.0304   | 0.665148597 | count | 1           |
| KDM6B      | 0.5641555 | 0.214956  | 2.6245 | 0.00871  | 0.665332421 | count | 1           |
| ACP2       | 0.620158  | 0.20739   | 2.9903 | 0.00281  | 0.665678375 | count | 1           |
| FLCN       | 0.6469368 | 0.2676764 | 2.4169 | 0.0157   | 0.666337668 | count | 1           |
| SMPD2      | 0.9315719 | 0.3377246 | 2.7584 | 0.00584  | 0.666638646 | count | 1           |
| ZNF396     | 0.7925737 | 0.3970969 | 1.9959 | 0.046    | 0.666734632 | count | 1           |
| SOX9       | 0.577833  | 0.254083  | 2.2742 | 0.023    | 0.666845573 | count | 1           |
| AC008915.2 | 0.9320874 | 0.4867071 | 1.9151 | 0.0556   | 0.66694063  | count | 1           |

|            |           |           |        |          |             |       |             |
|------------|-----------|-----------|--------|----------|-------------|-------|-------------|
| CLCN7      | 0.588859  | 0.3285228 | 1.7924 | 0.0731   | 0.66709685  | count | 1           |
| ZNF676     | 0.6021771 | 0.2737833 | 2.1995 | 0.0279   | 0.667403737 | count | 1           |
| INMT       | 0.4718988 | 0.0718447 | 6.5683 | 5.80E-11 | 0.667655644 | count | 1.38E-06    |
| CARF       | 0.5791505 | 0.3178869 | 1.8219 | 0.0686   | 0.668298679 | count | 1           |
| KLHL36     | 0.5329908 | 0.1913112 | 2.786  | 0.00536  | 0.669368525 | count | 1           |
| GALNT16    | 0.7111933 | 0.2175246 | 3.2695 | 0.00109  | 0.66939681  | count | 1           |
| SMARCAD1   | 0.5177642 | 0.173743  | 2.9801 | 0.0029   | 0.66941513  | count | 1           |
| QSER1      | 0.5234689 | 0.1702215 | 3.0752 | 0.00212  | 0.669510398 | count | 1           |
| NDFIP2     | 0.5428209 | 0.1699329 | 3.1943 | 0.00141  | 0.669686989 | count | 1           |
| STARD9     | 0.5681457 | 0.2819852 | 2.0148 | 0.044    | 0.669851817 | count | 1           |
| HDAC10     | 1.8505594 | 0.7509689 | 2.4642 | 0.0138   | 0.670004605 | count | 1           |
| ALG1       | 0.6879021 | 0.2612216 | 2.6334 | 0.00849  | 0.67036801  | count | 1           |
| PTGS1      | 0.6884406 | 0.3646755 | 1.8878 | 0.0591   | 0.670847681 | count | 1           |
| YIPF1      | 0.6219111 | 0.2639045 | 2.3566 | 0.0185   | 0.671159657 | count | 1           |
| RNF146     | 0.490862  | 0.1005102 | 4.8837 | 1.09E-06 | 0.671209818 | count | 0.02534577  |
| A4GALT     | 0.4868431 | 0.0937471 | 5.1932 | 2.18E-07 | 0.671703992 | count | 0.005095532 |
| GRK4       | 0.8363382 | 0.3872855 | 2.1595 | 0.0309   | 0.672016802 | count | 1           |
| RPUSD2     | 0.6266494 | 0.2954379 | 2.1211 | 0.034    | 0.672217494 | count | 1           |
| TRIM7      | 0.639055  | 0.2364285 | 2.703  | 0.0069   | 0.672408122 | count | 1           |
| DHRX       | 0.5479515 | 0.1680666 | 3.2603 | 0.00112  | 0.672432026 | count | 1           |
| GDPD3      | 1.3015459 | 0.8988701 | 1.448  | 0.148    | 0.672608811 | count | 1           |
| FBXO2      | 0.5571563 | 0.2303985 | 2.4182 | 0.0156   | 0.673060985 | count | 1           |
| ZNF251     | 0.6359219 | 0.2973196 | 2.1388 | 0.0325   | 0.673537924 | count | 1           |
| IBA57      | 0.861303  | 0.3538861 | 2.4338 | 0.015    | 0.674321553 | count | 1           |
| RNLS       | 0.6557242 | 0.3090102 | 2.122  | 0.0339   | 0.67473594  | count | 1           |
| VASN       | 0.4773023 | 0.0704664 | 6.7735 | 1.46E-11 | 0.674951459 | count | 3.47E-07    |
| RGS10      | 0.4857824 | 0.1015101 | 4.7856 | 1.77E-06 | 0.675972106 | count | 0.04108524  |
| NRIP2      | 0.750155  | 0.2356948 | 3.1827 | 0.00147  | 0.676278309 | count | 1           |
| EVC        | 0.5791334 | 0.3101961 | 1.867  | 0.062    | 0.676578269 | count | 1           |
| QRSL1      | 0.6577595 | 0.2506151 | 2.6246 | 0.00871  | 0.6766782   | count | 1           |
| TCTN1      | 0.5099508 | 0.1349665 | 3.7784 | 0.00016  | 0.677328438 | count | 1           |
| TMEM71     | 4.083091  | 1.3295262 | 3.0711 | 0.00215  | 0.677573028 | count | 1           |
| LIN7A      | 0.7771819 | 0.2956626 | 2.6286 | 0.00861  | 0.677666066 | count | 1           |
| AC108734.4 | 1.3166795 | 0.6453411 | 2.0403 | 0.0414   | 0.677910346 | count | 1           |
| NUP133     | 0.7651693 | 0.2534851 | 3.0186 | 0.00256  | 0.678596348 | count | 1           |
| SLC29A1    | 0.4889991 | 0.087518  | 5.5874 | 2.47E-08 | 0.678956154 | count | 0.000580178 |
| APOL6      | 0.5031811 | 0.1372381 | 3.6665 | 0.000249 | 0.679162375 | count | 1           |
| AP001160.1 | 0.6078125 | 0.3300801 | 1.8414 | 0.0656   | 0.679231312 | count | 1           |
| FAM102B    | 0.5677798 | 0.2528661 | 2.2454 | 0.0248   | 0.679489058 | count | 1           |
| DUS3L      | 0.6561955 | 0.312741  | 2.0982 | 0.036    | 0.680026664 | count | 1           |
| ZNF565     | 0.7441259 | 0.3385023 | 2.1983 | 0.028    | 0.680436069 | count | 1           |
| ANKDD1A    | 0.5969805 | 0.2711294 | 2.2018 | 0.0277   | 0.680875318 | count | 1           |
| NFE2L2     | 0.4780719 | 0.0522305 | 9.1531 | 8.96E-20 | 0.681459589 | count | 2.15E-15    |
| FBXO27     | 0.6321356 | 0.2599025 | 2.4322 | 0.0151   | 0.681517686 | count | 1           |
| MGARP      | 0.5384744 | 0.2527759 | 2.1302 | 0.0332   | 0.682554352 | count | 1           |

|            |            |             |        |          |             |       |             |
|------------|------------|-------------|--------|----------|-------------|-------|-------------|
| PRRT2      | 0.5397387  | 0.1805795   | 2.9889 | 0.00282  | 0.682571422 | count | 1           |
| PLSCR4     | 0.4896421  | 0.0851153   | 5.7527 | 9.50E-09 | 0.68299138  | count | 0.000223497 |
| HCG11      | 0.5549891  | 0.1499099   | 3.7022 | 0.000217 | 0.683111432 | count | 1           |
| MLH3       | 0.5191342  | 0.1400699   | 3.7063 | 0.000213 | 0.683415983 | count | 1           |
| AC103591.3 | 1.1566978  | 0.4485714   | 2.5786 | 0.00996  | 0.683642141 | count | 1           |
| GRN        | 0.4862133  | 0.0680826   | 7.1415 | 1.11E-12 | 0.68365386  | count | 2.64E-08    |
| ZNF800     | 0.5246367  | 0.1390592   | 3.7728 | 0.000164 | 0.683695679 | count | 1           |
| EPHB2      | 1.649412   | 0.5161335   | 3.1957 | 0.00141  | 0.684157021 | count | 1           |
| NSUN2      | 0.6562952  | 0.2833637   | 2.3161 | 0.0206   | 0.684794209 | count | 1           |
| SERPINB9   | 0.5849077  | 0.3010442   | 1.9429 | 0.0521   | 0.685005267 | count | 1           |
| C12orf49   | 0.5418023  | 0.1760444   | 3.0776 | 0.0021   | 0.685114249 | count | 1           |
| REV3L      | 0.5234533  | 0.1434823   | 3.6482 | 0.000268 | 0.686182357 | count | 1           |
| CYBA       | 0.4821695  | 0.0581207   | 8.296  | 1.49E-16 | 0.686543868 | count | 3.56E-12    |
| RPP25      | 0.5815218  | 0.2544496   | 2.2854 | 0.0223   | 0.686798287 | count | 1           |
| MRC2       | 0.4922008  | 0.1015474   | 4.847  | 1.31E-06 | 0.68695232  | count | 0.03044047  |
| LDLR       | 0.7635411  | 0.3216448   | 2.3739 | 0.0177   | 0.687007478 | count | 1           |
| CACTIN     | 0.7765516  | 0.4145097   | 1.8734 | 0.0611   | 0.687520396 | count | 1           |
| CPD        | 0.6010379  | 0.2317833   | 2.5931 | 0.00955  | 0.687711181 | count | 1           |
| FOXD1      | 0.5612954  | 0.1447822   | 3.8768 | 0.000108 | 0.68828041  | count | 1           |
| SPAST      | 0.6351894  | 0.2021151   | 3.1427 | 0.00169  | 0.688287377 | count | 1           |
| TEP1       | 0.7541597  | 0.5574725   | 1.3528 | 0.176    | 0.688629251 | count | 1           |
| FNDC10     | 1.9615537  | 0.9954792   | 1.9705 | 0.0489   | 0.689157814 | count | 1           |
| NNAT       | 1.9615537  | 1.1125016   | 1.7632 | 0.078    | 0.689157814 | count | 1           |
| ZHX3       | 0.5238384  | 0.1610038   | 3.2536 | 0.00115  | 0.68988453  | count | 1           |
| VWA5A      | 0.5609028  | 0.2131414   | 2.6316 | 0.00853  | 0.690160011 | count | 1           |
| CTSA       | 0.4940248  | 0.0851161   | 5.8041 | 7.02E-09 | 0.690919812 | count | 0.000165237 |
| ERMP1      | 1.6816969  | 0.8484422   | 1.9821 | 0.0475   | 0.691611453 | count | 1           |
| AC116667.1 | 0.826782   | 0.5943162   | 1.3911 | 0.164    | 0.691666728 | count | 1           |
| CTSF       | 0.4868495  | 0.0558164   | 8.7223 | 4.06E-18 | 0.691756193 | count | 9.73E-14    |
| LRRC8D     | 1.2552273  | 0.4267565   | 2.9413 | 0.00329  | 0.691762215 | count | 1           |
| GHR        | 0.5732942  | 0.1855514   | 3.0897 | 0.00202  | 0.691857226 | count | 1           |
| HAGHL      | 1.4924642  | 0.6285628   | 2.3744 | 0.0176   | 0.691869484 | count | 1           |
| AP3S2      | 0.6852146  | 0.3044183   | 2.2509 | 0.0245   | 0.692044978 | count | 1           |
| AC006504.5 | 1.0150443  | 0.5131639   | 1.978  | 0.048    | 0.692806584 | count | 1           |
| MAP3K11    | 0.6802597  | 0.3624179   | 1.877  | 0.0606   | 0.692854328 | count | 1           |
| NCOA7      | 0.4977638  | 0.0861702   | 5.7765 | 8.26E-09 | 0.693013297 | count | 0.000194374 |
| METTL15    | 0.5575077  | 0.1836747   | 3.0353 | 0.00242  | 0.693601998 | count | 1           |
| RELT       | 1.989399   | 1.2156579   | 1.6365 | 0.102    | 0.69369063  | count | 1           |
| OMG        | 1.989399   | 1.4179318   | 1.403  | 0.161    | 0.69369063  | count | 1           |
| ZBTB7C     | 0.6875736  | 0.2760721   | 2.4906 | 0.0128   | 0.694237081 | count | 1           |
| MCEE       | 0.5427883  | 0.1458814   | 3.7208 | 0.000202 | 0.694306173 | count | 1           |
| BRAT1      | 0.6117823  | 0.2055009   | 2.977  | 0.00293  | 0.69437265  | count | 1           |
| KIAA0513   | 1.0638279  | 0.560106    | 1.8993 | 0.0576   | 0.694788652 | count | 1           |
| AC099489.1 | 16.239958  | 1654.685696 | 0.0098 | 0.992    | 0.695276671 | count | 1           |
| NWD1       | 16.6655261 | 1397.84909  | 0.0119 | 0.99     | 0.695276698 | count | 1           |

|            |            |             |        |          |             |       |          |
|------------|------------|-------------|--------|----------|-------------|-------|----------|
| TDRD5      | 16.9944744 | 2535.949642 | 0.0067 | 0.995    | 0.695276713 | count | 1        |
| FHDC1      | 17.1542634 | 638.5080727 | 0.0269 | 0.9786   | 0.695276718 | count | 1        |
| ZFHX2      | 17.156172  | 1036.326636 | 0.0166 | 0.987    | 0.695276718 | count | 1        |
| CYP27C1    | 17.2355929 | 1249.469498 | 0.0138 | 0.989    | 0.695276721 | count | 1        |
| FAM160A1   | 17.2379625 | 1678.635392 | 0.0103 | 0.992    | 0.695276721 | count | 1        |
| CALCA      | 17.2773533 | 2580.637426 | 0.0067 | 0.995    | 0.695276722 | count | 1        |
| AC009242.1 | 17.4973324 | 2225.105991 | 0.0079 | 0.994    | 0.695276727 | count | 1        |
| SDR42E1    | 17.4977576 | 2524.315464 | 0.0069 | 0.994    | 0.695276727 | count | 1        |
| AC022762.2 | 17.4983247 | 2661.891768 | 0.0066 | 0.995    | 0.695276727 | count | 1        |
| ALKAL1     | 17.5000062 | 3575.783997 | 0.0049 | 0.996    | 0.695276727 | count | 1        |
| ST6GALNAC2 | 17.5000062 | 3575.78383  | 0.0049 | 0.996    | 0.695276727 | count | 1        |
| LINC02511  | 18.3068447 | 1375.236876 | 0.0133 | 0.989    | 0.69527674  | count | 1        |
| DUXA       | 16.4805364 | 1033.942769 | 0.0159 | 0.987    | 0.695276743 | count | 1        |
| SHISA6     | 16.6111579 | 1037.279852 | 0.016  | 0.987    | 0.695276751 | count | 1        |
| AP003501.2 | 16.8258407 | 2046.218037 | 0.0082 | 0.993    | 0.695276761 | count | 1        |
| ICAM4      | 16.8938307 | 1213.529946 | 0.0139 | 0.989    | 0.695276764 | count | 1        |
| LRP1B      | 17.0145798 | 746.6779371 | 0.0228 | 0.9818   | 0.695276769 | count | 1        |
| FERMT1     | 17.1793545 | 646.6870008 | 0.0266 | 0.9788   | 0.695276774 | count | 1        |
| AL139022.2 | 17.4895543 | 2935.208151 | 0.006  | 0.995    | 0.695276782 | count | 1        |
| RIPPLY1    | 17.5000062 | 3575.783894 | 0.0049 | 0.996    | 0.695276783 | count | 1        |
| LINC02406  | 17.5000062 | 3575.783894 | 0.0049 | 0.996    | 0.695276783 | count | 1        |
| ADGRG4     | 17.9347044 | 1317.032464 | 0.0136 | 0.9891   | 0.695276791 | count | 1        |
| SLC17A7    | 17.9383846 | 978.9728135 | 0.0183 | 0.9854   | 0.695276791 | count | 1        |
| DSCAML1    | 18.2255323 | 1787.536681 | 0.0102 | 0.992    | 0.695276794 | count | 1        |
| ABCC10     | 1.1200513  | 0.4864678   | 2.3024 | 0.0214   | 0.695985901 | count | 1        |
| AMMECR1L   | 0.7876308  | 0.3162506   | 2.4905 | 0.0128   | 0.696169317 | count | 1        |
| ARHGFE3    | 1.066989   | 0.3076884   | 3.4678 | 0.000531 | 0.69638518  | count | 1        |
| TSC22D3    | 0.4892472  | 0.049748    | 9.8345 | 1.52E-22 | 0.696447669 | count | 3.66E-18 |
| TTC39C     | 0.6469699  | 0.2563403   | 2.5239 | 0.0116   | 0.696499753 | count | 1        |
| TET2       | 0.547276   | 0.1816386   | 3.013  | 0.0026   | 0.697139378 | count | 1        |
| CDKN2AIP   | 0.5242462  | 0.1340558   | 3.9107 | 9.37E-05 | 0.697267484 | count | 1        |
| SLC11A2    | 0.6171551  | 0.2049957   | 3.0106 | 0.00263  | 0.697513679 | count | 1        |
| ZCCHC24    | 0.5370734  | 0.1464251   | 3.6679 | 0.000248 | 0.699091828 | count | 1        |
| COL8A2     | 0.5533302  | 0.1754472   | 3.1538 | 0.00162  | 0.699307887 | count | 1        |
| FBXW8      | 0.8766265  | 0.350147    | 2.5036 | 0.0123   | 0.699504798 | count | 1        |
| SESTD1     | 0.5116437  | 0.0832882   | 6.1431 | 8.96E-10 | 0.699874618 | count | 2.12E-05 |
| ARSA       | 0.5457114  | 0.1623012   | 3.3623 | 0.000781 | 0.699920629 | count | 1        |
| ACVR2A     | 0.8389281  | 0.2640331   | 3.1774 | 0.0015   | 0.700433217 | count | 1        |
| PDGFRA     | 0.4998447  | 0.0837582   | 5.9677 | 2.63E-09 | 0.700538909 | count | 6.20E-05 |
| SEMA3D     | 0.5760628  | 0.2024681   | 2.8452 | 0.00446  | 0.700650164 | count | 1        |
| PRRX1      | 0.4908536  | 0.0506376   | 9.6935 | 5.88E-22 | 0.700912123 | count | 1.41E-17 |
| MECR       | 0.6155064  | 0.2305707   | 2.6695 | 0.00763  | 0.700952028 | count | 1        |
| MIATNB     | 1.0768711  | 0.5149993   | 2.091  | 0.0366   | 0.701357421 | count | 1        |
| TGFBR2     | 0.4989134  | 0.0746704   | 6.6815 | 2.72E-11 | 0.701642179 | count | 6.45E-07 |
| INSIG1     | 0.5781416  | 0.2608421   | 2.2164 | 0.0267   | 0.701734357 | count | 1        |

|            |           |           |        |          |             |       |             |
|------------|-----------|-----------|--------|----------|-------------|-------|-------------|
| ARHGAP20   | 0.6192131 | 0.2383053 | 2.5984 | 0.0094   | 0.702375445 | count | 1           |
| ZC3HAV1L   | 0.7957071 | 0.4646717 | 1.7124 | 0.0869   | 0.702450692 | count | 1           |
| ZNF813     | 1.3890356 | 0.5983845 | 2.3213 | 0.0203   | 0.702507135 | count | 1           |
| AHI1       | 0.4997214 | 0.0953202 | 5.2426 | 1.67E-07 | 0.702648995 | count | 0.003905629 |
| PLBD2      | 0.5746892 | 0.1693574 | 3.3934 | 0.000698 | 0.70291583  | count | 1           |
| TBC1D2B    | 0.5226275 | 0.1369257 | 3.8169 | 0.000137 | 0.70331738  | count | 1           |
| AC016831.5 | 0.7106425 | 0.3848175 | 1.8467 | 0.0649   | 0.703561217 | count | 1           |
| LDB1       | 0.5766132 | 0.2632466 | 2.1904 | 0.0286   | 0.703917649 | count | 1           |
| WIZ        | 0.6816182 | 0.2450096 | 2.782  | 0.00543  | 0.70441046  | count | 1           |
| GPR153     | 1.542107  | 0.3931301 | 3.9226 | 8.92E-05 | 0.705820312 | count | 1           |
| WDR90      | 1.0870396 | 0.6038872 | 1.8001 | 0.0719   | 0.706444443 | count | 1           |
| TNFRSF21   | 1.2939908 | 0.4825954 | 2.6813 | 0.00737  | 0.706562977 | count | 1           |
| GTPBP10    | 0.5709317 | 0.2083303 | 2.7405 | 0.00616  | 0.706620121 | count | 1           |
| STOM       | 0.503645  | 0.0701247 | 7.1821 | 8.27E-13 | 0.706822543 | count | 1.97E-08    |
| AUH        | 0.5702611 | 0.1822949 | 3.1282 | 0.00177  | 0.706892639 | count | 1           |
| OSMR       | 0.5445119 | 0.1245214 | 4.3728 | 1.26E-05 | 0.707565249 | count | 0.290115    |
| SMPD1      | 0.5637819 | 0.1625171 | 3.4691 | 0.000528 | 0.707855091 | count | 1           |
| MOCS3      | 0.8892072 | 0.3466515 | 2.5651 | 0.0104   | 0.707986232 | count | 1           |
| NAPB       | 1.2139576 | 0.5819865 | 2.0859 | 0.0371   | 0.708132649 | count | 1           |
| SLC27A1    | 0.7231167 | 0.2840593 | 2.5457 | 0.0109   | 0.708321491 | count | 1           |
| ARHGEF35   | 0.9136342 | 0.4193395 | 2.1787 | 0.0294   | 0.708629718 | count | 1           |
| BCKDHB     | 0.5891002 | 0.1792286 | 3.2869 | 0.00102  | 0.708714294 | count | 1           |
| NECTIN1    | 1.0926639 | 0.5417967 | 2.0167 | 0.0438   | 0.709245328 | count | 1           |
| AACS       | 1.0458193 | 0.3186179 | 3.2824 | 0.00104  | 0.709308052 | count | 1           |
| NEAT1      | 0.4933459 | 0.1026763 | 4.8049 | 1.61E-06 | 0.709311831 | count | 0.03738581  |
| KCP        | 2.0916554 | 1.5649773 | 1.3365 | 0.181    | 0.709446733 | count | 1           |
| TMCO6      | 0.9150117 | 0.4487573 | 2.039  | 0.0415   | 0.709521453 | count | 1           |
| TMEM9B     | 0.5211804 | 0.108962  | 4.7831 | 1.79E-06 | 0.709867668 | count | 0.04154232  |
| CAMK1D     | 0.561221  | 0.2308973 | 2.4306 | 0.0151   | 0.71062869  | count | 1           |
| ARL17B     | 0.7702771 | 0.4332329 | 1.778  | 0.0755   | 0.710658394 | count | 1           |
| FNIP1      | 0.5235096 | 0.1168094 | 4.4817 | 7.63E-06 | 0.710852497 | count | 0.17600884  |
| C1orf52    | 0.5255848 | 0.1185863 | 4.4321 | 9.61E-06 | 0.711242902 | count | 0.22144323  |
| PCDHB5     | 0.8372146 | 0.4515102 | 1.8543 | 0.0638   | 0.711513365 | count | 1           |
| NCSTN      | 0.5529545 | 0.1464217 | 3.7765 | 0.000162 | 0.711517275 | count | 1           |
| ARMH4      | 0.6188758 | 0.2975938 | 2.0796 | 0.0376   | 0.711940462 | count | 1           |
| Z93930.2   | 0.6586109 | 0.3672007 | 1.7936 | 0.073    | 0.712050307 | count | 1           |
| G3BP1      | 0.5064649 | 0.1207458 | 4.1945 | 2.80E-05 | 0.712083943 | count | 0.641928    |
| MFAP3      | 1.0119245 | 0.4745846 | 2.1322 | 0.0331   | 0.712751557 | count | 1           |
| ANKRD53    | 2.1163697 | 1.1485461 | 1.8427 | 0.0655   | 0.713052746 | count | 1           |
| ATXN2L     | 0.7079755 | 0.2853749 | 2.4809 | 0.0132   | 0.713131608 | count | 1           |
| PTPRF      | 0.5741633 | 0.2033294 | 2.8238 | 0.00477  | 0.713689441 | count | 1           |
| CGNL1      | 0.5480945 | 0.1615738 | 3.3922 | 0.000701 | 0.714132365 | count | 1           |
| TTC30B     | 0.858152  | 0.386334  | 2.2213 | 0.0264   | 0.714215493 | count | 1           |
| RIC1       | 0.6411999 | 0.281988  | 2.2739 | 0.023    | 0.714448671 | count | 1           |
| CPEB3      | 0.7986787 | 0.4407909 | 1.8119 | 0.0701   | 0.714915207 | count | 1           |



|             |           |           |        |          |             |       |             |
|-------------|-----------|-----------|--------|----------|-------------|-------|-------------|
| NGF         | 0.5811532 | 0.1744355 | 3.3316 | 0.000872 | 0.715438416 | count | 1           |
| MAN1A1      | 0.5363682 | 0.1090486 | 4.9186 | 9.10E-07 | 0.715552082 | count | 0.02117843  |
| INMT-MINDY4 | 1.0579376 | 0.5448071 | 1.9419 | 0.0522   | 0.715729218 | count | 1           |
| TNS2        | 0.5252968 | 0.1115927 | 4.7073 | 2.60E-06 | 0.716033987 | count | 0.0602654   |
| FGL2        | 0.4991753 | 0.0770303 | 6.4802 | 1.04E-10 | 0.71662876  | count | 2.46E-06    |
| SEMA4A      | 0.6797388 | 0.3272746 | 2.077  | 0.0379   | 0.716686322 | count | 1           |
| AL359541.1  | 1.7983824 | 1.2508037 | 1.4378 | 0.151    | 0.717022745 | count | 1           |
| PARP6       | 0.9039868 | 0.3449292 | 2.6208 | 0.00881  | 0.717887805 | count | 1           |
| VASH2       | 2.8818891 | 1.3725615 | 2.0996 | 0.0358   | 0.717992745 | count | 1           |
| MGLL        | 0.513436  | 0.0803334 | 6.3913 | 1.85E-10 | 0.718675518 | count | 4.38E-06    |
| MCL1        | 0.5111772 | 0.0773693 | 6.607  | 4.49E-11 | 0.718835047 | count | 1.06E-06    |
| IKZF5       | 0.6348668 | 0.3045131 | 2.0849 | 0.0372   | 0.719193619 | count | 1           |
| TPBG        | 0.5346202 | 0.1278498 | 4.1816 | 2.96E-05 | 0.719231999 | count | 0.6784024   |
| IL20RB      | 2.905401  | 1.2371811 | 2.3484 | 0.0189   | 0.719487677 | count | 1           |
| AL049775.1  | 2.1642806 | 1.2280584 | 1.7624 | 0.0781   | 0.719828345 | count | 1           |
| CD79B       | 1.0658977 | 0.5910963 | 1.8033 | 0.0714   | 0.719923519 | count | 1           |
| GCC1        | 0.7816605 | 0.4766411 | 1.6399 | 0.101    | 0.720002265 | count | 1           |
| SYNGR1      | 0.5237628 | 0.1155747 | 4.5318 | 6.03E-06 | 0.720209581 | count | 0.13923873  |
| SLC22A18    | 0.7621299 | 0.2879056 | 2.6472 | 0.00815  | 0.720494328 | count | 1           |
| ADGRB3      | 0.6474882 | 0.2919855 | 2.2175 | 0.0266   | 0.721052519 | count | 1           |
| CMTM3       | 0.538499  | 0.1064566 | 5.0584 | 4.44E-07 | 0.721132224 | count | 0.010358076 |
| TNNC2       | 0.7538562 | 0.3293829 | 2.2887 | 0.0222   | 0.72113942  | count | 1           |
| NABP1       | 0.5963007 | 0.2301711 | 2.5907 | 0.00962  | 0.721530805 | count | 1           |
| EML1        | 0.5578846 | 0.1544984 | 3.6109 | 0.000309 | 0.721847694 | count | 1           |
| TKFC        | 0.8355157 | 0.3372078 | 2.4777 | 0.0133   | 0.721965307 | count | 1           |
| AC068987.5  | 2.9470676 | 1.2331414 | 2.3899 | 0.0169   | 0.722057318 | count | 1           |
| ZNF35       | 0.7640657 | 0.3058039 | 2.4985 | 0.0125   | 0.722135506 | count | 1           |
| SGPL1       | 0.8358375 | 0.3563616 | 2.3455 | 0.0191   | 0.722206803 | count | 1           |
| AC005261.1  | 0.5949067 | 0.2250633 | 2.6433 | 0.00825  | 0.722737769 | count | 1           |
| KDM4D       | 1.606888  | 1.1547982 | 1.3915 | 0.164    | 0.723263129 | count | 1           |
| ABCA2       | 0.6591105 | 0.2789784 | 2.3626 | 0.0182   | 0.723364378 | count | 1           |
| AC007038.1  | 1.8304125 | 1.6923684 | 1.0816 | 0.2795   | 0.723592884 | count | 1           |
| AC007906.2  | 1.3400007 | 0.5814485 | 2.3046 | 0.0212   | 0.723640532 | count | 1           |
| LONRF2      | 1.3403016 | 0.4620797 | 2.9006 | 0.00375  | 0.72375045  | count | 1           |
| ISCA2       | 0.5595189 | 0.1609154 | 3.4771 | 0.000513 | 0.724475682 | count | 1           |
| KNOP1       | 0.5451561 | 0.1603439 | 3.3999 | 0.000681 | 0.725879379 | count | 1           |
| SPEF2       | 0.6942078 | 0.2642872 | 2.6267 | 0.00866  | 0.726189042 | count | 1           |
| GSTM3       | 0.5167893 | 0.0736072 | 7.0209 | 2.61E-12 | 0.726295886 | count | 6.20E-08    |
| SLC25A21    | 1.845981  | 1.033172  | 1.7867 | 0.0741   | 0.72672556  | count | 1           |
| ATP6V1B2    | 0.5712297 | 0.1449602 | 3.9406 | 8.28E-05 | 0.726859956 | count | 1           |
| SCAF4       | 0.6138627 | 0.243622  | 2.5197 | 0.0118   | 0.727076695 | count | 1           |
| ELMSAN1     | 0.5611442 | 0.1459129 | 3.8457 | 0.000122 | 0.727636018 | count | 1           |
| LPCAT4      | 0.6003145 | 0.2114607 | 2.8389 | 0.00455  | 0.727649256 | count | 1           |
| PPFIBP2     | 0.7243469 | 0.2724262 | 2.6589 | 0.00787  | 0.728210116 | count | 1           |
| LAMP2       | 0.5221707 | 0.0740983 | 7.047  | 2.17E-12 | 0.728229316 | count | 5.16E-08    |

|            |           |           |        |          |             |       |             |
|------------|-----------|-----------|--------|----------|-------------|-------|-------------|
| PNPLA6     | 0.745688  | 0.3194236 | 2.3345 | 0.0196   | 0.728357422 | count | 1           |
| FAM180A    | 0.5513137 | 0.1740121 | 3.1682 | 0.00155  | 0.728865371 | count | 1           |
| MEGF6      | 0.532232  | 0.1823851 | 2.9182 | 0.00354  | 0.729209815 | count | 1           |
| LINC00294  | 0.9215865 | 0.3956898 | 2.3291 | 0.0199   | 0.729590648 | count | 1           |
| CLCN3      | 0.5567771 | 0.1381563 | 4.0301 | 5.69E-05 | 0.730333089 | count | 1           |
| ACADS      | 0.588162  | 0.1932507 | 3.0435 | 0.00235  | 0.730537953 | count | 1           |
| AL645608.1 | 0.7409663 | 0.5019833 | 1.4761 | 0.14     | 0.730848424 | count | 1           |
| GLB1       | 0.5797578 | 0.1528922 | 3.7919 | 0.000152 | 0.730913073 | count | 1           |
| SPG11      | 0.640905  | 0.2110516 | 3.0367 | 0.00241  | 0.730968395 | count | 1           |
| SLC43A1    | 1.089146  | 0.3762469 | 2.8948 | 0.00382  | 0.73206687  | count | 1           |
| PLA2G4A    | 0.76673   | 0.3062909 | 2.5033 | 0.0123   | 0.732205037 | count | 1           |
| HAND2-AS1  | 0.6084902 | 0.2429052 | 2.5051 | 0.0123   | 0.732685311 | count | 1           |
| UBL3       | 0.5430467 | 0.0951832 | 5.7053 | 1.25E-08 | 0.732895498 | count | 0.000293975 |
| CNTNAP3B   | 0.6339474 | 0.3262666 | 1.943  | 0.0521   | 0.733122113 | count | 1           |
| SLC38A7    | 1.2749557 | 0.5066272 | 2.5166 | 0.0119   | 0.733260515 | count | 1           |
| AFDN       | 0.547175  | 0.1536925 | 3.5602 | 0.000375 | 0.733371882 | count | 1           |
| RN7SL832P  | 0.9523823 | 0.4421406 | 2.154  | 0.0313   | 0.73349042  | count | 1           |
| NAT1       | 1.0927115 | 0.5542999 | 1.9713 | 0.0488   | 0.733914948 | count | 1           |
| FAM57A     | 0.8228741 | 0.3620671 | 2.2727 | 0.0231   | 0.733915132 | count | 1           |
| ZNF93      | 0.9075385 | 0.9307605 | 0.9751 | 0.33     | 0.735044661 | count | 1           |
| EFS        | 0.5947853 | 0.1904613 | 3.1229 | 0.0018   | 0.735169342 | count | 1           |
| CYP4V2     | 0.6178548 | 0.2159803 | 2.8607 | 0.00425  | 0.735194732 | count | 1           |
| THBS4      | 1.3719893 | 0.8737388 | 1.5703 | 0.116    | 0.735203975 | count | 1           |
| HSPA1B     | 0.5137595 | 0.0733058 | 7.0084 | 2.86E-12 | 0.735904567 | count | 6.80E-08    |
| RABGAP1L   | 0.5835702 | 0.1405634 | 4.1516 | 3.38E-05 | 0.73644788  | count | 0.7741552   |
| PLD3       | 0.5209033 | 0.0626644 | 8.3126 | 1.30E-16 | 0.736581238 | count | 3.11E-12    |
| DPY19L3    | 0.7104172 | 0.3295137 | 2.156  | 0.0312   | 0.736920814 | count | 1           |
| GPHA2      | 2.295035  | 1.3314382 | 1.7237 | 0.0848   | 0.736945226 | count | 1           |
| GNPTG      | 0.5335825 | 0.0834347 | 6.3952 | 1.81E-10 | 0.73705549  | count | 4.29E-06    |
| TMEM185A   | 0.63778   | 0.2095717 | 3.0433 | 0.00236  | 0.737334485 | count | 1           |
| ARL4A      | 0.5659989 | 0.1981546 | 2.8564 | 0.00431  | 0.737965905 | count | 1           |
| HSD17B7    | 0.7064485 | 0.2046945 | 3.4512 | 0.000564 | 0.738016775 | count | 1           |
| DZIP1      | 0.6343383 | 0.2537281 | 2.5001 | 0.0125   | 0.738035015 | count | 1           |
| SRRD       | 0.6638855 | 0.2253601 | 2.9459 | 0.00324  | 0.73822866  | count | 1           |
| SLC35E3    | 0.5670163 | 0.1476803 | 3.8395 | 0.000125 | 0.738258192 | count | 1           |
| TDRP       | 1.2883001 | 0.4658668 | 2.7654 | 0.00571  | 0.738626871 | count | 1           |
| C2orf72    | 1.288815  | 0.9197142 | 1.4013 | 0.161    | 0.738832948 | count | 1           |
| STARD5     | 0.8748731 | 0.3904306 | 2.2408 | 0.0251   | 0.738993117 | count | 1           |
| DPY19L2    | 1.6693467 | 0.7422027 | 2.2492 | 0.0246   | 0.739287322 | count | 1           |
| PHYKPL     | 0.5618295 | 0.1349555 | 4.1631 | 3.21E-05 | 0.73937689  | count | 0.7353147   |
| TNKS1BP1   | 0.5860315 | 0.2107147 | 2.7812 | 0.00544  | 0.739464788 | count | 1           |
| FOSL2      | 0.5741715 | 0.1337734 | 4.2921 | 1.82E-05 | 0.74065174  | count | 0.418327    |
| L1TD1      | 0.8773139 | 0.8307045 | 1.0561 | 0.291    | 0.740759076 | count | 1           |
| ZNF454     | 0.8775875 | 0.4523289 | 1.9402 | 0.0524   | 0.740956896 | count | 1           |
| SLC39A8    | 0.6960801 | 0.2575679 | 2.7025 | 0.00691  | 0.741495154 | count | 1           |

|            |           |           |         |          |             |       |             |
|------------|-----------|-----------|---------|----------|-------------|-------|-------------|
| TLR3       | 0.6466193 | 0.2116476 | 3.0552  | 0.00227  | 0.742217207 | count | 1           |
| FBLN5      | 0.5207013 | 0.0620732 | 8.3885  | 6.94E-17 | 0.742906358 | count | 1.66E-12    |
| CXCL2      | 0.5392408 | 0.253523  | 2.127   | 0.0335   | 0.743130988 | count | 1           |
| DPYD       | 0.5905282 | 0.1688786 | 3.4968  | 0.000477 | 0.743202362 | count | 1           |
| ZNF816     | 1.2999108 | 0.617776  | 2.1042  | 0.0354   | 0.743258088 | count | 1           |
| NYNRIN     | 0.7632565 | 0.3260712 | 2.3408  | 0.0193   | 0.743851119 | count | 1           |
| WDR19      | 0.6339609 | 0.3072926 | 2.0631  | 0.0392   | 0.743936755 | count | 1           |
| CHKA       | 0.9016374 | 0.5190471 | 1.7371  | 0.0825   | 0.744970488 | count | 1           |
| IL15RA     | 0.590656  | 0.1567189 | 3.7689  | 0.000167 | 0.745130743 | count | 1           |
| SIRT1      | 0.6329028 | 0.2115329 | 2.992   | 0.00279  | 0.746713062 | count | 1           |
| SLITRK4    | 0.7014812 | 0.3481604 | 2.0148  | 0.044    | 0.746832571 | count | 1           |
| KIAA1614   | 0.8535256 | 0.5732123 | 1.489   | 0.137    | 0.746838774 | count | 1           |
| INPP5E     | 1.0361001 | 0.45516   | 2.2763  | 0.0229   | 0.747135653 | count | 1           |
| LPCAT1     | 0.6463773 | 0.2549395 | 2.5354  | 0.0113   | 0.749090936 | count | 1           |
| ABHD6      | 0.9514014 | 0.379058  | 2.5099  | 0.0121   | 0.749196809 | count | 1           |
| GNPTAB     | 0.5673805 | 0.1590691 | 3.5669  | 0.000366 | 0.750088941 | count | 1           |
| FOXO1      | 0.5793579 | 0.1382063 | 4.192   | 2.83E-05 | 0.750711146 | count | 0.6487492   |
| SERTAD1    | 0.5301334 | 0.0726143 | 7.3007  | 3.49E-13 | 0.751088235 | count | 8.31E-09    |
| NOL6       | 0.7986905 | 0.4575619 | 1.7455  | 0.081    | 0.751303094 | count | 1           |
| ZBTB20-AS2 | 1.1274239 | 0.4571466 | 2.4662  | 0.0137   | 0.751714167 | count | 1           |
| FANK1      | 1.419498  | 1.0496933 | 1.3523  | 0.176    | 0.751915529 | count | 1           |
| SOAT1      | 0.5939816 | 0.1739472 | 3.4147  | 0.000645 | 0.752602224 | count | 1           |
| LRRN1      | 1.246042  | 1.0931343 | 1.1399  | 0.254    | 0.752724346 | count | 1           |
| FGD4       | 0.5829579 | 0.1372199 | 4.2483  | 2.21E-05 | 0.753525286 | count | 0.5074381   |
| AL161457.2 | 1.1311362 | 0.5887839 | 1.9211  | 0.0548   | 0.753596806 | count | 1           |
| KLF10      | 0.5465753 | 0.1096902 | 4.9829  | 6.55E-07 | 0.753760179 | count | 0.01526805  |
| ACLY       | 0.6258125 | 0.1707944 | 3.6641  | 0.000252 | 0.7542754   | count | 1           |
| COPG1      | 0.5868801 | 0.1754219 | 3.3455  | 0.000829 | 0.75473912  | count | 1           |
| RTN4       | 0.5275609 | 0.0404155 | 13.0534 | 4.24E-38 | 0.755022465 | count | 1.03E-33    |
| POLR2J3    | 0.8376133 | 0.8545102 | 0.9802  | 0.327    | 0.755604431 | count | 1           |
| C2orf81    | 1.3317387 | 0.6170664 | 2.1582  | 0.031    | 0.755773402 | count | 1           |
| PROS1      | 0.539129  | 0.0840391 | 6.4152  | 1.59E-10 | 0.756017174 | count | 3.77E-06    |
| PPP2R2A    | 0.5518962 | 0.0970196 | 5.6885  | 1.38E-08 | 0.756390422 | count | 0.000324507 |
| DPYSL2     | 0.541653  | 0.0784241 | 6.9067  | 5.82E-12 | 0.757396147 | count | 1.38E-07    |
| CORO2B     | 1.7450618 | 0.5598402 | 3.1171  | 0.00184  | 0.757703583 | count | 1           |
| CCNH       | 0.5584807 | 0.1130897 | 4.9384  | 8.23E-07 | 0.757727483 | count | 0.019162732 |
| TEPSIN     | 0.8403389 | 0.422014  | 1.9913  | 0.0465   | 0.757756233 | count | 1           |
| IRAK3      | 0.5877734 | 0.1684812 | 3.4887  | 0.000491 | 0.757768296 | count | 1           |
| TNKS2      | 0.5775268 | 0.1353481 | 4.267   | 2.03E-05 | 0.758329983 | count | 0.4663925   |
| ZNF354C    | 0.8424228 | 0.4004171 | 2.1039  | 0.0355   | 0.759399913 | count | 1           |
| EBF1       | 0.5469306 | 0.0838483 | 6.5229  | 7.84E-11 | 0.760207918 | count | 1.86E-06    |
| NBPF9      | 0.96836   | 0.6209641 | 1.5594  | 0.119    | 0.760225461 | count | 1           |
| STRN       | 0.5958276 | 0.1924288 | 3.0964  | 0.00197  | 0.760353238 | count | 1           |
| GPR1       | 2.5025544 | 0.9661941 | 2.5901  | 0.00963  | 0.760359411 | count | 1           |
| SLC15A4    | 0.5803118 | 0.1509378 | 3.8447  | 0.000123 | 0.760564788 | count | 1           |

|             |           |           |        |          |             |       |            |
|-------------|-----------|-----------|--------|----------|-------------|-------|------------|
| AP001528.2  | 0.5501496 | 0.1163347 | 4.729  | 2.34E-06 | 0.760571075 | count | 0.05425524 |
| ATP6V1G2    | 2.0297636 | 0.9767462 | 2.0781 | 0.0378   | 0.760827355 | count | 1          |
| PARPBP      | 1.7616112 | 0.7480038 | 2.3551 | 0.0186   | 0.761585692 | count | 1          |
| SLC43A2     | 0.9704855 | 0.5820583 | 1.6673 | 0.0955   | 0.761601418 | count | 1          |
| ASB13       | 0.6776249 | 0.4193482 | 1.6159 | 0.106    | 0.761906324 | count | 1          |
| CD74        | 0.5331431 | 0.1109668 | 4.8045 | 1.61E-06 | 0.762078886 | count | 0.03738581 |
| RNF44       | 1.2030326 | 0.4358006 | 2.7605 | 0.0058   | 0.762374375 | count | 1          |
| PER1        | 0.5868293 | 0.1437575 | 4.0821 | 4.56E-05 | 0.762399243 | count | 1          |
| EPS8L1      | 1.0644707 | 0.5523079 | 1.9273 | 0.054    | 0.763291164 | count | 1          |
| DRAM1       | 0.5914568 | 0.1430989 | 4.1332 | 3.66E-05 | 0.76363776  | count | 0.837957   |
| MAU2        | 0.67405   | 0.2499414 | 2.6968 | 0.00703  | 0.763892231 | count | 1          |
| PXYLP1      | 0.76356   | 0.3266156 | 2.3378 | 0.0195   | 0.76402073  | count | 1          |
| ZNF649      | 0.679776  | 0.2634871 | 2.5799 | 0.00992  | 0.764181279 | count | 1          |
| DLX5        | 0.537139  | 0.1218844 | 4.407  | 1.08E-05 | 0.764882064 | count | 0.2487564  |
| ARL5B       | 0.6750843 | 0.2118774 | 3.1862 | 0.00145  | 0.764997179 | count | 1          |
| CABP1       | 1.460105  | 0.4084886 | 3.5744 | 0.000356 | 0.765767624 | count | 1          |
| MON2        | 0.5948798 | 0.1700199 | 3.4989 | 0.000473 | 0.767328986 | count | 1          |
| FAM171B     | 0.7904805 | 0.2251785 | 3.5105 | 0.000453 | 0.767682926 | count | 1          |
| PRKAR2B     | 0.683502  | 0.1795751 | 3.8062 | 0.000143 | 0.768119415 | count | 1          |
| BRPF1       | 0.898049  | 0.3917268 | 2.2925 | 0.0219   | 0.768293128 | count | 1          |
| AC007952.4  | 0.7114631 | 0.3494152 | 2.0362 | 0.0418   | 0.769213964 | count | 1          |
| PLCG2       | 0.5395573 | 0.1358385 | 3.972  | 7.26E-05 | 0.770541277 | count | 1          |
| ASXL2       | 0.6780888 | 0.2648156 | 2.5606 | 0.0105   | 0.770993895 | count | 1          |
| CDC6        | 2.6180527 | 1.1271017 | 2.3228 | 0.0202   | 0.771618571 | count | 1          |
| LRR6        | 1.3753393 | 0.5160178 | 2.6653 | 0.00773  | 0.772493424 | count | 1          |
| UBTD2       | 0.5990055 | 0.1754529 | 3.4141 | 0.000647 | 0.772517166 | count | 1          |
| PLEKHA5     | 0.5606365 | 0.0943948 | 5.9393 | 3.13E-09 | 0.772646424 | count | 7.38E-05   |
| PRMT6       | 0.8163812 | 0.4761448 | 1.7146 | 0.0865   | 0.774424507 | count | 1          |
| CLEC16A     | 1.2975794 | 0.5437131 | 2.3865 | 0.0171   | 0.774677164 | count | 1          |
| RAD51B      | 0.9665367 | 0.4345124 | 2.2244 | 0.0262   | 0.774795979 | count | 1          |
| HELZ        | 0.6004053 | 0.184136  | 3.2607 | 0.00112  | 0.775520443 | count | 1          |
| SETD4       | 0.6623326 | 0.2755292 | 2.4039 | 0.0163   | 0.775599296 | count | 1          |
| DDI2        | 0.7355668 | 0.3708976 | 1.9832 | 0.0474   | 0.775715202 | count | 1          |
| CLSTN3      | 0.9471186 | 0.3465328 | 2.7331 | 0.0063   | 0.776507429 | count | 1          |
| IPO11       | 0.994839  | 0.4023503 | 2.4726 | 0.0135   | 0.777266208 | count | 1          |
| ANKS1A      | 0.6420161 | 0.2030419 | 3.162  | 0.00158  | 0.777673876 | count | 1          |
| RBM12       | 0.6874286 | 0.2304612 | 2.9828 | 0.00287  | 0.778165594 | count | 1          |
| PRELP       | 0.5422746 | 0.0553906 | 9.79   | 2.33E-22 | 0.778463995 | count | 5.61E-18   |
| SEPSECS-AS1 | 1.180986  | 0.8066719 | 1.464  | 0.143    | 0.778487041 | count | 1          |
| DNAJB1      | 0.5463763 | 0.0896483 | 6.0947 | 1.21E-09 | 0.779183166 | count | 2.86E-05   |
| CREB3L1     | 0.7804544 | 0.2352304 | 3.3178 | 0.000916 | 0.779314612 | count | 1          |
| AL645608.8  | 0.9733827 | 0.4782711 | 2.0352 | 0.0419   | 0.779338162 | count | 1          |
| DLX6        | 0.5661053 | 0.1648924 | 3.4332 | 0.000603 | 0.779782509 | count | 1          |
| 2-Mar       | 0.6118015 | 0.170914  | 3.5796 | 0.000349 | 0.780926803 | count | 1          |
| AP002495.2  | 1.1380756 | 0.5122713 | 2.2216 | 0.0264   | 0.781244032 | count | 1          |

|            |            |             |         |          |             |       |             |
|------------|------------|-------------|---------|----------|-------------|-------|-------------|
| CMTR2      | 0.7053108  | 0.2822276   | 2.4991  | 0.0125   | 0.781334038 | count | 1           |
| IFT88      | 0.605035   | 0.1656708   | 3.652   | 0.000264 | 0.781350197 | count | 1           |
| USP24      | 0.7123402  | 0.244437    | 2.9142  | 0.00359  | 0.781531755 | count | 1           |
| PTPRN2     | 0.825179   | 0.4339475   | 1.9016  | 0.0573   | 0.781828833 | count | 1           |
| TFDP1      | 0.6606928  | 0.1910768   | 3.4577  | 0.000551 | 0.781906925 | count | 1           |
| KAZN       | 0.5917748  | 0.1806324   | 3.2761  | 0.00106  | 0.782486441 | count | 1           |
| LIMA1      | 0.5513044  | 0.0686379   | 8.0321  | 1.28E-15 | 0.782499956 | count | 3.06E-11    |
| EFHC1      | 0.6165651  | 0.1586102   | 3.8873  | 0.000103 | 0.782885029 | count | 1           |
| CFI        | 0.6072723  | 0.1336671   | 4.5432  | 5.72E-06 | 0.783540528 | count | 0.1321034   |
| ADK        | 0.592922   | 0.1209699   | 4.9014  | 9.93E-07 | 0.78397356  | count | 0.023101152 |
| EPS8L2     | 0.7545406  | 0.2471806   | 3.0526  | 0.00229  | 0.784096201 | count | 1           |
| AC107464.3 | 1.406532   | 0.927652    | 1.5162  | 0.13     | 0.784157261 | count | 1           |
| CD276      | 0.6518814  | 0.1713493   | 3.8044  | 0.000144 | 0.784356284 | count | 1           |
| AC004494.1 | 16.5518505 | 1780.936528 | 0.0093  | 0.993    | 0.784415294 | count | 1           |
| LINC00926  | 16.67405   | 1076.122051 | 0.0155  | 0.9876   | 0.784415302 | count | 1           |
| HIST3H2BB  | 16.8347217 | 1682.931755 | 0.01    | 0.992    | 0.784415311 | count | 1           |
| LINC01186  | 16.943737  | 1346.603083 | 0.0126  | 0.99     | 0.784415316 | count | 1           |
| EPHA7      | 16.9675926 | 1035.20757  | 0.0164  | 0.987    | 0.784415317 | count | 1           |
| AL118505.1 | 17.0995988 | 2701.147041 | 0.0063  | 0.995    | 0.784415322 | count | 1           |
| ART5       | 17.1316645 | 1160.505294 | 0.0148  | 0.988    | 0.784415324 | count | 1           |
| BMP7       | 17.2641603 | 1123.776564 | 0.0154  | 0.988    | 0.784415328 | count | 1           |
| AK8        | 17.2739691 | 1389.991078 | 0.0124  | 0.99     | 0.784415329 | count | 1           |
| ODF3L1     | 17.2852362 | 1686.983251 | 0.0102  | 0.992    | 0.784415329 | count | 1           |
| CATSPERZ   | 17.5579028 | 1646.529224 | 0.0107  | 0.991    | 0.784415337 | count | 1           |
| AC024132.3 | 17.650794  | 1648.709668 | 0.0107  | 0.991    | 0.784415339 | count | 1           |
| AL133410.1 | 17.6521685 | 2132.344    | 0.0083  | 0.993    | 0.784415339 | count | 1           |
| LENEP      | 17.6557875 | 3865.490443 | 0.0046  | 0.996    | 0.784415339 | count | 1           |
| TOGARAM2   | 17.7207549 | 2782.407811 | 0.0064  | 0.995    | 0.78441534  | count | 1           |
| DBX2       | 17.8574635 | 1509.029557 | 0.0118  | 0.991    | 0.784415343 | count | 1           |
| EPHA5      | 16.831616  | 814.7437406 | 0.0207  | 0.984    | 0.784415371 | count | 1           |
| SLC16A14   | 16.8692732 | 1029.20123  | 0.0164  | 0.987    | 0.784415373 | count | 1           |
| LMX1A      | 16.9175912 | 1037.457865 | 0.0163  | 0.987    | 0.784415375 | count | 1           |
| LINC01748  | 17.6546894 | 3356.5735   | 0.0053  | 0.996    | 0.7844154   | count | 1           |
| PLAC9      | 0.5455401  | 0.0397604   | 13.7207 | 8.09E-42 | 0.784454682 | count | 1.96E-37    |
| PHETA2     | 0.7024425  | 0.194675    | 3.6083  | 0.000312 | 0.784936434 | count | 1           |
| CCDC36     | 1.5194548  | 0.5821482   | 2.6101  | 0.00909  | 0.785310838 | count | 1           |
| KLF13      | 0.5609361  | 0.0845466   | 6.6346  | 3.73E-11 | 0.78606308  | count | 8.85E-07    |
| AP006621.3 | 0.8051366  | 0.3271731   | 2.4609  | 0.0139   | 0.78772294  | count | 1           |
| TMC6       | 1.5295891  | 0.8717964   | 1.7545  | 0.0794   | 0.788565786 | count | 1           |
| INVS       | 0.7848279  | 0.3043999   | 2.5783  | 0.00997  | 0.789597427 | count | 1           |
| CEP131     | 0.8964195  | 0.3863466   | 2.3202  | 0.0204   | 0.790565703 | count | 1           |
| BHMT2      | 0.6115791  | 0.1791109   | 3.4145  | 0.000646 | 0.790822758 | count | 1           |
| SHE        | 1.3368196  | 0.5416003   | 2.4683  | 0.0136   | 0.790910677 | count | 1           |
| CYP7B1     | 0.7420889  | 0.1759988   | 4.2164  | 2.54E-05 | 0.79123803  | count | 0.5825744   |
| PTCH1      | 0.8092328  | 0.3166479   | 2.5556  | 0.0106   | 0.791312703 | count | 1           |

|            |           |           |        |          |             |       |            |
|------------|-----------|-----------|--------|----------|-------------|-------|------------|
| SUMO4      | 1.8970743 | 1.0000245 | 1.897  | 0.0579   | 0.791512731 | count | 1          |
| RIPOR3     | 2.867646  | 1.085198  | 2.6425 | 0.00826  | 0.792241333 | count | 1          |
| TMEM99     | 0.6138748 | 0.1516698 | 4.0474 | 5.28E-05 | 0.792473449 | count | 1          |
| AHDC1      | 0.6419442 | 0.203981  | 3.1471 | 0.00166  | 0.792563715 | count | 1          |
| PTK2B      | 0.9316033 | 0.5329342 | 1.7481 | 0.0805   | 0.79265008  | count | 1          |
| SOGA1      | 0.775213  | 0.2663826 | 2.9101 | 0.00363  | 0.792672752 | count | 1          |
| RHBDL1     | 1.3413125 | 0.6704282 | 2.0007 | 0.0455   | 0.792743041 | count | 1          |
| AIF1L      | 0.6357331 | 0.2133257 | 2.9801 | 0.0029   | 0.793134298 | count | 1          |
| IFT122     | 0.6997449 | 0.3113242 | 2.2476 | 0.0247   | 0.794159085 | count | 1          |
| RAB3IL1    | 0.6670713 | 0.1430844 | 4.6621 | 3.24E-06 | 0.794789261 | count | 0.07503192 |
| FGFR1      | 0.5655488 | 0.0725799 | 7.7921 | 8.52E-15 | 0.796318698 | count | 2.03E-10   |
| H6PD       | 0.6128684 | 0.1650169 | 3.714  | 0.000207 | 0.796539169 | count | 1          |
| CYSLTR1    | 0.904921  | 0.4205818 | 2.1516 | 0.0315   | 0.797006099 | count | 1          |
| CIT        | 0.8348292 | 0.5572323 | 1.4982 | 0.134    | 0.798141958 | count | 1          |
| MIR222HG   | 0.7948278 | 0.3770822 | 2.1078 | 0.0351   | 0.798687623 | count | 1          |
| RNF139     | 0.6432054 | 0.1829571 | 3.5156 | 0.000444 | 0.79879648  | count | 1          |
| GPSM1      | 0.879972  | 0.5834561 | 1.5082 | 0.132    | 0.799069607 | count | 1          |
| ZDHHC8     | 0.7194384 | 0.2665761 | 2.6988 | 0.00699  | 0.799364202 | count | 1          |
| CYP3A5     | 1.2868961 | 0.6088794 | 2.1135 | 0.0346   | 0.800434525 | count | 1          |
| IQUB       | 1.5681652 | 0.7420865 | 2.1132 | 0.0347   | 0.800739663 | count | 1          |
| ITFG2      | 0.6451464 | 0.190795  | 3.3814 | 0.000729 | 0.80112044  | count | 1          |
| GSC        | 0.9837046 | 0.3579943 | 2.7478 | 0.00603  | 0.801405708 | count | 1          |
| HHLA3      | 0.6992245 | 0.2726431 | 2.5646 | 0.0104   | 0.801825249 | count | 1          |
| USP44      | 1.1788715 | 0.3656722 | 3.2238 | 0.00128  | 0.80237673  | count | 1          |
| IPO13      | 1.2307782 | 0.4518083 | 2.7241 | 0.00648  | 0.802626891 | count | 1          |
| VPS35L     | 0.7077971 | 0.2074021 | 3.4127 | 0.00065  | 0.80274458  | count | 1          |
| RSRP1      | 0.5669392 | 0.0689689 | 8.2202 | 2.79E-16 | 0.803181412 | count | 6.67E-12   |
| AC087386.1 | 1.368857  | 0.6737581 | 2.0317 | 0.0423   | 0.803858918 | count | 1          |
| TP53I11    | 0.658619  | 0.216858  | 3.0371 | 0.00241  | 0.804358063 | count | 1          |
| ACKR1      | 0.7472964 | 0.6588452 | 1.1343 | 0.257    | 0.8050479   | count | 1          |
| EDC3       | 0.9028281 | 0.3861675 | 2.3379 | 0.0194   | 0.806462168 | count | 1          |
| TRRAP      | 0.7300651 | 0.3285447 | 2.2221 | 0.0263   | 0.806891918 | count | 1          |
| SIRPA      | 0.8779332 | 0.2702732 | 3.2483 | 0.00117  | 0.807283429 | count | 1          |
| SIPA1L2    | 0.7378996 | 0.3412674 | 2.1622 | 0.0307   | 0.807584654 | count | 1          |
| SPIN2A     | 0.9351263 | 0.3550442 | 2.6338 | 0.00848  | 0.807727039 | count | 1          |
| METTL7A    | 0.5823508 | 0.0756737 | 7.6956 | 1.80E-14 | 0.808947009 | count | 4.29E-10   |
| AUTS2      | 0.6330557 | 0.2145865 | 2.9501 | 0.0032   | 0.809568416 | count | 1          |
| NUP35      | 0.6843145 | 0.1961759 | 3.4883 | 0.000492 | 0.810483328 | count | 1          |
| AP001157.1 | 0.7945387 | 0.5165055 | 1.5383 | 0.124    | 0.810594437 | count | 1          |
| SRGAP2     | 0.660489  | 0.2121668 | 3.1131 | 0.00187  | 0.810680055 | count | 1          |
| STK38      | 0.7003724 | 0.2391979 | 2.928  | 0.00343  | 0.81069558  | count | 1          |
| LAMB2      | 0.580207  | 0.0911167 | 6.3677 | 2.16E-10 | 0.811443347 | count | 5.11E-06   |
| WDR37      | 0.850721  | 0.2990109 | 2.8451 | 0.00446  | 0.811580391 | count | 1          |
| ZNF736     | 0.9581474 | 0.433693  | 2.2093 | 0.0272   | 0.811667877 | count | 1          |
| CSRNP2     | 0.7836459 | 0.4840157 | 1.6191 | 0.106    | 0.811676115 | count | 1          |

|            |           |           |         |          |             |       |            |
|------------|-----------|-----------|---------|----------|-------------|-------|------------|
| PAPSS2     | 0.7629617 | 0.2285501 | 3.3383  | 0.000851 | 0.811711341 | count | 1          |
| CYP4X1     | 0.591341  | 0.145701  | 4.0586  | 5.04E-05 | 0.812107578 | count | 1          |
| DDHD1      | 0.6877371 | 0.2303098 | 2.9861  | 0.00284  | 0.812325481 | count | 1          |
| DNAH1      | 2.0069855 | 2.1898953 | 0.9165  | 0.3595   | 0.813494683 | count | 1          |
| MAF        | 0.6655113 | 0.1559983 | 4.2661  | 2.04E-05 | 0.813846213 | count | 0.4686696  |
| EFCAB7     | 0.8370249 | 0.2622376 | 3.1919  | 0.00143  | 0.815537725 | count | 1          |
| ARHGAP32   | 1.4011946 | 0.4872124 | 2.8759  | 0.00405  | 0.816653707 | count | 1          |
| CBLN1      | 0.8779682 | 0.4298285 | 2.0426  | 0.0412   | 0.816729133 | count | 1          |
| AC114284.1 | 1.6209074 | 0.9548658 | 1.6975  | 0.0897   | 0.816838561 | count | 1          |
| FAM13A     | 0.6181346 | 0.1356411 | 4.5571  | 5.35E-06 | 0.817024438 | count | 0.12361175 |
| RBPJ       | 0.5825339 | 0.0775774 | 7.5091  | 7.44E-14 | 0.81798309  | count | 1.77E-09   |
| FZD2       | 0.6386489 | 0.1911449 | 3.3412  | 0.000843 | 0.818009273 | count | 1          |
| PTCH2      | 1.0908354 | 0.4787763 | 2.2784  | 0.0228   | 0.818522711 | count | 1          |
| ATP1B2     | 0.7422258 | 0.2359218 | 3.1461  | 0.00167  | 0.819391534 | count | 1          |
| EBP        | 0.6595707 | 0.1745025 | 3.7797  | 0.00016  | 0.819535993 | count | 1          |
| FZD7       | 0.6552781 | 0.1973219 | 3.3209  | 0.000906 | 0.819888741 | count | 1          |
| LIG4       | 0.8955336 | 0.2679114 | 3.3426  | 0.000838 | 0.821346425 | count | 1          |
| PLEKHF1    | 0.6521232 | 0.1574705 | 4.1412  | 3.53E-05 | 0.822055088 | count | 0.8084759  |
| FAM162B    | 0.7607042 | 0.2146458 | 3.544   | 0.000399 | 0.822601226 | count | 1          |
| ALDH2      | 0.5784908 | 0.0489229 | 11.8245 | 1.09E-31 | 0.822789786 | count | 2.63E-27   |
| F8A1       | 0.6400741 | 0.1502279 | 4.2607  | 2.09E-05 | 0.823352371 | count | 0.4799894  |
| ACOX1      | 0.6590836 | 0.1627758 | 4.049   | 5.25E-05 | 0.823413882 | count | 1          |
| KLF9       | 0.5884062 | 0.0654416 | 8.9913  | 3.83E-19 | 0.823681361 | count | 9.19E-15   |
| MAGI3      | 0.8090809 | 0.2489441 | 3.2501  | 0.00116  | 0.82401023  | count | 1          |
| ITIH5      | 0.607611  | 0.1279204 | 4.7499  | 2.11E-06 | 0.824034726 | count | 0.04893301 |
| ATRN       | 0.8160693 | 0.2791463 | 2.9234  | 0.00348  | 0.824280262 | count | 1          |
| SCN1B      | 0.6619965 | 0.1881268 | 3.5189  | 0.000439 | 0.824719263 | count | 1          |
| CLTRN      | 1.8199314 | 1.8296202 | 0.9947  | 0.3199   | 0.824995349 | count | 1          |
| CENPW      | 1.1039729 | 0.3392871 | 3.2538  | 0.00115  | 0.826281776 | count | 1          |
| SLC19A2    | 1.1396245 | 0.4141138 | 2.752   | 0.00595  | 0.826543798 | count | 1          |
| TRIM73     | 0.8265994 | 0.2838397 | 2.9122  | 0.00361  | 0.827377387 | count | 1          |
| PDE10A     | 1.106031  | 0.7477669 | 1.4791  | 0.139    | 0.827492408 | count | 1          |
| GLT8D1     | 0.6041479 | 0.0959671 | 6.2954  | 3.43E-10 | 0.828823585 | count | 8.11E-06   |
| PAXIP1     | 0.9051499 | 0.3305857 | 2.738   | 0.00621  | 0.828989466 | count | 1          |
| RAD18      | 0.8932133 | 0.332256  | 2.6883  | 0.00721  | 0.829090616 | count | 1          |
| GNS        | 0.6312335 | 0.1347242 | 4.6854  | 2.90E-06 | 0.830970262 | count | 0.0671901  |
| AC234582.1 | 1.1126709 | 0.6307952 | 1.7639  | 0.0778   | 0.831389241 | count | 1          |
| AC144831.1 | 1.5407867 | 0.9108053 | 1.6917  | 0.0908   | 0.831590276 | count | 1          |
| CLIP4      | 0.7112458 | 0.1905898 | 3.7318  | 0.000193 | 0.832075921 | count | 1          |
| FAM117B    | 0.8655701 | 0.2797887 | 3.0937  | 0.00199  | 0.832280673 | count | 1          |
| CDCA7L     | 0.8249847 | 0.3282066 | 2.5136  | 0.012    | 0.832382661 | count | 1          |
| SH3BP2     | 1.0889713 | 0.3605667 | 3.0202  | 0.00254  | 0.836069486 | count | 1          |
| WIP1       | 0.6738888 | 0.1441023 | 4.6765  | 3.02E-06 | 0.8366537   | count | 0.06996132 |
| TRIL       | 3.7842059 | 1.3351704 | 2.8342  | 0.00462  | 0.837268278 | count | 1          |
| AL161772.1 | 0.7848476 | 0.2713677 | 2.8922  | 0.00385  | 0.837717729 | count | 1          |

|            |           |           |        |          |             |       |             |
|------------|-----------|-----------|--------|----------|-------------|-------|-------------|
| YY2        | 1.0917417 | 0.9723157 | 1.1228 | 0.262    | 0.837757984 | count | 1           |
| MNS1       | 0.6954509 | 0.1973073 | 3.5247 | 0.000429 | 0.837801178 | count | 1           |
| TOB1       | 0.5985643 | 0.0813941 | 7.3539 | 2.36E-13 | 0.838428446 | count | 5.62E-09    |
| HDAC7      | 0.6707797 | 0.1687292 | 3.9755 | 7.16E-05 | 0.838585518 | count | 1           |
| GREM2      | 0.6295949 | 0.2680392 | 2.3489 | 0.0189   | 0.838593191 | count | 1           |
| CPT1A      | 0.6411132 | 0.1680386 | 3.8153 | 0.000138 | 0.838877974 | count | 1           |
| NR4A3      | 0.7450436 | 0.3090506 | 2.4107 | 0.016    | 0.839151907 | count | 1           |
| AKR1C1     | 0.615867  | 0.1042503 | 5.9076 | 3.79E-09 | 0.839596649 | count | 8.93E-05    |
| CLMN       | 0.8481079 | 0.227718  | 3.7244 | 0.000199 | 0.839730496 | count | 1           |
| RPN1       | 0.6124205 | 0.098104  | 6.2426 | 4.80E-10 | 0.839896701 | count | 1.13E-05    |
| CELF2      | 0.6109908 | 0.1005725 | 6.0751 | 1.37E-09 | 0.840063338 | count | 3.23E-05    |
| EPB41L2    | 0.5929748 | 0.0617673 | 9.6001 | 1.43E-21 | 0.841265171 | count | 3.44E-17    |
| LINC00891  | 1.0442464 | 0.5649541 | 1.8484 | 0.0646   | 0.841678673 | count | 1           |
| FAM43B     | 2.6349549 | 1.078415  | 2.4434 | 0.0146   | 0.841749876 | count | 1           |
| TRHDE      | 1.4669945 | 0.6490712 | 2.2601 | 0.0239   | 0.841844462 | count | 1           |
| GTF3C1     | 0.7056604 | 0.207269  | 3.4046 | 0.00067  | 0.842317276 | count | 1           |
| SH3BGR2    | 0.7059553 | 0.3712091 | 1.9018 | 0.0573   | 0.842651868 | count | 1           |
| LCA5L      | 1.1690534 | 0.5612726 | 2.0829 | 0.0373   | 0.842898489 | count | 1           |
| AC079298.3 | 2.6551941 | 1.1722387 | 2.2651 | 0.0236   | 0.843775742 | count | 1           |
| BMPER      | 0.8066817 | 0.3722704 | 2.1669 | 0.0303   | 0.844117723 | count | 1           |
| AHNAK2     | 0.6633954 | 0.1425215 | 4.6547 | 3.36E-06 | 0.844746358 | count | 0.07779072  |
| OLFML2B    | 0.6111734 | 0.0854466 | 7.1527 | 1.02E-12 | 0.844877309 | count | 2.43E-08    |
| AL583785.1 | 2.6707685 | 1.1157144 | 2.3938 | 0.0167   | 0.845309411 | count | 1           |
| SLC1A3     | 2.191236  | 0.96056   | 2.2812 | 0.0226   | 0.846122658 | count | 1           |
| ITGA5      | 0.6655946 | 0.23116   | 2.8794 | 0.00401  | 0.848285127 | count | 1           |
| SMAD3      | 0.6685015 | 0.1602173 | 4.1725 | 3.08E-05 | 0.848470868 | count | 0.7056896   |
| ZNF600     | 1.222423  | 0.427661  | 2.8584 | 0.00428  | 0.848772532 | count | 1           |
| MPZL1      | 0.6203295 | 0.0995358 | 6.2322 | 5.12E-10 | 0.849747817 | count | 1.21E-05    |
| CD68       | 0.6376825 | 0.1285579 | 4.9603 | 7.36E-07 | 0.849838677 | count | 0.017147328 |
| GJC2       | 1.4928556 | 0.6440704 | 2.3178 | 0.0205   | 0.851439797 | count | 1           |
| HACE1      | 0.9101838 | 0.374426  | 2.4309 | 0.0151   | 0.852159852 | count | 1           |
| SPATA7     | 0.674511  | 0.3240943 | 2.0812 | 0.0375   | 0.852193652 | count | 1           |
| GNAO1      | 1.0605347 | 0.8108802 | 1.3079 | 0.191    | 0.852315382 | count | 1           |
| MAMDC2     | 0.8223577 | 0.2171329 | 3.7873 | 0.000155 | 0.853591904 | count | 1           |
| RUNX1T1    | 0.6590934 | 0.1416877 | 4.6517 | 3.41E-06 | 0.853789709 | count | 0.07894491  |
| C1RL-AS1   | 0.8643929 | 0.399592  | 2.1632 | 0.0306   | 0.85407231  | count | 1           |
| HOXA3      | 0.6534827 | 0.180196  | 3.6265 | 0.000291 | 0.854662985 | count | 1           |
| TRIM11     | 0.767197  | 0.2921217 | 2.6263 | 0.00867  | 0.855697315 | count | 1           |
| LPIN3      | 0.7366009 | 0.2171975 | 3.3914 | 0.000703 | 0.857664863 | count | 1           |
| TMEM30B    | 0.6608697 | 0.1657106 | 3.9881 | 6.79E-05 | 0.857873123 | count | 1           |
| KIAA0100   | 0.6916651 | 0.1687674 | 4.0983 | 4.25E-05 | 0.859068147 | count | 0.972315    |
| ACYP1      | 0.6389712 | 0.1335209 | 4.7856 | 1.77E-06 | 0.859929647 | count | 0.04108524  |
| GBGT1      | 0.909     | 0.4354922 | 2.0872 | 0.0369   | 0.860124449 | count | 1           |
| TRIOBP     | 0.6373791 | 0.1174666 | 5.426  | 6.13E-08 | 0.860832838 | count | 0.001436872 |
| DLAT       | 0.8426685 | 0.2615831 | 3.2214 | 0.00129  | 0.860924283 | count | 1           |



|            |            |             |        |          |             |       |             |
|------------|------------|-------------|--------|----------|-------------|-------|-------------|
| AC073115.1 | 1.5229974  | 2.3848979   | 0.6386 | 0.5231   | 0.862409069 | count | 1           |
| CHST12     | 0.6324122  | 0.1194608   | 5.2939 | 1.27E-07 | 0.862536721 | count | 0.002972562 |
| TCN2       | 0.7561834  | 0.2261536   | 3.3437 | 0.000835 | 0.863011034 | count | 1           |
| PID1       | 0.6218386  | 0.0789386   | 7.8775 | 4.37E-15 | 0.863608295 | count | 1.04E-10    |
| TMEM19     | 0.7430612  | 0.2173923   | 3.4181 | 0.000638 | 0.86474595  | count | 1           |
| ZNF609     | 0.7563081  | 0.3657497   | 2.0678 | 0.0387   | 0.865994142 | count | 1           |
| BHLHE41    | 0.6321672  | 0.1245007   | 5.0776 | 4.01E-07 | 0.866197114 | count | 0.009357335 |
| ANGPTL4    | 0.6375306  | 0.1519915   | 4.1945 | 2.80E-05 | 0.86625076  | count | 0.641928    |
| AVIL       | 1.5340549  | 0.7131646   | 2.1511 | 0.0315   | 0.866375732 | count | 1           |
| VPS13D     | 0.6894265  | 0.2233213   | 3.0872 | 0.00204  | 0.866387053 | count | 1           |
| POMGNT2    | 0.8646235  | 0.2236207   | 3.8665 | 0.000112 | 0.868126224 | count | 1           |
| LINC01239  | 16.7953874 | 684.2781242 | 0.0245 | 0.98     | 0.868365397 | count | 1           |
| SPHKAP     | 16.937459  | 884.4362315 | 0.0192 | 0.985    | 0.868365405 | count | 1           |
| HOXC4      | 16.9812537 | 618.1637046 | 0.0275 | 0.9781   | 0.868365408 | count | 1           |
| HCN1       | 17.0374698 | 1089.729154 | 0.0156 | 0.988    | 0.86836541  | count | 1           |
| TMEM132B   | 17.0493633 | 1149.225854 | 0.0148 | 0.9882   | 0.868365411 | count | 1           |
| ZNF233     | 17.1897054 | 1330.123259 | 0.0129 | 0.9897   | 0.868365417 | count | 1           |
| GDF6       | 17.4628123 | 1063.909642 | 0.0164 | 0.987    | 0.868365427 | count | 1           |
| AC005730.2 | 17.7844845 | 1452.21149  | 0.0122 | 0.99     | 0.868365435 | count | 1           |
| SPRR2G     | 17.7872161 | 2417.890934 | 0.0074 | 0.994    | 0.868365435 | count | 1           |
| TMEM45B    | 17.7897291 | 3652.766654 | 0.0049 | 0.996    | 0.868365435 | count | 1           |
| AC123912.1 | 17.7897293 | 3652.766733 | 0.0049 | 0.996    | 0.868365435 | count | 1           |
| SLC6A15    | 18.0227151 | 1568.084074 | 0.0115 | 0.991    | 0.86836544  | count | 1           |
| GNAZ       | 16.6151217 | 1097.80668  | 0.0151 | 0.9879   | 0.868365451 | count | 1           |
| S100A14    | 17.4368886 | 2910.634387 | 0.006  | 0.995    | 0.868365491 | count | 1           |
| KCNIP4     | 17.786334  | 2059.910786 | 0.0086 | 0.993    | 0.868365501 | count | 1           |
| KHDRBS2    | 17.7867129 | 2304.441638 | 0.0077 | 0.994    | 0.868365501 | count | 1           |
| KPNA1      | 0.6815569  | 0.2014842   | 3.3827 | 0.000725 | 0.868806843 | count | 1           |
| SH3PXD2B   | 0.7427437  | 0.2296311   | 3.2345 | 0.00123  | 0.869165751 | count | 1           |
| ADAMTS4    | 0.9314033  | 0.3023134   | 3.0809 | 0.00208  | 0.869369677 | count | 1           |
| ANGPTL1    | 0.6440616  | 0.1044955   | 6.1635 | 7.88E-10 | 0.869706491 | count | 1.86E-05    |
| NPR1       | 0.6657992  | 0.1340344   | 4.9674 | 7.10E-07 | 0.869825886 | count | 0.01654513  |
| CLCN4      | 1.8127788  | 0.4747368   | 3.8185 | 0.000136 | 0.870317794 | count | 1           |
| METTL27    | 1.3809691  | 0.6429018   | 2.148  | 0.0318   | 0.871133772 | count | 1           |
| NKD1       | 0.8307379  | 0.3597442   | 2.3092 | 0.021    | 0.872242798 | count | 1           |
| PAX6       | 2.3732854  | 1.9717729   | 1.2036 | 0.2288   | 0.873696646 | count | 1           |
| NDST1      | 1.0699106  | 0.4024258   | 2.6587 | 0.00788  | 0.874206699 | count | 1           |
| SOCS3      | 0.6160087  | 0.0748482   | 8.2301 | 2.57E-16 | 0.874422502 | count | 6.14E-12    |
| MRPL53     | 0.9263057  | 0.4613917   | 2.0076 | 0.0448   | 0.874443403 | count | 1           |
| GMFB       | 0.7194022  | 0.1900007   | 3.7863 | 0.000155 | 0.875239701 | count | 1           |
| Z97200.1   | 1.0966618  | 0.4432513   | 2.4741 | 0.0134   | 0.875606116 | count | 1           |
| TUBGCP4    | 0.7775117  | 0.2557446   | 3.0402 | 0.00238  | 0.876430517 | count | 1           |
| ZNF713     | 1.1925384  | 0.9238816   | 1.2908 | 0.197    | 0.877188049 | count | 1           |
| PPP1R10    | 0.6273918  | 0.0940624   | 6.67   | 2.94E-11 | 0.87850672  | count | 6.97E-07    |
| CAT        | 0.6287503  | 0.0793534   | 7.9234 | 3.04E-15 | 0.878629301 | count | 7.26E-11    |

|            |           |           |         |          |             |       |             |
|------------|-----------|-----------|---------|----------|-------------|-------|-------------|
| ALDH1A3    | 1.1293039 | 0.4416977 | 2.5567  | 0.0106   | 0.878791254 | count | 1           |
| HFE        | 1.0548784 | 0.3451179 | 3.0566  | 0.00225  | 0.879080741 | count | 1           |
| ZNF487     | 0.862801  | 0.3267009 | 2.641   | 0.0083   | 0.879366054 | count | 1           |
| TMEM51     | 1.4010842 | 0.3634901 | 3.8545  | 0.000118 | 0.879825133 | count | 1           |
| PRKAG2     | 0.6857932 | 0.1389435 | 4.9358  | 8.34E-07 | 0.880372166 | count | 0.019417188 |
| POLE       | 1.1631713 | 0.5351881 | 2.1734  | 0.0298   | 0.880460879 | count | 1           |
| B3GNT7     | 1.057349  | 0.8905707 | 1.1873  | 0.235    | 0.880763295 | count | 1           |
| SKIL       | 0.6305256 | 0.0899468 | 7.01    | 2.82E-12 | 0.881485083 | count | 6.70E-08    |
| ZNF587     | 0.8298742 | 0.5450442 | 1.5226  | 0.128    | 0.881518104 | count | 1           |
| PSMG3-AS1  | 0.9594868 | 0.5241946 | 1.8304  | 0.0673   | 0.881988906 | count | 1           |
| RPAP1      | 1.0595934 | 0.4757825 | 2.2271  | 0.026    | 0.882290305 | count | 1           |
| MFS14B     | 0.7043596 | 0.210178  | 3.3513  | 0.000813 | 0.882304952 | count | 1           |
| LMF1       | 0.7476805 | 0.2497193 | 2.9941  | 0.00277  | 0.883582771 | count | 1           |
| C1RL       | 0.6638264 | 0.1330719 | 4.9885  | 6.37E-07 | 0.883957196 | count | 0.014849744 |
| DHCR24     | 1.1691859 | 0.4236215 | 2.76    | 0.00581  | 0.883983411 | count | 1           |
| TEAD1      | 0.6694542 | 0.1558012 | 4.2968  | 1.78E-05 | 0.884172917 | count | 0.4092042   |
| ZNF184     | 0.8692067 | 0.2888338 | 3.0094  | 0.00264  | 0.885209061 | count | 1           |
| PCDH18     | 0.6885068 | 0.1529714 | 4.5009  | 6.98E-06 | 0.885232094 | count | 0.1610984   |
| RIN1       | 1.0246856 | 0.4299163 | 2.3835  | 0.0172   | 0.885314394 | count | 1           |
| AC245452.1 | 1.5896036 | 0.6364786 | 2.4975  | 0.0126   | 0.885842498 | count | 1           |
| B4GAT1     | 0.6826726 | 0.1215634 | 5.6158  | 2.10E-08 | 0.886619891 | count | 0.000493374 |
| ADH1B      | 0.6169338 | 0.0588407 | 10.4848 | 2.31E-25 | 0.886907724 | count | 5.57E-21    |
| ANKRD33B   | 0.8943709 | 0.3264329 | 2.7398  | 0.00618  | 0.887585216 | count | 1           |
| AL161669.3 | 2.4790546 | 1.0942535 | 2.2655  | 0.0235   | 0.887816615 | count | 1           |
| CES1       | 0.6368672 | 0.123295  | 5.1654  | 2.53E-07 | 0.88789766  | count | 0.005911092 |
| KLHL23     | 0.7238604 | 0.170955  | 4.2342  | 2.35E-05 | 0.887943389 | count | 0.5394425   |
| DAB2       | 0.6477327 | 0.0924443 | 7.0067  | 2.89E-12 | 0.888130491 | count | 6.87E-08    |
| PALD1      | 1.1767    | 0.8244013 | 1.4273  | 0.154    | 0.888368222 | count | 1           |
| CCDC180    | 1.3025473 | 1.0711522 | 1.216   | 0.224    | 0.889261687 | count | 1           |
| SLC35F6    | 0.6869205 | 0.1627959 | 4.2195  | 2.51E-05 | 0.889450622 | count | 0.5757187   |
| ZNF761     | 0.8494422 | 0.3793458 | 2.2392  | 0.0252   | 0.890010416 | count | 1           |
| MYCBP2     | 0.628568  | 0.0873693 | 7.1944  | 7.57E-13 | 0.890620698 | count | 1.80E-08    |
| CDK20      | 1.2582177 | 0.5341253 | 2.3557  | 0.0185   | 0.89083123  | count | 1           |
| TSPAN17    | 1.0727334 | 0.4888413 | 2.1944  | 0.0283   | 0.891197265 | count | 1           |
| GDF15      | 0.6676169 | 0.2207173 | 3.0248  | 0.00251  | 0.891333946 | count | 1           |
| KRBA2      | 1.3082406 | 0.557597  | 2.3462  | 0.019    | 0.892065828 | count | 1           |
| PPP1R15B   | 0.672163  | 0.2174325 | 3.0914  | 0.00201  | 0.892962426 | count | 1           |
| RHBDF1     | 0.734825  | 0.1596421 | 4.603   | 4.31E-06 | 0.893112589 | count | 0.09968168  |
| CHST7      | 0.8005346 | 0.2497877 | 3.2049  | 0.00136  | 0.893661344 | count | 1           |
| ADAM9      | 0.6713042 | 0.1262254 | 5.3183  | 1.11E-07 | 0.89370268  | count | 0.002598954 |
| TP53INP2   | 1.5137856 | 0.5243235 | 2.8871  | 0.00391  | 0.893706426 | count | 1           |
| CCDC18     | 1.0062887 | 0.4877408 | 2.0632  | 0.0392   | 0.896261169 | count | 1           |
| TYW1       | 0.8071483 | 0.2017938 | 3.9999  | 6.46E-05 | 0.8968906   | count | 1           |
| C7         | 0.6452645 | 0.1727418 | 3.7354  | 0.00019  | 0.896956148 | count | 1           |
| UBXN2A     | 0.6612441 | 0.1194067 | 5.5377  | 3.28E-08 | 0.897332469 | count | 0.000770046 |

|            |           |           |        |          |             |       |             |
|------------|-----------|-----------|--------|----------|-------------|-------|-------------|
| ZSCAN25    | 1.0089239 | 0.5206765 | 1.9377 | 0.0527   | 0.898234969 | count | 1           |
| SAA1       | 2.565278  | 1.064494  | 2.4099 | 0.016    | 0.89838724  | count | 1           |
| WDR81      | 1.2732492 | 0.3457361 | 3.6827 | 0.000234 | 0.898673053 | count | 1           |
| PRDM5      | 0.8336577 | 0.2999026 | 2.7798 | 0.00547  | 0.899267925 | count | 1           |
| ITIH3      | 1.1341959 | 0.369569  | 3.069  | 0.00216  | 0.899363257 | count | 1           |
| ZNF783     | 1.232591  | 0.5762911 | 2.1388 | 0.0325   | 0.899410133 | count | 1           |
| KCNK17     | 0.6643788 | 0.1391411 | 4.7749 | 1.87E-06 | 0.899532584 | count | 0.04339335  |
| BMP1       | 0.8303333 | 0.2594886 | 3.1999 | 0.00139  | 0.900395329 | count | 1           |
| CRABP2     | 0.7234573 | 0.1776674 | 4.072  | 4.76E-05 | 0.900623396 | count | 1           |
| RNPEP      | 0.7106876 | 0.1596513 | 4.4515 | 8.78E-06 | 0.901062599 | count | 0.2024229   |
| NDRG1      | 0.6798423 | 0.1389604 | 4.8923 | 1.04E-06 | 0.901760693 | count | 0.02419144  |
| LINC00640  | 2.1908355 | 1.8444752 | 1.1878 | 0.235    | 0.901971075 | count | 1           |
| AL512598.1 | 1.7744116 | 0.9770056 | 1.8162 | 0.0694   | 0.903962416 | count | 1           |
| HEXB       | 0.6486007 | 0.0764878 | 8.4798 | 3.23E-17 | 0.905530595 | count | 7.73E-13    |
| RNF19A     | 0.6559443 | 0.1084854 | 6.0464 | 1.63E-09 | 0.906389406 | count | 3.85E-05    |
| GRAMD4     | 1.3984635 | 0.6370279 | 2.1953 | 0.0282   | 0.907717097 | count | 1           |
| AFF3       | 1.210301  | 0.5257447 | 2.3021 | 0.0214   | 0.907758991 | count | 1           |
| SOX13      | 1.1225037 | 0.3317891 | 3.3832 | 0.000724 | 0.908597587 | count | 1           |
| AC069148.1 | 1.040562  | 0.9428446 | 1.1036 | 0.27     | 0.909487497 | count | 1           |
| GRK5       | 0.6874031 | 0.1766553 | 3.8912 | 0.000102 | 0.909488978 | count | 1           |
| PAFAH2     | 0.9476428 | 0.4366    | 2.1705 | 0.03     | 0.909651938 | count | 1           |
| SLC25A13   | 0.7538203 | 0.2272454 | 3.3172 | 0.000918 | 0.909940793 | count | 1           |
| BMPR1B     | 0.7215603 | 0.2096347 | 3.442  | 0.000584 | 0.910445386 | count | 1           |
| LANCL2     | 1.560331  | 0.7231667 | 2.1576 | 0.031    | 0.911148254 | count | 1           |
| ELOVL2     | 1.6710411 | 1.2102141 | 1.3808 | 0.167    | 0.913021102 | count | 1           |
| TARBP1     | 1.0637235 | 0.5294449 | 2.0091 | 0.0446   | 0.913110273 | count | 1           |
| CST3       | 0.6338976 | 0.033356  | 19.004 | 6.98E-77 | 0.91376413  | count | 1.70E-72    |
| OMD        | 0.6381175 | 0.0608835 | 10.481 | 2.40E-25 | 0.91416701  | count | 5.78E-21    |
| ORAI3      | 0.7088493 | 0.1422795 | 4.9821 | 6.58E-07 | 0.914221394 | count | 0.015337322 |
| ZNF436     | 0.925151  | 0.4601098 | 2.0107 | 0.0444   | 0.914476606 | count | 1           |
| SH3D19     | 0.6724323 | 0.1114286 | 6.0346 | 1.75E-09 | 0.914748079 | count | 4.13E-05    |
| NUMBL      | 0.7337073 | 0.1646565 | 4.456  | 8.60E-06 | 0.915260547 | count | 0.1982902   |
| SRSF6      | 0.6729948 | 0.1086421 | 6.1946 | 6.49E-10 | 0.915302059 | count | 1.53E-05    |
| VGLL3      | 0.7258532 | 0.1964683 | 3.6945 | 0.000224 | 0.915657294 | count | 1           |
| RBM24      | 1.052583  | 0.2746185 | 3.8329 | 0.000129 | 0.918191996 | count | 1           |
| BCO2       | 1.0358662 | 0.3830656 | 2.7041 | 0.00688  | 0.918287363 | count | 1           |
| RORB       | 1.2298136 | 0.3969403 | 3.0982 | 0.00196  | 0.918857004 | count | 1           |
| TCEAL7     | 0.7102026 | 0.1581042 | 4.492  | 7.27E-06 | 0.920675129 | count | 0.16775525  |
| PHLPP2     | 1.4997481 | 0.688771  | 2.1774 | 0.0295   | 0.920838466 | count | 1           |
| VEGFA      | 0.7655458 | 0.1721739 | 4.4464 | 8.99E-06 | 0.921549704 | count | 0.20724647  |
| NFKB1      | 0.7160284 | 0.1737919 | 4.12   | 3.87E-05 | 0.921731334 | count | 0.8856882   |
| LAMA2      | 0.6959737 | 0.1408614 | 4.9408 | 8.13E-07 | 0.921830775 | count | 0.018930705 |
| ECHDC1     | 0.6712471 | 0.106191  | 6.3211 | 2.91E-10 | 0.921967756 | count | 6.89E-06    |
| RAB8B      | 0.6707722 | 0.1079697 | 6.2126 | 5.79E-10 | 0.922414315 | count | 1.37E-05    |
| ZBTB33     | 1.059015  | 0.4104989 | 2.5798 | 0.00992  | 0.922830331 | count | 1           |

|            |            |             |        |          |             |       |             |
|------------|------------|-------------|--------|----------|-------------|-------|-------------|
| MANBA      | 0.854031   | 0.2375926   | 3.5945 | 0.000329 | 0.923824297 | count | 1           |
| ZNF503     | 0.6563538  | 0.0774612   | 8.4733 | 3.41E-17 | 0.92406019  | count | 8.16E-13    |
| PARP4      | 0.7906549  | 0.2251073   | 3.5123 | 0.00045  | 0.92423122  | count | 1           |
| NR2F1-AS1  | 1.5083421  | 0.42131     | 3.5801 | 0.000348 | 0.924285271 | count | 1           |
| TSPAN18    | 1.375458   | 0.484197    | 2.8407 | 0.00453  | 0.924448102 | count | 1           |
| AXL        | 0.6629293  | 0.0716698   | 9.2498 | 3.72E-20 | 0.925420502 | count | 8.93E-16    |
| GPR146     | 1.4400612  | 0.4476765   | 3.2167 | 0.00131  | 0.926102764 | count | 1           |
| ATG2A      | 1.1263595  | 0.4262445   | 2.6425 | 0.00826  | 0.926971764 | count | 1           |
| ATAD3B     | 1.3316344  | 0.714187    | 1.8645 | 0.0623   | 0.92848289  | count | 1           |
| CSTA       | 2.3545436  | 0.7472183   | 3.1511 | 0.00164  | 0.929062529 | count | 1           |
| IQCK       | 0.7407558  | 0.1813888   | 4.0838 | 4.53E-05 | 0.929441403 | count | 1           |
| PRMT9      | 0.8079803  | 0.2317296   | 3.4867 | 0.000495 | 0.929856069 | count | 1           |
| TRUB1      | 0.8330555  | 0.2513019   | 3.315  | 0.000925 | 0.930747937 | count | 1           |
| AC098650.1 | 2.3681791  | 0.8606345   | 2.7517 | 0.00596  | 0.931151554 | count | 1           |
| IL6        | 0.7064362  | 0.4114149   | 1.7171 | 0.086    | 0.931335559 | count | 1           |
| MDGA1      | 1.0897749  | 0.7789251   | 1.3991 | 0.162    | 0.931386085 | count | 1           |
| CBFA2T3    | 2.3736941  | 1.044592    | 2.2724 | 0.0231   | 0.93198944  | count | 1           |
| ZNF844     | 0.8255722  | 0.3504997   | 2.3554 | 0.0186   | 0.93326701  | count | 1           |
| CXCL10     | 0.9229643  | 0.8078047   | 1.1426 | 0.2533   | 0.933767994 | count | 1           |
| S100B      | 1.1907624  | 0.5968066   | 1.9952 | 0.0461   | 0.934316856 | count | 1           |
| VPS39      | 0.8912895  | 0.3084774   | 2.8893 | 0.00388  | 0.934964509 | count | 1           |
| TPPP3      | 0.6803361  | 0.1390377   | 4.8932 | 1.03E-06 | 0.93498137  | count | 0.02395986  |
| EIF2AK3    | 0.9431567  | 0.387789    | 2.4321 | 0.0151   | 0.937564598 | count | 1           |
| C14orf180  | 1.1682766  | 0.4261693   | 2.7413 | 0.00615  | 0.937805913 | count | 1           |
| TAC1       | 0.769819   | 0.4188959   | 1.8377 | 0.0662   | 0.938449362 | count | 1           |
| ACOX3      | 0.9360691  | 0.3957444   | 2.3653 | 0.0181   | 0.938546026 | count | 1           |
| MBP        | 0.6975637  | 0.1226182   | 5.6889 | 1.38E-08 | 0.940338312 | count | 0.000324507 |
| ID2        | 0.6641149  | 0.0757806   | 8.7637 | 2.84E-18 | 0.942273914 | count | 6.81E-14    |
| SLC2A4     | 0.9881539  | 0.3748323   | 2.6363 | 0.00842  | 0.943176136 | count | 1           |
| KCNIP3     | 1.5563875  | 0.3889231   | 4.0018 | 6.41E-05 | 0.943189746 | count | 1           |
| ZNF516     | 1.4164186  | 0.4119939   | 3.438  | 0.000593 | 0.943530904 | count | 1           |
| LDB2       | 0.7834928  | 0.203682    | 3.8466 | 0.000122 | 0.943839872 | count | 1           |
| ARHGEF10   | 0.8298154  | 0.2829919   | 2.9323 | 0.00339  | 0.944138696 | count | 1           |
| SLC35G2    | 0.827366   | 0.2686109   | 3.0802 | 0.00208  | 0.944644282 | count | 1           |
| HEG1       | 0.7162667  | 0.1660169   | 4.3144 | 1.64E-05 | 0.945366041 | count | 0.3771836   |
| SULT1A2    | 1.929369   | 1.518018    | 1.271  | 0.204    | 0.945388282 | count | 1           |
| CPXM2      | 0.6821799  | 0.0969075   | 7.0395 | 2.29E-12 | 0.945405821 | count | 5.44E-08    |
| PIFO       | 1.3679027  | 0.6029721   | 2.2686 | 0.0234   | 0.946483402 | count | 1           |
| ATP8A1     | 0.8681509  | 0.2896297   | 2.9975 | 0.00274  | 0.94658707  | count | 1           |
| PLIN2      | 0.7128426  | 0.1365242   | 5.2214 | 1.87E-07 | 0.946939828 | count | 0.00437206  |
| TNNC1      | 0.8187029  | 0.3994992   | 2.0493 | 0.0405   | 0.946945711 | count | 1           |
| ADRA1D     | 16.9527772 | 592.2914296 | 0.0286 | 0.9772   | 0.947697895 | count | 1           |
| FOLH1      | 17.298475  | 746.8643461 | 0.0232 | 0.9815   | 0.947697912 | count | 1           |
| PCP4L1     | 16.8114113 | 682.9167956 | 0.0246 | 0.98     | 0.947697955 | count | 1           |
| RIMS2      | 16.8911272 | 740.5095462 | 0.0228 | 0.982    | 0.94769796  | count | 1           |

|            |            |             |         |          |             |       |             |
|------------|------------|-------------|---------|----------|-------------|-------|-------------|
| TNNT2      | 16.9096567 | 2661.872746 | 0.0064  | 0.995    | 0.947697962 | count | 1           |
| VANGL2     | 16.9608401 | 1084.169333 | 0.0156  | 0.9875   | 0.947697965 | count | 1           |
| AC092691.1 | 17.1327846 | 1170.032482 | 0.0146  | 0.988    | 0.947697974 | count | 1           |
| OR2L2      | 17.1505058 | 2849.322841 | 0.006   | 0.995    | 0.947697975 | count | 1           |
| HRASLS5    | 17.4778218 | 1084.750828 | 0.0161  | 0.987    | 0.947697988 | count | 1           |
| EYA4       | 17.7314291 | 1030.46919  | 0.0172  | 0.9863   | 0.947697996 | count | 1           |
| AC138932.5 | 17.9078244 | 3478.118687 | 0.0051  | 0.996    | 0.947698    | count | 1           |
| AC009061.2 | 1.3720737  | 0.9507991   | 1.4431  | 0.149    | 0.948528262 | count | 1           |
| RELL1      | 0.8443541  | 0.2250504   | 3.7518  | 0.000178 | 0.949458436 | count | 1           |
| HDAC4      | 1.033272   | 0.2680448   | 3.8548  | 0.000118 | 0.950017444 | count | 1           |
| KLF3       | 0.6763554  | 0.0785922   | 8.6059  | 1.11E-17 | 0.953097735 | count | 2.66E-13    |
| ADAMTSL2   | 1.801238   | 0.4768767   | 3.7772  | 0.000161 | 0.953238789 | count | 1           |
| TBP        | 0.9612397  | 0.2734251   | 3.5156  | 0.000444 | 0.953289197 | count | 1           |
| PLCE1      | 0.8711645  | 0.2081984   | 4.1843  | 2.93E-05 | 0.953848859 | count | 0.6715853   |
| TMEFF2     | 0.8278051  | 0.3838338   | 2.1567  | 0.0311   | 0.953940884 | count | 1           |
| PTGFR      | 2.186663   | 0.6185133   | 3.5354  | 0.000412 | 0.953961405 | count | 1           |
| AP5B1      | 1.0027409  | 0.4169256   | 2.4051  | 0.0162   | 0.955121242 | count | 1           |
| HUNK       | 1.807812   | 1.001614    | 1.8049  | 0.0712   | 0.955167126 | count | 1           |
| PFN4       | 2.5381676  | 1.6594757   | 1.5295  | 0.126    | 0.955208221 | count | 1           |
| SERPING1   | 0.6650218  | 0.0352949   | 18.8419 | 1.15E-75 | 0.955536854 | count | 2.79E-71    |
| PAK3       | 0.9210191  | 0.2354145   | 3.9123  | 9.31E-05 | 0.957080892 | count | 1           |
| HLA-DPA1   | 0.6809095  | 0.122998    | 5.5359  | 3.31E-08 | 0.957325719 | count | 0.000777056 |
| DIRC3      | 1.390802   | 0.6192273   | 2.246   | 0.0248   | 0.957645965 | count | 1           |
| DDR2       | 0.6860718  | 0.1203342   | 5.7014  | 1.28E-08 | 0.957880077 | count | 0.000301005 |
| SLC23A2    | 0.8943974  | 0.2808003   | 3.1852  | 0.00146  | 0.958582454 | count | 1           |
| PRR15      | 1.0211102  | 0.334331    | 3.0542  | 0.00227  | 0.96060678  | count | 1           |
| ZMIZ1      | 0.7898828  | 0.1830283   | 4.3156  | 1.63E-05 | 0.961646954 | count | 0.3749      |
| FZD4       | 0.7259347  | 0.1669229   | 4.3489  | 1.41E-05 | 0.962249692 | count | 0.3244833   |
| ATP11A     | 1.012862   | 0.3194436   | 3.1707  | 0.00153  | 0.963369763 | count | 1           |
| REPS1      | 0.8945381  | 0.4171971   | 2.1442  | 0.0321   | 0.963516447 | count | 1           |
| MGAT1      | 0.7051348  | 0.0961727   | 7.332   | 2.78E-13 | 0.964006464 | count | 6.62E-09    |
| SPON1      | 0.7615257  | 0.2563809   | 2.9703  | 0.00299  | 0.964019138 | count | 1           |
| SOBP       | 0.7510588  | 0.2432917   | 3.0871  | 0.00204  | 0.964500254 | count | 1           |
| NPY5R      | 1.0828355  | 0.3442964   | 3.1451  | 0.00167  | 0.964958112 | count | 1           |
| RARG       | 0.7528863  | 0.1563576   | 4.8152  | 1.53E-06 | 0.965152659 | count | 0.03553578  |
| DOCK9      | 0.9943173  | 0.2785378   | 3.5698  | 0.000362 | 0.965616992 | count | 1           |
| ATF3       | 0.675095   | 0.0804154   | 8.3951  | 6.56E-17 | 0.965944866 | count | 1.57E-12    |
| TSPAN4     | 0.6853831  | 0.0680171   | 10.0766 | 1.42E-23 | 0.966728853 | count | 3.42E-19    |
| P2RY14     | 2.2739505  | 0.9869174   | 2.3041  | 0.0213   | 0.970055364 | count | 1           |
| ABL1       | 0.7930815  | 0.1714754   | 4.625   | 3.87E-06 | 0.970197125 | count | 0.08954019  |
| MEOX2      | 0.7327305  | 0.1471219   | 4.9804  | 6.64E-07 | 0.971031327 | count | 0.015475848 |
| FBXL13     | 1.0913175  | 0.2795042   | 3.9045  | 9.61E-05 | 0.971195463 | count | 1           |
| ELN        | 0.6824886  | 0.10855     | 6.2873  | 3.61E-10 | 0.972447999 | count | 8.54E-06    |
| NRARP      | 0.8205476  | 0.2743014   | 2.9914  | 0.0028   | 0.973500576 | count | 1           |
| TBC1D24    | 1.1745682  | 0.3501668   | 3.3543  | 0.000804 | 0.974183481 | count | 1           |

|            |           |           |         |          |             |       |             |
|------------|-----------|-----------|---------|----------|-------------|-------|-------------|
| PODXL2     | 0.9396582 | 0.2148181 | 4.3742  | 1.25E-05 | 0.974302381 | count | 0.28785     |
| RAB30      | 0.8027815 | 0.1602254 | 5.0103  | 5.69E-07 | 0.974812055 | count | 0.013269649 |
| SLC9B2     | 0.8724203 | 0.2428163 | 3.5929  | 0.000331 | 0.974812361 | count | 1           |
| BX255925.3 | 1.3316547 | 0.8004751 | 1.6636  | 0.0963   | 0.974849378 | count | 1           |
| TMEM184B   | 0.8396419 | 0.2270267 | 3.6984  | 0.00022  | 0.974975299 | count | 1           |
| UNG        | 0.8476336 | 0.2049611 | 4.1356  | 3.62E-05 | 0.975143221 | count | 0.8288352   |
| WFDC2      | 0.9492307 | 0.3397082 | 2.7943  | 0.00523  | 0.976937965 | count | 1           |
| TBC1D9     | 0.9718691 | 0.3044542 | 3.1922  | 0.00142  | 0.977192169 | count | 1           |
| ZNF518B    | 0.9231189 | 0.2721672 | 3.3917  | 0.000702 | 0.981147661 | count | 1           |
| MIR22HG    | 0.7031254 | 0.1122505 | 6.2639  | 4.19E-10 | 0.982424809 | count | 9.91E-06    |
| CYB561D2   | 0.8372928 | 0.203451  | 4.1155  | 3.95E-05 | 0.985131602 | count | 0.9039575   |
| AMACR      | 1.3986576 | 1.0613844 | 1.3178  | 0.188    | 0.986279213 | count | 1           |
| ACOX2      | 0.8931736 | 0.2531069 | 3.5288  | 0.000423 | 0.988236351 | count | 1           |
| CNKSR2     | 1.927334  | 0.5370948 | 3.5884  | 0.000337 | 0.988594178 | count | 1           |
| DNAJC25    | 0.8988215 | 0.2309473 | 3.8919  | 0.000101 | 0.989851227 | count | 1           |
| SGPP1      | 1.52057   | 0.3786422 | 4.0158  | 6.04E-05 | 0.989871308 | count | 1           |
| MT1M       | 0.7010439 | 0.0811626 | 8.6375  | 8.44E-18 | 0.991249807 | count | 2.02E-13    |
| SPATA6     | 0.735971  | 0.1261754 | 5.8329  | 5.92E-09 | 0.99190294  | count | 0.000139363 |
| FAM171A1   | 0.8895807 | 0.3607744 | 2.4658  | 0.0137   | 0.996076088 | count | 1           |
| PYROXD2    | 1.0534441 | 0.3362164 | 3.1332  | 0.00174  | 0.996116482 | count | 1           |
| SEC24A     | 0.9396406 | 0.2743507 | 3.425   | 0.000622 | 0.996863171 | count | 1           |
| CHODL      | 1.53719   | 0.4058175 | 3.7879  | 0.000154 | 0.99698011  | count | 1           |
| CLSTN2     | 2.16696   | 0.5478952 | 3.9551  | 7.80E-05 | 0.999798275 | count | 1           |
| TRANK1     | 0.9614805 | 0.3365107 | 2.8572  | 0.0043   | 1.000400083 | count | 1           |
| SLC4A4     | 1.1498185 | 0.4270354 | 2.6926  | 0.00712  | 1.000503352 | count | 1           |
| POP1       | 1.2161179 | 0.4583569 | 2.6532  | 0.00801  | 1.001181532 | count | 1           |
| AL355312.2 | 1.9877066 | 2.0837947 | 0.9539  | 0.3402   | 1.004336318 | count | 1           |
| ABHD5      | 0.7547566 | 0.1653645 | 4.5642  | 5.18E-06 | 1.004490572 | count | 0.11969426  |
| APP        | 0.7076602 | 0.0559557 | 12.6468 | 6.48E-36 | 1.00506955  | count | 1.57E-31    |
| GATM       | 1.313987  | 0.4686039 | 2.804   | 0.00507  | 1.006921988 | count | 1           |
| RAB32      | 0.7214373 | 0.0840574 | 8.5827  | 1.35E-17 | 1.007826556 | count | 3.23E-13    |
| ACACB      | 1.0355439 | 0.2597791 | 3.9862  | 6.84E-05 | 1.008528754 | count | 1           |
| RASIP1     | 1.502975  | 0.4834137 | 3.1091  | 0.00189  | 1.010085852 | count | 1           |
| TNFSF13B   | 0.7464255 | 0.1459797 | 5.1132  | 3.33E-07 | 1.011950988 | count | 0.007773219 |
| ATP8B4     | 1.8669019 | 0.7580283 | 2.4628  | 0.0138   | 1.012618836 | count | 1           |
| KLHL15     | 1.1486619 | 0.4503677 | 2.5505  | 0.0108   | 1.012749058 | count | 1           |
| IQCC       | 2.5460642 | 2.288556  | 1.1125  | 0.266    | 1.013155338 | count | 1           |
| SIX1       | 0.7893825 | 0.1615584 | 4.886   | 1.07E-06 | 1.013556008 | count | 0.02488606  |
| MELTF      | 1.1037152 | 0.5432338 | 2.0317  | 0.0423   | 1.014955745 | count | 1           |
| ZNF117     | 1.0674766 | 0.397791  | 2.6835  | 0.00732  | 1.016887554 | count | 1           |
| AQP3       | 0.9796389 | 0.2578641 | 3.7991  | 0.000148 | 1.017092316 | count | 1           |
| ARRB1      | 1.0465688 | 0.3295048 | 3.1762  | 0.0015   | 1.017712405 | count | 1           |
| FRMD6      | 0.8155997 | 0.1558142 | 5.2344  | 1.75E-07 | 1.017824983 | count | 0.0040922   |
| ARID3A     | 2.0435254 | 0.6983331 | 2.9263  | 0.00345  | 1.018238113 | count | 1           |
| RHOBTB3    | 0.762851  | 0.1078646 | 7.0723  | 1.82E-12 | 1.018455588 | count | 4.33E-08    |

|            |            |             |         |          |             |       |             |
|------------|------------|-------------|---------|----------|-------------|-------|-------------|
| MEG8       | 1.8898939  | 0.617026    | 3.0629  | 0.00221  | 1.019340572 | count | 1           |
| PTGDR      | 1.7683441  | 0.6577722   | 2.6884  | 0.00721  | 1.019432902 | count | 1           |
| MIRLET7BHG | 0.9696128  | 0.3760491   | 2.5784  | 0.00996  | 1.019583564 | count | 1           |
| PDE7A      | 1.1601208  | 0.2942536   | 3.9426  | 8.21E-05 | 1.020923545 | count | 1           |
| CLDN1      | 2.2751529  | 1.3105299   | 1.7361  | 0.0826   | 1.021273996 | count | 1           |
| UCHL1      | 0.753031   | 0.134984    | 5.5787  | 2.60E-08 | 1.022143023 | count | 0.00061061  |
| ADAM15     | 0.9118709  | 0.1981966   | 4.6008  | 4.35E-06 | 1.022591987 | count | 0.10060245  |
| DOK7       | 17.3540937 | 1387.377187 | 0.0125  | 0.99     | 1.022894438 | count | 1           |
| CDH23      | 17.451809  | 1479.496629 | 0.0118  | 0.991    | 1.022894442 | count | 1           |
| LINC00473  | 16.9792216 | 1334.524122 | 0.0127  | 0.99     | 1.022894491 | count | 1           |
| ECEL1      | 17.2525544 | 1270.557728 | 0.0136  | 0.9892   | 1.022894506 | count | 1           |
| ADRA2B     | 17.4397206 | 1027.297903 | 0.017   | 0.986    | 1.022894515 | count | 1           |
| LUZP2      | 17.5070504 | 950.9390575 | 0.0184  | 0.985    | 1.022894517 | count | 1           |
| CD70       | 18.302633  | 630.1996241 | 0.029   | 0.977    | 1.022894904 | count | 1           |
| GLUL       | 0.7319226  | 0.0722458   | 10.131  | 8.26E-24 | 1.02400583  | count | 1.99E-19    |
| PNMA2      | 0.9020785  | 0.2534924   | 3.5586  | 0.000378 | 1.026419883 | count | 1           |
| ARAP1      | 0.9550864  | 0.2286886   | 4.1764  | 3.03E-05 | 1.027021015 | count | 0.6943548   |
| FRRS1      | 1.2853947  | 0.3400299   | 3.7802  | 0.000159 | 1.027598648 | count | 1           |
| HAS2       | 1.0703531  | 0.2780496   | 3.8495  | 0.00012  | 1.028460601 | count | 1           |
| CTHRC1     | 0.7291646  | 0.1276034   | 5.7143  | 1.19E-08 | 1.029250972 | count | 0.000279876 |
| KDEL1      | 1.0623059  | 0.2823723   | 3.7621  | 0.000171 | 1.030754452 | count | 1           |
| MYADM      | 0.7251348  | 0.0634865   | 11.4219 | 1.03E-29 | 1.031695879 | count | 2.49E-25    |
| BCAM       | 0.7405962  | 0.1042649   | 7.103   | 1.46E-12 | 1.032279985 | count | 3.47E-08    |
| NCK1       | 0.7829486  | 0.1266115   | 6.1839  | 6.94E-10 | 1.033854559 | count | 1.64E-05    |
| CDC14A     | 1.4984549  | 0.4193103   | 3.5736  | 0.000357 | 1.034459365 | count | 1           |
| IGFBP4     | 0.7247367  | 0.0673361   | 10.763  | 1.28E-26 | 1.036077287 | count | 3.09E-22    |
| SDCBP      | 0.7302416  | 0.0637167   | 11.4608 | 6.67E-30 | 1.036133696 | count | 1.61E-25    |
| ADA        | 1.9494284  | 0.5762196   | 3.3831  | 0.000724 | 1.036205199 | count | 1           |
| CCDC74B    | 1.1867536  | 0.5021227   | 2.3635  | 0.0182   | 1.039756071 | count | 1           |
| IGF2BP2    | 1.122616   | 0.4449625   | 2.5229  | 0.0117   | 1.04022125  | count | 1           |
| ECHDC2     | 0.7528921  | 0.1182133   | 6.3689  | 2.14E-10 | 1.040697178 | count | 5.07E-06    |
| IMPA2      | 0.9763234  | 0.2252803   | 4.3338  | 1.50E-05 | 1.04225322  | count | 0.34512     |
| RALGDS     | 1.1916826  | 0.3233743   | 3.6851  | 0.000232 | 1.043215839 | count | 1           |
| GLI3       | 1.0394073  | 0.2633072   | 3.9475  | 8.04E-05 | 1.043497182 | count | 1           |
| STK3       | 0.8165564  | 0.1407056   | 5.8033  | 7.05E-09 | 1.043570382 | count | 0.000165936 |
| ARHGAP15   | 1.4667205  | 0.345067    | 4.2505  | 2.19E-05 | 1.044158476 | count | 0.5028678   |
| GLI2       | 1.8453383  | 0.5435577   | 3.3949  | 0.000694 | 1.044367461 | count | 1           |
| LINC01638  | 3.6024445  | 1.1995878   | 3.0031  | 0.00269  | 1.044472453 | count | 1           |
| ABCC1      | 0.9298473  | 0.3209546   | 2.8971  | 0.00379  | 1.044683935 | count | 1           |
| TRIP10     | 0.7821379  | 0.1402115   | 5.5783  | 2.60E-08 | 1.045054594 | count | 0.00061061  |
| ZFYVE28    | 1.3828039  | 0.548027    | 2.5232  | 0.0117   | 1.045366913 | count | 1           |
| SCARB1     | 2.4120064  | 1.200012    | 2.01    | 0.0445   | 1.045776564 | count | 1           |
| SLC2A10    | 0.9277808  | 0.2381807   | 3.8953  | 9.98E-05 | 1.04619507  | count | 1           |
| DUSP14     | 0.793741   | 0.1546334   | 5.133   | 3.00E-07 | 1.046694603 | count | 0.0070053   |
| MCC        | 1.1077736  | 0.3835681   | 2.8881  | 0.0039   | 1.0490967   | count | 1           |

|            |           |           |         |          |             |       |             |
|------------|-----------|-----------|---------|----------|-------------|-------|-------------|
| NEK11      | 1.0014909 | 0.3006788 | 3.3308  | 0.000875 | 1.049189763 | count | 1           |
| OTUD3      | 0.9732707 | 0.4143309 | 2.349   | 0.0189   | 1.049488781 | count | 1           |
| HSD3B7     | 0.8189017 | 0.1692415 | 4.8387  | 1.36E-06 | 1.049981726 | count | 0.03160096  |
| CACNB4     | 1.1092408 | 0.3185953 | 3.4817  | 0.000504 | 1.050259508 | count | 1           |
| PNMA8B     | 1.3987556 | 0.4970765 | 2.814   | 0.00492  | 1.054064592 | count | 1           |
| PHGDH      | 0.7692216 | 0.0886706 | 8.6751  | 6.11E-18 | 1.054719824 | count | 1.46E-13    |
| NR1H3      | 1.1279058 | 0.3253799 | 3.4664  | 0.000533 | 1.054824785 | count | 1           |
| PPP1R15A   | 0.7383897 | 0.0581207 | 12.7044 | 3.20E-36 | 1.05539023  | count | 7.74E-32    |
| CORO6      | 2.2093404 | 0.6157327 | 3.5881  | 0.000337 | 1.056033467 | count | 1           |
| SLC7A6     | 1.4917608 | 0.4725537 | 3.1568  | 0.00161  | 1.056396099 | count | 1           |
| ANXA3      | 0.9249709 | 0.3897554 | 2.3732  | 0.0177   | 1.05691254  | count | 1           |
| EVC2       | 0.9711478 | 0.2858013 | 3.398   | 0.000686 | 1.057005755 | count | 1           |
| OR2A1-AS1  | 1.2115895 | 0.5204519 | 2.328   | 0.02     | 1.057107367 | count | 1           |
| GGCX       | 0.9010182 | 0.2387958 | 3.7732  | 0.000164 | 1.059864527 | count | 1           |
| CNOT8      | 0.8525191 | 0.1598399 | 5.3336  | 1.02E-07 | 1.060252469 | count | 0.002388636 |
| TENM3      | 2.9535405 | 1.1491591 | 2.5702  | 0.0102   | 1.061080526 | count | 1           |
| LGI4       | 0.8859452 | 0.1730759 | 5.1188  | 3.23E-07 | 1.061573412 | count | 0.007540758 |
| IRAK1BP1   | 0.9235655 | 0.2536766 | 3.6407  | 0.000276 | 1.061765878 | count | 1           |
| OPN3       | 1.1251773 | 0.6312394 | 1.7825  | 0.0748   | 1.06284488  | count | 1           |
| NGFR       | 1.0240656 | 0.4038047 | 2.536   | 0.0113   | 1.06383816  | count | 1           |
| DUSP18     | 0.9841926 | 0.3765092 | 2.614   | 0.00899  | 1.064926393 | count | 1           |
| ZNF549     | 1.7077218 | 0.8462754 | 2.0179  | 0.0437   | 1.065511417 | count | 1           |
| CRYBG3     | 0.8281764 | 0.1533007 | 5.4023  | 7.00E-08 | 1.065624494 | count | 0.00164024  |
| GRIP2      | 1.1419646 | 0.3299853 | 3.4607  | 0.000545 | 1.065707121 | count | 1           |
| RALGPS2    | 1.3512705 | 0.3464908 | 3.8999  | 9.80E-05 | 1.066881232 | count | 1           |
| SPOCK1     | 0.8934407 | 0.1961389 | 4.5551  | 5.41E-06 | 1.069964015 | count | 0.12497641  |
| KLF11      | 0.9110758 | 0.2605824 | 3.4963  | 0.000477 | 1.070830682 | count | 1           |
| ZC3H12A    | 0.9264953 | 0.3557653 | 2.6042  | 0.00925  | 1.070925164 | count | 1           |
| TBC1D16    | 0.9520263 | 0.3012597 | 3.1602  | 0.00159  | 1.071069448 | count | 1           |
| SGMS2      | 0.9024944 | 0.1811845 | 4.9811  | 6.61E-07 | 1.07115396  | count | 0.015406588 |
| NT5E       | 0.7771069 | 0.1044132 | 7.4426  | 1.22E-13 | 1.072586152 | count | 2.91E-09    |
| ARHGAP12   | 0.8266066 | 0.1353175 | 6.1086  | 1.11E-09 | 1.074182264 | count | 2.62E-05    |
| AC020916.1 | 0.7918141 | 0.2033818 | 3.8932  | 0.000101 | 1.076310412 | count | 1           |
| GPBAR1     | 1.4418824 | 0.4004245 | 3.6009  | 0.000321 | 1.077178544 | count | 1           |
| AC025259.3 | 2.108275  | 0.9244349 | 2.2806  | 0.0226   | 1.077548901 | count | 1           |
| ITPR3      | 1.9553761 | 0.5116192 | 3.8219  | 0.000135 | 1.077599138 | count | 1           |
| CDKN1A     | 0.7681269 | 0.1007154 | 7.6267  | 3.05E-14 | 1.07818822  | count | 7.27E-10    |
| FCGRT      | 0.7588105 | 0.0587106 | 12.9246 | 2.12E-37 | 1.079178544 | count | 5.13E-33    |
| CHPT1      | 0.7725971 | 0.0822049 | 9.3984  | 9.46E-21 | 1.079947211 | count | 2.27E-16    |
| CPEB1      | 1.449198  | 0.4043372 | 3.5841  | 0.000343 | 1.081041476 | count | 1           |
| ERLIN1     | 0.8952601 | 0.1918215 | 4.6672  | 3.16E-06 | 1.082129446 | count | 0.07319192  |
| ACER3      | 0.971473  | 0.3080535 | 3.1536  | 0.00163  | 1.083143707 | count | 1           |
| FBN2       | 1.329637  | 0.5334113 | 2.4927  | 0.0127   | 1.089264855 | count | 1           |
| RADIL      | 1.69167   | 0.4021487 | 4.2066  | 2.65E-05 | 1.090130692 | count | 0.607645    |
| DOCK8      | 1.5122312 | 0.52077   | 2.9038  | 0.00371  | 1.09048536  | count | 1           |



|            |            |             |        |          |             |       |             |
|------------|------------|-------------|--------|----------|-------------|-------|-------------|
| MUC20-OT1  | 0.8151076  | 0.2097381   | 3.8863 | 0.000104 | 1.090945902 | count | 1           |
| MCUB       | 0.86534    | 0.1600244   | 5.4075 | 6.80E-08 | 1.091652798 | count | 0.001593648 |
| RGMA       | 0.9574288  | 0.1766875   | 5.4188 | 6.39E-08 | 1.094121484 | count | 0.001497688 |
| ENPP3      | 16.7854449 | 2127.533857 | 0.0079 | 0.994    | 1.094364944 | count | 1           |
| C19orf18   | 16.9296977 | 1180.143743 | 0.0143 | 0.9886   | 1.094364955 | count | 1           |
| MBNL3      | 17.0381473 | 656.1949951 | 0.026  | 0.979    | 1.094364962 | count | 1           |
| AC023024.1 | 17.4310643 | 3270.270023 | 0.0053 | 0.996    | 1.094364984 | count | 1           |
| HMCN2      | 17.5488938 | 1364.550564 | 0.0129 | 0.99     | 1.094364989 | count | 1           |
| ENTPD2     | 16.4759274 | 870.1050571 | 0.0189 | 0.985    | 1.09436499  | count | 1           |
| LINC00968  | 17.7085999 | 831.520021  | 0.0213 | 0.983    | 1.094364994 | count | 1           |
| HOXC5      | 17.8075961 | 832.3034791 | 0.0214 | 0.983    | 1.094364997 | count | 1           |
| ADAMTSL5   | 18.3784477 | 1132.404735 | 0.0162 | 0.9871   | 1.094365011 | count | 1           |
| AL512274.1 | 17.111768  | 2944.93154  | 0.0058 | 0.995    | 1.094365044 | count | 1           |
| LINC02144  | 17.4311159 | 3270.289707 | 0.0053 | 0.996    | 1.09436506  | count | 1           |
| SCN7A      | 17.4669779 | 1096.357666 | 0.0159 | 0.987    | 1.094365062 | count | 1           |
| MMP27      | 17.5658853 | 600.4317792 | 0.0293 | 0.977    | 1.094365066 | count | 1           |
| HLA-DRB5   | 0.7960593  | 0.1497684   | 5.3153 | 1.13E-07 | 1.095462385 | count | 0.002645556 |
| C6orf132   | 3.4245096  | 1.7850649   | 1.9184 | 0.0551   | 1.098163842 | count | 1           |
| EYA2       | 2.7747059  | 0.6821204   | 4.0678 | 4.85E-05 | 1.098242099 | count | 1           |
| MLPH       | 2.1978075  | 1.0738676   | 2.0466 | 0.0408   | 1.098643253 | count | 1           |
| AC020911.2 | 1.3743711  | 0.534403    | 2.5718 | 0.0102   | 1.098858306 | count | 1           |
| ZNF519     | 1.3468754  | 0.4370703   | 3.0816 | 0.00207  | 1.099885228 | count | 1           |
| NMNAT2     | 1.4868754  | 0.4081304   | 3.6431 | 0.000273 | 1.100672115 | count | 1           |
| ELF4       | 2.4419769  | 1.0397122   | 2.3487 | 0.0189   | 1.101028547 | count | 1           |
| FMO1       | 2.2165512  | 0.6866394   | 3.2281 | 0.00126  | 1.102868266 | count | 1           |
| LINC02202  | 1.1933768  | 0.3724176   | 3.2044 | 0.00137  | 1.104951015 | count | 1           |
| LINC01252  | 1.417602   | 0.9370255   | 1.5129 | 0.13     | 1.105020058 | count | 1           |
| JHY        | 1.1048628  | 0.309075    | 3.5747 | 0.000355 | 1.107450254 | count | 1           |
| CABLES2    | 2.4889113  | 1.566475    | 1.5889 | 0.112    | 1.109077773 | count | 1           |
| BHLHE40    | 0.8367774  | 0.1471414   | 5.6869 | 1.39E-08 | 1.110080121 | count | 0.000326831 |
| LRP3       | 0.9225602  | 0.1730831   | 5.3302 | 1.04E-07 | 1.112957516 | count | 0.002435264 |
| SLC22A5    | 1.2535846  | 0.3816248   | 3.2849 | 0.00103  | 1.112964959 | count | 1           |
| PKDCC      | 0.8413085  | 0.1295002   | 6.4966 | 9.32E-11 | 1.113075936 | count | 2.21E-06    |
| HSPA6      | 1.0678691  | 0.6453241   | 1.6548 | 0.0981   | 1.116111242 | count | 1           |
| ZDHHC9     | 1.0439755  | 0.4219654   | 2.4741 | 0.0134   | 1.116932121 | count | 1           |
| PAPLN      | 1.1957067  | 0.5909719   | 2.0233 | 0.0431   | 1.117546575 | count | 1           |
| PBX3       | 0.8879231  | 0.1546185   | 5.7427 | 1.01E-08 | 1.117560642 | count | 0.000237592 |
| AC007032.1 | 1.4838721  | 0.6347646   | 2.3377 | 0.0195   | 1.120881592 | count | 1           |
| PLP1       | 3.8914324  | 1.1695592   | 3.3273 | 0.000886 | 1.121752031 | count | 1           |
| TRIM25     | 0.9878677  | 0.2472444   | 3.9955 | 6.58E-05 | 1.122289813 | count | 1           |
| ARHGAP21   | 0.8029608  | 0.1024193   | 7.8399 | 5.86E-15 | 1.12297998  | count | 1.40E-10    |
| TSPAN7     | 0.8973201  | 0.199823    | 4.4906 | 7.32E-06 | 1.125091491 | count | 0.16889436  |
| HIF3A      | 1.361722   | 0.3211488   | 4.2402 | 2.29E-05 | 1.125842214 | count | 0.5257611   |
| GPAT3      | 1.337709   | 0.6110197   | 2.1893 | 0.0286   | 1.126764043 | count | 1           |
| TMEM255A   | 4.033295   | 1.0219284   | 3.9467 | 8.07E-05 | 1.127058441 | count | 1           |

|            |            |             |        |          |             |       |             |
|------------|------------|-------------|--------|----------|-------------|-------|-------------|
| OSR1       | 0.8001164  | 0.1079019   | 7.4152 | 1.50E-13 | 1.128970996 | count | 3.57E-09    |
| MAPK10     | 0.8496167  | 0.1606509   | 5.2886 | 1.30E-07 | 1.129312753 | count | 0.00304252  |
| MN1        | 0.9557303  | 0.2130131   | 4.4867 | 7.45E-06 | 1.129614143 | count | 0.1718864   |
| SRPX2      | 0.9766191  | 0.2306532   | 4.2341 | 2.35E-05 | 1.13309279  | count | 0.5394425   |
| Z82217.1   | 1.6018565  | 1.2053183   | 1.329  | 0.184    | 1.133477056 | count | 1           |
| EEF2K      | 0.9403516  | 0.2126238   | 4.4226 | 1.00E-05 | 1.136995124 | count | 0.2304      |
| HSPB8      | 0.8312655  | 0.120002    | 6.9271 | 5.05E-12 | 1.139479557 | count | 1.20E-07    |
| CNFN       | 1.7525558  | 0.9510351   | 1.8428 | 0.0654   | 1.144017189 | count | 1           |
| WASF3      | 0.9817839  | 0.1807021   | 5.4332 | 5.90E-08 | 1.144411807 | count | 0.001383019 |
| GPER1      | 1.1485265  | 0.3509665   | 3.2725 | 0.00108  | 1.14449067  | count | 1           |
| RERGL      | 0.8121741  | 0.1386273   | 5.8587 | 5.08E-09 | 1.144613834 | count | 0.00011967  |
| CYP51A1    | 1.4551072  | 0.5475801   | 2.6573 | 0.00791  | 1.145553025 | count | 1           |
| RAI2       | 0.9032403  | 0.1545507   | 5.8443 | 5.53E-09 | 1.146125422 | count | 0.000130209 |
| C1orf167   | 0.9858279  | 0.2205771   | 4.4693 | 8.08E-06 | 1.148730244 | count | 0.1863248   |
| SLC29A3    | 1.6969489  | 0.7570497   | 2.2415 | 0.0251   | 1.14965688  | count | 1           |
| TMEM154    | 2.7621039  | 0.9425443   | 2.9305 | 0.00341  | 1.149922883 | count | 1           |
| SNX33      | 1.0067503  | 0.2516699   | 4.0003 | 6.45E-05 | 1.152135503 | count | 1           |
| ADAMTSL3   | 0.846138   | 0.1271264   | 6.6559 | 3.23E-11 | 1.152304247 | count | 7.66E-07    |
| MEPCE      | 1.0141279  | 0.2729282   | 3.7157 | 0.000206 | 1.152862836 | count | 1           |
| ADGRA2     | 0.9620375  | 0.1812639   | 5.3074 | 1.18E-07 | 1.152935669 | count | 0.002762262 |
| COX4I2     | 0.9139479  | 0.185501    | 4.9269 | 8.72E-07 | 1.153416465 | count | 0.020298416 |
| HSF4       | 1.2752719  | 0.3449853   | 3.6966 | 0.000222 | 1.153606619 | count | 1           |
| NME5       | 1.078561   | 0.4180275   | 2.5801 | 0.00992  | 1.154874839 | count | 1           |
| COMP       | 1.51359    | 0.7129626   | 2.123  | 0.0338   | 1.157714425 | count | 1           |
| CBR3       | 0.8554822  | 0.1136526   | 7.5272 | 6.49E-14 | 1.157792551 | count | 1.55E-09    |
| VAT1       | 0.8494018  | 0.1029336   | 8.2519 | 2.15E-16 | 1.162021793 | count | 5.14E-12    |
| NOG        | 16.8623175 | 1029.498094 | 0.0164 | 0.9869   | 1.162461367 | count | 1           |
| FGF16      | 16.9383102 | 707.0598131 | 0.024  | 0.981    | 1.162461373 | count | 1           |
| NKAIN4     | 17.197602  | 2374.818809 | 0.0072 | 0.994    | 1.162461391 | count | 1           |
| AC104066.2 | 17.1990299 | 3076.26621  | 0.0056 | 0.996    | 1.162461391 | count | 1           |
| TSKS       | 17.442071  | 776.5308423 | 0.0225 | 0.9821   | 1.162461404 | count | 1           |
| AC092354.1 | 16.4981507 | 2059.435617 | 0.008  | 0.994    | 1.16246141  | count | 1           |
| HSPA12B    | 17.563312  | 652.2020067 | 0.0269 | 0.979    | 1.16246141  | count | 1           |
| SOSTDC1    | 16.6837514 | 1299.924822 | 0.0128 | 0.99     | 1.16246143  | count | 1           |
| AC004540.2 | 18.4090871 | 1271.006731 | 0.0145 | 0.9884   | 1.162461434 | count | 1           |
| GREM1      | 16.9439762 | 1166.19922  | 0.0145 | 0.9884   | 1.162461454 | count | 1           |
| TMEM150C   | 17.1951123 | 1316.884497 | 0.0131 | 0.9896   | 1.162461471 | count | 1           |
| IGF2       | 17.5757466 | 1160.937817 | 0.0151 | 0.9879   | 1.16246149  | count | 1           |
| GPC5       | 17.6400569 | 1143.505876 | 0.0154 | 0.9877   | 1.162461493 | count | 1           |
| TBC1D12    | 0.9479804  | 0.1807598   | 5.2444 | 1.66E-07 | 1.165619161 | count | 0.003882408 |
| CAB39L     | 0.8729328  | 0.1233717   | 7.0756 | 1.77E-12 | 1.167327538 | count | 4.21E-08    |
| PARVB      | 1.4299271  | 0.4078236   | 3.5062 | 0.00046  | 1.167424646 | count | 1           |
| DOCK4      | 1.295108   | 0.3355826   | 3.8593 | 0.000116 | 1.167771393 | count | 1           |
| TRERF1     | 1.4949405  | 0.4234752   | 3.5302 | 0.00042  | 1.167815596 | count | 1           |
| RUFY3      | 0.9388976  | 0.1897765   | 4.9474 | 7.86E-07 | 1.168850223 | count | 0.01830594  |

|            |            |             |         |          |             |       |             |
|------------|------------|-------------|---------|----------|-------------|-------|-------------|
| RPGRIP1L   | 1.2646281  | 0.3384737   | 3.7363  | 0.00019  | 1.169414205 | count | 1           |
| ALDH1L2    | 1.0961002  | 0.223744    | 4.8989  | 1.01E-06 | 1.171302731 | count | 0.02349563  |
| SH3BP5     | 0.8505758  | 0.0997649   | 8.5258  | 2.19E-17 | 1.173562809 | count | 5.24E-13    |
| KIAA0556   | 1.4206956  | 0.5130205   | 2.7693  | 0.00565  | 1.178812807 | count | 1           |
| HLA-DRB1   | 0.8282597  | 0.1200881   | 6.8971  | 6.22E-12 | 1.179096302 | count | 1.48E-07    |
| OLFML2A    | 1.3310137  | 0.2432453   | 5.4719  | 4.75E-08 | 1.179993985 | count | 0.00111397  |
| PLEKHA6    | 2.0541446  | 0.8254449   | 2.4885  | 0.0129   | 1.181576924 | count | 1           |
| MT1G       | 1.0101494  | 0.4337244   | 2.329   | 0.0199   | 1.183222423 | count | 1           |
| GRB14      | 1.3565687  | 1.429593    | 0.9489  | 0.3427   | 1.18362512  | count | 1           |
| C14orf132  | 0.9368521  | 0.2881223   | 3.2516  | 0.00116  | 1.185483252 | count | 1           |
| FLNB       | 1.0189806  | 0.2153154   | 4.7325  | 2.30E-06 | 1.18693792  | count | 0.0533347   |
| ZFP36L2    | 0.8300564  | 0.0535973   | 15.4869 | 1.88E-52 | 1.187612398 | count | 4.56E-48    |
| COLGALT2   | 3.117231   | 0.6407623   | 4.8649  | 1.19E-06 | 1.190083316 | count | 0.02766155  |
| SREBF2     | 1.0669809  | 0.2898104   | 3.6817  | 0.000235 | 1.191031259 | count | 1           |
| SAMHD1     | 0.8693823  | 0.1071634   | 8.1127  | 6.69E-16 | 1.193706002 | count | 1.60E-11    |
| LONRF3     | 3.1791862  | 1.8647847   | 1.7049  | 0.0883   | 1.195848687 | count | 1           |
| TMEM119    | 1.1105494  | 0.4159936   | 2.6696  | 0.00763  | 1.20092928  | count | 1           |
| TPRG1      | 1.4874844  | 0.7243933   | 2.0534  | 0.0401   | 1.201326827 | count | 1           |
| ATF5       | 0.9708374  | 0.2014786   | 4.8186  | 1.50E-06 | 1.201678583 | count | 0.0348435   |
| CLIC2      | 0.9763383  | 0.2023486   | 4.825   | 1.46E-06 | 1.203261446 | count | 0.03391872  |
| RNF125     | 2.7818093  | 1.4670061   | 1.8962  | 0.058    | 1.203413563 | count | 1           |
| SOCS1      | 0.9103894  | 0.1604649   | 5.6734  | 1.51E-08 | 1.205006967 | count | 0.000354956 |
| LRRC75B    | 1.0553811  | 0.2523485   | 4.1822  | 2.95E-05 | 1.205861343 | count | 0.67614     |
| CDH6       | 1.073023   | 0.2039424   | 5.2614  | 1.51E-07 | 1.20912501  | count | 0.003532796 |
| PLEKHA2    | 1.1149475  | 0.2782666   | 4.0068  | 6.28E-05 | 1.210227436 | count | 1           |
| PLD1       | 1.2094318  | 0.3070418   | 3.939   | 8.34E-05 | 1.211679642 | count | 1           |
| OLFML1     | 0.8981403  | 0.1089315   | 8.245   | 2.28E-16 | 1.213480806 | count | 5.45E-12    |
| KIAA1841   | 1.1146617  | 0.3364822   | 3.3127  | 0.000933 | 1.219838879 | count | 1           |
| ROBO4      | 2.3627943  | 0.7845474   | 3.0117  | 0.00262  | 1.221177225 | count | 1           |
| FAM43A     | 1.8772933  | 0.4446933   | 4.2215  | 2.49E-05 | 1.221701532 | count | 0.5712309   |
| MOK        | 1.094831   | 0.2119802   | 5.1648  | 2.54E-07 | 1.22288368  | count | 0.005934202 |
| ADGRG2     | 2.93449    | 0.7902165   | 3.7135  | 0.000207 | 1.223078222 | count | 1           |
| SLFN11     | 1.0553031  | 0.1874657   | 5.6293  | 1.94E-08 | 1.225364869 | count | 0.000455881 |
| DACT2      | 3.569735   | 1.137253    | 3.1389  | 0.00171  | 1.225428446 | count | 1           |
| FSTL3      | 0.9095687  | 0.1280247   | 7.1046  | 1.44E-12 | 1.226033504 | count | 3.42E-08    |
| GPSM2      | 1.082368   | 0.2306844   | 4.692   | 2.80E-06 | 1.226215726 | count | 0.0648844   |
| FABP4      | 0.8859249  | 0.2865203   | 3.092   | 0.002    | 1.226914144 | count | 1           |
| LRFN5      | 17.618497  | 1333.680038 | 0.0132  | 0.9895   | 1.227487957 | count | 1           |
| PRKCQ      | 17.2790001 | 3201.763199 | 0.0054  | 0.996    | 1.227488023 | count | 1           |
| CTSK       | 0.8633852  | 0.0748174   | 11.5399 | 2.75E-30 | 1.227671395 | count | 6.64E-26    |
| PCSK5      | 1.0813163  | 0.2556635   | 4.2295  | 2.40E-05 | 1.228857469 | count | 0.550776    |
| SLC17A5    | 0.9913505  | 0.1879359   | 5.2749  | 1.40E-07 | 1.231631809 | count | 0.003276    |
| SEMA6A     | 2.2415121  | 1.0242816   | 2.1884  | 0.0287   | 1.232745737 | count | 1           |
| EPHX1      | 0.8746263  | 0.0686049   | 12.7487 | 1.86E-36 | 1.233070141 | count | 4.50E-32    |
| AC239809.3 | 2.4238087  | 1.4096428   | 1.7194  | 0.0856   | 1.234224459 | count | 1           |





|            |            |             |         |          |             |       |             |
|------------|------------|-------------|---------|----------|-------------|-------|-------------|
| KCNJ12     | 18.2015939 | 663.8196858 | 0.0274  | 0.978    | 1.349358247 | count | 1           |
| PMP22      | 0.9453757  | 0.0531181   | 17.7976 | 4.95E-68 | 1.350651744 | count | 1.20E-63    |
| LRRRC10B   | 2.070412   | 0.4853697   | 4.2656  | 2.04E-05 | 1.350930023 | count | 0.4686696   |
| CAVIN2     | 0.9764623  | 0.2197913   | 4.4427  | 9.15E-06 | 1.352670544 | count | 0.21089835  |
| C1R        | 0.9420705  | 0.0465612   | 20.233  | 2.20E-86 | 1.354693251 | count | 5.35E-82    |
| ACKR4      | 1.0004285  | 0.1389459   | 7.2001  | 7.26E-13 | 1.354848715 | count | 1.73E-08    |
| CDKN1C     | 0.9526254  | 0.0723257   | 13.1713 | 9.59E-39 | 1.355246152 | count | 2.32E-34    |
| DSE        | 1.0557541  | 0.1449286   | 7.2847  | 3.93E-13 | 1.355317471 | count | 9.36E-09    |
| QPRT       | 1.270139   | 0.4099575   | 3.0982  | 0.00196  | 1.360076712 | count | 1           |
| TEX26-AS1  | 1.5648616  | 0.8795076   | 1.7792  | 0.0753   | 1.362235624 | count | 1           |
| CHEK2      | 1.3372689  | 0.311241    | 4.2966  | 1.78E-05 | 1.365644832 | count | 0.4092042   |
| SSC5D      | 1.2531671  | 0.2531358   | 4.9506  | 7.73E-07 | 1.36631999  | count | 0.018003943 |
| CCNL1      | 0.9680691  | 0.1003887   | 9.6432  | 9.49E-22 | 1.367663503 | count | 2.28E-17    |
| AC254633.1 | 2.223787   | 0.5461272   | 4.0719  | 4.76E-05 | 1.369515949 | count | 1           |
| DLL1       | 2.3587355  | 1.0893376   | 2.1653  | 0.0304   | 1.373439225 | count | 1           |
| PPL        | 1.1884762  | 0.251873    | 4.7186  | 2.46E-06 | 1.37363219  | count | 0.05703018  |
| PXN        | 1.2453579  | 0.2291761   | 5.4341  | 5.87E-08 | 1.373875003 | count | 0.001376104 |
| TET1       | 1.1688926  | 0.2374393   | 4.9229  | 8.90E-07 | 1.374918228 | count | 0.02071564  |
| NAALAD2    | 2.3659623  | 0.7591049   | 3.1168  | 0.00184  | 1.375313936 | count | 1           |
| FOXP2      | 1.2422367  | 0.3396785   | 3.6571  | 0.000259 | 1.375617343 | count | 1           |
| GDPD5      | 1.7003891  | 0.3698418   | 4.5976  | 4.42E-06 | 1.375761811 | count | 0.10220808  |
| GPX3       | 0.9723748  | 0.0823723   | 11.8046 | 1.37E-31 | 1.376532903 | count | 3.31E-27    |
| XG         | 1.0670998  | 0.1823167   | 5.853   | 5.25E-09 | 1.377528146 | count | 0.000123659 |
| CYBRD1     | 0.9781737  | 0.0767683   | 12.7419 | 2.02E-36 | 1.378487638 | count | 4.89E-32    |
| S1PR2      | 1.8254697  | 0.3684304   | 4.9547  | 7.57E-07 | 1.378868298 | count | 0.017635829 |
| NTNG1      | 1.940153   | 0.5846867   | 3.3183  | 0.000915 | 1.382893717 | count | 1           |
| UST        | 1.7233652  | 0.3576752   | 4.8182  | 1.51E-06 | 1.38817454  | count | 0.03507277  |
| CCDC69     | 1.2331456  | 0.2088189   | 5.9053  | 3.84E-09 | 1.388767582 | count | 9.05E-05    |
| CCDC146    | 1.1382018  | 0.2191886   | 5.1928  | 2.18E-07 | 1.39105793  | count | 0.005095532 |
| OLFM1      | 1.196769   | 0.2058905   | 5.8126  | 6.67E-09 | 1.392008936 | count | 0.000157012 |
| KIF21A     | 1.1218741  | 0.23882     | 4.6976  | 2.73E-06 | 1.392009652 | count | 0.06327048  |
| CCL28      | 1.2562289  | 0.2631197   | 4.7744  | 1.87E-06 | 1.39368785  | count | 0.04339335  |
| NCAM2      | 1.9684824  | 0.6008942   | 3.2759  | 0.00106  | 1.394571832 | count | 1           |
| KLF2       | 0.9734089  | 0.061778    | 15.7566 | 3.56E-54 | 1.398467983 | count | 8.64E-50    |
| WNT2       | 3.811211   | 1.0932597   | 3.4861  | 0.000496 | 1.401039163 | count | 1           |
| HS6ST1     | 1.6283124  | 0.3657646   | 4.4518  | 8.77E-06 | 1.401521786 | count | 0.20220112  |
| IL17D      | 1.2017473  | 0.2305926   | 5.2116  | 1.98E-07 | 1.403464001 | count | 0.004628844 |
| IQCA1      | 3.2398939  | 1.115629    | 2.9041  | 0.00371  | 1.403598498 | count | 1           |
| POLR3G     | 3.248232   | 1.3126272   | 2.4746  | 0.0134   | 1.404483859 | count | 1           |
| HBB        | 16.8619924 | 1709.898609 | 0.0099  | 0.9921   | 1.406638197 | count | 1           |
| AC092910.3 | 16.952786  | 2315.450746 | 0.0073  | 0.994    | 1.406638207 | count | 1           |
| DPP4       | 17.4930811 | 800.5015502 | 0.0219  | 0.9826   | 1.40663825  | count | 1           |
| PAPPA2     | 3.2753194  | 1.6777232   | 1.9522  | 0.051    | 1.407313349 | count | 1           |
| PTGDS      | 0.9848936  | 0.2824053   | 3.4875  | 5.00E-04 | 1.408594669 | count | 1           |
| SLC43A3    | 1.0915483  | 0.1817688   | 6.0051  | 2.10E-09 | 1.410972337 | count | 4.95E-05    |



|            |            |             |         |           |             |       |             |
|------------|------------|-------------|---------|-----------|-------------|-------|-------------|
| AC116036.2 | 2.2913348  | 2.3609817   | 0.9705  | 0.332     | 1.512224586 | count | 1           |
| CDA        | 2.087075   | 0.6117994   | 3.4114  | 0.000653  | 1.51645459  | count | 1           |
| PTPRS      | 1.3880667  | 0.3360414   | 4.1306  | 3.70E-05  | 1.517536595 | count | 0.847078    |
| USP2       | 2.4146237  | 0.7149525   | 3.3773  | 0.00074   | 1.520033316 | count | 1           |
| CHRD       | 1.4662239  | 0.2607945   | 5.6221  | 2.03E-08  | 1.525212988 | count | 0.000476989 |
| 3-Mar      | 1.484147   | 0.3516575   | 4.2204  | 2.50E-05  | 1.525473202 | count | 0.573475    |
| FGF9       | 4.355423   | 1.5787252   | 2.7588  | 0.00583   | 1.526553382 | count | 1           |
| MATN2      | 1.1389526  | 0.1996566   | 5.7046  | 1.26E-08  | 1.527603945 | count | 0.000296314 |
| TRIO       | 1.2449329  | 0.2987674   | 4.1669  | 3.16E-05  | 1.529847283 | count | 0.723956    |
| IFITM1     | 1.1067608  | 0.1177874   | 9.3963  | 9.65E-21  | 1.531227682 | count | 2.32E-16    |
| NOVA1      | 1.2218048  | 0.1657318   | 7.3722  | 2.06E-13  | 1.533295224 | count | 4.91E-09    |
| NTRK2      | 1.1328495  | 0.1023096   | 11.0728 | 4.71E-28  | 1.533366653 | count | 1.14E-23    |
| PCK1       | 1.591875   | 0.8807359   | 1.8074  | 0.0708    | 1.539090794 | count | 1           |
| KCNQ1OT1   | 1.1441508  | 0.2668875   | 4.287   | 1.86E-05  | 1.543436782 | count | 0.4274652   |
| ADAMTS2    | 1.4164866  | 0.2601252   | 5.4454  | 5.51E-08  | 1.543522511 | count | 0.00129193  |
| SLC16A7    | 1.1591707  | 0.153607    | 7.5463  | 5.61E-14  | 1.545537413 | count | 1.34E-09    |
| TNFSF9     | 2.1679168  | 0.5476222   | 3.9588  | 7.68E-05  | 1.548292561 | count | 1           |
| CCL21      | 1.1123815  | 0.4348972   | 2.5578  | 0.0106    | 1.549433595 | count | 1           |
| IER2       | 1.0802535  | 0.0596742   | 18.1025 | 3.19E-70  | 1.552745801 | count | 7.75E-66    |
| ESR1       | 1.4879415  | 0.4148741   | 3.5865  | 0.00034   | 1.564253679 | count | 1           |
| SPRR2F     | 17.6674479 | 1457.394285 | 0.0121  | 0.99      | 1.565979273 | count | 1           |
| LTBP4      | 1.0974004  | 0.0604581   | 18.1514 | 1.41E-70  | 1.567532475 | count | 3.43E-66    |
| SKAP2      | 1.7724459  | 0.4404846   | 4.0239  | 5.84E-05  | 1.577218836 | count | 1           |
| ECM1       | 1.1675876  | 0.1268645   | 9.2034  | 5.68E-20  | 1.584039822 | count | 1.36E-15    |
| TPST1      | 1.2503984  | 0.14824     | 8.435   | 4.70E-17  | 1.585555289 | count | 1.12E-12    |
| ZNF385A    | 1.3812148  | 0.2238446   | 6.1704  | 7.55E-10  | 1.586064959 | count | 1.78E-05    |
| XPNPEP2    | 3.7676514  | 1.1191973   | 3.3664  | 0.000769  | 1.586318817 | count | 1           |
| PRICKLE1   | 1.726339   | 0.3555816   | 4.855   | 1.25E-06  | 1.587357793 | count | 0.0290525   |
| CACHD1     | 1.5626963  | 0.364225    | 4.2905  | 1.83E-05  | 1.588974253 | count | 0.4205889   |
| MAFF       | 1.1563015  | 0.1115557   | 10.3652 | 7.83E-25  | 1.589553597 | count | 1.89E-20    |
| RBPMS2     | 1.6828736  | 0.2655492   | 6.3373  | 2.62E-10  | 1.593245424 | count | 6.20E-06    |
| MATN4      | 3.3874071  | 1.2783389   | 2.6499  | 0.00809   | 1.593675374 | count | 1           |
| PRRG3      | 3.959481   | 1.407424    | 2.8133  | 0.00493   | 1.599422981 | count | 1           |
| OLFM4      | 1.9833615  | 0.6912876   | 2.8691  | 0.00414   | 1.615077837 | count | 1           |
| KRT27      | 16.811538  | 608.9671725 | 0.0276  | 0.978     | 1.615408411 | count | 1           |
| SREBF1     | 1.558752   | 0.2652075   | 5.8775  | 4.54E-09  | 1.616397463 | count | 0.000106981 |
| FSTL1      | 1.1348367  | 0.0773288   | 14.6755 | 2.00E-47  | 1.616769545 | count | 4.85E-43    |
| KANK3      | 2.814547   | 0.9558393   | 2.9446  | 0.00325   | 1.617346977 | count | 1           |
| FOSB       | 1.135995   | 0.089904    | 12.6356 | 7.42E-36  | 1.623059848 | count | 1.79E-31    |
| TMOD2      | 1.3596652  | 0.2222384   | 6.118   | 1.05E-09  | 1.623421734 | count | 2.48E-05    |
| JUNB       | 1.1274071  | 0.0510253   | 22.0951 | 1.15E-101 | 1.623676441 | count | 2.80E-97    |
| C2CD4B     | 2.481163   | 1.4680727   | 1.6901  | 0.0911    | 1.627554824 | count | 1           |
| LINC00632  | 1.6347247  | 0.3947845   | 4.1408  | 3.54E-05  | 1.627944392 | count | 0.8106954   |
| HHIP-AS1   | 2.713788   | 0.6042859   | 4.4909  | 7.31E-06  | 1.628275502 | count | 0.16867094  |
| ABCC9      | 1.1936121  | 0.1273365   | 9.3737  | 1.19E-20  | 1.631967471 | count | 2.86E-16    |



|            |            |             |         |          |             |       |             |
|------------|------------|-------------|---------|----------|-------------|-------|-------------|
| KREMEN1    | 1.9374633  | 0.3299221   | 5.8725  | 4.67E-09 | 1.64248608  | count | 0.00011003  |
| IL18       | 1.9092826  | 0.3893642   | 4.9036  | 9.82E-07 | 1.642784997 | count | 0.022847212 |
| COLEC12    | 1.2446003  | 0.1420685   | 8.7606  | 2.92E-18 | 1.64672083  | count | 7.00E-14    |
| VEGFD      | 3.2175689  | 1.2423048   | 2.59    | 0.00964  | 1.650505197 | count | 1           |
| ANKRD65    | 2.3837995  | 0.6236199   | 3.8225  | 0.000134 | 1.650767744 | count | 1           |
| THBS1      | 1.2602583  | 0.1776539   | 7.0939  | 1.56E-12 | 1.651123792 | count | 3.71E-08    |
| CPB1       | 17.2446579 | 1017.237102 | 0.017   | 0.986    | 1.663199948 | count | 1           |
| STC1       | 16.921628  | 1676.574863 | 0.0101  | 0.992    | 1.663200008 | count | 1           |
| ACVRL1     | 1.6135613  | 0.2326954   | 6.9342  | 4.81E-12 | 1.66836337  | count | 1.14E-07    |
| TMEM233    | 1.35475    | 0.3224147   | 4.2019  | 2.71E-05 | 1.673027677 | count | 0.6213488   |
| FAM198A    | 1.8443375  | 0.4289537   | 4.2996  | 1.76E-05 | 1.675248776 | count | 0.404624    |
| NAV3       | 1.9708784  | 0.5410999   | 3.6424  | 0.000274 | 1.676605278 | count | 1           |
| GPRC5A     | 1.2435482  | 0.1760083   | 7.0653  | 1.91E-12 | 1.677341985 | count | 4.54E-08    |
| NHSL1      | 1.8711084  | 0.5904822   | 3.1688  | 0.00154  | 1.678419598 | count | 1           |
| LINC00924  | 2.07796    | 0.5839086   | 3.5587  | 0.000377 | 1.679701174 | count | 1           |
| WNT5B      | 1.9502547  | 0.5983311   | 3.2595  | 0.00113  | 1.680997445 | count | 1           |
| ADD3       | 1.2116066  | 0.0965198   | 12.5529 | 2.03E-35 | 1.686103938 | count | 4.91E-31    |
| AC245595.1 | 1.2944945  | 0.1379764   | 9.382   | 1.10E-20 | 1.687809377 | count | 2.64E-16    |
| BNC2       | 1.8523839  | 0.3766664   | 4.9178  | 9.13E-07 | 1.693068962 | count | 0.021247336 |
| HIC1       | 1.3778294  | 0.1961551   | 7.0242  | 2.55E-12 | 1.694893701 | count | 6.06E-08    |
| GPAT2      | 1.783847   | 0.6723631   | 2.6531  | 0.00801  | 1.695450914 | count | 1           |
| MYC        | 1.2813513  | 0.1271719   | 10.0757 | 1.43E-23 | 1.699235267 | count | 3.44E-19    |
| MIR99AHG   | 1.4939687  | 0.2052775   | 7.2778  | 4.13E-13 | 1.704088572 | count | 9.83E-09    |
| GRID2      | 1.9939309  | 0.5032629   | 3.962   | 7.57E-05 | 1.704870569 | count | 1           |
| GLB1L      | 1.912356   | 0.5821617   | 3.2849  | 0.00103  | 1.716700106 | count | 1           |
| GLI1       | 3.4561882  | 1.4168976   | 2.4393  | 0.0148   | 1.718221962 | count | 1           |
| ASAP3      | 1.9953004  | 0.4384406   | 4.5509  | 5.51E-06 | 1.721105358 | count | 0.12726998  |
| PILRA      | 3.2101083  | 0.8170022   | 3.9291  | 8.68E-05 | 1.721613893 | count | 1           |
| NFKBIZ     | 1.2362854  | 0.1299557   | 9.5131  | 3.24E-21 | 1.723013131 | count | 7.79E-17    |
| ELMO1      | 2.0075391  | 0.5244394   | 3.828   | 0.000131 | 1.727773033 | count | 1           |
| MTSS1      | 1.5856884  | 0.3493278   | 4.5393  | 5.83E-06 | 1.727936326 | count | 0.13463802  |
| SERPINA5   | 4.020789   | 1.2680137   | 3.1709  | 0.00153  | 1.729811167 | count | 1           |
| SMPDL3A    | 1.7038135  | 0.386895    | 4.4038  | 1.09E-05 | 1.731801176 | count | 0.2510379   |
| MME        | 3.0945904  | 1.0995279   | 2.8145  | 0.00491  | 1.737119272 | count | 1           |
| SH2D4A     | 1.6547489  | 0.2604282   | 6.354   | 2.36E-10 | 1.744366959 | count | 5.59E-06    |
| ACE        | 3.402237   | 1.6167203   | 2.1044  | 0.0354   | 1.74815373  | count | 1           |
| EBF3       | 2.7273367  | 0.5986294   | 4.556   | 5.38E-06 | 1.751640266 | count | 0.12429414  |
| PLTP       | 1.2534078  | 0.0942523   | 13.2984 | 1.91E-39 | 1.752777916 | count | 4.63E-35    |
| ZNF521     | 18.1775563 | 726.0104149 | 0.025   | 0.98     | 1.754280759 | count | 1           |
| CERS1      | 18.351613  | 739.6153586 | 0.0248  | 0.98     | 1.754281172 | count | 1           |
| PLCB1      | 2.6487957  | 0.5357381   | 4.9442  | 7.99E-07 | 1.75817986  | count | 0.018607112 |
| SHC2       | 1.8640501  | 0.375532    | 4.9638  | 7.23E-07 | 1.771165227 | count | 0.0168459   |
| RASSF4     | 1.4312828  | 0.1984085   | 7.2138  | 6.58E-13 | 1.778043615 | count | 1.57E-08    |
| IL16       | 2.9024689  | 0.8711622   | 3.3317  | 0.000872 | 1.793295877 | count | 1           |
| PRCP       | 1.3272563  | 0.120418    | 11.0221 | 8.13E-28 | 1.793469459 | count | 1.96E-23    |

|         |            |             |         |           |             |       |             |
|---------|------------|-------------|---------|-----------|-------------|-------|-------------|
| NPY1R   | 1.3289259  | 0.1570543   | 8.4616  | 3.76E-17  | 1.795627512 | count | 9.00E-13    |
| COL9A3  | 17.0952575 | 1159.355595 | 0.0147  | 0.988     | 1.797751704 | count | 1           |
| CHL1    | 17.2637407 | 474.7691765 | 0.0364  | 0.971     | 1.797751725 | count | 1           |
| TNFSF14 | 17.3819606 | 1452.504149 | 0.012   | 0.99      | 1.797751738 | count | 1           |
| USP53   | 1.2896746  | 0.1288547   | 10.0087 | 2.77E-23  | 1.799221517 | count | 6.67E-19    |
| ADCY3   | 1.5620745  | 0.1788347   | 8.7347  | 3.65E-18  | 1.800705037 | count | 8.75E-14    |
| GPNMB   | 1.2709012  | 0.0756058   | 16.8096 | 3.82E-61  | 1.801542693 | count | 9.27E-57    |
| HES5    | 1.638244   | 0.526547    | 3.1113  | 0.00188   | 1.806423818 | count | 1           |
| GALNT12 | 1.9479539  | 0.348745    | 5.5856  | 2.50E-08  | 1.814046372 | count | 0.0005872   |
| CKB     | 1.3275715  | 0.1105998   | 12.0034 | 1.38E-32  | 1.815099242 | count | 3.33E-28    |
| WISP2   | 1.2721705  | 0.1038565   | 12.2493 | 7.70E-34  | 1.816033087 | count | 1.86E-29    |
| EGR1    | 1.2757311  | 0.0609211   | 20.9407 | 4.55E-92  | 1.828512892 | count | 1.11E-87    |
| ARL4D   | 1.372093   | 0.1530574   | 8.9646  | 4.86E-19  | 1.832084483 | count | 1.17E-14    |
| BRINP3  | 17.8858483 | 700.6803305 | 0.0255  | 0.9796    | 1.839951193 | count | 1           |
| ADAM33  | 1.598242   | 0.2611755   | 6.1194  | 1.04E-09  | 1.846809128 | count | 2.46E-05    |
| C1S     | 1.2906154  | 0.0599587   | 21.5251 | 7.06E-97  | 1.847435412 | count | 1.72E-92    |
| BIN1    | 1.684282   | 0.2019029   | 8.342   | 1.02E-16  | 1.852396768 | count | 2.44E-12    |
| ZNF423  | 2.3013896  | 0.4447978   | 5.174   | 2.41E-07  | 1.855533319 | count | 0.005631206 |
| MEG3    | 1.3560309  | 0.2073679   | 6.5393  | 7.04E-11  | 1.866525231 | count | 1.67E-06    |
| ACSL5   | 3.5703581  | 1.2165482   | 2.9348  | 0.00336   | 1.872507815 | count | 1           |
| PLPP3   | 1.3681781  | 0.1056179   | 12.954  | 1.47E-37  | 1.880569516 | count | 3.56E-33    |
| SLC18A3 | 17.9631979 | 970.5016174 | 0.0185  | 0.985     | 1.880951242 | count | 1           |
| CEP152  | 2.3600508  | 0.7293052   | 3.236   | 0.00122   | 1.880952198 | count | 1           |
| DENND2A | 3.3927299  | 1.2353056   | 2.7465  | 0.00605   | 1.881720765 | count | 1           |
| ZFP36   | 1.3138634  | 0.0588561   | 22.3233 | 1.30E-103 | 1.890414552 | count | 3.16E-99    |
| AGTR1   | 1.8501291  | 0.3019453   | 6.1274  | 9.88E-10  | 1.891336389 | count | 2.33E-05    |
| GFPT2   | 2.0016737  | 0.2902735   | 6.8958  | 6.28E-12  | 1.893599966 | count | 1.49E-07    |
| TWIST2  | 1.4650186  | 0.1860465   | 7.8745  | 4.47E-15  | 1.897359755 | count | 1.07E-10    |
| CCL8    | 1.8008113  | 0.4855653   | 3.7087  | 0.000211  | 1.903560866 | count | 1           |
| STXBP1  | 1.6547247  | 0.2550646   | 6.4875  | 9.90E-11  | 1.904909725 | count | 2.35E-06    |
| OLFML3  | 1.3750508  | 0.1027233   | 13.386  | 6.23E-40  | 1.905716932 | count | 1.51E-35    |
| TSPAN8  | 1.6493115  | 0.264391    | 6.2382  | 4.93E-10  | 1.917701245 | count | 1.17E-05    |
| MLXIPL  | 17.332179  | 492.4946874 | 0.0352  | 0.972     | 1.920817945 | count | 1           |
| CH25H   | 2.331666   | 0.6955048   | 3.3525  | 0.000809  | 1.921471515 | count | 1           |
| DIO3OS  | 1.9667871  | 0.5209108   | 3.7757  | 0.000162  | 1.922335141 | count | 1           |
| C1orf21 | 1.5345577  | 0.1599524   | 9.5938  | 1.52E-21  | 1.933830959 | count | 3.65E-17    |
| TCIM    | 1.5258892  | 0.2732158   | 5.5849  | 2.51E-08  | 1.942784342 | count | 0.000589524 |
| ANK2    | 1.514555   | 0.2563456   | 5.9083  | 3.77E-09  | 1.944805987 | count | 8.89E-05    |
| ALKAL2  | 3.9550429  | 1.3277249   | 2.9788  | 0.00291   | 1.945250235 | count | 1           |
| PCDH17  | 2.7080214  | 0.7718057   | 3.5087  | 0.000456  | 1.947064574 | count | 1           |
| TNFAIP2 | 1.481966   | 0.1700832   | 8.7132  | 4.40E-18  | 1.954953262 | count | 1.05E-13    |
| FAIM2   | 3.2950586  | 0.8642221   | 3.8127  | 0.00014   | 1.957206935 | count | 1           |
| DBN1    | 1.4504148  | 0.1250392   | 11.5997 | 1.40E-30  | 1.957875664 | count | 3.38E-26    |
| CMYA5   | 2.0076353  | 0.5705877   | 3.5185  | 0.000439  | 1.959550806 | count | 1           |
| CYGB    | 1.491391   | 0.1852979   | 8.0486  | 1.12E-15  | 1.961754822 | count | 2.68E-11    |

|           |            |             |         |          |             |       |             |
|-----------|------------|-------------|---------|----------|-------------|-------|-------------|
| CRABP1    | 2.362194   | 0.6086498   | 3.881   | 0.000106 | 1.968551139 | count | 1           |
| ZFHX4     | 1.8749733  | 0.3570627   | 5.2511  | 1.60E-07 | 1.969255196 | count | 0.00374288  |
| HLX       | 2.0614051  | 0.4003562   | 5.1489  | 2.76E-07 | 1.974621236 | count | 0.00644598  |
| WNT2B     | 2.2570439  | 0.4846313   | 4.6572  | 3.32E-06 | 1.978001819 | count | 0.0768746   |
| MSX1      | 1.4728223  | 0.1379296   | 10.6781 | 3.12E-26 | 1.978534825 | count | 7.52E-22    |
| RAMP2-AS1 | 18.0596369 | 833.3956701 | 0.0217  | 0.9827   | 1.997392185 | count | 1           |
| SLIT3     | 1.4238747  | 0.1107794   | 12.8532 | 5.13E-37 | 2.00405214  | count | 1.24E-32    |
| ASPA      | 3.4504671  | 0.971055    | 3.5533  | 0.000385 | 2.011104165 | count | 1           |
| NDNF      | 1.7182123  | 0.3160346   | 5.4368  | 5.78E-08 | 2.011710434 | count | 0.001355121 |
| GPC3      | 1.4924323  | 0.2344062   | 6.3669  | 2.17E-10 | 2.01690816  | count | 5.14E-06    |
| ANGPTL5   | 2.4838857  | 0.37993     | 6.5377  | 7.11E-11 | 2.022033231 | count | 1.69E-06    |
| ELANE     | 3.5777117  | 1.4323682   | 2.4978  | 0.0125   | 2.029455576 | count | 1           |
| RASSF2    | 2.242562   | 0.4905025   | 4.572   | 4.99E-06 | 2.036768402 | count | 0.11533886  |
| TLR5      | 2.048359   | 0.3620965   | 5.6569  | 1.66E-08 | 2.042533528 | count | 0.0003902   |
| MMP2      | 1.4639275  | 0.1013512   | 14.4441 | 4.90E-46 | 2.047907191 | count | 1.19E-41    |
| PCOLCE2   | 1.4503315  | 0.1083549   | 13.385  | 6.31E-40 | 2.055339775 | count | 1.53E-35    |
| LSP1      | 1.6073884  | 0.1738453   | 9.2461  | 3.85E-20 | 2.057405413 | count | 9.24E-16    |
| GRIK1     | 18.1351693 | 977.4654396 | 0.0186  | 0.985    | 2.070105656 | count | 1           |
| KRT222    | 18.2277714 | 648.415276  | 0.0281  | 0.9776   | 2.070105662 | count | 1           |
| WNT10B    | 18.2345027 | 638.5505402 | 0.0286  | 0.977    | 2.070105662 | count | 1           |
| RETREG1   | 2.132802   | 0.3121624   | 6.8323  | 9.74E-12 | 2.080597947 | count | 2.31E-07    |
| MAN1C1    | 1.7737027  | 0.2224505   | 7.9735  | 2.04E-15 | 2.088177457 | count | 4.87E-11    |
| BST1      | 1.6191395  | 0.1651034   | 9.8068  | 1.98E-22 | 2.090538277 | count | 4.76E-18    |
| ABCC2     | 3.1876478  | 1.1063388   | 2.8813  | 0.00398  | 2.095590489 | count | 1           |
| WNT5A     | 3.4946957  | 1.0217564   | 3.4203  | 0.000632 | 2.101240879 | count | 1           |
| ALDH1A1   | 1.5833387  | 0.1297568   | 12.2024 | 1.34E-33 | 2.103979879 | count | 3.24E-29    |
| MT1A      | 1.7035695  | 0.203648    | 8.3653  | 8.42E-17 | 2.111235173 | count | 2.01E-12    |
| FYN       | 1.6838001  | 0.2021804   | 8.3282  | 1.15E-16 | 2.120663375 | count | 2.75E-12    |
| PRPH      | 3.6272342  | 0.8761747   | 4.1399  | 3.55E-05 | 2.120950865 | count | 0.8129145   |
| FGF7      | 1.5132285  | 0.1020244   | 14.832  | 2.23E-48 | 2.136911164 | count | 5.41E-44    |
| FGF10     | 4.3743153  | 1.5321521   | 2.855   | 0.00433  | 2.137136204 | count | 1           |
| PDGFRL    | 1.5284118  | 0.0957198   | 15.9676 | 1.54E-55 | 2.14578273  | count | 3.74E-51    |
| STXBP6    | 2.458165   | 0.3826947   | 6.4233  | 1.50E-10 | 2.148387858 | count | 3.55E-06    |
| DCLK1     | 1.8590983  | 0.2252033   | 8.2552  | 2.09E-16 | 2.160267318 | count | 5.00E-12    |
| ADH1C     | 3.8127513  | 1.6297252   | 2.3395  | 0.0194   | 2.172391204 | count | 1           |
| TMEM100   | 2.2162611  | 0.5198309   | 4.2634  | 2.06E-05 | 2.181275695 | count | 0.473182    |
| BTG2      | 1.5402272  | 0.0829629   | 18.5653 | 1.31E-73 | 2.199817099 | count | 3.18E-69    |
| PYHIN1    | 17.31015   | 482.3974028 | 0.0359  | 0.9714   | 2.205383373 | count | 1           |
| NOX4      | 1.9381534  | 0.2928542   | 6.6182  | 4.17E-11 | 2.21065621  | count | 9.89E-07    |
| SLIT2     | 1.6285121  | 0.1503612   | 10.8307 | 6.27E-27 | 2.216404437 | count | 1.51E-22    |
| ISM1      | 2.366947   | 0.3275688   | 7.2258  | 6.03E-13 | 2.233498979 | count | 1.44E-08    |
| NR4A1     | 1.5667212  | 0.1044923   | 14.9937 | 2.28E-49 | 2.234153933 | count | 5.53E-45    |
| ADGRD1    | 3.4133608  | 0.8433023   | 4.0476  | 5.28E-05 | 2.236349124 | count | 1           |
| TNNT3     | 17.237641  | 539.0423273 | 0.032   | 0.9745   | 2.237309667 | count | 1           |
| PCSK6     | 17.5465169 | 626.9873373 | 0.028   | 0.9777   | 2.237309713 | count | 1           |

|           |            |             |         |           |             |       |             |
|-----------|------------|-------------|---------|-----------|-------------|-------|-------------|
| TGFBR3    | 1.8604569  | 0.2017      | 9.2239  | 4.71E-20  | 2.240977847 | count | 1.13E-15    |
| FGFBP2    | 2.4651915  | 0.8653854   | 2.8487  | 0.00441   | 2.241890464 | count | 1           |
| ROBO3     | 2.4455715  | 0.3936473   | 6.2126  | 5.79E-10  | 2.243428493 | count | 1.37E-05    |
| CLDN11    | 2.371617   | 0.5011001   | 4.7328  | 2.30E-06  | 2.257052312 | count | 0.0533347   |
| APOLD1    | 2.2836282  | 0.4076219   | 5.6023  | 2.27E-08  | 2.269061828 | count | 0.000533291 |
| CCDC80    | 1.5847816  | 0.0794454   | 19.9481 | 3.88E-84  | 2.270896345 | count | 9.43E-80    |
| ABI3BP    | 1.6121855  | 0.1048357   | 15.3782 | 9.15E-52  | 2.283267365 | count | 2.22E-47    |
| ADAMTSL4  | 2.8408319  | 0.4106682   | 6.9176  | 5.40E-12  | 2.294937383 | count | 1.28E-07    |
| CDON      | 2.77325    | 0.4741317   | 5.8491  | 5.37E-09  | 2.300613358 | count | 0.000126474 |
| RDH10     | 2.3962418  | 0.3570436   | 6.7113  | 2.23E-11  | 2.301519761 | count | 5.29E-07    |
| NR2F1     | 2.311536   | 0.4068796   | 5.6811  | 1.44E-08  | 2.320800509 | count | 0.000338544 |
| CLEC3B    | 2.2257916  | 0.291283    | 7.6413  | 2.73E-14  | 2.321962614 | count | 6.51E-10    |
| SLPI      | 1.642216   | 0.2118983   | 7.75    | 1.18E-14  | 2.347930726 | count | 2.81E-10    |
| TXNIP     | 1.6471446  | 0.0726361   | 22.6767 | 1.19E-106 | 2.35599163  | count | 2.89E-102   |
| LINC02381 | 2.4108354  | 0.3732361   | 6.4593  | 1.19E-10  | 2.357388852 | count | 2.82E-06    |
| SHISA3    | 2.2658915  | 0.2984731   | 7.5916  | 3.98E-14  | 2.370974795 | count | 9.49E-10    |
| CDC42EP2  | 2.2471903  | 0.2973708   | 7.5569  | 5.18E-14  | 2.383197012 | count | 1.23E-09    |
| GSN       | 1.6722388  | 0.0646671   | 25.8592 | 1.38E-135 | 2.409951533 | count | 3.36E-131   |
| GPRC5B    | 2.3501555  | 0.5052316   | 4.6516  | 3.41E-06  | 2.42289836  | count | 0.07894491  |
| EMP1      | 1.7524051  | 0.1318236   | 13.2936 | 2.03E-39  | 2.42624867  | count | 4.92E-35    |
| CREB5     | 2.0064508  | 0.2773968   | 7.2331  | 5.72E-13  | 2.430655275 | count | 1.36E-08    |
| PLXNC1    | 2.5855177  | 0.4310369   | 5.9984  | 2.19E-09  | 2.447867211 | count | 5.17E-05    |
| IGFBP6    | 1.7043083  | 0.0805756   | 21.1517 | 8.58E-94  | 2.454404852 | count | 2.09E-89    |
| CRISPLD2  | 1.9365391  | 0.2128049   | 9.1001  | 1.45E-19  | 2.455551893 | count | 3.48E-15    |
| SEMA3B    | 2.000187   | 0.228255    | 8.7629  | 2.86E-18  | 2.464404313 | count | 6.86E-14    |
| SPON2     | 2.0648945  | 0.4880047   | 4.2313  | 2.38E-05  | 2.465600124 | count | 0.5462338   |
| RASD1     | 1.8335904  | 0.3125076   | 5.8673  | 4.82E-09  | 2.469563034 | count | 0.000113559 |
| ABCA6     | 1.8793891  | 0.1783927   | 10.5351 | 1.38E-25  | 2.483096843 | count | 3.33E-21    |
| ZNF385B   | 2.5761472  | 0.3904854   | 6.5973  | 4.79E-11  | 2.490618558 | count | 1.14E-06    |
| ADAMTS5   | 3.7300417  | 0.8805524   | 4.236   | 2.33E-05  | 2.508175675 | count | 0.5348748   |
| IGSF10    | 2.0965919  | 0.4127166   | 5.08    | 3.96E-07  | 2.509274691 | count | 0.009241452 |
| TIMP3     | 1.7489714  | 0.094718    | 18.465  | 7.20E-73  | 2.511170836 | count | 1.75E-68    |
| PTGES     | 3.6036757  | 0.7873217   | 4.5771  | 4.87E-06  | 2.523209922 | count | 0.11258953  |
| PAMR1     | 2.0855961  | 0.4172563   | 4.9984  | 6.05E-07  | 2.527758084 | count | 0.014106785 |
| BCHE      | 17.1295296 | 460.2578363 | 0.0372  | 0.9703    | 2.548525456 | count | 1           |
| CTSH      | 1.9436606  | 0.171421    | 11.3385 | 2.59E-29  | 2.563348055 | count | 6.25E-25    |
| MAB21L1   | 3.0424474  | 0.6631406   | 4.5879  | 4.63E-06  | 2.573552189 | count | 0.10705949  |
| SLC1A7    | 17.424422  | 448.1755742 | 0.0389  | 0.969     | 2.5737525   | count | 1           |
| UAP1      | 1.9157942  | 0.1437438   | 13.3278 | 1.31E-39  | 2.583498055 | count | 3.17E-35    |
| FLRT2     | 2.0906035  | 0.2317264   | 9.0219  | 2.92E-19  | 2.592891097 | count | 7.01E-15    |
| SRPX      | 1.9132956  | 0.1565415   | 12.2223 | 1.06E-33  | 2.597418918 | count | 2.56E-29    |
| LVRN      | 17.5522825 | 420.707172  | 0.0417  | 0.967     | 2.59854586  | count | 1           |
| OAF       | 2.6662061  | 0.2978004   | 8.953   | 5.38E-19  | 2.660867415 | count | 1.29E-14    |
| DNM1      | 3.3107855  | 0.5664196   | 5.8451  | 5.50E-09  | 2.663630324 | count | 0.00012952  |
| CNTFR     | 17.6848117 | 384.7048313 | 0.046   | 0.963     | 2.670468027 | count | 1           |

|           |            |             |         |          |             |       |             |
|-----------|------------|-------------|---------|----------|-------------|-------|-------------|
| KLF4      | 1.9083049  | 0.1378417   | 13.8442 | 1.59E-42 | 2.677678042 | count | 3.85E-38    |
| PHYHIP    | 4.405796   | 1.096394    | 4.0184  | 5.98E-05 | 2.678676943 | count | 1           |
| C1QTNF4   | 2.5865155  | 0.4678074   | 5.529   | 3.44E-08 | 2.689332959 | count | 0.00080754  |
| DHRS3     | 1.9745701  | 0.1378761   | 14.3213 | 2.63E-45 | 2.703397159 | count | 6.38E-41    |
| MYOC      | 2.4167954  | 0.587609    | 4.1129  | 3.99E-05 | 2.716241617 | count | 0.9130317   |
| ADM       | 2.101534   | 0.2894037   | 7.2616  | 4.65E-13 | 2.747484136 | count | 1.11E-08    |
| ABLIM1    | 2.1310977  | 0.2721646   | 7.8302  | 6.33E-15 | 2.763760992 | count | 1.51E-10    |
| FBN1      | 1.968854   | 0.1375381   | 14.315  | 2.86E-45 | 2.766187799 | count | 6.93E-41    |
| HP        | 17.9505654 | 1259.111223 | 0.0143  | 0.9886   | 2.782901674 | count | 1           |
| ENPP6     | 17.8252278 | 490.58199   | 0.0363  | 0.971    | 2.782901779 | count | 1           |
| C17orf58  | 2.3343966  | 0.2320771   | 10.0587 | 1.69E-23 | 2.834642606 | count | 4.07E-19    |
| GALNT15   | 2.3333441  | 0.2759552   | 8.4555  | 3.96E-17 | 2.83787944  | count | 9.48E-13    |
| GSTM5     | 2.1810017  | 0.1970653   | 11.0674 | 4.99E-28 | 2.861245787 | count | 1.20E-23    |
| GAS7      | 2.885704   | 0.479258    | 6.0212  | 1.90E-09 | 2.862175015 | count | 4.48E-05    |
| NTM       | 3.4402988  | 0.6725421   | 5.1154  | 3.29E-07 | 2.874380627 | count | 0.007680176 |
| BOC       | 2.4609308  | 0.3807328   | 6.4637  | 1.16E-10 | 2.902597132 | count | 2.75E-06    |
| GFRA1     | 4.1301122  | 0.6907967   | 5.9788  | 2.46E-09 | 2.922746584 | count | 5.80E-05    |
| ABCA8     | 2.1426923  | 0.163138    | 13.1342 | 1.53E-38 | 2.936597881 | count | 3.70E-34    |
| LINC01133 | 2.8210516  | 0.3615106   | 7.8035  | 7.79E-15 | 2.944564575 | count | 1.86E-10    |
| DNASE1L3  | 2.8470294  | 0.7043075   | 4.0423  | 5.40E-05 | 2.960672274 | count | 1           |
| RSPO3     | 2.5068999  | 0.3488937   | 7.1853  | 8.09E-13 | 2.967713868 | count | 1.92E-08    |
| APBB1IP   | 3.6468104  | 0.705127    | 5.1718  | 2.44E-07 | 2.971260586 | count | 0.00570106  |
| RARRES1   | 2.1306254  | 0.256781    | 8.2974  | 1.48E-16 | 2.976142569 | count | 3.54E-12    |
| HSD11B1   | 2.6283486  | 0.2841056   | 9.2513  | 3.67E-20 | 3.010092819 | count | 8.81E-16    |
| F10       | 2.1978724  | 0.134178    | 16.3803 | 2.95E-58 | 3.031734759 | count | 7.16E-54    |
| PENK      | 16.3274951 | 1267.085044 | 0.0129  | 0.9897   | 3.039829243 | count | 1           |
| F3        | 2.3619777  | 0.2046712   | 11.5404 | 2.74E-30 | 3.080164608 | count | 6.62E-26    |
| PLBD1     | 2.4305052  | 0.2305158   | 10.5438 | 1.26E-25 | 3.099030725 | count | 3.04E-21    |
| SERPINF1  | 2.2156957  | 0.1183502   | 18.7215 | 9.10E-75 | 3.159232235 | count | 2.21E-70    |
| WNT11     | 4.3372574  | 1.1749967   | 3.6913  | 0.000226 | 3.167274663 | count | 1           |
| EPB41L3   | 18.1480363 | 568.0425831 | 0.0319  | 0.975    | 3.177843588 | count | 1           |
| AOX1      | 3.178167   | 0.4058586   | 7.8307  | 6.30E-15 | 3.192275369 | count | 1.50E-10    |
| FBLN2     | 2.3143485  | 0.1172751   | 19.7344 | 1.80E-82 | 3.217885205 | count | 4.37E-78    |
| SFRP2     | 2.2407518  | 0.1520596   | 14.736  | 8.58E-48 | 3.22045297  | count | 2.08E-43    |
| EMILIN2   | 3.7112701  | 0.7031441   | 5.2781  | 1.38E-07 | 3.256601061 | count | 0.003229338 |
| CD34      | 2.4392054  | 0.1901184   | 12.8299 | 6.85E-37 | 3.266036966 | count | 1.66E-32    |
| FGF18     | 4.4177704  | 0.8888703   | 4.9701  | 7.00E-07 | 3.26803496  | count | 0.0163128   |
| SFRP4     | 2.2998089  | 0.2483415   | 9.2607  | 3.37E-20 | 3.276482885 | count | 8.09E-16    |
| TNXB      | 2.3827731  | 0.1680944   | 14.1752 | 1.91E-44 | 3.307863426 | count | 4.63E-40    |
| CADM3     | 4.1661857  | 0.8285282   | 5.0284  | 5.18E-07 | 3.314325159 | count | 0.012081314 |
| RAMP2     | 2.4921753  | 0.2900249   | 8.593   | 1.24E-17 | 3.358135605 | count | 2.97E-13    |
| SVEP1     | 3.0777107  | 0.4181911   | 7.3596  | 2.27E-13 | 3.365128397 | count | 5.41E-09    |
| ABCA9     | 3.1491843  | 0.3359037   | 9.3753  | 1.17E-20 | 3.415501122 | count | 2.81E-16    |
| ANGPTL7   | 3.5667701  | 1.4766002   | 2.4155  | 0.0158   | 3.420521519 | count | 1           |
| TSKU      | 3.0986985  | 0.3388034   | 9.146   | 9.56E-20 | 3.459586263 | count | 2.29E-15    |

|          |            |             |         |           |             |       |             |
|----------|------------|-------------|---------|-----------|-------------|-------|-------------|
| OSR2     | 3.1002546  | 0.333461    | 9.2972  | 2.41E-20  | 3.484899939 | count | 5.79E-16    |
| CD248    | 2.9460813  | 0.2573666   | 11.447  | 7.77E-30  | 3.523157198 | count | 1.88E-25    |
| CPVL     | 2.827419   | 0.3547533   | 7.9701  | 2.10E-15  | 3.569091651 | count | 5.01E-11    |
| C1QTNF3  | 4.571466   | 0.7806711   | 5.8558  | 5.16E-09  | 3.574614218 | count | 0.000121549 |
| RBP4     | 3.7311954  | 0.6055515   | 6.1616  | 7.98E-10  | 3.624331742 | count | 1.89E-05    |
| SEMA3C   | 3.0151223  | 0.2897532   | 10.4058 | 5.18E-25  | 3.647141972 | count | 1.25E-20    |
| DCN      | 2.5791901  | 0.1234321   | 20.8956 | 1.06E-91  | 3.71009239  | count | 2.58E-87    |
| CYP4B1   | 4.0614464  | 0.8037187   | 5.0533  | 4.55E-07  | 3.750637978 | count | 0.01061424  |
| PLAT     | 2.7244949  | 0.2102211   | 12.9601 | 1.36E-37  | 3.753173708 | count | 3.29E-33    |
| ITM2A    | 2.7128943  | 0.1612881   | 16.8202 | 3.23E-61  | 3.760594449 | count | 7.84E-57    |
| PALM     | 18.6548742 | 575.6296069 | 0.0324  | 0.974     | 3.764505134 | count | 1           |
| PODN     | 2.972112   | 0.2302913   | 12.9059 | 2.67E-37  | 3.839110124 | count | 6.46E-33    |
| ABCA10   | 4.9645252  | 1.1373716   | 4.3649  | 1.31E-05  | 3.850825381 | count | 0.3015882   |
| HTRA3    | 4.0016345  | 0.6544229   | 6.1148  | 1.07E-09  | 3.953377734 | count | 2.53E-05    |
| C16orf89 | 3.3958323  | 0.3994363   | 8.5016  | 2.68E-17  | 3.986324997 | count | 6.42E-13    |
| TMEM176B | 3.4078144  | 0.3432418   | 9.9283  | 6.09E-23  | 3.99740245  | count | 1.47E-18    |
| TMEM176A | 3.7909773  | 0.4487241   | 8.4483  | 4.20E-17  | 4.096512227 | count | 1.01E-12    |
| GAS1     | 3.1928241  | 0.2368663   | 13.4794 | 1.87E-40  | 4.197124555 | count | 4.53E-36    |
| MGST1    | 3.0849197  | 0.2022863   | 15.2503 | 5.81E-51  | 4.207686918 | count | 1.41E-46    |
| SFRP1    | 3.0650539  | 0.2523575   | 12.1457 | 2.62E-33  | 4.274088538 | count | 6.33E-29    |
| FAM180B  | 17.9793929 | 340.2329313 | 0.0528  | 0.958     | 4.298588268 | count | 1           |
| VIT      | 17.9066117 | 268.2458291 | 0.0668  | 0.947     | 4.306134182 | count | 1           |
| FBLN1    | 3.0628256  | 0.1399379   | 21.887  | 6.58E-100 | 4.360825206 | count | 1.60E-95    |
| TSHZ2    | 4.616681   | 0.6247751   | 7.3893  | 1.82E-13  | 4.516771141 | count | 4.34E-09    |
| LEPR     | 3.5291465  | 0.3521802   | 10.0209 | 2.46E-23  | 4.543205066 | count | 5.92E-19    |
| ACKR3    | 3.351995   | 0.2145628   | 15.6224 | 2.58E-53  | 4.622257338 | count | 6.26E-49    |
| LRRN4CL  | 4.7688425  | 0.5630937   | 8.469   | 3.53E-17  | 4.976059759 | count | 8.45E-13    |
| CHRD1    | 4.9746471  | 0.5189488   | 9.586   | 1.63E-21  | 5.370602589 | count | 3.92E-17    |
| IGF1     | 4.3197059  | 0.4856388   | 8.8949  | 9.00E-19  | 5.384570694 | count | 2.16E-14    |
| SCARA5   | 5.6515375  | 0.8469896   | 6.6725  | 2.89E-11  | 5.597021801 | count | 6.86E-07    |
| PRG4     | 17.9003612 | 651.239353  | 0.0275  | 0.9781    | 5.665107328 | count | 1           |
| PI16     | 4.6699163  | 0.5365278   | 8.704   | 4.76E-18  | 6.017549243 | count | 1.14E-13    |
| MFAP5    | 4.4980391  | 0.4403886   | 10.2138 | 3.61E-24  | 6.05555333  | count | 8.70E-20    |
| C3       | 5.5110554  | 0.8017343   | 6.8739  | 7.31E-12  | 6.477500165 | count | 1.74E-07    |
| PLA2G2A  | 6.280764   | 1.3186367   | 4.7631  | 1.98E-06  | 7.253301604 | count | 0.04593006  |
| CXCL14   | 6.2946866  | 2.1989508   | 2.8626  | 0.00423   | 7.600449595 | count | 1           |
| APOD     | 5.5784369  | 1.137787    | 4.9029  | 9.85E-07  | 7.730358282 | count | 0.022916025 |
| CFD      | 8.0189793  | 1.9432039   | 4.1267  | 3.76E-05  | 10.72399151 | count | 0.860664    |
