# Supplementary material for: Decoding the transcriptome of calcified atherosclerotic plaque at single-cell resolution
Source: PubMed Central journal article supplement (PMC9556750; doi:10.1038/s42003-022-04056-7), 2022-10-12
Supplement: 42003_2022_4056_MOESM8_ESM.pdf [file 42003_2022_4056_MOESM8_ESM.pdf]

## Full differential gene expression results for ECs.

| gene_short_name | estimate   | std_err   | test_val | p_value  | normalized_effect | model_component | q_value     |
|-----------------|------------|-----------|----------|----------|-------------------|-----------------|-------------|
| ITLN1           | -4.1722926 | 0.2581334 | -16.1633 | 3.21E-56 | -6.009543464      | count           | 7.79E-52    |
| DKK2            | -4.468834  | 0.516515  | -8.6519  | 8.45E-18 | -5.522560972      | count           | 2.03E-13    |
| F5              | -4.6694793 | 0.5147427 | -9.0715  | 2.17E-19 | -5.267558637      | count           | 5.22E-15    |
| FN1             | -3.4973426 | 0.2216463 | -15.7789 | 9.04E-54 | -4.963365584      | count           | 2.19E-49    |
| OGN             | -3.5126207 | 0.3248464 | -10.8132 | 1.01E-26 | -4.895360242      | count           | 2.44E-22    |
| OMD             | -3.4606343 | 0.2385148 | -14.5091 | 5.01E-46 | -4.833601486      | count           | 1.22E-41    |
| BGN             | -3.3998031 | 0.1679278 | -20.2456 | 4.32E-85 | -4.833525893      | count           | 1.05E-80    |
| LY6H            | -4.2879663 | 1.0018638 | -4.28    | 1.93E-05 | -4.809078951      | count           | 0.4465827   |
| DCN             | -3.3349059 | 0.2937627 | -11.3524 | 3.17E-29 | -4.680054458      | count           | 7.67E-25    |
| TSTD1           | -3.804856  | 0.4719314 | -8.0623  | 1.10E-15 | -4.613688085      | count           | 2.64E-11    |
| HMCN1           | -3.6566695 | 0.2651927 | -13.7887 | 7.04E-42 | -4.574409394      | count           | 1.71E-37    |
| S100A4          | -3.2257799 | 0.1788366 | -18.0376 | 7.58E-69 | -4.570422918      | count           | 1.84E-64    |
| PDE3A           | -4.4939056 | 0.4589135 | -9.7925  | 2.78E-22 | -4.486600091      | count           | 6.70E-18    |
| CP              | -3.3168571 | 0.2431467 | -13.6414 | 4.72E-41 | -4.463685936      | count           | 1.14E-36    |
| SPP1            | -3.995772  | 0.6345706 | -6.2968  | 3.52E-10 | -4.428021726      | count           | 8.35E-06    |
| SCX             | -3.5164863 | 0.3153682 | -11.1504 | 2.83E-28 | -4.401471123      | count           | 6.84E-24    |
| AC004540.2      | -3.4143943 | 0.289533  | -11.7928 | 2.37E-31 | -4.31330964       | count           | 5.73E-27    |
| APOC1           | -4.565626  | 0.9686085 | -4.7136  | 2.55E-06 | -4.2562491        | count           | 0.05946855  |
| SULF1           | -2.9993749 | 0.1914052 | -15.6703 | 4.36E-53 | -4.236805178      | count           | 1.06E-48    |
| MMP2            | -3.265662  | 0.1872163 | -17.4433 | 1.01E-64 | -4.186725609      | count           | 2.45E-60    |
| HHIP            | -3.9336704 | 0.5324486 | -7.3879  | 1.97E-13 | -4.184504438      | count           | 4.71E-09    |
| SELL            | -3.1072681 | 0.19413   | -16.0061 | 3.27E-55 | -4.138996429      | count           | 7.94E-51    |
| LTBP2           | -3.1150906 | 0.2376807 | -13.1062 | 4.06E-38 | -4.133489873      | count           | 9.84E-34    |
| ESM1            | -3.1807946 | 0.598616  | -5.3136  | 1.16E-07 | -4.080086606      | count           | 0.002726348 |
| BMP6            | -3.2024981 | 0.248665  | -12.8788 | 6.69E-37 | -4.046753687      | count           | 1.62E-32    |
| PTPRJ           | -3.5248748 | 0.4069547 | -8.6616  | 7.78E-18 | -3.949115578      | count           | 1.87E-13    |
| GDF15           | -3.0819417 | 0.4019117 | -7.6682  | 2.40E-14 | -3.8535757        | count           | 5.74E-10    |
| AL355596.1      | -5.7305828 | 0.9820376 | -5.8354  | 5.99E-09 | -3.830187933      | count           | 0.000141628 |
| ALDH1A1         | -2.9071955 | 0.1970737 | -14.7518 | 1.83E-47 | -3.806677219      | count           | 4.44E-43    |
| ECM2            | -4.0259635 | 0.4335427 | -9.2862  | 3.14E-20 | -3.731479412      | count           | 7.56E-16    |
| FEZ1            | -2.9402872 | 0.2636017 | -11.1543 | 2.72E-28 | -3.731344688      | count           | 6.58E-24    |
| GXYLT2          | -3.7889773 | 0.4212042 | -8.9956  | 4.26E-19 | -3.720884727      | count           | 1.02E-14    |
| NRG1            | -3.3628329 | 0.3810812 | -8.8245  | 1.91E-18 | -3.710656447      | count           | 4.59E-14    |
| PRELP           | -2.8168656 | 0.2519711 | -11.1793 | 2.08E-28 | -3.700686539      | count           | 5.03E-24    |
| MRC2            | -3.57128   | 0.4247559 | -8.4078  | 6.60E-17 | -3.649379941      | count           | 1.58E-12    |
| HHIP-AS1        | -3.276318  | 0.3448036 | -9.502   | 4.31E-21 | -3.639227689      | count           | 1.04E-16    |
| EFEMP1          | -2.542567  | 0.1330019 | -19.1168 | 1.31E-76 | -3.634045968      | count           | 3.18E-72    |
| HMCN2           | -4.226826  | 0.5801133 | -7.2862  | 4.14E-13 | -3.629570655      | count           | 9.89E-09    |
| TBX1            | -2.961094  | 0.2654432 | -11.1553 | 2.69E-28 | -3.616656268      | count           | 6.50E-24    |
| SERPINE1        | -2.5416989 | 0.1570204 | -16.1871 | 2.25E-56 | -3.567700562      | count           | 5.46E-52    |
| COL8A1          | -2.5449686 | 0.1367094 | -18.6159 | 5.80E-73 | -3.562809696      | count           | 1.41E-68    |
| GJA5            | -2.6409719 | 0.2567556 | -10.2859 | 2.23E-24 | -3.557606113      | count           | 5.38E-20    |
| S100B           | -4.4388197 | 0.5661862 | -7.8399  | 6.39E-15 | -3.526642929      | count           | 1.53E-10    |
| APOE            | -3.1880842 | 0.3971453 | -8.0275  | 1.46E-15 | -3.526273284      | count           | 3.50E-11    |

|           |            |           |          |           |              |       |             |
|-----------|------------|-----------|----------|-----------|--------------|-------|-------------|
| IRF6      | -3.6566533 | 0.3494825 | -10.4631 | 3.75E-25  | -3.496982677 | count | 9.05E-21    |
| SRPX2     | -3.184806  | 0.5781522 | -5.5086  | 3.95E-08  | -3.439190041 | count | 0.000930976 |
| THBS1     | -2.4906816 | 0.1778782 | -14.0022 | 4.34E-43  | -3.417790568 | count | 1.05E-38    |
| SLC7A2    | -3.697397  | 0.4670118 | -7.9171  | 3.49E-15  | -3.389645952 | count | 8.36E-11    |
| CTSK      | -2.6574582 | 0.2436366 | -10.9075 | 3.77E-27  | -3.385333275 | count | 9.11E-23    |
| LINC01133 | -4.261055  | 0.5772385 | -7.3818  | 2.06E-13  | -3.33742112  | count | 4.92E-09    |
| GLIPR1    | -2.7630375 | 0.3327724 | -8.3031  | 1.57E-16  | -3.325265516 | count | 3.77E-12    |
| LINC01013 | -3.340772  | 0.563859  | -5.9248  | 3.51E-09  | -3.297026885 | count | 8.31E-05    |
| RAB34     | -2.4820034 | 0.1709566 | -14.5183 | 4.42E-46  | -3.296196648 | count | 1.07E-41    |
| IQCA1     | -3.0857738 | 0.3401921 | -9.0707  | 2.19E-19  | -3.259879901 | count | 5.27E-15    |
| RCN3      | -2.724501  | 0.2621096 | -10.3945 | 7.50E-25  | -3.253744762 | count | 1.81E-20    |
| PAPSS2    | -2.7395883 | 0.29542   | -9.2735  | 3.52E-20  | -3.247767063 | count | 8.47E-16    |
| SPINT2    | -2.4277331 | 0.1795519 | -13.5211 | 2.20E-40  | -3.244652419 | count | 5.33E-36    |
| GDF7      | -2.4916911 | 0.2272333 | -10.9653 | 2.04E-27  | -3.244611422 | count | 4.93E-23    |
| EDN1      | -2.2604229 | 0.1076221 | -21.0033 | 5.50E-91  | -3.24453513  | count | 1.34E-86    |
| TMEM98    | -2.402663  | 0.1981331 | -12.1265 | 5.19E-33  | -3.227638272 | count | 1.26E-28    |
| TPM2      | -2.3512545 | 0.1900899 | -12.3692 | 3.04E-34  | -3.195076037 | count | 7.36E-30    |
| PROCR     | -2.2303528 | 0.0839716 | -26.5608 | 1.25E-138 | -3.188340724 | count | 3.04E-134   |
| FIBIN     | -3.2767462 | 0.3991253 | -8.2098  | 3.36E-16  | -3.176806128 | count | 8.06E-12    |
| C1S       | -2.3084087 | 0.1442296 | -16.0051 | 3.31E-55  | -3.175458045 | count | 8.03E-51    |
| MEIS2     | -2.421175  | 0.1760127 | -13.7557 | 1.08E-41  | -3.144012624 | count | 2.62E-37    |
| SEMA3C    | -3.4166613 | 0.4567518 | -7.4803  | 9.90E-14  | -3.133378961 | count | 2.37E-09    |
| GDF6      | -3.313812  | 0.3737294 | -8.8669  | 1.32E-18  | -3.116443326 | count | 3.17E-14    |
| FBLIM1    | -2.2658386 | 0.1437712 | -15.76   | 1.19E-53  | -3.114372128 | count | 2.89E-49    |
| SERPINE2  | -2.5192205 | 0.3023396 | -8.3324  | 1.23E-16  | -3.091262344 | count | 2.95E-12    |
| KCNT2     | -2.5981023 | 0.2968902 | -8.7511  | 3.61E-18  | -3.07501882  | count | 8.68E-14    |
| C19orf33  | -2.4788113 | 0.2493228 | -9.9422  | 6.59E-23  | -3.073908127 | count | 1.59E-18    |
| MFAP2     | -2.5964284 | 0.2768515 | -9.3784  | 1.35E-20  | -3.061649221 | count | 3.25E-16    |
| ELN       | -2.1557909 | 0.1087295 | -19.8271 | 6.64E-82  | -3.058691392 | count | 1.61E-77    |
| CYP4X1    | -2.7419692 | 0.3070893 | -8.9289  | 7.67E-19  | -3.043462393 | count | 1.84E-14    |
| LUM       | -3.132798  | 0.6514422 | -4.809   | 1.60E-06  | -3.035394418 | count | 0.03736     |
| MGP       | -2.1031129 | 0.0694017 | -30.3035 | 2.12E-174 | -3.033378146 | count | 5.16E-170   |
| FGF18     | -2.3869094 | 0.3779922 | -6.3147  | 3.14E-10  | -3.028699581 | count | 7.45E-06    |
| CES1      | -2.970769  | 0.3568475 | -8.325   | 1.31E-16  | -3.020439117 | count | 3.14E-12    |
| TFAP2A    | -3.6375822 | 0.4761366 | -7.6398  | 2.98E-14  | -3.020171181 | count | 7.13E-10    |
| NOG       | -4.2548885 | 1.3666125 | -3.1135  | 0.0019    | -3.0092441   | count | 1           |
| AQP5      | -3.431695  | 0.5228487 | -6.5635  | 6.26E-11  | -2.977775504 | count | 1.49E-06    |
| WIPF3     | -2.5213793 | 0.3590315 | -7.0227  | 2.73E-12  | -2.969305468 | count | 6.51E-08    |
| KCNMB4    | -2.4448898 | 0.2361913 | -10.3513 | 1.16E-24  | -2.956950096 | count | 2.80E-20    |
| EMX2      | -4.9057979 | 0.9548239 | -5.1379  | 2.97E-07  | -2.932205196 | count | 0.006963759 |
| CDH11     | -2.1542002 | 0.165986  | -12.9782 | 1.98E-37  | -2.92829155  | count | 4.80E-33    |
| PDZK1IP1  | -2.630117  | 0.3582255 | -7.3421  | 2.75E-13  | -2.915649582 | count | 6.57E-09    |
| PLA2G2A   | -2.8435438 | 0.9756882 | -2.9144  | 0.0036    | -2.915168029 | count | 1           |
| KCNK15    | -2.378899  | 0.2368967 | -10.0419 | 2.49E-23  | -2.914797147 | count | 6.01E-19    |
| COL3A1    | -2.2072614 | 0.189858  | -11.6259 | 1.55E-30  | -2.913023329 | count | 3.75E-26    |

|         |            |             |          |           |              |       |             |
|---------|------------|-------------|----------|-----------|--------------|-------|-------------|
| PTGFRN  | -3.3097425 | 0.5595318   | -5.9152  | 3.72E-09  | -2.907426195 | count | 8.80E-05    |
| GSG1L   | -3.6958154 | 0.6251108   | -5.9123  | 3.79E-09  | -2.898906183 | count | 8.97E-05    |
| PTGIS   | -2.0626957 | 0.1068542   | -19.3038 | 5.47E-78  | -2.884318715 | count | 1.33E-73    |
| POU4F1  | -3.6599816 | 0.6629067   | -5.5211  | 3.68E-08  | -2.883149535 | count | 0.000867413 |
| SLC6A1  | -4.1454325 | 0.7533314   | -5.5028  | 4.08E-08  | -2.879828868 | count | 0.000961452 |
| SLPI    | -2.0143869 | 0.1223893   | -16.4588 | 3.88E-58  | -2.842995914 | count | 9.42E-54    |
| HEY2    | -2.2595826 | 0.384566    | -5.8757  | 4.72E-09  | -2.838612637 | count | 0.000111633 |
| FBP2    | -4.0052164 | 0.6050407   | -6.6197  | 4.31E-11  | -2.836553916 | count | 1.03E-06    |
| SFRP1   | -2.1597975 | 0.2369035   | -9.1168  | 1.45E-19  | -2.829536619 | count | 3.49E-15    |
| IGFBP3  | -1.9802505 | 0.1889308   | -10.4814 | 3.11E-25  | -2.821420923 | count | 7.51E-21    |
| PLA2G5  | -3.0166381 | 0.5428997   | -5.5565  | 3.01E-08  | -2.820499183 | count | 0.000709848 |
| KAZALD1 | -3.519033  | 0.6248147   | -5.6321  | 1.96E-08  | -2.817550327 | count | 0.000462678 |
| FIGN    | -3.916105  | 0.6253522   | -6.2622  | 4.39E-10  | -2.80661849  | count | 1.04E-05    |
| BMX     | -1.9642601 | 0.0922182   | -21.3001 | 2.45E-93  | -2.79412841  | count | 5.95E-89    |
| COL1A2  | -2.6258713 | 0.4100876   | -6.4032  | 1.78E-10  | -2.778195659 | count | 4.23E-06    |
| PCDH7   | -2.250575  | 0.2169287   | -10.3747 | 9.15E-25  | -2.757546075 | count | 2.21E-20    |
| FMOD    | -2.2061265 | 0.2275738   | -9.6941  | 7.10E-22  | -2.751263918 | count | 1.71E-17    |
| TRDC    | -3.240022  | 0.4860304   | -6.6663  | 3.16E-11  | -2.740278992 | count | 7.52E-07    |
| ATP13A3 | -2.1675634 | 0.2168576   | -9.9953  | 3.93E-23  | -2.737003284 | count | 9.48E-19    |
| FOXC2   | -2.0683227 | 0.2254204   | -9.1754  | 8.56E-20  | -2.733214963 | count | 2.06E-15    |
| TRPM3   | -4.447476  | 0.8728935   | -5.0951  | 3.72E-07  | -2.72765721  | count | 0.008718564 |
| NEXN    | -2.261298  | 0.3985396   | -5.674   | 1.54E-08  | -2.711327094 | count | 0.000363671 |
| HSPA6   | -2.4497817 | 0.4827787   | -5.0743  | 4.15E-07  | -2.69709797  | count | 0.00972428  |
| ART4    | -2.505224  | 0.3439518   | -7.2836  | 4.22E-13  | -2.664032311 | count | 1.01E-08    |
| PCDH10  | -2.0962465 | 0.2075273   | -10.1011 | 1.40E-23  | -2.663046526 | count | 3.38E-19    |
| NEGR1   | -4.1210939 | 0.6955533   | -5.9249  | 3.51E-09  | -2.649444068 | count | 8.31E-05    |
| LYPD2   | -20.350832 | 561.4359024 | -0.0362  | 0.971     | -2.646890214 | count | 1           |
| MPZL2   | -1.8725487 | 0.080725    | -23.1966 | 6.62E-109 | -2.643660454 | count | 1.61E-104   |
| FERMT3  | -3.739341  | 0.499789    | -7.4818  | 9.79E-14  | -2.640540249 | count | 2.34E-09    |
| ABCC3   | -2.5557128 | 0.3350261   | -7.6284  | 3.25E-14  | -2.630593967 | count | 7.77E-10    |
| NTN1    | -2.5045875 | 0.3504588   | -7.1466  | 1.13E-12  | -2.61154709  | count | 2.70E-08    |
| RNF212B | -3.2503933 | 0.477344    | -6.8093  | 1.20E-11  | -2.599537674 | count | 2.86E-07    |
| CALHM4  | -4.45776   | 0.8854814   | -5.0343  | 5.10E-07  | -2.59567183  | count | 0.0119442   |
| FAM107B | -1.8550601 | 0.1066267   | -17.3977 | 2.06E-64  | -2.593625451 | count | 5.00E-60    |
| C1QB    | -2.836142  | 0.3695808   | -7.6739  | 2.30E-14  | -2.589495859 | count | 5.50E-10    |
| SVEP1   | -2.4223306 | 0.4564247   | -5.3072  | 1.20E-07  | -2.583456134 | count | 0.00281988  |
| BCO2    | -2.4691197 | 0.3486225   | -7.0825  | 1.79E-12  | -2.57798537  | count | 4.27E-08    |
| LSAMP   | -3.5790408 | 0.657826    | -5.4407  | 5.77E-08  | -2.576751721 | count | 0.001358489 |
| SNHG18  | -2.6469628 | 0.5900226   | -4.4862  | 7.55E-06  | -2.574505771 | count | 0.17539405  |
| SULT1A1 | -2.6024016 | 0.4707225   | -5.5285  | 3.53E-08  | -2.574067308 | count | 0.000832198 |
| MSMP    | -2.302339  | 0.4743732   | -4.8534  | 1.28E-06  | -2.563591705 | count | 0.0299136   |
| ITGBL1  | -2.4491755 | 0.4395167   | -5.5724  | 2.75E-08  | -2.558975431 | count | 0.000648725 |
| CCL4L2  | -2.0702902 | 0.2618458   | -7.9065  | 3.79E-15  | -2.556414619 | count | 9.08E-11    |
| HMGCLL1 | -3.4628144 | 1.0441549   | -3.3164  | 0.000924  | -2.526143983 | count | 1           |
| SV2A    | -3.720804  | 0.6075381   | -6.1244  | 1.04E-09  | -2.522587366 | count | 2.46E-05    |

|          |             |             |          |          |              |       |             |
|----------|-------------|-------------|----------|----------|--------------|-------|-------------|
| SEMA5A   | -3.6895007  | 0.5429494   | -6.7953  | 1.32E-11 | -2.511047696 | count | 3.14E-07    |
| RGS10    | -2.1172541  | 0.4026412   | -5.2584  | 1.56E-07 | -2.506746932 | count | 0.003663816 |
| C1R      | -1.7544493  | 0.0807171   | -21.7358 | 7.85E-97 | -2.494592783 | count | 1.91E-92    |
| C4orf48  | -1.8783522  | 0.1347397   | -13.9406 | 9.73E-43 | -2.492219918 | count | 2.36E-38    |
| TMC7     | -2.1899652  | 0.2849066   | -7.6866  | 2.08E-14 | -2.491016287 | count | 4.98E-10    |
| GRB14    | -2.110691   | 0.2995207   | -7.0469  | 2.30E-12 | -2.488859575 | count | 5.49E-08    |
| TWIST2   | -3.3784146  | 0.6165496   | -5.4796  | 4.65E-08 | -2.487029323 | count | 0.00109554  |
| KCNMB1   | -2.427506   | 0.4390251   | -5.5293  | 3.52E-08 | -2.481775168 | count | 0.000829875 |
| SSTR1    | -3.030388   | 0.5582994   | -5.4279  | 6.20E-08 | -2.471166988 | count | 0.001459418 |
| PRKAR2B  | -2.522862   | 0.4568233   | -5.5226  | 3.65E-08 | -2.467685161 | count | 0.000860378 |
| CTSG     | -3.572042   | 1.2425261   | -2.8748  | 0.00407  | -2.465503529 | count | 1           |
| PI15     | -20.9581863 | 725.6798665 | -0.0289  | 0.977    | -2.462386899 | count | 1           |
| RIMS4    | -19.898375  | 621.574901  | -0.032   | 0.974    | -2.462386535 | count | 1           |
| NLGN1    | -3.011334   | 0.5674678   | -5.3066  | 1.21E-07 | -2.459363682 | count | 0.002843137 |
| TNFRSF21 | -2.7984342  | 0.4119734   | -6.7928  | 1.34E-11 | -2.450680662 | count | 3.19E-07    |
| SGCE     | -1.7977701  | 0.1774086   | -10.1335 | 1.01E-23 | -2.442865193 | count | 2.44E-19    |
| PKHD1L1  | -1.918999   | 0.2425872   | -7.9106  | 3.67E-15 | -2.436918282 | count | 8.79E-11    |
| RARRES2  | -2.2798383  | 0.3056983   | -7.4578  | 1.17E-13 | -2.418161116 | count | 2.80E-09    |
| SLIT3    | -3.0689179  | 0.6894397   | -4.4513  | 8.87E-06 | -2.414496279 | count | 0.20595253  |
| BICC1    | -2.7410118  | 0.5938989   | -4.6153  | 4.10E-06 | -2.408708738 | count | 0.0954808   |
| CRYAB    | -1.9670263  | 0.2758129   | -7.1317  | 1.26E-12 | -2.397935525 | count | 3.01E-08    |
| IL11RA   | -1.8058516  | 0.2040241   | -8.8512  | 1.51E-18 | -2.392781413 | count | 3.63E-14    |
| KLHL13   | -2.3479907  | 0.3715226   | -6.3199  | 3.04E-10 | -2.376415869 | count | 7.22E-06    |
| MEDAG    | -1.7694661  | 0.1691926   | -10.4583 | 3.93E-25 | -2.36976495  | count | 9.49E-21    |
| PTPRR    | -2.3098995  | 0.3628566   | -6.3659  | 2.27E-10 | -2.369719115 | count | 5.39E-06    |
| PDGFRL   | -2.2374657  | 0.4111712   | -5.4417  | 5.74E-08 | -2.351468629 | count | 0.001351483 |
| IL1RN    | -4.031509   | 0.8325606   | -4.8423  | 1.35E-06 | -2.351269731 | count | 0.0315441   |
| EMP3     | -1.6634411  | 0.1076864   | -15.4471 | 1.08E-51 | -2.348291386 | count | 2.62E-47    |
| PLA2G4A  | -1.8303015  | 0.1991106   | -9.1924  | 7.35E-20 | -2.347013377 | count | 1.77E-15    |
| NCKAP5   | -4.008553   | 0.6975506   | -5.7466  | 1.01E-08 | -2.345240711 | count | 0.000238602 |
| TMEM120A | -1.6787876  | 0.0979087   | -17.1465 | 1.05E-62 | -2.340506905 | count | 2.55E-58    |
| BMPER    | -2.4067231  | 0.3554316   | -6.7713  | 1.55E-11 | -2.326745553 | count | 3.69E-07    |
| SMAD6    | -1.7291379  | 0.1630807   | -10.603  | 8.97E-26 | -2.311605604 | count | 2.17E-21    |
| FGFRL1   | -1.9940843  | 0.2558384   | -7.7943  | 9.10E-15 | -2.310904426 | count | 2.18E-10    |
| LGR4     | -3.8504755  | 0.7060771   | -5.4533  | 5.38E-08 | -2.300757332 | count | 0.001266936 |
| EMILIN1  | -3.1889735  | 0.8931941   | -3.5703  | 0.000363 | -2.291169379 | count | 1           |
| TRAPPC3L | -2.4595287  | 0.4487895   | -5.4804  | 4.63E-08 | -2.288722171 | count | 0.001090874 |
| PDGFD    | -1.7337517  | 0.1822259   | -9.5143  | 3.84E-21 | -2.282228605 | count | 9.25E-17    |
| NAV1     | -1.7063665  | 0.1405483   | -12.1408 | 4.40E-33 | -2.279717446 | count | 1.07E-28    |
| SPI1     | -2.637457   | 0.8023531   | -3.2872  | 0.00102  | -2.271221901 | count | 1           |
| GPR183   | -3.7452737  | 0.9832866   | -3.8089  | 0.000143 | -2.268157275 | count | 1           |
| LYNX1    | -2.1792324  | 0.3358865   | -6.488   | 1.03E-10 | -2.267937172 | count | 2.45E-06    |
| EXT1     | -1.8388759  | 0.1899961   | -9.6785  | 8.23E-22 | -2.26777311  | count | 1.98E-17    |
| COL12A1  | -2.8290923  | 0.463207    | -6.1076  | 1.15E-09 | -2.265673205 | count | 2.72E-05    |
| ANXA3    | -1.6445891  | 0.14987     | -10.9734 | 1.88E-27 | -2.263379008 | count | 4.54E-23    |

|              |             |             |          |           |              |       |             |
|--------------|-------------|-------------|----------|-----------|--------------|-------|-------------|
| LOX          | -2.0431359  | 0.3064847   | -6.6664  | 3.15E-11  | -2.251815053 | count | 7.50E-07    |
| TREM2        | -21.240949  | 1459.032613 | -0.0146  | 0.988     | -2.250779497 | count | 1           |
| AC105383.1   | -20.9605677 | 723.4811214 | -0.029   | 0.977     | -2.250779268 | count | 1           |
| CCL3         | -1.9416289  | 0.2831096   | -6.8582  | 8.57E-12  | -2.250729833 | count | 2.04E-07    |
| PTGDS        | -1.5940984  | 0.1584373   | -10.0614 | 2.06E-23  | -2.243874019 | count | 4.97E-19    |
| BAMBI        | -1.71907    | 0.2846958   | -6.0383  | 1.77E-09  | -2.227944502 | count | 4.19E-05    |
| APLN         | -2.2972575  | 0.3752517   | -6.1219  | 1.06E-09  | -2.227611225 | count | 2.51E-05    |
| PCDH9        | -1.8079946  | 0.4331614   | -4.174   | 3.09E-05  | -2.217719798 | count | 0.713481    |
| CLIP3        | -4.1371882  | 0.8768279   | -4.7184  | 2.50E-06  | -2.211886886 | count | 0.0583075   |
| GRIK5        | -4.1371882  | 0.8768279   | -4.7184  | 2.50E-06  | -2.211886886 | count | 0.0583075   |
| PLXNA4       | -1.7267798  | 0.2153416   | -8.0188  | 1.56E-15  | -2.210912412 | count | 3.74E-11    |
| ACSM3        | -2.4774223  | 0.3660696   | -6.7676  | 1.59E-11  | -2.204267125 | count | 3.79E-07    |
| DTX3         | -3.5378686  | 0.7538083   | -4.6933  | 2.82E-06  | -2.19640555  | count | 0.06573984  |
| SOBP         | -2.3502266  | 0.7298305   | -3.2202  | 0.0013    | -2.194424148 | count | 1           |
| CRTAC1       | -1.5223366  | 0.0658954   | -23.1023 | 4.14E-108 | -2.182220579 | count | 1.01E-103   |
| PGF          | -1.6138843  | 0.1803067   | -8.9508  | 6.33E-19  | -2.180050007 | count | 1.52E-14    |
| ALCAM        | -1.7402245  | 0.2167457   | -8.0289  | 1.44E-15  | -2.176617283 | count | 3.45E-11    |
| TENT5A       | -1.6218876  | 0.1403348   | -11.5573 | 3.32E-30  | -2.173009577 | count | 8.03E-26    |
| GLIPR2       | -1.9316377  | 0.3346643   | -5.7719  | 8.71E-09  | -2.161295902 | count | 0.000205791 |
| CREB5        | -1.7130348  | 0.2135694   | -8.021   | 1.53E-15  | -2.159945668 | count | 3.67E-11    |
| MAP1B        | -1.742131   | 0.1609522   | -10.8239 | 9.07E-27  | -2.153735548 | count | 2.19E-22    |
| PCDH11X      | -2.0223113  | 0.7985915   | -2.5323  | 0.0114    | -2.153014513 | count | 1           |
| CKB          | -2.0377954  | 0.3228351   | -6.3122  | 3.19E-10  | -2.147313161 | count | 7.57E-06    |
| PLXNA2       | -1.5829161  | 0.1567733   | -10.0968 | 1.45E-23  | -2.144565621 | count | 3.50E-19    |
| HOMER3       | -1.554818   | 0.1248211   | -12.4564 | 1.08E-34  | -2.136389547 | count | 2.62E-30    |
| SELP         | -1.5081398  | 0.0806405   | -18.702  | 1.39E-73  | -2.127371617 | count | 3.38E-69    |
| DDR2         | -1.7601593  | 0.2797685   | -6.2915  | 3.64E-10  | -2.126113475 | count | 8.64E-06    |
| EGFLAM       | -2.617515   | 0.4504461   | -5.8109  | 6.92E-09  | -2.120846715 | count | 0.000163582 |
| NAV2         | -1.8279851  | 0.37184     | -4.9161  | 9.35E-07  | -2.119170376 | count | 0.021864975 |
| FGL2         | -1.5756694  | 0.1742622   | -9.0419  | 2.83E-19  | -2.11778303  | count | 6.81E-15    |
| OTC          | -1.6085987  | 0.1923355   | -8.3635  | 9.53E-17  | -2.116848064 | count | 2.29E-12    |
| HTR4         | -3.0627751  | 0.6923268   | -4.4239  | 1.01E-05  | -2.115338975 | count | 0.2343806   |
| SYNDIG1      | -3.7250909  | 1.3650701   | -2.7289  | 0.0064    | -2.103421778 | count | 1           |
| PLTP         | -1.5891851  | 0.1831048   | -8.6791  | 6.70E-18  | -2.101729256 | count | 1.61E-13    |
| BCAT1        | -2.5865762  | 0.7369432   | -3.5099  | 0.000455  | -2.098659349 | count | 1           |
| SHROOM3      | -3.0258831  | 0.554655    | -5.4554  | 5.32E-08  | -2.096003681 | count | 0.00125286  |
| PRDM6        | -3.2820071  | 0.5317142   | -6.1725  | 7.71E-10  | -2.093367921 | count | 1.83E-05    |
| GATA6-AS1    | -1.8232111  | 0.292027    | -6.2433  | 4.94E-10  | -2.091135369 | count | 1.17E-05    |
| SMIM6        | -3.015883   | 0.7571398   | -3.9833  | 6.97E-05  | -2.090698751 | count | 1           |
| CRISPLD1     | -1.8612968  | 0.2754686   | -6.7568  | 1.71E-11  | -2.082556929 | count | 4.07E-07    |
| CLIC3        | -1.7241849  | 0.2030633   | -8.4909  | 3.30E-17  | -2.082336194 | count | 7.92E-13    |
| SLC25A34-AS1 | -2.4663637  | 0.4778502   | -5.1614  | 2.63E-07  | -2.077665033 | count | 0.006169454 |
| MOV10L1      | -2.6649652  | 0.5667698   | -4.702   | 2.70E-06  | -2.074994844 | count | 0.0629559   |
| CDKN2C       | -1.6952004  | 0.2043304   | -8.2964  | 1.66E-16  | -2.053750734 | count | 3.98E-12    |
| LTBP4        | -1.4724491  | 0.0964138   | -15.2722 | 1.29E-50  | -2.052745346 | count | 3.13E-46    |

|           |             |             |          |          |              |       |             |
|-----------|-------------|-------------|----------|----------|--------------|-------|-------------|
| BMP4      | -1.4530176  | 0.1183649   | -12.2757 | 9.13E-34 | -2.047635029 | count | 2.21E-29    |
| LEPR      | -1.4900906  | 0.1222959   | -12.1843 | 2.65E-33 | -2.046032045 | count | 6.42E-29    |
| BMP2      | -1.5105951  | 0.1953777   | -7.7317  | 1.48E-14 | -2.044342506 | count | 3.54E-10    |
| PDZK1     | -3.1717136  | 0.5879778   | -5.3943  | 7.46E-08 | -2.043795677 | count | 0.001755114 |
| ITGB5     | -1.7523043  | 0.2309804   | -7.5864  | 4.47E-14 | -2.040934576 | count | 1.07E-09    |
| SNCAIP    | -1.6194368  | 0.2200588   | -7.3591  | 2.43E-13 | -2.037011319 | count | 5.81E-09    |
| CYR61     | -1.4169194  | 0.1184065   | -11.9666 | 3.28E-32 | -2.026211311 | count | 7.94E-28    |
| FAM3B     | -2.151047   | 0.5420765   | -3.9682  | 7.43E-05 | -2.015655032 | count | 1           |
| LYZ       | -1.9722924  | 0.4639756   | -4.2509  | 2.20E-05 | -2.006546446 | count | 0.508838    |
| GRAMD1B   | -20.7783954 | 859.920683  | -0.0242  | 0.981    | -2.002709248 | count | 1           |
| LINC00607 | -20.4605516 | 852.7165775 | -0.024   | 0.981    | -2.002709246 | count | 1           |
| LILRA2    | -21.01748   | 1585.113289 | -0.0133  | 0.989    | -2.002709032 | count | 1           |
| TRDN-AS1  | -21.015837  | 1115.673802 | -0.0188  | 0.985    | -2.002709032 | count | 1           |
| EREG      | -20.220267  | 804.8441952 | -0.0251  | 0.98     | -2.002709028 | count | 1           |
| APCDD1L   | -20.219666  | 722.0252961 | -0.028   | 0.978    | -2.002709028 | count | 1           |
| CTGF      | -1.3951578  | 0.0988434   | -14.1148 | 9.83E-44 | -1.997731347 | count | 2.38E-39    |
| ANKRD1    | -2.3634557  | 0.9633201   | -2.4534  | 0.0142   | -1.996795286 | count | 1           |
| LRP1      | -2.1762824  | 0.5678437   | -3.8325  | 0.00013  | -1.996006377 | count | 1           |
| MTMR11    | -2.048593   | 0.6007306   | -3.4102  | 0.000659 | -1.992958901 | count | 1           |
| ANGPT2    | -1.4154441  | 0.1705336   | -8.3001  | 1.61E-16 | -1.984177143 | count | 3.86E-12    |
| CXCR4     | -2.038732   | 0.4759503   | -4.2835  | 1.90E-05 | -1.983414689 | count | 0.439736    |
| B3GNT9    | -2.2688089  | 0.3977471   | -5.7041  | 1.29E-08 | -1.977608145 | count | 0.000304672 |
| SCRN1     | -2.7903232  | 0.6843118   | -4.0776  | 4.68E-05 | -1.963939763 | count | 1           |
| EFNA5     | -2.1912529  | 0.4467056   | -4.9054  | 9.87E-07 | -1.962726995 | count | 0.023078034 |
| PLEKHA4   | -1.7527286  | 0.270322    | -6.4839  | 1.06E-10 | -1.95987603  | count | 2.52E-06    |
| LGALS1    | -1.3725742  | 0.0920425   | -14.9124 | 1.99E-48 | -1.959075615 | count | 4.83E-44    |
| QPCT      | -1.877865   | 0.2706056   | -6.9395  | 4.88E-12 | -1.957309364 | count | 1.16E-07    |
| FMO2      | -1.5511653  | 0.2401024   | -6.4604  | 1.23E-10 | -1.946136583 | count | 2.92E-06    |
| SSX2IP    | -1.714651   | 0.2935115   | -5.8419  | 5.77E-09 | -1.942053521 | count | 0.000136432 |
| FBLN7     | -1.9878581  | 0.3428821   | -5.7975  | 7.49E-09 | -1.933921411 | count | 0.000177019 |
| SLC16A5   | -1.6964664  | 0.2363106   | -7.179   | 8.99E-13 | -1.932853951 | count | 2.15E-08    |
| XXYL1-AS2 | -3.759386   | 0.8730197   | -4.3062  | 1.72E-05 | -1.930048769 | count | 0.39818     |
| RAC2      | -2.1537246  | 0.4946556   | -4.354   | 1.39E-05 | -1.929748002 | count | 0.3220352   |
| PTN       | -2.732709   | 0.9861435   | -2.7711  | 0.00562  | -1.929420033 | count | 1           |
| SEMA7A    | -3.241309   | 1.1498047   | -2.819   | 0.0049   | -1.929025707 | count | 1           |
| C15orf48  | -3.746252   | 0.9030276   | -4.1485  | 3.45E-05 | -1.926420044 | count | 0.7960185   |
| PHLDB1    | -1.7731914  | 0.2585246   | -6.8589  | 8.53E-12 | -1.922101456 | count | 2.03E-07    |
| INMT      | -1.3955999  | 0.1286127   | -10.8512 | 6.81E-27 | -1.918899095 | count | 1.65E-22    |
| RGS9      | -2.090841   | 0.5454994   | -3.8329  | 0.000129 | -1.918737508 | count | 1           |
| OSGIN2    | -1.486556   | 0.2284713   | -6.5065  | 9.10E-11 | -1.916950443 | count | 2.16E-06    |
| SEZ6L2    | -2.3283793  | 0.5259514   | -4.427   | 9.93E-06 | -1.904257707 | count | 0.23046537  |
| FBLN5     | -1.5785588  | 0.3086264   | -5.1148  | 3.36E-07 | -1.904118696 | count | 0.007876176 |
| PMEPA1    | -1.3686934  | 0.1187115   | -11.5296 | 4.51E-30 | -1.901327379 | count | 1.09E-25    |
| RAB31     | -2.177879   | 0.2792223   | -7.7998  | 8.72E-15 | -1.900407137 | count | 2.09E-10    |
| PDE4B     | -1.4665384  | 0.2151005   | -6.8179  | 1.13E-11 | -1.900375786 | count | 2.69E-07    |

|            |            |             |          |          |              |       |             |
|------------|------------|-------------|----------|----------|--------------|-------|-------------|
| VASN       | -3.6465281 | 0.7695462   | -4.7385  | 2.26E-06 | -1.897737005 | count | 0.05273032  |
| SUCNR1     | -3.133635  | 1.1578938   | -2.7063  | 0.00685  | -1.882593905 | count | 1           |
| PRRT1      | -2.1386296 | 0.4560531   | -4.6894  | 2.87E-06 | -1.866580793 | count | 0.06689683  |
| VAT1L      | -3.074796  | 0.6545497   | -4.6976  | 2.76E-06 | -1.856016493 | count | 0.0643494   |
| PTX3       | -2.3579101 | 0.6548993   | -3.6004  | 0.000323 | -1.85529623  | count | 1           |
| COLEC12    | -1.8248426 | 0.4307272   | -4.2367  | 2.34E-05 | -1.85487724  | count | 0.541008    |
| PTPRG      | -1.4153815 | 0.1439662   | -9.8313  | 1.92E-22 | -1.851443986 | count | 4.63E-18    |
| ACKR3      | -1.3206812 | 0.1535003   | -8.6038  | 1.27E-17 | -1.845545867 | count | 3.05E-13    |
| SLC6A6     | -2.010193  | 0.2892002   | -6.9509  | 4.51E-12 | -1.844611037 | count | 1.08E-07    |
| PLCD3      | -1.6366208 | 0.4502925   | -3.6346  | 0.000284 | -1.839919855 | count | 1           |
| COL4A1     | -1.3241151 | 0.1221307   | -10.8418 | 7.52E-27 | -1.836222663 | count | 1.82E-22    |
| ABI3BP     | -1.4101733 | 0.1700865   | -8.2909  | 1.73E-16 | -1.832775636 | count | 4.15E-12    |
| LYVE1      | -1.8216057 | 0.4171937   | -4.3663  | 1.31E-05 | -1.826026469 | count | 0.3035532   |
| SDC3       | -1.6135619 | 0.2906186   | -5.5522  | 3.09E-08 | -1.825127235 | count | 0.000728591 |
| NPTX2      | -2.424066  | 0.7383259   | -3.2832  | 0.00104  | -1.822576267 | count | 1           |
| NFE2L3     | -1.4014695 | 0.1893459   | -7.4016  | 1.78E-13 | -1.812656074 | count | 4.25E-09    |
| IGKC       | -1.407747  | 0.1070071   | -13.1556 | 2.20E-38 | -1.81144068  | count | 5.33E-34    |
| MYOZ2      | -4.1994822 | 1.4395299   | -2.9173  | 0.0036   | -1.806433217 | count | 1           |
| ALDH3A1    | -1.8535423 | 0.5334573   | -3.4746  | 0.00052  | -1.801384037 | count | 1           |
| EFEMP2     | -1.3941486 | 0.1953366   | -7.1372  | 1.21E-12 | -1.798453448 | count | 2.89E-08    |
| AC245297.3 | -1.7048632 | 0.3243039   | -5.257   | 1.58E-07 | -1.793176525 | count | 0.003710472 |
| CAP2       | -1.785707  | 0.4218189   | -4.2333  | 2.38E-05 | -1.789101664 | count | 0.5501846   |
| NOX4       | -2.676319  | 0.9142616   | -2.9273  | 0.00345  | -1.782487058 | count | 1           |
| CDA        | -1.2801882 | 0.1058376   | -12.0958 | 7.41E-33 | -1.781959348 | count | 1.79E-28    |
| CD44       | -2.1029616 | 0.4911429   | -4.2818  | 1.92E-05 | -1.781811441 | count | 0.4443072   |
| COL16A1    | -1.9808962 | 0.4221621   | -4.6923  | 2.83E-06 | -1.774593067 | count | 0.06597013  |
| PRSS2      | -1.5784636 | 1.1725883   | -1.3461  | 0.1784   | -1.77277099  | count | 1           |
| CCDC152    | -1.6231595 | 0.3538431   | -4.5872  | 4.69E-06 | -1.77071587  | count | 0.10916444  |
| RASGEF1B   | -1.622143  | 0.2252248   | -7.2023  | 7.60E-13 | -1.769572176 | count | 1.81E-08    |
| HSPA1A     | -1.2269705 | 0.0703516   | -17.4405 | 1.05E-64 | -1.76339899  | count | 2.55E-60    |
| PDGFRB     | -2.6426659 | 0.5776419   | -4.5749  | 4.97E-06 | -1.762516548 | count | 0.11567178  |
| RGS1       | -3.2247081 | 0.9321509   | -3.4594  | 0.00055  | -1.752886643 | count | 1           |
| NRTN       | -2.847616  | 0.6309145   | -4.5135  | 6.64E-06 | -1.745448494 | count | 0.15432688  |
| PTGS2      | -1.2270202 | 0.0980262   | -12.5173 | 5.26E-35 | -1.743987602 | count | 1.27E-30    |
| PPM1L      | -1.6575725 | 0.3213712   | -5.1578  | 2.68E-07 | -1.741858805 | count | 0.00628594  |
| TAGLN      | -1.2163466 | 0.1806686   | -6.7325  | 2.02E-11 | -1.729872102 | count | 4.81E-07    |
| CACNG8     | -1.7530192 | 0.3692476   | -4.7475  | 2.16E-06 | -1.728975518 | count | 0.05040576  |
| SFRP4      | -1.7808461 | 0.5641809   | -3.1565  | 0.00161  | -1.728671287 | count | 1           |
| ABCA8      | -1.3911056 | 0.390191    | -3.5652  | 0.00037  | -1.722335122 | count | 1           |
| FCGR2B     | -20.727858 | 1371.417147 | -0.0151  | 0.988    | -1.702940616 | count | 1           |
| DPP10      | -20.727858 | 1371.417147 | -0.0151  | 0.988    | -1.702940616 | count | 1           |
| NLRC3      | -20.726558 | 1018.429566 | -0.0204  | 0.984    | -1.702940616 | count | 1           |
| IGSF23     | -20.725615 | 784.8861939 | -0.0264  | 0.979    | -1.702940616 | count | 1           |
| SCML4      | -19.980423 | 835.9104646 | -0.0239  | 0.981    | -1.702940612 | count | 1           |
| TNS3       | -2.0730361 | 0.3232597   | -6.4129  | 1.67E-10 | -1.697811063 | count | 3.97E-06    |

|            |            |           |          |          |              |       |             |
|------------|------------|-----------|----------|----------|--------------|-------|-------------|
| PAWR       | -1.2427748 | 0.135041  | -9.2029  | 6.68E-20 | -1.697541495 | count | 1.61E-15    |
| GLT8D2     | -1.3515144 | 0.1855873 | -7.2824  | 4.26E-13 | -1.691265263 | count | 1.02E-08    |
| LRRC17     | -2.1447051 | 0.4035399 | -5.3147  | 1.15E-07 | -1.690414125 | count | 0.00270296  |
| AMHR2      | -3.6628464 | 0.9114699 | -4.0186  | 6.01E-05 | -1.68844754  | count | 1           |
| CPAMD8     | -1.3704482 | 0.1922754 | -7.1275  | 1.30E-12 | -1.687607609 | count | 3.10E-08    |
| KCNN4      | -1.427625  | 0.2036442 | -7.0104  | 2.98E-12 | -1.685660501 | count | 7.11E-08    |
| CLDN15     | -1.2288444 | 0.1406228 | -8.7386  | 4.02E-18 | -1.683672561 | count | 9.66E-14    |
| SFTPD-AS1  | -2.352406  | 0.7164336 | -3.2835  | 0.00104  | -1.68138958  | count | 1           |
| PI16       | -2.226699  | 0.3334375 | -6.678   | 2.92E-11 | -1.678381703 | count | 6.95E-07    |
| CXCL1      | -1.2480303 | 0.407622  | -3.0617  | 0.0022   | -1.66803423  | count | 1           |
| CHST1      | -1.4612546 | 0.2489223 | -5.8703  | 4.87E-09 | -1.667911476 | count | 0.000115171 |
| PAPSS1     | -1.2121338 | 0.1125022 | -10.7743 | 1.52E-26 | -1.665285406 | count | 3.67E-22    |
| DDAH1      | -1.7154692 | 0.4137678 | -4.146   | 3.49E-05 | -1.66278981  | count | 0.8051779   |
| ZNF483     | -1.7154692 | 0.4297524 | -3.9918  | 6.73E-05 | -1.66278981  | count | 1           |
| SLC4A4     | -1.9647781 | 0.3537938 | -5.5535  | 3.07E-08 | -1.662729149 | count | 0.000723906 |
| LAPTM5     | -1.2582135 | 0.1944271 | -6.4714  | 1.14E-10 | -1.659552674 | count | 2.71E-06    |
| LINC01235  | -1.550682  | 0.2925525 | -5.3005  | 1.25E-07 | -1.658894477 | count | 0.002937    |
| CREB3L2    | -1.2575712 | 0.1561271 | -8.0548  | 1.17E-15 | -1.657313219 | count | 2.80E-11    |
| TIMP1      | -1.1494269 | 0.0639013 | -17.9875 | 1.70E-68 | -1.656290552 | count | 4.13E-64    |
| AL365259.1 | -2.9893537 | 0.8549569 | -3.4965  | 0.000479 | -1.654666567 | count | 1           |
| CPE        | -1.1584356 | 0.1137061 | -10.188  | 5.92E-24 | -1.652284751 | count | 1.43E-19    |
| ABHD2      | -1.2074203 | 0.1289827 | -9.3611  | 1.58E-20 | -1.649804689 | count | 3.80E-16    |
| UHRF1      | -3.515772  | 0.9080753 | -3.8717  | 0.000111 | -1.647214151 | count | 1           |
| AC009414.2 | -1.2149731 | 0.1497418 | -8.1138  | 7.30E-16 | -1.645160212 | count | 1.75E-11    |
| RAMP1      | -2.0082365 | 0.7094327 | -2.8308  | 0.00468  | -1.643573594 | count | 1           |
| AL442663.3 | -3.5010092 | 1.2261894 | -2.8552  | 0.00433  | -1.64284425  | count | 1           |
| IL1RL1     | -5.2401023 | 1.3679991 | -3.8305  | 1.00E-04 | -1.638420147 | count | 1           |
| MEI1       | -1.8772595 | 0.4355488 | -4.3101  | 1.69E-05 | -1.634710809 | count | 0.3912519   |
| SFRP5      | -2.639255  | 0.6472011 | -4.078   | 4.67E-05 | -1.633244359 | count | 1           |
| SH3TC1     | -1.3413307 | 0.2467701 | -5.4355  | 5.94E-08 | -1.632409237 | count | 0.001398395 |
| SH3RF2     | -1.9298797 | 0.4749739 | -4.0631  | 4.98E-05 | -1.63220031  | count | 1           |
| DHH        | -1.4157568 | 0.2730534 | -5.1849  | 2.32E-07 | -1.632185728 | count | 0.005444576 |
| HSPG2      | -1.1374995 | 0.0553456 | -20.5527 | 1.84E-87 | -1.629802462 | count | 4.47E-83    |
| ITGAV      | -1.2215    | 0.1584344 | -7.7098  | 1.75E-14 | -1.627022286 | count | 4.19E-10    |
| AC144831.1 | -1.987827  | 0.4373254 | -4.5454  | 5.72E-06 | -1.626358101 | count | 0.13307008  |
| OSBPL3     | -1.819256  | 0.4718389 | -3.8557  | 0.000118 | -1.625377572 | count | 1           |
| PIK3AP1    | -3.424037  | 0.9409679 | -3.6388  | 0.000279 | -1.619360941 | count | 1           |
| RGS7BP     | -1.4659233 | 0.2475027 | -5.9229  | 3.56E-09 | -1.618888671 | count | 8.43E-05    |
| RGS3       | -1.1460624 | 0.1241314 | -9.2327  | 5.11E-20 | -1.608210811 | count | 1.23E-15    |
| TBXAS1     | -2.239749  | 0.566536  | -3.9534  | 7.90E-05 | -1.601891061 | count | 1           |
| PDGFC      | -1.6528626 | 0.343084  | -4.8177  | 1.53E-06 | -1.599330434 | count | 0.03573009  |
| VIPR1      | -3.3610102 | 0.8057722 | -4.1712  | 3.12E-05 | -1.599247944 | count | 0.7203456   |
| AATK       | -2.867099  | 0.5602646 | -5.1174  | 3.31E-07 | -1.598673737 | count | 0.007759633 |
| PDZRN4     | -1.7462034 | 0.4114651 | -4.2439  | 2.27E-05 | -1.59537016  | count | 0.5248921   |
| FBXO3-DT   | -3.338362  | 0.8908579 | -3.7474  | 0.000182 | -1.5918238   | count | 1           |



|          |            |           |          |          |              |       |             |
|----------|------------|-----------|----------|----------|--------------|-------|-------------|
| COL4A2   | -1.141326  | 0.1120548 | -10.1854 | 6.07E-24 | -1.591516388 | count | 1.46E-19    |
| SGCG     | -1.699364  | 0.455841  | -3.728   | 0.000197 | -1.584908942 | count | 1           |
| DSE      | -1.4153683 | 0.2618896 | -5.4044  | 7.06E-08 | -1.583443014 | count | 0.001661359 |
| SLC26A4  | -1.8199215 | 0.4575058 | -3.9779  | 7.13E-05 | -1.582315229 | count | 1           |
| CRIM1    | -1.1062453 | 0.0637747 | -17.3461 | 4.64E-64 | -1.582315229 | count | 1.13E-59    |
| UNC5B    | -1.5651051 | 0.291712  | -5.3652  | 8.75E-08 | -1.581863677 | count | 0.002058088 |
| SULT1B1  | -3.3025925 | 0.8973558 | -3.6804  | 0.000237 | -1.57988589  | count | 1           |
| RHOB     | -1.1039064 | 0.0691842 | -15.956  | 6.81E-55 | -1.579205527 | count | 1.65E-50    |
| CLCN4    | -2.0063816 | 0.4954424 | -4.0497  | 5.27E-05 | -1.579052686 | count | 1           |
| B3GALNT1 | -1.2349327 | 0.2195544 | -5.6247  | 2.04E-08 | -1.575943107 | count | 0.000481542 |
| PLEKHA6  | -2.3462098 | 0.5869118 | -3.9976  | 6.57E-05 | -1.57564408  | count | 1           |
| TRPV2    | -1.9994153 | 0.5561648 | -3.595   | 0.00033  | -1.573366282 | count | 1           |
| CST6     | -1.998206  | 0.64007   | -3.1219  | 0.00182  | -1.572378548 | count | 1           |
| SYNM     | -1.3456977 | 0.2973576 | -4.5255  | 6.28E-06 | -1.571861076 | count | 0.14604768  |
| DZIP1    | -3.273292  | 0.9373113 | -3.4922  | 0.000487 | -1.56991106  | count | 1           |
| PRKACB   | -1.279413  | 0.1959847 | -6.5281  | 7.90E-11 | -1.568425305 | count | 1.88E-06    |
| SLC16A4  | -1.2737262 | 0.2363225 | -5.3898  | 7.65E-08 | -1.565465831 | count | 0.001799663 |
| SPEG     | -2.324351  | 0.547397  | -4.2462  | 2.25E-05 | -1.561145313 | count | 0.5203125   |
| IL7      | -1.4082356 | 0.3112162 | -4.5249  | 6.30E-06 | -1.55255347  | count | 0.1465002   |
| MAP2     | -1.602934  | 0.2607121 | -6.1483  | 8.96E-10 | -1.548503517 | count | 2.12E-05    |
| EVI5     | -1.1186052 | 0.117757  | -9.4993  | 4.42E-21 | -1.547866471 | count | 1.06E-16    |
| SCN8A    | -3.206442  | 0.7641621 | -4.196   | 2.80E-05 | -1.5464927   | count | 0.646828    |
| ZNF771   | -1.2376697 | 0.2009641 | -6.1587  | 8.40E-10 | -1.542149118 | count | 1.99E-05    |
| AR       | -1.194764  | 0.1944475 | -6.1444  | 9.18E-10 | -1.540827946 | count | 2.18E-05    |
| C8orf34  | -3.1599133 | 0.7091559 | -4.4559  | 8.69E-06 | -1.529647875 | count | 0.20179049  |
| ARHGAP18 | -1.0829937 | 0.0998576 | -10.8454 | 7.24E-27 | -1.525650474 | count | 1.75E-22    |
| DHRS3    | -1.1027312 | 0.1281873 | -8.6025  | 1.29E-17 | -1.52464418  | count | 3.10E-13    |
| GJA4     | -1.0848014 | 0.1546296 | -7.0155  | 2.87E-12 | -1.523087003 | count | 6.85E-08    |
| RBP1     | -1.1065122 | 0.1293398 | -8.5551  | 1.92E-17 | -1.519685887 | count | 4.61E-13    |
| ITGA10   | -1.0871525 | 0.0936101 | -11.6136 | 1.77E-30 | -1.519616854 | count | 4.28E-26    |
| MYO1D    | -1.2340815 | 0.1888037 | -6.5363  | 7.48E-11 | -1.519345979 | count | 1.78E-06    |
| FHDC1    | -1.8577637 | 0.5687801 | -3.2662  | 0.0011   | -1.515326774 | count | 1           |
| TOR4A    | -1.4209137 | 0.3382841 | -4.2004  | 2.75E-05 | -1.514045148 | count | 0.635305    |
| SLC44A5  | -1.744434  | 0.7775505 | -2.2435  | 0.0249   | -1.513368591 | count | 1           |
| PPP1R14A | -1.1914572 | 0.2017743 | -5.9049  | 3.96E-09 | -1.511923349 | count | 9.37E-05    |
| ARL4D    | -1.1100497 | 0.139259  | -7.9711  | 2.28E-15 | -1.511624101 | count | 5.46E-11    |
| FAM20C   | -2.1126892 | 0.6053911 | -3.4898  | 0.000491 | -1.509476951 | count | 1           |
| CCDC80   | -1.0782396 | 0.1295583 | -8.3224  | 1.34E-16 | -1.508402954 | count | 3.22E-12    |
| TCEAL2   | -1.2469186 | 0.230241  | -5.4157  | 6.63E-08 | -1.50468975  | count | 0.001560371 |
| ZNF396   | -2.668741  | 0.743958  | -3.5872  | 0.00034  | -1.500817549 | count | 1           |
| FUT8     | -1.1972622 | 0.179569  | -6.6674  | 3.13E-11 | -1.499989459 | count | 7.45E-07    |
| PLD1     | -1.2821804 | 0.292844  | -4.3784  | 1.24E-05 | -1.495005399 | count | 0.2873948   |
| P4HA2    | -1.1840906 | 0.2187412 | -5.4132  | 6.72E-08 | -1.494506162 | count | 0.001581485 |
| VAMP8    | -1.067116  | 0.1229189 | -8.6815  | 6.56E-18 | -1.493989387 | count | 1.58E-13    |
| OSBPL6   | -1.4151567 | 0.3325512 | -4.2555  | 2.16E-05 | -1.492483363 | count | 0.499608    |

|             |            |           |          |          |              |       |             |
|-------------|------------|-----------|----------|----------|--------------|-------|-------------|
| HOXB5       | -1.546602  | 0.509282  | -3.0368  | 0.00241  | -1.490967352 | count | 1           |
| SC5D        | -1.213036  | 0.2183901 | -5.5544  | 3.05E-08 | -1.488772458 | count | 0.000719251 |
| NOS1        | -2.645214  | 0.6445617 | -4.1039  | 4.18E-05 | -1.488656435 | count | 0.9637408   |
| PLLP        | -1.1148959 | 0.1750633 | -6.3685  | 2.23E-10 | -1.485910437 | count | 5.29E-06    |
| GATA5       | -3.9229826 | 1.1054286 | -3.5488  | 0.000393 | -1.483880679 | count | 1           |
| CDYL2       | -2.209636  | 0.5055182 | -4.371   | 1.28E-05 | -1.483627918 | count | 0.2966528   |
| ANOS1       | -1.5148287 | 0.3151879 | -4.8061  | 1.62E-06 | -1.483404321 | count | 0.03782214  |
| KLF15       | -2.0762466 | 0.4721346 | -4.3976  | 1.14E-05 | -1.482490056 | count | 0.2643546   |
| HEPH        | -3.0254209 | 0.9607206 | -3.1491  | 0.00166  | -1.478435672 | count | 1           |
| PTGS1       | -1.168275  | 0.2645998 | -4.4153  | 1.05E-05 | -1.476702678 | count | 0.2436      |
| CD68        | -1.197231  | 0.2151042 | -5.5658  | 2.86E-08 | -1.476438675 | count | 0.000674588 |
| RND2        | -1.809626  | 0.5176166 | -3.4961  | 0.00048  | -1.473723432 | count | 1           |
| CDH13       | -1.0536171 | 0.1263687 | -8.3376  | 1.18E-16 | -1.472757015 | count | 2.83E-12    |
| NPAS2       | -1.9546037 | 0.5020915 | -3.8929  | 0.000101 | -1.468032949 | count | 1           |
| SEMA3F      | -1.094125  | 0.1419779 | -7.7063  | 1.79E-14 | -1.465580549 | count | 4.28E-10    |
| THY1        | -1.3120516 | 0.2620913 | -5.0061  | 5.90E-07 | -1.463033465 | count | 0.01381072  |
| RGS11       | -1.330123  | 0.2993719 | -4.443   | 9.22E-06 | -1.462588855 | count | 0.21405152  |
| NETO2       | -2.1713252 | 0.6553762 | -3.3131  | 0.000935 | -1.457238263 | count | 1           |
| CYP1B1      | -1.029275  | 0.0968053 | -10.6324 | 6.62E-26 | -1.45334574  | count | 1.60E-21    |
| CUBN        | -1.2943677 | 0.2851373 | -4.5395  | 5.88E-06 | -1.452190628 | count | 0.13678056  |
| AP000695.2  | -1.9344541 | 0.5208045 | -3.7144  | 0.000208 | -1.452028436 | count | 1           |
| TMSB15B-AS1 | -1.675482  | 0.6889091 | -2.4321  | 0.0151   | -1.44971385  | count | 1           |
| DOCK8       | -1.5917663 | 0.6425059 | -2.4774  | 0.0133   | -1.446189402 | count | 1           |
| CALD1       | -1.0086474 | 0.0585079 | -17.2395 | 2.46E-63 | -1.444806424 | count | 5.97E-59    |
| TRIP6       | -1.069748  | 0.1355925 | -7.8894  | 4.34E-15 | -1.443847136 | count | 1.04E-10    |
| CITED4      | -1.0794339 | 0.2046999 | -5.2732  | 1.44E-07 | -1.441483476 | count | 0.003382848 |
| PDE5A       | -1.451988  | 0.4906395 | -2.9594  | 0.00311  | -1.44051106  | count | 1           |
| SHTN1       | -1.3539939 | 0.361006  | -3.7506  | 0.00018  | -1.439127908 | count | 1           |
| DYRK4       | -1.055914  | 0.1416441 | -7.4547  | 1.20E-13 | -1.438068816 | count | 2.87E-09    |
| SRGN        | -1.0000637 | 0.0708783 | -14.1096 | 1.05E-43 | -1.435300685 | count | 2.55E-39    |
| GPR176      | -3.6836884 | 1.057541  | -3.4833  | 0.000503 | -1.433536883 | count | 1           |
| KANK1       | -1.274205  | 0.2715202 | -4.6929  | 2.83E-06 | -1.428542414 | count | 0.06597013  |
| PHLDA1      | -1.0667477 | 0.2300411 | -4.6372  | 3.70E-06 | -1.428392171 | count | 0.0861878   |
| MIR503HG    | -3.6573447 | 0.8686299 | -4.2105  | 2.63E-05 | -1.427444251 | count | 0.6077141   |
| PLEKHO1     | -1.119862  | 0.1655276 | -6.7654  | 1.62E-11 | -1.42589903  | count | 3.86E-07    |
| UNC5B-AS1   | -2.8935492 | 1.3485387 | -2.1457  | 0.032    | -1.424606521 | count | 1           |
| ASS1        | -1.0042159 | 0.076812  | -13.0737 | 6.08E-38 | -1.423147151 | count | 1.47E-33    |
| MIR4435-2HG | -1.0832293 | 0.2446722 | -4.4273  | 9.91E-06 | -1.414799129 | count | 0.2300111   |
| ALDH3A2     | -1.0539064 | 0.1451742 | -7.2596  | 5.02E-13 | -1.41399577  | count | 1.20E-08    |
| ID4         | -1.1254739 | 0.2919984 | -3.8544  | 0.000119 | -1.413352722 | count | 1           |
| ZDHHC4      | -1.119358  | 0.2350397 | -4.7624  | 2.01E-06 | -1.408162958 | count | 0.0469134   |
| PTPRF       | -1.3519849 | 0.2990306 | -4.5212  | 6.41E-06 | -1.406929898 | count | 0.14901968  |
| CEBPB       | -1.0024916 | 0.1002001 | -10.0049 | 3.58E-23 | -1.403998469 | count | 8.63E-19    |
| SETBP1      | -1.1023911 | 0.2184279 | -5.0469  | 4.78E-07 | -1.400886862 | count | 0.011196194 |
| PTPRS       | -2.2527824 | 0.8793432 | -2.5619  | 0.0105   | -1.400697873 | count | 1           |

|          |             |             |          |          |              |       |             |
|----------|-------------|-------------|----------|----------|--------------|-------|-------------|
| CGNL1    | -1.8689093  | 0.3970303   | -4.7072  | 2.63E-06 | -1.399640445 | count | 0.06132634  |
| ABAT     | -1.7869853  | 0.4401547   | -4.0599  | 5.05E-05 | -1.397045729 | count | 1           |
| CYBA     | -0.9897616  | 0.0880895   | -11.2359 | 1.13E-28 | -1.394049751 | count | 2.73E-24    |
| ZEB2     | -1.1913179  | 0.2817383   | -4.2285  | 2.43E-05 | -1.391493147 | count | 0.5616702   |
| MSI2     | -1.0881854  | 0.1730035   | -6.29    | 3.68E-10 | -1.388878443 | count | 8.73E-06    |
| C1QC     | -1.7063482  | 0.4364341   | -3.9097  | 9.46E-05 | -1.383726469 | count | 1           |
| TMTC2    | -1.1574977  | 0.247686    | -4.6732  | 3.11E-06 | -1.383700508 | count | 0.07246611  |
| GDF11    | -1.8489011  | 0.4596519   | -4.0224  | 5.92E-05 | -1.38355655  | count | 1           |
| TMEM45A  | -1.2702062  | 0.2576173   | -4.9306  | 8.68E-07 | -1.382383089 | count | 0.020300784 |
| SMOC1    | -1.4905561  | 0.4586591   | -3.2498  | 0.00117  | -1.378537865 | count | 1           |
| MT1G     | -2.440593   | 0.8473609   | -2.8802  | 0.004    | -1.378276021 | count | 1           |
| HSPA1B   | -0.9615668  | 0.0737835   | -13.0323 | 1.01E-37 | -1.374251683 | count | 2.45E-33    |
| PLEKHH2  | -1.6373151  | 0.4027009   | -4.0658  | 4.92E-05 | -1.370899802 | count | 1           |
| GLRB     | -1.482124   | 0.42293     | -3.5044  | 0.000465 | -1.370159119 | count | 1           |
| CAPS     | -1.3849097  | 0.3433626   | -4.0334  | 5.65E-05 | -1.369752634 | count | 1           |
| IGLC2    | -1.509475   | 0.136166    | -11.0855 | 5.68E-28 | -1.366095855 | count | 1.37E-23    |
| SCD5     | -1.2978323  | 0.2957823   | -4.3878  | 1.19E-05 | -1.362155475 | count | 0.2758777   |
| C2orf15  | -1.680134   | 0.4726334   | -3.5548  | 0.000385 | -1.360748753 | count | 1           |
| ARHGDI3  | -3.3960076  | 0.9636599   | -3.5241  | 0.000432 | -1.360710914 | count | 1           |
| FAM241B  | -1.419213   | 0.4827369   | -2.9399  | 0.00331  | -1.360338459 | count | 1           |
| ABCA1    | -1.146433   | 0.2345363   | -4.8881  | 1.08E-06 | -1.359784663 | count | 0.02524824  |
| MFAP5    | -1.9121826  | 0.6158144   | -3.1051  | 0.00192  | -1.358748539 | count | 1           |
| MUM1L1   | -3.38799    | 0.9041542   | -3.7471  | 0.000183 | -1.358477742 | count | 1           |
| IL18     | -3.38799    | 0.9133764   | -3.7093  | 0.000212 | -1.358477742 | count | 1           |
| PRDM16   | -2.403357   | 0.5483814   | -4.3826  | 1.22E-05 | -1.357351327 | count | 0.2828082   |
| PAPLN    | -2.3982415  | 0.7848245   | -3.0558  | 0.00227  | -1.35445776  | count | 1           |
| IGHM     | -2.7248038  | 0.9843849   | -2.768   | 0.00568  | -1.350639633 | count | 1           |
| RGS5     | -1.241749   | 0.3289333   | -3.7751  | 0.000163 | -1.349791308 | count | 1           |
| RCAN2    | -1.6668382  | 0.317151    | -5.2557  | 1.59E-07 | -1.349077509 | count | 0.003733797 |
| ADAM9    | -1.0890198  | 0.2109195   | -5.1632  | 2.60E-07 | -1.348991397 | count | 0.0060996   |
| APOBEC3C | -1.3637338  | 0.3130772   | -4.3559  | 1.37E-05 | -1.347398987 | count | 0.3174153   |
| NFIX     | -1.0211601  | 0.1728381   | -5.9082  | 3.88E-09 | -1.344370029 | count | 9.18E-05    |
| EGFR     | -1.356479   | 0.3543446   | -3.8281  | 0.000132 | -1.33973998  | count | 1           |
| ALPK3    | -1.3764647  | 0.2783123   | -4.9458  | 8.04E-07 | -1.339399894 | count | 0.018806364 |
| PRR5L    | -1.3361113  | 0.3682725   | -3.6281  | 0.000291 | -1.337771955 | count | 1           |
| COL6A2   | -1.2622402  | 0.218419    | -5.779   | 8.36E-09 | -1.336320488 | count | 0.000197547 |
| ANGPTL2  | -1.021947   | 0.1738908   | -5.8769  | 4.68E-09 | -1.331897098 | count | 0.000110691 |
| MCOLN2   | -3.294001   | 1.623057    | -2.0295  | 0.0425   | -1.331454457 | count | 1           |
| FAP      | -1.4416404  | 0.3129053   | -4.6073  | 4.26E-06 | -1.329905776 | count | 0.09918132  |
| ENOX1    | -20.6587087 | 1208.571483 | -0.0171  | 0.986    | -1.324095971 | count | 1           |
| EMX2OS   | -20.3632701 | 724.3797045 | -0.0281  | 0.978    | -1.32409597  | count | 1           |
| OLR1     | -20.0179877 | 1057.504351 | -0.0189  | 0.985    | -1.324095968 | count | 1           |
| TSPOAP1  | -19.8602969 | 912.0209946 | -0.0218  | 0.983    | -1.324095968 | count | 1           |
| NRK      | -19.8601425 | 736.6406331 | -0.027   | 0.978    | -1.324095968 | count | 1           |
| CD163    | -19.8227155 | 1083.562295 | -0.0183  | 0.985    | -1.324095968 | count | 1           |

|             |            |             |         |          |              |       |             |
|-------------|------------|-------------|---------|----------|--------------|-------|-------------|
| COL8A2      | -20.454014 | 825.0360395 | -0.0248 | 0.98     | -1.324095883 | count | 1           |
| LEMD1       | -20.319953 | 1118.392656 | -0.0182 | 0.986    | -1.324095883 | count | 1           |
| CDS1        | -20.319953 | 1118.392656 | -0.0182 | 0.986    | -1.324095883 | count | 1           |
| HOXA10      | -20.319953 | 1118.392656 | -0.0182 | 0.986    | -1.324095883 | count | 1           |
| PRSS1       | -20.319953 | 1118.392656 | -0.0182 | 0.986    | -1.324095883 | count | 1           |
| AC108002.1  | -20.319953 | 1118.392656 | -0.0182 | 0.986    | -1.324095883 | count | 1           |
| ARHGEF39    | -20.319953 | 1118.392656 | -0.0182 | 0.986    | -1.324095883 | count | 1           |
| USP2-AS1    | -20.319953 | 1118.392656 | -0.0182 | 0.986    | -1.324095883 | count | 1           |
| AC068790.9  | -20.319953 | 1118.392656 | -0.0182 | 0.986    | -1.324095883 | count | 1           |
| AC091057.2  | -20.319953 | 1118.392656 | -0.0182 | 0.986    | -1.324095883 | count | 1           |
| SLAMF9      | -20.318901 | 787.4075016 | -0.0258 | 0.979    | -1.324095883 | count | 1           |
| IGFBP1      | -20.318901 | 787.4075016 | -0.0258 | 0.979    | -1.324095883 | count | 1           |
| PCDH9-AS1   | -20.318901 | 787.4075016 | -0.0258 | 0.979    | -1.324095883 | count | 1           |
| RHBDL1      | -20.318901 | 787.4075016 | -0.0258 | 0.979    | -1.324095883 | count | 1           |
| WNK4        | -20.318901 | 787.4075016 | -0.0258 | 0.979    | -1.324095883 | count | 1           |
| C22orf15    | -20.318901 | 787.4075016 | -0.0258 | 0.979    | -1.324095883 | count | 1           |
| ACVR1       | -1.1638772 | 0.2113176   | -5.5077 | 3.97E-08 | -1.323678207 | count | 0.00093565  |
| TSKU        | -1.584833  | 0.4459012   | -3.5542 | 0.000385 | -1.323308915 | count | 1           |
| ANTXR2      | -1.3221776 | 0.3387543   | -3.9031 | 9.73E-05 | -1.32288479  | count | 1           |
| PSORS1C1    | -1.3385675 | 0.296005    | -4.5221 | 6.38E-06 | -1.320828403 | count | 0.148335    |
| LPCAT2      | -0.9581358 | 0.1156066   | -8.2879 | 1.78E-16 | -1.318949989 | count | 4.27E-12    |
| ETNK2       | -1.5334153 | 0.385257    | -3.9802 | 7.06E-05 | -1.317580852 | count | 1           |
| PXDC1       | -0.9449698 | 0.1016524   | -9.2961 | 2.87E-20 | -1.316685158 | count | 6.91E-16    |
| LDLRAD4-AS1 | -1.969463  | 0.5261582   | -3.7431 | 0.000185 | -1.31465142  | count | 1           |
| POF1B       | -1.2808889 | 0.3547813   | -3.6104 | 0.000311 | -1.31301188  | count | 1           |
| C16orf74    | -3.2304392 | 0.7063464   | -4.5734 | 5.01E-06 | -1.312289649 | count | 0.11659773  |
| CFAP70      | -1.7605231 | 0.6230625   | -2.8256 | 0.00475  | -1.312069233 | count | 1           |
| ADAMTS17    | -2.633779  | 0.7651594   | -3.4421 | 0.000586 | -1.308469371 | count | 1           |
| PRR26       | -2.633779  | 1.0917388   | -2.4125 | 0.0159   | -1.308469371 | count | 1           |
| SPATA18     | -2.633779  | 1.0996833   | -2.395  | 0.0167   | -1.308469371 | count | 1           |
| CHCHD10     | -0.9571453 | 0.1242392   | -7.7041 | 1.82E-14 | -1.306635925 | count | 4.36E-10    |
| SKAP1       | -1.952067  | 0.5388872   | -3.6224 | 0.000297 | -1.302122645 | count | 1           |
| ACVR1C      | -3.195823  | 0.9365276   | -3.4124 | 0.000653 | -1.301548729 | count | 1           |
| HCN1        | -3.195823  | 0.9365276   | -3.4124 | 0.000653 | -1.301548729 | count | 1           |
| BTK         | -3.195823  | 0.9365276   | -3.4124 | 0.000653 | -1.301548729 | count | 1           |
| PCOLCE2     | -2.610521  | 0.7070311   | -3.6922 | 0.000227 | -1.297450122 | count | 1           |
| CRABP2      | -3.1804051 | 0.9275028   | -3.429  | 0.000615 | -1.296695562 | count | 1           |
| TXNRD2      | -1.0886489 | 0.2218092   | -4.908  | 9.73E-07 | -1.293660751 | count | 0.022751659 |
| BEST1       | -1.9398669 | 0.5750635   | -3.3733 | 0.000753 | -1.293316529 | count | 1           |
| SLC9A7      | -1.4291638 | 0.3572934   | -4      | 6.50E-05 | -1.287706528 | count | 1           |
| AC055874.1  | -1.104859  | 0.3621716   | -3.0507 | 0.00231  | -1.286506441 | count | 1           |
| CARF        | -1.1922581 | 0.3211424   | -3.7126 | 0.000209 | -1.282011872 | count | 1           |
| RND3        | -0.9371806 | 0.1777382   | -5.2728 | 1.45E-07 | -1.28094852  | count | 0.00340605  |
| SYNGR1      | -1.4543991 | 0.5325815   | -2.7308 | 0.00636  | -1.279521746 | count | 1           |
| KCNJ2       | -1.0070846 | 0.3706921   | -2.7168 | 0.00663  | -1.278950102 | count | 1           |

|             |            |           |          |           |              |       |             |
|-------------|------------|-----------|----------|-----------|--------------|-------|-------------|
| MERTK       | -1.2593588 | 0.3457386 | -3.6425  | 0.000275  | -1.273178475 | count | 1           |
| CALHM5      | -1.1727174 | 0.2475627 | -4.7371  | 2.28E-06  | -1.270764389 | count | 0.05319012  |
| PCDH15      | -1.5203313 | 0.527436  | -2.8825  | 0.00398   | -1.264657116 | count | 1           |
| RHOQ        | -1.0224448 | 0.209498  | -4.8805  | 1.12E-06  | -1.264112192 | count | 0.02618112  |
| ZMAT3       | -1.1663539 | 0.2481901 | -4.6994  | 2.74E-06  | -1.263483709 | count | 0.06388584  |
| SIPA1L2     | -1.628108  | 0.2895765 | -5.6224  | 2.07E-08  | -1.262434841 | count | 0.000488561 |
| NCAM1       | -1.073139  | 0.3421809 | -3.1362  | 0.00173   | -1.259222514 | count | 1           |
| H2AFJ       | -0.8984749 | 0.092871  | -9.6744  | 8.55E-22  | -1.258800279 | count | 2.06E-17    |
| TNFRSF12A   | -0.9192213 | 0.1392146 | -6.6029  | 4.82E-11  | -1.25822128  | count | 1.15E-06    |
| S100A6      | -0.8723059 | 0.0319665 | -27.2881 | 2.25E-145 | -1.257343894 | count | 5.47E-141   |
| LINC00926   | -2.523596  | 1.0278005 | -2.4553  | 0.0141    | -1.255419726 | count | 1           |
| MECOM       | -0.9046268 | 0.1174315 | -7.7034  | 1.83E-14  | -1.249807736 | count | 4.38E-10    |
| ACTC1       | -1.682142  | 0.8715078 | -1.9302  | 0.0537    | -1.248171329 | count | 1           |
| BEX1        | -1.1343589 | 0.391885  | -2.8946  | 0.00383   | -1.246650244 | count | 1           |
| DNAJB1      | -0.8739837 | 0.0713183 | -12.2547 | 1.17E-33  | -1.24626592  | count | 2.83E-29    |
| LAMB1       | -0.8951089 | 0.1282604 | -6.9788  | 3.71E-12  | -1.242347944 | count | 8.85E-08    |
| FBXO17      | -1.6040437 | 0.3048156 | -5.2623  | 1.53E-07  | -1.241918751 | count | 0.003593511 |
| ZNF439      | -1.3033616 | 0.4227292 | -3.0832  | 0.00207   | -1.241271751 | count | 1           |
| IPO13       | -1.3516778 | 0.421498  | -3.2068  | 0.00136   | -1.240367854 | count | 1           |
| TGFB2       | -1.0479615 | 0.3876072 | -2.7037  | 0.0069    | -1.238663506 | count | 1           |
| ATG2A       | -1.0235459 | 0.2542048 | -4.0265  | 5.81E-05  | -1.234732148 | count | 1           |
| ME1         | -1.4070529 | 0.4617031 | -3.0475  | 0.00233   | -1.234207729 | count | 1           |
| NDRG4       | -0.9701655 | 0.2017656 | -4.8084  | 1.60E-06  | -1.232862242 | count | 0.03736     |
| PCDHGA12    | -1.2201639 | 0.4421763 | -2.7595  | 0.00583   | -1.230867324 | count | 1           |
| HTRA1       | -0.8644155 | 0.067012  | -12.8994 | 5.20E-37  | -1.228871133 | count | 1.26E-32    |
| SDC4        | -1.4807836 | 0.3406363 | -4.3471  | 1.43E-05  | -1.228637336 | count | 0.3312738   |
| SH3RF1      | -1.0017197 | 0.2101808 | -4.766   | 1.98E-06  | -1.228524993 | count | 0.04621716  |
| ACOT7       | -0.9740233 | 0.175154  | -5.561   | 2.94E-08  | -1.227537755 | count | 0.00069337  |
| MINPP1      | -0.9490059 | 0.180213  | -5.266   | 1.50E-07  | -1.226841241 | count | 0.0035232   |
| IGSF6       | -2.4598105 | 0.7803336 | -3.1523  | 0.00164   | -1.223763365 | count | 1           |
| SKIL        | -0.8655223 | 0.0718949 | -12.0387 | 1.43E-32  | -1.223686114 | count | 3.46E-28    |
| STMN3       | -0.9164618 | 0.1556922 | -5.8864  | 4.42E-09  | -1.223684425 | count | 0.000104564 |
| CCSER2      | -0.8783169 | 0.0969332 | -9.061   | 2.38E-19  | -1.222301509 | count | 5.73E-15    |
| C1QA        | -1.5221439 | 0.3780857 | -4.0259  | 5.83E-05  | -1.221492146 | count | 1           |
| BPGM        | -0.9211123 | 0.1588168 | -5.7998  | 7.39E-09  | -1.218021429 | count | 0.000174663 |
| SNX18       | -0.9522284 | 0.1783872 | -5.338   | 1.02E-07  | -1.215043965 | count | 0.00239802  |
| CPNE5       | -1.0556275 | 0.2768167 | -3.8135  | 0.00014   | -1.214859133 | count | 1           |
| AC022007.1  | -2.932897  | 0.8653981 | -3.3891  | 0.000711  | -1.212979067 | count | 1           |
| SERPINA5    | -2.932897  | 0.8653981 | -3.3891  | 0.000711  | -1.212979067 | count | 1           |
| SMIM5       | -2.932897  | 0.8653981 | -3.3891  | 0.000711  | -1.212979067 | count | 1           |
| L3MBTL4-AS1 | -2.932897  | 0.8653981 | -3.3891  | 0.000711  | -1.212979067 | count | 1           |
| PPP4R1-AS1  | -2.932897  | 0.8653981 | -3.3891  | 0.000711  | -1.212979067 | count | 1           |
| AP000695.1  | -2.932897  | 0.8653981 | -3.3891  | 0.000711  | -1.212979067 | count | 1           |
| KIAA1958    | -2.932897  | 0.90617   | -3.2366  | 0.00122   | -1.212979067 | count | 1           |
| AL132780.1  | -2.932897  | 0.90617   | -3.2366  | 0.00122   | -1.212979067 | count | 1           |

|            |            |           |          |          |              |       |             |
|------------|------------|-----------|----------|----------|--------------|-------|-------------|
| P3H3       | -1.0427895 | 0.2507612 | -4.1585  | 3.30E-05 | -1.211236312 | count | 0.76164     |
| STAB1      | -0.8841901 | 0.1416222 | -6.2433  | 4.94E-10 | -1.209122631 | count | 1.17E-05    |
| LMO7       | -1.4172834 | 0.4390101 | -3.2284  | 0.00126  | -1.209025644 | count | 1           |
| C1orf54    | -0.8735088 | 0.1067716 | -8.1811  | 4.24E-16 | -1.207104273 | count | 1.02E-11    |
| RTKN2      | -1.8176727 | 0.874275  | -2.0791  | 0.0377   | -1.204333567 | count | 1           |
| TTLL3      | -1.0818671 | 0.267183  | -4.0492  | 5.28E-05 | -1.203133045 | count | 1           |
| GJA1       | -0.857056  | 0.086359  | -9.9243  | 7.83E-23 | -1.202605484 | count | 1.89E-18    |
| ARL5A      | -0.9264438 | 0.2172948 | -4.2635  | 2.08E-05 | -1.202468168 | count | 0.4811456   |
| HOXA5      | -1.3396126 | 0.3918232 | -3.4189  | 0.000638 | -1.200205859 | count | 1           |
| PODXL      | -0.8518121 | 0.0912957 | -9.3303  | 2.10E-20 | -1.199571726 | count | 5.06E-16    |
| MAP3K5     | -1.2622981 | 0.2916614 | -4.328   | 1.56E-05 | -1.199084545 | count | 0.3612492   |
| DANT2      | -2.133355  | 0.6567664 | -3.2483  | 0.00117  | -1.199022106 | count | 1           |
| QPCTL      | -2.133355  | 0.6567664 | -3.2483  | 0.00117  | -1.199022106 | count | 1           |
| WIP1       | -1.0845472 | 0.2452369 | -4.4224  | 1.01E-05 | -1.197841926 | count | 0.2343806   |
| TNFRSF4    | -0.9216606 | 0.2468717 | -3.7334  | 0.000193 | -1.197415035 | count | 1           |
| SRRM3      | -1.9438334 | 0.5673827 | -3.426   | 0.000622 | -1.197065147 | count | 1           |
| KISS1      | -1.544087  | 0.8248706 | -1.8719  | 0.0613   | -1.190711968 | count | 1           |
| SMAD7      | -0.9641776 | 0.1799488 | -5.3581  | 9.10E-08 | -1.189914932 | count | 0.002140047 |
| LTC4S      | -0.8279616 | 0.0585566 | -14.1395 | 7.09E-44 | -1.186515492 | count | 1.72E-39    |
| HIPK2      | -0.907216  | 0.1641357 | -5.5272  | 3.56E-08 | -1.185387676 | count | 0.000839199 |
| GPRIN3     | -2.3835878 | 0.5051394 | -4.7187  | 2.49E-06 | -1.185085424 | count | 0.05807676  |
| ETV4       | -1.7910959 | 0.5952117 | -3.0092  | 0.00264  | -1.184818786 | count | 1           |
| AC007998.3 | -1.2941003 | 0.3985946 | -3.2467  | 0.00118  | -1.183068739 | count | 1           |
| MAP1A      | -1.9228761 | 0.7228042 | -2.6603  | 0.00785  | -1.182850367 | count | 1           |
| PKIA       | -1.2237605 | 0.4569983 | -2.6778  | 0.00745  | -1.180288039 | count | 1           |
| NMT2       | -0.9859914 | 0.2308083 | -4.2719  | 2.00E-05 | -1.179984151 | count | 0.46274     |
| MAST4      | -0.860159  | 0.1300813 | -6.6125  | 4.52E-11 | -1.179885573 | count | 1.08E-06    |
| SERPIN9    | -0.9019413 | 0.1579977 | -5.7086  | 1.26E-08 | -1.179468177 | count | 0.000297599 |
| SAMD14     | -1.4721491 | 0.4465776 | -3.2965  | 0.000991 | -1.177259436 | count | 1           |
| SEC31B     | -1.7760587 | 0.6133619 | -2.8956  | 0.00381  | -1.173756176 | count | 1           |
| SAMD11     | -1.5906974 | 0.613557  | -2.5926  | 0.00958  | -1.173213701 | count | 1           |
| BMPR2      | -0.82425   | 0.0725506 | -11.361  | 2.89E-29 | -1.171028692 | count | 6.99E-25    |
| IKZF4      | -1.5202739 | 0.4959507 | -3.0654  | 0.0022   | -1.170348416 | count | 1           |
| IDUA       | -0.9978446 | 0.2540496 | -3.9278  | 8.78E-05 | -1.167346292 | count | 1           |
| KIAA1147   | -1.0440687 | 0.237859  | -4.3894  | 1.18E-05 | -1.166736534 | count | 0.2735948   |
| AXL        | -2.8060277 | 0.7570103 | -3.7067  | 0.000214 | -1.165903814 | count | 1           |
| GPR161     | -1.1327661 | 0.2665952 | -4.249   | 2.22E-05 | -1.165629052 | count | 0.5134416   |
| TBC1D16    | -1.1198035 | 0.3283984 | -3.4099  | 0.000659 | -1.16450766  | count | 1           |
| THSD4      | -1.003232  | 0.2820808 | -3.5565  | 0.000382 | -1.163332279 | count | 1           |
| ERCC6      | -0.9312613 | 0.1931208 | -4.8222  | 1.50E-06 | -1.160933678 | count | 0.0350355   |
| DACH1      | -1.0600453 | 0.4224044 | -2.5096  | 0.0121   | -1.160686407 | count | 1           |
| CNNM2      | -1.3650456 | 0.4044046 | -3.3754  | 0.000747 | -1.160159316 | count | 1           |
| ST8SIA6    | -0.8368421 | 0.1503622 | -5.5655  | 2.86E-08 | -1.158938003 | count | 0.000674588 |
| RGN        | -1.7551323 | 0.491695  | -3.5696  | 0.000364 | -1.158337733 | count | 1           |
| ARHGAP4    | -1.1134188 | 0.2721021 | -4.0919  | 4.40E-05 | -1.157435247 | count | 1           |

|            |            |           |          |          |              |       |             |
|------------|------------|-----------|----------|----------|--------------|-------|-------------|
| CCL3L1     | -1.4467413 | 0.516423  | -2.8015  | 0.00512  | -1.154769824 | count | 1           |
| LAMA2      | -1.358203  | 0.5909296 | -2.2984  | 0.0216   | -1.153759925 | count | 1           |
| FCHSD1     | -1.2628526 | 0.496921  | -2.5414  | 0.0111   | -1.151995812 | count | 1           |
| MICAL1     | -1.3950844 | 0.497562  | -2.8038  | 0.00509  | -1.150522222 | count | 1           |
| ORMDL3     | -1.057743  | 0.3080003 | -3.4342  | 0.000603 | -1.148948974 | count | 1           |
| ABL2       | -0.8604713 | 0.1350647 | -6.3708  | 2.20E-10 | -1.14781115  | count | 5.22E-06    |
| AL359504.2 | -2.0474636 | 0.5954686 | -3.4384  | 0.000594 | -1.146604148 | count | 1           |
| LTB        | -1.4921447 | 0.7936783 | -1.88    | 0.0602   | -1.146282501 | count | 1           |
| CFH        | -0.8010207 | 0.0604349 | -13.2543 | 6.41E-39 | -1.144450484 | count | 1.55E-34    |
| AAK1       | -0.8254537 | 0.1163949 | -7.0918  | 1.67E-12 | -1.140554554 | count | 3.99E-08    |
| PLEKHA2    | -3.8896914 | 1.3282948 | -2.9283  | 0.00344  | -1.140517784 | count | 1           |
| PREX1      | -1.1851425 | 0.3877767 | -3.0563  | 0.00226  | -1.140120271 | count | 1           |
| SMIM3      | -1.4298462 | 0.4410271 | -3.2421  | 0.0012   | -1.139814498 | count | 1           |
| HSPA4L     | -1.0202144 | 0.3186418 | -3.2018  | 0.00138  | -1.138729777 | count | 1           |
| FADS1      | -1.1179202 | 0.2801731 | -3.9901  | 6.78E-05 | -1.135443881 | count | 1           |
| COL23A1    | -2.0264754 | 0.4203491 | -4.8209  | 1.51E-06 | -1.133674385 | count | 0.03526605  |
| CACNB2     | -2.71843   | 1.091867  | -2.4897  | 0.0128   | -1.13182184  | count | 1           |
| TNIK       | -2.71843   | 1.1108005 | -2.4473  | 0.0145   | -1.13182184  | count | 1           |
| AP001189.5 | -1.373936  | 0.5875441 | -2.3384  | 0.0194   | -1.1312477   | count | 1           |
| FKBP5      | -0.8246642 | 0.098347  | -8.3853  | 7.96E-17 | -1.128422271 | count | 1.91E-12    |
| ATP10A     | -2.7075019 | 0.8049438 | -3.3636  | 0.00078  | -1.127482142 | count | 1           |
| ANGPTL4    | -0.8785971 | 0.1878321 | -4.6776  | 3.04E-06 | -1.126790893 | count | 0.0708472   |
| EVA1A      | -1.8402547 | 0.5150772 | -3.5728  | 0.000359 | -1.126453554 | count | 1           |
| SLC46A1    | -1.2130161 | 0.4812961 | -2.5203  | 0.0118   | -1.12636073  | count | 1           |
| EFHB       | -1.612532  | 0.6925476 | -2.3284  | 0.02     | -1.126140804 | count | 1           |
| TNFSF13B   | -1.2116753 | 0.4984273 | -2.431   | 0.0151   | -1.125007032 | count | 1           |
| NQO1       | -0.8143971 | 0.1211223 | -6.7238  | 2.14E-11 | -1.124545202 | count | 5.09E-07    |
| DMD        | -1.7091035 | 0.4987554 | -3.4267  | 0.00062  | -1.124339813 | count | 1           |
| FAM171B    | -0.8720441 | 0.1630476 | -5.3484  | 9.60E-08 | -1.121107911 | count | 0.002257152 |
| ARSE       | -1.6052808 | 0.5980372 | -2.6842  | 0.00731  | -1.120452026 | count | 1           |
| SPDYA      | -2.2566785 | 0.719227  | -3.1376  | 0.00172  | -1.118813959 | count | 1           |
| PLA2R1     | -0.9144658 | 0.2942765 | -3.1075  | 0.00191  | -1.118185552 | count | 1           |
| C2orf88    | -2.0006555 | 0.6082236 | -3.2893  | 0.00102  | -1.117708591 | count | 1           |
| UQCC2      | -0.8178307 | 0.1197099 | -6.8318  | 1.03E-11 | -1.116503702 | count | 2.45E-07    |
| ANO8       | -1.4552057 | 0.5279959 | -2.7561  | 0.00589  | -1.11467054  | count | 1           |
| TMEM106C   | -0.8387613 | 0.1601354 | -5.2378  | 1.75E-07 | -1.113551604 | count | 0.00410865  |
| NPEPPS     | -0.8142268 | 0.1427315 | -5.7046  | 1.29E-08 | -1.11309311  | count | 0.000304672 |
| ARMCX2     | -0.9075581 | 0.2634812 | -3.4445  | 0.000581 | -1.112365108 | count | 1           |
| ALDOC      | -0.897957  | 0.2529095 | -3.5505  | 0.000391 | -1.110935361 | count | 1           |
| GOLT1A     | -2.239749  | 0.7063383 | -3.1709  | 0.00154  | -1.109811703 | count | 1           |
| DLX6-AS1   | -2.239749  | 0.73964   | -3.0282  | 0.00248  | -1.109811703 | count | 1           |
| HOXA7      | -2.239749  | 0.975255  | -2.2966  | 0.0217   | -1.109811703 | count | 1           |
| GPR34      | -2.239749  | 0.9996378 | -2.2406  | 0.0251   | -1.109811703 | count | 1           |
| LST1       | -1.6877288 | 0.4991653 | -3.3811  | 0.000732 | -1.108518245 | count | 1           |
| FILIP1     | -0.7932544 | 0.1131526 | -7.0105  | 2.97E-12 | -1.107503533 | count | 7.08E-08    |

|            |            |           |          |          |              |       |             |
|------------|------------|-----------|----------|----------|--------------|-------|-------------|
| SOX5       | -1.5101293 | 0.5032362 | -3.0008  | 0.00272  | -1.106963962 | count | 1           |
| WWTR1      | -0.7742585 | 0.0564629 | -13.7127 | 1.88E-41 | -1.106289852 | count | 4.56E-37    |
| LINC00092  | -2.6481246 | 0.6915824 | -3.8291  | 0.000131 | -1.103573388 | count | 1           |
| POMC       | -1.5053117 | 0.5297857 | -2.8414  | 0.00453  | -1.102999717 | count | 1           |
| FRMD6      | -1.0254258 | 0.2686129 | -3.8175  | 0.000138 | -1.10258395  | count | 1           |
| PFN2       | -0.8594213 | 0.2216518 | -3.8773  | 0.000108 | -1.10163321  | count | 1           |
| AC016394.1 | -1.2112088 | 0.4031385 | -3.0044  | 0.00268  | -1.100703548 | count | 1           |
| KIAA1549L  | -3.659084  | 1.2473433 | -2.9335  | 0.00338  | -1.100312954 | count | 1           |
| LRP3       | -1.675861  | 0.4778869 | -3.5068  | 0.000461 | -1.099725787 | count | 1           |
| IL13RA2    | -1.4361519 | 0.4598117 | -3.1233  | 0.00181  | -1.09836475  | count | 1           |
| TGM2       | -0.7791687 | 0.075382  | -10.3363 | 1.35E-24 | -1.098050234 | count | 3.26E-20    |
| NID2       | -1.4353588 | 0.5017536 | -2.8607  | 0.00426  | -1.097686076 | count | 1           |
| FBXO38     | -0.8882729 | 0.2560563 | -3.4691  | 0.00053  | -1.096047731 | count | 1           |
| APOD       | -0.7844744 | 0.2841828 | -2.7605  | 0.0058   | -1.095168045 | count | 1           |
| MIR155HG   | -1.0569349 | 0.3086854 | -3.424   | 0.000626 | -1.094947327 | count | 1           |
| P4HB       | -0.7722206 | 0.0646269 | -11.9489 | 4.02E-32 | -1.094562019 | count | 9.73E-28    |
| CACNB4     | -2.6251887 | 0.8037821 | -3.266   | 0.0011   | -1.094191344 | count | 1           |
| TPPP3      | -0.9593608 | 0.2931663 | -3.2724  | 0.00108  | -1.093421013 | count | 1           |
| RFLNB      | -0.8061959 | 0.1623806 | -4.9649  | 7.29E-07 | -1.091765939 | count | 0.017057871 |
| MYOM3      | -2.2017886 | 0.6712697 | -3.28    | 0.00105  | -1.089498961 | count | 1           |
| EBF4       | -1.488551  | 0.5082151 | -2.929   | 0.00343  | -1.089207169 | count | 1           |
| SYNPO      | -0.78058   | 0.0983344 | -7.938   | 2.96E-15 | -1.089136571 | count | 7.09E-11    |
| HOXA2      | -1.3723858 | 0.4591794 | -2.9888  | 0.00283  | -1.08896645  | count | 1           |
| ALPL       | -1.1544014 | 0.4585265 | -2.5176  | 0.0119   | -1.088454092 | count | 1           |
| ATP2A3     | -1.0047934 | 0.245046  | -4.1004  | 4.24E-05 | -1.088231991 | count | 0.9774472   |
| INSIG2     | -0.8092595 | 0.1499008 | -5.3986  | 7.29E-08 | -1.085548856 | count | 0.001715337 |
| ROBO3      | -0.8461744 | 0.1870559 | -4.5236  | 6.33E-06 | -1.08426153  | count | 0.14718516  |
| OAZ1       | -0.7541141 | 0.0375455 | -20.0853 | 7.27E-84 | -1.083807217 | count | 1.77E-79    |
| METTTL25   | -0.8349636 | 0.1886183 | -4.4267  | 9.94E-06 | -1.082546263 | count | 0.23068752  |
| LRIG1      | -0.7990371 | 0.15921   | -5.0188  | 5.53E-07 | -1.081952913 | count | 0.012946836 |
| AC010737.1 | -1.3607036 | 0.5292531 | -2.571   | 0.0102   | -1.078634652 | count | 1           |
| FLRT3      | -1.93739   | 0.6941354 | -2.7911  | 0.00529  | -1.0783364   | count | 1           |
| CPEB4      | -0.7881083 | 0.1218369 | -6.4686  | 1.17E-10 | -1.078183917 | count | 2.78E-06    |
| TXNDC5     | -1.6437881 | 0.543684  | -3.0234  | 0.00252  | -1.075940445 | count | 1           |
| AL121655.1 | -1.643455  | 0.7733203 | -2.1252  | 0.0337   | -1.075693241 | count | 1           |
| EFS        | -1.643455  | 0.9971897 | -1.6481  | 0.0994   | -1.075693241 | count | 1           |
| IGHG3      | -1.932608  | 0.3066238 | -6.3029  | 3.39E-10 | -1.075346725 | count | 8.04E-06    |
| TDRD9      | -1.470908  | 0.866491  | -1.6975  | 0.0897   | -1.074688769 | count | 1           |
| GSTT2B     | -0.7893691 | 0.1510407 | -5.2262  | 1.86E-07 | -1.074292329 | count | 0.00436635  |
| LIMCH1     | -0.7620506 | 0.0974807 | -7.8175  | 7.60E-15 | -1.072839604 | count | 1.82E-10    |
| MYO9B      | -0.8574069 | 0.1905419 | -4.4998  | 7.08E-06 | -1.072781411 | count | 0.1645038   |
| ARSJ       | -1.4652121 | 0.4228582 | -3.465   | 0.000538 | -1.070001267 | count | 1           |
| TRAM2      | -0.8690881 | 0.2155738 | -4.0315  | 5.69E-05 | -1.069083457 | count | 1           |
| ITSN2      | -0.7679895 | 0.1106183 | -6.9427  | 4.78E-12 | -1.068283907 | count | 1.14E-07    |
| ZSCAN31    | -0.8624728 | 0.2691179 | -3.2048  | 0.00137  | -1.068141262 | count | 1           |



|            |            |           |          |          |              |       |             |
|------------|------------|-----------|----------|----------|--------------|-------|-------------|
| GFPT1      | -0.8725186 | 0.2312253 | -3.7735  | 0.000164 | -1.068057032 | count | 1           |
| RAB15      | -1.2321409 | 0.4964862 | -2.4817  | 0.0131   | -1.066953142 | count | 1           |
| VASH1      | -0.8444872 | 0.1917321 | -4.4045  | 1.10E-05 | -1.065823334 | count | 0.255101    |
| MEGF6      | -0.8932502 | 0.218626  | -4.0857  | 4.52E-05 | -1.065037553 | count | 1           |
| FOLR2      | -2.1559992 | 0.7706584 | -2.7976  | 0.00518  | -1.064775705 | count | 1           |
| LAIR1      | -2.1559992 | 0.8749808 | -2.4641  | 0.0138   | -1.064775705 | count | 1           |
| FUT10      | -0.8895364 | 0.2762975 | -3.2195  | 0.0013   | -1.064105405 | count | 1           |
| TMEM87B    | -0.7931426 | 0.1582037 | -5.0134  | 5.68E-07 | -1.063627382 | count | 0.01329688  |
| ARHGEF40   | -0.9553095 | 0.3316785 | -2.8802  | 0.004    | -1.062667834 | count | 1           |
| TP53TG3D   | -1.2984865 | 0.5444649 | -2.3849  | 0.0172   | -1.062551323 | count | 1           |
| FZD8       | -0.8209321 | 0.1934082 | -4.2446  | 2.26E-05 | -1.061618714 | count | 0.5226024   |
| SLC22A23   | -1.1487319 | 0.4423896 | -2.5967  | 0.00946  | -1.061544771 | count | 1           |
| AP001527.2 | -1.6242765 | 0.5949209 | -2.7302  | 0.00637  | -1.061456429 | count | 1           |
| HACD1      | -0.8480563 | 0.2155505 | -3.9344  | 8.55E-05 | -1.060756807 | count | 1           |
| SDSL       | -0.9641191 | 0.3241556 | -2.9742  | 0.00296  | -1.058073578 | count | 1           |
| SELENBP1   | -0.80016   | 0.1802999 | -4.4379  | 9.44E-06 | -1.057836574 | count | 0.21914016  |
| ANK1       | -1.1916643 | 0.3973761 | -2.9988  | 0.00273  | -1.055924306 | count | 1           |
| HEG1       | -0.7415028 | 0.073966  | -10.0249 | 2.94E-23 | -1.055373515 | count | 7.09E-19    |
| MICAL2     | -0.9205919 | 0.2731859 | -3.3698  | 0.000762 | -1.052841661 | count | 1           |
| GATA6      | -0.7721017 | 0.1307792 | -5.9039  | 3.98E-09 | -1.051850223 | count | 9.42E-05    |
| FSTL1      | -0.7611862 | 0.1290676 | -5.8976  | 4.14E-09 | -1.049481307 | count | 9.79E-05    |
| IGIP       | -1.051082  | 0.4357839 | -2.4119  | 0.0159   | -1.048920056 | count | 1           |
| CEMIP      | -2.5161593 | 0.5755053 | -4.3721  | 1.28E-05 | -1.048523004 | count | 0.2966528   |
| DYSF       | -0.9307028 | 0.2743374 | -3.3925  | 0.000702 | -1.047112692 | count | 1           |
| SEL1L3     | -0.8987252 | 0.2397574 | -3.7485  | 0.000182 | -1.046758485 | count | 1           |
| CSGALNACT1 | -0.7462964 | 0.1075288 | -6.9404  | 4.85E-12 | -1.044556389 | count | 1.16E-07    |
| KCNK15-AS1 | -2.1186365 | 0.8490478 | -2.4953  | 0.0126   | -1.044435266 | count | 1           |
| IFI6       | -0.7313753 | 0.0819072 | -8.9293  | 7.65E-19 | -1.04426154  | count | 1.84E-14    |
| FHL2       | -0.8678843 | 0.2122036 | -4.0899  | 4.44E-05 | -1.044089543 | count | 1           |
| CAPS2      | -1.1538997 | 0.4407373 | -2.6181  | 0.00889  | -1.043913765 | count | 1           |
| IFI27L2    | -0.772272  | 0.1289412 | -5.9893  | 2.38E-09 | -1.043646168 | count | 5.64E-05    |
| CERCAM     | -0.8782226 | 0.2464698 | -3.5632  | 0.000373 | -1.042704059 | count | 1           |
| CHST3      | -0.925624  | 0.2680035 | -3.4538  | 0.000561 | -1.041116821 | count | 1           |
| SMOX       | -1.0280676 | 0.2734143 | -3.7601  | 0.000173 | -1.037982337 | count | 1           |
| UCHL1      | -1.0865869 | 0.4078459 | -2.6642  | 0.00776  | -1.037900992 | count | 1           |
| SOX8       | -1.7039841 | 0.6661391 | -2.558   | 0.0106   | -1.032494808 | count | 1           |
| DIRAS3     | -1.5849161 | 0.6022819 | -2.6315  | 0.00855  | -1.032215143 | count | 1           |
| TMEM158    | -1.58412   | 0.608591  | -2.6029  | 0.00929  | -1.031623526 | count | 1           |
| SLC6A8     | -1.2624907 | 0.4503645 | -2.8033  | 0.00509  | -1.029838959 | count | 1           |
| COL5A2     | -1.581514  | 0.319729  | -4.9464  | 8.01E-07 | -1.029686501 | count | 0.018736992 |
| TSPAN15    | -0.7993719 | 0.1881304 | -4.249   | 2.22E-05 | -1.029516306 | count | 0.5134416   |
| DKK3       | -0.7966297 | 0.1639681 | -4.8584  | 1.25E-06 | -1.027140293 | count | 0.02921375  |
| PCDH17     | -0.75066   | 0.1237775 | -6.0646  | 1.50E-09 | -1.025323363 | count | 3.55E-05    |
| OGFOD2     | -1.0141755 | 0.3165195 | -3.2041  | 0.00137  | -1.022956663 | count | 1           |
| ALOX5AP    | -1.2971569 | 0.7091812 | -1.8291  | 0.0675   | -1.022498765 | count | 1           |

|            |            |           |         |          |              |       |             |
|------------|------------|-----------|---------|----------|--------------|-------|-------------|
| TOX        | -1.57092   | 0.4415472 | -3.5578 | 0.00038  | -1.021812511 | count | 1           |
| EPB41L1    | -1.0880229 | 0.4043829 | -2.6906 | 0.00718  | -1.020655668 | count | 1           |
| ITGB3      | -0.9878321 | 0.3685489 | -2.6803 | 0.0074   | -1.018737698 | count | 1           |
| ITPR2      | -0.7243848 | 0.0930046 | -7.7887 | 9.50E-15 | -1.018619102 | count | 2.27E-10    |
| CDC45      | -1.6817738 | 0.69668   | -2.414  | 0.0158   | -1.017106418 | count | 1           |
| C1QTNF4    | -2.4418076 | 0.7227356 | -3.3786 | 0.000739 | -1.016421647 | count | 1           |
| LINC01943  | -2.0665611 | 0.6423058 | -3.2174 | 0.00131  | -1.015856302 | count | 1           |
| FXVD6      | -0.7315508 | 0.1063955 | -6.8758 | 7.59E-12 | -1.015796872 | count | 1.81E-07    |
| ITLN2      | -3.2660388 | 1.0997539 | -2.9698 | 0.00301  | -1.015541484 | count | 1           |
| ZNF365     | -3.2660388 | 1.0997539 | -2.9698 | 0.00301  | -1.015541484 | count | 1           |
| MMP19      | -3.2660388 | 1.1705155 | -2.7903 | 0.0053   | -1.015541484 | count | 1           |
| IDS        | -0.7336527 | 0.1089355 | -6.7347 | 1.99E-11 | -1.015456186 | count | 4.74E-07    |
| FAM102B    | -0.8766989 | 0.3347496 | -2.619  | 0.00887  | -1.015400233 | count | 1           |
| NCS1       | -2.4391696 | 0.8787126 | -2.7758 | 0.00554  | -1.015269264 | count | 1           |
| FCN1       | -1.83566   | 0.7180233 | -2.5565 | 0.0106   | -1.014401045 | count | 1           |
| PRRX2      | -1.83566   | 0.7328722 | -2.5047 | 0.0123   | -1.014401045 | count | 1           |
| NUDT4      | -0.7395233 | 0.1191165 | -6.2084 | 6.16E-10 | -1.013887698 | count | 1.46E-05    |
| SHF        | -0.8712391 | 0.2733956 | -3.1867 | 0.00145  | -1.01341185  | count | 1           |
| AF127577.4 | -1.468688  | 0.6395331 | -2.2965 | 0.0217   | -1.013159225 | count | 1           |
| KIAA1211L  | -0.7687669 | 0.1892064 | -4.0631 | 4.98E-05 | -1.011020733 | count | 1           |
| C21orf2    | -0.8458257 | 0.2251117 | -3.7574 | 0.000175 | -1.009932955 | count | 1           |
| GPRC5A     | -0.752438  | 0.1738133 | -4.329  | 1.55E-05 | -1.009797158 | count | 0.358949    |
| PCDHGB7    | -1.1188848 | 0.431945  | -2.5903 | 0.00964  | -1.009303037 | count | 1           |
| SHISA3     | -1.1714344 | 0.5465594 | -2.1433 | 0.0322   | -1.009139611 | count | 1           |
| S100A3     | -1.0578905 | 0.3331409 | -3.1755 | 0.00151  | -1.00824149  | count | 1           |
| CALU       | -0.7150672 | 0.0877502 | -8.1489 | 5.50E-16 | -1.005934062 | count | 1.32E-11    |
| ANKRD44    | -1.1145791 | 0.3924224 | -2.8403 | 0.00454  | -1.005052315 | count | 1           |
| ZDHC2      | -0.7407348 | 0.1384771 | -5.3492 | 9.56E-08 | -1.003213139 | count | 0.002247843 |
| ZNF155     | -1.0905408 | 0.3631334 | -3.0031 | 0.0027   | -1.003061041 | count | 1           |
| GLIS2      | -1.1645223 | 0.3774905 | -3.0849 | 0.00206  | -1.002569641 | count | 1           |
| AL031666.1 | -1.1642356 | 0.5970156 | -1.9501 | 0.0513   | -1.00229718  | count | 1           |
| SMARCD3    | -1.380999  | 0.6303786 | -2.1907 | 0.0286   | -1.000753076 | count | 1           |
| CLIP4      | -2.396028  | 0.8046472 | -2.9777 | 0.00293  | -0.996296942 | count | 1           |
| AC092171.4 | -2.396028  | 0.8046472 | -2.9777 | 0.00293  | -0.996296942 | count | 1           |
| XYLT1      | -2.396028  | 0.8494419 | -2.8207 | 0.00483  | -0.996296942 | count | 1           |
| AC080038.1 | -2.396028  | 0.9200335 | -2.6043 | 0.00926  | -0.996296942 | count | 1           |
| DEPP1      | -0.6955023 | 0.0948788 | -7.3304 | 3.00E-13 | -0.993545947 | count | 7.17E-09    |
| SGO1       | -3.176456  | 1.165887  | -2.7245 | 0.00648  | -0.993204936 | count | 1           |
| PDE3B      | -2.0244748 | 0.8794555 | -2.302  | 0.0214   | -0.992582926 | count | 1           |
| PCDHGA11   | -2.0244748 | 1.1536089 | -1.7549 | 0.0794   | -0.992582926 | count | 1           |
| CSRNP3     | -2.0241682 | 0.7787193 | -2.5994 | 0.00939  | -0.992412874 | count | 1           |
| AC018797.2 | -1.2627257 | 0.5092514 | -2.4796 | 0.0132   | -0.992145709 | count | 1           |
| KANK2      | -0.8401352 | 0.3351745 | -2.5066 | 0.0122   | -0.992055648 | count | 1           |
| LINC00167  | -1.7979539 | 0.8143654 | -2.2078 | 0.0273   | -0.990551433 | count | 1           |
| PDE4DIP    | -0.862376  | 0.2733268 | -3.1551 | 0.00162  | -0.988425834 | count | 1           |

|            |            |           |         |          |              |       |             |
|------------|------------|-----------|---------|----------|--------------|-------|-------------|
| POMT2      | -1.0385761 | 0.4418157 | -2.3507 | 0.0188   | -0.988310768 | count | 1           |
| TUBA1C     | -0.7038795 | 0.0902981 | -7.7951 | 9.05E-15 | -0.988114825 | count | 2.17E-10    |
| SLC39A7    | -0.7155957 | 0.1159259 | -6.1729 | 7.69E-10 | -0.988109298 | count | 1.82E-05    |
| HNRNPA1P48 | -0.8460971 | 0.2667936 | -3.1714 | 0.00153  | -0.987280212 | count | 1           |
| FCN3       | -1.78915   | 0.508464  | -3.5187 | 0.000441 | -0.984973602 | count | 1           |
| Z99289.1   | -3.1379686 | 1.469539  | -2.1353 | 0.0328   | -0.983260508 | count | 1           |
| IL1B       | -2.3601976 | 0.7306727 | -3.2302 | 0.00125  | -0.980366485 | count | 1           |
| TTC9       | -0.9632896 | 0.3219767 | -2.9918 | 0.0028   | -0.980236786 | count | 1           |
| SPARC      | -0.6867082 | 0.0702816 | -9.7708 | 3.42E-22 | -0.978664802 | count | 8.24E-18    |
| PTPN3      | -2.3551017 | 0.6414156 | -3.6717 | 0.000245 | -0.978088394 | count | 1           |
| CACNA2D2   | -2.3551017 | 0.6545596 | -3.598  | 0.000326 | -0.978088394 | count | 1           |
| WFDC1      | -2.3551017 | 0.7518422 | -3.1324 | 0.00175  | -0.978088394 | count | 1           |
| FADS3      | -0.7239299 | 0.1436724 | -5.0388 | 4.99E-07 | -0.977529415 | count | 0.011687079 |
| RETREG1    | -0.9602518 | 0.4152353 | -2.3125 | 0.0208   | -0.976930731 | count | 1           |
| AC244090.1 | -0.7827528 | 0.232302  | -3.3695 | 0.000763 | -0.976892388 | count | 1           |
| N4BP2      | -0.8994971 | 0.2879715 | -3.1236 | 0.00181  | -0.975884045 | count | 1           |
| S1PR2      | -1.5063475 | 0.5572471 | -2.7032 | 0.00691  | -0.973811599 | count | 1           |
| PRKG1      | -1.50617   | 0.620876  | -2.4259 | 0.0153   | -0.973679584 | count | 1           |
| KCTD11     | -1.1333411 | 0.4770386 | -2.3758 | 0.0176   | -0.972969189 | count | 1           |
| PKD1       | -0.7931206 | 0.1921509 | -4.1276 | 3.77E-05 | -0.972847818 | count | 0.8695882   |
| FAM149B1   | -1.0218985 | 0.3802674 | -2.6873 | 0.00725  | -0.971123188 | count | 1           |
| CFB        | -1.1035644 | 0.3958087 | -2.7881 | 0.00534  | -0.970469968 | count | 1           |
| TMED3      | -0.7041181 | 0.1356466 | -5.1908 | 2.25E-07 | -0.967134316 | count | 0.005280525 |
| ACVRL1     | -0.691048  | 0.0837697 | -8.2494 | 2.43E-16 | -0.966550582 | count | 5.83E-12    |
| LY75       | -0.9212629 | 0.3431894 | -2.6844 | 0.00731  | -0.966001796 | count | 1           |
| TNFRSF9    | -3.0643495 | 1.206017  | -2.5409 | 0.0111   | -0.963658549 | count | 1           |
| DOK5       | -0.8162344 | 0.259889  | -3.1407 | 0.0017   | -0.96275082  | count | 1           |
| CXCL2      | -0.6670304 | 0.1221032 | -5.4628 | 5.10E-08 | -0.960149548 | count | 0.001201254 |
| GPX3       | -0.7270991 | 0.1508024 | -4.8215 | 1.50E-06 | -0.959705316 | count | 0.0350355   |
| AAMDC      | -0.6792418 | 0.0784316 | -8.6603 | 7.86E-18 | -0.959594929 | count | 1.89E-13    |
| BNIP3L     | -0.6771566 | 0.0763242 | -8.8721 | 1.26E-18 | -0.959478343 | count | 3.03E-14    |
| DAG1       | -0.7493236 | 0.1797903 | -4.1678 | 3.17E-05 | -0.95746838  | count | 0.7318579   |
| FAM198B    | -0.6750793 | 0.0824648 | -8.1863 | 4.07E-16 | -0.956886004 | count | 9.76E-12    |
| SULT1A2    | -3.039434  | 1.0347314 | -2.9374 | 0.00334  | -0.956852525 | count | 1           |
| SRGAP3     | -3.039434  | 1.0611723 | -2.8642 | 0.00421  | -0.956852525 | count | 1           |
| C3         | -1.1153631 | 0.5987498 | -1.8628 | 0.0626   | -0.955932631 | count | 1           |
| AL118508.1 | -1.958514  | 0.4897108 | -3.9993 | 6.52E-05 | -0.955831101 | count | 1           |
| AC090152.1 | -1.958318  | 0.5819206 | -3.3653 | 0.000775 | -0.955721855 | count | 1           |
| MLLT11     | -1.0050571 | 0.3820889 | -2.6304 | 0.00858  | -0.953788907 | count | 1           |
| C6orf48    | -0.6859038 | 0.0899047 | -7.6292 | 3.23E-14 | -0.953595601 | count | 7.73E-10    |
| ROM1       | -0.718906  | 0.1493251 | -4.8144 | 1.56E-06 | -0.953324886 | count | 0.03642912  |
| LRRC61     | -3.0254208 | 1.0711582 | -2.8244 | 0.00477  | -0.952987364 | count | 1           |
| LTBP3      | -0.6870995 | 0.1167307 | -5.8862 | 4.43E-09 | -0.952709673 | count | 0.000104792 |
| CLMP       | -1.2655203 | 0.7753168 | -1.6323 | 0.103    | -0.952687369 | count | 1           |
| CHD3       | -0.7491807 | 0.1798944 | -4.1646 | 3.22E-05 | -0.951799372 | count | 0.7432726   |

|            |            |           |          |          |              |       |             |
|------------|------------|-----------|----------|----------|--------------|-------|-------------|
| FUT8-AS1   | -1.476162  | 0.5044867 | -2.9261  | 0.00346  | -0.951383318 | count | 1           |
| MLEC       | -0.6887146 | 0.1123357 | -6.1309  | 9.99E-10 | -0.951361779 | count | 2.37E-05    |
| GAS6       | -0.6642353 | 0.0640808 | -10.3656 | 1.00E-24 | -0.951300975 | count | 2.41E-20    |
| TRNP1      | -3.011875  | 0.7757211 | -3.8827  | 0.000106 | -0.9492247   | count | 1           |
| SLC2A6     | -0.9984442 | 0.3285482 | -3.039   | 0.0024   | -0.946988812 | count | 1           |
| AL136038.3 | -1.2104055 | 0.5077291 | -2.384   | 0.0172   | -0.946138017 | count | 1           |
| LRRK2      | -0.7942152 | 0.2618406 | -3.0332  | 0.00244  | -0.94611507  | count | 1           |
| AC112229.3 | -1.104815  | 0.5834631 | -1.8935  | 0.0584   | -0.945947751 | count | 1           |
| NDUFA4L2   | -1.3139369 | 0.6755627 | -1.945   | 0.0519   | -0.945747806 | count | 1           |
| LDLRAP1    | -0.9212537 | 0.2451718 | -3.7576  | 0.000175 | -0.945625089 | count | 1           |
| RBMS3      | -0.6765346 | 0.0987258 | -6.8527  | 8.90E-12 | -0.945011401 | count | 2.12E-07    |
| AEBP1      | -0.8385586 | 0.2576542 | -3.2546  | 0.00115  | -0.944263456 | count | 1           |
| CALCRL     | -0.6567321 | 0.0485112 | -13.5377 | 1.78E-40 | -0.943794268 | count | 4.31E-36    |
| PTK7       | -1.1653939 | 0.4328598 | -2.6923  | 0.00714  | -0.941919242 | count | 1           |
| MAPK10     | -2.2730182 | 0.7472289 | -3.0419  | 0.00237  | -0.940991526 | count | 1           |
| SNX24      | -0.7592742 | 0.2108242 | -3.6015  | 0.000322 | -0.94093622  | count | 1           |
| CCL4       | -0.738671  | 0.2194906 | -3.3654  | 0.000775 | -0.940898066 | count | 1           |
| NKG7       | -1.2490732 | 0.5555509 | -2.2484  | 0.0246   | -0.938707534 | count | 1           |
| RNASET2    | -0.712627  | 0.1794557 | -3.971   | 7.34E-05 | -0.93816962  | count | 1           |
| COL13A1    | -1.5664803 | 0.5382291 | -2.9104  | 0.00364  | -0.937081062 | count | 1           |
| MXD4       | -0.6725574 | 0.1063967 | -6.3212  | 3.02E-10 | -0.936805132 | count | 7.17E-06    |
| AC012510.1 | -2.2599244 | 0.8421278 | -2.6836  | 0.00733  | -0.935007394 | count | 1           |
| AC006273.1 | -2.2599244 | 1.0402659 | -2.1724  | 0.0299   | -0.935007394 | count | 1           |
| EDIL3      | -0.7935784 | 0.2032354 | -3.9047  | 9.66E-05 | -0.935007362 | count | 1           |
| GZMA       | -1.7096357 | 0.5328626 | -3.2084  | 0.00135  | -0.934471619 | count | 1           |
| PTPRB      | -0.6562239 | 0.069424  | -9.4524  | 6.82E-21 | -0.933391585 | count | 1.64E-16    |
| GINS4      | -1.1557013 | 0.4793139 | -2.4112  | 0.016    | -0.933175018 | count | 1           |
| PIGG       | -0.7716381 | 0.2374544 | -3.2496  | 0.00117  | -0.933011548 | count | 1           |
| NLGN2      | -1.0413246 | 0.3760252 | -2.7693  | 0.00566  | -0.932936405 | count | 1           |
| PANK1      | -1.4502248 | 0.7427684 | -1.9525  | 0.051    | -0.932125064 | count | 1           |
| PLXNA1     | -1.4498463 | 0.5408869 | -2.6805  | 0.00739  | -0.931844106 | count | 1           |
| RBMS3-AS3  | -0.8821674 | 0.2886596 | -3.0561  | 0.00226  | -0.931523422 | count | 1           |
| LINC01759  | -1.5580992 | 0.6636454 | -2.3478  | 0.019    | -0.931261024 | count | 1           |
| CDCA7L     | -1.5580992 | 0.6636454 | -2.3478  | 0.019    | -0.931261024 | count | 1           |
| LINC01063  | -1.5580992 | 0.761531  | -2.046   | 0.0409   | -0.931261024 | count | 1           |
| AC048382.5 | -1.914284  | 0.6543471 | -2.9255  | 0.00347  | -0.931026098 | count | 1           |
| RNF166     | -0.7721652 | 0.2269057 | -3.403   | 0.000676 | -0.930898524 | count | 1           |
| CXCL12     | -0.6591128 | 0.1220928 | -5.3985  | 7.29E-08 | -0.927509589 | count | 0.001715337 |
| NUCB2      | -0.6473234 | 0.053079  | -12.1955 | 2.33E-33 | -0.92586969  | count | 5.64E-29    |
| NME9       | -1.546602  | 0.6112628 | -2.5302  | 0.0115   | -0.923277912 | count | 1           |
| AC092807.3 | -1.546602  | 0.9393492 | -1.6465  | 0.0998   | -0.923277912 | count | 1           |
| HNMT       | -0.8461215 | 0.4113867 | -2.0568  | 0.0398   | -0.921975725 | count | 1           |
| RASD1      | -0.6972618 | 0.2187419 | -3.1876  | 0.00145  | -0.921019528 | count | 1           |
| TCTEX1D4   | -1.896283  | 0.8748868 | -2.1675  | 0.0303   | -0.920898839 | count | 1           |
| EDDM13     | -1.896283  | 0.9255849 | -2.0487  | 0.0406   | -0.920898839 | count | 1           |

|            |            |           |          |          |              |       |             |
|------------|------------|-----------|----------|----------|--------------|-------|-------------|
| PDGFA      | -0.6748297 | 0.1325706 | -5.0903  | 3.81E-07 | -0.920477033 | count | 0.008929116 |
| GATB       | -0.838437  | 0.3234159 | -2.5924  | 0.00958  | -0.919910405 | count | 1           |
| MIAT       | -1.225546  | 0.3668177 | -3.341   | 0.000846 | -0.918737651 | count | 1           |
| ISG15      | -0.6470306 | 0.0968118 | -6.6834  | 2.81E-11 | -0.917658916 | count | 6.69E-07    |
| GALNT2     | -0.6820767 | 0.1555089 | -4.3861  | 1.20E-05 | -0.915915931 | count | 0.278184    |
| MS4A4A     | -2.8935491 | 1.0825087 | -2.673   | 0.00756  | -0.915291661 | count | 1           |
| LINC01637  | -2.8935491 | 1.3850298 | -2.0892  | 0.0368   | -0.915291661 | count | 1           |
| ARFGAP1    | -0.8398488 | 0.26609   | -3.1563  | 0.00162  | -0.91477075  | count | 1           |
| CDKL5      | -0.7929415 | 0.2899372 | -2.7349  | 0.00628  | -0.914437482 | count | 1           |
| AC004846.1 | -1.5320307 | 0.6564508 | -2.3338  | 0.0197   | -0.913162075 | count | 1           |
| ACTA2      | -0.7490515 | 0.3477033 | -2.1543  | 0.0313   | -0.912438121 | count | 1           |
| ENGASE     | -0.9989545 | 0.3937513 | -2.537   | 0.0112   | -0.911501006 | count | 1           |
| C19orf18   | -1.1698731 | 0.5710618 | -2.0486  | 0.0406   | -0.910613299 | count | 1           |
| MON1A      | -0.8626196 | 0.2925778 | -2.9483  | 0.00322  | -0.909637875 | count | 1           |
| B3GNT7     | -1.2685055 | 0.6080415 | -2.0862  | 0.0371   | -0.908600777 | count | 1           |
| SLFN12     | -0.7185466 | 0.1750895 | -4.1039  | 4.18E-05 | -0.907683573 | count | 0.9637408   |
| HIP1R      | -0.7395474 | 0.2055585 | -3.5977  | 0.000327 | -0.907419307 | count | 1           |
| GNG2       | -1.8701451 | 0.9112707 | -2.0522  | 0.0402   | -0.906166046 | count | 1           |
| JAG1       | -0.6541201 | 0.1310124 | -4.9928  | 6.32E-07 | -0.905988876 | count | 0.01479196  |
| PIH1D2     | -0.867158  | 0.3678185 | -2.3576  | 0.0185   | -0.905809011 | count | 1           |
| MTUS1      | -0.630347  | 0.0471296 | -13.3748 | 1.41E-39 | -0.904786879 | count | 3.42E-35    |
| KCTD2      | -0.7848863 | 0.2880607 | -2.7247  | 0.00648  | -0.904754486 | count | 1           |
| CNR1       | -0.9711322 | 0.3738367 | -2.5977  | 0.00943  | -0.902009332 | count | 1           |
| AC008915.2 | -0.9252394 | 0.4583934 | -2.0184  | 0.0436   | -0.901296391 | count | 1           |
| NOS3       | -0.6636381 | 0.123364  | -5.3795  | 8.09E-08 | -0.900228978 | count | 0.001903092 |
| ADAMTS6    | -0.7842625 | 0.3075879 | -2.5497  | 0.0108   | -0.899630492 | count | 1           |
| COL27A1    | -1.857404  | 0.6688916 | -2.7768  | 0.00553  | -0.89897303  | count | 1           |
| PKIG       | -0.6339859 | 0.078786  | -8.0469  | 1.25E-15 | -0.898811468 | count | 3.00E-11    |
| NIPAL3     | -0.7327075 | 0.2096982 | -3.4941  | 0.000483 | -0.898774859 | count | 1           |
| ASPHD2     | -1.2553099 | 0.58127   | -2.1596  | 0.0309   | -0.897833466 | count | 1           |
| RRAD       | -0.8436989 | 0.4486008 | -1.8807  | 0.0601   | -0.896744129 | count | 1           |
| ZNF550     | -1.0796482 | 0.405417  | -2.6631  | 0.00779  | -0.894749328 | count | 1           |
| AGPS       | -0.6884403 | 0.2069593 | -3.3265  | 0.000891 | -0.894704275 | count | 1           |
| GPR173     | -1.3974783 | 0.659286  | -2.1197  | 0.0341   | -0.893019466 | count | 1           |
| NGRN       | -0.7818953 | 0.2511223 | -3.1136  | 0.00187  | -0.892262865 | count | 1           |
| NAGLU      | -0.7326796 | 0.2249438 | -3.2572  | 0.00114  | -0.891871914 | count | 1           |
| CHPF2      | -0.7493975 | 0.2335141 | -3.2092  | 0.00135  | -0.890840258 | count | 1           |
| ASPHD1     | -1.640394  | 0.8270227 | -1.9835  | 0.0474   | -0.890382147 | count | 1           |
| ZNF703     | -2.80984   | 0.6978189 | -4.0266  | 5.81E-05 | -0.890156    | count | 1           |
| TMEM47     | -0.6578879 | 0.13041   | -5.0448  | 4.84E-07 | -0.890101721 | count | 0.011336248 |
| MFGE8      | -0.6438726 | 0.1111869 | -5.7909  | 7.79E-09 | -0.889856115 | count | 0.000184101 |
| SCN2A      | -2.1621765 | 0.7655635 | -2.8243  | 0.00477  | -0.88981593  | count | 1           |
| PCDH11Y    | -2.1621765 | 0.81843   | -2.6419  | 0.00829  | -0.88981593  | count | 1           |
| AC139795.3 | -1.3913671 | 0.6382535 | -2.18    | 0.0293   | -0.888495156 | count | 1           |
| TRAF1      | -1.4954633 | 0.5769412 | -2.5921  | 0.00959  | -0.887790305 | count | 1           |

|            |            |           |          |           |              |       |             |
|------------|------------|-----------|----------|-----------|--------------|-------|-------------|
| BST2       | -0.6167706 | 0.0532571 | -11.581  | 2.55E-30  | -0.88673104  | count | 6.17E-26    |
| FTL        | -0.6139408 | 0.0261994 | -23.4334 | 6.53E-111 | -0.884983876 | count | 1.59E-106   |
| SLC11A2    | -0.7645686 | 0.2558726 | -2.9881  | 0.00283   | -0.884474881 | count | 1           |
| PDGFB      | -0.6677254 | 0.1515135 | -4.407   | 1.09E-05  | -0.883248071 | count | 0.2527928   |
| ARSA       | -0.69934   | 0.1997851 | -3.5005  | 0.000472  | -0.881373751 | count | 1           |
| AIF1L      | -0.6726299 | 0.1489807 | -4.5149  | 6.60E-06  | -0.879537612 | count | 0.1534038   |
| SFXN1      | -0.7240866 | 0.2231811 | -3.2444  | 0.00119   | -0.878685194 | count | 1           |
| AP001453.2 | -1.177834  | 0.530956  | -2.2183  | 0.0266    | -0.878354194 | count | 1           |
| AC093677.2 | -0.9031551 | 0.4080103 | -2.2136  | 0.0269    | -0.878142747 | count | 1           |
| ITPR3      | -0.7559924 | 0.2757276 | -2.7418  | 0.00615   | -0.878078209 | count | 1           |
| EHD1       | -0.7060819 | 0.2111073 | -3.3447  | 0.000835  | -0.876930865 | count | 1           |
| AC009962.1 | -1.294215  | 0.5141651 | -2.5171  | 0.0119    | -0.876538813 | count | 1           |
| EPB41L2    | -0.6411471 | 0.1395342 | -4.5949  | 4.52E-06  | -0.873827153 | count | 0.10521656  |
| SLC7A8     | -1.3712387 | 0.3647299 | -3.7596  | 0.000174  | -0.873604802 | count | 1           |
| CCDC91     | -0.6767167 | 0.1652912 | -4.0941  | 4.36E-05  | -0.871587766 | count | 1           |
| PHF19      | -0.7280464 | 0.2371967 | -3.0694  | 0.00217   | -0.870444155 | count | 1           |
| FTH1       | -0.6033872 | 0.0291338 | -20.7109 | 1.08E-88  | -0.870088963 | count | 2.62E-84    |
| HMOX2      | -0.632198  | 0.1105757 | -5.7173  | 1.20E-08  | -0.869919839 | count | 0.00028344  |
| TSPAN3     | -0.6207172 | 0.0853581 | -7.2719  | 4.59E-13  | -0.869267325 | count | 1.10E-08    |
| IFT80      | -0.7840159 | 0.2828143 | -2.7722  | 0.00561   | -0.869092075 | count | 1           |
| ZNF540     | -0.8420519 | 0.3395183 | -2.4801  | 0.0132    | -0.868811485 | count | 1           |
| NOMO1      | -0.788582  | 0.3819231 | -2.0648  | 0.039     | -0.868549412 | count | 1           |
| DUSP10     | -1.0502041 | 0.3958703 | -2.6529  | 0.00803   | -0.86766973  | count | 1           |
| RNF10      | -0.6294833 | 0.1198939 | -5.2503  | 1.63E-07  | -0.866840552 | count | 0.003827566 |
| KCNE4      | -2.732709  | 1.0375939 | -2.6337  | 0.00849   | -0.866199892 | count | 1           |
| ATP2B2     | -2.732709  | 1.0375939 | -2.6337  | 0.00849   | -0.866199892 | count | 1           |
| HSPB2      | -2.732709  | 1.0375939 | -2.6337  | 0.00849   | -0.866199892 | count | 1           |
| PTGIR      | -2.732709  | 1.0375939 | -2.6337  | 0.00849   | -0.866199892 | count | 1           |
| ZNF320     | -2.732709  | 1.0375939 | -2.6337  | 0.00849   | -0.866199892 | count | 1           |
| AL136162.1 | -2.1069323 | 0.7950863 | -2.6499  | 0.0081    | -0.863913012 | count | 1           |
| NFIA-AS2   | -2.1069323 | 0.8114048 | -2.5966  | 0.00946   | -0.863913012 | count | 1           |
| SLC31A1    | -0.7504774 | 0.3100542 | -2.4205  | 0.0156    | -0.863450863 | count | 1           |
| KLF5       | -0.9694013 | 0.3254298 | -2.9788  | 0.00292   | -0.862570965 | count | 1           |
| ZNF500     | -0.9319717 | 0.3895587 | -2.3924  | 0.0168    | -0.86252907  | count | 1           |
| LIG4       | -0.9486608 | 0.3735937 | -2.5393  | 0.0112    | -0.861534518 | count | 1           |
| PPP2R5B    | -0.6874741 | 0.2199462 | -3.1256  | 0.00179   | -0.859939253 | count | 1           |
| C15orf39   | -0.8613384 | 0.3840269 | -2.2429  | 0.025     | -0.85865562  | count | 1           |
| FBXL17     | -0.7180831 | 0.2455783 | -2.924   | 0.00348   | -0.858123027 | count | 1           |
| DLGAP1     | -1.3490912 | 0.6858335 | -1.9671  | 0.0493    | -0.857242986 | count | 1           |
| ERCC6L2    | -0.6511239 | 0.210652  | -3.091   | 0.00201   | -0.857227808 | count | 1           |
| FUK        | -0.9258538 | 0.3563301 | -2.5983  | 0.00942   | -0.856375237 | count | 1           |
| ANKRD33B   | -2.70126   | 0.7094179 | -3.8077  | 0.000143  | -0.856220507 | count | 1           |
| ZMYND8     | -0.6382715 | 0.1876663 | -3.4011  | 0.000681  | -0.855533166 | count | 1           |
| ITIH5      | -0.7400341 | 0.319303  | -2.3177  | 0.0205    | -0.854941256 | count | 1           |
| CEP83-DT   | -1.3450901 | 0.6098391 | -2.2056  | 0.0275    | -0.854289762 | count | 1           |

|            |            |           |         |          |              |       |             |
|------------|------------|-----------|---------|----------|--------------|-------|-------------|
| ZNF268     | -0.7273988 | 0.2667028 | -2.7274 | 0.00642  | -0.854181009 | count | 1           |
| ATXN1      | -0.669948  | 0.2021081 | -3.3148 | 0.000929 | -0.853884941 | count | 1           |
| TM6SF1     | -0.6313674 | 0.1679588 | -3.7591 | 0.000174 | -0.853495445 | count | 1           |
| AL137186.2 | -0.7751533 | 0.3024334 | -2.5631 | 0.0104   | -0.853013352 | count | 1           |
| CYP11A1    | -2.079157  | 0.8311374 | -2.5016 | 0.0124   | -0.850803988 | count | 1           |
| PSTPIP1    | -2.079157  | 0.8311374 | -2.5016 | 0.0124   | -0.850803988 | count | 1           |
| TNFSF13    | -2.079157  | 0.8311374 | -2.5016 | 0.0124   | -0.850803988 | count | 1           |
| AL358113.1 | -2.079157  | 1.0266924 | -2.0251 | 0.043    | -0.850803988 | count | 1           |
| BCAS3      | -0.7635226 | 0.3001564 | -2.5437 | 0.011    | -0.850717268 | count | 1           |
| TMEM164    | -0.957067  | 0.3768232 | -2.5398 | 0.0111   | -0.850554541 | count | 1           |
| POR        | -0.6379207 | 0.1827032 | -3.4916 | 0.000488 | -0.849633398 | count | 1           |
| THEMIS2    | -2.07568   | 0.7852212 | -2.6434 | 0.00825  | -0.84915922  | count | 1           |
| SORT1      | -0.7151889 | 0.2311003 | -3.0947 | 0.00199  | -0.848749143 | count | 1           |
| RHEBL1     | -0.976079  | 0.4563633 | -2.1388 | 0.0325   | -0.847856207 | count | 1           |
| GSTM2      | -1.2562333 | 0.5230038 | -2.402  | 0.0164   | -0.84698972  | count | 1           |
| MYL12B     | -0.5883275 | 0.0311846 | -18.866 | 8.97E-75 | -0.846954334 | count | 2.18E-70    |
| IL32       | -0.5975659 | 0.1425606 | -4.1917 | 2.86E-05 | -0.845582465 | count | 0.6605742   |
| TSPAN2     | -0.6141331 | 0.1299715 | -4.7251 | 2.41E-06 | -0.845532308 | count | 0.05621566  |
| NOTCH2     | -1.2513962 | 0.4405344 | -2.8406 | 0.00454  | -0.843233479 | count | 1           |
| MTHFD1L    | -0.6587877 | 0.2072321 | -3.179  | 0.00149  | -0.842772266 | count | 1           |
| N4BP3      | -1.2502103 | 0.4557495 | -2.7432 | 0.00612  | -0.842312816 | count | 1           |
| AC013400.1 | -1.250055  | 0.6750451 | -1.8518 | 0.0642   | -0.842192571 | count | 1           |
| INAFM2     | -0.9287705 | 0.2917465 | -3.1835 | 0.00147  | -0.841844158 | count | 1           |
| DPP7       | -0.593166  | 0.0689027 | -8.6088 | 1.22E-17 | -0.841669597 | count | 2.93E-13    |
| LDLRAD2    | -1.3267668 | 0.5722606 | -2.3185 | 0.0205   | -0.840776742 | count | 1           |
| RTCA-AS1   | -2.0571271 | 0.7644469 | -2.691  | 0.00717  | -0.84036957  | count | 1           |
| AC096677.1 | -2.0571271 | 0.9168355 | -2.2437 | 0.0249   | -0.84036957  | count | 1           |
| C12orf57   | -0.5888094 | 0.0608551 | -9.6756 | 8.46E-22 | -0.840052303 | count | 2.04E-17    |
| TIMP2      | -0.5928886 | 0.0723765 | -8.1917 | 3.89E-16 | -0.839716636 | count | 9.33E-12    |
| DUSP14     | -0.6564117 | 0.1811069 | -3.6244 | 0.000295 | -0.838553875 | count | 1           |
| MARVELD1   | -0.6476904 | 0.1952517 | -3.3172 | 0.000921 | -0.838162431 | count | 1           |
| PRADC1     | -0.6306972 | 0.1608779 | -3.9203 | 9.06E-05 | -0.837883736 | count | 1           |
| DIXDC1     | -0.5987272 | 0.1074808 | -5.5705 | 2.78E-08 | -0.83755772  | count | 0.000655746 |
| ANAPC15    | -0.6206752 | 0.1529062 | -4.0592 | 5.06E-05 | -0.836541862 | count | 1           |
| ST7        | -0.7125219 | 0.2359273 | -3.0201 | 0.00255  | -0.836058939 | count | 1           |
| HPS5       | -0.6808124 | 0.238351  | -2.8563 | 0.00432  | -0.835323726 | count | 1           |
| STEAP1     | -1.4193226 | 0.6149833 | -2.3079 | 0.0211   | -0.835075712 | count | 1           |
| CDR2       | -0.6935076 | 0.241832  | -2.8677 | 0.00417  | -0.833062708 | count | 1           |
| ELL2       | -0.7515227 | 0.2456808 | -3.0589 | 0.00224  | -0.831332417 | count | 1           |
| SOX17      | -0.5908487 | 0.139077  | -4.2484 | 2.22E-05 | -0.829891774 | count | 0.5134416   |
| NOTCH4     | -0.6264096 | 0.1573084 | -3.982  | 7.01E-05 | -0.828909789 | count | 1           |
| ELMO3      | -2.0325312 | 0.6359113 | -3.1962 | 0.00141  | -0.828683824 | count | 1           |
| NINL       | -2.030457  | 0.7056716 | -2.8773 | 0.00404  | -0.827696487 | count | 1           |
| METRNL     | -0.5808547 | 0.0695336 | -8.3536 | 1.03E-16 | -0.827040685 | count | 2.47E-12    |
| CYB5R2     | -1.54078   | 0.7073406 | -2.1783 | 0.0295   | -0.826948408 | count | 1           |

|            |            |             |         |          |              |       |             |
|------------|------------|-------------|---------|----------|--------------|-------|-------------|
| MLLT1      | -0.6361334 | 0.1757764   | -3.619  | 0.000301 | -0.826328468 | count | 1           |
| NSUN5      | -0.7225555 | 0.3219526   | -2.2443 | 0.0249   | -0.82593166  | count | 1           |
| FBXO2      | -1.003739  | 0.5696906   | -1.7619 | 0.0782   | -0.825106717 | count | 1           |
| C2orf81    | -1.003507  | 0.5217397   | -1.9234 | 0.0545   | -0.82489503  | count | 1           |
| EIF4EBP1   | -0.5995206 | 0.1166906   | -5.1377 | 2.98E-07 | -0.824593826 | count | 0.006986908 |
| PIGB       | -0.8924958 | 0.4065087   | -2.1955 | 0.0282   | -0.822891868 | count | 1           |
| WSB1       | -0.5756909 | 0.0584517   | -9.849  | 1.62E-22 | -0.82121841  | count | 3.91E-18    |
| PGRMC2     | -0.5867939 | 0.0919058   | -6.3847 | 2.01E-10 | -0.820846847 | count | 4.77E-06    |
| TEX9       | -0.9261351 | 0.358953    | -2.5801 | 0.00993  | -0.820491334 | count | 1           |
| KIF26A     | -0.6722707 | 0.1953307   | -3.4417 | 0.000587 | -0.820463447 | count | 1           |
| CTNNAL1    | -0.5785511 | 0.082017    | -7.054  | 2.19E-12 | -0.820392839 | count | 5.23E-08    |
| MIR193BHG  | -0.9060015 | 0.4452406   | -2.0349 | 0.042    | -0.819356781 | count | 1           |
| CTSB       | -0.5799783 | 0.0855708   | -6.7778 | 1.49E-11 | -0.818601816 | count | 3.55E-07    |
| OCIAD2     | -0.575818  | 0.0682026   | -8.4428 | 4.93E-17 | -0.818475371 | count | 1.18E-12    |
| MIR99AHG   | -0.5925957 | 0.1337121   | -4.4319 | 9.71E-06 | -0.818339148 | count | 0.22537881  |
| AGER       | -1.7099544 | 0.7997239   | -2.1382 | 0.0326   | -0.815369742 | count | 1           |
| CCDC88B    | -1.2137541 | 0.6763566   | -1.7945 | 0.0728   | -0.814062056 | count | 1           |
| NOP9       | -0.9398999 | 0.4067605   | -2.3107 | 0.0209   | -0.813347813 | count | 1           |
| ST20       | -0.7996952 | 0.3613731   | -2.2129 | 0.027    | -0.813147141 | count | 1           |
| TTC13      | -0.8402376 | 0.3727479   | -2.2542 | 0.0243   | -0.812454837 | count | 1           |
| NES        | -0.5737708 | 0.089779    | -6.3909 | 1.93E-10 | -0.810818021 | count | 4.58E-06    |
| LARP1B     | -0.6608119 | 0.2395749   | -2.7583 | 0.00585  | -0.810085888 | count | 1           |
| SPAG8      | -1.2083788 | 0.5722648   | -2.1116 | 0.0348   | -0.809905442 | count | 1           |
| SGCB       | -0.6047927 | 0.1552284   | -3.8961 | 1.00E-04 | -0.809696985 | count | 1           |
| ZNF497     | -1.699364  | 0.7527873   | -2.2574 | 0.0241   | -0.809350818 | count | 1           |
| HOXB-AS3   | -1.699364  | 0.9083128   | -1.8709 | 0.0615   | -0.809350818 | count | 1           |
| CERS1      | -1.699364  | 1.0880277   | -1.5619 | 0.118    | -0.809350818 | count | 1           |
| SKI        | -0.6031905 | 0.1494815   | -4.0352 | 5.60E-05 | -0.809096964 | count | 1           |
| FZD7       | -1.6986905 | 0.5010853   | -3.39   | 0.000709 | -0.808968045 | count | 1           |
| AL008733.1 | -20.623999 | 1302.018173 | -0.0158 | 0.987    | -0.808903787 | count | 1           |
| IL22RA1    | -20.623999 | 1302.018173 | -0.0158 | 0.987    | -0.808903787 | count | 1           |
| SPOCD1     | -20.623999 | 1302.018173 | -0.0158 | 0.987    | -0.808903787 | count | 1           |
| TMEM125    | -20.623999 | 1302.018173 | -0.0158 | 0.987    | -0.808903787 | count | 1           |
| AC135803.1 | -20.623999 | 1302.018173 | -0.0158 | 0.987    | -0.808903787 | count | 1           |
| NEXN-AS1   | -20.623999 | 1302.018173 | -0.0158 | 0.987    | -0.808903787 | count | 1           |
| COL24A1    | -20.623999 | 1302.018173 | -0.0158 | 0.987    | -0.808903787 | count | 1           |
| KIAA1324   | -20.623999 | 1302.018173 | -0.0158 | 0.987    | -0.808903787 | count | 1           |
| BCAN       | -20.623999 | 1302.018173 | -0.0158 | 0.987    | -0.808903787 | count | 1           |
| AL590560.1 | -20.623999 | 1302.018173 | -0.0158 | 0.987    | -0.808903787 | count | 1           |
| AL121987.1 | -20.623999 | 1302.018173 | -0.0158 | 0.987    | -0.808903787 | count | 1           |
| MTRNR2L11  | -20.623999 | 1302.018173 | -0.0158 | 0.987    | -0.808903787 | count | 1           |
| FMN2       | -20.623999 | 1302.018173 | -0.0158 | 0.987    | -0.808903787 | count | 1           |
| NLRP3      | -20.623999 | 1302.018173 | -0.0158 | 0.987    | -0.808903787 | count | 1           |
| KCNF1      | -20.623999 | 1302.018173 | -0.0158 | 0.987    | -0.808903787 | count | 1           |
| NLRC4      | -20.623999 | 1302.018173 | -0.0158 | 0.987    | -0.808903787 | count | 1           |



|             |            |             |         |       |              |       |   |
|-------------|------------|-------------|---------|-------|--------------|-------|---|
| GPR17       | -20.623999 | 1302.018173 | -0.0158 | 0.987 | -0.808903787 | count | 1 |
| CCDC74A     | -20.623999 | 1302.018173 | -0.0158 | 0.987 | -0.808903787 | count | 1 |
| LINC01087   | -20.623999 | 1302.018173 | -0.0158 | 0.987 | -0.808903787 | count | 1 |
| TNFAIP6     | -20.623999 | 1302.018173 | -0.0158 | 0.987 | -0.808903787 | count | 1 |
| AC091488.1  | -20.623999 | 1302.018173 | -0.0158 | 0.987 | -0.808903787 | count | 1 |
| KCNH7       | -20.623999 | 1302.018173 | -0.0158 | 0.987 | -0.808903787 | count | 1 |
| AC010680.1  | -20.623999 | 1302.018173 | -0.0158 | 0.987 | -0.808903787 | count | 1 |
| AC096667.1  | -20.623999 | 1302.018173 | -0.0158 | 0.987 | -0.808903787 | count | 1 |
| SLC4A3      | -20.623999 | 1302.018173 | -0.0158 | 0.987 | -0.808903787 | count | 1 |
| LINC01907   | -20.623999 | 1302.018173 | -0.0158 | 0.987 | -0.808903787 | count | 1 |
| ARPC4-TTLL3 | -20.623999 | 1302.018173 | -0.0158 | 0.987 | -0.808903787 | count | 1 |
| ACVR2B-AS1  | -20.623999 | 1302.018173 | -0.0158 | 0.987 | -0.808903787 | count | 1 |
| CSPG5       | -20.623999 | 1302.018173 | -0.0158 | 0.987 | -0.808903787 | count | 1 |
| TMRSS7      | -20.623999 | 1302.018173 | -0.0158 | 0.987 | -0.808903787 | count | 1 |
| GAP43       | -20.623999 | 1302.018173 | -0.0158 | 0.987 | -0.808903787 | count | 1 |
| ZIC4        | -20.623999 | 1302.018173 | -0.0158 | 0.987 | -0.808903787 | count | 1 |
| MED12L      | -20.623999 | 1302.018173 | -0.0158 | 0.987 | -0.808903787 | count | 1 |
| CNGA1       | -20.623999 | 1302.018173 | -0.0158 | 0.987 | -0.808903787 | count | 1 |
| TMRSS11E    | -20.623999 | 1302.018173 | -0.0158 | 0.987 | -0.808903787 | count | 1 |
| ETNPPL      | -20.623999 | 1302.018173 | -0.0158 | 0.987 | -0.808903787 | count | 1 |
| AC115622.1  | -20.623999 | 1302.018173 | -0.0158 | 0.987 | -0.808903787 | count | 1 |
| AC019193.2  | -20.623999 | 1302.018173 | -0.0158 | 0.987 | -0.808903787 | count | 1 |
| AF250324.1  | -20.623999 | 1302.018173 | -0.0158 | 0.987 | -0.808903787 | count | 1 |
| AC010457.1  | -20.623999 | 1302.018173 | -0.0158 | 0.987 | -0.808903787 | count | 1 |
| HCG17       | -20.623999 | 1302.018173 | -0.0158 | 0.987 | -0.808903787 | count | 1 |
| RHAG        | -20.623999 | 1302.018173 | -0.0158 | 0.987 | -0.808903787 | count | 1 |
| AL023806.2  | -20.623999 | 1302.018173 | -0.0158 | 0.987 | -0.808903787 | count | 1 |
| TMEM184A    | -20.623999 | 1302.018173 | -0.0158 | 0.987 | -0.808903787 | count | 1 |
| AC004947.1  | -20.623999 | 1302.018173 | -0.0158 | 0.987 | -0.808903787 | count | 1 |
| AC006159.2  | -20.623999 | 1302.018173 | -0.0158 | 0.987 | -0.808903787 | count | 1 |
| CHRM2       | -20.623999 | 1302.018173 | -0.0158 | 0.987 | -0.808903787 | count | 1 |
| MBOAT4      | -20.623999 | 1302.018173 | -0.0158 | 0.987 | -0.808903787 | count | 1 |
| AL354707.1  | -20.623999 | 1302.018173 | -0.0158 | 0.987 | -0.808903787 | count | 1 |
| AL136366.1  | -20.623999 | 1302.018173 | -0.0158 | 0.987 | -0.808903787 | count | 1 |
| CA9         | -20.623999 | 1302.018173 | -0.0158 | 0.987 | -0.808903787 | count | 1 |
| PAPPA-AS1   | -20.623999 | 1302.018173 | -0.0158 | 0.987 | -0.808903787 | count | 1 |
| PAEP        | -20.623999 | 1302.018173 | -0.0158 | 0.987 | -0.808903787 | count | 1 |
| AC174065.1  | -20.623999 | 1302.018173 | -0.0158 | 0.987 | -0.808903787 | count | 1 |
| OVCH2       | -20.623999 | 1302.018173 | -0.0158 | 0.987 | -0.808903787 | count | 1 |
| AC044810.3  | -20.623999 | 1302.018173 | -0.0158 | 0.987 | -0.808903787 | count | 1 |
| AL078612.1  | -20.623999 | 1302.018173 | -0.0158 | 0.987 | -0.808903787 | count | 1 |
| AP001257.1  | -20.623999 | 1302.018173 | -0.0158 | 0.987 | -0.808903787 | count | 1 |
| AP001107.1  | -20.623999 | 1302.018173 | -0.0158 | 0.987 | -0.808903787 | count | 1 |
| TMEM151A    | -20.623999 | 1302.018173 | -0.0158 | 0.987 | -0.808903787 | count | 1 |
| GAL         | -20.623999 | 1302.018173 | -0.0158 | 0.987 | -0.808903787 | count | 1 |

|            |            |             |         |       |              |       |   |
|------------|------------|-------------|---------|-------|--------------|-------|---|
| AP002989.1 | -20.623999 | 1302.018173 | -0.0158 | 0.987 | -0.808903787 | count | 1 |
| PRF1       | -20.623999 | 1302.018173 | -0.0158 | 0.987 | -0.808903787 | count | 1 |
| CNNM1      | -20.623999 | 1302.018173 | -0.0158 | 0.987 | -0.808903787 | count | 1 |
| NKX2-3     | -20.623999 | 1302.018173 | -0.0158 | 0.987 | -0.808903787 | count | 1 |
| MMP21      | -20.623999 | 1302.018173 | -0.0158 | 0.987 | -0.808903787 | count | 1 |
| AC005833.1 | -20.623999 | 1302.018173 | -0.0158 | 0.987 | -0.808903787 | count | 1 |
| GALNT8     | -20.623999 | 1302.018173 | -0.0158 | 0.987 | -0.808903787 | count | 1 |
| AC117498.2 | -20.623999 | 1302.018173 | -0.0158 | 0.987 | -0.808903787 | count | 1 |
| KRT86      | -20.623999 | 1302.018173 | -0.0158 | 0.987 | -0.808903787 | count | 1 |
| MIP        | -20.623999 | 1302.018173 | -0.0158 | 0.987 | -0.808903787 | count | 1 |
| HMGA2      | -20.623999 | 1302.018173 | -0.0158 | 0.987 | -0.808903787 | count | 1 |
| OTOGL      | -20.623999 | 1302.018173 | -0.0158 | 0.987 | -0.808903787 | count | 1 |
| TEX26      | -20.623999 | 1302.018173 | -0.0158 | 0.987 | -0.808903787 | count | 1 |
| AL355974.2 | -20.623999 | 1302.018173 | -0.0158 | 0.987 | -0.808903787 | count | 1 |
| AL139385.1 | -20.623999 | 1302.018173 | -0.0158 | 0.987 | -0.808903787 | count | 1 |
| DHRS2      | -20.623999 | 1302.018173 | -0.0158 | 0.987 | -0.808903787 | count | 1 |
| AL139353.2 | -20.623999 | 1302.018173 | -0.0158 | 0.987 | -0.808903787 | count | 1 |
| AL133163.2 | -20.623999 | 1302.018173 | -0.0158 | 0.987 | -0.808903787 | count | 1 |
| PLEK2      | -20.623999 | 1302.018173 | -0.0158 | 0.987 | -0.808903787 | count | 1 |
| GALNT16    | -20.623999 | 1302.018173 | -0.0158 | 0.987 | -0.808903787 | count | 1 |
| GPR132     | -20.623999 | 1302.018173 | -0.0158 | 0.987 | -0.808903787 | count | 1 |
| IGHV4-4    | -20.623999 | 1302.018173 | -0.0158 | 0.987 | -0.808903787 | count | 1 |
| AC087457.1 | -20.623999 | 1302.018173 | -0.0158 | 0.987 | -0.808903787 | count | 1 |
| C15orf53   | -20.623999 | 1302.018173 | -0.0158 | 0.987 | -0.808903787 | count | 1 |
| AC012377.1 | -20.623999 | 1302.018173 | -0.0158 | 0.987 | -0.808903787 | count | 1 |
| LINC01169  | -20.623999 | 1302.018173 | -0.0158 | 0.987 | -0.808903787 | count | 1 |
| AC068870.1 | -20.623999 | 1302.018173 | -0.0158 | 0.987 | -0.808903787 | count | 1 |
| SRRM2-AS1  | -20.623999 | 1302.018173 | -0.0158 | 0.987 | -0.808903787 | count | 1 |
| LINC00922  | -20.623999 | 1302.018173 | -0.0158 | 0.987 | -0.808903787 | count | 1 |
| AC012184.1 | -20.623999 | 1302.018173 | -0.0158 | 0.987 | -0.808903787 | count | 1 |
| TAT-AS1    | -20.623999 | 1302.018173 | -0.0158 | 0.987 | -0.808903787 | count | 1 |
| NECAB2     | -20.623999 | 1302.018173 | -0.0158 | 0.987 | -0.808903787 | count | 1 |
| FOXL1      | -20.623999 | 1302.018173 | -0.0158 | 0.987 | -0.808903787 | count | 1 |
| ZNF469     | -20.623999 | 1302.018173 | -0.0158 | 0.987 | -0.808903787 | count | 1 |
| SNAI3      | -20.623999 | 1302.018173 | -0.0158 | 0.987 | -0.808903787 | count | 1 |
| AC129492.4 | -20.623999 | 1302.018173 | -0.0158 | 0.987 | -0.808903787 | count | 1 |
| AC005703.4 | -20.623999 | 1302.018173 | -0.0158 | 0.987 | -0.808903787 | count | 1 |
| AC098850.2 | -20.623999 | 1302.018173 | -0.0158 | 0.987 | -0.808903787 | count | 1 |
| CCL7       | -20.623999 | 1302.018173 | -0.0158 | 0.987 | -0.808903787 | count | 1 |
| KRTAP4-11  | -20.623999 | 1302.018173 | -0.0158 | 0.987 | -0.808903787 | count | 1 |
| GFAP       | -20.623999 | 1302.018173 | -0.0158 | 0.987 | -0.808903787 | count | 1 |
| IGF2BP1    | -20.623999 | 1302.018173 | -0.0158 | 0.987 | -0.808903787 | count | 1 |
| DLX4       | -20.623999 | 1302.018173 | -0.0158 | 0.987 | -0.808903787 | count | 1 |
| LINC01152  | -20.623999 | 1302.018173 | -0.0158 | 0.987 | -0.808903787 | count | 1 |
| SOX9       | -20.623999 | 1302.018173 | -0.0158 | 0.987 | -0.808903787 | count | 1 |

|             |             |             |         |         |              |       |   |
|-------------|-------------|-------------|---------|---------|--------------|-------|---|
| TMEM200C    | -20.623999  | 1302.018173 | -0.0158 | 0.987   | -0.808903787 | count | 1 |
| AC091588.3  | -20.623999  | 1302.018173 | -0.0158 | 0.987   | -0.808903787 | count | 1 |
| HMSD        | -20.623999  | 1302.018173 | -0.0158 | 0.987   | -0.808903787 | count | 1 |
| AL139351.1  | -20.623999  | 1302.018173 | -0.0158 | 0.987   | -0.808903787 | count | 1 |
| SMIM25      | -20.623999  | 1302.018173 | -0.0158 | 0.987   | -0.808903787 | count | 1 |
| LAMA5-AS1   | -20.623999  | 1302.018173 | -0.0158 | 0.987   | -0.808903787 | count | 1 |
| FUT5        | -20.623999  | 1302.018173 | -0.0158 | 0.987   | -0.808903787 | count | 1 |
| RETN        | -20.623999  | 1302.018173 | -0.0158 | 0.987   | -0.808903787 | count | 1 |
| HOMER3-AS1  | -20.623999  | 1302.018173 | -0.0158 | 0.987   | -0.808903787 | count | 1 |
| KRTDAP      | -20.623999  | 1302.018173 | -0.0158 | 0.987   | -0.808903787 | count | 1 |
| RYR1        | -20.623999  | 1302.018173 | -0.0158 | 0.987   | -0.808903787 | count | 1 |
| NPAS1       | -20.623999  | 1302.018173 | -0.0158 | 0.987   | -0.808903787 | count | 1 |
| LINC01869   | -20.623999  | 1302.018173 | -0.0158 | 0.987   | -0.808903787 | count | 1 |
| CACNG6      | -20.623999  | 1302.018173 | -0.0158 | 0.987   | -0.808903787 | count | 1 |
| RAB36       | -20.623999  | 1302.018173 | -0.0158 | 0.987   | -0.808903787 | count | 1 |
| SH3BP1      | -20.623999  | 1302.018173 | -0.0158 | 0.987   | -0.808903787 | count | 1 |
| ARNT2       | -20.569872  | 983.1629617 | -0.0209 | 0.983   | -0.808903787 | count | 1 |
| CAMP        | -19.842798  | 723.8455375 | -0.0274 | 0.978   | -0.808903786 | count | 1 |
| JAML        | -19.842798  | 723.8455375 | -0.0274 | 0.978   | -0.808903786 | count | 1 |
| FGFR2       | -20.4551929 | 1212.738474 | -0.0169 | 0.987   | -0.808903725 | count | 1 |
| NALCN       | -20.4551929 | 1212.738474 | -0.0169 | 0.987   | -0.808903725 | count | 1 |
| LBP         | -20.4551929 | 1212.738474 | -0.0169 | 0.987   | -0.808903725 | count | 1 |
| ITGAM       | -20.1986477 | 972.4960885 | -0.0208 | 0.983   | -0.808903725 | count | 1 |
| CHD5        | -20.1663165 | 1218.493905 | -0.0166 | 0.987   | -0.808903725 | count | 1 |
| AC239803.3  | -20.1663165 | 1218.493905 | -0.0166 | 0.987   | -0.808903725 | count | 1 |
| C5orf58     | -20.1663165 | 1218.493905 | -0.0166 | 0.987   | -0.808903725 | count | 1 |
| IGF2BP3     | -20.1663165 | 1218.493905 | -0.0166 | 0.987   | -0.808903725 | count | 1 |
| PALM2-AKAP2 | -20.1663165 | 1218.493905 | -0.0166 | 0.987   | -0.808903725 | count | 1 |
| SIX4        | -20.1663165 | 1218.493905 | -0.0166 | 0.987   | -0.808903725 | count | 1 |
| SPINT1      | -20.1663165 | 1218.493905 | -0.0166 | 0.987   | -0.808903725 | count | 1 |
| NWD1        | -20.1663165 | 1218.493905 | -0.0166 | 0.987   | -0.808903725 | count | 1 |
| FCGR1A      | -20.0576209 | 1539.941243 | -0.013  | 0.99    | -0.808903725 | count | 1 |
| FNDC5       | -20.0572905 | 1230.679754 | -0.0163 | 0.987   | -0.808903725 | count | 1 |
| XG          | -20.0572905 | 1230.679754 | -0.0163 | 0.987   | -0.808903725 | count | 1 |
| BMP7        | -20.0572905 | 1230.679754 | -0.0163 | 0.987   | -0.808903725 | count | 1 |
| GRM2        | -19.891083  | 1232.224367 | -0.0161 | 0.987   | -0.808903724 | count | 1 |
| AC011632.1  | -19.891083  | 1232.224367 | -0.0161 | 0.987   | -0.808903724 | count | 1 |
| C11orf21    | -19.891083  | 1232.224367 | -0.0161 | 0.987   | -0.808903724 | count | 1 |
| SPTBN5      | -19.891083  | 1232.224367 | -0.0161 | 0.987   | -0.808903724 | count | 1 |
| SMTNL2      | -19.6703593 | 849.510942  | -0.0232 | 0.982   | -0.808903724 | count | 1 |
| DNASE2B     | -19.6698758 | 729.5964702 | -0.027  | 0.978   | -0.808903724 | count | 1 |
| SUSD4       | -19.6698758 | 729.5964702 | -0.027  | 0.978   | -0.808903724 | count | 1 |
| KIF7        | -19.6005298 | 952.758042  | -0.0206 | 0.984   | -0.808903723 | count | 1 |
| SPPL2B      | -0.6559327  | 0.2211547   | -2.9659 | 0.00304 | -0.807714352 | count | 1 |
| MMEL1       | -1.0510821  | 0.4517777   | -2.3265 | 0.0201  | -0.807267401 | count | 1 |

|            |            |           |          |          |              |       |             |
|------------|------------|-----------|----------|----------|--------------|-------|-------------|
| AC073254.1 | -1.5093965 | 0.6535256 | -2.3096  | 0.021    | -0.806997459 | count | 1           |
| AC015819.2 | -1.5093965 | 0.8129752 | -1.8566  | 0.0635   | -0.806997459 | count | 1           |
| BTC        | -0.7773555 | 0.3397488 | -2.288   | 0.0222   | -0.806507088 | count | 1           |
| ADAMTS7    | -1.0917773 | 0.4557832 | -2.3954  | 0.0167   | -0.80598405  | count | 1           |
| GLG1       | -0.5792834 | 0.1065696 | -5.4357  | 5.93E-08 | -0.80594624  | count | 0.0013961   |
| FAM129A    | -0.6514517 | 0.221547  | -2.9405  | 0.0033   | -0.805607564 | count | 1           |
| NAXE       | -0.5782341 | 0.1020091 | -5.6685  | 1.59E-08 | -0.80503061  | count | 0.000375447 |
| CKAP4      | -0.6072986 | 0.1540712 | -3.9417  | 8.29E-05 | -0.804839631 | count | 1           |
| PXDN       | -0.6079949 | 0.2150279 | -2.8275  | 0.00472  | -0.803636834 | count | 1           |
| TCTN1      | -0.6360596 | 0.1896209 | -3.3544  | 0.000806 | -0.802444656 | count | 1           |
| DISP1      | -0.843116  | 0.3462786 | -2.4348  | 0.015    | -0.80240274  | count | 1           |
| KIF13B     | -0.6022074 | 0.1482703 | -4.0616  | 5.01E-05 | -0.80234519  | count | 1           |
| GABRD      | -0.9516945 | 0.353012  | -2.6959  | 0.00706  | -0.802118619 | count | 1           |
| HYOU1      | -0.6645496 | 0.2082257 | -3.1915  | 0.00143  | -0.801965021 | count | 1           |
| ATP6V1C2   | -1.5011862 | 0.6659387 | -2.2542  | 0.0243   | -0.801782707 | count | 1           |
| C1orf122   | -0.5718532 | 0.0865831 | -6.6047  | 4.76E-11 | -0.801666171 | count | 1.13E-06    |
| SLC7A6     | -0.8183278 | 0.2854945 | -2.8664  | 0.00418  | -0.801606369 | count | 1           |
| ACOX2      | -1.1359829 | 0.5809838 | -1.9553  | 0.0507   | -0.801041996 | count | 1           |
| FGF2       | -0.5914099 | 0.1511045 | -3.9139  | 9.30E-05 | -0.800963569 | count | 1           |
| PLXNA3     | -0.9047349 | 0.4100444 | -2.2064  | 0.0274   | -0.799755015 | count | 1           |
| FHL1       | -0.5725906 | 0.1223687 | -4.6792  | 3.02E-06 | -0.798816819 | count | 0.07038412  |
| IL12A      | -1.9696008 | 0.8908087 | -2.211   | 0.0271   | -0.79863261  | count | 1           |
| AP003419.2 | -2.5247664 | 1.0223595 | -2.4695  | 0.0136   | -0.79809216  | count | 1           |
| CCDC169    | -2.5247664 | 1.0223595 | -2.4695  | 0.0136   | -0.79809216  | count | 1           |
| MPZ        | -2.5247664 | 1.2616677 | -2.0011  | 0.0455   | -0.79809216  | count | 1           |
| OXT        | -2.5247664 | 1.3152073 | -1.9197  | 0.055    | -0.79809216  | count | 1           |
| ECM1       | -1.0813294 | 0.4169175 | -2.5936  | 0.00955  | -0.797245211 | count | 1           |
| PCBP4      | -0.7015904 | 0.2702379 | -2.5962  | 0.00948  | -0.796840772 | count | 1           |
| SLC1A4     | -0.9222349 | 0.4304243 | -2.1426  | 0.0322   | -0.796552108 | count | 1           |
| CALR       | -0.5559934 | 0.0470865 | -11.8079 | 2.00E-31 | -0.795402364 | count | 4.84E-27    |
| MTRF1L     | -0.5834945 | 0.1227062 | -4.7552  | 2.08E-06 | -0.795207366 | count | 0.04854304  |
| GZMK       | -2.5161594 | 0.7846065 | -3.2069  | 0.00136  | -0.795170865 | count | 1           |
| CCDC151    | -2.5134947 | 0.8242454 | -3.0494  | 0.00231  | -0.794264934 | count | 1           |
| FAM95B1    | -2.5134947 | 0.9415496 | -2.6695  | 0.00764  | -0.794264934 | count | 1           |
| ITGA4      | -2.5134947 | 1.014402  | -2.4778  | 0.0133   | -0.794264934 | count | 1           |
| PTBP2      | -0.6256803 | 0.1781452 | -3.5122  | 0.000452 | -0.792777604 | count | 1           |
| ERRFI1     | -0.6742524 | 0.2128415 | -3.1679  | 0.00155  | -0.792620753 | count | 1           |
| CLDN10     | -0.6353097 | 0.3810475 | -1.6673  | 0.0956   | -0.791577164 | count | 1           |
| GMDS       | -0.563088  | 0.0947675 | -5.9418  | 3.17E-09 | -0.791175944 | count | 7.50E-05    |
| GLDN       | -1.2587599 | 0.5574266 | -2.2582  | 0.024    | -0.790809175 | count | 1           |
| WFDC2      | -1.2587599 | 0.6691241 | -1.8812  | 0.06     | -0.790809175 | count | 1           |
| VSIG4      | -1.6663915 | 0.7258384 | -2.2958  | 0.0218   | -0.790609955 | count | 1           |
| CEP170B    | -0.8314955 | 0.3505796 | -2.3718  | 0.0178   | -0.79047648  | count | 1           |
| DST        | -0.5661814 | 0.1117804 | -5.0651  | 4.35E-07 | -0.789180126 | count | 0.010190745 |
| VWF        | -0.5483955 | 0.0541909 | -10.1197 | 1.16E-23 | -0.789066564 | count | 2.80E-19    |

|           |            |           |         |          |              |       |             |
|-----------|------------|-----------|---------|----------|--------------|-------|-------------|
| ECE1      | -0.5556318 | 0.0812455 | -6.8389 | 9.79E-12 | -0.788969752 | count | 2.33E-07    |
| SSR4      | -0.5492697 | 0.0395384 | -13.892 | 1.84E-42 | -0.788501248 | count | 4.46E-38    |
| CAMK2N1   | -1.9479988 | 0.7983817 | -2.4399 | 0.0148   | -0.788273327 | count | 1           |
| TOP2B     | -0.5916523 | 0.1585828 | -3.7309 | 0.000195 | -0.787187772 | count | 1           |
| E2F3      | -0.6297204 | 0.2511587 | -2.5073 | 0.0122   | -0.78594311  | count | 1           |
| BAHD1     | -0.7314581 | 0.2711933 | -2.6972 | 0.00704  | -0.784557062 | count | 1           |
| PRSS36    | -1.4734663 | 0.6699073 | -2.1995 | 0.0279   | -0.784193274 | count | 1           |
| SOX15     | -1.4734663 | 0.7038106 | -2.0936 | 0.0364   | -0.784193274 | count | 1           |
| CYBRD1    | -0.5853659 | 0.1328941 | -4.4048 | 1.10E-05 | -0.784139945 | count | 0.255101    |
| SIPA1L1   | -0.6720402 | 0.2271854 | -2.9581 | 0.00312  | -0.783650631 | count | 1           |
| STK38L    | -0.5922257 | 0.1430657 | -4.1395 | 3.58E-05 | -0.78354855  | count | 0.825906    |
| PDE4A     | -0.6828945 | 0.3447638 | -1.9808 | 0.0477   | -0.782624559 | count | 1           |
| CD276     | -0.9569388 | 0.3081024 | -3.1059 | 0.00192  | -0.782471193 | count | 1           |
| NMRAL1    | -0.5928931 | 0.1636443 | -3.6231 | 0.000296 | -0.781727414 | count | 1           |
| SESTD1    | -0.5973841 | 0.1849382 | -3.2302 | 0.00125  | -0.781589097 | count | 1           |
| ACTR5     | -0.7791353 | 0.343719  | -2.2668 | 0.0235   | -0.781345778 | count | 1           |
| PLPPR2    | -0.687897  | 0.2467509 | -2.7878 | 0.00534  | -0.780629323 | count | 1           |
| CDC25A    | -1.6485127 | 0.6155067 | -2.6783 | 0.00744  | -0.780449498 | count | 1           |
| TTL       | -0.6641589 | 0.2275413 | -2.9188 | 0.00354  | -0.780329801 | count | 1           |
| KDELR3    | -0.5822045 | 0.163121  | -3.5692 | 0.000364 | -0.778686054 | count | 1           |
| SLC22A17  | -0.5966044 | 0.1948599 | -3.0617 | 0.00222  | -0.778505239 | count | 1           |
| TBCEL     | -0.8479306 | 0.363455  | -2.333  | 0.0197   | -0.778357465 | count | 1           |
| GDE1      | -0.6081674 | 0.1810619 | -3.3589 | 0.000793 | -0.777730385 | count | 1           |
| LINC01836 | -1.3355754 | 0.7078468 | -1.8868 | 0.0593   | -0.777388901 | count | 1           |
| MRPS30-DT | -0.7357674 | 0.3340556 | -2.2025 | 0.0277   | -0.775837719 | count | 1           |
| RNF121    | -0.653502  | 0.2398496 | -2.7246 | 0.00648  | -0.775811779 | count | 1           |
| ARFGEF2   | -0.5929409 | 0.1943137 | -3.0515 | 0.0023   | -0.775680353 | count | 1           |
| SMC6      | -0.5853312 | 0.1527331 | -3.8324 | 0.00013  | -0.773773303 | count | 1           |
| HAS2      | -0.6205984 | 0.200324  | -3.098  | 0.00197  | -0.772789505 | count | 1           |
| LINC01550 | -1.914284  | 0.7301906 | -2.6216 | 0.0088   | -0.772068275 | count | 1           |
| AKAP6     | -1.914284  | 0.7652304 | -2.5016 | 0.0124   | -0.772068275 | count | 1           |
| FAS       | -0.8010223 | 0.3094753 | -2.5883 | 0.00969  | -0.77173879  | count | 1           |
| BMPR1A    | -0.8754418 | 0.4528875 | -1.933  | 0.0533   | -0.771459133 | count | 1           |
| CIART     | -0.7040875 | 0.2840348 | -2.4789 | 0.0132   | -0.7710899   | count | 1           |
| SNX30     | -0.7891808 | 0.3900398 | -2.0233 | 0.0431   | -0.771020696 | count | 1           |
| PINK1     | -0.5545811 | 0.0959714 | -5.7786 | 8.37E-09 | -0.770914528 | count | 0.000197775 |
| FARP1     | -0.5719916 | 0.1463398 | -3.9087 | 9.50E-05 | -0.769538046 | count | 1           |
| KLRG1     | -0.9701107 | 0.3810364 | -2.546  | 0.011    | -0.767341316 | count | 1           |
| CELF2     | -0.5736337 | 0.180719  | -3.1742 | 0.00152  | -0.766685278 | count | 1           |
| MEX3D     | -0.7261784 | 0.2273396 | -3.1942 | 0.00142  | -0.765156258 | count | 1           |
| TEN1      | -0.5956097 | 0.172508  | -3.4527 | 0.000563 | -0.764242549 | count | 1           |
| SSFA2     | -0.5376641 | 0.0785457 | -6.8452 | 9.37E-12 | -0.76386689  | count | 2.23E-07    |
| CPQ       | -0.5478361 | 0.1129684 | -4.8495 | 1.31E-06 | -0.763862578 | count | 0.03061339  |
| RFK       | -0.5439971 | 0.0964085 | -5.6426 | 1.84E-08 | -0.763602846 | count | 0.000434369 |
| CMTM7     | -0.6480152 | 0.2302705 | -2.8141 | 0.00493  | -0.763579302 | count | 1           |

|            |            |           |          |          |              |       |            |
|------------|------------|-----------|----------|----------|--------------|-------|------------|
| AC004540.1 | -1.1477052 | 0.4020961 | -2.8543  | 0.00435  | -0.763163429 | count | 1          |
| PIK3CD     | -1.1467415 | 0.7064154 | -1.6233  | 0.105    | -0.762423772 | count | 1          |
| ARRDC3-AS1 | -1.144616  | 0.6300657 | -1.8167  | 0.0694   | -0.760792727 | count | 1          |
| AP001107.9 | -1.144616  | 0.7200031 | -1.5897  | 0.112    | -0.760792727 | count | 1          |
| SEC24A     | -0.6478665 | 0.2735796 | -2.3681  | 0.0179   | -0.76050991  | count | 1          |
| POC1B      | -0.6472851 | 0.2469862 | -2.6207  | 0.00882  | -0.759803083 | count | 1          |
| PLOD1      | -0.5949877 | 0.1941657 | -3.0643  | 0.0022   | -0.759532491 | count | 1          |
| DOK4       | -0.6422945 | 0.243362  | -2.6393  | 0.00836  | -0.759376386 | count | 1          |
| ATAD1      | -0.5696461 | 0.1546446 | -3.6836  | 0.000234 | -0.758827247 | count | 1          |
| TMEM81     | -1.886634  | 0.8334428 | -2.2637  | 0.0237   | -0.758749299 | count | 1          |
| PRND       | -1.886634  | 0.8334428 | -2.2637  | 0.0237   | -0.758749299 | count | 1          |
| AC006213.1 | -1.886634  | 0.8334428 | -2.2637  | 0.0237   | -0.758749299 | count | 1          |
| AP001189.6 | -1.886634  | 1.0174854 | -1.8542  | 0.0638   | -0.758749299 | count | 1          |
| MGAT4B     | -0.554665  | 0.1146783 | -4.8367  | 1.39E-06 | -0.758619056 | count | 0.03247457 |
| AC018816.1 | -1.0831276 | 0.6084623 | -1.7801  | 0.0752   | -0.758575237 | count | 1          |
| CRYZ       | -0.6179921 | 0.3083578 | -2.0041  | 0.0452   | -0.757974921 | count | 1          |
| CMTR1      | -0.6507356 | 0.2727402 | -2.3859  | 0.0171   | -0.757896147 | count | 1          |
| ZNF319     | -0.9929787 | 0.5086745 | -1.9521  | 0.051    | -0.757233724 | count | 1          |
| CYP27A1    | -0.6297459 | 0.1922431 | -3.2758  | 0.00107  | -0.756432759 | count | 1          |
| LMO2       | -0.527216  | 0.0443031 | -11.9002 | 7.00E-32 | -0.7563928   | count | 1.69E-27   |
| ATP5MC3    | -0.5304909 | 0.0622453 | -8.5226  | 2.53E-17 | -0.756366753 | count | 6.07E-13   |
| KLHL29     | -1.8800107 | 0.6664819 | -2.8208  | 0.00482  | -0.755555781 | count | 1          |
| TMEM38A    | -0.690291  | 0.3355081 | -2.0574  | 0.0397   | -0.755246664 | count | 1          |
| AL691432.2 | -1.0308133 | 0.5086156 | -2.0267  | 0.0428   | -0.755156987 | count | 1          |
| LMLN       | -0.7164773 | 0.3348995 | -2.1394  | 0.0325   | -0.754360745 | count | 1          |
| SLC25A4    | -0.5439904 | 0.120545  | -4.5128  | 6.67E-06 | -0.753923887 | count | 0.1550108  |
| ASPM       | -4.7605636 | 2.7698575 | -1.7187  | 0.0858   | -0.753507781 | count | 1          |
| ERGIC1     | -0.5639641 | 0.1498412 | -3.7637  | 0.000171 | -0.751579895 | count | 1          |
| TRERF1     | -1.2952048 | 0.4709612 | -2.7501  | 0.006    | -0.749734265 | count | 1          |
| AC100793.2 | -1.0708062 | 0.5521368 | -1.9394  | 0.0526   | -0.748717818 | count | 1          |
| DDR1       | -1.0687252 | 0.4382226 | -2.4388  | 0.0148   | -0.747054675 | count | 1          |
| ARL17A     | -0.815025  | 0.4070859 | -2.0021  | 0.0454   | -0.745631321 | count | 1          |
| PLAU       | -0.7288842 | 0.444812  | -1.6386  | 0.101    | -0.745212198 | count | 1          |
| NAT14      | -0.6453859 | 0.3119583 | -2.0688  | 0.0387   | -0.744938466 | count | 1          |
| SAMD8      | -0.5819438 | 0.1903641 | -3.057   | 0.00226  | -0.743530126 | count | 1          |
| ZNF529-AS1 | -0.7199042 | 0.3677712 | -1.9575  | 0.0504   | -0.743435552 | count | 1          |
| CCNJ       | -0.7124618 | 0.3464741 | -2.0563  | 0.0398   | -0.742782094 | count | 1          |
| PGM2L1     | -0.537758  | 0.1254965 | -4.285   | 1.89E-05 | -0.742467336 | count | 0.4374594  |
| ERN1       | -0.566081  | 0.2140057 | -2.6452  | 0.00821  | -0.741234905 | count | 1          |
| PHYHD1     | -0.810582  | 0.312786  | -2.5915  | 0.00961  | -0.741223278 | count | 1          |
| RGL3       | -2.3600349 | 0.7843049 | -3.0091  | 0.00264  | -0.740948596 | count | 1          |
| AGO3       | -0.5554871 | 0.1785985 | -3.1103  | 0.00189  | -0.740547136 | count | 1          |
| SLC4A7     | -0.5735451 | 0.2246922 | -2.5526  | 0.0107   | -0.739709314 | count | 1          |
| LSR        | -0.5433295 | 0.148314  | -3.6634  | 0.000254 | -0.739536453 | count | 1          |
| CYTOR      | -0.5612299 | 0.1596852 | -3.5146  | 0.000447 | -0.738277766 | count | 1          |

|            |            |           |         |          |              |       |            |
|------------|------------|-----------|---------|----------|--------------|-------|------------|
| DCHS1      | -0.5585872 | 0.1706314 | -3.2736 | 0.00107  | -0.737919819 | count | 1          |
| IRAK1      | -0.5855814 | 0.1904305 | -3.075  | 0.00213  | -0.737363144 | count | 1          |
| NPLOC4     | -0.5950243 | 0.1936106 | -3.0733 | 0.00214  | -0.737190149 | count | 1          |
| ARMC7      | -0.5987835 | 0.2217704 | -2.7    | 0.00698  | -0.737183114 | count | 1          |
| STMP1      | -0.5279965 | 0.1012941 | -5.2125 | 2.00E-07 | -0.736496283 | count | 0.0046948  |
| SMPDL3B    | -1.2756826 | 0.4814354 | -2.6497 | 0.0081   | -0.736404177 | count | 1          |
| ATP10D     | -0.5384358 | 0.159501  | -3.3758 | 0.000746 | -0.734891675 | count | 1          |
| ST3GAL1    | -0.5518988 | 0.1452335 | -3.8001 | 0.000148 | -0.734464068 | count | 1          |
| TMEM37     | -0.7540186 | 0.4222605 | -1.7857 | 0.0743   | -0.734262416 | count | 1          |
| IREB2      | -0.5654588 | 0.1896097 | -2.9822 | 0.00289  | -0.729090256 | count | 1          |
| POGK       | -0.5963742 | 0.2536448 | -2.3512 | 0.0188   | -0.728982734 | count | 1          |
| CAPN5      | -0.9981553 | 0.4185163 | -2.385  | 0.0171   | -0.728103354 | count | 1          |
| AL162231.1 | -1.1725507 | 0.5795092 | -2.0234 | 0.0431   | -0.727988583 | count | 1          |
| CHDH       | -1.1725507 | 0.5938392 | -1.9745 | 0.0484   | -0.727988583 | count | 1          |
| AC010331.1 | -1.1725507 | 0.6676624 | -1.7562 | 0.0792   | -0.727988583 | count | 1          |
| ABCA7      | -1.1725507 | 0.8392211 | -1.3972 | 0.162    | -0.727988583 | count | 1          |
| PIF1       | -4.349977  | 2.3181409 | -1.8765 | 0.0607   | -0.727929831 | count | 1          |
| SREBF2     | -0.6388567 | 0.276934  | -2.3069 | 0.0211   | -0.726530603 | count | 1          |
| PLAUR      | -0.5338051 | 0.1483    | -3.5995 | 0.000324 | -0.725569273 | count | 1          |
| ZBTB4      | -0.5565292 | 0.1575504 | -3.5324 | 0.000419 | -0.724704746 | count | 1          |
| PRTFDC1    | -0.7550833 | 0.3659272 | -2.0635 | 0.0392   | -0.724284619 | count | 1          |
| COG6       | -0.5869585 | 0.2266803 | -2.5894 | 0.00967  | -0.723852785 | count | 1          |
| RNASEH2A   | -0.9928962 | 0.6148478 | -1.6149 | 0.106    | -0.723758949 | count | 1          |
| SIRT4      | -1.1653829 | 0.6444586 | -1.8083 | 0.0707   | -0.722796217 | count | 1          |
| RGCC       | -0.5175958 | 0.1984854 | -2.6077 | 0.00916  | -0.722195842 | count | 1          |
| MGAT4A     | -0.5213865 | 0.1098894 | -4.7446 | 2.19E-06 | -0.721661941 | count | 0.05110365 |
| ATG9B      | -1.1633282 | 0.6060127 | -1.9196 | 0.055    | -0.721308763 | count | 1          |
| CLIP2      | -0.7892551 | 0.7638217 | -1.0333 | 0.302    | -0.720101089 | count | 1          |
| VAX2       | -1.5419922 | 0.8211721 | -1.8778 | 0.0605   | -0.720018342 | count | 1          |
| AC099524.1 | -1.5419922 | 0.9403071 | -1.6399 | 0.101    | -0.720018342 | count | 1          |
| PPP1CB     | -0.5068683 | 0.0667599 | -7.5924 | 4.27E-14 | -0.719981029 | count | 1.02E-09   |
| RCN2       | -0.5096728 | 0.0732019 | -6.9626 | 4.16E-12 | -0.719978068 | count | 9.92E-08   |
| ZNF134     | -0.6735639 | 0.2815817 | -2.3921 | 0.0168   | -0.719307913 | count | 1          |
| BRCA1      | -0.7875449 | 0.3524287 | -2.2346 | 0.0255   | -0.718409991 | count | 1          |
| SYT11      | -0.5789546 | 0.2052791 | -2.8203 | 0.00483  | -0.718257887 | count | 1          |
| AC245060.5 | -0.9859953 | 0.5411045 | -1.8222 | 0.0685   | -0.718063577 | count | 1          |
| RGS5       | -1.2472518 | 0.5776478 | -2.1592 | 0.0309   | -0.717046299 | count | 1          |
| NPW        | -2.2923766 | 0.5743048 | -3.9916 | 6.73E-05 | -0.716800993 | count | 1          |
| PYCARD-AS1 | -0.945448  | 0.5195039 | -1.8199 | 0.0689   | -0.716604178 | count | 1          |
| POU2F1     | -0.598442  | 0.2440806 | -2.4518 | 0.0143   | -0.715469983 | count | 1          |
| IKBKE      | -1.7949522 | 0.7248511 | -2.4763 | 0.0133   | -0.714460472 | count | 1          |
| DPY19L3    | -0.6634885 | 0.3210851 | -2.0664 | 0.0389   | -0.713760602 | count | 1          |
| PGPEP1     | -0.6304607 | 0.2810691 | -2.2431 | 0.025    | -0.712839248 | count | 1          |
| AGA        | -0.5548498 | 0.1852416 | -2.9953 | 0.00277  | -0.711838111 | count | 1          |
| SORBS2     | -0.5253024 | 0.1304368 | -4.0273 | 5.80E-05 | -0.711807815 | count | 1          |

|            |            |           |          |          |              |       |             |
|------------|------------|-----------|----------|----------|--------------|-------|-------------|
| C7orf26    | -0.5972291 | 0.2296929 | -2.6001  | 0.00937  | -0.711683608 | count | 1           |
| EDC3       | -0.6520492 | 0.2901788 | -2.2471  | 0.0247   | -0.711443528 | count | 1           |
| ANO5       | -1.3563147 | 0.7931946 | -1.7099  | 0.0874   | -0.710253612 | count | 1           |
| CEP131     | -0.6765766 | 0.3629548 | -1.8641  | 0.0624   | -0.710077328 | count | 1           |
| MT-ND6     | -0.5298141 | 0.1438823 | -3.6823  | 0.000236 | -0.70921377  | count | 1           |
| MAPK8IP3   | -1.019881  | 0.3769065 | -2.7059  | 0.00685  | -0.708162086 | count | 1           |
| AC147651.1 | -1.5206628 | 0.757291  | -2.008   | 0.0447   | -0.70795498  | count | 1           |
| APOA1      | -1.7809392 | 0.8741651 | -2.0373  | 0.0417   | -0.707681115 | count | 1           |
| C3orf36    | -1.7809392 | 1.0372553 | -1.717   | 0.0861   | -0.707681115 | count | 1           |
| TGFB1      | -0.5046358 | 0.090329  | -5.5866  | 2.54E-08 | -0.707635996 | count | 0.000599262 |
| HSP90B1    | -0.4921327 | 0.0412663 | -11.9258 | 5.23E-32 | -0.707594099 | count | 1.27E-27    |
| CTSD       | -0.5011767 | 0.0771563 | -6.4956  | 9.77E-11 | -0.70719171  | count | 2.32E-06    |
| ARHGEF5    | -1.0183565 | 0.5485932 | -1.8563  | 0.0635   | -0.706952819 | count | 1           |
| SELENOM    | -0.49242   | 0.0456881 | -10.7779 | 1.47E-26 | -0.706777434 | count | 3.55E-22    |
| CYB561D1   | -0.8729258 | 0.5137414 | -1.6992  | 0.0894   | -0.706605932 | count | 1           |
| VANGL2     | -2.2639044 | 0.8342168 | -2.7138  | 0.00669  | -0.70653752  | count | 1           |
| AC099518.2 | -2.2639044 | 0.8342168 | -2.7138  | 0.00669  | -0.70653752  | count | 1           |
| LINC00278  | -2.2639044 | 0.8611973 | -2.6288  | 0.00862  | -0.70653752  | count | 1           |
| THSD7B     | -2.2639044 | 1.277191  | -1.7726  | 0.0764   | -0.70653752  | count | 1           |
| PRKCB      | -2.2639044 | 1.329829  | -1.7024  | 0.0888   | -0.70653752  | count | 1           |
| ITPR1L2    | -0.5129207 | 0.1297607 | -3.9528  | 7.92E-05 | -0.70588889  | count | 1           |
| ACVR1B     | -0.5821839 | 0.2342231 | -2.4856  | 0.013    | -0.70568836  | count | 1           |
| CITED2     | -0.5050539 | 0.1158088 | -4.3611  | 1.34E-05 | -0.705077796 | count | 0.310478    |
| UHRF1BP1L  | -0.6230766 | 0.2673147 | -2.3309  | 0.0198   | -0.704149577 | count | 1           |
| FAM104B    | -0.5254983 | 0.1596268 | -3.292   | 0.00101  | -0.703711794 | count | 1           |
| ABHD17C    | -0.6535014 | 0.2831129 | -2.3083  | 0.0211   | -0.702479743 | count | 1           |
| SNHG21     | -0.6638842 | 0.3800671 | -1.7468  | 0.0808   | -0.702385597 | count | 1           |
| RRM2B      | -0.5517883 | 0.2330131 | -2.3681  | 0.018    | -0.702356518 | count | 1           |
| COL21A1    | -0.6385228 | 0.3215245 | -1.9859  | 0.0471   | -0.70085647  | count | 1           |
| HSD17B12   | -0.4926513 | 0.0721205 | -6.8309  | 1.03E-11 | -0.700363527 | count | 2.45E-07    |
| PYGB       | -0.5938352 | 0.2347499 | -2.5297  | 0.0115   | -0.700226836 | count | 1           |
| GTF2I      | -0.4961203 | 0.091516  | -5.4211  | 6.43E-08 | -0.69991239  | count | 0.001513429 |
| ABCA6      | -0.5972308 | 0.4333325 | -1.3782  | 0.168    | -0.699072074 | count | 1           |
| AL157392.5 | -1.220508  | 0.8887653 | -1.3733  | 0.17     | -0.698901445 | count | 1           |
| PAMR1      | -1.220508  | 0.9547654 | -1.2783  | 0.201    | -0.698901445 | count | 1           |
| ACTG2      | -1.220508  | 1.0280918 | -1.1872  | 0.235    | -0.698901445 | count | 1           |
| METTL27    | -0.8399089 | 0.53649   | -1.5656  | 0.118    | -0.698776304 | count | 1           |
| LINC01963  | -1.0631983 | 0.6169417 | -1.7233  | 0.0849   | -0.698677184 | count | 1           |
| HCST       | -1.0626251 | 0.4875627 | -2.1795  | 0.0294   | -0.698242548 | count | 1           |
| PRRT2      | -0.8912908 | 0.3932243 | -2.2666  | 0.0235   | -0.698076312 | count | 1           |
| ITPK1      | -0.6034382 | 0.2263982 | -2.6654  | 0.00773  | -0.697868958 | count | 1           |
| GBP6       | -2.239749  | 0.9996379 | -2.2406  | 0.0251   | -0.697786863 | count | 1           |
| AC019069.1 | -2.239749  | 0.9996379 | -2.2406  | 0.0251   | -0.697786863 | count | 1           |
| AC010680.2 | -2.239749  | 0.9996379 | -2.2406  | 0.0251   | -0.697786863 | count | 1           |
| 4-Mar      | -2.239749  | 0.9996379 | -2.2406  | 0.0251   | -0.697786863 | count | 1           |



|             |            |           |         |          |              |       |             |
|-------------|------------|-----------|---------|----------|--------------|-------|-------------|
| AC004492.1  | -2.239749  | 0.9996379 | -2.2406 | 0.0251   | -0.697786863 | count | 1           |
| OR2A42      | -2.239749  | 0.9996379 | -2.2406 | 0.0251   | -0.697786863 | count | 1           |
| AC107959.1  | -2.239749  | 0.9996379 | -2.2406 | 0.0251   | -0.697786863 | count | 1           |
| CA3         | -2.239749  | 0.9996379 | -2.2406 | 0.0251   | -0.697786863 | count | 1           |
| AC087752.4  | -2.239749  | 0.9996379 | -2.2406 | 0.0251   | -0.697786863 | count | 1           |
| SYK         | -2.239749  | 0.9996379 | -2.2406 | 0.0251   | -0.697786863 | count | 1           |
| UBQLNL      | -2.239749  | 0.9996379 | -2.2406 | 0.0251   | -0.697786863 | count | 1           |
| MYEOV       | -2.239749  | 0.9996379 | -2.2406 | 0.0251   | -0.697786863 | count | 1           |
| CACNA1C-AS2 | -2.239749  | 0.9996379 | -2.2406 | 0.0251   | -0.697786863 | count | 1           |
| HP          | -2.239749  | 0.9996379 | -2.2406 | 0.0251   | -0.697786863 | count | 1           |
| RAC3        | -2.239749  | 0.9996379 | -2.2406 | 0.0251   | -0.697786863 | count | 1           |
| AP1M2       | -2.239749  | 0.9996379 | -2.2406 | 0.0251   | -0.697786863 | count | 1           |
| DHDH        | -2.239749  | 0.9996379 | -2.2406 | 0.0251   | -0.697786863 | count | 1           |
| ZKSCAN8     | -0.8909246 | 0.4133987 | -2.1551 | 0.0312   | -0.697756424 | count | 1           |
| IGFBP6      | -0.5010784 | 0.2085445 | -2.4027 | 0.0163   | -0.69750669  | count | 1           |
| 11-Sep      | -0.4965406 | 0.0907803 | -5.4697 | 4.91E-08 | -0.697430129 | count | 0.001156698 |
| WLS         | -0.5025122 | 0.1144654 | -4.3901 | 1.18E-05 | -0.696577053 | count | 0.2735948   |
| ATIC        | -0.8155446 | 0.5230162 | -1.5593 | 0.119    | -0.695946068 | count | 1           |
| INKA1       | -0.575675  | 0.2626441 | -2.1918 | 0.0285   | -0.695663225 | count | 1           |
| BCL7A       | -1.1277945 | 0.5825383 | -1.936  | 0.053    | -0.695654191 | count | 1           |
| SLC35F2     | -0.5655904 | 0.2214912 | -2.5536 | 0.0107   | -0.69528135  | count | 1           |
| MT1E        | -0.5799409 | 0.2631802 | -2.2036 | 0.0276   | -0.694843962 | count | 1           |
| DNAJC3      | -0.4902561 | 0.0737383 | -6.6486 | 3.55E-11 | -0.694752745 | count | 8.45E-07    |
| AGPAT1      | -0.5239216 | 0.1527893 | -3.429  | 0.000615 | -0.694679805 | count | 1           |
| NPNT        | -0.8595606 | 0.4814638 | -1.7853 | 0.0743   | -0.694624189 | count | 1           |
| CA2         | -1.055594  | 0.4878485 | -2.1638 | 0.0306   | -0.692914318 | count | 1           |
| ADGRL1      | -0.6199885 | 0.2726058 | -2.2743 | 0.023    | -0.692657239 | count | 1           |
| SYDE2       | -0.7612304 | 0.5040933 | -1.5101 | 0.131    | -0.692440964 | count | 1           |
| AMFR        | -0.5517854 | 0.1710631 | -3.2256 | 0.00127  | -0.691530949 | count | 1           |
| HSDL1       | -0.6181212 | 0.2855255 | -2.1649 | 0.0305   | -0.690482325 | count | 1           |
| RPP25       | -0.584207  | 0.2273606 | -2.5695 | 0.0102   | -0.688501762 | count | 1           |
| PEMT        | -0.5052814 | 0.1428409 | -3.5374 | 0.000411 | -0.688099705 | count | 1           |
| WBP1L       | -0.5212277 | 0.1611879 | -3.2337 | 0.00124  | -0.687895504 | count | 1           |
| FAM69A      | -1.2040507 | 0.7869601 | -1.53   | 0.126    | -0.687768614 | count | 1           |
| ABCA9       | -1.2040507 | 0.8074213 | -1.4912 | 0.136    | -0.687768614 | count | 1           |
| RUNX1T1     | -0.491935  | 0.1087583 | -4.5232 | 6.35E-06 | -0.687542075 | count | 0.14764385  |
| RNF32       | -0.9937942 | 0.9305273 | -1.068  | 0.286    | -0.687510257 | count | 1           |
| TMX4        | -0.4892445 | 0.1033659 | -4.7331 | 2.32E-06 | -0.686792854 | count | 0.05412096  |
| VCL         | -0.5035107 | 0.1293809 | -3.8917 | 0.000102 | -0.686252602 | count | 1           |
| DENND5B     | -0.6389004 | 0.3192087 | -2.0015 | 0.0454   | -0.686009409 | count | 1           |
| RPA4        | -1.4810266 | 0.6542855 | -2.2636 | 0.0237   | -0.6855867   | count | 1           |
| LYPD1       | -3.867807  | 0.7042203 | -5.4923 | 4.33E-08 | -0.684711802 | count | 0.001020321 |
| DIAPH3      | -3.867807  | 0.935149  | -4.136  | 3.64E-05 | -0.684711802 | count | 0.8396752   |
| JCHAIN      | -2.2035633 | 0.3164656 | -6.963  | 4.15E-12 | -0.684608011 | count | 9.90E-08    |
| PRKCE       | -0.6587984 | 0.2972269 | -2.2165 | 0.0267   | -0.683777641 | count | 1           |

|            |            |           |         |          |              |       |             |
|------------|------------|-----------|---------|----------|--------------|-------|-------------|
| KLHL6      | -0.7521673 | 0.6077413 | -1.2376 | 0.216    | -0.683519769 | count | 1           |
| SLC39A14   | -0.5819599 | 0.2288107 | -2.5434 | 0.011    | -0.683222901 | count | 1           |
| MYBL1      | -1.7303837 | 0.7030259 | -2.4613 | 0.0139   | -0.683218595 | count | 1           |
| PDLIM4     | -0.4898346 | 0.0940245 | -5.2097 | 2.03E-07 | -0.683199181 | count | 0.004765019 |
| SNX29      | -0.5319294 | 0.2112327 | -2.5182 | 0.0119   | -0.682720611 | count | 1           |
| WDR66      | -1.1959694 | 0.6469142 | -1.8487 | 0.0646   | -0.682311525 | count | 1           |
| AC078883.3 | -1.3115209 | 0.6182591 | -2.1213 | 0.034    | -0.682209022 | count | 1           |
| LRRC49     | -0.5661244 | 0.2427698 | -2.3319 | 0.0198   | -0.681854458 | count | 1           |
| CA11       | -0.6214482 | 0.3612987 | -1.72   | 0.0855   | -0.681266081 | count | 1           |
| SUGP2      | -0.5369629 | 0.2175578 | -2.4681 | 0.0136   | -0.6811807   | count | 1           |
| TMIE       | -1.1942142 | 0.6369146 | -1.875  | 0.0609   | -0.681127108 | count | 1           |
| HNRNPUL2   | -0.5542054 | 0.1970971 | -2.8118 | 0.00496  | -0.680930618 | count | 1           |
| BACE1      | -0.5890706 | 0.2527754 | -2.3304 | 0.0199   | -0.680656587 | count | 1           |
| TYMS       | -0.7984377 | 0.4295934 | -1.8586 | 0.0632   | -0.679959931 | count | 1           |
| OSBPL11    | -0.6111725 | 0.2837904 | -2.1536 | 0.0314   | -0.678270895 | count | 1           |
| SLC30A1    | -0.5386421 | 0.2227093 | -2.4186 | 0.0156   | -0.678124293 | count | 1           |
| TBC1D1     | -0.4979402 | 0.1292007 | -3.854  | 0.000119 | -0.677817773 | count | 1           |
| DGKE       | -0.5085193 | 0.1610731 | -3.1571 | 0.00161  | -0.677555844 | count | 1           |
| THEM6      | -0.5056969 | 0.1460509 | -3.4625 | 0.000543 | -0.677545701 | count | 1           |
| CAPG       | -0.5332257 | 0.2034659 | -2.6207 | 0.00882  | -0.677316344 | count | 1           |
| DDIT4      | -0.4811252 | 0.0936243 | -5.1389 | 2.96E-07 | -0.677055398 | count | 0.006940608 |
| AP003486.1 | -1.100947  | 0.5984501 | -1.8397 | 0.0659   | -0.676362311 | count | 1           |
| RNF11      | -0.488969  | 0.1058298 | -4.6203 | 4.01E-06 | -0.676203618 | count | 0.0933929   |
| ARNTL      | -1.1863917 | 0.6548038 | -1.8118 | 0.0701   | -0.675852421 | count | 1           |
| CTSF       | -0.4818965 | 0.10283   | -4.6863 | 2.92E-06 | -0.675614258 | count | 0.06805936  |
| DRAM1      | -0.5238348 | 0.2031034 | -2.5792 | 0.00996  | -0.675248937 | count | 1           |
| AL356481.1 | -1.0312785 | 0.492539  | -2.0938 | 0.0364   | -0.674533987 | count | 1           |
| SNRPN      | -0.4799485 | 0.0865118 | -5.5478 | 3.17E-08 | -0.674362256 | count | 0.000747423 |
| AL355312.4 | -1.459925  | 0.6908862 | -2.1131 | 0.0347   | -0.67370832  | count | 1           |
| SAR1B      | -0.4908355 | 0.1198167 | -4.0966 | 4.31E-05 | -0.673476297 | count | 0.9935412   |
| TTLL7      | -0.7417335 | 0.4299087 | -1.7253 | 0.0846   | -0.67326424  | count | 1           |
| ARSG       | -0.69511   | 0.3402398 | -2.043  | 0.0411   | -0.673047274 | count | 1           |
| WASF1      | -0.8623807 | 0.5815965 | -1.4828 | 0.138    | -0.672882975 | count | 1           |
| MEIS1-AS2  | -3.7581563 | 1.8388239 | -2.0438 | 0.0411   | -0.67250577  | count | 1           |
| NUP160     | -0.5538065 | 0.2125974 | -2.605  | 0.00924  | -0.672145861 | count | 1           |
| CCSAP      | -0.9742389 | 0.5666654 | -1.7192 | 0.0857   | -0.672087409 | count | 1           |
| ZNF182     | -0.6746002 | 0.3714504 | -1.8161 | 0.0695   | -0.670146911 | count | 1           |
| OPHN1      | -0.5598136 | 0.2416689 | -2.3164 | 0.0206   | -0.670019898 | count | 1           |
| AJUBA      | -1.4531581 | 0.70163   | -2.0711 | 0.0384   | -0.669904052 | count | 1           |
| RNASE6     | -1.4531581 | 0.8081938 | -1.798  | 0.0723   | -0.669904052 | count | 1           |
| ABHD15     | -0.8896846 | 0.4872822 | -1.8258 | 0.068    | -0.669319883 | count | 1           |
| KLHL35     | -1.0904039 | 0.6398419 | -1.7042 | 0.0885   | -0.668809019 | count | 1           |
| PPIL2      | -0.5756981 | 0.2760226 | -2.0857 | 0.0371   | -0.667542523 | count | 1           |
| WDFY3      | -0.5219771 | 0.2323917 | -2.2461 | 0.0248   | -0.667233599 | count | 1           |
| BAX        | -0.4722738 | 0.0792881 | -5.9564 | 2.90E-09 | -0.666555652 | count | 6.87E-05    |

|            |            |           |          |          |              |       |             |
|------------|------------|-----------|----------|----------|--------------|-------|-------------|
| NORAD      | -0.4674296 | 0.069218  | -6.753   | 1.76E-11 | -0.664952524 | count | 4.19E-07    |
| POFUT1     | -0.6478678 | 0.3247111 | -1.9952  | 0.0461   | -0.664928471 | count | 1           |
| PLEKHG4    | -1.0840929 | 0.6757247 | -1.6043  | 0.109    | -0.664294029 | count | 1           |
| SLC2A9     | -1.0840929 | 0.6934394 | -1.5634  | 0.118    | -0.664294029 | count | 1           |
| NF1        | -0.5147331 | 0.1704875 | -3.0192  | 0.00256  | -0.66404389  | count | 1           |
| PDZD8      | -0.5193448 | 0.1796424 | -2.891   | 0.00387  | -0.663806235 | count | 1           |
| PIK3R1     | -0.5014429 | 0.1568453 | -3.1971  | 0.0014   | -0.663220931 | count | 1           |
| DLG5       | -1.0816026 | 0.4748024 | -2.278   | 0.0228   | -0.662513718 | count | 1           |
| GADD45GIP1 | -0.4655738 | 0.0596648 | -7.8032  | 8.50E-15 | -0.662417762 | count | 2.04E-10    |
| MYL6B      | -0.4749735 | 0.098935  | -4.8009  | 1.66E-06 | -0.661762464 | count | 0.03875436  |
| SOX4       | -0.4645962 | 0.088476  | -5.2511  | 1.63E-07 | -0.661490542 | count | 0.003827566 |
| AC067838.1 | -2.1404101 | 1.087337  | -1.9685  | 0.0491   | -0.661427704 | count | 1           |
| IGFBP5     | -0.4707252 | 0.2630334 | -1.7896  | 0.0736   | -0.661110219 | count | 1           |
| FNDC4      | -0.5998977 | 0.2667893 | -2.2486  | 0.0246   | -0.660998927 | count | 1           |
| HCFC1R1    | -0.4691831 | 0.0859092 | -5.4614  | 5.14E-08 | -0.66096327  | count | 0.001210624 |
| PRR15      | -0.5635204 | 0.296552  | -1.9002  | 0.0575   | -0.660869057 | count | 1           |
| RHOBTB2    | -0.6034225 | 0.3437273 | -1.7555  | 0.0793   | -0.660623052 | count | 1           |
| 4-Sep      | -0.5623096 | 0.2242599 | -2.5074  | 0.0122   | -0.659402471 | count | 1           |
| TAB2       | -0.5640823 | 0.2438377 | -2.3134  | 0.0208   | -0.658991699 | count | 1           |
| TBCD       | -0.5040924 | 0.2491786 | -2.023   | 0.0432   | -0.658887516 | count | 1           |
| BEX3       | -0.4623064 | 0.0656614 | -7.0408  | 2.40E-12 | -0.658617261 | count | 5.73E-08    |
| TMEM30B    | -1.43254   | 0.5933886 | -2.4142  | 0.0158   | -0.658328556 | count | 1           |
| B9D1       | -0.6295428 | 0.3653272 | -1.7232  | 0.085    | -0.658135922 | count | 1           |
| HEY1       | -0.6239552 | 0.251538  | -2.4806  | 0.0132   | -0.657994242 | count | 1           |
| MX2        | -0.5481167 | 0.2806151 | -1.9533  | 0.0509   | -0.657611651 | count | 1           |
| PQLC2      | -0.6135738 | 0.4090527 | -1.5     | 0.134    | -0.657504222 | count | 1           |
| LINC00311  | -2.129204  | 0.7923739 | -2.6871  | 0.00725  | -0.657292838 | count | 1           |
| SEC61A1    | -0.4848044 | 0.1538126 | -3.1519  | 0.00164  | -0.657095377 | count | 1           |
| A1BG       | -2.1277519 | 0.6849202 | -3.1066  | 0.00191  | -0.656756823 | count | 1           |
| SH3BGR13   | -0.4564406 | 0.0332727 | -13.7182 | 1.75E-41 | -0.656449295 | count | 4.24E-37    |
| TNFRSF8    | -0.7236765 | 0.4748489 | -1.524   | 0.128    | -0.655554099 | count | 1           |
| THBS3      | -0.560774  | 0.2900308 | -1.9335  | 0.0533   | -0.654997939 | count | 1           |
| CNPY2      | -0.4659846 | 0.0855331 | -5.448   | 5.54E-08 | -0.654861561 | count | 0.001304559 |
| RNF170     | -0.5070066 | 0.2208539 | -2.2957  | 0.0218   | -0.654614233 | count | 1           |
| ERP27      | -1.2671955 | 0.5603158 | -2.2616  | 0.0238   | -0.654614131 | count | 1           |
| PRNCR1     | -0.9515304 | 0.593966  | -1.602   | 0.109    | -0.654243007 | count | 1           |
| CLDN14     | -1.068865  | 0.7238531 | -1.4766  | 0.14     | -0.653419595 | count | 1           |
| AL645465.1 | -2.1186365 | 0.9878091 | -2.1448  | 0.0321   | -0.653388596 | count | 1           |
| TMEM215    | -2.1186365 | 1.0314456 | -2.054   | 0.0401   | -0.653388596 | count | 1           |
| NANOS3     | -2.1186365 | 1.187274  | -1.7845  | 0.0745   | -0.653388596 | count | 1           |
| TOM1L2     | -0.5611162 | 0.2729385 | -2.0558  | 0.0399   | -0.652777757 | count | 1           |
| ZNF175     | -0.6852804 | 0.3798759 | -1.804   | 0.0713   | -0.65272858  | count | 1           |
| AL357055.3 | -1.263277  | 0.8456213 | -1.4939  | 0.135    | -0.652182599 | count | 1           |
| MAP3K7CL   | -0.8683564 | 0.4297685 | -2.0205  | 0.0434   | -0.651352297 | count | 1           |
| UBA6-AS1   | -0.6411539 | 0.3927242 | -1.6326  | 0.103    | -0.650467685 | count | 1           |

|            |            |           |          |          |              |       |             |
|------------|------------|-----------|----------|----------|--------------|-------|-------------|
| MXD1       | -0.6169344 | 0.3019355 | -2.0433  | 0.0411   | -0.650210528 | count | 1           |
| HRCT1      | -0.4683764 | 0.1201171 | -3.8993  | 9.88E-05 | -0.650029171 | count | 1           |
| HMOX1      | -0.4893955 | 0.21601   | -2.2656  | 0.0236   | -0.649912395 | count | 1           |
| SDC2       | -1.0621755 | 0.6022486 | -1.7637  | 0.0779   | -0.648651539 | count | 1           |
| CD81       | -0.4499622 | 0.0303603 | -14.8207 | 7.08E-48 | -0.647798548 | count | 1.72E-43    |
| CU638689.4 | -0.8329671 | 0.6078769 | -1.3703  | 0.171    | -0.647377309 | count | 1           |
| DUSP8      | -0.7152257 | 0.4007799 | -1.7846  | 0.0744   | -0.647282706 | count | 1           |
| CAPRIN2    | -0.5180592 | 0.2898729 | -1.7872  | 0.074    | -0.647204934 | count | 1           |
| MATN2      | -0.4900142 | 0.1961029 | -2.4988  | 0.0125   | -0.647046564 | count | 1           |
| PYCR1      | -1.0596323 | 0.5090422 | -2.0816  | 0.0375   | -0.646840352 | count | 1           |
| MCAM       | -0.4597285 | 0.1011747 | -4.5439  | 5.76E-06 | -0.646661639 | count | 0.13399488  |
| SMCR5      | -2.1000152 | 0.7867807 | -2.6691  | 0.00765  | -0.646496323 | count | 1           |
| TNFRSF18   | -1.4111429 | 0.7537537 | -1.8722  | 0.0613   | -0.646342521 | count | 1           |
| MSRB1      | -0.4972211 | 0.1854429 | -2.6813  | 0.00738  | -0.645687504 | count | 1           |
| ZNF418     | -0.7131325 | 0.5509598 | -1.2943  | 0.196    | -0.645235634 | count | 1           |
| POLR2J     | -0.4577256 | 0.0887663 | -5.1565  | 2.69E-07 | -0.645224796 | count | 0.006309126 |
| CCDC34     | -0.503592  | 0.2162219 | -2.3291  | 0.0199   | -0.64492607  | count | 1           |
| C9orf3     | -0.4602465 | 0.0838934 | -5.4861  | 4.48E-08 | -0.64396883  | count | 0.001055622 |
| RASGRF2    | -0.5235202 | 0.2145599 | -2.44    | 0.0148   | -0.643763264 | count | 1           |
| KLHL4      | -0.7114963 | 0.4066345 | -1.7497  | 0.0803   | -0.643635983 | count | 1           |
| CALM1      | -0.4465775 | 0.0337998 | -13.2124 | 1.08E-38 | -0.643113307 | count | 2.62E-34    |
| TMEM64     | -0.6860109 | 0.3007053 | -2.2813  | 0.0226   | -0.642655379 | count | 1           |
| ARHGAP32   | -0.7782441 | 0.4059973 | -1.9169  | 0.0554   | -0.642512554 | count | 1           |
| ADM        | -0.4721043 | 0.1679784 | -2.8105  | 0.00498  | -0.641775105 | count | 1           |
| TUBA1A     | -0.4485137 | 0.0588073 | -7.6268  | 3.29E-14 | -0.64141031  | count | 7.87E-10    |
| CHID1      | -0.4643263 | 0.1119509 | -4.1476  | 3.46E-05 | -0.640987018 | count | 0.7982912   |
| SLC35E2B   | -0.6467245 | 0.3183066 | -2.0318  | 0.0423   | -0.64074521  | count | 1           |
| PSAP       | -0.4477566 | 0.050775  | -8.8184  | 2.01E-18 | -0.640148312 | count | 4.83E-14    |
| TOR1AIP2   | -0.4605658 | 0.1042278 | -4.4188  | 1.03E-05 | -0.639927915 | count | 0.2389909   |
| DMKN       | -0.5014693 | 0.2161189 | -2.3203  | 0.0204   | -0.639713311 | count | 1           |
| CAB39L     | -0.8544623 | 0.3706722 | -2.3052  | 0.0212   | -0.639684193 | count | 1           |
| NRGN       | -0.4658621 | 0.1178593 | -3.9527  | 7.92E-05 | -0.639375952 | count | 1           |
| FRMD4B     | -0.4506733 | 0.0728622 | -6.1853  | 7.12E-10 | -0.639360499 | count | 1.69E-05    |
| AL132780.2 | -1.04893   | 0.8677341 | -1.2088  | 0.227    | -0.639227165 | count | 1           |
| SLC27A5    | -0.4916632 | 0.1825292 | -2.6936  | 0.00711  | -0.638965006 | count | 1           |
| GRIP2      | -3.4929455 | 1.5774516 | -2.2143  | 0.0269   | -0.638913493 | count | 1           |
| USP53      | -0.4715395 | 0.1303456 | -3.6176  | 0.000303 | -0.638736226 | count | 1           |
| EFNA4      | -0.5642747 | 0.2814256 | -2.0051  | 0.0451   | -0.638580642 | count | 1           |
| ARFGEF3    | -0.5448013 | 0.2443331 | -2.2297  | 0.0258   | -0.638213005 | count | 1           |
| GEN1       | -0.9304467 | 0.4364556 | -2.1318  | 0.0331   | -0.637740533 | count | 1           |
| MRPL17     | -0.4518559 | 0.0873795 | -5.1712  | 2.49E-07 | -0.637125509 | count | 0.005842785 |
| ZNF618     | -0.6287036 | 0.3468812 | -1.8124  | 0.07     | -0.637107353 | count | 1           |
| ST3GAL4    | -0.4893377 | 0.214667  | -2.2795  | 0.0227   | -0.637075872 | count | 1           |
| VMAC       | -0.5790723 | 0.3195426 | -1.8122  | 0.0701   | -0.637072734 | count | 1           |
| ITGB1      | -0.4443406 | 0.052178  | -8.5159  | 2.67E-17 | -0.636124273 | count | 6.41E-13    |

|            |            |           |         |          |              |       |          |
|------------|------------|-----------|---------|----------|--------------|-------|----------|
| PROCA1     | -1.12597   | 0.6299722 | -1.7873 | 0.074    | -0.635329204 | count | 1        |
| SEC14L2    | -0.8492104 | 0.4244218 | -2.0009 | 0.0455   | -0.635281454 | count | 1        |
| TSPAN5     | -0.5043826 | 0.195783  | -2.5762 | 0.01     | -0.635148529 | count | 1        |
| SDF4       | -0.4512885 | 0.0755203 | -5.9757 | 2.58E-09 | -0.635054914 | count | 6.11E-05 |
| AK1        | -0.526669  | 0.3039414 | -1.7328 | 0.0832   | -0.634853831 | count | 1        |
| THTPA      | -0.5295532 | 0.2359383 | -2.2445 | 0.0249   | -0.634713114 | count | 1        |
| CHRNA10    | -1.390123  | 0.8205724 | -1.6941 | 0.0904   | -0.634596529 | count | 1        |
| CAMK1D     | -0.5769046 | 0.2598819 | -2.2199 | 0.0265   | -0.634585425 | count | 1        |
| ATP6V0E2   | -0.5732403 | 0.2695462 | -2.1267 | 0.0335   | -0.634439403 | count | 1        |
| CDCA8      | -2.066743  | 0.7985485 | -2.5881 | 0.0097   | -0.634145637 | count | 1        |
| TMEM44-AS1 | -0.8174852 | 0.4169036 | -1.9608 | 0.05     | -0.634005605 | count | 1        |
| PTPN14     | -0.4702112 | 0.1266235 | -3.7135 | 0.000208 | -0.633639021 | count | 1        |
| PCNX2      | -1.6276512 | 0.618426  | -2.6319 | 0.00854  | -0.633583641 | count | 1        |
| AC009041.2 | -0.882614  | 0.4716618 | -1.8713 | 0.0614   | -0.6335137   | count | 1        |
| WDR26      | -0.490417  | 0.1966473 | -2.4939 | 0.0127   | -0.632843711 | count | 1        |
| FSD1L      | -1.229839  | 0.5342797 | -2.3019 | 0.0214   | -0.631493827 | count | 1        |
| ELMOD2     | -0.489347  | 0.180444  | -2.7119 | 0.00673  | -0.631440191 | count | 1        |
| NAPEPLD    | -0.654684  | 0.3675343 | -1.7813 | 0.075    | -0.631324739 | count | 1        |
| MGAT5      | -0.550066  | 0.3465479 | -1.5873 | 0.113    | -0.631170864 | count | 1        |
| ZNF266     | -0.7118858 | 0.3537017 | -2.0127 | 0.0442   | -0.630328712 | count | 1        |
| LY6K       | -0.6367584 | 0.4486798 | -1.4192 | 0.156    | -0.630261104 | count | 1        |
| CHSY1      | -0.4596763 | 0.1195808 | -3.8441 | 0.000124 | -0.629995458 | count | 1        |
| RAB30      | -0.6218667 | 0.2819519 | -2.2056 | 0.0275   | -0.629780238 | count | 1        |
| EMC1       | -0.5657681 | 0.2405612 | -2.3519 | 0.0187   | -0.629673707 | count | 1        |
| UBR3       | -0.5110646 | 0.2148393 | -2.3788 | 0.0174   | -0.629467707 | count | 1        |
| GBF1       | -0.500228  | 0.2461543 | -2.0322 | 0.0422   | -0.628786995 | count | 1        |
| MYDGF      | -0.4414435 | 0.0596333 | -7.4026 | 1.76E-13 | -0.62818221  | count | 4.21E-09 |
| TMEM189    | -0.5068621 | 0.2391527 | -2.1194 | 0.0341   | -0.628100851 | count | 1        |
| SLC12A2    | -0.4872664 | 0.1855616 | -2.6259 | 0.00869  | -0.628028585 | count | 1        |
| IQCK       | -0.4592254 | 0.1365959 | -3.3619 | 0.000785 | -0.626774624 | count | 1        |
| FAM214A    | -0.4890848 | 0.1640473 | -2.9814 | 0.00289  | -0.626021734 | count | 1        |
| PMPCA      | -0.477008  | 0.1926695 | -2.4758 | 0.0134   | -0.625529617 | count | 1        |
| GAB2       | -0.6114703 | 0.3432465 | -1.7814 | 0.075    | -0.625528403 | count | 1        |
| CACNA1A    | -0.6174748 | 0.3804156 | -1.6232 | 0.105    | -0.625077036 | count | 1        |
| TMEM217    | -1.0286191 | 0.6560329 | -1.5679 | 0.117    | -0.624820259 | count | 1        |
| INHBA      | -1.0286191 | 0.7741381 | -1.3287 | 0.184    | -0.624820259 | count | 1        |
| ZNF382     | -0.9136282 | 0.4919531 | -1.8571 | 0.0634   | -0.624623045 | count | 1        |
| ZNF329     | -0.6783311 | 0.3932658 | -1.7249 | 0.0847   | -0.623514229 | count | 1        |
| KYNU       | -0.5322047 | 0.3036207 | -1.7529 | 0.0797   | -0.622988479 | count | 1        |
| TSNAXIP1   | -2.036639  | 0.6829459 | -2.9821 | 0.00289  | -0.622936002 | count | 1        |
| FBXL22     | -1.2159356 | 0.6755649 | -1.7999 | 0.072    | -0.622923239 | count | 1        |
| DUSP3      | -0.475499  | 0.2236333 | -2.1262 | 0.0336   | -0.622530181 | count | 1        |
| CCDC30     | -0.6650179 | 0.3487986 | -1.9066 | 0.0567   | -0.621576915 | count | 1        |
| ENG        | -0.4335326 | 0.0492577 | -8.8013 | 2.34E-18 | -0.621527557 | count | 5.62E-14 |
| CCL8       | -0.5038434 | 0.9181949 | -0.5487 | 0.5832   | -0.620364215 | count | 1        |

|             |            |           |         |          |              |       |            |
|-------------|------------|-----------|---------|----------|--------------|-------|------------|
| ALDH18A1    | -0.6196385 | 0.3197586 | -1.9378 | 0.0527   | -0.620048786 | count | 1          |
| SLC20A1     | -0.4506698 | 0.1224583 | -3.6802 | 0.000238 | -0.619650355 | count | 1          |
| ZDHHC11     | -1.1023964 | 0.7364862 | -1.4968 | 0.135    | -0.619631388 | count | 1          |
| STX3        | -0.5116169 | 0.2180509 | -2.3463 | 0.019    | -0.619623776 | count | 1          |
| ADRB2       | -0.4636659 | 0.1537023 | -3.0166 | 0.00258  | -0.619412981 | count | 1          |
| TTN-AS1     | -0.5376408 | 0.3503786 | -1.5345 | 0.125    | -0.619229782 | count | 1          |
| SSR3        | -0.4356006 | 0.0615653 | -7.0754 | 1.88E-12 | -0.618962204 | count | 4.49E-08   |
| GUF1        | -0.5058417 | 0.2754521 | -1.8364 | 0.0664   | -0.617159446 | count | 1          |
| CHRM3       | -0.6163851 | 0.2789778 | -2.2094 | 0.0272   | -0.616600713 | count | 1          |
| PLIN5       | -0.7491724 | 0.5092743 | -1.4711 | 0.141    | -0.616191754 | count | 1          |
| AES         | -0.4327408 | 0.0569902 | -7.5932 | 4.24E-14 | -0.616161725 | count | 1.01E-09   |
| SLC12A4     | -0.5643264 | 0.2610614 | -2.1617 | 0.0307   | -0.615991644 | count | 1          |
| AC048341.1  | -0.9529177 | 0.4611211 | -2.0665 | 0.0389   | -0.615831242 | count | 1          |
| PRKCA       | -0.7961332 | 0.4580158 | -1.7382 | 0.0823   | -0.615626168 | count | 1          |
| TSHZ3       | -0.5120334 | 0.250055  | -2.0477 | 0.0407   | -0.614962331 | count | 1          |
| ZNF90       | -0.7281268 | 0.38219   | -1.9051 | 0.0569   | -0.614724334 | count | 1          |
| ST5         | -0.6812942 | 0.3879602 | -1.7561 | 0.0792   | -0.614184163 | count | 1          |
| AC010976.2  | -0.8579602 | 0.5238266 | -1.6379 | 0.102    | -0.61358151  | count | 1          |
| TMEM91      | -0.4510995 | 0.1610991 | -2.8001 | 0.00514  | -0.61353536  | count | 1          |
| KIAA0556    | -0.6459898 | 0.3797984 | -1.7009 | 0.0891   | -0.612767313 | count | 1          |
| TMEM178A    | -0.9474082 | 0.4493433 | -2.1084 | 0.0351   | -0.61173628  | count | 1          |
| DPY19L1     | -0.499973  | 0.2077995 | -2.406  | 0.0162   | -0.611294412 | count | 1          |
| SFT2D2      | -0.4522917 | 0.14783   | -3.0595 | 0.00224  | -0.611130654 | count | 1          |
| NBPF14      | -1.346889  | 0.4814019 | -2.7978 | 0.00518  | -0.610535393 | count | 1          |
| LINC01715   | -1.088439  | 0.7603762 | -1.4314 | 0.152    | -0.610368785 | count | 1          |
| INPP5D      | -0.5013753 | 0.3141552 | -1.5959 | 0.111    | -0.610058946 | count | 1          |
| PTP4A2      | -0.4326624 | 0.0861925 | -5.0197 | 5.50E-07 | -0.609724979 | count | 0.01287715 |
| SPATA20     | -0.4783204 | 0.1892316 | -2.5277 | 0.0115   | -0.609657951 | count | 1          |
| P2RX4       | -0.5423598 | 0.2586353 | -2.097  | 0.0361   | -0.6095717   | count | 1          |
| VAV2        | -0.6241791 | 0.3411393 | -1.8297 | 0.0674   | -0.608777238 | count | 1          |
| DDHD1       | -0.4924359 | 0.3074705 | -1.6016 | 0.109    | -0.608579842 | count | 1          |
| CD34        | -0.4260743 | 0.0674014 | -6.3214 | 3.01E-10 | -0.608339725 | count | 7.14E-06   |
| TOLLIP-AS1  | -0.6887726 | 0.4094464 | -1.6822 | 0.0926   | -0.608189029 | count | 1          |
| DUSP18      | -0.4846798 | 0.2485162 | -1.9503 | 0.0512   | -0.607833154 | count | 1          |
| MAFK        | -0.5061936 | 0.2314442 | -2.1871 | 0.0288   | -0.607757931 | count | 1          |
| COPS7A      | -0.4510058 | 0.142338  | -3.1686 | 0.00155  | -0.60775258  | count | 1          |
| ASAP2       | -0.4458969 | 0.1516294 | -2.9407 | 0.0033   | -0.607279531 | count | 1          |
| KLHL42      | -0.5230393 | 0.2426104 | -2.1559 | 0.0312   | -0.607055652 | count | 1          |
| USP2        | -1.5718895 | 0.7043161 | -2.2318 | 0.0257   | -0.606750132 | count | 1          |
| ZFY-AS1     | -1.5718895 | 0.7199559 | -2.1833 | 0.0291   | -0.606750132 | count | 1          |
| ZNF221      | -1.001749  | 0.5393592 | -1.8573 | 0.0634   | -0.605845455 | count | 1          |
| HELLS       | -0.5927845 | 0.3036287 | -1.9523 | 0.051    | -0.605375315 | count | 1          |
| TXNRD1      | -0.4434364 | 0.1386099 | -3.1992 | 0.00139  | -0.605058054 | count | 1          |
| NECTIN3-AS1 | -1.0004768 | 0.6445396 | -1.5522 | 0.121    | -0.604949561 | count | 1          |
| MAP3K2      | -0.4438809 | 0.1545049 | -2.8729 | 0.0041   | -0.604340044 | count | 1          |

|            |            |           |          |          |              |       |             |
|------------|------------|-----------|----------|----------|--------------|-------|-------------|
| SFXN3      | -0.4616639 | 0.1610873 | -2.8659  | 0.00419  | -0.603671654 | count | 1           |
| ELOB       | -0.421145  | 0.0438975 | -9.5938  | 1.83E-21 | -0.603451711 | count | 4.41E-17    |
| JAZF1      | -0.4820448 | 0.249836  | -1.9294  | 0.0538   | -0.603425033 | count | 1           |
| IFT122     | -0.5532367 | 0.2910261 | -1.901   | 0.0574   | -0.603368304 | count | 1           |
| SH3D21     | -1.5646636 | 0.8329595 | -1.8784  | 0.0604   | -0.603281067 | count | 1           |
| LINC01315  | -1.5646636 | 0.8450751 | -1.8515  | 0.0642   | -0.603281067 | count | 1           |
| AL358472.3 | -1.5646636 | 0.8749496 | -1.7883  | 0.0738   | -0.603281067 | count | 1           |
| SCGB1B2P   | -1.5646636 | 0.8918765 | -1.7543  | 0.0795   | -0.603281067 | count | 1           |
| NUSAP1     | -1.9827716 | 0.7221919 | -2.7455  | 0.00608  | -0.602809402 | count | 1           |
| GAA        | -0.4530237 | 0.1662993 | -2.7241  | 0.00649  | -0.602451541 | count | 1           |
| HIVEP3     | -0.7144901 | 0.3554797 | -2.0099  | 0.0445   | -0.602163793 | count | 1           |
| RAB32      | -0.435119  | 0.1112012 | -3.9129  | 9.34E-05 | -0.602035109 | count | 1           |
| HCLS1      | -0.5108373 | 0.2542216 | -2.0094  | 0.0446   | -0.601664384 | count | 1           |
| JPT1       | -0.4312217 | 0.0957302 | -4.5046  | 6.93E-06 | -0.601250152 | count | 0.16104627  |
| CAND2      | -0.6664877 | 0.5266912 | -1.2654  | 0.206    | -0.599799237 | count | 1           |
| DNAJC5     | -0.4813218 | 0.2225595 | -2.1627  | 0.0307   | -0.599249639 | count | 1           |
| PLPP1      | -0.421837  | 0.1207419 | -3.4937  | 0.000484 | -0.599009463 | count | 1           |
| PEPD       | -0.4276864 | 0.0832112 | -5.1398  | 2.94E-07 | -0.598738974 | count | 0.0068943   |
| ABCC1      | -0.5702436 | 0.2879717 | -1.9802  | 0.0478   | -0.598619301 | count | 1           |
| FAM114A1   | -0.4282958 | 0.1031436 | -4.1524  | 3.39E-05 | -0.59805362  | count | 0.7823103   |
| NDUFC2     | -0.4176992 | 0.04742   | -8.8085  | 2.20E-18 | -0.597770315 | count | 5.29E-14    |
| UFD1       | -0.4244773 | 0.0767893 | -5.5278  | 3.55E-08 | -0.597448654 | count | 0.000836877 |
| FAM229B    | -0.4453368 | 0.145215  | -3.0667  | 0.00219  | -0.596694754 | count | 1           |
| IL10RA     | -3.2101602 | 1.4659925 | -2.1898  | 0.0286   | -0.596456229 | count | 1           |
| LDHD       | -0.6041323 | 0.3777232 | -1.5994  | 0.11     | -0.596044448 | count | 1           |
| SKIV2L     | -0.5504079 | 0.4570278 | -1.2043  | 0.229    | -0.595891116 | count | 1           |
| ARMCX6     | -0.4395061 | 0.1328032 | -3.3095  | 0.000947 | -0.595170689 | count | 1           |
| ID2-AS1    | -1.546602  | 0.8653981 | -1.7872  | 0.074    | -0.594619605 | count | 1           |
| SLC15A2    | -1.546602  | 0.8653981 | -1.7872  | 0.074    | -0.594619605 | count | 1           |
| ART3       | -1.546602  | 0.8653981 | -1.7872  | 0.074    | -0.594619605 | count | 1           |
| AC093627.4 | -1.546602  | 0.8653981 | -1.7872  | 0.074    | -0.594619605 | count | 1           |
| ODF3L1     | -1.546602  | 0.8653981 | -1.7872  | 0.074    | -0.594619605 | count | 1           |
| AC015917.2 | -1.546602  | 0.8653981 | -1.7872  | 0.074    | -0.594619605 | count | 1           |
| Z98885.3   | -1.546602  | 0.8653981 | -1.7872  | 0.074    | -0.594619605 | count | 1           |
| MTF1       | -0.518417  | 0.2438709 | -2.1258  | 0.0336   | -0.593623108 | count | 1           |
| TAS2R31    | -1.9571313 | 0.8978666 | -2.1798  | 0.0294   | -0.593205052 | count | 1           |
| ENOSF1     | -0.4709569 | 0.1894948 | -2.4853  | 0.013    | -0.593193452 | count | 1           |
| AP3D1      | -0.4610872 | 0.1721462 | -2.6785  | 0.00744  | -0.593087686 | count | 1           |
| PROSER1    | -0.5604037 | 0.3272097 | -1.7127  | 0.0869   | -0.592981719 | count | 1           |
| KCNK7      | -1.3150733 | 0.759669  | -1.7311  | 0.0835   | -0.592921977 | count | 1           |
| AL358472.2 | -1.3150733 | 0.8499399 | -1.5473  | 0.122    | -0.592921977 | count | 1           |
| AC027682.6 | -0.7446275 | 0.4991559 | -1.4918  | 0.136    | -0.592702507 | count | 1           |
| FZD2       | -0.870333  | 0.6497836 | -1.3394  | 0.181    | -0.591053197 | count | 1           |
| GPSM1      | -0.7425854 | 0.5038211 | -1.4739  | 0.141    | -0.59091086  | count | 1           |
| SERF2      | -0.4100864 | 0.0241232 | -16.9997 | 1.02E-61 | -0.590637727 | count | 2.48E-57    |

|              |            |           |         |          |              |       |           |
|--------------|------------|-----------|---------|----------|--------------|-------|-----------|
| DGKD         | -0.6147772 | 0.4157974 | -1.4785 | 0.139    | -0.590383005 | count | 1         |
| ZNF668       | -0.5454489 | 0.3109273 | -1.7543 | 0.0795   | -0.590288227 | count | 1         |
| SH3KBP1      | -0.4649815 | 0.1802901 | -2.5791 | 0.00996  | -0.589927048 | count | 1         |
| FASTK        | -0.4507973 | 0.1670528 | -2.6985 | 0.00701  | -0.58926736  | count | 1         |
| NEAT1        | -0.4096789 | 0.0623298 | -6.5728 | 5.88E-11 | -0.589122446 | count | 1.40E-06  |
| AGL          | -0.4447329 | 0.1750977 | -2.5399 | 0.0111   | -0.588465058 | count | 1         |
| ARMC2        | -0.7930367 | 0.4866186 | -1.6297 | 0.103    | -0.588464875 | count | 1         |
| RNF207       | -0.7927401 | 0.4266132 | -1.8582 | 0.0632   | -0.588219027 | count | 1         |
| MYL9         | -0.4149115 | 0.0995867 | -4.1663 | 3.19E-05 | -0.588110419 | count | 0.7363796 |
| CBR4         | -0.4724078 | 0.2348    | -2.012  | 0.0443   | -0.587918557 | count | 1         |
| TP53INP2     | -0.9135146 | 0.514307  | -1.7762 | 0.0758   | -0.586644784 | count | 1         |
| AP001627.1   | -0.666159  | 0.3495676 | -1.9057 | 0.0568   | -0.586613205 | count | 1         |
| RHBDF1       | -0.6528332 | 0.3623785 | -1.8015 | 0.0717   | -0.586565711 | count | 1         |
| USB1         | -0.4587614 | 0.2027771 | -2.2624 | 0.0238   | -0.586557348 | count | 1         |
| PCDHB14      | -0.5749869 | 0.5509606 | -1.0436 | 0.297    | -0.586228589 | count | 1         |
| STAM         | -0.4492105 | 0.1734707 | -2.5895 | 0.00966  | -0.586173404 | count | 1         |
| FASTKD5      | -0.5688069 | 0.3284973 | -1.7315 | 0.0835   | -0.585701977 | count | 1         |
| HIST2H2AC    | -0.4817744 | 0.2004734 | -2.4032 | 0.0163   | -0.585626963 | count | 1         |
| CD58         | -0.4292427 | 0.1245146 | -3.4473 | 0.000575 | -0.58554387  | count | 1         |
| AC087741.1   | -0.9110704 | 0.5997575 | -1.5191 | 0.129    | -0.584842128 | count | 1         |
| PCDHB2       | -0.600849  | 0.4070729 | -1.476  | 0.14     | -0.584622273 | count | 1         |
| C7orf50      | -0.4173655 | 0.086803  | -4.8082 | 1.60E-06 | -0.584276459 | count | 0.03736   |
| FXYD2        | -1.52479   | 0.6496101 | -2.3472 | 0.019    | -0.58417907  | count | 1         |
| ZDHHC1       | -0.5396844 | 0.3849014 | -1.4021 | 0.161    | -0.583779542 | count | 1         |
| FUCA2        | -0.4316022 | 0.1449851 | -2.9769 | 0.00294  | -0.583350573 | count | 1         |
| NUDT14       | -0.4209991 | 0.1038372 | -4.0544 | 5.16E-05 | -0.583145482 | count | 1         |
| COPA         | -0.4273861 | 0.1193054 | -3.5823 | 0.000346 | -0.582836364 | count | 1         |
| ATF7IP2      | -0.591277  | 0.3098505 | -1.9083 | 0.0565   | -0.582607811 | count | 1         |
| RAB11B-AS1   | -0.4681919 | 0.2190123 | -2.1377 | 0.0326   | -0.582561969 | count | 1         |
| BTNL9        | -0.550953  | 0.2964758 | -1.8583 | 0.0632   | -0.582510879 | count | 1         |
| IL34         | -0.5385057 | 0.2926464 | -1.8401 | 0.0659   | -0.582449252 | count | 1         |
| TLX1         | -3.1255765 | 1.4430967 | -2.1659 | 0.0304   | -0.582410889 | count | 1         |
| METTL8       | -0.4911328 | 0.2684905 | -1.8292 | 0.0675   | -0.581819057 | count | 1         |
| RNASE1       | -0.4036808 | 0.0358253 | -11.268 | 7.95E-29 | -0.58146245  | count | 1.92E-24  |
| DGCR8        | -0.6348106 | 0.3637257 | -1.7453 | 0.081    | -0.580627788 | count | 1         |
| DENND3       | -0.4881839 | 0.2406353 | -2.0287 | 0.0426   | -0.580144155 | count | 1         |
| RASSF4       | -0.5327729 | 0.3525486 | -1.5112 | 0.131    | -0.580118251 | count | 1         |
| C21orf58     | -0.8558979 | 0.5360407 | -1.5967 | 0.11     | -0.57992641  | count | 1         |
| EOGT         | -0.4961122 | 0.2279076 | -2.1768 | 0.0296   | -0.579464741 | count | 1         |
| ALDH1A3      | -0.4315719 | 0.1726679 | -2.4994 | 0.0125   | -0.579376719 | count | 1         |
| ZHX1-C8orf76 | -0.9034381 | 0.7534402 | -1.1991 | 0.231    | -0.579219071 | count | 1         |
| RARG         | -0.4789708 | 0.2382534 | -2.0103 | 0.0445   | -0.57910198  | count | 1         |
| ARHGAP22     | -3.1055984 | 1.4692748 | -2.1137 | 0.0346   | -0.579004253 | count | 1         |
| POLD4        | -0.6124609 | 0.4185724 | -1.4632 | 0.144    | -0.578859017 | count | 1         |
| GPX7         | -0.4384674 | 0.1939415 | -2.2608 | 0.0238   | -0.578553713 | count | 1         |



|            |            |           |         |          |              |       |            |
|------------|------------|-----------|---------|----------|--------------|-------|------------|
| GOLIM4     | -0.4100597 | 0.0891675 | -4.5988 | 4.44E-06 | -0.578320461 | count | 0.10335876 |
| MYO19      | -0.5464471 | 0.2753281 | -1.9847 | 0.0473   | -0.577523158 | count | 1          |
| LRP6       | -0.4676888 | 0.1698845 | -2.753  | 0.00594  | -0.577329677 | count | 1          |
| AC006160.1 | -1.914284  | 0.9074346 | -2.1096 | 0.035    | -0.57713073  | count | 1          |
| GPLD1      | -1.914284  | 0.9074346 | -2.1096 | 0.035    | -0.57713073  | count | 1          |
| SHOX2      | -1.914284  | 0.9341073 | -2.0493 | 0.0405   | -0.57713073  | count | 1          |
| GALNT5     | -1.914284  | 0.9445724 | -2.0266 | 0.0428   | -0.57713073  | count | 1          |
| MCF2L2     | -1.914284  | 0.9445724 | -2.0266 | 0.0428   | -0.57713073  | count | 1          |
| AC019117.2 | -1.914284  | 1.180214  | -1.622  | 0.105    | -0.57713073  | count | 1          |
| PTPRD-AS1  | -1.914284  | 1.180214  | -1.622  | 0.105    | -0.57713073  | count | 1          |
| PCSK7      | -0.4561103 | 0.182817  | -2.4949 | 0.0127   | -0.576792792 | count | 1          |
| CCND1      | -0.4057896 | 0.0963173 | -4.213  | 2.60E-05 | -0.576728948 | count | 0.600808   |
| SMCR8      | -0.6008868 | 0.3618376 | -1.6607 | 0.0969   | -0.576192042 | count | 1          |
| LURAP1L    | -0.8985128 | 0.4422666 | -2.0316 | 0.0423   | -0.57559526  | count | 1          |
| VPS33A     | -0.5220241 | 0.3012098 | -1.7331 | 0.0832   | -0.575548559 | count | 1          |
| TCIM       | -0.4222629 | 0.1405201 | -3.005  | 0.00268  | -0.575484536 | count | 1          |
| CEACAM19   | -1.0354877 | 0.6455796 | -1.604  | 0.109    | -0.575455014 | count | 1          |
| HHIPL1     | -1.0354877 | 0.9361045 | -1.1062 | 0.269    | -0.575455014 | count | 1          |
| PLA2G4C    | -0.4625603 | 0.2009798 | -2.3015 | 0.0214   | -0.575409139 | count | 1          |
| PBX3       | -0.4963295 | 0.268562  | -1.8481 | 0.0647   | -0.575082471 | count | 1          |
| NT5E       | -0.4231229 | 0.1534505 | -2.7574 | 0.00586  | -0.575010103 | count | 1          |
| DPP9       | -0.4557023 | 0.2771302 | -1.6444 | 0.1      | -0.574519227 | count | 1          |
| CCDC167    | -0.443532  | 0.1768688 | -2.5077 | 0.0122   | -0.573824083 | count | 1          |
| CDK2AP2    | -0.4141479 | 0.1137735 | -3.6401 | 0.000278 | -0.573603978 | count | 1          |
| GSTO1      | -0.4021294 | 0.0548016 | -7.3379 | 2.84E-13 | -0.573519639 | count | 6.79E-09   |
| LINC01503  | -1.13435   | 0.6882769 | -1.6481 | 0.0994   | -0.573046112 | count | 1          |
| BICRA      | -0.6386998 | 0.4714966 | -1.3546 | 0.176    | -0.572901203 | count | 1          |
| ATP8B2     | -0.4749188 | 0.2672029 | -1.7774 | 0.0756   | -0.572510878 | count | 1          |
| TMEM181    | -0.4640546 | 0.2237144 | -2.0743 | 0.0381   | -0.571533464 | count | 1          |
| ZFYVE27    | -0.4932308 | 0.2545563 | -1.9376 | 0.0528   | -0.571378633 | count | 1          |
| C8orf37    | -0.6253675 | 0.4122194 | -1.5171 | 0.129    | -0.571363815 | count | 1          |
| GSTM4      | -0.4872349 | 0.228967  | -2.128  | 0.0334   | -0.570955382 | count | 1          |
| WWC2       | -0.4388652 | 0.1956204 | -2.2435 | 0.0249   | -0.570448195 | count | 1          |
| POLR3H     | -0.4705924 | 0.2616214 | -1.7988 | 0.0722   | -0.570233498 | count | 1          |
| KDM8       | -1.895012  | 0.6757798 | -2.8042 | 0.00508  | -0.569893716 | count | 1          |
| AP003306.2 | -1.1289798 | 0.7039115 | -1.6039 | 0.109    | -0.569789661 | count | 1          |
| AP1S3      | -3.0515224 | 1.1467216 | -2.6611 | 0.0078   | -0.569614332 | count | 1          |
| BX088651.4 | -3.0515224 | 1.1467216 | -2.6611 | 0.0078   | -0.569614332 | count | 1          |
| AC034236.2 | -1.1285085 | 0.5838604 | -1.9328 | 0.0534   | -0.569504059 | count | 1          |
| POC1A      | -1.2721497 | 0.7318921 | -1.7382 | 0.0823   | -0.569297788 | count | 1          |
| SH2D4A     | -0.6344811 | 0.2959184 | -2.1441 | 0.0321   | -0.568829088 | count | 1          |
| CERS6      | -0.4787464 | 0.245891  | -1.947  | 0.0516   | -0.568620182 | count | 1          |
| UQCRHL     | -0.7168458 | 0.4984719 | -1.4381 | 0.151    | -0.568389698 | count | 1          |
| NRSN2      | -0.5775066 | 0.3418846 | -1.6892 | 0.0913   | -0.568243946 | count | 1          |
| AC011603.2 | -0.9474128 | 0.6158896 | -1.5383 | 0.124    | -0.567787855 | count | 1          |

|             |            |           |         |          |              |       |             |
|-------------|------------|-----------|---------|----------|--------------|-------|-------------|
| S100A2      | -0.9474128 | 0.6352465 | -1.4914 | 0.136    | -0.567787855 | count | 1           |
| AC007388.1  | -0.503621  | 0.2551159 | -1.9741 | 0.0485   | -0.567542711 | count | 1           |
| FNDC3B      | -0.4197865 | 0.1509414 | -2.7811 | 0.00545  | -0.567445346 | count | 1           |
| TRABD2A     | -0.8395183 | 0.395293  | -2.1238 | 0.0338   | -0.567342074 | count | 1           |
| TRAPPC2L    | -0.4031163 | 0.0834442 | -4.831  | 1.43E-06 | -0.56731514  | count | 0.03340766  |
| COX7A1      | -0.4000751 | 0.0725862 | -5.5117 | 3.88E-08 | -0.567237564 | count | 0.000914516 |
| GABARAPL2   | -0.3953285 | 0.0422116 | -9.3654 | 1.52E-20 | -0.56681882  | count | 3.66E-16    |
| NUDT4B      | -1.1235526 | 0.6335512 | -1.7734 | 0.0763   | -0.566502187 | count | 1           |
| AC051619.5  | -0.5620724 | 0.5333006 | -1.054  | 0.292    | -0.565997441 | count | 1           |
| OTUD7B      | -0.4590225 | 0.2285862 | -2.0081 | 0.0447   | -0.565199443 | count | 1           |
| TMEM143     | -0.7368805 | 0.5269803 | -1.3983 | 0.162    | -0.56501836  | count | 1           |
| PREPL       | -0.4390101 | 0.1768674 | -2.4821 | 0.0131   | -0.564881456 | count | 1           |
| GANAB       | -0.4180343 | 0.1731119 | -2.4148 | 0.0158   | -0.564647203 | count | 1           |
| HOXB7       | -0.8357731 | 0.7126611 | -1.1727 | 0.241    | -0.564470946 | count | 1           |
| CABCOCO1    | -1.1199424 | 0.7544538 | -1.4844 | 0.138    | -0.564317373 | count | 1           |
| ST3GAL6-AS1 | -1.1199424 | 1.4957914 | -0.7487 | 0.4541   | -0.564317373 | count | 1           |
| PLS3        | -0.3993628 | 0.0834829 | -4.7838 | 1.81E-06 | -0.563862302 | count | 0.04225083  |
| GATA2       | -0.4122054 | 0.1225304 | -3.3641 | 0.000778 | -0.563836405 | count | 1           |
| KCNJ2-AS1   | -0.7631853 | 0.6133484 | -1.2443 | 0.213    | -0.563799467 | count | 1           |
| GATA2-AS1   | -0.4119418 | 0.1369096 | -3.0089 | 0.00265  | -0.563740208 | count | 1           |
| GBA         | -0.4577175 | 0.2714828 | -1.686  | 0.0919   | -0.563557199 | count | 1           |
| PTTG1IP     | -0.3930619 | 0.0507914 | -7.7387 | 1.40E-14 | -0.562657311 | count | 3.35E-10    |
| AC240274.1  | -0.7615439 | 0.398539  | -1.9108 | 0.0561   | -0.562447689 | count | 1           |
| INPP5A      | -0.528332  | 0.3033296 | -1.7418 | 0.0817   | -0.562199063 | count | 1           |
| GDPD5       | -0.5583379 | 0.4884583 | -1.1431 | 0.253    | -0.562032229 | count | 1           |
| JADE1       | -0.4443416 | 0.171201  | -2.5954 | 0.0095   | -0.561641958 | count | 1           |
| ATP1B3      | -0.3968942 | 0.0727423 | -5.4562 | 5.30E-08 | -0.561480565 | count | 0.001248203 |
| AC025164.1  | -0.5236625 | 0.3013178 | -1.7379 | 0.0823   | -0.561458734 | count | 1           |
| IMPA2       | -0.5516748 | 0.3238732 | -1.7034 | 0.0886   | -0.56122278  | count | 1           |
| PON2        | -0.3992981 | 0.0853642 | -4.6776 | 3.04E-06 | -0.561221925 | count | 0.0708472   |
| SRR         | -0.5445881 | 0.3627829 | -1.5011 | 0.133    | -0.55951023  | count | 1           |
| RPS27L      | -0.3905096 | 0.0478376 | -8.1632 | 4.90E-16 | -0.559159566 | count | 1.17E-11    |
| APLP1       | -0.8287817 | 0.4728014 | -1.7529 | 0.0797   | -0.559117508 | count | 1           |
| TMEM30A     | -0.4006954 | 0.0979944 | -4.089  | 4.46E-05 | -0.559091873 | count | 1           |
| TP53I11     | -0.4554378 | 0.2311124 | -1.9706 | 0.0489   | -0.558213303 | count | 1           |
| AC025031.2  | -2.9868714 | 1.4540932 | -2.0541 | 0.0401   | -0.558068925 | count | 1           |
| SNIP1       | -0.4453534 | 0.2030643 | -2.1932 | 0.0284   | -0.557574035 | count | 1           |
| AIFM2       | -0.8734283 | 0.5356907 | -1.6305 | 0.103    | -0.55719927  | count | 1           |
| SETD6       | -0.5057989 | 0.2866224 | -1.7647 | 0.0777   | -0.556965297 | count | 1           |
| NXPH3       | -1.0067765 | 0.7347346 | -1.3703 | 0.171    | -0.556682318 | count | 1           |
| DHX57       | -0.4996325 | 0.4524581 | -1.1043 | 0.27     | -0.556656276 | count | 1           |
| EFCAB14     | -0.3981886 | 0.1161364 | -3.4286 | 0.000616 | -0.555885956 | count | 1           |
| AL157832.1  | -1.2472518 | 0.7443145 | -1.6757 | 0.0939   | -0.555673494 | count | 1           |
| GINS2       | -1.1050011 | 0.7548845 | -1.4638 | 0.143    | -0.555292163 | count | 1           |
| TMTC4       | -0.5581378 | 0.3085438 | -1.8089 | 0.0706   | -0.555144925 | count | 1           |

|             |            |           |         |          |              |       |             |
|-------------|------------|-----------|---------|----------|--------------|-------|-------------|
| PRDM1       | -0.5039705 | 0.3209555 | -1.5702 | 0.116    | -0.55487345  | count | 1           |
| AHR         | -0.4005275 | 0.1091158 | -3.6707 | 0.000247 | -0.554794465 | count | 1           |
| GPX4        | -0.3859629 | 0.0438418 | -8.8035 | 2.29E-18 | -0.553803088 | count | 5.51E-14    |
| CS          | -0.452767  | 0.2509039 | -1.8045 | 0.0713   | -0.553587016 | count | 1           |
| CLTB        | -0.3897496 | 0.0588272 | -6.6253 | 4.15E-11 | -0.55334089  | count | 9.87E-07    |
| GYG1        | -0.4064307 | 0.1262584 | -3.219  | 0.0013   | -0.553283274 | count | 1           |
| RB1CC1      | -0.3987533 | 0.1088029 | -3.6649 | 0.000252 | -0.553280161 | count | 1           |
| PAM         | -0.4038356 | 0.1427324 | -2.8293 | 0.0047   | -0.553081687 | count | 1           |
| TSNARE1     | -0.6604882 | 0.5002144 | -1.3204 | 0.187    | -0.552735443 | count | 1           |
| COL17A1     | -0.8192592 | 0.3982944 | -2.0569 | 0.0398   | -0.551839252 | count | 1           |
| ZNF710      | -0.7805544 | 0.5347496 | -1.4597 | 0.144    | -0.551640831 | count | 1           |
| FAM198B-AS1 | -0.5228572 | 0.3219141 | -1.6242 | 0.104    | -0.551459907 | count | 1           |
| TTC39B      | -0.4784972 | 0.2770775 | -1.7269 | 0.0843   | -0.551419926 | count | 1           |
| DEF8        | -0.4136998 | 0.1630581 | -2.5371 | 0.0112   | -0.551122229 | count | 1           |
| RRAS        | -0.3871086 | 0.0691862 | -5.5952 | 2.42E-08 | -0.550790084 | count | 0.000570999 |
| COL6A1      | -0.4407303 | 0.199554  | -2.2086 | 0.0273   | -0.550717265 | count | 1           |
| LAMP2       | -0.3939589 | 0.0992329 | -3.97   | 7.37E-05 | -0.550298694 | count | 1           |
| RHOD        | -0.4169039 | 0.1667783 | -2.4997 | 0.0125   | -0.550137761 | count | 1           |
| AC012629.2  | -1.8417174 | 0.8304793 | -2.2177 | 0.0267   | -0.549870932 | count | 1           |
| LPCAT1      | -0.4353763 | 0.2381972 | -1.8278 | 0.0677   | -0.549277529 | count | 1           |
| AL136454.1  | -0.6948472 | 0.5328367 | -1.3041 | 0.192    | -0.549234212 | count | 1           |
| AL512625.1  | -0.9933676 | 0.5115183 | -1.942  | 0.0522   | -0.547955013 | count | 1           |
| DPF2        | -0.4244697 | 0.1782349 | -2.3815 | 0.0173   | -0.547669237 | count | 1           |
| HYAL2       | -0.3813806 | 0.0581535 | -6.5582 | 6.48E-11 | -0.547125573 | count | 1.54E-06    |
| PCDHB6      | -1.4456392 | 1.015101  | -1.4241 | 0.155    | -0.546504469 | count | 1           |
| SESN1       | -0.5020591 | 0.2790249 | -1.7993 | 0.0721   | -0.545332252 | count | 1           |
| HDLBP       | -0.386387  | 0.0858008 | -4.5033 | 6.97E-06 | -0.545071115 | count | 0.16196886  |
| LRRC75B     | -0.6096042 | 0.3799545 | -1.6044 | 0.109    | -0.544879682 | count | 1           |
| IQSEC1      | -0.4556618 | 0.2196108 | -2.0749 | 0.0381   | -0.543920307 | count | 1           |
| FNBP4       | -0.3933805 | 0.1192513 | -3.2988 | 0.000983 | -0.543560882 | count | 1           |
| PRX         | -0.6680954 | 0.4523253 | -1.477  | 0.14     | -0.543538316 | count | 1           |
| NANOS1      | -0.6680954 | 0.4977137 | -1.3423 | 0.18     | -0.543538316 | count | 1           |
| NOD1        | -0.4718554 | 0.3112252 | -1.5161 | 0.13     | -0.543526535 | count | 1           |
| MANEA-DT    | -0.6340611 | 0.460713  | -1.3763 | 0.169    | -0.54294386  | count | 1           |
| DUS2        | -0.5342025 | 0.6282458 | -0.8503 | 0.395    | -0.542537111 | count | 1           |
| PTCH2       | -1.4368152 | 0.6960172 | -2.0643 | 0.0391   | -0.54232783  | count | 1           |
| NISCH       | -0.4381248 | 0.2251212 | -1.9462 | 0.0517   | -0.542291982 | count | 1           |
| PPIC        | -0.3803395 | 0.0579479 | -6.5635 | 6.26E-11 | -0.542139304 | count | 1.49E-06    |
| SCARF2      | -0.6663166 | 0.5625326 | -1.1845 | 0.236    | -0.541957329 | count | 1           |
| RBM38       | -0.4583166 | 0.245906  | -1.8638 | 0.0625   | -0.541895655 | count | 1           |
| ATAD2       | -0.4923255 | 0.3819347 | -1.289  | 0.197    | -0.541561544 | count | 1           |
| FAM49A      | -0.5451174 | 0.4209253 | -1.295  | 0.195    | -0.541481473 | count | 1           |
| CHMP4C      | -1.8187514 | 0.6161668 | -2.9517 | 0.00319  | -0.541243101 | count | 1           |
| ID1         | -0.3762435 | 0.0580926 | -6.4766 | 1.11E-10 | -0.540850623 | count | 2.64E-06    |
| ZNF385A     | -0.5941105 | 0.3923962 | -1.5141 | 0.13     | -0.540809419 | count | 1           |

|            |            |           |         |          |              |       |             |
|------------|------------|-----------|---------|----------|--------------|-------|-------------|
| TTC3       | -0.3845575 | 0.0893886 | -4.3021 | 1.75E-05 | -0.540618916 | count | 0.40509     |
| DEAF1      | -0.4053417 | 0.1544373 | -2.6246 | 0.00872  | -0.540160412 | count | 1           |
| SDF2L1     | -0.3906865 | 0.1141136 | -3.4237 | 0.000627 | -0.539302046 | count | 1           |
| NDUFA7     | -0.4930984 | 0.3080232 | -1.6008 | 0.11     | -0.538902675 | count | 1           |
| CDK8       | -0.5812234 | 0.4015371 | -1.4475 | 0.148    | -0.538155621 | count | 1           |
| RRAS2      | -0.4635144 | 0.2001389 | -2.316  | 0.0206   | -0.538138687 | count | 1           |
| MTSS1L     | -0.7317767 | 0.4857516 | -1.5065 | 0.132    | -0.538015866 | count | 1           |
| VAV3       | -0.5554302 | 0.4496165 | -1.2353 | 0.217    | -0.537851336 | count | 1           |
| KCNK1      | -1.0759494 | 0.6026841 | -1.7853 | 0.0743   | -0.537824647 | count | 1           |
| TWIST1     | -1.808835  | 0.4774213 | -3.7888 | 0.000155 | -0.537518559 | count | 1           |
| PLEKHM3    | -0.523976  | 0.3537832 | -1.4811 | 0.139    | -0.537290937 | count | 1           |
| KTN1-AS1   | -0.6605968 | 0.470068  | -1.4053 | 0.16     | -0.536877624 | count | 1           |
| TPM1       | -0.3787138 | 0.0817228 | -4.6341 | 3.75E-06 | -0.536857407 | count | 0.08734875  |
| FNIP2      | -0.3819529 | 0.1134631 | -3.3663 | 0.000772 | -0.536824131 | count | 1           |
| TPRG1L     | -0.4006631 | 0.1474876 | -2.7166 | 0.00664  | -0.536522006 | count | 1           |
| HYAL3      | -0.5538615 | 0.4414566 | -1.2546 | 0.21     | -0.53624211  | count | 1           |
| FAM201A    | -2.869324  | 0.8376097 | -3.4256 | 0.000622 | -0.536214045 | count | 1           |
| SLC47A1    | -2.869324  | 0.8376097 | -3.4256 | 0.000622 | -0.536214045 | count | 1           |
| CCL26      | -2.869324  | 1.361883  | -2.1069 | 0.0352   | -0.536214045 | count | 1           |
| FMN1       | -2.869324  | 1.384276  | -2.0728 | 0.0383   | -0.536214045 | count | 1           |
| TMEM245    | -0.39082   | 0.1628024 | -2.4006 | 0.0164   | -0.535967657 | count | 1           |
| MAP3K7     | -0.451565  | 0.2334537 | -1.9343 | 0.0532   | -0.535485448 | count | 1           |
| IGLC3      | -0.5273732 | 0.2055737 | -2.5654 | 0.0104   | -0.535246865 | count | 1           |
| ZSCAN20    | -0.8999738 | 0.6656124 | -1.3521 | 0.176    | -0.534926271 | count | 1           |
| WDR35      | -0.8999738 | 0.6760989 | -1.3311 | 0.183    | -0.534926271 | count | 1           |
| PGM1       | -0.4780023 | 0.2319499 | -2.0608 | 0.0394   | -0.534744351 | count | 1           |
| TMED10     | -0.3764478 | 0.0711084 | -5.294  | 1.29E-07 | -0.533878596 | count | 0.003030855 |
| LINC01358  | -0.6571336 | 0.6261087 | -1.0496 | 0.294    | -0.53380491  | count | 1           |
| CTBS       | -0.3826886 | 0.1117587 | -3.4242 | 0.000626 | -0.533709378 | count | 1           |
| LRRC8A     | -0.3966303 | 0.1466627 | -2.7044 | 0.00689  | -0.533626272 | count | 1           |
| JUP        | -0.4044484 | 0.1764137 | -2.2926 | 0.0219   | -0.533512521 | count | 1           |
| KLHL24     | -0.3919385 | 0.1504238 | -2.6056 | 0.00922  | -0.533409021 | count | 1           |
| TSPAN6     | -0.3839673 | 0.1190563 | -3.2251 | 0.00127  | -0.533195344 | count | 1           |
| ZNF821     | -0.566962  | 0.3291764 | -1.7224 | 0.0851   | -0.533144871 | count | 1           |
| NPR2       | -0.5197983 | 0.3477063 | -1.4949 | 0.135    | -0.532795724 | count | 1           |
| DNAL1      | -0.4305168 | 0.2432699 | -1.7697 | 0.0769   | -0.532683565 | count | 1           |
| DEPDC4     | -0.9696437 | 0.7330244 | -1.3228 | 0.186    | -0.532578637 | count | 1           |
| PCDHB9     | -1.0663384 | 0.6550631 | -1.6278 | 0.104    | -0.53207019  | count | 1           |
| PCGF5      | -0.3933164 | 0.1319705 | -2.9803 | 0.0029   | -0.531934699 | count | 1           |
| GMPR       | -0.3963755 | 0.1871167 | -2.1183 | 0.0342   | -0.531693013 | count | 1           |
| MICALL2    | -0.9665058 | 0.5323055 | -1.8157 | 0.0695   | -0.530551126 | count | 1           |
| UQCR11     | -0.3726135 | 0.0568573 | -6.5535 | 6.68E-11 | -0.530534644 | count | 1.59E-06    |
| AC113383.1 | -2.838283  | 0.6569331 | -4.3205 | 1.61E-05 | -0.53026327  | count | 0.3727794   |
| EPHB2      | -2.838283  | 1.396509  | -2.0324 | 0.0422   | -0.53026327  | count | 1           |
| FIBP       | -0.3781519 | 0.0935588 | -4.0419 | 5.45E-05 | -0.529256609 | count | 1           |

|            |            |           |         |          |              |       |             |
|------------|------------|-----------|---------|----------|--------------|-------|-------------|
| CTDSPL     | -0.4062366 | 0.1805349 | -2.2502 | 0.0245   | -0.528909126 | count | 1           |
| NFIC       | -0.3717594 | 0.0720712 | -5.1582 | 2.67E-07 | -0.527392199 | count | 0.006262752 |
| TMEM63A    | -0.5098645 | 0.3963652 | -1.2864 | 0.198    | -0.52737269  | count | 1           |
| FEM1C      | -0.4276971 | 0.189421  | -2.2579 | 0.024    | -0.526951865 | count | 1           |
| EXOC3L1    | -0.4792997 | 0.2697593 | -1.7768 | 0.0757   | -0.52669398  | count | 1           |
| CIB2       | -0.4639117 | 0.2917096 | -1.5903 | 0.112    | -0.526693329 | count | 1           |
| PDIA3      | -0.3676618 | 0.0457158 | -8.0423 | 1.29E-15 | -0.52652418  | count | 3.09E-11    |
| TTYH1      | -1.7791982 | 0.8182048 | -2.1745 | 0.0298   | -0.526392873 | count | 1           |
| PLEKHA5    | -0.4129196 | 0.2166354 | -1.9061 | 0.0567   | -0.526357824 | count | 1           |
| KDM4B      | -0.439475  | 0.256905  | -1.7107 | 0.0873   | -0.525706009 | count | 1           |
| TEP1       | -0.6013465 | 0.4875064 | -1.2335 | 0.217    | -0.525265512 | count | 1           |
| ABLIM2     | -0.5680146 | 0.3761009 | -1.5103 | 0.131    | -0.525115395 | count | 1           |
| STK17B     | -0.5233907 | 0.3480633 | -1.5037 | 0.133    | -0.525035181 | count | 1           |
| BATF2      | -0.7154374 | 0.4976275 | -1.4377 | 0.151    | -0.524673309 | count | 1           |
| ERLEC1     | -0.3712084 | 0.0806295 | -4.6039 | 4.33E-06 | -0.524480054 | count | 0.1008024   |
| ZNF841     | -0.5771865 | 0.3668782 | -1.5732 | 0.116    | -0.524337836 | count | 1           |
| GLIS3      | -0.3985354 | 0.1821611 | -2.1878 | 0.0288   | -0.523783201 | count | 1           |
| RNASEH2C   | -0.3714269 | 0.0726584 | -5.112  | 3.41E-07 | -0.523774467 | count | 0.007992699 |
| COL18A1    | -0.3726163 | 0.0913793 | -4.0777 | 4.68E-05 | -0.523477588 | count | 1           |
| AC098850.3 | -0.6650507 | 0.751582  | -0.8849 | 0.376    | -0.523428804 | count | 1           |
| SULF2      | -0.3712796 | 0.0887278 | -4.1845 | 2.95E-05 | -0.523335764 | count | 0.681273    |
| PARVA      | -0.3844832 | 0.1247181 | -3.0828 | 0.00207  | -0.523188493 | count | 1           |
| SPESP1     | -0.4427447 | 0.358631  | -1.2345 | 0.217    | -0.522994746 | count | 1           |
| CCDC24     | -0.6124903 | 0.4396112 | -1.3933 | 0.164    | -0.522990344 | count | 1           |
| P2RY6      | -0.6868518 | 0.3398545 | -2.021  | 0.0434   | -0.522768847 | count | 1           |
| ATG4D      | -0.7808446 | 0.4448732 | -1.7552 | 0.0793   | -0.522637924 | count | 1           |
| ZNF510     | -0.5054865 | 0.3034819 | -1.6656 | 0.0959   | -0.522630513 | count | 1           |
| HAGHL      | -1.3940247 | 0.8422996 | -1.655  | 0.098    | -0.522150338 | count | 1           |
| SUV39H2    | -0.6632719 | 0.4263199 | -1.5558 | 0.12     | -0.521893498 | count | 1           |
| HIST1H2BN  | -0.5746657 | 0.4587477 | -1.2527 | 0.21     | -0.521888832 | count | 1           |
| ZNF530     | -0.8238328 | 0.445254  | -1.8503 | 0.0644   | -0.521134491 | count | 1           |
| FAM92A     | -0.4072579 | 0.1703104 | -2.3913 | 0.0169   | -0.520343379 | count | 1           |
| NCOA3      | -0.3828219 | 0.1449295 | -2.6414 | 0.0083   | -0.520305251 | count | 1           |
| AC025569.1 | -0.8786076 | 0.4692667 | -1.8723 | 0.0613   | -0.520243302 | count | 1           |
| BCL2L11    | -0.4680408 | 0.2333333 | -2.0059 | 0.045    | -0.520218374 | count | 1           |
| C3orf14    | -0.404594  | 0.2064485 | -1.9598 | 0.0501   | -0.519950923 | count | 1           |
| POLR3A     | -0.4827656 | 0.3323577 | -1.4525 | 0.146    | -0.519768404 | count | 1           |
| RGP1       | -0.4675051 | 0.2563709 | -1.8235 | 0.0683   | -0.519601705 | count | 1           |
| SUSD3      | -0.9491987 | 0.6472945 | -1.4664 | 0.143    | -0.519395333 | count | 1           |
| TM9SF2     | -0.3701474 | 0.0955625 | -3.8734 | 0.00011  | -0.519359656 | count | 1           |
| SACS       | -0.4080356 | 0.3225449 | -1.2651 | 0.206    | -0.519353516 | count | 1           |
| CDO1       | -0.3833071 | 0.1862923 | -2.0576 | 0.0397   | -0.51934499  | count | 1           |
| ANKRD13B   | -0.6602273 | 0.5422157 | -1.2176 | 0.223    | -0.519267022 | count | 1           |
| AC097103.2 | -0.7082749 | 0.5186835 | -1.3655 | 0.172    | -0.518839988 | count | 1           |
| SP2        | -0.4455819 | 0.2581709 | -1.7259 | 0.0845   | -0.518787769 | count | 1           |

|           |            |           |          |          |              |       |             |
|-----------|------------|-----------|----------|----------|--------------|-------|-------------|
| P3H4      | -0.4279301 | 0.2458922 | -1.7403  | 0.0819   | -0.518713088 | count | 1           |
| PPP1R32   | -1.0433204 | 0.6492598 | -1.6069  | 0.108    | -0.518339045 | count | 1           |
| STK4      | -0.3862405 | 0.1421449 | -2.7172  | 0.00662  | -0.51820349  | count | 1           |
| ZNF224    | -0.3955513 | 0.1754318 | -2.2547  | 0.0242   | -0.517845295 | count | 1           |
| TGOLN2    | -0.3640945 | 0.0763973 | -4.7658  | 1.98E-06 | -0.516967931 | count | 0.04621716  |
| ZDHHC6    | -0.4017756 | 0.1754237 | -2.2903  | 0.0221   | -0.516851325 | count | 1           |
| CABIN1    | -0.4077788 | 0.2684649 | -1.5189  | 0.129    | -0.516165223 | count | 1           |
| CSNK2A3   | -1.380999  | 0.8812415 | -1.5671  | 0.117    | -0.516034806 | count | 1           |
| ANTXR1    | -1.380999  | 0.9758142 | -1.4152  | 0.157    | -0.516034806 | count | 1           |
| SLC7A11   | -1.380999  | 1.080311  | -1.2783  | 0.201    | -0.516034806 | count | 1           |
| CABLES1   | -0.5338199 | 0.4382782 | -1.218   | 0.223    | -0.51572     | count | 1           |
| FAM107A   | -0.373343  | 0.1082744 | -3.4481  | 0.000573 | -0.515481626 | count | 1           |
| PPIB      | -0.3586155 | 0.0357529 | -10.0304 | 2.79E-23 | -0.515297372 | count | 6.73E-19    |
| PGR       | -1.749411  | 0.6215346 | -2.8147  | 0.00492  | -0.515222402 | count | 1           |
| FDPS      | -0.3642073 | 0.0720438 | -5.0554  | 4.58E-07 | -0.514835823 | count | 0.010728192 |
| NFIA      | -0.3614083 | 0.0727821 | -4.9656  | 7.27E-07 | -0.514679181 | count | 0.0170118   |
| MACF1     | -0.3613528 | 0.0762149 | -4.7412  | 2.23E-06 | -0.514670983 | count | 0.05203259  |
| MPP3      | -1.1709118 | 0.5349172 | -2.189   | 0.0287   | -0.514299651 | count | 1           |
| FOXC1     | -0.3600917 | 0.0677692 | -5.3135  | 1.16E-07 | -0.514282743 | count | 0.002726348 |
| LIN54     | -0.5025577 | 0.3243863 | -1.5493  | 0.121    | -0.514274722 | count | 1           |
| TKT       | -0.3633667 | 0.077704  | -4.6763  | 3.06E-06 | -0.513818621 | count | 0.07130718  |
| RAB3GAP2  | -0.3890313 | 0.2033124 | -1.9135  | 0.0558   | -0.513292494 | count | 1           |
| C20orf202 | -0.9392876 | 0.643714  | -1.4592  | 0.145    | -0.513027655 | count | 1           |
| FMNL1     | -0.9392876 | 0.6858466 | -1.3695  | 0.171    | -0.513027655 | count | 1           |
| ALDH2     | -0.3643417 | 0.0755303 | -4.8238  | 1.49E-06 | -0.513023634 | count | 0.0348064   |
| GLIPR1L2  | -0.6525832 | 0.5204823 | -1.2538  | 0.21     | -0.512680397 | count | 1           |
| ABR       | -0.4073704 | 0.2474198 | -1.6465  | 0.0998   | -0.512540523 | count | 1           |
| ACE       | -0.3921217 | 0.2058049 | -1.9053  | 0.0568   | -0.511624446 | count | 1           |
| AIF1      | -0.6150338 | 0.6475766 | -0.9497  | 0.342    | -0.511535878 | count | 1           |
| SPRY3     | -0.6979772 | 0.5152574 | -1.3546  | 0.176    | -0.510470146 | count | 1           |
| LUCAT1    | -0.7638941 | 0.751752  | -1.0162  | 0.31     | -0.509836394 | count | 1           |
| REEP5     | -0.3573863 | 0.0578447 | -6.1784  | 7.43E-10 | -0.509664444 | count | 1.76E-05    |
| PSMB5     | -0.3572814 | 0.0538225 | -6.6381  | 3.81E-11 | -0.509358224 | count | 9.06E-07    |
| Z97989.1  | -1.161365  | 0.5971532 | -1.9448  | 0.0519   | -0.509170981 | count | 1           |
| LGALS9    | -0.3652053 | 0.1098689 | -3.324   | 0.000899 | -0.509127858 | count | 1           |
| CCDC3     | -0.3747655 | 0.1405083 | -2.6672  | 0.00769  | -0.509122967 | count | 1           |
| ZNF428    | -0.3628306 | 0.0880415 | -4.1211  | 3.88E-05 | -0.509058766 | count | 0.8948832   |
| CAMSAP1   | -0.4800356 | 0.3036886 | -1.5807  | 0.114    | -0.508668963 | count | 1           |
| PTEN      | -0.3653719 | 0.0983441 | -3.7152  | 0.000207 | -0.508310841 | count | 1           |
| CPEB3     | -0.5338806 | 0.4360621 | -1.2243  | 0.221    | -0.508192082 | count | 1           |
| ASH2L     | -0.4072374 | 0.2156551 | -1.8884  | 0.0591   | -0.508101482 | count | 1           |
| PSME4     | -0.4418885 | 0.2899945 | -1.5238  | 0.128    | -0.507982522 | count | 1           |
| PIAS2     | -0.4006896 | 0.2055469 | -1.9494  | 0.0514   | -0.507767658 | count | 1           |
| CD164     | -0.3624392 | 0.0897376 | -4.0389  | 5.52E-05 | -0.507262479 | count | 1           |
| EXOC3-AS1 | -0.5122006 | 0.3833718 | -1.336   | 0.182    | -0.507065222 | count | 1           |

|            |            |           |          |          |              |       |             |
|------------|------------|-----------|----------|----------|--------------|-------|-------------|
| GNPTG      | -0.3613182 | 0.0978552 | -3.6924  | 0.000226 | -0.506764538 | count | 1           |
| MRPL34     | -0.358845  | 0.0817682 | -4.3886  | 1.18E-05 | -0.506344739 | count | 0.2735948   |
| ZBTB49     | -0.5396007 | 0.427343  | -1.2627  | 0.207    | -0.505827854 | count | 1           |
| KAT2B      | -0.4256804 | 0.2185593 | -1.9477  | 0.0516   | -0.505655968 | count | 1           |
| WDR92      | -0.4085601 | 0.2842717 | -1.4372  | 0.151    | -0.504985434 | count | 1           |
| HIVEP2     | -0.4474935 | 0.2536288 | -1.7644  | 0.0778   | -0.504894764 | count | 1           |
| SPINDOC    | -0.5474238 | 0.381415  | -1.4352  | 0.151    | -0.504849944 | count | 1           |
| KCNQ1OT1   | -0.38614   | 0.346296  | -1.1151  | 0.265    | -0.504562017 | count | 1           |
| MAN1C1     | -0.3952538 | 0.2224578 | -1.7768  | 0.0757   | -0.504137178 | count | 1           |
| CD63       | -0.350099  | 0.0292147 | -11.9837 | 2.70E-32 | -0.503678007 | count | 6.53E-28    |
| PRKAA2     | -0.4791103 | 0.4996612 | -0.9589  | 0.338    | -0.503351213 | count | 1           |
| ETFBKMT    | -0.4970503 | 0.3712124 | -1.339   | 0.181    | -0.50296988  | count | 1           |
| TFEC       | -2.6990201 | 1.26887   | -2.1271  | 0.0335   | -0.502700878 | count | 1           |
| CCDC18     | -0.5652484 | 0.4350431 | -1.2993  | 0.194    | -0.502453555 | count | 1           |
| AC016394.2 | -2.6961697 | 1.078254  | -2.5005  | 0.0125   | -0.5021226   | count | 1           |
| DDI2       | -0.4407347 | 0.2762406 | -1.5955  | 0.111    | -0.501991369 | count | 1           |
| KIF15      | -2.6932144 | 1.1154196 | -2.4145  | 0.0158   | -0.501522506 | count | 1           |
| PRKCD      | -1.1467415 | 0.9145693 | -1.2539  | 0.21     | -0.501336024 | count | 1           |
| PTCHD4     | -0.9206147 | 0.5804236 | -1.5861  | 0.113    | -0.501072718 | count | 1           |
| MKL1       | -0.4950762 | 0.3708775 | -1.3349  | 0.182    | -0.50087388  | count | 1           |
| ATXN2-AS   | -1.7099544 | 1.0781574 | -1.586   | 0.113    | -0.500451802 | count | 1           |
| APOBEC3A   | -1.7099544 | 1.0781574 | -1.586   | 0.113    | -0.500451802 | count | 1           |
| AC019131.2 | -1.7099544 | 1.121006  | -1.5254  | 0.127    | -0.500451802 | count | 1           |
| AL157832.3 | -1.7099544 | 1.121006  | -1.5254  | 0.127    | -0.500451802 | count | 1           |
| AL139317.3 | -1.7099544 | 1.121006  | -1.5254  | 0.127    | -0.500451802 | count | 1           |
| AC087222.1 | -1.7099544 | 1.182766  | -1.4457  | 0.148    | -0.500451802 | count | 1           |
| ZNF653     | -0.6382819 | 0.4271335 | -1.4943  | 0.135    | -0.500387503 | count | 1           |
| RNF41      | -0.3948998 | 0.1932203 | -2.0438  | 0.0411   | -0.500311547 | count | 1           |
| PELI2      | -0.4269276 | 0.2729944 | -1.5639  | 0.118    | -0.50026345  | count | 1           |
| KCNC4      | -0.6023913 | 0.4296121 | -1.4022  | 0.161    | -0.500145653 | count | 1           |
| ANKRD36B   | -0.4297894 | 0.3120474 | -1.3773  | 0.169    | -0.499888593 | count | 1           |
| TIMM8B     | -0.360144  | 0.095556  | -3.7689  | 0.000167 | -0.499523596 | count | 1           |
| FAM110A    | -0.4402363 | 0.2801136 | -1.5716  | 0.116    | -0.498969554 | count | 1           |
| SLC26A2    | -0.3898022 | 0.2311422 | -1.6864  | 0.0918   | -0.498923714 | count | 1           |
| FKBP2      | -0.3491097 | 0.0593072 | -5.8865  | 4.42E-09 | -0.498907316 | count | 0.000104564 |
| PPARGC1B   | -1.141137  | 0.8156092 | -1.3991  | 0.162    | -0.498340059 | count | 1           |
| AC237221.1 | -1.141137  | 0.8156092 | -1.3991  | 0.162    | -0.498340059 | count | 1           |
| DLGAP2     | -1.141137  | 0.8156092 | -1.3991  | 0.162    | -0.498340059 | count | 1           |
| CTSV       | -1.141137  | 0.8156092 | -1.3991  | 0.162    | -0.498340059 | count | 1           |
| AC120049.1 | -1.141137  | 0.8156092 | -1.3991  | 0.162    | -0.498340059 | count | 1           |
| VN1R1      | -1.141137  | 0.8156092 | -1.3991  | 0.162    | -0.498340059 | count | 1           |
| AC083805.1 | -1.141137  | 1.033045  | -1.1046  | 0.269    | -0.498340059 | count | 1           |
| PRKX       | -0.4238023 | 0.249677  | -1.6974  | 0.0897   | -0.498300051 | count | 1           |
| RALA       | -0.3540665 | 0.0886207 | -3.9953  | 6.63E-05 | -0.498289624 | count | 1           |
| SEPSECS    | -0.5235287 | 0.3467896 | -1.5096  | 0.131    | -0.497756654 | count | 1           |

|            |            |           |          |          |              |       |             |
|------------|------------|-----------|----------|----------|--------------|-------|-------------|
| TLR5       | -0.6349168 | 0.5689142 | -1.116   | 0.265    | -0.497500683 | count | 1           |
| AL928654.1 | -0.8443641 | 0.6860497 | -1.2308  | 0.219    | -0.496870164 | count | 1           |
| TRIB3      | -0.5985686 | 0.4832142 | -1.2387  | 0.216    | -0.49670765  | count | 1           |
| FAM98B     | -0.4025704 | 0.2187192 | -1.8406  | 0.0658   | -0.496421803 | count | 1           |
| AC087286.2 | -1.137368  | 0.7222732 | -1.5747  | 0.115    | -0.49632706  | count | 1           |
| CHPF       | -0.7892721 | 0.6591235 | -1.1975  | 0.231    | -0.496254624 | count | 1           |
| ZFP1       | -0.406798  | 0.2816184 | -1.4445  | 0.149    | -0.496211285 | count | 1           |
| NFATC1     | -0.4023842 | 0.2142501 | -1.8781  | 0.0605   | -0.496187648 | count | 1           |
| NAA38      | -0.3499975 | 0.0706136 | -4.9565  | 7.61E-07 | -0.496167235 | count | 0.017802834 |
| CCPG1      | -0.3483736 | 0.0658099 | -5.2936  | 1.29E-07 | -0.496046258 | count | 0.003030855 |
| SIL1       | -0.3695624 | 0.161294  | -2.2912  | 0.022    | -0.495630794 | count | 1           |
| ZDHHC20    | -0.3862306 | 0.182164  | -2.1202  | 0.0341   | -0.495449002 | count | 1           |
| RTTN       | -0.5378192 | 0.3792991 | -1.4179  | 0.156    | -0.495423611 | count | 1           |
| ANKRD45    | -0.613465  | 0.5171767 | -1.1862  | 0.236    | -0.495253361 | count | 1           |
| SIN3B      | -0.3770029 | 0.1695322 | -2.2238  | 0.0262   | -0.495162159 | count | 1           |
| PRDX2      | -0.3459544 | 0.0503072 | -6.8768  | 7.54E-12 | -0.494154401 | count | 1.80E-07    |
| ZHX3       | -0.3991454 | 0.2383515 | -1.6746  | 0.0941   | -0.494107859 | count | 1           |
| RTL10      | -0.4477434 | 0.282032  | -1.5876  | 0.112    | -0.493890947 | count | 1           |
| ZNF430     | -0.3974456 | 0.2117016 | -1.8774  | 0.0606   | -0.493855979 | count | 1           |
| GPSM3      | -0.3819839 | 0.2289565 | -1.6684  | 0.0954   | -0.493642316 | count | 1           |
| GLT8D1     | -0.3674837 | 0.1328408 | -2.7663  | 0.00571  | -0.493461747 | count | 1           |
| PEX12      | -0.59465   | 0.4472199 | -1.3297  | 0.184    | -0.493186303 | count | 1           |
| 8-Mar      | -0.3898447 | 0.2008339 | -1.9411  | 0.0523   | -0.493097148 | count | 1           |
| ZNF503     | -0.3920761 | 0.1944685 | -2.0161  | 0.0439   | -0.492971188 | count | 1           |
| MBTPS2     | -0.5666184 | 0.3732252 | -1.5182  | 0.129    | -0.492708646 | count | 1           |
| TTF2       | -0.4386633 | 0.2953485 | -1.4852  | 0.138    | -0.491997468 | count | 1           |
| ADI1       | -0.34908   | 0.0853246 | -4.0912  | 4.41E-05 | -0.49159207  | count | 1           |
| RFWD3      | -0.578342  | 0.3825639 | -1.5118  | 0.131    | -0.491580188 | count | 1           |
| PIK3R4     | -0.4113325 | 0.3327064 | -1.2363  | 0.216    | -0.491244365 | count | 1           |
| FCER1G     | -0.9044084 | 0.5797756 | -1.5599  | 0.119    | -0.490742284 | count | 1           |
| SRPRB      | -0.3611064 | 0.1312003 | -2.7523  | 0.00596  | -0.489983169 | count | 1           |
| TRIM33     | -0.3676171 | 0.1791353 | -2.0522  | 0.0402   | -0.489928362 | count | 1           |
| HMGB3      | -0.4140571 | 0.2202202 | -1.8802  | 0.0602   | -0.489903726 | count | 1           |
| EXOG       | -0.4193877 | 0.2976865 | -1.4088  | 0.159    | -0.489355888 | count | 1           |
| MBD3       | -0.3837279 | 0.2009014 | -1.91    | 0.0562   | -0.489214273 | count | 1           |
| IGFBP7     | -0.3391973 | 0.0366292 | -9.2603  | 3.97E-20 | -0.489134246 | count | 9.56E-16    |
| AL138995.1 | -0.540678  | 0.3347067 | -1.6154  | 0.106    | -0.488983409 | count | 1           |
| AC040970.1 | -0.832351  | 0.5624129 | -1.48    | 0.139    | -0.488718284 | count | 1           |
| NAALADL1   | -0.3826138 | 0.2401068 | -1.5935  | 0.111    | -0.488389277 | count | 1           |
| DEXI       | -0.3658156 | 0.1344045 | -2.7218  | 0.00653  | -0.488007292 | count | 1           |
| ZNF124     | -0.3949452 | 0.2979741 | -1.3254  | 0.185    | -0.487834576 | count | 1           |
| RPP14      | -0.4191196 | 0.2488906 | -1.684   | 0.0923   | -0.487137846 | count | 1           |
| SNHG9      | -0.365403  | 0.1672771 | -2.1844  | 0.029    | -0.486949587 | count | 1           |
| TSPYL4     | -0.4032039 | 0.2495449 | -1.6158  | 0.106    | -0.486806921 | count | 1           |
| RPL27A     | -0.3387849 | 0.0320495 | -10.5707 | 1.25E-25 | -0.486741817 | count | 3.02E-21    |



|            |            |           |         |          |              |       |             |
|------------|------------|-----------|---------|----------|--------------|-------|-------------|
| NDUFB2     | -0.340311  | 0.0512393 | -6.6416 | 3.72E-11 | -0.485990727 | count | 8.85E-07    |
| MRPL33     | -0.3419061 | 0.0674477 | -5.0692 | 4.26E-07 | -0.48588839  | count | 0.00998118  |
| AC004148.2 | -0.6203155 | 0.6001806 | -1.0335 | 0.301    | -0.485000335 | count | 1           |
| DOCK6      | -0.3687094 | 0.175699  | -2.0985 | 0.0359   | -0.484848624 | count | 1           |
| TLE1       | -0.362308  | 0.156845  | -2.31   | 0.021    | -0.484707483 | count | 1           |
| VAR5       | -0.4422452 | 0.2694925 | -1.641  | 0.101    | -0.484535202 | count | 1           |
| SEMA3F-AS1 | -1.6671    | 0.7332483 | -2.2736 | 0.0231   | -0.484454173 | count | 1           |
| AL023581.2 | -1.6671    | 0.8581036 | -1.9428 | 0.0521   | -0.484454173 | count | 1           |
| LINC01752  | -1.6671    | 0.9451294 | -1.7639 | 0.0779   | -0.484454173 | count | 1           |
| FHL3       | -0.3696929 | 0.1769628 | -2.0891 | 0.0368   | -0.484357133 | count | 1           |
| PTPRU      | -1.3125111 | 0.7913588 | -1.6586 | 0.0973   | -0.484106514 | count | 1           |
| AL391069.2 | -1.3125111 | 0.8122316 | -1.6159 | 0.106    | -0.484106514 | count | 1           |
| SGIP1      | -0.824595  | 0.602605  | -1.3684 | 0.171    | -0.483468618 | count | 1           |
| AC008736.1 | -0.5835462 | 0.4996204 | -1.168  | 0.243    | -0.483224429 | count | 1           |
| BCL9       | -0.4377725 | 0.3268046 | -1.3396 | 0.181    | -0.482509677 | count | 1           |
| AP001528.1 | -1.3085588 | 0.7137048 | -1.8335 | 0.0668   | -0.482276361 | count | 1           |
| PLIN3      | -0.3539029 | 0.1336259 | -2.6485 | 0.00813  | -0.481011258 | count | 1           |
| AC005332.4 | -0.4586645 | 0.377287  | -1.2157 | 0.224    | -0.480970908 | count | 1           |
| BICRAL     | -0.4288509 | 0.270977  | -1.5826 | 0.114    | -0.480636689 | count | 1           |
| MKLN1      | -0.354066  | 0.1656335 | -2.1376 | 0.0326   | -0.48036133  | count | 1           |
| PIGL       | -0.4358868 | 0.2926772 | -1.4893 | 0.137    | -0.480358921 | count | 1           |
| RAD50      | -0.4756316 | 0.4301883 | -1.1056 | 0.269    | -0.480264127 | count | 1           |
| PANK3      | -0.3779565 | 0.2162027 | -1.7482 | 0.0805   | -0.479842622 | count | 1           |
| SMIM14     | -0.3422621 | 0.1020669 | -3.3533 | 0.000809 | -0.478887425 | count | 1           |
| C1orf216   | -0.5301697 | 0.3551528 | -1.4928 | 0.136    | -0.478853541 | count | 1           |
| RAP2C-AS1  | -0.5642411 | 0.4965542 | -1.1363 | 0.256    | -0.478675276 | count | 1           |
| BAIAP2-DT  | -0.519894  | 0.3117352 | -1.6677 | 0.0955   | -0.477877054 | count | 1           |
| LAMTOR5    | -0.3358308 | 0.0603563 | -5.5641 | 2.89E-08 | -0.477754169 | count | 0.000681607 |
| FAM136A    | -0.3610264 | 0.1699817 | -2.1239 | 0.0338   | -0.477499844 | count | 1           |
| SYNC       | -0.3844648 | 0.2055617 | -1.8703 | 0.0615   | -0.477433438 | count | 1           |
| AL133342.1 | -0.8827633 | 0.6160892 | -1.4328 | 0.152    | -0.477012201 | count | 1           |
| PDIA6      | -0.3337103 | 0.0511861 | -6.5196 | 8.35E-11 | -0.476925683 | count | 1.98E-06    |
| ZNF844     | -0.4354918 | 0.3087523 | -1.4105 | 0.159    | -0.476873563 | count | 1           |
| KIT        | -0.7199042 | 0.6785707 | -1.0609 | 0.289    | -0.476861841 | count | 1           |
| TERF1      | -0.3447784 | 0.1406002 | -2.4522 | 0.0143   | -0.476585352 | count | 1           |
| ZNF407     | -0.4028141 | 0.2190997 | -1.8385 | 0.0661   | -0.476273606 | count | 1           |
| MCRIP2     | -0.3955979 | 0.2371144 | -1.6684 | 0.0954   | -0.476127188 | count | 1           |
| SMARCD2    | -0.3782794 | 0.177066  | -2.1364 | 0.0327   | -0.476084632 | count | 1           |
| PTPN21     | -0.6545557 | 0.4315291 | -1.5168 | 0.129    | -0.475400947 | count | 1           |
| DPP3       | -0.4661512 | 0.3262943 | -1.4286 | 0.153    | -0.475326363 | count | 1           |
| BCAP29     | -0.3328313 | 0.0624646 | -5.3283 | 1.07E-07 | -0.475026834 | count | 0.002515249 |
| PURG       | -0.7585889 | 0.6476293 | -1.1713 | 0.242    | -0.474347428 | count | 1           |
| FAM189A1   | -1.095859  | 0.668798  | -1.6385 | 0.101    | -0.474277782 | count | 1           |
| OS9        | -0.335795  | 0.0734471 | -4.5719 | 5.05E-06 | -0.474058582 | count | 0.11751855  |
| SLC35B2    | -0.3917281 | 0.2768298 | -1.4151 | 0.157    | -0.473898734 | count | 1           |

|            |            |           |         |          |              |       |             |
|------------|------------|-----------|---------|----------|--------------|-------|-------------|
| AKT1       | -0.3464997 | 0.1296538 | -2.6725 | 0.00757  | -0.473753051 | count | 1           |
| DDX28      | -0.5248019 | 0.4157982 | -1.2622 | 0.207    | -0.473687164 | count | 1           |
| APLP2      | -0.3323969 | 0.0720308 | -4.6146 | 4.12E-06 | -0.473046977 | count | 0.09594244  |
| DNAJC10    | -0.3404067 | 0.1209463 | -2.8145 | 0.00492  | -0.47184     | count | 1           |
| GRK6       | -0.446481  | 0.3053081 | -1.4624 | 0.144    | -0.471692477 | count | 1           |
| PPP1R14B   | -0.3296968 | 0.0539289 | -6.1135 | 1.11E-09 | -0.471675935 | count | 2.63E-05    |
| ARHGAP45   | -0.556567  | 0.5146258 | -1.0815 | 0.28     | -0.471668422 | count | 1           |
| PMEL       | -0.9638559 | 0.7947216 | -1.2128 | 0.225    | -0.471513633 | count | 1           |
| ADCY1      | -0.9638559 | 0.8742779 | -1.1025 | 0.27     | -0.471513633 | count | 1           |
| CCNO       | -0.9638559 | 1.0091502 | -0.9551 | 0.34     | -0.471513633 | count | 1           |
| CDH5       | -0.3327841 | 0.0759804 | -4.3799 | 1.23E-05 | -0.471193276 | count | 0.2850894   |
| AC091959.3 | -0.7538696 | 0.6471272 | -1.1649 | 0.244    | -0.470993467 | count | 1           |
| RALGAPB    | -0.3822385 | 0.2212775 | -1.7274 | 0.0842   | -0.47087524  | count | 1           |
| ZDHC9      | -0.3890342 | 0.2401047 | -1.6203 | 0.105    | -0.470569823 | count | 1           |
| MAPRE2     | -0.361279  | 0.1706634 | -2.1169 | 0.0344   | -0.47009079  | count | 1           |
| MYOZ3      | -0.623456  | 0.5533561 | -1.1267 | 0.26     | -0.469907368 | count | 1           |
| MAPK1      | -0.3464327 | 0.1370255 | -2.5282 | 0.0115   | -0.469784168 | count | 1           |
| HSPH1      | -0.3415327 | 0.1085174 | -3.1473 | 0.00167  | -0.469153082 | count | 1           |
| PPP1R9A    | -0.4697991 | 0.5693945 | -0.8251 | 0.409    | -0.468698875 | count | 1           |
| DUSP19     | -0.4282749 | 0.3343822 | -1.2808 | 0.2      | -0.468693767 | count | 1           |
| SEC61B     | -0.3263439 | 0.0436123 | -7.4828 | 9.72E-14 | -0.467560524 | count | 2.32E-09    |
| NUDT3      | -0.3422746 | 0.1373909 | -2.4912 | 0.0128   | -0.46628221  | count | 1           |
| TAF5L      | -0.5079372 | 0.3373472 | -1.5057 | 0.132    | -0.466206586 | count | 1           |
| ADAL       | -0.4138452 | 0.261568  | -1.5822 | 0.114    | -0.465768472 | count | 1           |
| TRIM13     | -0.3503953 | 0.144564  | -2.4238 | 0.0154   | -0.465761451 | count | 1           |
| CCDC85B    | -0.3237778 | 0.0352828 | -9.1767 | 8.47E-20 | -0.465574137 | count | 2.04E-15    |
| AC112220.2 | -0.797633  | 0.686505  | -1.1619 | 0.245    | -0.465302852 | count | 1           |
| CYFIP2     | -0.797633  | 0.7606738 | -1.0486 | 0.294    | -0.465302852 | count | 1           |
| DRAP1      | -0.3312118 | 0.0863203 | -3.837  | 0.000127 | -0.46505289  | count | 1           |
| HSPA5      | -0.325925  | 0.0642785 | -5.0705 | 4.23E-07 | -0.464523638 | count | 0.009911313 |
| RDX        | -0.3244672 | 0.0607    | -5.3454 | 9.76E-08 | -0.464179222 | count | 0.002294674 |
| SLC38A6    | -0.4123736 | 0.3066102 | -1.3449 | 0.179    | -0.464060973 | count | 1           |
| GPR153     | -2.5134947 | 0.9429517 | -2.6656 | 0.00773  | -0.464008433 | count | 1           |
| HAVCR2     | -2.5134947 | 0.9429517 | -2.6656 | 0.00773  | -0.464008433 | count | 1           |
| CXCR3      | -2.5134947 | 0.9429517 | -2.6656 | 0.00773  | -0.464008433 | count | 1           |
| TMEM249    | -2.5134947 | 0.9429517 | -2.6656 | 0.00773  | -0.464008433 | count | 1           |
| PLK1       | -2.5134947 | 0.9429517 | -2.6656 | 0.00773  | -0.464008433 | count | 1           |
| PTOV1-AS2  | -2.5134947 | 0.9429517 | -2.6656 | 0.00773  | -0.464008433 | count | 1           |
| APOB       | -2.5134947 | 1.31061   | -1.9178 | 0.0552   | -0.464008433 | count | 1           |
| AL022068.1 | -2.5134947 | 1.31061   | -1.9178 | 0.0552   | -0.464008433 | count | 1           |
| VTN        | -2.5134947 | 1.31061   | -1.9178 | 0.0552   | -0.464008433 | count | 1           |
| AL021707.2 | -2.5134947 | 1.31061   | -1.9178 | 0.0552   | -0.464008433 | count | 1           |
| PANX2      | -2.5134947 | 1.31061   | -1.9178 | 0.0552   | -0.464008433 | count | 1           |
| AC010680.4 | -2.5134947 | 1.353401  | -1.8572 | 0.0634   | -0.464008433 | count | 1           |
| AC092903.2 | -2.5134947 | 1.353401  | -1.8572 | 0.0634   | -0.464008433 | count | 1           |

|            |            |           |         |          |              |       |             |
|------------|------------|-----------|---------|----------|--------------|-------|-------------|
| TSPAN32    | -2.5134947 | 1.353401  | -1.8572 | 0.0634   | -0.464008433 | count | 1           |
| ZW10       | -0.4506771 | 0.3249352 | -1.387  | 0.166    | -0.463528209 | count | 1           |
| ZNF154     | -0.5137972 | 0.4282359 | -1.1998 | 0.23     | -0.463112824 | count | 1           |
| SELENOT    | -0.3293378 | 0.083625  | -3.9383 | 8.41E-05 | -0.462922089 | count | 1           |
| AL391422.3 | -0.4957609 | 0.3652102 | -1.3575 | 0.175    | -0.462343857 | count | 1           |
| UQCRQ      | -0.3242592 | 0.0565333 | -5.7357 | 1.08E-08 | -0.462078272 | count | 0.000255118 |
| TOLLIP     | -0.3534647 | 0.1718309 | -2.057  | 0.0398   | -0.461756924 | count | 1           |
| SLC9A3R2   | -0.3205229 | 0.0623677 | -5.1392 | 2.95E-07 | -0.460839878 | count | 0.006917455 |
| AC007038.2 | -0.5323526 | 0.4743053 | -1.1224 | 0.262    | -0.460811716 | count | 1           |
| UBB        | -0.3199699 | 0.0323687 | -9.8852 | 1.14E-22 | -0.460119199 | count | 2.75E-18    |
| RECK       | -0.3825793 | 0.2359987 | -1.6211 | 0.105    | -0.460118166 | count | 1           |
| SPEN       | -0.3437567 | 0.1420923 | -2.4192 | 0.0156   | -0.459892429 | count | 1           |
| RPN2       | -0.3247199 | 0.0703191 | -4.6178 | 4.06E-06 | -0.459363327 | count | 0.09455334  |
| SLC29A3    | -0.6344238 | 0.4062501 | -1.5617 | 0.118    | -0.459267226 | count | 1           |
| HSP90AA1   | -0.3194451 | 0.0368387 | -8.6715 | 7.15E-18 | -0.459137017 | count | 1.72E-13    |
| CCL28      | -0.3738746 | 0.2893169 | -1.2923 | 0.196    | -0.458406777 | count | 1           |
| MPZL1      | -0.3362873 | 0.1375172 | -2.4454 | 0.0145   | -0.458196477 | count | 1           |
| CABP4      | -0.9408694 | 0.690267  | -1.3631 | 0.173    | -0.458145143 | count | 1           |
| UNC119B    | -0.48377   | 0.394452  | -1.2264 | 0.22     | -0.457859401 | count | 1           |
| RPUSD2     | -0.4272846 | 0.3547537 | -1.2045 | 0.229    | -0.457844757 | count | 1           |
| SFT2D3     | -0.3850902 | 0.2652652 | -1.4517 | 0.147    | -0.457777983 | count | 1           |
| PGM3       | -0.3541338 | 0.1818118 | -1.9478 | 0.0515   | -0.457657284 | count | 1           |
| ARPC5      | -0.3198708 | 0.0520193 | -6.1491 | 8.92E-10 | -0.457065254 | count | 2.11E-05    |
| ZNRF1      | -0.3311307 | 0.1112208 | -2.9772 | 0.00293  | -0.456612051 | count | 1           |
| LSM10      | -0.3318162 | 0.1289967 | -2.5723 | 0.0102   | -0.456518019 | count | 1           |
| NMD3       | -0.3452378 | 0.160422  | -2.1521 | 0.0315   | -0.456410911 | count | 1           |
| ATPAF1     | -0.3627178 | 0.2089729 | -1.7357 | 0.0827   | -0.456187913 | count | 1           |
| WDR37      | -0.3962262 | 0.2852329 | -1.3891 | 0.165    | -0.456042014 | count | 1           |
| SLC5A3     | -0.3675288 | 0.3052382 | -1.2041 | 0.229    | -0.456032471 | count | 1           |
| MAP3K12    | -0.3413545 | 0.1589257 | -2.1479 | 0.0318   | -0.45577358  | count | 1           |
| FAM222B    | -0.3936313 | 0.3493481 | -1.1268 | 0.26     | -0.454887533 | count | 1           |
| MAGED1     | -0.3579051 | 0.1782839 | -2.0075 | 0.0448   | -0.454625942 | count | 1           |
| AHNAK2     | -0.3283311 | 0.130573  | -2.5145 | 0.012    | -0.454470303 | count | 1           |
| GPR107     | -0.3654693 | 0.228579  | -1.5989 | 0.11     | -0.454279013 | count | 1           |
| GCLM       | -0.3457696 | 0.1765893 | -1.958  | 0.0503   | -0.454036338 | count | 1           |
| ZNF341     | -0.6041324 | 0.5284474 | -1.1432 | 0.253    | -0.45395259  | count | 1           |
| ADNP2      | -0.3960761 | 0.2580147 | -1.5351 | 0.125    | -0.453873497 | count | 1           |
| UBL5       | -0.3176921 | 0.0466566 | -6.8092 | 1.20E-11 | -0.453829422 | count | 2.86E-07    |
| PHIP       | -0.3272713 | 0.1190907 | -2.7481 | 0.00603  | -0.453611912 | count | 1           |
| BLOC1S6    | -0.3332271 | 0.1367765 | -2.4363 | 0.0149   | -0.453503329 | count | 1           |
| AC009560.1 | -1.0562048 | 0.7422713 | -1.4229 | 0.155    | -0.453421282 | count | 1           |
| EXTL2      | -0.393587  | 0.2567323 | -1.5331 | 0.125    | -0.452921387 | count | 1           |
| C11orf49   | -0.3579054 | 0.2318484 | -1.5437 | 0.123    | -0.452740651 | count | 1           |
| CNOT8      | -0.3415971 | 0.1744899 | -1.9577 | 0.0504   | -0.452656269 | count | 1           |
| RASSF8-AS1 | -0.3900209 | 0.2439549 | -1.5987 | 0.11     | -0.452439519 | count | 1           |

|            |            |           |         |          |              |       |             |
|------------|------------|-----------|---------|----------|--------------|-------|-------------|
| GSTP1      | -0.3143597 | 0.0346616 | -9.0694 | 2.21E-19 | -0.452096549 | count | 5.32E-15    |
| DDX24      | -0.3158005 | 0.0501034 | -6.303  | 3.39E-10 | -0.451596232 | count | 8.04E-06    |
| LASP1      | -0.3385691 | 0.1652147 | -2.0493 | 0.0405   | -0.451570335 | count | 1           |
| PLEKHA3    | -0.3218797 | 0.0919196 | -3.5018 | 0.00047  | -0.450907329 | count | 1           |
| NDUFA4     | -0.3141369 | 0.0378642 | -8.2964 | 1.66E-16 | -0.450904181 | count | 3.98E-12    |
| WRNIP1     | -0.3441458 | 0.1736607 | -1.9817 | 0.0476   | -0.450869258 | count | 1           |
| ZNF318     | -0.4308385 | 0.2917082 | -1.477  | 0.14     | -0.450622621 | count | 1           |
| ANAPC11    | -0.3166772 | 0.0615702 | -5.1433 | 2.89E-07 | -0.450493726 | count | 0.006777628 |
| BCL2A1     | -0.7245838 | 1.0316702 | -0.7023 | 0.483    | -0.450274891 | count | 1           |
| ANKRD9     | -0.3585511 | 0.1963787 | -1.8258 | 0.068    | -0.450151681 | count | 1           |
| ZCRB1      | -0.3183981 | 0.085332  | -3.7313 | 0.000194 | -0.449968703 | count | 1           |
| DAPL1      | -0.8395946 | 0.882304  | -0.9516 | 0.341    | -0.449865633 | count | 1           |
| PTPA       | -0.3434438 | 0.1679821 | -2.0445 | 0.041    | -0.449592528 | count | 1           |
| AC116407.2 | -0.4623157 | 0.380759  | -1.2142 | 0.225    | -0.449347012 | count | 1           |
| DIP2B      | -0.4085392 | 0.2797066 | -1.4606 | 0.144    | -0.449227627 | count | 1           |
| FAM199X    | -0.3484394 | 0.1905496 | -1.8286 | 0.0676   | -0.44881539  | count | 1           |
| NSD3       | -0.3173288 | 0.0787764 | -4.0282 | 5.77E-05 | -0.448592302 | count | 1           |
| TBC1D2B    | -0.3520763 | 0.2100417 | -1.6762 | 0.0938   | -0.448292843 | count | 1           |
| ARHGEF9    | -0.3485678 | 0.2171258 | -1.6054 | 0.109    | -0.448013888 | count | 1           |
| PCMTD1     | -0.3156745 | 0.0690544 | -4.5714 | 5.06E-06 | -0.4480118   | count | 0.1177462   |
| NEK5       | -0.5765667 | 0.5457124 | -1.0565 | 0.291    | -0.447800629 | count | 1           |
| SMG6       | -0.3349951 | 0.1583048 | -2.1161 | 0.0344   | -0.447645825 | count | 1           |
| COL14A1    | -0.5962676 | 0.5810318 | -1.0262 | 0.305    | -0.447480717 | count | 1           |
| AC092747.4 | -0.5070823 | 0.4006753 | -1.2656 | 0.206    | -0.447380955 | count | 1           |
| MIB1       | -0.358496  | 0.254969  | -1.406  | 0.16     | -0.447071268 | count | 1           |
| WASHC4     | -0.3391084 | 0.1643138 | -2.0638 | 0.0391   | -0.44706728  | count | 1           |
| GTF2H2     | -0.4441709 | 0.555831  | -0.7991 | 0.424    | -0.447057583 | count | 1           |
| SLC26A11   | -0.4310189 | 0.285737  | -1.5084 | 0.132    | -0.446736592 | count | 1           |
| GOLGB1     | -0.3160871 | 0.0758407 | -4.1678 | 3.17E-05 | -0.446472849 | count | 0.7318579   |
| PWWP2A     | -0.3386757 | 0.1805761 | -1.8755 | 0.0608   | -0.44588628  | count | 1           |
| TAS2R14    | -0.8329054 | 0.8149238 | -1.0221 | 0.307    | -0.445688107 | count | 1           |
| GALNS      | -0.426063  | 0.4415335 | -0.965  | 0.335    | -0.445427343 | count | 1           |
| CYB5D2     | -0.3265345 | 0.1248314 | -2.6158 | 0.00895  | -0.445409963 | count | 1           |
| CSNK1G1    | -0.3642457 | 0.2916253 | -1.249  | 0.212    | -0.445378693 | count | 1           |
| FAM111A-DT | -0.4582612 | 0.3824941 | -1.1981 | 0.231    | -0.445205257 | count | 1           |
| SH3BP4     | -0.3336432 | 0.1583996 | -2.1063 | 0.0353   | -0.445167294 | count | 1           |
| SSBP4      | -0.3166718 | 0.0863855 | -3.6658 | 0.000251 | -0.445018475 | count | 1           |
| ARHGAP6    | -0.441962  | 0.3050566 | -1.4488 | 0.148    | -0.444732757 | count | 1           |
| R3HDM1     | -0.3398601 | 0.181297  | -1.8746 | 0.061    | -0.444501046 | count | 1           |
| ACAA1      | -0.3226281 | 0.1223403 | -2.6371 | 0.00841  | -0.444371685 | count | 1           |
| PHPT1      | -0.3122213 | 0.0642534 | -4.8592 | 1.24E-06 | -0.443922995 | count | 0.02898128  |
| AC009118.2 | -0.6413457 | 0.695993  | -0.9215 | 0.357    | -0.442957236 | count | 1           |
| BHMT2      | -0.4759816 | 0.4654609 | -1.0226 | 0.307    | -0.44284392  | count | 1           |
| GPRC5D-AS1 | -0.3628338 | 0.3250722 | -1.1162 | 0.264    | -0.442597933 | count | 1           |
| TGFBR1     | -0.4307413 | 0.298635  | -1.4424 | 0.149    | -0.442157194 | count | 1           |

|                |            |           |         |          |              |       |           |
|----------------|------------|-----------|---------|----------|--------------|-------|-----------|
| AL136295.2     | -0.511736  | 0.5249666 | -0.9748 | 0.33     | -0.441732383 | count | 1         |
| GCN1           | -0.4064923 | 0.3004166 | -1.3531 | 0.176    | -0.441086417 | count | 1         |
| TXNDC16        | -0.4536359 | 0.3019534 | -1.5023 | 0.133    | -0.440484155 | count | 1         |
| LINC00211      | -0.7104701 | 0.6131494 | -1.1587 | 0.247    | -0.440349118 | count | 1         |
| AL928921.2     | -0.7104701 | 0.6323939 | -1.1235 | 0.261    | -0.440349118 | count | 1         |
| GOLGA3         | -0.3293392 | 0.2260327 | -1.457  | 0.145    | -0.440235345 | count | 1         |
| NDRG3          | -0.3507361 | 0.2313842 | -1.5158 | 0.13     | -0.440185505 | count | 1         |
| ZBED4          | -0.5502954 | 0.4370414 | -1.2591 | 0.208    | -0.440146461 | count | 1         |
| ANO6           | -0.3269836 | 0.1406561 | -2.3247 | 0.0202   | -0.439928999 | count | 1         |
| STIMATE        | -0.610034  | 0.4972121 | -1.2269 | 0.22     | -0.439831146 | count | 1         |
| CHEK1          | -0.610034  | 0.5238437 | -1.1645 | 0.244    | -0.439831146 | count | 1         |
| TBC1D5         | -0.3228611 | 0.1259176 | -2.5641 | 0.0104   | -0.439670016 | count | 1         |
| YAF2           | -0.3301022 | 0.1647634 | -2.0035 | 0.0452   | -0.439496516 | count | 1         |
| TRAF3          | -0.3950143 | 0.3522102 | -1.1215 | 0.262    | -0.439102049 | count | 1         |
| CSTB           | -0.3064787 | 0.0507964 | -6.0335 | 1.82E-09 | -0.438947703 | count | 4.31E-05  |
| FAM126B        | -0.3615898 | 0.2161725 | -1.6727 | 0.0945   | -0.438934564 | count | 1         |
| LXN            | -0.3088083 | 0.0861973 | -3.5826 | 0.000346 | -0.43890715  | count | 1         |
| CPXM2          | -0.3124811 | 0.0926404 | -3.3731 | 0.000754 | -0.438729745 | count | 1         |
| KIRREL1        | -0.5851953 | 0.4638629 | -1.2616 | 0.207    | -0.438391027 | count | 1         |
| NAPA           | -0.3158692 | 0.1076539 | -2.9341 | 0.00337  | -0.438352882 | count | 1         |
| HAGH           | -0.3169515 | 0.110278  | -2.8741 | 0.00408  | -0.438334386 | count | 1         |
| ZNF816-ZNF321P | -0.6678483 | 0.5612908 | -1.1898 | 0.234    | -0.43832257  | count | 1         |
| FGFR1OP        | -0.4512286 | 0.4365509 | -1.0336 | 0.301    | -0.438028602 | count | 1         |
| TMEM154        | -0.4455618 | 0.406356  | -1.0965 | 0.273    | -0.437970665 | count | 1         |
| EVI5L          | -0.6347178 | 0.4604839 | -1.3784 | 0.168    | -0.437877149 | count | 1         |
| MPC2           | -0.3103723 | 0.0801589 | -3.872  | 0.00011  | -0.437312118 | count | 1         |
| ANKRD37        | -0.328621  | 0.1642408 | -2.0008 | 0.0455   | -0.437274456 | count | 1         |
| CTTNBP2NL      | -0.312812  | 0.0910733 | -3.4347 | 0.000602 | -0.437088594 | count | 1         |
| MTFR1L         | -0.3451735 | 0.1913326 | -1.804  | 0.0713   | -0.437018228 | count | 1         |
| ASPRV1         | -0.5465609 | 0.5866743 | -0.9316 | 0.352    | -0.436914033 | count | 1         |
| MASTL          | -0.5830902 | 0.4330738 | -1.3464 | 0.178    | -0.436665757 | count | 1         |
| MAMLD1         | -0.5830902 | 0.4394224 | -1.3269 | 0.185    | -0.436665757 | count | 1         |
| KCTD17         | -0.3553891 | 0.2364974 | -1.5027 | 0.133    | -0.436276338 | count | 1         |
| KCND1          | -1.02254   | 0.761744  | -1.3424 | 0.18     | -0.435883138 | count | 1         |
| PTPN20         | -1.02254   | 0.761744  | -1.3424 | 0.18     | -0.435883138 | count | 1         |
| LINC01750      | -1.02254   | 0.8914027 | -1.1471 | 0.251    | -0.435883138 | count | 1         |
| AC011043.1     | -0.4765774 | 0.4006587 | -1.1895 | 0.234    | -0.435729042 | count | 1         |
| PYGL           | -0.4041067 | 0.2800651 | -1.4429 | 0.149    | -0.435331595 | count | 1         |
| DBNDD1         | -0.7029915 | 0.7057507 | -0.9961 | 0.319    | -0.435105452 | count | 1         |
| LRPAP1         | -0.3070524 | 0.0684933 | -4.483  | 7.66E-06 | -0.434979363 | count | 0.1779418 |
| AC044849.1     | -0.4009366 | 0.3644323 | -1.1002 | 0.271    | -0.434851304 | count | 1         |
| ATL2           | -0.3260258 | 0.2021273 | -1.613  | 0.107    | -0.434697378 | count | 1         |
| CDC14B         | -0.6304226 | 0.3017472 | -2.0892 | 0.0368   | -0.434589819 | count | 1         |
| COX7A2         | -0.3036968 | 0.0487023 | -6.2358 | 5.18E-10 | -0.434552165 | count | 1.23E-05  |
| CES4A          | -1.2033793 | 0.7853008 | -1.5324 | 0.126    | -0.434129521 | count | 1         |

|            |            |           |         |          |              |       |          |
|------------|------------|-----------|---------|----------|--------------|-------|----------|
| ZNF774     | -1.2033793 | 0.8049665 | -1.4949 | 0.135    | -0.434129521 | count | 1        |
| SIRPB2     | -1.2033793 | 0.8049665 | -1.4949 | 0.135    | -0.434129521 | count | 1        |
| FAM85B     | -1.2033793 | 0.8243397 | -1.4598 | 0.144    | -0.434129521 | count | 1        |
| VCP        | -0.3098741 | 0.1005453 | -3.0819 | 0.00208  | -0.434067292 | count | 1        |
| TMED7      | -0.3240855 | 0.1372396 | -2.3615 | 0.0183   | -0.433763885 | count | 1        |
| GNRH1      | -0.8133464 | 0.8460619 | -0.9613 | 0.336    | -0.433518692 | count | 1        |
| LYL1       | -0.3091204 | 0.0904782 | -3.4165 | 0.000643 | -0.433277928 | count | 1        |
| KIF1C      | -0.3306425 | 0.1841589 | -1.7954 | 0.0727   | -0.432991559 | count | 1        |
| SMIM20     | -0.3218798 | 0.1561578 | -2.0612 | 0.0394   | -0.432836432 | count | 1        |
| GSDME      | -0.6997119 | 0.7194217 | -0.9726 | 0.331    | -0.432809451 | count | 1        |
| FLOT2      | -0.3235096 | 0.1726746 | -1.8735 | 0.0611   | -0.43258355  | count | 1        |
| JMJD4      | -0.3491518 | 0.2472738 | -1.412  | 0.158    | -0.432012268 | count | 1        |
| SPAG4      | -0.4577614 | 0.3939257 | -1.1621 | 0.245    | -0.431921173 | count | 1        |
| DNAJC16    | -0.371272  | 0.2557983 | -1.4514 | 0.147    | -0.431840623 | count | 1        |
| MYO5A      | -0.3355113 | 0.2136734 | -1.5702 | 0.116    | -0.431491033 | count | 1        |
| ACADVL     | -0.3124808 | 0.1070292 | -2.9196 | 0.00353  | -0.431127256 | count | 1        |
| ADAMTSL3   | -0.5757696 | 0.3443687 | -1.672  | 0.0946   | -0.430673212 | count | 1        |
| TRMT2B     | -0.4333113 | 0.2913063 | -1.4875 | 0.137    | -0.430632508 | count | 1        |
| TWNK       | -0.4240971 | 0.4323082 | -0.981  | 0.327    | -0.4306202   | count | 1        |
| AC005339.1 | -1.5203921 | 0.8386156 | -1.813  | 0.0699   | -0.430221002 | count | 1        |
| GPRC5B     | -0.3163149 | 0.1406607 | -2.2488 | 0.0246   | -0.429850956 | count | 1        |
| STARD5     | -0.4884138 | 0.4756758 | -1.0268 | 0.305    | -0.429846853 | count | 1        |
| USP27X     | -0.3847829 | 0.3326881 | -1.1566 | 0.248    | -0.429788155 | count | 1        |
| HOXB6      | -0.7440843 | 0.6381263 | -1.166  | 0.244    | -0.429620601 | count | 1        |
| NCBP2-AS2  | -0.312772  | 0.1189862 | -2.6286 | 0.00862  | -0.429524908 | count | 1        |
| MYO1C      | -0.3121422 | 0.1197203 | -2.6073 | 0.00918  | -0.428740001 | count | 1        |
| ARPC2      | -0.2991625 | 0.0467914 | -6.3935 | 1.90E-10 | -0.428582183 | count | 4.51E-06 |
| AC011444.2 | -1.1905394 | 0.8255896 | -1.442  | 0.149    | -0.428330841 | count | 1        |
| ZNF700     | -0.4612056 | 0.4181242 | -1.103  | 0.27     | -0.428326233 | count | 1        |
| THEM4      | -0.3358882 | 0.1943838 | -1.728  | 0.0841   | -0.427946357 | count | 1        |
| MCM5       | -0.3493161 | 0.2968593 | -1.1767 | 0.239    | -0.427747807 | count | 1        |
| ADD1       | -0.306044  | 0.1002705 | -3.0522 | 0.00229  | -0.427706126 | count | 1        |
| NPTN       | -0.3096984 | 0.1143084 | -2.7093 | 0.00678  | -0.427408087 | count | 1        |
| ZNF827     | -0.5519572 | 0.4767232 | -1.1578 | 0.247    | -0.427047421 | count | 1        |
| UBASH3B    | -1.1876391 | 0.5461036 | -2.1748 | 0.0297   | -0.427023531 | count | 1        |
| SLC22A5    | -0.6517513 | 0.4474524 | -1.4566 | 0.145    | -0.4265149   | count | 1        |
| AL683813.1 | -0.8858441 | 0.5093391 | -1.7392 | 0.0821   | -0.426486123 | count | 1        |
| NBPF3      | -0.6195613 | 0.5290981 | -1.171  | 0.242    | -0.426294158 | count | 1        |
| TNPO1      | -0.311     | 0.1235767 | -2.5167 | 0.0119   | -0.425730911 | count | 1        |
| THNSL2     | -0.8837253 | 0.5197609 | -1.7003 | 0.0892   | -0.425277008 | count | 1        |
| IDH2       | -0.3540032 | 0.2095539 | -1.6893 | 0.0913   | -0.425048435 | count | 1        |
| MIEN1      | -0.3034055 | 0.0956432 | -3.1723 | 0.00153  | -0.424978227 | count | 1        |
| NCKAP5L    | -0.3976449 | 0.2628821 | -1.5126 | 0.13     | -0.424964993 | count | 1        |
| KIF26B     | -1.182855  | 0.8049512 | -1.4695 | 0.142    | -0.424869181 | count | 1        |
| GPR84      | -1.182855  | 0.8049512 | -1.4695 | 0.142    | -0.424869181 | count | 1        |

|             |            |           |         |          |              |       |            |
|-------------|------------|-----------|---------|----------|--------------|-------|------------|
| HIST2H2AB   | -1.182855  | 0.8213331 | -1.4402 | 0.15     | -0.424869181 | count | 1          |
| QSOX2       | -0.504968  | 0.4552225 | -1.1093 | 0.267    | -0.424863308 | count | 1          |
| CHMP1B      | -0.3101052 | 0.1136884 | -2.7277 | 0.00642  | -0.424013033 | count | 1          |
| RASSF2      | -0.5478233 | 0.503171  | -1.0887 | 0.276    | -0.423573754 | count | 1          |
| ZNF579      | -0.3629064 | 0.280167  | -1.2953 | 0.195    | -0.423482382 | count | 1          |
| ASB3        | -0.5033887 | 0.4010853 | -1.2551 | 0.21     | -0.423439352 | count | 1          |
| SEC61G      | -0.2974757 | 0.0560441 | -5.3079 | 1.20E-07 | -0.423305317 | count | 0.00281988 |
| TULP4       | -0.3127328 | 0.1379816 | -2.2665 | 0.0235   | -0.423233573 | count | 1          |
| SLC30A5     | -0.327665  | 0.1943562 | -1.6859 | 0.0919   | -0.423044039 | count | 1          |
| L3MBTL3     | -0.3595782 | 0.2522294 | -1.4256 | 0.154    | -0.422551584 | count | 1          |
| FBP1        | -0.5022275 | 0.5005632 | -1.0033 | 0.316    | -0.422392697 | count | 1          |
| ERGIC3      | -0.3009287 | 0.092026  | -3.27   | 0.00109  | -0.422361295 | count | 1          |
| SSUH2       | -1.497249  | 0.5479652 | -2.7324 | 0.00633  | -0.421764251 | count | 1          |
| AC011447.3  | -0.4542798 | 0.3868026 | -1.1744 | 0.24     | -0.421536318 | count | 1          |
| PLEKHH3     | -0.3584845 | 0.2394505 | -1.4971 | 0.134    | -0.421236574 | count | 1          |
| ZNF786      | -0.6444973 | 0.4116714 | -1.5656 | 0.118    | -0.421211203 | count | 1          |
| TMBIM1      | -0.3015168 | 0.0925457 | -3.258  | 0.00114  | -0.421147077 | count | 1          |
| PNKP        | -0.321789  | 0.1598546 | -2.013  | 0.0442   | -0.420950012 | count | 1          |
| ARIH2OS     | -0.4460633 | 0.2979936 | -1.4969 | 0.135    | -0.420297441 | count | 1          |
| AC025682.1  | -0.5625293 | 0.5487393 | -1.0251 | 0.305    | -0.419863546 | count | 1          |
| RPE         | -0.3270534 | 0.1909256 | -1.713  | 0.0868   | -0.419547473 | count | 1          |
| USP46       | -0.3232821 | 0.2102452 | -1.5376 | 0.124    | -0.419340653 | count | 1          |
| MYL4        | -1.1698418 | 0.7392376 | -1.5825 | 0.114    | -0.41902227  | count | 1          |
| ARMH3       | -0.4383949 | 0.3485304 | -1.2578 | 0.209    | -0.41900054  | count | 1          |
| AL132656.2  | -0.8725438 | 0.7427086 | -1.1748 | 0.24     | -0.418908648 | count | 1          |
| AC012467.2  | -0.8725438 | 0.7889167 | -1.106  | 0.269    | -0.418908648 | count | 1          |
| ZSCAN16-AS1 | -0.3444932 | 0.202707  | -1.6995 | 0.0893   | -0.418811361 | count | 1          |
| ZNF680      | -0.338522  | 0.2235615 | -1.5142 | 0.13     | -0.418638597 | count | 1          |
| FAM120C     | -0.3857523 | 0.4240687 | -0.9096 | 0.363    | -0.417835588 | count | 1          |
| CCDC189     | -1.1670912 | 0.6434155 | -1.8139 | 0.0698   | -0.41778887  | count | 1          |
| AC068491.3  | -1.4862854 | 0.7378794 | -2.0143 | 0.0441   | -0.417768955 | count | 1          |
| AL162274.2  | -1.4862854 | 0.7558652 | -1.9663 | 0.0494   | -0.417768955 | count | 1          |
| NUPR1       | -0.2927579 | 0.0755697 | -3.874  | 0.00011  | -0.41755039  | count | 1          |
| ANKFY1      | -0.3541673 | 0.2486722 | -1.4242 | 0.154    | -0.417481139 | count | 1          |
| TIMM8A      | -0.3321598 | 0.2506997 | -1.3249 | 0.185    | -0.417184756 | count | 1          |
| ZKSCAN2     | -0.9861547 | 0.6517742 | -1.513  | 0.13     | -0.417108891 | count | 1          |
| USP42       | -0.353562  | 0.2847425 | -1.2417 | 0.214    | -0.416751518 | count | 1          |
| PRDM8       | -2.297496  | 0.7559495 | -3.0392 | 0.00239  | -0.416726636 | count | 1          |
| CDR2L       | -0.4359764 | 0.2767313 | -1.5755 | 0.115    | -0.41657154  | count | 1          |
| ZNF442      | -0.6380341 | 0.4061623 | -1.5709 | 0.116    | -0.416494844 | count | 1          |
| FMC1        | -0.3275884 | 0.187497  | -1.7472 | 0.0807   | -0.416147591 | count | 1          |
| AL451007.3  | -1.4810266 | 0.9305496 | -1.5916 | 0.112    | -0.415855262 | count | 1          |
| OIT3        | -1.4810266 | 0.9305496 | -1.5916 | 0.112    | -0.415855262 | count | 1          |
| AC008378.1  | -1.4810266 | 0.9845423 | -1.5043 | 0.133    | -0.415855262 | count | 1          |
| AC010542.4  | -1.4810266 | 1.276758  | -1.16   | 0.246    | -0.415855262 | count | 1          |

|            |            |           |         |          |              |       |            |
|------------|------------|-----------|---------|----------|--------------|-------|------------|
| EXOSC4     | -0.3137474 | 0.1625376 | -1.9303 | 0.0537   | -0.415422219 | count | 1          |
| SNRK       | -0.2961079 | 0.0901253 | -3.2855 | 0.00103  | -0.415420637 | count | 1          |
| ZNF169     | -0.5214639 | 0.4674527 | -1.1155 | 0.265    | -0.415266965 | count | 1          |
| ZNF503-AS2 | -1.4791    | 0.686312  | -2.1551 | 0.0312   | -0.415154661 | count | 1          |
| PKNOX2     | -1.4791    | 0.7424611 | -1.9922 | 0.0465   | -0.415154661 | count | 1          |
| ANK2       | -1.4791    | 1.069681  | -1.3827 | 0.167    | -0.415154661 | count | 1          |
| AP001830.1 | -0.635065  | 0.4903023 | -1.2953 | 0.195    | -0.414331114 | count | 1          |
| CIB1       | -0.2927356 | 0.0734794 | -3.9839 | 6.95E-05 | -0.413448241 | count | 1          |
| CACNA2D1   | -0.3306343 | 0.2120996 | -1.5589 | 0.119    | -0.413210406 | count | 1          |
| PRMT2      | -0.292602  | 0.0869591 | -3.3648 | 0.000776 | -0.413198392 | count | 1          |
| LTB4R2     | -0.5759973 | 0.5159003 | -1.1165 | 0.264    | -0.412913989 | count | 1          |
| OST4       | -0.2882829 | 0.042389  | -6.8009 | 1.27E-11 | -0.412779645 | count | 3.03E-07   |
| AC108463.3 | -2.2792187 | 0.6818174 | -3.3429 | 0.00084  | -0.412642717 | count | 1          |
| RMND5B     | -0.3410811 | 0.2585394 | -1.3193 | 0.187    | -0.412525716 | count | 1          |
| PTCD2      | -0.5754247 | 0.3981482 | -1.4453 | 0.149    | -0.412463263 | count | 1          |
| DAPK2      | -0.601076  | 0.5668361 | -1.0604 | 0.289    | -0.412232102 | count | 1          |
| SMAD5-AS1  | -0.632081  | 0.6527746 | -0.9683 | 0.333    | -0.412158295 | count | 1          |
| RASSF8     | -0.3040958 | 0.1272778 | -2.3892 | 0.017    | -0.4121373   | count | 1          |
| COBL       | -2.2762461 | 1.205097  | -1.8888 | 0.059    | -0.411977509 | count | 1          |
| LOXL4      | -2.2762461 | 1.205097  | -1.8888 | 0.059    | -0.411977509 | count | 1          |
| AC034243.1 | -2.2762461 | 1.239098  | -1.837  | 0.0663   | -0.411977509 | count | 1          |
| DNA2       | -2.2762461 | 1.239098  | -1.837  | 0.0663   | -0.411977509 | count | 1          |
| DACT3      | -2.2762461 | 1.239098  | -1.837  | 0.0663   | -0.411977509 | count | 1          |
| AL357033.4 | -2.2762461 | 1.31997   | -1.7245 | 0.0847   | -0.411977509 | count | 1          |
| C11orf24   | -0.4252512 | 0.3426692 | -1.241  | 0.215    | -0.411600433 | count | 1          |
| ELFN1      | -0.3947709 | 0.3347226 | -1.1794 | 0.238    | -0.411481642 | count | 1          |
| RRAGD      | -0.5739582 | 0.5281337 | -1.0868 | 0.277    | -0.411309181 | count | 1          |
| ZNF225     | -0.5739582 | 0.5533593 | -1.0372 | 0.3      | -0.411309181 | count | 1          |
| TRAC       | -0.8588753 | 0.7764475 | -1.1062 | 0.269    | -0.411152591 | count | 1          |
| AC078883.1 | -0.4299541 | 0.4082322 | -1.0532 | 0.292    | -0.410528015 | count | 1          |
| CHAC1      | -0.6673968 | 0.6854788 | -0.9736 | 0.33     | -0.410301171 | count | 1          |
| FLNA       | -0.2908278 | 0.0985731 | -2.9504 | 0.0032   | -0.410257029 | count | 1          |
| FAM3D      | -0.775259  | 0.6587989 | -1.1768 | 0.239    | -0.410020364 | count | 1          |
| AC068987.5 | -0.9708764 | 0.5515021 | -1.7604 | 0.0784   | -0.409283595 | count | 1          |
| GRN        | -0.2872583 | 0.064154  | -4.4776 | 7.85E-06 | -0.409126797 | count | 0.1823398  |
| CLTC       | -0.2950539 | 0.1047002 | -2.8181 | 0.00487  | -0.408936861 | count | 1          |
| ABCA3      | -0.4759742 | 0.3583542 | -1.3282 | 0.184    | -0.40884299  | count | 1          |
| NFE2L2     | -0.2869037 | 0.0641796 | -4.4703 | 8.12E-06 | -0.40875936  | count | 0.18857888 |
| AP002884.1 | -0.4119438 | 0.4067441 | -1.0128 | 0.311    | -0.408454365 | count | 1          |
| CNTN1      | -0.853455  | 0.7894236 | -1.0811 | 0.28     | -0.408085815 | count | 1          |
| GOLGA6L10  | -0.853455  | 0.7894236 | -1.0811 | 0.28     | -0.408085815 | count | 1          |
| ENPP6      | -0.853455  | 0.9517458 | -0.8967 | 0.37     | -0.408085815 | count | 1          |
| LINC01242  | -0.853455  | 0.9517458 | -0.8967 | 0.37     | -0.408085815 | count | 1          |
| HOXA1      | -0.6264045 | 0.6821229 | -0.9183 | 0.359    | -0.408030297 | count | 1          |
| AL606491.1 | -0.5696505 | 0.6780219 | -0.8402 | 0.401    | -0.407921914 | count | 1          |



|            |            |           |         |          |              |       |            |
|------------|------------|-----------|---------|----------|--------------|-------|------------|
| GOLGA4     | -0.2880953 | 0.0912171 | -3.1583 | 0.0016   | -0.407450598 | count | 1          |
| CSNK2A2    | -0.2943851 | 0.1105    | -2.6641 | 0.00776  | -0.407400703 | count | 1          |
| AC099778.1 | -0.5943638 | 0.4776506 | -1.2443 | 0.213    | -0.407143901 | count | 1          |
| SMC4       | -0.2967821 | 0.1267989 | -2.3406 | 0.0193   | -0.407126503 | count | 1          |
| LRRC69     | -0.7097845 | 0.6706234 | -1.0584 | 0.29     | -0.407052492 | count | 1          |
| NHLRC2     | -0.3159819 | 0.1994737 | -1.5841 | 0.113    | -0.406943387 | count | 1          |
| UQCRC1     | -0.2988342 | 0.1322587 | -2.2595 | 0.0239   | -0.40686877  | count | 1          |
| NBPF1      | -0.3903906 | 0.3242291 | -1.2041 | 0.229    | -0.406743543 | count | 1          |
| AC008764.8 | -0.9658931 | 0.6120787 | -1.5781 | 0.115    | -0.406738785 | count | 1          |
| MICA       | -0.3085886 | 0.1686325 | -1.8299 | 0.0674   | -0.406455896 | count | 1          |
| NEDD4L     | -0.3370045 | 0.2475316 | -1.3615 | 0.173    | -0.406441364 | count | 1          |
| ZNF728     | -0.4630776 | 0.5619051 | -0.8241 | 0.41     | -0.406164107 | count | 1          |
| AC005332.7 | -0.3508232 | 0.2568115 | -1.3661 | 0.172    | -0.405879436 | count | 1          |
| ARHGEF17   | -0.7682233 | 0.5463164 | -1.4062 | 0.16     | -0.405709014 | count | 1          |
| PRR11      | -0.7682233 | 0.5804192 | -1.3236 | 0.186    | -0.405709014 | count | 1          |
| FBXO9      | -0.2936606 | 0.1210143 | -2.4267 | 0.0153   | -0.405558583 | count | 1          |
| PACERR     | -0.7070226 | 0.723788  | -0.9768 | 0.329    | -0.405245309 | count | 1          |
| BACE2      | -0.2852713 | 0.0753122 | -3.7879 | 0.000155 | -0.405116959 | count | 1          |
| KCNK6      | -0.4618945 | 0.4378293 | -1.055  | 0.292    | -0.405061483 | count | 1          |
| NLRX1      | -0.5095644 | 0.5079496 | -1.0032 | 0.316    | -0.405049984 | count | 1          |
| ZCCHC24    | -0.3004772 | 0.1572601 | -1.9107 | 0.0561   | -0.404956808 | count | 1          |
| ITGA3      | -0.3188325 | 0.2063837 | -1.5449 | 0.122    | -0.404875775 | count | 1          |
| TMED9      | -0.2852557 | 0.0664665 | -4.2917 | 1.83E-05 | -0.404867542 | count | 0.4235901  |
| ZNF461     | -0.4370829 | 0.4761211 | -0.918  | 0.359    | -0.404718248 | count | 1          |
| AC087386.1 | -0.5087219 | 0.591992  | -0.8593 | 0.39     | -0.404327742 | count | 1          |
| LINC02478  | -0.5087219 | 0.7048999 | -0.7217 | 0.471    | -0.404327742 | count | 1          |
| MSANTD2    | -0.3283916 | 0.2800113 | -1.1728 | 0.241    | -0.404275128 | count | 1          |
| AP4E1      | -0.3761881 | 0.4115309 | -0.9141 | 0.361    | -0.404258125 | count | 1          |
| BRPF3      | -0.3914526 | 0.3687186 | -1.0617 | 0.288    | -0.404160003 | count | 1          |
| FHOD1      | -0.3913816 | 0.2755184 | -1.4205 | 0.156    | -0.404083844 | count | 1          |
| SMIM7      | -0.2872281 | 0.0848039 | -3.387  | 0.000717 | -0.403930223 | count | 1          |
| LCLAT1     | -0.3307641 | 0.2325766 | -1.4222 | 0.155    | -0.403716923 | count | 1          |
| SLAIN1     | -0.9598613 | 0.5212985 | -1.8413 | 0.0657   | -0.403663581 | count | 1          |
| LY6G5C     | -0.4118659 | 0.3193229 | -1.2898 | 0.197    | -0.403343828 | count | 1          |
| TAOK2      | -0.308979  | 0.2083098 | -1.4833 | 0.138    | -0.403047371 | count | 1          |
| SLC25A45   | -0.5230106 | 0.4061483 | -1.2877 | 0.198    | -0.402800583 | count | 1          |
| SEMA4A     | -0.3329907 | 0.2023976 | -1.6452 | 0.1      | -0.402555705 | count | 1          |
| ERCC4      | -0.3124678 | 0.177551  | -1.7599 | 0.0785   | -0.40236425  | count | 1          |
| ARL6IP5    | -0.2804748 | 0.0440395 | -6.3687 | 2.23E-10 | -0.402289397 | count | 5.29E-06   |
| PCYOX1     | -0.2963867 | 0.1457599 | -2.0334 | 0.0421   | -0.402246129 | count | 1          |
| ATF6       | -0.2987984 | 0.1314161 | -2.2737 | 0.0231   | -0.401900276 | count | 1          |
| ENO1       | -0.2815823 | 0.0527657 | -5.3365 | 1.02E-07 | -0.401757892 | count | 0.00239802 |
| S100A13    | -0.2799967 | 0.0465715 | -6.0122 | 2.07E-09 | -0.401697983 | count | 4.90E-05   |
| FYCO1      | -0.3623076 | 0.2917742 | -1.2417 | 0.214    | -0.401690617 | count | 1          |
| ZNF208     | -0.3263223 | 0.2676933 | -1.219  | 0.223    | -0.40168477  | count | 1          |

|            |            |           |         |          |              |       |             |
|------------|------------|-----------|---------|----------|--------------|-------|-------------|
| MPP6       | -0.4492175 | 0.4194772 | -1.0709 | 0.284    | -0.401542582 | count | 1           |
| CXCL8      | -0.3063394 | 0.3683118 | -0.8317 | 0.406    | -0.40146083  | count | 1           |
| ATAD3A     | -0.3641593 | 0.2917035 | -1.2484 | 0.212    | -0.401427253 | count | 1           |
| SNX8       | -0.3455513 | 0.3059951 | -1.1293 | 0.259    | -0.401222959 | count | 1           |
| ZNF460     | -0.3732821 | 0.3351091 | -1.1139 | 0.265    | -0.401031212 | count | 1           |
| CPM        | -0.8409197 | 0.5183862 | -1.6222 | 0.105    | -0.401012717 | count | 1           |
| SEC11C     | -0.2829123 | 0.075847  | -3.73   | 0.000195 | -0.400983289 | count | 1           |
| CKAP2      | -0.3495258 | 0.2528529 | -1.3823 | 0.167    | -0.400966782 | count | 1           |
| FAM120AOS  | -0.290788  | 0.1219252 | -2.385  | 0.0171   | -0.400931883 | count | 1           |
| ZNF69      | -0.5047196 | 0.4339589 | -1.1631 | 0.245    | -0.400898921 | count | 1           |
| CYP2U1     | -0.3263623 | 0.2458607 | -1.3274 | 0.184    | -0.40089521  | count | 1           |
| KRT19      | -0.7002113 | 0.6404349 | -1.0933 | 0.274    | -0.400794937 | count | 1           |
| KCNE3      | -0.5604385 | 0.695332  | -0.806  | 0.42     | -0.400691612 | count | 1           |
| YPEL5      | -0.2849343 | 0.0856379 | -3.3272 | 0.000889 | -0.400568002 | count | 1           |
| FAM24B     | -0.5041281 | 0.5931681 | -0.8499 | 0.395    | -0.400392473 | count | 1           |
| CISD2      | -0.2977294 | 0.1515496 | -1.9646 | 0.0496   | -0.399965973 | count | 1           |
| ATXN2      | -0.2951905 | 0.1404393 | -2.1019 | 0.0357   | -0.399734978 | count | 1           |
| MMD        | -0.4126977 | 0.3175752 | -1.2995 | 0.194    | -0.398875759 | count | 1           |
| RNFT1      | -0.3326055 | 0.2754314 | -1.2076 | 0.227    | -0.398853388 | count | 1           |
| NTPCR      | -0.287748  | 0.1175425 | -2.448  | 0.0144   | -0.398343507 | count | 1           |
| KCNQ4      | -1.43254   | 0.8074241 | -1.7742 | 0.0761   | -0.398295791 | count | 1           |
| AC011374.2 | -1.43254   | 0.8074241 | -1.7742 | 0.0761   | -0.398295791 | count | 1           |
| LINC00884  | -1.43254   | 0.8715477 | -1.6437 | 0.1      | -0.398295791 | count | 1           |
| GPATCH2L   | -0.3069797 | 0.2125254 | -1.4444 | 0.149    | -0.39796351  | count | 1           |
| MIR29B2CHG | -0.612512  | 0.4764629 | -1.2855 | 0.199    | -0.397955959 | count | 1           |
| MAMSTR     | -0.5171427 | 0.4828714 | -1.071  | 0.284    | -0.397907359 | count | 1           |
| AL050341.2 | -0.3788307 | 0.3063906 | -1.2364 | 0.216    | -0.397710613 | count | 1           |
| SURF4      | -0.2899957 | 0.1250228 | -2.3195 | 0.0204   | -0.397604835 | count | 1           |
| COPE       | -0.2803485 | 0.0642454 | -4.3637 | 1.33E-05 | -0.397519925 | count | 0.3081743   |
| CASC2      | -0.5563635 | 0.5792817 | -0.9604 | 0.337    | -0.397499081 | count | 1           |
| PUSL1      | -0.3447515 | 0.2811446 | -1.2262 | 0.22     | -0.397047806 | count | 1           |
| SERTAD4    | -0.3508411 | 0.2449628 | -1.4322 | 0.152    | -0.396981077 | count | 1           |
| HIVEP1     | -0.296713  | 0.154042  | -1.9262 | 0.0542   | -0.396851041 | count | 1           |
| SH3BP5L    | -0.4441751 | 0.3644254 | -1.2188 | 0.223    | -0.396770936 | count | 1           |
| ZDHHC14    | -0.3403693 | 0.2387598 | -1.4256 | 0.154    | -0.396583177 | count | 1           |
| PSMB6      | -0.2770097 | 0.0524459 | -5.2818 | 1.38E-07 | -0.394991476 | count | 0.003242034 |
| ORC6       | -0.9427019 | 0.7359128 | -1.281  | 0.2      | -0.394945622 | count | 1           |
| ITM2C      | -0.9427019 | 0.8254096 | -1.1421 | 0.254    | -0.394945622 | count | 1           |
| AC009163.7 | -0.9427019 | 0.8272306 | -1.1396 | 0.255    | -0.394945622 | count | 1           |
| MAP4K4     | -0.2831066 | 0.1114168 | -2.541  | 0.0111   | -0.394638331 | count | 1           |
| SLC2A13    | -0.5130701 | 0.4721364 | -1.0867 | 0.277    | -0.394515657 | count | 1           |
| DNAJB2     | -0.3156932 | 0.1971426 | -1.6013 | 0.109    | -0.394259947 | count | 1           |
| C1QTNF6    | -0.3726469 | 0.4655496 | -0.8004 | 0.424    | -0.394238474 | count | 1           |
| SCAMP4     | -0.3222603 | 0.2141284 | -1.505  | 0.132    | -0.394049494 | count | 1           |
| ZNF629     | -0.4079226 | 0.3283423 | -1.2424 | 0.214    | -0.394043626 | count | 1           |

|            |            |           |         |          |              |       |             |
|------------|------------|-----------|---------|----------|--------------|-------|-------------|
| NRSN2-AS1  | -0.3931372 | 0.3745792 | -1.0495 | 0.294    | -0.393572501 | count | 1           |
| PDIA4      | -0.2862571 | 0.1171178 | -2.4442 | 0.0146   | -0.393320074 | count | 1           |
| BSG        | -0.2751223 | 0.0537671 | -5.1169 | 3.32E-07 | -0.393103171 | count | 0.007782744 |
| SEC63      | -0.2839135 | 0.1103624 | -2.5726 | 0.0101   | -0.392849675 | count | 1           |
| TM9SF3     | -0.2779672 | 0.0801341 | -3.4688 | 0.000531 | -0.392838776 | count | 1           |
| GPR162     | -0.4948881 | 0.5119048 | -0.9668 | 0.334    | -0.392490873 | count | 1           |
| XPO6       | -0.3469485 | 0.352781  | -0.9835 | 0.325    | -0.392460566 | count | 1           |
| ZNF416     | -0.4810019 | 0.4622078 | -1.0407 | 0.298    | -0.392407766 | count | 1           |
| PDE6B      | -0.5498118 | 0.6090646 | -0.9027 | 0.367    | -0.392373781 | count | 1           |
| TMEM121    | -0.3035504 | 0.1863193 | -1.6292 | 0.103    | -0.392342917 | count | 1           |
| PHETA1     | -0.5100675 | 0.4189209 | -1.2176 | 0.223    | -0.392017389 | count | 1           |
| SYCE1L     | -0.3449363 | 0.2706519 | -1.2745 | 0.203    | -0.392003614 | count | 1           |
| PXMP2      | -0.2976606 | 0.1774448 | -1.6775 | 0.0936   | -0.391930332 | count | 1           |
| HECW2      | -0.3060072 | 0.2601533 | -1.1763 | 0.24     | -0.391776019 | count | 1           |
| CERNA1     | -0.6851701 | 0.8253906 | -0.8301 | 0.407    | -0.39100023  | count | 1           |
| AC004466.1 | -0.6851701 | 0.8594246 | -0.7972 | 0.425    | -0.39100023  | count | 1           |
| NAP1L1     | -0.2737063 | 0.048463  | -5.6477 | 1.79E-08 | -0.390969543 | count | 0.000422583 |
| GUSB       | -0.2824693 | 0.109912  | -2.57   | 0.0102   | -0.39095232  | count | 1           |
| FRAT2      | -0.3242639 | 0.2103074 | -1.5419 | 0.123    | -0.390787535 | count | 1           |
| GABRE      | -0.5725782 | 0.5413494 | -1.0577 | 0.29     | -0.390695684 | count | 1           |
| CHD4       | -0.2812133 | 0.1036098 | -2.7142 | 0.00669  | -0.39068215  | count | 1           |
| PRDX5      | -0.2734958 | 0.0551503 | -4.9591 | 7.51E-07 | -0.390618359 | count | 0.017571147 |
| C1orf53    | -0.6019756 | 0.4614592 | -1.3045 | 0.192    | -0.390342621 | count | 1           |
| ZNF641     | -0.52597   | 0.3896457 | -1.3499 | 0.177    | -0.3902108   | count | 1           |
| NEMP2      | -0.4221872 | 0.4403519 | -0.9587 | 0.338    | -0.390199081 | count | 1           |
| SCRIB      | -0.3989288 | 0.349019  | -1.143  | 0.253    | -0.39010706  | count | 1           |
| TMEM233    | -0.3282379 | 0.3313716 | -0.9905 | 0.322    | -0.390048575 | count | 1           |
| SLC35E4    | -0.3216353 | 0.2165016 | -1.4856 | 0.137    | -0.389564067 | count | 1           |
| SNHG25     | -0.4655657 | 0.4076629 | -1.142  | 0.254    | -0.389494195 | count | 1           |
| RAB11FIP3  | -0.4147078 | 0.3377227 | -1.228  | 0.22     | -0.38927505  | count | 1           |
| TTC7B      | -0.4031908 | 0.3483796 | -1.1573 | 0.247    | -0.389259768 | count | 1           |
| PPP1R26    | -0.4282817 | 0.4244156 | -1.0091 | 0.313    | -0.389175862 | count | 1           |
| PPM1H      | -0.9301505 | 0.6141685 | -1.5145 | 0.13     | -0.388597636 | count | 1           |
| NECTIN3    | -0.3133674 | 0.2119533 | -1.4785 | 0.139    | -0.388528981 | count | 1           |
| ZNF630     | -0.5441815 | 0.4779503 | -1.1386 | 0.255    | -0.38797676  | count | 1           |
| METTL4     | -0.2946614 | 0.2138774 | -1.3777 | 0.168    | -0.38794527  | count | 1           |
| SGK1       | -0.2815007 | 0.102626  | -2.743  | 0.00613  | -0.387741366 | count | 1           |
| AHCYL1     | -0.2849439 | 0.1280692 | -2.2249 | 0.0262   | -0.387196312 | count | 1           |
| DBN1       | -0.2865927 | 0.1274427 | -2.2488 | 0.0246   | -0.386829757 | count | 1           |
| TIGD6      | -0.4421046 | 0.5142138 | -0.8598 | 0.39     | -0.386661199 | count | 1           |
| RCSD1      | -0.4879468 | 0.4288144 | -1.1379 | 0.255    | -0.386567279 | count | 1           |
| ZNF621     | -0.3553497 | 0.3118771 | -1.1394 | 0.255    | -0.386499331 | count | 1           |
| SPRYD4     | -0.3383423 | 0.3050511 | -1.1091 | 0.267    | -0.386102048 | count | 1           |
| ZC3H11A    | -0.6318686 | 0.7048816 | -0.8964 | 0.37     | -0.38580144  | count | 1           |
| DSCC1      | -0.4173743 | 0.3619315 | -1.1532 | 0.249    | -0.385517553 | count | 1           |

|            |            |           |         |          |              |       |             |
|------------|------------|-----------|---------|----------|--------------|-------|-------------|
| ZNF423     | -0.3590871 | 0.2638686 | -1.3609 | 0.174    | -0.38528928  | count | 1           |
| USP40      | -0.3738287 | 0.32365   | -1.155  | 0.248    | -0.385285346 | count | 1           |
| AL445472.1 | -0.4404747 | 0.3649009 | -1.2071 | 0.227    | -0.385149449 | count | 1           |
| NADSYN1    | -0.3306721 | 0.2411271 | -1.3714 | 0.17     | -0.385030672 | count | 1           |
| CNPY4      | -0.3008195 | 0.2002964 | -1.5019 | 0.133    | -0.384603186 | count | 1           |
| RPS6KA1    | -0.7332612 | 0.5859007 | -1.2515 | 0.211    | -0.384424026 | count | 1           |
| ZNF624     | -0.3512697 | 0.4001533 | -0.8778 | 0.38     | -0.384413885 | count | 1           |
| LBH        | -0.2807712 | 0.1473067 | -1.906  | 0.0567   | -0.384397747 | count | 1           |
| SYNJ1      | -0.3300616 | 0.2509779 | -1.3151 | 0.189    | -0.384303803 | count | 1           |
| NOVA1      | -0.2979073 | 0.1943436 | -1.5329 | 0.125    | -0.384199    | count | 1           |
| GPX8       | -0.2829441 | 0.1696873 | -1.6674 | 0.0955   | -0.384009736 | count | 1           |
| DEGS1      | -0.2768248 | 0.1097745 | -2.5218 | 0.0117   | -0.383370696 | count | 1           |
| VASH2      | -2.1493314 | 1.013404  | -2.1209 | 0.034    | -0.383363703 | count | 1           |
| F12        | -0.5916887 | 0.5485935 | -1.0786 | 0.281    | -0.382932544 | count | 1           |
| LINC00882  | -0.808476  | 0.5968105 | -1.3547 | 0.176    | -0.382834393 | count | 1           |
| ABCB1      | -0.3299165 | 0.2141426 | -1.5406 | 0.124    | -0.382656503 | count | 1           |
| TAOK3      | -0.282574  | 0.1452477 | -1.9455 | 0.0518   | -0.382545048 | count | 1           |
| PLPP3      | -0.277414  | 0.1353784 | -2.0492 | 0.0405   | -0.382538167 | count | 1           |
| FDXR       | -0.3366535 | 0.3179695 | -1.0588 | 0.29     | -0.382353031 | count | 1           |
| DOCK9-DT   | -0.4468227 | 0.3621299 | -1.2339 | 0.217    | -0.382231642 | count | 1           |
| HEMK1      | -0.381884  | 0.3083759 | -1.2384 | 0.216    | -0.381844302 | count | 1           |
| SGMS1-AS1  | -0.4821576 | 0.4980153 | -0.9682 | 0.333    | -0.381634974 | count | 1           |
| B3GNT8     | -0.446143  | 0.4407494 | -1.0122 | 0.312    | -0.381613345 | count | 1           |
| KCNAB2     | -0.446143  | 0.4779097 | -0.9335 | 0.351    | -0.381613345 | count | 1           |
| SMARCD1    | -0.2848405 | 0.1443061 | -1.9739 | 0.0485   | -0.381548192 | count | 1           |
| 8-Sep      | -0.310511  | 0.2382074 | -1.3035 | 0.193    | -0.381105922 | count | 1           |
| P4HTM      | -0.2922301 | 0.180192  | -1.6218 | 0.105    | -0.380982296 | count | 1           |
| CDNF       | -0.5589179 | 0.594339  | -0.9404 | 0.347    | -0.380434572 | count | 1           |
| MFSD9      | -0.5589179 | 0.6200573 | -0.9014 | 0.367    | -0.380434572 | count | 1           |
| ZFYVE1     | -0.3544612 | 0.3001853 | -1.1808 | 0.238    | -0.380166708 | count | 1           |
| TLCD2      | -0.3034698 | 0.2077027 | -1.4611 | 0.144    | -0.380038065 | count | 1           |
| AL669831.5 | -0.5132393 | 0.4220645 | -1.216  | 0.224    | -0.379953548 | count | 1           |
| CYTH3      | -0.3568514 | 0.2944515 | -1.2119 | 0.226    | -0.379953413 | count | 1           |
| IGFBP7-AS1 | -0.802551  | 0.7275375 | -1.1031 | 0.27     | -0.379534843 | count | 1           |
| LAMA4      | -0.2691935 | 0.0907337 | -2.9669 | 0.00303  | -0.379196861 | count | 1           |
| CRELD1     | -0.2857282 | 0.168794  | -1.6928 | 0.0906   | -0.379120847 | count | 1           |
| AC114811.2 | -2.129204  | 0.982021  | -2.1682 | 0.0302   | -0.378795378 | count | 1           |
| AC026367.3 | -2.129204  | 1.017725  | -2.0921 | 0.0365   | -0.378795378 | count | 1           |
| MAP4K2     | -0.5566231 | 0.4514119 | -1.2331 | 0.218    | -0.378714788 | count | 1           |
| PLAGL2     | -0.4428731 | 0.4945637 | -0.8955 | 0.371    | -0.378640219 | count | 1           |
| CASC15     | -0.5115157 | 0.2843816 | -1.7987 | 0.0722   | -0.378567599 | count | 1           |
| ZNF331     | -0.3071897 | 0.2620975 | -1.172  | 0.241    | -0.378532685 | count | 1           |
| AC008050.1 | -0.909681  | 0.6681768 | -1.3614 | 0.173    | -0.378298013 | count | 1           |
| PEBP1      | -0.2638883 | 0.0450621 | -5.8561 | 5.30E-09 | -0.378084879 | count | 0.000125334 |
| KANSL3     | -0.3741407 | 0.2674861 | -1.3987 | 0.162    | -0.377928791 | count | 1           |

|            |            |           |         |          |              |       |             |
|------------|------------|-----------|---------|----------|--------------|-------|-------------|
| TADA3      | -0.2794617 | 0.1553729 | -1.7987 | 0.0722   | -0.377672956 | count | 1           |
| AC008267.5 | -0.3698945 | 0.3900961 | -0.9482 | 0.343    | -0.377368296 | count | 1           |
| ENC1       | -0.4088585 | 0.3225248 | -1.2677 | 0.205    | -0.377245929 | count | 1           |
| RAB5IF     | -0.2766036 | 0.1171483 | -2.3611 | 0.0183   | -0.377132934 | count | 1           |
| NCKAP1     | -0.2703707 | 0.1044521 | -2.5885 | 0.00969  | -0.37703989  | count | 1           |
| CAVIN3     | -0.2651297 | 0.0686855 | -3.8601 | 0.000116 | -0.376788532 | count | 1           |
| WASHC5     | -0.3120074 | 0.2648783 | -1.1779 | 0.239    | -0.376734533 | count | 1           |
| NDUFS5     | -0.2624766 | 0.0451583 | -5.8124 | 6.87E-09 | -0.376016995 | count | 0.000162407 |
| PTGR2      | -0.5528877 | 0.3350376 | -1.6502 | 0.099    | -0.375917904 | count | 1           |
| LOXL1      | -0.5523171 | 0.8192153 | -0.6742 | 0.5      | -0.375490936 | count | 1           |
| PPM1M      | -0.3094619 | 0.2419071 | -1.2793 | 0.201    | -0.375489144 | count | 1           |
| GPI        | -0.2805258 | 0.1356185 | -2.0685 | 0.0387   | -0.375389253 | count | 1           |
| ERBB2      | -0.3277387 | 0.3198871 | -1.0245 | 0.306    | -0.37537977  | count | 1           |
| ARHGEF2    | -0.2879788 | 0.1813788 | -1.5877 | 0.112    | -0.374426735 | count | 1           |
| MADCAM1    | -1.3658211 | 0.8660261 | -1.5771 | 0.115    | -0.374406419 | count | 1           |
| PSMB4      | -0.2639544 | 0.0642586 | -4.1077 | 4.11E-05 | -0.37439565  | count | 0.9477249   |
| AC021092.1 | -1.0687252 | 0.7920203 | -1.3494 | 0.177    | -0.374277952 | count | 1           |
| AC100803.3 | -0.5503957 | 0.5899667 | -0.9329 | 0.351    | -0.374053738 | count | 1           |
| PPARA      | -0.3081465 | 0.3010953 | -1.0234 | 0.306    | -0.37386529  | count | 1           |
| ST6GALNAC4 | -0.2867551 | 0.1552114 | -1.8475 | 0.0648   | -0.373774283 | count | 1           |
| UBE2S      | -0.2669842 | 0.0983352 | -2.715  | 0.00667  | -0.37368646  | count | 1           |
| NSUN4      | -0.3276498 | 0.2917482 | -1.1231 | 0.262    | -0.37360409  | count | 1           |
| HSPA13     | -0.3175971 | 0.256612  | -1.2377 | 0.216    | -0.373487737 | count | 1           |
| HIST1H2BC  | -0.4472177 | 0.5890552 | -0.7592 | 0.448    | -0.373138237 | count | 1           |
| KIF5B      | -0.2629636 | 0.067424  | -3.9001 | 9.84E-05 | -0.37309798  | count | 1           |
| PCK2       | -0.3454636 | 0.3470759 | -0.9954 | 0.32     | -0.37287263  | count | 1           |
| DUSP16     | -0.3815975 | 0.4272264 | -0.8932 | 0.372    | -0.372425656 | count | 1           |
| UBXN6      | -0.2846732 | 0.150836  | -1.8873 | 0.0592   | -0.372231602 | count | 1           |
| LIMA1      | -0.2605419 | 0.0578647 | -4.5026 | 6.99E-06 | -0.372066054 | count | 0.16242663  |
| URB2       | -0.4858862 | 0.4701196 | -1.0335 | 0.301    | -0.371970139 | count | 1           |
| HCFC2      | -0.2903388 | 0.2003844 | -1.4489 | 0.147    | -0.37191177  | count | 1           |
| TRIM37     | -0.2961084 | 0.2265802 | -1.3069 | 0.191    | -0.371875307 | count | 1           |
| MANF       | -0.2695215 | 0.1036587 | -2.6001 | 0.00937  | -0.371730129 | count | 1           |
| NCBP1      | -0.3421249 | 0.3066744 | -1.1156 | 0.265    | -0.371686664 | count | 1           |
| MYO1B      | -0.3171234 | 0.2691299 | -1.1783 | 0.239    | -0.371624256 | count | 1           |
| NME4       | -0.2671723 | 0.1022192 | -2.6137 | 0.009    | -0.371521548 | count | 1           |
| RDH10      | -0.3966723 | 0.3376027 | -1.175  | 0.24     | -0.371521265 | count | 1           |
| JCAD       | -0.2683352 | 0.1347931 | -1.9907 | 0.0466   | -0.371157091 | count | 1           |
| TBX3       | -0.7874296 | 0.2983991 | -2.6388 | 0.00837  | -0.371142747 | count | 1           |
| DXO        | -0.3394427 | 0.300553  | -1.1294 | 0.259    | -0.371095263 | count | 1           |
| NDUFS8     | -0.2621168 | 0.0776815 | -3.3742 | 0.00075  | -0.370983539 | count | 1           |
| TOP1MT     | -0.331549  | 0.2766345 | -1.1985 | 0.231    | -0.3707771   | count | 1           |
| DCTD       | -0.2767801 | 0.1279269 | -2.1636 | 0.0306   | -0.370674931 | count | 1           |
| KIAA0930   | -0.3538764 | 0.2603974 | -1.359  | 0.174    | -0.370621652 | count | 1           |
| SPSB2      | -0.3264    | 0.3448477 | -0.9466 | 0.344    | -0.370396717 | count | 1           |

|            |            |           |         |          |              |       |           |
|------------|------------|-----------|---------|----------|--------------|-------|-----------|
| C2CD4D     | -0.6532429 | 0.6960741 | -0.9385 | 0.348    | -0.370361782 | count | 1         |
| SYT17      | -0.7854356 | 0.5549028 | -1.4154 | 0.157    | -0.370039205 | count | 1         |
| SRPX       | -0.2704442 | 0.1305819 | -2.0711 | 0.0384   | -0.370024218 | count | 1         |
| TMEM205    | -0.2615851 | 0.0800061 | -3.2696 | 0.00109  | -0.369959384 | count | 1         |
| ILF3       | -0.2664082 | 0.1063813 | -2.5043 | 0.0123   | -0.36978098  | count | 1         |
| TEAD1      | -0.2747283 | 0.1607029 | -1.7095 | 0.0875   | -0.369747425 | count | 1         |
| USP48      | -0.2707914 | 0.1270138 | -2.132  | 0.0331   | -0.369721071 | count | 1         |
| SMIM30     | -0.2721404 | 0.1267077 | -2.1478 | 0.0318   | -0.36959227  | count | 1         |
| TIGD7      | -0.5443872 | 0.5392681 | -1.0095 | 0.313    | -0.369564626 | count | 1         |
| AC083964.1 | -1.3520913 | 0.7327361 | -1.8453 | 0.0651   | -0.369533041 | count | 1         |
| ANKRD35    | -1.3520913 | 0.8056203 | -1.6783 | 0.0934   | -0.369533041 | count | 1         |
| CTH        | -0.4546787 | 0.4831652 | -0.941  | 0.347    | -0.369455071 | count | 1         |
| BBOF1      | -0.3888066 | 0.3591753 | -1.0825 | 0.279    | -0.36942853  | count | 1         |
| PFDN2      | -0.2596576 | 0.060189  | -4.314  | 1.66E-05 | -0.36938786  | count | 0.3843398 |
| JMY        | -0.2869436 | 0.199477  | -1.4385 | 0.15     | -0.369136275 | count | 1         |
| FRS2       | -0.3117082 | 0.2890307 | -1.0785 | 0.281    | -0.368857128 | count | 1         |
| HECTD4     | -0.2945193 | 0.2986312 | -0.9862 | 0.324    | -0.368674078 | count | 1         |
| IMMP2L     | -0.2721836 | 0.1477264 | -1.8425 | 0.0655   | -0.368633051 | count | 1         |
| MMP25-AS1  | -0.3491905 | 0.3787872 | -0.9219 | 0.357    | -0.368606205 | count | 1         |
| UGGT1      | -0.2958686 | 0.2267101 | -1.3051 | 0.192    | -0.36851348  | count | 1         |
| ZNF852     | -0.5191296 | 0.5456857 | -0.9513 | 0.342    | -0.368497158 | count | 1         |
| IFI44      | -0.2665215 | 0.1273975 | -2.092  | 0.0365   | -0.368425917 | count | 1         |
| NPRL3      | -0.298919  | 0.2089938 | -1.4303 | 0.153    | -0.368182887 | count | 1         |
| PET100     | -0.2662292 | 0.106398  | -2.5022 | 0.0124   | -0.36785716  | count | 1         |
| DOLK       | -0.303417  | 0.2328542 | -1.303  | 0.193    | -0.367115973 | count | 1         |
| CKAP5      | -0.2978503 | 0.2033234 | -1.4649 | 0.143    | -0.366846103 | count | 1         |
| NAP1L3     | -0.4047246 | 0.4229394 | -0.9569 | 0.339    | -0.366643472 | count | 1         |
| PTK2       | -0.2652693 | 0.106988  | -2.4794 | 0.0132   | -0.366017441 | count | 1         |
| PGAM1      | -0.2582336 | 0.0671169 | -3.8475 | 0.000122 | -0.365814946 | count | 1         |
| SIX5       | -0.3223692 | 0.2656469 | -1.2135 | 0.225    | -0.365734347 | count | 1         |
| ARL2BP     | -0.2586989 | 0.0794667 | -3.2554 | 0.00115  | -0.365692254 | count | 1         |
| TARBP1     | -0.3119281 | 0.2797787 | -1.1149 | 0.265    | -0.365409129 | count | 1         |
| PCCB       | -0.3551356 | 0.2933639 | -1.2106 | 0.226    | -0.365327986 | count | 1         |
| AP006621.3 | -0.3902069 | 0.463868  | -0.8412 | 0.4      | -0.365173196 | count | 1         |
| ETAA1      | -0.2934963 | 0.2425715 | -1.2099 | 0.226    | -0.364868903 | count | 1         |
| WSB2       | -0.2839877 | 0.1715097 | -1.6558 | 0.0979   | -0.364502124 | count | 1         |
| PRRC2A     | -0.2803981 | 0.1766309 | -1.5875 | 0.113    | -0.364151114 | count | 1         |
| SREBF1     | -0.3891609 | 0.3516839 | -1.1066 | 0.269    | -0.364146991 | count | 1         |
| MEN1       | -0.3572116 | 0.4038971 | -0.8844 | 0.377    | -0.363949724 | count | 1         |
| UROD       | -0.2625953 | 0.1153103 | -2.2773 | 0.0228   | -0.363879413 | count | 1         |
| UNC119     | -0.2852693 | 0.2131797 | -1.3382 | 0.181    | -0.363152995 | count | 1         |
| ZNF518A    | -0.2766377 | 0.1759677 | -1.5721 | 0.116    | -0.362989919 | count | 1         |
| SYNJ2      | -0.299932  | 0.2662897 | -1.1263 | 0.26     | -0.362826515 | count | 1         |
| LCP1       | -0.8777272 | 0.5403577 | -1.6243 | 0.104    | -0.362354361 | count | 1         |
| DNP1       | -0.264779  | 0.141633  | -1.8695 | 0.0617   | -0.362235097 | count | 1         |

|            |            |           |         |          |              |       |          |
|------------|------------|-----------|---------|----------|--------------|-------|----------|
| SLC22A4    | -0.3714967 | 0.3354743 | -1.1074 | 0.268    | -0.362148274 | count | 1        |
| OBSCN      | -0.8771209 | 0.7250577 | -1.2097 | 0.226    | -0.362053447 | count | 1        |
| LINC01132  | -0.8771209 | 0.7263714 | -1.2075 | 0.227    | -0.362053447 | count | 1        |
| AP001347.1 | -0.5625293 | 0.6271503 | -0.897  | 0.37     | -0.362052565 | count | 1        |
| RNF180     | -0.2964098 | 0.2354491 | -1.2589 | 0.208    | -0.361931596 | count | 1        |
| LTB4R      | -0.3757712 | 0.3524711 | -1.0661 | 0.286    | -0.361626484 | count | 1        |
| HOXD4      | -0.4585336 | 0.7128849 | -0.6432 | 0.52     | -0.361584806 | count | 1        |
| FXVD1      | -0.5962701 | 0.6274762 | -0.9503 | 0.342    | -0.361519742 | count | 1        |
| RETREG3    | -0.3109009 | 0.2705444 | -1.1492 | 0.251    | -0.361517862 | count | 1        |
| AC016065.1 | -0.3808342 | 0.398507  | -0.9557 | 0.339    | -0.361505086 | count | 1        |
| SLC26A6    | -0.6950641 | 0.6627075 | -1.0488 | 0.294    | -0.361440389 | count | 1        |
| ARHGAP33   | -0.7697117 | 0.9715947 | -0.7922 | 0.428    | -0.361362765 | count | 1        |
| LINC00476  | -0.317081  | 0.2967929 | -1.0684 | 0.285    | -0.361267665 | count | 1        |
| COMT       | -0.2547423 | 0.0733316 | -3.4738 | 0.000521 | -0.361172365 | count | 1        |
| MSANTD4    | -0.3117802 | 0.2912875 | -1.0704 | 0.285    | -0.361163198 | count | 1        |
| KDELR2     | -0.253992  | 0.0699096 | -3.6331 | 0.000285 | -0.360475854 | count | 1        |
| NATD1      | -0.5598787 | 0.462583  | -1.2103 | 0.226    | -0.36016384  | count | 1        |
| MFSD12     | -0.2855947 | 0.2390647 | -1.1946 | 0.232    | -0.360127662 | count | 1        |
| MAN2B2     | -0.3239169 | 0.2844689 | -1.1387 | 0.255    | -0.360045167 | count | 1        |
| GPATCH8    | -0.263641  | 0.143212  | -1.8409 | 0.0657   | -0.359908923 | count | 1        |
| IZUMO4     | -1.0354877 | 0.8843408 | -1.1709 | 0.242    | -0.359852811 | count | 1        |
| BDH1       | -1.0354877 | 0.8870855 | -1.1673 | 0.243    | -0.359852811 | count | 1        |
| AL365356.5 | -1.0354877 | 0.8870855 | -1.1673 | 0.243    | -0.359852811 | count | 1        |
| ABHD1      | -1.0354877 | 0.9139577 | -1.133  | 0.257    | -0.359852811 | count | 1        |
| AC010680.3 | -1.0354877 | 0.9139577 | -1.133  | 0.257    | -0.359852811 | count | 1        |
| ANKH       | -0.2916566 | 0.1973986 | -1.4775 | 0.14     | -0.359823099 | count | 1        |
| MPC1       | -0.2584395 | 0.1082237 | -2.388  | 0.017    | -0.359643046 | count | 1        |
| AC006449.2 | -0.4706186 | 0.6239976 | -0.7542 | 0.451    | -0.359379928 | count | 1        |
| TPR        | -0.2519155 | 0.0629012 | -4.0049 | 6.37E-05 | -0.359111122 | count | 1        |
| MYL5       | -0.3329054 | 0.2825115 | -1.1784 | 0.239    | -0.358913793 | count | 1        |
| ZER1       | -0.3025244 | 0.2475061 | -1.2223 | 0.222    | -0.358912224 | count | 1        |
| TBX19      | -0.6904826 | 0.5041434 | -1.3696 | 0.171    | -0.358703011 | count | 1        |
| WDR59      | -0.3427823 | 0.320629  | -1.0691 | 0.285    | -0.358614617 | count | 1        |
| MAN2A1     | -0.280125  | 0.2195089 | -1.2761 | 0.202    | -0.358266177 | count | 1        |
| ADPRHL2    | -0.2767269 | 0.1921886 | -1.4399 | 0.15     | -0.357666976 | count | 1        |
| JAM3       | -0.2764333 | 0.17373   | -1.5912 | 0.112    | -0.357628173 | count | 1        |
| TACR2      | -0.8678991 | 0.9329099 | -0.9303 | 0.352    | -0.357484018 | count | 1        |
| DYNLT3     | -0.2583033 | 0.1162978 | -2.2211 | 0.0264   | -0.35722809  | count | 1        |
| ATP6V0E1   | -0.2487886 | 0.041071  | -6.0575 | 1.57E-09 | -0.356724202 | count | 3.72E-05 |
| ZNF28      | -0.3759939 | 0.3595384 | -1.0458 | 0.296    | -0.356700887 | count | 1        |
| KDM2B      | -0.5270492 | 0.482505  | -1.0923 | 0.275    | -0.356656037 | count | 1        |
| APOL4      | -0.3707108 | 0.4310386 | -0.86   | 0.39     | -0.356543267 | count | 1        |
| BAD        | -0.2533634 | 0.0827907 | -3.0603 | 0.00223  | -0.356526631 | count | 1        |
| AL162431.2 | -1.3150733 | 1.0751091 | -1.2232 | 0.221    | -0.356471233 | count | 1        |
| LINC01018  | -1.3150733 | 1.0751091 | -1.2232 | 0.221    | -0.356471233 | count | 1        |

|             |            |           |         |          |              |       |             |
|-------------|------------|-----------|---------|----------|--------------|-------|-------------|
| ELOVL4      | -1.3150733 | 1.0751091 | -1.2232 | 0.221    | -0.356471233 | count | 1           |
| AC011287.1  | -1.3150733 | 1.0751091 | -1.2232 | 0.221    | -0.356471233 | count | 1           |
| VIPR2       | -1.3150733 | 1.0751091 | -1.2232 | 0.221    | -0.356471233 | count | 1           |
| TMEM35A     | -1.3150733 | 1.0751091 | -1.2232 | 0.221    | -0.356471233 | count | 1           |
| AC083837.1  | -1.3150733 | 1.0751091 | -1.2232 | 0.221    | -0.356471233 | count | 1           |
| AC023632.2  | -1.3150733 | 1.0751091 | -1.2232 | 0.221    | -0.356471233 | count | 1           |
| OPLAH       | -1.3150733 | 1.0751091 | -1.2232 | 0.221    | -0.356471233 | count | 1           |
| RDH16       | -1.3150733 | 1.0751091 | -1.2232 | 0.221    | -0.356471233 | count | 1           |
| AC026401.1  | -1.3150733 | 1.0751091 | -1.2232 | 0.221    | -0.356471233 | count | 1           |
| JPH2        | -1.3150733 | 1.0751091 | -1.2232 | 0.221    | -0.356471233 | count | 1           |
| LINC01480   | -1.3150733 | 1.0751091 | -1.2232 | 0.221    | -0.356471233 | count | 1           |
| OSM         | -1.3150733 | 1.0751091 | -1.2232 | 0.221    | -0.356471233 | count | 1           |
| AL627309.1  | -1.3150733 | 1.147367  | -1.1462 | 0.252    | -0.356471233 | count | 1           |
| AL360270.3  | -1.3150733 | 1.147367  | -1.1462 | 0.252    | -0.356471233 | count | 1           |
| AL355304.1  | -1.3150733 | 1.147367  | -1.1462 | 0.252    | -0.356471233 | count | 1           |
| JAZF1-AS1   | -1.3150733 | 1.147367  | -1.1462 | 0.252    | -0.356471233 | count | 1           |
| AC010834.2  | -1.3150733 | 1.147367  | -1.1462 | 0.252    | -0.356471233 | count | 1           |
| Z95114.4    | -1.3150733 | 1.147367  | -1.1462 | 0.252    | -0.356471233 | count | 1           |
| IFNLR1      | -1.3150733 | 1.457547  | -0.9023 | 0.367    | -0.356471233 | count | 1           |
| AL133523.1  | -1.3150733 | 1.457547  | -0.9023 | 0.367    | -0.356471233 | count | 1           |
| GSEC        | -0.3704937 | 0.4678229 | -0.792  | 0.428    | -0.356325303 | count | 1           |
| MOB1B       | -0.3237848 | 0.266789  | -1.2136 | 0.225    | -0.355713755 | count | 1           |
| PARK7       | -0.2481371 | 0.045696  | -5.4302 | 6.12E-08 | -0.355581807 | count | 0.001440648 |
| NOL6        | -0.4084423 | 0.4277407 | -0.9549 | 0.34     | -0.3555553   | count | 1           |
| TSC22D1-AS1 | -0.8633369 | 0.5647504 | -1.5287 | 0.126    | -0.355228653 | count | 1           |
| EVI2B       | -1.024651  | 0.6262015 | -1.6363 | 0.102    | -0.355181508 | count | 1           |
| RETREG2     | -0.263965  | 0.1408135 | -1.8746 | 0.061    | -0.355030421 | count | 1           |
| EEF1A2      | -1.3106704 | 0.5955635 | -2.2007 | 0.0278   | -0.354925451 | count | 1           |
| GEMIN5      | -0.3061621 | 0.2588548 | -1.1828 | 0.237    | -0.354514867 | count | 1           |
| DLGAP1-AS2  | -0.5238525 | 0.6685059 | -0.7836 | 0.433    | -0.354283386 | count | 1           |
| WWTR1-AS1   | -0.5238525 | 0.6702653 | -0.7816 | 0.435    | -0.354283386 | count | 1           |
| C7orf43     | -0.4069633 | 0.4098514 | -0.993  | 0.321    | -0.354194279 | count | 1           |
| EPC2        | -0.265759  | 0.1545082 | -1.72   | 0.0855   | -0.353946826 | count | 1           |
| LATS2       | -0.2806415 | 0.1964884 | -1.4283 | 0.153    | -0.353802649 | count | 1           |
| CASTOR3     | -1.3074454 | 0.7074534 | -1.8481 | 0.0647   | -0.353794256 | count | 1           |
| PRPF40B     | -0.4065248 | 0.3705015 | -1.0972 | 0.273    | -0.353790841 | count | 1           |
| BTBD2       | -0.2804294 | 0.2206885 | -1.2707 | 0.204    | -0.353531862 | count | 1           |
| AC026471.1  | -0.3629151 | 0.327711  | -1.1074 | 0.268    | -0.353432773 | count | 1           |
| P3H1        | -0.3131633 | 0.2482171 | -1.2617 | 0.207    | -0.353323265 | count | 1           |
| AHCTF1      | -0.2673566 | 0.1570391 | -1.7025 | 0.0888   | -0.353298318 | count | 1           |
| CCDC9B      | -1.0202334 | 0.6447268 | -1.5824 | 0.114    | -0.353281832 | count | 1           |
| SEN3        | -0.479844  | 0.4636063 | -1.035  | 0.301    | -0.353218713 | count | 1           |
| LUC7L3      | -0.2505052 | 0.0975416 | -2.5682 | 0.0103   | -0.353143939 | count | 1           |
| AC096992.2  | -1.019685  | 0.6385315 | -1.5969 | 0.11     | -0.353046158 | count | 1           |
| IER5L       | -0.2504883 | 0.1025128 | -2.4435 | 0.0146   | -0.352626445 | count | 1           |



|            |            |           |         |          |              |       |             |
|------------|------------|-----------|---------|----------|--------------|-------|-------------|
| LAT        | -0.4790486 | 0.5961243 | -0.8036 | 0.422    | -0.352585021 | count | 1           |
| CD3D       | -2.013772  | 0.8139441 | -2.4741 | 0.0134   | -0.352510177 | count | 1           |
| ATP6V1D    | -0.2603303 | 0.1315643 | -1.9787 | 0.0479   | -0.352487588 | count | 1           |
| ZNF587     | -0.3342182 | 0.4248906 | -0.7866 | 0.432    | -0.352296459 | count | 1           |
| TANC2      | -0.2873792 | 0.2375683 | -1.2097 | 0.227    | -0.352279464 | count | 1           |
| NUBP1      | -0.2607594 | 0.1553953 | -1.678  | 0.0935   | -0.352248488 | count | 1           |
| MAGOHB     | -0.2620206 | 0.1452332 | -1.8041 | 0.0713   | -0.351975283 | count | 1           |
| 2-Sep      | -0.2476658 | 0.0616279 | -4.0187 | 6.01E-05 | -0.351955938 | count | 1           |
| MEGF8      | -0.4338804 | 0.4188612 | -1.0359 | 0.3      | -0.351428699 | count | 1           |
| AC099791.2 | -0.4774255 | 0.5242421 | -0.9107 | 0.363    | -0.351292354 | count | 1           |
| LRP8       | -0.4774255 | 0.5648466 | -0.8452 | 0.398    | -0.351292354 | count | 1           |
| CD9        | -0.2441994 | 0.0497319 | -4.9103 | 9.62E-07 | -0.351237028 | count | 0.022495408 |
| KAT14      | -0.3607137 | 0.3633738 | -0.9927 | 0.321    | -0.351199423 | count | 1           |
| KCNQ1      | -0.8551209 | 0.5772737 | -1.4813 | 0.139    | -0.35117571  | count | 1           |
| SLC27A3    | -0.2682636 | 0.1700214 | -1.5778 | 0.115    | -0.351123066 | count | 1           |
| STX6       | -0.2645699 | 0.1614751 | -1.6385 | 0.101    | -0.351031201 | count | 1           |
| DECR2      | -0.2802443 | 0.2253145 | -1.2438 | 0.214    | -0.350567303 | count | 1           |
| NDUFS6     | -0.2477966 | 0.0667779 | -3.7108 | 0.000211 | -0.350512006 | count | 1           |
| MIR181A1HG | -0.4594699 | 0.4017155 | -1.1438 | 0.253    | -0.350219643 | count | 1           |
| EIF5       | -0.2467362 | 0.0617012 | -3.9989 | 6.53E-05 | -0.350148182 | count | 1           |
| CPOX       | -0.4592025 | 0.3630214 | -1.2649 | 0.206    | -0.350000271 | count | 1           |
| ERV3-1     | -0.3047153 | 0.2931238 | -1.0395 | 0.299    | -0.349928033 | count | 1           |
| SLC7A7     | -0.3058713 | 0.2798039 | -1.0932 | 0.274    | -0.349769485 | count | 1           |
| MORN1      | -0.5786062 | 0.5116703 | -1.1308 | 0.258    | -0.349572542 | count | 1           |
| PCDHB12    | -0.5447195 | 0.6275286 | -0.868  | 0.385    | -0.349391784 | count | 1           |
| SPRED3     | -0.5447195 | 0.6282154 | -0.8671 | 0.386    | -0.349391784 | count | 1           |
| TP53I13    | -0.26199   | 0.1542642 | -1.6983 | 0.0896   | -0.349244211 | count | 1           |
| CUEDC2     | -0.2489585 | 0.0882173 | -2.8221 | 0.00481  | -0.349154897 | count | 1           |
| SAXO2      | -0.4740984 | 0.9013656 | -0.526  | 0.599    | -0.3486445   | count | 1           |
| ARF4-AS1   | -0.5771859 | 0.6591357 | -0.8757 | 0.381    | -0.348614873 | count | 1           |
| ALKBH5     | -0.2643175 | 0.1708464 | -1.5471 | 0.122    | -0.348589053 | count | 1           |
| ZMAT1      | -0.279883  | 0.1915251 | -1.4613 | 0.144    | -0.348329744 | count | 1           |
| PRKD3      | -0.2544939 | 0.1272032 | -2.0007 | 0.0455   | -0.348254232 | count | 1           |
| AC009053.2 | -0.6186372 | 0.6049663 | -1.0226 | 0.307    | -0.348230651 | count | 1           |
| MYH11      | -0.3624153 | 0.5763614 | -0.6288 | 0.53     | -0.348221688 | count | 1           |
| CTSZ       | -0.2439264 | 0.0646234 | -3.7746 | 0.000164 | -0.348202862 | count | 1           |
| DMPK       | -0.3728709 | 0.4383474 | -0.8506 | 0.395    | -0.348194838 | count | 1           |
| MOGS       | -0.3132218 | 0.2362171 | -1.326  | 0.185    | -0.347851384 | count | 1           |
| CBX1       | -0.2529683 | 0.1380057 | -1.833  | 0.0669   | -0.347778566 | count | 1           |
| MZB1       | -1.992409  | 0.8599656 | -2.3168 | 0.0206   | -0.347637732 | count | 1           |
| PCSK4      | -1.992409  | 0.8599656 | -2.3168 | 0.0206   | -0.347637732 | count | 1           |
| CD2        | -1.992409  | 1.224583  | -1.627  | 0.104    | -0.347637732 | count | 1           |
| GHRLOS     | -1.992409  | 1.224583  | -1.627  | 0.104    | -0.347637732 | count | 1           |
| UNC13A     | -1.992409  | 1.224583  | -1.627  | 0.104    | -0.347637732 | count | 1           |
| SYT5       | -1.992409  | 1.224583  | -1.627  | 0.104    | -0.347637732 | count | 1           |

|            |            |           |         |          |              |       |          |
|------------|------------|-----------|---------|----------|--------------|-------|----------|
| WDR63      | -1.992409  | 1.277794  | -1.5593 | 0.119    | -0.347637732 | count | 1        |
| TMEM130    | -1.992409  | 1.277794  | -1.5593 | 0.119    | -0.347637732 | count | 1        |
| COPRS      | -0.2478717 | 0.0862648 | -2.8734 | 0.00409  | -0.34751497  | count | 1        |
| PARD6A     | -0.2903977 | 0.2423605 | -1.1982 | 0.231    | -0.347352266 | count | 1        |
| ARHGAP44   | -0.5749294 | 0.581601  | -0.9885 | 0.323    | -0.347094256 | count | 1        |
| LDOC1      | -0.2652101 | 0.17121   | -1.549  | 0.121    | -0.347091045 | count | 1        |
| NUMB       | -0.2571795 | 0.1413981 | -1.8188 | 0.069    | -0.347017593 | count | 1        |
| ACP6       | -0.4174659 | 0.473079  | -0.8824 | 0.378    | -0.346774572 | count | 1        |
| OSBPL7     | -0.3772318 | 0.3884636 | -0.9711 | 0.332    | -0.346659203 | count | 1        |
| CD59       | -0.2409885 | 0.0354099 | -6.8057 | 1.23E-11 | -0.346571339 | count | 2.93E-07 |
| AC074032.1 | -0.3604929 | 0.2919296 | -1.2349 | 0.217    | -0.346295269 | count | 1        |
| EVA1B      | -0.245343  | 0.0930361 | -2.6371 | 0.00841  | -0.346010926 | count | 1        |
| ZFHX3      | -0.2761228 | 0.2146914 | -1.2861 | 0.199    | -0.345904535 | count | 1        |
| MAPK6      | -0.2813611 | 0.2079958 | -1.3527 | 0.176    | -0.345522363 | count | 1        |
| TMEM115    | -0.259345  | 0.1476687 | -1.7563 | 0.0792   | -0.34551928  | count | 1        |
| PDLIM7     | -0.2492854 | 0.1115938 | -2.2339 | 0.0256   | -0.344710143 | count | 1        |
| CBWD5      | -0.315686  | 0.2281872 | -1.3835 | 0.167    | -0.344413432 | count | 1        |
| CUL9       | -0.425586  | 0.5002778 | -0.8507 | 0.395    | -0.344266946 | count | 1        |
| ERCC1      | -0.2508283 | 0.1331636 | -1.8836 | 0.0597   | -0.344228524 | count | 1        |
| PRNP       | -0.2529515 | 0.1388128 | -1.8222 | 0.0685   | -0.343887655 | count | 1        |
| KANSL1L    | -0.3007504 | 0.235218  | -1.2786 | 0.201    | -0.343782559 | count | 1        |
| FBXO34     | -0.2537621 | 0.1345757 | -1.8856 | 0.0594   | -0.343763646 | count | 1        |
| SNX7       | -0.2555533 | 0.1433825 | -1.7823 | 0.0748   | -0.34364621  | count | 1        |
| FAM173A    | -0.2517895 | 0.1431109 | -1.7594 | 0.0786   | -0.343566326 | count | 1        |
| BOP1       | -0.3093975 | 0.2423109 | -1.2769 | 0.202    | -0.343495753 | count | 1        |
| TMEM160    | -0.2448303 | 0.0959826 | -2.5508 | 0.0108   | -0.343329051 | count | 1        |
| FAM120A    | -0.2518596 | 0.1553077 | -1.6217 | 0.105    | -0.343227917 | count | 1        |
| RNF44      | -0.2823477 | 0.2145668 | -1.3159 | 0.188    | -0.342891842 | count | 1        |
| AC005332.5 | -0.4856693 | 0.5683348 | -0.8545 | 0.393    | -0.342699255 | count | 1        |
| GNG5       | -0.238253  | 0.0352684 | -6.7554 | 1.73E-11 | -0.342224786 | count | 4.12E-07 |
| CLCF1      | -0.3364112 | 0.3132027 | -1.0741 | 0.283    | -0.342009171 | count | 1        |
| MLYCD      | -0.3003516 | 0.2695998 | -1.1141 | 0.265    | -0.341775236 | count | 1        |
| TMEM54     | -0.2539068 | 0.1315058 | -1.9308 | 0.0536   | -0.341552473 | count | 1        |
| ID2        | -0.2402604 | 0.0952148 | -2.5234 | 0.0117   | -0.341497852 | count | 1        |
| LAMP1      | -0.2414731 | 0.0748894 | -3.2244 | 0.00128  | -0.341411505 | count | 1        |
| C5         | -0.9923407 | 0.5630175 | -1.7625 | 0.0781   | -0.341349059 | count | 1        |
| DUSP26     | -0.7330188 | 0.6084498 | -1.2047 | 0.228    | -0.341294659 | count | 1        |
| TMEM117    | -0.6611177 | 0.5027272 | -1.3151 | 0.189    | -0.341258359 | count | 1        |
| AL022328.4 | -0.5329151 | 0.5619482 | -0.9483 | 0.343    | -0.341039249 | count | 1        |
| ARID5A     | -0.2426986 | 0.1007714 | -2.4084 | 0.0161   | -0.340809655 | count | 1        |
| ZSCAN30    | -0.3235859 | 0.2627102 | -1.2317 | 0.218    | -0.340739148 | count | 1        |
| FAXDC2     | -0.2547188 | 0.2135258 | -1.1929 | 0.233    | -0.34062578  | count | 1        |
| TM2D1      | -0.2428125 | 0.0924969 | -2.6251 | 0.00871  | -0.340579028 | count | 1        |
| NAALADL2   | -0.3383283 | 0.2816114 | -1.2014 | 0.23     | -0.34044617  | count | 1        |
| EVC2       | -0.6595349 | 0.5084291 | -1.2972 | 0.195    | -0.340323032 | count | 1        |

|            |            |           |         |          |              |       |            |
|------------|------------|-----------|---------|----------|--------------|-------|------------|
| POFUT2     | -0.3418015 | 0.2934741 | -1.1647 | 0.244    | -0.340269279 | count | 1          |
| METTL26    | -0.2397885 | 0.0762196 | -3.146  | 0.00167  | -0.339751864 | count | 1          |
| DNAH1      | -0.6581622 | 0.7040365 | -0.9348 | 0.35     | -0.339512293 | count | 1          |
| TMED2      | -0.2415016 | 0.0808664 | -2.9864 | 0.00285  | -0.339336104 | count | 1          |
| PRKCSH     | -0.2502309 | 0.1221468 | -2.0486 | 0.0406   | -0.339270793 | count | 1          |
| AC069224.1 | -0.729197  | 0.528642  | -1.3794 | 0.168    | -0.339219054 | count | 1          |
| GGCX       | -0.2687978 | 0.1811942 | -1.4835 | 0.138    | -0.339182293 | count | 1          |
| PRDM4      | -0.2994847 | 0.2686641 | -1.1147 | 0.265    | -0.339175673 | count | 1          |
| TRAF7      | -0.2566583 | 0.161924  | -1.5851 | 0.113    | -0.339051056 | count | 1          |
| LMOD1      | -0.6039668 | 0.7284085 | -0.8292 | 0.407    | -0.338925093 | count | 1          |
| AC008764.6 | -0.7285972 | 0.8196359 | -0.8889 | 0.374    | -0.338893545 | count | 1          |
| ROR1       | -0.7285972 | 0.8509527 | -0.8562 | 0.392    | -0.338893545 | count | 1          |
| ABCC10     | -0.3902856 | 0.4743021 | -0.8229 | 0.411    | -0.338880411 | count | 1          |
| ZHX2       | -0.3442959 | 0.3614141 | -0.9526 | 0.341    | -0.338819304 | count | 1          |
| ZNF229     | -0.9858975 | 0.6936576 | -1.4213 | 0.155    | -0.338607985 | count | 1          |
| ACACA      | -0.3482164 | 0.3284395 | -1.0602 | 0.289    | -0.338539421 | count | 1          |
| RABGGTB    | -0.2506766 | 0.1345594 | -1.8629 | 0.0626   | -0.338312222 | count | 1          |
| WWC3       | -0.2659503 | 0.2198973 | -1.2094 | 0.227    | -0.338282502 | count | 1          |
| LMF1       | -0.2889764 | 0.3120255 | -0.9261 | 0.354    | -0.337997574 | count | 1          |
| RBM14-RBM4 | -0.8280173 | 0.7211175 | -1.1482 | 0.251    | -0.337886017 | count | 1          |
| BEND3      | -0.8280173 | 0.7534022 | -1.099  | 0.272    | -0.337886017 | count | 1          |
| ANXA5      | -0.2353054 | 0.0462378 | -5.089  | 3.84E-07 | -0.336805614 | count | 0.00899904 |
| RPS6KB1    | -0.2559833 | 0.2027255 | -1.2627 | 0.207    | -0.336612254 | count | 1          |
| DYNC111    | -0.3604461 | 0.6280819 | -0.5739 | 0.566    | -0.336065414 | count | 1          |
| CDC42EP2   | -0.2464944 | 0.1344679 | -1.8331 | 0.0669   | -0.335880259 | count | 1          |
| EIF3A      | -0.2380314 | 0.0914788 | -2.602  | 0.00932  | -0.335867587 | count | 1          |
| CBX6       | -0.2465685 | 0.126014  | -1.9567 | 0.0505   | -0.335805963 | count | 1          |
| MARS       | -0.3005032 | 0.2614539 | -1.1494 | 0.251    | -0.335216604 | count | 1          |
| DCUN1D3    | -0.2689718 | 0.1991071 | -1.3509 | 0.177    | -0.335153393 | count | 1          |
| TNRC6A     | -0.2485608 | 0.1583959 | -1.5692 | 0.117    | -0.33507764  | count | 1          |
| PLN        | -0.8218915 | 0.7408458 | -1.1094 | 0.267    | -0.334899664 | count | 1          |
| ZNF287     | -0.3489996 | 0.378214  | -0.9228 | 0.356    | -0.334793903 | count | 1          |
| ZNF276     | -0.2862214 | 0.217027  | -1.3188 | 0.187    | -0.334712287 | count | 1          |
| SERGEF     | -0.2583059 | 0.176952  | -1.4598 | 0.144    | -0.334582079 | count | 1          |
| SARAF      | -0.2350522 | 0.057975  | -4.0544 | 5.17E-05 | -0.334405677 | count | 1          |
| AK3        | -0.2399686 | 0.1174319 | -2.0435 | 0.0411   | -0.33423232  | count | 1          |
| TALDO1     | -0.2348303 | 0.0644928 | -3.6412 | 0.000276 | -0.333490385 | count | 1          |
| ARHGEF10   | -0.2974043 | 0.3076721 | -0.9666 | 0.334    | -0.333433497 | count | 1          |
| SS18L1     | -0.3697601 | 0.3310958 | -1.1168 | 0.264    | -0.333418421 | count | 1          |
| PDE4D      | -0.2496547 | 0.1950228 | -1.2801 | 0.201    | -0.333017841 | count | 1          |
| AP001453.4 | -1.2472518 | 0.9189287 | -1.3573 | 0.175    | -0.332853504 | count | 1          |
| SCNN1D     | -1.2472518 | 0.9584843 | -1.3013 | 0.193    | -0.332853504 | count | 1          |
| AC073610.3 | -1.2472518 | 0.9584843 | -1.3013 | 0.193    | -0.332853504 | count | 1          |
| AC010889.1 | -1.2472518 | 0.9584843 | -1.3013 | 0.193    | -0.332853504 | count | 1          |
| LINC00654  | -1.2472518 | 1.237323  | -1.008  | 0.314    | -0.332853504 | count | 1          |

|            |            |           |         |          |              |       |           |
|------------|------------|-----------|---------|----------|--------------|-------|-----------|
| VPS37B     | -0.2537492 | 0.1911132 | -1.3277 | 0.184    | -0.332463475 | count | 1         |
| WDR24      | -0.3754933 | 0.4806358 | -0.7812 | 0.435    | -0.332316654 | count | 1         |
| WWP2       | -0.2804555 | 0.2344069 | -1.1964 | 0.232    | -0.332260015 | count | 1         |
| SLC38A7    | -0.3913299 | 0.4410054 | -0.8874 | 0.375    | -0.332086114 | count | 1         |
| SNRPD3     | -0.2337867 | 0.0641028 | -3.6471 | 0.00027  | -0.331906522 | count | 1         |
| MRPL57     | -0.2340434 | 0.0701331 | -3.3371 | 0.000858 | -0.331846586 | count | 1         |
| COX8A      | -0.2322738 | 0.0526418 | -4.4123 | 1.06E-05 | -0.331663439 | count | 0.2458988 |
| SORD       | -0.3232153 | 0.3155045 | -1.0244 | 0.306    | -0.331400793 | count | 1         |
| PIAS3      | -0.2683594 | 0.2147244 | -1.2498 | 0.211    | -0.331330519 | count | 1         |
| 9-Mar      | -0.270689  | 0.2173856 | -1.2452 | 0.213    | -0.330795891 | count | 1         |
| ABHD5      | -0.2394534 | 0.1310516 | -1.8272 | 0.0678   | -0.33062447  | count | 1         |
| BET1L      | -0.2765625 | 0.2895278 | -0.9552 | 0.34     | -0.330521357 | count | 1         |
| LARP4B     | -0.259151  | 0.2242864 | -1.1554 | 0.248    | -0.330362309 | count | 1         |
| COX5A      | -0.231598  | 0.0546617 | -4.2369 | 2.34E-05 | -0.33031771  | count | 0.541008  |
| REEP3      | -0.2354609 | 0.1055489 | -2.2308 | 0.0258   | -0.330007981 | count | 1         |
| AC254633.1 | -1.914284  | 1.229147  | -1.5574 | 0.119    | -0.329830055 | count | 1         |
| LINC01635  | -1.914284  | 1.229147  | -1.5574 | 0.119    | -0.329830055 | count | 1         |
| MAEL       | -1.914284  | 1.229147  | -1.5574 | 0.119    | -0.329830055 | count | 1         |
| CFHR3      | -1.914284  | 1.229147  | -1.5574 | 0.119    | -0.329830055 | count | 1         |
| AC013472.3 | -1.914284  | 1.229147  | -1.5574 | 0.119    | -0.329830055 | count | 1         |
| CREG2      | -1.914284  | 1.229147  | -1.5574 | 0.119    | -0.329830055 | count | 1         |
| TMEM163    | -1.914284  | 1.229147  | -1.5574 | 0.119    | -0.329830055 | count | 1         |
| POLQ       | -1.914284  | 1.229147  | -1.5574 | 0.119    | -0.329830055 | count | 1         |
| HCG9       | -1.914284  | 1.229147  | -1.5574 | 0.119    | -0.329830055 | count | 1         |
| LINC01186  | -1.914284  | 1.229147  | -1.5574 | 0.119    | -0.329830055 | count | 1         |
| NEFM       | -1.914284  | 1.229147  | -1.5574 | 0.119    | -0.329830055 | count | 1         |
| RECQL4     | -1.914284  | 1.229147  | -1.5574 | 0.119    | -0.329830055 | count | 1         |
| AF186192.1 | -1.914284  | 1.229147  | -1.5574 | 0.119    | -0.329830055 | count | 1         |
| BMS1P14    | -1.914284  | 1.229147  | -1.5574 | 0.119    | -0.329830055 | count | 1         |
| LBHD1      | -1.914284  | 1.229147  | -1.5574 | 0.119    | -0.329830055 | count | 1         |
| AP000904.1 | -1.914284  | 1.229147  | -1.5574 | 0.119    | -0.329830055 | count | 1         |
| AL356020.1 | -1.914284  | 1.229147  | -1.5574 | 0.119    | -0.329830055 | count | 1         |
| ARHGAP11A  | -1.914284  | 1.229147  | -1.5574 | 0.119    | -0.329830055 | count | 1         |
| AC004494.1 | -1.914284  | 1.229147  | -1.5574 | 0.119    | -0.329830055 | count | 1         |
| SPIRE2     | -1.914284  | 1.229147  | -1.5574 | 0.119    | -0.329830055 | count | 1         |
| GP1BA      | -1.914284  | 1.229147  | -1.5574 | 0.119    | -0.329830055 | count | 1         |
| AC006441.1 | -1.914284  | 1.229147  | -1.5574 | 0.119    | -0.329830055 | count | 1         |
| ELAVL3     | -1.914284  | 1.229147  | -1.5574 | 0.119    | -0.329830055 | count | 1         |
| ZNF20      | -1.914284  | 1.229147  | -1.5574 | 0.119    | -0.329830055 | count | 1         |
| A1BG-AS1   | -1.914284  | 1.229147  | -1.5574 | 0.119    | -0.329830055 | count | 1         |
| AC006547.3 | -1.914284  | 1.229147  | -1.5574 | 0.119    | -0.329830055 | count | 1         |
| TMEM240    | -1.914284  | 1.336383  | -1.4324 | 0.152    | -0.329830055 | count | 1         |
| PIK3CD-AS2 | -1.914284  | 1.336383  | -1.4324 | 0.152    | -0.329830055 | count | 1         |
| FHAD1      | -1.914284  | 1.336383  | -1.4324 | 0.152    | -0.329830055 | count | 1         |
| AGMAT      | -1.914284  | 1.336383  | -1.4324 | 0.152    | -0.329830055 | count | 1         |

|             |            |           |         |          |              |       |   |
|-------------|------------|-----------|---------|----------|--------------|-------|---|
| AC005034.4  | -1.914284  | 1.336383  | -1.4324 | 0.152    | -0.329830055 | count | 1 |
| AC093388.1  | -1.914284  | 1.336383  | -1.4324 | 0.152    | -0.329830055 | count | 1 |
| TXK         | -1.914284  | 1.336383  | -1.4324 | 0.152    | -0.329830055 | count | 1 |
| TLR2        | -1.914284  | 1.336383  | -1.4324 | 0.152    | -0.329830055 | count | 1 |
| LINC02363   | -1.914284  | 1.336383  | -1.4324 | 0.152    | -0.329830055 | count | 1 |
| HIST1H4J    | -1.914284  | 1.336383  | -1.4324 | 0.152    | -0.329830055 | count | 1 |
| LINC01564   | -1.914284  | 1.336383  | -1.4324 | 0.152    | -0.329830055 | count | 1 |
| BMP5        | -1.914284  | 1.336383  | -1.4324 | 0.152    | -0.329830055 | count | 1 |
| MCF2        | -1.914284  | 1.336383  | -1.4324 | 0.152    | -0.329830055 | count | 1 |
| TEX15       | -1.914284  | 1.336383  | -1.4324 | 0.152    | -0.329830055 | count | 1 |
| SLC26A7     | -1.914284  | 1.336383  | -1.4324 | 0.152    | -0.329830055 | count | 1 |
| AP003696.1  | -1.914284  | 1.336383  | -1.4324 | 0.152    | -0.329830055 | count | 1 |
| RIMS2       | -1.914284  | 1.336383  | -1.4324 | 0.152    | -0.329830055 | count | 1 |
| ZNF252P-AS1 | -1.914284  | 1.336383  | -1.4324 | 0.152    | -0.329830055 | count | 1 |
| GNA14-AS1   | -1.914284  | 1.336383  | -1.4324 | 0.152    | -0.329830055 | count | 1 |
| AC107884.1  | -1.914284  | 1.336383  | -1.4324 | 0.152    | -0.329830055 | count | 1 |
| AL391684.1  | -1.914284  | 1.336383  | -1.4324 | 0.152    | -0.329830055 | count | 1 |
| FAM71D      | -1.914284  | 1.336383  | -1.4324 | 0.152    | -0.329830055 | count | 1 |
| AC012651.1  | -1.914284  | 1.336383  | -1.4324 | 0.152    | -0.329830055 | count | 1 |
| AC073941.1  | -1.914284  | 1.336383  | -1.4324 | 0.152    | -0.329830055 | count | 1 |
| WDR93       | -1.914284  | 1.336383  | -1.4324 | 0.152    | -0.329830055 | count | 1 |
| PRC1-AS1    | -1.914284  | 1.336383  | -1.4324 | 0.152    | -0.329830055 | count | 1 |
| ZFR2        | -1.914284  | 1.336383  | -1.4324 | 0.152    | -0.329830055 | count | 1 |
| AC008752.1  | -1.914284  | 1.336383  | -1.4324 | 0.152    | -0.329830055 | count | 1 |
| AC020928.3  | -1.914284  | 1.336383  | -1.4324 | 0.152    | -0.329830055 | count | 1 |
| SPIB        | -1.914284  | 1.336383  | -1.4324 | 0.152    | -0.329830055 | count | 1 |
| ZRANB3      | -0.4902088 | 0.4485079 | -1.093  | 0.274    | -0.329453179 | count | 1 |
| U73166.1    | -0.6409406 | 0.4882054 | -1.3129 | 0.189    | -0.329373759 | count | 1 |
| ARID1A      | -0.2557926 | 0.1669844 | -1.5318 | 0.126    | -0.329353899 | count | 1 |
| XRN1        | -0.2389087 | 0.1182554 | -2.0203 | 0.0435   | -0.329347742 | count | 1 |
| COX7B       | -0.2315354 | 0.0576744 | -4.0145 | 6.12E-05 | -0.329324124 | count | 1 |
| SLIT2       | -0.6405228 | 0.6056671 | -1.0575 | 0.29     | -0.329128569 | count | 1 |
| TFDP2       | -0.2390121 | 0.1278294 | -1.8698 | 0.0616   | -0.329102947 | count | 1 |
| REST        | -0.2368883 | 0.1048986 | -2.2583 | 0.024    | -0.329021235 | count | 1 |
| NUP205      | -0.387454  | 0.3743825 | -1.0349 | 0.301    | -0.328609432 | count | 1 |
| AXIN2       | -0.9622729 | 0.6203769 | -1.5511 | 0.121    | -0.328607837 | count | 1 |
| CRY2        | -0.3033127 | 0.2823456 | -1.0743 | 0.283    | -0.3283871   | count | 1 |
| FSTL3       | -0.4189721 | 0.4389262 | -0.9545 | 0.34     | -0.328291123 | count | 1 |
| VOPP1       | -0.2530845 | 0.144869  | -1.747  | 0.0808   | -0.328057804 | count | 1 |
| SH3GLB1     | -0.2301085 | 0.0594504 | -3.8706 | 1.00E-04 | -0.327774798 | count | 1 |
| TRMT9B      | -0.5861921 | 0.4783935 | -1.2253 | 0.221    | -0.327712421 | count | 1 |
| DMGDH       | -0.6376612 | 0.6837305 | -0.9326 | 0.351    | -0.32745009  | count | 1 |
| AL121983.1  | -0.6376612 | 0.7484497 | -0.852  | 0.394    | -0.32745009  | count | 1 |
| CANX        | -0.2296446 | 0.060747  | -3.7803 | 2.00E-04 | -0.327358209 | count | 1 |
| AC114490.2  | -0.9592445 | 0.9947243 | -0.9643 | 0.335    | -0.32733171  | count | 1 |

|             |            |           |         |         |              |       |   |
|-------------|------------|-----------|---------|---------|--------------|-------|---|
| PSRC1       | -0.9592445 | 0.9947243 | -0.9643 | 0.335   | -0.32733171  | count | 1 |
| FAM72D      | -0.9592445 | 0.9947243 | -0.9643 | 0.335   | -0.32733171  | count | 1 |
| AC009950.1  | -0.9592445 | 0.9947243 | -0.9643 | 0.335   | -0.32733171  | count | 1 |
| FRK         | -0.9592445 | 0.9947243 | -0.9643 | 0.335   | -0.32733171  | count | 1 |
| GET4        | -0.9592445 | 0.9947243 | -0.9643 | 0.335   | -0.32733171  | count | 1 |
| OR52I1      | -0.9592445 | 0.9947243 | -0.9643 | 0.335   | -0.32733171  | count | 1 |
| LINC02550   | -0.9592445 | 0.9947243 | -0.9643 | 0.335   | -0.32733171  | count | 1 |
| C16orf95    | -0.9592445 | 0.9947243 | -0.9643 | 0.335   | -0.32733171  | count | 1 |
| AC092070.3  | -0.9592445 | 0.9947243 | -0.9643 | 0.335   | -0.32733171  | count | 1 |
| ADGRF3      | -0.9592445 | 1.078244  | -0.8896 | 0.374   | -0.32733171  | count | 1 |
| AP002026.1  | -0.9592445 | 1.078244  | -0.8896 | 0.374   | -0.32733171  | count | 1 |
| SLC26A4-AS1 | -0.9592445 | 1.078244  | -0.8896 | 0.374   | -0.32733171  | count | 1 |
| ERICH5      | -0.9592445 | 1.078244  | -0.8896 | 0.374   | -0.32733171  | count | 1 |
| LINC00937   | -0.9592445 | 1.078244  | -0.8896 | 0.374   | -0.32733171  | count | 1 |
| TECTA       | -0.9592445 | 1.229632  | -0.7801 | 0.435   | -0.32733171  | count | 1 |
| GFRA1       | -0.9592445 | 1.229632  | -0.7801 | 0.435   | -0.32733171  | count | 1 |
| DGUOK-AS1   | -0.9592445 | 1.298125  | -0.7389 | 0.46    | -0.32733171  | count | 1 |
| AC114763.1  | -0.9592445 | 1.298125  | -0.7389 | 0.46    | -0.32733171  | count | 1 |
| AC021321.1  | -0.9592445 | 1.298125  | -0.7389 | 0.46    | -0.32733171  | count | 1 |
| GDF10       | -0.9592445 | 1.298125  | -0.7389 | 0.46    | -0.32733171  | count | 1 |
| PELI3       | -0.395244  | 0.4985692 | -0.7928 | 0.428   | -0.327213378 | count | 1 |
| TBC1D7      | -0.2877412 | 0.234259  | -1.2283 | 0.219   | -0.327110846 | count | 1 |
| CARD6       | -0.241522  | 0.149664  | -1.6138 | 0.107   | -0.326884137 | count | 1 |
| TNFRSF10C   | -0.3948467 | 0.4308181 | -0.9165 | 0.359   | -0.326864685 | count | 1 |
| AL355075.4  | -0.3948467 | 0.6261517 | -0.6306 | 0.528   | -0.326864685 | count | 1 |
| CTSS        | -0.2327235 | 0.1054065 | -2.2079 | 0.0273  | -0.326713249 | count | 1 |
| NOMO3       | -1.22917   | 0.6309278 | -1.9482 | 0.0515  | -0.326629225 | count | 1 |
| PCDHGA3     | -1.22917   | 0.7151977 | -1.7186 | 0.0858  | -0.326629225 | count | 1 |
| AC078909.1  | -1.22917   | 0.7988263 | -1.5387 | 0.124   | -0.326629225 | count | 1 |
| BTBD19      | -0.5843278 | 0.4459908 | -1.3102 | 0.19    | -0.32654036  | count | 1 |
| AGPAT5      | -0.2408652 | 0.1683271 | -1.4309 | 0.153   | -0.326505705 | count | 1 |
| C9orf116    | -0.5121786 | 0.5582873 | -0.9174 | 0.359   | -0.326442869 | count | 1 |
| MRPS28      | -0.2484687 | 0.1655927 | -1.5005 | 0.134   | -0.326425716 | count | 1 |
| COX14       | -0.2322175 | 0.0858562 | -2.7047 | 0.00688 | -0.326244145 | count | 1 |
| CTF1        | -0.5836559 | 0.5377987 | -1.0853 | 0.278   | -0.32611812  | count | 1 |
| BNC2-AS1    | -0.8030025 | 0.654892  | -1.2262 | 0.22    | -0.325731836 | count | 1 |
| RGS12       | -0.2593351 | 0.2071901 | -1.2517 | 0.211   | -0.325639991 | count | 1 |
| MLXIP       | -0.2458757 | 0.1519774 | -1.6178 | 0.106   | -0.324900546 | count | 1 |
| VPS11       | -0.2867458 | 0.2727747 | -1.0512 | 0.293   | -0.324427207 | count | 1 |
| VSTM4       | -0.3668743 | 0.5044762 | -0.7272 | 0.467   | -0.324300953 | count | 1 |
| TOR2A       | -0.3109148 | 0.3855031 | -0.8065 | 0.42    | -0.324251244 | count | 1 |
| PPP4R3A     | -0.2422522 | 0.1526844 | -1.5866 | 0.113   | -0.324142999 | count | 1 |
| CBFA2T2     | -0.3105695 | 0.361859  | -0.8583 | 0.391   | -0.323879942 | count | 1 |
| WDFY2       | -0.2953932 | 0.282523  | -1.0456 | 0.296   | -0.323730731 | count | 1 |
| RHBDD2      | -0.2388734 | 0.1324729 | -1.8032 | 0.0715  | -0.323589981 | count | 1 |

|            |            |           |         |          |              |       |            |
|------------|------------|-----------|---------|----------|--------------|-------|------------|
| GPR137     | -0.2475688 | 0.2016283 | -1.2278 | 0.22     | -0.323561198 | count | 1          |
| NFATC4     | -1.219705  | 0.9341136 | -1.3057 | 0.192    | -0.32338389  | count | 1          |
| NPC2       | -0.2250586 | 0.0448167 | -5.0218 | 5.45E-07 | -0.323274996 | count | 0.01276063 |
| CD99       | -0.2248461 | 0.0362383 | -6.2047 | 6.30E-10 | -0.32320768  | count | 1.49E-05   |
| AC009061.2 | -0.4263776 | 0.5354135 | -0.7964 | 0.426    | -0.323197849 | count | 1          |
| AL360012.1 | -0.4600046 | 0.6710352 | -0.6855 | 0.493    | -0.323085861 | count | 1          |
| DPY19L2    | -0.4600046 | 0.7295981 | -0.6305 | 0.528    | -0.323085861 | count | 1          |
| BCL2L1     | -0.2464496 | 0.1602975 | -1.5375 | 0.124    | -0.323058757 | count | 1          |
| PRKCZ      | -0.3324321 | 0.3135364 | -1.0603 | 0.289    | -0.322595522 | count | 1          |
| ZNF93      | -0.4592197 | 0.4385891 | -1.047  | 0.295    | -0.322488436 | count | 1          |
| KIF3B      | -0.2559534 | 0.2028977 | -1.2615 | 0.207    | -0.322314692 | count | 1          |
| ACOX3      | -0.2977517 | 0.3277982 | -0.9083 | 0.364    | -0.322204695 | count | 1          |
| PSMD6-AS2  | -0.944851  | 0.7507907 | -1.2585 | 0.208    | -0.321284538 | count | 1          |
| AC022144.1 | -0.944851  | 0.7753899 | -1.2185 | 0.223    | -0.321284538 | count | 1          |
| AC007541.1 | -0.3351642 | 0.3503634 | -0.9566 | 0.339    | -0.320985402 | count | 1          |
| AMPD2      | -0.3447656 | 0.4245528 | -0.8121 | 0.417    | -0.320804876 | count | 1          |
| DYNLL1     | -0.2230837 | 0.0354736 | -6.2887 | 3.71E-10 | -0.320585479 | count | 8.80E-06   |
| MOAP1      | -0.2573777 | 0.1964472 | -1.3102 | 0.19     | -0.3205227   | count | 1          |
| AL590226.1 | -0.2448855 | 0.1934229 | -1.2661 | 0.206    | -0.320515458 | count | 1          |
| NDUFAF8    | -0.2337931 | 0.1104434 | -2.1169 | 0.0344   | -0.320492413 | count | 1          |
| SERPINB9P1 | -0.2731992 | 0.4035704 | -0.677  | 0.498    | -0.320325293 | count | 1          |
| PIK3R3     | -0.2349541 | 0.123621  | -1.9006 | 0.0575   | -0.319912474 | count | 1          |
| SND1-IT1   | -0.9408823 | 0.7443451 | -1.264  | 0.206    | -0.319622444 | count | 1          |
| RPL13A     | -0.2219082 | 0.0229045 | -9.6884 | 7.49E-22 | -0.319576904 | count | 1.81E-17   |
| DMXL1      | -0.2393996 | 0.1933329 | -1.2383 | 0.216    | -0.319090931 | count | 1          |
| AC090515.2 | -0.7891344 | 0.7511606 | -1.0506 | 0.294    | -0.31904038  | count | 1          |
| ZNF582     | -0.274034  | 0.2799654 | -0.9788 | 0.328    | -0.31902706  | count | 1          |
| ATP2A2     | -0.2416051 | 0.1683529 | -1.4351 | 0.151    | -0.319018272 | count | 1          |
| HRASLS     | -1.206603  | 0.6774988 | -1.781  | 0.075    | -0.318906039 | count | 1          |
| AL133551.1 | -1.206603  | 0.7836413 | -1.5397 | 0.124    | -0.318906039 | count | 1          |
| CLCN7      | -0.3209953 | 0.3037693 | -1.0567 | 0.291    | -0.31881405  | count | 1          |
| TNFSF12    | -0.2266896 | 0.0931954 | -2.4324 | 0.0151   | -0.318496581 | count | 1          |
| LRRC58     | -0.2595322 | 0.2583922 | -1.0044 | 0.315    | -0.318340426 | count | 1          |
| PGLS       | -0.2242478 | 0.0693984 | -3.2313 | 0.00125  | -0.318280431 | count | 1          |
| BMP1       | -0.2732257 | 0.2566218 | -1.0647 | 0.287    | -0.318068038 | count | 1          |
| CPNE1      | -0.2362076 | 0.1172945 | -2.0138 | 0.0441   | -0.317353262 | count | 1          |
| ZBTB38     | -0.2248771 | 0.0893258 | -2.5175 | 0.0119   | -0.316780839 | count | 1          |
| NDUFB11    | -0.2216725 | 0.0528792 | -4.1921 | 2.85E-05 | -0.316711612 | count | 0.658293   |
| IGHMBP2    | -0.2891314 | 0.3866761 | -0.7477 | 0.455    | -0.316695444 | count | 1          |
| SIPA1      | -0.2666818 | 0.2379416 | -1.1208 | 0.262    | -0.316639135 | count | 1          |
| PGM2       | -0.2339227 | 0.1364828 | -1.7139 | 0.0867   | -0.316337207 | count | 1          |
| BRD3OS     | -0.3453557 | 0.3424929 | -1.0084 | 0.313    | -0.31604833  | count | 1          |
| ARHGEF12   | -0.2280369 | 0.1253452 | -1.8193 | 0.069    | -0.316039337 | count | 1          |
| CCL21      | -0.2940852 | 0.3323559 | -0.8849 | 0.376    | -0.315938947 | count | 1          |
| CLCN6      | -0.4327274 | 0.4191192 | -1.0325 | 0.302    | -0.315933447 | count | 1          |

|             |            |           |         |          |              |       |            |
|-------------|------------|-----------|---------|----------|--------------|-------|------------|
| ATP6AP1     | -0.2299078 | 0.1159962 | -1.982  | 0.0476   | -0.315831522 | count | 1          |
| PCNX1       | -0.2596487 | 0.2162254 | -1.2008 | 0.23     | -0.315664665 | count | 1          |
| AKR1B1      | -0.2301245 | 0.1314496 | -1.7507 | 0.0801   | -0.315376834 | count | 1          |
| TRAPPC10    | -0.2418453 | 0.1734812 | -1.3941 | 0.163    | -0.315263669 | count | 1          |
| SAT1        | -0.2195056 | 0.0755609 | -2.905  | 0.0037   | -0.315153007 | count | 1          |
| KPNA1       | -0.2526817 | 0.2128465 | -1.1872 | 0.235    | -0.314601055 | count | 1          |
| B4GAT1      | -0.2395371 | 0.1765071 | -1.3571 | 0.175    | -0.314378567 | count | 1          |
| NOS1AP      | -0.3381147 | 0.4318081 | -0.783  | 0.434    | -0.314348183 | count | 1          |
| FAM171A2    | -1.1931329 | 0.7175918 | -1.6627 | 0.0965   | -0.314320325 | count | 1          |
| TMIGD3      | -1.1931329 | 0.8110659 | -1.4711 | 0.141    | -0.314320325 | count | 1          |
| CLIC5       | -0.3041331 | 0.3326293 | -0.9143 | 0.361    | -0.314154153 | count | 1          |
| PCDHB16     | -0.401909  | 0.4387852 | -0.916  | 0.36     | -0.314043108 | count | 1          |
| FAM214B     | -0.2698276 | 0.3045548 | -0.886  | 0.376    | -0.314037347 | count | 1          |
| ATM         | -0.2406816 | 0.178863  | -1.3456 | 0.179    | -0.313988299 | count | 1          |
| NDFIP1      | -0.2220824 | 0.0735209 | -3.0207 | 0.00255  | -0.313847421 | count | 1          |
| CEP63       | -0.235572  | 0.1581174 | -1.4899 | 0.136    | -0.313478183 | count | 1          |
| TIAM2       | -0.4935203 | 0.5680052 | -0.8689 | 0.385    | -0.313393447 | count | 1          |
| PSMD8       | -0.2199229 | 0.0579583 | -3.7945 | 2.00E-04 | -0.31334582  | count | 1          |
| SEMA3G      | -0.3192913 | 0.316203  | -1.0098 | 0.313    | -0.313311707 | count | 1          |
| ARMC9       | -0.3231907 | 0.396738  | -0.8146 | 0.415    | -0.313284743 | count | 1          |
| BBC3        | -0.2446294 | 0.1879752 | -1.3014 | 0.193    | -0.313137177 | count | 1          |
| TRIM2       | -0.2558379 | 0.3016661 | -0.8481 | 0.396    | -0.313075615 | count | 1          |
| COX6B1      | -0.2186111 | 0.0451276 | -4.8443 | 1.34E-06 | -0.313065797 | count | 0.03131178 |
| LRCH3       | -0.2531984 | 0.2210284 | -1.1455 | 0.252    | -0.312967652 | count | 1          |
| SEPSECS-AS1 | -0.3419223 | 0.4788328 | -0.7141 | 0.475    | -0.312764465 | count | 1          |
| LSM1        | -0.2270887 | 0.1135721 | -1.9995 | 0.0457   | -0.312234102 | count | 1          |
| JTB         | -0.2198687 | 0.0667221 | -3.2953 | 0.000996 | -0.312216272 | count | 1          |
| DAP         | -0.2225408 | 0.091964  | -2.4199 | 0.0156   | -0.312041315 | count | 1          |
| EPOR        | -0.3261628 | 0.3822784 | -0.8532 | 0.394    | -0.312023222 | count | 1          |
| TMEM17      | -0.3470787 | 0.5577629 | -0.6223 | 0.534    | -0.312008478 | count | 1          |
| HNRNPLL     | -0.245106  | 0.1900715 | -1.2895 | 0.197    | -0.31188436  | count | 1          |
| SCFD2       | -0.299107  | 0.3412512 | -0.8765 | 0.381    | -0.311567199 | count | 1          |
| SH3BP2      | -0.2296089 | 0.1832708 | -1.2528 | 0.21     | -0.311454655 | count | 1          |
| BTBD6       | -0.2292623 | 0.1266628 | -1.81   | 0.0704   | -0.311438384 | count | 1          |
| B4GALT1-AS1 | -0.3771705 | 0.5271117 | -0.7155 | 0.474    | -0.311387523 | count | 1          |
| MCM9        | -0.3211775 | 0.3799443 | -0.8453 | 0.398    | -0.311258798 | count | 1          |
| LINC00982   | -0.5208874 | 0.6087615 | -0.8557 | 0.392    | -0.311015019 | count | 1          |
| CSNK1A1     | -0.2177211 | 0.0531775 | -4.0942 | 4.36E-05 | -0.310968503 | count | 1          |
| LSS         | -0.4261727 | 0.5089639 | -0.8373 | 0.402    | -0.310787619 | count | 1          |
| OOEP        | -0.6090503 | 0.916421  | -0.6646 | 0.506    | -0.310762301 | count | 1          |
| NRDE2       | -0.257384  | 0.2604866 | -0.9881 | 0.323    | -0.310580701 | count | 1          |
| MMP14       | -0.2689098 | 0.2332042 | -1.1531 | 0.249    | -0.310549687 | count | 1          |
| HERC2       | -0.2236694 | 0.1226685 | -1.8234 | 0.0684   | -0.310460908 | count | 1          |
| DNASE2      | -0.2270239 | 0.1413933 | -1.6056 | 0.108    | -0.310291578 | count | 1          |
| TAF1C       | -0.2909909 | 0.2548482 | -1.1418 | 0.254    | -0.310262756 | count | 1          |



|             |            |           |         |          |              |       |          |
|-------------|------------|-----------|---------|----------|--------------|-------|----------|
| RBAK-RBAKDN | -0.2636445 | 0.2633175 | -1.0012 | 0.317    | -0.309978768 | count | 1        |
| FBXO3       | -0.2294296 | 0.1338142 | -1.7145 | 0.0865   | -0.309915701 | count | 1        |
| UBA5        | -0.2333666 | 0.1535677 | -1.5196 | 0.129    | -0.309864805 | count | 1        |
| NBPF9       | -0.5575398 | 0.6888491 | -0.8094 | 0.418    | -0.309782823 | count | 1        |
| AC009126.1  | -0.4245145 | 0.5460639 | -0.7774 | 0.437    | -0.309487446 | count | 1        |
| EGFL7       | -0.2156426 | 0.0512502 | -4.2076 | 2.66E-05 | -0.309226451 | count | 0.614593 |
| MZT1        | -0.2320681 | 0.1540035 | -1.5069 | 0.132    | -0.308784845 | count | 1        |
| ABCC4       | -0.2663479 | 0.2411685 | -1.1044 | 0.27     | -0.308741454 | count | 1        |
| C8orf33     | -0.2255373 | 0.1183519 | -1.9057 | 0.0568   | -0.308321781 | count | 1        |
| SLC25A20    | -0.3142604 | 0.3063054 | -1.026  | 0.305    | -0.308195197 | count | 1        |
| PPM1A       | -0.245399  | 0.1957694 | -1.2535 | 0.21     | -0.307937968 | count | 1        |
| LINC00839   | -0.2885945 | 0.3032511 | -0.9517 | 0.341    | -0.307637704 | count | 1        |
| HOXB-AS1    | -0.4068069 | 0.5374815 | -0.7569 | 0.449    | -0.307337706 | count | 1        |
| C3orf62     | -0.3004292 | 0.3572836 | -0.8409 | 0.4      | -0.307302263 | count | 1        |
| POLR2B      | -0.2274969 | 0.1362706 | -1.6694 | 0.0951   | -0.30729117  | count | 1        |
| BSDC1       | -0.2362253 | 0.2061895 | -1.1457 | 0.252    | -0.307103018 | count | 1        |
| TET1        | -0.3305647 | 0.3218238 | -1.0272 | 0.304    | -0.307030325 | count | 1        |
| CLDN5       | -0.2137902 | 0.0893148 | -2.3937 | 0.0167   | -0.306991181 | count | 1        |
| PPP6C       | -0.2239228 | 0.1240807 | -1.8047 | 0.0712   | -0.30697009  | count | 1        |
| AL159169.2  | -0.6686547 | 0.8205292 | -0.8149 | 0.415    | -0.306715049 | count | 1        |
| EVC         | -0.6686547 | 0.824043  | -0.8114 | 0.417    | -0.306715049 | count | 1        |
| AC005253.1  | -0.6686547 | 0.824043  | -0.8114 | 0.417    | -0.306715049 | count | 1        |
| PPT2        | -0.3353746 | 0.3244539 | -1.0337 | 0.301    | -0.30650918  | count | 1        |
| SH2B3       | -0.2390479 | 0.1756172 | -1.3612 | 0.174    | -0.30626804  | count | 1        |
| PI4K2A      | -0.371237  | 0.4217866 | -0.8802 | 0.379    | -0.306208504 | count | 1        |
| WEE2-AS1    | -1.8097986 | 0.8231737 | -2.1986 | 0.028    | -0.306111537 | count | 1        |
| AC104984.3  | -1.8097986 | 1.060884  | -1.7059 | 0.0881   | -0.306111537 | count | 1        |
| ADA2        | -0.3543569 | 0.524008  | -0.6762 | 0.499    | -0.306102029 | count | 1        |
| ZNF254      | -0.2425171 | 0.2347082 | -1.0333 | 0.302    | -0.306092214 | count | 1        |
| CH25H       | -0.2550005 | 0.3759518 | -0.6783 | 0.498    | -0.306045845 | count | 1        |
| MPZL3       | -0.4373101 | 0.3814299 | -1.1465 | 0.252    | -0.305870775 | count | 1        |
| MAGT1       | -0.2214536 | 0.1281686 | -1.7278 | 0.0841   | -0.304889706 | count | 1        |
| ALOX5       | -0.5114689 | 0.5623444 | -0.9095 | 0.363    | -0.304794535 | count | 1        |
| UBE3A       | -0.2206409 | 0.108152  | -2.0401 | 0.0414   | -0.304605934 | count | 1        |
| NBEAL1      | -0.224255  | 0.1305532 | -1.7177 | 0.086    | -0.304247792 | count | 1        |
| MN1         | -0.3788481 | 0.424313  | -0.8929 | 0.372    | -0.304207649 | count | 1        |
| MRAS        | -0.2257663 | 0.1587207 | -1.4224 | 0.155    | -0.303487357 | count | 1        |
| PCGF3       | -0.2486029 | 0.2184324 | -1.1381 | 0.255    | -0.303431539 | count | 1        |
| HECA        | -0.2322387 | 0.1792284 | -1.2958 | 0.195    | -0.303365547 | count | 1        |
| ZNF14       | -0.2889    | 0.3196967 | -0.9037 | 0.366    | -0.303181499 | count | 1        |
| PLBD2       | -0.2723899 | 0.3023687 | -0.9009 | 0.368    | -0.303151752 | count | 1        |
| NRCAM       | -0.5466649 | 0.7686137 | -0.7112 | 0.477    | -0.303025084 | count | 1        |
| ZNF71       | -0.3128401 | 0.3565264 | -0.8775 | 0.38     | -0.302877751 | count | 1        |
| MUC12       | -0.7552588 | 0.6772521 | -1.1152 | 0.265    | -0.302837757 | count | 1        |
| GRAMD1A     | -0.2179528 | 0.1080925 | -2.0164 | 0.0439   | -0.302537635 | count | 1        |

|           |            |           |         |          |              |       |             |
|-----------|------------|-----------|---------|----------|--------------|-------|-------------|
| CASC4     | -0.2201956 | 0.1139683 | -1.9321 | 0.0535   | -0.30249552  | count | 1           |
| SFSWAP    | -0.2215386 | 0.1475379 | -1.5016 | 0.133    | -0.302405006 | count | 1           |
| ZNF660    | -0.3209311 | 0.357634  | -0.8974 | 0.37     | -0.302395935 | count | 1           |
| TTC14     | -0.2233405 | 0.1700721 | -1.3132 | 0.189    | -0.302347376 | count | 1           |
| ZNF609    | -0.2563966 | 0.2442526 | -1.0497 | 0.294    | -0.302309748 | count | 1           |
| LDHB      | -0.2120415 | 0.0568213 | -3.7317 | 2.00E-04 | -0.302206907 | count | 1           |
| PTP4A3    | -0.2216121 | 0.1428921 | -1.5509 | 0.121    | -0.302132777 | count | 1           |
| NNT       | -0.2686842 | 0.2666758 | -1.0075 | 0.314    | -0.30207361  | count | 1           |
| ABCB8     | -0.291973  | 0.332354  | -0.8785 | 0.38     | -0.301214615 | count | 1           |
| ZFC3H1    | -0.2192759 | 0.1266185 | -1.7318 | 0.0834   | -0.301112562 | count | 1           |
| NEU3      | -0.39903   | 0.528765  | -0.7546 | 0.451    | -0.301060532 | count | 1           |
| TPP1      | -0.2224741 | 0.1648166 | -1.3498 | 0.177    | -0.300974287 | count | 1           |
| COPZ1     | -0.2151919 | 0.0916927 | -2.3469 | 0.019    | -0.300674781 | count | 1           |
| ZNF273    | -0.2510343 | 0.3268624 | -0.768  | 0.443    | -0.300384154 | count | 1           |
| TMEM126B  | -0.216791  | 0.1187223 | -1.826  | 0.068    | -0.300327501 | count | 1           |
| ARPC5L    | -0.2121684 | 0.0796557 | -2.6636 | 0.00778  | -0.300239103 | count | 1           |
| PLXNB1    | -0.5033887 | 0.6345033 | -0.7934 | 0.428    | -0.299474135 | count | 1           |
| PRELID1   | -0.2099255 | 0.056988  | -3.6837 | 2.00E-04 | -0.29935169  | count | 1           |
| GIN1      | -0.292881  | 0.3450768 | -0.8487 | 0.396    | -0.299341836 | count | 1           |
| MFAP4     | -0.3468946 | 0.5543237 | -0.6258 | 0.531    | -0.299331011 | count | 1           |
| ZBTB43    | -0.2441982 | 0.2398117 | -1.0183 | 0.309    | -0.299280512 | count | 1           |
| COX6C     | -0.2085531 | 0.0417012 | -5.0011 | 6.06E-07 | -0.298788458 | count | 0.014184642 |
| MRPS6     | -0.2143993 | 0.1137165 | -1.8854 | 0.0595   | -0.298551842 | count | 1           |
| TMEM167B  | -0.2290869 | 0.1876323 | -1.2209 | 0.222    | -0.298497672 | count | 1           |
| RAD51B    | -0.272683  | 0.3437874 | -0.7932 | 0.428    | -0.298247878 | count | 1           |
| PUS10     | -0.2554566 | 0.2639432 | -0.9678 | 0.333    | -0.298100942 | count | 1           |
| B4GALT1   | -0.213552  | 0.1079834 | -1.9776 | 0.0481   | -0.298080296 | count | 1           |
| RXYLT1    | -0.2216519 | 0.1640385 | -1.3512 | 0.177    | -0.298042909 | count | 1           |
| LYSMD3    | -0.2321734 | 0.1766551 | -1.3143 | 0.189    | -0.297707152 | count | 1           |
| SUB1      | -0.2082688 | 0.0492943 | -4.225  | 2.47E-05 | -0.297656427 | count | 0.5708664   |
| MEF2D     | -0.2370839 | 0.2212419 | -1.0716 | 0.284    | -0.297385905 | count | 1           |
| FLVCR1-DT | -0.2968703 | 0.4708555 | -0.6305 | 0.528    | -0.297370781 | count | 1           |
| CDC27     | -0.2123656 | 0.0927574 | -2.2895 | 0.0221   | -0.297236809 | count | 1           |
| FGFR3     | -0.8867854 | 0.4834825 | -1.8342 | 0.0667   | -0.297199275 | count | 1           |
| PSPH      | -0.2935357 | 0.4112229 | -0.7138 | 0.475    | -0.297050362 | count | 1           |
| SEMA4B    | -1.766913  | 0.7218803 | -2.4477 | 0.0144   | -0.296434616 | count | 1           |
| ANXA7     | -0.2096316 | 0.0724112 | -2.895  | 0.00382  | -0.296264017 | count | 1           |
| SLC43A3   | -0.2304147 | 0.1911475 | -1.2054 | 0.228    | -0.296070248 | count | 1           |
| ALKBH8    | -0.2562647 | 0.3235374 | -0.7921 | 0.428    | -0.295673681 | count | 1           |
| TEX261    | -0.2370735 | 0.2279926 | -1.0398 | 0.299    | -0.295445231 | count | 1           |
| SLC35B4   | -0.2539897 | 0.2718335 | -0.9344 | 0.35     | -0.295273836 | count | 1           |
| NR3C1     | -0.2097248 | 0.0831071 | -2.5235 | 0.0117   | -0.295247568 | count | 1           |
| SPIRE1    | -0.2409425 | 0.2181568 | -1.1044 | 0.269    | -0.295237444 | count | 1           |
| IER3      | -0.205074  | 0.0750053 | -2.7341 | 0.00629  | -0.295222809 | count | 1           |
| ANKRD11   | -0.2108805 | 0.0915683 | -2.303  | 0.0214   | -0.295110626 | count | 1           |

|            |            |           |         |          |              |       |          |
|------------|------------|-----------|---------|----------|--------------|-------|----------|
| RNF7       | -0.2067391 | 0.0600667 | -3.4418 | 0.000586 | -0.295040898 | count | 1        |
| MTURN      | -0.2178181 | 0.1270546 | -1.7144 | 0.0866   | -0.295021448 | count | 1        |
| UBFD1      | -0.2516318 | 0.2558623 | -0.9835 | 0.325    | -0.294602195 | count | 1        |
| CPPED1     | -0.2291195 | 0.1930021 | -1.1871 | 0.235    | -0.294390695 | count | 1        |
| NPPC       | -0.3221971 | 0.3767994 | -0.8551 | 0.393    | -0.293949145 | count | 1        |
| TSPYL1     | -0.2131959 | 0.1185389 | -1.7985 | 0.0722   | -0.293680235 | count | 1        |
| SCPEP1     | -0.2165807 | 0.1315822 | -1.646  | 0.0999   | -0.293428911 | count | 1        |
| ORAI2      | -0.2439808 | 0.1967042 | -1.2403 | 0.215    | -0.293406573 | count | 1        |
| TMED4      | -0.2107045 | 0.1160386 | -1.8158 | 0.0695   | -0.293305396 | count | 1        |
| SDHAF1     | -0.2337638 | 0.2076913 | -1.1255 | 0.26     | -0.293174732 | count | 1        |
| MCL1       | -0.2058378 | 0.0637532 | -3.2287 | 0.00126  | -0.292848874 | count | 1        |
| KRBA1      | -0.4396858 | 0.7713374 | -0.57   | 0.569    | -0.292659088 | count | 1        |
| KDM4A-AS1  | -1.749411  | 1.000808  | -1.748  | 0.0806   | -0.292498364 | count | 1        |
| GALNT13    | -1.749411  | 1.000808  | -1.748  | 0.0806   | -0.292498364 | count | 1        |
| ARHGAP9    | -1.749411  | 1.000808  | -1.748  | 0.0806   | -0.292498364 | count | 1        |
| AC027020.2 | -1.749411  | 1.000808  | -1.748  | 0.0806   | -0.292498364 | count | 1        |
| FAM133A    | -1.749411  | 1.033734  | -1.6923 | 0.0907   | -0.292498364 | count | 1        |
| ZNF594     | -0.8741258 | 0.7042651 | -1.2412 | 0.215    | -0.292015523 | count | 1        |
| MS4A7      | -0.8741258 | 0.7357283 | -1.1881 | 0.235    | -0.292015523 | count | 1        |
| CYB5R3     | -0.2040607 | 0.0501454 | -4.0694 | 4.85E-05 | -0.291810733 | count | 1        |
| CMBL       | -0.2230994 | 0.1687034 | -1.3224 | 0.186    | -0.291784604 | count | 1        |
| LBX2-AS1   | -0.4618945 | 0.5866671 | -0.7873 | 0.431    | -0.291459652 | count | 1        |
| LCA5L      | -0.3635817 | 0.4660662 | -0.7801 | 0.435    | -0.291233748 | count | 1        |
| CLCN3      | -0.2119883 | 0.1254865 | -1.6893 | 0.0913   | -0.291233647 | count | 1        |
| PLCL2      | -0.5269271 | 0.6742465 | -0.7815 | 0.435    | -0.290827317 | count | 1        |
| TAX1BP3    | -0.2152157 | 0.1212635 | -1.7748 | 0.076    | -0.290816751 | count | 1        |
| AC239800.3 | -1.741519  | 0.6366095 | -2.7356 | 0.00627  | -0.290726028 | count | 1        |
| PDE6A      | -1.741519  | 0.6741043 | -2.5835 | 0.00983  | -0.290726028 | count | 1        |
| KCTD21     | -0.4171633 | 0.4996637 | -0.8349 | 0.404    | -0.29069093  | count | 1        |
| KPNA6      | -0.2231348 | 0.1743086 | -1.2801 | 0.201    | -0.290439837 | count | 1        |
| MEF2A      | -0.2067533 | 0.0842905 | -2.4529 | 0.0142   | -0.290398163 | count | 1        |
| CCDC191    | -0.2448646 | 0.2541901 | -0.9633 | 0.335    | -0.290323988 | count | 1        |
| SGSM1      | -0.2769064 | 0.3889488 | -0.7119 | 0.477    | -0.290247881 | count | 1        |
| MAFA       | -1.1209862 | 0.7346991 | -1.5258 | 0.127    | -0.290080359 | count | 1        |
| PTHLH      | -0.2495437 | 0.2857939 | -0.8732 | 0.383    | -0.290013348 | count | 1        |
| VCPIP1     | -0.2332296 | 0.2515083 | -0.9273 | 0.354    | -0.289587132 | count | 1        |
| HEXB       | -0.2083494 | 0.1054414 | -1.976  | 0.0483   | -0.289369017 | count | 1        |
| DBI        | -0.2029183 | 0.0609743 | -3.3279 | 0.000886 | -0.289335348 | count | 1        |
| ZNF773     | -0.3290443 | 0.412896  | -0.7969 | 0.426    | -0.289317378 | count | 1        |
| ITPR1-DT   | -0.4150922 | 0.7676468 | -0.5407 | 0.589    | -0.289135949 | count | 1        |
| GDI1       | -0.2264144 | 0.1893021 | -1.196  | 0.232    | -0.288927486 | count | 1        |
| PRKD1      | -0.5711196 | 0.6621637 | -0.8625 | 0.388    | -0.288905778 | count | 1        |
| ATP5F1E    | -0.2004445 | 0.029214  | -6.8612 | 8.39E-12 | -0.288325444 | count | 2.00E-07 |
| ZFP69B     | -0.4861867 | 0.6221275 | -0.7815 | 0.435    | -0.288197652 | count | 1        |
| AL121761.1 | -0.4861867 | 0.6259358 | -0.7767 | 0.437    | -0.288197652 | count | 1        |

|            |            |           |         |          |              |       |          |
|------------|------------|-----------|---------|----------|--------------|-------|----------|
| ATP6V0B    | -0.2026275 | 0.0612774 | -3.3067 | 0.000956 | -0.288173099 | count | 1        |
| CRELD2     | -0.2097606 | 0.1184743 | -1.7705 | 0.0768   | -0.287997477 | count | 1        |
| NCOA4      | -0.2079005 | 0.1080625 | -1.9239 | 0.0545   | -0.287936228 | count | 1        |
| ITPA       | -0.2166279 | 0.1646304 | -1.3158 | 0.188    | -0.28780963  | count | 1        |
| AVPI1      | -0.2495377 | 0.2785203 | -0.8959 | 0.37     | -0.287769939 | count | 1        |
| AGAP6      | -0.4559766 | 0.6216673 | -0.7335 | 0.463    | -0.287381472 | count | 1        |
| SMCO4      | -0.2153567 | 0.1709898 | -1.2595 | 0.208    | -0.287275513 | count | 1        |
| TMEM191C   | -0.4847659 | 0.735908  | -0.6587 | 0.51     | -0.287269343 | count | 1        |
| AL024507.2 | -0.568206  | 0.4735031 | -1.2    | 0.23     | -0.287239635 | count | 1        |
| F13A1      | -0.8622166 | 0.8756904 | -0.9846 | 0.325    | -0.287161465 | count | 1        |
| AC109587.1 | -0.8622166 | 0.9285881 | -0.9285 | 0.353    | -0.287161465 | count | 1        |
| FOXQ1      | -0.8622166 | 0.9915979 | -0.8695 | 0.385    | -0.287161465 | count | 1        |
| ADAM17     | -0.2125031 | 0.1427825 | -1.4883 | 0.137    | -0.287133103 | count | 1        |
| PHLDB3     | -0.3205667 | 0.4480416 | -0.7155 | 0.474    | -0.287128918 | count | 1        |
| POLN       | -1.111599  | 0.6439135 | -1.7263 | 0.0844   | -0.286967629 | count | 1        |
| RASGRP3    | -0.2213882 | 0.170816  | -1.2961 | 0.195    | -0.28689575  | count | 1        |
| PRSS27     | -1.11112   | 0.6703513 | -1.6575 | 0.0975   | -0.286809032 | count | 1        |
| ADGRA3     | -0.8613157 | 0.5470359 | -1.5745 | 0.115    | -0.286795162 | count | 1        |
| DCAKD      | -0.2621785 | 0.30044   | -0.8726 | 0.383    | -0.286491649 | count | 1        |
| TMX3       | -0.2104656 | 0.1327525 | -1.5854 | 0.113    | -0.285870788 | count | 1        |
| C1RL       | -0.2182457 | 0.19249   | -1.1338 | 0.257    | -0.285816885 | count | 1        |
| ZNF316     | -0.2800022 | 0.4238834 | -0.6606 | 0.509    | -0.285785928 | count | 1        |
| ARSK       | -0.2727216 | 0.3161961 | -0.8625 | 0.388    | -0.285741607 | count | 1        |
| CD46       | -0.2015374 | 0.0816122 | -2.4695 | 0.0136   | -0.285549265 | count | 1        |
| FLNB       | -0.2041879 | 0.1057749 | -1.9304 | 0.0537   | -0.285444137 | count | 1        |
| AZIN1      | -0.216319  | 0.1560343 | -1.3864 | 0.166    | -0.285405296 | count | 1        |
| TIA1       | -0.2196272 | 0.1731485 | -1.2684 | 0.205    | -0.285352533 | count | 1        |
| ARHGEF37   | -0.2627342 | 0.2746932 | -0.9565 | 0.339    | -0.285294132 | count | 1        |
| H2AFV      | -0.2023247 | 0.0818896 | -2.4707 | 0.0135   | -0.285156277 | count | 1        |
| ZBED3-AS1  | -0.5174158 | 0.5836842 | -0.8865 | 0.375    | -0.284980711 | count | 1        |
| KCTD5      | -0.2550487 | 0.3081457 | -0.8277 | 0.408    | -0.284960423 | count | 1        |
| ZNF652     | -0.2106917 | 0.1480119 | -1.4235 | 0.155    | -0.284957483 | count | 1        |
| ZNF25      | -0.2658836 | 0.3098037 | -0.8582 | 0.391    | -0.284889628 | count | 1        |
| GPAA1      | -0.2061916 | 0.109397  | -1.8848 | 0.0596   | -0.28484961  | count | 1        |
| TMCC1-AS1  | -0.4809497 | 0.5537323 | -0.8686 | 0.385    | -0.284778277 | count | 1        |
| ARAF       | -0.2377206 | 0.2125896 | -1.1182 | 0.264    | -0.284215906 | count | 1        |
| VAMP4      | -0.2140094 | 0.1905802 | -1.1229 | 0.262    | -0.28415605  | count | 1        |
| C10orf88   | -0.2783494 | 0.3605079 | -0.7721 | 0.44     | -0.284048647 | count | 1        |
| BIK        | -0.5625293 | 0.7614264 | -0.7388 | 0.46     | -0.283998759 | count | 1        |
| RAB2A      | -0.1988639 | 0.0589609 | -3.3728 | 8.00E-04 | -0.283543226 | count | 1        |
| ZFPM1      | -0.2235028 | 0.2189013 | -1.021  | 0.307    | -0.283397275 | count | 1        |
| RPS11      | -0.1968743 | 0.0273931 | -7.187  | 8.48E-13 | -0.283291541 | count | 2.02E-08 |
| CDCA3      | -0.7137689 | 0.7902766 | -0.9032 | 0.367    | -0.283274209 | count | 1        |
| MCRIP1     | -0.2020522 | 0.0877875 | -2.3016 | 0.0214   | -0.283252664 | count | 1        |
| SPDL1      | -0.2520237 | 0.3052706 | -0.8256 | 0.409    | -0.282960543 | count | 1        |

|            |            |           |         |          |              |       |          |
|------------|------------|-----------|---------|----------|--------------|-------|----------|
| FBH1       | -0.21971   | 0.1876622 | -1.1708 | 0.242    | -0.282784461 | count | 1        |
| CD2AP      | -0.2020041 | 0.1068815 | -1.89   | 0.0589   | -0.282577708 | count | 1        |
| GORASP1    | -0.2516862 | 0.3445085 | -0.7306 | 0.465    | -0.282573836 | count | 1        |
| UBA52      | -0.1960748 | 0.0245163 | -7.9977 | 1.85E-15 | -0.282294993 | count | 4.43E-11 |
| CDC42BPA   | -0.2079891 | 0.1284949 | -1.6187 | 0.106    | -0.282163141 | count | 1        |
| MED16      | -0.2215832 | 0.2098755 | -1.0558 | 0.291    | -0.282017925 | count | 1        |
| SAMD13     | -0.3525623 | 0.5314904 | -0.6633 | 0.507    | -0.281903715 | count | 1        |
| RSPH4A     | -0.5587175 | 0.4013527 | -1.3921 | 0.164    | -0.281826491 | count | 1        |
| TBC1D10C   | -0.7104701 | 0.8416429 | -0.8441 | 0.399    | -0.28173222  | count | 1        |
| AL358472.5 | -0.7104701 | 0.8941338 | -0.7946 | 0.427    | -0.28173222  | count | 1        |
| AC048382.6 | -0.7104701 | 0.9482578 | -0.7492 | 0.454    | -0.28173222  | count | 1        |
| ZNF219     | -0.2648757 | 0.2964927 | -0.8934 | 0.372    | -0.281713425 | count | 1        |
| C17orf97   | -0.5118183 | 0.5689575 | -0.8996 | 0.368    | -0.281549473 | count | 1        |
| FBXW2      | -0.2164677 | 0.1742764 | -1.2421 | 0.214    | -0.281456367 | count | 1        |
| TADA2B     | -0.2812697 | 0.3725205 | -0.755  | 0.45     | -0.281252049 | count | 1        |
| DDX19A     | -0.2352056 | 0.2675936 | -0.879  | 0.379    | -0.281164415 | count | 1        |
| POLR2L     | -0.1962137 | 0.0480585 | -4.0828 | 4.58E-05 | -0.281092596 | count | 1        |
| EME2       | -0.4747535 | 0.4922727 | -0.9644 | 0.335    | -0.280740879 | count | 1        |
| JOSD1      | -0.2062183 | 0.1422267 | -1.4499 | 0.147    | -0.280467336 | count | 1        |
| ATF5       | -0.2118305 | 0.1773727 | -1.1943 | 0.232    | -0.280294427 | count | 1        |
| MRGBP      | -0.2228425 | 0.1944415 | -1.1461 | 0.252    | -0.280185016 | count | 1        |
| C17orf100  | -0.4222445 | 0.62303   | -0.6777 | 0.498    | -0.280097984 | count | 1        |
| TIMMDC1    | -0.1990007 | 0.087654  | -2.2703 | 0.0233   | -0.279687507 | count | 1        |
| YIPF1      | -0.2237023 | 0.2241191 | -0.9981 | 0.318    | -0.279526826 | count | 1        |
| NCOR2      | -0.2233406 | 0.1744173 | -1.2805 | 0.2      | -0.279520587 | count | 1        |
| ARL8B      | -0.2051917 | 0.1359002 | -1.5099 | 0.131    | -0.279509893 | count | 1        |
| U2AF1L5    | -0.3182523 | 0.4620188 | -0.6888 | 0.491    | -0.279397597 | count | 1        |
| ZNF805     | -0.2476516 | 0.3250241 | -0.7619 | 0.446    | -0.279329649 | count | 1        |
| CACUL1     | -0.2090809 | 0.1603308 | -1.3041 | 0.192    | -0.279122041 | count | 1        |
| RGS2       | -0.2105505 | 0.2102741 | -1.0013 | 0.317    | -0.279071455 | count | 1        |
| MMP24OS    | -0.1999912 | 0.1074245 | -1.8617 | 0.0628   | -0.278885023 | count | 1        |
| PTRHD1     | -0.2016976 | 0.1138025 | -1.7723 | 0.0764   | -0.278743731 | count | 1        |
| ZC3H7B     | -0.2280421 | 0.2219233 | -1.0276 | 0.304    | -0.27862835  | count | 1        |
| AC005498.3 | -0.384815  | 0.5648608 | -0.6813 | 0.496    | -0.278556601 | count | 1        |
| C2         | -0.7029915 | 0.9615876 | -0.7311 | 0.465    | -0.278243852 | count | 1        |
| FAM66B     | -0.7029915 | 0.9615876 | -0.7311 | 0.465    | -0.278243852 | count | 1        |
| AC011603.1 | -0.7029915 | 1.0355057 | -0.6789 | 0.497    | -0.278243852 | count | 1        |
| AC092119.2 | -0.7029915 | 1.0355057 | -0.6789 | 0.497    | -0.278243852 | count | 1        |
| LINC01547  | -0.7029915 | 1.0355057 | -0.6789 | 0.497    | -0.278243852 | count | 1        |
| C19orf57   | -0.7029915 | 1.128126  | -0.6231 | 0.533    | -0.278243852 | count | 1        |
| AC018904.1 | -0.7029915 | 1.191759  | -0.5899 | 0.555    | -0.278243852 | count | 1        |
| TEX41      | -0.7029915 | 1.7357289 | -0.405  | 0.6855   | -0.278243852 | count | 1        |
| LGI2       | -0.3586471 | 0.3993388 | -0.8981 | 0.369    | -0.278228197 | count | 1        |
| AL049629.2 | -0.348104  | 0.8323731 | -0.4182 | 0.676    | -0.278137197 | count | 1        |
| COX18      | -0.2635097 | 0.3553569 | -0.7415 | 0.458    | -0.27807601  | count | 1        |

|            |            |           |         |          |              |       |           |
|------------|------------|-----------|---------|----------|--------------|-------|-----------|
| TSPO       | -0.1934894 | 0.0395158 | -4.8965 | 1.03E-06 | -0.277882604 | count | 0.0240814 |
| REXO2      | -0.1951538 | 0.0682553 | -2.8592 | 0.00428  | -0.277671241 | count | 1         |
| UQCR10     | -0.1959089 | 0.0738713 | -2.652  | 0.00805  | -0.277641139 | count | 1         |
| FAM219B    | -0.2274459 | 0.2354462 | -0.966  | 0.334    | -0.277275571 | count | 1         |
| MOB3A      | -0.2495391 | 0.3159763 | -0.7897 | 0.43     | -0.27718762  | count | 1         |
| TIE1       | -0.1976819 | 0.0972291 | -2.0332 | 0.0421   | -0.27713122  | count | 1         |
| ICAM2      | -0.1951801 | 0.0765138 | -2.5509 | 0.0108   | -0.27710737  | count | 1         |
| NDUFB8     | -0.1944374 | 0.0598465 | -3.2489 | 0.0012   | -0.277025646 | count | 1         |
| PTPN6      | -0.4689854 | 0.5088098 | -0.9217 | 0.357    | -0.276990484 | count | 1         |
| ACOT2      | -0.4178798 | 0.7667365 | -0.545  | 0.586    | -0.276966042 | count | 1         |
| PTDSS2     | -0.230487  | 0.2368095 | -0.9733 | 0.33     | -0.276949951 | count | 1         |
| NGEF       | -0.5041281 | 0.7982321 | -0.6316 | 0.528    | -0.276847079 | count | 1         |
| MIR181A2HG | -0.5041281 | 0.8656052 | -0.5824 | 0.56     | -0.276847079 | count | 1         |
| RPRML      | -0.4405784 | 0.7565761 | -0.5823 | 0.56     | -0.276809244 | count | 1         |
| DND1       | -0.4405784 | 1.2478863 | -0.3531 | 0.7241   | -0.276809244 | count | 1         |
| TMEM204    | -0.195988  | 0.0891567 | -2.1982 | 0.028    | -0.276742023 | count | 1         |
| DGUOK      | -0.198305  | 0.0996502 | -1.99   | 0.0467   | -0.276527882 | count | 1         |
| RPS6KA2    | -0.2046361 | 0.1470071 | -1.392  | 0.164    | -0.27645231  | count | 1         |
| CDH23      | -0.2346328 | 0.211415  | -1.1098 | 0.267    | -0.276243925 | count | 1         |
| PHACTR2    | -0.1941455 | 0.0692028 | -2.8055 | 0.0051   | -0.276154802 | count | 1         |
| DCTN3      | -0.1947863 | 0.0682305 | -2.8548 | 0.00434  | -0.276148914 | count | 1         |
| TST        | -0.2051502 | 0.1643902 | -1.2479 | 0.212    | -0.275847527 | count | 1         |
| TFPT       | -0.2018222 | 0.1590097 | -1.2692 | 0.204    | -0.275775378 | count | 1         |
| SNF8       | -0.1958302 | 0.0824404 | -2.3754 | 0.0176   | -0.275208417 | count | 1         |
| HLTF       | -0.2009865 | 0.1341923 | -1.4977 | 0.134    | -0.275119973 | count | 1         |
| LINC01006  | -0.2438625 | 0.3030422 | -0.8047 | 0.421    | -0.274972072 | count | 1         |
| GOSR2      | -0.2064022 | 0.1650879 | -1.2503 | 0.211    | -0.274854651 | count | 1         |
| MAML2      | -0.21313   | 0.1904518 | -1.1191 | 0.263    | -0.274798604 | count | 1         |
| AP5S1      | -0.2474057 | 0.3132346 | -0.7898 | 0.43     | -0.274768148 | count | 1         |
| CCDC107    | -0.1987435 | 0.1109561 | -1.7912 | 0.0734   | -0.27476666  | count | 1         |
| YWHAH      | -0.1934387 | 0.070028  | -2.7623 | 0.00578  | -0.274576401 | count | 1         |
| LPXN       | -0.3193868 | 0.5354188 | -0.5965 | 0.551    | -0.274483416 | count | 1         |
| ZDHHC5     | -0.2090148 | 0.1599546 | -1.3067 | 0.191    | -0.274429064 | count | 1         |
| ADAMTS1    | -0.1914485 | 0.0866761 | -2.2088 | 0.0273   | -0.274201372 | count | 1         |
| PHF21A     | -0.2280676 | 0.2387818 | -0.9551 | 0.34     | -0.274001941 | count | 1         |
| PBXIP1     | -0.2086787 | 0.1776118 | -1.1749 | 0.24     | -0.273792409 | count | 1         |
| GSTO2      | -0.5443741 | 0.3854154 | -1.4124 | 0.158    | -0.273680818 | count | 1         |
| LHPP       | -0.2636079 | 0.3356986 | -0.7853 | 0.432    | -0.273595988 | count | 1         |
| GRASP      | -0.192317  | 0.063816  | -3.0136 | 0.0026   | -0.27354274  | count | 1         |
| LIMK2      | -0.2343884 | 0.2947123 | -0.7953 | 0.427    | -0.273110113 | count | 1         |
| ATOX1      | -0.1924218 | 0.0656636 | -2.9304 | 0.00341  | -0.27301596  | count | 1         |
| GPR182     | -0.6912505 | 0.5657647 | -1.2218 | 0.222    | -0.272788209 | count | 1         |
| TSEN34     | -0.1972691 | 0.1105337 | -1.7847 | 0.0744   | -0.272238676 | count | 1         |
| POLH       | -0.4337324 | 0.4405727 | -0.9845 | 0.325    | -0.272127065 | count | 1         |
| RTN4RL1    | -0.3628002 | 0.4877865 | -0.7438 | 0.457    | -0.272009468 | count | 1         |

|            |            |           |         |          |              |       |   |
|------------|------------|-----------|---------|----------|--------------|-------|---|
| AC136475.1 | -0.6022657 | 0.5900401 | -1.0207 | 0.307    | -0.271908292 | count | 1 |
| PANK4      | -0.3097177 | 0.3585362 | -0.8638 | 0.388    | -0.271571979 | count | 1 |
| TNKS1BP1   | -0.2123145 | 0.1928423 | -1.101  | 0.271    | -0.271407439 | count | 1 |
| SLC52A3    | -0.3229613 | 0.3763157 | -0.8582 | 0.391    | -0.271269649 | count | 1 |
| FUCA1      | -0.2045854 | 0.17928   | -1.1412 | 0.254    | -0.271268786 | count | 1 |
| MSANTD3    | -0.2151613 | 0.2058973 | -1.045  | 0.296    | -0.271222227 | count | 1 |
| ABRACL     | -0.1940381 | 0.1005941 | -1.9289 | 0.0538   | -0.270962123 | count | 1 |
| JAG2       | -0.2273321 | 0.1995302 | -1.1393 | 0.255    | -0.270841905 | count | 1 |
| LINC01515  | -0.3611621 | 0.5277308 | -0.6844 | 0.494    | -0.270703488 | count | 1 |
| THAP8      | -0.4591954 | 0.6670718 | -0.6884 | 0.491    | -0.27064303  | count | 1 |
| RPAP1      | -0.2494524 | 0.3786234 | -0.6588 | 0.51     | -0.270544073 | count | 1 |
| LBX2       | -0.8209166 | 0.737993  | -1.1124 | 0.266    | -0.270498951 | count | 1 |
| CDKN2B     | -0.8209166 | 0.8059278 | -1.0186 | 0.308    | -0.270498951 | count | 1 |
| TRAPPC2    | -0.2199665 | 0.2381229 | -0.9238 | 0.356    | -0.270342811 | count | 1 |
| TNFAIP8    | -0.2303708 | 0.2475146 | -0.9307 | 0.352    | -0.2702433   | count | 1 |
| MAPK8IP1   | -0.5985444 | 0.5591161 | -1.0705 | 0.284    | -0.269983806 | count | 1 |
| GALNT10    | -0.2161876 | 0.2036399 | -1.0616 | 0.289    | -0.269589929 | count | 1 |
| CMTM8      | -0.1956005 | 0.1147397 | -1.7047 | 0.0884   | -0.269225059 | count | 1 |
| NME1       | -0.192255  | 0.0942025 | -2.0409 | 0.0414   | -0.268910474 | count | 1 |
| ARRB2      | -0.2590926 | 0.3373286 | -0.7681 | 0.443    | -0.268784    | count | 1 |
| JMJD8      | -0.1993881 | 0.1414185 | -1.4099 | 0.159    | -0.268667406 | count | 1 |
| CHADL      | -0.4906308 | 0.6284601 | -0.7807 | 0.435    | -0.268626407 | count | 1 |
| ZNF521     | -0.1965128 | 0.1242653 | -1.5814 | 0.114    | -0.268615705 | count | 1 |
| PEX26      | -0.2185469 | 0.270054  | -0.8093 | 0.418    | -0.268577207 | count | 1 |
| AL022323.1 | -0.8155789 | 0.7334117 | -1.112  | 0.266    | -0.268365045 | count | 1 |
| GNL3L      | -0.2230591 | 0.2532385 | -0.8808 | 0.378    | -0.267901679 | count | 1 |
| DUSP12     | -0.2053829 | 0.1787662 | -1.1489 | 0.251    | -0.267820038 | count | 1 |
| MED22      | -0.2897903 | 0.340264  | -0.8517 | 0.394    | -0.267728224 | count | 1 |
| COL15A1    | -0.1894864 | 0.0940114 | -2.0156 | 0.0439   | -0.267614667 | count | 1 |
| GABRP      | -1.05235   | 0.9318463 | -1.1293 | 0.259    | -0.267549163 | count | 1 |
| IGHG4      | -1.05235   | 0.9318463 | -1.1293 | 0.259    | -0.267549163 | count | 1 |
| AC007319.1 | -1.05235   | 1.063933  | -0.9891 | 0.323    | -0.267549163 | count | 1 |
| AC138028.4 | -1.0523504 | 1.060513  | -0.9923 | 0.321    | -0.267549161 | count | 1 |
| SYMPK      | -0.2296846 | 0.2472415 | -0.929  | 0.353    | -0.267539722 | count | 1 |
| TM4SF18    | -0.1896718 | 0.1061812 | -1.7863 | 0.0742   | -0.267536728 | count | 1 |
| XYLB       | -1.0518244 | 0.6019995 | -1.7472 | 0.0807   | -0.267378565 | count | 1 |
| NDUFB7     | -0.1876088 | 0.061058  | -3.0726 | 0.0021   | -0.267031009 | count | 1 |
| ZNF684     | -0.2291308 | 0.2706333 | -0.8466 | 0.397    | -0.266884122 | count | 1 |
| MED9       | -0.2725306 | 0.3723298 | -0.732  | 0.464    | -0.265960846 | count | 1 |
| CST7       | -1.630004  | 1.096845  | -1.4861 | 0.137    | -0.26589276  | count | 1 |
| GTF2E2     | -0.2077564 | 0.175017  | -1.1871 | 0.235    | -0.265832808 | count | 1 |
| KRT10      | -0.185967  | 0.0537579 | -3.4593 | 6.00E-04 | -0.265739796 | count | 1 |
| COPZ2      | -0.1943801 | 0.1211646 | -1.6043 | 0.109    | -0.265689453 | count | 1 |
| NPIPB5     | -0.2434651 | 0.2362561 | -1.0305 | 0.303    | -0.265597355 | count | 1 |
| ARMCX3     | -0.1912133 | 0.0980318 | -1.9505 | 0.0512   | -0.265536581 | count | 1 |

|            |            |           |         |        |              |       |   |
|------------|------------|-----------|---------|--------|--------------|-------|---|
| WDR54      | -0.1951396 | 0.1586594 | -1.2299 | 0.219  | -0.265041411 | count | 1 |
| CYLD       | -0.2045553 | 0.1835801 | -1.1143 | 0.265  | -0.264913983 | count | 1 |
| MARVELD2   | -0.2713377 | 0.4445527 | -0.6104 | 0.542  | -0.264758999 | count | 1 |
| RNF168     | -0.1921968 | 0.1326313 | -1.4491 | 0.147  | -0.264749539 | count | 1 |
| TCF19      | -0.4228172 | 0.4812893 | -0.8785 | 0.38   | -0.264685198 | count | 1 |
| PDE12      | -0.2198394 | 0.2190094 | -1.0038 | 0.316  | -0.264675004 | count | 1 |
| ZSWIM9     | -0.2473762 | 0.2956331 | -0.8368 | 0.403  | -0.264593655 | count | 1 |
| TMEM258    | -0.1857583 | 0.0569662 | -3.2609 | 0.0011 | -0.264576558 | count | 1 |
| PIGK       | -0.1977829 | 0.1508866 | -1.3108 | 0.19   | -0.264564754 | count | 1 |
| VKORC1L1   | -0.2030942 | 0.1807558 | -1.1236 | 0.261  | -0.264382979 | count | 1 |
| ZKSCAN1    | -0.1931507 | 0.1695829 | -1.139  | 0.255  | -0.264180805 | count | 1 |
| PIGP       | -0.1921454 | 0.1140378 | -1.6849 | 0.0921 | -0.264125497 | count | 1 |
| PHF23      | -0.2012355 | 0.1820432 | -1.1054 | 0.269  | -0.26396073  | count | 1 |
| NDUFA1     | -0.1850962 | 0.0566807 | -3.2656 | 0.0011 | -0.263652827 | count | 1 |
| ARFGAP3    | -0.1891775 | 0.1058927 | -1.7865 | 0.0741 | -0.263549713 | count | 1 |
| GIGYF2     | -0.1957295 | 0.1528795 | -1.2803 | 0.201  | -0.263519386 | count | 1 |
| ARHGEF19   | -0.2297722 | 0.2803032 | -0.8197 | 0.412  | -0.263503358 | count | 1 |
| AC008124.1 | -0.2234505 | 0.2513241 | -0.8891 | 0.374  | -0.262878232 | count | 1 |
| KCTD9      | -0.2257257 | 0.2216971 | -1.0182 | 0.309  | -0.2628541   | count | 1 |
| SFXN5      | -0.313387  | 0.375217  | -0.8352 | 0.404  | -0.262840988 | count | 1 |
| CSTF3      | -0.2159289 | 0.2415949 | -0.8938 | 0.372  | -0.262461299 | count | 1 |
| B4GALT2    | -0.2070648 | 0.2073063 | -0.9988 | 0.318  | -0.262360576 | count | 1 |
| CFAP53     | -0.3790057 | 0.8543989 | -0.4436 | 0.657  | -0.262209945 | count | 1 |
| APBB1      | -0.2295969 | 0.3052917 | -0.7521 | 0.452  | -0.262179325 | count | 1 |
| BX539320.1 | -0.5829592 | 0.7090467 | -0.8222 | 0.411  | -0.261954916 | count | 1 |
| ABL1       | -0.2303106 | 0.2515889 | -0.9154 | 0.36   | -0.261848367 | count | 1 |
| STS        | -0.5824715 | 0.643374  | -0.9053 | 0.365  | -0.2617045   | count | 1 |
| ENTPD7     | -0.6672102 | 0.7246803 | -0.9207 | 0.357  | -0.261697654 | count | 1 |
| TMEM52     | -0.6672102 | 0.7515606 | -0.8878 | 0.375  | -0.261697654 | count | 1 |
| SLC27A1    | -0.2399581 | 0.3232443 | -0.7423 | 0.458  | -0.261688703 | count | 1 |
| XRCC3      | -0.3964878 | 0.5528068 | -0.7172 | 0.473  | -0.261682937 | count | 1 |
| ZNF674-AS1 | -0.4180239 | 0.6837792 | -0.6113 | 0.541  | -0.261426272 | count | 1 |
| XKR8       | -0.2343874 | 0.33152   | -0.707  | 0.48   | -0.261424959 | count | 1 |
| DNAJC13    | -0.2057948 | 0.2106548 | -0.9769 | 0.329  | -0.261413673 | count | 1 |
| AC015922.4 | -0.3957655 | 0.5241539 | -0.7551 | 0.45   | -0.26116886  | count | 1 |
| GNA12      | -0.2201317 | 0.2478467 | -0.8882 | 0.375  | -0.260573894 | count | 1 |
| RANBP17    | -0.7959654 | 0.494481  | -1.6097 | 0.108  | -0.26056295  | count | 1 |
| NCAPD2     | -0.3184273 | 0.5066745 | -0.6285 | 0.53   | -0.260481552 | count | 1 |
| PTCH1      | -0.2453182 | 0.3225136 | -0.7606 | 0.447  | -0.26041738  | count | 1 |
| ZYX        | -0.1891776 | 0.1744402 | -1.0845 | 0.278  | -0.259741431 | count | 1 |
| STAU2      | -0.2010689 | 0.1780963 | -1.129  | 0.259  | -0.259632541 | count | 1 |
| MORC4      | -0.2315933 | 0.2946289 | -0.7861 | 0.432  | -0.259586493 | count | 1 |
| TXNL4A     | -0.1839145 | 0.0804176 | -2.287  | 0.0223 | -0.259298764 | count | 1 |
| CTDNEP1    | -0.1852929 | 0.1031687 | -1.796  | 0.0726 | -0.259228922 | count | 1 |
| CD48       | -1.0264623 | 0.6383764 | -1.6079 | 0.108  | -0.259191556 | count | 1 |



|           |            |           |         |          |              |       |            |
|-----------|------------|-----------|---------|----------|--------------|-------|------------|
| INTS8     | -0.2102852 | 0.3024886 | -0.6952 | 0.487    | -0.258826197 | count | 1          |
| SMARCA2   | -0.1865986 | 0.1178812 | -1.5829 | 0.114    | -0.258681894 | count | 1          |
| CXXC5     | -0.190995  | 0.1326743 | -1.4396 | 0.15     | -0.258615129 | count | 1          |
| GCNT1     | -0.2226372 | 0.3124314 | -0.7126 | 0.476    | -0.258242379 | count | 1          |
| SOS1      | -0.1939917 | 0.1479899 | -1.3108 | 0.19     | -0.257972535 | count | 1          |
| ELOVL5    | -0.1946138 | 0.149372  | -1.3029 | 0.193    | -0.257969642 | count | 1          |
| IVNS1ABP  | -0.191937  | 0.1855768 | -1.0343 | 0.301    | -0.257687868 | count | 1          |
| VPS13D    | -0.2074407 | 0.2304073 | -0.9003 | 0.368    | -0.257681574 | count | 1          |
| RAB11B    | -0.1851597 | 0.1038987 | -1.7821 | 0.0748   | -0.257608105 | count | 1          |
| AAGAB     | -0.2047258 | 0.2095936 | -0.9768 | 0.329    | -0.257566623 | count | 1          |
| TEFM      | -0.2069759 | 0.2534179 | -0.8167 | 0.414    | -0.257545318 | count | 1          |
| MTIF2     | -0.1968649 | 0.1779638 | -1.1062 | 0.269    | -0.257434805 | count | 1          |
| AGGF1     | -0.2150266 | 0.2913419 | -0.7381 | 0.461    | -0.257428617 | count | 1          |
| ZNF667    | -0.255407  | 0.3496627 | -0.7304 | 0.465    | -0.257380904 | count | 1          |
| EMC7      | -0.1832672 | 0.0840187 | -2.1813 | 0.0292   | -0.257365638 | count | 1          |
| NBPF15    | -0.3226781 | 0.4333749 | -0.7446 | 0.457    | -0.25674903  | count | 1          |
| TP53INP1  | -0.2477788 | 0.3581624 | -0.6918 | 0.489    | -0.256744667 | count | 1          |
| MIB2      | -0.2168662 | 0.265539  | -0.8167 | 0.414    | -0.256652596 | count | 1          |
| ZBTB14    | -0.2121585 | 0.2658589 | -0.798  | 0.425    | -0.25659621  | count | 1          |
| KIAA0100  | -0.1952191 | 0.1851434 | -1.0544 | 0.292    | -0.25637577  | count | 1          |
| POMP      | -0.1788877 | 0.0482756 | -3.7056 | 0.000215 | -0.255982305 | count | 1          |
| RHOBTB3   | -0.2295575 | 0.2721311 | -0.8436 | 0.399    | -0.255933831 | count | 1          |
| GLRX5     | -0.1819036 | 0.08934   | -2.0361 | 0.0418   | -0.255790352 | count | 1          |
| CMKLR1    | -0.2123426 | 0.2743781 | -0.7739 | 0.439    | -0.255531469 | count | 1          |
| SPTY2D1OS | -0.435433  | 0.495074  | -0.8795 | 0.379    | -0.255330791 | count | 1          |
| UHMK1     | -0.1932798 | 0.1650869 | -1.1708 | 0.242    | -0.255296011 | count | 1          |
| COG5      | -0.2007707 | 0.3130082 | -0.6414 | 0.521    | -0.254974799 | count | 1          |
| TSTA3     | -0.1859135 | 0.127796  | -1.4548 | 0.146    | -0.254842441 | count | 1          |
| HAGLROS   | -0.2073522 | 0.2216783 | -0.9354 | 0.35     | -0.254662766 | count | 1          |
| G6PD      | -0.2056571 | 0.2062331 | -0.9972 | 0.319    | -0.254523554 | count | 1          |
| DLEU2     | -0.217012  | 0.2485227 | -0.8732 | 0.383    | -0.254336473 | count | 1          |
| OTULIN    | -0.206598  | 0.2121912 | -0.9736 | 0.33     | -0.254236675 | count | 1          |
| TMEM136   | -0.2176603 | 0.2788648 | -0.7805 | 0.435    | -0.254225143 | count | 1          |
| NUDT19    | -0.2217974 | 0.2749054 | -0.8068 | 0.42     | -0.254203395 | count | 1          |
| UBE2F     | -0.2057444 | 0.1928933 | -1.0666 | 0.286    | -0.254157606 | count | 1          |
| NTMT1     | -0.1928256 | 0.1647268 | -1.1706 | 0.242    | -0.254056808 | count | 1          |
| ATP5PF    | -0.1771393 | 0.0422802 | -4.1897 | 2.88E-05 | -0.2539961   | count | 0.6651648  |
| ETF1      | -0.1856038 | 0.1200185 | -1.5465 | 0.122    | -0.25398897  | count | 1          |
| HSD11B1L  | -0.2244058 | 0.2900333 | -0.7737 | 0.439    | -0.253845752 | count | 1          |
| CYB561D2  | -0.2042351 | 0.2262383 | -0.9027 | 0.367    | -0.25365756  | count | 1          |
| RANBP2    | -0.1857585 | 0.1461506 | -1.271  | 0.204    | -0.253626523 | count | 1          |
| TMEM25    | -0.1963215 | 0.2099049 | -0.9353 | 0.35     | -0.253455401 | count | 1          |
| SKP1      | -0.1764832 | 0.0362254 | -4.8718 | 1.17E-06 | -0.253423545 | count | 0.02734641 |
| PKD2      | -0.1969406 | 0.2638303 | -0.7465 | 0.455    | -0.2532471   | count | 1          |
| ZFAND2B   | -0.1861644 | 0.1296842 | -1.4355 | 0.151    | -0.253014993 | count | 1          |

|            |            |           |         |         |              |       |   |
|------------|------------|-----------|---------|---------|--------------|-------|---|
| CEP126     | -0.2151746 | 0.3141633 | -0.6849 | 0.493   | -0.25299841  | count | 1 |
| SERP2      | -0.7767613 | 0.8397848 | -0.925  | 0.355   | -0.2529836   | count | 1 |
| AC007878.1 | -0.7767613 | 0.8848454 | -0.8778 | 0.38    | -0.2529836   | count | 1 |
| AL049780.1 | -0.7767613 | 1.0025431 | -0.7748 | 0.439   | -0.2529836   | count | 1 |
| MRPL53     | -0.3020392 | 0.3663527 | -0.8244 | 0.41    | -0.252879688 | count | 1 |
| CNTNAP1    | -0.6478665 | 0.8255277 | -0.7848 | 0.433   | -0.252852711 | count | 1 |
| PISD       | -0.2280319 | 0.2731883 | -0.8347 | 0.404   | -0.252832911 | count | 1 |
| AL162258.2 | -0.5069775 | 0.6935675 | -0.731  | 0.465   | -0.252655897 | count | 1 |
| SLC44A3    | -0.5069775 | 0.6956185 | -0.7288 | 0.466   | -0.252655897 | count | 1 |
| GDPD1      | -0.5069775 | 0.697385  | -0.727  | 0.467   | -0.252655897 | count | 1 |
| NDUFA11    | -0.1771377 | 0.062409  | -2.8383 | 0.0046  | -0.252351378 | count | 1 |
| INO80B     | -0.3173733 | 0.4179244 | -0.7594 | 0.448   | -0.252306625 | count | 1 |
| MRPL27     | -0.1813111 | 0.1050376 | -1.7262 | 0.0844  | -0.252292199 | count | 1 |
| APEX1      | -0.1782637 | 0.073549  | -2.4237 | 0.0154  | -0.252287927 | count | 1 |
| TMCO1      | -0.1776098 | 0.0700162 | -2.5367 | 0.0112  | -0.25188168  | count | 1 |
| TGFB111    | -0.1836839 | 0.1308865 | -1.4034 | 0.161   | -0.251877529 | count | 1 |
| AL034417.4 | -1.564617  | 0.832937  | -1.8784 | 0.0604  | -0.251549241 | count | 1 |
| AC137767.1 | -0.2614477 | 0.5862038 | -0.446  | 0.656   | -0.251546228 | count | 1 |
| ULK1       | -0.2230516 | 0.334745  | -0.6663 | 0.505   | -0.251082122 | count | 1 |
| EML3       | -0.2081549 | 0.234891  | -0.8862 | 0.376   | -0.251068477 | count | 1 |
| EIF4G3     | -0.1837181 | 0.13016   | -1.4115 | 0.158   | -0.250710888 | count | 1 |
| VWA1       | -0.1767413 | 0.0816805 | -2.1638 | 0.0306  | -0.250688235 | count | 1 |
| TMEM220    | -0.1901242 | 0.1973784 | -0.9632 | 0.336   | -0.250635683 | count | 1 |
| KHDRBS3    | -0.2082619 | 0.2485477 | -0.8379 | 0.402   | -0.250557652 | count | 1 |
| YIPF2      | -0.1844666 | 0.1461872 | -1.2619 | 0.207   | -0.250486848 | count | 1 |
| LEAP2      | -0.3244601 | 0.3876257 | -0.837  | 0.403   | -0.250247361 | count | 1 |
| ITFG1      | -0.1841144 | 0.1363938 | -1.3499 | 0.177   | -0.250006666 | count | 1 |
| UBE2H      | -0.1791654 | 0.1159253 | -1.5455 | 0.122   | -0.249891116 | count | 1 |
| KIAA0513   | -0.3144372 | 0.4087765 | -0.7692 | 0.442   | -0.249850839 | count | 1 |
| TEPSIN     | -0.2564902 | 0.3671047 | -0.6987 | 0.485   | -0.249826012 | count | 1 |
| SLMAP      | -0.1986189 | 0.2207837 | -0.8996 | 0.368   | -0.249810785 | count | 1 |
| EMB        | -1.5561777 | 0.7780849 | -2      | 0.0456  | -0.249711621 | count | 1 |
| ARHGEF25   | -1.5561777 | 0.8019676 | -1.9404 | 0.0524  | -0.249711621 | count | 1 |
| PPP1R8     | -0.2041302 | 0.2312124 | -0.8829 | 0.377   | -0.249614729 | count | 1 |
| STK40      | -0.2136584 | 0.2855772 | -0.7482 | 0.454   | -0.249480202 | count | 1 |
| DCTN1      | -0.1901181 | 0.2008264 | -0.9467 | 0.344   | -0.249460451 | count | 1 |
| LPP-AS2    | -0.2662742 | 0.3846364 | -0.6923 | 0.489   | -0.249144436 | count | 1 |
| AGFG1      | -0.1887437 | 0.1544509 | -1.222  | 0.222   | -0.249116202 | count | 1 |
| ZNF362     | -0.1998679 | 0.2249222 | -0.8886 | 0.374   | -0.249033661 | count | 1 |
| RNF139-AS1 | -0.5573316 | 0.6268227 | -0.8891 | 0.374   | -0.248862398 | count | 1 |
| RWDD1      | -0.1738508 | 0.0565072 | -3.0766 | 0.0021  | -0.248514238 | count | 1 |
| MLIP       | -0.3604461 | 0.653337  | -0.5517 | 0.581   | -0.248486492 | count | 1 |
| CD3E       | -1.5502348 | 0.5362099 | -2.8911 | 0.00387 | -0.248419531 | count | 1 |
| ZNF226     | -0.1872259 | 0.1858592 | -1.0074 | 0.314   | -0.248396182 | count | 1 |
| CTDSP1     | -0.1792378 | 0.1069982 | -1.6751 | 0.094   | -0.248326175 | count | 1 |

|            |            |           |         |          |              |       |            |
|------------|------------|-----------|---------|----------|--------------|-------|------------|
| AL022238.2 | -0.9917125 | 0.7655582 | -1.2954 | 0.195    | -0.248098393 | count | 1          |
| TVP23C     | -0.3039697 | 0.4485069 | -0.6777 | 0.498    | -0.248080426 | count | 1          |
| SH3D19     | -0.1883132 | 0.1607545 | -1.1714 | 0.242    | -0.24807529  | count | 1          |
| SLC25A13   | -0.1895459 | 0.1904416 | -0.9953 | 0.32     | -0.247800651 | count | 1          |
| ATXN7L3    | -0.2005176 | 0.2282046 | -0.8787 | 0.38     | -0.247631551 | count | 1          |
| DYNC1H1    | -0.1772782 | 0.1040623 | -1.7036 | 0.0886   | -0.247569778 | count | 1          |
| SYNCRIP    | -0.1752259 | 0.0774752 | -2.2617 | 0.0238   | -0.247464099 | count | 1          |
| SBNO2      | -0.1908409 | 0.2030599 | -0.9398 | 0.347    | -0.247248427 | count | 1          |
| LRFN3      | -0.2727918 | 0.4262585 | -0.64   | 0.522    | -0.247210214 | count | 1          |
| RABAC1     | -0.1723211 | 0.0424196 | -4.0623 | 4.99E-05 | -0.247198118 | count | 1          |
| AC093525.4 | -0.7619861 | 0.7828613 | -0.9733 | 0.33     | -0.24719294  | count | 1          |
| NDUFC1     | -0.1733191 | 0.0590448 | -2.9354 | 0.0034   | -0.247018784 | count | 1          |
| CIDEB      | -0.2252147 | 0.2991508 | -0.7528 | 0.452    | -0.246792495 | count | 1          |
| ZBTB20     | -0.1733432 | 0.0805087 | -2.1531 | 0.0314   | -0.246417954 | count | 1          |
| MRPL51     | -0.1732056 | 0.0600184 | -2.8859 | 0.00393  | -0.246365726 | count | 1          |
| VDAC2      | -0.172404  | 0.0550744 | -3.1304 | 0.0018   | -0.2459551   | count | 1          |
| AL161772.1 | -1.5387039 | 0.8905381 | -1.7278 | 0.0841   | -0.245917176 | count | 1          |
| AL022323.3 | -1.5387039 | 0.8905381 | -1.7278 | 0.0841   | -0.245917176 | count | 1          |
| CAGE1      | -1.5387039 | 1.071509  | -1.436  | 0.151    | -0.245917176 | count | 1          |
| C1QL1      | -1.5387039 | 1.18188   | -1.3019 | 0.193    | -0.245917176 | count | 1          |
| XPOT       | -0.202351  | 0.229117  | -0.8832 | 0.377    | -0.245761466 | count | 1          |
| HERC1      | -0.1885511 | 0.1866291 | -1.0103 | 0.312    | -0.245722987 | count | 1          |
| ADPRH      | -0.2096281 | 0.2891417 | -0.725  | 0.469    | -0.245555777 | count | 1          |
| COQ7       | -0.1888749 | 0.2313851 | -0.8163 | 0.414    | -0.2451179   | count | 1          |
| MARK3      | -0.1905908 | 0.1615868 | -1.1795 | 0.238    | -0.245018745 | count | 1          |
| PHETA2     | -0.2235495 | 0.3553472 | -0.6291 | 0.529    | -0.244931218 | count | 1          |
| CCNL2      | -0.1818177 | 0.1401045 | -1.2977 | 0.194    | -0.244885991 | count | 1          |
| AL359915.2 | -0.3283228 | 0.672934  | -0.4879 | 0.626    | -0.244662527 | count | 1          |
| ARCN1      | -0.1776151 | 0.1164663 | -1.525  | 0.127    | -0.244603174 | count | 1          |
| RBBP9      | -0.2193895 | 0.2908875 | -0.7542 | 0.451    | -0.244387129 | count | 1          |
| PRRT3      | -0.2425625 | 0.4464848 | -0.5433 | 0.587    | -0.244085419 | count | 1          |
| HSPA8      | -0.169465  | 0.03676   | -4.61   | 4.21E-06 | -0.243712709 | count | 0.09802985 |
| ATP2C1     | -0.1850084 | 0.1694929 | -1.0915 | 0.275    | -0.243695559 | count | 1          |
| LMOD3      | -0.3708074 | 0.5385644 | -0.6885 | 0.491    | -0.24348463  | count | 1          |
| AC010642.2 | -0.1824289 | 0.148492  | -1.2285 | 0.219    | -0.243476364 | count | 1          |
| PPFIBP2    | -0.6271051 | 0.6826167 | -0.9187 | 0.358    | -0.243438651 | count | 1          |
| NUP188     | -0.2310999 | 0.3197722 | -0.7227 | 0.47     | -0.243086858 | count | 1          |
| TMC4       | -0.4479899 | 0.8698608 | -0.515  | 0.607    | -0.24293196  | count | 1          |
| C1orf162   | -0.4894778 | 0.4873707 | -1.0043 | 0.315    | -0.242924127 | count | 1          |
| PCDH1      | -0.1823314 | 0.154996  | -1.1764 | 0.24     | -0.242876193 | count | 1          |
| CDK2AP1    | -0.2127537 | 0.3128342 | -0.6801 | 0.497    | -0.242628141 | count | 1          |
| FKBP15     | -0.2093678 | 0.2557902 | -0.8185 | 0.413    | -0.242615491 | count | 1          |
| NMT1       | -0.1784425 | 0.1524463 | -1.1705 | 0.242    | -0.242274666 | count | 1          |
| NCOA1      | -0.1816739 | 0.1734079 | -1.0477 | 0.295    | -0.242232449 | count | 1          |
| STN1       | -0.1807634 | 0.1544766 | -1.1702 | 0.242    | -0.241686676 | count | 1          |

|            |            |           |         |        |              |       |   |
|------------|------------|-----------|---------|--------|--------------|-------|---|
| BDH2       | -0.1724383 | 0.1017172 | -1.6953 | 0.0901 | -0.241400856 | count | 1 |
| ZC3H12C    | -0.2107199 | 0.3345614 | -0.6298 | 0.529  | -0.241302334 | count | 1 |
| AL021368.2 | -0.4133343 | 0.5232823 | -0.7899 | 0.43   | -0.241211823 | count | 1 |
| ATAT1      | -0.2449866 | 0.3386696 | -0.7234 | 0.47   | -0.241196737 | count | 1 |
| TGFB2-AS1  | -0.9696437 | 1.079353  | -0.8984 | 0.369  | -0.241129401 | count | 1 |
| FOXP4-AS1  | -0.9696437 | 1.079353  | -0.8984 | 0.369  | -0.241129401 | count | 1 |
| AC084346.2 | -0.9696437 | 1.079353  | -0.8984 | 0.369  | -0.241129401 | count | 1 |
| ST6GALNAC2 | -0.9696437 | 1.079353  | -0.8984 | 0.369  | -0.241129401 | count | 1 |
| KIF2C      | -0.9696437 | 1.08045   | -0.8974 | 0.37   | -0.241129401 | count | 1 |
| PAQR6      | -0.9696437 | 1.08045   | -0.8974 | 0.37   | -0.241129401 | count | 1 |
| AL353593.1 | -0.9696437 | 1.08045   | -0.8974 | 0.37   | -0.241129401 | count | 1 |
| COLEC11    | -0.9696437 | 1.08045   | -0.8974 | 0.37   | -0.241129401 | count | 1 |
| KIF5C      | -0.9696437 | 1.08045   | -0.8974 | 0.37   | -0.241129401 | count | 1 |
| AC017048.3 | -0.9696437 | 1.08045   | -0.8974 | 0.37   | -0.241129401 | count | 1 |
| AL024498.1 | -0.9696437 | 1.08045   | -0.8974 | 0.37   | -0.241129401 | count | 1 |
| SYCP2L     | -0.9696437 | 1.08045   | -0.8974 | 0.37   | -0.241129401 | count | 1 |
| HIST1H1B   | -0.9696437 | 1.08045   | -0.8974 | 0.37   | -0.241129401 | count | 1 |
| CASC8      | -0.9696437 | 1.08045   | -0.8974 | 0.37   | -0.241129401 | count | 1 |
| C9orf163   | -0.9696437 | 1.08045   | -0.8974 | 0.37   | -0.241129401 | count | 1 |
| AC087393.2 | -0.9696437 | 1.08045   | -0.8974 | 0.37   | -0.241129401 | count | 1 |
| AC090912.2 | -0.9696437 | 1.08045   | -0.8974 | 0.37   | -0.241129401 | count | 1 |
| PHACTR3    | -0.9696437 | 1.08045   | -0.8974 | 0.37   | -0.241129401 | count | 1 |
| CACTIN-AS1 | -0.9696437 | 1.08045   | -0.8974 | 0.37   | -0.241129401 | count | 1 |
| CEBPA-DT   | -0.9696437 | 1.08045   | -0.8974 | 0.37   | -0.241129401 | count | 1 |
| CD1C       | -0.9696437 | 1.466782  | -0.6611 | 0.509  | -0.241129401 | count | 1 |
| AC010336.1 | -0.9696437 | 1.466782  | -0.6611 | 0.509  | -0.241129401 | count | 1 |
| FAM20B     | -0.1926437 | 0.2193969 | -0.8781 | 0.38   | -0.241120479 | count | 1 |
| RNF8       | -0.1781597 | 0.1364208 | -1.306  | 0.192  | -0.241088192 | count | 1 |
| CSRP1      | -0.1697446 | 0.0736259 | -2.3055 | 0.0212 | -0.24082259  | count | 1 |
| AC012615.1 | -0.2211576 | 0.336918  | -0.6564 | 0.512  | -0.240773566 | count | 1 |
| IMMT       | -0.1806736 | 0.1409568 | -1.2818 | 0.2    | -0.24041537  | count | 1 |
| TCEANC2    | -0.2414752 | 0.3897516 | -0.6196 | 0.536  | -0.240366711 | count | 1 |
| ROGDI      | -0.198389  | 0.268051  | -0.7401 | 0.459  | -0.240325372 | count | 1 |
| CLPP       | -0.1716698 | 0.0929914 | -1.8461 | 0.065  | -0.240306078 | count | 1 |
| SLC16A2    | -0.2652221 | 0.3659958 | -0.7247 | 0.469  | -0.240098987 | count | 1 |
| UBL4A      | -0.1876961 | 0.1952772 | -0.9612 | 0.337  | -0.239685875 | count | 1 |
| ADGRB1     | -0.9649831 | 0.697988  | -1.3825 | 0.167  | -0.239665303 | count | 1 |
| C5AR1      | -0.9649831 | 0.9433235 | -1.023  | 0.306  | -0.239665303 | count | 1 |
| BISPR      | -0.2075148 | 0.3161825 | -0.6563 | 0.512  | -0.239511367 | count | 1 |
| ENO3       | -0.4104964 | 0.7950175 | -0.5163 | 0.606  | -0.239407218 | count | 1 |
| ANKRD23    | -0.4104964 | 1.10741   | -0.3707 | 0.711  | -0.239407218 | count | 1 |
| CREB3L1    | -0.2160212 | 0.2529011 | -0.8542 | 0.393  | -0.239267609 | count | 1 |
| DCAF7      | -0.1836061 | 0.1646787 | -1.1149 | 0.265  | -0.239235797 | count | 1 |
| FAM192A    | -0.1773151 | 0.1342237 | -1.321  | 0.187  | -0.239222526 | count | 1 |
| ABHD4      | -0.2489958 | 0.3478513 | -0.7158 | 0.474  | -0.239196327 | count | 1 |

|             |            |           |         |          |              |       |             |
|-------------|------------|-----------|---------|----------|--------------|-------|-------------|
| XPO1        | -0.1741963 | 0.1277818 | -1.3632 | 0.173    | -0.238873469 | count | 1           |
| INPP5B      | -0.2143815 | 0.314439  | -0.6818 | 0.495    | -0.238706781 | count | 1           |
| ARL8A       | -0.1762634 | 0.1230601 | -1.4323 | 0.152    | -0.238661951 | count | 1           |
| MTERF4      | -0.1842829 | 0.1675022 | -1.1002 | 0.271    | -0.238474786 | count | 1           |
| RPL27       | -0.1658747 | 0.0293238 | -5.6567 | 1.70E-08 | -0.238436194 | count | 0.000401387 |
| ALDH1L1-AS1 | -0.5363445 | 0.8106689 | -0.6616 | 0.508    | -0.238243264 | count | 1           |
| CEP72       | -0.5363445 | 0.8106689 | -0.6616 | 0.508    | -0.238243264 | count | 1           |
| RNASE4      | -0.5363445 | 0.8336127 | -0.6434 | 0.52     | -0.238243264 | count | 1           |
| ATG9A       | -0.5363445 | 0.9132832 | -0.5873 | 0.557    | -0.238243264 | count | 1           |
| AL009178.2  | -0.5363445 | 0.9132832 | -0.5873 | 0.557    | -0.238243264 | count | 1           |
| TRMU        | -0.203956  | 0.2695261 | -0.7567 | 0.449    | -0.237986594 | count | 1           |
| KIF1B       | -0.1821735 | 0.1824774 | -0.9983 | 0.318    | -0.237734322 | count | 1           |
| PCSK5       | -0.2415461 | 0.4698732 | -0.5141 | 0.607    | -0.237712613 | count | 1           |
| SAMSN1      | -1.5006011 | 0.8367005 | -1.7935 | 0.073    | -0.237694332 | count | 1           |
| ECPAS       | -0.1808052 | 0.1932786 | -0.9355 | 0.35     | -0.237656106 | count | 1           |
| ZMYM5       | -0.1804982 | 0.1777293 | -1.0156 | 0.31     | -0.237565354 | count | 1           |
| NUCKS1      | -0.1655662 | 0.0469719 | -3.5248 | 0.000431 | -0.237486588 | count | 1           |
| KAT5        | -0.194237  | 0.2117458 | -0.9173 | 0.359    | -0.237383257 | count | 1           |
| ACSL4       | -0.17796   | 0.1573    | -1.1313 | 0.258    | -0.237255561 | count | 1           |
| TMEM230     | -0.1668917 | 0.0628109 | -2.6571 | 0.00793  | -0.237061575 | count | 1           |
| ZNF337-AS1  | -0.3447656 | 0.6257235 | -0.551  | 0.582    | -0.236958944 | count | 1           |
| EMC6        | -0.1695526 | 0.0987986 | -1.7161 | 0.0862   | -0.236797795 | count | 1           |
| ALG2        | -0.1809009 | 0.1698727 | -1.0649 | 0.287    | -0.236426914 | count | 1           |
| PRDX1       | -0.1643056 | 0.0338955 | -4.8474 | 1.32E-06 | -0.236261567 | count | 0.03084576  |
| FAM96B      | -0.1661396 | 0.0633205 | -2.6238 | 0.00874  | -0.236242498 | count | 1           |
| FLCN        | -0.2899964 | 0.3631301 | -0.7986 | 0.425    | -0.236143615 | count | 1           |
| TMEM147     | -0.1670095 | 0.0764565 | -2.1844 | 0.029    | -0.235935135 | count | 1           |
| ZCCHC17     | -0.169043  | 0.1051615 | -1.6075 | 0.108    | -0.235658439 | count | 1           |
| NDUFAB1     | -0.1658227 | 0.0653546 | -2.5373 | 0.0112   | -0.235648304 | count | 1           |
| HECTD1      | -0.1703284 | 0.1145193 | -1.4873 | 0.137    | -0.235511007 | count | 1           |
| RAPGEF6     | -0.252033  | 0.4242964 | -0.594  | 0.553    | -0.235380122 | count | 1           |
| TMOD1       | -0.1728127 | 0.1420897 | -1.2162 | 0.224    | -0.235305701 | count | 1           |
| DLG3        | -0.4351009 | 0.5901292 | -0.7373 | 0.461    | -0.235248932 | count | 1           |
| OPA3        | -0.191252  | 0.2429184 | -0.7873 | 0.431    | -0.235153537 | count | 1           |
| STRN4       | -0.1911353 | 0.21541   | -0.8873 | 0.375    | -0.235008531 | count | 1           |
| TOPBP1      | -0.180343  | 0.2016788 | -0.8942 | 0.371    | -0.234765002 | count | 1           |
| MANBAL      | -0.1764721 | 0.1647283 | -1.0713 | 0.284    | -0.234554331 | count | 1           |
| ACOT4       | -0.4740798 | 0.8497431 | -0.5579 | 0.577    | -0.234418085 | count | 1           |
| CCL15       | -0.4740798 | 0.9127618 | -0.5194 | 0.604    | -0.234418085 | count | 1           |
| SUCLG2-AS1  | -0.4740798 | 0.91966   | -0.5155 | 0.606    | -0.234418085 | count | 1           |
| AC073389.1  | -0.4740678 | 0.6993972 | -0.6778 | 0.498    | -0.234411484 | count | 1           |
| LINC01569   | -0.4335308 | 0.7003783 | -0.619  | 0.536    | -0.234315687 | count | 1           |
| IQSEC3      | -0.9474081 | 0.7722123 | -1.2269 | 0.22     | -0.234168498 | count | 1           |
| ADAM28      | -0.9474081 | 0.8354633 | -1.134  | 0.257    | -0.234168498 | count | 1           |
| PSMB3       | -0.1638334 | 0.0524656 | -3.1227 | 0.0018   | -0.233790659 | count | 1           |

|              |            |           |         |       |              |       |   |
|--------------|------------|-----------|---------|-------|--------------|-------|---|
| UBL3         | -0.1730831 | 0.138654  | -1.2483 | 0.212 | -0.233729858 | count | 1 |
| AKR1E2       | -0.376896  | 0.6414969 | -0.5875 | 0.557 | -0.233694489 | count | 1 |
| GALK1        | -0.1762026 | 0.1839525 | -0.9579 | 0.338 | -0.233693752 | count | 1 |
| ARC          | -0.3143642 | 0.5693038 | -0.5522 | 0.581 | -0.233675244 | count | 1 |
| SEC13        | -0.1696941 | 0.1217492 | -1.3938 | 0.163 | -0.233503862 | count | 1 |
| CFAP74       | -1.4810266 | 1.1204    | -1.3219 | 0.186 | -0.233498549 | count | 1 |
| CD84         | -1.4810266 | 1.1204    | -1.3219 | 0.186 | -0.233498549 | count | 1 |
| CACNA2D3     | -1.4810266 | 1.1204    | -1.3219 | 0.186 | -0.233498549 | count | 1 |
| PCDHA12      | -1.4810266 | 1.1204    | -1.3219 | 0.186 | -0.233498549 | count | 1 |
| LINC00574    | -1.4810266 | 1.1204    | -1.3219 | 0.186 | -0.233498549 | count | 1 |
| NPM2         | -1.4810266 | 1.1204    | -1.3219 | 0.186 | -0.233498549 | count | 1 |
| CARD9        | -1.4810266 | 1.1204    | -1.3219 | 0.186 | -0.233498549 | count | 1 |
| ADAM8        | -1.4810266 | 1.1204    | -1.3219 | 0.186 | -0.233498549 | count | 1 |
| SERINC4      | -1.4810266 | 1.1204    | -1.3219 | 0.186 | -0.233498549 | count | 1 |
| ACSM2B       | -1.4810266 | 1.1204    | -1.3219 | 0.186 | -0.233498549 | count | 1 |
| AC007333.2   | -1.4810266 | 1.1204    | -1.3219 | 0.186 | -0.233498549 | count | 1 |
| PDF          | -1.4810266 | 1.1204    | -1.3219 | 0.186 | -0.233498549 | count | 1 |
| AC135178.2   | -1.4810266 | 1.1204    | -1.3219 | 0.186 | -0.233498549 | count | 1 |
| NOS2         | -1.4810266 | 1.1204    | -1.3219 | 0.186 | -0.233498549 | count | 1 |
| AP000350.7   | -1.4810266 | 1.1204    | -1.3219 | 0.186 | -0.233498549 | count | 1 |
| MCHR1        | -1.4810266 | 1.1204    | -1.3219 | 0.186 | -0.233498549 | count | 1 |
| TMEM56-RWDD3 | -1.4810266 | 1.316629  | -1.1249 | 0.261 | -0.233498549 | count | 1 |
| FP700111.1   | -1.4810266 | 1.316629  | -1.1249 | 0.261 | -0.233498549 | count | 1 |
| LINC01139    | -1.4810266 | 1.316629  | -1.1249 | 0.261 | -0.233498549 | count | 1 |
| PKP4-AS1     | -1.4810266 | 1.316629  | -1.1249 | 0.261 | -0.233498549 | count | 1 |
| AC007563.2   | -1.4810266 | 1.316629  | -1.1249 | 0.261 | -0.233498549 | count | 1 |
| AC090948.2   | -1.4810266 | 1.316629  | -1.1249 | 0.261 | -0.233498549 | count | 1 |
| ADAMTS9-AS1  | -1.4810266 | 1.316629  | -1.1249 | 0.261 | -0.233498549 | count | 1 |
| CNTN3        | -1.4810266 | 1.316629  | -1.1249 | 0.261 | -0.233498549 | count | 1 |
| ROBO2        | -1.4810266 | 1.316629  | -1.1249 | 0.261 | -0.233498549 | count | 1 |
| AC126283.1   | -1.4810266 | 1.316629  | -1.1249 | 0.261 | -0.233498549 | count | 1 |
| AC092354.1   | -1.4810266 | 1.316629  | -1.1249 | 0.261 | -0.233498549 | count | 1 |
| HIST1H2AM    | -1.4810266 | 1.316629  | -1.1249 | 0.261 | -0.233498549 | count | 1 |
| LINC01556    | -1.4810266 | 1.316629  | -1.1249 | 0.261 | -0.233498549 | count | 1 |
| HCG21        | -1.4810266 | 1.316629  | -1.1249 | 0.261 | -0.233498549 | count | 1 |
| AL033504.1   | -1.4810266 | 1.316629  | -1.1249 | 0.261 | -0.233498549 | count | 1 |
| AL078604.2   | -1.4810266 | 1.316629  | -1.1249 | 0.261 | -0.233498549 | count | 1 |
| LINC01952    | -1.4810266 | 1.316629  | -1.1249 | 0.261 | -0.233498549 | count | 1 |
| ASMTL-AS1    | -1.4810266 | 1.316629  | -1.1249 | 0.261 | -0.233498549 | count | 1 |
| FAM87A       | -1.4810266 | 1.316629  | -1.1249 | 0.261 | -0.233498549 | count | 1 |
| FAM66A       | -1.4810266 | 1.316629  | -1.1249 | 0.261 | -0.233498549 | count | 1 |
| LINC01410    | -1.4810266 | 1.316629  | -1.1249 | 0.261 | -0.233498549 | count | 1 |
| AC124798.1   | -1.4810266 | 1.316629  | -1.1249 | 0.261 | -0.233498549 | count | 1 |
| IDI2         | -1.4810266 | 1.316629  | -1.1249 | 0.261 | -0.233498549 | count | 1 |
| PITX3        | -1.4810266 | 1.316629  | -1.1249 | 0.261 | -0.233498549 | count | 1 |

|            |            |           |         |          |              |       |   |
|------------|------------|-----------|---------|----------|--------------|-------|---|
| SMIM2-AS1  | -1.4810266 | 1.316629  | -1.1249 | 0.261    | -0.233498549 | count | 1 |
| AL928654.3 | -1.4810266 | 1.316629  | -1.1249 | 0.261    | -0.233498549 | count | 1 |
| AC130343.2 | -1.4810266 | 1.316629  | -1.1249 | 0.261    | -0.233498549 | count | 1 |
| AC005224.3 | -1.4810266 | 1.316629  | -1.1249 | 0.261    | -0.233498549 | count | 1 |
| ZNF177     | -1.4810266 | 1.316629  | -1.1249 | 0.261    | -0.233498549 | count | 1 |
| AC005625.1 | -1.4810266 | 1.316629  | -1.1249 | 0.261    | -0.233498549 | count | 1 |
| SULT2B1    | -1.4810266 | 1.316629  | -1.1249 | 0.261    | -0.233498549 | count | 1 |
| SMIM17     | -1.4810266 | 1.316629  | -1.1249 | 0.261    | -0.233498549 | count | 1 |
| TM2D2      | -0.16815   | 0.1167957 | -1.4397 | 0.15     | -0.233486311 | count | 1 |
| TRIM3      | -0.2275529 | 0.366472  | -0.6209 | 0.535    | -0.233157307 | count | 1 |
| ZNF2       | -0.2428425 | 0.4088824 | -0.5939 | 0.553    | -0.23310625  | count | 1 |
| SMG8       | -0.2792015 | 0.4757016 | -0.5869 | 0.557    | -0.232927539 | count | 1 |
| METT15     | -0.1792307 | 0.2232129 | -0.803  | 0.422    | -0.232918564 | count | 1 |
| STX2       | -0.1736512 | 0.1662438 | -1.0446 | 0.296    | -0.232640344 | count | 1 |
| SF3B5      | -0.1634656 | 0.0625121 | -2.6149 | 0.00897  | -0.232459299 | count | 1 |
| MTA1       | -0.1771866 | 0.1630777 | -1.0865 | 0.277    | -0.232390641 | count | 1 |
| ISOC2      | -0.1717429 | 0.1422544 | -1.2073 | 0.227    | -0.232370203 | count | 1 |
| CHMP1A     | -0.1771536 | 0.1450789 | -1.2211 | 0.222    | -0.232347098 | count | 1 |
| IFI27      | -0.1611935 | 0.0401786 | -4.0119 | 6.18E-05 | -0.232280614 | count | 1 |
| BCOR       | -0.2085743 | 0.3113054 | -0.67   | 0.503    | -0.232125506 | count | 1 |
| CLIC4      | -0.1639565 | 0.0817867 | -2.0047 | 0.0451   | -0.231920588 | count | 1 |
| ANKRD28    | -0.1681441 | 0.1145005 | -1.4685 | 0.142    | -0.231898937 | count | 1 |
| APRT       | -0.1623574 | 0.0588772 | -2.7576 | 0.00586  | -0.231773756 | count | 1 |
| ZNF470     | -0.2778359 | 0.5238666 | -0.5304 | 0.596    | -0.231738556 | count | 1 |
| BMI1       | -0.1848854 | 0.2156675 | -0.8573 | 0.391    | -0.231682532 | count | 1 |
| FASN       | -0.292358  | 0.4187333 | -0.6982 | 0.485    | -0.231452203 | count | 1 |
| IFT20      | -0.1671046 | 0.1108761 | -1.5071 | 0.132    | -0.231444701 | count | 1 |
| AC087500.1 | -0.5227935 | 0.6437959 | -0.812  | 0.417    | -0.231436217 | count | 1 |
| PAM16      | -0.3735097 | 0.4385474 | -0.8517 | 0.394    | -0.231429749 | count | 1 |
| AL445524.1 | -0.1904294 | 0.2349629 | -0.8105 | 0.418    | -0.231119011 | count | 1 |
| FGFR1      | -0.172205  | 0.1544821 | -1.1147 | 0.265    | -0.230887921 | count | 1 |
| IMPA1      | -0.1780919 | 0.1768625 | -1.007  | 0.314    | -0.230826026 | count | 1 |
| GABARAPL1  | -0.166137  | 0.1093355 | -1.5195 | 0.129    | -0.230787761 | count | 1 |
| MESD       | -0.1626757 | 0.0803269 | -2.0252 | 0.0429   | -0.230763354 | count | 1 |
| CYB561D2   | -0.3223259 | 0.6828393 | -0.472  | 0.637    | -0.230653486 | count | 1 |
| OVCH1-AS1  | -0.3223259 | 0.7496435 | -0.43   | 0.667    | -0.230653486 | count | 1 |
| SERINC3    | -0.1631374 | 0.0791589 | -2.0609 | 0.0394   | -0.230465886 | count | 1 |
| TMEM170B   | -0.4665507 | 0.500057  | -0.933  | 0.351    | -0.230278433 | count | 1 |
| PLK3       | -0.1723942 | 0.1839309 | -0.9373 | 0.349    | -0.230233734 | count | 1 |
| MIPOL1     | -0.1848253 | 0.2252264 | -0.8206 | 0.412    | -0.230113744 | count | 1 |
| TECPR2     | -0.1971177 | 0.2748023 | -0.7173 | 0.473    | -0.229894638 | count | 1 |
| ULK4       | -0.2463434 | 0.3534741 | -0.6969 | 0.486    | -0.229894096 | count | 1 |
| CCDC88A    | -0.1692103 | 0.1519783 | -1.1134 | 0.266    | -0.229823624 | count | 1 |
| TMEM80     | -0.1739601 | 0.195519  | -0.8897 | 0.374    | -0.229776295 | count | 1 |
| GOLGA6L4   | -0.3346163 | 0.7611576 | -0.4396 | 0.66     | -0.229530666 | count | 1 |

|            |            |           |         |         |              |       |   |
|------------|------------|-----------|---------|---------|--------------|-------|---|
| CLPTM1L    | -0.1720268 | 0.1513741 | -1.1364 | 0.256   | -0.229526218 | count | 1 |
| CDK16      | -0.1833307 | 0.2980565 | -0.6151 | 0.539   | -0.229357841 | count | 1 |
| AZI2       | -0.1695462 | 0.1485495 | -1.1413 | 0.254   | -0.229238515 | count | 1 |
| PRUNE2     | -0.3202492 | 0.4127595 | -0.7759 | 0.438   | -0.22907833  | count | 1 |
| CHMP2A     | -0.1602908 | 0.0532817 | -3.0084 | 0.00265 | -0.228901537 | count | 1 |
| RTL5       | -0.9301505 | 0.8900199 | -1.0451 | 0.296   | -0.228808531 | count | 1 |
| SOCS1      | -0.180964  | 0.2464756 | -0.7342 | 0.463   | -0.228708226 | count | 1 |
| NPL        | -0.2812521 | 0.5157478 | -0.5453 | 0.586   | -0.228698384 | count | 1 |
| ZNF277     | -0.1741493 | 0.1667999 | -1.0441 | 0.297   | -0.228543298 | count | 1 |
| NINJ1      | -0.166158  | 0.1386008 | -1.1988 | 0.231   | -0.228339645 | count | 1 |
| ALS2CR12   | -1.456546  | 0.8496667 | -1.7143 | 0.0866  | -0.228279682 | count | 1 |
| C19orf70   | -0.1605211 | 0.0675945 | -2.3748 | 0.0176  | -0.228103446 | count | 1 |
| NRG4       | -0.7125031 | 0.71161   | -1.0013 | 0.317   | -0.22806098  | count | 1 |
| KANSL1     | -0.1652997 | 0.1243258 | -1.3296 | 0.184   | -0.227856929 | count | 1 |
| PSMC5      | -0.1605589 | 0.0620765 | -2.5865 | 0.00975 | -0.227816699 | count | 1 |
| REX1BD     | -0.1603764 | 0.0641391 | -2.5004 | 0.0125  | -0.227724443 | count | 1 |
| AC079807.1 | -0.5919561 | 0.6582558 | -0.8993 | 0.369   | -0.227689449 | count | 1 |
| PCM1       | -0.1613031 | 0.0824473 | -1.9564 | 0.0505  | -0.227609673 | count | 1 |
| VMP1       | -0.1628643 | 0.0993592 | -1.6391 | 0.101   | -0.227401282 | count | 1 |
| EXOC6B     | -0.1771534 | 0.2211205 | -0.8012 | 0.423   | -0.227379792 | count | 1 |
| ELP6       | -0.1690158 | 0.1418012 | -1.1919 | 0.233   | -0.227315188 | count | 1 |
| PHF3       | -0.1617215 | 0.0919299 | -1.7592 | 0.0787  | -0.227235571 | count | 1 |
| TECPR1     | -0.1759786 | 0.2046916 | -0.8597 | 0.39    | -0.227228609 | count | 1 |
| ARHGAP23   | -0.1701841 | 0.1807044 | -0.9418 | 0.346   | -0.227055783 | count | 1 |
| DEPTOR     | -0.2145274 | 0.2950178 | -0.7272 | 0.467   | -0.22703948  | count | 1 |
| EIF4G2     | -0.1592159 | 0.0600528 | -2.6513 | 0.0081  | -0.226932514 | count | 1 |
| CHMP3      | -0.1609604 | 0.0757215 | -2.1257 | 0.0336  | -0.226863209 | count | 1 |
| C7orf25    | -0.7091837 | 0.9316804 | -0.7612 | 0.447   | -0.226792115 | count | 1 |
| AMN1       | -0.1848581 | 0.2335208 | -0.7916 | 0.429   | -0.22675167  | count | 1 |
| NAPB       | -0.2719756 | 0.5269536 | -0.5161 | 0.606   | -0.226641397 | count | 1 |
| LCAT       | -0.2719756 | 0.6159355 | -0.4416 | 0.659   | -0.226641397 | count | 1 |
| CREBRF     | -0.1630781 | 0.1084209 | -1.5041 | 0.133   | -0.226503721 | count | 1 |
| SLC25A32   | -0.1689832 | 0.1638285 | -1.0315 | 0.302   | -0.226358276 | count | 1 |
| LINC01353  | -0.255018  | 0.5549598 | -0.4595 | 0.646   | -0.226314519 | count | 1 |
| MTSS1      | -0.1734169 | 0.1730629 | -1.002  | 0.316   | -0.226236017 | count | 1 |
| ATRX       | -0.1588703 | 0.0705338 | -2.2524 | 0.0244  | -0.226135236 | count | 1 |
| ALG12      | -0.203121  | 0.2704781 | -0.751  | 0.453   | -0.225950779 | count | 1 |
| MIR210HG   | -0.2779145 | 0.7677184 | -0.362  | 0.717   | -0.225861658 | count | 1 |
| DHRSX      | -0.1836367 | 0.2267964 | -0.8097 | 0.418   | -0.225694789 | count | 1 |
| ALDH7A1    | -0.1705356 | 0.1832634 | -0.9305 | 0.352   | -0.225628684 | count | 1 |
| MAGED2     | -0.1599297 | 0.0787546 | -2.0307 | 0.0424  | -0.225555535 | count | 1 |
| NOC2L      | -0.1722256 | 0.1622229 | -1.0617 | 0.288   | -0.225522421 | count | 1 |
| MYO10      | -0.175174  | 0.1901618 | -0.9212 | 0.357   | -0.225518653 | count | 1 |
| NR1D2      | -0.1645988 | 0.1374315 | -1.1977 | 0.231   | -0.22544187  | count | 1 |
| ING2       | -0.1659268 | 0.1363296 | -1.2171 | 0.224   | -0.225219461 | count | 1 |



|            |            |           |         |        |              |       |   |
|------------|------------|-----------|---------|--------|--------------|-------|---|
| SLK        | -0.1604257 | 0.0821754 | -1.9522 | 0.051  | -0.225185726 | count | 1 |
| PCYT1A     | -0.1759479 | 0.2275643 | -0.7732 | 0.439  | -0.225083476 | count | 1 |
| AC120114.1 | -1.44139   | 0.8881284 | -1.623  | 0.105  | -0.225065145 | count | 1 |
| GCHFR      | -0.1613161 | 0.1195968 | -1.3488 | 0.178  | -0.225044667 | count | 1 |
| ODR4       | -0.1663215 | 0.1492303 | -1.1145 | 0.265  | -0.22500647  | count | 1 |
| DNAJC15    | -0.1580351 | 0.0690018 | -2.2903 | 0.0221 | -0.224951742 | count | 1 |
| CCDC126    | -0.1876402 | 0.2575535 | -0.7285 | 0.466  | -0.224861676 | count | 1 |
| DNAJC28    | -0.417071  | 0.5811013 | -0.7177 | 0.473  | -0.224567321 | count | 1 |
| TMED5      | -0.1674759 | 0.1534698 | -1.0913 | 0.275  | -0.224519058 | count | 1 |
| APEH       | -0.2138082 | 0.2787606 | -0.767  | 0.443  | -0.224503846 | count | 1 |
| PIP5K1A    | -0.197933  | 0.2432275 | -0.8138 | 0.416  | -0.224459159 | count | 1 |
| RAB7A      | -0.1582091 | 0.0658761 | -2.4016 | 0.0164 | -0.224168314 | count | 1 |
| TXLNA      | -0.1726705 | 0.1771307 | -0.9748 | 0.33   | -0.224146268 | count | 1 |
| ATXN1L     | -0.1928384 | 0.2556101 | -0.7544 | 0.451  | -0.224024042 | count | 1 |
| STK24      | -0.1686805 | 0.1459326 | -1.1559 | 0.248  | -0.223909404 | count | 1 |
| LMAN2      | -0.1580711 | 0.0698672 | -2.2624 | 0.0237 | -0.223625834 | count | 1 |
| LRRC41     | -0.1769631 | 0.1898688 | -0.932  | 0.351  | -0.223610052 | count | 1 |
| NEK4       | -0.2205047 | 0.2733283 | -0.8067 | 0.42   | -0.223600656 | count | 1 |
| AP000547.3 | -0.3424205 | 0.5853359 | -0.585  | 0.559  | -0.223559651 | count | 1 |
| AC005261.1 | -0.1815589 | 0.1851653 | -0.9805 | 0.327  | -0.223556898 | count | 1 |
| PLCD4      | -1.434101  | 0.6767716 | -2.119  | 0.0342 | -0.223523782 | count | 1 |
| EMG1       | -1.434101  | 0.6863808 | -2.0894 | 0.0368 | -0.223523782 | count | 1 |
| XPR1       | -0.1832551 | 0.2453322 | -0.747  | 0.455  | -0.22333143  | count | 1 |
| AC117503.1 | -0.9123507 | 0.672077  | -1.3575 | 0.175  | -0.223319541 | count | 1 |
| TMEM86A    | -0.4148079 | 0.6673614 | -0.6216 | 0.534  | -0.223232024 | count | 1 |
| C2CD2      | -0.1907829 | 0.2806834 | -0.6797 | 0.497  | -0.223183637 | count | 1 |
| SLAIN2     | -0.163208  | 0.126108  | -1.2942 | 0.196  | -0.223146251 | count | 1 |
| MAGI3      | -0.2038799 | 0.2604438 | -0.7828 | 0.434  | -0.222984207 | count | 1 |
| ATG7       | -0.1975045 | 0.2536968 | -0.7785 | 0.436  | -0.222929055 | count | 1 |
| STX16      | -0.1700109 | 0.1726307 | -0.9848 | 0.325  | -0.222924594 | count | 1 |
| TDG        | -0.163634  | 0.1293137 | -1.2654 | 0.206  | -0.222879279 | count | 1 |
| TMEM208    | -0.1592204 | 0.0989955 | -1.6084 | 0.108  | -0.222863916 | count | 1 |
| PIGT       | -0.1597145 | 0.1074489 | -1.4864 | 0.137  | -0.22284446  | count | 1 |
| AP2S1      | -0.1564909 | 0.0616091 | -2.5401 | 0.0111 | -0.222639393 | count | 1 |
| EIF4G1     | -0.1621817 | 0.131734  | -1.2311 | 0.218  | -0.222523782 | count | 1 |
| PDXK       | -0.1807214 | 0.2028666 | -0.8908 | 0.373  | -0.2225154   | count | 1 |
| PTS        | -0.1628675 | 0.128795  | -1.2645 | 0.206  | -0.222374521 | count | 1 |
| CYB561     | -0.1669866 | 0.1806523 | -0.9244 | 0.355  | -0.222337596 | count | 1 |
| EZR        | -0.1676365 | 0.1747621 | -0.9592 | 0.338  | -0.222274906 | count | 1 |
| SHISA4     | -0.1681373 | 0.1853776 | -0.907  | 0.364  | -0.221909052 | count | 1 |
| MRPS34     | -0.1572854 | 0.0850801 | -1.8487 | 0.0646 | -0.221899175 | count | 1 |
| FAM8A1     | -0.178823  | 0.2144887 | -0.8337 | 0.405  | -0.221801267 | count | 1 |
| PDZD2      | -0.225733  | 0.4387658 | -0.5145 | 0.607  | -0.221732418 | count | 1 |
| DLGAP4     | -0.1655085 | 0.1440188 | -1.1492 | 0.251  | -0.221683074 | count | 1 |
| SERPINH1   | -0.1571345 | 0.0873636 | -1.7986 | 0.0722 | -0.221536818 | count | 1 |

|            |            |           |         |          |              |       |             |
|------------|------------|-----------|---------|----------|--------------|-------|-------------|
| GLTP       | -0.1610623 | 0.1169426 | -1.3773 | 0.169    | -0.221235292 | count | 1           |
| AC015802.6 | -0.3390755 | 0.6032715 | -0.5621 | 0.574    | -0.221225136 | count | 1           |
| SEC23A     | -0.1654916 | 0.1546526 | -1.0701 | 0.285    | -0.221174675 | count | 1           |
| ZFP41      | -0.5017417 | 1.0070283 | -0.4982 | 0.618    | -0.220939008 | count | 1           |
| AC092287.1 | -0.5017417 | 1.0070283 | -0.4982 | 0.618    | -0.220939008 | count | 1           |
| PARVG      | -0.5017417 | 1.0070283 | -0.4982 | 0.618    | -0.220939008 | count | 1           |
| RASA3      | -0.2072669 | 0.3389896 | -0.6114 | 0.541    | -0.220832627 | count | 1           |
| ZNF324     | -0.2333001 | 0.3505546 | -0.6655 | 0.506    | -0.220598769 | count | 1           |
| RFXAP      | -0.1808797 | 0.2126503 | -0.8506 | 0.395    | -0.220405958 | count | 1           |
| CLN5       | -0.1604841 | 0.1367957 | -1.1732 | 0.241    | -0.220272626 | count | 1           |
| SLC25A27   | -0.6919396 | 0.5018585 | -1.3788 | 0.168    | -0.220230224 | count | 1           |
| ADAMTSL1   | -0.5749025 | 0.2978217 | -1.9304 | 0.0537   | -0.220134642 | count | 1           |
| DNASE1     | -0.23276   | 0.6855098 | -0.3395 | 0.734    | -0.220072708 | count | 1           |
| DIO3OS     | -0.296849  | 0.5471672 | -0.5425 | 0.588    | -0.219958238 | count | 1           |
| SAP30L     | -0.1644093 | 0.1820927 | -0.9029 | 0.367    | -0.219917933 | count | 1           |
| TNPO2      | -0.1938432 | 0.2981733 | -0.6501 | 0.516    | -0.219748943 | count | 1           |
| ZZEF1      | -0.1810371 | 0.2659508 | -0.6807 | 0.496    | -0.219596617 | count | 1           |
| TMF1       | -0.1584954 | 0.10442   | -1.5179 | 0.129    | -0.219435311 | count | 1           |
| BAG1       | -0.1548503 | 0.0727512 | -2.1285 | 0.0334   | -0.219387664 | count | 1           |
| AC135178.3 | -0.6890349 | 0.7479264 | -0.9213 | 0.357    | -0.219129821 | count | 1           |
| LDLRAD4    | -0.1738657 | 0.1982963 | -0.8768 | 0.381    | -0.219052842 | count | 1           |
| CBLL1      | -0.1828279 | 0.2152186 | -0.8495 | 0.396    | -0.219027592 | count | 1           |
| MARK4      | -0.1979925 | 0.2483107 | -0.7974 | 0.425    | -0.218954069 | count | 1           |
| LRRC6      | -0.2010058 | 0.2840468 | -0.7077 | 0.479    | -0.21842826  | count | 1           |
| ZNHIT2     | -0.2155208 | 0.4004555 | -0.5382 | 0.59     | -0.218425247 | count | 1           |
| ZNF91      | -0.1610071 | 0.1872574 | -0.8598 | 0.39     | -0.218390899 | count | 1           |
| LINC00623  | -0.4962376 | 0.8104814 | -0.6123 | 0.54     | -0.218210127 | count | 1           |
| PPM1B      | -0.1885432 | 0.2301066 | -0.8194 | 0.413    | -0.218147589 | count | 1           |
| TTL4       | -0.6862543 | 0.4786979 | -1.4336 | 0.152    | -0.218077763 | count | 1           |
| MALAT1     | -0.1511337 | 0.0269972 | -5.5981 | 2.38E-08 | -0.218031072 | count | 0.000561585 |
| SPCS1      | -0.1522383 | 0.0458195 | -3.3226 | 0.000904 | -0.21800933  | count | 1           |
| CHCHD1     | -0.1587076 | 0.1172549 | -1.3535 | 0.176    | -0.21757113  | count | 1           |
| C12orf73   | -0.180114  | 0.2746115 | -0.6559 | 0.512    | -0.21741591  | count | 1           |
| FAM172A    | -0.1614295 | 0.1517579 | -1.0637 | 0.288    | -0.217314734 | count | 1           |
| PSMA5      | -0.1548278 | 0.0867725 | -1.7843 | 0.0745   | -0.217264813 | count | 1           |
| ZNF417     | -0.5681025 | 0.6268605 | -0.9063 | 0.365    | -0.217137987 | count | 1           |
| TXNL4B     | -0.22115   | 0.3293075 | -0.6716 | 0.502    | -0.217111326 | count | 1           |
| YIPF4      | -0.1583166 | 0.1293449 | -1.224  | 0.221    | -0.216720218 | count | 1           |
| SIGMAR1    | -0.1724934 | 0.2021159 | -0.8534 | 0.393    | -0.216678401 | count | 1           |
| NACC2      | -0.1737788 | 0.2668945 | -0.6511 | 0.515    | -0.216600254 | count | 1           |
| U2AF1L4    | -0.1894555 | 0.273891  | -0.6917 | 0.489    | -0.216594179 | count | 1           |
| TIRAP      | -0.292286  | 0.3952775 | -0.7394 | 0.46     | -0.216397589 | count | 1           |
| NDUFA6     | -0.1539332 | 0.085596  | -1.7984 | 0.0722   | -0.216168846 | count | 1           |
| MROH1      | -0.2355332 | 0.408751  | -0.5762 | 0.565    | -0.216018643 | count | 1           |
| ACAP3      | -0.2175143 | 0.4663992 | -0.4664 | 0.641    | -0.215912764 | count | 1           |

|            |            |           |         |          |              |       |   |
|------------|------------|-----------|---------|----------|--------------|-------|---|
| ZNF707     | -0.4021642 | 0.6240855 | -0.6444 | 0.519    | -0.215794361 | count | 1 |
| RAB6B      | -0.3729029 | 0.7849295 | -0.4751 | 0.635    | -0.215686735 | count | 1 |
| CD151      | -0.1500348 | 0.0414362 | -3.6209 | 0.000299 | -0.215556902 | count | 1 |
| RWDD3      | -0.3308751 | 0.5321268 | -0.6218 | 0.534    | -0.215513978 | count | 1 |
| MIDN       | -0.1523913 | 0.0990191 | -1.539  | 0.124    | -0.215317508 | count | 1 |
| BBS1       | -0.5635598 | 0.7275313 | -0.7746 | 0.439    | -0.21514118  | count | 1 |
| RAB40C     | -0.1933938 | 0.2766548 | -0.699  | 0.485    | -0.214950003 | count | 1 |
| CUX1       | -0.1573514 | 0.1561371 | -1.0078 | 0.314    | -0.214717449 | count | 1 |
| ABHD17A    | -0.1515875 | 0.0778498 | -1.9472 | 0.0516   | -0.214705167 | count | 1 |
| LINC00240  | -0.4378376 | 0.884602  | -0.495  | 0.621    | -0.214609917 | count | 1 |
| BIRC2      | -0.1591773 | 0.1334973 | -1.1924 | 0.233    | -0.214427527 | count | 1 |
| NKRF       | -0.209268  | 0.3400113 | -0.6155 | 0.538    | -0.213995296 | count | 1 |
| SULT1A3    | -0.2462434 | 0.4730312 | -0.5206 | 0.603    | -0.213914612 | count | 1 |
| HKR1       | -0.202238  | 0.2983504 | -0.6779 | 0.498    | -0.213769746 | count | 1 |
| TMCC3      | -0.1637265 | 0.206636  | -0.7923 | 0.428    | -0.213686218 | count | 1 |
| AC010618.3 | -0.3696429 | 0.5500888 | -0.672  | 0.502    | -0.213646106 | count | 1 |
| CSDE1      | -0.1500033 | 0.0599189 | -2.5034 | 0.0124   | -0.213622097 | count | 1 |
| REXO5      | -0.4867534 | 0.607107  | -0.8018 | 0.423    | -0.213523242 | count | 1 |
| UBE2O      | -0.1941964 | 0.3622314 | -0.5361 | 0.592    | -0.213468206 | count | 1 |
| NOM1       | -0.1753803 | 0.2521851 | -0.6954 | 0.487    | -0.213155274 | count | 1 |
| JMJD6      | -0.161958  | 0.1766    | -0.9171 | 0.359    | -0.213032701 | count | 1 |
| SPNS3      | -0.4346239 | 0.5992417 | -0.7253 | 0.468    | -0.212867972 | count | 1 |
| PTPRC      | -0.4346231 | 0.6068007 | -0.7163 | 0.474    | -0.212867537 | count | 1 |
| FBRS       | -0.1732278 | 0.2075396 | -0.8347 | 0.404    | -0.212778212 | count | 1 |
| KRBA2      | -0.1902781 | 0.3487691 | -0.5456 | 0.585    | -0.212539436 | count | 1 |
| ALKBH7     | -0.1494524 | 0.0668821 | -2.2346 | 0.0255   | -0.21249139  | count | 1 |
| TNXB       | -0.1524246 | 0.1407091 | -1.0833 | 0.279    | -0.212347891 | count | 1 |
| DNAJC25    | -0.1931411 | 0.2723984 | -0.709  | 0.478    | -0.212288076 | count | 1 |
| CLCC1      | -0.1797618 | 0.2257993 | -0.7961 | 0.426    | -0.212207676 | count | 1 |
| SH3BGR     | -0.2396352 | 0.4269407 | -0.5613 | 0.575    | -0.212190888 | count | 1 |
| GGT7       | -0.2864537 | 0.5113405 | -0.5602 | 0.575    | -0.211854233 | count | 1 |
| RACGAP1    | -0.4325604 | 0.5838164 | -0.7409 | 0.459    | -0.211750734 | count | 1 |
| AL031663.3 | -0.3437489 | 0.763759  | -0.4501 | 0.653    | -0.211648888 | count | 1 |
| RUNDC1     | -0.207018  | 0.3697172 | -0.5599 | 0.576    | -0.211642236 | count | 1 |
| SDCBP2     | -0.1671808 | 0.2143024 | -0.7801 | 0.435    | -0.211438516 | count | 1 |
| RAB30-AS1  | -0.1639154 | 0.2030941 | -0.8071 | 0.42     | -0.211346757 | count | 1 |
| KLHL21     | -0.194481  | 0.3291995 | -0.5908 | 0.555    | -0.211209694 | count | 1 |
| KIAA1191   | -0.1621824 | 0.1705487 | -0.9509 | 0.342    | -0.211155699 | count | 1 |
| PTGR1      | -0.1579776 | 0.1473102 | -1.0724 | 0.284    | -0.211088321 | count | 1 |
| ZFPL1      | -0.1574733 | 0.1533718 | -1.0267 | 0.305    | -0.211053096 | count | 1 |
| MAP4K3     | -0.1699301 | 0.2062633 | -0.8239 | 0.41     | -0.211042812 | count | 1 |
| TRIM8      | -0.1520407 | 0.1203647 | -1.2632 | 0.207    | -0.210872891 | count | 1 |
| SDF2       | -0.1508548 | 0.0963177 | -1.5662 | 0.117    | -0.210854546 | count | 1 |
| PIP5K1C    | -0.1686381 | 0.1838822 | -0.9171 | 0.359    | -0.210821183 | count | 1 |
| LSM7       | -0.1485717 | 0.0701274 | -2.1186 | 0.0342   | -0.210810293 | count | 1 |

|                |            |           |         |        |              |       |   |
|----------------|------------|-----------|---------|--------|--------------|-------|---|
| CEBPA          | -0.4812251 | 0.5745721 | -0.8375 | 0.402  | -0.210800252 | count | 1 |
| PRR19          | -0.8706638 | 0.7337543 | -1.1866 | 0.235  | -0.210623162 | count | 1 |
| EPHA3          | -0.8706638 | 0.8044356 | -1.0823 | 0.279  | -0.210623162 | count | 1 |
| LINC01303      | -0.8706638 | 0.8079733 | -1.0776 | 0.281  | -0.210623162 | count | 1 |
| DDX17          | -0.147856  | 0.0784652 | -1.8844 | 0.0596 | -0.210548242 | count | 1 |
| NDN            | -0.1532832 | 0.1387746 | -1.1045 | 0.269  | -0.210480947 | count | 1 |
| BLOC1S2        | -0.1542813 | 0.1332658 | -1.1577 | 0.247  | -0.210152405 | count | 1 |
| VPS37A         | -0.1587128 | 0.1802829 | -0.8804 | 0.379  | -0.210149985 | count | 1 |
| ANKIB1         | -0.1606226 | 0.1810963 | -0.8869 | 0.375  | -0.210089095 | count | 1 |
| C6orf132       | -0.6645576 | 0.9958158 | -0.6673 | 0.505  | -0.209913593 | count | 1 |
| ARL11          | -0.6645576 | 0.9958158 | -0.6673 | 0.505  | -0.209913593 | count | 1 |
| AKAP5          | -0.6645576 | 0.9958158 | -0.6673 | 0.505  | -0.209913593 | count | 1 |
| RTEL1-TNFRSF6B | -0.6645576 | 0.9958158 | -0.6673 | 0.505  | -0.209913593 | count | 1 |
| CD53           | -0.6645576 | 1.018276  | -0.6526 | 0.514  | -0.209913593 | count | 1 |
| INE2           | -0.6645576 | 1.018276  | -0.6526 | 0.514  | -0.209913593 | count | 1 |
| AC073611.1     | -0.6645576 | 1.018276  | -0.6526 | 0.514  | -0.209913593 | count | 1 |
| SEPT4-AS1      | -0.6645576 | 1.018276  | -0.6526 | 0.514  | -0.209913593 | count | 1 |
| AC123912.1     | -0.6645576 | 1.018276  | -0.6526 | 0.514  | -0.209913593 | count | 1 |
| MFSD14C        | -0.166779  | 0.2435662 | -0.6847 | 0.494  | -0.209750455 | count | 1 |
| COX17          | -0.1485261 | 0.0769806 | -1.9294 | 0.0538 | -0.209697521 | count | 1 |
| AC008741.2     | -0.307288  | 0.4892746 | -0.628  | 0.53   | -0.209659263 | count | 1 |
| GSTM3          | -0.1687961 | 0.1838638 | -0.918  | 0.359  | -0.209621956 | count | 1 |
| IL13RA1        | -0.1504075 | 0.1088821 | -1.3814 | 0.167  | -0.209512577 | count | 1 |
| NAT9           | -0.1739966 | 0.2343847 | -0.7424 | 0.458  | -0.209425416 | count | 1 |
| MRPL41         | -0.1483894 | 0.0759265 | -1.9544 | 0.0508 | -0.209333083 | count | 1 |
| TMEM251        | -0.1623591 | 0.223844  | -0.7253 | 0.468  | -0.209327032 | count | 1 |
| SLC25A53       | -0.2216964 | 0.3837999 | -0.5776 | 0.564  | -0.209311555 | count | 1 |
| KIAA2013       | -0.1564398 | 0.1642041 | -0.9527 | 0.341  | -0.209303908 | count | 1 |
| CEP192         | -0.1757496 | 0.2364729 | -0.7432 | 0.457  | -0.209286427 | count | 1 |
| CSAD           | -0.1587994 | 0.1867534 | -0.8503 | 0.395  | -0.208992767 | count | 1 |
| SMURF2         | -0.1557869 | 0.1534295 | -1.0154 | 0.31   | -0.208956066 | count | 1 |
| WDPCP          | -0.2062948 | 0.3419437 | -0.6033 | 0.546  | -0.208858759 | count | 1 |
| INO80D         | -0.1579883 | 0.1799424 | -0.878  | 0.38   | -0.208573522 | count | 1 |
| CEP295         | -0.1691189 | 0.2495847 | -0.6776 | 0.498  | -0.208095981 | count | 1 |
| GFOD1          | -0.1516562 | 0.1452914 | -1.0438 | 0.297  | -0.208041576 | count | 1 |
| PSMD7          | -0.1470217 | 0.0828165 | -1.7753 | 0.076  | -0.207810476 | count | 1 |
| MRFAP1         | -0.1460204 | 0.0571434 | -2.5553 | 0.0107 | -0.207520589 | count | 1 |
| SULT1C4        | -0.1684016 | 0.2059951 | -0.8175 | 0.414  | -0.207205098 | count | 1 |
| TMEM38B        | -0.2007924 | 0.304751  | -0.6589 | 0.51   | -0.207023936 | count | 1 |
| NRL            | -0.2909469 | 0.5662706 | -0.5138 | 0.607  | -0.206970428 | count | 1 |
| AC008494.3     | -0.3034293 | 0.8168773 | -0.3715 | 0.71   | -0.206868921 | count | 1 |
| PHACTR1        | -0.2296495 | 0.3008518 | -0.7633 | 0.445  | -0.206862989 | count | 1 |
| MGMT           | -0.1460225 | 0.0737207 | -1.9808 | 0.0477 | -0.206698399 | count | 1 |
| IGF1R          | -0.1531146 | 0.1785236 | -0.8577 | 0.391  | -0.206664733 | count | 1 |
| ZNF638         | -0.1487748 | 0.1038898 | -1.432  | 0.152  | -0.206478615 | count | 1 |

|            |            |           |         |          |              |       |   |
|------------|------------|-----------|---------|----------|--------------|-------|---|
| CTPS1      | -0.2219676 | 0.4691449 | -0.4731 | 0.636    | -0.206475871 | count | 1 |
| ACOX1      | -0.1603184 | 0.2400126 | -0.668  | 0.504    | -0.206475631 | count | 1 |
| C11orf58   | -0.1442519 | 0.0470214 | -3.0678 | 0.00218  | -0.206473078 | count | 1 |
| SUOX       | -0.2291861 | 0.3473235 | -0.6599 | 0.509    | -0.206432035 | count | 1 |
| ATP6V1G1   | -0.1441617 | 0.0471829 | -3.0554 | 0.00227  | -0.206421931 | count | 1 |
| IQGAP1     | -0.1454207 | 0.0747612 | -1.9451 | 0.0519   | -0.206290912 | count | 1 |
| ARHGEF11   | -0.2037649 | 0.4038734 | -0.5045 | 0.614    | -0.206238689 | count | 1 |
| SLC41A1    | -0.1669864 | 0.2555016 | -0.6536 | 0.513    | -0.206235933 | count | 1 |
| PDE7A      | -0.2215291 | 0.3903478 | -0.5675 | 0.57     | -0.206055878 | count | 1 |
| EIF3F      | -0.1438072 | 0.0422127 | -3.4067 | 0.000667 | -0.206006527 | count | 1 |
| REM1       | -0.8551209 | 0.827195  | -1.0338 | 0.301    | -0.20594697  | count | 1 |
| GCSH       | -0.1513856 | 0.1474966 | -1.0264 | 0.305    | -0.205927784 | count | 1 |
| LPP        | -0.1467905 | 0.0938946 | -1.5634 | 0.118    | -0.205907595 | count | 1 |
| FOXJ2      | -0.1773679 | 0.2502171 | -0.7089 | 0.478    | -0.205817291 | count | 1 |
| C9orf16    | -0.1438619 | 0.0514129 | -2.7982 | 0.00517  | -0.205810912 | count | 1 |
| ARPC3      | -0.1434567 | 0.040143  | -3.5736 | 0.000358 | -0.205781415 | count | 1 |
| CBX5       | -0.1492203 | 0.1167316 | -1.2783 | 0.201    | -0.205636608 | count | 1 |
| GNA11      | -0.1526559 | 0.1657322 | -0.9211 | 0.357    | -0.205304267 | count | 1 |
| LRP10      | -0.146559  | 0.0989696 | -1.4808 | 0.139    | -0.205281689 | count | 1 |
| IFT22      | -0.1518147 | 0.140259  | -1.0824 | 0.279    | -0.205110278 | count | 1 |
| IKBKG      | -0.1654221 | 0.2270694 | -0.7285 | 0.466    | -0.205033825 | count | 1 |
| GDAP2      | -0.1876263 | 0.2923385 | -0.6418 | 0.521    | -0.204903152 | count | 1 |
| LIMD2      | -0.1544276 | 0.175696  | -0.8789 | 0.38     | -0.204790455 | count | 1 |
| FAM57A     | -0.2596957 | 0.3862223 | -0.6724 | 0.501    | -0.204459824 | count | 1 |
| SGSH       | -0.172688  | 0.3148771 | -0.5484 | 0.583    | -0.204388743 | count | 1 |
| ZNF284     | -0.3546881 | 0.6572402 | -0.5397 | 0.589    | -0.204318633 | count | 1 |
| AC098650.1 | -0.3546881 | 0.7068328 | -0.5018 | 0.616    | -0.204318633 | count | 1 |
| STAG3      | -0.3546881 | 0.7321201 | -0.4845 | 0.628    | -0.204318633 | count | 1 |
| TUBG1      | -0.1555619 | 0.1759125 | -0.8843 | 0.377    | -0.204302048 | count | 1 |
| OSBPL9     | -0.1523918 | 0.1362492 | -1.1185 | 0.263    | -0.204299709 | count | 1 |
| MSX1       | -0.1503588 | 0.1715697 | -0.8764 | 0.381    | -0.204133979 | count | 1 |
| TSEN54     | -0.1717507 | 0.2569367 | -0.6685 | 0.504    | -0.203876693 | count | 1 |
| FCGRT      | -0.1419726 | 0.0448144 | -3.168  | 0.00155  | -0.203854444 | count | 1 |
| TFRC       | -0.1977645 | 0.2926304 | -0.6758 | 0.499    | -0.203835524 | count | 1 |
| RMRP       | -0.4666649 | 0.5912334 | -0.7893 | 0.43     | -0.20366021  | count | 1 |
| CCNB1IP1   | -0.1491677 | 0.1284192 | -1.1616 | 0.246    | -0.203467146 | count | 1 |
| RNF145     | -0.1528483 | 0.1826851 | -0.8367 | 0.403    | -0.203428925 | count | 1 |
| VANGL1     | -0.173396  | 0.2261886 | -0.7666 | 0.443    | -0.20328179  | count | 1 |
| CDC42EP5   | -0.1443616 | 0.0864148 | -1.6706 | 0.0949   | -0.203214347 | count | 1 |
| ITGA5      | -0.1459241 | 0.1019912 | -1.4308 | 0.153    | -0.203057976 | count | 1 |
| NXF1       | -0.167447  | 0.2529506 | -0.662  | 0.508    | -0.202945734 | count | 1 |
| SEMA6B     | -0.154114  | 0.1471505 | -1.0473 | 0.295    | -0.202925959 | count | 1 |
| MSH3       | -0.1665081 | 0.2407779 | -0.6915 | 0.489    | -0.202722496 | count | 1 |
| AURKAIP1   | -0.1427713 | 0.0682285 | -2.0925 | 0.0365   | -0.202576986 | count | 1 |
| ZMYND11    | -0.14855   | 0.1302936 | -1.1401 | 0.254    | -0.202423075 | count | 1 |

|            |            |           |         |        |              |       |   |
|------------|------------|-----------|---------|--------|--------------|-------|---|
| TET2       | -0.164578  | 0.2183993 | -0.7536 | 0.451  | -0.202055195 | count | 1 |
| SMIM29     | -0.149556  | 0.1395921 | -1.0714 | 0.284  | -0.201912564 | count | 1 |
| NONO       | -0.1448797 | 0.1021465 | -1.4184 | 0.156  | -0.201873541 | count | 1 |
| D2HGDH     | -0.1746335 | 0.3782536 | -0.4617 | 0.644  | -0.20184342  | count | 1 |
| BAG2       | -0.3781044 | 0.4862508 | -0.7776 | 0.437  | -0.201747056 | count | 1 |
| TNFRSF11B  | -0.181582  | 0.3027652 | -0.5997 | 0.549  | -0.201614741 | count | 1 |
| LONP1      | -0.1788019 | 0.330128  | -0.5416 | 0.588  | -0.201508522 | count | 1 |
| CREG1      | -0.1453017 | 0.1102752 | -1.3176 | 0.188  | -0.201506344 | count | 1 |
| ZNF793-AS1 | -0.273078  | 0.5926366 | -0.4608 | 0.645  | -0.201467677 | count | 1 |
| AC110285.6 | -0.3776073 | 0.8839828 | -0.4272 | 0.669  | -0.201458301 | count | 1 |
| PLPPR4     | -0.3776073 | 1.3396409 | -0.2819 | 0.7781 | -0.201458301 | count | 1 |
| INSIG1     | -0.1448036 | 0.1328623 | -1.0899 | 0.276  | -0.201393663 | count | 1 |
| NLK        | -0.1763223 | 0.3704357 | -0.476  | 0.634  | -0.201371936 | count | 1 |
| NUDT12     | -0.1711055 | 0.3324242 | -0.5147 | 0.607  | -0.201225649 | count | 1 |
| IL20RA     | -0.8392143 | 0.7438283 | -1.1282 | 0.259  | -0.201194151 | count | 1 |
| SOD2-OT1   | -0.8392143 | 0.8104659 | -1.0355 | 0.301  | -0.201194151 | count | 1 |
| AC008686.1 | -0.8392143 | 0.8104659 | -1.0355 | 0.301  | -0.201194151 | count | 1 |
| DDAH2      | -0.1420407 | 0.0720378 | -1.9718 | 0.0487 | -0.201056347 | count | 1 |
| BBS2       | -0.1682586 | 0.2799821 | -0.601  | 0.548  | -0.200833428 | count | 1 |
| GMPPA      | -0.1615021 | 0.2281317 | -0.7079 | 0.479  | -0.200832537 | count | 1 |
| MELTF-AS1  | -0.5304238 | 0.786997  | -0.674  | 0.5    | -0.200698828 | count | 1 |
| RNF212     | -0.5304238 | 0.824382  | -0.6434 | 0.52   | -0.200698828 | count | 1 |
| MPG        | -0.1422198 | 0.0796865 | -1.7847 | 0.0744 | -0.200441975 | count | 1 |
| VPS52      | -0.1945222 | 0.4017298 | -0.4842 | 0.628  | -0.200423498 | count | 1 |
| NEK1       | -0.1579954 | 0.188553  | -0.8379 | 0.402  | -0.200262781 | count | 1 |
| MIRLET7BHG | -0.1999717 | 0.3222761 | -0.6205 | 0.535  | -0.200251499 | count | 1 |
| VSIG2      | -0.529361  | 0.676994  | -0.7819 | 0.434  | -0.200239217 | count | 1 |
| ADSS       | -0.1447703 | 0.1158634 | -1.2495 | 0.212  | -0.199889693 | count | 1 |
| SLC4A2     | -0.1728871 | 0.2510088 | -0.6888 | 0.491  | -0.199798628 | count | 1 |
| TRIM73     | -0.2812868 | 0.5614299 | -0.501  | 0.616  | -0.199730562 | count | 1 |
| FKBP3      | -0.1437233 | 0.1154395 | -1.245  | 0.213  | -0.199611186 | count | 1 |
| SAMD15     | -0.4582894 | 0.6932929 | -0.661  | 0.509  | -0.199573911 | count | 1 |
| MILR1      | -0.2255596 | 0.4168568 | -0.5411 | 0.588  | -0.199317963 | count | 1 |
| TTC37      | -0.1463882 | 0.1348002 | -1.086  | 0.278  | -0.199316629 | count | 1 |
| SNX14      | -0.1567863 | 0.1900505 | -0.825  | 0.409  | -0.199223202 | count | 1 |
| CENPN      | -0.2345676 | 0.4758784 | -0.4929 | 0.622  | -0.199010055 | count | 1 |
| ASXL3      | -0.2603245 | 0.540927  | -0.4813 | 0.63   | -0.198544566 | count | 1 |
| LPIN1      | -0.1618084 | 0.2237321 | -0.7232 | 0.47   | -0.198218964 | count | 1 |
| ARL9       | -0.6328256 | 0.6621495 | -0.9557 | 0.339  | -0.198117715 | count | 1 |
| ASB7       | -0.1999067 | 0.3648944 | -0.5478 | 0.584  | -0.198023151 | count | 1 |
| HES2       | -1.3106704 | 0.9683344 | -1.3535 | 0.176  | -0.197902891 | count | 1 |
| IGSF3      | -1.3106704 | 0.9683344 | -1.3535 | 0.176  | -0.197902891 | count | 1 |
| EPHX3      | -1.3106704 | 0.9683344 | -1.3535 | 0.176  | -0.197902891 | count | 1 |
| FAM162B    | -1.3106704 | 1.141671  | -1.148  | 0.251  | -0.197902891 | count | 1 |
| AP001160.2 | -1.3106704 | 1.141671  | -1.148  | 0.251  | -0.197902891 | count | 1 |

|              |            |           |         |         |              |       |   |
|--------------|------------|-----------|---------|---------|--------------|-------|---|
| ZNF625-ZNF20 | -1.3106704 | 1.186717  | -1.1045 | 0.269   | -0.197902891 | count | 1 |
| CTTN         | -0.1405567 | 0.0893396 | -1.5733 | 0.116   | -0.197851344 | count | 1 |
| KIAA1109     | -0.1429205 | 0.1239251 | -1.1533 | 0.249   | -0.19785075  | count | 1 |
| IZUMO1       | -0.4065725 | 0.5666165 | -0.7175 | 0.473   | -0.197764209 | count | 1 |
| IFI44L       | -0.1392856 | 0.0989428 | -1.4077 | 0.159   | -0.197759616 | count | 1 |
| ATP5MG       | -0.1379635 | 0.0436343 | -3.1618 | 0.00158 | -0.19759878  | count | 1 |
| PRPS1        | -0.1499151 | 0.174802  | -0.8576 | 0.391   | -0.197369696 | count | 1 |
| CENPW        | -0.1667343 | 0.2566831 | -0.6496 | 0.516   | -0.197262118 | count | 1 |
| ADGRF5       | -0.1434379 | 0.130918  | -1.0956 | 0.273   | -0.196999977 | count | 1 |
| PINK1-AS     | -1.304972  | 0.8812506 | -1.4808 | 0.139   | -0.196743195 | count | 1 |
| AC018557.1   | -1.304972  | 0.910491  | -1.4333 | 0.152   | -0.196743195 | count | 1 |
| PTPRE        | -0.1408281 | 0.1219055 | -1.1552 | 0.248   | -0.19661261  | count | 1 |
| FIG4         | -0.1908719 | 0.3809975 | -0.501  | 0.616   | -0.196584762 | count | 1 |
| ATP5ME       | -0.1384146 | 0.0653913 | -2.1167 | 0.0344  | -0.196418848 | count | 1 |
| ERMAP        | -0.2576033 | 0.4576071 | -0.5629 | 0.574   | -0.19637414  | count | 1 |
| TBC1D14      | -0.1680429 | 0.3740788 | -0.4492 | 0.653   | -0.196261624 | count | 1 |
| IRGQ         | -0.2112546 | 0.4197991 | -0.5032 | 0.615   | -0.196227974 | count | 1 |
| RHEB         | -0.138345  | 0.0683097 | -2.0253 | 0.0429  | -0.196188038 | count | 1 |
| PSMA2        | -0.1412171 | 0.1002631 | -1.4085 | 0.159   | -0.196057693 | count | 1 |
| AC112220.4   | -0.5194878 | 0.6026616 | -0.862  | 0.389   | -0.195980104 | count | 1 |
| PHC3         | -0.1500793 | 0.2368299 | -0.6337 | 0.526   | -0.19562443  | count | 1 |
| ZNF664       | -0.1679349 | 0.2606152 | -0.6444 | 0.519   | -0.195444858 | count | 1 |
| CCDC84       | -0.1553154 | 0.2512879 | -0.6181 | 0.537   | -0.194935838 | count | 1 |
| ANKRD20A8P   | -0.6239297 | 0.8728168 | -0.7148 | 0.475   | -0.19484178  | count | 1 |
| AL139099.1   | -0.6239297 | 0.8728168 | -0.7148 | 0.475   | -0.19484178  | count | 1 |
| AC007566.1   | -0.6239297 | 0.8848642 | -0.7051 | 0.481   | -0.19484178  | count | 1 |
| KIZ-AS1      | -0.6239297 | 0.8848642 | -0.7051 | 0.481   | -0.19484178  | count | 1 |
| ZNF726       | -0.6239297 | 0.8848642 | -0.7051 | 0.481   | -0.19484178  | count | 1 |
| AL391845.2   | -0.6239297 | 1.018209  | -0.6128 | 0.54    | -0.19484178  | count | 1 |
| PGS1         | -0.1612045 | 0.2117825 | -0.7612 | 0.447   | -0.194840032 | count | 1 |
| LIMK1        | -0.2747086 | 0.4746587 | -0.5787 | 0.563   | -0.194814328 | count | 1 |
| TTC38        | -0.2206143 | 0.3394236 | -0.65   | 0.516   | -0.194806764 | count | 1 |
| DHDDS        | -0.157777  | 0.2300982 | -0.6857 | 0.493   | -0.194763896 | count | 1 |
| LRRC20       | -0.4008646 | 0.6100475 | -0.6571 | 0.511   | -0.194713225 | count | 1 |
| CYB5A        | -0.1367386 | 0.0665432 | -2.0549 | 0.04    | -0.194632941 | count | 1 |
| FBXO42       | -0.1794493 | 0.3948607 | -0.4545 | 0.65    | -0.194610732 | count | 1 |
| NDUFB10      | -0.1361317 | 0.0506819 | -2.686  | 0.00727 | -0.194584589 | count | 1 |
| SGTB         | -0.1575746 | 0.2284283 | -0.6898 | 0.49    | -0.194511889 | count | 1 |
| SERPINA1     | -0.8161453 | 0.8287573 | -0.9848 | 0.325   | -0.194360618 | count | 1 |
| ZFAND2A      | -0.1491026 | 0.1786473 | -0.8346 | 0.404   | -0.194344368 | count | 1 |
| RPS10        | -0.1357373 | 0.0434086 | -3.127  | 0.00178 | -0.194066455 | count | 1 |
| ST3GAL3      | -0.2402424 | 0.3756393 | -0.6396 | 0.523   | -0.194038119 | count | 1 |
| ZNF260       | -0.1648173 | 0.2880422 | -0.5722 | 0.567   | -0.19374503  | count | 1 |
| SETMAR       | -0.2118737 | 0.3616505 | -0.5859 | 0.558   | -0.193687098 | count | 1 |
| ATMIN        | -0.1505965 | 0.198347  | -0.7593 | 0.448   | -0.193683081 | count | 1 |

|            |            |           |         |        |              |       |   |
|------------|------------|-----------|---------|--------|--------------|-------|---|
| IPO4       | -0.2850439 | 0.5422492 | -0.5257 | 0.599  | -0.193626516 | count | 1 |
| TMEM104    | -0.2850439 | 0.5859353 | -0.4865 | 0.627  | -0.193626516 | count | 1 |
| ELAVL1     | -0.1432493 | 0.1363546 | -1.0506 | 0.294  | -0.193625098 | count | 1 |
| ZDHHC21    | -0.1548532 | 0.2234536 | -0.693  | 0.488  | -0.193452961 | count | 1 |
| PFDN6      | -0.147569  | 0.1508027 | -0.9786 | 0.328  | -0.192926058 | count | 1 |
| TIMM10B    | -0.1481094 | 0.1866675 | -0.7934 | 0.428  | -0.192888856 | count | 1 |
| LINC01094  | -0.3147826 | 0.6703185 | -0.4696 | 0.639  | -0.192610448 | count | 1 |
| AL118558.3 | -0.2836085 | 0.6833988 | -0.415  | 0.678  | -0.19259633  | count | 1 |
| ICK        | -0.1513987 | 0.2036868 | -0.7433 | 0.457  | -0.192567499 | count | 1 |
| TCEAL4     | -0.1350335 | 0.058097  | -2.3243 | 0.0202 | -0.192528447 | count | 1 |
| KPNA4      | -0.1394304 | 0.0998203 | -1.3968 | 0.163  | -0.192528281 | count | 1 |
| LUC7L2     | -0.1433925 | 0.1435416 | -0.999  | 0.318  | -0.192188536 | count | 1 |
| HSD17B10   | -0.1388001 | 0.114632  | -1.2108 | 0.226  | -0.192184434 | count | 1 |
| ANKS6      | -0.1850244 | 0.3861777 | -0.4791 | 0.632  | -0.192108532 | count | 1 |
| IQGAP2     | -0.8084281 | 0.743361  | -1.0875 | 0.277  | -0.192090397 | count | 1 |
| HEBP1      | -0.1351388 | 0.0696967 | -1.939  | 0.0526 | -0.191882073 | count | 1 |
| NPIP15     | -1.280559  | 0.5336739 | -2.3995 | 0.0165 | -0.191799754 | count | 1 |
| FYTTD1     | -0.1377343 | 0.1014575 | -1.3576 | 0.175  | -0.191678639 | count | 1 |
| TUSC3      | -0.145316  | 0.1824024 | -0.7967 | 0.426  | -0.191528603 | count | 1 |
| TTBK2      | -0.167071  | 0.2291308 | -0.7292 | 0.466  | -0.191466544 | count | 1 |
| ZNF212     | -0.2699418 | 0.4585944 | -0.5886 | 0.556  | -0.191258887 | count | 1 |
| LNPEP      | -0.1422786 | 0.15356   | -0.9265 | 0.354  | -0.191075237 | count | 1 |
| TRIM22     | -0.1385173 | 0.1178776 | -1.1751 | 0.24   | -0.191063285 | count | 1 |
| ANKRD39    | -0.1559589 | 0.2233019 | -0.6984 | 0.485  | -0.190989125 | count | 1 |
| GCC1       | -0.1889771 | 0.3270847 | -0.5778 | 0.563  | -0.190951543 | count | 1 |
| ACTR6      | -0.1403033 | 0.1325718 | -1.0583 | 0.29   | -0.190907641 | count | 1 |
| ZNF527     | -0.2591954 | 0.4369639 | -0.5932 | 0.553  | -0.190736549 | count | 1 |
| CEP350     | -0.1401103 | 0.1363086 | -1.0279 | 0.304  | -0.190693963 | count | 1 |
| RAD52      | -0.2160763 | 0.4768929 | -0.4531 | 0.651  | -0.190672424 | count | 1 |
| SUMF2      | -0.1366194 | 0.099803  | -1.3689 | 0.171  | -0.190343299 | count | 1 |
| CDON       | -0.1754349 | 0.3515435 | -0.499  | 0.618  | -0.190185155 | count | 1 |
| DEF6       | -0.392237  | 0.6807198 | -0.5762 | 0.565  | -0.190115986 | count | 1 |
| NQO2       | -0.1419563 | 0.1475529 | -0.9621 | 0.336  | -0.189933201 | count | 1 |
| NPR1       | -0.1412656 | 0.1484155 | -0.9518 | 0.341  | -0.189929857 | count | 1 |
| ABHD8      | -0.2015943 | 0.3976351 | -0.507  | 0.612  | -0.189832091 | count | 1 |
| DIS3L2     | -0.1631619 | 0.2880185 | -0.5665 | 0.571  | -0.189823405 | count | 1 |
| SZRD1      | -0.1374893 | 0.1347815 | -1.0201 | 0.308  | -0.189785785 | count | 1 |
| TOMM5      | -0.1389219 | 0.136051  | -1.0211 | 0.307  | -0.189763463 | count | 1 |
| AC027097.2 | -0.6100206 | 0.72303   | -0.8437 | 0.399  | -0.189747098 | count | 1 |
| DLX2       | -0.6100206 | 0.7246651 | -0.8418 | 0.4    | -0.189747098 | count | 1 |
| ATP6V0D1   | -0.1400626 | 0.1243295 | -1.1265 | 0.26   | -0.189720588 | count | 1 |
| LIN9       | -0.219149  | 0.3714105 | -0.59   | 0.555  | -0.189602473 | count | 1 |
| KCTD20     | -0.1391538 | 0.1404622 | -0.9907 | 0.322  | -0.189581652 | count | 1 |
| KMT5A      | -0.1402146 | 0.1301717 | -1.0772 | 0.282  | -0.189570789 | count | 1 |
| SOCS4      | -0.1408408 | 0.1548778 | -0.9094 | 0.363  | -0.189499179 | count | 1 |



|             |            |           |         |          |              |       |          |
|-------------|------------|-----------|---------|----------|--------------|-------|----------|
| BAG4        | -0.1458428 | 0.1934812 | -0.7538 | 0.451    | -0.18945216  | count | 1        |
| FAM3A       | -0.1424847 | 0.1666761 | -0.8549 | 0.393    | -0.189385412 | count | 1        |
| SARS2       | -0.2787995 | 0.4472324 | -0.6234 | 0.533    | -0.189148836 | count | 1        |
| RBM34       | -0.179204  | 0.3558842 | -0.5035 | 0.615    | -0.188980248 | count | 1        |
| ATP6V0A1    | -0.1503681 | 0.2609898 | -0.5761 | 0.565    | -0.188959929 | count | 1        |
| AC106707.1  | -0.2406788 | 0.3174116 | -0.7583 | 0.448    | -0.188869815 | count | 1        |
| MRPS11      | -0.1388649 | 0.1330964 | -1.0433 | 0.297    | -0.188844649 | count | 1        |
| SYTL4       | -0.1647792 | 0.258122  | -0.6384 | 0.523    | -0.188806268 | count | 1        |
| YDJC        | -0.1495195 | 0.2109373 | -0.7088 | 0.478    | -0.188687951 | count | 1        |
| C3orf18     | -1.2619061 | 0.7930028 | -1.5913 | 0.112    | -0.188049736 | count | 1        |
| CASP9       | -0.1900007 | 0.4114239 | -0.4618 | 0.644    | -0.187988817 | count | 1        |
| APTX        | -0.148015  | 0.2077776 | -0.7124 | 0.476    | -0.187766645 | count | 1        |
| TLN1        | -0.1317554 | 0.071261  | -1.8489 | 0.0646   | -0.187535121 | count | 1        |
| TPH1        | -0.1309913 | 0.0450475 | -2.9078 | 0.00367  | -0.187523867 | count | 1        |
| RPL15       | -0.1300813 | 0.0215766 | -6.0288 | 1.87E-09 | -0.187419215 | count | 4.43E-05 |
| MPST        | -0.1348392 | 0.1114506 | -1.2099 | 0.226    | -0.187371499 | count | 1        |
| ZNF865      | -0.232252  | 0.4018204 | -0.578  | 0.563    | -0.187334771 | count | 1        |
| YLPM1       | -0.1462923 | 0.1881435 | -0.7776 | 0.437    | -0.187323373 | count | 1        |
| TOB2        | -0.1397642 | 0.1595964 | -0.8757 | 0.381    | -0.187228905 | count | 1        |
| STK11       | -0.1439606 | 0.2063734 | -0.6976 | 0.486    | -0.187150507 | count | 1        |
| CFAP161     | -1.257234  | 0.7223707 | -1.7404 | 0.0819   | -0.187114156 | count | 1        |
| ZNF23       | -1.257234  | 0.9173073 | -1.3706 | 0.171    | -0.187114156 | count | 1        |
| AC006064.2  | -1.257234  | 0.9908143 | -1.2689 | 0.205    | -0.187114156 | count | 1        |
| IMPDH1      | -0.1518377 | 0.1734006 | -0.8756 | 0.381    | -0.187015294 | count | 1        |
| CDKN2D      | -0.1350608 | 0.1194449 | -1.1307 | 0.258    | -0.186971991 | count | 1        |
| LLGL1       | -0.4982355 | 0.6055536 | -0.8228 | 0.411    | -0.186878264 | count | 1        |
| UAP1L1      | -0.3263353 | 0.5769752 | -0.5656 | 0.572    | -0.186787498 | count | 1        |
| NDUFB1      | -0.1319563 | 0.0723401 | -1.8241 | 0.0682   | -0.186699619 | count | 1        |
| AL139246.5  | -0.1886751 | 0.3963227 | -0.4761 | 0.634    | -0.186647719 | count | 1        |
| COX7C       | -0.1300339 | 0.0359888 | -3.6132 | 0.000308 | -0.186638843 | count | 1        |
| AC005261.3  | -0.2115187 | 0.4250405 | -0.4976 | 0.619    | -0.186525368 | count | 1        |
| ZFHX4       | -0.7891344 | 1.0312802 | -0.7652 | 0.444    | -0.186449496 | count | 1        |
| NEURL3      | -0.7891344 | 1.0632278 | -0.7422 | 0.458    | -0.186449496 | count | 1        |
| GPR1        | -0.7891344 | 1.0632278 | -0.7422 | 0.458    | -0.186449496 | count | 1        |
| AC121247.1  | -0.7891344 | 1.0632278 | -0.7422 | 0.458    | -0.186449496 | count | 1        |
| DENND6A-AS1 | -0.7891344 | 1.0632278 | -0.7422 | 0.458    | -0.186449496 | count | 1        |
| STBD1       | -0.7891344 | 1.0632278 | -0.7422 | 0.458    | -0.186449496 | count | 1        |
| RBM24       | -0.7891344 | 1.0632278 | -0.7422 | 0.458    | -0.186449496 | count | 1        |
| AC008149.1  | -0.7891344 | 1.0632278 | -0.7422 | 0.458    | -0.186449496 | count | 1        |
| AL122035.2  | -0.7891344 | 1.0632278 | -0.7422 | 0.458    | -0.186449496 | count | 1        |
| PLS1        | -0.7891344 | 1.37454   | -0.5741 | 0.566    | -0.186449496 | count | 1        |
| LILRB5      | -0.7891344 | 1.37454   | -0.5741 | 0.566    | -0.186449496 | count | 1        |
| ZNF181      | -0.147734  | 0.2464118 | -0.5995 | 0.549    | -0.186418838 | count | 1        |
| RETSAT      | -0.176772  | 0.4178637 | -0.423  | 0.672    | -0.186369198 | count | 1        |
| ARF4        | -0.1316115 | 0.0690046 | -1.9073 | 0.0566   | -0.186341204 | count | 1        |

|          |            |           |         |          |              |       |             |
|----------|------------|-----------|---------|----------|--------------|-------|-------------|
| REV1     | -0.1401322 | 0.1544833 | -0.9071 | 0.364    | -0.18624542  | count | 1           |
| MZF1     | -0.176513  | 0.2982553 | -0.5918 | 0.554    | -0.186091207 | count | 1           |
| SETD5    | -0.1378477 | 0.1537762 | -0.8964 | 0.37     | -0.185988726 | count | 1           |
| PRRC1    | -0.1385612 | 0.1767414 | -0.784  | 0.433    | -0.185916779 | count | 1           |
| NNMT     | -0.1293499 | 0.0519071 | -2.4919 | 0.0128   | -0.185826572 | count | 1           |
| XPA      | -0.1337713 | 0.1178045 | -1.1355 | 0.256    | -0.185506468 | count | 1           |
| DCP2     | -0.1354884 | 0.1339943 | -1.0111 | 0.312    | -0.18550578  | count | 1           |
| CYP4V2   | -0.1721727 | 0.3343298 | -0.515  | 0.607    | -0.185377931 | count | 1           |
| SCMH1    | -0.1817858 | 0.3259769 | -0.5577 | 0.577    | -0.185328229 | count | 1           |
| CCDC92   | -0.1448674 | 0.199556  | -0.7259 | 0.468    | -0.185283186 | count | 1           |
| NFS1     | -0.1661958 | 0.2582366 | -0.6436 | 0.52     | -0.185256383 | count | 1           |
| CHTF18   | -0.2732265 | 0.594437  | -0.4596 | 0.646    | -0.18516119  | count | 1           |
| GIT2     | -0.154762  | 0.2227975 | -0.6946 | 0.487    | -0.18506932  | count | 1           |
| RARA-AS1 | -0.1432463 | 0.196828  | -0.7278 | 0.467    | -0.184722031 | count | 1           |
| PECAM1   | -0.1283652 | 0.0407374 | -3.151  | 0.00164  | -0.184635108 | count | 1           |
| ASPSCR1  | -0.148795  | 0.2346231 | -0.6342 | 0.526    | -0.184587556 | count | 1           |
| TMEM59   | -0.1284883 | 0.0395848 | -3.2459 | 0.00118  | -0.18449425  | count | 1           |
| KAZN     | -0.1417518 | 0.2093448 | -0.6771 | 0.498    | -0.184415781 | count | 1           |
| PTBP1    | -0.135248  | 0.134793  | -1.0034 | 0.316    | -0.184336897 | count | 1           |
| CTNND1   | -0.1344571 | 0.1353535 | -0.9934 | 0.321    | -0.184241577 | count | 1           |
| USP1     | -0.1329747 | 0.123407  | -1.0775 | 0.281    | -0.18421927  | count | 1           |
| HM13     | -0.1312773 | 0.0901623 | -1.456  | 0.146    | -0.183906995 | count | 1           |
| ZNF326   | -0.1328907 | 0.1185753 | -1.1207 | 0.263    | -0.183532181 | count | 1           |
| TANGO2   | -0.2010043 | 0.3764439 | -0.534  | 0.593    | -0.183472965 | count | 1           |
| FMNL3    | -0.1492579 | 0.2501976 | -0.5966 | 0.551    | -0.183087177 | count | 1           |
| HIF1A    | -0.131038  | 0.0941736 | -1.3915 | 0.164    | -0.183084342 | count | 1           |
| CAMKMT   | -0.1831317 | 0.3254734 | -0.5627 | 0.574    | -0.183029146 | count | 1           |
| CASD1    | -0.13889   | 0.1954135 | -0.7107 | 0.477    | -0.183020286 | count | 1           |
| HSPB1    | -0.1271131 | 0.0335391 | -3.79   | 0.000154 | -0.183015327 | count | 1           |
| METTL17  | -0.1565787 | 0.2554108 | -0.613  | 0.54     | -0.182720274 | count | 1           |
| DDB2     | -0.139175  | 0.1717842 | -0.8102 | 0.418    | -0.182425433 | count | 1           |
| NCSTN    | -0.1369734 | 0.1595669 | -0.8584 | 0.391    | -0.182306276 | count | 1           |
| IGHA1    | -1.232694  | 0.2294966 | -5.3713 | 8.47E-08 | -0.182225324 | count | 0.001992313 |
| TUSC2    | -0.1327171 | 0.1258262 | -1.0548 | 0.292    | -0.182206025 | count | 1           |
| RBBP6    | -0.1306169 | 0.1056691 | -1.2361 | 0.217    | -0.181983001 | count | 1           |
| ACBD5    | -0.139227  | 0.1652209 | -0.8427 | 0.399    | -0.18196574  | count | 1           |
| ATP5PD   | -0.1274219 | 0.052517  | -2.4263 | 0.0153   | -0.181959343 | count | 1           |
| TOX2     | -0.1708843 | 0.2816148 | -0.6068 | 0.544    | -0.181411324 | count | 1           |
| HOMEZ    | -0.1696295 | 0.3121587 | -0.5434 | 0.587    | -0.181351054 | count | 1           |
| ADPRM    | -0.1717135 | 0.3477247 | -0.4938 | 0.621    | -0.180942185 | count | 1           |
| BCL9L    | -0.1439489 | 0.2592522 | -0.5552 | 0.579    | -0.18083614  | count | 1           |
| PPM1J    | -0.2668434 | 0.5671835 | -0.4705 | 0.638    | -0.180603891 | count | 1           |
| ATRIP    | -0.1868516 | 0.3440074 | -0.5432 | 0.587    | -0.1804418   | count | 1           |
| RCC1L    | -0.1410722 | 0.1914418 | -0.7369 | 0.461    | -0.180399538 | count | 1           |
| ETHE1    | -0.1275393 | 0.0855157 | -1.4914 | 0.136    | -0.180143804 | count | 1           |

|             |            |           |         |         |              |       |   |
|-------------|------------|-----------|---------|---------|--------------|-------|---|
| AF165147.1  | -1.222128  | 0.7438854 | -1.6429 | 0.101   | -0.180133611 | count | 1 |
| LYSMD4      | -0.2129357 | 0.410011  | -0.5193 | 0.604   | -0.180047002 | count | 1 |
| PLA2G15     | -0.1864259 | 0.4152379 | -0.449  | 0.653   | -0.180021054 | count | 1 |
| MRPL43      | -0.1270333 | 0.076727  | -1.6557 | 0.0979  | -0.17977401  | count | 1 |
| TERF2IP     | -0.1262996 | 0.0668467 | -1.8894 | 0.0589  | -0.179627289 | count | 1 |
| USP18       | -0.1588455 | 0.2923529 | -0.5433 | 0.587   | -0.179560772 | count | 1 |
| ZNF26       | -0.1628261 | 0.3323515 | -0.4899 | 0.624   | -0.179502704 | count | 1 |
| FSIP2       | -0.3718157 | 0.7055304 | -0.527  | 0.598   | -0.179303803 | count | 1 |
| AMOT        | -0.1934791 | 0.4189977 | -0.4618 | 0.644   | -0.179284602 | count | 1 |
| SLC35A5     | -0.140227  | 0.2074865 | -0.6758 | 0.499   | -0.179110626 | count | 1 |
| ATP5F1B     | -0.1262751 | 0.0590548 | -2.1383 | 0.0326  | -0.179101592 | count | 1 |
| SAR1A       | -0.1276145 | 0.0906354 | -1.408  | 0.159   | -0.178972534 | count | 1 |
| RPAIN       | -0.1275787 | 0.0964931 | -1.3222 | 0.186   | -0.178943963 | count | 1 |
| TRABD       | -0.1405182 | 0.1933919 | -0.7266 | 0.468   | -0.178857298 | count | 1 |
| ALG13       | -0.1293187 | 0.1144532 | -1.1299 | 0.259   | -0.178791108 | count | 1 |
| PHACTR4     | -0.131565  | 0.1237682 | -1.063  | 0.288   | -0.178644109 | count | 1 |
| RIDA        | -0.1428431 | 0.216591  | -0.6595 | 0.51    | -0.17862233  | count | 1 |
| CD7         | -0.7619861 | 0.8888581 | -0.8573 | 0.391   | -0.178597015 | count | 1 |
| INMT-MINDY4 | -0.7619861 | 0.9870292 | -0.772  | 0.44    | -0.178597015 | count | 1 |
| ADRM1       | -0.1264504 | 0.0752356 | -1.6807 | 0.0929  | -0.178585836 | count | 1 |
| CLHC1       | -0.2527224 | 0.496057  | -0.5095 | 0.61    | -0.178464922 | count | 1 |
| COPS8       | -0.1282926 | 0.0997073 | -1.2867 | 0.198   | -0.178408012 | count | 1 |
| PNP         | -0.126212  | 0.0816641 | -1.5455 | 0.122   | -0.178402228 | count | 1 |
| PRRC2C      | -0.1248847 | 0.0562273 | -2.2211 | 0.0264  | -0.178286286 | count | 1 |
| CTU2        | -0.1474606 | 0.2562694 | -0.5754 | 0.565   | -0.178076901 | count | 1 |
| ANKRD50     | -0.1492839 | 0.2170477 | -0.6878 | 0.492   | -0.177962711 | count | 1 |
| RAB21       | -0.1282952 | 0.1011963 | -1.2678 | 0.205   | -0.177898088 | count | 1 |
| AL135925.1  | -0.1392857 | 0.2027813 | -0.6869 | 0.492   | -0.17769722  | count | 1 |
| SOX18       | -0.1236169 | 0.0630223 | -1.9615 | 0.0499  | -0.177543242 | count | 1 |
| XPNPEP1     | -0.1447686 | 0.2083115 | -0.695  | 0.487   | -0.177534803 | count | 1 |
| ZBTB3       | -0.3684436 | 0.5356403 | -0.6879 | 0.492   | -0.177527821 | count | 1 |
| HSD17B14    | -0.1423058 | 0.2339818 | -0.6082 | 0.543   | -0.177376139 | count | 1 |
| HECTD2      | -0.150071  | 0.2812168 | -0.5336 | 0.594   | -0.1773449   | count | 1 |
| POGLUT1     | -0.1313881 | 0.1541313 | -0.8524 | 0.394   | -0.177121886 | count | 1 |
| YKT6        | -0.1477837 | 0.2398298 | -0.6162 | 0.538   | -0.177118368 | count | 1 |
| UBL7        | -0.1320332 | 0.1658788 | -0.796  | 0.426   | -0.177055062 | count | 1 |
| VPS53       | -0.1449677 | 0.2921304 | -0.4962 | 0.62    | -0.177043679 | count | 1 |
| YWHAB       | -0.1230491 | 0.0381639 | -3.2242 | 0.00128 | -0.176627477 | count | 1 |
| SELENOS     | -0.1241994 | 0.0684402 | -1.8147 | 0.0697  | -0.17662174  | count | 1 |
| S100A16     | -0.1235002 | 0.0506052 | -2.4405 | 0.0147  | -0.176489443 | count | 1 |
| CBX7        | -0.1381922 | 0.2123066 | -0.6509 | 0.515   | -0.176087804 | count | 1 |
| SCARB2      | -0.1249662 | 0.088254  | -1.416  | 0.157   | -0.175745208 | count | 1 |
| AC026691.1  | -0.5711196 | 0.8295056 | -0.6885 | 0.491   | -0.175676402 | count | 1 |
| AL391832.2  | -0.5711196 | 0.8395697 | -0.6803 | 0.496   | -0.175676402 | count | 1 |
| LINC02574   | -0.5711196 | 0.8558111 | -0.6673 | 0.505   | -0.175676402 | count | 1 |

|            |            |           |         |          |              |       |             |
|------------|------------|-----------|---------|----------|--------------|-------|-------------|
| ANO1       | -0.5711196 | 0.8958585 | -0.6375 | 0.524    | -0.175676402 | count | 1           |
| C2CD5      | -0.16124   | 0.2814175 | -0.573  | 0.567    | -0.175657135 | count | 1           |
| SHROOM4    | -0.1286436 | 0.1402364 | -0.9173 | 0.359    | -0.175605734 | count | 1           |
| PRAG1      | -0.2312673 | 0.6557557 | -0.3527 | 0.724    | -0.175468383 | count | 1           |
| DAD1       | -0.1223005 | 0.0418645 | -2.9213 | 0.00351  | -0.175431552 | count | 1           |
| SMC1A      | -0.1295002 | 0.1488164 | -0.8702 | 0.384    | -0.175423374 | count | 1           |
| TMEM9      | -0.1273404 | 0.1319144 | -0.9653 | 0.334    | -0.175390208 | count | 1           |
| PTRH2      | -0.1310669 | 0.1502113 | -0.8725 | 0.383    | -0.175310543 | count | 1           |
| LIPG       | -0.750476  | 0.7910433 | -0.9487 | 0.343    | -0.175297927 | count | 1           |
| DNAJC27    | -0.1814005 | 0.3460276 | -0.5242 | 0.6      | -0.175057335 | count | 1           |
| OGFOD1     | -0.1436253 | 0.2423425 | -0.5927 | 0.553    | -0.17501203  | count | 1           |
| SLC23A2    | -0.1637756 | 0.2958871 | -0.5535 | 0.58     | -0.174991361 | count | 1           |
| VAPB       | -0.135744  | 0.1784053 | -0.7609 | 0.447    | -0.174823552 | count | 1           |
| ZNF473     | -0.2117969 | 0.4479612 | -0.4728 | 0.636    | -0.174798938 | count | 1           |
| QSOX1      | -0.1333619 | 0.173044  | -0.7707 | 0.441    | -0.174770316 | count | 1           |
| VKORC1     | -0.1230026 | 0.0710706 | -1.7307 | 0.0836   | -0.174654097 | count | 1           |
| TTYH2      | -0.2583515 | 0.5270876 | -0.4901 | 0.624    | -0.174557545 | count | 1           |
| AGAP4      | -0.2583515 | 0.5527623 | -0.4674 | 0.64     | -0.174557545 | count | 1           |
| FAM131A    | -0.1610786 | 0.2718534 | -0.5925 | 0.554    | -0.174384115 | count | 1           |
| MCU        | -0.1450869 | 0.2728757 | -0.5317 | 0.595    | -0.174310115 | count | 1           |
| ZNF770     | -0.1312319 | 0.1678132 | -0.782  | 0.434    | -0.174094503 | count | 1           |
| FAM53A     | -0.4051626 | 0.8281502 | -0.4892 | 0.625    | -0.174011815 | count | 1           |
| AL590399.1 | -0.4051626 | 0.8361251 | -0.4846 | 0.628    | -0.174011815 | count | 1           |
| PBLD       | -0.4051626 | 0.836677  | -0.4843 | 0.628    | -0.174011815 | count | 1           |
| AC009065.4 | -0.4669879 | 0.8124191 | -0.5748 | 0.565    | -0.173660181 | count | 1           |
| SEMA6D     | -0.1903984 | 0.3692597 | -0.5156 | 0.606    | -0.173534185 | count | 1           |
| FASTKD1    | -0.2054439 | 0.3933954 | -0.5222 | 0.602    | -0.173507254 | count | 1           |
| R3HCC1L    | -0.1429547 | 0.2208242 | -0.6474 | 0.517    | -0.173406981 | count | 1           |
| SGSM3      | -0.2850127 | 0.5202665 | -0.5478 | 0.584    | -0.173267048 | count | 1           |
| BAG3       | -0.124508  | 0.1077858 | -1.1551 | 0.248    | -0.172857124 | count | 1           |
| HK1        | -0.1295663 | 0.1561325 | -0.8298 | 0.407    | -0.172745179 | count | 1           |
| RPS16      | -0.1199728 | 0.0238564 | -5.0289 | 5.25E-07 | -0.172729203 | count | 0.012293925 |
| AL445228.2 | -0.5625293 | 1.016648  | -0.5533 | 0.58     | -0.1726048   | count | 1           |
| AC099522.2 | -0.5625293 | 1.016648  | -0.5533 | 0.58     | -0.1726048   | count | 1           |
| HCG27      | -0.5625293 | 1.0161469 | -0.5536 | 0.58     | -0.1726048   | count | 1           |
| FZD9       | -0.5625293 | 1.0161469 | -0.5536 | 0.58     | -0.1726048   | count | 1           |
| XRCC2      | -0.5625293 | 1.016648  | -0.5533 | 0.58     | -0.1726048   | count | 1           |
| AL158151.1 | -0.5625293 | 1.0161469 | -0.5536 | 0.58     | -0.1726048   | count | 1           |
| GOLGA8H    | -0.5625293 | 1.016648  | -0.5533 | 0.58     | -0.1726048   | count | 1           |
| AC011825.2 | -0.5625293 | 1.0161469 | -0.5536 | 0.58     | -0.1726048   | count | 1           |
| AC020928.2 | -0.5625293 | 1.0161469 | -0.5536 | 0.58     | -0.1726048   | count | 1           |
| DM1-AS     | -0.5625293 | 1.016648  | -0.5533 | 0.58     | -0.1726048   | count | 1           |
| ZNF460-AS1 | -0.5625293 | 1.0161469 | -0.5536 | 0.58     | -0.1726048   | count | 1           |
| MYO6       | -0.1292158 | 0.1533714 | -0.8425 | 0.4      | -0.172437612 | count | 1           |
| EMC9       | -0.146386  | 0.2309361 | -0.6339 | 0.526    | -0.172407961 | count | 1           |

|            |            |           |         |          |              |       |             |
|------------|------------|-----------|---------|----------|--------------|-------|-------------|
| KCNN3      | -0.1237204 | 0.1228621 | -1.007  | 0.314    | -0.172390649 | count | 1           |
| TACC3      | -0.2835893 | 0.6749756 | -0.4201 | 0.674    | -0.172347897 | count | 1           |
| ST6GALNAC6 | -0.2269287 | 0.5907152 | -0.3842 | 0.701    | -0.172041817 | count | 1           |
| STUB1      | -0.121541  | 0.0810828 | -1.499  | 0.134    | -0.172018703 | count | 1           |
| AC002451.1 | -0.2138737 | 0.5772842 | -0.3705 | 0.711    | -0.171979417 | count | 1           |
| ZSWIM7     | -0.1242465 | 0.1298822 | -0.9566 | 0.339    | -0.171811776 | count | 1           |
| TMEM8A     | -0.1428626 | 0.2559873 | -0.5581 | 0.577    | -0.171613377 | count | 1           |
| PSMA4      | -0.1211693 | 0.0698735 | -1.7341 | 0.083    | -0.171472937 | count | 1           |
| RPL7L1     | -0.121323  | 0.0893182 | -1.3583 | 0.174    | -0.17102953  | count | 1           |
| VGF        | -0.3245593 | 0.7013446 | -0.4628 | 0.644    | -0.170988892 | count | 1           |
| RCC2       | -0.1410298 | 0.2070097 | -0.6813 | 0.496    | -0.170652298 | count | 1           |
| THUMPD2    | -0.1420589 | 0.2111701 | -0.6727 | 0.501    | -0.17063915  | count | 1           |
| C17orf67   | -0.1361339 | 0.2265862 | -0.6008 | 0.548    | -0.170438972 | count | 1           |
| HMGNI      | -0.1193375 | 0.0600405 | -1.9876 | 0.047    | -0.170293262 | count | 1           |
| TAB1       | -0.1688762 | 0.3863733 | -0.4371 | 0.662    | -0.170248612 | count | 1           |
| SPRYD7     | -0.1284044 | 0.1624928 | -0.7902 | 0.429    | -0.170236645 | count | 1           |
| ARL6IP4    | -0.1188771 | 0.0475727 | -2.4989 | 0.0125   | -0.170007662 | count | 1           |
| GOLGA7     | -0.1209862 | 0.0862208 | -1.4032 | 0.161    | -0.169993208 | count | 1           |
| CXCL3      | -0.1198066 | 0.2400097 | -0.4992 | 0.618    | -0.169885751 | count | 1           |
| WDR83OS    | -0.1185297 | 0.0460337 | -2.5748 | 0.0101   | -0.169849185 | count | 1           |
| LRMDA      | -0.1221536 | 0.1123052 | -1.0877 | 0.277    | -0.169767771 | count | 1           |
| RNH1       | -0.1189698 | 0.0558167 | -2.1314 | 0.0331   | -0.169733724 | count | 1           |
| ARL10      | -0.2238732 | 0.5645017 | -0.3966 | 0.692    | -0.169631599 | count | 1           |
| CCDC71L    | -0.122629  | 0.1423513 | -0.8615 | 0.389    | -0.169570688 | count | 1           |
| ANG        | -0.1403535 | 0.2571656 | -0.5458 | 0.585    | -0.169419084 | count | 1           |
| GAPDH      | -0.117414  | 0.0227454 | -5.1621 | 2.62E-07 | -0.169253984 | count | 0.006146258 |
| IQCG       | -0.1563089 | 0.3165252 | -0.4938 | 0.621    | -0.16914338  | count | 1           |
| PHF20L1    | -0.1220596 | 0.1084831 | -1.1251 | 0.261    | -0.169048379 | count | 1           |
| GPS1       | -0.1291655 | 0.1617313 | -0.7986 | 0.425    | -0.169003721 | count | 1           |
| HAUS1      | -0.124838  | 0.1316807 | -0.948  | 0.343    | -0.168986102 | count | 1           |
| CUTA       | -0.1190389 | 0.0711821 | -1.6723 | 0.0946   | -0.168962026 | count | 1           |
| C17orf51   | -0.1920876 | 0.4145429 | -0.4634 | 0.643    | -0.16890274  | count | 1           |
| GCDH       | -0.1487973 | 0.3145086 | -0.4731 | 0.636    | -0.168825603 | count | 1           |
| RAB20      | -0.1917306 | 0.4576883 | -0.4189 | 0.675    | -0.168579846 | count | 1           |
| TMEM184B   | -0.1306682 | 0.1823091 | -0.7167 | 0.474    | -0.168251361 | count | 1           |
| AL355472.1 | -0.1790051 | 0.362548  | -0.4937 | 0.622    | -0.168056631 | count | 1           |
| SCAMP1     | -0.1238156 | 0.138064  | -0.8968 | 0.37     | -0.167801234 | count | 1           |
| CCDC171    | -0.1550866 | 0.3712136 | -0.4178 | 0.676    | -0.167801092 | count | 1           |
| NFIB       | -0.117411  | 0.0584382 | -2.0091 | 0.0446   | -0.167767612 | count | 1           |
| DHFR2      | -0.1841227 | 0.3936665 | -0.4677 | 0.64     | -0.167666209 | count | 1           |
| MNAT1      | -0.12298   | 0.126019  | -0.9759 | 0.329    | -0.167613977 | count | 1           |
| RAB18      | -0.1220364 | 0.114176  | -1.0688 | 0.285    | -0.167572026 | count | 1           |
| EDF1       | -0.1168456 | 0.0392635 | -2.9759 | 0.00295  | -0.167561328 | count | 1           |
| KIAA1755   | -0.3915344 | 0.5816192 | -0.6732 | 0.501    | -0.167554921 | count | 1           |
| YIPF6      | -0.1226571 | 0.1264291 | -0.9702 | 0.332    | -0.167528978 | count | 1           |

|            |            |           |         |         |              |       |   |
|------------|------------|-----------|---------|---------|--------------|-------|---|
| ADCY6      | -0.1628079 | 0.3282356 | -0.496  | 0.62    | -0.167166975 | count | 1 |
| RAB4A      | -0.1218217 | 0.1135906 | -1.0725 | 0.284   | -0.166987835 | count | 1 |
| ZNF185     | -0.2938392 | 1.4300808 | -0.2055 | 0.8372  | -0.166943081 | count | 1 |
| LIN7C      | -0.126705  | 0.1736626 | -0.7296 | 0.466   | -0.166896166 | count | 1 |
| AC008966.1 | -0.2596313 | 0.760123  | -0.3416 | 0.733   | -0.166623642 | count | 1 |
| SGSM2      | -0.1728269 | 0.3716164 | -0.4651 | 0.642   | -0.166602573 | count | 1 |
| C1orf226   | -1.152249  | 0.594239  | -1.939  | 0.0526  | -0.166502809 | count | 1 |
| SAAL1      | -0.1487313 | 0.2835191 | -0.5246 | 0.6     | -0.166381765 | count | 1 |
| SAMD1      | -0.1266256 | 0.1837791 | -0.689  | 0.491   | -0.166359212 | count | 1 |
| AL161457.2 | -0.1970774 | 1.1068706 | -0.178  | 0.8587  | -0.166220951 | count | 1 |
| DSTN       | -0.1155916 | 0.0375222 | -3.0806 | 0.00209 | -0.166126096 | count | 1 |
| ZSCAN26    | -0.1354824 | 0.239049  | -0.5668 | 0.571   | -0.166058168 | count | 1 |
| PPP6R3     | -0.1236948 | 0.1642772 | -0.753  | 0.452   | -0.166036071 | count | 1 |
| INCENP     | -0.2733705 | 0.5914243 | -0.4622 | 0.644   | -0.165764531 | count | 1 |
| ANKRD6     | -0.2580307 | 0.4187104 | -0.6163 | 0.538   | -0.165540414 | count | 1 |
| STX1B      | -0.3140914 | 0.7384339 | -0.4253 | 0.671   | -0.165057919 | count | 1 |
| SARM1      | -0.1957395 | 0.5825891 | -0.336  | 0.737   | -0.165057458 | count | 1 |
| PRPF18     | -0.125532  | 0.1722207 | -0.7289 | 0.466   | -0.165025526 | count | 1 |
| SIGIRR     | -0.1164308 | 0.0721872 | -1.6129 | 0.107   | -0.165018457 | count | 1 |
| IPO7       | -0.1212124 | 0.1362609 | -0.8896 | 0.374   | -0.16490575  | count | 1 |
| FUT11      | -0.131889  | 0.256123  | -0.5149 | 0.607   | -0.164832205 | count | 1 |
| AVL9       | -0.1555082 | 0.4024509 | -0.3864 | 0.699   | -0.164831486 | count | 1 |
| SRL        | -0.2901485 | 0.7564995 | -0.3835 | 0.701   | -0.164706196 | count | 1 |
| KPNA2      | -0.1261215 | 0.1798752 | -0.7012 | 0.483   | -0.164634858 | count | 1 |
| HIST1H1E   | -0.1201413 | 0.1585182 | -0.7579 | 0.449   | -0.164478155 | count | 1 |
| NDUFB3     | -0.1170365 | 0.0834445 | -1.4026 | 0.161   | -0.164329812 | count | 1 |
| PTRH1      | -0.1279686 | 0.186449  | -0.6863 | 0.493   | -0.164084537 | count | 1 |
| MTBP       | -0.4440167 | 0.527931  | -0.8411 | 0.4     | -0.164068772 | count | 1 |
| HIST1H4I   | -0.4435272 | 0.9539729 | -0.4649 | 0.642   | -0.163865553 | count | 1 |
| PLPP7      | -0.4435272 | 0.9539729 | -0.4649 | 0.642   | -0.163865553 | count | 1 |
| LINC01198  | -0.4435272 | 0.9539729 | -0.4649 | 0.642   | -0.163865553 | count | 1 |
| LINC01588  | -0.4435272 | 0.9539729 | -0.4649 | 0.642   | -0.163865553 | count | 1 |
| AC126773.2 | -0.4435272 | 0.9539729 | -0.4649 | 0.642   | -0.163865553 | count | 1 |
| AC007786.1 | -0.4435272 | 0.9539729 | -0.4649 | 0.642   | -0.163865553 | count | 1 |
| AC211476.2 | -0.4435272 | 0.9766226 | -0.4541 | 0.65    | -0.163865553 | count | 1 |
| TCEAL7     | -0.4435272 | 0.9766226 | -0.4541 | 0.65    | -0.163865553 | count | 1 |
| FAM83G     | -0.4435272 | 0.9766226 | -0.4541 | 0.65    | -0.163865553 | count | 1 |
| ZNF592     | -0.1596105 | 0.3534335 | -0.4516 | 0.652   | -0.163826099 | count | 1 |
| AC003102.1 | -0.1504397 | 0.4004214 | -0.3757 | 0.707   | -0.163725133 | count | 1 |
| NLGN4Y     | -0.232632  | 0.4677966 | -0.4973 | 0.619   | -0.163636661 | count | 1 |
| SNX11      | -0.1430177 | 0.3002404 | -0.4763 | 0.634   | -0.163590727 | count | 1 |
| TRAPPC6B   | -0.1253794 | 0.2016492 | -0.6218 | 0.534   | -0.16340875  | count | 1 |
| PRRX1      | -0.2696444 | 0.7733364 | -0.3487 | 0.727   | -0.163370777 | count | 1 |
| ST20-AS1   | -0.2322629 | 0.6738714 | -0.3447 | 0.73    | -0.163365237 | count | 1 |
| FAM71E1    | -0.2322629 | 0.6992822 | -0.3321 | 0.74    | -0.163365237 | count | 1 |

|            |            |           |         |        |              |       |   |
|------------|------------|-----------|---------|--------|--------------|-------|---|
| ATP5PB     | -0.1151479 | 0.0668205 | -1.7232 | 0.085  | -0.163339767 | count | 1 |
| RABEPK     | -0.1293757 | 0.2057452 | -0.6288 | 0.53   | -0.163333204 | count | 1 |
| METTL9     | -0.116026  | 0.0824377 | -1.4074 | 0.159  | -0.163314221 | count | 1 |
| DCUN1D1    | -0.1264317 | 0.1800167 | -0.7023 | 0.483  | -0.163238508 | count | 1 |
| MRPL28     | -0.1176209 | 0.1070904 | -1.0983 | 0.272  | -0.162971468 | count | 1 |
| COMMD8     | -0.1190425 | 0.1303252 | -0.9134 | 0.361  | -0.162867229 | count | 1 |
| TUBGCP5    | -0.1494378 | 0.2720729 | -0.5493 | 0.583  | -0.16261941  | count | 1 |
| AL645939.4 | -1.131205  | 0.8459315 | -1.3372 | 0.181  | -0.162469029 | count | 1 |
| TMEM129    | -0.1327631 | 0.2379593 | -0.5579 | 0.577  | -0.162364834 | count | 1 |
| SLC35B1    | -0.1201447 | 0.1391375 | -0.8635 | 0.388  | -0.16225113  | count | 1 |
| AIG1       | -0.1154109 | 0.0935715 | -1.2334 | 0.218  | -0.162234979 | count | 1 |
| COMMD3     | -0.1172008 | 0.118     | -0.9932 | 0.321  | -0.162050577 | count | 1 |
| PSMB1      | -0.1130075 | 0.0462944 | -2.4411 | 0.0147 | -0.161849473 | count | 1 |
| GIPC1      | -0.1199612 | 0.1280265 | -0.937  | 0.349  | -0.161727614 | count | 1 |
| EIF2B2     | -0.1188201 | 0.1542571 | -0.7703 | 0.441  | -0.161726497 | count | 1 |
| AL358852.1 | -0.2520062 | 0.5427452 | -0.4643 | 0.642  | -0.161469313 | count | 1 |
| ZFAND4     | -0.2295494 | 0.5174431 | -0.4436 | 0.657  | -0.161370949 | count | 1 |
| GNAI2      | -0.1123975 | 0.0444471 | -2.5288 | 0.0115 | -0.161202571 | count | 1 |
| HMGXB3     | -0.1204149 | 0.1689228 | -0.7128 | 0.476  | -0.161154289 | count | 1 |
| ZFHX2      | -0.6990189 | 0.8340857 | -0.8381 | 0.402  | -0.160770394 | count | 1 |
| SMARCA4    | -0.1212236 | 0.1534771 | -0.7898 | 0.43   | -0.160592387 | count | 1 |
| AP3M2      | -0.1262023 | 0.2154267 | -0.5858 | 0.558  | -0.160531531 | count | 1 |
| AP4B1-AS1  | -1.1209862 | 0.7959762 | -1.4083 | 0.159  | -0.160522468 | count | 1 |
| AL034417.3 | -1.1209862 | 0.8578082 | -1.3068 | 0.191  | -0.160522468 | count | 1 |
| GLS2       | -1.1209862 | 0.9516402 | -1.178  | 0.239  | -0.160522468 | count | 1 |
| RASGRP1    | -1.1209862 | 0.9516402 | -1.178  | 0.239  | -0.160522468 | count | 1 |
| CLPTM1     | -0.1207746 | 0.1577712 | -0.7655 | 0.444  | -0.16050654  | count | 1 |
| CENPX      | -0.1144089 | 0.0896308 | -1.2764 | 0.202  | -0.160468629 | count | 1 |
| ANKRD53    | -0.3356225 | 0.9867705 | -0.3401 | 0.734  | -0.160382109 | count | 1 |
| LINC02298  | -0.3356225 | 0.9867705 | -0.3401 | 0.734  | -0.160382109 | count | 1 |
| RBFADN     | -0.3356225 | 0.9867705 | -0.3401 | 0.734  | -0.160382109 | count | 1 |
| GOLGA8A    | -0.1309904 | 0.2296383 | -0.5704 | 0.568  | -0.16018027  | count | 1 |
| GPR89A     | -0.1900955 | 0.3758876 | -0.5057 | 0.613  | -0.160154287 | count | 1 |
| RBPJ       | -0.1164151 | 0.1204881 | -0.9662 | 0.334  | -0.16012312  | count | 1 |
| GNE        | -0.1705971 | 0.3692223 | -0.462  | 0.644  | -0.159982747 | count | 1 |
| TCN2       | -0.1132086 | 0.0897412 | -1.2615 | 0.207  | -0.15984501  | count | 1 |
| ANKRD27    | -0.1702997 | 0.4336107 | -0.3927 | 0.695  | -0.159697475 | count | 1 |
| SRM        | -0.1138067 | 0.0897662 | -1.2678 | 0.205  | -0.159670496 | count | 1 |
| CDKN2A     | -1.116497  | 0.7909203 | -1.4116 | 0.158  | -0.159669739 | count | 1 |
| IFFO2      | -0.2815447 | 0.4767238 | -0.5906 | 0.555  | -0.159505046 | count | 1 |
| PANO1      | -0.3744162 | 0.7997743 | -0.4682 | 0.64   | -0.159502982 | count | 1 |
| AGAP5      | -0.3744162 | 0.7997743 | -0.4682 | 0.64   | -0.159502982 | count | 1 |
| ADNP-AS1   | -0.3744162 | 0.8112599 | -0.4615 | 0.644  | -0.159502982 | count | 1 |
| AC027307.2 | -0.3744162 | 0.8137644 | -0.4601 | 0.645  | -0.159502982 | count | 1 |
| AP003352.1 | -0.3744162 | 0.8615684 | -0.4346 | 0.664  | -0.159502982 | count | 1 |

|              |            |           |         |        |              |       |   |
|--------------|------------|-----------|---------|--------|--------------|-------|---|
| TDRD6        | -0.3744162 | 0.8672277 | -0.4317 | 0.666  | -0.159502982 | count | 1 |
| ZDHC3        | -0.1160328 | 0.1301333 | -0.8916 | 0.373  | -0.15942729  | count | 1 |
| HSPB11       | -0.1158984 | 0.1232219 | -0.9406 | 0.347  | -0.159410949 | count | 1 |
| LRRC27       | -0.2486686 | 0.4563124 | -0.545  | 0.586  | -0.159218024 | count | 1 |
| TMEM14A      | -0.1159912 | 0.1367912 | -0.8479 | 0.397  | -0.159040696 | count | 1 |
| OAT          | -0.1225974 | 0.1815972 | -0.6751 | 0.5    | -0.158978114 | count | 1 |
| LZTR1        | -0.1452047 | 0.2951604 | -0.492  | 0.623  | -0.158902974 | count | 1 |
| CAD          | -0.2036575 | 0.4906656 | -0.4151 | 0.678  | -0.158789977 | count | 1 |
| AC023509.4   | -0.1884842 | 0.4229203 | -0.4457 | 0.656  | -0.158755997 | count | 1 |
| TC2N         | -0.2098452 | 0.7682279 | -0.2732 | 0.785  | -0.158597892 | count | 1 |
| NUDCD2       | -0.1136245 | 0.0972598 | -1.1683 | 0.243  | -0.158592834 | count | 1 |
| BABAM1       | -0.113817  | 0.1090642 | -1.0436 | 0.297  | -0.158585312 | count | 1 |
| SLC25A10     | -0.6904826 | 0.8476291 | -0.8146 | 0.415  | -0.158395617 | count | 1 |
| DOPEY1       | -0.1336248 | 0.376533  | -0.3549 | 0.723  | -0.15820877  | count | 1 |
| RGS17        | -0.6895237 | 0.6558764 | -1.0513 | 0.293  | -0.158129479 | count | 1 |
| ADIPOR1      | -0.1169502 | 0.138496  | -0.8444 | 0.399  | -0.157976785 | count | 1 |
| HACD2        | -0.1286002 | 0.2070929 | -0.621  | 0.535  | -0.157877389 | count | 1 |
| IL7R         | -0.5207547 | 0.6020665 | -0.8649 | 0.387  | -0.1578523   | count | 1 |
| GARS         | -0.1205752 | 0.1642295 | -0.7342 | 0.463  | -0.157829651 | count | 1 |
| ENTPD1-AS1   | -0.1918501 | 0.7306673 | -0.2626 | 0.793  | -0.15781998  | count | 1 |
| TP53BP1      | -0.1294708 | 0.2056273 | -0.6296 | 0.529  | -0.157631077 | count | 1 |
| WVOX         | -0.1322823 | 0.2594261 | -0.5099 | 0.61   | -0.157516182 | count | 1 |
| ARF1         | -0.1100838 | 0.0477866 | -2.3037 | 0.0213 | -0.157504852 | count | 1 |
| ANKRD13A     | -0.1272619 | 0.2253958 | -0.5646 | 0.572  | -0.157410709 | count | 1 |
| HESX1        | -0.2459605 | 0.6501972 | -0.3783 | 0.705  | -0.1573935   | count | 1 |
| PCDHGC3      | -0.1634436 | 0.3590405 | -0.4552 | 0.649  | -0.15736911  | count | 1 |
| POLR1A       | -0.1677142 | 0.4306101 | -0.3895 | 0.697  | -0.157218341 | count | 1 |
| NAMPT        | -0.11053   | 0.0693424 | -1.594  | 0.111  | -0.157130448 | count | 1 |
| LINC01546    | -1.103028  | 0.9197374 | -1.1993 | 0.231  | -0.157121125 | count | 1 |
| WASHC3       | -0.1131238 | 0.1074091 | -1.0532 | 0.292  | -0.157078893 | count | 1 |
| BOLA2-SMG1P6 | -0.2774631 | 0.5866596 | -0.473  | 0.636  | -0.157044261 | count | 1 |
| ZNF582-AS1   | -0.1329748 | 0.2649072 | -0.502  | 0.616  | -0.156955074 | count | 1 |
| FBXL14       | -0.1863931 | 0.4299209 | -0.4336 | 0.665  | -0.156942338 | count | 1 |
| NDUFA13      | -0.1133852 | 0.1236102 | -0.9173 | 0.359  | -0.15676527  | count | 1 |
| MAPKAPK3     | -0.1669272 | 0.3859164 | -0.4325 | 0.665  | -0.156464033 | count | 1 |
| YAP1         | -0.1186013 | 0.1771299 | -0.6696 | 0.503  | -0.156374452 | count | 1 |
| MIGA1        | -0.1187876 | 0.1736374 | -0.6841 | 0.494  | -0.15622553  | count | 1 |
| LINC00504    | -0.2982575 | 0.6519033 | -0.4575 | 0.647  | -0.156138134 | count | 1 |
| MMRN2        | -0.1097129 | 0.0626514 | -1.7512 | 0.08   | -0.156008326 | count | 1 |
| PDK2         | -0.1182614 | 0.1945461 | -0.6079 | 0.543  | -0.155924543 | count | 1 |
| ZNF620       | -0.1401819 | 0.3100258 | -0.4522 | 0.651  | -0.155904534 | count | 1 |
| C2orf42      | -0.1944596 | 0.3963513 | -0.4906 | 0.624  | -0.155854397 | count | 1 |
| LINC01772    | -1.095859  | 0.9721537 | -1.1272 | 0.26   | -0.155770121 | count | 1 |
| MATN3        | -1.095859  | 0.9721537 | -1.1272 | 0.26   | -0.155770121 | count | 1 |
| HAAO         | -1.095859  | 0.9721537 | -1.1272 | 0.26   | -0.155770121 | count | 1 |



|             |            |           |         |        |              |       |   |
|-------------|------------|-----------|---------|--------|--------------|-------|---|
| AL031123.1  | -1.095859  | 0.9721537 | -1.1272 | 0.26   | -0.155770121 | count | 1 |
| AL445623.2  | -1.095859  | 0.9721537 | -1.1272 | 0.26   | -0.155770121 | count | 1 |
| SORL1       | -1.095859  | 0.9721537 | -1.1272 | 0.26   | -0.155770121 | count | 1 |
| LINC02308   | -1.095859  | 0.9721537 | -1.1272 | 0.26   | -0.155770121 | count | 1 |
| AC103691.2  | -1.095859  | 0.9721537 | -1.1272 | 0.26   | -0.155770121 | count | 1 |
| TSSK3       | -1.095859  | 1.156854  | -0.9473 | 0.344  | -0.155770121 | count | 1 |
| AL358072.1  | -1.095859  | 1.156854  | -0.9473 | 0.344  | -0.155770121 | count | 1 |
| NOTCH2NL    | -1.095859  | 1.156854  | -0.9473 | 0.344  | -0.155770121 | count | 1 |
| AC010207.1  | -1.095859  | 1.156854  | -0.9473 | 0.344  | -0.155770121 | count | 1 |
| AC110792.3  | -1.095859  | 1.156854  | -0.9473 | 0.344  | -0.155770121 | count | 1 |
| PCSK1       | -1.095859  | 1.156854  | -0.9473 | 0.344  | -0.155770121 | count | 1 |
| PCDHGA7     | -1.095859  | 1.156854  | -0.9473 | 0.344  | -0.155770121 | count | 1 |
| AL357497.1  | -1.095859  | 1.156854  | -0.9473 | 0.344  | -0.155770121 | count | 1 |
| AC092171.5  | -1.095859  | 1.156854  | -0.9473 | 0.344  | -0.155770121 | count | 1 |
| AC113133.1  | -1.095859  | 1.156854  | -0.9473 | 0.344  | -0.155770121 | count | 1 |
| AL158071.5  | -1.095859  | 1.156854  | -0.9473 | 0.344  | -0.155770121 | count | 1 |
| BCDIN3D-AS1 | -1.095859  | 1.156854  | -0.9473 | 0.344  | -0.155770121 | count | 1 |
| LINC00571   | -1.095859  | 1.156854  | -0.9473 | 0.344  | -0.155770121 | count | 1 |
| DPH6-DT     | -1.095859  | 1.156854  | -0.9473 | 0.344  | -0.155770121 | count | 1 |
| AC007496.2  | -1.095859  | 1.156854  | -0.9473 | 0.344  | -0.155770121 | count | 1 |
| DNAAF1      | -1.095859  | 1.156854  | -0.9473 | 0.344  | -0.155770121 | count | 1 |
| SHISA6      | -1.095859  | 1.156854  | -0.9473 | 0.344  | -0.155770121 | count | 1 |
| MPP2        | -1.095859  | 1.156854  | -0.9473 | 0.344  | -0.155770121 | count | 1 |
| HRH4        | -1.095859  | 1.156854  | -0.9473 | 0.344  | -0.155770121 | count | 1 |
| PODNL1      | -1.095859  | 1.156854  | -0.9473 | 0.344  | -0.155770121 | count | 1 |
| AF129408.1  | -1.095859  | 1.156854  | -0.9473 | 0.344  | -0.155770121 | count | 1 |
| AC007405.3  | -1.095859  | 1.259801  | -0.8699 | 0.384  | -0.155770121 | count | 1 |
| PABPN1      | -0.1139896 | 0.1367827 | -0.8334 | 0.405  | -0.155733504 | count | 1 |
| NACC1       | -0.1412291 | 0.2789037 | -0.5064 | 0.613  | -0.155389412 | count | 1 |
| GNB1        | -0.1108159 | 0.0893294 | -1.2405 | 0.215  | -0.155366246 | count | 1 |
| PALMD       | -0.1082576 | 0.0487005 | -2.2229 | 0.0263 | -0.155354503 | count | 1 |
| NKIRAS2     | -0.1175079 | 0.1604501 | -0.7324 | 0.464  | -0.155207615 | count | 1 |
| AGRN        | -0.1158971 | 0.1741222 | -0.6656 | 0.506  | -0.155021637 | count | 1 |
| ABCA2       | -0.1443351 | 0.4223208 | -0.3418 | 0.733  | -0.154984399 | count | 1 |
| WNT3        | -0.3647016 | 0.8372077 | -0.4356 | 0.663  | -0.154962556 | count | 1 |
| KMT2C       | -0.1143925 | 0.1411478 | -0.8104 | 0.418  | -0.154950079 | count | 1 |
| TMEM106B    | -0.1112061 | 0.1226411 | -0.9068 | 0.365  | -0.154445793 | count | 1 |
| PIGM        | -0.1296093 | 0.264361  | -0.4903 | 0.624  | -0.154305571 | count | 1 |
| AC013271.1  | -0.1402433 | 0.3793812 | -0.3697 | 0.712  | -0.154290885 | count | 1 |
| FAM89B      | -0.1090186 | 0.0720214 | -1.5137 | 0.13   | -0.154237627 | count | 1 |
| ULK2        | -0.1601788 | 0.4605873 | -0.3478 | 0.728  | -0.154161315 | count | 1 |
| RAB5B       | -0.121516  | 0.242806  | -0.5005 | 0.617  | -0.153961474 | count | 1 |
| HIGD1A      | -0.1124192 | 0.1249186 | -0.8999 | 0.368  | -0.153850658 | count | 1 |
| AC023590.1  | -0.5092074 | 0.7550372 | -0.6744 | 0.5    | -0.153828673 | count | 1 |
| AC091814.1  | -0.5092074 | 0.8677562 | -0.5868 | 0.557  | -0.153828673 | count | 1 |

|               |            |           |         |        |              |       |   |
|---------------|------------|-----------|---------|--------|--------------|-------|---|
| ZNF713        | -0.4187115 | 0.5658162 | -0.74   | 0.459  | -0.153626818 | count | 1 |
| HIST1H1A      | -0.1439886 | 0.3747752 | -0.3842 | 0.701  | -0.153546142 | count | 1 |
| PGBD4         | -0.181649  | 0.4504941 | -0.4032 | 0.687  | -0.152831885 | count | 1 |
| ZMYM6         | -0.1503987 | 0.3250184 | -0.4627 | 0.644  | -0.152788247 | count | 1 |
| PSMB7         | -0.1091958 | 0.089219  | -1.2239 | 0.221  | -0.152744983 | count | 1 |
| USP34         | -0.1096613 | 0.1081692 | -1.0138 | 0.311  | -0.152671999 | count | 1 |
| MDM2          | -0.1152926 | 0.1799776 | -0.6406 | 0.522  | -0.152270612 | count | 1 |
| CCR10         | -0.269258  | 0.7850428 | -0.343  | 0.732  | -0.152110317 | count | 1 |
| NDUFB4        | -0.1063706 | 0.051315  | -2.0729 | 0.0383 | -0.152011108 | count | 1 |
| AC099518.5    | -0.1309393 | 0.2940858 | -0.4452 | 0.656  | -0.151970526 | count | 1 |
| FP565260.6    | -1.075419  | 0.8412272 | -1.2784 | 0.201  | -0.151940633 | count | 1 |
| AC107419.1    | -1.075419  | 0.9165697 | -1.1733 | 0.241  | -0.151940633 | count | 1 |
| AC090971.2    | -1.075419  | 0.9165697 | -1.1733 | 0.241  | -0.151940633 | count | 1 |
| OSTC          | -0.1065402 | 0.0635991 | -1.6752 | 0.094  | -0.151710664 | count | 1 |
| MED21         | -0.1125065 | 0.1348561 | -0.8343 | 0.404  | -0.151701632 | count | 1 |
| PSMA1         | -0.1063621 | 0.0610869 | -1.7412 | 0.0818 | -0.151089754 | count | 1 |
| EIF4E2        | -0.1097171 | 0.1161516 | -0.9446 | 0.345  | -0.151070577 | count | 1 |
| NEU1          | -0.1117287 | 0.1393548 | -0.8018 | 0.423  | -0.150854345 | count | 1 |
| C1orf198      | -0.1414768 | 0.3846086 | -0.3678 | 0.713  | -0.150829573 | count | 1 |
| KAT6B         | -0.1149705 | 0.1655807 | -0.6943 | 0.488  | -0.150781353 | count | 1 |
| KCTD10        | -0.1156199 | 0.2081546 | -0.5555 | 0.579  | -0.150634326 | count | 1 |
| MAP7D1        | -0.1123345 | 0.1354112 | -0.8296 | 0.407  | -0.150558768 | count | 1 |
| NCAPG2        | -0.1716724 | 0.4700168 | -0.3652 | 0.715  | -0.150490087 | count | 1 |
| EMC10         | -0.1098539 | 0.1290772 | -0.8511 | 0.395  | -0.150457129 | count | 1 |
| GPR180        | -0.1331567 | 0.3086338 | -0.4314 | 0.666  | -0.150200149 | count | 1 |
| KNTC1         | -0.2660693 | 0.6055061 | -0.4394 | 0.66   | -0.15019752  | count | 1 |
| TPTEP2-CSNK1E | -0.3157003 | 0.6498251 | -0.4858 | 0.627  | -0.150099321 | count | 1 |
| MSL2          | -0.1301856 | 0.2728144 | -0.4772 | 0.633  | -0.149959487 | count | 1 |
| ATP5MPL       | -0.1057993 | 0.0655825 | -1.6132 | 0.107  | -0.149823297 | count | 1 |
| ASH1L         | -0.1079248 | 0.1047089 | -1.0307 | 0.303  | -0.149747071 | count | 1 |
| ARL3          | -0.1072024 | 0.1004341 | -1.0674 | 0.286  | -0.149738212 | count | 1 |
| AC079313.2    | -0.1780571 | 0.5663484 | -0.3144 | 0.753  | -0.149723622 | count | 1 |
| CREB3         | -0.1106063 | 0.1433212 | -0.7717 | 0.44   | -0.149716989 | count | 1 |
| DPH7          | -0.1210592 | 0.2033322 | -0.5954 | 0.552  | -0.14968752  | count | 1 |
| LCP2          | -0.3147826 | 0.8742914 | -0.36   | 0.719  | -0.149627932 | count | 1 |
| POMK          | -0.3147826 | 0.8920386 | -0.3529 | 0.724  | -0.149627932 | count | 1 |
| MAPK8         | -0.1228531 | 0.2149483 | -0.5715 | 0.568  | -0.149514484 | count | 1 |
| NDUFS4        | -0.1066071 | 0.0872069 | -1.2225 | 0.222  | -0.149315174 | count | 1 |
| CYB561A3      | -0.1243639 | 0.2351314 | -0.5289 | 0.597  | -0.149213824 | count | 1 |
| SIN3A         | -0.1118441 | 0.1764323 | -0.6339 | 0.526  | -0.148968181 | count | 1 |
| UBA6          | -0.1146771 | 0.1738726 | -0.6595 | 0.51   | -0.148915396 | count | 1 |
| TUFM          | -0.104789  | 0.0633227 | -1.6548 | 0.0981 | -0.148792873 | count | 1 |
| CCDC25        | -0.1054914 | 0.0887303 | -1.1889 | 0.235  | -0.148738839 | count | 1 |
| RHBDD3        | -0.138438  | 0.2875971 | -0.4814 | 0.63   | -0.148565884 | count | 1 |
| LSM3          | -0.1046383 | 0.0728063 | -1.4372 | 0.151  | -0.148238536 | count | 1 |

|              |            |           |         |       |              |       |   |
|--------------|------------|-----------|---------|-------|--------------|-------|---|
| HDHD5        | -0.1166178 | 0.2103153 | -0.5545 | 0.579 | -0.148093858 | count | 1 |
| PDAP1        | -0.1046679 | 0.0723882 | -1.4459 | 0.148 | -0.14800746  | count | 1 |
| ARL1         | -0.1054645 | 0.0957855 | -1.101  | 0.271 | -0.147722688 | count | 1 |
| FCRLB        | -0.2202669 | 0.6704953 | -0.3285 | 0.743 | -0.1476756   | count | 1 |
| AL118506.1   | -0.3489546 | 0.6774304 | -0.5151 | 0.607 | -0.14764753  | count | 1 |
| PATL1        | -0.1349392 | 0.2852943 | -0.473  | 0.636 | -0.147528084 | count | 1 |
| CDH24        | -0.1481953 | 0.3956123 | -0.3746 | 0.708 | -0.147502029 | count | 1 |
| MVB12A       | -0.1056885 | 0.1065135 | -0.9923 | 0.321 | -0.147388664 | count | 1 |
| ATP6AP2      | -0.103785  | 0.0690028 | -1.5041 | 0.133 | -0.147377562 | count | 1 |
| STX1A        | -0.3483707 | 0.7253716 | -0.4803 | 0.631 | -0.14737736  | count | 1 |
| SLC52A2      | -0.1102493 | 0.1598141 | -0.6899 | 0.49  | -0.147181781 | count | 1 |
| XBP1         | -0.1050048 | 0.1006373 | -1.0434 | 0.297 | -0.147172856 | count | 1 |
| DECR1        | -0.1042074 | 0.0809598 | -1.2871 | 0.198 | -0.14707219  | count | 1 |
| AC093525.6   | -0.3473882 | 0.7128654 | -0.4873 | 0.626 | -0.14692292  | count | 1 |
| CCNYL1       | -0.1154099 | 0.1947133 | -0.5927 | 0.553 | -0.146731131 | count | 1 |
| VDAC1        | -0.10425   | 0.0796116 | -1.3095 | 0.19  | -0.146715696 | count | 1 |
| MDK          | -0.1026163 | 0.0674556 | -1.5212 | 0.128 | -0.146612313 | count | 1 |
| ZNF496       | -0.1706271 | 0.3882423 | -0.4395 | 0.66  | -0.146525271 | count | 1 |
| FER          | -0.1166044 | 0.2105347 | -0.5538 | 0.58  | -0.146285146 | count | 1 |
| EIF5A2       | -0.1251715 | 0.3849159 | -0.3252 | 0.745 | -0.146235892 | count | 1 |
| RASSF5       | -0.2088213 | 0.78559   | -0.2658 | 0.79  | -0.146201734 | count | 1 |
| HINT2        | -0.1043642 | 0.1053409 | -0.9907 | 0.322 | -0.146170049 | count | 1 |
| GALNT3       | -0.1777223 | 0.6344774 | -0.2801 | 0.779 | -0.145857093 | count | 1 |
| PPP1R2       | -0.1034703 | 0.0867319 | -1.193  | 0.233 | -0.145534362 | count | 1 |
| THUMPD3      | -0.108833  | 0.1658857 | -0.6561 | 0.512 | -0.145480292 | count | 1 |
| WEE1         | -0.1157862 | 0.2489196 | -0.4652 | 0.642 | -0.145465889 | count | 1 |
| AP2B1        | -0.1045439 | 0.1187204 | -0.8806 | 0.379 | -0.145437729 | count | 1 |
| DCUN1D5      | -0.1076925 | 0.1403887 | -0.7671 | 0.443 | -0.145390201 | count | 1 |
| RPL26L1      | -0.1040876 | 0.0986305 | -1.0553 | 0.291 | -0.145239932 | count | 1 |
| NDUFS1       | -0.1076998 | 0.1488014 | -0.7238 | 0.469 | -0.145152193 | count | 1 |
| RNF181       | -0.102615  | 0.0794733 | -1.2912 | 0.197 | -0.144954384 | count | 1 |
| TCF7         | -0.227346  | 0.3886529 | -0.585  | 0.559 | -0.144905014 | count | 1 |
| MTMR9        | -0.1213451 | 0.2353423 | -0.5156 | 0.606 | -0.144788839 | count | 1 |
| TELO2        | -0.1235104 | 0.2687963 | -0.4595 | 0.646 | -0.144760878 | count | 1 |
| PPRC1        | -0.1546817 | 0.3326408 | -0.465  | 0.642 | -0.1447467   | count | 1 |
| ZNF699       | -0.1399667 | 0.4459487 | -0.3139 | 0.754 | -0.144620784 | count | 1 |
| DR1          | -0.1066955 | 0.1427135 | -0.7476 | 0.455 | -0.144497884 | count | 1 |
| GRPEL2       | -0.1502136 | 0.3800243 | -0.3953 | 0.693 | -0.144385767 | count | 1 |
| C12orf4      | -0.118561  | 0.2504062 | -0.4735 | 0.636 | -0.144253524 | count | 1 |
| NMB          | -0.1252637 | 0.2486724 | -0.5037 | 0.614 | -0.144234766 | count | 1 |
| BIVM         | -0.1420161 | 0.3896822 | -0.3644 | 0.716 | -0.144134563 | count | 1 |
| C21orf62-AS1 | -0.1910947 | 0.4898732 | -0.3901 | 0.696 | -0.143931625 | count | 1 |
| HNRNPAB      | -0.1017929 | 0.0705255 | -1.4433 | 0.149 | -0.143925689 | count | 1 |
| ZC2HC1C      | -0.4799623 | 0.735216  | -0.6528 | 0.514 | -0.14374391  | count | 1 |
| CLK1         | -0.1034234 | 0.0951953 | -1.0864 | 0.277 | -0.143178321 | count | 1 |

|            |            |           |         |        |              |       |   |
|------------|------------|-----------|---------|--------|--------------|-------|---|
| TIGD2      | -0.302143  | 0.6218734 | -0.4859 | 0.627  | -0.14315586  | count | 1 |
| TAX1BP1    | -0.1004629 | 0.066616  | -1.5081 | 0.1316 | -0.143008949 | count | 1 |
| UTP11      | -0.1032361 | 0.1087858 | -0.949  | 0.343  | -0.143008916 | count | 1 |
| REPIN1     | -0.1108147 | 0.1915837 | -0.5784 | 0.563  | -0.142984468 | count | 1 |
| SPTAN1     | -0.1011109 | 0.0863072 | -1.1715 | 0.241  | -0.142916221 | count | 1 |
| SDHA       | -0.1058764 | 0.144752  | -0.7314 | 0.465  | -0.142884117 | count | 1 |
| ZFP82      | -0.160017  | 0.4797187 | -0.3336 | 0.739  | -0.142697835 | count | 1 |
| TNRC6C     | -0.1114625 | 0.203065  | -0.5489 | 0.583  | -0.142665291 | count | 1 |
| AC019205.1 | -0.6328602 | 0.8173747 | -0.7743 | 0.439  | -0.142629613 | count | 1 |
| AC107959.4 | -0.1482957 | 0.4642434 | -0.3194 | 0.749  | -0.142507081 | count | 1 |
| MBD2       | -0.1012748 | 0.0895347 | -1.1311 | 0.258  | -0.142321656 | count | 1 |
| PIK3C2B    | -0.1060543 | 0.159621  | -0.6644 | 0.506  | -0.142232759 | count | 1 |
| FAM122B    | -0.1255476 | 0.3181307 | -0.3946 | 0.693  | -0.142173814 | count | 1 |
| SRSF2      | -0.1006271 | 0.075791  | -1.3277 | 0.184  | -0.142129635 | count | 1 |
| AVEN       | -0.1091099 | 0.1878906 | -0.5807 | 0.561  | -0.142118172 | count | 1 |
| TSC22D2    | -0.1061042 | 0.132208  | -0.8026 | 0.422  | -0.142065947 | count | 1 |
| IFNAR1     | -0.1009106 | 0.0916725 | -1.1008 | 0.271  | -0.141984926 | count | 1 |
| GOLGA2     | -0.1029711 | 0.115956  | -0.888  | 0.375  | -0.1419693   | count | 1 |
| LANCL1     | -0.1143326 | 0.2420395 | -0.4724 | 0.637  | -0.141819259 | count | 1 |
| AC008556.1 | -0.4740678 | 0.8953495 | -0.5295 | 0.597  | -0.14172966  | count | 1 |
| TRIP11     | -0.1008231 | 0.1103344 | -0.9138 | 0.361  | -0.141435009 | count | 1 |
| MNS1       | -0.1768629 | 0.4063155 | -0.4353 | 0.663  | -0.141324779 | count | 1 |
| AASDHPPT   | -0.1020175 | 0.1239059 | -0.8233 | 0.41   | -0.141246978 | count | 1 |
| LZIC       | -0.1037796 | 0.1530677 | -0.678  | 0.498  | -0.141208389 | count | 1 |
| ZNF778     | -0.2345676 | 0.674597  | -0.3477 | 0.728  | -0.141014031 | count | 1 |
| REP15      | -0.2345676 | 0.8132869 | -0.2884 | 0.773  | -0.141014031 | count | 1 |
| ABI1       | -0.1056318 | 0.1443088 | -0.732  | 0.464  | -0.140599437 | count | 1 |
| TBC1D9     | -0.1103754 | 0.1959199 | -0.5634 | 0.573  | -0.140466629 | count | 1 |
| TBL1XR1    | -0.101037  | 0.1125458 | -0.8977 | 0.369  | -0.140378125 | count | 1 |
| AKAP13     | -0.0989604 | 0.085758  | -1.154  | 0.249  | -0.140377902 | count | 1 |
| FZD1       | -0.2203538 | 0.3927282 | -0.5611 | 0.575  | -0.140237748 | count | 1 |
| 2-Mar      | -0.1000462 | 0.0825523 | -1.2119 | 0.226  | -0.140232944 | count | 1 |
| POLA2      | -0.1709416 | 0.3970977 | -0.4305 | 0.667  | -0.140134123 | count | 1 |
| IGFBP2     | -0.0980548 | 0.0706221 | -1.3884 | 0.1651 | -0.139836706 | count | 1 |
| YEATS2     | -0.1178598 | 0.3489572 | -0.3377 | 0.736  | -0.139803979 | count | 1 |
| TAL1       | -0.1174135 | 0.2530229 | -0.464  | 0.643  | -0.139670831 | count | 1 |
| NDUFAF5    | -0.1515134 | 0.3634247 | -0.4169 | 0.677  | -0.139587785 | count | 1 |
| KLF3       | -0.0981828 | 0.0763943 | -1.2852 | 0.199  | -0.139542231 | count | 1 |
| MZT2B      | -0.0975949 | 0.0507529 | -1.9229 | 0.0546 | -0.139540043 | count | 1 |
| ADGRG1     | -0.1030156 | 0.145815  | -0.7065 | 0.48   | -0.139459668 | count | 1 |
| ZEB1       | -0.098899  | 0.0837529 | -1.1808 | 0.238  | -0.139402068 | count | 1 |
| UNK        | -0.1205573 | 0.2510554 | -0.4802 | 0.631  | -0.139295848 | count | 1 |
| SH3YL1     | -0.1083324 | 0.2069062 | -0.5236 | 0.601  | -0.139222289 | count | 1 |
| PSMC4      | -0.09946   | 0.0936679 | -1.0618 | 0.288  | -0.139130474 | count | 1 |
| LAMTOR4    | -0.097418  | 0.0568477 | -1.7137 | 0.0867 | -0.139006634 | count | 1 |

|            |            |           |         |         |              |       |   |
|------------|------------|-----------|---------|---------|--------------|-------|---|
| OAZ2       | -0.1008109 | 0.134053  | -0.752  | 0.452   | -0.138964182 | count | 1 |
| USF2       | -0.1008566 | 0.1118944 | -0.9014 | 0.367   | -0.138755758 | count | 1 |
| ACTN4      | -0.0976709 | 0.0743344 | -1.3139 | 0.189   | -0.138687585 | count | 1 |
| SELENON    | -0.1019197 | 0.1293489 | -0.7879 | 0.431   | -0.138563029 | count | 1 |
| EPHB1      | -0.3815236 | 0.9978679 | -0.3823 | 0.702   | -0.138518707 | count | 1 |
| CASTOR2    | -0.3815236 | 0.9978679 | -0.3823 | 0.702   | -0.138518707 | count | 1 |
| LOXL1-AS1  | -0.3815236 | 0.9978679 | -0.3823 | 0.702   | -0.138518707 | count | 1 |
| AC092329.3 | -0.3815236 | 0.9978679 | -0.3823 | 0.702   | -0.138518707 | count | 1 |
| ZNF350-AS1 | -0.3815236 | 0.9978679 | -0.3823 | 0.702   | -0.138518707 | count | 1 |
| NALT1      | -0.3815236 | 1.139772  | -0.3347 | 0.738   | -0.138518707 | count | 1 |
| PRDM5      | -0.125838  | 0.2981463 | -0.4221 | 0.673   | -0.138259801 | count | 1 |
| MUL1       | -0.1232106 | 0.2520689 | -0.4888 | 0.625   | -0.138207293 | count | 1 |
| C1orf159   | -0.1578719 | 0.4467096 | -0.3534 | 0.724   | -0.138103495 | count | 1 |
| ARIH2      | -0.1053333 | 0.1667053 | -0.6319 | 0.528   | -0.138095535 | count | 1 |
| SMAP2      | -0.1256254 | 0.3022533 | -0.4156 | 0.678   | -0.138023509 | count | 1 |
| YARS       | -0.1115404 | 0.2231281 | -0.4999 | 0.617   | -0.137845133 | count | 1 |
| AC243960.1 | -0.1453179 | 0.5680721 | -0.2558 | 0.798   | -0.137751381 | count | 1 |
| PI4K2B     | -0.1572035 | 0.3734897 | -0.4209 | 0.674   | -0.137504818 | count | 1 |
| FUBP3      | -0.1143042 | 0.2365243 | -0.4833 | 0.629   | -0.137405784 | count | 1 |
| KHSRP      | -0.1106248 | 0.197766  | -0.5594 | 0.576   | -0.137192466 | count | 1 |
| TMED1      | -0.1015957 | 0.1456226 | -0.6977 | 0.485   | -0.137092484 | count | 1 |
| GLYR1      | -0.1060344 | 0.1825862 | -0.5807 | 0.561   | -0.137044061 | count | 1 |
| ASAH2B     | -0.2899852 | 0.6721459 | -0.4314 | 0.666   | -0.136966576 | count | 1 |
| CABP1      | -0.2899852 | 0.8169698 | -0.355  | 0.723   | -0.136966576 | count | 1 |
| GADD45G    | -0.1025152 | 0.2087241 | -0.4912 | 0.623   | -0.136763438 | count | 1 |
| ARHGAP17   | -0.1045062 | 0.1728682 | -0.6045 | 0.546   | -0.136716954 | count | 1 |
| MB21D2     | -0.1506742 | 0.4825047 | -0.3123 | 0.755   | -0.136555621 | count | 1 |
| TIMM13     | -0.0970548 | 0.0874192 | -1.1102 | 0.267   | -0.136554634 | count | 1 |
| UBA1       | -0.1098038 | 0.2592842 | -0.4235 | 0.672   | -0.136401777 | count | 1 |
| EFNB2      | -0.0971945 | 0.0906573 | -1.0721 | 0.284   | -0.136240012 | count | 1 |
| DHX30      | -0.1042959 | 0.1693098 | -0.616  | 0.538   | -0.13603504  | count | 1 |
| CAAP1      | -0.1022979 | 0.1744733 | -0.5863 | 0.558   | -0.135804418 | count | 1 |
| EIF1AY     | -0.0975904 | 0.1342071 | -0.7272 | 0.467   | -0.135751211 | count | 1 |
| EID1       | -0.094429  | 0.0364432 | -2.5911 | 0.00962 | -0.135674246 | count | 1 |
| AC104031.1 | -0.1522067 | 0.3813303 | -0.3991 | 0.69    | -0.135576529 | count | 1 |
| PIN4       | -0.0970802 | 0.1005538 | -0.9655 | 0.334   | -0.135472685 | count | 1 |
| SLC2A4RG   | -0.0965116 | 0.0966524 | -0.9985 | 0.318   | -0.135380569 | count | 1 |
| MBOAT7     | -0.1065046 | 0.2238177 | -0.4759 | 0.634   | -0.134846476 | count | 1 |
| C19orf12   | -0.1098335 | 0.2262536 | -0.4854 | 0.627   | -0.134692349 | count | 1 |
| MRC1       | -0.3204664 | 0.4781387 | -0.6702 | 0.503   | -0.134555186 | count | 1 |
| SETD7      | -0.1031612 | 0.1877002 | -0.5496 | 0.583   | -0.134549356 | count | 1 |
| CSNK1D     | -0.0990242 | 0.134858  | -0.7343 | 0.463   | -0.134508994 | count | 1 |
| CCS        | -0.0975825 | 0.1193765 | -0.8174 | 0.414   | -0.134421168 | count | 1 |
| YIF1A      | -0.0961474 | 0.1031197 | -0.9324 | 0.351   | -0.134331109 | count | 1 |
| TM7SF3     | -0.1001039 | 0.1394235 | -0.718  | 0.473   | -0.134284529 | count | 1 |

|            |            |           |         |       |              |       |   |
|------------|------------|-----------|---------|-------|--------------|-------|---|
| MRPL40     | -0.0955337 | 0.0936036 | -1.0206 | 0.308 | -0.134092918 | count | 1 |
| MLH3       | -0.1032871 | 0.1975892 | -0.5227 | 0.601 | -0.133836213 | count | 1 |
| SERINC1    | -0.0942846 | 0.0822834 | -1.1459 | 0.252 | -0.133703067 | count | 1 |
| MEX3A      | -0.2382541 | 0.4917774 | -0.4845 | 0.628 | -0.133623133 | count | 1 |
| CSGALNACT2 | -0.1065499 | 0.2361478 | -0.4512 | 0.652 | -0.133603471 | count | 1 |
| MTR        | -0.1012618 | 0.3009514 | -0.3365 | 0.737 | -0.133598325 | count | 1 |
| PIR        | -0.0957319 | 0.1298508 | -0.7372 | 0.461 | -0.133566511 | count | 1 |
| RABEP1     | -0.0987728 | 0.1490902 | -0.6625 | 0.508 | -0.133362855 | count | 1 |
| SRPRA      | -0.0947984 | 0.0865006 | -1.0959 | 0.273 | -0.133351614 | count | 1 |
| DEPDC5     | -0.1356632 | 0.4928321 | -0.2753 | 0.783 | -0.133344578 | count | 1 |
| UBAC2-AS1  | -0.1837838 | 0.6439011 | -0.2854 | 0.775 | -0.133333335 | count | 1 |
| RFTN2      | -0.1009263 | 0.1904695 | -0.5299 | 0.596 | -0.133312536 | count | 1 |
| MRPL42     | -0.0962818 | 0.1067985 | -0.9015 | 0.367 | -0.133293744 | count | 1 |
| HRAS       | -0.0966647 | 0.119513  | -0.8088 | 0.419 | -0.133218346 | count | 1 |
| CACYBP     | -0.0945723 | 0.082557  | -1.1455 | 0.252 | -0.13320891  | count | 1 |
| JOSD2      | -0.0962569 | 0.1261865 | -0.7628 | 0.446 | -0.13306535  | count | 1 |
| SDR39U1    | -0.1045246 | 0.1752955 | -0.5963 | 0.551 | -0.1329852   | count | 1 |
| ZNF593     | -0.0956504 | 0.1137617 | -0.8408 | 0.401 | -0.13288387  | count | 1 |
| LINC01088  | -0.5962758 | 0.8553768 | -0.6971 | 0.486 | -0.132860316 | count | 1 |
| AL137802.2 | -0.5962758 | 0.9341562 | -0.6383 | 0.523 | -0.132860316 | count | 1 |
| LINC01948  | -0.5962758 | 1.178177  | -0.5061 | 0.613 | -0.132860316 | count | 1 |
| ARF3       | -0.0975875 | 0.1447086 | -0.6744 | 0.5   | -0.132730405 | count | 1 |
| SLC25A46   | -0.1082402 | 0.2194434 | -0.4932 | 0.622 | -0.13272614  | count | 1 |
| TMEM203    | -0.1001819 | 0.1653729 | -0.6058 | 0.545 | -0.132702086 | count | 1 |
| TUBGCP3    | -0.1036723 | 0.242674  | -0.4272 | 0.669 | -0.132649118 | count | 1 |
| CHD8       | -0.101889  | 0.1777097 | -0.5733 | 0.566 | -0.132570866 | count | 1 |
| IDH1       | -0.1063315 | 0.1956383 | -0.5435 | 0.587 | -0.132502498 | count | 1 |
| TPCN2      | -0.2210412 | 0.5096895 | -0.4337 | 0.665 | -0.132479137 | count | 1 |
| AC002070.1 | -0.1539539 | 0.5088023 | -0.3026 | 0.762 | -0.131862687 | count | 1 |
| PCDH12     | -0.1044583 | 0.1750363 | -0.5968 | 0.551 | -0.131716762 | count | 1 |
| CMTM6      | -0.0950371 | 0.132955  | -0.7148 | 0.475 | -0.131567999 | count | 1 |
| MAFTRR     | -0.253997  | 0.8158243 | -0.3113 | 0.756 | -0.131535881 | count | 1 |
| CMC2       | -0.0982403 | 0.1430075 | -0.687  | 0.492 | -0.131395748 | count | 1 |
| TBCB       | -0.0925304 | 0.072275  | -1.2803 | 0.201 | -0.131343427 | count | 1 |
| ZMIZ2      | -0.1128046 | 0.282184  | -0.3998 | 0.689 | -0.131212325 | count | 1 |
| AC026801.2 | -0.1963822 | 0.6751225 | -0.2909 | 0.771 | -0.131014538 | count | 1 |
| FKBP7      | -0.0986962 | 0.1818583 | -0.5427 | 0.587 | -0.130939569 | count | 1 |
| NUP58      | -0.1034775 | 0.2116606 | -0.4889 | 0.625 | -0.130473769 | count | 1 |
| NDUFAF3    | -0.0916057 | 0.0638565 | -1.4346 | 0.152 | -0.130313418 | count | 1 |
| DDX39B     | -0.1017412 | 0.1899312 | -0.5357 | 0.592 | -0.130307698 | count | 1 |
| EMC4       | -0.0919728 | 0.0710477 | -1.2945 | 0.196 | -0.130293856 | count | 1 |
| AL049840.1 | -0.1223834 | 0.3158004 | -0.3875 | 0.698 | -0.130222291 | count | 1 |
| CISD1      | -0.0937734 | 0.0933666 | -1.0044 | 0.315 | -0.129945715 | count | 1 |
| AC139530.1 | -0.1391436 | 0.3790485 | -0.3671 | 0.714 | -0.129931639 | count | 1 |
| AKR7A2     | -0.0929726 | 0.0987409 | -0.9416 | 0.346 | -0.129930306 | count | 1 |

|            |            |           |         |       |              |       |   |
|------------|------------|-----------|---------|-------|--------------|-------|---|
| ERAP2      | -0.0951936 | 0.1637074 | -0.5815 | 0.561 | -0.129853973 | count | 1 |
| ZNF576     | -0.1021919 | 0.194588  | -0.5252 | 0.6   | -0.129687372 | count | 1 |
| PARP8      | -0.216567  | 0.6227495 | -0.3478 | 0.728 | -0.12966664  | count | 1 |
| SNPH       | -0.9515088 | 0.6814452 | -1.3963 | 0.163 | -0.129441433 | count | 1 |
| VAMP2      | -0.0906999 | 0.0638651 | -1.4202 | 0.156 | -0.129350077 | count | 1 |
| ZNF814     | -0.1148382 | 0.2866697 | -0.4006 | 0.689 | -0.129336496 | count | 1 |
| GHDC       | -0.0993805 | 0.1861492 | -0.5339 | 0.593 | -0.129294629 | count | 1 |
| TCEAL9     | -0.0914304 | 0.0801443 | -1.1408 | 0.254 | -0.129263705 | count | 1 |
| NCF1       | -0.2747086 | 0.660623  | -0.4158 | 0.678 | -0.129239875 | count | 1 |
| AC022098.1 | -0.178294  | 0.5017409 | -0.3554 | 0.722 | -0.12921411  | count | 1 |
| PIDD1      | -0.3078196 | 0.5716632 | -0.5385 | 0.59  | -0.128801678 | count | 1 |
| ZNF570     | -0.1052355 | 0.2584663 | -0.4072 | 0.684 | -0.128490473 | count | 1 |
| MRPS16     | -0.09207   | 0.1085983 | -0.8478 | 0.397 | -0.128418643 | count | 1 |
| CYP3A5     | -0.4346239 | 0.8483618 | -0.5123 | 0.608 | -0.128410137 | count | 1 |
| AC007228.2 | -0.4346239 | 0.9850866 | -0.4412 | 0.659 | -0.128410137 | count | 1 |
| GPR160     | -0.1395508 | 0.4028813 | -0.3464 | 0.729 | -0.128351602 | count | 1 |
| HFE        | -0.1254818 | 0.4210321 | -0.298  | 0.766 | -0.128305697 | count | 1 |
| ZNF706     | -0.0901837 | 0.0621476 | -1.4511 | 0.147 | -0.128297155 | count | 1 |
| EPS15L1    | -0.1119203 | 0.2557905 | -0.4375 | 0.662 | -0.128226401 | count | 1 |
| MAPKAPK5   | -0.1078546 | 0.2417577 | -0.4461 | 0.656 | -0.128216456 | count | 1 |
| IFT57      | -0.0925799 | 0.1059879 | -0.8735 | 0.382 | -0.128177702 | count | 1 |
| ZNF738     | -0.1242108 | 0.3748044 | -0.3314 | 0.74  | -0.128118713 | count | 1 |
| PI4KA      | -0.1194064 | 0.3271119 | -0.365  | 0.715 | -0.127900018 | count | 1 |
| ZNF554     | -0.2136654 | 0.5667107 | -0.377  | 0.706 | -0.127845521 | count | 1 |
| COG8       | -0.1701825 | 0.4189332 | -0.4062 | 0.685 | -0.127686119 | count | 1 |
| SLC25A44   | -0.1258326 | 0.2932402 | -0.4291 | 0.668 | -0.127472299 | count | 1 |
| KIAA0232   | -0.0962814 | 0.1722973 | -0.5588 | 0.576 | -0.127231969 | count | 1 |
| SUPV3L1    | -0.1075676 | 0.2340519 | -0.4596 | 0.646 | -0.127127023 | count | 1 |
| AL645728.1 | -0.1551398 | 0.5032592 | -0.3083 | 0.758 | -0.126844578 | count | 1 |
| METAP1     | -0.1007206 | 0.2033862 | -0.4952 | 0.62  | -0.126804741 | count | 1 |
| DCTN5      | -0.1029972 | 0.2809175 | -0.3666 | 0.714 | -0.126753312 | count | 1 |
| NPY1R      | -0.2696444 | 0.7445299 | -0.3622 | 0.717 | -0.126690858 | count | 1 |
| TRAPPC1    | -0.0891861 | 0.0790544 | -1.1282 | 0.259 | -0.126383814 | count | 1 |
| SCAND1     | -0.0885983 | 0.0633171 | -1.3993 | 0.162 | -0.126060848 | count | 1 |
| GXYLT1     | -0.0963075 | 0.1995036 | -0.4827 | 0.629 | -0.126044502 | count | 1 |
| KIAA1468   | -0.1202091 | 0.2950802 | -0.4074 | 0.684 | -0.125990164 | count | 1 |
| ABCC6      | -0.9317854 | 0.8384882 | -1.1113 | 0.267 | -0.125976306 | count | 1 |
| LINC02166  | -0.9317854 | 0.969316  | -0.9613 | 0.336 | -0.125976306 | count | 1 |
| AL137784.2 | -0.9317854 | 1.151865  | -0.8089 | 0.419 | -0.125976306 | count | 1 |
| SOX13      | -0.1090192 | 0.2654131 | -0.4108 | 0.681 | -0.125852064 | count | 1 |
| FDX1       | -0.0909586 | 0.1172351 | -0.7759 | 0.438 | -0.125730172 | count | 1 |
| TMEM165    | -0.0889343 | 0.0731614 | -1.2156 | 0.224 | -0.125598029 | count | 1 |
| CDK5RAP3   | -0.0926441 | 0.1362061 | -0.6802 | 0.496 | -0.125538685 | count | 1 |
| KNOP1      | -0.0916704 | 0.1506486 | -0.6085 | 0.543 | -0.125403059 | count | 1 |
| USP38      | -0.1042625 | 0.2473942 | -0.4214 | 0.673 | -0.125253114 | count | 1 |

|            |            |           |         |         |              |       |   |
|------------|------------|-----------|---------|---------|--------------|-------|---|
| MAPRE3     | -0.1289794 | 0.3587117 | -0.3596 | 0.719   | -0.125190456 | count | 1 |
| PGGT1B     | -0.0938622 | 0.1867644 | -0.5026 | 0.615   | -0.125187959 | count | 1 |
| VPS13C     | -0.0890934 | 0.1044036 | -0.8534 | 0.394   | -0.125168043 | count | 1 |
| ZNF607     | -0.2093499 | 0.6465841 | -0.3238 | 0.746   | -0.12514114  | count | 1 |
| AC005726.5 | -0.2093499 | 0.7304867 | -0.2866 | 0.774   | -0.12514114  | count | 1 |
| ZNF613     | -0.1728269 | 0.5907828 | -0.2925 | 0.77    | -0.125120059 | count | 1 |
| BRCA2      | -0.1727195 | 0.4198156 | -0.4114 | 0.681   | -0.125039716 | count | 1 |
| AL121832.2 | -0.2663293 | 0.6201406 | -0.4295 | 0.668   | -0.125025582 | count | 1 |
| OSGEP      | -0.0943437 | 0.1501991 | -0.6281 | 0.53    | -0.125013891 | count | 1 |
| RPS6KB2    | -0.0998057 | 0.2207562 | -0.4521 | 0.651   | -0.124915688 | count | 1 |
| AP002495.2 | -0.1875815 | 0.5129296 | -0.3657 | 0.715   | -0.124914354 | count | 1 |
| TRIM56     | -0.0912821 | 0.1316461 | -0.6934 | 0.488   | -0.124680158 | count | 1 |
| DERL1      | -0.0909138 | 0.1351337 | -0.6728 | 0.501   | -0.124668882 | count | 1 |
| BLCAP      | -0.0911776 | 0.1484486 | -0.6142 | 0.539   | -0.124537154 | count | 1 |
| SPRY4      | -0.114124  | 0.2481542 | -0.4599 | 0.646   | -0.124527081 | count | 1 |
| WDR1       | -0.0897655 | 0.1016133 | -0.8834 | 0.377   | -0.124414327 | count | 1 |
| LAMTOR1    | -0.08727   | 0.0571233 | -1.5277 | 0.1267  | -0.124363849 | count | 1 |
| ZNF619     | -0.1560639 | 0.5532202 | -0.2821 | 0.778   | -0.124257507 | count | 1 |
| ZNF432     | -0.1203123 | 0.3649042 | -0.3297 | 0.742   | -0.124044021 | count | 1 |
| PLPP5      | -0.091514  | 0.1260349 | -0.7261 | 0.468   | -0.124004018 | count | 1 |
| HGS        | -0.0993672 | 0.2361007 | -0.4209 | 0.674   | -0.123977624 | count | 1 |
| VAPA       | -0.0868639 | 0.0536586 | -1.6188 | 0.106   | -0.123941329 | count | 1 |
| TOMM7      | -0.0862452 | 0.0363849 | -2.3704 | 0.0178  | -0.123716986 | count | 1 |
| RPL23      | -0.0860196 | 0.0312218 | -2.7551 | 0.00591 | -0.123711802 | count | 1 |
| AC024909.2 | -0.9182065 | 0.7731912 | -1.1876 | 0.235   | -0.123609587 | count | 1 |
| RFLNA      | -0.9182065 | 1.05275   | -0.8722 | 0.383   | -0.123609587 | count | 1 |
| SLFN13     | -0.1855725 | 0.6612403 | -0.2806 | 0.779   | -0.12352476  | count | 1 |
| ZNF829     | -0.1551073 | 0.3993891 | -0.3884 | 0.698   | -0.123475338 | count | 1 |
| AP000866.2 | -0.1285561 | 0.4303683 | -0.2987 | 0.765   | -0.123222415 | count | 1 |
| BCL2L2     | -0.1025257 | 0.274307  | -0.3738 | 0.709   | -0.123152743 | count | 1 |
| ZDBF2      | -0.1336374 | 0.4232775 | -0.3157 | 0.752   | -0.122810525 | count | 1 |
| AGAP2-AS1  | -0.0943807 | 0.1924887 | -0.4903 | 0.624   | -0.122766418 | count | 1 |
| RAB13      | -0.0854513 | 0.0455007 | -1.878  | 0.0605  | -0.122638908 | count | 1 |
| ATP2B4     | -0.0887325 | 0.1162911 | -0.763  | 0.446   | -0.122631727 | count | 1 |
| RIC1       | -0.1178197 | 0.3296369 | -0.3574 | 0.721   | -0.122468854 | count | 1 |
| CAB39      | -0.0951305 | 0.1879581 | -0.5061 | 0.613   | -0.122310589 | count | 1 |
| YWHAQ      | -0.0864185 | 0.0742244 | -1.1643 | 0.244   | -0.122158007 | count | 1 |
| CHMP7      | -0.1257935 | 0.2704318 | -0.4652 | 0.642   | -0.122048706 | count | 1 |
| LDHC       | -0.3397221 | 0.830396  | -0.4091 | 0.682   | -0.121874967 | count | 1 |
| SFR1       | -0.0919214 | 0.1651122 | -0.5567 | 0.578   | -0.12186061  | count | 1 |
| TXNDC17    | -0.0863065 | 0.0754918 | -1.1433 | 0.253   | -0.121762439 | count | 1 |
| SECISBP2L  | -0.08859   | 0.1276125 | -0.6942 | 0.488   | -0.1217035   | count | 1 |
| ISCU       | -0.0851135 | 0.0554137 | -1.536  | 0.125   | -0.121611084 | count | 1 |
| C19orf47   | -0.2177582 | 0.4879345 | -0.4463 | 0.655   | -0.121538239 | count | 1 |
| CCDC28B    | -0.1065173 | 0.2651369 | -0.4017 | 0.688   | -0.121482521 | count | 1 |



|            |            |           |         |          |              |       |   |
|------------|------------|-----------|---------|----------|--------------|-------|---|
| PSMD13     | -0.0868248 | 0.0942553 | -0.9212 | 0.357    | -0.121393255 | count | 1 |
| MTHFS      | -0.0961812 | 0.3048049 | -0.3156 | 0.752    | -0.12089122  | count | 1 |
| YAE1D1     | -0.0990453 | 0.2593514 | -0.3819 | 0.703    | -0.12088762  | count | 1 |
| RIOK3      | -0.0869244 | 0.0989556 | -0.8784 | 0.38     | -0.12080989  | count | 1 |
| MYEF2      | -0.1042365 | 0.2736415 | -0.3809 | 0.703    | -0.120733556 | count | 1 |
| RABIF      | -0.0991236 | 0.2145153 | -0.4621 | 0.644    | -0.120725582 | count | 1 |
| FAM200B    | -0.0872283 | 0.1191206 | -0.7323 | 0.464    | -0.120680066 | count | 1 |
| PLCB1      | -0.0886358 | 0.1243358 | -0.7129 | 0.476    | -0.12062462  | count | 1 |
| RRP1B      | -0.0900394 | 0.1583991 | -0.5684 | 0.57     | -0.120450897 | count | 1 |
| AC009902.2 | -0.2333734 | 0.8079703 | -0.2888 | 0.773    | -0.120240078 | count | 1 |
| PHYHIPL    | -0.2333734 | 0.8706977 | -0.268  | 0.789    | -0.120240078 | count | 1 |
| ZNF682     | -0.1350734 | 0.4303793 | -0.3138 | 0.754    | -0.120009319 | count | 1 |
| MRM2       | -0.0924193 | 0.2192897 | -0.4214 | 0.673    | -0.119806277 | count | 1 |
| ZNF425     | -0.2557338 | 0.6547615 | -0.3906 | 0.696    | -0.119720919 | count | 1 |
| LRRC34     | -0.1503795 | 0.7819529 | -0.1923 | 0.848    | -0.119613238 | count | 1 |
| SMS        | -0.0909755 | 0.178659  | -0.5092 | 0.611    | -0.119611556 | count | 1 |
| ZNF280D    | -0.0909468 | 0.195502  | -0.4652 | 0.642    | -0.119573704 | count | 1 |
| SUN2       | -0.0886802 | 0.1502643 | -0.5902 | 0.555    | -0.119502267 | count | 1 |
| PHKG1      | -0.0976765 | 0.2473826 | -0.3948 | 0.693    | -0.119207179 | count | 1 |
| RAP2C      | -0.0999084 | 0.2750396 | -0.3633 | 0.716    | -0.11903882  | count | 1 |
| PHAX       | -0.0855585 | 0.1157269 | -0.7393 | 0.46     | -0.118946164 | count | 1 |
| VPS13B     | -0.103762  | 0.2734258 | -0.3795 | 0.704    | -0.118801821 | count | 1 |
| MGA        | -0.1029355 | 0.2390331 | -0.4306 | 0.667    | -0.11877282  | count | 1 |
| LSM11      | -0.1877982 | 0.6242036 | -0.3009 | 0.764    | -0.118679488 | count | 1 |
| FAM86C1    | -0.1419356 | 0.5000045 | -0.2839 | 0.777    | -0.118654033 | count | 1 |
| CDKN1C     | -0.0836221 | 0.102234  | -0.8179 | 0.413    | -0.11840225  | count | 1 |
| TP53RK     | -0.0901859 | 0.2170628 | -0.4155 | 0.678    | -0.118173171 | count | 1 |
| REXO1      | -0.0939748 | 0.1936733 | -0.4852 | 0.628    | -0.118104903 | count | 1 |
| CCNQ       | -0.0880965 | 0.146556  | -0.6011 | 0.548    | -0.118090858 | count | 1 |
| NUP62      | -0.0928948 | 0.2153254 | -0.4314 | 0.666    | -0.11798282  | count | 1 |
| TNKS2-AS1  | -0.1774099 | 0.8763781 | -0.2024 | 0.84     | -0.117890136 | count | 1 |
| FRZB       | -0.1695475 | 0.7677949 | -0.2208 | 0.825    | -0.117778461 | count | 1 |
| PIGQ       | -0.1001865 | 0.2539317 | -0.3945 | 0.693    | -0.117607384 | count | 1 |
| MRPL54     | -0.0834873 | 0.0872409 | -0.957  | 0.339    | -0.117410453 | count | 1 |
| RPLP2      | -0.0814539 | 0.0212767 | -3.8283 | 0.000132 | -0.117346011 | count | 1 |
| MYL6       | -0.0814488 | 0.0276668 | -2.9439 | 0.00327  | -0.117319916 | count | 1 |
| SKA1       | -0.4008646 | 0.9446038 | -0.4244 | 0.671    | -0.117230731 | count | 1 |
| CENPM      | -0.4008646 | 0.9702395 | -0.4132 | 0.68     | -0.117230731 | count | 1 |
| TTC33      | -0.0935318 | 0.2111596 | -0.4429 | 0.658    | -0.117202241 | count | 1 |
| FMNL2      | -0.0935318 | 0.2330346 | -0.4014 | 0.688    | -0.117202241 | count | 1 |
| MAGEH1     | -0.087183  | 0.1631391 | -0.5344 | 0.593    | -0.117093924 | count | 1 |
| PMF1       | -0.0855745 | 0.1174285 | -0.7287 | 0.466    | -0.116708694 | count | 1 |
| PDCD6      | -0.0819033 | 0.0599162 | -1.367  | 0.1718   | -0.11661833  | count | 1 |
| ASRGL1     | -0.089817  | 0.1905211 | -0.4714 | 0.637    | -0.1166182   | count | 1 |
| GAS2L3     | -0.2805801 | 0.7652314 | -0.3667 | 0.714    | -0.116532195 | count | 1 |

|                |            |           |         |         |              |       |   |
|----------------|------------|-----------|---------|---------|--------------|-------|---|
| PRDX6          | -0.0815051 | 0.0506273 | -1.6099 | 0.1075  | -0.116481652 | count | 1 |
| ZNF264         | -0.0949659 | 0.2253343 | -0.4214 | 0.673   | -0.116358654 | count | 1 |
| OAZ3           | -0.122706  | 0.4891262 | -0.2509 | 0.802   | -0.115966543 | count | 1 |
| PYCARD         | -0.0827784 | 0.1046481 | -0.791  | 0.429   | -0.115916746 | count | 1 |
| MED11          | -0.0882027 | 0.1868943 | -0.4719 | 0.637   | -0.115879235 | count | 1 |
| GID4           | -0.0989883 | 0.280102  | -0.3534 | 0.724   | -0.115812058 | count | 1 |
| WIPI2          | -0.0844166 | 0.1303987 | -0.6474 | 0.517   | -0.115630569 | count | 1 |
| THUMPD1        | -0.0821259 | 0.0985371 | -0.8335 | 0.405   | -0.115522242 | count | 1 |
| FAM102A        | -0.1661021 | 0.3608779 | -0.4603 | 0.645   | -0.115305009 | count | 1 |
| GNPDA1         | -0.0855844 | 0.1672743 | -0.5116 | 0.609   | -0.115280823 | count | 1 |
| UBE2B          | -0.0808403 | 0.0567697 | -1.424  | 0.1546  | -0.115275745 | count | 1 |
| YIPF3          | -0.0812794 | 0.0735559 | -1.105  | 0.269   | -0.115186891 | count | 1 |
| C1RL-AS1       | -0.1448541 | 0.7723944 | -0.1875 | 0.851   | -0.115107243 | count | 1 |
| RPL17-C18orf32 | -0.2773761 | 0.8423506 | -0.3293 | 0.742   | -0.115100066 | count | 1 |
| LMCD1-AS1      | -0.2773761 | 0.8458065 | -0.3279 | 0.743   | -0.115100066 | count | 1 |
| H3F3A          | -0.0798701 | 0.0295031 | -2.7072 | 0.00683 | -0.115002726 | count | 1 |
| FAT4           | -0.0899457 | 0.2139632 | -0.4204 | 0.674   | -0.114889509 | count | 1 |
| ARG2           | -0.123215  | 0.4251171 | -0.2898 | 0.772   | -0.114806271 | count | 1 |
| CTXN1          | -0.8666206 | 0.8041358 | -1.0777 | 0.281   | -0.114760132 | count | 1 |
| RAB33B         | -0.0915009 | 0.202835  | -0.4511 | 0.652   | -0.114472399 | count | 1 |
| ALG9           | -0.2451768 | 0.4582131 | -0.5351 | 0.593   | -0.114462506 | count | 1 |
| RAD18          | -0.1084999 | 0.3111022 | -0.3488 | 0.727   | -0.114448305 | count | 1 |
| ZFR            | -0.0817365 | 0.1037475 | -0.7878 | 0.431   | -0.114402295 | count | 1 |
| ERICH6-AS1     | -0.133942  | 0.4730904 | -0.2831 | 0.777   | -0.114360045 | count | 1 |
| KDM5D          | -0.101601  | 0.3215117 | -0.316  | 0.752   | -0.114298735 | count | 1 |
| CPSF2          | -0.0905677 | 0.2120683 | -0.4271 | 0.669   | -0.11427906  | count | 1 |
| TMTC3          | -0.0920323 | 0.2230971 | -0.4125 | 0.68    | -0.114215501 | count | 1 |
| PAFAH2         | -0.1399187 | 0.5532388 | -0.2529 | 0.8     | -0.114106477 | count | 1 |
| DKKL1          | -0.5236463 | 0.6905279 | -0.7583 | 0.448   | -0.114023297 | count | 1 |
| SLC39A11       | -0.0957159 | 0.3291478 | -0.2908 | 0.771   | -0.11401109  | count | 1 |
| LINC00840      | -0.2440181 | 0.4366607 | -0.5588 | 0.576   | -0.11388701  | count | 1 |
| ZBED3          | -0.0894474 | 0.1993364 | -0.4487 | 0.654   | -0.11385889  | count | 1 |
| SERHL2         | -0.1574512 | 0.4698714 | -0.3351 | 0.738   | -0.113649718 | count | 1 |
| SLC24A1        | -0.1637857 | 0.4161072 | -0.3936 | 0.694   | -0.113643882 | count | 1 |
| DFFA           | -0.0841987 | 0.1425598 | -0.5906 | 0.555   | -0.113643524 | count | 1 |
| SWI5           | -0.0823216 | 0.1325133 | -0.6212 | 0.534   | -0.113613581 | count | 1 |
| HSBP1          | -0.0796307 | 0.0554804 | -1.4353 | 0.1513  | -0.113608765 | count | 1 |
| DHX29          | -0.0814922 | 0.1182913 | -0.6889 | 0.491   | -0.113569528 | count | 1 |
| IFT140         | -0.1391604 | 0.4538435 | -0.3066 | 0.759   | -0.11347351  | count | 1 |
| NR1H3          | -0.096929  | 0.2989826 | -0.3242 | 0.746   | -0.113385554 | count | 1 |
| STK19          | -0.0842727 | 0.1495936 | -0.5633 | 0.573   | -0.113346589 | count | 1 |
| SLC9A6         | -0.1425098 | 0.5248312 | -0.2715 | 0.786   | -0.113197956 | count | 1 |
| ZSCAN18        | -0.0833975 | 0.1290503 | -0.6462 | 0.518   | -0.113115508 | count | 1 |
| SSU72          | -0.0801261 | 0.0835977 | -0.9585 | 0.338   | -0.113099029 | count | 1 |
| CCDC12         | -0.0804558 | 0.0945774 | -0.8507 | 0.395   | -0.113058543 | count | 1 |

|            |            |           |         |        |              |       |   |
|------------|------------|-----------|---------|--------|--------------|-------|---|
| ABHD14A    | -0.0848004 | 0.1806996 | -0.4693 | 0.639  | -0.112965353 | count | 1 |
| TAOK1      | -0.0828498 | 0.1402845 | -0.5906 | 0.555  | -0.112904818 | count | 1 |
| CAMTA1     | -0.0794526 | 0.0658687 | -1.2062 | 0.228  | -0.112839795 | count | 1 |
| ATP6V1E1   | -0.0807347 | 0.1015769 | -0.7948 | 0.427  | -0.112722606 | count | 1 |
| MTPN       | -0.0791025 | 0.0689446 | -1.1473 | 0.251  | -0.112682158 | count | 1 |
| TBRG1      | -0.082521  | 0.1321401 | -0.6245 | 0.532  | -0.112641852 | count | 1 |
| MRPS15     | -0.080574  | 0.095289  | -0.8456 | 0.398  | -0.112542559 | count | 1 |
| AL138689.2 | -0.8530056 | 0.6535951 | -1.3051 | 0.192  | -0.112462177 | count | 1 |
| PC         | -0.8530056 | 0.7716602 | -1.1054 | 0.269  | -0.112462177 | count | 1 |
| ZNF148     | -0.0813152 | 0.1295472 | -0.6277 | 0.53   | -0.112443769 | count | 1 |
| UQCRB      | -0.0782887 | 0.0351829 | -2.2252 | 0.0261 | -0.112425734 | count | 1 |
| ATRAID     | -0.0787568 | 0.0573433 | -1.3734 | 0.17   | -0.112373955 | count | 1 |
| SELENOK    | -0.0789006 | 0.0616041 | -1.2808 | 0.2004 | -0.112348434 | count | 1 |
| SERPINB1   | -0.0784575 | 0.0667932 | -1.1746 | 0.24   | -0.112191621 | count | 1 |
| CISD3      | -0.0810039 | 0.1155027 | -0.7013 | 0.483  | -0.112086823 | count | 1 |
| SPPL2A     | -0.080334  | 0.0968895 | -0.8291 | 0.407  | -0.112032313 | count | 1 |
| SMPD1      | -0.0887467 | 0.212799  | -0.417  | 0.677  | -0.111971332 | count | 1 |
| ARMCX4     | -0.1129677 | 0.3955192 | -0.2856 | 0.775  | -0.111961959 | count | 1 |
| ZBED1      | -0.0869311 | 0.177404  | -0.49   | 0.624  | -0.111949707 | count | 1 |
| PRSS23     | -0.079083  | 0.0911505 | -0.8676 | 0.386  | -0.111882597 | count | 1 |
| ZNF408     | -0.1200946 | 0.3780501 | -0.3177 | 0.751  | -0.111850636 | count | 1 |
| CDC42EP1   | -0.0832955 | 0.1363423 | -0.6109 | 0.541  | -0.111817784 | count | 1 |
| MT-ATP6    | -0.0775603 | 0.0308888 | -2.511  | 0.0121 | -0.111783449 | count | 1 |
| AC005332.1 | -0.313757  | 0.7928294 | -0.3957 | 0.692  | -0.111717954 | count | 1 |
| UBE2G2     | -0.0803748 | 0.1057252 | -0.7602 | 0.447  | -0.11155156  | count | 1 |
| ZNF577     | -0.0948527 | 0.2626721 | -0.3611 | 0.718  | -0.111302954 | count | 1 |
| SDR16C5    | -0.2688481 | 0.9306012 | -0.2889 | 0.773  | -0.111299563 | count | 1 |
| AJM1       | -0.2688481 | 0.9306012 | -0.2889 | 0.773  | -0.111299563 | count | 1 |
| RPRD1A     | -0.0886624 | 0.2039324 | -0.4348 | 0.664  | -0.111237314 | count | 1 |
| PM20D2     | -0.1541517 | 0.468226  | -0.3292 | 0.742  | -0.111196726 | count | 1 |
| ZNF519     | -0.1132906 | 0.4019883 | -0.2818 | 0.778  | -0.111045382 | count | 1 |
| KIAA1328   | -0.0961201 | 0.282591  | -0.3401 | 0.734  | -0.110849798 | count | 1 |
| UBQLN1     | -0.0858742 | 0.1662168 | -0.5166 | 0.605  | -0.110794341 | count | 1 |
| DCXR       | -0.0806894 | 0.1249257 | -0.6459 | 0.518  | -0.110426537 | count | 1 |
| FARP2      | -0.1153912 | 0.4020271 | -0.287  | 0.774  | -0.110413369 | count | 1 |
| ZNF76      | -0.1091727 | 0.2995034 | -0.3645 | 0.716  | -0.110381565 | count | 1 |
| AL355312.2 | -0.214849  | 0.8986657 | -0.2391 | 0.811  | -0.110185667 | count | 1 |
| EFL1       | -0.1052777 | 0.3904297 | -0.2696 | 0.787  | -0.11016508  | count | 1 |
| SCAMP2     | -0.078907  | 0.1145091 | -0.6891 | 0.491  | -0.110096143 | count | 1 |
| ERC2       | -0.5069775 | 1.183515  | -0.4284 | 0.668  | -0.10980511  | count | 1 |
| AC008083.2 | -0.5069775 | 1.183515  | -0.4284 | 0.668  | -0.10980511  | count | 1 |
| C1QTNF12   | -0.5069775 | 1.212713  | -0.4181 | 0.676  | -0.10980511  | count | 1 |
| AC092634.3 | -0.5069775 | 1.212713  | -0.4181 | 0.676  | -0.10980511  | count | 1 |
| AC026904.3 | -0.5069775 | 1.212713  | -0.4181 | 0.676  | -0.10980511  | count | 1 |
| C8G        | -0.5069775 | 1.212713  | -0.4181 | 0.676  | -0.10980511  | count | 1 |

|            |            |           |         |        |              |       |   |
|------------|------------|-----------|---------|--------|--------------|-------|---|
| AP000654.1 | -0.5069775 | 1.212713  | -0.4181 | 0.676  | -0.10980511  | count | 1 |
| AC126614.1 | -0.5069775 | 1.212713  | -0.4181 | 0.676  | -0.10980511  | count | 1 |
| EWSAT1     | -0.5069775 | 1.212713  | -0.4181 | 0.676  | -0.10980511  | count | 1 |
| AP005329.1 | -0.5069775 | 1.212713  | -0.4181 | 0.676  | -0.10980511  | count | 1 |
| AC138969.1 | -0.5069775 | 1.496755  | -0.3387 | 0.735  | -0.10980511  | count | 1 |
| QKI        | -0.0772152 | 0.0738978 | -1.0449 | 0.296  | -0.109692464 | count | 1 |
| TMEM11     | -0.083613  | 0.1526105 | -0.5479 | 0.584  | -0.109685261 | count | 1 |
| CCL2       | -0.0759582 | 0.1634073 | -0.4648 | 0.642  | -0.109362729 | count | 1 |
| ABI2       | -0.0827816 | 0.1508159 | -0.5489 | 0.583  | -0.109344092 | count | 1 |
| COPG2      | -0.1062025 | 0.3616629 | -0.2937 | 0.769  | -0.109324737 | count | 1 |
| AP3M1      | -0.0870551 | 0.2250784 | -0.3868 | 0.699  | -0.109211832 | count | 1 |
| SZT2       | -0.0985168 | 0.4436806 | -0.222  | 0.824  | -0.109159348 | count | 1 |
| NR2C2      | -0.0952276 | 0.2881381 | -0.3305 | 0.741  | -0.108955462 | count | 1 |
| PLD3       | -0.0783645 | 0.120629  | -0.6496 | 0.516  | -0.108944893 | count | 1 |
| CTNNB1     | -0.0768339 | 0.0872689 | -0.8804 | 0.379  | -0.108904066 | count | 1 |
| ZFP14      | -0.0912066 | 0.2636268 | -0.346  | 0.729  | -0.108903633 | count | 1 |
| C8orf82    | -0.0834282 | 0.1874571 | -0.4451 | 0.656  | -0.108897618 | count | 1 |
| AL732292.2 | -0.8309538 | 0.8104542 | -1.0253 | 0.305  | -0.10877385  | count | 1 |
| AC021097.1 | -0.8309538 | 0.8876173 | -0.9362 | 0.349  | -0.10877385  | count | 1 |
| RORC       | -0.8309538 | 0.929176  | -0.8943 | 0.371  | -0.10877385  | count | 1 |
| RAB5A      | -0.0784443 | 0.1102245 | -0.7117 | 0.477  | -0.108704334 | count | 1 |
| TTC4       | -0.1108757 | 0.4048799 | -0.2738 | 0.784  | -0.108645513 | count | 1 |
| HCFC1      | -0.0905158 | 0.2270962 | -0.3986 | 0.69   | -0.10864128  | count | 1 |
| NUP88      | -0.1007597 | 0.2794919 | -0.3605 | 0.718  | -0.108444734 | count | 1 |
| LNX2       | -0.124534  | 0.3753514 | -0.3318 | 0.74   | -0.108384441 | count | 1 |
| DOT1L      | -0.1718483 | 0.530579  | -0.3239 | 0.746  | -0.108221824 | count | 1 |
| CHST14     | -0.0876184 | 0.2267706 | -0.3864 | 0.699  | -0.108136688 | count | 1 |
| GPR137C    | -0.1716649 | 0.6376644 | -0.2692 | 0.788  | -0.108101979 | count | 1 |
| SENP6      | -0.0772674 | 0.1120436 | -0.6896 | 0.49   | -0.108065498 | count | 1 |
| AP003392.4 | -0.2107312 | 0.6371334 | -0.3307 | 0.741  | -0.107962434 | count | 1 |
| KNSTRN     | -0.117566  | 0.3916888 | -0.3002 | 0.764  | -0.107795583 | count | 1 |
| VEZT       | -0.0789135 | 0.1317782 | -0.5988 | 0.549  | -0.107659582 | count | 1 |
| NBPF20     | -0.3714406 | 0.763956  | -0.4862 | 0.627  | -0.107653267 | count | 1 |
| ZNF502     | -0.1098225 | 0.386915  | -0.2838 | 0.777  | -0.107599303 | count | 1 |
| MCM3AP     | -0.0885925 | 0.326192  | -0.2716 | 0.786  | -0.107593434 | count | 1 |
| MOCS2      | -0.0772385 | 0.1104901 | -0.6991 | 0.485  | -0.107546503 | count | 1 |
| C11orf54   | -0.0806024 | 0.1662846 | -0.4847 | 0.628  | -0.107510504 | count | 1 |
| PLEKHA1    | -0.0773938 | 0.1164368 | -0.6647 | 0.506  | -0.107285491 | count | 1 |
| RBM44      | -0.2597302 | 0.5178121 | -0.5016 | 0.616  | -0.107254454 | count | 1 |
| DMAC1      | -0.0764981 | 0.1043309 | -0.7332 | 0.463  | -0.107142844 | count | 1 |
| AFMID      | -0.0832464 | 0.1936995 | -0.4298 | 0.667  | -0.106976978 | count | 1 |
| PTOV1-AS1  | -0.1801531 | 0.7383863 | -0.244  | 0.807  | -0.106974741 | count | 1 |
| FKBP1A     | -0.0742928 | 0.0337445 | -2.2016 | 0.0278 | -0.106868421 | count | 1 |
| ARHGEF6    | -0.1148049 | 0.432174  | -0.2656 | 0.791  | -0.106845824 | count | 1 |
| PAQR4      | -0.1148049 | 0.4632679 | -0.2478 | 0.804  | -0.106845824 | count | 1 |

|            |            |           |         |          |              |       |   |
|------------|------------|-----------|---------|----------|--------------|-------|---|
| SMIM4      | -0.0787235 | 0.1404618 | -0.5605 | 0.575    | -0.106671601 | count | 1 |
| SLC35A1    | -0.0839218 | 0.2039825 | -0.4114 | 0.681    | -0.106671095 | count | 1 |
| TMEM248    | -0.0774971 | 0.1187795 | -0.6524 | 0.514    | -0.106554942 | count | 1 |
| ZFP30      | -0.1100196 | 0.3972905 | -0.2769 | 0.782    | -0.106529365 | count | 1 |
| FBXO48     | -0.0961607 | 0.3225857 | -0.2981 | 0.766    | -0.106525974 | count | 1 |
| MGST3      | -0.0742122 | 0.0411792 | -1.8022 | 0.0716   | -0.106455382 | count | 1 |
| NBEA       | -0.104318  | 0.3336199 | -0.3127 | 0.755    | -0.106409267 | count | 1 |
| PTGES2     | -0.0798607 | 0.1715067 | -0.4656 | 0.642    | -0.106318265 | count | 1 |
| NECTIN1    | -0.366219  | 0.6883394 | -0.532  | 0.595    | -0.105969838 | count | 1 |
| PKDCC      | -0.366219  | 0.7859143 | -0.466  | 0.641    | -0.105969838 | count | 1 |
| UCHL3      | -0.0780388 | 0.1428868 | -0.5462 | 0.585    | -0.105952777 | count | 1 |
| IMMP1L     | -0.0819775 | 0.1906676 | -0.43   | 0.667    | -0.105944834 | count | 1 |
| 1-Sep      | -0.1047213 | 0.3415224 | -0.3066 | 0.759    | -0.105825806 | count | 1 |
| RPL18A     | -0.0734087 | 0.0208461 | -3.5215 | 0.000436 | -0.105818371 | count | 1 |
| ZC2HC1A    | -0.0782977 | 0.1449507 | -0.5402 | 0.589    | -0.105801251 | count | 1 |
| PIP4K2C    | -0.1416404 | 0.5110244 | -0.2772 | 0.782    | -0.105705399 | count | 1 |
| CLU        | -0.0731682 | 0.0441162 | -1.6585 | 0.0973   | -0.105490614 | count | 1 |
| DOCK1      | -0.0787262 | 0.1412766 | -0.5572 | 0.577    | -0.105191245 | count | 1 |
| GNA13      | -0.0833834 | 0.2187656 | -0.3812 | 0.703    | -0.105176806 | count | 1 |
| C2orf27B   | -0.2548921 | 0.8956462 | -0.2846 | 0.776    | -0.105115727 | count | 1 |
| AC007364.1 | -0.2548921 | 0.8956794 | -0.2846 | 0.776    | -0.105115727 | count | 1 |
| ZNF354C    | -0.1112849 | 0.4073127 | -0.2732 | 0.785    | -0.105011045 | count | 1 |
| DYRK1B     | -0.0910596 | 0.2907112 | -0.3132 | 0.754    | -0.104972141 | count | 1 |
| FIS1       | -0.0730061 | 0.0436957 | -1.6708 | 0.0949   | -0.10463392  | count | 1 |
| PDLIM1     | -0.0727736 | 0.0426006 | -1.7083 | 0.0877   | -0.104597843 | count | 1 |
| B9D2       | -0.0844121 | 0.2341937 | -0.3604 | 0.719    | -0.104534089 | count | 1 |
| PSMA7      | -0.0727016 | 0.0369546 | -1.9673 | 0.0492   | -0.104404531 | count | 1 |
| RHOT2      | -0.0814499 | 0.1978311 | -0.4117 | 0.681    | -0.104337499 | count | 1 |
| SCARA3     | -0.0791053 | 0.1742367 | -0.454  | 0.65     | -0.104225491 | count | 1 |
| GMCL1      | -0.0818084 | 0.2301121 | -0.3555 | 0.722    | -0.104220238 | count | 1 |
| MRPS18A    | -0.0768612 | 0.1452561 | -0.5291 | 0.597    | -0.104204186 | count | 1 |
| SESN2      | -0.1052239 | 0.4366699 | -0.241  | 0.81     | -0.104188365 | count | 1 |
| PFDN4      | -0.0753804 | 0.109592  | -0.6878 | 0.492    | -0.104184514 | count | 1 |
| SNHG10     | -0.0992967 | 0.3753049 | -0.2646 | 0.791    | -0.103839713 | count | 1 |
| IRAK1BP1   | -0.0826519 | 0.2353555 | -0.3512 | 0.725    | -0.10381534  | count | 1 |
| UBE2M      | -0.0734463 | 0.0735639 | -0.9984 | 0.318    | -0.103634507 | count | 1 |
| FBXL8      | -0.0962454 | 0.4100605 | -0.2347 | 0.814    | -0.103539696 | count | 1 |
| SNU13      | -0.0724462 | 0.0492858 | -1.4699 | 0.1417   | -0.103460523 | count | 1 |
| SLC39A9    | -0.0905683 | 0.280973  | -0.3223 | 0.747    | -0.103157922 | count | 1 |
| TRIM5      | -0.0800419 | 0.2163634 | -0.3699 | 0.711    | -0.103047983 | count | 1 |
| KLHL20     | -0.0794522 | 0.1940085 | -0.4095 | 0.682    | -0.103031829 | count | 1 |
| Z82217.1   | -0.1142657 | 0.4405226 | -0.2594 | 0.795    | -0.103012849 | count | 1 |
| AC112907.3 | -0.2500644 | 0.8808535 | -0.2839 | 0.777    | -0.1029869   | count | 1 |
| PRICKLE1   | -0.095601  | 0.2919167 | -0.3275 | 0.743    | -0.102839865 | count | 1 |
| HDAC8      | -0.0829591 | 0.2219774 | -0.3737 | 0.709    | -0.102726456 | count | 1 |

|            |            |           |         |        |              |       |   |
|------------|------------|-----------|---------|--------|--------------|-------|---|
| DUS3L      | -0.0918032 | 0.3305442 | -0.2777 | 0.781  | -0.102696268 | count | 1 |
| PIEZO2     | -0.7939494 | 0.3618657 | -2.194  | 0.0283 | -0.102678358 | count | 1 |
| TLR1       | -0.1332057 | 0.5623396 | -0.2369 | 0.813  | -0.102557334 | count | 1 |
| STOML1     | -0.0941313 | 0.3023909 | -0.3113 | 0.756  | -0.102516487 | count | 1 |
| DHX35      | -0.111175  | 0.3983441 | -0.2805 | 0.779  | -0.102378061 | count | 1 |
| PJA2       | -0.0728568 | 0.087053  | -0.8369 | 0.403  | -0.102295886 | count | 1 |
| AC104389.4 | -0.1845267 | 0.7014321 | -0.2631 | 0.793  | -0.102176948 | count | 1 |
| AC074117.1 | -0.1324172 | 0.4605491 | -0.2875 | 0.774  | -0.101935613 | count | 1 |
| MRPL52     | -0.0723905 | 0.0809215 | -0.8946 | 0.371  | -0.101803507 | count | 1 |
| DCAF6      | -0.0791532 | 0.2100243 | -0.3769 | 0.706  | -0.101800404 | count | 1 |
| AC002467.1 | -0.1051697 | 0.4041196 | -0.2602 | 0.795  | -0.101769827 | count | 1 |
| FAM133B    | -0.0719227 | 0.0831217 | -0.8653 | 0.387  | -0.101747045 | count | 1 |
| PDCD4      | -0.0720358 | 0.093293  | -0.7721 | 0.44   | -0.101650467 | count | 1 |
| NEMP1      | -0.1611287 | 0.4986167 | -0.3232 | 0.747  | -0.101232259 | count | 1 |
| GABPB2     | -0.0991947 | 0.3419891 | -0.2901 | 0.772  | -0.101123861 | count | 1 |
| HACD4      | -0.1103931 | 0.4900247 | -0.2253 | 0.822  | -0.101115369 | count | 1 |
| SKA2       | -0.0779673 | 0.1863327 | -0.4184 | 0.676  | -0.101100298 | count | 1 |
| CNOT6      | -0.0876898 | 0.2728091 | -0.3214 | 0.748  | -0.101060695 | count | 1 |
| PNKD       | -0.0715389 | 0.0846618 | -0.845  | 0.398  | -0.100911405 | count | 1 |
| P2RY2      | -0.7830262 | 0.6991284 | -1.12   | 0.263  | -0.100901593 | count | 1 |
| CFL1       | -0.0700923 | 0.0330731 | -2.1193 | 0.0342 | -0.1007254   | count | 1 |
| RBSN       | -0.0862332 | 0.2477158 | -0.3481 | 0.728  | -0.100453521 | count | 1 |
| EID2       | -0.0757984 | 0.1626252 | -0.4661 | 0.641  | -0.100380279 | count | 1 |
| G3BP2      | -0.0713543 | 0.087378  | -0.8166 | 0.414  | -0.10024915  | count | 1 |
| LUC7L      | -0.0741903 | 0.1566223 | -0.4737 | 0.636  | -0.100143051 | count | 1 |
| TFG        | -0.0716664 | 0.0849332 | -0.8438 | 0.399  | -0.100089659 | count | 1 |
| AXIN1      | -0.0963942 | 0.5564432 | -0.1732 | 0.862  | -0.099963442 | count | 1 |
| ZFP3       | -0.1685378 | 0.638013  | -0.2642 | 0.792  | -0.09981105  | count | 1 |
| GORASP2    | -0.073174  | 0.131417  | -0.5568 | 0.578  | -0.099722252 | count | 1 |
| PRKDC      | -0.0707971 | 0.0942253 | -0.7514 | 0.452  | -0.099526787 | count | 1 |
| NKAPL      | -0.0898493 | 0.3915229 | -0.2295 | 0.819  | -0.09947718  | count | 1 |
| ARL6       | -0.0937412 | 0.3392925 | -0.2763 | 0.782  | -0.099452594 | count | 1 |
| TSPYL2     | -0.0749717 | 0.1604104 | -0.4674 | 0.64   | -0.099442885 | count | 1 |
| MAP2K3     | -0.0752889 | 0.1670662 | -0.4507 | 0.652  | -0.099304947 | count | 1 |
| ARHGAP35   | -0.0801396 | 0.2352025 | -0.3407 | 0.733  | -0.099219602 | count | 1 |
| MFN1       | -0.0782428 | 0.1809291 | -0.4325 | 0.665  | -0.099182606 | count | 1 |
| DGCR2      | -0.0784105 | 0.2727929 | -0.2874 | 0.774  | -0.099142728 | count | 1 |
| CCDC85C    | -0.1000524 | 0.4194565 | -0.2385 | 0.811  | -0.099004865 | count | 1 |
| SOST       | -0.1939796 | 1.0299468 | -0.1883 | 0.851  | -0.098962681 | count | 1 |
| GLUD2      | -0.1939796 | 1.054516  | -0.184  | 0.854  | -0.098962681 | count | 1 |
| SMARCAL1   | -0.0902378 | 0.3125355 | -0.2887 | 0.773  | -0.098816702 | count | 1 |
| NACA2      | -0.1573546 | 0.446271  | -0.3526 | 0.724  | -0.09877886  | count | 1 |
| AP2M1      | -0.0694778 | 0.0620938 | -1.1189 | 0.263  | -0.098733809 | count | 1 |
| GLYCTK     | -0.0944599 | 0.3164903 | -0.2985 | 0.765  | -0.098730158 | count | 1 |
| SSR1       | -0.0709181 | 0.1110111 | -0.6388 | 0.523  | -0.098345275 | count | 1 |

|            |            |           |         |        |              |       |   |
|------------|------------|-----------|---------|--------|--------------|-------|---|
| AP002490.1 | -0.46044   | 0.8182519 | -0.5627 | 0.574  | -0.098236183 | count | 1 |
| PROSER3    | -0.2121372 | 0.5107045 | -0.4154 | 0.678  | -0.098180154 | count | 1 |
| CBX3       | -0.0690736 | 0.0628426 | -1.0992 | 0.272  | -0.098123402 | count | 1 |
| ANAPC13    | -0.0706912 | 0.1054531 | -0.6704 | 0.503  | -0.098018834 | count | 1 |
| PRR34-AS1  | -0.0800185 | 0.2203576 | -0.3631 | 0.717  | -0.097957605 | count | 1 |
| UBXN4      | -0.0685462 | 0.0580238 | -1.1813 | 0.2376 | -0.097918719 | count | 1 |
| MAP10      | -0.1360337 | 0.4307719 | -0.3158 | 0.752  | -0.09778049  | count | 1 |
| PCNP       | -0.0693201 | 0.0858228 | -0.8077 | 0.419  | -0.097565187 | count | 1 |
| CD96       | -0.7619861 | 1.205026  | -0.6323 | 0.527  | -0.097508302 | count | 1 |
| RASL11B    | -0.7619861 | 1.205026  | -0.6323 | 0.527  | -0.097508302 | count | 1 |
| SLITRK4    | -0.7619861 | 1.205026  | -0.6323 | 0.527  | -0.097508302 | count | 1 |
| KCNMA1     | -0.7619861 | 1.205026  | -0.6323 | 0.527  | -0.097508302 | count | 1 |
| TMEM121B   | -0.7619861 | 1.205026  | -0.6323 | 0.527  | -0.097508302 | count | 1 |
| TRIM46     | -0.7619861 | 1.268579  | -0.6007 | 0.548  | -0.097508302 | count | 1 |
| DCAF12L1   | -0.7619861 | 1.268579  | -0.6007 | 0.548  | -0.097508302 | count | 1 |
| AC011595.1 | -0.7619861 | 1.268579  | -0.6007 | 0.548  | -0.097508302 | count | 1 |
| SLC24A4    | -0.7619861 | 1.268579  | -0.6007 | 0.548  | -0.097508302 | count | 1 |
| TPX2       | -0.7619861 | 1.268579  | -0.6007 | 0.548  | -0.097508302 | count | 1 |
| PABPC1L    | -0.7619861 | 1.268579  | -0.6007 | 0.548  | -0.097508302 | count | 1 |
| LILRB4     | -0.7619861 | 1.268579  | -0.6007 | 0.548  | -0.097508302 | count | 1 |
| AF130417.1 | -0.7619861 | 1.268579  | -0.6007 | 0.548  | -0.097508302 | count | 1 |
| TEKT2      | -0.7619861 | 1.308295  | -0.5824 | 0.56   | -0.097508302 | count | 1 |
| LINC01816  | -0.7619861 | 1.308295  | -0.5824 | 0.56   | -0.097508302 | count | 1 |
| GCC2-AS1   | -0.7619861 | 1.308295  | -0.5824 | 0.56   | -0.097508302 | count | 1 |
| LINC02009  | -0.7619861 | 1.308295  | -0.5824 | 0.56   | -0.097508302 | count | 1 |
| NSUN7      | -0.7619861 | 1.308295  | -0.5824 | 0.56   | -0.097508302 | count | 1 |
| AC108062.1 | -0.7619861 | 1.308295  | -0.5824 | 0.56   | -0.097508302 | count | 1 |
| AC026741.1 | -0.7619861 | 1.308295  | -0.5824 | 0.56   | -0.097508302 | count | 1 |
| AC010245.1 | -0.7619861 | 1.308295  | -0.5824 | 0.56   | -0.097508302 | count | 1 |
| AC116312.1 | -0.7619861 | 1.308295  | -0.5824 | 0.56   | -0.097508302 | count | 1 |
| PRR7-AS1   | -0.7619861 | 1.308295  | -0.5824 | 0.56   | -0.097508302 | count | 1 |
| AC005162.3 | -0.7619861 | 1.308295  | -0.5824 | 0.56   | -0.097508302 | count | 1 |
| AC018638.6 | -0.7619861 | 1.308295  | -0.5824 | 0.56   | -0.097508302 | count | 1 |
| LINC01607  | -0.7619861 | 1.308295  | -0.5824 | 0.56   | -0.097508302 | count | 1 |
| AL731571.1 | -0.7619861 | 1.308295  | -0.5824 | 0.56   | -0.097508302 | count | 1 |
| AC129507.2 | -0.7619861 | 1.308295  | -0.5824 | 0.56   | -0.097508302 | count | 1 |
| SHBG       | -0.7619861 | 1.308295  | -0.5824 | 0.56   | -0.097508302 | count | 1 |
| AC008763.2 | -0.7619861 | 1.308295  | -0.5824 | 0.56   | -0.097508302 | count | 1 |
| GP6        | -0.7619861 | 1.308295  | -0.5824 | 0.56   | -0.097508302 | count | 1 |
| MIS18A-AS1 | -0.7619861 | 1.308295  | -0.5824 | 0.56   | -0.097508302 | count | 1 |
| YIPF5      | -0.0694998 | 0.0948428 | -0.7328 | 0.464  | -0.097461501 | count | 1 |
| LRR8D      | -0.0910386 | 0.4017927 | -0.2266 | 0.821  | -0.097235827 | count | 1 |
| INTS10     | -0.0708748 | 0.139073  | -0.5096 | 0.61   | -0.097035772 | count | 1 |
| ATP5F1D    | -0.0676597 | 0.0474337 | -1.4264 | 0.154  | -0.096886189 | count | 1 |
| DBF4B      | -0.2748703 | 0.7402007 | -0.3713 | 0.71   | -0.096766901 | count | 1 |

|            |            |           |         |         |              |       |   |
|------------|------------|-----------|---------|---------|--------------|-------|---|
| MFN2       | -0.0847096 | 0.3188281 | -0.2657 | 0.79    | -0.096438195 | count | 1 |
| RITA1      | -0.0795782 | 0.2431712 | -0.3273 | 0.744   | -0.096373362 | count | 1 |
| CD22       | -0.7537716 | 0.650378  | -1.159  | 0.247   | -0.096193891 | count | 1 |
| WRN        | -0.0810655 | 0.2905208 | -0.279  | 0.78    | -0.096192005 | count | 1 |
| RRAGB      | -0.0810546 | 0.2216441 | -0.3657 | 0.715   | -0.096178998 | count | 1 |
| CCDC88C    | -0.0852072 | 0.2672459 | -0.3188 | 0.75    | -0.096163929 | count | 1 |
| TRMT11     | -0.0744245 | 0.1897658 | -0.3922 | 0.695   | -0.096153926 | count | 1 |
| ZNF81      | -0.1291452 | 0.6557108 | -0.197  | 0.844   | -0.096153105 | count | 1 |
| GATAD2A    | -0.0747457 | 0.2357871 | -0.317  | 0.751   | -0.096113806 | count | 1 |
| FAM89A     | -0.0723931 | 0.14902   | -0.4858 | 0.627   | -0.095912299 | count | 1 |
| DCLK2      | -0.1102949 | 0.4754597 | -0.232  | 0.817   | -0.095779746 | count | 1 |
| SOD1       | -0.0667645 | 0.0489625 | -1.3636 | 0.173   | -0.09565657  | count | 1 |
| CNOT2      | -0.0686397 | 0.1067373 | -0.6431 | 0.52    | -0.095650152 | count | 1 |
| ME3        | -0.0867456 | 0.3219205 | -0.2695 | 0.788   | -0.095496783 | count | 1 |
| UNC13D     | -0.1729369 | 0.5014737 | -0.3449 | 0.73    | -0.09549263  | count | 1 |
| SPCS2      | -0.0667433 | 0.0521459 | -1.2799 | 0.201   | -0.09547598  | count | 1 |
| SEC22C     | -0.0707987 | 0.1490497 | -0.475  | 0.635   | -0.095395021 | count | 1 |
| NKTR       | -0.0674284 | 0.0927712 | -0.7268 | 0.467   | -0.095225476 | count | 1 |
| NCEH1      | -0.0789348 | 0.2738636 | -0.2882 | 0.773   | -0.09514094  | count | 1 |
| GABPB1-AS1 | -0.0697224 | 0.1689715 | -0.4126 | 0.68    | -0.095123943 | count | 1 |
| SPAG16     | -0.0714532 | 0.1678526 | -0.4257 | 0.67    | -0.095101171 | count | 1 |
| GTPBP8     | -0.0723242 | 0.1829413 | -0.3953 | 0.693   | -0.095027803 | count | 1 |
| MIR497HG   | -0.1606378 | 0.6313518 | -0.2544 | 0.799   | -0.094959474 | count | 1 |
| KLKB1      | -0.7441327 | 0.8721605 | -0.8532 | 0.394   | -0.094659012 | count | 1 |
| LPAR4      | -0.7441327 | 0.8721605 | -0.8532 | 0.394   | -0.094659012 | count | 1 |
| GSDMC      | -0.7441327 | 0.9911182 | -0.7508 | 0.453   | -0.094659012 | count | 1 |
| AC012485.3 | -0.7441327 | 1.027152  | -0.7245 | 0.469   | -0.094659012 | count | 1 |
| TMEM50B    | -0.0678425 | 0.1031125 | -0.6579 | 0.511   | -0.094612695 | count | 1 |
| OSBP2      | -0.3302475 | 0.7149135 | -0.4619 | 0.644   | -0.094505493 | count | 1 |
| MTFP1      | -0.3302475 | 0.7328925 | -0.4506 | 0.652   | -0.094505493 | count | 1 |
| MCFD2      | -0.0671523 | 0.0892434 | -0.7525 | 0.452   | -0.094361109 | count | 1 |
| NDUFA12    | -0.0662343 | 0.058881  | -1.1249 | 0.2607  | -0.094336113 | count | 1 |
| AC107464.3 | -0.2302597 | 0.9823443 | -0.2344 | 0.815   | -0.094309361 | count | 1 |
| MBNL1      | -0.0663297 | 0.0710307 | -0.9338 | 0.35    | -0.094255144 | count | 1 |
| ZNF585A    | -0.0999957 | 0.4769511 | -0.2097 | 0.834   | -0.094213968 | count | 1 |
| EMD        | -0.0681952 | 0.1119298 | -0.6093 | 0.542   | -0.094122487 | count | 1 |
| ZBTB5      | -0.1310711 | 0.5644241 | -0.2322 | 0.816   | -0.094121564 | count | 1 |
| USP6NL     | -0.080806  | 0.2389645 | -0.3382 | 0.735   | -0.094092768 | count | 1 |
| FKBPL      | -0.0733774 | 0.1823782 | -0.4023 | 0.687   | -0.094062047 | count | 1 |
| FCHSD2     | -0.0684071 | 0.1530932 | -0.4468 | 0.655   | -0.093690538 | count | 1 |
| RPL37A     | -0.06497   | 0.0248307 | -2.6165 | 0.00893 | -0.093513374 | count | 1 |
| NDUFS7     | -0.0661798 | 0.0810028 | -0.817  | 0.414   | -0.093412595 | count | 1 |
| SPAG9      | -0.0656518 | 0.0650361 | -1.0095 | 0.313   | -0.093359607 | count | 1 |
| LPGAT1     | -0.0670114 | 0.1185737 | -0.5651 | 0.572   | -0.093230532 | count | 1 |
| AIMP1      | -0.0665705 | 0.1058631 | -0.6288 | 0.53    | -0.093196747 | count | 1 |



|            |            |           |         |        |              |       |   |
|------------|------------|-----------|---------|--------|--------------|-------|---|
| MOB3C      | -0.0877763 | 0.2798733 | -0.3136 | 0.754  | -0.093066622 | count | 1 |
| UVRAG      | -0.0666542 | 0.1114095 | -0.5983 | 0.55   | -0.093054181 | count | 1 |
| NUDCD3     | -0.0714247 | 0.1861713 | -0.3837 | 0.701  | -0.092972665 | count | 1 |
| NARS       | -0.0669924 | 0.1034876 | -0.6473 | 0.517  | -0.092749438 | count | 1 |
| PABPC5     | -0.1207058 | 0.4826027 | -0.2501 | 0.803  | -0.092721431 | count | 1 |
| PJA1       | -0.1048168 | 0.4055925 | -0.2584 | 0.796  | -0.092703921 | count | 1 |
| ICMT       | -0.0709113 | 0.2050414 | -0.3458 | 0.729  | -0.092585388 | count | 1 |
| CLSTN1     | -0.0699887 | 0.1614726 | -0.4334 | 0.665  | -0.092352689 | count | 1 |
| AMOTL2     | -0.0772053 | 0.2293055 | -0.3367 | 0.736  | -0.092098362 | count | 1 |
| CPT1A      | -0.0678701 | 0.1529907 | -0.4436 | 0.657  | -0.092073758 | count | 1 |
| ZNF235     | -0.1060752 | 0.5212798 | -0.2035 | 0.839  | -0.092054707 | count | 1 |
| IGHG1      | -0.4348681 | 0.2099134 | -2.0717 | 0.0384 | -0.09200943  | count | 1 |
| RILPL1     | -0.0720058 | 0.1721173 | -0.4184 | 0.676  | -0.092002331 | count | 1 |
| STAG1      | -0.0695557 | 0.1699423 | -0.4093 | 0.682  | -0.091992269 | count | 1 |
| MTCH2      | -0.0685787 | 0.1525013 | -0.4497 | 0.653  | -0.091952057 | count | 1 |
| MAGEE1     | -0.1990044 | 0.5705453 | -0.3488 | 0.727  | -0.091781837 | count | 1 |
| PPP2CB     | -0.0670574 | 0.1138019 | -0.5892 | 0.556  | -0.091764496 | count | 1 |
| ANKRD36C   | -0.0736867 | 0.2729751 | -0.2699 | 0.787  | -0.09166286  | count | 1 |
| BRWD1      | -0.069192  | 0.1632613 | -0.4238 | 0.672  | -0.091561333 | count | 1 |
| AP001107.2 | -0.4325604 | 0.9914033 | -0.4363 | 0.663  | -0.091452053 | count | 1 |
| CNTN4      | -0.4325604 | 1.024322  | -0.4223 | 0.673  | -0.091452053 | count | 1 |
| CEBPB-AS1  | -0.4325604 | 1.024322  | -0.4223 | 0.673  | -0.091452053 | count | 1 |
| PDE11A     | -0.4325604 | 1.1281294 | -0.3834 | 0.701  | -0.091452053 | count | 1 |
| CDKL4      | -0.4325604 | 1.157165  | -0.3738 | 0.709  | -0.091452053 | count | 1 |
| MYLK4      | -0.4325604 | 1.157165  | -0.3738 | 0.709  | -0.091452053 | count | 1 |
| AC006504.1 | -0.4325604 | 1.310327  | -0.3301 | 0.741  | -0.091452053 | count | 1 |
| MIA3       | -0.0651958 | 0.0968648 | -0.6731 | 0.501  | -0.091376922 | count | 1 |
| MTRF1      | -0.0982972 | 0.3734679 | -0.2632 | 0.792  | -0.091272558 | count | 1 |
| TMEM175    | -0.0731314 | 0.2103747 | -0.3476 | 0.728  | -0.091261769 | count | 1 |
| AC018645.2 | -0.4314758 | 0.6747304 | -0.6395 | 0.523  | -0.091190346 | count | 1 |
| PAQR7      | -0.0920513 | 0.3813393 | -0.2414 | 0.809  | -0.090997735 | count | 1 |
| AC090517.4 | -0.1150714 | 0.4857116 | -0.2369 | 0.813  | -0.090962486 | count | 1 |
| MSL3       | -0.0672984 | 0.1352872 | -0.4974 | 0.619  | -0.090824443 | count | 1 |
| ASF1A      | -0.0673976 | 0.1357158 | -0.4966 | 0.62   | -0.090740492 | count | 1 |
| SELENOI    | -0.104503  | 0.4406851 | -0.2371 | 0.813  | -0.090668019 | count | 1 |
| BCORL1     | -0.1089315 | 0.4443204 | -0.2452 | 0.806  | -0.090569459 | count | 1 |
| ZEB1-AS1   | -0.0854145 | 0.3178102 | -0.2688 | 0.788  | -0.090540215 | count | 1 |
| TTC26      | -0.1115503 | 0.4412439 | -0.2528 | 0.8    | -0.090532748 | count | 1 |
| SIPA1L3    | -0.1115503 | 0.4711821 | -0.2367 | 0.813  | -0.090532748 | count | 1 |
| GSE1       | -0.0712923 | 0.2120504 | -0.3362 | 0.737  | -0.090227717 | count | 1 |
| USP5       | -0.0799316 | 0.2904845 | -0.2752 | 0.783  | -0.09016926  | count | 1 |
| TOMM20     | -0.0630036 | 0.0505295 | -1.2469 | 0.213  | -0.090025843 | count | 1 |
| TRAM1      | -0.0632658 | 0.0678214 | -0.9328 | 0.351  | -0.089969566 | count | 1 |
| PLCL1      | -0.4264047 | 0.3800471 | -1.122  | 0.262  | -0.089968936 | count | 1 |
| SELENOF    | -0.0633317 | 0.0639191 | -0.9908 | 0.322  | -0.089924008 | count | 1 |

|            |            |           |         |        |              |       |   |
|------------|------------|-----------|---------|--------|--------------|-------|---|
| RAC1       | -0.0625198 | 0.0319442 | -1.9572 | 0.0504 | -0.089912892 | count | 1 |
| LINC01023  | -0.1631447 | 0.4588662 | -0.3555 | 0.722  | -0.089872638 | count | 1 |
| NDUFA5     | -0.0636505 | 0.0747516 | -0.8515 | 0.395  | -0.089856404 | count | 1 |
| AL357079.1 | -0.3147826 | 1.1612    | -0.2711 | 0.786  | -0.089647995 | count | 1 |
| TMEM232    | -0.3147826 | 1.1612    | -0.2711 | 0.786  | -0.089647995 | count | 1 |
| UNC5CL     | -0.3147826 | 1.1612    | -0.2711 | 0.786  | -0.089647995 | count | 1 |
| AL121748.2 | -0.3147826 | 1.1612    | -0.2711 | 0.786  | -0.089647995 | count | 1 |
| CCBE1      | -0.3147826 | 1.1612    | -0.2711 | 0.786  | -0.089647995 | count | 1 |
| AC022098.3 | -0.3147826 | 1.1612    | -0.2711 | 0.786  | -0.089647995 | count | 1 |
| C7orf61    | -0.3147826 | 1.166985  | -0.2697 | 0.787  | -0.089647995 | count | 1 |
| PLEKHB1    | -0.3147826 | 1.166985  | -0.2697 | 0.787  | -0.089647995 | count | 1 |
| CSPG4      | -0.3147826 | 1.166985  | -0.2697 | 0.787  | -0.089647995 | count | 1 |
| AL031775.1 | -0.3147826 | 1.346355  | -0.2338 | 0.815  | -0.089647995 | count | 1 |
| SHC4       | -0.3147826 | 1.346355  | -0.2338 | 0.815  | -0.089647995 | count | 1 |
| AL391095.1 | -0.3147826 | 1.346355  | -0.2338 | 0.815  | -0.089647995 | count | 1 |
| CTPS2      | -0.0937591 | 0.3635554 | -0.2579 | 0.797  | -0.089458325 | count | 1 |
| BBX        | -0.0635267 | 0.0968192 | -0.6561 | 0.512  | -0.08944627  | count | 1 |
| BTBD7      | -0.0650758 | 0.1213234 | -0.5364 | 0.592  | -0.089344397 | count | 1 |
| PARL       | -0.0659734 | 0.1530287 | -0.4311 | 0.666  | -0.089287625 | count | 1 |
| GOLGA7B    | -0.1355232 | 0.4927141 | -0.2751 | 0.783  | -0.089262835 | count | 1 |
| TCEAL3     | -0.0633618 | 0.0973264 | -0.651  | 0.515  | -0.089017443 | count | 1 |
| ERP44      | -0.0633811 | 0.0966653 | -0.6557 | 0.512  | -0.088942655 | count | 1 |
| RNF103     | -0.0765829 | 0.245544  | -0.3119 | 0.755  | -0.088834809 | count | 1 |
| EPB41      | -0.0681904 | 0.2172847 | -0.3138 | 0.754  | -0.088751588 | count | 1 |
| FAM45A     | -0.0652323 | 0.1516826 | -0.4301 | 0.667  | -0.088611733 | count | 1 |
| ENKD1      | -0.0758488 | 0.2554558 | -0.2969 | 0.767  | -0.088587503 | count | 1 |
| DNAAF4     | -0.0700906 | 0.2274342 | -0.3082 | 0.758  | -0.088587191 | count | 1 |
| AL024508.2 | -0.2167215 | 0.6996435 | -0.3098 | 0.757  | -0.088428987 | count | 1 |
| SMAD4      | -0.0665144 | 0.2004312 | -0.3319 | 0.74   | -0.088427682 | count | 1 |
| TNKS       | -0.0699413 | 0.2094448 | -0.3339 | 0.738  | -0.088397849 | count | 1 |
| CD47       | -0.0624985 | 0.0889472 | -0.7026 | 0.482  | -0.088172043 | count | 1 |
| CARD16     | -0.0619955 | 0.083925  | -0.7387 | 0.46   | -0.08777149  | count | 1 |
| CCDC180    | -0.1592068 | 0.8002399 | -0.1989 | 0.842  | -0.087619714 | count | 1 |
| PPP4R2     | -0.0631355 | 0.1075833 | -0.5869 | 0.557  | -0.087602716 | count | 1 |
| NUBP2      | -0.0641991 | 0.1368714 | -0.469  | 0.639  | -0.087578039 | count | 1 |
| SLC2A10    | -0.1106723 | 0.4813997 | -0.2299 | 0.818  | -0.087416763 | count | 1 |
| SF3B6      | -0.0612642 | 0.0545237 | -1.1236 | 0.2613 | -0.087414448 | count | 1 |
| ZNF135     | -0.1218761 | 0.5373364 | -0.2268 | 0.821  | -0.087360191 | count | 1 |
| ZNF106     | -0.0623854 | 0.0964218 | -0.647  | 0.518  | -0.087339334 | count | 1 |
| ERBIN      | -0.0635687 | 0.1248312 | -0.5092 | 0.611  | -0.087304398 | count | 1 |
| CCDC159    | -0.0692566 | 0.2227857 | -0.3109 | 0.756  | -0.08729682  | count | 1 |
| RAET1G     | -0.0926523 | 0.5013418 | -0.1848 | 0.853  | -0.087207827 | count | 1 |
| SLC46A3    | -0.0754585 | 0.3293975 | -0.2291 | 0.819  | -0.08720639  | count | 1 |
| RAMP2      | -0.0605304 | 0.0366897 | -1.6498 | 0.0991 | -0.087192706 | count | 1 |
| UTY        | -0.0713758 | 0.3090702 | -0.2309 | 0.817  | -0.087153488 | count | 1 |

|            |            |           |         |        |              |       |   |
|------------|------------|-----------|---------|--------|--------------|-------|---|
| DZIP3      | -0.0716789 | 0.3043333 | -0.2355 | 0.814  | -0.087153319 | count | 1 |
| MRPL35     | -0.0662682 | 0.1702423 | -0.3893 | 0.697  | -0.087108696 | count | 1 |
| STMN1      | -0.0618911 | 0.0937817 | -0.6599 | 0.509  | -0.087041697 | count | 1 |
| NOL12      | -0.0809322 | 0.3284493 | -0.2464 | 0.805  | -0.086932781 | count | 1 |
| VPS35L     | -0.0714794 | 0.2210038 | -0.3234 | 0.746  | -0.086909677 | count | 1 |
| RIN3       | -0.0837499 | 0.3042573 | -0.2753 | 0.783  | -0.086729682 | count | 1 |
| NFATC2IP   | -0.068902  | 0.2130133 | -0.3235 | 0.746  | -0.08672925  | count | 1 |
| PAXBP1-AS1 | -0.1096648 | 0.5421546 | -0.2023 | 0.84   | -0.086605456 | count | 1 |
| C19orf53   | -0.0605288 | 0.0506052 | -1.1961 | 0.232  | -0.086523468 | count | 1 |
| BTN2A1     | -0.0697199 | 0.2158637 | -0.323  | 0.747  | -0.08641897  | count | 1 |
| SPTSSA     | -0.0620487 | 0.1045963 | -0.5932 | 0.553  | -0.086259691 | count | 1 |
| MRPS21     | -0.0604828 | 0.0624232 | -0.9689 | 0.333  | -0.086089807 | count | 1 |
| ANO7       | -0.1696091 | 0.6798737 | -0.2495 | 0.803  | -0.085997409 | count | 1 |
| LEPROTL1   | -0.0627691 | 0.1253858 | -0.5006 | 0.617  | -0.085993435 | count | 1 |
| SEC24D     | -0.0712999 | 0.2708466 | -0.2632 | 0.792  | -0.085896063 | count | 1 |
| CTBP1      | -0.0645338 | 0.1593651 | -0.4049 | 0.686  | -0.085524147 | count | 1 |
| ANXA2      | -0.0593785 | 0.0338345 | -1.755  | 0.0794 | -0.085372619 | count | 1 |
| BICD1      | -0.0646422 | 0.2062769 | -0.3134 | 0.754  | -0.0853328   | count | 1 |
| ATP6AP1L   | -0.0948501 | 0.5390028 | -0.176  | 0.86   | -0.085264919 | count | 1 |
| PPIL4      | -0.0608925 | 0.1003899 | -0.6066 | 0.544  | -0.085207193 | count | 1 |
| ROCK2      | -0.0608063 | 0.0974841 | -0.6238 | 0.533  | -0.085177371 | count | 1 |
| CNOT6L     | -0.0614137 | 0.1143623 | -0.537  | 0.591  | -0.08514277  | count | 1 |
| UBE2W      | -0.0643613 | 0.155036  | -0.4151 | 0.678  | -0.085059557 | count | 1 |
| COQ9       | -0.0643999 | 0.1811062 | -0.3556 | 0.722  | -0.085012256 | count | 1 |
| BZW1       | -0.0594293 | 0.054504  | -1.0904 | 0.2756 | -0.084854015 | count | 1 |
| TCEA1      | -0.0597356 | 0.072446  | -0.8246 | 0.41   | -0.084764567 | count | 1 |
| FAM124B    | -0.0888129 | 0.2869292 | -0.3095 | 0.757  | -0.084683207 | count | 1 |
| LTF        | -0.1539352 | 0.5113661 | -0.301  | 0.763  | -0.084610173 | count | 1 |
| CEP120     | -0.0724159 | 0.2637554 | -0.2746 | 0.784  | -0.084556296 | count | 1 |
| MNT        | -0.0712065 | 0.2454305 | -0.2901 | 0.772  | -0.084435194 | count | 1 |
| ZNF511     | -0.0637892 | 0.1794839 | -0.3554 | 0.722  | -0.084396988 | count | 1 |
| RNF219     | -0.0645645 | 0.1827534 | -0.3533 | 0.724  | -0.084340928 | count | 1 |
| MFSD4B     | -0.0852443 | 0.390505  | -0.2183 | 0.827  | -0.08419765  | count | 1 |
| OTUD5      | -0.0692077 | 0.2108056 | -0.3283 | 0.743  | -0.084135756 | count | 1 |
| CTNNA1     | -0.0595826 | 0.0816704 | -0.7295 | 0.466  | -0.084065518 | count | 1 |
| DLGAP1-AS1 | -0.0715008 | 0.2497001 | -0.2863 | 0.775  | -0.084025196 | count | 1 |
| LONP2      | -0.0621255 | 0.1472875 | -0.4218 | 0.673  | -0.084020472 | count | 1 |
| KIF3A      | -0.0649379 | 0.1811952 | -0.3584 | 0.72   | -0.084015383 | count | 1 |
| AC147651.4 | -0.0969376 | 0.3986452 | -0.2432 | 0.808  | -0.084004517 | count | 1 |
| ZNF614     | -0.0849702 | 0.390052  | -0.2178 | 0.828  | -0.083924061 | count | 1 |
| YWHAG      | -0.060906  | 0.1125044 | -0.5414 | 0.588  | -0.083884733 | count | 1 |
| RAB22A     | -0.061238  | 0.1325749 | -0.4619 | 0.644  | -0.083738192 | count | 1 |
| CSNK1G3    | -0.0609572 | 0.1283208 | -0.475  | 0.635  | -0.083636911 | count | 1 |
| PROSER2    | -0.0846453 | 0.3642349 | -0.2324 | 0.816  | -0.083599789 | count | 1 |
| CDC123     | -0.0597541 | 0.0905679 | -0.6598 | 0.509  | -0.08354788  | count | 1 |

|            |            |           |         |        |              |       |   |
|------------|------------|-----------|---------|--------|--------------|-------|---|
| COX10      | -0.0836177 | 0.3409668 | -0.2452 | 0.806  | -0.083451881 | count | 1 |
| RCBTB1     | -0.0836177 | 0.3478939 | -0.2404 | 0.81   | -0.083451881 | count | 1 |
| SYAP1      | -0.0606578 | 0.1132369 | -0.5357 | 0.592  | -0.083375729 | count | 1 |
| SON        | -0.0581411 | 0.0527753 | -1.1017 | 0.271  | -0.083191546 | count | 1 |
| DUSP28     | -0.0779859 | 0.3316821 | -0.2351 | 0.814  | -0.083183584 | count | 1 |
| SRRT       | -0.0640366 | 0.1829626 | -0.35   | 0.726  | -0.083130003 | count | 1 |
| WDR33      | -0.0599339 | 0.1112808 | -0.5386 | 0.59   | -0.083118385 | count | 1 |
| ZNF649     | -0.0727609 | 0.3109407 | -0.234  | 0.815  | -0.083097861 | count | 1 |
| PDCD7      | -0.0598328 | 0.1166987 | -0.5127 | 0.608  | -0.083025324 | count | 1 |
| RALGAPA1   | -0.0630448 | 0.1990259 | -0.3168 | 0.751  | -0.08296768  | count | 1 |
| NAA35      | -0.0686844 | 0.2271059 | -0.3024 | 0.762  | -0.082929492 | count | 1 |
| COX6A1     | -0.0578437 | 0.0428535 | -1.3498 | 0.177  | -0.082908869 | count | 1 |
| CES2       | -0.0788256 | 0.289021  | -0.2727 | 0.785  | -0.082886639 | count | 1 |
| ABLIM1     | -0.0586397 | 0.0885588 | -0.6622 | 0.508  | -0.082854156 | count | 1 |
| ATP6V1B2   | -0.06939   | 0.2400365 | -0.2891 | 0.773  | -0.082731392 | count | 1 |
| PURB       | -0.0606911 | 0.1294257 | -0.4689 | 0.639  | -0.082727771 | count | 1 |
| CACTIN     | -0.0954303 | 0.3621941 | -0.2635 | 0.792  | -0.082678731 | count | 1 |
| AC007611.1 | -0.2372494 | 0.7530561 | -0.315  | 0.753  | -0.08260051  | count | 1 |
| CYTH2      | -0.0599892 | 0.1105314 | -0.5427 | 0.587  | -0.082553586 | count | 1 |
| GTF2IRD2   | -0.0971411 | 0.5247153 | -0.1851 | 0.853  | -0.082451071 | count | 1 |
| SETD3      | -0.0619573 | 0.1476227 | -0.4197 | 0.675  | -0.082316412 | count | 1 |
| LRP5L      | -0.1623468 | 0.5977135 | -0.2716 | 0.786  | -0.082163175 | count | 1 |
| C17orf75   | -0.0639173 | 0.1994466 | -0.3205 | 0.749  | -0.081986074 | count | 1 |
| DNAJB5     | -0.1246581 | 0.7069039 | -0.1763 | 0.86   | -0.08191617  | count | 1 |
| EIF2AK1    | -0.0605847 | 0.1596033 | -0.3796 | 0.704  | -0.081908023 | count | 1 |
| UBE2Z      | -0.0599134 | 0.1228048 | -0.4879 | 0.626  | -0.081889492 | count | 1 |
| GPR89B     | -0.1190778 | 0.4835235 | -0.2463 | 0.805  | -0.081873452 | count | 1 |
| RPSA       | -0.0568221 | 0.0273844 | -2.075  | 0.0381 | -0.081799629 | count | 1 |
| RNF157     | -0.1780571 | 0.8717014 | -0.2043 | 0.838  | -0.081663335 | count | 1 |
| SEH1L      | -0.0680784 | 0.2693142 | -0.2528 | 0.8    | -0.081589665 | count | 1 |
| NOTCH1     | -0.0601255 | 0.1495457 | -0.4021 | 0.688  | -0.081386171 | count | 1 |
| ABHD13     | -0.063335  | 0.20537   | -0.3084 | 0.758  | -0.081319854 | count | 1 |
| UBXN7      | -0.0648933 | 0.2059551 | -0.3151 | 0.753  | -0.08119568  | count | 1 |
| ASAH1      | -0.0584097 | 0.1103354 | -0.5294 | 0.597  | -0.081048864 | count | 1 |
| SNX13      | -0.0619317 | 0.1942787 | -0.3188 | 0.75   | -0.080952679 | count | 1 |
| INPPL1     | -0.0974445 | 0.3690792 | -0.264  | 0.792  | -0.080863741 | count | 1 |
| POGZ       | -0.0600078 | 0.1696515 | -0.3537 | 0.724  | -0.080860605 | count | 1 |
| UTP14C     | -0.0794019 | 0.3492698 | -0.2273 | 0.82   | -0.080761302 | count | 1 |
| PCGF2      | -0.057793  | 0.1003765 | -0.5758 | 0.565  | -0.080634675 | count | 1 |
| DZIP1L     | -0.1366671 | 0.5170522 | -0.2643 | 0.792  | -0.080341585 | count | 1 |
| AC007325.4 | -0.1364776 | 0.6539136 | -0.2087 | 0.835  | -0.080226642 | count | 1 |
| CEP104     | -0.0674227 | 0.2294542 | -0.2938 | 0.769  | -0.08015405  | count | 1 |
| ZCWPW2     | -0.2306646 | 0.5207843 | -0.4429 | 0.658  | -0.080151127 | count | 1 |
| ZNF324B    | -0.2306646 | 0.5851758 | -0.3942 | 0.693  | -0.080151127 | count | 1 |
| RTF2       | -0.0566644 | 0.0721246 | -0.7856 | 0.432  | -0.080099706 | count | 1 |

|            |            |           |         |        |              |       |   |
|------------|------------|-----------|---------|--------|--------------|-------|---|
| IL1RAP     | -0.1079776 | 0.4608455 | -0.2343 | 0.815  | -0.080069792 | count | 1 |
| SLC41A2    | -0.0923119 | 0.4218341 | -0.2188 | 0.827  | -0.079937796 | count | 1 |
| WDR61      | -0.0576931 | 0.1169801 | -0.4932 | 0.622  | -0.079922525 | count | 1 |
| DNAJC8     | -0.0562144 | 0.0665041 | -0.8453 | 0.398  | -0.079901844 | count | 1 |
| TRMT13     | -0.064324  | 0.2020194 | -0.3184 | 0.75   | -0.079842505 | count | 1 |
| CAPZA2     | -0.0559166 | 0.0552404 | -1.0122 | 0.312  | -0.079767699 | count | 1 |
| STIP1      | -0.0597803 | 0.1429427 | -0.4182 | 0.676  | -0.079687863 | count | 1 |
| CYC1       | -0.0565901 | 0.0815458 | -0.694  | 0.488  | -0.079663636 | count | 1 |
| ELOA       | -0.058528  | 0.1355766 | -0.4317 | 0.666  | -0.079427102 | count | 1 |
| PAXIP1     | -0.1105292 | 0.4841919 | -0.2283 | 0.819  | -0.079048973 | count | 1 |
| BRK1       | -0.0552942 | 0.0520261 | -1.0628 | 0.288  | -0.078977693 | count | 1 |
| ZNF662     | -0.1001314 | 0.4549577 | -0.2201 | 0.826  | -0.078942424 | count | 1 |
| STOM       | -0.0551563 | 0.0528593 | -1.0435 | 0.297  | -0.078844643 | count | 1 |
| GNB2       | -0.0555272 | 0.0679963 | -0.8166 | 0.414  | -0.078744207 | count | 1 |
| THADA      | -0.0659499 | 0.259017  | -0.2546 | 0.799  | -0.078611365 | count | 1 |
| FKBP10     | -0.0585326 | 0.1528234 | -0.383  | 0.702  | -0.07858312  | count | 1 |
| ZFPM2      | -0.0646082 | 0.2815386 | -0.2295 | 0.819  | -0.078521741 | count | 1 |
| TCF25      | -0.0553213 | 0.0767725 | -0.7206 | 0.471  | -0.078391243 | count | 1 |
| FAM43A     | -0.0581566 | 0.1789557 | -0.325  | 0.745  | -0.078389292 | count | 1 |
| EEF1G      | -0.0993008 | 0.6099214 | -0.1628 | 0.871  | -0.078275971 | count | 1 |
| AC239868.2 | -0.1137699 | 0.5772104 | -0.1971 | 0.844  | -0.078138422 | count | 1 |
| RUSC1-AS1  | -0.2775474 | 0.8271481 | -0.3355 | 0.737  | -0.078128153 | count | 1 |
| KLHDC9     | -0.0678937 | 0.3259319 | -0.2083 | 0.835  | -0.078123394 | count | 1 |
| RBM12B     | -0.0639039 | 0.2858164 | -0.2236 | 0.823  | -0.077994609 | count | 1 |
| FAM78A     | -0.1251195 | 0.5665465 | -0.2208 | 0.825  | -0.077982984 | count | 1 |
| CHD2       | -0.0573261 | 0.1469899 | -0.39   | 0.697  | -0.077980691 | count | 1 |
| TRIM66     | -0.0841381 | 0.5156012 | -0.1632 | 0.87   | -0.07797014  | count | 1 |
| INO80      | -0.0582598 | 0.1706989 | -0.3413 | 0.733  | -0.077966008 | count | 1 |
| RAN        | -0.0542993 | 0.0475606 | -1.1417 | 0.2537 | -0.077673342 | count | 1 |
| SLC10A7    | -0.0959011 | 0.3648762 | -0.2628 | 0.793  | -0.077622478 | count | 1 |
| DVL3       | -0.0777195 | 0.2675765 | -0.2905 | 0.771  | -0.077509807 | count | 1 |
| AC116667.1 | -0.6327451 | 0.9350967 | -0.6767 | 0.499  | -0.077507776 | count | 1 |
| AC011450.1 | -0.6327451 | 0.9350967 | -0.6767 | 0.499  | -0.077507776 | count | 1 |
| AL139246.3 | -0.6327451 | 1.068577  | -0.5921 | 0.554  | -0.077507776 | count | 1 |
| KIAA2012   | -0.6327451 | 1.068577  | -0.5921 | 0.554  | -0.077507776 | count | 1 |
| PFKFB4     | -0.6327451 | 1.068577  | -0.5921 | 0.554  | -0.077507776 | count | 1 |
| GJB7       | -0.6327451 | 1.068577  | -0.5921 | 0.554  | -0.077507776 | count | 1 |
| FATE1      | -0.6327451 | 1.068577  | -0.5921 | 0.554  | -0.077507776 | count | 1 |
| TMPRSS5    | -0.6327451 | 1.068577  | -0.5921 | 0.554  | -0.077507776 | count | 1 |
| ACSM2A     | -0.6327451 | 1.068577  | -0.5921 | 0.554  | -0.077507776 | count | 1 |
| AC009088.1 | -0.6327451 | 1.068577  | -0.5921 | 0.554  | -0.077507776 | count | 1 |
| APCDD1     | -0.6327451 | 1.068577  | -0.5921 | 0.554  | -0.077507776 | count | 1 |
| FCGBP      | -0.6327451 | 1.068577  | -0.5921 | 0.554  | -0.077507776 | count | 1 |
| EPB41L4B   | -0.6327451 | 1.095066  | -0.5778 | 0.563  | -0.077507776 | count | 1 |
| FOXN2      | -0.0577939 | 0.1580816 | -0.3656 | 0.715  | -0.077341489 | count | 1 |

|            |            |           |         |        |              |       |   |
|------------|------------|-----------|---------|--------|--------------|-------|---|
| RILPL2     | -0.0545967 | 0.0767039 | -0.7118 | 0.477  | -0.077333902 | count | 1 |
| PPP2R1B    | -0.066932  | 0.2635804 | -0.2539 | 0.8    | -0.077010879 | count | 1 |
| FOXP4      | -0.1038447 | 0.4576064 | -0.2269 | 0.82   | -0.076944166 | count | 1 |
| CASC3      | -0.0586335 | 0.1908977 | -0.3071 | 0.759  | -0.076847946 | count | 1 |
| TOR1A      | -0.0580543 | 0.1664642 | -0.3487 | 0.727  | -0.076708237 | count | 1 |
| EEF1E1     | -0.0555311 | 0.1264283 | -0.4392 | 0.661  | -0.076534785 | count | 1 |
| GNAZ       | -0.0900044 | 0.4306843 | -0.209  | 0.834  | -0.076305188 | count | 1 |
| STAG2      | -0.0547594 | 0.1079977 | -0.507  | 0.612  | -0.076258808 | count | 1 |
| RPS29      | -0.0530009 | 0.0286094 | -1.8526 | 0.0641 | -0.076234962 | count | 1 |
| SRGAP2C    | -0.0624563 | 0.2307333 | -0.2707 | 0.787  | -0.076221109 | count | 1 |
| LINC01560  | -0.0789541 | 0.4377576 | -0.1804 | 0.857  | -0.076142222 | count | 1 |
| TMEM254    | -0.0833435 | 0.402167  | -0.2072 | 0.836  | -0.076042549 | count | 1 |
| SMYD5      | -0.093881  | 0.4560871 | -0.2058 | 0.837  | -0.075960848 | count | 1 |
| ATP5MC1    | -0.0536361 | 0.072393  | -0.7409 | 0.459  | -0.075884179 | count | 1 |
| MCCC1      | -0.0654473 | 0.2891448 | -0.2263 | 0.821  | -0.075852388 | count | 1 |
| U62317.3   | -0.366219  | 0.8417156 | -0.4351 | 0.664  | -0.075749584 | count | 1 |
| HES7       | -0.366219  | 0.9096423 | -0.4026 | 0.687  | -0.075749584 | count | 1 |
| AC027575.2 | -0.366219  | 0.965499  | -0.3793 | 0.704  | -0.075749584 | count | 1 |
| PMVK       | -0.0562203 | 0.1451169 | -0.3874 | 0.698  | -0.075749471 | count | 1 |
| MAATS1     | -0.2696444 | 0.9885599 | -0.2728 | 0.785  | -0.07571503  | count | 1 |
| DRAIC      | -0.2696444 | 0.9885599 | -0.2728 | 0.785  | -0.07571503  | count | 1 |
| ANKRD7     | -0.2696444 | 0.9974871 | -0.2703 | 0.787  | -0.07571503  | count | 1 |
| AC009034.1 | -0.2696444 | 1.188738  | -0.2268 | 0.821  | -0.07571503  | count | 1 |
| AL512408.1 | -0.2696444 | 1.2966049 | -0.208  | 0.835  | -0.07571503  | count | 1 |
| YIF1B      | -0.0560577 | 0.1627296 | -0.3445 | 0.731  | -0.075706927 | count | 1 |
| PDP2       | -0.1016642 | 0.6167577 | -0.1648 | 0.869  | -0.075297027 | count | 1 |
| COMMD2     | -0.0544583 | 0.125369  | -0.4344 | 0.664  | -0.075210129 | count | 1 |
| LYPLA1     | -0.0537648 | 0.0955203 | -0.5629 | 0.574  | -0.07518452  | count | 1 |
| TTL12      | -0.1092692 | 0.4126804 | -0.2648 | 0.791  | -0.074977576 | count | 1 |
| SYNRG      | -0.0570122 | 0.1656822 | -0.3441 | 0.731  | -0.074868752 | count | 1 |
| AC083880.1 | -0.1367356 | 0.5082261 | -0.269  | 0.788  | -0.074842156 | count | 1 |
| AC022613.2 | -0.1202119 | 0.4987456 | -0.241  | 0.81   | -0.074842    | count | 1 |
| AL603832.2 | -0.3620297 | 0.7443086 | -0.4864 | 0.627  | -0.074778798 | count | 1 |
| PPP1CA     | -0.053052  | 0.087081  | -0.6092 | 0.542  | -0.074567314 | count | 1 |
| LRRK1      | -0.0670936 | 0.3123068 | -0.2148 | 0.83   | -0.074515877 | count | 1 |
| SRRD       | -0.058413  | 0.1999611 | -0.2921 | 0.77   | -0.074505822 | count | 1 |
| SREK1      | -0.0535398 | 0.1117477 | -0.4791 | 0.632  | -0.074444225 | count | 1 |
| CHCHD2     | -0.0517532 | 0.0361262 | -1.4326 | 0.152  | -0.074276458 | count | 1 |
| PIGH       | -0.0569907 | 0.181871  | -0.3134 | 0.754  | -0.074258597 | count | 1 |
| AC010999.2 | -0.1625471 | 0.894651  | -0.1817 | 0.856  | -0.074240387 | count | 1 |
| FAM69C     | -0.6089485 | 0.9083283 | -0.6704 | 0.503  | -0.073983587 | count | 1 |
| VPS29      | -0.0520509 | 0.0664341 | -0.7835 | 0.433  | -0.073841082 | count | 1 |
| MYCBP2     | -0.0520896 | 0.0818829 | -0.6361 | 0.525  | -0.073824149 | count | 1 |
| CRIP2      | -0.0513321 | 0.0375442 | -1.3672 | 0.172  | -0.073823411 | count | 1 |
| SRP14      | -0.0511751 | 0.0354528 | -1.4435 | 0.149  | -0.073711427 | count | 1 |

|            |            |           |         |        |              |       |   |
|------------|------------|-----------|---------|--------|--------------|-------|---|
| LARP1      | -0.0543085 | 0.1392156 | -0.3901 | 0.696  | -0.073501823 | count | 1 |
| TLDC1      | -0.0735318 | 0.3512665 | -0.2093 | 0.834  | -0.073295989 | count | 1 |
| MCTS1      | -0.0527185 | 0.1134222 | -0.4648 | 0.642  | -0.07306947  | count | 1 |
| RSRC2      | -0.0514767 | 0.0685707 | -0.7507 | 0.453  | -0.073054571 | count | 1 |
| PEX7       | -0.0637482 | 0.317974  | -0.2005 | 0.841  | -0.073044295 | count | 1 |
| ZFAND3     | -0.056021  | 0.1712705 | -0.3271 | 0.744  | -0.072761296 | count | 1 |
| LATS1      | -0.0596312 | 0.2692918 | -0.2214 | 0.825  | -0.072760871 | count | 1 |
| ARPC1B     | -0.0508301 | 0.052134  | -0.975  | 0.3297 | -0.072678792 | count | 1 |
| TBCE       | -0.1799446 | 0.6435301 | -0.2796 | 0.78   | -0.072666073 | count | 1 |
| ITSN1      | -0.0566406 | 0.2234938 | -0.2534 | 0.8    | -0.07262917  | count | 1 |
| SENP2      | -0.0580509 | 0.2735902 | -0.2122 | 0.832  | -0.072608296 | count | 1 |
| MBTPS1     | -0.0529583 | 0.135168  | -0.3918 | 0.695  | -0.072567182 | count | 1 |
| TUBE1      | -0.0555571 | 0.1990085 | -0.2792 | 0.78   | -0.072550111 | count | 1 |
| CLIP1      | -0.0524814 | 0.1180663 | -0.4445 | 0.657  | -0.07236095  | count | 1 |
| IMPAD1     | -0.0549751 | 0.1705426 | -0.3224 | 0.747  | -0.072327614 | count | 1 |
| SPAAR      | -0.0975536 | 0.4041615 | -0.2414 | 0.809  | -0.072195529 | count | 1 |
| GORAB      | -0.0634899 | 0.2819166 | -0.2252 | 0.822  | -0.072152898 | count | 1 |
| SLA        | -0.5957913 | 0.8043092 | -0.7407 | 0.459  | -0.072056192 | count | 1 |
| CLDN7      | -0.1007714 | 0.6025658 | -0.1672 | 0.867  | -0.071930547 | count | 1 |
| AP3S1      | -0.0518066 | 0.1015679 | -0.5101 | 0.61   | -0.071846539 | count | 1 |
| FAAP20     | -0.0511943 | 0.1047605 | -0.4887 | 0.625  | -0.071667264 | count | 1 |
| KIAA0391   | -0.1093526 | 0.6278148 | -0.1742 | 0.862  | -0.071622707 | count | 1 |
| ATP5IF1    | -0.0501477 | 0.0570551 | -0.8789 | 0.3795 | -0.071501206 | count | 1 |
| LINC01843  | -0.2557338 | 0.7880105 | -0.3245 | 0.746  | -0.071494646 | count | 1 |
| SMUG1      | -0.0612273 | 0.2804193 | -0.2183 | 0.827  | -0.071431731 | count | 1 |
| CAPN15     | -0.0641234 | 0.2914708 | -0.22   | 0.826  | -0.071197861 | count | 1 |
| UPF3A      | -0.0503878 | 0.095331  | -0.5286 | 0.597  | -0.071152267 | count | 1 |
| ILK        | -0.0515533 | 0.1051506 | -0.4903 | 0.624  | -0.071101569 | count | 1 |
| ATP11B     | -0.057923  | 0.2195714 | -0.2638 | 0.792  | -0.071096658 | count | 1 |
| IKBKB      | -0.0542158 | 0.2231611 | -0.2429 | 0.808  | -0.071094813 | count | 1 |
| ORC3       | -0.0542772 | 0.2101615 | -0.2583 | 0.796  | -0.070978153 | count | 1 |
| SEC31A     | -0.0507718 | 0.1024526 | -0.4956 | 0.62   | -0.070837872 | count | 1 |
| SLC30A6    | -0.0634365 | 0.3093918 | -0.205  | 0.838  | -0.070785339 | count | 1 |
| NIT2       | -0.0544749 | 0.192644  | -0.2828 | 0.777  | -0.070748875 | count | 1 |
| C1GALT1C1L | -0.0955962 | 0.7611262 | -0.1256 | 0.9    | -0.070720306 | count | 1 |
| MSC-AS1    | -0.1079807 | 0.6637353 | -0.1627 | 0.871  | -0.070703249 | count | 1 |
| ERC1       | -0.0525686 | 0.1635627 | -0.3214 | 0.748  | -0.070644712 | count | 1 |
| ATP6V0A2   | -0.0621922 | 0.2898209 | -0.2146 | 0.83   | -0.070365498 | count | 1 |
| GMEB2      | -0.0712809 | 0.5798937 | -0.1229 | 0.902  | -0.070283327 | count | 1 |
| TPGS1      | -0.0503443 | 0.1069673 | -0.4707 | 0.638  | -0.070275374 | count | 1 |
| ZNF37A     | -0.0551017 | 0.2082094 | -0.2646 | 0.791  | -0.070271597 | count | 1 |
| GNAQ       | -0.0502098 | 0.1059951 | -0.4737 | 0.636  | -0.070147823 | count | 1 |
| BACH1      | -0.0524887 | 0.1750696 | -0.2998 | 0.764  | -0.070141448 | count | 1 |
| LRRC37A3   | -0.1391057 | 0.6468566 | -0.215  | 0.83   | -0.069983589 | count | 1 |
| MMACHC     | -0.1391057 | 0.6915009 | -0.2012 | 0.841  | -0.069983589 | count | 1 |

|            |            |           |         |       |              |       |   |
|------------|------------|-----------|---------|-------|--------------|-------|---|
| CDK2       | -0.0652385 | 0.28778   | -0.2267 | 0.821 | -0.069964581 | count | 1 |
| MCTP2      | -0.0676126 | 0.3498748 | -0.1932 | 0.847 | -0.06989236  | count | 1 |
| MTX3       | -0.0625821 | 0.3383027 | -0.185  | 0.853 | -0.069826617 | count | 1 |
| CPSF6      | -0.0534743 | 0.1618261 | -0.3304 | 0.741 | -0.069773064 | count | 1 |
| GABARAP    | -0.0732888 | 0.2894424 | -0.2532 | 0.8   | -0.069735786 | count | 1 |
| SLC35A3    | -0.0554217 | 0.2007114 | -0.2761 | 0.782 | -0.069615766 | count | 1 |
| DDX6       | -0.0496843 | 0.0924515 | -0.5374 | 0.591 | -0.069439329 | count | 1 |
| EDRF1      | -0.0587583 | 0.3936501 | -0.1493 | 0.881 | -0.069409913 | count | 1 |
| PEG3       | -0.3378264 | 0.9014372 | -0.3748 | 0.708 | -0.069218387 | count | 1 |
| CABLES2    | -0.3378264 | 0.9372514 | -0.3604 | 0.719 | -0.069218387 | count | 1 |
| ALG5       | -0.0497861 | 0.1140494 | -0.4365 | 0.662 | -0.06917866  | count | 1 |
| SLC36A4    | -0.0603915 | 0.2931708 | -0.206  | 0.837 | -0.068900928 | count | 1 |
| PTPN4      | -0.0565672 | 0.2272612 | -0.2489 | 0.803 | -0.068863699 | count | 1 |
| RAPGEF2    | -0.0534342 | 0.2042872 | -0.2616 | 0.794 | -0.068781441 | count | 1 |
| HPS4       | -0.0555567 | 0.2582224 | -0.2152 | 0.83  | -0.068689166 | count | 1 |
| TMEM214    | -0.0561656 | 0.2610365 | -0.2152 | 0.83  | -0.068659079 | count | 1 |
| RFX7       | -0.0603915 | 0.2866748 | -0.2107 | 0.833 | -0.068613883 | count | 1 |
| IRAK3      | -0.0498859 | 0.1251856 | -0.3985 | 0.69  | -0.068482385 | count | 1 |
| EHD3       | -0.0763744 | 0.4638596 | -0.1646 | 0.869 | -0.068467646 | count | 1 |
| DERL3      | -0.5705888 | 0.7889911 | -0.7232 | 0.47  | -0.068406263 | count | 1 |
| EFNA3      | -0.0709247 | 0.4475928 | -0.1585 | 0.874 | -0.068326837 | count | 1 |
| GALNT7     | -0.0552693 | 0.2237179 | -0.247  | 0.805 | -0.068210779 | count | 1 |
| TNFAIP2    | -0.052137  | 0.1801222 | -0.2895 | 0.772 | -0.068174018 | count | 1 |
| SLC30A7    | -0.0526647 | 0.2051935 | -0.2567 | 0.797 | -0.068162311 | count | 1 |
| KDELC2     | -0.0559333 | 0.2257645 | -0.2478 | 0.804 | -0.068089337 | count | 1 |
| MZT2A      | -0.0482939 | 0.0947388 | -0.5098 | 0.61  | -0.067932579 | count | 1 |
| CLTA       | -0.0473521 | 0.0455924 | -1.0386 | 0.299 | -0.067778389 | count | 1 |
| FOSL1      | -0.0531288 | 0.2094244 | -0.2537 | 0.8   | -0.067749407 | count | 1 |
| TMEM144    | -0.0637006 | 0.3755568 | -0.1696 | 0.865 | -0.067369671 | count | 1 |
| SNX21      | -0.0567721 | 0.2541879 | -0.2233 | 0.823 | -0.067250773 | count | 1 |
| FGF12      | -0.3284974 | 0.6129216 | -0.536  | 0.592 | -0.067097072 | count | 1 |
| BRAT1      | -0.0537984 | 0.1997155 | -0.2694 | 0.788 | -0.066959498 | count | 1 |
| FNDC3A     | -0.0479713 | 0.1161014 | -0.4132 | 0.68  | -0.066922562 | count | 1 |
| SPG21      | -0.0500791 | 0.154731  | -0.3237 | 0.746 | -0.066797968 | count | 1 |
| ZNF263     | -0.0646203 | 0.2970107 | -0.2176 | 0.828 | -0.066776754 | count | 1 |
| NCDN       | -0.1074707 | 0.7022764 | -0.153  | 0.878 | -0.066718367 | count | 1 |
| DBP        | -0.0523879 | 0.2178692 | -0.2405 | 0.81  | -0.066649074 | count | 1 |
| MAP7       | -0.1463467 | 0.5108578 | -0.2865 | 0.775 | -0.066549889 | count | 1 |
| OSTM1      | -0.0500477 | 0.171289  | -0.2922 | 0.77  | -0.066295339 | count | 1 |
| ACLY       | -0.0512458 | 0.1858506 | -0.2757 | 0.783 | -0.066083374 | count | 1 |
| RIPOR1     | -0.0487122 | 0.1389359 | -0.3506 | 0.726 | -0.066035129 | count | 1 |
| DDIAS      | -0.3226714 | 0.6873043 | -0.4695 | 0.639 | -0.065778481 | count | 1 |
| AC104986.2 | -0.1205665 | 0.544495  | -0.2214 | 0.825 | -0.065731005 | count | 1 |
| MRE11      | -0.0501755 | 0.1811028 | -0.2771 | 0.782 | -0.065651009 | count | 1 |
| KNL1       | -0.2361796 | 0.8317617 | -0.284  | 0.776 | -0.065620444 | count | 1 |



|            |            |           |         |       |              |       |   |
|------------|------------|-----------|---------|-------|--------------|-------|---|
| RHOBTB1    | -0.0592776 | 0.4102922 | -0.1445 | 0.885 | -0.065445219 | count | 1 |
| XRCC6      | -0.0461259 | 0.0746941 | -0.6175 | 0.537 | -0.065140537 | count | 1 |
| ECHS1      | -0.0462185 | 0.0827208 | -0.5587 | 0.576 | -0.065129025 | count | 1 |
| SCRN3      | -0.0506225 | 0.23309   | -0.2172 | 0.828 | -0.065091098 | count | 1 |
| CHPT1      | -0.0495108 | 0.1770415 | -0.2797 | 0.78  | -0.064957556 | count | 1 |
| SPACA9     | -0.0536871 | 0.2729879 | -0.1967 | 0.844 | -0.064911017 | count | 1 |
| SCHIP1     | -0.0910791 | 0.4783128 | -0.1904 | 0.849 | -0.064886409 | count | 1 |
| ZC3H8      | -0.0493113 | 0.1815772 | -0.2716 | 0.786 | -0.06482211  | count | 1 |
| ADAR       | -0.0465195 | 0.1092215 | -0.4259 | 0.67  | -0.0647399   | count | 1 |
| BRWD1-AS2  | -0.1611287 | 0.6588192 | -0.2446 | 0.807 | -0.064720997 | count | 1 |
| AC069544.1 | -0.1611287 | 0.6615681 | -0.2436 | 0.808 | -0.064720997 | count | 1 |
| ENOPH1     | -0.0500494 | 0.170436  | -0.2937 | 0.769 | -0.064713551 | count | 1 |
| PHB        | -0.0454653 | 0.0729064 | -0.6236 | 0.533 | -0.064374125 | count | 1 |
| MPHOSPH9   | -0.0628117 | 0.3872011 | -0.1622 | 0.871 | -0.064341187 | count | 1 |
| BAK1       | -0.0572463 | 0.3226561 | -0.1774 | 0.859 | -0.063842567 | count | 1 |
| DHX33      | -0.0620822 | 0.3532077 | -0.1758 | 0.86  | -0.063588597 | count | 1 |
| PGD        | -0.0534311 | 0.2820749 | -0.1894 | 0.85  | -0.063458532 | count | 1 |
| ELOVL3     | -0.0970352 | 0.6646014 | -0.146  | 0.884 | -0.063386324 | count | 1 |
| C11orf98   | -0.1263226 | 0.4766385 | -0.265  | 0.791 | -0.063343723 | count | 1 |
| SEMA4C     | -0.0493586 | 0.1857225 | -0.2658 | 0.79  | -0.063205455 | count | 1 |
| USE1       | -0.0463476 | 0.1359116 | -0.341  | 0.733 | -0.063141181 | count | 1 |
| ST3GAL6    | -0.055132  | 0.2467361 | -0.2234 | 0.823 | -0.06312729  | count | 1 |
| USP30      | -0.0745876 | 0.4801764 | -0.1553 | 0.877 | -0.063075999 | count | 1 |
| KRT18      | -0.045337  | 0.1433638 | -0.3162 | 0.752 | -0.062979252 | count | 1 |
| ZNF557     | -0.058353  | 0.3290562 | -0.1773 | 0.859 | -0.06294111  | count | 1 |
| FAM111A    | -0.0461831 | 0.14437   | -0.3199 | 0.749 | -0.062886121 | count | 1 |
| UBE2L3     | -0.0443557 | 0.0734046 | -0.6043 | 0.546 | -0.062818592 | count | 1 |
| DGLUCY     | -0.0488069 | 0.1917022 | -0.2546 | 0.799 | -0.062812689 | count | 1 |
| SQOR       | -0.0453411 | 0.1170599 | -0.3873 | 0.699 | -0.062517602 | count | 1 |
| EIF4EBP2   | -0.0468726 | 0.1754074 | -0.2672 | 0.789 | -0.062486383 | count | 1 |
| GTF2F2     | -0.046723  | 0.1611474 | -0.2899 | 0.772 | -0.062343383 | count | 1 |
| PWAR6      | -0.0872147 | 0.4916708 | -0.1774 | 0.859 | -0.062085242 | count | 1 |
| FBXO7      | -0.0447325 | 0.1054475 | -0.4242 | 0.671 | -0.061955486 | count | 1 |
| NFAT5      | -0.0444984 | 0.1299699 | -0.3424 | 0.732 | -0.061631024 | count | 1 |
| RC3H1      | -0.0480712 | 0.216195  | -0.2224 | 0.824 | -0.061553362 | count | 1 |
| HSPE1      | -0.0431036 | 0.0600624 | -0.7176 | 0.473 | -0.061465583 | count | 1 |
| HIST1H2BD  | -0.0990187 | 0.7194405 | -0.1376 | 0.891 | -0.061354283 | count | 1 |
| STEAP2     | -0.519753  | 0.4962311 | -1.0474 | 0.295 | -0.061211456 | count | 1 |
| C4orf46    | -0.0778622 | 0.5167642 | -0.1507 | 0.88  | -0.061140659 | count | 1 |
| MRPL20     | -0.0429982 | 0.0681229 | -0.6312 | 0.528 | -0.061104807 | count | 1 |
| CHM        | -0.0451686 | 0.1371571 | -0.3293 | 0.742 | -0.061080693 | count | 1 |
| POLR2I     | -0.0434007 | 0.0824737 | -0.5262 | 0.599 | -0.061046604 | count | 1 |
| RYR2       | -0.51813   | 0.6797833 | -0.7622 | 0.446 | -0.060985442 | count | 1 |
| GTF2A2     | -0.0429506 | 0.0646091 | -0.6648 | 0.506 | -0.060951164 | count | 1 |
| WWP1       | -0.0437327 | 0.1145553 | -0.3818 | 0.703 | -0.060926969 | count | 1 |

|            |            |           |         |        |              |       |   |
|------------|------------|-----------|---------|--------|--------------|-------|---|
| XXYLT1     | -0.0658115 | 0.3868057 | -0.1701 | 0.865  | -0.06082886  | count | 1 |
| SNX27      | -0.0478893 | 0.2032412 | -0.2356 | 0.814  | -0.060461101 | count | 1 |
| HRH1       | -0.045574  | 0.1583354 | -0.2878 | 0.773  | -0.060424839 | count | 1 |
| ETFA       | -0.0434986 | 0.1097926 | -0.3962 | 0.692  | -0.060267308 | count | 1 |
| VPS26B     | -0.0491213 | 0.2378532 | -0.2065 | 0.836  | -0.060261768 | count | 1 |
| PSMF1      | -0.0429865 | 0.0947037 | -0.4539 | 0.65   | -0.060179346 | count | 1 |
| CEP57L1    | -0.0490912 | 0.2053847 | -0.239  | 0.811  | -0.060106382 | count | 1 |
| UBA3       | -0.044619  | 0.1398211 | -0.3191 | 0.75   | -0.059992957 | count | 1 |
| HLX-AS1    | -0.5104434 | 0.898281  | -0.5682 | 0.57   | -0.059918065 | count | 1 |
| AGT        | -0.5104434 | 0.9547641 | -0.5346 | 0.593  | -0.059918065 | count | 1 |
| PFKFB3     | -0.0602033 | 0.2662694 | -0.2261 | 0.821  | -0.059912329 | count | 1 |
| ROBO1      | -0.0622387 | 0.3043371 | -0.2045 | 0.838  | -0.059890447 | count | 1 |
| DNASE1L1   | -0.0445876 | 0.1413014 | -0.3155 | 0.752  | -0.05988391  | count | 1 |
| PCDHB15    | -0.1097946 | 0.5572014 | -0.197  | 0.844  | -0.05969976  | count | 1 |
| MIA2       | -0.0447945 | 0.1647657 | -0.2719 | 0.786  | -0.059684642 | count | 1 |
| NUFIP2     | -0.0425107 | 0.1266896 | -0.3355 | 0.737  | -0.059425711 | count | 1 |
| CCDC15     | -0.0910644 | 0.6098559 | -0.1493 | 0.881  | -0.059409073 | count | 1 |
| CAVIN1     | -0.0414016 | 0.0499348 | -0.8291 | 0.407  | -0.059336633 | count | 1 |
| KCNN2      | -0.0662329 | 0.3864851 | -0.1714 | 0.864  | -0.059285753 | count | 1 |
| SGMS2      | -0.051248  | 0.2993571 | -0.1712 | 0.864  | -0.059113658 | count | 1 |
| TRAK2      | -0.0464142 | 0.2083897 | -0.2227 | 0.824  | -0.059032668 | count | 1 |
| TBCA       | -0.0413408 | 0.054467  | -0.759  | 0.4479 | -0.058948403 | count | 1 |
| COQ8B      | -0.0508796 | 0.246125  | -0.2067 | 0.836  | -0.058901701 | count | 1 |
| GLYATL2    | -0.5028284 | 0.9866301 | -0.5096 | 0.61   | -0.058865648 | count | 1 |
| TAF5       | -0.0559304 | 0.2941901 | -0.1901 | 0.849  | -0.058667329 | count | 1 |
| TNFAIP8L1  | -0.0426279 | 0.1340091 | -0.3181 | 0.75   | -0.058542306 | count | 1 |
| TBXA2R     | -0.0516994 | 0.2859282 | -0.1808 | 0.857  | -0.058441233 | count | 1 |
| KYAT3      | -0.0484635 | 0.2403932 | -0.2016 | 0.84   | -0.058438314 | count | 1 |
| AFAP1L2    | -0.0531783 | 0.2560569 | -0.2077 | 0.835  | -0.058358828 | count | 1 |
| CBR1       | -0.0434322 | 0.1782801 | -0.2436 | 0.808  | -0.0583522   | count | 1 |
| MAP2K2     | -0.0412282 | 0.0753066 | -0.5475 | 0.584  | -0.058286446 | count | 1 |
| AC073111.5 | -0.0579199 | 0.3695544 | -0.1567 | 0.875  | -0.058206546 | count | 1 |
| DDX51      | -0.0527192 | 0.3699483 | -0.1425 | 0.887  | -0.058168907 | count | 1 |
| MRPL14     | -0.0417669 | 0.1030784 | -0.4052 | 0.685  | -0.058088037 | count | 1 |
| MAN1A2     | -0.0419699 | 0.114112  | -0.3678 | 0.713  | -0.058060711 | count | 1 |
| OBSL1      | -0.0473976 | 0.265245  | -0.1787 | 0.858  | -0.057790386 | count | 1 |
| TRIM35     | -0.0550178 | 0.343961  | -0.16   | 0.873  | -0.05770437  | count | 1 |
| TNIP1      | -0.0432657 | 0.1664351 | -0.26   | 0.795  | -0.05764498  | count | 1 |
| ZMPSTE24   | -0.0433968 | 0.16481   | -0.2633 | 0.792  | -0.057177683 | count | 1 |
| CDH2       | -0.1430425 | 0.4823065 | -0.2966 | 0.767  | -0.057160415 | count | 1 |
| PDLIM5     | -0.0403761 | 0.0799595 | -0.505  | 0.614  | -0.057129378 | count | 1 |
| DES12      | -0.041579  | 0.1210603 | -0.3435 | 0.731  | -0.05712095  | count | 1 |
| MRM1       | -0.0916875 | 0.496288  | -0.1847 | 0.853  | -0.056717578 | count | 1 |
| BOK        | -0.0475919 | 0.2275274 | -0.2092 | 0.834  | -0.056500334 | count | 1 |
| GPNMB      | -0.1657216 | 0.8598652 | -0.1927 | 0.847  | -0.056475137 | count | 1 |

|            |            |           |         |        |              |       |   |
|------------|------------|-----------|---------|--------|--------------|-------|---|
| RAB14      | -0.039808  | 0.0720357 | -0.5526 | 0.581  | -0.056417125 | count | 1 |
| ALAS1      | -0.043836  | 0.2020172 | -0.217  | 0.828  | -0.056403307 | count | 1 |
| MRPS14     | -0.0410427 | 0.1420368 | -0.289  | 0.773  | -0.05605032  | count | 1 |
| SLC26A1    | -0.1237706 | 0.9256593 | -0.1337 | 0.894  | -0.055940113 | count | 1 |
| HSPB7      | -0.1237706 | 1.0250306 | -0.1207 | 0.904  | -0.055940113 | count | 1 |
| AP002770.1 | -0.1237706 | 1.714501  | -0.0722 | 0.9425 | -0.055940113 | count | 1 |
| OCRL       | -0.0516428 | 0.3557293 | -0.1452 | 0.885  | -0.055665876 | count | 1 |
| DTL        | -0.1392041 | 0.823161  | -0.1691 | 0.866  | -0.05556548  | count | 1 |
| PPP4R1     | -0.0426978 | 0.1750944 | -0.2439 | 0.807  | -0.055561199 | count | 1 |
| APMAP      | -0.0410169 | 0.1453285 | -0.2822 | 0.778  | -0.055494675 | count | 1 |
| ACBD6      | -0.040133  | 0.1178351 | -0.3406 | 0.733  | -0.055404697 | count | 1 |
| MLST8      | -0.0426956 | 0.1856935 | -0.2299 | 0.818  | -0.055378867 | count | 1 |
| VILL       | -0.0655483 | 0.3782655 | -0.1733 | 0.862  | -0.05534956  | count | 1 |
| AC004854.2 | -0.0778984 | 0.5348378 | -0.1456 | 0.884  | -0.055349545 | count | 1 |
| PMPCB      | -0.0399054 | 0.1183201 | -0.3373 | 0.736  | -0.055159064 | count | 1 |
| CKLF       | -0.0397932 | 0.1236767 | -0.3218 | 0.748  | -0.055089633 | count | 1 |
| TMEM139    | -0.0772906 | 0.5746616 | -0.1345 | 0.893  | -0.054910962 | count | 1 |
| MUC1       | -0.0772906 | 0.5982718 | -0.1292 | 0.897  | -0.054910962 | count | 1 |
| NRAS       | -0.0420697 | 0.1785526 | -0.2356 | 0.814  | -0.054785168 | count | 1 |
| FTX        | -0.0401939 | 0.1446336 | -0.2779 | 0.781  | -0.054763531 | count | 1 |
| SYVN1      | -0.0517776 | 0.2949156 | -0.1756 | 0.861  | -0.054690768 | count | 1 |
| SLC12A6    | -0.0430316 | 0.219706  | -0.1959 | 0.845  | -0.054455537 | count | 1 |
| FAM185A    | -0.0693415 | 0.5174209 | -0.134  | 0.893  | -0.054365984 | count | 1 |
| TMEM39A    | -0.0517746 | 0.3549233 | -0.1459 | 0.884  | -0.054283709 | count | 1 |
| BMF        | -0.1975231 | 0.6895538 | -0.2865 | 0.775  | -0.054208205 | count | 1 |
| AC015712.1 | -0.1592068 | 1.119536  | -0.1422 | 0.887  | -0.054148256 | count | 1 |
| AL139260.1 | -0.1592068 | 1.130039  | -0.1409 | 0.888  | -0.054148256 | count | 1 |
| HIST1H4D   | -0.1592068 | 1.130039  | -0.1409 | 0.888  | -0.054148256 | count | 1 |
| TTK        | -0.1592068 | 1.130039  | -0.1409 | 0.888  | -0.054148256 | count | 1 |
| MYCNOS     | -0.1592068 | 1.135903  | -0.1402 | 0.889  | -0.054148256 | count | 1 |
| AC109347.1 | -0.1592068 | 1.135903  | -0.1402 | 0.889  | -0.054148256 | count | 1 |
| GATD3B     | -0.1592068 | 1.135903  | -0.1402 | 0.889  | -0.054148256 | count | 1 |
| STAB2      | -0.4664433 | 0.4056823 | -1.1498 | 0.25   | -0.053905893 | count | 1 |
| SMOC2      | -0.4663117 | 0.9615589 | -0.485  | 0.628  | -0.053888161 | count | 1 |
| HAUS3      | -0.0461753 | 0.2599565 | -0.1776 | 0.859  | -0.05380951  | count | 1 |
| BPNT1      | -0.0463315 | 0.265454  | -0.1745 | 0.861  | -0.053807466 | count | 1 |
| LEKR1      | -0.1077387 | 0.9529203 | -0.1131 | 0.91   | -0.053765851 | count | 1 |
| ACAT2      | -0.0423722 | 0.197096  | -0.215  | 0.83   | -0.053686663 | count | 1 |
| YY1        | -0.0377323 | 0.0633464 | -0.5957 | 0.551  | -0.053654213 | count | 1 |
| GHR        | -0.0821143 | 0.5018893 | -0.1636 | 0.87   | -0.053466014 | count | 1 |
| BX284668.5 | -0.0431731 | 0.2218815 | -0.1946 | 0.846  | -0.053434376 | count | 1 |
| RGL1       | -0.0597069 | 0.3310894 | -0.1803 | 0.857  | -0.053391709 | count | 1 |
| VPS28      | -0.03733   | 0.0482988 | -0.7729 | 0.4397 | -0.053375187 | count | 1 |
| CUL3       | -0.039325  | 0.1584164 | -0.2482 | 0.804  | -0.053372504 | count | 1 |
| TIMM17A    | -0.0399804 | 0.1726316 | -0.2316 | 0.817  | -0.053237487 | count | 1 |

|             |            |           |         |       |              |       |   |
|-------------|------------|-----------|---------|-------|--------------|-------|---|
| PSMD11      | -0.0381638 | 0.1000755 | -0.3813 | 0.703 | -0.05319282  | count | 1 |
| AC012360.3  | -0.062879  | 0.4616572 | -0.1362 | 0.892 | -0.05307224  | count | 1 |
| RALBP1      | -0.0373509 | 0.0773617 | -0.4828 | 0.629 | -0.052967313 | count | 1 |
| SGCD        | -0.0601373 | 0.6217831 | -0.0967 | 0.923 | -0.052823972 | count | 1 |
| CLPB        | -0.0495952 | 0.3155525 | -0.1572 | 0.875 | -0.052745424 | count | 1 |
| ZNF639      | -0.0397816 | 0.1634853 | -0.2433 | 0.808 | -0.052439554 | count | 1 |
| UQCRFS1     | -0.0375195 | 0.0933169 | -0.4021 | 0.688 | -0.052409923 | count | 1 |
| GLRX3       | -0.0381173 | 0.1129537 | -0.3375 | 0.736 | -0.052333834 | count | 1 |
| PGP         | -0.0384465 | 0.1218393 | -0.3156 | 0.752 | -0.052105929 | count | 1 |
| DMXL2       | -0.0631455 | 0.5180093 | -0.1219 | 0.903 | -0.052098649 | count | 1 |
| EPHA2       | -0.0442767 | 0.2450219 | -0.1807 | 0.857 | -0.05209055  | count | 1 |
| RNGTT       | -0.0456867 | 0.282173  | -0.1619 | 0.871 | -0.052060482 | count | 1 |
| AGBL5       | -0.066391  | 0.382127  | -0.1737 | 0.862 | -0.052024848 | count | 1 |
| TSLP        | -0.0442897 | 0.2754866 | -0.1608 | 0.872 | -0.051943441 | count | 1 |
| GYS1        | -0.0553976 | 0.5498747 | -0.1007 | 0.92  | -0.051874854 | count | 1 |
| ARL4C       | -0.0389889 | 0.1812732 | -0.2151 | 0.83  | -0.051789379 | count | 1 |
| GINM1       | -0.0363688 | 0.0662348 | -0.5491 | 0.583 | -0.051671168 | count | 1 |
| NFU1        | -0.0378537 | 0.127712  | -0.2964 | 0.767 | -0.051521859 | count | 1 |
| MRPS7       | -0.0369402 | 0.1004875 | -0.3676 | 0.713 | -0.051508732 | count | 1 |
| AC007114.1  | -0.0535221 | 0.5013036 | -0.1068 | 0.915 | -0.051443342 | count | 1 |
| NAGK        | -0.0374186 | 0.1399989 | -0.2673 | 0.789 | -0.051267768 | count | 1 |
| CETN2       | -0.0382677 | 0.146869  | -0.2606 | 0.794 | -0.051266678 | count | 1 |
| COBLL1      | -0.0372532 | 0.1476235 | -0.2524 | 0.801 | -0.050937228 | count | 1 |
| DNAJB4      | -0.0356638 | 0.0866444 | -0.4116 | 0.681 | -0.050472457 | count | 1 |
| ZCCHC14     | -0.0413823 | 0.2389854 | -0.1732 | 0.863 | -0.050437434 | count | 1 |
| RNASEH1-AS1 | -0.0433365 | 0.3089061 | -0.1403 | 0.888 | -0.05031751  | count | 1 |
| ECSCR       | -0.0349563 | 0.0381372 | -0.9166 | 0.359 | -0.050236898 | count | 1 |
| TLNRD1      | -0.0364998 | 0.1348497 | -0.2707 | 0.787 | -0.050164623 | count | 1 |
| BLVRB       | -0.0357938 | 0.0962233 | -0.372  | 0.71  | -0.050102261 | count | 1 |
| H2AFY       | -0.0357611 | 0.099967  | -0.3577 | 0.721 | -0.050066473 | count | 1 |
| WDFY1       | -0.0385132 | 0.1787512 | -0.2155 | 0.829 | -0.050027881 | count | 1 |
| AC107214.1  | -0.4372868 | 0.9568322 | -0.457  | 0.648 | -0.050013263 | count | 1 |
| LINC00303   | -0.4372868 | 1.075515  | -0.4066 | 0.684 | -0.050013263 | count | 1 |
| HIST1H2BB   | -0.4372868 | 1.075515  | -0.4066 | 0.684 | -0.050013263 | count | 1 |
| IKZF1       | -0.4372868 | 1.075515  | -0.4066 | 0.684 | -0.050013263 | count | 1 |
| C9orf170    | -0.4372868 | 1.075515  | -0.4066 | 0.684 | -0.050013263 | count | 1 |
| MRVI1-AS1   | -0.4372868 | 1.075515  | -0.4066 | 0.684 | -0.050013263 | count | 1 |
| SPTBN2      | -0.4372868 | 1.075515  | -0.4066 | 0.684 | -0.050013263 | count | 1 |
| PRKCQ       | -0.4372868 | 1.075515  | -0.4066 | 0.684 | -0.050013263 | count | 1 |
| TEX26-AS1   | -0.4372868 | 1.075515  | -0.4066 | 0.684 | -0.050013263 | count | 1 |
| GZMB        | -0.4372868 | 1.075515  | -0.4066 | 0.684 | -0.050013263 | count | 1 |
| AC025580.1  | -0.4372868 | 1.075515  | -0.4066 | 0.684 | -0.050013263 | count | 1 |
| AC092140.2  | -0.4372868 | 1.075515  | -0.4066 | 0.684 | -0.050013263 | count | 1 |
| LINC00887   | -0.4372868 | 1.129831  | -0.387  | 0.699 | -0.050013263 | count | 1 |
| ARHGAP24    | -0.0559393 | 0.3703647 | -0.151  | 0.88  | -0.049994127 | count | 1 |

|            |            |           |         |        |              |       |   |
|------------|------------|-----------|---------|--------|--------------|-------|---|
| DNAJB11    | -0.0372936 | 0.1299279 | -0.287  | 0.774  | -0.04991956  | count | 1 |
| PTOV1      | -0.0365429 | 0.145102  | -0.2518 | 0.801  | -0.049911391 | count | 1 |
| HP1BP3     | -0.0350829 | 0.0774215 | -0.4531 | 0.65   | -0.049815297 | count | 1 |
| RBBP4      | -0.0365758 | 0.1277736 | -0.2863 | 0.775  | -0.049805724 | count | 1 |
| AC245452.1 | -0.1251195 | 0.802852  | -0.1558 | 0.876  | -0.049741925 | count | 1 |
| GATA3      | -0.072968  | 0.6390123 | -0.1142 | 0.909  | -0.049691519 | count | 1 |
| CEP170     | -0.0372236 | 0.1447021 | -0.2572 | 0.797  | -0.04963152  | count | 1 |
| NBDY       | -0.0349607 | 0.0694193 | -0.5036 | 0.615  | -0.049597994 | count | 1 |
| MRPS12     | -0.0354347 | 0.1055288 | -0.3358 | 0.737  | -0.049267131 | count | 1 |
| PPIA       | -0.0342405 | 0.0316585 | -1.0816 | 0.28   | -0.049246787 | count | 1 |
| NEDD8      | -0.0343659 | 0.0465331 | -0.7385 | 0.46   | -0.049202938 | count | 1 |
| BRD1       | -0.0371135 | 0.1648531 | -0.2251 | 0.822  | -0.049167867 | count | 1 |
| BLM        | -0.1449918 | 0.6825577 | -0.2124 | 0.832  | -0.049101573 | count | 1 |
| LRRC56     | -0.1449918 | 0.7052685 | -0.2056 | 0.837  | -0.049101573 | count | 1 |
| C19orf44   | -0.0558545 | 0.5426097 | -0.1029 | 0.918  | -0.049029326 | count | 1 |
| OGT        | -0.0365093 | 0.2135906 | -0.1709 | 0.864  | -0.04900472  | count | 1 |
| ZBED5-AS1  | -0.0431937 | 0.3069127 | -0.1407 | 0.888  | -0.049003305 | count | 1 |
| MEG8       | -0.4290383 | 0.8771626 | -0.4891 | 0.625  | -0.048925169 | count | 1 |
| XKR6       | -0.0689555 | 0.5424448 | -0.1271 | 0.899  | -0.048906973 | count | 1 |
| GTF2H2C    | -0.0466267 | 0.4536076 | -0.1028 | 0.918  | -0.04885898  | count | 1 |
| IP6K2      | -0.0360279 | 0.1286412 | -0.2801 | 0.779  | -0.048738685 | count | 1 |
| EPCAM      | -0.0749139 | 0.8484897 | -0.0883 | 0.93   | -0.048701156 | count | 1 |
| SREK1IP1   | -0.0346204 | 0.0982286 | -0.3524 | 0.725  | -0.048518423 | count | 1 |
| AC016876.1 | -0.0404526 | 0.2712751 | -0.1491 | 0.881  | -0.048514675 | count | 1 |
| PRDM2      | -0.0357667 | 0.1777228 | -0.2012 | 0.841  | -0.048181733 | count | 1 |
| CAMLG      | -0.0341541 | 0.0792244 | -0.4311 | 0.666  | -0.048159331 | count | 1 |
| ZNF777     | -0.0583472 | 0.4685381 | -0.1245 | 0.901  | -0.048100455 | count | 1 |
| HDAC5      | -0.0374305 | 0.1956403 | -0.1913 | 0.848  | -0.048053454 | count | 1 |
| MCTP1      | -0.03402   | 0.085699  | -0.397  | 0.691  | -0.047975684 | count | 1 |
| ZC3H11B    | -0.1755017 | 0.8552502 | -0.2052 | 0.837  | -0.047825673 | count | 1 |
| AL034549.1 | -0.0822433 | 0.5524001 | -0.1489 | 0.882  | -0.047732553 | count | 1 |
| AL353751.1 | -0.0958398 | 0.7783771 | -0.1231 | 0.902  | -0.047680128 | count | 1 |
| LINC01004  | -0.0958398 | 0.8846576 | -0.1083 | 0.914  | -0.047680128 | count | 1 |
| CHORDC1    | -0.0349434 | 0.1276379 | -0.2738 | 0.784  | -0.047557595 | count | 1 |
| RPLP1      | -0.0329083 | 0.0178654 | -1.842  | 0.0656 | -0.047456403 | count | 1 |
| KCTD21-AS1 | -0.1054028 | 0.7733301 | -0.1363 | 0.892  | -0.047400379 | count | 1 |
| RIC3       | -0.0451817 | 0.4150347 | -0.1089 | 0.913  | -0.047337348 | count | 1 |
| FKBP1C     | -0.2387405 | 0.8447349 | -0.2826 | 0.777  | -0.047306598 | count | 1 |
| AL139412.1 | -0.2387405 | 0.8484338 | -0.2814 | 0.778  | -0.047306598 | count | 1 |
| PHF13      | -0.0396199 | 0.2264629 | -0.175  | 0.861  | -0.047267928 | count | 1 |
| SAMD4A     | -0.0440975 | 0.3357885 | -0.1313 | 0.896  | -0.047190072 | count | 1 |
| MTF2       | -0.0347788 | 0.1347736 | -0.2581 | 0.796  | -0.047171104 | count | 1 |
| ZNF568     | -0.0392338 | 0.2828915 | -0.1387 | 0.89   | -0.047166187 | count | 1 |
| AP001157.1 | -0.0602194 | 0.6472465 | -0.093  | 0.926  | -0.047135794 | count | 1 |
| DUSP11     | -0.0345051 | 0.136281  | -0.2532 | 0.8    | -0.047105136 | count | 1 |

|            |            |           |         |        |              |       |   |
|------------|------------|-----------|---------|--------|--------------|-------|---|
| NUAK2      | -0.0763829 | 0.6527037 | -0.117  | 0.907  | -0.047086221 | count | 1 |
| LINC01252  | -0.0763829 | 0.6941139 | -0.11   | 0.912  | -0.047086221 | count | 1 |
| IPO11      | -0.0335707 | 0.0962191 | -0.3489 | 0.727  | -0.047035043 | count | 1 |
| MIR3681HG  | -0.2372494 | 1.0091923 | -0.2351 | 0.814  | -0.046987248 | count | 1 |
| AC012360.1 | -0.2372494 | 1.0091923 | -0.2351 | 0.814  | -0.046987248 | count | 1 |
| GABRB2     | -0.2372494 | 1.0091923 | -0.2351 | 0.814  | -0.046987248 | count | 1 |
| HUS1B      | -0.2372494 | 1.0091923 | -0.2351 | 0.814  | -0.046987248 | count | 1 |
| AL008729.1 | -0.2372494 | 1.331098  | -0.1782 | 0.859  | -0.046987248 | count | 1 |
| TNF        | -0.2372494 | 1.331098  | -0.1782 | 0.859  | -0.046987248 | count | 1 |
| FADS2      | -0.2372494 | 1.331098  | -0.1782 | 0.859  | -0.046987248 | count | 1 |
| RPUSD3     | -0.0366418 | 0.2110047 | -0.1737 | 0.862  | -0.046894447 | count | 1 |
| PPP6R2     | -0.0372682 | 0.293106  | -0.1271 | 0.899  | -0.046769242 | count | 1 |
| DPY30      | -0.0333888 | 0.0991967 | -0.3366 | 0.736  | -0.046740783 | count | 1 |
| MZF1-AS1   | -0.0513151 | 0.416478  | -0.1232 | 0.902  | -0.046601089 | count | 1 |
| FAM27C     | -0.0454927 | 0.3521472 | -0.1292 | 0.897  | -0.046507411 | count | 1 |
| NHLRC4     | -0.0858734 | 0.5925542 | -0.1449 | 0.885  | -0.046416956 | count | 1 |
| ROCK1      | -0.0328963 | 0.0995702 | -0.3304 | 0.741  | -0.046411318 | count | 1 |
| AC005921.2 | -0.0355192 | 0.1657381 | -0.2143 | 0.83   | -0.04638231  | count | 1 |
| EEF2       | -0.032347  | 0.0410341 | -0.7883 | 0.431  | -0.046379525 | count | 1 |
| GLIS2-AS1  | -0.4075918 | 0.7139099 | -0.5709 | 0.568  | -0.046123098 | count | 1 |
| LAGE3      | -0.0329803 | 0.1112153 | -0.2965 | 0.767  | -0.046000237 | count | 1 |
| TROVE2     | -0.0326606 | 0.0898657 | -0.3634 | 0.716  | -0.045998871 | count | 1 |
| CRLS1      | -0.0345664 | 0.1654083 | -0.209  | 0.834  | -0.045789679 | count | 1 |
| ATF7       | -0.0341168 | 0.1744295 | -0.1956 | 0.845  | -0.045663065 | count | 1 |
| PITRM1     | -0.0394666 | 0.3256051 | -0.1212 | 0.904  | -0.045648228 | count | 1 |
| THAP7      | -0.0344669 | 0.2232822 | -0.1544 | 0.877  | -0.045557683 | count | 1 |
| SRD5A1     | -0.0510051 | 0.512025  | -0.0996 | 0.921  | -0.045550265 | count | 1 |
| SMARCB1    | -0.0331455 | 0.1245329 | -0.2662 | 0.79   | -0.045519683 | count | 1 |
| KDELR1     | -0.0317863 | 0.0521934 | -0.609  | 0.543  | -0.045470884 | count | 1 |
| KLF16      | -0.0359684 | 0.187977  | -0.1913 | 0.848  | -0.045261767 | count | 1 |
| AL354733.3 | -0.2291403 | 0.6965517 | -0.329  | 0.742  | -0.045255866 | count | 1 |
| CTU1       | -0.0370282 | 0.2688127 | -0.1377 | 0.89   | -0.04511844  | count | 1 |
| UBE2J1     | -0.0323922 | 0.1048564 | -0.3089 | 0.757  | -0.045048415 | count | 1 |
| TUBG2      | -0.0426716 | 0.3388553 | -0.1259 | 0.9    | -0.045028675 | count | 1 |
| AC246817.2 | -0.1000506 | 1.0653319 | -0.0939 | 0.925  | -0.044927577 | count | 1 |
| AC090527.3 | -0.1000506 | 1.9624622 | -0.051  | 0.9593 | -0.044927577 | count | 1 |
| AP3B1      | -0.0332821 | 0.1385164 | -0.2403 | 0.81   | -0.044800487 | count | 1 |
| ARMC10     | -0.0331284 | 0.136979  | -0.2418 | 0.809  | -0.044757447 | count | 1 |
| AL117332.1 | -0.0423794 | 0.462631  | -0.0916 | 0.927  | -0.044718936 | count | 1 |
| WDR81      | -0.0450089 | 0.424214  | -0.1061 | 0.916  | -0.04470737  | count | 1 |
| MFSD1      | -0.0333637 | 0.1744372 | -0.1913 | 0.848  | -0.044597891 | count | 1 |
| AL158152.1 | -0.1122577 | 0.8286076 | -0.1355 | 0.892  | -0.044463631 | count | 1 |
| AL136982.7 | -0.1317083 | 0.9787023 | -0.1346 | 0.893  | -0.044423336 | count | 1 |
| AL078581.1 | -0.1317083 | 1.1226979 | -0.1173 | 0.907  | -0.044423336 | count | 1 |
| WNT5B      | -0.1317083 | 1.12142   | -0.1174 | 0.907  | -0.044423336 | count | 1 |

|            |            |           |         |       |              |       |   |
|------------|------------|-----------|---------|-------|--------------|-------|---|
| FAM157C    | -0.1317083 | 1.2291655 | -0.1072 | 0.915 | -0.044423336 | count | 1 |
| AC127496.5 | -0.1317083 | 1.2291655 | -0.1072 | 0.915 | -0.044423336 | count | 1 |
| SPECC1L    | -0.0415077 | 0.3833784 | -0.1083 | 0.914 | -0.044406816 | count | 1 |
| HMG2       | -0.0311136 | 0.057844  | -0.5379 | 0.591 | -0.044381803 | count | 1 |
| C1QBP      | -0.0311828 | 0.0674862 | -0.4621 | 0.644 | -0.044257755 | count | 1 |
| TYRO3      | -0.0975005 | 0.6346322 | -0.1536 | 0.878 | -0.043751872 | count | 1 |
| RHOF       | -0.1104249 | 0.5652901 | -0.1953 | 0.845 | -0.043714564 | count | 1 |
| TINAGL1    | -0.0306312 | 0.0684447 | -0.4475 | 0.655 | -0.043422646 | count | 1 |
| SERP1      | -0.0303282 | 0.0519035 | -0.5843 | 0.559 | -0.043367858 | count | 1 |
| CCNC       | -0.0320059 | 0.131495  | -0.2434 | 0.808 | -0.043357801 | count | 1 |
| PKM        | -0.0303836 | 0.0657809 | -0.4619 | 0.644 | -0.043259197 | count | 1 |
| SLC33A1    | -0.0475617 | 0.3760107 | -0.1265 | 0.899 | -0.043168563 | count | 1 |
| SOCS2      | -0.0302717 | 0.0796558 | -0.38   | 0.704 | -0.043028667 | count | 1 |
| AC120053.1 | -0.2184218 | 0.8632019 | -0.253  | 0.8   | -0.042981215 | count | 1 |
| LINC01852  | -0.2184218 | 0.8722956 | -0.2504 | 0.802 | -0.042981215 | count | 1 |
| LINGO1     | -0.1585353 | 0.8225126 | -0.1927 | 0.847 | -0.042966797 | count | 1 |
| AC116407.1 | -0.1585353 | 0.8225126 | -0.1927 | 0.847 | -0.042966797 | count | 1 |
| PLEKHM2    | -0.0323837 | 0.1589798 | -0.2037 | 0.839 | -0.042940588 | count | 1 |
| SEC22A     | -0.0368647 | 0.2712618 | -0.1359 | 0.892 | -0.042928943 | count | 1 |
| PEX11A     | -0.0468459 | 0.4645499 | -0.1008 | 0.92  | -0.04251438  | count | 1 |
| AL450384.2 | -0.2158395 | 0.8844389 | -0.244  | 0.807 | -0.042435561 | count | 1 |
| COPS6      | -0.029969  | 0.080784  | -0.371  | 0.711 | -0.042328763 | count | 1 |
| AL591895.1 | -0.1255932 | 0.6582394 | -0.1908 | 0.849 | -0.042281938 | count | 1 |
| NUDT1      | -0.034362  | 0.2357102 | -0.1458 | 0.884 | -0.0421994   | count | 1 |
| ZNF675     | -0.0336134 | 0.2517051 | -0.1335 | 0.894 | -0.042113725 | count | 1 |
| DMRTA1     | -0.0848733 | 0.6920194 | -0.1226 | 0.902 | -0.042103686 | count | 1 |
| PUM1       | -0.0308509 | 0.172096  | -0.1793 | 0.858 | -0.041908231 | count | 1 |
| IER3-AS1   | -0.0520805 | 0.5651681 | -0.0922 | 0.927 | -0.041832306 | count | 1 |
| CDKL3      | -0.042087  | 0.3943902 | -0.1067 | 0.915 | -0.041789877 | count | 1 |
| TSTD3      | -0.0419953 | 0.4500279 | -0.0933 | 0.926 | -0.041698349 | count | 1 |
| SAYSD1     | -0.0330962 | 0.2277762 | -0.1453 | 0.884 | -0.041698096 | count | 1 |
| GBE1       | -0.0378299 | 0.2597687 | -0.1456 | 0.884 | -0.041682234 | count | 1 |
| STAMPB     | -0.0313167 | 0.1631846 | -0.1919 | 0.848 | -0.041670028 | count | 1 |
| POLR2K     | -0.0291802 | 0.0688071 | -0.4241 | 0.672 | -0.04135775  | count | 1 |
| COMMD5     | -0.0308679 | 0.1647086 | -0.1874 | 0.851 | -0.041344562 | count | 1 |
| COMTD1     | -0.0322171 | 0.2083831 | -0.1546 | 0.877 | -0.041309181 | count | 1 |
| GLB1       | -0.033158  | 0.2425012 | -0.1367 | 0.891 | -0.041289466 | count | 1 |
| AL359232.1 | -0.0562114 | 0.7524948 | -0.0747 | 0.94  | -0.041267498 | count | 1 |
| PPIL1      | -0.0346425 | 0.2467637 | -0.1404 | 0.888 | -0.041203928 | count | 1 |
| BOD1       | -0.0295756 | 0.1063622 | -0.2781 | 0.781 | -0.041066177 | count | 1 |
| OPA1       | -0.0327055 | 0.271334  | -0.1205 | 0.904 | -0.040852088 | count | 1 |
| SLCO5A1    | -0.366219  | 1.134027  | -0.3229 | 0.747 | -0.040827329 | count | 1 |
| AL035461.2 | -0.366219  | 1.134027  | -0.3229 | 0.747 | -0.040827329 | count | 1 |
| AC008752.2 | -0.366219  | 1.134027  | -0.3229 | 0.747 | -0.040827329 | count | 1 |
| EAF1-AS1   | -0.366219  | 1.1912    | -0.3074 | 0.759 | -0.040827329 | count | 1 |

|            |            |           |         |        |              |       |   |
|------------|------------|-----------|---------|--------|--------------|-------|---|
| SLC51A     | -0.366219  | 1.1912    | -0.3074 | 0.759  | -0.040827329 | count | 1 |
| AC008522.1 | -0.366219  | 1.1912    | -0.3074 | 0.759  | -0.040827329 | count | 1 |
| AL138831.2 | -0.366219  | 1.1912    | -0.3074 | 0.759  | -0.040827329 | count | 1 |
| AL731533.2 | -0.366219  | 1.1912    | -0.3074 | 0.759  | -0.040827329 | count | 1 |
| FAM222A    | -0.366219  | 1.1912    | -0.3074 | 0.759  | -0.040827329 | count | 1 |
| NOTCH3     | -0.366219  | 1.1912    | -0.3074 | 0.759  | -0.040827329 | count | 1 |
| AC023509.2 | -0.366219  | 1.199435  | -0.3053 | 0.76   | -0.040827329 | count | 1 |
| LINC00639  | -0.366219  | 1.199435  | -0.3053 | 0.76   | -0.040827329 | count | 1 |
| ANKLE1     | -0.366219  | 1.199435  | -0.3053 | 0.76   | -0.040827329 | count | 1 |
| COA6       | -0.029852  | 0.1380325 | -0.2163 | 0.829  | -0.040802399 | count | 1 |
| ZSCAN12    | -0.0554867 | 0.640131  | -0.0867 | 0.931  | -0.04072968  | count | 1 |
| YWHAZ      | -0.0286416 | 0.0668433 | -0.4285 | 0.668  | -0.040689389 | count | 1 |
| ACTN1      | -0.0285274 | 0.0664811 | -0.4291 | 0.6679 | -0.040647309 | count | 1 |
| RAPGEF5    | -0.0291114 | 0.1022121 | -0.2848 | 0.776  | -0.040559844 | count | 1 |
| TOMM40L    | -0.0596668 | 0.4465454 | -0.1336 | 0.894  | -0.04051976  | count | 1 |
| CEP162     | -0.0320979 | 0.2216348 | -0.1448 | 0.885  | -0.040091837 | count | 1 |
| SENP8      | -0.0566052 | 0.4943694 | -0.1145 | 0.909  | -0.040047094 | count | 1 |
| AGO1       | -0.0357889 | 0.3207141 | -0.1116 | 0.911  | -0.040029857 | count | 1 |
| IFNG       | -0.3596709 | 0.917387  | -0.3921 | 0.695  | -0.040002344 | count | 1 |
| CEACAM21   | -0.0614515 | 0.6923892 | -0.0888 | 0.929  | -0.039831694 | count | 1 |
| NAA50      | -0.0302334 | 0.1554618 | -0.1945 | 0.846  | -0.039741813 | count | 1 |
| VPS8       | -0.0373803 | 0.3085797 | -0.1211 | 0.904  | -0.039703772 | count | 1 |
| H1FX       | -0.0278174 | 0.074726  | -0.3723 | 0.7097 | -0.039696965 | count | 1 |
| AC074386.1 | -0.1004436 | 0.7787919 | -0.129  | 0.897  | -0.039648665 | count | 1 |
| TMEM167A   | -0.0284821 | 0.1054698 | -0.27   | 0.787  | -0.039631468 | count | 1 |
| CLDND2     | -0.0583472 | 0.6035608 | -0.0967 | 0.923  | -0.039612582 | count | 1 |
| TMEM192    | -0.0304621 | 0.190594  | -0.1598 | 0.873  | -0.039557002 | count | 1 |
| SLC37A4    | -0.0346208 | 0.2889689 | -0.1198 | 0.905  | -0.039414186 | count | 1 |
| AC092835.1 | -0.0640717 | 0.5707291 | -0.1123 | 0.911  | -0.039386107 | count | 1 |
| GNPDA2     | -0.0311038 | 0.2035779 | -0.1528 | 0.879  | -0.039236277 | count | 1 |
| SSSCA1     | -0.0282269 | 0.1175655 | -0.2401 | 0.81   | -0.039184233 | count | 1 |
| MED12      | -0.0328415 | 0.3030817 | -0.1084 | 0.914  | -0.039162725 | count | 1 |
| PLXDC2     | -0.0282357 | 0.1201034 | -0.2351 | 0.814  | -0.03913907  | count | 1 |
| BFSP1      | -0.038971  | 0.4815112 | -0.0809 | 0.935  | -0.039074146 | count | 1 |
| RGPD5      | -0.0412003 | 0.4111341 | -0.1002 | 0.92   | -0.039032498 | count | 1 |
| COX20      | -0.0280518 | 0.1015175 | -0.2763 | 0.782  | -0.039032488 | count | 1 |
| COPB2      | -0.0281648 | 0.1033694 | -0.2725 | 0.785  | -0.038912429 | count | 1 |
| YY1AP1     | -0.033692  | 0.2462413 | -0.1368 | 0.891  | -0.03880859  | count | 1 |
| ALG11      | -0.0482209 | 0.5363216 | -0.0899 | 0.928  | -0.038705754 | count | 1 |
| SGK3       | -0.0318251 | 0.2261101 | -0.1408 | 0.888  | -0.038683513 | count | 1 |
| ISPD       | -0.0668925 | 0.5695901 | -0.1174 | 0.907  | -0.03868144  | count | 1 |
| AL080276.2 | -0.1977645 | 1.1439943 | -0.1729 | 0.863  | -0.038641777 | count | 1 |
| FBXL13     | -0.1977645 | 1.149677  | -0.172  | 0.863  | -0.038641777 | count | 1 |
| RAD54B     | -0.1977645 | 1.149677  | -0.172  | 0.863  | -0.038641777 | count | 1 |
| AP003086.1 | -0.1977645 | 1.149677  | -0.172  | 0.863  | -0.038641777 | count | 1 |



|               |            |           |         |       |              |       |   |
|---------------|------------|-----------|---------|-------|--------------|-------|---|
| AC103740.1    | -0.1977645 | 1.149677  | -0.172  | 0.863 | -0.038641777 | count | 1 |
| WDR62         | -0.1977645 | 1.149677  | -0.172  | 0.863 | -0.038641777 | count | 1 |
| AC137936.1    | -0.1977645 | 1.153572  | -0.1714 | 0.864 | -0.038641777 | count | 1 |
| AL589843.1    | -0.1977645 | 1.153572  | -0.1714 | 0.864 | -0.038641777 | count | 1 |
| PIWIL4        | -0.1977645 | 1.153572  | -0.1714 | 0.864 | -0.038641777 | count | 1 |
| TEX14         | -0.1977645 | 1.153572  | -0.1714 | 0.864 | -0.038641777 | count | 1 |
| SPOCK1        | -0.1977645 | 1.416541  | -0.1396 | 0.889 | -0.038641777 | count | 1 |
| AC010325.1    | -0.1977645 | 1.416541  | -0.1396 | 0.889 | -0.038641777 | count | 1 |
| SRSF10        | -0.0273844 | 0.0805194 | -0.3401 | 0.734 | -0.038630208 | count | 1 |
| SLC25A6       | -0.0268322 | 0.0412932 | -0.6498 | 0.516 | -0.03852171  | count | 1 |
| SIAH2         | -0.0296352 | 0.1796048 | -0.165  | 0.869 | -0.038512988 | count | 1 |
| BTG1          | -0.026786  | 0.0564303 | -0.4747 | 0.635 | -0.038470668 | count | 1 |
| CLOCK         | -0.0297787 | 0.1877021 | -0.1586 | 0.874 | -0.038365841 | count | 1 |
| ULBP2         | -0.1141701 | 0.4942101 | -0.231  | 0.817 | -0.038302428 | count | 1 |
| MAML3         | -0.0323748 | 0.3372814 | -0.096  | 0.924 | -0.03828362  | count | 1 |
| APP           | -0.0267463 | 0.062987  | -0.4246 | 0.671 | -0.038195575 | count | 1 |
| FAM151B       | -0.0704117 | 1.031471  | -0.0683 | 0.946 | -0.037913008 | count | 1 |
| ASPN          | -0.0704117 | 1.16149   | -0.0606 | 0.952 | -0.037913008 | count | 1 |
| STX18         | -0.0297316 | 0.2138028 | -0.1391 | 0.889 | -0.037872411 | count | 1 |
| PLOD2         | -0.0288247 | 0.1802985 | -0.1599 | 0.873 | -0.037863966 | count | 1 |
| PTMA          | -0.0262048 | 0.0210613 | -1.2442 | 0.214 | -0.037785631 | count | 1 |
| AL139384.1    | -0.0763177 | 0.6598356 | -0.1157 | 0.908 | -0.037774785 | count | 1 |
| GARNL3        | -0.0763177 | 0.7851946 | -0.0972 | 0.923 | -0.037774785 | count | 1 |
| COPS5         | -0.0269682 | 0.0932658 | -0.2892 | 0.772 | -0.03774215  | count | 1 |
| SLC37A1       | -0.0416051 | 0.4047332 | -0.1028 | 0.918 | -0.037728874 | count | 1 |
| MRPS27        | -0.029     | 0.1656236 | -0.1751 | 0.861 | -0.037716494 | count | 1 |
| ARHGEF28      | -0.0339053 | 0.2718327 | -0.1247 | 0.901 | -0.037541492 | count | 1 |
| FAM213B       | -0.0311914 | 0.2157731 | -0.1446 | 0.885 | -0.037384421 | count | 1 |
| MRPL47        | -0.027133  | 0.1291318 | -0.2101 | 0.834 | -0.03718931  | count | 1 |
| RPS20         | -0.025781  | 0.0298952 | -0.8624 | 0.389 | -0.037055226 | count | 1 |
| DNAJC25-GNG10 | -0.0505277 | 0.5782526 | -0.0874 | 0.93  | -0.037053511 | count | 1 |
| CLEC14A       | -0.0257408 | 0.0451996 | -0.5695 | 0.569 | -0.03701932  | count | 1 |
| PRKCI         | -0.0290959 | 0.1994518 | -0.1459 | 0.884 | -0.037019053 | count | 1 |
| TNS1          | -0.0278692 | 0.1833472 | -0.152  | 0.879 | -0.037005931 | count | 1 |
| AKAP9         | -0.0261616 | 0.0843505 | -0.3102 | 0.756 | -0.036929945 | count | 1 |
| IER3IP1       | -0.0264993 | 0.1030577 | -0.2571 | 0.797 | -0.036888897 | count | 1 |
| ATG101        | -0.0273637 | 0.1232835 | -0.222  | 0.824 | -0.036866456 | count | 1 |
| APOO          | -0.0297039 | 0.2384475 | -0.1246 | 0.901 | -0.036799058 | count | 1 |
| GNLY          | -0.0398643 | 0.4315156 | -0.0924 | 0.926 | -0.03670928  | count | 1 |
| ITGB2         | -0.3325403 | 0.6197684 | -0.5366 | 0.592 | -0.036622345 | count | 1 |
| CKS1B         | -0.0278589 | 0.163291  | -0.1706 | 0.865 | -0.036617446 | count | 1 |
| NSUN3         | -0.0316625 | 0.2989732 | -0.1059 | 0.916 | -0.036464924 | count | 1 |
| COMMD4        | -0.0261732 | 0.1114272 | -0.2349 | 0.814 | -0.036363083 | count | 1 |
| POLR2H        | -0.0261652 | 0.1097159 | -0.2385 | 0.812 | -0.036305114 | count | 1 |
| CHCHD4        | -0.0295634 | 0.2454109 | -0.1205 | 0.904 | -0.036154209 | count | 1 |

|            |            |           |         |       |              |       |   |
|------------|------------|-----------|---------|-------|--------------|-------|---|
| DPT        | -0.3284974 | 0.9236259 | -0.3557 | 0.722 | -0.036123915 | count | 1 |
| BNIP3      | -0.0256286 | 0.1031544 | -0.2484 | 0.804 | -0.035854539 | count | 1 |
| CCDC163    | -0.0552367 | 0.683571  | -0.0808 | 0.936 | -0.035754488 | count | 1 |
| COX5B      | -0.0248744 | 0.0445684 | -0.5581 | 0.577 | -0.035644256 | count | 1 |
| CRNDE      | -0.0273303 | 0.1618762 | -0.1688 | 0.866 | -0.035624903 | count | 1 |
| HABP4      | -0.0276301 | 0.1544775 | -0.1789 | 0.858 | -0.0354917   | count | 1 |
| SRA1       | -0.0254312 | 0.107073  | -0.2375 | 0.812 | -0.035374501 | count | 1 |
| KLHL11     | -0.054519  | 0.6535088 | -0.0834 | 0.934 | -0.035284348 | count | 1 |
| AQP11      | -0.054519  | 0.7369157 | -0.074  | 0.941 | -0.035284348 | count | 1 |
| MRPL18     | -0.0250694 | 0.0926554 | -0.2706 | 0.787 | -0.035247202 | count | 1 |
| TMEM92     | -0.0608756 | 0.4812728 | -0.1265 | 0.899 | -0.035151453 | count | 1 |
| RANBP1     | -0.0248126 | 0.0719998 | -0.3446 | 0.73  | -0.035120187 | count | 1 |
| NSD1       | -0.0259068 | 0.1410038 | -0.1837 | 0.854 | -0.035069627 | count | 1 |
| PITPNA     | -0.0260973 | 0.1383553 | -0.1886 | 0.85  | -0.035045661 | count | 1 |
| RFNG       | -0.0261198 | 0.168567  | -0.155  | 0.877 | -0.034994291 | count | 1 |
| CCDC130    | -0.0264368 | 0.1592546 | -0.166  | 0.868 | -0.034973193 | count | 1 |
| KBTBD7     | -0.0304452 | 0.2959194 | -0.1029 | 0.918 | -0.034926568 | count | 1 |
| ZNF133     | -0.0406339 | 0.4562575 | -0.0891 | 0.929 | -0.034898108 | count | 1 |
| FOSL2      | -0.0250622 | 0.1165081 | -0.2151 | 0.83  | -0.034811692 | count | 1 |
| PPTC7      | -0.032726  | 0.2784918 | -0.1175 | 0.906 | -0.034743125 | count | 1 |
| L3MBTL1    | -0.1293071 | 0.9205128 | -0.1405 | 0.888 | -0.034715466 | count | 1 |
| AC006480.2 | -0.1035619 | 0.5989849 | -0.1729 | 0.863 | -0.034630896 | count | 1 |
| TMEM185A   | -0.0288791 | 0.3009845 | -0.0959 | 0.924 | -0.034607604 | count | 1 |
| CALM3      | -0.0244765 | 0.0829425 | -0.2951 | 0.768 | -0.034335264 | count | 1 |
| MGAT3      | -0.0468133 | 0.5388589 | -0.0869 | 0.931 | -0.034304589 | count | 1 |
| FDFT1      | -0.0260464 | 0.1582635 | -0.1646 | 0.869 | -0.034296942 | count | 1 |
| SLC6A9     | -0.3127957 | 0.9463668 | -0.3305 | 0.741 | -0.034200972 | count | 1 |
| TMSB15B    | -0.3127957 | 1.021165  | -0.3063 | 0.759 | -0.034200972 | count | 1 |
| AC092111.1 | -0.3127957 | 1.021165  | -0.3063 | 0.759 | -0.034200972 | count | 1 |
| AL049775.1 | -0.3127957 | 1.021165  | -0.3063 | 0.759 | -0.034200972 | count | 1 |
| GOLGA8R    | -0.3127957 | 1.021165  | -0.3063 | 0.759 | -0.034200972 | count | 1 |
| AL390208.1 | -0.3127957 | 1.119343  | -0.2794 | 0.78  | -0.034200972 | count | 1 |
| TNK2       | -0.0314475 | 0.3769324 | -0.0834 | 0.934 | -0.034039417 | count | 1 |
| NREP       | -0.0263198 | 0.1973273 | -0.1334 | 0.894 | -0.034028044 | count | 1 |
| FCGR2A     | -0.0864781 | 0.805555  | -0.1074 | 0.915 | -0.03399806  | count | 1 |
| ROMO1      | -0.0239774 | 0.0817071 | -0.2935 | 0.769 | -0.033810354 | count | 1 |
| SPATS2     | -0.0251319 | 0.1435313 | -0.1751 | 0.861 | -0.033748339 | count | 1 |
| LGALS3BP   | -0.308464  | 0.6379206 | -0.4835 | 0.629 | -0.03367406  | count | 1 |
| LMNA       | -0.0234267 | 0.0476957 | -0.4912 | 0.623 | -0.033616463 | count | 1 |
| RAD23A     | -0.0236476 | 0.0723258 | -0.327  | 0.744 | -0.03354859  | count | 1 |
| SAP130     | -0.0492132 | 0.5052309 | -0.0974 | 0.922 | -0.033346909 | count | 1 |
| RECQL5     | -0.0426144 | 0.5326167 | -0.08   | 0.936 | -0.03324859  | count | 1 |
| NUP98      | -0.0266927 | 0.2217026 | -0.1204 | 0.904 | -0.033173364 | count | 1 |
| B4GALT7    | -0.0259615 | 0.1886905 | -0.1376 | 0.891 | -0.033138173 | count | 1 |
| VPS25      | -0.0241785 | 0.1268919 | -0.1905 | 0.849 | -0.033029518 | count | 1 |

|            |            |           |         |       |              |       |   |
|------------|------------|-----------|---------|-------|--------------|-------|---|
| UQCC3      | -0.0237893 | 0.1220548 | -0.1949 | 0.845 | -0.032855733 | count | 1 |
| ZNF367     | -0.0983966 | 0.8372761 | -0.1175 | 0.906 | -0.032851554 | count | 1 |
| TCP10L     | -0.0983966 | 0.8730016 | -0.1127 | 0.91  | -0.032851554 | count | 1 |
| CCNY       | -0.0240503 | 0.1145101 | -0.21   | 0.834 | -0.03274039  | count | 1 |
| DUSP7      | -0.0273162 | 0.2245696 | -0.1216 | 0.903 | -0.03273122  | count | 1 |
| DTD2       | -0.0407005 | 0.4483505 | -0.0908 | 0.928 | -0.032625772 | count | 1 |
| MAP1S      | -0.0268324 | 0.2660587 | -0.1009 | 0.92  | -0.032460384 | count | 1 |
| AL035413.1 | -0.0351461 | 0.4451225 | -0.079  | 0.937 | -0.032342423 | count | 1 |
| RHOJ       | -0.0234261 | 0.1164931 | -0.2011 | 0.841 | -0.032335688 | count | 1 |
| AC003681.1 | -0.2971874 | 0.7351415 | -0.4043 | 0.686 | -0.032309645 | count | 1 |
| UBTF       | -0.0234284 | 0.1265597 | -0.1851 | 0.853 | -0.032291221 | count | 1 |
| STOML2     | -0.0230482 | 0.0969461 | -0.2377 | 0.812 | -0.032166684 | count | 1 |
| NAP1L4     | -0.023091  | 0.1020723 | -0.2262 | 0.821 | -0.032127552 | count | 1 |
| OR51E1     | -0.2949269 | 0.631297  | -0.4672 | 0.64  | -0.032037392 | count | 1 |
| AC006157.1 | -0.1657216 | 0.979928  | -0.1691 | 0.866 | -0.032025737 | count | 1 |
| AC009404.1 | -0.1657216 | 0.996209  | -0.1664 | 0.868 | -0.032025737 | count | 1 |
| AC005480.1 | -0.1657216 | 0.996209  | -0.1664 | 0.868 | -0.032025737 | count | 1 |
| AMH        | -0.1657216 | 0.996209  | -0.1664 | 0.868 | -0.032025737 | count | 1 |
| UQCRH      | -0.0222295 | 0.0423271 | -0.5252 | 0.599 | -0.031853218 | count | 1 |
| ANAPC1     | -0.0268052 | 0.2679646 | -0.1    | 0.92  | -0.031775893 | count | 1 |
| APOL1      | -0.0231306 | 0.1111024 | -0.2083 | 0.835 | -0.031771086 | count | 1 |
| PRR7       | -0.0247965 | 0.1902174 | -0.1304 | 0.896 | -0.031751108 | count | 1 |
| DHCR7      | -0.0280574 | 0.4894704 | -0.0573 | 0.954 | -0.031651381 | count | 1 |
| EMC3       | -0.0225734 | 0.0967796 | -0.2332 | 0.816 | -0.031628947 | count | 1 |
| ZNF605     | -0.0260677 | 0.2900214 | -0.0899 | 0.928 | -0.031604629 | count | 1 |
| EFHC1      | -0.0254705 | 0.2230331 | -0.1142 | 0.909 | -0.031600136 | count | 1 |
| ABCB10     | -0.0353665 | 0.4150302 | -0.0852 | 0.932 | -0.031509011 | count | 1 |
| BCR        | -0.023187  | 0.1452849 | -0.1596 | 0.873 | -0.031491858 | count | 1 |
| AC145207.5 | -0.1621322 | 0.5788358 | -0.2801 | 0.779 | -0.031293299 | count | 1 |
| AC018638.7 | -0.1621322 | 0.5822164 | -0.2785 | 0.781 | -0.031293299 | count | 1 |
| BACH2      | -0.0688938 | 0.8098955 | -0.0851 | 0.932 | -0.030672547 | count | 1 |
| AC111182.1 | -0.0688938 | 0.8711875 | -0.0791 | 0.937 | -0.030672547 | count | 1 |
| ZNF704     | -0.0260977 | 0.2390614 | -0.1092 | 0.913 | -0.03056603  | count | 1 |
| TMEM51     | -0.028407  | 0.3196376 | -0.0889 | 0.929 | -0.030548094 | count | 1 |
| CBFB       | -0.0253991 | 0.2230449 | -0.1139 | 0.909 | -0.030506194 | count | 1 |
| IFRD2      | -0.0225564 | 0.1313913 | -0.1717 | 0.864 | -0.030485333 | count | 1 |
| CUL4B      | -0.0237987 | 0.2125928 | -0.1119 | 0.911 | -0.030407553 | count | 1 |
| SLC25A3    | -0.021024  | 0.0406256 | -0.5175 | 0.605 | -0.030154024 | count | 1 |
| PKN2       | -0.0215116 | 0.102908  | -0.209  | 0.834 | -0.030115713 | count | 1 |
| NDUFV2     | -0.0210638 | 0.0595915 | -0.3535 | 0.724 | -0.030004374 | count | 1 |
| ZCCHC18    | -0.2777079 | 0.8229983 | -0.3374 | 0.736 | -0.029977319 | count | 1 |
| PRPF4      | -0.0252027 | 0.233192  | -0.1081 | 0.914 | -0.029956321 | count | 1 |
| ZNHIT1     | -0.0209067 | 0.0529426 | -0.3949 | 0.693 | -0.029865196 | count | 1 |
| HMGB1      | -0.0207334 | 0.0304491 | -0.6809 | 0.496 | -0.029844209 | count | 1 |
| RIMKLB     | -0.0233273 | 0.2296421 | -0.1016 | 0.919 | -0.029836499 | count | 1 |

|            |            |           |         |       |              |       |   |
|------------|------------|-----------|---------|-------|--------------|-------|---|
| LYN        | -0.0241001 | 0.1805087 | -0.1335 | 0.894 | -0.029689656 | count | 1 |
| WDR82      | -0.0222192 | 0.1634445 | -0.1359 | 0.892 | -0.02952775  | count | 1 |
| H2AFZ      | -0.0202559 | 0.0531107 | -0.3814 | 0.703 | -0.029001241 | count | 1 |
| SNX3       | -0.0201387 | 0.0460399 | -0.4374 | 0.662 | -0.028856312 | count | 1 |
| ZNF443     | -0.0391455 | 0.5319146 | -0.0736 | 0.941 | -0.028642375 | count | 1 |
| HEATR5A    | -0.0321439 | 0.460154  | -0.0699 | 0.944 | -0.028623781 | count | 1 |
| CCNF       | -0.0858734 | 0.9002923 | -0.0954 | 0.924 | -0.028560344 | count | 1 |
| PHKB       | -0.0207651 | 0.1344438 | -0.1545 | 0.877 | -0.028429737 | count | 1 |
| TMEM50A    | -0.0195882 | 0.0535556 | -0.3658 | 0.715 | -0.028002966 | count | 1 |
| SLC25A37   | -0.0198547 | 0.0961322 | -0.2065 | 0.836 | -0.027957363 | count | 1 |
| EXD2       | -0.0260575 | 0.3208478 | -0.0812 | 0.935 | -0.027832966 | count | 1 |
| DES1       | -0.0213965 | 0.1728237 | -0.1238 | 0.901 | -0.02779713  | count | 1 |
| FAM204A    | -0.0195295 | 0.0785183 | -0.2487 | 0.804 | -0.027557682 | count | 1 |
| ARHGEF7    | -0.0215909 | 0.2049765 | -0.1053 | 0.916 | -0.027492212 | count | 1 |
| CFLAR-AS1  | -0.2565265 | 0.7190757 | -0.3567 | 0.721 | -0.027476408 | count | 1 |
| LRRN2      | -0.061531  | 0.4778717 | -0.1288 | 0.898 | -0.027338759 | count | 1 |
| EPN1       | -0.0200686 | 0.1231149 | -0.163  | 0.871 | -0.027178634 | count | 1 |
| ZFP90      | -0.0209329 | 0.2140732 | -0.0978 | 0.922 | -0.027150051 | count | 1 |
| HAUS7      | -0.0468864 | 0.5980702 | -0.0784 | 0.938 | -0.026982883 | count | 1 |
| AL117336.3 | -0.0468864 | 0.6845044 | -0.0685 | 0.945 | -0.026982883 | count | 1 |
| PITPNM2    | -0.0503075 | 0.5188527 | -0.097  | 0.923 | -0.02695168  | count | 1 |
| CERS2      | -0.0195436 | 0.1080535 | -0.1809 | 0.856 | -0.026934954 | count | 1 |
| STK39      | -0.0417177 | 0.6659411 | -0.0626 | 0.95  | -0.026923238 | count | 1 |
| ALKBH6     | -0.0253555 | 0.3109908 | -0.0815 | 0.935 | -0.026897352 | count | 1 |
| EI24       | -0.0191008 | 0.0946238 | -0.2019 | 0.84  | -0.026658352 | count | 1 |
| FBXW4      | -0.0266171 | 0.3239697 | -0.0822 | 0.935 | -0.026647304 | count | 1 |
| ZNF214     | -0.037796  | 0.7124925 | -0.053  | 0.958 | -0.026637521 | count | 1 |
| ZNF486     | -0.0251029 | 0.3314718 | -0.0757 | 0.94  | -0.026628678 | count | 1 |
| HNRNPU     | -0.018486  | 0.0578184 | -0.3197 | 0.749 | -0.026404117 | count | 1 |
| SEC16A     | -0.0230839 | 0.2622342 | -0.088  | 0.93  | -0.026361656 | count | 1 |
| HPRT1      | -0.0192009 | 0.1176296 | -0.1632 | 0.87  | -0.026328204 | count | 1 |
| EMC2       | -0.018813  | 0.0951688 | -0.1977 | 0.843 | -0.026250225 | count | 1 |
| BLOC1S1    | -0.0186329 | 0.0816307 | -0.2283 | 0.819 | -0.026249899 | count | 1 |
| AC022730.4 | -0.0425248 | 0.7429232 | -0.0572 | 0.954 | -0.026011701 | count | 1 |
| AC106791.1 | -0.0425248 | 0.8804815 | -0.0483 | 0.961 | -0.026011701 | count | 1 |
| LRP12      | -0.0259398 | 0.3625043 | -0.0716 | 0.943 | -0.025967079 | count | 1 |
| SPATA2L    | -0.0241042 | 0.3271661 | -0.0737 | 0.941 | -0.025909609 | count | 1 |
| SF3A2      | -0.02055   | 0.2561298 | -0.0802 | 0.936 | -0.025803201 | count | 1 |
| POP7       | -0.0186193 | 0.12378   | -0.1504 | 0.88  | -0.02566066  | count | 1 |
| NDUFB6     | -0.0181783 | 0.0825281 | -0.2203 | 0.826 | -0.025628783 | count | 1 |
| SP4        | -0.024494  | 0.2949413 | -0.083  | 0.934 | -0.025404551 | count | 1 |
| TRABD2B    | -0.0308889 | 0.5653633 | -0.0546 | 0.956 | -0.025344551 | count | 1 |
| ERG        | -0.0179692 | 0.0800294 | -0.2245 | 0.822 | -0.025341665 | count | 1 |
| PTPN7      | -0.1323599 | 0.7574564 | -0.1747 | 0.861 | -0.025285127 | count | 1 |
| METRN      | -0.0181536 | 0.1195037 | -0.1519 | 0.879 | -0.025272835 | count | 1 |

|            |            |           |         |        |              |       |   |
|------------|------------|-----------|---------|--------|--------------|-------|---|
| NOL4L      | -0.0205902 | 0.2049226 | -0.1005 | 0.92   | -0.025216789 | count | 1 |
| C6orf203   | -0.0195547 | 0.20579   | -0.095  | 0.924  | -0.025084622 | count | 1 |
| SCFD1      | -0.0186736 | 0.1383644 | -0.135  | 0.893  | -0.025071328 | count | 1 |
| HNRNPC     | -0.0176181 | 0.0691748 | -0.2547 | 0.799  | -0.02506442  | count | 1 |
| TIMM21     | -0.0209973 | 0.2476339 | -0.0848 | 0.932  | -0.02495031  | count | 1 |
| SNRNP27    | -0.0182443 | 0.1336536 | -0.1365 | 0.891  | -0.024801959 | count | 1 |
| DCBLD1     | -0.0212343 | 0.26314   | -0.0807 | 0.936  | -0.024780297 | count | 1 |
| CCDC66     | -0.0176911 | 0.1171324 | -0.151  | 0.88   | -0.024467085 | count | 1 |
| KRT8       | -0.0187257 | 0.193547  | -0.0968 | 0.923  | -0.024437118 | count | 1 |
| SPHK2      | -0.0268832 | 0.4988548 | -0.0539 | 0.957  | -0.024325208 | count | 1 |
| DYNC1LI2   | -0.017115  | 0.079684  | -0.2148 | 0.83   | -0.024161141 | count | 1 |
| BAG6       | -0.0181612 | 0.1655006 | -0.1097 | 0.913  | -0.024119878 | count | 1 |
| LCMT1      | -0.0177207 | 0.1619859 | -0.1094 | 0.913  | -0.023773196 | count | 1 |
| TPGS2      | -0.017301  | 0.1377833 | -0.1256 | 0.9    | -0.02368532  | count | 1 |
| LMF2       | -0.017486  | 0.1403422 | -0.1246 | 0.901  | -0.023665593 | count | 1 |
| CTBP2      | -0.0173317 | 0.1348674 | -0.1285 | 0.898  | -0.023651869 | count | 1 |
| ERH        | -0.0165453 | 0.0548207 | -0.3018 | 0.763  | -0.023610311 | count | 1 |
| TMA7       | -0.0164173 | 0.0413324 | -0.3972 | 0.691  | -0.023543576 | count | 1 |
| MSN        | -0.0165445 | 0.0709232 | -0.2333 | 0.816  | -0.023504473 | count | 1 |
| GSTZ1      | -0.0197496 | 0.257516  | -0.0767 | 0.939  | -0.023465644 | count | 1 |
| MGST2      | -0.0162809 | 0.0474667 | -0.343  | 0.732  | -0.02333566  | count | 1 |
| BRD2       | -0.0166459 | 0.0893214 | -0.1864 | 0.852  | -0.023316098 | count | 1 |
| RTF1       | -0.0164055 | 0.0780768 | -0.2101 | 0.834  | -0.023222232 | count | 1 |
| SUMO2      | -0.0160915 | 0.0326868 | -0.4923 | 0.623  | -0.023126477 | count | 1 |
| CCDC102A   | -0.0188717 | 0.236233  | -0.0799 | 0.936  | -0.023109738 | count | 1 |
| ANKRD12    | -0.0161939 | 0.0694043 | -0.2333 | 0.8155 | -0.023081162 | count | 1 |
| AC103724.4 | -0.0295214 | 0.5253766 | -0.0562 | 0.955  | -0.022977725 | count | 1 |
| AC005840.2 | -0.0428447 | 0.8374482 | -0.0512 | 0.959  | -0.022910444 | count | 1 |
| ACADM      | -0.0166236 | 0.1207584 | -0.1377 | 0.891  | -0.022895233 | count | 1 |
| XRCC5      | -0.0160735 | 0.0645853 | -0.2489 | 0.803  | -0.02287225  | count | 1 |
| NEK7       | -0.0177828 | 0.1980748 | -0.0898 | 0.928  | -0.022763094 | count | 1 |
| SLC14A1    | -0.0395749 | 0.4957253 | -0.0798 | 0.936  | -0.022735061 | count | 1 |
| MID1IP1    | -0.016631  | 0.16406   | -0.1014 | 0.919  | -0.022647567 | count | 1 |
| AL392172.1 | -0.0213579 | 0.3731802 | -0.0572 | 0.954  | -0.022647048 | count | 1 |
| PPP6R1     | -0.0205708 | 0.3283958 | -0.0626 | 0.95   | -0.022628559 | count | 1 |
| MAP2K5     | -0.0191849 | 0.2757567 | -0.0696 | 0.945  | -0.022385143 | count | 1 |
| LIMS2      | -0.0157658 | 0.0738015 | -0.2136 | 0.831  | -0.02227886  | count | 1 |
| AC004908.1 | -0.1172356 | 1.032709  | -0.1135 | 0.91   | -0.022278616 | count | 1 |
| RMND5A     | -0.0174169 | 0.2150307 | -0.081  | 0.935  | -0.022198094 | count | 1 |
| PIGC       | -0.0165477 | 0.1646182 | -0.1005 | 0.92   | -0.022145873 | count | 1 |
| PPDPF      | -0.0154506 | 0.0507336 | -0.3045 | 0.761  | -0.022113207 | count | 1 |
| TCAF1      | -0.0165522 | 0.1711339 | -0.0967 | 0.923  | -0.021970788 | count | 1 |
| C20orf96   | -0.0207194 | 0.3466257 | -0.0598 | 0.952  | -0.021968517 | count | 1 |
| ACTR2      | -0.0154485 | 0.0777567 | -0.1987 | 0.843  | -0.021846869 | count | 1 |
| ZBTB1      | -0.0167887 | 0.1650412 | -0.1017 | 0.919  | -0.021789268 | count | 1 |

|            |            |           |         |       |              |       |   |
|------------|------------|-----------|---------|-------|--------------|-------|---|
| PPP1R3C    | -0.0220315 | 0.4710929 | -0.0468 | 0.963 | -0.021587834 | count | 1 |
| AC022916.1 | -0.0486137 | 0.8809339 | -0.0552 | 0.956 | -0.021522224 | count | 1 |
| SLFN11     | -0.0164001 | 0.1967336 | -0.0834 | 0.934 | -0.021461489 | count | 1 |
| GZMM       | -0.0648119 | 0.8200359 | -0.079  | 0.937 | -0.021416028 | count | 1 |
| DCAF1      | -0.0205962 | 0.5007871 | -0.0411 | 0.967 | -0.021352465 | count | 1 |
| RAB43      | -0.0803795 | 0.9703604 | -0.0828 | 0.934 | -0.02123835  | count | 1 |
| GPRIN1     | -0.0803795 | 0.9703604 | -0.0828 | 0.934 | -0.02123835  | count | 1 |
| Z84485.1   | -0.0803795 | 0.9703604 | -0.0828 | 0.934 | -0.02123835  | count | 1 |
| DPEP1      | -0.0803795 | 0.9703604 | -0.0828 | 0.934 | -0.02123835  | count | 1 |
| ASPA       | -0.0803795 | 1.1841324 | -0.0679 | 0.946 | -0.02123835  | count | 1 |
| HDAC3      | -0.0160246 | 0.1636881 | -0.0979 | 0.922 | -0.021237245 | count | 1 |
| AKR1A1     | -0.0149337 | 0.0830807 | -0.1797 | 0.857 | -0.021151591 | count | 1 |
| AC108673.2 | -0.0638827 | 0.7813973 | -0.0818 | 0.935 | -0.021102928 | count | 1 |
| KIAA1217   | -0.0165162 | 0.181407  | -0.091  | 0.927 | -0.021095666 | count | 1 |
| PEA15      | -0.0148856 | 0.0819625 | -0.1816 | 0.856 | -0.021014948 | count | 1 |
| SNRPG      | -0.0148114 | 0.0697532 | -0.2123 | 0.832 | -0.020983463 | count | 1 |
| NDUFB9     | -0.0146999 | 0.0615495 | -0.2388 | 0.811 | -0.020969773 | count | 1 |
| KIAA0895L  | -0.0287112 | 0.43631   | -0.0658 | 0.948 | -0.02096441  | count | 1 |
| CYP1B1-AS1 | -0.0226893 | 0.408131  | -0.0556 | 0.956 | -0.020841573 | count | 1 |
| RAB10      | -0.0146843 | 0.0934297 | -0.1572 | 0.875 | -0.020626048 | count | 1 |
| SCAMP5     | -0.0301997 | 0.8005981 | -0.0377 | 0.97  | -0.020380737 | count | 1 |
| SMAP1      | -0.014703  | 0.1204264 | -0.1221 | 0.903 | -0.020306181 | count | 1 |
| IPO9       | -0.0178593 | 0.2594269 | -0.0688 | 0.945 | -0.020303174 | count | 1 |
| TRIM69     | -0.015115  | 0.155259  | -0.0974 | 0.922 | -0.020210823 | count | 1 |
| ATP5MD     | -0.0141212 | 0.0621175 | -0.2273 | 0.82  | -0.020056162 | count | 1 |
| VPS36      | -0.0143168 | 0.1010891 | -0.1416 | 0.887 | -0.019980231 | count | 1 |
| DYNC2H1    | -0.0162849 | 0.2779053 | -0.0586 | 0.953 | -0.019858751 | count | 1 |
| AC093323.1 | -0.0180523 | 0.3175128 | -0.0569 | 0.955 | -0.019853358 | count | 1 |
| RAB11FIP2  | -0.015816  | 0.2209302 | -0.0716 | 0.943 | -0.019797018 | count | 1 |
| DPCD       | -0.0154723 | 0.203329  | -0.0761 | 0.939 | -0.019553273 | count | 1 |
| UGDH       | -0.0177357 | 0.2664257 | -0.0666 | 0.947 | -0.019504582 | count | 1 |
| ZMAT5      | -0.0146604 | 0.1780582 | -0.0823 | 0.934 | -0.01944859  | count | 1 |
| ZNF250     | -0.017257  | 0.32943   | -0.0524 | 0.958 | -0.019360867 | count | 1 |
| HBP1       | -0.0141127 | 0.1200104 | -0.1176 | 0.906 | -0.019295454 | count | 1 |
| FKBP8      | -0.0134718 | 0.0808902 | -0.1665 | 0.868 | -0.019031385 | count | 1 |
| EEF1D      | -0.0132199 | 0.0310432 | -0.4259 | 0.67  | -0.019022171 | count | 1 |
| ACOT9      | -0.0140836 | 0.1372268 | -0.1026 | 0.918 | -0.019012037 | count | 1 |
| AP001462.1 | -0.0429698 | 0.6579649 | -0.0653 | 0.948 | -0.018993718 | count | 1 |
| ADAMTSL2   | -0.0429698 | 0.6919563 | -0.0621 | 0.95  | -0.018993718 | count | 1 |
| KLHL17     | -0.0429698 | 0.9100417 | -0.0472 | 0.962 | -0.018993718 | count | 1 |
| SCD        | -0.0486529 | 0.5203425 | -0.0935 | 0.926 | -0.018917485 | count | 1 |
| FRRS1      | -0.0713743 | 0.6779538 | -0.1053 | 0.916 | -0.018803386 | count | 1 |
| HNRNPR     | -0.013298  | 0.077512  | -0.1716 | 0.864 | -0.018788831 | count | 1 |
| COQ5       | -0.0148918 | 0.2091831 | -0.0712 | 0.943 | -0.018639273 | count | 1 |
| FAM66C     | -0.0262513 | 0.6518487 | -0.0403 | 0.968 | -0.018457346 | count | 1 |

|             |            |           |         |       |              |       |   |
|-------------|------------|-----------|---------|-------|--------------|-------|---|
| B3GAT3      | -0.0135937 | 0.1528596 | -0.0889 | 0.929 | -0.018275457 | count | 1 |
| BPTF        | -0.0128867 | 0.090133  | -0.143  | 0.886 | -0.01818375  | count | 1 |
| MYORG       | -0.0338488 | 0.7758919 | -0.0436 | 0.965 | -0.018058954 | count | 1 |
| ACR         | -0.0338488 | 0.9092005 | -0.0372 | 0.97  | -0.018058954 | count | 1 |
| CASP10      | -0.0136696 | 0.1929808 | -0.0708 | 0.944 | -0.017922991 | count | 1 |
| USP44       | -0.0237148 | 0.5976634 | -0.0397 | 0.968 | -0.017888547 | count | 1 |
| ENO2        | -0.0212183 | 0.4449355 | -0.0477 | 0.962 | -0.017785204 | count | 1 |
| LINC01558   | -0.0215385 | 0.5379216 | -0.04   | 0.968 | -0.017643889 | count | 1 |
| NME3        | -0.0123727 | 0.0661367 | -0.1871 | 0.852 | -0.01763372  | count | 1 |
| IL10RB-DT   | -0.0250845 | 0.5321849 | -0.0471 | 0.962 | -0.01763273  | count | 1 |
| ANO2        | -0.0185638 | 0.3741676 | -0.0496 | 0.96  | -0.017532247 | count | 1 |
| MAP1LC3A    | -0.0124424 | 0.1055264 | -0.1179 | 0.906 | -0.017385422 | count | 1 |
| PRAF2       | -0.0125685 | 0.1148807 | -0.1094 | 0.913 | -0.017322355 | count | 1 |
| MAP2K4      | -0.0142232 | 0.2681011 | -0.0531 | 0.958 | -0.017269111 | count | 1 |
| AL022069.1  | -0.0911088 | 0.9252774 | -0.0985 | 0.922 | -0.0171569   | count | 1 |
| MPV17       | -0.0124774 | 0.1319402 | -0.0946 | 0.925 | -0.017029435 | count | 1 |
| TOE1        | -0.014979  | 0.267009  | -0.0561 | 0.955 | -0.017024556 | count | 1 |
| ATP9A       | -0.018238  | 0.4628736 | -0.0394 | 0.969 | -0.016989054 | count | 1 |
| KIDINS220   | -0.012426  | 0.1462208 | -0.085  | 0.932 | -0.016907229 | count | 1 |
| DIS3L       | -0.015856  | 0.3419454 | -0.0464 | 0.963 | -0.016803212 | count | 1 |
| PORCN       | -0.0154433 | 0.3838549 | -0.0402 | 0.968 | -0.016789638 | count | 1 |
| OTUD7A      | -0.0236987 | 0.5870136 | -0.0404 | 0.968 | -0.01665385  | count | 1 |
| APOBEC3F    | -0.0203052 | 0.5537301 | -0.0367 | 0.971 | -0.016630034 | count | 1 |
| EXOC6       | -0.0118156 | 0.1619866 | -0.0729 | 0.942 | -0.016269313 | count | 1 |
| ARHGEF35    | -0.0366402 | 0.6490245 | -0.0565 | 0.955 | -0.016167343 | count | 1 |
| ZNF292      | -0.0118692 | 0.1734595 | -0.0684 | 0.945 | -0.016161364 | count | 1 |
| TRAF5       | -0.0133793 | 0.2670762 | -0.0501 | 0.96  | -0.015975133 | count | 1 |
| SLC25A22    | -0.0184608 | 0.393644  | -0.0469 | 0.963 | -0.015797859 | count | 1 |
| CHIC1       | -0.0128612 | 0.2737033 | -0.047  | 0.963 | -0.015774342 | count | 1 |
| AL645933.2  | -0.0212021 | 0.4442975 | -0.0477 | 0.962 | -0.015458345 | count | 1 |
| PAIP2       | -0.0108032 | 0.078916  | -0.1369 | 0.891 | -0.015306755 | count | 1 |
| AL353708.1  | -0.0583472 | 1.1238618 | -0.0519 | 0.959 | -0.015305839 | count | 1 |
| MELTF       | -0.0583472 | 1.1238618 | -0.0519 | 0.959 | -0.015305839 | count | 1 |
| PKIB        | -0.0583472 | 1.1238618 | -0.0519 | 0.959 | -0.015305839 | count | 1 |
| ZNF239      | -0.0583472 | 1.1248922 | -0.0519 | 0.959 | -0.015305839 | count | 1 |
| CYP17A1-AS1 | -0.0583472 | 1.1245989 | -0.0519 | 0.959 | -0.015305839 | count | 1 |
| SNX22       | -0.0583472 | 1.1248922 | -0.0519 | 0.959 | -0.015305839 | count | 1 |
| HSPB9       | -0.0583472 | 1.1248922 | -0.0519 | 0.959 | -0.015305839 | count | 1 |
| AC100793.4  | -0.0583472 | 1.1248922 | -0.0519 | 0.959 | -0.015305839 | count | 1 |
| ZNF491      | -0.0583472 | 1.1238618 | -0.0519 | 0.959 | -0.015305839 | count | 1 |
| ZNRF3-AS1   | -0.0583472 | 1.29907   | -0.0449 | 0.964 | -0.015305839 | count | 1 |
| CAND1       | -0.0112139 | 0.1407446 | -0.0797 | 0.937 | -0.015146639 | count | 1 |
| TESK1       | -0.0126621 | 0.2414645 | -0.0524 | 0.958 | -0.015037015 | count | 1 |
| GTF2H5      | -0.0106925 | 0.0951383 | -0.1124 | 0.911 | -0.014976061 | count | 1 |
| CNPY3       | -0.0109564 | 0.1263039 | -0.0867 | 0.931 | -0.014949683 | count | 1 |

|            |            |           |         |        |              |       |   |
|------------|------------|-----------|---------|--------|--------------|-------|---|
| CDV3       | -0.010461  | 0.0669007 | -0.1564 | 0.876  | -0.014887963 | count | 1 |
| ACSL3      | -0.0107676 | 0.1395217 | -0.0772 | 0.938  | -0.014505506 | count | 1 |
| TP53TG1    | -0.0106037 | 0.1320319 | -0.0803 | 0.936  | -0.014465041 | count | 1 |
| FEM1B      | -0.0113459 | 0.2163198 | -0.0524 | 0.958  | -0.014456402 | count | 1 |
| DCAF8      | -0.0120918 | 0.2290261 | -0.0528 | 0.958  | -0.014359167 | count | 1 |
| POLR3K     | -0.0106951 | 0.1467601 | -0.0729 | 0.942  | -0.014280591 | count | 1 |
| FAM162A    | -0.0101711 | 0.0915738 | -0.1111 | 0.912  | -0.014250184 | count | 1 |
| CPLANE2    | -0.0202497 | 0.53674   | -0.0377 | 0.97   | -0.014220009 | count | 1 |
| ZNF74      | -0.0202497 | 0.5303556 | -0.0382 | 0.97   | -0.014220009 | count | 1 |
| TXNDC15    | -0.0103178 | 0.1177868 | -0.0876 | 0.93   | -0.014217615 | count | 1 |
| ACSF3      | -0.0127263 | 0.2437361 | -0.0522 | 0.958  | -0.013911839 | count | 1 |
| MPHOSPH10  | -0.0099895 | 0.1069272 | -0.0934 | 0.926  | -0.013909297 | count | 1 |
| MAPK7      | -0.0132003 | 0.361939  | -0.0365 | 0.971  | -0.013885207 | count | 1 |
| CCDC144NL  | -0.0150766 | 0.4877563 | -0.0309 | 0.975  | -0.013833343 | count | 1 |
| UBR1       | -0.0108326 | 0.1923334 | -0.0563 | 0.955  | -0.013832543 | count | 1 |
| POLR2D     | -0.0112539 | 0.2339776 | -0.0481 | 0.962  | -0.013827886 | count | 1 |
| CFLAR      | -0.0097216 | 0.0841109 | -0.1156 | 0.908  | -0.013792902 | count | 1 |
| PFN1       | -0.0095426 | 0.0370436 | -0.2576 | 0.797  | -0.013713609 | count | 1 |
| GTF3A      | -0.0096208 | 0.0779636 | -0.1234 | 0.902  | -0.013601247 | count | 1 |
| AC124068.2 | -0.0254871 | 0.6870195 | -0.0371 | 0.97   | -0.013569056 | count | 1 |
| WDR44      | -0.0116516 | 0.2643567 | -0.0441 | 0.965  | -0.013541794 | count | 1 |
| ZNF213-AS1 | -0.0176785 | 0.5490726 | -0.0322 | 0.974  | -0.013319811 | count | 1 |
| FAM13B     | -0.0105332 | 0.2007655 | -0.0525 | 0.958  | -0.013218898 | count | 1 |
| SSR2       | -0.0092401 | 0.0537582 | -0.1719 | 0.8635 | -0.013185065 | count | 1 |
| ZBTB8OS    | -0.0095572 | 0.1299519 | -0.0735 | 0.941  | -0.013092222 | count | 1 |
| C22orf39   | -0.0096849 | 0.141435  | -0.0685 | 0.945  | -0.012989829 | count | 1 |
| PPP1R15B   | -0.0093529 | 0.1310453 | -0.0714 | 0.943  | -0.012670516 | count | 1 |
| HDGF       | -0.0090983 | 0.0961158 | -0.0947 | 0.925  | -0.01265877  | count | 1 |
| CHRNA5     | -0.0237681 | 0.560774  | -0.0424 | 0.966  | -0.01264836  | count | 1 |
| RPL6       | -0.00874   | 0.0205613 | -0.4251 | 0.671  | -0.012599111 | count | 1 |
| YTHDF3     | -0.0098544 | 0.2017229 | -0.0489 | 0.961  | -0.012555124 | count | 1 |
| SLX4       | -0.0381536 | 0.5897759 | -0.0647 | 0.948  | -0.012503499 | count | 1 |
| JADE2      | -0.0107321 | 0.2394384 | -0.0448 | 0.964  | -0.012384653 | count | 1 |
| CASK       | -0.009967  | 0.2023296 | -0.0493 | 0.961  | -0.012375326 | count | 1 |
| CEP76      | -0.0128879 | 0.3662338 | -0.0352 | 0.972  | -0.012319976 | count | 1 |
| COA5       | -0.008854  | 0.1228366 | -0.0721 | 0.943  | -0.012258942 | count | 1 |
| CDADC1     | -0.0100282 | 0.2510114 | -0.04   | 0.968  | -0.01211834  | count | 1 |
| AC025259.3 | -0.0647061 | 0.6923839 | -0.0935 | 0.926  | -0.012073066 | count | 1 |
| DNAJC4     | -0.0085907 | 0.1017923 | -0.0844 | 0.933  | -0.012006509 | count | 1 |
| GOT1       | -0.0094956 | 0.2073102 | -0.0458 | 0.963  | -0.01199658  | count | 1 |
| PGGHG      | -0.0115301 | 0.3067667 | -0.0376 | 0.97   | -0.011941208 | count | 1 |
| AL021068.1 | -0.1172356 | 1.170115  | -0.1002 | 0.92   | -0.011925448 | count | 1 |
| LINC00702  | -0.1172356 | 1.170115  | -0.1002 | 0.92   | -0.011925448 | count | 1 |
| AC087482.1 | -0.1172356 | 1.170115  | -0.1002 | 0.92   | -0.011925448 | count | 1 |
| AC074044.1 | -0.1172356 | 1.182523  | -0.0991 | 0.921  | -0.011925448 | count | 1 |



|            |            |           |         |       |              |       |   |
|------------|------------|-----------|---------|-------|--------------|-------|---|
| LINC02289  | -0.1172356 | 1.197251  | -0.0979 | 0.922 | -0.011925448 | count | 1 |
| ISM2       | -0.1172356 | 1.197251  | -0.0979 | 0.922 | -0.011925448 | count | 1 |
| SLC19A1    | -0.0195521 | 0.8093364 | -0.0242 | 0.981 | -0.011896206 | count | 1 |
| SMC5-AS1   | -0.0449422 | 0.9922244 | -0.0453 | 0.964 | -0.011737516 | count | 1 |
| THBS2      | -0.0449422 | 1.054433  | -0.0426 | 0.966 | -0.011737516 | count | 1 |
| LGMN       | -0.0086945 | 0.150862  | -0.0576 | 0.954 | -0.011723929 | count | 1 |
| BTD        | -0.0088642 | 0.1747408 | -0.0507 | 0.96  | -0.011657801 | count | 1 |
| CCZ1       | -0.0089758 | 0.1765637 | -0.0508 | 0.959 | -0.011655058 | count | 1 |
| CRK        | -0.0084531 | 0.1071583 | -0.0789 | 0.937 | -0.01165477  | count | 1 |
| SIRT1      | -0.0092547 | 0.2266699 | -0.0408 | 0.967 | -0.011629914 | count | 1 |
| CERS5      | -0.0092668 | 0.1853823 | -0.05   | 0.96  | -0.011628827 | count | 1 |
| TOPORS     | -0.008449  | 0.1085899 | -0.0778 | 0.938 | -0.011627419 | count | 1 |
| ATG13      | -0.0100899 | 0.4360983 | -0.0231 | 0.982 | -0.01155568  | count | 1 |
| UCP2       | -0.0153409 | 0.5701408 | -0.0269 | 0.979 | -0.01155336  | count | 1 |
| ICAM3      | -0.0087923 | 0.1725276 | -0.051  | 0.959 | -0.011526023 | count | 1 |
| TSPAN13    | -0.00847   | 0.1447411 | -0.0585 | 0.953 | -0.011477476 | count | 1 |
| STAT1      | -0.0081593 | 0.1156066 | -0.0706 | 0.944 | -0.011376649 | count | 1 |
| ANKMY1     | -0.0258168 | 0.5620315 | -0.0459 | 0.963 | -0.011357182 | count | 1 |
| ZDHHC7     | -0.00964   | 0.2423909 | -0.0398 | 0.968 | -0.011082326 | count | 1 |
| PARVB      | -0.0078626 | 0.0890578 | -0.0883 | 0.93  | -0.011055428 | count | 1 |
| DIP2A      | -0.0088614 | 0.2416292 | -0.0367 | 0.971 | -0.010946064 | count | 1 |
| DPY19L4    | -0.0086502 | 0.209787  | -0.0412 | 0.967 | -0.010941936 | count | 1 |
| MORF4L1    | -0.0075886 | 0.043276  | -0.1754 | 0.861 | -0.010875683 | count | 1 |
| PSMD1      | -0.0078724 | 0.1181155 | -0.0666 | 0.947 | -0.010850753 | count | 1 |
| C1QTNF3    | -0.0278676 | 1.110021  | -0.0251 | 0.98  | -0.010769647 | count | 1 |
| LINC01545  | -0.0278676 | 1.108084  | -0.0251 | 0.98  | -0.010769647 | count | 1 |
| LINC00671  | -0.0278676 | 1.403862  | -0.0199 | 0.984 | -0.010769647 | count | 1 |
| UBAC2      | -0.0079958 | 0.1460359 | -0.0548 | 0.956 | -0.010759492 | count | 1 |
| SUCLG1     | -0.007666  | 0.1035466 | -0.074  | 0.941 | -0.010675673 | count | 1 |
| ARMCX5     | -0.0094327 | 0.2849564 | -0.0331 | 0.974 | -0.010623594 | count | 1 |
| GOLGA8B    | -0.0103374 | 0.4035495 | -0.0256 | 0.98  | -0.010616405 | count | 1 |
| PPARG      | -0.0077864 | 0.1455057 | -0.0535 | 0.957 | -0.010529236 | count | 1 |
| FSCN1      | -0.0075593 | 0.1189588 | -0.0635 | 0.949 | -0.010471211 | count | 1 |
| MR1        | -0.0101414 | 0.3734986 | -0.0272 | 0.978 | -0.010414878 | count | 1 |
| PAFAH1B2   | -0.007563  | 0.124629  | -0.0607 | 0.952 | -0.010386891 | count | 1 |
| AC107068.1 | -0.0395908 | 0.9793573 | -0.0404 | 0.968 | -0.010321678 | count | 1 |
| AL662797.1 | -0.0395908 | 0.9793573 | -0.0404 | 0.968 | -0.010321678 | count | 1 |
| SSPO       | -0.0395908 | 1.1620129 | -0.0341 | 0.973 | -0.010321678 | count | 1 |
| AP006623.1 | -0.0395733 | 0.5024265 | -0.0788 | 0.937 | -0.010317057 | count | 1 |
| MDH2       | -0.0071234 | 0.068705  | -0.1037 | 0.917 | -0.010115739 | count | 1 |
| WDR53      | -0.0098204 | 0.3427815 | -0.0286 | 0.977 | -0.009906415 | count | 1 |
| POMT1      | -0.0104961 | 0.3565687 | -0.0294 | 0.977 | -0.009901741 | count | 1 |
| TAF9       | -0.0070702 | 0.1132743 | -0.0624 | 0.95  | -0.009815856 | count | 1 |
| PCDHB10    | -0.0152159 | 0.4985643 | -0.0305 | 0.976 | -0.009762129 | count | 1 |
| CEP290     | -0.0071823 | 0.1497493 | -0.048  | 0.962 | -0.009718046 | count | 1 |

|            |            |           |         |       |              |       |   |
|------------|------------|-----------|---------|-------|--------------|-------|---|
| ATXN10     | -0.0069362 | 0.11714   | -0.0592 | 0.953 | -0.009592411 | count | 1 |
| GRK5       | -0.0076776 | 0.203726  | -0.0377 | 0.97  | -0.009546997 | count | 1 |
| SNRNP70    | -0.0068906 | 0.1118216 | -0.0616 | 0.951 | -0.009507178 | count | 1 |
| APBA3      | -0.0094874 | 0.3695975 | -0.0257 | 0.98  | -0.009381967 | count | 1 |
| SNED1      | -0.007642  | 0.2298665 | -0.0332 | 0.973 | -0.009333139 | count | 1 |
| ARHGDI1A   | -0.0066197 | 0.082651  | -0.0801 | 0.936 | -0.009314639 | count | 1 |
| TUBGCP2    | -0.0068583 | 0.1453752 | -0.0472 | 0.962 | -0.009218639 | count | 1 |
| ATP13A2    | -0.0082369 | 0.3053692 | -0.027  | 0.978 | -0.009190034 | count | 1 |
| NCAPH      | -0.0911088 | 1.139917  | -0.0799 | 0.936 | -0.009177763 | count | 1 |
| SH3TC2-DT  | -0.0911088 | 1.139917  | -0.0799 | 0.936 | -0.009177763 | count | 1 |
| LINC00924  | -0.0911088 | 1.139917  | -0.0799 | 0.936 | -0.009177763 | count | 1 |
| HPN        | -0.0911088 | 1.139917  | -0.0799 | 0.936 | -0.009177763 | count | 1 |
| TRO        | -0.0911088 | 1.144219  | -0.0796 | 0.937 | -0.009177763 | count | 1 |
| AC011484.1 | -0.0911088 | 1.144219  | -0.0796 | 0.937 | -0.009177763 | count | 1 |
| SDHB       | -0.00662   | 0.1087005 | -0.0609 | 0.951 | -0.009165491 | count | 1 |
| AC103706.1 | -0.0150464 | 0.5845025 | -0.0257 | 0.979 | -0.009145177 | count | 1 |
| PHLPP2     | -0.0207595 | 0.5288535 | -0.0393 | 0.969 | -0.009119488 | count | 1 |
| AC147067.2 | -0.0349898 | 0.8127889 | -0.043  | 0.966 | -0.009108326 | count | 1 |
| AC103691.1 | -0.0349898 | 0.8125675 | -0.0431 | 0.966 | -0.009108326 | count | 1 |
| MICU1      | -0.0067348 | 0.1710336 | -0.0394 | 0.969 | -0.008950084 | count | 1 |
| ATG3       | -0.0063008 | 0.0979998 | -0.0643 | 0.949 | -0.008807136 | count | 1 |
| TEX264     | -0.0062064 | 0.084706  | -0.0733 | 0.942 | -0.008712287 | count | 1 |
| EFCC1      | -0.008701  | 0.3341808 | -0.026  | 0.979 | -0.008511111 | count | 1 |
| GLI3       | -0.0156405 | 0.4732455 | -0.033  | 0.974 | -0.008306026 | count | 1 |
| CDAN1      | -0.0445722 | 0.6530412 | -0.0683 | 0.946 | -0.00825795  | count | 1 |
| ZMYM1      | -0.0063644 | 0.2474485 | -0.0257 | 0.979 | -0.008167593 | count | 1 |
| ZNF526     | -0.0090971 | 0.5265229 | -0.0173 | 0.986 | -0.008072139 | count | 1 |
| RAD1       | -0.0064665 | 0.2521975 | -0.0256 | 0.98  | -0.008053255 | count | 1 |
| PARD3      | -0.0071172 | 0.328843  | -0.0216 | 0.983 | -0.008014119 | count | 1 |
| ROBO4      | -0.0056571 | 0.137053  | -0.0413 | 0.967 | -0.007911276 | count | 1 |
| ERGIC2     | -0.0055605 | 0.0985373 | -0.0564 | 0.955 | -0.007768855 | count | 1 |
| AL136040.1 | -0.0113674 | 0.563695  | -0.0202 | 0.984 | -0.007640561 | count | 1 |
| AC026202.2 | -0.0193389 | 0.8060949 | -0.024  | 0.981 | -0.007454893 | count | 1 |
| CCDC136    | -0.0193389 | 0.9286452 | -0.0208 | 0.983 | -0.007454893 | count | 1 |
| RBPMS2     | -0.0740338 | 0.8676966 | -0.0853 | 0.932 | -0.007410223 | count | 1 |
| TIPARP     | -0.0052374 | 0.1053693 | -0.0497 | 0.96  | -0.007302922 | count | 1 |
| DHX36      | -0.0051045 | 0.0890985 | -0.0573 | 0.954 | -0.007197133 | count | 1 |
| SURF1      | -0.0050564 | 0.1381717 | -0.0366 | 0.971 | -0.00699433  | count | 1 |
| IGFLR1     | -0.026812  | 0.6656144 | -0.0403 | 0.968 | -0.006960712 | count | 1 |
| MEIS1      | -0.026812  | 0.7717727 | -0.0347 | 0.972 | -0.006960712 | count | 1 |
| AC012313.1 | -0.069182  | 0.9919556 | -0.0697 | 0.944 | -0.006912021 | count | 1 |
| AC093827.5 | -0.0112274 | 0.6364461 | -0.0176 | 0.986 | -0.006817921 | count | 1 |
| PPP3CB     | -0.0052238 | 0.2095565 | -0.0249 | 0.98  | -0.006741699 | count | 1 |
| HTRA2      | -0.0049091 | 0.1253735 | -0.0392 | 0.969 | -0.006725552 | count | 1 |
| AC104532.2 | -0.0258168 | 0.8379016 | -0.0308 | 0.975 | -0.006700146 | count | 1 |

|            |            |           |         |        |              |       |   |
|------------|------------|-----------|---------|--------|--------------|-------|---|
| MAZ        | -0.0048959 | 0.1194332 | -0.041  | 0.967  | -0.006670131 | count | 1 |
| LRP11      | -0.005365  | 0.2261497 | -0.0237 | 0.981  | -0.006625786 | count | 1 |
| RPA1       | -0.0051732 | 0.2118565 | -0.0244 | 0.981  | -0.006508462 | count | 1 |
| ZNF207     | -0.0046633 | 0.1126521 | -0.0414 | 0.967  | -0.006483371 | count | 1 |
| NDUFV1     | -0.0046251 | 0.1068524 | -0.0433 | 0.965  | -0.006427678 | count | 1 |
| GLO1       | -0.0045929 | 0.1076175 | -0.0427 | 0.966  | -0.006373513 | count | 1 |
| EBNA1BP2   | -0.004621  | 0.1167838 | -0.0396 | 0.968  | -0.006371749 | count | 1 |
| GAN        | -0.0056595 | 0.2685635 | -0.0211 | 0.983  | -0.006281927 | count | 1 |
| AL442128.2 | -0.01629   | 0.6639119 | -0.0245 | 0.98   | -0.006273931 | count | 1 |
| MYO7B      | -0.0621183 | 0.8261147 | -0.0752 | 0.94   | -0.006189874 | count | 1 |
| ZNF236-DT  | -0.0621183 | 0.8752415 | -0.071  | 0.943  | -0.006189874 | count | 1 |
| ZXDC       | -0.005619  | 0.3026914 | -0.0186 | 0.985  | -0.006102904 | count | 1 |
| CREB1      | -0.0044782 | 0.1388022 | -0.0323 | 0.974  | -0.00607451  | count | 1 |
| WDR45      | -0.0044239 | 0.1348458 | -0.0328 | 0.974  | -0.006027019 | count | 1 |
| RPL3       | -0.00406   | 0.0203791 | -0.1992 | 0.842  | -0.005851593 | count | 1 |
| KIAA2026   | -0.0041091 | 0.1707238 | -0.0241 | 0.981  | -0.005518804 | count | 1 |
| RBM25      | -0.003816  | 0.064666  | -0.059  | 0.953  | -0.005426911 | count | 1 |
| ILF2       | -0.003748  | 0.0653068 | -0.0574 | 0.954  | -0.005305676 | count | 1 |
| MAST2      | -0.0052341 | 0.5229854 | -0.01   | 0.992  | -0.005226235 | count | 1 |
| FAH        | -0.0056912 | 0.5520413 | -0.0103 | 0.992  | -0.005214735 | count | 1 |
| XKR9       | -0.0512394 | 0.8696892 | -0.0589 | 0.953  | -0.005085041 | count | 1 |
| NUDT18     | -0.0038436 | 0.2439934 | -0.0158 | 0.987  | -0.004854564 | count | 1 |
| DNMBP      | -0.0043105 | 0.3152468 | -0.0137 | 0.989  | -0.004830401 | count | 1 |
| RAB1A      | -0.0033931 | 0.0862485 | -0.0393 | 0.969  | -0.004756141 | count | 1 |
| AC064807.1 | -0.0050439 | 0.3823643 | -0.0132 | 0.989  | -0.004754662 | count | 1 |
| IFI35      | -0.0032882 | 0.1061387 | -0.031  | 0.975  | -0.004575038 | count | 1 |
| CHCHD5     | -0.0032815 | 0.1116085 | -0.0294 | 0.977  | -0.004552603 | count | 1 |
| HAS2-AS1   | -0.0118033 | 0.9686619 | -0.0122 | 0.99   | -0.004539899 | count | 1 |
| RAB37      | -0.0118033 | 0.9686292 | -0.0122 | 0.99   | -0.004539899 | count | 1 |
| AL445426.1 | -0.0118033 | 1.0816451 | -0.0109 | 0.991  | -0.004539899 | count | 1 |
| ZNF572     | -0.0118033 | 1.0816743 | -0.0109 | 0.991  | -0.004539899 | count | 1 |
| FRMD6-AS1  | -0.0074669 | 0.5730836 | -0.013  | 0.99   | -0.00453035  | count | 1 |
| MID2       | -0.0046174 | 0.4194089 | -0.011  | 0.991  | -0.004514237 | count | 1 |
| ANAPC16    | -0.0031493 | 0.053708  | -0.0586 | 0.9532 | -0.004498096 | count | 1 |
| C2CD3      | -0.0043355 | 0.5353126 | -0.0081 | 0.994  | -0.004449411 | count | 1 |
| TPRKB      | -0.0031489 | 0.0977336 | -0.0322 | 0.974  | -0.004405033 | count | 1 |
| CWC15      | -0.0029085 | 0.0973829 | -0.0299 | 0.976  | -0.004087163 | count | 1 |
| EXPH5      | -0.0060882 | 0.6294966 | -0.0097 | 0.992  | -0.003692669 | count | 1 |
| TARSL2     | -0.0029346 | 0.2214125 | -0.0133 | 0.989  | -0.003686552 | count | 1 |
| TPP2       | -0.0029604 | 0.2114469 | -0.014  | 0.989  | -0.003655589 | count | 1 |
| ATR        | -0.0032757 | 0.3021721 | -0.0108 | 0.991  | -0.003653091 | count | 1 |
| SLC35G2    | -0.0027098 | 0.1568868 | -0.0173 | 0.986  | -0.003648449 | count | 1 |
| NOXA1      | -0.0044097 | 0.5764163 | -0.0077 | 0.994  | -0.003511933 | count | 1 |
| RRP36      | -0.0025717 | 0.131278  | -0.0196 | 0.984  | -0.00349835  | count | 1 |
| SLC35A2    | -0.0026288 | 0.1937675 | -0.0136 | 0.989  | -0.003366211 | count | 1 |

|            |            |           |           |          |              |       |             |
|------------|------------|-----------|-----------|----------|--------------|-------|-------------|
| ZDHC15     | -0.0039287 | 0.3948198 | -0.01     | 0.992    | -0.003283434 | count | 1           |
| AGAP1      | -0.0029365 | 0.3197678 | -0.0092   | 0.993    | -0.00327471  | count | 1           |
| RC3H2      | -0.002334  | 0.2320921 | -0.0101   | 0.992    | -0.003029883 | count | 1           |
| AC108047.1 | -0.0060232 | 0.6852722 | -0.0088   | 0.993    | -0.002926305 | count | 1           |
| COL6A3     | -0.0060232 | 0.7499227 | -0.008    | 0.994    | -0.002926305 | count | 1           |
| TMBIM6     | -0.0018672 | 0.0445233 | -0.0419   | 0.967    | -0.00267773  | count | 1           |
| TMEM231    | -0.0022756 | 0.2734275 | -0.0083   | 0.993    | -0.00262421  | count | 1           |
| INPP5E     | -0.0032602 | 0.3722018 | -0.0088   | 0.993    | -0.002595919 | count | 1           |
| ZNF101     | -0.0024462 | 0.3544927 | -0.0069   | 0.994    | -0.002570101 | count | 1           |
| ABCD1      | -0.0036488 | 0.7204385 | -0.0051   | 0.996    | -0.002448453 | count | 1           |
| HUWE1      | -0.0017915 | 0.1480598 | -0.0121   | 0.99     | -0.002429272 | count | 1           |
| AC008393.1 | -0.0032976 | 0.5281328 | -0.0062   | 0.995    | -0.002395689 | count | 1           |
| COX4I1     | -0.0016531 | 0.033094  | -0.05     | 0.96     | -0.002377544 | count | 1           |
| EIF2AK3    | -0.0029602 | 0.416012  | -0.0071   | 0.994    | -0.002356918 | count | 1           |
| TMEM8B     | -0.0030911 | 0.4623216 | -0.0067   | 0.995    | -0.002322441 | count | 1           |
| PAXBP1     | -0.001699  | 0.1518652 | -0.0112   | 0.991    | -0.002281721 | count | 1           |
| AC010883.1 | -0.0042389 | 0.9019296 | -0.0047   | 0.996    | -0.00205844  | count | 1           |
| EPHB3      | -0.0042389 | 0.8009761 | -0.0053   | 0.996    | -0.00205844  | count | 1           |
| THOC2      | -0.0014404 | 0.1223333 | -0.0118   | 0.991    | -0.001982324 | count | 1           |
| CDK3       | -0.0051584 | 0.6481844 | -0.008    | 0.994    | -0.001980176 | count | 1           |
| NEMF       | -0.0013954 | 0.1036562 | -0.0135   | 0.989    | -0.001936497 | count | 1           |
| RBM39      | -0.0011968 | 0.0555551 | -0.0215   | 0.983    | -0.001705875 | count | 1           |
| PIGS       | -0.0012786 | 0.2500847 | -0.0051   | 0.996    | -0.001525388 | count | 1           |
| ETV2       | -0.0020776 | 0.5567419 | -0.0037   | 0.997    | -0.001508997 | count | 1           |
| TRIM38     | -0.0010686 | 0.1399005 | -0.0076   | 0.994    | -0.001451734 | count | 1           |
| C4orf3     | -0.0010111 | 0.0532738 | -0.019    | 0.9849   | -0.001443194 | count | 1           |
| PSMC3      | -0.0009113 | 0.0793305 | -0.0115   | 0.991    | -0.001285844 | count | 1           |
| TRIM58     | -0.0030911 | 1.1563776 | -0.0027   | 0.998    | -0.001185867 | count | 1           |
| GTF3C1     | -0.0009416 | 0.2259399 | -0.0042   | 0.997    | -0.001179397 | count | 1           |
| CYB5RL     | -0.0016524 | 0.4989849 | -0.0033   | 0.997    | -0.001108332 | count | 1           |
| DDX42      | -0.0006568 | 0.1306314 | -0.005    | 0.996    | -0.000917863 | count | 1           |
| OAF        | -0.0006475 | 0.1732269 | -0.0037   | 0.997    | -0.000855359 | count | 1           |
| TRIP10     | -0.0006495 | 0.1865183 | -0.0035   | 0.997    | -0.000851189 | count | 1           |
| ZSCAN29    | -0.0011813 | 0.611766  | -0.0019   | 0.998    | -0.000715671 | count | 1           |
| RHOA       | -0.0004868 | 0.0364711 | -0.0133   | 0.989    | -0.000699077 | count | 1           |
| CAV1       | -0.0003557 | 0.0415941 | -0.0086   | 0.993    | -0.000512396 | count | 1           |
| MRPL13     | -0.0002505 | 0.105725  | -0.0024   | 0.998    | -0.000348247 | count | 1           |
| PDCD4-AS1  | -0.0006401 | 0.652929  | -0.001    | 0.999    | -0.000310538 | count | 1           |
| RARRES1    | -0.0002181 | 0.3406967 | -6.00E-04 | 0.999    | -0.00024652  | count | 1           |
| ICE2       | -0.0001447 | 0.1500457 | -0.001    | 0.999    | -0.000195329 | count | 1           |
| SPCS3      | -7.78E-05  | 0.071056  | -0.0011   | 0.999    | -0.000110354 | count | 1           |
| PRPF4B     | -5.27E-05  | 0.0788541 | -7.00E-04 | 0.999    | -7.47E-05    | count | 1           |
| VEPH1      | -2.5444956 | 0.6769205 | -3.7589   | 2.00E-04 | -1.85E-07    | count | 1           |
| FOXM1      | -3.66826   | 0.8766987 | -4.1842   | 2.95E-05 | -1.10E-07    | count | 0.681273    |
| MDGA1      | -1.693682  | 0.3341342 | -5.0689   | 4.27E-07 | -9.75E-08    | count | 0.010004183 |

|            |             |             |         |          |           |       |            |
|------------|-------------|-------------|---------|----------|-----------|-------|------------|
| MOBP       | -3.286604   | 1.4635746   | -2.2456 | 0.0248   | -9.66E-08 | count | 1          |
| AC083967.1 | -2.8881016  | 0.4659016   | -6.199  | 6.53E-10 | -8.12E-08 | count | 1.55E-05   |
| FAM19A5    | -1.5027613  | 0.4370598   | -3.4383 | 6.00E-04 | -8.04E-08 | count | 1          |
| OLFML2B    | -2.5999291  | 0.9336513   | -2.7847 | 0.0054   | -6.92E-08 | count | 1          |
| AC073534.2 | -2.5051094  | 0.7412536   | -3.3796 | 7.00E-04 | -6.54E-08 | count | 1          |
| KLRB1      | -20.2356123 | 1035.306322 | -0.0195 | 0.984    | -6.09E-08 | count | 1          |
| MST1R      | -19.8041464 | 1161.825649 | -0.017  | 0.986    | -6.08E-08 | count | 1          |
| ACTR3C     | -19.9850832 | 1377.575607 | -0.0145 | 0.988    | -6.07E-08 | count | 1          |
| SLC10A5    | -19.9850832 | 1377.575607 | -0.0145 | 0.988    | -6.07E-08 | count | 1          |
| FAM95C     | -19.9850832 | 1377.575607 | -0.0145 | 0.988    | -6.07E-08 | count | 1          |
| ANKRD18A   | -19.9850832 | 1377.575607 | -0.0145 | 0.988    | -6.07E-08 | count | 1          |
| AURKB      | -19.9850832 | 1377.575607 | -0.0145 | 0.988    | -6.07E-08 | count | 1          |
| GTSE1      | -19.9850832 | 1377.575607 | -0.0145 | 0.988    | -6.07E-08 | count | 1          |
| PEAK3      | -19.6976694 | 1193.175564 | -0.0165 | 0.987    | -6.07E-08 | count | 1          |
| AC113349.1 | -19.8047141 | 1328.437406 | -0.0149 | 0.988    | -6.07E-08 | count | 1          |
| ACOT11     | -2.3642253  | 0.7054568   | -3.3513 | 8.00E-04 | -6.00E-08 | count | 1          |
| DKK1       | -2.2819658  | 0.5037423   | -4.53   | 6.15E-06 | -5.67E-08 | count | 0.14304285 |
| SLC6A3     | -2.157497   | 0.8122681   | -2.6561 | 0.008    | -5.20E-08 | count | 1          |
| MIR34AHG   | -2.0709834  | 1.0215306   | -2.0273 | 0.0427   | -4.86E-08 | count | 1          |
| AC008629.1 | -2.0709834  | 1.055563    | -1.962  | 0.0499   | -4.85E-08 | count | 1          |
| AC114760.2 | -2.0709834  | 1.1205312   | -1.8482 | 0.0647   | -4.85E-08 | count | 1          |
| PTK6       | -2.0045168  | 0.7648181   | -2.6209 | 0.0088   | -4.62E-08 | count | 1          |
| AC090229.1 | -1.9166133  | 0.7215687   | -2.6562 | 0.008    | -4.30E-08 | count | 1          |
| GPC1       | -0.9697203  | 0.4109536   | -2.3597 | 0.0184   | -4.26E-08 | count | 1          |
| PITPNM1    | -1.6681279  | 0.6998545   | -2.3835 | 0.0172   | -3.47E-08 | count | 1          |
| IGHG2      | -1.5696016  | 0.2298761   | -6.828  | 1.05E-11 | -3.16E-08 | count | 2.50E-07   |
| LINC00862  | -1.4902631  | 0.8156022   | -1.8272 | 0.0678   | -2.91E-08 | count | 1          |
| AC018643.1 | -2.6874309  | 0.6454505   | -4.1637 | 3.23E-05 | -2.69E-08 | count | 0.7455486  |
| AC009974.1 | -2.6874309  | 0.7473503   | -3.5959 | 3.00E-04 | -2.68E-08 | count | 1          |
| CAVIN4     | -2.6874309  | 0.7473503   | -3.5959 | 3.00E-04 | -2.68E-08 | count | 1          |
| GBGT1      | -1.3772117  | 0.7902148   | -1.7428 | 0.0815   | -2.59E-08 | count | 1          |
| AC022762.2 | -1.3772117  | 0.8405353   | -1.6385 | 0.101    | -2.59E-08 | count | 1          |
| AC011815.2 | -1.3772117  | 0.5395572   | -2.5525 | 0.0107   | -2.59E-08 | count | 1          |
| OXTR       | -0.6263138  | 0.4275164   | -1.465  | 0.143    | -2.40E-08 | count | 1          |
| AC074011.1 | -19.593386  | 1132.555494 | -0.0173 | 0.986    | -2.26E-08 | count | 1          |
| KCNA3      | -19.593386  | 1132.555494 | -0.0173 | 0.986    | -2.26E-08 | count | 1          |
| DOCK2      | -19.593386  | 1132.555494 | -0.0173 | 0.986    | -2.26E-08 | count | 1          |
| EFHC2      | -19.593386  | 1132.555494 | -0.0173 | 0.986    | -2.26E-08 | count | 1          |
| RUBCNL     | -19.593386  | 1132.555494 | -0.0173 | 0.986    | -2.26E-08 | count | 1          |
| AC133540.1 | -19.593386  | 1132.555494 | -0.0173 | 0.986    | -2.26E-08 | count | 1          |
| MCOLN3     | -19.593386  | 1132.555494 | -0.0173 | 0.986    | -2.26E-08 | count | 1          |
| AC024560.3 | -19.593386  | 1132.555494 | -0.0173 | 0.986    | -2.26E-08 | count | 1          |
| AL121845.1 | -19.593386  | 1132.555494 | -0.0173 | 0.986    | -2.26E-08 | count | 1          |
| SPTA1      | -19.593386  | 1132.555494 | -0.0173 | 0.986    | -2.26E-08 | count | 1          |
| NECTIN4    | -19.593386  | 1132.555494 | -0.0173 | 0.986    | -2.26E-08 | count | 1          |

|            |             |             |         |          |           |       |          |
|------------|-------------|-------------|---------|----------|-----------|-------|----------|
| IL11       | -19.593386  | 1132.555494 | -0.0173 | 0.986    | -2.26E-08 | count | 1        |
| SRC        | -19.9990524 | 795.4136066 | -0.0251 | 0.98     | -2.26E-08 | count | 1        |
| C1QTNF8    | -19.9990524 | 795.4136066 | -0.0251 | 0.98     | -2.26E-08 | count | 1        |
| P2RX6      | -19.9990524 | 795.4136066 | -0.0251 | 0.98     | -2.26E-08 | count | 1        |
| OR52H1     | -20.000999  | 1388.581995 | -0.0144 | 0.989    | -2.25E-08 | count | 1        |
| ZIC2       | -20.000999  | 1388.581995 | -0.0144 | 0.989    | -2.25E-08 | count | 1        |
| DPP6       | -20.000999  | 1388.581995 | -0.0144 | 0.989    | -2.25E-08 | count | 1        |
| SLC9C2     | -20.000999  | 1388.581995 | -0.0144 | 0.989    | -2.25E-08 | count | 1        |
| ANKUB1     | -20.000999  | 1388.581995 | -0.0144 | 0.989    | -2.25E-08 | count | 1        |
| SULT1E1    | -20.000999  | 1388.581995 | -0.0144 | 0.989    | -2.25E-08 | count | 1        |
| AC092691.1 | -20.5118914 | 940.2228856 | -0.0218 | 0.983    | -2.25E-08 | count | 1        |
| RGPD8      | -19.8459164 | 1209.335099 | -0.0164 | 0.987    | -2.25E-08 | count | 1        |
| MANCR      | -20.1854816 | 1379.772764 | -0.0146 | 0.988    | -2.24E-08 | count | 1        |
| GPC6       | -20.5127604 | 1184.470362 | -0.0173 | 0.986    | -2.24E-08 | count | 1        |
| CHL1       | -19.3203885 | 1215.793224 | -0.0159 | 0.987    | -2.24E-08 | count | 1        |
| GZMH       | -19.3203885 | 1215.793224 | -0.0159 | 0.987    | -2.24E-08 | count | 1        |
| SLC16A12   | -19.3203885 | 1215.793224 | -0.0159 | 0.987    | -2.24E-08 | count | 1        |
| AC060766.4 | -19.3203885 | 1215.793224 | -0.0159 | 0.987    | -2.24E-08 | count | 1        |
| EPN3       | -19.3203885 | 1215.793224 | -0.0159 | 0.987    | -2.24E-08 | count | 1        |
| AATBC      | -19.3203885 | 1215.793224 | -0.0159 | 0.987    | -2.24E-08 | count | 1        |
| CCDC129    | -19.3203885 | 1215.793224 | -0.0159 | 0.987    | -2.24E-08 | count | 1        |
| PDCD1      | -20.5147011 | 1795.231728 | -0.0114 | 0.991    | -2.24E-08 | count | 1        |
| PDE8B      | -20.5147011 | 1795.231728 | -0.0114 | 0.991    | -2.24E-08 | count | 1        |
| HAR1A      | -20.1530927 | 1210.906108 | -0.0166 | 0.987    | -2.22E-08 | count | 1        |
| P2RY13     | -19.5788905 | 1505.747932 | -0.013  | 0.99     | -2.22E-08 | count | 1        |
| AP000355.1 | -19.5788905 | 1505.747932 | -0.013  | 0.99     | -2.22E-08 | count | 1        |
| DSCAM      | -19.0713188 | 828.2707621 | -0.023  | 0.982    | -2.17E-08 | count | 1        |
| AC017002.3 | -19.3602847 | 1016.090372 | -0.0191 | 0.985    | -2.16E-08 | count | 1        |
| AC104452.1 | -19.0729482 | 1444.399666 | -0.0132 | 0.989    | -2.16E-08 | count | 1        |
| AL360181.2 | -19.0729482 | 1444.399666 | -0.0132 | 0.989    | -2.16E-08 | count | 1        |
| CD4        | -2.2819658  | 0.6850001   | -3.3313 | 9.00E-04 | -2.09E-08 | count | 1        |
| ADRA2B     | -2.2819658  | 0.6850001   | -3.3313 | 9.00E-04 | -2.09E-08 | count | 1        |
| CORO2B     | -2.2819658  | 0.6850001   | -3.3313 | 9.00E-04 | -2.09E-08 | count | 1        |
| AL357518.1 | -2.2819658  | 0.6850001   | -3.3313 | 9.00E-04 | -2.09E-08 | count | 1        |
| ADRA2A     | -2.2819658  | 0.6850001   | -3.3313 | 9.00E-04 | -2.09E-08 | count | 1        |
| PART1      | -2.2819658  | 0.4835266   | -4.7194 | 2.48E-06 | -2.09E-08 | count | 0.057846 |
| LEFTY2     | -1.175441   | 0.803926    | -1.4621 | 0.144    | -2.05E-08 | count | 1        |
| CD33       | -1.1555612  | 0.7445391   | -1.552  | 0.121    | -2.00E-08 | count | 1        |
| GAPLINC    | -1.1555612  | 0.7445391   | -1.552  | 0.121    | -2.00E-08 | count | 1        |
| HK2        | -1.1555612  | 0.6897983   | -1.6752 | 0.094    | -2.00E-08 | count | 1        |
| NTRK2      | -1.1356813  | 0.692874    | -1.6391 | 0.101    | -1.95E-08 | count | 1        |
| FIRRE      | -1.0471456  | 0.6661399   | -1.572  | 0.116    | -1.74E-08 | count | 1        |
| SALRNA2    | -2.0234718  | 0.8371546   | -2.4171 | 0.0157   | -1.73E-08 | count | 1        |
| CD247      | -2.0234718  | 0.8371546   | -2.4171 | 0.0157   | -1.73E-08 | count | 1        |
| ULBP1      | -2.0234718  | 0.8371546   | -2.4171 | 0.0157   | -1.73E-08 | count | 1        |

|            |            |           |         |          |           |       |   |
|------------|------------|-----------|---------|----------|-----------|-------|---|
| RUNX3      | -2.0234718 | 1.0874784 | -1.8607 | 0.0629   | -1.73E-08 | count | 1 |
| AL731577.1 | -0.4398255 | 0.3424471 | -1.2844 | 0.199    | -1.56E-08 | count | 1 |
| ADCY3      | -0.9339107 | 0.7627211 | -1.2244 | 0.221    | -1.49E-08 | count | 1 |
| AC087627.1 | -0.9339107 | 0.7627211 | -1.2244 | 0.221    | -1.49E-08 | count | 1 |
| AL109811.2 | -0.9339107 | 0.8112289 | -1.1512 | 0.25     | -1.49E-08 | count | 1 |
| AC079193.2 | -1.8209161 | 0.5495776 | -3.3133 | 9.00E-04 | -1.46E-08 | count | 1 |
| DNAH7      | -0.8956714 | 0.5758066 | -1.5555 | 0.12     | -1.41E-08 | count | 1 |
| PPP2R2B    | -1.7294147 | 1.0019231 | -1.7261 | 0.0844   | -1.35E-08 | count | 1 |
| TICAM2     | -1.7294147 | 1.0019231 | -1.7261 | 0.0844   | -1.35E-08 | count | 1 |
| TRAF3IP3   | -1.7294147 | 0.7656726 | -2.2587 | 0.024    | -1.35E-08 | count | 1 |
| AL137002.2 | -1.7294147 | 1.0650048 | -1.6239 | 0.105    | -1.35E-08 | count | 1 |
| AC026150.1 | -0.8208593 | 0.8751388 | -0.938  | 0.348    | -1.25E-08 | count | 1 |
| AL078590.3 | -1.6385945 | 0.4663165 | -3.5139 | 4.00E-04 | -1.24E-08 | count | 1 |
| LGR6       | -1.5888186 | 0.7914276 | -2.0075 | 0.0448   | -1.19E-08 | count | 1 |
| AC098934.4 | -1.5888186 | 0.7914276 | -2.0075 | 0.0448   | -1.19E-08 | count | 1 |
| AL445493.3 | -1.5888186 | 0.7914276 | -2.0075 | 0.0448   | -1.19E-08 | count | 1 |
| AL391832.3 | -1.5888186 | 0.7914276 | -2.0075 | 0.0448   | -1.19E-08 | count | 1 |
| KRTCAP3    | -1.5888186 | 0.7914276 | -2.0075 | 0.0448   | -1.19E-08 | count | 1 |
| AC005740.4 | -1.5888186 | 0.7914276 | -2.0075 | 0.0448   | -1.19E-08 | count | 1 |
| AC114939.1 | -1.5888186 | 0.7914276 | -2.0075 | 0.0448   | -1.19E-08 | count | 1 |
| TCEAL6     | -1.5888186 | 0.7914276 | -2.0075 | 0.0448   | -1.19E-08 | count | 1 |
| AC087521.4 | -1.5888186 | 0.7914276 | -2.0075 | 0.0448   | -1.19E-08 | count | 1 |
| RERG       | -1.5888186 | 0.7914276 | -2.0075 | 0.0448   | -1.19E-08 | count | 1 |
| AC034102.4 | -1.5888186 | 0.7914276 | -2.0075 | 0.0448   | -1.19E-08 | count | 1 |
| AC025423.1 | -1.5888186 | 0.7914276 | -2.0075 | 0.0448   | -1.19E-08 | count | 1 |
| CPB2-AS1   | -1.5888186 | 0.7914276 | -2.0075 | 0.0448   | -1.19E-08 | count | 1 |
| AC001226.1 | -1.5888186 | 0.7914276 | -2.0075 | 0.0448   | -1.19E-08 | count | 1 |
| AL356019.2 | -1.5888186 | 0.7914276 | -2.0075 | 0.0448   | -1.19E-08 | count | 1 |
| AL357093.2 | -1.5888186 | 0.7914276 | -2.0075 | 0.0448   | -1.19E-08 | count | 1 |
| AC008731.1 | -1.5888186 | 0.7914276 | -2.0075 | 0.0448   | -1.19E-08 | count | 1 |
| AC087164.1 | -1.5888186 | 0.7914276 | -2.0075 | 0.0448   | -1.19E-08 | count | 1 |
| VGLL3      | -1.5888186 | 0.7914276 | -2.0075 | 0.0448   | -1.19E-08 | count | 1 |
| AC019257.2 | -1.5888186 | 0.7914276 | -2.0075 | 0.0448   | -1.19E-08 | count | 1 |
| EFCAB1     | -1.5888186 | 0.7914276 | -2.0075 | 0.0448   | -1.19E-08 | count | 1 |
| LCNL1      | -1.5888186 | 0.7914276 | -2.0075 | 0.0448   | -1.19E-08 | count | 1 |
| DRD4       | -1.5888186 | 0.7914276 | -2.0075 | 0.0448   | -1.19E-08 | count | 1 |
| PRR4       | -1.5888186 | 0.7914276 | -2.0075 | 0.0448   | -1.19E-08 | count | 1 |
| AC012085.2 | -1.5888186 | 0.7914276 | -2.0075 | 0.0448   | -1.19E-08 | count | 1 |
| RNFT2      | -1.5888186 | 0.7914276 | -2.0075 | 0.0448   | -1.19E-08 | count | 1 |
| UBE2Q2L    | -1.5888186 | 0.7914276 | -2.0075 | 0.0448   | -1.19E-08 | count | 1 |
| ADGRE2     | -1.5888186 | 0.7914276 | -2.0075 | 0.0448   | -1.19E-08 | count | 1 |
| LMTK3      | -1.5888186 | 0.7914276 | -2.0075 | 0.0448   | -1.19E-08 | count | 1 |
| SIGLEC9    | -1.5888186 | 0.7914276 | -2.0075 | 0.0448   | -1.19E-08 | count | 1 |
| UPB1       | -1.5888186 | 0.7914276 | -2.0075 | 0.0448   | -1.19E-08 | count | 1 |
| C3AR1      | -1.5888186 | 0.5589765 | -2.8424 | 0.0045   | -1.19E-08 | count | 1 |

|            |             |             |         |        |           |       |   |
|------------|-------------|-------------|---------|--------|-----------|-------|---|
| FGF14      | -1.5888186  | 0.6047124   | -2.6274 | 0.0086 | -1.18E-08 | count | 1 |
| AC093901.1 | -1.5888186  | 0.6047124   | -2.6274 | 0.0086 | -1.18E-08 | count | 1 |
| MAG        | -0.3360557  | 0.3454363   | -0.9728 | 0.331  | -1.15E-08 | count | 1 |
| DNHD1      | -0.737823   | 0.7681139   | -0.9606 | 0.337  | -1.09E-08 | count | 1 |
| SLC9C1     | -1.4154509  | 0.5283422   | -2.679  | 0.0074 | -9.91E-09 | count | 1 |
| HTRA3      | -1.4154509  | 0.5283422   | -2.679  | 0.0074 | -9.91E-09 | count | 1 |
| KHDC1      | -1.4154509  | 0.5283422   | -2.679  | 0.0074 | -9.91E-09 | count | 1 |
| LINC00605  | -1.4154509  | 0.6090376   | -2.3241 | 0.0202 | -9.91E-09 | count | 1 |
| AP002884.4 | -0.6725279  | 0.5393965   | -1.2468 | 0.213  | -9.66E-09 | count | 1 |
| AL031714.1 | -0.6725279  | 0.4668597   | -1.4405 | 0.15   | -9.66E-09 | count | 1 |
| DOCK10     | -0.6429945  | 0.8916008   | -0.7212 | 0.471  | -9.13E-09 | count | 1 |
| AC004771.5 | -0.6429945  | 0.6444463   | -0.9977 | 0.318  | -9.12E-09 | count | 1 |
| S100A5     | -19.8977787 | 1318.734964 | -0.0151 | 0.988  | -8.33E-09 | count | 1 |
| PAX6       | -19.8977787 | 1318.734964 | -0.0151 | 0.988  | -8.33E-09 | count | 1 |
| SGCA       | -19.8977787 | 1318.734964 | -0.0151 | 0.988  | -8.33E-09 | count | 1 |
| AC011472.1 | -19.8977787 | 1318.734964 | -0.0151 | 0.988  | -8.33E-09 | count | 1 |
| AL139147.1 | -19.8977787 | 1318.734964 | -0.0151 | 0.988  | -8.33E-09 | count | 1 |
| PM20D1     | -19.8977787 | 1318.734964 | -0.0151 | 0.988  | -8.33E-09 | count | 1 |
| AC009242.1 | -19.8977787 | 1318.734964 | -0.0151 | 0.988  | -8.33E-09 | count | 1 |
| CCL20      | -19.8977787 | 1318.734964 | -0.0151 | 0.988  | -8.33E-09 | count | 1 |
| VIPR1-AS1  | -19.8977787 | 1318.734964 | -0.0151 | 0.988  | -8.33E-09 | count | 1 |
| AC107072.2 | -19.8977787 | 1318.734964 | -0.0151 | 0.988  | -8.33E-09 | count | 1 |
| AC026785.2 | -19.8977787 | 1318.734964 | -0.0151 | 0.988  | -8.33E-09 | count | 1 |
| NIM1K      | -19.8977787 | 1318.734964 | -0.0151 | 0.988  | -8.33E-09 | count | 1 |
| ADRA1B     | -19.8977787 | 1318.734964 | -0.0151 | 0.988  | -8.33E-09 | count | 1 |
| MPIG6B     | -19.8977787 | 1318.734964 | -0.0151 | 0.988  | -8.33E-09 | count | 1 |
| IMPG1      | -19.8977787 | 1318.734964 | -0.0151 | 0.988  | -8.33E-09 | count | 1 |
| AL359715.3 | -19.8977787 | 1318.734964 | -0.0151 | 0.988  | -8.33E-09 | count | 1 |
| ESR1       | -19.8977787 | 1318.734964 | -0.0151 | 0.988  | -8.33E-09 | count | 1 |
| AL158070.1 | -19.8977787 | 1318.734964 | -0.0151 | 0.988  | -8.33E-09 | count | 1 |
| FOLR3      | -19.8977787 | 1318.734964 | -0.0151 | 0.988  | -8.33E-09 | count | 1 |
| C10orf105  | -19.8977787 | 1318.734964 | -0.0151 | 0.988  | -8.33E-09 | count | 1 |
| AC067750.1 | -19.8977787 | 1318.734964 | -0.0151 | 0.988  | -8.33E-09 | count | 1 |
| CYP2C9     | -19.8977787 | 1318.734964 | -0.0151 | 0.988  | -8.33E-09 | count | 1 |
| NELL2      | -19.8977787 | 1318.734964 | -0.0151 | 0.988  | -8.33E-09 | count | 1 |
| AC079313.1 | -19.8977787 | 1318.734964 | -0.0151 | 0.988  | -8.33E-09 | count | 1 |
| CA12       | -19.8977787 | 1318.734964 | -0.0151 | 0.988  | -8.33E-09 | count | 1 |
| LINC01597  | -19.8977787 | 1318.734964 | -0.0151 | 0.988  | -8.33E-09 | count | 1 |
| AC004156.1 | -19.8977787 | 1318.734964 | -0.0151 | 0.988  | -8.33E-09 | count | 1 |
| CRLF1      | -19.8977787 | 1318.734964 | -0.0151 | 0.988  | -8.33E-09 | count | 1 |
| CEACAM16   | -19.8977787 | 1318.734964 | -0.0151 | 0.988  | -8.33E-09 | count | 1 |
| CALML6     | -19.8977787 | 1318.734964 | -0.0151 | 0.988  | -8.33E-09 | count | 1 |
| SETSIP     | -19.8977787 | 1318.734964 | -0.0151 | 0.988  | -8.33E-09 | count | 1 |
| COL11A1    | -19.8977787 | 1318.734964 | -0.0151 | 0.988  | -8.33E-09 | count | 1 |
| AC020594.1 | -19.8977787 | 1318.734964 | -0.0151 | 0.988  | -8.33E-09 | count | 1 |



|            |             |             |         |       |           |       |   |
|------------|-------------|-------------|---------|-------|-----------|-------|---|
| AC018682.1 | -19.8977787 | 1318.734964 | -0.0151 | 0.988 | -8.33E-09 | count | 1 |
| AC073263.1 | -19.8977787 | 1318.734964 | -0.0151 | 0.988 | -8.33E-09 | count | 1 |
| LINC01856  | -19.8977787 | 1318.734964 | -0.0151 | 0.988 | -8.33E-09 | count | 1 |
| AC019068.1 | -19.8977787 | 1318.734964 | -0.0151 | 0.988 | -8.33E-09 | count | 1 |
| HTD2       | -19.8977787 | 1318.734964 | -0.0151 | 0.988 | -8.33E-09 | count | 1 |
| AC007370.2 | -19.8977787 | 1318.734964 | -0.0151 | 0.988 | -8.33E-09 | count | 1 |
| AC078845.1 | -19.8977787 | 1318.734964 | -0.0151 | 0.988 | -8.33E-09 | count | 1 |
| PHF24      | -19.8977787 | 1318.734964 | -0.0151 | 0.988 | -8.33E-09 | count | 1 |
| AL807752.6 | -19.8977787 | 1318.734964 | -0.0151 | 0.988 | -8.33E-09 | count | 1 |
| AC068733.3 | -19.8977787 | 1318.734964 | -0.0151 | 0.988 | -8.33E-09 | count | 1 |
| MRGPRF-AS1 | -19.8977787 | 1318.734964 | -0.0151 | 0.988 | -8.33E-09 | count | 1 |
| SCN2B      | -19.8977787 | 1318.734964 | -0.0151 | 0.988 | -8.33E-09 | count | 1 |
| AL136369.2 | -19.8977787 | 1318.734964 | -0.0151 | 0.988 | -8.33E-09 | count | 1 |
| ADGRA1     | -19.8977787 | 1318.734964 | -0.0151 | 0.988 | -8.33E-09 | count | 1 |
| GRIN2B     | -19.8977787 | 1318.734964 | -0.0151 | 0.988 | -8.33E-09 | count | 1 |
| C1QL4      | -19.8977787 | 1318.734964 | -0.0151 | 0.988 | -8.33E-09 | count | 1 |
| AC068987.4 | -19.8977787 | 1318.734964 | -0.0151 | 0.988 | -8.33E-09 | count | 1 |
| LIPC       | -19.8977787 | 1318.734964 | -0.0151 | 0.988 | -8.33E-09 | count | 1 |
| SLX1A      | -19.8977787 | 1318.734964 | -0.0151 | 0.988 | -8.33E-09 | count | 1 |
| AC027682.2 | -19.8977787 | 1318.734964 | -0.0151 | 0.988 | -8.33E-09 | count | 1 |
| HCRT       | -19.8977787 | 1318.734964 | -0.0151 | 0.988 | -8.33E-09 | count | 1 |
| TUBB1      | -19.8977787 | 1318.734964 | -0.0151 | 0.988 | -8.33E-09 | count | 1 |
| CDH4       | -19.8977787 | 1318.734964 | -0.0151 | 0.988 | -8.33E-09 | count | 1 |
| CCER2      | -19.8977787 | 1318.734964 | -0.0151 | 0.988 | -8.33E-09 | count | 1 |
| AC011462.1 | -19.8977787 | 1318.734964 | -0.0151 | 0.988 | -8.33E-09 | count | 1 |
| FPR3       | -19.8977787 | 1318.734964 | -0.0151 | 0.988 | -8.33E-09 | count | 1 |
| FASLG      | -19.8977787 | 1318.734964 | -0.0151 | 0.988 | -8.33E-09 | count | 1 |
| CTSE       | -19.8977787 | 1318.734964 | -0.0151 | 0.988 | -8.33E-09 | count | 1 |
| AC097724.1 | -19.8977787 | 1318.734964 | -0.0151 | 0.988 | -8.33E-09 | count | 1 |
| AC019080.4 | -19.8977787 | 1318.734964 | -0.0151 | 0.988 | -8.33E-09 | count | 1 |
| STX19      | -19.8977787 | 1318.734964 | -0.0151 | 0.988 | -8.33E-09 | count | 1 |
| AC016924.1 | -19.8977787 | 1318.734964 | -0.0151 | 0.988 | -8.33E-09 | count | 1 |
| LINC02100  | -19.8977787 | 1318.734964 | -0.0151 | 0.988 | -8.33E-09 | count | 1 |
| AC106786.1 | -19.8977787 | 1318.734964 | -0.0151 | 0.988 | -8.33E-09 | count | 1 |
| PCDHA8     | -19.8977787 | 1318.734964 | -0.0151 | 0.988 | -8.33E-09 | count | 1 |
| GFPT2      | -19.8977787 | 1318.734964 | -0.0151 | 0.988 | -8.33E-09 | count | 1 |
| AC138035.1 | -19.8977787 | 1318.734964 | -0.0151 | 0.988 | -8.33E-09 | count | 1 |
| AC008080.1 | -19.8977787 | 1318.734964 | -0.0151 | 0.988 | -8.33E-09 | count | 1 |
| AC211486.5 | -19.8977787 | 1318.734964 | -0.0151 | 0.988 | -8.33E-09 | count | 1 |
| TSGA13     | -19.8977787 | 1318.734964 | -0.0151 | 0.988 | -8.33E-09 | count | 1 |
| LINC00102  | -19.8977787 | 1318.734964 | -0.0151 | 0.988 | -8.33E-09 | count | 1 |
| AF233439.1 | -19.8977787 | 1318.734964 | -0.0151 | 0.988 | -8.33E-09 | count | 1 |
| LINC01239  | -19.8977787 | 1318.734964 | -0.0151 | 0.988 | -8.33E-09 | count | 1 |
| ADAMTS13   | -19.8977787 | 1318.734964 | -0.0151 | 0.988 | -8.33E-09 | count | 1 |
| GPHA2      | -19.8977787 | 1318.734964 | -0.0151 | 0.988 | -8.33E-09 | count | 1 |

|              |             |             |         |       |           |       |   |
|--------------|-------------|-------------|---------|-------|-----------|-------|---|
| ST8SIA6-AS1  | -19.8977787 | 1318.734964 | -0.0151 | 0.988 | -8.33E-09 | count | 1 |
| PRKG1-AS1    | -19.8977787 | 1318.734964 | -0.0151 | 0.988 | -8.33E-09 | count | 1 |
| AL356753.1   | -19.8977787 | 1318.734964 | -0.0151 | 0.988 | -8.33E-09 | count | 1 |
| TSPAN8       | -19.8977787 | 1318.734964 | -0.0151 | 0.988 | -8.33E-09 | count | 1 |
| GPR18        | -19.8977787 | 1318.734964 | -0.0151 | 0.988 | -8.33E-09 | count | 1 |
| ZIC5         | -19.8977787 | 1318.734964 | -0.0151 | 0.988 | -8.33E-09 | count | 1 |
| JPH4         | -19.8977787 | 1318.734964 | -0.0151 | 0.988 | -8.33E-09 | count | 1 |
| AL049875.1   | -19.8977787 | 1318.734964 | -0.0151 | 0.988 | -8.33E-09 | count | 1 |
| FAM81A       | -19.8977787 | 1318.734964 | -0.0151 | 0.988 | -8.33E-09 | count | 1 |
| AC099489.1   | -19.8977787 | 1318.734964 | -0.0151 | 0.988 | -8.33E-09 | count | 1 |
| AC009123.1   | -19.8977787 | 1318.734964 | -0.0151 | 0.988 | -8.33E-09 | count | 1 |
| P2RX5        | -19.8977787 | 1318.734964 | -0.0151 | 0.988 | -8.33E-09 | count | 1 |
| LINC01497    | -19.8977787 | 1318.734964 | -0.0151 | 0.988 | -8.33E-09 | count | 1 |
| NETO1        | -19.8977787 | 1318.734964 | -0.0151 | 0.988 | -8.33E-09 | count | 1 |
| EMILIN3      | -19.8977787 | 1318.734964 | -0.0151 | 0.988 | -8.33E-09 | count | 1 |
| AC016590.3   | -19.8977787 | 1318.734964 | -0.0151 | 0.988 | -8.33E-09 | count | 1 |
| AC006946.2   | -19.8977787 | 1318.734964 | -0.0151 | 0.988 | -8.33E-09 | count | 1 |
| ABCA4        | -19.8977787 | 1318.734964 | -0.0151 | 0.988 | -8.33E-09 | count | 1 |
| LHX9         | -19.8977787 | 1318.734964 | -0.0151 | 0.988 | -8.33E-09 | count | 1 |
| MAL          | -19.8977787 | 1318.734964 | -0.0151 | 0.988 | -8.33E-09 | count | 1 |
| TFCP2L1      | -19.8977787 | 1318.734964 | -0.0151 | 0.988 | -8.33E-09 | count | 1 |
| GPR39        | -19.8977787 | 1318.734964 | -0.0151 | 0.988 | -8.33E-09 | count | 1 |
| AC107029.2   | -19.8977787 | 1318.734964 | -0.0151 | 0.988 | -8.33E-09 | count | 1 |
| AC005674.1   | -19.8977787 | 1318.734964 | -0.0151 | 0.988 | -8.33E-09 | count | 1 |
| PROM1        | -19.8977787 | 1318.734964 | -0.0151 | 0.988 | -8.33E-09 | count | 1 |
| AC097480.1   | -19.8977787 | 1318.734964 | -0.0151 | 0.988 | -8.33E-09 | count | 1 |
| CLDN22       | -19.8977787 | 1318.734964 | -0.0151 | 0.988 | -8.33E-09 | count | 1 |
| NCR3         | -19.8977787 | 1318.734964 | -0.0151 | 0.988 | -8.33E-09 | count | 1 |
| AC004948.1   | -19.8977787 | 1318.734964 | -0.0151 | 0.988 | -8.33E-09 | count | 1 |
| TLR7         | -19.8977787 | 1318.734964 | -0.0151 | 0.988 | -8.33E-09 | count | 1 |
| AL359851.1   | -19.8977787 | 1318.734964 | -0.0151 | 0.988 | -8.33E-09 | count | 1 |
| AC107959.2   | -19.8977787 | 1318.734964 | -0.0151 | 0.988 | -8.33E-09 | count | 1 |
| LYNX1-SLURP2 | -19.8977787 | 1318.734964 | -0.0151 | 0.988 | -8.33E-09 | count | 1 |
| C9orf47      | -19.8977787 | 1318.734964 | -0.0151 | 0.988 | -8.33E-09 | count | 1 |
| CALML3-AS1   | -19.8977787 | 1318.734964 | -0.0151 | 0.988 | -8.33E-09 | count | 1 |
| ADRB1        | -19.8977787 | 1318.734964 | -0.0151 | 0.988 | -8.33E-09 | count | 1 |
| AL157756.1   | -19.8977787 | 1318.734964 | -0.0151 | 0.988 | -8.33E-09 | count | 1 |
| ATP8B4       | -19.8977787 | 1318.734964 | -0.0151 | 0.988 | -8.33E-09 | count | 1 |
| CCL22        | -19.8977787 | 1318.734964 | -0.0151 | 0.988 | -8.33E-09 | count | 1 |
| CNDP1        | -19.8977787 | 1318.734964 | -0.0151 | 0.988 | -8.33E-09 | count | 1 |
| AL050327.1   | -19.8977787 | 1318.734964 | -0.0151 | 0.988 | -8.33E-09 | count | 1 |
| CD209        | -19.8977787 | 1318.734964 | -0.0151 | 0.988 | -8.33E-09 | count | 1 |
| FBXO27       | -19.8977787 | 1318.734964 | -0.0151 | 0.988 | -8.33E-09 | count | 1 |
| LINC00853    | -19.8977787 | 1318.734964 | -0.0151 | 0.988 | -8.33E-09 | count | 1 |
| AL136304.1   | -19.8977787 | 1318.734964 | -0.0151 | 0.988 | -8.33E-09 | count | 1 |

|            |             |             |         |       |           |       |   |
|------------|-------------|-------------|---------|-------|-----------|-------|---|
| FIBCD1     | -19.8977787 | 1318.734964 | -0.0151 | 0.988 | -8.33E-09 | count | 1 |
| SDS        | -19.8977787 | 1318.734964 | -0.0151 | 0.988 | -8.33E-09 | count | 1 |
| APOBR      | -19.8977787 | 1318.734964 | -0.0151 | 0.988 | -8.33E-09 | count | 1 |
| GRIA3      | -20.5924504 | 1315.213111 | -0.0157 | 0.988 | -8.31E-09 | count | 1 |
| GFRA2      | -20.5924504 | 1315.213111 | -0.0157 | 0.988 | -8.31E-09 | count | 1 |
| LINC02024  | -20.5924504 | 1315.213111 | -0.0157 | 0.988 | -8.31E-09 | count | 1 |
| AL596220.1 | -20.5924504 | 1315.213111 | -0.0157 | 0.988 | -8.31E-09 | count | 1 |
| TPSAB1     | -20.5924504 | 1315.213111 | -0.0157 | 0.988 | -8.31E-09 | count | 1 |
| RNF43      | -20.5924504 | 1315.213111 | -0.0157 | 0.988 | -8.31E-09 | count | 1 |
| SIX2       | -20.5924504 | 1315.213111 | -0.0157 | 0.988 | -8.31E-09 | count | 1 |
| DOK7       | -20.5924504 | 1315.213111 | -0.0157 | 0.988 | -8.31E-09 | count | 1 |
| CLDN10-AS1 | -20.5924504 | 1315.213111 | -0.0157 | 0.988 | -8.31E-09 | count | 1 |
| TRBC1      | -0.5877367  | 0.4538616   | -1.295  | 0.195 | -8.16E-09 | count | 1 |
| ERVW-1     | -0.5817077  | 1.1466035   | -0.5073 | 0.612 | -8.06E-09 | count | 1 |
| AC108863.1 | -0.5817077  | 1.1466035   | -0.5073 | 0.612 | -8.06E-09 | count | 1 |
| AC006042.4 | -0.5817077  | 1.1466035   | -0.5073 | 0.612 | -8.05E-09 | count | 1 |
| FOXS1      | -0.5817077  | 1.1466035   | -0.5073 | 0.612 | -8.05E-09 | count | 1 |
| PTPRH      | -0.5817077  | 1.1466035   | -0.5073 | 0.612 | -8.05E-09 | count | 1 |
| TRIM72     | -0.5817077  | 0.8713277   | -0.6676 | 0.504 | -8.05E-09 | count | 1 |
| LINC02145  | -0.5817077  | 0.8713277   | -0.6676 | 0.504 | -8.05E-09 | count | 1 |
| AL021707.7 | -0.5817077  | 0.8713277   | -0.6676 | 0.504 | -8.05E-09 | count | 1 |
| LINC00598  | -0.5817077  | 0.8937593   | -0.6509 | 0.515 | -8.05E-09 | count | 1 |
| SRRM5      | -0.5817077  | 0.8937593   | -0.6509 | 0.515 | -8.05E-09 | count | 1 |
| AP005717.1 | -0.5817077  | 0.8713277   | -0.6676 | 0.504 | -8.05E-09 | count | 1 |
| ARHGAP30   | -0.5817077  | 0.8713277   | -0.6676 | 0.504 | -8.05E-09 | count | 1 |
| PQLC2L     | -0.5817077  | 0.8713277   | -0.6676 | 0.504 | -8.05E-09 | count | 1 |
| AL355916.1 | -0.5817077  | 0.8937593   | -0.6509 | 0.515 | -8.05E-09 | count | 1 |
| FBXL16     | -0.5817077  | 0.8713277   | -0.6676 | 0.504 | -8.05E-09 | count | 1 |
| TF         | -0.5817077  | 0.8713277   | -0.6676 | 0.504 | -8.05E-09 | count | 1 |
| AC103739.1 | -18.9704541 | 1372.243144 | -0.0138 | 0.989 | -7.99E-09 | count | 1 |
| HBZ        | -18.9704541 | 1372.243144 | -0.0138 | 0.989 | -7.99E-09 | count | 1 |
| FP671120.1 | -18.9704541 | 1372.243144 | -0.0138 | 0.989 | -7.99E-09 | count | 1 |
| SLC6A17    | -18.9704541 | 1372.243144 | -0.0138 | 0.989 | -7.99E-09 | count | 1 |
| ZSWIM2     | -18.9704541 | 1372.243144 | -0.0138 | 0.989 | -7.99E-09 | count | 1 |
| ERVMER34-1 | -18.9704541 | 1372.243144 | -0.0138 | 0.989 | -7.99E-09 | count | 1 |
| AC106789.1 | -18.9704541 | 1372.243144 | -0.0138 | 0.989 | -7.99E-09 | count | 1 |
| GPR63      | -18.9704541 | 1372.243144 | -0.0138 | 0.989 | -7.99E-09 | count | 1 |
| SMIM10L2B  | -18.9704541 | 1372.243144 | -0.0138 | 0.989 | -7.99E-09 | count | 1 |
| AC022784.1 | -18.9704541 | 1372.243144 | -0.0138 | 0.989 | -7.99E-09 | count | 1 |
| PPP1R42    | -18.9704541 | 1372.243144 | -0.0138 | 0.989 | -7.99E-09 | count | 1 |
| AL158071.3 | -18.9704541 | 1372.243144 | -0.0138 | 0.989 | -7.99E-09 | count | 1 |
| AC004466.3 | -18.9704541 | 1372.243144 | -0.0138 | 0.989 | -7.99E-09 | count | 1 |
| AC015909.2 | -18.9704541 | 1372.243144 | -0.0138 | 0.989 | -7.99E-09 | count | 1 |
| AP002478.1 | -18.9704541 | 1372.243144 | -0.0138 | 0.989 | -7.99E-09 | count | 1 |
| ITCH-AS1   | -18.9704541 | 1372.243144 | -0.0138 | 0.989 | -7.99E-09 | count | 1 |

|            |             |             |         |       |           |       |   |
|------------|-------------|-------------|---------|-------|-----------|-------|---|
| AL109917.1 | -18.9704541 | 1372.243144 | -0.0138 | 0.989 | -7.99E-09 | count | 1 |
| BX284668.2 | -18.9704541 | 1372.243144 | -0.0138 | 0.989 | -7.99E-09 | count | 1 |
| TMEM269    | -18.9704541 | 1372.243144 | -0.0138 | 0.989 | -7.99E-09 | count | 1 |
| AMPD1      | -18.9704541 | 1372.243144 | -0.0138 | 0.989 | -7.99E-09 | count | 1 |
| SLAMF7     | -18.9704541 | 1372.243144 | -0.0138 | 0.989 | -7.99E-09 | count | 1 |
| DLG1-AS1   | -18.9704541 | 1372.243144 | -0.0138 | 0.989 | -7.99E-09 | count | 1 |
| SYNE1-AS1  | -18.9704541 | 1372.243144 | -0.0138 | 0.989 | -7.99E-09 | count | 1 |
| SLC26A5    | -18.9704541 | 1372.243144 | -0.0138 | 0.989 | -7.99E-09 | count | 1 |
| STAR       | -18.9704541 | 1372.243144 | -0.0138 | 0.989 | -7.99E-09 | count | 1 |
| AC090739.1 | -18.9704541 | 1372.243144 | -0.0138 | 0.989 | -7.99E-09 | count | 1 |
| AP000924.1 | -18.9704541 | 1372.243144 | -0.0138 | 0.989 | -7.99E-09 | count | 1 |
| DPYSL4     | -18.9704541 | 1372.243144 | -0.0138 | 0.989 | -7.99E-09 | count | 1 |
| AC124947.1 | -18.9704541 | 1372.243144 | -0.0138 | 0.989 | -7.99E-09 | count | 1 |
| AC073655.2 | -18.9704541 | 1372.243144 | -0.0138 | 0.989 | -7.99E-09 | count | 1 |
| AL132639.3 | -18.9704541 | 1372.243144 | -0.0138 | 0.989 | -7.99E-09 | count | 1 |
| IGHV1-24   | -18.9704541 | 1372.243144 | -0.0138 | 0.989 | -7.99E-09 | count | 1 |
| RASGRF1    | -18.9704541 | 1372.243144 | -0.0138 | 0.989 | -7.99E-09 | count | 1 |
| AC107958.2 | -18.9704541 | 1372.243144 | -0.0138 | 0.989 | -7.99E-09 | count | 1 |
| KRT28      | -18.9704541 | 1372.243144 | -0.0138 | 0.989 | -7.99E-09 | count | 1 |
| HSF5       | -18.9704541 | 1372.243144 | -0.0138 | 0.989 | -7.99E-09 | count | 1 |
| CDH7       | -18.9704541 | 1372.243144 | -0.0138 | 0.989 | -7.99E-09 | count | 1 |
| APOC2      | -18.9704541 | 1372.243144 | -0.0138 | 0.989 | -7.99E-09 | count | 1 |
| AC007326.4 | -18.9704541 | 1372.243144 | -0.0138 | 0.989 | -7.99E-09 | count | 1 |
| IGLV4-60   | -18.9704541 | 1372.243144 | -0.0138 | 0.989 | -7.99E-09 | count | 1 |
| KMO        | -18.9704541 | 1372.243144 | -0.0138 | 0.989 | -7.99E-09 | count | 1 |
| SCG2       | -18.9704541 | 1372.243144 | -0.0138 | 0.989 | -7.99E-09 | count | 1 |
| SP140      | -18.9704541 | 1372.243144 | -0.0138 | 0.989 | -7.99E-09 | count | 1 |
| CXCR6      | -18.9704541 | 1372.243144 | -0.0138 | 0.989 | -7.99E-09 | count | 1 |
| AC112487.1 | -18.9704541 | 1372.243144 | -0.0138 | 0.989 | -7.99E-09 | count | 1 |
| SLC12A8    | -18.9704541 | 1372.243144 | -0.0138 | 0.989 | -7.99E-09 | count | 1 |
| CXCL5      | -18.9704541 | 1372.243144 | -0.0138 | 0.989 | -7.99E-09 | count | 1 |
| LINC02273  | -18.9704541 | 1372.243144 | -0.0138 | 0.989 | -7.99E-09 | count | 1 |
| LINC02365  | -18.9704541 | 1372.243144 | -0.0138 | 0.989 | -7.99E-09 | count | 1 |
| AC026740.1 | -18.9704541 | 1372.243144 | -0.0138 | 0.989 | -7.99E-09 | count | 1 |
| AL035604.1 | -18.9704541 | 1372.243144 | -0.0138 | 0.989 | -7.99E-09 | count | 1 |
| WDR86      | -18.9704541 | 1372.243144 | -0.0138 | 0.989 | -7.99E-09 | count | 1 |
| AC112493.1 | -18.9704541 | 1372.243144 | -0.0138 | 0.989 | -7.99E-09 | count | 1 |
| XPNPEP2    | -18.9704541 | 1372.243144 | -0.0138 | 0.989 | -7.99E-09 | count | 1 |
| AC100797.4 | -18.9704541 | 1372.243144 | -0.0138 | 0.989 | -7.99E-09 | count | 1 |
| SIT1       | -18.9704541 | 1372.243144 | -0.0138 | 0.989 | -7.99E-09 | count | 1 |
| AL354861.2 | -18.9704541 | 1372.243144 | -0.0138 | 0.989 | -7.99E-09 | count | 1 |
| BX248123.1 | -18.9704541 | 1372.243144 | -0.0138 | 0.989 | -7.99E-09 | count | 1 |
| HTR7       | -18.9704541 | 1372.243144 | -0.0138 | 0.989 | -7.99E-09 | count | 1 |
| VDR        | -18.9704541 | 1372.243144 | -0.0138 | 0.989 | -7.99E-09 | count | 1 |
| AC008147.1 | -18.9704541 | 1372.243144 | -0.0138 | 0.989 | -7.99E-09 | count | 1 |

|              |             |             |         |       |           |       |   |
|--------------|-------------|-------------|---------|-------|-----------|-------|---|
| C12orf56     | -18.9704541 | 1372.243144 | -0.0138 | 0.989 | -7.99E-09 | count | 1 |
| AC025035.1   | -18.9704541 | 1372.243144 | -0.0138 | 0.989 | -7.99E-09 | count | 1 |
| AC108704.1   | -18.9704541 | 1372.243144 | -0.0138 | 0.989 | -7.99E-09 | count | 1 |
| LINC00545    | -18.9704541 | 1372.243144 | -0.0138 | 0.989 | -7.99E-09 | count | 1 |
| AL162377.3   | -18.9704541 | 1372.243144 | -0.0138 | 0.989 | -7.99E-09 | count | 1 |
| ADAM21       | -18.9704541 | 1372.243144 | -0.0138 | 0.989 | -7.99E-09 | count | 1 |
| ACOT1        | -18.9704541 | 1372.243144 | -0.0138 | 0.989 | -7.99E-09 | count | 1 |
| AC012645.4   | -18.9704541 | 1372.243144 | -0.0138 | 0.989 | -7.99E-09 | count | 1 |
| AC118754.1   | -18.9704541 | 1372.243144 | -0.0138 | 0.989 | -7.99E-09 | count | 1 |
| AC005324.3   | -18.9704541 | 1372.243144 | -0.0138 | 0.989 | -7.99E-09 | count | 1 |
| SLC4A11      | -18.9704541 | 1372.243144 | -0.0138 | 0.989 | -7.99E-09 | count | 1 |
| EDN3         | -18.9704541 | 1372.243144 | -0.0138 | 0.989 | -7.99E-09 | count | 1 |
| AC004221.1   | -18.9704541 | 1372.243144 | -0.0138 | 0.989 | -7.99E-09 | count | 1 |
| IGLV6-57     | -18.9704541 | 1372.243144 | -0.0138 | 0.989 | -7.99E-09 | count | 1 |
| AC114488.1   | -18.9704541 | 1372.243144 | -0.0138 | 0.989 | -7.99E-09 | count | 1 |
| TNFSF4       | -18.9704541 | 1372.243144 | -0.0138 | 0.989 | -7.99E-09 | count | 1 |
| GAS5-AS1     | -18.9704541 | 1372.243144 | -0.0138 | 0.989 | -7.99E-09 | count | 1 |
| B3GALT2      | -18.9704541 | 1372.243144 | -0.0138 | 0.989 | -7.99E-09 | count | 1 |
| LINC01934    | -18.9704541 | 1372.243144 | -0.0138 | 0.989 | -7.99E-09 | count | 1 |
| PPP1R1C      | -18.9704541 | 1372.243144 | -0.0138 | 0.989 | -7.99E-09 | count | 1 |
| PRICKLE2-AS3 | -18.9704541 | 1372.243144 | -0.0138 | 0.989 | -7.99E-09 | count | 1 |
| AC139792.1   | -18.9704541 | 1372.243144 | -0.0138 | 0.989 | -7.99E-09 | count | 1 |
| SOX30        | -18.9704541 | 1372.243144 | -0.0138 | 0.989 | -7.99E-09 | count | 1 |
| AL138831.1   | -18.9704541 | 1372.243144 | -0.0138 | 0.989 | -7.99E-09 | count | 1 |
| AL008729.2   | -18.9704541 | 1372.243144 | -0.0138 | 0.989 | -7.99E-09 | count | 1 |
| AL512274.1   | -18.9704541 | 1372.243144 | -0.0138 | 0.989 | -7.99E-09 | count | 1 |
| DOK2         | -18.9704541 | 1372.243144 | -0.0138 | 0.989 | -7.99E-09 | count | 1 |
| AC022733.2   | -18.9704541 | 1372.243144 | -0.0138 | 0.989 | -7.99E-09 | count | 1 |
| AC103718.1   | -18.9704541 | 1372.243144 | -0.0138 | 0.989 | -7.99E-09 | count | 1 |
| FGD3         | -18.9704541 | 1372.243144 | -0.0138 | 0.989 | -7.99E-09 | count | 1 |
| AC090589.2   | -18.9704541 | 1372.243144 | -0.0138 | 0.989 | -7.99E-09 | count | 1 |
| CATSPER1     | -18.9704541 | 1372.243144 | -0.0138 | 0.989 | -7.99E-09 | count | 1 |
| B3GNT6       | -18.9704541 | 1372.243144 | -0.0138 | 0.989 | -7.99E-09 | count | 1 |
| AC105411.1   | -18.9704541 | 1372.243144 | -0.0138 | 0.989 | -7.99E-09 | count | 1 |
| LINC02073    | -18.9704541 | 1372.243144 | -0.0138 | 0.989 | -7.99E-09 | count | 1 |
| LINC01982    | -18.9704541 | 1372.243144 | -0.0138 | 0.989 | -7.99E-09 | count | 1 |
| CD300LB      | -18.9704541 | 1372.243144 | -0.0138 | 0.989 | -7.99E-09 | count | 1 |
| ATCAY        | -18.9704541 | 1372.243144 | -0.0138 | 0.989 | -7.99E-09 | count | 1 |
| IL12RB1      | -18.9704541 | 1372.243144 | -0.0138 | 0.989 | -7.99E-09 | count | 1 |
| CRYBA4       | -18.9704541 | 1372.243144 | -0.0138 | 0.989 | -7.99E-09 | count | 1 |
| AP001626.1   | -18.9704541 | 1372.243144 | -0.0138 | 0.989 | -7.99E-09 | count | 1 |
| AL391244.3   | -18.9704541 | 1372.243144 | -0.0138 | 0.989 | -7.99E-09 | count | 1 |
| MFSD2A       | -18.9704541 | 1372.243144 | -0.0138 | 0.989 | -7.99E-09 | count | 1 |
| GUCA2A       | -18.9704541 | 1372.243144 | -0.0138 | 0.989 | -7.99E-09 | count | 1 |
| LINC01776    | -18.9704541 | 1372.243144 | -0.0138 | 0.989 | -7.99E-09 | count | 1 |

|                |             |             |         |       |           |       |   |
|----------------|-------------|-------------|---------|-------|-----------|-------|---|
| AL139161.1     | -18.9704541 | 1372.243144 | -0.0138 | 0.989 | -7.99E-09 | count | 1 |
| BCL11A         | -18.9704541 | 1372.243144 | -0.0138 | 0.989 | -7.99E-09 | count | 1 |
| IL1A           | -18.9704541 | 1372.243144 | -0.0138 | 0.989 | -7.99E-09 | count | 1 |
| CDCA7          | -18.9704541 | 1372.243144 | -0.0138 | 0.989 | -7.99E-09 | count | 1 |
| WNT5A-AS1      | -18.9704541 | 1372.243144 | -0.0138 | 0.989 | -7.99E-09 | count | 1 |
| ESYT3          | -18.9704541 | 1372.243144 | -0.0138 | 0.989 | -7.99E-09 | count | 1 |
| ANKRD31        | -18.9704541 | 1372.243144 | -0.0138 | 0.989 | -7.99E-09 | count | 1 |
| AL139095.4     | -18.9704541 | 1372.243144 | -0.0138 | 0.989 | -7.99E-09 | count | 1 |
| HOXA6          | -18.9704541 | 1372.243144 | -0.0138 | 0.989 | -7.99E-09 | count | 1 |
| HOXA9          | -18.9704541 | 1372.243144 | -0.0138 | 0.989 | -7.99E-09 | count | 1 |
| AL732314.6     | -18.9704541 | 1372.243144 | -0.0138 | 0.989 | -7.99E-09 | count | 1 |
| LINC01402      | -18.9704541 | 1372.243144 | -0.0138 | 0.989 | -7.99E-09 | count | 1 |
| AL590399.3     | -18.9704541 | 1372.243144 | -0.0138 | 0.989 | -7.99E-09 | count | 1 |
| AL162727.2     | -18.9704541 | 1372.243144 | -0.0138 | 0.989 | -7.99E-09 | count | 1 |
| NLRP6          | -18.9704541 | 1372.243144 | -0.0138 | 0.989 | -7.99E-09 | count | 1 |
| AP001972.3     | -18.9704541 | 1372.243144 | -0.0138 | 0.989 | -7.99E-09 | count | 1 |
| SPX            | -18.9704541 | 1372.243144 | -0.0138 | 0.989 | -7.99E-09 | count | 1 |
| AC004816.2     | -18.9704541 | 1372.243144 | -0.0138 | 0.989 | -7.99E-09 | count | 1 |
| DIO2           | -18.9704541 | 1372.243144 | -0.0138 | 0.989 | -7.99E-09 | count | 1 |
| CYP19A1        | -18.9704541 | 1372.243144 | -0.0138 | 0.989 | -7.99E-09 | count | 1 |
| ITGAX          | -18.9704541 | 1372.243144 | -0.0138 | 0.989 | -7.99E-09 | count | 1 |
| CD300E         | -18.9704541 | 1372.243144 | -0.0138 | 0.989 | -7.99E-09 | count | 1 |
| ZBP1           | -18.9704541 | 1372.243144 | -0.0138 | 0.989 | -7.99E-09 | count | 1 |
| AL390036.1     | -18.9704541 | 1372.243144 | -0.0138 | 0.989 | -7.99E-09 | count | 1 |
| SUSD5          | -18.9704541 | 1372.243144 | -0.0138 | 0.989 | -7.99E-09 | count | 1 |
| AC124944.1     | -18.9704541 | 1372.243144 | -0.0138 | 0.989 | -7.99E-09 | count | 1 |
| C6orf15        | -18.9704541 | 1372.243144 | -0.0138 | 0.989 | -7.99E-09 | count | 1 |
| MYH8           | -18.9704541 | 1372.243144 | -0.0138 | 0.989 | -7.99E-09 | count | 1 |
| Z97055.2       | -18.9704541 | 1372.243144 | -0.0138 | 0.989 | -7.99E-09 | count | 1 |
| LCK            | -18.9704541 | 1372.243144 | -0.0138 | 0.989 | -7.99E-09 | count | 1 |
| TENT5B         | -19.664885  | 1369.031422 | -0.0144 | 0.989 | -7.97E-09 | count | 1 |
| AC087645.4     | -19.664885  | 1369.031422 | -0.0144 | 0.989 | -7.97E-09 | count | 1 |
| BX470102.1     | -19.6656654 | 1942.648764 | -0.0101 | 0.992 | -7.97E-09 | count | 1 |
| HIST1H3J       | -19.6656654 | 1942.648764 | -0.0101 | 0.992 | -7.97E-09 | count | 1 |
| AL161785.3     | -19.6656654 | 1942.648764 | -0.0101 | 0.992 | -7.97E-09 | count | 1 |
| FCRL5          | -19.6656654 | 1942.648764 | -0.0101 | 0.992 | -7.97E-09 | count | 1 |
| C4orf45        | -19.6656654 | 1942.648764 | -0.0101 | 0.992 | -7.97E-09 | count | 1 |
| TMEM110-MUSTN1 | -19.6656654 | 1942.648764 | -0.0101 | 0.992 | -7.97E-09 | count | 1 |
| AC004522.2     | -19.6656654 | 1942.648764 | -0.0101 | 0.992 | -7.97E-09 | count | 1 |
| PAGE1          | -19.6656654 | 1942.648764 | -0.0101 | 0.992 | -7.97E-09 | count | 1 |
| AC010271.1     | -19.6656654 | 1942.648764 | -0.0101 | 0.992 | -7.97E-09 | count | 1 |
| AL049775.2     | -19.6656654 | 1942.648764 | -0.0101 | 0.992 | -7.97E-09 | count | 1 |
| AC131159.2     | -1.1555612  | 1.0536576   | -1.0967 | 0.273 | -7.37E-09 | count | 1 |
| AC002553.2     | -1.1555612  | 1.0536576   | -1.0967 | 0.273 | -7.37E-09 | count | 1 |
| KCNJ8          | -1.1555612  | 1.0536576   | -1.0967 | 0.273 | -7.37E-09 | count | 1 |

|               |            |           |         |       |           |       |   |
|---------------|------------|-----------|---------|-------|-----------|-------|---|
| CRTAM         | -1.1555612 | 1.0536576 | -1.0967 | 0.273 | -7.37E-09 | count | 1 |
| FCGR1B        | -1.1555612 | 1.0536576 | -1.0967 | 0.273 | -7.37E-09 | count | 1 |
| LINC02345     | -1.1555612 | 1.0536576 | -1.0967 | 0.273 | -7.37E-09 | count | 1 |
| MS4A1         | -1.1555612 | 0.9762994 | -1.1836 | 0.237 | -7.37E-09 | count | 1 |
| COCH          | -1.1555612 | 1.0536576 | -1.0967 | 0.273 | -7.37E-09 | count | 1 |
| SYNJ2BP-COX16 | -1.1555612 | 1.0536576 | -1.0967 | 0.273 | -7.37E-09 | count | 1 |
| DBH-AS1       | -1.1555612 | 1.0536576 | -1.0967 | 0.273 | -7.37E-09 | count | 1 |
| AC138331.1    | -1.1555612 | 1.0536576 | -1.0967 | 0.273 | -7.37E-09 | count | 1 |
| AFF3          | -1.1555612 | 1.0536576 | -1.0967 | 0.273 | -7.37E-09 | count | 1 |
| AC090061.1    | -1.1555612 | 1.0536576 | -1.0967 | 0.273 | -7.37E-09 | count | 1 |
| AC007376.2    | -1.1555612 | 1.0536576 | -1.0967 | 0.273 | -7.37E-09 | count | 1 |
| CHI3L1        | -1.1555612 | 0.9762994 | -1.1836 | 0.237 | -7.37E-09 | count | 1 |
| AC067817.2    | -1.1555612 | 1.0536576 | -1.0967 | 0.273 | -7.37E-09 | count | 1 |
| NODAL         | -1.1555612 | 1.0536576 | -1.0967 | 0.273 | -7.37E-09 | count | 1 |
| AC073592.1    | -1.1555612 | 1.0536576 | -1.0967 | 0.273 | -7.37E-09 | count | 1 |
| AC145207.6    | -1.1555612 | 1.0536576 | -1.0967 | 0.273 | -7.37E-09 | count | 1 |
| ABCG8         | -1.1555612 | 1.0536576 | -1.0967 | 0.273 | -7.37E-09 | count | 1 |
| STAT4         | -1.1555612 | 1.0536576 | -1.0967 | 0.273 | -7.37E-09 | count | 1 |
| AL008723.1    | -1.1555612 | 1.0536576 | -1.0967 | 0.273 | -7.37E-09 | count | 1 |
| AC126755.3    | -1.1555612 | 1.0536576 | -1.0967 | 0.273 | -7.37E-09 | count | 1 |
| AC135178.4    | -1.1555612 | 1.0536576 | -1.0967 | 0.273 | -7.37E-09 | count | 1 |
| AC004816.1    | -1.1555612 | 1.0536576 | -1.0967 | 0.273 | -7.37E-09 | count | 1 |
| AC009902.3    | -1.1555612 | 1.0536576 | -1.0967 | 0.273 | -7.37E-09 | count | 1 |
| AC087071.1    | -1.1555612 | 0.9762994 | -1.1836 | 0.237 | -7.37E-09 | count | 1 |
| NAV2-AS3      | -1.1555612 | 1.0536576 | -1.0967 | 0.273 | -7.37E-09 | count | 1 |
| ADRA1D        | -1.1555612 | 1.0536576 | -1.0967 | 0.273 | -7.37E-09 | count | 1 |
| ANK3          | -1.1555612 | 0.9762994 | -1.1836 | 0.237 | -7.37E-09 | count | 1 |
| AC025165.5    | -1.1555612 | 1.0536576 | -1.0967 | 0.273 | -7.37E-09 | count | 1 |
| KRT17         | -1.1555612 | 0.9762994 | -1.1836 | 0.237 | -7.37E-09 | count | 1 |
| LY6G6C        | -1.1555612 | 1.0536576 | -1.0967 | 0.273 | -7.37E-09 | count | 1 |
| AL358075.1    | -1.1555612 | 1.0536576 | -1.0967 | 0.273 | -7.37E-09 | count | 1 |
| ARSD-AS1      | -1.1555612 | 1.0536576 | -1.0967 | 0.273 | -7.37E-09 | count | 1 |
| AC092118.1    | -1.1555612 | 1.0536576 | -1.0967 | 0.273 | -7.37E-09 | count | 1 |
| AL355488.1    | -1.1555612 | 0.9762994 | -1.1836 | 0.237 | -7.37E-09 | count | 1 |
| HAND2-AS1     | -1.1555612 | 1.0536576 | -1.0967 | 0.273 | -7.37E-09 | count | 1 |
| RIPOR3        | -1.1555612 | 1.0536576 | -1.0967 | 0.273 | -7.37E-09 | count | 1 |
| AC011498.4    | -1.1555612 | 0.9762994 | -1.1836 | 0.237 | -7.37E-09 | count | 1 |
| AC110048.2    | -1.1555612 | 0.9762994 | -1.1836 | 0.237 | -7.37E-09 | count | 1 |
| C1QTNF5       | -1.1555612 | 1.0536576 | -1.0967 | 0.273 | -7.37E-09 | count | 1 |
| LINC02091     | -0.5319467 | 0.6164839 | -0.8629 | 0.388 | -7.22E-09 | count | 1 |
| CCL18         | -0.5319467 | 0.6164839 | -0.8629 | 0.388 | -7.22E-09 | count | 1 |
| RP1           | -0.4740531 | 0.5966732 | -0.7945 | 0.427 | -6.28E-09 | count | 1 |
| PLB1          | -0.430808  | 0.7000874 | -0.6154 | 0.538 | -5.61E-09 | count | 1 |
| AP001020.3    | -0.8956714 | 0.9274946 | -0.9657 | 0.334 | -5.17E-09 | count | 1 |
| KCNA5         | -0.8956714 | 0.9274946 | -0.9657 | 0.334 | -5.17E-09 | count | 1 |

|            |            |           |         |       |           |       |   |
|------------|------------|-----------|---------|-------|-----------|-------|---|
| TEAD3      | -0.8956714 | 0.6850001 | -1.3075 | 0.191 | -5.17E-09 | count | 1 |
| AC002066.1 | -0.8956714 | 0.6850001 | -1.3075 | 0.191 | -5.17E-09 | count | 1 |
| AL591845.1 | -0.8956714 | 0.6850001 | -1.3075 | 0.191 | -5.17E-09 | count | 1 |
| AC022893.1 | -0.8956714 | 0.6850001 | -1.3075 | 0.191 | -5.17E-09 | count | 1 |
| HM13-AS1   | -0.8956714 | 0.6850001 | -1.3075 | 0.191 | -5.17E-09 | count | 1 |
| AC110799.1 | -0.8956714 | 0.6850001 | -1.3075 | 0.191 | -5.17E-09 | count | 1 |
| OR51M1     | -0.8956714 | 0.6850001 | -1.3075 | 0.191 | -5.17E-09 | count | 1 |
| FITM1      | -0.8956714 | 0.6850001 | -1.3075 | 0.191 | -5.17E-09 | count | 1 |
| AC127521.1 | -0.8956714 | 0.6850001 | -1.3075 | 0.191 | -5.17E-09 | count | 1 |
| RSPH1      | -0.8956714 | 0.6850001 | -1.3075 | 0.191 | -5.17E-09 | count | 1 |
| BNIPL      | -0.3945091 | 0.5919581 | -0.6664 | 0.505 | -5.06E-09 | count | 1 |
| TUFT1      | -0.3360557 | 0.4975742 | -0.6754 | 0.499 | -4.21E-09 | count | 1 |
| AL121899.1 | -0.7223038 | 0.6106702 | -1.1828 | 0.237 | -3.89E-09 | count | 1 |
| LINC01060  | -0.7223038 | 0.6106702 | -1.1828 | 0.237 | -3.89E-09 | count | 1 |
| TREM1      | -0.7223038 | 0.6106702 | -1.1828 | 0.237 | -3.89E-09 | count | 1 |
| AL359715.1 | -0.7223038 | 0.6106702 | -1.1828 | 0.237 | -3.89E-09 | count | 1 |
| LAT2       | -0.7223038 | 0.6106702 | -1.1828 | 0.237 | -3.89E-09 | count | 1 |
| MSR1       | -0.7223038 | 0.6106702 | -1.1828 | 0.237 | -3.89E-09 | count | 1 |
| AP003472.1 | -0.7223038 | 0.6106702 | -1.1828 | 0.237 | -3.89E-09 | count | 1 |
| AL512598.1 | -0.7223038 | 0.6106702 | -1.1828 | 0.237 | -3.89E-09 | count | 1 |
| GNB3       | -0.7223038 | 0.6106702 | -1.1828 | 0.237 | -3.89E-09 | count | 1 |
| IGHA2      | -0.7223038 | 0.6106702 | -1.1828 | 0.237 | -3.89E-09 | count | 1 |
| FENDRR     | -0.7223038 | 0.6106702 | -1.1828 | 0.237 | -3.89E-09 | count | 1 |
| AC005759.1 | -0.7223038 | 0.6106702 | -1.1828 | 0.237 | -3.89E-09 | count | 1 |
| GPR171     | -0.7223038 | 0.6106702 | -1.1828 | 0.237 | -3.89E-09 | count | 1 |
| SAP25      | -0.7223038 | 0.6106702 | -1.1828 | 0.237 | -3.89E-09 | count | 1 |
| AC026333.4 | -0.7223038 | 0.6106702 | -1.1828 | 0.237 | -3.89E-09 | count | 1 |
| FAM239B    | -0.2623742 | 0.6038418 | -0.4345 | 0.664 | -3.19E-09 | count | 1 |
| UPK3B      | -0.2401389 | 1.2544861 | -0.1914 | 0.848 | -2.90E-09 | count | 1 |
| AC137630.3 | -0.2401389 | 0.8186954 | -0.2933 | 0.769 | -2.90E-09 | count | 1 |
| AL359091.4 | -0.2401389 | 0.8186954 | -0.2933 | 0.769 | -2.90E-09 | count | 1 |
| EDNRA      | -0.2401389 | 0.8186954 | -0.2933 | 0.769 | -2.90E-09 | count | 1 |
| AL162426.1 | -0.2401389 | 0.8186954 | -0.2933 | 0.769 | -2.90E-09 | count | 1 |
| AL137779.2 | -0.2401389 | 0.8186954 | -0.2933 | 0.769 | -2.90E-09 | count | 1 |
| AL365194.1 | -0.4902063 | 0.6454505 | -0.7595 | 0.448 | -2.41E-09 | count | 1 |
| AL023584.2 | -0.4902063 | 0.6454505 | -0.7595 | 0.448 | -2.41E-09 | count | 1 |
| ST8SIA1    | -0.4902063 | 0.6454505 | -0.7595 | 0.448 | -2.41E-09 | count | 1 |
| AC092653.1 | -0.4902063 | 0.6454505 | -0.7595 | 0.448 | -2.41E-09 | count | 1 |
| VXN        | -0.4902063 | 0.6454505 | -0.7595 | 0.448 | -2.41E-09 | count | 1 |
| CD6        | -0.4902063 | 0.6454505 | -0.7595 | 0.448 | -2.41E-09 | count | 1 |
| NR2E3      | -0.4902063 | 0.6454505 | -0.7595 | 0.448 | -2.41E-09 | count | 1 |
| AC127002.1 | -0.2025243 | 0.6245925 | -0.3243 | 0.746 | -2.40E-09 | count | 1 |
| IMPG2      | -0.3168387 | 0.5248472 | -0.6037 | 0.546 | -1.45E-09 | count | 1 |
| AC091588.2 | -0.2876506 | 0.8399163 | -0.3425 | 0.732 | -1.30E-09 | count | 1 |
| AL021368.3 | -0.2876506 | 0.890913  | -0.3229 | 0.747 | -1.30E-09 | count | 1 |



|            |            |             |         |       |           |       |   |
|------------|------------|-------------|---------|-------|-----------|-------|---|
| SLC5A4     | -0.2876506 | 0.890913    | -0.3229 | 0.747 | -1.30E-09 | count | 1 |
| SERPINA3   | -0.2876506 | 0.8399163   | -0.3425 | 0.732 | -1.30E-09 | count | 1 |
| SYN1       | -0.2876506 | 0.8399163   | -0.3425 | 0.732 | -1.30E-09 | count | 1 |
| TGM1       | -0.2876506 | 0.890913    | -0.3229 | 0.747 | -1.30E-09 | count | 1 |
| GPR37      | -0.2876506 | 0.8399163   | -0.3425 | 0.732 | -1.30E-09 | count | 1 |
| SLC4A8     | -0.2876506 | 0.890913    | -0.3229 | 0.747 | -1.30E-09 | count | 1 |
| AL136141.1 | -0.2876506 | 0.890913    | -0.3229 | 0.747 | -1.30E-09 | count | 1 |
| LINC01176  | -0.2876506 | 0.890913    | -0.3229 | 0.747 | -1.30E-09 | count | 1 |
| GJC1       | -0.0098542 | 0.4780007   | -0.0206 | 0.984 | -2.94E-10 | count | 1 |
| GSTM1      | -0.0291566 | 0.3725025   | -0.0783 | 0.938 | -1.19E-10 | count | 1 |
| FOXO6      | -0.0291566 | 0.5283423   | -0.0552 | 0.956 | -1.19E-10 | count | 1 |
| AC009171.2 | -0.0291566 | 0.5283423   | -0.0552 | 0.956 | -1.19E-10 | count | 1 |
| PZP        | -0.0098542 | 0.5862813   | -0.0168 | 0.987 | -1.08E-10 | count | 1 |
| STEAP4     | -0.0098542 | 0.8303307   | -0.0119 | 0.991 | -1.08E-10 | count | 1 |
| C8orf89    | -0.0098542 | 0.8303307   | -0.0119 | 0.991 | -1.08E-10 | count | 1 |
| AADAT      | -0.0098542 | 0.8303307   | -0.0119 | 0.991 | -1.08E-10 | count | 1 |
| GTF2H4     | -0.0098542 | 0.8303307   | -0.0119 | 0.991 | -1.08E-10 | count | 1 |
| LINC01504  | -0.0098542 | 0.8303307   | -0.0119 | 0.991 | -1.08E-10 | count | 1 |
| PMF1-BGLAP | 0.0065064  | 0.7997091   | 0.0081  | 0.994 | 7.10E-11  | count | 1 |
| LINC01068  | 0.0065064  | 0.8002759   | 0.0081  | 0.994 | 7.10E-11  | count | 1 |
| LINC02576  | 0.0065064  | 0.8002759   | 0.0081  | 0.994 | 7.10E-11  | count | 1 |
| AC003965.1 | 0.0065064  | 0.9167602   | 0.0071  | 0.994 | 7.10E-11  | count | 1 |
| EVI2A      | 0.0065064  | 1.3586498   | 0.0048  | 0.996 | 7.10E-11  | count | 1 |
| AC032044.1 | 0.0206193  | 0.6116181   | 0.0337  | 0.973 | 2.24E-10  | count | 1 |
| GPR65      | 0.0206193  | 1.0605833   | 0.0194  | 0.984 | 2.24E-10  | count | 1 |
| C9orf66    | 0.3763085  | 0.5997022   | 0.6275  | 0.53  | 1.30E-09  | count | 1 |
| FAM43B     | 0.3763085  | 0.5997022   | 0.6275  | 0.53  | 1.30E-09  | count | 1 |
| AL445985.1 | 18.0416002 | 4003.863848 | 0.0045  | 0.996 | 1.69E-09  | count | 1 |
| PDE1C      | 18.0416    | 4003.863136 | 0.0045  | 0.996 | 1.69E-09  | count | 1 |
| AL354694.1 | 18.0416002 | 4003.86319  | 0.0045  | 0.996 | 1.69E-09  | count | 1 |
| AP002990.1 | 18.0415995 | 4003.863465 | 0.0045  | 0.996 | 1.69E-09  | count | 1 |
| CCDC81     | 18.0416    | 4003.863574 | 0.0045  | 0.996 | 1.69E-09  | count | 1 |
| AL157392.4 | 18.0415995 | 4003.863574 | 0.0045  | 0.996 | 1.69E-09  | count | 1 |
| AC068722.2 | 18.0415998 | 4003.863739 | 0.0045  | 0.996 | 1.69E-09  | count | 1 |
| AC011731.1 | 18.0416003 | 4003.863794 | 0.0045  | 0.996 | 1.69E-09  | count | 1 |
| AL031281.2 | 18.0415998 | 4003.864342 | 0.0045  | 0.996 | 1.69E-09  | count | 1 |
| AL445490.1 | 18.0416    | 4003.863574 | 0.0045  | 0.996 | 1.69E-09  | count | 1 |
| KANK4      | 18.0416001 | 4003.863519 | 0.0045  | 0.996 | 1.69E-09  | count | 1 |
| SPATA42    | 18.0415996 | 4003.862861 | 0.0045  | 0.996 | 1.69E-09  | count | 1 |
| LINC01936  | 18.0415999 | 4003.863848 | 0.0045  | 0.996 | 1.69E-09  | count | 1 |
| SATB2      | 18.0416001 | 4003.863136 | 0.0045  | 0.996 | 1.69E-09  | count | 1 |
| AC055764.2 | 18.0415994 | 4003.863519 | 0.0045  | 0.996 | 1.69E-09  | count | 1 |
| DEPDC1B    | 18.0415995 | 4003.863245 | 0.0045  | 0.996 | 1.69E-09  | count | 1 |
| BEND6      | 18.0415993 | 4003.863794 | 0.0045  | 0.996 | 1.69E-09  | count | 1 |
| AL365275.1 | 18.0415999 | 4003.863629 | 0.0045  | 0.996 | 1.69E-09  | count | 1 |

|               |            |             |        |       |          |       |   |
|---------------|------------|-------------|--------|-------|----------|-------|---|
| MLXIPL        | 18.0415993 | 4003.863245 | 0.0045 | 0.996 | 1.69E-09 | count | 1 |
| AC103724.3    | 18.0415999 | 4003.864177 | 0.0045 | 0.996 | 1.69E-09 | count | 1 |
| LINC01603     | 18.0415993 | 4003.863629 | 0.0045 | 0.996 | 1.69E-09 | count | 1 |
| PGM5P3-AS1    | 18.0416001 | 4003.86341  | 0.0045 | 0.996 | 1.69E-09 | count | 1 |
| BAAT          | 18.0415997 | 4003.862861 | 0.0045 | 0.996 | 1.69E-09 | count | 1 |
| LCN10         | 18.0415995 | 4003.863574 | 0.0045 | 0.996 | 1.69E-09 | count | 1 |
| EHF           | 18.0415997 | 4003.862916 | 0.0045 | 0.996 | 1.69E-09 | count | 1 |
| IL2RA         | 18.0415989 | 4003.862533 | 0.0045 | 0.996 | 1.69E-09 | count | 1 |
| AL591767.1    | 18.0415998 | 4003.863136 | 0.0045 | 0.996 | 1.69E-09 | count | 1 |
| SDK2          | 18.0415999 | 4003.863574 | 0.0045 | 0.996 | 1.69E-09 | count | 1 |
| MYOM1         | 18.0416001 | 4003.863739 | 0.0045 | 0.996 | 1.69E-09 | count | 1 |
| AL132821.1    | 18.0416    | 4003.863903 | 0.0045 | 0.996 | 1.69E-09 | count | 1 |
| DLGAP4-AS1    | 18.0415995 | 4003.863245 | 0.0045 | 0.996 | 1.69E-09 | count | 1 |
| AC005005.3    | 18.0416    | 4003.863903 | 0.0045 | 0.996 | 1.69E-09 | count | 1 |
| AL109811.3    | 18.0415987 | 4003.863629 | 0.0045 | 0.996 | 1.69E-09 | count | 1 |
| AL109659.2    | 18.0415994 | 4003.863739 | 0.0045 | 0.996 | 1.69E-09 | count | 1 |
| AL356488.2    | 18.0415996 | 4003.862752 | 0.0045 | 0.996 | 1.69E-09 | count | 1 |
| PHGDH         | 18.0415991 | 4003.862258 | 0.0045 | 0.996 | 1.69E-09 | count | 1 |
| FAM72C        | 18.0415988 | 4003.863136 | 0.0045 | 0.996 | 1.69E-09 | count | 1 |
| AL359921.2    | 18.0415999 | 4003.863136 | 0.0045 | 0.996 | 1.69E-09 | count | 1 |
| AC098828.2    | 18.0415999 | 4003.863465 | 0.0045 | 0.996 | 1.69E-09 | count | 1 |
| AC018690.1    | 18.0415998 | 4003.863465 | 0.0045 | 0.996 | 1.69E-09 | count | 1 |
| ARHGEF4       | 18.0415988 | 4003.863136 | 0.0045 | 0.996 | 1.69E-09 | count | 1 |
| AC011997.1    | 18.0415996 | 4003.863355 | 0.0045 | 0.996 | 1.69E-09 | count | 1 |
| CCR1          | 18.0415989 | 4003.863519 | 0.0045 | 0.996 | 1.69E-09 | count | 1 |
| AC012557.1    | 18.0415993 | 4003.862697 | 0.0045 | 0.996 | 1.69E-09 | count | 1 |
| KCNAB1        | 18.0415995 | 4003.864013 | 0.0045 | 0.996 | 1.69E-09 | count | 1 |
| SLC7A14       | 18.041599  | 4003.863081 | 0.0045 | 0.996 | 1.69E-09 | count | 1 |
| C1QTNF7       | 18.0415992 | 4003.86341  | 0.0045 | 0.996 | 1.69E-09 | count | 1 |
| AC026726.1    | 18.0415987 | 4003.86319  | 0.0045 | 0.996 | 1.69E-09 | count | 1 |
| PCDHGB2       | 18.0415996 | 4003.862971 | 0.0045 | 0.996 | 1.69E-09 | count | 1 |
| CSF1R         | 18.0415991 | 4003.8633   | 0.0045 | 0.996 | 1.69E-09 | count | 1 |
| FSCN3         | 18.0415993 | 4003.863081 | 0.0045 | 0.996 | 1.69E-09 | count | 1 |
| KEL           | 18.0415992 | 4003.863794 | 0.0045 | 0.996 | 1.69E-09 | count | 1 |
| AL732314.4    | 18.0415992 | 4003.863519 | 0.0045 | 0.996 | 1.69E-09 | count | 1 |
| PHKA1-AS1     | 18.0415992 | 4003.863465 | 0.0045 | 0.996 | 1.69E-09 | count | 1 |
| LINC01285     | 18.0415991 | 4003.86341  | 0.0045 | 0.996 | 1.69E-09 | count | 1 |
| TKTL1         | 18.0415991 | 4003.863245 | 0.0045 | 0.996 | 1.69E-09 | count | 1 |
| TNFRSF10A-AS1 | 18.0415993 | 4003.863355 | 0.0045 | 0.996 | 1.69E-09 | count | 1 |
| ERICD         | 18.0415992 | 4003.863848 | 0.0045 | 0.996 | 1.69E-09 | count | 1 |
| RASEF         | 18.0415989 | 4003.863026 | 0.0045 | 0.996 | 1.69E-09 | count | 1 |
| SHC3          | 18.0415993 | 4003.86341  | 0.0045 | 0.996 | 1.69E-09 | count | 1 |
| LCN8          | 18.0415985 | 4003.863629 | 0.0045 | 0.996 | 1.69E-09 | count | 1 |
| FAM180B       | 18.0415992 | 4003.863245 | 0.0045 | 0.996 | 1.69E-09 | count | 1 |
| AP001267.2    | 18.041599  | 4003.862916 | 0.0045 | 0.996 | 1.69E-09 | count | 1 |

|            |            |             |        |       |          |       |   |
|------------|------------|-------------|--------|-------|----------|-------|---|
| DDX25      | 18.0415991 | 4003.86341  | 0.0045 | 0.996 | 1.69E-09 | count | 1 |
| WDFY4      | 18.0415996 | 4003.863958 | 0.0045 | 0.996 | 1.69E-09 | count | 1 |
| RBM20      | 18.041599  | 4003.863574 | 0.0045 | 0.996 | 1.69E-09 | count | 1 |
| AC005383.1 | 18.0415994 | 4003.863574 | 0.0045 | 0.996 | 1.69E-09 | count | 1 |
| FAM53B-AS1 | 18.0415994 | 4003.863355 | 0.0045 | 0.996 | 1.69E-09 | count | 1 |
| DDX11-AS1  | 18.0415993 | 4003.863355 | 0.0045 | 0.996 | 1.69E-09 | count | 1 |
| AC083805.3 | 18.041599  | 4003.863026 | 0.0045 | 0.996 | 1.69E-09 | count | 1 |
| F10        | 18.0415992 | 4003.862916 | 0.0045 | 0.996 | 1.69E-09 | count | 1 |
| AC004846.2 | 18.0415997 | 4003.863794 | 0.0045 | 0.996 | 1.69E-09 | count | 1 |
| AC079322.1 | 18.0415991 | 4003.863465 | 0.0045 | 0.996 | 1.69E-09 | count | 1 |
| AC002310.2 | 18.0415992 | 4003.863355 | 0.0045 | 0.996 | 1.69E-09 | count | 1 |
| CAPNS2     | 18.0415987 | 4003.86319  | 0.0045 | 0.996 | 1.69E-09 | count | 1 |
| AC026461.3 | 18.0415993 | 4003.863794 | 0.0045 | 0.996 | 1.69E-09 | count | 1 |
| AC005899.6 | 18.0415999 | 4003.864013 | 0.0045 | 0.996 | 1.69E-09 | count | 1 |
| MEIOC      | 18.0415993 | 4003.863629 | 0.0045 | 0.996 | 1.69E-09 | count | 1 |
| AP005671.1 | 18.0415996 | 4003.863136 | 0.0045 | 0.996 | 1.69E-09 | count | 1 |
| AC007998.4 | 18.0415997 | 4003.863848 | 0.0045 | 0.996 | 1.69E-09 | count | 1 |
| AC100847.1 | 18.0415986 | 4003.863519 | 0.0045 | 0.996 | 1.69E-09 | count | 1 |
| PLCG1-AS1  | 18.0415993 | 4003.8633   | 0.0045 | 0.996 | 1.69E-09 | count | 1 |
| OSCAR      | 18.0415992 | 4003.8633   | 0.0045 | 0.996 | 1.69E-09 | count | 1 |
| AC008735.2 | 18.0415992 | 4003.863355 | 0.0045 | 0.996 | 1.69E-09 | count | 1 |
| BAIAP2L2   | 18.0415994 | 4003.863684 | 0.0045 | 0.996 | 1.69E-09 | count | 1 |
| LINC01990  | 18.0415988 | 4003.8633   | 0.0045 | 0.996 | 1.69E-09 | count | 1 |
| AC012640.4 | 18.0415984 | 4003.863739 | 0.0045 | 0.996 | 1.69E-09 | count | 1 |
| AC010343.3 | 18.041599  | 4003.862752 | 0.0045 | 0.996 | 1.69E-09 | count | 1 |
| AL645929.2 | 18.0415986 | 4003.863794 | 0.0045 | 0.996 | 1.69E-09 | count | 1 |
| CA3-AS1    | 18.0415992 | 4003.863519 | 0.0045 | 0.996 | 1.69E-09 | count | 1 |
| CASC18     | 18.0415987 | 4003.864013 | 0.0045 | 0.996 | 1.69E-09 | count | 1 |
| AC026367.1 | 18.041599  | 4003.86341  | 0.0045 | 0.996 | 1.69E-09 | count | 1 |
| AL162574.2 | 18.0415987 | 4003.864397 | 0.0045 | 0.996 | 1.69E-09 | count | 1 |
| FSD2       | 18.041599  | 4003.862587 | 0.0045 | 0.996 | 1.69E-09 | count | 1 |
| CA5A       | 18.041599  | 4003.863958 | 0.0045 | 0.996 | 1.69E-09 | count | 1 |
| AC138028.1 | 18.0415993 | 4003.863629 | 0.0045 | 0.996 | 1.69E-09 | count | 1 |
| LINC00470  | 18.0415987 | 4003.863465 | 0.0045 | 0.996 | 1.69E-09 | count | 1 |
| FAM209B    | 18.0415988 | 4003.863465 | 0.0045 | 0.996 | 1.69E-09 | count | 1 |
| LINC01783  | 18.0415984 | 4003.86319  | 0.0045 | 0.996 | 1.69E-09 | count | 1 |
| FOXD3-AS1  | 18.0415985 | 4003.863574 | 0.0045 | 0.996 | 1.69E-09 | count | 1 |
| NTNG1      | 18.0415983 | 4003.863355 | 0.0045 | 0.996 | 1.69E-09 | count | 1 |
| OR5H14     | 18.041599  | 4003.86319  | 0.0045 | 0.996 | 1.69E-09 | count | 1 |
| CDKL2      | 18.0415984 | 4003.862861 | 0.0045 | 0.996 | 1.69E-09 | count | 1 |
| OSR2       | 18.0415991 | 4003.86341  | 0.0045 | 0.996 | 1.69E-09 | count | 1 |
| AP000781.1 | 18.0415986 | 4003.863245 | 0.0045 | 0.996 | 1.69E-09 | count | 1 |
| LINC02259  | 18.0415986 | 4003.863519 | 0.0045 | 0.996 | 1.69E-09 | count | 1 |
| AC103876.1 | 18.0415982 | 4003.862752 | 0.0045 | 0.996 | 1.69E-09 | count | 1 |
| SEC14L5    | 18.041599  | 4003.86319  | 0.0045 | 0.996 | 1.69E-09 | count | 1 |

|             |            |             |        |       |          |       |   |
|-------------|------------|-------------|--------|-------|----------|-------|---|
| AC093484.3  | 18.0415987 | 4003.863465 | 0.0045 | 0.996 | 1.69E-09 | count | 1 |
| GAS2L2      | 18.0415982 | 4003.863465 | 0.0045 | 0.996 | 1.69E-09 | count | 1 |
| TBC1D3L     | 18.0415981 | 4003.863245 | 0.0045 | 0.996 | 1.69E-09 | count | 1 |
| CSDC2       | 18.0415982 | 4003.862697 | 0.0045 | 0.996 | 1.69E-09 | count | 1 |
| U62317.4    | 18.0415984 | 4003.863794 | 0.0045 | 0.996 | 1.69E-09 | count | 1 |
| AC009975.1  | 17.3463251 | 4002.390864 | 0.0043 | 0.997 | 1.69E-09 | count | 1 |
| AC020634.1  | 17.3463256 | 4002.391438 | 0.0043 | 0.997 | 1.69E-09 | count | 1 |
| MAS1        | 17.3463256 | 4002.391438 | 0.0043 | 0.997 | 1.69E-09 | count | 1 |
| KCNQ1-AS1   | 17.3463254 | 4002.391411 | 0.0043 | 0.997 | 1.69E-09 | count | 1 |
| ANKK1       | 17.3463256 | 4002.391438 | 0.0043 | 0.997 | 1.69E-09 | count | 1 |
| AC016395.1  | 17.3463254 | 4002.391137 | 0.0043 | 0.997 | 1.69E-09 | count | 1 |
| PLA2G4E-AS1 | 17.3463256 | 4002.391438 | 0.0043 | 0.997 | 1.69E-09 | count | 1 |
| BCAR4       | 17.3463256 | 4002.391438 | 0.0043 | 0.997 | 1.69E-09 | count | 1 |
| AC109460.2  | 17.3463253 | 4002.391082 | 0.0043 | 0.997 | 1.69E-09 | count | 1 |
| FAM57B      | 17.3463256 | 4002.39152  | 0.0043 | 0.997 | 1.69E-09 | count | 1 |
| RNFT1-DT    | 17.3463253 | 4002.391082 | 0.0043 | 0.997 | 1.69E-09 | count | 1 |
| DLGAP1-AS4  | 17.3463254 | 4002.391411 | 0.0043 | 0.997 | 1.69E-09 | count | 1 |
| AL049794.1  | 17.3463256 | 4002.391438 | 0.0043 | 0.997 | 1.69E-09 | count | 1 |
| MYLK2       | 17.3463254 | 4002.391411 | 0.0043 | 0.997 | 1.69E-09 | count | 1 |
| FO393400.1  | 17.3463256 | 4002.39152  | 0.0043 | 0.997 | 1.69E-09 | count | 1 |
| AZU1        | 17.3463256 | 4002.391438 | 0.0043 | 0.997 | 1.69E-09 | count | 1 |
| AL591163.1  | 17.3463246 | 4002.39111  | 0.0043 | 0.997 | 1.69E-09 | count | 1 |
| AL139423.1  | 17.3463254 | 4002.39152  | 0.0043 | 0.997 | 1.69E-09 | count | 1 |
| CD164L2     | 17.3463247 | 4002.390973 | 0.0043 | 0.997 | 1.69E-09 | count | 1 |
| GRIK3       | 17.3463248 | 4002.391465 | 0.0043 | 0.997 | 1.69E-09 | count | 1 |
| AC098484.3  | 17.3463254 | 4002.391246 | 0.0043 | 0.997 | 1.69E-09 | count | 1 |
| AL358075.2  | 17.346325  | 4002.390946 | 0.0043 | 0.997 | 1.69E-09 | count | 1 |
| ELAVL4      | 17.3463249 | 4002.391274 | 0.0043 | 0.997 | 1.69E-09 | count | 1 |
| LINC01135   | 17.3463253 | 4002.391356 | 0.0043 | 0.997 | 1.69E-09 | count | 1 |
| AL354872.2  | 17.3463254 | 4002.39152  | 0.0043 | 0.997 | 1.69E-09 | count | 1 |
| AL355816.1  | 17.3463253 | 4002.391274 | 0.0043 | 0.997 | 1.69E-09 | count | 1 |
| C1orf143    | 17.3463249 | 4002.391274 | 0.0043 | 0.997 | 1.69E-09 | count | 1 |
| LYPLAL1-DT  | 17.3463251 | 4002.390946 | 0.0043 | 0.997 | 1.69E-09 | count | 1 |
| AC096642.1  | 17.3463252 | 4002.391219 | 0.0043 | 0.997 | 1.69E-09 | count | 1 |
| AL672291.1  | 17.3463253 | 4002.391164 | 0.0043 | 0.997 | 1.69E-09 | count | 1 |
| ST6GAL2     | 17.3463248 | 4002.391465 | 0.0043 | 0.997 | 1.69E-09 | count | 1 |
| RPRM        | 17.3463252 | 4002.391164 | 0.0043 | 0.997 | 1.69E-09 | count | 1 |
| TMEFF2      | 17.3463248 | 4002.391465 | 0.0043 | 0.997 | 1.69E-09 | count | 1 |
| CCK         | 17.3463254 | 4002.39111  | 0.0043 | 0.997 | 1.69E-09 | count | 1 |
| ZBTB20-AS3  | 17.3463246 | 4002.39111  | 0.0043 | 0.997 | 1.69E-09 | count | 1 |
| IL12A-AS1   | 17.346325  | 4002.391328 | 0.0043 | 0.997 | 1.69E-09 | count | 1 |
| AC009570.1  | 17.3463253 | 4002.391356 | 0.0043 | 0.997 | 1.69E-09 | count | 1 |
| MTTP        | 17.3463248 | 4002.391465 | 0.0043 | 0.997 | 1.69E-09 | count | 1 |
| AC079341.2  | 17.3463253 | 4002.391301 | 0.0043 | 0.997 | 1.69E-09 | count | 1 |
| TRPC3       | 17.3463248 | 4002.391465 | 0.0043 | 0.997 | 1.69E-09 | count | 1 |

|             |            |             |        |       |          |       |   |
|-------------|------------|-------------|--------|-------|----------|-------|---|
| AC107214.2  | 17.3463246 | 4002.39111  | 0.0043 | 0.997 | 1.69E-09 | count | 1 |
| BHMT        | 17.3463252 | 4002.391219 | 0.0043 | 0.997 | 1.69E-09 | count | 1 |
| AC011405.1  | 17.3463255 | 4002.391137 | 0.0043 | 0.997 | 1.69E-09 | count | 1 |
| SLC4A9      | 17.3463254 | 4002.391164 | 0.0043 | 0.997 | 1.69E-09 | count | 1 |
| AC244517.1  | 17.3463253 | 4002.391055 | 0.0043 | 0.997 | 1.69E-09 | count | 1 |
| LINC01962   | 17.3463251 | 4002.391274 | 0.0043 | 0.997 | 1.69E-09 | count | 1 |
| AL031963.1  | 17.3463252 | 4002.390891 | 0.0043 | 0.997 | 1.69E-09 | count | 1 |
| VWDE        | 17.3463253 | 4002.391356 | 0.0043 | 0.997 | 1.69E-09 | count | 1 |
| AC002064.1  | 17.3463249 | 4002.391274 | 0.0043 | 0.997 | 1.69E-09 | count | 1 |
| OR2AE1      | 17.3463251 | 4002.391164 | 0.0043 | 0.997 | 1.69E-09 | count | 1 |
| DOCK4-AS1   | 17.3463251 | 4002.391055 | 0.0043 | 0.997 | 1.69E-09 | count | 1 |
| TRBC2       | 17.3463253 | 4002.391301 | 0.0043 | 0.997 | 1.69E-09 | count | 1 |
| NDP         | 17.3463249 | 4002.391274 | 0.0043 | 0.997 | 1.69E-09 | count | 1 |
| AC231533.1  | 17.3463248 | 4002.391465 | 0.0043 | 0.997 | 1.69E-09 | count | 1 |
| CT55        | 17.3463252 | 4002.391219 | 0.0043 | 0.997 | 1.69E-09 | count | 1 |
| RP1L1       | 17.3463252 | 4002.391219 | 0.0043 | 0.997 | 1.69E-09 | count | 1 |
| AC037459.2  | 17.3463251 | 4002.391164 | 0.0043 | 0.997 | 1.69E-09 | count | 1 |
| AC009686.2  | 17.3463255 | 4002.391438 | 0.0043 | 0.997 | 1.69E-09 | count | 1 |
| AC016405.2  | 17.346325  | 4002.391    | 0.0043 | 0.997 | 1.69E-09 | count | 1 |
| AC087045.2  | 17.3463252 | 4002.391164 | 0.0043 | 0.997 | 1.69E-09 | count | 1 |
| MELK        | 17.346325  | 4002.390946 | 0.0043 | 0.997 | 1.69E-09 | count | 1 |
| FRMPD1      | 17.3463254 | 4002.39152  | 0.0043 | 0.997 | 1.69E-09 | count | 1 |
| ACTL7B      | 17.3463254 | 4002.391137 | 0.0043 | 0.997 | 1.69E-09 | count | 1 |
| AL157938.2  | 17.3463254 | 4002.391137 | 0.0043 | 0.997 | 1.69E-09 | count | 1 |
| OR56B1      | 17.3463252 | 4002.391219 | 0.0043 | 0.997 | 1.69E-09 | count | 1 |
| TUB         | 17.3463249 | 4002.391274 | 0.0043 | 0.997 | 1.69E-09 | count | 1 |
| AP000753.1  | 17.346325  | 4002.390946 | 0.0043 | 0.997 | 1.69E-09 | count | 1 |
| MIR194-2HG  | 17.3463253 | 4002.391301 | 0.0043 | 0.997 | 1.69E-09 | count | 1 |
| TRPC6       | 17.3463248 | 4002.391465 | 0.0043 | 0.997 | 1.69E-09 | count | 1 |
| TP53AIP1    | 17.3463255 | 4002.391301 | 0.0043 | 0.997 | 1.69E-09 | count | 1 |
| OLAH        | 17.346325  | 4002.390946 | 0.0043 | 0.997 | 1.69E-09 | count | 1 |
| SH2D4B      | 17.346325  | 4002.391328 | 0.0043 | 0.997 | 1.69E-09 | count | 1 |
| AL139124.1  | 17.3463252 | 4002.391383 | 0.0043 | 0.997 | 1.69E-09 | count | 1 |
| AL158163.1  | 17.3463246 | 4002.39111  | 0.0043 | 0.997 | 1.69E-09 | count | 1 |
| AC005832.4  | 17.3463252 | 4002.391602 | 0.0043 | 0.997 | 1.69E-09 | count | 1 |
| PLBD1-AS1   | 17.3463252 | 4002.391219 | 0.0043 | 0.997 | 1.69E-09 | count | 1 |
| AC022509.1  | 17.3463252 | 4002.391246 | 0.0043 | 0.997 | 1.69E-09 | count | 1 |
| DENND5B-AS1 | 17.3463251 | 4002.390946 | 0.0043 | 0.997 | 1.69E-09 | count | 1 |
| PKP2        | 17.3463253 | 4002.391055 | 0.0043 | 0.997 | 1.69E-09 | count | 1 |
| LINC02156   | 17.3463252 | 4002.391301 | 0.0043 | 0.997 | 1.69E-09 | count | 1 |
| AC024257.5  | 17.3463251 | 4002.391164 | 0.0043 | 0.997 | 1.69E-09 | count | 1 |
| CYP27B1     | 17.3463252 | 4002.390891 | 0.0043 | 0.997 | 1.69E-09 | count | 1 |
| WSCD2       | 17.346325  | 4002.391219 | 0.0043 | 0.997 | 1.69E-09 | count | 1 |
| MYO1H       | 17.3463246 | 4002.39111  | 0.0043 | 0.997 | 1.69E-09 | count | 1 |
| ACOD1       | 17.3463246 | 4002.39111  | 0.0043 | 0.997 | 1.69E-09 | count | 1 |

|               |            |             |        |       |          |       |   |
|---------------|------------|-------------|--------|-------|----------|-------|---|
| AL136964.1    | 17.3463254 | 4002.391602 | 0.0043 | 0.997 | 1.69E-09 | count | 1 |
| AL161431.1    | 17.3463255 | 4002.391137 | 0.0043 | 0.997 | 1.69E-09 | count | 1 |
| BCL2L2-PABPN1 | 17.3463251 | 4002.391164 | 0.0043 | 0.997 | 1.69E-09 | count | 1 |
| TRIM9         | 17.346325  | 4002.390946 | 0.0043 | 0.997 | 1.69E-09 | count | 1 |
| PWRN4         | 17.3463254 | 4002.391575 | 0.0043 | 0.997 | 1.69E-09 | count | 1 |
| AC090970.2    | 17.3463251 | 4002.390946 | 0.0043 | 0.997 | 1.69E-09 | count | 1 |
| AC009690.2    | 17.3463248 | 4002.391465 | 0.0043 | 0.997 | 1.69E-09 | count | 1 |
| AC140725.1    | 17.3463254 | 4002.39152  | 0.0043 | 0.997 | 1.69E-09 | count | 1 |
| Z69706.1      | 17.3463254 | 4002.39111  | 0.0043 | 0.997 | 1.69E-09 | count | 1 |
| AC009065.3    | 17.3463255 | 4002.391438 | 0.0043 | 0.997 | 1.69E-09 | count | 1 |
| TMC5          | 17.3463252 | 4002.391602 | 0.0043 | 0.997 | 1.69E-09 | count | 1 |
| LCMT1-AS2     | 17.3463253 | 4002.391274 | 0.0043 | 0.997 | 1.69E-09 | count | 1 |
| ATP2A1        | 17.3463253 | 4002.391164 | 0.0043 | 0.997 | 1.69E-09 | count | 1 |
| AC092337.1    | 17.3463254 | 4002.391246 | 0.0043 | 0.997 | 1.69E-09 | count | 1 |
| BEAN1         | 17.3463252 | 4002.391219 | 0.0043 | 0.997 | 1.69E-09 | count | 1 |
| SCIMP         | 17.3463252 | 4002.391301 | 0.0043 | 0.997 | 1.69E-09 | count | 1 |
| AC129492.2    | 17.3463253 | 4002.391411 | 0.0043 | 0.997 | 1.69E-09 | count | 1 |
| AC005224.1    | 17.3463248 | 4002.391465 | 0.0043 | 0.997 | 1.69E-09 | count | 1 |
| CCDC144NL-AS1 | 17.346325  | 4002.390946 | 0.0043 | 0.997 | 1.69E-09 | count | 1 |
| CRYBA1        | 17.3463254 | 4002.39111  | 0.0043 | 0.997 | 1.69E-09 | count | 1 |
| AC004231.1    | 17.3463254 | 4002.39111  | 0.0043 | 0.997 | 1.69E-09 | count | 1 |
| AC007922.1    | 17.3463253 | 4002.391575 | 0.0043 | 0.997 | 1.69E-09 | count | 1 |
| AL021396.1    | 17.3463252 | 4002.391219 | 0.0043 | 0.997 | 1.69E-09 | count | 1 |
| AL050320.1    | 17.3463252 | 4002.390864 | 0.0043 | 0.997 | 1.69E-09 | count | 1 |
| C20orf144     | 17.3463253 | 4002.391301 | 0.0043 | 0.997 | 1.69E-09 | count | 1 |
| TLDC2         | 17.3463252 | 4002.391219 | 0.0043 | 0.997 | 1.69E-09 | count | 1 |
| GTSF1L        | 17.346325  | 4002.391164 | 0.0043 | 0.997 | 1.69E-09 | count | 1 |
| FAM209A       | 17.346325  | 4002.391164 | 0.0043 | 0.997 | 1.69E-09 | count | 1 |
| AC012617.1    | 17.3463253 | 4002.391411 | 0.0043 | 0.997 | 1.69E-09 | count | 1 |
| AC006213.3    | 17.3463251 | 4002.391192 | 0.0043 | 0.997 | 1.69E-09 | count | 1 |
| NAPSA         | 17.3463251 | 4002.391192 | 0.0043 | 0.997 | 1.69E-09 | count | 1 |
| SIGLEC14      | 17.3463253 | 4002.391164 | 0.0043 | 0.997 | 1.69E-09 | count | 1 |
| AC245128.3    | 17.346325  | 4002.391219 | 0.0043 | 0.997 | 1.69E-09 | count | 1 |
| AC000068.1    | 17.3463255 | 4002.391301 | 0.0043 | 0.997 | 1.69E-09 | count | 1 |
| PWP2          | 17.3463252 | 4002.391055 | 0.0043 | 0.997 | 1.69E-09 | count | 1 |
| FAM87B        | 17.3463249 | 4002.391438 | 0.0043 | 0.997 | 1.69E-09 | count | 1 |
| PLCH2         | 17.3463249 | 4002.391055 | 0.0043 | 0.997 | 1.69E-09 | count | 1 |
| Z97987.1      | 17.3463252 | 4002.391192 | 0.0043 | 0.997 | 1.69E-09 | count | 1 |
| AL031731.1    | 17.3463245 | 4002.390973 | 0.0043 | 0.997 | 1.69E-09 | count | 1 |
| SPATA21       | 17.3463244 | 4002.391028 | 0.0043 | 0.997 | 1.69E-09 | count | 1 |
| AKR7A3        | 17.3463248 | 4002.391164 | 0.0043 | 0.997 | 1.69E-09 | count | 1 |
| RHD           | 17.346325  | 4002.391438 | 0.0043 | 0.997 | 1.69E-09 | count | 1 |
| AL513327.2    | 17.346325  | 4002.391137 | 0.0043 | 0.997 | 1.69E-09 | count | 1 |
| ZMYM4-AS1     | 17.3463248 | 4002.391055 | 0.0043 | 0.997 | 1.69E-09 | count | 1 |
| ORC1          | 17.3463248 | 4002.391055 | 0.0043 | 0.997 | 1.69E-09 | count | 1 |

|            |            |             |        |       |          |       |   |
|------------|------------|-------------|--------|-------|----------|-------|---|
| ST6GALNAC5 | 17.3463251 | 4002.391028 | 0.0043 | 0.997 | 1.69E-09 | count | 1 |
| LINC01362  | 17.346325  | 4002.391383 | 0.0043 | 0.997 | 1.69E-09 | count | 1 |
| AC239798.2 | 17.3463249 | 4002.390918 | 0.0043 | 0.997 | 1.69E-09 | count | 1 |
| AC239804.1 | 17.346325  | 4002.391356 | 0.0043 | 0.997 | 1.69E-09 | count | 1 |
| THEM5      | 17.3463248 | 4002.391328 | 0.0043 | 0.997 | 1.69E-09 | count | 1 |
| AL365181.3 | 17.346325  | 4002.391192 | 0.0043 | 0.997 | 1.69E-09 | count | 1 |
| ATP1A2     | 17.346325  | 4002.391356 | 0.0043 | 0.997 | 1.69E-09 | count | 1 |
| AL831711.1 | 17.3463249 | 4002.391328 | 0.0043 | 0.997 | 1.69E-09 | count | 1 |
| CCDC181    | 17.346325  | 4002.391465 | 0.0043 | 0.997 | 1.69E-09 | count | 1 |
| C1orf105   | 17.3463248 | 4002.391055 | 0.0043 | 0.997 | 1.69E-09 | count | 1 |
| PAPPA2     | 17.346325  | 4002.391383 | 0.0043 | 0.997 | 1.69E-09 | count | 1 |
| BRINP3     | 17.346325  | 4002.391246 | 0.0043 | 0.997 | 1.69E-09 | count | 1 |
| TNNT2      | 17.3463248 | 4002.391055 | 0.0043 | 0.997 | 1.69E-09 | count | 1 |
| ELF3       | 17.3463248 | 4002.391055 | 0.0043 | 0.997 | 1.69E-09 | count | 1 |
| IL10       | 17.3463247 | 4002.39111  | 0.0043 | 0.997 | 1.69E-09 | count | 1 |
| LINC01814  | 17.3463248 | 4002.391465 | 0.0043 | 0.997 | 1.69E-09 | count | 1 |
| OSR1       | 17.3463248 | 4002.391055 | 0.0043 | 0.997 | 1.69E-09 | count | 1 |
| AC012354.1 | 17.3463252 | 4002.39152  | 0.0043 | 0.997 | 1.69E-09 | count | 1 |
| STPG4      | 17.3463248 | 4002.391164 | 0.0043 | 0.997 | 1.69E-09 | count | 1 |
| AC011306.1 | 17.3463248 | 4002.390918 | 0.0043 | 0.997 | 1.69E-09 | count | 1 |
| AC016747.2 | 17.3463249 | 4002.391055 | 0.0043 | 0.997 | 1.69E-09 | count | 1 |
| AC008074.1 | 17.3463247 | 4002.391164 | 0.0043 | 0.997 | 1.69E-09 | count | 1 |
| FAM178B    | 17.3463252 | 4002.391192 | 0.0043 | 0.997 | 1.69E-09 | count | 1 |
| ZAP70      | 17.346325  | 4002.391246 | 0.0043 | 0.997 | 1.69E-09 | count | 1 |
| LINC01114  | 17.3463252 | 4002.391192 | 0.0043 | 0.997 | 1.69E-09 | count | 1 |
| AC016910.1 | 17.3463248 | 4002.391055 | 0.0043 | 0.997 | 1.69E-09 | count | 1 |
| KCNJ3      | 17.3463248 | 4002.391055 | 0.0043 | 0.997 | 1.69E-09 | count | 1 |
| KLHL41     | 17.3463249 | 4002.390918 | 0.0043 | 0.997 | 1.69E-09 | count | 1 |
| CHRNA1     | 17.346325  | 4002.390864 | 0.0043 | 0.997 | 1.69E-09 | count | 1 |
| AC009948.3 | 17.3463246 | 4002.391    | 0.0043 | 0.997 | 1.69E-09 | count | 1 |
| ZNF804A    | 17.3463248 | 4002.391328 | 0.0043 | 0.997 | 1.69E-09 | count | 1 |
| LINC01792  | 17.3463248 | 4002.391    | 0.0043 | 0.997 | 1.69E-09 | count | 1 |
| ABCB6      | 17.3463249 | 4002.39111  | 0.0043 | 0.997 | 1.69E-09 | count | 1 |
| AC053503.2 | 17.346325  | 4002.391192 | 0.0043 | 0.997 | 1.69E-09 | count | 1 |
| PID1       | 17.346325  | 4002.391    | 0.0043 | 0.997 | 1.69E-09 | count | 1 |
| KCNJ13     | 17.346325  | 4002.391192 | 0.0043 | 0.997 | 1.69E-09 | count | 1 |
| SAG        | 17.3463252 | 4002.39111  | 0.0043 | 0.997 | 1.69E-09 | count | 1 |
| GBX2       | 17.3463248 | 4002.391465 | 0.0043 | 0.997 | 1.69E-09 | count | 1 |
| GPR35      | 17.3463246 | 4002.391028 | 0.0043 | 0.997 | 1.69E-09 | count | 1 |
| AC090948.1 | 17.3463252 | 4002.391192 | 0.0043 | 0.997 | 1.69E-09 | count | 1 |
| LINC02084  | 17.346325  | 4002.391246 | 0.0043 | 0.997 | 1.69E-09 | count | 1 |
| AC112220.3 | 17.3463248 | 4002.390782 | 0.0043 | 0.997 | 1.69E-09 | count | 1 |
| ARPP21     | 17.3463248 | 4002.391328 | 0.0043 | 0.997 | 1.69E-09 | count | 1 |
| CDHR4      | 17.346325  | 4002.39152  | 0.0043 | 0.997 | 1.69E-09 | count | 1 |
| IL17RB     | 17.3463251 | 4002.391    | 0.0043 | 0.997 | 1.69E-09 | count | 1 |

|             |            |             |        |       |          |       |   |
|-------------|------------|-------------|--------|-------|----------|-------|---|
| LINC02044   | 17.3463249 | 4002.390809 | 0.0043 | 0.997 | 1.69E-09 | count | 1 |
| AC112503.1  | 17.3463248 | 4002.391055 | 0.0043 | 0.997 | 1.69E-09 | count | 1 |
| AGTR1       | 17.3463252 | 4002.39111  | 0.0043 | 0.997 | 1.69E-09 | count | 1 |
| AC078795.1  | 17.3463248 | 4002.391082 | 0.0043 | 0.997 | 1.69E-09 | count | 1 |
| AC078795.3  | 17.3463252 | 4002.391411 | 0.0043 | 0.997 | 1.69E-09 | count | 1 |
| AC007823.1  | 17.3463252 | 4002.391274 | 0.0043 | 0.997 | 1.69E-09 | count | 1 |
| AC090425.2  | 17.346325  | 4002.391219 | 0.0043 | 0.997 | 1.69E-09 | count | 1 |
| AC069431.1  | 17.3463252 | 4002.391246 | 0.0043 | 0.997 | 1.69E-09 | count | 1 |
| HTR3C       | 17.3463248 | 4002.391411 | 0.0043 | 0.997 | 1.69E-09 | count | 1 |
| LINC01840   | 17.3463247 | 4002.391219 | 0.0043 | 0.997 | 1.69E-09 | count | 1 |
| AC139887.1  | 17.3463248 | 4002.390918 | 0.0043 | 0.997 | 1.69E-09 | count | 1 |
| CFAP99      | 17.3463246 | 4002.391055 | 0.0043 | 0.997 | 1.69E-09 | count | 1 |
| HGFAC       | 17.3463246 | 4002.391055 | 0.0043 | 0.997 | 1.69E-09 | count | 1 |
| AC025539.1  | 17.3463248 | 4002.391055 | 0.0043 | 0.997 | 1.69E-09 | count | 1 |
| NCAPG       | 17.3463244 | 4002.390918 | 0.0043 | 0.997 | 1.69E-09 | count | 1 |
| RHOH        | 17.346325  | 4002.390973 | 0.0043 | 0.997 | 1.69E-09 | count | 1 |
| AC106052.1  | 17.3463247 | 4002.391328 | 0.0043 | 0.997 | 1.69E-09 | count | 1 |
| AC108067.1  | 17.3463252 | 4002.39111  | 0.0043 | 0.997 | 1.69E-09 | count | 1 |
| CXXC4-AS1   | 17.3463252 | 4002.39111  | 0.0043 | 0.997 | 1.69E-09 | count | 1 |
| LRIT3       | 17.3463247 | 4002.390918 | 0.0043 | 0.997 | 1.69E-09 | count | 1 |
| LINC01091   | 17.3463253 | 4002.391219 | 0.0043 | 0.997 | 1.69E-09 | count | 1 |
| AC097658.2  | 17.3463249 | 4002.390918 | 0.0043 | 0.997 | 1.69E-09 | count | 1 |
| SMARCA5-AS1 | 17.346325  | 4002.390836 | 0.0043 | 0.997 | 1.69E-09 | count | 1 |
| AC110813.1  | 17.3463252 | 4002.39111  | 0.0043 | 0.997 | 1.69E-09 | count | 1 |
| AC079298.3  | 17.3463249 | 4002.391356 | 0.0043 | 0.997 | 1.69E-09 | count | 1 |
| LINC02269   | 17.3463252 | 4002.390973 | 0.0043 | 0.997 | 1.69E-09 | count | 1 |
| HPGD        | 17.3463248 | 4002.391164 | 0.0043 | 0.997 | 1.69E-09 | count | 1 |
| AC093801.1  | 17.3463251 | 4002.391602 | 0.0043 | 0.997 | 1.69E-09 | count | 1 |
| CDH18       | 17.3463248 | 4002.391164 | 0.0043 | 0.997 | 1.69E-09 | count | 1 |
| PURPL       | 17.3463246 | 4002.391055 | 0.0043 | 0.997 | 1.69E-09 | count | 1 |
| AC114956.1  | 17.3463248 | 4002.391164 | 0.0043 | 0.997 | 1.69E-09 | count | 1 |
| AC008966.2  | 17.3463249 | 4002.391028 | 0.0043 | 0.997 | 1.69E-09 | count | 1 |
| LINC02101   | 17.3463253 | 4002.391164 | 0.0043 | 0.997 | 1.69E-09 | count | 1 |
| GAPT        | 17.3463248 | 4002.390864 | 0.0043 | 0.997 | 1.69E-09 | count | 1 |
| AC026725.1  | 17.3463252 | 4002.391    | 0.0043 | 0.997 | 1.69E-09 | count | 1 |
| LINC01949   | 17.3463248 | 4002.391055 | 0.0043 | 0.997 | 1.69E-09 | count | 1 |
| AC010395.1  | 17.3463247 | 4002.391028 | 0.0043 | 0.997 | 1.69E-09 | count | 1 |
| CATSPER3    | 17.3463252 | 4002.391192 | 0.0043 | 0.997 | 1.69E-09 | count | 1 |
| AC008438.1  | 17.3463248 | 4002.390918 | 0.0043 | 0.997 | 1.69E-09 | count | 1 |
| PCDHA3      | 17.346325  | 4002.391328 | 0.0043 | 0.997 | 1.69E-09 | count | 1 |
| AL445309.1  | 17.3463247 | 4002.391246 | 0.0043 | 0.997 | 1.69E-09 | count | 1 |
| ELOVL2      | 17.3463248 | 4002.391055 | 0.0043 | 0.997 | 1.69E-09 | count | 1 |
| AL031775.2  | 17.346325  | 4002.39152  | 0.0043 | 0.997 | 1.69E-09 | count | 1 |
| POM121L2    | 17.3463252 | 4002.391274 | 0.0043 | 0.997 | 1.69E-09 | count | 1 |
| DDX39B-AS1  | 17.346325  | 4002.390973 | 0.0043 | 0.997 | 1.69E-09 | count | 1 |



|             |            |             |        |       |          |       |   |
|-------------|------------|-------------|--------|-------|----------|-------|---|
| TCP11       | 17.3463252 | 4002.39111  | 0.0043 | 0.997 | 1.69E-09 | count | 1 |
| ARMC12      | 17.346325  | 4002.391164 | 0.0043 | 0.997 | 1.69E-09 | count | 1 |
| CRIP3       | 17.346325  | 4002.391137 | 0.0043 | 0.997 | 1.69E-09 | count | 1 |
| POLH-AS1    | 17.3463252 | 4002.39111  | 0.0043 | 0.997 | 1.69E-09 | count | 1 |
| AL359715.2  | 17.346325  | 4002.391137 | 0.0043 | 0.997 | 1.69E-09 | count | 1 |
| SLC16A10    | 17.3463249 | 4002.391137 | 0.0043 | 0.997 | 1.69E-09 | count | 1 |
| WISP3       | 17.3463248 | 4002.390864 | 0.0043 | 0.997 | 1.69E-09 | count | 1 |
| AL034349.1  | 17.3463246 | 4002.390727 | 0.0043 | 0.997 | 1.69E-09 | count | 1 |
| ULBP3       | 17.3463248 | 4002.391055 | 0.0043 | 0.997 | 1.69E-09 | count | 1 |
| C6orf99     | 17.3463252 | 4002.391192 | 0.0043 | 0.997 | 1.69E-09 | count | 1 |
| CCR6        | 17.3463252 | 4002.39111  | 0.0043 | 0.997 | 1.69E-09 | count | 1 |
| KIF25-AS1   | 17.3463248 | 4002.391055 | 0.0043 | 0.997 | 1.69E-09 | count | 1 |
| AC073957.1  | 17.3463248 | 4002.390973 | 0.0043 | 0.997 | 1.69E-09 | count | 1 |
| ANKRD61     | 17.3463249 | 4002.391438 | 0.0043 | 0.997 | 1.69E-09 | count | 1 |
| GRID2IP     | 17.3463251 | 4002.391465 | 0.0043 | 0.997 | 1.69E-09 | count | 1 |
| AC010082.1  | 17.3463248 | 4002.391164 | 0.0043 | 0.997 | 1.69E-09 | count | 1 |
| ANLN        | 17.3463249 | 4002.391301 | 0.0043 | 0.997 | 1.69E-09 | count | 1 |
| GCK         | 17.3463248 | 4002.391055 | 0.0043 | 0.997 | 1.69E-09 | count | 1 |
| DDC         | 17.346325  | 4002.391    | 0.0043 | 0.997 | 1.69E-09 | count | 1 |
| AC068533.4  | 17.3463248 | 4002.390864 | 0.0043 | 0.997 | 1.69E-09 | count | 1 |
| SPDYE5      | 17.3463248 | 4002.391246 | 0.0043 | 0.997 | 1.69E-09 | count | 1 |
| HEPACAM2    | 17.346325  | 4002.391    | 0.0043 | 0.997 | 1.69E-09 | count | 1 |
| ASB4        | 17.3463251 | 4002.391465 | 0.0043 | 0.997 | 1.69E-09 | count | 1 |
| EFCAB10     | 17.3463248 | 4002.391055 | 0.0043 | 0.997 | 1.69E-09 | count | 1 |
| LINC01393   | 17.346325  | 4002.391219 | 0.0043 | 0.997 | 1.69E-09 | count | 1 |
| AC006333.1  | 17.3463251 | 4002.391301 | 0.0043 | 0.997 | 1.69E-09 | count | 1 |
| STRIP2      | 17.3463249 | 4002.391192 | 0.0043 | 0.997 | 1.69E-09 | count | 1 |
| AC091736.1  | 17.3463252 | 4002.391383 | 0.0043 | 0.997 | 1.69E-09 | count | 1 |
| AC115618.1  | 17.3463252 | 4002.391192 | 0.0043 | 0.997 | 1.69E-09 | count | 1 |
| CCNB3       | 17.346325  | 4002.391137 | 0.0043 | 0.997 | 1.69E-09 | count | 1 |
| LINC00891   | 17.3463249 | 4002.391    | 0.0043 | 0.997 | 1.69E-09 | count | 1 |
| NCBP2L      | 17.3463248 | 4002.391465 | 0.0043 | 0.997 | 1.69E-09 | count | 1 |
| LHFPL1      | 17.3463252 | 4002.391164 | 0.0043 | 0.997 | 1.69E-09 | count | 1 |
| SH2D1A      | 17.3463248 | 4002.391055 | 0.0043 | 0.997 | 1.69E-09 | count | 1 |
| SASH3       | 17.3463252 | 4002.391192 | 0.0043 | 0.997 | 1.69E-09 | count | 1 |
| ARHGAP36    | 17.3463252 | 4002.39111  | 0.0043 | 0.997 | 1.69E-09 | count | 1 |
| LINC00632   | 17.346325  | 4002.391383 | 0.0043 | 0.997 | 1.69E-09 | count | 1 |
| PNMA6A      | 17.3463248 | 4002.391328 | 0.0043 | 0.997 | 1.69E-09 | count | 1 |
| AC245140.1  | 17.346325  | 4002.391192 | 0.0043 | 0.997 | 1.69E-09 | count | 1 |
| SMIM9       | 17.3463251 | 4002.391    | 0.0043 | 0.997 | 1.69E-09 | count | 1 |
| AC129915.3  | 17.3463248 | 4002.391274 | 0.0043 | 0.997 | 1.69E-09 | count | 1 |
| KBTBD11-OT1 | 17.3463251 | 4002.39111  | 0.0043 | 0.997 | 1.69E-09 | count | 1 |
| FGF20       | 17.3463252 | 4002.391192 | 0.0043 | 0.997 | 1.69E-09 | count | 1 |
| AC027117.2  | 17.3463248 | 4002.391246 | 0.0043 | 0.997 | 1.69E-09 | count | 1 |
| FGF17       | 17.3463246 | 4002.390918 | 0.0043 | 0.997 | 1.69E-09 | count | 1 |

|            |            |             |        |       |          |       |   |
|------------|------------|-------------|--------|-------|----------|-------|---|
| LGI3       | 17.3463248 | 4002.391438 | 0.0043 | 0.997 | 1.69E-09 | count | 1 |
| SCARA5     | 17.3463248 | 4002.391246 | 0.0043 | 0.997 | 1.69E-09 | count | 1 |
| AC022915.2 | 17.3463252 | 4002.391575 | 0.0043 | 0.997 | 1.69E-09 | count | 1 |
| AC079089.1 | 17.3463252 | 4002.39111  | 0.0043 | 0.997 | 1.69E-09 | count | 1 |
| AC034114.2 | 17.3463247 | 4002.390973 | 0.0043 | 0.997 | 1.69E-09 | count | 1 |
| SAMD12-AS1 | 17.3463249 | 4002.391055 | 0.0043 | 0.997 | 1.69E-09 | count | 1 |
| MAPK15     | 17.346325  | 4002.391055 | 0.0043 | 0.997 | 1.69E-09 | count | 1 |
| LINC01388  | 17.3463246 | 4002.390918 | 0.0043 | 0.997 | 1.69E-09 | count | 1 |
| AL359076.1 | 17.3463249 | 4002.391137 | 0.0043 | 0.997 | 1.69E-09 | count | 1 |
| ANKRD18B   | 17.3463249 | 4002.391055 | 0.0043 | 0.997 | 1.69E-09 | count | 1 |
| AL354989.1 | 17.3463252 | 4002.391328 | 0.0043 | 0.997 | 1.69E-09 | count | 1 |
| KIF24      | 17.3463248 | 4002.391164 | 0.0043 | 0.997 | 1.69E-09 | count | 1 |
| CNTFR      | 17.3463248 | 4002.391246 | 0.0043 | 0.997 | 1.69E-09 | count | 1 |
| AL591368.1 | 17.3463248 | 4002.391246 | 0.0043 | 0.997 | 1.69E-09 | count | 1 |
| AL353764.1 | 17.3463249 | 4002.390918 | 0.0043 | 0.997 | 1.69E-09 | count | 1 |
| RNF183     | 17.346325  | 4002.391356 | 0.0043 | 0.997 | 1.69E-09 | count | 1 |
| CFAP157    | 17.3463247 | 4002.391192 | 0.0043 | 0.997 | 1.69E-09 | count | 1 |
| AL158151.4 | 17.3463248 | 4002.391    | 0.0043 | 0.997 | 1.69E-09 | count | 1 |
| BX649632.1 | 17.3463249 | 4002.391137 | 0.0043 | 0.997 | 1.69E-09 | count | 1 |
| AC136475.3 | 17.3463249 | 4002.391301 | 0.0043 | 0.997 | 1.69E-09 | count | 1 |
| IFITM10    | 17.3463251 | 4002.391219 | 0.0043 | 0.997 | 1.69E-09 | count | 1 |
| OLFML1     | 17.346325  | 4002.391383 | 0.0043 | 0.997 | 1.69E-09 | count | 1 |
| AMPD3      | 17.3463248 | 4002.391    | 0.0043 | 0.997 | 1.69E-09 | count | 1 |
| LINC02547  | 17.3463249 | 4002.391356 | 0.0043 | 0.997 | 1.69E-09 | count | 1 |
| ABTB2      | 17.3463252 | 4002.39111  | 0.0043 | 0.997 | 1.69E-09 | count | 1 |
| F2         | 17.3463248 | 4002.391411 | 0.0043 | 0.997 | 1.69E-09 | count | 1 |
| MYBPC3     | 17.3463246 | 4002.391137 | 0.0043 | 0.997 | 1.69E-09 | count | 1 |
| CCDC87     | 17.346325  | 4002.390973 | 0.0043 | 0.997 | 1.69E-09 | count | 1 |
| AC004923.4 | 17.3463248 | 4002.391301 | 0.0043 | 0.997 | 1.69E-09 | count | 1 |
| DNAJB13    | 17.3463248 | 4002.391    | 0.0043 | 0.997 | 1.69E-09 | count | 1 |
| AP002812.2 | 17.3463251 | 4002.391356 | 0.0043 | 0.997 | 1.69E-09 | count | 1 |
| CNTN5      | 17.3463249 | 4002.391164 | 0.0043 | 0.997 | 1.69E-09 | count | 1 |
| APOA1-AS   | 17.3463252 | 4002.391192 | 0.0043 | 0.997 | 1.69E-09 | count | 1 |
| SCN4B      | 17.346325  | 4002.391383 | 0.0043 | 0.997 | 1.69E-09 | count | 1 |
| AP004147.1 | 17.346325  | 4002.391219 | 0.0043 | 0.997 | 1.69E-09 | count | 1 |
| AP003501.1 | 17.3463254 | 4002.391246 | 0.0043 | 0.997 | 1.69E-09 | count | 1 |
| GATA3-AS1  | 17.346325  | 4002.391383 | 0.0043 | 0.997 | 1.69E-09 | count | 1 |
| MKX        | 17.3463249 | 4002.391356 | 0.0043 | 0.997 | 1.69E-09 | count | 1 |
| ANTXRL     | 17.3463252 | 4002.390864 | 0.0043 | 0.997 | 1.69E-09 | count | 1 |
| LINC00843  | 17.3463249 | 4002.391    | 0.0043 | 0.997 | 1.69E-09 | count | 1 |
| ATOH7      | 17.3463248 | 4002.390918 | 0.0043 | 0.997 | 1.69E-09 | count | 1 |
| AL450311.2 | 17.3463246 | 4002.391438 | 0.0043 | 0.997 | 1.69E-09 | count | 1 |
| MSS51      | 17.3463251 | 4002.390891 | 0.0043 | 0.997 | 1.69E-09 | count | 1 |
| AL138767.1 | 17.346325  | 4002.391219 | 0.0043 | 0.997 | 1.69E-09 | count | 1 |
| AL389885.1 | 17.3463248 | 4002.391164 | 0.0043 | 0.997 | 1.69E-09 | count | 1 |

|            |            |             |        |       |          |       |   |
|------------|------------|-------------|--------|-------|----------|-------|---|
| CYP2C8     | 17.3463248 | 4002.391246 | 0.0043 | 0.997 | 1.69E-09 | count | 1 |
| HOGA1      | 17.3463248 | 4002.391192 | 0.0043 | 0.997 | 1.69E-09 | count | 1 |
| HPSE2      | 17.346325  | 4002.391356 | 0.0043 | 0.997 | 1.69E-09 | count | 1 |
| EDRF1-AS1  | 17.3463251 | 4002.390891 | 0.0043 | 0.997 | 1.69E-09 | count | 1 |
| AL162274.1 | 17.3463252 | 4002.391    | 0.0043 | 0.997 | 1.69E-09 | count | 1 |
| AL451069.2 | 17.3463248 | 4002.391055 | 0.0043 | 0.997 | 1.69E-09 | count | 1 |
| AC006064.1 | 17.3463252 | 4002.391192 | 0.0043 | 0.997 | 1.69E-09 | count | 1 |
| PIANP      | 17.346325  | 4002.391356 | 0.0043 | 0.997 | 1.69E-09 | count | 1 |
| AC125494.2 | 17.346325  | 4002.391137 | 0.0043 | 0.997 | 1.69E-09 | count | 1 |
| AC092111.2 | 17.3463247 | 4002.391383 | 0.0043 | 0.997 | 1.69E-09 | count | 1 |
| TAS2R43    | 17.346325  | 4002.391246 | 0.0043 | 0.997 | 1.69E-09 | count | 1 |
| AC010168.1 | 17.3463252 | 4002.39111  | 0.0043 | 0.997 | 1.69E-09 | count | 1 |
| AC092794.1 | 17.3463252 | 4002.39111  | 0.0043 | 0.997 | 1.69E-09 | count | 1 |
| C12orf54   | 17.3463251 | 4002.391082 | 0.0043 | 0.997 | 1.69E-09 | count | 1 |
| HIGD1C     | 17.3463252 | 4002.39111  | 0.0043 | 0.997 | 1.69E-09 | count | 1 |
| AC021072.1 | 17.3463248 | 4002.390918 | 0.0043 | 0.997 | 1.69E-09 | count | 1 |
| PPP1R1A    | 17.346325  | 4002.391137 | 0.0043 | 0.997 | 1.69E-09 | count | 1 |
| AC009779.3 | 17.3463247 | 4002.391301 | 0.0043 | 0.997 | 1.69E-09 | count | 1 |
| SLC39A5    | 17.3463252 | 4002.39111  | 0.0043 | 0.997 | 1.69E-09 | count | 1 |
| NXPH4      | 17.3463252 | 4002.391192 | 0.0043 | 0.997 | 1.69E-09 | count | 1 |
| TPH2       | 17.3463248 | 4002.390864 | 0.0043 | 0.997 | 1.69E-09 | count | 1 |
| AC011611.4 | 17.346325  | 4002.390836 | 0.0043 | 0.997 | 1.69E-09 | count | 1 |
| AC107032.2 | 17.3463249 | 4002.391    | 0.0043 | 0.997 | 1.69E-09 | count | 1 |
| AC124784.1 | 17.346325  | 4002.390891 | 0.0043 | 0.997 | 1.69E-09 | count | 1 |
| C12orf50   | 17.3463247 | 4002.391137 | 0.0043 | 0.997 | 1.69E-09 | count | 1 |
| AC090001.1 | 17.3463246 | 4002.391    | 0.0043 | 0.997 | 1.69E-09 | count | 1 |
| AC026367.2 | 17.3463249 | 4002.391164 | 0.0043 | 0.997 | 1.69E-09 | count | 1 |
| LINC00507  | 17.3463251 | 4002.391356 | 0.0043 | 0.997 | 1.69E-09 | count | 1 |
| AC131212.1 | 17.3463248 | 4002.39111  | 0.0043 | 0.997 | 1.69E-09 | count | 1 |
| PSPC1-AS2  | 17.3463251 | 4002.391    | 0.0043 | 0.997 | 1.69E-09 | count | 1 |
| GJB6       | 17.3463251 | 4002.391028 | 0.0043 | 0.997 | 1.69E-09 | count | 1 |
| AL138966.2 | 17.3463249 | 4002.391246 | 0.0043 | 0.997 | 1.69E-09 | count | 1 |
| SERPINE3   | 17.3463247 | 4002.391246 | 0.0043 | 0.997 | 1.69E-09 | count | 1 |
| AL445209.1 | 17.3463252 | 4002.391082 | 0.0043 | 0.997 | 1.69E-09 | count | 1 |
| ATP11A-AS1 | 17.3463252 | 4002.391219 | 0.0043 | 0.997 | 1.69E-09 | count | 1 |
| RNASE2     | 17.3463252 | 4002.391328 | 0.0043 | 0.997 | 1.69E-09 | count | 1 |
| TRAV22     | 17.346325  | 4002.39111  | 0.0043 | 0.997 | 1.69E-09 | count | 1 |
| AL136018.1 | 17.346325  | 4002.391192 | 0.0043 | 0.997 | 1.69E-09 | count | 1 |
| AL121790.1 | 17.346325  | 4002.391356 | 0.0043 | 0.997 | 1.69E-09 | count | 1 |
| AL049870.3 | 17.3463246 | 4002.391137 | 0.0043 | 0.997 | 1.69E-09 | count | 1 |
| LINC00640  | 17.3463252 | 4002.39111  | 0.0043 | 0.997 | 1.69E-09 | count | 1 |
| ADAM20     | 17.3463252 | 4002.391028 | 0.0043 | 0.997 | 1.69E-09 | count | 1 |
| RGS6       | 17.346325  | 4002.391028 | 0.0043 | 0.997 | 1.69E-09 | count | 1 |
| AF111169.3 | 17.3463251 | 4002.391411 | 0.0043 | 0.997 | 1.69E-09 | count | 1 |
| DIO2-AS1   | 17.3463252 | 4002.391164 | 0.0043 | 0.997 | 1.69E-09 | count | 1 |

|               |            |             |        |       |          |       |   |
|---------------|------------|-------------|--------|-------|----------|-------|---|
| BCL11B        | 17.3463249 | 4002.391164 | 0.0043 | 0.997 | 1.69E-09 | count | 1 |
| PLD4          | 17.3463252 | 4002.39111  | 0.0043 | 0.997 | 1.69E-09 | count | 1 |
| AC012414.5    | 17.3463249 | 4002.390809 | 0.0043 | 0.997 | 1.69E-09 | count | 1 |
| AC087473.1    | 17.3463248 | 4002.390918 | 0.0043 | 0.997 | 1.69E-09 | count | 1 |
| C15orf62      | 17.3463248 | 4002.391055 | 0.0043 | 0.997 | 1.69E-09 | count | 1 |
| AC020661.1    | 17.3463252 | 4002.39111  | 0.0043 | 0.997 | 1.69E-09 | count | 1 |
| JMJD7-PLA2G4B | 17.3463248 | 4002.391    | 0.0043 | 0.997 | 1.69E-09 | count | 1 |
| AC084757.4    | 17.3463252 | 4002.391192 | 0.0043 | 0.997 | 1.69E-09 | count | 1 |
| PYGO1         | 17.3463252 | 4002.39111  | 0.0043 | 0.997 | 1.69E-09 | count | 1 |
| IGDCC4        | 17.3463248 | 4002.391192 | 0.0043 | 0.997 | 1.69E-09 | count | 1 |
| LINC02204     | 17.3463252 | 4002.39111  | 0.0043 | 0.997 | 1.69E-09 | count | 1 |
| AC090826.1    | 17.346325  | 4002.391055 | 0.0043 | 0.997 | 1.69E-09 | count | 1 |
| CYP1A1        | 17.3463249 | 4002.391055 | 0.0043 | 0.997 | 1.69E-09 | count | 1 |
| AC105020.1    | 17.3463252 | 4002.39111  | 0.0043 | 0.997 | 1.69E-09 | count | 1 |
| TMEM266       | 17.3463248 | 4002.391055 | 0.0043 | 0.997 | 1.69E-09 | count | 1 |
| AC021483.2    | 17.3463248 | 4002.391055 | 0.0043 | 0.997 | 1.69E-09 | count | 1 |
| SH3GL3        | 17.3463254 | 4002.391246 | 0.0043 | 0.997 | 1.69E-09 | count | 1 |
| AC087286.1    | 17.3463246 | 4002.390782 | 0.0043 | 0.997 | 1.69E-09 | count | 1 |
| TLL13P        | 17.3463252 | 4002.391    | 0.0043 | 0.997 | 1.69E-09 | count | 1 |
| AC021422.1    | 17.3463252 | 4002.391192 | 0.0043 | 0.997 | 1.69E-09 | count | 1 |
| AC090907.1    | 17.3463252 | 4002.391192 | 0.0043 | 0.997 | 1.69E-09 | count | 1 |
| AL022341.1    | 17.3463246 | 4002.390918 | 0.0043 | 0.997 | 1.69E-09 | count | 1 |
| AC093525.3    | 17.3463248 | 4002.391055 | 0.0043 | 0.997 | 1.69E-09 | count | 1 |
| AC141586.2    | 17.3463249 | 4002.391137 | 0.0043 | 0.997 | 1.69E-09 | count | 1 |
| AC004233.4    | 17.3463248 | 4002.391055 | 0.0043 | 0.997 | 1.69E-09 | count | 1 |
| ZSCAN10       | 17.3463248 | 4002.391055 | 0.0043 | 0.997 | 1.69E-09 | count | 1 |
| LINC02177     | 17.3463251 | 4002.391356 | 0.0043 | 0.997 | 1.69E-09 | count | 1 |
| NPIPB6        | 17.3463245 | 4002.391246 | 0.0043 | 0.997 | 1.69E-09 | count | 1 |
| MYLK3         | 17.3463246 | 4002.391    | 0.0043 | 0.997 | 1.69E-09 | count | 1 |
| AC018845.3    | 17.3463249 | 4002.391356 | 0.0043 | 0.997 | 1.69E-09 | count | 1 |
| ITFG1-AS1     | 17.346325  | 4002.391328 | 0.0043 | 0.997 | 1.69E-09 | count | 1 |
| NKD1          | 17.3463248 | 4002.391246 | 0.0043 | 0.997 | 1.69E-09 | count | 1 |
| AC007728.2    | 17.3463248 | 4002.391028 | 0.0043 | 0.997 | 1.69E-09 | count | 1 |
| AC106779.1    | 17.3463247 | 4002.391301 | 0.0043 | 0.997 | 1.69E-09 | count | 1 |
| AC018552.3    | 17.3463249 | 4002.390727 | 0.0043 | 0.997 | 1.69E-09 | count | 1 |
| LINC01572     | 17.3463248 | 4002.391164 | 0.0043 | 0.997 | 1.69E-09 | count | 1 |
| AC009108.3    | 17.3463247 | 4002.391137 | 0.0043 | 0.997 | 1.69E-09 | count | 1 |
| AC010538.1    | 17.3463249 | 4002.391301 | 0.0043 | 0.997 | 1.69E-09 | count | 1 |
| AC116914.2    | 17.3463251 | 4002.391246 | 0.0043 | 0.997 | 1.69E-09 | count | 1 |
| TEKT1         | 17.3463252 | 4002.39111  | 0.0043 | 0.997 | 1.69E-09 | count | 1 |
| AC135178.1    | 17.3463253 | 4002.391192 | 0.0043 | 0.997 | 1.69E-09 | count | 1 |
| AC104982.1    | 17.3463248 | 4002.391055 | 0.0043 | 0.997 | 1.69E-09 | count | 1 |
| AC104984.1    | 17.3463249 | 4002.391274 | 0.0043 | 0.997 | 1.69E-09 | count | 1 |
| TMEM132E      | 17.3463248 | 4002.39111  | 0.0043 | 0.997 | 1.69E-09 | count | 1 |
| AC004223.4    | 17.3463248 | 4002.391055 | 0.0043 | 0.997 | 1.69E-09 | count | 1 |

|             |            |             |        |       |          |       |   |
|-------------|------------|-------------|--------|-------|----------|-------|---|
| UNC45B      | 17.3463248 | 4002.391055 | 0.0043 | 0.997 | 1.69E-09 | count | 1 |
| RDM1        | 17.3463244 | 4002.390782 | 0.0043 | 0.997 | 1.69E-09 | count | 1 |
| CCL15-CCL14 | 17.3463248 | 4002.391192 | 0.0043 | 0.997 | 1.69E-09 | count | 1 |
| IKZF3       | 17.3463248 | 4002.391055 | 0.0043 | 0.997 | 1.69E-09 | count | 1 |
| HAP1        | 17.346325  | 4002.391328 | 0.0043 | 0.997 | 1.69E-09 | count | 1 |
| ASB16       | 17.3463246 | 4002.391055 | 0.0043 | 0.997 | 1.69E-09 | count | 1 |
| SPATA32     | 17.3463248 | 4002.391055 | 0.0043 | 0.997 | 1.69E-09 | count | 1 |
| CR936218.1  | 17.3463244 | 4002.390918 | 0.0043 | 0.997 | 1.69E-09 | count | 1 |
| AC015795.1  | 17.3463253 | 4002.391465 | 0.0043 | 0.997 | 1.69E-09 | count | 1 |
| AC004707.1  | 17.3463252 | 4002.39111  | 0.0043 | 0.997 | 1.69E-09 | count | 1 |
| AC015845.2  | 17.3463248 | 4002.391082 | 0.0043 | 0.997 | 1.69E-09 | count | 1 |
| RBFOX3      | 17.3463251 | 4002.391    | 0.0043 | 0.997 | 1.69E-09 | count | 1 |
| AC110285.3  | 17.3463251 | 4002.391219 | 0.0043 | 0.997 | 1.69E-09 | count | 1 |
| AC129510.2  | 17.3463248 | 4002.391055 | 0.0043 | 0.997 | 1.69E-09 | count | 1 |
| AP000919.4  | 17.3463248 | 4002.391164 | 0.0043 | 0.997 | 1.69E-09 | count | 1 |
| AP001496.1  | 17.3463248 | 4002.391164 | 0.0043 | 0.997 | 1.69E-09 | count | 1 |
| AP001793.2  | 17.3463251 | 4002.391082 | 0.0043 | 0.997 | 1.69E-09 | count | 1 |
| AC090772.3  | 17.3463248 | 4002.391055 | 0.0043 | 0.997 | 1.69E-09 | count | 1 |
| DSCAS       | 17.3463246 | 4002.391055 | 0.0043 | 0.997 | 1.69E-09 | count | 1 |
| DTNA        | 17.346325  | 4002.391356 | 0.0043 | 0.997 | 1.69E-09 | count | 1 |
| DCC         | 17.3463246 | 4002.391055 | 0.0043 | 0.997 | 1.69E-09 | count | 1 |
| AL049712.1  | 17.3463246 | 4002.390918 | 0.0043 | 0.997 | 1.69E-09 | count | 1 |
| AL121890.3  | 17.3463248 | 4002.390918 | 0.0043 | 0.997 | 1.69E-09 | count | 1 |
| AL121890.2  | 17.3463248 | 4002.391028 | 0.0043 | 0.997 | 1.69E-09 | count | 1 |
| SLC24A3     | 17.3463249 | 4002.391164 | 0.0043 | 0.997 | 1.69E-09 | count | 1 |
| FAM182B     | 17.3463252 | 4002.391164 | 0.0043 | 0.997 | 1.69E-09 | count | 1 |
| AL110115.2  | 17.3463249 | 4002.391219 | 0.0043 | 0.997 | 1.69E-09 | count | 1 |
| MYH7B       | 17.3463249 | 4002.390918 | 0.0043 | 0.997 | 1.69E-09 | count | 1 |
| AL035420.2  | 17.3463246 | 4002.391055 | 0.0043 | 0.997 | 1.69E-09 | count | 1 |
| VSTM2L      | 17.3463247 | 4002.391328 | 0.0043 | 0.997 | 1.69E-09 | count | 1 |
| HNF4A       | 17.3463246 | 4002.390782 | 0.0043 | 0.997 | 1.69E-09 | count | 1 |
| STK4-AS1    | 17.3463248 | 4002.391164 | 0.0043 | 0.997 | 1.69E-09 | count | 1 |
| TNNC2       | 17.3463249 | 4002.390918 | 0.0043 | 0.997 | 1.69E-09 | count | 1 |
| AL096828.3  | 17.3463249 | 4002.391246 | 0.0043 | 0.997 | 1.69E-09 | count | 1 |
| AL121829.2  | 17.3463248 | 4002.391055 | 0.0043 | 0.997 | 1.69E-09 | count | 1 |
| LINC00266-1 | 17.3463247 | 4002.391    | 0.0043 | 0.997 | 1.69E-09 | count | 1 |
| ZNF556      | 17.346325  | 4002.391602 | 0.0043 | 0.997 | 1.69E-09 | count | 1 |
| AC007292.1  | 17.3463248 | 4002.391055 | 0.0043 | 0.997 | 1.69E-09 | count | 1 |
| AC011444.1  | 17.3463246 | 4002.391192 | 0.0043 | 0.997 | 1.69E-09 | count | 1 |
| AC011471.2  | 17.346325  | 4002.391602 | 0.0043 | 0.997 | 1.69E-09 | count | 1 |
| MCEMP1      | 17.3463248 | 4002.391    | 0.0043 | 0.997 | 1.69E-09 | count | 1 |
| OR7C1       | 17.346325  | 4002.390809 | 0.0043 | 0.997 | 1.69E-09 | count | 1 |
| CCDC194     | 17.3463246 | 4002.39111  | 0.0043 | 0.997 | 1.69E-09 | count | 1 |
| AC010319.3  | 17.346325  | 4002.391328 | 0.0043 | 0.997 | 1.69E-09 | count | 1 |
| AC007192.2  | 17.3463248 | 4002.391219 | 0.0043 | 0.997 | 1.69E-09 | count | 1 |

|              |            |             |        |       |          |       |   |
|--------------|------------|-------------|--------|-------|----------|-------|---|
| TM6SF2       | 17.3463252 | 4002.39111  | 0.0043 | 0.997 | 1.69E-09 | count | 1 |
| AC010300.1   | 17.3463247 | 4002.391028 | 0.0043 | 0.997 | 1.69E-09 | count | 1 |
| AC011443.1   | 17.3463249 | 4002.391328 | 0.0043 | 0.997 | 1.69E-09 | count | 1 |
| GNG8         | 17.346325  | 4002.391356 | 0.0043 | 0.997 | 1.69E-09 | count | 1 |
| AC010519.1   | 17.3463249 | 4002.391493 | 0.0043 | 0.997 | 1.69E-09 | count | 1 |
| NOP53-AS1    | 17.3463249 | 4002.390727 | 0.0043 | 0.997 | 1.69E-09 | count | 1 |
| SLC17A7      | 17.3463248 | 4002.391328 | 0.0043 | 0.997 | 1.69E-09 | count | 1 |
| ZNF534       | 17.3463248 | 4002.391055 | 0.0043 | 0.997 | 1.69E-09 | count | 1 |
| COX6B2       | 17.3463251 | 4002.391082 | 0.0043 | 0.997 | 1.69E-09 | count | 1 |
| AC010522.1   | 17.3463248 | 4002.391055 | 0.0043 | 0.997 | 1.69E-09 | count | 1 |
| LINC00266-4P | 17.346325  | 4002.391246 | 0.0043 | 0.997 | 1.69E-09 | count | 1 |
| AC016027.1   | 17.3463248 | 4002.391028 | 0.0043 | 0.997 | 1.69E-09 | count | 1 |
| PRODH        | 17.346325  | 4002.391055 | 0.0043 | 0.997 | 1.69E-09 | count | 1 |
| AC007663.3   | 17.3463252 | 4002.39111  | 0.0043 | 0.997 | 1.69E-09 | count | 1 |
| AC245060.6   | 17.3463252 | 4002.391192 | 0.0043 | 0.997 | 1.69E-09 | count | 1 |
| LINC02556    | 17.346325  | 4002.391    | 0.0043 | 0.997 | 1.69E-09 | count | 1 |
| VPREB3       | 17.3463249 | 4002.391055 | 0.0043 | 0.997 | 1.69E-09 | count | 1 |
| AC253536.6   | 17.3463252 | 4002.391328 | 0.0043 | 0.997 | 1.69E-09 | count | 1 |
| SUSD2        | 17.3463248 | 4002.391411 | 0.0043 | 0.997 | 1.69E-09 | count | 1 |
| GAL3ST1      | 17.346325  | 4002.391246 | 0.0043 | 0.997 | 1.69E-09 | count | 1 |
| IL2RB        | 17.3463244 | 4002.391028 | 0.0043 | 0.997 | 1.69E-09 | count | 1 |
| Z83847.1     | 17.3463252 | 4002.39111  | 0.0043 | 0.997 | 1.69E-09 | count | 1 |
| AL022238.4   | 17.3463252 | 4002.39111  | 0.0043 | 0.997 | 1.69E-09 | count | 1 |
| PHF21B       | 17.3463247 | 4002.390918 | 0.0043 | 0.997 | 1.69E-09 | count | 1 |
| AL023802.1   | 17.3463248 | 4002.391055 | 0.0043 | 0.997 | 1.69E-09 | count | 1 |
| FP236383.2   | 17.3463249 | 4002.391055 | 0.0043 | 0.997 | 1.69E-09 | count | 1 |
| LINC01668    | 17.3463252 | 4002.39111  | 0.0043 | 0.997 | 1.69E-09 | count | 1 |
| LINC01679    | 17.3463252 | 4002.39111  | 0.0043 | 0.997 | 1.69E-09 | count | 1 |
| AP001059.3   | 17.3463252 | 4002.39111  | 0.0043 | 0.997 | 1.69E-09 | count | 1 |
| ADGRB2       | 17.3463246 | 4002.390836 | 0.0043 | 0.997 | 1.69E-09 | count | 1 |
| AL139158.2   | 17.3463243 | 4002.390946 | 0.0043 | 0.997 | 1.69E-09 | count | 1 |
| AL450468.2   | 17.3463247 | 4002.390809 | 0.0043 | 0.997 | 1.69E-09 | count | 1 |
| LINC01719    | 17.3463247 | 4002.391301 | 0.0043 | 0.997 | 1.69E-09 | count | 1 |
| CGN          | 17.3463244 | 4002.390918 | 0.0043 | 0.997 | 1.69E-09 | count | 1 |
| LRRC71       | 17.3463244 | 4002.3907   | 0.0043 | 0.997 | 1.69E-09 | count | 1 |
| CCDC190      | 17.3463249 | 4002.390918 | 0.0043 | 0.997 | 1.69E-09 | count | 1 |
| LAX1         | 17.3463247 | 4002.391274 | 0.0043 | 0.997 | 1.69E-09 | count | 1 |
| AL359921.1   | 17.3463247 | 4002.390809 | 0.0043 | 0.997 | 1.69E-09 | count | 1 |
| VSNL1        | 17.3463246 | 4002.39111  | 0.0043 | 0.997 | 1.69E-09 | count | 1 |
| ABCG5        | 17.3463245 | 4002.390918 | 0.0043 | 0.997 | 1.69E-09 | count | 1 |
| AC007389.5   | 17.3463247 | 4002.390946 | 0.0043 | 0.997 | 1.69E-09 | count | 1 |
| DQX1         | 17.3463246 | 4002.3907   | 0.0043 | 0.997 | 1.69E-09 | count | 1 |
| SH2D6        | 17.3463245 | 4002.390782 | 0.0043 | 0.997 | 1.69E-09 | count | 1 |
| POU3F3       | 17.3463243 | 4002.390946 | 0.0043 | 0.997 | 1.69E-09 | count | 1 |
| AC105760.1   | 17.3463242 | 4002.39111  | 0.0043 | 0.997 | 1.69E-09 | count | 1 |

|            |            |             |        |       |          |       |   |
|------------|------------|-------------|--------|-------|----------|-------|---|
| ERFE       | 17.3463246 | 4002.390836 | 0.0043 | 0.997 | 1.69E-09 | count | 1 |
| AC098479.1 | 17.3463247 | 4002.39111  | 0.0043 | 0.997 | 1.69E-09 | count | 1 |
| LINC00870  | 17.3463243 | 4002.390946 | 0.0043 | 0.997 | 1.69E-09 | count | 1 |
| PLCXD2     | 17.3463247 | 4002.391137 | 0.0043 | 0.997 | 1.69E-09 | count | 1 |
| TIGIT      | 17.3463247 | 4002.390809 | 0.0043 | 0.997 | 1.69E-09 | count | 1 |
| TP63       | 17.3463247 | 4002.390809 | 0.0043 | 0.997 | 1.69E-09 | count | 1 |
| AC027607.1 | 17.3463248 | 4002.391164 | 0.0043 | 0.997 | 1.69E-09 | count | 1 |
| AC096734.2 | 17.3463246 | 4002.391055 | 0.0043 | 0.997 | 1.69E-09 | count | 1 |
| GYPA       | 17.3463247 | 4002.390836 | 0.0043 | 0.997 | 1.69E-09 | count | 1 |
| C5orf67    | 17.3463246 | 4002.391055 | 0.0043 | 0.997 | 1.69E-09 | count | 1 |
| LINC01170  | 17.3463247 | 4002.391082 | 0.0043 | 0.997 | 1.69E-09 | count | 1 |
| MATR3      | 17.3463246 | 4002.391137 | 0.0043 | 0.997 | 1.69E-09 | count | 1 |
| LTA        | 17.3463246 | 4002.390782 | 0.0043 | 0.997 | 1.69E-09 | count | 1 |
| GUCA1B     | 17.3463245 | 4002.390973 | 0.0043 | 0.997 | 1.69E-09 | count | 1 |
| AL356234.2 | 17.3463244 | 4002.391219 | 0.0043 | 0.997 | 1.69E-09 | count | 1 |
| ECT2L      | 17.3463249 | 4002.391301 | 0.0043 | 0.997 | 1.69E-09 | count | 1 |
| LINC01447  | 17.3463245 | 4002.391028 | 0.0043 | 0.997 | 1.69E-09 | count | 1 |
| AC073842.2 | 17.3463247 | 4002.391082 | 0.0043 | 0.997 | 1.69E-09 | count | 1 |
| AC092849.1 | 17.3463247 | 4002.39111  | 0.0043 | 0.997 | 1.69E-09 | count | 1 |
| AC073314.1 | 17.3463244 | 4002.391082 | 0.0043 | 0.997 | 1.69E-09 | count | 1 |
| VCX3B      | 17.3463244 | 4002.391082 | 0.0043 | 0.997 | 1.69E-09 | count | 1 |
| MAP3K15    | 17.3463248 | 4002.391164 | 0.0043 | 0.997 | 1.69E-09 | count | 1 |
| CENPI      | 17.3463247 | 4002.391246 | 0.0043 | 0.997 | 1.69E-09 | count | 1 |
| ARMCX3-AS1 | 17.3463248 | 4002.391164 | 0.0043 | 0.997 | 1.69E-09 | count | 1 |
| LINC00894  | 17.3463246 | 4002.391246 | 0.0043 | 0.997 | 1.69E-09 | count | 1 |
| AC037459.4 | 17.3463246 | 4002.391055 | 0.0043 | 0.997 | 1.69E-09 | count | 1 |
| AC026979.1 | 17.3463245 | 4002.390946 | 0.0043 | 0.997 | 1.69E-09 | count | 1 |
| AC068389.4 | 17.3463248 | 4002.391028 | 0.0043 | 0.997 | 1.69E-09 | count | 1 |
| CLVS1      | 17.3463248 | 4002.391246 | 0.0043 | 0.997 | 1.69E-09 | count | 1 |
| GPT        | 17.3463246 | 4002.390782 | 0.0043 | 0.997 | 1.69E-09 | count | 1 |
| ORM1       | 17.3463247 | 4002.390809 | 0.0043 | 0.997 | 1.69E-09 | count | 1 |
| LCN12      | 17.3463244 | 4002.390891 | 0.0043 | 0.997 | 1.69E-09 | count | 1 |
| SLC1A2     | 17.3463246 | 4002.391137 | 0.0043 | 0.997 | 1.69E-09 | count | 1 |
| AP003086.3 | 17.3463245 | 4002.391219 | 0.0043 | 0.997 | 1.69E-09 | count | 1 |
| AP001825.1 | 17.3463246 | 4002.391055 | 0.0043 | 0.997 | 1.69E-09 | count | 1 |
| AP000936.1 | 17.3463244 | 4002.390918 | 0.0043 | 0.997 | 1.69E-09 | count | 1 |
| NEBL-AS1   | 17.3463248 | 4002.391246 | 0.0043 | 0.997 | 1.69E-09 | count | 1 |
| AL645634.2 | 17.3463244 | 4002.391    | 0.0043 | 0.997 | 1.69E-09 | count | 1 |
| LINC00595  | 17.3463249 | 4002.39111  | 0.0043 | 0.997 | 1.69E-09 | count | 1 |
| DNMBP-AS1  | 17.3463248 | 4002.391082 | 0.0043 | 0.997 | 1.69E-09 | count | 1 |
| BCL2L14    | 17.3463245 | 4002.391465 | 0.0043 | 0.997 | 1.69E-09 | count | 1 |
| AC087257.1 | 17.3463247 | 4002.391082 | 0.0043 | 0.997 | 1.69E-09 | count | 1 |
| AC084032.1 | 17.3463244 | 4002.390891 | 0.0043 | 0.997 | 1.69E-09 | count | 1 |
| AC010205.1 | 17.3463248 | 4002.391465 | 0.0043 | 0.997 | 1.69E-09 | count | 1 |
| AL590096.1 | 17.3463247 | 4002.39111  | 0.0043 | 0.997 | 1.69E-09 | count | 1 |

|            |            |             |        |       |          |       |   |
|------------|------------|-------------|--------|-------|----------|-------|---|
| AL161668.3 | 17.3463246 | 4002.3907   | 0.0043 | 0.997 | 1.69E-09 | count | 1 |
| AL121594.1 | 17.3463246 | 4002.391055 | 0.0043 | 0.997 | 1.69E-09 | count | 1 |
| AL162311.1 | 17.3463248 | 4002.391164 | 0.0043 | 0.997 | 1.69E-09 | count | 1 |
| GOLGA8S    | 17.3463244 | 4002.390809 | 0.0043 | 0.997 | 1.69E-09 | count | 1 |
| CCNB2      | 17.3463248 | 4002.391356 | 0.0043 | 0.997 | 1.69E-09 | count | 1 |
| AC036108.2 | 17.3463246 | 4002.390918 | 0.0043 | 0.997 | 1.69E-09 | count | 1 |
| AL031705.1 | 17.3463246 | 4002.391    | 0.0043 | 0.997 | 1.69E-09 | count | 1 |
| AC009065.8 | 17.3463245 | 4002.390946 | 0.0043 | 0.997 | 1.69E-09 | count | 1 |
| MTRNR2L4   | 17.3463248 | 4002.391356 | 0.0043 | 0.997 | 1.69E-09 | count | 1 |
| AC138932.5 | 17.3463244 | 4002.391164 | 0.0043 | 0.997 | 1.69E-09 | count | 1 |
| LINC02137  | 17.3463247 | 4002.390946 | 0.0043 | 0.997 | 1.69E-09 | count | 1 |
| AC009095.1 | 17.3463246 | 4002.391137 | 0.0043 | 0.997 | 1.69E-09 | count | 1 |
| P2RX1      | 17.3463241 | 4002.390645 | 0.0043 | 0.997 | 1.69E-09 | count | 1 |
| CLEC10A    | 17.3463242 | 4002.39111  | 0.0043 | 0.997 | 1.69E-09 | count | 1 |
| AC005695.3 | 17.3463247 | 4002.39111  | 0.0043 | 0.997 | 1.69E-09 | count | 1 |
| AC127537.1 | 17.3463244 | 4002.391137 | 0.0043 | 0.997 | 1.69E-09 | count | 1 |
| AC006441.4 | 17.3463247 | 4002.390918 | 0.0043 | 0.997 | 1.69E-09 | count | 1 |
| AC005180.1 | 17.3463248 | 4002.391246 | 0.0043 | 0.997 | 1.69E-09 | count | 1 |
| AC004687.1 | 17.3463245 | 4002.390864 | 0.0043 | 0.997 | 1.69E-09 | count | 1 |
| GPR142     | 17.3463244 | 4002.391055 | 0.0043 | 0.997 | 1.69E-09 | count | 1 |
| LINC01254  | 17.3463246 | 4002.391    | 0.0043 | 0.997 | 1.69E-09 | count | 1 |
| CIDEA      | 17.3463247 | 4002.391301 | 0.0043 | 0.997 | 1.69E-09 | count | 1 |
| AL121753.1 | 17.3463246 | 4002.390782 | 0.0043 | 0.997 | 1.69E-09 | count | 1 |
| FO393401.1 | 17.3463247 | 4002.390946 | 0.0043 | 0.997 | 1.69E-09 | count | 1 |
| BIRC7      | 17.3463246 | 4002.3907   | 0.0043 | 0.997 | 1.69E-09 | count | 1 |
| MATK       | 17.3463246 | 4002.390809 | 0.0043 | 0.997 | 1.69E-09 | count | 1 |
| AC022098.2 | 17.346325  | 4002.391137 | 0.0043 | 0.997 | 1.69E-09 | count | 1 |
| LINC00664  | 17.3463246 | 4002.391055 | 0.0043 | 0.997 | 1.69E-09 | count | 1 |
| AC010271.2 | 17.3463249 | 4002.391137 | 0.0043 | 0.997 | 1.69E-09 | count | 1 |
| AC011466.1 | 17.3463244 | 4002.391164 | 0.0043 | 0.997 | 1.69E-09 | count | 1 |
| KIR2DL4    | 17.3463249 | 4002.39111  | 0.0043 | 0.997 | 1.69E-09 | count | 1 |
| BRSK1      | 17.3463244 | 4002.390891 | 0.0043 | 0.997 | 1.69E-09 | count | 1 |
| AL022313.2 | 17.3463249 | 4002.391356 | 0.0043 | 0.997 | 1.69E-09 | count | 1 |
| AP001432.1 | 17.3463246 | 4002.390782 | 0.0043 | 0.997 | 1.69E-09 | count | 1 |
| LINC00313  | 17.3463249 | 4002.390918 | 0.0043 | 0.997 | 1.69E-09 | count | 1 |
| LINC00844  | 18.92534   | 3970.265366 | 0.0048 | 0.996 | 1.69E-09 | count | 1 |
| LHFPL4     | 18.9253393 | 3970.26426  | 0.0048 | 0.996 | 1.69E-09 | count | 1 |
| NANOGNB    | 18.9253395 | 3970.264813 | 0.0048 | 0.996 | 1.69E-09 | count | 1 |
| DNAH10OS   | 18.9253395 | 3970.264813 | 0.0048 | 0.996 | 1.69E-09 | count | 1 |
| AC106886.5 | 18.9253395 | 3970.264813 | 0.0048 | 0.996 | 1.69E-09 | count | 1 |
| AC090617.3 | 18.9253393 | 3970.264979 | 0.0048 | 0.996 | 1.69E-09 | count | 1 |
| AD000671.3 | 18.9253388 | 3970.264094 | 0.0048 | 0.996 | 1.69E-09 | count | 1 |
| KCNK17     | 18.9253389 | 3970.265919 | 0.0048 | 0.996 | 1.69E-09 | count | 1 |
| AL138899.1 | 18.9253384 | 3970.2652   | 0.0048 | 0.996 | 1.69E-09 | count | 1 |
| AK5        | 18.9253383 | 3970.264758 | 0.0048 | 0.996 | 1.69E-09 | count | 1 |



|             |            |             |        |       |          |       |   |
|-------------|------------|-------------|--------|-------|----------|-------|---|
| IGKV1-5     | 18.9253379 | 3970.264371 | 0.0048 | 0.996 | 1.69E-09 | count | 1 |
| C12orf42    | 18.9253379 | 3970.264371 | 0.0048 | 0.996 | 1.69E-09 | count | 1 |
| AC010422.2  | 18.9253381 | 3970.264758 | 0.0048 | 0.996 | 1.69E-09 | count | 1 |
| LINC01562   | 18.9231442 | 2800.276759 | 0.0068 | 0.995 | 1.69E-09 | count | 1 |
| DSCAML1     | 18.9231441 | 2800.276837 | 0.0068 | 0.995 | 1.69E-09 | count | 1 |
| IGLV1-51    | 18.9231441 | 2800.276837 | 0.0068 | 0.995 | 1.69E-09 | count | 1 |
| AC009226.1  | 18.9231426 | 2800.276214 | 0.0068 | 0.995 | 1.69E-09 | count | 1 |
| SIDT1       | 18.9231442 | 2800.276681 | 0.0068 | 0.995 | 1.69E-09 | count | 1 |
| ANKRD20A4   | 18.9231439 | 2800.276603 | 0.0068 | 0.995 | 1.69E-09 | count | 1 |
| AC091057.3  | 18.9231432 | 2800.275669 | 0.0068 | 0.995 | 1.69E-09 | count | 1 |
| AL096701.3  | 18.9231437 | 2800.276097 | 0.0068 | 0.995 | 1.69E-09 | count | 1 |
| GPRIN2      | 18.9231432 | 2800.276487 | 0.0068 | 0.995 | 1.69E-09 | count | 1 |
| DISP3       | 18.9231424 | 2800.276409 | 0.0068 | 0.995 | 1.69E-09 | count | 1 |
| AC084035.1  | 18.9231423 | 2800.275397 | 0.0068 | 0.995 | 1.69E-09 | count | 1 |
| RNF133      | 18.9231424 | 2800.275786 | 0.0068 | 0.995 | 1.69E-09 | count | 1 |
| AFF2        | 18.9231435 | 2800.275708 | 0.0068 | 0.995 | 1.69E-09 | count | 1 |
| MYH3        | 18.9231425 | 2800.276136 | 0.0068 | 0.995 | 1.69E-09 | count | 1 |
| STARD6      | 18.9231424 | 2800.276954 | 0.0068 | 0.995 | 1.69E-09 | count | 1 |
| HAPLN1      | 18.9231414 | 2800.276058 | 0.0068 | 0.995 | 1.69E-09 | count | 1 |
| PLXNB3      | 18.9231419 | 2800.276214 | 0.0068 | 0.995 | 1.69E-09 | count | 1 |
| AL031847.1  | 18.2260961 | 2798.965808 | 0.0065 | 0.995 | 1.69E-09 | count | 1 |
| BEST4       | 18.2260967 | 2798.966389 | 0.0065 | 0.995 | 1.69E-09 | count | 1 |
| ZRANB2-AS1  | 18.2260965 | 2798.966176 | 0.0065 | 0.995 | 1.69E-09 | count | 1 |
| LINC01708   | 18.2260962 | 2798.966389 | 0.0065 | 0.995 | 1.69E-09 | count | 1 |
| AL139011.2  | 18.2260962 | 2798.966292 | 0.0065 | 0.995 | 1.69E-09 | count | 1 |
| Z99943.1    | 18.2260958 | 2798.966137 | 0.0065 | 0.995 | 1.69E-09 | count | 1 |
| AL590723.1  | 18.2260963 | 2798.965905 | 0.0065 | 0.995 | 1.69E-09 | count | 1 |
| ACTA1       | 18.2260965 | 2798.966079 | 0.0065 | 0.995 | 1.69E-09 | count | 1 |
| BX323046.1  | 18.2260961 | 2798.966079 | 0.0065 | 0.995 | 1.69E-09 | count | 1 |
| AC007378.1  | 18.2260963 | 2798.966157 | 0.0065 | 0.995 | 1.69E-09 | count | 1 |
| LINC01829   | 18.2260961 | 2798.966312 | 0.0065 | 0.995 | 1.69E-09 | count | 1 |
| LRRTM4      | 18.2260962 | 2798.966157 | 0.0065 | 0.995 | 1.69E-09 | count | 1 |
| ST3GAL5-AS1 | 18.2260962 | 2798.966079 | 0.0065 | 0.995 | 1.69E-09 | count | 1 |
| AC005237.1  | 18.2260964 | 2798.966312 | 0.0065 | 0.995 | 1.69E-09 | count | 1 |
| ZNF197-AS1  | 18.2260961 | 2798.965808 | 0.0065 | 0.995 | 1.69E-09 | count | 1 |
| AC096887.1  | 18.226096  | 2798.966118 | 0.0065 | 0.995 | 1.69E-09 | count | 1 |
| YEATS2-AS1  | 18.2260961 | 2798.966137 | 0.0065 | 0.995 | 1.69E-09 | count | 1 |
| ATP13A4     | 18.226096  | 2798.966137 | 0.0065 | 0.995 | 1.69E-09 | count | 1 |
| AC046143.2  | 18.2260963 | 2798.966234 | 0.0065 | 0.995 | 1.69E-09 | count | 1 |
| RBM47       | 18.2260963 | 2798.966137 | 0.0065 | 0.995 | 1.69E-09 | count | 1 |
| AC095060.1  | 18.2260963 | 2798.966002 | 0.0065 | 0.995 | 1.69E-09 | count | 1 |
| DAPP1       | 18.2260963 | 2798.966002 | 0.0065 | 0.995 | 1.69E-09 | count | 1 |
| PITX2       | 18.2260963 | 2798.965963 | 0.0065 | 0.995 | 1.69E-09 | count | 1 |
| TTC29       | 18.2260963 | 2798.965905 | 0.0065 | 0.995 | 1.69E-09 | count | 1 |
| C5orf66     | 18.2260961 | 2798.966273 | 0.0065 | 0.995 | 1.69E-09 | count | 1 |

|              |            |             |        |       |          |       |   |
|--------------|------------|-------------|--------|-------|----------|-------|---|
| NBAT1        | 18.2260961 | 2798.966312 | 0.0065 | 0.995 | 1.69E-09 | count | 1 |
| TBX18        | 18.2260963 | 2798.966079 | 0.0065 | 0.995 | 1.69E-09 | count | 1 |
| AL589826.2   | 18.2260961 | 2798.966292 | 0.0065 | 0.995 | 1.69E-09 | count | 1 |
| AL023284.4   | 18.2260963 | 2798.966176 | 0.0065 | 0.995 | 1.69E-09 | count | 1 |
| LINC02528    | 18.2260961 | 2798.966157 | 0.0065 | 0.995 | 1.69E-09 | count | 1 |
| AL596442.2   | 18.2260963 | 2798.966195 | 0.0065 | 0.995 | 1.69E-09 | count | 1 |
| AL078605.1   | 18.2260963 | 2798.966157 | 0.0065 | 0.995 | 1.69E-09 | count | 1 |
| SCIN         | 18.2260963 | 2798.966079 | 0.0065 | 0.995 | 1.69E-09 | count | 1 |
| AC105446.1   | 18.2260965 | 2798.96606  | 0.0065 | 0.995 | 1.69E-09 | count | 1 |
| SSMEM1       | 18.2260965 | 2798.966195 | 0.0065 | 0.995 | 1.69E-09 | count | 1 |
| AC092198.1   | 18.2260964 | 2798.965982 | 0.0065 | 0.995 | 1.69E-09 | count | 1 |
| TMEM255A     | 18.226096  | 2798.966021 | 0.0065 | 0.995 | 1.69E-09 | count | 1 |
| AF131215.7   | 18.2260965 | 2798.966118 | 0.0065 | 0.995 | 1.69E-09 | count | 1 |
| LZTS1        | 18.2260963 | 2798.966079 | 0.0065 | 0.995 | 1.69E-09 | count | 1 |
| AC010834.3   | 18.2260961 | 2798.966157 | 0.0065 | 0.995 | 1.69E-09 | count | 1 |
| KCNS2        | 18.2260963 | 2798.965905 | 0.0065 | 0.995 | 1.69E-09 | count | 1 |
| AC103853.1   | 18.2260963 | 2798.966176 | 0.0065 | 0.995 | 1.69E-09 | count | 1 |
| RSPO2        | 18.2260963 | 2798.966195 | 0.0065 | 0.995 | 1.69E-09 | count | 1 |
| AC084116.3   | 18.2260963 | 2798.966002 | 0.0065 | 0.995 | 1.69E-09 | count | 1 |
| EQTN         | 18.2260961 | 2798.965808 | 0.0065 | 0.995 | 1.69E-09 | count | 1 |
| DNM1         | 18.2260959 | 2798.966079 | 0.0065 | 0.995 | 1.69E-09 | count | 1 |
| CFAP77       | 18.2260963 | 2798.966002 | 0.0065 | 0.995 | 1.69E-09 | count | 1 |
| BX649601.1   | 18.2260963 | 2798.96604  | 0.0065 | 0.995 | 1.69E-09 | count | 1 |
| AC069287.2   | 18.2260967 | 2798.966195 | 0.0065 | 0.995 | 1.69E-09 | count | 1 |
| HBG2         | 18.2260962 | 2798.96604  | 0.0065 | 0.995 | 1.69E-09 | count | 1 |
| GIF          | 18.2260962 | 2798.966157 | 0.0065 | 0.995 | 1.69E-09 | count | 1 |
| MYRF         | 18.2260962 | 2798.966079 | 0.0065 | 0.995 | 1.69E-09 | count | 1 |
| HRASLS2      | 18.2260963 | 2798.966079 | 0.0065 | 0.995 | 1.69E-09 | count | 1 |
| AP000769.3   | 18.2260961 | 2798.966137 | 0.0065 | 0.995 | 1.69E-09 | count | 1 |
| OR2AT4       | 18.226096  | 2798.966292 | 0.0065 | 0.995 | 1.69E-09 | count | 1 |
| AP002360.3   | 18.2260965 | 2798.966137 | 0.0065 | 0.995 | 1.69E-09 | count | 1 |
| TENM4        | 18.2260959 | 2798.966118 | 0.0065 | 0.995 | 1.69E-09 | count | 1 |
| NAALAD2      | 18.2260962 | 2798.966234 | 0.0065 | 0.995 | 1.69E-09 | count | 1 |
| ST14         | 18.2260962 | 2798.966254 | 0.0065 | 0.995 | 1.69E-09 | count | 1 |
| ADAMTS8      | 18.2260963 | 2798.966079 | 0.0065 | 0.995 | 1.69E-09 | count | 1 |
| AL157834.2   | 18.2260963 | 2798.965905 | 0.0065 | 0.995 | 1.69E-09 | count | 1 |
| AL133353.1   | 18.2260962 | 2798.965866 | 0.0065 | 0.995 | 1.69E-09 | count | 1 |
| WDR11-AS1    | 18.226096  | 2798.966137 | 0.0065 | 0.995 | 1.69E-09 | count | 1 |
| CLEC4C       | 18.2260958 | 2798.965963 | 0.0065 | 0.995 | 1.69E-09 | count | 1 |
| PRH2         | 18.2260963 | 2798.965963 | 0.0065 | 0.995 | 1.69E-09 | count | 1 |
| AC008011.2   | 18.226096  | 2798.96637  | 0.0065 | 0.995 | 1.69E-09 | count | 1 |
| AC025423.4   | 18.2260959 | 2798.965963 | 0.0065 | 0.995 | 1.69E-09 | count | 1 |
| PPFIA2       | 18.2260963 | 2798.966079 | 0.0065 | 0.995 | 1.69E-09 | count | 1 |
| AC133794.1   | 18.2260965 | 2798.966118 | 0.0065 | 0.995 | 1.69E-09 | count | 1 |
| POC1B-GALNT4 | 18.2260957 | 2798.965982 | 0.0065 | 0.995 | 1.69E-09 | count | 1 |

|            |            |             |        |       |          |       |   |
|------------|------------|-------------|--------|-------|----------|-------|---|
| FZD10      | 18.2260958 | 2798.965885 | 0.0065 | 0.995 | 1.69E-09 | count | 1 |
| AL590787.1 | 18.2260963 | 2798.966079 | 0.0065 | 0.995 | 1.69E-09 | count | 1 |
| AL355916.2 | 18.2260959 | 2798.96604  | 0.0065 | 0.995 | 1.69E-09 | count | 1 |
| AL162171.2 | 18.226096  | 2798.96637  | 0.0065 | 0.995 | 1.69E-09 | count | 1 |
| COX8C      | 18.2260963 | 2798.965905 | 0.0065 | 0.995 | 1.69E-09 | count | 1 |
| AL355102.3 | 18.2260962 | 2798.96635  | 0.0065 | 0.995 | 1.69E-09 | count | 1 |
| AL160313.1 | 18.2260963 | 2798.966002 | 0.0065 | 0.995 | 1.69E-09 | count | 1 |
| LINC02323  | 18.2260963 | 2798.965905 | 0.0065 | 0.995 | 1.69E-09 | count | 1 |
| IGHV3-64D  | 18.2260965 | 2798.966254 | 0.0065 | 0.995 | 1.69E-09 | count | 1 |
| IGHV3-20   | 18.226096  | 2798.966157 | 0.0065 | 0.995 | 1.69E-09 | count | 1 |
| GREM1      | 18.2260967 | 2798.96637  | 0.0065 | 0.995 | 1.69E-09 | count | 1 |
| AC022929.2 | 18.2260959 | 2798.965905 | 0.0065 | 0.995 | 1.69E-09 | count | 1 |
| C15orf54   | 18.226096  | 2798.966002 | 0.0065 | 0.995 | 1.69E-09 | count | 1 |
| AC079328.2 | 18.2260963 | 2798.966002 | 0.0065 | 0.995 | 1.69E-09 | count | 1 |
| AC011944.1 | 18.2260963 | 2798.966195 | 0.0065 | 0.995 | 1.69E-09 | count | 1 |
| AC120498.9 | 18.2260961 | 2798.966079 | 0.0065 | 0.995 | 1.69E-09 | count | 1 |
| RBFOX1     | 18.2260964 | 2798.966312 | 0.0065 | 0.995 | 1.69E-09 | count | 1 |
| TEKT5      | 18.2260963 | 2798.966331 | 0.0065 | 0.995 | 1.69E-09 | count | 1 |
| IL21R      | 18.2260964 | 2798.96637  | 0.0065 | 0.995 | 1.69E-09 | count | 1 |
| AC138904.3 | 18.2260967 | 2798.966215 | 0.0065 | 0.995 | 1.69E-09 | count | 1 |
| NPIPB13    | 18.2260958 | 2798.966137 | 0.0065 | 0.995 | 1.69E-09 | count | 1 |
| PRSS53     | 18.2260961 | 2798.966137 | 0.0065 | 0.995 | 1.69E-09 | count | 1 |
| AC140912.1 | 18.2260963 | 2798.966176 | 0.0065 | 0.995 | 1.69E-09 | count | 1 |
| AC091153.3 | 18.2260965 | 2798.966195 | 0.0065 | 0.995 | 1.69E-09 | count | 1 |
| PIMREG     | 18.226096  | 2798.96604  | 0.0065 | 0.995 | 1.69E-09 | count | 1 |
| PIK3R5     | 18.226096  | 2798.966292 | 0.0065 | 0.995 | 1.69E-09 | count | 1 |
| MYH13      | 18.2260958 | 2798.965982 | 0.0065 | 0.995 | 1.69E-09 | count | 1 |
| AC015908.3 | 18.2260963 | 2798.966331 | 0.0065 | 0.995 | 1.69E-09 | count | 1 |
| LINC00670  | 18.2260963 | 2798.966079 | 0.0065 | 0.995 | 1.69E-09 | count | 1 |
| AC130324.1 | 18.226096  | 2798.966002 | 0.0065 | 0.995 | 1.69E-09 | count | 1 |
| RASL10B    | 18.226096  | 2798.966176 | 0.0065 | 0.995 | 1.69E-09 | count | 1 |
| AC243829.1 | 18.226096  | 2798.96637  | 0.0065 | 0.995 | 1.69E-09 | count | 1 |
| AC004585.1 | 18.2260963 | 2798.966002 | 0.0065 | 0.995 | 1.69E-09 | count | 1 |
| AC002558.2 | 18.2260963 | 2798.965905 | 0.0065 | 0.995 | 1.69E-09 | count | 1 |
| BRIP1      | 18.2260963 | 2798.966176 | 0.0065 | 0.995 | 1.69E-09 | count | 1 |
| GRIN2C     | 18.2260961 | 2798.966079 | 0.0065 | 0.995 | 1.69E-09 | count | 1 |
| AC132938.1 | 18.2260963 | 2798.965905 | 0.0065 | 0.995 | 1.69E-09 | count | 1 |
| GACAT2     | 18.2260961 | 2798.965905 | 0.0065 | 0.995 | 1.69E-09 | count | 1 |
| KLHL14     | 18.2260967 | 2798.966215 | 0.0065 | 0.995 | 1.69E-09 | count | 1 |
| AC105094.2 | 18.226096  | 2798.966002 | 0.0065 | 0.995 | 1.69E-09 | count | 1 |
| AC018529.2 | 18.2260964 | 2798.966137 | 0.0065 | 0.995 | 1.69E-09 | count | 1 |
| BCAS1      | 18.2260961 | 2798.966157 | 0.0065 | 0.995 | 1.69E-09 | count | 1 |
| OGFR-AS1   | 18.2260965 | 2798.966118 | 0.0065 | 0.995 | 1.69E-09 | count | 1 |
| ZBTB46-AS1 | 18.2260967 | 2798.966195 | 0.0065 | 0.995 | 1.69E-09 | count | 1 |
| AC010422.3 | 18.2260965 | 2798.96606  | 0.0065 | 0.995 | 1.69E-09 | count | 1 |

|              |            |             |        |       |          |       |   |
|--------------|------------|-------------|--------|-------|----------|-------|---|
| AC022148.2   | 18.226096  | 2798.965924 | 0.0065 | 0.995 | 1.69E-09 | count | 1 |
| AC007193.2   | 18.2260963 | 2798.966157 | 0.0065 | 0.995 | 1.69E-09 | count | 1 |
| AC000068.2   | 18.226096  | 2798.966021 | 0.0065 | 0.995 | 1.69E-09 | count | 1 |
| AP000350.6   | 18.2260966 | 2798.966389 | 0.0065 | 0.995 | 1.69E-09 | count | 1 |
| SCO2         | 18.2260965 | 2798.966254 | 0.0065 | 0.995 | 1.69E-09 | count | 1 |
| SMIM11B      | 18.2260963 | 2798.966099 | 0.0065 | 0.995 | 1.69E-09 | count | 1 |
| AP001628.2   | 18.2260961 | 2798.966195 | 0.0065 | 0.995 | 1.69E-09 | count | 1 |
| FRGCA        | 18.2260961 | 2798.966312 | 0.0065 | 0.995 | 1.69E-09 | count | 1 |
| SLFNL1-AS1   | 18.2260956 | 2798.965982 | 0.0065 | 0.995 | 1.69E-09 | count | 1 |
| AL050343.2   | 18.2260962 | 2798.966118 | 0.0065 | 0.995 | 1.69E-09 | count | 1 |
| AC239803.2   | 18.226096  | 2798.966079 | 0.0065 | 0.995 | 1.69E-09 | count | 1 |
| UBE2Q1-AS1   | 18.2260961 | 2798.966137 | 0.0065 | 0.995 | 1.69E-09 | count | 1 |
| AL355388.2   | 18.2260962 | 2798.966118 | 0.0065 | 0.995 | 1.69E-09 | count | 1 |
| LY9          | 18.2260961 | 2798.966176 | 0.0065 | 0.995 | 1.69E-09 | count | 1 |
| RGS4         | 18.2260955 | 2798.965963 | 0.0065 | 0.995 | 1.69E-09 | count | 1 |
| AL606489.1   | 18.2260962 | 2798.966118 | 0.0065 | 0.995 | 1.69E-09 | count | 1 |
| AL591848.2   | 18.2260959 | 2798.965944 | 0.0065 | 0.995 | 1.69E-09 | count | 1 |
| GREB1        | 18.2260963 | 2798.965963 | 0.0065 | 0.995 | 1.69E-09 | count | 1 |
| AC010096.1   | 18.2260958 | 2798.966137 | 0.0065 | 0.995 | 1.69E-09 | count | 1 |
| AC012511.1   | 18.2260961 | 2798.966099 | 0.0065 | 0.995 | 1.69E-09 | count | 1 |
| RNF103-CHMP3 | 18.2260956 | 2798.966234 | 0.0065 | 0.995 | 1.69E-09 | count | 1 |
| CD8B         | 18.2260956 | 2798.966079 | 0.0065 | 0.995 | 1.69E-09 | count | 1 |
| AC074387.1   | 18.2260961 | 2798.966157 | 0.0065 | 0.995 | 1.69E-09 | count | 1 |
| AC017002.1   | 18.2260955 | 2798.965963 | 0.0065 | 0.995 | 1.69E-09 | count | 1 |
| NMUR1        | 18.2260961 | 2798.966157 | 0.0065 | 0.995 | 1.69E-09 | count | 1 |
| HDAC11-AS1   | 18.2260962 | 2798.966079 | 0.0065 | 0.995 | 1.69E-09 | count | 1 |
| BSN          | 18.2260958 | 2798.96606  | 0.0065 | 0.995 | 1.69E-09 | count | 1 |
| OR5H1        | 18.2260958 | 2798.966079 | 0.0065 | 0.995 | 1.69E-09 | count | 1 |
| STXBP5L      | 18.2260961 | 2798.966176 | 0.0065 | 0.995 | 1.69E-09 | count | 1 |
| LINC02029    | 18.2260958 | 2798.966118 | 0.0065 | 0.995 | 1.69E-09 | count | 1 |
| AC026353.1   | 18.2260959 | 2798.96604  | 0.0065 | 0.995 | 1.69E-09 | count | 1 |
| AC092953.2   | 18.2260956 | 2798.965866 | 0.0065 | 0.995 | 1.69E-09 | count | 1 |
| AC131235.4   | 18.2260959 | 2798.966099 | 0.0065 | 0.995 | 1.69E-09 | count | 1 |
| STPG2        | 18.2260961 | 2798.966409 | 0.0065 | 0.995 | 1.69E-09 | count | 1 |
| LINC02435    | 18.226096  | 2798.966099 | 0.0065 | 0.995 | 1.69E-09 | count | 1 |
| AC078850.1   | 18.2260962 | 2798.966137 | 0.0065 | 0.995 | 1.69E-09 | count | 1 |
| AC084871.2   | 18.2260957 | 2798.966021 | 0.0065 | 0.995 | 1.69E-09 | count | 1 |
| AC021087.1   | 18.226096  | 2798.966099 | 0.0065 | 0.995 | 1.69E-09 | count | 1 |
| ADGRV1       | 18.2260963 | 2798.965924 | 0.0065 | 0.995 | 1.69E-09 | count | 1 |
| ARSI         | 18.2260962 | 2798.966118 | 0.0065 | 0.995 | 1.69E-09 | count | 1 |
| AL021997.3   | 18.2260959 | 2798.966176 | 0.0065 | 0.995 | 1.69E-09 | count | 1 |
| CLPSL1       | 18.2260956 | 2798.966176 | 0.0065 | 0.995 | 1.69E-09 | count | 1 |
| Z84484.1     | 18.226096  | 2798.965905 | 0.0065 | 0.995 | 1.69E-09 | count | 1 |
| TRDN         | 18.2260956 | 2798.966176 | 0.0065 | 0.995 | 1.69E-09 | count | 1 |
| MOXD1        | 18.2260956 | 2798.966079 | 0.0065 | 0.995 | 1.69E-09 | count | 1 |

|            |            |             |        |       |          |       |   |
|------------|------------|-------------|--------|-------|----------|-------|---|
| AL450344.2 | 18.2260959 | 2798.966099 | 0.0065 | 0.995 | 1.69E-09 | count | 1 |
| AC104073.4 | 18.2260959 | 2798.966157 | 0.0065 | 0.995 | 1.69E-09 | count | 1 |
| AC114737.1 | 18.2260962 | 2798.966118 | 0.0065 | 0.995 | 1.69E-09 | count | 1 |
| AC003991.2 | 18.2260963 | 2798.966176 | 0.0065 | 0.995 | 1.69E-09 | count | 1 |
| MUC3A      | 18.2260956 | 2798.965827 | 0.0065 | 0.995 | 1.69E-09 | count | 1 |
| AC093668.3 | 18.2260959 | 2798.965944 | 0.0065 | 0.995 | 1.69E-09 | count | 1 |
| AC007384.1 | 18.2260961 | 2798.966273 | 0.0065 | 0.995 | 1.69E-09 | count | 1 |
| LINC01510  | 18.2260958 | 2798.965924 | 0.0065 | 0.995 | 1.69E-09 | count | 1 |
| NLGN4X     | 18.2260961 | 2798.966079 | 0.0065 | 0.995 | 1.69E-09 | count | 1 |
| WWC3-AS1   | 18.2260956 | 2798.966234 | 0.0065 | 0.995 | 1.69E-09 | count | 1 |
| ALG13-AS1  | 18.2260959 | 2798.965827 | 0.0065 | 0.995 | 1.69E-09 | count | 1 |
| PNCK       | 18.2260959 | 2798.966157 | 0.0065 | 0.995 | 1.69E-09 | count | 1 |
| LINC00535  | 18.2260961 | 2798.966157 | 0.0065 | 0.995 | 1.69E-09 | count | 1 |
| CCDC26     | 18.2260956 | 2798.96606  | 0.0065 | 0.995 | 1.69E-09 | count | 1 |
| TG         | 18.2260959 | 2798.966157 | 0.0065 | 0.995 | 1.69E-09 | count | 1 |
| FOXH1      | 18.2260959 | 2798.966176 | 0.0065 | 0.995 | 1.69E-09 | count | 1 |
| AL136980.1 | 18.2260959 | 2798.966176 | 0.0065 | 0.995 | 1.69E-09 | count | 1 |
| TAL2       | 18.2260962 | 2798.966118 | 0.0065 | 0.995 | 1.69E-09 | count | 1 |
| AL162724.2 | 18.2260961 | 2798.966176 | 0.0065 | 0.995 | 1.69E-09 | count | 1 |
| AC090587.1 | 18.2260961 | 2798.966157 | 0.0065 | 0.995 | 1.69E-09 | count | 1 |
| AC080023.1 | 18.2260963 | 2798.965963 | 0.0065 | 0.995 | 1.69E-09 | count | 1 |
| OR8J3      | 18.2260962 | 2798.966118 | 0.0065 | 0.995 | 1.69E-09 | count | 1 |
| AP002812.5 | 18.226096  | 2798.965905 | 0.0065 | 0.995 | 1.69E-09 | count | 1 |
| LINC00838  | 18.2260961 | 2798.966273 | 0.0065 | 0.995 | 1.69E-09 | count | 1 |
| RPEL1      | 18.2260962 | 2798.966118 | 0.0065 | 0.995 | 1.69E-09 | count | 1 |
| PNLIPRP1   | 18.226096  | 2798.965944 | 0.0065 | 0.995 | 1.69E-09 | count | 1 |
| AC010198.1 | 18.2260959 | 2798.966176 | 0.0065 | 0.995 | 1.69E-09 | count | 1 |
| KRT2       | 18.2260959 | 2798.96604  | 0.0065 | 0.995 | 1.69E-09 | count | 1 |
| LINC02399  | 18.2260959 | 2798.966137 | 0.0065 | 0.995 | 1.69E-09 | count | 1 |
| AC016257.1 | 18.2260958 | 2798.966157 | 0.0065 | 0.995 | 1.69E-09 | count | 1 |
| IL17D      | 18.226096  | 2798.965944 | 0.0065 | 0.995 | 1.69E-09 | count | 1 |
| AL589745.1 | 18.226096  | 2798.966157 | 0.0065 | 0.995 | 1.69E-09 | count | 1 |
| RPGRIP1    | 18.2260962 | 2798.966137 | 0.0065 | 0.995 | 1.69E-09 | count | 1 |
| AL355102.4 | 18.226096  | 2798.965944 | 0.0065 | 0.995 | 1.69E-09 | count | 1 |
| IGHV4-39   | 18.2260962 | 2798.966118 | 0.0065 | 0.995 | 1.69E-09 | count | 1 |
| ITPKA      | 18.2260959 | 2798.966157 | 0.0065 | 0.995 | 1.69E-09 | count | 1 |
| JMJD7      | 18.2260957 | 2798.966118 | 0.0065 | 0.995 | 1.69E-09 | count | 1 |
| CPEB1-AS1  | 18.226096  | 2798.965944 | 0.0065 | 0.995 | 1.69E-09 | count | 1 |
| AC036108.4 | 18.2260961 | 2798.966157 | 0.0065 | 0.995 | 1.69E-09 | count | 1 |
| AL023881.1 | 18.2260961 | 2798.966099 | 0.0065 | 0.995 | 1.69E-09 | count | 1 |
| AL031709.1 | 18.226096  | 2798.965982 | 0.0065 | 0.995 | 1.69E-09 | count | 1 |
| TEDC2      | 18.2260962 | 2798.966118 | 0.0065 | 0.995 | 1.69E-09 | count | 1 |
| C16orf71   | 18.2260955 | 2798.965827 | 0.0065 | 0.995 | 1.69E-09 | count | 1 |
| AC040162.3 | 18.2260961 | 2798.966118 | 0.0065 | 0.995 | 1.69E-09 | count | 1 |
| CDRT1      | 18.2260962 | 2798.966118 | 0.0065 | 0.995 | 1.69E-09 | count | 1 |

|               |            |             |        |        |          |       |   |
|---------------|------------|-------------|--------|--------|----------|-------|---|
| AC120024.1    | 18.2260954 | 2798.965866 | 0.0065 | 0.995  | 1.69E-09 | count | 1 |
| NOL4          | 18.2260961 | 2798.966118 | 0.0065 | 0.995  | 1.69E-09 | count | 1 |
| ZNF559-ZNF177 | 18.2260958 | 2798.96606  | 0.0065 | 0.995  | 1.69E-09 | count | 1 |
| AC008747.1    | 18.2260956 | 2798.965866 | 0.0065 | 0.995  | 1.69E-09 | count | 1 |
| TSKS          | 18.2260962 | 2798.966137 | 0.0065 | 0.995  | 1.69E-09 | count | 1 |
| IZUMO2        | 18.2260959 | 2798.96604  | 0.0065 | 0.995  | 1.69E-09 | count | 1 |
| C19orf81      | 18.2260961 | 2798.966137 | 0.0065 | 0.995  | 1.69E-09 | count | 1 |
| AC006946.3    | 18.2260959 | 2798.966176 | 0.0065 | 0.995  | 1.69E-09 | count | 1 |
| IGLC7         | 18.2260962 | 2798.966118 | 0.0065 | 0.995  | 1.69E-09 | count | 1 |
| FO393418.1    | 18.2260963 | 2798.966176 | 0.0065 | 0.995  | 1.69E-09 | count | 1 |
| PVALB         | 18.226096  | 2798.965944 | 0.0065 | 0.995  | 1.69E-09 | count | 1 |
| AC105053.1    | 18.2260954 | 2798.965866 | 0.0065 | 0.995  | 1.69E-09 | count | 1 |
| AC021151.1    | 18.2260958 | 2798.965944 | 0.0065 | 0.995  | 1.69E-09 | count | 1 |
| COL10A1       | 18.2260958 | 2798.965944 | 0.0065 | 0.995  | 1.69E-09 | count | 1 |
| ACE2          | 18.2260955 | 2798.965944 | 0.0065 | 0.995  | 1.69E-09 | count | 1 |
| CERS3         | 18.2260955 | 2798.965944 | 0.0065 | 0.995  | 1.69E-09 | count | 1 |
| TNFRSF17      | 18.2260958 | 2798.965769 | 0.0065 | 0.995  | 1.69E-09 | count | 1 |
| CTRL          | 18.2260956 | 2798.966021 | 0.0065 | 0.995  | 1.69E-09 | count | 1 |
| KCNH4         | 18.2260955 | 2798.965982 | 0.0065 | 0.995  | 1.69E-09 | count | 1 |
| ACTN2         | 0.193987   | 0.3595193   | 0.5396 | 0.59   | 1.96E-09 | count | 1 |
| HPSE          | 0.1982341  | 0.952364    | 0.2081 | 0.835  | 2.00E-09 | count | 1 |
| CD200R1       | 0.8871341  | 0.4711826   | 1.8828 | 0.0598 | 2.52E-09 | count | 1 |
| ACAP1         | 0.104721   | 0.9876369   | 0.106  | 0.916  | 2.99E-09 | count | 1 |
| LGALS4        | 0.3659891  | 0.7857752   | 0.4658 | 0.641  | 3.46E-09 | count | 1 |
| AL512625.3    | 0.3659891  | 0.7857752   | 0.4658 | 0.641  | 3.46E-09 | count | 1 |
| TNNI2         | 0.3709531  | 0.7915377   | 0.4686 | 0.639  | 3.50E-09 | count | 1 |
| CCL13         | 0.4986664  | 1.1088655   | 0.4497 | 0.653  | 4.47E-09 | count | 1 |
| PNMA8A        | 0.4986664  | 0.7460722   | 0.6684 | 0.504  | 4.47E-09 | count | 1 |
| PLAC4         | 0.5071505  | 0.8839757   | 0.5737 | 0.566  | 4.53E-09 | count | 1 |
| LRRC25        | 17.9676782 | 5460.656503 | 0.0033 | 0.997  | 4.58E-09 | count | 1 |
| PILRA         | 17.9661851 | 4498.137886 | 0.004  | 0.997  | 4.58E-09 | count | 1 |
| RELN          | 17.7421641 | 4878.372601 | 0.0036 | 0.997  | 4.58E-09 | count | 1 |
| IYD           | 17.7421639 | 4878.37275  | 0.0036 | 0.997  | 4.58E-09 | count | 1 |
| TMEM26        | 17.7421639 | 4878.37275  | 0.0036 | 0.997  | 4.58E-09 | count | 1 |
| OR7D4         | 17.7421641 | 4878.373245 | 0.0036 | 0.997  | 4.58E-09 | count | 1 |
| GREM2         | 18.1467225 | 2808.392145 | 0.0065 | 0.995  | 4.58E-09 | count | 1 |
| LPL           | 17.9643639 | 3266.922759 | 0.0055 | 0.996  | 4.58E-09 | count | 1 |
| GHRL          | 18.1458905 | 2428.578444 | 0.0075 | 0.994  | 4.58E-09 | count | 1 |
| ESR2          | 18.1458901 | 2428.578887 | 0.0075 | 0.994  | 4.58E-09 | count | 1 |
| SLC23A3       | 17.9625533 | 2429.044982 | 0.0074 | 0.994  | 4.58E-09 | count | 1 |
| AL358781.1    | 17.9625543 | 2429.045007 | 0.0074 | 0.994  | 4.58E-09 | count | 1 |
| ZNF571-AS1    | 17.9625545 | 2429.044908 | 0.0074 | 0.994  | 4.58E-09 | count | 1 |
| C1orf220      | 17.962553  | 2429.044613 | 0.0074 | 0.994  | 4.58E-09 | count | 1 |
| AL034397.3    | 17.4515781 | 4218.663467 | 0.0041 | 0.997  | 4.58E-09 | count | 1 |
| CMTM2         | 17.4515781 | 4218.663467 | 0.0041 | 0.997  | 4.58E-09 | count | 1 |

|            |            |             |        |       |          |       |   |
|------------|------------|-------------|--------|-------|----------|-------|---|
| LONRF2     | 17.4515773 | 4218.663659 | 0.0041 | 0.997 | 4.58E-09 | count | 1 |
| AC073869.3 | 17.451578  | 4218.663339 | 0.0041 | 0.997 | 4.58E-09 | count | 1 |
| NBPF19     | 17.7381415 | 2429.201477 | 0.0073 | 0.994 | 4.58E-09 | count | 1 |
| AC015967.1 | 17.7381419 | 2429.201329 | 0.0073 | 0.994 | 4.58E-09 | count | 1 |
| KCTD16     | 17.7381414 | 2429.201329 | 0.0073 | 0.994 | 4.58E-09 | count | 1 |
| FUT2       | 17.7381416 | 2429.201698 | 0.0073 | 0.994 | 4.58E-09 | count | 1 |
| AC011773.4 | 17.738141  | 2429.201501 | 0.0073 | 0.994 | 4.58E-09 | count | 1 |
| AIRN       | 17.7381402 | 2429.201378 | 0.0073 | 0.994 | 4.58E-09 | count | 1 |
| AOAH       | 17.450034  | 3140.231052 | 0.0056 | 0.996 | 4.58E-09 | count | 1 |
| TOMM20L    | 17.4500336 | 3140.231258 | 0.0056 | 0.996 | 4.58E-09 | count | 1 |
| TPM1-AS    | 17.4500335 | 3140.230989 | 0.0056 | 0.996 | 4.58E-09 | count | 1 |
| GEMIN7-AS1 | 17.4500342 | 3140.231179 | 0.0056 | 0.996 | 4.58E-09 | count | 1 |
| AL358933.1 | 17.4500335 | 3140.231195 | 0.0056 | 0.996 | 4.58E-09 | count | 1 |
| TRPC4      | 17.4500335 | 3140.230941 | 0.0056 | 0.996 | 4.58E-09 | count | 1 |
| AC130469.1 | 17.4500334 | 3140.230973 | 0.0056 | 0.996 | 4.58E-09 | count | 1 |
| AC010636.2 | 17.4500338 | 3140.230973 | 0.0056 | 0.996 | 4.58E-09 | count | 1 |
| SBK3       | 17.4500332 | 3140.230751 | 0.0056 | 0.996 | 4.58E-09 | count | 1 |
| MRGPRF     | 17.4489229 | 2429.029628 | 0.0072 | 0.994 | 4.58E-09 | count | 1 |
| UCN        | 17.4489229 | 2429.029665 | 0.0072 | 0.994 | 4.58E-09 | count | 1 |
| LINC02043  | 17.4489225 | 2429.029591 | 0.0072 | 0.994 | 4.58E-09 | count | 1 |
| ADORA3     | 17.4489228 | 2429.029628 | 0.0072 | 0.994 | 4.58E-09 | count | 1 |
| AC144450.1 | 17.4489225 | 2429.029444 | 0.0072 | 0.994 | 4.58E-09 | count | 1 |
| IL20RB     | 17.4489227 | 2429.029346 | 0.0072 | 0.994 | 4.58E-09 | count | 1 |
| AC083843.2 | 17.4489226 | 2429.029493 | 0.0072 | 0.994 | 4.58E-09 | count | 1 |
| AC073912.2 | 17.4489227 | 2429.02964  | 0.0072 | 0.994 | 4.58E-09 | count | 1 |
| RAB11FIP4  | 17.4489228 | 2429.029506 | 0.0072 | 0.994 | 4.58E-09 | count | 1 |
| AC080038.2 | 17.4489231 | 2429.029604 | 0.0072 | 0.994 | 4.58E-09 | count | 1 |
| AC010336.4 | 17.4489223 | 2429.029616 | 0.0072 | 0.994 | 4.58E-09 | count | 1 |
| AL160408.2 | 17.4489225 | 2429.029702 | 0.0072 | 0.994 | 4.58E-09 | count | 1 |
| AC135507.1 | 17.4489226 | 2429.02953  | 0.0072 | 0.994 | 4.58E-09 | count | 1 |
| AC012640.1 | 17.4489223 | 2429.02953  | 0.0072 | 0.994 | 4.58E-09 | count | 1 |
| AL355073.2 | 17.4489225 | 2429.02942  | 0.0072 | 0.994 | 4.58E-09 | count | 1 |
| FPR1       | 17.4489225 | 2429.029616 | 0.0072 | 0.994 | 4.58E-09 | count | 1 |
| AL008635.1 | 17.448922  | 2429.029444 | 0.0072 | 0.994 | 4.58E-09 | count | 1 |
| AL513327.1 | 17.4489224 | 2429.029665 | 0.0072 | 0.994 | 4.58E-09 | count | 1 |
| CSMD2      | 17.4489221 | 2429.029457 | 0.0072 | 0.994 | 4.58E-09 | count | 1 |
| AL133245.1 | 17.4489224 | 2429.029591 | 0.0072 | 0.994 | 4.58E-09 | count | 1 |
| FSIP2-AS1  | 17.4489224 | 2429.029738 | 0.0072 | 0.994 | 4.58E-09 | count | 1 |
| AL645940.1 | 17.448922  | 2429.02926  | 0.0072 | 0.994 | 4.58E-09 | count | 1 |
| AP003392.1 | 17.4489224 | 2429.029591 | 0.0072 | 0.994 | 4.58E-09 | count | 1 |
| AC109460.1 | 17.4489218 | 2429.029371 | 0.0072 | 0.994 | 4.58E-09 | count | 1 |
| AC138207.7 | 17.4489223 | 2429.029738 | 0.0072 | 0.994 | 4.58E-09 | count | 1 |
| MYO5B      | 17.4489221 | 2429.029751 | 0.0072 | 0.994 | 4.58E-09 | count | 1 |
| AL359555.4 | 17.4489219 | 2429.029542 | 0.0072 | 0.994 | 4.58E-09 | count | 1 |
| AP000345.2 | 17.4489222 | 2429.029628 | 0.0072 | 0.994 | 4.58E-09 | count | 1 |

|            |            |             |        |       |          |       |   |
|------------|------------|-------------|--------|-------|----------|-------|---|
| DCDC2      | 17.448922  | 2429.029628 | 0.0072 | 0.994 | 4.58E-09 | count | 1 |
| AC022021.1 | 17.4489221 | 2429.029628 | 0.0072 | 0.994 | 4.58E-09 | count | 1 |
| AC079601.1 | 17.4489222 | 2429.029775 | 0.0072 | 0.994 | 4.58E-09 | count | 1 |
| AC092718.8 | 17.4489221 | 2429.029407 | 0.0072 | 0.994 | 4.58E-09 | count | 1 |
| TJP3       | 17.448922  | 2429.02964  | 0.0072 | 0.994 | 4.58E-09 | count | 1 |
| AL021707.1 | 17.4489223 | 2429.029689 | 0.0072 | 0.994 | 4.58E-09 | count | 1 |
| ARHGEF10L  | 19.0295889 | 4182.795173 | 0.0045 | 0.996 | 4.58E-09 | count | 1 |
| PTGER2     | 19.0295889 | 4182.795173 | 0.0045 | 0.996 | 4.58E-09 | count | 1 |
| AP005436.1 | 19.0295881 | 4182.795518 | 0.0045 | 0.996 | 4.58E-09 | count | 1 |
| FPR2       | 19.0295881 | 4182.795518 | 0.0045 | 0.996 | 4.58E-09 | count | 1 |
| AC010680.5 | 19.0295874 | 4182.795086 | 0.0045 | 0.996 | 4.58E-09 | count | 1 |
| ZBBX       | 17.0428118 | 3438.843885 | 0.005  | 0.996 | 4.58E-09 | count | 1 |
| BRSK2      | 17.0428118 | 3438.843677 | 0.005  | 0.996 | 4.58E-09 | count | 1 |
| SLC1A7     | 17.0428117 | 3438.843937 | 0.005  | 0.996 | 4.58E-09 | count | 1 |
| C1orf229   | 17.0428116 | 3438.843937 | 0.005  | 0.996 | 4.58E-09 | count | 1 |
| ADGRG4     | 17.0428115 | 3438.84385  | 0.005  | 0.996 | 4.58E-09 | count | 1 |
| ZNF32-AS3  | 17.0428113 | 3438.843607 | 0.005  | 0.996 | 4.58E-09 | count | 1 |
| ADGRD1     | 17.0428117 | 3438.843937 | 0.005  | 0.996 | 4.58E-09 | count | 1 |
| AC107081.2 | 17.0428113 | 3438.843972 | 0.005  | 0.996 | 4.58E-09 | count | 1 |
| FLJ45513   | 17.0428116 | 3438.843798 | 0.005  | 0.996 | 4.58E-09 | count | 1 |
| RGS9BP     | 17.0428116 | 3438.843954 | 0.005  | 0.996 | 4.58E-09 | count | 1 |
| AC000067.1 | 17.0428115 | 3438.843607 | 0.005  | 0.996 | 4.58E-09 | count | 1 |
| ZNF280A    | 17.0428114 | 3438.843711 | 0.005  | 0.996 | 4.58E-09 | count | 1 |
| FOXE3      | 17.0428114 | 3438.843746 | 0.005  | 0.996 | 4.58E-09 | count | 1 |
| CD160      | 17.0428112 | 3438.84392  | 0.005  | 0.996 | 4.58E-09 | count | 1 |
| XKR4       | 17.0428114 | 3438.843816 | 0.005  | 0.996 | 4.58E-09 | count | 1 |
| KLK11      | 17.0428114 | 3438.843816 | 0.005  | 0.996 | 4.58E-09 | count | 1 |
| TNNT1      | 17.0428115 | 3438.843902 | 0.005  | 0.996 | 4.58E-09 | count | 1 |
| AC004882.1 | 17.0428111 | 3438.843781 | 0.005  | 0.996 | 4.58E-09 | count | 1 |
| OMG        | 18.6257965 | 3418.096954 | 0.0054 | 0.996 | 4.58E-09 | count | 1 |
| AC008735.4 | 18.6257965 | 3418.096954 | 0.0054 | 0.996 | 4.58E-09 | count | 1 |
| IGHD       | 18.6257963 | 3418.096389 | 0.0054 | 0.996 | 4.58E-09 | count | 1 |
| SPN        | 18.3329806 | 2198.183688 | 0.0083 | 0.993 | 4.58E-09 | count | 1 |
| AL121601.1 | 18.3311538 | 1698.200872 | 0.0108 | 0.991 | 4.58E-09 | count | 1 |
| IGHGP      | 18.3311536 | 1698.20068  | 0.0108 | 0.991 | 4.58E-09 | count | 1 |
| CENPS-CORT | 18.1885895 | 3853.339405 | 0.0047 | 0.996 | 4.59E-09 | count | 1 |
| AL731563.3 | 18.4091039 | 3670.842421 | 0.005  | 0.996 | 4.59E-09 | count | 1 |
| AC107952.2 | 18.1880874 | 3198.013202 | 0.0057 | 0.995 | 4.59E-09 | count | 1 |
| WDR97      | 18.1880899 | 3198.010638 | 0.0057 | 0.995 | 4.59E-09 | count | 1 |
| CD248      | 18.1881117 | 3198.020027 | 0.0057 | 0.995 | 4.59E-09 | count | 1 |
| SPC25      | 18.223756  | 3626.254255 | 0.005  | 0.996 | 4.59E-09 | count | 1 |
| AC009486.1 | 18.2237549 | 3626.25469  | 0.005  | 0.996 | 4.59E-09 | count | 1 |
| COL4A6     | 17.9845626 | 4146.665794 | 0.0043 | 0.997 | 4.59E-09 | count | 1 |
| FAM169A    | 17.9845577 | 4146.661972 | 0.0043 | 0.997 | 4.59E-09 | count | 1 |
| HIST1H2AB  | 18.4079427 | 3184.74675  | 0.0058 | 0.995 | 4.59E-09 | count | 1 |



|            |            |             |        |       |          |       |   |
|------------|------------|-------------|--------|-------|----------|-------|---|
| VSTM5      | 18.2222592 | 3145.792453 | 0.0058 | 0.995 | 4.59E-09 | count | 1 |
| AC021739.2 | 18.2222811 | 3145.804231 | 0.0058 | 0.995 | 4.59E-09 | count | 1 |
| WAS        | 18.2222396 | 3145.795697 | 0.0058 | 0.995 | 4.59E-09 | count | 1 |
| AC135048.3 | 17.9842115 | 3202.389221 | 0.0056 | 0.996 | 4.59E-09 | count | 1 |
| AL137003.1 | 18.2222325 | 3145.779707 | 0.0058 | 0.995 | 4.59E-09 | count | 1 |
| ADAMTS14   | 18.2222324 | 3145.779707 | 0.0058 | 0.995 | 4.59E-09 | count | 1 |
| LINC01460  | 17.9841738 | 3202.378498 | 0.0056 | 0.996 | 4.59E-09 | count | 1 |
| RAD21L1    | 18.2222324 | 3145.779599 | 0.0058 | 0.995 | 4.59E-09 | count | 1 |
| AL390860.1 | 17.9841731 | 3202.372201 | 0.0056 | 0.996 | 4.59E-09 | count | 1 |
| AL596325.1 | 17.9841803 | 3202.374867 | 0.0056 | 0.996 | 4.59E-09 | count | 1 |
| PRMT8      | 17.9841857 | 3202.387292 | 0.0056 | 0.996 | 4.59E-09 | count | 1 |
| ADCY2      | 17.9842041 | 3202.383321 | 0.0056 | 0.996 | 4.59E-09 | count | 1 |
| PCDHA10    | 17.9841752 | 3202.38455  | 0.0056 | 0.996 | 4.59E-09 | count | 1 |
| AC016738.1 | 17.9841928 | 3202.380711 | 0.0056 | 0.996 | 4.59E-09 | count | 1 |
| OCLM       | 17.984186  | 3202.377893 | 0.0056 | 0.996 | 4.59E-09 | count | 1 |
| AL353759.1 | 17.9842042 | 3202.373789 | 0.0056 | 0.996 | 4.59E-09 | count | 1 |
| AC025178.1 | 17.9841845 | 3202.371709 | 0.0056 | 0.996 | 4.59E-09 | count | 1 |
| AL136295.6 | 18.2222798 | 3145.804446 | 0.0058 | 0.995 | 4.59E-09 | count | 1 |
| AC234582.2 | 18.2222516 | 3145.792955 | 0.0058 | 0.995 | 4.59E-09 | count | 1 |
| SEPLPG     | 17.9841862 | 3202.371577 | 0.0056 | 0.996 | 4.59E-09 | count | 1 |
| CCNA2      | 18.222281  | 3145.804213 | 0.0058 | 0.995 | 4.59E-09 | count | 1 |
| CTRC       | 17.9841993 | 3202.380352 | 0.0056 | 0.996 | 4.59E-09 | count | 1 |
| AC008764.3 | 17.984186  | 3202.381014 | 0.0056 | 0.996 | 4.59E-09 | count | 1 |
| AC005840.4 | 17.9841927 | 3202.386971 | 0.0056 | 0.996 | 4.59E-09 | count | 1 |
| AP003068.1 | 17.9841814 | 3202.384342 | 0.0056 | 0.996 | 4.59E-09 | count | 1 |
| AC009509.4 | 17.9841988 | 3202.383491 | 0.0056 | 0.996 | 4.59E-09 | count | 1 |
| AC064836.2 | 17.9841875 | 3202.377704 | 0.0056 | 0.996 | 4.59E-09 | count | 1 |
| AC112236.2 | 17.9841875 | 3202.390337 | 0.0056 | 0.996 | 4.59E-09 | count | 1 |
| DNAJC9-AS1 | 18.222281  | 3145.803944 | 0.0058 | 0.995 | 4.59E-09 | count | 1 |
| AC002480.4 | 18.2222805 | 3145.804051 | 0.0058 | 0.995 | 4.59E-09 | count | 1 |
| ADCY5      | 17.9841784 | 3202.368891 | 0.0056 | 0.996 | 4.59E-09 | count | 1 |
| LINC00958  | 17.9841793 | 3202.381392 | 0.0056 | 0.996 | 4.59E-09 | count | 1 |
| AC025263.1 | 17.7127668 | 3184.440297 | 0.0056 | 0.996 | 4.59E-09 | count | 1 |
| SLC16A9    | 17.7127695 | 3184.444793 | 0.0056 | 0.996 | 4.59E-09 | count | 1 |
| AL449106.1 | 17.7127476 | 3184.451965 | 0.0056 | 0.996 | 4.59E-09 | count | 1 |
| GRIP1      | 17.7127536 | 3184.436749 | 0.0056 | 0.996 | 4.59E-09 | count | 1 |
| AC092117.1 | 17.7127442 | 3184.442453 | 0.0056 | 0.996 | 4.59E-09 | count | 1 |
| PTGES3L    | 17.7127744 | 3184.454027 | 0.0056 | 0.996 | 4.59E-09 | count | 1 |
| SLC25A21   | 17.7127665 | 3184.440279 | 0.0056 | 0.996 | 4.59E-09 | count | 1 |
| AC012368.2 | 17.7127574 | 3184.446094 | 0.0056 | 0.996 | 4.59E-09 | count | 1 |
| AC009802.1 | 17.7127457 | 3184.432587 | 0.0056 | 0.996 | 4.59E-09 | count | 1 |
| SEMA4G     | 17.7127613 | 3184.440799 | 0.0056 | 0.996 | 4.59E-09 | count | 1 |
| RFX8       | 17.7127537 | 3184.436675 | 0.0056 | 0.996 | 4.59E-09 | count | 1 |
| AL606760.2 | 17.7127421 | 3184.452596 | 0.0056 | 0.996 | 4.59E-09 | count | 1 |
| RBM5-AS1   | 17.7127374 | 3184.438272 | 0.0056 | 0.996 | 4.59E-09 | count | 1 |

|            |            |             |        |       |          |       |   |
|------------|------------|-------------|--------|-------|----------|-------|---|
| AC005962.1 | 17.7127665 | 3184.440372 | 0.0056 | 0.996 | 4.59E-09 | count | 1 |
| AC012615.2 | 17.7127664 | 3184.440335 | 0.0056 | 0.996 | 4.59E-09 | count | 1 |
| AL135744.1 | 17.7127542 | 3184.436526 | 0.0056 | 0.996 | 4.59E-09 | count | 1 |
| AL606468.1 | 17.7127392 | 3184.44288  | 0.0056 | 0.996 | 4.59E-09 | count | 1 |
| AL662890.1 | 17.7127385 | 3184.443103 | 0.0056 | 0.996 | 4.59E-09 | count | 1 |
| EFCAB3     | 17.7127739 | 3184.454064 | 0.0056 | 0.996 | 4.59E-09 | count | 1 |
| AC137630.4 | 17.7127388 | 3184.442954 | 0.0056 | 0.996 | 4.59E-09 | count | 1 |
| AC064807.4 | 17.7127624 | 3184.440576 | 0.0056 | 0.996 | 4.59E-09 | count | 1 |
| SLC16A6    | 17.7127574 | 3184.446168 | 0.0056 | 0.996 | 4.59E-09 | count | 1 |
| AC239800.2 | 17.7127382 | 3184.443158 | 0.0056 | 0.996 | 4.59E-09 | count | 1 |
| AC005534.1 | 17.7127494 | 3184.456684 | 0.0056 | 0.996 | 4.59E-09 | count | 1 |
| LRRRC73    | 17.7127548 | 3184.436489 | 0.0056 | 0.996 | 4.59E-09 | count | 1 |
| AC099518.6 | 17.7127515 | 3184.446781 | 0.0056 | 0.996 | 4.59E-09 | count | 1 |
| LINC01993  | 17.7127554 | 3184.456126 | 0.0056 | 0.996 | 4.59E-09 | count | 1 |
| TMEM238L   | 17.7127398 | 3184.442694 | 0.0056 | 0.996 | 4.59E-09 | count | 1 |
| TMEM145    | 17.7127534 | 3184.436768 | 0.0056 | 0.996 | 4.59E-09 | count | 1 |
| AP001781.1 | 17.7127405 | 3184.433033 | 0.0056 | 0.996 | 4.59E-09 | count | 1 |
| ZSCAN1     | 17.7127523 | 3184.446484 | 0.0056 | 0.996 | 4.59E-09 | count | 1 |
| AC121761.1 | 17.7127546 | 3184.436489 | 0.0056 | 0.996 | 4.59E-09 | count | 1 |
| GREB1L     | 17.7127399 | 3184.442675 | 0.0056 | 0.996 | 4.59E-09 | count | 1 |
| AC011472.4 | 17.7127549 | 3184.436415 | 0.0056 | 0.996 | 4.59E-09 | count | 1 |
| AC092809.4 | 17.7127415 | 3184.432866 | 0.0056 | 0.996 | 4.59E-09 | count | 1 |
| CHRNA7     | 17.7127614 | 3184.440818 | 0.0056 | 0.996 | 4.59E-09 | count | 1 |
| LRRRC66    | 17.7127395 | 3184.44275  | 0.0056 | 0.996 | 4.59E-09 | count | 1 |
| AC211433.2 | 17.7127703 | 3184.449865 | 0.0056 | 0.996 | 4.59E-09 | count | 1 |
| AL606763.1 | 17.7127733 | 3184.454157 | 0.0056 | 0.996 | 4.59E-09 | count | 1 |
| AC090844.2 | 17.7127401 | 3184.442731 | 0.0056 | 0.996 | 4.59E-09 | count | 1 |
| Z82244.2   | 17.7127569 | 3184.446224 | 0.0056 | 0.996 | 4.59E-09 | count | 1 |
| BIRC5      | 17.7127662 | 3184.440335 | 0.0056 | 0.996 | 4.59E-09 | count | 1 |
| AL137847.2 | 17.7127605 | 3184.440892 | 0.0056 | 0.996 | 4.59E-09 | count | 1 |
| LIMS4      | 17.7127436 | 3184.442601 | 0.0056 | 0.996 | 4.59E-09 | count | 1 |
| AC010273.1 | 17.7127615 | 3184.440836 | 0.0056 | 0.996 | 4.59E-09 | count | 1 |
| AC136475.4 | 17.7127441 | 3184.442545 | 0.0056 | 0.996 | 4.59E-09 | count | 1 |
| AC010531.6 | 17.7127439 | 3184.442657 | 0.0056 | 0.996 | 4.59E-09 | count | 1 |
| RB1-DT     | 17.7127663 | 3184.440409 | 0.0056 | 0.996 | 4.59E-09 | count | 1 |
| PLEKHG3    | 17.7127359 | 3184.43844  | 0.0056 | 0.996 | 4.59E-09 | count | 1 |
| AC008440.2 | 17.7127628 | 3184.440465 | 0.0056 | 0.996 | 4.59E-09 | count | 1 |
| ENO4       | 17.7127567 | 3184.446224 | 0.0056 | 0.996 | 4.59E-09 | count | 1 |
| AC018521.2 | 17.712742  | 3184.432736 | 0.0056 | 0.996 | 4.59E-09 | count | 1 |
| KIF20A     | 17.7127547 | 3184.436452 | 0.0056 | 0.996 | 4.59E-09 | count | 1 |
| AC104806.2 | 17.7127444 | 3184.442527 | 0.0056 | 0.996 | 4.59E-09 | count | 1 |
| AC093620.1 | 17.7127358 | 3184.433368 | 0.0056 | 0.996 | 4.59E-09 | count | 1 |
| AC138393.3 | 17.7127732 | 3184.454306 | 0.0056 | 0.996 | 4.59E-09 | count | 1 |
| AL031673.1 | 17.7127445 | 3184.442434 | 0.0056 | 0.996 | 4.59E-09 | count | 1 |
| CD8A       | 17.7127438 | 3184.442675 | 0.0056 | 0.996 | 4.59E-09 | count | 1 |

|             |            |             |        |        |          |       |   |
|-------------|------------|-------------|--------|--------|----------|-------|---|
| AC009630.1  | 17.7127604 | 3184.450646 | 0.0056 | 0.996  | 4.59E-09 | count | 1 |
| AC007952.5  | 17.7127489 | 3184.437083 | 0.0056 | 0.996  | 4.59E-09 | count | 1 |
| ARHGAP15    | 17.7127405 | 3184.433052 | 0.0056 | 0.996  | 4.59E-09 | count | 1 |
| AC078788.1  | 17.7127597 | 3184.450701 | 0.0056 | 0.996  | 4.59E-09 | count | 1 |
| AP001412.1  | 17.7127439 | 3184.442527 | 0.0056 | 0.996  | 4.59E-09 | count | 1 |
| SIRPB1      | 17.7127447 | 3184.442471 | 0.0056 | 0.996  | 4.59E-09 | count | 1 |
| LINC00239   | 17.7127437 | 3184.452206 | 0.0056 | 0.996  | 4.59E-09 | count | 1 |
| AC005050.1  | 17.7127531 | 3184.44628  | 0.0056 | 0.996  | 4.59E-09 | count | 1 |
| VSIG8       | 17.7127323 | 3184.438514 | 0.0056 | 0.996  | 4.59E-09 | count | 1 |
| AC004477.3  | 17.7127397 | 3184.442694 | 0.0056 | 0.996  | 4.59E-09 | count | 1 |
| AL031587.3  | 17.7127375 | 3184.438161 | 0.0056 | 0.996  | 4.59E-09 | count | 1 |
| GGN         | 0.5255445  | 0.7802413   | 0.6736 | 0.501  | 4.66E-09 | count | 1 |
| TMPO-AS1    | 0.6186588  | 0.7361235   | 0.8404 | 0.401  | 5.30E-09 | count | 1 |
| AP000866.5  | 0.6519882  | 0.8267036   | 0.7887 | 0.43   | 5.51E-09 | count | 1 |
| AL162311.3  | 0.8599741  | 0.7508324   | 1.1454 | 0.252  | 6.71E-09 | count | 1 |
| CXADR       | 1.0694557  | 0.5142197   | 2.0798 | 0.0376 | 7.72E-09 | count | 1 |
| KCNJ1       | 0.4986664  | 1.6385299   | 0.3043 | 0.761  | 1.22E-08 | count | 1 |
| COMP        | 17.7550746 | 4909.964995 | 0.0036 | 0.997  | 1.24E-08 | count | 1 |
| RPS6KB2-AS1 | 17.3069183 | 3924.302224 | 0.0044 | 0.996  | 1.24E-08 | count | 1 |
| CYBB        | 17.439264  | 3229.208782 | 0.0054 | 0.996  | 1.24E-08 | count | 1 |
| SOSTDC1     | 17.7560724 | 2784.830354 | 0.0064 | 0.995  | 1.24E-08 | count | 1 |
| NDST3       | 17.4383524 | 2769.513823 | 0.0063 | 0.995  | 1.24E-08 | count | 1 |
| IRX6        | 17.5552154 | 2146.97053  | 0.0082 | 0.993  | 1.24E-08 | count | 1 |
| CLCN2       | 17.6583643 | 1470.086163 | 0.012  | 0.99   | 1.24E-08 | count | 1 |
| LRRC37A     | 18.1804394 | 2376.189647 | 0.0077 | 0.994  | 1.25E-08 | count | 1 |
| LINC002481  | 18.1573199 | 3032.288211 | 0.006  | 0.995  | 1.25E-08 | count | 1 |
| AC068282.1  | 18.1573195 | 3032.288041 | 0.006  | 0.995  | 1.25E-08 | count | 1 |
| P3H2-AS1    | 17.7217948 | 1914.569994 | 0.0093 | 0.993  | 1.25E-08 | count | 1 |
| OR3A3       | 17.8021437 | 2653.842023 | 0.0067 | 0.995  | 1.25E-08 | count | 1 |
| AC012557.2  | 17.9206756 | 2690.156047 | 0.0067 | 0.995  | 1.25E-08 | count | 1 |
| AC137723.1  | 17.6145819 | 1920.785411 | 0.0092 | 0.993  | 1.25E-08 | count | 1 |
| LINC02193   | 17.4937884 | 2173.483223 | 0.008  | 0.994  | 1.25E-08 | count | 1 |
| AC011446.2  | 17.7874072 | 2188.146187 | 0.0081 | 0.994  | 1.25E-08 | count | 1 |
| LKAAEAR1    | 18.0175411 | 2444.171227 | 0.0074 | 0.994  | 1.25E-08 | count | 1 |
| CHRDL1      | 17.3534999 | 1933.825113 | 0.009  | 0.993  | 1.25E-08 | count | 1 |
| NUDT11      | 17.3534955 | 1933.825172 | 0.009  | 0.993  | 1.25E-08 | count | 1 |
| OTUD6A      | 17.1891934 | 2977.256761 | 0.0058 | 0.995  | 1.25E-08 | count | 1 |
| AF213884.3  | 18.5056191 | 3489.560438 | 0.0053 | 0.996  | 1.25E-08 | count | 1 |
| AC093512.1  | 17.6791958 | 1941.415286 | 0.0091 | 0.993  | 1.25E-08 | count | 1 |
| AC074099.1  | 17.6971063 | 1918.756474 | 0.0092 | 0.993  | 1.25E-08 | count | 1 |
| DCAF4L1     | 0.6461573  | 0.7977921   | 0.8099 | 0.418  | 1.49E-08 | count | 1 |
| SLC2A14     | 0.8091383  | 0.4021      | 2.0123 | 0.0443 | 1.75E-08 | count | 1 |
| LAMC2       | 0.8468141  | 1.1062048   | 0.7655 | 0.444  | 1.81E-08 | count | 1 |
| ADAM33      | 0.9889465  | 1.8818467   | 0.5255 | 0.599  | 2.00E-08 | count | 1 |
| AC009336.2  | 17.0480871 | 3447.926631 | 0.0049 | 0.996  | 3.38E-08 | count | 1 |

|             |           |           |          |       |             |       |   |
|-------------|-----------|-----------|----------|-------|-------------|-------|---|
| MRPL55      | 7.19E-05  | 0.1338088 | 5.00E-04 | 1     | 9.93E-05    | count | 1 |
| CACNB3      | 0.0004214 | 0.414713  | 0.001    | 0.999 | 0.000366632 | count | 1 |
| CCDC125     | 0.0004713 | 0.2706615 | 0.0017   | 0.999 | 0.000567817 | count | 1 |
| SELENOO     | 0.0005482 | 0.3853076 | 0.0014   | 0.999 | 0.000598491 | count | 1 |
| TMEM199     | 0.0005728 | 0.2234433 | 0.0026   | 0.998 | 0.000726017 | count | 1 |
| RPL23A      | 0.0005259 | 0.0248994 | 0.0211   | 0.983 | 0.000757311 | count | 1 |
| C15orf40    | 0.0005706 | 0.1620101 | 0.0035   | 0.997 | 0.000778193 | count | 1 |
| NECAB3      | 0.0014259 | 0.4463892 | 0.0032   | 0.997 | 0.001305154 | count | 1 |
| UQCC1       | 0.0016346 | 0.3668189 | 0.0045   | 0.996 | 0.001421879 | count | 1 |
| USP13       | 0.0013302 | 0.2959479 | 0.0045   | 0.996 | 0.001569123 | count | 1 |
| B3GNT10     | 0.0034986 | 0.8417283 | 0.0042   | 0.997 | 0.001695426 | count | 1 |
| AC119674.2  | 0.0058797 | 0.5813996 | 0.0101   | 0.992 | 0.001900562 | count | 1 |
| AP1M1       | 0.0015657 | 0.2156155 | 0.0073   | 0.994 | 0.001957979 | count | 1 |
| CCNDBP1     | 0.0016972 | 0.1025554 | 0.0165   | 0.987 | 0.002379693 | count | 1 |
| THAP9       | 0.0034986 | 0.70182   | 0.005    | 0.996 | 0.002538252 | count | 1 |
| CCM2        | 0.0019634 | 0.1569105 | 0.0125   | 0.99  | 0.002645878 | count | 1 |
| APLNR       | 0.0019417 | 0.1682405 | 0.0115   | 0.991 | 0.002676232 | count | 1 |
| ZNF776      | 0.0032183 | 0.5266976 | 0.0061   | 0.995 | 0.002686447 | count | 1 |
| NDUFA2      | 0.0020402 | 0.078307  | 0.0261   | 0.979 | 0.002885379 | count | 1 |
| TM9SF4      | 0.0023782 | 0.2493753 | 0.0095   | 0.992 | 0.002998888 | count | 1 |
| LPIN2       | 0.0024348 | 0.2265948 | 0.0107   | 0.991 | 0.003082014 | count | 1 |
| SMARCE1     | 0.002316  | 0.1151955 | 0.0201   | 0.984 | 0.003183982 | count | 1 |
| SIX1        | 0.0335104 | 0.9564235 | 0.035    | 0.972 | 0.003221222 | count | 1 |
| RABL6       | 0.0024324 | 0.1663551 | 0.0146   | 0.988 | 0.003236232 | count | 1 |
| RFX3        | 0.0028637 | 0.2791669 | 0.0103   | 0.992 | 0.003387489 | count | 1 |
| GM2A        | 0.0036811 | 0.4013499 | 0.0092   | 0.993 | 0.003465772 | count | 1 |
| ZNF506      | 0.0026684 | 0.1991217 | 0.0134   | 0.989 | 0.003479401 | count | 1 |
| KIF1BP      | 0.0026606 | 0.1714263 | 0.0155   | 0.988 | 0.003536423 | count | 1 |
| C19orf24    | 0.0025332 | 0.101649  | 0.0249   | 0.98  | 0.003536461 | count | 1 |
| LINC01184   | 0.0027479 | 0.1664009 | 0.0165   | 0.987 | 0.003625466 | count | 1 |
| SLC7A1      | 0.0038241 | 0.3829913 | 0.01     | 0.992 | 0.003691951 | count | 1 |
| PPP1R26-AS1 | 0.021041  | 1.156281  | 0.0182   | 0.985 | 0.003809233 | count | 1 |
| FOLH1       | 0.021041  | 1.156281  | 0.0182   | 0.985 | 0.003809233 | count | 1 |
| AC009318.2  | 0.021041  | 1.156281  | 0.0182   | 0.985 | 0.003809233 | count | 1 |
| ASTN2       | 0.021041  | 1.15821   | 0.0182   | 0.986 | 0.003809233 | count | 1 |
| ERCC8       | 0.0048471 | 0.3764697 | 0.0129   | 0.99  | 0.003952385 | count | 1 |
| KHDC4       | 0.0037617 | 0.2308119 | 0.0163   | 0.987 | 0.004212339 | count | 1 |
| DLST        | 0.0033886 | 0.219666  | 0.0154   | 0.988 | 0.004217799 | count | 1 |
| S100A12     | 0.0134238 | 0.8976758 | 0.015    | 0.988 | 0.004328869 | count | 1 |
| LYAR        | 0.0031721 | 0.1234569 | 0.0257   | 0.98  | 0.004349264 | count | 1 |
| SEC61A2     | 0.0093629 | 0.6383859 | 0.0147   | 0.988 | 0.004530133 | count | 1 |
| BECN1       | 0.0033098 | 0.1248476 | 0.0265   | 0.979 | 0.004538899 | count | 1 |
| UVSSA       | 0.0035846 | 0.3597323 | 0.01     | 0.992 | 0.004624454 | count | 1 |
| POLR3F      | 0.0039671 | 0.2524215 | 0.0157   | 0.987 | 0.004718484 | count | 1 |
| RPL4        | 0.0032919 | 0.0358562 | 0.0918   | 0.927 | 0.004723743 | count | 1 |

|            |           |           |        |        |             |       |   |
|------------|-----------|-----------|--------|--------|-------------|-------|---|
| AC020765.2 | 0.0084386 | 0.6676835 | 0.0126 | 0.99   | 0.004791532 | count | 1 |
| SAE1       | 0.0037635 | 0.155527  | 0.0242 | 0.981  | 0.004914289 | count | 1 |
| AP2A2      | 0.0037061 | 0.1586251 | 0.0234 | 0.981  | 0.004930652 | count | 1 |
| NAIF1      | 0.0068893 | 0.4312007 | 0.016  | 0.987  | 0.004994817 | count | 1 |
| GABPA      | 0.0037742 | 0.1467151 | 0.0257 | 0.979  | 0.00505011  | count | 1 |
| CAV2       | 0.0035449 | 0.0564223 | 0.0628 | 0.95   | 0.005064604 | count | 1 |
| FAM206A    | 0.0043627 | 0.2765157 | 0.0158 | 0.987  | 0.005188866 | count | 1 |
| GNG12-AS1  | 0.0070559 | 0.4326026 | 0.0163 | 0.987  | 0.005290906 | count | 1 |
| ETFB       | 0.003763  | 0.0759859 | 0.0495 | 0.961  | 0.005351939 | count | 1 |
| LINC01615  | 0.0063709 | 0.4883196 | 0.013  | 0.99   | 0.005429683 | count | 1 |
| COPS4      | 0.0040354 | 0.1347514 | 0.0299 | 0.976  | 0.005471223 | count | 1 |
| SLC25A12   | 0.004989  | 0.2670731 | 0.0187 | 0.985  | 0.005660599 | count | 1 |
| UBP1       | 0.0046615 | 0.2312711 | 0.0202 | 0.984  | 0.005700131 | count | 1 |
| POLDIP2    | 0.0044759 | 0.167897  | 0.0267 | 0.979  | 0.005856719 | count | 1 |
| BTBD1      | 0.0045456 | 0.1911739 | 0.0238 | 0.981  | 0.005863989 | count | 1 |
| CELF4      | 0.0103524 | 0.8388856 | 0.0123 | 0.99   | 0.005875451 | count | 1 |
| C6orf89    | 0.0042995 | 0.1315871 | 0.0327 | 0.974  | 0.005893799 | count | 1 |
| TXNL1      | 0.0041971 | 0.0787213 | 0.0533 | 0.957  | 0.005896631 | count | 1 |
| POLR2J3    | 0.0044097 | 0.1759569 | 0.0251 | 0.98   | 0.006028029 | count | 1 |
| S100A11    | 0.0043076 | 0.0345762 | 0.1246 | 0.901  | 0.006195894 | count | 1 |
| TERC       | 0.0346753 | 1.118725  | 0.031  | 0.975  | 0.00624736  | count | 1 |
| AC008906.1 | 0.0346753 | 1.118725  | 0.031  | 0.975  | 0.00624736  | count | 1 |
| AL137003.2 | 0.0346753 | 1.118725  | 0.031  | 0.975  | 0.00624736  | count | 1 |
| FSBP       | 0.0346753 | 1.118725  | 0.031  | 0.975  | 0.00624736  | count | 1 |
| C9orf152   | 0.0346753 | 1.118725  | 0.031  | 0.975  | 0.00624736  | count | 1 |
| AC084824.5 | 0.0346753 | 1.1171246 | 0.031  | 0.975  | 0.00624736  | count | 1 |
| HEXA-AS1   | 0.0346753 | 1.1171246 | 0.031  | 0.975  | 0.00624736  | count | 1 |
| GAREM1     | 0.0346753 | 1.23073   | 0.0282 | 0.978  | 0.00624736  | count | 1 |
| CLNS1A     | 0.0044939 | 0.0965234 | 0.0466 | 0.963  | 0.006307957 | count | 1 |
| PPA1       | 0.0044913 | 0.0718371 | 0.0625 | 0.95   | 0.006384528 | count | 1 |
| COMMD9     | 0.0049192 | 0.1610635 | 0.0305 | 0.976  | 0.006589938 | count | 1 |
| MAPRE1     | 0.0048994 | 0.1211544 | 0.0404 | 0.968  | 0.006714795 | count | 1 |
| HLA-C      | 0.0046647 | 0.0296225 | 0.1575 | 0.8749 | 0.006718864 | count | 1 |
| ABCB9      | 0.021041  | 0.9476197 | 0.0222 | 0.982  | 0.006769025 | count | 1 |
| OTUD6B-AS1 | 0.0048381 | 0.0997072 | 0.0485 | 0.961  | 0.006796102 | count | 1 |
| PRMT1      | 0.0047804 | 0.0680324 | 0.0703 | 0.944  | 0.006801529 | count | 1 |
| FPGT       | 0.0057129 | 0.258949  | 0.0221 | 0.982  | 0.006880437 | count | 1 |
| TXN        | 0.0048097 | 0.0475503 | 0.1012 | 0.919  | 0.006904977 | count | 1 |
| ARAP3      | 0.0054849 | 0.2100412 | 0.0261 | 0.979  | 0.007028094 | count | 1 |
| TMEM263    | 0.0053306 | 0.1545729 | 0.0345 | 0.972  | 0.007132342 | count | 1 |
| MST1       | 0.0755387 | 0.6911327 | 0.1093 | 0.913  | 0.007146877 | count | 1 |
| AC139887.4 | 0.0755387 | 0.8514546 | 0.0887 | 0.929  | 0.007146877 | count | 1 |
| RDH5       | 0.0083566 | 0.4886886 | 0.0171 | 0.986  | 0.007261258 | count | 1 |
| SHMT2      | 0.006353  | 0.2351367 | 0.027  | 0.978  | 0.007422374 | count | 1 |
| ATF1       | 0.0056334 | 0.1461996 | 0.0385 | 0.969  | 0.007615228 | count | 1 |

|             |           |           |        |        |             |       |   |
|-------------|-----------|-----------|--------|--------|-------------|-------|---|
| SLC38A2     | 0.0055154 | 0.0782705 | 0.0705 | 0.944  | 0.007825969 | count | 1 |
| RAD51AP1    | 0.0139144 | 0.7113959 | 0.0196 | 0.984  | 0.007890143 | count | 1 |
| SPICE1      | 0.0074962 | 0.3068134 | 0.0244 | 0.981  | 0.007924111 | count | 1 |
| AARS        | 0.0067087 | 0.2472071 | 0.0271 | 0.978  | 0.007933354 | count | 1 |
| MED27       | 0.0063065 | 0.1912746 | 0.033  | 0.974  | 0.007940303 | count | 1 |
| AL355338.1  | 0.0067379 | 0.323984  | 0.0208 | 0.983  | 0.008012506 | count | 1 |
| ATP5PO      | 0.0056344 | 0.0531413 | 0.106  | 0.916  | 0.008047475 | count | 1 |
| FAM160B1    | 0.00652   | 0.2135443 | 0.0305 | 0.976  | 0.008139177 | count | 1 |
| DDX52       | 0.0060402 | 0.1428923 | 0.0423 | 0.966  | 0.008200127 | count | 1 |
| LRRFIP2     | 0.0059639 | 0.0978565 | 0.0609 | 0.951  | 0.008348772 | count | 1 |
| AL590560.2  | 0.0465609 | 0.976254  | 0.0477 | 0.962  | 0.008353511 | count | 1 |
| PRKAR2A-AS1 | 0.0465609 | 0.976254  | 0.0477 | 0.962  | 0.008353511 | count | 1 |
| ATP5F1C     | 0.0059075 | 0.0531727 | 0.1111 | 0.912  | 0.008437157 | count | 1 |
| RNPEPL1     | 0.006331  | 0.1556237 | 0.0407 | 0.968  | 0.00856584  | count | 1 |
| TCTE3       | 0.0119883 | 0.6474144 | 0.0185 | 0.985  | 0.008682727 | count | 1 |
| NRBP2       | 0.0082791 | 0.3022553 | 0.0274 | 0.978  | 0.008811363 | count | 1 |
| MEA1        | 0.0063612 | 0.0972597 | 0.0654 | 0.948  | 0.00888146  | count | 1 |
| CLN8        | 0.0068973 | 0.2469106 | 0.0279 | 0.978  | 0.008928128 | count | 1 |
| AL050343.1  | 0.028103  | 0.8027265 | 0.035  | 0.972  | 0.009020852 | count | 1 |
| RPS6KA5     | 0.007612  | 0.24339   | 0.0313 | 0.975  | 0.009229185 | count | 1 |
| RAF1        | 0.0072218 | 0.1941157 | 0.0372 | 0.97   | 0.009233814 | count | 1 |
| VPS16       | 0.0081579 | 0.2684821 | 0.0304 | 0.976  | 0.009399676 | count | 1 |
| RAI1        | 0.0089031 | 0.374162  | 0.0238 | 0.981  | 0.009474852 | count | 1 |
| PLEC        | 0.0067535 | 0.0932591 | 0.0724 | 0.942  | 0.009485991 | count | 1 |
| VCPKMT      | 0.0083764 | 0.3384201 | 0.0248 | 0.98   | 0.009501214 | count | 1 |
| ITPRIPL1    | 0.0137309 | 0.5299116 | 0.0259 | 0.979  | 0.009574454 | count | 1 |
| GRIA2       | 0.1051825 | 0.9767123 | 0.1077 | 0.914  | 0.009840543 | count | 1 |
| AC067930.1  | 0.1051825 | 0.9767123 | 0.1077 | 0.914  | 0.009840543 | count | 1 |
| KCNQ3       | 0.1051825 | 1.236186  | 0.0851 | 0.932  | 0.009840543 | count | 1 |
| PTPN11      | 0.0072559 | 0.1131003 | 0.0642 | 0.949  | 0.010008692 | count | 1 |
| TBC1D8B     | 0.0092256 | 0.3031888 | 0.0304 | 0.976  | 0.010063332 | count | 1 |
| HNRNPUL1    | 0.0074512 | 0.1265469 | 0.0589 | 0.953  | 0.010095857 | count | 1 |
| BROX        | 0.0075664 | 0.1364755 | 0.0554 | 0.956  | 0.010224607 | count | 1 |
| CCT3        | 0.0072469 | 0.067077  | 0.108  | 0.914  | 0.010255424 | count | 1 |
| HEBP2       | 0.0073287 | 0.071828  | 0.102  | 0.9187 | 0.010438238 | count | 1 |
| DCLRE1A     | 0.0185285 | 0.6700667 | 0.0277 | 0.978  | 0.010494651 | count | 1 |
| AL136115.2  | 0.113463  | 1.141585  | 0.0994 | 0.921  | 0.010582002 | count | 1 |
| AC006116.8  | 0.113463  | 1.141585  | 0.0994 | 0.921  | 0.010582002 | count | 1 |
| VPS54       | 0.0094201 | 0.2728487 | 0.0345 | 0.972  | 0.010812556 | count | 1 |
| TRMT112     | 0.0076196 | 0.047237  | 0.1613 | 0.872  | 0.010905223 | count | 1 |
| PPP4C       | 0.0078249 | 0.0864109 | 0.0906 | 0.928  | 0.010989617 | count | 1 |
| MCM6        | 0.0117101 | 0.3446986 | 0.034  | 0.973  | 0.011012662 | count | 1 |
| ATAD3B      | 0.0159134 | 0.6170082 | 0.0258 | 0.979  | 0.011091227 | count | 1 |
| ATG12       | 0.0080537 | 0.1129845 | 0.0713 | 0.943  | 0.011115387 | count | 1 |
| MUS81       | 0.0093051 | 0.241423  | 0.0385 | 0.969  | 0.011149838 | count | 1 |

|            |           |           |        |       |             |       |   |
|------------|-----------|-----------|--------|-------|-------------|-------|---|
| CCNJL      | 0.1207569 | 1.107196  | 0.1091 | 0.913 | 0.011231188 | count | 1 |
| HR         | 0.1207569 | 1.107196  | 0.1091 | 0.913 | 0.011231188 | count | 1 |
| ZNF763     | 0.1207569 | 1.107196  | 0.1091 | 0.913 | 0.011231188 | count | 1 |
| SLC25A34   | 0.1207569 | 1.114578  | 0.1083 | 0.914 | 0.011231188 | count | 1 |
| AC137932.3 | 0.1207569 | 1.114578  | 0.1083 | 0.914 | 0.011231188 | count | 1 |
| MTCL1      | 0.0631868 | 0.5871395 | 0.1076 | 0.914 | 0.011269702 | count | 1 |
| DPH5       | 0.0092384 | 0.2373324 | 0.0389 | 0.969 | 0.011270983 | count | 1 |
| COPB1      | 0.0082066 | 0.1110472 | 0.0739 | 0.941 | 0.011362204 | count | 1 |
| GNPTAB     | 0.0088217 | 0.178909  | 0.0493 | 0.961 | 0.011465016 | count | 1 |
| RPS19      | 0.0079556 | 0.0233843 | 0.3402 | 0.734 | 0.011465372 | count | 1 |
| HOOK3      | 0.0083178 | 0.1163251 | 0.0715 | 0.943 | 0.011506086 | count | 1 |
| GOT2       | 0.0096023 | 0.2567848 | 0.0374 | 0.97  | 0.011561699 | count | 1 |
| LOXL2      | 0.009443  | 0.235124  | 0.0402 | 0.968 | 0.011588379 | count | 1 |
| PHKG2      | 0.0099162 | 0.2709    | 0.0366 | 0.971 | 0.01175706  | count | 1 |
| ZNF644     | 0.0085599 | 0.1114642 | 0.0768 | 0.939 | 0.011830149 | count | 1 |
| PSMD2      | 0.0087827 | 0.1319028 | 0.0666 | 0.947 | 0.012156722 | count | 1 |
| RNF111     | 0.0096219 | 0.2094672 | 0.0459 | 0.963 | 0.012247603 | count | 1 |
| ZNHIT6     | 0.0092214 | 0.1952078 | 0.0472 | 0.962 | 0.012277693 | count | 1 |
| RAB1B      | 0.0090913 | 0.1331252 | 0.0683 | 0.946 | 0.012429108 | count | 1 |
| FLAD1      | 0.0103257 | 0.2778815 | 0.0372 | 0.97  | 0.012461148 | count | 1 |
| CEP95      | 0.0108089 | 0.271246  | 0.0398 | 0.968 | 0.012703307 | count | 1 |
| IL4R       | 0.0099552 | 0.2084788 | 0.0478 | 0.962 | 0.012873712 | count | 1 |
| HMGNA4     | 0.0164325 | 0.4079379 | 0.0403 | 0.968 | 0.013037596 | count | 1 |
| ING5       | 0.0105421 | 0.2015123 | 0.0523 | 0.958 | 0.013116558 | count | 1 |
| EIF5AL1    | 0.0303453 | 0.6511322 | 0.0466 | 0.963 | 0.013139808 | count | 1 |
| MBOAT1     | 0.0162481 | 0.4751397 | 0.0342 | 0.973 | 0.013222309 | count | 1 |
| CHD6       | 0.0097568 | 0.1352864 | 0.0721 | 0.943 | 0.0132585   | count | 1 |
| NEK9       | 0.0115296 | 0.2628763 | 0.0439 | 0.965 | 0.013280954 | count | 1 |
| ENDOG      | 0.0102    | 0.1859175 | 0.0549 | 0.956 | 0.013286227 | count | 1 |
| MAP4       | 0.0094307 | 0.0738636 | 0.1277 | 0.898 | 0.013340481 | count | 1 |
| TRMT61A    | 0.0114764 | 0.2791993 | 0.0411 | 0.967 | 0.013402881 | count | 1 |
| RUVBL2     | 0.0101041 | 0.1596101 | 0.0633 | 0.95  | 0.013482993 | count | 1 |
| SNRNPB     | 0.0094987 | 0.062936  | 0.1509 | 0.88  | 0.013488391 | count | 1 |
| ATL3       | 0.0098493 | 0.1177038 | 0.0837 | 0.933 | 0.013644406 | count | 1 |
| FAM168A    | 0.0121602 | 0.2934064 | 0.0414 | 0.967 | 0.01366918  | count | 1 |
| ZNF584     | 0.0196767 | 0.4545534 | 0.0433 | 0.965 | 0.013703339 | count | 1 |
| SNUPN      | 0.0107811 | 0.2146111 | 0.0502 | 0.96  | 0.013941253 | count | 1 |
| PRG4       | 0.0788469 | 0.6037999 | 0.1306 | 0.896 | 0.013984731 | count | 1 |
| PTPRA      | 0.0101548 | 0.0962979 | 0.1055 | 0.916 | 0.014196359 | count | 1 |
| MGAT1      | 0.0102411 | 0.1093169 | 0.0937 | 0.925 | 0.014267117 | count | 1 |
| R3HCC1     | 0.0108695 | 0.17123   | 0.0635 | 0.949 | 0.014319912 | count | 1 |
| PTPN9      | 0.0139354 | 0.4461677 | 0.0312 | 0.975 | 0.014504811 | count | 1 |
| DYNLT1     | 0.0103357 | 0.0750037 | 0.1378 | 0.89  | 0.014657002 | count | 1 |
| TMEM14B    | 0.0103467 | 0.0675963 | 0.1531 | 0.878 | 0.014693551 | count | 1 |
| ZFAT       | 0.0231498 | 0.640342  | 0.0362 | 0.971 | 0.014724574 | count | 1 |

|            |           |           |        |        |             |       |   |
|------------|-----------|-----------|--------|--------|-------------|-------|---|
| TIGD1      | 0.0231498 | 0.6730098 | 0.0344 | 0.973  | 0.014724574 | count | 1 |
| SUGCT      | 0.0231498 | 0.6798747 | 0.0341 | 0.973  | 0.014724574 | count | 1 |
| AFG1L      | 0.0181018 | 0.5764071 | 0.0314 | 0.975  | 0.014725978 | count | 1 |
| RANGAP1    | 0.0152013 | 0.3369128 | 0.0451 | 0.964  | 0.014823223 | count | 1 |
| E2F6       | 0.0121895 | 0.2338413 | 0.0521 | 0.958  | 0.014838053 | count | 1 |
| ENDOU      | 0.0346753 | 0.6667201 | 0.052  | 0.959  | 0.014996298 | count | 1 |
| PTPMT1     | 0.0114787 | 0.1977135 | 0.0581 | 0.954  | 0.015015922 | count | 1 |
| FBXO25     | 0.0116511 | 0.1829992 | 0.0637 | 0.949  | 0.01503928  | count | 1 |
| NDUFAF7    | 0.0128738 | 0.2679207 | 0.0481 | 0.962  | 0.015127761 | count | 1 |
| WAC        | 0.0108609 | 0.0959551 | 0.1132 | 0.91   | 0.015144722 | count | 1 |
| DPM3       | 0.0108958 | 0.1008916 | 0.108  | 0.914  | 0.015147932 | count | 1 |
| EXOC3      | 0.0122057 | 0.2340421 | 0.0522 | 0.958  | 0.015232132 | count | 1 |
| YPEL1      | 0.0127897 | 0.2966585 | 0.0431 | 0.966  | 0.015432204 | count | 1 |
| MOSPD3     | 0.0116529 | 0.1731113 | 0.0673 | 0.946  | 0.015506643 | count | 1 |
| ARHGDI     | 0.0108904 | 0.0587327 | 0.1854 | 0.8529 | 0.015538007 | count | 1 |
| BAHCC1     | 0.0165508 | 0.604926  | 0.0274 | 0.978  | 0.015757861 | count | 1 |
| USP19      | 0.0170138 | 0.3819366 | 0.0445 | 0.964  | 0.01576861  | count | 1 |
| HES6       | 0.0626157 | 0.8550986 | 0.0732 | 0.942  | 0.01577936  | count | 1 |
| SMIM37     | 0.0113113 | 0.0966943 | 0.117  | 0.907  | 0.015856279 | count | 1 |
| CRIP1      | 0.011931  | 0.1656114 | 0.072  | 0.943  | 0.015861467 | count | 1 |
| LINC01876  | 0.0498223 | 0.9452322 | 0.0527 | 0.958  | 0.015883399 | count | 1 |
| HSPA12A    | 0.0498223 | 0.9463739 | 0.0526 | 0.958  | 0.015883399 | count | 1 |
| KATNAL1    | 0.0135266 | 0.3178183 | 0.0426 | 0.966  | 0.015894073 | count | 1 |
| PNISR      | 0.0112215 | 0.0743825 | 0.1509 | 0.88   | 0.015897271 | count | 1 |
| ZNF77      | 0.0153436 | 0.3673286 | 0.0418 | 0.967  | 0.01596801  | count | 1 |
| GPN2       | 0.0135009 | 0.2372632 | 0.0569 | 0.955  | 0.016003083 | count | 1 |
| GPBP1L1    | 0.0119887 | 0.1470827 | 0.0815 | 0.935  | 0.01600389  | count | 1 |
| ADCY9      | 0.0188598 | 0.440782  | 0.0428 | 0.966  | 0.016040221 | count | 1 |
| FAM229A    | 0.0267317 | 0.5084316 | 0.0526 | 0.958  | 0.016088926 | count | 1 |
| PAFAH1B1   | 0.0115231 | 0.0996325 | 0.1157 | 0.908  | 0.01619678  | count | 1 |
| AC005076.1 | 0.0185849 | 0.4562196 | 0.0407 | 0.968  | 0.016419827 | count | 1 |
| CDIPT      | 0.0118058 | 0.1037919 | 0.1137 | 0.909  | 0.016423991 | count | 1 |
| C3orf52    | 0.0314467 | 0.6126772 | 0.0513 | 0.959  | 0.01649968  | count | 1 |
| ZNF257     | 0.0223465 | 0.5027394 | 0.0444 | 0.965  | 0.016706798 | count | 1 |
| CRY1       | 0.0158768 | 0.2956507 | 0.0537 | 0.957  | 0.01676786  | count | 1 |
| AC004130.1 | 0.0208274 | 0.5628713 | 0.037  | 0.97   | 0.016935108 | count | 1 |
| KMT2A      | 0.0119813 | 0.0877449 | 0.1365 | 0.891  | 0.016935385 | count | 1 |
| WDR11      | 0.012971  | 0.2059478 | 0.063  | 0.95   | 0.01700161  | count | 1 |
| DHX38      | 0.0136307 | 0.2058939 | 0.0662 | 0.947  | 0.017059773 | count | 1 |
| ZFAND6     | 0.01223   | 0.0998    | 0.1225 | 0.902  | 0.017113616 | count | 1 |
| NEDD4      | 0.0125644 | 0.1294923 | 0.097  | 0.923  | 0.017242795 | count | 1 |
| IFI27L1    | 0.0130776 | 0.1837799 | 0.0712 | 0.943  | 0.017296371 | count | 1 |
| RCOR1      | 0.0136441 | 0.2293829 | 0.0595 | 0.953  | 0.017324038 | count | 1 |
| SNX19      | 0.0147841 | 0.2965168 | 0.0499 | 0.96   | 0.01737002  | count | 1 |
| RMDN1      | 0.0129157 | 0.152737  | 0.0846 | 0.933  | 0.017456188 | count | 1 |



|            |           |           |        |        |             |       |   |
|------------|-----------|-----------|--------|--------|-------------|-------|---|
| USP7       | 0.0130683 | 0.1393733 | 0.0938 | 0.925  | 0.017792634 | count | 1 |
| DYRK3      | 0.0171383 | 0.2888874 | 0.0593 | 0.953  | 0.017967509 | count | 1 |
| HIKESHI    | 0.0129747 | 0.0949151 | 0.1367 | 0.891  | 0.018112201 | count | 1 |
| CCDC47     | 0.012803  | 0.0684077 | 0.1872 | 0.852  | 0.018164222 | count | 1 |
| LINC00886  | 0.0421069 | 0.7986591 | 0.0527 | 0.958  | 0.018171872 | count | 1 |
| AC092069.1 | 0.0156116 | 0.307909  | 0.0507 | 0.96   | 0.018226406 | count | 1 |
| ZMYM2      | 0.0137453 | 0.1694035 | 0.0811 | 0.935  | 0.018289817 | count | 1 |
| TWF2       | 0.0132026 | 0.106402  | 0.1241 | 0.901  | 0.018335712 | count | 1 |
| NDUFS3     | 0.0130931 | 0.1036474 | 0.1263 | 0.899  | 0.018336725 | count | 1 |
| SELENOH    | 0.0128807 | 0.0582339 | 0.2212 | 0.825  | 0.01836263  | count | 1 |
| VCAN       | 0.0137588 | 0.2094278 | 0.0657 | 0.948  | 0.018448738 | count | 1 |
| SEL1L      | 0.0136935 | 0.1491149 | 0.0918 | 0.927  | 0.018661312 | count | 1 |
| AC104794.2 | 0.0171488 | 0.3103281 | 0.0553 | 0.956  | 0.018691329 | count | 1 |
| RTN4       | 0.0132097 | 0.0599891 | 0.2202 | 0.826  | 0.018827297 | count | 1 |
| NAA10      | 0.0132314 | 0.0636961 | 0.2077 | 0.835  | 0.01883407  | count | 1 |
| CENPBD1    | 0.023398  | 0.4858201 | 0.0482 | 0.962  | 0.019016642 | count | 1 |
| LSM8       | 0.0135315 | 0.082259  | 0.1645 | 0.869  | 0.019143954 | count | 1 |
| TSG101     | 0.0136898 | 0.1094131 | 0.1251 | 0.9    | 0.019174684 | count | 1 |
| STEAP1B    | 0.0766929 | 0.5908853 | 0.1298 | 0.897  | 0.019235898 | count | 1 |
| ZNF566     | 0.0183742 | 0.4799148 | 0.0383 | 0.969  | 0.019260564 | count | 1 |
| ATP1A1     | 0.0135504 | 0.067925  | 0.1995 | 0.842  | 0.019282216 | count | 1 |
| AVIL       | 0.0322592 | 0.4905189 | 0.0658 | 0.948  | 0.019390363 | count | 1 |
| TCF7L2     | 0.0142866 | 0.1495698 | 0.0955 | 0.924  | 0.019391542 | count | 1 |
| JPX        | 0.0143635 | 0.1503613 | 0.0955 | 0.924  | 0.019400215 | count | 1 |
| HACD3      | 0.0138335 | 0.1019091 | 0.1357 | 0.892  | 0.019419892 | count | 1 |
| ZBTB12     | 0.0611456 | 1.1050162 | 0.0553 | 0.956  | 0.019423576 | count | 1 |
| TRIL       | 0.0611456 | 1.1070819 | 0.0552 | 0.956  | 0.019423576 | count | 1 |
| RCOR2      | 0.0611456 | 1.1070819 | 0.0552 | 0.956  | 0.019423576 | count | 1 |
| AC025031.4 | 0.0611456 | 1.1070819 | 0.0552 | 0.956  | 0.019423576 | count | 1 |
| GSDMB      | 0.0611456 | 1.1070819 | 0.0552 | 0.956  | 0.019423576 | count | 1 |
| LINC00309  | 0.0611456 | 1.382313  | 0.0442 | 0.965  | 0.019423576 | count | 1 |
| DNAJC14    | 0.0208216 | 0.3391933 | 0.0614 | 0.951  | 0.019556288 | count | 1 |
| ARID4B     | 0.0138468 | 0.0759115 | 0.1824 | 0.855  | 0.019560408 | count | 1 |
| CAPNS1     | 0.0137908 | 0.0591045 | 0.2333 | 0.8155 | 0.019655042 | count | 1 |
| ZNF138     | 0.0154548 | 0.2217864 | 0.0697 | 0.944  | 0.019710613 | count | 1 |
| SMARCD1    | 0.0149678 | 0.2010304 | 0.0745 | 0.941  | 0.019795075 | count | 1 |
| ISYNA1     | 0.0150574 | 0.23029   | 0.0654 | 0.948  | 0.019891563 | count | 1 |
| MRPL21     | 0.0142727 | 0.0972162 | 0.1468 | 0.883  | 0.019967447 | count | 1 |
| SVIL       | 0.014604  | 0.1228617 | 0.1189 | 0.905  | 0.020250731 | count | 1 |
| ORMDL2     | 0.0147108 | 0.1130721 | 0.1301 | 0.896  | 0.020344797 | count | 1 |
| CCDC127    | 0.0154728 | 0.1892739 | 0.0817 | 0.935  | 0.020356585 | count | 1 |
| PPIL6      | 0.0231498 | 0.4613243 | 0.0502 | 0.96   | 0.020438239 | count | 1 |
| PPP2R5D    | 0.0201811 | 0.3705749 | 0.0545 | 0.957  | 0.020471571 | count | 1 |
| SSNA1      | 0.0145781 | 0.0918468 | 0.1587 | 0.874  | 0.020492209 | count | 1 |
| WDR19      | 0.0202225 | 0.4687315 | 0.0431 | 0.966  | 0.020513465 | count | 1 |

|            |           |           |        |        |             |       |   |
|------------|-----------|-----------|--------|--------|-------------|-------|---|
| KAT7       | 0.0162611 | 0.2074394 | 0.0784 | 0.938  | 0.020738158 | count | 1 |
| B3GALNT2   | 0.0200222 | 0.2931786 | 0.0683 | 0.946  | 0.020825975 | count | 1 |
| AL450998.2 | 0.0173613 | 0.2596054 | 0.0669 | 0.947  | 0.02084297  | count | 1 |
| BHLHB9     | 0.021926  | 0.4637008 | 0.0473 | 0.962  | 0.020860043 | count | 1 |
| KARS       | 0.0153132 | 0.1611435 | 0.095  | 0.924  | 0.020978802 | count | 1 |
| TP53I3     | 0.015557  | 0.1411203 | 0.1102 | 0.912  | 0.021043709 | count | 1 |
| FBXW11     | 0.0156506 | 0.1517757 | 0.1031 | 0.918  | 0.021075861 | count | 1 |
| TPH1       | 0.1207569 | 0.7872883 | 0.1534 | 0.878  | 0.021100713 | count | 1 |
| ZNF784     | 0.1207569 | 0.7846801 | 0.1539 | 0.878  | 0.021100713 | count | 1 |
| PKN3       | 0.0162551 | 0.2358942 | 0.0689 | 0.945  | 0.021152282 | count | 1 |
| MTHFD2L    | 0.0170143 | 0.2284227 | 0.0745 | 0.941  | 0.02116166  | count | 1 |
| CHODL      | 0.0669149 | 0.5825311 | 0.1149 | 0.909  | 0.02121744  | count | 1 |
| HSD17B8    | 0.0165929 | 0.2197468 | 0.0755 | 0.94   | 0.021250639 | count | 1 |
| MDM1       | 0.0188701 | 0.2792347 | 0.0676 | 0.946  | 0.02147312  | count | 1 |
| TCP1       | 0.0153852 | 0.0867437 | 0.1774 | 0.859  | 0.021558284 | count | 1 |
| MROH6      | 0.0259277 | 0.4228113 | 0.0613 | 0.951  | 0.021558929 | count | 1 |
| SLC20A2    | 0.0196067 | 0.2960969 | 0.0662 | 0.947  | 0.021599999 | count | 1 |
| DOK1       | 0.0197264 | 0.2739547 | 0.072  | 0.943  | 0.021731618 | count | 1 |
| DYNLRB1    | 0.0153787 | 0.0538195 | 0.2857 | 0.7751 | 0.021955123 | count | 1 |
| C14orf119  | 0.0157488 | 0.098345  | 0.1601 | 0.873  | 0.021982217 | count | 1 |
| TMLHE      | 0.0199487 | 0.30276   | 0.0659 | 0.947  | 0.022089571 | count | 1 |
| CU638689.5 | 0.039239  | 0.9564982 | 0.041  | 0.967  | 0.022111879 | count | 1 |
| GTF2H1     | 0.017302  | 0.1802321 | 0.096  | 0.924  | 0.022328083 | count | 1 |
| ACTRT3     | 0.0321968 | 0.6615198 | 0.0487 | 0.961  | 0.022363706 | count | 1 |
| ELAVL2     | 0.0321968 | 0.7003096 | 0.046  | 0.963  | 0.022363706 | count | 1 |
| CCAR1      | 0.0165404 | 0.1655062 | 0.0999 | 0.92   | 0.022406055 | count | 1 |
| CLASRP     | 0.0201126 | 0.2725511 | 0.0738 | 0.941  | 0.02248855  | count | 1 |
| AC078802.1 | 0.0711061 | 0.9696316 | 0.0733 | 0.942  | 0.022516445 | count | 1 |
| NHLRC1     | 0.0711061 | 0.9696316 | 0.0733 | 0.942  | 0.022516445 | count | 1 |
| NEXMIF     | 0.0711061 | 1.106081  | 0.0643 | 0.949  | 0.022516445 | count | 1 |
| PNPLA7     | 0.0711061 | 1.106081  | 0.0643 | 0.949  | 0.022516445 | count | 1 |
| RPS12      | 0.0157174 | 0.0187349 | 0.8389 | 0.402  | 0.022666458 | count | 1 |
| FAM216A    | 0.0262905 | 0.4060582 | 0.0647 | 0.948  | 0.022778343 | count | 1 |
| PRH1       | 0.0183861 | 0.2322012 | 0.0792 | 0.937  | 0.022829465 | count | 1 |
| UBXN2A     | 0.0176742 | 0.1809078 | 0.0977 | 0.922  | 0.022867863 | count | 1 |
| AKT2       | 0.019503  | 0.2912844 | 0.067  | 0.947  | 0.022906157 | count | 1 |
| TOMM70     | 0.0169659 | 0.1509539 | 0.1124 | 0.911  | 0.023014286 | count | 1 |
| ZNF879     | 0.0383563 | 0.5877935 | 0.0653 | 0.948  | 0.023021899 | count | 1 |
| KCTD12     | 0.0164787 | 0.1044373 | 0.1578 | 0.875  | 0.023262458 | count | 1 |
| BUD31      | 0.0165367 | 0.0809065 | 0.2044 | 0.838  | 0.023279059 | count | 1 |
| UBA2       | 0.0171521 | 0.1220759 | 0.1405 | 0.888  | 0.023474141 | count | 1 |
| NFATC2     | 0.0184367 | 0.2219853 | 0.0831 | 0.934  | 0.023535876 | count | 1 |
| AL450326.1 | 0.0223267 | 0.4198673 | 0.0532 | 0.958  | 0.023563189 | count | 1 |
| TRAPPC13   | 0.0217842 | 0.3517006 | 0.0619 | 0.951  | 0.023595189 | count | 1 |
| MAP3K13    | 0.0170443 | 0.111053  | 0.1535 | 0.878  | 0.023696097 | count | 1 |

|            |           |           |        |        |             |       |   |
|------------|-----------|-----------|--------|--------|-------------|-------|---|
| FBXW7      | 0.0181961 | 0.1895324 | 0.096  | 0.924  | 0.023763854 | count | 1 |
| MED8       | 0.0180041 | 0.1522069 | 0.1183 | 0.906  | 0.023907239 | count | 1 |
| SLIRP      | 0.0172162 | 0.087617  | 0.1965 | 0.844  | 0.023973396 | count | 1 |
| UMPS       | 0.0187921 | 0.215376  | 0.0873 | 0.93   | 0.023989173 | count | 1 |
| SEC22B     | 0.0176686 | 0.1163093 | 0.1519 | 0.879  | 0.024303431 | count | 1 |
| MRPS36     | 0.0174622 | 0.1009428 | 0.173  | 0.863  | 0.024382697 | count | 1 |
| MED17      | 0.0257234 | 0.3304623 | 0.0778 | 0.938  | 0.024459962 | count | 1 |
| AHSA1      | 0.0179816 | 0.1202786 | 0.1495 | 0.881  | 0.024552544 | count | 1 |
| TAF1D      | 0.0173882 | 0.0786114 | 0.2212 | 0.825  | 0.024565481 | count | 1 |
| CDK19      | 0.0236903 | 0.3121688 | 0.0759 | 0.94   | 0.024631074 | count | 1 |
| MMS22L     | 0.0297133 | 0.4404781 | 0.0675 | 0.946  | 0.024690553 | count | 1 |
| SYNE1      | 0.0181368 | 0.1282245 | 0.1414 | 0.888  | 0.024826223 | count | 1 |
| PPHLN1     | 0.0181588 | 0.1272145 | 0.1427 | 0.887  | 0.024956721 | count | 1 |
| YPEL3      | 0.0176767 | 0.0837682 | 0.211  | 0.833  | 0.025100043 | count | 1 |
| RBX1       | 0.0176408 | 0.0609933 | 0.2892 | 0.772  | 0.025107006 | count | 1 |
| PUDP       | 0.0235331 | 0.3575054 | 0.0658 | 0.948  | 0.025171127 | count | 1 |
| AC124312.1 | 0.0363156 | 0.7222685 | 0.0503 | 0.96   | 0.025202696 | count | 1 |
| RABGEF1    | 0.0256019 | 0.4349533 | 0.0589 | 0.953  | 0.025204    | count | 1 |
| CWF19L1    | 0.0225773 | 0.290425  | 0.0777 | 0.938  | 0.025238719 | count | 1 |
| ZNF513     | 0.0254366 | 0.349663  | 0.0727 | 0.942  | 0.025301023 | count | 1 |
| FUNDC1     | 0.0195025 | 0.172894  | 0.1128 | 0.91   | 0.025315113 | count | 1 |
| KLHDC10    | 0.019561  | 0.1888053 | 0.1036 | 0.917  | 0.025450797 | count | 1 |
| PIK3R2     | 0.2935232 | 1.081219  | 0.2715 | 0.786  | 0.025565853 | count | 1 |
| TMEM9B-AS1 | 0.2935232 | 1.102052  | 0.2663 | 0.79   | 0.025565853 | count | 1 |
| PCDH18     | 0.2935232 | 1.159126  | 0.2532 | 0.8    | 0.025565853 | count | 1 |
| AC091563.1 | 0.2935232 | 1.165386  | 0.2519 | 0.801  | 0.025565853 | count | 1 |
| AL162586.1 | 0.2935232 | 1.425015  | 0.206  | 0.837  | 0.025565853 | count | 1 |
| PLGLB1     | 0.2955192 | 1.109806  | 0.2663 | 0.79   | 0.025720168 | count | 1 |
| AC078883.2 | 0.2955192 | 1.109806  | 0.2663 | 0.79   | 0.025720168 | count | 1 |
| ATP2A1-AS1 | 0.2955192 | 1.109806  | 0.2663 | 0.79   | 0.025720168 | count | 1 |
| POC5       | 0.0215695 | 0.2720091 | 0.0793 | 0.937  | 0.025823818 | count | 1 |
| PARP15     | 0.2976949 | 1.193464  | 0.2494 | 0.803  | 0.025888095 | count | 1 |
| EIF2S2     | 0.0182028 | 0.0574944 | 0.3166 | 0.7516 | 0.02599936  | count | 1 |
| EFCAB13    | 0.0234343 | 0.2610478 | 0.0898 | 0.928  | 0.026069771 | count | 1 |
| GPALPP1    | 0.019823  | 0.1734477 | 0.1143 | 0.909  | 0.026122831 | count | 1 |
| FAM126A    | 0.020633  | 0.2195896 | 0.094  | 0.925  | 0.026126169 | count | 1 |
| ARAP1      | 0.0252427 | 0.3462682 | 0.0729 | 0.942  | 0.026240492 | count | 1 |
| ZNF83      | 0.0195675 | 0.1620973 | 0.1207 | 0.904  | 0.026417165 | count | 1 |
| RNF135     | 0.0206459 | 0.2151604 | 0.096  | 0.924  | 0.026566329 | count | 1 |
| PCID2      | 0.0197894 | 0.1492288 | 0.1326 | 0.895  | 0.026655451 | count | 1 |
| HHEX       | 0.0191787 | 0.101838  | 0.1883 | 0.851  | 0.026827464 | count | 1 |
| PXMP4      | 0.0232464 | 0.3043309 | 0.0764 | 0.939  | 0.026848828 | count | 1 |
| ALG14      | 0.0213889 | 0.2291067 | 0.0934 | 0.926  | 0.026872437 | count | 1 |
| SURF6      | 0.0210588 | 0.196335  | 0.1073 | 0.915  | 0.026991992 | count | 1 |
| RPL28      | 0.0187386 | 0.0200064 | 0.9366 | 0.349  | 0.027015419 | count | 1 |

|              |           |           |        |        |             |       |   |
|--------------|-----------|-----------|--------|--------|-------------|-------|---|
| EIF3D        | 0.0192463 | 0.0679803 | 0.2831 | 0.777  | 0.027266832 | count | 1 |
| CMPK1        | 0.0196681 | 0.0905766 | 0.2171 | 0.828  | 0.027544524 | count | 1 |
| CDPF1        | 0.0260139 | 0.3333607 | 0.078  | 0.938  | 0.027633965 | count | 1 |
| PCBD2        | 0.029142  | 0.3411755 | 0.0854 | 0.932  | 0.027697511 | count | 1 |
| AL021453.1   | 0.0334248 | 0.4940737 | 0.0677 | 0.946  | 0.027756873 | count | 1 |
| DCTN2        | 0.0198375 | 0.0889263 | 0.2231 | 0.823  | 0.027778171 | count | 1 |
| WDR18        | 0.020749  | 0.1550016 | 0.1339 | 0.894  | 0.027858259 | count | 1 |
| HYAL1        | 0.0237661 | 0.2242407 | 0.106  | 0.916  | 0.02790414  | count | 1 |
| UBR2         | 0.0207339 | 0.1729006 | 0.1199 | 0.905  | 0.027954915 | count | 1 |
| PPARD        | 0.028558  | 0.3809359 | 0.075  | 0.94   | 0.028103413 | count | 1 |
| TMUB2        | 0.0217795 | 0.176681  | 0.1233 | 0.902  | 0.028150432 | count | 1 |
| CIAO1        | 0.0209779 | 0.1522308 | 0.1378 | 0.89   | 0.028186094 | count | 1 |
| TRIM68       | 0.0356752 | 0.5712601 | 0.0624 | 0.95   | 0.028205203 | count | 1 |
| ALAD         | 0.0256261 | 0.3171479 | 0.0808 | 0.936  | 0.028215008 | count | 1 |
| NOP10        | 0.0198404 | 0.0551059 | 0.36   | 0.7188 | 0.028321301 | count | 1 |
| MIPEP        | 0.0310967 | 0.3731134 | 0.0833 | 0.934  | 0.028338032 | count | 1 |
| MIS18A       | 0.024318  | 0.3011636 | 0.0807 | 0.936  | 0.02855094  | count | 1 |
| CCNI         | 0.0199346 | 0.0393512 | 0.5066 | 0.612  | 0.028623444 | count | 1 |
| RTL8A        | 0.0206507 | 0.1089263 | 0.1896 | 0.85   | 0.028645509 | count | 1 |
| KIN          | 0.0207175 | 0.1288424 | 0.1608 | 0.872  | 0.02868491  | count | 1 |
| ODC1         | 0.0204496 | 0.1256994 | 0.1627 | 0.871  | 0.028808001 | count | 1 |
| ZFP28        | 0.0321379 | 0.4263878 | 0.0754 | 0.94   | 0.028820617 | count | 1 |
| PYURF        | 0.0202733 | 0.0628453 | 0.3226 | 0.747  | 0.028839799 | count | 1 |
| BRF1         | 0.0260825 | 0.2865455 | 0.091  | 0.927  | 0.02886488  | count | 1 |
| CLIC1        | 0.0200934 | 0.0375863 | 0.5346 | 0.593  | 0.0288675   | count | 1 |
| STK3         | 0.0219929 | 0.173366  | 0.1269 | 0.899  | 0.029013858 | count | 1 |
| HSF2BP       | 0.0556731 | 0.8421513 | 0.0661 | 0.947  | 0.029028172 | count | 1 |
| GALK2        | 0.0235468 | 0.2073977 | 0.1135 | 0.91   | 0.029082059 | count | 1 |
| SLC44A1      | 0.021731  | 0.1651105 | 0.1316 | 0.895  | 0.029108962 | count | 1 |
| KIF9-AS1     | 0.0486597 | 0.6777291 | 0.0718 | 0.943  | 0.029134648 | count | 1 |
| UBE3C        | 0.0231667 | 0.2058697 | 0.1125 | 0.91   | 0.029366316 | count | 1 |
| OSMR         | 0.0225406 | 0.2027153 | 0.1112 | 0.911  | 0.029368453 | count | 1 |
| GRB2         | 0.0208553 | 0.0878747 | 0.2373 | 0.812  | 0.029373375 | count | 1 |
| EIF5A        | 0.0206836 | 0.0628995 | 0.3288 | 0.742  | 0.029472411 | count | 1 |
| NUDT16L1     | 0.022411  | 0.1770381 | 0.1266 | 0.899  | 0.029565001 | count | 1 |
| TMEM223      | 0.0215594 | 0.1301922 | 0.1656 | 0.868  | 0.029638394 | count | 1 |
| TMEM161B-AS1 | 0.0245363 | 0.2743186 | 0.0894 | 0.929  | 0.029650283 | count | 1 |
| KIF9         | 0.0216547 | 0.1175928 | 0.1842 | 0.854  | 0.029817458 | count | 1 |
| RPL21        | 0.0207036 | 0.0218052 | 0.9495 | 0.342  | 0.029828989 | count | 1 |
| AC103736.1   | 0.1207569 | 0.6406867 | 0.1885 | 0.851  | 0.029842245 | count | 1 |
| FURIN        | 0.0256295 | 0.2313966 | 0.1108 | 0.912  | 0.029994612 | count | 1 |
| TRMT12       | 0.0270481 | 0.260471  | 0.1038 | 0.917  | 0.030079851 | count | 1 |
| GLUD1        | 0.0216748 | 0.1119965 | 0.1935 | 0.847  | 0.030128674 | count | 1 |
| KRCC1        | 0.0220456 | 0.1308444 | 0.1685 | 0.866  | 0.030387912 | count | 1 |
| E4F1         | 0.0292709 | 0.3910755 | 0.0748 | 0.94   | 0.030413968 | count | 1 |

|            |           |           |        |        |             |       |   |
|------------|-----------|-----------|--------|--------|-------------|-------|---|
| NT5DC3     | 0.0818304 | 0.8060173 | 0.1015 | 0.919  | 0.030606119 | count | 1 |
| KCTD15     | 0.0315093 | 0.3597941 | 0.0876 | 0.93   | 0.030659538 | count | 1 |
| ZUP1       | 0.0281787 | 0.3154166 | 0.0893 | 0.929  | 0.030679641 | count | 1 |
| L3HYPDH    | 0.0243944 | 0.2333862 | 0.1045 | 0.917  | 0.030957532 | count | 1 |
| BX890604.1 | 0.043059  | 0.5399079 | 0.0798 | 0.936  | 0.030990234 | count | 1 |
| GAK        | 0.0274029 | 0.2285847 | 0.1199 | 0.905  | 0.03128511  | count | 1 |
| SLC25A36   | 0.0224727 | 0.0990338 | 0.2269 | 0.821  | 0.03146922  | count | 1 |
| SH3GL1     | 0.0244183 | 0.1824461 | 0.1338 | 0.894  | 0.031501968 | count | 1 |
| PIAS4      | 0.0293691 | 0.3292744 | 0.0892 | 0.929  | 0.031593657 | count | 1 |
| EMP2       | 0.0220663 | 0.0519793 | 0.4245 | 0.671  | 0.031611975 | count | 1 |
| MYH9       | 0.022166  | 0.0659769 | 0.336  | 0.7369 | 0.031654447 | count | 1 |
| ZNF85      | 0.025125  | 0.2445912 | 0.1027 | 0.918  | 0.031806962 | count | 1 |
| AC104825.1 | 0.0611456 | 0.7814752 | 0.0782 | 0.938  | 0.031836186 | count | 1 |
| GK         | 0.0568636 | 0.5143479 | 0.1106 | 0.912  | 0.031903699 | count | 1 |
| ANO10      | 0.0256104 | 0.2126254 | 0.1204 | 0.904  | 0.031937002 | count | 1 |
| HAS3       | 0.0378322 | 0.6332234 | 0.0597 | 0.952  | 0.03207425  | count | 1 |
| TCEA2      | 0.0233169 | 0.1170046 | 0.1993 | 0.842  | 0.032221108 | count | 1 |
| LRRC14     | 0.0315461 | 0.3063972 | 0.103  | 0.918  | 0.03223859  | count | 1 |
| DPYD       | 0.0251174 | 0.2021458 | 0.1243 | 0.901  | 0.032251915 | count | 1 |
| DDOST      | 0.0229697 | 0.0847406 | 0.2711 | 0.786  | 0.032338447 | count | 1 |
| AF064858.1 | 0.0866033 | 0.7943942 | 0.109  | 0.913  | 0.032344637 | count | 1 |
| FAHD1      | 0.0249402 | 0.1956404 | 0.1275 | 0.899  | 0.032366297 | count | 1 |
| HAX1       | 0.022909  | 0.0808601 | 0.2833 | 0.777  | 0.032388259 | count | 1 |
| USP24      | 0.0275941 | 0.2496636 | 0.1105 | 0.912  | 0.032582047 | count | 1 |
| KIF21A     | 0.0301369 | 0.3339377 | 0.0902 | 0.928  | 0.032614589 | count | 1 |
| TMEM206    | 0.0393555 | 0.4183439 | 0.0941 | 0.925  | 0.032648377 | count | 1 |
| KLF8       | 0.0290232 | 0.2755144 | 0.1053 | 0.916  | 0.032720549 | count | 1 |
| PHC1       | 0.0329828 | 0.4064273 | 0.0812 | 0.935  | 0.032775678 | count | 1 |
| LSM12      | 0.0236692 | 0.1086873 | 0.2178 | 0.828  | 0.032793647 | count | 1 |
| MIER1      | 0.0232072 | 0.0798295 | 0.2907 | 0.771  | 0.032819275 | count | 1 |
| BORA       | 0.0693145 | 0.6916368 | 0.1002 | 0.92   | 0.032996685 | count | 1 |
| RNMT       | 0.0237677 | 0.1124882 | 0.2113 | 0.833  | 0.033016852 | count | 1 |
| TMED8      | 0.0363473 | 0.3889738 | 0.0934 | 0.926  | 0.033096733 | count | 1 |
| VPS45      | 0.0293099 | 0.3131516 | 0.0936 | 0.925  | 0.033323058 | count | 1 |
| NDUFA10    | 0.0237189 | 0.0861405 | 0.2754 | 0.783  | 0.033438882 | count | 1 |
| B3GNTL1    | 0.0449528 | 0.6281024 | 0.0716 | 0.943  | 0.033458925 | count | 1 |
| IKZF5      | 0.0322891 | 0.3619549 | 0.0892 | 0.929  | 0.033538485 | count | 1 |
| THAP11     | 0.0248945 | 0.1644752 | 0.1514 | 0.88   | 0.03363573  | count | 1 |
| KMT2B      | 0.0251875 | 0.1781868 | 0.1414 | 0.888  | 0.033638675 | count | 1 |
| GCAT       | 0.0276634 | 0.285182  | 0.097  | 0.923  | 0.033710642 | count | 1 |
| LSG1       | 0.0251824 | 0.182338  | 0.1381 | 0.89   | 0.033843567 | count | 1 |
| EPDR1      | 0.0348195 | 0.4935763 | 0.0705 | 0.944  | 0.033865582 | count | 1 |
| MMP1       | 0.4059749 | 0.629479  | 0.6449 | 0.519  | 0.033879784 | count | 1 |
| RHPN1      | 0.0332011 | 0.300624  | 0.1104 | 0.912  | 0.033923242 | count | 1 |
| PPP1R3G    | 0.1382599 | 1.12831   | 0.1225 | 0.902  | 0.033966337 | count | 1 |

|            |           |           |        |        |             |       |   |
|------------|-----------|-----------|--------|--------|-------------|-------|---|
| GPC2       | 0.1382599 | 1.12831   | 0.1225 | 0.902  | 0.033966337 | count | 1 |
| FAM71F2    | 0.1382599 | 1.12831   | 0.1225 | 0.902  | 0.033966337 | count | 1 |
| SPIN2A     | 0.1382599 | 1.12831   | 0.1225 | 0.902  | 0.033966337 | count | 1 |
| MRVI1      | 0.1382599 | 1.12831   | 0.1225 | 0.902  | 0.033966337 | count | 1 |
| AP001062.1 | 0.1382599 | 1.12831   | 0.1225 | 0.902  | 0.033966337 | count | 1 |
| SDC1       | 0.1382599 | 1.1346253 | 0.1219 | 0.903  | 0.033966337 | count | 1 |
| CEP295NL   | 0.1382599 | 1.302298  | 0.1062 | 0.915  | 0.033966337 | count | 1 |
| C1orf74    | 0.1382599 | 1.3181    | 0.1049 | 0.916  | 0.033966337 | count | 1 |
| CDK6       | 0.0279265 | 0.229133  | 0.1219 | 0.903  | 0.034099483 | count | 1 |
| DNAJB12    | 0.025156  | 0.1323056 | 0.1901 | 0.849  | 0.034358156 | count | 1 |
| BBS12      | 0.0477861 | 0.5268264 | 0.0907 | 0.928  | 0.034359193 | count | 1 |
| EIF1B      | 0.0241844 | 0.061981  | 0.3902 | 0.696  | 0.034434327 | count | 1 |
| PACSIN3    | 0.0662787 | 0.768452  | 0.0862 | 0.931  | 0.034462658 | count | 1 |
| PRDX3      | 0.0244724 | 0.0750533 | 0.3261 | 0.744  | 0.034591961 | count | 1 |
| PEX19      | 0.0274217 | 0.2143875 | 0.1279 | 0.898  | 0.034710483 | count | 1 |
| RPL19      | 0.0242662 | 0.0170048 | 1.427  | 0.154  | 0.034992565 | count | 1 |
| ZNF347     | 0.0276528 | 0.2823226 | 0.0979 | 0.922  | 0.035002606 | count | 1 |
| RABEP2     | 0.0289749 | 0.2411258 | 0.1202 | 0.904  | 0.035081861 | count | 1 |
| MOB1A      | 0.0251532 | 0.097332  | 0.2584 | 0.796  | 0.035262708 | count | 1 |
| STARD4-AS1 | 0.2083008 | 0.6465766 | 0.3222 | 0.747  | 0.035274498 | count | 1 |
| LINC01126  | 0.1439601 | 1.1047751 | 0.1303 | 0.896  | 0.035298596 | count | 1 |
| LINC00997  | 0.1439601 | 1.0982246 | 0.1311 | 0.896  | 0.035298596 | count | 1 |
| LIN37      | 0.1439601 | 1.2729807 | 0.1131 | 0.91   | 0.035298596 | count | 1 |
| ADCY7      | 0.1439601 | 1.6336445 | 0.0881 | 0.9298 | 0.035298596 | count | 1 |
| SUPT5H     | 0.0271996 | 0.1696418 | 0.1603 | 0.873  | 0.035484382 | count | 1 |
| TMEM108    | 0.0952922 | 0.7694125 | 0.1239 | 0.901  | 0.035496421 | count | 1 |
| AC018362.2 | 0.2101562 | 0.7849648 | 0.2677 | 0.789  | 0.035564985 | count | 1 |
| RTN4IP1    | 0.0453597 | 0.5590202 | 0.0811 | 0.935  | 0.035797887 | count | 1 |
| CYTIP      | 0.4356511 | 0.7954889 | 0.5477 | 0.584  | 0.035948473 | count | 1 |
| INTS5      | 0.0416682 | 0.3475865 | 0.1199 | 0.905  | 0.036011367 | count | 1 |
| BRI3       | 0.0251643 | 0.0452645 | 0.5559 | 0.578  | 0.036075878 | count | 1 |
| DCTN6      | 0.0260168 | 0.1055452 | 0.2465 | 0.805  | 0.036117341 | count | 1 |
| NPIPA5     | 0.4396376 | 1.062097  | 0.4139 | 0.679  | 0.036222499 | count | 1 |
| TGFBI      | 0.4396376 | 1.11474   | 0.3944 | 0.693  | 0.036222499 | count | 1 |
| SLC25A39   | 0.0265733 | 0.1253344 | 0.212  | 0.832  | 0.036353372 | count | 1 |
| KREMEN1    | 0.0977636 | 0.5726123 | 0.1707 | 0.864  | 0.036389795 | count | 1 |
| RBM3       | 0.0255705 | 0.0542611 | 0.4712 | 0.638  | 0.036407167 | count | 1 |
| ACAD10     | 0.0576936 | 0.7849258 | 0.0735 | 0.941  | 0.036408299 | count | 1 |
| PKD2L2     | 0.1490635 | 1.0356163 | 0.1439 | 0.886  | 0.036486868 | count | 1 |
| PYCR2      | 0.0273359 | 0.1451022 | 0.1884 | 0.851  | 0.036489871 | count | 1 |
| TMPO       | 0.0267876 | 0.1328037 | 0.2017 | 0.84   | 0.036696923 | count | 1 |
| SNX32      | 0.4466317 | 1.087529  | 0.4107 | 0.681  | 0.036701068 | count | 1 |
| AC007038.1 | 0.4466317 | 1.090297  | 0.4096 | 0.682  | 0.036701068 | count | 1 |
| LINC00242  | 0.4466317 | 1.090297  | 0.4096 | 0.682  | 0.036701068 | count | 1 |
| PCLAF      | 0.4466317 | 1.242488  | 0.3595 | 0.719  | 0.036701068 | count | 1 |

|            |           |           |        |       |             |       |   |
|------------|-----------|-----------|--------|-------|-------------|-------|---|
| AC136604.3 | 0.0861337 | 1.0919    | 0.0789 | 0.937 | 0.036707166 | count | 1 |
| MTRF2      | 0.0861337 | 1.0919    | 0.0789 | 0.937 | 0.036707166 | count | 1 |
| AC005225.2 | 0.0861337 | 1.0919    | 0.0789 | 0.937 | 0.036707166 | count | 1 |
| AC106028.4 | 0.0861337 | 1.0919    | 0.0789 | 0.937 | 0.036707166 | count | 1 |
| DPH1       | 0.0861337 | 1.0919    | 0.0789 | 0.937 | 0.036707166 | count | 1 |
| ASB1       | 0.0861337 | 1.179391  | 0.073  | 0.942 | 0.036707166 | count | 1 |
| PRR14L     | 0.0288452 | 0.2245831 | 0.1284 | 0.898 | 0.036805129 | count | 1 |
| MINOS1     | 0.0261268 | 0.081706  | 0.3198 | 0.749 | 0.036816965 | count | 1 |
| AC022784.3 | 0.2183519 | 0.9504848 | 0.2297 | 0.818 | 0.036843281 | count | 1 |
| SARDH      | 0.2183519 | 0.9504848 | 0.2297 | 0.818 | 0.036843281 | count | 1 |
| AL590428.1 | 0.2183519 | 1.0290359 | 0.2122 | 0.832 | 0.036843281 | count | 1 |
| LRRN1      | 0.2183519 | 1.247814  | 0.175  | 0.861 | 0.036843281 | count | 1 |
| AC004922.1 | 0.2183519 | 1.247814  | 0.175  | 0.861 | 0.036843281 | count | 1 |
| LPCAT3     | 0.0298774 | 0.2073908 | 0.1441 | 0.885 | 0.036887106 | count | 1 |
| POLR2J3    | 0.0992621 | 0.684842  | 0.1449 | 0.885 | 0.036930811 | count | 1 |
| DUT        | 0.0258418 | 0.0602221 | 0.4291 | 0.668 | 0.036935179 | count | 1 |
| UAP1       | 0.0283929 | 0.1588455 | 0.1787 | 0.858 | 0.037039425 | count | 1 |
| MAPK13     | 0.2198601 | 1.1182927 | 0.1966 | 0.844 | 0.037077657 | count | 1 |
| AC007448.3 | 0.2198601 | 1.1182927 | 0.1966 | 0.844 | 0.037077657 | count | 1 |
| MAFIP      | 0.2198601 | 1.127178  | 0.1951 | 0.845 | 0.037077657 | count | 1 |
| AL121672.2 | 0.2198601 | 1.14004   | 0.1929 | 0.847 | 0.037077657 | count | 1 |
| FAM239A    | 0.2198601 | 1.375293  | 0.1599 | 0.873 | 0.037077657 | count | 1 |
| WIPF2      | 0.0288112 | 0.2066821 | 0.1394 | 0.889 | 0.03709443  | count | 1 |
| AC092053.3 | 0.4540692 | 1.099963  | 0.4128 | 0.68  | 0.037206925 | count | 1 |
| SRSF12     | 0.4540692 | 1.099963  | 0.4128 | 0.68  | 0.037206925 | count | 1 |
| AL513550.1 | 0.4540692 | 1.099963  | 0.4128 | 0.68  | 0.037206925 | count | 1 |
| UFSP2      | 0.0273396 | 0.147828  | 0.1849 | 0.853 | 0.037272478 | count | 1 |
| GNPNAT1    | 0.0306006 | 0.2193528 | 0.1395 | 0.889 | 0.037282974 | count | 1 |
| EXOSC1     | 0.0274921 | 0.1370934 | 0.2005 | 0.841 | 0.037283532 | count | 1 |
| ARHGEF16   | 0.2212237 | 1.0896208 | 0.203  | 0.839 | 0.037289334 | count | 1 |
| CLEC4A     | 0.2212237 | 1.0896208 | 0.203  | 0.839 | 0.037289334 | count | 1 |
| AC104590.1 | 0.2212237 | 1.0896208 | 0.203  | 0.839 | 0.037289334 | count | 1 |
| ZGPAT      | 0.2212237 | 1.0896208 | 0.203  | 0.839 | 0.037289334 | count | 1 |
| DMC1       | 0.2212237 | 1.0896208 | 0.203  | 0.839 | 0.037289334 | count | 1 |
| AC133550.2 | 0.2212237 | 1.1031177 | 0.2005 | 0.841 | 0.037289334 | count | 1 |
| ZSWIM5     | 0.2212237 | 1.1125946 | 0.1988 | 0.842 | 0.037289334 | count | 1 |
| RNF26      | 0.0405899 | 0.3231759 | 0.1256 | 0.9   | 0.03749002  | count | 1 |
| RPUSD1     | 0.0309483 | 0.2506515 | 0.1235 | 0.902 | 0.037547962 | count | 1 |
| FBXW5      | 0.0271806 | 0.1116503 | 0.2434 | 0.808 | 0.037647651 | count | 1 |
| ZNF514     | 0.0398263 | 0.3482574 | 0.1144 | 0.909 | 0.037795932 | count | 1 |
| CHD1L      | 0.0338475 | 0.3231198 | 0.1048 | 0.917 | 0.037798283 | count | 1 |
| CTSO       | 0.0287038 | 0.1728805 | 0.166  | 0.868 | 0.037858254 | count | 1 |
| SPOP       | 0.0274572 | 0.1034229 | 0.2655 | 0.791 | 0.037998313 | count | 1 |
| COPS9      | 0.0269039 | 0.0649432 | 0.4143 | 0.679 | 0.038120617 | count | 1 |
| RPRD2      | 0.0297922 | 0.2002879 | 0.1487 | 0.882 | 0.03828354  | count | 1 |

|              |           |           |        |        |             |       |   |
|--------------|-----------|-----------|--------|--------|-------------|-------|---|
| NPC1         | 0.0344745 | 0.2944762 | 0.1171 | 0.907  | 0.038674608 | count | 1 |
| TNFRSF14-AS1 | 0.0540616 | 0.4519896 | 0.1196 | 0.905  | 0.038821476 | count | 1 |
| IQCC         | 0.1260407 | 0.8015755 | 0.1572 | 0.875  | 0.039219402 | count | 1 |
| AP001269.4   | 0.0628357 | 0.7389298 | 0.085  | 0.932  | 0.039606469 | count | 1 |
| CFAP57       | 0.4943126 | 1.20845   | 0.409  | 0.683  | 0.039890116 | count | 1 |
| SPR          | 0.0302806 | 0.1965066 | 0.1541 | 0.878  | 0.039935733 | count | 1 |
| POLE3        | 0.0298441 | 0.1513408 | 0.1972 | 0.844  | 0.040132039 | count | 1 |
| TBCK         | 0.0338119 | 0.2840386 | 0.119  | 0.905  | 0.040238138 | count | 1 |
| RALGPS2      | 0.0429972 | 0.3475338 | 0.1237 | 0.902  | 0.040256834 | count | 1 |
| TMEM44       | 0.0316318 | 0.2139329 | 0.1479 | 0.882  | 0.040441239 | count | 1 |
| INO80C       | 0.0296661 | 0.1289183 | 0.2301 | 0.818  | 0.040487619 | count | 1 |
| GTF3C4       | 0.0347678 | 0.324045  | 0.1073 | 0.915  | 0.040530553 | count | 1 |
| TXLNB        | 0.0455758 | 0.4647891 | 0.0981 | 0.922  | 0.040786632 | count | 1 |
| TSC22D4      | 0.0320857 | 0.1959131 | 0.1638 | 0.87   | 0.040797417 | count | 1 |
| ELP4         | 0.033121  | 0.2264811 | 0.1462 | 0.884  | 0.040812026 | count | 1 |
| POP4         | 0.0298104 | 0.1251709 | 0.2382 | 0.812  | 0.040850949 | count | 1 |
| C3orf58      | 0.0311229 | 0.1646762 | 0.189  | 0.85   | 0.040948398 | count | 1 |
| GPATCH3      | 0.0356214 | 0.4993898 | 0.0713 | 0.943  | 0.040950988 | count | 1 |
| ATP6V1E2     | 0.1684481 | 0.7998611 | 0.2106 | 0.833  | 0.040961756 | count | 1 |
| RAET1E       | 0.1684481 | 0.9205483 | 0.183  | 0.855  | 0.040961756 | count | 1 |
| TSC2         | 0.0337437 | 0.2172436 | 0.1553 | 0.877  | 0.041019105 | count | 1 |
| AC087623.3   | 0.0735778 | 0.4796907 | 0.1534 | 0.878  | 0.041109394 | count | 1 |
| ZNF589       | 0.0573891 | 0.4628667 | 0.124  | 0.901  | 0.041182811 | count | 1 |
| MMS19        | 0.0389404 | 0.3453134 | 0.1128 | 0.91   | 0.041307914 | count | 1 |
| VIM          | 0.0286426 | 0.0237916 | 1.2039 | 0.229  | 0.04131495  | count | 1 |
| DYNLL2       | 0.0318282 | 0.1838118 | 0.1732 | 0.863  | 0.041661097 | count | 1 |
| CARMN        | 0.0746551 | 0.7639967 | 0.0977 | 0.922  | 0.041700053 | count | 1 |
| HEXIM1       | 0.0322541 | 0.1572452 | 0.2051 | 0.837  | 0.041776959 | count | 1 |
| RPL7         | 0.029137  | 0.0252629 | 1.1533 | 0.249  | 0.041945906 | count | 1 |
| ZBTB11-AS1   | 0.041858  | 0.3142957 | 0.1332 | 0.894  | 0.041957271 | count | 1 |
| AC006333.2   | 0.0370834 | 0.3157444 | 0.1174 | 0.907  | 0.041957735 | count | 1 |
| CRADD        | 0.0376125 | 0.3307735 | 0.1137 | 0.909  | 0.041988144 | count | 1 |
| SCP2         | 0.0296394 | 0.0656643 | 0.4514 | 0.652  | 0.042152772 | count | 1 |
| MORF4L2      | 0.0301905 | 0.086781  | 0.3479 | 0.728  | 0.042314586 | count | 1 |
| NSF          | 0.0362389 | 0.24134   | 0.1502 | 0.881  | 0.042376253 | count | 1 |
| PDCL         | 0.0305688 | 0.1095037 | 0.2792 | 0.78   | 0.04239673  | count | 1 |
| TMEM184C     | 0.0366381 | 0.3545395 | 0.1033 | 0.918  | 0.042418701 | count | 1 |
| ADH5         | 0.0301954 | 0.0884166 | 0.3415 | 0.733  | 0.042499092 | count | 1 |
| CSNK2A1      | 0.0309338 | 0.1188742 | 0.2602 | 0.795  | 0.042651553 | count | 1 |
| FAM149A      | 0.0517032 | 0.5551745 | 0.0931 | 0.926  | 0.042799822 | count | 1 |
| EXOSC10      | 0.0338182 | 0.1962047 | 0.1724 | 0.863  | 0.042896839 | count | 1 |
| NUDT5        | 0.0310437 | 0.1173295 | 0.2646 | 0.791  | 0.04307865  | count | 1 |
| C5orf24      | 0.031015  | 0.1010622 | 0.3069 | 0.759  | 0.043183522 | count | 1 |
| RNF139       | 0.033933  | 0.1894522 | 0.1791 | 0.858  | 0.043191259 | count | 1 |
| PFDN5        | 0.0300909 | 0.0281831 | 1.0677 | 0.2858 | 0.04330317  | count | 1 |



|            |           |           |        |        |             |       |   |
|------------|-----------|-----------|--------|--------|-------------|-------|---|
| PPFIA1     | 0.0319049 | 0.1614934 | 0.1976 | 0.843  | 0.043309968 | count | 1 |
| SPPL3      | 0.0328605 | 0.174699  | 0.1881 | 0.851  | 0.043359161 | count | 1 |
| IL1R1      | 0.0306418 | 0.0853513 | 0.359  | 0.72   | 0.043521727 | count | 1 |
| ZP3        | 0.0568415 | 0.3663882 | 0.1551 | 0.877  | 0.043528609 | count | 1 |
| CTNNBIP1   | 0.0331279 | 0.1598701 | 0.2072 | 0.836  | 0.043661194 | count | 1 |
| LINC00685  | 0.0432597 | 0.3410893 | 0.1268 | 0.899  | 0.043759581 | count | 1 |
| TRIM28     | 0.0324918 | 0.1413426 | 0.2299 | 0.818  | 0.043793968 | count | 1 |
| SRSF9      | 0.0308401 | 0.0576067 | 0.5354 | 0.592  | 0.043935929 | count | 1 |
| DPH3       | 0.0323783 | 0.129396  | 0.2502 | 0.802  | 0.043940397 | count | 1 |
| CLEC11A    | 0.0789292 | 0.4088568 | 0.193  | 0.847  | 0.044040244 | count | 1 |
| NOL7       | 0.0308843 | 0.0580277 | 0.5322 | 0.5946 | 0.044055782 | count | 1 |
| PSME3      | 0.0358011 | 0.211878  | 0.169  | 0.866  | 0.044107418 | count | 1 |
| TMEM123    | 0.0312401 | 0.0804924 | 0.3881 | 0.698  | 0.04427041  | count | 1 |
| MFSD11     | 0.0338726 | 0.186771  | 0.1814 | 0.856  | 0.044421971 | count | 1 |
| B3GALT4    | 0.0344717 | 0.2150021 | 0.1603 | 0.873  | 0.04445249  | count | 1 |
| TMX2       | 0.0322766 | 0.1220151 | 0.2645 | 0.791  | 0.044521329 | count | 1 |
| FUZ        | 0.0405559 | 0.2952187 | 0.1374 | 0.891  | 0.044588583 | count | 1 |
| FUBP1      | 0.0336405 | 0.1362455 | 0.2469 | 0.805  | 0.044713211 | count | 1 |
| RASAL3     | 0.1448686 | 0.9942973 | 0.1457 | 0.884  | 0.044806726 | count | 1 |
| PACRGL     | 0.041     | 0.296279  | 0.1384 | 0.89   | 0.044832436 | count | 1 |
| CR381653.1 | 0.094958  | 0.8019891 | 0.1184 | 0.906  | 0.044887555 | count | 1 |
| AC105760.2 | 0.094958  | 0.9431545 | 0.1007 | 0.92   | 0.044887555 | count | 1 |
| TRAPPC3    | 0.0322859 | 0.1015595 | 0.3179 | 0.751  | 0.04499566  | count | 1 |
| CDIP1      | 0.0339367 | 0.1744113 | 0.1946 | 0.846  | 0.045062684 | count | 1 |
| AC016773.1 | 0.5761798 | 1.139477  | 0.5057 | 0.613  | 0.045075474 | count | 1 |
| POMGNT1    | 0.0352759 | 0.213476  | 0.1652 | 0.869  | 0.045185349 | count | 1 |
| SLC22A18AS | 0.0658707 | 0.7932671 | 0.083  | 0.934  | 0.045427723 | count | 1 |
| PCNA       | 0.0336251 | 0.1398814 | 0.2404 | 0.81   | 0.045690784 | count | 1 |
| LINC01704  | 0.5864397 | 1.080719  | 0.5426 | 0.587  | 0.045700263 | count | 1 |
| UCKL1-AS1  | 0.5864397 | 1.138642  | 0.515  | 0.607  | 0.045700263 | count | 1 |
| IRF5       | 0.5864397 | 1.183695  | 0.4954 | 0.62   | 0.045700263 | count | 1 |
| PKP1       | 0.5864397 | 1.236804  | 0.4742 | 0.635  | 0.045700263 | count | 1 |
| CCDC124    | 0.0326352 | 0.0893617 | 0.3652 | 0.715  | 0.045755952 | count | 1 |
| SRI        | 0.0321935 | 0.0617618 | 0.5213 | 0.602  | 0.045789168 | count | 1 |
| CRTC1      | 0.0442769 | 0.4760625 | 0.093  | 0.926  | 0.045927011 | count | 1 |
| EXTL3      | 0.0499833 | 0.4296263 | 0.1163 | 0.907  | 0.046102243 | count | 1 |
| UFC1       | 0.0323801 | 0.0531514 | 0.6092 | 0.5424 | 0.046233619 | count | 1 |
| MYLPF      | 0.5971708 | 1.088783  | 0.5485 | 0.583  | 0.046347923 | count | 1 |
| RALY       | 0.0330844 | 0.0839384 | 0.3942 | 0.694  | 0.04665411  | count | 1 |
| KIAA1549   | 0.078495  | 0.8045834 | 0.0976 | 0.922  | 0.046663841 | count | 1 |
| AC026401.3 | 0.126469  | 0.64329   | 0.1966 | 0.844  | 0.046666211 | count | 1 |
| FUOM       | 0.0399642 | 0.2976732 | 0.1343 | 0.893  | 0.046718966 | count | 1 |
| CTBP1-DT   | 0.0469037 | 0.3421489 | 0.1371 | 0.891  | 0.046985315 | count | 1 |
| DNAJC24    | 0.0395584 | 0.2906776 | 0.1361 | 0.892  | 0.047057424 | count | 1 |
| OSBPL8     | 0.0338403 | 0.106288  | 0.3184 | 0.75   | 0.047136414 | count | 1 |

|            |           |           |        |        |             |       |   |
|------------|-----------|-----------|--------|--------|-------------|-------|---|
| USP8       | 0.0341174 | 0.117355  | 0.2907 | 0.771  | 0.047168301 | count | 1 |
| BLOC1S5    | 0.0350655 | 0.160123  | 0.219  | 0.827  | 0.047212093 | count | 1 |
| ADAMTS3    | 0.0472587 | 0.4318224 | 0.1094 | 0.913  | 0.047338829 | count | 1 |
| HMG3       | 0.0334225 | 0.05533   | 0.6041 | 0.5459 | 0.04782959  | count | 1 |
| FBRSL1     | 0.0452632 | 0.3351163 | 0.1351 | 0.893  | 0.047982242 | count | 1 |
| GPT2       | 0.1307031 | 1.236856  | 0.1057 | 0.916  | 0.048166428 | count | 1 |
| PDS5A      | 0.0368574 | 0.1584045 | 0.2327 | 0.816  | 0.048168507 | count | 1 |
| WAPL       | 0.0362883 | 0.1609605 | 0.2254 | 0.822  | 0.048181552 | count | 1 |
| SLF2       | 0.0364226 | 0.2002479 | 0.1819 | 0.856  | 0.048211902 | count | 1 |
| TNR        | 0.630739  | 0.9304949 | 0.6779 | 0.498  | 0.048335858 | count | 1 |
| MPPE1      | 0.0400168 | 0.2209906 | 0.1811 | 0.856  | 0.048415831 | count | 1 |
| FAM174A    | 0.0349889 | 0.1215458 | 0.2879 | 0.773  | 0.048490756 | count | 1 |
| PBRM1      | 0.0357266 | 0.1276397 | 0.2799 | 0.78   | 0.048531443 | count | 1 |
| NDUFB5     | 0.0341435 | 0.0681705 | 0.5009 | 0.617  | 0.04854997  | count | 1 |
| SEC62      | 0.0338574 | 0.0432911 | 0.7821 | 0.434  | 0.048610793 | count | 1 |
| VAMP1      | 0.1032859 | 0.7797271 | 0.1325 | 0.895  | 0.048712456 | count | 1 |
| PCDHB7     | 0.1032859 | 0.8324744 | 0.1241 | 0.901  | 0.048712456 | count | 1 |
| RAB11FIP1  | 0.0353377 | 0.1626147 | 0.2173 | 0.828  | 0.048841647 | count | 1 |
| C9orf78    | 0.0345973 | 0.0867572 | 0.3988 | 0.69   | 0.0488861   | count | 1 |
| GNL3       | 0.0362367 | 0.1301761 | 0.2784 | 0.781  | 0.048930883 | count | 1 |
| TPT1       | 0.0339767 | 0.0190076 | 1.7875 | 0.074  | 0.049000474 | count | 1 |
| FANCC      | 0.0711748 | 0.5604688 | 0.127  | 0.899  | 0.04903008  | count | 1 |
| ZXDB       | 0.0608562 | 0.3593646 | 0.1693 | 0.866  | 0.049130469 | count | 1 |
| KTN1       | 0.0342482 | 0.0452248 | 0.7573 | 0.449  | 0.049144618 | count | 1 |
| ITPR1      | 0.036677  | 0.1547193 | 0.2371 | 0.813  | 0.049275708 | count | 1 |
| IFT74      | 0.0373514 | 0.1956329 | 0.1909 | 0.849  | 0.049305058 | count | 1 |
| AL591846.2 | 0.0597534 | 0.4794437 | 0.1246 | 0.901  | 0.049394308 | count | 1 |
| GANC       | 0.0521837 | 0.3255603 | 0.1603 | 0.873  | 0.049437651 | count | 1 |
| SVIP       | 0.0349911 | 0.0864616 | 0.4047 | 0.686  | 0.049446934 | count | 1 |
| DGCR6L     | 0.035732  | 0.1330605 | 0.2685 | 0.788  | 0.049473345 | count | 1 |
| TBC1D17    | 0.0417347 | 0.2691795 | 0.155  | 0.877  | 0.049638518 | count | 1 |
| PRCC       | 0.0380583 | 0.2027342 | 0.1877 | 0.851  | 0.049665312 | count | 1 |
| EFNB1      | 0.0460011 | 0.2686835 | 0.1712 | 0.864  | 0.049702293 | count | 1 |
| SF1        | 0.035058  | 0.0748244 | 0.4685 | 0.639  | 0.049712302 | count | 1 |
| GSPT1      | 0.0355932 | 0.0878645 | 0.4051 | 0.685  | 0.04994393  | count | 1 |
| KLC1       | 0.0382226 | 0.1575693 | 0.2426 | 0.808  | 0.049950041 | count | 1 |
| RUNX1      | 0.0842558 | 0.5651008 | 0.1491 | 0.881  | 0.050019099 | count | 1 |
| CENPP      | 0.0842558 | 0.5663318 | 0.1488 | 0.882  | 0.050019099 | count | 1 |
| AC245014.3 | 0.6600811 | 0.8135182 | 0.8114 | 0.417  | 0.050027158 | count | 1 |
| MED7       | 0.0395221 | 0.2337308 | 0.1691 | 0.866  | 0.05005785  | count | 1 |
| RPP38      | 0.0372969 | 0.1963183 | 0.19   | 0.849  | 0.05021338  | count | 1 |
| SUDS3      | 0.0367488 | 0.1431919 | 0.2566 | 0.797  | 0.050273195 | count | 1 |
| MICAL3     | 0.0481304 | 0.2614625 | 0.1841 | 0.854  | 0.05028432  | count | 1 |
| GBP7       | 0.0431661 | 0.3272314 | 0.1319 | 0.895  | 0.050287646 | count | 1 |
| STX7       | 0.0366542 | 0.1216778 | 0.3012 | 0.763  | 0.05032318  | count | 1 |

|            |           |           |        |        |             |       |   |
|------------|-----------|-----------|--------|--------|-------------|-------|---|
| ARHGEF15   | 0.0378075 | 0.1939664 | 0.1949 | 0.845  | 0.050537613 | count | 1 |
| EEA1       | 0.0360317 | 0.0965618 | 0.3731 | 0.709  | 0.050539244 | count | 1 |
| ARFGF1     | 0.0375202 | 0.1447597 | 0.2592 | 0.796  | 0.050581291 | count | 1 |
| RMDN2      | 0.045249  | 0.3519925 | 0.1286 | 0.898  | 0.050711978 | count | 1 |
| ECHDC1     | 0.0370745 | 0.1291371 | 0.2871 | 0.774  | 0.050728588 | count | 1 |
| ZNF562     | 0.0425267 | 0.2881092 | 0.1476 | 0.883  | 0.050840241 | count | 1 |
| NECAP2     | 0.0367332 | 0.1192236 | 0.3081 | 0.758  | 0.05090673  | count | 1 |
| LY6G5B     | 0.6783599 | 1.097942  | 0.6178 | 0.537  | 0.051059308 | count | 1 |
| TRIQQ      | 0.0379961 | 0.1785624 | 0.2128 | 0.832  | 0.051100667 | count | 1 |
| AC097634.1 | 0.0633509 | 0.4649136 | 0.1363 | 0.892  | 0.051121475 | count | 1 |
| RTL8C      | 0.0366045 | 0.0911881 | 0.4014 | 0.688  | 0.051144581 | count | 1 |
| RBFOX2     | 0.0377777 | 0.1398497 | 0.2701 | 0.787  | 0.05116212  | count | 1 |
| UCHL5      | 0.0380512 | 0.1516115 | 0.251  | 0.802  | 0.051362446 | count | 1 |
| AL158212.2 | 0.0866033 | 0.5611906 | 0.1543 | 0.877  | 0.051383617 | count | 1 |
| ACOT13     | 0.0378797 | 0.1408701 | 0.2689 | 0.788  | 0.051399438 | count | 1 |
| DCLK1      | 0.121912  | 0.5048425 | 0.2415 | 0.809  | 0.051420825 | count | 1 |
| C1orf56    | 0.0380512 | 0.1455683 | 0.2614 | 0.794  | 0.051426108 | count | 1 |
| PHF14      | 0.0366545 | 0.0937175 | 0.3911 | 0.696  | 0.051479075 | count | 1 |
| SLC35D1    | 0.058643  | 0.5041942 | 0.1163 | 0.907  | 0.051482684 | count | 1 |
| RNF216     | 0.0389065 | 0.175488  | 0.2217 | 0.825  | 0.051495468 | count | 1 |
| FAM193A    | 0.0476732 | 0.275001  | 0.1734 | 0.862  | 0.051500068 | count | 1 |
| CAPN1      | 0.0386185 | 0.1788517 | 0.2159 | 0.829  | 0.051532864 | count | 1 |
| NSMCE2     | 0.0398073 | 0.1706449 | 0.2333 | 0.816  | 0.051710815 | count | 1 |
| ZMYM4      | 0.0383207 | 0.1547491 | 0.2476 | 0.804  | 0.051758207 | count | 1 |
| APH1B      | 0.0405956 | 0.2043217 | 0.1987 | 0.843  | 0.051824965 | count | 1 |
| SARS       | 0.0371079 | 0.0918743 | 0.4039 | 0.686  | 0.05188106  | count | 1 |
| IKZF2      | 0.07007   | 0.5281624 | 0.1327 | 0.894  | 0.051894722 | count | 1 |
| ABCC5      | 0.04935   | 0.3867939 | 0.1276 | 0.898  | 0.051928451 | count | 1 |
| SLC2A1     | 0.1010897 | 0.6573897 | 0.1538 | 0.878  | 0.052085762 | count | 1 |
| UBE4B      | 0.0510945 | 0.3067879 | 0.1665 | 0.868  | 0.052094238 | count | 1 |
| SRSF11     | 0.0365858 | 0.0638514 | 0.573  | 0.5667 | 0.052153654 | count | 1 |
| ADAT2      | 0.0594965 | 0.4267837 | 0.1394 | 0.889  | 0.05222482  | count | 1 |
| ZNF544     | 0.0468625 | 0.3229816 | 0.1451 | 0.885  | 0.052269392 | count | 1 |
| ZBTB40     | 0.0559967 | 0.3759219 | 0.149  | 0.882  | 0.052329858 | count | 1 |
| U2AF1      | 0.7020951 | 0.7553028 | 0.9296 | 0.353  | 0.052375413 | count | 1 |
| RPS17      | 0.0382726 | 0.1254347 | 0.3051 | 0.76   | 0.052377042 | count | 1 |
| ALG1L2     | 0.0649548 | 0.7123828 | 0.0912 | 0.927  | 0.052400571 | count | 1 |
| SFMBT2     | 0.0764652 | 0.3558887 | 0.2149 | 0.83   | 0.052614823 | count | 1 |
| EFNA1      | 0.037109  | 0.0879278 | 0.422  | 0.673  | 0.052676592 | count | 1 |
| BRCC3      | 0.0424369 | 0.2235724 | 0.1898 | 0.849  | 0.052705409 | count | 1 |
| TM4SF1     | 0.0365958 | 0.0506494 | 0.7225 | 0.47   | 0.052716036 | count | 1 |
| FAM217B    | 0.0411938 | 0.2399108 | 0.1717 | 0.864  | 0.05275131  | count | 1 |
| C1orf123   | 0.0374951 | 0.0793639 | 0.4724 | 0.637  | 0.052900547 | count | 1 |
| WDR45B     | 0.0390868 | 0.1385287 | 0.2822 | 0.778  | 0.052902834 | count | 1 |
| STYX       | 0.0409884 | 0.2068555 | 0.1982 | 0.843  | 0.052934902 | count | 1 |

|            |           |           |        |        |             |       |   |
|------------|-----------|-----------|--------|--------|-------------|-------|---|
| HDAC2      | 0.0383314 | 0.1374841 | 0.2788 | 0.78   | 0.052941317 | count | 1 |
| ING4       | 0.0406515 | 0.176993  | 0.2297 | 0.818  | 0.053119194 | count | 1 |
| SNHG19     | 0.0596123 | 0.3446839 | 0.1729 | 0.863  | 0.053231715 | count | 1 |
| RAB29      | 0.0403648 | 0.16956   | 0.2381 | 0.812  | 0.053277246 | count | 1 |
| NCOR1      | 0.0378065 | 0.0895035 | 0.4224 | 0.673  | 0.053387006 | count | 1 |
| BTG3       | 0.0386809 | 0.1213529 | 0.3187 | 0.75   | 0.053547199 | count | 1 |
| SP100      | 0.0375762 | 0.0624141 | 0.602  | 0.5472 | 0.053564678 | count | 1 |
| GALNT14    | 0.726381  | 0.9004072 | 0.8067 | 0.42   | 0.053694272 | count | 1 |
| BCL2       | 0.0725705 | 0.471111  | 0.154  | 0.878  | 0.053719815 | count | 1 |
| CD82       | 0.0480137 | 0.2930961 | 0.1638 | 0.87   | 0.053796851 | count | 1 |
| UIMC1      | 0.0419937 | 0.1945194 | 0.2159 | 0.829  | 0.053880851 | count | 1 |
| ZBTB47     | 0.0910809 | 0.552619  | 0.1648 | 0.869  | 0.053981898 | count | 1 |
| ARL15      | 0.0425598 | 0.2049273 | 0.2077 | 0.835  | 0.054025337 | count | 1 |
| MAN2C1     | 0.0437008 | 0.2915527 | 0.1499 | 0.881  | 0.054094061 | count | 1 |
| PRKAR2A    | 0.0402617 | 0.1455143 | 0.2767 | 0.782  | 0.054105804 | count | 1 |
| DDX5       | 0.0377579 | 0.0379787 | 0.9942 | 0.32   | 0.054199623 | count | 1 |
| SEM1       | 0.0379407 | 0.0497418 | 0.7628 | 0.446  | 0.054212838 | count | 1 |
| NDUFA3     | 0.0385062 | 0.0844172 | 0.4561 | 0.648  | 0.054261621 | count | 1 |
| FAM53C     | 0.0462306 | 0.2688277 | 0.172  | 0.863  | 0.054351451 | count | 1 |
| NHP2       | 0.038281  | 0.0756157 | 0.5063 | 0.613  | 0.054370287 | count | 1 |
| LSM4       | 0.0387915 | 0.0904397 | 0.4289 | 0.668  | 0.054386654 | count | 1 |
| CSKMT      | 0.0425239 | 0.2165662 | 0.1964 | 0.844  | 0.054395651 | count | 1 |
| STRAP      | 0.038965  | 0.0844783 | 0.4612 | 0.645  | 0.054676131 | count | 1 |
| RPS19BP1   | 0.0386859 | 0.0769368 | 0.5028 | 0.615  | 0.054856439 | count | 1 |
| IDH3A      | 0.0441896 | 0.2104595 | 0.21   | 0.834  | 0.054876723 | count | 1 |
| KANSL1-AS1 | 0.0444998 | 0.173671  | 0.2562 | 0.798  | 0.054892643 | count | 1 |
| GSK3B      | 0.0411295 | 0.1488963 | 0.2762 | 0.782  | 0.055017873 | count | 1 |
| HAUS8      | 0.0616675 | 0.4212517 | 0.1464 | 0.884  | 0.055049251 | count | 1 |
| TRAF4      | 0.0433719 | 0.2119474 | 0.2046 | 0.838  | 0.055054013 | count | 1 |
| ZNF471     | 0.0551884 | 0.4066936 | 0.1357 | 0.892  | 0.055227031 | count | 1 |
| MACO1      | 0.0416397 | 0.1681595 | 0.2476 | 0.804  | 0.055510424 | count | 1 |
| ATP5F1A    | 0.0394475 | 0.0640357 | 0.616  | 0.538  | 0.056000465 | count | 1 |
| SRCAP      | 0.089406  | 0.6669666 | 0.134  | 0.893  | 0.056009331 | count | 1 |
| CMTM4      | 0.109075  | 0.675269  | 0.1615 | 0.872  | 0.056081925 | count | 1 |
| GGH        | 0.0525344 | 0.3688898 | 0.1424 | 0.887  | 0.056377125 | count | 1 |
| CBWD6      | 0.079006  | 0.6477463 | 0.122  | 0.903  | 0.056443052 | count | 1 |
| AC024257.3 | 0.778728  | 1.279618  | 0.6086 | 0.543  | 0.056443652 | count | 1 |
| SET        | 0.0395376 | 0.0454105 | 0.8707 | 0.384  | 0.056618859 | count | 1 |
| EID2B      | 0.0567844 | 0.3671707 | 0.1547 | 0.877  | 0.056812749 | count | 1 |
| PFKP       | 0.0434958 | 0.160367  | 0.2712 | 0.786  | 0.056946398 | count | 1 |
| IL18R1     | 0.0565492 | 0.3944042 | 0.1434 | 0.886  | 0.057109477 | count | 1 |
| SPG7       | 0.0437686 | 0.1725779 | 0.2536 | 0.8    | 0.057185401 | count | 1 |
| FZR1       | 0.0515939 | 0.2904883 | 0.1776 | 0.859  | 0.057244603 | count | 1 |
| CEP164     | 0.0434489 | 0.1597206 | 0.272  | 0.786  | 0.057276235 | count | 1 |
| METTL22    | 0.0654223 | 0.5549576 | 0.1179 | 0.906  | 0.057371697 | count | 1 |

|            |           |           |        |       |             |       |   |
|------------|-----------|-----------|--------|-------|-------------|-------|---|
| SCAI       | 0.0518034 | 0.3729299 | 0.1389 | 0.89  | 0.057475906 | count | 1 |
| PTGDR      | 0.0973059 | 0.5496305 | 0.177  | 0.859 | 0.0575846   | count | 1 |
| CSF2RB     | 0.0423338 | 0.1957854 | 0.2162 | 0.829 | 0.057694748 | count | 1 |
| KLHL23     | 0.0597313 | 0.411575  | 0.1451 | 0.885 | 0.057901614 | count | 1 |
| CDK5       | 0.0463544 | 0.2373743 | 0.1953 | 0.845 | 0.057997094 | count | 1 |
| CCDC82     | 0.0414507 | 0.1001575 | 0.4139 | 0.679 | 0.058004964 | count | 1 |
| TYK2       | 0.0537344 | 0.3196067 | 0.1681 | 0.866 | 0.058011543 | count | 1 |
| SETD2      | 0.0425879 | 0.1427459 | 0.2983 | 0.765 | 0.058169495 | count | 1 |
| ARVCF      | 0.0615137 | 0.9192843 | 0.0669 | 0.947 | 0.058200089 | count | 1 |
| IFNGR2     | 0.0418708 | 0.1128345 | 0.3711 | 0.711 | 0.058201472 | count | 1 |
| KMT5C      | 0.0929861 | 0.5077461 | 0.1831 | 0.855 | 0.058203709 | count | 1 |
| ZNF383     | 0.0543451 | 0.2996555 | 0.1814 | 0.856 | 0.058309167 | count | 1 |
| SLU7       | 0.042073  | 0.1094096 | 0.3845 | 0.701 | 0.058470787 | count | 1 |
| WDCP       | 0.0646032 | 0.488229  | 0.1323 | 0.895 | 0.058574478 | count | 1 |
| STT3B      | 0.0451743 | 0.1692472 | 0.2669 | 0.79  | 0.0586234   | count | 1 |
| DCLRE1C    | 0.0572382 | 0.3078915 | 0.1859 | 0.853 | 0.058808642 | count | 1 |
| MED13      | 0.0436977 | 0.1363178 | 0.3206 | 0.749 | 0.058840547 | count | 1 |
| TRIP12     | 0.0424014 | 0.1416317 | 0.2994 | 0.765 | 0.058926888 | count | 1 |
| NOVA2      | 0.0449325 | 0.2250133 | 0.1997 | 0.842 | 0.058940237 | count | 1 |
| AC073335.2 | 0.161711  | 0.928026  | 0.1743 | 0.862 | 0.059031565 | count | 1 |
| CREBL2     | 0.0464147 | 0.223769  | 0.2074 | 0.836 | 0.059108763 | count | 1 |
| GLRX       | 0.0429248 | 0.1188263 | 0.3612 | 0.718 | 0.05924814  | count | 1 |
| ZNF708     | 0.0478927 | 0.2168156 | 0.2209 | 0.825 | 0.059366588 | count | 1 |
| AL031280.1 | 0.3724766 | 0.9504006 | 0.3919 | 0.695 | 0.059449042 | count | 1 |
| SAMD10     | 0.3724766 | 0.9504006 | 0.3919 | 0.695 | 0.059449042 | count | 1 |
| ERMP1      | 0.0530988 | 0.3008385 | 0.1765 | 0.86  | 0.059466694 | count | 1 |
| CAPN10     | 0.0595474 | 0.3264433 | 0.1824 | 0.855 | 0.059556408 | count | 1 |
| GPR143     | 0.0907448 | 0.5637186 | 0.161  | 0.872 | 0.059642588 | count | 1 |
| CHMP6      | 0.0460258 | 0.1705644 | 0.2698 | 0.787 | 0.059726305 | count | 1 |
| MRPS10     | 0.0433835 | 0.1227473 | 0.3534 | 0.724 | 0.059776973 | count | 1 |
| ATP5MF     | 0.0428433 | 0.0932905 | 0.4592 | 0.646 | 0.059999122 | count | 1 |
| MT-CO2     | 0.0416287 | 0.0296132 | 1.4057 | 0.16  | 0.060015113 | count | 1 |
| EP400      | 0.0483653 | 0.2348672 | 0.2059 | 0.837 | 0.060047962 | count | 1 |
| CCDC173    | 0.3772349 | 1.0690324 | 0.3529 | 0.724 | 0.060104858 | count | 1 |
| AL135905.1 | 0.3772349 | 1.0959641 | 0.3442 | 0.731 | 0.060104858 | count | 1 |
| CLSTN3     | 0.0515913 | 0.2751915 | 0.1875 | 0.851 | 0.060256662 | count | 1 |
| LZTS3      | 0.1439601 | 0.7778834 | 0.1851 | 0.853 | 0.06033275  | count | 1 |
| GCNA       | 0.1439601 | 0.8414415 | 0.1711 | 0.864 | 0.06033275  | count | 1 |
| AC005046.1 | 0.166021  | 1.0935173 | 0.1518 | 0.879 | 0.06052491  | count | 1 |
| RASSF1-AS1 | 0.166021  | 1.0959745 | 0.1515 | 0.88  | 0.06052491  | count | 1 |
| AC007620.2 | 0.166021  | 1.0959745 | 0.1515 | 0.88  | 0.06052491  | count | 1 |
| LRRC4      | 0.166021  | 1.1963612 | 0.1388 | 0.89  | 0.06052491  | count | 1 |
| AC069185.1 | 0.166021  | 1.1986076 | 0.1385 | 0.89  | 0.06052491  | count | 1 |
| KLHL25     | 0.166021  | 1.1963612 | 0.1388 | 0.89  | 0.06052491  | count | 1 |
| AL390198.1 | 0.166021  | 1.1986076 | 0.1385 | 0.89  | 0.06052491  | count | 1 |

|           |           |           |        |         |             |       |   |
|-----------|-----------|-----------|--------|---------|-------------|-------|---|
| ODF2L     | 0.0430646 | 0.0870835 | 0.4945 | 0.621   | 0.06057994  | count | 1 |
| PAPOLA    | 0.0430955 | 0.0832307 | 0.5178 | 0.605   | 0.060779141 | count | 1 |
| FST       | 0.3823346 | 1.2002587 | 0.3185 | 0.75    | 0.060805005 | count | 1 |
| ZNF548    | 0.0579109 | 0.3143069 | 0.1842 | 0.854   | 0.060878661 | count | 1 |
| OTOA      | 0.8696995 | 1.265138  | 0.6874 | 0.492   | 0.060930727 | count | 1 |
| ADAMTS18  | 0.8703858 | 0.3179957 | 2.7371 | 0.00624 | 0.060963224 | count | 1 |
| TPMT      | 0.0476632 | 0.1982414 | 0.2404 | 0.81    | 0.061198974 | count | 1 |
| TRIR      | 0.0428289 | 0.0484921 | 0.8832 | 0.3772  | 0.061280901 | count | 1 |
| UBTD2     | 0.0487487 | 0.2214201 | 0.2202 | 0.826   | 0.061484962 | count | 1 |
| CETP      | 0.0861958 | 0.4036662 | 0.2135 | 0.831   | 0.061487788 | count | 1 |
| MRPS33    | 0.0447355 | 0.1282478 | 0.3488 | 0.727   | 0.061512625 | count | 1 |
| IL41      | 0.3878088 | 1.1088359 | 0.3497 | 0.727   | 0.061553452 | count | 1 |
| LINC01191 | 0.3878088 | 1.357162  | 0.2857 | 0.775   | 0.061553452 | count | 1 |
| SSH1      | 0.0476234 | 0.1797322 | 0.265  | 0.791   | 0.061644159 | count | 1 |
| SUCLA2    | 0.0472396 | 0.1726265 | 0.2737 | 0.784   | 0.061712091 | count | 1 |
| LINC02328 | 0.1115436 | 0.8281166 | 0.1347 | 0.893   | 0.061728771 | count | 1 |
| USP39     | 0.0488589 | 0.2147821 | 0.2275 | 0.82    | 0.06177899  | count | 1 |
| STAT5B    | 0.0475778 | 0.2216671 | 0.2146 | 0.83    | 0.061833506 | count | 1 |
| ADPRHL1   | 0.1699031 | 0.9591927 | 0.1771 | 0.859   | 0.061866469 | count | 1 |
| CLMN      | 0.1699031 | 0.9616227 | 0.1767 | 0.86    | 0.061866469 | count | 1 |
| LINC00910 | 0.1699031 | 0.9616227 | 0.1767 | 0.86    | 0.061866469 | count | 1 |
| EMID1     | 0.1323026 | 0.6469404 | 0.2045 | 0.838   | 0.061898895 | count | 1 |
| MOB4      | 0.0447641 | 0.1174215 | 0.3812 | 0.703   | 0.061931564 | count | 1 |
| LINS1     | 0.0521339 | 0.3038153 | 0.1716 | 0.864   | 0.062123998 | count | 1 |
| ATP5MGL   | 0.895488  | 1.052035  | 0.8512 | 0.395   | 0.06213833  | count | 1 |
| HPS1      | 0.0507869 | 0.2568967 | 0.1977 | 0.843   | 0.062400764 | count | 1 |
| UBE2K     | 0.0451052 | 0.1173613 | 0.3843 | 0.701   | 0.062471371 | count | 1 |
| UBR4      | 0.0487597 | 0.2138476 | 0.228  | 0.82    | 0.062480976 | count | 1 |
| LINC00323 | 0.0846618 | 0.5634641 | 0.1503 | 0.881   | 0.062518853 | count | 1 |
| HERPUD1   | 0.0440688 | 0.0676453 | 0.6515 | 0.515   | 0.062606617 | count | 1 |
| ZBTB21    | 0.0533345 | 0.2526052 | 0.2111 | 0.833   | 0.062669335 | count | 1 |
| PTAR1     | 0.0496337 | 0.2102778 | 0.236  | 0.813   | 0.062677958 | count | 1 |
| LRP1B     | 0.9087614 | 1.049973  | 0.8655 | 0.387   | 0.062749182 | count | 1 |
| SERPIN6   | 0.0441178 | 0.0616554 | 0.7156 | 0.474   | 0.062788285 | count | 1 |
| CHKB-DT   | 0.1343699 | 0.644093  | 0.2086 | 0.835   | 0.062830039 | count | 1 |
| HILPDA    | 0.0483372 | 0.2220317 | 0.2177 | 0.828   | 0.062866839 | count | 1 |
| ELMOD3    | 0.0539498 | 0.3147153 | 0.1714 | 0.864   | 0.063389352 | count | 1 |
| RAD23B    | 0.046369  | 0.1248442 | 0.3714 | 0.71    | 0.063446315 | count | 1 |
| GBA2      | 0.0612989 | 0.3751631 | 0.1634 | 0.87    | 0.063458447 | count | 1 |
| MCM7      | 0.0530119 | 0.2297966 | 0.2307 | 0.818   | 0.063486608 | count | 1 |
| PKN1      | 0.0464012 | 0.1202474 | 0.3859 | 0.7     | 0.063540169 | count | 1 |
| ADPGK     | 0.0528046 | 0.251303  | 0.2101 | 0.834   | 0.063690071 | count | 1 |
| BCL6      | 0.0525824 | 0.238369  | 0.2206 | 0.825   | 0.063841678 | count | 1 |
| KCMF1     | 0.0475699 | 0.1501937 | 0.3167 | 0.751   | 0.063843794 | count | 1 |
| MT1F      | 0.2108671 | 0.8011686 | 0.2632 | 0.792   | 0.063845698 | count | 1 |

|            |           |           |        |         |             |       |   |
|------------|-----------|-----------|--------|---------|-------------|-------|---|
| PTP4A1     | 0.0512684 | 0.1962941 | 0.2612 | 0.794   | 0.064034541 | count | 1 |
| SLC17A5    | 0.054676  | 0.309377  | 0.1767 | 0.86    | 0.064044181 | count | 1 |
| ZNF518B    | 0.0602127 | 0.3259277 | 0.1847 | 0.853   | 0.064153056 | count | 1 |
| CYP26B1    | 0.9401578 | 1.5764863 | 0.5964 | 0.551   | 0.064165555 | count | 1 |
| DCBLD2     | 0.0649777 | 0.3655965 | 0.1777 | 0.859   | 0.064305769 | count | 1 |
| FANCM      | 0.0710152 | 0.3643613 | 0.1949 | 0.845   | 0.064325064 | count | 1 |
| RSF1       | 0.0453887 | 0.0778424 | 0.5831 | 0.56    | 0.064413948 | count | 1 |
| C8orf88    | 0.0702224 | 0.5695074 | 0.1233 | 0.902   | 0.06457566  | count | 1 |
| CNN2       | 0.0528206 | 0.2287089 | 0.231  | 0.817   | 0.064648515 | count | 1 |
| MUT        | 0.0534708 | 0.25769   | 0.2075 | 0.836   | 0.064916549 | count | 1 |
| UBE2I      | 0.046016  | 0.0785786 | 0.5856 | 0.558   | 0.064968659 | count | 1 |
| TCEAL8     | 0.0464331 | 0.0918237 | 0.5057 | 0.613   | 0.065015358 | count | 1 |
| FOXP1      | 0.0455848 | 0.0682024 | 0.6684 | 0.504   | 0.065030157 | count | 1 |
| ADARB1     | 0.0513987 | 0.2327918 | 0.2208 | 0.825   | 0.065061682 | count | 1 |
| CCDC40     | 0.179855  | 0.7932727 | 0.2267 | 0.821   | 0.065290418 | count | 1 |
| AC017100.1 | 0.179855  | 0.8905753 | 0.202  | 0.84    | 0.065290418 | count | 1 |
| XAF1       | 0.0464657 | 0.1211901 | 0.3834 | 0.701   | 0.065457213 | count | 1 |
| PCBD1      | 0.0466661 | 0.1004111 | 0.4648 | 0.642   | 0.065575599 | count | 1 |
| AIMP2      | 0.05014   | 0.1810978 | 0.2769 | 0.782   | 0.065628646 | count | 1 |
| VAMP5      | 0.0457748 | 0.0463805 | 0.9869 | 0.324   | 0.065664452 | count | 1 |
| C8orf59    | 0.0461156 | 0.0634702 | 0.7266 | 0.4676  | 0.065704615 | count | 1 |
| SLC9A8     | 0.0705908 | 0.4382325 | 0.1611 | 0.872   | 0.065828908 | count | 1 |
| SCAF4      | 0.0519082 | 0.2595835 | 0.2    | 0.842   | 0.065861742 | count | 1 |
| SPATA12    | 0.1815961 | 0.7852121 | 0.2313 | 0.817   | 0.065887191 | count | 1 |
| PIP5KL1    | 0.1815961 | 0.7850543 | 0.2313 | 0.817   | 0.065887191 | count | 1 |
| LINC01431  | 0.1815961 | 0.7852121 | 0.2313 | 0.817   | 0.065887191 | count | 1 |
| CLN3       | 0.1815961 | 0.9917062 | 0.1831 | 0.855   | 0.065887196 | count | 1 |
| MOB2       | 0.0468048 | 0.0839205 | 0.5577 | 0.577   | 0.066032049 | count | 1 |
| CERK       | 0.0565881 | 0.2615296 | 0.2164 | 0.829   | 0.066066859 | count | 1 |
| LNP1       | 0.2191255 | 0.9251614 | 0.2369 | 0.813   | 0.066168718 | count | 1 |
| UXT        | 0.0464533 | 0.0573589 | 0.8099 | 0.418   | 0.066174494 | count | 1 |
| CHTF8      | 0.0505072 | 0.1741174 | 0.2901 | 0.772   | 0.066196056 | count | 1 |
| RPL41      | 0.0460447 | 0.0171323 | 2.6876 | 0.00724 | 0.066395361 | count | 1 |
| TRIM39     | 0.0725269 | 0.3611368 | 0.2008 | 0.841   | 0.066671921 | count | 1 |
| AL359711.2 | 0.2212237 | 0.7823925 | 0.2828 | 0.777   | 0.066756841 | count | 1 |
| WTAP       | 0.0474848 | 0.0897886 | 0.5289 | 0.597   | 0.066827634 | count | 1 |
| TMBIM4     | 0.0468316 | 0.0502336 | 0.9323 | 0.351   | 0.067014247 | count | 1 |
| GGCT       | 0.0481247 | 0.1061805 | 0.4532 | 0.65    | 0.067054748 | count | 1 |
| AC090630.1 | 0.0730414 | 0.5320083 | 0.1373 | 0.891   | 0.067139727 | count | 1 |
| CHST12     | 0.0488707 | 0.1332472 | 0.3668 | 0.714   | 0.067236849 | count | 1 |
| NABP2      | 0.0501681 | 0.1607785 | 0.312  | 0.755   | 0.067275343 | count | 1 |
| TRMT61B    | 0.0559501 | 0.2299495 | 0.2433 | 0.808   | 0.067314065 | count | 1 |
| PRPF6      | 0.0482059 | 0.0939383 | 0.5132 | 0.608   | 0.067383047 | count | 1 |
| SSBP1      | 0.0473835 | 0.0586863 | 0.8074 | 0.42    | 0.067477995 | count | 1 |
| TNFRSF19   | 1.0196217 | 1.6062464 | 0.6348 | 0.5256  | 0.067577215 | count | 1 |

|            |           |           |        |        |             |       |   |
|------------|-----------|-----------|--------|--------|-------------|-------|---|
| PDCD2L     | 0.0659001 | 0.3310501 | 0.1991 | 0.842  | 0.067638743 | count | 1 |
| STXBP5-AS1 | 0.1870214 | 0.6745995 | 0.2772 | 0.782  | 0.067742487 | count | 1 |
| MTG2       | 0.0586188 | 0.282204  | 0.2077 | 0.835  | 0.067746239 | count | 1 |
| PLIN2      | 0.0488722 | 0.1216388 | 0.4018 | 0.688  | 0.067946399 | count | 1 |
| RINL       | 0.0547085 | 0.2523191 | 0.2168 | 0.828  | 0.068006624 | count | 1 |
| PAFAH1B3   | 0.0500682 | 0.1411114 | 0.3548 | 0.723  | 0.068143094 | count | 1 |
| SIAE       | 0.0611963 | 0.3091975 | 0.1979 | 0.843  | 0.068165661 | count | 1 |
| RTRAF      | 0.0477561 | 0.0535109 | 0.8925 | 0.372  | 0.068168645 | count | 1 |
| SHARPIN    | 0.0492451 | 0.1111678 | 0.443  | 0.658  | 0.068184293 | count | 1 |
| XPO7       | 0.0599001 | 0.2596016 | 0.2307 | 0.818  | 0.068195572 | count | 1 |
| SOCS7      | 0.079434  | 0.56762   | 0.1399 | 0.889  | 0.068223428 | count | 1 |
| LETM2      | 0.2928941 | 0.6247556 | 0.4688 | 0.639  | 0.068260916 | count | 1 |
| FBXO6      | 0.0600574 | 0.327535  | 0.1834 | 0.855  | 0.068373722 | count | 1 |
| BTBD10     | 0.0513492 | 0.1714659 | 0.2995 | 0.765  | 0.068433499 | count | 1 |
| MAX        | 0.0495758 | 0.1215974 | 0.4077 | 0.684  | 0.06847648  | count | 1 |
| MFSD8      | 0.0635609 | 0.3752433 | 0.1694 | 0.866  | 0.068550366 | count | 1 |
| OCIAD1     | 0.0480165 | 0.0532954 | 0.9009 | 0.3677 | 0.068644559 | count | 1 |
| LARS2      | 0.1003099 | 0.565626  | 0.1773 | 0.859  | 0.068668569 | count | 1 |
| AC015712.2 | 0.1170028 | 0.6344942 | 0.1844 | 0.854  | 0.068910674 | count | 1 |
| AC025283.2 | 0.1170028 | 0.6674556 | 0.1753 | 0.861  | 0.068910674 | count | 1 |
| DENND5A    | 0.0524378 | 0.2691035 | 0.1949 | 0.846  | 0.06893912  | count | 1 |
| CCDC90B    | 0.0490643 | 0.0936889 | 0.5237 | 0.601  | 0.06903422  | count | 1 |
| ZBTB16     | 0.0510633 | 0.1549206 | 0.3296 | 0.742  | 0.069209404 | count | 1 |
| SNRPA1     | 0.0508945 | 0.1410228 | 0.3609 | 0.718  | 0.069299483 | count | 1 |
| ZNF853     | 0.1015395 | 0.4443964 | 0.2285 | 0.819  | 0.069491824 | count | 1 |
| UFM1       | 0.049606  | 0.0981796 | 0.5053 | 0.613  | 0.069548223 | count | 1 |
| ALDOA      | 0.0558073 | 0.2386731 | 0.2338 | 0.815  | 0.069686162 | count | 1 |
| EIF3B      | 0.0521629 | 0.1849047 | 0.2821 | 0.778  | 0.069810275 | count | 1 |
| RNF227     | 0.091792  | 0.4997859 | 0.1837 | 0.854  | 0.069820114 | count | 1 |
| CCDC120    | 0.091792  | 0.5163688 | 0.1778 | 0.859  | 0.069820114 | count | 1 |
| LRRC75A    | 0.0507944 | 0.1176279 | 0.4318 | 0.666  | 0.06988093  | count | 1 |
| ZNF345     | 0.0814399 | 0.3689756 | 0.2207 | 0.825  | 0.069922855 | count | 1 |
| DNAJC21    | 0.0497715 | 0.0857528 | 0.5804 | 0.562  | 0.07001936  | count | 1 |
| PRPF38B    | 0.0500076 | 0.0960634 | 0.5206 | 0.603  | 0.070170197 | count | 1 |
| BLMH       | 0.0540408 | 0.152209  | 0.355  | 0.723  | 0.070214468 | count | 1 |
| NFXL1      | 0.0669006 | 0.3591913 | 0.1863 | 0.852  | 0.070258423 | count | 1 |
| WDR5       | 0.0638359 | 0.3131899 | 0.2038 | 0.839  | 0.07039019  | count | 1 |
| KLF12      | 0.1952658 | 0.5161668 | 0.3783 | 0.705  | 0.070549425 | count | 1 |
| TOM1       | 0.05944   | 0.2593586 | 0.2292 | 0.819  | 0.070606393 | count | 1 |
| RSBN1L     | 0.050368  | 0.1119546 | 0.4499 | 0.653  | 0.070607701 | count | 1 |
| L1TD1      | 1.095932  | 1.376548  | 0.7961 | 0.426  | 0.070631055 | count | 1 |
| GRAP       | 0.062373  | 0.2765479 | 0.2255 | 0.822  | 0.070708745 | count | 1 |
| ZBTB7B     | 0.0808434 | 0.3935809 | 0.2054 | 0.837  | 0.070718727 | count | 1 |
| OGA        | 0.0515953 | 0.1506472 | 0.3425 | 0.732  | 0.070751478 | count | 1 |
| ATP6V1A    | 0.0577492 | 0.2048951 | 0.2818 | 0.778  | 0.070793411 | count | 1 |



|            |           |           |        |        |             |       |   |
|------------|-----------|-----------|--------|--------|-------------|-------|---|
| KMT2D      | 0.0636375 | 0.3290139 | 0.1934 | 0.847  | 0.07086863  | count | 1 |
| MXRA5      | 0.4582498 | 0.7292065 | 0.6284 | 0.53   | 0.070900225 | count | 1 |
| CXCL9      | 0.0543808 | 0.9115431 | 0.0597 | 0.9524 | 0.071021342 | count | 1 |
| SOX12      | 0.0798263 | 0.3519403 | 0.2268 | 0.821  | 0.07105624  | count | 1 |
| MTHFD2     | 0.0613916 | 0.2670254 | 0.2299 | 0.818  | 0.071179001 | count | 1 |
| JKAMP      | 0.0529996 | 0.1428302 | 0.3711 | 0.711  | 0.071511798 | count | 1 |
| FXYD5      | 0.0499097 | 0.0386614 | 1.2909 | 0.197  | 0.071770856 | count | 1 |
| KTI12      | 0.0629377 | 0.2341126 | 0.2688 | 0.788  | 0.071916013 | count | 1 |
| ICOSLG     | 0.3111045 | 1.1734445 | 0.2651 | 0.791  | 0.072052719 | count | 1 |
| DNAJB9     | 0.0528504 | 0.1287844 | 0.4104 | 0.682  | 0.072059486 | count | 1 |
| AC020915.1 | 0.2404646 | 1.1082836 | 0.217  | 0.828  | 0.072110751 | count | 1 |
| AC145285.6 | 0.2404646 | 1.1136782 | 0.2159 | 0.829  | 0.072110751 | count | 1 |
| DAGLA      | 0.2404646 | 1.2381161 | 0.1942 | 0.846  | 0.072110751 | count | 1 |
| HFM1       | 0.2404646 | 1.242947  | 0.1935 | 0.847  | 0.072110751 | count | 1 |
| STAM2      | 0.0560771 | 0.2008246 | 0.2792 | 0.78   | 0.072112047 | count | 1 |
| WDTC1      | 0.0622408 | 0.2990982 | 0.2081 | 0.835  | 0.072158625 | count | 1 |
| ATXN7      | 0.2408481 | 1.0846936 | 0.222  | 0.824  | 0.072216743 | count | 1 |
| WWC2-AS2   | 0.2408481 | 1.0879188 | 0.2214 | 0.825  | 0.072216743 | count | 1 |
| RLN2       | 0.2408481 | 1.0879188 | 0.2214 | 0.825  | 0.072216743 | count | 1 |
| IPCEF1     | 0.2408481 | 1.1998428 | 0.2007 | 0.841  | 0.072216743 | count | 1 |
| AF196972.1 | 0.2408481 | 1.1998428 | 0.2007 | 0.841  | 0.072216743 | count | 1 |
| CCDC184    | 0.2411982 | 1.0258798 | 0.2351 | 0.814  | 0.072313478 | count | 1 |
| CNN1       | 0.2411982 | 1.0995638 | 0.2194 | 0.826  | 0.072313478 | count | 1 |
| PEX3       | 0.0557481 | 0.19636   | 0.2839 | 0.777  | 0.07248356  | count | 1 |
| CRYBB2     | 0.3137937 | 1.1012745 | 0.2849 | 0.776  | 0.072608364 | count | 1 |
| PLEKHM1    | 0.064063  | 0.3017218 | 0.2123 | 0.832  | 0.072613765 | count | 1 |
| SMDT1      | 0.0512869 | 0.064614  | 0.7937 | 0.427  | 0.07298744  | count | 1 |
| IFT27      | 0.0556616 | 0.165462  | 0.3364 | 0.737  | 0.073031699 | count | 1 |
| ZNF414     | 0.0610927 | 0.2563075 | 0.2384 | 0.812  | 0.073122704 | count | 1 |
| C12orf75   | 0.0598373 | 0.2783565 | 0.215  | 0.83   | 0.073204316 | count | 1 |
| STT3A      | 0.05742   | 0.1992829 | 0.2881 | 0.773  | 0.073244735 | count | 1 |
| LACTB      | 0.0535947 | 0.1266975 | 0.423  | 0.672  | 0.073321912 | count | 1 |
| STIM1      | 0.0694363 | 0.2876201 | 0.2414 | 0.809  | 0.073413133 | count | 1 |
| SEC24B-AS1 | 0.1032859 | 0.5689572 | 0.1815 | 0.856  | 0.073417065 | count | 1 |
| SLC44A2    | 0.0534471 | 0.1279247 | 0.4178 | 0.676  | 0.073502972 | count | 1 |
| MADD       | 0.0753656 | 0.3554557 | 0.212  | 0.832  | 0.073712214 | count | 1 |
| KANSL2     | 0.0603917 | 0.2989074 | 0.202  | 0.84   | 0.073736272 | count | 1 |
| SYP        | 0.0896922 | 0.4172687 | 0.215  | 0.83   | 0.073752961 | count | 1 |
| C8orf48    | 0.1002362 | 0.6845203 | 0.1464 | 0.884  | 0.073788187 | count | 1 |
| GATAD1     | 0.0533768 | 0.1257992 | 0.4243 | 0.671  | 0.073827293 | count | 1 |
| DCAF11     | 0.060382  | 0.217174  | 0.278  | 0.781  | 0.073868174 | count | 1 |
| WTIP       | 0.0613079 | 0.2122468 | 0.2889 | 0.773  | 0.07390379  | count | 1 |
| POLR2F     | 0.0526907 | 0.0891299 | 0.5912 | 0.554  | 0.073904152 | count | 1 |
| UCK2       | 0.0586405 | 0.2134824 | 0.2747 | 0.784  | 0.073923196 | count | 1 |
| PSMD4      | 0.0522361 | 0.0703222 | 0.7428 | 0.458  | 0.073973849 | count | 1 |

|             |           |           |        |       |             |       |   |
|-------------|-----------|-----------|--------|-------|-------------|-------|---|
| ADAM19      | 0.1786348 | 0.5001582 | 0.3572 | 0.721 | 0.074109888 | count | 1 |
| SHPRH       | 0.0560418 | 0.1738007 | 0.3224 | 0.747 | 0.074131962 | count | 1 |
| SAV1        | 0.0537905 | 0.1230923 | 0.437  | 0.662 | 0.074370626 | count | 1 |
| CNKSR3      | 0.055869  | 0.1687682 | 0.331  | 0.741 | 0.074479562 | count | 1 |
| NAGPA       | 0.0590906 | 0.2354907 | 0.2509 | 0.802 | 0.074488854 | count | 1 |
| YARS2       | 0.0608465 | 0.2187195 | 0.2782 | 0.781 | 0.074576001 | count | 1 |
| NENF        | 0.0524641 | 0.0718729 | 0.73   | 0.465 | 0.074605983 | count | 1 |
| C8orf76     | 0.0604939 | 0.2438395 | 0.2481 | 0.804 | 0.074807401 | count | 1 |
| ABHD12      | 0.0619345 | 0.2056934 | 0.3011 | 0.763 | 0.074824536 | count | 1 |
| KRIT1       | 0.0545359 | 0.1205527 | 0.4524 | 0.651 | 0.075058673 | count | 1 |
| M6PR        | 0.0542405 | 0.1147606 | 0.4726 | 0.637 | 0.075165183 | count | 1 |
| DERL2       | 0.0553073 | 0.1313918 | 0.4209 | 0.674 | 0.075171608 | count | 1 |
| PSMD14      | 0.0555503 | 0.1290431 | 0.4305 | 0.667 | 0.075261556 | count | 1 |
| TARDBP      | 0.0581574 | 0.1876403 | 0.3099 | 0.757 | 0.07530851  | count | 1 |
| FAM3C       | 0.0536227 | 0.0906998 | 0.5912 | 0.554 | 0.07537837  | count | 1 |
| PITPNA-AS1  | 0.0590001 | 0.2203654 | 0.2677 | 0.789 | 0.075491068 | count | 1 |
| PINLYP      | 0.1029278 | 0.6576748 | 0.1565 | 0.876 | 0.07572841  | count | 1 |
| BNIP2       | 0.0534237 | 0.0720966 | 0.741  | 0.459 | 0.07581282  | count | 1 |
| RBL2        | 0.05574   | 0.1528843 | 0.3646 | 0.715 | 0.075852393 | count | 1 |
| Z93930.2    | 0.0885024 | 0.4047642 | 0.2187 | 0.827 | 0.075897007 | count | 1 |
| STRADA      | 0.0761273 | 0.3675849 | 0.2071 | 0.836 | 0.075979206 | count | 1 |
| AC127024.6  | 1.244491  | 1.532698  | 0.812  | 0.417 | 0.076000175 | count | 1 |
| BICD2       | 0.0615866 | 0.2403382 | 0.2562 | 0.798 | 0.076024411 | count | 1 |
| COA4        | 0.0543655 | 0.0900204 | 0.6039 | 0.546 | 0.076414613 | count | 1 |
| NADK2       | 0.0677274 | 0.3358934 | 0.2016 | 0.84  | 0.07642086  | count | 1 |
| NOL3        | 0.0613133 | 0.2245489 | 0.2731 | 0.785 | 0.076538072 | count | 1 |
| HIST1H2AG   | 0.1235043 | 0.781797  | 0.158  | 0.874 | 0.076757182 | count | 1 |
| ANKRD42     | 0.0757114 | 0.2785575 | 0.2718 | 0.786 | 0.076963109 | count | 1 |
| NAGA        | 0.0750717 | 0.3334086 | 0.2252 | 0.822 | 0.076968199 | count | 1 |
| ICE1        | 0.0564855 | 0.1488932 | 0.3794 | 0.704 | 0.077044048 | count | 1 |
| EPG5        | 0.0710903 | 0.3538338 | 0.2009 | 0.841 | 0.077064137 | count | 1 |
| MRPL12      | 0.0558686 | 0.1230787 | 0.4539 | 0.65  | 0.077096354 | count | 1 |
| UBE2V2      | 0.0555966 | 0.1114915 | 0.4987 | 0.618 | 0.077153635 | count | 1 |
| RNF24       | 0.0725371 | 0.3810582 | 0.1904 | 0.849 | 0.077181236 | count | 1 |
| SPART       | 0.0560948 | 0.1145612 | 0.4896 | 0.624 | 0.077502982 | count | 1 |
| AC009831.1  | 0.1527033 | 0.7862891 | 0.1942 | 0.846 | 0.077609537 | count | 1 |
| VSIG10L     | 0.1527033 | 0.8364236 | 0.1826 | 0.855 | 0.077609537 | count | 1 |
| AC004865.2  | 0.5114354 | 1.105132  | 0.4628 | 0.644 | 0.077616612 | count | 1 |
| FPGT-TNNI3K | 0.5114354 | 1.1208902 | 0.4563 | 0.648 | 0.077616612 | count | 1 |
| MTMR4       | 0.0763783 | 0.2825768 | 0.2703 | 0.787 | 0.077634722 | count | 1 |
| CYSTM1      | 0.0547632 | 0.0623111 | 0.8789 | 0.38  | 0.078031546 | count | 1 |
| AC004982.2  | 0.1421316 | 0.6403711 | 0.222  | 0.824 | 0.078046771 | count | 1 |
| STK11IP     | 0.1421316 | 0.6680064 | 0.2128 | 0.832 | 0.078046771 | count | 1 |
| DGKA        | 0.0722895 | 0.2773884 | 0.2606 | 0.794 | 0.078354462 | count | 1 |
| AL133453.1  | 0.0659978 | 0.2602185 | 0.2536 | 0.8   | 0.078358655 | count | 1 |

|            |           |           |        |         |             |       |   |
|------------|-----------|-----------|--------|---------|-------------|-------|---|
| SPRED2     | 0.0844373 | 0.3814206 | 0.2214 | 0.825   | 0.078582331 | count | 1 |
| SLC12A5    | 0.0738978 | 0.3653266 | 0.2023 | 0.84    | 0.078617457 | count | 1 |
| AC009283.1 | 0.5201394 | 1.1580766 | 0.4491 | 0.653   | 0.078688575 | count | 1 |
| PEBP4      | 0.126742  | 0.8087607 | 0.1567 | 0.875   | 0.078709513 | count | 1 |
| GATD3A     | 0.1551253 | 0.865671  | 0.1792 | 0.858   | 0.078789493 | count | 1 |
| MPDU1      | 0.0617798 | 0.2028951 | 0.3045 | 0.761   | 0.078789648 | count | 1 |
| AFF4       | 0.0568724 | 0.1058945 | 0.5371 | 0.591   | 0.078827023 | count | 1 |
| LINC01268  | 1.336912  | 1.052506  | 1.2702 | 0.204   | 0.078988666 | count | 1 |
| GPR4       | 0.0675137 | 0.2513281 | 0.2686 | 0.788   | 0.079002668 | count | 1 |
| NIPSNAP2   | 0.0574169 | 0.116066  | 0.4947 | 0.621   | 0.079019516 | count | 1 |
| RIF1       | 0.0581053 | 0.1471027 | 0.395  | 0.693   | 0.07902824  | count | 1 |
| SMC3       | 0.0563054 | 0.0917839 | 0.6135 | 0.54    | 0.079072823 | count | 1 |
| SMARCA5    | 0.0566701 | 0.0952088 | 0.5952 | 0.552   | 0.079354342 | count | 1 |
| AIDA       | 0.0573743 | 0.1222978 | 0.4691 | 0.639   | 0.079380714 | count | 1 |
| AKAP8L     | 0.0649068 | 0.1789756 | 0.3627 | 0.717   | 0.07938102  | count | 1 |
| MAP7D3     | 0.0596674 | 0.1683485 | 0.3544 | 0.723   | 0.079389986 | count | 1 |
| ORAI3      | 0.0589976 | 0.1661943 | 0.355  | 0.723   | 0.079408965 | count | 1 |
| COLGALT1   | 0.0679449 | 0.2221276 | 0.3059 | 0.76    | 0.079504572 | count | 1 |
| CNBP       | 0.0555905 | 0.0458882 | 1.2114 | 0.226   | 0.079580273 | count | 1 |
| ACOT8      | 0.0653694 | 0.2654172 | 0.2463 | 0.805   | 0.079629454 | count | 1 |
| ATRN       | 0.0754408 | 0.3176028 | 0.2375 | 0.812   | 0.079708703 | count | 1 |
| SNX17      | 0.0572632 | 0.0986949 | 0.5802 | 0.562   | 0.079770717 | count | 1 |
| ANKLE2     | 0.0596875 | 0.1738437 | 0.3433 | 0.731   | 0.079797887 | count | 1 |
| HIST1H2BJ  | 0.1574207 | 0.7995351 | 0.1969 | 0.844   | 0.079906302 | count | 1 |
| SDHC       | 0.0570669 | 0.084557  | 0.6749 | 0.5     | 0.080042705 | count | 1 |
| NID1       | 0.0608506 | 0.222399  | 0.2736 | 0.784   | 0.08011918  | count | 1 |
| ZNF202     | 0.270255  | 0.6755273 | 0.4001 | 0.689   | 0.080261202 | count | 1 |
| SUCO       | 0.0596629 | 0.1632288 | 0.3655 | 0.715   | 0.080275492 | count | 1 |
| C2orf76    | 0.0588685 | 0.1629792 | 0.3612 | 0.718   | 0.080325582 | count | 1 |
| CENPE      | 0.2705779 | 0.7692817 | 0.3517 | 0.725   | 0.080348596 | count | 1 |
| EEF1A1     | 0.0557568 | 0.0172843 | 3.2259 | 0.00127 | 0.080419347 | count | 1 |
| WASHC2C    | 0.0689787 | 0.3319568 | 0.2078 | 0.835   | 0.08045434  | count | 1 |
| LDB1       | 0.0742421 | 0.3140669 | 0.2364 | 0.813   | 0.080454744 | count | 1 |
| THAP3      | 0.0673486 | 0.2687107 | 0.2506 | 0.802   | 0.080574991 | count | 1 |
| IBTK       | 0.0614646 | 0.217142  | 0.2831 | 0.777   | 0.080576258 | count | 1 |
| ABCD3      | 0.0770653 | 0.2799372 | 0.2753 | 0.783   | 0.080840881 | count | 1 |
| SUMO4      | 0.3545907 | 0.6855013 | 0.5173 | 0.605   | 0.08090343  | count | 1 |
| MBD5       | 0.0639304 | 0.1988568 | 0.3215 | 0.748   | 0.080971005 | count | 1 |
| BCAP31     | 0.0567794 | 0.0578929 | 0.9808 | 0.327   | 0.080972723 | count | 1 |
| PROB1      | 0.538956  | 0.9152697 | 0.5888 | 0.556   | 0.080980239 | count | 1 |
| ZNF503-AS1 | 0.538956  | 1.1040778 | 0.4882 | 0.625   | 0.080980239 | count | 1 |
| NFKBIE     | 0.0668022 | 0.2476257 | 0.2698 | 0.787   | 0.081030841 | count | 1 |
| ADAM12     | 1.413403  | 0.8774818 | 1.6107 | 0.107   | 0.081275356 | count | 1 |
| UBE2Q1     | 0.0602415 | 0.1397438 | 0.4311 | 0.666   | 0.081538314 | count | 1 |
| TSEN15     | 0.065     | 0.2079373 | 0.3126 | 0.755   | 0.081697616 | count | 1 |

|            |           |           |        |        |             |       |   |
|------------|-----------|-----------|--------|--------|-------------|-------|---|
| PRKRA      | 0.0603903 | 0.1324162 | 0.4561 | 0.648  | 0.081808996 | count | 1 |
| FAM210B    | 0.0590984 | 0.125898  | 0.4694 | 0.639  | 0.081890657 | count | 1 |
| AL590822.2 | 1.4393706 | 1.7865904 | 0.8057 | 0.4205 | 0.082015344 | count | 1 |
| HNRNPA2B1  | 0.0571593 | 0.0385779 | 1.4817 | 0.139  | 0.082070937 | count | 1 |
| CCNG1      | 0.0611158 | 0.1836928 | 0.3327 | 0.739  | 0.082082155 | count | 1 |
| SCAF11     | 0.0579254 | 0.0766218 | 0.756  | 0.45   | 0.082099921 | count | 1 |
| PDK3       | 0.0926551 | 0.4255662 | 0.2177 | 0.828  | 0.0823083   | count | 1 |
| BRD8       | 0.0613409 | 0.1666949 | 0.368  | 0.713  | 0.082354012 | count | 1 |
| FBXL19     | 0.0863957 | 0.7802539 | 0.1107 | 0.912  | 0.082473455 | count | 1 |
| DCAF12     | 0.0729859 | 0.2675372 | 0.2728 | 0.785  | 0.082662266 | count | 1 |
| DNM1L      | 0.0609055 | 0.1344207 | 0.4531 | 0.651  | 0.082705956 | count | 1 |
| CALCOCO1   | 0.0652443 | 0.2020944 | 0.3228 | 0.747  | 0.082727752 | count | 1 |
| PLEKHF2    | 0.0701147 | 0.215579  | 0.3252 | 0.745  | 0.082763057 | count | 1 |
| CD1D       | 0.1271729 | 0.5649561 | 0.2251 | 0.822  | 0.082902876 | count | 1 |
| CMC4       | 0.0988267 | 0.4571968 | 0.2162 | 0.829  | 0.082918773 | count | 1 |
| NRDC       | 0.0595807 | 0.1091556 | 0.5458 | 0.585  | 0.082952543 | count | 1 |
| RNF130     | 0.0594141 | 0.1037914 | 0.5724 | 0.567  | 0.083043991 | count | 1 |
| SIVA1      | 0.0584524 | 0.0670175 | 0.8722 | 0.383  | 0.083179256 | count | 1 |
| GH1        | 0.1221348 | 0.5719919 | 0.2135 | 0.831  | 0.083213749 | count | 1 |
| PEX2       | 0.0609691 | 0.1387642 | 0.4394 | 0.66   | 0.083224181 | count | 1 |
| CACNA1C    | 0.1222346 | 0.5277908 | 0.2316 | 0.817  | 0.083279933 | count | 1 |
| EWSR1      | 0.0600124 | 0.1160663 | 0.5171 | 0.605  | 0.083284704 | count | 1 |
| MRPL16     | 0.0595568 | 0.1000632 | 0.5952 | 0.552  | 0.083419627 | count | 1 |
| CMTM3      | 0.0619403 | 0.1545187 | 0.4009 | 0.689  | 0.083555387 | count | 1 |
| MIOS       | 0.0941105 | 0.3288515 | 0.2862 | 0.775  | 0.083581853 | count | 1 |
| WNK3       | 0.1282826 | 0.4845749 | 0.2647 | 0.791  | 0.083605264 | count | 1 |
| TRIM65     | 0.0809706 | 0.2847424 | 0.2844 | 0.776  | 0.083630819 | count | 1 |
| STARD7     | 0.0625783 | 0.15734   | 0.3977 | 0.691  | 0.083723243 | count | 1 |
| MX1        | 0.0594135 | 0.1122996 | 0.5291 | 0.597  | 0.083745775 | count | 1 |
| RGL2       | 0.0603142 | 0.1207882 | 0.4993 | 0.618  | 0.083772834 | count | 1 |
| ACTR3      | 0.0596284 | 0.0841356 | 0.7087 | 0.479  | 0.083839154 | count | 1 |
| STK25      | 0.0610086 | 0.1074887 | 0.5676 | 0.57   | 0.083916775 | count | 1 |
| POLR3E     | 0.0758934 | 0.2820477 | 0.2691 | 0.788  | 0.084010246 | count | 1 |
| FNBP1      | 0.0633362 | 0.1720397 | 0.3681 | 0.713  | 0.084019298 | count | 1 |
| POM121C    | 0.0649671 | 0.2090128 | 0.3108 | 0.756  | 0.084032022 | count | 1 |
| TMEM9B     | 0.0599967 | 0.1026411 | 0.5845 | 0.559  | 0.084050803 | count | 1 |
| RPA2       | 0.061978  | 0.1284732 | 0.4824 | 0.63   | 0.084224718 | count | 1 |
| RER1       | 0.0600069 | 0.095473  | 0.6285 | 0.53   | 0.084276244 | count | 1 |
| OTUD6B     | 0.0778255 | 0.3146084 | 0.2474 | 0.805  | 0.084306908 | count | 1 |
| UBALD2     | 0.0604267 | 0.0993854 | 0.608  | 0.543  | 0.084403242 | count | 1 |
| PATJ       | 0.083106  | 0.3920665 | 0.212  | 0.832  | 0.084403683 | count | 1 |
| ZKSCAN7    | 1.5364507 | 2.0041915 | 0.7666 | 0.4434 | 0.08462775  | count | 1 |
| CD37       | 0.1546678 | 0.5611269 | 0.2756 | 0.783  | 0.084658565 | count | 1 |
| FAM208A    | 0.0621446 | 0.1545011 | 0.4022 | 0.688  | 0.084752015 | count | 1 |
| MAP3K20    | 0.0659218 | 0.2088391 | 0.3157 | 0.752  | 0.085043396 | count | 1 |

|            |           |           |        |        |             |       |   |
|------------|-----------|-----------|--------|--------|-------------|-------|---|
| CMSS1      | 0.0648665 | 0.1664333 | 0.3897 | 0.697  | 0.085240029 | count | 1 |
| TIMM17B    | 0.063854  | 0.1722928 | 0.3706 | 0.711  | 0.085286648 | count | 1 |
| TBC1D12    | 0.0656529 | 0.2053276 | 0.3197 | 0.749  | 0.085327217 | count | 1 |
| MRPL24     | 0.0625554 | 0.1255998 | 0.4981 | 0.618  | 0.085423168 | count | 1 |
| FAR1       | 0.0654873 | 0.1671966 | 0.3917 | 0.695  | 0.085489205 | count | 1 |
| AP4M1      | 0.0699691 | 0.2199898 | 0.3181 | 0.75   | 0.085544925 | count | 1 |
| KRR1       | 0.0611225 | 0.0923794 | 0.6616 | 0.508  | 0.085589725 | count | 1 |
| RLIM       | 0.0658304 | 0.1855383 | 0.3548 | 0.723  | 0.08568698  | count | 1 |
| AK6        | 0.0624107 | 0.1244946 | 0.5013 | 0.616  | 0.085910896 | count | 1 |
| CFAP97     | 0.0608921 | 0.0838951 | 0.7258 | 0.468  | 0.086058272 | count | 1 |
| STX10      | 0.0628052 | 0.1207182 | 0.5203 | 0.603  | 0.086103587 | count | 1 |
| ZNF184     | 0.0795462 | 0.5105749 | 0.1558 | 0.876  | 0.086155626 | count | 1 |
| PIGO       | 0.0841327 | 0.3598276 | 0.2338 | 0.815  | 0.086164584 | count | 1 |
| ASCC2      | 0.0683274 | 0.2120835 | 0.3222 | 0.747  | 0.08620137  | count | 1 |
| SGPL1      | 0.108031  | 0.4898862 | 0.2205 | 0.825  | 0.086469011 | count | 1 |
| TGIF2      | 0.0770382 | 0.296729  | 0.2596 | 0.795  | 0.086475905 | count | 1 |
| DHRS4-AS1  | 0.0684231 | 0.2220352 | 0.3082 | 0.758  | 0.086536783 | count | 1 |
| RANGRF     | 0.0640471 | 0.1506949 | 0.425  | 0.671  | 0.086705693 | count | 1 |
| SNX10      | 0.0933325 | 0.500129  | 0.1866 | 0.852  | 0.086747328 | count | 1 |
| MRPL4      | 0.0622832 | 0.1086773 | 0.5731 | 0.567  | 0.086757644 | count | 1 |
| CLEC16A    | 0.0962415 | 0.522674  | 0.1841 | 0.854  | 0.086836829 | count | 1 |
| EXOC7      | 0.065557  | 0.1510394 | 0.434  | 0.664  | 0.086915397 | count | 1 |
| AC046143.1 | 1.633515  | 1.05885   | 1.5427 | 0.123  | 0.087011873 | count | 1 |
| SCNM1      | 0.0654605 | 0.1529867 | 0.4279 | 0.669  | 0.08735394  | count | 1 |
| REPS2      | 0.2456476 | 0.6499389 | 0.378  | 0.705  | 0.087379456 | count | 1 |
| PJVK       | 0.2456476 | 0.7231508 | 0.3397 | 0.734  | 0.087379456 | count | 1 |
| AC097532.2 | 0.2457001 | 0.6425246 | 0.3824 | 0.702  | 0.087396703 | count | 1 |
| AC093635.1 | 0.2457001 | 0.6438157 | 0.3816 | 0.703  | 0.087396703 | count | 1 |
| RANBP3L    | 0.1898564 | 0.9518921 | 0.1995 | 0.842  | 0.087409056 | count | 1 |
| LINC02104  | 0.1898564 | 0.9518921 | 0.1995 | 0.842  | 0.087409056 | count | 1 |
| KDM4C      | 0.0782598 | 0.2895537 | 0.2703 | 0.787  | 0.08744113  | count | 1 |
| ARMCX1     | 0.0661889 | 0.1639005 | 0.4038 | 0.686  | 0.08747688  | count | 1 |
| POLR2E     | 0.0623555 | 0.0841891 | 0.7407 | 0.459  | 0.087585794 | count | 1 |
| INPP5F     | 0.0745815 | 0.2747767 | 0.2714 | 0.786  | 0.087752441 | count | 1 |
| CYP20A1    | 0.0642097 | 0.1369914 | 0.4687 | 0.639  | 0.087770716 | count | 1 |
| AQP3       | 0.0659457 | 0.2365809 | 0.2787 | 0.78   | 0.087923816 | count | 1 |
| MTDH       | 0.0616169 | 0.0556604 | 1.107  | 0.2684 | 0.088088943 | count | 1 |
| MAPKAP1    | 0.0649792 | 0.160972  | 0.4037 | 0.686  | 0.088206084 | count | 1 |
| GOLT1B     | 0.0686401 | 0.2042362 | 0.3361 | 0.737  | 0.088217497 | count | 1 |
| SPIN2B     | 0.0754661 | 0.2517656 | 0.2997 | 0.764  | 0.088253443 | count | 1 |
| PDCD1LG2   | 0.1014767 | 0.5190457 | 0.1955 | 0.845  | 0.088469952 | count | 1 |
| LINC01209  | 0.1924013 | 0.7824249 | 0.2459 | 0.806  | 0.088517317 | count | 1 |
| AC005498.2 | 0.1924013 | 0.7814691 | 0.2462 | 0.806  | 0.088517317 | count | 1 |
| CLSPN      | 0.1924013 | 1.0627283 | 0.181  | 0.856  | 0.088517317 | count | 1 |
| LSP1       | 0.1924013 | 1.1545768 | 0.1666 | 0.868  | 0.088517317 | count | 1 |

|              |           |           |        |         |             |       |   |
|--------------|-----------|-----------|--------|---------|-------------|-------|---|
| ZDHC16       | 0.0817822 | 0.2963642 | 0.276  | 0.783   | 0.088556978 | count | 1 |
| SLC43A2      | 0.0918221 | 0.4151092 | 0.2212 | 0.825   | 0.088622192 | count | 1 |
| IDO1         | 0.3023984 | 0.8186508 | 0.3694 | 0.712   | 0.088867732 | count | 1 |
| ANKRD17      | 0.0661206 | 0.1519494 | 0.4351 | 0.663   | 0.088978705 | count | 1 |
| SYS1         | 0.0653204 | 0.1361222 | 0.4799 | 0.631   | 0.089323193 | count | 1 |
| SH3PXD2A-AS1 | 0.3047506 | 0.7807381 | 0.3903 | 0.696   | 0.089489963 | count | 1 |
| ZNF789       | 0.0898435 | 0.4115095 | 0.2183 | 0.827   | 0.089511872 | count | 1 |
| ANKRD13C     | 0.0737213 | 0.2265644 | 0.3254 | 0.745   | 0.089570981 | count | 1 |
| PSEN1        | 0.073464  | 0.2059922 | 0.3566 | 0.721   | 0.089622505 | count | 1 |
| GDPGP1       | 0.1951832 | 0.6364819 | 0.3067 | 0.759   | 0.089726885 | count | 1 |
| HGH1         | 0.0856372 | 0.4104287 | 0.2087 | 0.835   | 0.08974574  | count | 1 |
| ACTR1A       | 0.065955  | 0.1260753 | 0.5231 | 0.601   | 0.08975334  | count | 1 |
| LINC01465    | 0.3060024 | 0.786888  | 0.3889 | 0.697   | 0.089820675 | count | 1 |
| EDA2R        | 0.3060024 | 0.9454096 | 0.3237 | 0.746   | 0.089820675 | count | 1 |
| SLC45A4      | 0.2193746 | 0.7125479 | 0.3079 | 0.758   | 0.089926181 | count | 1 |
| YBX1         | 0.0624968 | 0.0275547 | 2.2681 | 0.0234  | 0.089980187 | count | 1 |
| MYO15B       | 0.0866102 | 0.7157649 | 0.121  | 0.904   | 0.090089134 | count | 1 |
| SNTB2        | 0.0634717 | 0.0753874 | 0.8419 | 0.4     | 0.090124291 | count | 1 |
| PVR          | 0.0823474 | 0.3487727 | 0.2361 | 0.813   | 0.090163411 | count | 1 |
| MIR762HG     | 0.1130565 | 0.4624783 | 0.2445 | 0.807   | 0.090407667 | count | 1 |
| S1PR4        | 0.0851811 | 0.4121209 | 0.2067 | 0.836   | 0.090510233 | count | 1 |
| PSMD6        | 0.0652043 | 0.1083039 | 0.602  | 0.547   | 0.090520715 | count | 1 |
| DOCK5        | 0.6209272 | 0.7147959 | 0.8687 | 0.385   | 0.090561977 | count | 1 |
| SNX4         | 0.0683607 | 0.169034  | 0.4044 | 0.686   | 0.090578091 | count | 1 |
| EIF6         | 0.064426  | 0.0884405 | 0.7285 | 0.466   | 0.090716258 | count | 1 |
| ZNF615       | 0.1238986 | 0.4592302 | 0.2698 | 0.787   | 0.090770391 | count | 1 |
| GNL1         | 0.0672036 | 0.1246011 | 0.5393 | 0.59    | 0.090971567 | count | 1 |
| TOMM34       | 0.0755333 | 0.2508564 | 0.3011 | 0.763   | 0.091169995 | count | 1 |
| ATP6V1F      | 0.0639766 | 0.0603987 | 1.0592 | 0.2896  | 0.09119112  | count | 1 |
| RPL9         | 0.0633382 | 0.0230568 | 2.747  | 0.00605 | 0.091254727 | count | 1 |
| EPHA4        | 0.0675362 | 0.1748507 | 0.3863 | 0.699   | 0.091314693 | count | 1 |
| TMEM33       | 0.0702238 | 0.1825923 | 0.3846 | 0.701   | 0.091320507 | count | 1 |
| ALDH5A1      | 0.0936279 | 0.6312994 | 0.1483 | 0.882   | 0.091350969 | count | 1 |
| NCLN         | 0.0786771 | 0.279388  | 0.2816 | 0.778   | 0.091397941 | count | 1 |
| ATXN7L1      | 0.091792  | 0.3672577 | 0.2499 | 0.803   | 0.091430339 | count | 1 |
| ZSCAN16      | 0.0808324 | 0.3177016 | 0.2544 | 0.799   | 0.091485079 | count | 1 |
| DIAPH1       | 0.0676033 | 0.1496461 | 0.4518 | 0.651   | 0.091485433 | count | 1 |
| LINC02453    | 0.6292599 | 1.0407621 | 0.6046 | 0.545   | 0.091500269 | count | 1 |
| AC026471.4   | 0.6292599 | 1.1369978 | 0.5534 | 0.58    | 0.091500269 | count | 1 |
| SCN4A        | 0.6292955 | 1.149307  | 0.5475 | 0.584   | 0.091504255 | count | 1 |
| ZC3HAV1L     | 0.1033864 | 0.4735889 | 0.2183 | 0.827   | 0.091684457 | count | 1 |
| N4BP2L2      | 0.0644205 | 0.0668488 | 0.9637 | 0.3353  | 0.091880932 | count | 1 |
| YBEY         | 0.068877  | 0.19324   | 0.3564 | 0.722   | 0.091903334 | count | 1 |
| PEX1         | 0.0703818 | 0.2084705 | 0.3376 | 0.736   | 0.092051647 | count | 1 |
| HARS2        | 0.083407  | 0.300767  | 0.2773 | 0.782   | 0.092260542 | count | 1 |

|            |           |           |        |        |             |       |   |
|------------|-----------|-----------|--------|--------|-------------|-------|---|
| VIPAS39    | 0.0819896 | 0.3374354 | 0.243  | 0.808  | 0.092394659 | count | 1 |
| FGFR1OP2   | 0.0658017 | 0.0915834 | 0.7185 | 0.473  | 0.092418233 | count | 1 |
| CAPN2      | 0.0661004 | 0.0958053 | 0.6899 | 0.49   | 0.092513293 | count | 1 |
| SUMO1      | 0.065124  | 0.0597247 | 1.0904 | 0.276  | 0.092696272 | count | 1 |
| ZNF233     | 0.6400243 | 1.1323393 | 0.5652 | 0.572  | 0.092702806 | count | 1 |
| DCP1B      | 0.0952035 | 0.3560551 | 0.2674 | 0.789  | 0.092868619 | count | 1 |
| TMEM132A   | 0.1112838 | 0.4256044 | 0.2615 | 0.794  | 0.093169182 | count | 1 |
| CCDC106    | 0.0741452 | 0.2221019 | 0.3338 | 0.739  | 0.09327084  | count | 1 |
| ZCCHC10    | 0.0690145 | 0.1428227 | 0.4832 | 0.629  | 0.093282107 | count | 1 |
| DDX39A     | 0.0700537 | 0.1521578 | 0.4604 | 0.645  | 0.093429634 | count | 1 |
| ST6GAL1    | 0.0674283 | 0.1230588 | 0.5479 | 0.584  | 0.093555474 | count | 1 |
| AC009506.1 | 0.0900835 | 0.368249  | 0.2446 | 0.807  | 0.093664308 | count | 1 |
| ACBD3-AS1  | 0.1380295 | 0.8834793 | 0.1562 | 0.876  | 0.093716925 | count | 1 |
| ITGA8      | 0.1382693 | 0.6059842 | 0.2282 | 0.82   | 0.093874801 | count | 1 |
| CYB5R1     | 0.067694  | 0.1130024 | 0.599  | 0.549  | 0.093883013 | count | 1 |
| PPIE       | 0.068232  | 0.1348729 | 0.5059 | 0.613  | 0.09389908  | count | 1 |
| PACS2      | 0.0729458 | 0.1720009 | 0.4241 | 0.672  | 0.093906995 | count | 1 |
| PSD        | 0.6512123 | 1.1619814 | 0.5604 | 0.575  | 0.093941334 | count | 1 |
| EPC1       | 0.066947  | 0.0923445 | 0.725  | 0.469  | 0.093941849 | count | 1 |
| LAPTM4A    | 0.065467  | 0.0418958 | 1.5626 | 0.118  | 0.093985348 | count | 1 |
| NAGS       | 0.1148479 | 0.5056097 | 0.2271 | 0.82   | 0.094015619 | count | 1 |
| MANEAL     | 0.1148479 | 0.6206732 | 0.185  | 0.853  | 0.094015619 | count | 1 |
| CFAP20     | 0.0682453 | 0.1182161 | 0.5773 | 0.564  | 0.094087486 | count | 1 |
| Z99289.3   | 0.2302831 | 0.7861675 | 0.2929 | 0.77   | 0.094093531 | count | 1 |
| PRR29      | 0.2302831 | 0.7861675 | 0.2929 | 0.77   | 0.094093531 | count | 1 |
| RELL2      | 0.2302831 | 0.8488473 | 0.2713 | 0.786  | 0.094093531 | count | 1 |
| SLC50A1    | 0.071734  | 0.2042075 | 0.3513 | 0.725  | 0.094240569 | count | 1 |
| CFAP36     | 0.0669311 | 0.0927325 | 0.7218 | 0.471  | 0.094276048 | count | 1 |
| AC024060.1 | 0.2669377 | 0.8264679 | 0.323  | 0.747  | 0.094325535 | count | 1 |
| TBC1D10B   | 0.0840973 | 0.263898  | 0.3187 | 0.75   | 0.09433848  | count | 1 |
| PCSK6      | 0.2311419 | 1.1107653 | 0.2081 | 0.835  | 0.094420404 | count | 1 |
| CCT8       | 0.0667763 | 0.0728788 | 0.9163 | 0.36   | 0.094479275 | count | 1 |
| USP3       | 0.0718464 | 0.1840336 | 0.3904 | 0.696  | 0.09450276  | count | 1 |
| AKIRIN1    | 0.069162  | 0.1243968 | 0.556  | 0.578  | 0.09451051  | count | 1 |
| ELOA-AS1   | 0.0959234 | 0.4796145 | 0.2    | 0.841  | 0.094549602 | count | 1 |
| AP003108.2 | 0.2315421 | 0.786798  | 0.2943 | 0.769  | 0.094572676 | count | 1 |
| DTWD1      | 0.0691118 | 0.1353979 | 0.5104 | 0.61   | 0.094593958 | count | 1 |
| AC015982.1 | 0.26818   | 0.7900044 | 0.3395 | 0.734  | 0.094727831 | count | 1 |
| IRF3       | 0.0703841 | 0.133702  | 0.5264 | 0.599  | 0.09473707  | count | 1 |
| BORCS7     | 0.0676725 | 0.085926  | 0.7876 | 0.431  | 0.094874161 | count | 1 |
| ZNF215     | 0.2686326 | 0.7904218 | 0.3399 | 0.734  | 0.094874314 | count | 1 |
| PTPRM      | 0.068836  | 0.1150116 | 0.5985 | 0.55   | 0.094955222 | count | 1 |
| SAP18      | 0.0663647 | 0.0452707 | 1.466  | 0.1428 | 0.095012732 | count | 1 |
| FAM198A    | 2.048468  | 1.290271  | 1.5876 | 0.112  | 0.095050971 | count | 1 |
| ZC3H7A     | 0.0710882 | 0.1546524 | 0.4597 | 0.646  | 0.095160007 | count | 1 |

|            |           |           |        |        |             |       |   |
|------------|-----------|-----------|--------|--------|-------------|-------|---|
| MIR4458HG  | 0.0800227 | 0.3216363 | 0.2488 | 0.804  | 0.095165138 | count | 1 |
| CACNB1     | 0.6628334 | 1.120465  | 0.5916 | 0.554  | 0.095215654 | count | 1 |
| TLE4       | 0.0698295 | 0.1292315 | 0.5403 | 0.589  | 0.095258292 | count | 1 |
| RP9        | 0.0700135 | 0.1566093 | 0.4471 | 0.655  | 0.095267154 | count | 1 |
| SPATA7     | 0.0773162 | 0.2285703 | 0.3383 | 0.735  | 0.095351648 | count | 1 |
| INTS7      | 0.1405355 | 0.5783548 | 0.243  | 0.808  | 0.095365953 | count | 1 |
| AC234582.1 | 0.140754  | 0.7836156 | 0.1796 | 0.857  | 0.095509643 | count | 1 |
| SAMD4B     | 0.0739643 | 0.2035362 | 0.3634 | 0.716  | 0.095551272 | count | 1 |
| NKAP       | 0.0688223 | 0.1071766 | 0.6421 | 0.521  | 0.095727406 | count | 1 |
| EIF3K      | 0.066737  | 0.0369366 | 1.8068 | 0.0709 | 0.095859371 | count | 1 |
| IRF7       | 0.070448  | 0.1478051 | 0.4766 | 0.634  | 0.095925841 | count | 1 |
| MCRS1      | 0.074776  | 0.1961063 | 0.3813 | 0.703  | 0.096166679 | count | 1 |
| NUDT22     | 0.0721361 | 0.1726282 | 0.4179 | 0.676  | 0.096242207 | count | 1 |
| RPL22L1    | 0.0682017 | 0.0759803 | 0.8976 | 0.369  | 0.096439151 | count | 1 |
| AURKA      | 0.1660209 | 0.7738397 | 0.2145 | 0.83   | 0.09661151  | count | 1 |
| RBM48      | 0.0756086 | 0.2236028 | 0.3381 | 0.735  | 0.096666366 | count | 1 |
| CHST2      | 0.1073838 | 0.3898764 | 0.2754 | 0.783  | 0.096722672 | count | 1 |
| C1orf43    | 0.0682871 | 0.07218   | 0.9461 | 0.344  | 0.096727519 | count | 1 |
| ZNF616     | 0.1373261 | 0.4833969 | 0.2841 | 0.776  | 0.096916518 | count | 1 |
| H1FO       | 0.0697792 | 0.1555715 | 0.4485 | 0.654  | 0.096924671 | count | 1 |
| ANKRD36    | 0.080224  | 0.2504588 | 0.3203 | 0.749  | 0.097015464 | count | 1 |
| CWC27      | 0.0722646 | 0.1422167 | 0.5081 | 0.611  | 0.097024644 | count | 1 |
| TATDN3     | 0.0810615 | 0.233006  | 0.3479 | 0.728  | 0.097124722 | count | 1 |
| MYO1E      | 0.0727193 | 0.1744092 | 0.4169 | 0.677  | 0.097181916 | count | 1 |
| IFFO1      | 0.0950913 | 0.4598765 | 0.2068 | 0.836  | 0.09725943  | count | 1 |
| NDUF4F1    | 0.0860564 | 0.3429226 | 0.251  | 0.802  | 0.097352035 | count | 1 |
| AMMECR1    | 0.1220327 | 0.5443878 | 0.2242 | 0.823  | 0.097423804 | count | 1 |
| CWC25      | 0.0704185 | 0.1178801 | 0.5974 | 0.55   | 0.097524344 | count | 1 |
| PRKACA     | 0.0758765 | 0.2147788 | 0.3533 | 0.724  | 0.097577153 | count | 1 |
| AC008549.2 | 0.1680112 | 0.8390493 | 0.2002 | 0.841  | 0.097721608 | count | 1 |
| GNG7       | 0.0899372 | 0.2767888 | 0.3249 | 0.745  | 0.097861459 | count | 1 |
| PHYKPL     | 0.0747598 | 0.1643168 | 0.455  | 0.649  | 0.097956043 | count | 1 |
| VPS18      | 0.1341635 | 0.4424275 | 0.3032 | 0.762  | 0.098084842 | count | 1 |
| GHITM      | 0.0694437 | 0.0709888 | 0.9782 | 0.328  | 0.098245909 | count | 1 |
| ENDOV      | 0.0761672 | 0.2144479 | 0.3552 | 0.722  | 0.098387695 | count | 1 |
| POLR1D     | 0.0695617 | 0.0692221 | 1.0049 | 0.315  | 0.098399431 | count | 1 |
| PTPN1      | 0.0727499 | 0.1459456 | 0.4985 | 0.618  | 0.098408566 | count | 1 |
| EFCAB2     | 0.0808703 | 0.2991161 | 0.2704 | 0.787  | 0.09841317  | count | 1 |
| TRMT10B    | 0.0817559 | 0.2555936 | 0.3199 | 0.749  | 0.098415381 | count | 1 |
| TSC22D1    | 0.0690733 | 0.0732757 | 0.9427 | 0.346  | 0.098417882 | count | 1 |
| CDC5L      | 0.0703199 | 0.0993257 | 0.708  | 0.479  | 0.098470136 | count | 1 |
| TAF3       | 0.0749446 | 0.1644929 | 0.4556 | 0.649  | 0.098507141 | count | 1 |
| PIH1D1     | 0.071267  | 0.1129654 | 0.6309 | 0.528  | 0.098578765 | count | 1 |
| STX12      | 0.0723842 | 0.1162523 | 0.6226 | 0.534  | 0.098693695 | count | 1 |
| HNRNPA0    | 0.0697498 | 0.0680932 | 1.0243 | 0.306  | 0.098710064 | count | 1 |



|            |           |           |        |        |             |       |   |
|------------|-----------|-----------|--------|--------|-------------|-------|---|
| RIBC1      | 0.1699031 | 0.747524  | 0.2273 | 0.82   | 0.098775756 | count | 1 |
| MUTYH      | 0.0974907 | 0.2961137 | 0.3292 | 0.742  | 0.09883809  | count | 1 |
| NPM1       | 0.0688531 | 0.0334364 | 2.0592 | 0.0396 | 0.098955987 | count | 1 |
| HNRNPM     | 0.0698908 | 0.0719852 | 0.9709 | 0.332  | 0.098957209 | count | 1 |
| PLXNB2     | 0.0845301 | 0.2575781 | 0.3282 | 0.743  | 0.09908644  | count | 1 |
| IMP3       | 0.0696875 | 0.0769117 | 0.9061 | 0.365  | 0.099091109 | count | 1 |
| MUM1       | 0.0773926 | 0.2332635 | 0.3318 | 0.74   | 0.099138696 | count | 1 |
| STX5       | 0.0750829 | 0.1576206 | 0.4764 | 0.634  | 0.099146444 | count | 1 |
| FAM50A     | 0.0717132 | 0.1164598 | 0.6158 | 0.538  | 0.099195205 | count | 1 |
| SEPHS1     | 0.0763005 | 0.178975  | 0.4263 | 0.67   | 0.099272983 | count | 1 |
| PRDM15     | 0.1615798 | 0.5744885 | 0.2813 | 0.779  | 0.099521708 | count | 1 |
| BANF1      | 0.0699936 | 0.0637012 | 1.0988 | 0.272  | 0.09957726  | count | 1 |
| TUBA4A     | 0.0717069 | 0.106358  | 0.6742 | 0.5    | 0.099579056 | count | 1 |
| ZNF850     | 0.1471501 | 0.5081905 | 0.2896 | 0.772  | 0.099709503 | count | 1 |
| MED31      | 0.073306  | 0.1382417 | 0.5303 | 0.596  | 0.099880422 | count | 1 |
| MICU2      | 0.0763473 | 0.1735042 | 0.44   | 0.66   | 0.099898048 | count | 1 |
| CC2D1A     | 0.0947604 | 0.2869383 | 0.3302 | 0.741  | 0.099906464 | count | 1 |
| PODXL2     | 0.4535928 | 1.0595536 | 0.4281 | 0.669  | 0.100006581 | count | 1 |
| PCDHGA8    | 0.4535928 | 1.0921793 | 0.4153 | 0.678  | 0.100006581 | count | 1 |
| AC127024.5 | 0.4535928 | 1.0909844 | 0.4158 | 0.678  | 0.100006581 | count | 1 |
| HSPB6      | 0.4535928 | 1.0921793 | 0.4153 | 0.678  | 0.100006581 | count | 1 |
| AL355312.3 | 0.4535928 | 1.1527405 | 0.3935 | 0.694  | 0.100006581 | count | 1 |
| C3orf67    | 0.4535928 | 1.542747  | 0.294  | 0.769  | 0.100006581 | count | 1 |
| ARPC1A     | 0.0704856 | 0.0669881 | 1.0522 | 0.293  | 0.100028907 | count | 1 |
| PSMC6      | 0.0717931 | 0.0949614 | 0.756  | 0.45   | 0.100100724 | count | 1 |
| ACTG1      | 0.0694814 | 0.0321389 | 2.1619 | 0.0307 | 0.100135128 | count | 1 |
| LRRC42     | 0.0835166 | 0.2283902 | 0.3657 | 0.715  | 0.100288634 | count | 1 |
| TAPBP      | 0.0707164 | 0.0812828 | 0.87   | 0.384  | 0.100309096 | count | 1 |
| PSMA3-AS1  | 0.0745091 | 0.1368877 | 0.5443 | 0.586  | 0.100378377 | count | 1 |
| BCL6B      | 0.0744382 | 0.1517381 | 0.4906 | 0.624  | 0.100444428 | count | 1 |
| SRGAP2B    | 0.0918451 | 0.25202   | 0.3644 | 0.716  | 0.100466987 | count | 1 |
| KMT5B      | 0.075516  | 0.1644976 | 0.4591 | 0.646  | 0.10047229  | count | 1 |
| TAF2       | 0.0840187 | 0.2515662 | 0.334  | 0.738  | 0.100646964 | count | 1 |
| FLYWCH1    | 0.0883466 | 0.2421272 | 0.3649 | 0.715  | 0.100728184 | count | 1 |
| SMYD2      | 0.1073092 | 0.3635658 | 0.2952 | 0.768  | 0.100865883 | count | 1 |
| AC005034.3 | 0.1737797 | 0.7006791 | 0.248  | 0.804  | 0.100932528 | count | 1 |
| ARHGAP21   | 0.0734139 | 0.1630587 | 0.4502 | 0.653  | 0.101098355 | count | 1 |
| PDCD2      | 0.0730805 | 0.1030365 | 0.7093 | 0.478  | 0.101276727 | count | 1 |
| AC108866.1 | 0.460901  | 1.0843802 | 0.425  | 0.671  | 0.101360473 | count | 1 |
| AC026250.1 | 0.460901  | 1.0843802 | 0.425  | 0.671  | 0.101360473 | count | 1 |
| AC007952.7 | 0.460901  | 1.0843802 | 0.425  | 0.671  | 0.101360473 | count | 1 |
| LINC00562  | 0.460901  | 1.3290762 | 0.3468 | 0.729  | 0.101360473 | count | 1 |
| NUTF2      | 0.0725206 | 0.0975055 | 0.7438 | 0.457  | 0.101388682 | count | 1 |
| SUMO3      | 0.0719226 | 0.0824542 | 0.8723 | 0.383  | 0.10141527  | count | 1 |
| PDCD6IP    | 0.0728963 | 0.1063007 | 0.6858 | 0.493  | 0.101425689 | count | 1 |

|            |           |           |        |       |             |       |   |
|------------|-----------|-----------|--------|-------|-------------|-------|---|
| RBBP7      | 0.0734548 | 0.1104991 | 0.6648 | 0.506 | 0.101430139 | count | 1 |
| TPRN       | 0.1093994 | 0.4749464 | 0.2303 | 0.818 | 0.101439435 | count | 1 |
| MAF1       | 0.0727458 | 0.0980024 | 0.7423 | 0.458 | 0.101484895 | count | 1 |
| MDN1       | 0.0869815 | 0.2967207 | 0.2931 | 0.769 | 0.101627912 | count | 1 |
| SHKBP1     | 0.0751606 | 0.1405544 | 0.5347 | 0.593 | 0.101750991 | count | 1 |
| CASP3      | 0.0752402 | 0.1615256 | 0.4658 | 0.641 | 0.101800181 | count | 1 |
| ZNF720     | 0.0791121 | 0.1839869 | 0.43   | 0.667 | 0.102000559 | count | 1 |
| NIFK       | 0.0726167 | 0.0963351 | 0.7538 | 0.451 | 0.102038135 | count | 1 |
| CLINT1     | 0.0728587 | 0.1006758 | 0.7237 | 0.469 | 0.102041128 | count | 1 |
| ZNF17      | 0.1658512 | 0.5728455 | 0.2895 | 0.772 | 0.102048861 | count | 1 |
| LUZP1      | 0.0720714 | 0.0736166 | 0.979  | 0.328 | 0.102077714 | count | 1 |
| ZNF200     | 0.0903737 | 0.3188268 | 0.2835 | 0.777 | 0.102196428 | count | 1 |
| SLC35A4    | 0.0845646 | 0.2363162 | 0.3578 | 0.72  | 0.102234742 | count | 1 |
| TASP1      | 0.0893388 | 0.2530443 | 0.3531 | 0.724 | 0.102240552 | count | 1 |
| UTRN       | 0.0724471 | 0.0898265 | 0.8065 | 0.42  | 0.102302305 | count | 1 |
| LMAN1      | 0.0720757 | 0.0687709 | 1.0481 | 0.295 | 0.102395541 | count | 1 |
| FOXN3-AS1  | 0.1226328 | 0.5759234 | 0.2129 | 0.831 | 0.102467837 | count | 1 |
| HUS1       | 0.0820673 | 0.217803  | 0.3768 | 0.706 | 0.102626068 | count | 1 |
| SLC38A10   | 0.0806368 | 0.1850554 | 0.4357 | 0.663 | 0.102633026 | count | 1 |
| ANKRD49    | 0.0820808 | 0.2540772 | 0.3231 | 0.747 | 0.102788531 | count | 1 |
| AC068620.1 | 0.4686546 | 1.0931605 | 0.4287 | 0.668 | 0.1027886   | count | 1 |
| FGF13      | 0.4686546 | 1.0931605 | 0.4287 | 0.668 | 0.1027886   | count | 1 |
| SLC16A1    | 0.0882911 | 0.2530397 | 0.3489 | 0.727 | 0.102821406 | count | 1 |
| CCNT1      | 0.0833424 | 0.2139235 | 0.3896 | 0.697 | 0.102922337 | count | 1 |
| ATXN7L3B   | 0.0738488 | 0.1081959 | 0.6825 | 0.495 | 0.102980808 | count | 1 |
| CYP2R1     | 0.1232606 | 0.4228584 | 0.2915 | 0.771 | 0.102981104 | count | 1 |
| ADO        | 0.0907008 | 0.2908279 | 0.3119 | 0.755 | 0.102983348 | count | 1 |
| SNRPD1     | 0.0728413 | 0.0737443 | 0.9878 | 0.323 | 0.102986918 | count | 1 |
| TMCC1      | 0.0897289 | 0.2955726 | 0.3036 | 0.761 | 0.103064067 | count | 1 |
| MED14OS    | 0.1098851 | 0.4065289 | 0.2703 | 0.787 | 0.103248593 | count | 1 |
| RHOC       | 0.0721126 | 0.0468605 | 1.5389 | 0.124 | 0.103553989 | count | 1 |
| HSPA14     | 0.0862601 | 0.2317612 | 0.3722 | 0.71  | 0.103563284 | count | 1 |
| OXR1       | 0.0749939 | 0.1212933 | 0.6183 | 0.536 | 0.103634884 | count | 1 |
| QTRT1      | 0.0775595 | 0.1807891 | 0.429  | 0.668 | 0.10363498  | count | 1 |
| CCT6A      | 0.0730138 | 0.0650882 | 1.1218 | 0.262 | 0.103725922 | count | 1 |
| LACTB2     | 0.0786538 | 0.1792471 | 0.4388 | 0.661 | 0.103732965 | count | 1 |
| HPS6       | 0.1216447 | 0.3603317 | 0.3376 | 0.736 | 0.103737517 | count | 1 |
| TTC23      | 0.0934993 | 0.2635869 | 0.3547 | 0.723 | 0.10382911  | count | 1 |
| ATXN7      | 0.7462608 | 1.1156939 | 0.6689 | 0.504 | 0.104008691 | count | 1 |
| FAM91A1    | 0.0818851 | 0.200279  | 0.4089 | 0.683 | 0.104099756 | count | 1 |
| MPPED2     | 0.7478608 | 0.8120451 | 0.921  | 0.357 | 0.104171369 | count | 1 |
| SFT2D1     | 0.0767975 | 0.137831  | 0.5572 | 0.577 | 0.104191087 | count | 1 |
| RBM26      | 0.0762088 | 0.1551229 | 0.4913 | 0.623 | 0.104209135 | count | 1 |
| TRIM27     | 0.0801719 | 0.1745004 | 0.4594 | 0.646 | 0.104214695 | count | 1 |
| ZNF701     | 0.0898331 | 0.4051739 | 0.2217 | 0.825 | 0.10426343  | count | 1 |

|            |           |           |        |          |             |       |   |
|------------|-----------|-----------|--------|----------|-------------|-------|---|
| PSMC2      | 0.0760395 | 0.1204998 | 0.631  | 0.528    | 0.104440132 | count | 1 |
| ORAOV1     | 0.0941863 | 0.3426439 | 0.2749 | 0.783    | 0.104585129 | count | 1 |
| ZNF585B    | 0.1312528 | 0.5057084 | 0.2595 | 0.795    | 0.104605395 | count | 1 |
| GRK3       | 0.2581662 | 0.7882263 | 0.3275 | 0.743    | 0.104616489 | count | 1 |
| MAP3K6     | 0.0844845 | 0.2533619 | 0.3335 | 0.739    | 0.104672259 | count | 1 |
| SMIM13     | 0.0948211 | 0.2763176 | 0.3432 | 0.732    | 0.104770148 | count | 1 |
| IST1       | 0.0777812 | 0.1481523 | 0.525  | 0.6      | 0.10494592  | count | 1 |
| RSRC1      | 0.0766164 | 0.1446333 | 0.5297 | 0.596    | 0.104988786 | count | 1 |
| ADNP       | 0.0775183 | 0.132659  | 0.5843 | 0.559    | 0.104995605 | count | 1 |
| ACKR2      | 0.2592157 | 1.0381929 | 0.2497 | 0.803    | 0.105008955 | count | 1 |
| AP002761.3 | 0.2592157 | 1.0447896 | 0.2481 | 0.804    | 0.105008955 | count | 1 |
| SMIM10L1   | 0.0753593 | 0.1180578 | 0.6383 | 0.523    | 0.10501543  | count | 1 |
| TRAIP      | 0.2596637 | 1.0739662 | 0.2418 | 0.809    | 0.105176405 | count | 1 |
| TINCR      | 0.2596637 | 1.0886744 | 0.2385 | 0.812    | 0.105176405 | count | 1 |
| AC090198.1 | 0.2596637 | 1.2518561 | 0.2074 | 0.836    | 0.105176405 | count | 1 |
| CCDC13     | 0.7585519 | 1.0609615 | 0.715  | 0.475    | 0.105252688 | count | 1 |
| TUBGCP4    | 0.1031118 | 0.3122574 | 0.3302 | 0.741    | 0.105360458 | count | 1 |
| ZRANB2     | 0.0746627 | 0.0978148 | 0.7633 | 0.445    | 0.105422052 | count | 1 |
| AGTRAP     | 0.0751368 | 0.0962881 | 0.7803 | 0.435    | 0.105502284 | count | 1 |
| CLUAP1     | 0.0798266 | 0.1794193 | 0.4449 | 0.656    | 0.105674826 | count | 1 |
| KIAA1143   | 0.0767164 | 0.1279107 | 0.5998 | 0.549    | 0.105749762 | count | 1 |
| DGAT1      | 0.0799115 | 0.2014764 | 0.3966 | 0.692    | 0.10578691  | count | 1 |
| BEX5       | 0.0853717 | 0.1970555 | 0.4332 | 0.665    | 0.105935993 | count | 1 |
| PLEKHG5    | 0.1076528 | 0.4999907 | 0.2153 | 0.83     | 0.105947138 | count | 1 |
| OXSM       | 0.0912015 | 0.2854322 | 0.3195 | 0.749    | 0.106185989 | count | 1 |
| EXOSC2     | 0.100852  | 0.3093623 | 0.326  | 0.744    | 0.10625636  | count | 1 |
| R3HDM2     | 0.0767571 | 0.1321203 | 0.581  | 0.561    | 0.106266434 | count | 1 |
| SPTBN1     | 0.0742154 | 0.0587319 | 1.2636 | 0.206    | 0.106334778 | count | 1 |
| USF3       | 0.0834006 | 0.1961065 | 0.4253 | 0.671    | 0.106366443 | count | 1 |
| DENND6A    | 0.0868055 | 0.2132838 | 0.407  | 0.684    | 0.10641911  | count | 1 |
| VIM-AS1    | 0.1305599 | 0.4668612 | 0.2797 | 0.78     | 0.10657591  | count | 1 |
| EPS15      | 0.0785427 | 0.1453408 | 0.5404 | 0.589    | 0.106637878 | count | 1 |
| CSNK1G2    | 0.0837883 | 0.1838543 | 0.4557 | 0.649    | 0.106858902 | count | 1 |
| EDEM3      | 0.0837894 | 0.2361368 | 0.3548 | 0.723    | 0.1069731   | count | 1 |
| GAS1       | 0.184837  | 0.5188966 | 0.3562 | 0.722    | 0.10706047  | count | 1 |
| ABHD14B    | 0.0774756 | 0.1154684 | 0.671  | 0.502    | 0.107073607 | count | 1 |
| IL18BP     | 0.0804604 | 0.165331  | 0.4867 | 0.627    | 0.107179247 | count | 1 |
| FRG1       | 0.0765877 | 0.0918042 | 0.8342 | 0.404    | 0.107367877 | count | 1 |
| NDEL1      | 0.0834805 | 0.1887833 | 0.4422 | 0.658    | 0.107418142 | count | 1 |
| ERBB3      | 0.374815  | 0.8190299 | 0.4576 | 0.647    | 0.107555634 | count | 1 |
| RPL24      | 0.0746543 | 0.0210917 | 3.5395 | 0.000407 | 0.107582422 | count | 1 |
| TMEM259    | 0.0784358 | 0.1191026 | 0.6586 | 0.51     | 0.107689494 | count | 1 |
| MECR       | 0.0882478 | 0.2727229 | 0.3236 | 0.746    | 0.107767474 | count | 1 |
| GMIP       | 0.376952  | 0.6502369 | 0.5797 | 0.562    | 0.108092548 | count | 1 |
| AL132639.2 | 0.3772349 | 0.7643807 | 0.4935 | 0.622    | 0.108163558 | count | 1 |

|            |            |             |        |         |             |       |   |
|------------|------------|-------------|--------|---------|-------------|-------|---|
| NDUFA8     | 0.0768282  | 0.0843077   | 0.9113 | 0.362   | 0.108206092 | count | 1 |
| RPL26      | 0.0751041  | 0.0230546   | 3.2577 | 0.00114 | 0.108233853 | count | 1 |
| AC068338.3 | 0.1602601  | 0.6873742   | 0.2331 | 0.816   | 0.108279371 | count | 1 |
| ERCC2      | 0.1153605  | 0.3973293   | 0.2903 | 0.772   | 0.108307211 | count | 1 |
| ZNF740     | 0.1139128  | 0.4310433   | 0.2643 | 0.792   | 0.108320707 | count | 1 |
| SRP9       | 0.0761185  | 0.0621378   | 1.225  | 0.221   | 0.108380947 | count | 1 |
| BNC2       | 0.0951731  | 0.2956424   | 0.3219 | 0.748   | 0.108446753 | count | 1 |
| HEXDC      | 0.08394    | 0.2338796   | 0.3589 | 0.72    | 0.108483918 | count | 1 |
| ST3GAL2    | 0.0934384  | 0.2301523   | 0.406  | 0.685   | 0.108770865 | count | 1 |
| DCAF5      | 0.0847191  | 0.171592    | 0.4937 | 0.622   | 0.108802967 | count | 1 |
| ZNF711     | 0.1880493  | 0.4937417   | 0.3809 | 0.703   | 0.108834087 | count | 1 |
| CXorf40B   | 0.0967087  | 0.2881538   | 0.3356 | 0.737   | 0.108835617 | count | 1 |
| METTL6     | 0.09296    | 0.3156412   | 0.2945 | 0.768   | 0.108896307 | count | 1 |
| ANKRD40    | 0.0821336  | 0.1681964   | 0.4883 | 0.625   | 0.108940732 | count | 1 |
| TMEM183A   | 0.0812516  | 0.1422851   | 0.571  | 0.568   | 0.108941555 | count | 1 |
| RAD21      | 0.0775979  | 0.0896166   | 0.8659 | 0.387   | 0.108971774 | count | 1 |
| RPS13      | 0.0756525  | 0.0200919   | 3.7653 | 0.00017 | 0.109071258 | count | 1 |
| RAB5C      | 0.0767796  | 0.0674061   | 1.1391 | 0.255   | 0.109103544 | count | 1 |
| TADA2A     | 0.0889126  | 0.2613903   | 0.3402 | 0.734   | 0.109188122 | count | 1 |
| KLC4       | 0.1616836  | 0.6254828   | 0.2585 | 0.796   | 0.109206783 | count | 1 |
| HOMER1     | 0.2020612  | 0.4938738   | 0.4091 | 0.682   | 0.10925528  | count | 1 |
| AC093157.1 | 0.085174   | 0.2122718   | 0.4012 | 0.688   | 0.109280554 | count | 1 |
| AL035563.1 | 0.2022045  | 0.761962    | 0.2654 | 0.791   | 0.109328689 | count | 1 |
| CGRRF1     | 0.0838902  | 0.2041744   | 0.4109 | 0.681   | 0.109354919 | count | 1 |
| SNX9       | 0.0792377  | 0.1127193   | 0.703  | 0.482   | 0.109602742 | count | 1 |
| CNPPD1     | 0.0831072  | 0.1642178   | 0.5061 | 0.613   | 0.109831043 | count | 1 |
| LZTFL1     | 0.08839    | 0.2209268   | 0.4001 | 0.689   | 0.109834864 | count | 1 |
| FAM98C     | 0.0849047  | 0.2042804   | 0.4156 | 0.678   | 0.109909359 | count | 1 |
| ZNF304     | 0.1194802  | 0.3960161   | 0.3017 | 0.763   | 0.110620709 | count | 1 |
| CNOT7      | 0.0812587  | 0.140683    | 0.5776 | 0.564   | 0.110644295 | count | 1 |
| CRAT       | 0.0940801  | 0.2425831   | 0.3878 | 0.698   | 0.110850269 | count | 1 |
| C1D        | 0.0802798  | 0.1205782   | 0.6658 | 0.506   | 0.11087072  | count | 1 |
| SLC25A5    | 0.0776024  | 0.0525597   | 1.4765 | 0.1399  | 0.110930897 | count | 1 |
| UCKL1      | 0.086554   | 0.1839275   | 0.4706 | 0.638   | 0.110936318 | count | 1 |
| WDR46      | 0.0860031  | 0.1800447   | 0.4777 | 0.633   | 0.110949128 | count | 1 |
| SMIM12     | 0.0816454  | 0.1387281   | 0.5885 | 0.556   | 0.111064044 | count | 1 |
| SBSPON     | 15.939517  | 1799.33141  | 0.0089 | 0.993   | 0.111116848 | count | 1 |
| SLC6A2     | 15.9395187 | 1799.330371 | 0.0089 | 0.993   | 0.111116848 | count | 1 |
| CDC20B     | 15.9395188 | 1799.332264 | 0.0089 | 0.993   | 0.111116848 | count | 1 |
| AP001269.2 | 15.939521  | 1799.332253 | 0.0089 | 0.993   | 0.111116848 | count | 1 |
| AC026304.1 | 16.1706519 | 1801.538391 | 0.009  | 0.993   | 0.111116851 | count | 1 |
| FCGR3B     | 16.2981114 | 2285.628495 | 0.0071 | 0.9943  | 0.111116852 | count | 1 |
| AC016907.2 | 16.3808283 | 2571.920411 | 0.0064 | 0.995   | 0.111116853 | count | 1 |
| MYO15A     | 16.3808306 | 2571.92186  | 0.0064 | 0.995   | 0.111116853 | count | 1 |
| NTRK3      | 16.3808318 | 2571.923346 | 0.0064 | 0.995   | 0.111116853 | count | 1 |

|            |            |             |        |        |             |       |   |
|------------|------------|-------------|--------|--------|-------------|-------|---|
| SNCA-AS1   | 16.3808338 | 2571.923813 | 0.0064 | 0.995  | 0.111116853 | count | 1 |
| AC105001.1 | 16.3816727 | 3007.477429 | 0.0054 | 0.996  | 0.111116853 | count | 1 |
| AC136489.1 | 16.3816751 | 3007.476225 | 0.0054 | 0.996  | 0.111116853 | count | 1 |
| LYG2       | 16.6184828 | 1881.080752 | 0.0088 | 0.993  | 0.111116855 | count | 1 |
| AL391988.1 | 16.6700499 | 1739.419408 | 0.0096 | 0.9924 | 0.111116855 | count | 1 |
| TBX15      | 16.6830307 | 5240.567881 | 0.0032 | 0.997  | 0.111116855 | count | 1 |
| CCR5       | 16.6830309 | 5240.568023 | 0.0032 | 0.997  | 0.111116855 | count | 1 |
| MSANTD1    | 16.6830309 | 5240.568023 | 0.0032 | 0.997  | 0.111116855 | count | 1 |
| AC091849.2 | 16.6830308 | 5240.568058 | 0.0032 | 0.997  | 0.111116855 | count | 1 |
| SAPCD1-AS1 | 16.6830309 | 5240.568023 | 0.0032 | 0.997  | 0.111116855 | count | 1 |
| AL009178.3 | 16.6830308 | 5240.567846 | 0.0032 | 0.997  | 0.111116855 | count | 1 |
| AL109910.2 | 16.6830309 | 5240.568235 | 0.0032 | 0.997  | 0.111116855 | count | 1 |
| ABCB5      | 16.6830309 | 5240.568023 | 0.0032 | 0.997  | 0.111116855 | count | 1 |
| AC099552.1 | 16.6830308 | 5240.567846 | 0.0032 | 0.997  | 0.111116855 | count | 1 |
| VEGFD      | 16.6830309 | 5240.568023 | 0.0032 | 0.997  | 0.111116855 | count | 1 |
| AL353616.2 | 16.6830309 | 5240.568023 | 0.0032 | 0.997  | 0.111116855 | count | 1 |
| HTR3A      | 16.6830308 | 5240.568058 | 0.0032 | 0.997  | 0.111116855 | count | 1 |
| PLEKHS1    | 16.6830309 | 5240.568023 | 0.0032 | 0.997  | 0.111116855 | count | 1 |
| AC079315.1 | 16.6830309 | 5240.568023 | 0.0032 | 0.997  | 0.111116855 | count | 1 |
| AL583810.3 | 16.6830309 | 5240.568023 | 0.0032 | 0.997  | 0.111116855 | count | 1 |
| CDH8       | 16.6830309 | 5240.568023 | 0.0032 | 0.997  | 0.111116855 | count | 1 |
| FBXW10     | 16.6830308 | 5240.567846 | 0.0032 | 0.997  | 0.111116855 | count | 1 |
| LINC01901  | 16.6830309 | 5240.568023 | 0.0032 | 0.997  | 0.111116855 | count | 1 |
| AC145212.1 | 16.6830309 | 5240.568023 | 0.0032 | 0.997  | 0.111116855 | count | 1 |
| LINC01873  | 16.683031  | 5240.568199 | 0.0032 | 0.997  | 0.111116855 | count | 1 |
| U91328.1   | 16.683031  | 5240.568199 | 0.0032 | 0.997  | 0.111116855 | count | 1 |
| AC084757.2 | 16.683031  | 5240.568199 | 0.0032 | 0.997  | 0.111116855 | count | 1 |
| AC011500.3 | 16.683031  | 5240.568199 | 0.0032 | 0.997  | 0.111116855 | count | 1 |
| AC022154.1 | 16.683031  | 5240.568199 | 0.0032 | 0.997  | 0.111116855 | count | 1 |
| FP236383.3 | 16.683031  | 5240.568199 | 0.0032 | 0.997  | 0.111116855 | count | 1 |
| AC105271.1 | 16.6830311 | 5240.568164 | 0.0032 | 0.997  | 0.111116855 | count | 1 |
| AC114808.2 | 16.6830311 | 5240.568164 | 0.0032 | 0.997  | 0.111116855 | count | 1 |
| AC012065.4 | 16.6830311 | 5240.568164 | 0.0032 | 0.997  | 0.111116855 | count | 1 |
| AL591503.1 | 16.6830311 | 5240.567952 | 0.0032 | 0.997  | 0.111116855 | count | 1 |
| ZCCHC12    | 16.6830311 | 5240.567952 | 0.0032 | 0.997  | 0.111116855 | count | 1 |
| PRDM12     | 16.6830311 | 5240.568164 | 0.0032 | 0.997  | 0.111116855 | count | 1 |
| AL583810.1 | 16.6830311 | 5240.568164 | 0.0032 | 0.997  | 0.111116855 | count | 1 |
| KRT24      | 16.6830311 | 5240.568164 | 0.0032 | 0.997  | 0.111116855 | count | 1 |
| MMP11      | 16.6830311 | 5240.568164 | 0.0032 | 0.997  | 0.111116855 | count | 1 |
| AC099566.1 | 16.6830313 | 5240.568306 | 0.0032 | 0.997  | 0.111116855 | count | 1 |
| PROK2      | 16.6830312 | 5240.567917 | 0.0032 | 0.997  | 0.111116855 | count | 1 |
| AC096586.1 | 16.6830313 | 5240.568306 | 0.0032 | 0.997  | 0.111116855 | count | 1 |
| AC135457.1 | 16.6830312 | 5240.568129 | 0.0032 | 0.997  | 0.111116855 | count | 1 |
| AL034374.1 | 16.6830312 | 5240.567917 | 0.0032 | 0.997  | 0.111116855 | count | 1 |
| IFT74-AS1  | 16.6830312 | 5240.567917 | 0.0032 | 0.997  | 0.111116855 | count | 1 |

|            |            |             |        |        |             |       |   |
|------------|------------|-------------|--------|--------|-------------|-------|---|
| AL359182.2 | 16.6830312 | 5240.567917 | 0.0032 | 0.997  | 0.111116855 | count | 1 |
| AC073389.3 | 16.6830312 | 5240.568129 | 0.0032 | 0.997  | 0.111116855 | count | 1 |
| LINC02387  | 16.6830312 | 5240.568341 | 0.0032 | 0.997  | 0.111116855 | count | 1 |
| AL160191.1 | 16.6830312 | 5240.568341 | 0.0032 | 0.997  | 0.111116855 | count | 1 |
| C17orf64   | 16.6830312 | 5240.568129 | 0.0032 | 0.997  | 0.111116855 | count | 1 |
| CIRBP-AS1  | 16.6830312 | 5240.567917 | 0.0032 | 0.997  | 0.111116855 | count | 1 |
| AC011445.2 | 16.6830312 | 5240.568129 | 0.0032 | 0.997  | 0.111116855 | count | 1 |
| AJ011932.1 | 16.6830312 | 5240.567917 | 0.0032 | 0.997  | 0.111116855 | count | 1 |
| AL031283.1 | 16.6830314 | 5240.56827  | 0.0032 | 0.997  | 0.111116855 | count | 1 |
| LINC00636  | 16.7009707 | 2553.480301 | 0.0065 | 0.9948 | 0.111116855 | count | 1 |
| SYCP3      | 16.7009728 | 2553.481631 | 0.0065 | 0.9948 | 0.111116855 | count | 1 |
| AL596202.1 | 16.7009731 | 2553.482536 | 0.0065 | 0.9948 | 0.111116855 | count | 1 |
| AC004889.1 | 16.7009731 | 2553.482546 | 0.0065 | 0.9948 | 0.111116855 | count | 1 |
| H3F3C      | 16.7009771 | 2553.484292 | 0.0065 | 0.9948 | 0.111116855 | count | 1 |
| PLK4       | 15.7288872 | 1364.556518 | 0.0115 | 0.9908 | 0.111116855 | count | 1 |
| AL354760.1 | 16.8947092 | 4282.004062 | 0.0039 | 0.997  | 0.111116856 | count | 1 |
| AC079148.1 | 16.8947092 | 4282.004013 | 0.0039 | 0.997  | 0.111116856 | count | 1 |
| CDCP2      | 16.8947093 | 4282.004086 | 0.0039 | 0.997  | 0.111116856 | count | 1 |
| AC019171.1 | 16.8947093 | 4282.004111 | 0.0039 | 0.997  | 0.111116856 | count | 1 |
| DLEC1      | 16.8947093 | 4282.004037 | 0.0039 | 0.997  | 0.111116856 | count | 1 |
| LINC02067  | 16.8947093 | 4282.004111 | 0.0039 | 0.997  | 0.111116856 | count | 1 |
| AC008875.1 | 16.8947094 | 4282.004135 | 0.0039 | 0.997  | 0.111116856 | count | 1 |
| GRPR       | 16.8947093 | 4282.004086 | 0.0039 | 0.997  | 0.111116856 | count | 1 |
| NANOG      | 16.8947093 | 4282.004111 | 0.0039 | 0.997  | 0.111116856 | count | 1 |
| SYNDIG1L   | 16.8947093 | 4282.004062 | 0.0039 | 0.997  | 0.111116856 | count | 1 |
| AC005291.1 | 16.8947093 | 4282.004111 | 0.0039 | 0.997  | 0.111116856 | count | 1 |
| KCNJ6      | 16.8947093 | 4282.004111 | 0.0039 | 0.997  | 0.111116856 | count | 1 |
| RAB42      | 16.8947129 | 4282.015126 | 0.0039 | 0.997  | 0.111116856 | count | 1 |
| AL022326.1 | 16.8947196 | 4282.006338 | 0.0039 | 0.997  | 0.111116856 | count | 1 |
| AP001267.1 | 16.8947228 | 4282.003425 | 0.0039 | 0.997  | 0.111116856 | count | 1 |
| KHDRBS2    | 16.8947261 | 4282.008811 | 0.0039 | 0.997  | 0.111116856 | count | 1 |
| EME1       | 16.8947261 | 4282.008811 | 0.0039 | 0.997  | 0.111116856 | count | 1 |
| GHRHR      | 16.8947296 | 4282.011503 | 0.0039 | 0.997  | 0.111116856 | count | 1 |
| SLC35G5    | 16.8947296 | 4282.011552 | 0.0039 | 0.997  | 0.111116856 | count | 1 |
| CARMIL3    | 16.8947329 | 4282.016962 | 0.0039 | 0.997  | 0.111116856 | count | 1 |
| AC011921.1 | 16.8947329 | 4282.016962 | 0.0039 | 0.997  | 0.111116856 | count | 1 |
| SMO        | 16.894733  | 4282.016987 | 0.0039 | 0.997  | 0.111116856 | count | 1 |
| AL021707.5 | 15.8887974 | 1671.56676  | 0.0095 | 0.992  | 0.111116858 | count | 1 |
| AC009318.1 | 15.9395151 | 1799.330544 | 0.0089 | 0.993  | 0.111116859 | count | 1 |
| AC093157.2 | 15.939517  | 1799.331404 | 0.0089 | 0.993  | 0.111116859 | count | 1 |
| RNF128     | 15.939517  | 1799.331406 | 0.0089 | 0.993  | 0.111116859 | count | 1 |
| KCNIP2-AS1 | 15.939517  | 1799.331407 | 0.0089 | 0.993  | 0.111116859 | count | 1 |
| EIF2S3B    | 15.939517  | 1799.331407 | 0.0089 | 0.993  | 0.111116859 | count | 1 |
| AC005261.2 | 15.9395176 | 1799.331404 | 0.0089 | 0.993  | 0.111116859 | count | 1 |
| AP000446.1 | 15.939518  | 1799.33053  | 0.0089 | 0.993  | 0.111116859 | count | 1 |

|            |            |             |        |        |             |       |   |
|------------|------------|-------------|--------|--------|-------------|-------|---|
| AC002470.1 | 15.939518  | 1799.330533 | 0.0089 | 0.993  | 0.111116859 | count | 1 |
| CCDC168    | 15.9395181 | 1799.332423 | 0.0089 | 0.993  | 0.111116859 | count | 1 |
| AC023355.1 | 15.9395181 | 1799.332426 | 0.0089 | 0.993  | 0.111116859 | count | 1 |
| CHST6      | 15.9395181 | 1799.332421 | 0.0089 | 0.993  | 0.111116859 | count | 1 |
| IL1RL2     | 15.9395184 | 1799.331705 | 0.0089 | 0.993  | 0.111116859 | count | 1 |
| CYP2E1     | 15.9395185 | 1799.331554 | 0.0089 | 0.993  | 0.111116859 | count | 1 |
| AC124045.1 | 15.9395188 | 1799.330373 | 0.0089 | 0.993  | 0.111116859 | count | 1 |
| KIF6       | 15.9395188 | 1799.332265 | 0.0089 | 0.993  | 0.111116859 | count | 1 |
| TMEM71     | 15.9395191 | 1799.331549 | 0.0089 | 0.993  | 0.111116859 | count | 1 |
| EPHB6      | 15.9395193 | 1799.331395 | 0.0089 | 0.993  | 0.111116859 | count | 1 |
| AL451074.2 | 15.9395195 | 1799.331089 | 0.0089 | 0.993  | 0.111116859 | count | 1 |
| COLQ       | 15.9395195 | 1799.331089 | 0.0089 | 0.993  | 0.111116859 | count | 1 |
| CNTN2      | 15.9395206 | 1799.331234 | 0.0089 | 0.993  | 0.111116859 | count | 1 |
| AL450306.1 | 15.9395206 | 1799.331236 | 0.0089 | 0.993  | 0.111116859 | count | 1 |
| NCKAP1L    | 15.9395206 | 1799.331233 | 0.0089 | 0.993  | 0.111116859 | count | 1 |
| AL121917.1 | 15.9395206 | 1799.332108 | 0.0089 | 0.993  | 0.111116859 | count | 1 |
| AC005288.1 | 15.9395211 | 1799.332252 | 0.0089 | 0.993  | 0.111116859 | count | 1 |
| TTY10      | 15.9395211 | 1799.332253 | 0.0089 | 0.993  | 0.111116859 | count | 1 |
| AC233992.3 | 15.9395212 | 1799.332105 | 0.0089 | 0.993  | 0.111116859 | count | 1 |
| LINC02334  | 15.9395216 | 1799.33225  | 0.0089 | 0.993  | 0.111116859 | count | 1 |
| CFAP47     | 15.9395224 | 1799.331075 | 0.0089 | 0.993  | 0.111116859 | count | 1 |
| AC079174.2 | 15.9395232 | 1799.332807 | 0.0089 | 0.993  | 0.111116859 | count | 1 |
| SLC2A1-AS1 | 17.5309873 | 3839.022159 | 0.0046 | 0.996  | 0.111116859 | count | 1 |
| AC005523.1 | 17.5309881 | 3839.017634 | 0.0046 | 0.996  | 0.111116859 | count | 1 |
| EFNB3      | 17.5309915 | 3839.022159 | 0.0046 | 0.996  | 0.111116859 | count | 1 |
| ESRP2      | 17.5309928 | 3839.015285 | 0.0046 | 0.996  | 0.111116859 | count | 1 |
| ADORA2B    | 17.5309934 | 3839.013044 | 0.0046 | 0.996  | 0.111116859 | count | 1 |
| C17orf82   | 17.5309953 | 3839.022072 | 0.0046 | 0.996  | 0.111116859 | count | 1 |
| AC044802.2 | 17.5309986 | 3839.024226 | 0.0046 | 0.996  | 0.111116859 | count | 1 |
| SEC23A-AS1 | 17.5310042 | 3839.017352 | 0.0046 | 0.996  | 0.111116859 | count | 1 |
| LPAR2      | 15.9765637 | 1371.779095 | 0.0116 | 0.9907 | 0.111116859 | count | 1 |
| MMP25      | 16.0680819 | 1262.412484 | 0.0127 | 0.99   | 0.11111686  | count | 1 |
| SP6        | 16.1377483 | 2415.69751  | 0.0067 | 0.995  | 0.111116861 | count | 1 |
| GINS1      | 16.1706473 | 1801.537309 | 0.009  | 0.993  | 0.111116861 | count | 1 |
| IL6R-AS1   | 16.1706479 | 1801.537308 | 0.009  | 0.993  | 0.111116861 | count | 1 |
| AC096564.1 | 16.1706479 | 1801.537306 | 0.009  | 0.993  | 0.111116861 | count | 1 |
| RERGL      | 16.1706479 | 1801.537306 | 0.009  | 0.993  | 0.111116861 | count | 1 |
| ADPGK-AS1  | 16.1706485 | 1801.537855 | 0.009  | 0.993  | 0.111116861 | count | 1 |
| AC007613.1 | 16.1706485 | 1801.537859 | 0.009  | 0.993  | 0.111116861 | count | 1 |
| AL513314.2 | 16.1706497 | 1801.538404 | 0.009  | 0.993  | 0.111116861 | count | 1 |
| PIPOX      | 16.1706508 | 1801.537846 | 0.009  | 0.993  | 0.111116861 | count | 1 |
| TTC25      | 16.1706508 | 1801.537842 | 0.009  | 0.993  | 0.111116861 | count | 1 |
| KIF14      | 16.1706509 | 1801.538245 | 0.009  | 0.993  | 0.111116861 | count | 1 |
| INKA2      | 16.1706512 | 1801.537994 | 0.009  | 0.993  | 0.111116861 | count | 1 |
| PTGFR      | 16.170652  | 1801.53769  | 0.009  | 0.993  | 0.111116861 | count | 1 |

|            |            |             |        |        |             |       |   |
|------------|------------|-------------|--------|--------|-------------|-------|---|
| AC005037.1 | 16.170652  | 1801.538391 | 0.009  | 0.993  | 0.111116861 | count | 1 |
| AC020978.5 | 16.1706547 | 1801.537129 | 0.009  | 0.993  | 0.111116861 | count | 1 |
| DLGAP3     | 16.1706549 | 1801.537678 | 0.009  | 0.993  | 0.111116861 | count | 1 |
| OCA2       | 16.1706553 | 1801.537126 | 0.009  | 0.993  | 0.111116861 | count | 1 |
| FOXF1      | 16.1706553 | 1801.537126 | 0.009  | 0.993  | 0.111116861 | count | 1 |
| AC091057.6 | 16.1706559 | 1801.537675 | 0.009  | 0.993  | 0.111116861 | count | 1 |
| RPS6KA6    | 16.170656  | 1801.537678 | 0.009  | 0.993  | 0.111116861 | count | 1 |
| AC008555.2 | 16.1708534 | 2063.169049 | 0.0078 | 0.994  | 0.111116861 | count | 1 |
| AC008758.4 | 16.255764  | 1545.249648 | 0.0105 | 0.9916 | 0.111116862 | count | 1 |
| CELSR3     | 16.3475077 | 1793.193037 | 0.0091 | 0.993  | 0.111116863 | count | 1 |
| AC087392.5 | 16.3478388 | 1970.89155  | 0.0083 | 0.993  | 0.111116863 | count | 1 |
| AL136038.5 | 16.3478423 | 1970.891957 | 0.0083 | 0.993  | 0.111116863 | count | 1 |
| HDAC2-AS2  | 16.3478429 | 1970.893982 | 0.0083 | 0.993  | 0.111116863 | count | 1 |
| C4orf19    | 16.3753231 | 1763.010904 | 0.0093 | 0.9926 | 0.111116863 | count | 1 |
| AC023509.3 | 16.3753246 | 1763.012068 | 0.0093 | 0.9926 | 0.111116863 | count | 1 |
| AC044802.1 | 16.3753247 | 1763.012071 | 0.0093 | 0.9926 | 0.111116863 | count | 1 |
| AC004223.2 | 16.3765432 | 1892.144756 | 0.0087 | 0.993  | 0.111116864 | count | 1 |
| NEB        | 16.3808267 | 2571.919435 | 0.0064 | 0.995  | 0.111116864 | count | 1 |
| TTL6       | 16.3808268 | 2571.91944  | 0.0064 | 0.995  | 0.111116864 | count | 1 |
| AC009720.1 | 16.380827  | 2571.920422 | 0.0064 | 0.995  | 0.111116864 | count | 1 |
| AP005205.2 | 16.3808275 | 2571.919912 | 0.0064 | 0.995  | 0.111116864 | count | 1 |
| AC024475.1 | 16.3808276 | 2571.919912 | 0.0064 | 0.995  | 0.111116864 | count | 1 |
| AC107982.3 | 16.3808276 | 2571.919912 | 0.0064 | 0.995  | 0.111116864 | count | 1 |
| ZBTB8B     | 16.3808277 | 2571.922396 | 0.0064 | 0.995  | 0.111116864 | count | 1 |
| ARHGEF33   | 16.3808282 | 2571.920406 | 0.0064 | 0.995  | 0.111116864 | count | 1 |
| AC004754.1 | 16.3808282 | 2571.920406 | 0.0064 | 0.995  | 0.111116864 | count | 1 |
| AC103810.2 | 16.3808282 | 2571.92039  | 0.0064 | 0.995  | 0.111116864 | count | 1 |
| AL512770.1 | 16.3808284 | 2571.920406 | 0.0064 | 0.995  | 0.111116864 | count | 1 |
| AC090360.1 | 16.3808293 | 2571.919398 | 0.0064 | 0.995  | 0.111116864 | count | 1 |
| ZNF709     | 16.3808295 | 2571.921871 | 0.0064 | 0.995  | 0.111116864 | count | 1 |
| CNR2       | 16.3808298 | 2571.921377 | 0.0064 | 0.995  | 0.111116864 | count | 1 |
| AC093525.7 | 16.3808301 | 2571.91988  | 0.0064 | 0.995  | 0.111116864 | count | 1 |
| AL050403.2 | 16.3808301 | 2571.91988  | 0.0064 | 0.995  | 0.111116864 | count | 1 |
| VIL1       | 16.3808302 | 2571.920857 | 0.0064 | 0.995  | 0.111116864 | count | 1 |
| RNF150     | 16.3808302 | 2571.922364 | 0.0064 | 0.995  | 0.111116864 | count | 1 |
| AC112250.2 | 16.3808303 | 2571.922369 | 0.0064 | 0.995  | 0.111116864 | count | 1 |
| PON3       | 16.3808303 | 2571.920862 | 0.0064 | 0.995  | 0.111116864 | count | 1 |
| SOX6       | 16.3808303 | 2571.920868 | 0.0064 | 0.995  | 0.111116864 | count | 1 |
| AC092490.1 | 16.3808303 | 2571.920873 | 0.0064 | 0.995  | 0.111116864 | count | 1 |
| AL121761.2 | 16.3808304 | 2571.920868 | 0.0064 | 0.995  | 0.111116864 | count | 1 |
| SLITRK5    | 16.3808307 | 2571.921865 | 0.0064 | 0.995  | 0.111116864 | count | 1 |
| AC005224.4 | 16.380831  | 2571.922842 | 0.0064 | 0.995  | 0.111116864 | count | 1 |
| AL354732.1 | 16.3808313 | 2571.92384  | 0.0064 | 0.995  | 0.111116864 | count | 1 |
| TTC39A-AS1 | 16.3808317 | 2571.923335 | 0.0064 | 0.995  | 0.111116864 | count | 1 |
| ITGB1BP2   | 16.380832  | 2571.920342 | 0.0064 | 0.995  | 0.111116864 | count | 1 |



|            |            |             |        |        |             |       |   |
|------------|------------|-------------|--------|--------|-------------|-------|---|
| AL603839.3 | 16.3808321 | 2571.920342 | 0.0064 | 0.995  | 0.111116864 | count | 1 |
| PSAT1      | 16.3808321 | 2571.920353 | 0.0064 | 0.995  | 0.111116864 | count | 1 |
| CENPA      | 16.3808322 | 2571.920358 | 0.0064 | 0.995  | 0.111116864 | count | 1 |
| FCER1A     | 16.3808326 | 2571.92134  | 0.0064 | 0.995  | 0.111116864 | count | 1 |
| AC092718.3 | 16.3808326 | 2571.919833 | 0.0064 | 0.995  | 0.111116864 | count | 1 |
| HDHD5-AS1  | 16.3808326 | 2571.919838 | 0.0064 | 0.995  | 0.111116864 | count | 1 |
| IGHEP2     | 16.3808329 | 2571.92082  | 0.0064 | 0.995  | 0.111116864 | count | 1 |
| AC073195.1 | 16.3808333 | 2571.921818 | 0.0064 | 0.995  | 0.111116864 | count | 1 |
| AC024267.6 | 16.3808335 | 2571.922815 | 0.0064 | 0.995  | 0.111116864 | count | 1 |
| LINC00449  | 16.380834  | 2571.922311 | 0.0064 | 0.995  | 0.111116864 | count | 1 |
| AL136382.1 | 16.3808345 | 2571.921807 | 0.0064 | 0.995  | 0.111116864 | count | 1 |
| AC020907.3 | 16.3808349 | 2571.922794 | 0.0064 | 0.995  | 0.111116864 | count | 1 |
| AL031665.2 | 16.3808353 | 2571.922295 | 0.0064 | 0.995  | 0.111116864 | count | 1 |
| CFAP58     | 16.3808355 | 2571.923282 | 0.0064 | 0.995  | 0.111116864 | count | 1 |
| AL161756.1 | 16.3808355 | 2571.923282 | 0.0064 | 0.995  | 0.111116864 | count | 1 |
| PCDHGA1    | 16.3808356 | 2571.923282 | 0.0064 | 0.995  | 0.111116864 | count | 1 |
| PTPRD      | 16.381673  | 3007.475697 | 0.0054 | 0.996  | 0.111116864 | count | 1 |
| KCNIP2     | 16.381673  | 3007.477442 | 0.0054 | 0.996  | 0.111116864 | count | 1 |
| RAVER1     | 16.3816731 | 3007.475697 | 0.0054 | 0.996  | 0.111116864 | count | 1 |
| AC099811.4 | 16.3816744 | 3007.475666 | 0.0054 | 0.996  | 0.111116864 | count | 1 |
| AF287957.1 | 16.381676  | 3007.475057 | 0.0054 | 0.996  | 0.111116864 | count | 1 |
| AC005014.2 | 16.3816763 | 3007.476212 | 0.0054 | 0.996  | 0.111116864 | count | 1 |
| DGKI       | 16.3816785 | 3007.476765 | 0.0054 | 0.996  | 0.111116864 | count | 1 |
| CXorf57    | 16.432348  | 1526.063632 | 0.0108 | 0.9914 | 0.111116864 | count | 1 |
| BCAS4      | 16.4357094 | 2188.145925 | 0.0075 | 0.994  | 0.111116864 | count | 1 |
| AC132192.1 | 16.4619503 | 1095.350522 | 0.015  | 0.988  | 0.111116864 | count | 1 |
| GYPE       | 16.4688389 | 1276.07049  | 0.0129 | 0.9897 | 0.111116864 | count | 1 |
| MAPT       | 16.4932752 | 1783.148506 | 0.0092 | 0.9926 | 0.111116864 | count | 1 |
| AC012213.3 | 16.4932773 | 1783.150769 | 0.0092 | 0.9926 | 0.111116864 | count | 1 |
| RORA-AS1   | 16.4936606 | 1917.383143 | 0.0086 | 0.9931 | 0.111116864 | count | 1 |
| AC244100.2 | 16.4936607 | 1917.383149 | 0.0086 | 0.9931 | 0.111116864 | count | 1 |
| GAS6-AS1   | 16.4936632 | 1917.382583 | 0.0086 | 0.9931 | 0.111116864 | count | 1 |
| CNIH2      | 16.5426425 | 2038.323469 | 0.0081 | 0.994  | 0.111116865 | count | 1 |
| AC103746.1 | 16.5426485 | 1779.934884 | 0.0093 | 0.9926 | 0.111116865 | count | 1 |
| AC022098.4 | 16.5426492 | 1779.934468 | 0.0093 | 0.9926 | 0.111116865 | count | 1 |
| AC022306.2 | 16.5426497 | 1779.934881 | 0.0093 | 0.9926 | 0.111116865 | count | 1 |
| AC119674.1 | 16.5426504 | 1779.935528 | 0.0093 | 0.9926 | 0.111116865 | count | 1 |
| TRIP13     | 16.5426519 | 1779.934468 | 0.0093 | 0.9926 | 0.111116865 | count | 1 |
| AL031846.2 | 16.5426519 | 1779.935249 | 0.0093 | 0.9926 | 0.111116865 | count | 1 |
| AC015468.3 | 16.5434964 | 1910.005895 | 0.0087 | 0.993  | 0.111116865 | count | 1 |
| LINC02062  | 16.5532423 | 1522.677153 | 0.0109 | 0.9913 | 0.111116865 | count | 1 |
| CRISPLD2   | 16.5545636 | 1720.824282 | 0.0096 | 0.9923 | 0.111116865 | count | 1 |
| ZNF710-AS1 | 16.5684333 | 1243.825631 | 0.0133 | 0.9894 | 0.111116865 | count | 1 |
| SH2D3A     | 16.6184828 | 1881.082317 | 0.0088 | 0.993  | 0.111116865 | count | 1 |
| AC055876.5 | 16.6188419 | 1982.961697 | 0.0084 | 0.9933 | 0.111116865 | count | 1 |

|               |            |             |        |        |             |       |   |
|---------------|------------|-------------|--------|--------|-------------|-------|---|
| AC097468.3    | 16.618992  | 2079.70339  | 0.008  | 0.9936 | 0.111116865 | count | 1 |
| ANPEP         | 16.6194909 | 2346.334762 | 0.0071 | 0.994  | 0.111116865 | count | 1 |
| NOX5          | 16.6646798 | 1451.741331 | 0.0115 | 0.9908 | 0.111116866 | count | 1 |
| LINC02367     | 16.6712074 | 1825.661204 | 0.0091 | 0.9927 | 0.111116866 | count | 1 |
| KCNIP3        | 16.6758669 | 1783.547096 | 0.0093 | 0.9925 | 0.111116866 | count | 1 |
| LINC01730     | 16.6758707 | 1783.547087 | 0.0093 | 0.9925 | 0.111116866 | count | 1 |
| AL109761.1    | 16.6830306 | 5240.567704 | 0.0032 | 0.997  | 0.111116866 | count | 1 |
| REELD1        | 16.6830307 | 5240.568164 | 0.0032 | 0.997  | 0.111116866 | count | 1 |
| AC012313.7    | 16.6830307 | 5240.567846 | 0.0032 | 0.997  | 0.111116866 | count | 1 |
| AJAP1         | 16.6830309 | 5240.568023 | 0.0032 | 0.997  | 0.111116866 | count | 1 |
| NPPA-AS1      | 16.6830309 | 5240.567987 | 0.0032 | 0.997  | 0.111116866 | count | 1 |
| AL121992.2    | 16.6830309 | 5240.567881 | 0.0032 | 0.997  | 0.111116866 | count | 1 |
| TMEM61        | 16.6830309 | 5240.568164 | 0.0032 | 0.997  | 0.111116866 | count | 1 |
| CYP2J2        | 16.6830309 | 5240.567952 | 0.0032 | 0.997  | 0.111116866 | count | 1 |
| AC099794.1    | 16.6830309 | 5240.567917 | 0.0032 | 0.997  | 0.111116866 | count | 1 |
| GPR61         | 16.6830309 | 5240.567881 | 0.0032 | 0.997  | 0.111116866 | count | 1 |
| PTPN22        | 16.6830309 | 5240.567846 | 0.0032 | 0.997  | 0.111116866 | count | 1 |
| AL356356.1    | 16.6830309 | 5240.567846 | 0.0032 | 0.997  | 0.111116866 | count | 1 |
| TNFAIP8L2     | 16.6830309 | 5240.567952 | 0.0032 | 0.997  | 0.111116866 | count | 1 |
| LINC01641     | 16.6830309 | 5240.567917 | 0.0032 | 0.997  | 0.111116866 | count | 1 |
| LINC00582     | 16.6830309 | 5240.567952 | 0.0032 | 0.997  | 0.111116866 | count | 1 |
| AL357556.4    | 16.6830309 | 5240.567881 | 0.0032 | 0.997  | 0.111116866 | count | 1 |
| CHRM3-AS2     | 16.6830308 | 5240.568164 | 0.0032 | 0.997  | 0.111116866 | count | 1 |
| DNAJC5G       | 16.6830309 | 5240.567952 | 0.0032 | 0.997  | 0.111116866 | count | 1 |
| AC012593.1    | 16.6830309 | 5240.568093 | 0.0032 | 0.997  | 0.111116866 | count | 1 |
| ZEB2-AS1      | 16.6830309 | 5240.568023 | 0.0032 | 0.997  | 0.111116866 | count | 1 |
| TUBA4B        | 16.6830309 | 5240.568058 | 0.0032 | 0.997  | 0.111116866 | count | 1 |
| SNORC         | 16.6830309 | 5240.567846 | 0.0032 | 0.997  | 0.111116866 | count | 1 |
| AC018809.2    | 16.6830309 | 5240.567987 | 0.0032 | 0.997  | 0.111116866 | count | 1 |
| SAMMSON       | 16.6830309 | 5240.568023 | 0.0032 | 0.997  | 0.111116866 | count | 1 |
| AC110491.3    | 16.6830309 | 5240.568129 | 0.0032 | 0.997  | 0.111116866 | count | 1 |
| NPHP3-AS1     | 16.6830309 | 5240.568164 | 0.0032 | 0.997  | 0.111116866 | count | 1 |
| LINC00881     | 16.6830309 | 5240.567881 | 0.0032 | 0.997  | 0.111116866 | count | 1 |
| LINC02054     | 16.6830309 | 5240.567917 | 0.0032 | 0.997  | 0.111116866 | count | 1 |
| FGFBP2        | 16.6830309 | 5240.568164 | 0.0032 | 0.997  | 0.111116866 | count | 1 |
| AC106864.1    | 16.6830309 | 5240.568164 | 0.0032 | 0.997  | 0.111116866 | count | 1 |
| AC108935.1    | 16.6830309 | 5240.567846 | 0.0032 | 0.997  | 0.111116866 | count | 1 |
| FAM160A1      | 16.6830309 | 5240.567917 | 0.0032 | 0.997  | 0.111116866 | count | 1 |
| C1QTNF3-AMACR | 16.6830309 | 5240.568164 | 0.0032 | 0.997  | 0.111116866 | count | 1 |
| LINC02122     | 16.6830308 | 5240.567704 | 0.0032 | 0.997  | 0.111116866 | count | 1 |
| AC026427.1    | 16.6830309 | 5240.567917 | 0.0032 | 0.997  | 0.111116866 | count | 1 |
| LINC00992     | 16.6830309 | 5240.567881 | 0.0032 | 0.997  | 0.111116866 | count | 1 |
| REEP2         | 16.6830309 | 5240.567881 | 0.0032 | 0.997  | 0.111116866 | count | 1 |
| PLAC8L1       | 16.6830309 | 5240.567952 | 0.0032 | 0.997  | 0.111116866 | count | 1 |
| AL513548.1    | 16.6830309 | 5240.568023 | 0.0032 | 0.997  | 0.111116866 | count | 1 |

|             |            |             |        |       |             |       |   |
|-------------|------------|-------------|--------|-------|-------------|-------|---|
| C6orf47-AS1 | 16.6830309 | 5240.567881 | 0.0032 | 0.997 | 0.111116866 | count | 1 |
| AL356277.3  | 16.6830309 | 5240.567987 | 0.0032 | 0.997 | 0.111116866 | count | 1 |
| AL589666.1  | 16.6830309 | 5240.568129 | 0.0032 | 0.997 | 0.111116866 | count | 1 |
| KLHL32      | 16.6830309 | 5240.567846 | 0.0032 | 0.997 | 0.111116866 | count | 1 |
| GRM1        | 16.6830309 | 5240.568129 | 0.0032 | 0.997 | 0.111116866 | count | 1 |
| AL356417.3  | 16.6830309 | 5240.567987 | 0.0032 | 0.997 | 0.111116866 | count | 1 |
| AC092171.2  | 16.6830309 | 5240.568023 | 0.0032 | 0.997 | 0.111116866 | count | 1 |
| AC007255.1  | 16.6830308 | 5240.568164 | 0.0032 | 0.997 | 0.111116866 | count | 1 |
| AC004988.1  | 16.6830309 | 5240.568058 | 0.0032 | 0.997 | 0.111116866 | count | 1 |
| AC005537.1  | 16.6830309 | 5240.568023 | 0.0032 | 0.997 | 0.111116866 | count | 1 |
| TAC1        | 16.6830308 | 5240.567846 | 0.0032 | 0.997 | 0.111116866 | count | 1 |
| MAP7D2      | 16.6830309 | 5240.567881 | 0.0032 | 0.997 | 0.111116866 | count | 1 |
| ERAS        | 16.6830308 | 5240.568058 | 0.0032 | 0.997 | 0.111116866 | count | 1 |
| AL139398.1  | 16.6830309 | 5240.567952 | 0.0032 | 0.997 | 0.111116866 | count | 1 |
| TSIX        | 16.6830309 | 5240.567987 | 0.0032 | 0.997 | 0.111116866 | count | 1 |
| GPR174      | 16.6830309 | 5240.568129 | 0.0032 | 0.997 | 0.111116866 | count | 1 |
| RHOXF1      | 16.6830309 | 5240.567775 | 0.0032 | 0.997 | 0.111116866 | count | 1 |
| TPD52L3     | 16.6830309 | 5240.567881 | 0.0032 | 0.997 | 0.111116866 | count | 1 |
| PIP5K1B     | 16.6830309 | 5240.567917 | 0.0032 | 0.997 | 0.111116866 | count | 1 |
| NXNL2       | 16.6830309 | 5240.567917 | 0.0032 | 0.997 | 0.111116866 | count | 1 |
| OR1L8       | 16.6830309 | 5240.567987 | 0.0032 | 0.997 | 0.111116866 | count | 1 |
| CYSRT1      | 16.6830309 | 5240.568164 | 0.0032 | 0.997 | 0.111116866 | count | 1 |
| AC091053.1  | 16.6830309 | 5240.568129 | 0.0032 | 0.997 | 0.111116866 | count | 1 |
| SMTNL1      | 16.6830308 | 5240.568023 | 0.0032 | 0.997 | 0.111116866 | count | 1 |
| AP003721.1  | 16.6830308 | 5240.56774  | 0.0032 | 0.997 | 0.111116866 | count | 1 |
| AP002373.1  | 16.6830309 | 5240.567952 | 0.0032 | 0.997 | 0.111116866 | count | 1 |
| AP000941.1  | 16.6830309 | 5240.567917 | 0.0032 | 0.997 | 0.111116866 | count | 1 |
| ARMC3       | 16.6830308 | 5240.56774  | 0.0032 | 0.997 | 0.111116866 | count | 1 |
| AL121749.1  | 16.6830309 | 5240.567917 | 0.0032 | 0.997 | 0.111116866 | count | 1 |
| ANXA8       | 16.6830309 | 5240.567987 | 0.0032 | 0.997 | 0.111116866 | count | 1 |
| AL121928.1  | 16.6830309 | 5240.567917 | 0.0032 | 0.997 | 0.111116866 | count | 1 |
| AC018630.2  | 16.6830309 | 5240.567917 | 0.0032 | 0.997 | 0.111116866 | count | 1 |
| TAS2R46     | 16.6830308 | 5240.56781  | 0.0032 | 0.997 | 0.111116866 | count | 1 |
| SMCO3       | 16.6830309 | 5240.567987 | 0.0032 | 0.997 | 0.111116866 | count | 1 |
| AC008083.3  | 16.6830309 | 5240.568129 | 0.0032 | 0.997 | 0.111116866 | count | 1 |
| LINC01154   | 16.6830308 | 5240.568164 | 0.0032 | 0.997 | 0.111116866 | count | 1 |
| AC020656.2  | 16.6830309 | 5240.568164 | 0.0032 | 0.997 | 0.111116866 | count | 1 |
| PLA2G1B     | 16.6830309 | 5240.567846 | 0.0032 | 0.997 | 0.111116866 | count | 1 |
| CCNA1       | 16.6830308 | 5240.568164 | 0.0032 | 0.997 | 0.111116866 | count | 1 |
| AC004817.3  | 16.6830308 | 5240.568023 | 0.0032 | 0.997 | 0.111116866 | count | 1 |
| AC005476.2  | 16.6830309 | 5240.567881 | 0.0032 | 0.997 | 0.111116866 | count | 1 |
| AC123768.2  | 16.6830309 | 5240.567881 | 0.0032 | 0.997 | 0.111116866 | count | 1 |
| AC010809.1  | 16.6830309 | 5240.567917 | 0.0032 | 0.997 | 0.111116866 | count | 1 |
| BUB1B       | 16.6830309 | 5240.567881 | 0.0032 | 0.997 | 0.111116866 | count | 1 |
| CAPN3       | 16.6830309 | 5240.567846 | 0.0032 | 0.997 | 0.111116866 | count | 1 |

|            |            |             |        |       |             |       |   |
|------------|------------|-------------|--------|-------|-------------|-------|---|
| AC027237.3 | 16.6830308 | 5240.56781  | 0.0032 | 0.997 | 0.111116866 | count | 1 |
| AC118658.1 | 16.6830309 | 5240.568023 | 0.0032 | 0.997 | 0.111116866 | count | 1 |
| SLC5A11    | 16.6830309 | 5240.567917 | 0.0032 | 0.997 | 0.111116866 | count | 1 |
| AC007336.1 | 16.6830309 | 5240.568129 | 0.0032 | 0.997 | 0.111116866 | count | 1 |
| CDH3       | 16.6830309 | 5240.568023 | 0.0032 | 0.997 | 0.111116866 | count | 1 |
| AC092718.6 | 16.6830309 | 5240.567952 | 0.0032 | 0.997 | 0.111116866 | count | 1 |
| AC093484.2 | 16.6830309 | 5240.567775 | 0.0032 | 0.997 | 0.111116866 | count | 1 |
| GSDMA      | 16.6830309 | 5240.568341 | 0.0032 | 0.997 | 0.111116866 | count | 1 |
| GALR2      | 16.6830309 | 5240.567987 | 0.0032 | 0.997 | 0.111116866 | count | 1 |
| AC100788.1 | 16.6830309 | 5240.567917 | 0.0032 | 0.997 | 0.111116866 | count | 1 |
| FSCN2      | 16.6830308 | 5240.567704 | 0.0032 | 0.997 | 0.111116866 | count | 1 |
| AP005059.1 | 16.6830309 | 5240.567881 | 0.0032 | 0.997 | 0.111116866 | count | 1 |
| AP005432.2 | 16.6830309 | 5240.567917 | 0.0032 | 0.997 | 0.111116866 | count | 1 |
| AC023983.2 | 16.6830309 | 5240.568093 | 0.0032 | 0.997 | 0.111116866 | count | 1 |
| AC016205.1 | 16.6830308 | 5240.568058 | 0.0032 | 0.997 | 0.111116866 | count | 1 |
| SLC25A41   | 16.6830309 | 5240.567881 | 0.0032 | 0.997 | 0.111116866 | count | 1 |
| CD70       | 16.6830309 | 5240.567987 | 0.0032 | 0.997 | 0.111116866 | count | 1 |
| ANGPTL6    | 16.6830309 | 5240.568093 | 0.0032 | 0.997 | 0.111116866 | count | 1 |
| AC018761.3 | 16.6830309 | 5240.567917 | 0.0032 | 0.997 | 0.111116866 | count | 1 |
| AC024075.3 | 16.6830308 | 5240.568023 | 0.0032 | 0.997 | 0.111116866 | count | 1 |
| AC024563.1 | 16.6830308 | 5240.56781  | 0.0032 | 0.997 | 0.111116866 | count | 1 |
| CCDC8      | 16.6830308 | 5240.567704 | 0.0032 | 0.997 | 0.111116866 | count | 1 |
| LILRB2     | 16.6830309 | 5240.568129 | 0.0032 | 0.997 | 0.111116866 | count | 1 |
| LINC01660  | 16.6830309 | 5240.567917 | 0.0032 | 0.997 | 0.111116866 | count | 1 |
| AC254562.2 | 16.6830309 | 5240.567775 | 0.0032 | 0.997 | 0.111116866 | count | 1 |
| BACH1-IT2  | 16.6830309 | 5240.567917 | 0.0032 | 0.997 | 0.111116866 | count | 1 |
| AP000275.2 | 16.6830309 | 5240.567952 | 0.0032 | 0.997 | 0.111116866 | count | 1 |
| HCRTR1     | 16.683031  | 5240.568093 | 0.0032 | 0.997 | 0.111116866 | count | 1 |
| AL451062.1 | 16.683031  | 5240.568164 | 0.0032 | 0.997 | 0.111116866 | count | 1 |
| FYB2       | 16.683031  | 5240.568093 | 0.0032 | 0.997 | 0.111116866 | count | 1 |
| AL583808.1 | 16.683031  | 5240.568093 | 0.0032 | 0.997 | 0.111116866 | count | 1 |
| NBPF10     | 16.683031  | 5240.567987 | 0.0032 | 0.997 | 0.111116866 | count | 1 |
| AL592295.3 | 16.683031  | 5240.568093 | 0.0032 | 0.997 | 0.111116866 | count | 1 |
| TEX35      | 16.683031  | 5240.567987 | 0.0032 | 0.997 | 0.111116866 | count | 1 |
| RGS18      | 16.683031  | 5240.567846 | 0.0032 | 0.997 | 0.111116866 | count | 1 |
| AC012358.1 | 16.683031  | 5240.567952 | 0.0032 | 0.997 | 0.111116866 | count | 1 |
| CNNM3-DT   | 16.683031  | 5240.567881 | 0.0032 | 0.997 | 0.111116866 | count | 1 |
| AC019197.1 | 16.683031  | 5240.567917 | 0.0032 | 0.997 | 0.111116866 | count | 1 |
| AC007879.3 | 16.683031  | 5240.567952 | 0.0032 | 0.997 | 0.111116866 | count | 1 |
| BOK-AS1    | 16.683031  | 5240.567987 | 0.0032 | 0.997 | 0.111116866 | count | 1 |
| CPB1       | 16.683031  | 5240.567952 | 0.0032 | 0.997 | 0.111116866 | count | 1 |
| ERICH6     | 16.683031  | 5240.567846 | 0.0032 | 0.997 | 0.111116866 | count | 1 |
| AC078795.2 | 16.683031  | 5240.567952 | 0.0032 | 0.997 | 0.111116866 | count | 1 |
| DGKG       | 16.683031  | 5240.567987 | 0.0032 | 0.997 | 0.111116866 | count | 1 |
| FGG        | 16.683031  | 5240.568058 | 0.0032 | 0.997 | 0.111116866 | count | 1 |

|            |           |             |        |       |             |       |   |
|------------|-----------|-------------|--------|-------|-------------|-------|---|
| AC034229.1 | 16.683031 | 5240.568341 | 0.0032 | 0.997 | 0.111116866 | count | 1 |
| AC079465.1 | 16.683031 | 5240.567881 | 0.0032 | 0.997 | 0.111116866 | count | 1 |
| SPINK9     | 16.683031 | 5240.567881 | 0.0032 | 0.997 | 0.111116866 | count | 1 |
| AC008443.4 | 16.683031 | 5240.567952 | 0.0032 | 0.997 | 0.111116866 | count | 1 |
| AL138885.3 | 16.683031 | 5240.567881 | 0.0032 | 0.997 | 0.111116866 | count | 1 |
| AL021807.1 | 16.683031 | 5240.568306 | 0.0032 | 0.997 | 0.111116866 | count | 1 |
| CDSN       | 16.683031 | 5240.568023 | 0.0032 | 0.997 | 0.111116866 | count | 1 |
| MSH5       | 16.683031 | 5240.567881 | 0.0032 | 0.997 | 0.111116866 | count | 1 |
| CFAP206    | 16.683031 | 5240.568129 | 0.0032 | 0.997 | 0.111116866 | count | 1 |
| GRIK2      | 16.683031 | 5240.567987 | 0.0032 | 0.997 | 0.111116866 | count | 1 |
| FO393415.3 | 16.683031 | 5240.568093 | 0.0032 | 0.997 | 0.111116866 | count | 1 |
| RAET1L     | 16.683031 | 5240.568093 | 0.0032 | 0.997 | 0.111116866 | count | 1 |
| AL355297.2 | 16.683031 | 5240.567987 | 0.0032 | 0.997 | 0.111116866 | count | 1 |
| AL009176.1 | 16.683031 | 5240.567846 | 0.0032 | 0.997 | 0.111116866 | count | 1 |
| SLC29A4    | 16.683031 | 5240.567987 | 0.0032 | 0.997 | 0.111116866 | count | 1 |
| AC005091.1 | 16.683031 | 5240.568058 | 0.0032 | 0.997 | 0.111116866 | count | 1 |
| TRIM74     | 16.683031 | 5240.567881 | 0.0032 | 0.997 | 0.111116866 | count | 1 |
| LMOD2      | 16.683031 | 5240.568058 | 0.0032 | 0.997 | 0.111116866 | count | 1 |
| AC006372.2 | 16.683031 | 5240.567881 | 0.0032 | 0.997 | 0.111116866 | count | 1 |
| AC078960.1 | 16.683031 | 5240.567881 | 0.0032 | 0.997 | 0.111116866 | count | 1 |
| AL591501.1 | 16.683031 | 5240.567917 | 0.0032 | 0.997 | 0.111116866 | count | 1 |
| IGSF1      | 16.683031 | 5240.568164 | 0.0032 | 0.997 | 0.111116866 | count | 1 |
| PNMA3      | 16.683031 | 5240.567881 | 0.0032 | 0.997 | 0.111116866 | count | 1 |
| AC022784.8 | 16.683031 | 5240.567952 | 0.0032 | 0.997 | 0.111116866 | count | 1 |
| AC104964.1 | 16.683031 | 5240.567846 | 0.0032 | 0.997 | 0.111116866 | count | 1 |
| FAM167A    | 16.683031 | 5240.567952 | 0.0032 | 0.997 | 0.111116866 | count | 1 |
| EYA1       | 16.683031 | 5240.567952 | 0.0032 | 0.997 | 0.111116866 | count | 1 |
| AP003465.1 | 16.683031 | 5240.56781  | 0.0032 | 0.997 | 0.111116866 | count | 1 |
| SNX31      | 16.683031 | 5240.567987 | 0.0032 | 0.997 | 0.111116866 | count | 1 |
| AC100803.1 | 16.683031 | 5240.567952 | 0.0032 | 0.997 | 0.111116866 | count | 1 |
| C9orf24    | 16.683031 | 5240.568093 | 0.0032 | 0.997 | 0.111116866 | count | 1 |
| KCNJ11     | 16.683031 | 5240.568093 | 0.0032 | 0.997 | 0.111116866 | count | 1 |
| AP001453.1 | 16.683031 | 5240.567881 | 0.0032 | 0.997 | 0.111116866 | count | 1 |
| AP001273.2 | 16.683031 | 5240.567952 | 0.0032 | 0.997 | 0.111116866 | count | 1 |
| AP000757.1 | 16.683031 | 5240.56827  | 0.0032 | 0.997 | 0.111116866 | count | 1 |
| AP003396.1 | 16.683031 | 5240.567846 | 0.0032 | 0.997 | 0.111116866 | count | 1 |
| CACNA2D4   | 16.683031 | 5240.567987 | 0.0032 | 0.997 | 0.111116866 | count | 1 |
| NRIP2      | 16.683031 | 5240.567987 | 0.0032 | 0.997 | 0.111116866 | count | 1 |
| AC024896.1 | 16.683031 | 5240.567952 | 0.0032 | 0.997 | 0.111116866 | count | 1 |
| AC008083.1 | 16.683031 | 5240.567881 | 0.0032 | 0.997 | 0.111116866 | count | 1 |
| AC083809.1 | 16.683031 | 5240.567952 | 0.0032 | 0.997 | 0.111116866 | count | 1 |
| HAL        | 16.683031 | 5240.567846 | 0.0032 | 0.997 | 0.111116866 | count | 1 |
| AC083806.2 | 16.683031 | 5240.568129 | 0.0032 | 0.997 | 0.111116866 | count | 1 |
| LINC00944  | 16.683031 | 5240.567881 | 0.0032 | 0.997 | 0.111116866 | count | 1 |
| MMP17      | 16.683031 | 5240.567952 | 0.0032 | 0.997 | 0.111116866 | count | 1 |

|            |            |             |        |       |             |       |   |
|------------|------------|-------------|--------|-------|-------------|-------|---|
| AL445288.1 | 16.683031  | 5240.567917 | 0.0032 | 0.997 | 0.111116866 | count | 1 |
| AL136526.1 | 16.683031  | 5240.568093 | 0.0032 | 0.997 | 0.111116866 | count | 1 |
| TEX29      | 16.683031  | 5240.567881 | 0.0032 | 0.997 | 0.111116866 | count | 1 |
| ATP4B      | 16.683031  | 5240.567987 | 0.0032 | 0.997 | 0.111116866 | count | 1 |
| AC007262.2 | 16.683031  | 5240.568341 | 0.0032 | 0.997 | 0.111116866 | count | 1 |
| SLC24A5    | 16.683031  | 5240.567917 | 0.0032 | 0.997 | 0.111116866 | count | 1 |
| AC011939.3 | 16.683031  | 5240.56827  | 0.0032 | 0.997 | 0.111116866 | count | 1 |
| AC108861.1 | 16.683031  | 5240.568164 | 0.0032 | 0.997 | 0.111116866 | count | 1 |
| CHRN4      | 16.683031  | 5240.567952 | 0.0032 | 0.997 | 0.111116866 | count | 1 |
| CRTC3-AS1  | 16.683031  | 5240.567846 | 0.0032 | 0.997 | 0.111116866 | count | 1 |
| CCDC78     | 16.683031  | 5240.568023 | 0.0032 | 0.997 | 0.111116866 | count | 1 |
| AC093512.2 | 16.683031  | 5240.567952 | 0.0032 | 0.997 | 0.111116866 | count | 1 |
| AC135050.1 | 16.683031  | 5240.567881 | 0.0032 | 0.997 | 0.111116866 | count | 1 |
| SLC9A5     | 16.683031  | 5240.567952 | 0.0032 | 0.997 | 0.111116866 | count | 1 |
| AC009120.4 | 16.683031  | 5240.568341 | 0.0032 | 0.997 | 0.111116866 | count | 1 |
| AC009063.3 | 16.683031  | 5240.56827  | 0.0032 | 0.997 | 0.111116866 | count | 1 |
| CDH15      | 16.683031  | 5240.568093 | 0.0032 | 0.997 | 0.111116866 | count | 1 |
| VPS9D1-AS1 | 16.683031  | 5240.567881 | 0.0032 | 0.997 | 0.111116866 | count | 1 |
| HASPIN     | 16.683031  | 5240.567881 | 0.0032 | 0.997 | 0.111116866 | count | 1 |
| AC004771.4 | 16.683031  | 5240.568129 | 0.0032 | 0.997 | 0.111116866 | count | 1 |
| AC068025.2 | 16.683031  | 5240.567952 | 0.0032 | 0.997 | 0.111116866 | count | 1 |
| AC243585.2 | 16.683031  | 5240.567917 | 0.0032 | 0.997 | 0.111116866 | count | 1 |
| MYCBPAP    | 16.683031  | 5240.568129 | 0.0032 | 0.997 | 0.111116866 | count | 1 |
| AC064805.2 | 16.683031  | 5240.568093 | 0.0032 | 0.997 | 0.111116866 | count | 1 |
| AC087289.4 | 16.683031  | 5240.568093 | 0.0032 | 0.997 | 0.111116866 | count | 1 |
| AC110285.1 | 16.683031  | 5240.568164 | 0.0032 | 0.997 | 0.111116866 | count | 1 |
| AC132938.3 | 16.683031  | 5240.567704 | 0.0032 | 0.997 | 0.111116866 | count | 1 |
| ZNF750     | 16.683031  | 5240.568129 | 0.0032 | 0.997 | 0.111116866 | count | 1 |
| AC015819.1 | 16.683031  | 5240.567846 | 0.0032 | 0.997 | 0.111116866 | count | 1 |
| C18orf65   | 16.683031  | 5240.568412 | 0.0032 | 0.997 | 0.111116866 | count | 1 |
| ZNF831     | 16.683031  | 5240.568023 | 0.0032 | 0.997 | 0.111116866 | count | 1 |
| KF456478.1 | 16.683031  | 5240.56827  | 0.0032 | 0.997 | 0.111116866 | count | 1 |
| CATSPERD   | 16.683031  | 5240.567987 | 0.0032 | 0.997 | 0.111116866 | count | 1 |
| RTBDN      | 16.683031  | 5240.567952 | 0.0032 | 0.997 | 0.111116866 | count | 1 |
| AC020913.1 | 16.683031  | 5240.567846 | 0.0032 | 0.997 | 0.111116866 | count | 1 |
| DLL3       | 16.683031  | 5240.567952 | 0.0032 | 0.997 | 0.111116866 | count | 1 |
| MIMT1      | 16.683031  | 5240.567952 | 0.0032 | 0.997 | 0.111116866 | count | 1 |
| LINC00896  | 16.683031  | 5240.567846 | 0.0032 | 0.997 | 0.111116866 | count | 1 |
| AP000553.3 | 16.683031  | 5240.568093 | 0.0032 | 0.997 | 0.111116866 | count | 1 |
| U62317.2   | 16.683031  | 5240.568129 | 0.0032 | 0.997 | 0.111116866 | count | 1 |
| AP001172.1 | 16.683031  | 5240.567917 | 0.0032 | 0.997 | 0.111116866 | count | 1 |
| AL627309.3 | 16.6830311 | 5240.568093 | 0.0032 | 0.997 | 0.111116866 | count | 1 |
| CCDC27     | 16.6830312 | 5240.568023 | 0.0032 | 0.997 | 0.111116866 | count | 1 |
| AL121992.1 | 16.6830311 | 5240.568129 | 0.0032 | 0.997 | 0.111116866 | count | 1 |
| AL109936.2 | 16.6830311 | 5240.56827  | 0.0032 | 0.997 | 0.111116866 | count | 1 |

|              |            |             |        |       |             |       |   |
|--------------|------------|-------------|--------|-------|-------------|-------|---|
| E2F2         | 16.6830311 | 5240.568129 | 0.0032 | 0.997 | 0.111116866 | count | 1 |
| AL391650.1   | 16.6830311 | 5240.56827  | 0.0032 | 0.997 | 0.111116866 | count | 1 |
| AL929472.2   | 16.6830311 | 5240.56827  | 0.0032 | 0.997 | 0.111116866 | count | 1 |
| TMCO2        | 16.6830311 | 5240.56827  | 0.0032 | 0.997 | 0.111116866 | count | 1 |
| MPL          | 16.6830311 | 5240.568164 | 0.0032 | 0.997 | 0.111116866 | count | 1 |
| AL513218.1   | 16.6830312 | 5240.568199 | 0.0032 | 0.997 | 0.111116866 | count | 1 |
| MSH4         | 16.6830311 | 5240.56827  | 0.0032 | 0.997 | 0.111116866 | count | 1 |
| LINC01780    | 16.6830311 | 5240.568129 | 0.0032 | 0.997 | 0.111116866 | count | 1 |
| NBPF26       | 16.6830312 | 5240.568058 | 0.0032 | 0.997 | 0.111116866 | count | 1 |
| BGLAP        | 16.6830311 | 5240.568341 | 0.0032 | 0.997 | 0.111116866 | count | 1 |
| TSACC        | 16.6830312 | 5240.568093 | 0.0032 | 0.997 | 0.111116866 | count | 1 |
| SLAMF1       | 16.6830312 | 5240.567987 | 0.0032 | 0.997 | 0.111116866 | count | 1 |
| AL121985.1   | 16.6830312 | 5240.56827  | 0.0032 | 0.997 | 0.111116866 | count | 1 |
| KIAA1614-AS1 | 16.6830312 | 5240.568058 | 0.0032 | 0.997 | 0.111116866 | count | 1 |
| PDC          | 16.6830311 | 5240.568235 | 0.0032 | 0.997 | 0.111116866 | count | 1 |
| CRB1         | 16.6830312 | 5240.568058 | 0.0032 | 0.997 | 0.111116866 | count | 1 |
| INAVA        | 16.6830311 | 5240.568235 | 0.0032 | 0.997 | 0.111116866 | count | 1 |
| LINC01136    | 16.6830312 | 5240.567952 | 0.0032 | 0.997 | 0.111116866 | count | 1 |
| OBSCN-AS1    | 16.6830312 | 5240.568093 | 0.0032 | 0.997 | 0.111116866 | count | 1 |
| AC080162.1   | 16.6830311 | 5240.56827  | 0.0032 | 0.997 | 0.111116866 | count | 1 |
| AC012073.1   | 16.6830312 | 5240.568199 | 0.0032 | 0.997 | 0.111116866 | count | 1 |
| SLC30A3      | 16.6830311 | 5240.568235 | 0.0032 | 0.997 | 0.111116866 | count | 1 |
| AC007391.1   | 16.6830311 | 5240.56827  | 0.0032 | 0.997 | 0.111116866 | count | 1 |
| KCNG3        | 16.6830311 | 5240.568058 | 0.0032 | 0.997 | 0.111116866 | count | 1 |
| AC073283.1   | 16.6830311 | 5240.56827  | 0.0032 | 0.997 | 0.111116866 | count | 1 |
| AC008280.3   | 16.6830312 | 5240.568093 | 0.0032 | 0.997 | 0.111116866 | count | 1 |
| CD207        | 16.6830311 | 5240.56827  | 0.0032 | 0.997 | 0.111116866 | count | 1 |
| AC006030.1   | 16.6830312 | 5240.568235 | 0.0032 | 0.997 | 0.111116866 | count | 1 |
| PROM2        | 16.6830312 | 5240.567987 | 0.0032 | 0.997 | 0.111116866 | count | 1 |
| AC010884.1   | 16.6830312 | 5240.567987 | 0.0032 | 0.997 | 0.111116866 | count | 1 |
| AC112229.2   | 16.6830311 | 5240.56827  | 0.0032 | 0.997 | 0.111116866 | count | 1 |
| AC104653.2   | 16.6830311 | 5240.568023 | 0.0032 | 0.997 | 0.111116866 | count | 1 |
| AC104653.1   | 16.6830311 | 5240.56781  | 0.0032 | 0.997 | 0.111116866 | count | 1 |
| AC009312.1   | 16.6830312 | 5240.568023 | 0.0032 | 0.997 | 0.111116866 | count | 1 |
| AJ239322.2   | 16.6830311 | 5240.56827  | 0.0032 | 0.997 | 0.111116866 | count | 1 |
| AC009480.1   | 16.6830311 | 5240.56827  | 0.0032 | 0.997 | 0.111116866 | count | 1 |
| AC009336.1   | 16.6830311 | 5240.568235 | 0.0032 | 0.997 | 0.111116866 | count | 1 |
| AC068196.1   | 16.6830311 | 5240.568341 | 0.0032 | 0.997 | 0.111116866 | count | 1 |
| RUFY4        | 16.6830311 | 5240.567881 | 0.0032 | 0.997 | 0.111116866 | count | 1 |
| IHH          | 16.6830311 | 5240.56827  | 0.0032 | 0.997 | 0.111116866 | count | 1 |
| NHEJ1        | 16.6830311 | 5240.56827  | 0.0032 | 0.997 | 0.111116866 | count | 1 |
| IRS1         | 16.6830312 | 5240.568058 | 0.0032 | 0.997 | 0.111116866 | count | 1 |
| AC026191.1   | 16.6830311 | 5240.56827  | 0.0032 | 0.997 | 0.111116866 | count | 1 |
| LINC00691    | 16.6830312 | 5240.568058 | 0.0032 | 0.997 | 0.111116866 | count | 1 |
| AC126118.1   | 16.6830312 | 5240.568199 | 0.0032 | 0.997 | 0.111116866 | count | 1 |

|              |            |             |        |       |             |       |   |
|--------------|------------|-------------|--------|-------|-------------|-------|---|
| AC098613.1   | 16.6830311 | 5240.56827  | 0.0032 | 0.997 | 0.111116866 | count | 1 |
| GPR62        | 16.6830311 | 5240.568129 | 0.0032 | 0.997 | 0.111116866 | count | 1 |
| FLNB-AS1     | 16.6830312 | 5240.568199 | 0.0032 | 0.997 | 0.111116866 | count | 1 |
| GPR27        | 16.6830311 | 5240.56827  | 0.0032 | 0.997 | 0.111116866 | count | 1 |
| ARHGAP31-AS1 | 16.6830312 | 5240.568199 | 0.0032 | 0.997 | 0.111116866 | count | 1 |
| LINC02014    | 16.6830312 | 5240.568306 | 0.0032 | 0.997 | 0.111116866 | count | 1 |
| AC072039.2   | 16.6830311 | 5240.568129 | 0.0032 | 0.997 | 0.111116866 | count | 1 |
| AC080013.6   | 16.6830312 | 5240.568058 | 0.0032 | 0.997 | 0.111116866 | count | 1 |
| GMNC         | 16.6830311 | 5240.56827  | 0.0032 | 0.997 | 0.111116866 | count | 1 |
| TNK2-AS1     | 16.6830311 | 5240.568093 | 0.0032 | 0.997 | 0.111116866 | count | 1 |
| AC068620.2   | 16.6830311 | 5240.56827  | 0.0032 | 0.997 | 0.111116866 | count | 1 |
| AC069307.1   | 16.6830311 | 5240.568129 | 0.0032 | 0.997 | 0.111116866 | count | 1 |
| AC020741.1   | 16.6830312 | 5240.567987 | 0.0032 | 0.997 | 0.111116866 | count | 1 |
| PF4          | 16.6830311 | 5240.568129 | 0.0032 | 0.997 | 0.111116866 | count | 1 |
| ODAPH        | 16.6830311 | 5240.568129 | 0.0032 | 0.997 | 0.111116866 | count | 1 |
| PRKG2        | 16.6830312 | 5240.567987 | 0.0032 | 0.997 | 0.111116866 | count | 1 |
| SNHG27       | 16.6830311 | 5240.56827  | 0.0032 | 0.997 | 0.111116866 | count | 1 |
| AC096711.2   | 16.6830312 | 5240.568058 | 0.0032 | 0.997 | 0.111116866 | count | 1 |
| TRIM60       | 16.6830312 | 5240.56781  | 0.0032 | 0.997 | 0.111116866 | count | 1 |
| AC019163.1   | 16.6830312 | 5240.56781  | 0.0032 | 0.997 | 0.111116866 | count | 1 |
| AC098864.1   | 16.6830311 | 5240.56827  | 0.0032 | 0.997 | 0.111116866 | count | 1 |
| PLEKHG4B     | 16.6830311 | 5240.568199 | 0.0032 | 0.997 | 0.111116866 | count | 1 |
| LINC02102    | 16.6830311 | 5240.56827  | 0.0032 | 0.997 | 0.111116866 | count | 1 |
| AC034231.1   | 16.6830311 | 5240.567881 | 0.0032 | 0.997 | 0.111116866 | count | 1 |
| C6           | 16.6830311 | 5240.56827  | 0.0032 | 0.997 | 0.111116866 | count | 1 |
| DDX4         | 16.6830311 | 5240.56827  | 0.0032 | 0.997 | 0.111116866 | count | 1 |
| AC104113.1   | 16.6830311 | 5240.56827  | 0.0032 | 0.997 | 0.111116866 | count | 1 |
| AC018754.1   | 16.6830311 | 5240.56827  | 0.0032 | 0.997 | 0.111116866 | count | 1 |
| AC010261.1   | 16.6830311 | 5240.567952 | 0.0032 | 0.997 | 0.111116866 | count | 1 |
| AC106786.2   | 16.6830311 | 5240.56827  | 0.0032 | 0.997 | 0.111116866 | count | 1 |
| AC010240.3   | 16.6830311 | 5240.568341 | 0.0032 | 0.997 | 0.111116866 | count | 1 |
| AC005609.5   | 16.6830311 | 5240.568023 | 0.0032 | 0.997 | 0.111116866 | count | 1 |
| PCDHB8       | 16.6830311 | 5240.56827  | 0.0032 | 0.997 | 0.111116866 | count | 1 |
| SAP30L-AS1   | 16.6830311 | 5240.56827  | 0.0032 | 0.997 | 0.111116866 | count | 1 |
| KIF4B        | 16.6830311 | 5240.56827  | 0.0032 | 0.997 | 0.111116866 | count | 1 |
| AL357054.3   | 16.6830311 | 5240.568129 | 0.0032 | 0.997 | 0.111116866 | count | 1 |
| U91328.3     | 16.6830311 | 5240.56827  | 0.0032 | 0.997 | 0.111116866 | count | 1 |
| HIST1H3I     | 16.6830312 | 5240.568058 | 0.0032 | 0.997 | 0.111116866 | count | 1 |
| HIST1H2BO    | 16.6830311 | 5240.56827  | 0.0032 | 0.997 | 0.111116866 | count | 1 |
| AL662791.1   | 16.6830312 | 5240.568093 | 0.0032 | 0.997 | 0.111116866 | count | 1 |
| SLC26A8      | 16.6830311 | 5240.56827  | 0.0032 | 0.997 | 0.111116866 | count | 1 |
| ENPP5        | 16.6830312 | 5240.568058 | 0.0032 | 0.997 | 0.111116866 | count | 1 |
| AL121974.1   | 16.6830312 | 5240.568023 | 0.0032 | 0.997 | 0.111116866 | count | 1 |
| RIMS1        | 16.6830311 | 5240.56827  | 0.0032 | 0.997 | 0.111116866 | count | 1 |
| AL603910.1   | 16.6830311 | 5240.56827  | 0.0032 | 0.997 | 0.111116866 | count | 1 |



|             |            |             |        |       |             |       |   |
|-------------|------------|-------------|--------|-------|-------------|-------|---|
| AL080317.2  | 16.6830312 | 5240.568023 | 0.0032 | 0.997 | 0.111116866 | count | 1 |
| AL356234.3  | 16.6830311 | 5240.56827  | 0.0032 | 0.997 | 0.111116866 | count | 1 |
| LINC01277   | 16.6830311 | 5240.56827  | 0.0032 | 0.997 | 0.111116866 | count | 1 |
| AL133260.2  | 16.6830311 | 5240.568129 | 0.0032 | 0.997 | 0.111116866 | count | 1 |
| Z94721.1    | 16.6830311 | 5240.568129 | 0.0032 | 0.997 | 0.111116866 | count | 1 |
| AC091729.1  | 16.6830312 | 5240.567987 | 0.0032 | 0.997 | 0.111116866 | count | 1 |
| TRGC2       | 16.6830311 | 5240.567881 | 0.0032 | 0.997 | 0.111116866 | count | 1 |
| AMPH        | 16.6830311 | 5240.56827  | 0.0032 | 0.997 | 0.111116866 | count | 1 |
| AC004870.4  | 16.6830311 | 5240.56827  | 0.0032 | 0.997 | 0.111116866 | count | 1 |
| C7orf57     | 16.6830311 | 5240.568023 | 0.0032 | 0.997 | 0.111116866 | count | 1 |
| AC006012.1  | 16.6830311 | 5240.568199 | 0.0032 | 0.997 | 0.111116866 | count | 1 |
| CLDN3       | 16.6830311 | 5240.568093 | 0.0032 | 0.997 | 0.111116866 | count | 1 |
| CLDN4       | 16.6830312 | 5240.568199 | 0.0032 | 0.997 | 0.111116866 | count | 1 |
| AC002454.1  | 16.6830312 | 5240.567987 | 0.0032 | 0.997 | 0.111116866 | count | 1 |
| AC002429.2  | 16.6830311 | 5240.568023 | 0.0032 | 0.997 | 0.111116866 | count | 1 |
| DLX6        | 16.6830311 | 5240.56827  | 0.0032 | 0.997 | 0.111116866 | count | 1 |
| AC007938.2  | 16.6830311 | 5240.56827  | 0.0032 | 0.997 | 0.111116866 | count | 1 |
| OR9A4       | 16.6830311 | 5240.568129 | 0.0032 | 0.997 | 0.111116866 | count | 1 |
| CTAGE6      | 16.6830311 | 5240.568058 | 0.0032 | 0.997 | 0.111116866 | count | 1 |
| AC093726.2  | 16.6830311 | 5240.568164 | 0.0032 | 0.997 | 0.111116866 | count | 1 |
| PTCHD1      | 16.6830311 | 5240.56827  | 0.0032 | 0.997 | 0.111116866 | count | 1 |
| AC115618.2  | 16.6830311 | 5240.56827  | 0.0032 | 0.997 | 0.111116866 | count | 1 |
| AL035427.1  | 16.6830312 | 5240.568058 | 0.0032 | 0.997 | 0.111116866 | count | 1 |
| INTS6L-AS1  | 16.6830311 | 5240.568023 | 0.0032 | 0.997 | 0.111116866 | count | 1 |
| AL078639.1  | 16.6830312 | 5240.568058 | 0.0032 | 0.997 | 0.111116866 | count | 1 |
| AC245187.2  | 16.6830311 | 5240.568129 | 0.0032 | 0.997 | 0.111116866 | count | 1 |
| AC021242.3  | 16.6830312 | 5240.568058 | 0.0032 | 0.997 | 0.111116866 | count | 1 |
| FAM66D      | 16.6830312 | 5240.568023 | 0.0032 | 0.997 | 0.111116866 | count | 1 |
| ESCO2       | 16.6830312 | 5240.568235 | 0.0032 | 0.997 | 0.111116866 | count | 1 |
| AC104051.2  | 16.6830312 | 5240.568058 | 0.0032 | 0.997 | 0.111116866 | count | 1 |
| AC022182.1  | 16.6830311 | 5240.56827  | 0.0032 | 0.997 | 0.111116866 | count | 1 |
| AC009812.3  | 16.6830312 | 5240.56781  | 0.0032 | 0.997 | 0.111116866 | count | 1 |
| AC090568.2  | 16.6830311 | 5240.56827  | 0.0032 | 0.997 | 0.111116866 | count | 1 |
| C8orf37-AS1 | 16.6830311 | 5240.568235 | 0.0032 | 0.997 | 0.111116866 | count | 1 |
| FBXO43      | 16.6830311 | 5240.56827  | 0.0032 | 0.997 | 0.111116866 | count | 1 |
| AC013546.1  | 16.6830311 | 5240.56827  | 0.0032 | 0.997 | 0.111116866 | count | 1 |
| AC067930.2  | 16.6830312 | 5240.567987 | 0.0032 | 0.997 | 0.111116866 | count | 1 |
| C9orf92     | 16.6830311 | 5240.56827  | 0.0032 | 0.997 | 0.111116866 | count | 1 |
| CR786580.1  | 16.6830311 | 5240.56827  | 0.0032 | 0.997 | 0.111116866 | count | 1 |
| TMEM252     | 16.6830311 | 5240.568093 | 0.0032 | 0.997 | 0.111116866 | count | 1 |
| AL135924.2  | 16.6830311 | 5240.56827  | 0.0032 | 0.997 | 0.111116866 | count | 1 |
| AL137847.1  | 16.6830312 | 5240.567987 | 0.0032 | 0.997 | 0.111116866 | count | 1 |
| AL606807.1  | 16.6830312 | 5240.568199 | 0.0032 | 0.997 | 0.111116866 | count | 1 |
| LINC01509   | 16.6830312 | 5240.567881 | 0.0032 | 0.997 | 0.111116866 | count | 1 |
| TNFSF15     | 16.6830312 | 5240.567881 | 0.0032 | 0.997 | 0.111116866 | count | 1 |

|            |            |             |        |       |             |       |   |
|------------|------------|-------------|--------|-------|-------------|-------|---|
| AL161630.1 | 16.6830312 | 5240.56781  | 0.0032 | 0.997 | 0.111116866 | count | 1 |
| TLL11-IT1  | 16.6830311 | 5240.568129 | 0.0032 | 0.997 | 0.111116866 | count | 1 |
| AL158151.3 | 16.6830311 | 5240.56827  | 0.0032 | 0.997 | 0.111116866 | count | 1 |
| AL353803.1 | 16.6830312 | 5240.568199 | 0.0032 | 0.997 | 0.111116866 | count | 1 |
| C9orf139   | 16.6830312 | 5240.568093 | 0.0032 | 0.997 | 0.111116866 | count | 1 |
| ENTPD8     | 16.6830311 | 5240.56827  | 0.0032 | 0.997 | 0.111116866 | count | 1 |
| AP006621.1 | 16.6830312 | 5240.568199 | 0.0032 | 0.997 | 0.111116866 | count | 1 |
| OR51B5     | 16.6830312 | 5240.568199 | 0.0032 | 0.997 | 0.111116866 | count | 1 |
| OR52N1     | 16.6830312 | 5240.568306 | 0.0032 | 0.997 | 0.111116866 | count | 1 |
| AC087280.2 | 16.6830311 | 5240.568023 | 0.0032 | 0.997 | 0.111116866 | count | 1 |
| AC018523.2 | 16.6830311 | 5240.56827  | 0.0032 | 0.997 | 0.111116866 | count | 1 |
| OR9Q1      | 16.6830311 | 5240.568164 | 0.0032 | 0.997 | 0.111116866 | count | 1 |
| AP000640.1 | 16.6830311 | 5240.568129 | 0.0032 | 0.997 | 0.111116866 | count | 1 |
| MAJIN      | 16.6830312 | 5240.568023 | 0.0032 | 0.997 | 0.111116866 | count | 1 |
| SHANK2     | 16.6830311 | 5240.56827  | 0.0032 | 0.997 | 0.111116866 | count | 1 |
| ZNF705E    | 16.6830311 | 5240.567917 | 0.0032 | 0.997 | 0.111116866 | count | 1 |
| CHRDL2     | 16.6830312 | 5240.568023 | 0.0032 | 0.997 | 0.111116866 | count | 1 |
| MOGAT2     | 16.6830311 | 5240.56827  | 0.0032 | 0.997 | 0.111116866 | count | 1 |
| AP002360.2 | 16.6830311 | 5240.56827  | 0.0032 | 0.997 | 0.111116866 | count | 1 |
| AP001189.4 | 16.6830311 | 5240.56827  | 0.0032 | 0.997 | 0.111116866 | count | 1 |
| CARD18     | 16.6830311 | 5240.568129 | 0.0032 | 0.997 | 0.111116866 | count | 1 |
| CD3G       | 16.6830311 | 5240.568093 | 0.0032 | 0.997 | 0.111116866 | count | 1 |
| TTC36      | 16.6830312 | 5240.568199 | 0.0032 | 0.997 | 0.111116866 | count | 1 |
| AP003397.1 | 16.6830311 | 5240.568129 | 0.0032 | 0.997 | 0.111116866 | count | 1 |
| AL157895.1 | 16.6830311 | 5240.56827  | 0.0032 | 0.997 | 0.111116866 | count | 1 |
| AL391839.2 | 16.6830311 | 5240.56827  | 0.0032 | 0.997 | 0.111116866 | count | 1 |
| AL731537.1 | 16.6830311 | 5240.568235 | 0.0032 | 0.997 | 0.111116866 | count | 1 |
| STOX1      | 16.6830311 | 5240.568093 | 0.0032 | 0.997 | 0.111116866 | count | 1 |
| SYNPO2L    | 16.6830311 | 5240.56827  | 0.0032 | 0.997 | 0.111116866 | count | 1 |
| AL356608.1 | 16.6830311 | 5240.56827  | 0.0032 | 0.997 | 0.111116866 | count | 1 |
| ATRNL1     | 16.6830311 | 5240.56827  | 0.0032 | 0.997 | 0.111116866 | count | 1 |
| AL354950.1 | 16.6830312 | 5240.567917 | 0.0032 | 0.997 | 0.111116866 | count | 1 |
| FGF23      | 16.6830312 | 5240.568023 | 0.0032 | 0.997 | 0.111116866 | count | 1 |
| AC092745.1 | 16.6830312 | 5240.568023 | 0.0032 | 0.997 | 0.111116866 | count | 1 |
| AC008115.4 | 16.6830312 | 5240.568058 | 0.0032 | 0.997 | 0.111116866 | count | 1 |
| OVCH1      | 16.6830312 | 5240.568093 | 0.0032 | 0.997 | 0.111116866 | count | 1 |
| AC004801.6 | 16.6830311 | 5240.56827  | 0.0032 | 0.997 | 0.111116866 | count | 1 |
| DDN        | 16.6830312 | 5240.568058 | 0.0032 | 0.997 | 0.111116866 | count | 1 |
| ANKRD33    | 16.6830312 | 5240.568058 | 0.0032 | 0.997 | 0.111116866 | count | 1 |
| NPFF       | 16.6830311 | 5240.568235 | 0.0032 | 0.997 | 0.111116866 | count | 1 |
| AC024884.2 | 16.6830311 | 5240.568023 | 0.0032 | 0.997 | 0.111116866 | count | 1 |
| SLC26A10   | 16.6830311 | 5240.568341 | 0.0032 | 0.997 | 0.111116866 | count | 1 |
| AC020656.1 | 16.6830312 | 5240.568023 | 0.0032 | 0.997 | 0.111116866 | count | 1 |
| LINC02410  | 16.6830311 | 5240.568129 | 0.0032 | 0.997 | 0.111116866 | count | 1 |
| AC131238.1 | 16.6830311 | 5240.56827  | 0.0032 | 0.997 | 0.111116866 | count | 1 |

|            |            |             |        |       |             |       |   |
|------------|------------|-------------|--------|-------|-------------|-------|---|
| SRRM4      | 16.6830312 | 5240.567952 | 0.0032 | 0.997 | 0.111116866 | count | 1 |
| AL021546.1 | 16.6830311 | 5240.567775 | 0.0032 | 0.997 | 0.111116866 | count | 1 |
| TMEM132C   | 16.6830311 | 5240.56827  | 0.0032 | 0.997 | 0.111116866 | count | 1 |
| RIMBP2     | 16.6830311 | 5240.56827  | 0.0032 | 0.997 | 0.111116866 | count | 1 |
| USP12-AS2  | 16.6830311 | 5240.56827  | 0.0032 | 0.997 | 0.111116866 | count | 1 |
| FARP1-AS1  | 16.6830312 | 5240.567987 | 0.0032 | 0.997 | 0.111116866 | count | 1 |
| AL391262.1 | 16.6830311 | 5240.56827  | 0.0032 | 0.997 | 0.111116866 | count | 1 |
| AC004817.4 | 16.6830311 | 5240.568199 | 0.0032 | 0.997 | 0.111116866 | count | 1 |
| AC005479.1 | 16.6830312 | 5240.568306 | 0.0032 | 0.997 | 0.111116866 | count | 1 |
| AF111167.2 | 16.6830312 | 5240.567987 | 0.0032 | 0.997 | 0.111116866 | count | 1 |
| AL118558.4 | 16.6830312 | 5240.56827  | 0.0032 | 0.997 | 0.111116866 | count | 1 |
| ASPG       | 16.6830312 | 5240.567987 | 0.0032 | 0.997 | 0.111116866 | count | 1 |
| AC026150.3 | 16.6830311 | 5240.568093 | 0.0032 | 0.997 | 0.111116866 | count | 1 |
| ARHGAP11B  | 16.6830311 | 5240.56827  | 0.0032 | 0.997 | 0.111116866 | count | 1 |
| AC020661.3 | 16.6830311 | 5240.568023 | 0.0032 | 0.997 | 0.111116866 | count | 1 |
| EXD1       | 16.6830311 | 5240.568093 | 0.0032 | 0.997 | 0.111116866 | count | 1 |
| FOXB1      | 16.6830311 | 5240.568093 | 0.0032 | 0.997 | 0.111116866 | count | 1 |
| C15orf59   | 16.6830311 | 5240.56827  | 0.0032 | 0.997 | 0.111116866 | count | 1 |
| AC025219.1 | 16.6830311 | 5240.56827  | 0.0032 | 0.997 | 0.111116866 | count | 1 |
| AC021739.3 | 16.6830312 | 5240.568093 | 0.0032 | 0.997 | 0.111116866 | count | 1 |
| PLIN1      | 16.6830311 | 5240.568235 | 0.0032 | 0.997 | 0.111116866 | count | 1 |
| AC091167.5 | 16.6830312 | 5240.567987 | 0.0032 | 0.997 | 0.111116866 | count | 1 |
| AC027013.1 | 16.6830311 | 5240.56827  | 0.0032 | 0.997 | 0.111116866 | count | 1 |
| HBA1       | 16.6830311 | 5240.56827  | 0.0032 | 0.997 | 0.111116866 | count | 1 |
| PDIA2      | 16.6830311 | 5240.568341 | 0.0032 | 0.997 | 0.111116866 | count | 1 |
| TPSB2      | 16.6830311 | 5240.56827  | 0.0032 | 0.997 | 0.111116866 | count | 1 |
| SYNGR3     | 16.6830311 | 5240.568199 | 0.0032 | 0.997 | 0.111116866 | count | 1 |
| AC106820.5 | 16.6830311 | 5240.568093 | 0.0032 | 0.997 | 0.111116866 | count | 1 |
| AC012173.1 | 16.6830311 | 5240.568199 | 0.0032 | 0.997 | 0.111116866 | count | 1 |
| AC092375.2 | 16.6830312 | 5240.568306 | 0.0032 | 0.997 | 0.111116866 | count | 1 |
| PDZD9      | 16.6830312 | 5240.568093 | 0.0032 | 0.997 | 0.111116866 | count | 1 |
| VWA3A      | 16.6830311 | 5240.567881 | 0.0032 | 0.997 | 0.111116866 | count | 1 |
| LINC02175  | 16.6830311 | 5240.568058 | 0.0032 | 0.997 | 0.111116866 | count | 1 |
| AC007495.1 | 16.6830312 | 5240.567881 | 0.0032 | 0.997 | 0.111116866 | count | 1 |
| AC092118.2 | 16.6830312 | 5240.568058 | 0.0032 | 0.997 | 0.111116866 | count | 1 |
| AC092378.1 | 16.6830311 | 5240.56827  | 0.0032 | 0.997 | 0.111116866 | count | 1 |
| AC027682.3 | 16.6830311 | 5240.568058 | 0.0032 | 0.997 | 0.111116866 | count | 1 |
| AC004943.3 | 16.6830312 | 5240.568235 | 0.0032 | 0.997 | 0.111116866 | count | 1 |
| AC009159.1 | 16.6830311 | 5240.568341 | 0.0032 | 0.997 | 0.111116866 | count | 1 |
| AC009148.1 | 16.6830312 | 5240.567952 | 0.0032 | 0.997 | 0.111116866 | count | 1 |
| AC134312.1 | 16.6830312 | 5240.568023 | 0.0032 | 0.997 | 0.111116866 | count | 1 |
| CPNE7      | 16.6830311 | 5240.56827  | 0.0032 | 0.997 | 0.111116866 | count | 1 |
| AC113189.1 | 16.6830311 | 5240.568164 | 0.0032 | 0.997 | 0.111116866 | count | 1 |
| AC129492.1 | 16.6830312 | 5240.568058 | 0.0032 | 0.997 | 0.111116866 | count | 1 |
| TEKT3      | 16.6830311 | 5240.568093 | 0.0032 | 0.997 | 0.111116866 | count | 1 |

|             |            |             |        |       |             |       |   |
|-------------|------------|-------------|--------|-------|-------------|-------|---|
| SEZ6        | 16.6830311 | 5240.56827  | 0.0032 | 0.997 | 0.111116866 | count | 1 |
| AC084809.1  | 16.6830311 | 5240.568093 | 0.0032 | 0.997 | 0.111116866 | count | 1 |
| ARL5C       | 16.6830311 | 5240.56827  | 0.0032 | 0.997 | 0.111116866 | count | 1 |
| STAC2       | 16.6830312 | 5240.567846 | 0.0032 | 0.997 | 0.111116866 | count | 1 |
| AC138150.2  | 16.6830311 | 5240.56827  | 0.0032 | 0.997 | 0.111116866 | count | 1 |
| AC091132.1  | 16.6830311 | 5240.568129 | 0.0032 | 0.997 | 0.111116866 | count | 1 |
| MPO         | 16.6830311 | 5240.56827  | 0.0032 | 0.997 | 0.111116866 | count | 1 |
| TMEM105     | 16.6830311 | 5240.568235 | 0.0032 | 0.997 | 0.111116866 | count | 1 |
| AC139149.1  | 16.6830311 | 5240.56827  | 0.0032 | 0.997 | 0.111116866 | count | 1 |
| AP005328.1  | 16.6830311 | 5240.56827  | 0.0032 | 0.997 | 0.111116866 | count | 1 |
| AP005131.1  | 16.6830311 | 5240.56827  | 0.0032 | 0.997 | 0.111116866 | count | 1 |
| AC027449.1  | 16.6830311 | 5240.568164 | 0.0032 | 0.997 | 0.111116866 | count | 1 |
| AL133396.2  | 16.6830311 | 5240.56827  | 0.0032 | 0.997 | 0.111116866 | count | 1 |
| AL158013.1  | 16.6830312 | 5240.567987 | 0.0032 | 0.997 | 0.111116866 | count | 1 |
| AL035252.3  | 16.6830312 | 5240.568023 | 0.0032 | 0.997 | 0.111116866 | count | 1 |
| AL034550.2  | 16.6830312 | 5240.568093 | 0.0032 | 0.997 | 0.111116866 | count | 1 |
| AL121895.2  | 16.6830311 | 5240.56827  | 0.0032 | 0.997 | 0.111116866 | count | 1 |
| AL359555.2  | 16.6830312 | 5240.56781  | 0.0032 | 0.997 | 0.111116866 | count | 1 |
| AL391095.3  | 16.6830312 | 5240.567987 | 0.0032 | 0.997 | 0.111116866 | count | 1 |
| UBE2C       | 16.6830311 | 5240.56827  | 0.0032 | 0.997 | 0.111116866 | count | 1 |
| MIR1-1HG    | 16.6830311 | 5240.567917 | 0.0032 | 0.997 | 0.111116866 | count | 1 |
| RTXL1       | 16.6830311 | 5240.56827  | 0.0032 | 0.997 | 0.111116866 | count | 1 |
| AC005954.2  | 16.6830311 | 5240.56827  | 0.0032 | 0.997 | 0.111116866 | count | 1 |
| DPP9-AS1    | 16.6830311 | 5240.568023 | 0.0032 | 0.997 | 0.111116866 | count | 1 |
| ACER1       | 16.6830311 | 5240.56827  | 0.0032 | 0.997 | 0.111116866 | count | 1 |
| ANGPTL8     | 16.6830312 | 5240.568058 | 0.0032 | 0.997 | 0.111116866 | count | 1 |
| SYCE2       | 16.6830311 | 5240.568129 | 0.0032 | 0.997 | 0.111116866 | count | 1 |
| C19orf67    | 16.6830312 | 5240.568058 | 0.0032 | 0.997 | 0.111116866 | count | 1 |
| TMEM221     | 16.6830311 | 5240.56827  | 0.0032 | 0.997 | 0.111116866 | count | 1 |
| AC011477.4  | 16.6830311 | 5240.568341 | 0.0032 | 0.997 | 0.111116866 | count | 1 |
| ZNF729      | 16.6830311 | 5240.56827  | 0.0032 | 0.997 | 0.111116866 | count | 1 |
| AC092295.1  | 16.6830311 | 5240.568341 | 0.0032 | 0.997 | 0.111116866 | count | 1 |
| AC011479.1  | 16.6830311 | 5240.568093 | 0.0032 | 0.997 | 0.111116866 | count | 1 |
| HIPK4       | 16.6830311 | 5240.568129 | 0.0032 | 0.997 | 0.111116866 | count | 1 |
| LILRA5      | 16.6830311 | 5240.568093 | 0.0032 | 0.997 | 0.111116866 | count | 1 |
| AC006115.1  | 16.6830312 | 5240.568058 | 0.0032 | 0.997 | 0.111116866 | count | 1 |
| AC004076.2  | 16.6830312 | 5240.567987 | 0.0032 | 0.997 | 0.111116866 | count | 1 |
| LINC00895   | 16.6830311 | 5240.568341 | 0.0032 | 0.997 | 0.111116866 | count | 1 |
| IGLC6       | 16.6830311 | 5240.56827  | 0.0032 | 0.997 | 0.111116866 | count | 1 |
| ADORA2A-AS1 | 16.6830312 | 5240.568058 | 0.0032 | 0.997 | 0.111116866 | count | 1 |
| C22orf23    | 16.6830312 | 5240.568199 | 0.0032 | 0.997 | 0.111116866 | count | 1 |
| PNPLA3      | 16.6830312 | 5240.568058 | 0.0032 | 0.997 | 0.111116866 | count | 1 |
| AP003900.1  | 16.6830312 | 5240.568023 | 0.0032 | 0.997 | 0.111116866 | count | 1 |
| LINC02246   | 16.6830311 | 5240.56827  | 0.0032 | 0.997 | 0.111116866 | count | 1 |
| AJ009632.2  | 16.6830311 | 5240.56827  | 0.0032 | 0.997 | 0.111116866 | count | 1 |

|             |            |             |        |       |             |       |   |
|-------------|------------|-------------|--------|-------|-------------|-------|---|
| AP001596.1  | 16.6830312 | 5240.568058 | 0.0032 | 0.997 | 0.111116866 | count | 1 |
| AP000265.1  | 16.6830312 | 5240.567881 | 0.0032 | 0.997 | 0.111116866 | count | 1 |
| RIPPLY3     | 16.6830312 | 5240.568199 | 0.0032 | 0.997 | 0.111116866 | count | 1 |
| DSCR9       | 16.6830312 | 5240.568093 | 0.0032 | 0.997 | 0.111116866 | count | 1 |
| LINC01423   | 16.6830312 | 5240.567952 | 0.0032 | 0.997 | 0.111116866 | count | 1 |
| CBS         | 16.6830312 | 5240.567952 | 0.0032 | 0.997 | 0.111116866 | count | 1 |
| AP001056.2  | 16.6830311 | 5240.56827  | 0.0032 | 0.997 | 0.111116866 | count | 1 |
| LINC01786   | 16.6830313 | 5240.568129 | 0.0032 | 0.997 | 0.111116866 | count | 1 |
| AL033528.2  | 16.6830313 | 5240.568376 | 0.0032 | 0.997 | 0.111116866 | count | 1 |
| C1orf232    | 16.6830313 | 5240.568235 | 0.0032 | 0.997 | 0.111116866 | count | 1 |
| HPCA        | 16.6830313 | 5240.568058 | 0.0032 | 0.997 | 0.111116866 | count | 1 |
| COL9A2      | 16.6830313 | 5240.568376 | 0.0032 | 0.997 | 0.111116866 | count | 1 |
| ARMH1       | 16.6830313 | 5240.568376 | 0.0032 | 0.997 | 0.111116866 | count | 1 |
| LINC01144   | 16.6830313 | 5240.568376 | 0.0032 | 0.997 | 0.111116866 | count | 1 |
| GPR88       | 16.6830313 | 5240.568376 | 0.0032 | 0.997 | 0.111116866 | count | 1 |
| ALX3        | 16.6830313 | 5240.568376 | 0.0032 | 0.997 | 0.111116866 | count | 1 |
| AL365361.1  | 16.6830313 | 5240.568376 | 0.0032 | 0.997 | 0.111116866 | count | 1 |
| EDARADD     | 16.6830313 | 5240.568376 | 0.0032 | 0.997 | 0.111116866 | count | 1 |
| TRIM54      | 16.6830313 | 5240.568376 | 0.0032 | 0.997 | 0.111116866 | count | 1 |
| CLEC4F      | 16.6830313 | 5240.568199 | 0.0032 | 0.997 | 0.111116866 | count | 1 |
| AC009237.15 | 16.6830313 | 5240.568376 | 0.0032 | 0.997 | 0.111116866 | count | 1 |
| BUB1        | 16.6830313 | 5240.568376 | 0.0032 | 0.997 | 0.111116866 | count | 1 |
| ACOXL       | 16.6830313 | 5240.567987 | 0.0032 | 0.997 | 0.111116866 | count | 1 |
| AC009299.3  | 16.6830313 | 5240.568376 | 0.0032 | 0.997 | 0.111116866 | count | 1 |
| DHRS9       | 16.6830313 | 5240.568376 | 0.0032 | 0.997 | 0.111116866 | count | 1 |
| AC007966.1  | 16.6830313 | 5240.568376 | 0.0032 | 0.997 | 0.111116866 | count | 1 |
| UNC80       | 16.6830313 | 5240.568376 | 0.0032 | 0.997 | 0.111116866 | count | 1 |
| AC116096.1  | 16.6830313 | 5240.568235 | 0.0032 | 0.997 | 0.111116866 | count | 1 |
| AC024933.1  | 16.6830313 | 5240.568376 | 0.0032 | 0.997 | 0.111116866 | count | 1 |
| TPRG1       | 16.6830313 | 5240.568376 | 0.0032 | 0.997 | 0.111116866 | count | 1 |
| AC005699.1  | 16.6830313 | 5240.568376 | 0.0032 | 0.997 | 0.111116866 | count | 1 |
| BMPR1B-DT   | 16.6830313 | 5240.568376 | 0.0032 | 0.997 | 0.111116866 | count | 1 |
| AP001961.1  | 16.6830313 | 5240.568376 | 0.0032 | 0.997 | 0.111116866 | count | 1 |
| AC093879.2  | 16.6830313 | 5240.568376 | 0.0032 | 0.997 | 0.111116866 | count | 1 |
| FABP2       | 16.6830313 | 5240.568376 | 0.0032 | 0.997 | 0.111116866 | count | 1 |
| C4orf51     | 16.6830313 | 5240.568376 | 0.0032 | 0.997 | 0.111116866 | count | 1 |
| SPATA9      | 16.6830313 | 5240.568376 | 0.0032 | 0.997 | 0.111116866 | count | 1 |
| SLC27A6     | 16.6830313 | 5240.568164 | 0.0032 | 0.997 | 0.111116866 | count | 1 |
| PCDHGB4     | 16.6830313 | 5240.568376 | 0.0032 | 0.997 | 0.111116866 | count | 1 |
| UNC5A       | 16.6830313 | 5240.568376 | 0.0032 | 0.997 | 0.111116866 | count | 1 |
| FAM153C     | 16.6830313 | 5240.568376 | 0.0032 | 0.997 | 0.111116866 | count | 1 |
| ADAMTS2     | 16.6830313 | 5240.568376 | 0.0032 | 0.997 | 0.111116866 | count | 1 |
| HIST1H3F    | 16.6830313 | 5240.568376 | 0.0032 | 0.997 | 0.111116866 | count | 1 |
| HCG15       | 16.6830313 | 5240.568376 | 0.0032 | 0.997 | 0.111116866 | count | 1 |
| AL662791.2  | 16.6830313 | 5240.568199 | 0.0032 | 0.997 | 0.111116866 | count | 1 |

|             |            |             |        |       |             |       |   |
|-------------|------------|-------------|--------|-------|-------------|-------|---|
| COL19A1     | 16.6830313 | 5240.568376 | 0.0032 | 0.997 | 0.111116866 | count | 1 |
| VNN2        | 16.6830313 | 5240.568376 | 0.0032 | 0.997 | 0.111116866 | count | 1 |
| RAET1E-AS1  | 16.6830313 | 5240.568058 | 0.0032 | 0.997 | 0.111116866 | count | 1 |
| LINC02544   | 16.6830313 | 5240.568376 | 0.0032 | 0.997 | 0.111116866 | count | 1 |
| AC005154.6  | 16.6830313 | 5240.568058 | 0.0032 | 0.997 | 0.111116866 | count | 1 |
| POU6F2-AS2  | 16.6830313 | 5240.568376 | 0.0032 | 0.997 | 0.111116866 | count | 1 |
| NACAD       | 16.6830313 | 5240.567987 | 0.0032 | 0.997 | 0.111116866 | count | 1 |
| CNTNAP2     | 16.6830313 | 5240.568058 | 0.0032 | 0.997 | 0.111116866 | count | 1 |
| ASMT        | 16.6830313 | 5240.568376 | 0.0032 | 0.997 | 0.111116866 | count | 1 |
| AC009630.2  | 16.6830313 | 5240.568482 | 0.0032 | 0.997 | 0.111116866 | count | 1 |
| NKAIN3      | 16.6830313 | 5240.568376 | 0.0032 | 0.997 | 0.111116866 | count | 1 |
| PAG1        | 16.6830313 | 5240.567987 | 0.0032 | 0.997 | 0.111116866 | count | 1 |
| AC090572.3  | 16.6830313 | 5240.568376 | 0.0032 | 0.997 | 0.111116866 | count | 1 |
| AC090579.1  | 16.6830313 | 5240.567952 | 0.0032 | 0.997 | 0.111116866 | count | 1 |
| FOXD4L5     | 16.6830313 | 5240.568376 | 0.0032 | 0.997 | 0.111116866 | count | 1 |
| C9orf147    | 16.6830313 | 5240.568376 | 0.0032 | 0.997 | 0.111116866 | count | 1 |
| HMGA1P4     | 16.6830313 | 5240.568376 | 0.0032 | 0.997 | 0.111116866 | count | 1 |
| AP000759.1  | 16.6830313 | 5240.568376 | 0.0032 | 0.997 | 0.111116866 | count | 1 |
| AP001790.1  | 16.6830313 | 5240.568058 | 0.0032 | 0.997 | 0.111116866 | count | 1 |
| CFAP300     | 16.6830313 | 5240.568447 | 0.0032 | 0.997 | 0.111116866 | count | 1 |
| AP001527.1  | 16.6830313 | 5240.568376 | 0.0032 | 0.997 | 0.111116866 | count | 1 |
| CASP5       | 16.6830313 | 5240.568376 | 0.0032 | 0.997 | 0.111116866 | count | 1 |
| FXVD6-FXVD2 | 16.6830313 | 5240.568376 | 0.0032 | 0.997 | 0.111116866 | count | 1 |
| AP003390.1  | 16.6830313 | 5240.568376 | 0.0032 | 0.997 | 0.111116866 | count | 1 |
| MALRD1      | 16.6830313 | 5240.568376 | 0.0032 | 0.997 | 0.111116866 | count | 1 |
| PCAT5       | 16.6830313 | 5240.568376 | 0.0032 | 0.997 | 0.111116866 | count | 1 |
| MAT1A       | 16.6830313 | 5240.568376 | 0.0032 | 0.997 | 0.111116866 | count | 1 |
| PRLHR       | 16.6830313 | 5240.568199 | 0.0032 | 0.997 | 0.111116866 | count | 1 |
| LINC02449   | 16.6830313 | 5240.568058 | 0.0032 | 0.997 | 0.111116866 | count | 1 |
| AC022509.3  | 16.6830313 | 5240.568376 | 0.0032 | 0.997 | 0.111116866 | count | 1 |
| TROAP       | 16.6830313 | 5240.568376 | 0.0032 | 0.997 | 0.111116866 | count | 1 |
| AC025165.2  | 16.6830313 | 5240.568376 | 0.0032 | 0.997 | 0.111116866 | count | 1 |
| LINC02384   | 16.6830313 | 5240.568376 | 0.0032 | 0.997 | 0.111116866 | count | 1 |
| AC126178.1  | 16.6830313 | 5240.568376 | 0.0032 | 0.997 | 0.111116866 | count | 1 |
| AC126175.1  | 16.6830313 | 5240.568376 | 0.0032 | 0.997 | 0.111116866 | count | 1 |
| AC069209.1  | 16.6830313 | 5240.568376 | 0.0032 | 0.997 | 0.111116866 | count | 1 |
| UBE2L5      | 16.6830313 | 5240.568058 | 0.0032 | 0.997 | 0.111116866 | count | 1 |
| GRTP1       | 16.6830313 | 5240.568376 | 0.0032 | 0.997 | 0.111116866 | count | 1 |
| AC022613.1  | 16.6830313 | 5240.568058 | 0.0032 | 0.997 | 0.111116866 | count | 1 |
| OIP5        | 16.6830313 | 5240.568376 | 0.0032 | 0.997 | 0.111116866 | count | 1 |
| AC090510.2  | 16.6830313 | 5240.568376 | 0.0032 | 0.997 | 0.111116866 | count | 1 |
| AL031600.3  | 16.6830313 | 5240.567987 | 0.0032 | 0.997 | 0.111116866 | count | 1 |
| AC009021.1  | 16.6830313 | 5240.568376 | 0.0032 | 0.997 | 0.111116866 | count | 1 |
| AC136944.2  | 16.6830313 | 5240.568376 | 0.0032 | 0.997 | 0.111116866 | count | 1 |
| NOD2        | 16.6830313 | 5240.568376 | 0.0032 | 0.997 | 0.111116866 | count | 1 |

|             |            |             |        |        |             |       |   |
|-------------|------------|-------------|--------|--------|-------------|-------|---|
| CMTM1       | 16.6830313 | 5240.568376 | 0.0032 | 0.997  | 0.111116866 | count | 1 |
| SMPD3       | 16.6830313 | 5240.568376 | 0.0032 | 0.997  | 0.111116866 | count | 1 |
| AC009097.3  | 16.6830313 | 5240.568376 | 0.0032 | 0.997  | 0.111116866 | count | 1 |
| AC015853.2  | 16.6830313 | 5240.568376 | 0.0032 | 0.997  | 0.111116866 | count | 1 |
| AC024267.3  | 16.6830313 | 5240.568376 | 0.0032 | 0.997  | 0.111116866 | count | 1 |
| AC018521.7  | 16.6830313 | 5240.568376 | 0.0032 | 0.997  | 0.111116866 | count | 1 |
| AC091180.4  | 16.6830313 | 5240.568376 | 0.0032 | 0.997  | 0.111116866 | count | 1 |
| AC005920.1  | 16.6830313 | 5240.568376 | 0.0032 | 0.997  | 0.111116866 | count | 1 |
| TBX2        | 16.6830313 | 5240.568376 | 0.0032 | 0.997  | 0.111116866 | count | 1 |
| AC021504.1  | 16.6830313 | 5240.568376 | 0.0032 | 0.997  | 0.111116866 | count | 1 |
| AL136531.2  | 16.6830313 | 5240.568376 | 0.0032 | 0.997  | 0.111116866 | count | 1 |
| AL121760.1  | 16.6830313 | 5240.568376 | 0.0032 | 0.997  | 0.111116866 | count | 1 |
| GNRH2       | 16.6830313 | 5240.568376 | 0.0032 | 0.997  | 0.111116866 | count | 1 |
| AC005220.1  | 16.6830313 | 5240.568447 | 0.0032 | 0.997  | 0.111116866 | count | 1 |
| LINC01775   | 16.6830313 | 5240.568376 | 0.0032 | 0.997  | 0.111116866 | count | 1 |
| TEX45       | 16.6830313 | 5240.568341 | 0.0032 | 0.997  | 0.111116866 | count | 1 |
| AC010323.1  | 16.6830313 | 5240.568376 | 0.0032 | 0.997  | 0.111116866 | count | 1 |
| AC010422.6  | 16.6830313 | 5240.568376 | 0.0032 | 0.997  | 0.111116866 | count | 1 |
| PTGER1      | 16.6830313 | 5240.568376 | 0.0032 | 0.997  | 0.111116866 | count | 1 |
| FFAR2       | 16.6830313 | 5240.568058 | 0.0032 | 0.997  | 0.111116866 | count | 1 |
| AC005515.2  | 16.6830313 | 5240.568376 | 0.0032 | 0.997  | 0.111116866 | count | 1 |
| AC010616.1  | 16.6830313 | 5240.568376 | 0.0032 | 0.997  | 0.111116866 | count | 1 |
| AC008403.3  | 16.6830313 | 5240.568023 | 0.0032 | 0.997  | 0.111116866 | count | 1 |
| LHB         | 16.6830313 | 5240.568058 | 0.0032 | 0.997  | 0.111116866 | count | 1 |
| AC008687.4  | 16.6830313 | 5240.568058 | 0.0032 | 0.997  | 0.111116866 | count | 1 |
| AC020909.3  | 16.6830313 | 5240.568376 | 0.0032 | 0.997  | 0.111116866 | count | 1 |
| AP000357.2  | 16.6830313 | 5240.568023 | 0.0032 | 0.997  | 0.111116866 | count | 1 |
| CYTH4       | 16.6830313 | 5240.568376 | 0.0032 | 0.997  | 0.111116866 | count | 1 |
| AL031590.1  | 16.6830313 | 5240.568376 | 0.0032 | 0.997  | 0.111116866 | count | 1 |
| CHODL-AS1   | 16.6830313 | 5240.568376 | 0.0032 | 0.997  | 0.111116866 | count | 1 |
| HUNK        | 16.6830313 | 5240.567987 | 0.0032 | 0.997  | 0.111116866 | count | 1 |
| AL359881.1  | 16.6830314 | 5240.56827  | 0.0032 | 0.997  | 0.111116866 | count | 1 |
| C1orf189    | 16.6830314 | 5240.568341 | 0.0032 | 0.997  | 0.111116866 | count | 1 |
| AL512343.2  | 16.6830314 | 5240.568306 | 0.0032 | 0.997  | 0.111116866 | count | 1 |
| ZMYND10     | 16.6830314 | 5240.56827  | 0.0032 | 0.997  | 0.111116866 | count | 1 |
| PRG2        | 16.6830314 | 5240.568306 | 0.0032 | 0.997  | 0.111116866 | count | 1 |
| AC024941.2  | 16.6830314 | 5240.568164 | 0.0032 | 0.997  | 0.111116866 | count | 1 |
| AC060809.1  | 16.6830314 | 5240.568341 | 0.0032 | 0.997  | 0.111116866 | count | 1 |
| AC022167.1  | 16.6830314 | 5240.568341 | 0.0032 | 0.997  | 0.111116866 | count | 1 |
| AC027130.1  | 16.6830314 | 5240.568306 | 0.0032 | 0.997  | 0.111116866 | count | 1 |
| AC087294.1  | 16.6830315 | 5240.568306 | 0.0032 | 0.997  | 0.111116866 | count | 1 |
| ELL3        | 16.7009714 | 2553.480748 | 0.0065 | 0.9948 | 0.111116866 | count | 1 |
| ENPP3       | 16.700973  | 2553.482536 | 0.0065 | 0.9948 | 0.111116866 | count | 1 |
| SLC5A2      | 16.7009732 | 2553.48344  | 0.0065 | 0.9948 | 0.111116866 | count | 1 |
| RASGRF2-AS1 | 16.7009736 | 2553.482078 | 0.0065 | 0.9948 | 0.111116866 | count | 1 |

|             |            |             |        |        |             |       |   |
|-------------|------------|-------------|--------|--------|-------------|-------|---|
| TMEM254-AS1 | 16.7009737 | 2553.482983 | 0.0065 | 0.9948 | 0.111116866 | count | 1 |
| TMSB15B     | 16.7009742 | 2553.482515 | 0.0065 | 0.9948 | 0.111116866 | count | 1 |
| AL121894.2  | 16.7009742 | 2553.481631 | 0.0065 | 0.9948 | 0.111116866 | count | 1 |
| AC004943.2  | 16.7009747 | 2553.484334 | 0.0065 | 0.9948 | 0.111116866 | count | 1 |
| AP000911.1  | 16.7009751 | 2553.482972 | 0.0065 | 0.9948 | 0.111116866 | count | 1 |
| TAPT1-AS1   | 16.7009763 | 2553.483845 | 0.0065 | 0.9948 | 0.111116866 | count | 1 |
| DNAH2       | 16.7009765 | 2553.483866 | 0.0065 | 0.9948 | 0.111116866 | count | 1 |
| NCF2        | 16.7009767 | 2553.4816   | 0.0065 | 0.9948 | 0.111116866 | count | 1 |
| AC020917.3  | 16.7009766 | 2553.483866 | 0.0065 | 0.9948 | 0.111116866 | count | 1 |
| COL11A2     | 16.7009774 | 2553.482037 | 0.0065 | 0.9948 | 0.111116866 | count | 1 |
| LINC02158   | 16.7009777 | 2553.480686 | 0.0065 | 0.9948 | 0.111116866 | count | 1 |
| SCGN        | 16.7009789 | 2553.482931 | 0.0065 | 0.9948 | 0.111116866 | count | 1 |
| AC128687.2  | 16.700979  | 2553.483824 | 0.0065 | 0.9948 | 0.111116866 | count | 1 |
| ASB15       | 16.7009792 | 2553.483835 | 0.0065 | 0.9948 | 0.111116866 | count | 1 |
| CCDC116     | 16.7009792 | 2553.483835 | 0.0065 | 0.9948 | 0.111116866 | count | 1 |
| KIF4A       | 16.7018313 | 2849.558405 | 0.0059 | 0.995  | 0.111116866 | count | 1 |
| FHL5        | 16.7018341 | 2849.559392 | 0.0059 | 0.995  | 0.111116866 | count | 1 |
| TRPV1       | 16.7018342 | 2849.56039  | 0.0059 | 0.995  | 0.111116866 | count | 1 |
| AC133555.3  | 16.7018347 | 2849.558881 | 0.0059 | 0.995  | 0.111116866 | count | 1 |
| AC010809.3  | 16.7018358 | 2849.55786  | 0.0059 | 0.995  | 0.111116866 | count | 1 |
| DIO3        | 16.7030109 | 3364.747092 | 0.005  | 0.996  | 0.111116866 | count | 1 |
| ROPN1B      | 16.727533  | 1764.409498 | 0.0095 | 0.9924 | 0.111116866 | count | 1 |
| ITGA11      | 16.7275355 | 1764.409722 | 0.0095 | 0.9924 | 0.111116866 | count | 1 |
| RNF31       | 16.7888099 | 1782.188735 | 0.0094 | 0.9925 | 0.111116867 | count | 1 |
| Z99774.1    | 16.7888114 | 1782.187085 | 0.0094 | 0.9925 | 0.111116867 | count | 1 |
| AL031666.2  | 16.7888135 | 1782.187956 | 0.0094 | 0.9925 | 0.111116867 | count | 1 |
| AC007881.3  | 16.7892311 | 1912.1232   | 0.0088 | 0.993  | 0.111116867 | count | 1 |
| SNTB1       | 16.8038218 | 1760.443694 | 0.0095 | 0.9924 | 0.111116867 | count | 1 |
| PRKCZ-AS1   | 16.8947094 | 4282.004086 | 0.0039 | 0.997  | 0.111116867 | count | 1 |
| AL390728.5  | 16.8947094 | 4282.004135 | 0.0039 | 0.997  | 0.111116867 | count | 1 |
| CACNA1D     | 16.8947094 | 4282.004037 | 0.0039 | 0.997  | 0.111116867 | count | 1 |
| OSTN-AS1    | 16.8947094 | 4282.004086 | 0.0039 | 0.997  | 0.111116867 | count | 1 |
| KCTD8       | 16.8947094 | 4282.004111 | 0.0039 | 0.997  | 0.111116867 | count | 1 |
| STK32A      | 16.8947093 | 4282.004111 | 0.0039 | 0.997  | 0.111116867 | count | 1 |
| AC005082.1  | 16.8947094 | 4282.004086 | 0.0039 | 0.997  | 0.111116867 | count | 1 |
| AC074183.1  | 16.8947094 | 4282.004086 | 0.0039 | 0.997  | 0.111116867 | count | 1 |
| ASB11       | 16.8947093 | 4282.004062 | 0.0039 | 0.997  | 0.111116867 | count | 1 |
| AL583839.1  | 16.8947094 | 4282.004135 | 0.0039 | 0.997  | 0.111116867 | count | 1 |
| KC877392.1  | 16.8947094 | 4282.004135 | 0.0039 | 0.997  | 0.111116867 | count | 1 |
| GAS2        | 16.8947094 | 4282.004062 | 0.0039 | 0.997  | 0.111116867 | count | 1 |
| SPART-AS1   | 16.8947094 | 4282.004086 | 0.0039 | 0.997  | 0.111116867 | count | 1 |
| AC092119.3  | 16.8947094 | 4282.004037 | 0.0039 | 0.997  | 0.111116867 | count | 1 |
| AC106782.6  | 16.8947094 | 4282.004086 | 0.0039 | 0.997  | 0.111116867 | count | 1 |
| AC145207.2  | 16.8947094 | 4282.004111 | 0.0039 | 0.997  | 0.111116867 | count | 1 |
| MIA-RAB4B   | 16.8947094 | 4282.004086 | 0.0039 | 0.997  | 0.111116867 | count | 1 |



|            |            |             |        |       |             |       |   |
|------------|------------|-------------|--------|-------|-------------|-------|---|
| AL022322.2 | 16.8947094 | 4282.004086 | 0.0039 | 0.997 | 0.111116867 | count | 1 |
| AP000295.1 | 16.8947094 | 4282.004062 | 0.0039 | 0.997 | 0.111116867 | count | 1 |
| FOX2       | 16.8947096 | 4282.004135 | 0.0039 | 0.997 | 0.111116867 | count | 1 |
| DEPDC1     | 16.8947095 | 4282.00416  | 0.0039 | 0.997 | 0.111116867 | count | 1 |
| RXFP4      | 16.8947095 | 4282.004062 | 0.0039 | 0.997 | 0.111116867 | count | 1 |
| HAPLN2     | 16.8947096 | 4282.00416  | 0.0039 | 0.997 | 0.111116867 | count | 1 |
| ADCY10     | 16.8947095 | 4282.004086 | 0.0039 | 0.997 | 0.111116867 | count | 1 |
| AL121983.2 | 16.8947095 | 4282.004086 | 0.0039 | 0.997 | 0.111116867 | count | 1 |
| AL078644.2 | 16.8947095 | 4282.004086 | 0.0039 | 0.997 | 0.111116867 | count | 1 |
| AC026316.5 | 16.8947096 | 4282.004135 | 0.0039 | 0.997 | 0.111116867 | count | 1 |
| CTBP1-AS   | 16.8947096 | 4282.004135 | 0.0039 | 0.997 | 0.111116867 | count | 1 |
| AC141928.1 | 16.8947095 | 4282.004135 | 0.0039 | 0.997 | 0.111116867 | count | 1 |
| CPEB2-DT   | 16.8947095 | 4282.004135 | 0.0039 | 0.997 | 0.111116867 | count | 1 |
| AC069200.1 | 16.8947096 | 4282.004111 | 0.0039 | 0.997 | 0.111116867 | count | 1 |
| AC092354.2 | 16.8947096 | 4282.004086 | 0.0039 | 0.997 | 0.111116867 | count | 1 |
| AC008906.2 | 16.8947095 | 4282.004086 | 0.0039 | 0.997 | 0.111116867 | count | 1 |
| CCNI2      | 16.8947095 | 4282.004111 | 0.0039 | 0.997 | 0.111116867 | count | 1 |
| AL662796.1 | 16.8947096 | 4282.004086 | 0.0039 | 0.997 | 0.111116867 | count | 1 |
| AL021368.1 | 16.8947095 | 4282.004062 | 0.0039 | 0.997 | 0.111116867 | count | 1 |
| AC073073.2 | 16.8947095 | 4282.004062 | 0.0039 | 0.997 | 0.111116867 | count | 1 |
| AC009275.1 | 16.8947096 | 4282.004086 | 0.0039 | 0.997 | 0.111116867 | count | 1 |
| AC084116.1 | 16.8947096 | 4282.004086 | 0.0039 | 0.997 | 0.111116867 | count | 1 |
| BX005266.2 | 16.8947095 | 4282.004062 | 0.0039 | 0.997 | 0.111116867 | count | 1 |
| C9orf106   | 16.8947095 | 4282.004086 | 0.0039 | 0.997 | 0.111116867 | count | 1 |
| OR2AG2     | 16.8947095 | 4282.004037 | 0.0039 | 0.997 | 0.111116867 | count | 1 |
| AKR1C4     | 16.8947095 | 4282.004111 | 0.0039 | 0.997 | 0.111116867 | count | 1 |
| ASAH2      | 16.8947096 | 4282.004135 | 0.0039 | 0.997 | 0.111116867 | count | 1 |
| AC068987.2 | 16.8947095 | 4282.004111 | 0.0039 | 0.997 | 0.111116867 | count | 1 |
| CCDC62     | 16.8947095 | 4282.004086 | 0.0039 | 0.997 | 0.111116867 | count | 1 |
| AC027290.1 | 16.8947095 | 4282.004037 | 0.0039 | 0.997 | 0.111116867 | count | 1 |
| LINC00284  | 16.8947096 | 4282.004111 | 0.0039 | 0.997 | 0.111116867 | count | 1 |
| AL359513.1 | 16.8947096 | 4282.004111 | 0.0039 | 0.997 | 0.111116867 | count | 1 |
| AL627171.2 | 16.8947096 | 4282.004135 | 0.0039 | 0.997 | 0.111116867 | count | 1 |
| AC013553.4 | 16.8947095 | 4282.004062 | 0.0039 | 0.997 | 0.111116867 | count | 1 |
| AL022341.2 | 16.8947095 | 4282.004111 | 0.0039 | 0.997 | 0.111116867 | count | 1 |
| CCDC154    | 16.8947096 | 4282.004135 | 0.0039 | 0.997 | 0.111116867 | count | 1 |
| AC007014.1 | 16.8947095 | 4282.004062 | 0.0039 | 0.997 | 0.111116867 | count | 1 |
| TMED6      | 16.8947096 | 4282.004086 | 0.0039 | 0.997 | 0.111116867 | count | 1 |
| AC010531.3 | 16.8947095 | 4282.004086 | 0.0039 | 0.997 | 0.111116867 | count | 1 |
| AIPL1      | 16.8947095 | 4282.004062 | 0.0039 | 0.997 | 0.111116867 | count | 1 |
| AC068234.3 | 16.8947095 | 4282.004111 | 0.0039 | 0.997 | 0.111116867 | count | 1 |
| AC100778.3 | 16.8947095 | 4282.004135 | 0.0039 | 0.997 | 0.111116867 | count | 1 |
| FAM129C    | 16.8947095 | 4282.004111 | 0.0039 | 0.997 | 0.111116867 | count | 1 |
| ADM2       | 16.8947095 | 4282.004135 | 0.0039 | 0.997 | 0.111116867 | count | 1 |
| UGT8       | 16.8947097 | 4282.004111 | 0.0039 | 0.997 | 0.111116867 | count | 1 |

|              |            |             |        |       |             |       |   |
|--------------|------------|-------------|--------|-------|-------------|-------|---|
| MAGEE2       | 16.8947097 | 4282.00416  | 0.0039 | 0.997 | 0.111116867 | count | 1 |
| C9orf153     | 16.8947097 | 4282.00416  | 0.0039 | 0.997 | 0.111116867 | count | 1 |
| AP000350.5   | 16.8947097 | 4282.004135 | 0.0039 | 0.997 | 0.111116867 | count | 1 |
| CYP2D6       | 16.8947097 | 4282.004135 | 0.0039 | 0.997 | 0.111116867 | count | 1 |
| AL512604.3   | 16.8947098 | 4282.004086 | 0.0039 | 0.997 | 0.111116867 | count | 1 |
| LINC01291    | 16.8947126 | 4282.009521 | 0.0039 | 0.997 | 0.111116867 | count | 1 |
| HPDL         | 16.8947128 | 4282.009496 | 0.0039 | 0.997 | 0.111116867 | count | 1 |
| DES          | 16.8947128 | 4282.009496 | 0.0039 | 0.997 | 0.111116867 | count | 1 |
| FAM166B      | 16.8947127 | 4282.009569 | 0.0039 | 0.997 | 0.111116867 | count | 1 |
| AC136475.9   | 16.8947128 | 4282.009545 | 0.0039 | 0.997 | 0.111116867 | count | 1 |
| DNAH9        | 16.8947128 | 4282.015151 | 0.0039 | 0.997 | 0.111116867 | count | 1 |
| AC016590.1   | 16.8947127 | 4282.009447 | 0.0039 | 0.997 | 0.111116867 | count | 1 |
| LINC02580    | 16.894713  | 4282.009521 | 0.0039 | 0.997 | 0.111116867 | count | 1 |
| TEKT4        | 16.8947129 | 4282.009472 | 0.0039 | 0.997 | 0.111116867 | count | 1 |
| KBTBD12      | 16.8947129 | 4282.012238 | 0.0039 | 0.997 | 0.111116867 | count | 1 |
| AC083829.2   | 16.8947129 | 4282.009472 | 0.0039 | 0.997 | 0.111116867 | count | 1 |
| SNX15        | 16.8947129 | 4282.012238 | 0.0039 | 0.997 | 0.111116867 | count | 1 |
| AL049871.1   | 16.8947129 | 4282.009496 | 0.0039 | 0.997 | 0.111116867 | count | 1 |
| SLX1B        | 16.8947129 | 4282.012238 | 0.0039 | 0.997 | 0.111116867 | count | 1 |
| AC012588.1   | 16.894713  | 4282.012262 | 0.0039 | 0.997 | 0.111116867 | count | 1 |
| AP000253.1   | 16.8947129 | 4282.012238 | 0.0039 | 0.997 | 0.111116867 | count | 1 |
| HAND2        | 16.8947131 | 4282.009472 | 0.0039 | 0.997 | 0.111116867 | count | 1 |
| AL031432.1   | 16.894716  | 4282.006534 | 0.0039 | 0.997 | 0.111116867 | count | 1 |
| IDI2-AS1     | 16.894716  | 4282.006559 | 0.0039 | 0.997 | 0.111116867 | count | 1 |
| SLCO1B3      | 16.8947159 | 4282.006583 | 0.0039 | 0.997 | 0.111116867 | count | 1 |
| GALNT4       | 16.894716  | 4282.006534 | 0.0039 | 0.997 | 0.111116867 | count | 1 |
| AP000845.1   | 16.894716  | 4282.00651  | 0.0039 | 0.997 | 0.111116867 | count | 1 |
| CCDC114      | 16.894716  | 4282.006607 | 0.0039 | 0.997 | 0.111116867 | count | 1 |
| AC011476.3   | 16.894716  | 4282.006607 | 0.0039 | 0.997 | 0.111116867 | count | 1 |
| PIK3IP1-AS1  | 16.894716  | 4282.006559 | 0.0039 | 0.997 | 0.111116867 | count | 1 |
| AL391069.4   | 16.8947161 | 4282.006607 | 0.0039 | 0.997 | 0.111116867 | count | 1 |
| AC244197.2   | 16.8947161 | 4282.006583 | 0.0039 | 0.997 | 0.111116867 | count | 1 |
| IL23A        | 16.8947161 | 4282.006583 | 0.0039 | 0.997 | 0.111116867 | count | 1 |
| LATS2-AS1    | 16.8947161 | 4282.006583 | 0.0039 | 0.997 | 0.111116867 | count | 1 |
| SLC10A1      | 16.8947161 | 4282.006607 | 0.0039 | 0.997 | 0.111116867 | count | 1 |
| TEX46        | 16.8947162 | 4282.006583 | 0.0039 | 0.997 | 0.111116867 | count | 1 |
| AL356441.1   | 16.8947162 | 4282.006583 | 0.0039 | 0.997 | 0.111116867 | count | 1 |
| TRAPPC12-AS1 | 16.8947162 | 4282.006559 | 0.0039 | 0.997 | 0.111116867 | count | 1 |
| AC008277.1   | 16.8947162 | 4282.006559 | 0.0039 | 0.997 | 0.111116867 | count | 1 |
| ZNF385B      | 16.8947162 | 4282.006534 | 0.0039 | 0.997 | 0.111116867 | count | 1 |
| UNC5C        | 16.8947162 | 4282.006607 | 0.0039 | 0.997 | 0.111116867 | count | 1 |
| LINC00243    | 16.8947163 | 4282.012164 | 0.0039 | 0.997 | 0.111116867 | count | 1 |
| FGD2         | 16.8947162 | 4282.006559 | 0.0039 | 0.997 | 0.111116867 | count | 1 |
| EYS          | 16.8947162 | 4282.006583 | 0.0039 | 0.997 | 0.111116867 | count | 1 |
| ATP5MF-PTCD1 | 16.8947163 | 4282.006607 | 0.0039 | 0.997 | 0.111116867 | count | 1 |

|                 |            |             |        |       |             |       |   |
|-----------------|------------|-------------|--------|-------|-------------|-------|---|
| GAL3ST4         | 16.8947162 | 4282.006607 | 0.0039 | 0.997 | 0.111116867 | count | 1 |
| AC027702.1      | 16.8947162 | 4282.006534 | 0.0039 | 0.997 | 0.111116867 | count | 1 |
| SAPCD2          | 16.8947162 | 4282.006559 | 0.0039 | 0.997 | 0.111116867 | count | 1 |
| PARD3-AS1       | 16.8947163 | 4282.006583 | 0.0039 | 0.997 | 0.111116867 | count | 1 |
| GLIPR1L1        | 16.8947162 | 4282.006607 | 0.0039 | 0.997 | 0.111116867 | count | 1 |
| ALDH1L2         | 16.8947162 | 4282.006607 | 0.0039 | 0.997 | 0.111116867 | count | 1 |
| AC107241.1      | 16.8947163 | 4282.006607 | 0.0039 | 0.997 | 0.111116867 | count | 1 |
| AC010761.2      | 16.8947163 | 4282.006632 | 0.0039 | 0.997 | 0.111116867 | count | 1 |
| LRRC46          | 16.8947163 | 4282.006607 | 0.0039 | 0.997 | 0.111116867 | count | 1 |
| AP005203.1      | 16.8947162 | 4282.006559 | 0.0039 | 0.997 | 0.111116867 | count | 1 |
| AC005614.1      | 16.8947162 | 4282.006607 | 0.0039 | 0.997 | 0.111116867 | count | 1 |
| PRR34           | 16.8947163 | 4282.006559 | 0.0039 | 0.997 | 0.111116867 | count | 1 |
| IQCJ-SCHIP1-AS1 | 16.8947164 | 4282.006583 | 0.0039 | 0.997 | 0.111116867 | count | 1 |
| AC006435.1      | 16.8947164 | 4282.006559 | 0.0039 | 0.997 | 0.111116867 | count | 1 |
| LINC02148       | 16.8947196 | 4282.006338 | 0.0039 | 0.997 | 0.111116867 | count | 1 |
| PPT2-EGFL8      | 16.8947195 | 4282.017648 | 0.0039 | 0.997 | 0.111116867 | count | 1 |
| AC026979.3      | 16.8947196 | 4282.009104 | 0.0039 | 0.997 | 0.111116867 | count | 1 |
| AP000769.2      | 16.8947196 | 4282.017599 | 0.0039 | 0.997 | 0.111116867 | count | 1 |
| COLCA1          | 16.8947196 | 4282.009104 | 0.0039 | 0.997 | 0.111116867 | count | 1 |
| AL392046.1      | 16.8947196 | 4282.017623 | 0.0039 | 0.997 | 0.111116867 | count | 1 |
| AL122035.1      | 16.8947195 | 4282.017623 | 0.0039 | 0.997 | 0.111116867 | count | 1 |
| AC092718.5      | 16.8947196 | 4282.009104 | 0.0039 | 0.997 | 0.111116867 | count | 1 |
| PHOSPHO1        | 16.8947195 | 4282.006363 | 0.0039 | 0.997 | 0.111116867 | count | 1 |
| AL021392.1      | 16.8947195 | 4282.017648 | 0.0039 | 0.997 | 0.111116867 | count | 1 |
| AL391152.1      | 16.8947197 | 4282.012042 | 0.0039 | 0.997 | 0.111116867 | count | 1 |
| LINC00677       | 16.8947198 | 4282.006338 | 0.0039 | 0.997 | 0.111116867 | count | 1 |
| NHLH1           | 16.8947227 | 4282.009055 | 0.0039 | 0.997 | 0.111116867 | count | 1 |
| AC139099.3      | 16.8947227 | 4282.009055 | 0.0039 | 0.997 | 0.111116867 | count | 1 |
| LNCSRLR         | 16.8947228 | 4282.009055 | 0.0039 | 0.997 | 0.111116867 | count | 1 |
| DCT             | 16.8947229 | 4282.00908  | 0.0039 | 0.997 | 0.111116867 | count | 1 |
| REM2            | 16.8947228 | 4282.003401 | 0.0039 | 0.997 | 0.111116867 | count | 1 |
| SLC25A47        | 16.8947228 | 4282.009031 | 0.0039 | 0.997 | 0.111116867 | count | 1 |
| SLC28A2         | 16.8947229 | 4282.00908  | 0.0039 | 0.997 | 0.111116867 | count | 1 |
| AC106886.3      | 16.8947229 | 4282.009006 | 0.0039 | 0.997 | 0.111116867 | count | 1 |
| CNTD1           | 16.8947229 | 4282.00908  | 0.0039 | 0.997 | 0.111116867 | count | 1 |
| CU634019.6      | 16.8947229 | 4282.009031 | 0.0039 | 0.997 | 0.111116867 | count | 1 |
| AL139424.3      | 16.8947231 | 4282.009104 | 0.0039 | 0.997 | 0.111116867 | count | 1 |
| CNKSR1          | 16.894723  | 4282.003425 | 0.0039 | 0.997 | 0.111116867 | count | 1 |
| CD38            | 16.894723  | 4282.00345  | 0.0039 | 0.997 | 0.111116867 | count | 1 |
| AL353596.1      | 16.8947231 | 4282.00908  | 0.0039 | 0.997 | 0.111116867 | count | 1 |
| CEL             | 16.8947231 | 4282.009031 | 0.0039 | 0.997 | 0.111116867 | count | 1 |
| AC012313.5      | 16.8947231 | 4282.00908  | 0.0039 | 0.997 | 0.111116867 | count | 1 |
| AC002116.2      | 16.8947232 | 4282.009031 | 0.0039 | 0.997 | 0.111116867 | count | 1 |
| LINC02033       | 16.8947261 | 4282.014416 | 0.0039 | 0.997 | 0.111116867 | count | 1 |
| STEAP3-AS1      | 16.8947262 | 4282.008835 | 0.0039 | 0.997 | 0.111116867 | count | 1 |

|            |            |             |        |        |             |       |   |
|------------|------------|-------------|--------|--------|-------------|-------|---|
| FOX D1     | 16.8947263 | 4282.008835 | 0.0039 | 0.997  | 0.111116867 | count | 1 |
| SLC36A1    | 16.8947263 | 4282.014514 | 0.0039 | 0.997  | 0.111116867 | count | 1 |
| HIST1H4F   | 16.8947263 | 4282.011601 | 0.0039 | 0.997  | 0.111116867 | count | 1 |
| AC006960.3 | 16.8947263 | 4282.008835 | 0.0039 | 0.997  | 0.111116867 | count | 1 |
| NLRP2B     | 16.8947262 | 4282.008835 | 0.0039 | 0.997  | 0.111116867 | count | 1 |
| CCKBR      | 16.8947263 | 4282.008811 | 0.0039 | 0.997  | 0.111116867 | count | 1 |
| AP002761.2 | 16.8947263 | 4282.008811 | 0.0039 | 0.997  | 0.111116867 | count | 1 |
| ABCC2      | 16.8947262 | 4282.008835 | 0.0039 | 0.997  | 0.111116867 | count | 1 |
| NOXRED1    | 16.8947263 | 4282.011577 | 0.0039 | 0.997  | 0.111116867 | count | 1 |
| LINC01483  | 16.8947262 | 4282.011577 | 0.0039 | 0.997  | 0.111116867 | count | 1 |
| SMIM11A    | 16.8947262 | 4282.008835 | 0.0039 | 0.997  | 0.111116867 | count | 1 |
| FO393415.1 | 16.8947265 | 4282.014441 | 0.0039 | 0.997  | 0.111116867 | count | 1 |
| AP001610.1 | 16.8947264 | 4282.011577 | 0.0039 | 0.997  | 0.111116867 | count | 1 |
| BX005214.2 | 16.8947296 | 4282.011552 | 0.0039 | 0.997  | 0.111116867 | count | 1 |
| AP001107.4 | 16.8947296 | 4282.011528 | 0.0039 | 0.997  | 0.111116867 | count | 1 |
| CYYR1-AS1  | 16.8947296 | 4282.011552 | 0.0039 | 0.997  | 0.111116867 | count | 1 |
| C1orf61    | 16.8947299 | 4282.011552 | 0.0039 | 0.997  | 0.111116867 | count | 1 |
| AL845472.1 | 16.8947298 | 4282.011552 | 0.0039 | 0.997  | 0.111116867 | count | 1 |
| AL157700.1 | 16.894733  | 4282.016987 | 0.0039 | 0.997  | 0.111116867 | count | 1 |
| AC053513.1 | 16.8947332 | 4282.019729 | 0.0039 | 0.997  | 0.111116867 | count | 1 |
| AC239868.3 | 16.9410811 | 2540.297844 | 0.0067 | 0.995  | 0.111116867 | count | 1 |
| GSN-AS1    | 16.9410812 | 2540.297844 | 0.0067 | 0.995  | 0.111116867 | count | 1 |
| AL139383.1 | 16.941082  | 2540.298284 | 0.0067 | 0.995  | 0.111116867 | count | 1 |
| AL022322.1 | 16.9410824 | 2540.297844 | 0.0067 | 0.995  | 0.111116867 | count | 1 |
| LINC01140  | 16.9410831 | 2540.298253 | 0.0067 | 0.995  | 0.111116867 | count | 1 |
| AC010245.2 | 16.9410857 | 2540.297393 | 0.0067 | 0.995  | 0.111116867 | count | 1 |
| NEO1       | 16.9410858 | 2540.296544 | 0.0067 | 0.995  | 0.111116867 | count | 1 |
| LGI4       | 16.941909  | 2764.466513 | 0.0061 | 0.995  | 0.111116867 | count | 1 |
| SV2C       | 16.9419124 | 2764.466045 | 0.0061 | 0.995  | 0.111116867 | count | 1 |
| AL139011.1 | 16.9443018 | 3686.98782  | 0.0046 | 0.996  | 0.111116867 | count | 1 |
| FCMR       | 17.0755785 | 1710.725459 | 0.01   | 0.992  | 0.111116868 | count | 1 |
| AL132657.1 | 17.1067929 | 2539.795151 | 0.0067 | 0.9946 | 0.111116868 | count | 1 |
| JPH1       | 17.1067942 | 2539.797572 | 0.0067 | 0.9946 | 0.111116868 | count | 1 |
| AC068446.2 | 17.1335717 | 2530.381069 | 0.0068 | 0.9946 | 0.111116868 | count | 1 |
| AC072022.1 | 17.1335763 | 2530.381464 | 0.0068 | 0.9946 | 0.111116868 | count | 1 |
| AL117379.1 | 17.1335766 | 2530.381029 | 0.0068 | 0.9946 | 0.111116868 | count | 1 |
| HSF4       | 17.1343427 | 2710.695345 | 0.0063 | 0.995  | 0.111116868 | count | 1 |
| AL031055.1 | 17.1350811 | 2879.945103 | 0.0059 | 0.9953 | 0.111116868 | count | 1 |
| AL137145.1 | 17.1365608 | 3474.934776 | 0.0049 | 0.9961 | 0.111116868 | count | 1 |
| PRPH2      | 17.2274763 | 1700.68505  | 0.0101 | 0.9919 | 0.111116869 | count | 1 |
| AL139022.2 | 17.2277672 | 2252.421055 | 0.0076 | 0.994  | 0.111116869 | count | 1 |
| CITED1     | 17.2354197 | 3136.261146 | 0.0055 | 0.9956 | 0.111116869 | count | 1 |
| LRRN4CL    | 17.2950334 | 2673.319207 | 0.0065 | 0.9948 | 0.111116869 | count | 1 |
| AL137077.2 | 17.2950366 | 2673.317908 | 0.0065 | 0.9948 | 0.111116869 | count | 1 |
| ZG16B      | 17.4655034 | 2445.821948 | 0.0071 | 0.9943 | 0.111116869 | count | 1 |

|            |            |             |        |        |             |       |   |
|------------|------------|-------------|--------|--------|-------------|-------|---|
| AC010359.1 | 17.4655035 | 2445.821948 | 0.0071 | 0.9943 | 0.111116869 | count | 1 |
| RGPD2      | 17.4655098 | 2445.824603 | 0.0071 | 0.9943 | 0.111116869 | count | 1 |
| ZNF385C    | 17.5309813 | 3839.01324  | 0.0046 | 0.996  | 0.11111687  | count | 1 |
| SSC4D      | 17.5309816 | 3839.010934 | 0.0046 | 0.996  | 0.11111687  | count | 1 |
| HRK        | 17.5309816 | 3839.010977 | 0.0046 | 0.996  | 0.11111687  | count | 1 |
| AC079354.3 | 17.5309851 | 3839.01089  | 0.0046 | 0.996  | 0.11111687  | count | 1 |
| FAXC       | 17.5309855 | 3839.010912 | 0.0046 | 0.996  | 0.11111687  | count | 1 |
| MIR646HG   | 17.5309856 | 3839.010912 | 0.0046 | 0.996  | 0.11111687  | count | 1 |
| C2orf50    | 17.5309859 | 3839.008584 | 0.0046 | 0.996  | 0.11111687  | count | 1 |
| IGSF9B     | 17.530986  | 3839.008649 | 0.0046 | 0.996  | 0.11111687  | count | 1 |
| CD28       | 17.5309866 | 3839.024422 | 0.0046 | 0.996  | 0.11111687  | count | 1 |
| AL603832.1 | 17.5309876 | 3839.019853 | 0.0046 | 0.996  | 0.11111687  | count | 1 |
| ASIP       | 17.5309884 | 3839.01535  | 0.0046 | 0.996  | 0.11111687  | count | 1 |
| LINC01030  | 17.5309899 | 3839.008541 | 0.0046 | 0.996  | 0.11111687  | count | 1 |
| APOBEC3H   | 17.53099   | 3839.008584 | 0.0046 | 0.996  | 0.11111687  | count | 1 |
| RRH        | 17.5309911 | 3839.022116 | 0.0046 | 0.996  | 0.11111687  | count | 1 |
| AC026471.3 | 17.5309911 | 3839.022116 | 0.0046 | 0.996  | 0.11111687  | count | 1 |
| AC004832.6 | 17.5309922 | 3839.017613 | 0.0046 | 0.996  | 0.11111687  | count | 1 |
| PTGER3     | 17.5309928 | 3839.015263 | 0.0046 | 0.996  | 0.11111687  | count | 1 |
| ART5       | 17.5309927 | 3839.015285 | 0.0046 | 0.996  | 0.11111687  | count | 1 |
| FO704657.1 | 17.5309929 | 3839.012979 | 0.0046 | 0.996  | 0.11111687  | count | 1 |
| AC005753.1 | 17.530993  | 3839.013044 | 0.0046 | 0.996  | 0.11111687  | count | 1 |
| AC103974.1 | 17.5309929 | 3839.015285 | 0.0046 | 0.996  | 0.11111687  | count | 1 |
| CHRFAM7A   | 17.5309937 | 3839.010781 | 0.0046 | 0.996  | 0.11111687  | count | 1 |
| PLS3-AS1   | 17.5309946 | 3839.024248 | 0.0046 | 0.996  | 0.11111687  | count | 1 |
| AL133215.2 | 17.5309946 | 3839.02427  | 0.0046 | 0.996  | 0.11111687  | count | 1 |
| AL035420.3 | 17.5309946 | 3839.00395  | 0.0046 | 0.996  | 0.11111687  | count | 1 |
| S100Z      | 17.5309949 | 3839.02427  | 0.0046 | 0.996  | 0.11111687  | count | 1 |
| FBXO24     | 17.5309957 | 3839.019766 | 0.0046 | 0.996  | 0.11111687  | count | 1 |
| AC009121.2 | 17.5309955 | 3839.019723 | 0.0046 | 0.996  | 0.11111687  | count | 1 |
| RPL34-AS1  | 17.5309959 | 3839.019766 | 0.0046 | 0.996  | 0.11111687  | count | 1 |
| Z95114.1   | 17.5309962 | 3839.017526 | 0.0046 | 0.996  | 0.11111687  | count | 1 |
| Z97200.1   | 17.5309968 | 3839.015263 | 0.0046 | 0.996  | 0.11111687  | count | 1 |
| AC023024.1 | 17.5309977 | 3839.00841  | 0.0046 | 0.996  | 0.11111687  | count | 1 |
| AC090948.3 | 17.5309986 | 3839.024183 | 0.0046 | 0.996  | 0.11111687  | count | 1 |
| AC012087.1 | 17.5309986 | 3839.024226 | 0.0046 | 0.996  | 0.11111687  | count | 1 |
| LINC01574  | 17.5309987 | 3839.024226 | 0.0046 | 0.996  | 0.11111687  | count | 1 |
| AP003559.1 | 17.5309996 | 3839.019701 | 0.0046 | 0.996  | 0.11111687  | count | 1 |
| CFAP58-DT  | 17.5309994 | 3839.021964 | 0.0046 | 0.996  | 0.11111687  | count | 1 |
| AC011495.3 | 17.5309996 | 3839.019658 | 0.0046 | 0.996  | 0.11111687  | count | 1 |
| ITGA7      | 17.5309998 | 3839.019723 | 0.0046 | 0.996  | 0.11111687  | count | 1 |
| SHISA2     | 17.5310002 | 3839.017373 | 0.0046 | 0.996  | 0.11111687  | count | 1 |
| TLE6       | 17.5310006 | 3839.017417 | 0.0046 | 0.996  | 0.11111687  | count | 1 |
| AC034187.1 | 17.5310029 | 3839.024139 | 0.0046 | 0.996  | 0.11111687  | count | 1 |
| AC055811.3 | 17.5310029 | 3839.024139 | 0.0046 | 0.996  | 0.11111687  | count | 1 |

|             |            |             |        |        |             |       |   |
|-------------|------------|-------------|--------|--------|-------------|-------|---|
| ACHE        | 17.531003  | 3839.024161 | 0.0046 | 0.996  | 0.11111687  | count | 1 |
| FLG-AS1     | 17.5310032 | 3839.02192  | 0.0046 | 0.996  | 0.11111687  | count | 1 |
| CSTA        | 17.5310036 | 3839.021898 | 0.0046 | 0.996  | 0.11111687  | count | 1 |
| AC096711.1  | 17.5310032 | 3839.021855 | 0.0046 | 0.996  | 0.11111687  | count | 1 |
| AL157373.2  | 17.5310035 | 3839.019614 | 0.0046 | 0.996  | 0.11111687  | count | 1 |
| AK8         | 17.5310032 | 3839.021877 | 0.0046 | 0.996  | 0.11111687  | count | 1 |
| AC025034.1  | 17.5310033 | 3839.02192  | 0.0046 | 0.996  | 0.11111687  | count | 1 |
| AC027307.1  | 17.5310032 | 3839.02192  | 0.0046 | 0.996  | 0.11111687  | count | 1 |
| OLFM2       | 17.5310036 | 3839.019636 | 0.0046 | 0.996  | 0.11111687  | count | 1 |
| WNT2        | 17.5310039 | 3839.019614 | 0.0046 | 0.996  | 0.11111687  | count | 1 |
| AC021028.1  | 17.5310037 | 3839.021877 | 0.0046 | 0.996  | 0.11111687  | count | 1 |
| TSPOAP1-AS1 | 17.531007  | 3839.024096 | 0.0046 | 0.996  | 0.11111687  | count | 1 |
| XCL2        | 17.7262022 | 2273.181344 | 0.0078 | 0.9938 | 0.11111687  | count | 1 |
| C16orf54    | 18.1047706 | 3272.19187  | 0.0055 | 0.9956 | 0.111116871 | count | 1 |
| E2F8        | 18.1050301 | 3790.348531 | 0.0048 | 0.9962 | 0.111116871 | count | 1 |
| GDF9        | 18.1050362 | 3790.344613 | 0.0048 | 0.9962 | 0.111116871 | count | 1 |
| HIST1H2AL   | 18.1050371 | 3790.352449 | 0.0048 | 0.9962 | 0.111116871 | count | 1 |
| WFDC3       | 18.1050401 | 3790.344529 | 0.0048 | 0.9962 | 0.111116871 | count | 1 |
| HMGS1       | 0.0910223  | 0.2760198   | 0.3298 | 0.742  | 0.111135943 | count | 1 |
| AC138150.1  | 0.2760974  | 0.6501312   | 0.4247 | 0.671  | 0.11128595  | count | 1 |
| ZHX1        | 0.0826712  | 0.1629102   | 0.5075 | 0.612  | 0.111349254 | count | 1 |
| RNF141      | 0.0886546  | 0.2206285   | 0.4018 | 0.688  | 0.1114366   | count | 1 |
| PFKM        | 0.0925056  | 0.2521347   | 0.3669 | 0.714  | 0.111526922 | count | 1 |
| EIF3I       | 0.0783343  | 0.0573059   | 1.367  | 0.172  | 0.111566361 | count | 1 |
| EFCAB11     | 0.0959724  | 0.2778926   | 0.3454 | 0.73   | 0.111697895 | count | 1 |
| NOL9        | 0.0857378  | 0.2240498   | 0.3827 | 0.702  | 0.111755055 | count | 1 |
| SMIM26      | 0.0793537  | 0.0805033   | 0.9857 | 0.324  | 0.111813619 | count | 1 |
| SLC35B3     | 0.0902588  | 0.2229608   | 0.4048 | 0.686  | 0.111968391 | count | 1 |
| BSCL2       | 0.3925648  | 1.0666544   | 0.368  | 0.713  | 0.111990107 | count | 1 |
| AC079305.1  | 0.3925648  | 1.0788754   | 0.3639 | 0.716  | 0.111990107 | count | 1 |
| AC004771.3  | 0.3925648  | 1.1669171   | 0.3364 | 0.737  | 0.111990107 | count | 1 |
| GZF1        | 0.106378   | 0.3058748   | 0.3478 | 0.728  | 0.112008903 | count | 1 |
| PICALM      | 0.0818435  | 0.114829    | 0.7127 | 0.476  | 0.112054606 | count | 1 |
| SLC25A1     | 0.0863562  | 0.1793012   | 0.4816 | 0.63   | 0.112310027 | count | 1 |
| PCNX4       | 0.0890198  | 0.17935     | 0.4963 | 0.62   | 0.112327282 | count | 1 |
| SNRPB2      | 0.0795369  | 0.0826281   | 0.9626 | 0.336  | 0.112407824 | count | 1 |
| TNS2        | 0.0806208  | 0.119375    | 0.6754 | 0.5    | 0.112440871 | count | 1 |
| SMARCC1     | 0.0861786  | 0.1797507   | 0.4794 | 0.632  | 0.112565559 | count | 1 |
| SMC2        | 0.0839464  | 0.1713811   | 0.4898 | 0.624  | 0.112587912 | count | 1 |
| LRRCS9      | 0.0860445  | 0.1611756   | 0.5339 | 0.593  | 0.112693455 | count | 1 |
| KIAA1671    | 0.0874758  | 0.1806056   | 0.4843 | 0.628  | 0.112742222 | count | 1 |
| PAX8        | 0.324968   | 1.0184978   | 0.3191 | 0.75   | 0.112764128 | count | 1 |
| BABAM2      | 0.0841131  | 0.15287     | 0.5502 | 0.582  | 0.112810936 | count | 1 |
| BCL2L13     | 0.0943258  | 0.2434144   | 0.3875 | 0.698  | 0.112911615 | count | 1 |
| UHRF1BP1    | 0.1188835  | 0.4282761   | 0.2776 | 0.781  | 0.112967605 | count | 1 |

|             |           |           |        |          |             |       |   |
|-------------|-----------|-----------|--------|----------|-------------|-------|---|
| VWCE        | 0.1258619 | 0.5211827 | 0.2415 | 0.809    | 0.113038793 | count | 1 |
| CBL         | 0.0900932 | 0.1964002 | 0.4587 | 0.646    | 0.113084434 | count | 1 |
| OGFOD3      | 0.0849476 | 0.1704338 | 0.4984 | 0.618    | 0.1131403   | count | 1 |
| ZNF205      | 0.0905876 | 0.2307377 | 0.3926 | 0.695    | 0.113227208 | count | 1 |
| PIK3CG      | 0.2275296 | 0.7161634 | 0.3177 | 0.751    | 0.113329644 | count | 1 |
| CSNK2B      | 0.0795691 | 0.0610905 | 1.3025 | 0.193    | 0.113353955 | count | 1 |
| LINC01336   | 0.3981081 | 1.0885411 | 0.3657 | 0.715    | 0.113363367 | count | 1 |
| AC009549.1  | 0.3981081 | 1.0885411 | 0.3657 | 0.715    | 0.113363367 | count | 1 |
| AL512791.2  | 0.3981081 | 1.0885411 | 0.3657 | 0.715    | 0.113363367 | count | 1 |
| AC138207.2  | 0.3981081 | 1.0986417 | 0.3624 | 0.717    | 0.113363367 | count | 1 |
| HCG25       | 0.3981081 | 1.1058592 | 0.36   | 0.719    | 0.113363367 | count | 1 |
| AC091948.1  | 0.3981081 | 1.2239933 | 0.3253 | 0.745    | 0.113363367 | count | 1 |
| AL449266.1  | 0.3981081 | 1.2304758 | 0.3235 | 0.746    | 0.113363367 | count | 1 |
| MRPS18C     | 0.0801514 | 0.081482  | 0.9837 | 0.325    | 0.113406129 | count | 1 |
| DNAJB14     | 0.0815702 | 0.10649   | 0.766  | 0.444    | 0.113479687 | count | 1 |
| POLR3GL     | 0.0804421 | 0.0820182 | 0.9808 | 0.327    | 0.113519825 | count | 1 |
| TCF12       | 0.0864345 | 0.1558496 | 0.5546 | 0.579    | 0.113630102 | count | 1 |
| ALYREF      | 0.0820102 | 0.103517  | 0.7922 | 0.428    | 0.113698932 | count | 1 |
| IDH1-AS1    | 0.3280378 | 1.0895669 | 0.3011 | 0.763    | 0.113719549 | count | 1 |
| AC008946.1  | 0.3280378 | 1.0895669 | 0.3011 | 0.763    | 0.113719549 | count | 1 |
| SMAD2       | 0.0832159 | 0.1298428 | 0.6409 | 0.522    | 0.113796309 | count | 1 |
| IL17RC      | 0.0969047 | 0.2798196 | 0.3463 | 0.729    | 0.113822279 | count | 1 |
| NIPSNAP3B   | 0.1766615 | 0.7984132 | 0.2213 | 0.825    | 0.113869845 | count | 1 |
| MRPS23      | 0.0826861 | 0.123772  | 0.6681 | 0.504    | 0.113999105 | count | 1 |
| NRG2        | 0.252287  | 0.6332872 | 0.3984 | 0.69     | 0.114116402 | count | 1 |
| ERCC5       | 0.147426  | 0.5200394 | 0.2835 | 0.777    | 0.114126392 | count | 1 |
| OSBPL2      | 0.0926549 | 0.2825688 | 0.3279 | 0.743    | 0.11416233  | count | 1 |
| GAS6-DT     | 0.1292934 | 0.5014571 | 0.2578 | 0.797    | 0.114182993 | count | 1 |
| DDT         | 0.0805116 | 0.0752232 | 1.0703 | 0.285    | 0.114186171 | count | 1 |
| NSA2        | 0.0802204 | 0.0637538 | 1.2583 | 0.208    | 0.114223016 | count | 1 |
| MGRN1       | 0.1000494 | 0.3738477 | 0.2676 | 0.789    | 0.114392228 | count | 1 |
| ZNF730      | 0.8545897 | 1.0536518 | 0.8111 | 0.417    | 0.114537185 | count | 1 |
| TM4SF19-AS1 | 0.8545897 | 1.1133287 | 0.7676 | 0.443    | 0.114537185 | count | 1 |
| AC093495.1  | 0.8545897 | 1.1174656 | 0.7648 | 0.444    | 0.114537185 | count | 1 |
| RPS27       | 0.0795777 | 0.0217855 | 3.6528 | 0.000264 | 0.11465175  | count | 1 |
| POLDIP3     | 0.1097066 | 0.2309653 | 0.475  | 0.635    | 0.114654582 | count | 1 |
| DOK3        | 0.3313496 | 1.0961602 | 0.3023 | 0.762    | 0.114748055 | count | 1 |
| LINC01801   | 0.3313496 | 1.1965484 | 0.2769 | 0.782    | 0.114748055 | count | 1 |
| AC009133.2  | 0.3313496 | 1.6161832 | 0.205  | 0.8376   | 0.114748055 | count | 1 |
| GTF2E1      | 0.1278047 | 0.3808425 | 0.3356 | 0.737    | 0.114748572 | count | 1 |
| KCND3       | 0.1783644 | 0.788067  | 0.2263 | 0.821    | 0.114922389 | count | 1 |
| NPTXR       | 0.1260632 | 0.4249845 | 0.2966 | 0.767    | 0.114951202 | count | 1 |
| NOA1        | 0.0882091 | 0.1665858 | 0.5295 | 0.596    | 0.11504716  | count | 1 |
| LARP7       | 0.0816358 | 0.0888423 | 0.9189 | 0.358    | 0.115142763 | count | 1 |
| LINC01473   | 0.1415098 | 0.4123843 | 0.3432 | 0.732    | 0.115285618 | count | 1 |

|            |           |           |        |          |             |       |   |
|------------|-----------|-----------|--------|----------|-------------|-------|---|
| EXOC1      | 0.0850506 | 0.154164  | 0.5517 | 0.581    | 0.115302543 | count | 1 |
| UBE4A      | 0.0882745 | 0.183343  | 0.4815 | 0.63     | 0.115372825 | count | 1 |
| ATP2B1-AS1 | 0.0856359 | 0.1575071 | 0.5437 | 0.587    | 0.115408505 | count | 1 |
| DNALI1     | 0.0977374 | 0.4339266 | 0.2252 | 0.822    | 0.115453244 | count | 1 |
| SQSTM1     | 0.0806468 | 0.0507638 | 1.5887 | 0.112    | 0.115467608 | count | 1 |
| COA3       | 0.08218   | 0.0905174 | 0.9079 | 0.364    | 0.115645238 | count | 1 |
| GALNT6     | 0.867729  | 1.0948134 | 0.7926 | 0.428    | 0.115749056 | count | 1 |
| TNFRSF10B  | 0.0852629 | 0.1485311 | 0.574  | 0.566    | 0.115831664 | count | 1 |
| ZNF547     | 0.1799852 | 1.3241574 | 0.1359 | 0.8919   | 0.115923382 | count | 1 |
| RRBP1      | 0.0816185 | 0.0725802 | 1.1245 | 0.261    | 0.116012735 | count | 1 |
| PHTF2      | 0.1012156 | 0.3192352 | 0.3171 | 0.751    | 0.116144363 | count | 1 |
| TANK       | 0.0870446 | 0.1424745 | 0.6109 | 0.541    | 0.116322868 | count | 1 |
| PLPP2      | 0.0914799 | 0.2001841 | 0.457  | 0.648    | 0.116499435 | count | 1 |
| ZCCHC7     | 0.0860763 | 0.1426091 | 0.6036 | 0.546    | 0.116528831 | count | 1 |
| GNG12      | 0.0833707 | 0.0967854 | 0.8614 | 0.389    | 0.116597504 | count | 1 |
| LENG1      | 0.084934  | 0.1338607 | 0.6345 | 0.526    | 0.116635946 | count | 1 |
| FEZ2       | 0.0823062 | 0.0798373 | 1.0309 | 0.303    | 0.116688484 | count | 1 |
| RBM41      | 0.1020798 | 0.2832984 | 0.3603 | 0.719    | 0.11669319  | count | 1 |
| KDM5A      | 0.0860511 | 0.1903062 | 0.4522 | 0.651    | 0.11674947  | count | 1 |
| STRN3      | 0.0851698 | 0.1284389 | 0.6631 | 0.507    | 0.116837384 | count | 1 |
| CPT1C      | 0.54777   | 0.8008113 | 0.684  | 0.494    | 0.116880334 | count | 1 |
| SBF2       | 0.0927339 | 0.1976039 | 0.4693 | 0.639    | 0.117136673 | count | 1 |
| SLC15A3    | 0.0952853 | 0.2585039 | 0.3686 | 0.712    | 0.117178268 | count | 1 |
| CBWD2      | 0.1194747 | 0.3656875 | 0.3267 | 0.744    | 0.11739754  | count | 1 |
| LIN52      | 0.1381992 | 0.5113361 | 0.2703 | 0.787    | 0.117522737 | count | 1 |
| DDB1       | 0.0896592 | 0.1717552 | 0.522  | 0.602    | 0.117711053 | count | 1 |
| MPLKIP     | 0.0842209 | 0.1095537 | 0.7688 | 0.442    | 0.117855552 | count | 1 |
| RPL22      | 0.0818238 | 0.0229406 | 3.5668 | 0.000368 | 0.117868845 | count | 1 |
| HDX        | 0.1010601 | 0.2797302 | 0.3613 | 0.718    | 0.117945278 | count | 1 |
| RSAD2      | 0.0964578 | 0.2864156 | 0.3368 | 0.736    | 0.117958514 | count | 1 |
| TTC8       | 0.0988376 | 0.2873915 | 0.3439 | 0.731    | 0.117982902 | count | 1 |
| PALLD      | 0.0931496 | 0.2073556 | 0.4492 | 0.653    | 0.118083171 | count | 1 |
| EPN2       | 0.087317  | 0.1520223 | 0.5744 | 0.566    | 0.118400235 | count | 1 |
| BRPF1      | 0.1145208 | 0.3939043 | 0.2907 | 0.771    | 0.118734167 | count | 1 |
| ZNF625     | 0.1845438 | 0.679997  | 0.2714 | 0.786    | 0.118734516 | count | 1 |
| MAEA       | 0.0925027 | 0.1760667 | 0.5254 | 0.599    | 0.118756894 | count | 1 |
| CTHRC1     | 0.0842237 | 0.1117756 | 0.7535 | 0.451    | 0.11891186  | count | 1 |
| MFF        | 0.0869433 | 0.1204942 | 0.7216 | 0.471    | 0.118931216 | count | 1 |
| TIAL1      | 0.0852427 | 0.0986589 | 0.864  | 0.388    | 0.119163737 | count | 1 |
| TMEM250    | 0.0951172 | 0.2275312 | 0.418  | 0.676    | 0.11919463  | count | 1 |
| MGME1      | 0.0999862 | 0.2535758 | 0.3943 | 0.693    | 0.119344111 | count | 1 |
| TMEM67     | 0.101351  | 0.3928017 | 0.258  | 0.796    | 0.119350801 | count | 1 |
| NUDT2      | 0.0888585 | 0.1396644 | 0.6362 | 0.525    | 0.119375641 | count | 1 |
| AKR1C3     | 0.0836703 | 0.0684107 | 1.2231 | 0.221    | 0.119458972 | count | 1 |
| AP000866.1 | 0.2408481 | 0.8061492 | 0.2988 | 0.765    | 0.119528814 | count | 1 |



|            |           |           |        |        |             |       |   |
|------------|-----------|-----------|--------|--------|-------------|-------|---|
| SEMA6A-AS1 | 0.2408481 | 0.8155731 | 0.2953 | 0.768  | 0.119528814 | count | 1 |
| NPIPB4     | 0.2408481 | 0.8514695 | 0.2829 | 0.777  | 0.119528814 | count | 1 |
| LINC00619  | 0.4234574 | 0.6386683 | 0.663  | 0.507  | 0.119573175 | count | 1 |
| ZNF7       | 0.0988325 | 0.2352107 | 0.4202 | 0.674  | 0.120130703 | count | 1 |
| C6orf136   | 0.1040536 | 0.2509638 | 0.4146 | 0.678  | 0.120220939 | count | 1 |
| ANXA1      | 0.0836589 | 0.0441296 | 1.8958 | 0.0581 | 0.120260675 | count | 1 |
| ZNF587B    | 0.1606929 | 0.5591565 | 0.2874 | 0.774  | 0.120576841 | count | 1 |
| GSR        | 0.0990253 | 0.2480112 | 0.3993 | 0.69   | 0.120607018 | count | 1 |
| UPRT       | 0.1104751 | 0.3136188 | 0.3523 | 0.725  | 0.120618701 | count | 1 |
| MRS2       | 0.1010641 | 0.29685   | 0.3405 | 0.734  | 0.120621325 | count | 1 |
| SMPD2      | 0.1147295 | 0.3479403 | 0.3297 | 0.742  | 0.120688698 | count | 1 |
| LINC00271  | 0.350726  | 0.8563162 | 0.4096 | 0.682  | 0.120719152 | count | 1 |
| TMEM68     | 0.1064759 | 0.3112096 | 0.3421 | 0.732  | 0.120725125 | count | 1 |
| HIGD2A     | 0.0848928 | 0.0671205 | 1.2648 | 0.206  | 0.120760004 | count | 1 |
| FOXJ3      | 0.0888951 | 0.1311383 | 0.6779 | 0.498  | 0.120785819 | count | 1 |
| SLC39A3    | 0.0901471 | 0.1705685 | 0.5285 | 0.597  | 0.120791071 | count | 1 |
| KDM6B      | 0.0923837 | 0.1759487 | 0.5251 | 0.6    | 0.120886663 | count | 1 |
| SHMT1      | 0.1126888 | 0.3513309 | 0.3207 | 0.748  | 0.12090654  | count | 1 |
| RPGRIP1L   | 0.1397156 | 0.5237682 | 0.2668 | 0.79   | 0.121040199 | count | 1 |
| ARV1       | 0.0912995 | 0.1735644 | 0.526  | 0.599  | 0.121120604 | count | 1 |
| SINHCAF    | 0.0883018 | 0.1226125 | 0.7202 | 0.471  | 0.121168852 | count | 1 |
| HPS3       | 0.1131953 | 0.3246037 | 0.3487 | 0.727  | 0.121443391 | count | 1 |
| SH3PXD2A   | 0.1034965 | 0.2982017 | 0.3471 | 0.729  | 0.121857267 | count | 1 |
| AP003469.4 | 0.5778316 | 1.092312  | 0.529  | 0.597  | 0.122010202 | count | 1 |
| PDE8A      | 0.0980127 | 0.250219  | 0.3917 | 0.695  | 0.122097698 | count | 1 |
| FNIP1      | 0.091906  | 0.1843762 | 0.4985 | 0.618  | 0.122213664 | count | 1 |
| TOP1       | 0.0864332 | 0.0778586 | 1.1101 | 0.267  | 0.122335825 | count | 1 |
| TSPAN17    | 0.1069291 | 0.2717971 | 0.3934 | 0.694  | 0.122640644 | count | 1 |
| PDZD11     | 0.0902236 | 0.1330788 | 0.678  | 0.498  | 0.122994458 | count | 1 |
| MRPL2      | 0.09073   | 0.1305783 | 0.6948 | 0.487  | 0.123115573 | count | 1 |
| CCDC186    | 0.089401  | 0.1373183 | 0.651  | 0.515  | 0.123169489 | count | 1 |
| SBDS       | 0.0861053 | 0.0523228 | 1.6457 | 0.0999 | 0.123170211 | count | 1 |
| CYREN      | 0.1027674 | 0.2418294 | 0.425  | 0.671  | 0.123239037 | count | 1 |
| SRRM2      | 0.086126  | 0.0557652 | 1.5444 | 0.123  | 0.123316381 | count | 1 |
| CCT5       | 0.0873652 | 0.0737758 | 1.1842 | 0.236  | 0.123379538 | count | 1 |
| ADAMTS10   | 0.1920987 | 0.5465236 | 0.3515 | 0.725  | 0.123379641 | count | 1 |
| AFAP1      | 0.0930292 | 0.1726532 | 0.5388 | 0.59   | 0.123408095 | count | 1 |
| SNRNP200   | 0.0920127 | 0.1775746 | 0.5182 | 0.604  | 0.123422906 | count | 1 |
| USP6       | 0.5877755 | 1.0703813 | 0.5491 | 0.583  | 0.12368043  | count | 1 |
| HMBOX1     | 0.0937277 | 0.1767198 | 0.5304 | 0.596  | 0.123685065 | count | 1 |
| FBXL7      | 0.1168396 | 0.3171548 | 0.3684 | 0.713  | 0.123717121 | count | 1 |
| PIN1       | 0.0878687 | 0.0842043 | 1.0435 | 0.297  | 0.123853777 | count | 1 |
| BNIP1      | 0.1062288 | 0.2914682 | 0.3645 | 0.716  | 0.1239264   | count | 1 |
| QRICH1     | 0.1033607 | 0.280825  | 0.3681 | 0.713  | 0.123945334 | count | 1 |
| INTS1      | 0.1064829 | 0.2728902 | 0.3902 | 0.696  | 0.124220307 | count | 1 |

|            |           |           |        |          |             |       |             |
|------------|-----------|-----------|--------|----------|-------------|-------|-------------|
| GOLM1      | 0.0936038 | 0.1877238 | 0.4986 | 0.618    | 0.124288502 | count | 1           |
| RNF169     | 0.094634  | 0.1832553 | 0.5164 | 0.606    | 0.12437162  | count | 1           |
| LACC1      | 0.116021  | 0.3071879 | 0.3777 | 0.706    | 0.124437305 | count | 1           |
| AC022182.2 | 0.2771285 | 0.7749603 | 0.3576 | 0.721    | 0.124466085 | count | 1           |
| AC025181.2 | 0.1201545 | 0.3293625 | 0.3648 | 0.715    | 0.124492626 | count | 1           |
| IDI1       | 0.0939773 | 0.1478319 | 0.6357 | 0.525    | 0.124600263 | count | 1           |
| LZTS2      | 0.0933052 | 0.1679685 | 0.5555 | 0.579    | 0.124613785 | count | 1           |
| RPL13      | 0.086448  | 0.0172463 | 5.0126 | 5.71E-07 | 0.12466745  | count | 0.013366539 |
| CPLANE1    | 0.1053867 | 0.3502586 | 0.3009 | 0.764    | 0.125095286 | count | 1           |
| C11orf95   | 0.1239583 | 0.3216353 | 0.3854 | 0.7      | 0.125258641 | count | 1           |
| RYK        | 0.0937063 | 0.1416037 | 0.6618 | 0.508    | 0.125401018 | count | 1           |
| AC124242.1 | 0.5981651 | 1.324897  | 0.4515 | 0.652    | 0.125411503 | count | 1           |
| GMPPB      | 0.1055111 | 0.2671859 | 0.3949 | 0.693    | 0.125569035 | count | 1           |
| AL135818.2 | 0.3152229 | 0.7835856 | 0.4023 | 0.688    | 0.125574758 | count | 1           |
| RELL1      | 0.0962736 | 0.2032562 | 0.4737 | 0.636    | 0.125613579 | count | 1           |
| AC005523.2 | 0.1628269 | 0.5469859 | 0.2977 | 0.766    | 0.125673273 | count | 1           |
| HMGNS      | 0.0958401 | 0.1917197 | 0.4999 | 0.617    | 0.125717767 | count | 1           |
| AC008079.2 | 0.9822514 | 1.2197586 | 0.8053 | 0.421    | 0.12574747  | count | 1           |
| TRADD      | 0.0933268 | 0.1445319 | 0.6457 | 0.519    | 0.125787345 | count | 1           |
| PXK        | 0.0969186 | 0.1998405 | 0.485  | 0.628    | 0.125799095 | count | 1           |
| ZNF410     | 0.2065214 | 0.5681417 | 0.3635 | 0.716    | 0.12584155  | count | 1           |
| MECP2      | 0.0944357 | 0.150669  | 0.6268 | 0.531    | 0.125959679 | count | 1           |
| HLCS       | 0.4501909 | 0.8059317 | 0.5586 | 0.576    | 0.125998505 | count | 1           |
| ID3        | 0.0875221 | 0.0532983 | 1.6421 | 0.101    | 0.12606123  | count | 1           |
| CDKN1B     | 0.0915654 | 0.1221192 | 0.7498 | 0.453    | 0.126164925 | count | 1           |
| DDX20      | 0.1072545 | 0.2974707 | 0.3606 | 0.718    | 0.126245454 | count | 1           |
| TMEM94     | 0.1178097 | 0.3528635 | 0.3339 | 0.739    | 0.126331507 | count | 1           |
| MAGEF1     | 0.098286  | 0.2015731 | 0.4876 | 0.626    | 0.126725869 | count | 1           |
| RAD51C     | 0.0967104 | 0.194993  | 0.496  | 0.62     | 0.126774696 | count | 1           |
| PUF60      | 0.0906536 | 0.0937107 | 0.9674 | 0.333    | 0.126796732 | count | 1           |
| RTCA       | 0.095169  | 0.1690564 | 0.5629 | 0.574    | 0.126880094 | count | 1           |
| MRPS5      | 0.0921698 | 0.1174179 | 0.785  | 0.433    | 0.126996265 | count | 1           |
| AHI1       | 0.0914383 | 0.1239863 | 0.7375 | 0.461    | 0.127043239 | count | 1           |
| GIPC3      | 0.135738  | 0.3733501 | 0.3636 | 0.716    | 0.127060002 | count | 1           |
| ZNF569     | 0.132431  | 0.3709073 | 0.357  | 0.721    | 0.127098986 | count | 1           |
| C18orf54   | 0.1606059 | 0.5451041 | 0.2946 | 0.768    | 0.127297823 | count | 1           |
| NKAPD1     | 0.096945  | 0.1670587 | 0.5803 | 0.562    | 0.127550422 | count | 1           |
| AP5Z1      | 0.1222837 | 0.3164744 | 0.3864 | 0.699    | 0.127613725 | count | 1           |
| UBE2E1     | 0.0945015 | 0.1385713 | 0.682  | 0.495    | 0.127645116 | count | 1           |
| TMEM39B    | 0.0949149 | 0.1703176 | 0.5573 | 0.577    | 0.127667646 | count | 1           |
| PRELID3A   | 0.2097421 | 0.6294566 | 0.3332 | 0.739    | 0.127704833 | count | 1           |
| USP22      | 0.092397  | 0.1229214 | 0.7517 | 0.452    | 0.127727583 | count | 1           |
| GCLC       | 0.1184353 | 0.3572128 | 0.3316 | 0.74     | 0.127756528 | count | 1           |
| PSD3       | 0.6140222 | 0.7860095 | 0.7812 | 0.435    | 0.128026154 | count | 1           |
| ZFYVE16    | 0.0957231 | 0.1703262 | 0.562  | 0.574    | 0.12809214  | count | 1           |

|            |           |           |        |        |             |       |   |
|------------|-----------|-----------|--------|--------|-------------|-------|---|
| RILP       | 0.0951779 | 0.1663755 | 0.5721 | 0.567  | 0.128149875 | count | 1 |
| LINC00847  | 0.108604  | 0.2926624 | 0.3711 | 0.711  | 0.128183825 | count | 1 |
| TMEM116    | 0.1369841 | 0.5059467 | 0.2707 | 0.787  | 0.128202962 | count | 1 |
| HSF2       | 0.108631  | 0.245824  | 0.4419 | 0.659  | 0.128215428 | count | 1 |
| C14orf132  | 0.107985  | 0.2955613 | 0.3654 | 0.715  | 0.128489931 | count | 1 |
| C5orf22    | 0.1132421 | 0.366637  | 0.3089 | 0.757  | 0.128830813 | count | 1 |
| ICA1L      | 0.1218179 | 0.4519889 | 0.2695 | 0.788  | 0.128916981 | count | 1 |
| TRAPPC12   | 0.1021634 | 0.189824  | 0.5382 | 0.59   | 0.129450427 | count | 1 |
| AKAP8      | 0.1046555 | 0.2200562 | 0.4756 | 0.634  | 0.129508569 | count | 1 |
| SSH2       | 0.1066524 | 0.2196336 | 0.4856 | 0.627  | 0.129568946 | count | 1 |
| PIKFYVE    | 0.1130946 | 0.2615018 | 0.4325 | 0.665  | 0.129643441 | count | 1 |
| AC245140.2 | 0.2628251 | 0.638837  | 0.4114 | 0.681  | 0.129653594 | count | 1 |
| AC124283.1 | 0.2629826 | 0.5492893 | 0.4788 | 0.632  | 0.129725683 | count | 1 |
| BORCS8     | 0.0999989 | 0.167081  | 0.5985 | 0.55   | 0.129780492 | count | 1 |
| ETNK1      | 0.0970442 | 0.1507536 | 0.6437 | 0.52   | 0.129854767 | count | 1 |
| DMAP1      | 0.0981875 | 0.1621862 | 0.6054 | 0.545  | 0.129898717 | count | 1 |
| BLOC1S3    | 0.1428575 | 0.469547  | 0.3042 | 0.761  | 0.129928649 | count | 1 |
| AP5M1      | 0.1079698 | 0.2754089 | 0.392  | 0.695  | 0.130032459 | count | 1 |
| NBR1       | 0.0968313 | 0.1515642 | 0.6389 | 0.523  | 0.130056697 | count | 1 |
| YTHDC2     | 0.1000888 | 0.1636829 | 0.6115 | 0.541  | 0.130096122 | count | 1 |
| AL049597.2 | 0.2140834 | 0.8006196 | 0.2674 | 0.789  | 0.130211558 | count | 1 |
| TNRC18     | 0.1072214 | 0.2508748 | 0.4274 | 0.669  | 0.130255304 | count | 1 |
| AC020916.1 | 0.0961757 | 0.1660984 | 0.579  | 0.563  | 0.130276724 | count | 1 |
| CMPK2      | 0.1170692 | 0.2903094 | 0.4033 | 0.687  | 0.130324852 | count | 1 |
| CNTRL      | 0.1035031 | 0.2125028 | 0.4871 | 0.626  | 0.130337438 | count | 1 |
| SRSF1      | 0.0969759 | 0.1257255 | 0.7713 | 0.441  | 0.130476625 | count | 1 |
| FIP1L1     | 0.0970217 | 0.1431971 | 0.6775 | 0.498  | 0.130493657 | count | 1 |
| ATP5MC2    | 0.090865  | 0.0356725 | 2.5472 | 0.0109 | 0.13060966  | count | 1 |
| GTF3C6     | 0.0933362 | 0.0895625 | 1.0421 | 0.297  | 0.130821541 | count | 1 |
| FOPNL      | 0.099267  | 0.1844842 | 0.5381 | 0.591  | 0.130821767 | count | 1 |
| ORC4       | 0.1011065 | 0.1970513 | 0.5131 | 0.608  | 0.130898764 | count | 1 |
| DPH2       | 0.1349661 | 0.3739509 | 0.3609 | 0.718  | 0.130947777 | count | 1 |
| CARMIL1    | 0.1001077 | 0.1772286 | 0.5649 | 0.572  | 0.131211048 | count | 1 |
| FLT1       | 0.0925135 | 0.0864473 | 1.0702 | 0.285  | 0.131612721 | count | 1 |
| DACT1      | 1.055745  | 1.1425529 | 0.924  | 0.356  | 0.131656043 | count | 1 |
| OSER1      | 0.0978203 | 0.1490548 | 0.6563 | 0.512  | 0.131784663 | count | 1 |
| GALT       | 0.102746  | 0.1958671 | 0.5246 | 0.6    | 0.131845122 | count | 1 |
| ZNF84      | 0.1094899 | 0.2145819 | 0.5102 | 0.61   | 0.131849307 | count | 1 |
| TSPAN18    | 0.0946115 | 0.1033205 | 0.9157 | 0.36   | 0.131895652 | count | 1 |
| ZNF595     | 0.1430818 | 0.3679301 | 0.3889 | 0.697  | 0.132003925 | count | 1 |
| EIF5B      | 0.092668  | 0.0694154 | 1.335  | 0.182  | 0.132054426 | count | 1 |
| MFAP3L     | 1.0615352 | 1.474305  | 0.72   | 0.472  | 0.132105588 | count | 1 |
| TOGARAM1   | 0.1048474 | 0.1876208 | 0.5588 | 0.576  | 0.132188947 | count | 1 |
| PNN        | 0.0935463 | 0.0778002 | 1.2024 | 0.229  | 0.132389297 | count | 1 |
| AUH        | 0.1111276 | 0.2667728 | 0.4166 | 0.677  | 0.132864598 | count | 1 |

|            |           |           |        |       |             |       |   |
|------------|-----------|-----------|--------|-------|-------------|-------|---|
| SCN3B      | 0.1357475 | 0.4402169 | 0.3084 | 0.758 | 0.133097714 | count | 1 |
| LINC00960  | 0.3362734 | 0.539315  | 0.6235 | 0.533 | 0.133113738 | count | 1 |
| HNRNPA3    | 0.0933743 | 0.0574552 | 1.6252 | 0.104 | 0.133153419 | count | 1 |
| UBALD1     | 0.1146297 | 0.2759757 | 0.4154 | 0.678 | 0.133210771 | count | 1 |
| AC006213.2 | 0.1731422 | 0.6951914 | 0.2491 | 0.803 | 0.133366772 | count | 1 |
| LDLRAD3    | 0.1193384 | 0.2846158 | 0.4193 | 0.675 | 0.133431905 | count | 1 |
| CCHCR1     | 0.114501  | 0.3742321 | 0.306  | 0.76  | 0.133488135 | count | 1 |
| NRP1       | 0.094176  | 0.0885916 | 1.063  | 0.288 | 0.133510937 | count | 1 |
| INPP4B     | 0.1447817 | 0.4778828 | 0.303  | 0.762 | 0.133537935 | count | 1 |
| DEDD2      | 0.1114499 | 0.2448146 | 0.4552 | 0.649 | 0.133569052 | count | 1 |
| NHLRC3     | 0.10413   | 0.2362845 | 0.4407 | 0.659 | 0.133612522 | count | 1 |
| GSTCD      | 0.1647706 | 0.4898732 | 0.3364 | 0.737 | 0.133667691 | count | 1 |
| ALG1       | 0.1232676 | 0.3685332 | 0.3345 | 0.738 | 0.133668691 | count | 1 |
| STAT2      | 0.1005174 | 0.164892  | 0.6096 | 0.542 | 0.133688817 | count | 1 |
| AC142472.1 | 0.2339429 | 0.7250509 | 0.3227 | 0.747 | 0.133847629 | count | 1 |
| CARD19     | 0.0960808 | 0.1228748 | 0.7819 | 0.434 | 0.133930199 | count | 1 |
| TMEM141    | 0.0956573 | 0.0942079 | 1.0154 | 0.31  | 0.13405546  | count | 1 |
| FDXACB1    | 0.1924013 | 0.55203   | 0.3485 | 0.727 | 0.134194483 | count | 1 |
| PPP1R12C   | 0.1105045 | 0.221537  | 0.4988 | 0.618 | 0.134487129 | count | 1 |
| ZNF433     | 0.1699926 | 0.4977439 | 0.3415 | 0.733 | 0.134499366 | count | 1 |
| GGPS1      | 0.1010415 | 0.1729896 | 0.5841 | 0.559 | 0.134684186 | count | 1 |
| RCOR3      | 0.1045218 | 0.1748067 | 0.5979 | 0.55  | 0.134846341 | count | 1 |
| GOPC       | 0.0963458 | 0.1026596 | 0.9385 | 0.348 | 0.13487138  | count | 1 |
| ITGAE      | 0.0981295 | 0.1208461 | 0.812  | 0.417 | 0.134922035 | count | 1 |
| NTN4       | 0.107374  | 0.2083712 | 0.5153 | 0.606 | 0.135184008 | count | 1 |
| POC1B-AS1  | 0.170892  | 0.6710741 | 0.2547 | 0.799 | 0.135187976 | count | 1 |
| GART       | 0.1045383 | 0.1947063 | 0.5369 | 0.591 | 0.135431352 | count | 1 |
| TIMM23     | 0.1088179 | 0.2121193 | 0.513  | 0.608 | 0.135474252 | count | 1 |
| PRRC2B     | 0.0997172 | 0.1595529 | 0.625  | 0.532 | 0.135488494 | count | 1 |
| B3GNT5     | 0.1382643 | 0.4041996 | 0.3421 | 0.732 | 0.13551958  | count | 1 |
| PHB2       | 0.0954036 | 0.0641327 | 1.4876 | 0.137 | 0.135534506 | count | 1 |
| AL354836.1 | 1.107682  | 1.0945755 | 1.012  | 0.312 | 0.135606398 | count | 1 |
| POLR2G     | 0.0970975 | 0.0883849 | 1.0986 | 0.272 | 0.135816721 | count | 1 |
| KDM3A      | 0.1158688 | 0.2303529 | 0.503  | 0.615 | 0.135896066 | count | 1 |
| AL512329.2 | 0.2765753 | 0.9451612 | 0.2926 | 0.77  | 0.135922203 | count | 1 |
| SMG1       | 0.0992271 | 0.15764   | 0.6295 | 0.529 | 0.135983559 | count | 1 |
| HDAC6      | 0.1277844 | 0.3074335 | 0.4156 | 0.678 | 0.136026509 | count | 1 |
| LINC00346  | 0.1720009 | 0.4623584 | 0.372  | 0.71  | 0.136036655 | count | 1 |
| CCP110     | 0.1128384 | 0.2380239 | 0.4741 | 0.635 | 0.136154534 | count | 1 |
| PLEKHB2    | 0.1050574 | 0.1666383 | 0.6305 | 0.528 | 0.136209403 | count | 1 |
| ZNF836     | 0.1178307 | 0.2897424 | 0.4067 | 0.684 | 0.136444688 | count | 1 |
| AP000487.1 | 0.277743  | 1.082413  | 0.2566 | 0.798 | 0.136452244 | count | 1 |
| AC010320.1 | 0.277743  | 1.406289  | 0.1975 | 0.843 | 0.136452244 | count | 1 |
| FAM174B    | 0.1773052 | 0.5695838 | 0.3113 | 0.756 | 0.136462462 | count | 1 |
| SRGAP1     | 0.1124729 | 0.2742184 | 0.4102 | 0.682 | 0.136587429 | count | 1 |

|            |           |           |        |         |             |       |   |
|------------|-----------|-----------|--------|---------|-------------|-------|---|
| SLTM       | 0.0965331 | 0.0849151 | 1.1368 | 0.256   | 0.136704772 | count | 1 |
| GTF2F1     | 0.0982711 | 0.1118282 | 0.8788 | 0.38    | 0.137067606 | count | 1 |
| DNAJC19    | 0.097476  | 0.0919853 | 1.0597 | 0.289   | 0.137112118 | count | 1 |
| APLF       | 0.1782011 | 0.5676229 | 0.3139 | 0.754   | 0.137127976 | count | 1 |
| CYHR1      | 0.100249  | 0.1354888 | 0.7399 | 0.459   | 0.137252731 | count | 1 |
| EMC8       | 0.1061489 | 0.1803703 | 0.5885 | 0.556   | 0.137284238 | count | 1 |
| ARPP19     | 0.0996103 | 0.1196604 | 0.8324 | 0.405   | 0.137500935 | count | 1 |
| AL592148.3 | 1.1343851 | 1.0324418 | 1.0987 | 0.272   | 0.137567443 | count | 1 |
| TTC39A     | 1.1343851 | 1.1577762 | 0.9798 | 0.327   | 0.137567443 | count | 1 |
| PHF7       | 0.1790737 | 0.5480477 | 0.3267 | 0.744   | 0.137775949 | count | 1 |
| ZNF671     | 0.2586814 | 0.6329875 | 0.4087 | 0.683   | 0.137813156 | count | 1 |
| ATF6B      | 0.1039897 | 0.1571542 | 0.6617 | 0.508   | 0.137828336 | count | 1 |
| USP45      | 0.1518675 | 0.3474915 | 0.437  | 0.662   | 0.13793049  | count | 1 |
| SEMA6C     | 0.1703545 | 0.405111  | 0.4205 | 0.674   | 0.138056051 | count | 1 |
| ZNF165     | 0.6769326 | 0.9679097 | 0.6994 | 0.484   | 0.138078439 | count | 1 |
| CINP       | 0.1022819 | 0.1470428 | 0.6956 | 0.487   | 0.138526308 | count | 1 |
| SLC39A13   | 0.1100009 | 0.2046511 | 0.5375 | 0.591   | 0.138648525 | count | 1 |
| AP001160.1 | 0.122974  | 0.3405237 | 0.3611 | 0.718   | 0.138650674 | count | 1 |
| AL445686.2 | 0.282656  | 0.6686299 | 0.4227 | 0.673   | 0.138678143 | count | 1 |
| PPP4R3B    | 0.1015028 | 0.1373231 | 0.7392 | 0.46    | 0.13891231  | count | 1 |
| AQP7       | 0.155489  | 0.3233555 | 0.4809 | 0.631   | 0.138993618 | count | 1 |
| LYPLAL1    | 0.1032276 | 0.1508101 | 0.6845 | 0.494   | 0.139002911 | count | 1 |
| BMS1       | 0.1042498 | 0.1576497 | 0.6613 | 0.508   | 0.13900663  | count | 1 |
| MYSM1      | 0.1102871 | 0.2058746 | 0.5357 | 0.592   | 0.13900715  | count | 1 |
| PSIP1      | 0.0975611 | 0.0673683 | 1.4482 | 0.1477  | 0.13906962  | count | 1 |
| C16orf87   | 0.1070497 | 0.1832881 | 0.5841 | 0.559   | 0.13910368  | count | 1 |
| FAM228B    | 0.1067599 | 0.1987771 | 0.5371 | 0.591   | 0.139138091 | count | 1 |
| FAM69B     | 0.0989837 | 0.0943192 | 1.0495 | 0.294   | 0.139303666 | count | 1 |
| FAF2       | 0.1033396 | 0.1566021 | 0.6599 | 0.509   | 0.139333558 | count | 1 |
| VAMP7      | 0.1068847 | 0.18451   | 0.5793 | 0.562   | 0.139496819 | count | 1 |
| AL356275.1 | 0.1813938 | 0.5254105 | 0.3452 | 0.73    | 0.139497659 | count | 1 |
| PIGBOS1    | 0.104316  | 0.1693373 | 0.616  | 0.538   | 0.139663438 | count | 1 |
| SLC16A3    | 0.1141223 | 0.2270958 | 0.5025 | 0.615   | 0.139667173 | count | 1 |
| MCM2       | 0.6880114 | 1.0352543 | 0.6646 | 0.506   | 0.139796535 | count | 1 |
| ADGRE5     | 0.2191255 | 0.6046172 | 0.3624 | 0.717   | 0.139856785 | count | 1 |
| MTM1       | 0.1142936 | 0.2377011 | 0.4808 | 0.631   | 0.139875289 | count | 1 |
| EHMT2      | 0.1080896 | 0.1969772 | 0.5487 | 0.583   | 0.139897421 | count | 1 |
| RPL36AL    | 0.0974519 | 0.0350405 | 2.7811 | 0.00545 | 0.139967455 | count | 1 |
| NR2F6      | 0.1026595 | 0.1525951 | 0.6728 | 0.501   | 0.140000418 | count | 1 |
| EXOSC5     | 0.1056632 | 0.2004568 | 0.5271 | 0.598   | 0.140038397 | count | 1 |
| NR1D1      | 0.1128942 | 0.2569785 | 0.4393 | 0.66    | 0.140084091 | count | 1 |
| INSR       | 0.1018891 | 0.1501621 | 0.6785 | 0.497   | 0.140125701 | count | 1 |
| ZNF107     | 0.1262198 | 0.3235981 | 0.3901 | 0.697   | 0.140388335 | count | 1 |
| C12orf65   | 0.1027484 | 0.1637553 | 0.6275 | 0.53    | 0.140446573 | count | 1 |
| WDR34      | 0.1136605 | 0.2375054 | 0.4786 | 0.632   | 0.140576385 | count | 1 |

|            |           |           |        |          |             |       |   |
|------------|-----------|-----------|--------|----------|-------------|-------|---|
| PIGU       | 0.1252793 | 0.3082408 | 0.4064 | 0.684    | 0.140617239 | count | 1 |
| GPR108     | 0.1006573 | 0.1080814 | 0.9313 | 0.352    | 0.140644428 | count | 1 |
| PITPNB     | 0.1002779 | 0.0990306 | 1.0126 | 0.311    | 0.140658769 | count | 1 |
| MED4       | 0.1006163 | 0.0929198 | 1.0828 | 0.279    | 0.140732367 | count | 1 |
| RPL36      | 0.0978375 | 0.0253851 | 3.8541 | 0.000119 | 0.140853597 | count | 1 |
| THRAP3     | 0.0991295 | 0.0704632 | 1.4068 | 0.16     | 0.140971946 | count | 1 |
| SP1        | 0.1119261 | 0.1991513 | 0.562  | 0.574    | 0.141060696 | count | 1 |
| MTERF1     | 0.1326293 | 0.3928962 | 0.3376 | 0.736    | 0.141108638 | count | 1 |
| MT-ND4     | 0.0979476 | 0.0305068 | 3.2107 | 0.00134  | 0.141173722 | count | 1 |
| SHPK       | 0.4193417 | 0.7925292 | 0.5291 | 0.597    | 0.141233469 | count | 1 |
| MTOR       | 0.1228648 | 0.3277962 | 0.3748 | 0.708    | 0.141235197 | count | 1 |
| Z68871.1   | 0.5158501 | 0.7028268 | 0.734  | 0.463    | 0.141250449 | count | 1 |
| ITGA2      | 0.1044417 | 0.1636194 | 0.6383 | 0.523    | 0.141284001 | count | 1 |
| NAA16      | 0.1176931 | 0.2589453 | 0.4545 | 0.649    | 0.141321673 | count | 1 |
| MAFG       | 0.1056468 | 0.1463011 | 0.7221 | 0.47     | 0.141439487 | count | 1 |
| AHCYL2     | 0.1583823 | 0.4519238 | 0.3505 | 0.726    | 0.141514614 | count | 1 |
| AC007950.2 | 0.6994707 | 1.0668252 | 0.6557 | 0.512    | 0.141557499 | count | 1 |
| STAM-AS1   | 0.6994707 | 1.1267009 | 0.6208 | 0.535    | 0.141557499 | count | 1 |
| ARHGAP5    | 0.1072777 | 0.1866164 | 0.5749 | 0.565    | 0.141575513 | count | 1 |
| MAPK3      | 0.1010286 | 0.0884148 | 1.1427 | 0.253    | 0.14170273  | count | 1 |
| MATR3      | 0.1294088 | 0.3710577 | 0.3488 | 0.727    | 0.141771752 | count | 1 |
| EPRS       | 0.1015049 | 0.0999757 | 1.0153 | 0.31     | 0.141786456 | count | 1 |
| AFAP1L1    | 0.1066607 | 0.1627399 | 0.6554 | 0.512    | 0.141895816 | count | 1 |
| RAMP2-AS1  | 0.1270982 | 0.3040936 | 0.418  | 0.676    | 0.142003933 | count | 1 |
| OXA1L      | 0.1030237 | 0.1203151 | 0.8563 | 0.392    | 0.142005206 | count | 1 |
| ACIN1      | 0.1030533 | 0.1186655 | 0.8684 | 0.385    | 0.142025369 | count | 1 |
| NPRL2      | 0.1231241 | 0.2816978 | 0.4371 | 0.662    | 0.142027703 | count | 1 |
| ZNF431     | 0.1183649 | 0.2439442 | 0.4852 | 0.628    | 0.142121619 | count | 1 |
| CFI        | 0.1006678 | 0.0819496 | 1.2284 | 0.219    | 0.142149051 | count | 1 |
| AC008467.1 | 0.4225397 | 0.8430659 | 0.5012 | 0.616    | 0.142165853 | count | 1 |
| BATF       | 0.5201394 | 0.7631699 | 0.6816 | 0.496    | 0.142221031 | count | 1 |
| AL135999.1 | 0.5201394 | 0.8404645 | 0.6189 | 0.536    | 0.142221031 | count | 1 |
| KLHL26     | 0.2130259 | 0.5563601 | 0.3829 | 0.702    | 0.142246172 | count | 1 |
| TAF12      | 0.1031498 | 0.1233089 | 0.8365 | 0.403    | 0.142299528 | count | 1 |
| SLC25A11   | 0.1044487 | 0.1321752 | 0.7902 | 0.429    | 0.142307309 | count | 1 |
| CD200      | 0.1029883 | 0.1390003 | 0.7409 | 0.459    | 0.142414095 | count | 1 |
| PPM1G      | 0.1009283 | 0.0820617 | 1.2299 | 0.219    | 0.142432283 | count | 1 |
| HBEGF      | 0.1017322 | 0.1302355 | 0.7811 | 0.435    | 0.142446667 | count | 1 |
| TATDN1     | 0.1031617 | 0.1235486 | 0.835  | 0.404    | 0.142451467 | count | 1 |
| CLCN5      | 0.223563  | 0.502835  | 0.4446 | 0.657    | 0.142541172 | count | 1 |
| ZNF888     | 0.2503522 | 0.8048107 | 0.3111 | 0.756    | 0.142643364 | count | 1 |
| FTO        | 0.118555  | 0.3286497 | 0.3607 | 0.718    | 0.142675765 | count | 1 |
| SNAPIN     | 0.1030887 | 0.1123888 | 0.9173 | 0.359    | 0.142691618 | count | 1 |
| NEDD9      | 0.1021914 | 0.0873352 | 1.1701 | 0.242    | 0.142712864 | count | 1 |
| KLHL5      | 0.1066336 | 0.1824161 | 0.5846 | 0.559    | 0.142756348 | count | 1 |

|             |           |           |        |        |             |       |   |
|-------------|-----------|-----------|--------|--------|-------------|-------|---|
| ZNF891      | 0.133394  | 0.4508669 | 0.2959 | 0.767  | 0.142802872 | count | 1 |
| SLC37A3     | 0.1599621 | 0.3521858 | 0.4542 | 0.65   | 0.142890086 | count | 1 |
| HINT3       | 0.1170028 | 0.2359883 | 0.4958 | 0.62   | 0.142894942 | count | 1 |
| PDSS1       | 0.1691163 | 0.4792825 | 0.3529 | 0.724  | 0.143049628 | count | 1 |
| PDCL3       | 0.1047385 | 0.1404035 | 0.746  | 0.456  | 0.143102219 | count | 1 |
| SLC12A9-AS1 | 0.4258427 | 0.7943038 | 0.5361 | 0.592  | 0.143126651 | count | 1 |
| NDUFA9      | 0.1044885 | 0.1354721 | 0.7713 | 0.441  | 0.143256225 | count | 1 |
| CAP1        | 0.1010915 | 0.073059  | 1.3837 | 0.167  | 0.143273507 | count | 1 |
| VPS37C      | 0.1222874 | 0.2884028 | 0.424  | 0.672  | 0.143351748 | count | 1 |
| ABCB4       | 0.7113159 | 1.0638588 | 0.6686 | 0.504  | 0.143360618 | count | 1 |
| MPP5        | 0.1140284 | 0.2250232 | 0.5067 | 0.612  | 0.143694176 | count | 1 |
| IRF9        | 0.1103743 | 0.1660592 | 0.6647 | 0.506  | 0.144030999 | count | 1 |
| MRPL11      | 0.1024609 | 0.0928961 | 1.103  | 0.27   | 0.144044274 | count | 1 |
| IPO8        | 0.1120669 | 0.2379554 | 0.471  | 0.638  | 0.144146629 | count | 1 |
| LRIG3       | 0.10628   | 0.1779601 | 0.5972 | 0.55   | 0.144197843 | count | 1 |
| MAP3K21     | 0.5293048 | 0.7883733 | 0.6714 | 0.502  | 0.144284504 | count | 1 |
| SERPINF1    | 0.5293048 | 0.8873005 | 0.5965 | 0.551  | 0.144284504 | count | 1 |
| MOSPD2      | 0.114459  | 0.2070399 | 0.5528 | 0.58   | 0.144414414 | count | 1 |
| TAPBPL      | 0.111956  | 0.1790243 | 0.6254 | 0.532  | 0.144514249 | count | 1 |
| ARHGAP29    | 0.1010486 | 0.0608752 | 1.6599 | 0.097  | 0.144537567 | count | 1 |
| CAPZA1      | 0.1037919 | 0.1100008 | 0.9436 | 0.345  | 0.144602723 | count | 1 |
| MMADHC      | 0.1033251 | 0.0964972 | 1.0708 | 0.284  | 0.144619696 | count | 1 |
| CCL5        | 0.1344247 | 0.8390153 | 0.1602 | 0.873  | 0.144758654 | count | 1 |
| EIF3J       | 0.102857  | 0.0885561 | 1.1615 | 0.246  | 0.144833722 | count | 1 |
| ADAMTS5     | 0.2171479 | 0.3401704 | 0.6384 | 0.523  | 0.144864034 | count | 1 |
| FBXO21      | 0.1057257 | 0.1571557 | 0.6727 | 0.501  | 0.144922518 | count | 1 |
| OXCT1       | 0.1207638 | 0.2480236 | 0.4869 | 0.626  | 0.144977471 | count | 1 |
| ENTPD2      | 0.5327748 | 1.2052945 | 0.442  | 0.659  | 0.145062011 | count | 1 |
| SLC25A23    | 0.1355686 | 0.4584533 | 0.2957 | 0.767  | 0.145096644 | count | 1 |
| AL078459.1  | 1.244491  | 0.9693516 | 1.2838 | 0.199  | 0.145176427 | count | 1 |
| DAZAP2      | 0.1033535 | 0.0876822 | 1.1787 | 0.239  | 0.145256805 | count | 1 |
| DCPS        | 0.1099893 | 0.193408  | 0.5687 | 0.57   | 0.14529787  | count | 1 |
| SEC11A      | 0.1014591 | 0.0431227 | 2.3528 | 0.0187 | 0.145504156 | count | 1 |
| RSAD1       | 0.1297035 | 0.2879171 | 0.4505 | 0.652  | 0.145522996 | count | 1 |
| EIF4A2      | 0.1023418 | 0.0610482 | 1.6764 | 0.0938 | 0.145528941 | count | 1 |
| NHSL2       | 0.1079447 | 0.1529655 | 0.7057 | 0.48   | 0.145570297 | count | 1 |
| AGO2        | 0.1120581 | 0.2184492 | 0.513  | 0.608  | 0.145581295 | count | 1 |
| C12orf49    | 0.1136125 | 0.2232311 | 0.5089 | 0.611  | 0.14585388  | count | 1 |
| CORO1A      | 0.4361316 | 0.7254019 | 0.6012 | 0.548  | 0.146105286 | count | 1 |
| PRKAR1A     | 0.1050951 | 0.0987794 | 1.0639 | 0.287  | 0.146128215 | count | 1 |
| SIKE1       | 0.1099554 | 0.162807  | 0.6754 | 0.499  | 0.146329458 | count | 1 |
| SLC25A14    | 0.1732262 | 0.3887114 | 0.4456 | 0.656  | 0.146421434 | count | 1 |
| RNF5        | 0.1071277 | 0.1179538 | 0.9082 | 0.364  | 0.146447986 | count | 1 |
| DDX46       | 0.1034796 | 0.0776073 | 1.3334 | 0.183  | 0.146544672 | count | 1 |
| MRPL36      | 0.1055831 | 0.1081614 | 0.9762 | 0.329  | 0.146619533 | count | 1 |

|              |           |           |        |        |             |       |   |
|--------------|-----------|-----------|--------|--------|-------------|-------|---|
| MTHFR        | 0.1187901 | 0.3147997 | 0.3774 | 0.706  | 0.14663175  | count | 1 |
| HDGFL3       | 0.102914  | 0.0660431 | 1.5583 | 0.1193 | 0.146712114 | count | 1 |
| AC005838.2   | 0.2305056 | 0.5756241 | 0.4004 | 0.689  | 0.146729076 | count | 1 |
| VEGFB        | 0.1044873 | 0.1048545 | 0.9965 | 0.319  | 0.146740975 | count | 1 |
| IBA57        | 0.1340353 | 0.3207223 | 0.4179 | 0.676  | 0.146771513 | count | 1 |
| CHP1         | 0.1060998 | 0.1080759 | 0.9817 | 0.326  | 0.146781159 | count | 1 |
| TRDMT1       | 0.1315331 | 0.3279702 | 0.4011 | 0.688  | 0.146897139 | count | 1 |
| TECR         | 0.1043172 | 0.089155  | 1.1701 | 0.242  | 0.146905596 | count | 1 |
| PPIF         | 0.14863   | 0.4358887 | 0.341  | 0.733  | 0.146952284 | count | 1 |
| TMEM131      | 0.113639  | 0.1918264 | 0.5924 | 0.554  | 0.147044533 | count | 1 |
| PPFIA3       | 0.1079726 | 0.1433758 | 0.7531 | 0.451  | 0.147062792 | count | 1 |
| OTUD3        | 0.1537551 | 0.362488  | 0.4242 | 0.671  | 0.147122225 | count | 1 |
| TMEM191B     | 0.5421358 | 1.1724927 | 0.4624 | 0.644  | 0.147149381 | count | 1 |
| SERINC2      | 0.1368427 | 0.291035  | 0.4702 | 0.638  | 0.147324551 | count | 1 |
| ZC3H13       | 0.1050088 | 0.0926955 | 1.1328 | 0.257  | 0.147326751 | count | 1 |
| HTATSF1      | 0.1087729 | 0.1510433 | 0.7201 | 0.471  | 0.147373944 | count | 1 |
| PCDHB11      | 0.5436322 | 0.653268  | 0.8322 | 0.405  | 0.14748169  | count | 1 |
| FECH         | 0.1463694 | 0.4122498 | 0.3551 | 0.723  | 0.147487731 | count | 1 |
| TTLL1        | 0.1315343 | 0.3990263 | 0.3296 | 0.742  | 0.147551829 | count | 1 |
| RNF115       | 0.1051809 | 0.0990089 | 1.0623 | 0.288  | 0.147736041 | count | 1 |
| MAPKAPK5-AS1 | 0.1120375 | 0.1660661 | 0.6747 | 0.5    | 0.147749898 | count | 1 |
| ACTL6A       | 0.1119762 | 0.1851197 | 0.6049 | 0.545  | 0.147751268 | count | 1 |
| BRD4         | 0.1067719 | 0.1059611 | 1.0077 | 0.314  | 0.14809805  | count | 1 |
| EPB41L4A     | 0.109867  | 0.1534995 | 0.7157 | 0.474  | 0.148107877 | count | 1 |
| MAP1LC3B2    | 0.1836064 | 0.5652476 | 0.3248 | 0.745  | 0.148432691 | count | 1 |
| ZC3H4        | 0.1234321 | 0.2702911 | 0.4567 | 0.648  | 0.148494596 | count | 1 |
| NUCB1        | 0.1044827 | 0.0636828 | 1.6407 | 0.101  | 0.148734785 | count | 1 |
| ERF          | 0.111085  | 0.1312027 | 0.8467 | 0.397  | 0.148753017 | count | 1 |
| ZNF665       | 0.1642354 | 0.3600737 | 0.4561 | 0.648  | 0.148876237 | count | 1 |
| HSD17B4      | 0.1126953 | 0.1546406 | 0.7288 | 0.466  | 0.148937824 | count | 1 |
| PDHB         | 0.1072003 | 0.1077088 | 0.9953 | 0.32   | 0.149078583 | count | 1 |
| CUL2         | 0.1133035 | 0.160758  | 0.7048 | 0.481  | 0.149157913 | count | 1 |
| LMAN2L       | 0.1559603 | 0.3315859 | 0.4703 | 0.638  | 0.149185693 | count | 1 |
| NUDC         | 0.1052904 | 0.0693587 | 1.5181 | 0.129  | 0.149245808 | count | 1 |
| TDP1         | 0.1675987 | 0.3975371 | 0.4216 | 0.673  | 0.14952868  | count | 1 |
| TATDN2       | 0.1705539 | 0.4514147 | 0.3778 | 0.706  | 0.149610485 | count | 1 |
| EIF1AD       | 0.1241529 | 0.2939835 | 0.4223 | 0.673  | 0.149690268 | count | 1 |
| POLR1B       | 0.1531839 | 0.3763597 | 0.407  | 0.684  | 0.149841104 | count | 1 |
| ARHGAP19     | 0.1629082 | 0.4474592 | 0.3641 | 0.716  | 0.149843999 | count | 1 |
| DNAJC30      | 0.1165323 | 0.2023327 | 0.5759 | 0.565  | 0.149859719 | count | 1 |
| RNF13        | 0.1062717 | 0.079367  | 1.339  | 0.181  | 0.150092607 | count | 1 |
| RASGRP2      | 1.323205  | 1.0198439 | 1.2975 | 0.195  | 0.150170973 | count | 1 |
| AC106869.1   | 0.3850555 | 0.6026172 | 0.639  | 0.523  | 0.150188238 | count | 1 |
| ELOC         | 0.1055068 | 0.0614762 | 1.7162 | 0.0862 | 0.150204714 | count | 1 |
| JRK          | 0.1859408 | 0.7443288 | 0.2498 | 0.803  | 0.150255056 | count | 1 |



|            |           |           |        |        |             |       |   |
|------------|-----------|-----------|--------|--------|-------------|-------|---|
| VPS39      | 0.1233269 | 0.2723066 | 0.4529 | 0.651  | 0.150264492 | count | 1 |
| POLD2      | 0.1111729 | 0.1588121 | 0.7035 | 0.482  | 0.150314247 | count | 1 |
| NAA25      | 0.1323846 | 0.2796011 | 0.4735 | 0.636  | 0.150351988 | count | 1 |
| SPA17      | 0.1300006 | 0.3043358 | 0.4272 | 0.669  | 0.150384943 | count | 1 |
| DGKQ       | 0.2493875 | 0.5724197 | 0.4357 | 0.663  | 0.150389567 | count | 1 |
| AGBL3      | 0.1381778 | 0.3576447 | 0.3864 | 0.699  | 0.150437595 | count | 1 |
| CORO7      | 0.2090604 | 0.3933489 | 0.5315 | 0.595  | 0.150483193 | count | 1 |
| DNAJC7     | 0.1078361 | 0.0929912 | 1.1596 | 0.246  | 0.150494145 | count | 1 |
| SH3BGRL    | 0.1055344 | 0.0589839 | 1.7892 | 0.0737 | 0.150569105 | count | 1 |
| DAXX       | 0.1157627 | 0.1696287 | 0.6824 | 0.495  | 0.150706948 | count | 1 |
| MBD4       | 0.1086603 | 0.1242393 | 0.8741 | 0.382  | 0.150728771 | count | 1 |
| FAM135A    | 0.133289  | 0.3206151 | 0.4157 | 0.678  | 0.150761581 | count | 1 |
| MEX3B      | 0.2853961 | 0.5766346 | 0.4949 | 0.621  | 0.150975214 | count | 1 |
| CDC14A     | 0.1342646 | 0.2471033 | 0.5434 | 0.587  | 0.151223426 | count | 1 |
| DIDO1      | 0.1177394 | 0.1991602 | 0.5912 | 0.554  | 0.151264394 | count | 1 |
| SMIM15     | 0.1120604 | 0.1536943 | 0.7291 | 0.466  | 0.151290913 | count | 1 |
| RNF152     | 0.2102724 | 0.4777968 | 0.4401 | 0.66   | 0.151316991 | count | 1 |
| MED30      | 0.1094794 | 0.1219852 | 0.8975 | 0.37   | 0.151334876 | count | 1 |
| HAUS2      | 0.1159382 | 0.2000305 | 0.5796 | 0.562  | 0.151362606 | count | 1 |
| USP35      | 0.2863183 | 0.7744607 | 0.3697 | 0.712  | 0.151425993 | count | 1 |
| POLR2A     | 0.1137338 | 0.1491039 | 0.7628 | 0.446  | 0.151474316 | count | 1 |
| PDHA1      | 0.1119482 | 0.1423149 | 0.7866 | 0.432  | 0.151537803 | count | 1 |
| P4HA3      | 0.1335228 | 0.3559844 | 0.3751 | 0.708  | 0.151629201 | count | 1 |
| WNT9B      | 0.5626931 | 0.7679536 | 0.7327 | 0.464  | 0.151681772 | count | 1 |
| AC005229.4 | 0.1481344 | 0.377161  | 0.3928 | 0.695  | 0.151775901 | count | 1 |
| CLK3       | 0.1156524 | 0.1765502 | 0.6551 | 0.512  | 0.151781686 | count | 1 |
| UEVLD      | 0.1419984 | 0.3139694 | 0.4523 | 0.651  | 0.15187217  | count | 1 |
| U47924.2   | 0.39029   | 0.8319335 | 0.4691 | 0.639  | 0.151987739 | count | 1 |
| AC002553.1 | 0.39029   | 0.8319335 | 0.4691 | 0.639  | 0.151987739 | count | 1 |
| AC106782.2 | 0.39029   | 0.8386633 | 0.4654 | 0.642  | 0.151987739 | count | 1 |
| COX11      | 0.1164338 | 0.1718355 | 0.6776 | 0.498  | 0.152006618 | count | 1 |
| ZNF358     | 0.1101029 | 0.1255018 | 0.8773 | 0.38   | 0.152156356 | count | 1 |
| STXBP4     | 0.1841178 | 0.3932827 | 0.4682 | 0.64   | 0.152175326 | count | 1 |
| KDM2A      | 0.1129532 | 0.158569  | 0.7123 | 0.476  | 0.152206533 | count | 1 |
| CHMP5      | 0.1067766 | 0.0590436 | 1.8084 | 0.0706 | 0.152233514 | count | 1 |
| RAMMET     | 0.1144182 | 0.1613925 | 0.7089 | 0.478  | 0.152246382 | count | 1 |
| HECTD3     | 0.2118092 | 0.4522586 | 0.4683 | 0.64   | 0.152373578 | count | 1 |
| IFT172     | 0.2118092 | 0.4888393 | 0.4333 | 0.665  | 0.152373578 | count | 1 |
| MASP1      | 0.2122529 | 0.5636519 | 0.3766 | 0.707  | 0.152678491 | count | 1 |
| ZNF552     | 0.2405964 | 0.6856045 | 0.3509 | 0.726  | 0.152790162 | count | 1 |
| DDO        | 0.4599685 | 0.9987227 | 0.4606 | 0.645  | 0.152923313 | count | 1 |
| ZNF564     | 0.2409683 | 0.6801166 | 0.3543 | 0.723  | 0.153012966 | count | 1 |
| TCTEX1D2   | 0.1315181 | 0.2506283 | 0.5248 | 0.6    | 0.153116245 | count | 1 |
| PPP1R11    | 0.1111592 | 0.109739  | 1.0129 | 0.311  | 0.153195547 | count | 1 |
| AL731661.1 | 0.3482487 | 0.9907115 | 0.3515 | 0.725  | 0.15323156  | count | 1 |

|            |           |           |        |          |             |       |          |
|------------|-----------|-----------|--------|----------|-------------|-------|----------|
| PXT1       | 0.3482487 | 1.349242  | 0.2581 | 0.796    | 0.15323156  | count | 1        |
| CCDC7      | 0.1898068 | 0.5896653 | 0.3219 | 0.748    | 0.153269401 | count | 1        |
| CCDC174    | 0.1114483 | 0.1357501 | 0.821  | 0.412    | 0.153316034 | count | 1        |
| POLR2C     | 0.1114909 | 0.1224415 | 0.9106 | 0.363    | 0.15337451  | count | 1        |
| KATNAL2    | 0.1753352 | 0.4079541 | 0.4298 | 0.667    | 0.15368339  | count | 1        |
| ERG28      | 0.1119387 | 0.1327267 | 0.8434 | 0.399    | 0.153740277 | count | 1        |
| TMSB4X     | 0.1066534 | 0.0263884 | 4.0417 | 5.45E-05 | 0.153763148 | count | 1        |
| BBIP1      | 0.1151651 | 0.1616302 | 0.7125 | 0.476    | 0.15376752  | count | 1        |
| PLEKHN1    | 0.3959995 | 0.7802663 | 0.5075 | 0.612    | 0.153943353 | count | 1        |
| RAB17      | 0.1591994 | 0.4997491 | 0.3186 | 0.75     | 0.153944023 | count | 1        |
| ARHGAP1    | 0.1223911 | 0.2431014 | 0.5035 | 0.615    | 0.153966408 | count | 1        |
| SERAC1     | 0.2319555 | 0.4410543 | 0.5259 | 0.599    | 0.154225602 | count | 1        |
| TPM4       | 0.1076745 | 0.0485689 | 2.2169 | 0.0267   | 0.154447095 | count | 1        |
| OSGIN1     | 0.7870227 | 1.1025608 | 0.7138 | 0.475    | 0.154481567 | count | 1        |
| CDK12      | 0.113343  | 0.1451239 | 0.781  | 0.435    | 0.15463296  | count | 1        |
| IRAK2      | 0.1522737 | 0.4842429 | 0.3145 | 0.753    | 0.154656423 | count | 1        |
| BIN1       | 0.1916668 | 0.4513615 | 0.4246 | 0.671    | 0.154718028 | count | 1        |
| GLCE       | 0.1178136 | 0.1982766 | 0.5942 | 0.552    | 0.154887177 | count | 1        |
| ENO1-AS1   | 0.3527794 | 0.8346821 | 0.4227 | 0.673    | 0.155020891 | count | 1        |
| CHCHD3     | 0.1142651 | 0.1311775 | 0.8711 | 0.384    | 0.155041174 | count | 1        |
| RFC3       | 0.1340892 | 0.2530535 | 0.5299 | 0.596    | 0.155061683 | count | 1        |
| SOD3       | 0.5787015 | 0.9212548 | 0.6282 | 0.53     | 0.155162498 | count | 1        |
| AL133338.1 | 0.3196487 | 0.7652212 | 0.4177 | 0.676    | 0.155230812 | count | 1        |
| TIGD4      | 0.3196487 | 0.8096796 | 0.3948 | 0.693    | 0.155230812 | count | 1        |
| ZNRD1      | 0.1119642 | 0.1283002 | 0.8727 | 0.383    | 0.155253397 | count | 1        |
| WASL       | 0.1108299 | 0.0897154 | 1.2354 | 0.217    | 0.155499972 | count | 1        |
| ZNF335     | 0.1692208 | 0.440335  | 0.3843 | 0.701    | 0.155500442 | count | 1        |
| CCNK       | 0.1175134 | 0.1706081 | 0.6888 | 0.491    | 0.155834848 | count | 1        |
| GDPD3      | 0.3548589 | 0.8208832 | 0.4323 | 0.666    | 0.155840431 | count | 1        |
| UROS       | 0.1183508 | 0.1698596 | 0.6968 | 0.486    | 0.155863293 | count | 1        |
| METTL2B    | 0.1287966 | 0.2337361 | 0.551  | 0.582    | 0.155914221 | count | 1        |
| IFITM3     | 0.1081558 | 0.024761  | 4.368  | 1.30E-05 | 0.15593238  | count | 0.301249 |
| PRPF19     | 0.1214662 | 0.3073044 | 0.3953 | 0.693    | 0.156025511 | count | 1        |
| BCLAF1     | 0.1107351 | 0.090451  | 1.2243 | 0.221    | 0.156050097 | count | 1        |
| PIP4K2B    | 0.1261635 | 0.2392313 | 0.5274 | 0.598    | 0.156177217 | count | 1        |
| GGACT      | 0.159827  | 0.5231142 | 0.3055 | 0.76     | 0.156198388 | count | 1        |
| GTF2H3     | 0.1190353 | 0.1768449 | 0.6731 | 0.501    | 0.15620126  | count | 1        |
| FAM71A     | 0.7993316 | 1.0627721 | 0.7521 | 0.452    | 0.156225108 | count | 1        |
| C6orf62    | 0.1149531 | 0.1257557 | 0.9141 | 0.361    | 0.156247805 | count | 1        |
| GAMT       | 0.1429182 | 0.3086172 | 0.4631 | 0.643    | 0.156357305 | count | 1        |
| ZNF549     | 0.2176235 | 0.5881488 | 0.37   | 0.711    | 0.156364458 | count | 1        |
| ANKRD10    | 0.1117697 | 0.1095667 | 1.0201 | 0.308    | 0.156422615 | count | 1        |
| USO1       | 0.1154371 | 0.1404238 | 0.8221 | 0.411    | 0.156461234 | count | 1        |
| SUSD6      | 0.12058   | 0.2186735 | 0.5514 | 0.581    | 0.156476455 | count | 1        |
| NKIRAS1    | 0.1430318 | 0.3330255 | 0.4295 | 0.668    | 0.156479773 | count | 1        |

|            |           |           |        |       |             |       |   |
|------------|-----------|-----------|--------|-------|-------------|-------|---|
| RPGR       | 0.1123286 | 0.1097411 | 1.0236 | 0.306 | 0.156693503 | count | 1 |
| MINCR      | 0.2359774 | 0.4573975 | 0.5159 | 0.606 | 0.156756766 | count | 1 |
| FGD5       | 0.114544  | 0.1528319 | 0.7495 | 0.454 | 0.156835629 | count | 1 |
| C6orf226   | 0.1213328 | 0.193841  | 0.6259 | 0.531 | 0.156947492 | count | 1 |
| CNIH4      | 0.1117428 | 0.0913358 | 1.2234 | 0.221 | 0.157077484 | count | 1 |
| AC005696.1 | 0.4747411 | 1.0788407 | 0.44   | 0.66  | 0.157091059 | count | 1 |
| AL390728.6 | 0.1363413 | 0.3056376 | 0.4461 | 0.656 | 0.157098543 | count | 1 |
| MTPAP      | 0.139189  | 0.2628209 | 0.5296 | 0.596 | 0.157350414 | count | 1 |
| PGRMC1     | 0.1111551 | 0.0814307 | 1.365  | 0.172 | 0.15738995  | count | 1 |
| FMO5       | 0.1610764 | 0.4133378 | 0.3897 | 0.697 | 0.157392684 | count | 1 |
| EVL        | 0.1170041 | 0.2375172 | 0.4926 | 0.622 | 0.157492876 | count | 1 |
| RAP2B      | 0.1191834 | 0.1644583 | 0.7247 | 0.469 | 0.157559671 | count | 1 |
| ISG20L2    | 0.1251285 | 0.2090836 | 0.5985 | 0.55  | 0.157588688 | count | 1 |
| NDUF4F4    | 0.118804  | 0.1689845 | 0.703  | 0.482 | 0.15769207  | count | 1 |
| GGNBP2     | 0.1123524 | 0.0894745 | 1.2557 | 0.209 | 0.157756796 | count | 1 |
| ZBTB44     | 0.1238343 | 0.2015552 | 0.6144 | 0.539 | 0.157790802 | count | 1 |
| SPATA5     | 0.1554372 | 0.3169768 | 0.4904 | 0.624 | 0.157807114 | count | 1 |
| AC007920.2 | 0.4074079 | 1.0676622 | 0.3816 | 0.703 | 0.157828585 | count | 1 |
| AC010491.1 | 0.4074079 | 1.0676622 | 0.3816 | 0.703 | 0.157828585 | count | 1 |
| AIFM3      | 0.4074079 | 1.0858939 | 0.3752 | 0.708 | 0.157828585 | count | 1 |
| FAM50B     | 0.132222  | 0.2385676 | 0.5542 | 0.579 | 0.157844332 | count | 1 |
| CAPN12     | 0.8119562 | 1.0555195 | 0.7692 | 0.442 | 0.157995011 | count | 1 |
| TMEM62     | 0.1655268 | 0.3756679 | 0.4406 | 0.66  | 0.158121612 | count | 1 |
| C2orf69    | 0.1318993 | 0.2869124 | 0.4597 | 0.646 | 0.158220843 | count | 1 |
| OCEL1      | 0.1217351 | 0.1991768 | 0.6112 | 0.541 | 0.158326734 | count | 1 |
| TCF3       | 0.1306415 | 0.2612781 | 0.5    | 0.617 | 0.158459052 | count | 1 |
| STK38      | 0.1333858 | 0.2498489 | 0.5339 | 0.593 | 0.158822956 | count | 1 |
| EXT2       | 0.1258601 | 0.1981012 | 0.6353 | 0.525 | 0.158899726 | count | 1 |
| ZSWIM4     | 0.3019838 | 0.535772  | 0.5636 | 0.573 | 0.159047288 | count | 1 |
| PCDHB3     | 0.2647518 | 0.6529098 | 0.4055 | 0.685 | 0.159055768 | count | 1 |
| CMC1       | 0.1151731 | 0.1145321 | 1.0056 | 0.315 | 0.15908699  | count | 1 |
| DMWD       | 0.1272455 | 0.2157935 | 0.5897 | 0.555 | 0.159171738 | count | 1 |
| ITPRIP     | 0.1306154 | 0.2116893 | 0.617  | 0.537 | 0.159379346 | count | 1 |
| TAF6       | 0.1341176 | 0.2229529 | 0.6016 | 0.548 | 0.1596857   | count | 1 |
| OPTN       | 0.1136513 | 0.0960207 | 1.1836 | 0.237 | 0.159764413 | count | 1 |
| MRPL50     | 0.1167724 | 0.1324581 | 0.8816 | 0.378 | 0.159787616 | count | 1 |
| NBPF11     | 0.2226318 | 0.6694606 | 0.3326 | 0.739 | 0.159793751 | count | 1 |
| DISP2      | 0.4133539 | 1.082262  | 0.3819 | 0.703 | 0.159841748 | count | 1 |
| EIF4EBP3   | 0.4133539 | 1.16747   | 0.3541 | 0.723 | 0.159841748 | count | 1 |
| MRPL22     | 0.1146075 | 0.1009163 | 1.1357 | 0.256 | 0.15984223  | count | 1 |
| AL022323.4 | 0.6007041 | 0.5706782 | 1.0526 | 0.293 | 0.159877629 | count | 1 |
| SLC30A9    | 0.1203459 | 0.1789996 | 0.6723 | 0.501 | 0.159956203 | count | 1 |
| ENAH       | 0.1181115 | 0.1365936 | 0.8647 | 0.387 | 0.159988197 | count | 1 |
| GPR137B    | 0.1576594 | 0.3547154 | 0.4445 | 0.657 | 0.160018745 | count | 1 |
| MIER3      | 0.1638478 | 0.4193465 | 0.3907 | 0.696 | 0.16004033  | count | 1 |

|            |           |           |        |          |             |       |             |
|------------|-----------|-----------|--------|----------|-------------|-------|-------------|
| RNF220     | 0.1356932 | 0.2417872 | 0.5612 | 0.575    | 0.160269715 | count | 1           |
| PARPBP     | 0.2234253 | 0.6427188 | 0.3476 | 0.728    | 0.160336376 | count | 1           |
| PNMA8B     | 0.2234253 | 0.7515657 | 0.2973 | 0.766    | 0.160336376 | count | 1           |
| ANKRD52    | 0.2040354 | 0.6751489 | 0.3022 | 0.763    | 0.160391261 | count | 1           |
| LINC00921  | 0.2040354 | 0.7697597 | 0.2651 | 0.791    | 0.160391261 | count | 1           |
| VTI1B      | 0.1151839 | 0.1084714 | 1.0619 | 0.288    | 0.160580599 | count | 1           |
| GLS        | 0.1131753 | 0.0867443 | 1.3047 | 0.192    | 0.160595033 | count | 1           |
| NFYA       | 0.1868578 | 0.6999058 | 0.267  | 0.79     | 0.160599579 | count | 1           |
| C15orf61   | 0.1192153 | 0.1489329 | 0.8005 | 0.424    | 0.160616807 | count | 1           |
| HINT1      | 0.1111719 | 0.0343088 | 3.2563 | 0.00114  | 0.160652543 | count | 1           |
| FITM2      | 0.1907256 | 0.5366639 | 0.3554 | 0.722    | 0.160721137 | count | 1           |
| ZNF275     | 0.2045584 | 0.7929366 | 0.258  | 0.796    | 0.160786266 | count | 1           |
| ZNF444     | 0.145777  | 0.295221  | 0.4938 | 0.621    | 0.161061265 | count | 1           |
| DENND4A    | 0.1279475 | 0.2785748 | 0.4593 | 0.646    | 0.161317702 | count | 1           |
| EIF3L      | 0.1136287 | 0.0600237 | 1.8931 | 0.0585   | 0.16147225  | count | 1           |
| ACP1       | 0.1153346 | 0.0958695 | 1.203  | 0.229    | 0.161525248 | count | 1           |
| PREP       | 0.1579018 | 0.3679918 | 0.4291 | 0.668    | 0.161590231 | count | 1           |
| HIST1H2BE  | 0.490941  | 0.7778977 | 0.6311 | 0.528    | 0.161611147 | count | 1           |
| AL662884.4 | 0.2437409 | 0.5693705 | 0.4281 | 0.669    | 0.161628732 | count | 1           |
| FXR1       | 0.1142925 | 0.077042  | 1.4835 | 0.138    | 0.161667384 | count | 1           |
| RWDD2B     | 0.1265352 | 0.2750043 | 0.4601 | 0.645    | 0.161712667 | count | 1           |
| RPS9       | 0.1122932 | 0.0221855 | 5.0616 | 4.43E-07 | 0.161808004 | count | 0.010377718 |
| AUP1       | 0.1155487 | 0.094366  | 1.2245 | 0.221    | 0.1618926   | count | 1           |
| PPP1R13B   | 0.1230568 | 0.1458814 | 0.8435 | 0.399    | 0.161939205 | count | 1           |
| MYH10      | 0.1219706 | 0.2111184 | 0.5777 | 0.563    | 0.161955053 | count | 1           |
| TIMM44     | 0.1267797 | 0.2213865 | 0.5727 | 0.567    | 0.16202323  | count | 1           |
| POLR2M     | 0.1301189 | 0.2302391 | 0.5651 | 0.572    | 0.162036768 | count | 1           |
| PUM2       | 0.1254238 | 0.2329751 | 0.5384 | 0.59     | 0.162076084 | count | 1           |
| STRIP1     | 0.1853379 | 0.3015144 | 0.6147 | 0.539    | 0.16218209  | count | 1           |
| MED14      | 0.1437027 | 0.2734743 | 0.5255 | 0.599    | 0.162386068 | count | 1           |
| CALM2      | 0.1132689 | 0.0429035 | 2.6401 | 0.00834  | 0.162465277 | count | 1           |
| DDX1       | 0.1189385 | 0.1340568 | 0.8872 | 0.375    | 0.162680658 | count | 1           |
| AFTPH      | 0.1248686 | 0.2303176 | 0.5422 | 0.588    | 0.162734927 | count | 1           |
| TEK        | 0.1176509 | 0.124053  | 0.9484 | 0.343    | 0.162807429 | count | 1           |
| UBE2D2     | 0.114358  | 0.0613675 | 1.8635 | 0.0625   | 0.162829207 | count | 1           |
| LYRM2      | 0.1168683 | 0.1205411 | 0.9695 | 0.332    | 0.162924957 | count | 1           |
| DYNC112    | 0.1152133 | 0.086909  | 1.3257 | 0.185    | 0.162937658 | count | 1           |
| APH1A      | 0.1159137 | 0.0851341 | 1.3615 | 0.173    | 0.162993195 | count | 1           |
| SLC10A3    | 0.1263991 | 0.2066997 | 0.6115 | 0.541    | 0.16305279  | count | 1           |
| AC009133.1 | 0.2583076 | 0.5642806 | 0.4578 | 0.647    | 0.163354306 | count | 1           |
| CXorf56    | 0.1458473 | 0.3505743 | 0.416  | 0.677    | 0.163387888 | count | 1           |
| PHTF1      | 0.1314478 | 0.2359974 | 0.557  | 0.578    | 0.163433259 | count | 1           |
| BANP       | 0.1531521 | 0.3122221 | 0.4905 | 0.624    | 0.163601961 | count | 1           |
| PNPT1      | 0.1237442 | 0.1881028 | 0.6579 | 0.511    | 0.163648358 | count | 1           |
| RBM6       | 0.1201264 | 0.1628475 | 0.7377 | 0.461    | 0.163718083 | count | 1           |

|            |           |           |        |          |             |       |             |
|------------|-----------|-----------|--------|----------|-------------|-------|-------------|
| PAXIP1-AS2 | 0.1392384 | 0.2882051 | 0.4831 | 0.629    | 0.16395457  | count | 1           |
| UBE2Q2     | 0.1183411 | 0.123505  | 0.9582 | 0.338    | 0.163969755 | count | 1           |
| EIF3H      | 0.114695  | 0.0504734 | 2.2724 | 0.0231   | 0.164125462 | count | 1           |
| FAM78B     | 0.2596636 | 0.8795811 | 0.2952 | 0.768    | 0.164159209 | count | 1           |
| AFDN       | 0.1162228 | 0.0850137 | 1.3671 | 0.172    | 0.164222982 | count | 1           |
| AL118516.1 | 0.1216578 | 0.1996556 | 0.6093 | 0.542    | 0.164498498 | count | 1           |
| MRPL45     | 0.1216958 | 0.1385813 | 0.8782 | 0.38     | 0.16478265  | count | 1           |
| AC027307.3 | 0.6240331 | 0.7929027 | 0.787  | 0.431    | 0.16479072  | count | 1           |
| ZMYND19    | 0.1729113 | 0.3506646 | 0.4931 | 0.622    | 0.165001822 | count | 1           |
| DBT        | 0.1546255 | 0.3525842 | 0.4385 | 0.661    | 0.165149213 | count | 1           |
| CHMP2B     | 0.1181445 | 0.0970562 | 1.2173 | 0.224    | 0.165211772 | count | 1           |
| IQSEC2     | 0.1396007 | 0.3227739 | 0.4325 | 0.665    | 0.165283356 | count | 1           |
| RPLP0      | 0.1148872 | 0.0266888 | 4.3047 | 1.73E-05 | 0.16556869  | count | 0.4004777   |
| PES1       | 0.1317275 | 0.2107098 | 0.6252 | 0.532    | 0.165627751 | count | 1           |
| DNAJC1     | 0.1175464 | 0.0919417 | 1.2785 | 0.201    | 0.165681453 | count | 1           |
| RPS25      | 0.1150372 | 0.0203416 | 5.6553 | 1.72E-08 | 0.165783376 | count | 0.000406092 |
| NUP214     | 0.129708  | 0.1963781 | 0.6605 | 0.509    | 0.165908448 | count | 1           |
| MDM4       | 0.1219669 | 0.1464357 | 0.8329 | 0.405    | 0.165913147 | count | 1           |
| ZFP64      | 0.1719984 | 0.4157361 | 0.4137 | 0.679    | 0.166024239 | count | 1           |
| TOB1       | 0.1199417 | 0.1180637 | 1.0159 | 0.31     | 0.166088223 | count | 1           |
| GRHPR      | 0.1190511 | 0.0906206 | 1.3137 | 0.189    | 0.166219916 | count | 1           |
| MANEA      | 0.1459938 | 0.2897963 | 0.5038 | 0.614    | 0.166251312 | count | 1           |
| FCF1       | 0.1434187 | 0.2720042 | 0.5273 | 0.598    | 0.16627215  | count | 1           |
| PSMD10     | 0.1310716 | 0.2103608 | 0.6231 | 0.533    | 0.166406679 | count | 1           |
| PTER       | 0.1655772 | 0.3650473 | 0.4536 | 0.65     | 0.166434342 | count | 1           |
| GALNT1     | 0.1224784 | 0.1166057 | 1.0504 | 0.294    | 0.166486533 | count | 1           |
| ESRRA      | 0.1379762 | 0.2645038 | 0.5216 | 0.602    | 0.166563796 | count | 1           |
| UFL1       | 0.1196231 | 0.1106602 | 1.081  | 0.28     | 0.166648643 | count | 1           |
| ZNF43      | 0.1331414 | 0.2105652 | 0.6323 | 0.527    | 0.166950273 | count | 1           |
| SUZ12      | 0.1206567 | 0.1242702 | 0.9709 | 0.332    | 0.166958245 | count | 1           |
| AP000766.1 | 0.6345898 | 0.7826162 | 0.8109 | 0.418    | 0.166985058 | count | 1           |
| WBP4       | 0.1201318 | 0.1187153 | 1.0119 | 0.312    | 0.167091006 | count | 1           |
| ERLIN1     | 0.1255781 | 0.1846709 | 0.68   | 0.497    | 0.167258327 | count | 1           |
| TFE3       | 0.1623976 | 0.3494343 | 0.4647 | 0.642    | 0.167415679 | count | 1           |
| VPS13A     | 0.124985  | 0.1725061 | 0.7245 | 0.469    | 0.16761086  | count | 1           |
| SRSF7      | 0.1179809 | 0.0621816 | 1.8974 | 0.0579   | 0.167633638 | count | 1           |
| FERMT2     | 0.1187228 | 0.0751993 | 1.5788 | 0.115    | 0.167941427 | count | 1           |
| MYOF       | 0.120266  | 0.1139248 | 1.0557 | 0.291    | 0.168022938 | count | 1           |
| ZNF830     | 0.1275096 | 0.1775738 | 0.7181 | 0.473    | 0.168152984 | count | 1           |
| ARPC4      | 0.1195975 | 0.08112   | 1.4743 | 0.141    | 0.168181802 | count | 1           |
| KLC2       | 0.254245  | 0.5491207 | 0.463  | 0.643    | 0.168191276 | count | 1           |
| LITAF      | 0.1221254 | 0.1489161 | 0.8201 | 0.412    | 0.168322458 | count | 1           |
| MED10      | 0.1201153 | 0.0911933 | 1.3172 | 0.188    | 0.168407669 | count | 1           |
| CHMP4A     | 0.1203348 | 0.0940462 | 1.2795 | 0.201    | 0.168434057 | count | 1           |
| FRY-AS1    | 0.8896917 | 1.1810395 | 0.7533 | 0.451    | 0.168492304 | count | 1           |

|            |           |           |        |        |             |       |   |
|------------|-----------|-----------|--------|--------|-------------|-------|---|
| TCP11L1    | 0.1746363 | 0.4334431 | 0.4029 | 0.687  | 0.168508341 | count | 1 |
| MRPL3      | 0.1228519 | 0.1365914 | 0.8994 | 0.369  | 0.168547319 | count | 1 |
| ALG8       | 0.1333087 | 0.2509755 | 0.5312 | 0.595  | 0.168643536 | count | 1 |
| WDR73      | 0.1406996 | 0.2488769 | 0.5653 | 0.572  | 0.168671445 | count | 1 |
| CUL5       | 0.1226671 | 0.1318425 | 0.9304 | 0.352  | 0.168764853 | count | 1 |
| QRSL1      | 0.1411248 | 0.2449385 | 0.5762 | 0.565  | 0.168774217 | count | 1 |
| TMEM87A    | 0.122818  | 0.1147879 | 1.07   | 0.285  | 0.168892584 | count | 1 |
| MAD2L1BP   | 0.1355848 | 0.222279  | 0.61   | 0.542  | 0.16903917  | count | 1 |
| ZNF75A     | 0.149178  | 0.2558938 | 0.583  | 0.56   | 0.169168648 | count | 1 |
| UBE2N      | 0.1209418 | 0.0906842 | 1.3337 | 0.182  | 0.169239373 | count | 1 |
| SPATA17    | 0.6455648 | 0.7858923 | 0.8214 | 0.411  | 0.169247417 | count | 1 |
| ZNF32      | 0.1227448 | 0.1309299 | 0.9375 | 0.349  | 0.169317309 | count | 1 |
| B3GAT2     | 0.3523024 | 0.515581  | 0.6833 | 0.494  | 0.169538388 | count | 1 |
| PHC2       | 0.1246516 | 0.1293159 | 0.9639 | 0.335  | 0.169713208 | count | 1 |
| EML2       | 0.1299518 | 0.2220668 | 0.5852 | 0.558  | 0.169794154 | count | 1 |
| SCYL1      | 0.1362337 | 0.2142112 | 0.636  | 0.525  | 0.17008763  | count | 1 |
| GTPBP1     | 0.1472753 | 0.4679291 | 0.3147 | 0.753  | 0.170121681 | count | 1 |
| PLEKHJ1    | 0.133081  | 0.2017117 | 0.6598 | 0.509  | 0.170195269 | count | 1 |
| AP000894.4 | 0.6504821 | 1.0646175 | 0.611  | 0.541  | 0.170254811 | count | 1 |
| NTHL1      | 0.1234457 | 0.1239468 | 0.996  | 0.319  | 0.170281932 | count | 1 |
| ATP9B      | 0.1424046 | 0.3595195 | 0.3961 | 0.692  | 0.17028898  | count | 1 |
| METTL16    | 0.1341643 | 0.2176451 | 0.6164 | 0.538  | 0.170306373 | count | 1 |
| TP53BP2    | 0.1369345 | 0.214318  | 0.6389 | 0.523  | 0.170708651 | count | 1 |
| ZKSCAN5    | 0.2074566 | 0.5633198 | 0.3683 | 0.713  | 0.170744147 | count | 1 |
| SMG7       | 0.1323217 | 0.1933242 | 0.6845 | 0.494  | 0.170793653 | count | 1 |
| CCDC43     | 0.1256225 | 0.1433347 | 0.8764 | 0.381  | 0.170829932 | count | 1 |
| SAC3D1     | 0.1474185 | 0.2951839 | 0.4994 | 0.618  | 0.170852497 | count | 1 |
| MMP28      | 0.1220516 | 0.1138558 | 1.072  | 0.284  | 0.171000193 | count | 1 |
| NBEAL2     | 0.1673623 | 0.4259417 | 0.3929 | 0.694  | 0.171072579 | count | 1 |
| RCE1       | 0.1366469 | 0.2240538 | 0.6099 | 0.542  | 0.171079235 | count | 1 |
| ENTPD4     | 0.1647707 | 0.3210157 | 0.5133 | 0.608  | 0.171098995 | count | 1 |
| CRTC3      | 0.1390778 | 0.2226873 | 0.6245 | 0.532  | 0.17116871  | count | 1 |
| WDR7       | 0.1704839 | 0.52492   | 0.3248 | 0.745  | 0.171258608 | count | 1 |
| PRPF31     | 0.1236061 | 0.1119851 | 1.1038 | 0.27   | 0.171268908 | count | 1 |
| USP10      | 0.1327078 | 0.190135  | 0.698  | 0.485  | 0.171289062 | count | 1 |
| TMEM128    | 0.1334322 | 0.2190853 | 0.609  | 0.543  | 0.171300856 | count | 1 |
| NCOA5      | 0.196259  | 0.4232139 | 0.4637 | 0.643  | 0.171427022 | count | 1 |
| DHX40      | 0.1312335 | 0.178383  | 0.7357 | 0.462  | 0.171460034 | count | 1 |
| LAMTOR3    | 0.1315195 | 0.1724665 | 0.7626 | 0.446  | 0.17171514  | count | 1 |
| ACAD11     | 0.9159349 | 1.0474518 | 0.8744 | 0.382  | 0.171884418 | count | 1 |
| VPS37D     | 0.2727275 | 0.583482  | 0.4674 | 0.64   | 0.171885425 | count | 1 |
| PAK2       | 0.1208242 | 0.0663188 | 1.8219 | 0.0686 | 0.172050372 | count | 1 |
| DYNC1LI1   | 0.1249681 | 0.1130121 | 1.1058 | 0.269  | 0.172079901 | count | 1 |
| VBP1       | 0.1260113 | 0.1191359 | 1.0577 | 0.29   | 0.172084667 | count | 1 |
| TERF2      | 0.1317064 | 0.1863459 | 0.7068 | 0.48   | 0.17241606  | count | 1 |

|            |           |           |        |          |             |       |   |
|------------|-----------|-----------|--------|----------|-------------|-------|---|
| AC105942.1 | 0.1750059 | 0.4738047 | 0.3694 | 0.712    | 0.172423578 | count | 1 |
| DUSP1      | 0.1198075 | 0.0470196 | 2.548  | 0.0109   | 0.172430962 | count | 1 |
| CDK20      | 0.6617442 | 1.0672329 | 0.6201 | 0.535    | 0.172547599 | count | 1 |
| PGK1       | 0.1211103 | 0.0565196 | 2.1428 | 0.0322   | 0.172662056 | count | 1 |
| LMBRD2     | 0.1689583 | 0.3979419 | 0.4246 | 0.671    | 0.172669966 | count | 1 |
| ZNF440     | 0.2151586 | 0.4542655 | 0.4736 | 0.636    | 0.172922917 | count | 1 |
| TMEM218    | 0.132822  | 0.1774422 | 0.7485 | 0.454    | 0.173043825 | count | 1 |
| ARID3B     | 0.9254604 | 0.830274  | 1.1146 | 0.265    | 0.173097162 | count | 1 |
| TTY15      | 0.1568869 | 0.2831208 | 0.5541 | 0.58     | 0.173145148 | count | 1 |
| TMEM53     | 0.1533812 | 0.2751725 | 0.5574 | 0.577    | 0.173169014 | count | 1 |
| DARS2      | 0.1819048 | 0.4994065 | 0.3642 | 0.716    | 0.173360415 | count | 1 |
| NCBP3      | 0.1280238 | 0.1335792 | 0.9584 | 0.338    | 0.173417911 | count | 1 |
| FBXO11     | 0.1314033 | 0.1513659 | 0.8681 | 0.385    | 0.173546731 | count | 1 |
| RPL38      | 0.1208976 | 0.0330268 | 3.6606 | 0.000256 | 0.17363972  | count | 1 |
| SLC27A4    | 0.252287  | 0.5266416 | 0.479  | 0.632    | 0.173676557 | count | 1 |
| C16orf70   | 0.1896511 | 0.4446801 | 0.4265 | 0.67     | 0.173728022 | count | 1 |
| LRSAM1     | 0.163863  | 0.4019453 | 0.4077 | 0.684    | 0.173734617 | count | 1 |
| TUT4       | 0.1242697 | 0.1070992 | 1.1603 | 0.246    | 0.173751615 | count | 1 |
| AC234772.3 | 0.5360749 | 0.6972042 | 0.7689 | 0.442    | 0.173929495 | count | 1 |
| PFKL       | 0.1297942 | 0.1459483 | 0.8893 | 0.374    | 0.173970946 | count | 1 |
| TLE2       | 0.1402597 | 0.2006957 | 0.6989 | 0.485    | 0.174031398 | count | 1 |
| CXorf38    | 0.1337967 | 0.2277759 | 0.5874 | 0.557    | 0.174054787 | count | 1 |
| IK         | 0.1226984 | 0.073641  | 1.6662 | 0.0958   | 0.174119707 | count | 1 |
| TARS2      | 0.1787139 | 0.3175447 | 0.5628 | 0.574    | 0.17420651  | count | 1 |
| ZNHIT3     | 0.125913  | 0.1194466 | 1.0541 | 0.292    | 0.174257376 | count | 1 |
| EIF1AX     | 0.1231835 | 0.0711011 | 1.7325 | 0.0833   | 0.174304534 | count | 1 |
| PEX6       | 0.1469827 | 0.299929  | 0.4901 | 0.624    | 0.174386837 | count | 1 |
| HTR2B      | 0.1906174 | 0.4876704 | 0.3909 | 0.696    | 0.174587132 | count | 1 |
| TRIM23     | 0.1377617 | 0.228744  | 0.6023 | 0.547    | 0.174642693 | count | 1 |
| ARMC8      | 0.1362517 | 0.2013763 | 0.6766 | 0.499    | 0.174732895 | count | 1 |
| SPAST      | 0.138199  | 0.2204936 | 0.6268 | 0.531    | 0.174785456 | count | 1 |
| P4HA1      | 0.1322402 | 0.1797677 | 0.7356 | 0.462    | 0.174922441 | count | 1 |
| SEC14L1    | 0.1235987 | 0.0931344 | 1.3271 | 0.185    | 0.175075349 | count | 1 |
| JUN        | 0.1215209 | 0.0509231 | 2.3864 | 0.0171   | 0.175084971 | count | 1 |
| PIGV       | 0.1838267 | 0.4100054 | 0.4484 | 0.654    | 0.175143677 | count | 1 |
| CGGBP1     | 0.1256282 | 0.1062045 | 1.1829 | 0.237    | 0.175400113 | count | 1 |
| HIST1H4C   | 0.1233092 | 0.080714  | 1.5277 | 0.127    | 0.175446422 | count | 1 |
| APPBP2     | 0.1338752 | 0.2090027 | 0.6405 | 0.522    | 0.175464587 | count | 1 |
| PTCD3      | 0.1411333 | 0.2203981 | 0.6404 | 0.522    | 0.175640729 | count | 1 |
| AC004241.1 | 0.460901  | 0.7745338 | 0.5951 | 0.552    | 0.175651234 | count | 1 |
| ARID3A     | 0.460901  | 0.7745338 | 0.5951 | 0.552    | 0.175651234 | count | 1 |
| TTC21A     | 0.460901  | 0.7970103 | 0.5783 | 0.563    | 0.175651234 | count | 1 |
| BAG5       | 0.1268707 | 0.1039757 | 1.2202 | 0.222    | 0.175662362 | count | 1 |
| UBR7       | 0.1473636 | 0.2375293 | 0.6204 | 0.535    | 0.175725408 | count | 1 |
| EIF3M      | 0.1238248 | 0.0654555 | 1.8917 | 0.0586   | 0.17580304  | count | 1 |

|              |           |           |        |          |             |       |             |
|--------------|-----------|-----------|--------|----------|-------------|-------|-------------|
| ACAA2        | 0.129809  | 0.1404756 | 0.9241 | 0.356    | 0.175827972 | count | 1           |
| RPS15        | 0.1221353 | 0.0205453 | 5.9447 | 3.12E-09 | 0.176030905 | count | 7.39E-05    |
| SLC25A25-AS1 | 0.5452533 | 0.7592324 | 0.7182 | 0.473    | 0.17638554  | count | 1           |
| DIRC2        | 0.1657097 | 0.3429932 | 0.4831 | 0.629    | 0.176772043 | count | 1           |
| CREBBP       | 0.1347321 | 0.1880139 | 0.7166 | 0.474    | 0.176802016 | count | 1           |
| TUBGCP6      | 0.2476722 | 0.5306825 | 0.4667 | 0.641    | 0.176823202 | count | 1           |
| ATP1B1       | 0.2476837 | 0.4995643 | 0.4958 | 0.62     | 0.17683098  | count | 1           |
| HMBS         | 0.1691978 | 0.3217527 | 0.5259 | 0.599    | 0.176875871 | count | 1           |
| ZSWIM6       | 0.1491192 | 0.2551969 | 0.5843 | 0.559    | 0.176893215 | count | 1           |
| RBCK1        | 0.1260293 | 0.0989961 | 1.2731 | 0.203    | 0.1770822   | count | 1           |
| TCOF1        | 0.1524201 | 0.2496196 | 0.6106 | 0.542    | 0.177147468 | count | 1           |
| NUMA1        | 0.1296419 | 0.14112   | 0.9187 | 0.358    | 0.177172851 | count | 1           |
| ATG4A        | 0.1519629 | 0.2379322 | 0.6387 | 0.523    | 0.177178042 | count | 1           |
| NUP37        | 0.1380441 | 0.200675  | 0.6879 | 0.492    | 0.177183464 | count | 1           |
| FXN          | 0.1421857 | 0.2256398 | 0.6301 | 0.529    | 0.177201404 | count | 1           |
| PTMS         | 0.1234272 | 0.041585  | 2.9681 | 0.00302  | 0.177270059 | count | 1           |
| BIRC6        | 0.1310402 | 0.1518736 | 0.8628 | 0.388    | 0.177292872 | count | 1           |
| RARS         | 0.1328879 | 0.178026  | 0.7465 | 0.455    | 0.177405017 | count | 1           |
| DSEL         | 0.1461342 | 0.2257468 | 0.6473 | 0.517    | 0.177429442 | count | 1           |
| ALS2         | 0.1676094 | 0.3449238 | 0.4859 | 0.627    | 0.177631932 | count | 1           |
| CC2D2A       | 0.1452557 | 0.2737491 | 0.5306 | 0.596    | 0.177745994 | count | 1           |
| YWHAE        | 0.1241621 | 0.0472976 | 2.6251 | 0.00871  | 0.177761098 | count | 1           |
| CUTC         | 0.1331664 | 0.1554995 | 0.8564 | 0.392    | 0.177775246 | count | 1           |
| BDP1         | 0.1264232 | 0.1059787 | 1.1929 | 0.233    | 0.177854145 | count | 1           |
| TMEM234      | 0.1497209 | 0.2664095 | 0.562  | 0.574    | 0.178057604 | count | 1           |
| RPS6KA3      | 0.1306173 | 0.1282905 | 1.0181 | 0.309    | 0.178392993 | count | 1           |
| PRKRIP1      | 0.1377033 | 0.1731899 | 0.7951 | 0.427    | 0.178426981 | count | 1           |
| GPAM         | 0.1762523 | 0.4117878 | 0.428  | 0.669    | 0.178472321 | count | 1           |
| UBTD1        | 0.1325417 | 0.1547826 | 0.8563 | 0.392    | 0.1786192   | count | 1           |
| WDR55        | 0.1421681 | 0.2154899 | 0.6597 | 0.509    | 0.178653563 | count | 1           |
| ARID4A       | 0.1277915 | 0.1054533 | 1.2118 | 0.226    | 0.178762518 | count | 1           |
| POT1         | 0.1710394 | 0.3516802 | 0.4863 | 0.627    | 0.178762609 | count | 1           |
| UBE2E3       | 0.1272655 | 0.0835354 | 1.5235 | 0.128    | 0.178958155 | count | 1           |
| STARD3NL     | 0.1310559 | 0.1268576 | 1.0331 | 0.302    | 0.179063415 | count | 1           |
| ZGRF1        | 0.3744372 | 0.8449427 | 0.4432 | 0.658    | 0.1790759   | count | 1           |
| PLAA         | 0.1587541 | 0.2558234 | 0.6206 | 0.535    | 0.1791463   | count | 1           |
| CDS2         | 0.1338556 | 0.1575541 | 0.8496 | 0.396    | 0.17918962  | count | 1           |
| KLHL36       | 0.144609  | 0.2382444 | 0.607  | 0.544    | 0.179381591 | count | 1           |
| LRRC23       | 0.1432061 | 0.2357067 | 0.6076 | 0.544    | 0.179470409 | count | 1           |
| REV3L        | 0.1314844 | 0.1448011 | 0.908  | 0.364    | 0.179998841 | count | 1           |
| MICU3        | 0.1518426 | 0.2715534 | 0.5592 | 0.576    | 0.180086872 | count | 1           |
| RSPRY1       | 0.1422736 | 0.1955273 | 0.7276 | 0.467    | 0.180112258 | count | 1           |
| PSTPIP2      | 0.5594828 | 0.8553303 | 0.6541 | 0.513    | 0.180160768 | count | 1           |
| COG3         | 0.1527532 | 0.2742406 | 0.557  | 0.578    | 0.180182911 | count | 1           |
| RPS3         | 0.1250193 | 0.0216631 | 5.7711 | 8.75E-09 | 0.180239698 | count | 0.000206728 |



|            |           |           |        |          |             |       |   |
|------------|-----------|-----------|--------|----------|-------------|-------|---|
| ZNF667-AS1 | 0.1301437 | 0.1175602 | 1.107  | 0.268    | 0.180327829 | count | 1 |
| TMEM14C    | 0.1260972 | 0.0537454 | 2.3462 | 0.019    | 0.180401404 | count | 1 |
| WDR70      | 0.1403414 | 0.184306  | 0.7615 | 0.446    | 0.180444773 | count | 1 |
| LILRB3     | 0.9853701 | 1.0456905 | 0.9423 | 0.346    | 0.180504061 | count | 1 |
| SCML2      | 0.9853701 | 1.0945184 | 0.9003 | 0.368    | 0.180504061 | count | 1 |
| NKAIN2     | 0.9853701 | 1.182762  | 0.8331 | 0.405    | 0.180504061 | count | 1 |
| TRIM62     | 0.9853701 | 1.1993312 | 0.8216 | 0.411    | 0.180504061 | count | 1 |
| ARL6IP1    | 0.1271982 | 0.0818522 | 1.554  | 0.12     | 0.180556149 | count | 1 |
| PPP1R7     | 0.1301812 | 0.1063271 | 1.2243 | 0.221    | 0.180725707 | count | 1 |
| GAPVD1     | 0.1421621 | 0.1994853 | 0.7126 | 0.476    | 0.180784707 | count | 1 |
| DHRS12     | 0.1474935 | 0.3235023 | 0.4559 | 0.648    | 0.180789187 | count | 1 |
| SOCS5      | 0.1453385 | 0.2595824 | 0.5599 | 0.576    | 0.18082977  | count | 1 |
| SUPT20H    | 0.1398886 | 0.1873535 | 0.7467 | 0.455    | 0.180950948 | count | 1 |
| LNPK       | 0.1625723 | 0.3106625 | 0.5233 | 0.601    | 0.181022343 | count | 1 |
| PANK2      | 0.1426985 | 0.1901522 | 0.7504 | 0.453    | 0.181060758 | count | 1 |
| SLC25A30   | 0.2009399 | 0.3948077 | 0.509  | 0.611    | 0.181097262 | count | 1 |
| LIG1       | 0.1927144 | 0.3807056 | 0.5062 | 0.613    | 0.181175374 | count | 1 |
| TRIM44     | 0.1297363 | 0.1111109 | 1.1676 | 0.243    | 0.181204844 | count | 1 |
| RAI14      | 0.1300478 | 0.1137686 | 1.1431 | 0.253    | 0.181450424 | count | 1 |
| MT-ND5     | 0.1261159 | 0.0377749 | 3.3386 | 0.000853 | 0.181482759 | count | 1 |
| SLC25A38   | 0.1459611 | 0.2139596 | 0.6822 | 0.495    | 0.181597805 | count | 1 |
| HDAC7      | 0.132664  | 0.1282329 | 1.0346 | 0.301    | 0.181609036 | count | 1 |
| ZNF248     | 0.1780792 | 0.3344507 | 0.5325 | 0.594    | 0.181786005 | count | 1 |
| CAPRIN1    | 0.1334627 | 0.1422094 | 0.9385 | 0.348    | 0.181877515 | count | 1 |
| NUMBL      | 0.2020119 | 0.3713866 | 0.5439 | 0.587    | 0.182032358 | count | 1 |
| CLPX       | 0.1433446 | 0.2048867 | 0.6996 | 0.484    | 0.182077723 | count | 1 |
| TWF1       | 0.1350374 | 0.1457614 | 0.9264 | 0.354    | 0.182084714 | count | 1 |
| IFT52      | 0.1366983 | 0.1497037 | 0.9131 | 0.361    | 0.182162112 | count | 1 |
| RNF20      | 0.1386111 | 0.2025013 | 0.6845 | 0.494    | 0.182195069 | count | 1 |
| UTP18      | 0.138199  | 0.1804309 | 0.7659 | 0.444    | 0.182279325 | count | 1 |
| ZNF445     | 0.1721244 | 0.3587644 | 0.4798 | 0.631    | 0.182324191 | count | 1 |
| HNRNP3     | 0.1297389 | 0.0817921 | 1.5862 | 0.113    | 0.182372967 | count | 1 |
| AP000254.1 | 0.3264742 | 0.960306  | 0.34   | 0.734    | 0.182428168 | count | 1 |
| NBN        | 0.134324  | 0.149532  | 0.8983 | 0.369    | 0.182535323 | count | 1 |
| OGDH       | 0.150395  | 0.2475607 | 0.6075 | 0.544    | 0.182550393 | count | 1 |
| TACC2      | 0.1594431 | 0.2404058 | 0.6632 | 0.507    | 0.182704754 | count | 1 |
| SLC39A6    | 0.160724  | 0.3274119 | 0.4909 | 0.624    | 0.182784418 | count | 1 |
| PASK       | 0.5695479 | 0.7661472 | 0.7434 | 0.457    | 0.182807436 | count | 1 |
| ERI3       | 0.1358989 | 0.145582  | 0.9335 | 0.351    | 0.182827789 | count | 1 |
| HOMER2     | 0.2282103 | 0.5625473 | 0.4057 | 0.685    | 0.182963872 | count | 1 |
| RSRP1      | 0.1290191 | 0.0709055 | 1.8196 | 0.0689   | 0.183050037 | count | 1 |
| SPTLC1     | 0.1353437 | 0.1298498 | 1.0423 | 0.297    | 0.183197356 | count | 1 |
| ADCK1      | 0.3280378 | 0.8010969 | 0.4095 | 0.682    | 0.183227844 | count | 1 |
| TSPAN11    | 0.2785839 | 0.5427844 | 0.5132 | 0.608    | 0.183267648 | count | 1 |
| KDM3B      | 0.1509981 | 0.2601195 | 0.5805 | 0.562    | 0.183274993 | count | 1 |

|            |           |           |        |          |             |       |             |
|------------|-----------|-----------|--------|----------|-------------|-------|-------------|
| CDC37L1    | 0.1384575 | 0.2093724 | 0.6613 | 0.508    | 0.183566948 | count | 1           |
| SF3B1      | 0.1302528 | 0.0742807 | 1.7535 | 0.0796   | 0.184223874 | count | 1           |
| ST13       | 0.12869   | 0.0513171 | 2.5077 | 0.0122   | 0.184246115 | count | 1           |
| WRB        | 0.1343746 | 0.1438919 | 0.9339 | 0.35     | 0.18424686  | count | 1           |
| STARD10    | 0.1445547 | 0.2461045 | 0.5874 | 0.557    | 0.184391073 | count | 1           |
| SHROOM2    | 0.2589328 | 0.5449781 | 0.4751 | 0.635    | 0.18441798  | count | 1           |
| ZNF816     | 0.2590456 | 0.6421026 | 0.4034 | 0.687    | 0.184493863 | count | 1           |
| FARSA      | 0.1427043 | 0.1876697 | 0.7604 | 0.447    | 0.184570327 | count | 1           |
| AC098487.1 | 0.2431599 | 0.5231939 | 0.4648 | 0.642    | 0.184723481 | count | 1           |
| USP33      | 0.1379887 | 0.1571313 | 0.8782 | 0.38     | 0.184839619 | count | 1           |
| TMEM237    | 0.1607962 | 0.2885281 | 0.5573 | 0.577    | 0.184889362 | count | 1           |
| IFNAR2     | 0.1372394 | 0.183907  | 0.7462 | 0.456    | 0.184925708 | count | 1           |
| FAM96A     | 0.1359568 | 0.1436143 | 0.9467 | 0.344    | 0.185012145 | count | 1           |
| CEP112     | 0.1343786 | 0.1273007 | 1.0556 | 0.291    | 0.185032007 | count | 1           |
| SSB        | 0.1298085 | 0.0570836 | 2.274  | 0.023    | 0.185093629 | count | 1           |
| DNAJC12    | 0.2372041 | 0.5168475 | 0.4589 | 0.646    | 0.185275111 | count | 1           |
| SLC35E3    | 0.1404213 | 0.2479047 | 0.5664 | 0.571    | 0.185296752 | count | 1           |
| GPR82      | 0.5793753 | 0.9361844 | 0.6189 | 0.536    | 0.18537277  | count | 1           |
| RAB9A      | 0.138662  | 0.16045   | 0.8642 | 0.388    | 0.185452476 | count | 1           |
| SRP72      | 0.1308899 | 0.0738526 | 1.7723 | 0.0765   | 0.185505036 | count | 1           |
| TMSB10     | 0.1289236 | 0.0249812 | 5.1608 | 2.63E-07 | 0.185872862 | count | 0.006169454 |
| UTP14A     | 0.1445038 | 0.2033312 | 0.7107 | 0.477    | 0.185928241 | count | 1           |
| ZRSR2      | 0.1535948 | 0.2225907 | 0.69   | 0.49     | 0.186010512 | count | 1           |
| AC007114.2 | 0.3586305 | 0.7676371 | 0.4672 | 0.64     | 0.1860347   | count | 1           |
| NR2C1      | 0.1476497 | 0.2130727 | 0.693  | 0.488    | 0.18642159  | count | 1           |
| MOCS3      | 0.5834607 | 0.6597215 | 0.8844 | 0.377    | 0.186433746 | count | 1           |
| MXD3       | 0.3601635 | 1.109316  | 0.3247 | 0.745    | 0.186752633 | count | 1           |
| COMMD10    | 0.1369077 | 0.1413829 | 0.9683 | 0.333    | 0.186800929 | count | 1           |
| EAPP       | 0.1329394 | 0.091187  | 1.4579 | 0.145    | 0.186950489 | count | 1           |
| PCDHGA10   | 0.1696192 | 0.3580798 | 0.4737 | 0.636    | 0.186959004 | count | 1           |
| SLC18B1    | 0.214789  | 0.3872878 | 0.5546 | 0.579    | 0.187031198 | count | 1           |
| EIF3G      | 0.1308704 | 0.0516546 | 2.5336 | 0.0113   | 0.187053208 | count | 1           |
| MS4A6A     | 0.2018096 | 0.5440898 | 0.3709 | 0.711    | 0.187053269 | count | 1           |
| FAM193B    | 0.2151171 | 0.3647393 | 0.5898 | 0.555    | 0.187306557 | count | 1           |
| TUSC1      | 0.136659  | 0.1282221 | 1.0658 | 0.287    | 0.187336742 | count | 1           |
| BCL7C      | 0.1324312 | 0.0782409 | 1.6926 | 0.0906   | 0.187414343 | count | 1           |
| PSKH1      | 0.1649186 | 0.4005365 | 0.4117 | 0.681    | 0.187483981 | count | 1           |
| RAD17      | 0.1504121 | 0.1897447 | 0.7927 | 0.428    | 0.187636993 | count | 1           |
| ACSM1      | 0.5890233 | 1.0462768 | 0.563  | 0.574    | 0.187873231 | count | 1           |
| AP002433.1 | 0.5890233 | 1.0624537 | 0.5544 | 0.579    | 0.187873231 | count | 1           |
| MCF2L-AS1  | 0.5890233 | 1.0624537 | 0.5544 | 0.579    | 0.187873231 | count | 1           |
| SLC16A8    | 0.5890233 | 1.14478   | 0.5145 | 0.607    | 0.187873231 | count | 1           |
| EIF4A1     | 0.1327783 | 0.073355  | 1.8101 | 0.0704   | 0.187928729 | count | 1           |
| RHBDL2     | 0.3952899 | 0.8109777 | 0.4874 | 0.626    | 0.18794246  | count | 1           |
| AL356056.2 | 0.3952899 | 0.8557956 | 0.4619 | 0.644    | 0.18794246  | count | 1           |

|             |           |           |        |        |             |       |   |
|-------------|-----------|-----------|--------|--------|-------------|-------|---|
| TBC1D4      | 0.1596258 | 0.2701252 | 0.5909 | 0.555  | 0.188189302 | count | 1 |
| ZFX         | 0.1459904 | 0.1726869 | 0.8454 | 0.398  | 0.188321103 | count | 1 |
| MDFI        | 0.148318  | 0.2008627 | 0.7384 | 0.46   | 0.188347352 | count | 1 |
| PARS2       | 0.7431726 | 1.0307432 | 0.721  | 0.471  | 0.188536368 | count | 1 |
| NOMO2       | 0.7431726 | 1.0307432 | 0.721  | 0.471  | 0.188536368 | count | 1 |
| ERP29       | 0.1322503 | 0.0590445 | 2.2398 | 0.0252 | 0.18864025  | count | 1 |
| RAD54L2     | 0.1760041 | 0.3071528 | 0.573  | 0.567  | 0.188686352 | count | 1 |
| CHEK2       | 0.3647517 | 0.5569252 | 0.6549 | 0.513  | 0.188897518 | count | 1 |
| SAMD12      | 0.163209  | 0.2920739 | 0.5588 | 0.576  | 0.188903435 | count | 1 |
| AL365203.2  | 0.3187285 | 0.6588366 | 0.4838 | 0.629  | 0.188946798 | count | 1 |
| SNX5        | 0.1358267 | 0.1082489 | 1.2548 | 0.21   | 0.188962128 | count | 1 |
| SLBP        | 0.1387933 | 0.139827  | 0.9926 | 0.321  | 0.189201774 | count | 1 |
| CAMK2G      | 0.1477959 | 0.2311961 | 0.6393 | 0.523  | 0.189252101 | count | 1 |
| ORC2        | 0.1563355 | 0.2355455 | 0.6637 | 0.507  | 0.189294197 | count | 1 |
| CNTROB      | 0.2765187 | 0.5702823 | 0.4849 | 0.628  | 0.189338571 | count | 1 |
| TMEM147-AS1 | 1.061359  | 1.033803  | 1.0267 | 0.305  | 0.189369249 | count | 1 |
| PPAN        | 0.1621223 | 0.2671196 | 0.6069 | 0.544  | 0.189445284 | count | 1 |
| AC018647.2  | 0.2771285 | 0.5472781 | 0.5064 | 0.613  | 0.189730376 | count | 1 |
| KRTCAP2     | 0.1335615 | 0.0702742 | 1.9006 | 0.0575 | 0.189803504 | count | 1 |
| LGALSL      | 0.1436652 | 0.1829472 | 0.7853 | 0.432  | 0.189859138 | count | 1 |
| AGPAT3      | 0.153135  | 0.2568016 | 0.5963 | 0.551  | 0.189861185 | count | 1 |
| IER5        | 0.136123  | 0.1140025 | 1.194  | 0.233  | 0.1899829   | count | 1 |
| SNAP25      | 0.59751   | 0.6787438 | 0.8803 | 0.379  | 0.190058016 | count | 1 |
| SMC5        | 0.1429976 | 0.1423126 | 1.0048 | 0.315  | 0.190094726 | count | 1 |
| RPS6KA4     | 0.1977021 | 0.2949755 | 0.6702 | 0.503  | 0.190146306 | count | 1 |
| MORN2       | 0.1440962 | 0.1880325 | 0.7663 | 0.444  | 0.19022357  | count | 1 |
| EGLN2       | 0.3676243 | 0.778425  | 0.4723 | 0.637  | 0.190237414 | count | 1 |
| SLC7A6OS    | 0.1490345 | 0.211377  | 0.7051 | 0.481  | 0.190258773 | count | 1 |
| PPT1        | 0.1385543 | 0.1259705 | 1.0999 | 0.271  | 0.190349665 | count | 1 |
| KLHDC2      | 0.139019  | 0.1381341 | 1.0064 | 0.314  | 0.190389169 | count | 1 |
| AC092053.2  | 0.5990937 | 1.1692519 | 0.5124 | 0.608  | 0.190464185 | count | 1 |
| DNAAF3      | 0.5990937 | 1.1683556 | 0.5128 | 0.608  | 0.190464185 | count | 1 |
| MMP24       | 0.5990937 | 1.1747996 | 0.51   | 0.61   | 0.190464185 | count | 1 |
| ARF6        | 0.1375505 | 0.1035966 | 1.3278 | 0.184  | 0.19052399  | count | 1 |
| INTS6       | 0.1379862 | 0.1042151 | 1.3241 | 0.186  | 0.190715849 | count | 1 |
| AC072061.1  | 0.3428573 | 0.7316211 | 0.4686 | 0.639  | 0.190771986 | count | 1 |
| NYAP1       | 0.7551317 | 1.0631043 | 0.7103 | 0.478  | 0.190799121 | count | 1 |
| AL445248.1  | 0.7551317 | 1.122288  | 0.6729 | 0.501  | 0.190799121 | count | 1 |
| POLD1       | 0.4466783 | 0.617329  | 0.7236 | 0.469  | 0.190955501 | count | 1 |
| ZNFX1       | 0.1416402 | 0.1679383 | 0.8434 | 0.399  | 0.191012462 | count | 1 |
| TSPAN9      | 0.1394478 | 0.1314099 | 1.0612 | 0.289  | 0.191148419 | count | 1 |
| ZNF846      | 0.1795833 | 0.3594043 | 0.4997 | 0.617  | 0.191277441 | count | 1 |
| SAP30BP     | 0.1391437 | 0.1146447 | 1.2137 | 0.225  | 0.191310876 | count | 1 |
| MCC         | 0.1705465 | 0.2857399 | 0.5969 | 0.551  | 0.191438496 | count | 1 |
| AC004918.1  | 0.2455485 | 0.953933  | 0.2574 | 0.797  | 0.19148155  | count | 1 |

|            |           |           |        |        |             |       |   |
|------------|-----------|-----------|--------|--------|-------------|-------|---|
| DHRS7B     | 0.1417785 | 0.1603552 | 0.8842 | 0.377  | 0.191488746 | count | 1 |
| MAPK12     | 0.1473009 | 0.1805462 | 0.8159 | 0.415  | 0.191514007 | count | 1 |
| PIAS1      | 0.1447971 | 0.2002277 | 0.7232 | 0.47   | 0.191643548 | count | 1 |
| TXNDC12    | 0.1359696 | 0.084039  | 1.6179 | 0.106  | 0.191664253 | count | 1 |
| AC092279.1 | 0.603849  | 0.96827   | 0.6236 | 0.533  | 0.191680942 | count | 1 |
| ZSCAN25    | 0.23406   | 0.4564257 | 0.5128 | 0.608  | 0.191706869 | count | 1 |
| LETM1      | 0.1511782 | 0.2111556 | 0.716  | 0.474  | 0.191736669 | count | 1 |
| EPM2AIP1   | 0.152359  | 0.2419804 | 0.6296 | 0.529  | 0.191844414 | count | 1 |
| C18orf32   | 0.1695725 | 0.2431732 | 0.6973 | 0.486  | 0.19193929  | count | 1 |
| SNAP23     | 0.1372196 | 0.097515  | 1.4072 | 0.159  | 0.192002303 | count | 1 |
| YME1L1     | 0.1371012 | 0.0935113 | 1.4661 | 0.143  | 0.192061254 | count | 1 |
| VWA8       | 0.2401048 | 0.4940209 | 0.486  | 0.627  | 0.19206869  | count | 1 |
| MTCH1      | 0.1357012 | 0.0710223 | 1.9107 | 0.0561 | 0.192118097 | count | 1 |
| RABL2B     | 0.2295697 | 0.4189883 | 0.5479 | 0.584  | 0.19213045  | count | 1 |
| AL158835.1 | 0.1901991 | 0.7162723 | 0.2655 | 0.791  | 0.192254488 | count | 1 |
| CREM       | 0.1413411 | 0.1453403 | 0.9725 | 0.331  | 0.192403485 | count | 1 |
| SOD2       | 0.134771  | 0.0888934 | 1.5161 | 0.13   | 0.192455465 | count | 1 |
| SNRPC      | 0.1370239 | 0.0890678 | 1.5384 | 0.124  | 0.192534724 | count | 1 |
| SNRPD2     | 0.1347411 | 0.0522364 | 2.5794 | 0.01   | 0.192575729 | count | 1 |
| BCKDK      | 0.1463694 | 0.1705764 | 0.8581 | 0.391  | 0.192673176 | count | 1 |
| SOS2       | 0.1469277 | 0.2090635 | 0.7028 | 0.482  | 0.192715151 | count | 1 |
| BCAR3      | 0.1637147 | 0.2233052 | 0.7331 | 0.464  | 0.192948471 | count | 1 |
| SNX6       | 0.1356029 | 0.0679714 | 1.995  | 0.0461 | 0.19307906  | count | 1 |
| LINC01695  | 0.7674375 | 1.1800149 | 0.6504 | 0.516  | 0.193105092 | count | 1 |
| AC114271.1 | 0.6096015 | 1.071166  | 0.5691 | 0.569  | 0.193147119 | count | 1 |
| NUP210L    | 0.6096015 | 1.0907615 | 0.5589 | 0.576  | 0.193147119 | count | 1 |
| TRIM24     | 0.1538184 | 0.1910261 | 0.8052 | 0.421  | 0.193170109 | count | 1 |
| FPGS       | 0.1599523 | 0.2463067 | 0.6494 | 0.516  | 0.193216547 | count | 1 |
| RBBP8      | 0.1578167 | 0.2190793 | 0.7204 | 0.471  | 0.19331495  | count | 1 |
| XRCC4      | 0.1715215 | 0.2611016 | 0.6569 | 0.511  | 0.193324697 | count | 1 |
| TRRAP      | 0.1755495 | 0.3858277 | 0.455  | 0.649  | 0.193380337 | count | 1 |
| NKX3-1     | 0.2118945 | 0.3849205 | 0.5505 | 0.582  | 0.193434736 | count | 1 |
| TRMT10A    | 0.1748198 | 0.2823743 | 0.6191 | 0.536  | 0.193523862 | count | 1 |
| NEK8       | 0.3098382 | 0.6209426 | 0.499  | 0.618  | 0.193552269 | count | 1 |
| SDHAF2     | 0.1408753 | 0.1340967 | 1.0506 | 0.294  | 0.193560745 | count | 1 |
| CTIF       | 0.179568  | 0.3389625 | 0.5298 | 0.596  | 0.19356297  | count | 1 |
| EXOC8      | 0.1777796 | 0.2734298 | 0.6502 | 0.516  | 0.193800183 | count | 1 |
| NOSIP      | 0.1376775 | 0.0919649 | 1.4971 | 0.134  | 0.193811758 | count | 1 |
| ADAT3      | 1.1014591 | 1.194945  | 0.9218 | 0.357  | 0.193818462 | count | 1 |
| TMEM241    | 0.2959335 | 0.5508837 | 0.5372 | 0.591  | 0.193903888 | count | 1 |
| PFAS       | 0.3280076 | 0.5640024 | 0.5816 | 0.561  | 0.193998411 | count | 1 |
| ARRDC3     | 0.1390855 | 0.1399318 | 0.994  | 0.32   | 0.194020831 | count | 1 |
| FAF1       | 0.1565932 | 0.2105659 | 0.7437 | 0.457  | 0.194108558 | count | 1 |
| SAMD9      | 0.1436147 | 0.1475818 | 0.9731 | 0.331  | 0.194350431 | count | 1 |
| UNKL       | 0.2130259 | 0.3877191 | 0.5494 | 0.583  | 0.194433225 | count | 1 |

|             |           |           |        |          |             |       |             |
|-------------|-----------|-----------|--------|----------|-------------|-------|-------------|
| SERTAD4-AS1 | 0.1405085 | 0.1090957 | 1.2879 | 0.198    | 0.194522056 | count | 1           |
| VEZF1       | 0.1423797 | 0.1318702 | 1.0797 | 0.28     | 0.194756109 | count | 1           |
| ZNF446      | 0.1985533 | 0.375289  | 0.5291 | 0.597    | 0.195002776 | count | 1           |
| PDIK1L      | 0.1986278 | 0.4081894 | 0.4866 | 0.627    | 0.195073971 | count | 1           |
| ANAPC7      | 0.1622689 | 0.2235904 | 0.7257 | 0.468    | 0.195124955 | count | 1           |
| RPS26       | 0.1354617 | 0.0239625 | 5.6531 | 1.74E-08 | 0.195143031 | count | 0.000410797 |
| PPP1R10     | 0.1378924 | 0.0763538 | 1.806  | 0.071    | 0.195216869 | count | 1           |
| EGFL8       | 0.5220406 | 1.1097655 | 0.4704 | 0.638    | 0.195235381 | count | 1           |
| AASS        | 0.1811597 | 0.2630418 | 0.6887 | 0.491    | 0.195245275 | count | 1           |
| FAM219A     | 0.1592144 | 0.2570261 | 0.6194 | 0.536    | 0.195360648 | count | 1           |
| ZNF441      | 0.2057743 | 0.4753386 | 0.4329 | 0.665    | 0.195433668 | count | 1           |
| CPNE2       | 0.1403428 | 0.107176  | 1.3095 | 0.19     | 0.195437562 | count | 1           |
| CENPO       | 0.78009   | 1.0594841 | 0.7363 | 0.462    | 0.195452545 | count | 1           |
| NHS         | 0.78009   | 1.1106836 | 0.7024 | 0.483    | 0.195452545 | count | 1           |
| NDST2       | 0.78009   | 1.1836432 | 0.6591 | 0.51     | 0.195452545 | count | 1           |
| DET1        | 0.2142545 | 0.4547621 | 0.4711 | 0.638    | 0.195517069 | count | 1           |
| ZNF623      | 0.2058987 | 0.4696733 | 0.4384 | 0.661    | 0.19554828  | count | 1           |
| AL160006.1  | 0.6195796 | 0.9789903 | 0.6329 | 0.527    | 0.195675474 | count | 1           |
| EBLN3P      | 0.1454168 | 0.1545762 | 0.9407 | 0.347    | 0.195772951 | count | 1           |
| PARP4       | 0.148533  | 0.1776873 | 0.8359 | 0.403    | 0.195835493 | count | 1           |
| GLMN        | 0.185154  | 0.3406916 | 0.5435 | 0.587    | 0.19583691  | count | 1           |
| PINX1       | 0.160277  | 0.2523728 | 0.6351 | 0.525    | 0.195936703 | count | 1           |
| CCDC36      | 0.2761542 | 0.6301783 | 0.4382 | 0.661    | 0.195956857 | count | 1           |
| MCMBP       | 0.1547998 | 0.1842641 | 0.8401 | 0.401    | 0.196069379 | count | 1           |
| EIF4A3      | 0.1415113 | 0.1022551 | 1.3839 | 0.166    | 0.19633817  | count | 1           |
| ZNF532      | 0.159753  | 0.2611675 | 0.6117 | 0.541    | 0.196360111 | count | 1           |
| CHAF1A      | 0.622855  | 0.6314215 | 0.9864 | 0.324    | 0.19650126  | count | 1           |
| RPS5        | 0.1364129 | 0.0238132 | 5.7285 | 1.12E-08 | 0.196552897 | count | 0.000264555 |
| C1GALT1C1   | 0.1441513 | 0.140333  | 1.0272 | 0.304    | 0.196609253 | count | 1           |
| GDI2        | 0.1389496 | 0.0670735 | 2.0716 | 0.0384   | 0.196628648 | count | 1           |
| AC011468.5  | 0.5264999 | 0.7718655 | 0.6821 | 0.495    | 0.196631425 | count | 1           |
| ATG10       | 0.1763794 | 0.2851445 | 0.6186 | 0.536    | 0.197018098 | count | 1           |
| RPN1        | 0.1417904 | 0.1096801 | 1.2928 | 0.196    | 0.197150491 | count | 1           |
| RNF6        | 0.1540443 | 0.1928995 | 0.7986 | 0.425    | 0.197194095 | count | 1           |
| MTFR1       | 0.2194631 | 0.3790852 | 0.5789 | 0.563    | 0.197207019 | count | 1           |
| CRKL        | 0.1719572 | 0.3006884 | 0.5719 | 0.567    | 0.197531877 | count | 1           |
| DAP3        | 0.1487248 | 0.1404239 | 1.0591 | 0.29     | 0.197579325 | count | 1           |
| MRPL37      | 0.1441535 | 0.1323497 | 1.0892 | 0.276    | 0.197718611 | count | 1           |
| LEPROT      | 0.1379762 | 0.0468434 | 2.9455 | 0.00325  | 0.197917673 | count | 1           |
| AIP         | 0.141475  | 0.0937497 | 1.5091 | 0.131    | 0.198154087 | count | 1           |
| SEN5        | 0.1512564 | 0.1791382 | 0.8444 | 0.399    | 0.198359549 | count | 1           |
| C2CD2L      | 0.2799082 | 0.4991008 | 0.5608 | 0.575    | 0.19845991  | count | 1           |
| STX4        | 0.1482236 | 0.1495572 | 0.9911 | 0.322    | 0.198709317 | count | 1           |
| DIP2C       | 0.221267  | 0.4018925 | 0.5506 | 0.582    | 0.198770436 | count | 1           |
| TMEM138     | 0.1612688 | 0.257879  | 0.6254 | 0.532    | 0.19888123  | count | 1           |

|            |           |           |        |          |             |       |            |
|------------|-----------|-----------|--------|----------|-------------|-------|------------|
| PCYT2      | 0.1816414 | 0.2804961 | 0.6476 | 0.517    | 0.198965741 | count | 1          |
| MRPL38     | 0.4217984 | 1.0518498 | 0.401  | 0.688    | 0.199048604 | count | 1          |
| EEF1AKMT1  | 0.1561388 | 0.2177056 | 0.7172 | 0.473    | 0.199053557 | count | 1          |
| RHNO1      | 0.1801409 | 0.3460346 | 0.5206 | 0.603    | 0.199309062 | count | 1          |
| VHL        | 0.1717952 | 0.2810532 | 0.6113 | 0.541    | 0.199345349 | count | 1          |
| FXR2       | 0.185129  | 0.3626721 | 0.5105 | 0.61     | 0.199437842 | count | 1          |
| RNF19A     | 0.1434321 | 0.114374  | 1.2541 | 0.21     | 0.199501522 | count | 1          |
| RNF148     | 0.535989  | 1.0533278 | 0.5089 | 0.611    | 0.199587525 | count | 1          |
| CARNS1     | 0.535989  | 1.1359852 | 0.4718 | 0.637    | 0.199587525 | count | 1          |
| RPS6       | 0.138503  | 0.0219543 | 6.3087 | 3.27E-10 | 0.199625305 | count | 7.76E-06   |
| NIPA2      | 0.1556336 | 0.1829379 | 0.8507 | 0.395    | 0.199781171 | count | 1          |
| NCL        | 0.1393921 | 0.0487863 | 2.8572 | 0.00431  | 0.199928276 | count | 1          |
| TBC1D10A   | 0.1652853 | 0.1974607 | 0.8371 | 0.403    | 0.200008052 | count | 1          |
| CCDC115    | 0.1452703 | 0.1249981 | 1.1622 | 0.245    | 0.200046375 | count | 1          |
| XPNPEP3    | 0.1731309 | 0.402621  | 0.43   | 0.667    | 0.200219787 | count | 1          |
| BTRC       | 0.1801902 | 0.296448  | 0.6078 | 0.543    | 0.20029597  | count | 1          |
| AP001816.1 | 0.1471252 | 0.1493962 | 0.9848 | 0.325    | 0.200341073 | count | 1          |
| ABCF2      | 0.174456  | 0.2625774 | 0.6644 | 0.506    | 0.200358816 | count | 1          |
| RANBP9     | 0.1550675 | 0.1983089 | 0.7819 | 0.434    | 0.200451114 | count | 1          |
| BBS10      | 0.2138897 | 0.4150279 | 0.5154 | 0.606    | 0.20045179  | count | 1          |
| MTA3       | 0.1672425 | 0.2567149 | 0.6515 | 0.515    | 0.200576425 | count | 1          |
| INCA1      | 0.4728841 | 1.0195224 | 0.4638 | 0.643    | 0.200597078 | count | 1          |
| 7-Sep      | 0.1400682 | 0.0452666 | 3.0943 | 0.00199  | 0.200910642 | count | 1          |
| FGD5-AS1   | 0.1450099 | 0.1104146 | 1.3133 | 0.189    | 0.200965454 | count | 1          |
| IFRD1      | 0.145176  | 0.1082457 | 1.3412 | 0.18     | 0.201128143 | count | 1          |
| GCC2       | 0.1425419 | 0.0894582 | 1.5934 | 0.111    | 0.201141672 | count | 1          |
| RPS21      | 0.1399658 | 0.0294577 | 4.7514 | 2.12E-06 | 0.201265788 | count | 0.04947444 |
| CELF1      | 0.1506845 | 0.2171081 | 0.6941 | 0.488    | 0.201296072 | count | 1          |
| PNRC1      | 0.1399656 | 0.038249  | 3.6593 | 0.000258 | 0.201308086 | count | 1          |
| PEX13      | 0.1592393 | 0.2016148 | 0.7898 | 0.43     | 0.201411344 | count | 1          |
| NAB2       | 0.1727018 | 0.2933631 | 0.5887 | 0.556    | 0.20163476  | count | 1          |
| STK35      | 0.1884473 | 0.3489727 | 0.54   | 0.589    | 0.201750928 | count | 1          |
| ANAPC2     | 0.2469693 | 0.4566171 | 0.5409 | 0.589    | 0.201800394 | count | 1          |
| CREB3L4    | 0.1686818 | 0.2880568 | 0.5856 | 0.558    | 0.201808718 | count | 1          |
| CWF19L2    | 0.1459376 | 0.1456376 | 1.0021 | 0.316    | 0.201827013 | count | 1          |
| CCDC22     | 0.1691278 | 0.2633912 | 0.6421 | 0.521    | 0.201850451 | count | 1          |
| RTCB       | 0.1473069 | 0.1156418 | 1.2738 | 0.203    | 0.201851199 | count | 1          |
| ZFP2       | 0.428871  | 0.694304  | 0.6177 | 0.537    | 0.201980637 | count | 1          |
| FOXO3      | 0.1535134 | 0.1675168 | 0.9164 | 0.36     | 0.202023212 | count | 1          |
| PHF12      | 0.1854808 | 0.3277222 | 0.566  | 0.571    | 0.202033144 | count | 1          |
| CBX4       | 0.1670143 | 0.2586062 | 0.6458 | 0.518    | 0.202076241 | count | 1          |
| VPS33B     | 0.393266  | 0.5444362 | 0.7223 | 0.47     | 0.202096518 | count | 1          |
| ZBTB20-AS2 | 0.3250004 | 0.5077868 | 0.64   | 0.522    | 0.202284888 | count | 1          |
| FBXL18     | 0.5450785 | 1.071377  | 0.5088 | 0.611    | 0.202400782 | count | 1          |
| MYZAP      | 0.5450785 | 1.071377  | 0.5088 | 0.611    | 0.202400782 | count | 1          |

|            |           |           |        |          |             |       |          |
|------------|-----------|-----------|--------|----------|-------------|-------|----------|
| CBY1       | 0.1504752 | 0.1390604 | 1.0821 | 0.279    | 0.202487328 | count | 1        |
| OSBPL10    | 0.1597995 | 0.2147077 | 0.7443 | 0.457    | 0.202580762 | count | 1        |
| GPKOW      | 0.1658306 | 0.2615481 | 0.634  | 0.526    | 0.202652584 | count | 1        |
| H6PD       | 0.1557012 | 0.2070443 | 0.752  | 0.452    | 0.202659341 | count | 1        |
| NOC4L      | 0.1752734 | 0.2734631 | 0.6409 | 0.522    | 0.202660757 | count | 1        |
| RPL39      | 0.1407593 | 0.0232534 | 6.0533 | 1.61E-09 | 0.202837984 | count | 3.81E-05 |
| EPM2A      | 0.4310422 | 0.6196842 | 0.6956 | 0.487    | 0.202878101 | count | 1        |
| HMG20A     | 0.1663628 | 0.2710765 | 0.6137 | 0.539    | 0.2029128   | count | 1        |
| RFC1       | 0.1435209 | 0.0799806 | 1.7944 | 0.0729   | 0.203095122 | count | 1        |
| SNHG15     | 0.1509984 | 0.1368067 | 1.1037 | 0.27     | 0.20312101  | count | 1        |
| SHOC2      | 0.1480719 | 0.1286488 | 1.151  | 0.25     | 0.203250467 | count | 1        |
| AC118553.1 | 0.4803236 | 1.0528615 | 0.4562 | 0.648    | 0.203303752 | count | 1        |
| POLE2      | 0.4803236 | 1.1335337 | 0.4237 | 0.672    | 0.203303752 | count | 1        |
| GATAD2B    | 0.1530627 | 0.1736774 | 0.8813 | 0.378    | 0.203312364 | count | 1        |
| SMAD9      | 0.1503968 | 0.1423488 | 1.0565 | 0.291    | 0.203377061 | count | 1        |
| MFSD5      | 0.1766072 | 0.294986  | 0.5987 | 0.549    | 0.203495075 | count | 1        |
| POMGNT2    | 0.25525   | 0.5105619 | 0.4999 | 0.617    | 0.20359824  | count | 1        |
| SAT2       | 0.1448178 | 0.0910771 | 1.5901 | 0.112    | 0.203601193 | count | 1        |
| SUGT1      | 0.1440128 | 0.0807109 | 1.7843 | 0.0745   | 0.203785194 | count | 1        |
| CX3CL1     | 0.150005  | 0.2161845 | 0.6939 | 0.488    | 0.204011526 | count | 1        |
| TMEM19     | 0.1636652 | 0.2432704 | 0.6728 | 0.501    | 0.204013754 | count | 1        |
| BX088645.1 | 0.8273562 | 1.0180743 | 0.8127 | 0.416    | 0.204014013 | count | 1        |
| CAMTA2     | 0.1875997 | 0.266733  | 0.7033 | 0.482    | 0.20429588  | count | 1        |
| RPS15A     | 0.1417536 | 0.0219076 | 6.4705 | 1.15E-10 | 0.204341616 | count | 2.73E-06 |
| TMEM219    | 0.1430382 | 0.0518784 | 2.7572 | 0.00587  | 0.204596417 | count | 1        |
| PCCA       | 0.1764069 | 0.2627385 | 0.6714 | 0.502    | 0.204617767 | count | 1        |
| ESCO1      | 0.1560115 | 0.1739696 | 0.8968 | 0.37     | 0.204808221 | count | 1        |
| ZNF384     | 0.1880817 | 0.2822197 | 0.6664 | 0.505    | 0.204810451 | count | 1        |
| BUD23      | 0.1462849 | 0.0975685 | 1.4993 | 0.134    | 0.205181909 | count | 1        |
| SETD1B     | 0.213829  | 0.3998553 | 0.5348 | 0.593    | 0.205185816 | count | 1        |
| NUTM2A-AS1 | 0.1613471 | 0.1985818 | 0.8125 | 0.417    | 0.205205301 | count | 1        |
| URB1       | 0.197117  | 0.3322466 | 0.5933 | 0.553    | 0.205386649 | count | 1        |
| PRPF40A    | 0.1457648 | 0.0852223 | 1.7104 | 0.0873   | 0.205451951 | count | 1        |
| AGAP3      | 0.1720007 | 0.2328276 | 0.7387 | 0.46     | 0.20572962  | count | 1        |
| BDNF-AS    | 0.2371665 | 0.5519766 | 0.4297 | 0.667    | 0.205737176 | count | 1        |
| AQR        | 0.1626738 | 0.2008386 | 0.81   | 0.418    | 0.205958    | count | 1        |
| SUPT7L     | 0.1682911 | 0.2669011 | 0.6305 | 0.528    | 0.206006207 | count | 1        |
| MAP3K11    | 0.1489395 | 0.1002135 | 1.4862 | 0.137    | 0.206066919 | count | 1        |
| WASF2      | 0.1438928 | 0.0522828 | 2.7522 | 0.00596  | 0.206077867 | count | 1        |
| PPP1R15A   | 0.1438032 | 0.0542258 | 2.6519 | 0.00805  | 0.206145183 | count | 1        |
| AP001043.1 | 0.4881806 | 1.0736808 | 0.4547 | 0.649    | 0.206147781 | count | 1        |
| GRB7       | 0.4881806 | 1.1438859 | 0.4268 | 0.67     | 0.206147781 | count | 1        |
| MIS18BP1   | 0.1475417 | 0.1122503 | 1.3144 | 0.189    | 0.206184329 | count | 1        |
| LINC00663  | 1.222943  | 1.0569253 | 1.1571 | 0.247    | 0.206385792 | count | 1        |
| FBXO8      | 0.1569866 | 0.2034857 | 0.7715 | 0.44     | 0.206567008 | count | 1        |

|            |           |           |        |          |             |       |          |
|------------|-----------|-----------|--------|----------|-------------|-------|----------|
| SUPT16H    | 0.1490121 | 0.1191159 | 1.251  | 0.211    | 0.206632445 | count | 1        |
| ZNF839     | 0.2534051 | 0.4644375 | 0.5456 | 0.585    | 0.206813137 | count | 1        |
| SDHD       | 0.1456678 | 0.0714373 | 2.0391 | 0.0415   | 0.206852934 | count | 1        |
| SIK3       | 0.1622025 | 0.226171  | 0.7172 | 0.473    | 0.206935036 | count | 1        |
| TWSG1      | 0.1665653 | 0.2448625 | 0.6802 | 0.496    | 0.206981536 | count | 1        |
| WASHC2A    | 0.167392  | 0.2632139 | 0.636  | 0.525    | 0.207030946 | count | 1        |
| EDEM1      | 0.1763533 | 0.3058791 | 0.5765 | 0.564    | 0.207052945 | count | 1        |
| TRA2B      | 0.1476854 | 0.0864289 | 1.7088 | 0.0876   | 0.207220213 | count | 1        |
| SF3B4      | 0.1525921 | 0.1484901 | 1.0276 | 0.304    | 0.207266133 | count | 1        |
| PRUNE1     | 0.2349623 | 0.5735301 | 0.4097 | 0.682    | 0.20734025  | count | 1        |
| RPL31      | 0.144309  | 0.0336833 | 4.2843 | 1.90E-05 | 0.207354476 | count | 0.439736 |
| MAGOH      | 0.1470849 | 0.0805934 | 1.825  | 0.0681   | 0.207755784 | count | 1        |
| AC093249.6 | 0.849402  | 1.0398457 | 0.8169 | 0.414    | 0.207896872 | count | 1        |
| LINC01765  | 0.849402  | 1.0603892 | 0.801  | 0.423    | 0.207896872 | count | 1        |
| SUPT6H     | 0.1568426 | 0.1866924 | 0.8401 | 0.401    | 0.207911075 | count | 1        |
| PPP1R12A   | 0.1477954 | 0.0944993 | 1.564  | 0.118    | 0.208050273 | count | 1        |
| GRAMD1C    | 0.1902777 | 0.3408364 | 0.5583 | 0.577    | 0.208240719 | count | 1        |
| PURA       | 0.1480765 | 0.1012077 | 1.4631 | 0.144    | 0.20824076  | count | 1        |
| EEF1AKMT3  | 0.24972   | 0.46575   | 0.5362 | 0.592    | 0.208241907 | count | 1        |
| LRRC47     | 0.168728  | 0.2117322 | 0.7969 | 0.426    | 0.208328389 | count | 1        |
| SCCPDH     | 0.1540327 | 0.1446043 | 1.0652 | 0.287    | 0.208449486 | count | 1        |
| EIF2S1     | 0.1508479 | 0.1222424 | 1.234  | 0.217    | 0.208522667 | count | 1        |
| RNF14      | 0.1762901 | 0.3170934 | 0.556  | 0.578    | 0.208693353 | count | 1        |
| SPEF2      | 0.2176235 | 0.4000526 | 0.544  | 0.586    | 0.20871373  | count | 1        |
| COPS7B     | 0.1854347 | 0.3107102 | 0.5968 | 0.551    | 0.20873483  | count | 1        |
| AC073896.2 | 0.2954528 | 0.4480473 | 0.6594 | 0.51     | 0.208777796 | count | 1        |
| POM121     | 0.1722741 | 0.2647945 | 0.6506 | 0.515    | 0.208797223 | count | 1        |
| EPHX4      | 0.1827874 | 0.3330139 | 0.5489 | 0.583    | 0.209025207 | count | 1        |
| RBM28      | 0.1633891 | 0.2147043 | 0.761  | 0.447    | 0.209062328 | count | 1        |
| TRIAP1     | 0.1536871 | 0.1456426 | 1.0552 | 0.291    | 0.209195611 | count | 1        |
| F11R       | 0.161512  | 0.1898926 | 0.8505 | 0.395    | 0.209225142 | count | 1        |
| DTYMK      | 0.1568572 | 0.1787636 | 0.8775 | 0.38     | 0.209243716 | count | 1        |
| COG4       | 0.1727063 | 0.2244909 | 0.7693 | 0.442    | 0.209314867 | count | 1        |
| THAP9-AS1  | 0.1574918 | 0.1599514 | 0.9846 | 0.325    | 0.209356326 | count | 1        |
| CEBPZOS    | 0.1532475 | 0.1314738 | 1.1656 | 0.244    | 0.209363897 | count | 1        |
| TIMM22     | 0.1664717 | 0.1903951 | 0.8743 | 0.382    | 0.209453678 | count | 1        |
| COASY      | 0.1689372 | 0.2164615 | 0.7804 | 0.435    | 0.209579907 | count | 1        |
| ANKRD13D   | 0.1664322 | 0.1958255 | 0.8499 | 0.395    | 0.209667238 | count | 1        |
| UACA       | 0.1480799 | 0.0897181 | 1.6505 | 0.099    | 0.209746586 | count | 1        |
| PLBD1      | 0.1674058 | 0.2344561 | 0.714  | 0.475    | 0.209796799 | count | 1        |
| ARRDC4     | 0.2340526 | 0.5774225 | 0.4053 | 0.685    | 0.209823683 | count | 1        |
| E2F4       | 0.154495  | 0.138563  | 1.115  | 0.265    | 0.210094945 | count | 1        |
| PEX5       | 0.2343759 | 0.3605776 | 0.65   | 0.516    | 0.210102542 | count | 1        |
| ARHGAP39   | 0.8622452 | 1.1717845 | 0.7358 | 0.462    | 0.210127083 | count | 1        |
| TMCO3      | 0.156393  | 0.1776554 | 0.8803 | 0.379    | 0.21020329  | count | 1        |



|            |            |             |        |        |             |       |   |
|------------|------------|-------------|--------|--------|-------------|-------|---|
| FRA10AC1   | 0.1514852  | 0.1189565   | 1.2735 | 0.203  | 0.210418085 | count | 1 |
| PPP2R2A    | 0.1493638  | 0.0911114   | 1.6394 | 0.101  | 0.210446058 | count | 1 |
| TICAM1     | 0.1752132  | 0.2661327   | 0.6584 | 0.51   | 0.210496087 | count | 1 |
| ARFRP1     | 0.1537326  | 0.1337834   | 1.1491 | 0.251  | 0.210588856 | count | 1 |
| AC116913.1 | 0.3234723  | 0.6256069   | 0.5171 | 0.605  | 0.210597193 | count | 1 |
| CDC73      | 0.1511105  | 0.1182587   | 1.2778 | 0.201  | 0.21060151  | count | 1 |
| STARD8     | 0.182995   | 0.2632121   | 0.6952 | 0.487  | 0.210739497 | count | 1 |
| AC007032.1 | 0.2199559  | 0.4744547   | 0.4636 | 0.643  | 0.210880234 | count | 1 |
| ACSL5      | 0.1706822  | 0.202913    | 0.8412 | 0.4    | 0.211057887 | count | 1 |
| AC100786.1 | 0.5018498  | 0.7982508   | 0.6287 | 0.53   | 0.211060124 | count | 1 |
| SLC45A3    | 0.5018498  | 0.8366869   | 0.5998 | 0.549  | 0.211060124 | count | 1 |
| IPPK       | 0.3836772  | 0.5543093   | 0.6922 | 0.489  | 0.211225393 | count | 1 |
| FAM129B    | 0.1609719  | 0.1534386   | 1.0491 | 0.294  | 0.211406874 | count | 1 |
| RBMS1      | 0.1508936  | 0.0874804   | 1.7249 | 0.0847 | 0.211529642 | count | 1 |
| MLKL       | 0.1631804  | 0.1577466   | 1.0344 | 0.301  | 0.211535929 | count | 1 |
| SHC1       | 0.1532744  | 0.1144679   | 1.339  | 0.181  | 0.211540627 | count | 1 |
| STEAP3     | 0.1787892  | 0.2871176   | 0.6227 | 0.534  | 0.211611218 | count | 1 |
| STX8       | 0.1571836  | 0.1497622   | 1.0496 | 0.294  | 0.211612209 | count | 1 |
| KIAA1257   | 0.4144333  | 0.6270699   | 0.6609 | 0.509  | 0.211749397 | count | 1 |
| ALKBH4     | 0.1816099  | 0.2722705   | 0.667  | 0.505  | 0.211881216 | count | 1 |
| STAT3      | 0.1487198  | 0.0648582   | 2.293  | 0.0219 | 0.21189468  | count | 1 |
| WDR47      | 0.1891968  | 0.3116243   | 0.6071 | 0.544  | 0.211997775 | count | 1 |
| C1orf109   | 0.197086   | 0.2879388   | 0.6845 | 0.494  | 0.212044276 | count | 1 |
| ENTPD5     | 0.2239137  | 0.396445    | 0.5648 | 0.572  | 0.212099119 | count | 1 |
| PRRG3      | 0.6863451  | 1.0423614   | 0.6585 | 0.51   | 0.212114678 | count | 1 |
| CCDC57     | 0.2407866  | 0.4773757   | 0.5044 | 0.614  | 0.21227482  | count | 1 |
| NR5A2      | 0.1624741  | 0.2159124   | 0.7525 | 0.452  | 0.212294422 | count | 1 |
| PLEKHF1    | 0.1695571  | 0.2463705   | 0.6882 | 0.491  | 0.21246717  | count | 1 |
| USP37      | 0.1832956  | 0.2705396   | 0.6775 | 0.498  | 0.212485351 | count | 1 |
| TMEM131L   | 0.233588   | 0.4144902   | 0.5636 | 0.573  | 0.212513867 | count | 1 |
| UBOX5      | 0.3433152  | 0.7033791   | 0.4881 | 0.626  | 0.212740595 | count | 1 |
| INAFM1     | 0.1775632  | 0.2823154   | 0.629  | 0.529  | 0.212795604 | count | 1 |
| UBA7       | 0.2033367  | 0.3117611   | 0.6522 | 0.514  | 0.213193235 | count | 1 |
| PDCD10     | 0.1515707  | 0.0904065   | 1.6765 | 0.0937 | 0.213276216 | count | 1 |
| NSMCE1     | 0.1540225  | 0.1090477   | 1.4124 | 0.158  | 0.213279634 | count | 1 |
| MBIP       | 0.1623234  | 0.1802426   | 0.9006 | 0.368  | 0.213297483 | count | 1 |
| ZNF337     | 0.186932   | 0.3194258   | 0.5852 | 0.558  | 0.213686162 | count | 1 |
| KRAS       | 0.1521767  | 0.0847364   | 1.7959 | 0.0726 | 0.213727918 | count | 1 |
| TMEM222    | 0.1602382  | 0.1672169   | 0.9583 | 0.338  | 0.213730572 | count | 1 |
| PIK3C2A    | 0.1523333  | 0.094228    | 1.6166 | 0.106  | 0.213752566 | count | 1 |
| ATG2B      | 0.177683   | 0.2936678   | 0.605  | 0.545  | 0.213902819 | count | 1 |
| ATOH8      | 0.1786087  | 0.2030444   | 0.8797 | 0.379  | 0.214032343 | count | 1 |
| ZNF780A    | 0.1737876  | 0.2632784   | 0.6601 | 0.509  | 0.214153054 | count | 1 |
| MVD        | 0.1938862  | 0.2589119   | 0.7488 | 0.454  | 0.214223064 | count | 1 |
| FOCAD-AS1  | 15.8064403 | 1591.705555 | 0.0099 | 0.992  | 0.214284072 | count | 1 |

|            |            |             |        |        |             |       |   |
|------------|------------|-------------|--------|--------|-------------|-------|---|
| AC136469.1 | 15.9579307 | 1169.134637 | 0.0136 | 0.9891 | 0.214284077 | count | 1 |
| AL034417.2 | 16.0812974 | 2250.649461 | 0.0071 | 0.994  | 0.21428408  | count | 1 |
| AC104248.1 | 16.0812974 | 2250.649463 | 0.0071 | 0.994  | 0.21428408  | count | 1 |
| MREG       | 16.081359  | 1813.694207 | 0.0089 | 0.993  | 0.21428408  | count | 1 |
| AC018553.1 | 16.0813636 | 1813.693826 | 0.0089 | 0.993  | 0.21428408  | count | 1 |
| AC069503.2 | 16.0813644 | 1813.694512 | 0.0089 | 0.993  | 0.21428408  | count | 1 |
| AL160272.1 | 16.0813658 | 1813.694134 | 0.0089 | 0.993  | 0.21428408  | count | 1 |
| BEGAIN     | 16.0813658 | 1813.694136 | 0.0089 | 0.993  | 0.21428408  | count | 1 |
| AC005264.1 | 16.0813658 | 1813.694133 | 0.0089 | 0.993  | 0.21428408  | count | 1 |
| AC124016.2 | 16.1173956 | 1131.021599 | 0.0143 | 0.9886 | 0.214284081 | count | 1 |
| IGSF10     | 16.1954455 | 2604.288729 | 0.0062 | 0.995  | 0.214284083 | count | 1 |
| AC090844.3 | 16.1954455 | 2604.288706 | 0.0062 | 0.995  | 0.214284083 | count | 1 |
| AC022382.1 | 16.1954456 | 2604.288712 | 0.0062 | 0.995  | 0.214284083 | count | 1 |
| CPNE4      | 16.1954456 | 2604.288729 | 0.0062 | 0.995  | 0.214284083 | count | 1 |
| AL391807.1 | 16.1954456 | 2604.288734 | 0.0062 | 0.995  | 0.214284083 | count | 1 |
| ADAP1      | 16.1954456 | 2604.288706 | 0.0062 | 0.995  | 0.214284083 | count | 1 |
| PRRT4      | 16.1954456 | 2604.28874  | 0.0062 | 0.995  | 0.214284083 | count | 1 |
| AC079949.2 | 16.1954456 | 2604.288706 | 0.0062 | 0.995  | 0.214284083 | count | 1 |
| RAPGEFL1   | 16.1954456 | 2604.288706 | 0.0062 | 0.995  | 0.214284083 | count | 1 |
| HIST1H3E   | 16.1954481 | 2604.288695 | 0.0062 | 0.995  | 0.214284083 | count | 1 |
| AC009318.4 | 16.1954501 | 2604.290123 | 0.0062 | 0.995  | 0.214284083 | count | 1 |
| TMEM225B   | 16.1954502 | 2604.288431 | 0.0062 | 0.995  | 0.214284083 | count | 1 |
| CXCR2      | 16.1954503 | 2604.288459 | 0.0062 | 0.995  | 0.214284083 | count | 1 |
| AL080317.1 | 16.1954503 | 2604.288475 | 0.0062 | 0.995  | 0.214284083 | count | 1 |
| AP006287.2 | 16.1954503 | 2604.288459 | 0.0062 | 0.995  | 0.214284083 | count | 1 |
| CCDC38     | 16.1954503 | 2604.290139 | 0.0062 | 0.995  | 0.214284083 | count | 1 |
| AL049780.2 | 16.1954503 | 2604.290161 | 0.0062 | 0.995  | 0.214284083 | count | 1 |
| FOXJ1      | 16.1954503 | 2604.288475 | 0.0062 | 0.995  | 0.214284083 | count | 1 |
| VPS33B-DT  | 16.1954504 | 2604.28847  | 0.0062 | 0.995  | 0.214284083 | count | 1 |
| AC119403.1 | 16.1954504 | 2604.288459 | 0.0062 | 0.995  | 0.214284083 | count | 1 |
| CRB3       | 16.1954504 | 2604.288475 | 0.0062 | 0.995  | 0.214284083 | count | 1 |
| TMEM236    | 16.1954573 | 2604.289682 | 0.0062 | 0.995  | 0.214284083 | count | 1 |
| AC005775.1 | 16.1957269 | 3330.79116  | 0.0049 | 0.996  | 0.214284083 | count | 1 |
| MAP4K1     | 16.1957291 | 3330.791118 | 0.0049 | 0.996  | 0.214284083 | count | 1 |
| HIST1H2AI  | 16.1957292 | 3330.791097 | 0.0049 | 0.996  | 0.214284083 | count | 1 |
| AL512306.3 | 16.1957339 | 3330.792901 | 0.0049 | 0.996  | 0.214284083 | count | 1 |
| AC080013.1 | 16.1957339 | 3330.792901 | 0.0049 | 0.996  | 0.214284083 | count | 1 |
| FAM72B     | 16.2907275 | 1818.278145 | 0.009  | 0.993  | 0.214284084 | count | 1 |
| AL596094.1 | 16.2907285 | 1818.278486 | 0.009  | 0.993  | 0.214284084 | count | 1 |
| FRG1-DT    | 16.2907314 | 1818.280323 | 0.009  | 0.993  | 0.214284084 | count | 1 |
| SSTR2      | 16.290732  | 1818.279079 | 0.009  | 0.993  | 0.214284084 | count | 1 |
| RAD21-AS1  | 16.2907324 | 1818.279691 | 0.009  | 0.993  | 0.214284084 | count | 1 |
| DENND2A    | 16.3775717 | 3179.446288 | 0.0052 | 0.996  | 0.214284086 | count | 1 |
| TMEM35B    | 16.3775718 | 3179.44632  | 0.0052 | 0.996  | 0.214284086 | count | 1 |
| TFR2       | 16.3775718 | 3179.44632  | 0.0052 | 0.996  | 0.214284086 | count | 1 |

|            |            |             |        |        |             |       |   |
|------------|------------|-------------|--------|--------|-------------|-------|---|
| EXTL3-AS1  | 16.3775718 | 3179.446383 | 0.0052 | 0.996  | 0.214284086 | count | 1 |
| TNFSF14    | 16.3775718 | 3179.446367 | 0.0052 | 0.996  | 0.214284086 | count | 1 |
| ITIH4      | 16.3775719 | 3179.446478 | 0.0052 | 0.996  | 0.214284086 | count | 1 |
| LINC01102  | 16.377572  | 3179.446494 | 0.0052 | 0.996  | 0.214284086 | count | 1 |
| LINC02427  | 16.377572  | 3179.446256 | 0.0052 | 0.996  | 0.214284086 | count | 1 |
| UGT3A2     | 16.377572  | 3179.44632  | 0.0052 | 0.996  | 0.214284086 | count | 1 |
| AC005618.1 | 16.377572  | 3179.446399 | 0.0052 | 0.996  | 0.214284086 | count | 1 |
| AP000842.2 | 16.377572  | 3179.446367 | 0.0052 | 0.996  | 0.214284086 | count | 1 |
| STK24-AS1  | 16.377572  | 3179.446383 | 0.0052 | 0.996  | 0.214284086 | count | 1 |
| AC012174.1 | 16.377572  | 3179.446415 | 0.0052 | 0.996  | 0.214284086 | count | 1 |
| LINC01909  | 16.377572  | 3179.446478 | 0.0052 | 0.996  | 0.214284086 | count | 1 |
| AC024575.1 | 16.377572  | 3179.446573 | 0.0052 | 0.996  | 0.214284086 | count | 1 |
| AC007773.1 | 16.377572  | 3179.446367 | 0.0052 | 0.996  | 0.214284086 | count | 1 |
| Z73429.1   | 16.377572  | 3179.446241 | 0.0052 | 0.996  | 0.214284086 | count | 1 |
| AC069148.1 | 16.3775721 | 3179.44643  | 0.0052 | 0.996  | 0.214284086 | count | 1 |
| UPK1B      | 16.3775721 | 3179.446399 | 0.0052 | 0.996  | 0.214284086 | count | 1 |
| AL354977.2 | 16.3775721 | 3179.446446 | 0.0052 | 0.996  | 0.214284086 | count | 1 |
| CUZD1      | 16.3775721 | 3179.446494 | 0.0052 | 0.996  | 0.214284086 | count | 1 |
| AC092338.2 | 16.3775721 | 3179.446446 | 0.0052 | 0.996  | 0.214284086 | count | 1 |
| AC004069.1 | 16.3775722 | 3179.446494 | 0.0052 | 0.996  | 0.214284086 | count | 1 |
| CDH12      | 16.3775722 | 3179.446367 | 0.0052 | 0.996  | 0.214284086 | count | 1 |
| AC006042.2 | 16.3775722 | 3179.446383 | 0.0052 | 0.996  | 0.214284086 | count | 1 |
| KCND2      | 16.3775722 | 3179.446557 | 0.0052 | 0.996  | 0.214284086 | count | 1 |
| AC084357.2 | 16.3775722 | 3179.446509 | 0.0052 | 0.996  | 0.214284086 | count | 1 |
| SRCIN1     | 16.3775722 | 3179.446541 | 0.0052 | 0.996  | 0.214284086 | count | 1 |
| AC011451.1 | 16.3775722 | 3179.44643  | 0.0052 | 0.996  | 0.214284086 | count | 1 |
| AC097059.1 | 16.3775723 | 3179.446415 | 0.0052 | 0.996  | 0.214284086 | count | 1 |
| NRIP3      | 16.3775723 | 3179.446462 | 0.0052 | 0.996  | 0.214284086 | count | 1 |
| AP000238.1 | 16.3775723 | 3179.44643  | 0.0052 | 0.996  | 0.214284086 | count | 1 |
| LEFTY1     | 16.3783084 | 4499.87515  | 0.0036 | 0.997  | 0.214284086 | count | 1 |
| AC005697.2 | 16.3783084 | 4499.875284 | 0.0036 | 0.997  | 0.214284086 | count | 1 |
| CABP7      | 16.3783084 | 4499.87515  | 0.0036 | 0.997  | 0.214284086 | count | 1 |
| GNGT1      | 16.3783085 | 4499.875351 | 0.0036 | 0.997  | 0.214284086 | count | 1 |
| AC073529.1 | 16.3783085 | 4499.875418 | 0.0036 | 0.997  | 0.214284086 | count | 1 |
| AC140125.2 | 16.3783086 | 4499.875239 | 0.0036 | 0.997  | 0.214284086 | count | 1 |
| AC104316.2 | 16.3783086 | 4499.875597 | 0.0036 | 0.997  | 0.214284086 | count | 1 |
| AC124254.1 | 16.3783086 | 4499.875597 | 0.0036 | 0.997  | 0.214284086 | count | 1 |
| LINC01134  | 16.3783087 | 4499.875396 | 0.0036 | 0.997  | 0.214284086 | count | 1 |
| AL355574.1 | 16.3783088 | 4499.875262 | 0.0036 | 0.997  | 0.214284086 | count | 1 |
| AC135178.5 | 16.3783088 | 4499.875463 | 0.0036 | 0.997  | 0.214284086 | count | 1 |
| RPS6KL1    | 16.396801  | 1549.260734 | 0.0106 | 0.9916 | 0.214284086 | count | 1 |
| MAP9       | 16.4526101 | 1811.174522 | 0.0091 | 0.993  | 0.214284087 | count | 1 |
| RFPL1S     | 16.4528294 | 1990.627381 | 0.0083 | 0.993  | 0.214284087 | count | 1 |
| ARMC4      | 16.4772632 | 1782.25535  | 0.0092 | 0.993  | 0.214284088 | count | 1 |
| C11orf65   | 16.5248147 | 1624.252484 | 0.0102 | 0.9919 | 0.214284089 | count | 1 |

|             |            |             |        |        |             |       |   |
|-------------|------------|-------------|--------|--------|-------------|-------|---|
| AC012645.1  | 16.5871477 | 1801.58329  | 0.0092 | 0.993  | 0.214284089 | count | 1 |
| AL359265.3  | 16.5891278 | 2597.48559  | 0.0064 | 0.995  | 0.214284089 | count | 1 |
| TMPPE       | 16.5891288 | 2597.488007 | 0.0064 | 0.995  | 0.214284089 | count | 1 |
| AL133346.1  | 16.5891289 | 2597.488018 | 0.0064 | 0.995  | 0.214284089 | count | 1 |
| TAS2R30     | 16.589129  | 2597.488018 | 0.0064 | 0.995  | 0.214284089 | count | 1 |
| AP000442.2  | 16.5891291 | 2597.488018 | 0.0064 | 0.995  | 0.214284089 | count | 1 |
| OSBPL10-AS1 | 16.5891294 | 2597.486793 | 0.0064 | 0.995  | 0.214284089 | count | 1 |
| AC109454.2  | 16.5891309 | 2597.489233 | 0.0064 | 0.995  | 0.214284089 | count | 1 |
| NPTX1       | 16.5891357 | 2597.489047 | 0.0064 | 0.995  | 0.214284089 | count | 1 |
| AC092587.1  | 16.5891393 | 2597.491432 | 0.0064 | 0.995  | 0.214284089 | count | 1 |
| TRPM2-AS    | 16.5891415 | 2597.487646 | 0.0064 | 0.995  | 0.214284089 | count | 1 |
| FCGR3A      | 16.5891418 | 2597.48641  | 0.0064 | 0.995  | 0.214284089 | count | 1 |
| DCDC1       | 16.5891419 | 2597.48641  | 0.0064 | 0.995  | 0.214284089 | count | 1 |
| PLEKHG6     | 16.589143  | 2597.488839 | 0.0064 | 0.995  | 0.214284089 | count | 1 |
| AC104260.1  | 16.589143  | 2597.488839 | 0.0064 | 0.995  | 0.214284089 | count | 1 |
| AP003392.5  | 16.5891434 | 2597.48885  | 0.0064 | 0.995  | 0.214284089 | count | 1 |
| NRG3        | 16.5897408 | 3037.222323 | 0.0055 | 0.996  | 0.21428409  | count | 1 |
| AL353622.1  | 16.5897451 | 3037.217818 | 0.0055 | 0.996  | 0.21428409  | count | 1 |
| AC092802.1  | 16.7190272 | 2354.295751 | 0.0071 | 0.994  | 0.214284091 | count | 1 |
| AL928970.1  | 16.7190286 | 2354.298201 | 0.0071 | 0.994  | 0.214284091 | count | 1 |
| SLAMF8      | 16.7190345 | 2354.298025 | 0.0071 | 0.994  | 0.214284091 | count | 1 |
| FGF22       | 16.7190345 | 2354.298025 | 0.0071 | 0.994  | 0.214284091 | count | 1 |
| AC007383.3  | 16.7190432 | 2354.29785  | 0.0071 | 0.994  | 0.214284091 | count | 1 |
| GLIS3-AS1   | 16.7190433 | 2354.297845 | 0.0071 | 0.994  | 0.214284091 | count | 1 |
| F2RL1       | 16.7190452 | 2354.29906  | 0.0071 | 0.994  | 0.214284091 | count | 1 |
| AC125603.3  | 16.7191308 | 3144.322756 | 0.0053 | 0.996  | 0.214284091 | count | 1 |
| ENPP1       | 16.7582501 | 1802.23862  | 0.0093 | 0.993  | 0.214284092 | count | 1 |
| AC009501.1  | 15.8053302 | 1342.174171 | 0.0118 | 0.9906 | 0.214284092 | count | 1 |
| AC008537.4  | 16.8637875 | 2584.55139  | 0.0065 | 0.995  | 0.214284093 | count | 1 |
| GOLGA8M     | 16.8637908 | 2584.553481 | 0.0065 | 0.995  | 0.214284093 | count | 1 |
| EML5        | 16.8637917 | 2584.555638 | 0.0065 | 0.995  | 0.214284093 | count | 1 |
| QRICH2      | 16.8637933 | 2584.55346  | 0.0065 | 0.995  | 0.214284093 | count | 1 |
| DCST2       | 16.8637942 | 2584.552349 | 0.0065 | 0.995  | 0.214284093 | count | 1 |
| AL121987.2  | 16.8778933 | 1779.058572 | 0.0095 | 0.9924 | 0.214284093 | count | 1 |
| H2AFY2      | 15.8645632 | 1174.218025 | 0.0135 | 0.989  | 0.214284094 | count | 1 |
| SLC29A2     | 15.8648797 | 1248.61995  | 0.0127 | 0.99   | 0.214284094 | count | 1 |
| GLB1L2      | 17.0762026 | 2572.805774 | 0.0066 | 0.9947 | 0.214284095 | count | 1 |
| AC068790.8  | 17.2265851 | 3111.987735 | 0.0055 | 0.996  | 0.214284096 | count | 1 |
| AL080317.3  | 17.2280929 | 2573.750923 | 0.0067 | 0.995  | 0.214284096 | count | 1 |
| AC034111.1  | 16.0705818 | 1167.397035 | 0.0138 | 0.989  | 0.2142841   | count | 1 |
| GABBR2      | 16.0812875 | 2250.647534 | 0.0071 | 0.994  | 0.2142841   | count | 1 |
| AC021086.1  | 16.081295  | 2250.649502 | 0.0071 | 0.994  | 0.2142841   | count | 1 |
| AC007879.2  | 16.0812961 | 2250.650735 | 0.0071 | 0.994  | 0.2142841   | count | 1 |
| AC005332.8  | 16.0813561 | 1813.692218 | 0.0089 | 0.993  | 0.2142841   | count | 1 |
| ZSCAN23     | 16.0813591 | 1813.694227 | 0.0089 | 0.993  | 0.2142841   | count | 1 |

|            |            |             |        |        |             |       |   |
|------------|------------|-------------|--------|--------|-------------|-------|---|
| LINC01123  | 16.0813617 | 1813.692812 | 0.0089 | 0.993  | 0.2142841   | count | 1 |
| CDK5R1     | 16.0813617 | 1813.692807 | 0.0089 | 0.993  | 0.2142841   | count | 1 |
| TRPV4      | 16.0813633 | 1813.695192 | 0.0089 | 0.993  | 0.2142841   | count | 1 |
| AQP10      | 16.0813634 | 1813.695196 | 0.0089 | 0.993  | 0.2142841   | count | 1 |
| POU5F1B    | 16.0813634 | 1813.695196 | 0.0089 | 0.993  | 0.2142841   | count | 1 |
| AC016722.3 | 16.0813645 | 1813.694514 | 0.0089 | 0.993  | 0.2142841   | count | 1 |
| MSX2       | 16.0813645 | 1813.694515 | 0.0089 | 0.993  | 0.2142841   | count | 1 |
| AP001029.2 | 16.0813646 | 1813.694145 | 0.0089 | 0.993  | 0.2142841   | count | 1 |
| PARD6B     | 16.0813646 | 1813.695825 | 0.0089 | 0.993  | 0.2142841   | count | 1 |
| CBARP      | 16.0813646 | 1813.694139 | 0.0089 | 0.993  | 0.2142841   | count | 1 |
| CD226      | 16.0813647 | 1813.694153 | 0.0089 | 0.993  | 0.2142841   | count | 1 |
| AL022157.1 | 16.0813648 | 1813.693781 | 0.0089 | 0.993  | 0.2142841   | count | 1 |
| LINC00235  | 16.0813659 | 1813.694136 | 0.0089 | 0.993  | 0.2142841   | count | 1 |
| EFCAB5     | 16.0813659 | 1813.694136 | 0.0089 | 0.993  | 0.2142841   | count | 1 |
| AC009309.1 | 16.1264785 | 1062.688384 | 0.0152 | 0.9879 | 0.214284101 | count | 1 |
| AC121338.2 | 16.1954455 | 2604.288718 | 0.0062 | 0.995  | 0.214284102 | count | 1 |
| AL590434.1 | 16.1954456 | 2604.288695 | 0.0062 | 0.995  | 0.214284102 | count | 1 |
| AP000442.1 | 16.1954456 | 2604.288706 | 0.0062 | 0.995  | 0.214284102 | count | 1 |
| LINC02551  | 16.1954456 | 2604.288723 | 0.0062 | 0.995  | 0.214284102 | count | 1 |
| AL137026.1 | 16.1954456 | 2604.288701 | 0.0062 | 0.995  | 0.214284102 | count | 1 |
| ZGLP1      | 16.1954456 | 2604.288706 | 0.0062 | 0.995  | 0.214284102 | count | 1 |
| PRKCG      | 16.1954456 | 2604.288701 | 0.0062 | 0.995  | 0.214284102 | count | 1 |
| AL451042.2 | 16.1954457 | 2604.288723 | 0.0062 | 0.995  | 0.214284102 | count | 1 |
| EFCAB12    | 16.1954457 | 2604.288712 | 0.0062 | 0.995  | 0.214284102 | count | 1 |
| AC026412.3 | 16.1954457 | 2604.288734 | 0.0062 | 0.995  | 0.214284102 | count | 1 |
| LY86       | 16.1954457 | 2604.288712 | 0.0062 | 0.995  | 0.214284102 | count | 1 |
| AC004982.1 | 16.1954457 | 2604.288723 | 0.0062 | 0.995  | 0.214284102 | count | 1 |
| DLX5       | 16.1954457 | 2604.288712 | 0.0062 | 0.995  | 0.214284102 | count | 1 |
| LRFN5      | 16.1954457 | 2604.288723 | 0.0062 | 0.995  | 0.214284102 | count | 1 |
| MAP3K9     | 16.1954457 | 2604.288723 | 0.0062 | 0.995  | 0.214284102 | count | 1 |
| AC123768.3 | 16.195448  | 2604.28869  | 0.0062 | 0.995  | 0.214284102 | count | 1 |
| AC009133.4 | 16.195448  | 2604.28869  | 0.0062 | 0.995  | 0.214284102 | count | 1 |
| ZNF843     | 16.195448  | 2604.28869  | 0.0062 | 0.995  | 0.214284102 | count | 1 |
| AC005329.2 | 16.195448  | 2604.288673 | 0.0062 | 0.995  | 0.214284102 | count | 1 |
| FAM131C    | 16.1954502 | 2604.290123 | 0.0062 | 0.995  | 0.214284102 | count | 1 |
| AC010173.1 | 16.1954502 | 2604.288442 | 0.0062 | 0.995  | 0.214284102 | count | 1 |
| GRIN3B     | 16.1954502 | 2604.288453 | 0.0062 | 0.995  | 0.214284102 | count | 1 |
| AC027319.1 | 16.1954502 | 2604.290134 | 0.0062 | 0.995  | 0.214284102 | count | 1 |
| AC104667.2 | 16.1954503 | 2604.290145 | 0.0062 | 0.995  | 0.214284102 | count | 1 |
| SMAD1-AS1  | 16.1954503 | 2604.290145 | 0.0062 | 0.995  | 0.214284102 | count | 1 |
| AC005520.1 | 16.1954503 | 2604.288442 | 0.0062 | 0.995  | 0.214284102 | count | 1 |
| AL137786.1 | 16.1954503 | 2604.288442 | 0.0062 | 0.995  | 0.214284102 | count | 1 |
| AC009119.2 | 16.1954503 | 2604.290128 | 0.0062 | 0.995  | 0.214284102 | count | 1 |
| ONECUT2    | 16.1954503 | 2604.288464 | 0.0062 | 0.995  | 0.214284102 | count | 1 |
| AL109955.1 | 16.1954503 | 2604.288459 | 0.0062 | 0.995  | 0.214284102 | count | 1 |

|            |            |             |        |        |             |       |   |
|------------|------------|-------------|--------|--------|-------------|-------|---|
| AC008770.1 | 16.1954503 | 2604.288425 | 0.0062 | 0.995  | 0.214284102 | count | 1 |
| AL360091.3 | 16.1954504 | 2604.290139 | 0.0062 | 0.995  | 0.214284102 | count | 1 |
| KLB        | 16.1954504 | 2604.288481 | 0.0062 | 0.995  | 0.214284102 | count | 1 |
| AC093799.1 | 16.1954504 | 2604.288464 | 0.0062 | 0.995  | 0.214284102 | count | 1 |
| CCL27      | 16.1954504 | 2604.288475 | 0.0062 | 0.995  | 0.214284102 | count | 1 |
| AP000808.1 | 16.1954504 | 2604.288464 | 0.0062 | 0.995  | 0.214284102 | count | 1 |
| AC013565.3 | 16.1954504 | 2604.288459 | 0.0062 | 0.995  | 0.214284102 | count | 1 |
| AC019254.1 | 16.1954504 | 2604.288486 | 0.0062 | 0.995  | 0.214284102 | count | 1 |
| AC092115.2 | 16.1954504 | 2604.288475 | 0.0062 | 0.995  | 0.214284102 | count | 1 |
| RNF112     | 16.1954504 | 2604.288459 | 0.0062 | 0.995  | 0.214284102 | count | 1 |
| AC068234.2 | 16.1954504 | 2604.288459 | 0.0062 | 0.995  | 0.214284102 | count | 1 |
| AC007663.2 | 16.1954504 | 2604.288459 | 0.0062 | 0.995  | 0.214284102 | count | 1 |
| DRAXIN     | 16.1954526 | 2604.290112 | 0.0062 | 0.995  | 0.214284102 | count | 1 |
| FCRL6      | 16.1954527 | 2604.290101 | 0.0062 | 0.995  | 0.214284102 | count | 1 |
| AL590708.1 | 16.1954527 | 2604.290112 | 0.0062 | 0.995  | 0.214284102 | count | 1 |
| EML6       | 16.1954528 | 2604.290117 | 0.0062 | 0.995  | 0.214284102 | count | 1 |
| ADAM11     | 16.1954528 | 2604.290117 | 0.0062 | 0.995  | 0.214284102 | count | 1 |
| PSD4       | 16.1954529 | 2604.290128 | 0.0062 | 0.995  | 0.214284102 | count | 1 |
| AP002992.1 | 16.1957175 | 3330.789743 | 0.0049 | 0.996  | 0.214284102 | count | 1 |
| TMEM200A   | 16.1957222 | 3330.791626 | 0.0049 | 0.996  | 0.214284102 | count | 1 |
| HSD11B1    | 16.1957223 | 3330.791682 | 0.0049 | 0.996  | 0.214284102 | count | 1 |
| E2F7       | 16.1957292 | 3330.797737 | 0.0049 | 0.996  | 0.214284102 | count | 1 |
| AC079447.1 | 16.1957293 | 3330.795545 | 0.0049 | 0.996  | 0.214284102 | count | 1 |
| TRIM34     | 16.1957293 | 3330.797744 | 0.0049 | 0.996  | 0.214284102 | count | 1 |
| C16orf89   | 16.1957293 | 3330.79109  | 0.0049 | 0.996  | 0.214284102 | count | 1 |
| LINC00482  | 16.1957294 | 3330.791125 | 0.0049 | 0.996  | 0.214284102 | count | 1 |
| AC080013.5 | 16.1957315 | 3330.790787 | 0.0049 | 0.996  | 0.214284102 | count | 1 |
| CYP21A2    | 16.1957315 | 3330.790773 | 0.0049 | 0.996  | 0.214284102 | count | 1 |
| LINC01229  | 16.1957315 | 3330.79522  | 0.0049 | 0.996  | 0.214284102 | count | 1 |
| MPP4       | 16.1957339 | 3330.792944 | 0.0049 | 0.996  | 0.214284102 | count | 1 |
| STKLD1     | 16.2288102 | 1092.711526 | 0.0149 | 0.9882 | 0.214284103 | count | 1 |
| TMEM31     | 16.2513469 | 1866.975096 | 0.0087 | 0.9931 | 0.214284104 | count | 1 |
| FREM3      | 16.2905945 | 2256.435867 | 0.0072 | 0.994  | 0.214284104 | count | 1 |
| TMEM40     | 16.2907277 | 1818.279407 | 0.009  | 0.993  | 0.214284104 | count | 1 |
| DENND6A-DT | 16.2907277 | 1818.279404 | 0.009  | 0.993  | 0.214284104 | count | 1 |
| HIST1H2AK  | 16.29073   | 1818.27936  | 0.009  | 0.993  | 0.214284104 | count | 1 |
| C11orf91   | 16.290732  | 1818.279079 | 0.009  | 0.993  | 0.214284104 | count | 1 |
| AL353719.1 | 16.3069825 | 1068.064703 | 0.0153 | 0.9878 | 0.214284105 | count | 1 |
| MYMX       | 16.3619029 | 1116.468059 | 0.0147 | 0.9883 | 0.214284106 | count | 1 |
| AL606760.3 | 16.3635463 | 1080.227539 | 0.0151 | 0.9879 | 0.214284106 | count | 1 |
| AL031432.3 | 16.3775718 | 3179.446446 | 0.0052 | 0.996  | 0.214284106 | count | 1 |
| EXTL1      | 16.3775718 | 3179.446351 | 0.0052 | 0.996  | 0.214284106 | count | 1 |
| AL136115.1 | 16.3775718 | 3179.446351 | 0.0052 | 0.996  | 0.214284106 | count | 1 |
| EFR3B      | 16.3775718 | 3179.446383 | 0.0052 | 0.996  | 0.214284106 | count | 1 |
| HCG14      | 16.3775718 | 3179.446415 | 0.0052 | 0.996  | 0.214284106 | count | 1 |

|             |            |             |        |       |             |       |   |
|-------------|------------|-------------|--------|-------|-------------|-------|---|
| SPDYE1      | 16.3775718 | 3179.446462 | 0.0052 | 0.996 | 0.214284106 | count | 1 |
| MIRLET7DHG  | 16.3775718 | 3179.446193 | 0.0052 | 0.996 | 0.214284106 | count | 1 |
| UPK2        | 16.3775718 | 3179.446351 | 0.0052 | 0.996 | 0.214284106 | count | 1 |
| KIF11       | 16.3775718 | 3179.446462 | 0.0052 | 0.996 | 0.214284106 | count | 1 |
| AC022087.1  | 16.3775718 | 3179.446288 | 0.0052 | 0.996 | 0.214284106 | count | 1 |
| AC022167.2  | 16.3775718 | 3179.446209 | 0.0052 | 0.996 | 0.214284106 | count | 1 |
| AC012123.1  | 16.3775718 | 3179.446256 | 0.0052 | 0.996 | 0.214284106 | count | 1 |
| LINC01311   | 16.3775718 | 3179.446209 | 0.0052 | 0.996 | 0.214284106 | count | 1 |
| AL451007.2  | 16.3775719 | 3179.446509 | 0.0052 | 0.996 | 0.214284106 | count | 1 |
| AC093459.1  | 16.3775719 | 3179.446272 | 0.0052 | 0.996 | 0.214284106 | count | 1 |
| LINC01600   | 16.3775719 | 3179.446383 | 0.0052 | 0.996 | 0.214284106 | count | 1 |
| LINC00265   | 16.3775719 | 3179.446383 | 0.0052 | 0.996 | 0.214284106 | count | 1 |
| AC003991.1  | 16.3775719 | 3179.446383 | 0.0052 | 0.996 | 0.214284106 | count | 1 |
| FAM86B2     | 16.3775719 | 3179.446383 | 0.0052 | 0.996 | 0.214284106 | count | 1 |
| KCNC1       | 16.3775719 | 3179.446383 | 0.0052 | 0.996 | 0.214284106 | count | 1 |
| AC079906.1  | 16.3775719 | 3179.446383 | 0.0052 | 0.996 | 0.214284106 | count | 1 |
| EHD4-AS1    | 16.3775719 | 3179.446209 | 0.0052 | 0.996 | 0.214284106 | count | 1 |
| AC005899.7  | 16.3775719 | 3179.446351 | 0.0052 | 0.996 | 0.214284106 | count | 1 |
| GDF5        | 16.3775719 | 3179.446383 | 0.0052 | 0.996 | 0.214284106 | count | 1 |
| JSRP1       | 16.3775719 | 3179.446383 | 0.0052 | 0.996 | 0.214284106 | count | 1 |
| UPK3A       | 16.3775719 | 3179.446336 | 0.0052 | 0.996 | 0.214284106 | count | 1 |
| MYT1L       | 16.377572  | 3179.446367 | 0.0052 | 0.996 | 0.214284106 | count | 1 |
| FAM228A     | 16.377572  | 3179.446494 | 0.0052 | 0.996 | 0.214284106 | count | 1 |
| AC013403.2  | 16.377572  | 3179.446367 | 0.0052 | 0.996 | 0.214284106 | count | 1 |
| LYG1        | 16.377572  | 3179.446415 | 0.0052 | 0.996 | 0.214284106 | count | 1 |
| AC097634.3  | 16.377572  | 3179.446351 | 0.0052 | 0.996 | 0.214284106 | count | 1 |
| UBE2QL1     | 16.377572  | 3179.446494 | 0.0052 | 0.996 | 0.214284106 | count | 1 |
| AL451064.1  | 16.377572  | 3179.446399 | 0.0052 | 0.996 | 0.214284106 | count | 1 |
| AL136088.1  | 16.377572  | 3179.446446 | 0.0052 | 0.996 | 0.214284106 | count | 1 |
| CCDC73      | 16.377572  | 3179.446351 | 0.0052 | 0.996 | 0.214284106 | count | 1 |
| TIGD3       | 16.377572  | 3179.446494 | 0.0052 | 0.996 | 0.214284106 | count | 1 |
| AP000911.2  | 16.377572  | 3179.446494 | 0.0052 | 0.996 | 0.214284106 | count | 1 |
| DCUN1D2-AS  | 16.377572  | 3179.446462 | 0.0052 | 0.996 | 0.214284106 | count | 1 |
| AC123768.4  | 16.377572  | 3179.446494 | 0.0052 | 0.996 | 0.214284106 | count | 1 |
| AC023908.3  | 16.377572  | 3179.446288 | 0.0052 | 0.996 | 0.214284106 | count | 1 |
| ACAN        | 16.377572  | 3179.446367 | 0.0052 | 0.996 | 0.214284106 | count | 1 |
| SLC12A5-AS1 | 16.377572  | 3179.446272 | 0.0052 | 0.996 | 0.214284106 | count | 1 |
| AC024592.3  | 16.377572  | 3179.446336 | 0.0052 | 0.996 | 0.214284106 | count | 1 |
| ZNF560      | 16.377572  | 3179.446509 | 0.0052 | 0.996 | 0.214284106 | count | 1 |
| AC010487.2  | 16.377572  | 3179.446383 | 0.0052 | 0.996 | 0.214284106 | count | 1 |
| AC098484.2  | 16.3775721 | 3179.446383 | 0.0052 | 0.996 | 0.214284106 | count | 1 |
| IL12RB2     | 16.3775721 | 3179.446336 | 0.0052 | 0.996 | 0.214284106 | count | 1 |
| HIST2H4A    | 16.3775721 | 3179.446351 | 0.0052 | 0.996 | 0.214284106 | count | 1 |
| SLC8A1-AS1  | 16.3775721 | 3179.446351 | 0.0052 | 0.996 | 0.214284106 | count | 1 |
| CD86        | 16.3775721 | 3179.446478 | 0.0052 | 0.996 | 0.214284106 | count | 1 |

|            |            |             |        |       |             |       |   |
|------------|------------|-------------|--------|-------|-------------|-------|---|
| SERPINI2   | 16.3775721 | 3179.446336 | 0.0052 | 0.996 | 0.214284106 | count | 1 |
| TMEM171    | 16.3775721 | 3179.446573 | 0.0052 | 0.996 | 0.214284106 | count | 1 |
| AL023583.1 | 16.3775721 | 3179.446288 | 0.0052 | 0.996 | 0.214284106 | count | 1 |
| HIST1H3C   | 16.3775721 | 3179.446415 | 0.0052 | 0.996 | 0.214284106 | count | 1 |
| ZNF451-AS1 | 16.3775721 | 3179.44643  | 0.0052 | 0.996 | 0.214284106 | count | 1 |
| CXorf58    | 16.3775721 | 3179.446446 | 0.0052 | 0.996 | 0.214284106 | count | 1 |
| BRINP1     | 16.3775721 | 3179.446478 | 0.0052 | 0.996 | 0.214284106 | count | 1 |
| AC136475.7 | 16.3775721 | 3179.446478 | 0.0052 | 0.996 | 0.214284106 | count | 1 |
| AP000842.3 | 16.3775721 | 3179.446509 | 0.0052 | 0.996 | 0.214284106 | count | 1 |
| AC005342.1 | 16.3775721 | 3179.446478 | 0.0052 | 0.996 | 0.214284106 | count | 1 |
| LINC02415  | 16.3775721 | 3179.446478 | 0.0052 | 0.996 | 0.214284106 | count | 1 |
| AL512506.3 | 16.3775721 | 3179.446478 | 0.0052 | 0.996 | 0.214284106 | count | 1 |
| AC092757.3 | 16.3775721 | 3179.446478 | 0.0052 | 0.996 | 0.214284106 | count | 1 |
| BTBD17     | 16.3775721 | 3179.446351 | 0.0052 | 0.996 | 0.214284106 | count | 1 |
| NPHS1      | 16.3775721 | 3179.446288 | 0.0052 | 0.996 | 0.214284106 | count | 1 |
| RHCE       | 16.3775722 | 3179.446446 | 0.0052 | 0.996 | 0.214284106 | count | 1 |
| PCDHGA4    | 16.3775722 | 3179.446383 | 0.0052 | 0.996 | 0.214284106 | count | 1 |
| TUBB2B     | 16.3775722 | 3179.446256 | 0.0052 | 0.996 | 0.214284106 | count | 1 |
| TRGV9      | 16.3775722 | 3179.446383 | 0.0052 | 0.996 | 0.214284106 | count | 1 |
| POU6F2     | 16.3775722 | 3179.446383 | 0.0052 | 0.996 | 0.214284106 | count | 1 |
| CASC9      | 16.3775722 | 3179.446336 | 0.0052 | 0.996 | 0.214284106 | count | 1 |
| AL359736.1 | 16.3775722 | 3179.446462 | 0.0052 | 0.996 | 0.214284106 | count | 1 |
| LINC00637  | 16.3775722 | 3179.446367 | 0.0052 | 0.996 | 0.214284106 | count | 1 |
| AC027237.2 | 16.3775722 | 3179.446415 | 0.0052 | 0.996 | 0.214284106 | count | 1 |
| CCDC33     | 16.3775722 | 3179.446383 | 0.0052 | 0.996 | 0.214284106 | count | 1 |
| ZNF132     | 16.3775722 | 3179.446288 | 0.0052 | 0.996 | 0.214284106 | count | 1 |
| AL020996.1 | 16.3775723 | 3179.446478 | 0.0052 | 0.996 | 0.214284106 | count | 1 |
| AC069277.1 | 16.3775723 | 3179.446494 | 0.0052 | 0.996 | 0.214284106 | count | 1 |
| SPRY4-AS1  | 16.3775723 | 3179.446478 | 0.0052 | 0.996 | 0.214284106 | count | 1 |
| AC104964.4 | 16.3775723 | 3179.446462 | 0.0052 | 0.996 | 0.214284106 | count | 1 |
| MAMDC2-AS1 | 16.3775723 | 3179.446494 | 0.0052 | 0.996 | 0.214284106 | count | 1 |
| AL136084.2 | 16.3775723 | 3179.446446 | 0.0052 | 0.996 | 0.214284106 | count | 1 |
| AC022075.1 | 16.3775723 | 3179.446336 | 0.0052 | 0.996 | 0.214284106 | count | 1 |
| LCTL       | 16.3775723 | 3179.44643  | 0.0052 | 0.996 | 0.214284106 | count | 1 |
| AC022167.3 | 16.3775723 | 3179.446383 | 0.0052 | 0.996 | 0.214284106 | count | 1 |
| CABYR      | 16.3775723 | 3179.446494 | 0.0052 | 0.996 | 0.214284106 | count | 1 |
| TP53TG5    | 16.3775723 | 3179.446525 | 0.0052 | 0.996 | 0.214284106 | count | 1 |
| EBI3       | 16.3775723 | 3179.446446 | 0.0052 | 0.996 | 0.214284106 | count | 1 |
| CARD14     | 16.3775724 | 3179.44643  | 0.0052 | 0.996 | 0.214284106 | count | 1 |
| AC011511.2 | 16.3775724 | 3179.44643  | 0.0052 | 0.996 | 0.214284106 | count | 1 |
| AL360014.1 | 16.3783085 | 4499.87506  | 0.0036 | 0.997 | 0.214284106 | count | 1 |
| ITGB7      | 16.3783085 | 4499.875239 | 0.0036 | 0.997 | 0.214284106 | count | 1 |
| IL21R-AS1  | 16.3783085 | 4499.875508 | 0.0036 | 0.997 | 0.214284106 | count | 1 |
| AL354824.1 | 16.3783085 | 4499.875441 | 0.0036 | 0.997 | 0.214284106 | count | 1 |
| LINC00337  | 16.3783086 | 4499.875329 | 0.0036 | 0.997 | 0.214284106 | count | 1 |



|            |            |             |        |        |             |       |   |
|------------|------------|-------------|--------|--------|-------------|-------|---|
| MATN1      | 16.3783086 | 4499.875396 | 0.0036 | 0.997  | 0.214284106 | count | 1 |
| ATP6V1G2   | 16.3783086 | 4499.87553  | 0.0036 | 0.997  | 0.214284106 | count | 1 |
| AL138889.1 | 16.3783086 | 4499.875284 | 0.0036 | 0.997  | 0.214284106 | count | 1 |
| TSPAN33    | 16.3783086 | 4499.87562  | 0.0036 | 0.997  | 0.214284106 | count | 1 |
| AC011933.4 | 16.3783086 | 4499.875463 | 0.0036 | 0.997  | 0.214284106 | count | 1 |
| AC010327.4 | 16.3783086 | 4499.875127 | 0.0036 | 0.997  | 0.214284106 | count | 1 |
| SERPINC1   | 16.3783087 | 4499.875262 | 0.0036 | 0.997  | 0.214284106 | count | 1 |
| PRSS40A    | 16.3783087 | 4499.875396 | 0.0036 | 0.997  | 0.214284106 | count | 1 |
| COL4A3     | 16.3783087 | 4499.875262 | 0.0036 | 0.997  | 0.214284106 | count | 1 |
| CLSTN2     | 16.3783087 | 4499.875508 | 0.0036 | 0.997  | 0.214284106 | count | 1 |
| SPSB4      | 16.3783087 | 4499.875508 | 0.0036 | 0.997  | 0.214284106 | count | 1 |
| EFCAB9     | 16.3783087 | 4499.875441 | 0.0036 | 0.997  | 0.214284106 | count | 1 |
| AC013470.2 | 16.3783087 | 4499.875508 | 0.0036 | 0.997  | 0.214284106 | count | 1 |
| AC092647.5 | 16.3783087 | 4499.875351 | 0.0036 | 0.997  | 0.214284106 | count | 1 |
| AC021237.1 | 16.3783087 | 4499.875441 | 0.0036 | 0.997  | 0.214284106 | count | 1 |
| AC022400.6 | 16.3783087 | 4499.875396 | 0.0036 | 0.997  | 0.214284106 | count | 1 |
| LINC00621  | 16.3783087 | 4499.875217 | 0.0036 | 0.997  | 0.214284106 | count | 1 |
| AC105020.2 | 16.3783087 | 4499.875441 | 0.0036 | 0.997  | 0.214284106 | count | 1 |
| MATN4      | 16.3783087 | 4499.875351 | 0.0036 | 0.997  | 0.214284106 | count | 1 |
| AC074135.1 | 16.3783087 | 4499.875239 | 0.0036 | 0.997  | 0.214284106 | count | 1 |
| AL591848.3 | 16.3783088 | 4499.875418 | 0.0036 | 0.997  | 0.214284106 | count | 1 |
| LINC01143  | 16.3783088 | 4499.875239 | 0.0036 | 0.997  | 0.214284106 | count | 1 |
| TMEM156    | 16.3783088 | 4499.875239 | 0.0036 | 0.997  | 0.214284106 | count | 1 |
| AL136309.2 | 16.3783088 | 4499.875239 | 0.0036 | 0.997  | 0.214284106 | count | 1 |
| ALDH8A1    | 16.3783088 | 4499.875239 | 0.0036 | 0.997  | 0.214284106 | count | 1 |
| AC013714.1 | 16.3783088 | 4499.875441 | 0.0036 | 0.997  | 0.214284106 | count | 1 |
| CYP17A1    | 16.3783088 | 4499.875239 | 0.0036 | 0.997  | 0.214284106 | count | 1 |
| AC023310.4 | 16.3783088 | 4499.875239 | 0.0036 | 0.997  | 0.214284106 | count | 1 |
| AC009139.1 | 16.3783088 | 4499.875239 | 0.0036 | 0.997  | 0.214284106 | count | 1 |
| AC005899.8 | 16.3783088 | 4499.875485 | 0.0036 | 0.997  | 0.214284106 | count | 1 |
| AC087289.2 | 16.3783088 | 4499.875239 | 0.0036 | 0.997  | 0.214284106 | count | 1 |
| AANAT      | 16.3783088 | 4499.875239 | 0.0036 | 0.997  | 0.214284106 | count | 1 |
| FHOD3      | 16.3783088 | 4499.875239 | 0.0036 | 0.997  | 0.214284106 | count | 1 |
| SLC13A3    | 16.3783088 | 4499.875239 | 0.0036 | 0.997  | 0.214284106 | count | 1 |
| ZNF280B    | 16.3783088 | 4499.875485 | 0.0036 | 0.997  | 0.214284106 | count | 1 |
| GRIK1      | 16.3783088 | 4499.875239 | 0.0036 | 0.997  | 0.214284106 | count | 1 |
| AP000322.1 | 16.3783088 | 4499.875418 | 0.0036 | 0.997  | 0.214284106 | count | 1 |
| NCR3LG1    | 16.3968016 | 1549.261134 | 0.0106 | 0.9916 | 0.214284106 | count | 1 |
| ANKS1B     | 16.3974041 | 1641.824088 | 0.01   | 0.992  | 0.214284106 | count | 1 |
| NPB        | 16.4526023 | 1811.174576 | 0.0091 | 0.993  | 0.214284107 | count | 1 |
| GPR3       | 16.4526064 | 1811.175714 | 0.0091 | 0.993  | 0.214284107 | count | 1 |
| PATL2      | 16.4526068 | 1811.174545 | 0.0091 | 0.993  | 0.214284107 | count | 1 |
| AC092687.3 | 16.452607  | 1811.175147 | 0.0091 | 0.993  | 0.214284107 | count | 1 |
| BX005040.1 | 16.4526104 | 1811.176878 | 0.0091 | 0.993  | 0.214284107 | count | 1 |
| MAMDC4     | 16.4772628 | 1782.254749 | 0.0092 | 0.993  | 0.214284108 | count | 1 |

|            |            |             |        |        |             |       |   |
|------------|------------|-------------|--------|--------|-------------|-------|---|
| NLRP12     | 16.4772677 | 1782.257359 | 0.0092 | 0.993  | 0.214284108 | count | 1 |
| AP005530.1 | 16.4782475 | 1912.620132 | 0.0086 | 0.993  | 0.214284108 | count | 1 |
| PODN       | 16.5248122 | 1624.252697 | 0.0102 | 0.9919 | 0.214284108 | count | 1 |
| CDC20      | 16.5248132 | 1624.253319 | 0.0102 | 0.9919 | 0.214284108 | count | 1 |
| MTRNR2L6   | 16.5871418 | 1801.582743 | 0.0092 | 0.993  | 0.214284109 | count | 1 |
| AC090971.1 | 16.5871419 | 1801.582756 | 0.0092 | 0.993  | 0.214284109 | count | 1 |
| AP001318.2 | 16.5871429 | 1801.584153 | 0.0092 | 0.993  | 0.214284109 | count | 1 |
| TRAPPC5    | 16.5871478 | 1801.583296 | 0.0092 | 0.993  | 0.214284109 | count | 1 |
| MIA        | 16.5872858 | 2346.752824 | 0.0071 | 0.994  | 0.214284109 | count | 1 |
| AC117382.2 | 16.587289  | 2346.752796 | 0.0071 | 0.994  | 0.214284109 | count | 1 |
| FAM111B    | 16.589129  | 2597.488018 | 0.0064 | 0.995  | 0.214284109 | count | 1 |
| AC099518.4 | 16.589129  | 2597.488029 | 0.0064 | 0.995  | 0.214284109 | count | 1 |
| AMT        | 16.5891291 | 2597.48804  | 0.0064 | 0.995  | 0.214284109 | count | 1 |
| CSF2RA     | 16.5891296 | 2597.486804 | 0.0064 | 0.995  | 0.214284109 | count | 1 |
| PPP1R27    | 16.5891298 | 2597.486804 | 0.0064 | 0.995  | 0.214284109 | count | 1 |
| AC127070.2 | 16.5891396 | 2597.491464 | 0.0064 | 0.995  | 0.214284109 | count | 1 |
| SYT6       | 16.5891397 | 2597.486432 | 0.0064 | 0.995  | 0.214284109 | count | 1 |
| AC141930.3 | 16.5891413 | 2597.492657 | 0.0064 | 0.995  | 0.214284109 | count | 1 |
| SMCO2      | 16.5891413 | 2597.487614 | 0.0064 | 0.995  | 0.214284109 | count | 1 |
| AP001636.3 | 16.5891414 | 2597.492679 | 0.0064 | 0.995  | 0.214284109 | count | 1 |
| AC107871.1 | 16.5891415 | 2597.487646 | 0.0064 | 0.995  | 0.214284109 | count | 1 |
| AL513217.1 | 16.5891416 | 2597.487657 | 0.0064 | 0.995  | 0.214284109 | count | 1 |
| AC017071.1 | 16.5891421 | 2597.48641  | 0.0064 | 0.995  | 0.214284109 | count | 1 |
| AC137630.2 | 16.5891431 | 2597.48885  | 0.0064 | 0.995  | 0.214284109 | count | 1 |
| AC114488.3 | 16.5891432 | 2597.488839 | 0.0064 | 0.995  | 0.214284109 | count | 1 |
| LRRC7      | 16.5891432 | 2597.488839 | 0.0064 | 0.995  | 0.214284109 | count | 1 |
| ACTN3      | 16.5891432 | 2597.488861 | 0.0064 | 0.995  | 0.214284109 | count | 1 |
| SPC24      | 16.5891433 | 2597.48885  | 0.0064 | 0.995  | 0.214284109 | count | 1 |
| AP000962.1 | 16.5891433 | 2597.488861 | 0.0064 | 0.995  | 0.214284109 | count | 1 |
| NSG1       | 16.5892266 | 3322.125778 | 0.005  | 0.996  | 0.214284109 | count | 1 |
| AP003392.6 | 16.589234  | 3322.125484 | 0.005  | 0.996  | 0.214284109 | count | 1 |
| PYHIN1     | 16.5892345 | 3322.123903 | 0.005  | 0.996  | 0.214284109 | count | 1 |
| SCAANT1    | 16.6334315 | 1798.857262 | 0.0092 | 0.993  | 0.21428411  | count | 1 |
| AL162411.1 | 16.6334391 | 1798.860392 | 0.0092 | 0.993  | 0.21428411  | count | 1 |
| AC130371.2 | 16.6334392 | 1798.858643 | 0.0092 | 0.993  | 0.21428411  | count | 1 |
| NDUFB2-AS1 | 16.6334408 | 1798.860074 | 0.0092 | 0.993  | 0.21428411  | count | 1 |
| STIL       | 16.7031462 | 1791.849366 | 0.0093 | 0.9926 | 0.214284111 | count | 1 |
| AC027682.4 | 16.7190249 | 2354.294521 | 0.0071 | 0.994  | 0.214284111 | count | 1 |
| AC010864.1 | 16.7190264 | 2354.296966 | 0.0071 | 0.994  | 0.214284111 | count | 1 |
| FOXA3      | 16.7190264 | 2354.296971 | 0.0071 | 0.994  | 0.214284111 | count | 1 |
| KCNC3      | 16.7190264 | 2354.296961 | 0.0071 | 0.994  | 0.214284111 | count | 1 |
| OTUB2      | 16.7190266 | 2354.296986 | 0.0071 | 0.994  | 0.214284111 | count | 1 |
| AD000090.1 | 16.7190271 | 2354.295751 | 0.0071 | 0.994  | 0.214284111 | count | 1 |
| LINC02587  | 16.719033  | 2354.29556  | 0.0071 | 0.994  | 0.214284111 | count | 1 |
| HBA2       | 16.7190343 | 2354.298025 | 0.0071 | 0.994  | 0.214284111 | count | 1 |

|             |            |             |        |        |             |       |   |
|-------------|------------|-------------|--------|--------|-------------|-------|---|
| AC021851.1  | 16.7190344 | 2354.298015 | 0.0071 | 0.994  | 0.214284111 | count | 1 |
| AL158211.3  | 16.7190431 | 2354.297835 | 0.0071 | 0.994  | 0.214284111 | count | 1 |
| PAGR1       | 16.7190431 | 2354.297845 | 0.0071 | 0.994  | 0.214284111 | count | 1 |
| CYP51A1-AS1 | 16.7190432 | 2354.297845 | 0.0071 | 0.994  | 0.214284111 | count | 1 |
| C9orf41-AS1 | 16.7190452 | 2354.299055 | 0.0071 | 0.994  | 0.214284111 | count | 1 |
| TMEM253     | 16.7190452 | 2354.29905  | 0.0071 | 0.994  | 0.214284111 | count | 1 |
| HIST2H4B    | 16.7190453 | 2354.29906  | 0.0071 | 0.994  | 0.214284111 | count | 1 |
| TNNC1       | 16.7190453 | 2354.29906  | 0.0071 | 0.994  | 0.214284111 | count | 1 |
| AC092634.5  | 16.7191281 | 3144.322762 | 0.0053 | 0.996  | 0.214284111 | count | 1 |
| SYTL1       | 16.7191289 | 3144.321133 | 0.0053 | 0.996  | 0.214284111 | count | 1 |
| AC007750.1  | 16.7191366 | 3144.315902 | 0.0053 | 0.996  | 0.214284111 | count | 1 |
| HIST1H3B    | 16.7191369 | 3144.322501 | 0.0053 | 0.996  | 0.214284111 | count | 1 |
| AC110285.5  | 16.751054  | 1758.722472 | 0.0095 | 0.9924 | 0.214284112 | count | 1 |
| ZNF732      | 16.751056  | 1758.725988 | 0.0095 | 0.9924 | 0.214284112 | count | 1 |
| AC010175.1  | 16.7520306 | 1845.788725 | 0.0091 | 0.9928 | 0.214284112 | count | 1 |
| AP001922.5  | 16.7582456 | 1802.238645 | 0.0093 | 0.993  | 0.214284112 | count | 1 |
| BRICD5      | 16.7586856 | 1933.646721 | 0.0087 | 0.993  | 0.214284112 | count | 1 |
| TTC23L      | 16.8637868 | 2584.552489 | 0.0065 | 0.995  | 0.214284113 | count | 1 |
| AL035530.2  | 16.8637868 | 2584.552489 | 0.0065 | 0.995  | 0.214284113 | count | 1 |
| AC007216.2  | 16.8637874 | 2584.551379 | 0.0065 | 0.995  | 0.214284113 | count | 1 |
| AL031708.1  | 16.8637876 | 2584.551379 | 0.0065 | 0.995  | 0.214284113 | count | 1 |
| AL357673.1  | 16.8637883 | 2584.553557 | 0.0065 | 0.995  | 0.214284113 | count | 1 |
| C17orf113   | 16.8637884 | 2584.553568 | 0.0065 | 0.995  | 0.214284113 | count | 1 |
| AC073591.1  | 16.8637933 | 2584.553438 | 0.0065 | 0.995  | 0.214284113 | count | 1 |
| AC055713.1  | 16.8637942 | 2584.555595 | 0.0065 | 0.995  | 0.214284113 | count | 1 |
| AC012409.3  | 16.8637951 | 2584.554506 | 0.0065 | 0.995  | 0.214284113 | count | 1 |
| AL033384.2  | 16.863796  | 3305.763433 | 0.0051 | 0.996  | 0.214284113 | count | 1 |
| AC104184.1  | 16.8638001 | 2584.554398 | 0.0065 | 0.995  | 0.214284113 | count | 1 |
| POU5F1      | 16.8638001 | 2584.554398 | 0.0065 | 0.995  | 0.214284113 | count | 1 |
| AL049840.2  | 16.8638002 | 2584.554387 | 0.0065 | 0.995  | 0.214284113 | count | 1 |
| AC139795.2  | 16.8638065 | 3305.765874 | 0.0051 | 0.996  | 0.214284113 | count | 1 |
| ABCC9       | 16.8638076 | 3305.768701 | 0.0051 | 0.996  | 0.214284113 | count | 1 |
| LINC00852   | 16.8638099 | 3305.764453 | 0.0051 | 0.996  | 0.214284113 | count | 1 |
| AC079610.2  | 16.8644504 | 1800.565225 | 0.0094 | 0.993  | 0.214284113 | count | 1 |
| AL031123.2  | 16.864455  | 1800.565207 | 0.0094 | 0.993  | 0.214284113 | count | 1 |
| BANK1       | 16.8778905 | 1779.056117 | 0.0095 | 0.9924 | 0.214284113 | count | 1 |
| AL355802.2  | 16.9105905 | 3309.931418 | 0.0051 | 0.996  | 0.214284113 | count | 1 |
| CSF3R       | 16.9746327 | 1362.734159 | 0.0125 | 0.9901 | 0.214284114 | count | 1 |
| CHSY3       | 17.0698818 | 1762.728024 | 0.0097 | 0.9923 | 0.214284115 | count | 1 |
| CYP4B1      | 17.0762003 | 2572.805816 | 0.0066 | 0.9947 | 0.214284115 | count | 1 |
| UBAP1L      | 17.0762003 | 2572.805806 | 0.0066 | 0.9947 | 0.214284115 | count | 1 |
| MFSD14A     | 17.076202  | 2572.811754 | 0.0066 | 0.9947 | 0.214284115 | count | 1 |
| C5orf17     | 17.0762038 | 2572.804763 | 0.0066 | 0.9947 | 0.214284115 | count | 1 |
| CLTRN       | 17.0762101 | 2572.808668 | 0.0066 | 0.9947 | 0.214284115 | count | 1 |
| PXYLP1      | 17.0768759 | 2799.747269 | 0.0061 | 0.995  | 0.214284115 | count | 1 |

|            |            |             |        |          |             |       |             |
|------------|------------|-------------|--------|----------|-------------|-------|-------------|
| AL162231.2 | 17.0768835 | 2799.747165 | 0.0061 | 0.995    | 0.214284115 | count | 1           |
| AL691403.2 | 17.0768845 | 2799.751453 | 0.0061 | 0.995    | 0.214284115 | count | 1           |
| TNNI3K     | 17.0768874 | 2799.751453 | 0.0061 | 0.995    | 0.214284115 | count | 1           |
| SUSD1      | 17.2266178 | 2329.925139 | 0.0074 | 0.9941   | 0.214284116 | count | 1           |
| 10-Mar     | 17.22662   | 2329.923084 | 0.0074 | 0.9941   | 0.214284116 | count | 1           |
| C4orf36    | 17.2266229 | 2329.926113 | 0.0074 | 0.9941   | 0.214284116 | count | 1           |
| PIFO       | 17.2498309 | 2562.825227 | 0.0067 | 0.9946   | 0.214284116 | count | 1           |
| AC015727.1 | 17.2498316 | 2562.822418 | 0.0067 | 0.9946   | 0.214284116 | count | 1           |
| FOXI2      | 17.2498349 | 2562.826132 | 0.0067 | 0.9946   | 0.214284116 | count | 1           |
| LINC01770  | 17.5561049 | 2312.755572 | 0.0076 | 0.9939   | 0.214284118 | count | 1           |
| ATP8A2     | 17.8012539 | 2300.354198 | 0.0077 | 0.9938   | 0.21428412  | count | 1           |
| RGS8       | 17.8023806 | 2424.233654 | 0.0073 | 0.9941   | 0.21428412  | count | 1           |
| LOH12CR2   | 0.2323348  | 0.5325496   | 0.4363 | 0.663    | 0.21434396  | count | 1           |
| AL645568.1 | 0.3663584  | 0.8397133   | 0.4363 | 0.663    | 0.214606579 | count | 1           |
| CMTR2      | 0.1768592  | 0.2423527   | 0.7298 | 0.466    | 0.214722316 | count | 1           |
| PELP1      | 0.1900902  | 0.3099293   | 0.6133 | 0.54     | 0.214756563 | count | 1           |
| LINC01521  | 0.6974775  | 1.0930382   | 0.6381 | 0.523    | 0.214775908 | count | 1           |
| USP3-AS1   | 0.6974775  | 1.2023554   | 0.5801 | 0.562    | 0.214775908 | count | 1           |
| HIBCH      | 0.1599945  | 0.1483441   | 1.0785 | 0.281    | 0.215094174 | count | 1           |
| TNRC6B     | 0.1524901  | 0.0879778   | 1.7333 | 0.0832   | 0.21510846  | count | 1           |
| KDM7A      | 0.1752866  | 0.2544881   | 0.6888 | 0.491    | 0.215241151 | count | 1           |
| AC009118.3 | 0.5877755  | 0.8963271   | 0.6558 | 0.512    | 0.215375806 | count | 1           |
| EIF4H      | 0.1540764  | 0.0867414   | 1.7763 | 0.0758   | 0.215414698 | count | 1           |
| MT-ND1     | 0.1496332  | 0.0376611   | 3.9731 | 7.27E-05 | 0.215543288 | count | 1           |
| NCAPD3     | 0.2103111  | 0.3288799   | 0.6395 | 0.523    | 0.215543644 | count | 1           |
| MINDY2     | 0.1572814  | 0.1429609   | 1.1002 | 0.271    | 0.215588787 | count | 1           |
| AP005329.3 | 0.2590817  | 0.5315795   | 0.4874 | 0.626    | 0.215684552 | count | 1           |
| EEF1B2     | 0.149798   | 0.0291348   | 5.1415 | 2.92E-07 | 0.215694053 | count | 0.006847692 |
| CCDC59     | 0.1541595  | 0.0976569   | 1.5786 | 0.115    | 0.215699424 | count | 1           |
| TYW5       | 0.2227916  | 0.649052    | 0.3433 | 0.731    | 0.21584761  | count | 1           |
| PRMT9      | 0.201999   | 0.4829473   | 0.4183 | 0.676    | 0.215936077 | count | 1           |
| SASS6      | 0.172414   | 0.3517418   | 0.4902 | 0.624    | 0.216012331 | count | 1           |
| SDHAF3     | 0.1870316  | 0.2517286   | 0.743  | 0.458    | 0.21604018  | count | 1           |
| UMAD1      | 0.1891696  | 0.3071658   | 0.6159 | 0.538    | 0.216201005 | count | 1           |
| HARS       | 0.1590278  | 0.1360681   | 1.1687 | 0.243    | 0.216234909 | count | 1           |
| SMAD5      | 0.1554942  | 0.1270789   | 1.2236 | 0.221    | 0.216317137 | count | 1           |
| DRC3       | 0.2379533  | 0.4475826   | 0.5316 | 0.595    | 0.216336222 | count | 1           |
| MMAB       | 0.1631839  | 0.1651542   | 0.9881 | 0.323    | 0.216477842 | count | 1           |
| CXorf40A   | 0.2381659  | 0.446587    | 0.5333 | 0.594    | 0.21652223  | count | 1           |
| POU2F2     | 0.3946589  | 0.8135409   | 0.4851 | 0.628    | 0.216646261 | count | 1           |
| SRP19      | 0.1559023  | 0.1132405   | 1.3767 | 0.169    | 0.216683999 | count | 1           |
| CIP2A      | 0.3339047  | 0.5646139   | 0.5914 | 0.554    | 0.216860245 | count | 1           |
| ZSCAN32    | 0.3339047  | 0.6152517   | 0.5427 | 0.587    | 0.216860245 | count | 1           |
| UGDH-AS1   | 0.5929136  | 0.7728726   | 0.7672 | 0.443    | 0.216910748 | count | 1           |
| ANAPC5     | 0.1552271  | 0.1087183   | 1.4278 | 0.153    | 0.216916997 | count | 1           |

|            |           |           |        |          |             |       |          |
|------------|-----------|-----------|--------|----------|-------------|-------|----------|
| CCDC86     | 0.1884614 | 0.2923494 | 0.6446 | 0.519    | 0.216932207 | count | 1        |
| MCPH1-AS1  | 0.3709142 | 1.0759818 | 0.3447 | 0.73     | 0.217025772 | count | 1        |
| AL080250.1 | 0.7089825 | 1.0601761 | 0.6687 | 0.504    | 0.2175026   | count | 1        |
| SLFN12L    | 0.7089825 | 1.1577281 | 0.6124 | 0.54     | 0.2175026   | count | 1        |
| RALGPS1    | 0.7089825 | 1.160933  | 0.6107 | 0.541    | 0.2175026   | count | 1        |
| TMEM109    | 0.153306  | 0.071666  | 2.1392 | 0.0325   | 0.217524243 | count | 1        |
| AF001548.2 | 0.4274608 | 0.7854392 | 0.5442 | 0.586    | 0.217628995 | count | 1        |
| TADA1      | 0.4274608 | 0.8129574 | 0.5258 | 0.599    | 0.217628995 | count | 1        |
| RAB24      | 0.227287  | 0.5677306 | 0.4003 | 0.689    | 0.217679762 | count | 1        |
| DUSP15     | 0.3520676 | 0.4845478 | 0.7266 | 0.468    | 0.217701431 | count | 1        |
| ZBTB17     | 0.1981422 | 0.3035635 | 0.6527 | 0.514    | 0.217768928 | count | 1        |
| RUBCN      | 0.256661  | 0.4737767 | 0.5417 | 0.588    | 0.217944788 | count | 1        |
| DSN1       | 0.1839614 | 0.3152974 | 0.5835 | 0.56     | 0.218215118 | count | 1        |
| SIRT3      | 0.19859   | 0.2822554 | 0.7036 | 0.482    | 0.218251115 | count | 1        |
| JDP2       | 0.1642368 | 0.1519386 | 1.0809 | 0.28     | 0.218272957 | count | 1        |
| USP16      | 0.1575627 | 0.1232566 | 1.2783 | 0.201    | 0.21833984  | count | 1        |
| BPHL       | 0.2083953 | 0.3971617 | 0.5247 | 0.6      | 0.218367805 | count | 1        |
| PER3       | 0.1590785 | 0.1489323 | 1.0681 | 0.286    | 0.21845455  | count | 1        |
| SNRNP25    | 0.1647444 | 0.1762144 | 0.9349 | 0.35     | 0.218536219 | count | 1        |
| CDK17      | 0.1646418 | 0.1597961 | 1.0303 | 0.303    | 0.218708018 | count | 1        |
| SHLD3      | 0.2529513 | 0.4939277 | 0.5121 | 0.609    | 0.218840567 | count | 1        |
| INTS12     | 0.169546  | 0.1798964 | 0.9425 | 0.346    | 0.218844015 | count | 1        |
| TMEM74B    | 0.1888954 | 0.3973042 | 0.4754 | 0.635    | 0.218873732 | count | 1        |
| ZNF451     | 0.1623813 | 0.1934968 | 0.8392 | 0.401    | 0.218992221 | count | 1        |
| CAPN11     | 0.2138522 | 0.3864786 | 0.5533 | 0.58     | 0.21907666  | count | 1        |
| HNRNPD     | 0.1544019 | 0.0658237 | 2.3457 | 0.0191   | 0.219204754 | count | 1        |
| URB1-AS1   | 0.1874173 | 0.3015873 | 0.6214 | 0.534    | 0.219208875 | count | 1        |
| NIPBL      | 0.158808  | 0.1224744 | 1.2967 | 0.195    | 0.21929962  | count | 1        |
| ZNF334     | 0.3550112 | 0.5889668 | 0.6028 | 0.547    | 0.219364668 | count | 1        |
| EIF4E      | 0.1615521 | 0.1310126 | 1.2331 | 0.218    | 0.219387198 | count | 1        |
| ZNF24      | 0.1580338 | 0.1137715 | 1.389  | 0.165    | 0.219404568 | count | 1        |
| CEP83      | 0.1927671 | 0.3051251 | 0.6318 | 0.528    | 0.219427188 | count | 1        |
| BMT2       | 0.2142162 | 0.4019309 | 0.533  | 0.594    | 0.219439639 | count | 1        |
| IARS2      | 0.1589099 | 0.1336051 | 1.1894 | 0.234    | 0.219524616 | count | 1        |
| QTRT2      | 0.1690109 | 0.1858022 | 0.9096 | 0.363    | 0.219538291 | count | 1        |
| LAMTOR2    | 0.1560758 | 0.0891976 | 1.7498 | 0.0803   | 0.219623495 | count | 1        |
| TMEM242    | 0.1603287 | 0.1348732 | 1.1887 | 0.235    | 0.219751455 | count | 1        |
| PNPLA6     | 0.2070257 | 0.4589305 | 0.4511 | 0.652    | 0.219829212 | count | 1        |
| CFDP1      | 0.1564751 | 0.0955939 | 1.6369 | 0.102    | 0.219849646 | count | 1        |
| NT5C2      | 0.2088    | 0.2914511 | 0.7164 | 0.474    | 0.22025086  | count | 1        |
| SMIM10L2A  | 0.7208648 | 1.2105288 | 0.5955 | 0.552    | 0.220293653 | count | 1        |
| FAU        | 0.152932  | 0.0203274 | 7.5234 | 7.17E-14 | 0.220421209 | count | 1.71E-09 |
| AC005332.6 | 0.433911  | 0.8386547 | 0.5174 | 0.605    | 0.220522854 | count | 1        |
| TRIOBP     | 0.1584236 | 0.0989746 | 1.6006 | 0.11     | 0.220575849 | count | 1        |
| URI1       | 0.1599989 | 0.1419139 | 1.1274 | 0.26     | 0.220582692 | count | 1        |

|            |           |           |        |        |             |       |   |
|------------|-----------|-----------|--------|--------|-------------|-------|---|
| PHKA2      | 0.2361665 | 0.4617789 | 0.5114 | 0.609  | 0.220590627 | count | 1 |
| SRGAP2     | 0.1725165 | 0.1673008 | 1.0312 | 0.303  | 0.220643468 | count | 1 |
| MDP1       | 0.2121719 | 0.3637636 | 0.5833 | 0.56   | 0.220677454 | count | 1 |
| MSRB3      | 0.1576705 | 0.0968927 | 1.6273 | 0.104  | 0.220753155 | count | 1 |
| BFAR       | 0.1597699 | 0.1172638 | 1.3625 | 0.173  | 0.220820512 | count | 1 |
| LRRRC37B   | 0.285439  | 0.4814979 | 0.5928 | 0.553  | 0.220851212 | count | 1 |
| FUNDC2     | 0.1563789 | 0.0754847 | 2.0717 | 0.0384 | 0.220983599 | count | 1 |
| RDH11      | 0.1625686 | 0.1392721 | 1.1673 | 0.243  | 0.221082522 | count | 1 |
| UBR5       | 0.1728913 | 0.1904191 | 0.908  | 0.364  | 0.221118793 | count | 1 |
| HSPA2      | 0.1649397 | 0.1515555 | 1.0883 | 0.277  | 0.221168363 | count | 1 |
| CSTF2      | 0.1993485 | 0.3410594 | 0.5845 | 0.559  | 0.22117466  | count | 1 |
| NR4A1      | 0.1553307 | 0.1079259 | 1.4392 | 0.1502 | 0.22119084  | count | 1 |
| AC020911.2 | 0.2400918 | 0.4011446 | 0.5985 | 0.55   | 0.221235386 | count | 1 |
| PPP1CC     | 0.1588293 | 0.1008859 | 1.5743 | 0.116  | 0.221395873 | count | 1 |
| BEX4       | 0.1592742 | 0.1049666 | 1.5174 | 0.129  | 0.221441622 | count | 1 |
| DDA1       | 0.1756097 | 0.2103162 | 0.835  | 0.404  | 0.221660623 | count | 1 |
| CPT2       | 0.2131988 | 0.3698362 | 0.5765 | 0.564  | 0.221718305 | count | 1 |
| ADAT1      | 0.2028584 | 0.3248479 | 0.6245 | 0.532  | 0.221720264 | count | 1 |
| MSRB2      | 0.1593216 | 0.1177473 | 1.3531 | 0.176  | 0.221746476 | count | 1 |
| KIF27      | 0.2184702 | 0.3609227 | 0.6053 | 0.545  | 0.221891143 | count | 1 |
| BLOC1S4    | 0.1635625 | 0.1640454 | 0.9971 | 0.319  | 0.222050789 | count | 1 |
| MITF       | 0.2731352 | 0.4998221 | 0.5465 | 0.585  | 0.222100335 | count | 1 |
| PIK3C3     | 0.175918  | 0.1944059 | 0.9049 | 0.366  | 0.222310893 | count | 1 |
| CREBZF     | 0.171693  | 0.1780663 | 0.9642 | 0.335  | 0.222314595 | count | 1 |
| TRIP4      | 0.1847817 | 0.249033  | 0.742  | 0.458  | 0.22233646  | count | 1 |
| TYW3       | 0.1602288 | 0.1161277 | 1.3798 | 0.168  | 0.222354164 | count | 1 |
| MYLIP      | 0.1690137 | 0.176793  | 0.956  | 0.339  | 0.222419236 | count | 1 |
| SNHG12     | 0.200502  | 0.2213702 | 0.9057 | 0.365  | 0.222429055 | count | 1 |
| C10orf143  | 0.2352863 | 0.4454748 | 0.5282 | 0.597  | 0.222499255 | count | 1 |
| KDR        | 0.1638215 | 0.181037  | 0.9049 | 0.366  | 0.222511247 | count | 1 |
| PRR14      | 0.1872276 | 0.2457103 | 0.762  | 0.446  | 0.222599978 | count | 1 |
| VAR52      | 0.305692  | 0.8615555 | 0.3548 | 0.723  | 0.222633922 | count | 1 |
| ZNF397     | 0.1794413 | 0.20924   | 0.8576 | 0.391  | 0.22281107  | count | 1 |
| ZNF718     | 0.2062555 | 0.4324714 | 0.4769 | 0.633  | 0.22295063  | count | 1 |
| ETV3       | 0.1853152 | 0.2743029 | 0.6756 | 0.499  | 0.222969921 | count | 1 |
| RNF213     | 0.15912   | 0.1068729 | 1.4889 | 0.137  | 0.22297614  | count | 1 |
| BBS9       | 0.2196522 | 0.3867597 | 0.5679 | 0.57   | 0.223058216 | count | 1 |
| SLC25A33   | 0.1793754 | 0.194986  | 0.9199 | 0.358  | 0.223064178 | count | 1 |
| KXD1       | 0.1596829 | 0.1011071 | 1.5793 | 0.114  | 0.223114761 | count | 1 |
| RELB       | 0.1662945 | 0.1519463 | 1.0944 | 0.274  | 0.223135769 | count | 1 |
| ZDHHC24    | 0.1637849 | 0.133293  | 1.2288 | 0.219  | 0.223138078 | count | 1 |
| AC078881.1 | 0.7331277 | 0.8900991 | 0.8236 | 0.41   | 0.223147568 | count | 1 |
| EDEM2      | 0.1714889 | 0.1789263 | 0.9584 | 0.338  | 0.223220876 | count | 1 |
| MOSPD1     | 0.1836664 | 0.2370647 | 0.7748 | 0.439  | 0.223326963 | count | 1 |
| LINC01003  | 0.1782024 | 0.2047534 | 0.8703 | 0.384  | 0.223489078 | count | 1 |

|            |           |           |        |          |             |       |             |
|------------|-----------|-----------|--------|----------|-------------|-------|-------------|
| SBNO1      | 0.1696777 | 0.2034041 | 0.8342 | 0.404    | 0.223539189 | count | 1           |
| OTUB1      | 0.1622064 | 0.1319034 | 1.2297 | 0.219    | 0.223709545 | count | 1           |
| IRF2BP1    | 0.1920164 | 0.3073136 | 0.6248 | 0.532    | 0.223831043 | count | 1           |
| PIGX       | 0.1860567 | 0.3177535 | 0.5855 | 0.558    | 0.223850266 | count | 1           |
| ANP32E     | 0.1618965 | 0.1152948 | 1.4042 | 0.16     | 0.22399599  | count | 1           |
| TIMM50     | 0.1695795 | 0.1752022 | 0.9679 | 0.333    | 0.224014535 | count | 1           |
| RBM12      | 0.1875413 | 0.2476665 | 0.7572 | 0.449    | 0.224062118 | count | 1           |
| TPBG       | 0.165994  | 0.166398  | 0.9976 | 0.319    | 0.22424472  | count | 1           |
| HIP1       | 0.163467  | 0.1287264 | 1.2699 | 0.204    | 0.224386082 | count | 1           |
| MRPL44     | 0.1749718 | 0.2062852 | 0.8482 | 0.396    | 0.224399407 | count | 1           |
| SNHG7      | 0.156287  | 0.0470012 | 3.3252 | 0.000895 | 0.224442837 | count | 1           |
| AC025175.1 | 0.9482844 | 1.454747  | 0.6519 | 0.515    | 0.224478255 | count | 1           |
| MID1       | 0.1803032 | 0.2357446 | 0.7648 | 0.444    | 0.224535348 | count | 1           |
| ZADH2      | 0.1818079 | 0.236213  | 0.7697 | 0.442    | 0.224662063 | count | 1           |
| MAU2       | 0.1939979 | 0.2808999 | 0.6906 | 0.49     | 0.224689175 | count | 1           |
| RRP1       | 0.1821769 | 0.2113279 | 0.8621 | 0.389    | 0.22474659  | count | 1           |
| RAB12      | 0.1671966 | 0.1664839 | 1.0043 | 0.315    | 0.224954146 | count | 1           |
| AC023043.1 | 0.4443658 | 0.6508513 | 0.6827 | 0.495    | 0.225189126 | count | 1           |
| MAIP1      | 0.1835189 | 0.2425736 | 0.7565 | 0.449    | 0.225231398 | count | 1           |
| UBQLN4     | 0.2384255 | 0.3737016 | 0.638  | 0.524    | 0.225363418 | count | 1           |
| COIL       | 0.1682801 | 0.1716358 | 0.9804 | 0.327    | 0.225375927 | count | 1           |
| MAPKAPK2   | 0.1764661 | 0.1815432 | 0.972  | 0.331    | 0.225428722 | count | 1           |
| RECQL      | 0.1630233 | 0.1109263 | 1.4697 | 0.142    | 0.225630039 | count | 1           |
| ZNF507     | 0.1909191 | 0.2817487 | 0.6776 | 0.498    | 0.225756687 | count | 1           |
| EMSY       | 0.1958548 | 0.2726684 | 0.7183 | 0.473    | 0.226061139 | count | 1           |
| THBD       | 0.1584736 | 0.0694157 | 2.283  | 0.0225   | 0.226139399 | count | 1           |
| NSMAF      | 0.1960351 | 0.4392729 | 0.4463 | 0.655    | 0.22626575  | count | 1           |
| AL035071.1 | 0.2249317 | 0.3733156 | 0.6025 | 0.547    | 0.226350176 | count | 1           |
| ELOF1      | 0.1693231 | 0.1669137 | 1.0144 | 0.31     | 0.226420148 | count | 1           |
| METTL23    | 0.1640137 | 0.1251314 | 1.3107 | 0.19     | 0.226436997 | count | 1           |
| FBXL4      | 0.2097048 | 0.2669779 | 0.7855 | 0.432    | 0.226595044 | count | 1           |
| CBWD1      | 0.1761317 | 0.2416525 | 0.7289 | 0.466    | 0.226693283 | count | 1           |
| PLGRKT     | 0.1719693 | 0.1751457 | 0.9819 | 0.326    | 0.226788287 | count | 1           |
| KIAA0355   | 0.1635907 | 0.1229754 | 1.3303 | 0.184    | 0.226793154 | count | 1           |
| RPL35      | 0.1575825 | 0.0283734 | 5.5539 | 3.06E-08 | 0.226795054 | count | 0.000721579 |
| NELFCD     | 0.1785348 | 0.1926466 | 0.9267 | 0.354    | 0.226866541 | count | 1           |
| PCBP1      | 0.1589672 | 0.0551838 | 2.8807 | 0.004    | 0.227046348 | count | 1           |
| ZC3H14     | 0.1696352 | 0.1557435 | 1.0892 | 0.276    | 0.227096069 | count | 1           |
| ZSWIM8     | 0.1938029 | 0.4006895 | 0.4837 | 0.629    | 0.227222901 | count | 1           |
| ZNF528     | 0.2202921 | 0.3536757 | 0.6229 | 0.533    | 0.227228931 | count | 1           |
| ZFAS1      | 0.159626  | 0.0594012 | 2.6873 | 0.00725  | 0.227432573 | count | 1           |
| NRIP1      | 0.1797983 | 0.2108637 | 0.8527 | 0.394    | 0.227434016 | count | 1           |
| AP1B1      | 0.1864512 | 0.230559  | 0.8087 | 0.419    | 0.227543363 | count | 1           |
| RPL18      | 0.1578765 | 0.019792  | 7.9768 | 2.18E-15 | 0.227594633 | count | 5.22E-11    |
| EXOC3L2    | 0.1804159 | 0.1990262 | 0.9065 | 0.365    | 0.227668374 | count | 1           |

|            |           |           |        |          |             |       |          |
|------------|-----------|-----------|--------|----------|-------------|-------|----------|
| MED23      | 0.1889528 | 0.2447595 | 0.772  | 0.44     | 0.227785719 | count | 1        |
| FLII       | 0.1672511 | 0.1869854 | 0.8945 | 0.371    | 0.227891889 | count | 1        |
| ASNS       | 0.2595481 | 0.7946257 | 0.3266 | 0.744    | 0.228100373 | count | 1        |
| FKBP14     | 0.1929663 | 0.2529342 | 0.7629 | 0.446    | 0.228141275 | count | 1        |
| COQ4       | 0.1699879 | 0.1568098 | 1.084  | 0.278    | 0.22814698  | count | 1        |
| ACBD4      | 0.2166098 | 0.424985  | 0.5097 | 0.61     | 0.228283186 | count | 1        |
| SCARF1     | 0.1682742 | 0.1488426 | 1.1306 | 0.258    | 0.228304742 | count | 1        |
| AC010542.2 | 0.2882506 | 0.6947226 | 0.4149 | 0.678    | 0.228472608 | count | 1        |
| C15orf65   | 0.2070732 | 0.3514025 | 0.5893 | 0.556    | 0.228490126 | count | 1        |
| BEND5      | 0.1839295 | 0.2483592 | 0.7406 | 0.459    | 0.229002438 | count | 1        |
| PPA2       | 0.1704829 | 0.1393678 | 1.2233 | 0.221    | 0.229046238 | count | 1        |
| CLDN23     | 0.3393591 | 0.4444533 | 0.7635 | 0.445    | 0.229108054 | count | 1        |
| XPO5       | 0.2425353 | 0.405529  | 0.5981 | 0.55     | 0.229108809 | count | 1        |
| TMC6       | 0.2058257 | 0.3000209 | 0.686  | 0.493    | 0.229254222 | count | 1        |
| KDM5C      | 0.2015646 | 0.3202993 | 0.6293 | 0.529    | 0.22925856  | count | 1        |
| NUTM2B-AS1 | 0.170889  | 0.1387177 | 1.2319 | 0.218    | 0.229350188 | count | 1        |
| MDFIC      | 0.1678337 | 0.1333753 | 1.2584 | 0.208    | 0.229443376 | count | 1        |
| ZBED5      | 0.1764394 | 0.1982039 | 0.8902 | 0.373    | 0.229451786 | count | 1        |
| PABPC1     | 0.160281  | 0.0482968 | 3.3187 | 0.000916 | 0.229494135 | count | 1        |
| DBNL       | 0.1675406 | 0.1247639 | 1.3429 | 0.179    | 0.229518323 | count | 1        |
| ISY1       | 0.1720902 | 0.1720919 | 1      | 0.317    | 0.229641124 | count | 1        |
| C16orf72   | 0.176675  | 0.1729167 | 1.0217 | 0.307    | 0.229755882 | count | 1        |
| SLC39A10   | 0.1660587 | 0.1251731 | 1.3266 | 0.185    | 0.229898704 | count | 1        |
| PAK4       | 0.197975  | 0.2739784 | 0.7226 | 0.47     | 0.229950247 | count | 1        |
| DHFR       | 0.3278985 | 0.5545583 | 0.5913 | 0.554    | 0.230070715 | count | 1        |
| PNPO       | 0.1981033 | 0.2872451 | 0.6897 | 0.49     | 0.230096802 | count | 1        |
| SLC35E1    | 0.1820098 | 0.2427284 | 0.7498 | 0.453    | 0.23047     | count | 1        |
| THAP10     | 0.2472565 | 0.439016  | 0.5632 | 0.573    | 0.230562209 | count | 1        |
| GATC       | 0.1917657 | 0.2658517 | 0.7213 | 0.471    | 0.230624953 | count | 1        |
| PNMA1      | 0.1957052 | 0.2881267 | 0.6792 | 0.497    | 0.23070844  | count | 1        |
| TMUB1      | 0.1712489 | 0.1563808 | 1.0951 | 0.274    | 0.230750124 | count | 1        |
| TGDS       | 0.1857531 | 0.2431032 | 0.7641 | 0.445    | 0.230907835 | count | 1        |
| UBXN8      | 0.1779115 | 0.2073777 | 0.8579 | 0.391    | 0.2310117   | count | 1        |
| ANXA6      | 0.1798581 | 0.2023716 | 0.8888 | 0.374    | 0.231036974 | count | 1        |
| STK17A     | 0.1692856 | 0.1385877 | 1.2215 | 0.222    | 0.231047931 | count | 1        |
| GPIHBP1    | 0.1829165 | 0.2864185 | 0.6386 | 0.523    | 0.231068757 | count | 1        |
| ABCF1      | 0.1671712 | 0.1348973 | 1.2392 | 0.215    | 0.231104957 | count | 1        |
| TRMT2A     | 0.2117502 | 0.2853932 | 0.742  | 0.458    | 0.231224635 | count | 1        |
| RALB       | 0.1656486 | 0.1143054 | 1.4492 | 0.147    | 0.231233249 | count | 1        |
| RBMS2      | 0.1698896 | 0.14988   | 1.1335 | 0.257    | 0.231265101 | count | 1        |
| PSMG4      | 0.1677962 | 0.1253864 | 1.3382 | 0.181    | 0.231426023 | count | 1        |
| NUP54      | 0.1720472 | 0.1499494 | 1.1474 | 0.251    | 0.231523713 | count | 1        |
| RACK1      | 0.1607652 | 0.0225024 | 7.1443 | 1.15E-12 | 0.231689723 | count | 2.74E-08 |
| EPAS1      | 0.1621219 | 0.0688631 | 2.3543 | 0.0186   | 0.231737312 | count | 1        |
| PHF2       | 0.192786  | 0.2303776 | 0.8368 | 0.403    | 0.231835088 | count | 1        |



|            |           |           |        |          |             |       |          |
|------------|-----------|-----------|--------|----------|-------------|-------|----------|
| EC1        | 0.1679571 | 0.1236826 | 1.358  | 0.175    | 0.231924725 | count | 1        |
| ZNF449     | 0.2267588 | 0.3443173 | 0.6586 | 0.51     | 0.231925562 | count | 1        |
| PALD1      | 0.1838886 | 0.22641   | 0.8122 | 0.417    | 0.232007187 | count | 1        |
| AC096733.2 | 0.5619732 | 0.5476953 | 1.0261 | 0.305    | 0.232135736 | count | 1        |
| HIST2H2BE  | 0.6452817 | 0.7792442 | 0.8281 | 0.408    | 0.232235251 | count | 1        |
| SENP7      | 0.1737876 | 0.1543394 | 1.126  | 0.26     | 0.232266516 | count | 1        |
| AC002310.1 | 0.460901  | 0.6574645 | 0.701  | 0.483    | 0.232508192 | count | 1        |
| PDGFRA     | 0.2357348 | 0.4681681 | 0.5035 | 0.615    | 0.232614623 | count | 1        |
| ZMIZ1      | 0.1729101 | 0.1720441 | 1.005  | 0.315    | 0.232754723 | count | 1        |
| AMER1      | 1.0010591 | 1.3200832 | 0.7583 | 0.448    | 0.232789359 | count | 1        |
| AMDHD2     | 0.2243573 | 0.3240181 | 0.6924 | 0.489    | 0.233010678 | count | 1        |
| C1orf50    | 0.2361566 | 0.4463942 | 0.529  | 0.597    | 0.233017505 | count | 1        |
| C4orf33    | 0.1912733 | 0.2402827 | 0.796  | 0.426    | 0.233353626 | count | 1        |
| SH3BP5-AS1 | 0.6497938 | 1.0416441 | 0.6238 | 0.533    | 0.233528618 | count | 1        |
| PTPN13     | 0.6497938 | 1.0416441 | 0.6238 | 0.533    | 0.233528618 | count | 1        |
| ATP7B      | 0.6497938 | 1.0523087 | 0.6175 | 0.537    | 0.233528618 | count | 1        |
| C2orf92    | 0.6497938 | 1.1335482 | 0.5732 | 0.567    | 0.233528618 | count | 1        |
| AP4S1      | 0.2189013 | 0.3668517 | 0.5967 | 0.551    | 0.233564597 | count | 1        |
| IPO9-AS1   | 0.4295037 | 1.0410467 | 0.4126 | 0.68     | 0.233618072 | count | 1        |
| HDHD2      | 0.2218058 | 0.2991019 | 0.7416 | 0.458    | 0.233618615 | count | 1        |
| APOM       | 0.4634346 | 0.6289924 | 0.7368 | 0.461    | 0.233623062 | count | 1        |
| PPIG       | 0.1640508 | 0.069933  | 2.3458 | 0.0191   | 0.233748648 | count | 1        |
| FAM32A     | 0.1679069 | 0.1096723 | 1.531  | 0.126    | 0.233961592 | count | 1        |
| MPHOSPH6   | 0.1814793 | 0.2054263 | 0.8834 | 0.377    | 0.234120433 | count | 1        |
| FTSJ1      | 0.1919478 | 0.2438369 | 0.7872 | 0.431    | 0.234166034 | count | 1        |
| TNKS2      | 0.1745427 | 0.1491136 | 1.1705 | 0.242    | 0.234472469 | count | 1        |
| PILRB      | 0.1922236 | 0.3138451 | 0.6125 | 0.54     | 0.234498197 | count | 1        |
| THSD1      | 0.1842597 | 0.1921569 | 0.9589 | 0.338    | 0.234572785 | count | 1        |
| ZNF131     | 0.1763543 | 0.140487  | 1.2553 | 0.209    | 0.234700832 | count | 1        |
| RAP1A      | 0.1662501 | 0.0762595 | 2.1801 | 0.0293   | 0.234705222 | count | 1        |
| EBLN2      | 1.013993  | 1.0231568 | 0.991  | 0.322    | 0.234771075 | count | 1        |
| SMAD3      | 0.1972161 | 0.2494576 | 0.7906 | 0.429    | 0.234882122 | count | 1        |
| TCTN3      | 0.1800742 | 0.1792202 | 1.0048 | 0.315    | 0.234965023 | count | 1        |
| MRRF       | 0.188249  | 0.2004471 | 0.9391 | 0.348    | 0.234992314 | count | 1        |
| METTL5     | 0.1662292 | 0.0822432 | 2.0212 | 0.0434   | 0.23509925  | count | 1        |
| PLXND1     | 0.1681679 | 0.1190605 | 1.4125 | 0.158    | 0.23518109  | count | 1        |
| GMPR2      | 0.172589  | 0.1330568 | 1.2971 | 0.195    | 0.235238233 | count | 1        |
| RPL29      | 0.1631876 | 0.0207373 | 7.8693 | 5.08E-15 | 0.235267223 | count | 1.22E-10 |
| PSMC1      | 0.1671626 | 0.0822339 | 2.0328 | 0.0422   | 0.235285085 | count | 1        |
| CTCF       | 0.1722434 | 0.1319929 | 1.3049 | 0.192    | 0.235308554 | count | 1        |
| NFX1       | 0.1896234 | 0.2794714 | 0.6785 | 0.498    | 0.235310397 | count | 1        |
| ZBTB7A     | 0.1686212 | 0.1027952 | 1.6404 | 0.101    | 0.235355692 | count | 1        |
| CASP4      | 0.1660177 | 0.0793369 | 2.0926 | 0.0365   | 0.235401302 | count | 1        |
| PPME1      | 0.1942273 | 0.2554664 | 0.7603 | 0.447    | 0.235529492 | count | 1        |
| AKAP11     | 0.1807047 | 0.1885541 | 0.9584 | 0.338    | 0.23562076  | count | 1        |

|            |           |           |        |          |             |       |          |
|------------|-----------|-----------|--------|----------|-------------|-------|----------|
| MFAP1      | 0.1717549 | 0.1352529 | 1.2699 | 0.204    | 0.235761236 | count | 1        |
| DAB2       | 0.1677521 | 0.0964001 | 1.7402 | 0.0819   | 0.235774563 | count | 1        |
| STAU1      | 0.1663861 | 0.0740255 | 2.2477 | 0.0247   | 0.235815193 | count | 1        |
| MAPK1IP1L  | 0.1689667 | 0.0973929 | 1.7349 | 0.0829   | 0.235888637 | count | 1        |
| ZNF655     | 0.2139856 | 0.317999  | 0.6729 | 0.501    | 0.235952447 | count | 1        |
| TSR1       | 0.1904625 | 0.2314964 | 0.8227 | 0.411    | 0.23633973  | count | 1        |
| GLMP       | 0.1814205 | 0.1826485 | 0.9933 | 0.321    | 0.236383463 | count | 1        |
| RPL36A     | 0.1667437 | 0.0678261 | 2.4584 | 0.014    | 0.236443762 | count | 1        |
| GRSF1      | 0.173619  | 0.1324266 | 1.3111 | 0.19     | 0.236480136 | count | 1        |
| SOGA1      | 0.2051696 | 0.2534848 | 0.8094 | 0.418    | 0.236622828 | count | 1        |
| AL356056.1 | 0.435767  | 1.6497272 | 0.2641 | 0.7917   | 0.236631951 | count | 1        |
| C17orf107  | 0.6607173 | 1.064504  | 0.6207 | 0.535    | 0.236642188 | count | 1        |
| HSD17B1    | 0.6607173 | 1.0648625 | 0.6205 | 0.535    | 0.236642188 | count | 1        |
| AC001226.2 | 0.6607173 | 1.963742  | 0.3365 | 0.7366   | 0.236642188 | count | 1        |
| KBTBD4     | 0.1987291 | 0.2552833 | 0.7785 | 0.436    | 0.236657206 | count | 1        |
| USP30-AS1  | 1.027097  | 1.0433647 | 0.9844 | 0.325    | 0.236757031 | count | 1        |
| AC025171.4 | 0.5153981 | 0.6738645 | 0.7648 | 0.444    | 0.236799148 | count | 1        |
| GFM2       | 0.2336183 | 0.3346125 | 0.6982 | 0.485    | 0.236819434 | count | 1        |
| DEGS2      | 0.7951829 | 1.138282  | 0.6986 | 0.485    | 0.237182351 | count | 1        |
| TOP2A      | 0.7951829 | 1.1430503 | 0.6957 | 0.487    | 0.237182351 | count | 1        |
| FAM215B    | 0.2704182 | 0.3318373 | 0.8149 | 0.415    | 0.237220389 | count | 1        |
| LINC01355  | 0.3684062 | 0.7496303 | 0.4915 | 0.623    | 0.237334999 | count | 1        |
| KLF6       | 0.165614  | 0.0603061 | 2.7462 | 0.00607  | 0.237430421 | count | 1        |
| VASH1-AS1  | 0.3689867 | 0.5522654 | 0.6681 | 0.504    | 0.237676362 | count | 1        |
| FBN1       | 0.172245  | 0.1487428 | 1.158  | 0.247    | 0.23773351  | count | 1        |
| SMPDL3A    | 0.2041862 | 0.3645382 | 0.5601 | 0.575    | 0.237777904 | count | 1        |
| YES1       | 0.170511  | 0.1042831 | 1.6351 | 0.102    | 0.237807498 | count | 1        |
| UTP20      | 0.2031009 | 0.3684631 | 0.5512 | 0.582    | 0.237945793 | count | 1        |
| OSMR-AS1   | 0.5184911 | 0.6643902 | 0.7804 | 0.435    | 0.238008044 | count | 1        |
| UPF3B      | 0.1769167 | 0.1590498 | 1.1123 | 0.266    | 0.238043017 | count | 1        |
| UBE2T      | 0.2415136 | 0.4410071 | 0.5476 | 0.584    | 0.23812993  | count | 1        |
| TMEM256    | 0.1699487 | 0.0927391 | 1.8325 | 0.067    | 0.238186555 | count | 1        |
| PLXDC1     | 0.3889237 | 0.6429517 | 0.6049 | 0.545    | 0.238337411 | count | 1        |
| ZNF555     | 0.3701546 | 0.5930588 | 0.6241 | 0.533    | 0.238362843 | count | 1        |
| TP53       | 0.1871192 | 0.2006142 | 0.9327 | 0.351    | 0.23842689  | count | 1        |
| CFAP44     | 0.5195811 | 0.9149684 | 0.5679 | 0.57     | 0.238433476 | count | 1        |
| BTF3       | 0.1657383 | 0.0276668 | 5.9905 | 2.36E-09 | 0.238627152 | count | 5.59E-05 |
| CACHD1     | 0.1994469 | 0.2397818 | 0.8318 | 0.406    | 0.238640263 | count | 1        |
| ZBTB26     | 0.3548589 | 0.6718842 | 0.5282 | 0.597    | 0.238728756 | count | 1        |
| AC108488.1 | 0.2503522 | 0.4743035 | 0.5278 | 0.598    | 0.238971876 | count | 1        |
| ZFP91      | 0.1929986 | 0.2244097 | 0.86   | 0.39     | 0.23908237  | count | 1        |
| UQCRC2     | 0.1691117 | 0.0774513 | 2.1835 | 0.0291   | 0.23913801  | count | 1        |
| DDX59      | 0.1805457 | 0.1765967 | 1.0224 | 0.307    | 0.239250194 | count | 1        |
| PPCS       | 0.1693701 | 0.0815761 | 2.0762 | 0.038    | 0.239272051 | count | 1        |
| CHURC1     | 0.1687273 | 0.071498  | 2.3599 | 0.0183   | 0.239502022 | count | 1        |

|            |           |           |        |          |             |       |          |
|------------|-----------|-----------|--------|----------|-------------|-------|----------|
| PARD3B     | 0.2325865 | 0.3409876 | 0.6821 | 0.495    | 0.239549023 | count | 1        |
| GPN1       | 0.1836362 | 0.2060768 | 0.8911 | 0.373    | 0.239577661 | count | 1        |
| NMNAT3     | 0.2164188 | 0.3356246 | 0.6448 | 0.519    | 0.23970663  | count | 1        |
| CHFR       | 0.2961338 | 0.3764953 | 0.7866 | 0.432    | 0.239766525 | count | 1        |
| ANKRD26    | 0.1833149 | 0.2306081 | 0.7949 | 0.427    | 0.239794464 | count | 1        |
| EIF2AK4    | 0.1717537 | 0.1193891 | 1.4386 | 0.15     | 0.239804956 | count | 1        |
| AL451085.2 | 0.2896958 | 0.3853609 | 0.7518 | 0.452    | 0.239833053 | count | 1        |
| AC010136.1 | 0.6720465 | 1.6216012 | 0.4144 | 0.6786   | 0.239845211 | count | 1        |
| ZIK1       | 0.8074954 | 1.0721101 | 0.7532 | 0.451    | 0.239887397 | count | 1        |
| PRDM10     | 0.8074954 | 1.106473  | 0.7298 | 0.466    | 0.239887397 | count | 1        |
| TIMM9      | 0.1769598 | 0.1276968 | 1.3858 | 0.166    | 0.240096383 | count | 1        |
| NAP1L2     | 0.311977  | 0.5248046 | 0.5945 | 0.552    | 0.24011328  | count | 1        |
| XPC        | 0.1781385 | 0.1611395 | 1.1055 | 0.269    | 0.240210421 | count | 1        |
| CFL2       | 0.1761378 | 0.1370118 | 1.2856 | 0.199    | 0.240260996 | count | 1        |
| EARS2      | 0.4152955 | 0.6393878 | 0.6495 | 0.516    | 0.240272283 | count | 1        |
| RTN4RL2    | 0.5243893 | 0.6210735 | 0.8443 | 0.399    | 0.240306548 | count | 1        |
| ZFP69      | 0.5243893 | 0.7065267 | 0.7422 | 0.458    | 0.240306548 | count | 1        |
| AL161421.1 | 0.2463365 | 0.4039123 | 0.6099 | 0.542    | 0.24034737  | count | 1        |
| TSPAN10    | 0.2791069 | 0.4623671 | 0.6036 | 0.546    | 0.240384983 | count | 1        |
| HNRNPK     | 0.1685142 | 0.05453   | 3.0903 | 0.00202  | 0.2404321   | count | 1        |
| SARNP      | 0.204649  | 0.2620654 | 0.7809 | 0.435    | 0.241081948 | count | 1        |
| VPS4B      | 0.1736122 | 0.1236427 | 1.4041 | 0.16     | 0.241091308 | count | 1        |
| TBRG4      | 0.2147971 | 0.3790324 | 0.5667 | 0.571    | 0.241115189 | count | 1        |
| B3GLCT     | 0.3750388 | 0.5721402 | 0.6555 | 0.512    | 0.241229159 | count | 1        |
| ZC3H15     | 0.1697037 | 0.066934  | 2.5354 | 0.0113   | 0.241320854 | count | 1        |
| SCNN1A     | 0.4173545 | 0.6748834 | 0.6184 | 0.536    | 0.24133667  | count | 1        |
| TRIM59     | 0.3943713 | 0.6501039 | 0.6066 | 0.544    | 0.241352755 | count | 1        |
| ACBD3      | 0.17046   | 0.0938156 | 1.817  | 0.0693   | 0.241448564 | count | 1        |
| RMDN3      | 0.1893406 | 0.2004783 | 0.9444 | 0.345    | 0.241477945 | count | 1        |
| NACA       | 0.1676665 | 0.0218609 | 7.6697 | 2.37E-14 | 0.241678345 | count | 5.67E-10 |
| LINC02018  | 0.5901918 | 1.063755  | 0.5548 | 0.579    | 0.241732323 | count | 1        |
| CADM2      | 0.5901918 | 1.0841315 | 0.5444 | 0.586    | 0.241732323 | count | 1        |
| NT5DC1     | 0.1781932 | 0.1564143 | 1.1392 | 0.255    | 0.241762185 | count | 1        |
| MORN3      | 0.3763219 | 0.7938956 | 0.474  | 0.636    | 0.241980931 | count | 1        |
| PDP1       | 0.1974927 | 0.3099536 | 0.6372 | 0.524    | 0.242163399 | count | 1        |
| RAB8A      | 0.1758782 | 0.1188229 | 1.4802 | 0.139    | 0.242192877 | count | 1        |
| FEN1       | 0.3466058 | 0.488008  | 0.7102 | 0.478    | 0.242197761 | count | 1        |
| ACSL1      | 0.3962187 | 1.0101715 | 0.3922 | 0.695    | 0.242373286 | count | 1        |
| SNRNP35    | 0.1813004 | 0.1552554 | 1.1678 | 0.243    | 0.242532242 | count | 1        |
| BTF3L4     | 0.1738618 | 0.100866  | 1.7237 | 0.0849   | 0.24259833  | count | 1        |
| APBB1IP    | 0.8201165 | 1.2263686 | 0.6687 | 0.504    | 0.242633338 | count | 1        |
| RHOT1      | 0.1933886 | 0.2413869 | 0.8012 | 0.423    | 0.242645877 | count | 1        |
| ZNF280C    | 0.2723641 | 0.5699968 | 0.4778 | 0.633    | 0.242649885 | count | 1        |
| FLRT2      | 0.2006003 | 0.2215519 | 0.9054 | 0.365    | 0.242654171 | count | 1        |
| IL6ST      | 0.1692263 | 0.0621656 | 2.7222 | 0.00653  | 0.242724548 | count | 1        |

|             |           |           |        |          |             |       |   |
|-------------|-----------|-----------|--------|----------|-------------|-------|---|
| SLC30A4     | 0.2252018 | 0.3053833 | 0.7374 | 0.461    | 0.242932718 | count | 1 |
| TSN         | 0.181408  | 0.1552608 | 1.1684 | 0.243    | 0.24303988  | count | 1 |
| HTATIP2     | 0.17694   | 0.1288771 | 1.3729 | 0.17     | 0.243283276 | count | 1 |
| ZRANB1      | 0.1931619 | 0.270227  | 0.7148 | 0.475    | 0.243287465 | count | 1 |
| ZBTB11      | 0.1937361 | 0.1847722 | 1.0485 | 0.294    | 0.243391082 | count | 1 |
| CARS2       | 0.2044842 | 0.2210486 | 0.9251 | 0.355    | 0.243405248 | count | 1 |
| KBTBD11     | 0.5327748 | 0.8066467 | 0.6605 | 0.509    | 0.243559088 | count | 1 |
| WISP2       | 0.5327748 | 0.8511304 | 0.626  | 0.531    | 0.243559088 | count | 1 |
| AL163051.1  | 0.5327748 | 0.9586365 | 0.5558 | 0.578    | 0.243559088 | count | 1 |
| ACAD9       | 0.2189882 | 0.2518421 | 0.8695 | 0.385    | 0.243599756 | count | 1 |
| NRAV        | 0.3088955 | 0.5625673 | 0.5491 | 0.583    | 0.243859983 | count | 1 |
| ATP6V1H     | 0.1972956 | 0.1978167 | 0.9974 | 0.319    | 0.243957795 | count | 1 |
| FAM177A1    | 0.1722272 | 0.082352  | 2.0914 | 0.0366   | 0.244013895 | count | 1 |
| ZNF33A      | 0.1824668 | 0.1661282 | 1.0983 | 0.272    | 0.244176675 | count | 1 |
| CHRAC1      | 0.179587  | 0.1399998 | 1.2828 | 0.2      | 0.244295575 | count | 1 |
| LRRC28      | 0.2016157 | 0.2290193 | 0.8803 | 0.379    | 0.24436484  | count | 1 |
| DGCR6       | 0.6884227 | 0.6443589 | 1.0684 | 0.285    | 0.244428311 | count | 1 |
| PEX11B      | 0.2065669 | 0.2973268 | 0.6947 | 0.487    | 0.244605282 | count | 1 |
| GID8        | 0.1790057 | 0.1347651 | 1.3283 | 0.184    | 0.244606412 | count | 1 |
| FBXL20      | 0.2179761 | 0.3701271 | 0.5889 | 0.556    | 0.244609313 | count | 1 |
| RELA        | 0.1812978 | 0.1416617 | 1.2798 | 0.201    | 0.244743845 | count | 1 |
| MRPS2       | 0.179352  | 0.133655  | 1.3419 | 0.18     | 0.244830829 | count | 1 |
| PCIF1       | 0.1935078 | 0.2113856 | 0.9154 | 0.36     | 0.244880711 | count | 1 |
| MORF4L2-AS1 | 0.3812907 | 0.8933306 | 0.4268 | 0.67     | 0.244887406 | count | 1 |
| FRYL        | 0.1763722 | 0.1398828 | 1.2609 | 0.207    | 0.244937102 | count | 1 |
| TDRKH-AS1   | 0.5999629 | 1.0471146 | 0.573  | 0.567    | 0.245011805 | count | 1 |
| AC021188.1  | 0.5999629 | 1.1194748 | 0.5359 | 0.592    | 0.245011805 | count | 1 |
| ACTL10      | 0.5999629 | 1.1547046 | 0.5196 | 0.603    | 0.245011805 | count | 1 |
| SCML1       | 0.1838782 | 0.1567969 | 1.1727 | 0.241    | 0.245176056 | count | 1 |
| ELOVL1      | 0.1753914 | 0.1041011 | 1.6848 | 0.0921   | 0.24527568  | count | 1 |
| TM9SF1      | 0.2333658 | 0.3850276 | 0.6061 | 0.544    | 0.245463968 | count | 1 |
| DPEP2       | 0.2606183 | 0.4003405 | 0.651  | 0.515    | 0.245529927 | count | 1 |
| ZFYVE26     | 0.4914657 | 0.6621461 | 0.7422 | 0.458    | 0.245841006 | count | 1 |
| ARFIP1      | 0.1825669 | 0.1525952 | 1.1964 | 0.232    | 0.245843271 | count | 1 |
| FAM184B     | 0.2812005 | 0.6196035 | 0.4538 | 0.65     | 0.246231012 | count | 1 |
| BCL7B       | 0.178534  | 0.1266096 | 1.4101 | 0.159    | 0.246351927 | count | 1 |
| AMD1        | 0.1773467 | 0.0971892 | 1.8248 | 0.0681   | 0.246381815 | count | 1 |
| TIPRL       | 0.1762694 | 0.1005351 | 1.7533 | 0.0797   | 0.246564486 | count | 1 |
| MUC20       | 0.4931484 | 1.9218288 | 0.2566 | 0.7975   | 0.246567667 | count | 1 |
| BBS4        | 0.2049048 | 0.3487384 | 0.5876 | 0.557    | 0.246736675 | count | 1 |
| TRMT44      | 0.3053288 | 0.5196617 | 0.5876 | 0.557    | 0.246783146 | count | 1 |
| CSK         | 0.2190782 | 0.3003744 | 0.7294 | 0.466    | 0.246835313 | count | 1 |
| SF3B2       | 0.17412   | 0.0744771 | 2.3379 | 0.0195   | 0.246849736 | count | 1 |
| PA2G4       | 0.1738893 | 0.0650885 | 2.6716 | 0.00759  | 0.247079672 | count | 1 |
| CDC42       | 0.1722561 | 0.045446  | 3.7904 | 0.000154 | 0.247103137 | count | 1 |

|            |           |           |        |          |             |       |   |
|------------|-----------|-----------|--------|----------|-------------|-------|---|
| CRYBG1     | 0.2031389 | 0.2786811 | 0.7289 | 0.466    | 0.247160962 | count | 1 |
| LINC02315  | 0.3853148 | 1.072814  | 0.3592 | 0.72     | 0.247235725 | count | 1 |
| CARM1      | 0.2306559 | 0.3053032 | 0.7555 | 0.45     | 0.24724972  | count | 1 |
| STON2      | 1.0998431 | 1.0414184 | 1.0561 | 0.291    | 0.247392254 | count | 1 |
| SRP54      | 0.1817728 | 0.1555085 | 1.1689 | 0.243    | 0.247425976 | count | 1 |
| UNC50      | 0.178283  | 0.1183743 | 1.5061 | 0.132    | 0.247435741 | count | 1 |
| DENND1B    | 0.282656  | 0.4021088 | 0.7029 | 0.482    | 0.24744462  | count | 1 |
| AC004951.1 | 0.4585244 | 0.5184445 | 0.8844 | 0.377    | 0.247488716 | count | 1 |
| AC040977.1 | 0.4958684 | 0.7962084 | 0.6228 | 0.533    | 0.247740641 | count | 1 |
| VPS26A     | 0.17936   | 0.1100066 | 1.6304 | 0.103    | 0.247745584 | count | 1 |
| RARB       | 0.2249316 | 0.379045  | 0.5934 | 0.553    | 0.247746261 | count | 1 |
| CENPH      | 0.2569886 | 0.3780451 | 0.6798 | 0.497    | 0.247775926 | count | 1 |
| HSPA9      | 0.1788912 | 0.1087683 | 1.6447 | 0.1      | 0.248073001 | count | 1 |
| DTNBP1     | 0.1845606 | 0.1591125 | 1.1599 | 0.246    | 0.248108386 | count | 1 |
| EPST1      | 0.1814246 | 0.1828445 | 0.9922 | 0.321    | 0.248186521 | count | 1 |
| PSMG3      | 0.1836833 | 0.159308  | 1.153  | 0.249    | 0.248236792 | count | 1 |
| NR4A2      | 0.180655  | 0.1313033 | 1.3759 | 0.169    | 0.248294648 | count | 1 |
| DDX60      | 0.1882139 | 0.1981208 | 0.95   | 0.342    | 0.248329906 | count | 1 |
| CLASP1     | 0.2077183 | 0.2884443 | 0.7201 | 0.472    | 0.248385698 | count | 1 |
| PARD6G-AS1 | 0.6101494 | 1.0656121 | 0.5726 | 0.567    | 0.248407076 | count | 1 |
| ZSWIM1     | 0.6101494 | 1.094702  | 0.5574 | 0.577    | 0.248407076 | count | 1 |
| AC114291.1 | 0.6101494 | 1.1367817 | 0.5367 | 0.591    | 0.248407076 | count | 1 |
| THRA       | 0.18394   | 0.1611559 | 1.1414 | 0.254    | 0.248438458 | count | 1 |
| SLC35F5    | 0.1954927 | 0.2101719 | 0.9302 | 0.352    | 0.248466822 | count | 1 |
| SPOUT1     | 0.2094263 | 0.2252532 | 0.9297 | 0.353    | 0.248573095 | count | 1 |
| TSPAN4     | 0.1743143 | 0.0640341 | 2.7222 | 0.00653  | 0.248673497 | count | 1 |
| MRPL23     | 0.1860974 | 0.1438072 | 1.2941 | 0.196    | 0.248719008 | count | 1 |
| KEAP1      | 0.1893909 | 0.1641703 | 1.1536 | 0.249    | 0.248752879 | count | 1 |
| RPS6KC1    | 0.2282854 | 0.3558094 | 0.6416 | 0.521    | 0.248848545 | count | 1 |
| AKAP7      | 0.2125848 | 0.2688685 | 0.7907 | 0.429    | 0.248865254 | count | 1 |
| PARP12     | 0.1962672 | 0.2608886 | 0.7523 | 0.452    | 0.248897707 | count | 1 |
| VSIG10     | 0.2005473 | 0.238678  | 0.8402 | 0.401    | 0.249078042 | count | 1 |
| ZNF232     | 0.2403195 | 0.3370388 | 0.713  | 0.476    | 0.249107647 | count | 1 |
| A2M        | 0.1736179 | 0.0668036 | 2.5989 | 0.0094   | 0.249260811 | count | 1 |
| DPAGT1     | 0.1947741 | 0.2086364 | 0.9336 | 0.351    | 0.249322025 | count | 1 |
| RNF144A    | 0.224294  | 0.3526386 | 0.636  | 0.525    | 0.249371127 | count | 1 |
| HNRNPDL    | 0.1748357 | 0.0519576 | 3.365  | 0.000776 | 0.249841109 | count | 1 |
| PHF10      | 0.1889346 | 0.1705012 | 1.1081 | 0.268    | 0.250046586 | count | 1 |
| CBX8       | 0.4103329 | 0.8193567 | 0.5008 | 0.617    | 0.2501362   | count | 1 |
| CCDC6      | 0.1873357 | 0.1638072 | 1.1436 | 0.253    | 0.25046171  | count | 1 |
| RPTOR      | 0.3179524 | 0.5139476 | 0.6186 | 0.536    | 0.250567991 | count | 1 |
| TXN2       | 0.1778163 | 0.0859649 | 2.0685 | 0.0387   | 0.250594305 | count | 1 |
| TAF15      | 0.1809332 | 0.1167392 | 1.5499 | 0.121    | 0.250789399 | count | 1 |
| UBE3B      | 0.2258485 | 0.2917655 | 0.7741 | 0.439    | 0.251060793 | count | 1 |
| RANBP10    | 0.2316365 | 0.3088482 | 0.75   | 0.453    | 0.251077826 | count | 1 |

|            |           |           |        |          |             |       |          |
|------------|-----------|-----------|--------|----------|-------------|-------|----------|
| GEMIN6     | 0.1931322 | 0.2057963 | 0.9385 | 0.348    | 0.251163289 | count | 1        |
| RBM33      | 0.189026  | 0.2141482 | 0.8827 | 0.377    | 0.251234437 | count | 1        |
| SDCBP2-AS1 | 0.4671462 | 0.7603465 | 0.6144 | 0.539    | 0.251563438 | count | 1        |
| SLC35E2A   | 0.4671462 | 0.8780197 | 0.532  | 0.595    | 0.251563438 | count | 1        |
| SLC11A1    | 0.4376707 | 0.9538075 | 0.4589 | 0.646    | 0.251772113 | count | 1        |
| MIGA2      | 0.2747398 | 0.444881  | 0.6176 | 0.537    | 0.251799025 | count | 1        |
| AHCY       | 0.1917627 | 0.1695549 | 1.131  | 0.258    | 0.251844953 | count | 1        |
| DCP1A      | 0.1903005 | 0.1754667 | 1.0845 | 0.278    | 0.252090123 | count | 1        |
| RNF2       | 0.2038463 | 0.189411  | 1.0762 | 0.282    | 0.25235296  | count | 1        |
| BCL10      | 0.1805608 | 0.1195887 | 1.5098 | 0.131    | 0.252353201 | count | 1        |
| CCT2       | 0.1789385 | 0.0778716 | 2.2979 | 0.0216   | 0.252498427 | count | 1        |
| AC100830.1 | 0.3503771 | 1.4601076 | 0.24   | 0.8104   | 0.25276148  | count | 1        |
| C3orf38    | 0.2024099 | 0.2319617 | 0.8726 | 0.383    | 0.252814007 | count | 1        |
| CDC23      | 0.2188294 | 0.3459672 | 0.6325 | 0.527    | 0.252913224 | count | 1        |
| FRMD8      | 0.2286441 | 0.2773998 | 0.8242 | 0.41     | 0.252937045 | count | 1        |
| CCDC50     | 0.1781419 | 0.0791413 | 2.2509 | 0.0245   | 0.25314264  | count | 1        |
| NDUFAF2    | 0.1827441 | 0.1286719 | 1.4202 | 0.156    | 0.253236902 | count | 1        |
| EXOC2      | 0.2363991 | 0.2866768 | 0.8246 | 0.41     | 0.25324468  | count | 1        |
| TJP2       | 0.4410279 | 0.8014887 | 0.5503 | 0.582    | 0.253484859 | count | 1        |
| AC062029.1 | 0.4410279 | 0.9422508 | 0.4681 | 0.64     | 0.253484859 | count | 1        |
| MAN2A2     | 0.2767817 | 0.3983522 | 0.6948 | 0.487    | 0.253589032 | count | 1        |
| SCO1       | 0.2062229 | 0.2468868 | 0.8353 | 0.404    | 0.253602451 | count | 1        |
| PHF6       | 0.186633  | 0.1466646 | 1.2725 | 0.203    | 0.253776894 | count | 1        |
| GCA        | 0.1853349 | 0.1494565 | 1.2401 | 0.215    | 0.253796605 | count | 1        |
| HHLA3      | 0.2065433 | 0.2553717 | 0.8088 | 0.419    | 0.253991269 | count | 1        |
| FBXO30     | 0.2401282 | 0.3335708 | 0.7199 | 0.472    | 0.2540178   | count | 1        |
| KDSR       | 0.1829849 | 0.11416   | 1.6029 | 0.109    | 0.25419181  | count | 1        |
| CECR2      | 0.2322693 | 0.3511713 | 0.6614 | 0.508    | 0.25438081  | count | 1        |
| ATXN2L     | 0.2168236 | 0.2288772 | 0.9473 | 0.344    | 0.254467465 | count | 1        |
| PRICKLE3   | 0.3320264 | 0.5009517 | 0.6628 | 0.508    | 0.254518212 | count | 1        |
| ARHGAP20   | 0.1988657 | 0.2558077 | 0.7774 | 0.437    | 0.254988422 | count | 1        |
| FLT3LG     | 0.2000427 | 0.2490913 | 0.8031 | 0.422    | 0.25499004  | count | 1        |
| SNX1       | 0.1915759 | 0.154051  | 1.2436 | 0.214    | 0.25505052  | count | 1        |
| MRPL49     | 0.1997196 | 0.1761764 | 1.1336 | 0.257    | 0.255094312 | count | 1        |
| COL4A5     | 0.6305582 | 0.807973  | 0.7804 | 0.435    | 0.255137221 | count | 1        |
| CHN2       | 0.6305582 | 0.841414  | 0.7494 | 0.454    | 0.255137221 | count | 1        |
| WDR4       | 0.30295   | 0.4274743 | 0.7087 | 0.479    | 0.255146793 | count | 1        |
| APPL2      | 0.223947  | 0.2545897 | 0.8796 | 0.379    | 0.255148986 | count | 1        |
| MEGF9      | 0.2569176 | 0.4136573 | 0.6211 | 0.535    | 0.255169527 | count | 1        |
| TLE3       | 0.2083423 | 0.211162  | 0.9866 | 0.324    | 0.255287222 | count | 1        |
| RPL7A      | 0.1771961 | 0.0202188 | 8.7639 | 3.23E-18 | 0.255496974 | count | 7.76E-14 |
| DNAJB6     | 0.1816379 | 0.0799375 | 2.2723 | 0.0231   | 0.255534617 | count | 1        |
| RPL30      | 0.1772979 | 0.0192865 | 9.1928 | 7.32E-20 | 0.255644935 | count | 1.76E-15 |
| IRF2       | 0.1834267 | 0.1103277 | 1.6626 | 0.0965   | 0.255753192 | count | 1        |
| WDR13      | 0.185848  | 0.1127431 | 1.6484 | 0.0994   | 0.255758086 | count | 1        |

|            |           |           |        |          |             |       |          |
|------------|-----------|-----------|--------|----------|-------------|-------|----------|
| IAH1       | 0.1894492 | 0.1458919 | 1.2986 | 0.194    | 0.255765527 | count | 1        |
| PIBF1      | 0.1908126 | 0.1364868 | 1.398  | 0.162    | 0.255844401 | count | 1        |
| AL441992.1 | 0.3172564 | 0.4690382 | 0.6764 | 0.499    | 0.255845298 | count | 1        |
| ZBTB24     | 0.1989951 | 0.2436164 | 0.8168 | 0.414    | 0.255846699 | count | 1        |
| ENPP4      | 0.1960613 | 0.1877276 | 1.0444 | 0.296    | 0.256000463 | count | 1        |
| MCOLN1     | 0.2293998 | 0.2709703 | 0.8466 | 0.397    | 0.25604919  | count | 1        |
| RAB27A     | 0.190013  | 0.142499  | 1.3334 | 0.182    | 0.256057262 | count | 1        |
| AL035448.1 | 0.8840871 | 1.1388829 | 0.7763 | 0.438    | 0.256138787 | count | 1        |
| ASXL2      | 0.2065465 | 0.2249936 | 0.918  | 0.359    | 0.256436394 | count | 1        |
| GYPC       | 0.180578  | 0.0935526 | 1.9302 | 0.0537   | 0.256456838 | count | 1        |
| SPACA6     | 0.4776414 | 0.6214419 | 0.7686 | 0.442    | 0.256495068 | count | 1        |
| THOC7      | 0.1816593 | 0.0800614 | 2.269  | 0.0233   | 0.256657985 | count | 1        |
| AL135960.1 | 0.3113193 | 0.5634155 | 0.5526 | 0.581    | 0.256713307 | count | 1        |
| MYCBP      | 0.2149797 | 0.2592665 | 0.8292 | 0.407    | 0.256930592 | count | 1        |
| C12orf10   | 0.1834383 | 0.0985873 | 1.8607 | 0.0629   | 0.256930941 | count | 1        |
| WBP2       | 0.1847296 | 0.1065602 | 1.7336 | 0.0831   | 0.256987232 | count | 1        |
| AC020910.4 | 0.3567866 | 0.6413814 | 0.5563 | 0.578    | 0.257031189 | count | 1        |
| EIF2AK2    | 0.1832498 | 0.1060638 | 1.7277 | 0.0841   | 0.257134168 | count | 1        |
| CCDC110    | 0.3119663 | 0.5942271 | 0.525  | 0.6      | 0.257216122 | count | 1        |
| ABTB1      | 0.1886602 | 0.160685  | 1.1741 | 0.24     | 0.257320555 | count | 1        |
| ZNF610     | 0.4030182 | 0.5455583 | 0.7387 | 0.46     | 0.257507679 | count | 1        |
| ZNF800     | 0.1905357 | 0.1322614 | 1.4406 | 0.15     | 0.257595585 | count | 1        |
| TAF8       | 0.2091649 | 0.2322983 | 0.9004 | 0.368    | 0.257604408 | count | 1        |
| ZBTB6      | 0.2706779 | 0.4044193 | 0.6693 | 0.503    | 0.257607412 | count | 1        |
| SS18L2     | 0.1877618 | 0.1224485 | 1.5334 | 0.125    | 0.257732497 | count | 1        |
| BX537318.1 | 0.3581111 | 0.731629  | 0.4895 | 0.625    | 0.257911889 | count | 1        |
| SHE        | 0.188353  | 0.121212  | 1.5539 | 0.12     | 0.257959308 | count | 1        |
| RFX2       | 0.2395673 | 0.2825454 | 0.8479 | 0.397    | 0.258024635 | count | 1        |
| UBAP1      | 0.2167072 | 0.2484826 | 0.8721 | 0.383    | 0.258346249 | count | 1        |
| TTC5       | 0.2083132 | 0.2225107 | 0.9362 | 0.349    | 0.258602259 | count | 1        |
| PRPSAP2    | 0.208703  | 0.2168289 | 0.9625 | 0.336    | 0.258687873 | count | 1        |
| MCEE       | 0.2094562 | 0.2422701 | 0.8646 | 0.387    | 0.258799685 | count | 1        |
| GTDC1      | 0.26331   | 0.3335403 | 0.7894 | 0.43     | 0.258847977 | count | 1        |
| MDH1       | 0.1865568 | 0.112991  | 1.6511 | 0.0988   | 0.259088766 | count | 1        |
| IWS1       | 0.1928829 | 0.1491586 | 1.2931 | 0.196    | 0.259145156 | count | 1        |
| PAK1       | 0.8988705 | 0.8871042 | 1.0133 | 0.311    | 0.259163548 | count | 1        |
| ARGLU1     | 0.1812658 | 0.0560803 | 3.2323 | 0.00124  | 0.25927546  | count | 1        |
| NNT-AS1    | 0.1958852 | 0.2027778 | 0.966  | 0.334    | 0.259436815 | count | 1        |
| TSGA10     | 0.3612514 | 0.445536  | 0.8108 | 0.418    | 0.259997779 | count | 1        |
| HSD17B6    | 1.1933769 | 1.1742315 | 1.0163 | 0.31     | 0.260134629 | count | 1        |
| RPS24      | 0.1804467 | 0.019349  | 9.3259 | 2.19E-20 | 0.260178026 | count | 5.27E-16 |
| CCNH       | 0.1905888 | 0.1466085 | 1.3    | 0.194    | 0.260208393 | count | 1        |
| SH3GLB2    | 0.1998647 | 0.1839259 | 1.0867 | 0.277    | 0.260213974 | count | 1        |
| C12orf45   | 0.1981908 | 0.1740548 | 1.1387 | 0.255    | 0.260375046 | count | 1        |
| METTL21A   | 0.1997199 | 0.2034729 | 0.9816 | 0.326    | 0.260387239 | count | 1        |

|            |           |           |        |          |             |       |             |
|------------|-----------|-----------|--------|----------|-------------|-------|-------------|
| PSMB2      | 0.1838554 | 0.0746076 | 2.4643 | 0.0138   | 0.260406874 | count | 1           |
| GGA2       | 0.2334101 | 0.287793  | 0.811  | 0.417    | 0.260423093 | count | 1           |
| ACVR2A     | 0.2600722 | 0.3270154 | 0.7953 | 0.427    | 0.260511549 | count | 1           |
| NAPRT      | 0.1892526 | 0.1327369 | 1.4258 | 0.154    | 0.260692306 | count | 1           |
| TCERG1     | 0.193559  | 0.1682179 | 1.1506 | 0.25     | 0.260809351 | count | 1           |
| NR4A3      | 0.3909277 | 0.5920377 | 0.6603 | 0.509    | 0.260827067 | count | 1           |
| AC012306.2 | 0.2122452 | 0.2470887 | 0.859  | 0.39     | 0.260907915 | count | 1           |
| APPL1      | 0.1843149 | 0.0800007 | 2.3039 | 0.0213   | 0.260996677 | count | 1           |
| NUFIP1     | 0.2044096 | 0.2106984 | 0.9702 | 0.332    | 0.261023858 | count | 1           |
| SNURF      | 0.9097917 | 1.047429  | 0.8686 | 0.385    | 0.261375236 | count | 1           |
| SPATA41    | 0.9097917 | 1.047429  | 0.8686 | 0.385    | 0.261375236 | count | 1           |
| AC099850.1 | 0.9097917 | 1.047429  | 0.8686 | 0.385    | 0.261375236 | count | 1           |
| ZNF197     | 0.2442132 | 0.3217418 | 0.759  | 0.448    | 0.261388034 | count | 1           |
| MPI        | 0.2163527 | 0.2939304 | 0.7361 | 0.462    | 0.261420581 | count | 1           |
| CENPS      | 0.3108784 | 0.4250041 | 0.7315 | 0.465    | 0.261451835 | count | 1           |
| LINC01089  | 0.4567361 | 0.5277868 | 0.8654 | 0.387    | 0.26145475  | count | 1           |
| ORMDL1     | 0.1881843 | 0.1054446 | 1.7847 | 0.0744   | 0.261467454 | count | 1           |
| ESAM       | 0.1831897 | 0.060029  | 3.0517 | 0.0023   | 0.261578139 | count | 1           |
| TTC19      | 0.1920963 | 0.1234667 | 1.5559 | 0.12     | 0.261646711 | count | 1           |
| WBP1       | 0.7518667 | 1.0320141 | 0.7285 | 0.466    | 0.261668241 | count | 1           |
| MYL2       | 1.2064745 | 1.185584  | 1.0176 | 0.309    | 0.261838694 | count | 1           |
| RCAN1      | 0.1861026 | 0.1558259 | 1.1943 | 0.232    | 0.261880227 | count | 1           |
| SERBP1     | 0.1826063 | 0.0444337 | 4.1096 | 4.08E-05 | 0.261921231 | count | 0.9408888   |
| OXNAD1     | 0.2694028 | 0.4137357 | 0.6511 | 0.515    | 0.262005544 | count | 1           |
| ARMT1      | 0.2036675 | 0.2247306 | 0.9063 | 0.365    | 0.262026591 | count | 1           |
| KIF20B     | 0.2319651 | 0.3132298 | 0.7406 | 0.459    | 0.262083337 | count | 1           |
| ZNF599     | 0.2617519 | 0.4165847 | 0.6283 | 0.53     | 0.262135911 | count | 1           |
| LINC00667  | 0.1934971 | 0.1694359 | 1.142  | 0.254    | 0.262218605 | count | 1           |
| KAT8       | 0.1993973 | 0.1626433 | 1.226  | 0.22     | 0.262250344 | count | 1           |
| INTS11     | 0.1900895 | 0.1368194 | 1.3893 | 0.165    | 0.262711619 | count | 1           |
| SOX7       | 0.1895334 | 0.1437483 | 1.3185 | 0.187    | 0.26281143  | count | 1           |
| GNAS       | 0.1826671 | 0.0336278 | 5.432  | 6.06E-08 | 0.262990542 | count | 0.001426585 |
| SAMD9L     | 0.1919993 | 0.1371983 | 1.3994 | 0.162    | 0.263212367 | count | 1           |
| RPS3A      | 0.1825712 | 0.021319  | 8.5638 | 1.79E-17 | 0.26323178  | count | 4.30E-13    |
| MANSC1     | 0.1902191 | 0.1307618 | 1.4547 | 0.146    | 0.263266341 | count | 1           |
| ITGB1BP1   | 0.1867341 | 0.0834289 | 2.2382 | 0.0253   | 0.263271916 | count | 1           |
| NIN        | 0.20773   | 0.2523301 | 0.8232 | 0.41     | 0.263567061 | count | 1           |
| EXO5       | 0.3956339 | 0.6086638 | 0.65   | 0.516    | 0.263680533 | count | 1           |
| CDKAL1     | 0.2466099 | 0.2803104 | 0.8798 | 0.379    | 0.263882638 | count | 1           |
| ZNF628     | 0.3280378 | 0.5623251 | 0.5834 | 0.56     | 0.263997945 | count | 1           |
| HYLS1      | 0.3280378 | 0.5641498 | 0.5815 | 0.561    | 0.263997945 | count | 1           |
| ADAP2      | 0.9230063 | 1.6448005 | 0.5612 | 0.5747   | 0.264025632 | count | 1           |
| FH         | 0.2048758 | 0.1835428 | 1.1162 | 0.264    | 0.264241882 | count | 1           |
| NEPRO      | 0.2078311 | 0.2039255 | 1.0192 | 0.308    | 0.264262567 | count | 1           |
| FAAP24     | 0.3366787 | 0.6530254 | 0.5156 | 0.606    | 0.264355274 | count | 1           |



|            |           |           |        |          |             |       |          |
|------------|-----------|-----------|--------|----------|-------------|-------|----------|
| LRRC37A2   | 0.5351788 | 0.600088  | 0.8918 | 0.373    | 0.26446962  | count | 1        |
| EFR3A      | 0.2011321 | 0.180037  | 1.1172 | 0.264    | 0.26466437  | count | 1        |
| MTMR12     | 0.2099206 | 0.2321398 | 0.9043 | 0.366    | 0.264795442 | count | 1        |
| MYLK-AS1   | 0.7638457 | 1.0603712 | 0.7204 | 0.471    | 0.264832648 | count | 1        |
| MCM3AP-AS1 | 0.7638457 | 1.1412654 | 0.6693 | 0.503    | 0.264832648 | count | 1        |
| KLRD1      | 0.7638457 | 1.2106035 | 0.631  | 0.528    | 0.264832648 | count | 1        |
| FAM118A    | 0.1903586 | 0.1266297 | 1.5033 | 0.133    | 0.264888146 | count | 1        |
| GALNT12    | 1.2305311 | 1.0179668 | 1.2088 | 0.227    | 0.264918824 | count | 1        |
| AF117829.1 | 0.2461486 | 0.4329443 | 0.5685 | 0.57     | 0.264921612 | count | 1        |
| TAF6L      | 0.2434311 | 0.3245005 | 0.7502 | 0.453    | 0.264933386 | count | 1        |
| ELF2       | 0.1883794 | 0.0881551 | 2.1369 | 0.0327   | 0.264976871 | count | 1        |
| MARK2      | 0.2280587 | 0.313507  | 0.7274 | 0.467    | 0.265048307 | count | 1        |
| YTHDC1     | 0.1895087 | 0.1042402 | 1.818  | 0.0692   | 0.265221238 | count | 1        |
| PIK3CB     | 0.2119077 | 0.2485035 | 0.8527 | 0.394    | 0.265252311 | count | 1        |
| INF2       | 0.2066394 | 0.2155428 | 0.9587 | 0.338    | 0.26534178  | count | 1        |
| PTGES3     | 0.1859016 | 0.0522563 | 3.5575 | 0.000381 | 0.265607493 | count | 1        |
| SRRM1      | 0.1861981 | 0.059096  | 3.1508 | 0.00165  | 0.265636116 | count | 1        |
| SYNJ2BP    | 0.1932788 | 0.1544328 | 1.2515 | 0.211    | 0.265701235 | count | 1        |
| CCDC113    | 0.2867152 | 0.389372  | 0.7364 | 0.462    | 0.265746851 | count | 1        |
| DOCK7      | 0.2867152 | 0.3940489 | 0.7276 | 0.467    | 0.265746851 | count | 1        |
| SIRT2      | 0.2006933 | 0.169401  | 1.1847 | 0.236    | 0.265759379 | count | 1        |
| CSNK1E     | 0.204948  | 0.1991177 | 1.0293 | 0.303    | 0.265805583 | count | 1        |
| LINC00665  | 0.2417714 | 0.3849031 | 0.6281 | 0.53     | 0.265834882 | count | 1        |
| EGLN1      | 0.1920643 | 0.1320336 | 1.4547 | 0.146    | 0.265932742 | count | 1        |
| TMEM267    | 0.2237382 | 0.2775581 | 0.8061 | 0.42     | 0.265935322 | count | 1        |
| TUBB2A     | 0.2095282 | 0.1713822 | 1.2226 | 0.222    | 0.266112688 | count | 1        |
| DVL2       | 0.2613744 | 0.3084657 | 0.8473 | 0.397    | 0.266165468 | count | 1        |
| C5orf15    | 0.2052359 | 0.2049031 | 1.0016 | 0.317    | 0.266175615 | count | 1        |
| HVCN1      | 0.2252521 | 0.2725728 | 0.8264 | 0.409    | 0.266344206 | count | 1        |
| SLC25A43   | 0.2615919 | 0.309867  | 0.8442 | 0.399    | 0.26637959  | count | 1        |
| PRPF8      | 0.1963649 | 0.1489985 | 1.3179 | 0.188    | 0.266426225 | count | 1        |
| HERC3      | 0.2230768 | 0.3150875 | 0.708  | 0.479    | 0.266447201 | count | 1        |
| TANC1      | 0.2067831 | 0.1966199 | 1.0517 | 0.293    | 0.266454213 | count | 1        |
| GPBP1      | 0.1884293 | 0.0803379 | 2.3455 | 0.0191   | 0.266503232 | count | 1        |
| FP565260.1 | 1.243226  | 1.0293796 | 1.2077 | 0.227    | 0.266518511 | count | 1        |
| STRN       | 0.2000623 | 0.1841523 | 1.0864 | 0.277    | 0.266613322 | count | 1        |
| RPS8       | 0.184944  | 0.0196553 | 9.4094 | 1.02E-20 | 0.266709676 | count | 2.46E-16 |
| NUAK1      | 0.1903648 | 0.1053395 | 1.8072 | 0.0708   | 0.267163838 | count | 1        |
| GOSR1      | 0.1926263 | 0.1148901 | 1.6766 | 0.0937   | 0.267169795 | count | 1        |
| CRYZL1     | 0.1987524 | 0.1646055 | 1.2074 | 0.227    | 0.267252379 | count | 1        |
| NCOA7      | 0.1872341 | 0.0782459 | 2.3929 | 0.0168   | 0.267272029 | count | 1        |
| THYN1      | 0.1910594 | 0.0986905 | 1.9359 | 0.053    | 0.267532033 | count | 1        |
| CPSF3      | 0.2263462 | 0.2786905 | 0.8122 | 0.417    | 0.267615    | count | 1        |
| EIF2B3     | 0.2147315 | 0.2199706 | 0.9762 | 0.329    | 0.267635663 | count | 1        |
| RNF167     | 0.196621  | 0.1343942 | 1.463  | 0.144    | 0.267780226 | count | 1        |

|            |           |           |        |          |             |       |            |
|------------|-----------|-----------|--------|----------|-------------|-------|------------|
| RIC8A      | 0.200285  | 0.1527549 | 1.3112 | 0.19     | 0.267870781 | count | 1          |
| RBBP5      | 0.2381925 | 0.2580549 | 0.923  | 0.356    | 0.2678846   | count | 1          |
| NAE1       | 0.2027329 | 0.1647828 | 1.2303 | 0.219    | 0.267903763 | count | 1          |
| AP000787.1 | 0.2976942 | 0.6629531 | 0.449  | 0.653    | 0.268071816 | count | 1          |
| ZNF322     | 0.1979589 | 0.1519767 | 1.3026 | 0.193    | 0.268162953 | count | 1          |
| CAMKK1     | 0.2790936 | 0.4313301 | 0.6471 | 0.518    | 0.268235616 | count | 1          |
| ESS2       | 0.2540096 | 0.3292984 | 0.7714 | 0.441    | 0.268271343 | count | 1          |
| KLF2       | 0.1862538 | 0.0412135 | 4.5192 | 6.47E-06 | 0.268299931 | count | 0.15040162 |
| PDCD5      | 0.1888243 | 0.0665487 | 2.8374 | 0.00458  | 0.268336732 | count | 1          |
| ZNF790     | 0.257626  | 0.3915922 | 0.6579 | 0.511    | 0.268381017 | count | 1          |
| SHISA5     | 0.1906122 | 0.0861444 | 2.2127 | 0.027    | 0.268572857 | count | 1          |
| ATAD2B     | 0.2401077 | 0.2544711 | 0.9436 | 0.345    | 0.268870992 | count | 1          |
| BUB3       | 0.1939948 | 0.1032497 | 1.8789 | 0.0604   | 0.268920552 | count | 1          |
| HIPK1      | 0.2072306 | 0.1954122 | 1.0605 | 0.289    | 0.268940462 | count | 1          |
| GSDMD      | 0.1908087 | 0.0864598 | 2.2069 | 0.0274   | 0.268996204 | count | 1          |
| RUFY1      | 0.2079024 | 0.2004114 | 1.0374 | 0.3      | 0.269602334 | count | 1          |
| TBCC       | 0.2096022 | 0.1914976 | 1.0945 | 0.274    | 0.269820731 | count | 1          |
| PEL1       | 0.2056068 | 0.1617334 | 1.2713 | 0.204    | 0.269881051 | count | 1          |
| RNF144B    | 0.2610854 | 0.2782643 | 0.9383 | 0.348    | 0.269948    | count | 1          |
| RBAK       | 0.3052085 | 0.4925495 | 0.6197 | 0.536    | 0.270436498 | count | 1          |
| PAXX       | 0.1936631 | 0.1297308 | 1.4928 | 0.136    | 0.270467162 | count | 1          |
| ALG10B     | 0.2704131 | 0.3742338 | 0.7226 | 0.47     | 0.270499271 | count | 1          |
| CASTOR1    | 0.2816558 | 0.3314259 | 0.8498 | 0.395    | 0.270597952 | count | 1          |
| DUSP6      | 0.1941542 | 0.0915676 | 2.1203 | 0.0341   | 0.270604252 | count | 1          |
| CNOT3      | 0.2369598 | 0.2921558 | 0.8111 | 0.417    | 0.270639388 | count | 1          |
| NBPF12     | 1.2773664 | 1.3247034 | 0.9643 | 0.335    | 0.270734257 | count | 1          |
| EIF2B5     | 0.2215536 | 0.2070097 | 1.0703 | 0.285    | 0.270753069 | count | 1          |
| KIF16B     | 0.2418397 | 0.3159676 | 0.7654 | 0.444    | 0.270764953 | count | 1          |
| NT5C3A     | 0.1990193 | 0.1382045 | 1.44   | 0.15     | 0.270786907 | count | 1          |
| WNT2B      | 0.2887668 | 0.9134731 | 0.3161 | 0.752    | 0.270900207 | count | 1          |
| IFT46      | 0.245329  | 0.3051756 | 0.8039 | 0.422    | 0.270936928 | count | 1          |
| EZH2       | 0.6054847 | 0.6260269 | 0.9672 | 0.334    | 0.271015263 | count | 1          |
| 9-Sep      | 0.2000658 | 0.133523  | 1.4984 | 0.134    | 0.271073267 | count | 1          |
| NOP14-AS1  | 0.3112766 | 0.5710309 | 0.5451 | 0.586    | 0.271176034 | count | 1          |
| CA5B       | 0.2128958 | 0.2024169 | 1.0518 | 0.293    | 0.271197214 | count | 1          |
| CDC40      | 0.1952211 | 0.1177343 | 1.6581 | 0.0974   | 0.271239603 | count | 1          |
| AFF1       | 0.1964186 | 0.1386762 | 1.4164 | 0.157    | 0.27139367  | count | 1          |
| CDC26      | 0.1931835 | 0.0925528 | 2.0873 | 0.037    | 0.271503435 | count | 1          |
| EXOC5      | 0.2034403 | 0.1497935 | 1.3581 | 0.175    | 0.271530582 | count | 1          |
| FAM41C     | 0.4500175 | 0.6483105 | 0.6941 | 0.488    | 0.271641102 | count | 1          |
| ZNF580     | 0.1995963 | 0.133832  | 1.4914 | 0.136    | 0.272049988 | count | 1          |
| PCAT1      | 0.312422  | 0.4261393 | 0.7331 | 0.464    | 0.272120501 | count | 1          |
| ZNF646     | 0.3474282 | 0.5701775 | 0.6093 | 0.542    | 0.272219344 | count | 1          |
| GOLPH3     | 0.2066891 | 0.1564604 | 1.321  | 0.187    | 0.272371591 | count | 1          |
| SFTPD      | 0.9656522 | 1.1415966 | 0.8459 | 0.398    | 0.272389224 | count | 1          |

|            |           |           |        |          |             |       |          |
|------------|-----------|-----------|--------|----------|-------------|-------|----------|
| AKT1S1     | 0.2106141 | 0.2234638 | 0.9425 | 0.346    | 0.272454711 | count | 1        |
| SND1       | 0.2099148 | 0.2093166 | 1.0029 | 0.316    | 0.272593539 | count | 1        |
| KCTD18     | 0.2508307 | 0.3406476 | 0.7363 | 0.462    | 0.272771442 | count | 1        |
| USP25      | 0.2066889 | 0.1889694 | 1.0938 | 0.274    | 0.27280862  | count | 1        |
| DLG2       | 0.2948351 | 0.3673465 | 0.8026 | 0.422    | 0.272929656 | count | 1        |
| CCDC9      | 0.2641717 | 0.3691351 | 0.7157 | 0.474    | 0.273035552 | count | 1        |
| TET3       | 0.6868359 | 0.8146432 | 0.8431 | 0.399    | 0.273201369 | count | 1        |
| NSMCE4A    | 0.1982474 | 0.121644  | 1.6297 | 0.103    | 0.273265214 | count | 1        |
| AL355001.2 | 0.2463549 | 0.3468898 | 0.7102 | 0.478    | 0.273297471 | count | 1        |
| BAP1       | 0.23948   | 0.2939421 | 0.8147 | 0.415    | 0.273455469 | count | 1        |
| ATPAF2     | 0.2529362 | 0.3224379 | 0.7844 | 0.433    | 0.273535574 | count | 1        |
| CD2BP2     | 0.1989416 | 0.1217079 | 1.6346 | 0.102    | 0.2735389   | count | 1        |
| CCDC14     | 0.2095178 | 0.2132647 | 0.9824 | 0.326    | 0.273779264 | count | 1        |
| TJP1       | 0.1933741 | 0.0822169 | 2.352  | 0.0187   | 0.274060595 | count | 1        |
| TRPC4AP    | 0.224797  | 0.2616167 | 0.8593 | 0.39     | 0.274152074 | count | 1        |
| IL15       | 0.2067885 | 0.1753913 | 1.179  | 0.238    | 0.274167002 | count | 1        |
| IFT43      | 0.197529  | 0.1196676 | 1.6506 | 0.0989   | 0.274197154 | count | 1        |
| TMEM41B    | 0.2271661 | 0.240028  | 0.9464 | 0.344    | 0.274277069 | count | 1        |
| PSMG3-AS1  | 0.3502514 | 0.4959737 | 0.7062 | 0.48     | 0.274278619 | count | 1        |
| PTPRK      | 0.2077786 | 0.188791  | 1.1006 | 0.271    | 0.274379155 | count | 1        |
| ZNF41      | 0.3600167 | 0.9487114 | 0.3795 | 0.704    | 0.274415055 | count | 1        |
| KHDRBS1    | 0.1932151 | 0.067585  | 2.8588 | 0.00428  | 0.274589437 | count | 1        |
| AC008543.1 | 0.274705  | 0.4016985 | 0.6839 | 0.494    | 0.274635823 | count | 1        |
| DGKZ       | 0.2143821 | 0.1953887 | 1.0972 | 0.273    | 0.274677552 | count | 1        |
| LINC00957  | 0.9785498 | 1.0282505 | 0.9517 | 0.341    | 0.274862388 | count | 1        |
| LRFN1      | 0.9785498 | 1.0583541 | 0.9246 | 0.355    | 0.274862388 | count | 1        |
| AC008443.5 | 0.9785498 | 1.0750999 | 0.9102 | 0.363    | 0.274862388 | count | 1        |
| CTDSP2     | 0.2021852 | 0.1599966 | 1.2637 | 0.206    | 0.275135593 | count | 1        |
| PCNT       | 0.2728172 | 0.3362084 | 0.8115 | 0.417    | 0.27515934  | count | 1        |
| RERE       | 0.2002611 | 0.1456734 | 1.3747 | 0.169    | 0.275217367 | count | 1        |
| COMMD1     | 0.1979398 | 0.1040788 | 1.9018 | 0.0573   | 0.275233959 | count | 1        |
| FLOT1      | 0.1934447 | 0.0617406 | 3.1332 | 0.00175  | 0.275376602 | count | 1        |
| MAT2B      | 0.2075432 | 0.1929571 | 1.0756 | 0.282    | 0.275418217 | count | 1        |
| APBB2      | 0.2074867 | 0.1647026 | 1.2598 | 0.208    | 0.275470661 | count | 1        |
| HSP90AB1   | 0.1912073 | 0.0280245 | 6.8228 | 1.09E-11 | 0.275473772 | count | 2.60E-07 |
| AL139393.2 | 0.561748  | 0.7940796 | 0.7074 | 0.479    | 0.275541278 | count | 1        |
| AC110769.2 | 0.8056046 | 0.7463874 | 1.0793 | 0.281    | 0.275642763 | count | 1        |
| SNX12      | 0.2359175 | 0.2425984 | 0.9725 | 0.331    | 0.275652329 | count | 1        |
| ISG20      | 0.2042709 | 0.1861037 | 1.0976 | 0.272    | 0.27574268  | count | 1        |
| IFI30      | 0.2670795 | 0.4431391 | 0.6027 | 0.547    | 0.275942198 | count | 1        |
| ZNF517     | 0.5197609 | 0.6384836 | 0.8141 | 0.416    | 0.275973585 | count | 1        |
| ESF1       | 0.1970357 | 0.1033034 | 1.9073 | 0.0566   | 0.276024916 | count | 1        |
| KLF13      | 0.1959006 | 0.0927457 | 2.1122 | 0.0348   | 0.27605041  | count | 1        |
| PIP4P2     | 0.2121633 | 0.2219701 | 0.9558 | 0.339    | 0.276082027 | count | 1        |
| CATSPER2   | 0.6195202 | 0.5423558 | 1.1423 | 0.253    | 0.276162626 | count | 1        |

|            |           |           |        |          |             |       |           |
|------------|-----------|-----------|--------|----------|-------------|-------|-----------|
| CIRBP      | 0.1927695 | 0.0451332 | 4.2711 | 2.01E-05 | 0.276209919 | count | 0.4650135 |
| HCCS       | 0.2152908 | 0.1965027 | 1.0956 | 0.273    | 0.276584513 | count | 1         |
| SCOC       | 0.1977271 | 0.1039207 | 1.9027 | 0.0572   | 0.276744521 | count | 1         |
| EMILIN2    | 0.2992226 | 0.4396867 | 0.6805 | 0.496    | 0.276802577 | count | 1         |
| TCAF2      | 0.4176759 | 0.8117414 | 0.5145 | 0.607    | 0.276953068 | count | 1         |
| CLDN12     | 0.5226581 | 0.6274319 | 0.833  | 0.405    | 0.277295048 | count | 1         |
| NAA20      | 0.1961866 | 0.0762614 | 2.5726 | 0.0101   | 0.277328765 | count | 1         |
| GLCC1      | 0.3876537 | 0.5323662 | 0.7282 | 0.467    | 0.277411293 | count | 1         |
| MALINC1    | 0.5665696 | 0.8005761 | 0.7077 | 0.479    | 0.277530275 | count | 1         |
| CPNE3      | 0.1959057 | 0.0759831 | 2.5783 | 0.00998  | 0.277547418 | count | 1         |
| THAP5      | 0.2037888 | 0.1630021 | 1.2502 | 0.211    | 0.277555012 | count | 1         |
| RAVER2     | 0.3088942 | 0.3550843 | 0.8699 | 0.384    | 0.277650585 | count | 1         |
| ZNF678     | 0.2672647 | 0.4333354 | 0.6168 | 0.537    | 0.278098482 | count | 1         |
| KIFAP3     | 0.2023877 | 0.1495307 | 1.3535 | 0.176    | 0.278127732 | count | 1         |
| SMU1       | 0.2033991 | 0.1268673 | 1.6032 | 0.109    | 0.278162537 | count | 1         |
| AKNA       | 0.2588958 | 0.3526645 | 0.7341 | 0.463    | 0.278249405 | count | 1         |
| IARS       | 0.2252243 | 0.2319509 | 0.971  | 0.332    | 0.278450143 | count | 1         |
| FBXL2      | 0.4627965 | 0.6341476 | 0.7298 | 0.466    | 0.278465024 | count | 1         |
| LYRM4      | 0.2113347 | 0.2030503 | 1.0408 | 0.298    | 0.278595743 | count | 1         |
| AZIN2      | 0.5256045 | 0.6372319 | 0.8248 | 0.41     | 0.278636526 | count | 1         |
| LENG8-AS1  | 0.525631  | 0.7455085 | 0.7051 | 0.481    | 0.278648586 | count | 1         |
| VDAC3      | 0.1986197 | 0.0968905 | 2.0499 | 0.0405   | 0.278678836 | count | 1         |
| MAD2L1     | 0.4403332 | 0.5511202 | 0.799  | 0.424    | 0.278843233 | count | 1         |
| COPS2      | 0.1985349 | 0.0935213 | 2.1229 | 0.0339   | 0.279033073 | count | 1         |
| NCOA6      | 0.2419238 | 0.2720331 | 0.8893 | 0.374    | 0.279046614 | count | 1         |
| PFDN1      | 0.1986323 | 0.0905558 | 2.1935 | 0.0284   | 0.279194986 | count | 1         |
| ADAM10     | 0.2025853 | 0.1221909 | 1.6579 | 0.0974   | 0.279374105 | count | 1         |
| SMARCC2    | 0.2015944 | 0.124941  | 1.6135 | 0.107    | 0.279389226 | count | 1         |
| AL512353.1 | 0.7067665 | 1.0437839 | 0.6771 | 0.498    | 0.279426964 | count | 1         |
| FAM210A    | 0.2233387 | 0.2128276 | 1.0494 | 0.294    | 0.279748594 | count | 1         |
| FBXO5      | 0.316403  | 0.4248266 | 0.7448 | 0.456    | 0.279831433 | count | 1         |
| OGFRL1     | 0.2384848 | 0.2902848 | 0.8216 | 0.411    | 0.280183231 | count | 1         |
| RPL14      | 0.1944366 | 0.0225919 | 8.6065 | 1.24E-17 | 0.280207638 | count | 2.98E-13  |
| MSL1       | 0.2165084 | 0.1934402 | 1.1193 | 0.263    | 0.280225247 | count | 1         |
| ETFRF1     | 0.2012719 | 0.1078096 | 1.8669 | 0.062    | 0.280313052 | count | 1         |
| SPIN1      | 0.2164798 | 0.208346  | 1.039  | 0.299    | 0.280405381 | count | 1         |
| GTF2IRD1   | 0.4234958 | 0.6373238 | 0.6645 | 0.506    | 0.280432227 | count | 1         |
| PNRC2      | 0.1976591 | 0.0729283 | 2.7103 | 0.00676  | 0.280507578 | count | 1         |
| TFAM       | 0.2014307 | 0.1110917 | 1.8132 | 0.0699   | 0.280602655 | count | 1         |
| MLF2       | 0.200091  | 0.0923383 | 2.1669 | 0.0303   | 0.280635437 | count | 1         |
| FBXO28     | 0.2340975 | 0.3061603 | 0.7646 | 0.445    | 0.280672297 | count | 1         |
| CYCS       | 0.1991962 | 0.0808363 | 2.4642 | 0.0138   | 0.280695344 | count | 1         |
| TSSC4      | 0.2026065 | 0.1181427 | 1.7149 | 0.0865   | 0.280695917 | count | 1         |
| EEF1AKMT2  | 0.2094523 | 0.1694113 | 1.2364 | 0.216    | 0.280776659 | count | 1         |
| WDR41      | 0.2317421 | 0.2950911 | 0.7853 | 0.432    | 0.280857697 | count | 1         |

|            |           |           |        |          |             |       |             |
|------------|-----------|-----------|--------|----------|-------------|-------|-------------|
| ZCCHC9     | 0.2120401 | 0.1767583 | 1.1996 | 0.23     | 0.280943563 | count | 1           |
| TXNDC9     | 0.203796  | 0.1150119 | 1.772  | 0.0765   | 0.281224667 | count | 1           |
| NUDT7      | 0.2138342 | 0.2045123 | 1.0456 | 0.296    | 0.281241913 | count | 1           |
| PPP1R12B   | 0.3131052 | 0.4923399 | 0.636  | 0.525    | 0.2812421   | count | 1           |
| AC012640.2 | 0.4446019 | 0.8011473 | 0.555  | 0.579    | 0.281256667 | count | 1           |
| PARP1      | 0.2011311 | 0.1290895 | 1.5581 | 0.119    | 0.281266298 | count | 1           |
| COX16      | 0.2369098 | 0.2438152 | 0.9717 | 0.331    | 0.281306957 | count | 1           |
| MAP3K10    | 0.408137  | 0.556717  | 0.7331 | 0.464    | 0.281309501 | count | 1           |
| U2SURP     | 0.1983002 | 0.0760134 | 2.6088 | 0.00914  | 0.281426242 | count | 1           |
| KPNB1      | 0.2028392 | 0.1098923 | 1.8458 | 0.065    | 0.281430942 | count | 1           |
| BCCIP      | 0.2081302 | 0.1410251 | 1.4758 | 0.14     | 0.281714385 | count | 1           |
| BRD7       | 0.2007646 | 0.1007438 | 1.9928 | 0.0464   | 0.281809915 | count | 1           |
| UBE2G1     | 0.2155026 | 0.1752623 | 1.2296 | 0.219    | 0.28189274  | count | 1           |
| MT-ND3     | 0.1959003 | 0.0360986 | 5.4268 | 6.23E-08 | 0.282093827 | count | 0.001466417 |
| UBE2D3     | 0.1977838 | 0.0579344 | 3.4139 | 0.00065  | 0.282193349 | count | 1           |
| EVA1C      | 0.2026781 | 0.109245  | 1.8553 | 0.0637   | 0.282218566 | count | 1           |
| SWAP70     | 0.2007463 | 0.0860614 | 2.3326 | 0.0197   | 0.282260454 | count | 1           |
| LINC00672  | 0.7160112 | 0.7956495 | 0.8999 | 0.368    | 0.282284512 | count | 1           |
| AC092910.3 | 0.8321253 | 0.9591037 | 0.8676 | 0.386    | 0.282332107 | count | 1           |
| SCAF1      | 0.2614577 | 0.3037825 | 0.8607 | 0.389    | 0.282488894 | count | 1           |
| IDE        | 0.2601167 | 0.3189516 | 0.8155 | 0.415    | 0.282588637 | count | 1           |
| PNPLA4     | 0.2445362 | 0.269807  | 0.9063 | 0.365    | 0.282910604 | count | 1           |
| ZNF835     | 0.7183127 | 1.0704835 | 0.671  | 0.502    | 0.282992947 | count | 1           |
| AK2        | 0.2018132 | 0.0966621 | 2.0878 | 0.0369   | 0.283014833 | count | 1           |
| DDX3X      | 0.1988481 | 0.0649858 | 3.0599 | 0.00224  | 0.283042736 | count | 1           |
| SMARCA1    | 0.2240756 | 0.2090867 | 1.0717 | 0.284    | 0.283099992 | count | 1           |
| USP9X      | 0.2207933 | 0.18883   | 1.1693 | 0.242    | 0.283324371 | count | 1           |
| LMBRD1     | 0.2060181 | 0.1319117 | 1.5618 | 0.118    | 0.283357792 | count | 1           |
| GEM        | 0.2638787 | 0.6282041 | 0.4201 | 0.674    | 0.283448151 | count | 1           |
| CEP89      | 0.2269489 | 0.2157302 | 1.052  | 0.293    | 0.283448779 | count | 1           |
| GSPT2      | 0.2407168 | 0.2835176 | 0.849  | 0.396    | 0.283528671 | count | 1           |
| PPP1R3B    | 0.2227034 | 0.2783528 | 0.8001 | 0.424    | 0.2835488   | count | 1           |
| HSDL2      | 0.2163728 | 0.1690136 | 1.2802 | 0.201    | 0.283722362 | count | 1           |
| ZNF100     | 0.2233305 | 0.2560576 | 0.8722 | 0.383    | 0.283742993 | count | 1           |
| MFHAS1     | 0.240266  | 0.2398809 | 1.0016 | 0.317    | 0.283762182 | count | 1           |
| CUL4A      | 0.2212284 | 0.1999418 | 1.1065 | 0.269    | 0.283876752 | count | 1           |
| FRS3       | 0.5022253 | 0.7487969 | 0.6707 | 0.502    | 0.284126943 | count | 1           |
| CASP2      | 0.2541121 | 0.274374  | 0.9262 | 0.354    | 0.284165125 | count | 1           |
| MPDZ       | 0.2068039 | 0.1308365 | 1.5806 | 0.114    | 0.284215245 | count | 1           |
| ZNF57      | 0.4737804 | 0.8430803 | 0.562  | 0.574    | 0.284291137 | count | 1           |
| PLA2G16    | 0.2006232 | 0.0716477 | 2.8001 | 0.00514  | 0.28433658  | count | 1           |
| ATP6V1C1   | 0.2239344 | 0.2002727 | 1.1181 | 0.264    | 0.284501321 | count | 1           |
| EHD4       | 0.204043  | 0.1047356 | 1.9482 | 0.0515   | 0.284588681 | count | 1           |
| CIAPIN1    | 0.2173555 | 0.1627933 | 1.3352 | 0.182    | 0.284826829 | count | 1           |
| PPP2R3A    | 0.2527127 | 0.2625275 | 0.9626 | 0.336    | 0.284965953 | count | 1           |

|            |           |           |        |          |             |       |            |
|------------|-----------|-----------|--------|----------|-------------|-------|------------|
| DPYSL3     | 0.2051416 | 0.1432714 | 1.4318 | 0.152    | 0.285163599 | count | 1          |
| SNRPF      | 0.2017954 | 0.0683946 | 2.9505 | 0.0032   | 0.285211462 | count | 1          |
| TMEM159    | 0.2147449 | 0.1776865 | 1.2086 | 0.227    | 0.285294319 | count | 1          |
| AC004520.1 | 0.6450071 | 0.7940032 | 0.8123 | 0.417    | 0.285384935 | count | 1          |
| PER1       | 0.2231589 | 0.1712515 | 1.3031 | 0.193    | 0.285531164 | count | 1          |
| ETS1       | 0.2031064 | 0.0943372 | 2.153  | 0.0314   | 0.285755472 | count | 1          |
| CLEC7A     | 0.5056415 | 1.121137  | 0.451  | 0.652    | 0.285805205 | count | 1          |
| LIAS       | 0.2309794 | 0.2482775 | 0.9303 | 0.352    | 0.285908169 | count | 1          |
| TRAK1      | 0.273259  | 0.3946169 | 0.6925 | 0.489    | 0.286075597 | count | 1          |
| GRAMD2B    | 0.2347328 | 0.2431756 | 0.9653 | 0.334    | 0.286077693 | count | 1          |
| LINC01415  | 0.6472263 | 0.651763  | 0.993  | 0.321    | 0.286180362 | count | 1          |
| RPUSD4     | 0.2388325 | 0.245084  | 0.9745 | 0.33     | 0.286249584 | count | 1          |
| GSTA4      | 0.2269087 | 0.1945602 | 1.1663 | 0.244    | 0.286299537 | count | 1          |
| SETX       | 0.209914  | 0.1480517 | 1.4178 | 0.156    | 0.286344996 | count | 1          |
| CDC42BPB   | 0.2096236 | 0.1272409 | 1.6475 | 0.0996   | 0.286356628 | count | 1          |
| USP11      | 0.2432332 | 0.2679659 | 0.9077 | 0.364    | 0.286434988 | count | 1          |
| AL133415.1 | 1.0410032 | 1.0080027 | 1.0327 | 0.302    | 0.286477241 | count | 1          |
| FGFBP3     | 0.3024459 | 0.4525059 | 0.6684 | 0.504    | 0.286491467 | count | 1          |
| WIZ        | 0.2486532 | 0.3897796 | 0.6379 | 0.524    | 0.286640171 | count | 1          |
| ZBED6      | 0.7302278 | 1.066334  | 0.6848 | 0.494    | 0.286641798 | count | 1          |
| UFSP1      | 0.7302278 | 1.1285809 | 0.647  | 0.518    | 0.286641798 | count | 1          |
| AREL1      | 0.2928741 | 0.578206  | 0.5065 | 0.613    | 0.286733833 | count | 1          |
| LINC02035  | 0.543635  | 0.9717656 | 0.5594 | 0.576    | 0.28679272  | count | 1          |
| PLEKHA8    | 0.3028167 | 0.4817122 | 0.6286 | 0.53     | 0.286826852 | count | 1          |
| TNC        | 0.6491438 | 1.0068292 | 0.6447 | 0.519    | 0.286866665 | count | 1          |
| LSM14A     | 0.2076267 | 0.1169158 | 1.7759 | 0.0759   | 0.286891965 | count | 1          |
| LRRRC8C-DT | 0.2577797 | 0.3297651 | 0.7817 | 0.434    | 0.28692185  | count | 1          |
| USHBP1     | 0.2271842 | 0.2203019 | 1.0312 | 0.303    | 0.286979111 | count | 1          |
| RNF4       | 0.2292628 | 0.229195  | 1.0003 | 0.317    | 0.28707128  | count | 1          |
| SSRP1      | 0.2145319 | 0.1555014 | 1.3796 | 0.168    | 0.287120895 | count | 1          |
| COQ8A      | 0.2299393 | 0.2598739 | 0.8848 | 0.376    | 0.287133394 | count | 1          |
| SLCO3A1    | 0.2138315 | 0.1510878 | 1.4153 | 0.157    | 0.287207461 | count | 1          |
| RNF146     | 0.2143216 | 0.1714109 | 1.2503 | 0.211    | 0.287260887 | count | 1          |
| LINC00115  | 0.6504821 | 0.7957176 | 0.8175 | 0.414    | 0.287345138 | count | 1          |
| CAST       | 0.2003415 | 0.0451029 | 4.4419 | 9.27E-06 | 0.28756617  | count | 0.21520305 |
| MFSD13A    | 0.2787642 | 0.413442  | 0.6743 | 0.5      | 0.287599339 | count | 1          |
| JMJD1C     | 0.2029711 | 0.0758685 | 2.6753 | 0.00751  | 0.287603901 | count | 1          |
| ZNF581     | 0.2202776 | 0.1864154 | 1.1816 | 0.237    | 0.287711905 | count | 1          |
| HMCES      | 0.2245808 | 0.1785397 | 1.2579 | 0.209    | 0.28786865  | count | 1          |
| APIP       | 0.213204  | 0.1497261 | 1.424  | 0.155    | 0.28814438  | count | 1          |
| ARL2       | 0.2016518 | 0.0525888 | 3.8345 | 0.000129 | 0.288306353 | count | 1          |
| RBM26-AS1  | 0.4044086 | 0.6759715 | 0.5983 | 0.55     | 0.288347193 | count | 1          |
| LINC00941  | 0.4815092 | 0.8447663 | 0.57   | 0.569    | 0.288368942 | count | 1          |
| AC006299.1 | 0.4815092 | 0.8753775 | 0.5501 | 0.582    | 0.288368942 | count | 1          |
| NDUFS2     | 0.2102805 | 0.1227517 | 1.7131 | 0.0868   | 0.288408076 | count | 1          |

|            |           |           |         |          |             |       |          |
|------------|-----------|-----------|---------|----------|-------------|-------|----------|
| HIST1H3H   | 0.8569575 | 1.0582013 | 0.8098  | 0.418    | 0.288473586 | count | 1        |
| AC084036.1 | 0.8569575 | 1.1251463 | 0.7616  | 0.446    | 0.288473586 | count | 1        |
| CD24       | 0.8569575 | 1.1380347 | 0.753   | 0.452    | 0.288473586 | count | 1        |
| AC105277.1 | 0.8569575 | 1.1798528 | 0.7263  | 0.468    | 0.288473586 | count | 1        |
| AC016957.2 | 0.8569575 | 1.214359  | 0.7057  | 0.48     | 0.288473586 | count | 1        |
| UBXN2B     | 0.3267823 | 0.5174017 | 0.6316  | 0.528    | 0.288507611 | count | 1        |
| CNTNAP3    | 0.2450539 | 0.2792318 | 0.8776  | 0.38     | 0.288537019 | count | 1        |
| SYF2       | 0.2027144 | 0.0620325 | 3.2679  | 0.0011   | 0.288690276 | count | 1        |
| AC018362.1 | 1.0539079 | 1.1842623 | 0.8899  | 0.374    | 0.288803987 | count | 1        |
| NAA80      | 0.263257  | 0.4553251 | 0.5782  | 0.563    | 0.288815102 | count | 1        |
| C2orf73    | 0.8584322 | 0.7618037 | 1.1268  | 0.26     | 0.288834601 | count | 1        |
| C18orf21   | 0.2210724 | 0.1904856 | 1.1606  | 0.246    | 0.288927865 | count | 1        |
| RASSF7     | 0.2442246 | 0.2530282 | 0.9652  | 0.335    | 0.28909676  | count | 1        |
| MORC2-AS1  | 0.3534642 | 0.4399043 | 0.8035  | 0.422    | 0.28919001  | count | 1        |
| CXCL16     | 0.2420181 | 0.2692552 | 0.8988  | 0.369    | 0.289337467 | count | 1        |
| OR2A1-AS1  | 0.7398378 | 0.777378  | 0.9517  | 0.341    | 0.289561895 | count | 1        |
| SIDT2      | 0.2749554 | 0.4073171 | 0.675   | 0.5      | 0.289684186 | count | 1        |
| KIF3C      | 0.2931585 | 0.4374662 | 0.6701  | 0.503    | 0.289735646 | count | 1        |
| OXLD1      | 0.2179714 | 0.1802235 | 1.2095  | 0.227    | 0.289806495 | count | 1        |
| AC118553.2 | 0.5503568 | 1.0960292 | 0.5021  | 0.616    | 0.28981008  | count | 1        |
| ZYG11B     | 0.2321522 | 0.229848  | 1.01    | 0.313    | 0.289859114 | count | 1        |
| OSER1-DT   | 0.3402654 | 0.3984058 | 0.8541  | 0.393    | 0.289933808 | count | 1        |
| RPL11      | 0.2011484 | 0.0178047 | 11.2975 | 5.77E-29 | 0.290061124 | count | 1.40E-24 |
| GSKIP      | 0.2282618 | 0.2265957 | 1.0074  | 0.314    | 0.29024079  | count | 1        |
| PHLDA2     | 0.2331545 | 0.2431456 | 0.9589  | 0.338    | 0.29027984  | count | 1        |
| ING1       | 0.2153939 | 0.1382222 | 1.5583  | 0.119    | 0.290406064 | count | 1        |
| PYM1       | 0.2187912 | 0.1977752 | 1.1063  | 0.269    | 0.290497775 | count | 1        |
| ELK1       | 0.2557666 | 0.2747097 | 0.931   | 0.352    | 0.290552595 | count | 1        |
| RIT1       | 0.2131213 | 0.1411477 | 1.5099  | 0.131    | 0.290637194 | count | 1        |
| PRR13      | 0.2058041 | 0.0811795 | 2.5352  | 0.0113   | 0.290637986 | count | 1        |
| SLC1A3     | 0.6597477 | 1.1070394 | 0.596   | 0.551    | 0.290645745 | count | 1        |
| AP000879.1 | 0.6597477 | 1.1070394 | 0.596   | 0.551    | 0.290645745 | count | 1        |
| PRR29-AS1  | 0.6597477 | 1.1583474 | 0.5696  | 0.569    | 0.290645745 | count | 1        |
| AC008264.2 | 0.4407367 | 0.7422322 | 0.5938  | 0.553    | 0.290676871 | count | 1        |
| CRYBG3     | 0.2093283 | 0.1446514 | 1.4471  | 0.148    | 0.29109598  | count | 1        |
| CYFIP1     | 0.2161096 | 0.1426263 | 1.5152  | 0.13     | 0.291096653 | count | 1        |
| AP001505.1 | 1.0669602 | 1.0897499 | 0.9791  | 0.328    | 0.291132341 | count | 1        |
| SYNPO2     | 1.0669602 | 1.1341388 | 0.9408  | 0.347    | 0.291132341 | count | 1        |
| ZMYND15    | 1.459881  | 1.0631522 | 1.3732  | 0.17     | 0.291249738 | count | 1        |
| FANCD2     | 0.6617442 | 0.8090307 | 0.8179  | 0.413    | 0.291354193 | count | 1        |
| SETDB2     | 0.2979912 | 0.3765495 | 0.7914  | 0.429    | 0.291535028 | count | 1        |
| SLC25A40   | 0.3491898 | 0.3939877 | 0.8863  | 0.376    | 0.291640518 | count | 1        |
| DNTTIP2    | 0.207517  | 0.0903793 | 2.2961  | 0.0217   | 0.291706658 | count | 1        |
| LCMT2      | 0.488157  | 0.8857253 | 0.5511  | 0.582    | 0.291862077 | count | 1        |
| KATNA1     | 0.2236479 | 0.1758946 | 1.2715  | 0.204    | 0.291881238 | count | 1        |

|            |           |           |        |          |             |       |             |
|------------|-----------|-----------|--------|----------|-------------|-------|-------------|
| STRBP      | 0.273622  | 0.2735796 | 1.0002 | 0.317    | 0.291897403 | count | 1           |
| CKMT2-AS1  | 0.3164391 | 0.4091612 | 0.7734 | 0.439    | 0.291943837 | count | 1           |
| DIS3       | 0.2148596 | 0.1303741 | 1.648  | 0.0995   | 0.292020306 | count | 1           |
| AC008014.1 | 0.5183683 | 0.6900161 | 0.7512 | 0.453    | 0.292027528 | count | 1           |
| FABP4      | 0.2033355 | 0.1235117 | 1.6463 | 0.0998   | 0.292233432 | count | 1           |
| ZSCAN2     | 0.3657706 | 0.6134101 | 0.5963 | 0.551    | 0.292240171 | count | 1           |
| GPANK1     | 0.223067  | 0.1678183 | 1.3292 | 0.184    | 0.292244464 | count | 1           |
| PSENE1     | 0.2079808 | 0.0916942 | 2.2682 | 0.0234   | 0.292396159 | count | 1           |
| AP003068.2 | 1.47146   | 1.1892128 | 1.2373 | 0.216    | 0.292442838 | count | 1           |
| LDAH       | 0.4108749 | 0.5471683 | 0.7509 | 0.453    | 0.292543874 | count | 1           |
| SNAP47     | 0.2492465 | 0.2708251 | 0.9203 | 0.357    | 0.292571471 | count | 1           |
| PDLIM2     | 0.208506  | 0.0982583 | 2.122  | 0.0339   | 0.292620166 | count | 1           |
| HLA-DQA2   | 1.4737498 | 0.2442288 | 6.0343 | 1.81E-09 | 0.292677445 | count | 4.29E-05    |
| VRK3       | 0.2276126 | 0.2302483 | 0.9886 | 0.323    | 0.292757328 | count | 1           |
| TMEM127    | 0.2290709 | 0.2143312 | 1.0688 | 0.285    | 0.293009985 | count | 1           |
| CENPB      | 0.2253346 | 0.1812714 | 1.2431 | 0.214    | 0.293056141 | count | 1           |
| ASB6       | 0.2782763 | 0.3499385 | 0.7952 | 0.427    | 0.293068623 | count | 1           |
| ERO1B      | 0.2537764 | 0.2684334 | 0.9454 | 0.345    | 0.293366525 | count | 1           |
| ILVBL      | 0.2245676 | 0.1872031 | 1.1996 | 0.23     | 0.293453725 | count | 1           |
| LINC01106  | 1.0801527 | 1.1314039 | 0.9547 | 0.34     | 0.293460314 | count | 1           |
| NTAN1      | 0.2087627 | 0.0903833 | 2.3097 | 0.021    | 0.29355734  | count | 1           |
| WHAMM      | 0.2194303 | 0.1662481 | 1.3199 | 0.187    | 0.293631275 | count | 1           |
| HSPBAP1    | 0.2946318 | 0.3862722 | 0.7628 | 0.446    | 0.293773614 | count | 1           |
| DNMT1      | 0.2158247 | 0.135277  | 1.5954 | 0.111    | 0.29379581  | count | 1           |
| TRAPPC8    | 0.2427628 | 0.2904293 | 0.8359 | 0.403    | 0.293987823 | count | 1           |
| TULP3      | 0.2391748 | 0.2301299 | 1.0393 | 0.299    | 0.293999498 | count | 1           |
| DENR       | 0.2148799 | 0.1217374 | 1.7651 | 0.0777   | 0.294116254 | count | 1           |
| ZNF436-AS1 | 0.5601366 | 0.6720027 | 0.8335 | 0.405    | 0.294177612 | count | 1           |
| AP003059.1 | 0.4927721 | 0.8798773 | 0.56   | 0.575    | 0.294279287 | count | 1           |
| MOK        | 0.2474468 | 0.2825643 | 0.8757 | 0.381    | 0.294305148 | count | 1           |
| ZCCHC3     | 0.2420753 | 0.2943195 | 0.8225 | 0.411    | 0.294321164 | count | 1           |
| JAK1       | 0.2063601 | 0.0595199 | 3.4671 | 5.00E-04 | 0.294518604 | count | 1           |
| HLA-G      | 0.6707406 | 1.12307   | 0.5972 | 0.55     | 0.294534415 | count | 1           |
| DAGLB      | 0.3341366 | 0.4580322 | 0.7295 | 0.466    | 0.294634939 | count | 1           |
| VPS35      | 0.2100249 | 0.09815   | 2.1398 | 0.0325   | 0.294761353 | count | 1           |
| RCAN3      | 0.2882134 | 0.3422074 | 0.8422 | 0.4      | 0.294785959 | count | 1           |
| PHF20      | 0.2156927 | 0.1448053 | 1.4895 | 0.136    | 0.294948483 | count | 1           |
| ZNF764     | 0.3788421 | 0.5145137 | 0.7363 | 0.462    | 0.294989842 | count | 1           |
| BTBD9      | 0.3893765 | 0.505977  | 0.7696 | 0.442    | 0.295017035 | count | 1           |
| ATG4B      | 0.2432924 | 0.227569  | 1.0691 | 0.285    | 0.295203243 | count | 1           |
| EEF1AKMT4  | 0.3019952 | 0.3761103 | 0.8029 | 0.422    | 0.295286564 | count | 1           |
| NPDC1      | 0.2053423 | 0.0401068 | 5.1199 | 3.27E-07 | 0.295416364 | count | 0.007666515 |
| AC044839.1 | 0.6106633 | 1.3507409 | 0.4521 | 0.651    | 0.295433458 | count | 1           |
| CDC42SE1   | 0.2160395 | 0.1305744 | 1.6545 | 0.0981   | 0.295856575 | count | 1           |
| ERLIN2     | 0.2361644 | 0.2497562 | 0.9456 | 0.344    | 0.296364502 | count | 1           |



|          |           |           |        |          |             |       |          |
|----------|-----------|-----------|--------|----------|-------------|-------|----------|
| ITGA9    | 0.2361681 | 0.2372351 | 0.9955 | 0.32     | 0.296369084 | count | 1        |
| MOCS1    | 0.8896917 | 0.7539755 | 1.18   | 0.238    | 0.296391639 | count | 1        |
| WDR43    | 0.2162332 | 0.1265292 | 1.709  | 0.0876   | 0.296584582 | count | 1        |
| TAF10    | 0.2090876 | 0.0734506 | 2.8466 | 0.00445  | 0.296620111 | count | 1        |
| SERTAD3  | 0.2126313 | 0.1065366 | 1.9959 | 0.046    | 0.296794137 | count | 1        |
| TRNAU1AP | 0.2239973 | 0.1667837 | 1.343  | 0.179    | 0.296801999 | count | 1        |
| SCAMP3   | 0.219631  | 0.1584098 | 1.3865 | 0.166    | 0.296944236 | count | 1        |
| FBXO32   | 0.3427256 | 0.6367372 | 0.5383 | 0.59     | 0.296959457 | count | 1        |
| LEMD2    | 0.2587115 | 0.2658376 | 0.9732 | 0.331    | 0.296974702 | count | 1        |
| POLM     | 0.2723971 | 0.2970407 | 0.917  | 0.359    | 0.297071679 | count | 1        |
| JADE3    | 0.4729441 | 0.5729866 | 0.8254 | 0.409    | 0.297138902 | count | 1        |
| RARA     | 0.2215361 | 0.162717  | 1.3615 | 0.173    | 0.297179786 | count | 1        |
| G6PC3    | 0.2207053 | 0.1618479 | 1.3637 | 0.173    | 0.297339697 | count | 1        |
| CBWD3    | 0.4340366 | 0.4661444 | 0.9311 | 0.352    | 0.297415589 | count | 1        |
| BOD1L1   | 0.2094202 | 0.0930013 | 2.2518 | 0.0244   | 0.297519087 | count | 1        |
| ARL13B   | 0.2267263 | 0.1620077 | 1.3995 | 0.162    | 0.297531627 | count | 1        |
| TSC22D3  | 0.2092343 | 0.0654609 | 3.1963 | 0.00141  | 0.297607952 | count | 1        |
| IP6K1    | 0.2407187 | 0.2369368 | 1.016  | 0.31     | 0.297783501 | count | 1        |
| RASIP1   | 0.212179  | 0.0875862 | 2.4225 | 0.0155   | 0.297821697 | count | 1        |
| SAMD5    | 0.3828354 | 0.5251722 | 0.729  | 0.466    | 0.297861811 | count | 1        |
| WARS     | 0.21258   | 0.1201197 | 1.7697 | 0.0769   | 0.297960987 | count | 1        |
| PCED1A   | 0.3081929 | 0.372761  | 0.8268 | 0.408    | 0.298082372 | count | 1        |
| GTF2A1   | 0.2332258 | 0.210789  | 1.1064 | 0.269    | 0.298263194 | count | 1        |
| SHLD2    | 0.2435781 | 0.2368639 | 1.0283 | 0.304    | 0.298299394 | count | 1        |
| USP14    | 0.2179342 | 0.1455141 | 1.4977 | 0.134    | 0.298438728 | count | 1        |
| WDR25    | 0.2684163 | 0.292766  | 0.9168 | 0.359    | 0.298444111 | count | 1        |
| KDELC1   | 0.3445635 | 0.4457398 | 0.773  | 0.44     | 0.298456691 | count | 1        |
| KMT2E    | 0.2102244 | 0.0741834 | 2.8338 | 0.00463  | 0.298469963 | count | 1        |
| GPATCH1  | 0.2968814 | 0.2977682 | 0.997  | 0.319    | 0.298485845 | count | 1        |
| BORCS5   | 0.2641138 | 0.3009844 | 0.8775 | 0.38     | 0.298666737 | count | 1        |
| PHLDA3   | 0.2234614 | 0.1559549 | 1.4329 | 0.152    | 0.298761483 | count | 1        |
| WDR83    | 0.2467763 | 0.2546025 | 0.9693 | 0.332    | 0.298764059 | count | 1        |
| ZNF681   | 0.2771382 | 0.4176703 | 0.6635 | 0.507    | 0.298916503 | count | 1        |
| PDS5B    | 0.2242341 | 0.1531669 | 1.464  | 0.143    | 0.298958159 | count | 1        |
| ALDH1B1  | 0.3202432 | 0.3649661 | 0.8775 | 0.38     | 0.298990945 | count | 1        |
| KIAA0895 | 0.6198079 | 0.758178  | 0.8175 | 0.414    | 0.299082135 | count | 1        |
| ARSB     | 0.6839422 | 0.6667488 | 1.0258 | 0.305    | 0.299165507 | count | 1        |
| UCK1     | 0.2557632 | 0.2559487 | 0.9993 | 0.318    | 0.2992155   | count | 1        |
| WDR91    | 0.3247465 | 0.493507  | 0.658  | 0.511    | 0.29921781  | count | 1        |
| GEMIN7   | 0.2494643 | 0.2574744 | 0.9689 | 0.333    | 0.299426051 | count | 1        |
| ENTR1    | 0.2361469 | 0.2275068 | 1.038  | 0.299    | 0.29950218  | count | 1        |
| EBP      | 0.235145  | 0.1995007 | 1.1787 | 0.239    | 0.299505569 | count | 1        |
| YTHDF1   | 0.2457238 | 0.2161147 | 1.137  | 0.256    | 0.299805509 | count | 1        |
| RPL35A   | 0.2080694 | 0.0211381 | 9.8433 | 1.71E-22 | 0.299908627 | count | 4.12E-18 |
| FLVCR2   | 1.552245  | 1.4895899 | 1.0421 | 0.297    | 0.300431526 | count | 1        |

|            |           |           |         |          |             |       |          |
|------------|-----------|-----------|---------|----------|-------------|-------|----------|
| MITD1      | 0.2220094 | 0.1409953 | 1.5746  | 0.115    | 0.300549435 | count | 1        |
| HMG3-AS1   | 0.3471543 | 0.4936511 | 0.7032  | 0.482    | 0.300565485 | count | 1        |
| EPS8L1     | 0.3018898 | 0.3721807 | 0.8111  | 0.417    | 0.300716381 | count | 1        |
| LONRF3     | 0.3976967 | 0.7943573 | 0.5007  | 0.617    | 0.300805232 | count | 1        |
| BOLA1      | 0.2335883 | 0.2160135 | 1.0814  | 0.28     | 0.300873072 | count | 1        |
| UBC        | 0.2089011 | 0.0296223 | 7.0522  | 2.22E-12 | 0.300887738 | count | 5.30E-08 |
| RYR3       | 0.2386531 | 0.3189553 | 0.7482  | 0.454    | 0.300923913 | count | 1        |
| RPS18      | 0.2088066 | 0.0211653 | 9.8655  | 1.38E-22 | 0.301087685 | count | 3.33E-18 |
| SLC39A8    | 0.3478224 | 0.471012  | 0.7385  | 0.46     | 0.30110894  | count | 1        |
| ATF4       | 0.2127194 | 0.075747  | 2.8083  | 0.00502  | 0.301127829 | count | 1        |
| AP004609.3 | 0.4588232 | 0.5950563 | 0.7711  | 0.441    | 0.301324314 | count | 1        |
| RPS27A     | 0.2090124 | 0.0183895 | 11.3659 | 2.74E-29 | 0.301381375 | count | 6.63E-25 |
| NUDT21     | 0.2207304 | 0.1469915 | 1.5017  | 0.133    | 0.301802556 | count | 1        |
| PPP2R5E    | 0.2195543 | 0.1286076 | 1.7072  | 0.0879   | 0.301845911 | count | 1        |
| MANBA      | 0.315841  | 0.4058262 | 0.7783  | 0.436    | 0.30193254  | count | 1        |
| C2orf68    | 0.2755992 | 0.3461632 | 0.7962  | 0.426    | 0.301965245 | count | 1        |
| ARID1B     | 0.2204225 | 0.167597  | 1.3152  | 0.189    | 0.30220041  | count | 1        |
| VPS50      | 0.2524756 | 0.297842  | 0.8477  | 0.397    | 0.302295901 | count | 1        |
| ECH1       | 0.2132758 | 0.0729866 | 2.9221  | 0.0035   | 0.302625175 | count | 1        |
| TSR3       | 0.219181  | 0.1251083 | 1.7519  | 0.0799   | 0.30275493  | count | 1        |
| ELP2       | 0.23322   | 0.1895462 | 1.2304  | 0.219    | 0.30277154  | count | 1        |
| C1orf131   | 0.2208953 | 0.1425485 | 1.5496  | 0.121    | 0.30289723  | count | 1        |
| SERTAD2    | 0.2302078 | 0.1742576 | 1.3211  | 0.187    | 0.30292615  | count | 1        |
| KMT2E-AS1  | 0.2990093 | 0.3131864 | 0.9547  | 0.34     | 0.303020874 | count | 1        |
| MGAT2      | 0.2406649 | 0.1899132 | 1.2672  | 0.205    | 0.303063251 | count | 1        |
| APAF1      | 0.2486252 | 0.2504142 | 0.9929  | 0.321    | 0.303286092 | count | 1        |
| INTS2      | 0.3341157 | 0.3575018 | 0.9346  | 0.35     | 0.30333511  | count | 1        |
| PEX10      | 0.2527981 | 0.2388174 | 1.0585  | 0.29     | 0.30335321  | count | 1        |
| OGG1       | 0.2528396 | 0.257031  | 0.9837  | 0.325    | 0.303402084 | count | 1        |
| LURAP1     | 0.2848173 | 0.3839628 | 0.7418  | 0.458    | 0.303453533 | count | 1        |
| FANCB      | 0.4625139 | 0.653979  | 0.7072  | 0.479    | 0.303484473 | count | 1        |
| LIG3       | 0.2996833 | 0.3231613 | 0.9273  | 0.354    | 0.303677343 | count | 1        |
| C2orf74    | 0.2203519 | 0.1395096 | 1.5795  | 0.114    | 0.303687355 | count | 1        |
| AC079922.2 | 0.3575771 | 0.4599876 | 0.7774  | 0.437    | 0.303746409 | count | 1        |
| C18orf25   | 0.2549676 | 0.301179  | 0.8466  | 0.397    | 0.303807241 | count | 1        |
| FAM86B1    | 0.4148156 | 0.6249239 | 0.6638  | 0.507    | 0.304132076 | count | 1        |
| AC245595.1 | 0.2498576 | 0.2610182 | 0.9572  | 0.339    | 0.304198071 | count | 1        |
| ABHD10     | 0.2560196 | 0.279122  | 0.9172  | 0.359    | 0.304300894 | count | 1        |
| TTC27      | 0.2857368 | 0.295634  | 0.9665  | 0.334    | 0.304401237 | count | 1        |
| MIR22HG    | 0.2177674 | 0.1062718 | 2.0492  | 0.0405   | 0.304422957 | count | 1        |
| PCOLCE     | 0.4866368 | 0.4959426 | 0.9812  | 0.327    | 0.304723646 | count | 1        |
| NUP43      | 0.2897964 | 0.3479558 | 0.8329  | 0.405    | 0.304786638 | count | 1        |
| AC048341.2 | 0.7912029 | 0.9264784 | 0.854   | 0.393    | 0.304826991 | count | 1        |
| RAP2A      | 0.2565339 | 0.2548779 | 1.0065  | 0.314    | 0.304900099 | count | 1        |
| DOCK9      | 0.219437  | 0.1307388 | 1.6784  | 0.0934   | 0.305159155 | count | 1        |

|             |           |           |        |        |             |       |   |
|-------------|-----------|-----------|--------|--------|-------------|-------|---|
| FBXO46      | 0.3745121 | 0.4134243 | 0.9059 | 0.365  | 0.305198345 | count | 1 |
| XRRA1       | 0.2527105 | 0.305145  | 0.8282 | 0.408  | 0.305198404 | count | 1 |
| GTPBP3      | 0.2815882 | 0.2766456 | 1.0179 | 0.309  | 0.305206531 | count | 1 |
| GULP1       | 0.2304068 | 0.1849288 | 1.2459 | 0.213  | 0.305224842 | count | 1 |
| SRD5A3      | 0.2292006 | 0.1585947 | 1.4452 | 0.149  | 0.305275714 | count | 1 |
| CCDC112     | 0.2322817 | 0.1797151 | 1.2925 | 0.196  | 0.305286555 | count | 1 |
| KIAA0825    | 0.3318366 | 0.4491078 | 0.7389 | 0.46   | 0.305409311 | count | 1 |
| RAPGEF4     | 0.2370836 | 0.2012693 | 1.1779 | 0.239  | 0.305581235 | count | 1 |
| TTC17       | 0.2269037 | 0.1944774 | 1.1667 | 0.243  | 0.305635402 | count | 1 |
| NT5DC2      | 0.4882902 | 0.6316214 | 0.7731 | 0.44   | 0.305635619 | count | 1 |
| PCF11-AS1   | 0.9290361 | 1.181872  | 0.7861 | 0.432  | 0.305645821 | count | 1 |
| ATP7A       | 0.2542404 | 0.2766185 | 0.9191 | 0.358  | 0.305719376 | count | 1 |
| PDHX        | 0.267539  | 0.2891276 | 0.9253 | 0.355  | 0.305804187 | count | 1 |
| KLHL9       | 0.2543287 | 0.2880492 | 0.8829 | 0.377  | 0.305823586 | count | 1 |
| CNBD2       | 0.3045907 | 0.3840824 | 0.793  | 0.428  | 0.305924545 | count | 1 |
| ZFYVE28     | 0.3020706 | 0.3368323 | 0.8968 | 0.37   | 0.306001533 | count | 1 |
| NT5C        | 0.2336138 | 0.2043629 | 1.1431 | 0.253  | 0.306119099 | count | 1 |
| PATZ1       | 0.3204813 | 0.4131474 | 0.7757 | 0.438  | 0.306159365 | count | 1 |
| KCNS3       | 0.7042498 | 0.8130093 | 0.8662 | 0.386  | 0.306206893 | count | 1 |
| COL5A1      | 0.291199  | 0.3701651 | 0.7867 | 0.432  | 0.306210948 | count | 1 |
| IL15RA      | 0.2246495 | 0.1515873 | 1.482  | 0.138  | 0.306465173 | count | 1 |
| HEATR1      | 0.2454142 | 0.2784978 | 0.8812 | 0.378  | 0.306596854 | count | 1 |
| RSBN1       | 0.2246395 | 0.1411183 | 1.5919 | 0.112  | 0.306639039 | count | 1 |
| INO80E      | 0.2458311 | 0.2063937 | 1.1911 | 0.234  | 0.30669085  | count | 1 |
| TMCO4       | 0.2623128 | 0.3105866 | 0.8446 | 0.398  | 0.306711562 | count | 1 |
| MFSD3       | 0.3685484 | 0.4487104 | 0.8214 | 0.412  | 0.306718254 | count | 1 |
| SPTLC3      | 0.3550214 | 0.3624298 | 0.9796 | 0.327  | 0.306955997 | count | 1 |
| C16orf58    | 0.2740237 | 0.3185053 | 0.8603 | 0.39   | 0.307118098 | count | 1 |
| EPB41L4A-DT | 0.2921626 | 0.3960697 | 0.7377 | 0.461  | 0.30718916  | count | 1 |
| H1FX-AS1    | 0.4336452 | 0.6089897 | 0.7121 | 0.476  | 0.307216113 | count | 1 |
| TIGAR       | 0.2903534 | 0.3015712 | 0.9628 | 0.336  | 0.307286644 | count | 1 |
| RAB9B       | 1.1628937 | 1.0283809 | 1.1308 | 0.258  | 0.307492805 | count | 1 |
| AC016588.2  | 1.1628937 | 1.1251189 | 1.0336 | 0.301  | 0.307492805 | count | 1 |
| PDSS2       | 0.2541371 | 0.3059075 | 0.8308 | 0.406  | 0.30751609  | count | 1 |
| PSMA6       | 0.2443106 | 0.2376616 | 1.028  | 0.304  | 0.307591739 | count | 1 |
| STXBP6      | 1.163873  | 0.9544909 | 1.2194 | 0.223  | 0.307653212 | count | 1 |
| ARID2       | 0.2443668 | 0.2591934 | 0.9428 | 0.346  | 0.30766153  | count | 1 |
| KANTR       | 0.3866457 | 0.5630839 | 0.6867 | 0.492  | 0.307669635 | count | 1 |
| SRSF8       | 0.2231501 | 0.1160769 | 1.9224 | 0.0547 | 0.307694882 | count | 1 |
| ZNF837      | 0.9383727 | 0.737322  | 1.2727 | 0.203  | 0.307800368 | count | 1 |
| MBLAC1      | 0.4509484 | 0.548346  | 0.8224 | 0.411  | 0.307818182 | count | 1 |
| MSRA        | 0.2255216 | 0.1293893 | 1.743  | 0.0815 | 0.307836722 | count | 1 |
| IRF2BP2     | 0.2192972 | 0.1007979 | 2.1756 | 0.0297 | 0.307863308 | count | 1 |
| LLGL2       | 0.2827993 | 0.3000589 | 0.9425 | 0.346  | 0.308073853 | count | 1 |
| TMEM86B     | 0.4514336 | 1.7307145 | 0.2608 | 0.7942 | 0.308115298 | count | 1 |

|             |            |             |        |          |             |       |   |
|-------------|------------|-------------|--------|----------|-------------|-------|---|
| TRAM2-AS1   | 0.2557601  | 0.3225227   | 0.793  | 0.428    | 0.308170434 | count | 1 |
| OAS2        | 0.244521   | 0.2238461   | 1.0924 | 0.275    | 0.30822305  | count | 1 |
| LINC00342   | 0.8032137  | 1.0422208   | 0.7707 | 0.441    | 0.308314074 | count | 1 |
| AC233723.1  | 0.8032137  | 1.0422208   | 0.7707 | 0.441    | 0.308314074 | count | 1 |
| AC084018.2  | 0.8032137  | 1.3963856   | 0.5752 | 0.565    | 0.308314074 | count | 1 |
| IRAK4       | 0.2351362  | 0.1719932   | 1.3671 | 0.172    | 0.308465081 | count | 1 |
| RNF187      | 0.224663   | 0.1235877   | 1.8178 | 0.0692   | 0.308644764 | count | 1 |
| CEP128      | 0.7113835  | 0.6678349   | 1.0652 | 0.287    | 0.308656828 | count | 1 |
| GIT1        | 0.2308334  | 0.1950893   | 1.1832 | 0.237    | 0.308662057 | count | 1 |
| AC092040.1  | 0.4093474  | 0.6197444   | 0.6605 | 0.509    | 0.308873085 | count | 1 |
| LEMD3       | 0.2634402  | 0.2764002   | 0.9531 | 0.341    | 0.308874313 | count | 1 |
| MICALL1     | 0.4942905  | 0.534199    | 0.9253 | 0.355    | 0.308938193 | count | 1 |
| PBX1        | 0.2293854  | 0.1516656   | 1.5124 | 0.131    | 0.309051343 | count | 1 |
| NUP93       | 0.2714731  | 0.2764348   | 0.9821 | 0.326    | 0.3090827   | count | 1 |
| TMX1        | 0.2241127  | 0.1209258   | 1.8533 | 0.0639   | 0.309181246 | count | 1 |
| SMYD3       | 0.2408006  | 0.2378205   | 1.0125 | 0.311    | 0.309253856 | count | 1 |
| PAIP1       | 0.2206931  | 0.097644    | 2.2602 | 0.0239   | 0.309502149 | count | 1 |
| DHX37       | 0.4730209  | 0.4913211   | 0.9628 | 0.336    | 0.309610946 | count | 1 |
| AL356512.1  | 1.176424   | 0.9991428   | 1.1774 | 0.239    | 0.30969642  | count | 1 |
| PDRG1       | 0.2401275  | 0.2007636   | 1.1961 | 0.232    | 0.309716663 | count | 1 |
| TACC1       | 0.2164975  | 0.0569796   | 3.7996 | 0.000148 | 0.309727375 | count | 1 |
| MON2        | 0.2446771  | 0.2592617   | 0.9437 | 0.345    | 0.310180664 | count | 1 |
| AL391834.2  | 0.411329   | 0.6374304   | 0.6453 | 0.519    | 0.310240955 | count | 1 |
| AC091729.3  | 0.411329   | 0.672803    | 0.6114 | 0.541    | 0.310240955 | count | 1 |
| SMPD4       | 0.2782335  | 0.3494373   | 0.7962 | 0.426    | 0.310400867 | count | 1 |
| KIF2A       | 0.2231689  | 0.1233241   | 1.8096 | 0.0705   | 0.310494341 | count | 1 |
| ARL6IP6     | 0.2309329  | 0.1613878   | 1.4309 | 0.153    | 0.310532656 | count | 1 |
| CCNT2-AS1   | 15.6650279 | 1097.93939  | 0.0143 | 0.989    | 0.310563591 | count | 1 |
| AC099568.2  | 15.6652551 | 1180.563565 | 0.0133 | 0.989    | 0.310563591 | count | 1 |
| AC092718.1  | 15.6655052 | 1330.471684 | 0.0118 | 0.991    | 0.310563591 | count | 1 |
| GOLGA6L9    | 15.7741604 | 1274.45979  | 0.0124 | 0.99     | 0.310563596 | count | 1 |
| MEG3        | 15.7749112 | 1490.53614  | 0.0106 | 0.992    | 0.310563596 | count | 1 |
| PRMT5-AS1   | 15.8269311 | 1281.889948 | 0.0123 | 0.99     | 0.310563599 | count | 1 |
| ZNF311      | 15.8712932 | 1142.629118 | 0.0139 | 0.9889   | 0.310563601 | count | 1 |
| SYTL2       | 16.1247305 | 1274.149076 | 0.0127 | 0.99     | 0.310563611 | count | 1 |
| AL035587.1  | 16.1694426 | 1169.455765 | 0.0138 | 0.989    | 0.310563612 | count | 1 |
| AQP9        | 16.189037  | 2640.513854 | 0.0061 | 0.995    | 0.310563613 | count | 1 |
| FAT1        | 16.1953108 | 1815.526468 | 0.0089 | 0.993    | 0.310563613 | count | 1 |
| LINC01684   | 16.1953108 | 1815.526465 | 0.0089 | 0.993    | 0.310563613 | count | 1 |
| OSGEPL1-AS1 | 16.1953176 | 1815.52516  | 0.0089 | 0.993    | 0.310563613 | count | 1 |
| HOOK1       | 16.1953178 | 1815.527436 | 0.0089 | 0.993    | 0.310563613 | count | 1 |
| RAD9B       | 16.1953225 | 1815.529633 | 0.0089 | 0.993    | 0.310563613 | count | 1 |
| COL25A1     | 16.2093524 | 1082.184429 | 0.015  | 0.988    | 0.310563614 | count | 1 |
| C12orf60    | 16.2981106 | 1083.499671 | 0.015  | 0.988    | 0.310563616 | count | 1 |
| ZSCAN22     | 16.3468109 | 1565.112431 | 0.0104 | 0.9917   | 0.310563618 | count | 1 |

|                |            |             |        |        |             |       |   |
|----------------|------------|-------------|--------|--------|-------------|-------|---|
| PFN4           | 15.6650304 | 1097.939501 | 0.0143 | 0.989  | 0.310563619 | count | 1 |
| SLC25A15       | 16.3883475 | 2126.373796 | 0.0077 | 0.994  | 0.310563619 | count | 1 |
| AC087289.5     | 16.3883956 | 1823.185861 | 0.009  | 0.993  | 0.310563619 | count | 1 |
| PLD6           | 16.4182117 | 2597.664106 | 0.0063 | 0.995  | 0.31056362  | count | 1 |
| ASF1B          | 16.4182117 | 2597.664062 | 0.0063 | 0.995  | 0.31056362  | count | 1 |
| LOXL3          | 16.4182118 | 2597.664106 | 0.0063 | 0.995  | 0.31056362  | count | 1 |
| AL138820.1     | 16.4182163 | 2597.66393  | 0.0063 | 0.995  | 0.31056362  | count | 1 |
| AC106881.1     | 16.4182165 | 2597.663952 | 0.0063 | 0.995  | 0.31056362  | count | 1 |
| AC010761.1     | 16.4182256 | 2597.664948 | 0.0063 | 0.995  | 0.31056362  | count | 1 |
| AC091891.2     | 16.4182257 | 2597.664948 | 0.0063 | 0.995  | 0.31056362  | count | 1 |
| DNAH12         | 16.4185759 | 3100.105661 | 0.0053 | 0.996  | 0.31056362  | count | 1 |
| AL157786.1     | 16.418576  | 3100.105648 | 0.0053 | 0.996  | 0.31056362  | count | 1 |
| AC037487.2     | 16.4190648 | 3916.500606 | 0.0042 | 0.997  | 0.31056362  | count | 1 |
| AL391834.1     | 16.4830535 | 1560.380156 | 0.0106 | 0.9916 | 0.310563621 | count | 1 |
| PSMD6-AS1      | 16.4856667 | 2330.305771 | 0.0071 | 0.994  | 0.310563621 | count | 1 |
| AC021752.1     | 15.7741588 | 1274.460025 | 0.0124 | 0.99   | 0.310563624 | count | 1 |
| FAM74A7        | 16.708808  | 1808.07639  | 0.0092 | 0.993  | 0.310563626 | count | 1 |
| RAB27B         | 16.7088203 | 1808.080053 | 0.0092 | 0.993  | 0.310563626 | count | 1 |
| C9orf43        | 15.826932  | 1281.890652 | 0.0123 | 0.99   | 0.310563627 | count | 1 |
| FMO3           | 16.7529692 | 2604.1717   | 0.0064 | 0.995  | 0.310563627 | count | 1 |
| TTL9           | 16.7529692 | 2604.1717   | 0.0064 | 0.995  | 0.310563627 | count | 1 |
| NUF2           | 16.7529693 | 2604.171711 | 0.0064 | 0.995  | 0.310563627 | count | 1 |
| AMY2B          | 16.7529779 | 2604.175924 | 0.0064 | 0.995  | 0.310563627 | count | 1 |
| TOM1L1         | 16.7842261 | 3180.08239  | 0.0053 | 0.996  | 0.310563627 | count | 1 |
| AC036214.1     | 16.7842262 | 3180.08258  | 0.0053 | 0.996  | 0.310563627 | count | 1 |
| TUBB3          | 16.7842262 | 3180.08258  | 0.0053 | 0.996  | 0.310563627 | count | 1 |
| TRPM2          | 16.7842264 | 3180.082643 | 0.0053 | 0.996  | 0.310563627 | count | 1 |
| KLHL7-DT       | 16.7842265 | 3180.08239  | 0.0053 | 0.996  | 0.310563627 | count | 1 |
| LINC02099      | 16.7842265 | 3180.082517 | 0.0053 | 0.996  | 0.310563627 | count | 1 |
| AC090186.1     | 16.7842266 | 3180.082438 | 0.0053 | 0.996  | 0.310563627 | count | 1 |
| LVRN           | 16.7849288 | 4108.888571 | 0.0041 | 0.997  | 0.310563627 | count | 1 |
| C15orf38-AP3S2 | 16.7849289 | 4108.888408 | 0.0041 | 0.997  | 0.310563627 | count | 1 |
| AC099811.3     | 16.7849293 | 4108.888653 | 0.0041 | 0.997  | 0.310563627 | count | 1 |
| BDNF           | 16.7859246 | 5517.166162 | 0.003  | 0.998  | 0.310563627 | count | 1 |
| UBE2F-SCLY     | 16.7859248 | 5517.166602 | 0.003  | 0.998  | 0.310563627 | count | 1 |
| TFAP2B         | 16.7859248 | 5517.166327 | 0.003  | 0.998  | 0.310563627 | count | 1 |
| UCP3           | 16.7859248 | 5517.166602 | 0.003  | 0.998  | 0.310563627 | count | 1 |
| AC074050.4     | 16.8199204 | 1857.115591 | 0.0091 | 0.993  | 0.310563628 | count | 1 |
| RAB39A         | 16.8679405 | 2361.860369 | 0.0071 | 0.994  | 0.310563629 | count | 1 |
| AC004803.1     | 16.8679405 | 2361.860349 | 0.0071 | 0.994  | 0.310563629 | count | 1 |
| HCK            | 16.8679509 | 2361.862844 | 0.0071 | 0.994  | 0.310563629 | count | 1 |
| AL445483.1     | 16.8679511 | 2361.862844 | 0.0071 | 0.994  | 0.310563629 | count | 1 |
| AC104041.1     | 16.8679567 | 2361.862692 | 0.0071 | 0.994  | 0.310563629 | count | 1 |
| ACSM5          | 16.8683851 | 3785.791643 | 0.0045 | 0.996  | 0.310563629 | count | 1 |
| PITRM1-AS1     | 16.9958466 | 3916.153958 | 0.0043 | 0.997  | 0.310563631 | count | 1 |

|            |            |             |        |        |             |       |   |
|------------|------------|-------------|--------|--------|-------------|-------|---|
| NCAM2      | 15.9279696 | 1098.24999  | 0.0145 | 0.988  | 0.310563631 | count | 1 |
| LINC01119  | 15.9281412 | 1178.242024 | 0.0135 | 0.989  | 0.310563631 | count | 1 |
| HIST1H4B   | 15.9407648 | 1312.474306 | 0.0121 | 0.99   | 0.310563632 | count | 1 |
| CDC6       | 16.0168782 | 1096.059236 | 0.0146 | 0.988  | 0.310563635 | count | 1 |
| PFKFB2     | 16.01698   | 1162.521421 | 0.0138 | 0.989  | 0.310563635 | count | 1 |
| LINC00638  | 17.328201  | 2591.174587 | 0.0067 | 0.995  | 0.310563635 | count | 1 |
| AC027601.4 | 17.3282659 | 3097.824574 | 0.0056 | 0.996  | 0.310563635 | count | 1 |
| AC090510.1 | 16.0372886 | 1077.643678 | 0.0149 | 0.9881 | 0.310563636 | count | 1 |
| HNRNPA1L2  | 16.1248336 | 1092.258303 | 0.0148 | 0.9882 | 0.310563639 | count | 1 |
| TCAP       | 16.177106  | 1069.120732 | 0.0151 | 0.9879 | 0.310563641 | count | 1 |
| AC003101.2 | 16.1875699 | 1570.236863 | 0.0103 | 0.992  | 0.310563641 | count | 1 |
| CKMT2      | 16.1875704 | 1570.236594 | 0.0103 | 0.992  | 0.310563641 | count | 1 |
| AC013468.1 | 16.1875706 | 1570.235585 | 0.0103 | 0.992  | 0.310563641 | count | 1 |
| AOX1       | 16.187573  | 1570.237069 | 0.0103 | 0.992  | 0.310563641 | count | 1 |
| AC006449.5 | 16.187614  | 1874.085588 | 0.0086 | 0.993  | 0.310563641 | count | 1 |
| TMEM182    | 16.1876141 | 1874.085594 | 0.0086 | 0.993  | 0.310563641 | count | 1 |
| AL357078.1 | 16.1896743 | 2278.380674 | 0.0071 | 0.994  | 0.310563641 | count | 1 |
| AL355297.4 | 16.1953108 | 1815.526458 | 0.0089 | 0.993  | 0.310563641 | count | 1 |
| AL672277.1 | 16.1953108 | 1815.526455 | 0.0089 | 0.993  | 0.310563641 | count | 1 |
| MRPS24     | 16.1953178 | 1815.527427 | 0.0089 | 0.993  | 0.310563641 | count | 1 |
| AL590705.1 | 16.1953179 | 1815.527427 | 0.0089 | 0.993  | 0.310563641 | count | 1 |
| NECAB1     | 16.1953198 | 1815.527779 | 0.0089 | 0.993  | 0.310563641 | count | 1 |
| EFCAB6     | 16.1953244 | 1815.529611 | 0.0089 | 0.993  | 0.310563641 | count | 1 |
| AC097358.2 | 16.1953246 | 1815.529624 | 0.0089 | 0.993  | 0.310563641 | count | 1 |
| SNRK-AS1   | 16.1953481 | 2117.403849 | 0.0076 | 0.994  | 0.310563641 | count | 1 |
| AC016405.3 | 16.1953483 | 2117.403849 | 0.0076 | 0.994  | 0.310563641 | count | 1 |
| AC068768.1 | 16.1953504 | 2117.400173 | 0.0076 | 0.994  | 0.310563641 | count | 1 |
| NTF3       | 16.1953508 | 2117.402428 | 0.0076 | 0.994  | 0.310563641 | count | 1 |
| CDCA5      | 16.2701408 | 1144.877873 | 0.0142 | 0.9887 | 0.310563643 | count | 1 |
| AC233309.1 | 16.3468126 | 1565.112412 | 0.0104 | 0.9917 | 0.310563646 | count | 1 |
| HOXD10     | 16.3468146 | 1565.112383 | 0.0104 | 0.9917 | 0.310563646 | count | 1 |
| AL136985.3 | 16.3883549 | 2126.374877 | 0.0077 | 0.994  | 0.310563647 | count | 1 |
| AP001363.2 | 16.3883949 | 1823.184845 | 0.009  | 0.993  | 0.310563647 | count | 1 |
| SPAG5      | 16.3883985 | 1823.187219 | 0.009  | 0.993  | 0.310563647 | count | 1 |
| LINC01220  | 16.388399  | 1823.188624 | 0.009  | 0.993  | 0.310563647 | count | 1 |
| AC093627.5 | 16.3883991 | 1823.188631 | 0.009  | 0.993  | 0.310563647 | count | 1 |
| AL121672.3 | 16.3884007 | 1823.18755  | 0.009  | 0.993  | 0.310563647 | count | 1 |
| AL606760.1 | 16.3884074 | 1823.187116 | 0.009  | 0.993  | 0.310563647 | count | 1 |
| RFX3-AS1   | 16.4182114 | 2597.663985 | 0.0063 | 0.995  | 0.310563648 | count | 1 |
| TMEM200B   | 16.4182115 | 2597.663985 | 0.0063 | 0.995  | 0.310563648 | count | 1 |
| AC005550.2 | 16.4182115 | 2597.663996 | 0.0063 | 0.995  | 0.310563648 | count | 1 |
| AF131216.4 | 16.4182115 | 2597.66404  | 0.0063 | 0.995  | 0.310563648 | count | 1 |
| COLCA2     | 16.4182115 | 2597.663974 | 0.0063 | 0.995  | 0.310563648 | count | 1 |
| AKAP3      | 16.4182115 | 2597.663974 | 0.0063 | 0.995  | 0.310563648 | count | 1 |
| PRC1       | 16.4182115 | 2597.664095 | 0.0063 | 0.995  | 0.310563648 | count | 1 |

|              |            |             |        |        |             |       |   |
|--------------|------------|-------------|--------|--------|-------------|-------|---|
| AL360219.1   | 16.4182116 | 2597.664051 | 0.0063 | 0.995  | 0.310563648 | count | 1 |
| LGALS8-AS1   | 16.4182116 | 2597.664095 | 0.0063 | 0.995  | 0.310563648 | count | 1 |
| AC097662.1   | 16.4182116 | 2597.663996 | 0.0063 | 0.995  | 0.310563648 | count | 1 |
| DDIT4L       | 16.4182116 | 2597.664084 | 0.0063 | 0.995  | 0.310563648 | count | 1 |
| HIST1H2BF    | 16.4182116 | 2597.664084 | 0.0063 | 0.995  | 0.310563648 | count | 1 |
| ATP6V1FNB    | 16.4182116 | 2597.664051 | 0.0063 | 0.995  | 0.310563648 | count | 1 |
| LRRC24       | 16.4182116 | 2597.664051 | 0.0063 | 0.995  | 0.310563648 | count | 1 |
| AC007216.4   | 16.4182116 | 2597.664051 | 0.0063 | 0.995  | 0.310563648 | count | 1 |
| AC015726.1   | 16.4182116 | 2597.664084 | 0.0063 | 0.995  | 0.310563648 | count | 1 |
| AC016708.1   | 16.4182117 | 2597.664084 | 0.0063 | 0.995  | 0.310563648 | count | 1 |
| LINC01970    | 16.4182117 | 2597.664106 | 0.0063 | 0.995  | 0.310563648 | count | 1 |
| ZIM2-AS1     | 16.4182117 | 2597.664073 | 0.0063 | 0.995  | 0.310563648 | count | 1 |
| Z97192.1     | 16.4182118 | 2597.664127 | 0.0063 | 0.995  | 0.310563648 | count | 1 |
| SDK1         | 16.4182163 | 2597.663876 | 0.0063 | 0.995  | 0.310563648 | count | 1 |
| SEPT7-AS1    | 16.4182163 | 2597.66392  | 0.0063 | 0.995  | 0.310563648 | count | 1 |
| AC137630.1   | 16.4182164 | 2597.663898 | 0.0063 | 0.995  | 0.310563648 | count | 1 |
| AC012603.1   | 16.4182164 | 2597.663909 | 0.0063 | 0.995  | 0.310563648 | count | 1 |
| CMYA5        | 16.4182165 | 2597.66393  | 0.0063 | 0.995  | 0.310563648 | count | 1 |
| AL158152.2   | 16.4182165 | 2597.663963 | 0.0063 | 0.995  | 0.310563648 | count | 1 |
| AL139339.1   | 16.4182165 | 2597.663974 | 0.0063 | 0.995  | 0.310563648 | count | 1 |
| NEURL1       | 16.4182165 | 2597.663909 | 0.0063 | 0.995  | 0.310563648 | count | 1 |
| AC012150.1   | 16.4182165 | 2597.66393  | 0.0063 | 0.995  | 0.310563648 | count | 1 |
| RNASEH2B-AS1 | 16.4182165 | 2597.663952 | 0.0063 | 0.995  | 0.310563648 | count | 1 |
| UNC79        | 16.4182165 | 2597.66392  | 0.0063 | 0.995  | 0.310563648 | count | 1 |
| CACNA1F      | 16.4182167 | 2597.663963 | 0.0063 | 0.995  | 0.310563648 | count | 1 |
| AL049629.1   | 16.4182258 | 2597.664948 | 0.0063 | 0.995  | 0.310563648 | count | 1 |
| MMP2-AS1     | 16.4185759 | 3100.105596 | 0.0053 | 0.996  | 0.310563648 | count | 1 |
| PAPPA        | 16.418576  | 3100.105596 | 0.0053 | 0.996  | 0.310563648 | count | 1 |
| AC141424.1   | 16.418576  | 3100.105609 | 0.0053 | 0.996  | 0.310563648 | count | 1 |
| NLGN3        | 16.4185761 | 3100.105648 | 0.0053 | 0.996  | 0.310563648 | count | 1 |
| AC007292.2   | 16.4185761 | 3100.105661 | 0.0053 | 0.996  | 0.310563648 | count | 1 |
| ANKRD34A     | 16.4185769 | 3100.11069  | 0.0053 | 0.996  | 0.310563648 | count | 1 |
| WNT11        | 16.4185769 | 3100.11069  | 0.0053 | 0.996  | 0.310563648 | count | 1 |
| CCR7         | 16.4190648 | 3916.500655 | 0.0042 | 0.997  | 0.310563648 | count | 1 |
| GHET1        | 16.4443195 | 1700.512816 | 0.0097 | 0.9923 | 0.310563648 | count | 1 |
| AC135050.3   | 16.4775501 | 1514.253725 | 0.0109 | 0.9913 | 0.310563649 | count | 1 |
| AC104458.1   | 16.4830516 | 1560.38016  | 0.0106 | 0.9916 | 0.310563649 | count | 1 |
| ABCA10       | 16.4847342 | 2160.913691 | 0.0076 | 0.994  | 0.310563649 | count | 1 |
| FAM227A      | 16.5390162 | 1818.339988 | 0.0091 | 0.993  | 0.31056365  | count | 1 |
| AL590068.1   | 16.5390164 | 1818.339991 | 0.0091 | 0.993  | 0.31056365  | count | 1 |
| HIPK1-AS1    | 16.561463  | 1791.0746   | 0.0092 | 0.993  | 0.310563651 | count | 1 |
| AC124319.2   | 16.561463  | 1791.074594 | 0.0092 | 0.993  | 0.310563651 | count | 1 |
| GLDC         | 16.5614729 | 1791.07349  | 0.0092 | 0.993  | 0.310563651 | count | 1 |
| PLAC8        | 16.582114  | 1166.87153  | 0.0142 | 0.9887 | 0.310563651 | count | 1 |
| KIFC2        | 16.6021599 | 1556.047012 | 0.0107 | 0.9915 | 0.310563652 | count | 1 |

|                 |            |             |        |       |             |       |   |
|-----------------|------------|-------------|--------|-------|-------------|-------|---|
| AC123595.1      | 16.708808  | 1808.076387 | 0.0092 | 0.993 | 0.310563654 | count | 1 |
| AC026471.2      | 16.7088168 | 1808.077545 | 0.0092 | 0.993 | 0.310563654 | count | 1 |
| CCDC188         | 16.7088168 | 1808.077545 | 0.0092 | 0.993 | 0.310563654 | count | 1 |
| DGAT2           | 16.708821  | 1808.079058 | 0.0092 | 0.993 | 0.310563654 | count | 1 |
| AC097381.1      | 16.7529652 | 2604.169053 | 0.0064 | 0.995 | 0.310563655 | count | 1 |
| AC106739.1      | 16.7529652 | 2604.169031 | 0.0064 | 0.995 | 0.310563655 | count | 1 |
| E2F1            | 16.7529652 | 2604.169053 | 0.0064 | 0.995 | 0.310563655 | count | 1 |
| NTN5            | 16.7529691 | 2604.1717   | 0.0064 | 0.995 | 0.310563655 | count | 1 |
| AC138356.1      | 16.7529692 | 2604.1717   | 0.0064 | 0.995 | 0.310563655 | count | 1 |
| AP001469.3      | 16.7529692 | 2604.171733 | 0.0064 | 0.995 | 0.310563655 | count | 1 |
| FBXO15          | 16.7529693 | 2604.171733 | 0.0064 | 0.995 | 0.310563655 | count | 1 |
| AC092123.1      | 16.7529694 | 2604.171788 | 0.0064 | 0.995 | 0.310563655 | count | 1 |
| FAAH2           | 16.7529695 | 2604.171755 | 0.0064 | 0.995 | 0.310563655 | count | 1 |
| OR4D1           | 16.7529695 | 2604.171766 | 0.0064 | 0.995 | 0.310563655 | count | 1 |
| SERF1B          | 16.7529745 | 2604.1717   | 0.0064 | 0.995 | 0.310563655 | count | 1 |
| SLC25A30-AS1    | 16.7529785 | 2604.172902 | 0.0064 | 0.995 | 0.310563655 | count | 1 |
| AP002807.1      | 16.7529786 | 2604.172946 | 0.0064 | 0.995 | 0.310563655 | count | 1 |
| MEIG1           | 16.7529787 | 2604.172913 | 0.0064 | 0.995 | 0.310563655 | count | 1 |
| AC008622.2      | 16.7531575 | 3107.84932  | 0.0054 | 0.996 | 0.310563655 | count | 1 |
| LMO3            | 16.7531629 | 3107.845463 | 0.0054 | 0.996 | 0.310563655 | count | 1 |
| AL592301.1      | 16.7533948 | 3926.049183 | 0.0043 | 0.997 | 0.310563655 | count | 1 |
| LINC02210-CRHR1 | 16.7534037 | 3926.053159 | 0.0043 | 0.997 | 0.310563655 | count | 1 |
| COL4A4          | 16.7534228 | 3044.994244 | 0.0055 | 0.996 | 0.310563655 | count | 1 |
| TEX22           | 16.7536227 | 3485.812245 | 0.0048 | 0.996 | 0.310563655 | count | 1 |
| AC245297.2      | 16.784226  | 3180.08239  | 0.0053 | 0.996 | 0.310563655 | count | 1 |
| POT1-AS1        | 16.784226  | 3180.082343 | 0.0053 | 0.996 | 0.310563655 | count | 1 |
| AC024243.1      | 16.7842262 | 3180.082327 | 0.0053 | 0.996 | 0.310563655 | count | 1 |
| AP003721.4      | 16.7842262 | 3180.082548 | 0.0053 | 0.996 | 0.310563655 | count | 1 |
| AL162591.2      | 16.7842263 | 3180.082374 | 0.0053 | 0.996 | 0.310563655 | count | 1 |
| AC104187.1      | 16.7842263 | 3180.082628 | 0.0053 | 0.996 | 0.310563655 | count | 1 |
| FGF9            | 16.7842263 | 3180.082533 | 0.0053 | 0.996 | 0.310563655 | count | 1 |
| AL139220.2      | 16.7842264 | 3180.082517 | 0.0053 | 0.996 | 0.310563655 | count | 1 |
| SYCP1           | 16.7842264 | 3180.082327 | 0.0053 | 0.996 | 0.310563655 | count | 1 |
| EPHA6           | 16.7842264 | 3180.082548 | 0.0053 | 0.996 | 0.310563655 | count | 1 |
| GABRB1          | 16.7842264 | 3180.082548 | 0.0053 | 0.996 | 0.310563655 | count | 1 |
| AL513122.2      | 16.7842264 | 3180.082564 | 0.0053 | 0.996 | 0.310563655 | count | 1 |
| AL137025.1      | 16.7842264 | 3180.082596 | 0.0053 | 0.996 | 0.310563655 | count | 1 |
| NPIPB11         | 16.7842264 | 3180.082628 | 0.0053 | 0.996 | 0.310563655 | count | 1 |
| AC027682.1      | 16.7842264 | 3180.082501 | 0.0053 | 0.996 | 0.310563655 | count | 1 |
| RAP1GAP2        | 16.7842264 | 3180.082406 | 0.0053 | 0.996 | 0.310563655 | count | 1 |
| ATP1B2          | 16.7842264 | 3180.082469 | 0.0053 | 0.996 | 0.310563655 | count | 1 |
| AP000897.2      | 16.7842265 | 3180.082533 | 0.0053 | 0.996 | 0.310563655 | count | 1 |
| MAST1           | 16.7842265 | 3180.082485 | 0.0053 | 0.996 | 0.310563655 | count | 1 |
| AC006483.2      | 16.7842267 | 3180.082517 | 0.0053 | 0.996 | 0.310563655 | count | 1 |
| AC084082.1      | 16.7842267 | 3180.08258  | 0.0053 | 0.996 | 0.310563655 | count | 1 |



|            |            |             |        |        |             |       |   |
|------------|------------|-------------|--------|--------|-------------|-------|---|
| AL392048.1 | 16.7842267 | 3180.082485 | 0.0053 | 0.996  | 0.310563655 | count | 1 |
| AP001033.1 | 16.7842267 | 3180.082485 | 0.0053 | 0.996  | 0.310563655 | count | 1 |
| ZNF697     | 16.7842269 | 3180.082754 | 0.0053 | 0.996  | 0.310563655 | count | 1 |
| AC034102.6 | 16.7842269 | 3180.082533 | 0.0053 | 0.996  | 0.310563655 | count | 1 |
| GRIN2D     | 16.7849288 | 4108.888428 | 0.0041 | 0.997  | 0.310563655 | count | 1 |
| AL022328.3 | 16.7849288 | 4108.888326 | 0.0041 | 0.997  | 0.310563655 | count | 1 |
| AC113349.2 | 16.7849289 | 4108.888551 | 0.0041 | 0.997  | 0.310563655 | count | 1 |
| OR6A2      | 16.784929  | 4108.888612 | 0.0041 | 0.997  | 0.310563655 | count | 1 |
| ZSCAN4     | 16.7849291 | 4108.88851  | 0.0041 | 0.997  | 0.310563655 | count | 1 |
| CX3CR1     | 16.7849292 | 4108.888796 | 0.0041 | 0.997  | 0.310563655 | count | 1 |
| MND1       | 16.7849292 | 4108.888694 | 0.0041 | 0.997  | 0.310563655 | count | 1 |
| AL356417.1 | 16.7849292 | 4108.888756 | 0.0041 | 0.997  | 0.310563655 | count | 1 |
| AL354710.2 | 16.7849292 | 4108.888633 | 0.0041 | 0.997  | 0.310563655 | count | 1 |
| LINC01666  | 16.7849292 | 4108.888592 | 0.0041 | 0.997  | 0.310563655 | count | 1 |
| KLHL31     | 16.7849293 | 4108.888776 | 0.0041 | 0.997  | 0.310563655 | count | 1 |
| AC138627.1 | 16.7859245 | 5517.166355 | 0.003  | 0.998  | 0.310563655 | count | 1 |
| AC080188.1 | 16.7859246 | 5517.166382 | 0.003  | 0.998  | 0.310563655 | count | 1 |
| AL354956.1 | 16.7859247 | 5517.166162 | 0.003  | 0.998  | 0.310563655 | count | 1 |
| AC096586.2 | 16.785925  | 5517.16685  | 0.003  | 0.998  | 0.310563655 | count | 1 |
| SLC36A2    | 16.7859251 | 5517.166575 | 0.003  | 0.998  | 0.310563655 | count | 1 |
| LINC01238  | 16.7859252 | 5517.16674  | 0.003  | 0.998  | 0.310563655 | count | 1 |
| TNIP3      | 16.8190267 | 2063.985485 | 0.0081 | 0.993  | 0.310563656 | count | 1 |
| GVQW2      | 16.8191048 | 1769.618905 | 0.0095 | 0.9924 | 0.310563656 | count | 1 |
| VIP        | 16.8191083 | 1769.618275 | 0.0095 | 0.9924 | 0.310563656 | count | 1 |
| AC017083.2 | 16.8679404 | 2361.860349 | 0.0071 | 0.994  | 0.310563657 | count | 1 |
| AC087203.3 | 16.8679404 | 2361.860369 | 0.0071 | 0.994  | 0.310563657 | count | 1 |
| ELFN1-AS1  | 16.8679405 | 2361.860359 | 0.0071 | 0.994  | 0.310563657 | count | 1 |
| CRYGS      | 16.8679406 | 2361.860349 | 0.0071 | 0.994  | 0.310563657 | count | 1 |
| GPC4       | 16.8679406 | 2361.860369 | 0.0071 | 0.994  | 0.310563657 | count | 1 |
| TBX6       | 16.8679445 | 2361.865969 | 0.0071 | 0.994  | 0.310563657 | count | 1 |
| AC011815.1 | 16.8679511 | 2361.862844 | 0.0071 | 0.994  | 0.310563657 | count | 1 |
| AC108734.4 | 16.8679512 | 2361.862854 | 0.0071 | 0.994  | 0.310563657 | count | 1 |
| PLSCR3     | 16.8681363 | 2914.762318 | 0.0058 | 0.995  | 0.310563657 | count | 1 |
| PKN2-AS1   | 16.8681408 | 2914.76744  | 0.0058 | 0.995  | 0.310563657 | count | 1 |
| CALN1      | 16.8681408 | 2914.76744  | 0.0058 | 0.995  | 0.310563657 | count | 1 |
| CD79A      | 16.8681408 | 2914.767452 | 0.0058 | 0.995  | 0.310563657 | count | 1 |
| MKI67      | 16.8683852 | 3785.791676 | 0.0045 | 0.996  | 0.310563657 | count | 1 |
| AL162171.1 | 16.9402562 | 1789.73509  | 0.0095 | 0.9924 | 0.310563658 | count | 1 |
| IQCD       | 16.9956375 | 2597.526611 | 0.0065 | 0.995  | 0.310563659 | count | 1 |
| ERICH4     | 16.9956427 | 2597.525165 | 0.0065 | 0.995  | 0.310563659 | count | 1 |
| AC005899.5 | 16.9956432 | 2597.525198 | 0.0065 | 0.995  | 0.310563659 | count | 1 |
| ACRBP      | 16.995651  | 2597.528812 | 0.0065 | 0.995  | 0.310563659 | count | 1 |
| AL136418.1 | 16.995651  | 2597.528834 | 0.0065 | 0.995  | 0.310563659 | count | 1 |
| AL355816.2 | 16.9956515 | 2597.527432 | 0.0065 | 0.995  | 0.310563659 | count | 1 |
| DUOX1      | 16.9956515 | 2597.52741  | 0.0065 | 0.995  | 0.310563659 | count | 1 |

|            |            |             |         |          |             |       |          |
|------------|------------|-------------|---------|----------|-------------|-------|----------|
| TMEM74     | 16.9956518 | 2597.527432 | 0.0065  | 0.995    | 0.310563659 | count | 1        |
| LINC00900  | 16.99574   | 3100.006348 | 0.0055  | 0.996    | 0.310563659 | count | 1        |
| Z95115.1   | 16.9968941 | 3422.172279 | 0.005   | 0.996    | 0.310563659 | count | 1        |
| AP001596.2 | 17.0197819 | 1752.836588 | 0.0097  | 0.992    | 0.310563659 | count | 1        |
| TH         | 17.3269727 | 2345.852205 | 0.0074  | 0.994    | 0.310563663 | count | 1        |
| VLDLR      | 17.3269851 | 2345.850912 | 0.0074  | 0.994    | 0.310563663 | count | 1        |
| NRXN3      | 17.327016  | 2895.094589 | 0.006   | 0.995    | 0.310563663 | count | 1        |
| GUK1       | 0.2158365  | 0.0345322   | 6.2503  | 4.73E-10 | 0.310571525 | count | 1.12E-05 |
| DDX23      | 0.2486606  | 0.211674    | 1.1747  | 0.24     | 0.31059335  | count | 1        |
| TPD52L2    | 0.2323317  | 0.1444897   | 1.6079  | 0.108    | 0.31076781  | count | 1        |
| GCFC2      | 0.2466341  | 0.2667388   | 0.9246  | 0.355    | 0.310850292 | count | 1        |
| ZNF35      | 0.2920339  | 0.3020775   | 0.9668  | 0.334    | 0.310885581 | count | 1        |
| VGLL4      | 0.2202703  | 0.0917659   | 2.4003  | 0.0164   | 0.3110065   | count | 1        |
| ZFAND5     | 0.2211937  | 0.0825975   | 2.678   | 0.00745  | 0.311075468 | count | 1        |
| CRBN       | 0.2196241  | 0.0792079   | 2.7728  | 0.0056   | 0.31123331  | count | 1        |
| NPEPL1     | 0.2506752  | 0.2228483   | 1.1249  | 0.261    | 0.311313096 | count | 1        |
| TMEM243    | 0.2256569  | 0.1326835   | 1.7007  | 0.0891   | 0.311464657 | count | 1        |
| RNF25      | 0.2707516  | 0.2861277   | 0.9463  | 0.344    | 0.311507649 | count | 1        |
| ZNF626     | 0.2505172  | 0.2418986   | 1.0356  | 0.3      | 0.311571282 | count | 1        |
| NDST1-AS1  | 0.9549024  | 1.1252401   | 0.8486  | 0.396    | 0.311576245 | count | 1        |
| SERPING1   | 0.2180663  | 0.0700781   | 3.1118  | 0.00188  | 0.311582858 | count | 1        |
| RPS14      | 0.2161702  | 0.0195025   | 11.0842 | 5.77E-28 | 0.311694691 | count | 1.39E-23 |
| C6orf106   | 0.244122   | 0.1928332   | 1.266   | 0.206    | 0.31172737  | count | 1        |
| MLX        | 0.230297   | 0.1526201   | 1.509   | 0.131    | 0.311782142 | count | 1        |
| LINC02452  | 0.815528   | 1.1235891   | 0.7258  | 0.468    | 0.311857226 | count | 1        |
| ZNF296     | 0.4998538  | 0.6076266   | 0.8226  | 0.411    | 0.311990401 | count | 1        |
| CNNM3      | 0.4579259  | 0.5042072   | 0.9082  | 0.364    | 0.312083786 | count | 1        |
| ABT1       | 0.2310857  | 0.1434552   | 1.6109  | 0.107    | 0.312156459 | count | 1        |
| ZNF211     | 0.4144811  | 0.438506    | 0.9452  | 0.345    | 0.31241422  | count | 1        |
| DDHD2      | 0.2606774  | 0.2554856   | 1.0203  | 0.308    | 0.312626517 | count | 1        |
| CMAS       | 0.2317772  | 0.1466475   | 1.5805  | 0.114    | 0.313084505 | count | 1        |
| NAPG       | 0.2298738  | 0.1420138   | 1.6187  | 0.106    | 0.313290214 | count | 1        |
| INTS14     | 0.2534669  | 0.2400657   | 1.0558  | 0.291    | 0.313303951 | count | 1        |
| AL583785.1 | 0.2445404  | 0.1870474   | 1.3074  | 0.191    | 0.31343542  | count | 1        |
| UNC45A     | 0.2476033  | 0.2427346   | 1.0201  | 0.308    | 0.313495521 | count | 1        |
| FIZ1       | 0.3004359  | 0.4085964   | 0.7353  | 0.462    | 0.31350175  | count | 1        |
| FSIP1      | 0.604292   | 0.8032681   | 0.7523  | 0.452    | 0.313565755 | count | 1        |
| THNSL1     | 0.3947375  | 0.4931871   | 0.8004  | 0.424    | 0.313613005 | count | 1        |
| HSPA14     | 0.3287742  | 0.3509384   | 0.9368  | 0.349    | 0.313697427 | count | 1        |
| FMR1       | 0.2340432  | 0.1709368   | 1.3692  | 0.171    | 0.313725851 | count | 1        |
| EIF2A      | 0.2226312  | 0.0752854   | 2.9572  | 0.00313  | 0.313803394 | count | 1        |
| ARMC1      | 0.2361826  | 0.1607342   | 1.4694  | 0.142    | 0.313961035 | count | 1        |
| TPCN1      | 0.2748689  | 0.3224729   | 0.8524  | 0.394    | 0.313972914 | count | 1        |
| PARP14     | 0.2223512  | 0.1063463   | 2.0908  | 0.0366   | 0.313976759 | count | 1        |
| CLN6       | 0.72731    | 0.6708678   | 1.0841  | 0.278    | 0.314082389 | count | 1        |

|            |           |           |        |         |             |       |   |
|------------|-----------|-----------|--------|---------|-------------|-------|---|
| TOR1AIP1   | 0.2343984 | 0.1935319 | 1.2112 | 0.226   | 0.314086683 | count | 1 |
| FBXW9      | 0.3131009 | 0.3414852 | 0.9169 | 0.359   | 0.314116591 | count | 1 |
| PCMT1      | 0.2239898 | 0.0889348 | 2.5186 | 0.0118  | 0.314129376 | count | 1 |
| HMG20B     | 0.2285657 | 0.1221369 | 1.8714 | 0.0614  | 0.314176379 | count | 1 |
| CD109      | 0.2293286 | 0.1423528 | 1.611  | 0.107   | 0.314185845 | count | 1 |
| NDST1      | 0.2555326 | 0.2242607 | 1.1394 | 0.255   | 0.314298871 | count | 1 |
| HIST1H3A   | 0.9681515 | 1.0408217 | 0.9302 | 0.352   | 0.314567408 | count | 1 |
| NBAS       | 0.2529673 | 0.2208489 | 1.1454 | 0.252   | 0.314571866 | count | 1 |
| HIST1H4H   | 0.3870177 | 0.5516536 | 0.7016 | 0.483   | 0.314642708 | count | 1 |
| MTX2       | 0.2282122 | 0.1280047 | 1.7828 | 0.0747  | 0.314770367 | count | 1 |
| RNF214     | 0.2366487 | 0.1867482 | 1.2672 | 0.205   | 0.315116797 | count | 1 |
| TBL1X      | 0.2749825 | 0.3965371 | 0.6935 | 0.488   | 0.315192284 | count | 1 |
| EZH1       | 0.2371462 | 0.1834146 | 1.293  | 0.196   | 0.31536918  | count | 1 |
| LSM5       | 0.2238862 | 0.0874967 | 2.5588 | 0.0106  | 0.315407358 | count | 1 |
| SGTA       | 0.254055  | 0.1995387 | 1.2732 | 0.203   | 0.315445349 | count | 1 |
| PRMT6      | 0.3883375 | 0.622867  | 0.6235 | 0.533   | 0.315636521 | count | 1 |
| ZNF687     | 0.3883431 | 0.8296392 | 0.4681 | 0.64    | 0.315640726 | count | 1 |
| TOMM22     | 0.2241696 | 0.0862804 | 2.5982 | 0.00942 | 0.315661841 | count | 1 |
| F2R        | 0.2277738 | 0.1220513 | 1.8662 | 0.0621  | 0.315697049 | count | 1 |
| MTERF2     | 0.2628258 | 0.2674647 | 0.9827 | 0.326   | 0.315845017 | count | 1 |
| CENPJ      | 0.2887491 | 0.3640822 | 0.7931 | 0.428   | 0.315934903 | count | 1 |
| PABPC4L    | 0.398108  | 0.5634121 | 0.7066 | 0.48    | 0.316082391 | count | 1 |
| 6-Mar      | 0.2314069 | 0.1256799 | 1.8412 | 0.0657  | 0.316201267 | count | 1 |
| GAB3       | 0.4085511 | 0.4930724 | 0.8286 | 0.407   | 0.316233857 | count | 1 |
| AC144652.1 | 0.4085511 | 0.5323633 | 0.7674 | 0.443   | 0.316233857 | count | 1 |
| SMIM19     | 0.2274519 | 0.1176247 | 1.9337 | 0.0533  | 0.316404512 | count | 1 |
| GADD45A    | 0.2240799 | 0.1139046 | 1.9673 | 0.0493  | 0.316553751 | count | 1 |
| SLX4IP     | 0.3036275 | 0.3598671 | 0.8437 | 0.399   | 0.316709674 | count | 1 |
| GPHN       | 0.2842914 | 0.3315282 | 0.8575 | 0.391   | 0.31696826  | count | 1 |
| F8A1       | 0.265041  | 0.2591421 | 1.0228 | 0.307   | 0.317043287 | count | 1 |
| KLHL15     | 0.322133  | 0.4247126 | 0.7585 | 0.448   | 0.317102022 | count | 1 |
| SCAP       | 0.2691455 | 0.3013664 | 0.8931 | 0.372   | 0.31713953  | count | 1 |
| CHD9       | 0.2238651 | 0.0768823 | 2.9118 | 0.00362 | 0.317482993 | count | 1 |
| CARD8      | 0.2289809 | 0.1231763 | 1.859  | 0.0631  | 0.317496242 | count | 1 |
| TK2        | 0.2529251 | 0.20604   | 1.2276 | 0.22    | 0.31749719  | count | 1 |
| PSMD12     | 0.2283771 | 0.102934  | 2.2187 | 0.0266  | 0.317518181 | count | 1 |
| C17orf58   | 0.2410701 | 0.1892637 | 1.2737 | 0.203   | 0.317779043 | count | 1 |
| AC020915.3 | 0.3228893 | 0.4028397 | 0.8015 | 0.423   | 0.317813104 | count | 1 |
| NIPSNAP1   | 0.2572419 | 0.2381249 | 1.0803 | 0.28    | 0.317894677 | count | 1 |
| YTHDF2     | 0.2282248 | 0.1054499 | 2.1643 | 0.0305  | 0.317928725 | count | 1 |
| MOSMO      | 0.2356901 | 0.1615515 | 1.4589 | 0.145   | 0.318059796 | count | 1 |
| CCZ1B      | 0.3567589 | 0.3634935 | 0.9815 | 0.326   | 0.318151796 | count | 1 |
| ARL5B      | 0.2385054 | 0.1613197 | 1.4785 | 0.139   | 0.318221304 | count | 1 |
| CHAMP1     | 0.2654499 | 0.2581187 | 1.0284 | 0.304   | 0.31823762  | count | 1 |
| SNRPE      | 0.2252269 | 0.0744393 | 3.0256 | 0.0025  | 0.318253095 | count | 1 |

|            |           |           |        |          |             |       |          |
|------------|-----------|-----------|--------|----------|-------------|-------|----------|
| SUMF1      | 0.268039  | 0.2321023 | 1.1548 | 0.248    | 0.31829103  | count | 1        |
| MIF        | 0.224558  | 0.0696829 | 3.2226 | 0.00129  | 0.31848852  | count | 1        |
| GCH1       | 0.2710615 | 0.2479611 | 1.0932 | 0.274    | 0.318489908 | count | 1        |
| MRPL19     | 0.232912  | 0.1323189 | 1.7602 | 0.0785   | 0.318549744 | count | 1        |
| INVS       | 0.5738484 | 0.5423426 | 1.0581 | 0.29     | 0.318603511 | count | 1        |
| ANKAR      | 0.2683363 | 0.2414055 | 1.1116 | 0.266    | 0.318636715 | count | 1        |
| TOR1B      | 0.2826625 | 0.2837848 | 0.996  | 0.319    | 0.319080087 | count | 1        |
| AC008035.1 | 0.8410586 | 0.8803614 | 0.9554 | 0.339    | 0.319100475 | count | 1        |
| CACFD1     | 0.6712833 | 0.6265954 | 1.0713 | 0.284    | 0.319212889 | count | 1        |
| MISP3      | 0.3703162 | 0.5532419 | 0.6694 | 0.503    | 0.319324335 | count | 1        |
| LRFN4      | 0.3705404 | 0.3950186 | 0.938  | 0.348    | 0.319505094 | count | 1        |
| KIAA0753   | 0.3025898 | 0.4157874 | 0.7278 | 0.467    | 0.319779305 | count | 1        |
| EIF2D      | 0.2357674 | 0.1550745 | 1.5203 | 0.129    | 0.319956886 | count | 1        |
| STX17-AS1  | 0.3712052 | 0.4541802 | 0.8173 | 0.414    | 0.32004097  | count | 1        |
| ZBTB48     | 0.3719154 | 0.3806801 | 0.977  | 0.329    | 0.320613291 | count | 1        |
| CENPV      | 0.4721614 | 0.779396  | 0.6058 | 0.545    | 0.320738771 | count | 1        |
| NRF1       | 0.3867999 | 0.4458963 | 0.8675 | 0.386    | 0.32082447  | count | 1        |
| FBXO36     | 0.3721992 | 0.5710315 | 0.6518 | 0.515    | 0.320841947 | count | 1        |
| MAD2L2     | 0.2375639 | 0.1376499 | 1.7259 | 0.0845   | 0.321120055 | count | 1        |
| C1orf52    | 0.2342076 | 0.1252346 | 1.8702 | 0.0616   | 0.3211674   | count | 1        |
| PEF1       | 0.2305411 | 0.1015973 | 2.2692 | 0.0233   | 0.321170032 | count | 1        |
| NHSL1      | 0.3152833 | 0.3656185 | 0.8623 | 0.389    | 0.321360824 | count | 1        |
| AC083798.2 | 0.7491089 | 0.7776159 | 0.9633 | 0.335    | 0.32141048  | count | 1        |
| CRCP       | 0.2377195 | 0.169871  | 1.3994 | 0.162    | 0.321506021 | count | 1        |
| UNC93B1    | 0.2690832 | 0.2724097 | 0.9878 | 0.323    | 0.32178096  | count | 1        |
| UGP2       | 0.2280427 | 0.0956977 | 2.3829 | 0.0172   | 0.321805466 | count | 1        |
| NEIL1      | 0.2570325 | 0.2093416 | 1.2278 | 0.22     | 0.322166912 | count | 1        |
| VEGFA      | 0.2978169 | 0.3305584 | 0.901  | 0.368    | 0.322225123 | count | 1        |
| EXOSC6     | 0.2357496 | 0.1390926 | 1.6949 | 0.0902   | 0.322226806 | count | 1        |
| UBE2J2     | 0.239823  | 0.1439351 | 1.6662 | 0.0958   | 0.322295773 | count | 1        |
| ACTR10     | 0.2298521 | 0.0912238 | 2.5197 | 0.0118   | 0.322378475 | count | 1        |
| WDR5B      | 0.3386181 | 0.588794  | 0.5751 | 0.565    | 0.322618746 | count | 1        |
| ANKS3      | 0.3054266 | 0.3446195 | 0.8863 | 0.376    | 0.322669895 | count | 1        |
| RPL5       | 0.2238303 | 0.0219744 | 10.186 | 6.04E-24 | 0.322684878 | count | 1.46E-19 |
| TTC1       | 0.2298138 | 0.0910356 | 2.5244 | 0.0116   | 0.322789191 | count | 1        |
| CYB5R4     | 0.2735586 | 0.316597  | 0.8641 | 0.388    | 0.323071431 | count | 1        |
| RGS19      | 0.2429504 | 0.1718771 | 1.4135 | 0.158    | 0.323301824 | count | 1        |
| RRP7A      | 0.2318495 | 0.1236124 | 1.8756 | 0.0608   | 0.323435185 | count | 1        |
| RMND1      | 0.2437224 | 0.1973876 | 1.2347 | 0.217    | 0.323464856 | count | 1        |
| NOL11      | 0.2468481 | 0.1807656 | 1.3656 | 0.172    | 0.3236781   | count | 1        |
| OLMALINC   | 0.4773702 | 0.6454012 | 0.7396 | 0.46     | 0.323889656 | count | 1        |
| HNRNPL     | 0.2396072 | 0.1399786 | 1.7117 | 0.0871   | 0.323953309 | count | 1        |
| TOX4       | 0.2305898 | 0.0906109 | 2.5448 | 0.011    | 0.324040933 | count | 1        |
| TMEM140    | 0.2349038 | 0.1451343 | 1.6185 | 0.106    | 0.324043826 | count | 1        |
| ZNF575     | 0.757394  | 0.7498201 | 1.0101 | 0.313    | 0.324166105 | count | 1        |

|            |           |           |        |          |             |       |           |
|------------|-----------|-----------|--------|----------|-------------|-------|-----------|
| SGMS1      | 0.2546445 | 0.2228008 | 1.1429 | 0.253    | 0.324346153 | count | 1         |
| SLC39A1    | 0.2298194 | 0.0830056 | 2.7687 | 0.00567  | 0.324509627 | count | 1         |
| AMMECR1L   | 0.3185233 | 0.3574286 | 0.8912 | 0.373    | 0.32452797  | count | 1         |
| TFB2M      | 0.2690487 | 0.258754  | 1.0398 | 0.299    | 0.324549967 | count | 1         |
| LRRC4C     | 0.6852517 | 0.4790977 | 1.4303 | 0.153    | 0.324557004 | count | 1         |
| NCALD      | 0.4994955 | 0.5366689 | 0.9307 | 0.352    | 0.32489527  | count | 1         |
| AL161729.1 | 0.7604131 | 1.0963236 | 0.6936 | 0.488    | 0.325166243 | count | 1         |
| MYO9A      | 0.2408583 | 0.1600431 | 1.505  | 0.132    | 0.325175192 | count | 1         |
| BRAP       | 0.2839344 | 0.2786331 | 1.019  | 0.308    | 0.325190237 | count | 1         |
| NGDN       | 0.2387209 | 0.1317574 | 1.8118 | 0.0701   | 0.325277627 | count | 1         |
| HNRNPH1    | 0.2286777 | 0.0713288 | 3.206  | 0.00136  | 0.325401184 | count | 1         |
| RABL2A     | 0.4473531 | 0.5465002 | 0.8186 | 0.413    | 0.325709333 | count | 1         |
| TTC30A     | 0.4473531 | 0.5518122 | 0.8107 | 0.418    | 0.325709333 | count | 1         |
| ZBTB8A     | 0.2817537 | 0.3677967 | 0.7661 | 0.444    | 0.325950163 | count | 1         |
| UBLCP1     | 0.2530921 | 0.2064788 | 1.2258 | 0.22     | 0.325969886 | count | 1         |
| RUVBL1     | 0.2409241 | 0.1446801 | 1.6652 | 0.096    | 0.326075362 | count | 1         |
| PRDM11     | 0.4023803 | 0.5106569 | 0.788  | 0.431    | 0.3261761   | count | 1         |
| WAC-AS1    | 0.2391084 | 0.1472131 | 1.6242 | 0.104    | 0.326277492 | count | 1         |
| ZNF317     | 0.3861074 | 0.5464698 | 0.7065 | 0.48     | 0.326303041 | count | 1         |
| ZMAT2      | 0.2360487 | 0.1133149 | 2.0831 | 0.0373   | 0.326502932 | count | 1         |
| RNF114     | 0.2372344 | 0.1257113 | 1.8871 | 0.0592   | 0.32652135  | count | 1         |
| LRRC29     | 0.4640916 | 0.5537324 | 0.8381 | 0.402    | 0.326576416 | count | 1         |
| EMP1       | 0.2288839 | 0.0627131 | 3.6497 | 0.000267 | 0.326675207 | count | 1         |
| MKRN1      | 0.2618456 | 0.1964756 | 1.3327 | 0.183    | 0.326807629 | count | 1         |
| TMEM101    | 0.2395524 | 0.1333766 | 1.7961 | 0.0726   | 0.326879894 | count | 1         |
| RAI2       | 0.265067  | 0.2076814 | 1.2763 | 0.202    | 0.326886718 | count | 1         |
| IRX5       | 0.8697416 | 0.8112145 | 1.0721 | 0.284    | 0.327074754 | count | 1         |
| RB1        | 0.2386735 | 0.1409267 | 1.6936 | 0.0905   | 0.327148133 | count | 1         |
| SNX25      | 0.3165385 | 0.4030245 | 0.7854 | 0.432    | 0.327386258 | count | 1         |
| KDM1A      | 0.2473353 | 0.1897865 | 1.3032 | 0.193    | 0.327450611 | count | 1         |
| FEM1A      | 0.3624377 | 0.3869738 | 0.9366 | 0.349    | 0.32753765  | count | 1         |
| CNOT1      | 0.2528071 | 0.2002048 | 1.2627 | 0.207    | 0.327673421 | count | 1         |
| AUTS2      | 0.5287614 | 0.4662165 | 1.1342 | 0.257    | 0.327697546 | count | 1         |
| 2-Mar      | 0.2605199 | 0.2002844 | 1.3007 | 0.193    | 0.327701629 | count | 1         |
| VPS4A      | 0.2445536 | 0.149681  | 1.6338 | 0.102    | 0.328052002 | count | 1         |
| UBN1       | 0.2357632 | 0.1215478 | 1.9397 | 0.0525   | 0.328203747 | count | 1         |
| DCTN4      | 0.2675615 | 0.2577314 | 1.0381 | 0.299    | 0.328285145 | count | 1         |
| MTRNR2L12  | 0.2288552 | 0.0544043 | 4.2066 | 2.68E-05 | 0.328285945 | count | 0.6191872 |
| CDK1       | 0.3280244 | 0.3697947 | 0.887  | 0.375    | 0.328432641 | count | 1         |
| ZCCHC8     | 0.2582779 | 0.2124928 | 1.2155 | 0.224    | 0.328577534 | count | 1         |
| MRPL30     | 0.2598205 | 0.2263354 | 1.1479 | 0.251    | 0.3287474   | count | 1         |
| IQUB       | 1.0329812 | 1.0416814 | 0.9916 | 0.321    | 0.328758276 | count | 1         |
| POLE       | 1.3004679 | 1.0940855 | 1.1886 | 0.235    | 0.328764759 | count | 1         |
| FYB1       | 0.6399247 | 0.6983865 | 0.9163 | 0.36     | 0.328819203 | count | 1         |
| KDM5B      | 0.2449624 | 0.1700466 | 1.4406 | 0.15     | 0.328821361 | count | 1         |

|             |           |           |         |          |             |       |          |
|-------------|-----------|-----------|---------|----------|-------------|-------|----------|
| DARS        | 0.2382598 | 0.1268625 | 1.8781  | 0.0605   | 0.328823282 | count | 1        |
| NDOR1       | 0.8761731 | 0.8813602 | 0.9941  | 0.32     | 0.328839307 | count | 1        |
| RPS7        | 0.2281739 | 0.0219524 | 10.394  | 7.53E-25 | 0.328925024 | count | 1.82E-20 |
| AC010969.2  | 0.3895247 | 0.5739357 | 0.6787  | 0.497    | 0.328987456 | count | 1        |
| ACTB        | 0.2283074 | 0.0311518 | 7.3289  | 3.03E-13 | 0.329044244 | count | 7.24E-09 |
| SH2B2       | 0.3316757 | 0.3427234 | 0.9678  | 0.333    | 0.32905143  | count | 1        |
| PDCD11      | 0.2855151 | 0.4793243 | 0.5957  | 0.551    | 0.329141297 | count | 1        |
| SNHG8       | 0.2315069 | 0.0613172 | 3.7756  | 0.000163 | 0.329307781 | count | 1        |
| ABHD11      | 0.3100829 | 0.3187702 | 0.9727  | 0.331    | 0.329414105 | count | 1        |
| DDX10       | 0.269152  | 0.2284321 | 1.1783  | 0.239    | 0.329635545 | count | 1        |
| BRD3        | 0.2524392 | 0.184778  | 1.3662  | 0.172    | 0.329706738 | count | 1        |
| AHDC1       | 0.3240314 | 0.2912719 | 1.1125  | 0.266    | 0.329905507 | count | 1        |
| TRIM47      | 0.236318  | 0.1082307 | 2.1835  | 0.0291   | 0.329910247 | count | 1        |
| TRIO        | 0.2588781 | 0.3023374 | 0.8563  | 0.392    | 0.329997284 | count | 1        |
| PLCG1       | 0.2804236 | 0.3483891 | 0.8049  | 0.421    | 0.330128327 | count | 1        |
| RPS28       | 0.2291325 | 0.0214567 | 10.6788 | 4.10E-26 | 0.330296137 | count | 9.90E-22 |
| CNIH3       | 0.3196487 | 0.3544507 | 0.9018  | 0.367    | 0.330475264 | count | 1        |
| POLR2J2     | 0.4546853 | 0.7331246 | 0.6202  | 0.535    | 0.33052481  | count | 1        |
| PIK3IP1     | 0.2486906 | 0.1649408 | 1.5078  | 0.132    | 0.330589889 | count | 1        |
| SLC25A24    | 0.2479889 | 0.1566454 | 1.5831  | 0.114    | 0.330770504 | count | 1        |
| S1PR1       | 0.2366952 | 0.1147931 | 2.0619  | 0.0393   | 0.330774981 | count | 1        |
| TFDP1       | 0.2617848 | 0.201609  | 1.2985  | 0.194    | 0.33082429  | count | 1        |
| ARHGAP5-AS1 | 0.534758  | 0.5701471 | 0.9379  | 0.348    | 0.330923852 | count | 1        |
| B4GALT6     | 0.3922071 | 0.5801109 | 0.6761  | 0.499    | 0.331091973 | count | 1        |
| SYNE3       | 0.2643836 | 0.2254458 | 1.1727  | 0.241    | 0.331240086 | count | 1        |
| RXRB        | 0.2856059 | 0.264527  | 1.0797  | 0.28     | 0.331321696 | count | 1        |
| AP1S1       | 0.2441962 | 0.1368279 | 1.7847  | 0.0744   | 0.331564108 | count | 1        |
| IDNK        | 0.2713028 | 0.2607674 | 1.0404  | 0.298    | 0.33163948  | count | 1        |
| PIK3CA      | 0.2509321 | 0.1817576 | 1.3806  | 0.168    | 0.331680939 | count | 1        |
| NFKB1       | 0.2443733 | 0.1634192 | 1.4954  | 0.135    | 0.33188244  | count | 1        |
| TMEM229B    | 0.7046596 | 1.0453734 | 0.6741  | 0.5      | 0.331898943 | count | 1        |
| AL390957.1  | 0.7046596 | 2.3657216 | 0.2979  | 0.7658   | 0.331898943 | count | 1        |
| LYRM7       | 0.2701168 | 0.2455665 | 1.1     | 0.271    | 0.331922443 | count | 1        |
| APOPT1      | 0.2426904 | 0.1275169 | 1.9032  | 0.0571   | 0.332034087 | count | 1        |
| GAR1        | 0.2474904 | 0.1570643 | 1.5757  | 0.115    | 0.332075708 | count | 1        |
| PPCDC       | 0.2830198 | 0.3248602 | 0.8712  | 0.384    | 0.332215814 | count | 1        |
| GLRX2       | 0.2460419 | 0.1860977 | 1.3221  | 0.186    | 0.332220058 | count | 1        |
| HIF3A       | 0.2767414 | 0.1990414 | 1.3904  | 0.165    | 0.332227457 | count | 1        |
| C1orf35     | 0.2449376 | 0.1417848 | 1.7275  | 0.0842   | 0.33223978  | count | 1        |
| ZSWIM3      | 0.5671721 | 0.63631   | 0.8913  | 0.373    | 0.332368458 | count | 1        |
| RIMKLA      | 0.2839755 | 0.2842091 | 0.9992  | 0.318    | 0.332387578 | count | 1        |
| C8orf58     | 0.3000102 | 0.2763385 | 1.0857  | 0.278    | 0.332509884 | count | 1        |
| GFER        | 0.2482818 | 0.1712038 | 1.4502  | 0.147    | 0.332544966 | count | 1        |
| MBD6        | 0.3015073 | 0.2862778 | 1.0532  | 0.292    | 0.332607956 | count | 1        |
| MT-ND2      | 0.2309693 | 0.0374729 | 6.1636  | 8.15E-10 | 0.332710783 | count | 1.93E-05 |

|            |           |           |        |          |             |       |             |
|------------|-----------|-----------|--------|----------|-------------|-------|-------------|
| SAFB       | 0.2476678 | 0.1734142 | 1.4282 | 0.153    | 0.332759459 | count | 1           |
| EIF4B      | 0.2334606 | 0.0545445 | 4.2802 | 1.93E-05 | 0.332805727 | count | 0.4465827   |
| RGMB-AS1   | 0.891133  | 1.0214473 | 0.8724 | 0.383    | 0.332910673 | count | 1           |
| ACSM6      | 0.891133  | 1.0419837 | 0.8552 | 0.392    | 0.332910673 | count | 1           |
| SALL2      | 0.891133  | 1.223211  | 0.7285 | 0.466    | 0.332910673 | count | 1           |
| FASTKD3    | 0.3327075 | 0.358688  | 0.9276 | 0.354    | 0.332912067 | count | 1           |
| NUDT16     | 0.2417752 | 0.1212217 | 1.9945 | 0.0462   | 0.33297863  | count | 1           |
| NAB1       | 0.2524505 | 0.2340298 | 1.0787 | 0.281    | 0.332988491 | count | 1           |
| TMEM168    | 0.26451   | 0.2358738 | 1.1214 | 0.262    | 0.333048616 | count | 1           |
| LTN1       | 0.2484324 | 0.1558363 | 1.5942 | 0.111    | 0.333099248 | count | 1           |
| CASP8      | 0.2840383 | 0.2923001 | 0.9717 | 0.331    | 0.333383503 | count | 1           |
| SCUBE3     | 0.6055864 | 0.9707494 | 0.6238 | 0.533    | 0.333407268 | count | 1           |
| TRUB1      | 0.3121543 | 0.375393  | 0.8315 | 0.406    | 0.33348717  | count | 1           |
| RTKN       | 0.3141395 | 0.2749089 | 1.1427 | 0.253    | 0.333566752 | count | 1           |
| ANKMY2     | 0.3550485 | 0.4940518 | 0.7186 | 0.472    | 0.333658832 | count | 1           |
| CASKIN2    | 0.2529038 | 0.1653329 | 1.5297 | 0.126    | 0.333925489 | count | 1           |
| CCT7       | 0.2371883 | 0.0817437 | 2.9016 | 0.00374  | 0.33399964  | count | 1           |
| ABCG1      | 0.2509716 | 0.1642349 | 1.5281 | 0.127    | 0.334026256 | count | 1           |
| RCCD1      | 0.4607035 | 0.5073062 | 0.9081 | 0.364    | 0.334464398 | count | 1           |
| RABGAP1L   | 0.2718317 | 0.221003  | 1.23   | 0.219    | 0.334543323 | count | 1           |
| C17orf80   | 0.2737526 | 0.2540534 | 1.0775 | 0.281    | 0.334578958 | count | 1           |
| TTN        | 1.9862977 | 2.6156418 | 0.7594 | 0.4477   | 0.334605803 | count | 1           |
| RPS4X      | 0.2322225 | 0.021995  | 10.558 | 1.42E-25 | 0.334796479 | count | 3.43E-21    |
| TAPT1      | 0.279016  | 0.2673249 | 1.0437 | 0.297    | 0.334901771 | count | 1           |
| TUBA1B     | 0.233259  | 0.0435144 | 5.3605 | 8.98E-08 | 0.334961093 | count | 0.002112006 |
| GALC       | 0.3101575 | 0.3450649 | 0.8988 | 0.369    | 0.33512178  | count | 1           |
| EIF3J-DT   | 0.2533588 | 0.2001752 | 1.2657 | 0.206    | 0.335351818 | count | 1           |
| ACSF2      | 0.543102  | 0.6400361 | 0.8485 | 0.396    | 0.335394846 | count | 1           |
| COG8       | 0.5736699 | 0.8408117 | 0.6823 | 0.495    | 0.335616694 | count | 1           |
| COQ10A     | 0.3161925 | 0.2870239 | 1.1016 | 0.271    | 0.33566671  | count | 1           |
| DDX19B     | 0.2824054 | 0.2491603 | 1.1334 | 0.257    | 0.335792637 | count | 1           |
| DENND4B    | 0.3532521 | 0.3915826 | 0.9021 | 0.367    | 0.335827698 | count | 1           |
| CD72       | 0.7158857 | 1.1492905 | 0.6229 | 0.533    | 0.336101762 | count | 1           |
| CLP1       | 0.2800417 | 0.2510649 | 1.1154 | 0.265    | 0.33610739  | count | 1           |
| AC068338.2 | 0.4367624 | 0.6693004 | 0.6526 | 0.514    | 0.336144022 | count | 1           |
| NOP2       | 0.9038435 | 1.124994  | 0.8034 | 0.422    | 0.336333815 | count | 1           |
| PRKAG1     | 0.2561812 | 0.185516  | 1.3809 | 0.167    | 0.336381394 | count | 1           |
| ZNF558     | 0.4637024 | 0.5277609 | 0.8786 | 0.38     | 0.336423186 | count | 1           |
| KLHL18     | 0.2950939 | 0.3957231 | 0.7457 | 0.456    | 0.336450108 | count | 1           |
| ADD3       | 0.2539614 | 0.1872632 | 1.3562 | 0.175    | 0.336463044 | count | 1           |
| MAP3K4     | 0.2577317 | 0.2215488 | 1.1633 | 0.245    | 0.336544752 | count | 1           |
| AC133919.1 | 0.6588308 | 1.5561638 | 0.4234 | 0.6721   | 0.336771228 | count | 1           |
| CCAR2      | 0.3367847 | 0.3015408 | 1.1169 | 0.264    | 0.336806828 | count | 1           |
| ZDHHC13    | 0.3013533 | 0.3163287 | 0.9527 | 0.341    | 0.3368417   | count | 1           |
| CUL7       | 0.3368593 | 0.5284796 | 0.6374 | 0.524    | 0.336878038 | count | 1           |

|            |           |           |         |          |             |       |            |
|------------|-----------|-----------|---------|----------|-------------|-------|------------|
| DNPEP      | 0.2469288 | 0.1351164 | 1.8275  | 0.0677   | 0.337089337 | count | 1          |
| BACE1-AS   | 0.7972356 | 0.7302281 | 1.0918  | 0.275    | 0.337192363 | count | 1          |
| TTF1       | 0.2501015 | 0.1544491 | 1.6193  | 0.105    | 0.33726935  | count | 1          |
| MT-ND4L    | 0.2360756 | 0.0593913 | 3.9749  | 7.22E-05 | 0.337281198 | count | 1          |
| LARP6      | 0.249248  | 0.1554284 | 1.6036  | 0.109    | 0.337354382 | count | 1          |
| MALL       | 0.2392246 | 0.0853489 | 2.8029  | 0.0051   | 0.337482622 | count | 1          |
| XYLT2      | 0.3346785 | 0.4690961 | 0.7135  | 0.476    | 0.337587542 | count | 1          |
| AC009961.1 | 0.6148065 | 0.823811  | 0.7463  | 0.456    | 0.337653716 | count | 1          |
| NUDT9      | 0.2509318 | 0.1875322 | 1.3381  | 0.181    | 0.337656642 | count | 1          |
| RUNDC3B    | 0.3319983 | 0.2902333 | 1.1439  | 0.253    | 0.337668545 | count | 1          |
| TTPAL      | 0.4659196 | 0.4867339 | 0.9572  | 0.339    | 0.3378695   | count | 1          |
| TRUB2      | 0.2594603 | 0.1822032 | 1.424   | 0.155    | 0.337880402 | count | 1          |
| WBP11      | 0.2454837 | 0.1232693 | 1.9914  | 0.0465   | 0.337916528 | count | 1          |
| PARP9      | 0.2453594 | 0.1320297 | 1.8584  | 0.0632   | 0.337938146 | count | 1          |
| ZNF274     | 0.2906016 | 0.2825914 | 1.0283  | 0.304    | 0.337991072 | count | 1          |
| ARHGEF26   | 1.077677  | 0.7722557 | 1.3955  | 0.163    | 0.338121497 | count | 1          |
| TRNT1      | 0.2525265 | 0.1779299 | 1.4192  | 0.156    | 0.338184862 | count | 1          |
| POLR1E     | 0.2711578 | 0.2437288 | 1.1125  | 0.266    | 0.338242594 | count | 1          |
| FKRP       | 0.5229639 | 0.5361661 | 0.9754  | 0.329    | 0.338261463 | count | 1          |
| COQ6       | 0.2746203 | 0.2530596 | 1.0852  | 0.278    | 0.338460869 | count | 1          |
| SFXN2      | 1.3692294 | 1.0149767 | 1.349   | 0.177    | 0.338494644 | count | 1          |
| PEX16      | 0.2521551 | 0.1504062 | 1.6765  | 0.0938   | 0.338516195 | count | 1          |
| ST7L       | 0.2886633 | 0.2816711 | 1.0248  | 0.306    | 0.338683233 | count | 1          |
| TSPAN31    | 0.2499142 | 0.1499406 | 1.6668  | 0.0957   | 0.338689879 | count | 1          |
| LINC00893  | 0.9127407 | 0.8809086 | 1.0361  | 0.3      | 0.338710336 | count | 1          |
| ELMO2      | 0.5237698 | 0.4767515 | 1.0986  | 0.272    | 0.338717404 | count | 1          |
| ANKRA2     | 0.2994409 | 0.3179716 | 0.9417  | 0.346    | 0.338775737 | count | 1          |
| RPS23      | 0.2349579 | 0.0189504 | 12.3986 | 2.15E-34 | 0.33878262  | count | 5.21E-30   |
| AC062017.1 | 0.4405378 | 0.561044  | 0.7852  | 0.432    | 0.338789026 | count | 1          |
| IQCB1      | 0.2691543 | 0.2423459 | 1.1106  | 0.267    | 0.338807963 | count | 1          |
| GGA1       | 0.2837011 | 0.2804994 | 1.0114  | 0.312    | 0.338887516 | count | 1          |
| ANP32A     | 0.241484  | 0.0926067 | 2.6076  | 0.00917  | 0.339069883 | count | 1          |
| NELFB      | 0.2687292 | 0.1899258 | 1.4149  | 0.157    | 0.339080731 | count | 1          |
| SPATA5L1   | 0.3881411 | 0.5031836 | 0.7714  | 0.441    | 0.339111608 | count | 1          |
| ARNT       | 0.2890464 | 0.280949  | 1.0288  | 0.304    | 0.339122024 | count | 1          |
| NAA60      | 0.2691688 | 0.2021204 | 1.3317  | 0.183    | 0.339229815 | count | 1          |
| ABCF3      | 0.2815753 | 0.2572831 | 1.0944  | 0.274    | 0.339353165 | count | 1          |
| RBM8A      | 0.2376927 | 0.0534325 | 4.4485  | 8.99E-06 | 0.339418009 | count | 0.20872982 |
| AC009812.1 | 0.4683349 | 0.5559113 | 0.8425  | 0.4      | 0.339443277 | count | 1          |
| TMEM100    | 0.5252347 | 0.6823093 | 0.7698  | 0.441    | 0.339545679 | count | 1          |
| GTF2IRD2B  | 0.550894  | 0.5540427 | 0.9943  | 0.32     | 0.339550889 | count | 1          |
| C20orf194  | 0.2948158 | 0.2916034 | 1.011   | 0.312    | 0.339583218 | count | 1          |
| LETMD1     | 0.2479127 | 0.1333728 | 1.8588  | 0.0632   | 0.339625274 | count | 1          |
| URGCP      | 0.306649  | 0.3080414 | 0.9955  | 0.32     | 0.339637569 | count | 1          |
| COX7A2L    | 0.2388254 | 0.0646188 | 3.6959  | 0.000223 | 0.339639273 | count | 1          |



|            |           |           |        |          |             |       |          |
|------------|-----------|-----------|--------|----------|-------------|-------|----------|
| CDK18      | 0.9167941 | 1.0452361 | 0.8771 | 0.38     | 0.339787731 | count | 1        |
| AC009005.1 | 0.9167941 | 1.1957325 | 0.7667 | 0.443    | 0.339787731 | count | 1        |
| ERMARD     | 0.3042444 | 0.4208674 | 0.7229 | 0.47     | 0.339975729 | count | 1        |
| RABGAP1    | 0.26256   | 0.1712892 | 1.5328 | 0.125    | 0.340418921 | count | 1        |
| MED29      | 0.2533384 | 0.1608374 | 1.5751 | 0.115    | 0.340543013 | count | 1        |
| TCAIM      | 0.2673715 | 0.2460219 | 1.0868 | 0.277    | 0.340675191 | count | 1        |
| AC079630.1 | 0.4867787 | 0.8710392 | 0.5588 | 0.576    | 0.340810463 | count | 1        |
| PRKAR1B    | 0.2574222 | 0.1991484 | 1.2926 | 0.196    | 0.340843514 | count | 1        |
| MAP6       | 0.553338  | 0.6555901 | 0.844  | 0.399    | 0.340850546 | count | 1        |
| PROS1      | 0.2446928 | 0.1272498 | 1.9229 | 0.0546   | 0.340947756 | count | 1        |
| TENT4B     | 0.2916391 | 0.2786272 | 1.0467 | 0.295    | 0.341140008 | count | 1        |
| SART3      | 0.2717922 | 0.215195  | 1.263  | 0.207    | 0.341240923 | count | 1        |
| ITGA1      | 0.2676008 | 0.2286794 | 1.1702 | 0.242    | 0.341301024 | count | 1        |
| MEF2C-AS1  | 0.3358099 | 0.3683278 | 0.9117 | 0.362    | 0.341376325 | count | 1        |
| HSPA4      | 0.254961  | 0.1510339 | 1.6881 | 0.0915   | 0.341418815 | count | 1        |
| FZD6       | 0.2472566 | 0.1250803 | 1.9768 | 0.0482   | 0.341567769 | count | 1        |
| NME5       | 0.2868025 | 0.3618861 | 0.7925 | 0.428    | 0.3417171   | count | 1        |
| RPL10A     | 0.2374973 | 0.0250608 | 9.4768 | 5.44E-21 | 0.342191361 | count | 1.31E-16 |
| DFFB       | 0.7323108 | 0.7838037 | 0.9343 | 0.35     | 0.342193179 | count | 1        |
| RBM4B      | 0.3135768 | 0.3214726 | 0.9754 | 0.329    | 0.342193616 | count | 1        |
| ALKBH1     | 0.3745569 | 0.4095704 | 0.9145 | 0.361    | 0.342389626 | count | 1        |
| CSPP1      | 0.2735063 | 0.2083792 | 1.3125 | 0.189    | 0.342488079 | count | 1        |
| DHRS11     | 0.2821167 | 0.2679895 | 1.0527 | 0.293    | 0.342709381 | count | 1        |
| ATL1       | 0.2898369 | 0.2571935 | 1.1269 | 0.26     | 0.342730044 | count | 1        |
| PPP1R13L   | 0.3497489 | 0.3737356 | 0.9358 | 0.349    | 0.342959238 | count | 1        |
| GON7       | 0.2662428 | 0.2043351 | 1.303  | 0.193    | 0.34298011  | count | 1        |
| MTMR6      | 0.2593261 | 0.2401734 | 1.0797 | 0.28     | 0.343008702 | count | 1        |
| PPP1R37    | 0.316055  | 0.2886698 | 1.0949 | 0.274    | 0.343066442 | count | 1        |
| TGFB3      | 0.5094689 | 0.6856774 | 0.743  | 0.458    | 0.343117477 | count | 1        |
| AP3S2      | 0.4000141 | 0.5028584 | 0.7955 | 0.426    | 0.343128458 | count | 1        |
| EML1       | 0.2942904 | 0.2496543 | 1.1788 | 0.239    | 0.343181501 | count | 1        |
| RNLS       | 0.4740931 | 0.6153039 | 0.7705 | 0.441    | 0.343187625 | count | 1        |
| DNAJA4     | 0.4907148 | 0.8224088 | 0.5967 | 0.551    | 0.343263269 | count | 1        |
| FBXL15     | 0.248126  | 0.128741  | 1.9273 | 0.054    | 0.343522686 | count | 1        |
| RAB6A      | 0.2496478 | 0.1245876 | 2.0038 | 0.0452   | 0.343569907 | count | 1        |
| CYBC1      | 0.2523483 | 0.1480068 | 1.705  | 0.0883   | 0.343656955 | count | 1        |
| CFAP45     | 1.1051306 | 1.037468  | 1.0652 | 0.287    | 0.34370713  | count | 1        |
| AC107375.1 | 1.1051306 | 1.2630355 | 0.875  | 0.382    | 0.34370713  | count | 1        |
| GAS8       | 0.3411146 | 0.365857  | 0.9324 | 0.351    | 0.34378648  | count | 1        |
| AL133467.1 | 0.9323904 | 0.7622392 | 1.2232 | 0.221    | 0.343902202 | count | 1        |
| TRIM45     | 1.410076  | 1.2886917 | 1.0942 | 0.274    | 0.344006199 | count | 1        |
| SECISBP2   | 0.2496373 | 0.1283567 | 1.9449 | 0.0519   | 0.344085509 | count | 1        |
| KIF13A     | 0.2544716 | 0.1671548 | 1.5224 | 0.128    | 0.344097236 | count | 1        |
| CEP85      | 0.5338731 | 0.7110544 | 0.7508 | 0.453    | 0.344416318 | count | 1        |
| CTSA       | 0.2475728 | 0.1099144 | 2.2524 | 0.0244   | 0.344493248 | count | 1        |

|            |           |           |        |          |             |       |           |
|------------|-----------|-----------|--------|----------|-------------|-------|-----------|
| CEP97      | 0.3113224 | 0.3840127 | 0.8107 | 0.418    | 0.344648699 | count | 1         |
| LIN7B      | 0.3036884 | 0.3033501 | 1.0011 | 0.317    | 0.344725191 | count | 1         |
| NEURL2     | 0.6304469 | 0.8161404 | 0.7725 | 0.44     | 0.344801571 | count | 1         |
| MICB       | 0.4766544 | 0.6362237 | 0.7492 | 0.454    | 0.344849741 | count | 1         |
| FAM234B    | 0.3592045 | 0.434332  | 0.827  | 0.408    | 0.344855014 | count | 1         |
| DIAPH2     | 0.2516208 | 0.1584093 | 1.5884 | 0.112    | 0.344855545 | count | 1         |
| BAZ1B      | 0.2531814 | 0.1610116 | 1.5724 | 0.116    | 0.345078558 | count | 1         |
| EXD3       | 0.2830741 | 0.3128365 | 0.9049 | 0.366    | 0.345131698 | count | 1         |
| ZKSCAN3    | 0.822481  | 0.7782461 | 1.0568 | 0.291    | 0.345255435 | count | 1         |
| ZNF44      | 0.3199799 | 0.295029  | 1.0846 | 0.278    | 0.345359025 | count | 1         |
| JUND       | 0.2398978 | 0.0405831 | 5.9113 | 3.81E-09 | 0.345364549 | count | 9.02E-05  |
| TEX10      | 0.3895202 | 0.4032188 | 0.966  | 0.334    | 0.34546244  | count | 1         |
| ASNSD1     | 0.2546496 | 0.1557949 | 1.6345 | 0.102    | 0.345495317 | count | 1         |
| MED13L     | 0.2517338 | 0.14427   | 1.7449 | 0.0811   | 0.345526188 | count | 1         |
| MRAP2      | 0.3491537 | 0.4435152 | 0.7872 | 0.431    | 0.345559331 | count | 1         |
| MROH8      | 1.4221014 | 1.5489943 | 0.9181 | 0.359    | 0.345591791 | count | 1         |
| CTSW       | 0.439041  | 1.2714402 | 0.3453 | 0.7299   | 0.345779903 | count | 1         |
| TIMM10     | 0.2528424 | 0.102357  | 2.4702 | 0.0136   | 0.345906759 | count | 1         |
| PCDHB5     | 0.5945238 | 0.8296408 | 0.7166 | 0.474    | 0.345956966 | count | 1         |
| ZNF543     | 0.4508241 | 0.583747  | 0.7723 | 0.44     | 0.345972117 | count | 1         |
| RBM18      | 0.2643667 | 0.177278  | 1.4913 | 0.136    | 0.345984192 | count | 1         |
| ALDH4A1    | 1.4252894 | 1.042332  | 1.3674 | 0.172    | 0.346009363 | count | 1         |
| MORN4      | 0.9410006 | 0.9222383 | 1.0203 | 0.308    | 0.346152702 | count | 1         |
| IGBP1      | 0.2458613 | 0.0840113 | 2.9265 | 0.00346  | 0.346233876 | count | 1         |
| HAUS6      | 0.2906978 | 0.2618885 | 1.11   | 0.267    | 0.346254496 | count | 1         |
| PIGF       | 0.2539894 | 0.1665735 | 1.5248 | 0.127    | 0.346388898 | count | 1         |
| REXO4      | 0.2743044 | 0.2284588 | 1.2007 | 0.23     | 0.346407629 | count | 1         |
| SRSF5      | 0.2430207 | 0.0585251 | 4.1524 | 3.39E-05 | 0.346419779 | count | 0.7823103 |
| ZNF674     | 0.5151349 | 0.6189768 | 0.8322 | 0.405    | 0.346477738 | count | 1         |
| ZNF793     | 0.4206847 | 0.5063744 | 0.8308 | 0.406    | 0.346730591 | count | 1         |
| TBC1D13    | 0.3360712 | 0.3883577 | 0.8654 | 0.387    | 0.346741855 | count | 1         |
| PNO1       | 0.2621898 | 0.1620524 | 1.6179 | 0.106    | 0.346759958 | count | 1         |
| THAP1      | 0.2576855 | 0.1721499 | 1.4969 | 0.135    | 0.346784085 | count | 1         |
| GPATCH2    | 0.2558216 | 0.1419643 | 1.802  | 0.0717   | 0.346816391 | count | 1         |
| CD99L2     | 0.2996256 | 0.2745051 | 1.0915 | 0.275    | 0.347163991 | count | 1         |
| SLC25A51   | 0.4054555 | 0.5500611 | 0.7371 | 0.461    | 0.347459567 | count | 1         |
| UBE2A      | 0.2510185 | 0.1110738 | 2.2599 | 0.0239   | 0.347470737 | count | 1         |
| TBL2       | 0.3154561 | 0.2891801 | 1.0909 | 0.275    | 0.347491654 | count | 1         |
| RTN3       | 0.2469896 | 0.0967556 | 2.5527 | 0.0107   | 0.347545141 | count | 1         |
| MUC20-OT1  | 0.2716757 | 0.2082207 | 1.3047 | 0.192    | 0.347749163 | count | 1         |
| TTC28      | 0.2700556 | 0.1970872 | 1.3702 | 0.171    | 0.347829036 | count | 1         |
| AC005837.1 | 0.5400012 | 0.6456234 | 0.8364 | 0.403    | 0.347857491 | count | 1         |
| SPSB1      | 0.2995319 | 0.2580427 | 1.1608 | 0.246    | 0.34811138  | count | 1         |
| SEMA3B     | 0.8317314 | 0.7723828 | 1.0768 | 0.282    | 0.348173189 | count | 1         |
| IQCE       | 0.3118569 | 0.2917154 | 1.069  | 0.285    | 0.348218342 | count | 1         |

|            |           |           |         |          |             |       |            |
|------------|-----------|-----------|---------|----------|-------------|-------|------------|
| ZNF75D     | 0.4987884 | 0.5605468 | 0.8898  | 0.374    | 0.348278928 | count | 1          |
| PCBP2      | 0.2436388 | 0.0506488 | 4.8104  | 1.59E-06 | 0.348325199 | count | 0.03712809 |
| AC125807.2 | 0.5995354 | 0.9652115 | 0.6211  | 0.535    | 0.34842275  | count | 1          |
| RBL1       | 0.4543946 | 0.6856116 | 0.6628  | 0.508    | 0.348457437 | count | 1          |
| MRPL46     | 0.2602021 | 0.1651866 | 1.5752  | 0.115    | 0.348628676 | count | 1          |
| TMEM179B   | 0.245183  | 0.0694963 | 3.528   | 0.000426 | 0.348736332 | count | 1          |
| TNFRSF11A  | 0.7506099 | 0.8006689 | 0.9375  | 0.349    | 0.348899144 | count | 1          |
| HAUS4      | 0.3313527 | 0.391956  | 0.8454  | 0.398    | 0.348988658 | count | 1          |
| MT-CO3     | 0.2420675 | 0.0337293 | 7.1768  | 9.13E-13 | 0.348994617 | count | 2.18E-08   |
| CCDC157    | 1.4487014 | 1.0182299 | 1.4228  | 0.155    | 0.349040534 | count | 1          |
| YJEFN3     | 1.4487014 | 1.1241443 | 1.2887  | 0.198    | 0.349040534 | count | 1          |
| MARCKS     | 0.2459979 | 0.0796935 | 3.0868  | 0.00204  | 0.349141681 | count | 1          |
| MED28      | 0.2536974 | 0.1234986 | 2.0543  | 0.04     | 0.349314434 | count | 1          |
| ILKAP      | 0.2803019 | 0.2127415 | 1.3176  | 0.188    | 0.349457546 | count | 1          |
| ZFYVE9     | 0.2949448 | 0.2765571 | 1.0665  | 0.286    | 0.349504343 | count | 1          |
| GLOD4      | 0.2545786 | 0.1231583 | 2.0671  | 0.0388   | 0.349577333 | count | 1          |
| RPL12      | 0.2424553 | 0.0241709 | 10.0309 | 2.78E-23 | 0.349586378 | count | 6.71E-19   |
| SPTY2D1    | 0.2678538 | 0.1810262 | 1.4796  | 0.139    | 0.349613444 | count | 1          |
| LANCL3     | 0.6410827 | 0.7208189 | 0.8894  | 0.374    | 0.349622483 | count | 1          |
| DLG1       | 0.2664441 | 0.1921482 | 1.3867  | 0.166    | 0.34971438  | count | 1          |
| TRAF2      | 0.4013064 | 0.3302005 | 1.2153  | 0.224    | 0.349814927 | count | 1          |
| TFPI2      | 0.3071804 | 0.4968744 | 0.6182  | 0.536    | 0.349838446 | count | 1          |
| BEND7      | 0.2627736 | 0.2053255 | 1.2798  | 0.201    | 0.349886665 | count | 1          |
| TCF7L1     | 0.2839668 | 0.1929333 | 1.4718  | 0.141    | 0.350325725 | count | 1          |
| TARBP2     | 0.3044484 | 0.3575255 | 0.8515  | 0.395    | 0.350377688 | count | 1          |
| AC037459.3 | 0.8395854 | 0.9912536 | 0.847   | 0.397    | 0.350635129 | count | 1          |
| PARN       | 0.305829  | 0.2594011 | 1.179   | 0.239    | 0.350760873 | count | 1          |
| H2AFX      | 0.2582629 | 0.1369456 | 1.8859  | 0.0594   | 0.350786082 | count | 1          |
| AL157938.3 | 0.8400797 | 0.6163871 | 1.3629  | 0.173    | 0.350789597 | count | 1          |
| TBC1D23    | 0.2704697 | 0.2030729 | 1.3319  | 0.183    | 0.351314417 | count | 1          |
| AKIP1      | 0.2653075 | 0.1658167 | 1.6     | 0.11     | 0.351350749 | count | 1          |
| UBXN1      | 0.2459291 | 0.0547842 | 4.4891  | 7.45E-06 | 0.351354945 | count | 0.17308585 |
| DNAJA2     | 0.2529239 | 0.1122468 | 2.2533  | 0.0243   | 0.351443104 | count | 1          |
| MALSU1     | 0.2571704 | 0.1428844 | 1.7998  | 0.072    | 0.35146423  | count | 1          |
| MMP15      | 0.3297057 | 0.3593488 | 0.9175  | 0.359    | 0.351530299 | count | 1          |
| ARRDC1-AS1 | 0.3409468 | 0.3993257 | 0.8538  | 0.393    | 0.351556873 | count | 1          |
| C10orf25   | 0.4871259 | 0.4878932 | 0.9984  | 0.318    | 0.351623052 | count | 1          |
| ZNF598     | 0.3243631 | 0.2670937 | 1.2144  | 0.225    | 0.351764893 | count | 1          |
| ASCC3      | 0.2676431 | 0.1610025 | 1.6624  | 0.0966   | 0.352065428 | count | 1          |
| PRIMPOL    | 0.3116351 | 0.3669566 | 0.8492  | 0.396    | 0.352161889 | count | 1          |
| ZWILCH     | 0.3759674 | 0.4395547 | 0.8553  | 0.392    | 0.352184187 | count | 1          |
| LRBA       | 0.3155294 | 0.2882824 | 1.0945  | 0.274    | 0.352189868 | count | 1          |
| MBNL3      | 0.4882484 | 0.6232746 | 0.7834  | 0.433    | 0.352347029 | count | 1          |
| TMEM43     | 0.2552621 | 0.1274838 | 2.0023  | 0.0453   | 0.352398089 | count | 1          |
| TMEM187    | 0.2908417 | 0.2681175 | 1.0848  | 0.278    | 0.352412348 | count | 1          |

|            |           |           |        |          |             |       |           |
|------------|-----------|-----------|--------|----------|-------------|-------|-----------|
| TRPT1      | 0.2724144 | 0.2153933 | 1.2647 | 0.206    | 0.352508502 | count | 1         |
| ALPK1      | 0.3045669 | 0.2923673 | 1.0417 | 0.298    | 0.352737527 | count | 1         |
| BYSL       | 0.4051229 | 0.4109889 | 0.9857 | 0.324    | 0.352907443 | count | 1         |
| SIMC1      | 0.4490867 | 0.4499796 | 0.998  | 0.318    | 0.352985468 | count | 1         |
| SLC48A1    | 0.2598069 | 0.1442374 | 1.8012 | 0.0718   | 0.353197349 | count | 1         |
| ARMC6      | 0.3240352 | 0.3313521 | 0.9779 | 0.328    | 0.353208657 | count | 1         |
| FDX2       | 0.3771802 | 0.4020719 | 0.9381 | 0.348    | 0.353254129 | count | 1         |
| FBXL12     | 0.2816355 | 0.2251717 | 1.2508 | 0.211    | 0.35339947  | count | 1         |
| RPIA       | 0.2686254 | 0.1739519 | 1.5443 | 0.123    | 0.353537703 | count | 1         |
| SNAPC2     | 0.2699566 | 0.1797219 | 1.5021 | 0.133    | 0.353648638 | count | 1         |
| TCF4       | 0.2470075 | 0.0601832 | 4.1043 | 4.17E-05 | 0.353755331 | count | 0.9614769 |
| TCTA       | 0.2864151 | 0.2303655 | 1.2433 | 0.214    | 0.353841954 | count | 1         |
| TMEM216    | 0.2728155 | 0.2131221 | 1.2801 | 0.201    | 0.354070708 | count | 1         |
| TMEM99     | 0.2766869 | 0.2201443 | 1.2568 | 0.209    | 0.354074945 | count | 1         |
| LINC00662  | 0.2833603 | 0.2489557 | 1.1382 | 0.255    | 0.35415858  | count | 1         |
| FANCA      | 0.8518583 | 1.0349968 | 0.8231 | 0.411    | 0.354454134 | count | 1         |
| CORO1B     | 0.2542657 | 0.1060789 | 2.3969 | 0.0166   | 0.354482669 | count | 1         |
| AGFG2      | 0.3269848 | 0.3434016 | 0.9522 | 0.341    | 0.354506116 | count | 1         |
| HYI        | 0.25664   | 0.127721  | 2.0094 | 0.0446   | 0.354640392 | count | 1         |
| HEATR3     | 0.4226399 | 0.7488873 | 0.5644 | 0.573    | 0.354807337 | count | 1         |
| CDC37L1-DT | 0.6128586 | 0.6319873 | 0.9697 | 0.332    | 0.354941874 | count | 1         |
| NT5C3B     | 0.2615015 | 0.1457136 | 1.7946 | 0.0728   | 0.354985964 | count | 1         |
| PDPK1      | 0.2924996 | 0.2218801 | 1.3183 | 0.188    | 0.355064314 | count | 1         |
| BBS5       | 0.3842976 | 0.4202191 | 0.9145 | 0.361    | 0.355230302 | count | 1         |
| STAT6      | 0.2701344 | 0.187125  | 1.4436 | 0.149    | 0.355307948 | count | 1         |
| ITCH       | 0.2839719 | 0.2153129 | 1.3189 | 0.187    | 0.355375604 | count | 1         |
| AC016727.1 | 0.855789  | 0.796098  | 1.075  | 0.282    | 0.355670041 | count | 1         |
| MPHOSPH8   | 0.249255  | 0.0710096 | 3.5102 | 0.000455 | 0.355718201 | count | 1         |
| WDHD1      | 0.4242012 | 0.6083995 | 0.6972 | 0.486    | 0.356015986 | count | 1         |
| RBM10      | 0.2984536 | 0.2949336 | 1.0119 | 0.312    | 0.35610925  | count | 1         |
| FBXO44     | 0.3542098 | 0.4029704 | 0.879  | 0.379    | 0.356362746 | count | 1         |
| SBF2-AS1   | 0.6163924 | 0.6616223 | 0.9316 | 0.352    | 0.356662192 | count | 1         |
| COPS3      | 0.2649663 | 0.1455276 | 1.8207 | 0.0688   | 0.356727476 | count | 1         |
| TRMT1L     | 0.3185329 | 0.3247423 | 0.9809 | 0.327    | 0.356903497 | count | 1         |
| MED19      | 0.2596346 | 0.1288693 | 2.0147 | 0.044    | 0.357083632 | count | 1         |
| CAMSAP2    | 0.2634156 | 0.1911401 | 1.3781 | 0.168    | 0.357128615 | count | 1         |
| BTG2       | 0.2487087 | 0.0770607 | 3.2274 | 0.00126  | 0.357165584 | count | 1         |
| SPNS1      | 0.284697  | 0.2349619 | 1.2117 | 0.226    | 0.357177972 | count | 1         |
| MRPL15     | 0.2630527 | 0.1411012 | 1.8643 | 0.0624   | 0.357247402 | count | 1         |
| ADSSL1     | 0.3689125 | 0.4802194 | 0.7682 | 0.442    | 0.35729214  | count | 1         |
| WDR17      | 0.9847776 | 1.0324158 | 0.9539 | 0.34     | 0.357367145 | count | 1         |
| KIAA0040   | 0.2594208 | 0.1805411 | 1.4369 | 0.151    | 0.357693668 | count | 1         |
| LARP4      | 0.2679342 | 0.1582623 | 1.693  | 0.0906   | 0.357701888 | count | 1         |
| WDR76      | 0.3925648 | 0.4215294 | 0.9313 | 0.352    | 0.357809175 | count | 1         |
| TMEM201    | 0.7754421 | 0.6665789 | 1.1633 | 0.245    | 0.357864653 | count | 1         |

|            |           |           |         |          |             |       |          |
|------------|-----------|-----------|---------|----------|-------------|-------|----------|
| PANX1      | 0.3695798 | 0.4920766 | 0.7511  | 0.453    | 0.357903814 | count | 1        |
| STXBP2     | 0.9870235 | 0.883683  | 1.1169  | 0.264    | 0.357932303 | count | 1        |
| ST6GALNAC1 | 0.2817886 | 0.2573091 | 1.0951  | 0.274    | 0.358045797 | count | 1        |
| PLOD3      | 0.2688759 | 0.1556759 | 1.7272  | 0.0843   | 0.358085951 | count | 1        |
| USP51      | 0.3738535 | 0.3880475 | 0.9634  | 0.335    | 0.358143666 | count | 1        |
| FAM98A     | 0.2661513 | 0.1526318 | 1.7437  | 0.0813   | 0.358310271 | count | 1        |
| STK36      | 0.8644019 | 1.11634   | 0.7743  | 0.439    | 0.358322095 | count | 1        |
| SPATA6     | 0.2820574 | 0.2076369 | 1.3584  | 0.174    | 0.358382251 | count | 1        |
| CARHSP1    | 0.2527869 | 0.0811296 | 3.1158  | 0.00185  | 0.35853153  | count | 1        |
| CEP19      | 0.3346583 | 0.4124306 | 0.8114  | 0.417    | 0.358641396 | count | 1        |
| SRFBP1     | 0.2597717 | 0.1373535 | 1.8913  | 0.0587   | 0.358815963 | count | 1        |
| PRDX4      | 0.2518201 | 0.0750431 | 3.3557  | 0.000802 | 0.35882431  | count | 1        |
| RIN2       | 0.2592232 | 0.1335321 | 1.9413  | 0.0523   | 0.358894337 | count | 1        |
| IGF2R      | 0.284031  | 0.2163399 | 1.3129  | 0.189    | 0.358906118 | count | 1        |
| PPP2R3C    | 0.2660259 | 0.1617267 | 1.6449  | 0.1      | 0.359204709 | count | 1        |
| PKNOX1     | 0.3049389 | 0.263193  | 1.1586  | 0.247    | 0.35922343  | count | 1        |
| PRELID3B   | 0.2731003 | 0.1756576 | 1.5547  | 0.12     | 0.359364504 | count | 1        |
| NECAP1     | 0.2939554 | 0.2177156 | 1.3502  | 0.177    | 0.359414715 | count | 1        |
| DSTYK      | 0.3096763 | 0.2630084 | 1.1774  | 0.239    | 0.359586755 | count | 1        |
| ZNF141     | 0.318535  | 0.2808918 | 1.134   | 0.257    | 0.359720923 | count | 1        |
| LCORL      | 0.290493  | 0.2539895 | 1.1437  | 0.253    | 0.359875975 | count | 1        |
| AC087190.1 | 0.3469415 | 0.3630475 | 0.9556  | 0.339    | 0.359972478 | count | 1        |
| SLC41A3    | 0.2578941 | 0.1092244 | 2.3611  | 0.0183   | 0.359996416 | count | 1        |
| FBXW8      | 0.3612931 | 0.4198502 | 0.8605  | 0.39     | 0.360118005 | count | 1        |
| ZNF567     | 0.2730204 | 0.2051727 | 1.3307  | 0.183    | 0.360213781 | count | 1        |
| AC090114.2 | 0.3585236 | 0.374616  | 0.957   | 0.339    | 0.360494863 | count | 1        |
| C11orf68   | 0.2971646 | 0.2782537 | 1.068   | 0.286    | 0.360608875 | count | 1        |
| ABHD16A    | 0.9978332 | 1.1112029 | 0.898   | 0.369    | 0.360638741 | count | 1        |
| OVGP1      | 0.9978332 | 1.2357706 | 0.8075  | 0.419    | 0.360638741 | count | 1        |
| RTL6       | 0.3766293 | 0.4045963 | 0.9309  | 0.352    | 0.36065444  | count | 1        |
| PBDC1      | 0.2626577 | 0.1430895 | 1.8356  | 0.0665   | 0.360835442 | count | 1        |
| RNPS1      | 0.2569695 | 0.0918413 | 2.798   | 0.00518  | 0.360951739 | count | 1        |
| MRPL39     | 0.2721422 | 0.167483  | 1.6249  | 0.104    | 0.360983296 | count | 1        |
| TMEM161A   | 0.2822391 | 0.2018339 | 1.3984  | 0.162    | 0.361079562 | count | 1        |
| AKAP10     | 0.316249  | 0.435866  | 0.7256  | 0.468    | 0.361131785 | count | 1        |
| BCAS2      | 0.2607115 | 0.1151825 | 2.2635  | 0.0237   | 0.36114115  | count | 1        |
| MRPL9      | 0.2608274 | 0.1169773 | 2.2297  | 0.0258   | 0.361183978 | count | 1        |
| CCDC102B   | 0.3625524 | 0.4902356 | 0.7395  | 0.46     | 0.361311103 | count | 1        |
| YEATS4     | 0.2799865 | 0.2067172 | 1.3544  | 0.176    | 0.361333097 | count | 1        |
| ARRDC2     | 0.2814349 | 0.168343  | 1.6718  | 0.0947   | 0.36136296  | count | 1        |
| CARS       | 0.2860723 | 0.2125607 | 1.3458  | 0.178    | 0.361444912 | count | 1        |
| AAED1      | 0.2572902 | 0.0965761 | 2.6641  | 0.00776  | 0.361613867 | count | 1        |
| DTD1       | 0.2636614 | 0.125549  | 2.1001  | 0.0358   | 0.361626885 | count | 1        |
| AP1AR      | 0.2916772 | 0.2358796 | 1.2366  | 0.216    | 0.361848583 | count | 1        |
| RPL37      | 0.251175  | 0.022439  | 11.1937 | 1.78E-28 | 0.361935949 | count | 4.30E-24 |

|              |           |           |        |          |             |       |   |
|--------------|-----------|-----------|--------|----------|-------------|-------|---|
| SDE2         | 0.2842226 | 0.1990431 | 1.4279 | 0.153    | 0.362190577 | count | 1 |
| INSL3        | 0.8772123 | 1.0462192 | 0.8385 | 0.402    | 0.362235727 | count | 1 |
| AC092171.3   | 0.8772123 | 1.4266673 | 0.6149 | 0.539    | 0.362235727 | count | 1 |
| RORA         | 0.2643919 | 0.135179  | 1.9559 | 0.0506   | 0.362441259 | count | 1 |
| PRRG2        | 0.3018372 | 0.2656944 | 1.136  | 0.256    | 0.362464678 | count | 1 |
| PALB2        | 0.3384002 | 0.3856218 | 0.8775 | 0.38     | 0.362497092 | count | 1 |
| SATB1        | 0.3404226 | 0.310796  | 1.0953 | 0.273    | 0.362507677 | count | 1 |
| TLK1         | 0.2609215 | 0.1153813 | 2.2614 | 0.0238   | 0.362541714 | count | 1 |
| ETFDH        | 0.3033331 | 0.2704236 | 1.1217 | 0.262    | 0.362621803 | count | 1 |
| PHF1         | 0.273396  | 0.1667601 | 1.6395 | 0.101    | 0.362630135 | count | 1 |
| CDKN2AIP     | 0.2714993 | 0.1569376 | 1.73   | 0.0837   | 0.3628356   | count | 1 |
| KYAT1        | 0.4892575 | 0.7856965 | 0.6227 | 0.534    | 0.363031061 | count | 1 |
| TRAF3IP2-AS1 | 0.3555006 | 0.4292361 | 0.8282 | 0.408    | 0.363227212 | count | 1 |
| COG1         | 0.32722   | 0.2902514 | 1.1274 | 0.26     | 0.363255876 | count | 1 |
| KCNJ12       | 0.3412175 | 0.344538  | 0.9904 | 0.322    | 0.363320693 | count | 1 |
| NOP58        | 0.2634794 | 0.1248375 | 2.1106 | 0.0349   | 0.363499165 | count | 1 |
| KRT222       | 0.2888231 | 0.1995699 | 1.4472 | 0.148    | 0.363598345 | count | 1 |
| AFG3L2       | 0.2838248 | 0.2016635 | 1.4074 | 0.159    | 0.363743547 | count | 1 |
| TBK1         | 0.2729481 | 0.2717083 | 1.0046 | 0.315    | 0.363756575 | count | 1 |
| CEP250       | 0.5447356 | 0.52834   | 1.031  | 0.303    | 0.363867849 | count | 1 |
| SIK1B        | 1.0110695 | 1.1338511 | 0.8917 | 0.373    | 0.363921852 | count | 1 |
| GRHL1        | 0.4056084 | 0.4073927 | 0.9956 | 0.32     | 0.363949614 | count | 1 |
| FAM160B2     | 0.3309531 | 0.2944058 | 1.1241 | 0.261    | 0.36397103  | count | 1 |
| UPF1         | 0.2988969 | 0.2564325 | 1.1656 | 0.244    | 0.364027063 | count | 1 |
| DIMT1        | 0.2718223 | 0.1489099 | 1.8254 | 0.068    | 0.364063797 | count | 1 |
| AC243964.2   | 0.6735119 | 0.4627861 | 1.4553 | 0.146    | 0.364123608 | count | 1 |
| FAM104A      | 0.27156   | 0.1710898 | 1.5872 | 0.113    | 0.364224374 | count | 1 |
| AL357054.4   | 0.3179514 | 0.3453641 | 0.9206 | 0.357    | 0.364262697 | count | 1 |
| ZNF438       | 0.3283667 | 0.3330075 | 0.9861 | 0.324    | 0.364486191 | count | 1 |
| MED15        | 0.3043121 | 0.232258  | 1.3102 | 0.19     | 0.364575914 | count | 1 |
| SLC45A1      | 0.5987303 | 0.5693303 | 1.0516 | 0.293    | 0.36466054  | count | 1 |
| AC083843.3   | 0.7951935 | 0.6748954 | 1.1782 | 0.239    | 0.36488596  | count | 1 |
| USP47        | 0.2728786 | 0.1861385 | 1.466  | 0.143    | 0.364935433 | count | 1 |
| ZNF785       | 0.5467977 | 0.656141  | 0.8334 | 0.405    | 0.365068959 | count | 1 |
| PSME2        | 0.2555916 | 0.0651613 | 3.9224 | 8.98E-05 | 0.365303232 | count | 1 |
| DAZAP1       | 0.2705591 | 0.1297209 | 2.0857 | 0.0371   | 0.365686654 | count | 1 |
| MTMR10       | 0.3457037 | 0.3480496 | 0.9933 | 0.321    | 0.365729678 | count | 1 |
| PSMG2        | 0.2586813 | 0.0760639 | 3.4008 | 0.000681 | 0.365745884 | count | 1 |
| SPATS2L      | 0.2623774 | 0.0991102 | 2.6473 | 0.00816  | 0.365747127 | count | 1 |
| ZNF862       | 0.601293  | 0.5759884 | 1.0439 | 0.297    | 0.365986115 | count | 1 |
| PABPC4       | 0.2700552 | 0.1449137 | 1.8636 | 0.0625   | 0.366065208 | count | 1 |
| AC103591.3   | 0.4463665 | 0.5001906 | 0.8924 | 0.372    | 0.366118941 | count | 1 |
| CHML         | 0.3711176 | 0.4193451 | 0.885  | 0.376    | 0.366178277 | count | 1 |
| NEURL4       | 0.6785415 | 0.6754626 | 1.0046 | 0.315    | 0.366346033 | count | 1 |
| AGTPBP1      | 0.3045165 | 0.2485832 | 1.225  | 0.221    | 0.36638665  | count | 1 |

|            |           |           |         |          |             |       |             |
|------------|-----------|-----------|---------|----------|-------------|-------|-------------|
| RPS4Y1     | 0.2547671 | 0.0438182 | 5.8142  | 6.79E-09 | 0.366448231 | count | 0.000160522 |
| TRAPPC4    | 0.2630888 | 0.0994161 | 2.6463  | 0.00818  | 0.366535667 | count | 1           |
| LIMD1      | 0.4951049 | 0.5573801 | 0.8883  | 0.374    | 0.366913053 | count | 1           |
| CNDP2      | 0.2748062 | 0.1589887 | 1.7285  | 0.084    | 0.366934841 | count | 1           |
| N6AMT1     | 0.3152738 | 0.294474  | 1.0706  | 0.284    | 0.366994971 | count | 1           |
| AGO4       | 0.3409325 | 0.374146  | 0.9112  | 0.362    | 0.367113618 | count | 1           |
| RBMX       | 0.2606    | 0.0886897 | 2.9385  | 0.00333  | 0.367461379 | count | 1           |
| C1orf174   | 0.2800216 | 0.1948289 | 1.4373  | 0.151    | 0.367547301 | count | 1           |
| MRPL58     | 0.2862099 | 0.2283904 | 1.2532  | 0.21     | 0.367727205 | count | 1           |
| GNL2       | 0.2822203 | 0.2030796 | 1.3897  | 0.165    | 0.367899669 | count | 1           |
| IFITM2     | 0.2555253 | 0.0307507 | 8.3096  | 1.49E-16 | 0.367972917 | count | 3.58E-12    |
| NAP1L5     | 0.3316359 | 0.3256502 | 1.0184  | 0.309    | 0.367992014 | count | 1           |
| WDR27      | 0.4315677 | 0.5538649 | 0.7792  | 0.436    | 0.368111971 | count | 1           |
| RPL10      | 0.2552963 | 0.0203142 | 12.5674 | 2.89E-35 | 0.368226784 | count | 7.00E-31    |
| HBS1L      | 0.2762914 | 0.1729323 | 1.5977  | 0.11     | 0.368466447 | count | 1           |
| LBR        | 0.2694834 | 0.1382846 | 1.9488  | 0.0514   | 0.368531631 | count | 1           |
| ZNF468     | 0.4835464 | 0.5633698 | 0.8583  | 0.391    | 0.368594588 | count | 1           |
| PIIP5K1    | 0.5136208 | 0.6945377 | 0.7395  | 0.46     | 0.368603147 | count | 1           |
| HIRA       | 0.4978992 | 0.5559387 | 0.8956  | 0.371    | 0.368764232 | count | 1           |
| CDKN2AIPNL | 0.2835015 | 0.1908081 | 1.4858  | 0.137    | 0.368803575 | count | 1           |
| PSME1      | 0.2570476 | 0.0457747 | 5.6155  | 2.16E-08 | 0.368808043 | count | 0.000509738 |
| COA1       | 0.283524  | 0.1869806 | 1.5163  | 0.13     | 0.368832483 | count | 1           |
| CEMIP2     | 0.2632363 | 0.1222644 | 2.153   | 0.0314   | 0.368969666 | count | 1           |
| CAPN7      | 0.2932159 | 0.2213557 | 1.3246  | 0.185    | 0.369036639 | count | 1           |
| ATF7IP     | 0.2708954 | 0.1851469 | 1.4631  | 0.144    | 0.369139156 | count | 1           |
| FOXO4      | 0.5327748 | 0.5839876 | 0.9123  | 0.362    | 0.369164361 | count | 1           |
| KBTBD2     | 0.2677493 | 0.120265  | 2.2263  | 0.0261   | 0.369165657 | count | 1           |
| DYNC2LI1   | 0.2881628 | 0.2215994 | 1.3004  | 0.194    | 0.369223518 | count | 1           |
| SLC35F6    | 0.2799054 | 0.1706703 | 1.64    | 0.101    | 0.369390481 | count | 1           |
| RBM17      | 0.2616282 | 0.0883973 | 2.9597  | 0.00311  | 0.369512343 | count | 1           |
| LRCH4      | 0.4849909 | 0.5235831 | 0.9263  | 0.354    | 0.369585222 | count | 1           |
| BRAF       | 0.2926359 | 0.1946301 | 1.5035  | 0.133    | 0.369603875 | count | 1           |
| RSU1       | 0.2650052 | 0.1018047 | 2.6031  | 0.00929  | 0.369617741 | count | 1           |
| TMEM260    | 0.334787  | 0.2951075 | 1.1345  | 0.257    | 0.369728218 | count | 1           |
| CCNT2      | 0.2859124 | 0.2190569 | 1.3052  | 0.192    | 0.369746268 | count | 1           |
| COMMD7     | 0.2648689 | 0.1060668 | 2.4972  | 0.0126   | 0.369747423 | count | 1           |
| HEATR6     | 0.3229922 | 0.3277023 | 0.9856  | 0.324    | 0.369867353 | count | 1           |
| SH3RF3     | 0.4191493 | 0.466103  | 0.8993  | 0.369    | 0.369871107 | count | 1           |
| TTLL5      | 0.3827374 | 0.4119695 | 0.929   | 0.353    | 0.369937331 | count | 1           |
| FAM76A     | 0.285148  | 0.2054309 | 1.388   | 0.165    | 0.370402335 | count | 1           |
| F2RL3      | 0.8112096 | 0.6262498 | 1.2953  | 0.195    | 0.370508502 | count | 1           |
| GALNT11    | 0.2812057 | 0.1890078 | 1.4878  | 0.137    | 0.370510351 | count | 1           |
| TMEM102    | 0.3577101 | 0.3962277 | 0.9028  | 0.367    | 0.370648669 | count | 1           |
| AL359643.3 | 1.2475657 | 1.1520286 | 1.0829  | 0.279    | 0.370751954 | count | 1           |
| TBC1D19    | 0.4435073 | 0.5113515 | 0.8673  | 0.386    | 0.37089665  | count | 1           |

|            |           |           |        |          |             |       |            |
|------------|-----------|-----------|--------|----------|-------------|-------|------------|
| ZNF490     | 0.9062537 | 0.9492425 | 0.9547 | 0.34     | 0.370972265 | count | 1          |
| SLC16A14   | 0.4212275 | 0.4986962 | 0.8447 | 0.398    | 0.371572711 | count | 1          |
| NASP       | 0.2615016 | 0.0674947 | 3.8744 | 0.000109 | 0.371751753 | count | 1          |
| TDRD3      | 0.2866585 | 0.1945172 | 1.4737 | 0.141    | 0.37180663  | count | 1          |
| TCF20      | 0.3590954 | 0.3963788 | 0.9059 | 0.365    | 0.372019739 | count | 1          |
| ACADSB     | 0.3707452 | 0.4023104 | 0.9215 | 0.357    | 0.372172728 | count | 1          |
| YBX3       | 0.2588712 | 0.0382636 | 6.7655 | 1.62E-11 | 0.3722375   | count | 3.86E-07   |
| KLHL12     | 0.4155341 | 0.4077448 | 1.0191 | 0.308    | 0.37223873  | count | 1          |
| AC008637.1 | 0.5594375 | 0.8083616 | 0.6921 | 0.489    | 0.37240223  | count | 1          |
| PREB       | 0.3343051 | 0.2847997 | 1.1738 | 0.241    | 0.372443627 | count | 1          |
| VMA21      | 0.2766244 | 0.1530389 | 1.8075 | 0.0708   | 0.372748563 | count | 1          |
| GRPEL1     | 0.2721705 | 0.1259601 | 2.1608 | 0.0308   | 0.373040171 | count | 1          |
| HIRIP3     | 0.2872218 | 0.1851638 | 1.5512 | 0.121    | 0.373061875 | count | 1          |
| BAZ2A      | 0.278909  | 0.186089  | 1.4988 | 0.134    | 0.373064961 | count | 1          |
| HNRNPA1    | 0.2606378 | 0.0459589 | 5.6711 | 1.57E-08 | 0.373327498 | count | 0.00037074 |
| CPD        | 0.270903  | 0.1470122 | 1.8427 | 0.0655   | 0.373340565 | count | 1          |
| STK16      | 0.3016991 | 0.233736  | 1.2908 | 0.197    | 0.373495439 | count | 1          |
| UGGT2      | 0.2965411 | 0.2277949 | 1.3018 | 0.193    | 0.373592919 | count | 1          |
| SPRTN      | 0.3066489 | 0.2349036 | 1.3054 | 0.192    | 0.373946516 | count | 1          |
| RMC1       | 0.322863  | 0.2896694 | 1.1146 | 0.265    | 0.374470222 | count | 1          |
| ZNF18      | 0.7521925 | 0.6194095 | 1.2144 | 0.225    | 0.374623947 | count | 1          |
| CEP85L     | 0.2853348 | 0.1672548 | 1.706  | 0.0881   | 0.374655552 | count | 1          |
| PEAR1      | 0.3179058 | 0.2470485 | 1.2868 | 0.198    | 0.375075353 | count | 1          |
| AC027644.3 | 0.2992652 | 0.2393806 | 1.2502 | 0.211    | 0.375137735 | count | 1          |
| RPRD1B     | 0.3188663 | 0.2681239 | 1.1893 | 0.234    | 0.375203605 | count | 1          |
| NSMCE3     | 0.2748983 | 0.1573671 | 1.7469 | 0.0808   | 0.375243895 | count | 1          |
| AC007383.2 | 0.6552053 | 0.7501149 | 0.8735 | 0.382    | 0.375315454 | count | 1          |
| RAB23      | 0.6552053 | 0.7849871 | 0.8347 | 0.404    | 0.375315454 | count | 1          |
| STYXL1     | 0.3014328 | 0.2634184 | 1.1443 | 0.253    | 0.375321779 | count | 1          |
| MFSD10     | 0.2701175 | 0.1093884 | 2.4693 | 0.0136   | 0.375632099 | count | 1          |
| AL451085.1 | 1.0594878 | 1.0577119 | 1.0017 | 0.317    | 0.375645892 | count | 1          |
| HNRNPF     | 0.2646635 | 0.0669268 | 3.9545 | 7.86E-05 | 0.375699459 | count | 1          |
| CIPC       | 0.5657049 | 0.5135481 | 1.1016 | 0.271    | 0.376019739 | count | 1          |
| RWDD4      | 0.2760689 | 0.1425931 | 1.9361 | 0.053    | 0.376219685 | count | 1          |
| SCRN2      | 0.2879399 | 0.159496  | 1.8053 | 0.0711   | 0.376232551 | count | 1          |
| MVP        | 0.273223  | 0.1121137 | 2.437  | 0.0149   | 0.376571207 | count | 1          |
| FUS        | 0.2644802 | 0.0637254 | 4.1503 | 3.42E-05 | 0.376573965 | count | 0.789165   |
| TRPM7      | 0.3033413 | 0.2454357 | 1.2359 | 0.217    | 0.376591029 | count | 1          |
| WHRN       | 0.6579435 | 0.6647171 | 0.9898 | 0.322    | 0.376614737 | count | 1          |
| MPRIIP     | 0.2826259 | 0.1663885 | 1.6986 | 0.0895   | 0.376833804 | count | 1          |
| CTDSPL2    | 0.2828298 | 0.1929901 | 1.4655 | 0.143    | 0.376951939 | count | 1          |
| AL592183.1 | 0.3524737 | 0.4227413 | 0.8338 | 0.404    | 0.376965732 | count | 1          |
| CHAC2      | 0.4428564 | 0.4478469 | 0.9889 | 0.323    | 0.376972573 | count | 1          |
| ACO2       | 0.2895709 | 0.1951217 | 1.4841 | 0.138    | 0.377111312 | count | 1          |
| PQBP1      | 0.2703134 | 0.1078262 | 2.5069 | 0.0122   | 0.377264829 | count | 1          |



|            |           |           |         |          |             |       |            |
|------------|-----------|-----------|---------|----------|-------------|-------|------------|
| ZBTB33     | 0.3594105 | 0.3719409 | 0.9663  | 0.334    | 0.377268354 | count | 1          |
| SDAD1      | 0.2732998 | 0.1240788 | 2.2026  | 0.0277   | 0.377405012 | count | 1          |
| NVL        | 0.3700883 | 0.3391527 | 1.0912  | 0.275    | 0.377418712 | count | 1          |
| USP12      | 0.2834682 | 0.1823226 | 1.5548  | 0.12     | 0.377946114 | count | 1          |
| FMO4       | 0.4844546 | 0.5268979 | 0.9194  | 0.358    | 0.378093389 | count | 1          |
| SCN11A     | 0.5950263 | 1.1952121 | 0.4978  | 0.619    | 0.378233826 | count | 1          |
| SLC25A16   | 0.3354788 | 0.332489  | 1.009   | 0.313    | 0.378235936 | count | 1          |
| AC068888.1 | 0.2982574 | 0.2199671 | 1.3559  | 0.175    | 0.378241758 | count | 1          |
| DICER1     | 0.2786531 | 0.1651183 | 1.6876  | 0.0916   | 0.378279617 | count | 1          |
| B4GALT3    | 0.2967854 | 0.1933217 | 1.5352  | 0.125    | 0.378325224 | count | 1          |
| RPS2       | 0.2624423 | 0.0229276 | 11.4466 | 1.13E-29 | 0.3783862   | count | 2.73E-25   |
| ARHGAP12   | 0.3021056 | 0.2358715 | 1.2808  | 0.2      | 0.378635469 | count | 1          |
| HIST1H1C   | 0.2831177 | 0.1729445 | 1.637   | 0.102    | 0.378642703 | count | 1          |
| PRR3       | 0.3541759 | 0.3305994 | 1.0713  | 0.284    | 0.378712183 | count | 1          |
| MIEF1      | 0.3609907 | 0.4422468 | 0.8163  | 0.414    | 0.378854702 | count | 1          |
| CFAP46     | 0.8360437 | 1.2005543 | 0.6964  | 0.486    | 0.379102025 | count | 1          |
| MIATNB     | 1.0742627 | 0.8158585 | 1.3167  | 0.188    | 0.379135414 | count | 1          |
| MAN1B1     | 0.2997102 | 0.2032806 | 1.4744  | 0.14     | 0.379235382 | count | 1          |
| DNAJC2     | 0.2752293 | 0.1302714 | 2.1127  | 0.0347   | 0.37942278  | count | 1          |
| APOL3      | 0.2789626 | 0.1431084 | 1.9493  | 0.0514   | 0.379481018 | count | 1          |
| SUV39H1    | 0.9356252 | 1.1447804 | 0.8173  | 0.414    | 0.379618512 | count | 1          |
| RUFY2      | 0.2891094 | 0.1721564 | 1.6793  | 0.0932   | 0.379769217 | count | 1          |
| RPF2       | 0.2746485 | 0.1301978 | 2.1095  | 0.035    | 0.380060511 | count | 1          |
| GNG10      | 0.362348  | 0.3686216 | 0.983   | 0.326    | 0.380216742 | count | 1          |
| SLC15A4    | 0.3556649 | 0.4183337 | 0.8502  | 0.395    | 0.380239272 | count | 1          |
| ZC3H6      | 0.2837991 | 0.1789732 | 1.5857  | 0.113    | 0.380493668 | count | 1          |
| CEP57      | 0.2739767 | 0.1170835 | 2.34    | 0.0194   | 0.380493775 | count | 1          |
| TACO1      | 0.2994764 | 0.2410391 | 1.2424  | 0.214    | 0.380556193 | count | 1          |
| ARL16      | 0.2903881 | 0.1511905 | 1.9207  | 0.0549   | 0.380774155 | count | 1          |
| TIMM29     | 0.3274695 | 0.3036816 | 1.0783  | 0.281    | 0.380791964 | count | 1          |
| TUBB       | 0.2660666 | 0.0498996 | 5.332   | 1.05E-07 | 0.380893703 | count | 0.00246834 |
| RNF208     | 0.6303938 | 0.7464885 | 0.8445  | 0.398    | 0.380899282 | count | 1          |
| LDLR       | 0.29053   | 0.1744176 | 1.6657  | 0.0959   | 0.380958025 | count | 1          |
| CDK11B     | 0.2866836 | 0.1815175 | 1.5794  | 0.114    | 0.381085291 | count | 1          |
| LIX1L      | 0.2819204 | 0.1481394 | 1.9031  | 0.0571   | 0.381231882 | count | 1          |
| ZNF823     | 0.5527074 | 0.5099677 | 1.0838  | 0.279    | 0.381241763 | count | 1          |
| FOXO1      | 0.2741029 | 0.1180159 | 2.3226  | 0.0203   | 0.381314303 | count | 1          |
| MOB3B      | 0.3567807 | 0.377219  | 0.9458  | 0.344    | 0.381383224 | count | 1          |
| SFTA2      | 0.6313925 | 1.15088   | 0.5486  | 0.583    | 0.381406551 | count | 1          |
| RFT1       | 0.414926  | 0.3202016 | 1.2958  | 0.195    | 0.381676203 | count | 1          |
| DBF4       | 0.3137377 | 0.2698113 | 1.1628  | 0.245    | 0.381708157 | count | 1          |
| GUCD1      | 0.3046736 | 0.2220793 | 1.3719  | 0.17     | 0.381796648 | count | 1          |
| DHPS       | 0.2780796 | 0.1265989 | 2.1965  | 0.0281   | 0.381955608 | count | 1          |
| CDC16      | 0.2960232 | 0.1859542 | 1.5919  | 0.112    | 0.382346233 | count | 1          |
| C16orf91   | 0.2898806 | 0.1795212 | 1.6147  | 0.106    | 0.382409593 | count | 1          |

|            |           |           |        |         |             |       |   |
|------------|-----------|-----------|--------|---------|-------------|-------|---|
| AC145124.1 | 0.3519372 | 0.3452013 | 1.0195 | 0.308   | 0.382460086 | count | 1 |
| ATP8B1     | 0.2758184 | 0.1172743 | 2.3519 | 0.0187  | 0.382559223 | count | 1 |
| CCDC144A   | 0.3541745 | 0.4505638 | 0.7861 | 0.432   | 0.38283148  | count | 1 |
| DNAAF2     | 0.2960515 | 0.1906109 | 1.5532 | 0.12    | 0.38297169  | count | 1 |
| NCOA2      | 0.3472677 | 0.3501584 | 0.9917 | 0.321   | 0.38301252  | count | 1 |
| AC010654.1 | 1.318594  | 1.475757  | 0.8935 | 0.372   | 0.383087179 | count | 1 |
| ZNF573     | 0.3893268 | 0.5469562 | 0.7118 | 0.477   | 0.383165189 | count | 1 |
| AIFM1      | 0.3188289 | 0.2382561 | 1.3382 | 0.181   | 0.383200961 | count | 1 |
| SCLT1      | 0.3106785 | 0.2353853 | 1.3199 | 0.187   | 0.383220934 | count | 1 |
| MINDY1     | 0.3607596 | 0.4307768 | 0.8375 | 0.402   | 0.383255299 | count | 1 |
| PHRF1      | 0.3527231 | 0.3353851 | 1.0517 | 0.293   | 0.383281121 | count | 1 |
| ELP5       | 0.2940214 | 0.2300544 | 1.2781 | 0.201   | 0.383341392 | count | 1 |
| PTPN23     | 0.3683884 | 0.376135  | 0.9794 | 0.327   | 0.383781403 | count | 1 |
| FNTB       | 0.6362982 | 0.4860703 | 1.3091 | 0.191   | 0.383893878 | count | 1 |
| MSC        | 0.4025121 | 0.4978137 | 0.8086 | 0.419   | 0.383953926 | count | 1 |
| TBC1D25    | 0.4236622 | 0.4858829 | 0.8719 | 0.383   | 0.384198612 | count | 1 |
| POP5       | 0.2831577 | 0.1465022 | 1.9328 | 0.0534  | 0.38434911  | count | 1 |
| FLVCR1     | 0.637464  | 0.5467914 | 1.1658 | 0.244   | 0.384483959 | count | 1 |
| 5-Mar      | 0.2884459 | 0.1962144 | 1.4701 | 0.142   | 0.384972547 | count | 1 |
| LEF1       | 0.3624667 | 0.2914969 | 1.2435 | 0.214   | 0.384991852 | count | 1 |
| NRBP1      | 0.2808604 | 0.1250249 | 2.2464 | 0.0248  | 0.385005979 | count | 1 |
| ADSL       | 0.4189198 | 0.3834916 | 1.0924 | 0.275   | 0.385103119 | count | 1 |
| CDK4       | 0.2791959 | 0.120574  | 2.3156 | 0.0207  | 0.385598404 | count | 1 |
| PPP1R18    | 0.2802735 | 0.1165956 | 2.4038 | 0.0163  | 0.385642378 | count | 1 |
| MCMD2C2    | 0.780828  | 1.0552231 | 0.74   | 0.459   | 0.385768646 | count | 1 |
| NEIL2      | 0.3515627 | 0.4490426 | 0.7829 | 0.434   | 0.385794344 | count | 1 |
| ZNF146     | 0.3041859 | 0.2039447 | 1.4915 | 0.136   | 0.386043408 | count | 1 |
| ZNF22      | 0.2750616 | 0.1080937 | 2.5447 | 0.011   | 0.386209682 | count | 1 |
| TXLNG      | 0.2966629 | 0.2327229 | 1.2747 | 0.203   | 0.386486456 | count | 1 |
| ACD        | 0.303636  | 0.2038494 | 1.4895 | 0.136   | 0.386538161 | count | 1 |
| CDK14      | 1.788776  | 1.030723  | 1.7355 | 0.0828  | 0.386658004 | count | 1 |
| THOP1      | 0.4266836 | 0.4205352 | 1.0146 | 0.31    | 0.386746412 | count | 1 |
| C16orf86   | 0.3478246 | 0.346082  | 1.005  | 0.315   | 0.38697445  | count | 1 |
| GLIDR      | 0.9614359 | 1.1017502 | 0.8726 | 0.383   | 0.387061276 | count | 1 |
| FLYWCH2    | 0.277528  | 0.1000233 | 2.7746 | 0.00556 | 0.387182154 | count | 1 |
| AAR2       | 0.3331384 | 0.2716208 | 1.2265 | 0.22    | 0.387194185 | count | 1 |
| MTHFSD     | 0.5434246 | 0.5044734 | 1.0772 | 0.281   | 0.387433551 | count | 1 |
| ZNF281     | 0.30641   | 0.233188  | 1.314  | 0.189   | 0.387570412 | count | 1 |
| ASB8       | 0.2890467 | 0.1566217 | 1.8455 | 0.0651  | 0.38773026  | count | 1 |
| ERO1A      | 0.3049629 | 0.2277941 | 1.3388 | 0.181   | 0.387810619 | count | 1 |
| CHAF1B     | 0.613006  | 0.6641631 | 0.923  | 0.356   | 0.387956112 | count | 1 |
| RP2        | 0.3986075 | 0.3924592 | 1.0157 | 0.31    | 0.388157269 | count | 1 |
| AC012368.1 | 0.4868197 | 0.6308147 | 0.7717 | 0.44    | 0.388208064 | count | 1 |
| TBCCD1     | 0.5276796 | 0.4541007 | 1.162  | 0.245   | 0.388335946 | count | 1 |
| NUDT17     | 0.6828575 | 0.6081502 | 1.1228 | 0.262   | 0.388335956 | count | 1 |

|            |           |           |        |          |             |       |            |
|------------|-----------|-----------|--------|----------|-------------|-------|------------|
| LENG9      | 0.3199927 | 0.2524936 | 1.2673 | 0.205    | 0.388422702 | count | 1          |
| HSBP1L1    | 0.2981956 | 0.2018993 | 1.477  | 0.14     | 0.388457442 | count | 1          |
| TMEM150A   | 0.3018424 | 0.198329  | 1.5219 | 0.128    | 0.388502382 | count | 1          |
| OSTF1      | 0.276972  | 0.0969033 | 2.8582 | 0.00429  | 0.388560345 | count | 1          |
| MRNIP      | 0.3011585 | 0.1989081 | 1.5141 | 0.13     | 0.388885625 | count | 1          |
| PRPF38A    | 0.2844896 | 0.1219095 | 2.3336 | 0.0197   | 0.389202602 | count | 1          |
| CETN3      | 0.3048732 | 0.2056711 | 1.4823 | 0.138    | 0.38922249  | count | 1          |
| DLAT       | 0.3793634 | 0.3813811 | 0.9947 | 0.32     | 0.389264451 | count | 1          |
| SRSF3      | 0.2736237 | 0.0601729 | 4.5473 | 5.67E-06 | 0.389270402 | count | 0.13191255 |
| URM1       | 0.280097  | 0.1011916 | 2.768  | 0.00568  | 0.389309451 | count | 1          |
| ARID5B     | 0.2718805 | 0.0696428 | 3.9039 | 9.69E-05 | 0.389556532 | count | 1          |
| PPP2R2D    | 0.3069021 | 0.2058097 | 1.4912 | 0.136    | 0.389838189 | count | 1          |
| TMEM120B   | 0.5019029 | 0.9736111 | 0.5155 | 0.606    | 0.390330059 | count | 1          |
| HEXIM2     | 0.3525415 | 0.3729365 | 0.9453 | 0.345    | 0.390348683 | count | 1          |
| FAHD2A     | 0.3250175 | 0.2944991 | 1.1036 | 0.27     | 0.390459064 | count | 1          |
| GBP3       | 0.2864259 | 0.1813436 | 1.5795 | 0.114    | 0.390476908 | count | 1          |
| HYPK       | 0.5022761 | 0.5440186 | 0.9233 | 0.356    | 0.390590721 | count | 1          |
| RNF40      | 0.3455458 | 0.3225191 | 1.0714 | 0.284    | 0.390678871 | count | 1          |
| ZNF213     | 0.5313493 | 0.5625447 | 0.9445 | 0.345    | 0.390727775 | count | 1          |
| ACSS1      | 0.5313493 | 0.5724308 | 0.9282 | 0.353    | 0.390727775 | count | 1          |
| DDX49      | 0.3363264 | 0.256058  | 1.3135 | 0.189    | 0.390791496 | count | 1          |
| SAMM50     | 0.2943329 | 0.1472855 | 1.9984 | 0.0458   | 0.390807913 | count | 1          |
| IVD        | 0.2980214 | 0.2011434 | 1.4816 | 0.139    | 0.390889342 | count | 1          |
| TRIT1      | 0.3904795 | 0.4169547 | 0.9365 | 0.349    | 0.390937961 | count | 1          |
| PSMA3      | 0.2751984 | 0.0651899 | 4.2215 | 2.51E-05 | 0.391204642 | count | 0.5800861  |
| HEATR5B    | 0.3533839 | 0.367347  | 0.962  | 0.336    | 0.391247299 | count | 1          |
| RBMX2      | 0.2862146 | 0.1363618 | 2.0989 | 0.0359   | 0.391332251 | count | 1          |
| STK32B     | 0.7364591 | 1.099852  | 0.6696 | 0.503    | 0.391427022 | count | 1          |
| MAP1LC3B   | 0.2739315 | 0.0594502 | 4.6077 | 4.26E-06 | 0.391534273 | count | 0.09918132 |
| TCF4-AS2   | 1.1288768 | 1.059389  | 1.0656 | 0.287    | 0.391684574 | count | 1          |
| SUPT3H     | 0.371419  | 0.3492856 | 1.0634 | 0.288    | 0.391735804 | count | 1          |
| AL391069.3 | 0.6200483 | 0.6522935 | 0.9506 | 0.342    | 0.391736915 | count | 1          |
| USP15      | 0.2835123 | 0.1249339 | 2.2693 | 0.0233   | 0.391994419 | count | 1          |
| AC005520.2 | 0.3716986 | 0.4802339 | 0.774  | 0.439    | 0.392017581 | count | 1          |
| NSUN2      | 0.357572  | 0.315124  | 1.1347 | 0.257    | 0.392137427 | count | 1          |
| HAGLR      | 0.3576112 | 0.3724581 | 0.9601 | 0.337    | 0.392178772 | count | 1          |
| KBTBD6     | 0.4030889 | 0.7484883 | 0.5385 | 0.59     | 0.392267375 | count | 1          |
| PIEZO1     | 0.2964456 | 0.248524  | 1.1928 | 0.233    | 0.392511167 | count | 1          |
| ZBTB25     | 0.3389141 | 0.3174465 | 1.0676 | 0.286    | 0.392535272 | count | 1          |
| HNRNP2     | 0.2904143 | 0.1314394 | 2.2095 | 0.0272   | 0.39272991  | count | 1          |
| CDK13      | 0.2915573 | 0.1582244 | 1.8427 | 0.0655   | 0.392815251 | count | 1          |
| RNPEP      | 0.3125733 | 0.2040624 | 1.5318 | 0.126    | 0.39296525  | count | 1          |
| TAGLN2     | 0.2731869 | 0.0343349 | 7.9565 | 2.56E-15 | 0.393210632 | count | 6.13E-11   |
| RPAP2      | 0.2957899 | 0.1900734 | 1.5562 | 0.12     | 0.39339971  | count | 1          |
| SDCCAG8    | 0.2876902 | 0.1756175 | 1.6382 | 0.102    | 0.393480622 | count | 1          |

|            |           |           |         |          |             |       |             |
|------------|-----------|-----------|---------|----------|-------------|-------|-------------|
| ZNF783     | 0.8013005 | 0.7561513 | 1.0597  | 0.289    | 0.393604509 | count | 1           |
| LINC00294  | 0.8015824 | 0.6865274 | 1.1676  | 0.243    | 0.393711629 | count | 1           |
| TMEM173    | 0.2775899 | 0.0793273 | 3.4993  | 0.000474 | 0.393998881 | count | 1           |
| CENPL      | 0.7426729 | 0.594827  | 1.2486  | 0.212    | 0.394062347 | count | 1           |
| FKTN       | 0.4239662 | 0.5028231 | 0.8432  | 0.399    | 0.394183853 | count | 1           |
| AC010226.1 | 0.3577938 | 0.3510277 | 1.0193  | 0.308    | 0.394186199 | count | 1           |
| TGS1       | 0.2875566 | 0.1519606 | 1.8923  | 0.0586   | 0.394388133 | count | 1           |
| RPA3       | 0.2883507 | 0.1390455 | 2.0738  | 0.0382   | 0.394449615 | count | 1           |
| ZNF737     | 0.4424486 | 0.4870542 | 0.9084  | 0.364    | 0.394558693 | count | 1           |
| ADHFE1     | 0.6965192 | 0.7853616 | 0.8869  | 0.375    | 0.394686634 | count | 1           |
| MRPS30     | 0.2930641 | 0.1593935 | 1.8386  | 0.0661   | 0.394709107 | count | 1           |
| LIMS1      | 0.2765092 | 0.0676262 | 4.0888  | 4.46E-05 | 0.394905243 | count | 1           |
| HELZ       | 0.303647  | 0.3211965 | 0.9454  | 0.345    | 0.394932252 | count | 1           |
| ADA        | 0.3421557 | 0.3349648 | 1.0215  | 0.307    | 0.394960309 | count | 1           |
| TPM3       | 0.2751858 | 0.0414853 | 6.6333  | 3.93E-11 | 0.3951684   | count | 9.35E-07    |
| PGAP3      | 0.3951489 | 0.3478699 | 1.1359  | 0.256    | 0.395361531 | count | 1           |
| C19orf48   | 0.3240918 | 0.2358582 | 1.3741  | 0.17     | 0.395448091 | count | 1           |
| PRMT5      | 0.3323334 | 0.2856244 | 1.1635  | 0.245    | 0.39549611  | count | 1           |
| OSCP1      | 0.4068845 | 0.4419752 | 0.9206  | 0.357    | 0.395743771 | count | 1           |
| SLC2A8     | 0.3476881 | 0.3170563 | 1.0966  | 0.273    | 0.395871657 | count | 1           |
| SNAPC5     | 0.2972264 | 0.1512732 | 1.9648  | 0.0495   | 0.396104736 | count | 1           |
| PLPBP      | 0.2924764 | 0.1382591 | 2.1154  | 0.0345   | 0.396316828 | count | 1           |
| NSRP1      | 0.2801026 | 0.0823028 | 3.4033  | 0.000675 | 0.396535063 | count | 1           |
| PPP1R3F    | 0.4449905 | 0.4939197 | 0.9009  | 0.368    | 0.396654771 | count | 1           |
| PLVAP      | 0.2761866 | 0.0518266 | 5.3291  | 1.07E-07 | 0.396767196 | count | 0.002515249 |
| SCAF8      | 0.3249411 | 0.2427201 | 1.3387  | 0.181    | 0.39715673  | count | 1           |
| TEX2       | 0.3937583 | 0.3589148 | 1.0971  | 0.273    | 0.397238656 | count | 1           |
| AL357033.1 | 0.7021437 | 0.7507886 | 0.9352  | 0.35     | 0.397285445 | count | 1           |
| DDRGK1     | 0.2827599 | 0.0949052 | 2.9794  | 0.00291  | 0.397364413 | count | 1           |
| DYRK1A     | 0.3139591 | 0.1941624 | 1.617   | 0.106    | 0.397388192 | count | 1           |
| PARP3      | 0.4224704 | 0.5134756 | 0.8228  | 0.411    | 0.397426832 | count | 1           |
| AC106047.1 | 1.1547378 | 1.0304309 | 1.1206  | 0.263    | 0.397438463 | count | 1           |
| GLA        | 0.3100075 | 0.2108255 | 1.4704  | 0.142    | 0.397490204 | count | 1           |
| BRWD3      | 0.3684689 | 0.3219212 | 1.1446  | 0.252    | 0.397646194 | count | 1           |
| FBXL3      | 0.3000361 | 0.161286  | 1.8603  | 0.063    | 0.39776449  | count | 1           |
| RPL8       | 0.2760137 | 0.0204935 | 13.4684 | 4.30E-40 | 0.397948029 | count | 1.04E-35    |
| NSFL1C     | 0.2920032 | 0.1253002 | 2.3304  | 0.0199   | 0.39802555  | count | 1           |
| SMG9       | 0.3509585 | 0.2946256 | 1.1912  | 0.234    | 0.398050975 | count | 1           |
| SFXN4      | 0.3669829 | 0.2861978 | 1.2823  | 0.2      | 0.398150674 | count | 1           |
| ZNF561     | 0.3567714 | 0.3768809 | 0.9466  | 0.344    | 0.398224812 | count | 1           |
| MCM8       | 0.8137675 | 0.7523136 | 1.0817  | 0.279    | 0.398322732 | count | 1           |
| PDK1       | 0.6049606 | 0.495466  | 1.221   | 0.222    | 0.398396271 | count | 1           |
| FNDC11     | 1.4135728 | 1.0184859 | 1.3879  | 0.165    | 0.398464705 | count | 1           |
| WDR48      | 0.3058604 | 0.1935335 | 1.5804  | 0.114    | 0.398833963 | count | 1           |
| CCT4       | 0.2811911 | 0.0729452 | 3.8548  | 0.000118 | 0.398844211 | count | 1           |

|            |            |             |        |          |             |       |           |
|------------|------------|-------------|--------|----------|-------------|-------|-----------|
| ANGEL2     | 0.3054782  | 0.1868109   | 1.6352 | 0.102    | 0.39885307  | count | 1         |
| SACM1L     | 0.3316192  | 0.2667603   | 1.2431 | 0.214    | 0.399028817 | count | 1         |
| ESD        | 0.2812549  | 0.0715816   | 3.9291 | 8.73E-05 | 0.399142001 | count | 1         |
| TFCP2      | 0.3896302  | 0.3210516   | 1.2136 | 0.225    | 0.39927153  | count | 1         |
| FLNC       | 0.3300791  | 0.2344979   | 1.4076 | 0.159    | 0.399613732 | count | 1         |
| CCL19      | 1.4210457  | 1.031976    | 1.377  | 0.169    | 0.399622487 | count | 1         |
| NABP1      | 0.3486395  | 0.3746788   | 0.9305 | 0.352    | 0.399633278 | count | 1         |
| SLC9A9     | 0.4635692  | 0.4997303   | 0.9276 | 0.354    | 0.399685396 | count | 1         |
| RHOG       | 0.2898301  | 0.1244868   | 2.3282 | 0.02     | 0.39980172  | count | 1         |
| ZFY        | 0.3368682  | 0.307561    | 1.0953 | 0.273    | 0.399804111 | count | 1         |
| PPP2R1A    | 0.2883137  | 0.1075027   | 2.6819 | 0.00736  | 0.39984366  | count | 1         |
| VSIR       | 0.2865198  | 0.1146845   | 2.4983 | 0.0125   | 0.399901809 | count | 1         |
| AC124016.1 | 0.7078604  | 0.7842493   | 0.9026 | 0.367    | 0.399917496 | count | 1         |
| RPF1       | 0.3077576  | 0.1827536   | 1.684  | 0.0923   | 0.399930417 | count | 1         |
| MORC2      | 0.4001249  | 0.3937891   | 1.0161 | 0.31     | 0.400068523 | count | 1         |
| HIST1H2AC  | 0.3016631  | 0.1940155   | 1.5548 | 0.12     | 0.400079053 | count | 1         |
| NAPA-AS1   | 0.6689177  | 0.5365567   | 1.2467 | 0.213    | 0.400248712 | count | 1         |
| TUBB4B     | 0.2806921  | 0.0627609   | 4.4724 | 8.05E-06 | 0.400258032 | count | 0.1869693 |
| ADAM22     | 0.7574512  | 0.6543403   | 1.1576 | 0.247    | 0.400287092 | count | 1         |
| AL359258.2 | 1.4254123  | 1.1248169   | 1.2672 | 0.205    | 0.400295571 | count | 1         |
| SPATA33    | 0.317503   | 0.2359156   | 1.3458 | 0.178    | 0.400455352 | count | 1         |
| TTLL10     | 0.4730541  | 1.0748297   | 0.4401 | 0.66     | 0.400472884 | count | 1         |
| STK10      | 0.4041716  | 0.3330785   | 1.2134 | 0.225    | 0.400482251 | count | 1         |
| LRR1       | 0.3546021  | 0.3299282   | 1.0748 | 0.283    | 0.4005674   | count | 1         |
| CIR1       | 0.2838275  | 0.0924422   | 3.0703 | 0.00216  | 0.400661705 | count | 1         |
| STX18-AS1  | 15.7332099 | 1100.222497 | 0.0143 | 0.989    | 0.400817836 | count | 1         |
| ADAM32     | 15.7332106 | 1100.221906 | 0.0143 | 0.989    | 0.400817836 | count | 1         |
| AF129075.2 | 15.7332115 | 1100.222177 | 0.0143 | 0.989    | 0.400817836 | count | 1         |
| OPRL1      | 15.7333813 | 1183.020422 | 0.0133 | 0.989    | 0.400817836 | count | 1         |
| AL359198.1 | 15.7748343 | 1099.287547 | 0.0144 | 0.989    | 0.400817839 | count | 1         |
| AC016355.1 | 15.8368302 | 1095.569191 | 0.0145 | 0.988    | 0.400817843 | count | 1         |
| GPBAR1     | 15.8369983 | 1294.334945 | 0.0122 | 0.99     | 0.400817843 | count | 1         |
| AC008972.2 | 15.9954197 | 1089.410252 | 0.0147 | 0.988    | 0.400817852 | count | 1         |
| CAPN10-DT  | 16.0121211 | 1224.472169 | 0.0131 | 0.9896   | 0.400817853 | count | 1         |
| SEMA5B     | 16.0691778 | 1239.816683 | 0.013  | 0.99     | 0.400817855 | count | 1         |
| PHKA1      | 16.0883883 | 1202.040937 | 0.0134 | 0.9893   | 0.400817856 | count | 1         |
| AC025431.1 | 16.1084134 | 1578.692076 | 0.0102 | 0.992    | 0.400817857 | count | 1         |
| ITPKB-AS1  | 16.1084173 | 1578.693237 | 0.0102 | 0.992    | 0.400817857 | count | 1         |
| TMEM169    | 16.1088555 | 1761.63123  | 0.0091 | 0.993    | 0.400817857 | count | 1         |
| ANKDD1B    | 16.1578032 | 1214.837152 | 0.0133 | 0.9894   | 0.40081786  | count | 1         |
| SLC7A5     | 16.1712689 | 1080.284627 | 0.015  | 0.9881   | 0.40081786  | count | 1         |
| LINC01301  | 15.6141866 | 1244.538003 | 0.0125 | 0.99     | 0.400817863 | count | 1         |
| PDZD7      | 15.6142029 | 1104.158321 | 0.0141 | 0.989    | 0.400817863 | count | 1         |
| CHRNE      | 15.6142037 | 1104.158643 | 0.0141 | 0.989    | 0.400817863 | count | 1         |
| AL359541.1 | 16.2826689 | 1099.729244 | 0.0148 | 0.9882   | 0.400817865 | count | 1         |

|            |            |             |        |       |             |       |   |
|------------|------------|-------------|--------|-------|-------------|-------|---|
| AC019077.1 | 16.2843702 | 2203.097634 | 0.0074 | 0.994 | 0.400817865 | count | 1 |
| AL136531.1 | 16.2928561 | 1812.632484 | 0.009  | 0.993 | 0.400817865 | count | 1 |
| PLXNC1     | 16.2928633 | 1812.635714 | 0.009  | 0.993 | 0.400817865 | count | 1 |
| AL139384.2 | 16.2928633 | 1812.635714 | 0.009  | 0.993 | 0.400817865 | count | 1 |
| AC138696.2 | 16.2928675 | 1812.634715 | 0.009  | 0.993 | 0.400817865 | count | 1 |
| CDT1       | 16.2928698 | 1812.6347   | 0.009  | 0.993 | 0.400817865 | count | 1 |
| PLSCR2     | 16.2928748 | 1812.63713  | 0.009  | 0.993 | 0.400817865 | count | 1 |
| ENKUR      | 16.2930771 | 2439.375982 | 0.0067 | 0.995 | 0.400817865 | count | 1 |
| FAM83D     | 16.3269033 | 1089.817564 | 0.015  | 0.988 | 0.400817866 | count | 1 |
| AC007009.1 | 16.4317438 | 1571.362037 | 0.0105 | 0.992 | 0.40081787  | count | 1 |
| FAM170B    | 16.4317439 | 1571.362047 | 0.0105 | 0.992 | 0.40081787  | count | 1 |
| AC011511.1 | 16.4318006 | 1804.469323 | 0.0091 | 0.993 | 0.40081787  | count | 1 |
| WDR31      | 15.733169  | 1240.143982 | 0.0127 | 0.99  | 0.400817871 | count | 1 |
| AC127070.1 | 16.4727463 | 1823.002482 | 0.009  | 0.993 | 0.400817872 | count | 1 |
| WBP2NL     | 16.4727486 | 1823.003248 | 0.009  | 0.993 | 0.400817872 | count | 1 |
| IGF1       | 16.4727779 | 2054.72221  | 0.008  | 0.994 | 0.400817872 | count | 1 |
| AL021154.1 | 15.7747865 | 1239.030523 | 0.0127 | 0.99  | 0.400817874 | count | 1 |
| KLLN       | 15.7748364 | 1099.288758 | 0.0144 | 0.989 | 0.400817874 | count | 1 |
| CFAP43     | 15.775209  | 1179.441277 | 0.0134 | 0.989 | 0.400817874 | count | 1 |
| LCN2       | 16.596937  | 2588.721606 | 0.0064 | 0.995 | 0.400817875 | count | 1 |
| MTCP1      | 16.5969496 | 2588.730815 | 0.0064 | 0.995 | 0.400817875 | count | 1 |
| RIBC2      | 16.5969541 | 2588.73049  | 0.0064 | 0.995 | 0.400817875 | count | 1 |
| AC087241.3 | 16.5969602 | 2588.735171 | 0.0064 | 0.995 | 0.400817875 | count | 1 |
| AC084757.3 | 16.5969602 | 2588.735084 | 0.0064 | 0.995 | 0.400817875 | count | 1 |
| AC116036.2 | 16.5969687 | 2588.733957 | 0.0064 | 0.995 | 0.400817875 | count | 1 |
| CD19       | 16.5969687 | 2588.733968 | 0.0064 | 0.995 | 0.400817875 | count | 1 |
| FOXRED2    | 16.5969688 | 2588.733957 | 0.0064 | 0.995 | 0.400817875 | count | 1 |
| AC025580.3 | 16.5969689 | 2588.734011 | 0.0064 | 0.995 | 0.400817875 | count | 1 |
| AL021707.6 | 16.5973552 | 2972.526466 | 0.0056 | 0.996 | 0.400817875 | count | 1 |
| AC053503.5 | 16.5973555 | 2972.526665 | 0.0056 | 0.996 | 0.400817875 | count | 1 |
| AC087392.1 | 16.5973579 | 2972.520118 | 0.0056 | 0.996 | 0.400817875 | count | 1 |
| LINC02288  | 16.5978771 | 3620.283015 | 0.0046 | 0.996 | 0.400817875 | count | 1 |
| LINC01266  | 16.5979067 | 3620.292904 | 0.0046 | 0.996 | 0.400817875 | count | 1 |
| AC115522.1 | 16.6349284 | 2022.978373 | 0.0082 | 0.993 | 0.400817876 | count | 1 |
| AC091982.3 | 16.6349359 | 1794.860977 | 0.0093 | 0.993 | 0.400817876 | count | 1 |
| AC073896.3 | 15.836785  | 1234.951907 | 0.0128 | 0.99  | 0.400817878 | count | 1 |
| TSPAN19    | 15.8368303 | 1095.569485 | 0.0145 | 0.988 | 0.400817878 | count | 1 |
| KCNRG      | 15.8875376 | 1102.118596 | 0.0144 | 0.988 | 0.400817881 | count | 1 |
| AP001437.1 | 16.8791756 | 1776.058148 | 0.0095 | 0.992 | 0.400817882 | count | 1 |
| AC102953.2 | 16.8900171 | 2604.153109 | 0.0065 | 0.995 | 0.400817883 | count | 1 |
| FBXO39     | 16.8900209 | 2604.163096 | 0.0065 | 0.995 | 0.400817883 | count | 1 |
| LINC01273  | 16.8900211 | 2604.163096 | 0.0065 | 0.995 | 0.400817883 | count | 1 |
| RSPH14     | 16.8900211 | 2604.163096 | 0.0065 | 0.995 | 0.400817883 | count | 1 |
| MMP23B     | 16.8900214 | 2604.163129 | 0.0065 | 0.995 | 0.400817883 | count | 1 |
| AL133351.1 | 16.8902454 | 2990.184823 | 0.0056 | 0.995 | 0.400817883 | count | 1 |

|            |            |             |        |        |             |       |   |
|------------|------------|-------------|--------|--------|-------------|-------|---|
| AC124066.1 | 16.8902503 | 2990.180362 | 0.0056 | 0.995  | 0.400817883 | count | 1 |
| AL451050.2 | 16.89058   | 3381.272813 | 0.005  | 0.996  | 0.400817883 | count | 1 |
| ATXN7L2    | 15.9291985 | 1146.287147 | 0.0139 | 0.989  | 0.400817883 | count | 1 |
| SNHG22     | 16.9934353 | 2362.612863 | 0.0072 | 0.994  | 0.400817885 | count | 1 |
| SHISAL2A   | 16.9936728 | 2788.095698 | 0.0061 | 0.995  | 0.400817885 | count | 1 |
| AC098617.1 | 15.9839573 | 1241.884483 | 0.0129 | 0.99   | 0.400817886 | count | 1 |
| SSC5D      | 15.9840301 | 1101.734407 | 0.0145 | 0.988  | 0.400817886 | count | 1 |
| AL354696.2 | 15.9840302 | 1101.734406 | 0.0145 | 0.988  | 0.400817886 | count | 1 |
| FEV        | 17.0730428 | 3180.591032 | 0.0054 | 0.996  | 0.400817886 | count | 1 |
| PIWIL2     | 17.073043  | 3180.591127 | 0.0054 | 0.996  | 0.400817886 | count | 1 |
| AC015813.2 | 17.0737139 | 3898.806008 | 0.0044 | 0.997  | 0.400817886 | count | 1 |
| TMC8       | 17.0737139 | 3898.805891 | 0.0044 | 0.997  | 0.400817886 | count | 1 |
| SNAP25-AS1 | 17.0737139 | 3898.805736 | 0.0044 | 0.997  | 0.400817886 | count | 1 |
| ACBD7      | 17.0737143 | 3898.806319 | 0.0044 | 0.997  | 0.400817886 | count | 1 |
| TFAP2C     | 17.074662  | 5037.876852 | 0.0034 | 0.997  | 0.400817886 | count | 1 |
| PRR22      | 17.0860905 | 3229.285707 | 0.0053 | 0.996  | 0.400817886 | count | 1 |
| RAB39B     | 17.4142497 | 2354.518192 | 0.0074 | 0.994  | 0.400817891 | count | 1 |
| AP001020.1 | 16.1084159 | 1578.691366 | 0.0102 | 0.992  | 0.400817892 | count | 1 |
| TRG-AS1    | 16.1084181 | 1578.692598 | 0.0102 | 0.992  | 0.400817892 | count | 1 |
| AL096855.1 | 16.1085636 | 1812.742124 | 0.0089 | 0.993  | 0.400817892 | count | 1 |
| GSTM5      | 16.1085676 | 1812.73981  | 0.0089 | 0.993  | 0.400817892 | count | 1 |
| KCTD14     | 17.7021373 | 2341.556917 | 0.0076 | 0.994  | 0.400817895 | count | 1 |
| PYGM       | 16.2848768 | 2304.776544 | 0.0071 | 0.994  | 0.4008179   | count | 1 |
| AP001605.1 | 16.2928543 | 1812.633438 | 0.009  | 0.993  | 0.4008179   | count | 1 |
| SH3RF3-AS1 | 16.2928634 | 1812.635714 | 0.009  | 0.993  | 0.4008179   | count | 1 |
| HSPA1L     | 16.2928699 | 1812.6347   | 0.009  | 0.993  | 0.4008179   | count | 1 |
| AL691447.2 | 16.2929716 | 2043.020607 | 0.008  | 0.994  | 0.4008179   | count | 1 |
| ATAD3C     | 16.4317455 | 1571.363043 | 0.0105 | 0.992  | 0.400817905 | count | 1 |
| HIST1H2AE  | 16.4317998 | 1804.46876  | 0.0091 | 0.993  | 0.400817905 | count | 1 |
| AC009542.1 | 16.4323734 | 2279.351113 | 0.0072 | 0.994  | 0.400817905 | count | 1 |
| EPS8L2     | 16.4571191 | 1164.788975 | 0.0141 | 0.9887 | 0.400817906 | count | 1 |
| SYTL3      | 16.4726994 | 2087.813231 | 0.0079 | 0.994  | 0.400817907 | count | 1 |
| ACER2      | 16.4727463 | 1823.002482 | 0.009  | 0.993  | 0.400817907 | count | 1 |
| ERBB4      | 16.4727487 | 1823.003254 | 0.009  | 0.993  | 0.400817907 | count | 1 |
| CD81-AS1   | 16.4727494 | 1823.00393  | 0.009  | 0.993  | 0.400817907 | count | 1 |
| AP002449.1 | 16.4727503 | 1823.005448 | 0.009  | 0.993  | 0.400817907 | count | 1 |
| AC093227.1 | 16.4727631 | 2054.719132 | 0.008  | 0.994  | 0.400817907 | count | 1 |
| TIAF1      | 16.4727693 | 2054.722431 | 0.008  | 0.994  | 0.400817907 | count | 1 |
| FBXO41     | 16.4727779 | 2054.722203 | 0.008  | 0.994  | 0.400817907 | count | 1 |
| SH3TC2     | 16.5063017 | 1131.508556 | 0.0146 | 0.9884 | 0.400817908 | count | 1 |
| ADGRG2     | 16.5591308 | 1567.331583 | 0.0106 | 0.9916 | 0.400817909 | count | 1 |
| YY2        | 16.5969371 | 2588.72153  | 0.0064 | 0.995  | 0.40081791  | count | 1 |
| TMC3-AS1   | 16.5969371 | 2588.721617 | 0.0064 | 0.995  | 0.40081791  | count | 1 |
| ZNF285     | 16.5969374 | 2588.721617 | 0.0064 | 0.995  | 0.40081791  | count | 1 |
| AC008429.1 | 16.5969494 | 2588.730837 | 0.0064 | 0.995  | 0.40081791  | count | 1 |

|            |            |             |        |        |             |       |   |
|------------|------------|-------------|--------|--------|-------------|-------|---|
| LINC02068  | 16.5969539 | 2588.730436 | 0.0064 | 0.995  | 0.40081791  | count | 1 |
| ACSS3      | 16.5969604 | 2588.73516  | 0.0064 | 0.995  | 0.40081791  | count | 1 |
| PEG10      | 16.5973439 | 2972.516609 | 0.0056 | 0.996  | 0.40081791  | count | 1 |
| AC104109.2 | 16.5973555 | 2972.526677 | 0.0056 | 0.996  | 0.40081791  | count | 1 |
| CRACR2A    | 16.5973556 | 2972.526702 | 0.0056 | 0.996  | 0.40081791  | count | 1 |
| ODF3L2     | 16.5973581 | 2972.519994 | 0.0056 | 0.996  | 0.40081791  | count | 1 |
| AL031283.2 | 16.5978713 | 3620.276631 | 0.0046 | 0.996  | 0.40081791  | count | 1 |
| AC025754.2 | 16.6349358 | 1794.861008 | 0.0093 | 0.993  | 0.400817911 | count | 1 |
| AL031595.2 | 16.6349359 | 1794.860971 | 0.0093 | 0.993  | 0.400817911 | count | 1 |
| ACTR3B     | 16.7713922 | 1559.695863 | 0.0108 | 0.9914 | 0.400817915 | count | 1 |
| STK31      | 16.890017  | 2604.153087 | 0.0065 | 0.995  | 0.400817918 | count | 1 |
| AC011825.4 | 16.890017  | 2604.15312  | 0.0065 | 0.995  | 0.400817918 | count | 1 |
| BAALC-AS2  | 16.8900212 | 2604.159686 | 0.0065 | 0.995  | 0.400817918 | count | 1 |
| EDC4       | 16.8900216 | 2604.159786 | 0.0065 | 0.995  | 0.400817918 | count | 1 |
| ZNF286B    | 16.8900354 | 2604.162191 | 0.0065 | 0.995  | 0.400817918 | count | 1 |
| LINC02021  | 16.8902453 | 2990.188676 | 0.0056 | 0.995  | 0.400817918 | count | 1 |
| PCDHGA2    | 16.8902595 | 2990.187713 | 0.0056 | 0.995  | 0.400817918 | count | 1 |
| AC053527.1 | 16.8903421 | 3045.005414 | 0.0055 | 0.996  | 0.400817918 | count | 1 |
| LINC01001  | 16.8905665 | 3641.614681 | 0.0046 | 0.996  | 0.400817918 | count | 1 |
| AL358115.1 | 16.9934294 | 2362.61646  | 0.0072 | 0.994  | 0.40081792  | count | 1 |
| CPS1       | 16.9936677 | 2788.092328 | 0.0061 | 0.995  | 0.40081792  | count | 1 |
| AC016575.1 | 16.9939059 | 3156.892522 | 0.0054 | 0.996  | 0.40081792  | count | 1 |
| LIN7A      | 17.0730427 | 3180.590969 | 0.0054 | 0.996  | 0.400817921 | count | 1 |
| GNAO1      | 17.0730427 | 3180.590969 | 0.0054 | 0.996  | 0.400817921 | count | 1 |
| ALOX12     | 17.0730428 | 3180.591064 | 0.0054 | 0.996  | 0.400817921 | count | 1 |
| BCKDHA     | 17.0730428 | 3180.591064 | 0.0054 | 0.996  | 0.400817921 | count | 1 |
| SLC13A5    | 17.0730432 | 3180.59119  | 0.0054 | 0.996  | 0.400817921 | count | 1 |
| XCL1       | 17.0737138 | 3898.805775 | 0.0044 | 0.997  | 0.400817921 | count | 1 |
| AP006333.1 | 17.0737139 | 3898.806047 | 0.0044 | 0.997  | 0.400817921 | count | 1 |
| MAB21L1    | 17.073714  | 3898.806125 | 0.0044 | 0.997  | 0.400817921 | count | 1 |
| AC138894.1 | 17.073714  | 3898.806008 | 0.0044 | 0.997  | 0.400817921 | count | 1 |
| B3GNT3     | 17.4142513 | 2354.525578 | 0.0074 | 0.994  | 0.400817926 | count | 1 |
| C16orf46   | 17.4142514 | 2354.525598 | 0.0074 | 0.994  | 0.400817926 | count | 1 |
| C2orf70    | 17.4143254 | 2778.567256 | 0.0063 | 0.995  | 0.400817926 | count | 1 |
| KCNK13     | 17.9222083 | 2749.804898 | 0.0065 | 0.9948 | 0.400817931 | count | 1 |
| PAAF1      | 0.3332729  | 0.2426818   | 1.3733 | 0.17   | 0.400969467 | count | 1 |
| HOXA-AS2   | 0.34575    | 0.3451809   | 1.0016 | 0.317  | 0.401411971 | count | 1 |
| ZNF302     | 0.2986953  | 0.1646976   | 1.8136 | 0.0698 | 0.4016042   | count | 1 |
| JAK3       | 0.3516966  | 0.353353    | 0.9953 | 0.32   | 0.401672249 | count | 1 |
| CKS2       | 0.3319676  | 0.2223589   | 1.4929 | 0.136  | 0.401845467 | count | 1 |
| PCDHGA5    | 0.4846366  | 0.659151    | 0.7352 | 0.462  | 0.402195879 | count | 1 |
| SMIM8      | 0.3149058  | 0.2135794   | 1.4744 | 0.14   | 0.402203538 | count | 1 |
| TBC1D8-AS1 | 0.5491061  | 0.8879044   | 0.6184 | 0.536  | 0.402239431 | count | 1 |
| DNAJC3-DT  | 0.4099152  | 0.4164396   | 0.9843 | 0.325  | 0.402253403 | count | 1 |
| AC116366.3 | 0.7136698  | 0.8076868   | 0.8836 | 0.377  | 0.402582509 | count | 1 |



|            |           |           |        |          |             |       |           |
|------------|-----------|-----------|--------|----------|-------------|-------|-----------|
| GLUL       | 0.2855176 | 0.1069949 | 2.6685 | 0.00766  | 0.402763119 | count | 1         |
| BRMS1      | 0.2938148 | 0.1428339 | 2.057  | 0.0398   | 0.402849141 | count | 1         |
| UBE2L6     | 0.2862004 | 0.0886749 | 3.2275 | 0.00126  | 0.403657799 | count | 1         |
| C9orf64    | 0.4686308 | 0.5272254 | 0.8889 | 0.374    | 0.40368484  | count | 1         |
| SLC35D2    | 0.3092756 | 0.1740029 | 1.7774 | 0.0756   | 0.403745946 | count | 1         |
| SLC5A6     | 0.8283547 | 0.7325874 | 1.1307 | 0.258    | 0.403792283 | count | 1         |
| TAF11      | 0.2950684 | 0.1395512 | 2.1144 | 0.0346   | 0.404007257 | count | 1         |
| GRIPAP1    | 0.3066065 | 0.2230855 | 1.3744 | 0.169    | 0.404421999 | count | 1         |
| C5AR2      | 0.4358029 | 0.6686921 | 0.6517 | 0.515    | 0.40443148  | count | 1         |
| COG7       | 0.3661132 | 0.3190436 | 1.1475 | 0.251    | 0.404804488 | count | 1         |
| RRP15      | 0.2953849 | 0.1360074 | 2.1718 | 0.03     | 0.404852859 | count | 1         |
| SFPQ       | 0.2851456 | 0.0690219 | 4.1312 | 3.72E-05 | 0.404902891 | count | 0.8580924 |
| AC007365.1 | 1.0257686 | 1.0564187 | 0.971  | 0.332    | 0.404992158 | count | 1         |
| CNEP1R1    | 0.357367  | 0.3555436 | 1.0051 | 0.315    | 0.405071147 | count | 1         |
| RIPOR2     | 0.3310985 | 0.3574959 | 0.9262 | 0.354    | 0.405208644 | count | 1         |
| CEP41      | 0.4094481 | 0.3513934 | 1.1652 | 0.244    | 0.40541205  | count | 1         |
| RTL8B      | 0.3146214 | 0.2003011 | 1.5707 | 0.116    | 0.405691315 | count | 1         |
| SYNGR2     | 0.28616   | 0.0795347 | 3.5979 | 0.000326 | 0.405846678 | count | 1         |
| MYL12A     | 0.2818861 | 0.0307065 | 9.18   | 8.22E-20 | 0.405902801 | count | 1.98E-15  |
| DZANK1     | 0.7215151 | 0.6650667 | 1.0849 | 0.278    | 0.40616604  | count | 1         |
| RAB3A      | 0.5119909 | 0.5519075 | 0.9277 | 0.354    | 0.406250942 | count | 1         |
| NPAT       | 0.3092377 | 0.2244132 | 1.378  | 0.168    | 0.40633629  | count | 1         |
| MEAF6      | 0.2902597 | 0.1013654 | 2.8635 | 0.00422  | 0.406365117 | count | 1         |
| THSD7A     | 0.3017628 | 0.1604162 | 1.8811 | 0.0601   | 0.406684101 | count | 1         |
| PNPLA8     | 0.2962016 | 0.1311802 | 2.258  | 0.024    | 0.406751691 | count | 1         |
| ACAP2      | 0.2890037 | 0.1008509 | 2.8657 | 0.00419  | 0.406816266 | count | 1         |
| TMA16      | 0.2982662 | 0.157359  | 1.8955 | 0.0581   | 0.40730982  | count | 1         |
| HOOK2      | 0.36372   | 0.2931284 | 1.2408 | 0.215    | 0.407342556 | count | 1         |
| TRIM16L    | 0.6494642 | 0.7555141 | 0.8596 | 0.39     | 0.407364106 | count | 1         |
| KLRF1      | 0.6494642 | 0.8136069 | 0.7983 | 0.425    | 0.407364106 | count | 1         |
| LYSMD1     | 0.6494642 | 0.826638  | 0.7857 | 0.432    | 0.407364106 | count | 1         |
| TEX30      | 0.3586361 | 0.2857691 | 1.255  | 0.21     | 0.407915402 | count | 1         |
| TRMO       | 0.4017047 | 0.3404588 | 1.1799 | 0.238    | 0.40796874  | count | 1         |
| SYPL1      | 0.2871113 | 0.0662948 | 4.3308 | 1.54E-05 | 0.408465255 | count | 0.356664  |
| AC095055.1 | 1.0387998 | 1.1004815 | 0.944  | 0.345    | 0.408518293 | count | 1         |
| MON1B      | 0.3369545 | 0.2530473 | 1.3316 | 0.183    | 0.408518702 | count | 1         |
| RBM14      | 0.3961805 | 0.3508193 | 1.1293 | 0.259    | 0.408525445 | count | 1         |
| SEC23B     | 0.371461  | 0.341822  | 1.0867 | 0.277    | 0.40865271  | count | 1         |
| DPH6       | 0.3307847 | 0.2326035 | 1.4221 | 0.155    | 0.408744765 | count | 1         |
| MRPS25     | 0.3177172 | 0.1741272 | 1.8246 | 0.0682   | 0.408959335 | count | 1         |
| RNASEK     | 0.3033167 | 0.1539649 | 1.97   | 0.0489   | 0.40899895  | count | 1         |
| RNF215     | 0.3610306 | 0.2774152 | 1.3014 | 0.193    | 0.409080081 | count | 1         |
| MKNK2      | 0.2911565 | 0.1043491 | 2.7902 | 0.0053   | 0.409285204 | count | 1         |
| CTNBL1     | 0.3037451 | 0.1517085 | 2.0022 | 0.0454   | 0.409331647 | count | 1         |
| NXT1       | 0.2924459 | 0.0942945 | 3.1014 | 0.00195  | 0.409530968 | count | 1         |

|            |           |           |        |          |             |       |             |
|------------|-----------|-----------|--------|----------|-------------|-------|-------------|
| ENY2       | 0.2869344 | 0.0555182 | 5.1683 | 2.53E-07 | 0.409733995 | count | 0.005936139 |
| EFCAB7     | 0.5052139 | 0.4352505 | 1.1607 | 0.246    | 0.409738214 | count | 1           |
| B4GALT4    | 0.4429995 | 0.3803138 | 1.1648 | 0.244    | 0.410640557 | count | 1           |
| AC008771.1 | 0.4151331 | 0.3978612 | 1.0434 | 0.297    | 0.410714266 | count | 1           |
| DNAL4      | 0.3300015 | 0.2250084 | 1.4666 | 0.143    | 0.410740348 | count | 1           |
| ZNF669     | 0.3500029 | 0.3413545 | 1.0253 | 0.305    | 0.410782096 | count | 1           |
| SLCO2A1    | 0.2955132 | 0.1059048 | 2.7904 | 0.0053   | 0.4108864   | count | 1           |
| MFNG       | 0.2942734 | 0.1163025 | 2.5302 | 0.0115   | 0.410960254 | count | 1           |
| CAMK2D     | 0.3045804 | 0.1579823 | 1.9279 | 0.054    | 0.411041159 | count | 1           |
| MYD88      | 0.3312227 | 0.2273522 | 1.4569 | 0.145    | 0.411078486 | count | 1           |
| PLAGL1     | 0.3860661 | 0.2990782 | 1.2909 | 0.197    | 0.411289178 | count | 1           |
| EEF2K      | 0.3283398 | 0.247859  | 1.3247 | 0.185    | 0.411398499 | count | 1           |
| DHX16      | 0.3357343 | 0.2455723 | 1.3672 | 0.172    | 0.411446495 | count | 1           |
| YJU2       | 0.3275991 | 0.2197207 | 1.491  | 0.136    | 0.411498569 | count | 1           |
| ERI2       | 0.4970068 | 0.4952313 | 1.0036 | 0.316    | 0.411501945 | count | 1           |
| G0S2       | 0.3311064 | 0.5522366 | 0.5996 | 0.549    | 0.411517343 | count | 1           |
| BOLA3-AS1  | 0.5196513 | 0.5072218 | 1.0245 | 0.306    | 0.411700824 | count | 1           |
| DAPK3      | 0.3353969 | 0.2011143 | 1.6677 | 0.0955   | 0.411722571 | count | 1           |
| GAREM2     | 1.0519873 | 1.1161143 | 0.9425 | 0.346    | 0.412050965 | count | 1           |
| THAP4      | 0.3294171 | 0.2162387 | 1.5234 | 0.128    | 0.41220117  | count | 1           |
| FARSB      | 0.3428622 | 0.2615508 | 1.3109 | 0.19     | 0.412212181 | count | 1           |
| ACAT1      | 0.2957284 | 0.1061946 | 2.7848 | 0.00539  | 0.412248688 | count | 1           |
| PGBD1      | 0.3805828 | 0.54705   | 0.6957 | 0.487    | 0.412283028 | count | 1           |
| CLUH       | 0.4571646 | 0.5146916 | 0.8882 | 0.374    | 0.412288248 | count | 1           |
| SPSB3      | 0.2972969 | 0.1122443 | 2.6487 | 0.00813  | 0.412360352 | count | 1           |
| DROSHA     | 0.3828943 | 0.3403283 | 1.1251 | 0.261    | 0.412542446 | count | 1           |
| SLC3A2     | 0.2897625 | 0.064199  | 4.5135 | 6.64E-06 | 0.412642478 | count | 0.15432688  |
| TCHP       | 0.3262617 | 0.2219289 | 1.4701 | 0.142    | 0.412680282 | count | 1           |
| TRA2A      | 0.3001221 | 0.1276868 | 2.3505 | 0.0188   | 0.4127825   | count | 1           |
| FBXL19-AS1 | 1.5101721 | 1.0270096 | 1.4705 | 0.142    | 0.412870994 | count | 1           |
| L2HGDH     | 0.6602256 | 0.8409886 | 0.7851 | 0.432    | 0.413014562 | count | 1           |
| PPP1R3E    | 0.4581599 | 0.5277058 | 0.8682 | 0.385    | 0.413117282 | count | 1           |
| CRTC2      | 0.3776953 | 0.3130778 | 1.2064 | 0.228    | 0.413311694 | count | 1           |
| FGD1       | 0.4996294 | 0.7838138 | 0.6374 | 0.524    | 0.413468487 | count | 1           |
| EXOSC7     | 0.3044018 | 0.1577639 | 1.9295 | 0.0538   | 0.413722915 | count | 1           |
| AC118549.1 | 0.3271183 | 0.2223606 | 1.4711 | 0.141    | 0.413744173 | count | 1           |
| POLR3G     | 0.5000226 | 0.4872795 | 1.0262 | 0.305    | 0.413763141 | count | 1           |
| CEBPG      | 0.3036403 | 0.1276438 | 2.3788 | 0.0174   | 0.413768416 | count | 1           |
| GADD45B    | 0.2873883 | 0.0774324 | 3.7115 | 0.00021  | 0.41378006  | count | 1           |
| ZNF354B    | 0.3590578 | 0.305307  | 1.1761 | 0.24     | 0.413843583 | count | 1           |
| INTS9      | 0.5226718 | 0.571523  | 0.9145 | 0.361    | 0.413844439 | count | 1           |
| MED24      | 0.3529629 | 0.3047253 | 1.1583 | 0.247    | 0.414153638 | count | 1           |
| BBS7       | 0.3399439 | 0.2417205 | 1.4064 | 0.16     | 0.414335375 | count | 1           |
| DCAF4      | 0.4533674 | 0.419877  | 1.0798 | 0.28     | 0.414453639 | count | 1           |
| TBC1D9B    | 0.3229043 | 0.2006499 | 1.6093 | 0.108    | 0.414483228 | count | 1           |

|            |           |           |        |          |             |       |   |
|------------|-----------|-----------|--------|----------|-------------|-------|---|
| MAGIX      | 0.5870808 | 0.5041167 | 1.1646 | 0.244    | 0.414498899 | count | 1 |
| TTC39C     | 0.3769993 | 0.4306583 | 0.8754 | 0.381    | 0.414501479 | count | 1 |
| ASH1L-AS1  | 0.4475816 | 0.4953317 | 0.9036 | 0.366    | 0.414585452 | count | 1 |
| AKTIP      | 0.3206703 | 0.1972671 | 1.6256 | 0.104    | 0.414659873 | count | 1 |
| PBX2       | 0.3481456 | 0.2347635 | 1.483  | 0.138    | 0.414759074 | count | 1 |
| POLRMT     | 0.3969978 | 0.311537  | 1.2743 | 0.203    | 0.41481651  | count | 1 |
| TBC1D32    | 0.7925962 | 0.533237  | 1.4864 | 0.137    | 0.414849019 | count | 1 |
| CD302      | 0.3123364 | 0.1772688 | 1.7619 | 0.0782   | 0.414987792 | count | 1 |
| SGPP1      | 0.6097355 | 0.6274288 | 0.9718 | 0.331    | 0.415095084 | count | 1 |
| C6orf120   | 0.3301785 | 0.2400658 | 1.3754 | 0.169    | 0.415173654 | count | 1 |
| ITFG2-AS1  | 0.8592071 | 1.1521228 | 0.7458 | 0.456    | 0.415180155 | count | 1 |
| RFX1       | 0.3639867 | 0.2817249 | 1.292  | 0.196    | 0.415231874 | count | 1 |
| C19orf66   | 0.3018458 | 0.1176749 | 2.5651 | 0.0104   | 0.415435642 | count | 1 |
| METAP2     | 0.2942048 | 0.0803051 | 3.6636 | 0.000253 | 0.415586809 | count | 1 |
| RBFA       | 0.3142774 | 0.1620224 | 1.9397 | 0.0525   | 0.41564935  | count | 1 |
| SF3B3      | 0.3244234 | 0.2392442 | 1.356  | 0.175    | 0.415674465 | count | 1 |
| IMP4       | 0.3029912 | 0.1207698 | 2.5088 | 0.0122   | 0.415685181 | count | 1 |
| TAF13      | 0.3327034 | 0.2463314 | 1.3506 | 0.177    | 0.415696329 | count | 1 |
| ILF3-DT    | 0.306978  | 0.1619406 | 1.8956 | 0.0581   | 0.415802182 | count | 1 |
| SLC25A17   | 0.3802518 | 0.3417598 | 1.1126 | 0.266    | 0.41599432  | count | 1 |
| HAPLN3     | 0.2953863 | 0.0972933 | 3.036  | 0.00242  | 0.416189557 | count | 1 |
| NAA30      | 0.3624231 | 0.2983726 | 1.2147 | 0.225    | 0.416267729 | count | 1 |
| PCED1B     | 0.4252176 | 0.665592  | 0.6389 | 0.523    | 0.416358892 | count | 1 |
| C14orf93   | 0.4690879 | 0.5014567 | 0.9355 | 0.35     | 0.416423401 | count | 1 |
| IDH3G      | 0.3036615 | 0.1224766 | 2.4793 | 0.0132   | 0.416463818 | count | 1 |
| ZBTB42     | 0.7019604 | 0.6511795 | 1.078  | 0.281    | 0.416490567 | count | 1 |
| MRPL32     | 0.2961104 | 0.0912522 | 3.245  | 0.00119  | 0.416505304 | count | 1 |
| MINK1      | 0.3707102 | 0.3084236 | 1.202  | 0.229    | 0.416516002 | count | 1 |
| SPG11      | 0.3431834 | 0.2538959 | 1.3517 | 0.177    | 0.416668265 | count | 1 |
| AC009403.1 | 0.4941714 | 0.5660227 | 0.8731 | 0.383    | 0.416731012 | count | 1 |
| ANAPC10    | 0.3106141 | 0.1642492 | 1.8911 | 0.0587   | 0.416936749 | count | 1 |
| ISCA1      | 0.3067948 | 0.1275573 | 2.4052 | 0.0162   | 0.417043376 | count | 1 |
| SRP68      | 0.3309469 | 0.2157044 | 1.5343 | 0.125    | 0.417094623 | count | 1 |
| AC087672.2 | 0.7983775 | 0.7759131 | 1.029  | 0.304    | 0.417212059 | count | 1 |
| OTUD4      | 0.3368206 | 0.2433323 | 1.3842 | 0.166    | 0.417277408 | count | 1 |
| FBLN2      | 0.2950311 | 0.0948854 | 3.1093 | 0.00189  | 0.417284942 | count | 1 |
| DNMT3A     | 0.327593  | 0.2731452 | 1.1993 | 0.231    | 0.417333101 | count | 1 |
| MT1M       | 0.5048387 | 0.5207202 | 0.9695 | 0.332    | 0.417368008 | count | 1 |
| ELOVL6     | 1.544083  | 1.0155081 | 1.5205 | 0.128    | 0.417648797 | count | 1 |
| EIF4ENIF1  | 0.3490402 | 0.2678459 | 1.3031 | 0.193    | 0.417659578 | count | 1 |
| AP1G1      | 0.3254966 | 0.2359261 | 1.3797 | 0.168    | 0.418467105 | count | 1 |
| MRPL48     | 0.3217903 | 0.1966706 | 1.6362 | 0.102    | 0.418479724 | count | 1 |
| AC004825.2 | 0.6409631 | 0.7475856 | 0.8574 | 0.391    | 0.418492404 | count | 1 |
| AL023806.1 | 0.6409631 | 0.8491502 | 0.7548 | 0.45     | 0.418492404 | count | 1 |
| MRPS18B    | 0.3002412 | 0.1164366 | 2.5786 | 0.00997  | 0.418510889 | count | 1 |

|            |           |           |         |          |             |       |          |
|------------|-----------|-----------|---------|----------|-------------|-------|----------|
| TMEM42     | 0.3399037 | 0.2989374 | 1.137   | 0.256    | 0.419124772 | count | 1        |
| RASA1      | 0.3411543 | 0.2326643 | 1.4663  | 0.143    | 0.419309014 | count | 1        |
| DNTTIP1    | 0.3149859 | 0.1733051 | 1.8175  | 0.0692   | 0.419516368 | count | 1        |
| TSR2       | 0.3043642 | 0.120201  | 2.5321  | 0.0114   | 0.419891559 | count | 1        |
| KPTN       | 0.5960199 | 0.6121015 | 0.9737  | 0.33     | 0.419965008 | count | 1        |
| DCTPP1     | 0.3031466 | 0.1112351 | 2.7253  | 0.00647  | 0.420263361 | count | 1        |
| TTYH3      | 0.4338642 | 0.3551368 | 1.2217  | 0.222    | 0.420329515 | count | 1        |
| GOLPH3L    | 0.3287293 | 0.2031445 | 1.6182  | 0.106    | 0.42034104  | count | 1        |
| GATD1      | 0.3974504 | 0.3338599 | 1.1905  | 0.234    | 0.420406105 | count | 1        |
| NARF       | 0.3116257 | 0.1500267 | 2.0771  | 0.0379   | 0.420462896 | count | 1        |
| LINC00467  | 0.3865043 | 0.3738664 | 1.0338  | 0.301    | 0.420515809 | count | 1        |
| PLA2G6     | 1.0846177 | 1.0952367 | 0.9903  | 0.322    | 0.420638896 | count | 1        |
| PSPN       | 0.8068833 | 0.976205  | 0.8266  | 0.409    | 0.420672196 | count | 1        |
| MAGI2      | 0.371645  | 0.3893779 | 0.9545  | 0.34     | 0.420677039 | count | 1        |
| AC089984.1 | 1.266879  | 1.0889057 | 1.1634  | 0.245    | 0.421040698 | count | 1        |
| DDX3Y      | 0.3045262 | 0.1085691 | 2.8049  | 0.00507  | 0.421593072 | count | 1        |
| SMN1       | 0.423066  | 0.3972205 | 1.0651  | 0.287    | 0.42167557  | count | 1        |
| FAM173B    | 0.365148  | 0.3032907 | 1.204   | 0.229    | 0.421937743 | count | 1        |
| RNF217-AS1 | 0.6776679 | 1.8777123 | 0.3609  | 0.7182   | 0.422097469 | count | 1        |
| ZNF622     | 0.3211027 | 0.1800571 | 1.7833  | 0.0746   | 0.422866804 | count | 1        |
| ACP2       | 0.3369245 | 0.2436719 | 1.3827  | 0.167    | 0.422982668 | count | 1        |
| C5orf63    | 0.4174408 | 0.8702851 | 0.4797  | 0.632    | 0.423067091 | count | 1        |
| MTREX      | 0.3352441 | 0.1980616 | 1.6926  | 0.0906   | 0.423363598 | count | 1        |
| ATP13A1    | 0.4148702 | 0.3893929 | 1.0654  | 0.287    | 0.423745509 | count | 1        |
| SUGP1      | 0.3680669 | 0.3476336 | 1.0588  | 0.29     | 0.42388232  | count | 1        |
| UTP23      | 0.3051428 | 0.1279564 | 2.3847  | 0.0172   | 0.423907169 | count | 1        |
| DCAF10     | 0.3456047 | 0.2427039 | 1.424   | 0.155    | 0.423962996 | count | 1        |
| ANXA4      | 0.3024809 | 0.0970797 | 3.1158  | 0.00185  | 0.423991799 | count | 1        |
| ZNF747     | 0.4646939 | 0.3725334 | 1.2474  | 0.212    | 0.424022491 | count | 1        |
| MRPS17     | 0.3684502 | 0.3601303 | 1.0231  | 0.306    | 0.424309018 | count | 1        |
| PRR12      | 0.8850414 | 0.6160184 | 1.4367  | 0.151    | 0.424529062 | count | 1        |
| RLF        | 0.3284443 | 0.2221175 | 1.4787  | 0.139    | 0.424558337 | count | 1        |
| XIAP       | 0.3136656 | 0.1387267 | 2.261   | 0.0238   | 0.424674298 | count | 1        |
| UBAP2L     | 0.3356154 | 0.2209605 | 1.5189  | 0.129    | 0.424751793 | count | 1        |
| PPIP5K2    | 0.3192465 | 0.1502881 | 2.1242  | 0.0337   | 0.424780611 | count | 1        |
| RPL34      | 0.2947536 | 0.0199133 | 14.8019 | 9.18E-48 | 0.424990181 | count | 2.23E-43 |
| LRRTM2     | 0.7638457 | 0.828875  | 0.9215  | 0.357    | 0.425196241 | count | 1        |
| ARPIN      | 0.324055  | 0.1901366 | 1.7043  | 0.0884   | 0.42531412  | count | 1        |
| USP54      | 0.6839048 | 0.5529293 | 1.2369  | 0.216    | 0.425322613 | count | 1        |
| ZNF551     | 0.5852072 | 0.6814161 | 0.8588  | 0.391    | 0.425327631 | count | 1        |
| NCK2       | 0.332805  | 0.177998  | 1.8697  | 0.0616   | 0.425463823 | count | 1        |
| SLC29A1    | 0.3069595 | 0.1161894 | 2.6419  | 0.00829  | 0.425563652 | count | 1        |
| CDC34      | 0.3160583 | 0.1384046 | 2.2836  | 0.0225   | 0.425642351 | count | 1        |
| TEDC1      | 0.4027033 | 0.3388001 | 1.1886  | 0.235    | 0.425694962 | count | 1        |
| NF2        | 0.4080346 | 0.3919648 | 1.041   | 0.298    | 0.425767636 | count | 1        |

|            |           |           |        |          |             |       |             |
|------------|-----------|-----------|--------|----------|-------------|-------|-------------|
| SEC23IP    | 0.3460049 | 0.2911589 | 1.1884 | 0.235    | 0.425811815 | count | 1           |
| TAZ        | 0.3350443 | 0.2400439 | 1.3958 | 0.163    | 0.425812206 | count | 1           |
| ZNF487     | 0.4813581 | 0.5006155 | 0.9615 | 0.336    | 0.426417947 | count | 1           |
| AL117339.5 | 0.7226668 | 0.6583252 | 1.0977 | 0.272    | 0.426502674 | count | 1           |
| STXBP5     | 0.4322612 | 0.4236454 | 1.0203 | 0.308    | 0.426631025 | count | 1           |
| CC2D1B     | 0.540898  | 0.5170255 | 1.0462 | 0.296    | 0.426715743 | count | 1           |
| RAB2B      | 0.3485116 | 0.2945728 | 1.1831 | 0.237    | 0.426735621 | count | 1           |
| PAQR8      | 0.5073498 | 0.4725869 | 1.0736 | 0.283    | 0.426803415 | count | 1           |
| LSM6       | 0.3048129 | 0.103836  | 2.9355 | 0.00336  | 0.426827804 | count | 1           |
| NXN        | 0.3174421 | 0.172994  | 1.835  | 0.0666   | 0.426833915 | count | 1           |
| AL592295.4 | 1.1103661 | 1.0985178 | 1.0108 | 0.312    | 0.42726365  | count | 1           |
| ANKRD65    | 0.3350452 | 0.2168204 | 1.5453 | 0.122    | 0.427480603 | count | 1           |
| AC073332.1 | 0.4418068 | 0.447304  | 0.9877 | 0.323    | 0.427525342 | count | 1           |
| UBXN11     | 0.3974611 | 0.3537142 | 1.1237 | 0.261    | 0.427529012 | count | 1           |
| DCAF17     | 0.4688603 | 0.4469118 | 1.0491 | 0.294    | 0.427532125 | count | 1           |
| ACYP2      | 0.3470589 | 0.2168308 | 1.6006 | 0.11     | 0.427747415 | count | 1           |
| CHUK       | 0.4830778 | 0.4252981 | 1.1359 | 0.256    | 0.42781486  | count | 1           |
| NAT10      | 0.3769359 | 0.3198881 | 1.1783 | 0.239    | 0.427984016 | count | 1           |
| TNFAIP1    | 0.3084532 | 0.1266606 | 2.4353 | 0.0149   | 0.428043184 | count | 1           |
| BCL3       | 0.3067018 | 0.1238751 | 2.4759 | 0.0133   | 0.428210809 | count | 1           |
| GPER1      | 0.4301971 | 0.3762603 | 1.1433 | 0.253    | 0.428360385 | count | 1           |
| RNF149     | 0.3207106 | 0.188659  | 1.6999 | 0.0893   | 0.428388339 | count | 1           |
| ZNF256     | 0.8263081 | 0.7774084 | 1.0629 | 0.288    | 0.428500502 | count | 1           |
| EIF3E      | 0.2992262 | 0.0447791 | 6.6823 | 2.83E-11 | 0.428861566 | count | 6.74E-07    |
| SNW1       | 0.3047854 | 0.093272  | 3.2677 | 0.0011   | 0.428906762 | count | 1           |
| MSH6       | 0.3240383 | 0.1741234 | 1.861  | 0.0629   | 0.429403849 | count | 1           |
| HMGCL      | 0.3254646 | 0.1787044 | 1.8212 | 0.0687   | 0.42941946  | count | 1           |
| SPRYD3     | 0.3273918 | 0.1859073 | 1.761  | 0.0783   | 0.429635253 | count | 1           |
| SCOC-AS1   | 0.7295477 | 0.8204781 | 0.8892 | 0.374    | 0.429801616 | count | 1           |
| LRTOMT     | 0.4399924 | 0.4449965 | 0.9888 | 0.323    | 0.42991132  | count | 1           |
| EAF2       | 0.5329877 | 0.5556176 | 0.9593 | 0.338    | 0.429931854 | count | 1           |
| CAPZB      | 0.3015827 | 0.0600061 | 5.0259 | 5.33E-07 | 0.429958265 | count | 0.012480728 |
| MBLAC2     | 0.3831487 | 0.3356693 | 1.1414 | 0.254    | 0.429959399 | count | 1           |
| LRPPRC     | 0.3239182 | 0.1713647 | 1.8902 | 0.0588   | 0.430011779 | count | 1           |
| TOP3B      | 0.613405  | 0.5351357 | 1.1463 | 0.252    | 0.430521909 | count | 1           |
| AL121658.1 | 1.315378  | 0.736398  | 1.7862 | 0.0742   | 0.430594967 | count | 1           |
| LAYN       | 0.3310667 | 0.1945341 | 1.7018 | 0.0889   | 0.430657575 | count | 1           |
| BRD9       | 0.3346805 | 0.2138368 | 1.5651 | 0.118    | 0.430792879 | count | 1           |
| ARF5       | 0.3051339 | 0.0850215 | 3.5889 | 0.000338 | 0.430868543 | count | 1           |
| TAF7       | 0.3084383 | 0.1011603 | 3.049  | 0.00232  | 0.43088393  | count | 1           |
| NPM3       | 0.3768876 | 0.2627766 | 1.4343 | 0.152    | 0.430885732 | count | 1           |
| ASTE1      | 0.376956  | 0.2901157 | 1.2993 | 0.194    | 0.430961177 | count | 1           |
| ZNF878     | 0.777085  | 1.1276942 | 0.6891 | 0.491    | 0.431042915 | count | 1           |
| RCHY1      | 0.346201  | 0.2256828 | 1.534  | 0.125    | 0.431060438 | count | 1           |
| TNFRSF10D  | 0.3149712 | 0.1428486 | 2.2049 | 0.0275   | 0.431060654 | count | 1           |

|            |           |           |         |          |             |       |            |
|------------|-----------|-----------|---------|----------|-------------|-------|------------|
| MAPKBP1    | 0.5611524 | 0.4438146 | 1.2644  | 0.206    | 0.431139289 | count | 1          |
| GTF3C3     | 0.3582931 | 0.2189782 | 1.6362  | 0.102    | 0.431156598 | count | 1          |
| EPOP       | 0.8330226 | 0.6170076 | 1.3501  | 0.177    | 0.431182761 | count | 1          |
| APC        | 0.3265804 | 0.1577033 | 2.0709  | 0.0385   | 0.431301618 | count | 1          |
| VASP       | 0.3123934 | 0.1128426 | 2.7684  | 0.00567  | 0.431330318 | count | 1          |
| OMA1       | 0.3815182 | 0.3093109 | 1.2334  | 0.218    | 0.431440103 | count | 1          |
| SQLE       | 0.3601403 | 0.2711084 | 1.3284  | 0.184    | 0.431508908 | count | 1          |
| EIF1       | 0.2997937 | 0.0254881 | 11.7621 | 3.35E-31 | 0.431973755 | count | 8.11E-27   |
| G3BP1      | 0.3092263 | 0.1057038 | 2.9254  | 0.00347  | 0.432008227 | count | 1          |
| ENSA       | 0.3038422 | 0.0671958 | 4.5217  | 6.39E-06 | 0.432134104 | count | 0.14856111 |
| MAST3      | 0.8364251 | 0.5395937 | 1.5501  | 0.121    | 0.432537336 | count | 1          |
| CFAP69     | 0.7353917 | 0.7675519 | 0.9581  | 0.338    | 0.432592399 | count | 1          |
| IL17RA     | 0.4279112 | 0.3185034 | 1.3435  | 0.179    | 0.433073387 | count | 1          |
| LRRC45     | 0.5374547 | 0.5670032 | 0.9479  | 0.343    | 0.433156081 | count | 1          |
| TENT4A     | 0.4315999 | 0.352994  | 1.2227  | 0.222    | 0.433195511 | count | 1          |
| SELENOW    | 0.3010276 | 0.0351125 | 8.5732  | 1.65E-17 | 0.433235997 | count | 3.96E-13   |
| C12orf76   | 0.3240442 | 0.16955   | 1.9112  | 0.0561   | 0.433739368 | count | 1          |
| ITM2B      | 0.3008804 | 0.0258407 | 11.6437 | 1.27E-30 | 0.433792566 | count | 3.07E-26   |
| DCUN1D4    | 0.3526879 | 0.2382554 | 1.4803  | 0.139    | 0.433844175 | count | 1          |
| PHF5A      | 0.31305   | 0.1073258 | 2.9168  | 0.00356  | 0.434004462 | count | 1          |
| HDAC9      | 0.5075844 | 0.42354   | 1.1984  | 0.231    | 0.434186422 | count | 1          |
| SLC4A1AP   | 0.3230736 | 0.1575522 | 2.0506  | 0.0404   | 0.434194031 | count | 1          |
| APOL2      | 0.3444993 | 0.1873969 | 1.8383  | 0.0661   | 0.434336152 | count | 1          |
| FES        | 0.3377751 | 0.2169988 | 1.5566  | 0.12     | 0.434353216 | count | 1          |
| RWDD2A     | 0.6699986 | 0.631456  | 1.061   | 0.289    | 0.434403606 | count | 1          |
| ZNF92      | 0.3597136 | 0.2382261 | 1.51    | 0.131    | 0.434555545 | count | 1          |
| LAMC1      | 0.3173315 | 0.1421346 | 2.2326  | 0.0257   | 0.434569014 | count | 1          |
| PRPF3      | 0.345141  | 0.194094  | 1.7782  | 0.0755   | 0.434631499 | count | 1          |
| LMNB2      | 0.3909391 | 0.308071  | 1.269   | 0.205    | 0.434845302 | count | 1          |
| GSS        | 0.3393834 | 0.1928547 | 1.7598  | 0.0786   | 0.435653204 | count | 1          |
| LAP3       | 0.304949  | 0.0674008 | 4.5244  | 6.31E-06 | 0.435793889 | count | 0.14672643 |
| UBAC1      | 0.3186323 | 0.1341545 | 2.3751  | 0.0176   | 0.435801372 | count | 1          |
| CCDC58     | 0.3379746 | 0.2122603 | 1.5923  | 0.111    | 0.436008182 | count | 1          |
| RPL39L     | 0.4561078 | 0.5202529 | 0.8767  | 0.381    | 0.436080551 | count | 1          |
| AC027031.2 | 0.4277048 | 0.3482678 | 1.2281  | 0.22     | 0.436120521 | count | 1          |
| CIC        | 0.354675  | 0.2328931 | 1.5229  | 0.128    | 0.436230939 | count | 1          |
| MARF1      | 0.3486103 | 0.2261233 | 1.5417  | 0.123    | 0.436271364 | count | 1          |
| AL590617.2 | 0.5852968 | 0.7862424 | 0.7444  | 0.457    | 0.436711672 | count | 1          |
| STYK1      | 1.6910656 | 1.0689596 | 1.582   | 0.114    | 0.436790174 | count | 1          |
| ALS2CL     | 0.47991   | 0.4417034 | 1.0865  | 0.277    | 0.436813296 | count | 1          |
| PAPOLG     | 0.3928977 | 0.3233124 | 1.2152  | 0.224    | 0.436935738 | count | 1          |
| AP001267.3 | 0.7067664 | 0.8436951 | 0.8377  | 0.402    | 0.43704291  | count | 1          |
| TM7SF2     | 0.457289  | 0.475719  | 0.9613  | 0.337    | 0.437131937 | count | 1          |
| SUPT4H1    | 0.3118826 | 0.0954598 | 3.2672  | 0.0011   | 0.437671712 | count | 1          |
| ATE1       | 0.3397972 | 0.2156699 | 1.5755  | 0.115    | 0.437975558 | count | 1          |

|            |           |           |        |          |             |       |          |
|------------|-----------|-----------|--------|----------|-------------|-------|----------|
| BCS1L      | 0.3892642 | 0.2583093 | 1.507  | 0.132    | 0.438233769 | count | 1        |
| CFAP54     | 1.020234  | 0.6577336 | 1.5511 | 0.121    | 0.438254144 | count | 1        |
| STC2       | 0.4017256 | 0.3390029 | 1.185  | 0.236    | 0.438460989 | count | 1        |
| CTSL       | 0.3105807 | 0.091224  | 3.4046 | 0.000672 | 0.438523957 | count | 1        |
| S100PBP    | 0.3598949 | 0.2934018 | 1.2266 | 0.22     | 0.438818406 | count | 1        |
| IPO5       | 0.3337431 | 0.183404  | 1.8197 | 0.0689   | 0.438825684 | count | 1        |
| CELSR1     | 0.4760494 | 0.4488563 | 1.0606 | 0.289    | 0.438946532 | count | 1        |
| USP46-AS1  | 1.0227968 | 0.7854569 | 1.3022 | 0.193    | 0.439021795 | count | 1        |
| GLE1       | 0.5727977 | 0.6519081 | 0.8786 | 0.38     | 0.439024839 | count | 1        |
| GALNT15    | 0.3320368 | 0.2103174 | 1.5787 | 0.115    | 0.43905389  | count | 1        |
| C6orf163   | 1.360628  | 1.4449473 | 0.9416 | 0.346    | 0.439169486 | count | 1        |
| CPEB2      | 0.404486  | 0.3671868 | 1.1016 | 0.271    | 0.439205129 | count | 1        |
| PRKAA1     | 0.3328878 | 0.1729425 | 1.9248 | 0.0544   | 0.43930783  | count | 1        |
| ZNF677     | 0.3325629 | 0.1716115 | 1.9379 | 0.0527   | 0.439317226 | count | 1        |
| ZCCHC4     | 0.4650267 | 0.4069182 | 1.1428 | 0.253    | 0.439384174 | count | 1        |
| LRRCC1     | 0.3415707 | 0.2017508 | 1.693  | 0.0906   | 0.439514304 | count | 1        |
| 3-Mar      | 0.3574855 | 0.2219019 | 1.611  | 0.107    | 0.439605503 | count | 1        |
| SLFN5      | 0.3117536 | 0.109143  | 2.8564 | 0.00432  | 0.440200871 | count | 1        |
| MRPS22     | 0.3191873 | 0.1262034 | 2.5291 | 0.0115   | 0.440211802 | count | 1        |
| ORAI1      | 0.3163465 | 0.1073356 | 2.9473 | 0.00323  | 0.440369157 | count | 1        |
| LRRFIP1    | 0.3066101 | 0.0459083 | 6.6787 | 2.90E-11 | 0.440387427 | count | 6.90E-07 |
| CNOT10     | 0.3722862 | 0.2860761 | 1.3014 | 0.193    | 0.440587208 | count | 1        |
| DHX8       | 0.3583545 | 0.228451  | 1.5686 | 0.117    | 0.44064862  | count | 1        |
| USP27X-AS1 | 1.1641963 | 1.0599386 | 1.0984 | 0.272    | 0.440689348 | count | 1        |
| TIGD5      | 0.4177682 | 0.3592364 | 1.1629 | 0.245    | 0.440820982 | count | 1        |
| PLA2G12A   | 0.3965675 | 0.2830064 | 1.4013 | 0.161    | 0.440849972 | count | 1        |
| SPOPL      | 0.3725156 | 0.3182011 | 1.1707 | 0.242    | 0.440850505 | count | 1        |
| ZNF282     | 0.4206847 | 0.3828549 | 1.0988 | 0.272    | 0.441054949 | count | 1        |
| RBM22      | 0.3166909 | 0.1019663 | 3.1058 | 0.00192  | 0.441091376 | count | 1        |
| PEX14      | 0.4297253 | 0.3595439 | 1.1952 | 0.232    | 0.441211862 | count | 1        |
| TCEAL1     | 0.3220332 | 0.1464694 | 2.1986 | 0.028    | 0.441259319 | count | 1        |
| TBC1D31    | 0.6106633 | 0.8204145 | 0.7443 | 0.457    | 0.441353091 | count | 1        |
| SMNDC1     | 0.3215225 | 0.1398715 | 2.2987 | 0.0216   | 0.441885851 | count | 1        |
| LMO4       | 0.3187584 | 0.1190095 | 2.6784 | 0.00744  | 0.442006211 | count | 1        |
| SIRT7      | 0.3556953 | 0.2170749 | 1.6386 | 0.101    | 0.44201507  | count | 1        |
| CUL1       | 0.3436224 | 0.1915846 | 1.7936 | 0.073    | 0.442110009 | count | 1        |
| VPS51      | 0.3201737 | 0.1179077 | 2.7155 | 0.00666  | 0.442166916 | count | 1        |
| PIGN       | 0.3995684 | 0.4176515 | 0.9567 | 0.339    | 0.442171913 | count | 1        |
| NR2F1-AS1  | 0.4688354 | 0.4049097 | 1.1579 | 0.247    | 0.442722183 | count | 1        |
| TSM        | 0.3337758 | 0.1598536 | 2.088  | 0.0369   | 0.442745489 | count | 1        |
| ME2        | 0.365241  | 0.240914  | 1.5161 | 0.13     | 0.442749374 | count | 1        |
| RCN1       | 0.3127336 | 0.0809232 | 3.8646 | 0.000114 | 0.442837962 | count | 1        |
| ADCK2      | 0.3591079 | 0.2541924 | 1.4127 | 0.158    | 0.44292848  | count | 1        |
| GOLGA8N    | 1.0362368 | 0.9091013 | 1.1398 | 0.254    | 0.443024155 | count | 1        |
| RPP30      | 0.3309137 | 0.1535163 | 2.1556 | 0.0312   | 0.443146315 | count | 1        |

|            |           |           |         |          |             |       |             |
|------------|-----------|-----------|---------|----------|-------------|-------|-------------|
| DDX11      | 0.4229118 | 0.3629252 | 1.1653  | 0.244    | 0.4432686   | count | 1           |
| ZNF343     | 0.8053327 | 0.8168282 | 0.9859  | 0.324    | 0.443351165 | count | 1           |
| SLC22A18   | 0.5647891 | 0.6219321 | 0.9081  | 0.364    | 0.443422236 | count | 1           |
| RAP1B      | 0.3110933 | 0.0627343 | 4.9589  | 7.52E-07 | 0.443502687 | count | 0.017593792 |
| CPSF1      | 0.4088515 | 0.345484  | 1.1834  | 0.237    | 0.443729642 | count | 1           |
| RCBTB2     | 0.3543419 | 0.1940171 | 1.8263  | 0.0679   | 0.443847677 | count | 1           |
| PAICS      | 0.3376006 | 0.1764934 | 1.9128  | 0.0559   | 0.444067819 | count | 1           |
| CENPK      | 0.5412823 | 0.4813557 | 1.1245  | 0.261    | 0.444399817 | count | 1           |
| FAM171A1   | 0.3572047 | 0.2165647 | 1.6494  | 0.0992   | 0.444458508 | count | 1           |
| CDC42EP4   | 0.3379046 | 0.143271  | 2.3585  | 0.0184   | 0.444462294 | count | 1           |
| AC099063.4 | 0.9421325 | 1.1048946 | 0.8527  | 0.394    | 0.444594186 | count | 1           |
| TBC1D22B   | 0.661053  | 0.6958714 | 0.95    | 0.342    | 0.444672311 | count | 1           |
| MED20      | 0.7218307 | 0.5836177 | 1.2368  | 0.216    | 0.444678728 | count | 1           |
| OCLN       | 0.6891013 | 0.7657843 | 0.8999  | 0.368    | 0.444728032 | count | 1           |
| MAPK9      | 0.3750091 | 0.2998197 | 1.2508  | 0.211    | 0.444776582 | count | 1           |
| DDX21      | 0.3130692 | 0.0803712 | 3.8953  | 1.00E-04 | 0.445064149 | count | 1           |
| SHQ1       | 0.4196617 | 0.3533477 | 1.1877  | 0.235    | 0.445312289 | count | 1           |
| BID        | 0.3355037 | 0.1688839 | 1.9866  | 0.0471   | 0.445399495 | count | 1           |
| RBM4       | 0.3629327 | 0.235938  | 1.5383  | 0.124    | 0.445426625 | count | 1           |
| FAM189B    | 0.3765904 | 0.2647644 | 1.4224  | 0.155    | 0.445525543 | count | 1           |
| SBF1       | 0.9450495 | 0.8852806 | 1.0675  | 0.286    | 0.445597645 | count | 1           |
| PSMD3      | 0.3279179 | 0.1312939 | 2.4976  | 0.0126   | 0.445711262 | count | 1           |
| BCHE       | 0.6180353 | 0.4348806 | 1.4212  | 0.155    | 0.445954624 | count | 1           |
| ZNF586     | 0.5229152 | 0.5135403 | 1.0183  | 0.309    | 0.446055318 | count | 1           |
| PIGW       | 0.5842291 | 0.58691   | 0.9954  | 0.32     | 0.446722175 | count | 1           |
| CLBA1      | 0.6406533 | 0.7107849 | 0.9013  | 0.367    | 0.446872112 | count | 1           |
| HIST1H4A   | 0.665195  | 0.7504352 | 0.8864  | 0.375    | 0.447023047 | count | 1           |
| IL33       | 0.3130207 | 0.0714215 | 4.3827  | 1.22E-05 | 0.447125972 | count | 0.2828082   |
| ZNF524     | 0.3209331 | 0.1106258 | 2.9011  | 0.00375  | 0.44751165  | count | 1           |
| ZBTB46     | 0.3837531 | 0.2941491 | 1.3046  | 0.192    | 0.447889421 | count | 1           |
| TOP3A      | 0.4694981 | 0.4306463 | 1.0902  | 0.276    | 0.44797404  | count | 1           |
| C3orf80    | 0.4806806 | 0.403329  | 1.1918  | 0.233    | 0.448086001 | count | 1           |
| ADCY4      | 0.3338789 | 0.1534939 | 2.1752  | 0.0297   | 0.448277543 | count | 1           |
| C11orf74   | 0.3309651 | 0.1552875 | 2.1313  | 0.0332   | 0.448333568 | count | 1           |
| RPL32      | 0.3110796 | 0.0202127 | 15.3903 | 2.42E-51 | 0.448574677 | count | 5.87E-47    |
| TMEM18     | 0.3190246 | 0.1046781 | 3.0477  | 0.00233  | 0.448600759 | count | 1           |
| BLVRA      | 0.3282434 | 0.1360376 | 2.4129  | 0.0159   | 0.448763816 | count | 1           |
| SS18       | 0.3491954 | 0.2076994 | 1.6813  | 0.0928   | 0.448786635 | count | 1           |
| NUB1       | 0.3200595 | 0.0956496 | 3.3462  | 0.00083  | 0.448810591 | count | 1           |
| TNFAIP3    | 0.3223712 | 0.194856  | 1.6544  | 0.0982   | 0.448856709 | count | 1           |
| ZNF672     | 0.4117237 | 0.2883706 | 1.4278  | 0.153    | 0.448880558 | count | 1           |
| CIZ1       | 0.3752657 | 0.2514645 | 1.4923  | 0.136    | 0.449110865 | count | 1           |
| NUP155     | 0.4413305 | 0.3351286 | 1.3169  | 0.188    | 0.449206173 | count | 1           |
| REC8       | 0.6974775 | 0.6829041 | 1.0213  | 0.307    | 0.449219193 | count | 1           |
| RRS1       | 0.3994907 | 0.271583  | 1.471   | 0.141    | 0.44929117  | count | 1           |



|            |           |           |        |          |             |       |          |
|------------|-----------|-----------|--------|----------|-------------|-------|----------|
| NDUFV3     | 0.3276914 | 0.138482  | 2.3663 | 0.018    | 0.449325252 | count | 1        |
| LANCL2     | 0.6693201 | 0.5719202 | 1.1703 | 0.242    | 0.449358781 | count | 1        |
| PQLC3      | 0.3291198 | 0.1601543 | 2.055  | 0.04     | 0.449366662 | count | 1        |
| TMEM255B   | 0.3208499 | 0.1147739 | 2.7955 | 0.00522  | 0.449463768 | count | 1        |
| DPYSL2     | 0.3178205 | 0.0878964 | 3.6159 | 0.000305 | 0.449494201 | count | 1        |
| ZNF419     | 0.5736053 | 0.5397933 | 1.0626 | 0.288    | 0.449539729 | count | 1        |
| COMMD6     | 0.3134612 | 0.042577  | 7.3622 | 2.37E-13 | 0.449619316 | count | 5.66E-09 |
| DYM        | 0.3561475 | 0.2500226 | 1.4245 | 0.154    | 0.449730733 | count | 1        |
| AC100810.1 | 0.3574532 | 0.219088  | 1.6316 | 0.103    | 0.449817286 | count | 1        |
| SERTAD1    | 0.3154923 | 0.0695393 | 4.5369 | 5.95E-06 | 0.45036015  | count | 0.138397 |
| BCLAF3     | 0.3870763 | 0.2997323 | 1.2914 | 0.197    | 0.450374372 | count | 1        |
| ARIH1      | 0.3361715 | 0.1821858 | 1.8452 | 0.0651   | 0.450421696 | count | 1        |
| FARS2      | 0.3741887 | 0.2516619 | 1.4869 | 0.137    | 0.450663849 | count | 1        |
| RNF217     | 0.3462261 | 0.2120286 | 1.6329 | 0.103    | 0.450675185 | count | 1        |
| SWT1       | 0.4899669 | 0.4284145 | 1.1437 | 0.253    | 0.450763101 | count | 1        |
| HDGFL2     | 0.3379553 | 0.2060551 | 1.6401 | 0.101    | 0.450818005 | count | 1        |
| PMM2       | 0.3540356 | 0.2108948 | 1.6787 | 0.0933   | 0.450827478 | count | 1        |
| EIPR1      | 0.4139166 | 0.3688769 | 1.1221 | 0.262    | 0.451162405 | count | 1        |
| INPP5K     | 0.350825  | 0.1816178 | 1.9317 | 0.0535   | 0.451217731 | count | 1        |
| GALNT18    | 0.3573494 | 0.2330974 | 1.533  | 0.125    | 0.451217846 | count | 1        |
| VPS9D1     | 0.7012709 | 0.6400596 | 1.0956 | 0.273    | 0.451245978 | count | 1        |
| AC015813.1 | 1.4286232 | 1.041655  | 1.3715 | 0.17     | 0.451457425 | count | 1        |
| CROT       | 0.3870193 | 0.4106535 | 0.9424 | 0.346    | 0.451574234 | count | 1        |
| GPATCH4    | 0.3365332 | 0.1599057 | 2.1046 | 0.0354   | 0.451949468 | count | 1        |
| PYROXD1    | 0.3753273 | 0.2674477 | 1.4034 | 0.161    | 0.451996723 | count | 1        |
| PTBP3      | 0.3298068 | 0.1307769 | 2.5219 | 0.0117   | 0.45242289  | count | 1        |
| ZNF283     | 0.6095668 | 0.544902  | 1.1187 | 0.263    | 0.45245936  | count | 1        |
| NSL1       | 0.32594   | 0.1158628 | 2.8132 | 0.00494  | 0.452598819 | count | 1        |
| AMBRA1     | 0.9656521 | 0.8617015 | 1.1206 | 0.263    | 0.452625447 | count | 1        |
| RAB3GAP1   | 0.3473246 | 0.1804036 | 1.9253 | 0.0543   | 0.452962353 | count | 1        |
| SCG3       | 1.442167  | 0.9571778 | 1.5067 | 0.132    | 0.453822135 | count | 1        |
| RNF34      | 0.3654242 | 0.2352641 | 1.5533 | 0.12     | 0.453827704 | count | 1        |
| SLC38A5    | 0.4763278 | 0.6254547 | 0.7616 | 0.446    | 0.454018904 | count | 1        |
| AL162377.1 | 0.6121777 | 0.5754593 | 1.0638 | 0.288    | 0.454141958 | count | 1        |
| NOL10      | 0.3798783 | 0.2280325 | 1.6659 | 0.0958   | 0.454469501 | count | 1        |
| LIPE-AS1   | 0.4945756 | 0.4733238 | 1.0449 | 0.296    | 0.454662527 | count | 1        |
| PIP4P1     | 0.345912  | 0.1593217 | 2.1712 | 0.03     | 0.455091603 | count | 1        |
| LINC02356  | 1.077986  | 1.038472  | 1.0381 | 0.299    | 0.455201428 | count | 1        |
| DDX18      | 0.3215952 | 0.0888869 | 3.618  | 0.000302 | 0.455382412 | count | 1        |
| MIIP       | 0.3670914 | 0.2361925 | 1.5542 | 0.12     | 0.455850335 | count | 1        |
| MRFAP1L1   | 0.3487951 | 0.2128829 | 1.6384 | 0.101    | 0.455980757 | count | 1        |
| FKBP4      | 0.3503862 | 0.2164403 | 1.6189 | 0.106    | 0.4563058   | count | 1        |
| ZNF253     | 0.4280514 | 0.3966265 | 1.0792 | 0.281    | 0.456328279 | count | 1        |
| ZSCAN21    | 0.5109765 | 0.4139657 | 1.2343 | 0.217    | 0.456657422 | count | 1        |
| ZNF600     | 0.6571654 | 0.5529398 | 1.1885 | 0.235    | 0.456663774 | count | 1        |

|              |           |           |        |          |             |       |           |
|--------------|-----------|-----------|--------|----------|-------------|-------|-----------|
| ABO          | 0.4033275 | 0.4308763 | 0.9361 | 0.349    | 0.456786576 | count | 1         |
| CAT          | 0.3307971 | 0.1214565 | 2.7236 | 0.0065   | 0.45685371  | count | 1         |
| ZNF354A      | 0.369714  | 0.2448432 | 1.51   | 0.131    | 0.457063292 | count | 1         |
| MKNK1        | 0.3981236 | 0.3228441 | 1.2332 | 0.218    | 0.457239811 | count | 1         |
| SLC8B1       | 0.3840445 | 0.2903254 | 1.3228 | 0.186    | 0.457278182 | count | 1         |
| ZNF391       | 0.8382294 | 0.7806212 | 1.0738 | 0.283    | 0.457401575 | count | 1         |
| STPG1        | 0.5046951 | 0.3591769 | 1.4051 | 0.16     | 0.457489781 | count | 1         |
| CNRIP1       | 0.3341251 | 0.1269263 | 2.6324 | 0.00852  | 0.457624442 | count | 1         |
| ZDHHC23      | 0.6010205 | 0.4778498 | 1.2578 | 0.209    | 0.457950689 | count | 1         |
| ZNF234       | 0.6374764 | 0.5236983 | 1.2173 | 0.224    | 0.458004805 | count | 1         |
| MTMR1        | 0.5859437 | 0.7552845 | 0.7758 | 0.438    | 0.458058191 | count | 1         |
| IRF8         | 0.6599108 | 0.5484237 | 1.2033 | 0.229    | 0.458283254 | count | 1         |
| GNAI3        | 0.3293028 | 0.0930278 | 3.5398 | 0.000407 | 0.458384215 | count | 1         |
| ZNF333       | 0.5296949 | 0.4186644 | 1.2652 | 0.206    | 0.458460127 | count | 1         |
| ZNF217       | 0.3501505 | 0.1900679 | 1.8422 | 0.0655   | 0.458543108 | count | 1         |
| FGR          | 0.3943554 | 0.2510169 | 1.571  | 0.116    | 0.45855152  | count | 1         |
| MLLT10       | 0.3437206 | 0.1701165 | 2.0205 | 0.0434   | 0.458593999 | count | 1         |
| NFKBIL1      | 0.3408903 | 0.1622181 | 2.1014 | 0.0357   | 0.458600097 | count | 1         |
| ELAC1        | 0.4115803 | 0.3271756 | 1.258  | 0.209    | 0.458712213 | count | 1         |
| NDE1         | 0.3711772 | 0.2493225 | 1.4887 | 0.137    | 0.458828677 | count | 1         |
| THAP6        | 0.4039076 | 0.2787661 | 1.4489 | 0.147    | 0.45903222  | count | 1         |
| ZNF746       | 0.5219058 | 0.5261995 | 0.9918 | 0.321    | 0.459100211 | count | 1         |
| NOP53        | 0.3207387 | 0.0500844 | 6.404  | 1.77E-10 | 0.459277075 | count | 4.20E-06  |
| ADK          | 0.3834103 | 0.3043935 | 1.2596 | 0.208    | 0.459550292 | count | 1         |
| RABGGTA      | 0.366717  | 0.2343005 | 1.5652 | 0.118    | 0.459577132 | count | 1         |
| DTX4         | 0.5883959 | 0.4953475 | 1.1878 | 0.235    | 0.4597452   | count | 1         |
| SLC25A21-AS1 | 0.456013  | 0.369704  | 1.2335 | 0.218    | 0.459771136 | count | 1         |
| RRP8         | 0.363563  | 0.293568  | 1.2384 | 0.216    | 0.459901568 | count | 1         |
| CHCHD6       | 0.3837131 | 0.3247538 | 1.1816 | 0.237    | 0.459902558 | count | 1         |
| TFEB         | 0.3922984 | 0.2173865 | 1.8046 | 0.0712   | 0.460002904 | count | 1         |
| TBL3         | 0.4184146 | 0.2969565 | 1.409  | 0.159    | 0.460078884 | count | 1         |
| SPON1        | 0.987925  | 0.5532911 | 1.7855 | 0.0743   | 0.460106443 | count | 1         |
| UBE2E2       | 0.3677292 | 0.2627236 | 1.3997 | 0.162    | 0.460248133 | count | 1         |
| CEBPD        | 0.319807  | 0.0666666 | 4.7971 | 1.70E-06 | 0.460279841 | count | 0.0396865 |
| PRIM2        | 0.4608181 | 0.3188681 | 1.4452 | 0.149    | 0.460670492 | count | 1         |
| E2F5         | 0.7190224 | 0.528234  | 1.3612 | 0.174    | 0.460670885 | count | 1         |
| FAM161B      | 0.6057123 | 0.4626107 | 1.3093 | 0.191    | 0.461071554 | count | 1         |
| TRAPPC2B     | 0.3348679 | 0.1355572 | 2.4703 | 0.0136   | 0.461206228 | count | 1         |
| CXXC4        | 0.9916392 | 0.8178323 | 1.2125 | 0.225    | 0.461342261 | count | 1         |
| HERC6        | 0.426197  | 0.3961898 | 1.0757 | 0.282    | 0.461657284 | count | 1         |
| ATF2         | 0.3552943 | 0.1779841 | 1.9962 | 0.046    | 0.46167306  | count | 1         |
| MSH2         | 0.3815223 | 0.2329339 | 1.6379 | 0.102    | 0.461940531 | count | 1         |
| GNPAT        | 0.3890741 | 0.2543151 | 1.5299 | 0.126    | 0.462020577 | count | 1         |
| CCDC93       | 0.3609512 | 0.2215843 | 1.629  | 0.103    | 0.462030469 | count | 1         |
| C2orf49      | 0.3419889 | 0.158861  | 2.1528 | 0.0314   | 0.462044867 | count | 1         |

|            |           |           |         |          |             |       |          |
|------------|-----------|-----------|---------|----------|-------------|-------|----------|
| NARFL      | 0.3964891 | 0.325116  | 1.2195  | 0.223    | 0.462244358 | count | 1        |
| RENBP      | 0.5345668 | 0.559463  | 0.9555  | 0.339    | 0.462273252 | count | 1        |
| PCDHB4     | 0.4913674 | 0.3788472 | 1.297   | 0.195    | 0.462376872 | count | 1        |
| DOPEY2     | 0.5658819 | 0.4868714 | 1.1623  | 0.245    | 0.462399451 | count | 1        |
| COL4A3BP   | 0.3322304 | 0.1189614 | 2.7928  | 0.00526  | 0.462511886 | count | 1        |
| FIGNL1     | 0.5108791 | 0.4066749 | 1.2562  | 0.209    | 0.462618001 | count | 1        |
| TMEM134    | 0.3371542 | 0.1343174 | 2.5101  | 0.0121   | 0.462645945 | count | 1        |
| ARFIP2     | 0.3743755 | 0.2401132 | 1.5592  | 0.119    | 0.462686165 | count | 1        |
| NR2F1      | 0.3928499 | 0.2445756 | 1.6063  | 0.108    | 0.462998975 | count | 1        |
| SOAT1      | 0.3833005 | 0.273714  | 1.4004  | 0.162    | 0.46314797  | count | 1        |
| POLL       | 0.409204  | 0.3143697 | 1.3017  | 0.193    | 0.463177168 | count | 1        |
| YOD1       | 0.4922945 | 0.5650259 | 0.8713  | 0.384    | 0.463182175 | count | 1        |
| DHRS4L2    | 0.3385917 | 0.129767  | 2.6092  | 0.00912  | 0.463294609 | count | 1        |
| FOS        | 0.3214041 | 0.0428892 | 7.4938  | 8.95E-14 | 0.463350694 | count | 2.14E-09 |
| CFAP298    | 0.3360373 | 0.1173813 | 2.8628  | 0.00423  | 0.463413037 | count | 1        |
| FBXL5      | 0.3445765 | 0.1509899 | 2.2821  | 0.0226   | 0.463787795 | count | 1        |
| DUSP4      | 0.3663124 | 0.2408892 | 1.5207  | 0.128    | 0.463800769 | count | 1        |
| ZNF189     | 0.5197645 | 0.4343435 | 1.1967  | 0.232    | 0.463814869 | count | 1        |
| LMBR1      | 0.3771004 | 0.2802681 | 1.3455  | 0.179    | 0.463850079 | count | 1        |
| LINC02202  | 0.8025412 | 0.7424072 | 1.081   | 0.28     | 0.463937457 | count | 1        |
| AC061992.1 | 0.9176153 | 1.3292513 | 0.6903  | 0.49     | 0.463944431 | count | 1        |
| ZNRF2      | 0.4133409 | 0.2847293 | 1.4517  | 0.147    | 0.464225867 | count | 1        |
| COX15      | 0.3827679 | 0.2626953 | 1.4571  | 0.145    | 0.464273437 | count | 1        |
| LYPLA2     | 0.3433508 | 0.1456471 | 2.3574  | 0.0185   | 0.464358247 | count | 1        |
| ATG14      | 0.3562148 | 0.2039306 | 1.7467  | 0.0808   | 0.464376307 | count | 1        |
| RANBP3     | 0.405957  | 0.2828006 | 1.4355  | 0.151    | 0.464395062 | count | 1        |
| RNASEH2B   | 0.3653577 | 0.2449823 | 1.4914  | 0.136    | 0.46450852  | count | 1        |
| CNIH1      | 0.3289506 | 0.0879971 | 3.7382  | 0.000189 | 0.464633403 | count | 1        |
| AP001160.3 | 0.7621101 | 0.7707638 | 0.9888  | 0.323    | 0.464757121 | count | 1        |
| H3F3B      | 0.3225092 | 0.0289517 | 11.1396 | 3.19E-28 | 0.464765969 | count | 7.71E-24 |
| CRTAP      | 0.329134  | 0.0806056 | 4.0833  | 4.57E-05 | 0.465305597 | count | 1        |
| RBPM5      | 0.3297063 | 0.088417  | 3.729   | 0.000196 | 0.465496768 | count | 1        |
| PEAK1      | 0.3846671 | 0.2849341 | 1.35    | 0.177    | 0.46564145  | count | 1        |
| DSP        | 0.3708598 | 0.2914829 | 1.2723  | 0.203    | 0.465777046 | count | 1        |
| ALG3       | 0.3554031 | 0.1804016 | 1.9701  | 0.0489   | 0.465857276 | count | 1        |
| RNF123     | 0.6732971 | 0.6608901 | 1.0188  | 0.308    | 0.466145084 | count | 1        |
| PWP1       | 0.3370121 | 0.1179027 | 2.8584  | 0.00429  | 0.466389899 | count | 1        |
| TAMM41     | 0.4153939 | 0.3119974 | 1.3314  | 0.183    | 0.466435611 | count | 1        |
| MFSD14B    | 0.3929376 | 0.2578645 | 1.5238  | 0.128    | 0.466463899 | count | 1        |
| VAT1       | 0.3359881 | 0.1265796 | 2.6544  | 0.00799  | 0.466557232 | count | 1        |
| LAMB2      | 0.3381663 | 0.1548195 | 2.1843  | 0.029    | 0.466564458 | count | 1        |
| DLD        | 0.3506364 | 0.1610721 | 2.1769  | 0.0296   | 0.466605796 | count | 1        |
| C22orf34   | 0.766222  | 0.6727112 | 1.139   | 0.255    | 0.46677921  | count | 1        |
| WDR6       | 0.4110776 | 0.2718568 | 1.5121  | 0.131    | 0.466858918 | count | 1        |
| COA7       | 0.4290905 | 0.4393073 | 0.9767  | 0.329    | 0.466917255 | count | 1        |

|           |           |           |        |          |             |       |           |
|-----------|-----------|-----------|--------|----------|-------------|-------|-----------|
| MEMO1     | 0.4336975 | 0.7816375 | 0.5549 | 0.579    | 0.467010896 | count | 1         |
| RNPC3     | 0.3456388 | 0.2031274 | 1.7016 | 0.0889   | 0.467052133 | count | 1         |
| ABCB7     | 0.3774429 | 0.2680381 | 1.4082 | 0.159    | 0.467067077 | count | 1         |
| CROCC     | 0.486207  | 0.408244  | 1.191  | 0.234    | 0.467395236 | count | 1         |
| C5orf34   | 0.5614836 | 0.7066961 | 0.7945 | 0.427    | 0.467581559 | count | 1         |
| NMRK1     | 0.3355369 | 0.1118022 | 3.0012 | 0.00271  | 0.467632385 | count | 1         |
| FAM49B    | 0.3671574 | 0.2230112 | 1.6464 | 0.0998   | 0.467661308 | count | 1         |
| RBM42     | 0.3370034 | 0.1101861 | 3.0585 | 0.00225  | 0.467786196 | count | 1         |
| JARID2    | 0.3881326 | 0.3028362 | 1.2817 | 0.2      | 0.467903688 | count | 1         |
| RBM27     | 0.450987  | 0.3451242 | 1.3067 | 0.191    | 0.468061064 | count | 1         |
| TPST1     | 0.3875029 | 0.2626888 | 1.4751 | 0.14     | 0.468080793 | count | 1         |
| KIAA1586  | 0.3513915 | 0.1834514 | 1.9154 | 0.0555   | 0.46815975  | count | 1         |
| KDM6A     | 0.3926019 | 0.4579804 | 0.8572 | 0.391    | 0.468200523 | count | 1         |
| PRTG      | 0.9291746 | 0.5685532 | 1.6343 | 0.102    | 0.46827465  | count | 1         |
| ZNF420    | 0.4735425 | 0.34671   | 1.3658 | 0.172    | 0.468667025 | count | 1         |
| PSPC1     | 0.3795287 | 0.2241067 | 1.6935 | 0.0905   | 0.468897629 | count | 1         |
| TSNAX     | 0.3409919 | 0.1275317 | 2.6738 | 0.00754  | 0.46899469  | count | 1         |
| CEP44     | 0.3740754 | 0.2386112 | 1.5677 | 0.117    | 0.469164492 | count | 1         |
| FOXK1     | 0.4026512 | 0.2741598 | 1.4687 | 0.142    | 0.469176784 | count | 1         |
| BVES      | 0.8664531 | 2.0660066 | 0.4194 | 0.675    | 0.469215029 | count | 1         |
| ZNF766    | 0.377425  | 0.2433852 | 1.5507 | 0.121    | 0.469662039 | count | 1         |
| MTIF3     | 0.33214   | 0.0905877 | 3.6665 | 0.000251 | 0.469662315 | count | 1         |
| NFKBIB    | 0.392367  | 0.2208591 | 1.7765 | 0.0758   | 0.469962266 | count | 1         |
| UBIAD1    | 0.4843162 | 0.3384681 | 1.4309 | 0.153    | 0.470170584 | count | 1         |
| NEDD1     | 0.4061489 | 0.2626432 | 1.5464 | 0.122    | 0.470409667 | count | 1         |
| ZNF565    | 0.5547179 | 0.5659727 | 0.9801 | 0.327    | 0.470431163 | count | 1         |
| C19orf54  | 0.6377854 | 0.5449375 | 1.1704 | 0.242    | 0.470526424 | count | 1         |
| ANXA11    | 0.3325949 | 0.0784459 | 4.2398 | 2.31E-05 | 0.470734164 | count | 0.5340951 |
| CCDC17    | 1.1338756 | 1.1479191 | 0.9878 | 0.323    | 0.470909662 | count | 1         |
| THAP2     | 0.4094224 | 0.3130793 | 1.3077 | 0.191    | 0.471206417 | count | 1         |
| ASNA1     | 0.3456831 | 0.127534  | 2.7105 | 0.00676  | 0.471699626 | count | 1         |
| LINC02001 | 0.3781693 | 0.2130039 | 1.7754 | 0.0759   | 0.471812201 | count | 1         |
| WDR60     | 0.3436701 | 0.1275862 | 2.6936 | 0.00711  | 0.47188439  | count | 1         |
| C19orf25  | 0.3580577 | 0.1821039 | 1.9662 | 0.0494   | 0.472062314 | count | 1         |
| TDP2      | 0.3689564 | 0.2005105 | 1.8401 | 0.0659   | 0.472083551 | count | 1         |
| OARD1     | 0.3470465 | 0.1451567 | 2.3908 | 0.0169   | 0.472197773 | count | 1         |
| INTS3     | 0.3923249 | 0.2392341 | 1.6399 | 0.101    | 0.472809616 | count | 1         |
| LSMEM1    | 0.7429616 | 0.6287785 | 1.1816 | 0.237    | 0.473226228 | count | 1         |
| ZSCAN5A   | 0.7429616 | 0.7155611 | 1.0383 | 0.299    | 0.473226228 | count | 1         |
| SERINC5   | 0.4533209 | 0.3150029 | 1.4391 | 0.15     | 0.473355064 | count | 1         |
| VPS41     | 0.3666126 | 0.1917612 | 1.9118 | 0.056    | 0.47340089  | count | 1         |
| FBXO33    | 0.3981056 | 0.2561558 | 1.5542 | 0.12     | 0.473491953 | count | 1         |
| TXNDC11   | 0.4832627 | 0.3469589 | 1.3929 | 0.164    | 0.473503594 | count | 1         |
| ELF4      | 0.5104545 | 0.3279224 | 1.5566 | 0.12     | 0.473586162 | count | 1         |
| ARFGAP2   | 0.3680642 | 0.2030132 | 1.813  | 0.0699   | 0.473758893 | count | 1         |

|            |           |           |        |          |             |       |            |
|------------|-----------|-----------|--------|----------|-------------|-------|------------|
| TMEM150C   | 0.36161   | 0.1856738 | 1.9476 | 0.0516   | 0.473870734 | count | 1          |
| ZNF10      | 0.5245447 | 0.6955925 | 0.7541 | 0.451    | 0.473906834 | count | 1          |
| HMGA1      | 0.381568  | 0.2210314 | 1.7263 | 0.0844   | 0.474049309 | count | 1          |
| SLC39A4    | 0.3656604 | 0.2164434 | 1.6894 | 0.0913   | 0.474263827 | count | 1          |
| SNAP29     | 0.3460595 | 0.1477288 | 2.3425 | 0.0192   | 0.474314258 | count | 1          |
| RMI2       | 1.3101277 | 1.11573   | 1.1742 | 0.24     | 0.4743202   | count | 1          |
| IQCH       | 1.0315594 | 1.0861999 | 0.9497 | 0.342    | 0.474415625 | count | 1          |
| EPHA1-AS1  | 2.052575  | 1.1846763 | 1.7326 | 0.0833   | 0.474421042 | count | 1          |
| ZNF79      | 1.1467159 | 1.0414591 | 1.1011 | 0.271    | 0.47442428  | count | 1          |
| HLA-E      | 0.3293028 | 0.0285531 | 11.533 | 4.35E-30 | 0.474489001 | count | 1.05E-25   |
| AC011416.3 | 0.6644482 | 0.6423908 | 1.0343 | 0.301    | 0.474519178 | count | 1          |
| FAM120B    | 0.3946928 | 0.2711478 | 1.4556 | 0.146    | 0.474626857 | count | 1          |
| AMOTL1     | 0.3734513 | 0.2039598 | 1.831  | 0.0672   | 0.475058108 | count | 1          |
| DHX9       | 0.3505692 | 0.148627  | 2.3587 | 0.0184   | 0.475100164 | count | 1          |
| PPP5C      | 0.381562  | 0.2215656 | 1.7221 | 0.0852   | 0.475321766 | count | 1          |
| TMEM126A   | 0.3459169 | 0.1343577 | 2.5746 | 0.0101   | 0.475512837 | count | 1          |
| MNDA       | 0.7476012 | 0.9313889 | 0.8027 | 0.422    | 0.475639017 | count | 1          |
| CNOT4      | 0.3452099 | 0.1217602 | 2.8352 | 0.00461  | 0.475665901 | count | 1          |
| TM4SF1-AS1 | 0.6459997 | 0.6307512 | 1.0242 | 0.306    | 0.475736605 | count | 1          |
| PLEKHG2    | 0.5196479 | 0.4196439 | 1.2383 | 0.216    | 0.475757584 | count | 1          |
| WDSUB1     | 0.4149727 | 0.3462029 | 1.1986 | 0.231    | 0.475847704 | count | 1          |
| UTP3       | 0.3594674 | 0.1810137 | 1.9859 | 0.0471   | 0.475944491 | count | 1          |
| HSPA12B    | 0.3575225 | 0.152647  | 2.3422 | 0.0192   | 0.476037197 | count | 1          |
| ZNF286A    | 1.0366512 | 0.9539164 | 1.0867 | 0.277    | 0.476055784 | count | 1          |
| HS6ST1     | 0.4199027 | 0.336103  | 1.2493 | 0.212    | 0.476475327 | count | 1          |
| FAM208B    | 0.3616614 | 0.1792241 | 2.0179 | 0.0437   | 0.476504335 | count | 1          |
| TNFRSF1B   | 0.3501503 | 0.1735143 | 2.018  | 0.0437   | 0.476585011 | count | 1          |
| NAAA       | 0.3638768 | 0.1990128 | 1.8284 | 0.0676   | 0.477067764 | count | 1          |
| USP31      | 0.4150178 | 0.393756  | 1.054  | 0.292    | 0.477400874 | count | 1          |
| HDHC2      | 0.3719706 | 0.1851693 | 2.0088 | 0.0447   | 0.477515786 | count | 1          |
| GALE       | 0.3682412 | 0.1849778 | 1.9907 | 0.0466   | 0.477554454 | count | 1          |
| SELENOP    | 0.3355602 | 0.0737718 | 4.5486 | 5.63E-06 | 0.477700654 | count | 0.13098758 |
| C4orf47    | 1.5889641 | 1.0157348 | 1.5643 | 0.118    | 0.47777114  | count | 1          |
| TRIM52     | 0.3852916 | 0.3032114 | 1.2707 | 0.204    | 0.477899241 | count | 1          |
| CENPT      | 0.3894882 | 0.2679284 | 1.4537 | 0.146    | 0.477929699 | count | 1          |
| API5       | 0.3743664 | 0.2129303 | 1.7582 | 0.0788   | 0.478006265 | count | 1          |
| LTBP1      | 0.4229236 | 0.3613002 | 1.1706 | 0.242    | 0.478064396 | count | 1          |
| FYN        | 0.3531375 | 0.1543886 | 2.2873 | 0.0223   | 0.47819306  | count | 1          |
| S100A10    | 0.3318533 | 0.038309  | 8.6625 | 7.71E-18 | 0.47825853  | count | 1.85E-13   |
| ARNTL2     | 0.410907  | 0.3679514 | 1.1167 | 0.264    | 0.478451332 | count | 1          |
| IPMK       | 0.4283803 | 0.3345227 | 1.2806 | 0.2      | 0.478524711 | count | 1          |
| HARBI1     | 1.0445546 | 1.1334353 | 0.9216 | 0.357    | 0.478589511 | count | 1          |
| YTHDF3-AS1 | 0.5886902 | 0.5442964 | 1.0816 | 0.28     | 0.478909838 | count | 1          |
| KIAA0586   | 0.3789621 | 0.1905079 | 1.9892 | 0.0468   | 0.478967041 | count | 1          |
| THAP12     | 0.3501806 | 0.1402854 | 2.4962 | 0.0126   | 0.479021003 | count | 1          |

|            |            |             |        |          |             |       |            |
|------------|------------|-------------|--------|----------|-------------|-------|------------|
| ASL        | 0.3642794  | 0.1894137   | 1.9232 | 0.0546   | 0.479408778 | count | 1          |
| NUP153     | 0.4258114  | 0.2731377   | 1.559  | 0.119    | 0.47943576  | count | 1          |
| UBL7-AS1   | 0.4032785  | 0.2886697   | 1.397  | 0.163    | 0.47944639  | count | 1          |
| CLEC2D     | 1.047437   | 0.768768    | 1.3625 | 0.173    | 0.479509972 | count | 1          |
| ZNF8       | 0.557043   | 0.5435422   | 1.0248 | 0.306    | 0.479764264 | count | 1          |
| SHLD1      | 0.459962   | 0.3598329   | 1.2783 | 0.201    | 0.479890968 | count | 1          |
| SMC1B      | 0.8388856  | 1.194028    | 0.7026 | 0.482    | 0.480353574 | count | 1          |
| CLDND1     | 0.3456793  | 0.1056475   | 3.272  | 0.00108  | 0.480736203 | count | 1          |
| ASB13      | 0.5589211  | 0.4830037   | 1.1572 | 0.247    | 0.48121832  | count | 1          |
| FAIM       | 0.3859144  | 0.231043    | 1.6703 | 0.095    | 0.481245556 | count | 1          |
| ZNF559     | 0.4678897  | 0.3795307   | 1.2328 | 0.218    | 0.481339144 | count | 1          |
| FO681492.1 | 0.5135883  | 0.5429486   | 0.9459 | 0.344    | 0.481603867 | count | 1          |
| SPIDR      | 0.3795291  | 0.2250059   | 1.6868 | 0.0918   | 0.481672871 | count | 1          |
| ATP8B3     | 1.347388   | 1.0600354   | 1.2711 | 0.204    | 0.482289117 | count | 1          |
| PPIH       | 0.3569776  | 0.1464394   | 2.4377 | 0.0148   | 0.482472629 | count | 1          |
| RFC2       | 0.3849508  | 0.21715     | 1.7727 | 0.0764   | 0.482491825 | count | 1          |
| PPFIBP1    | 0.3421848  | 0.087545    | 3.9087 | 9.50E-05 | 0.48256389  | count | 1          |
| CCNL1      | 0.3387451  | 0.0735059   | 4.6084 | 4.24E-06 | 0.482576029 | count | 0.09872416 |
| FANCF      | 0.4339973  | 0.3288499   | 1.3197 | 0.187    | 0.482576611 | count | 1          |
| NCAPH2     | 0.459883   | 0.3339716   | 1.377  | 0.169    | 0.48277277  | count | 1          |
| ABHD3      | 0.5715772  | 0.4840899   | 1.1807 | 0.238    | 0.483218436 | count | 1          |
| SPAG7      | 0.3481459  | 0.1051919   | 3.3096 | 0.000946 | 0.483339007 | count | 1          |
| NPHP4      | 1.3529633  | 1.0737863   | 1.26   | 0.208    | 0.483461034 | count | 1          |
| SNAPC1     | 0.3591599  | 0.154336    | 2.3271 | 0.02     | 0.483490427 | count | 1          |
| SETD1A     | 0.515839   | 0.4375598   | 1.1789 | 0.239    | 0.483542606 | count | 1          |
| RBM43      | 0.3541186  | 0.169596    | 2.088  | 0.0369   | 0.483750532 | count | 1          |
| FAM76B     | 0.3646524  | 0.1812222   | 2.0122 | 0.0443   | 0.483792602 | count | 1          |
| TIPIN      | 0.3970292  | 0.2863436   | 1.3865 | 0.166    | 0.484516083 | count | 1          |
| TBCE       | 0.6810882  | 0.4613274   | 1.4764 | 0.14     | 0.484589574 | count | 1          |
| LY96       | 0.3460204  | 0.0994449   | 3.4795 | 0.00051  | 0.484720827 | count | 1          |
| ITGB4      | 0.3429469  | 0.1054808   | 3.2513 | 0.00116  | 0.484771758 | count | 1          |
| ST8SIA4    | 0.3727511  | 0.2540491   | 1.4672 | 0.142    | 0.484949087 | count | 1          |
| EXOC4      | 0.370441   | 0.2065488   | 1.7935 | 0.073    | 0.484983566 | count | 1          |
| AC021016.3 | 15.5478498 | 1104.094005 | 0.0141 | 0.989    | 0.485756709 | count | 1          |
| TMC1       | 15.5478498 | 1104.094004 | 0.0141 | 0.989    | 0.485756709 | count | 1          |
| FBXO10     | 15.5479137 | 1217.736267 | 0.0128 | 0.99     | 0.485756709 | count | 1          |
| STAMBPL1   | 15.7008653 | 1089.24976  | 0.0144 | 0.989    | 0.485756724 | count | 1          |
| PACRG      | 15.7008721 | 1089.250003 | 0.0144 | 0.989    | 0.485756724 | count | 1          |
| AC073263.2 | 15.7009049 | 1201.346701 | 0.0131 | 0.99     | 0.485756724 | count | 1          |
| AC005696.4 | 15.7945594 | 1214.200892 | 0.013  | 0.99     | 0.485756732 | count | 1          |
| AC005670.2 | 15.8342762 | 1100.224789 | 0.0144 | 0.989    | 0.485756735 | count | 1          |
| AC127164.1 | 15.8933547 | 1209.916621 | 0.0131 | 0.99     | 0.485756739 | count | 1          |
| AC245041.2 | 15.8935078 | 1461.45474  | 0.0109 | 0.991    | 0.485756739 | count | 1          |
| AP000438.1 | 15.9421732 | 1103.536876 | 0.0144 | 0.988    | 0.485756742 | count | 1          |
| DIABLO     | 15.9421745 | 1103.536258 | 0.0144 | 0.988    | 0.485756742 | count | 1          |

|             |            |             |        |        |             |       |   |
|-------------|------------|-------------|--------|--------|-------------|-------|---|
| AC092295.2  | 16.0084837 | 1577.790645 | 0.0101 | 0.992  | 0.485756747 | count | 1 |
| AC097359.2  | 16.0084948 | 1577.792735 | 0.0101 | 0.992  | 0.485756747 | count | 1 |
| AL731569.1  | 16.009012  | 2009.721695 | 0.008  | 0.994  | 0.485756747 | count | 1 |
| AC026254.2  | 16.0098107 | 2686.24849  | 0.006  | 0.995  | 0.485756747 | count | 1 |
| NEFH        | 16.0347863 | 1264.174692 | 0.0127 | 0.99   | 0.485756749 | count | 1 |
| AC108471.2  | 16.0348223 | 1186.617286 | 0.0135 | 0.989  | 0.485756749 | count | 1 |
| AC145285.2  | 16.0458516 | 1145.491261 | 0.014  | 0.989  | 0.485756749 | count | 1 |
| AC107027.1  | 15.5478538 | 1104.095039 | 0.0141 | 0.989  | 0.48575675  | count | 1 |
| AC233280.1  | 16.118317  | 1110.726107 | 0.0145 | 0.9884 | 0.485756754 | count | 1 |
| KCP         | 16.1907935 | 1099.742223 | 0.0147 | 0.988  | 0.485756758 | count | 1 |
| SCUBE1      | 16.1907935 | 1099.742225 | 0.0147 | 0.988  | 0.485756758 | count | 1 |
| TMEM220-AS1 | 16.207647  | 1579.56393  | 0.0103 | 0.992  | 0.485756759 | count | 1 |
| ADAMTS12    | 16.2169611 | 1212.277712 | 0.0134 | 0.989  | 0.485756759 | count | 1 |
| BHLHE40-AS1 | 16.2582868 | 1313.530746 | 0.0124 | 0.99   | 0.485756761 | count | 1 |
| AC145343.1  | 16.2954234 | 1089.636116 | 0.015  | 0.9881 | 0.485756763 | count | 1 |
| CYSLTR2     | 16.2971794 | 1929.33315  | 0.0084 | 0.993  | 0.485756763 | count | 1 |
| FAM181B     | 16.2971795 | 1929.333206 | 0.0084 | 0.993  | 0.485756763 | count | 1 |
| AL121821.1  | 16.2971796 | 1929.333228 | 0.0084 | 0.993  | 0.485756763 | count | 1 |
| TDRD1       | 16.2978182 | 2284.857887 | 0.0071 | 0.994  | 0.485756763 | count | 1 |
| SHCBP1L     | 16.2978183 | 2284.857937 | 0.0071 | 0.994  | 0.485756763 | count | 1 |
| PSMA8       | 16.2978184 | 2284.857837 | 0.0071 | 0.994  | 0.485756763 | count | 1 |
| GOLGA8Q     | 16.2984456 | 2592.423614 | 0.0063 | 0.995  | 0.485756763 | count | 1 |
| SLC6A15     | 16.2997749 | 3567.184013 | 0.0046 | 0.996  | 0.485756763 | count | 1 |
| LINC01915   | 16.3701595 | 1577.91325  | 0.0104 | 0.992  | 0.485756766 | count | 1 |
| TLL2        | 16.3701604 | 1577.912616 | 0.0104 | 0.992  | 0.485756766 | count | 1 |
| SYN3        | 16.3701633 | 1577.914376 | 0.0104 | 0.992  | 0.485756766 | count | 1 |
| TMEM178B    | 16.3701642 | 1577.914951 | 0.0104 | 0.992  | 0.485756766 | count | 1 |
| AC068305.2  | 16.370169  | 1577.915468 | 0.0104 | 0.992  | 0.485756766 | count | 1 |
| GRM3        | 16.3706995 | 1893.064235 | 0.0086 | 0.993  | 0.485756766 | count | 1 |
| LINC01659   | 16.3790737 | 1807.771676 | 0.0091 | 0.993  | 0.485756767 | count | 1 |
| AC011481.2  | 16.3790761 | 1807.77166  | 0.0091 | 0.993  | 0.485756767 | count | 1 |
| HIST1H2AH   | 16.3790835 | 1807.775221 | 0.0091 | 0.993  | 0.485756767 | count | 1 |
| AC080112.1  | 16.3790835 | 1807.77523  | 0.0091 | 0.993  | 0.485756767 | count | 1 |
| TGFA        | 16.3794054 | 2321.675019 | 0.0071 | 0.994  | 0.485756767 | count | 1 |
| TMEM56      | 16.3990345 | 1398.094463 | 0.0117 | 0.9906 | 0.485756768 | count | 1 |
| HBB         | 16.4017672 | 1398.413051 | 0.0117 | 0.9906 | 0.485756768 | count | 1 |
| MIF-AS1     | 16.4923571 | 1086.600564 | 0.0152 | 0.988  | 0.485756772 | count | 1 |
| MDH1B       | 16.5080677 | 1764.592658 | 0.0094 | 0.993  | 0.485756772 | count | 1 |
| DPF3        | 16.5496356 | 1399.16045  | 0.0118 | 0.9906 | 0.485756774 | count | 1 |
| WDR90       | 16.5670633 | 1203.642318 | 0.0138 | 0.989  | 0.485756774 | count | 1 |
| APBA1       | 16.6116814 | 1552.733337 | 0.0107 | 0.9915 | 0.485756776 | count | 1 |
| AC008040.5  | 16.6278325 | 1571.795647 | 0.0106 | 0.992  | 0.485756777 | count | 1 |
| ALDH1L1     | 16.6278996 | 1761.005292 | 0.0094 | 0.992  | 0.485756777 | count | 1 |
| RELT        | 16.6462657 | 1092.523001 | 0.0152 | 0.9878 | 0.485756777 | count | 1 |
| RGMA        | 16.7340063 | 1757.299702 | 0.0095 | 0.992  | 0.48575678  | count | 1 |

|             |            |             |        |          |             |       |           |
|-------------|------------|-------------|--------|----------|-------------|-------|-----------|
| TMEM79      | 16.7343758 | 1829.741076 | 0.0091 | 0.993    | 0.48575678  | count | 1         |
| TESMIN      | 16.7467609 | 2579.884454 | 0.0065 | 0.995    | 0.485756781 | count | 1         |
| MOCOS       | 16.7467609 | 2579.884497 | 0.0065 | 0.995    | 0.485756781 | count | 1         |
| AC008440.1  | 16.7467609 | 2579.884475 | 0.0065 | 0.995    | 0.485756781 | count | 1         |
| YPEL4       | 16.7467655 | 2579.884421 | 0.0065 | 0.995    | 0.485756781 | count | 1         |
| OR2I1P      | 16.7467745 | 2579.895258 | 0.0065 | 0.995    | 0.485756781 | count | 1         |
| MC1R        | 16.7471797 | 2890.186734 | 0.0058 | 0.995    | 0.485756781 | count | 1         |
| AMIGO1      | 16.7471798 | 2890.186698 | 0.0058 | 0.995    | 0.485756781 | count | 1         |
| FGF16       | 16.74718   | 2890.186806 | 0.0058 | 0.995    | 0.485756781 | count | 1         |
| HSD17B13    | 16.7471837 | 2890.185796 | 0.0058 | 0.995    | 0.485756781 | count | 1         |
| AL353708.3  | 16.7471885 | 2890.185712 | 0.0058 | 0.995    | 0.485756781 | count | 1         |
| SLC5A9      | 16.747191  | 2890.192109 | 0.0058 | 0.995    | 0.485756781 | count | 1         |
| PLEK        | 16.8238307 | 1833.450538 | 0.0092 | 0.9927   | 0.485756783 | count | 1         |
| SDR42E1     | 16.8305789 | 2170.261952 | 0.0078 | 0.994    | 0.485756783 | count | 1         |
| SLC4A5      | 17.0636132 | 3360.871327 | 0.0051 | 0.996    | 0.485756789 | count | 1         |
| AC002480.2  | 17.1026791 | 2360.416068 | 0.0072 | 0.994    | 0.48575679  | count | 1         |
| ALG1L       | 17.1026957 | 2360.418806 | 0.0072 | 0.994    | 0.48575679  | count | 1         |
| SYT12       | 17.1037047 | 4010.678513 | 0.0043 | 0.997    | 0.48575679  | count | 1         |
| NUP210      | 17.1037104 | 4010.68398  | 0.0043 | 0.997    | 0.48575679  | count | 1         |
| AC008914.1  | 17.1346842 | 1552.18642  | 0.011  | 0.9912   | 0.48575679  | count | 1         |
| PIK3C2G     | 17.193303  | 2914.72263  | 0.0059 | 0.995    | 0.485756792 | count | 1         |
| TPBGL       | 17.4922195 | 2359.10182  | 0.0074 | 0.994    | 0.485756797 | count | 1         |
| TLR6        | 17.4923462 | 2704.609299 | 0.0065 | 0.995    | 0.485756797 | count | 1         |
| AL645608.8  | 17.5191705 | 1908.570623 | 0.0092 | 0.9927   | 0.485756797 | count | 1         |
| S100A14     | 17.9748749 | 2464.078996 | 0.0073 | 0.9942   | 0.485756802 | count | 1         |
| AC025171.5  | 16.3701643 | 1577.914956 | 0.0104 | 0.992    | 0.485756808 | count | 1         |
| ARHGAP42    | 16.3790761 | 1807.771666 | 0.0091 | 0.993    | 0.485756808 | count | 1         |
| RIOK1       | 0.3663176  | 0.157935    | 2.3194 | 0.0204   | 0.485759973 | count | 1         |
| ALDH16A1    | 0.3833724  | 0.2019468   | 1.8984 | 0.0577   | 0.48644794  | count | 1         |
| XRN2        | 0.3431775  | 0.0801249   | 4.283  | 1.91E-05 | 0.486514703 | count | 0.4420122 |
| TRMT10C     | 0.3535564  | 0.1182146   | 2.9908 | 0.00281  | 0.486623597 | count | 1         |
| MMAA        | 0.5329184  | 0.4824792   | 1.1045 | 0.269    | 0.486841448 | count | 1         |
| QRFP        | 0.9800452  | 0.9096875   | 1.0773 | 0.281    | 0.486919901 | count | 1         |
| ADAMTS9-AS2 | 0.4706541  | 0.381698    | 1.2331 | 0.218    | 0.487251363 | count | 1         |
| GAS2L1      | 0.359999   | 0.1377011   | 2.6144 | 0.00899  | 0.487512014 | count | 1         |
| NFYC        | 0.372683   | 0.1683217   | 2.2141 | 0.0269   | 0.487587086 | count | 1         |
| TBC1D15     | 0.3507099  | 0.1132547   | 3.0966 | 0.00198  | 0.488014404 | count | 1         |
| CRAMP1      | 0.4622767  | 0.4807787   | 0.9615 | 0.336    | 0.488024007 | count | 1         |
| PPP3R1      | 0.3809989  | 0.1897551   | 2.0078 | 0.0448   | 0.48804803  | count | 1         |
| AC025287.2  | 1.1982225  | 1.0717937   | 1.118  | 0.264    | 0.488176341 | count | 1         |
| UBE2R2      | 0.3484735  | 0.1014109   | 3.4363 | 0.000599 | 0.488246157 | count | 1         |
| AC092140.1  | 1.3771384  | 1.1893065   | 1.1579 | 0.247    | 0.488479731 | count | 1         |
| CHERP       | 0.4396188  | 0.3531251   | 1.2449 | 0.213    | 0.488541118 | count | 1         |
| SSH3        | 0.4396188  | 0.4643412   | 0.9468 | 0.344    | 0.488541118 | count | 1         |
| DNM2        | 0.379095   | 0.1822736   | 2.0798 | 0.0376   | 0.488850379 | count | 1         |



|              |           |           |         |          |             |       |             |
|--------------|-----------|-----------|---------|----------|-------------|-------|-------------|
| SAFB2        | 0.3674262 | 0.1697347 | 2.1647  | 0.0305   | 0.488856262 | count | 1           |
| ERAP1        | 0.4299509 | 0.3211467 | 1.3388  | 0.181    | 0.489087268 | count | 1           |
| C5orf51      | 0.3876405 | 0.2273567 | 1.705   | 0.0883   | 0.489162195 | count | 1           |
| IKBIP        | 0.346902  | 0.0907581 | 3.8223  | 0.000135 | 0.489208354 | count | 1           |
| UHRF2        | 0.3709728 | 0.1841781 | 2.0142  | 0.0441   | 0.489330452 | count | 1           |
| TMEM238      | 0.3921048 | 0.2436127 | 1.6095  | 0.108    | 0.489410691 | count | 1           |
| CADPS2       | 0.3595208 | 0.1515769 | 2.3719  | 0.0178   | 0.489426252 | count | 1           |
| DLL4         | 0.3711079 | 0.1957341 | 1.896   | 0.0581   | 0.489506065 | count | 1           |
| ZBTB41       | 0.4020095 | 0.3099794 | 1.2969  | 0.195    | 0.489574253 | count | 1           |
| PLK2         | 0.3504338 | 0.1261065 | 2.7789  | 0.00549  | 0.489636168 | count | 1           |
| AC064836.3   | 0.4536757 | 0.4761852 | 0.9527  | 0.341    | 0.489894186 | count | 1           |
| FIGNL2       | 1.6726284 | 1.3318967 | 1.2558  | 0.209    | 0.490121966 | count | 1           |
| HADHA        | 0.3445024 | 0.0655136 | 5.2585  | 1.56E-07 | 0.490343286 | count | 0.003663816 |
| RFC5         | 0.5527124 | 0.4730428 | 1.1684  | 0.243    | 0.490426504 | count | 1           |
| MT-CYB       | 0.3401125 | 0.0303151 | 11.2192 | 1.35E-28 | 0.490439746 | count | 3.26E-24    |
| MAK          | 0.8618392 | 0.7345566 | 1.1733  | 0.241    | 0.490524684 | count | 1           |
| MEF2C        | 0.3446675 | 0.0762332 | 4.5212  | 6.41E-06 | 0.490644108 | count | 0.14901968  |
| ALDH9A1      | 0.3600053 | 0.1157571 | 3.11    | 0.00189  | 0.490876093 | count | 1           |
| MINDY3       | 0.3978727 | 0.2298546 | 1.731   | 0.0836   | 0.490970131 | count | 1           |
| WDR36        | 0.3965623 | 0.2308066 | 1.7182  | 0.0859   | 0.491524141 | count | 1           |
| ZNF160       | 0.3806162 | 0.2019482 | 1.8847  | 0.0596   | 0.491526306 | count | 1           |
| CCDC142      | 0.8174832 | 0.6020073 | 1.3579  | 0.175    | 0.491561041 | count | 1           |
| GRWD1        | 0.4084604 | 0.2309867 | 1.7683  | 0.0771   | 0.491658928 | count | 1           |
| TENT2        | 0.397264  | 0.2167375 | 1.8329  | 0.0669   | 0.491672968 | count | 1           |
| CHTOP        | 0.3644757 | 0.1492153 | 2.4426  | 0.0146   | 0.491969527 | count | 1           |
| ALG10        | 0.7798783 | 0.6416014 | 1.2155  | 0.224    | 0.492240599 | count | 1           |
| ZNF480       | 0.3859556 | 0.236308  | 1.6333  | 0.103    | 0.492503883 | count | 1           |
| REPS1        | 0.4728428 | 0.327888  | 1.4421  | 0.149    | 0.492531957 | count | 1           |
| ETV6         | 0.3667519 | 0.1658772 | 2.211   | 0.0271   | 0.492535004 | count | 1           |
| MIEF2        | 0.6368515 | 0.6008782 | 1.0599  | 0.289    | 0.492673022 | count | 1           |
| FANK1        | 0.6368515 | 0.6307427 | 1.0097  | 0.313    | 0.492673022 | count | 1           |
| EPB41L4A-AS1 | 0.3565794 | 0.1210371 | 2.946   | 0.00325  | 0.492678632 | count | 1           |
| MET          | 0.3575291 | 0.1633351 | 2.1889  | 0.0287   | 0.492963301 | count | 1           |
| AC064801.1   | 0.9970154 | 2.0978068 | 0.4753  | 0.6346   | 0.49299231  | count | 1           |
| MTAP         | 0.3762774 | 0.1826119 | 2.0605  | 0.0394   | 0.493070592 | count | 1           |
| SH2B1        | 0.445869  | 0.2742561 | 1.6257  | 0.104    | 0.493105305 | count | 1           |
| AL356599.1   | 0.4914743 | 0.5112286 | 0.9614  | 0.336    | 0.493127573 | count | 1           |
| AARSD1       | 0.584856  | 0.4248061 | 1.3768  | 0.169    | 0.493223919 | count | 1           |
| ZNF627       | 0.8680626 | 0.7735429 | 1.1222  | 0.262    | 0.493256304 | count | 1           |
| EFTUD2       | 0.4059299 | 0.2462499 | 1.6484  | 0.0994   | 0.493337206 | count | 1           |
| ENTPD3-AS1   | 0.5056055 | 0.4094159 | 1.2349  | 0.217    | 0.493788361 | count | 1           |
| AC060780.1   | 0.4446803 | 0.3445769 | 1.2905  | 0.197    | 0.493904574 | count | 1           |
| LCOR         | 0.3953016 | 0.1970054 | 2.0066  | 0.0449   | 0.493931897 | count | 1           |
| TTC9C        | 0.382588  | 0.2388591 | 1.6017  | 0.109    | 0.494025994 | count | 1           |
| ZNF808       | 0.423826  | 0.2887942 | 1.4676  | 0.142    | 0.494299246 | count | 1           |

|            |           |           |        |          |             |       |             |
|------------|-----------|-----------|--------|----------|-------------|-------|-------------|
| DUSP2      | 0.382637  | 0.2966772 | 1.2897 | 0.197    | 0.494458388 | count | 1           |
| LINC01535  | 1.223588  | 1.0272211 | 1.1912 | 0.234    | 0.494748333 | count | 1           |
| DNAJC17    | 0.3755395 | 0.1778909 | 2.1111 | 0.0349   | 0.494769015 | count | 1           |
| FAN1       | 0.4267351 | 0.3238517 | 1.3177 | 0.188    | 0.494781124 | count | 1           |
| EBAG9      | 0.3593496 | 0.1222275 | 2.94   | 0.00331  | 0.494806624 | count | 1           |
| ABCE1      | 0.3572356 | 0.1176268 | 3.037  | 0.00241  | 0.494870134 | count | 1           |
| DNAJC9     | 0.3852081 | 0.2002778 | 1.9234 | 0.0545   | 0.495003242 | count | 1           |
| ZBTB22     | 0.4131199 | 0.2581288 | 1.6004 | 0.11     | 0.49506773  | count | 1           |
| PARP11     | 0.4860612 | 0.3522733 | 1.3798 | 0.168    | 0.495376773 | count | 1           |
| UGCG       | 0.3524736 | 0.1274485 | 2.7656 | 0.00572  | 0.496097041 | count | 1           |
| MVB12B     | 0.5034867 | 0.3821016 | 1.3177 | 0.188    | 0.496181231 | count | 1           |
| PSEN2      | 0.4222801 | 0.3124197 | 1.3516 | 0.177    | 0.496460902 | count | 1           |
| VCAM1      | 0.3472957 | 0.1281439 | 2.7102 | 0.00677  | 0.49650727  | count | 1           |
| TUBB6      | 0.3511126 | 0.0791432 | 4.4364 | 9.50E-06 | 0.496566258 | count | 0.2205235   |
| CCDC148    | 1.1026526 | 1.05669   | 1.0435 | 0.297    | 0.496766186 | count | 1           |
| SNRNP40    | 0.3605834 | 0.1175482 | 3.0675 | 0.00218  | 0.496887696 | count | 1           |
| DPM2       | 0.3622586 | 0.1294263 | 2.799  | 0.00516  | 0.497049278 | count | 1           |
| STX17      | 0.3715769 | 0.1666959 | 2.2291 | 0.0259   | 0.497110138 | count | 1           |
| WDR77      | 0.435835  | 0.2618644 | 1.6644 | 0.0962   | 0.49716809  | count | 1           |
| DUSP5      | 0.3525785 | 0.1008371 | 3.4965 | 0.000479 | 0.497343059 | count | 1           |
| MRPS26     | 0.358337  | 0.1145968 | 3.1269 | 0.00178  | 0.497445764 | count | 1           |
| C1orf112   | 0.8300874 | 0.6463848 | 1.2842 | 0.199    | 0.497534095 | count | 1           |
| AC005070.3 | 0.7569293 | 0.6484293 | 1.1673 | 0.243    | 0.497693316 | count | 1           |
| TGFBRAP1   | 0.4723828 | 0.3438719 | 1.3737 | 0.17     | 0.498078832 | count | 1           |
| SIRPA      | 0.3835798 | 0.2015044 | 1.9036 | 0.0571   | 0.49812643  | count | 1           |
| MALT1      | 0.3745216 | 0.1690773 | 2.2151 | 0.0268   | 0.498170704 | count | 1           |
| SIRT5      | 0.4052388 | 0.2331755 | 1.7379 | 0.0823   | 0.498296946 | count | 1           |
| TNFRSF1A   | 0.3507378 | 0.067695  | 5.1811 | 2.36E-07 | 0.498467412 | count | 0.005538212 |
| AL359220.1 | 0.4790643 | 0.3462541 | 1.3836 | 0.167    | 0.498620633 | count | 1           |
| AC006942.1 | 0.8807044 | 0.8112256 | 1.0856 | 0.278    | 0.498770995 | count | 1           |
| GPR68      | 0.453334  | 0.390126  | 1.162  | 0.245    | 0.498808313 | count | 1           |
| ADIPOR2    | 0.3808457 | 0.1732996 | 2.1976 | 0.0281   | 0.499523748 | count | 1           |
| AC008608.2 | 0.8343548 | 0.6267691 | 1.3312 | 0.183    | 0.499545655 | count | 1           |
| AARS2      | 0.6841398 | 0.6667703 | 1.0261 | 0.305    | 0.499638414 | count | 1           |
| AC009779.2 | 0.5286835 | 0.4469008 | 1.183  | 0.237    | 0.49987404  | count | 1           |
| ANKRD54    | 0.4134126 | 0.2875695 | 1.4376 | 0.151    | 0.50032488  | count | 1           |
| EIF2B4     | 0.4097123 | 0.2279917 | 1.797  | 0.0724   | 0.500397518 | count | 1           |
| SMCHD1     | 0.3586573 | 0.1305352 | 2.7476 | 0.00604  | 0.50043376  | count | 1           |
| SCYL2      | 0.4163264 | 0.2819536 | 1.4766 | 0.14     | 0.500828903 | count | 1           |
| LIPE       | 0.7968444 | 0.5030499 | 1.584  | 0.113    | 0.500838505 | count | 1           |
| FAM168B    | 0.3942173 | 0.2632381 | 1.4976 | 0.134    | 0.50091025  | count | 1           |
| CATSPERG   | 0.7340937 | 0.6681042 | 1.0988 | 0.272    | 0.501126978 | count | 1           |
| TRPC1      | 0.6867319 | 0.5324575 | 1.2897 | 0.197    | 0.50124554  | count | 1           |
| PPP2CA     | 0.3684966 | 0.1272014 | 2.897  | 0.0038   | 0.501633571 | count | 1           |
| LINC02482  | 0.4501493 | 0.4427146 | 1.0168 | 0.309    | 0.501715959 | count | 1           |

|           |           |           |        |          |             |       |          |
|-----------|-----------|-----------|--------|----------|-------------|-------|----------|
| NME6      | 0.4017629 | 0.2429423 | 1.6537 | 0.0983   | 0.501806694 | count | 1        |
| MED26     | 0.8396219 | 0.5352583 | 1.5686 | 0.117    | 0.502021082 | count | 1        |
| NDC1      | 0.7104249 | 0.5400436 | 1.3155 | 0.188    | 0.50212495  | count | 1        |
| TESK2     | 0.9482844 | 0.7094    | 1.3367 | 0.181    | 0.502226902 | count | 1        |
| TBC1D8    | 0.597045  | 0.509593  | 1.1716 | 0.241    | 0.50235691  | count | 1        |
| TDRP      | 0.4223136 | 0.3105596 | 1.3598 | 0.174    | 0.502447749 | count | 1        |
| ZNF736    | 0.5057819 | 0.4007875 | 1.262  | 0.207    | 0.502453322 | count | 1        |
| HDAC1     | 0.3654622 | 0.1138607 | 3.2097 | 0.00134  | 0.502531238 | count | 1        |
| EIF2B1    | 0.3777147 | 0.1530456 | 2.468  | 0.0136   | 0.502563909 | count | 1        |
| LINC01534 | 0.7663697 | 0.7830829 | 0.9787 | 0.328    | 0.502757184 | count | 1        |
| BHLHE40   | 0.356309  | 0.0956209 | 3.7263 | 0.000198 | 0.502757772 | count | 1        |
| ZNF688    | 0.3833736 | 0.1964551 | 1.9515 | 0.0511   | 0.502786487 | count | 1        |
| SETD9     | 0.4096698 | 0.2384887 | 1.7178 | 0.0859   | 0.502804845 | count | 1        |
| NUDT6     | 0.4216585 | 0.3113113 | 1.3545 | 0.176    | 0.502807912 | count | 1        |
| CBX2      | 0.552248  | 0.441957  | 1.2496 | 0.212    | 0.50288455  | count | 1        |
| ALMS1     | 0.4979582 | 0.6156403 | 0.8088 | 0.419    | 0.503006815 | count | 1        |
| ZDHC11B   | 1.0258038 | 0.9078987 | 1.1299 | 0.259    | 0.50312696  | count | 1        |
| RBM5      | 0.3788848 | 0.1688486 | 2.2439 | 0.0249   | 0.503272026 | count | 1        |
| GRK4      | 0.7380008 | 0.621762  | 1.187  | 0.235    | 0.503334583 | count | 1        |
| ZNF98     | 1.1244871 | 0.5930502 | 1.8961 | 0.0581   | 0.503396031 | count | 1        |
| HERC4     | 0.4049061 | 0.2300414 | 1.7601 | 0.0785   | 0.503666227 | count | 1        |
| CHST11    | 0.4360478 | 0.2768373 | 1.5751 | 0.115    | 0.503679594 | count | 1        |
| KAT6A     | 0.3778586 | 0.1548414 | 2.4403 | 0.0147   | 0.503740957 | count | 1        |
| CEP135    | 0.4118421 | 0.222629  | 1.8499 | 0.0644   | 0.503762921 | count | 1        |
| DDX41     | 0.3919222 | 0.199188  | 1.9676 | 0.0492   | 0.503873398 | count | 1        |
| MPP7      | 1.4547507 | 1.0915652 | 1.3327 | 0.183    | 0.503929496 | count | 1        |
| KLHL28    | 0.3947735 | 0.2332282 | 1.6926 | 0.0906   | 0.503984211 | count | 1        |
| TRAF3IP1  | 0.4011333 | 0.2349104 | 1.7076 | 0.0878   | 0.504082724 | count | 1        |
| ZNF33B    | 0.3971062 | 0.2304288 | 1.7233 | 0.0849   | 0.504501443 | count | 1        |
| ZNF45     | 1.1285647 | 1.0410318 | 1.0841 | 0.278    | 0.50462215  | count | 1        |
| QARS      | 0.3792987 | 0.1530508 | 2.4783 | 0.0133   | 0.504642998 | count | 1        |
| ECT2      | 0.4890102 | 0.353636  | 1.3828 | 0.167    | 0.50506193  | count | 1        |
| PTCD1     | 1.1302771 | 0.7855315 | 1.4389 | 0.15     | 0.505135906 | count | 1        |
| GMEB1     | 0.4175163 | 0.2579485 | 1.6186 | 0.106    | 0.505138569 | count | 1        |
| GSN       | 0.3510104 | 0.0490693 | 7.1534 | 1.08E-12 | 0.505321743 | count | 2.58E-08 |
| TRIM32    | 0.7158857 | 0.7958831 | 0.8995 | 0.368    | 0.505358174 | count | 1        |
| LTA4H     | 0.3747454 | 0.1444554 | 2.5942 | 0.00953  | 0.505538467 | count | 1        |
| CNTNAP3B  | 0.3609371 | 0.132114  | 2.732  | 0.00633  | 0.505706249 | count | 1        |
| ASPH      | 0.3564467 | 0.084245  | 4.2311 | 2.40E-05 | 0.505715592 | count | 0.55476  |
| WIPF1     | 0.4129808 | 0.3393684 | 1.2169 | 0.224    | 0.505942333 | count | 1        |
| DHTKD1    | 0.5057588 | 0.490462  | 1.0312 | 0.303    | 0.506457997 | count | 1        |
| RAB28     | 0.4135918 | 0.2277028 | 1.8164 | 0.0694   | 0.50666951  | count | 1        |
| UBQLN2    | 0.4653819 | 0.2953891 | 1.5755 | 0.115    | 0.506767329 | count | 1        |
| LINC00513 | 0.7182865 | 0.4293833 | 1.6728 | 0.0945   | 0.506776574 | count | 1        |
| HS3ST1    | 0.3802257 | 0.1979614 | 1.9207 | 0.0549   | 0.506854863 | count | 1        |

|            |           |           |         |          |             |       |             |
|------------|-----------|-----------|---------|----------|-------------|-------|-------------|
| SNAI1      | 0.3785776 | 0.1624747 | 2.3301  | 0.0199   | 0.50688518  | count | 1           |
| GALM       | 0.4464548 | 0.2971917 | 1.5022  | 0.133    | 0.507051896 | count | 1           |
| FAM161A    | 0.4592078 | 0.3704786 | 1.2395  | 0.215    | 0.507136305 | count | 1           |
| RICTOR     | 0.4113818 | 0.1947367 | 2.1125  | 0.0347   | 0.507186039 | count | 1           |
| B3GNT2     | 0.3810164 | 0.1794422 | 2.1233  | 0.0338   | 0.507301977 | count | 1           |
| RTN4R      | 0.961309  | 1.0633427 | 0.904   | 0.366    | 0.50731339  | count | 1           |
| CATSPERE   | 0.961309  | 1.1778588 | 0.8161  | 0.414    | 0.50731339  | count | 1           |
| STAT5A     | 0.4085154 | 0.2332373 | 1.7515  | 0.08     | 0.507354968 | count | 1           |
| CCDC134    | 0.9615013 | 0.779438  | 1.2336  | 0.217    | 0.507388141 | count | 1           |
| IFNGR1     | 0.3574912 | 0.0810398 | 4.4113  | 1.07E-05 | 0.507523467 | count | 0.2481972   |
| GPS2       | 0.3920726 | 0.210381  | 1.8636  | 0.0625   | 0.507536349 | count | 1           |
| ZNF654     | 0.4288205 | 0.3344129 | 1.2823  | 0.2      | 0.507580765 | count | 1           |
| PI4KB      | 0.4486847 | 0.2788017 | 1.6093  | 0.108    | 0.507706778 | count | 1           |
| RAB40B     | 0.4077187 | 0.2315155 | 1.7611  | 0.0783   | 0.507747242 | count | 1           |
| BLZF1      | 0.4022678 | 0.2297173 | 1.7511  | 0.08     | 0.507749763 | count | 1           |
| AC013394.1 | 0.4214835 | 0.2856593 | 1.4755  | 0.14     | 0.507838587 | count | 1           |
| OXR1       | 0.4085258 | 0.2563095 | 1.5939  | 0.111    | 0.508052774 | count | 1           |
| B2M        | 0.3523262 | 0.0197722 | 17.8193 | 2.55E-67 | 0.508213018 | count | 6.19E-63    |
| PPP1R3D    | 0.4135708 | 0.2939607 | 1.4069  | 0.16     | 0.508255861 | count | 1           |
| HEXA       | 0.3617842 | 0.1018418 | 3.5524  | 0.000388 | 0.508277672 | count | 1           |
| AC078846.1 | 1.4777803 | 1.0167798 | 1.4534  | 0.146    | 0.508324711 | count | 1           |
| IQCH-AS1   | 1.4777803 | 1.0688416 | 1.3826  | 0.167    | 0.508324711 | count | 1           |
| PLSCR1     | 0.3558041 | 0.0605686 | 5.8744  | 4.75E-09 | 0.50836578  | count | 0.000112338 |
| NOL8       | 0.3770879 | 0.1761364 | 2.1409  | 0.0324   | 0.508803658 | count | 1           |
| ZNF717     | 0.5274902 | 0.4275438 | 1.2338  | 0.217    | 0.508804646 | count | 1           |
| LINC02185  | 0.3631159 | 0.1583102 | 2.2937  | 0.0219   | 0.508904462 | count | 1           |
| RAD51D     | 0.4609581 | 0.3697682 | 1.2466  | 0.213    | 0.508974018 | count | 1           |
| POMZP3     | 0.4932483 | 0.5317648 | 0.9276  | 0.354    | 0.509160199 | count | 1           |
| MAT2A      | 0.3853098 | 0.1722724 | 2.2366  | 0.0254   | 0.509187128 | count | 1           |
| TBC1D22A   | 0.3898687 | 0.2402537 | 1.6227  | 0.105    | 0.509392608 | count | 1           |
| KATNBL1    | 0.3680125 | 0.117831  | 3.1232  | 0.00181  | 0.50954033  | count | 1           |
| CALHM2     | 0.3706688 | 0.1300537 | 2.8501  | 0.0044   | 0.509705999 | count | 1           |
| DDX27      | 0.379115  | 0.1873781 | 2.0233  | 0.0431   | 0.509732051 | count | 1           |
| MKKS       | 0.4558733 | 0.2884827 | 1.5802  | 0.114    | 0.509791179 | count | 1           |
| BRF2       | 0.4389488 | 0.2842395 | 1.5443  | 0.123    | 0.509838338 | count | 1           |
| PYROXD2    | 0.6197126 | 0.4982831 | 1.2437  | 0.214    | 0.51036494  | count | 1           |
| HAT1       | 0.374009  | 0.1334457 | 2.8027  | 0.0051   | 0.510482232 | count | 1           |
| EMG1       | 0.3880651 | 0.1730932 | 2.2419  | 0.025    | 0.51048966  | count | 1           |
| GPD1L      | 0.455065  | 0.3688796 | 1.2336  | 0.217    | 0.510870288 | count | 1           |
| MED18      | 0.5064237 | 0.3901369 | 1.2981  | 0.194    | 0.510968043 | count | 1           |
| RBP7       | 0.3575507 | 0.0871638 | 4.1021  | 4.21E-05 | 0.511098313 | count | 0.9705734   |
| APBB3      | 0.6209825 | 0.4306411 | 1.442   | 0.149    | 0.511285456 | count | 1           |
| NPIPA1     | 1.291145  | 0.8860807 | 1.4571  | 0.145    | 0.511623721 | count | 1           |
| LPIN3      | 0.8606933 | 0.809983  | 1.0626  | 0.288    | 0.511841623 | count | 1           |
| SMIM1      | 0.9742595 | 1.0707682 | 0.9099  | 0.363    | 0.512325875 | count | 1           |

|            |           |           |        |          |             |       |   |
|------------|-----------|-----------|--------|----------|-------------|-------|---|
| SRSF4      | 0.365583  | 0.0909298 | 4.0205 | 5.96E-05 | 0.512451241 | count | 1 |
| APOOL      | 0.3978683 | 0.2198947 | 1.8094 | 0.0705   | 0.512589437 | count | 1 |
| ZC3HAV1    | 0.3756164 | 0.127198  | 2.953  | 0.00317  | 0.51265574  | count | 1 |
| MTMR2      | 0.4179468 | 0.2272269 | 1.8393 | 0.066    | 0.51267321  | count | 1 |
| SETDB1     | 0.4443566 | 0.3669525 | 1.2109 | 0.226    | 0.512888451 | count | 1 |
| TRAPPC9    | 0.6002292 | 0.4253203 | 1.4112 | 0.158    | 0.512905261 | count | 1 |
| FICD       | 0.4791068 | 0.3557812 | 1.3466 | 0.178    | 0.51319807  | count | 1 |
| PPM1F      | 0.4022223 | 0.2009107 | 2.002  | 0.0454   | 0.513291684 | count | 1 |
| PRMT3      | 0.5577183 | 0.4535542 | 1.2297 | 0.219    | 0.513485441 | count | 1 |
| DPP8       | 0.4006013 | 0.2025173 | 1.9781 | 0.048    | 0.513525255 | count | 1 |
| MAGI1      | 0.3910536 | 0.2069663 | 1.8895 | 0.0589   | 0.513540124 | count | 1 |
| LAS1L      | 0.4310816 | 0.2513906 | 1.7148 | 0.0865   | 0.513659896 | count | 1 |
| VAC14      | 0.5654509 | 0.4109002 | 1.3761 | 0.169    | 0.513773149 | count | 1 |
| THOC5      | 0.4636682 | 0.3226071 | 1.4373 | 0.151    | 0.51396672  | count | 1 |
| CSRNP2     | 0.5657948 | 0.4009916 | 1.411  | 0.158    | 0.514056009 | count | 1 |
| LIPT2      | 1.0576751 | 1.0153483 | 1.0417 | 0.298    | 0.514104981 | count | 1 |
| TRAFD1     | 0.4368136 | 0.292275  | 1.4945 | 0.135    | 0.514205431 | count | 1 |
| OLA1       | 0.3698719 | 0.1066808 | 3.4671 | 0.000534 | 0.514390112 | count | 1 |
| ENPP2      | 0.380667  | 0.2467786 | 1.5425 | 0.123    | 0.514940054 | count | 1 |
| ZPR1       | 0.3937243 | 0.1773061 | 2.2206 | 0.0265   | 0.515553477 | count | 1 |
| CHD1       | 0.3671248 | 0.1029262 | 3.5669 | 0.000367 | 0.515634083 | count | 1 |
| ZBTB39     | 0.6403216 | 0.4998964 | 1.2809 | 0.2      | 0.515647144 | count | 1 |
| RBM23      | 0.3936283 | 0.186539  | 2.1102 | 0.0349   | 0.515723612 | count | 1 |
| ACVR2B     | 0.5535415 | 0.4939663 | 1.1206 | 0.263    | 0.51577989  | count | 1 |
| THAP7-AS1  | 0.594329  | 0.5698903 | 1.0429 | 0.297    | 0.516141574 | count | 1 |
| NANS       | 0.3687172 | 0.1073712 | 3.434  | 0.000603 | 0.51615912  | count | 1 |
| ZNF426     | 0.4364058 | 0.3250559 | 1.3426 | 0.18     | 0.516237124 | count | 1 |
| FAM110D    | 0.3639391 | 0.0953962 | 3.815  | 0.000139 | 0.516396161 | count | 1 |
| MLLT6      | 0.3822143 | 0.1748715 | 2.1857 | 0.0289   | 0.516610858 | count | 1 |
| HIST2H2BF  | 1.1698209 | 0.7752333 | 1.509  | 0.131    | 0.516817054 | count | 1 |
| NELFE      | 0.3769894 | 0.1211447 | 3.1119 | 0.00188  | 0.516844047 | count | 1 |
| FAM118B    | 0.4340224 | 0.2928794 | 1.4819 | 0.138    | 0.517042793 | count | 1 |
| KDM4A      | 0.4886288 | 0.3593952 | 1.3596 | 0.174    | 0.517148121 | count | 1 |
| CAMKK2     | 0.3896812 | 0.211484  | 1.8426 | 0.0655   | 0.517190181 | count | 1 |
| LINC02147  | 0.5696165 | 0.4156289 | 1.3705 | 0.171    | 0.517196842 | count | 1 |
| PICK1      | 0.4887994 | 0.3228971 | 1.5138 | 0.13     | 0.517317965 | count | 1 |
| FAAP100    | 0.5428729 | 0.3832431 | 1.4165 | 0.157    | 0.517390782 | count | 1 |
| AC005726.1 | 0.924366  | 2.1611163 | 0.4277 | 0.6689   | 0.517467869 | count | 1 |
| DOHH       | 0.4281755 | 0.2554682 | 1.676  | 0.0938   | 0.517626258 | count | 1 |
| EEF2KMT    | 0.4760378 | 0.3305192 | 1.4403 | 0.15     | 0.517752441 | count | 1 |
| CRNKL1     | 0.4064162 | 0.2070172 | 1.9632 | 0.0497   | 0.51804978  | count | 1 |
| POLG2      | 0.4925833 | 0.3508321 | 1.404  | 0.16     | 0.518090517 | count | 1 |
| ZNF12      | 0.4350078 | 0.3286114 | 1.3238 | 0.186    | 0.518175913 | count | 1 |
| XPO4       | 0.5708577 | 0.3892563 | 1.4665 | 0.143    | 0.51821589  | count | 1 |
| ELMO1      | 0.3840577 | 0.1521165 | 2.5248 | 0.0116   | 0.518384271 | count | 1 |

|            |           |           |        |          |             |       |            |
|------------|-----------|-----------|--------|----------|-------------|-------|------------|
| PUS7L      | 0.3874312 | 0.1740266 | 2.2263 | 0.0261   | 0.518408532 | count | 1          |
| SIK1       | 1.0704753 | 1.0811255 | 0.9901 | 0.322    | 0.518443157 | count | 1          |
| ZCCHC2     | 0.4091772 | 0.2178308 | 1.8784 | 0.0604   | 0.51844895  | count | 1          |
| DNAJA1     | 0.3615429 | 0.0513859 | 7.0358 | 2.49E-12 | 0.518558567 | count | 5.94E-08   |
| TAF1B      | 0.4032483 | 0.1943924 | 2.0744 | 0.0381   | 0.518560629 | count | 1          |
| SNAPC3     | 0.4432101 | 0.2840416 | 1.5604 | 0.119    | 0.518801777 | count | 1          |
| SP3        | 0.3887331 | 0.1966123 | 1.9772 | 0.0481   | 0.518824486 | count | 1          |
| GNB1L      | 0.5720529 | 0.4085895 | 1.4001 | 0.162    | 0.519196696 | count | 1          |
| WRAP73     | 0.4082208 | 0.2220036 | 1.8388 | 0.0661   | 0.519317121 | count | 1          |
| RASSF3     | 0.402656  | 0.2012825 | 2.0005 | 0.0455   | 0.519435747 | count | 1          |
| AC132872.1 | 0.9294971 | 0.8914004 | 1.0427 | 0.297    | 0.519629782 | count | 1          |
| ZNF121     | 0.4671328 | 0.3051458 | 1.5309 | 0.126    | 0.519725429 | count | 1          |
| BRIX1      | 0.3761036 | 0.1095018 | 3.4347 | 0.000602 | 0.520163037 | count | 1          |
| FAM220A    | 1.1816753 | 1.09257   | 1.0816 | 0.28     | 0.520250948 | count | 1          |
| TENM2      | 1.3276737 | 1.1236761 | 1.1815 | 0.237    | 0.520377252 | count | 1          |
| RAB33A     | 1.0766794 | 0.9645509 | 1.1162 | 0.264    | 0.520531342 | count | 1          |
| ZNF493     | 0.4174912 | 0.3119131 | 1.3385 | 0.181    | 0.520945785 | count | 1          |
| CHKA       | 0.5259308 | 0.2861976 | 1.8376 | 0.0662   | 0.520978183 | count | 1          |
| NME7       | 0.4076505 | 0.2039922 | 1.9984 | 0.0458   | 0.521009663 | count | 1          |
| DAB2IP     | 0.4237059 | 0.3264298 | 1.298  | 0.194    | 0.52115852  | count | 1          |
| YRDC       | 0.3909694 | 0.1471081 | 2.6577 | 0.00791  | 0.521180542 | count | 1          |
| NIPAL2     | 0.5599998 | 0.483362  | 1.1586 | 0.247    | 0.521256446 | count | 1          |
| FADD       | 0.4281356 | 0.234254  | 1.8277 | 0.0677   | 0.521326661 | count | 1          |
| DNAAF5     | 0.4848644 | 0.2992186 | 1.6204 | 0.105    | 0.521696367 | count | 1          |
| CCDC117    | 0.4752918 | 0.3366029 | 1.412  | 0.158    | 0.521722767 | count | 1          |
| EGR4       | 1.920752  | 1.348822  | 1.424  | 0.155    | 0.521822872 | count | 1          |
| C7orf31    | 0.6995268 | 0.6541993 | 1.0693 | 0.285    | 0.521950592 | count | 1          |
| RCL1       | 0.4851548 | 0.2901112 | 1.6723 | 0.0946   | 0.521991223 | count | 1          |
| UBAP2      | 0.415798  | 0.2288069 | 1.8172 | 0.0693   | 0.522057011 | count | 1          |
| PHF8       | 0.5679856 | 0.4003186 | 1.4188 | 0.156    | 0.522057953 | count | 1          |
| TBC1D24    | 0.720711  | 0.5527382 | 1.3039 | 0.192    | 0.522109325 | count | 1          |
| EXOSC3     | 0.4169205 | 0.2347371 | 1.7761 | 0.0758   | 0.522189981 | count | 1          |
| LDHA       | 0.3638459 | 0.0449258 | 8.0988 | 8.24E-16 | 0.522325667 | count | 1.98E-11   |
| ALKBH3     | 0.4016807 | 0.2048598 | 1.9608 | 0.05     | 0.522590109 | count | 1          |
| PCDHGA6    | 1.0834145 | 1.0810018 | 1.0022 | 0.316    | 0.522787553 | count | 1          |
| ASCC1      | 0.4548225 | 0.3187693 | 1.4268 | 0.154    | 0.52287934  | count | 1          |
| HSCB       | 0.3933874 | 0.1721489 | 2.2852 | 0.0224   | 0.522910408 | count | 1          |
| TRIM7      | 1.339871  | 1.0490367 | 1.2772 | 0.202    | 0.523243648 | count | 1          |
| RBM19      | 0.5045132 | 0.3795101 | 1.3294 | 0.184    | 0.523410241 | count | 1          |
| AL627171.1 | 0.7745277 | 0.6357964 | 1.2182 | 0.223    | 0.523737329 | count | 1          |
| PCDHGB6    | 0.7475033 | 0.6016555 | 1.2424 | 0.214    | 0.523888423 | count | 1          |
| LMCD1      | 0.3659548 | 0.0676671 | 5.4082 | 6.91E-08 | 0.523941867 | count | 0.00162613 |
| KLHL8      | 0.4777959 | 0.3316407 | 1.4407 | 0.15     | 0.524327897 | count | 1          |
| ZNF670     | 0.5640003 | 0.5284367 | 1.0673 | 0.286    | 0.524642083 | count | 1          |
| BAZ2B      | 0.3769178 | 0.1154155 | 3.2657 | 0.00111  | 0.525082249 | count | 1          |

|              |           |           |        |          |             |       |             |
|--------------|-----------|-----------|--------|----------|-------------|-------|-------------|
| PCTP         | 0.525924  | 0.3922217 | 1.3409 | 0.18     | 0.525171477 | count | 1           |
| UNC13B       | 0.531133  | 0.6366846 | 0.8342 | 0.404    | 0.525740932 | count | 1           |
| RYBP         | 0.3914957 | 0.158604  | 2.4684 | 0.0136   | 0.526011976 | count | 1           |
| ADAMTSL4     | 1.0103904 | 0.615588  | 1.6413 | 0.101    | 0.526074297 | count | 1           |
| AGAP9        | 1.958848  | 1.4010642 | 1.3981 | 0.162    | 0.526097193 | count | 1           |
| ZFYVE19      | 0.4366109 | 0.287915  | 1.5165 | 0.13     | 0.526487766 | count | 1           |
| ZNF792       | 0.5733816 | 0.4495116 | 1.2756 | 0.202    | 0.526549589 | count | 1           |
| ABHD14A-ACY1 | 1.0118465 | 1.0482984 | 0.9652 | 0.335    | 0.526621128 | count | 1           |
| C12orf29     | 0.4057709 | 0.1996245 | 2.0327 | 0.0422   | 0.527118674 | count | 1           |
| TENT5C       | 0.5989432 | 0.4590646 | 1.3047 | 0.192    | 0.527168676 | count | 1           |
| SCUBE2       | 1.2062277 | 1.2313376 | 0.9796 | 0.327    | 0.527264757 | count | 1           |
| ELF1         | 0.372446  | 0.0732391 | 5.0853 | 3.92E-07 | 0.527378302 | count | 0.009185736 |
| FAM122C      | 0.5378802 | 0.4538093 | 1.1853 | 0.236    | 0.527445329 | count | 1           |
| TMEM246      | 0.5244336 | 0.4189382 | 1.2518 | 0.211    | 0.527833599 | count | 1           |
| EPHB4        | 0.385571  | 0.1266823 | 3.0436 | 0.00236  | 0.528162028 | count | 1           |
| SNX16        | 0.4398796 | 0.2357391 | 1.866  | 0.0622   | 0.528211132 | count | 1           |
| PITPNM3      | 0.6738938 | 0.5493036 | 1.2268 | 0.22     | 0.528457646 | count | 1           |
| RNASEH1      | 0.4156525 | 0.2177887 | 1.9085 | 0.0564   | 0.528557572 | count | 1           |
| NOC3L        | 0.3850763 | 0.1754489 | 2.1948 | 0.0283   | 0.52889117  | count | 1           |
| PRELID2      | 0.4337995 | 0.2743807 | 1.581  | 0.114    | 0.528915744 | count | 1           |
| SLC49A3      | 0.4285618 | 0.240744  | 1.7802 | 0.0752   | 0.529322734 | count | 1           |
| L3MBTL2      | 0.4437894 | 0.2827246 | 1.5697 | 0.117    | 0.529419731 | count | 1           |
| CLYBL        | 0.7849959 | 0.4285386 | 1.8318 | 0.0671   | 0.529506108 | count | 1           |
| SUFU         | 0.5698741 | 0.3773134 | 1.5103 | 0.131    | 0.529603802 | count | 1           |
| UPP1         | 0.3775092 | 0.1087608 | 3.471  | 0.000526 | 0.529612429 | count | 1           |
| MAPK14       | 0.4157412 | 0.2200235 | 1.8895 | 0.0589   | 0.529671209 | count | 1           |
| PACS1        | 0.4295598 | 0.2365004 | 1.8163 | 0.0694   | 0.529743742 | count | 1           |
| TAF4         | 0.7119172 | 0.5519435 | 1.2898 | 0.197    | 0.529773964 | count | 1           |
| ANKRD55      | 0.9549937 | 0.5828605 | 1.6385 | 0.101    | 0.530262742 | count | 1           |
| AC108673.3   | 0.8564417 | 0.6063661 | 1.4124 | 0.158    | 0.530343332 | count | 1           |
| PCGF6        | 0.4622049 | 0.2788444 | 1.6576 | 0.0975   | 0.53100088  | count | 1           |
| HDAC10       | 0.7598151 | 0.6639491 | 1.1444 | 0.253    | 0.531016525 | count | 1           |
| AL109741.1   | 0.401761  | 0.2355646 | 1.7055 | 0.0882   | 0.531087664 | count | 1           |
| DHRS13       | 0.6138216 | 0.515277  | 1.1912 | 0.234    | 0.531199346 | count | 1           |
| AATF         | 0.4074379 | 0.1655211 | 2.4615 | 0.0139   | 0.531290357 | count | 1           |
| NUP133       | 0.5325642 | 0.3374013 | 1.5784 | 0.115    | 0.53130662  | count | 1           |
| ARL17B       | 0.5424825 | 0.7324067 | 0.7407 | 0.459    | 0.531601178 | count | 1           |
| PTPRN2       | 0.3982538 | 0.1919315 | 2.075  | 0.0381   | 0.531941347 | count | 1           |
| AC026979.2   | 0.5659759 | 0.4799767 | 1.1792 | 0.238    | 0.532008085 | count | 1           |
| ZNF606       | 0.6497938 | 0.7101706 | 0.915  | 0.36     | 0.532025512 | count | 1           |
| AC023157.3   | 0.4206173 | 0.2627878 | 1.6006 | 0.11     | 0.532051668 | count | 1           |
| PTTG1        | 0.6151888 | 0.6046292 | 1.0175 | 0.309    | 0.532250755 | count | 1           |
| FAHD2B       | 0.4620714 | 0.2995477 | 1.5426 | 0.123    | 0.532468182 | count | 1           |
| AC015912.3   | 0.6645235 | 0.4922057 | 1.3501 | 0.177    | 0.532562045 | count | 1           |
| MTFMT        | 0.4555643 | 0.3187643 | 1.4292 | 0.153    | 0.53269234  | count | 1           |

|           |           |           |        |          |             |       |          |
|-----------|-----------|-----------|--------|----------|-------------|-------|----------|
| SCLY      | 1.3811996 | 1.0769639 | 1.2825 | 0.2      | 0.532747895 | count | 1        |
| CHST10    | 0.7910266 | 0.699627  | 1.1306 | 0.258    | 0.532813651 | count | 1        |
| SASH1     | 0.3787694 | 0.1130582 | 3.3502 | 0.000818 | 0.53282538  | count | 1        |
| R3HDM4    | 0.4054525 | 0.200336  | 2.0239 | 0.0431   | 0.53298505  | count | 1        |
| ZNF251    | 0.5078031 | 0.3834765 | 1.3242 | 0.186    | 0.533091461 | count | 1        |
| IFT88     | 0.4142091 | 0.1992389 | 2.079  | 0.0377   | 0.533211818 | count | 1        |
| ZNF611    | 0.5743802 | 0.4266356 | 1.3463 | 0.178    | 0.533402642 | count | 1        |
| LRIF1     | 0.3991943 | 0.1919141 | 2.0801 | 0.0376   | 0.533562592 | count | 1        |
| HOXD-AS2  | 0.4589569 | 0.3068511 | 1.4957 | 0.135    | 0.533615919 | count | 1        |
| DCAF13    | 0.3928204 | 0.1365632 | 2.8765 | 0.00405  | 0.53371776  | count | 1        |
| TRIM4     | 0.4142535 | 0.2295759 | 1.8044 | 0.0713   | 0.534094431 | count | 1        |
| NEK6      | 0.5356314 | 0.342008  | 1.5661 | 0.117    | 0.53413599  | count | 1        |
| C3orf33   | 0.9102891 | 0.7901935 | 1.152  | 0.249    | 0.534440506 | count | 1        |
| LAPTM4B   | 0.3826605 | 0.1036538 | 3.6917 | 0.000227 | 0.534481776 | count | 1        |
| PLEKHO2   | 0.4214558 | 0.2551341 | 1.6519 | 0.0987   | 0.534718506 | count | 1        |
| TMEM65    | 0.4299934 | 0.2395378 | 1.7951 | 0.0727   | 0.534735021 | count | 1        |
| UTP6      | 0.4025893 | 0.1784022 | 2.2566 | 0.0241   | 0.534742535 | count | 1        |
| GPATCH11  | 0.3978931 | 0.1649893 | 2.4116 | 0.0159   | 0.534827705 | count | 1        |
| SMYD4     | 0.4929053 | 0.436977  | 1.128  | 0.259    | 0.535078593 | count | 1        |
| TGIF1     | 0.3950517 | 0.1441093 | 2.7413 | 0.00616  | 0.535109283 | count | 1        |
| RPM1      | 0.4630726 | 0.3342391 | 1.3855 | 0.166    | 0.535152506 | count | 1        |
| ZBTB37    | 0.6541896 | 0.4964862 | 1.3176 | 0.188    | 0.5351655   | count | 1        |
| CDK11A    | 0.4218463 | 0.2215653 | 1.9039 | 0.057    | 0.535202343 | count | 1        |
| AMZ2      | 0.419816  | 0.2225129 | 1.8867 | 0.0593   | 0.535241958 | count | 1        |
| CD55      | 0.375762  | 0.0804666 | 4.6698 | 3.16E-06 | 0.535405369 | count | 0.073628 |
| LINC00987 | 0.4453909 | 0.3321563 | 1.3409 | 0.18     | 0.535670933 | count | 1        |
| SHB       | 0.434699  | 0.2304825 | 1.886  | 0.0594   | 0.535897395 | count | 1        |
| CYP51A1   | 0.6203818 | 0.5485383 | 1.131  | 0.258    | 0.536238726 | count | 1        |
| PPP3CC    | 0.4600086 | 0.2437345 | 1.8873 | 0.0592   | 0.536251156 | count | 1        |
| SVBP      | 0.3884939 | 0.126689  | 3.0665 | 0.00219  | 0.536811078 | count | 1        |
| ACTR8     | 0.4813196 | 0.3379996 | 1.424  | 0.155    | 0.536833807 | count | 1        |
| FAM13A    | 0.4464121 | 0.292639  | 1.5255 | 0.127    | 0.536857181 | count | 1        |
| SORBS3    | 0.3971489 | 0.1389274 | 2.8587 | 0.00429  | 0.537522329 | count | 1        |
| KCNJ14    | 1.2435671 | 1.1297106 | 1.1008 | 0.271    | 0.537680496 | count | 1        |
| AOC2      | 1.2435671 | 1.2117725 | 1.0262 | 0.305    | 0.537680496 | count | 1        |
| GSK3A     | 0.4299867 | 0.200382  | 2.1458 | 0.032    | 0.538127671 | count | 1        |
| DNAJC18   | 0.4734822 | 0.2988308 | 1.5844 | 0.113    | 0.538157385 | count | 1        |
| FBXO22    | 0.431713  | 0.2104086 | 2.0518 | 0.0403   | 0.538897726 | count | 1        |
| MBNL2     | 0.3895916 | 0.119089  | 3.2714 | 0.00108  | 0.538971676 | count | 1        |
| SWSAP1    | 0.4896472 | 0.358397  | 1.3662 | 0.172    | 0.538981574 | count | 1        |
| DDX60L    | 0.4293777 | 0.2209231 | 1.9436 | 0.052    | 0.539296143 | count | 1        |
| PPP2R3B   | 0.5814428 | 0.4992792 | 1.1646 | 0.244    | 0.539343554 | count | 1        |
| CEP152    | 0.5814428 | 0.5089179 | 1.1425 | 0.253    | 0.539343554 | count | 1        |
| ALG6      | 0.4731324 | 0.3050072 | 1.5512 | 0.121    | 0.539561168 | count | 1        |
| SMG5      | 0.5327848 | 0.4476381 | 1.1902 | 0.234    | 0.539591376 | count | 1        |



|            |           |           |        |          |             |       |          |
|------------|-----------|-----------|--------|----------|-------------|-------|----------|
| ARSD       | 0.4561041 | 0.2809934 | 1.6232 | 0.105    | 0.539927092 | count | 1        |
| NUDT15     | 0.4099659 | 0.2001552 | 2.0482 | 0.0406   | 0.540198339 | count | 1        |
| RPP25L     | 0.4157918 | 0.1961202 | 2.1201 | 0.0341   | 0.540602544 | count | 1        |
| SLC25A35   | 0.8060487 | 0.6604942 | 1.2204 | 0.222    | 0.541002333 | count | 1        |
| ZNF195     | 0.4214635 | 0.2581148 | 1.6329 | 0.103    | 0.541047985 | count | 1        |
| MPND       | 0.4817534 | 0.3033731 | 1.588  | 0.112    | 0.541375272 | count | 1        |
| NOB1       | 0.3888592 | 0.1203309 | 3.2316 | 0.00125  | 0.541614793 | count | 1        |
| EAF1       | 0.4719827 | 0.29784   | 1.5847 | 0.113    | 0.541737652 | count | 1        |
| USP21      | 1.14179   | 0.8618591 | 1.3248 | 0.185    | 0.54188269  | count | 1        |
| TM2D3      | 0.390113  | 0.1156565 | 3.373  | 0.000754 | 0.541892326 | count | 1        |
| ZNF484     | 0.4949532 | 0.3890075 | 1.2723 | 0.203    | 0.542132644 | count | 1        |
| LYPD5      | 0.6390922 | 0.4573099 | 1.3975 | 0.162    | 0.542200559 | count | 1        |
| SEPHS2     | 0.3877176 | 0.1069243 | 3.6261 | 0.000293 | 0.542646133 | count | 1        |
| NAF1       | 0.4811574 | 0.3089141 | 1.5576 | 0.119    | 0.54269816  | count | 1        |
| FAM234A    | 0.4266289 | 0.1996889 | 2.1365 | 0.0327   | 0.542710086 | count | 1        |
| MCCC2      | 0.4699246 | 0.3122559 | 1.5049 | 0.132    | 0.542730623 | count | 1        |
| PHYH       | 0.404153  | 0.1490874 | 2.7108 | 0.00675  | 0.5427999   | count | 1        |
| ELAC2      | 0.4611337 | 0.3233868 | 1.426  | 0.154    | 0.543057163 | count | 1        |
| GPN3       | 0.4010472 | 0.1500951 | 2.672  | 0.00759  | 0.543269777 | count | 1        |
| AL451165.2 | 0.5504983 | 0.3891685 | 1.4146 | 0.157    | 0.543397205 | count | 1        |
| PTDSS1     | 0.469151  | 0.2581353 | 1.8175 | 0.0693   | 0.543441587 | count | 1        |
| RING1      | 0.4169682 | 0.1781113 | 2.3411 | 0.0193   | 0.543487454 | count | 1        |
| ZNF117     | 0.5668931 | 0.3622419 | 1.565  | 0.118    | 0.543555983 | count | 1        |
| MRPL10     | 0.4062526 | 0.1711451 | 2.3737 | 0.0177   | 0.543625883 | count | 1        |
| IMPDH2     | 0.39151   | 0.1047766 | 3.7366 | 0.00019  | 0.543627286 | count | 1        |
| HIBADH     | 0.4325482 | 0.2124397 | 2.0361 | 0.0418   | 0.54379794  | count | 1        |
| CENPC      | 0.3898401 | 0.1124866 | 3.4657 | 0.000537 | 0.543947688 | count | 1        |
| POLR3C     | 0.459841  | 0.2944922 | 1.5615 | 0.119    | 0.544182696 | count | 1        |
| LHFPL6     | 0.3856873 | 0.0890665 | 4.3303 | 1.54E-05 | 0.544247181 | count | 0.356664 |
| PHOSPHO2   | 0.5948469 | 0.5452693 | 1.0909 | 0.275    | 0.544323755 | count | 1        |
| NOLC1      | 0.4014922 | 0.159562  | 2.5162 | 0.0119   | 0.544382676 | count | 1        |
| PQLC1      | 0.397951  | 0.127346  | 3.125  | 0.0018   | 0.544411709 | count | 1        |
| WDR20      | 0.4558802 | 0.3027231 | 1.5059 | 0.132    | 0.54448537  | count | 1        |
| GRAPL      | 1.1516307 | 1.1156211 | 1.0323 | 0.302    | 0.545021149 | count | 1        |
| DMAC2      | 0.4157281 | 0.1825477 | 2.2774 | 0.0228   | 0.545084633 | count | 1        |
| HENMT1     | 0.6830613 | 0.6216477 | 1.0988 | 0.272    | 0.54538602  | count | 1        |
| STARD4     | 0.5528583 | 0.4268092 | 1.2953 | 0.195    | 0.545541026 | count | 1        |
| GNG11      | 0.3794694 | 0.0472982 | 8.0229 | 1.51E-15 | 0.545944499 | count | 3.62E-11 |
| AC108134.3 | 0.7010001 | 0.4811833 | 1.4568 | 0.145    | 0.546654647 | count | 1        |
| MAP4K5     | 0.4076459 | 0.1523756 | 2.6753 | 0.00751  | 0.546736678 | count | 1        |
| KDM1B      | 0.5767283 | 0.4368475 | 1.3202 | 0.187    | 0.546777842 | count | 1        |
| ZFP37      | 0.7617595 | 0.5183478 | 1.4696 | 0.142    | 0.54680985  | count | 1        |
| PWWP2B     | 0.4816489 | 0.2978794 | 1.6169 | 0.106    | 0.547003358 | count | 1        |
| TCFL5      | 0.5071834 | 0.3153846 | 1.6081 | 0.108    | 0.547027125 | count | 1        |
| AC027097.1 | 0.450022  | 0.2476246 | 1.8174 | 0.0693   | 0.547113787 | count | 1        |

|            |           |           |        |          |             |       |          |
|------------|-----------|-----------|--------|----------|-------------|-------|----------|
| RSPH3      | 0.4894062 | 0.4148016 | 1.1799 | 0.238    | 0.54749736  | count | 1        |
| HINFP      | 0.5260372 | 0.4564759 | 1.1524 | 0.249    | 0.547656842 | count | 1        |
| NSUN6      | 0.4094564 | 0.1981942 | 2.0659 | 0.0389   | 0.548041595 | count | 1        |
| CDC37      | 0.3839025 | 0.0600523 | 6.3928 | 1.91E-10 | 0.54820312  | count | 4.54E-06 |
| TBC1D30    | 0.5424285 | 0.3370697 | 1.6092 | 0.108    | 0.548635929 | count | 1        |
| CNOT9      | 0.4258224 | 0.19373   | 2.198  | 0.028    | 0.548697853 | count | 1        |
| GTPBP2     | 0.7046116 | 0.4639853 | 1.5186 | 0.129    | 0.549060622 | count | 1        |
| NAT1       | 1.1645312 | 1.2767005 | 0.9121 | 0.362    | 0.549100909 | count | 1        |
| OTUD1      | 0.4453772 | 0.249405  | 1.7858 | 0.0742   | 0.549476984 | count | 1        |
| EHPB1L1    | 0.418189  | 0.173626  | 2.4086 | 0.0161   | 0.54972833  | count | 1        |
| AL139353.1 | 0.8971942 | 0.7828105 | 1.1461 | 0.252    | 0.549898918 | count | 1        |
| AC004812.2 | 0.6016501 | 0.5190668 | 1.1591 | 0.247    | 0.549925818 | count | 1        |
| HSF1       | 0.3991844 | 0.1286806 | 3.1021 | 0.00194  | 0.550067988 | count | 1        |
| POLR1C     | 0.4321524 | 0.2087618 | 2.0701 | 0.0385   | 0.550091269 | count | 1        |
| NDUFV2-AS1 | 0.5398308 | 0.4128646 | 1.3075 | 0.191    | 0.550094794 | count | 1        |
| TOMM40     | 0.4147061 | 0.1578684 | 2.6269 | 0.00866  | 0.550360891 | count | 1        |
| LTV1       | 0.4166001 | 0.1794309 | 2.3218 | 0.0203   | 0.550642658 | count | 1        |
| ASAP1      | 0.3913363 | 0.090551  | 4.3217 | 1.60E-05 | 0.550699622 | count | 0.37048  |
| CNP        | 0.4210494 | 0.1955673 | 2.153  | 0.0314   | 0.551006453 | count | 1        |
| TLK2       | 0.4273712 | 0.1985715 | 2.1522 | 0.0315   | 0.551071643 | count | 1        |
| DPM1       | 0.4131158 | 0.1630159 | 2.5342 | 0.0113   | 0.5513089   | count | 1        |
| GIGYF1     | 0.4325152 | 0.2597868 | 1.6649 | 0.096    | 0.551562965 | count | 1        |
| ZC3H3      | 1.173157  | 0.6639924 | 1.7668 | 0.0774   | 0.551807151 | count | 1        |
| DENND1A    | 0.5237581 | 0.4120492 | 1.2711 | 0.204    | 0.551946665 | count | 1        |
| SNX2       | 0.3951037 | 0.1051543 | 3.7574 | 0.000175 | 0.552006274 | count | 1        |
| CTR9       | 0.4154081 | 0.1729046 | 2.4025 | 0.0163   | 0.552189659 | count | 1        |
| AK9        | 0.4625953 | 0.295582  | 1.565  | 0.118    | 0.552211025 | count | 1        |
| NOP16      | 0.4402854 | 0.2128184 | 2.0688 | 0.0387   | 0.552635274 | count | 1        |
| SLC1A1     | 1.0829104 | 0.8013939 | 1.3513 | 0.177    | 0.552636993 | count | 1        |
| GFOD2      | 0.4110844 | 0.1541744 | 2.6664 | 0.00771  | 0.552663694 | count | 1        |
| NDRG1      | 0.3940057 | 0.0947438 | 4.1586 | 3.30E-05 | 0.552771396 | count | 0.76164  |
| AC016831.1 | 0.7719614 | 0.4593256 | 1.6806 | 0.0929   | 0.552863309 | count | 1        |
| RAB35      | 0.4432253 | 0.2349512 | 1.8865 | 0.0593   | 0.552871507 | count | 1        |
| REEP6      | 0.7289769 | 0.6216481 | 1.1727 | 0.241    | 0.553130031 | count | 1        |
| CPLX1      | 0.4047312 | 0.1180918 | 3.4273 | 0.000619 | 0.553308271 | count | 1        |
| SPOCK2     | 0.6540531 | 0.5726383 | 1.1422 | 0.253    | 0.55334411  | count | 1        |
| NPHP1      | 0.4727286 | 0.3900513 | 1.212  | 0.226    | 0.553375328 | count | 1        |
| SP110      | 0.3928395 | 0.1008032 | 3.8971 | 9.97E-05 | 0.553576101 | count | 1        |
| ANXA2R     | 0.4069223 | 0.1549453 | 2.6262 | 0.00868  | 0.55373212  | count | 1        |
| TUT1       | 0.5289849 | 0.3300698 | 1.6026 | 0.109    | 0.553858105 | count | 1        |
| MPRIP-AS1  | 0.8000368 | 0.6594872 | 1.2131 | 0.225    | 0.553962357 | count | 1        |
| AURKC      | 0.9059973 | 1.005376  | 0.9012 | 0.368    | 0.55405764  | count | 1        |
| USP4       | 0.4472988 | 0.2276166 | 1.9651 | 0.0495   | 0.554134486 | count | 1        |
| EFHD1      | 1.4801696 | 1.0676009 | 1.3864 | 0.166    | 0.554247528 | count | 1        |
| DEK        | 0.388289  | 0.0600138 | 6.47   | 1.16E-10 | 0.554480347 | count | 2.76E-06 |

|             |           |           |        |          |             |       |             |
|-------------|-----------|-----------|--------|----------|-------------|-------|-------------|
| ZC3H18      | 0.4402624 | 0.210768  | 2.0888 | 0.0368   | 0.554483929 | count | 1           |
| TIMELESS    | 0.831678  | 0.8253778 | 1.0076 | 0.314    | 0.554808006 | count | 1           |
| UBE2D1      | 0.4037415 | 0.1244614 | 3.2439 | 0.00119  | 0.554943274 | count | 1           |
| LINC00472   | 0.8672841 | 0.6586083 | 1.3168 | 0.188    | 0.555148938 | count | 1           |
| PLRG1       | 0.4088491 | 0.1458803 | 2.8026 | 0.0051   | 0.555255052 | count | 1           |
| AP002360.1  | 0.6456639 | 0.5351898 | 1.2064 | 0.228    | 0.555525935 | count | 1           |
| ADCK5       | 0.6698724 | 0.5358815 | 1.25   | 0.211    | 0.555895544 | count | 1           |
| ZFP36L1     | 0.3884988 | 0.0768473 | 5.0555 | 4.57E-07 | 0.556029467 | count | 0.010705225 |
| ZNF791      | 0.4176718 | 0.1467781 | 2.8456 | 0.00447  | 0.556036035 | count | 1           |
| AKIRIN2     | 0.408966  | 0.1409716 | 2.9011 | 0.00375  | 0.556133596 | count | 1           |
| MRPS31      | 0.4078917 | 0.1411636 | 2.8895 | 0.00389  | 0.556148647 | count | 1           |
| SCGB3A1     | 0.5218452 | 0.3737482 | 1.3962 | 0.163    | 0.556149305 | count | 1           |
| CNTLN       | 0.4194064 | 0.1780726 | 2.3553 | 0.0186   | 0.556265552 | count | 1           |
| FAM122A     | 0.4389249 | 0.225659  | 1.9451 | 0.0519   | 0.556339188 | count | 1           |
| C6orf47     | 0.472885  | 0.2863113 | 1.6516 | 0.0987   | 0.556341348 | count | 1           |
| AAAS        | 0.4766891 | 0.3342919 | 1.426  | 0.154    | 0.556363885 | count | 1           |
| PLP2        | 0.3947709 | 0.102057  | 3.8681 | 0.000112 | 0.556434687 | count | 1           |
| NR1H2       | 0.4046367 | 0.1228913 | 3.2926 | 0.00101  | 0.556932399 | count | 1           |
| AP4B1       | 0.6028746 | 0.3820764 | 1.5779 | 0.115    | 0.557272665 | count | 1           |
| PCNX3       | 0.5475252 | 0.5050226 | 1.0842 | 0.278    | 0.557357595 | count | 1           |
| PPP3CA      | 0.3943064 | 0.0876401 | 4.4992 | 7.10E-06 | 0.557785388 | count | 0.1649614   |
| COQ3        | 0.5524019 | 0.4375729 | 1.2624 | 0.207    | 0.557960139 | count | 1           |
| CSE1L       | 0.4628005 | 0.2459919 | 1.8814 | 0.06     | 0.558032813 | count | 1           |
| JAGN1       | 0.4064384 | 0.1221704 | 3.3268 | 0.00089  | 0.558048654 | count | 1           |
| CCDC146     | 0.6200845 | 0.4753856 | 1.3044 | 0.192    | 0.558226164 | count | 1           |
| MEX3C       | 0.4221037 | 0.1846886 | 2.2855 | 0.0224   | 0.558309869 | count | 1           |
| CHCHD7      | 0.4243644 | 0.2090448 | 2.03   | 0.0425   | 0.558565945 | count | 1           |
| MAP2K1      | 0.5411191 | 0.3180082 | 1.7016 | 0.0889   | 0.558737341 | count | 1           |
| CTDP1       | 0.6124692 | 0.4247793 | 1.4419 | 0.149    | 0.558803555 | count | 1           |
| TBC1D20     | 0.4496774 | 0.2402782 | 1.8715 | 0.0614   | 0.559250008 | count | 1           |
| ARRDC1      | 0.4193231 | 0.1633487 | 2.567  | 0.0103   | 0.55967686  | count | 1           |
| RPAP3       | 0.4207082 | 0.1841207 | 2.285  | 0.0224   | 0.559797889 | count | 1           |
| GNB5        | 0.4569728 | 0.3551691 | 1.2866 | 0.198    | 0.559921713 | count | 1           |
| DNAJC27-AS1 | 0.8772123 | 0.7816801 | 1.1222 | 0.262    | 0.560132696 | count | 1           |
| FN3KRP      | 0.4451744 | 0.2034262 | 2.1884 | 0.0287   | 0.561122881 | count | 1           |
| VWA5A       | 0.4797303 | 0.2840211 | 1.6891 | 0.0913   | 0.561229094 | count | 1           |
| TLCD1       | 1.1078256 | 1.0196407 | 1.0865 | 0.277    | 0.561450497 | count | 1           |
| CEP70       | 0.4899918 | 0.2866446 | 1.7094 | 0.0875   | 0.561452848 | count | 1           |
| TARS        | 0.4303957 | 0.1926011 | 2.2346 | 0.0255   | 0.561685912 | count | 1           |
| POLD3       | 0.4310328 | 0.2114562 | 2.0384 | 0.0416   | 0.561815018 | count | 1           |
| DLG4        | 0.7070949 | 0.4789863 | 1.4762 | 0.14     | 0.561840779 | count | 1           |
| SMIM27      | 0.4780516 | 0.2503185 | 1.9098 | 0.0563   | 0.562172108 | count | 1           |
| LSM2        | 0.3964568 | 0.0739578 | 5.3606 | 8.98E-08 | 0.562529832 | count | 0.002112006 |
| TMEM186     | 0.5530689 | 0.418136  | 1.3227 | 0.186    | 0.562579317 | count | 1           |
| CARD8-AS1   | 0.4239207 | 0.1809586 | 2.3426 | 0.0192   | 0.56286798  | count | 1           |

|            |            |             |        |          |             |       |   |
|------------|------------|-------------|--------|----------|-------------|-------|---|
| FOXN3      | 0.421217   | 0.1664184   | 2.5311 | 0.0114   | 0.563171114 | count | 1 |
| RTP4       | 0.4380438  | 0.2617876   | 1.6733 | 0.0944   | 0.56322244  | count | 1 |
| PXN-AS1    | 0.7896576  | 0.6640047   | 1.1892 | 0.234    | 0.563283087 | count | 1 |
| TTY14      | 0.5960198  | 0.5075052   | 1.1744 | 0.24     | 0.56335962  | count | 1 |
| FKBP11     | 0.4058653  | 0.1188604   | 3.4146 | 0.000648 | 0.563914137 | count | 1 |
| HPCAL1     | 0.4108288  | 0.1174831   | 3.4969 | 0.000478 | 0.564021184 | count | 1 |
| FAM200A    | 0.5506507  | 0.4262906   | 1.2917 | 0.197    | 0.564149308 | count | 1 |
| CCDC77     | 0.5846772  | 0.379088    | 1.5423 | 0.123    | 0.5643331   | count | 1 |
| TYW1B      | 1.215353   | 1.0728344   | 1.1328 | 0.257    | 0.56479482  | count | 1 |
| FKBP1B     | 0.4348648  | 0.204453    | 2.127  | 0.0335   | 0.564906191 | count | 1 |
| CDK10      | 0.4441197  | 0.2058141   | 2.1579 | 0.031    | 0.564955331 | count | 1 |
| AAMP       | 0.4184782  | 0.1337072   | 3.1298 | 0.00177  | 0.565023404 | count | 1 |
| MFSD6      | 0.4358543  | 0.2263482   | 1.9256 | 0.0543   | 0.565026423 | count | 1 |
| LSM14B     | 0.5307878  | 0.3920797   | 1.3538 | 0.176    | 0.565071664 | count | 1 |
| QSER1      | 0.4369739  | 0.203426    | 2.1481 | 0.0318   | 0.565262974 | count | 1 |
| NXT2       | 0.585835   | 0.4673425   | 1.2535 | 0.21     | 0.565351458 | count | 1 |
| GVQW3      | 1.2184993  | 0.8609266   | 1.4153 | 0.157    | 0.565746787 | count | 1 |
| TINF2      | 0.4249333  | 0.1741545   | 2.44   | 0.0148   | 0.565775761 | count | 1 |
| HIF1A-AS2  | 15.4567872 | 1093.041497 | 0.0141 | 0.989    | 0.565971586 | count | 1 |
| IGSF22     | 15.4569597 | 1187.601703 | 0.013  | 0.99     | 0.565971586 | count | 1 |
| LINC00471  | 15.6160709 | 1197.028218 | 0.013  | 0.99     | 0.565971606 | count | 1 |
| AC007249.2 | 15.6161843 | 1367.855675 | 0.0114 | 0.991    | 0.565971606 | count | 1 |
| AL117335.1 | 15.7429041 | 1102.524559 | 0.0143 | 0.989    | 0.565971619 | count | 1 |
| AC010524.1 | 15.7429045 | 1102.523657 | 0.0143 | 0.989    | 0.565971619 | count | 1 |
| TMCC2      | 15.8507451 | 1195.694712 | 0.0133 | 0.989    | 0.56597163  | count | 1 |
| AC009812.4 | 15.8775776 | 2353.673345 | 0.0067 | 0.995    | 0.565971632 | count | 1 |
| AC109322.1 | 15.8887204 | 1365.837476 | 0.0116 | 0.991    | 0.565971633 | count | 1 |
| LINC02186  | 15.9453082 | 1192.230571 | 0.0134 | 0.989    | 0.565971638 | count | 1 |
| AC006064.4 | 15.9453129 | 1192.231024 | 0.0134 | 0.989    | 0.565971638 | count | 1 |
| AL359397.2 | 15.9923501 | 1103.892137 | 0.0145 | 0.988    | 0.565971642 | count | 1 |
| AC010809.2 | 16.081475  | 1371.282313 | 0.0117 | 0.991    | 0.565971648 | count | 1 |
| AC090825.1 | 16.1131174 | 1575.340788 | 0.0102 | 0.992    | 0.56597165  | count | 1 |
| DKK4       | 16.1134018 | 1734.771546 | 0.0093 | 0.993    | 0.56597165  | count | 1 |
| AC015987.1 | 16.11422   | 2376.80474  | 0.0068 | 0.995    | 0.565971651 | count | 1 |
| LINC01703  | 15.6159753 | 1101.721273 | 0.0142 | 0.989    | 0.565971652 | count | 1 |
| AL049775.3 | 15.6162818 | 1590.051802 | 0.0098 | 0.992    | 0.565971652 | count | 1 |
| COL1A1     | 16.1606954 | 1376.050776 | 0.0117 | 0.991    | 0.565971654 | count | 1 |
| LYPD6      | 16.242089  | 1409.154224 | 0.0115 | 0.991    | 0.565971659 | count | 1 |
| FOXP2      | 16.2423333 | 1275.901731 | 0.0127 | 0.9898   | 0.565971659 | count | 1 |
| C10orf95   | 16.2965783 | 1579.159907 | 0.0103 | 0.992    | 0.565971662 | count | 1 |
| KIF25      | 15.7429069 | 1102.523981 | 0.0143 | 0.989    | 0.565971666 | count | 1 |
| AC226118.1 | 15.7429069 | 1102.523979 | 0.0143 | 0.989    | 0.565971666 | count | 1 |
| AC022211.2 | 15.7611336 | 1183.038361 | 0.0133 | 0.989    | 0.565971668 | count | 1 |
| AL353770.4 | 16.4020775 | 1095.052845 | 0.015  | 0.988    | 0.565971668 | count | 1 |
| KCNE1      | 16.4804183 | 1929.442365 | 0.0085 | 0.993    | 0.565971672 | count | 1 |

|                 |            |             |        |          |             |       |   |
|-----------------|------------|-------------|--------|----------|-------------|-------|---|
| Z97192.2        | 16.4810248 | 2229.948086 | 0.0074 | 0.994    | 0.565971672 | count | 1 |
| AC000403.1      | 16.5777224 | 2018.714665 | 0.0082 | 0.993    | 0.565971676 | count | 1 |
| GJC3            | 15.8507177 | 1100.460103 | 0.0144 | 0.989    | 0.565971676 | count | 1 |
| KIF18A          | 15.8507196 | 1100.459405 | 0.0144 | 0.989    | 0.565971676 | count | 1 |
| APOBEC3D        | 15.8508138 | 1183.301274 | 0.0134 | 0.989    | 0.565971676 | count | 1 |
| AC105285.1      | 15.850814  | 1183.301817 | 0.0134 | 0.989    | 0.565971676 | count | 1 |
| AC010997.5      | 15.8763637 | 1717.712164 | 0.0092 | 0.993    | 0.565971679 | count | 1 |
| TAF1A-AS1       | 15.8763638 | 1717.712169 | 0.0092 | 0.993    | 0.565971679 | count | 1 |
| BAIAP3          | 15.8763638 | 1717.71218  | 0.0092 | 0.993    | 0.565971679 | count | 1 |
| KCNAB3          | 15.8767526 | 1862.364763 | 0.0085 | 0.993    | 0.565971679 | count | 1 |
| AC009318.3      | 15.888711  | 1100.118553 | 0.0144 | 0.988    | 0.56597168  | count | 1 |
| DHX34           | 15.9452977 | 1362.464407 | 0.0117 | 0.991    | 0.565971685 | count | 1 |
| AC015908.2      | 16.8759628 | 2571.715953 | 0.0066 | 0.995    | 0.565971688 | count | 1 |
| ANKHD1-EIF4EBP3 | 15.9836479 | 1174.182712 | 0.0136 | 0.989    | 0.565971688 | count | 1 |
| TENM3           | 16.9652938 | 1724.65075  | 0.0098 | 0.9922   | 0.56597169  | count | 1 |
| DOC2A           | 16.0815367 | 1199.974918 | 0.0134 | 0.989    | 0.565971695 | count | 1 |
| AL138963.3      | 16.0815614 | 1104.390441 | 0.0146 | 0.988    | 0.565971695 | count | 1 |
| CALHM6          | 16.0815665 | 1104.390229 | 0.0146 | 0.988    | 0.565971695 | count | 1 |
| SPON2           | 16.0915623 | 1187.464474 | 0.0136 | 0.989    | 0.565971696 | count | 1 |
| AC090092.1      | 16.1140014 | 2231.121225 | 0.0072 | 0.994    | 0.565971697 | count | 1 |
| FCN2            | 16.2970839 | 1906.830368 | 0.0085 | 0.993    | 0.565971709 | count | 1 |
| PAN3-AS1        | 16.2976743 | 1098.750927 | 0.0148 | 0.988    | 0.565971709 | count | 1 |
| LINC02352       | 16.38947   | 1100.523392 | 0.0149 | 0.988    | 0.565971714 | count | 1 |
| CCDC141         | 16.4346649 | 1828.268871 | 0.009  | 0.9928   | 0.565971716 | count | 1 |
| TDGF1           | 16.447988  | 1578.975834 | 0.0104 | 0.992    | 0.565971717 | count | 1 |
| AC109347.2      | 16.4485097 | 2382.281657 | 0.0069 | 0.994    | 0.565971717 | count | 1 |
| LINC00511       | 16.4804184 | 1929.442443 | 0.0085 | 0.993    | 0.565971719 | count | 1 |
| C2CD4A          | 16.4810248 | 2229.94802  | 0.0074 | 0.994    | 0.565971719 | count | 1 |
| DCST1-AS1       | 16.6907929 | 1574.64461  | 0.0106 | 0.992    | 0.565971728 | count | 1 |
| AC097478.1      | 16.8759627 | 2571.7159   | 0.0066 | 0.995    | 0.565971734 | count | 1 |
| AC006059.1      | 16.875963  | 2571.715985 | 0.0066 | 0.995    | 0.565971734 | count | 1 |
| CASC1           | 16.875963  | 2571.715942 | 0.0066 | 0.995    | 0.565971734 | count | 1 |
| WNT9A           | 17.1997601 | 2356.842196 | 0.0073 | 0.994    | 0.565971743 | count | 1 |
| AL139280.1      | 17.1997605 | 2356.842276 | 0.0073 | 0.994    | 0.565971743 | count | 1 |
| ACTN1-AS1       | 17.2000478 | 2647.857372 | 0.0065 | 0.995    | 0.565971743 | count | 1 |
| ZFAND1          | 0.4053302  | 0.107421    | 3.7733 | 0.000164 | 0.56599198  | count | 1 |
| POPDC2          | 0.7707863  | 0.7660566   | 1.0062 | 0.314    | 0.5662523   | count | 1 |
| CDC42SE2        | 0.4228431  | 0.1599619   | 2.6434 | 0.00825  | 0.566278397 | count | 1 |
| ZDHC8           | 0.5186312  | 0.3085995   | 1.6806 | 0.093    | 0.566574731 | count | 1 |
| RNF113A         | 0.4482082  | 0.2207813   | 2.0301 | 0.0424   | 0.566649992 | count | 1 |
| RDH13           | 0.5194815  | 0.2834861   | 1.8325 | 0.067    | 0.567449662 | count | 1 |
| CNST            | 0.4297283  | 0.1946337   | 2.2079 | 0.0273   | 0.567704413 | count | 1 |
| SLC35C2         | 0.4484739  | 0.2645941   | 1.695  | 0.0902   | 0.568136798 | count | 1 |
| SLC35C1         | 0.4891105  | 0.2759979   | 1.7722 | 0.0765   | 0.568702752 | count | 1 |
| SUCLG2          | 0.4210407  | 0.1367868   | 3.0781 | 0.0021   | 0.569033276 | count | 1 |

|            |           |           |        |          |             |       |             |
|------------|-----------|-----------|--------|----------|-------------|-------|-------------|
| TONSL      | 0.5900966 | 0.4259917 | 1.3852 | 0.166    | 0.569096178 | count | 1           |
| IDH3B      | 0.4222686 | 0.1453885 | 2.9044 | 0.00371  | 0.56914818  | count | 1           |
| MSTO1      | 0.6028074 | 0.4582449 | 1.3155 | 0.188    | 0.569165415 | count | 1           |
| RNF38      | 0.4585176 | 0.2310482 | 1.9845 | 0.0473   | 0.569165747 | count | 1           |
| STK32C     | 0.4725591 | 0.2770432 | 1.7057 | 0.0882   | 0.569376616 | count | 1           |
| MED1       | 0.4534685 | 0.2557827 | 1.7729 | 0.0764   | 0.569387116 | count | 1           |
| PIM1       | 0.4367362 | 0.2119026 | 2.061  | 0.0394   | 0.56945388  | count | 1           |
| ARHGEF1    | 0.4349537 | 0.187974  | 2.3139 | 0.0207   | 0.569508859 | count | 1           |
| AL354920.1 | 1.2312274 | 0.7738962 | 1.5909 | 0.112    | 0.569574768 | count | 1           |
| RSL24D1    | 0.4020742 | 0.0695386 | 5.782  | 8.21E-09 | 0.570021526 | count | 0.000194011 |
| ASMTL      | 0.435635  | 0.1900649 | 2.292  | 0.022    | 0.570061342 | count | 1           |
| N4BP2L1    | 0.4282599 | 0.1905111 | 2.248  | 0.0247   | 0.57013696  | count | 1           |
| PRKAB2     | 0.6542755 | 0.5108256 | 1.2808 | 0.2      | 0.570217242 | count | 1           |
| USP28      | 0.5494131 | 0.3306557 | 1.6616 | 0.0967   | 0.570281285 | count | 1           |
| TK1        | 0.6900528 | 0.6428976 | 1.0733 | 0.283    | 0.570417456 | count | 1           |
| CADM4      | 1.3686811 | 1.0724118 | 1.2763 | 0.202    | 0.570447314 | count | 1           |
| VAMP3      | 0.4026305 | 0.0780799 | 5.1566 | 2.69E-07 | 0.570580273 | count | 0.006309126 |
| CCDC138    | 0.7046081 | 0.4846707 | 1.4538 | 0.146    | 0.570718023 | count | 1           |
| FOSB       | 0.3997092 | 0.0711691 | 5.6163 | 2.14E-08 | 0.570775859 | count | 0.00050504  |
| ALOX12-AS1 | 0.8619703 | 0.6075308 | 1.4188 | 0.156    | 0.570857942 | count | 1           |
| CCDC137    | 0.4334958 | 0.2026463 | 2.1392 | 0.0325   | 0.570946245 | count | 1           |
| PACSIN2    | 0.4428036 | 0.1864896 | 2.3744 | 0.0176   | 0.570968255 | count | 1           |
| SNX33      | 0.7049905 | 0.547322  | 1.2881 | 0.198    | 0.570984437 | count | 1           |
| TIMM23B    | 0.6455696 | 0.4721106 | 1.3674 | 0.172    | 0.571228588 | count | 1           |
| GTPBP6     | 0.4226467 | 0.1367795 | 3.09   | 0.00202  | 0.571322997 | count | 1           |
| GSTK1      | 0.4004624 | 0.0654044 | 6.1229 | 1.05E-09 | 0.571421985 | count | 2.49E-05    |
| AC017083.1 | 0.5470074 | 0.3850043 | 1.4208 | 0.155    | 0.571425183 | count | 1           |
| MARCKSL1   | 0.3990061 | 0.0642709 | 6.2082 | 6.17E-10 | 0.571474888 | count | 1.46E-05    |
| NUP50-DT   | 0.587229  | 0.4988448 | 1.1772 | 0.239    | 0.571662915 | count | 1           |
| LRP2BP     | 1.0595365 | 0.8029467 | 1.3196 | 0.187    | 0.571983335 | count | 1           |
| PPP1R35    | 0.423228  | 0.157644  | 2.6847 | 0.0073   | 0.572099034 | count | 1           |
| ZBTB18     | 0.5148001 | 0.3506468 | 1.4681 | 0.142    | 0.572160734 | count | 1           |
| AC011498.1 | 1.8790351 | 1.3302966 | 1.4125 | 0.158    | 0.572507568 | count | 1           |
| FCHO2      | 0.4137886 | 0.1213712 | 3.4093 | 0.000661 | 0.572846598 | count | 1           |
| CASP8AP2   | 0.4290876 | 0.1886281 | 2.2748 | 0.023    | 0.572930574 | count | 1           |
| CCDC61     | 0.4623854 | 0.2412103 | 1.9169 | 0.0553   | 0.573047037 | count | 1           |
| SLC25A42   | 0.947756  | 0.615623  | 1.5395 | 0.124    | 0.573470053 | count | 1           |
| SFMBT1     | 0.8679007 | 0.5977213 | 1.452  | 0.147    | 0.573966272 | count | 1           |
| NFYC-AS1   | 0.8085459 | 1.5987974 | 0.5057 | 0.6131   | 0.574292176 | count | 1           |
| KLHL2      | 0.495926  | 0.2843059 | 1.7443 | 0.0812   | 0.574682235 | count | 1           |
| DUS1L      | 0.4498641 | 0.1854452 | 2.4259 | 0.0153   | 0.574697917 | count | 1           |
| LARS       | 0.4103154 | 0.1062592 | 3.8615 | 0.000115 | 0.574722296 | count | 1           |
| CDK5RAP2   | 0.4662199 | 0.2483019 | 1.8776 | 0.0605   | 0.575223427 | count | 1           |
| ALDH6A1    | 0.4436507 | 0.203072  | 2.1847 | 0.029    | 0.575314283 | count | 1           |
| REL        | 0.4140078 | 0.1208805 | 3.4249 | 0.000624 | 0.575488323 | count | 1           |

|            |           |           |        |          |             |       |          |
|------------|-----------|-----------|--------|----------|-------------|-------|----------|
| TAF1       | 0.4597922 | 0.2783875 | 1.6516 | 0.0987   | 0.575761539 | count | 1        |
| LDB2       | 0.4040544 | 0.0660558 | 6.1169 | 1.09E-09 | 0.575812985 | count | 2.58E-05 |
| DDIT3      | 0.4280658 | 0.1750529 | 2.4454 | 0.0145   | 0.575870104 | count | 1        |
| LEO1       | 0.4277732 | 0.1511581 | 2.8297 | 0.00469  | 0.575927226 | count | 1        |
| LYRM1      | 0.4171343 | 0.1472144 | 2.8335 | 0.00464  | 0.576060291 | count | 1        |
| MSMO1      | 0.4498738 | 0.2044431 | 2.2005 | 0.0279   | 0.576195807 | count | 1        |
| KCTD13     | 0.7458942 | 0.5598355 | 1.3323 | 0.183    | 0.576253762 | count | 1        |
| MTA2       | 0.5090988 | 0.2854418 | 1.7835 | 0.0746   | 0.576615158 | count | 1        |
| DTX3L      | 0.4297056 | 0.2108128 | 2.0383 | 0.0416   | 0.576643632 | count | 1        |
| AL441883.1 | 1.1522612 | 0.8576114 | 1.3436 | 0.179    | 0.576780436 | count | 1        |
| RHBDD1     | 0.5988673 | 0.4923849 | 1.2163 | 0.224    | 0.576784893 | count | 1        |
| ISCA2      | 0.4264895 | 0.1597803 | 2.6692 | 0.00765  | 0.577456316 | count | 1        |
| ACO1       | 0.4681693 | 0.2095915 | 2.2337 | 0.0256   | 0.577552926 | count | 1        |
| SRP14-AS1  | 0.5346574 | 0.3568881 | 1.4981 | 0.134    | 0.577632496 | count | 1        |
| AP1S2      | 0.4112287 | 0.0985274 | 4.1737 | 3.09E-05 | 0.577818674 | count | 0.713481 |
| BTAF1      | 0.4809519 | 0.2430035 | 1.9792 | 0.0479   | 0.577995442 | count | 1        |
| NIPA1      | 0.6543376 | 0.5808768 | 1.1265 | 0.26     | 0.578091929 | count | 1        |
| DDX56      | 0.4543553 | 0.1947252 | 2.3333 | 0.0197   | 0.57819457  | count | 1        |
| SULT1C2    | 0.5700054 | 0.3427765 | 1.6629 | 0.0964   | 0.578474719 | count | 1        |
| CCDC149    | 0.4652077 | 0.2314638 | 2.0099 | 0.0445   | 0.578744943 | count | 1        |
| CBLN3      | 1.262769  | 1.1372253 | 1.1104 | 0.267    | 0.578902646 | count | 1        |
| MOV10      | 0.4851626 | 0.3297926 | 1.4711 | 0.141    | 0.579330192 | count | 1        |
| WDR78      | 0.608134  | 0.4420517 | 1.3757 | 0.169    | 0.579401529 | count | 1        |
| ATG16L1    | 0.9163909 | 0.6066912 | 1.5105 | 0.131    | 0.579504102 | count | 1        |
| PSMG1      | 0.4322196 | 0.1571992 | 2.7495 | 0.00601  | 0.579601889 | count | 1        |
| COPG1      | 0.5290274 | 0.2777285 | 1.9048 | 0.0569   | 0.579816432 | count | 1        |
| SHISAL1    | 1.016386  | 0.7571187 | 1.3424 | 0.18     | 0.580392364 | count | 1        |
| AACS       | 0.7720918 | 0.7078788 | 1.0907 | 0.275    | 0.580456112 | count | 1        |
| 7-Mar      | 0.4206473 | 0.1232044 | 3.4142 | 0.000649 | 0.580736272 | count | 1        |
| GTF3C5     | 0.4788369 | 0.2658511 | 1.8011 | 0.0718   | 0.58091933  | count | 1        |
| TMEM177    | 0.7048005 | 0.5591006 | 1.2606 | 0.208    | 0.580943526 | count | 1        |
| CYB5B      | 0.4209898 | 0.1194621 | 3.524  | 0.000432 | 0.581000168 | count | 1        |
| ECSIT      | 0.4398537 | 0.1725545 | 2.5491 | 0.0109   | 0.581119772 | count | 1        |
| C9orf72    | 0.498984  | 0.3075364 | 1.6225 | 0.105    | 0.581235287 | count | 1        |
| MYNN       | 0.4481819 | 0.2105928 | 2.1282 | 0.0334   | 0.581458479 | count | 1        |
| TDRD10     | 0.6043376 | 0.4028033 | 1.5003 | 0.134    | 0.581567999 | count | 1        |
| RBMXL1     | 0.4704341 | 0.2945678 | 1.597  | 0.11     | 0.581909587 | count | 1        |
| RNF185     | 0.7207415 | 0.4799327 | 1.5018 | 0.133    | 0.581914475 | count | 1        |
| SCN9A      | 0.8505215 | 0.4595508 | 1.8508 | 0.0643   | 0.582026537 | count | 1        |
| AC129507.4 | 2.645151  | 1.124274  | 2.3528 | 0.0187   | 0.582191658 | count | 1        |
| NFE2L1     | 0.4176336 | 0.116455  | 3.5862 | 0.000341 | 0.582439252 | count | 1        |
| AC091271.1 | 0.4868364 | 0.2748952 | 1.771  | 0.0767   | 0.582457756 | count | 1        |
| AC024940.1 | 1.2751477 | 1.1244739 | 1.134  | 0.257    | 0.582502387 | count | 1        |
| B3GALT6    | 0.4627163 | 0.2164209 | 2.138  | 0.0326   | 0.582632278 | count | 1        |
| SCN1B      | 0.4232247 | 0.1213355 | 3.4881 | 0.000494 | 0.582901172 | count | 1        |

|            |           |           |        |          |             |       |           |
|------------|-----------|-----------|--------|----------|-------------|-------|-----------|
| JMJD1C-AS1 | 0.6821249 | 0.5269171 | 1.2946 | 0.196    | 0.582965878 | count | 1         |
| AFDN-DT    | 1.0228492 | 0.7674105 | 1.3329 | 0.183    | 0.583087998 | count | 1         |
| ZXDA       | 0.7385693 | 0.5606022 | 1.3175 | 0.188    | 0.583097434 | count | 1         |
| SLC44A4    | 1.0887879 | 1.1437833 | 0.9519 | 0.341    | 0.583126564 | count | 1         |
| HOTAIRM1   | 0.4457059 | 0.1732658 | 2.5724 | 0.0102   | 0.583317069 | count | 1         |
| INTS4      | 0.6344749 | 0.4178847 | 1.5183 | 0.129    | 0.583435681 | count | 1         |
| HMGXB4     | 0.4269887 | 0.1388741 | 3.0746 | 0.00213  | 0.583928004 | count | 1         |
| NMI        | 0.4221718 | 0.1222459 | 3.4535 | 0.000562 | 0.583930507 | count | 1         |
| AC108477.1 | 1.1736542 | 1.1341178 | 1.0349 | 0.301    | 0.583985492 | count | 1         |
| CRIP1      | 0.4176352 | 0.1387069 | 3.0109 | 0.00263  | 0.584139884 | count | 1         |
| BZW2       | 0.4256507 | 0.1383526 | 3.0766 | 0.00211  | 0.584434409 | count | 1         |
| POLI       | 0.4828948 | 0.2867503 | 1.684  | 0.0923   | 0.584622732 | count | 1         |
| FBXL6      | 0.5204619 | 0.3635325 | 1.4317 | 0.152    | 0.584696775 | count | 1         |
| AL391121.1 | 0.5815164 | 0.4542382 | 1.2802 | 0.201    | 0.585006601 | count | 1         |
| FGGY       | 0.5448307 | 0.3451717 | 1.5784 | 0.115    | 0.585050801 | count | 1         |
| TTC30B     | 0.6853783 | 0.4944748 | 1.3861 | 0.166    | 0.585392726 | count | 1         |
| OSBP       | 0.4417454 | 0.1932348 | 2.2861 | 0.0223   | 0.585401352 | count | 1         |
| SNAPC4     | 0.7801279 | 0.6323602 | 1.2337 | 0.217    | 0.585481139 | count | 1         |
| ZNF880     | 0.4484168 | 0.2183567 | 2.0536 | 0.0401   | 0.586124464 | count | 1         |
| MKRN2      | 0.4809452 | 0.2500666 | 1.9233 | 0.0545   | 0.586390351 | count | 1         |
| MIR222HG   | 0.4483656 | 0.2084927 | 2.1505 | 0.0316   | 0.586396497 | count | 1         |
| FAM13A-AS1 | 1.4349969 | 1.9323812 | 0.7426 | 0.4578   | 0.586539198 | count | 1         |
| DENND6B    | 0.7820689 | 0.5464969 | 1.4311 | 0.153    | 0.586691662 | count | 1         |
| SCAPER     | 0.4502835 | 0.1800062 | 2.5015 | 0.0124   | 0.586761147 | count | 1         |
| ARRB1      | 0.4428642 | 0.1856723 | 2.3852 | 0.0171   | 0.586859056 | count | 1         |
| CD79B      | 0.4268189 | 0.118103  | 3.614  | 0.000307 | 0.586861153 | count | 1         |
| ELK4       | 0.4249963 | 0.1370853 | 3.1002 | 0.00195  | 0.58729196  | count | 1         |
| SART1      | 0.4922696 | 0.2830461 | 1.7392 | 0.0821   | 0.587482272 | count | 1         |
| DISC1      | 0.594395  | 0.455783  | 1.3041 | 0.192    | 0.587784446 | count | 1         |
| TEAD4      | 0.4720752 | 0.2027301 | 2.3286 | 0.02     | 0.58778693  | count | 1         |
| POLG       | 0.6055706 | 0.6068158 | 0.9979 | 0.318    | 0.587902423 | count | 1         |
| SPIN3      | 0.8949013 | 0.6721027 | 1.3315 | 0.183    | 0.587978827 | count | 1         |
| FAM72A     | 0.7842    | 0.608474  | 1.2888 | 0.198    | 0.58801929  | count | 1         |
| RALGAPA2   | 0.4300158 | 0.1396056 | 3.0802 | 0.00209  | 0.588125239 | count | 1         |
| HTT        | 0.4850531 | 0.2835534 | 1.7106 | 0.0873   | 0.588190243 | count | 1         |
| UPF2       | 0.4232421 | 0.1136808 | 3.7231 | 0.000201 | 0.588475541 | count | 1         |
| ZFYVE21    | 0.4155075 | 0.0827141 | 5.0234 | 5.40E-07 | 0.589012767 | count | 0.0126441 |
| CHN1       | 0.458353  | 0.2037065 | 2.2501 | 0.0245   | 0.590112936 | count | 1         |
| P2RY1      | 0.938461  | 0.5800788 | 1.6178 | 0.106    | 0.590209892 | count | 1         |
| AKAP1      | 0.5017092 | 0.3042696 | 1.6489 | 0.0993   | 0.590238025 | count | 1         |
| CRYL1      | 0.4284037 | 0.122051  | 3.51   | 0.000455 | 0.590495202 | count | 1         |
| ERVK3-1    | 0.6030002 | 0.3461051 | 1.7422 | 0.0816   | 0.590680133 | count | 1         |
| DOLPP1     | 0.6811202 | 0.5525368 | 1.2327 | 0.218    | 0.590735477 | count | 1         |
| ZNF721     | 0.4502766 | 0.1999322 | 2.2521 | 0.0244   | 0.590806102 | count | 1         |
| LMTK2      | 0.750444  | 0.5269309 | 1.4242 | 0.155    | 0.591030903 | count | 1         |



|            |           |           |        |          |             |       |           |
|------------|-----------|-----------|--------|----------|-------------|-------|-----------|
| RPL17      | 0.4245475 | 0.1025788 | 4.1387 | 3.60E-05 | 0.591249676 | count | 0.830484  |
| PRCP       | 0.4128656 | 0.0576151 | 7.1659 | 9.87E-13 | 0.591396324 | count | 2.36E-08  |
| ZWINT      | 1.0429553 | 1.0862032 | 0.9602 | 0.337    | 0.591398715 | count | 1         |
| ZNF492     | 1.0429553 | 1.1156752 | 0.9348 | 0.35     | 0.591398715 | count | 1         |
| AC006449.6 | 0.5933132 | 0.4094421 | 1.4491 | 0.147    | 0.591427259 | count | 1         |
| AL357060.1 | 0.6720088 | 0.6234445 | 1.0779 | 0.281    | 0.591846743 | count | 1         |
| AC093462.1 | 1.4579475 | 1.0408199 | 1.4008 | 0.161    | 0.591910878 | count | 1         |
| AC006504.5 | 0.721731  | 0.5856306 | 1.2324 | 0.218    | 0.592937483 | count | 1         |
| ATG4C      | 0.4735172 | 0.2365591 | 2.0017 | 0.0454   | 0.593149129 | count | 1         |
| TTLL11     | 1.6832075 | 1.0723471 | 1.5696 | 0.117    | 0.593180346 | count | 1         |
| ZNF813     | 1.6832075 | 1.2004704 | 1.4021 | 0.161    | 0.593180346 | count | 1         |
| NIPSNAP3A  | 0.4576661 | 0.2083432 | 2.1967 | 0.0281   | 0.593498257 | count | 1         |
| CSRNP1     | 0.4253269 | 0.1022942 | 4.1579 | 3.31E-05 | 0.593774805 | count | 0.7638818 |
| NRROS      | 0.5821864 | 0.5224048 | 1.1144 | 0.265    | 0.593941853 | count | 1         |
| INTS13     | 0.5293338 | 0.3477868 | 1.522  | 0.128    | 0.594122225 | count | 1         |
| TFIP11     | 0.5301804 | 0.3134547 | 1.6914 | 0.0909   | 0.59502058  | count | 1         |
| KHNYN      | 0.5549764 | 0.4184734 | 1.3262 | 0.185    | 0.59523015  | count | 1         |
| RFTN1      | 0.5063031 | 0.2251826 | 2.2484 | 0.0246   | 0.595407832 | count | 1         |
| CDC42EP3   | 0.4219305 | 0.0908152 | 4.646  | 3.54E-06 | 0.595452756 | count | 0.0824643 |
| TRAPPC6A   | 0.430937  | 0.1275891 | 3.3775 | 0.000742 | 0.595824749 | count | 1         |
| KCTD7      | 1.209798  | 0.9570578 | 1.2641 | 0.206    | 0.595903724 | count | 1         |
| BX284668.6 | 0.6682541 | 0.5526475 | 1.2092 | 0.227    | 0.596605088 | count | 1         |
| RUFY3      | 0.5063662 | 0.2569408 | 1.9708 | 0.0489   | 0.596907388 | count | 1         |
| GEMIN8     | 0.5160726 | 0.2762465 | 1.8682 | 0.0618   | 0.59692616  | count | 1         |
| KPNA3      | 0.436827  | 0.1439657 | 3.0342 | 0.00243  | 0.5970317   | count | 1         |
| GABPB1     | 0.5029106 | 0.2814908 | 1.7866 | 0.0741   | 0.59708576  | count | 1         |
| PLCD1      | 0.6431521 | 0.486819  | 1.3211 | 0.187    | 0.597089307 | count | 1         |
| CLK4       | 0.4666813 | 0.2227348 | 2.0952 | 0.0362   | 0.597196243 | count | 1         |
| CYTL1      | 0.4231616 | 0.1384602 | 3.0562 | 0.00226  | 0.597252081 | count | 1         |
| PIGA       | 0.9535849 | 0.6005793 | 1.5878 | 0.112    | 0.597460775 | count | 1         |
| L3MBTL4    | 1.4824959 | 1.035445  | 1.4317 | 0.152    | 0.597546807 | count | 1         |
| RBKS       | 0.6229847 | 0.405205  | 1.5375 | 0.124    | 0.597800713 | count | 1         |
| ZNF341-AS1 | 0.9549047 | 0.8048146 | 1.1865 | 0.236    | 0.598090247 | count | 1         |
| TSTD2      | 0.6171473 | 0.4153276 | 1.4859 | 0.137    | 0.59809744  | count | 1         |
| PARP6      | 0.6447076 | 0.4278728 | 1.5068 | 0.132    | 0.59838113  | count | 1         |
| HES1       | 0.4192056 | 0.1151068 | 3.6419 | 0.000276 | 0.598474317 | count | 1         |
| HADHB      | 0.426671  | 0.0971617 | 4.3914 | 1.17E-05 | 0.598546237 | count | 0.2712879 |
| ATP2B1     | 0.4242263 | 0.0961139 | 4.4138 | 1.05E-05 | 0.598696167 | count | 0.2436    |
| NCBP2      | 0.4400498 | 0.1390254 | 3.1652 | 0.00157  | 0.598779276 | count | 1         |
| RNF126     | 0.4440791 | 0.1427204 | 3.1115 | 0.00188  | 0.598804993 | count | 1         |
| TFAP4      | 0.6534287 | 0.425708  | 1.5349 | 0.125    | 0.598971296 | count | 1         |
| AL356488.3 | 0.8818438 | 0.6432385 | 1.3709 | 0.171    | 0.59902844  | count | 1         |
| TIPARP-AS1 | 0.8253527 | 0.6395252 | 1.2906 | 0.197    | 0.599045123 | count | 1         |
| IER2       | 0.416545  | 0.0539894 | 7.7153 | 1.67E-14 | 0.599051154 | count | 4.00E-10  |
| AC067852.2 | 0.6381013 | 0.570458  | 1.1186 | 0.263    | 0.599114297 | count | 1         |

|            |           |           |        |          |             |       |             |
|------------|-----------|-----------|--------|----------|-------------|-------|-------------|
| DHRS7      | 0.4233051 | 0.0827642 | 5.1146 | 3.36E-07 | 0.599436587 | count | 0.007876176 |
| POLK       | 0.4391785 | 0.1568053 | 2.8008 | 0.00513  | 0.59945928  | count | 1           |
| NET1       | 0.433255  | 0.1102055 | 3.9313 | 8.65E-05 | 0.599574555 | count | 1           |
| VTA1       | 0.4739769 | 0.2133061 | 2.2221 | 0.0264   | 0.600177158 | count | 1           |
| TBPL1      | 0.4439539 | 0.1488478 | 2.9826 | 0.00288  | 0.600356019 | count | 1           |
| CMIP       | 0.4275389 | 0.0987026 | 4.3316 | 1.53E-05 | 0.600383591 | count | 0.3543633   |
| ATG5       | 0.4479565 | 0.1796343 | 2.4937 | 0.0127   | 0.600392881 | count | 1           |
| SH3PXD2B   | 0.6637962 | 0.3802932 | 1.7455 | 0.081    | 0.600396752 | count | 1           |
| ZFP62      | 0.5544562 | 0.3444112 | 1.6099 | 0.108    | 0.600494565 | count | 1           |
| THOC1      | 0.472631  | 0.2357913 | 2.0044 | 0.0451   | 0.600845808 | count | 1           |
| NAA15      | 0.4603497 | 0.1946594 | 2.3649 | 0.0181   | 0.601054168 | count | 1           |
| GOLGA1     | 0.4646109 | 0.2813391 | 1.6514 | 0.0988   | 0.601064311 | count | 1           |
| INPP1      | 0.427494  | 0.0961534 | 4.446  | 9.10E-06 | 0.601490598 | count | 0.2112747   |
| FN3K       | 0.8295194 | 0.7116031 | 1.1657 | 0.244    | 0.601508995 | count | 1           |
| NEK11      | 0.6756374 | 0.4583097 | 1.4742 | 0.141    | 0.602419697 | count | 1           |
| F3         | 1.5049192 | 1.0429256 | 1.443  | 0.149    | 0.602597104 | count | 1           |
| ABRAXAS2   | 0.4727321 | 0.2232011 | 2.118  | 0.0343   | 0.60263305  | count | 1           |
| DHX32      | 0.5439248 | 0.2875054 | 1.8919 | 0.0586   | 0.602652973 | count | 1           |
| CCDC122    | 0.4751109 | 0.2581024 | 1.8408 | 0.0658   | 0.603915318 | count | 1           |
| NUS1       | 0.5055311 | 0.2841443 | 1.7791 | 0.0753   | 0.603924504 | count | 1           |
| DTWD2      | 0.8337186 | 0.6222228 | 1.3399 | 0.18     | 0.603986322 | count | 1           |
| TNFRSF25   | 0.8337186 | 1.0359332 | 0.8048 | 0.421    | 0.603986322 | count | 1           |
| ZNF350     | 0.5476703 | 0.3730083 | 1.4683 | 0.142    | 0.604106829 | count | 1           |
| PTPN12     | 0.4274    | 0.1117841 | 3.8231 | 0.000135 | 0.604358238 | count | 1           |
| CCNB1      | 0.8113896 | 0.6117706 | 1.3263 | 0.185    | 0.604825541 | count | 1           |
| ZBTB45     | 0.7713304 | 0.6160515 | 1.2521 | 0.211    | 0.604870316 | count | 1           |
| GRK2       | 0.4825799 | 0.2359101 | 2.0456 | 0.0409   | 0.604870624 | count | 1           |
| FAM53B     | 0.603166  | 0.4455904 | 1.3536 | 0.176    | 0.604950038 | count | 1           |
| ZNF136     | 0.5301189 | 0.2971009 | 1.7843 | 0.0745   | 0.605097014 | count | 1           |
| MTX1       | 0.4417678 | 0.1476588 | 2.9918 | 0.0028   | 0.605128772 | count | 1           |
| BTBD3      | 0.4607099 | 0.2223933 | 2.0716 | 0.0384   | 0.605499554 | count | 1           |
| MXI1       | 0.440031  | 0.1277528 | 3.4444 | 0.000581 | 0.605910336 | count | 1           |
| ZNF696     | 1.1506628 | 0.7701872 | 1.494  | 0.135    | 0.605952401 | count | 1           |
| DERA       | 0.443146  | 0.1395111 | 3.1764 | 0.00151  | 0.605992943 | count | 1           |
| SMN2       | 1.2412306 | 0.7430881 | 1.6704 | 0.095    | 0.606011614 | count | 1           |
| SIK2       | 0.5024241 | 0.2781    | 1.8066 | 0.0709   | 0.606261008 | count | 1           |
| CYB5D1     | 0.5796107 | 0.3629484 | 1.597  | 0.11     | 0.606543029 | count | 1           |
| DCAF15     | 0.5219558 | 0.2996409 | 1.7419 | 0.0816   | 0.606740503 | count | 1           |
| PLCXD1     | 1.7642153 | 1.0592859 | 1.6655 | 0.0959   | 0.606933304 | count | 1           |
| ACER3      | 0.5318878 | 0.2758756 | 1.928  | 0.054    | 0.607011803 | count | 1           |
| AC242426.2 | 1.082417  | 0.6261014 | 1.7288 | 0.084    | 0.6073822   | count | 1           |
| LINC00909  | 0.5044661 | 0.2909849 | 1.7337 | 0.0831   | 0.607490244 | count | 1           |
| DCAF16     | 0.5342835 | 0.2586783 | 2.0654 | 0.039    | 0.60765647  | count | 1           |
| PRKN       | 0.8980845 | 0.7417434 | 1.2108 | 0.226    | 0.60772098  | count | 1           |
| AC092164.1 | 1.247845  | 1.0242221 | 1.2183 | 0.223    | 0.608108546 | count | 1           |

|            |           |           |         |          |             |       |           |
|------------|-----------|-----------|---------|----------|-------------|-------|-----------|
| AC105020.6 | 1.247845  | 1.0642476 | 1.1725  | 0.241    | 0.608108546 | count | 1         |
| ERAL1      | 0.4865519 | 0.2642867 | 1.841   | 0.0657   | 0.608263643 | count | 1         |
| FNTA       | 0.4370048 | 0.1046729 | 4.175   | 3.07E-05 | 0.608336656 | count | 0.7088937 |
| PPM1D      | 0.4747439 | 0.1690711 | 2.808   | 0.00502  | 0.609268023 | count | 1         |
| MAD1L1     | 0.5721794 | 0.3091405 | 1.8509  | 0.0643   | 0.609295073 | count | 1         |
| LMBR1L     | 0.5440984 | 0.2593999 | 2.0975  | 0.036    | 0.609762927 | count | 1         |
| CLK2       | 0.7184034 | 0.4160251 | 1.7268  | 0.0843   | 0.609826189 | count | 1         |
| VPS26C     | 0.4872607 | 0.2501226 | 1.9481  | 0.0515   | 0.609848097 | count | 1         |
| KRI1       | 0.5610379 | 0.3637739 | 1.5423  | 0.123    | 0.609969182 | count | 1         |
| ACKR4      | 0.5268341 | 0.3570059 | 1.4757  | 0.14     | 0.610473536 | count | 1         |
| RAB8B      | 0.4472593 | 0.1477142 | 3.0279  | 0.00249  | 0.610587386 | count | 1         |
| TSPAN14    | 0.4428256 | 0.1204081 | 3.6777  | 0.00024  | 0.610789865 | count | 1         |
| HLA-A      | 0.4238408 | 0.0312829 | 13.5487 | 1.55E-40 | 0.610858249 | count | 3.76E-36  |
| PDXDC1     | 0.4759057 | 0.2115601 | 2.2495  | 0.0246   | 0.611210855 | count | 1         |
| PCMTD2     | 0.4568496 | 0.1786056 | 2.5579  | 0.0106   | 0.6113252   | count | 1         |
| ANKDD1A    | 0.6533159 | 0.5313555 | 1.2295  | 0.219    | 0.611899971 | count | 1         |
| KLHDC8B    | 0.4676659 | 0.1943247 | 2.4066  | 0.0162   | 0.612162099 | count | 1         |
| TEF        | 0.5558763 | 0.370669  | 1.4997  | 0.134    | 0.612607865 | count | 1         |
| MARS2      | 1.3847332 | 1.0312563 | 1.3428  | 0.179    | 0.612909589 | count | 1         |
| MAFG-DT    | 1.3847332 | 1.0621034 | 1.3038  | 0.192    | 0.612909589 | count | 1         |
| SP2-AS1    | 1.036308  | 0.7605287 | 1.3626  | 0.173    | 0.612935311 | count | 1         |
| HELZ2      | 0.5480303 | 0.2817002 | 1.9454  | 0.0518   | 0.613918584 | count | 1         |
| CCND2      | 0.4586833 | 0.1965923 | 2.3332  | 0.0197   | 0.61394565  | count | 1         |
| PLCB3      | 0.5217652 | 0.306779  | 1.7008  | 0.0891   | 0.614251295 | count | 1         |
| AL139289.2 | 1.1002448 | 1.2227678 | 0.8998  | 0.368    | 0.614462046 | count | 1         |
| ANKRD46    | 0.5032655 | 0.238976  | 2.1059  | 0.0353   | 0.614628918 | count | 1         |
| RAPGEF1    | 0.4791037 | 0.2065999 | 2.319   | 0.0205   | 0.614724558 | count | 1         |
| ZNF724     | 1.5606795 | 1.073225  | 1.4542  | 0.146    | 0.614759998 | count | 1         |
| LENG8      | 0.5964377 | 0.3393125 | 1.7578  | 0.0789   | 0.61530535  | count | 1         |
| TOR3A      | 0.4562932 | 0.1785586 | 2.5554  | 0.0107   | 0.615868979 | count | 1         |
| RAD9A      | 0.5272972 | 0.2533104 | 2.0816  | 0.0375   | 0.615881742 | count | 1         |
| SH2D3C     | 0.4676232 | 0.1700424 | 2.75    | 0.006    | 0.615950646 | count | 1         |
| USP49      | 1.3966185 | 1.1638006 | 1.2     | 0.23     | 0.616053534 | count | 1         |
| IFT81      | 0.5568508 | 0.3516805 | 1.5834  | 0.113    | 0.616113747 | count | 1         |
| CHRN1      | 0.5337704 | 0.2976582 | 1.7932  | 0.073    | 0.616386237 | count | 1         |
| ZNF781     | 0.6109952 | 0.3888451 | 1.5713  | 0.116    | 0.616583657 | count | 1         |
| SRSF6      | 0.4539186 | 0.1419104 | 3.1986  | 0.0014   | 0.61664479  | count | 1         |
| SNRNP48    | 0.478184  | 0.2060343 | 2.3209  | 0.0204   | 0.616884426 | count | 1         |
| DRG1       | 0.4728939 | 0.1815064 | 2.6054  | 0.00923  | 0.617810066 | count | 1         |
| RFC4       | 0.5995702 | 0.383691  | 1.5626  | 0.118    | 0.618281139 | count | 1         |
| ADGRL4     | 0.4324041 | 0.0626507 | 6.9018  | 6.34E-12 | 0.618333598 | count | 1.51E-07  |
| SUN1       | 0.4462763 | 0.1310743 | 3.4048  | 0.000672 | 0.618668037 | count | 1         |
| MORC3      | 0.4683987 | 0.1821176 | 2.572   | 0.0102   | 0.618705778 | count | 1         |
| SPRED1     | 0.5220942 | 0.2595229 | 2.0117  | 0.0443   | 0.618877746 | count | 1         |
| RSL1D1     | 0.4353358 | 0.0684324 | 6.3615  | 2.33E-10 | 0.61943783  | count | 5.53E-06  |

|            |           |           |        |          |             |       |             |
|------------|-----------|-----------|--------|----------|-------------|-------|-------------|
| MAF        | 0.7194898 | 0.3818038 | 1.8844 | 0.0596   | 0.619643424 | count | 1           |
| FOXK2      | 0.5514006 | 0.2682343 | 2.0557 | 0.0399   | 0.619704657 | count | 1           |
| AC097376.2 | 0.5970901 | 0.3841505 | 1.5543 | 0.12     | 0.61974221  | count | 1           |
| LINC01011  | 1.0523716 | 0.6106756 | 1.7233 | 0.0849   | 0.619850327 | count | 1           |
| TRMT6      | 0.4752614 | 0.2186969 | 2.1732 | 0.0299   | 0.620110878 | count | 1           |
| AGPAT2     | 0.4412448 | 0.1060325 | 4.1614 | 3.26E-05 | 0.62012848  | count | 0.7524406   |
| TMSB4Y     | 0.7952308 | 0.6500693 | 1.2233 | 0.221    | 0.620527197 | count | 1           |
| HGSNAT     | 0.481453  | 0.2076709 | 2.3183 | 0.0205   | 0.620541959 | count | 1           |
| TIFA       | 0.4506781 | 0.1629668 | 2.7655 | 0.00572  | 0.620670062 | count | 1           |
| LLPH       | 0.4551216 | 0.1590086 | 2.8622 | 0.00424  | 0.620739259 | count | 1           |
| ATP11C     | 0.4608551 | 0.1620675 | 2.8436 | 0.00449  | 0.621105664 | count | 1           |
| GTPBP4     | 0.4634405 | 0.1469135 | 3.1545 | 0.00162  | 0.621224481 | count | 1           |
| AL161785.1 | 1.5934061 | 1.0990748 | 1.4498 | 0.147    | 0.621641813 | count | 1           |
| CPTP       | 0.4660166 | 0.1695444 | 2.7486 | 0.00602  | 0.622105274 | count | 1           |
| ERCC3      | 0.5181931 | 0.2679032 | 1.9343 | 0.0532   | 0.622159546 | count | 1           |
| AC093827.4 | 0.6387275 | 0.4790511 | 1.3333 | 0.183    | 0.622360439 | count | 1           |
| PSMB8      | 0.4355625 | 0.0603152 | 7.2214 | 6.62E-13 | 0.622543266 | count | 1.58E-08    |
| CHMP4B     | 0.4545942 | 0.1356366 | 3.3516 | 0.000814 | 0.62270778  | count | 1           |
| GDF3       | 0.8189055 | 0.7614358 | 1.0755 | 0.282    | 0.622953807 | count | 1           |
| TMOD3      | 0.4357821 | 0.0657451 | 6.6284 | 4.07E-11 | 0.62316121  | count | 9.68E-07    |
| UTP25      | 0.5288975 | 0.287485  | 1.8397 | 0.0659   | 0.623736306 | count | 1           |
| CTNS       | 0.8972458 | 0.6383474 | 1.4056 | 0.16     | 0.624442557 | count | 1           |
| TCF15      | 0.569974  | 0.457445  | 1.246  | 0.213    | 0.624536562 | count | 1           |
| AL353194.1 | 0.6610285 | 0.602033  | 1.098  | 0.272    | 0.624576198 | count | 1           |
| MCM4       | 0.6767863 | 0.7107186 | 0.9523 | 0.341    | 0.624844967 | count | 1           |
| WFS1       | 0.5175674 | 0.2511387 | 2.0609 | 0.0394   | 0.624961874 | count | 1           |
| GGT5       | 0.46407   | 0.174121  | 2.6652 | 0.00774  | 0.625030353 | count | 1           |
| DNASE1L3   | 0.4402817 | 0.1673776 | 2.6305 | 0.00857  | 0.625229369 | count | 1           |
| COX19      | 0.5013259 | 0.2371182 | 2.1142 | 0.0346   | 0.625392184 | count | 1           |
| POP1       | 0.7398966 | 0.4639954 | 1.5946 | 0.111    | 0.625530592 | count | 1           |
| BCDIN3D    | 0.5711382 | 0.4009319 | 1.4245 | 0.154    | 0.625730631 | count | 1           |
| ZKSCAN4    | 1.3056884 | 1.0737288 | 1.216  | 0.224    | 0.626008101 | count | 1           |
| ZNF692     | 0.9336519 | 0.571673  | 1.6332 | 0.103    | 0.626465686 | count | 1           |
| SF3A3      | 0.4575214 | 0.1279964 | 3.5745 | 0.000357 | 0.626573638 | count | 1           |
| ZNF143     | 0.4983184 | 0.2327967 | 2.1406 | 0.0324   | 0.626815681 | count | 1           |
| RIN1       | 0.6224385 | 0.4481287 | 1.389  | 0.165    | 0.627130579 | count | 1           |
| REEP1      | 2.3929193 | 1.3893091 | 1.7224 | 0.0851   | 0.627430724 | count | 1           |
| PRPF39     | 0.5941127 | 0.3059204 | 1.9421 | 0.0522   | 0.627599519 | count | 1           |
| SIAH1      | 0.4774211 | 0.1653523 | 2.8873 | 0.00392  | 0.62766576  | count | 1           |
| CCDC28A    | 0.4795255 | 0.2046589 | 2.343  | 0.0192   | 0.627711178 | count | 1           |
| AHNAK      | 0.4388629 | 0.0813984 | 5.3915 | 7.58E-08 | 0.62788028  | count | 0.001783271 |
| RAB11A     | 0.4396808 | 0.0570912 | 7.7014 | 1.86E-14 | 0.627888941 | count | 4.45E-10    |
| EED        | 0.5222695 | 0.258561  | 2.0199 | 0.0435   | 0.628062465 | count | 1           |
| AZIN1-AS1  | 1.0193138 | 0.7198695 | 1.416  | 0.157    | 0.628173028 | count | 1           |
| SURF2      | 0.4785707 | 0.2147792 | 2.2282 | 0.0259   | 0.628826683 | count | 1           |

|            |           |           |        |          |             |       |            |
|------------|-----------|-----------|--------|----------|-------------|-------|------------|
| SPIN4      | 0.9764117 | 0.7569731 | 1.2899 | 0.197    | 0.628903637 | count | 1          |
| RXRA       | 0.4886933 | 0.2106395 | 2.32   | 0.0204   | 0.629172597 | count | 1          |
| COTL1      | 0.4451708 | 0.096998  | 4.5895 | 4.64E-06 | 0.629335642 | count | 0.10800528 |
| TWISTNB    | 0.4562578 | 0.1368158 | 3.3348 | 0.000865 | 0.629368443 | count | 1          |
| AC025159.1 | 0.6159261 | 0.428995  | 1.4357 | 0.151    | 0.629693452 | count | 1          |
| SGF29      | 0.5024195 | 0.2304469 | 2.1802 | 0.0293   | 0.629696915 | count | 1          |
| ATG16L2    | 0.6116546 | 0.3161289 | 1.9348 | 0.0531   | 0.629733288 | count | 1          |
| EFHD2      | 0.4542145 | 0.1161128 | 3.9118 | 9.38E-05 | 0.630107507 | count | 1          |
| ST7-AS1    | 1.141756  | 0.7725408 | 1.4779 | 0.14     | 0.630611037 | count | 1          |
| BOLA3      | 0.4684641 | 0.1441574 | 3.2497 | 0.00117  | 0.630861796 | count | 1          |
| CAMK1      | 0.4734534 | 0.1702798 | 2.7804 | 0.00547  | 0.63095087  | count | 1          |
| RCC1       | 0.8800983 | 0.5448204 | 1.6154 | 0.106    | 0.630963709 | count | 1          |
| LGALS8     | 0.4796973 | 0.2047056 | 2.3434 | 0.0192   | 0.631542196 | count | 1          |
| ZC3HC1     | 0.5981593 | 0.4066239 | 1.471  | 0.141    | 0.631555762 | count | 1          |
| STX11      | 0.5345889 | 0.2972299 | 1.7986 | 0.0722   | 0.631599375 | count | 1          |
| GDAP1      | 0.556817  | 0.3690912 | 1.5086 | 0.132    | 0.631872698 | count | 1          |
| KCNJ15     | 1.4584527 | 1.0874871 | 1.3411 | 0.18     | 0.631940676 | count | 1          |
| GON4L      | 0.4614128 | 0.1795808 | 2.5694 | 0.0102   | 0.632045971 | count | 1          |
| ECD        | 0.5004278 | 0.2036531 | 2.4573 | 0.0141   | 0.632062416 | count | 1          |
| LINC01354  | 0.6383389 | 0.5317365 | 1.2005 | 0.23     | 0.632204871 | count | 1          |
| RARS2      | 0.4728891 | 0.2059638 | 2.296  | 0.0218   | 0.632227166 | count | 1          |
| TRMT5      | 0.5157745 | 0.3033559 | 1.7002 | 0.0892   | 0.633274409 | count | 1          |
| IFIT5      | 0.4994603 | 0.2311785 | 2.1605 | 0.0308   | 0.633393499 | count | 1          |
| CDYL       | 0.4981184 | 0.2078834 | 2.3961 | 0.0166   | 0.633531449 | count | 1          |
| FAM47E     | 0.6158429 | 0.5200788 | 1.1841 | 0.236    | 0.633692156 | count | 1          |
| MKS1       | 0.672016  | 0.4924678 | 1.3646 | 0.172    | 0.633846187 | count | 1          |
| HAUS5      | 0.7662075 | 0.4070706 | 1.8822 | 0.0599   | 0.63449041  | count | 1          |
| LRRRC8C    | 0.4817454 | 0.1792582 | 2.6874 | 0.00724  | 0.634494902 | count | 1          |
| UBXN10-AS1 | 1.2324422 | 1.0247819 | 1.2026 | 0.229    | 0.634604946 | count | 1          |
| MT1A       | 1.470066  | 1.1754603 | 1.2506 | 0.211    | 0.634838094 | count | 1          |
| ZC4H2      | 0.7992142 | 0.5470792 | 1.4609 | 0.144    | 0.635125482 | count | 1          |
| NSMF       | 0.6416597 | 0.390613  | 1.6427 | 0.101    | 0.635187174 | count | 1          |
| KIZ        | 0.5562511 | 0.3179922 | 1.7493 | 0.0804   | 0.635295608 | count | 1          |
| YPEL2      | 0.450687  | 0.1018565 | 4.4247 | 1.00E-05 | 0.635559163 | count | 0.23207    |
| HSPBP1     | 0.4993005 | 0.2214873 | 2.2543 | 0.0243   | 0.635575611 | count | 1          |
| ZBTB10     | 0.4879283 | 0.1967677 | 2.4797 | 0.0132   | 0.635893992 | count | 1          |
| PRICKLE2   | 0.6609129 | 0.401988  | 1.6441 | 0.1      | 0.636252767 | count | 1          |
| VIRMA      | 0.4759933 | 0.1758081 | 2.7075 | 0.00682  | 0.636309082 | count | 1          |
| ZNF780B    | 0.5899834 | 0.3900562 | 1.5126 | 0.131    | 0.63633143  | count | 1          |
| AC009948.1 | 0.6105949 | 0.3576909 | 1.707  | 0.0879   | 0.636436235 | count | 1          |
| RINT1      | 0.6378901 | 0.4404241 | 1.4484 | 0.148    | 0.636634378 | count | 1          |
| FKBP9      | 0.4595258 | 0.1173044 | 3.9174 | 9.17E-05 | 0.636758016 | count | 1          |
| MYOM2      | 0.6282865 | 0.5537467 | 1.1346 | 0.257    | 0.636951018 | count | 1          |
| AL138762.1 | 0.9203673 | 0.7754848 | 1.1868 | 0.235    | 0.637097979 | count | 1          |
| NTNG2      | 0.9549155 | 1.4076473 | 0.6784 | 0.4976   | 0.637481248 | count | 1          |

|            |            |             |        |         |             |       |   |
|------------|------------|-------------|--------|---------|-------------|-------|---|
| C1QTNF2    | 0.5752875  | 0.3379378   | 1.7023 | 0.0888  | 0.637759432 | count | 1 |
| NELFA      | 0.5945331  | 0.3367777   | 1.7654 | 0.0776  | 0.637811704 | count | 1 |
| METTL2A    | 0.5250999  | 0.2686151   | 1.9548 | 0.0507  | 0.638166777 | count | 1 |
| C12orf66   | 0.6451109  | 0.4656839   | 1.3853 | 0.166   | 0.63828289  | count | 1 |
| ZNF578     | 0.8040538  | 0.643443    | 1.2496 | 0.212   | 0.638339224 | count | 1 |
| ANKZF1     | 0.6252904  | 0.3621823   | 1.7265 | 0.0844  | 0.638456623 | count | 1 |
| GMNN       | 0.5286981  | 0.2395011   | 2.2075 | 0.0274  | 0.639017501 | count | 1 |
| BCAR1      | 0.4735141  | 0.1472714   | 3.2152 | 0.00132 | 0.639443847 | count | 1 |
| RBM15B     | 0.5406009  | 0.2475743   | 2.1836 | 0.0291  | 0.639822847 | count | 1 |
| THOC6      | 0.5729921  | 0.3941771   | 1.4536 | 0.146   | 0.640206464 | count | 1 |
| GMPS       | 0.4816826  | 0.15035     | 3.2037 | 0.00137 | 0.640259254 | count | 1 |
| HDAC11     | 0.7910644  | 0.4793929   | 1.6501 | 0.099   | 0.641046907 | count | 1 |
| KIF17      | 0.6119827  | 0.3107638   | 1.9693 | 0.049   | 0.641456205 | count | 1 |
| IMPACT     | 0.4852994  | 0.1930535   | 2.5138 | 0.012   | 0.641472189 | count | 1 |
| AL358472.4 | 0.6332423  | 0.4150131   | 1.5258 | 0.127   | 0.641535748 | count | 1 |
| HCN3       | 15.5277758 | 1089.463283 | 0.0143 | 0.989   | 0.641960448 | count | 1 |
| HIST1H2BH  | 15.5277758 | 1089.463285 | 0.0143 | 0.989   | 0.641960448 | count | 1 |
| AMDHD1     | 15.5279382 | 1170.769964 | 0.0133 | 0.989   | 0.641960448 | count | 1 |
| LINC01481  | 15.6785643 | 1098.968003 | 0.0143 | 0.989   | 0.641960468 | count | 1 |
| AL445250.1 | 15.6785709 | 1098.968724 | 0.0143 | 0.989   | 0.641960468 | count | 1 |
| CAMK2N2    | 15.6785712 | 1098.969314 | 0.0143 | 0.989   | 0.641960468 | count | 1 |
| AC146944.4 | 15.678685  | 1180.977621 | 0.0133 | 0.989   | 0.641960468 | count | 1 |
| ANGPT1     | 15.6786853 | 1180.978276 | 0.0133 | 0.989   | 0.641960468 | count | 1 |
| AL138828.1 | 15.9027198 | 1099.449368 | 0.0145 | 0.988   | 0.641960493 | count | 1 |
| AMACR      | 15.9391607 | 1099.350034 | 0.0145 | 0.988   | 0.641960497 | count | 1 |
| PLAG1      | 15.9936342 | 1163.486809 | 0.0137 | 0.989   | 0.641960502 | count | 1 |
| NCF4       | 16.2069619 | 1572.586039 | 0.0103 | 0.992   | 0.641960519 | count | 1 |
| AL139089.1 | 16.2207774 | 1153.161309 | 0.0141 | 0.989   | 0.641960521 | count | 1 |
| MAN2B1     | 16.2801225 | 1083.484732 | 0.015  | 0.988   | 0.641960525 | count | 1 |
| ATP6V0C    | 16.2928842 | 1314.880206 | 0.0124 | 0.99    | 0.641960526 | count | 1 |
| CCDC65     | 16.3773161 | 1578.026167 | 0.0104 | 0.992   | 0.641960531 | count | 1 |
| PCDHGB5    | 16.3773257 | 1578.027456 | 0.0104 | 0.992   | 0.641960531 | count | 1 |
| ITGB8      | 16.499082  | 1091.81246  | 0.0151 | 0.9879  | 0.641960538 | count | 1 |
| LYPD3      | 16.5192599 | 1579.094627 | 0.0105 | 0.992   | 0.641960539 | count | 1 |
| CLGN       | 15.8908795 | 821.4775498 | 0.0193 | 0.9846  | 0.641960544 | count | 1 |
| SLC9B1     | 16.636541  | 2422.574614 | 0.0069 | 0.995   | 0.641960545 | count | 1 |
| GABRB3     | 16.6414891 | 1578.214184 | 0.0105 | 0.992   | 0.641960546 | count | 1 |
| SGK494     | 15.953653  | 1004.705362 | 0.0159 | 0.9873  | 0.64196055  | count | 1 |
| CLTCL1     | 16.7490814 | 1576.396    | 0.0106 | 0.992   | 0.64196055  | count | 1 |
| BX255925.3 | 16.7491868 | 1714.263302 | 0.0098 | 0.992   | 0.64196055  | count | 1 |
| BMPR1B     | 15.9896248 | 1555.323157 | 0.0103 | 0.992   | 0.641960553 | count | 1 |
| AL354822.1 | 17.274168  | 1694.272918 | 0.0102 | 0.9919  | 0.641960568 | count | 1 |
| IL1R2      | 17.2742091 | 1734.522876 | 0.01   | 0.992   | 0.641960568 | count | 1 |
| MTRNR2L1   | 17.2872782 | 2352.638857 | 0.0073 | 0.994   | 0.641960568 | count | 1 |
| AL583856.2 | 16.2079036 | 2068.360172 | 0.0078 | 0.994   | 0.641960571 | count | 1 |

|            |            |             |        |          |             |       |          |
|------------|------------|-------------|--------|----------|-------------|-------|----------|
| NPIPB2     | 17.6288013 | 2608.536775 | 0.0068 | 0.995    | 0.641960576 | count | 1        |
| CDHR3      | 16.6359767 | 2189.811748 | 0.0076 | 0.994    | 0.641960597 | count | 1        |
| OXGR1      | 16.6359769 | 2189.811764 | 0.0076 | 0.994    | 0.641960597 | count | 1        |
| ITGA2B     | 16.636541  | 2422.574721 | 0.0069 | 0.995    | 0.641960597 | count | 1        |
| GLT1D1     | 16.6409012 | 5131.302278 | 0.0032 | 0.997    | 0.641960597 | count | 1        |
| NMNAT2     | 16.6610407 | 1228.496182 | 0.0136 | 0.989    | 0.641960598 | count | 1        |
| DNMT3B     | 16.9323391 | 1709.094802 | 0.0099 | 0.992    | 0.641960609 | count | 1        |
| AC022364.1 | 16.9354571 | 1457.480881 | 0.0116 | 0.9907   | 0.64196061  | count | 1        |
| KBTBD8     | 1.254607   | 1.3284144   | 0.9444 | 0.345    | 0.642080648 | count | 1        |
| FBXO45     | 0.584662   | 0.3160691   | 1.8498 | 0.0645   | 0.642284241 | count | 1        |
| FGF14-AS2  | 0.6341037  | 0.4185779   | 1.5149 | 0.13     | 0.642331881 | count | 1        |
| DRG2       | 0.4893596  | 0.1763256   | 2.7753 | 0.00555  | 0.642378698 | count | 1        |
| FTSJ3      | 0.5328905  | 0.2450342   | 2.1748 | 0.0297   | 0.642709367 | count | 1        |
| RANBP6     | 0.5229496  | 0.2625451   | 1.9918 | 0.0465   | 0.642718942 | count | 1        |
| MXRA7      | 0.4618955  | 0.1144208   | 4.0368 | 5.57E-05 | 0.642867849 | count | 1        |
| RRAGC      | 0.4921974  | 0.1947489   | 2.5273 | 0.0115   | 0.643217124 | count | 1        |
| SFI1       | 1.006333   | 0.6255049   | 1.6088 | 0.108    | 0.643412703 | count | 1        |
| POU5F2     | 1.5059134  | 1.0155407   | 1.4829 | 0.138    | 0.643613065 | count | 1        |
| EPB41L5    | 0.7183654  | 0.4656282   | 1.5428 | 0.123    | 0.643659902 | count | 1        |
| COQ10B     | 0.4665323  | 0.1230064   | 3.7927 | 0.000152 | 0.64385896  | count | 1        |
| JRKL       | 0.611223   | 0.3912255   | 1.5623 | 0.118    | 0.644295064 | count | 1        |
| CLASP2     | 0.5544993  | 0.3193191   | 1.7365 | 0.0826   | 0.644387686 | count | 1        |
| ZNF799     | 0.7671997  | 0.38784     | 1.9781 | 0.048    | 0.645255133 | count | 1        |
| AL138724.1 | 0.6653497  | 0.464125    | 1.4336 | 0.152    | 0.645702667 | count | 1        |
| GNB4       | 0.4647959  | 0.1239824   | 3.7489 | 0.000181 | 0.64621434  | count | 1        |
| DRAM2      | 0.4792933  | 0.1573762   | 3.0455 | 0.00234  | 0.646459175 | count | 1        |
| PELO       | 0.4820106  | 0.1574971   | 3.0604 | 0.00223  | 0.646531613 | count | 1        |
| CC2D2B     | 1.2680162  | 0.7673915   | 1.6524 | 0.0986   | 0.646543957 | count | 1        |
| ZNF34      | 0.570959   | 0.2941455   | 1.9411 | 0.0524   | 0.647004847 | count | 1        |
| CCM2L      | 0.4891206  | 0.1525287   | 3.2067 | 0.00136  | 0.647281893 | count | 1        |
| THOC3      | 0.5676211  | 0.2871301   | 1.9769 | 0.0482   | 0.647561589 | count | 1        |
| MAP2K7     | 0.6147103  | 0.3280262   | 1.874  | 0.061    | 0.647687309 | count | 1        |
| DHRS1      | 0.4911102  | 0.2686348   | 1.8282 | 0.0676   | 0.647816069 | count | 1        |
| NGLY1      | 0.490325   | 0.1769079   | 2.7716 | 0.00561  | 0.647986213 | count | 1        |
| PPP5D1     | 1.119712   | 0.7683364   | 1.4573 | 0.145    | 0.648037866 | count | 1        |
| XAB2       | 0.5806835  | 0.3022117   | 1.9214 | 0.0548   | 0.648273322 | count | 1        |
| CHIC2      | 0.4677411  | 0.1139241   | 4.1057 | 4.15E-05 | 0.649179257 | count | 0.956907 |
| ULK3       | 0.6282837  | 0.3313098   | 1.8964 | 0.058    | 0.649458831 | count | 1        |
| DCUN1D2    | 1.193663   | 0.765986    | 1.5583 | 0.119    | 0.650151923 | count | 1        |
| ARHGAP10   | 0.548565   | 0.317312    | 1.7288 | 0.084    | 0.650253682 | count | 1        |
| RFXANK     | 0.488797   | 0.1725111   | 2.8334 | 0.00464  | 0.650301245 | count | 1        |
| METTL13    | 0.6429747  | 0.3362701   | 1.9121 | 0.056    | 0.650517321 | count | 1        |
| LY6E       | 0.4533244  | 0.0683809   | 6.6294 | 4.04E-11 | 0.650564125 | count | 9.61E-07 |
| DBR1       | 0.6920241  | 0.4557959   | 1.5183 | 0.129    | 0.650625246 | count | 1        |
| AL031777.3 | 0.9146888  | 0.5648054   | 1.6195 | 0.105    | 0.650626415 | count | 1        |

|            |           |           |        |          |             |       |             |
|------------|-----------|-----------|--------|----------|-------------|-------|-------------|
| TUT7       | 0.526696  | 0.2423029 | 2.1737 | 0.0298   | 0.650857055 | count | 1           |
| STRADB     | 0.727881  | 0.4884635 | 1.4901 | 0.136    | 0.651102177 | count | 1           |
| PXN        | 0.4951437 | 0.2095106 | 2.3633 | 0.0182   | 0.651138599 | count | 1           |
| IFIT1      | 0.4659079 | 0.1586313 | 2.937  | 0.00334  | 0.651468336 | count | 1           |
| EHMT1      | 0.4927199 | 0.1763969 | 2.7932 | 0.00525  | 0.651668132 | count | 1           |
| TDRKH      | 1.5400934 | 1.0171889 | 1.5141 | 0.13     | 0.651746528 | count | 1           |
| COG2       | 0.5499479 | 0.3590152 | 1.5318 | 0.126    | 0.651817406 | count | 1           |
| AC084033.3 | 0.5064488 | 0.2065714 | 2.4517 | 0.0143   | 0.651937054 | count | 1           |
| ST3GAL5    | 0.9844898 | 0.7592645 | 1.2966 | 0.195    | 0.652566232 | count | 1           |
| MAP3K3     | 0.4941516 | 0.1675169 | 2.9499 | 0.00321  | 0.652649393 | count | 1           |
| AC058791.1 | 0.494632  | 0.1617591 | 3.0578 | 0.00225  | 0.652973405 | count | 1           |
| AL365205.1 | 1.1326778 | 0.7746141 | 1.4622 | 0.144    | 0.653318254 | count | 1           |
| PPP1R16A   | 0.540185  | 0.2558784 | 2.1111 | 0.0349   | 0.653495182 | count | 1           |
| NPHP3      | 0.6285312 | 0.3034579 | 2.0712 | 0.0384   | 0.653610444 | count | 1           |
| WRAP53     | 0.7121344 | 0.4418765 | 1.6116 | 0.107    | 0.653612679 | count | 1           |
| FUT4       | 1.4002915 | 1.0220261 | 1.3701 | 0.171    | 0.653631953 | count | 1           |
| STXBP1     | 0.4987564 | 0.1701817 | 2.9307 | 0.00341  | 0.653761147 | count | 1           |
| HS2ST1     | 0.572013  | 0.3119465 | 1.8337 | 0.0668   | 0.654298434 | count | 1           |
| PAF1       | 0.511798  | 0.2116186 | 2.4185 | 0.0156   | 0.654465168 | count | 1           |
| PHLPP1     | 0.6430509 | 0.4174049 | 1.5406 | 0.124    | 0.65500326  | count | 1           |
| OSGEPL1    | 0.5896762 | 0.3700478 | 1.5935 | 0.111    | 0.655219787 | count | 1           |
| NECTIN2    | 0.462883  | 0.081698  | 5.6658 | 1.61E-08 | 0.655282513 | count | 0.000380153 |
| MRPS9      | 0.4934569 | 0.1793659 | 2.7511 | 0.00598  | 0.655622387 | count | 1           |
| FAM114A2   | 0.5025721 | 0.2170073 | 2.3159 | 0.0206   | 0.65571198  | count | 1           |
| IRF2BPL    | 0.497537  | 0.1556693 | 3.1961 | 0.00141  | 0.655813586 | count | 1           |
| SF3A1      | 0.4961431 | 0.191604  | 2.5894 | 0.00966  | 0.656394788 | count | 1           |
| LYRM9      | 0.5183428 | 0.2244019 | 2.3099 | 0.021    | 0.656630159 | count | 1           |
| HSPD1      | 0.4596415 | 0.0620786 | 7.4042 | 1.74E-13 | 0.656740246 | count | 4.16E-09    |
| IFI16      | 0.4591932 | 0.0594139 | 7.7287 | 1.51E-14 | 0.656792758 | count | 3.61E-10    |
| HDAC4      | 0.6781919 | 0.4402489 | 1.5405 | 0.124    | 0.656881299 | count | 1           |
| PCYOX1L    | 0.7989092 | 0.4910177 | 1.627  | 0.104    | 0.65735176  | count | 1           |
| DHODH      | 0.666762  | 0.41586   | 1.6033 | 0.109    | 0.657617967 | count | 1           |
| ANP32B     | 0.4603781 | 0.0592956 | 7.7641 | 1.15E-14 | 0.657656824 | count | 2.75E-10    |
| OLFML2A    | 0.4992435 | 0.2474824 | 2.0173 | 0.0438   | 0.65770362  | count | 1           |
| NLN        | 0.6931064 | 0.4028256 | 1.7206 | 0.0854   | 0.65784001  | count | 1           |
| HIST4H4    | 1.7827204 | 0.9837849 | 1.8121 | 0.0701   | 0.657945597 | count | 1           |
| RIOK2      | 0.5166515 | 0.2545633 | 2.0296 | 0.0425   | 0.658216227 | count | 1           |
| AL136295.5 | 0.854107  | 0.4345999 | 1.9653 | 0.0495   | 0.658278807 | count | 1           |
| HACE1      | 0.6520183 | 0.3988954 | 1.6346 | 0.102    | 0.658836922 | count | 1           |
| ZBTB34     | 1.5709409 | 0.9670447 | 1.6245 | 0.104    | 0.658895435 | count | 1           |
| ELL        | 0.6069309 | 0.3116441 | 1.9475 | 0.0516   | 0.65935456  | count | 1           |
| ECI2       | 0.4744949 | 0.1092207 | 4.3444 | 1.45E-05 | 0.65958883  | count | 0.3358925   |
| PAXIP1-AS1 | 0.688369  | 0.473591  | 1.4535 | 0.146    | 0.659874283 | count | 1           |
| LCA5       | 0.5294682 | 0.2446996 | 2.1637 | 0.0306   | 0.660122582 | count | 1           |
| RREB1      | 0.5837229 | 0.2733793 | 2.1352 | 0.0328   | 0.660618335 | count | 1           |



|             |           |           |        |          |             |       |           |
|-------------|-----------|-----------|--------|----------|-------------|-------|-----------|
| SPATC1L     | 0.514721  | 0.2508545 | 2.0519 | 0.0403   | 0.660778922 | count | 1         |
| USF1        | 0.580301  | 0.3790876 | 1.5308 | 0.126    | 0.661202161 | count | 1         |
| EXOSC9      | 0.4970821 | 0.1756595 | 2.8298 | 0.00469  | 0.661374753 | count | 1         |
| C8orf44     | 0.8394675 | 0.4872397 | 1.7229 | 0.085    | 0.661615571 | count | 1         |
| NFASC       | 0.7773567 | 0.6193204 | 1.2552 | 0.21     | 0.662302551 | count | 1         |
| RABL3       | 0.5549237 | 0.2638098 | 2.1035 | 0.0355   | 0.662998707 | count | 1         |
| POU6F1      | 1.0974295 | 0.8244743 | 1.3311 | 0.183    | 0.663005454 | count | 1         |
| ZNF330      | 0.5056026 | 0.1870008 | 2.7037 | 0.0069   | 0.663240575 | count | 1         |
| ESYT1       | 0.5144249 | 0.2186244 | 2.353  | 0.0187   | 0.663405825 | count | 1         |
| DTNB        | 0.7249585 | 0.5541679 | 1.3082 | 0.191    | 0.663946871 | count | 1         |
| LINC01290   | 1.4386455 | 0.7360379 | 1.9546 | 0.0507   | 0.664266766 | count | 1         |
| LRIG2       | 0.7008278 | 0.4132637 | 1.6958 | 0.09     | 0.664353408 | count | 1         |
| SCNN1B      | 0.9115167 | 0.547986  | 1.6634 | 0.0963   | 0.664606955 | count | 1         |
| FAM221A     | 0.6251185 | 0.3440879 | 1.8167 | 0.0694   | 0.664802151 | count | 1         |
| ZBTB2       | 0.6226901 | 0.3244607 | 1.9192 | 0.0551   | 0.665759153 | count | 1         |
| PYCR3       | 1.1038826 | 0.7282736 | 1.5158 | 0.13     | 0.66580311  | count | 1         |
| MARK1       | 1.2370876 | 0.7595894 | 1.6286 | 0.104    | 0.665952985 | count | 1         |
| RUSC2       | 0.7826846 | 0.5554904 | 1.409  | 0.159    | 0.666173268 | count | 1         |
| BST1        | 0.5554323 | 0.2765008 | 2.0088 | 0.0447   | 0.666202171 | count | 1         |
| SCAMP1-AS1  | 0.5869516 | 0.3019979 | 1.9436 | 0.052    | 0.666223233 | count | 1         |
| NPFFR2      | 1.6040998 | 1.1571998 | 1.3862 | 0.166    | 0.666381406 | count | 1         |
| FAM213A     | 0.4674526 | 0.0787732 | 5.9342 | 3.32E-09 | 0.666471569 | count | 7.86E-05  |
| ASXL1       | 0.4836018 | 0.1328022 | 3.6415 | 0.000276 | 0.667413596 | count | 1         |
| AC011978.2  | 1.1077307 | 0.6668015 | 1.6613 | 0.0968   | 0.667465715 | count | 1         |
| RRN3        | 0.5681327 | 0.2996693 | 1.8959 | 0.0581   | 0.667742656 | count | 1         |
| NRARP       | 0.4781741 | 0.1161574 | 4.1166 | 3.96E-05 | 0.667861464 | count | 0.9132948 |
| CWC22       | 0.4982784 | 0.1596825 | 3.1204 | 0.00182  | 0.667989337 | count | 1         |
| FRAT1       | 0.8310883 | 0.4863642 | 1.7088 | 0.0876   | 0.668079618 | count | 1         |
| SP140L      | 0.494742  | 0.1649264 | 2.9998 | 0.00273  | 0.668361024 | count | 1         |
| AKT3        | 0.4793189 | 0.1287981 | 3.7215 | 0.000202 | 0.669282711 | count | 1         |
| UBN2        | 0.5346682 | 0.2484924 | 2.1516 | 0.0315   | 0.669544295 | count | 1         |
| PYGO2       | 0.8166575 | 0.6266305 | 1.3033 | 0.193    | 0.669607673 | count | 1         |
| ACAD8       | 0.6118707 | 0.3416872 | 1.7907 | 0.0734   | 0.670125975 | count | 1         |
| OAS3        | 0.5516991 | 0.3098811 | 1.7804 | 0.0751   | 0.670297195 | count | 1         |
| PAK1IP1     | 0.4968772 | 0.1450469 | 3.4256 | 0.000622 | 0.67086233  | count | 1         |
| TMEM202-AS1 | 1.6251827 | 1.050141  | 1.5476 | 0.122    | 0.671035997 | count | 1         |
| CNNM4       | 1.0651636 | 1.006696  | 1.0581 | 0.29     | 0.671146306 | count | 1         |
| DUBR        | 0.9236965 | 0.7527275 | 1.2271 | 0.22     | 0.671653551 | count | 1         |
| MBTD1       | 0.6826787 | 0.4459775 | 1.5307 | 0.126    | 0.671736967 | count | 1         |
| DENND2C     | 0.7347498 | 0.4219805 | 1.7412 | 0.0818   | 0.671800192 | count | 1         |
| TAB3        | 1.0232764 | 0.5078879 | 2.0148 | 0.044    | 0.671936562 | count | 1         |
| IGSF8       | 0.5639779 | 0.2911446 | 1.9371 | 0.0528   | 0.671946994 | count | 1         |
| PDPR        | 0.652394  | 0.325372  | 2.0051 | 0.0451   | 0.672226164 | count | 1         |
| LYST        | 0.4775258 | 0.1119501 | 4.2655 | 2.06E-05 | 0.672625151 | count | 0.4765398 |
| PSMD9       | 0.5372687 | 0.2532105 | 2.1218 | 0.0339   | 0.672691557 | count | 1         |

|            |           |           |        |          |             |       |             |
|------------|-----------|-----------|--------|----------|-------------|-------|-------------|
| PML        | 0.4979198 | 0.1527051 | 3.2607 | 0.00113  | 0.672925221 | count | 1           |
| PARP10     | 0.6674223 | 0.3983823 | 1.6753 | 0.094    | 0.672949116 | count | 1           |
| SLC25A29   | 0.5041278 | 0.1613448 | 3.1245 | 0.0018   | 0.673024268 | count | 1           |
| PTPN2      | 0.4938485 | 0.1432589 | 3.4472 | 0.000575 | 0.673998905 | count | 1           |
| MRI1       | 0.6744906 | 0.3750721 | 1.7983 | 0.0722   | 0.674591227 | count | 1           |
| AP2A1      | 0.5389145 | 0.270839  | 1.9898 | 0.0467   | 0.674682767 | count | 1           |
| MLF1       | 0.4983545 | 0.1461771 | 3.4093 | 0.000661 | 0.675113179 | count | 1           |
| JPT2       | 0.5668203 | 0.2649585 | 2.1393 | 0.0325   | 0.675175785 | count | 1           |
| MT-ATP8    | 0.5049051 | 0.158871  | 3.1781 | 0.0015   | 0.675416647 | count | 1           |
| COQ2       | 0.7955302 | 0.4125587 | 1.9283 | 0.0539   | 0.675466032 | count | 1           |
| CIT        | 1.6461886 | 1.0901788 | 1.51   | 0.131    | 0.675593643 | count | 1           |
| HADH       | 0.5400037 | 0.2544209 | 2.1225 | 0.0339   | 0.676000282 | count | 1           |
| TRIM41     | 0.6480263 | 0.6887429 | 0.9409 | 0.347    | 0.67609873  | count | 1           |
| ZNF597     | 0.9315783 | 0.6044986 | 1.5411 | 0.123    | 0.676187581 | count | 1           |
| TSEN2      | 0.9057902 | 0.5355943 | 1.6912 | 0.0909   | 0.676211613 | count | 1           |
| SPTLC2     | 0.4862753 | 0.1206671 | 4.0299 | 5.73E-05 | 0.67636506  | count | 1           |
| NFATC3     | 0.5431199 | 0.2551463 | 2.1287 | 0.0334   | 0.677372129 | count | 1           |
| PAQR3      | 0.7019216 | 0.4240376 | 1.6553 | 0.098    | 0.677396838 | count | 1           |
| NUP85      | 0.6684377 | 0.3726143 | 1.7939 | 0.0729   | 0.678486053 | count | 1           |
| MYC        | 0.4858776 | 0.1323509 | 3.6711 | 0.000246 | 0.678583288 | count | 1           |
| NIP7       | 0.5077669 | 0.1680075 | 3.0223 | 0.00253  | 0.678952132 | count | 1           |
| AC104695.3 | 0.9112508 | 0.9775059 | 0.9322 | 0.351    | 0.679474952 | count | 1           |
| RRAGA      | 0.4854869 | 0.0986661 | 4.9205 | 9.14E-07 | 0.679593782 | count | 0.021375718 |
| TNFRSF14   | 0.4850837 | 0.1100438 | 4.4081 | 1.08E-05 | 0.679797698 | count | 0.250506    |
| FAM189A2   | 0.5919662 | 0.3957776 | 1.4957 | 0.135    | 0.679837852 | count | 1           |
| CUEDC1     | 0.60872   | 0.2880739 | 2.1131 | 0.0347   | 0.680037552 | count | 1           |
| CCT6B      | 1.1377987 | 0.900006  | 1.2642 | 0.206    | 0.680309455 | count | 1           |
| RRNAD1     | 0.5872291 | 0.3264895 | 1.7986 | 0.0722   | 0.68037157  | count | 1           |
| ADGRL2     | 0.5029777 | 0.16162   | 3.1121 | 0.00188  | 0.681441147 | count | 1           |
| EHD2       | 0.4935543 | 0.1300148 | 3.7961 | 0.00015  | 0.681473792 | count | 1           |
| MED25      | 0.6579044 | 0.3855484 | 1.7064 | 0.088    | 0.68152657  | count | 1           |
| RAB4B      | 1.6753568 | 1.0976683 | 1.5263 | 0.127    | 0.681791969 | count | 1           |
| PPP2R5C    | 0.4984776 | 0.149959  | 3.3241 | 0.000899 | 0.681873993 | count | 1           |
| BAALC-AS1  | 0.8921369 | 0.7657591 | 1.165  | 0.244    | 0.682045861 | count | 1           |
| METTL14    | 0.557548  | 0.240078  | 2.3224 | 0.0203   | 0.682543891 | count | 1           |
| UBR5-AS1   | 0.8528704 | 0.7188703 | 1.1864 | 0.236    | 0.68256379  | count | 1           |
| MHENCRC    | 0.8359505 | 0.4798466 | 1.7421 | 0.0816   | 0.682809036 | count | 1           |
| TEC        | 1.285245  | 1.1064842 | 1.1616 | 0.246    | 0.682905431 | count | 1           |
| KLHDC1     | 0.6401453 | 0.3991646 | 1.6037 | 0.109    | 0.682969346 | count | 1           |
| KCTD6      | 0.5820667 | 0.307503  | 1.8929 | 0.0585   | 0.683284982 | count | 1           |
| CENPQ      | 0.5550925 | 0.2650944 | 2.0939 | 0.0364   | 0.68366191  | count | 1           |
| GPR155     | 0.7405016 | 0.706698  | 1.0478 | 0.295    | 0.683699838 | count | 1           |
| KPNA5      | 0.6013161 | 0.3185838 | 1.8875 | 0.0592   | 0.683719194 | count | 1           |
| KLHDC4     | 0.6560986 | 0.4272707 | 1.5356 | 0.125    | 0.683803888 | count | 1           |
| GASAL1     | 0.6148792 | 0.322475  | 1.9067 | 0.0567   | 0.683947049 | count | 1           |

|            |           |           |         |          |             |       |           |
|------------|-----------|-----------|---------|----------|-------------|-------|-----------|
| LINC01686  | 0.6609252 | 0.5069384 | 1.3038  | 0.192    | 0.684382704 | count | 1         |
| NADK       | 0.5374897 | 0.2094146 | 2.5666  | 0.0103   | 0.684581869 | count | 1         |
| PCAT6      | 1.3882453 | 1.0380825 | 1.3373  | 0.181    | 0.684625026 | count | 1         |
| ZNF3       | 0.5988894 | 0.3623637 | 1.6527  | 0.0985   | 0.685309221 | count | 1         |
| GNS        | 0.4971369 | 0.1530913 | 3.2473  | 0.00118  | 0.685417453 | count | 1         |
| EXOSC8     | 0.4970542 | 0.1209774 | 4.1087  | 4.10E-05 | 0.685788112 | count | 0.94546   |
| AC093673.1 | 0.6193081 | 0.3465938 | 1.7868  | 0.0741   | 0.685937101 | count | 1         |
| AEN        | 0.9495734 | 0.6392192 | 1.4855  | 0.138    | 0.686463029 | count | 1         |
| RBM15      | 0.8788932 | 0.5690189 | 1.5446  | 0.123    | 0.687031629 | count | 1         |
| IL16       | 0.8789724 | 0.770358  | 1.141   | 0.254    | 0.687082173 | count | 1         |
| TNFSF10    | 0.478164  | 0.0626558 | 7.6316  | 3.17E-14 | 0.68712771  | count | 7.58E-10  |
| CALCOCO2   | 0.4826795 | 0.0720326 | 6.7008  | 2.50E-11 | 0.687155317 | count | 5.95E-07  |
| RDH14      | 0.5197154 | 0.1855412 | 2.8011  | 0.00513  | 0.687241326 | count | 1         |
| ZNF485     | 1.1008309 | 0.8346985 | 1.3188  | 0.187    | 0.687453637 | count | 1         |
| NDFIP2     | 0.5609127 | 0.2459083 | 2.281   | 0.0226   | 0.68753644  | count | 1         |
| WDR75      | 0.5522863 | 0.2409136 | 2.2925  | 0.022    | 0.687558322 | count | 1         |
| EGR3       | 0.5230789 | 0.1823537 | 2.8685  | 0.00416  | 0.68775177  | count | 1         |
| KRBOX4     | 0.545036  | 0.2372668 | 2.2971  | 0.0217   | 0.688693328 | count | 1         |
| CR1L       | 1.157986  | 1.1310568 | 1.0238  | 0.306    | 0.688787111 | count | 1         |
| TNK1       | 1.0585742 | 0.7422644 | 1.4261  | 0.154    | 0.689159933 | count | 1         |
| UBE2V1     | 0.5818139 | 0.2542081 | 2.2887  | 0.0222   | 0.689241586 | count | 1         |
| MIS12      | 0.6073455 | 0.3419499 | 1.7761  | 0.0758   | 0.690158566 | count | 1         |
| POLR3D     | 0.5499601 | 0.2075578 | 2.6497  | 0.0081   | 0.691110896 | count | 1         |
| KLF7       | 0.5142639 | 0.1530298 | 3.3605  | 0.000788 | 0.691331388 | count | 1         |
| HPF1       | 0.4991757 | 0.1241936 | 4.0193  | 5.99E-05 | 0.691515808 | count | 1         |
| DALRD3     | 0.5246214 | 0.1892964 | 2.7714  | 0.00562  | 0.69172134  | count | 1         |
| GAS7       | 1.4119638 | 1.2217356 | 1.1557  | 0.248    | 0.691736081 | count | 1         |
| PRKCH      | 0.5171583 | 0.1633029 | 3.1669  | 0.00156  | 0.691742498 | count | 1         |
| MLLT3      | 0.5351015 | 0.2212647 | 2.4184  | 0.0157   | 0.691796827 | count | 1         |
| MYO18A     | 0.5612521 | 0.2935507 | 1.9119  | 0.056    | 0.691925404 | count | 1         |
| PTPDC1     | 0.9593015 | 0.5268897 | 1.8207  | 0.0688   | 0.691973746 | count | 1         |
| CPNE8      | 0.4927502 | 0.1008939 | 4.8838  | 1.10E-06 | 0.692187662 | count | 0.0257147 |
| 1-Mar      | 0.7710968 | 0.4552407 | 1.6938  | 0.0904   | 0.692751996 | count | 1         |
| WDR3       | 0.5527311 | 0.2303698 | 2.3993  | 0.0165   | 0.692950372 | count | 1         |
| SENCR      | 0.5246477 | 0.1920379 | 2.732   | 0.00634  | 0.693015526 | count | 1         |
| MRPL1      | 0.5158805 | 0.1676804 | 3.0766  | 0.00211  | 0.693267982 | count | 1         |
| ZNF230     | 0.9104525 | 0.6431705 | 1.4156  | 0.157    | 0.693319633 | count | 1         |
| MT-CO1     | 0.4810567 | 0.0314574 | 15.2923 | 9.73E-51 | 0.69379387  | count | 2.36E-46  |
| TNIP2      | 0.5047724 | 0.1319768 | 3.8247  | 0.000134 | 0.693887953 | count | 1         |
| FASTKD2    | 0.5607356 | 0.2333836 | 2.4026  | 0.0163   | 0.69413486  | count | 1         |
| TRPS1      | 1.1158316 | 0.772868  | 1.4438  | 0.149    | 0.694198918 | count | 1         |
| GUCY1A1    | 0.5262189 | 0.2297155 | 2.2907  | 0.0221   | 0.69442082  | count | 1         |
| SLCO4A1    | 0.5323447 | 0.2083846 | 2.5546  | 0.0107   | 0.694427377 | count | 1         |
| POLB       | 0.5293531 | 0.1989677 | 2.6605  | 0.00785  | 0.695119972 | count | 1         |
| ZNF114     | 1.0714808 | 0.7721743 | 1.3876  | 0.165    | 0.695362034 | count | 1         |

|             |           |           |        |          |             |       |            |
|-------------|-----------|-----------|--------|----------|-------------|-------|------------|
| NKILA       | 1.3218459 | 1.0198438 | 1.2961 | 0.195    | 0.695395866 | count | 1          |
| ANKRD16     | 0.6217526 | 0.3173653 | 1.9591 | 0.0502   | 0.696124751 | count | 1          |
| USP9Y       | 0.8107239 | 0.7036267 | 1.1522 | 0.249    | 0.69617645  | count | 1          |
| ELK3        | 0.4902057 | 0.0712819 | 6.877  | 7.53E-12 | 0.696202944 | count | 1.80E-07   |
| PUM3        | 0.5074263 | 0.1277948 | 3.9706 | 7.35E-05 | 0.696425322 | count | 1          |
| TEAD2       | 0.5257814 | 0.1731637 | 3.0363 | 0.00242  | 0.696867252 | count | 1          |
| MAFF        | 0.4968222 | 0.1096717 | 4.5301 | 6.15E-06 | 0.696931371 | count | 0.14304285 |
| CCL16       | 2.0285666 | 1.2957169 | 1.5656 | 0.118    | 0.697080017 | count | 1          |
| TNPO3       | 0.5934536 | 0.305091  | 1.9452 | 0.0519   | 0.697597462 | count | 1          |
| CHKB        | 1.035579  | 0.7507258 | 1.3794 | 0.168    | 0.697615615 | count | 1          |
| RPP40       | 0.6210048 | 0.3220782 | 1.9281 | 0.0539   | 0.697769953 | count | 1          |
| NXPE3       | 0.5381267 | 0.206603  | 2.6046 | 0.00925  | 0.697925467 | count | 1          |
| DNM3        | 0.5510834 | 0.2295349 | 2.4009 | 0.0164   | 0.698133269 | count | 1          |
| GPAT3       | 0.6089058 | 0.3293512 | 1.8488 | 0.0646   | 0.698148992 | count | 1          |
| NCK1-DT     | 0.6632971 | 0.4484785 | 1.479  | 0.139    | 0.698376593 | count | 1          |
| N4BP1       | 0.5184845 | 0.1818662 | 2.8509 | 0.00439  | 0.698839891 | count | 1          |
| HELQ        | 0.5669949 | 0.2587758 | 2.1911 | 0.0285   | 0.699696355 | count | 1          |
| ETS2        | 0.4880359 | 0.0591303 | 8.2536 | 2.35E-16 | 0.699884023 | count | 5.64E-12   |
| A2M-AS1     | 1.1287222 | 0.809802  | 1.3938 | 0.163    | 0.699942282 | count | 1          |
| AC027277.1  | 0.8299824 | 0.4776791 | 1.7375 | 0.0824   | 0.700112578 | count | 1          |
| MFAP3       | 0.6445702 | 0.3400807 | 1.8953 | 0.0582   | 0.700285867 | count | 1          |
| PPM1K       | 0.5616812 | 0.2937827 | 1.9119 | 0.056    | 0.700527203 | count | 1          |
| SLC9A1      | 0.9004862 | 0.5449042 | 1.6526 | 0.0985   | 0.700729756 | count | 1          |
| GPAT4       | 0.6266334 | 0.316605  | 1.9792 | 0.0479   | 0.701227247 | count | 1          |
| SEMA4D      | 2.0583702 | 1.2396256 | 1.6605 | 0.0969   | 0.70127567  | count | 1          |
| AKAP17A     | 0.5421104 | 0.1880138 | 2.8834 | 0.00397  | 0.701568377 | count | 1          |
| LMNB1       | 0.8641939 | 0.4791305 | 1.8037 | 0.0714   | 0.701906954 | count | 1          |
| RORB        | 1.5852427 | 1.1241421 | 1.4102 | 0.159    | 0.7020671   | count | 1          |
| ANGEL1      | 0.8652063 | 0.5794849 | 1.4931 | 0.136    | 0.702586512 | count | 1          |
| CEBPZ       | 0.5025701 | 0.115848  | 4.3382 | 1.49E-05 | 0.702795581 | count | 0.3451287  |
| C1QTNF1     | 0.5130132 | 0.1712855 | 2.9951 | 0.00277  | 0.702848923 | count | 1          |
| AC008074.3  | 1.4500869 | 1.0955887 | 1.3236 | 0.186    | 0.702897179 | count | 1          |
| ARHGAP31    | 0.531126  | 0.182407  | 2.9118 | 0.00362  | 0.703512925 | count | 1          |
| EEFSEC      | 0.603844  | 0.3241015 | 1.8631 | 0.0625   | 0.704019516 | count | 1          |
| LIX1L-AS1   | 1.0484172 | 0.788712  | 1.3293 | 0.184    | 0.704099394 | count | 1          |
| CEACAM1     | 1.5952604 | 1.106796  | 1.4413 | 0.15     | 0.704491508 | count | 1          |
| AL355353.1  | 1.1962781 | 0.7900563 | 1.5142 | 0.13     | 0.7045501   | count | 1          |
| FBXO4       | 0.5587173 | 0.2389182 | 2.3385 | 0.0194   | 0.704695925 | count | 1          |
| CCDC32      | 0.5278455 | 0.1737488 | 3.038  | 0.0024   | 0.704825221 | count | 1          |
| FGF7        | 1.351116  | 0.8401647 | 1.6082 | 0.108    | 0.705144064 | count | 1          |
| MATN1-AS1   | 1.3519759 | 1.1760739 | 1.1496 | 0.25     | 0.705427265 | count | 1          |
| C1QTNF1-AS1 | 1.1427799 | 0.7867998 | 1.4524 | 0.146    | 0.706149829 | count | 1          |
| LINC02256   | 0.6988561 | 0.4852685 | 1.4401 | 0.15     | 0.706358893 | count | 1          |
| TSC1        | 0.6803147 | 0.3379958 | 2.0128 | 0.0442   | 0.706800287 | count | 1          |
| DOCK4       | 0.5236728 | 0.1600493 | 3.2719 | 0.00108  | 0.706820909 | count | 1          |

|            |            |             |        |          |             |       |            |
|------------|------------|-------------|--------|----------|-------------|-------|------------|
| HOXA3      | 0.6943288  | 0.4164658   | 1.6672 | 0.0956   | 0.706886675 | count | 1          |
| GTF2B      | 0.5130659  | 0.1477278   | 3.473  | 0.000522 | 0.707393097 | count | 1          |
| MCPH1      | 0.5773778  | 0.2447636   | 2.3589 | 0.0184   | 0.707942057 | count | 1          |
| DKC1       | 0.5405117  | 0.1909385   | 2.8308 | 0.00468  | 0.707959109 | count | 1          |
| ABCD4      | 0.5123504  | 0.1469007   | 3.4877 | 0.000495 | 0.708233578 | count | 1          |
| MTRR       | 0.6959547  | 0.495931    | 1.4033 | 0.161    | 0.708382816 | count | 1          |
| HCG11      | 0.6146919  | 0.3070008   | 2.0022 | 0.0454   | 0.708414752 | count | 1          |
| ICA1       | 0.5076891  | 0.1078263   | 4.7084 | 2.62E-06 | 0.708586284 | count | 0.06109578 |
| RAE1       | 0.5745799  | 0.2750823   | 2.0888 | 0.0368   | 0.7086864   | count | 1          |
| MAVS       | 0.5763802  | 0.2729863   | 2.1114 | 0.0348   | 0.708827257 | count | 1          |
| NIF3L1     | 0.5831759  | 0.3027356   | 1.9264 | 0.0542   | 0.709217996 | count | 1          |
| DENND4C    | 0.5679181  | 0.2562141   | 2.2166 | 0.0267   | 0.709692462 | count | 1          |
| MBD1       | 0.5837088  | 0.22979     | 2.5402 | 0.0111   | 0.709837832 | count | 1          |
| ATN1       | 0.5599811  | 0.2057522   | 2.7216 | 0.00654  | 0.710382219 | count | 1          |
| PRRG1      | 0.5431782  | 0.1800267   | 3.0172 | 0.00257  | 0.710603285 | count | 1          |
| WASHC1     | 0.5651003  | 0.2538637   | 2.226  | 0.0261   | 0.710996467 | count | 1          |
| ZNF727     | 1.283296   | 1.0664941   | 1.2033 | 0.229    | 0.711279547 | count | 1          |
| ACSS2      | 0.61558    | 0.3053374   | 2.0161 | 0.0439   | 0.711329345 | count | 1          |
| MAN1A1     | 0.5159944  | 0.1317783   | 3.9156 | 9.24E-05 | 0.711802914 | count | 1          |
| PDE6D      | 0.5480987  | 0.2196359   | 2.4955 | 0.0126   | 0.711876359 | count | 1          |
| SLC9B2     | 0.6858791  | 0.3989245   | 1.7193 | 0.0857   | 0.712059253 | count | 1          |
| AC007952.4 | 0.7059695  | 0.3172381   | 2.2254 | 0.0261   | 0.712835158 | count | 1          |
| NAV3       | 0.6575008  | 0.2993467   | 2.1965 | 0.0281   | 0.713256878 | count | 1          |
| NUPL2      | 0.5459497  | 0.252125    | 2.1654 | 0.0304   | 0.713354781 | count | 1          |
| TGFBR2     | 0.4966184  | 0.0567188   | 8.7558 | 3.46E-18 | 0.713622631 | count | 8.32E-14   |
| ACTR1B     | 0.5559305  | 0.1921546   | 2.8931 | 0.00384  | 0.713806555 | count | 1          |
| JPH3       | 15.593645  | 1287.908012 | 0.0121 | 0.99     | 0.714146334 | count | 1          |
| MEFV       | 15.8524924 | 1364.282297 | 0.0116 | 0.991    | 0.714146369 | count | 1          |
| LRRC3      | 15.8688349 | 1165.749642 | 0.0136 | 0.989    | 0.714146371 | count | 1          |
| AC130466.1 | 15.9512787 | 1098.036767 | 0.0145 | 0.988    | 0.71414638  | count | 1          |
| AC010894.2 | 15.951524  | 1541.125461 | 0.0104 | 0.992    | 0.71414638  | count | 1          |
| JARID2-AS1 | 15.5933974 | 1157.164819 | 0.0135 | 0.989    | 0.71414639  | count | 1          |
| NR6A1      | 16.0738958 | 1152.058279 | 0.014  | 0.989    | 0.714146393 | count | 1          |
| HIST1H2BK  | 16.0826168 | 1243.231117 | 0.0129 | 0.99     | 0.714146394 | count | 1          |
| AC130650.2 | 16.088212  | 883.6064679 | 0.0182 | 0.9855   | 0.714146394 | count | 1          |
| AC106782.1 | 16.0919507 | 1782.013591 | 0.009  | 0.993    | 0.714146395 | count | 1          |
| AC008555.1 | 16.0919508 | 1782.013602 | 0.009  | 0.993    | 0.714146395 | count | 1          |
| LMNTD2     | 16.1748829 | 1093.353286 | 0.0148 | 0.988    | 0.714146402 | count | 1          |
| PDZRN3     | 16.1748992 | 1232.661479 | 0.0131 | 0.99     | 0.714146402 | count | 1          |
| HS3ST3B1   | 16.1891063 | 1207.051533 | 0.0134 | 0.989    | 0.714146404 | count | 1          |
| LINC02019  | 15.7367365 | 1167.96829  | 0.0135 | 0.989    | 0.714146411 | count | 1          |
| CCDC150    | 15.7368449 | 1235.722479 | 0.0127 | 0.99     | 0.714146411 | count | 1          |
| ZMYND12    | 16.3313681 | 1156.110932 | 0.0141 | 0.989    | 0.714146415 | count | 1          |
| GPR85      | 16.3966527 | 1175.230514 | 0.014  | 0.989    | 0.71414642  | count | 1          |
| NUDT10     | 16.4515642 | 1697.702971 | 0.0097 | 0.992    | 0.714146423 | count | 1          |

|            |            |             |        |          |             |       |            |
|------------|------------|-------------|--------|----------|-------------|-------|------------|
| AC024337.2 | 16.451567  | 1697.704774 | 0.0097 | 0.992    | 0.714146423 | count | 1          |
| ZNF860     | 16.4679912 | 1169.48155  | 0.0141 | 0.989    | 0.714146425 | count | 1          |
| SLC19A2    | 16.5267808 | 1171.470773 | 0.0141 | 0.989    | 0.714146428 | count | 1          |
| DCLRE1B    | 16.5295539 | 1164.881924 | 0.0142 | 0.9887   | 0.714146428 | count | 1          |
| MESP1      | 16.7696688 | 1929.401942 | 0.0087 | 0.993    | 0.714146441 | count | 1          |
| KRBOX1     | 16.7702134 | 2159.115261 | 0.0078 | 0.994    | 0.714146441 | count | 1          |
| AC091132.5 | 16.824163  | 1304.89744  | 0.0129 | 0.9897   | 0.714146444 | count | 1          |
| PRRT3-AS1  | 16.89138   | 1094.355368 | 0.0154 | 0.9877   | 0.714146447 | count | 1          |
| USP20      | 16.9009789 | 1312.017866 | 0.0129 | 0.9897   | 0.714146447 | count | 1          |
| AL359644.1 | 16.5290831 | 1281.836742 | 0.0129 | 0.99     | 0.714146485 | count | 1          |
| SPACA6P-AS | 16.5852447 | 1700.005524 | 0.0098 | 0.992    | 0.714146488 | count | 1          |
| AC005730.2 | 16.7702133 | 2159.115149 | 0.0078 | 0.994    | 0.714146498 | count | 1          |
| TDRD12     | 16.7707466 | 2366.837874 | 0.0071 | 0.994    | 0.714146498 | count | 1          |
| CLEC3B     | 0.5560235  | 0.2034849   | 2.7325 | 0.00633  | 0.714466967 | count | 1          |
| TDRD7      | 0.7531982  | 0.4092334   | 1.8405 | 0.0658   | 0.714672795 | count | 1          |
| QDPR       | 0.5922078  | 0.2791761   | 2.1213 | 0.034    | 0.71483624  | count | 1          |
| METT18     | 0.6156052  | 0.3005283   | 2.0484 | 0.0406   | 0.71513398  | count | 1          |
| IQC�       | 1.2948854  | 0.9339634   | 1.3864 | 0.166    | 0.71548754  | count | 1          |
| AL031848.2 | 1.295651   | 1.0230076   | 1.2665 | 0.205    | 0.715764587 | count | 1          |
| PCF11      | 0.5289185  | 0.1257408   | 4.2064 | 2.68E-05 | 0.717174575 | count | 0.6191872  |
| FANCL      | 0.5527713  | 0.1821663   | 3.0344 | 0.00243  | 0.717785243 | count | 1          |
| MYCT1      | 0.5068767  | 0.0807165   | 6.2797 | 3.93E-10 | 0.71791214  | count | 9.32E-06   |
| NFIL3      | 0.537686   | 0.1607362   | 3.3451 | 0.000833 | 0.717959036 | count | 1          |
| PPP1R9B    | 0.5973172  | 0.2761768   | 2.1628 | 0.0306   | 0.718116235 | count | 1          |
| CCDC71     | 0.7424608  | 0.4616399   | 1.6083 | 0.108    | 0.718133286 | count | 1          |
| FOXRED1    | 0.8715995  | 0.5699995   | 1.5291 | 0.126    | 0.718344561 | count | 1          |
| C20orf204  | 0.5639818  | 0.2256981   | 2.4988 | 0.0125   | 0.718524925 | count | 1          |
| DVL1       | 0.6006768  | 0.2477333   | 2.4247 | 0.0154   | 0.719246108 | count | 1          |
| RIPK3      | 0.657488   | 0.3714851   | 1.7699 | 0.0769   | 0.719357743 | count | 1          |
| MMGT1      | 0.5663677  | 0.2236707   | 2.5322 | 0.0114   | 0.719545351 | count | 1          |
| TMEM209    | 0.5987248  | 0.2777245   | 2.1558 | 0.0312   | 0.719728139 | count | 1          |
| MACROD1    | 0.5561802  | 0.2032506   | 2.7364 | 0.00625  | 0.720238292 | count | 1          |
| RASA4B     | 1.6653216  | 1.0253007   | 1.6242 | 0.104    | 0.720905736 | count | 1          |
| ZNF174     | 0.7205533  | 0.4302092   | 1.6749 | 0.0941   | 0.721052377 | count | 1          |
| FANCG      | 0.9563843  | 0.6196656   | 1.5434 | 0.123    | 0.721099012 | count | 1          |
| AC087645.2 | 1.4008297  | 0.7086576   | 1.9767 | 0.0482   | 0.72122002  | count | 1          |
| FANCI      | 1.6673118  | 1.1544479   | 1.4443 | 0.149    | 0.721358373 | count | 1          |
| MCUR1      | 0.5190574  | 0.1147017   | 4.5253 | 6.29E-06 | 0.721380664 | count | 0.14627395 |
| ZNF394     | 0.5634581  | 0.2130972   | 2.6441 | 0.00824  | 0.721483582 | count | 1          |
| ORC5       | 0.654115   | 0.4028516   | 1.6237 | 0.105    | 0.721712145 | count | 1          |
| EPHX2      | 0.5794659  | 0.2184634   | 2.6525 | 0.00804  | 0.721876289 | count | 1          |
| MVK        | 0.7106762  | 0.4610506   | 1.5414 | 0.123    | 0.721891842 | count | 1          |
| KLF4       | 0.5049962  | 0.0746257   | 6.7671 | 1.60E-11 | 0.72224859  | count | 3.81E-07   |
| BORCS6     | 0.556664   | 0.218533    | 2.5473 | 0.0109   | 0.722248943 | count | 1          |
| TMEM63B    | 1.0146563  | 0.6269464   | 1.6184 | 0.106    | 0.722743533 | count | 1          |

|            |           |           |         |          |             |       |             |
|------------|-----------|-----------|---------|----------|-------------|-------|-------------|
| SIRT6      | 0.6014824 | 0.2809031 | 2.1412  | 0.0323   | 0.722884709 | count | 1           |
| CRLF3      | 0.8220994 | 0.4097931 | 2.0061  | 0.0449   | 0.723144164 | count | 1           |
| AC079834.2 | 1.2438988 | 1.0647295 | 1.1683  | 0.243    | 0.723579942 | count | 1           |
| KIAA1551   | 0.5191357 | 0.1336757 | 3.8835  | 0.000105 | 0.723769488 | count | 1           |
| ESYT2      | 0.5364074 | 0.2308893 | 2.3232  | 0.0202   | 0.724091662 | count | 1           |
| AC139887.2 | 1.0508136 | 0.640617  | 1.6403  | 0.101    | 0.724247598 | count | 1           |
| FNBP1L     | 0.5152744 | 0.1129868 | 4.5605  | 5.33E-06 | 0.724544119 | count | 0.12401311  |
| CCNG2      | 0.535248  | 0.1679191 | 3.1875  | 0.00145  | 0.724643473 | count | 1           |
| UNG        | 0.5844685 | 0.2189477 | 2.6694  | 0.00764  | 0.725174742 | count | 1           |
| SDCBP      | 0.5054677 | 0.0495972 | 10.1915 | 5.72E-24 | 0.725219492 | count | 1.38E-19    |
| RAP1GDS1   | 0.5980133 | 0.2738691 | 2.1836  | 0.0291   | 0.725252311 | count | 1           |
| ABHD6      | 0.5560299 | 0.2171127 | 2.561   | 0.0105   | 0.725373868 | count | 1           |
| ZNF583     | 0.6251257 | 0.3151827 | 1.9834  | 0.0474   | 0.725553364 | count | 1           |
| THG1L      | 0.6252363 | 0.2908975 | 2.1493  | 0.0317   | 0.725674281 | count | 1           |
| POLA1      | 1.0943696 | 0.6120637 | 1.788   | 0.0739   | 0.726885448 | count | 1           |
| ZNF467     | 0.5402637 | 0.1544241 | 3.4986  | 0.000475 | 0.726900827 | count | 1           |
| TVP23B     | 0.5973946 | 0.280411  | 2.1304  | 0.0332   | 0.726914796 | count | 1           |
| NUP107     | 0.6017307 | 0.281588  | 2.1369  | 0.0327   | 0.727068973 | count | 1           |
| AGMO       | 1.0233785 | 0.5979514 | 1.7115  | 0.0871   | 0.727501145 | count | 1           |
| ZNF48      | 0.8282308 | 0.4814794 | 1.7202  | 0.0855   | 0.72772812  | count | 1           |
| DDX50      | 0.5378686 | 0.1551935 | 3.4658  | 0.000537 | 0.727966445 | count | 1           |
| KLF10      | 0.5197834 | 0.0998648 | 5.2049  | 2.08E-07 | 0.728400067 | count | 0.004882176 |
| ZNF761     | 0.7965887 | 0.4498984 | 1.7706  | 0.0767   | 0.728552239 | count | 1           |
| DDTL       | 0.9240218 | 0.7255852 | 1.2735  | 0.203    | 0.728757579 | count | 1           |
| CANT1      | 0.666879  | 0.3675731 | 1.8143  | 0.0697   | 0.728848216 | count | 1           |
| AEBP2      | 0.6033424 | 0.2880263 | 2.0947  | 0.0363   | 0.72892535  | count | 1           |
| LYSMD2     | 0.5228334 | 0.1079922 | 4.8414  | 1.36E-06 | 0.729027524 | count | 0.0317764   |
| PTPN18     | 0.5487558 | 0.1962587 | 2.7961  | 0.00521  | 0.72927726  | count | 1           |
| MAPK11     | 0.5427704 | 0.1718508 | 3.1584  | 0.0016   | 0.729391822 | count | 1           |
| DNAJA3     | 0.70455   | 0.3527606 | 1.9972  | 0.0459   | 0.72963597  | count | 1           |
| ZNF765     | 0.8434497 | 0.5321826 | 1.5849  | 0.113    | 0.729636392 | count | 1           |
| AC036176.1 | 0.9728964 | 0.7433578 | 1.3088  | 0.191    | 0.730913644 | count | 1           |
| HIST1H4E   | 0.908544  | 0.5758995 | 1.5776  | 0.115    | 0.731349266 | count | 1           |
| BCL2L12    | 0.6167109 | 0.2492966 | 2.4738  | 0.0134   | 0.731550457 | count | 1           |
| TPRA1      | 0.5745674 | 0.2566324 | 2.2389  | 0.0252   | 0.731577326 | count | 1           |
| DDX47      | 1.5539303 | 1.0370105 | 1.4985  | 0.134    | 0.731668952 | count | 1           |
| NUDT8      | 0.5839389 | 0.2553185 | 2.2871  | 0.0223   | 0.732269498 | count | 1           |
| RNF138     | 0.5937017 | 0.2202536 | 2.6955  | 0.00707  | 0.732306315 | count | 1           |
| INTS6L     | 0.8923474 | 0.5545151 | 1.6092  | 0.108    | 0.732428276 | count | 1           |
| TAF4B      | 0.7673131 | 0.4699505 | 1.6328  | 0.103    | 0.732980508 | count | 1           |
| METAP1D    | 0.6304969 | 0.3472756 | 1.8156  | 0.0695   | 0.733302319 | count | 1           |
| RAB3D      | 0.6782019 | 0.3503203 | 1.9359  | 0.053    | 0.733922877 | count | 1           |
| AQP1       | 0.5111971 | 0.0623997 | 8.1923  | 3.87E-16 | 0.734572775 | count | 9.28E-12    |
| TYSND1     | 0.7151212 | 0.4824847 | 1.4822  | 0.138    | 0.735149134 | count | 1           |
| NAXD       | 0.686513  | 0.3555947 | 1.9306  | 0.0536   | 0.735409407 | count | 1           |

|            |           |           |        |          |             |       |            |
|------------|-----------|-----------|--------|----------|-------------|-------|------------|
| ATXN3      | 0.5350708 | 0.1600437 | 3.3433 | 0.000839 | 0.735527262 | count | 1          |
| BRI3BP     | 0.7707082 | 0.493372  | 1.5621 | 0.118    | 0.735827952 | count | 1          |
| TCEANC     | 1.733081  | 1.0769466 | 1.6093 | 0.108    | 0.73590656  | count | 1          |
| PEX11G     | 0.7432159 | 0.4372696 | 1.6997 | 0.0893   | 0.735942816 | count | 1          |
| ABHD17B    | 0.7634267 | 0.3613374 | 2.1128 | 0.0347   | 0.736017883 | count | 1          |
| RRP9       | 0.6566161 | 0.3020474 | 2.1739 | 0.0298   | 0.737546706 | count | 1          |
| ZNF574     | 0.900734  | 0.5636789 | 1.598  | 0.11     | 0.73807952  | count | 1          |
| CCDC51     | 0.650582  | 0.3487403 | 1.8655 | 0.0622   | 0.738387199 | count | 1          |
| AC136475.5 | 0.9857753 | 0.7601014 | 1.2969 | 0.195    | 0.738505785 | count | 1          |
| KLHL7      | 0.6530382 | 0.3096155 | 2.1092 | 0.035    | 0.738650492 | count | 1          |
| TMEM107    | 0.5559911 | 0.1892353 | 2.9381 | 0.00333  | 0.739251246 | count | 1          |
| TMTC1      | 0.5375473 | 0.1620048 | 3.3181 | 0.000918 | 0.73937582  | count | 1          |
| ABHD18     | 0.8442565 | 0.4600889 | 1.835  | 0.0666   | 0.739648793 | count | 1          |
| CARNMT1    | 0.6497368 | 0.3036959 | 2.1394 | 0.0325   | 0.739764076 | count | 1          |
| ITFG2      | 0.7160254 | 0.3609577 | 1.9837 | 0.0474   | 0.740385652 | count | 1          |
| PSMB10     | 0.5454139 | 0.1584213 | 3.4428 | 0.000584 | 0.740463353 | count | 1          |
| PCDHB13    | 0.942997  | 0.7791237 | 1.2103 | 0.226    | 0.740787676 | count | 1          |
| LHFPL2     | 0.6487203 | 0.3234404 | 2.0057 | 0.045    | 0.740899681 | count | 1          |
| BRMS1L     | 0.6348346 | 0.2777095 | 2.286  | 0.0223   | 0.741725265 | count | 1          |
| NIT1       | 0.5803108 | 0.2123632 | 2.7326 | 0.00632  | 0.741783707 | count | 1          |
| LTBR       | 0.5388036 | 0.1233161 | 4.3693 | 1.29E-05 | 0.742110618 | count | 0.2989446  |
| LRRC40     | 0.6261713 | 0.2617082 | 2.3926 | 0.0168   | 0.74217595  | count | 1          |
| ARL14EP    | 0.5498189 | 0.1624759 | 3.384  | 0.000724 | 0.742445191 | count | 1          |
| FABP5      | 0.5175969 | 0.1161095 | 4.4578 | 8.61E-06 | 0.742891534 | count | 0.19994142 |
| AC018653.3 | 1.0526371 | 0.6592284 | 1.5968 | 0.11     | 0.743280874 | count | 1          |
| PAOX       | 0.8625506 | 0.5550951 | 1.5539 | 0.12     | 0.743511009 | count | 1          |
| SLC2A11    | 1.0236671 | 0.5408067 | 1.8929 | 0.0585   | 0.744467536 | count | 1          |
| MYADM      | 0.5276739 | 0.0884747 | 5.9641 | 2.77E-09 | 0.744485756 | count | 6.56E-05   |
| SEC24C     | 0.6932332 | 0.5043365 | 1.3745 | 0.169    | 0.745471461 | count | 1          |
| RFX5       | 0.6620508 | 0.2733294 | 2.4222 | 0.0155   | 0.745716948 | count | 1          |
| PAN3       | 0.5783368 | 0.2160983 | 2.6763 | 0.00749  | 0.746075097 | count | 1          |
| RASSF1     | 0.5555964 | 0.1707802 | 3.2533 | 0.00115  | 0.746311568 | count | 1          |
| FOCAD      | 0.9994356 | 0.624599  | 1.6001 | 0.11     | 0.746498384 | count | 1          |
| ZNF676     | 0.6426703 | 0.3680944 | 1.7459 | 0.0809   | 0.746618859 | count | 1          |
| SNTA1      | 1.0280017 | 0.7383539 | 1.3923 | 0.164    | 0.746890306 | count | 1          |
| TRIM21     | 0.6788961 | 0.3110333 | 2.1827 | 0.0291   | 0.746977434 | count | 1          |
| HLX        | 0.5793688 | 0.2242752 | 2.5833 | 0.00984  | 0.747367205 | count | 1          |
| APOBEC3G   | 0.6150506 | 0.2549642 | 2.4123 | 0.0159   | 0.747407648 | count | 1          |
| KBTBD3     | 0.6086598 | 0.2579356 | 2.3597 | 0.0184   | 0.747884765 | count | 1          |
| STIM2      | 0.5470442 | 0.1451525 | 3.7688 | 0.000167 | 0.748015811 | count | 1          |
| RBM45      | 0.7342594 | 0.4540861 | 1.617  | 0.106    | 0.74819721  | count | 1          |
| GPCPD1     | 0.5438454 | 0.1558336 | 3.4899 | 0.000491 | 0.748222192 | count | 1          |
| KLF9       | 0.5338098 | 0.0874633 | 6.1032 | 1.18E-09 | 0.748618238 | count | 2.80E-05   |
| ABI3       | 0.5440257 | 0.1231072 | 4.4191 | 1.03E-05 | 0.748657776 | count | 0.2389909  |
| TUBD1      | 0.6232839 | 0.2827685 | 2.2042 | 0.0276   | 0.749161413 | count | 1          |



|            |           |           |        |          |             |       |            |
|------------|-----------|-----------|--------|----------|-------------|-------|------------|
| GPR146     | 0.5338116 | 0.114186  | 4.6749 | 3.08E-06 | 0.749316722 | count | 0.07177016 |
| TRIB2      | 0.5690649 | 0.1967621 | 2.8921 | 0.00386  | 0.749637346 | count | 1          |
| SPATA24    | 1.1893138 | 0.6514037 | 1.8258 | 0.068    | 0.74965284  | count | 1          |
| DEDD       | 0.6019395 | 0.2258784 | 2.6649 | 0.00775  | 0.749671433 | count | 1          |
| ZNF525     | 0.9585192 | 0.7263816 | 1.3196 | 0.187    | 0.75053816  | count | 1          |
| PLEKHG1    | 0.5752219 | 0.1941797 | 2.9623 | 0.00308  | 0.750602534 | count | 1          |
| PCDHGA9    | 1.6277346 | 1.0750607 | 1.5141 | 0.13     | 0.750725953 | count | 1          |
| CYP7B1     | 1.3163182 | 0.7631612 | 1.7248 | 0.0847   | 0.751326263 | count | 1          |
| CTC1       | 1.1452192 | 0.8543709 | 1.3404 | 0.18     | 0.751338365 | count | 1          |
| DONSON     | 1.5004153 | 0.7276947 | 2.0619 | 0.0393   | 0.751655508 | count | 1          |
| SRPK1      | 0.5511864 | 0.1386439 | 3.9756 | 7.20E-05 | 0.751670027 | count | 1          |
| FAM167B    | 0.5361555 | 0.1137784 | 4.7123 | 2.57E-06 | 0.751849574 | count | 0.0599324  |
| ZDHHC17    | 0.58515   | 0.216375  | 2.7043 | 0.00689  | 0.75187741  | count | 1          |
| RIPK1      | 0.5818634 | 0.2684913 | 2.1672 | 0.0303   | 0.75203839  | count | 1          |
| ZNF845     | 0.9849232 | 0.5931694 | 1.6604 | 0.0969   | 0.752789954 | count | 1          |
| SDR42E2    | 0.7836266 | 0.7252038 | 1.0806 | 0.28     | 0.753112258 | count | 1          |
| DCK        | 0.6629646 | 0.3177531 | 2.0864 | 0.037    | 0.753820457 | count | 1          |
| EID3       | 0.7404213 | 0.4043119 | 1.8313 | 0.0672   | 0.753830841 | count | 1          |
| DUSP22     | 0.5594982 | 0.1581834 | 3.537  | 0.000411 | 0.75413705  | count | 1          |
| PLD2       | 0.6449257 | 0.2623458 | 2.4583 | 0.014    | 0.754638368 | count | 1          |
| LRWD1      | 0.7266912 | 0.3277289 | 2.2174 | 0.0267   | 0.754680911 | count | 1          |
| WASF3      | 0.6404203 | 0.2956299 | 2.1663 | 0.0304   | 0.754853481 | count | 1          |
| HDDC3      | 0.5777575 | 0.2078821 | 2.7793 | 0.00549  | 0.75507972  | count | 1          |
| PPAT       | 0.8413374 | 0.44114   | 1.9072 | 0.0566   | 0.755205702 | count | 1          |
| TFB1M      | 0.6352329 | 0.3766186 | 1.6867 | 0.0918   | 0.755465021 | count | 1          |
| SMIM33     | 1.646979  | 1.3114712 | 1.2558 | 0.209    | 0.755512194 | count | 1          |
| ARHGAP27   | 0.7113275 | 0.3397165 | 2.0939 | 0.0364   | 0.756002057 | count | 1          |
| ZNF346     | 1.0166365 | 0.6348384 | 1.6014 | 0.109    | 0.756474639 | count | 1          |
| DMTF1      | 0.6855055 | 0.3189356 | 2.1494 | 0.0317   | 0.756617327 | count | 1          |
| AC116614.1 | 2.1078644 | 1.1351777 | 1.8569 | 0.0634   | 0.757741366 | count | 1          |
| GIMAP1     | 0.5318461 | 0.069681  | 7.6326 | 3.15E-14 | 0.758058927 | count | 7.54E-10   |
| C20orf27   | 0.5777048 | 0.1863667 | 3.0998 | 0.00196  | 0.75855446  | count | 1          |
| PGAP2      | 0.6087727 | 0.2426729 | 2.5086 | 0.0122   | 0.75874283  | count | 1          |
| LPAR6      | 0.5336445 | 0.0875575 | 6.0948 | 1.25E-09 | 0.759034081 | count | 2.96E-05   |
| MCM3       | 0.581657  | 0.2034121 | 2.8595 | 0.00427  | 0.759201557 | count | 1          |
| ZNF415     | 0.6752853 | 0.3812539 | 1.7712 | 0.0766   | 0.759570826 | count | 1          |
| C1GALT1    | 0.5916545 | 0.2630979 | 2.2488 | 0.0246   | 0.759974855 | count | 1          |
| BET1       | 0.5842329 | 0.1947658 | 2.9997 | 0.00273  | 0.76117247  | count | 1          |
| ATP11A     | 0.6496993 | 0.268367  | 2.4209 | 0.0155   | 0.761688716 | count | 1          |
| NAA40      | 0.8288461 | 0.643357  | 1.2883 | 0.198    | 0.761808528 | count | 1          |
| BASP1      | 0.9368562 | 0.87172   | 1.0747 | 0.283    | 0.762145966 | count | 1          |
| PRIM1      | 0.6732971 | 0.3126846 | 2.1533 | 0.0314   | 0.762398703 | count | 1          |
| SYNGAP1    | 0.8205341 | 0.6755783 | 1.2146 | 0.225    | 0.762807848 | count | 1          |
| DYNLRB2    | 1.6777548 | 1.1135923 | 1.5066 | 0.132    | 0.763013081 | count | 1          |
| C11orf80   | 1.12804   | 1.0462281 | 1.0782 | 0.281    | 0.763388561 | count | 1          |

|           |            |             |        |          |             |       |             |
|-----------|------------|-------------|--------|----------|-------------|-------|-------------|
| KIFC3     | 0.5777584  | 0.1770525   | 3.2632 | 0.00112  | 0.763538978 | count | 1           |
| BTN2A2    | 0.6248108  | 0.2404259   | 2.5988 | 0.00941  | 0.764616878 | count | 1           |
| KHK       | 0.9073893  | 0.4838413   | 1.8754 | 0.0608   | 0.765018221 | count | 1           |
| CENPF     | 1.0613905  | 0.8158793   | 1.3009 | 0.193    | 0.765347158 | count | 1           |
| EHHADH    | 0.7591131  | 0.3987314   | 1.9038 | 0.057    | 0.765857267 | count | 1           |
| ADH1B     | 1.8831964  | 1.7424152   | 1.0808 | 0.2799   | 0.766264516 | count | 1           |
| ADAM15    | 0.5389101  | 0.0749075   | 7.1943 | 8.05E-13 | 0.766424947 | count | 1.92E-08    |
| ZNF788P   | 1.2873263  | 2.0439749   | 0.6298 | 0.5289   | 0.766666474 | count | 1           |
| NRM       | 0.6515383  | 0.2564402   | 2.5407 | 0.0111   | 0.767209085 | count | 1           |
| TTC31     | 1.009337   | 0.6576233   | 1.5348 | 0.125    | 0.767397011 | count | 1           |
| ZNF222    | 0.8960334  | 0.5481267   | 1.6347 | 0.102    | 0.767531418 | count | 1           |
| DELE1     | 0.5820517  | 0.1819094   | 3.1997 | 0.00139  | 0.767729191 | count | 1           |
| KIAA1324L | 0.7872212  | 0.4733132   | 1.6632 | 0.0964   | 0.768532537 | count | 1           |
| CASP6     | 0.603134   | 0.2410969   | 2.5016 | 0.0124   | 0.768701601 | count | 1           |
| HIPK3     | 0.54625    | 0.0971149   | 5.6248 | 2.04E-08 | 0.769310927 | count | 0.000481542 |
| C11orf71  | 0.6756778  | 0.2875212   | 2.35   | 0.0188   | 0.769612481 | count | 1           |
| GFM1      | 0.5989505  | 0.2219303   | 2.6988 | 0.007    | 0.76962386  | count | 1           |
| PPP1R21   | 0.6498047  | 0.2640971   | 2.4605 | 0.0139   | 0.770252258 | count | 1           |
| CEP78     | 0.8123328  | 0.3917887   | 2.0734 | 0.0382   | 0.770427305 | count | 1           |
| TRAM1L1   | 1.5662321  | 1.1552777   | 1.3557 | 0.175    | 0.770524047 | count | 1           |
| HERPUD2   | 0.5866434  | 0.1808666   | 3.2435 | 0.00119  | 0.770750501 | count | 1           |
| SENP1     | 0.659736   | 0.4377365   | 1.5072 | 0.132    | 0.770932344 | count | 1           |
| PNPLA2    | 0.5516177  | 0.1112268   | 4.9594 | 7.50E-07 | 0.771211574 | count | 0.0175485   |
| EYA3      | 0.641923   | 0.2390462   | 2.6854 | 0.00729  | 0.771815304 | count | 1           |
| ERICH1    | 0.5515542  | 0.1131351   | 4.8752 | 1.15E-06 | 0.773245295 | count | 0.0268801   |
| TCTEX1D1  | 0.7803093  | 0.3674256   | 2.1237 | 0.0338   | 0.774078382 | count | 1           |
| CASC10    | 0.7092019  | 0.4160192   | 1.7047 | 0.0884   | 0.774514024 | count | 1           |
| SLCO2B1   | 0.9216524  | 0.5258824   | 1.7526 | 0.0798   | 0.774905414 | count | 1           |
| PSMD5     | 0.6209987  | 0.3314131   | 1.8738 | 0.0611   | 0.775165933 | count | 1           |
| RGS14     | 0.6611353  | 0.3006345   | 2.1991 | 0.028    | 0.776092585 | count | 1           |
| TMEM170A  | 0.5753508  | 0.1590182   | 3.6181 | 0.000302 | 0.776305853 | count | 1           |
| USP36     | 0.6424359  | 0.297113    | 2.1623 | 0.0307   | 0.776467215 | count | 1           |
| ZNF300    | 1.9398103  | 0.9986076   | 1.9425 | 0.0522   | 0.776746821 | count | 1           |
| ZBTB7C    | 1.1571336  | 0.5251846   | 2.2033 | 0.0277   | 0.777649435 | count | 1           |
| AKNAD1    | 1.2027501  | 0.8068574   | 1.4907 | 0.136    | 0.778052788 | count | 1           |
| TBC1D2    | 0.8240496  | 0.4371103   | 1.8852 | 0.0595   | 0.780062332 | count | 1           |
| BAZ1A     | 0.5659076  | 0.1264781   | 4.4744 | 7.97E-06 | 0.780369667 | count | 0.18511919  |
| BOLA2B    | 1.7523018  | 1.072727    | 1.6335 | 0.102    | 0.78042005  | count | 1           |
| ZNF112    | 0.7941967  | 1.4656785   | 0.5419 | 0.588    | 0.780471308 | count | 1           |
| ZNF16     | 1.2648141  | 0.8249077   | 1.5333 | 0.125    | 0.782274154 | count | 1           |
| NEK3      | 0.5807434  | 0.1713347   | 3.3895 | 0.00071  | 0.782650529 | count | 1           |
| CAVIN2    | 0.5469165  | 0.0715598   | 7.6428 | 2.91E-14 | 0.782724558 | count | 6.96E-10    |
| METTL1    | 0.7113396  | 0.2971477   | 2.3939 | 0.0167   | 0.782851838 | count | 1           |
| ZNF99     | 15.91738   | 1265.853655 | 0.0126 | 0.99     | 0.782891838 | count | 1           |
| CORT      | 15.6540149 | 1082.419191 | 0.0145 | 0.9885   | 0.78289186  | count | 1           |

|            |            |             |        |          |             |       |   |
|------------|------------|-------------|--------|----------|-------------|-------|---|
| AC018413.1 | 15.6542119 | 1145.822177 | 0.0137 | 0.989    | 0.78289186  | count | 1 |
| RIPPLY2    | 16.1833766 | 1653.874805 | 0.0098 | 0.9922   | 0.782891868 | count | 1 |
| CHGB       | 16.2132312 | 1207.948617 | 0.0134 | 0.989    | 0.782891871 | count | 1 |
| RAG1       | 16.2942249 | 1163.315074 | 0.014  | 0.989    | 0.782891878 | count | 1 |
| AC231981.1 | 15.7910445 | 1217.742239 | 0.013  | 0.99     | 0.782891881 | count | 1 |
| RASGEF1A   | 15.9172703 | 1148.368241 | 0.0139 | 0.989    | 0.782891899 | count | 1 |
| AC104596.1 | 15.9969117 | 1096.365292 | 0.0146 | 0.988    | 0.782891908 | count | 1 |
| HIST3H2A   | 16.0689951 | 660.2327815 | 0.0243 | 0.981    | 0.782891916 | count | 1 |
| ZNF772     | 16.9695812 | 1551.350505 | 0.0109 | 0.991    | 0.782891921 | count | 1 |
| LRCOL1     | 17.0967533 | 1572.625947 | 0.0109 | 0.991    | 0.782891926 | count | 1 |
| EIF3CL     | 16.1863737 | 3090.78725  | 0.0052 | 0.996    | 0.782891929 | count | 1 |
| AC002480.3 | 16.2042228 | 1799.721792 | 0.009  | 0.993    | 0.78289193  | count | 1 |
| PRSS57     | 16.2044579 | 1103.243824 | 0.0147 | 0.988    | 0.78289193  | count | 1 |
| ZNF404     | 16.2130244 | 1275.312679 | 0.0127 | 0.99     | 0.782891931 | count | 1 |
| ZBED8      | 16.2266949 | 1272.334142 | 0.0128 | 0.99     | 0.782891932 | count | 1 |
| ZNF749     | 16.2754833 | 1075.301282 | 0.0151 | 0.9879   | 0.782891937 | count | 1 |
| AC067930.4 | 17.4404797 | 2343.661935 | 0.0074 | 0.994    | 0.782891938 | count | 1 |
| DDN-AS1    | 16.3499129 | 1291.27282  | 0.0127 | 0.99     | 0.782891943 | count | 1 |
| FZD3       | 16.365151  | 1227.566002 | 0.0133 | 0.989    | 0.782891944 | count | 1 |
| FAM19A2    | 16.5202543 | 1880.505582 | 0.0088 | 0.993    | 0.782891956 | count | 1 |
| CRYBB1     | 16.5281827 | 1126.791613 | 0.0147 | 0.9883   | 0.782891957 | count | 1 |
| SYN2       | 16.5583954 | 1173.582709 | 0.0141 | 0.989    | 0.782891959 | count | 1 |
| HIST1H2BG  | 16.5584631 | 1625.438521 | 0.0102 | 0.992    | 0.782891959 | count | 1 |
| C19orf73   | 16.5585367 | 1276.716634 | 0.013  | 0.99     | 0.782891959 | count | 1 |
| MAB21L2    | 16.6462853 | 1577.66621  | 0.0106 | 0.992    | 0.782891964 | count | 1 |
| AC132192.2 | 16.6815168 | 1097.639352 | 0.0152 | 0.988    | 0.782891966 | count | 1 |
| FTCDNL1    | 16.6890645 | 1085.96422  | 0.0154 | 0.9877   | 0.782891967 | count | 1 |
| AP003031.2 | 16.7453942 | 2049.976204 | 0.0082 | 0.993    | 0.78289197  | count | 1 |
| RGS20      | 16.7566694 | 1686.788088 | 0.0099 | 0.992    | 0.782891971 | count | 1 |
| TEPP       | 16.8891129 | 2322.433318 | 0.0073 | 0.994    | 0.782891978 | count | 1 |
| KLK10      | 16.8891129 | 2322.433318 | 0.0073 | 0.994    | 0.782891978 | count | 1 |
| AC008105.3 | 16.8920025 | 4035.114874 | 0.0042 | 0.997    | 0.782891978 | count | 1 |
| SCRG1      | 1.0112395  | 0.6520445   | 1.5509 | 0.121    | 0.783048516 | count | 1 |
| PIGZ       | 0.6827343  | 0.3720817   | 1.8349 | 0.0666   | 0.783853487 | count | 1 |
| ZNF787     | 0.5843897  | 0.1655446   | 3.5301 | 0.000422 | 0.78400189  | count | 1 |
| SSPN       | 0.7326742  | 0.3995504   | 1.8337 | 0.0668   | 0.784106076 | count | 1 |
| CORO1C     | 0.5933894  | 0.1871944   | 3.1699 | 0.00154  | 0.784368923 | count | 1 |
| ETV5       | 0.7686469  | 0.3984469   | 1.9291 | 0.0538   | 0.784391568 | count | 1 |
| TPK1       | 0.6835458  | 0.3169575   | 2.1566 | 0.0311   | 0.784722837 | count | 1 |
| ZNF714     | 0.8812388  | 0.6701086   | 1.3151 | 0.189    | 0.785437599 | count | 1 |
| TRAF3IP2   | 0.6552663  | 0.2707192   | 2.4205 | 0.0156   | 0.785576181 | count | 1 |
| MRPS35     | 0.5779173  | 0.147742    | 3.9117 | 9.39E-05 | 0.786540408 | count | 1 |
| TANGO6     | 1.0698604  | 0.5640012   | 1.8969 | 0.0579   | 0.786724599 | count | 1 |
| DDX31      | 0.9088017  | 0.8821252   | 1.0302 | 0.303    | 0.786771972 | count | 1 |
| UBE2D4     | 0.5956974  | 0.1922496   | 3.0986 | 0.00196  | 0.787345952 | count | 1 |

|           |           |           |        |          |             |       |            |
|-----------|-----------|-----------|--------|----------|-------------|-------|------------|
| CHD7      | 0.6360096 | 0.2079066 | 3.0591 | 0.00224  | 0.787378015 | count | 1          |
| PHF11     | 0.5808466 | 0.1502437 | 3.866  | 0.000113 | 0.787596754 | count | 1          |
| MBNL1-AS1 | 0.6613676 | 0.3175313 | 2.0828 | 0.0374   | 0.787969463 | count | 1          |
| SMURF1    | 0.9128136 | 0.5785442 | 1.5778 | 0.115    | 0.789653846 | count | 1          |
| PHYHIP    | 0.9612475 | 0.7626584 | 1.2604 | 0.208    | 0.790307789 | count | 1          |
| SPINK5    | 0.8368998 | 1.6559942 | 0.5054 | 0.6133   | 0.790576524 | count | 1          |
| SERPINB8  | 0.722088  | 0.4011884 | 1.7999 | 0.072    | 0.790598447 | count | 1          |
| GK5       | 0.8205982 | 0.4200722 | 1.9535 | 0.0509   | 0.790644208 | count | 1          |
| NUP50     | 0.5983273 | 0.1859284 | 3.2181 | 0.00131  | 0.790737367 | count | 1          |
| CDK5RAP1  | 0.6956468 | 0.3518321 | 1.9772 | 0.0481   | 0.790758598 | count | 1          |
| DNM3OS    | 0.7291341 | 0.3018157 | 2.4158 | 0.0158   | 0.791124426 | count | 1          |
| SDHAF4    | 0.7881652 | 0.3894863 | 2.0236 | 0.0431   | 0.791868823 | count | 1          |
| CENPU     | 1.2336792 | 0.9058414 | 1.3619 | 0.173    | 0.79200277  | count | 1          |
| PUS3      | 0.6290857 | 0.247059  | 2.5463 | 0.0109   | 0.792474636 | count | 1          |
| ALKBH2    | 0.6199192 | 0.2037429 | 3.0427 | 0.00237  | 0.79261238  | count | 1          |
| GTPBP10   | 0.6895231 | 0.3266238 | 2.1111 | 0.0349   | 0.793301685 | count | 1          |
| PER2      | 0.607772  | 0.2239425 | 2.714  | 0.00669  | 0.793652194 | count | 1          |
| SLC12A9   | 0.7011053 | 0.2760944 | 2.5394 | 0.0112   | 0.794091403 | count | 1          |
| EBPL      | 0.5618034 | 0.0852662 | 6.5888 | 5.29E-11 | 0.794362457 | count | 1.26E-06   |
| CASP1     | 0.577832  | 0.1383166 | 4.1776 | 3.04E-05 | 0.794369634 | count | 0.7019968  |
| USP32     | 0.774534  | 0.4513099 | 1.7162 | 0.0862   | 0.794557566 | count | 1          |
| ZNF267    | 0.6046925 | 0.1773013 | 3.4105 | 0.000658 | 0.794613462 | count | 1          |
| DHX15     | 0.600864  | 0.2021847 | 2.9719 | 0.00299  | 0.794677478 | count | 1          |
| KDM4D     | 1.2400116 | 0.8777323 | 1.4127 | 0.158    | 0.79482366  | count | 1          |
| ARHGAP26  | 0.5870898 | 0.2127793 | 2.7591 | 0.00583  | 0.795046595 | count | 1          |
| PRKD2     | 0.6104716 | 0.1870679 | 3.2634 | 0.00111  | 0.795295483 | count | 1          |
| NEBL      | 1.117326  | 0.828819  | 1.3481 | 0.178    | 0.795456008 | count | 1          |
| TMEM106A  | 0.8617814 | 0.9009118 | 0.9566 | 0.339    | 0.795620006 | count | 1          |
| TMEM185B  | 0.6835637 | 0.3176271 | 2.1521 | 0.0315   | 0.79703375  | count | 1          |
| CCDC97    | 0.7185687 | 0.3589734 | 2.0017 | 0.0454   | 0.798999078 | count | 1          |
| TMEM268   | 1.3052218 | 1.1032296 | 1.1831 | 0.237    | 0.79905599  | count | 1          |
| EP300     | 0.6262278 | 0.1941866 | 3.2249 | 0.00127  | 0.799754917 | count | 1          |
| DLC1      | 0.577689  | 0.1251842 | 4.6147 | 4.12E-06 | 0.799979661 | count | 0.09594244 |
| SLC31A2   | 0.7915834 | 0.3813511 | 2.0757 | 0.038    | 0.800141585 | count | 1          |
| FBL       | 0.5825062 | 0.1138212 | 5.1177 | 3.30E-07 | 0.800181215 | count | 0.00773652 |
| TTC7A     | 0.8406579 | 0.461931  | 1.8199 | 0.0689   | 0.800644933 | count | 1          |
| WDYHV1    | 0.6988491 | 0.3238643 | 2.1578 | 0.031    | 0.80108476  | count | 1          |
| MTG1      | 1.3791861 | 0.8575635 | 1.6083 | 0.108    | 0.802081864 | count | 1          |
| LRRRC8B   | 0.8539454 | 0.5864115 | 1.4562 | 0.145    | 0.804437778 | count | 1          |
| P2RY8     | 1.0234019 | 0.9309102 | 1.0994 | 0.272    | 0.804495103 | count | 1          |
| SRPK2     | 0.5850787 | 0.1326847 | 4.4095 | 1.08E-05 | 0.804715578 | count | 0.250506   |
| RFFL      | 1.0476959 | 0.6557554 | 1.5977 | 0.11     | 0.804982778 | count | 1          |
| KIAA0319L | 0.6377157 | 0.2414496 | 2.6412 | 0.00831  | 0.805295051 | count | 1          |
| VPS72     | 0.6054919 | 0.1722526 | 3.5151 | 0.000447 | 0.80564023  | count | 1          |
| CFP       | 0.7227085 | 0.3572829 | 2.0228 | 0.0432   | 0.806062467 | count | 1          |

|            |           |           |         |          |             |       |             |
|------------|-----------|-----------|---------|----------|-------------|-------|-------------|
| MTMR14     | 0.6596472 | 0.2673692 | 2.4672  | 0.0137   | 0.806379595 | count | 1           |
| ZC3H10     | 1.573507  | 0.8272701 | 1.902   | 0.0573   | 0.806504781 | count | 1           |
| ZNF689     | 0.7729558 | 0.4783982 | 1.6157  | 0.106    | 0.806681178 | count | 1           |
| UXS1       | 0.6441373 | 0.222095  | 2.9003  | 0.00376  | 0.807318295 | count | 1           |
| JUNB       | 0.5605524 | 0.0452399 | 12.3907 | 2.36E-34 | 0.807725944 | count | 5.71E-30    |
| ZNF19      | 1.5782091 | 1.0722495 | 1.4719  | 0.141    | 0.807881572 | count | 1           |
| KIAA1614   | 1.7081762 | 1.1375411 | 1.5016  | 0.133    | 0.808027388 | count | 1           |
| AC007686.3 | 1.4804452 | 1.0007652 | 1.4793  | 0.139    | 0.809085328 | count | 1           |
| EDA        | 1.8862285 | 1.1265573 | 1.6743  | 0.0942   | 0.809117316 | count | 1           |
| APTR       | 0.8277061 | 0.4815304 | 1.7189  | 0.0857   | 0.809276868 | count | 1           |
| CD300LG    | 1.5847138 | 1.1056463 | 1.4333  | 0.152    | 0.809777837 | count | 1           |
| TAF9B      | 0.6478738 | 0.278784  | 2.3239  | 0.0202   | 0.81004051  | count | 1           |
| CCND3      | 0.58114   | 0.112297  | 5.175   | 2.44E-07 | 0.810148334 | count | 0.005725704 |
| HS3ST2     | 1.276193  | 0.7207803 | 1.7706  | 0.0767   | 0.810714134 | count | 1           |
| PET117     | 0.7148102 | 0.3531763 | 2.0239  | 0.0431   | 0.810951863 | count | 1           |
| CSF1       | 0.6087834 | 0.2186445 | 2.7844  | 0.0054   | 0.811069544 | count | 1           |
| RIC8B      | 0.8627046 | 0.3813266 | 2.2624  | 0.0238   | 0.81152253  | count | 1           |
| AC087477.2 | 1.185998  | 0.7329948 | 1.618   | 0.106    | 0.811739446 | count | 1           |
| TMEM161B   | 0.8929908 | 0.4598258 | 1.942   | 0.0522   | 0.811763036 | count | 1           |
| REEP4      | 0.7883188 | 0.3656037 | 2.1562  | 0.0312   | 0.811924221 | count | 1           |
| AC073072.1 | 2.5649738 | 1.4967118 | 1.7137  | 0.0867   | 0.811950918 | count | 1           |
| GOLGA5     | 0.6466335 | 0.2369424 | 2.7291  | 0.00639  | 0.812032327 | count | 1           |
| ARHGEF3    | 0.5985621 | 0.1499111 | 3.9928  | 6.70E-05 | 0.812892274 | count | 1           |
| CCDC153    | 1.4110539 | 0.7392966 | 1.9086  | 0.0564   | 0.813834785 | count | 1           |
| JAM2       | 0.5692457 | 0.064834  | 8.7801  | 2.81E-18 | 0.814070021 | count | 6.75E-14    |
| CST3       | 0.5658482 | 0.0449588 | 12.5859 | 2.31E-35 | 0.815263225 | count | 5.59E-31    |
| ZDHHC18    | 0.934629  | 0.5181878 | 1.8036  | 0.0714   | 0.815318604 | count | 1           |
| UTP15      | 0.729036  | 0.3439458 | 2.1196  | 0.0341   | 0.815347172 | count | 1           |
| OAS1       | 0.6010205 | 0.1846022 | 3.2558  | 0.00114  | 0.81584139  | count | 1           |
| SLC25A26   | 0.6835918 | 0.2539943 | 2.6914  | 0.00716  | 0.816092035 | count | 1           |
| ZNF227     | 0.7933806 | 0.3892814 | 2.0381  | 0.0416   | 0.816572984 | count | 1           |
| HIF1AN     | 0.8994011 | 0.5503931 | 1.6341  | 0.102    | 0.816678145 | count | 1           |
| TBP        | 0.8102276 | 0.3439675 | 2.3555  | 0.0186   | 0.816809747 | count | 1           |
| NDRG2      | 0.6266578 | 0.1926498 | 3.2528  | 0.00116  | 0.817146049 | count | 1           |
| PPM1N      | 1.6103814 | 1.3579836 | 1.1859  | 0.236    | 0.81716734  | count | 1           |
| PLSCR4     | 0.5899761 | 0.1334614 | 4.4206  | 1.02E-05 | 0.81776967  | count | 0.2366808   |
| GIMAP2     | 0.6050474 | 0.164562  | 3.6767  | 0.000241 | 0.817988865 | count | 1           |
| FAM207A    | 0.6208984 | 0.201259  | 3.0851  | 0.00206  | 0.81800574  | count | 1           |
| AP002748.3 | 1.0249144 | 0.6081456 | 1.6853  | 0.092    | 0.818951914 | count | 1           |
| AC012358.3 | 1.0728928 | 0.7104778 | 1.5101  | 0.131    | 0.819882372 | count | 1           |
| CD40       | 0.579416  | 0.0877894 | 6.6001  | 4.91E-11 | 0.820133194 | count | 1.17E-06    |
| BOC        | 0.6820409 | 0.370934  | 1.8387  | 0.0661   | 0.820331872 | count | 1           |
| METTL3     | 0.7837187 | 0.3203244 | 2.4466  | 0.0145   | 0.821090289 | count | 1           |
| SEC24B     | 0.6778468 | 0.2769244 | 2.4478  | 0.0144   | 0.821098454 | count | 1           |
| IL3RA      | 0.5787874 | 0.0895593 | 6.4626  | 1.21E-10 | 0.821286838 | count | 2.87E-06    |

|            |           |           |        |          |             |       |            |
|------------|-----------|-----------|--------|----------|-------------|-------|------------|
| STARD13    | 0.821909  | 0.3518679 | 2.3358 | 0.0196   | 0.821739475 | count | 1          |
| RBM7       | 0.6115561 | 0.1570639 | 3.8937 | 0.000101 | 0.822030923 | count | 1          |
| ZNF512B    | 0.9064145 | 0.5149555 | 1.7602 | 0.0785   | 0.822039598 | count | 1          |
| BHLHE41    | 1.078171  | 0.6735967 | 1.6006 | 0.11     | 0.822976615 | count | 1          |
| AC106897.1 | 0.9929677 | 0.6203054 | 1.6008 | 0.11     | 0.823295248 | count | 1          |
| MAFB       | 0.5875812 | 0.1739301 | 3.3783 | 0.00074  | 0.823457057 | count | 1          |
| WDR12      | 0.7005361 | 0.2508862 | 2.7922 | 0.00527  | 0.824962957 | count | 1          |
| TIMP4      | 2.71246   | 1.1463351 | 2.3662 | 0.018    | 0.82512246  | count | 1          |
| WDR74      | 0.6406131 | 0.241699  | 2.6505 | 0.00808  | 0.826058779 | count | 1          |
| IFIH1      | 0.6356531 | 0.1988605 | 3.1965 | 0.00141  | 0.826631457 | count | 1          |
| KIF21B     | 1.5360637 | 1.1286654 | 1.361  | 0.174    | 0.827115768 | count | 1          |
| ZNF223     | 1.0855819 | 1.171558  | 0.9266 | 0.354    | 0.827305427 | count | 1          |
| TMEM69     | 0.7236844 | 0.2883436 | 2.5098 | 0.0121   | 0.827507574 | count | 1          |
| ACYP1      | 0.6401976 | 0.2300814 | 2.7825 | 0.00543  | 0.827744873 | count | 1          |
| TRIM16     | 0.6718129 | 0.2704535 | 2.484  | 0.013    | 0.828564483 | count | 1          |
| FRMD4A     | 0.672787  | 0.2416576 | 2.7841 | 0.00541  | 0.828610383 | count | 1          |
| KLHDC3     | 0.6907351 | 0.2846863 | 2.4263 | 0.0153   | 0.828727177 | count | 1          |
| CYP46A1    | 1.0631199 | 1.8772896 | 0.5663 | 0.5712   | 0.828749913 | count | 1          |
| KIF22      | 0.6313661 | 0.1915501 | 3.2961 | 0.000993 | 0.829100743 | count | 1          |
| GJC2       | 0.6987824 | 0.2707956 | 2.5805 | 0.00992  | 0.829912086 | count | 1          |
| OGFR       | 0.6350503 | 0.2029279 | 3.1294 | 0.00177  | 0.83045752  | count | 1          |
| ZNF775     | 0.9297675 | 0.7499206 | 1.2398 | 0.215    | 0.830786814 | count | 1          |
| FZD5       | 0.87815   | 0.4626828 | 1.898  | 0.0578   | 0.83129962  | count | 1          |
| RIOX1      | 1.0673594 | 0.585804  | 1.822  | 0.0686   | 0.831307452 | count | 1          |
| SLC25A28   | 0.638644  | 0.1759284 | 3.6301 | 0.000288 | 0.831364248 | count | 1          |
| SOCS3      | 0.579363  | 0.0580996 | 9.9719 | 4.94E-23 | 0.83227613  | count | 1.19E-18   |
| ADAM23     | 1.3897168 | 0.6506837 | 2.1358 | 0.0328   | 0.832659323 | count | 1          |
| HIC2       | 0.9899198 | 1.2764199 | 0.7755 | 0.4381   | 0.832834393 | count | 1          |
| THRB       | 0.8631824 | 0.4772329 | 1.8087 | 0.0706   | 0.832837425 | count | 1          |
| SLC9A3R1   | 0.8996646 | 0.4622665 | 1.9462 | 0.0517   | 0.8333262   | count | 1          |
| AL135791.1 | 1.3931187 | 0.8205462 | 1.6978 | 0.0897   | 0.833970729 | count | 1          |
| A4GALT     | 0.6067384 | 0.1303979 | 4.653  | 3.43E-06 | 0.834305027 | count | 0.07990528 |
| SRF        | 0.8183411 | 0.3445796 | 2.3749 | 0.0176   | 0.834411158 | count | 1          |
| HLA-B      | 0.5790345 | 0.030147  | 19.207 | 2.84E-77 | 0.834898279 | count | 6.90E-73   |
| RPP21      | 0.7737975 | 0.4910795 | 1.5757 | 0.115    | 0.835107049 | count | 1          |
| SOCS6      | 0.716919  | 0.3423225 | 2.0943 | 0.0363   | 0.835349218 | count | 1          |
| FANCE      | 1.6779825 | 1.0137627 | 1.6552 | 0.098    | 0.835930958 | count | 1          |
| GLB1L      | 0.8753702 | 0.6394504 | 1.3689 | 0.171    | 0.836124135 | count | 1          |
| RSPO3      | 0.6576454 | 0.2013551 | 3.2661 | 0.0011   | 0.837001281 | count | 1          |
| ZNF529     | 0.8688045 | 0.4893342 | 1.7755 | 0.0759   | 0.837520499 | count | 1          |
| COL9A3     | 1.0785544 | 0.4966129 | 2.1718 | 0.03     | 0.838031866 | count | 1          |
| FUT1       | 0.9165308 | 0.687618  | 1.3329 | 0.183    | 0.838280396 | count | 1          |
| PDE9A      | 0.6687016 | 0.3265053 | 2.0481 | 0.0406   | 0.838573486 | count | 1          |
| PKD1L1     | 1.839098  | 1.0688822 | 1.7206 | 0.0854   | 0.839004831 | count | 1          |
| ARHGAP25   | 0.8078383 | 0.4461512 | 1.8107 | 0.0703   | 0.8391831   | count | 1          |

|             |            |             |         |          |             |       |             |
|-------------|------------|-------------|---------|----------|-------------|-------|-------------|
| PARP2       | 0.7399014  | 0.3139534   | 2.3567  | 0.0185   | 0.839773702 | count | 1           |
| XRCC1       | 0.6955754  | 0.2807068   | 2.4779  | 0.0133   | 0.840016881 | count | 1           |
| NAIP        | 0.7685363  | 0.5273765   | 1.4573  | 0.145    | 0.840256482 | count | 1           |
| LGALS3      | 0.5845175  | 0.0411861   | 14.1921 | 3.53E-44 | 0.841329172 | count | 8.56E-40    |
| LINC02447   | 2.0580464  | 1.1649055   | 1.7667  | 0.0774   | 0.841482305 | count | 1           |
| SLC2A3      | 0.5946452  | 0.0871442   | 6.8237  | 1.09E-11 | 0.842371022 | count | 2.60E-07    |
| AC020928.1  | 0.9597103  | 0.4955373   | 1.9367  | 0.0529   | 0.843301845 | count | 1           |
| SORBS1      | 1.1140274  | 0.6949525   | 1.603   | 0.109    | 0.843750857 | count | 1           |
| GPM6B       | 0.9902652  | 0.5860667   | 1.6897  | 0.0912   | 0.844205761 | count | 1           |
| PARP16      | 0.9902652  | 0.6023215   | 1.6441  | 0.1      | 0.844205761 | count | 1           |
| HIC1        | 0.7443915  | 0.2966636   | 2.5092  | 0.0122   | 0.844478616 | count | 1           |
| GINS3       | 1.0073985  | 0.4982807   | 2.0217  | 0.0433   | 0.844657342 | count | 1           |
| BARD1       | 0.6716327  | 0.2650114   | 2.5344  | 0.0113   | 0.845537189 | count | 1           |
| AL139274.2  | 0.8869151  | 0.4862567   | 1.824   | 0.0683   | 0.845581984 | count | 1           |
| GEMIN4      | 1.8713864  | 1.1474459   | 1.6309  | 0.103    | 0.846144597 | count | 1           |
| TMEM70      | 0.6039412  | 0.1310428   | 4.6087  | 4.24E-06 | 0.846465601 | count | 0.09872416  |
| FBF1        | 15.8902962 | 749.9137325 | 0.0212  | 0.9831   | 0.848509986 | count | 1           |
| SYNGAP1-AS1 | 15.711039  | 1136.141458 | 0.0138  | 0.989    | 0.848510022 | count | 1           |
| MYO1F       | 16.0400163 | 1094.527635 | 0.0147  | 0.988    | 0.84851007  | count | 1           |
| TRIM6       | 16.8089715 | 1690.270794 | 0.0099  | 0.992    | 0.848510073 | count | 1           |
| AC009237.14 | 16.1214952 | 1093.603626 | 0.0147  | 0.988    | 0.84851008  | count | 1           |
| LINC01506   | 16.2410062 | 1319.979122 | 0.0123  | 0.99     | 0.848510093 | count | 1           |
| AC005363.2  | 16.2410285 | 1269.051154 | 0.0128  | 0.99     | 0.848510093 | count | 1           |
| LINC01376   | 16.2410318 | 1215.983616 | 0.0134  | 0.989    | 0.848510093 | count | 1           |
| C6orf52     | 16.3747144 | 1159.976895 | 0.0141  | 0.989    | 0.848510106 | count | 1           |
| MEGF11      | 16.3823948 | 1141.981514 | 0.0143  | 0.989    | 0.848510106 | count | 1           |
| AL031963.3  | 16.5163487 | 1161.383257 | 0.0142  | 0.989    | 0.848510118 | count | 1           |
| AC007743.1  | 16.5799347 | 1073.654832 | 0.0154  | 0.9877   | 0.848510122 | count | 1           |
| FRMPD4      | 16.6342975 | 1466.907037 | 0.0113  | 0.991    | 0.848510126 | count | 1           |
| ALKAL2      | 16.7435522 | 1315.099495 | 0.0127  | 0.9898   | 0.848510133 | count | 1           |
| AL035681.1  | 17.0002054 | 5560.556669 | 0.0031  | 0.998    | 0.848510147 | count | 1           |
| TES         | 0.629332   | 0.1749119   | 3.598   | 0.000326 | 0.848535986 | count | 1           |
| AC087239.1  | 1.4342735  | 0.6759492   | 2.1219  | 0.0339   | 0.849586074 | count | 1           |
| FAM241A     | 0.602673   | 0.1087256   | 5.5431  | 3.25E-08 | 0.849603153 | count | 0.000766253 |
| TMEM60      | 0.6605163  | 0.2365151   | 2.7927  | 0.00526  | 0.849655784 | count | 1           |
| MGAT5B      | 1.6111323  | 1.0837079   | 1.4867  | 0.137    | 0.850272037 | count | 1           |
| G2E3        | 0.6615545  | 0.2389627   | 2.7684  | 0.00567  | 0.85034004  | count | 1           |
| LAMA5       | 0.6524057  | 0.2246308   | 2.9043  | 0.00371  | 0.850635338 | count | 1           |
| FLT4        | 0.7679918  | 0.4385291   | 1.7513  | 0.08     | 0.852305841 | count | 1           |
| NCKIPSD     | 1.0026487  | 0.5137018   | 1.9518  | 0.0511   | 0.852736445 | count | 1           |
| TPPP        | 1.0582896  | 0.776846    | 1.3623  | 0.173    | 0.853201777 | count | 1           |
| VTI1A       | 0.8091229  | 0.2993504   | 2.7029  | 0.00692  | 0.853515419 | count | 1           |
| TGFBR3      | 0.6035004  | 0.1031891   | 5.8485  | 5.54E-09 | 0.853943402 | count | 0.000130999 |
| DHRS4       | 0.7511659  | 0.2941816   | 2.5534  | 0.0107   | 0.854088079 | count | 1           |
| AC083973.1  | 0.9755413  | 1.0748332   | 0.9076  | 0.364    | 0.854718667 | count | 1           |

|             |           |           |        |          |             |       |             |
|-------------|-----------|-----------|--------|----------|-------------|-------|-------------|
| PMS2        | 0.7683197 | 0.4583776 | 1.6762 | 0.0938   | 0.855604905 | count | 1           |
| THUMPD3-AS1 | 0.6332291 | 0.1552064 | 4.0799 | 4.63E-05 | 0.855741425 | count | 1           |
| PDZD4       | 1.9184728 | 0.8951346 | 2.1432 | 0.0322   | 0.85621786  | count | 1           |
| CERS4       | 0.8919143 | 0.4763121 | 1.8725 | 0.0612   | 0.856659063 | count | 1           |
| SSBP2       | 0.6432903 | 0.1941857 | 3.3128 | 0.000936 | 0.85682581  | count | 1           |
| NRBF2       | 0.6228402 | 0.1405315 | 4.432  | 9.70E-06 | 0.857503901 | count | 0.2251564   |
| ZMYM3       | 0.9206184 | 0.4849878 | 1.8982 | 0.0578   | 0.857711268 | count | 1           |
| MTRNR2L8    | 0.6083731 | 0.0968664 | 6.2805 | 3.91E-10 | 0.857833868 | count | 9.28E-06    |
| RNF19B      | 0.83366   | 0.3563382 | 2.3395 | 0.0194   | 0.85820501  | count | 1           |
| ANAPC4      | 0.7316545 | 0.3618762 | 2.0218 | 0.0433   | 0.859208701 | count | 1           |
| TMEM41A     | 0.679932  | 0.2358312 | 2.8831 | 0.00397  | 0.859657077 | count | 1           |
| AC073508.3  | 1.7705559 | 1.0583543 | 1.6729 | 0.0945   | 0.860041481 | count | 1           |
| LIFR        | 0.6061339 | 0.1127404 | 5.3764 | 8.24E-08 | 0.860123158 | count | 0.001938295 |
| B4GALT5     | 0.6799609 | 0.2341039 | 2.9045 | 0.00371  | 0.860482798 | count | 1           |
| TXNRD3      | 1.1736542 | 0.7762682 | 1.5119 | 0.131    | 0.860563294 | count | 1           |
| KSR1        | 0.9348818 | 0.4841901 | 1.9308 | 0.0536   | 0.860772761 | count | 1           |
| HCG18       | 0.707764  | 0.3232629 | 2.1894 | 0.0286   | 0.860780485 | count | 1           |
| SKIDA1      | 0.7798276 | 0.4081024 | 1.9109 | 0.0561   | 0.861206053 | count | 1           |
| TKFC        | 0.7613639 | 0.3401963 | 2.238  | 0.0253   | 0.862213442 | count | 1           |
| DTX2        | 1.1769645 | 0.6518827 | 1.8055 | 0.0711   | 0.862348982 | count | 1           |
| EMCN        | 0.6030159 | 0.0796173 | 7.5739 | 4.91E-14 | 0.862564484 | count | 1.17E-09    |
| NDUF6       | 0.7319068 | 0.3371658 | 2.1708 | 0.03     | 0.86319533  | count | 1           |
| PLCG2       | 0.6047021 | 0.1110713 | 5.4443 | 5.66E-08 | 0.863248706 | count | 0.001332704 |
| HES4        | 0.6700566 | 0.2472129 | 2.7104 | 0.00676  | 0.863291197 | count | 1           |
| HLA-F       | 0.605381  | 0.0727249 | 8.3243 | 1.32E-16 | 0.863332383 | count | 3.17E-12    |
| MLH1        | 0.7997626 | 0.3373692 | 2.3706 | 0.0178   | 0.864091466 | count | 1           |
| PARG        | 0.78336   | 0.3459688 | 2.2643 | 0.0236   | 0.864760419 | count | 1           |
| ZNF571      | 1.1818761 | 0.6156759 | 1.9196 | 0.055    | 0.864991865 | count | 1           |
| ZNF429      | 0.7908839 | 0.3465792 | 2.282  | 0.0226   | 0.865804658 | count | 1           |
| LRRC70      | 1.3003278 | 0.6170796 | 2.1072 | 0.0352   | 0.865999317 | count | 1           |
| MT1X        | 0.6503804 | 0.1866223 | 3.485  | 5.00E-04 | 0.866037419 | count | 1           |
| SRBD1       | 0.7878978 | 0.3127867 | 2.519  | 0.0118   | 0.866117396 | count | 1           |
| APOL6       | 0.6567839 | 0.2003813 | 3.2777 | 0.00106  | 0.866264351 | count | 1           |
| WNK1        | 0.6179158 | 0.123898  | 4.9873 | 6.50E-07 | 0.866995713 | count | 0.0152126   |
| NANP        | 1.3045304 | 0.7896767 | 1.652  | 0.0987   | 0.867917683 | count | 1           |
| CD320       | 0.6077193 | 0.0916805 | 6.6287 | 4.06E-11 | 0.868440563 | count | 9.66E-07    |
| SLC16A13    | 1.5701806 | 1.0847161 | 1.4475 | 0.148    | 0.868578943 | count | 1           |
| DDX54       | 0.6805759 | 0.2354734 | 2.8902 | 0.00388  | 0.868611654 | count | 1           |
| ITGB3BP     | 0.66951   | 0.2161843 | 3.0969 | 0.00197  | 0.869228982 | count | 1           |
| TTC12       | 1.982611  | 1.1161273 | 1.7763 | 0.0758   | 0.869313085 | count | 1           |
| GIPC2       | 0.6346536 | 0.1359717 | 4.6675 | 3.19E-06 | 0.86951115  | count | 0.07432062  |
| DDX55       | 0.7256376 | 0.3653334 | 1.9862 | 0.0471   | 0.869671636 | count | 1           |
| P3H2        | 0.8412034 | 0.3012233 | 2.7926 | 0.00526  | 0.869913236 | count | 1           |
| GABBR1      | 0.8413619 | 0.4081488 | 2.0614 | 0.0394   | 0.870058387 | count | 1           |
| HOXD9       | 0.729383  | 0.3313915 | 2.201  | 0.0278   | 0.87070125  | count | 1           |



|            |           |           |        |          |             |       |             |
|------------|-----------|-----------|--------|----------|-------------|-------|-------------|
| AK7        | 1.1347596 | 0.6898338 | 1.645  | 0.1      | 0.871156361 | count | 1           |
| TTI2       | 0.7636747 | 0.334457  | 2.2833 | 0.0225   | 0.872172377 | count | 1           |
| EPB41L3    | 0.6334871 | 0.1520031 | 4.1676 | 3.17E-05 | 0.872264267 | count | 0.7318579   |
| ITPKB      | 0.6909885 | 0.3091824 | 2.2349 | 0.0255   | 0.873856756 | count | 1           |
| USPL1      | 0.831498  | 0.3744446 | 2.2206 | 0.0265   | 0.874573257 | count | 1           |
| DMTN       | 1.0525185 | 0.5567234 | 1.8906 | 0.0588   | 0.874691832 | count | 1           |
| IGF2       | 0.7434335 | 0.4488756 | 1.6562 | 0.0978   | 0.875889754 | count | 1           |
| AC106739.2 | 1.0056546 | 0.6230697 | 1.614  | 0.107    | 0.87619677  | count | 1           |
| FAM155A    | 0.9785498 | 0.4301425 | 2.2749 | 0.023    | 0.876204186 | count | 1           |
| PLA1A      | 0.7192422 | 0.2890217 | 2.4885 | 0.0129   | 0.876613592 | count | 1           |
| LIPT1      | 0.7194617 | 0.2614008 | 2.7523 | 0.00596  | 0.876866494 | count | 1           |
| NCK1       | 0.6328962 | 0.1218157 | 5.1955 | 2.19E-07 | 0.877229984 | count | 0.005140149 |
| C17orf49   | 0.9455374 | 0.4140449 | 2.2837 | 0.0225   | 0.87723373  | count | 1           |
| AC147067.1 | 0.7387883 | 0.3111881 | 2.3741 | 0.0177   | 0.877872353 | count | 1           |
| AC011511.5 | 2.0266475 | 0.993083  | 2.0408 | 0.0414   | 0.877900689 | count | 1           |
| RIPK2      | 0.6945782 | 0.2705989 | 2.5668 | 0.0103   | 0.878205448 | count | 1           |
| RAPH1      | 0.6575549 | 0.199538  | 3.2954 | 0.000995 | 0.878826235 | count | 1           |
| TPST2      | 0.6324787 | 0.1260251 | 5.0187 | 5.53E-07 | 0.879211728 | count | 0.012946836 |
| SKP2       | 1.1780436 | 0.7562633 | 1.5577 | 0.119    | 0.879779346 | count | 1           |
| C22orf46   | 1.0289065 | 0.5006666 | 2.0551 | 0.04     | 0.881810362 | count | 1           |
| TRAP1      | 0.6926743 | 0.2042313 | 3.3916 | 0.000705 | 0.882732895 | count | 1           |
| SERPIN1    | 0.7028724 | 0.3694788 | 1.9023 | 0.0572   | 0.883132852 | count | 1           |
| DUSP23     | 0.6176673 | 0.0701769 | 8.8016 | 2.33E-18 | 0.883391402 | count | 5.60E-14    |
| S100A9     | 1.107244  | 0.7932173 | 1.3959 | 0.163    | 0.883710745 | count | 1           |
| HERC5      | 0.6501213 | 0.1829984 | 3.5526 | 0.000388 | 0.884029324 | count | 1           |
| ZSCAN9     | 0.8802123 | 0.4751835 | 1.8524 | 0.0641   | 0.88409256  | count | 1           |
| AASDH      | 0.7085693 | 0.2326739 | 3.0453 | 0.00235  | 0.885334373 | count | 1           |
| ASGR1      | 0.6763703 | 0.2394547 | 2.8246 | 0.00477  | 0.885544963 | count | 1           |
| GPD2       | 0.8532699 | 0.3698021 | 2.3074 | 0.0211   | 0.885725686 | count | 1           |
| MFSD4A     | 0.7926419 | 0.4804318 | 1.6499 | 0.0991   | 0.886258125 | count | 1           |
| RUSC1      | 0.7303564 | 0.257641  | 2.8348 | 0.00462  | 0.888070242 | count | 1           |
| BMP2K      | 0.7623049 | 0.2773036 | 2.749  | 0.00602  | 0.888653605 | count | 1           |
| SHANK3     | 0.6684625 | 0.2656115 | 2.5167 | 0.0119   | 0.888876448 | count | 1           |
| TYW1       | 0.7929737 | 0.3247751 | 2.4416 | 0.0147   | 0.889471761 | count | 1           |
| NLRP1      | 0.6969619 | 0.2512562 | 2.7739 | 0.00558  | 0.890107426 | count | 1           |
| PGAM5      | 0.933075  | 0.4262421 | 2.1891 | 0.0287   | 0.890300762 | count | 1           |
| PPP1R36    | 1.0264269 | 0.6006056 | 1.709  | 0.0876   | 0.890829829 | count | 1           |
| Z93241.1   | 0.8701139 | 0.5092239 | 1.7087 | 0.0876   | 0.891221559 | count | 1           |
| ZNF236     | 0.8705028 | 0.4058207 | 2.145  | 0.032    | 0.891571485 | count | 1           |
| ENTPD1     | 0.6413384 | 0.120723  | 5.3125 | 1.17E-07 | 0.89184784  | count | 0.002749617 |
| NARS2      | 0.9650708 | 0.5221104 | 1.8484 | 0.0647   | 0.892388205 | count | 1           |
| CYYR1      | 0.6272358 | 0.0737999 | 8.4991 | 3.08E-17 | 0.892501355 | count | 7.39E-13    |
| ZCWPW1     | 0.9358629 | 0.5394953 | 1.7347 | 0.0829   | 0.892558629 | count | 1           |
| ATP8A1     | 0.7303577 | 0.2667915 | 2.7376 | 0.00623  | 0.893290809 | count | 1           |
| C12orf43   | 0.7067332 | 0.2373827 | 2.9772 | 0.00293  | 0.893731787 | count | 1           |

|            |            |             |        |          |             |       |             |
|------------|------------|-------------|--------|----------|-------------|-------|-------------|
| PMM1       | 0.9788154  | 0.5354707   | 1.828  | 0.0677   | 0.89441647  | count | 1           |
| BUD13      | 0.7901672  | 0.3292687   | 2.3998 | 0.0165   | 0.894808406 | count | 1           |
| BIN3       | 0.7691686  | 0.2711908   | 2.8363 | 0.0046   | 0.896077614 | count | 1           |
| MED6       | 0.6752999  | 0.1763712   | 3.8289 | 0.000132 | 0.896098294 | count | 1           |
| ZNF768     | 0.8370111  | 0.3588425   | 2.3325 | 0.0197   | 0.896338127 | count | 1           |
| LONRF1     | 0.8056648  | 0.3499678   | 2.3021 | 0.0214   | 0.896536994 | count | 1           |
| LINC00526  | 1.1548699  | 0.7542377   | 1.5312 | 0.126    | 0.897978094 | count | 1           |
| KLHL22     | 1.4277801  | 0.7402247   | 1.9288 | 0.0539   | 0.898040069 | count | 1           |
| HS1BP3     | 1.0704864  | 0.5181103   | 2.0661 | 0.0389   | 0.89853014  | count | 1           |
| HACL1      | 0.7114411  | 0.2362491   | 3.0114 | 0.00262  | 0.898602041 | count | 1           |
| GRB10      | 0.6656281  | 0.1920637   | 3.4657 | 0.000537 | 0.898609173 | count | 1           |
| HOXA4      | 0.7914901  | 0.3250008   | 2.4353 | 0.0149   | 0.898808769 | count | 1           |
| AC025171.3 | 0.9443198  | 0.4469892   | 2.1126 | 0.0347   | 0.89939158  | count | 1           |
| ABCA5      | 0.7140442  | 0.3309111   | 2.1578 | 0.031    | 0.900054048 | count | 1           |
| RARRES3    | 0.6390736  | 0.110899    | 5.7627 | 9.20E-09 | 0.900598015 | count | 0.00021735  |
| STAP2      | 0.7569329  | 0.3454651   | 2.1911 | 0.0285   | 0.901480206 | count | 1           |
| PPOX       | 0.8351255  | 0.3560156   | 2.3458 | 0.0191   | 0.902191844 | count | 1           |
| ARL4A      | 0.6320171  | 0.0760629   | 8.3091 | 1.49E-16 | 0.903280973 | count | 3.58E-12    |
| GEMIN2     | 0.8490644  | 0.3616823   | 2.3475 | 0.019    | 0.903818395 | count | 1           |
| TJAP1      | 0.9244734  | 0.4080537   | 2.2656 | 0.0236   | 0.903818838 | count | 1           |
| C11orf1    | 0.6675075  | 0.1534407   | 4.3503 | 1.41E-05 | 0.90469539  | count | 0.3266547   |
| VEGFC      | 0.6664281  | 0.1842263   | 3.6174 | 0.000303 | 0.905259949 | count | 1           |
| CDK7       | 0.7784189  | 0.3076461   | 2.5302 | 0.0115   | 0.906063867 | count | 1           |
| CDC7       | 1.9731515  | 0.810722    | 2.4338 | 0.015    | 0.906868951 | count | 1           |
| C15orf41   | 1.145713   | 0.6898583   | 1.6608 | 0.0969   | 0.90711392  | count | 1           |
| EGOT       | 1.4510245  | 0.8353665   | 1.737  | 0.0825   | 0.907381948 | count | 1           |
| UTP4       | 0.7779228  | 0.2860726   | 2.7193 | 0.00658  | 0.907624799 | count | 1           |
| LINC01137  | 0.9371817  | 0.4829684   | 1.9405 | 0.0524   | 0.907718137 | count | 1           |
| SPATA2     | 1.124316   | 0.557887    | 2.0153 | 0.044    | 0.907858644 | count | 1           |
| POLR3B     | 1.2648354  | 0.9313287   | 1.3581 | 0.175    | 0.908452146 | count | 1           |
| ELP3       | 0.8007735  | 0.3301493   | 2.4255 | 0.0154   | 0.908473461 | count | 1           |
| ELMSAN1    | 0.670305   | 0.1519273   | 4.412  | 1.06E-05 | 0.909707921 | count | 0.2458988   |
| PSMC3IP    | 2.2075777  | 1.0795488   | 2.0449 | 0.041    | 0.909962196 | count | 1           |
| TLR4       | 0.6735969  | 0.2196586   | 3.0666 | 0.00219  | 0.910193096 | count | 1           |
| CLIC2      | 0.6538722  | 0.1171683   | 5.5806 | 2.63E-08 | 0.91096842  | count | 0.000620443 |
| ZNF541     | 15.8113748 | 670.1419827 | 0.0236 | 0.9812   | 0.911273021 | count | 1           |
| AL451074.6 | 16.0962118 | 3570.134184 | 0.0045 | 0.996    | 0.911273064 | count | 1           |
| MGARP      | 16.159811  | 1144.77831  | 0.0141 | 0.989    | 0.911273072 | count | 1           |
| ECHDC3     | 15.7642203 | 1075.846827 | 0.0147 | 0.9883   | 0.911273081 | count | 1           |
| MEST       | 16.3606372 | 1249.645859 | 0.0131 | 0.99     | 0.911273094 | count | 1           |
| AC114490.3 | 15.8688885 | 709.0895625 | 0.0224 | 0.982    | 0.911273099 | count | 1           |
| RBPMS-AS1  | 15.8896831 | 1087.166496 | 0.0146 | 0.988    | 0.911273102 | count | 1           |
| ZBTB20-AS4 | 16.0810328 | 1243.94099  | 0.0129 | 0.99     | 0.91127313  | count | 1           |
| IL17RE     | 16.0810343 | 1243.939467 | 0.0129 | 0.99     | 0.91127313  | count | 1           |
| AC040169.1 | 16.1598572 | 1243.431165 | 0.013  | 0.99     | 0.91127314  | count | 1           |

|            |            |             |        |          |             |       |             |
|------------|------------|-------------|--------|----------|-------------|-------|-------------|
| CA13       | 16.2312278 | 1193.6583   | 0.0136 | 0.989    | 0.911273148 | count | 1           |
| ASCL2      | 16.5099705 | 1963.958332 | 0.0084 | 0.993    | 0.911273176 | count | 1           |
| STK26      | 16.5457055 | 1134.6548   | 0.0146 | 0.988    | 0.911273179 | count | 1           |
| RADIL      | 16.56226   | 1226.366038 | 0.0135 | 0.989    | 0.91127318  | count | 1           |
| LINC00630  | 16.5957854 | 1201.801893 | 0.0138 | 0.989    | 0.911273183 | count | 1           |
| RASAL2-AS1 | 16.6100624 | 1430.985049 | 0.0116 | 0.991    | 0.911273184 | count | 1           |
| C1QTNF9B   | 16.698314  | 1169.315986 | 0.0143 | 0.989    | 0.91127319  | count | 1           |
| AL359636.1 | 17.09162   | 2797.876791 | 0.0061 | 0.995    | 0.911273214 | count | 1           |
| LRRC2      | 17.2232772 | 1600.46755  | 0.0108 | 0.991    | 0.91127322  | count | 1           |
| PITHD1     | 0.6665034  | 0.1344328   | 4.9579 | 7.56E-07 | 0.912417261 | count | 0.01768662  |
| PECR       | 0.927342   | 0.5169084   | 1.794  | 0.0729   | 0.912666174 | count | 1           |
| ADRA2C     | 0.9275809  | 0.4842133   | 1.9156 | 0.0555   | 0.912868028 | count | 1           |
| AC008555.5 | 0.9277183  | 0.469905    | 1.9743 | 0.0485   | 0.912984062 | count | 1           |
| PAIP2B     | 1.4085632  | 0.7709601   | 1.827  | 0.0678   | 0.913722618 | count | 1           |
| LARGE1     | 1.4085632  | 1.0508806   | 1.3404 | 0.18     | 0.913722618 | count | 1           |
| MDC1       | 1.112974   | 0.4976281   | 2.2366 | 0.0254   | 0.91383806  | count | 1           |
| PTAFR      | 0.9287346  | 0.5856537   | 1.5858 | 0.113    | 0.913842466 | count | 1           |
| SLC25A19   | 1.1339978  | 0.5694928   | 1.9912 | 0.0466   | 0.913858563 | count | 1           |
| AC009113.1 | 1.850186   | 1.038841    | 1.781  | 0.075    | 0.915566132 | count | 1           |
| ZNF596     | 1.3186644  | 0.8246747   | 1.599  | 0.11     | 0.915948392 | count | 1           |
| LIFR-AS1   | 0.8261001  | 0.365372    | 2.261  | 0.0238   | 0.917180463 | count | 1           |
| AP5B1      | 1.7302014  | 1.0624793   | 1.6285 | 0.104    | 0.917371695 | count | 1           |
| FCHO1      | 1.366403   | 1.1054012   | 1.2361 | 0.217    | 0.917483057 | count | 1           |
| GNGT2      | 0.8885687  | 0.3580339   | 2.4818 | 0.0131   | 0.917943893 | count | 1           |
| UBE3D      | 0.9875321  | 0.4441158   | 2.2236 | 0.0263   | 0.918008392 | count | 1           |
| SMIM10     | 0.6863956  | 0.1717895   | 3.9956 | 6.62E-05 | 0.918110453 | count | 1           |
| CDK9       | 0.7027689  | 0.1811072   | 3.8804 | 0.000107 | 0.918523559 | count | 1           |
| AC016831.7 | 0.7481735  | 0.3012388   | 2.4837 | 0.0131   | 0.918906958 | count | 1           |
| SNRPA      | 0.6783608  | 0.1604497   | 4.2279 | 2.44E-05 | 0.919296459 | count | 0.5639572   |
| LIPA       | 0.6702106  | 0.1416811   | 4.7304 | 2.35E-06 | 0.919600877 | count | 0.05481845  |
| AL121944.1 | 1.1671078  | 0.6788517   | 1.7192 | 0.0857   | 0.919912954 | count | 1           |
| STOX2      | 0.7742181  | 0.286104    | 2.7061 | 0.00685  | 0.920698305 | count | 1           |
| BATF3      | 0.818065   | 0.3001897   | 2.7252 | 0.00647  | 0.920886015 | count | 1           |
| PGM5       | 0.6655355  | 0.1270291   | 5.2392 | 1.73E-07 | 0.922202587 | count | 0.004061867 |
| ODF2       | 0.819672   | 0.3890328   | 2.1069 | 0.0352   | 0.92253582  | count | 1           |
| IL27RA     | 0.7609583  | 0.3147156   | 2.4179 | 0.0157   | 0.923083512 | count | 1           |
| GGA3       | 1.0312425  | 0.5696714   | 1.8102 | 0.0704   | 0.924327992 | count | 1           |
| CEPT1      | 0.8192499  | 0.3556206   | 2.3037 | 0.0213   | 0.924900065 | count | 1           |
| RAB11FIP5  | 0.7199606  | 0.2218449   | 3.2453 | 0.00119  | 0.92512352  | count | 1           |
| RBP5       | 0.7739036  | 0.2674052   | 2.8941 | 0.00383  | 0.925448038 | count | 1           |
| DNAH6      | 1.1535377  | 0.5572772   | 2.07   | 0.0385   | 0.925870328 | count | 1           |
| AOC3       | 0.7068497  | 0.2341723   | 3.0185 | 0.00256  | 0.926443066 | count | 1           |
| ASB16-AS1  | 0.9995367  | 0.5855094   | 1.7071 | 0.0879   | 0.927275203 | count | 1           |
| DGKH       | 0.7424501  | 0.3239267   | 2.292  | 0.022    | 0.927588244 | count | 1           |
| TRIB1      | 0.6844579  | 0.1724913   | 3.9681 | 7.43E-05 | 0.92777266  | count | 1           |

|             |           |           |        |          |             |       |             |
|-------------|-----------|-----------|--------|----------|-------------|-------|-------------|
| PGBD2       | 0.917667  | 0.4200387 | 2.1847 | 0.029    | 0.928142814 | count | 1           |
| GMDS-DT     | 0.8280849 | 0.3560248 | 2.3259 | 0.0201   | 0.928264503 | count | 1           |
| PPWD1       | 0.7079126 | 0.1932012 | 3.6641 | 0.000253 | 0.929116089 | count | 1           |
| CD3EAP      | 0.9190401 | 0.389792  | 2.3578 | 0.0185   | 0.929347379 | count | 1           |
| ZNF691      | 1.0673579 | 0.5482628 | 1.9468 | 0.0517   | 0.930011002 | count | 1           |
| MAN1B1-DT   | 1.2437341 | 0.9278452 | 1.3405 | 0.18     | 0.932382028 | count | 1           |
| EIF2S3      | 0.6668977 | 0.101083  | 6.5975 | 4.99E-11 | 0.933224741 | count | 1.19E-06    |
| SLC35G1     | 1.1473408 | 0.6439673 | 1.7817 | 0.0749   | 0.935532505 | count | 1           |
| PUS7        | 0.8383748 | 0.3650126 | 2.2968 | 0.0217   | 0.935737996 | count | 1           |
| GRINA       | 0.7082993 | 0.1757248 | 4.0307 | 5.71E-05 | 0.93608764  | count | 1           |
| HOXB4       | 0.7073988 | 0.2020143 | 3.5017 | 0.00047  | 0.936410458 | count | 1           |
| GNAL        | 0.7996148 | 0.308594  | 2.5912 | 0.00962  | 0.937288058 | count | 1           |
| FGD6        | 0.719907  | 0.20296   | 3.547  | 0.000396 | 0.937680842 | count | 1           |
| CDC25B      | 0.7136833 | 0.2280621 | 3.1293 | 0.00177  | 0.937748475 | count | 1           |
| PPID        | 0.7032848 | 0.2043527 | 3.4415 | 0.000587 | 0.937755853 | count | 1           |
| MMP16       | 1.3246925 | 0.6480155 | 2.0442 | 0.041    | 0.938442045 | count | 1           |
| ECHDC2      | 0.7146687 | 0.2777746 | 2.5728 | 0.0101   | 0.93857175  | count | 1           |
| MIF4GD      | 0.7048216 | 0.244952  | 2.8774 | 0.00404  | 0.939750501 | count | 1           |
| TRAPPC11    | 0.8871811 | 0.3914476 | 2.2664 | 0.0235   | 0.939794185 | count | 1           |
| IQCJ-SCHIP1 | 1.1787322 | 0.6204782 | 1.8997 | 0.0576   | 0.941166622 | count | 1           |
| KIAA1841    | 0.9707151 | 0.4372368 | 2.2201 | 0.0265   | 0.942211491 | count | 1           |
| ZNF782      | 1.8255091 | 1.0662614 | 1.7121 | 0.087    | 0.943661751 | count | 1           |
| AC097534.2  | 0.7221077 | 0.2186843 | 3.3021 | 0.000972 | 0.943908624 | count | 1           |
| PVT1        | 1.3785561 | 0.7264304 | 1.8977 | 0.0578   | 0.944136313 | count | 1           |
| AC016831.5  | 0.7995125 | 0.2629457 | 3.0406 | 0.00238  | 0.944991274 | count | 1           |
| SCYL3       | 1.1661879 | 0.5961285 | 1.9563 | 0.0505   | 0.947258453 | count | 1           |
| CDKN3       | 0.7715884 | 0.3341191 | 2.3093 | 0.021    | 0.947292015 | count | 1           |
| JAK2        | 0.9105764 | 0.3759567 | 2.422  | 0.0155   | 0.947735884 | count | 1           |
| MIER2       | 0.80097   | 0.2875385 | 2.7856 | 0.00538  | 0.948461265 | count | 1           |
| MAP3K14     | 0.9967792 | 0.5556888 | 1.7938 | 0.073    | 0.948897238 | count | 1           |
| MTMR3       | 1.0072754 | 0.5250449 | 1.9185 | 0.0552   | 0.949490893 | count | 1           |
| RNASEL      | 0.9732527 | 0.452323  | 2.1517 | 0.0315   | 0.951102898 | count | 1           |
| TRIM25      | 0.720234  | 0.2076597 | 3.4683 | 0.000532 | 0.95138451  | count | 1           |
| OFD1        | 0.7074757 | 0.1587884 | 4.4555 | 8.70E-06 | 0.951930796 | count | 0.202014    |
| ZNF512      | 0.8913055 | 0.4457873 | 1.9994 | 0.0457   | 0.952143258 | count | 1           |
| ZNF66       | 1.8582163 | 1.1872904 | 1.5651 | 0.118    | 0.952232739 | count | 1           |
| PSMB9       | 0.6663512 | 0.067392  | 9.8877 | 1.12E-22 | 0.953120283 | count | 2.70E-18    |
| NME2        | 0.8977161 | 0.39219   | 2.289  | 0.0222   | 0.953988987 | count | 1           |
| NFYB        | 0.7065905 | 0.1607123 | 4.3966 | 1.14E-05 | 0.954213226 | count | 0.2643546   |
| DYRK2       | 1.0142417 | 0.4064024 | 2.4957 | 0.0126   | 0.954951117 | count | 1           |
| BCKDHB      | 0.8333083 | 0.3110571 | 2.679  | 0.00743  | 0.955280668 | count | 1           |
| PDLIM3      | 0.6800523 | 0.1113364 | 6.1081 | 1.15E-09 | 0.956626565 | count | 2.72E-05    |
| NOP56       | 0.7059387 | 0.1446708 | 4.8796 | 1.12E-06 | 0.956857478 | count | 0.02618112  |
| PREX2       | 0.6894164 | 0.1233716 | 5.5881 | 2.52E-08 | 0.957431153 | count | 0.000594569 |
| KITLG       | 0.7771918 | 0.2340239 | 3.321  | 0.000909 | 0.958684039 | count | 1           |

|            |            |             |        |          |             |       |             |
|------------|------------|-------------|--------|----------|-------------|-------|-------------|
| TRIM11     | 1.0191371  | 0.5086239   | 2.0037 | 0.0452   | 0.958778169 | count | 1           |
| 10-Sep     | 0.682195   | 0.1038822   | 6.567  | 6.11E-11 | 0.95901495  | count | 1.45E-06    |
| CASP7      | 0.7643385  | 0.2152063   | 3.5517 | 0.000389 | 0.959454758 | count | 1           |
| BX322562.1 | 0.9759824  | 0.4936086   | 1.9772 | 0.0481   | 0.95999221  | count | 1           |
| CCDC69     | 0.6855323  | 0.1227209   | 5.5861 | 2.55E-08 | 0.96170264  | count | 0.000601596 |
| NFKBIZ     | 0.6788747  | 0.1090823   | 6.2235 | 5.60E-10 | 0.962896087 | count | 1.33E-05    |
| NIFK-AS1   | 0.9075152  | 0.3837791   | 2.3647 | 0.0181   | 0.963187599 | count | 1           |
| AC025171.2 | 1.0266922  | 0.4782312   | 2.1469 | 0.0319   | 0.964668288 | count | 1           |
| NLE1       | 0.9094542  | 0.3494687   | 2.6024 | 0.00931  | 0.965004228 | count | 1           |
| BCAT2      | 0.7494609  | 0.2420759   | 3.096  | 0.00198  | 0.966054093 | count | 1           |
| SLC43A1    | 1.2751788  | 0.6056158   | 2.1056 | 0.0353   | 0.966085654 | count | 1           |
| WSCD1      | 0.9123274  | 0.3725913   | 2.4486 | 0.0144   | 0.967693895 | count | 1           |
| NMNAT1     | 0.8839567  | 0.3711833   | 2.3815 | 0.0173   | 0.96803581  | count | 1           |
| GMFG       | 0.6809195  | 0.0841327   | 8.0934 | 8.60E-16 | 0.968177928 | count | 2.06E-11    |
| PIM2       | 1.6960899  | 0.8488473   | 1.9981 | 0.0458   | 0.968384814 | count | 1           |
| MCAT       | 0.7835186  | 0.2895504   | 2.706  | 0.00685  | 0.96841934  | count | 1           |
| AC022706.1 | 0.848662   | 0.4882788   | 1.7381 | 0.0823   | 0.96879374  | count | 1           |
| SLC6A16    | 1.347852   | 0.7487763   | 1.8001 | 0.072    | 0.968864724 | count | 1           |
| C6orf141   | 0.7574083  | 0.2721399   | 2.7832 | 0.00542  | 0.969145328 | count | 1           |
| EGR1       | 0.6765531  | 0.0781114   | 8.6614 | 7.79E-18 | 0.969886273 | count | 1.87E-13    |
| CRACR2B    | 0.7026293  | 0.1476428   | 4.759  | 2.05E-06 | 0.9708945   | count | 0.04784495  |
| ZNF398     | 1.392424   | 0.8853087   | 1.5728 | 0.116    | 0.971018813 | count | 1           |
| FALEC      | 16.1827135 | 3152.718183 | 0.0051 | 0.996    | 0.971419139 | count | 1           |
| CAPN14     | 16.1830455 | 3225.835394 | 0.005  | 0.996    | 0.971419139 | count | 1           |
| HHAT       | 15.8535339 | 802.3222269 | 0.0198 | 0.984    | 0.971419159 | count | 1           |
| ARHGAP8    | 16.5737508 | 4421.851965 | 0.0037 | 0.997    | 0.971419181 | count | 1           |
| AC104211.2 | 17.329391  | 1653.525609 | 0.0105 | 0.992    | 0.971419228 | count | 1           |
| NUP62CL    | 16.3881543 | 1134.177706 | 0.0144 | 0.988    | 0.971419234 | count | 1           |
| SEC16B     | 16.4944698 | 1175.700955 | 0.014  | 0.989    | 0.971419244 | count | 1           |
| AC068473.5 | 16.6995872 | 2073.448024 | 0.0081 | 0.994    | 0.971419262 | count | 1           |
| SLC6A4     | 17.1782243 | 2366.679698 | 0.0073 | 0.994    | 0.971419292 | count | 1           |
| EDNRB      | 0.7477648  | 0.3002497   | 2.4905 | 0.0128   | 0.972106496 | count | 1           |
| TRMT1      | 0.8930142  | 0.3224412   | 2.7695 | 0.00565  | 0.973275901 | count | 1           |
| NFRKB      | 0.88945    | 0.4994817   | 1.7807 | 0.0751   | 0.973419426 | count | 1           |
| NUBPL      | 1.1153208  | 0.5481296   | 2.0348 | 0.042    | 0.973965954 | count | 1           |
| PGAP1      | 1.3999768  | 0.6380842   | 2.194  | 0.0283   | 0.974563238 | count | 1           |
| STXBP3     | 0.7218354  | 0.1889303   | 3.8206 | 0.000136 | 0.97520873  | count | 1           |
| SMTN       | 0.9072627  | 0.3651169   | 2.4849 | 0.013    | 0.975470856 | count | 1           |
| HMGCR      | 0.8797736  | 0.298922    | 2.9432 | 0.00328  | 0.977409098 | count | 1           |
| IL6R       | 0.9492372  | 0.6405859   | 1.4818 | 0.139    | 0.977648001 | count | 1           |
| SPRY2      | 0.8083112  | 0.2598845   | 3.1103 | 0.00189  | 0.979850791 | count | 1           |
| NUP35      | 0.8647643  | 0.31163     | 2.775  | 0.00556  | 0.980103144 | count | 1           |
| ZNF436     | 0.9259905  | 0.5165397   | 1.7927 | 0.0731   | 0.980448622 | count | 1           |
| SPNS2      | 0.7137566  | 0.1226817   | 5.818  | 6.64E-09 | 0.98047804  | count | 0.000156983 |
| CCDC96     | 1.1116652  | 0.4815244   | 2.3086 | 0.021    | 0.981939611 | count | 1           |

|            |           |           |         |          |             |       |            |
|------------|-----------|-----------|---------|----------|-------------|-------|------------|
| MTRNR2L10  | 1.3743734 | 0.8138661 | 1.6887  | 0.0914   | 0.981944006 | count | 1          |
| AC092683.1 | 1.201796  | 0.4624476 | 2.5988  | 0.00941  | 0.982669754 | count | 1          |
| KRT7       | 0.9548927 | 0.4099067 | 2.3295  | 0.0199   | 0.982697903 | count | 1          |
| ITM2A      | 0.6860235 | 0.0696977 | 9.8428  | 1.72E-22 | 0.982863617 | count | 4.15E-18   |
| SYCP2      | 1.132027  | 1.0299081 | 1.0992  | 0.272    | 0.985462021 | count | 1          |
| GBP5       | 0.8783031 | 0.4761261 | 1.8447  | 0.0652   | 0.988248039 | count | 1          |
| SMAD1      | 0.710226  | 0.131058  | 5.4192  | 6.50E-08 | 0.988773405 | count | 0.00152984 |
| RND1       | 0.7219203 | 0.2320019 | 3.1117  | 0.00188  | 0.989418683 | count | 1          |
| OASL       | 0.9358223 | 0.4258066 | 2.1978  | 0.028    | 0.989590227 | count | 1          |
| ENOX2      | 0.8538026 | 0.3312627 | 2.5774  | 0.01     | 0.991264122 | count | 1          |
| ATP23      | 0.8211468 | 0.3186123 | 2.5773  | 0.01     | 0.991325402 | count | 1          |
| GIMAP7     | 0.6900315 | 0.0548182 | 12.5876 | 2.27E-35 | 0.992555147 | count | 5.50E-31   |
| LRRC57     | 0.8057826 | 0.2450959 | 3.2876  | 0.00102  | 0.99313036  | count | 1          |
| TRIM14     | 1.1437348 | 0.5220895 | 2.1907  | 0.0286   | 0.993461376 | count | 1          |
| TCTN2      | 1.8886416 | 1.1367836 | 1.6614  | 0.0967   | 0.993566173 | count | 1          |
| KIAA1522   | 0.8197028 | 0.2786365 | 2.9418  | 0.00329  | 0.994253896 | count | 1          |
| SETD4      | 1.0682191 | 0.4434392 | 2.4089  | 0.0161   | 0.996691755 | count | 1          |
| ZNF30      | 1.4496782 | 1.1715763 | 1.2374  | 0.216    | 0.99745117  | count | 1          |
| GCNT2      | 1.0052633 | 0.3891156 | 2.5835  | 0.00983  | 0.997453023 | count | 1          |
| INPP4A     | 1.0484293 | 0.4307684 | 2.4339  | 0.015    | 0.997472875 | count | 1          |
| CPED1      | 1.4067141 | 0.5788873 | 2.43    | 0.0152   | 0.997593871 | count | 1          |
| PSMB8-AS1  | 0.7642091 | 0.1990146 | 3.84    | 0.000126 | 1.00042917  | count | 1          |
| LINC00649  | 1.3741002 | 0.7469277 | 1.8397  | 0.0659   | 1.000517539 | count | 1          |
| HSD3B7     | 0.7841521 | 0.2243113 | 3.4958  | 0.00048  | 1.001091295 | count | 1          |
| MTHFD1     | 0.9173262 | 0.361812  | 2.5354  | 0.0113   | 1.004263736 | count | 1          |
| INIP       | 0.8222929 | 0.2694811 | 3.0514  | 0.0023   | 1.004351503 | count | 1          |
| VMO1       | 1.4668532 | 0.7615415 | 1.9262  | 0.0542   | 1.00518576  | count | 1          |
| AC004839.1 | 1.7222892 | 1.1195853 | 1.5383  | 0.124    | 1.005570305 | count | 1          |
| ARMC5      | 0.9245062 | 0.3317754 | 2.7865  | 0.00536  | 1.007560916 | count | 1          |
| SSBP3      | 0.7774305 | 0.1959925 | 3.9666  | 7.47E-05 | 1.008028489 | count | 1          |
| SERF1A     | 1.7419213 | 1.0879862 | 1.6011  | 0.109    | 1.011938341 | count | 1          |
| FLI1       | 0.7438079 | 0.1504867 | 4.9427  | 8.17E-07 | 1.012036364 | count | 0.01910963 |
| ZNRF3      | 1.3984798 | 0.6983488 | 2.0026  | 0.0453   | 1.012653484 | count | 1          |
| EIF3C      | 1.535251  | 1.1901727 | 1.2899  | 0.197    | 1.012760528 | count | 1          |
| CBFA2T3    | 1.1011391 | 0.4499822 | 2.4471  | 0.0145   | 1.012823723 | count | 1          |
| CPSF7      | 0.899947  | 0.3195796 | 2.816   | 0.0049   | 1.013217981 | count | 1          |
| MTO1       | 0.9194165 | 0.3610351 | 2.5466  | 0.0109   | 1.013407007 | count | 1          |
| AL031058.1 | 1.7486453 | 1.0333996 | 1.6921  | 0.0907   | 1.014097575 | count | 1          |
| CEP68      | 0.7488702 | 0.1698321 | 4.4095  | 1.08E-05 | 1.017112078 | count | 0.250506   |
| IPP        | 0.9476094 | 0.405118  | 2.3391  | 0.0194   | 1.017877908 | count | 1          |
| POLE4      | 0.716743  | 0.0747629 | 9.5869  | 1.95E-21 | 1.01856119  | count | 4.70E-17   |
| MKL2       | 0.7231769 | 0.1074883 | 6.728   | 2.08E-11 | 1.019920124 | count | 4.95E-07   |
| FAM124A    | 1.1523528 | 0.4938781 | 2.3333  | 0.0197   | 1.020782135 | count | 1          |
| ING3       | 0.7801787 | 0.2105828 | 3.7049  | 0.000216 | 1.021551093 | count | 1          |
| TLR3       | 0.8488002 | 0.3427757 | 2.4763  | 0.0133   | 1.022394978 | count | 1          |

|            |            |             |        |          |             |       |             |
|------------|------------|-------------|--------|----------|-------------|-------|-------------|
| PRKAG2     | 0.7816371  | 0.2141428   | 3.6501 | 0.000267 | 1.022410572 | count | 1           |
| MAK16      | 0.8506781  | 0.2676512   | 3.1783 | 0.0015   | 1.022855108 | count | 1           |
| FBXO31     | 0.8408011  | 0.3831366   | 2.1945 | 0.0283   | 1.024068282 | count | 1           |
| SLC40A1    | 0.7513259  | 0.1760135   | 4.2686 | 2.03E-05 | 1.024807343 | count | 0.4696202   |
| SYT7       | 1.1301664  | 0.6450563   | 1.752  | 0.0799   | 1.024889416 | count | 1           |
| MPV17L2    | 0.8750539  | 0.2851107   | 3.0692 | 0.00217  | 1.025073384 | count | 1           |
| U2AF2      | 0.8419516  | 0.2377683   | 3.5411 | 0.000405 | 1.025377628 | count | 1           |
| PPIL3      | 0.8414534  | 0.3177039   | 2.6485 | 0.00813  | 1.026240299 | count | 1           |
| NPAS3      | 1.630442   | 0.7639265   | 2.1343 | 0.0329   | 1.026498    | count | 1           |
| HDHD3      | 0.929203   | 0.5716558   | 1.6255 | 0.104    | 1.026504727 | count | 1           |
| AC093297.2 | 1.8916812  | 1.1504952   | 1.6442 | 0.1      | 1.026571175 | count | 1           |
| ST6GALNAC3 | 0.8381302  | 0.2688365   | 3.1176 | 0.00184  | 1.027930587 | count | 1           |
| CSTF1      | 0.8683078  | 0.2979168   | 2.9146 | 0.00359  | 1.02797241  | count | 1           |
| AC018742.1 | 1.707475   | 1.0290034   | 1.6593 | 0.0972   | 1.028214954 | count | 1           |
| AC073352.2 | 16.4037855 | 1160.551843 | 0.0141 | 0.989    | 1.029157749 | count | 1           |
| MXRA8      | 16.074135  | 1331.524663 | 0.0121 | 0.99     | 1.029157778 | count | 1           |
| IL10RB     | 16.3481819 | 1089.085347 | 0.015  | 0.988    | 1.029157816 | count | 1           |
| AC010931.2 | 16.6178068 | 1217.927023 | 0.0136 | 0.989    | 1.029157844 | count | 1           |
| NUDT13     | 16.776817  | 1144.049629 | 0.0147 | 0.988    | 1.029157857 | count | 1           |
| FAM110B    | 17.424286  | 1488.703966 | 0.0117 | 0.991    | 1.029157894 | count | 1           |
| SLC38A9    | 1.1240599  | 0.4814963   | 2.3345 | 0.0196   | 1.029778928 | count | 1           |
| ISM1       | 2.0406482  | 1.0991402   | 1.8566 | 0.0635   | 1.031352564 | count | 1           |
| TMEM135    | 0.9101884  | 0.3793209   | 2.3995 | 0.0165   | 1.032374417 | count | 1           |
| CCNE2      | 2.0485466  | 1.0417179   | 1.9665 | 0.0493   | 1.033190255 | count | 1           |
| DHCR24     | 1.2862198  | 0.6430926   | 2.0001 | 0.0456   | 1.033648815 | count | 1           |
| SYDE1      | 1.222003   | 0.5488211   | 2.2266 | 0.0261   | 1.03370711  | count | 1           |
| RTN2       | 0.8316156  | 0.2745602   | 3.0289 | 0.00248  | 1.033838934 | count | 1           |
| TNFRSF10A  | 0.8158861  | 0.217695    | 3.7478 | 0.000182 | 1.033889996 | count | 1           |
| PRMT7      | 1.117753   | 0.64781     | 1.7254 | 0.0846   | 1.034108245 | count | 1           |
| CDCA4      | 1.0277468  | 0.3915688   | 2.6247 | 0.00872  | 1.035094939 | count | 1           |
| TIAM1      | 1.0767666  | 0.5121539   | 2.1024 | 0.0356   | 1.035140298 | count | 1           |
| ISLR2      | 1.4078005  | 0.7738631   | 1.8192 | 0.069    | 1.03564989  | count | 1           |
| CNOT11     | 0.9287869  | 0.3016667   | 3.0789 | 0.0021   | 1.036082494 | count | 1           |
| SLF1       | 0.8424968  | 0.2661113   | 3.166  | 0.00156  | 1.03814921  | count | 1           |
| NOV        | 1.0558115  | 0.73584     | 1.4348 | 0.151    | 1.039541755 | count | 1           |
| VRK1       | 0.8757171  | 0.269965    | 3.2438 | 0.00119  | 1.039918694 | count | 1           |
| CADM1      | 1.4164347  | 0.5778479   | 2.4512 | 0.0143   | 1.039982051 | count | 1           |
| CISH       | 1.667144   | 1.0324388   | 1.6148 | 0.106    | 1.04010063  | count | 1           |
| PCAT19     | 0.763482   | 0.1398163   | 5.4606 | 5.17E-08 | 1.041372488 | count | 0.001217638 |
| LINC00324  | 0.9168919  | 0.3510538   | 2.6118 | 0.00905  | 1.042068243 | count | 1           |
| TCIRG1     | 0.8126697  | 0.2055083   | 3.9544 | 7.86E-05 | 1.043245068 | count | 1           |
| AGK        | 0.9273544  | 0.3219216   | 2.8807 | 0.004    | 1.044003008 | count | 1           |
| CDKN1A     | 0.7351528  | 0.0974432   | 7.5444 | 6.13E-14 | 1.044257704 | count | 1.47E-09    |
| ABLIM3     | 0.8366408  | 0.2839538   | 2.9464 | 0.00324  | 1.045215399 | count | 1           |
| PUS1       | 1.0476959  | 0.6457615   | 1.6224 | 0.105    | 1.045842043 | count | 1           |

|           |           |           |         |          |             |       |            |
|-----------|-----------|-----------|---------|----------|-------------|-------|------------|
| ZNF546    | 1.0646848 | 0.5352118 | 1.9893  | 0.0468   | 1.04684048  | count | 1          |
| FAM20A    | 1.5132346 | 0.7786314 | 1.9435  | 0.0521   | 1.046852332 | count | 1          |
| TAF1A     | 1.9688205 | 1.0036215 | 1.9617  | 0.0499   | 1.047159452 | count | 1          |
| PRPS2     | 0.914103  | 0.3275967 | 2.7903  | 0.0053   | 1.047335996 | count | 1          |
| CHST15    | 0.9008673 | 0.3219252 | 2.7984  | 0.00517  | 1.048217436 | count | 1          |
| PCGF1     | 0.9257949 | 0.3898556 | 2.3747  | 0.0176   | 1.048331915 | count | 1          |
| DDX43     | 1.6902865 | 0.6483657 | 2.607   | 0.00918  | 1.048492081 | count | 1          |
| NFKBIA    | 0.727795  | 0.0772866 | 9.4168  | 9.48E-21 | 1.048557349 | count | 2.28E-16   |
| SPATA1    | 1.8630934 | 1.0903023 | 1.7088  | 0.0876   | 1.049185421 | count | 1          |
| GKAP1     | 0.8279361 | 0.3106488 | 2.6652  | 0.00774  | 1.049257093 | count | 1          |
| ZNF70     | 1.7705728 | 1.0712791 | 1.6528  | 0.0985   | 1.049344223 | count | 1          |
| FAM84A    | 1.1511869 | 0.7213208 | 1.5959  | 0.111    | 1.049609057 | count | 1          |
| ANKEF1    | 1.6299475 | 1.0511638 | 1.5506  | 0.121    | 1.050767646 | count | 1          |
| PKP4      | 0.7781502 | 0.174243  | 4.4659  | 8.29E-06 | 1.050787685 | count | 0.19251867 |
| ZFP36L2   | 0.7320622 | 0.0644144 | 11.3649 | 2.77E-29 | 1.052054426 | count | 6.70E-25   |
| NYNRIN    | 0.9358036 | 0.3299119 | 2.8365  | 0.00459  | 1.052542704 | count | 1          |
| C1orf167  | 1.295258  | 0.7930236 | 1.6333  | 0.103    | 1.053099092 | count | 1          |
| TIMP3     | 0.7364075 | 0.1010809 | 7.2853  | 4.17E-13 | 1.053391689 | count | 9.96E-09   |
| NRN1      | 0.7375122 | 0.0712052 | 10.3576 | 1.09E-24 | 1.05380652  | count | 2.63E-20   |
| NR2C2AP   | 0.8439396 | 0.23576   | 3.5797  | 0.00035  | 1.054881206 | count | 1          |
| GIMAP8    | 0.7527559 | 0.1270554 | 5.9246  | 3.52E-09 | 1.055312584 | count | 8.33E-05   |
| RRP12     | 1.450656  | 0.751882  | 1.9294  | 0.0538   | 1.056919095 | count | 1          |
| NINJ2     | 0.8686585 | 0.30926   | 2.8088  | 0.00501  | 1.057174801 | count | 1          |
| TFF3      | 0.7844873 | 0.2511362 | 3.1238  | 0.0018   | 1.05841596  | count | 1          |
| C9orf85   | 0.8096657 | 0.2198825 | 3.6823  | 0.000236 | 1.05869214  | count | 1          |
| LINC01116 | 0.7852792 | 0.1629274 | 4.8198  | 1.51E-06 | 1.061775742 | count | 0.03526605 |
| GIMAP6    | 0.7669166 | 0.1241291 | 6.1784  | 7.43E-10 | 1.061799734 | count | 1.76E-05   |
| LRCH2     | 1.05925   | 0.4855788 | 2.1814  | 0.0292   | 1.061853334 | count | 1          |
| HYKK      | 1.1829087 | 0.474863  | 2.4911  | 0.0128   | 1.062618857 | count | 1          |
| MAML1     | 1.0677547 | 0.4336884 | 2.462   | 0.0139   | 1.062645126 | count | 1          |
| PRPSAP1   | 0.7657671 | 0.1219022 | 6.2818  | 3.87E-10 | 1.063368543 | count | 9.18E-06   |
| HSD17B7   | 0.9198513 | 0.348858  | 2.6368  | 0.00842  | 1.063512447 | count | 1          |
| TAP1      | 0.7700651 | 0.1374688 | 5.6017  | 2.33E-08 | 1.063973777 | count | 0.00054981 |
| EHBP1     | 0.8790309 | 0.2437701 | 3.606   | 0.000316 | 1.064318808 | count | 1          |
| MAP3K8    | 0.7583192 | 0.1100543 | 6.8904  | 6.86E-12 | 1.065152722 | count | 1.64E-07   |
| ATP5S     | 0.8007043 | 0.1870039 | 4.2818  | 1.92E-05 | 1.06538218  | count | 0.4443072  |
| ZNF140    | 1.1614137 | 0.4338396 | 2.6771  | 0.00747  | 1.066380121 | count | 1          |
| TTI1      | 1.4337411 | 0.7335003 | 1.9547  | 0.0507   | 1.066624762 | count | 1          |
| KRT27     | 1.0146853 | 0.5262649 | 1.9281  | 0.0539   | 1.066682606 | count | 1          |
| ZNF180    | 1.1078715 | 0.7640175 | 1.4501  | 0.147    | 1.067322522 | count | 1          |
| ALDH1A2   | 0.7879515 | 0.1740631 | 4.5268  | 6.24E-06 | 1.067906375 | count | 0.14512368 |
| ZNF142    | 1.829439  | 1.048665  | 1.7445  | 0.0812   | 1.068164102 | count | 1          |
| PIM3      | 0.7462201 | 0.0749938 | 9.9504  | 6.08E-23 | 1.068762334 | count | 1.47E-18   |
| DNAJC11   | 1.1539453 | 0.838946  | 1.3755  | 0.169    | 1.069921368 | count | 1          |
| IRS2      | 2.2201883 | 1.2589959 | 1.7635  | 0.0779   | 1.070270881 | count | 1          |



|            |            |             |         |          |             |       |             |
|------------|------------|-------------|---------|----------|-------------|-------|-------------|
| SHC2       | 0.8634702  | 0.2585785   | 3.3393  | 0.000851 | 1.071045734 | count | 1           |
| BTBD8      | 1.2813236  | 0.6790473   | 1.8869  | 0.0593   | 1.071287519 | count | 1           |
| ZNF658     | 1.184668   | 0.4793916   | 2.4712  | 0.0135   | 1.073729881 | count | 1           |
| PRRG4      | 0.9145926  | 0.3752601   | 2.4372  | 0.0149   | 1.07401306  | count | 1           |
| PITPNC1    | 0.790256   | 0.1749647   | 4.5167  | 6.55E-06 | 1.075103849 | count | 0.1522482   |
| BCAM       | 0.752397   | 0.0694813   | 10.8288 | 8.61E-27 | 1.075526774 | count | 2.08E-22    |
| RHBDF2     | 1.4203487  | 0.6169016   | 2.3024  | 0.0214   | 1.077037992 | count | 1           |
| POSTN      | 0.7632169  | 0.1109647   | 6.878   | 7.48E-12 | 1.077839515 | count | 1.78E-07    |
| TMOD2      | 0.8321878  | 0.2345746   | 3.5476  | 0.000395 | 1.077849324 | count | 1           |
| RASL10A    | 0.8782497  | 0.2783275   | 3.1555  | 0.00162  | 1.079346613 | count | 1           |
| KCTD3      | 0.9237487  | 0.2836764   | 3.2563  | 0.00114  | 1.079406421 | count | 1           |
| ISOC1      | 1.0803789  | 0.4355885   | 2.4803  | 0.0132   | 1.079612084 | count | 1           |
| NSDHL      | 1.105522   | 0.4030785   | 2.7427  | 0.00613  | 1.080083717 | count | 1           |
| GLI4       | 0.9674591  | 0.3901697   | 2.4796  | 0.0132   | 1.081135819 | count | 1           |
| GPRC5C     | 0.8409233  | 0.2277124   | 3.6929  | 0.000226 | 1.081398509 | count | 1           |
| ZNF883     | 2.1110403  | 1.024906    | 2.0597  | 0.0395   | 1.081896413 | count | 1           |
| TMEM97     | 1.1838498  | 0.522892    | 2.264   | 0.0236   | 1.082704947 | count | 1           |
| SPATA6L    | 1.1998218  | 0.4876181   | 2.4606  | 0.0139   | 1.084518238 | count | 1           |
| LINC01513  | 16.0194751 | 1119.933302 | 0.0143  | 0.9886   | 1.084674173 | count | 1           |
| MAST4-AS1  | 16.2646307 | 1316.307469 | 0.0124  | 0.99     | 1.084674212 | count | 1           |
| UBD        | 16.3302189 | 1086.716507 | 0.015   | 0.988    | 1.084674221 | count | 1           |
| ZNF426-DT  | 16.3907137 | 1320.160307 | 0.0124  | 0.99     | 1.084674305 | count | 1           |
| GRAMD2A    | 16.4347898 | 1180.040952 | 0.0139  | 0.989    | 1.08467431  | count | 1           |
| TCHH       | 17.0718414 | 1575.076516 | 0.0108  | 0.991    | 1.084674366 | count | 1           |
| PHLDB2     | 0.8364362  | 0.2916409   | 2.868   | 0.00416  | 1.085543865 | count | 1           |
| FZD4       | 0.784155   | 0.1577528   | 4.9708  | 7.08E-07 | 1.087603054 | count | 0.016567908 |
| LFNG       | 0.790566   | 0.1687992   | 4.6835  | 2.96E-06 | 1.087863149 | count | 0.06898872  |
| NR2F2      | 0.7646585  | 0.0792973   | 9.6429  | 1.15E-21 | 1.09110854  | count | 2.77E-17    |
| LRCH1      | 0.8581117  | 0.2470308   | 3.4737  | 0.000521 | 1.09158504  | count | 1           |
| C5orf30    | 1.1965378  | 0.47697     | 2.5086  | 0.0122   | 1.091859009 | count | 1           |
| FAM13C     | 0.8240391  | 0.2145907   | 3.8401  | 0.000126 | 1.09280937  | count | 1           |
| SPECC1     | 1.0842569  | 0.4482481   | 2.4189  | 0.0156   | 1.095323689 | count | 1           |
| NRP2       | 0.7924248  | 0.1455319   | 5.445   | 5.64E-08 | 1.096439318 | count | 0.001328051 |
| NFKB2      | 0.9131579  | 0.264519    | 3.4521  | 0.000565 | 1.097500754 | count | 1           |
| ABRAXAS1   | 0.84243    | 0.1997067   | 4.2183  | 2.54E-05 | 1.097617608 | count | 0.586994    |
| CSTF2T     | 0.9031575  | 0.3015585   | 2.995   | 0.00277  | 1.09769721  | count | 1           |
| RFESD      | 1.8376724  | 1.0556108   | 1.7409  | 0.0818   | 1.098670973 | count | 1           |
| RN7SL832P  | 1.2503873  | 0.5713299   | 2.1886  | 0.0287   | 1.098678119 | count | 1           |
| ELP1       | 1.4998009  | 0.6208198   | 2.4158  | 0.0158   | 1.099394673 | count | 1           |
| AP001528.2 | 0.8213017  | 0.1951475   | 4.2086  | 2.65E-05 | 1.100101575 | count | 0.612309    |
| CD93       | 0.7771743  | 0.1099028   | 7.0715  | 1.93E-12 | 1.100594547 | count | 4.61E-08    |
| KANK3      | 0.7774648  | 0.0911498   | 8.5295  | 2.38E-17 | 1.100711296 | count | 5.71E-13    |
| GNAI1      | 0.8522481  | 0.2381023   | 3.5793  | 0.00035  | 1.10073927  | count | 1           |
| TRIM26     | 0.9420379  | 0.3839754   | 2.4534  | 0.0142   | 1.101143031 | count | 1           |
| IGFBP4     | 0.7649264  | 0.0455146   | 16.8062 | 2.00E-60 | 1.101440279 | count | 4.86E-56    |

|            |            |             |        |          |             |       |             |
|------------|------------|-------------|--------|----------|-------------|-------|-------------|
| TRPM4      | 0.976981   | 0.4004589   | 2.4397 | 0.0148   | 1.103239133 | count | 1           |
| FAM227B    | 1.2128959  | 0.6324855   | 1.9177 | 0.0553   | 1.10357778  | count | 1           |
| LINC00920  | 1.8545426  | 0.7663862   | 2.4199 | 0.0156   | 1.104065853 | count | 1           |
| DHX58      | 1.0323759  | 0.4049523   | 2.5494 | 0.0108   | 1.110241135 | count | 1           |
| ACADS      | 0.8831454  | 0.2603678   | 3.3919 | 0.000704 | 1.110508077 | count | 1           |
| KAT2A      | 1.0014597  | 0.410259    | 2.441  | 0.0147   | 1.111404611 | count | 1           |
| AREG       | 0.9004703  | 0.6952499   | 1.2952 | 0.195    | 1.1127302   | count | 1           |
| DNLZ       | 2.2574354  | 1.0373892   | 2.1761 | 0.0296   | 1.11361773  | count | 1           |
| TMCO6      | 1.1780233  | 0.5294538   | 2.225  | 0.0262   | 1.11377486  | count | 1           |
| MRM3       | 0.972151   | 0.3485135   | 2.7894 | 0.00532  | 1.115425436 | count | 1           |
| SNN        | 1.0017524  | 0.3773491   | 2.6547 | 0.00798  | 1.118477358 | count | 1           |
| SGO2       | 1.0723173  | 0.4199092   | 2.5537 | 0.0107   | 1.118506333 | count | 1           |
| EPS8       | 0.7983728  | 0.1089103   | 7.3306 | 3.00E-13 | 1.118989768 | count | 7.17E-09    |
| VRK2       | 0.9158997  | 0.2610039   | 3.5091 | 0.000457 | 1.119563631 | count | 1           |
| TSPAN12    | 0.8178954  | 0.1613591   | 5.0688 | 4.27E-07 | 1.122749907 | count | 0.010004183 |
| PMP22      | 0.7935944  | 0.0929904   | 8.5342 | 2.29E-17 | 1.124303601 | count | 5.50E-13    |
| S100A8     | 1.7618166  | 1.2228904   | 1.4407 | 0.15     | 1.124612318 | count | 1           |
| FGD4       | 0.8694943  | 0.2458165   | 3.5372 | 0.000411 | 1.12461361  | count | 1           |
| TSHZ1      | 0.9103258  | 0.2719117   | 3.3479 | 0.000825 | 1.125376063 | count | 1           |
| SKAP2      | 0.8270056  | 0.1532159   | 5.3976 | 7.33E-08 | 1.125803578 | count | 0.001724602 |
| HOXD1      | 0.9637592  | 0.3108734   | 3.1002 | 0.00195  | 1.126504638 | count | 1           |
| P2RX7      | 1.4837459  | 0.744824    | 1.9921 | 0.0465   | 1.126826511 | count | 1           |
| PTGER4     | 0.9230764  | 0.3415539   | 2.7026 | 0.00692  | 1.130592929 | count | 1           |
| CIITA      | 0.9550868  | 0.4605132   | 2.074  | 0.0382   | 1.132271506 | count | 1           |
| OPN3       | 1.495018   | 0.7532033   | 1.9849 | 0.0473   | 1.132588012 | count | 1           |
| PAN2       | 2.054661   | 0.9348647   | 2.1978 | 0.028    | 1.132694295 | count | 1           |
| GBP4       | 0.7990103  | 0.1247385   | 6.4055 | 1.76E-10 | 1.134040489 | count | 4.18E-06    |
| PROX1      | 1.3873396  | 0.6193318   | 2.2401 | 0.0252   | 1.135439174 | count | 1           |
| AL136084.3 | 1.1051105  | 0.5784109   | 1.9106 | 0.0562   | 1.136558771 | count | 1           |
| AL662844.4 | 2.209593   | 1.1078096   | 1.9946 | 0.0462   | 1.137859577 | count | 1           |
| TRAF6      | 1.151002   | 0.5543828   | 2.0762 | 0.038    | 1.137866729 | count | 1           |
| ARAP2      | 0.9224768  | 0.2807324   | 3.286  | 0.00103  | 1.138088003 | count | 1           |
| LRRC3B     | 16.0152922 | 717.980888  | 0.0223 | 0.9822   | 1.138133166 | count | 1           |
| SEMA4F     | 15.7500594 | 708.5564013 | 0.0222 | 0.982    | 1.138133187 | count | 1           |
| CD274      | 15.7783881 | 728.7539913 | 0.0217 | 0.983    | 1.138133194 | count | 1           |
| AC073349.1 | 15.9507541 | 1174.381225 | 0.0136 | 0.9892   | 1.138133232 | count | 1           |
| CALML4     | 15.9705505 | 694.7218907 | 0.023  | 0.982    | 1.138133236 | count | 1           |
| NT5M       | 16.2470601 | 691.2977267 | 0.0235 | 0.9813   | 1.138133285 | count | 1           |
| LRRIQ3     | 16.4604295 | 1218.392614 | 0.0135 | 0.9892   | 1.138133314 | count | 1           |
| SLC27A2    | 16.6041646 | 2598.491179 | 0.0064 | 0.995    | 1.13813333  | count | 1           |
| CCDC183    | 16.6203842 | 1134.817852 | 0.0146 | 0.988    | 1.138133332 | count | 1           |
| S100P      | 17.683279  | 2840.473366 | 0.0062 | 0.995    | 1.138133401 | count | 1           |
| C1orf21    | 0.8321651  | 0.1493522   | 5.5718 | 2.76E-08 | 1.140342661 | count | 0.000651056 |
| AP000692.2 | 1.2802983  | 0.7965286   | 1.6073 | 0.108    | 1.140465117 | count | 1           |
| AGPAT4     | 1.0610851  | 0.5468044   | 1.9405 | 0.0524   | 1.141324601 | count | 1           |

|             |           |           |         |          |             |       |             |
|-------------|-----------|-----------|---------|----------|-------------|-------|-------------|
| DUS4L       | 1.227505  | 0.5656007 | 2.1703  | 0.0301   | 1.142069456 | count | 1           |
| PLCXD3      | 0.8719695 | 0.198953  | 4.3828  | 1.22E-05 | 1.144108238 | count | 0.2828082   |
| MAP2K6      | 1.2863509 | 0.4910541 | 2.6196  | 0.00885  | 1.144581195 | count | 1           |
| ARMH4       | 0.9726657 | 0.4015874 | 2.4221  | 0.0155   | 1.144927072 | count | 1           |
| PLCE1       | 1.1514999 | 0.4073819 | 2.8266  | 0.00474  | 1.145045536 | count | 1           |
| LRP5        | 0.8739745 | 0.2199856 | 3.9729  | 7.28E-05 | 1.145629479 | count | 1           |
| FHIT        | 1.4313668 | 0.7321221 | 1.9551  | 0.0507   | 1.146364477 | count | 1           |
| TAP2        | 0.8837446 | 0.1932563 | 4.5729  | 5.02E-06 | 1.147870569 | count | 0.11682544  |
| ZNF454      | 2.0053975 | 1.116181  | 1.7967  | 0.0725   | 1.149294869 | count | 1           |
| SNAI2       | 1.1933468 | 0.5048345 | 2.3638  | 0.0182   | 1.149629249 | count | 1           |
| GATM        | 1.2388127 | 0.5725031 | 2.1639  | 0.0306   | 1.150342943 | count | 1           |
| ZC3H12A     | 0.8843156 | 0.2590594 | 3.4136  | 0.00065  | 1.15211191  | count | 1           |
| UBXN10      | 1.5016829 | 0.7703527 | 1.9493  | 0.0514   | 1.152893007 | count | 1           |
| KLHL3       | 0.8893355 | 0.3037728 | 2.9276  | 0.00344  | 1.153568991 | count | 1           |
| ANKHD1      | 1.4757757 | 0.5677583 | 2.5993  | 0.00939  | 1.155445184 | count | 1           |
| SOWAHC      | 1.1820352 | 0.4619313 | 2.5589  | 0.0106   | 1.155753469 | count | 1           |
| HID1-AS1    | 1.012496  | 0.4294355 | 2.3577  | 0.0185   | 1.156858347 | count | 1           |
| GPAT2       | 1.184794  | 0.7981364 | 1.4845  | 0.138    | 1.157945419 | count | 1           |
| GIMAP5      | 1.2509901 | 0.4640542 | 2.6958  | 0.00706  | 1.159202638 | count | 1           |
| C1orf115    | 0.8451461 | 0.1489026 | 5.6758  | 1.52E-08 | 1.159361277 | count | 0.000358963 |
| FILIP1L     | 0.8141116 | 0.1063571 | 7.6545  | 2.66E-14 | 1.160595775 | count | 6.36E-10    |
| BIRC3       | 0.8518377 | 0.1842598 | 4.623   | 3.96E-06 | 1.161024401 | count | 0.09223236  |
| 6-Sep       | 0.8909038 | 0.1949262 | 4.5705  | 5.08E-06 | 1.163139654 | count | 0.11820652  |
| GTF3C2      | 1.2449039 | 0.5009702 | 2.485   | 0.013    | 1.163754277 | count | 1           |
| INTS6-AS1   | 1.5987848 | 0.7449225 | 2.1462  | 0.0319   | 1.16515394  | count | 1           |
| MT2A        | 0.8193791 | 0.1499398 | 5.4647  | 5.05E-08 | 1.166490381 | count | 0.001189528 |
| TFPI        | 0.8153835 | 0.0740624 | 11.0094 | 1.28E-27 | 1.169119635 | count | 3.09E-23    |
| NOP14       | 0.921202  | 0.2322249 | 3.9669  | 7.47E-05 | 1.169145566 | count | 1           |
| CARD10      | 0.8876734 | 0.2105885 | 4.2152  | 2.58E-05 | 1.170556468 | count | 0.5962122   |
| ADD2        | 1.8963685 | 0.8004433 | 2.3691  | 0.0179   | 1.171177839 | count | 1           |
| ZNF501      | 1.2974017 | 0.6319488 | 2.053   | 0.0402   | 1.172873162 | count | 1           |
| GPRASP2     | 1.9027964 | 1.035118  | 1.8382  | 0.0661   | 1.173286478 | count | 1           |
| FJX1        | 1.1552533 | 0.4341034 | 2.6612  | 0.00783  | 1.173628212 | count | 1           |
| BEX2        | 1.0597879 | 0.4150646 | 2.5533  | 0.0107   | 1.175423652 | count | 1           |
| SLC16A1-AS1 | 1.2883484 | 0.5801421 | 2.2207  | 0.0264   | 1.176465003 | count | 1           |
| AC083862.2  | 1.7189497 | 0.9834514 | 1.7479  | 0.0806   | 1.17719845  | count | 1           |
| SLC12A7     | 1.0011129 | 0.389947  | 2.5673  | 0.0103   | 1.177503394 | count | 1           |
| ISLR        | 1.019399  | 0.3577969 | 2.8491  | 0.00442  | 1.177515712 | count | 1           |
| GPRASP1     | 1.8412535 | 0.9178736 | 2.006   | 0.045    | 1.177656702 | count | 1           |
| MRT04       | 0.8882395 | 0.1834548 | 4.8417  | 1.36E-06 | 1.178050683 | count | 0.0317764   |
| HOXB3       | 1.2418178 | 0.4818236 | 2.5773  | 0.01     | 1.178636934 | count | 1           |
| SEMA3A      | 1.490206  | 0.5612343 | 2.6552  | 0.00797  | 1.178850845 | count | 1           |
| MEPCE       | 1.0613687 | 0.3106893 | 3.4162  | 0.000644 | 1.18049623  | count | 1           |
| CBLB        | 0.9356478 | 0.2797624 | 3.3444  | 0.000836 | 1.18168454  | count | 1           |
| ENTPD6      | 1.5628155 | 0.7616652 | 2.0518  | 0.0403   | 1.1839473   | count | 1           |

|            |            |             |         |          |             |       |             |
|------------|------------|-------------|---------|----------|-------------|-------|-------------|
| EML4       | 0.8784505  | 0.1602219   | 5.4827  | 4.57E-08 | 1.184627062 | count | 0.001076783 |
| APEX2      | 1.2782039  | 0.3935299   | 3.248   | 0.00118  | 1.188054484 | count | 1           |
| ARHGAP28   | 1.278503   | 0.4889338   | 2.6149  | 0.00897  | 1.188270977 | count | 1           |
| AC040162.1 | 15.6890875 | 663.4221824 | 0.0236  | 0.981    | 1.189681851 | count | 1           |
| MACROD2    | 15.8185108 | 732.4447027 | 0.0216  | 0.983    | 1.189681886 | count | 1           |
| GPR135     | 15.9083133 | 776.1545949 | 0.0205  | 0.984    | 1.189681907 | count | 1           |
| FAAH       | 16.1435769 | 2390.682636 | 0.0068  | 0.995    | 1.189681955 | count | 1           |
| SNAI3-AS1  | 16.5636722 | 1706.996048 | 0.0097  | 0.992    | 1.189682017 | count | 1           |
| MAMDC2     | 16.6575295 | 1702.296089 | 0.0098  | 0.9922   | 1.189682027 | count | 1           |
| KCTD1      | 2.1663807  | 1.1016289   | 1.9665  | 0.0493   | 1.191943787 | count | 1           |
| SLC9A3     | 1.5147611  | 0.7559885   | 2.0037  | 0.0452   | 1.192068147 | count | 1           |
| SFRP2      | 1.2722929  | 1.5485261   | 0.8216  | 0.4114   | 1.192706186 | count | 1           |
| NSD2       | 1.2020293  | 0.5064333   | 2.3735  | 0.0177   | 1.192948861 | count | 1           |
| C16orf45   | 0.8750247  | 0.1668438   | 5.2446  | 1.68E-07 | 1.193130415 | count | 0.00394464  |
| TBKBP1     | 1.2115673  | 0.5225438   | 2.3186  | 0.0205   | 1.193644605 | count | 1           |
| SAP30      | 0.85757    | 0.1263481   | 6.7874  | 1.39E-11 | 1.195293876 | count | 3.31E-07    |
| PSTK       | 1.2237398  | 0.5674289   | 2.1566  | 0.0311   | 1.196071416 | count | 1           |
| PRKAB1     | 1.1489534  | 0.4478878   | 2.5653  | 0.0104   | 1.196651488 | count | 1           |
| IRX3       | 1.7738137  | 0.6497389   | 2.73    | 0.00637  | 1.199173109 | count | 1           |
| PRCD       | 1.294047   | 0.8714988   | 1.4849  | 0.138    | 1.199478933 | count | 1           |
| CYP4F12    | 2.3421696  | 1.0640088   | 2.2013  | 0.0278   | 1.199672724 | count | 1           |
| CCRL2      | 1.0974332  | 0.3427196   | 3.2021  | 0.00138  | 1.200290242 | count | 1           |
| STARD3     | 0.8871774  | 0.1715818   | 5.1706  | 2.50E-07 | 1.200740442 | count | 0.005866    |
| NLRC5      | 1.0374183  | 0.433251    | 2.3945  | 0.0167   | 1.201370175 | count | 1           |
| HLA-DRB5   | 0.8352933  | 0.0482742   | 17.3031 | 9.11E-64 | 1.201598717 | count | 2.21E-59    |
| SPRY1      | 0.8420026  | 0.0825903   | 10.1949 | 5.52E-24 | 1.204374057 | count | 1.33E-19    |
| SH3BP5     | 0.8450627  | 0.0748045   | 11.2969 | 5.81E-29 | 1.204417886 | count | 1.40E-24    |
| EPHX1      | 0.8554078  | 0.1039456   | 8.2294  | 2.87E-16 | 1.205849512 | count | 6.88E-12    |
| RAMP3      | 0.838838   | 0.0633159   | 13.2485 | 6.90E-39 | 1.205939272 | count | 1.67E-34    |
| RMI1       | 1.3810336  | 0.4830037   | 2.8593  | 0.00428  | 1.207302577 | count | 1           |
| AC098818.2 | 1.6930441  | 0.8153061   | 2.0766  | 0.0379   | 1.207692229 | count | 1           |
| MYBBP1A    | 1.1193538  | 0.3118462   | 3.5894  | 0.000337 | 1.208419501 | count | 1           |
| PLCB4      | 0.9089918  | 0.2167492   | 4.1937  | 2.83E-05 | 1.211790185 | count | 0.65373     |
| INTU       | 1.0428964  | 0.3251546   | 3.2074  | 0.00135  | 1.212133546 | count | 1           |
| NDC80      | 1.7041368  | 1.0119906   | 1.6839  | 0.0923   | 1.212521538 | count | 1           |
| C11orf96   | 0.8564586  | 0.1598495   | 5.3579  | 9.11E-08 | 1.213223178 | count | 0.002142217 |
| HELB       | 1.2659658  | 0.6360799   | 1.9903  | 0.0467   | 1.21328991  | count | 1           |
| AKAP2      | 1.1057767  | 0.3580224   | 3.0886  | 0.00203  | 1.216018682 | count | 1           |
| ETV7       | 1.5952279  | 0.7041673   | 2.2654  | 0.0236   | 1.217240447 | count | 1           |
| PPP2R5A    | 0.9003562  | 0.1646756   | 5.4675  | 4.97E-08 | 1.219920914 | count | 0.001170783 |
| AC016596.1 | 1.9690247  | 1.0264956   | 1.9182  | 0.0552   | 1.22071619  | count | 1           |
| NDNF       | 1.8958324  | 1.1577491   | 1.6375  | 0.102    | 1.221221994 | count | 1           |
| HSD17B11   | 0.8637566  | 0.0970307   | 8.9019  | 9.73E-19 | 1.221971041 | count | 2.34E-14    |
| MPP1       | 0.9609246  | 0.2099681   | 4.5765  | 4.94E-06 | 1.22641327  | count | 0.1149785   |
| INHBB      | 1.0275294  | 0.2627095   | 3.9113  | 9.40E-05 | 1.226713613 | count | 1           |

|            |            |             |         |          |             |       |             |
|------------|------------|-------------|---------|----------|-------------|-------|-------------|
| SLC16A11   | 2.0790089  | 1.0755476   | 1.933   | 0.0533   | 1.227197088 | count | 1           |
| SPAG1      | 1.0837532  | 0.3079815   | 3.5189  | 0.00044  | 1.22888578  | count | 1           |
| LCN6       | 0.9490056  | 0.2514176   | 3.7746  | 0.000164 | 1.231058947 | count | 1           |
| SHROOM1    | 1.3868627  | 0.5075518   | 2.7325  | 0.00633  | 1.233421469 | count | 1           |
| LINC00842  | 2.3515791  | 1.1395675   | 2.0636  | 0.0392   | 1.234526084 | count | 1           |
| ITPKC      | 0.9107292  | 0.1888232   | 4.8232  | 1.49E-06 | 1.234707493 | count | 0.0348064   |
| WDR89      | 1.2735036  | 0.542788    | 2.3462  | 0.019    | 1.23483285  | count | 1           |
| PMAIP1     | 1.0269397  | 0.3083557   | 3.3304  | 0.000879 | 1.2354723   | count | 1           |
| KIF19      | 1.4881268  | 0.6648014   | 2.2385  | 0.0253   | 1.23556671  | count | 1           |
| DNAH14     | 1.2334522  | 0.5614879   | 2.1968  | 0.0281   | 1.238587091 | count | 1           |
| IL2RG      | 16.5265963 | 1235.513174 | 0.0134  | 0.989    | 1.239452187 | count | 1           |
| FAM74A1    | 16.5299198 | 1158.095475 | 0.0143  | 0.9886   | 1.239452187 | count | 1           |
| MTMR8      | 16.8333539 | 1912.152155 | 0.0088  | 0.993    | 1.239452221 | count | 1           |
| ZNF563     | 17.1070215 | 1735.685071 | 0.0099  | 0.992    | 1.239452244 | count | 1           |
| TNMD       | 16.567221  | 1004.998334 | 0.0165  | 0.987    | 1.239452275 | count | 1           |
| AC092803.2 | 1.4966158  | 0.6775491   | 2.2089  | 0.0273   | 1.240493471 | count | 1           |
| GAB1       | 0.9816275  | 0.3200618   | 3.067   | 0.00218  | 1.242086039 | count | 1           |
| ZNF516     | 2.3967732  | 1.1015713   | 2.1758  | 0.0297   | 1.243951477 | count | 1           |
| MYO5C      | 0.9475478  | 0.2075981   | 4.5643  | 5.23E-06 | 1.245636993 | count | 0.12169164  |
| METTL7A    | 0.9130122  | 0.1573145   | 5.8037  | 7.22E-09 | 1.246710195 | count | 0.000170652 |
| RNF122     | 1.1055256  | 0.3392684   | 3.2586  | 0.00113  | 1.247404667 | count | 1           |
| LY6E-DT    | 1.6965283  | 1.064072    | 1.5944  | 0.111    | 1.247734703 | count | 1           |
| SNTG2      | 1.1953803  | 0.441482    | 2.7077  | 0.00682  | 1.247890117 | count | 1           |
| SYNE2      | 0.8764402  | 0.1046472   | 8.3752  | 8.65E-17 | 1.248228145 | count | 2.08E-12    |
| ADIRF      | 0.8721127  | 0.0471779   | 18.4856 | 5.01E-72 | 1.255368354 | count | 1.22E-67    |
| STON1      | 1.1170867  | 0.4564609   | 2.4473  | 0.0145   | 1.255538219 | count | 1           |
| AC104506.1 | 1.0316889  | 0.2859249   | 3.6083  | 0.000314 | 1.25605667  | count | 1           |
| RNF125     | 0.9300026  | 0.1902255   | 4.8889  | 1.07E-06 | 1.257439031 | count | 0.02501553  |
| AC108134.2 | 2.1927131  | 1.2290267   | 1.7841  | 0.0745   | 1.258208497 | count | 1           |
| KCNB1      | 1.4280945  | 0.6636571   | 2.1519  | 0.0315   | 1.260383814 | count | 1           |
| KATNB1     | 1.6882158  | 0.7527333   | 2.2428  | 0.025    | 1.262176978 | count | 1           |
| LAMA3      | 1.3000798  | 0.5137988   | 2.5303  | 0.0115   | 1.262975075 | count | 1           |
| SPATA13    | 1.2024037  | 0.4030898   | 2.983   | 0.00288  | 1.264536056 | count | 1           |
| GNA14      | 1.1238276  | 0.4083698   | 2.752   | 0.00596  | 1.265475286 | count | 1           |
| KLF11      | 0.9644619  | 0.193671    | 4.9799  | 6.75E-07 | 1.26584594  | count | 0.01579635  |
| STK33      | 2.1226864  | 1.2751112   | 1.6647  | 0.0961   | 1.267199008 | count | 1           |
| CXorf36    | 0.9049092  | 0.1039898   | 8.7019  | 5.51E-18 | 1.268703173 | count | 1.32E-13    |
| AMIGO2     | 1.0034481  | 0.2585151   | 3.8816  | 0.000106 | 1.268915811 | count | 1           |
| CLEC2B     | 0.8922893  | 0.0933259   | 9.561   | 2.48E-21 | 1.269837721 | count | 5.97E-17    |
| TRANK1     | 1.3325002  | 0.4827277   | 2.7604  | 0.00581  | 1.271432761 | count | 1           |
| TYMP       | 0.9157392  | 0.1388577   | 6.5948  | 5.08E-11 | 1.271713943 | count | 1.21E-06    |
| MGLL       | 0.8898329  | 0.1022486   | 8.7026  | 5.47E-18 | 1.271761586 | count | 1.31E-13    |
| COP1       | 1.223063   | 0.3613857   | 3.3844  | 0.000723 | 1.271877162 | count | 1           |
| ZNF366     | 1.2642432  | 0.3646784   | 3.4667  | 0.000535 | 1.27675198  | count | 1           |
| C3orf70    | 1.1994458  | 0.436005    | 2.751   | 0.00598  | 1.276846176 | count | 1           |

|            |            |             |         |          |             |       |             |
|------------|------------|-------------|---------|----------|-------------|-------|-------------|
| CCSER1     | 1.1967252  | 0.4616985   | 2.592   | 0.00959  | 1.279155091 | count | 1           |
| IRF1       | 0.8952511  | 0.0991196   | 9.032   | 3.09E-19 | 1.280916111 | count | 7.43E-15    |
| TSPAN7     | 0.8952236  | 0.06681     | 13.3996 | 1.03E-39 | 1.281661529 | count | 2.50E-35    |
| FAM117A    | 1.0846536  | 0.3387483   | 3.2019  | 0.00138  | 1.281848515 | count | 1           |
| CGAS       | 1.0083858  | 0.253939    | 3.971   | 7.34E-05 | 1.285079713 | count | 1           |
| TPD52L1    | 0.9124699  | 0.1031192   | 8.8487  | 1.55E-18 | 1.287294963 | count | 3.73E-14    |
| ASAP3      | 1.3321274  | 0.4588266   | 2.9033  | 0.00372  | 1.287401614 | count | 1           |
| P2RY11     | 15.5984163 | 1123.064003 | 0.0139  | 0.989    | 1.287562283 | count | 1           |
| CAHM       | 16.1840452 | 719.318984  | 0.0225  | 0.982    | 1.287562523 | count | 1           |
| HLA-DQB2   | 16.339882  | 1090.546254 | 0.015   | 0.988    | 1.287562551 | count | 1           |
| CNN3       | 0.9022953  | 0.0687379   | 13.1266 | 3.15E-38 | 1.28832451  | count | 7.63E-34    |
| C14orf28   | 1.8908191  | 0.8005142   | 2.362   | 0.0182   | 1.288412023 | count | 1           |
| PARD6G     | 1.4944506  | 0.6468278   | 2.3104  | 0.0209   | 1.290601421 | count | 1           |
| SYT1       | 1.7159029  | 0.8777939   | 1.9548  | 0.0507   | 1.292965326 | count | 1           |
| SLC16A7    | 1.0654161  | 0.3083808   | 3.4549  | 0.000559 | 1.295228552 | count | 1           |
| MPV17L     | 2.1304209  | 1.0681916   | 1.9944  | 0.0462   | 1.296282509 | count | 1           |
| CD36       | 0.9488341  | 0.2851472   | 3.3275  | 0.000888 | 1.296488872 | count | 1           |
| CXXC1      | 1.143004   | 0.3338139   | 3.4241  | 0.000626 | 1.297259529 | count | 1           |
| DPP4       | 1.2537835  | 0.3562938   | 3.519   | 0.00044  | 1.298193143 | count | 1           |
| HOXD3      | 1.3941428  | 0.6352021   | 2.1948  | 0.0283   | 1.298509489 | count | 1           |
| EEPD1      | 1.1808824  | 0.4759398   | 2.4812  | 0.0132   | 1.298899891 | count | 1           |
| CTTNBP2    | 1.4389452  | 0.4498521   | 3.1987  | 0.0014   | 1.299868452 | count | 1           |
| FAM184A    | 1.5787245  | 0.6669533   | 2.3671  | 0.018    | 1.301076032 | count | 1           |
| ENDOD1     | 0.9410369  | 0.1447912   | 6.4993  | 9.54E-11 | 1.303026579 | count | 2.27E-06    |
| ICAM1      | 0.9182086  | 0.1186634   | 7.7379  | 1.41E-14 | 1.304840942 | count | 3.38E-10    |
| DICER1-AS1 | 2.2675943  | 1.1428374   | 1.9842  | 0.0473   | 1.30613509  | count | 1           |
| C2CD4C     | 2.5497417  | 1.0799123   | 2.3611  | 0.0183   | 1.306540596 | count | 1           |
| FRY        | 0.9754848  | 0.159681    | 6.109   | 1.14E-09 | 1.309503418 | count | 2.70E-05    |
| ZNF608     | 0.9912147  | 0.2069177   | 4.7904  | 1.75E-06 | 1.309714736 | count | 0.040852    |
| CCDC85A    | 1.5491018  | 0.478272    | 3.239   | 0.00121  | 1.310961257 | count | 1           |
| CNFN       | 2.2952857  | 1.1186001   | 2.0519  | 0.0403   | 1.313068884 | count | 1           |
| BDKRB2     | 1.1486315  | 0.357924    | 3.2091  | 0.00135  | 1.314988046 | count | 1           |
| PMS1       | 1.0707179  | 0.2658941   | 4.0269  | 5.80E-05 | 1.318104711 | count | 1           |
| LRMP       | 1.297582   | 0.7476171   | 1.7356  | 0.0827   | 1.323066935 | count | 1           |
| ZNF395     | 1.1957854  | 0.431454    | 2.7715  | 0.00562  | 1.324544615 | count | 1           |
| AC090204.1 | 1.7115462  | 0.7548025   | 2.2675  | 0.0234   | 1.325057573 | count | 1           |
| C9orf40    | 1.0254091  | 0.2486324   | 4.1242  | 3.83E-05 | 1.326147208 | count | 0.8833895   |
| GBP2       | 0.9459044  | 0.1212806   | 7.7993  | 8.75E-15 | 1.326719922 | count | 2.10E-10    |
| BTN3A2     | 0.9507454  | 0.1414812   | 6.7199  | 2.20E-11 | 1.329700858 | count | 5.24E-07    |
| GBP1       | 0.9430748  | 0.1611451   | 5.8523  | 5.42E-09 | 1.330733388 | count | 0.000128167 |
| RAPGEF3    | 0.9888015  | 0.1862427   | 5.3092  | 1.19E-07 | 1.330954182 | count | 0.0027965   |
| RPH3AL     | 1.0351353  | 0.2431346   | 4.2575  | 2.14E-05 | 1.331333937 | count | 0.4950034   |
| CCDC121    | 1.142763   | 0.3778836   | 3.0241  | 0.00252  | 1.333403529 | count | 1           |
| ZFP36      | 0.9257878  | 0.0540254   | 17.1361 | 1.23E-62 | 1.333982329 | count | 2.99E-58    |
| RIOX2      | 1.0675337  | 0.25454     | 4.194   | 2.83E-05 | 1.33410249  | count | 0.65373     |

|            |            |             |         |          |             |       |             |
|------------|------------|-------------|---------|----------|-------------|-------|-------------|
| GPR157     | 16.3757522 | 713.526538  | 0.023   | 0.9817   | 1.334120051 | count | 1           |
| CLEC12A    | 16.3047974 | 768.2608393 | 0.0212  | 0.983    | 1.334120125 | count | 1           |
| HLA-DOB    | 16.4757155 | 985.1700095 | 0.0167  | 0.987    | 1.334120154 | count | 1           |
| KCNMB3     | 1.5087439  | 0.570028    | 2.6468  | 0.00817  | 1.33451062  | count | 1           |
| TRPM6      | 1.4777909  | 0.6114787   | 2.4167  | 0.0157   | 1.336073186 | count | 1           |
| CLEC1A     | 1.0599389  | 0.2445394   | 4.3344  | 1.51E-05 | 1.342606813 | count | 0.3497462   |
| RALGDS     | 0.9963727  | 0.2228225   | 4.4716  | 8.08E-06 | 1.343895147 | count | 0.187658    |
| NR2F2-AS1  | 1.5301425  | 0.4928337   | 3.1048  | 0.00192  | 1.34801777  | count | 1           |
| IFIT2      | 0.9970504  | 0.2214762   | 4.5018  | 7.02E-06 | 1.348209097 | count | 0.16311672  |
| CLDN11     | 1.3734363  | 0.7121163   | 1.9287  | 0.0539   | 1.349584841 | count | 1           |
| AC092384.1 | 1.441249   | 0.5253991   | 2.7432  | 0.00612  | 1.350086169 | count | 1           |
| CD14       | 0.9867193  | 0.1870881   | 5.2741  | 1.44E-07 | 1.350542567 | count | 0.003382848 |
| CDKL1      | 2.3328911  | 1.079128    | 2.1618  | 0.0307   | 1.350811716 | count | 1           |
| ZDHHC12    | 1.0716335  | 0.2559192   | 4.1874  | 2.91E-05 | 1.353338571 | count | 0.6720645   |
| HMGB2      | 0.9583709  | 0.1030714   | 9.2981  | 2.82E-20 | 1.354524802 | count | 6.79E-16    |
| ACACB      | 1.0704072  | 0.2795754   | 3.8287  | 0.000132 | 1.354955129 | count | 1           |
| POU3F1     | 1.7113862  | 0.7574644   | 2.2594  | 0.0239   | 1.357100997 | count | 1           |
| ITGA6      | 0.9560241  | 0.1080133   | 8.851   | 1.52E-18 | 1.357570604 | count | 3.65E-14    |
| JHY        | 1.4460082  | 0.4729536   | 3.0574  | 0.00225  | 1.362465742 | count | 1           |
| RASAL2     | 0.9960143  | 0.1518449   | 6.5594  | 6.43E-11 | 1.363765017 | count | 1.53E-06    |
| GNG4       | 1.5610128  | 0.8822353   | 1.7694  | 0.0769   | 1.367222874 | count | 1           |
| CCDC68     | 0.9988783  | 0.1394885   | 7.161   | 1.02E-12 | 1.371857355 | count | 2.43E-08    |
| PLAC9      | 0.9767937  | 0.1329649   | 7.3463  | 2.67E-13 | 1.373115803 | count | 6.38E-09    |
| PDE1A      | 15.7324571 | 749.9606789 | 0.021   | 0.983    | 1.379221959 | count | 1           |
| WDR49      | 16.0899999 | 683.3986733 | 0.0235  | 0.981    | 1.379222062 | count | 1           |
| ANKRD29    | 0.9908923  | 0.1334408   | 7.4257  | 1.49E-13 | 1.379351601 | count | 3.56E-09    |
| CADM3      | 1.2424931  | 0.4818736   | 2.5785  | 0.00998  | 1.380139339 | count | 1           |
| DDX58      | 1.0622482  | 0.2241589   | 4.7388  | 2.26E-06 | 1.38136857  | count | 0.05273032  |
| MME        | 1.7974336  | 0.81508     | 2.2052  | 0.0275   | 1.383008847 | count | 1           |
| ANGPTL1    | 2.110843   | 1.1222046   | 1.881   | 0.0601   | 1.389023088 | count | 1           |
| GIMAP4     | 0.9743244  | 0.0724706   | 13.4444 | 5.83E-40 | 1.393359187 | count | 1.41E-35    |
| RASA2      | 1.1501039  | 0.3293449   | 3.4921  | 0.000487 | 1.395465228 | count | 1           |
| MBP        | 2.2071346  | 1.0235628   | 2.1563  | 0.0311   | 1.395475899 | count | 1           |
| RASL11A    | 1.4247653  | 0.5110876   | 2.7877  | 0.00534  | 1.396234902 | count | 1           |
| BAIAP2     | 1.0769004  | 0.2544003   | 4.2331  | 2.38E-05 | 1.399345346 | count | 0.5501846   |
| BTN3A3     | 1.0908515  | 0.2470011   | 4.4164  | 1.04E-05 | 1.400930928 | count | 0.2412904   |
| TTC32      | 1.2261408  | 0.2954748   | 4.1497  | 3.43E-05 | 1.401356037 | count | 0.7914382   |
| SEMA3D     | 2.7217335  | 1.1162618   | 2.4383  | 0.0148   | 1.401796127 | count | 1           |
| ACP5       | 1.185865   | 0.5746044   | 2.0638  | 0.0391   | 1.404405358 | count | 1           |
| CYP39A1    | 1.5224531  | 0.5519626   | 2.7583  | 0.00585  | 1.406093266 | count | 1           |
| HLA-DMB    | 1.0322589  | 0.1778393   | 5.8044  | 7.19E-09 | 1.40629545  | count | 0.00016995  |
| MCUB       | 1.0177273  | 0.138328    | 7.3574  | 2.46E-13 | 1.40884087  | count | 5.88E-09    |
| TTC21B     | 1.341269   | 0.4194227   | 3.1979  | 0.0014   | 1.411346111 | count | 1           |
| HLA-DRB1   | 0.9819013  | 0.0455967   | 21.5345 | 3.28E-95 | 1.415099375 | count | 7.97E-91    |
| BDKRB1     | 1.6690497  | 0.7887146   | 2.1162  | 0.0344   | 1.419170871 | count | 1           |

|            |            |             |         |           |             |       |             |
|------------|------------|-------------|---------|-----------|-------------|-------|-------------|
| AC021054.1 | 2.2103915  | 1.3275023   | 1.6651  | 0.096     | 1.420721287 | count | 1           |
| PTGES      | 16.2626116 | 1308.535679 | 0.0124  | 0.9901    | 1.422956664 | count | 1           |
| PRR5       | 1.0948873  | 0.226634    | 4.8311  | 1.43E-06  | 1.425950203 | count | 0.03340766  |
| SPARCL1    | 0.9927242  | 0.0423732   | 23.4281 | 7.23E-111 | 1.431229734 | count | 1.76E-106   |
| PALM       | 1.1287806  | 0.2518637   | 4.4817  | 7.71E-06  | 1.432670709 | count | 0.17909559  |
| CYTH1      | 1.0822392  | 0.2094741   | 5.1665  | 2.56E-07  | 1.433240126 | count | 0.006006016 |
| FAM160A2   | 1.3310761  | 0.3267669   | 4.0735  | 4.76E-05  | 1.436882528 | count | 1           |
| IGF2BP2    | 1.266634   | 0.3894165   | 3.2526  | 0.00116   | 1.441279456 | count | 1           |
| OSBPL1A    | 1.0675795  | 0.1938611   | 5.5069  | 3.99E-08  | 1.442037553 | count | 0.000940323 |
| AC116366.1 | 1.354426   | 0.5493036   | 2.4657  | 0.0137    | 1.443230188 | count | 1           |
| GSAP       | 1.670613   | 0.9387701   | 1.7796  | 0.0753    | 1.445094331 | count | 1           |
| ETV1       | 1.1918101  | 0.3059031   | 3.896   | 1.00E-04  | 1.448100672 | count | 1           |
| PLPP6      | 1.7771448  | 0.7545635   | 2.3552  | 0.0186    | 1.450877214 | count | 1           |
| SAMHD1     | 1.049704   | 0.1516663   | 6.9211  | 5.55E-12  | 1.452638144 | count | 1.32E-07    |
| CPSF4      | 1.3711748  | 0.4017367   | 3.4131  | 0.000651  | 1.452718246 | count | 1           |
| AC068870.2 | 1.7593421  | 0.7692113   | 2.2872  | 0.0223    | 1.455680576 | count | 1           |
| MBOAT2     | 1.8850862  | 0.6939604   | 2.7164  | 0.00664   | 1.457281064 | count | 1           |
| AC007681.1 | 1.7371336  | 0.6789445   | 2.5586  | 0.0106    | 1.457308635 | count | 1           |
| SLC38A1    | 1.4409372  | 0.3887722   | 3.7064  | 0.000214  | 1.458142593 | count | 1           |
| SV2B       | 1.8219577  | 0.7754179   | 2.3496  | 0.0189    | 1.458833565 | count | 1           |
| NUDCD1     | 1.1004415  | 0.1964116   | 5.6027  | 2.32E-08  | 1.464401358 | count | 0.000547474 |
| TUBAL3     | 15.683563  | 706.6257327 | 0.0222  | 0.9823    | 1.465404312 | count | 1           |
| NR3C2      | 1.3601149  | 0.4518618   | 3.01    | 0.00264   | 1.467359703 | count | 1           |
| WARS2      | 1.4029287  | 0.4820547   | 2.9103  | 0.00364   | 1.469154416 | count | 1           |
| RAB3IL1    | 1.2780567  | 0.3439734   | 3.7156  | 0.000207  | 1.476525995 | count | 1           |
| HOXB2      | 1.1621008  | 0.2474508   | 4.6963  | 2.78E-06  | 1.477775674 | count | 0.06481292  |
| FAM84B     | 1.1609389  | 0.248804    | 4.6661  | 3.22E-06  | 1.480197751 | count | 0.07501634  |
| EBF3       | 1.2048901  | 0.3339861   | 3.6076  | 0.000315  | 1.480457794 | count | 1           |
| SYBU       | 1.2672436  | 0.2805411   | 4.5171  | 6.53E-06  | 1.486706662 | count | 0.15178985  |
| LRRC32     | 1.1060443  | 0.1685175   | 6.5634  | 6.26E-11  | 1.486915027 | count | 1.49E-06    |
| NFKBID     | 1.178975   | 0.2989126   | 3.9442  | 8.21E-05  | 1.487237927 | count | 1           |
| MTERF3     | 1.2874745  | 0.395866    | 3.2523  | 0.00116   | 1.488774089 | count | 1           |
| TNFAIP8L3  | 1.285465   | 0.345983    | 3.7154  | 0.000207  | 1.489541458 | count | 1           |
| ADAMTS9    | 1.0876262  | 0.173238    | 6.2782  | 3.96E-10  | 1.491242034 | count | 9.39E-06    |
| CDH26      | 1.5320703  | 0.48576     | 3.154   | 0.00163   | 1.491529374 | count | 1           |
| TCP11L2    | 1.1091832  | 0.2218039   | 5.0007  | 6.07E-07  | 1.49158869  | count | 0.014207442 |
| AIM2       | 1.4837617  | 0.4902322   | 3.0267  | 0.0025    | 1.498478327 | count | 1           |
| TSPAN1     | 1.1792109  | 0.3548266   | 3.3233  | 0.000901  | 1.498884729 | count | 1           |
| SLC10A6    | 1.392824   | 0.54125     | 2.5733  | 0.0101    | 1.50096003  | count | 1           |
| BTN3A1     | 1.2101479  | 0.2696711   | 4.4875  | 7.50E-06  | 1.506249575 | count | 0.17424     |
| ABCF2      | 16.2238434 | 754.8850647 | 0.0215  | 0.983     | 1.506638947 | count | 1           |
| HOXD8      | 1.1098998  | 0.1860471   | 5.9657  | 2.75E-09  | 1.507091214 | count | 6.51E-05    |
| AC067735.1 | 2.5339806  | 1.0637958   | 2.382   | 0.0173    | 1.508068623 | count | 1           |
| ADAMTS4    | 1.1425337  | 0.2331548   | 4.9003  | 1.01E-06  | 1.510934931 | count | 0.02361481  |
| PPP1R16B   | 1.224164   | 0.3299692   | 3.7099  | 0.000211  | 1.51093833  | count | 1           |



|            |            |             |         |           |             |       |             |
|------------|------------|-------------|---------|-----------|-------------|-------|-------------|
| LINC02197  | 1.7502589  | 1.3888782   | 1.2602  | 0.2077    | 1.515681358 | count | 1           |
| BAIAP2L1   | 2.0789021  | 0.7441562   | 2.7936  | 0.00525   | 1.52255455  | count | 1           |
| EIF4E3     | 1.3320632  | 0.424489    | 3.138   | 0.00172   | 1.524106385 | count | 1           |
| ODF3B      | 1.0968456  | 0.149191    | 7.352   | 2.56E-13  | 1.524683921 | count | 6.12E-09    |
| TSPYL5     | 1.5945905  | 0.6259498   | 2.5475  | 0.0109    | 1.528180915 | count | 1           |
| ATAD5      | 1.9022996  | 1.0158059   | 1.8727  | 0.0612    | 1.528588058 | count | 1           |
| OSBPL5     | 1.4267083  | 0.3730275   | 3.8247  | 0.000134  | 1.535424206 | count | 1           |
| CRHBP      | 1.1483728  | 0.2144506   | 5.355   | 9.26E-08  | 1.535442932 | count | 0.002177396 |
| SLC25A25   | 1.1539741  | 0.1998112   | 5.7753  | 8.54E-09  | 1.536368833 | count | 0.000201783 |
| AP1G2      | 1.6468014  | 0.6766143   | 2.4339  | 0.015     | 1.537161511 | count | 1           |
| MYPOP      | 1.6791971  | 0.6256651   | 2.6839  | 0.00732   | 1.538885991 | count | 1           |
| TXNIP      | 1.0702922  | 0.0653379   | 16.3809 | 1.25E-57  | 1.540726404 | count | 3.03E-53    |
| SERPINF2   | 1.7944937  | 0.7658257   | 2.3432  | 0.0192    | 1.540756152 | count | 1           |
| IFIT3      | 1.0945276  | 0.1947802   | 5.6193  | 2.11E-08  | 1.541627933 | count | 0.000497981 |
| KALRN      | 1.4921745  | 0.5718486   | 2.6094  | 0.00912   | 1.542909736 | count | 1           |
| EGR2       | 1.2210358  | 0.3690222   | 3.3088  | 0.000949  | 1.544732629 | count | 1           |
| ASB9       | 1.1958764  | 0.2400385   | 4.982   | 6.68E-07  | 1.545377674 | count | 0.015633204 |
| EPHA7      | 16.0069823 | 672.7528064 | 0.0238  | 0.981     | 1.546727345 | count | 1           |
| WNT4       | 16.0786464 | 690.8709493 | 0.0233  | 0.981     | 1.546727366 | count | 1           |
| CXCL14     | 16.3001408 | 3413.458153 | 0.0048  | 0.996     | 1.546727519 | count | 1           |
| C1QL2      | 17.0890467 | 1027.83943  | 0.0166  | 0.9867    | 1.54672755  | count | 1           |
| CSRP2      | 1.1073306  | 0.1685376   | 6.5702  | 5.98E-11  | 1.547870302 | count | 1.42E-06    |
| RAB3IP     | 2.1451709  | 0.7396671   | 2.9002  | 0.00376   | 1.548133144 | count | 1           |
| KCNK5      | 2.2745856  | 1.0830732   | 2.1001  | 0.0358    | 1.553451327 | count | 1           |
| GPSM2      | 1.4668072  | 0.7348253   | 1.9961  | 0.046     | 1.56025802  | count | 1           |
| PIP4K2A    | 1.2049052  | 0.2097875   | 5.7435  | 1.03E-08  | 1.56770453  | count | 0.000243317 |
| MEOX1      | 1.1903835  | 0.2175754   | 5.4711  | 4.87E-08  | 1.569752744 | count | 0.001147323 |
| TCEA3      | 1.2340929  | 0.2604232   | 4.7388  | 2.26E-06  | 1.571139065 | count | 0.05273032  |
| BAALC      | 1.2156654  | 0.2845248   | 4.2726  | 2.00E-05  | 1.573719768 | count | 0.46274     |
| LINC01117  | 1.5731778  | 0.5730097   | 2.7455  | 0.00608   | 1.581060121 | count | 1           |
| TPD52      | 1.2276171  | 0.2330355   | 5.2679  | 1.49E-07  | 1.581146195 | count | 0.003499861 |
| MAP3K1     | 1.1941369  | 0.254326    | 4.6953  | 2.79E-06  | 1.584945658 | count | 0.06504327  |
| LINC01725  | 15.7404464 | 1042.312013 | 0.0151  | 0.988     | 1.585731913 | count | 1           |
| PCLO       | 2.0334897  | 0.8031893   | 2.5318  | 0.0114    | 1.589753677 | count | 1           |
| ROPN1L     | 1.6070071  | 0.5262387   | 3.0538  | 0.00228   | 1.599513141 | count | 1           |
| TACSTD2    | 1.2805659  | 0.3526599   | 3.6312  | 0.000287  | 1.612418388 | count | 1           |
| FRMD3      | 1.6503565  | 0.4861421   | 3.3948  | 0.000696  | 1.616296921 | count | 1           |
| CA4        | 1.5272453  | 0.9702471   | 1.5741  | 0.116     | 1.61645799  | count | 1           |
| CD74       | 1.1327057  | 0.0469639   | 24.1187 | 8.52E-117 | 1.633151048 | count | 2.07E-112   |
| RASSF9     | 1.1605755  | 0.1351695   | 8.5861  | 1.48E-17  | 1.633747253 | count | 3.55E-13    |
| HOPX       | 1.7453992  | 0.5980289   | 2.9186  | 0.00354   | 1.639398303 | count | 1           |
| MCF2L      | 1.41502    | 0.4034448   | 3.5073  | 0.00046   | 1.640968572 | count | 1           |
| TLN2       | 1.4690723  | 0.407121    | 3.6084  | 0.000314  | 1.655283622 | count | 1           |
| RNF165     | 16.2749763 | 724.2590639 | 0.0225  | 0.982     | 1.660713668 | count | 1           |
| AL121603.2 | 1.3984112  | 0.4635808   | 3.0165  | 0.00258   | 1.661890472 | count | 1           |

|            |            |             |         |          |             |       |             |
|------------|------------|-------------|---------|----------|-------------|-------|-------------|
| PDE10A     | 1.9263033  | 0.612624    | 3.1443  | 0.00168  | 1.662744528 | count | 1           |
| DAPK1      | 1.5736772  | 0.4237548   | 3.7137  | 0.000208 | 1.665633842 | count | 1           |
| ERI1       | 1.8024119  | 0.5668127   | 3.1799  | 0.00149  | 1.666568331 | count | 1           |
| LINC01985  | 1.3152294  | 0.2673631   | 4.9193  | 9.20E-07 | 1.666685288 | count | 0.02151512  |
| MYRIP      | 1.3076571  | 0.208008    | 6.2866  | 3.76E-10 | 1.685540969 | count | 8.92E-06    |
| GMFB       | 1.9711865  | 0.7298058   | 2.701   | 0.00696  | 1.686754346 | count | 1           |
| MAOB       | 1.6082109  | 0.3911427   | 4.1116  | 4.04E-05 | 1.688581085 | count | 0.9317048   |
| SELE       | 1.1934186  | 0.2062988   | 5.7849  | 8.07E-09 | 1.695030561 | count | 0.00019071  |
| TMEM273    | 1.2246458  | 0.1484025   | 8.2522  | 2.38E-16 | 1.696271908 | count | 5.71E-12    |
| PARM1      | 16.00952   | 935.4906331 | 0.0171  | 0.986    | 1.696791806 | count | 1           |
| PAK3       | 16.0800325 | 703.6077151 | 0.0229  | 0.9818   | 1.69679183  | count | 1           |
| RBM11      | 16.2878991 | 717.5366734 | 0.0227  | 0.982    | 1.696791893 | count | 1           |
| HSPB8      | 1.3487788  | 0.3398763   | 3.9684  | 7.42E-05 | 1.700892695 | count | 1           |
| CCDC178    | 2.0052902  | 0.7650035   | 2.6213  | 0.00881  | 1.704550919 | count | 1           |
| TSHZ2      | 1.2173684  | 0.130297    | 9.343   | 1.87E-20 | 1.705486811 | count | 4.50E-16    |
| RAB3C      | 1.2858164  | 0.2014431   | 6.383   | 2.03E-10 | 1.70627728  | count | 4.82E-06    |
| CSF3       | 1.2987223  | 0.4191182   | 3.0987  | 0.00196  | 1.715125371 | count | 1           |
| RAB38      | 1.8924905  | 0.5007858   | 3.779   | 0.000161 | 1.721829422 | count | 1           |
| SLC1A5     | 1.4681334  | 0.2917352   | 5.0324  | 5.15E-07 | 1.723180389 | count | 0.012060785 |
| MYLK       | 1.2964007  | 0.2856421   | 4.5385  | 5.91E-06 | 1.725288457 | count | 0.13747251  |
| ICAM4      | 1.4715247  | 0.3662712   | 4.0176  | 6.04E-05 | 1.73652594  | count | 1           |
| SMAGP      | 1.2596583  | 0.1405789   | 8.9605  | 5.81E-19 | 1.739845277 | count | 1.40E-14    |
| MGST1      | 1.6883535  | 0.4575359   | 3.6901  | 0.000228 | 1.740610727 | count | 1           |
| PTK2B      | 1.8459146  | 0.5787138   | 3.1897  | 0.00144  | 1.749916745 | count | 1           |
| RHOA       | 1.3075482  | 0.1894117   | 6.9032  | 6.28E-12 | 1.751590477 | count | 1.50E-07    |
| LINC01197  | 1.3437374  | 0.2389112   | 5.6244  | 2.05E-08 | 1.751620457 | count | 0.000483862 |
| SNCA       | 1.4144331  | 0.2768412   | 5.1092  | 3.46E-07 | 1.755762696 | count | 0.008109548 |
| HLA-DMA    | 1.2310296  | 0.0886355   | 13.8887 | 1.92E-42 | 1.75754789  | count | 4.66E-38    |
| ACCS       | 2.6207152  | 1.0618032   | 2.4682  | 0.0136   | 1.762730136 | count | 1           |
| OLFML3     | 15.8406358 | 679.8270635 | 0.0233  | 0.9814   | 1.766349337 | count | 1           |
| RBP4       | 15.6857905 | 783.5656845 | 0.02    | 0.984    | 1.766349362 | count | 1           |
| FAM117B    | 16.1525912 | 718.6712986 | 0.0225  | 0.982    | 1.766349459 | count | 1           |
| HIST1H1D   | 1.9937118  | 0.7373201   | 2.704   | 0.00689  | 1.769596184 | count | 1           |
| ZNF385D    | 1.2635947  | 0.1175672   | 10.7479 | 2.00E-26 | 1.772329657 | count | 4.83E-22    |
| SNCG       | 1.2438642  | 0.0731603   | 17.0019 | 9.86E-62 | 1.782258433 | count | 2.39E-57    |
| AP002387.2 | 1.9821456  | 0.7677687   | 2.5817  | 0.00988  | 1.784721738 | count | 1           |
| APOLD1     | 1.3087806  | 0.1360874   | 9.6172  | 1.47E-21 | 1.786378494 | count | 3.54E-17    |
| FAR2       | 1.5119961  | 0.3801932   | 3.9769  | 7.16E-05 | 1.794066539 | count | 1           |
| HID1       | 1.5815934  | 0.4304737   | 3.6741  | 0.000243 | 1.794684288 | count | 1           |
| FBLN1      | 16.2844183 | 2047.319535 | 0.008   | 0.994    | 1.799909934 | count | 1           |
| RASSF10    | 16.7276754 | 911.9144112 | 0.0183  | 0.9854   | 1.799910043 | count | 1           |
| NBL1       | 1.28804    | 0.1222107   | 10.5395 | 1.72E-25 | 1.804471766 | count | 4.15E-21    |
| ATF3       | 1.2660379  | 0.1143691   | 11.0698 | 6.73E-28 | 1.806160282 | count | 1.63E-23    |
| NOCT       | 1.6991941  | 0.5871179   | 2.8941  | 0.00383  | 1.815457822 | count | 1           |
| OTULINL    | 1.4161821  | 0.3600239   | 3.9336  | 8.58E-05 | 1.821458066 | count | 1           |

|            |            |             |         |           |             |       |             |
|------------|------------|-------------|---------|-----------|-------------|-------|-------------|
| CXCL11     | 1.4515836  | 0.7808379   | 1.859   | 0.0631    | 1.822255753 | count | 1           |
| CHST7      | 1.4153562  | 0.2376666   | 5.9552  | 2.93E-09  | 1.827901229 | count | 6.94E-05    |
| GJB2       | 16.4736621 | 660.3707678 | 0.0249  | 0.9801    | 1.83270737  | count | 1           |
| HLF        | 16.7920734 | 725.0610168 | 0.0232  | 0.9815    | 1.832707441 | count | 1           |
| F8         | 1.4101881  | 0.238594    | 5.9104  | 3.83E-09  | 1.834431101 | count | 9.06E-05    |
| MMRN1      | 1.299934   | 0.132007    | 9.8475  | 1.64E-22  | 1.834437017 | count | 3.95E-18    |
| NEURL1B    | 1.4027394  | 0.2386478   | 5.8779  | 4.65E-09  | 1.841442362 | count | 0.000109986 |
| EGLN3      | 1.3606723  | 0.2335759   | 5.8254  | 6.36E-09  | 1.847679796 | count | 0.000150369 |
| OLFM1      | 1.3012537  | 0.1169745   | 11.1243 | 3.75E-28  | 1.849222287 | count | 9.06E-24    |
| CA8        | 1.8758315  | 0.4732476   | 3.9637  | 7.57E-05  | 1.850934334 | count | 1           |
| PDK4       | 1.3371855  | 0.1432183   | 9.3367  | 1.98E-20  | 1.855125528 | count | 4.77E-16    |
| ZNF462     | 1.4679023  | 0.2885685   | 5.0868  | 3.88E-07  | 1.862440657 | count | 0.009092392 |
| LAG3       | 2.7758092  | 1.1286404   | 2.4594  | 0.014     | 1.86540881  | count | 1           |
| GCNT4      | 2.587673   | 1.0304028   | 2.5113  | 0.0121    | 1.86817396  | count | 1           |
| CTSH       | 1.3168033  | 0.114222    | 11.5285 | 4.57E-30  | 1.868694353 | count | 1.11E-25    |
| SLC8A1     | 1.4540714  | 0.3431814   | 4.237   | 2.34E-05  | 1.869376856 | count | 0.541008    |
| HES5       | 1.6566484  | 0.5261665   | 3.1485  | 0.00166   | 1.870667124 | count | 1           |
| MYCN       | 2.1367842  | 1.0348588   | 2.0648  | 0.039     | 1.88058416  | count | 1           |
| MINDY4     | 1.6272474  | 0.3430081   | 4.7441  | 2.20E-06  | 1.881537114 | count | 0.0513348   |
| PDE7B      | 2.6377438  | 1.0663711   | 2.4736  | 0.0134    | 1.883763496 | count | 1           |
| C21orf91   | 1.3592965  | 0.1532053   | 8.8724  | 1.26E-18  | 1.896144599 | count | 3.03E-14    |
| AL035701.1 | 15.6370249 | 1056.170883 | 0.0148  | 0.9882    | 1.896146298 | count | 1           |
| ADGRA2     | 1.4528493  | 0.2798707   | 5.1911  | 2.24E-07  | 1.92955047  | count | 0.00525728  |
| CASZ1      | 2.1646197  | 0.9249791   | 2.3402  | 0.0193    | 1.949348752 | count | 1           |
| MYO7A      | 16.0929055 | 700.6501268 | 0.023   | 0.9817    | 1.95691332  | count | 1           |
| LNX1       | 1.9021021  | 0.7029758   | 2.7058  | 0.00686   | 1.963175604 | count | 1           |
| LPCAT4     | 1.4360663  | 0.1863832   | 7.7049  | 1.81E-14  | 1.967413366 | count | 4.33E-10    |
| CD83       | 1.6595828  | 0.4515259   | 3.6755  | 0.000242  | 1.967842079 | count | 1           |
| DAAM1      | 1.3958976  | 0.1307081   | 10.6795 | 4.07E-26  | 1.978780037 | count | 9.83E-22    |
| STARD9     | 1.6712649  | 0.4448203   | 3.7572  | 0.000175  | 1.979427631 | count | 1           |
| L1CAM      | 1.9441295  | 0.6429434   | 3.0238  | 0.00252   | 1.981530203 | count | 1           |
| RGMB       | 2.7541707  | 1.3482374   | 2.0428  | 0.0412    | 1.989516305 | count | 1           |
| TMEM176B   | 1.7038587  | 0.4893814   | 3.4817  | 0.000506  | 2.001569964 | count | 1           |
| SYT15      | 1.6932944  | 0.3366501   | 5.0298  | 5.22E-07  | 2.021848123 | count | 0.012224196 |
| TLL1       | 1.6808447  | 0.3253313   | 5.1666  | 2.55E-07  | 2.023976248 | count | 0.00598281  |
| IFITM1     | 1.4195799  | 0.0970228   | 14.6314 | 9.50E-47  | 2.024072168 | count | 2.30E-42    |
| DLL1       | 1.731442   | 0.4041251   | 4.2844  | 1.89E-05  | 2.030828572 | count | 0.4374594   |
| HLA-DRA    | 1.4188088  | 0.0616974   | 22.9962 | 3.23E-107 | 2.043032488 | count | 7.85E-103   |
| LRRIQ1     | 16.9905043 | 1119.88325  | 0.0152  | 0.988     | 2.043518566 | count | 1           |
| ICAM5      | 16.9365393 | 700.0885495 | 0.0242  | 0.9807    | 2.043518664 | count | 1           |
| HLA-DPB1   | 1.4392892  | 0.0769077   | 18.7145 | 1.13E-73  | 2.064478797 | count | 2.75E-69    |
| DENND2D    | 3.0532719  | 1.2078409   | 2.5279  | 0.0115    | 2.068504193 | count | 1           |
| ADGRG6     | 1.6984727  | 0.3249428   | 5.227   | 1.85E-07  | 2.07220629  | count | 0.00434306  |
| MAOA       | 1.6026788  | 0.2386931   | 6.7144  | 2.28E-11  | 2.0723191   | count | 5.43E-07    |
| GUCY1B1    | 2.2391504  | 0.7681972   | 2.9148  | 0.00359   | 2.087206888 | count | 1           |

|            |            |             |         |           |             |       |             |
|------------|------------|-------------|---------|-----------|-------------|-------|-------------|
| AC007906.2 | 16.124792  | 760.7726837 | 0.0212  | 0.9831    | 2.098495304 | count | 1           |
| AL033384.1 | 16.5256466 | 757.6035902 | 0.0218  | 0.983     | 2.098495349 | count | 1           |
| C2CD4B     | 1.4685602  | 0.1817163   | 8.0816  | 9.46E-16  | 2.106678081 | count | 2.27E-11    |
| GRAMD4     | 2.6477579  | 1.5464659   | 1.7121  | 0.087     | 2.108382878 | count | 1           |
| ADM5       | 1.5094078  | 0.1931006   | 7.8167  | 7.65E-15  | 2.116537856 | count | 1.83E-10    |
| C7         | 1.6369173  | 0.1911425   | 8.5639  | 1.78E-17  | 2.123217238 | count | 4.27E-13    |
| PTPN5      | 1.9963188  | 0.5934542   | 3.3639  | 0.000779  | 2.146705419 | count | 1           |
| SEMA6A     | 1.5727569  | 0.1955663   | 8.0421  | 1.30E-15  | 2.148087571 | count | 3.12E-11    |
| PDIA5      | 1.5851506  | 0.1759922   | 9.0069  | 3.86E-19  | 2.169229981 | count | 9.29E-15    |
| ANKS1A     | 1.8426044  | 0.5204146   | 3.5406  | 0.000406  | 2.172902241 | count | 1           |
| DOC2B      | 1.6394385  | 0.2205314   | 7.434   | 1.40E-13  | 2.174592878 | count | 3.35E-09    |
| NPR3       | 2.826138   | 1.0449104   | 2.7047  | 0.00688   | 2.184659132 | count | 1           |
| SECTM1     | 2.0750239  | 0.5722567   | 3.626   | 0.000293  | 2.192120843 | count | 1           |
| SESN3      | 1.6611986  | 0.2822274   | 5.886   | 4.43E-09  | 2.199723096 | count | 0.000104792 |
| AK4        | 1.8316647  | 0.3418404   | 5.3582  | 9.10E-08  | 2.204334845 | count | 0.002140047 |
| KL         | 2.8970559  | 1.1577947   | 2.5022  | 0.0124    | 2.207268142 | count | 1           |
| HLA-DQB1   | 1.5579265  | 0.1237547   | 12.5888 | 2.23E-35  | 2.211818885 | count | 5.40E-31    |
| SPHK1      | 1.6076125  | 0.1901838   | 8.4529  | 4.53E-17  | 2.21811582  | count | 1.09E-12    |
| PDE2A      | 1.702302   | 0.2602915   | 6.54    | 7.30E-11  | 2.226041598 | count | 1.74E-06    |
| PNMT       | 2.5878129  | 0.7454459   | 3.4715  | 0.000526  | 2.243171281 | count | 1           |
| CBR3       | 1.6667939  | 0.2521862   | 6.6094  | 4.61E-11  | 2.249139082 | count | 1.10E-06    |
| C2orf40    | 1.766749   | 0.3575758   | 4.9409  | 8.24E-07  | 2.24966669  | count | 0.019272536 |
| TACR1      | 1.8057663  | 0.3395265   | 5.3185  | 1.13E-07  | 2.262102225 | count | 0.002656065 |
| CORO2A     | 3.1625068  | 1.1653261   | 2.7138  | 0.00669   | 2.265743337 | count | 1           |
| PLAT       | 1.5898673  | 0.1315185   | 12.0885 | 8.06E-33  | 2.269761586 | count | 1.95E-28    |
| LRG1       | 1.6793807  | 0.3596656   | 4.6693  | 3.17E-06  | 2.273840202 | count | 0.07385783  |
| DSG2       | 1.9145409  | 0.4511869   | 4.2433  | 2.27E-05  | 2.274983541 | count | 0.5248921   |
| LRRC1      | 1.831381   | 0.2807451   | 6.5233  | 8.15E-11  | 2.279027731 | count | 1.94E-06    |
| TMEM88     | 1.6455238  | 0.1749511   | 9.4056  | 1.05E-20  | 2.282846359 | count | 2.53E-16    |
| IL17RD     | 16.87881   | 1091.133214 | 0.0155  | 0.988     | 2.299578079 | count | 1           |
| CTSC       | 1.6110203  | 0.1142656   | 14.0989 | 1.21E-43  | 2.307248985 | count | 2.93E-39    |
| CYSLTR1    | 1.7066808  | 0.2362678   | 7.2235  | 6.52E-13  | 2.307342008 | count | 1.56E-08    |
| HLA-DPA1   | 1.6054366  | 0.0707931   | 22.6779 | 1.48E-104 | 2.310302444 | count | 3.60E-100   |
| RGS16      | 1.6221448  | 0.159564    | 10.1661 | 7.35E-24  | 2.328321333 | count | 1.77E-19    |
| LHX6       | 2.1348862  | 0.4915679   | 4.343   | 1.46E-05  | 2.339739223 | count | 0.3381944   |
| CCL14      | 1.6664746  | 0.1130707   | 14.7383 | 2.20E-47  | 2.352897965 | count | 5.34E-43    |
| EBF1       | 2.007401   | 0.3742101   | 5.3644  | 8.80E-08  | 2.415791928 | count | 0.00206976  |
| TESC       | 1.7241786  | 0.1622322   | 10.6278 | 6.94E-26  | 2.416887475 | count | 1.68E-21    |
| GPM6A      | 1.9000011  | 0.3075754   | 6.1774  | 7.48E-10  | 2.422260874 | count | 1.77E-05    |
| CPVL       | 1.8610719  | 0.2864202   | 6.4977  | 9.64E-11  | 2.440063055 | count | 2.29E-06    |
| TPO        | 2.5822368  | 0.642531    | 4.0189  | 6.00E-05  | 2.451789096 | count | 1           |
| ABCG2      | 1.9022802  | 0.2786025   | 6.8279  | 1.06E-11  | 2.453415749 | count | 2.53E-07    |
| CCL23      | 1.7951564  | 0.4164085   | 4.311   | 1.68E-05  | 2.476231589 | count | 0.3889536   |
| PPL        | 2.4788174  | 0.6213477   | 3.9894  | 6.80E-05  | 2.483715846 | count | 1           |
| NOSTRIN    | 1.7658941  | 0.1437854   | 12.2815 | 8.53E-34  | 2.48463701  | count | 2.07E-29    |

|            |            |             |         |          |             |       |             |
|------------|------------|-------------|---------|----------|-------------|-------|-------------|
| DSC2       | 16.30026   | 480.0425002 | 0.034   | 0.973    | 2.49664457  | count | 1           |
| PLEKHA7    | 2.7010069  | 0.8541923   | 3.1621  | 0.00158  | 2.504568086 | count | 1           |
| AKAP12     | 1.8784725  | 0.3477755   | 5.4014  | 7.18E-08 | 2.548212777 | count | 0.001689526 |
| AVPR2      | 1.9344862  | 0.2688849   | 7.1945  | 8.04E-13 | 2.549173642 | count | 1.92E-08    |
| CFD        | 2.3757898  | 2.1947817   | 1.0825  | 0.2791   | 2.590785696 | count | 1           |
| PGM5-AS1   | 2.5181421  | 0.8411521   | 2.9937  | 0.00278  | 2.652194526 | count | 1           |
| TAGAP      | 3.2905107  | 1.1023115   | 2.9851  | 0.00286  | 2.668288991 | count | 1           |
| C1QTNF9    | 16.2951576 | 415.1515496 | 0.0393  | 0.9687   | 2.669999241 | count | 1           |
| PERP       | 1.932561   | 0.1741924   | 11.0944 | 5.17E-28 | 2.714510764 | count | 1.25E-23    |
| AKR1C2     | 2.1556176  | 0.4469758   | 4.8227  | 1.49E-06 | 2.726063998 | count | 0.0348064   |
| RASA4      | 1.979035   | 0.22316     | 8.8682  | 1.31E-18 | 2.736208216 | count | 3.15E-14    |
| TNFSF9     | 2.10402    | 0.4865239   | 4.3246  | 1.58E-05 | 2.753295738 | count | 0.3658648   |
| AKR1C1     | 2.0674796  | 0.2605432   | 7.9353  | 3.02E-15 | 2.827942563 | count | 7.23E-11    |
| PCDH19     | 2.6606202  | 0.7337784   | 3.6259  | 0.000293 | 2.834850225 | count | 1           |
| FGF11      | 3.1366339  | 1.2217471   | 2.5673  | 0.0103   | 2.877467808 | count | 1           |
| MEOX2      | 2.1434058  | 0.2461009   | 8.7095  | 5.16E-18 | 2.907229787 | count | 1.24E-13    |
| SH3BGRL2   | 2.204275   | 0.276819    | 7.9629  | 2.43E-15 | 2.927982249 | count | 5.82E-11    |
| TMEM176A   | 2.8061656  | 0.8719231   | 3.2184  | 0.0013   | 2.946988654 | count | 1           |
| CYGB       | 2.4953529  | 0.4532871   | 5.505   | 4.03E-08 | 3.023906274 | count | 0.00094971  |
| HLA-DOA    | 2.6218398  | 0.5293939   | 4.9525  | 7.77E-07 | 3.072435549 | count | 0.018176361 |
| PRKAG2-AS1 | 16.5383351 | 412.5679922 | 0.0401  | 0.968    | 3.221359956 | count | 1           |
| SCARB1     | 2.6976102  | 0.515471    | 5.2333  | 1.79E-07 | 3.272129886 | count | 0.004202383 |
| STC1       | 2.3771056  | 0.225871    | 10.5242 | 2.01E-25 | 3.375508163 | count | 4.85E-21    |
| DOCK11     | 4.0659912  | 1.1290709   | 3.6012  | 0.000322 | 3.429395336 | count | 1           |
| ACKR1      | 2.455559   | 0.1223453   | 20.0707 | 9.40E-84 | 3.533927825 | count | 2.28E-79    |
| GABRA2     | 16.7974686 | 504.5740619 | 0.0333  | 0.973    | 3.637975553 | count | 1           |
| ELOVL7     | 3.5644515  | 0.7709427   | 4.6235  | 3.95E-06 | 3.655693569 | count | 0.0920034   |
| CXCL10     | 2.8210981  | 1.9493698   | 1.4472  | 0.148    | 3.688322094 | count | 1           |
| HGF        | 17.0638014 | 480.5248833 | 0.0355  | 0.9717   | 3.692598786 | count | 1           |
| HLA-DQA1   | 2.6402895  | 0.2339352   | 11.2864 | 6.51E-29 | 3.722708    | count | 1.57E-24    |
| SEMA3E     | 4.2609449  | 1.0458166   | 4.0743  | 4.75E-05 | 3.748341768 | count | 1           |
| NTS        | 16.8195852 | 946.4827049 | 0.0178  | 0.9858   | 3.884696162 | count | 1           |
| MLPH       | 3.6311874  | 0.6642205   | 5.4668  | 4.99E-08 | 3.937819304 | count | 0.001175444 |
| IL6        | 3.0676273  | 0.5282481   | 5.8072  | 7.08E-09 | 4.117609721 | count | 0.000167357 |
| CADM3-AS1  | 4.4317353  | 1.2175843   | 3.6398  | 0.000278 | 4.207177102 | count | 1           |
