# Supplementary material for: Decoding the transcriptome of calcified atherosclerotic plaque at single-cell resolution
Source: PubMed Central journal article supplement (PMC9556750; doi:10.1038/s42003-022-04056-7), 2022-10-12
Supplement: 42003_2022_4056_MOESM11_ESM.pdf [file 42003_2022_4056_MOESM11_ESM.pdf]

## Contingency Table Values Used In Overlap Analysis (Fisher Exact Test)

Coordinate 1 - Network; Non-DE Genes = 1, DE Genes = 2

Coordinate 2 - Module; Non-DE Genes = 1, DE Genes = 2

| module_id | no_genes | eigen_pct_expl | cond_cor | cond_cor_pval | de_overlap_est | de_overlap_pval | cont_mat_11 | cont_mat_12 | cont_mat_21 | cont_mat_22 |
|-----------|----------|----------------|----------|---------------|----------------|-----------------|-------------|-------------|-------------|-------------|
| 1         | 318      | 10.94          | -0.5437  | 6.00E-213     | 10.3617        | 2.38E-69        | 6522        | 175         | 514         | 143         |
| 2         | 14       | 59.96          | 0.3501   | 7.30E-81      | 134.9992       | 2.66E-13        | 6696        | 1           | 644         | 13          |
| 35        | 89       | 11.33          | -0.3275  | 1.90E-70      | 5.3817         | 5.00E-11        | 6638        | 59          | 627         | 30          |
| 36        | 63       | 13.75          | -0.0261  | 0.085         | 4.8567         | 2.67E-07        | 6654        | 43          | 637         | 20          |
| 6         | 123      | 6.28           | -0.2089  | 5.80E-29      | 2.946          | 8.10E-06        | 6601        | 96          | 630         | 27          |
| 3         | 19       | 39.38          | -0.0953  | 2.60E-07      | 7.4882         | 0.0001205       | 6686        | 11          | 649         | 8           |
| 18        | 117      | 5.54           | -0.3021  | 9.00E-60      | 1.7522         | 0.03017         | 6597        | 100         | 640         | 17          |
| 29        | 221      | 4.97           | -0.2374  | 5.00E-37      | 1.312          | 0.1288          | 6501        | 196         | 632         | 25          |
| 32        | 175      | 4.94           | -0.2901  | 4.50E-55      | 1.2486         | 0.2167          | 6541        | 156         | 638         | 19          |
| 13        | 111      | 4.97           | -0.2304  | 5.90E-35      | 1.2399         | 0.2868          | 6598        | 99          | 645         | 12          |
| 24        | 177      | 4.53           | -0.2302  | 6.90E-35      | 1.0133         | 0.5194          | 6536        | 161         | 641         | 16          |
| 16        | 470      | 4.14           | -0.1889  | 6.20E-24      | 0.9725         | 0.591           | 6268        | 429         | 616         | 41          |
| 10        | 190      | 4.5            | -0.1889  | 6.20E-24      | 0.8068         | 0.8131          | 6521        | 176         | 643         | 14          |
| 39        | 108      | 4.86           | -0.1875  | 1.30E-23      | 0.7033         | 0.8602          | 6596        | 101         | 650         | 7           |
| 38        | 400      | 4.5            | -0.2336  | 7.00E-36      | 0.8182         | 0.871           | 6327        | 370         | 627         | 30          |
| 25        | 204      | 4.85           | -0.2394  | 1.20E-37      | 1.2457         | 0.8834          | 6507        | 190         | 643         | 14          |
| 12        | 193      | 4.97           | -0.1885  | 7.60E-24      | 0.7309         | 0.8912          | 6517        | 180         | 644         | 13          |
| 19        | 444      | 4.16           | -0.2305  | 5.60E-35      | 0.7811         | 0.9229          | 6285        | 412         | 625         | 32          |
| 28        | 123      | 5.12           | -0.1662  | 7.10E-19      | 0.611          | 0.9319          | 6581        | 116         | 650         | 7           |
| 17        | 156      | 4.85           | -0.196   | 1.20E-25      | 0.6189         | 0.9462          | 6550        | 147         | 648         | 9           |
| 34        | 160      | 4.88           | -0.2308  | 4.70E-35      | 0.6021         | 0.9556          | 6546        | 151         | 648         | 9           |
| 11        | 179      | 5.09           | -0.2391  | 1.40E-37      | 0.5971         | 0.9648          | 6528        | 169         | 647         | 10          |
| 23        | 245      | 3.69           | -0.1856  | 3.70E-23      | 0.6095         | 0.9777          | 6466        | 231         | 643         | 14          |
| 31        | 98       | 4.57           | -0.2371  | 6.20E-37      | 0.4303         | 0.9798          | 6603        | 94          | 653         | 4           |
| 15        | 299      | 4.09           | -0.2027  | 2.40E-27      | 0.6043         | 0.987           | 6415        | 282         | 640         | 17          |
| 20        | 233      | 4.29           | -0.2059  | 3.60E-28      | 0.5452         | 0.9898          | 6476        | 221         | 645         | 12          |
| 9         | 126      | 5.04           | -0.1968  | 7.50E-26      | 0.4168         | 0.9904          | 6576        | 121         | 652         | 5           |
| 22        | 128      | 4.67           | -0.1832  | 1.30E-22      | 0.4099         | 0.9916          | 6574        | 123         | 652         | 5           |
| 37        | 311      | 4.48           | -0.1744  | 1.20E-20      | 0.5785         | 0.9924          | 6403        | 294         | 640         | 17          |
| 4         | 255      | 4.49           | -0.1893  | 5.00E-24      | 0.5385         | 0.993           | 6455        | 242         | 644         | 13          |
| 27        | 135      | 4.83           | -0.2037  | 1.30E-27      | 0.3874         | 0.9947          | 6567        | 130         | 652         | 5           |
| 26        | 99       | 5.37           | -0.2204  | 4.40E-32      | 0.3154         | 0.9948          | 6601        | 96          | 654         | 3           |
| 8         | 176      | 4.53           | -0.2179  | 2.20E-31      | 0.416          | 0.9967          | 6528        | 169         | 650         | 7           |
| 5         | 245      | 4.3            | -0.208   | 1.00E-28      | 0.4703         | 0.9976          | 6463        | 234         | 646         | 11          |
| 33        | 129      | 4.43           | -0.1704  | 9.00E-20      | 0.3221         | 0.9977          | 6572        | 125         | 653         | 4           |
| 7         | 200      | 4.7            | -0.2081  | 9.70E-29      | 0.309          | 0.9998          | 6503        | 194         | 651         | 6           |
| 14        | 143      | 4.43           | -0.2062  | 3.10E-28      | 0.2149         | 0.9998          | 6557        | 140         | 654         | 3           |
| 30        | 255      | 4.19           | -0.2514  | 2.00E-41      | 0.3643         | 0.9998          | 6451        | 246         | 648         | 9           |
| 21        | 223      | 4.26           | -0.2548  | 1.50E-42      | 0.2753         | 1               | 6480        | 217         | 651         | 6           |
