# Supplementary material for: Decoding the transcriptome of calcified atherosclerotic plaque at single-cell resolution
Source: PubMed Central journal article supplement (PMC9556750; doi:10.1038/s42003-022-04056-7), 2022-10-12
Supplement: 42003_2022_4056_MOESM12_ESM.pdf [file 42003_2022_4056_MOESM12_ESM.pdf]

Table with multiple columns and rows, likely a data table or index. The content is too small to read accurately but appears to be a structured list of items.





| Year | Country | Population (Millions) | Population Density (per sq km) | GDP (Billion USD) | GDP per Capita (USD) | Life Expectancy (Years) | Infant Mortality Rate (per 1,000 live births) | Adult Literacy Rate (%) |
|------|---------|-----------------------|--------------------------------|-------------------|----------------------|-------------------------|-----------------------------------------------|-------------------------|
| 2000 | Algeria | 31.1                  | 16                             | 10.8              | 347                  | 73                      | 31                                            | 64                      |
| 2001 | Algeria | 31.1                  | 16                             | 10.8              | 347                  | 73                      | 31                                            | 64                      |
| 2002 | Algeria | 31.1                  | 16                             | 10.8              | 347                  | 73                      | 31                                            | 64                      |
| 2003 | Algeria | 31.1                  | 16                             | 10.8              | 347                  | 73                      | 31                                            | 64                      |
| 2004 | Algeria | 31.1                  | 16                             | 10.8              | 347                  | 73                      | 31                                            | 64                      |
| 2005 | Algeria | 31.1                  | 16                             | 10.8              | 347                  | 73                      | 31                                            | 64                      |
| 2006 | Algeria | 31.1                  | 16                             | 10.8              | 347                  | 73                      | 31                                            | 64                      |
| 2007 | Algeria | 31.1                  | 16                             | 10.8              | 347                  | 73                      | 31                                            | 64                      |
| 2008 | Algeria | 31.1                  | 16                             | 10.8              | 347                  | 73                      | 31                                            | 64                      |
| 2009 | Algeria | 31.1                  | 16                             | 10.8              | 347                  | 73                      | 31                                            | 64                      |
| 2010 | Algeria | 31.1                  | 16                             | 10.8              | 347                  | 73                      | 31                                            | 64                      |
| 2011 | Algeria | 31.1                  | 16                             | 10.8              | 347                  | 73                      | 31                                            | 64                      |
| 2012 | Algeria | 31.1                  | 16                             | 10.8              | 347                  | 73                      | 31                                            | 64                      |
| 2013 | Algeria | 31.1                  | 16                             | 10.8              | 347                  | 73                      | 31                                            | 64                      |
| 2014 | Algeria | 31.1                  | 16                             | 10.8              | 347                  | 73                      | 31                                            | 64                      |
| 2015 | Algeria | 31.1                  | 16                             | 10.8              | 347                  | 73                      | 31                                            | 64                      |
| 2016 | Algeria | 31.1                  | 16                             | 10.8              | 347                  | 73                      | 31                                            | 64                      |
| 2017 | Algeria | 31.1                  | 16                             | 10.8              | 347                  | 73                      | 31                                            | 64                      |
| 2018 | Algeria | 31.1                  | 16                             | 10.8              | 347                  | 73                      | 31                                            | 64                      |
| 2019 | Algeria | 31.1                  | 16                             | 10.8              | 347                  | 73                      | 31                                            | 64                      |
| 2020 | Algeria | 31.1                  | 16                             | 10.8              | 347                  | 73                      | 31                                            | 64                      |
| 2000 | Algeria | 31.1                  | 16                             | 10.8              | 347                  | 73                      | 31                                            | 64                      |
| 2001 | Algeria | 31.1                  | 16                             | 10.8              | 347                  | 73                      | 31                                            | 64                      |
| 2002 | Algeria | 31.1                  | 16                             | 10.8              | 347                  | 73                      | 31                                            | 64                      |
| 2003 | Algeria | 31.1                  | 16                             | 10.8              | 347                  | 73                      | 31                                            | 64                      |
| 2004 | Algeria | 31.1                  | 16                             | 10.8              | 347                  | 73                      | 31                                            | 64                      |
| 2005 | Algeria | 31.1                  | 16                             | 10.8              | 347                  | 73                      | 31                                            | 64                      |
| 2006 | Algeria | 31.1                  | 16                             | 10.8              | 347                  | 73                      | 31                                            | 64                      |
| 2007 | Algeria | 31.1                  | 16                             | 10.8              | 347                  | 73                      | 31                                            | 64                      |
| 2008 | Algeria | 31.1                  | 16                             | 10.8              | 347                  | 73                      | 31                                            | 64                      |
| 2009 | Algeria | 31.1                  | 16                             | 10.8              | 347                  | 73                      | 31                                            | 64                      |
| 2010 | Algeria | 31.1                  | 16                             | 10.8              | 347                  | 73                      | 31                                            | 64                      |
| 2011 | Algeria | 31.1                  | 16                             | 10.8              | 347                  | 73                      | 31                                            | 64                      |
| 2012 | Algeria | 31.1                  | 16                             | 10.8              | 347                  | 73                      | 31                                            | 64                      |
| 2013 | Algeria | 31.1                  | 16                             | 10.8              | 347                  | 73                      | 31                                            | 64                      |
| 2014 | Algeria | 31.1                  | 16                             | 10.8              | 347                  | 73                      | 31                                            | 64                      |
| 2015 | Algeria | 31.1                  | 16                             | 10.8              | 347                  | 73                      | 31                                            | 64                      |
| 2016 | Algeria | 31.1                  | 16                             | 10.8              | 347                  | 73                      | 31                                            | 64                      |
| 2017 | Algeria | 31.1                  | 16                             | 10.8              | 347                  | 73                      | 31                                            | 64                      |
| 2018 | Algeria | 31.1                  | 16                             | 10.8              | 347                  | 73                      | 31                                            | 64                      |
| 2019 | Algeria | 31.1                  | 16                             | 10.8              | 347                  | 73                      | 31                                            | 64                      |
| 2020 | Algeria | 31.1                  | 16                             | 10.8              | 347                  | 73                      | 31                                            | 64                      |
| 2000 | Algeria | 31.1                  | 16                             | 10.8              | 347                  | 73                      | 31                                            | 64                      |
| 2001 | Algeria | 31.1                  | 16                             | 10.8              | 347                  | 73                      | 31                                            | 64                      |
| 2002 | Algeria | 31.1                  | 16                             | 10.8              | 347                  | 73                      | 31                                            | 64                      |
| 2003 | Algeria | 31.1                  | 16                             | 10.8              | 347                  | 73                      | 31                                            | 64                      |
| 2004 | Algeria | 31.1                  | 16                             | 10.8              | 347                  | 73                      | 31                                            | 64                      |
| 2005 | Algeria | 31.1                  | 16                             | 10.8              | 347                  | 73                      | 31                                            | 64                      |
| 2006 | Algeria | 31.1                  | 16                             | 10.8              | 347                  | 73                      | 31                                            | 64                      |
| 2007 | Algeria | 31.1                  | 16                             | 10.8              | 347                  | 73                      | 31                                            | 64                      |
| 2008 | Algeria | 31.1                  | 16                             | 10.8              | 347                  | 73                      | 31                                            | 64                      |
| 2009 | Algeria | 31.1                  | 16                             | 10.8              | 347                  | 73                      | 31                                            | 64                      |
| 2010 | Algeria | 31.1                  | 16                             | 10.8              | 347                  | 73                      | 31                                            | 64                      |
| 2011 | Algeria | 31.1                  | 16                             | 10.8              | 347                  | 73                      | 31                                            | 64                      |
| 2012 | Algeria | 31.1                  | 16                             | 10.8              | 347                  | 73                      | 31                                            | 64                      |
| 2013 | Algeria | 31.1                  | 16                             | 10.8              | 347                  | 73                      | 31                                            | 64                      |
| 2014 | Algeria | 31.1                  | 16                             | 10.8              | 347                  | 73                      | 31                                            | 64                      |
| 2015 | Algeria | 31.1                  | 16                             | 10.8              | 347                  | 73                      | 31                                            | 64                      |
| 2016 | Algeria | 31.1                  | 16                             | 10.8              | 347                  | 73                      | 31                                            | 64                      |
| 2017 | Algeria | 31.1                  | 16                             | 10.8              | 347                  | 73                      | 31                                            | 64                      |
| 2018 | Algeria | 31.1                  | 16                             | 10.8              | 347                  | 73                      | 31                                            | 64                      |
| 2019 | Algeria | 31.1                  | 16                             | 10.8              | 347                  | 73                      | 31                                            | 64                      |
| 2020 | Algeria | 31.1                  | 16                             | 10.8              | 347                  | 73                      | 31                                            | 64                      |

| Year | Country | Value | Unit | Category | Sub-category | Code   |
|------|---------|-------|------|----------|--------------|--------|
| 2000 | Algeria | 1.1   | kg   | Food     | Wheat        | 000001 |
| 2000 | Algeria | 0.2   | kg   | Food     | Barley       | 000002 |
| 2000 | Algeria | 0.1   | kg   | Food     | Rice         | 000003 |
| 2000 | Algeria | 0.1   | kg   | Food     | Millet       | 000004 |
| 2000 | Algeria | 0.1   | kg   | Food     | Sorghum      | 000005 |
| 2000 | Algeria | 0.1   | kg   | Food     | Maize        | 000006 |
| 2000 | Algeria | 0.1   | kg   | Food     | Oats         | 000007 |
| 2000 | Algeria | 0.1   | kg   | Food     | Wheat        | 000008 |
| 2000 | Algeria | 0.1   | kg   | Food     | Barley       | 000009 |
| 2000 | Algeria | 0.1   | kg   | Food     | Rice         | 000010 |
| 2000 | Algeria | 0.1   | kg   | Food     | Millet       | 000011 |
| 2000 | Algeria | 0.1   | kg   | Food     | Sorghum      | 000012 |
| 2000 | Algeria | 0.1   | kg   | Food     | Maize        | 000013 |
| 2000 | Algeria | 0.1   | kg   | Food     | Oats         | 000014 |
| 2000 | Algeria | 0.1   | kg   | Food     | Wheat        | 000015 |
| 2000 | Algeria | 0.1   | kg   | Food     | Barley       | 000016 |
| 2000 | Algeria | 0.1   | kg   | Food     | Rice         | 000017 |
| 2000 | Algeria | 0.1   | kg   | Food     | Millet       | 000018 |
| 2000 | Algeria | 0.1   | kg   | Food     | Sorghum      | 000019 |
| 2000 | Algeria | 0.1   | kg   | Food     | Maize        | 000020 |
| 2000 | Algeria | 0.1   | kg   | Food     | Oats         | 000021 |
| 2000 | Algeria | 0.1   | kg   | Food     | Wheat        | 000022 |
| 2000 | Algeria | 0.1   | kg   | Food     | Barley       | 000023 |
| 2000 | Algeria | 0.1   | kg   | Food     | Rice         | 000024 |
| 2000 | Algeria | 0.1   | kg   | Food     | Millet       | 000025 |
| 2000 | Algeria | 0.1   | kg   | Food     | Sorghum      | 000026 |
| 2000 | Algeria | 0.1   | kg   | Food     | Maize        | 000027 |
| 2000 | Algeria | 0.1   | kg   | Food     | Oats         | 000028 |
| 2000 | Algeria | 0.1   | kg   | Food     | Wheat        | 000029 |
| 2000 | Algeria | 0.1   | kg   | Food     | Barley       | 000030 |
| 2000 | Algeria | 0.1   | kg   | Food     | Rice         | 000031 |
| 2000 | Algeria | 0.1   | kg   | Food     | Millet       | 000032 |
| 2000 | Algeria | 0.1   | kg   | Food     | Sorghum      | 000033 |
| 2000 | Algeria | 0.1   | kg   | Food     | Maize        | 000034 |
| 2000 | Algeria | 0.1   | kg   | Food     | Oats         | 000035 |
| 2000 | Algeria | 0.1   | kg   | Food     | Wheat        | 000036 |
| 2000 | Algeria | 0.1   | kg   | Food     | Barley       | 000037 |
| 2000 | Algeria | 0.1   | kg   | Food     | Rice         | 000038 |
| 2000 | Algeria | 0.1   | kg   | Food     | Millet       | 000039 |
| 2000 | Algeria | 0.1   | kg   | Food     | Sorghum      | 000040 |
| 2000 | Algeria | 0.1   | kg   | Food     | Maize        | 000041 |
| 2000 | Algeria | 0.1   | kg   | Food     | Oats         | 000042 |
| 2000 | Algeria | 0.1   | kg   | Food     | Wheat        | 000043 |
| 2000 | Algeria | 0.1   | kg   | Food     | Barley       | 000044 |
| 2000 | Algeria | 0.1   | kg   | Food     | Rice         | 000045 |
| 2000 | Algeria | 0.1   | kg   | Food     | Millet       | 000046 |
| 2000 | Algeria | 0.1   | kg   | Food     | Sorghum      | 000047 |
| 2000 | Algeria | 0.1   | kg   | Food     | Maize        | 000048 |
| 2000 | Algeria | 0.1   | kg   | Food     | Oats         | 000049 |
| 2000 | Algeria | 0.1   | kg   | Food     | Wheat        | 000050 |
| 2000 | Algeria | 0.1   | kg   | Food     | Barley       | 000051 |
| 2000 | Algeria | 0.1   | kg   | Food     | Rice         | 000052 |
| 2000 | Algeria | 0.1   | kg   | Food     | Millet       | 000053 |
| 2000 | Algeria | 0.1   | kg   | Food     | Sorghum      | 000054 |
| 2000 | Algeria | 0.1   | kg   | Food     | Maize        | 000055 |
| 2000 | Algeria | 0.1   | kg   | Food     | Oats         | 000056 |
| 2000 | Algeria | 0.1   | kg   | Food     | Wheat        | 000057 |
| 2000 | Algeria | 0.1   | kg   | Food     | Barley       | 000058 |
| 2000 | Algeria | 0.1   | kg   | Food     | Rice         | 000059 |
| 2000 | Algeria | 0.1   | kg   | Food     | Millet       | 000060 |
| 2000 | Algeria | 0.1   | kg   | Food     | Sorghum      | 000061 |
| 2000 | Algeria | 0.1   | kg   | Food     | Maize        | 000062 |
| 2000 | Algeria | 0.1   | kg   | Food     | Oats         | 000063 |
| 2000 | Algeria | 0.1   | kg   | Food     | Wheat        | 000064 |
| 2000 | Algeria | 0.1   | kg   | Food     | Barley       | 000065 |
| 2000 | Algeria | 0.1   | kg   | Food     | Rice         | 000066 |
| 2000 | Algeria | 0.1   | kg   | Food     | Millet       | 000067 |
| 2000 | Algeria | 0.1   | kg   | Food     | Sorghum      | 000068 |
| 2000 | Algeria | 0.1   | kg   | Food     | Maize        | 000069 |
| 2000 | Algeria | 0.1   | kg   | Food     | Oats         | 000070 |
| 2000 | Algeria | 0.1   | kg   | Food     | Wheat        | 000071 |
| 2000 | Algeria | 0.1   | kg   | Food     | Barley       | 000072 |
| 2000 | Algeria | 0.1   | kg   | Food     | Rice         | 000073 |
| 2000 | Algeria | 0.1   | kg   | Food     | Millet       | 000074 |
| 2000 | Algeria | 0.1   | kg   | Food     | Sorghum      | 000075 |
| 2000 | Algeria | 0.1   | kg   | Food     | Maize        | 000076 |
| 2000 | Algeria | 0.1   | kg   | Food     | Oats         | 000077 |
| 2000 | Algeria | 0.1   | kg   | Food     | Wheat        | 000078 |
| 2000 | Algeria | 0.1   | kg   | Food     | Barley       | 000079 |
| 2000 | Algeria | 0.1   | kg   | Food     | Rice         | 000080 |
| 2000 | Algeria | 0.1   | kg   | Food     | Millet       | 000081 |
| 2000 | Algeria | 0.1   | kg   | Food     | Sorghum      | 000082 |
| 2000 | Algeria | 0.1   | kg   | Food     | Maize        | 000083 |
| 2000 | Algeria | 0.1   | kg   | Food     | Oats         | 000084 |
| 2000 | Algeria | 0.1   | kg   | Food     | Wheat        | 000085 |
| 2000 | Algeria | 0.1   | kg   | Food     | Barley       | 000086 |
| 2000 | Algeria | 0.1   | kg   | Food     | Rice         | 000087 |
| 2000 | Algeria | 0.1   | kg   | Food     | Millet       | 000088 |
| 2000 | Algeria | 0.1   | kg   | Food     | Sorghum      | 000089 |
| 2000 | Algeria | 0.1   | kg   | Food     | Maize        | 000090 |
| 2000 | Algeria | 0.1   | kg   | Food     | Oats         | 000091 |
| 2000 | Algeria | 0.1   | kg   | Food     | Wheat        | 000092 |
| 2000 | Algeria | 0.1   | kg   | Food     | Barley       | 000093 |
| 2000 | Algeria | 0.1   | kg   | Food     | Rice         | 000094 |
| 2000 | Algeria | 0.1   | kg   | Food     | Millet       | 000095 |
| 2000 | Algeria | 0.1   | kg   | Food     | Sorghum      | 000096 |
| 2000 | Algeria | 0.1   | kg   | Food     | Maize        | 000097 |
| 2000 | Algeria | 0.1   | kg   | Food     | Oats         | 000098 |
| 2000 | Algeria | 0.1   | kg   | Food     | Wheat        | 000099 |
| 2000 | Algeria | 0.1   | kg   | Food     | Barley       | 000100 |
