# Supplementary material for: Decoding the transcriptome of calcified atherosclerotic plaque at single-cell resolution
Source: PubMed Central journal article supplement (PMC9556750; doi:10.1038/s42003-022-04056-7), 2022-10-12
Supplement: 42003_2022_4056_MOESM13_ESM.pdf [file 42003_2022_4056_MOESM13_ESM.pdf]

## Contingency Table Values Used In Overlap Analysis (Fisher Exact Test)

Coordinate 1 - Network; Non-DE Genes = 1, DE Genes = 2

Coordinate 2 - Module; Non-DE Genes = 1, DE Genes = 2

| module_id | no_genes | eigen_pct_expl | cond_cor | cond_cor_pval | de_overlap_est | de_overlap_pval | cont_mat_11 | cont_mat_12 | cont_mat_21 | cont_mat_22 |
|-----------|----------|----------------|----------|---------------|----------------|-----------------|-------------|-------------|-------------|-------------|
| 30        | 142      | 11.62          | 0.2973   | 4.20E-76      | 3.8317         | 6.09E-11        | 6663        | 99          | 755         | 43          |
| 31        | 284      | 9.35           | 0.1772   | 1.40E-27      | 2.4812         | 1.22E-08        | 6540        | 222         | 736         | 62          |
| 24        | 177      | 8.42           | 0.2783   | 1.30E-66      | 2.3819         | 1.31E-05        | 6623        | 139         | 760         | 38          |
| 13        | 401      | 6.96           | -0.0285  | 0.042         | 1.7982         | 4.01E-05        | 6429        | 333         | 730         | 68          |
| 11        | 250      | 6.38           | 0.0739   | 3.70E-06      | 1.9663         | 0.0001054       | 6558        | 204         | 752         | 46          |
| 28        | 15       | 46.45          | 0.0641   | 5.00E-05      | 7.4671         | 0.0004272       | 6754        | 8           | 791         | 7           |
| 14        | 23       | 35.35          | -0.0641  | 5.10E-05      | 3.73           | 0.00766         | 6746        | 16          | 791         | 7           |
| 2         | 166      | 8.98           | -0.0402  | 0.0074        | 1.7453         | 0.008006        | 6624        | 138         | 770         | 28          |
| 9         | 348      | 6.43           | 0.02     | 0.11          | 1.3785         | 0.03053         | 6462        | 300         | 750         | 48          |
| 18        | 422      | 5.07           | 0.0705   | 9.60E-06      | 1.1761         | 0.1654          | 6391        | 371         | 747         | 51          |
| 26        | 160      | 5.99           | 0.0743   | 3.30E-06      | 1.2159         | 0.243           | 6622        | 140         | 778         | 20          |
| 4         | 323      | 5.7            | -0.0244  | 0.069         | 1.1009         | 0.3217          | 6476        | 286         | 761         | 37          |
| 12        | 160      | 5.76           | 7.00E-04 | 0.48          | 1.1453         | 0.3279          | 6621        | 141         | 779         | 19          |
| 6         | 245      | 5.99           | 0.0612   | 1.00E-04      | 1.0968         | 0.356           | 6545        | 217         | 770         | 28          |
| 29        | 108      | 6.5            | 0.0926   | 9.60E-09      | 0.9604         | 0.5971          | 6665        | 97          | 787         | 11          |
| 15        | 287      | 5.56           | 0.0721   | 6.20E-06      | 0.9507         | 0.6294          | 6504        | 258         | 769         | 29          |
| 1         | 167      | 7.53           | 0.0095   | 0.28          | 0.8958         | 0.698           | 6611        | 151         | 782         | 16          |
| 21        | 214      | 6.16           | 0.0291   | 0.039         | 0.8214         | 0.821           | 6567        | 195         | 779         | 19          |
| 20        | 308      | 5.66           | 0.0545   | 0.00048       | 0.7405         | 0.9396          | 6479        | 283         | 773         | 25          |
| 17        | 213      | 6.19           | 0.0342   | 0.019         | 0.6819         | 0.9485          | 6565        | 197         | 782         | 16          |
| 3         | 183      | 5.74           | 0.0228   | 0.084         | 0.6422         | 0.9579          | 6592        | 170         | 785         | 13          |
| 25        | 298      | 5.64           | 0.0603   | 0.00013       | 0.6328         | 0.9863          | 6485        | 277         | 777         | 21          |
| 19        | 206      | 5.7            | 0.0419   | 0.0056        | 0.5169         | 0.9942          | 6568        | 194         | 786         | 12          |
| 7         | 86       | 6.94           | 0.0406   | 0.007         | 0.3037         | 0.9959          | 6679        | 83          | 795         | 3           |
| 10        | 522      | 5.13           | 0.0519   | 0.00083       | 0.6101         | 0.9988          | 6276        | 486         | 762         | 36          |
| 5         | 209      | 5.82           | 0.0325   | 0.025         | 0.4186         | 0.9992          | 6563        | 199         | 788         | 10          |
| 27        | 276      | 5.76           | 0.0412   | 0.0062        | 0.4772         | 0.9992          | 6501        | 261         | 783         | 15          |
| 23        | 257      | 5.67           | 0.0416   | 0.0058        | 0.4424         | 0.9995          | 6518        | 244         | 785         | 13          |
| 16        | 226      | 6.24           | 0.0359   | 0.015         | 0.3846         | 0.9998          | 6546        | 216         | 788         | 10          |
| 8         | 407      | 5.46           | 0.0444   | 0.0036        | 0.4235         | 1               | 6375        | 387         | 778         | 20          |
| 22        | 477      | 5.96           | 0.0367   | 0.013         | 0.4912         | 1               | 6312        | 450         | 771         | 27          |
