# Supplementary material for: Decoding the transcriptome of calcified atherosclerotic plaque at single-cell resolution
Source: PubMed Central journal article supplement (PMC9556750; doi:10.1038/s42003-022-04056-7), 2022-10-12
Supplement: 42003_2022_4056_MOESM15_ESM.pdf [file 42003_2022_4056_MOESM15_ESM.pdf]

STable20.EC.VSMC.Heatmap.Group.Abunds

|                            |        | AC Abundance Ratio | Cell Count |  |  |
|----------------------------|--------|--------------------|------------|--|--|
| <b>EC Heatmap Groups</b>   | Group1 | 0.084615385        | 390        |  |  |
|                            | Group2 | 0.675675676        | 259        |  |  |
|                            | Group3 | 0.967871486        | 249        |  |  |
| <b>VSMC Heatmap Groups</b> | Group1 | 0.007889546        | 507        |  |  |
|                            | Group2 | 0.413080895        | 581        |  |  |
|                            | Group3 | 0.717850288        | 521        |  |  |
|                            | Group4 | 0.722819594        | 837        |  |  |
|                            |        |                    |            |  |  |
|                            |        |                    |            |  |  |
|                            |        |                    |            |  |  |
|                            |        |                    |            |  |  |
|                            |        |                    |            |  |  |
|                            |        |                    |            |  |  |
|                            |        |                    |            |  |  |
|                            |        |                    |            |  |  |
|                            |        |                    |            |  |  |
|                            |        |                    |            |  |  |
|                            |        |                    |            |  |  |
|                            |        |                    |            |  |  |
|                            |        |                    |            |  |  |
|                            |        |                    |            |  |  |
|                            |        |                    |            |  |  |
|                            |        |                    |            |  |  |
|                            |        |                    |            |  |  |
|                            |        |                    |            |  |  |
|                            |        |                    |            |  |  |
