# Supplementary material for: Decoding the transcriptome of calcified atherosclerotic plaque at single-cell resolution
Source: PubMed Central journal article supplement (PMC9556750; doi:10.1038/s42003-022-04056-7), 2022-10-12
Supplement: 42003_2022_4056_MOESM17_ESM.pdf [file 42003_2022_4056_MOESM17_ESM.pdf]

| gene_short_name | num_cells_expressed | status | term        | estimate     | std_err     | test_val     | p_value   | normalized_effect | model_component | q_value     | Corrected NE |
|-----------------|---------------------|--------|-------------|--------------|-------------|--------------|-----------|-------------------|-----------------|-------------|--------------|
| VEGFC           | 27                  | FAIL   | subgrp_cont | -49.58313775 | 8.997166326 | -5.510972672 | 3.57E-08  | -51.22005055      | count           | 0.000814845 | -51.220051   |
| CFD             | 564                 | OK     | subgrp_cont | -10.64254054 | 0.209308313 | -50.84623909 | 0         | -13.93484881      | count           | 0           | -13.934849   |
| APOD            | 491                 | OK     | subgrp_cont | -8.480395165 | 0.236279743 | -35.89133403 | 4.17E-282 | -11.48818872      | count           | 1.01E-277   | -11.488189   |
| CXCL14          | 274                 | OK     | subgrp_cont | -8.009029729 | 0.347042551 | -23.07794737 | 7.71E-118 | -10.1545977       | count           | 1.87E-113   | -10.154598   |
| PLA2G2A         | 386                 | OK     | subgrp_cont | -9.089615308 | 0.301146354 | -30.18338161 | 3.91E-200 | -9.76845838       | count           | 9.50E-196   | -9.7684584   |
| PI16            | 459                 | OK     | subgrp_cont | -8.546690383 | 0.255677776 | -33.42758415 | 5.45E-245 | -9.269911527      | count           | 1.32E-240   | -9.2699115   |
| MFAP5           | 495                 | OK     | subgrp_cont | -7.401288084 | 0.190099792 | -38.93369905 | 0         | -9.257865641      | count           | 0           | -9.2578656   |
| C3              | 486                 | OK     | subgrp_cont | -8.616328157 | 0.256901545 | -33.53941746 | 1.28E-246 | -8.803008658      | count           | 3.12E-242   | -8.8030087   |
| SLPI            | 521                 | OK     | subgrp_cont | -5.830079922 | 0.249483188 | -23.36862843 | 8.91E-121 | -8.258481162      | count           | 2.16E-116   | -8.2584812   |
| SFRP2           | 764                 | OK     | subgrp_cont | -5.296024734 | 0.197245061 | -26.84997387 | 8.44E-159 | -7.555682777      | count           | 2.05E-154   | -7.5556828   |
| IGF1            | 335                 | OK     | subgrp_cont | -6.720508093 | 0.268850376 | -24.99720544 | 6.56E-138 | -7.494874076      | count           | 1.59E-133   | -7.4948741   |
| LEPR            | 425                 | OK     | subgrp_cont | -6.416465504 | 0.240727341 | -26.65449416 | 1.59E-156 | -7.469635316      | count           | 3.85E-152   | -7.4696353   |
| ACKR3           | 686                 | OK     | subgrp_cont | -5.484178854 | 0.145986899 | -37.5662399  | 0         | -7.414244937      | count           | 0           | -7.4142449   |
| CHRD1           | 444                 | OK     | subgrp_cont | -7.072515483 | 0.263499002 | -26.84076759 | 1.08E-158 | -7.337753501      | count           | 2.62E-154   | -7.3377535   |
| SCARA5          | 402                 | OK     | subgrp_cont | -6.217794213 | 0.23443655  | -26.52229015 | 5.36E-155 | -7.326715848      | count           | 1.30E-150   | -7.3267158   |
| MGST1           | 552                 | OK     | subgrp_cont | -5.412217582 | 0.15241485  | -35.50977862 | 3.47E-276 | -7.090040438      | count           | 8.44E-272   | -7.0900404   |
| LRRN4CL         | 355                 | OK     | subgrp_cont | -7.308934383 | 0.355845671 | -20.53961867 | 9.53E-94  | -7.007924653      | count           | 2.31E-89    | -7.0079247   |
| PRG4            | 100                 | OK     | subgrp_cont | -10.41837383 | 0.81305569  | -12.81385022 | 1.37E-37  | -6.952454368      | count           | 3.29E-33    | -6.9524544   |
| SERPINF1        | 807                 | OK     | subgrp_cont | -4.962893758 | 0.138145204 | -35.92519774 | 1.24E-282 | -6.929821086      | count           | 3.00E-278   | -6.9298211   |
| PLAT            | 535                 | OK     | subgrp_cont | -5.361188417 | 0.177294168 | -30.23894406 | 7.29E-201 | -6.921206434      | count           | 1.77E-196   | -6.9212064   |
| GAS1            | 513                 | OK     | subgrp_cont | -5.555386557 | 0.188429619 | -29.48255473 | 4.82E-191 | -6.835655913      | count           | 1.17E-186   | -6.8356559   |
| FBLN1           | 1014                | OK     | subgrp_cont | -4.831983812 | 0.123042661 | -39.27080056 | 0         | -6.829284984      | count           | 0           | -6.829285    |
| DCN             | 1010                | OK     | subgrp_cont | -4.752971234 | 0.167870076 | -28.3133918  | 2.36E-176 | -6.813039115      | count           | 5.74E-172   | -6.8130391   |
| SFRP1           | 478                 | OK     | subgrp_cont | -4.662098782 | 0.182912935 | -25.48807598 | 2.67E-143 | -6.491696645      | count           | 6.48E-139   | -6.4916966   |
| TMEM176B        | 324                 | OK     | subgrp_cont | -6.162537594 | 0.278771411 | -22.1060602  | 2.76E-108 | -6.454304377      | count           | 6.69E-104   | -6.4543044   |
| TSHZ2           | 337                 | OK     | subgrp_cont | -5.862986358 | 0.266783825 | -21.97654355 | 4.83E-107 | -6.348148541      | count           | 1.17E-102   | -6.3481485   |
| ITM2A           | 659                 | OK     | subgrp_cont | -4.65995233  | 0.135651317 | -34.35242977 | 1.30E-258 | -6.331836326      | count           | 3.15E-254   | -6.3318363   |
| CPVL            | 235                 | OK     | subgrp_cont | -6.19347146  | 0.360857658 | -17.16319807 | 5.01E-66  | -6.296414541      | count           | 1.21E-61    | -6.2964145   |
| TMEM176A        | 290                 | OK     | subgrp_cont | -5.763315935 | 0.277098978 | -20.79876289 | 4.44E-96  | -6.190504946      | count           | 1.07E-91    | -6.1905049   |
| VIT             | 229                 | OK     | subgrp_cont | -10.02595754 | 0.970830885 | -10.32719262 | 5.31E-25  | -6.108594495      | count           | 1.26E-20    | -6.1085945   |
| C16orf89        | 247                 | OK     | subgrp_cont | -5.400960552 | 0.300407947 | -17.97875392 | 2.86E-72  | -6.09626166       | count           | 6.90E-68    | -6.0962617   |
| TNXB            | 653                 | OK     | subgrp_cont | -4.465758736 | 0.147569107 | -30.26215195 | 3.61E-201 | -6.0583683        | count           | 8.77E-197   | -6.0583683   |
| SEMA3C          | 360                 | OK     | subgrp_cont | -5.373125719 | 0.239124874 | -22.46995736 | 8.17E-112 | -5.929124905      | count           | 1.98E-107   | -5.9291249   |
| FBLN2           | 684                 | OK     | subgrp_cont | -4.346363764 | 0.124494368 | -34.9121317  | 4.87E-267 | -5.906589275      | count           | 1.18E-262   | -5.9065893   |
| CD34            | 482                 | OK     | subgrp_cont | -4.477996279 | 0.174797621 | -25.61817635 | 9.57E-145 | -5.838572181      | count           | 2.32E-140   | -5.8385722   |
