# Supplementary material for: Decoding the transcriptome of calcified atherosclerotic plaque at single-cell resolution
Source: Commun Biol. 2022 Oct 12;5:1084. doi: 10.1038/s42003-022-04056-7 (PMC9556750; doi:10.1038/s42003-022-04056-7)
Supplement: Supplementary file 16 — Supplementary Data 14 [file 42003_2022_4056_MOESM16_ESM.pdf]

[illegible]























[illegible]















[illegible]





[illegible]
